# Supplementary material for: Cell-type-resolved somatic mosaicism reveals clonal dynamics of the human forebrain
Source: PubMed Central journal article supplement — bioRxiv. 2023 Oct 26:2023.10.24.563814. Preprint. [Version 2] doi: 10.1101/2023.10.24.563814 (PMC10634852; doi:10.1101/2023.10.24.563814), 2023-10-26

**a** ID01 1-106934533-C-T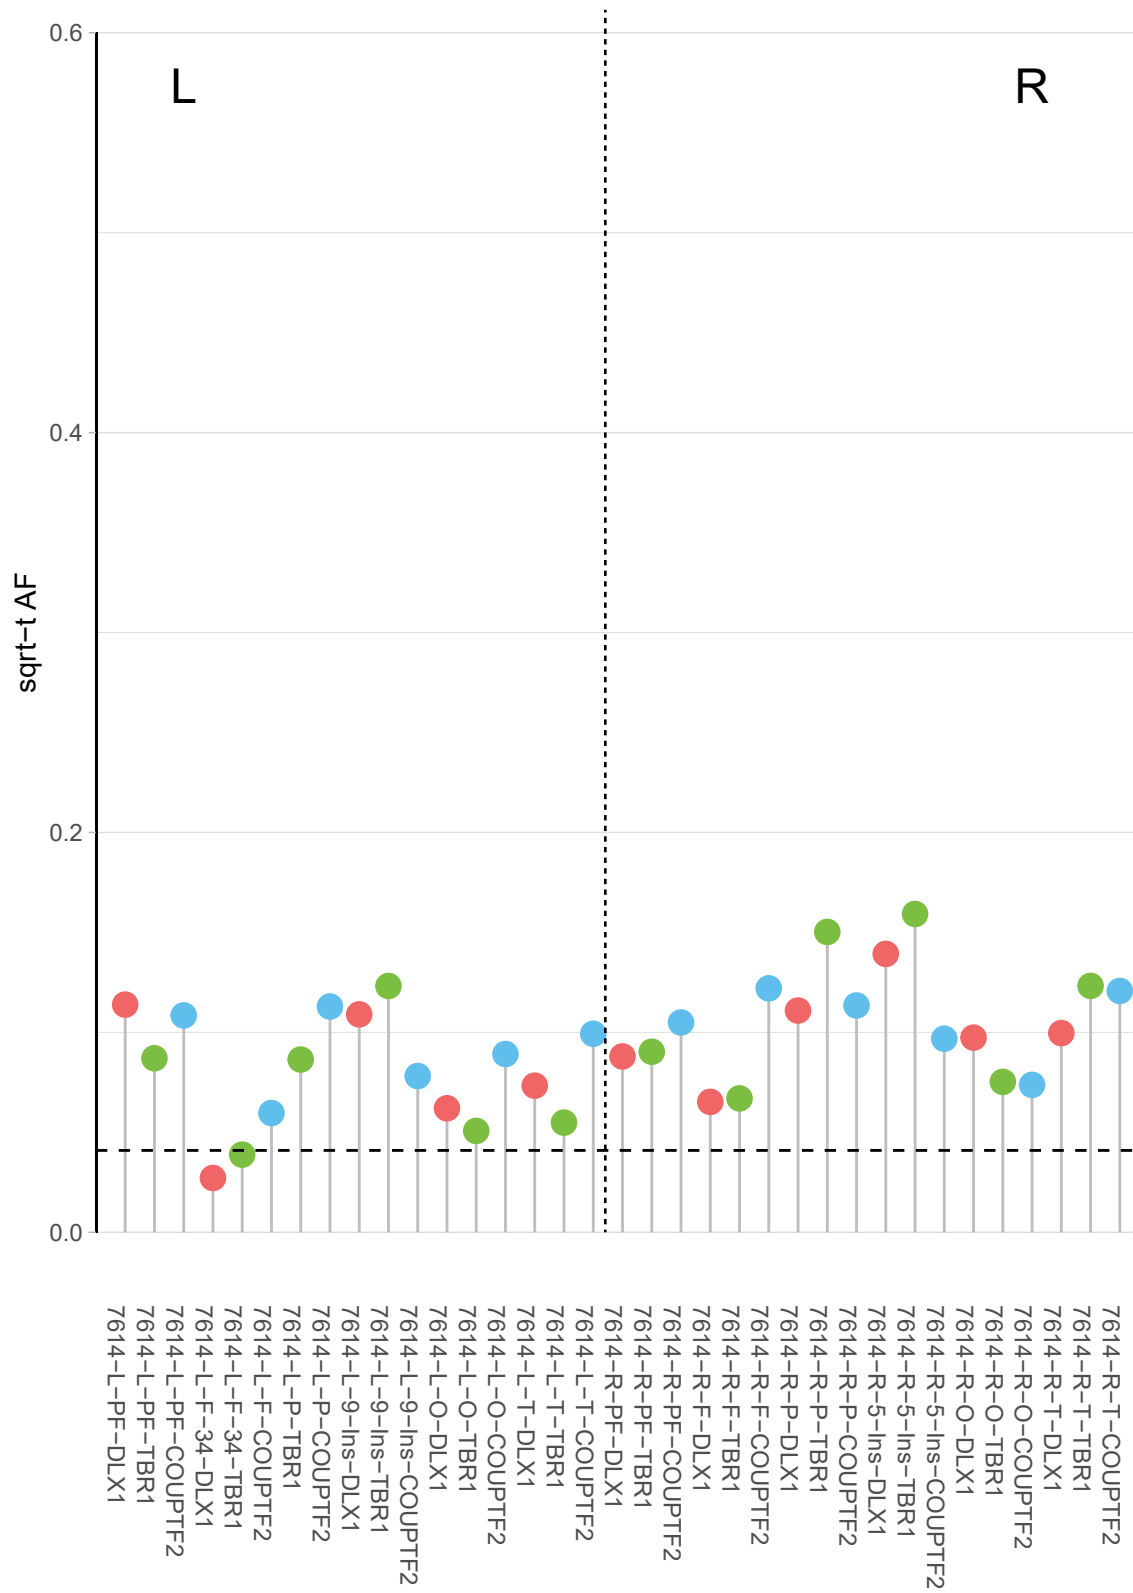**b**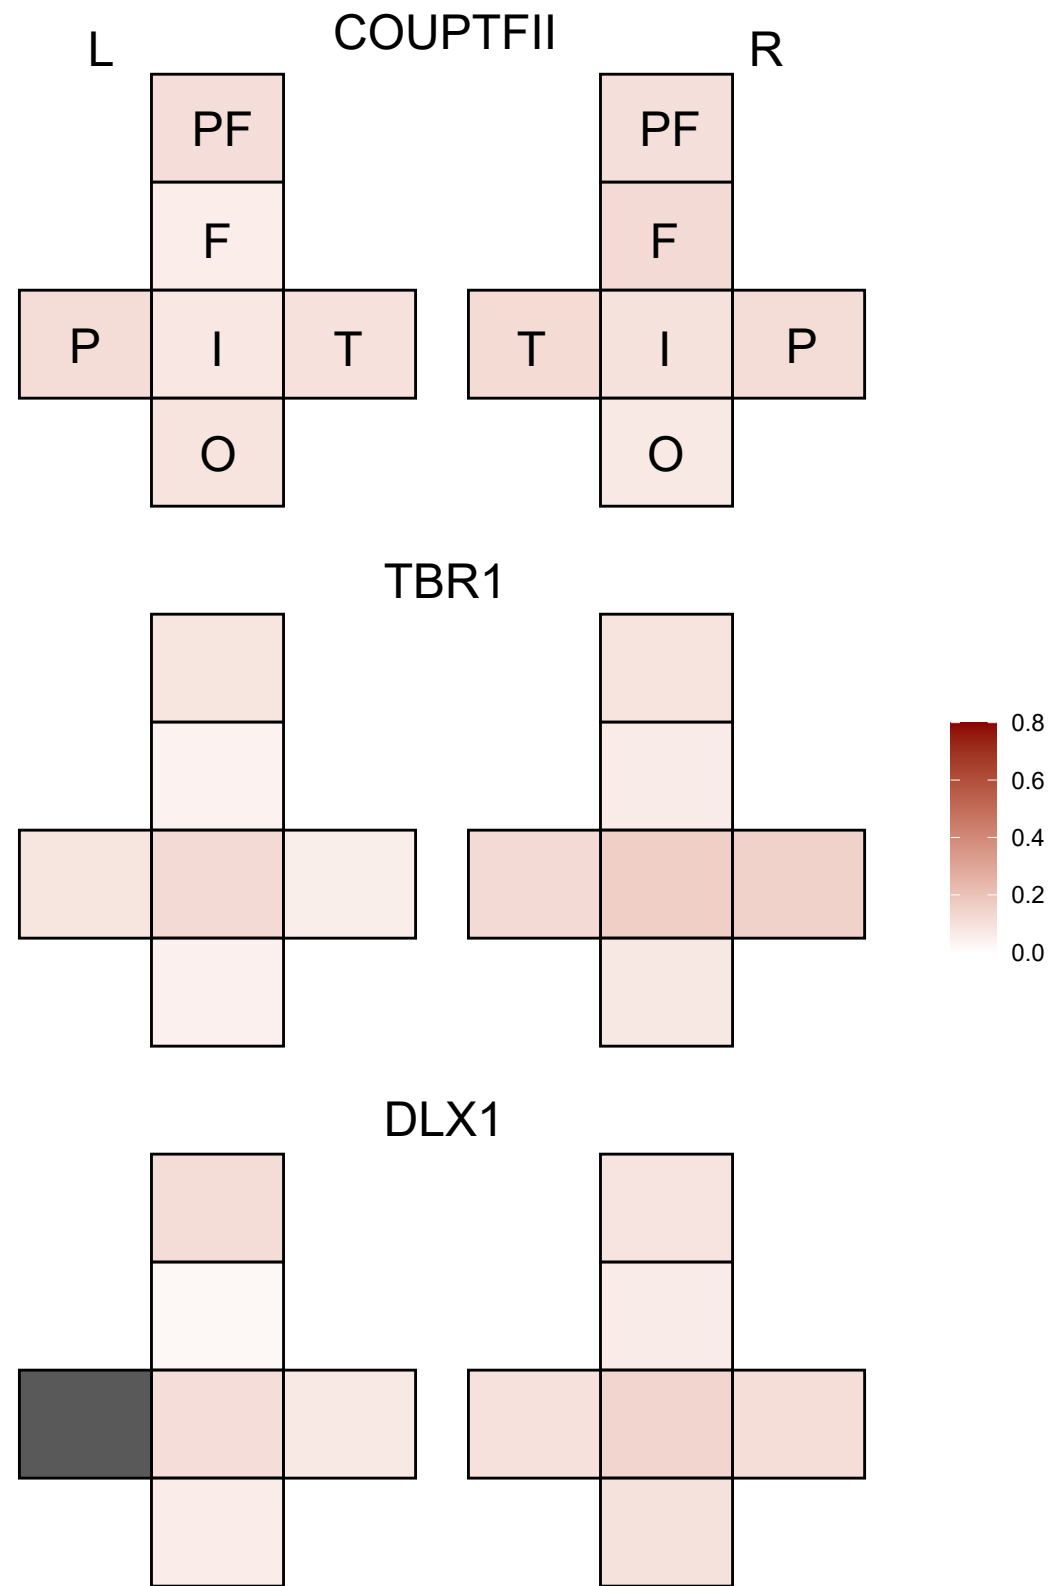

**a** ID01 1-168467950-G-A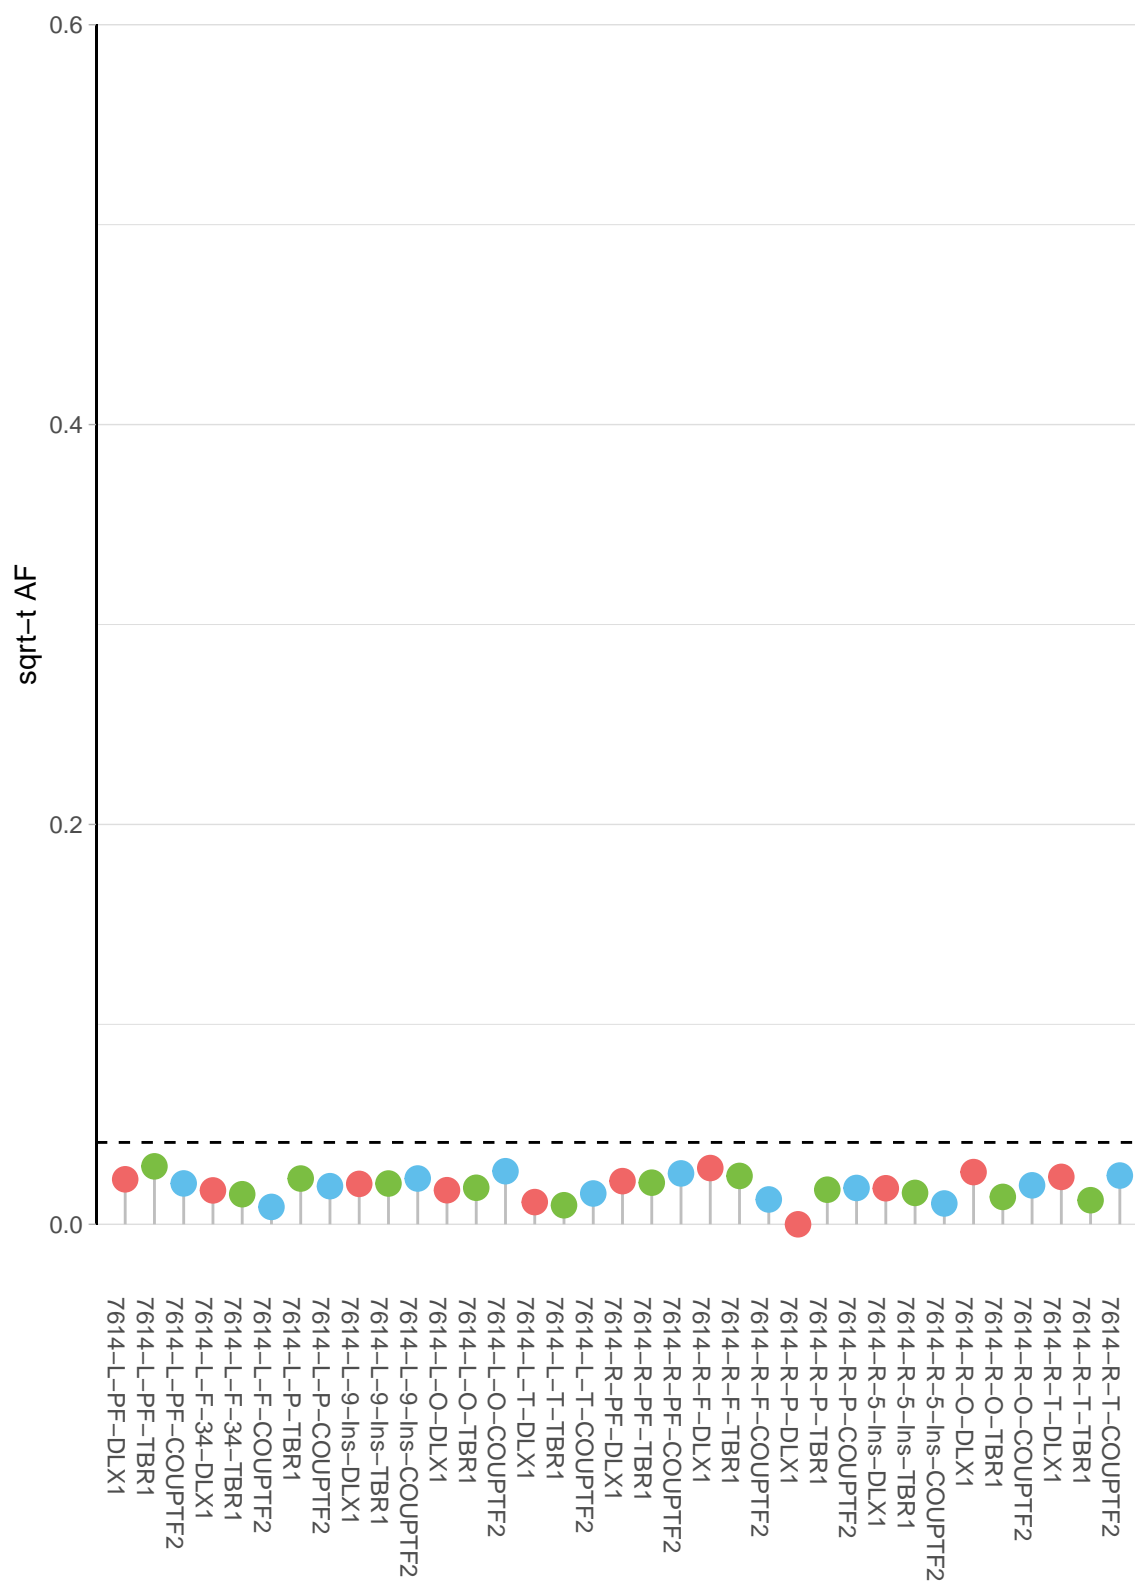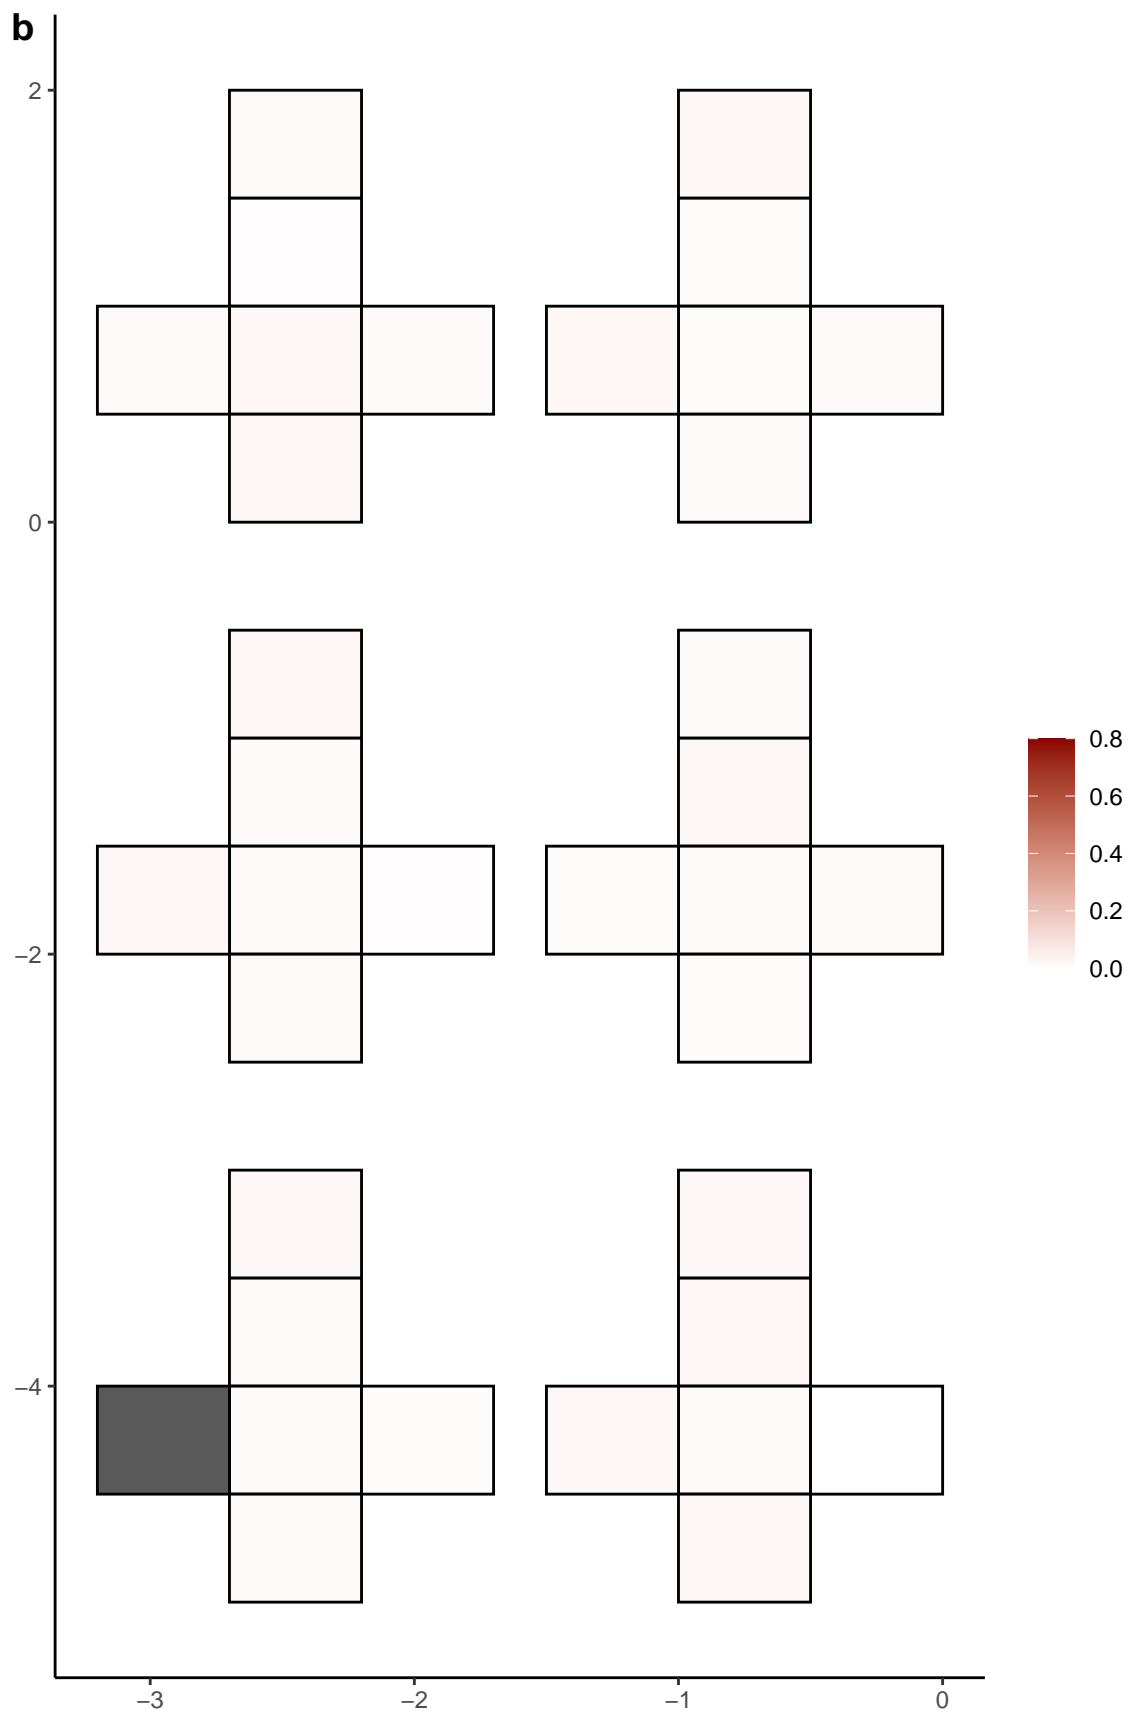

**a** ID01 1-169329191-G-A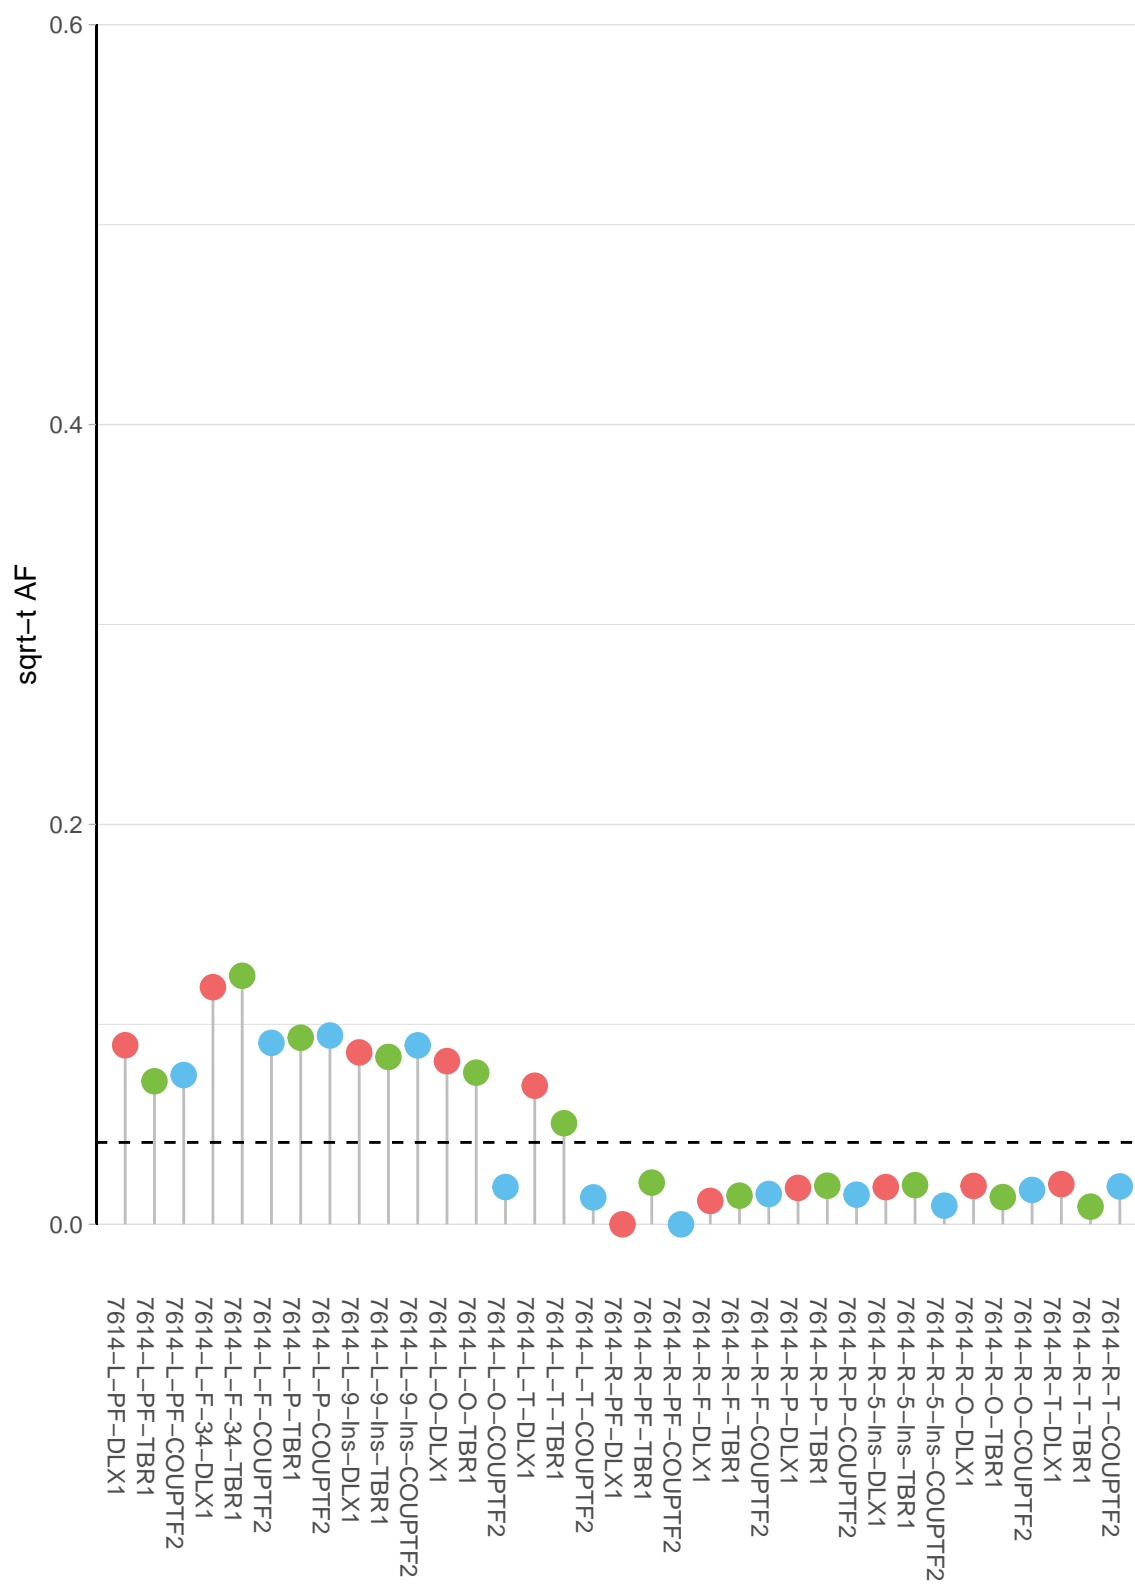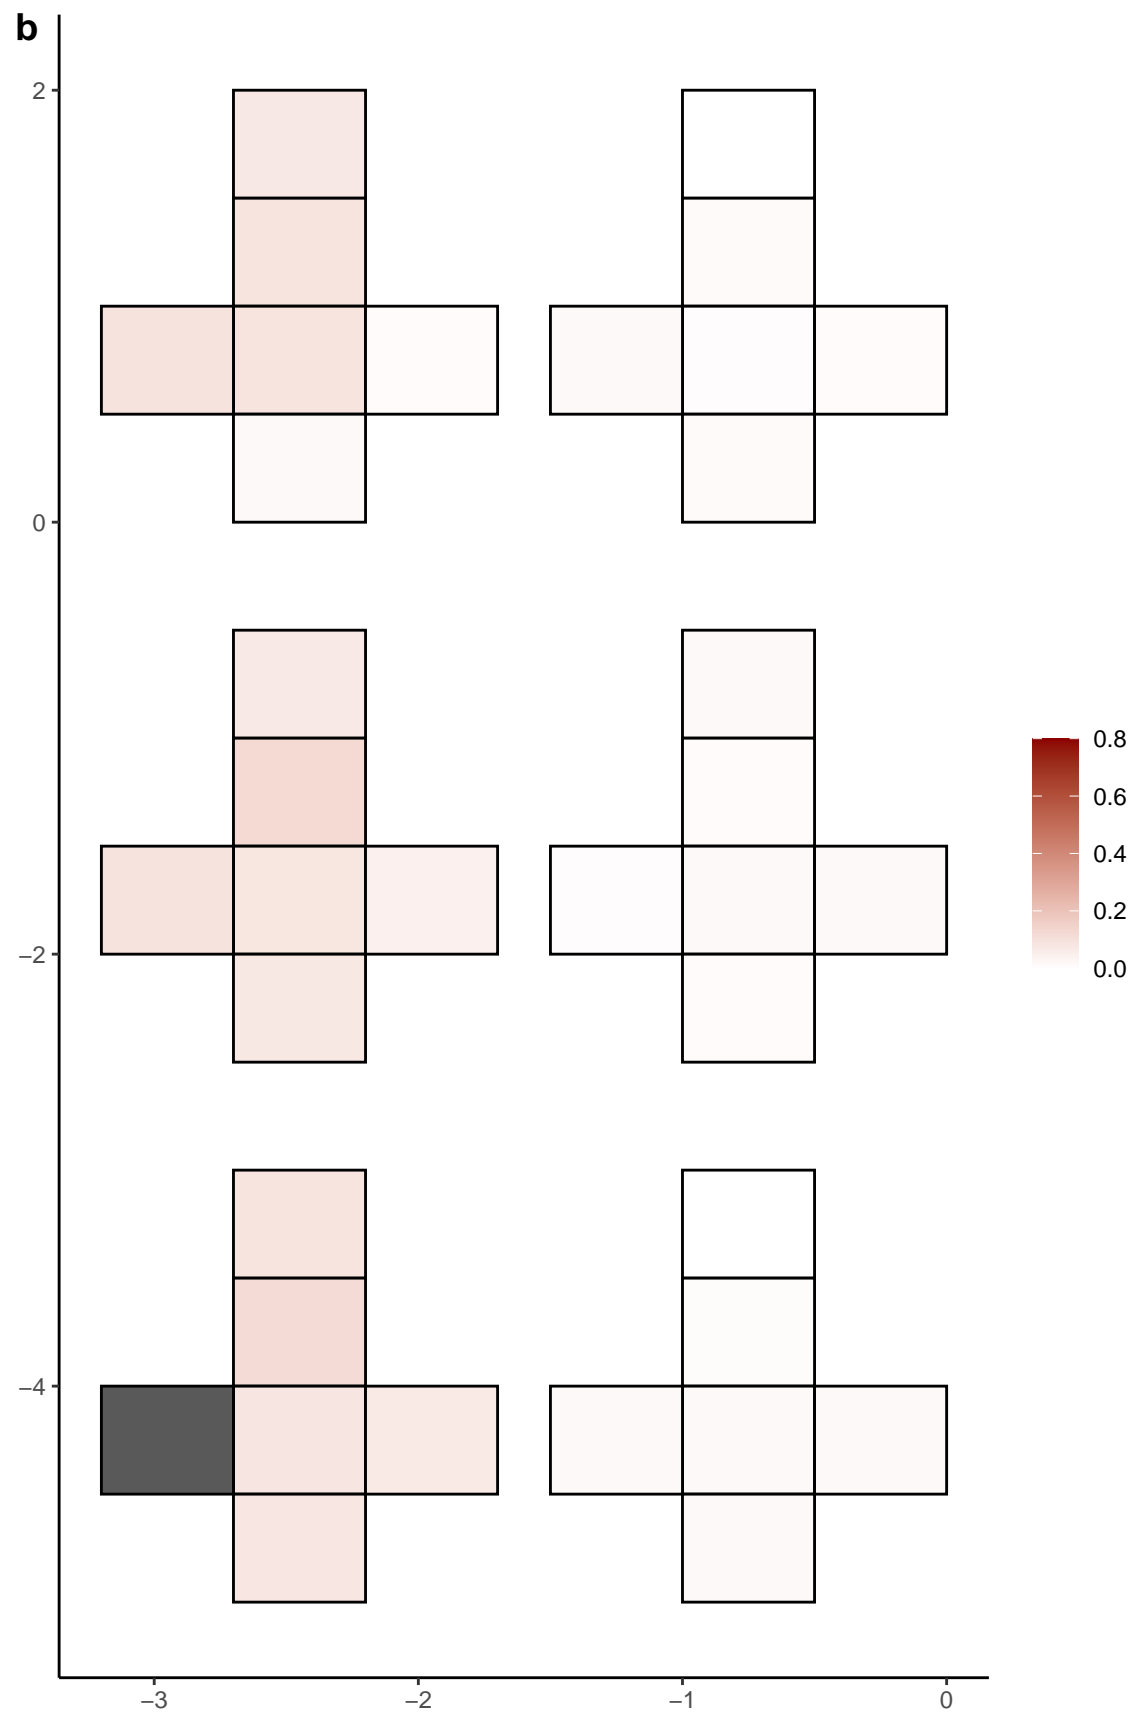

**a** ID01 1-180856518-T-G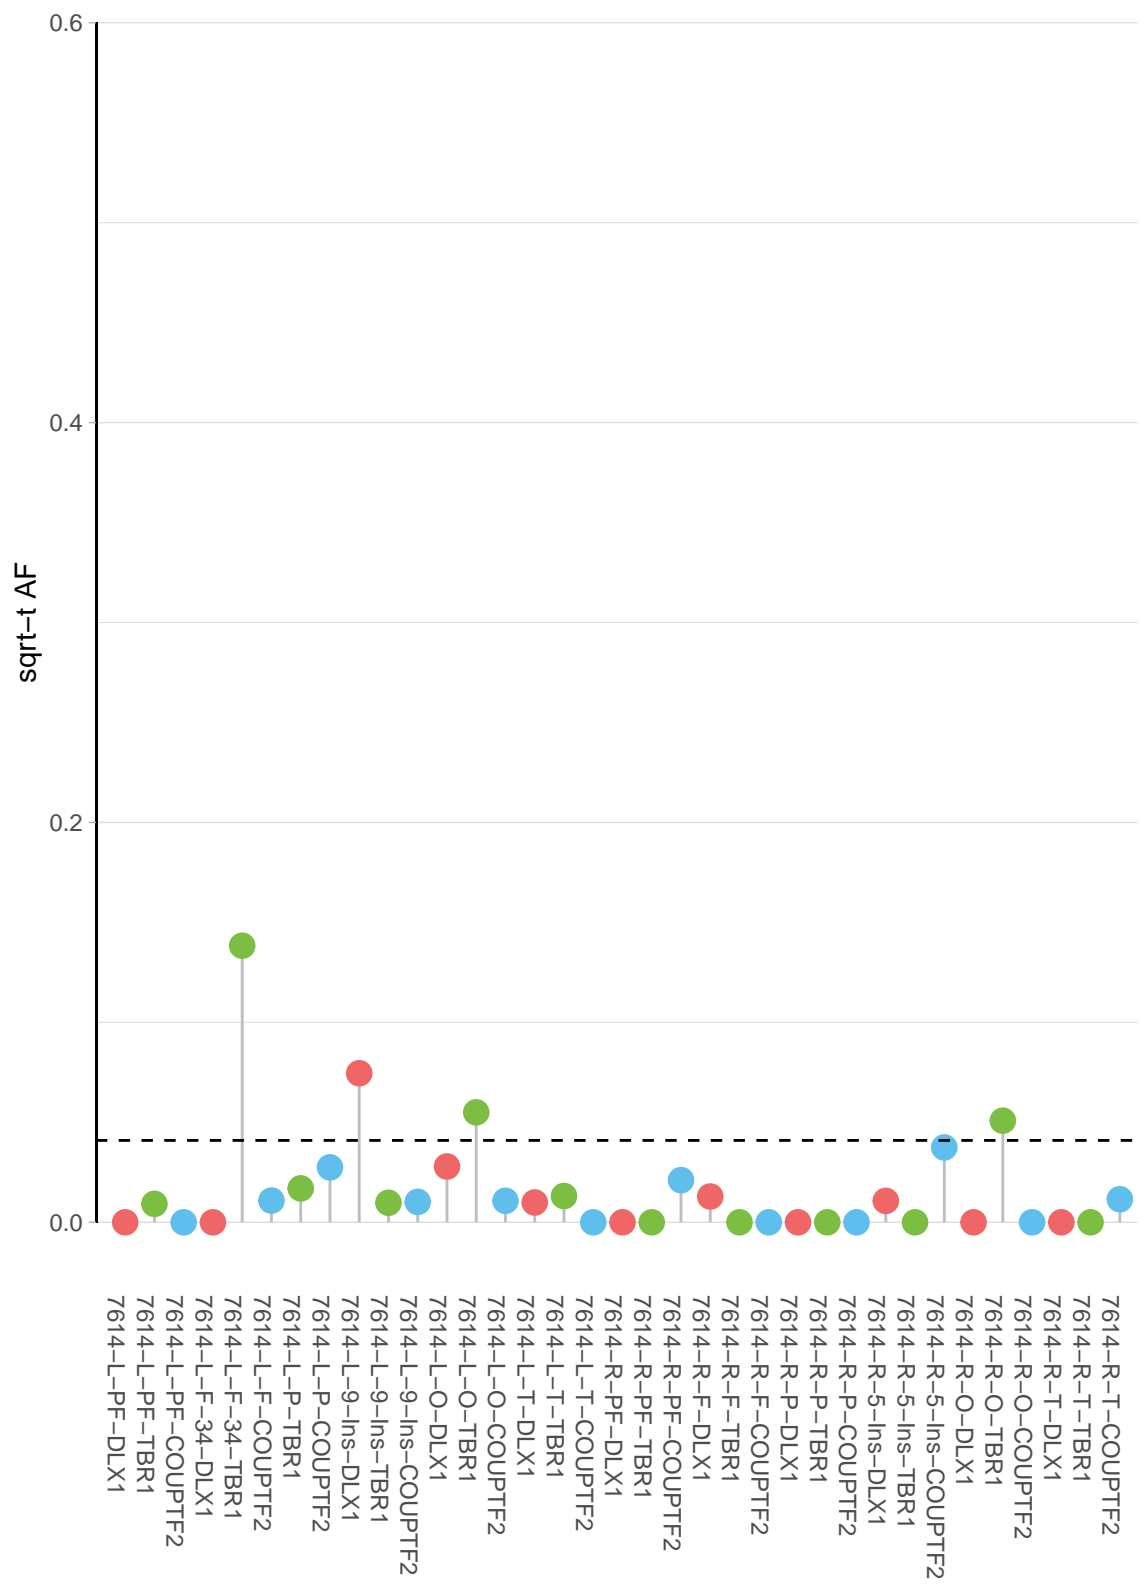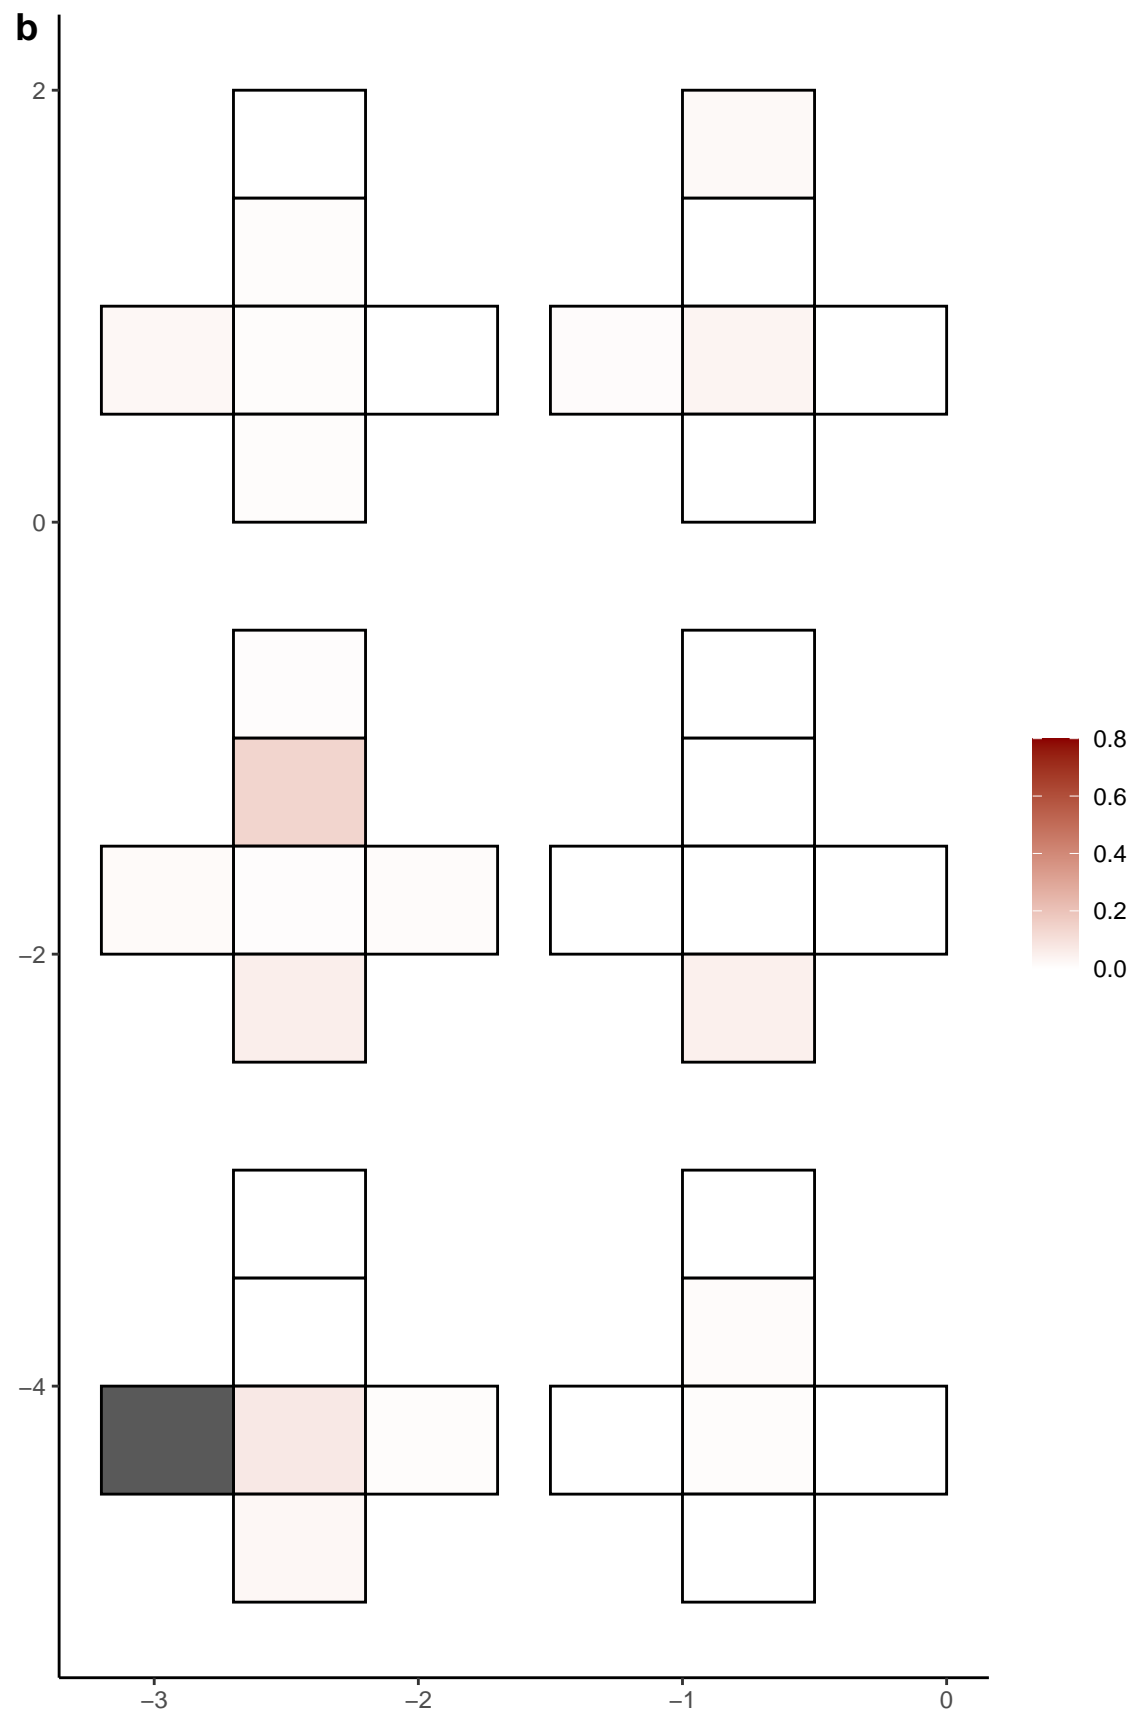

**a** ID01 1-188748555-G-A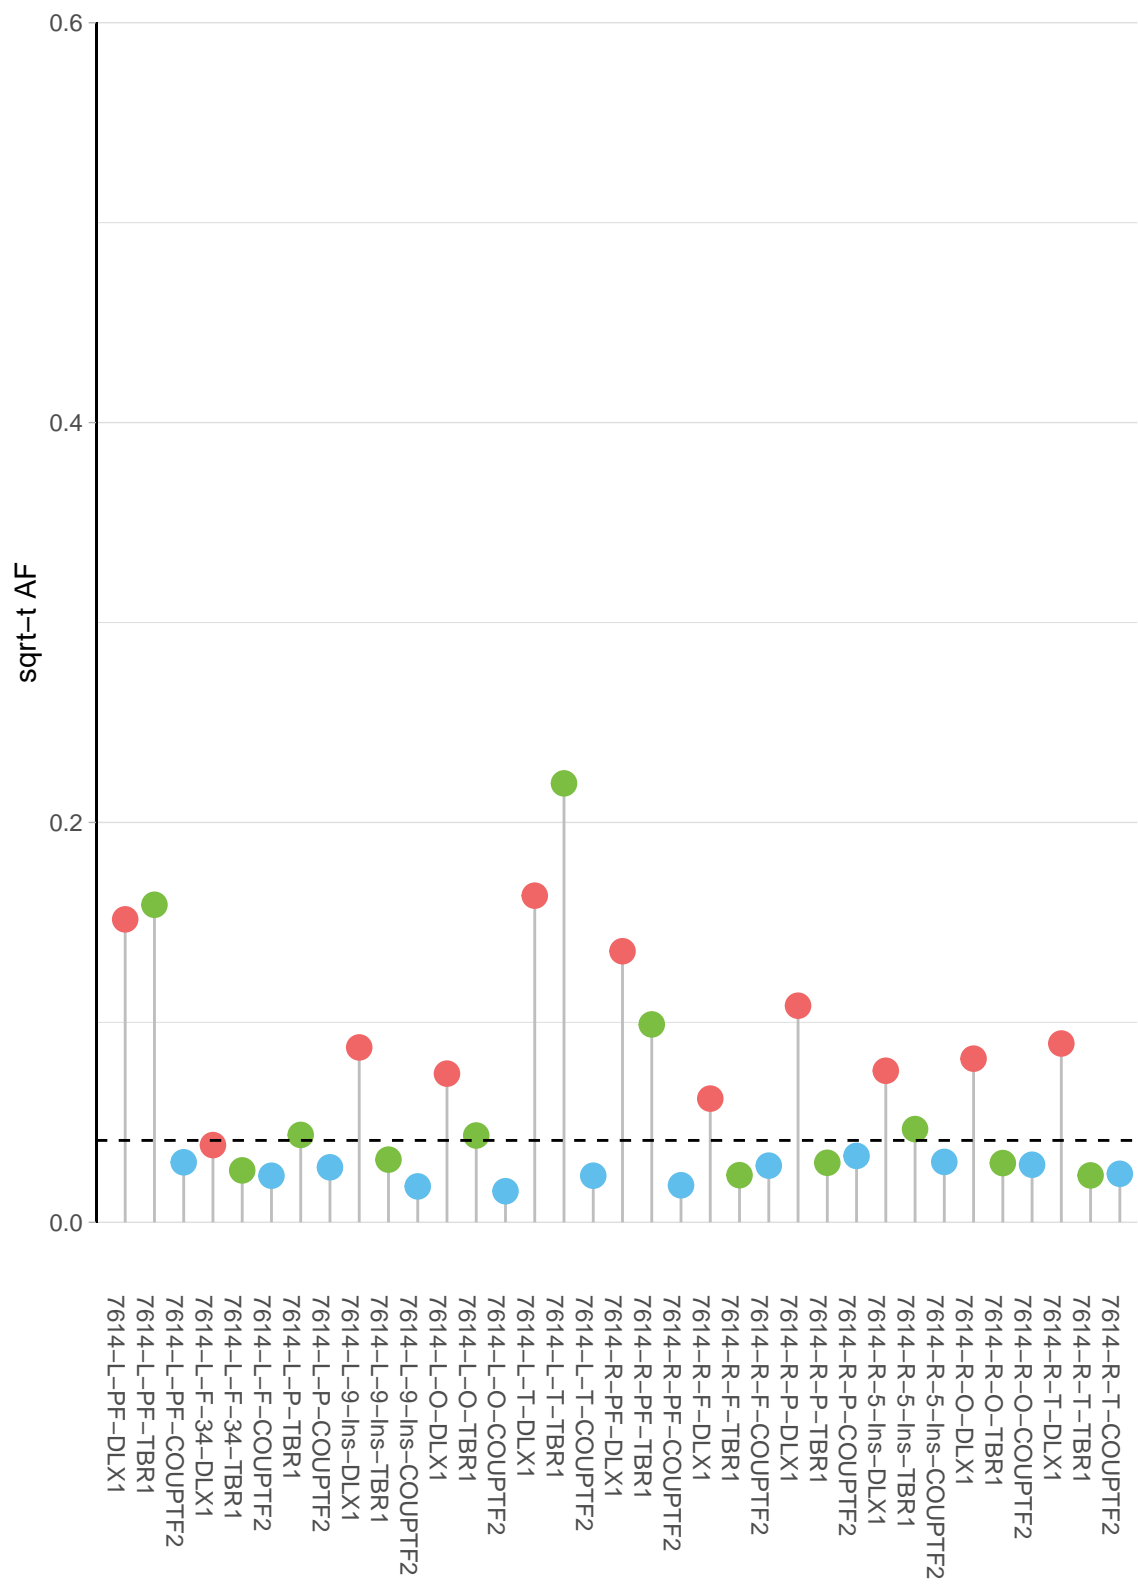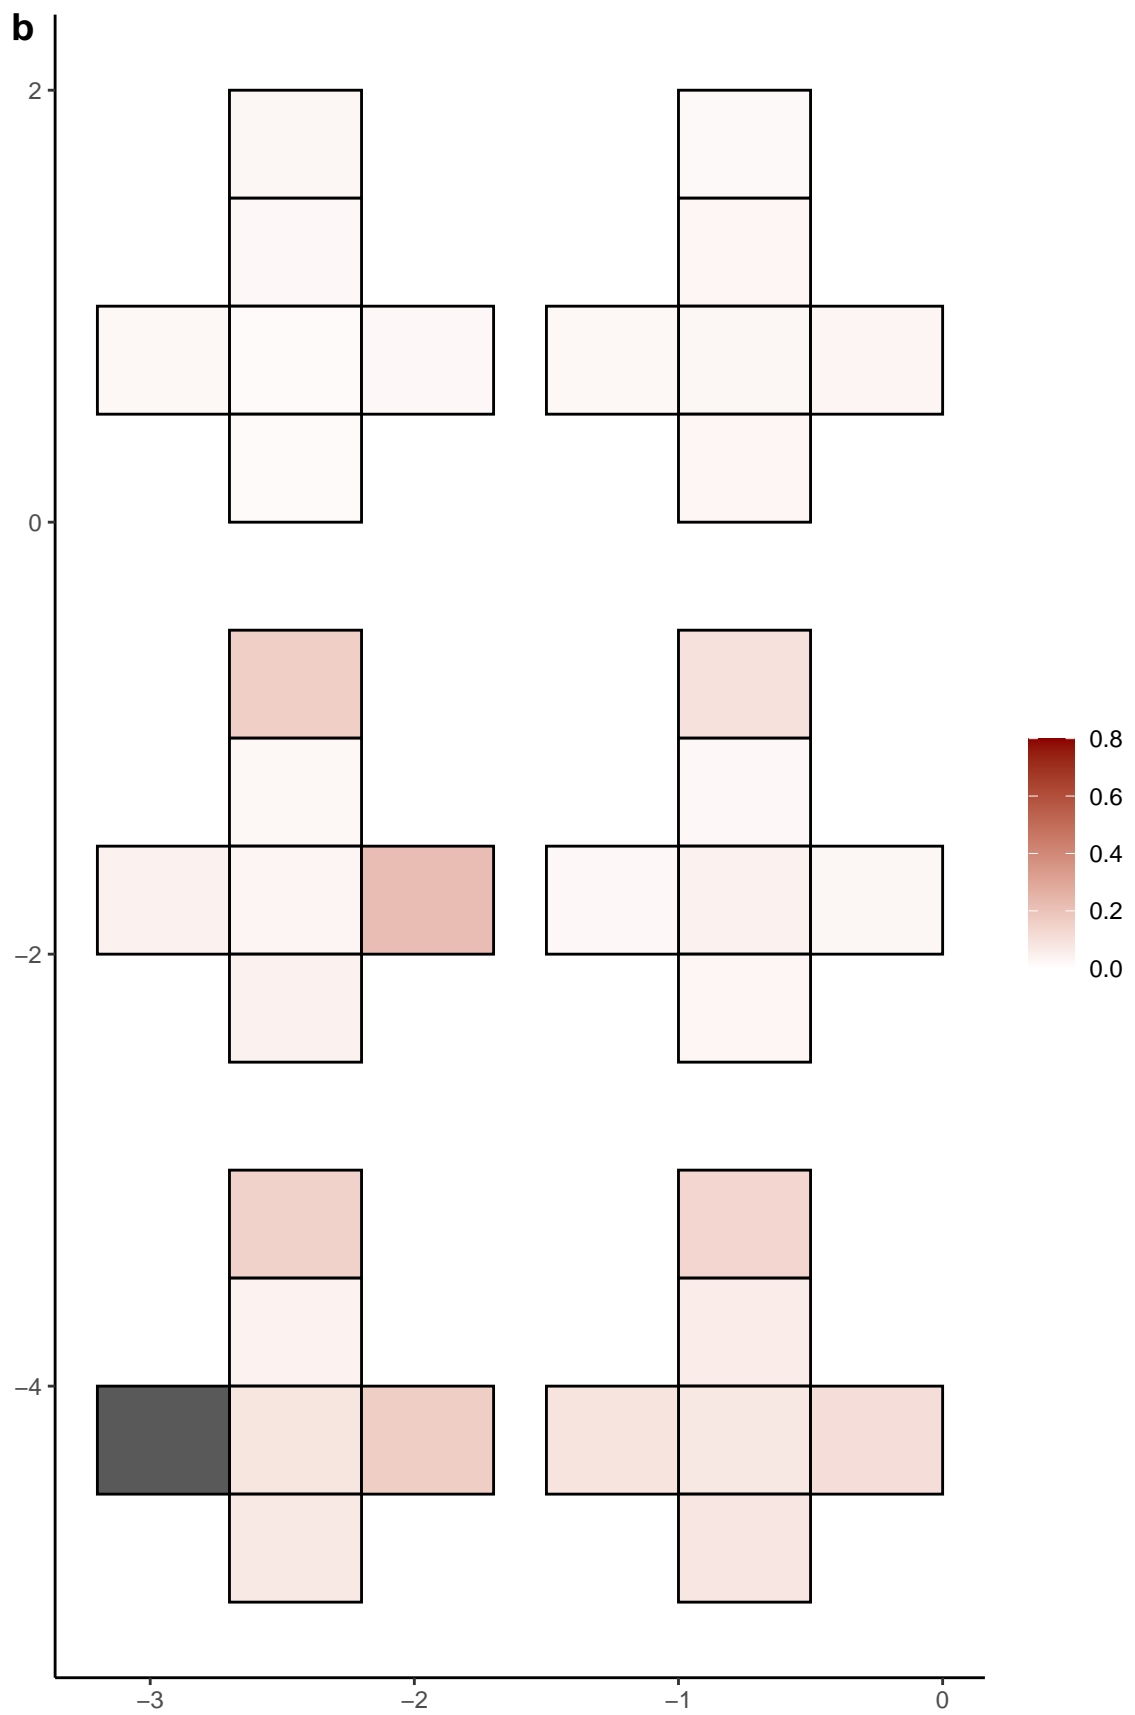

**a** ID01 1-212352377-G-T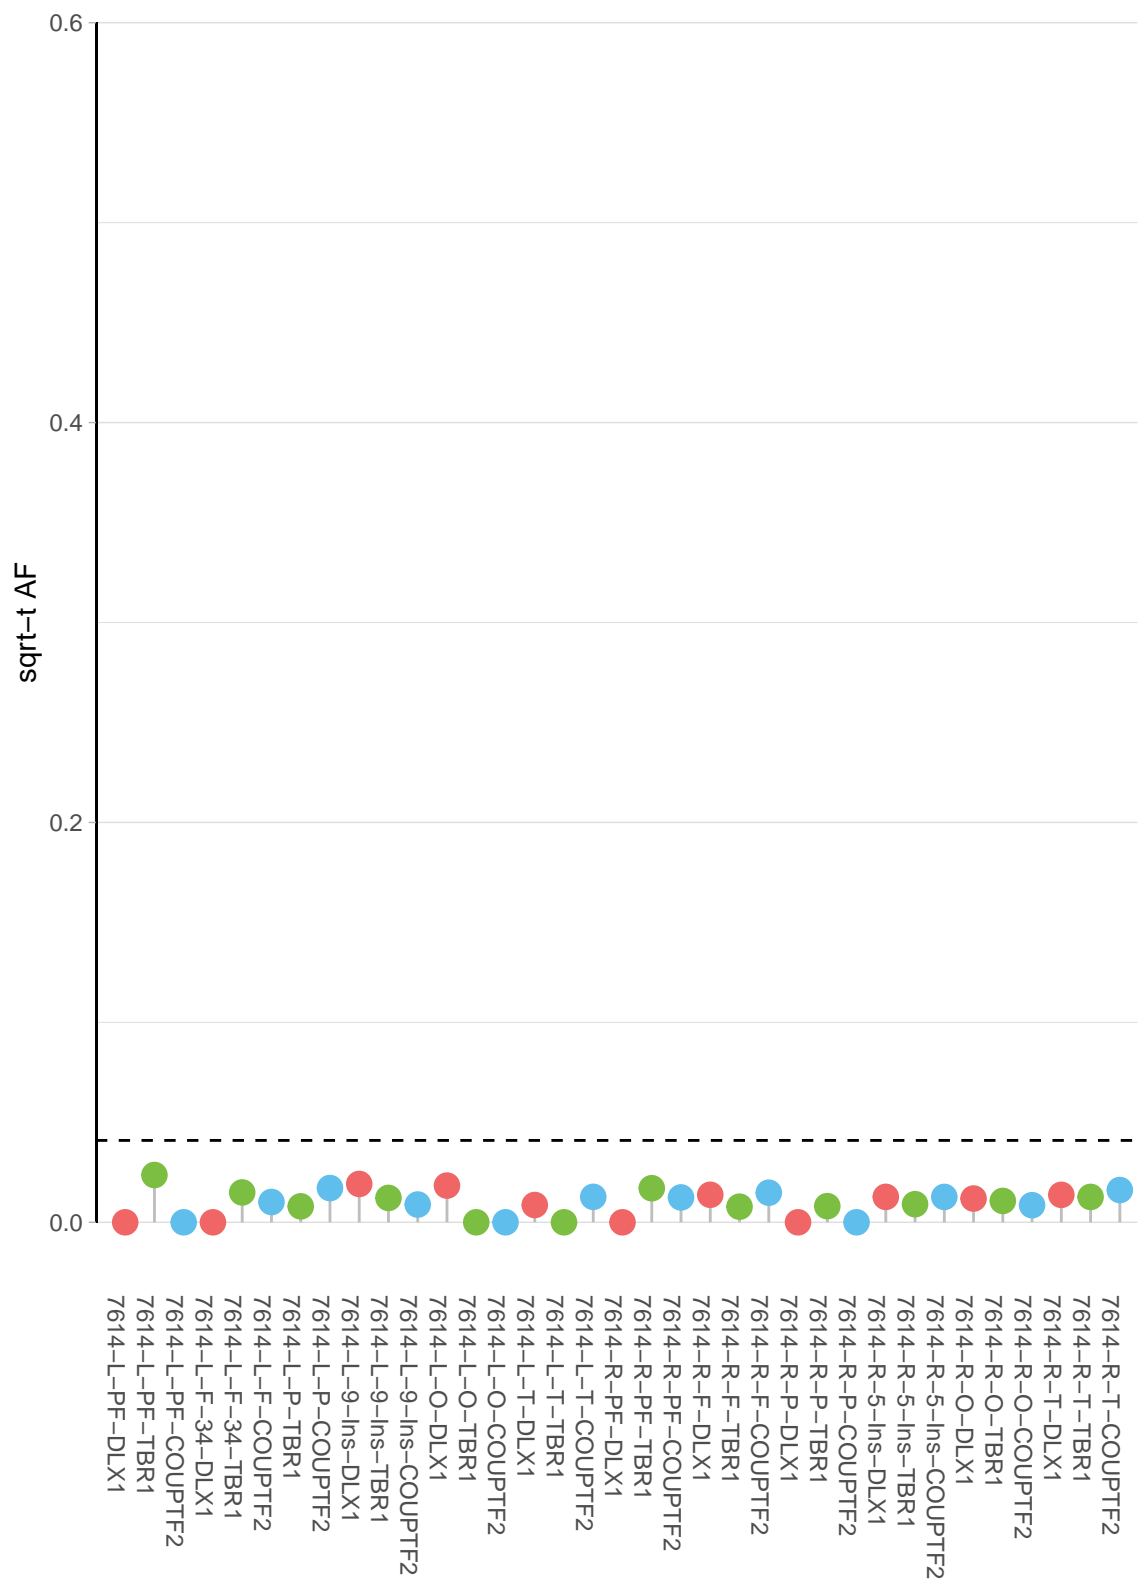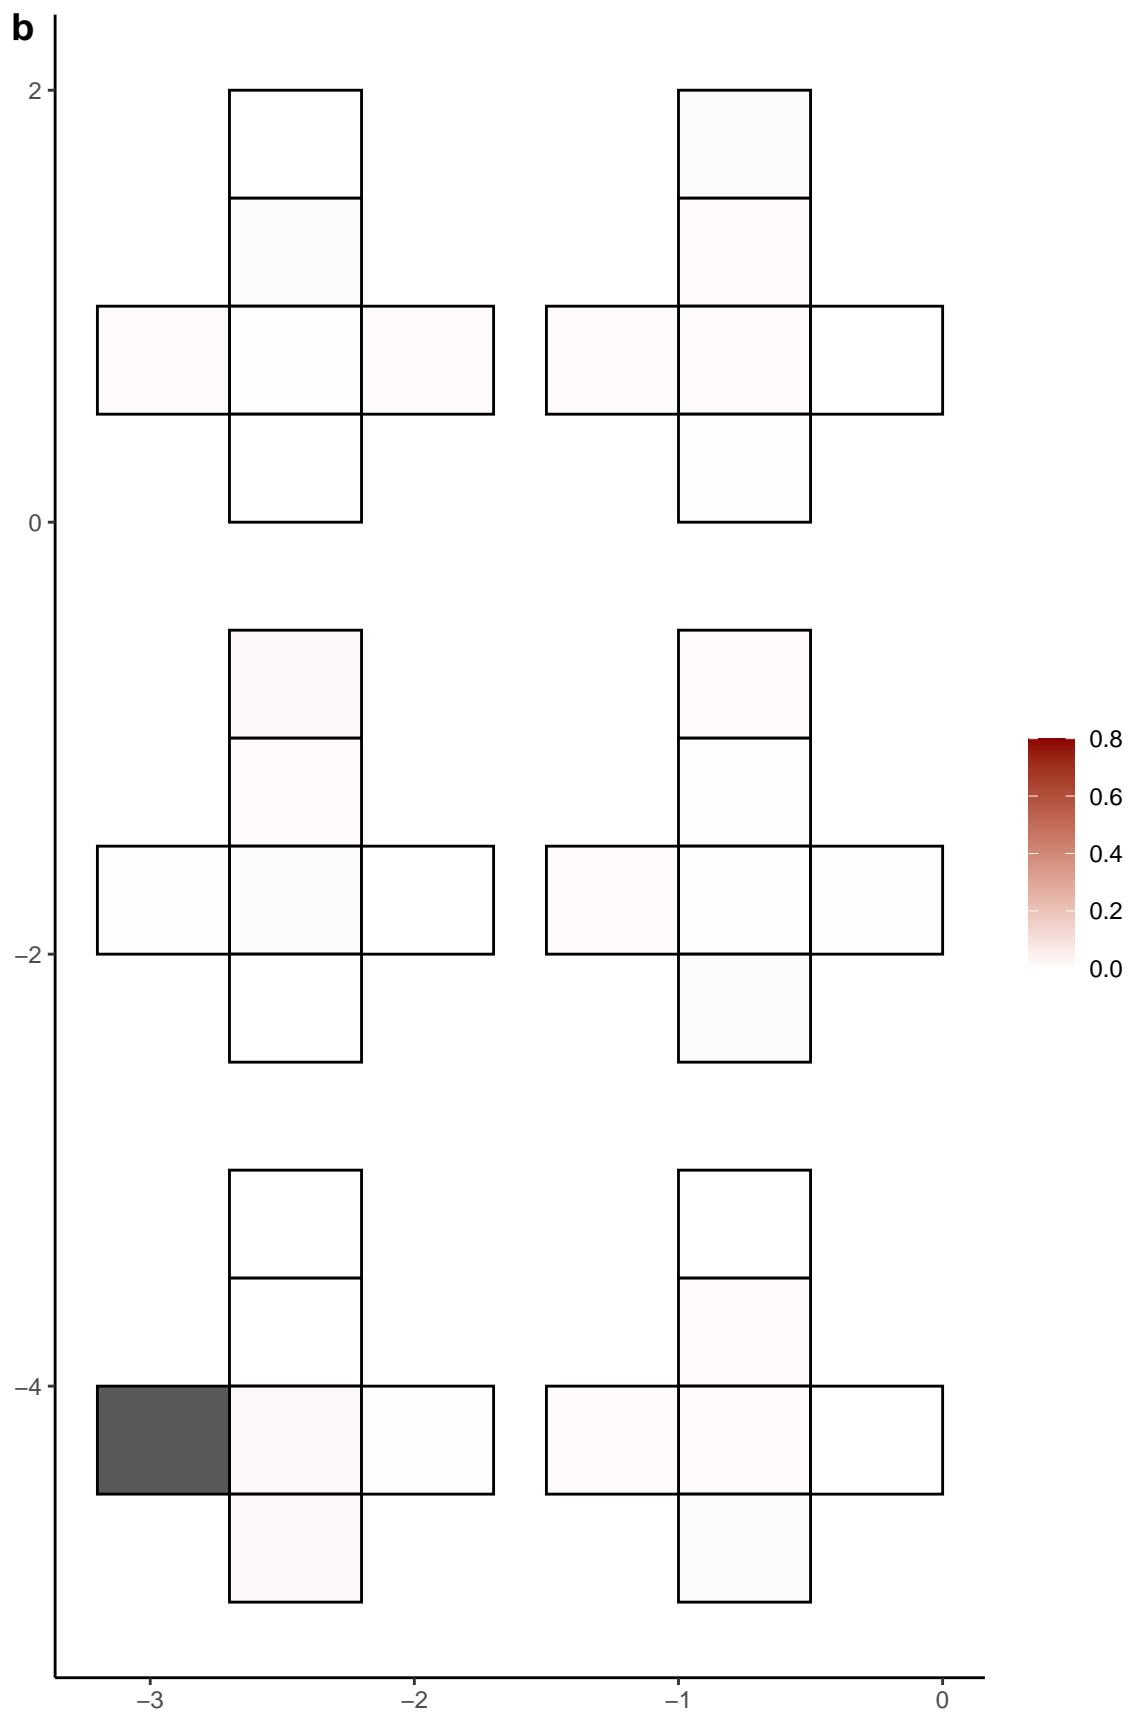



**a** ID01 1-239397797-T-A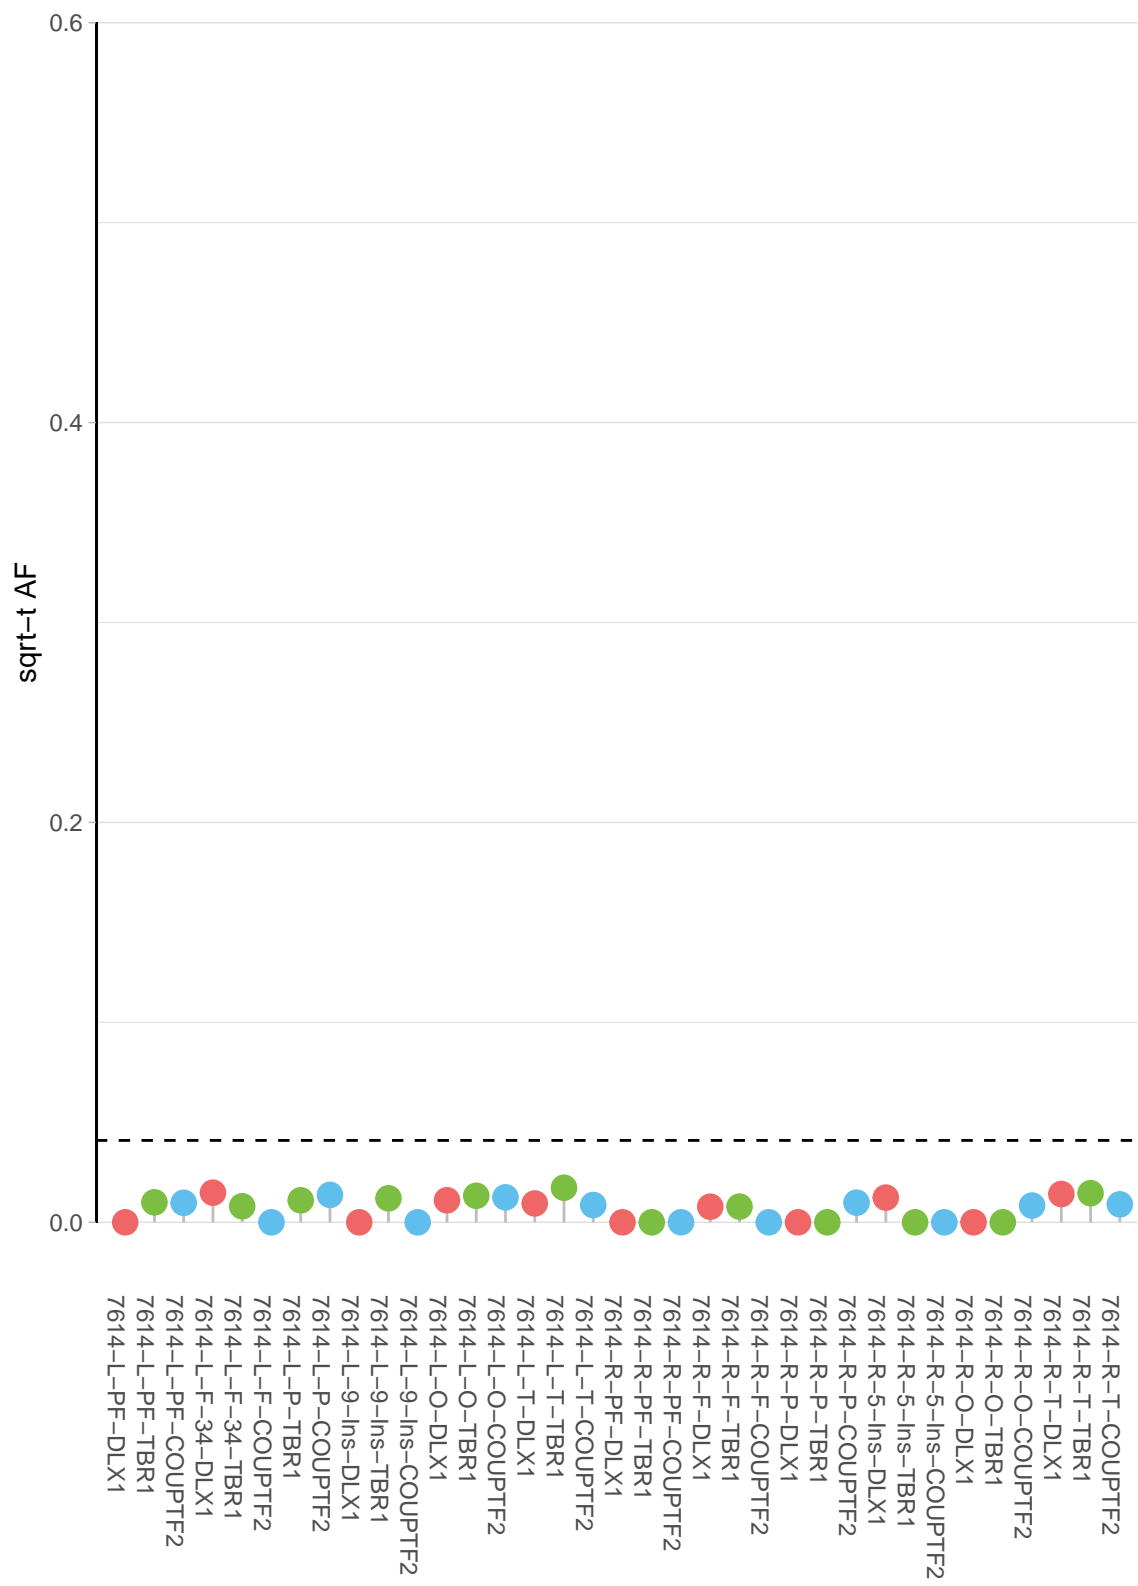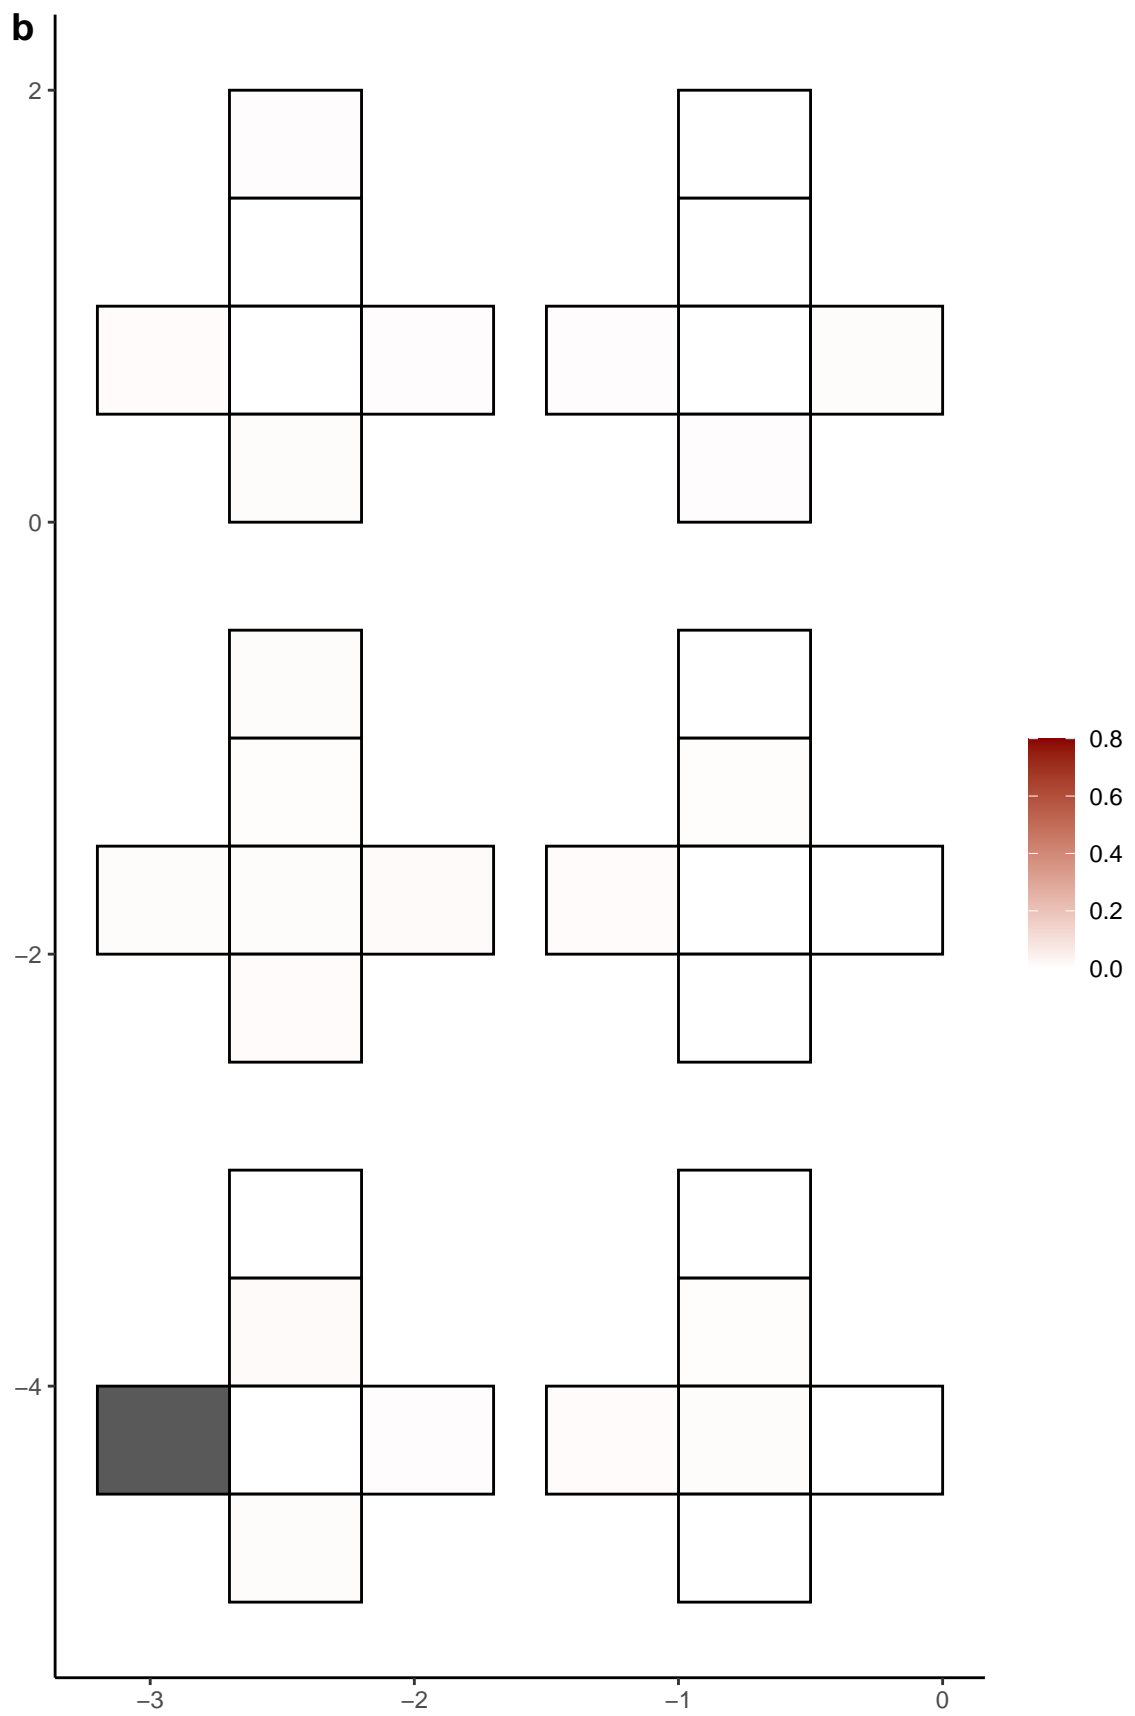



**a** ID01 1-240507547-A-T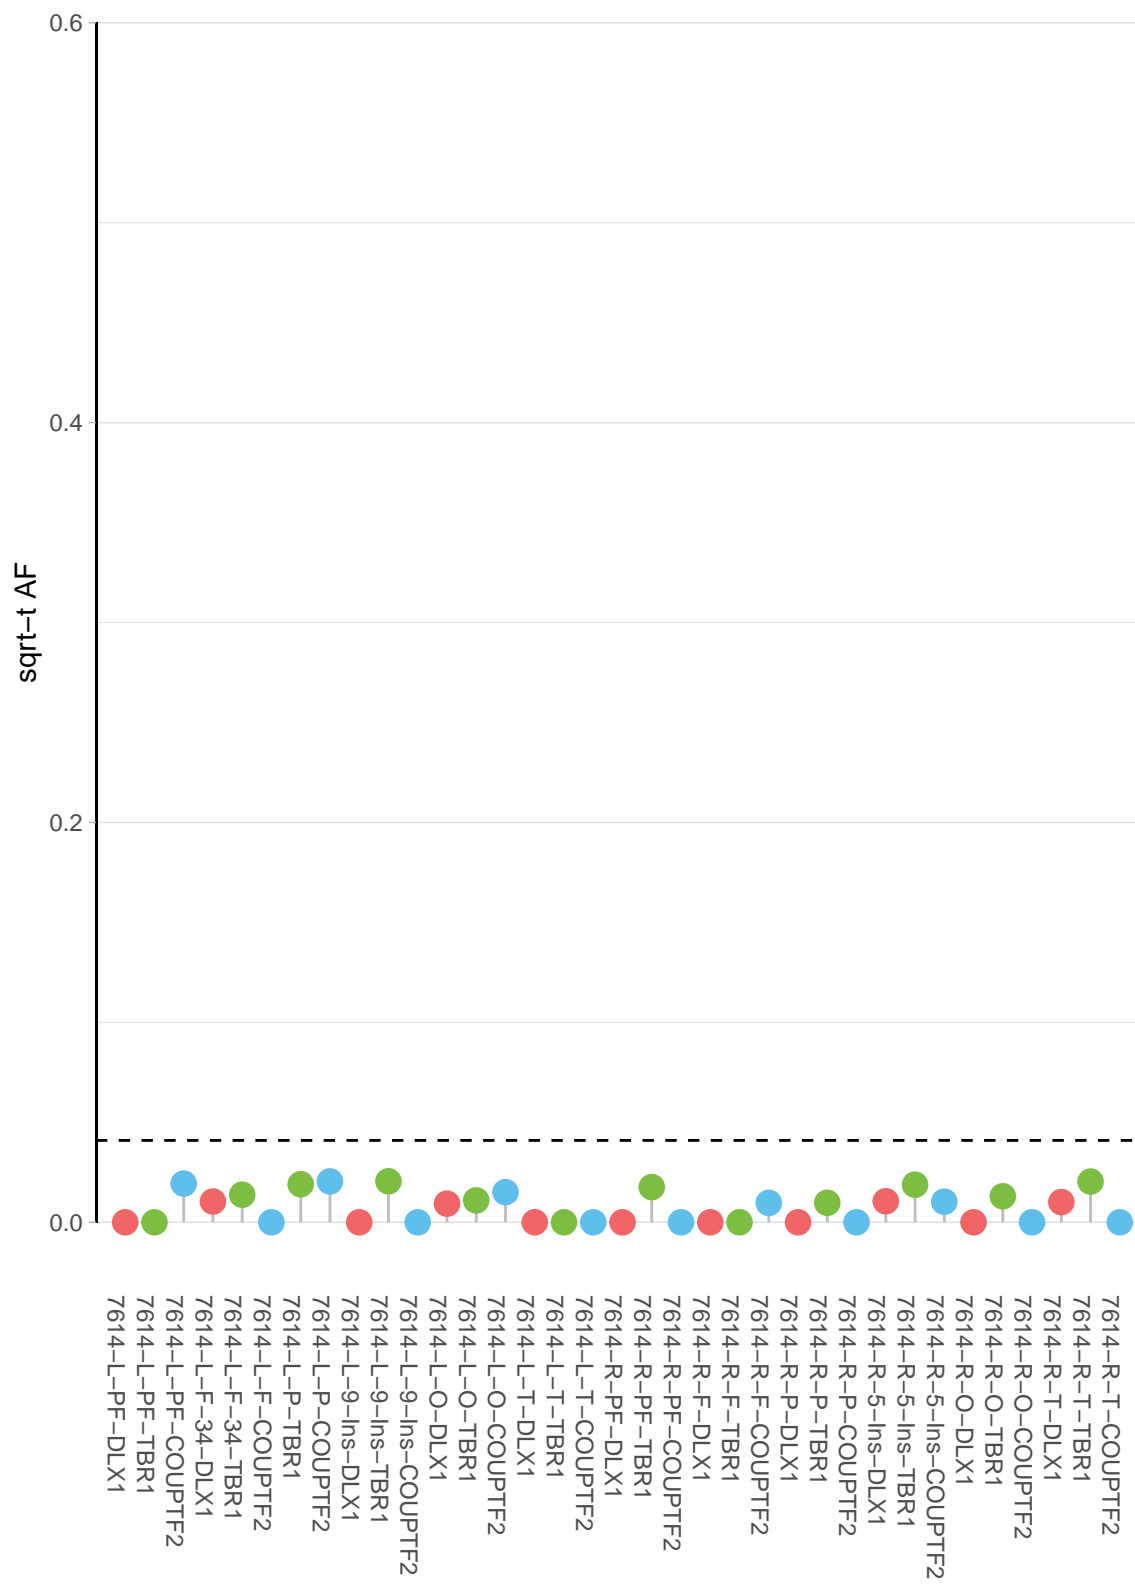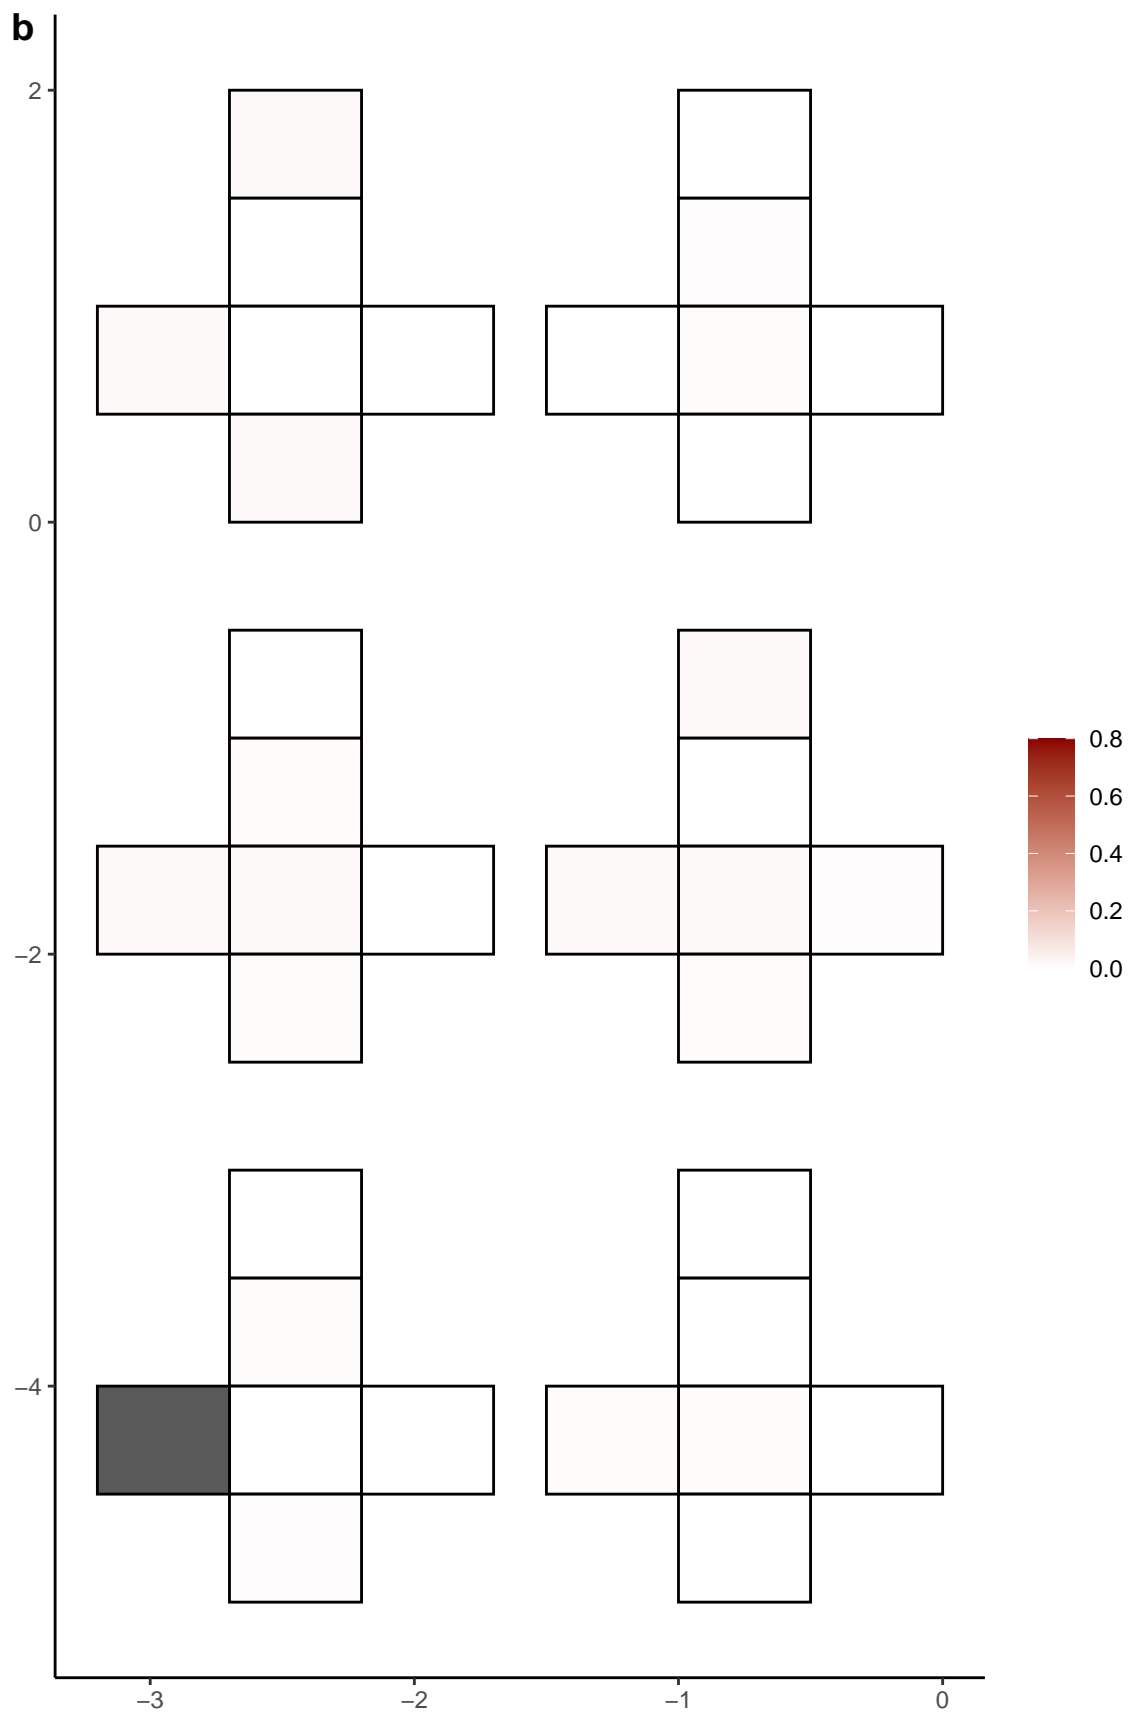

**a** ID01 1-241434408-C-T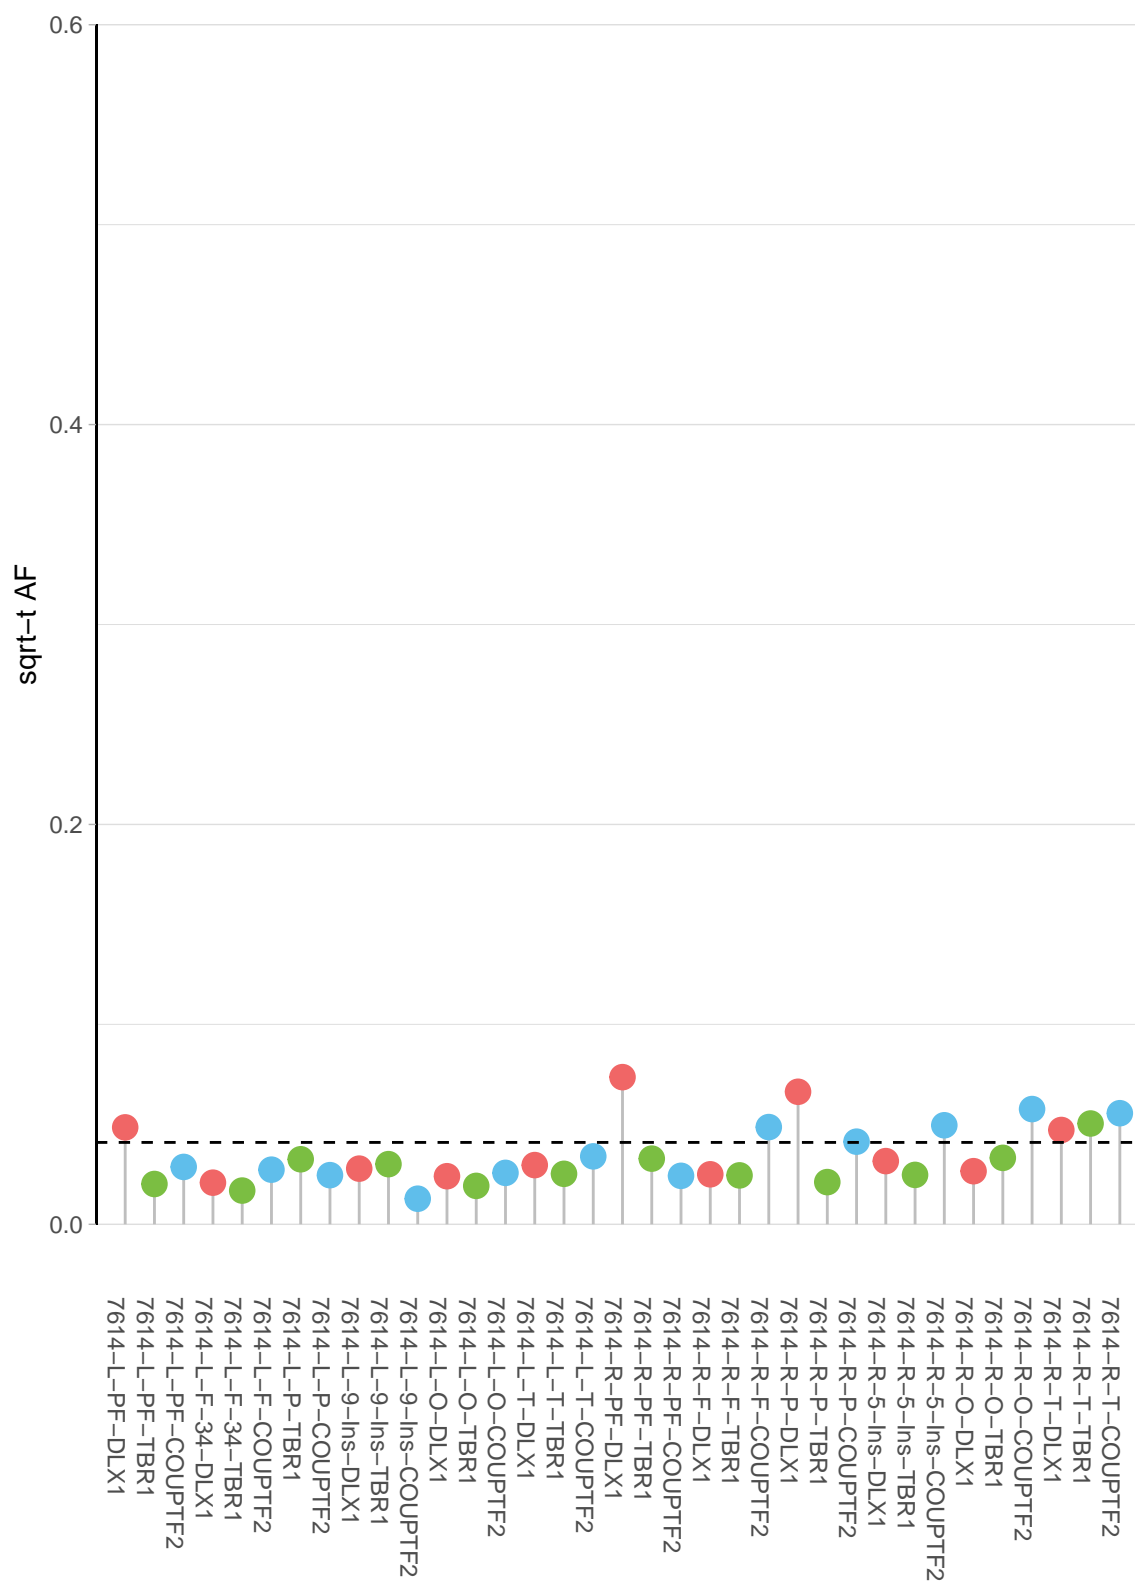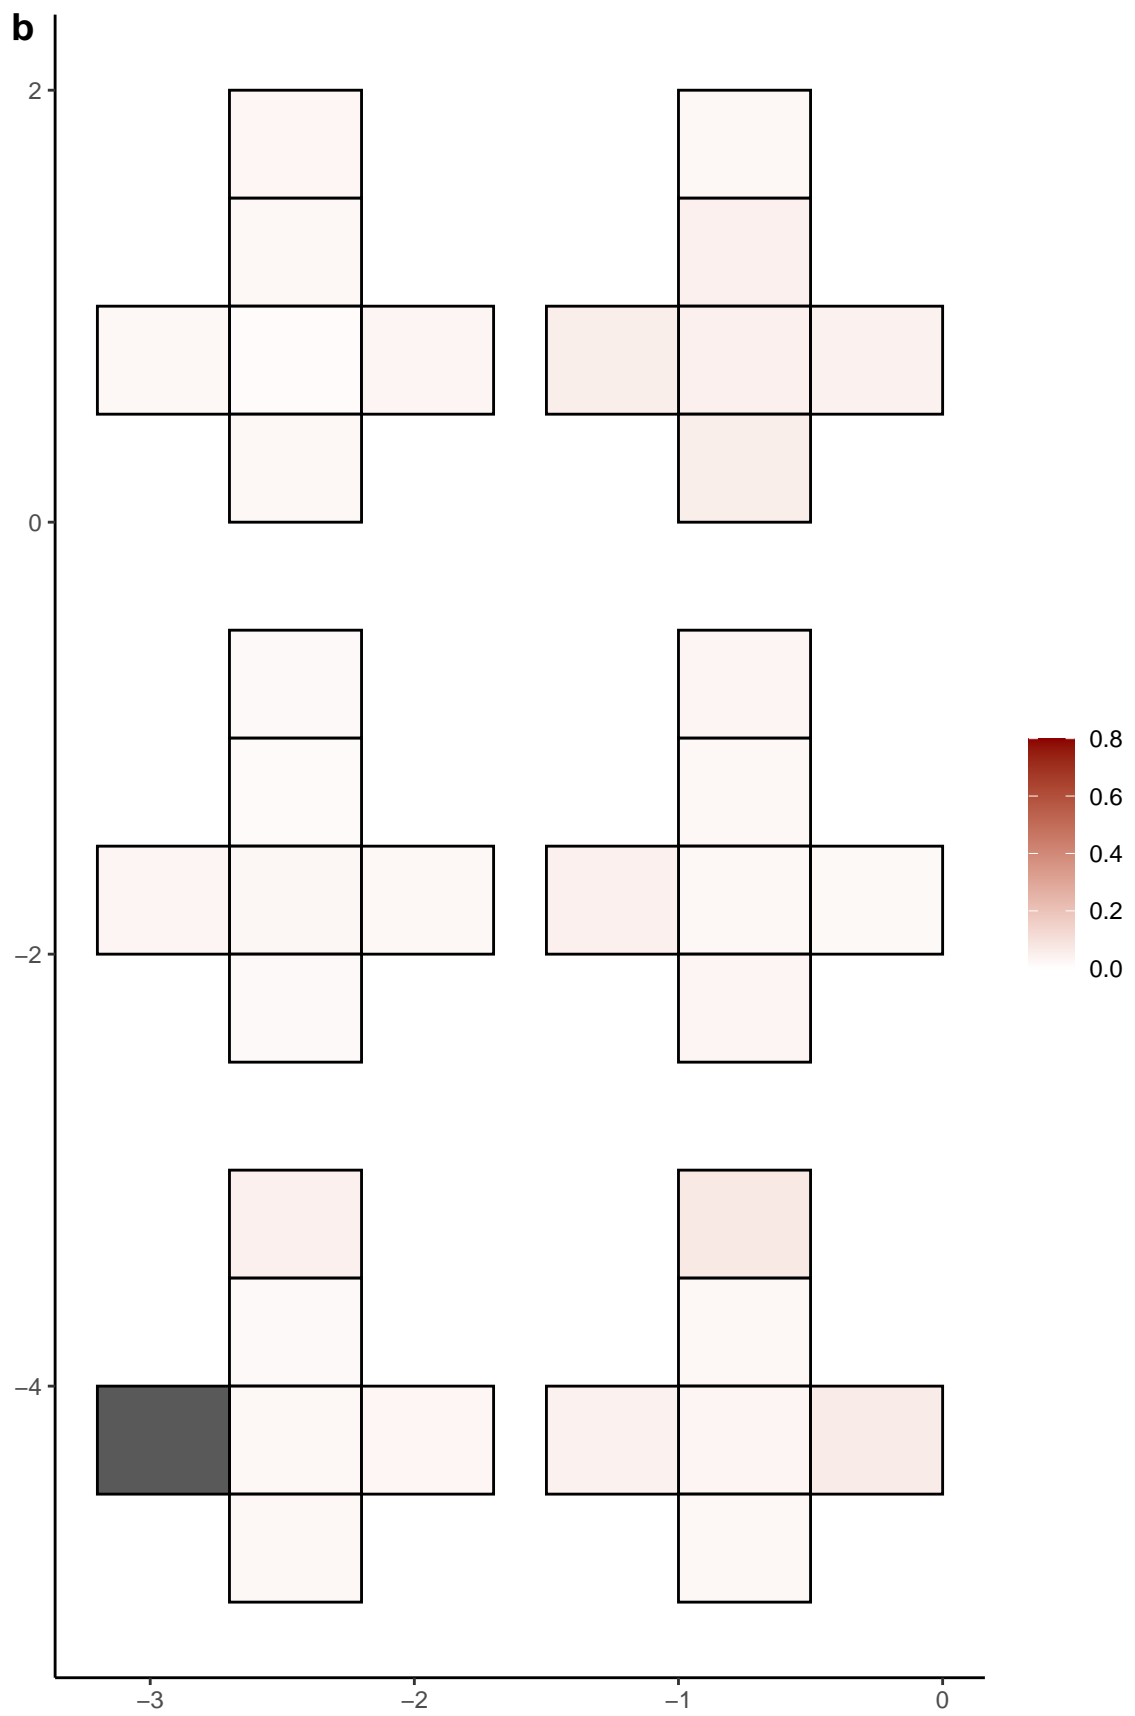

**a** ID01 1-31691734-G-A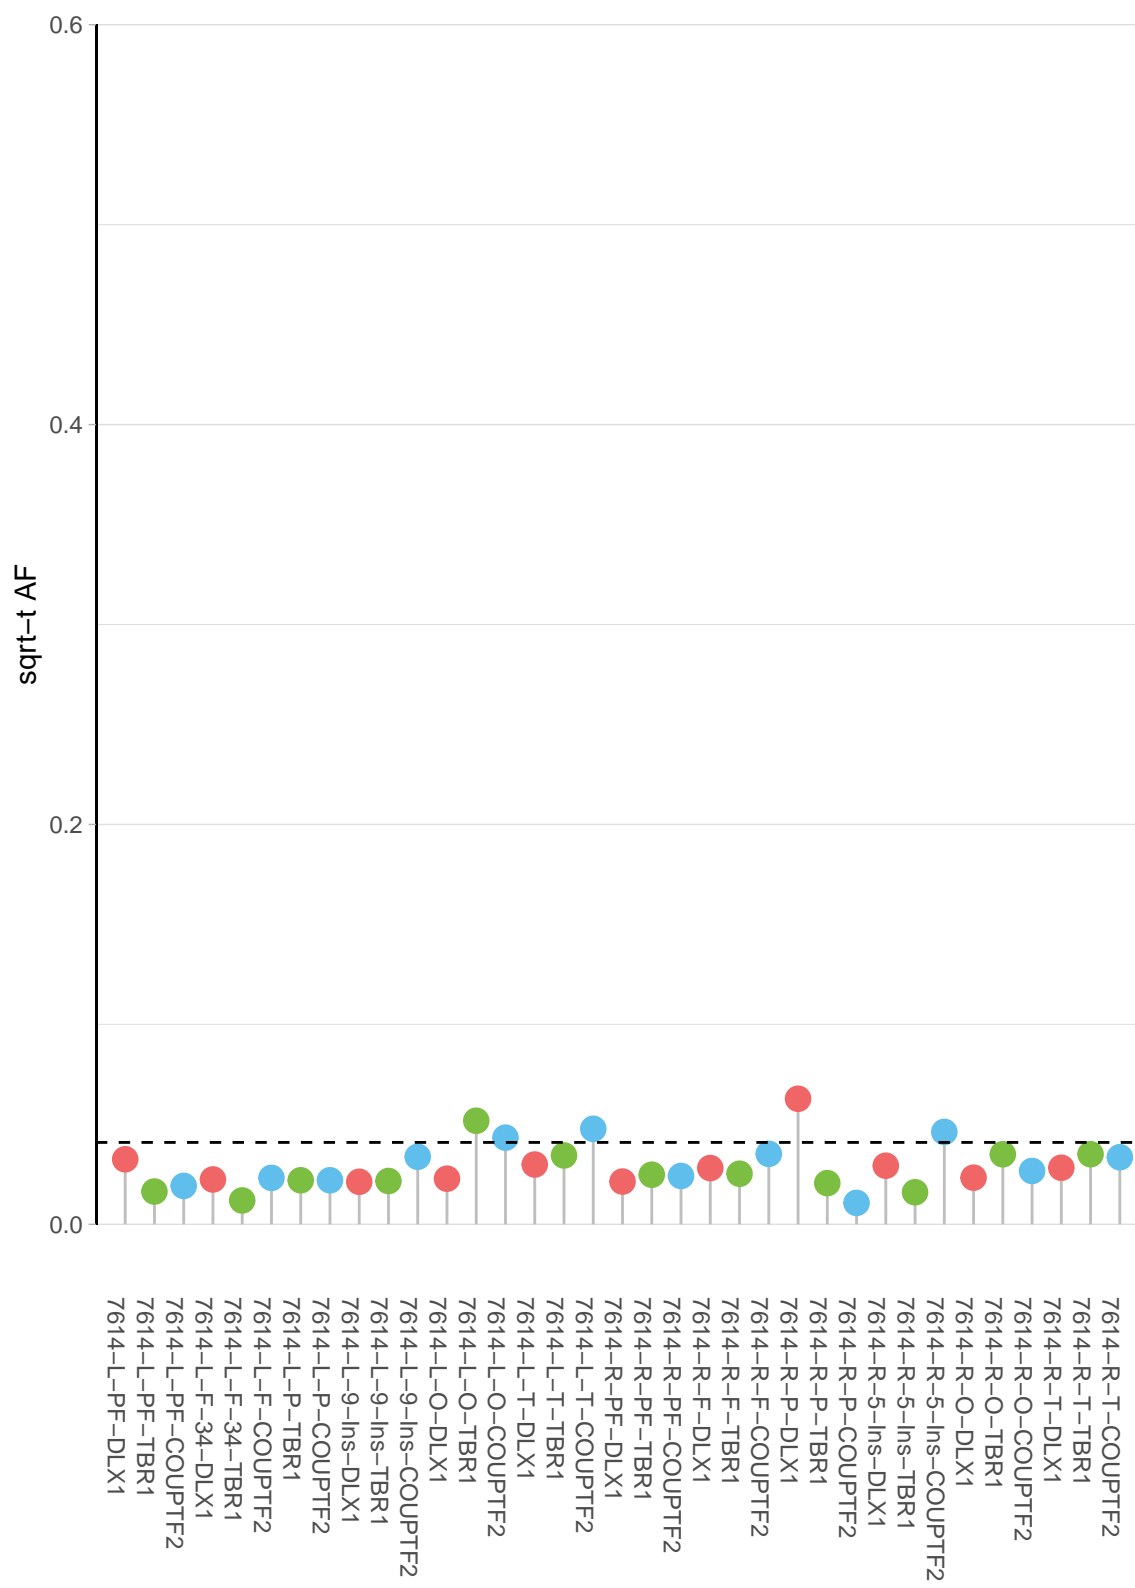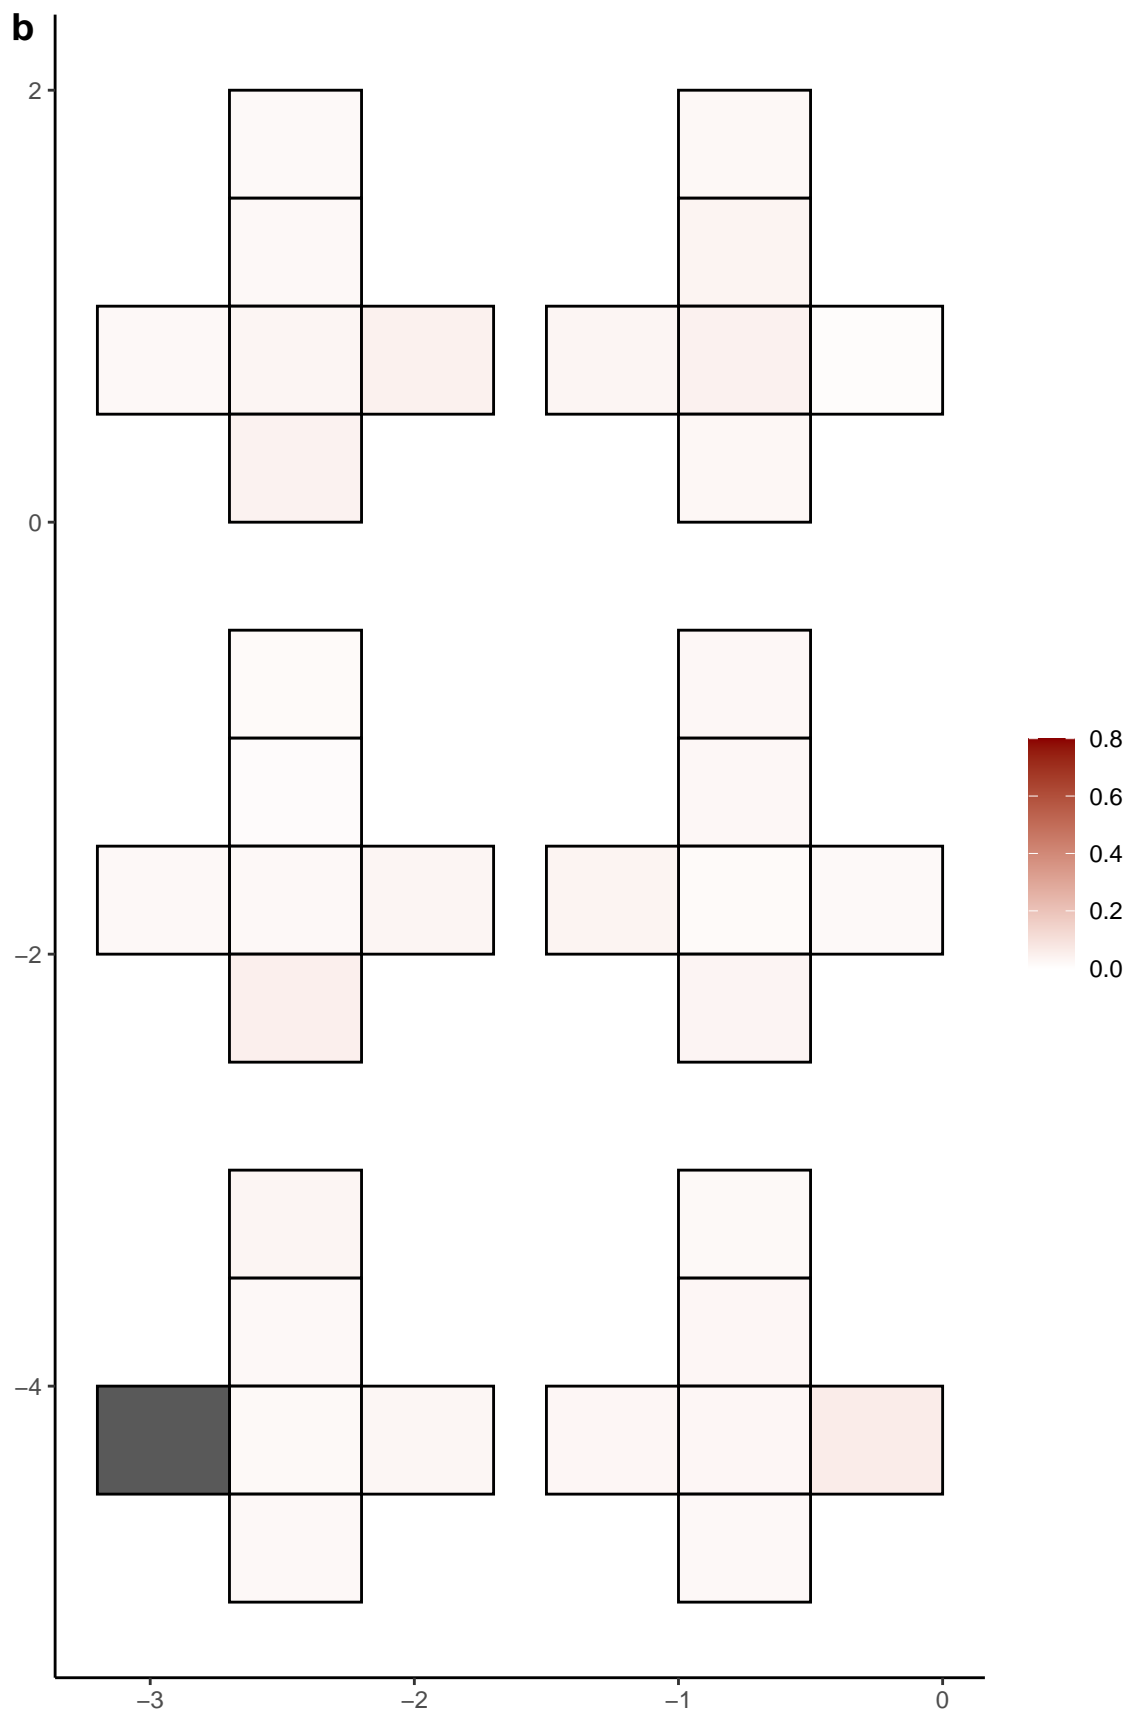

**a** ID01 1-45675887-A-C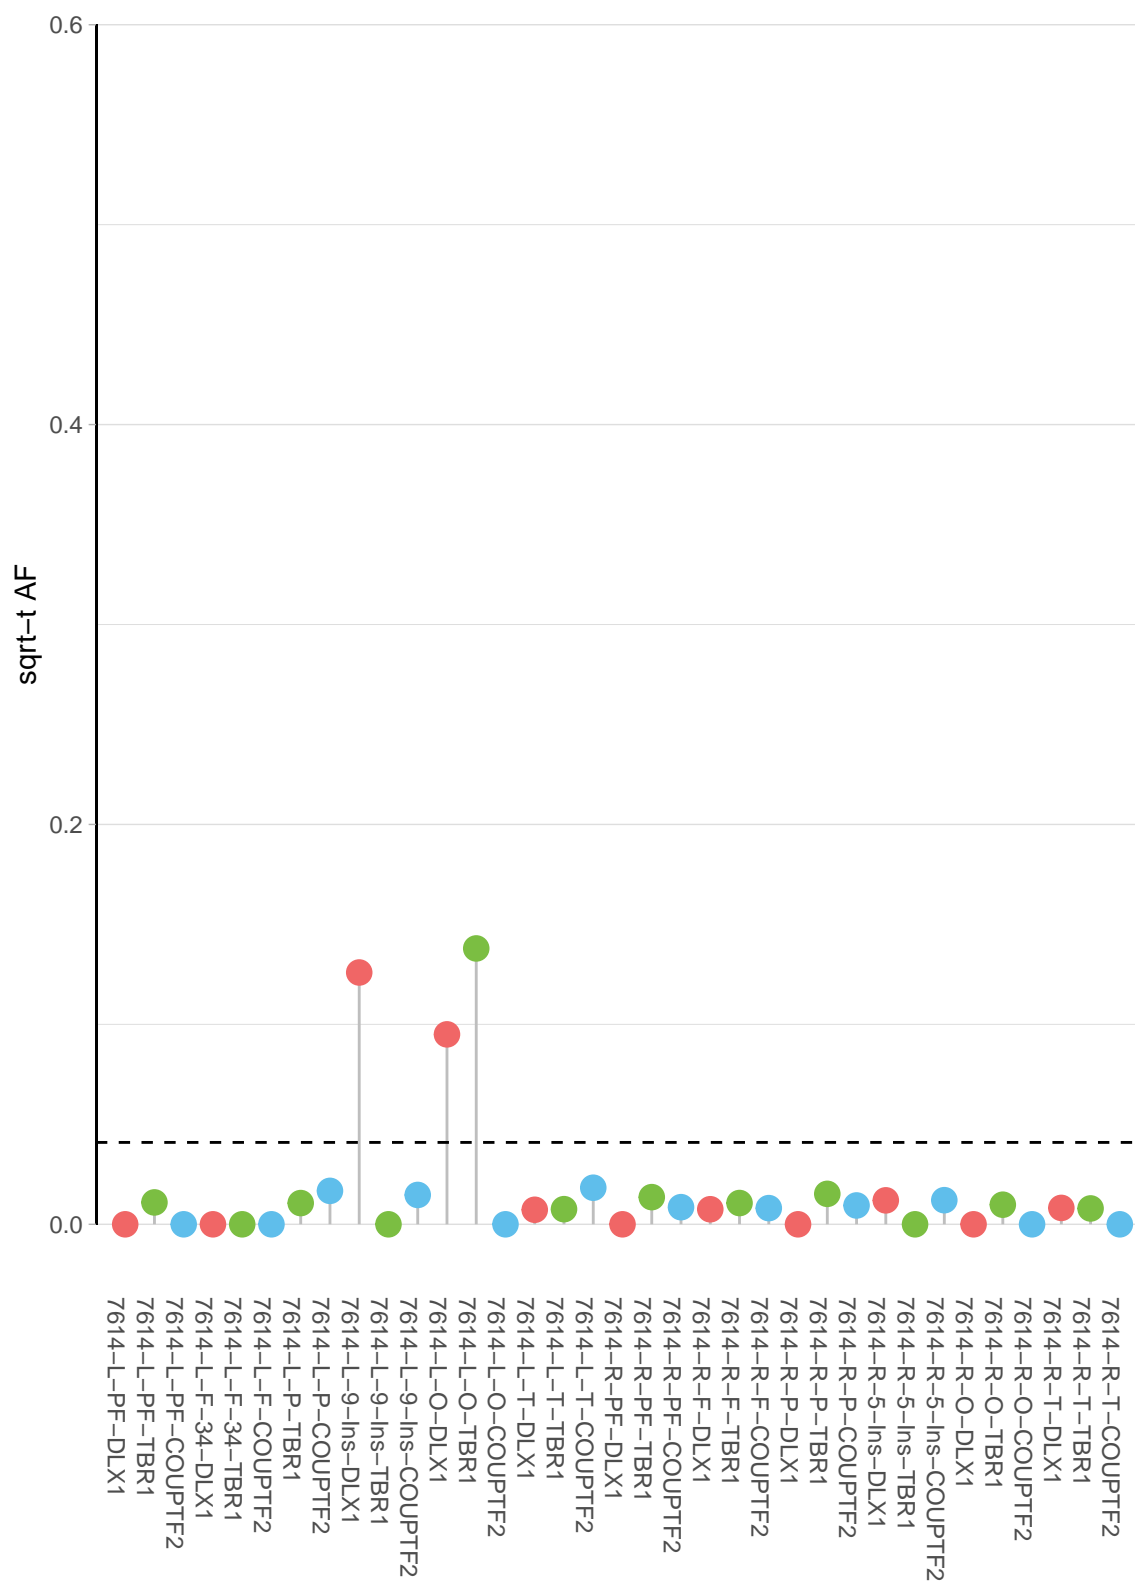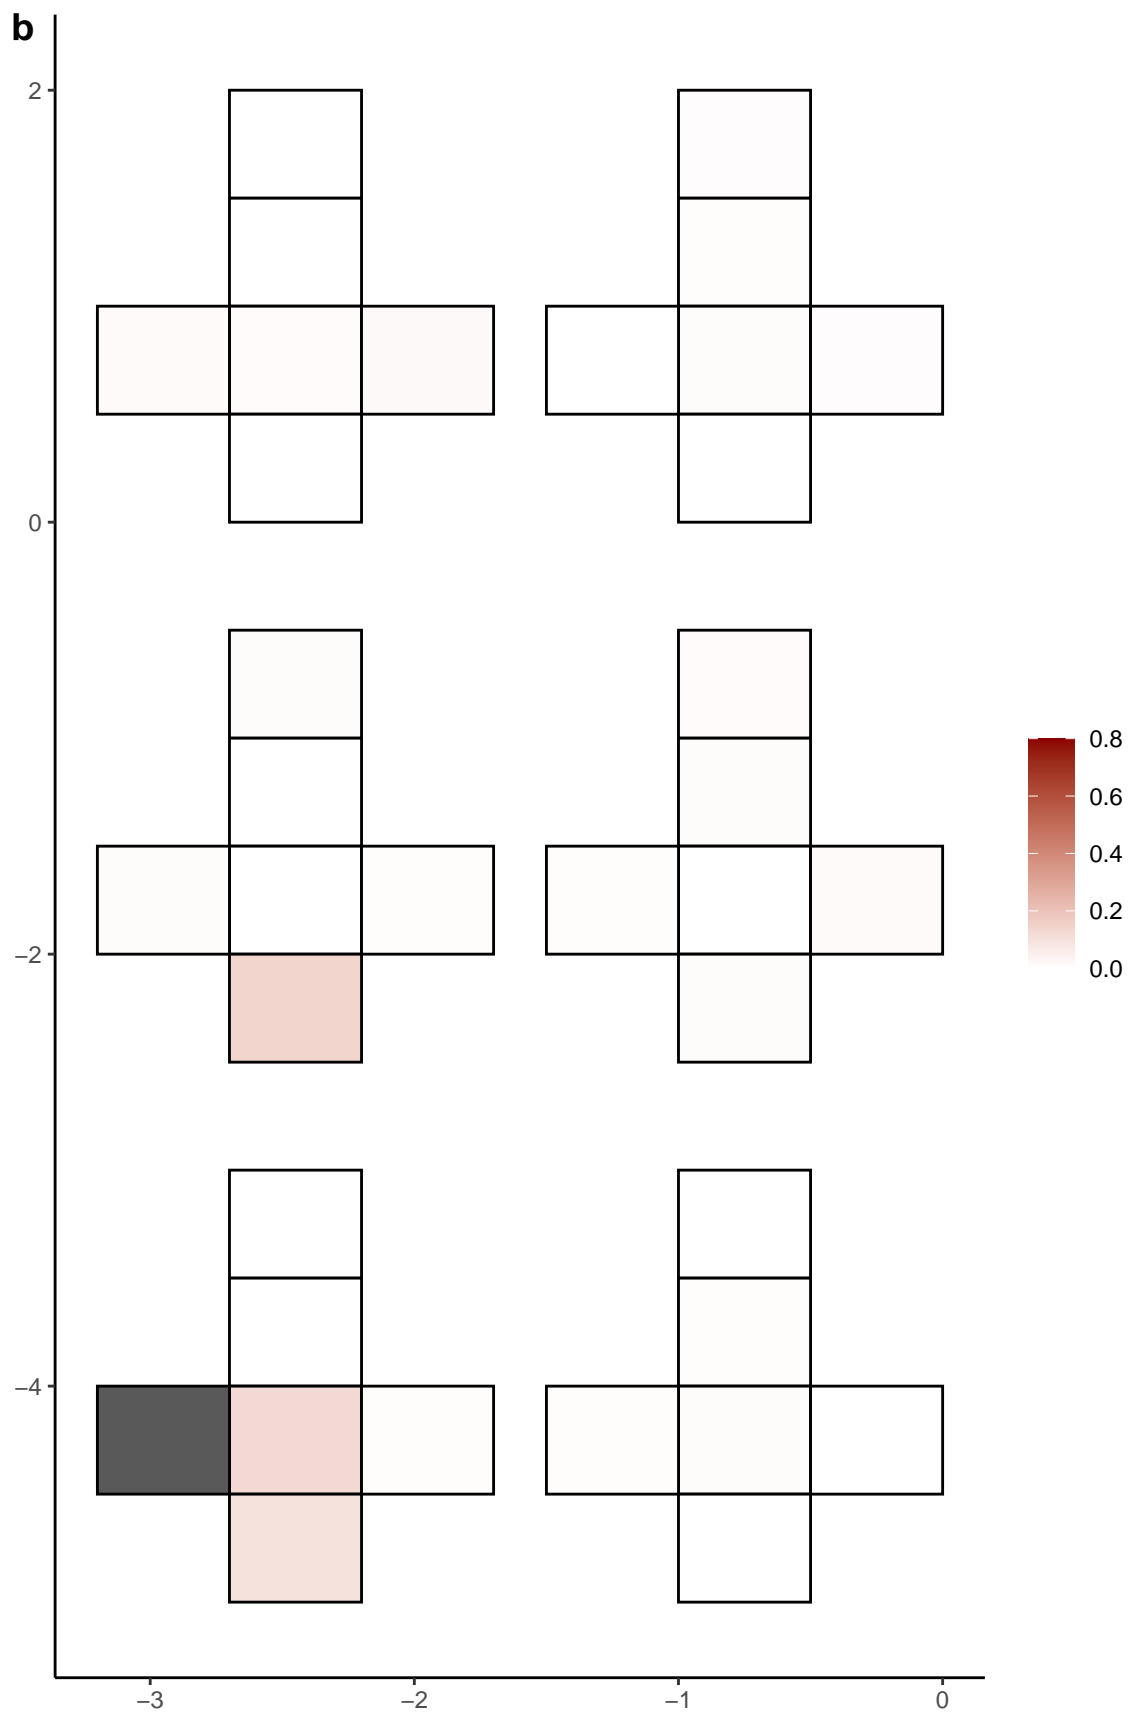

**a** ID01 1-64512024-C-T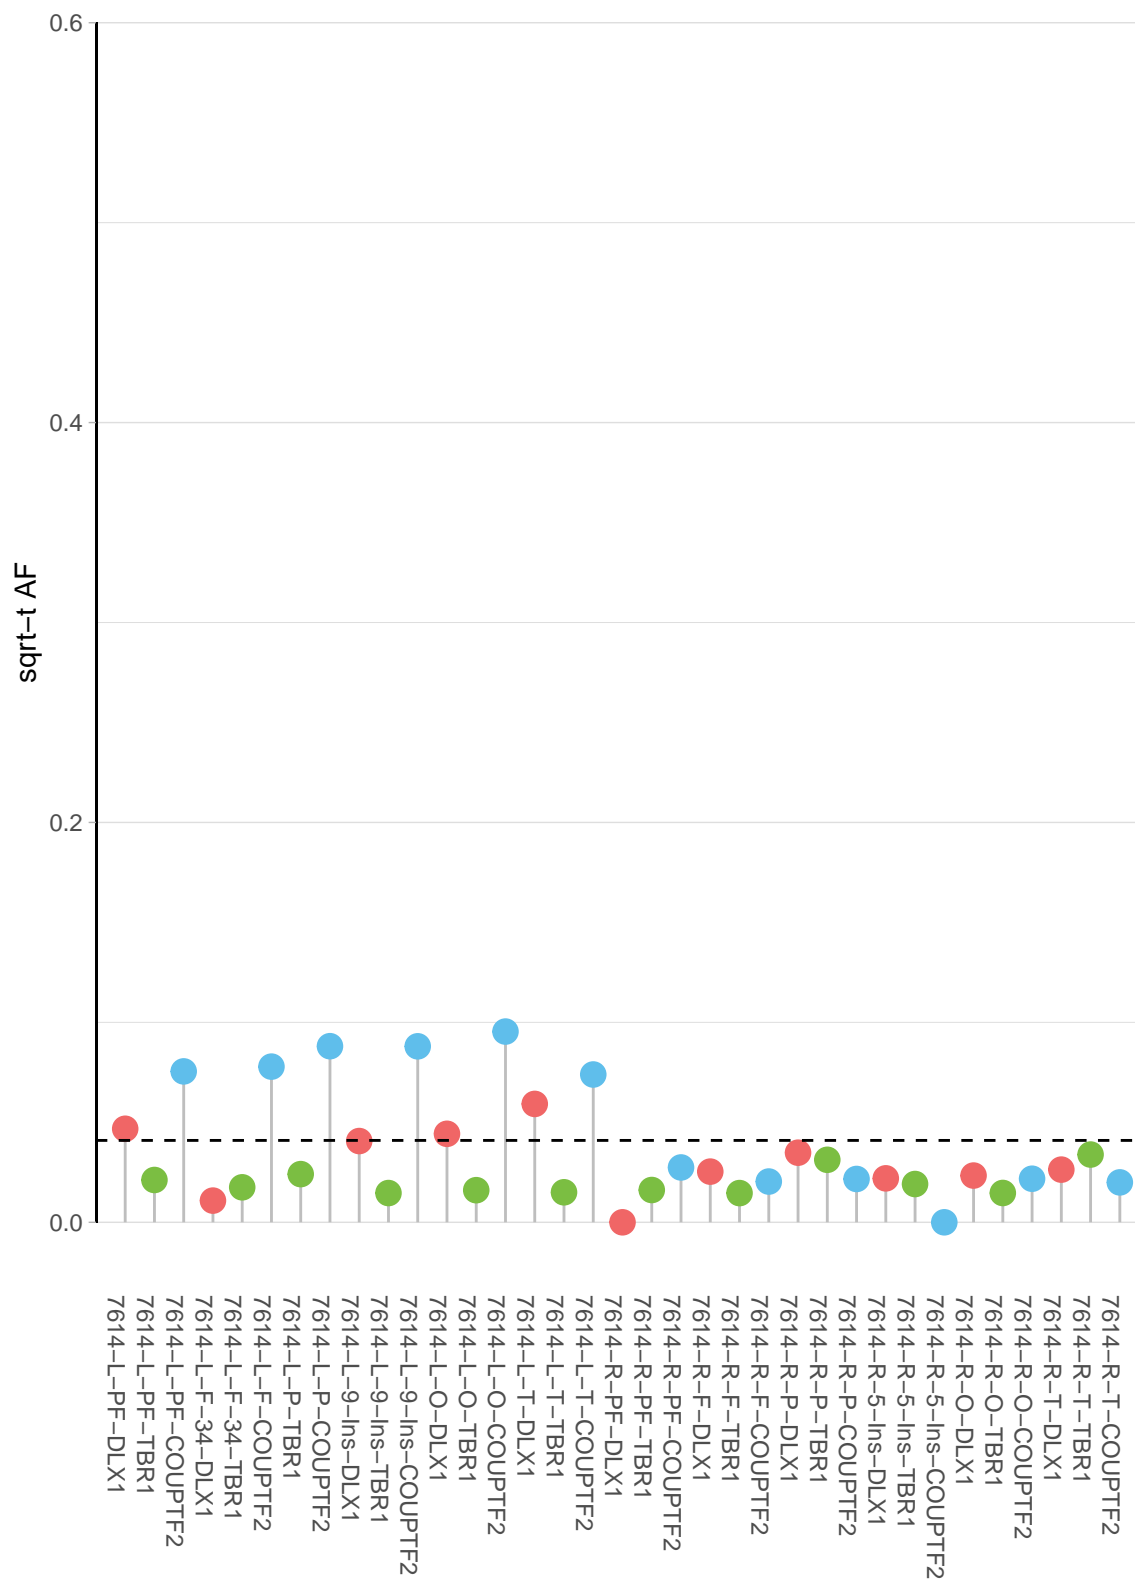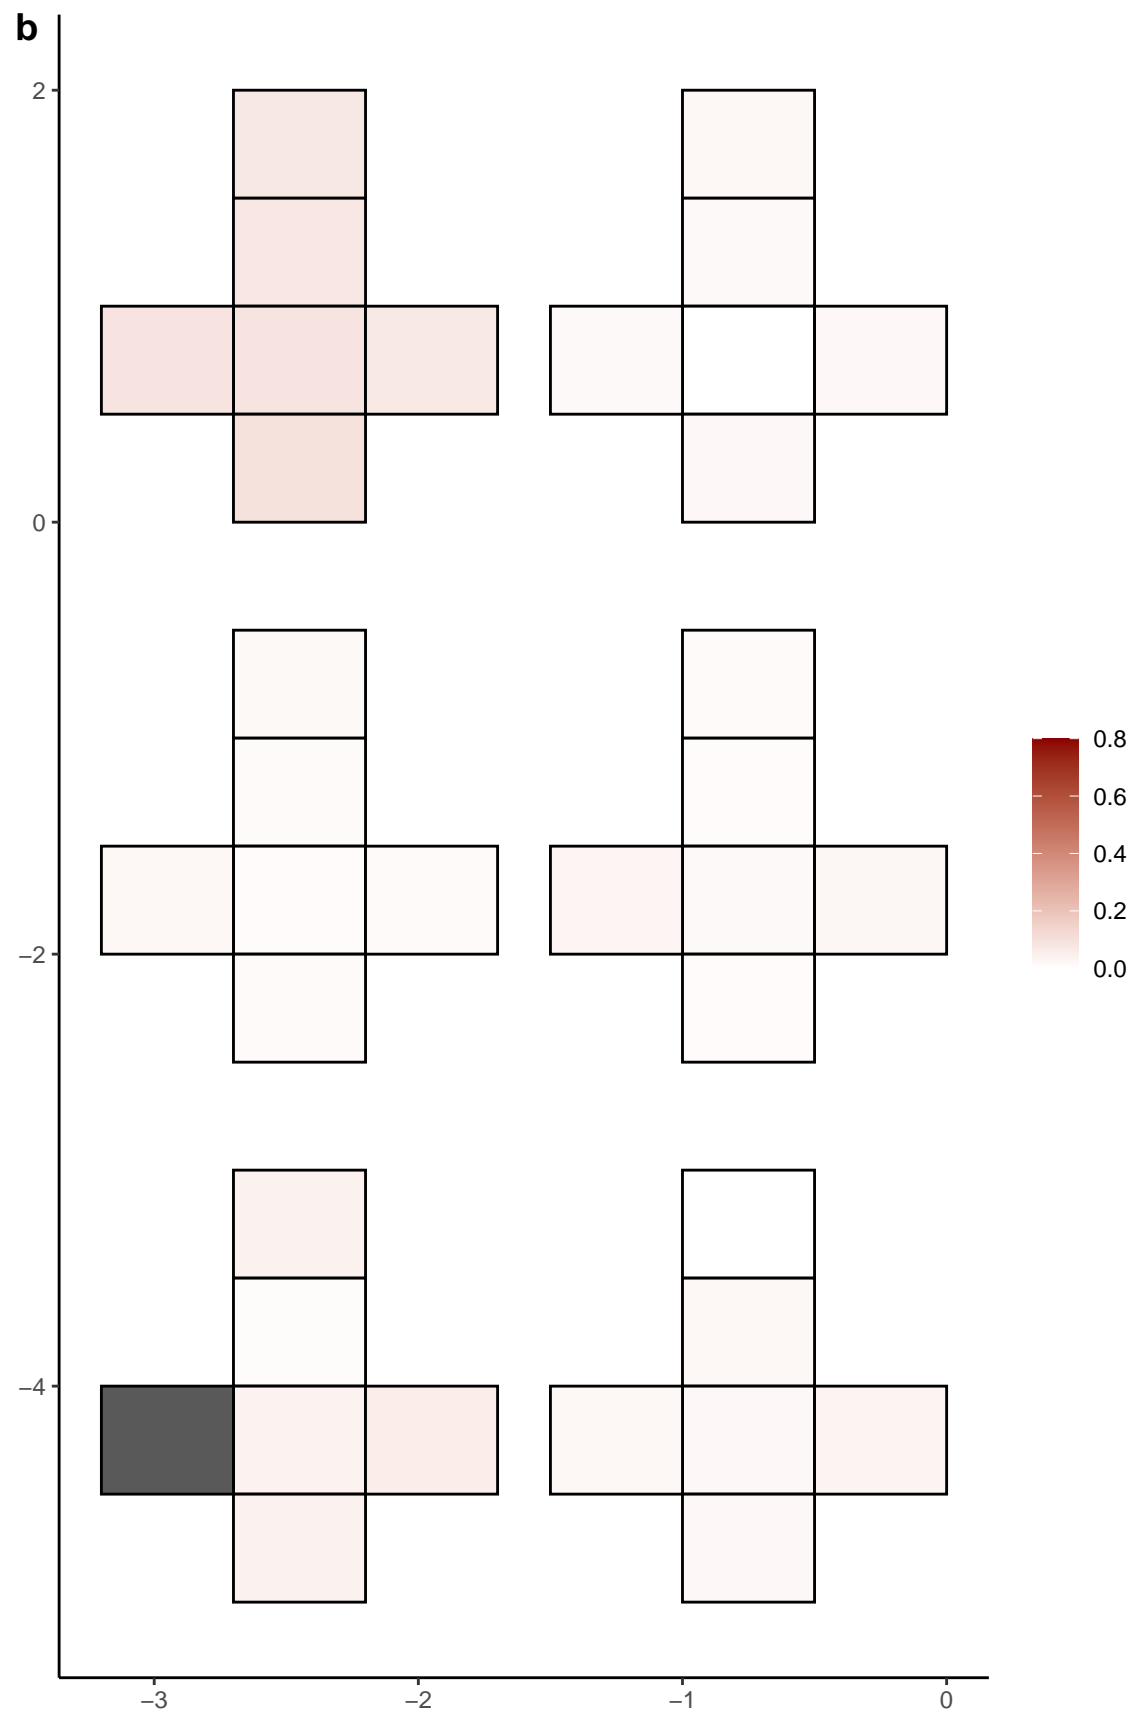

**a** ID01 1-98426749-G-A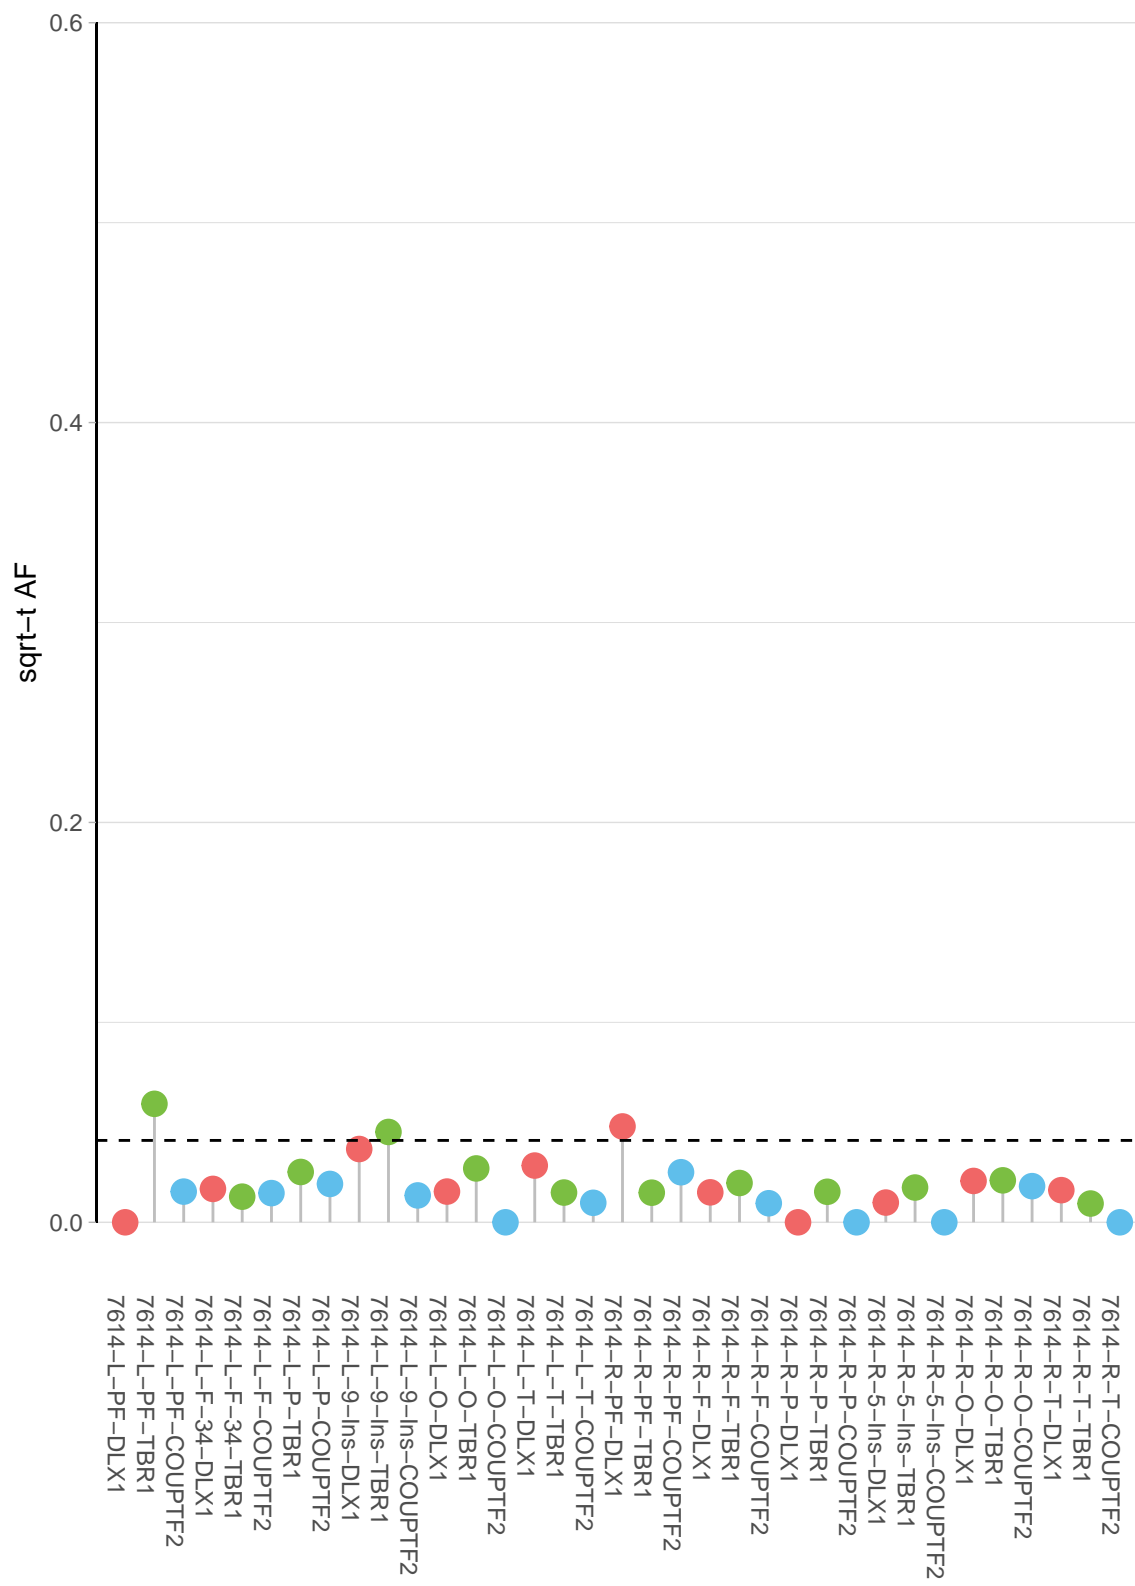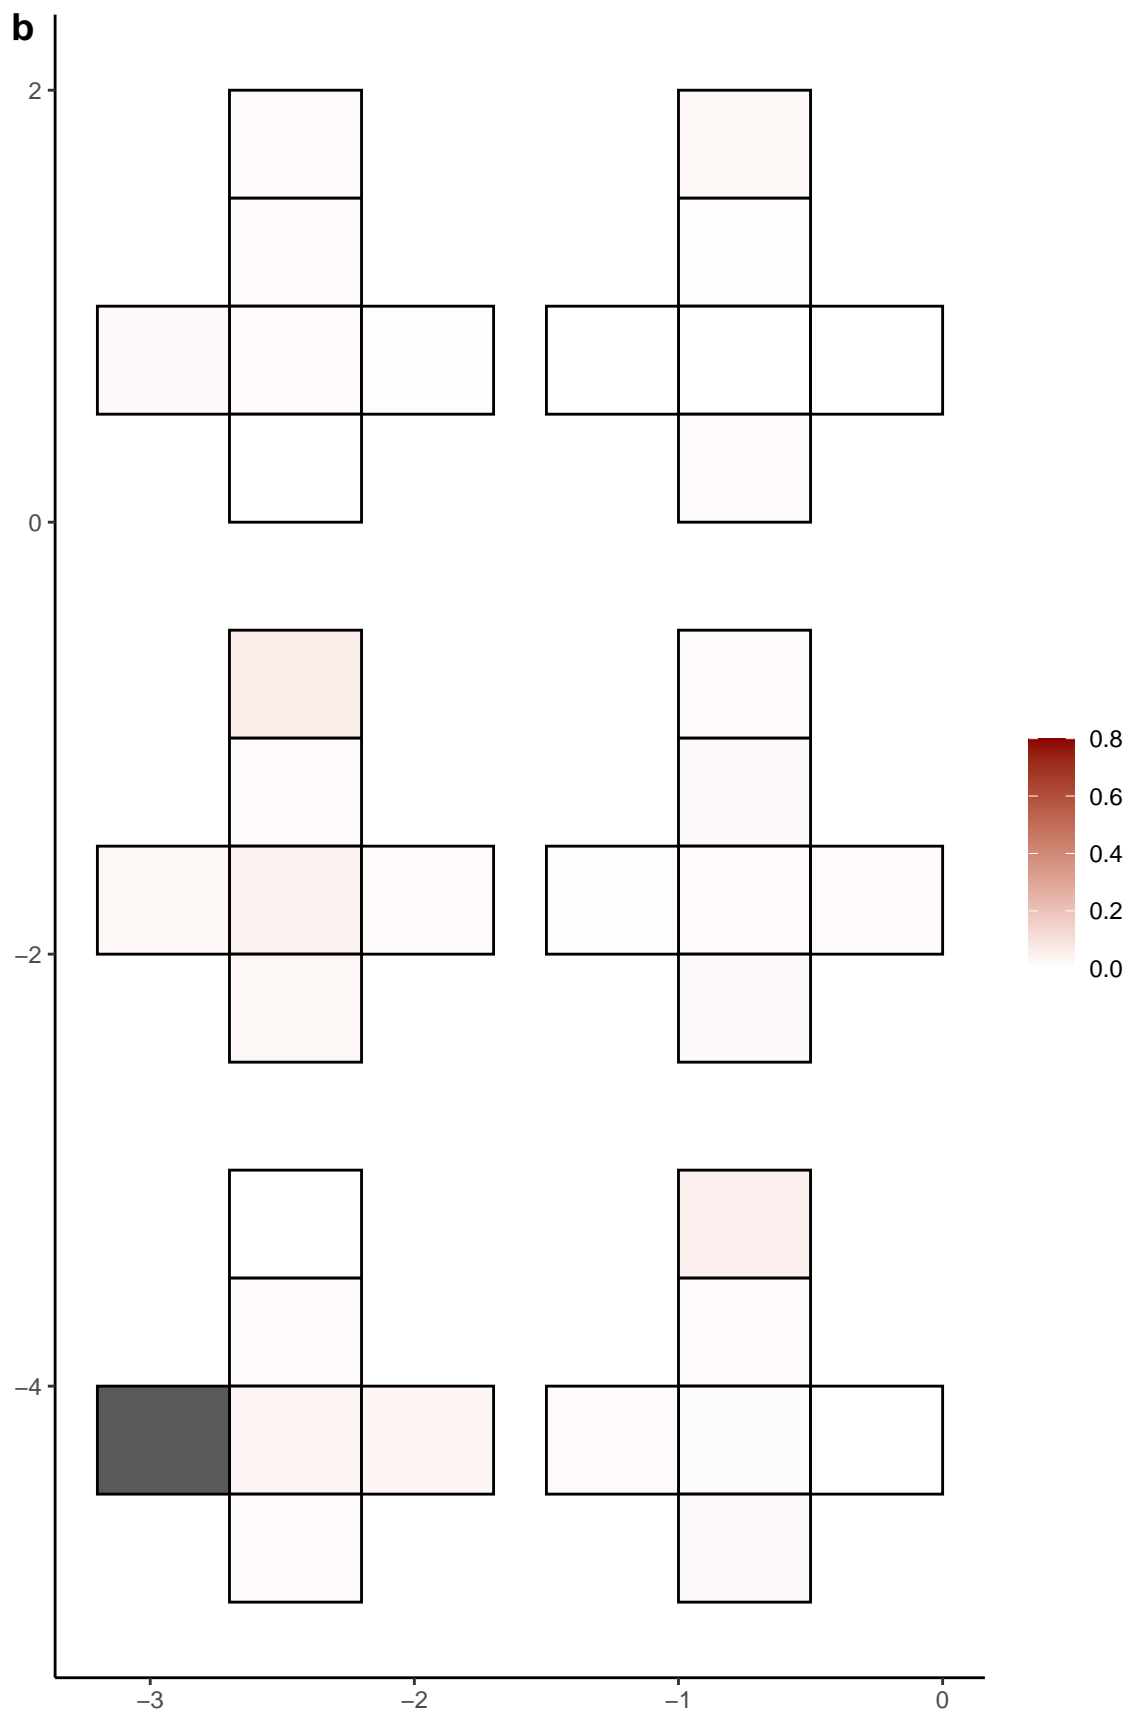

**a** ID01 1-99581604-C-G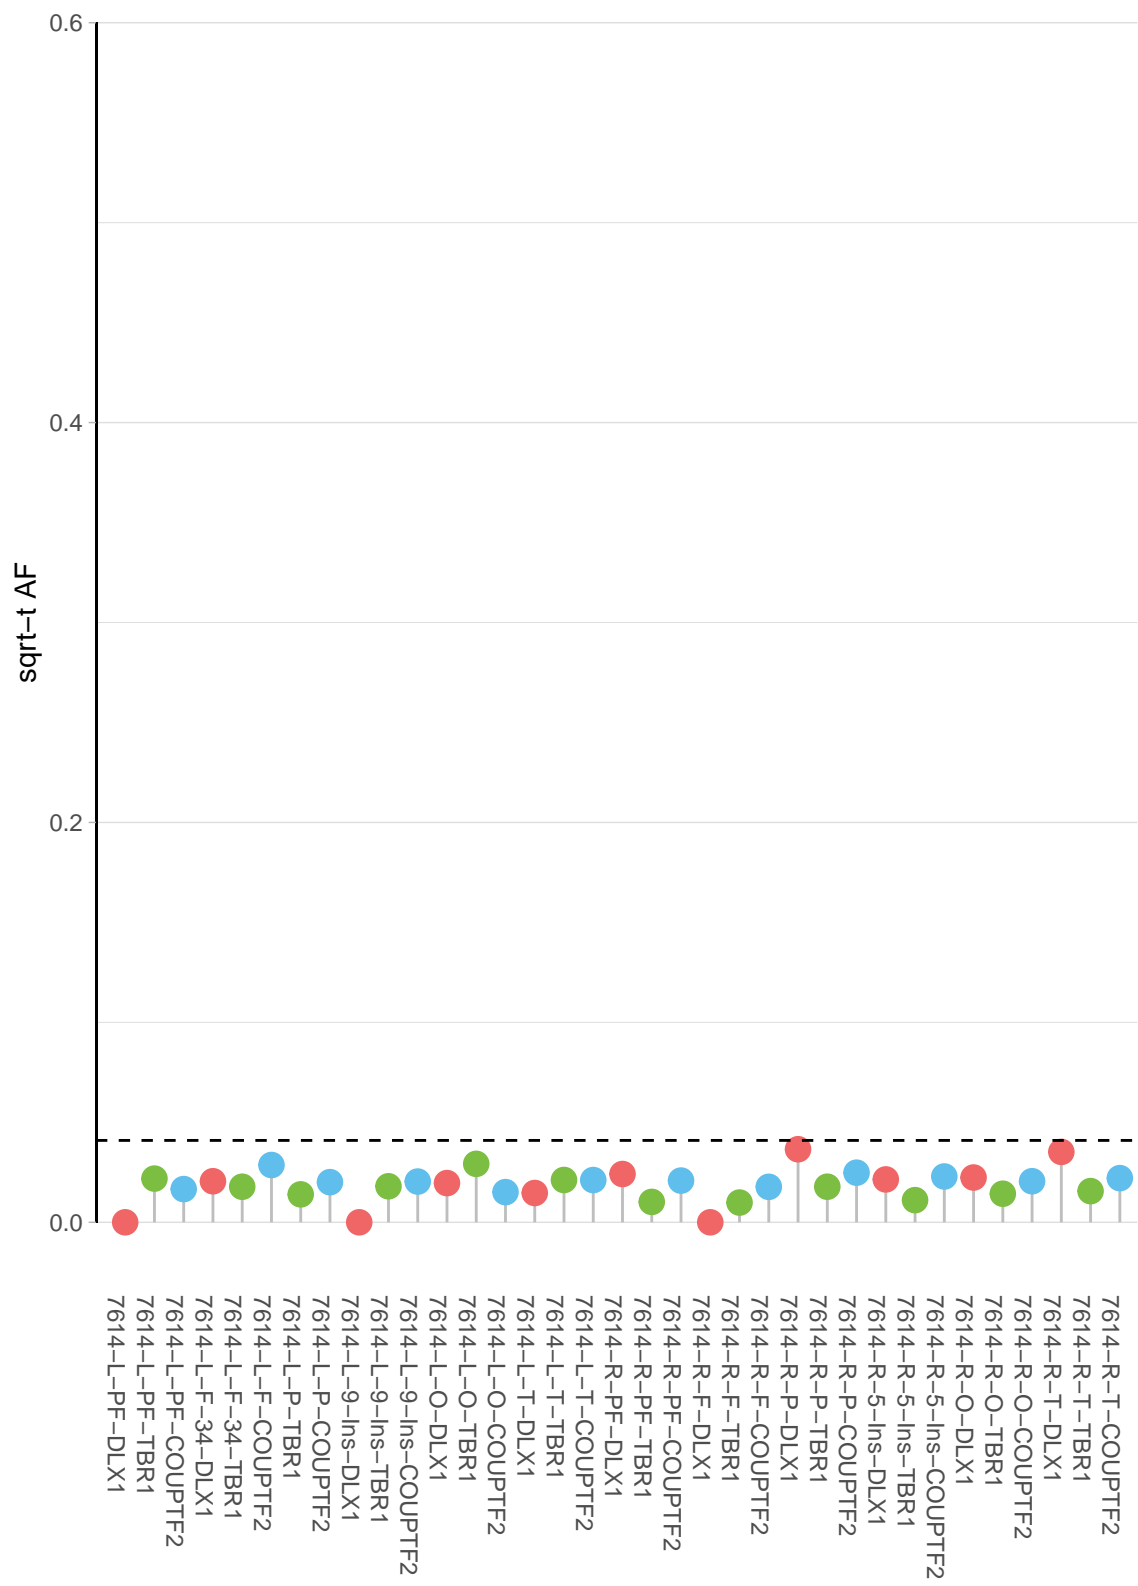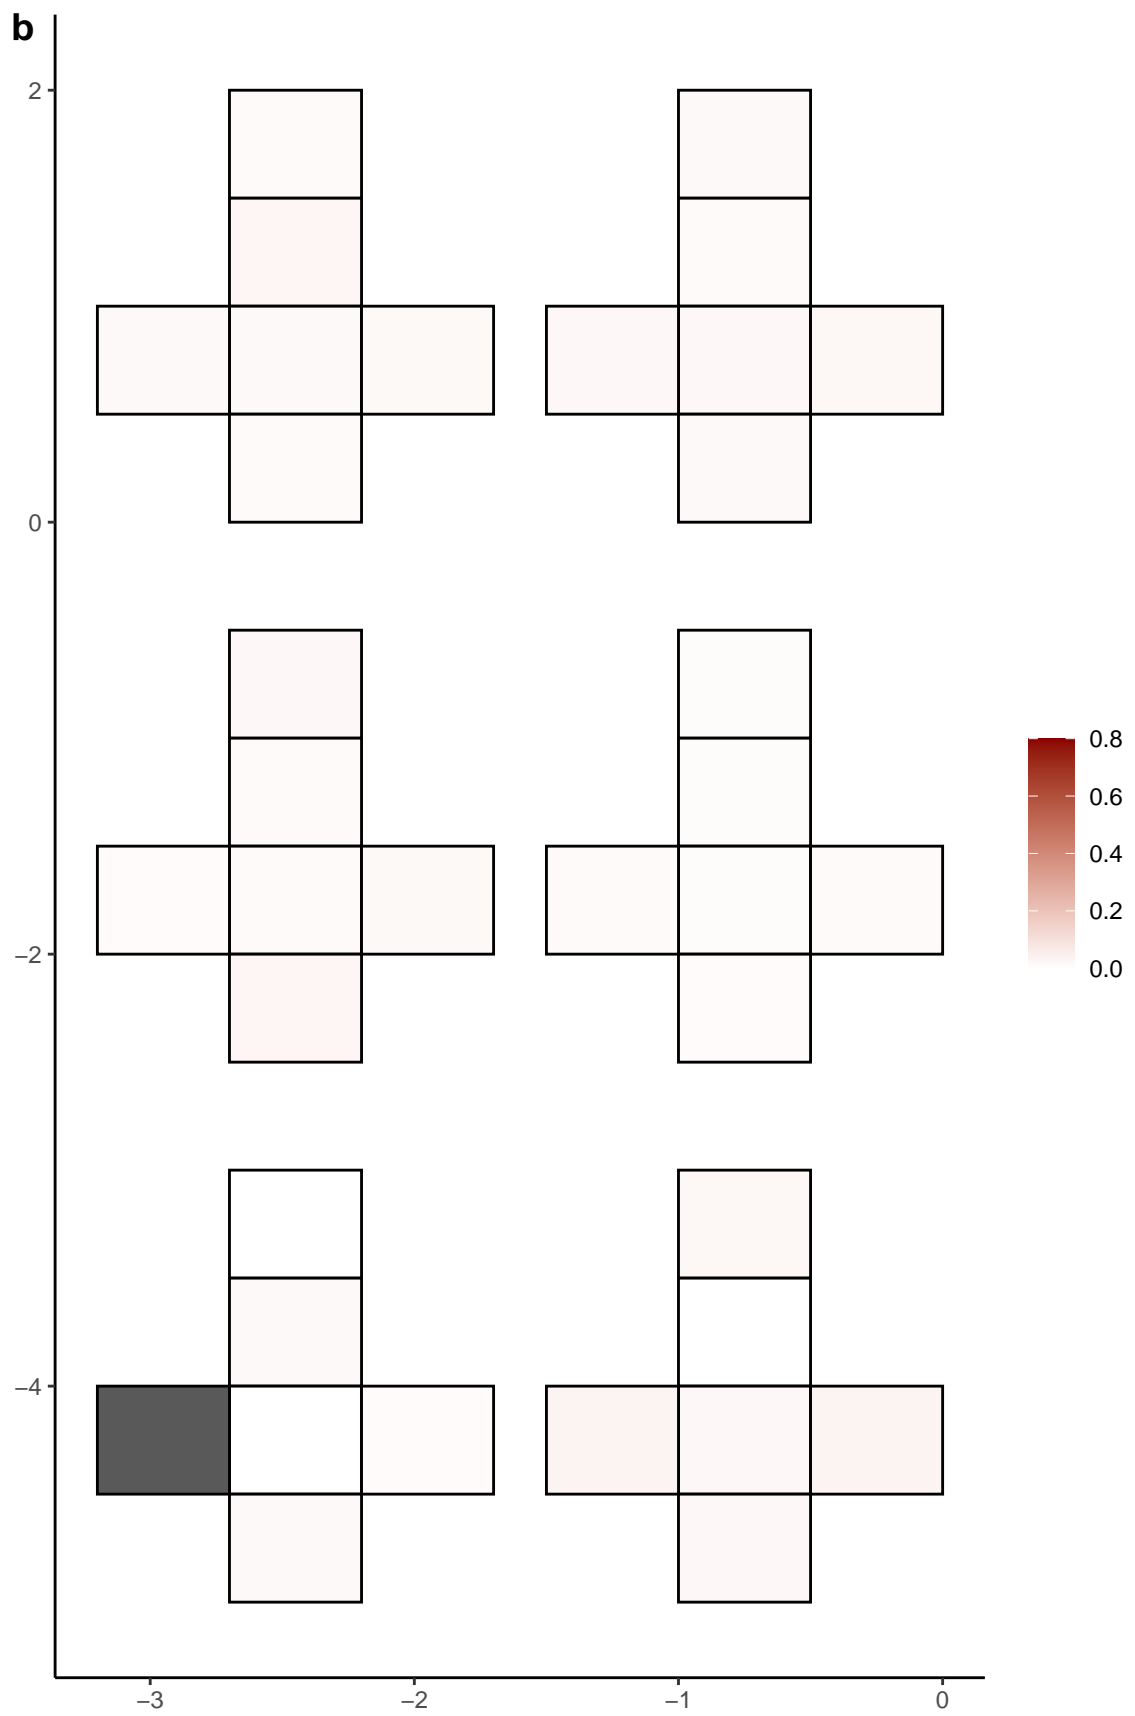

**a** ID01 10-116196503-C-T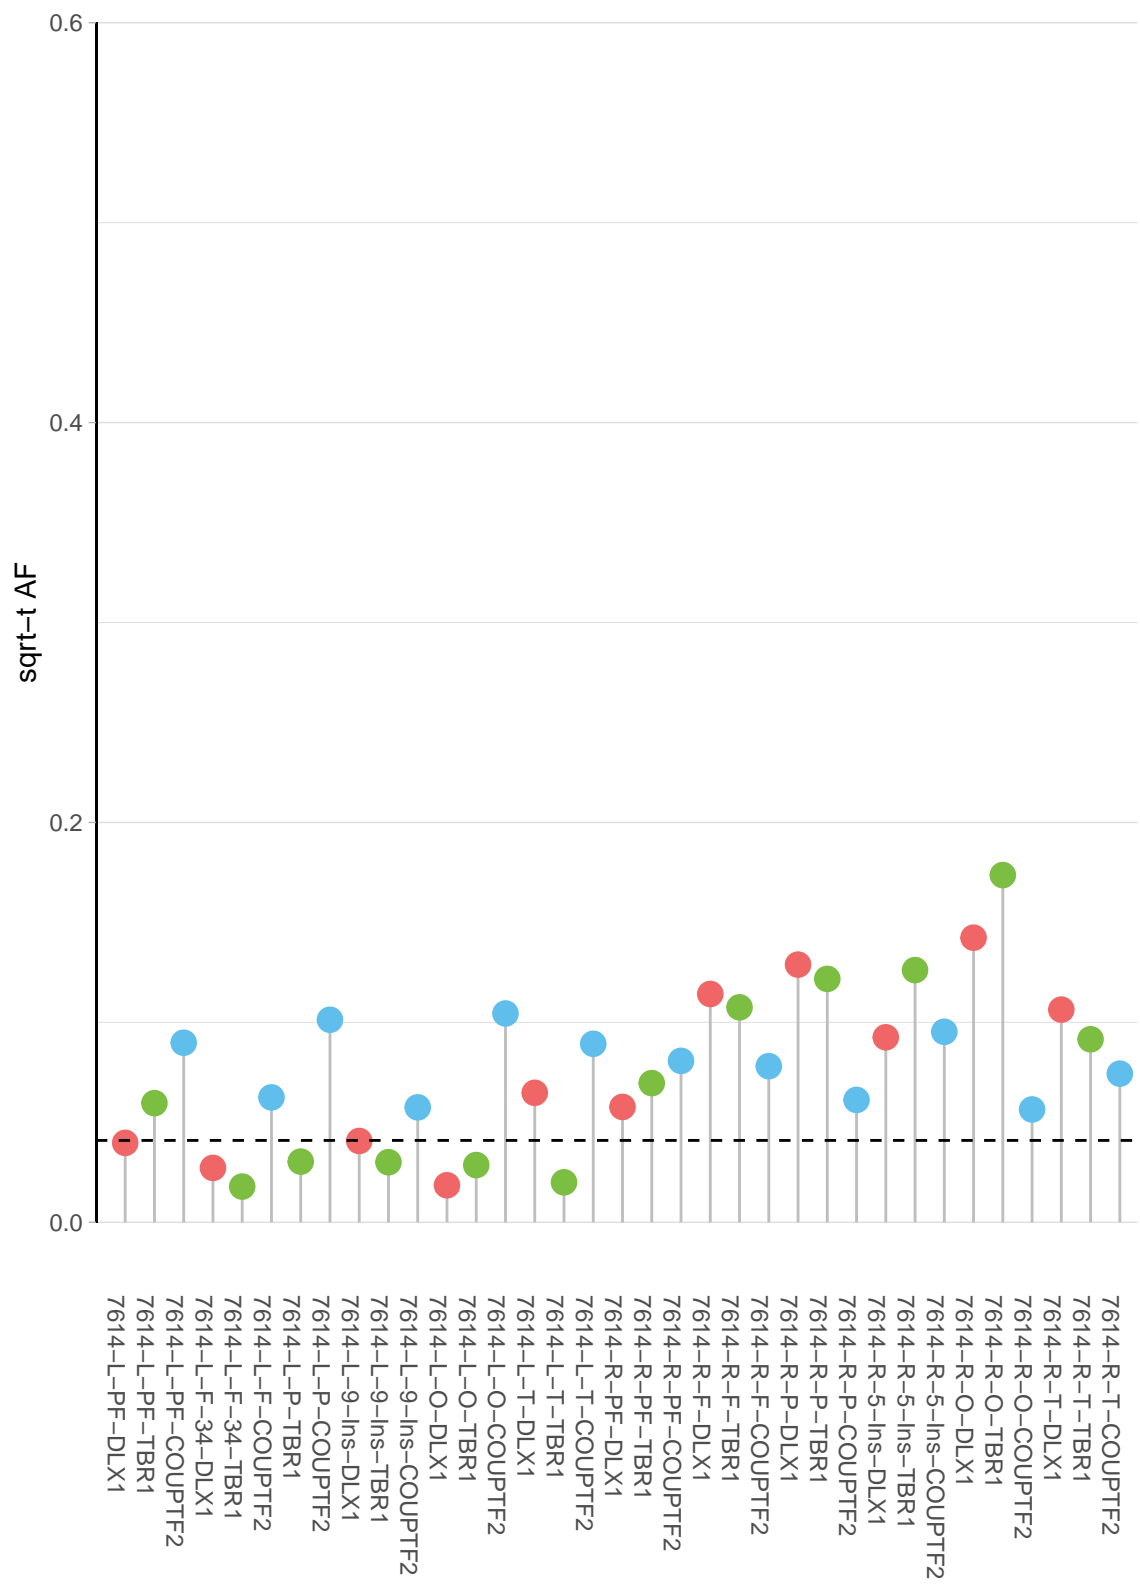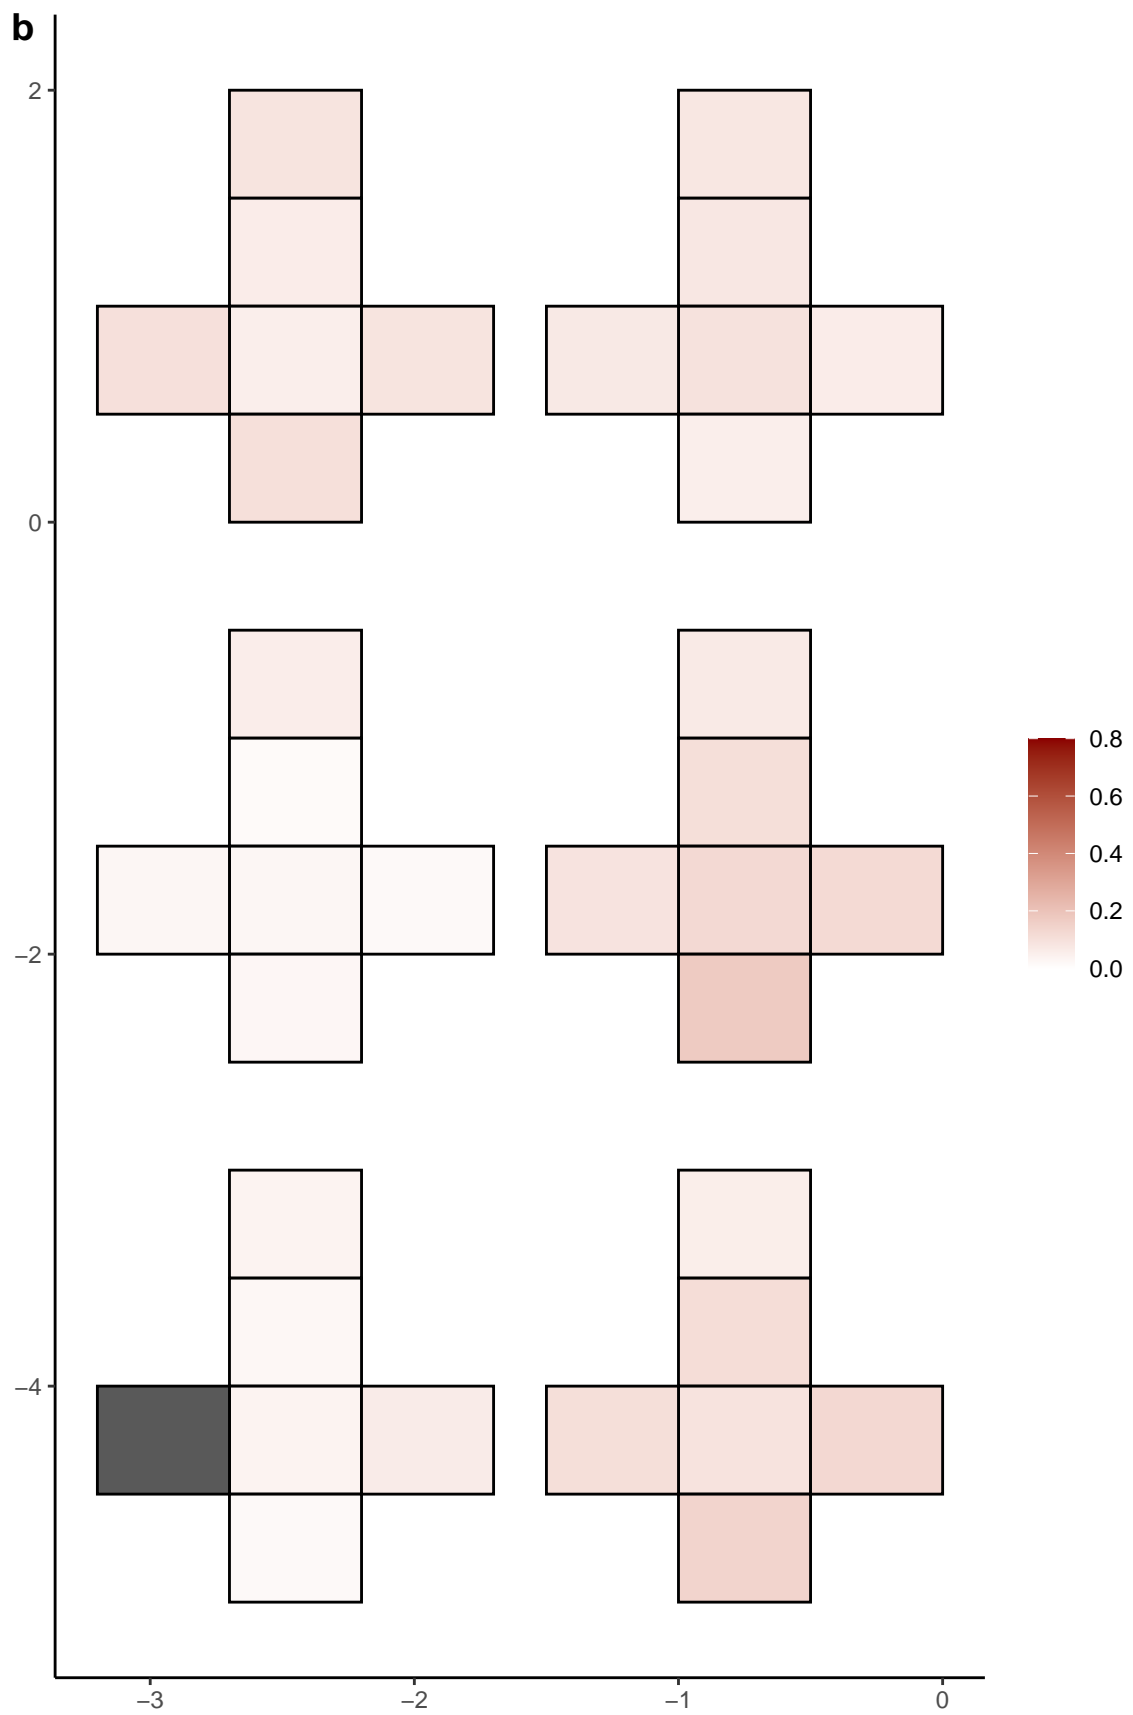



**a** ID01 10-127139902-G-A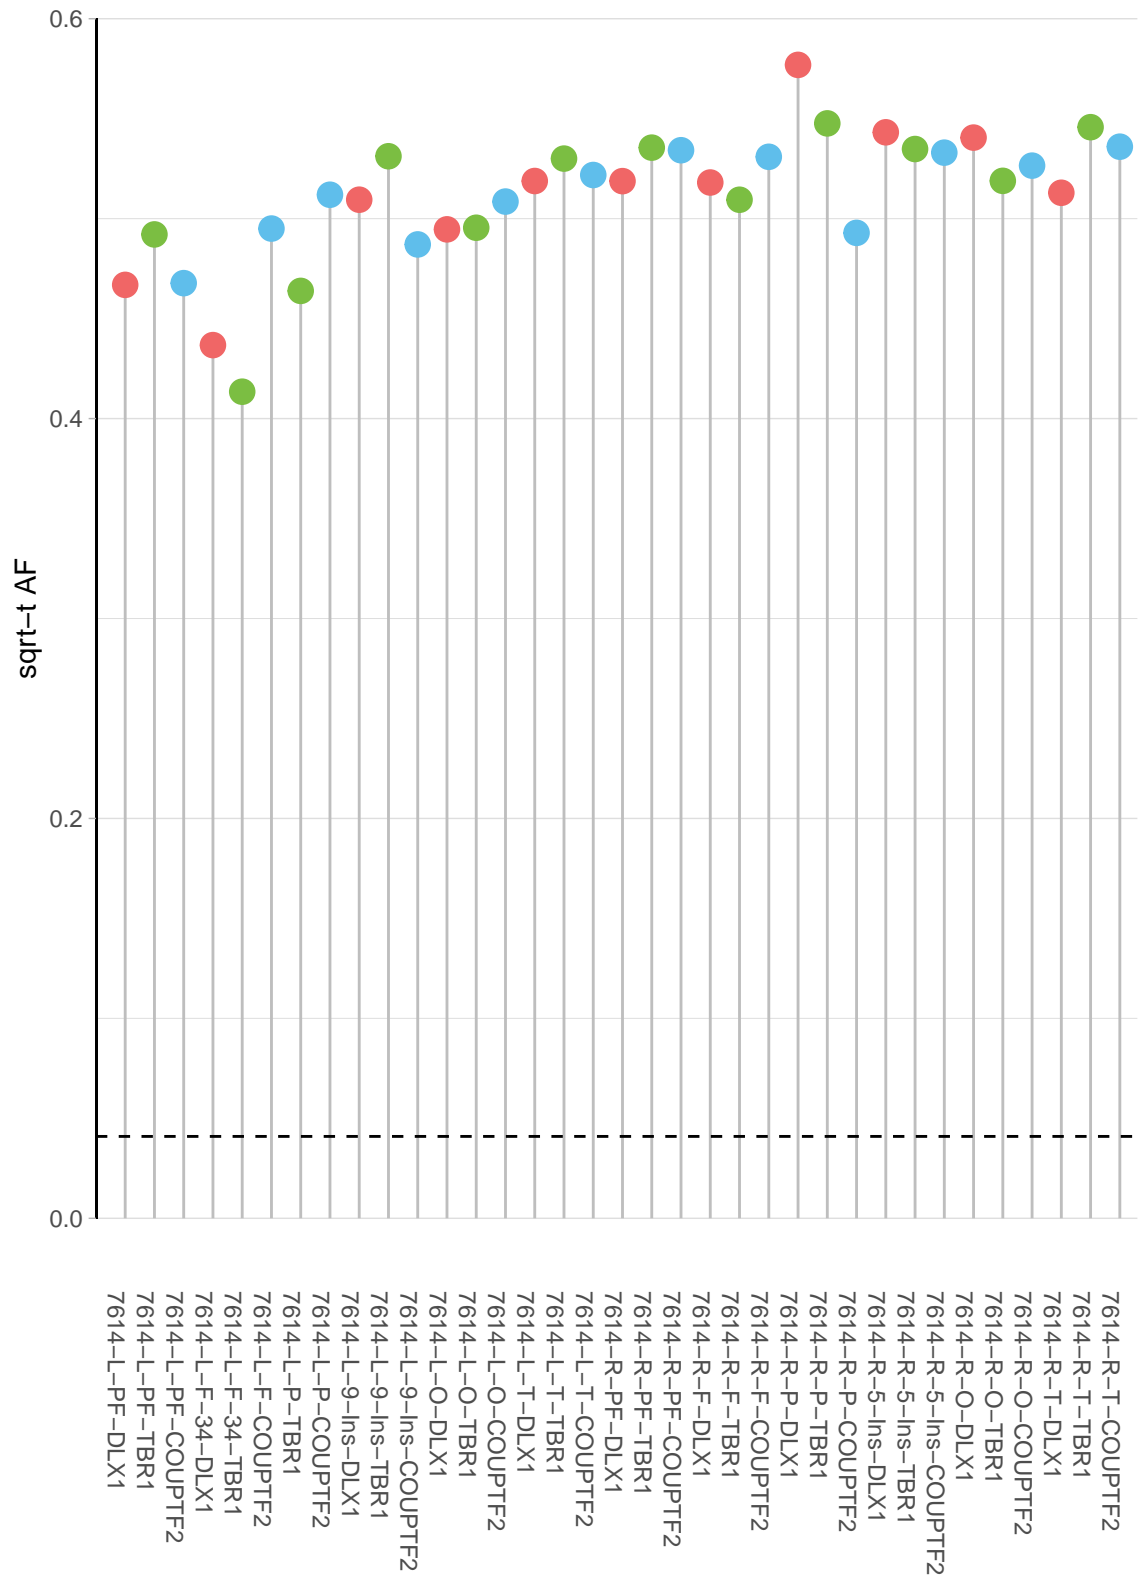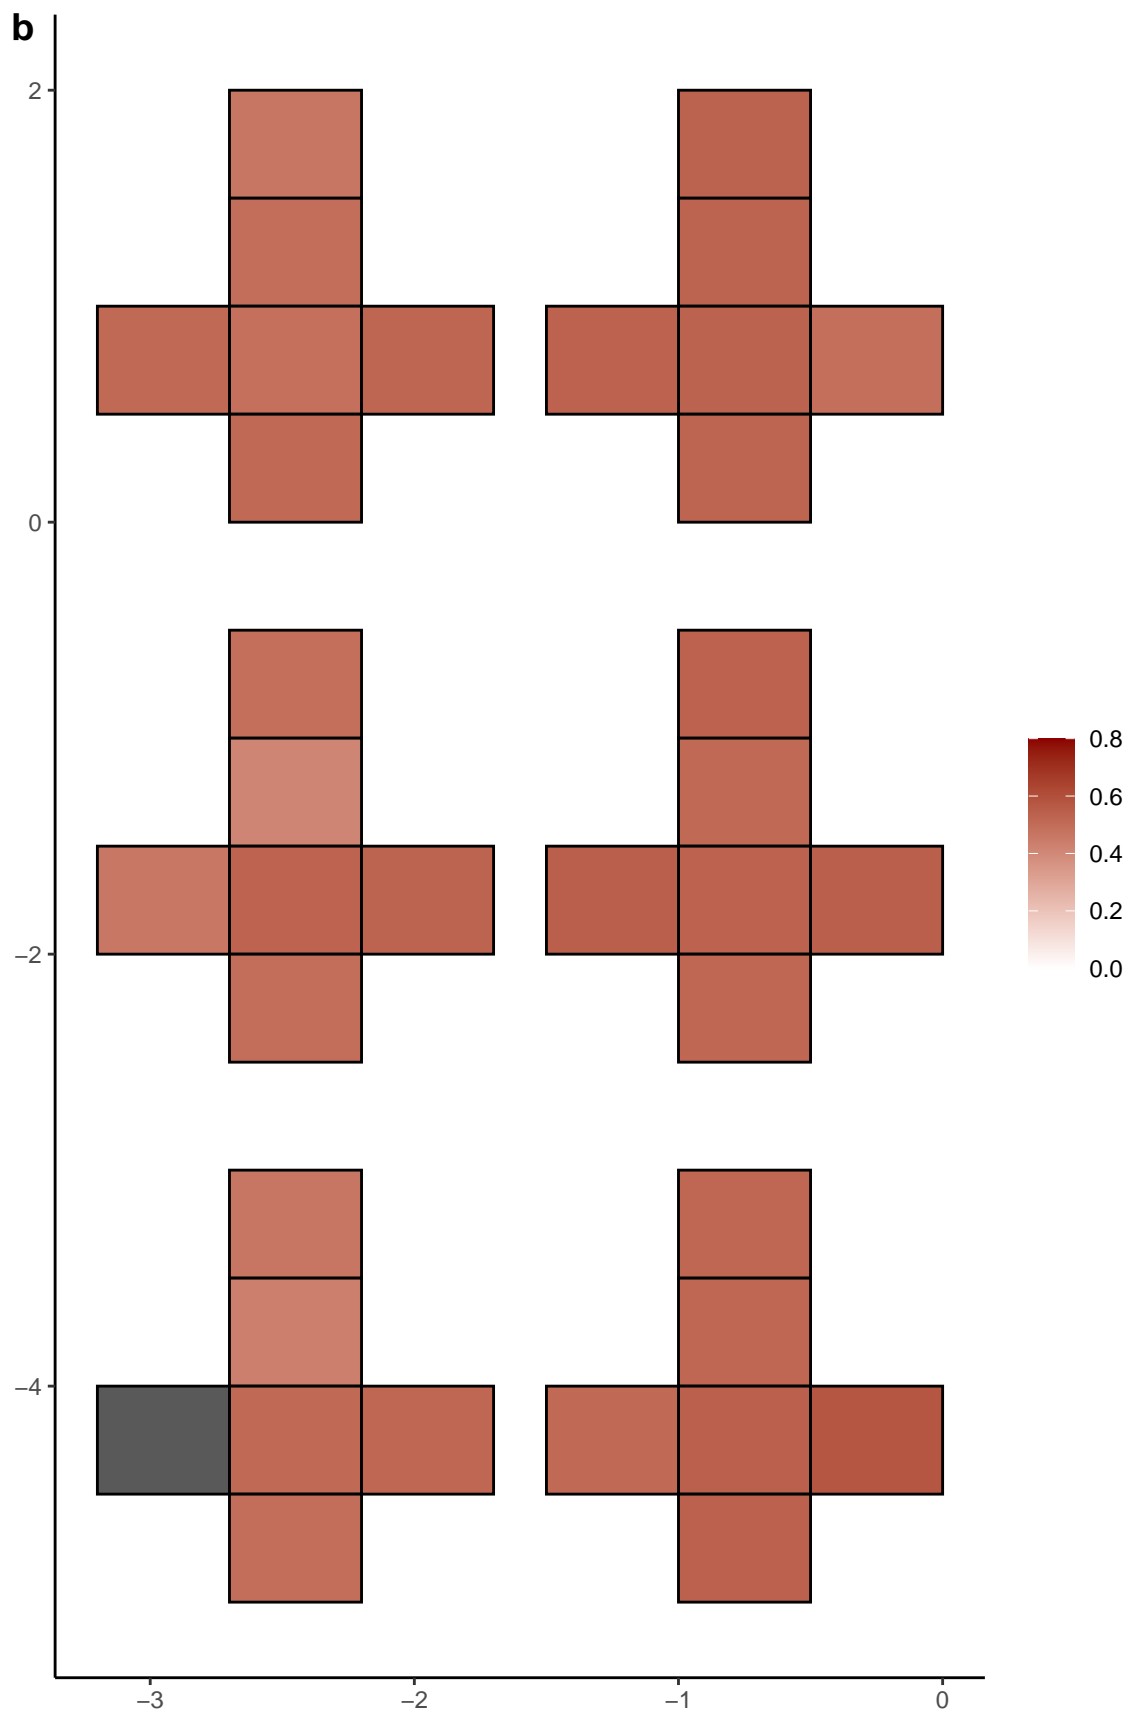

**a** ID01 10-133022785-C-T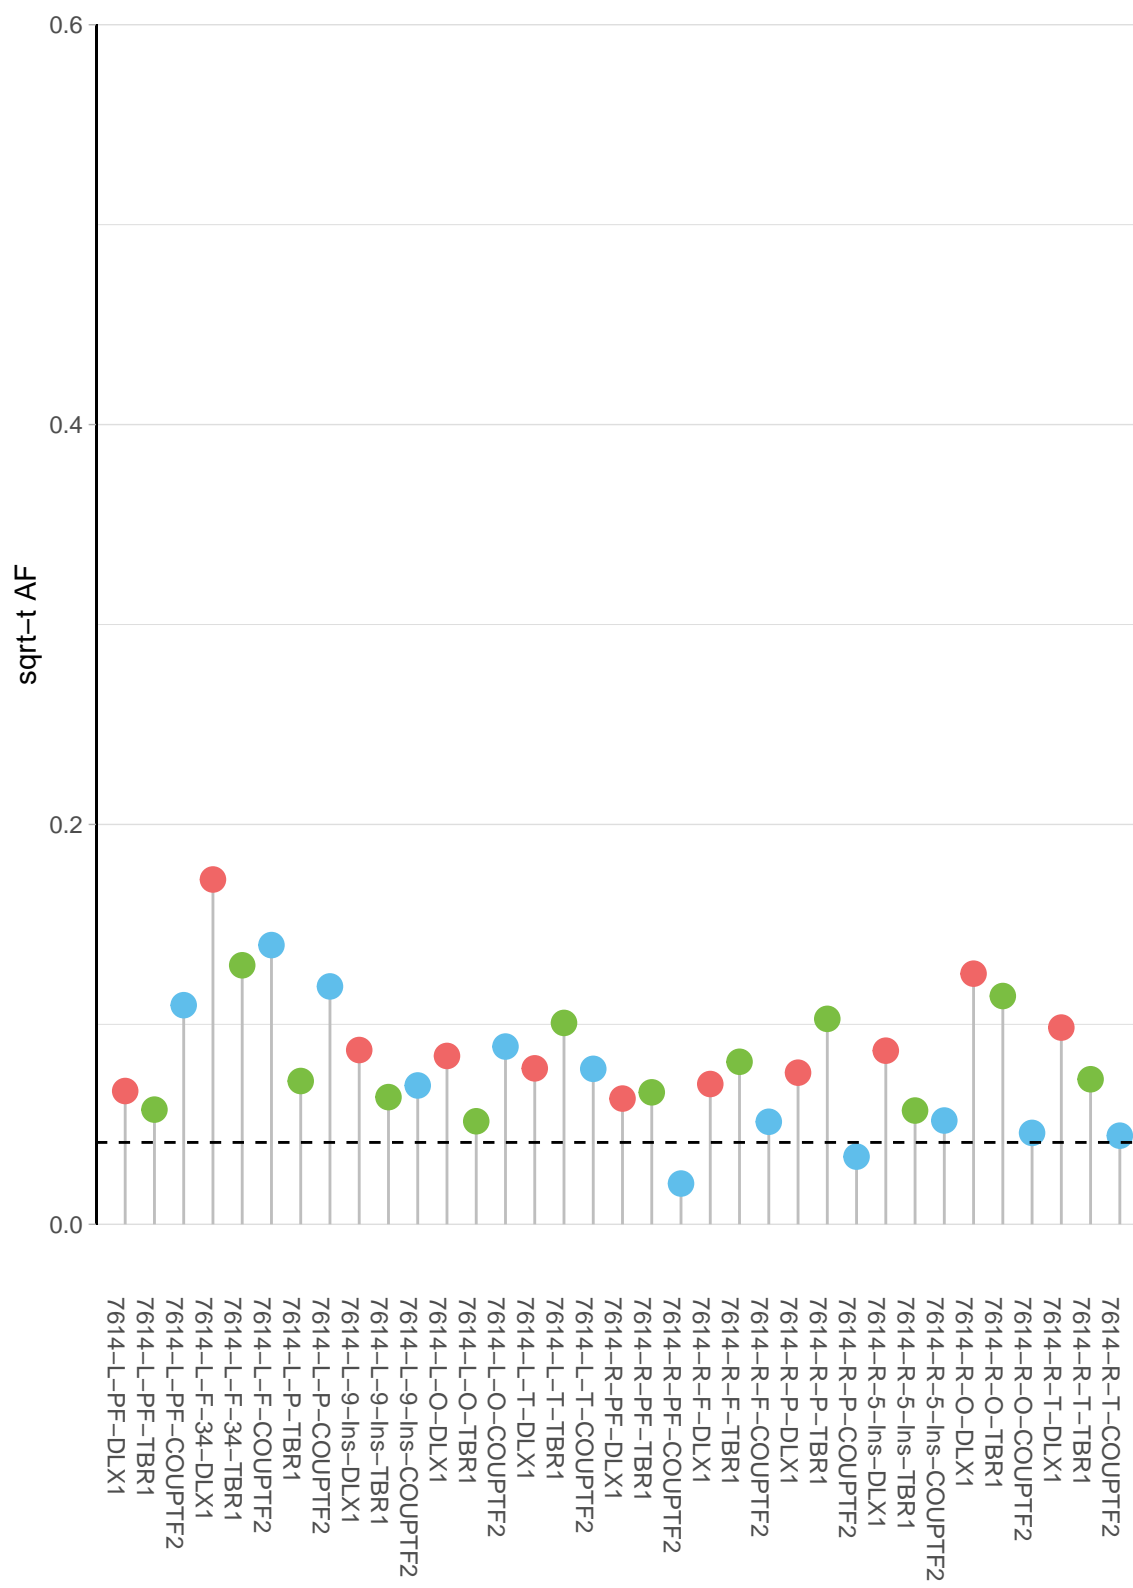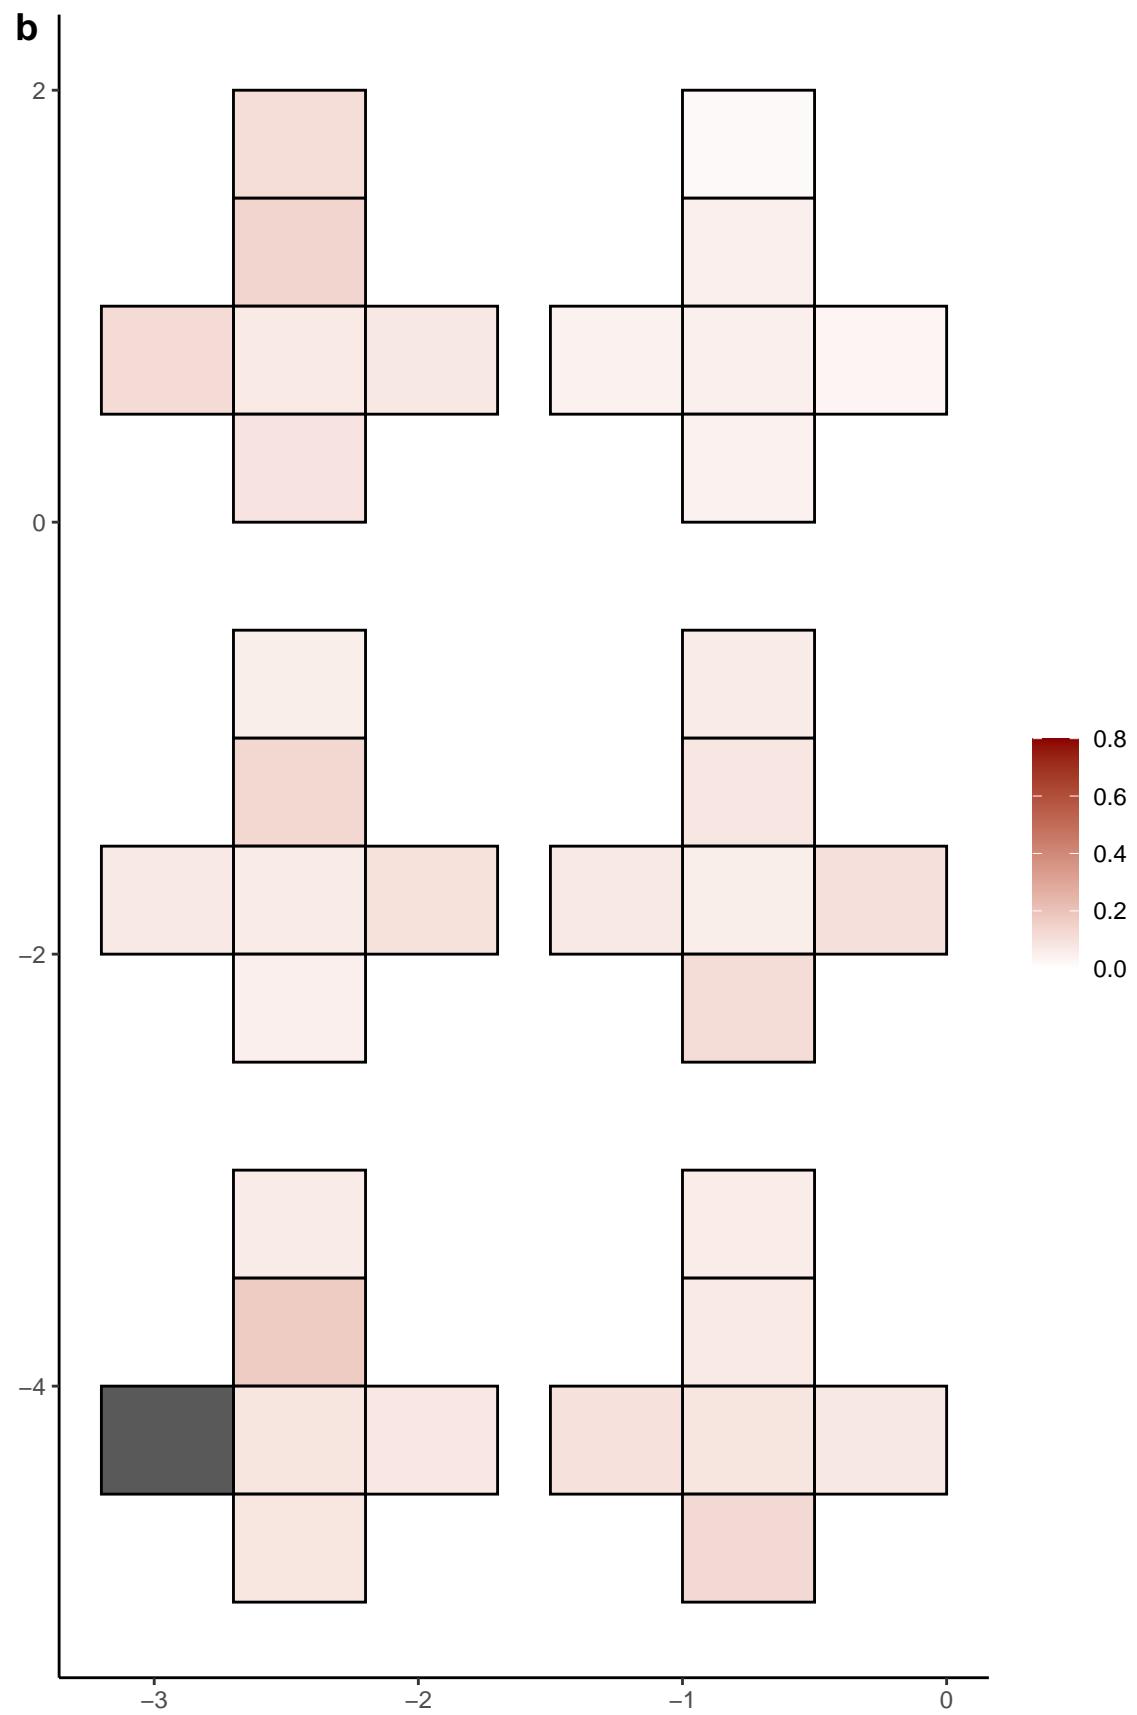

**a** ID01 10-134908190-G-A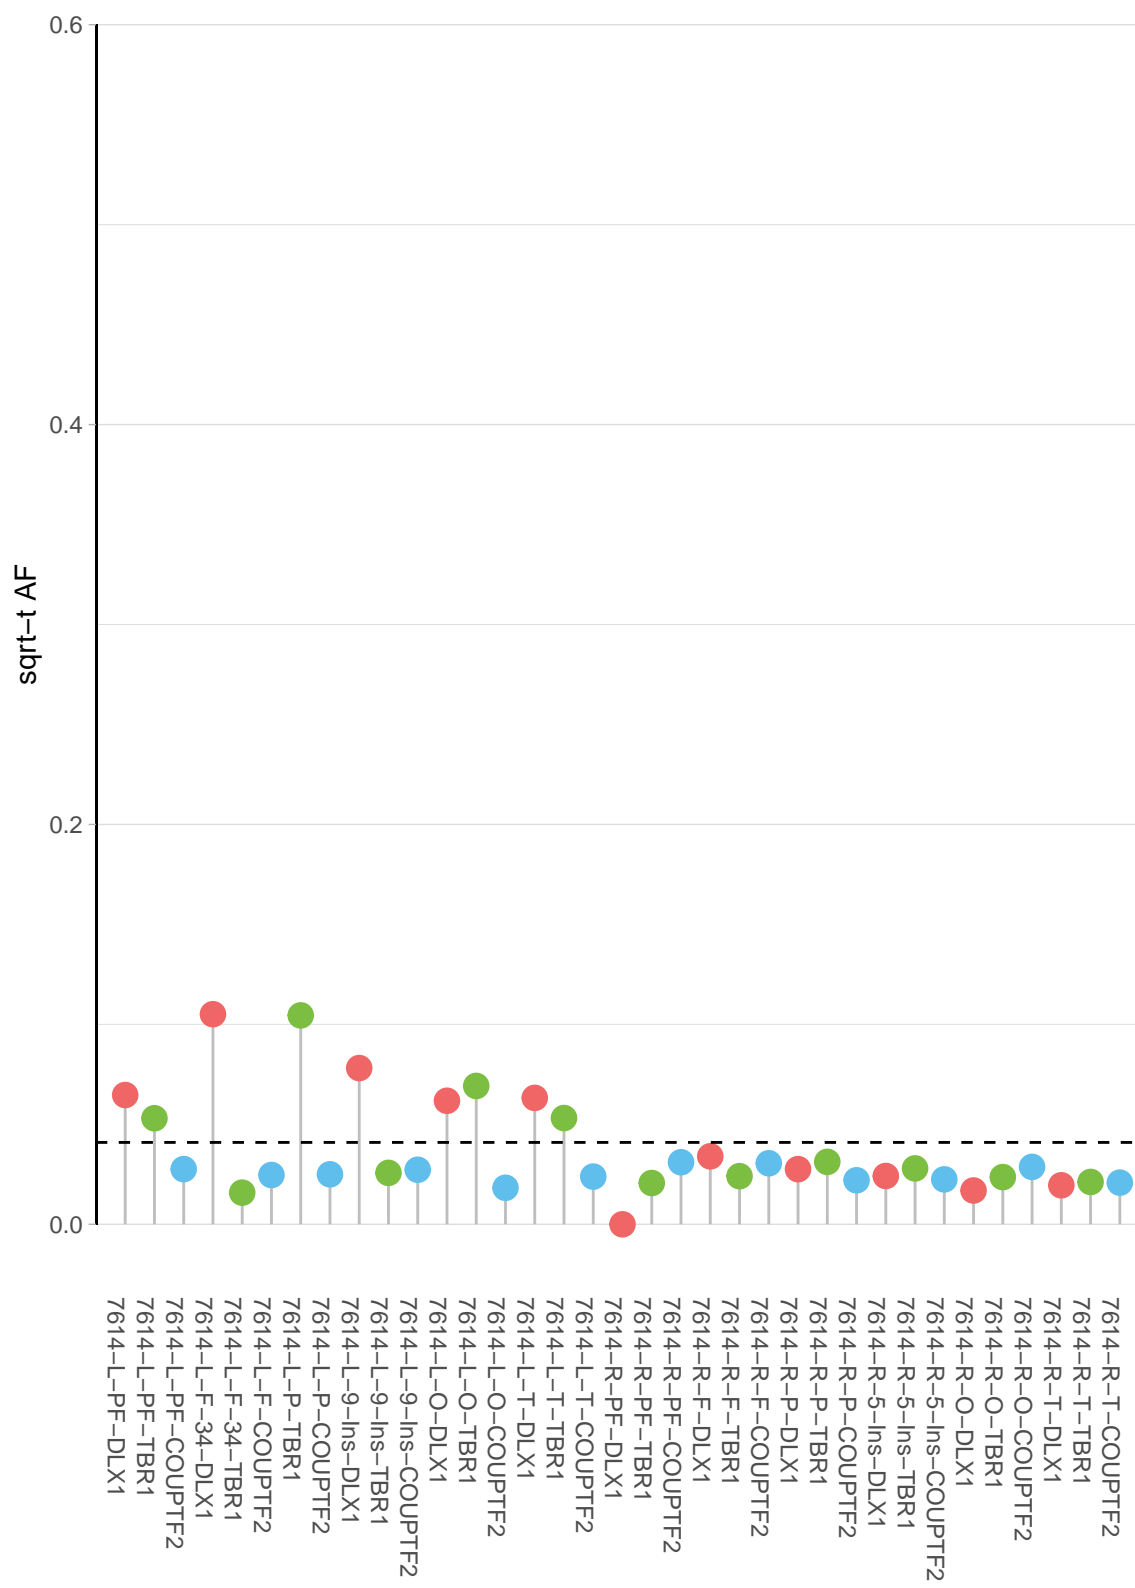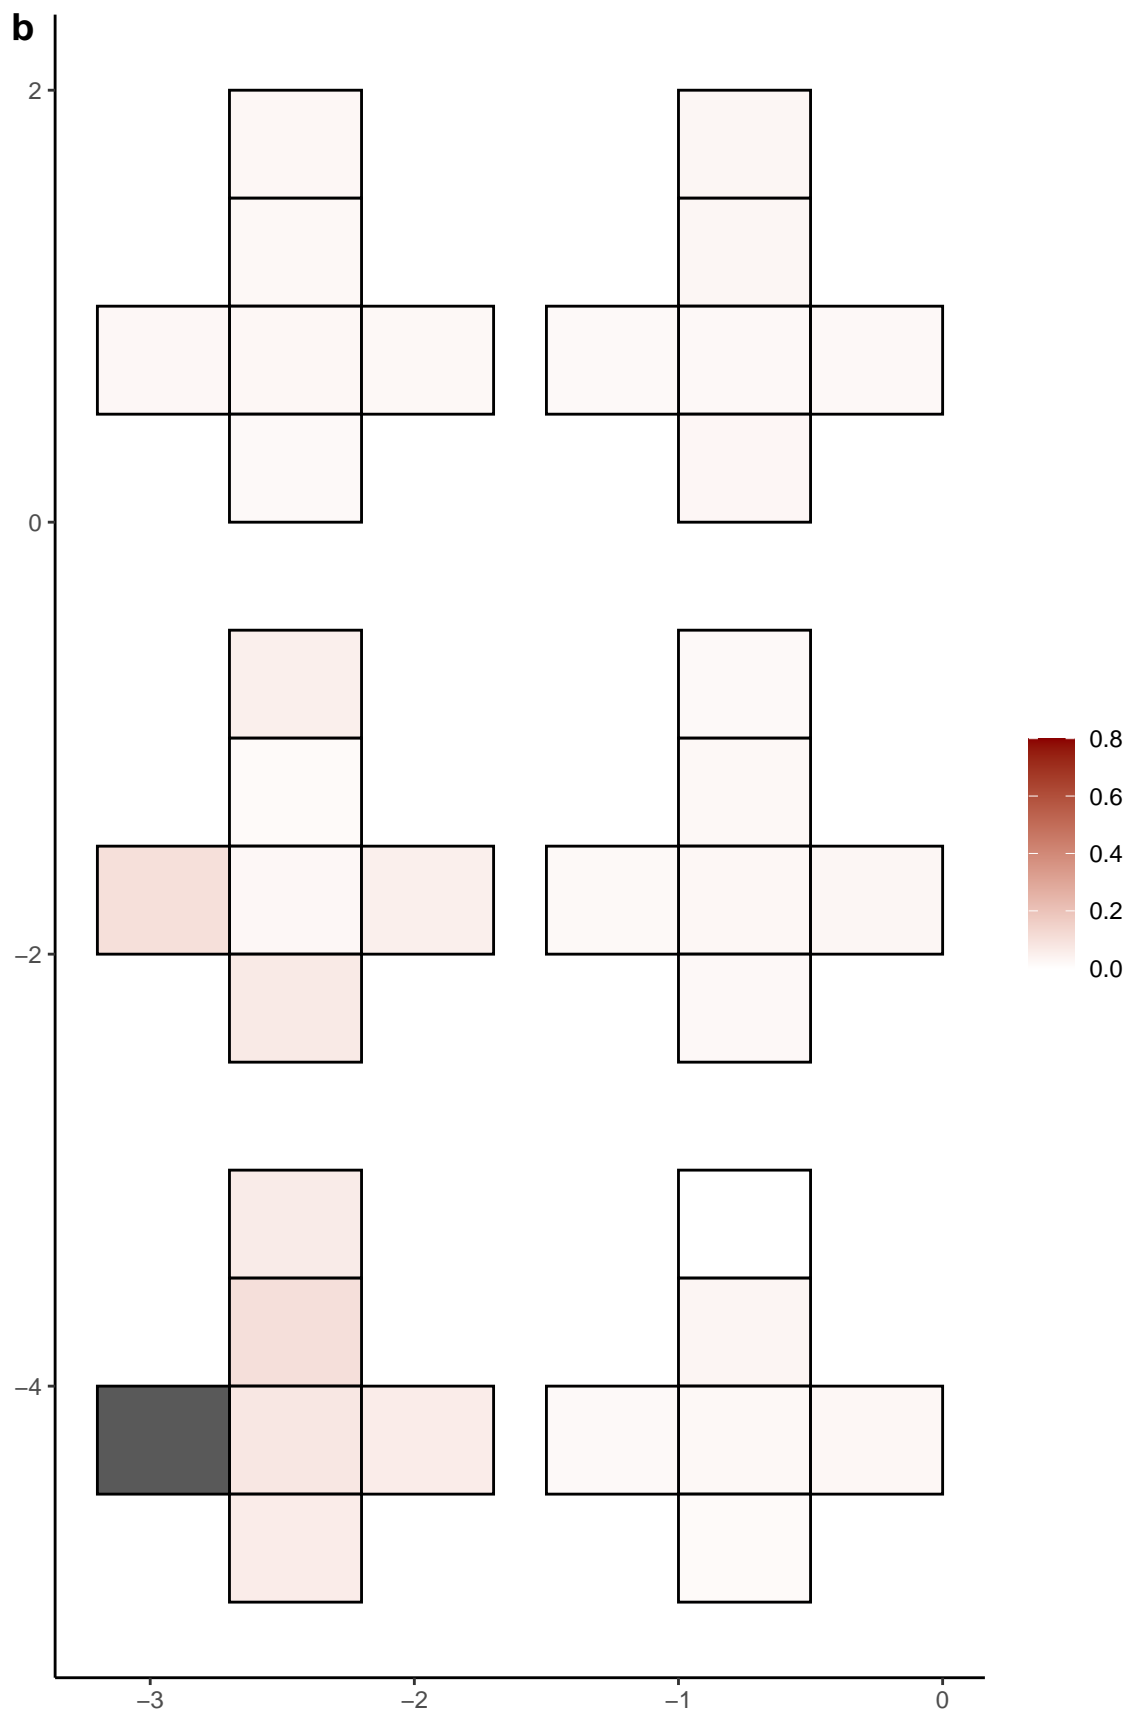

**a** ID01 10-23042694-GAGTT-G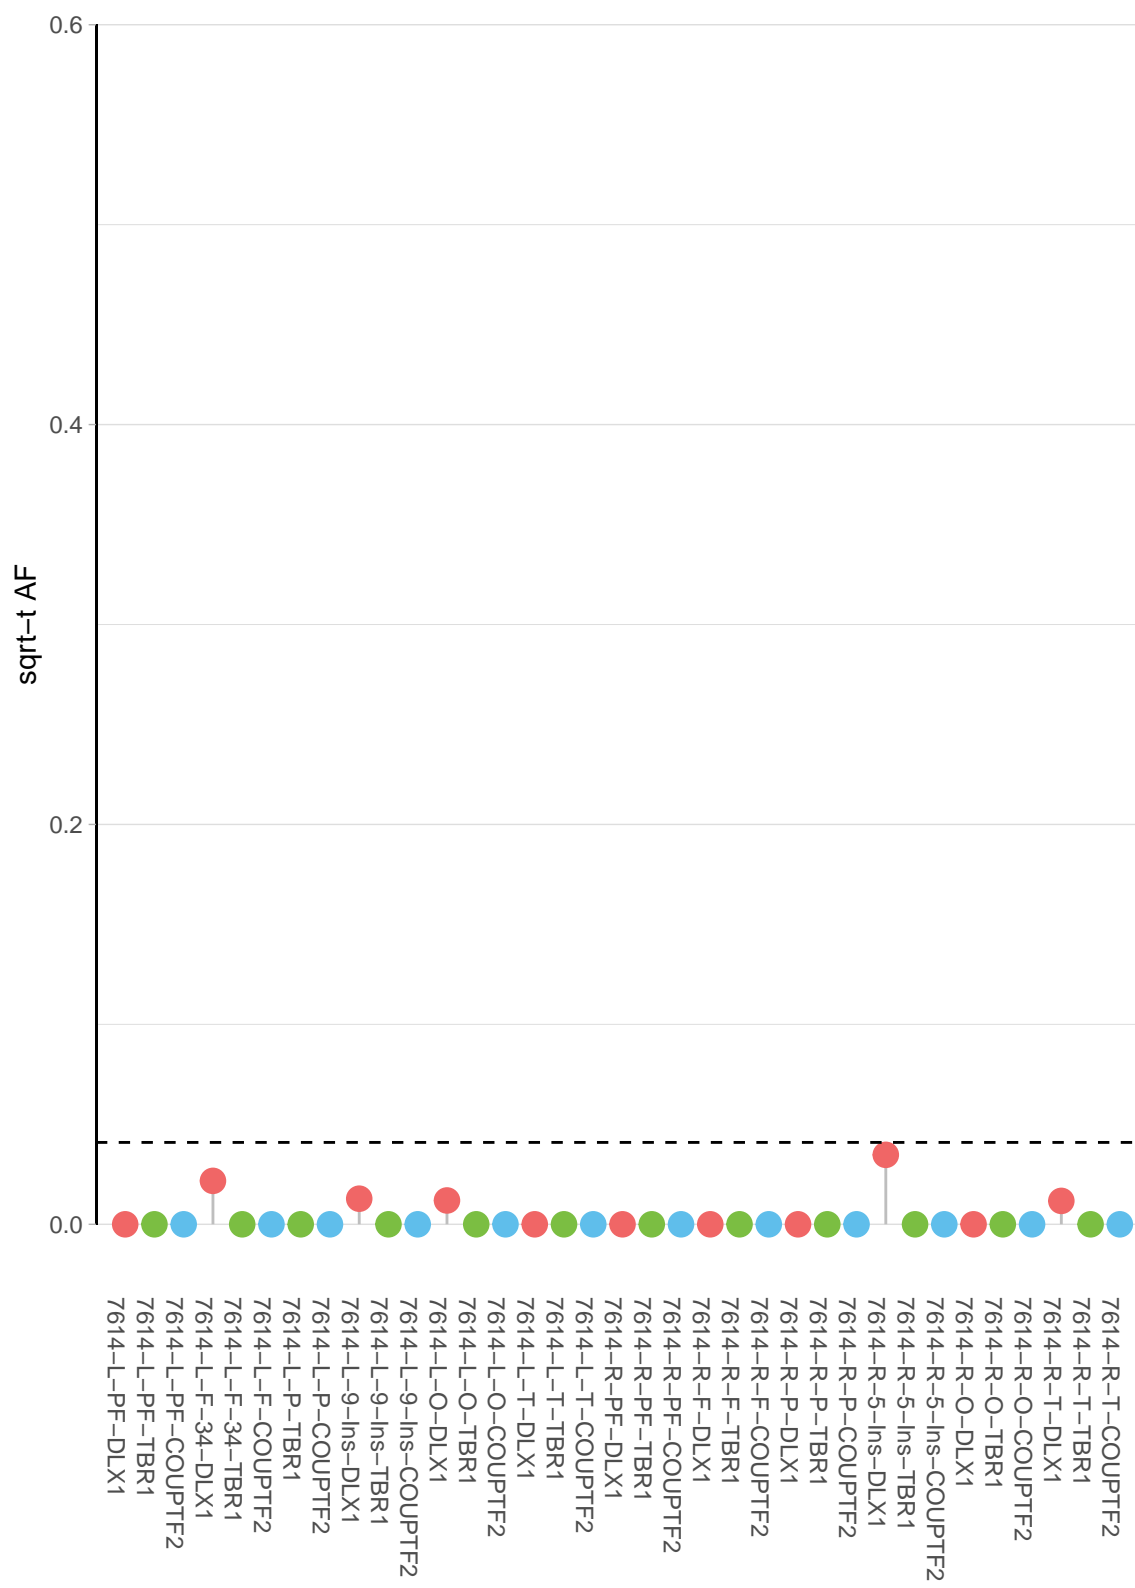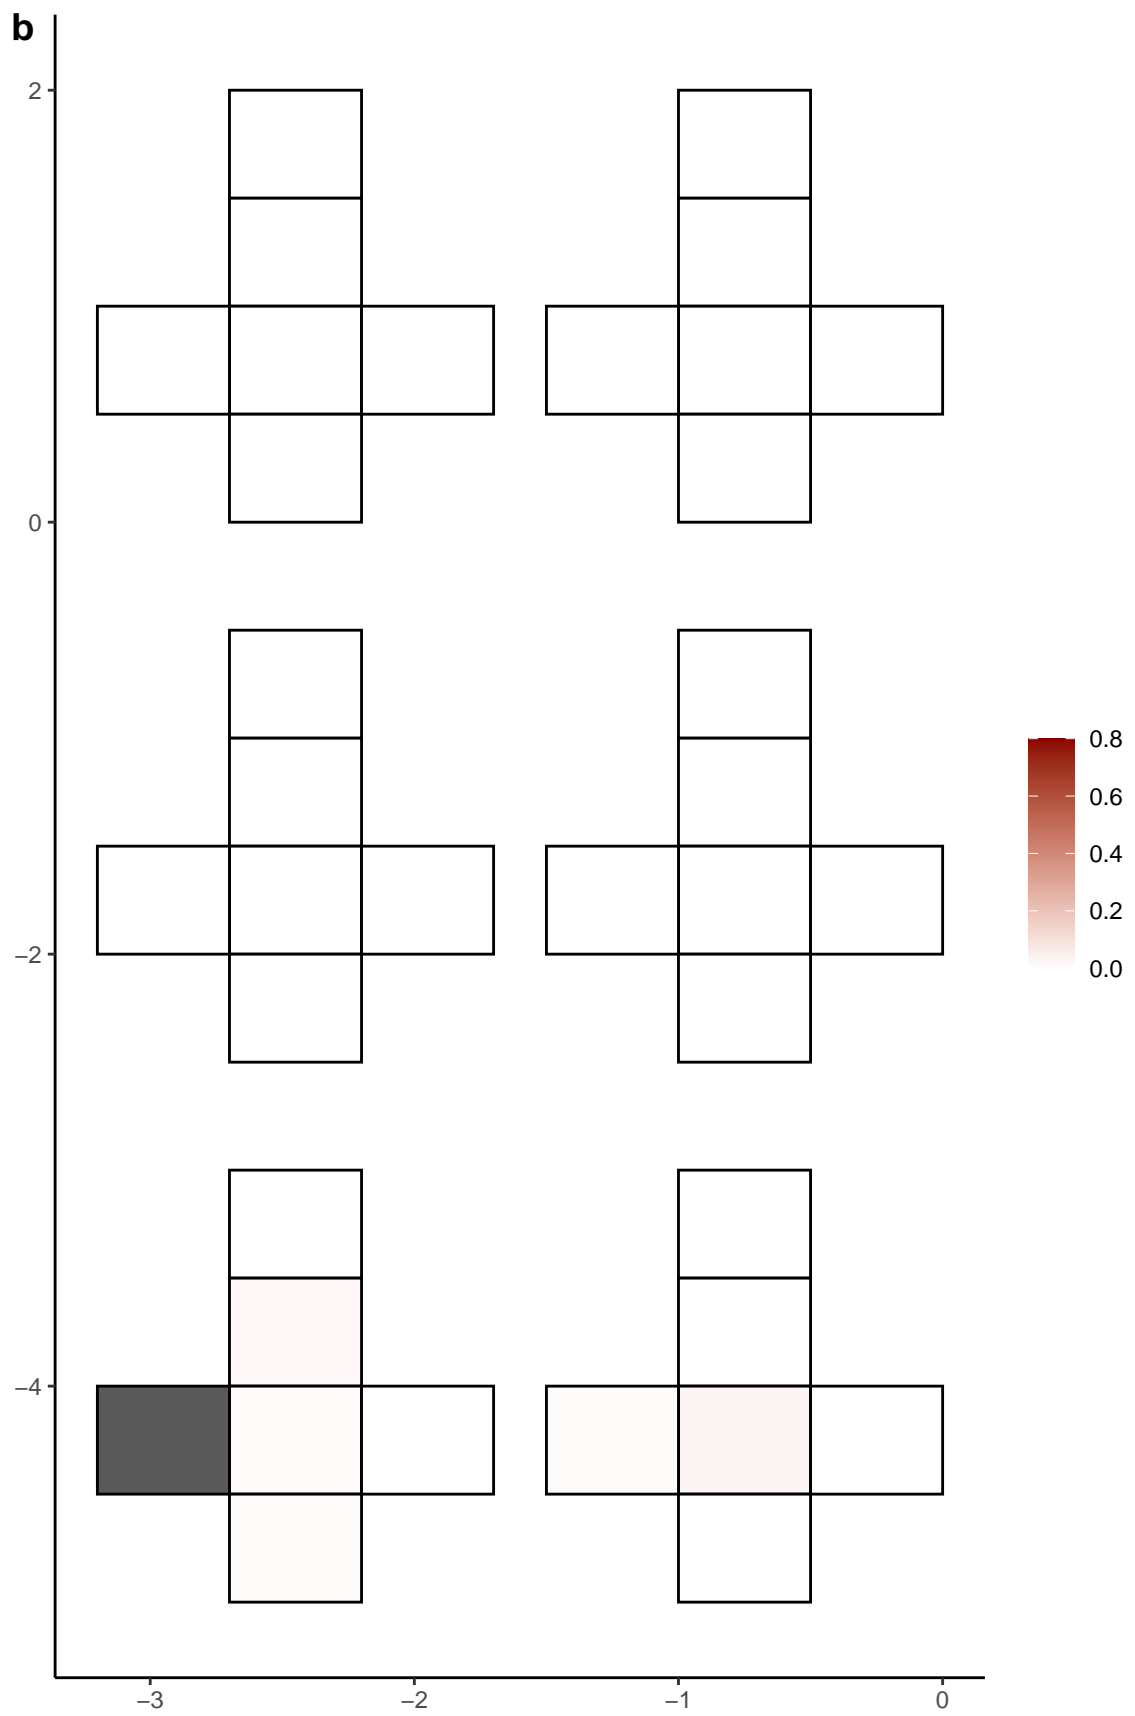

**a** ID01 10-71631216-G-A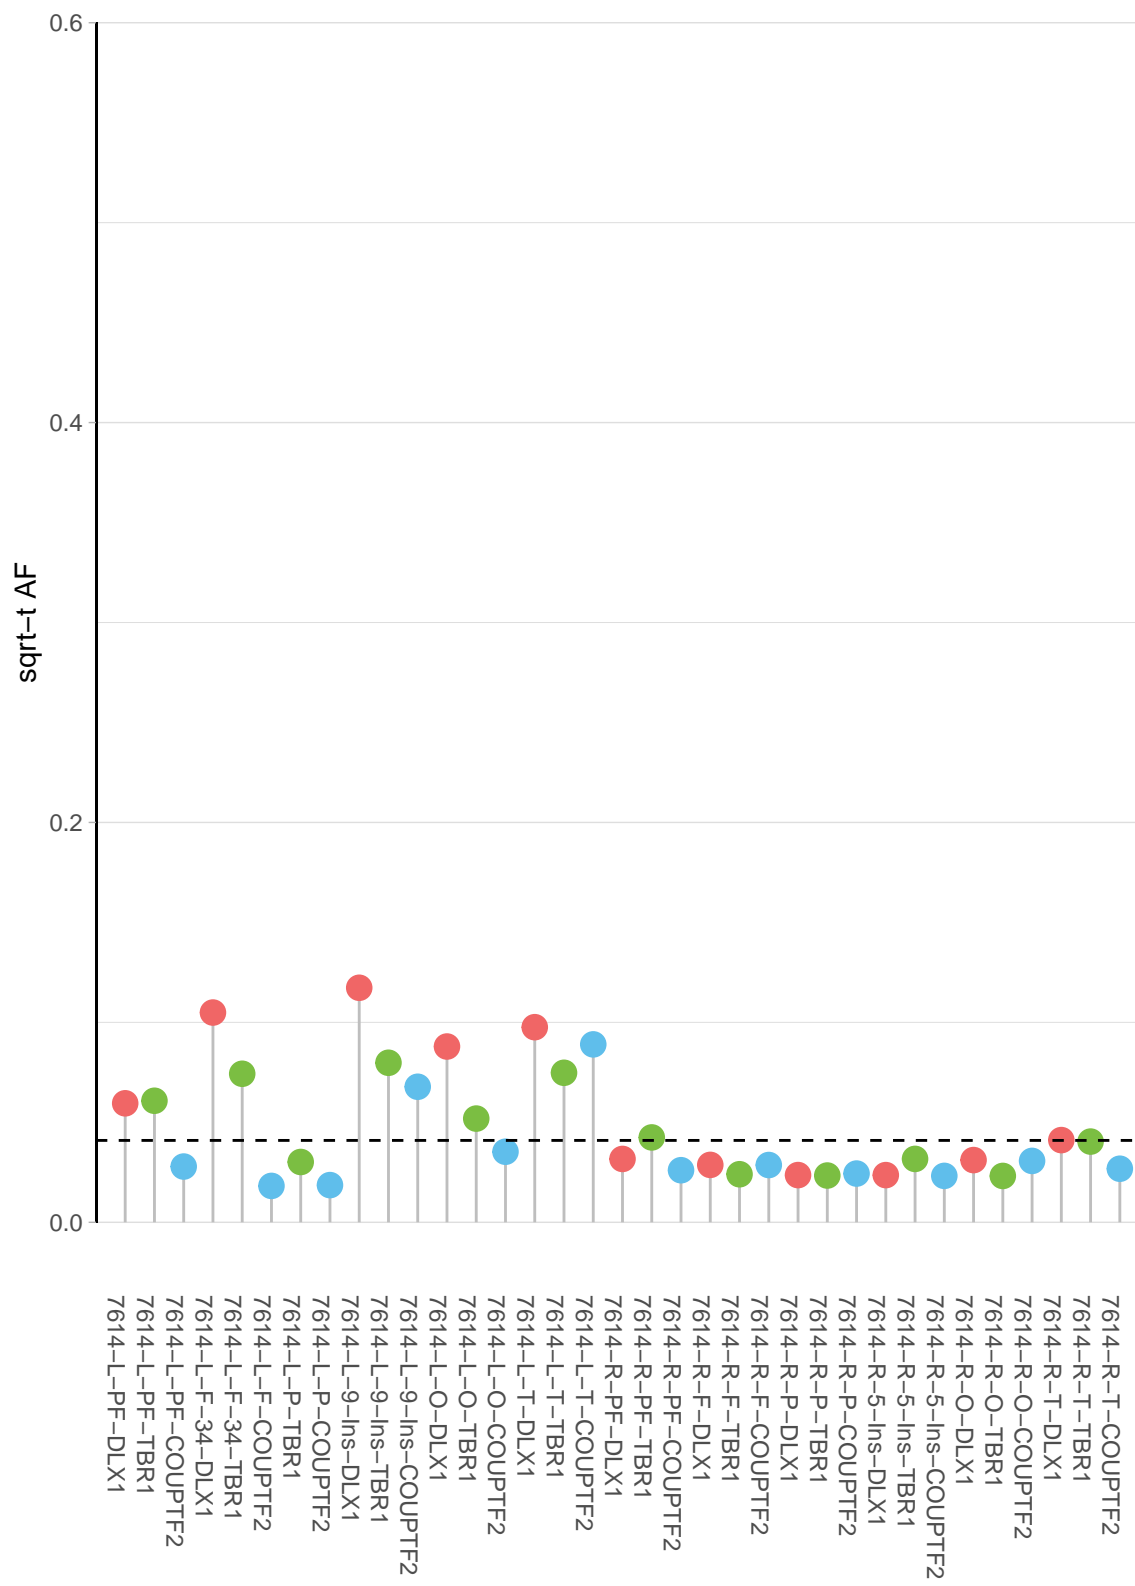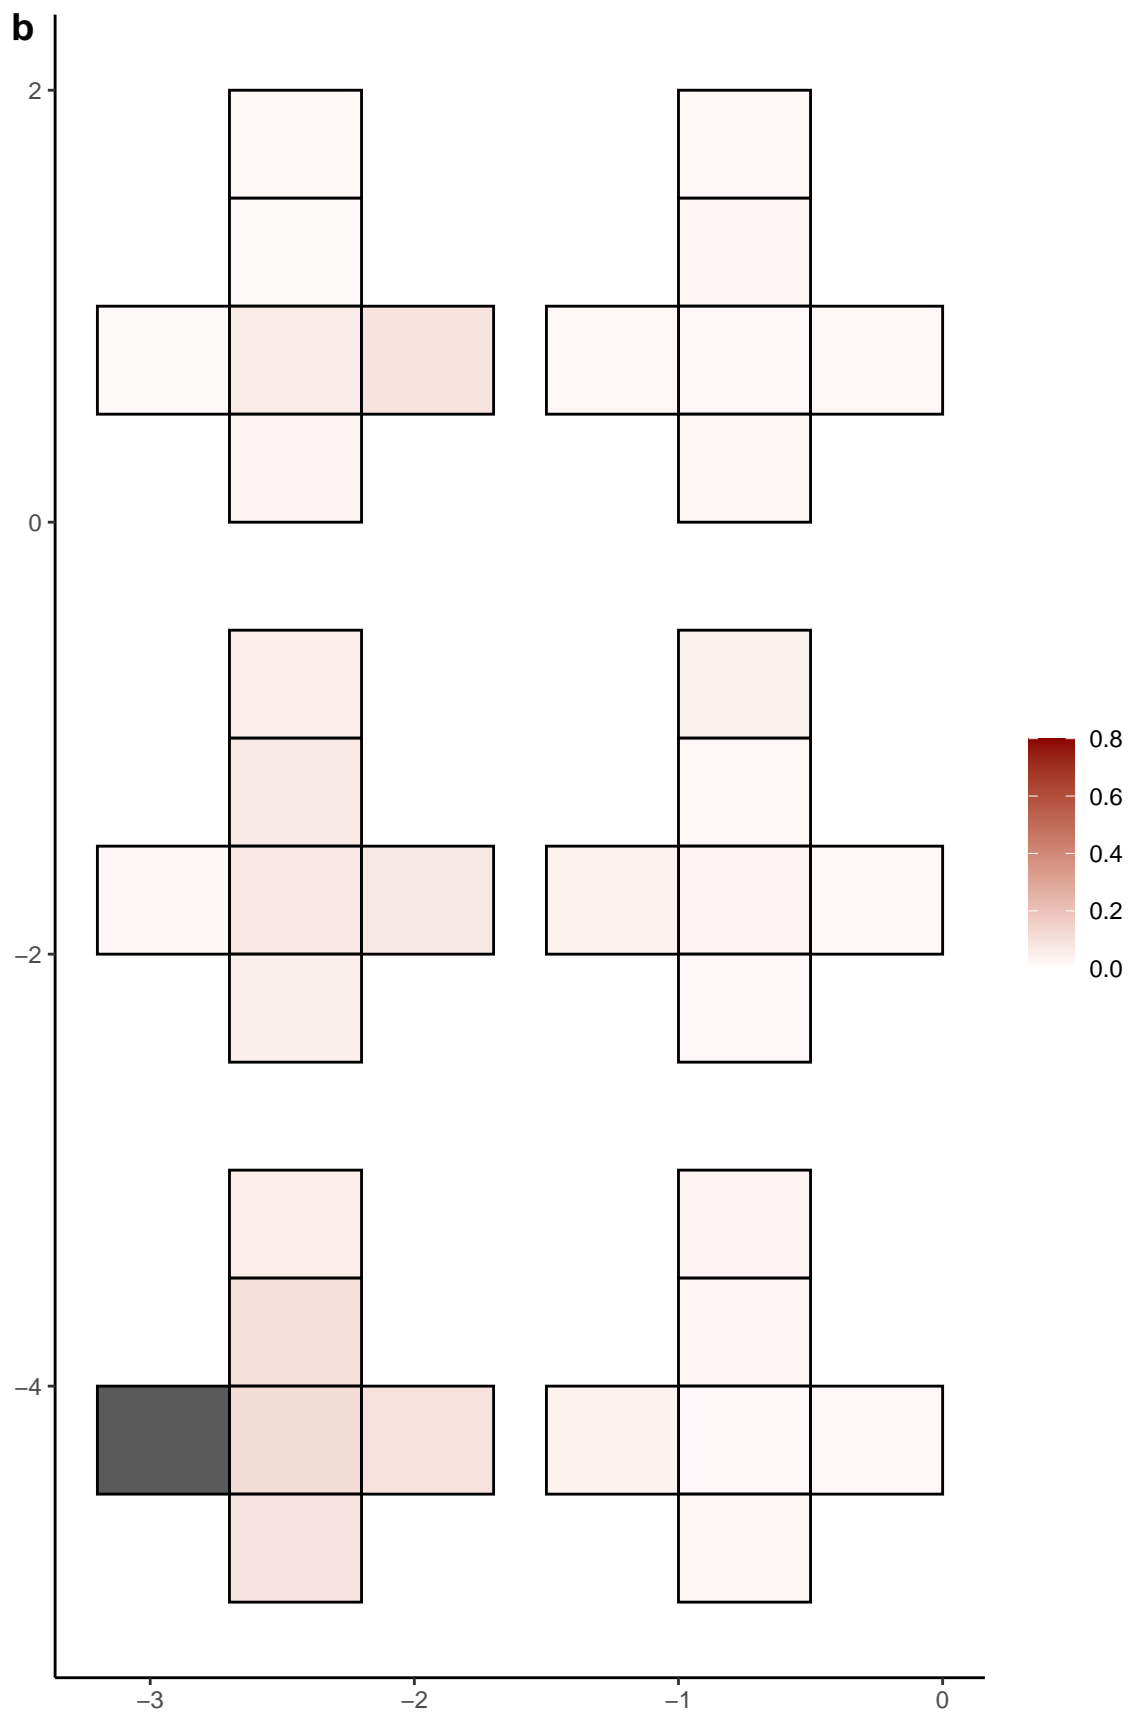

**a** ID01 10-84641815-C-T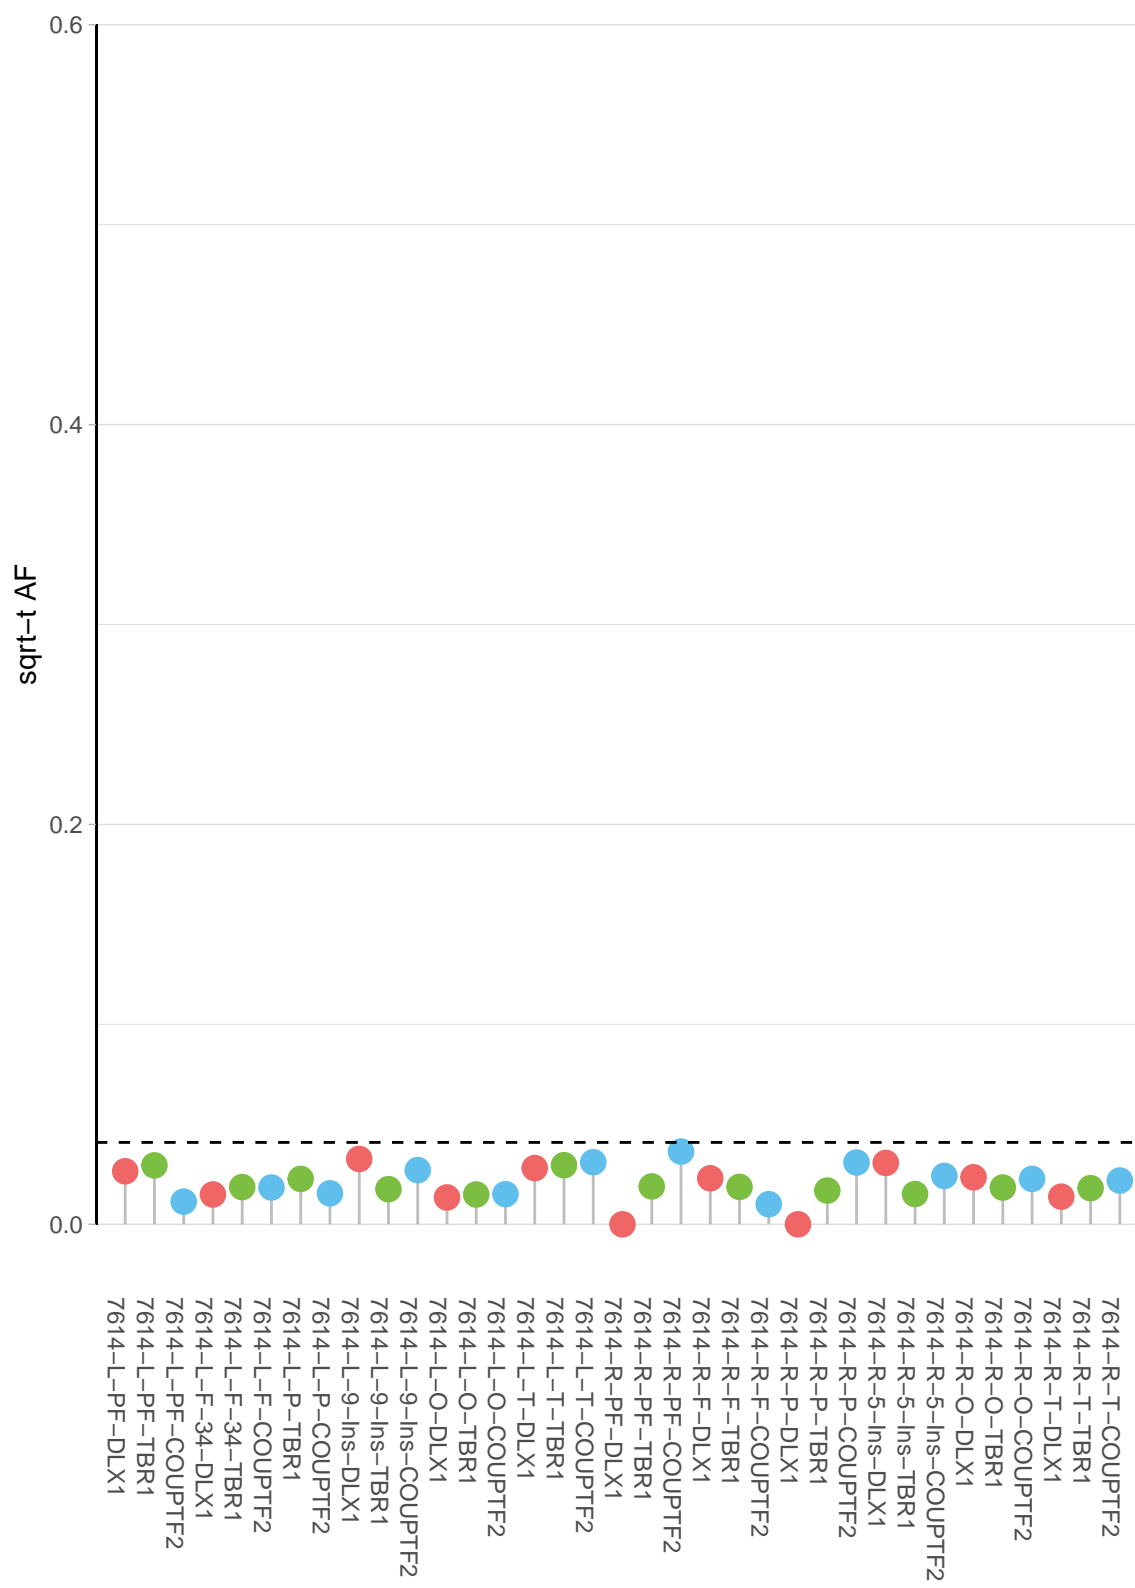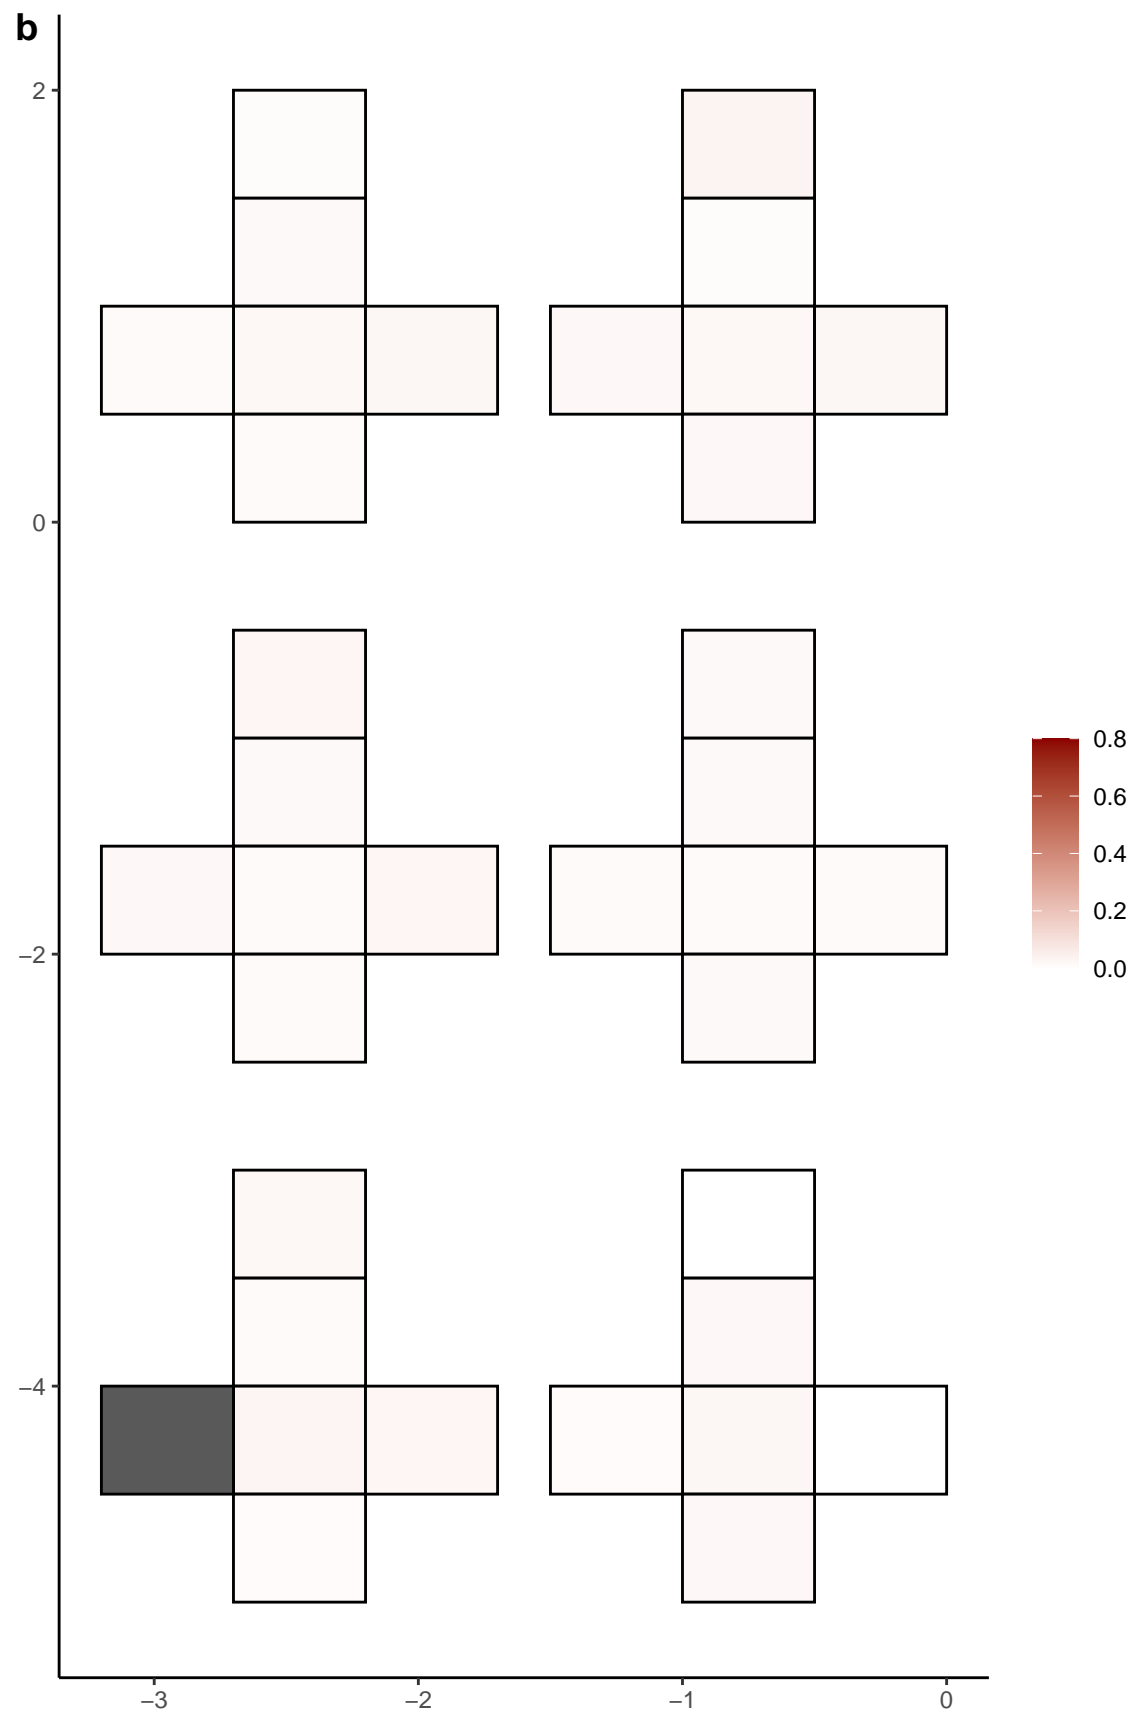

**a** ID01 10-97951160-C-T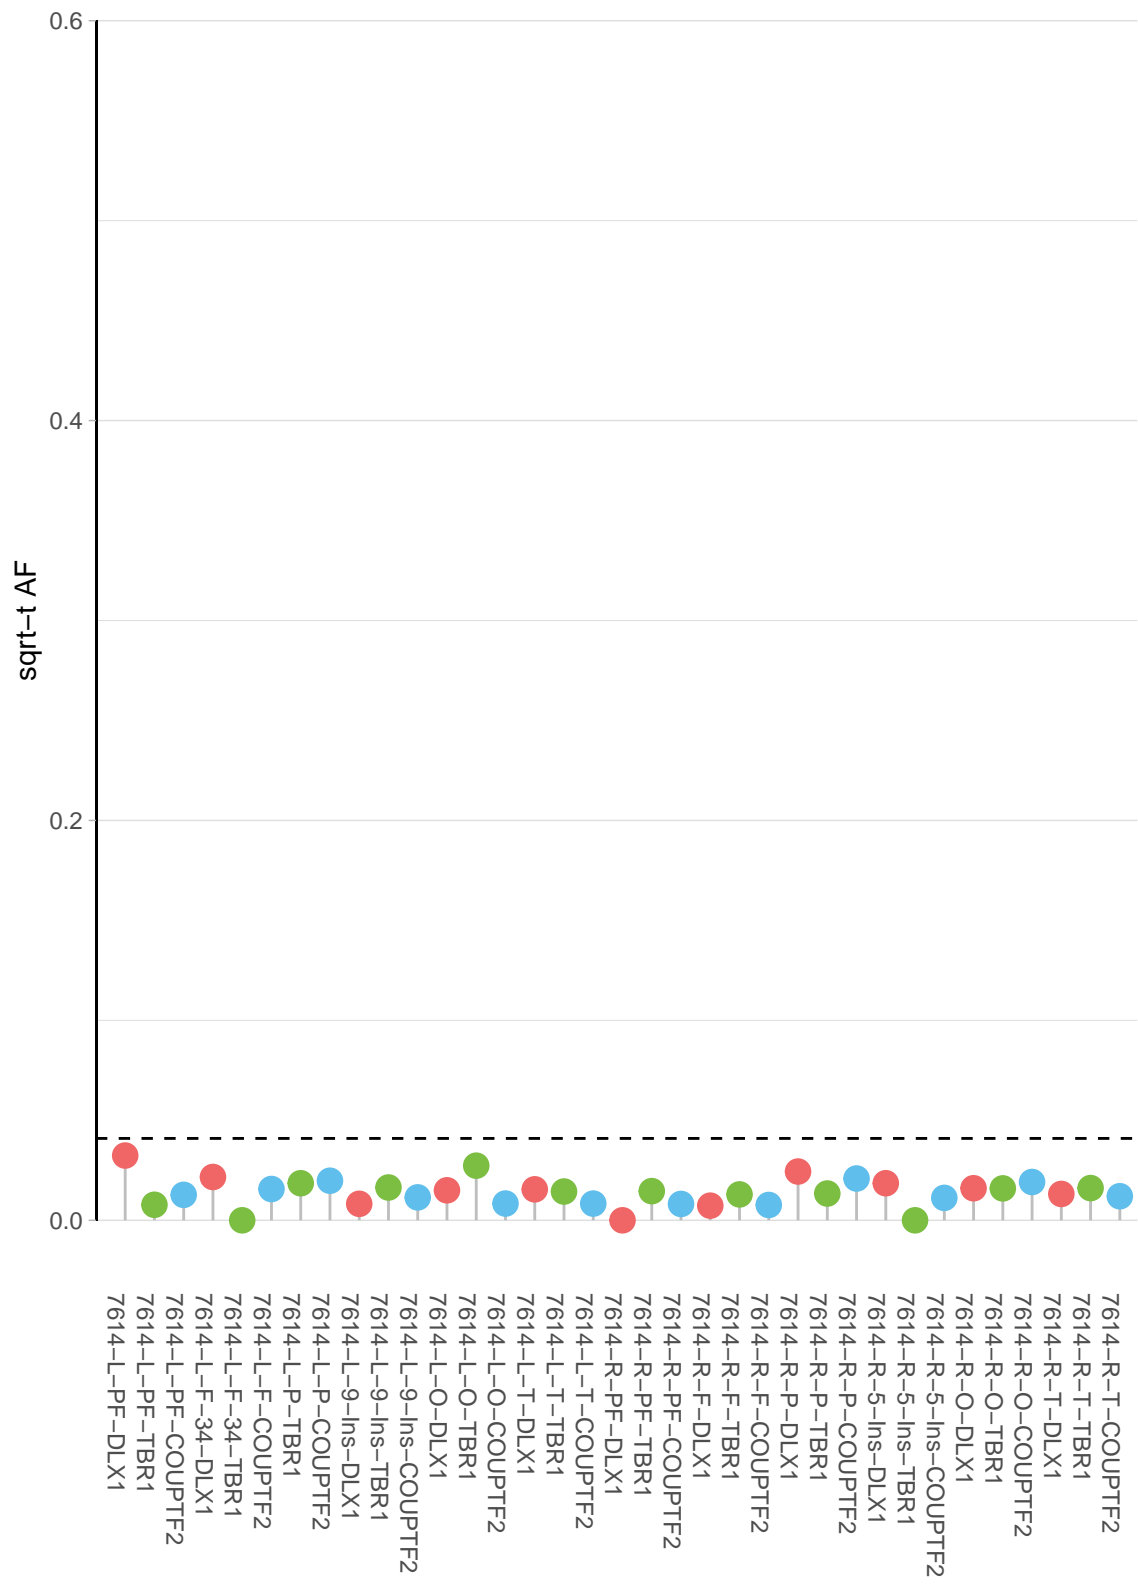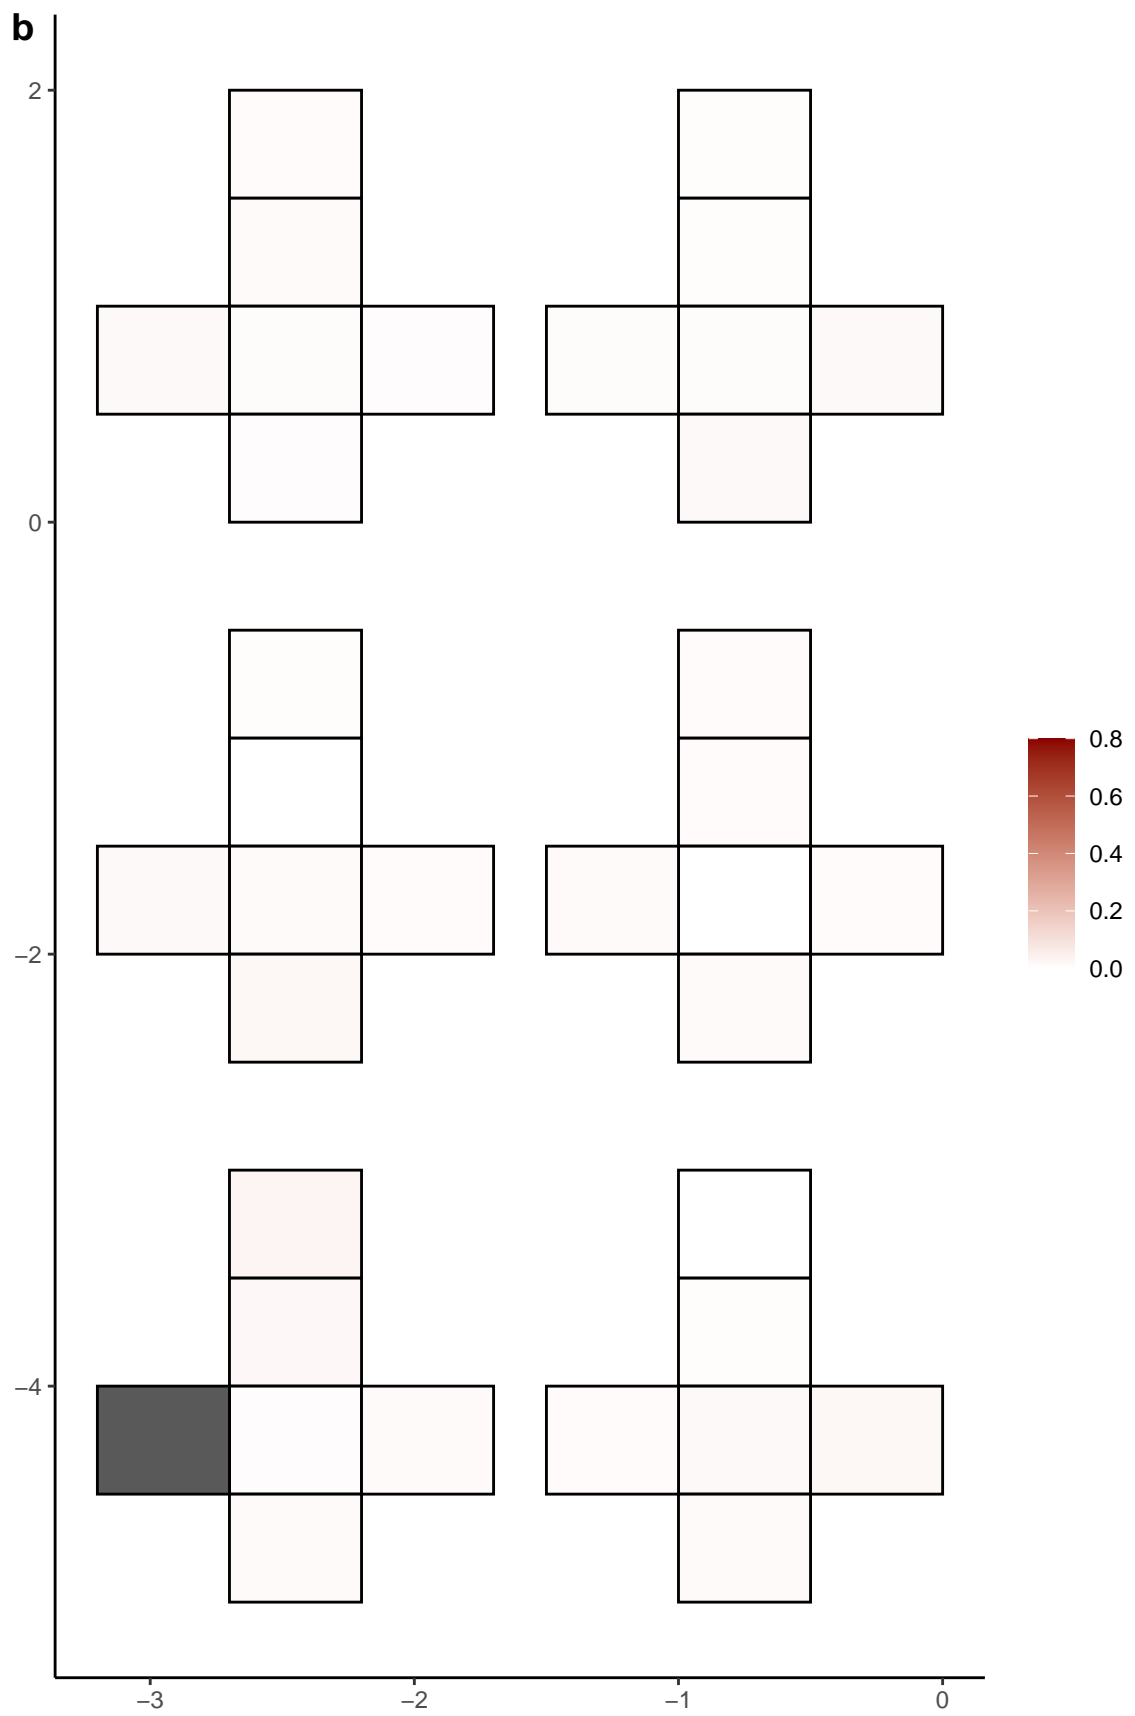

**a** ID01 10-98982494-C-CT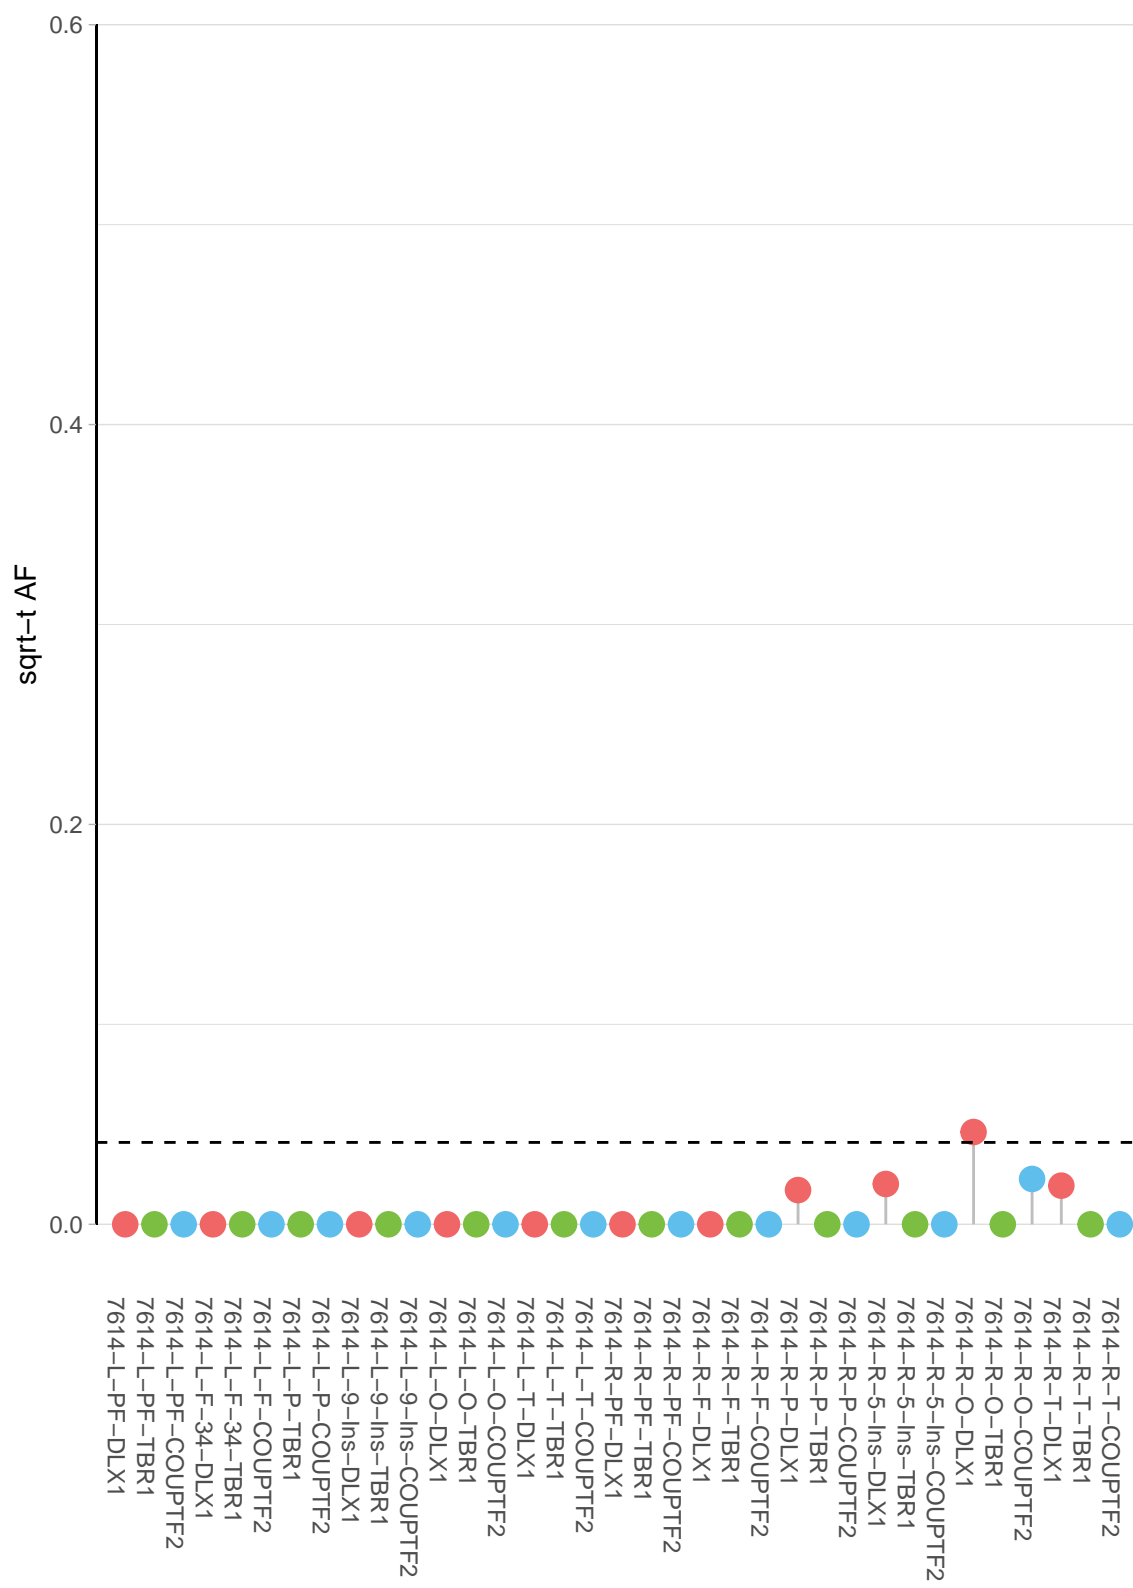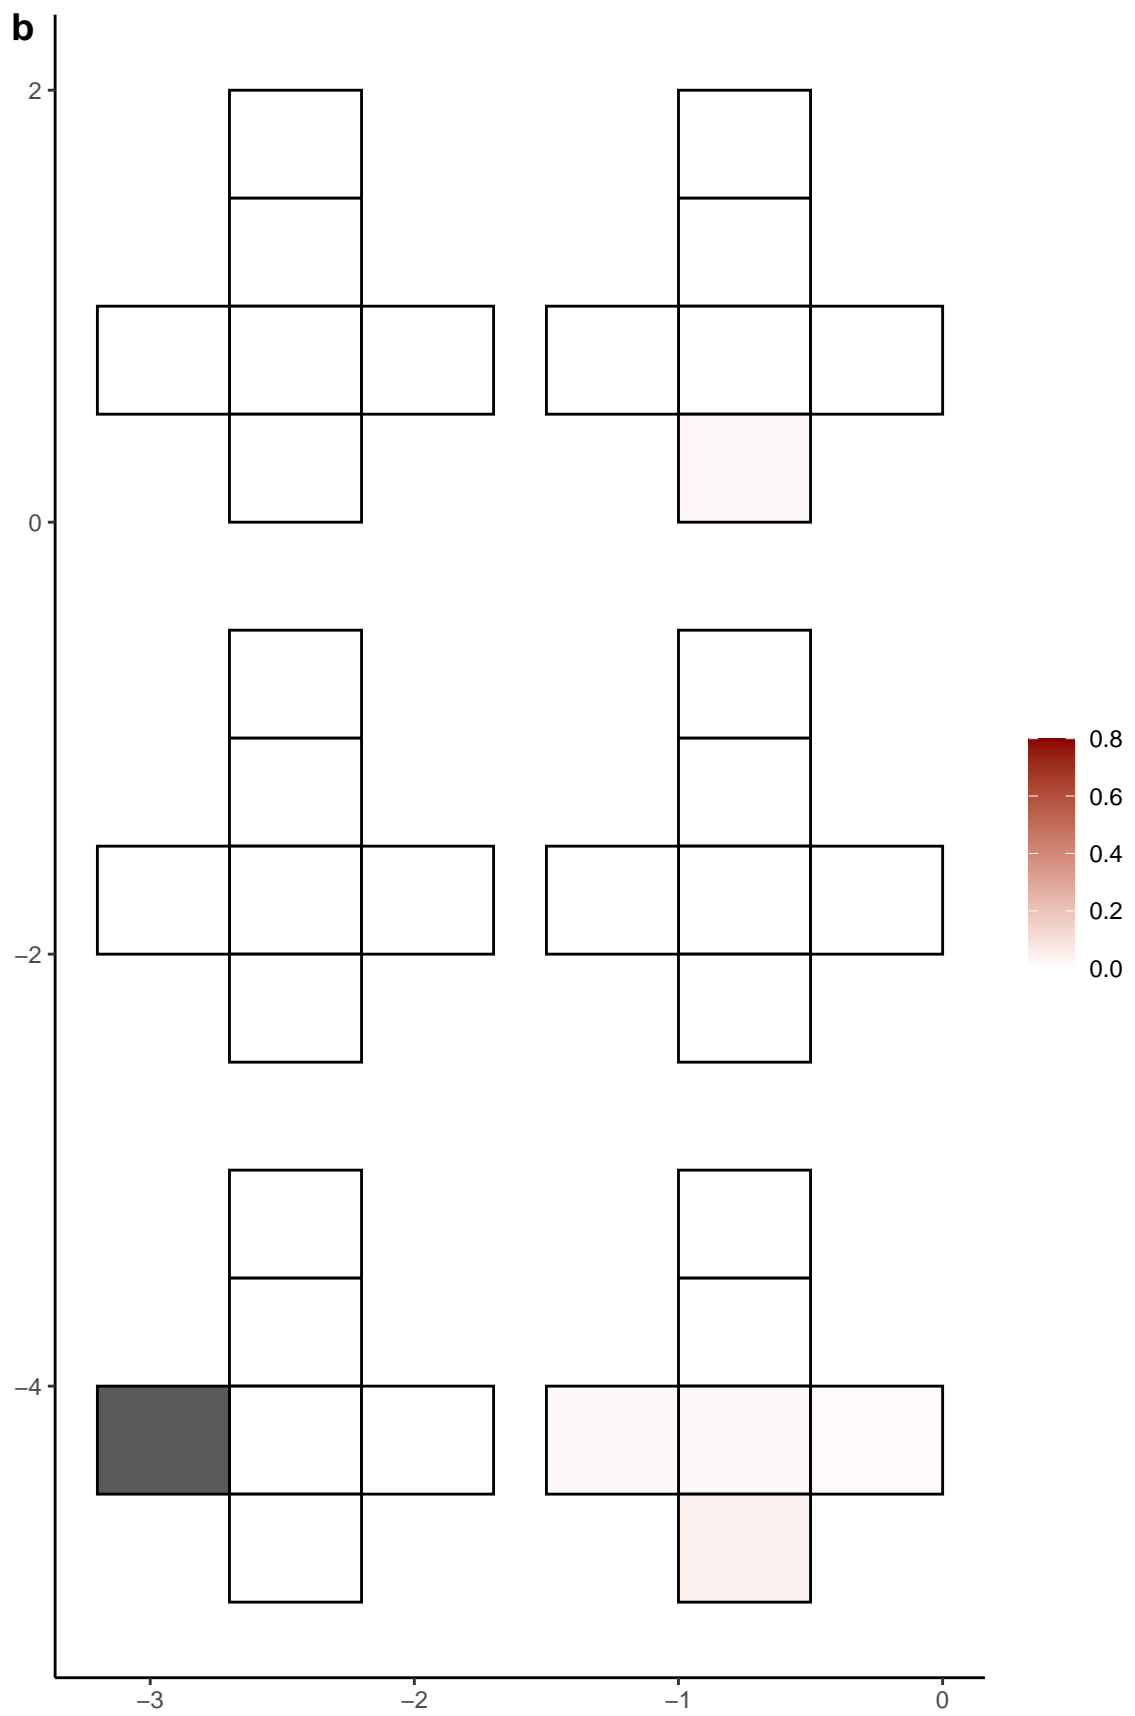



**a** ID01 11-110591774-A-C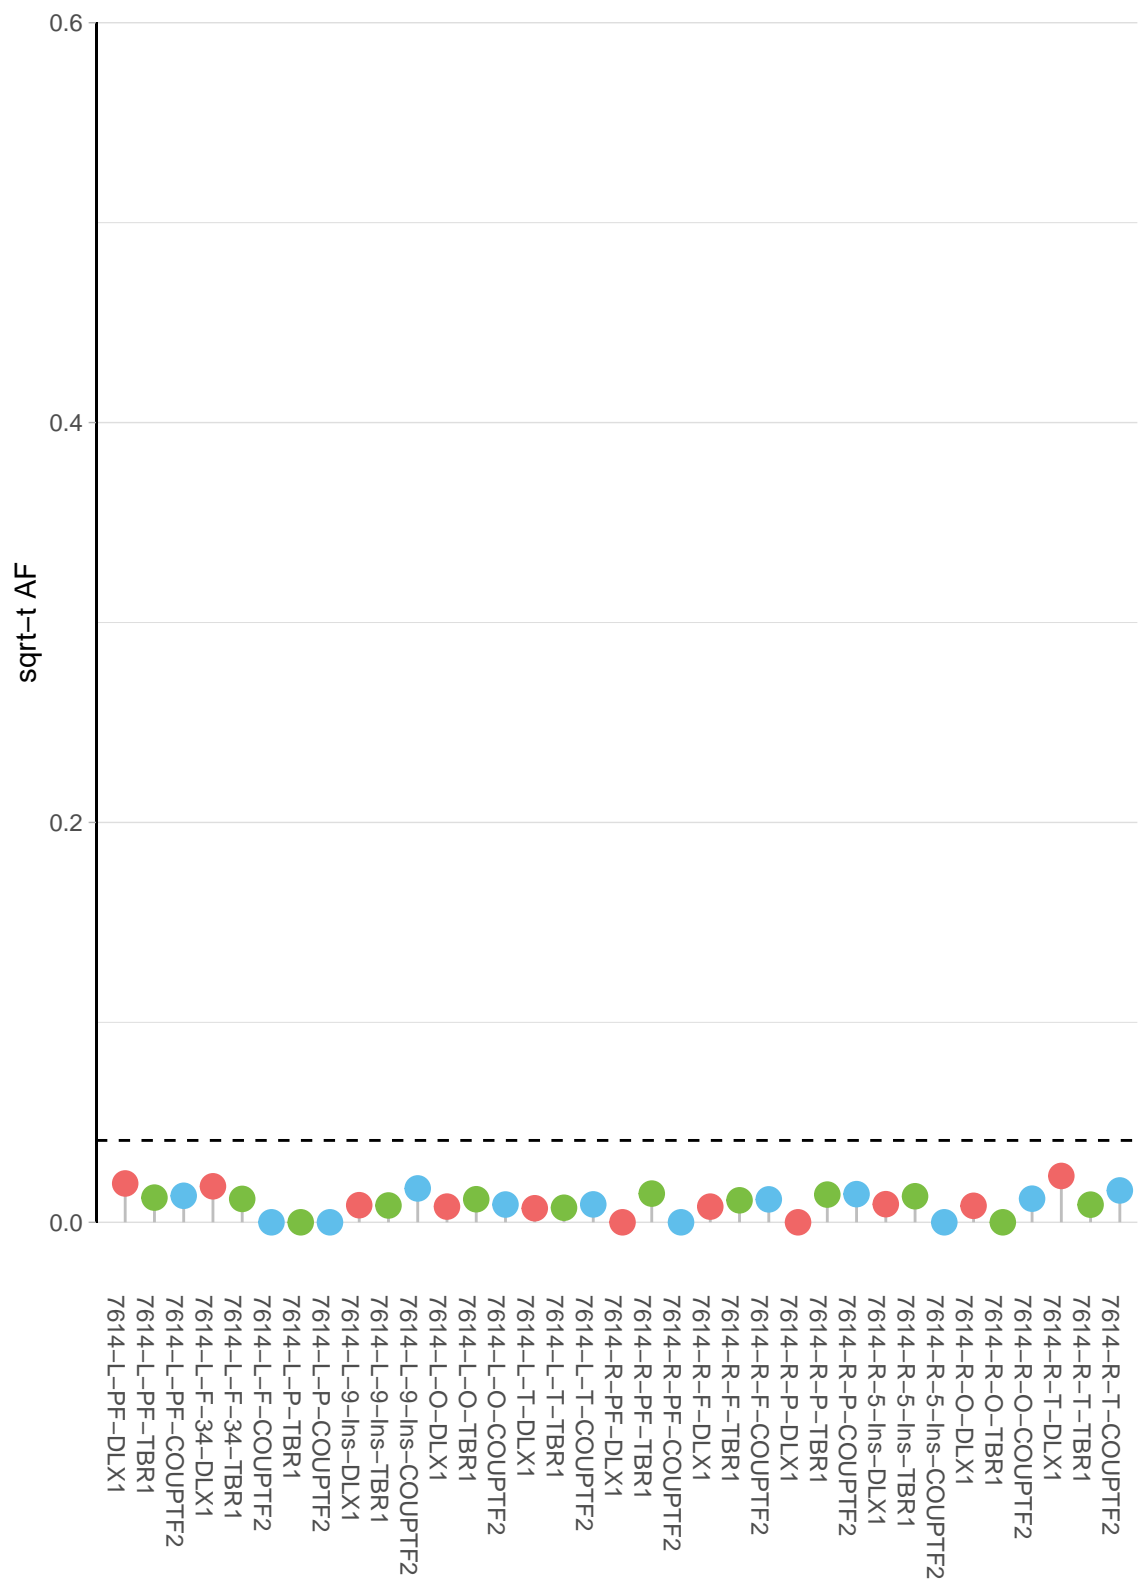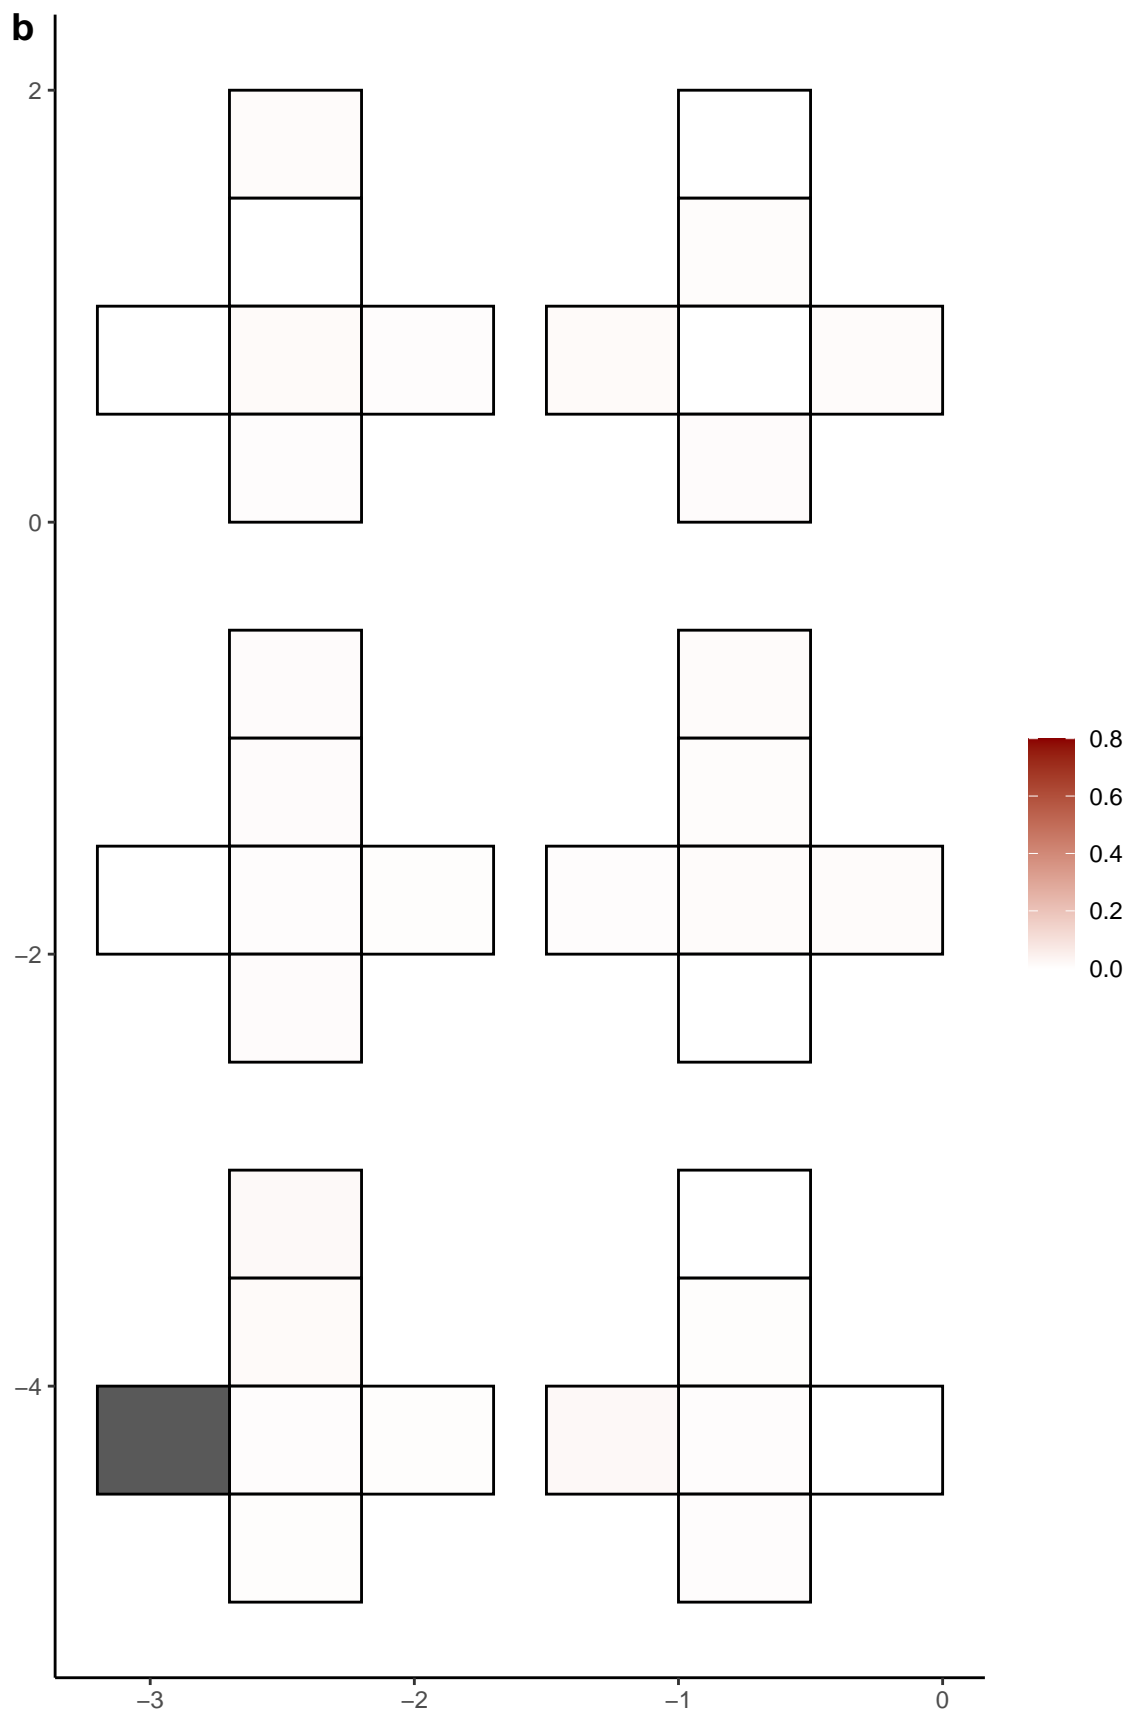

**a** ID01 11-114745430-C-A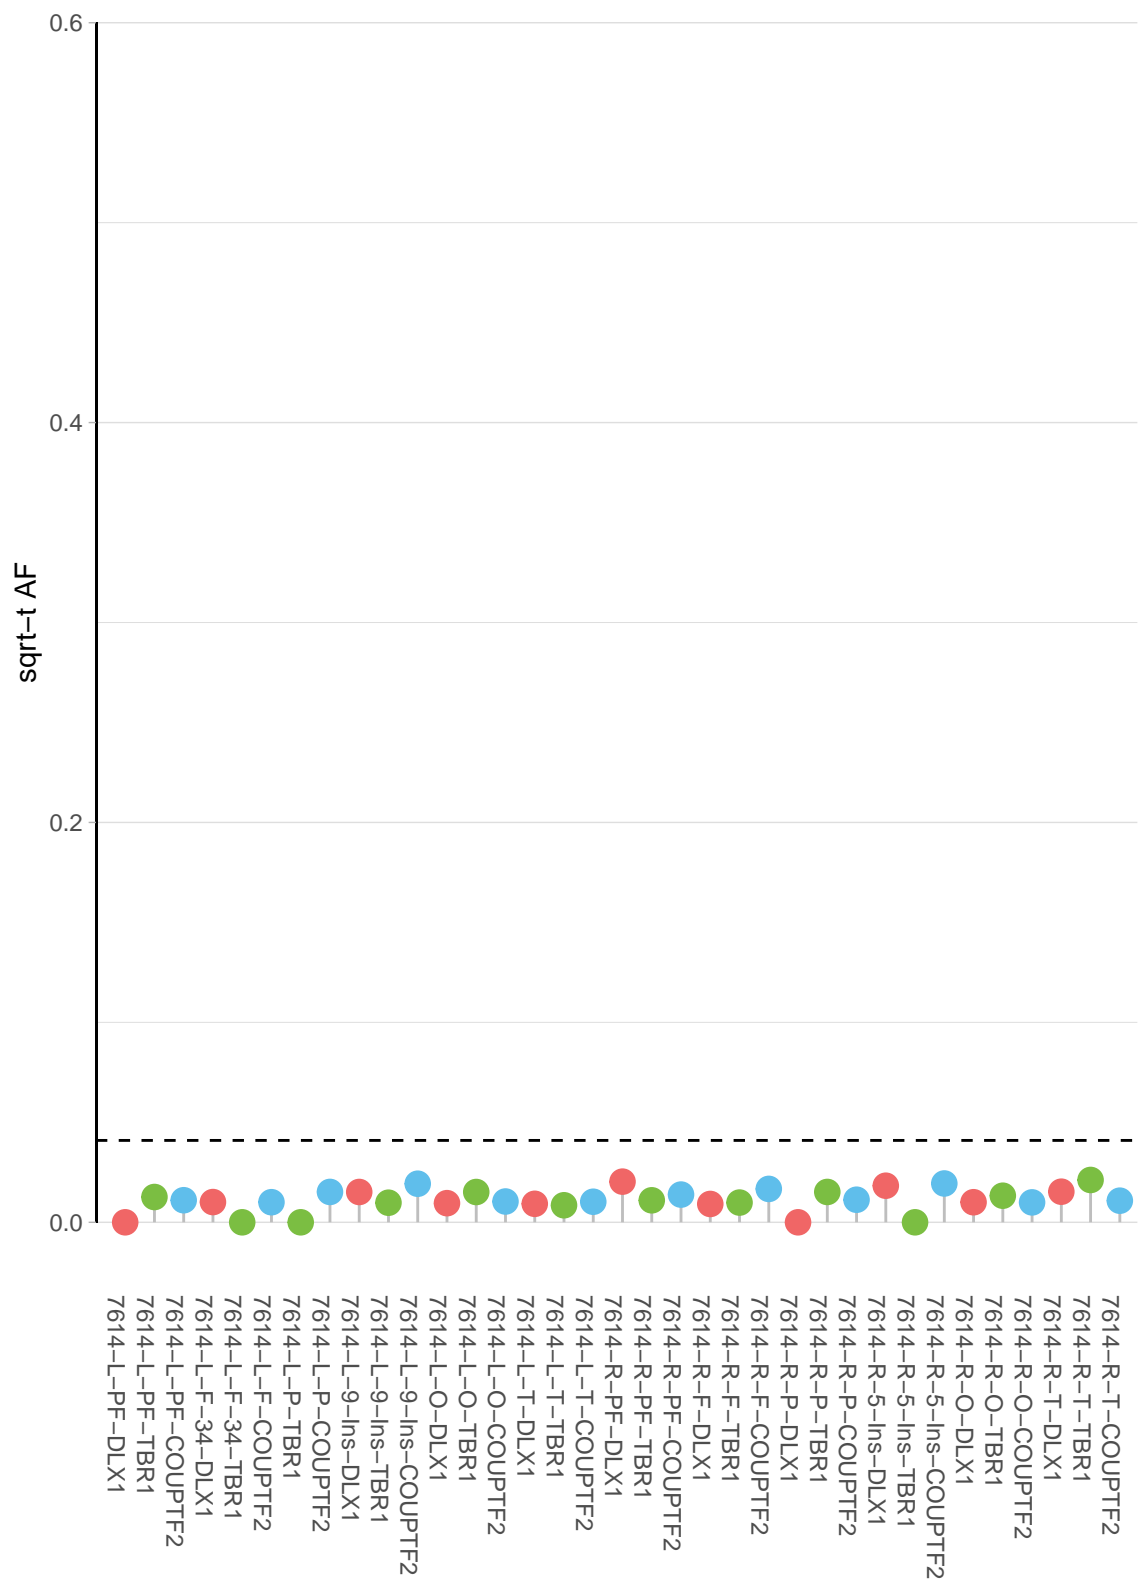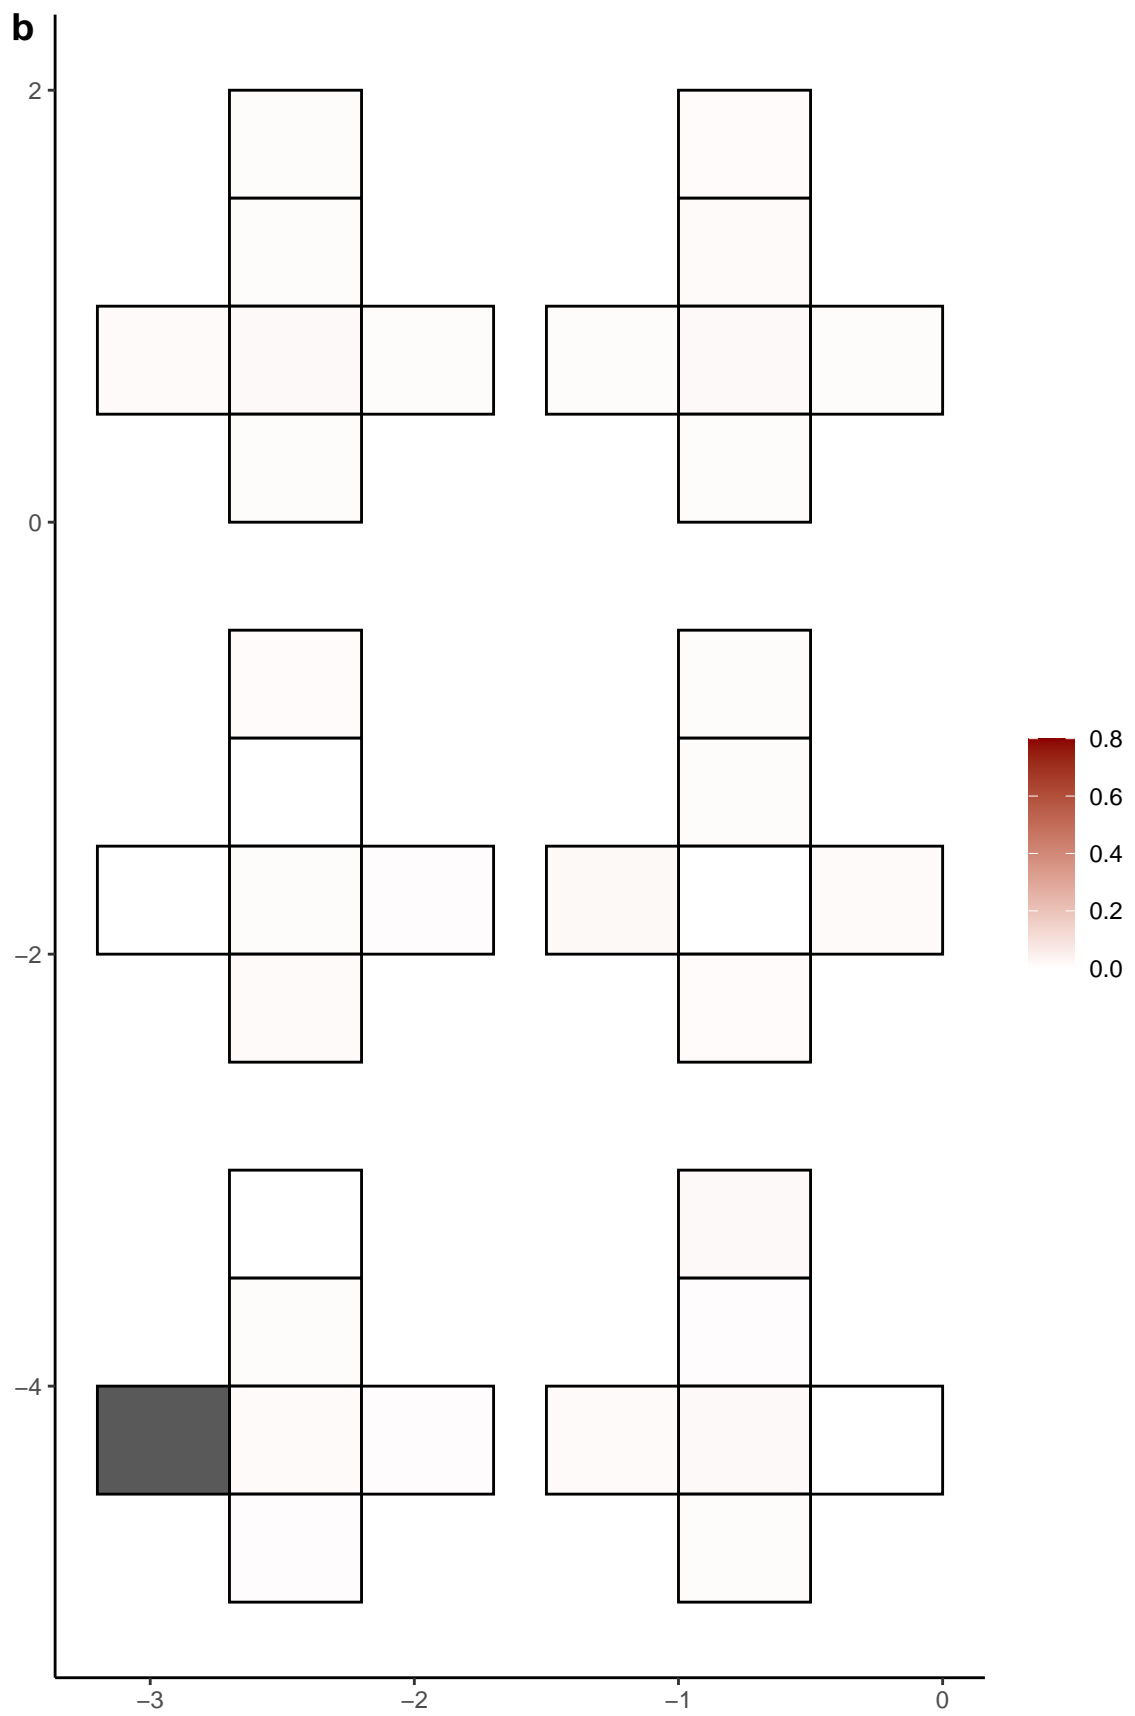

**a** ID01 11-115043033-C-T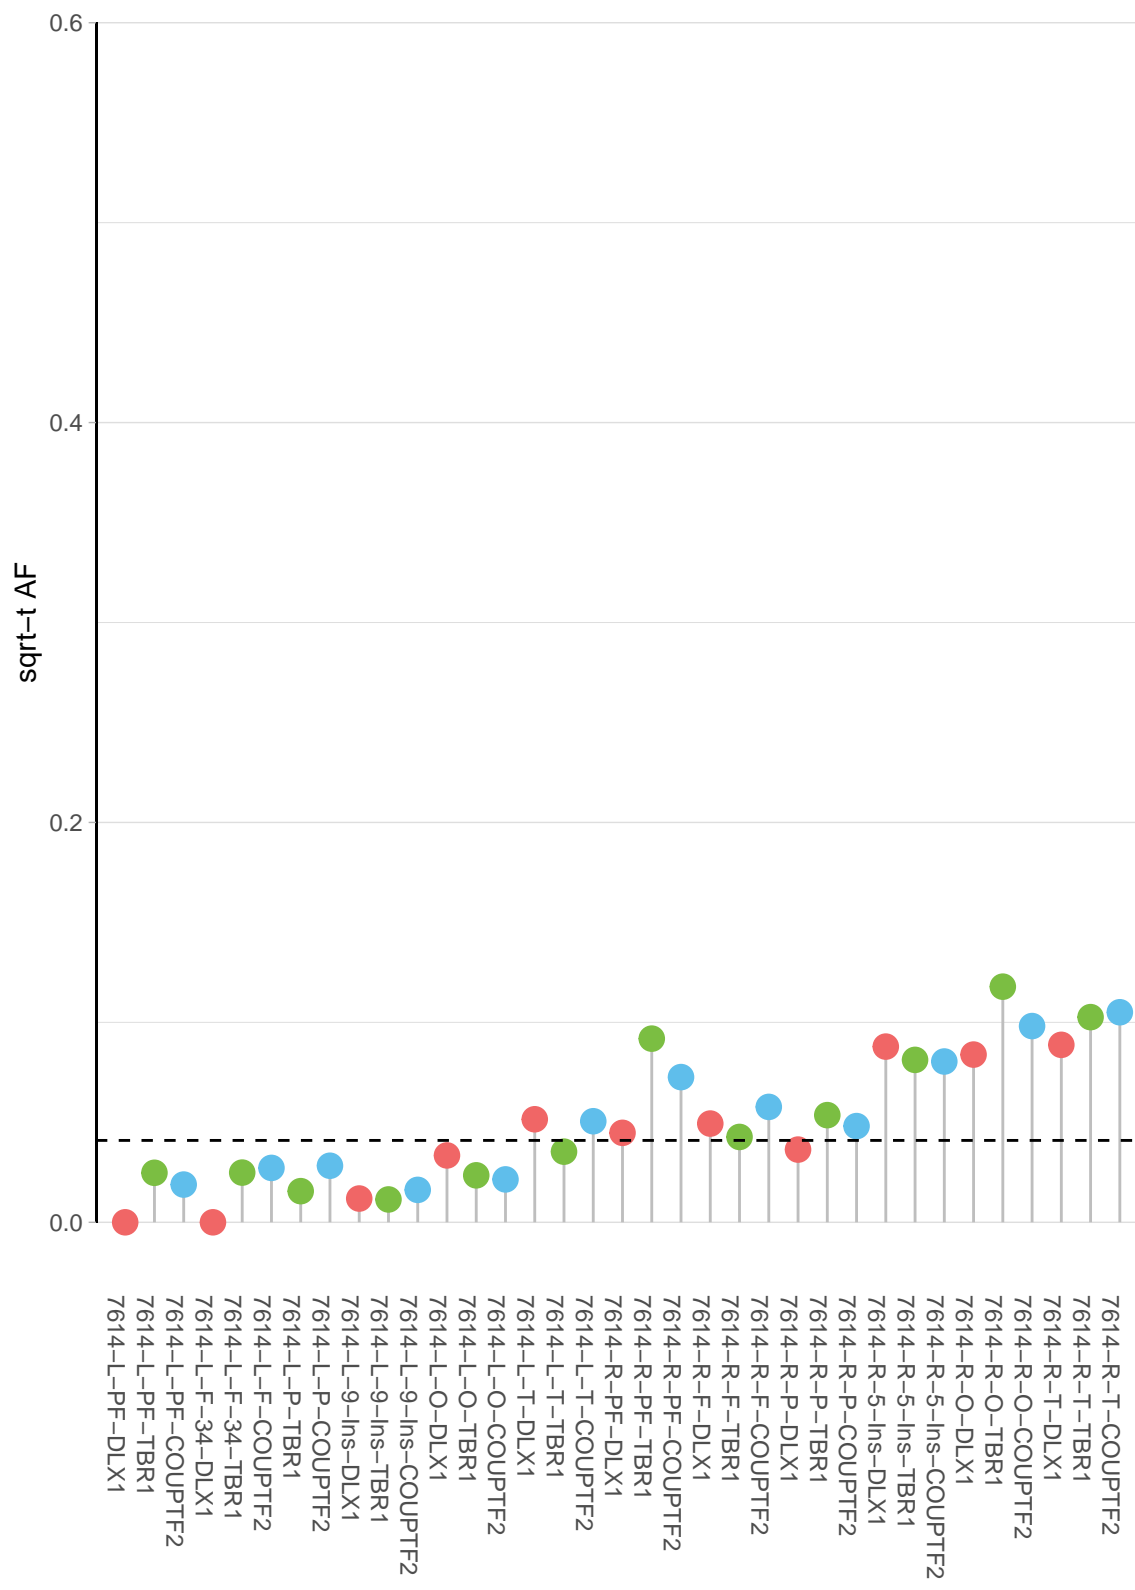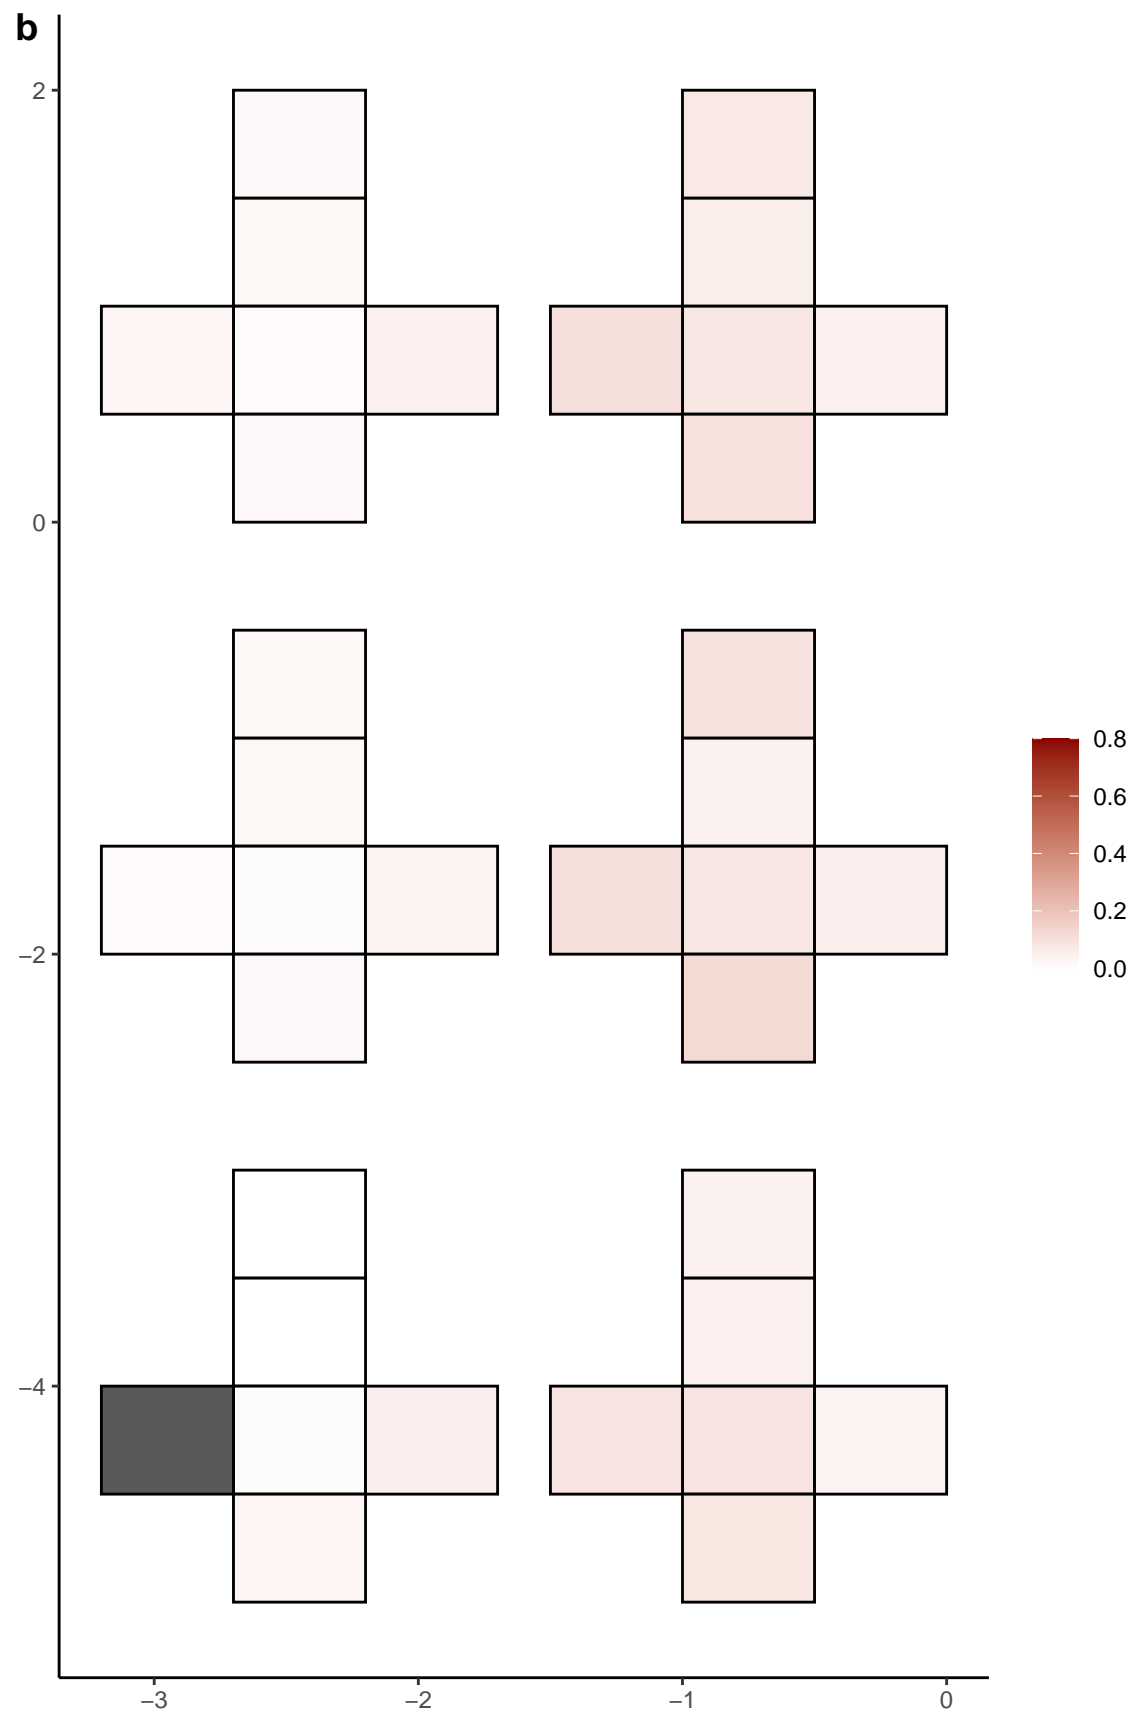

**a** ID01 11-117506570-A-C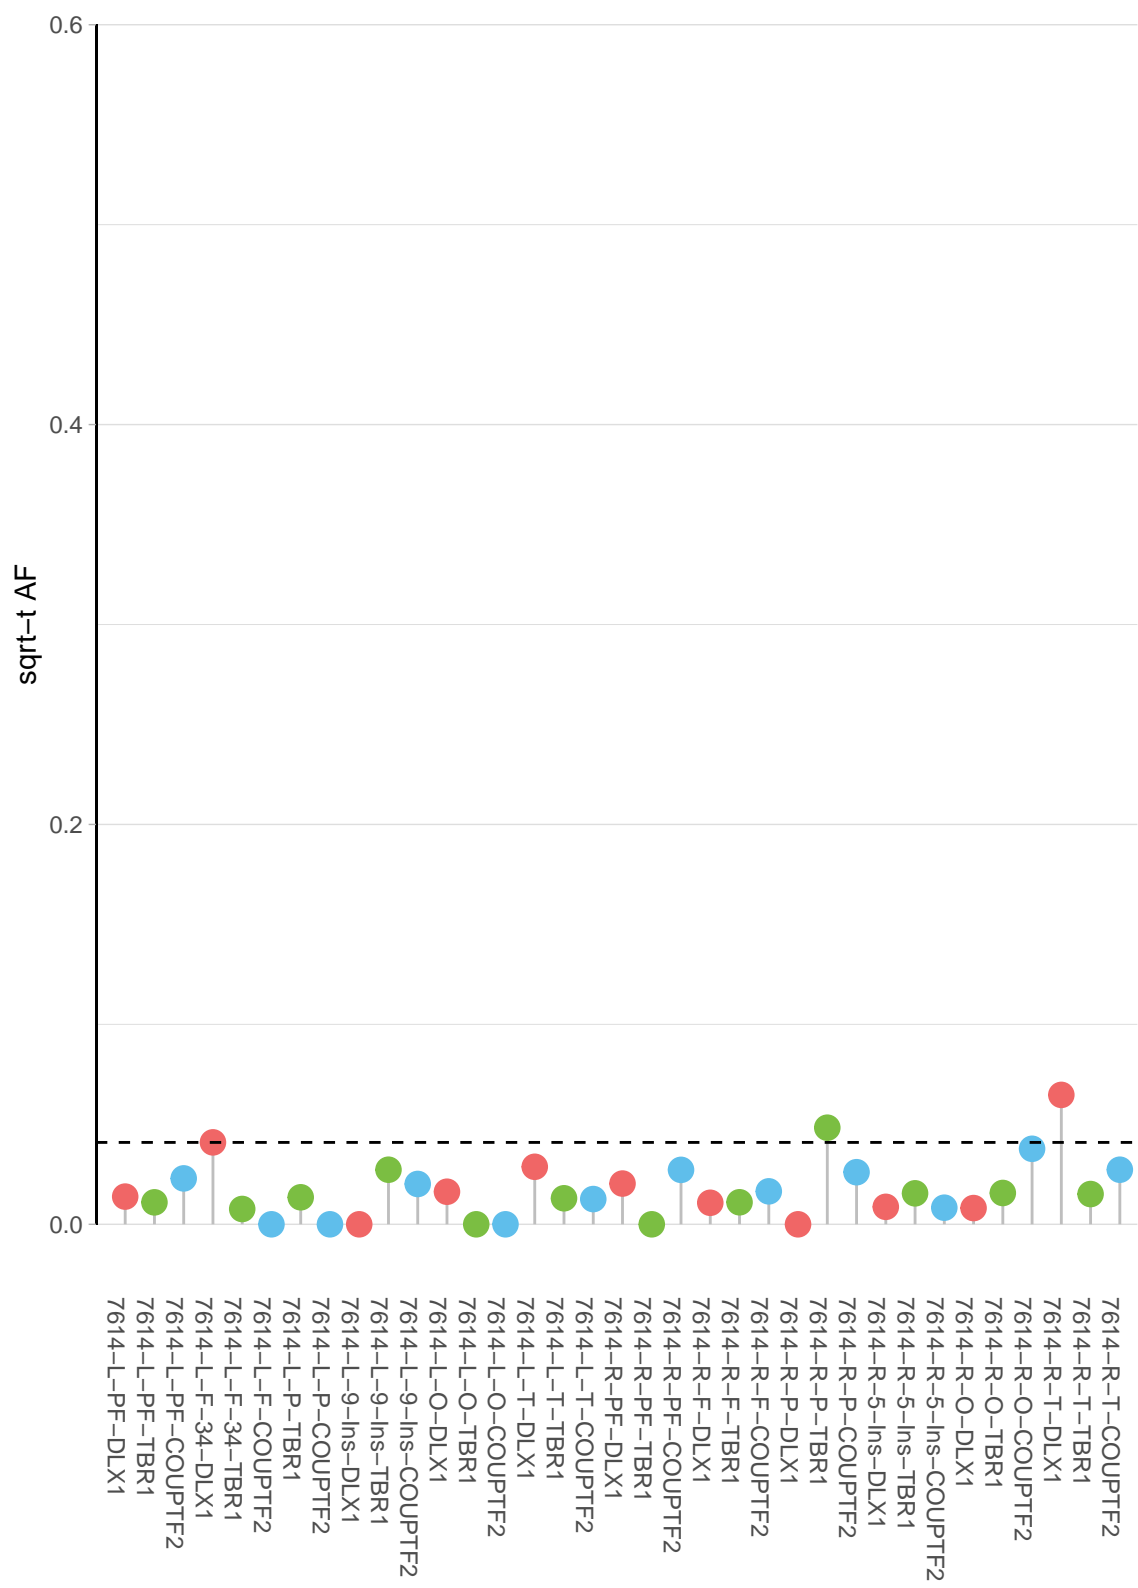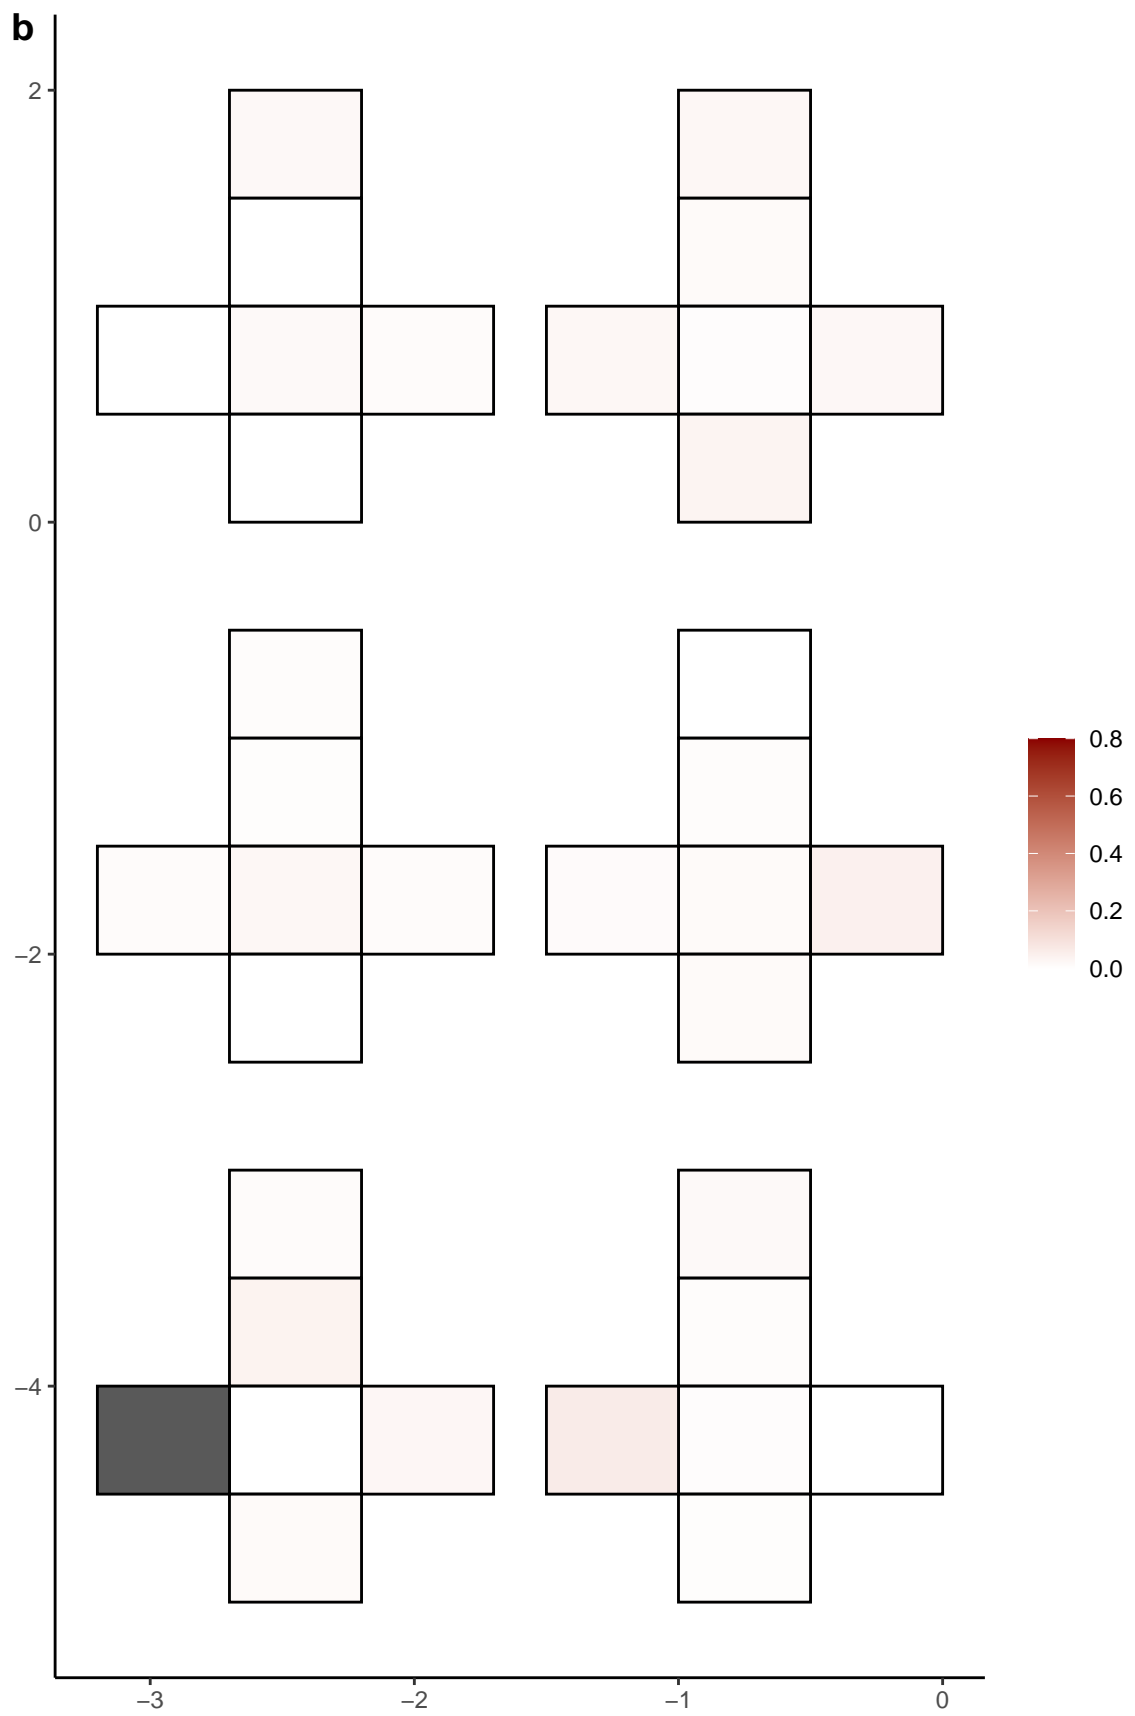

**a** ID01 11-123516528-G-A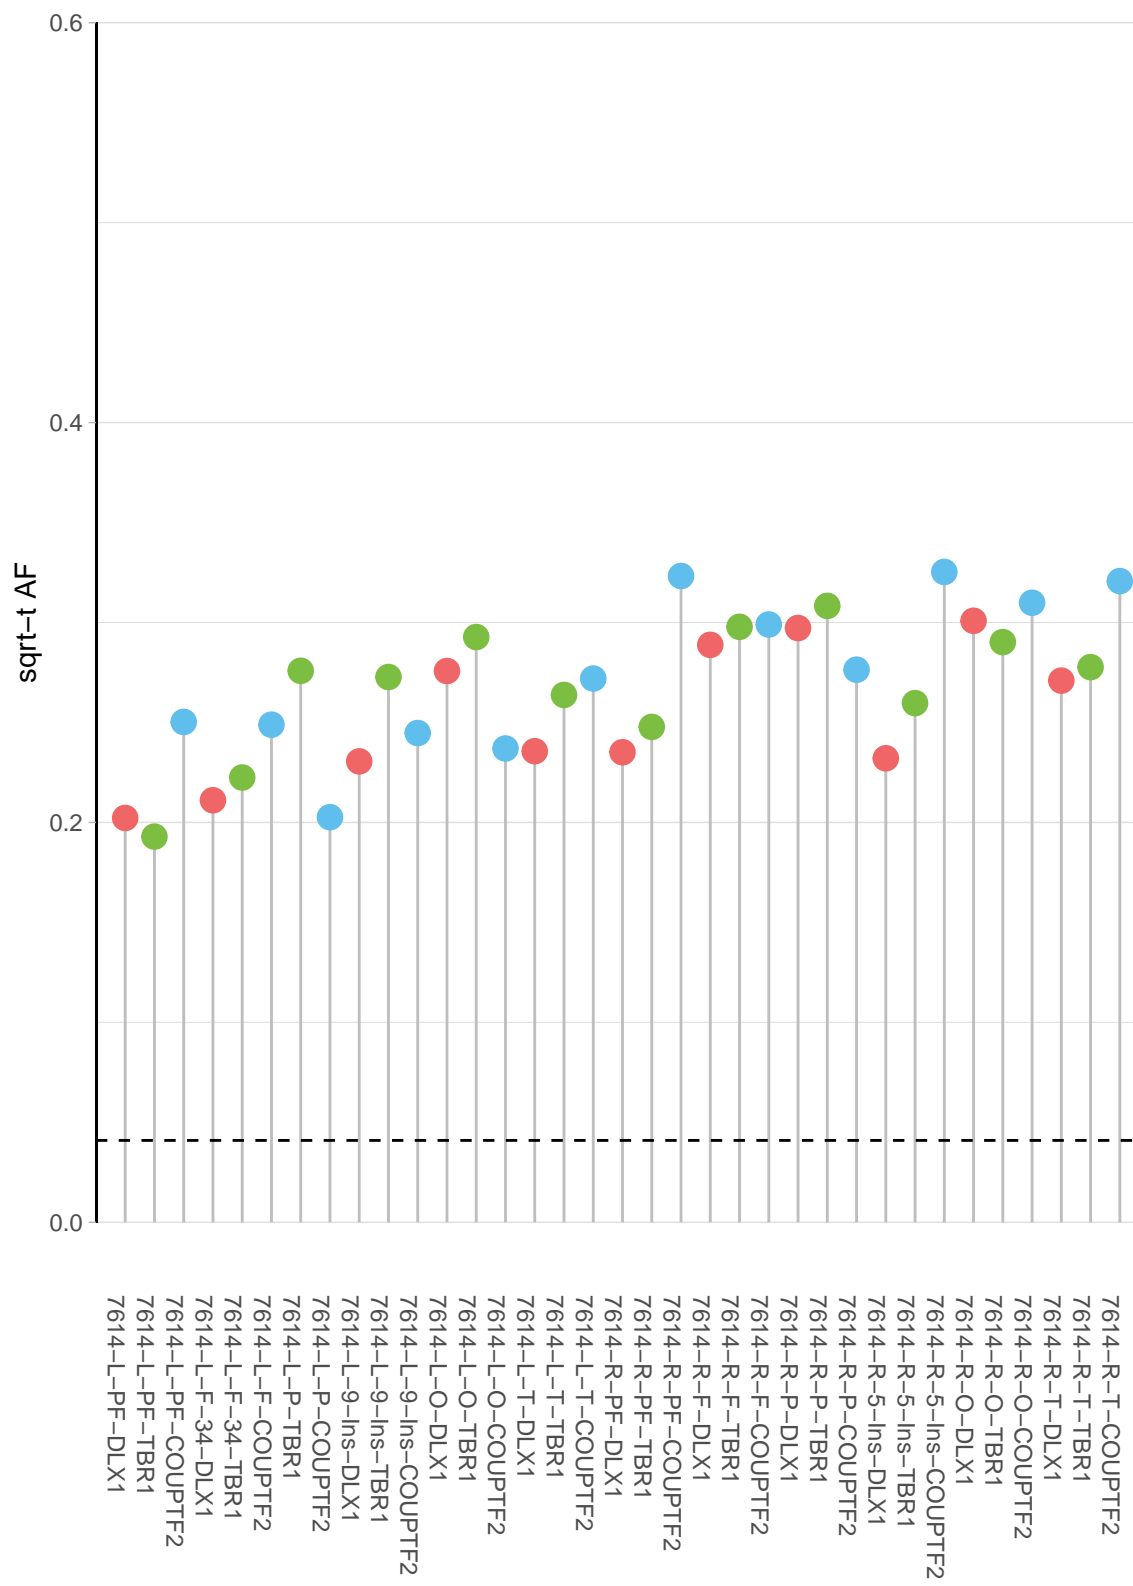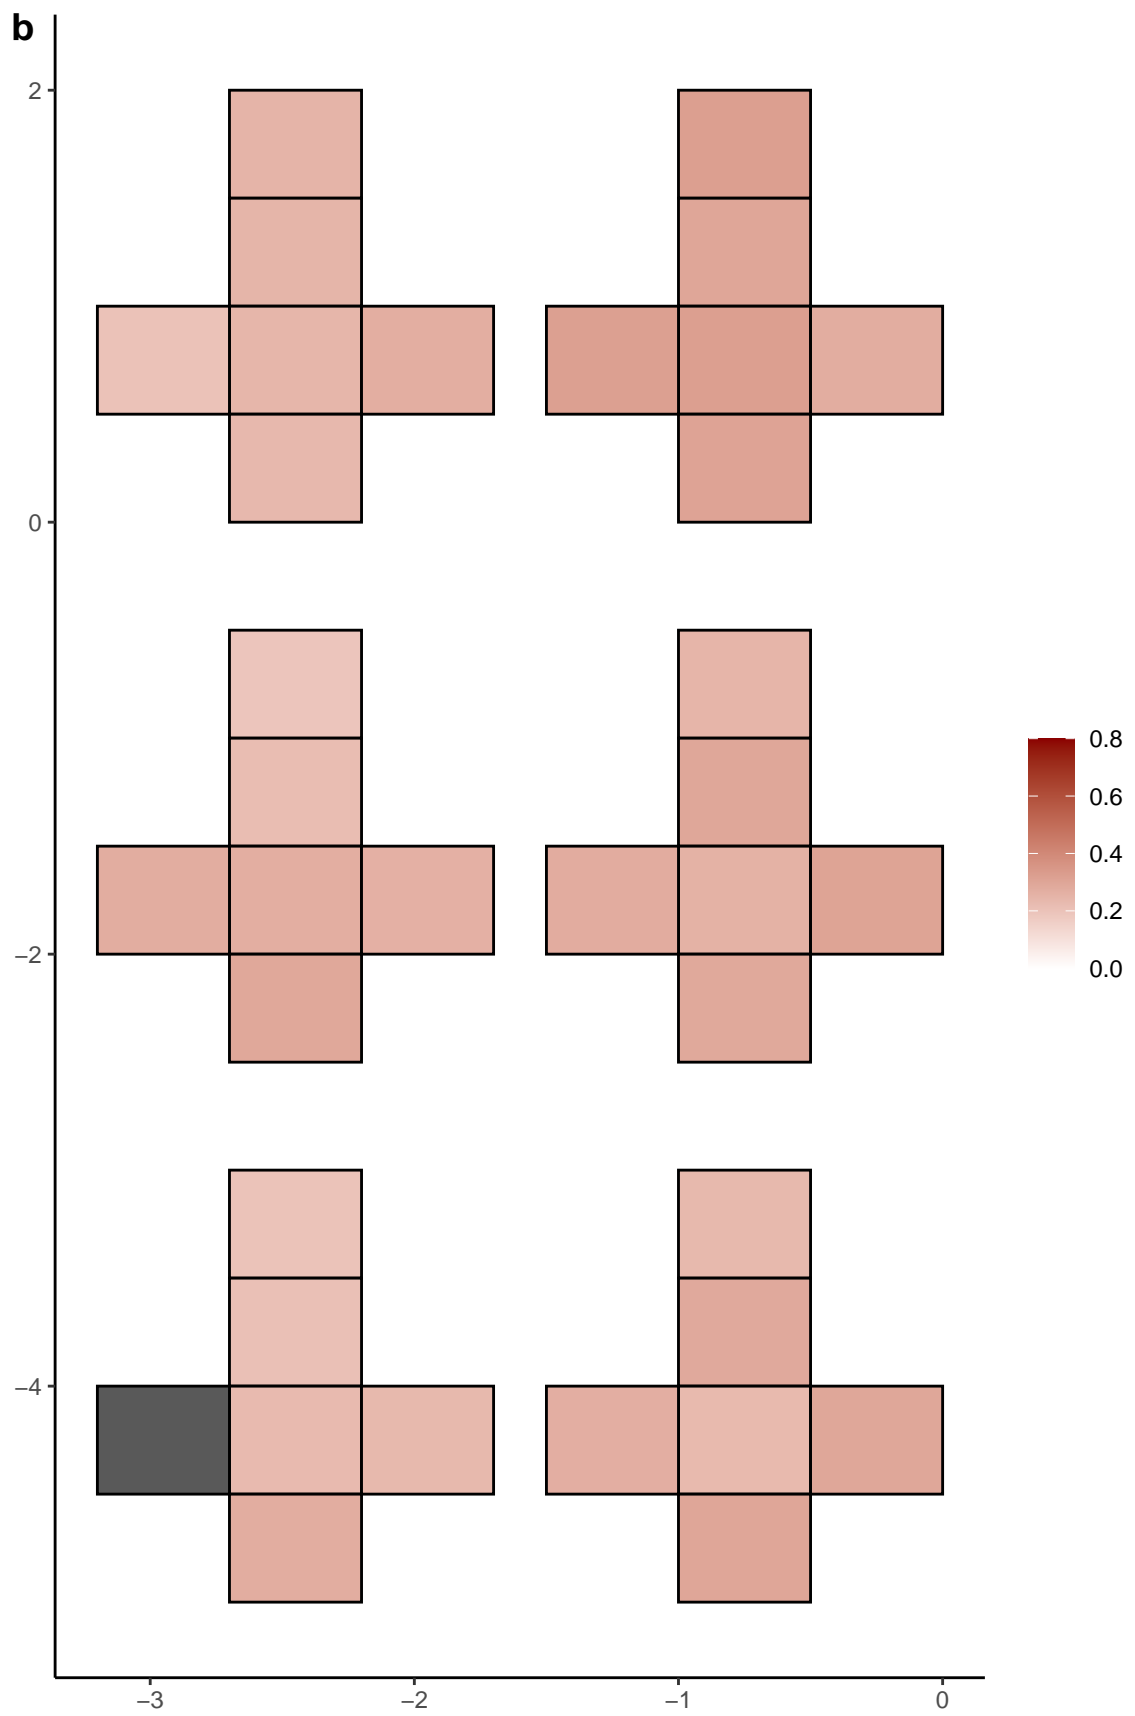

**a** ID01 11-129560658-C-T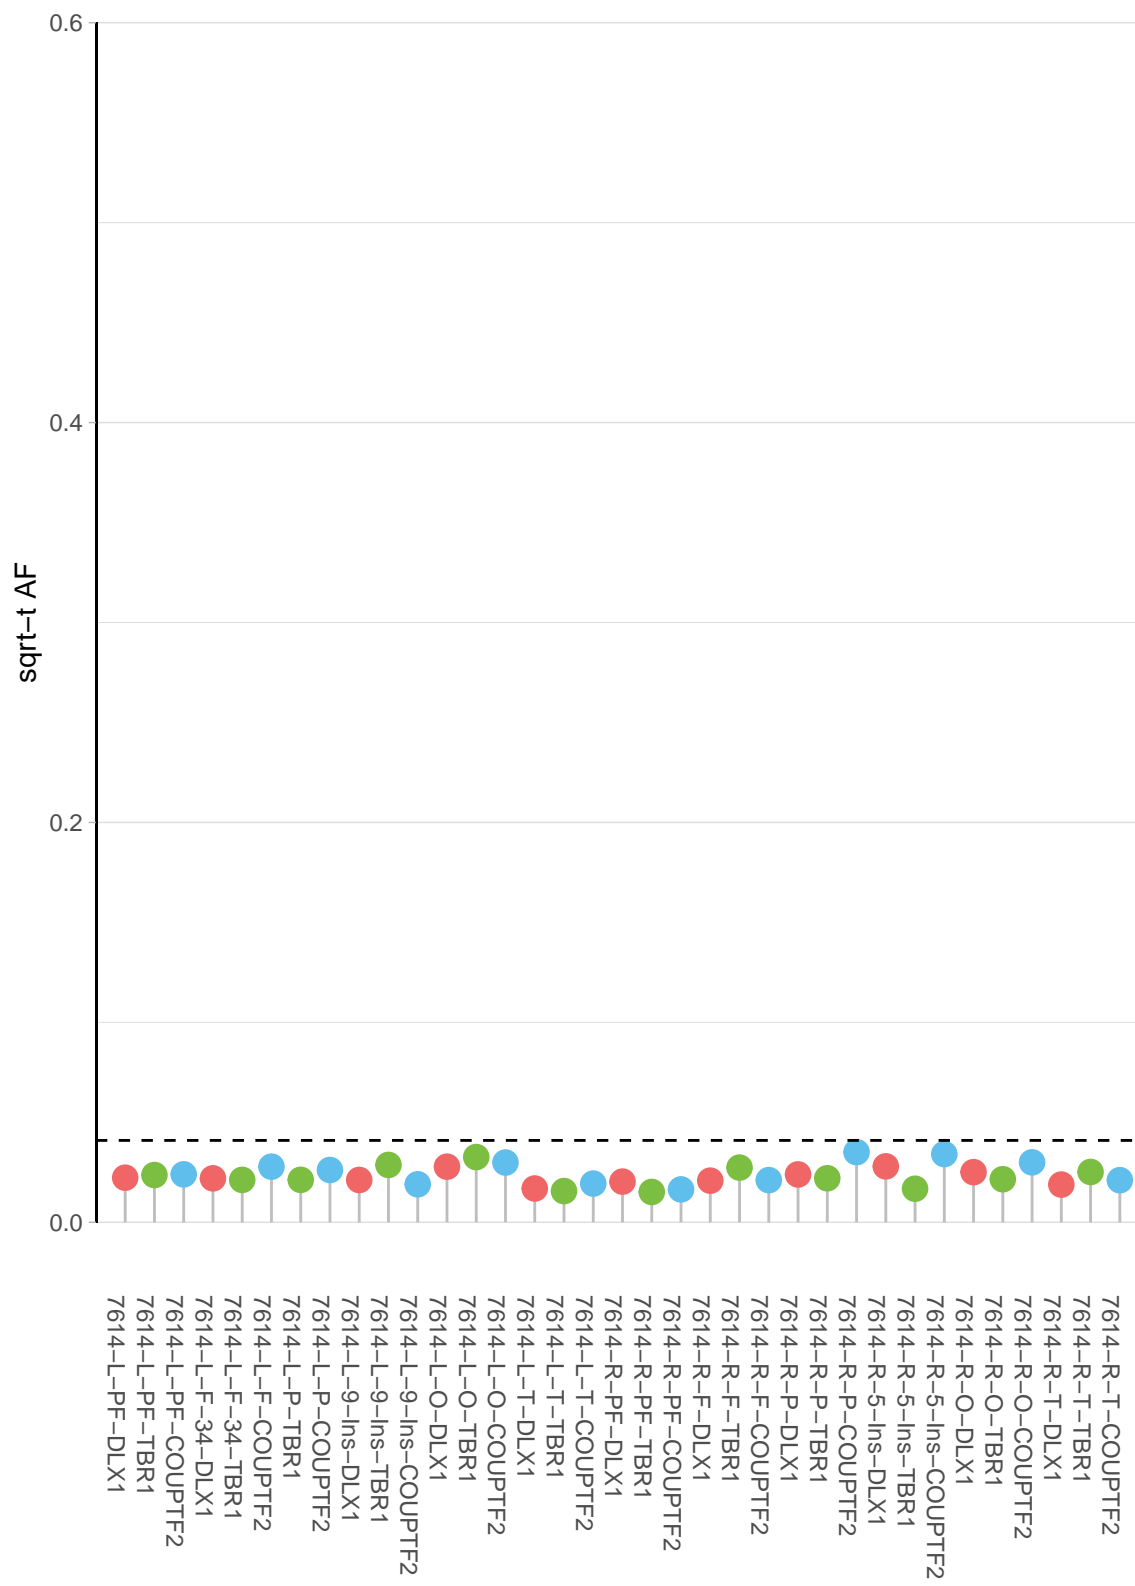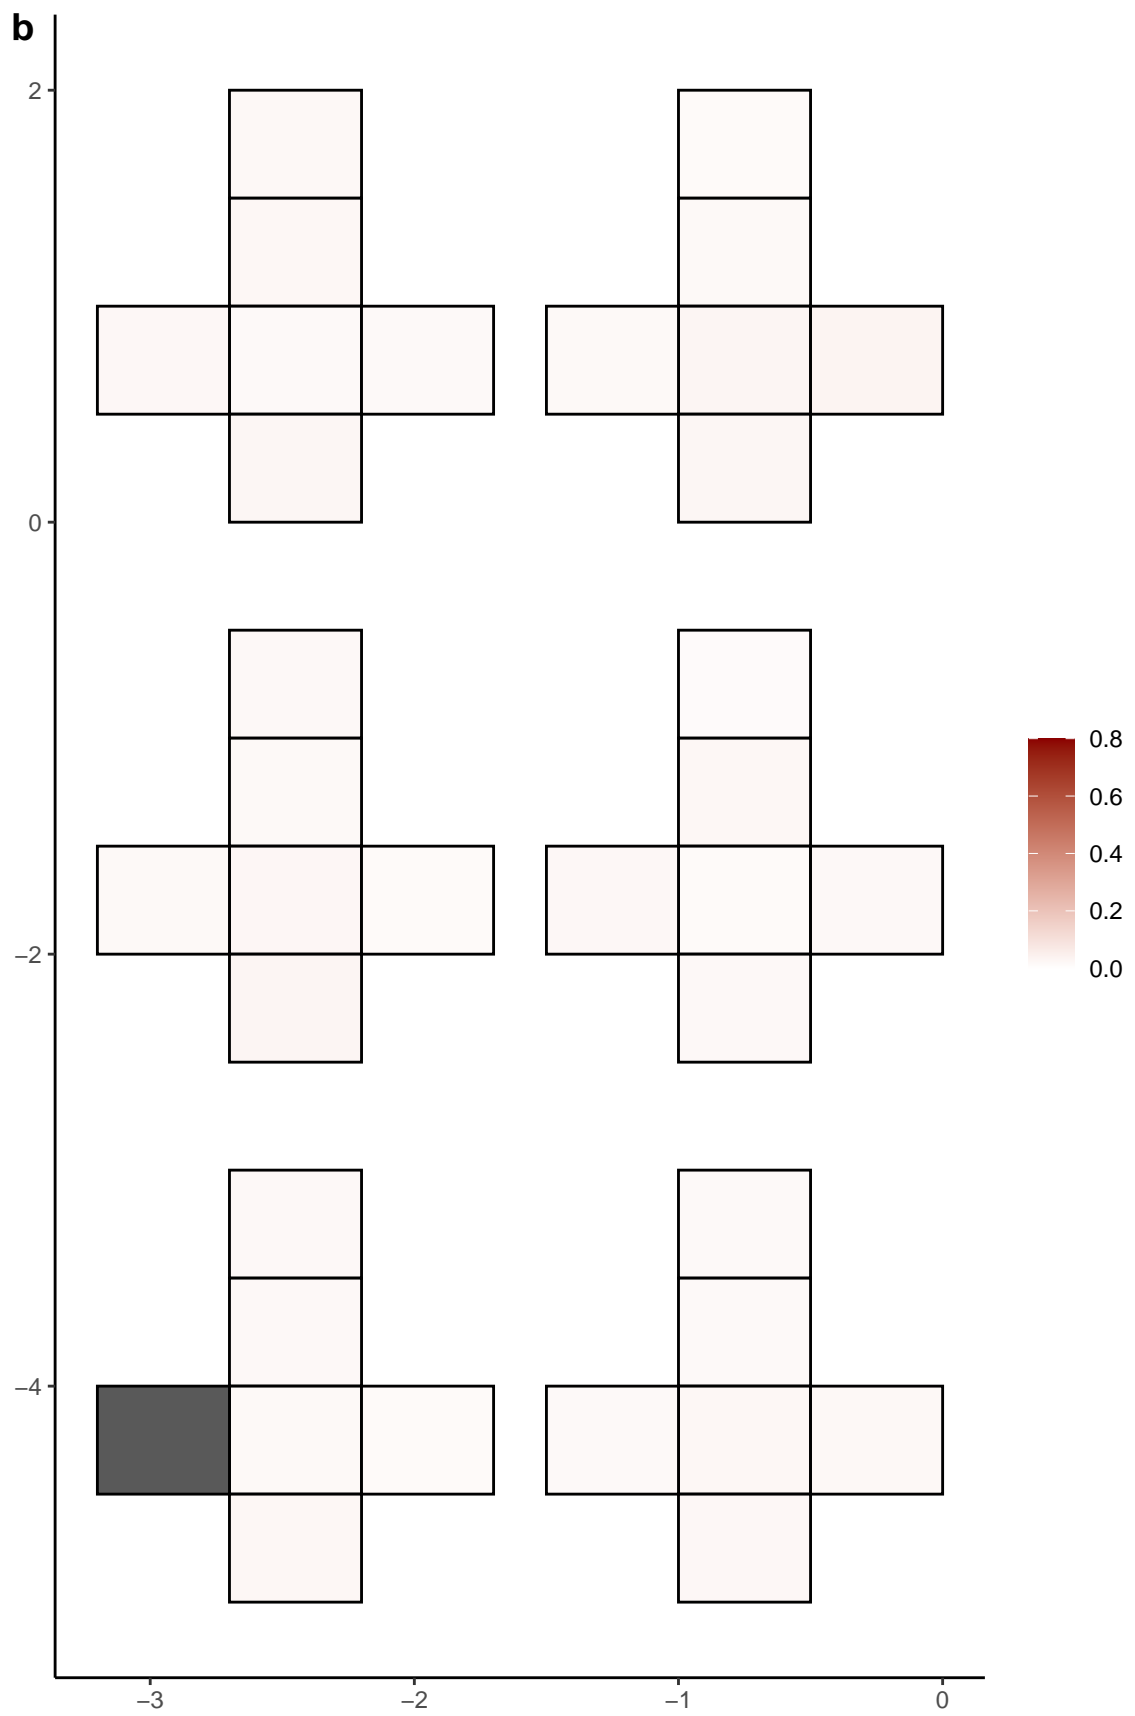

**a** ID01 11-34161341-C-T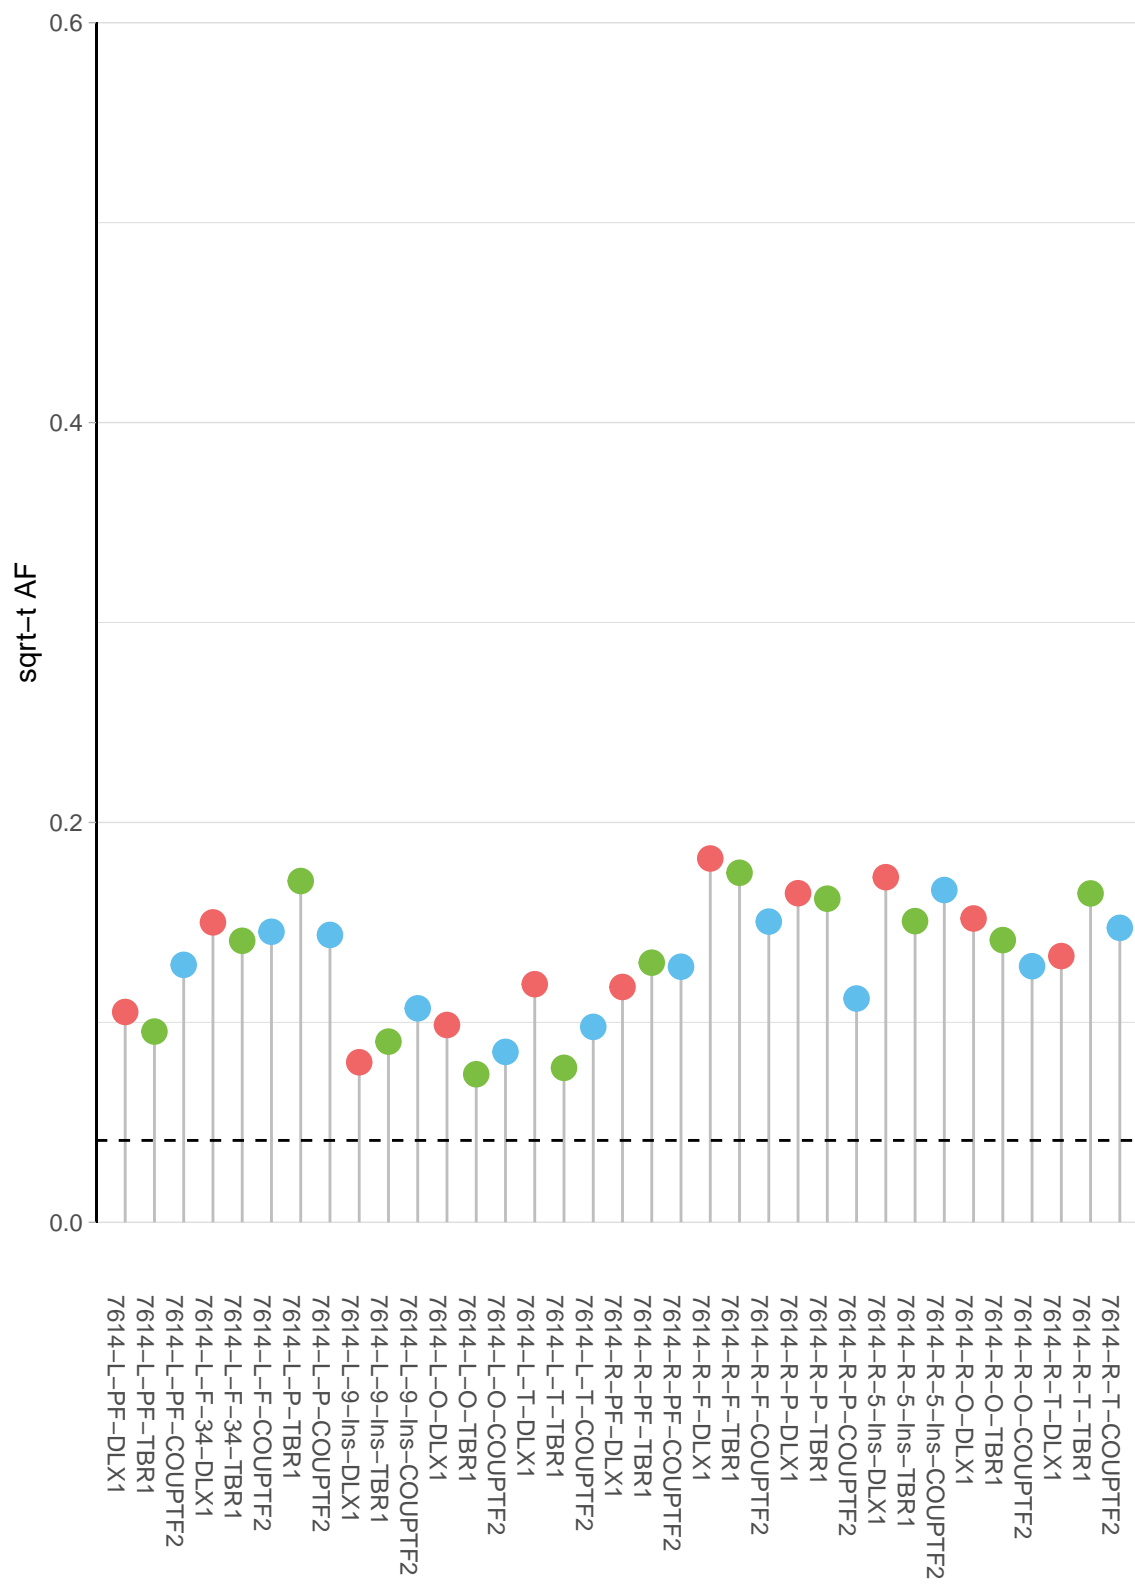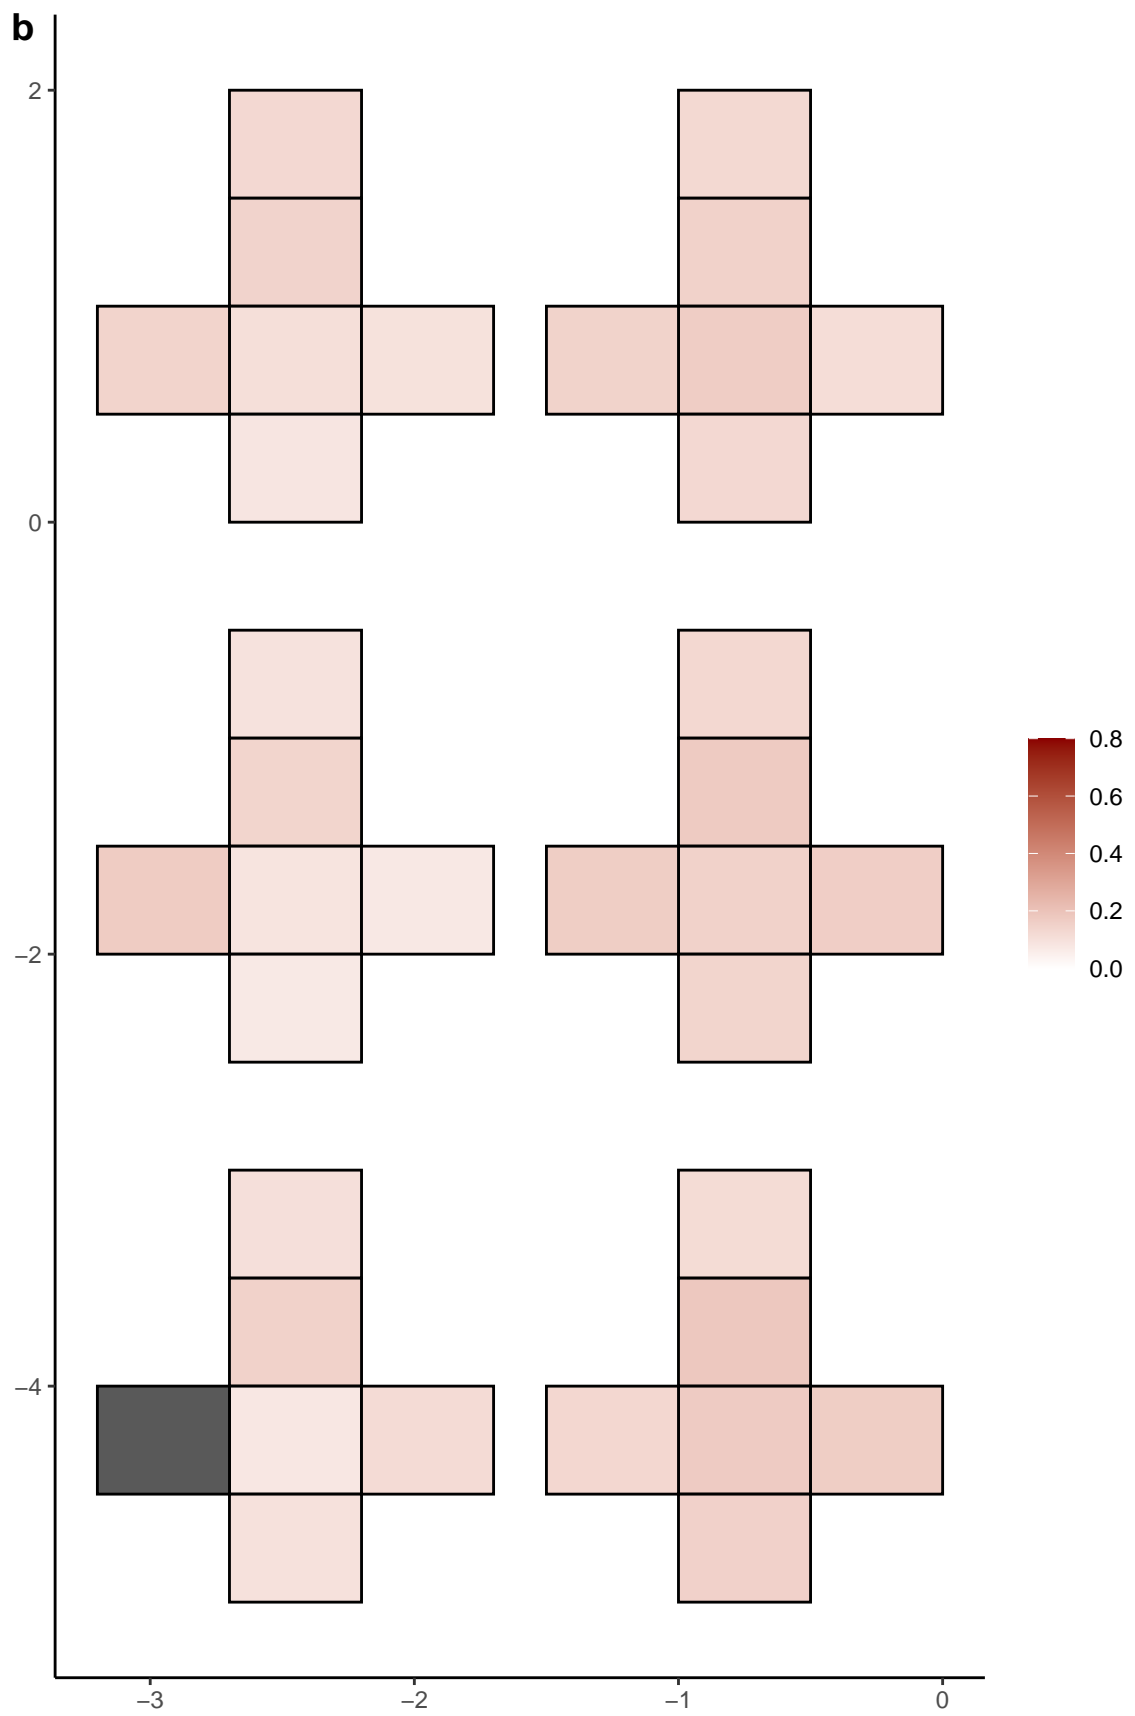

**a** ID01 11-43099503-A-C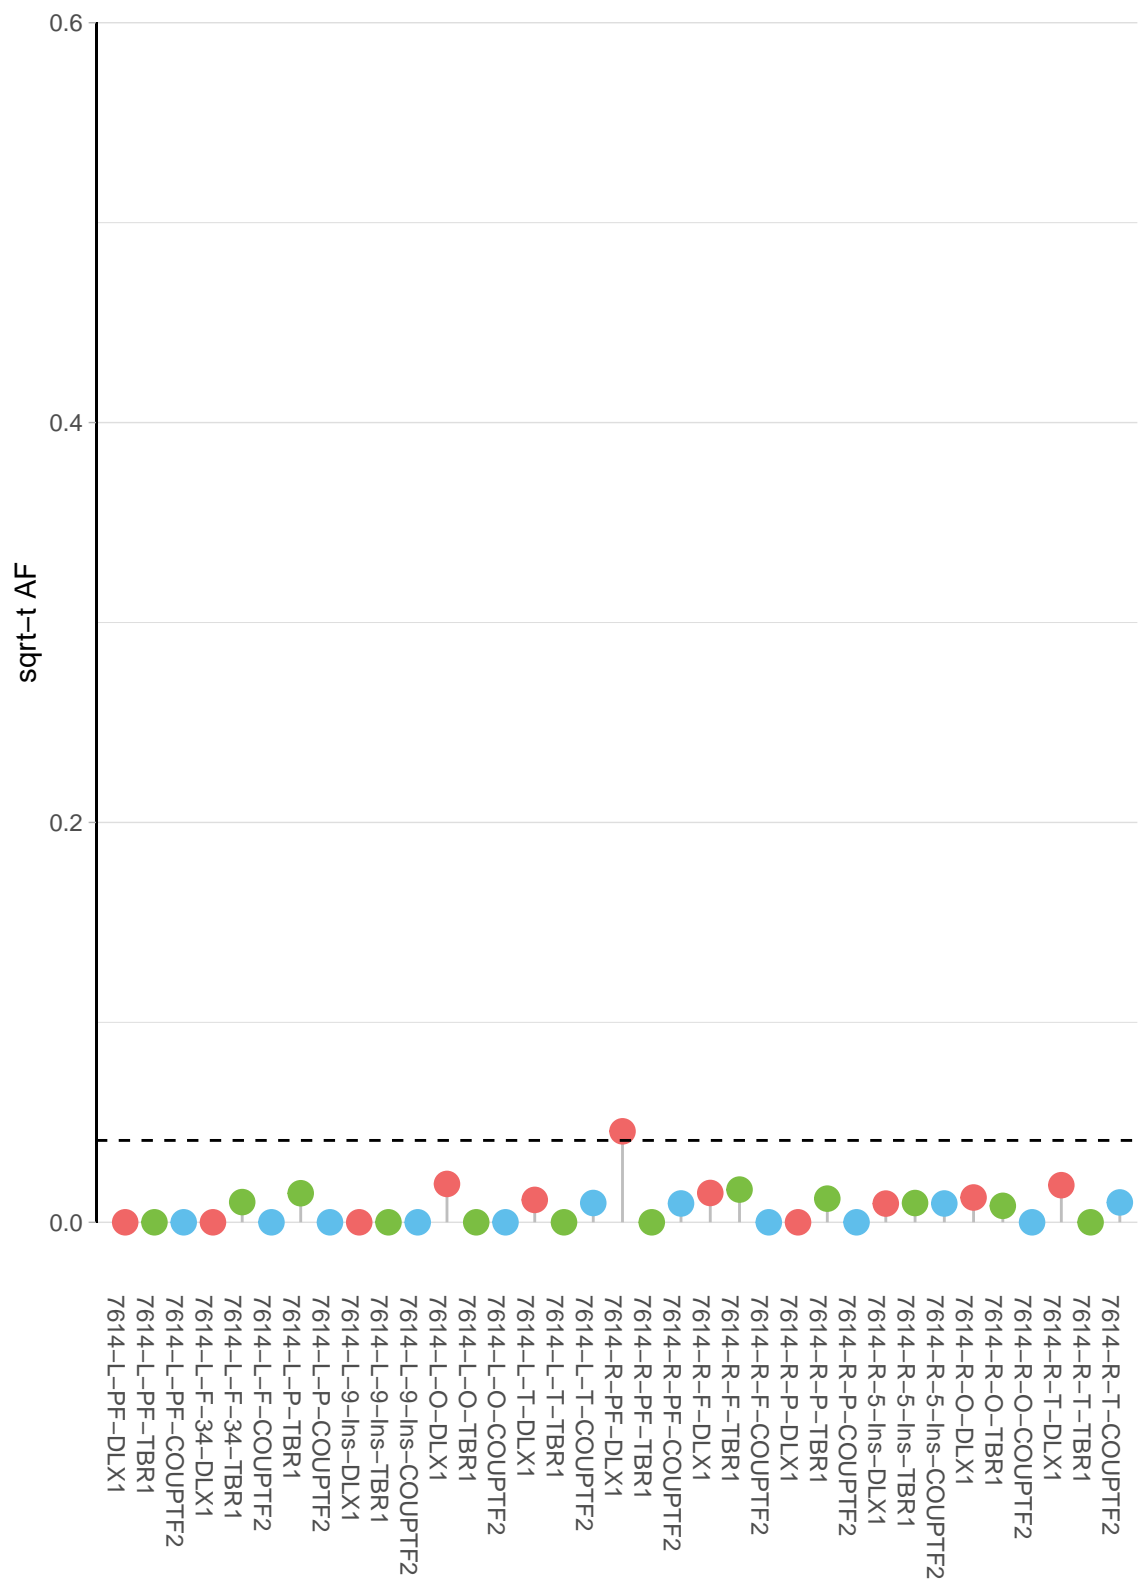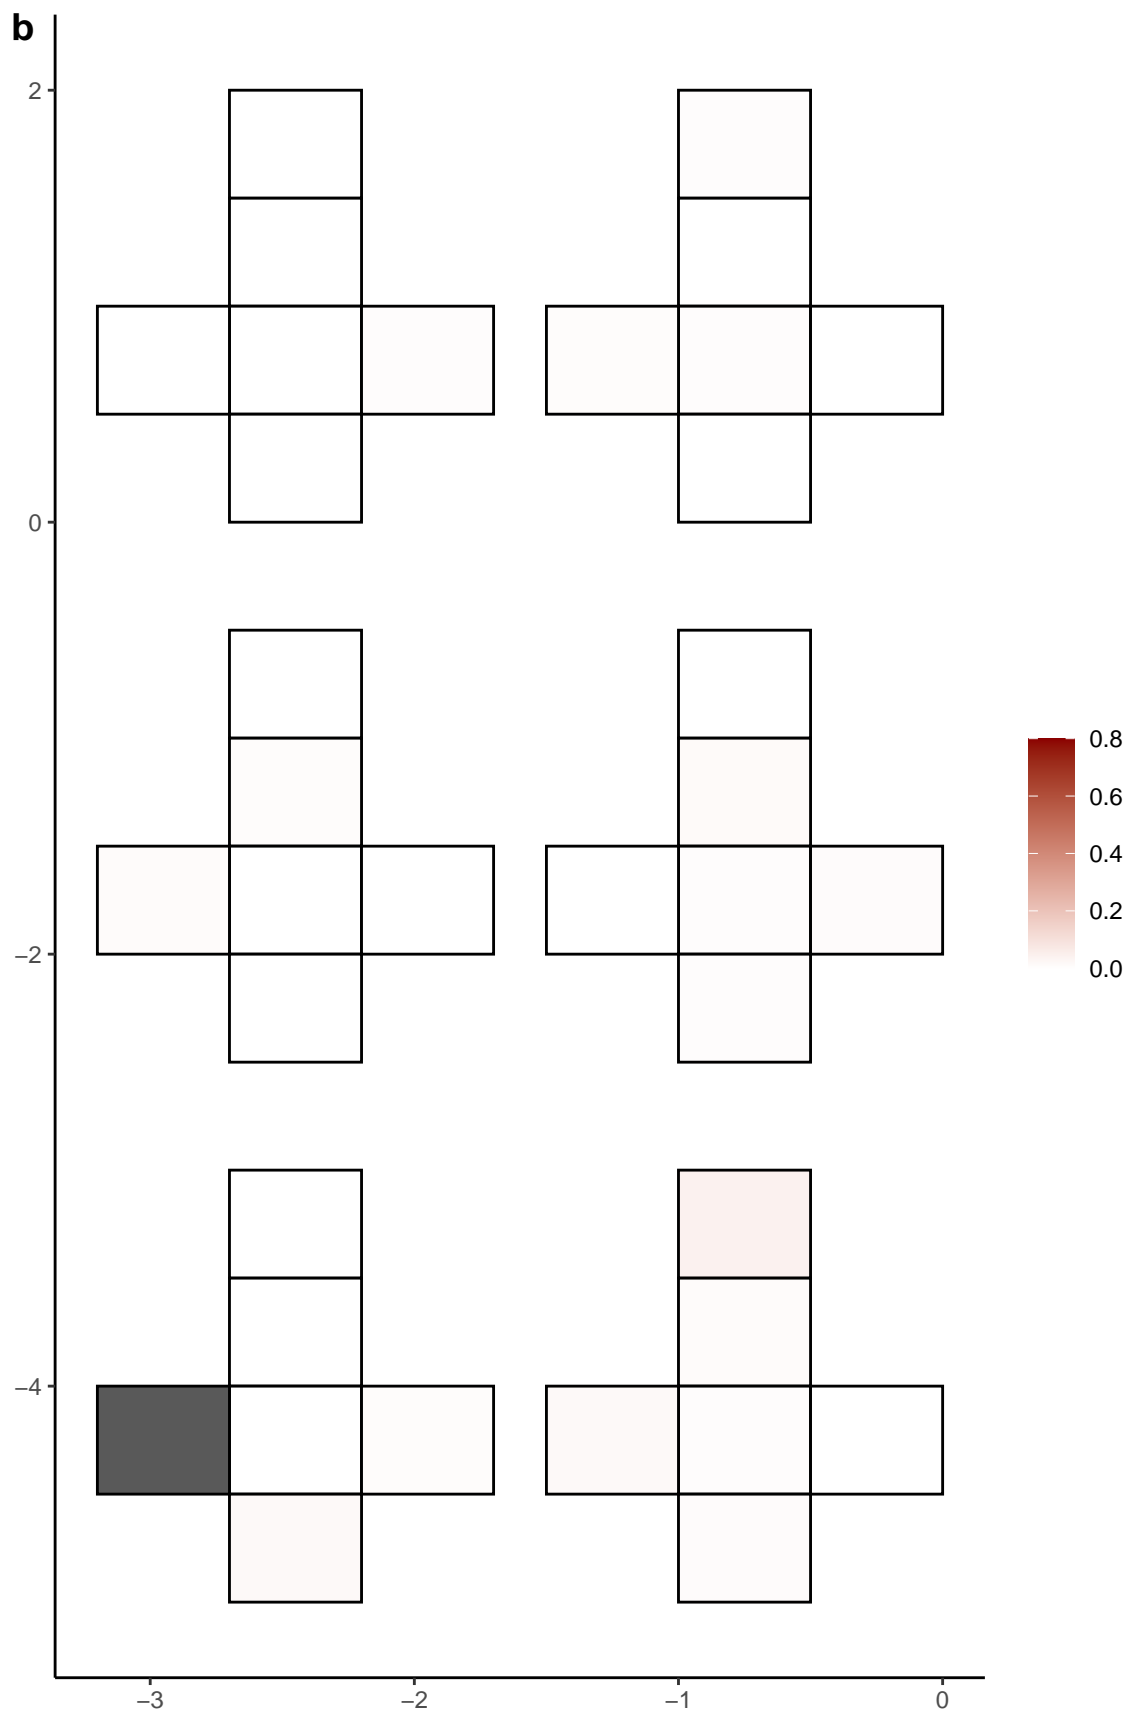



**a** ID01 11-5470408-T-C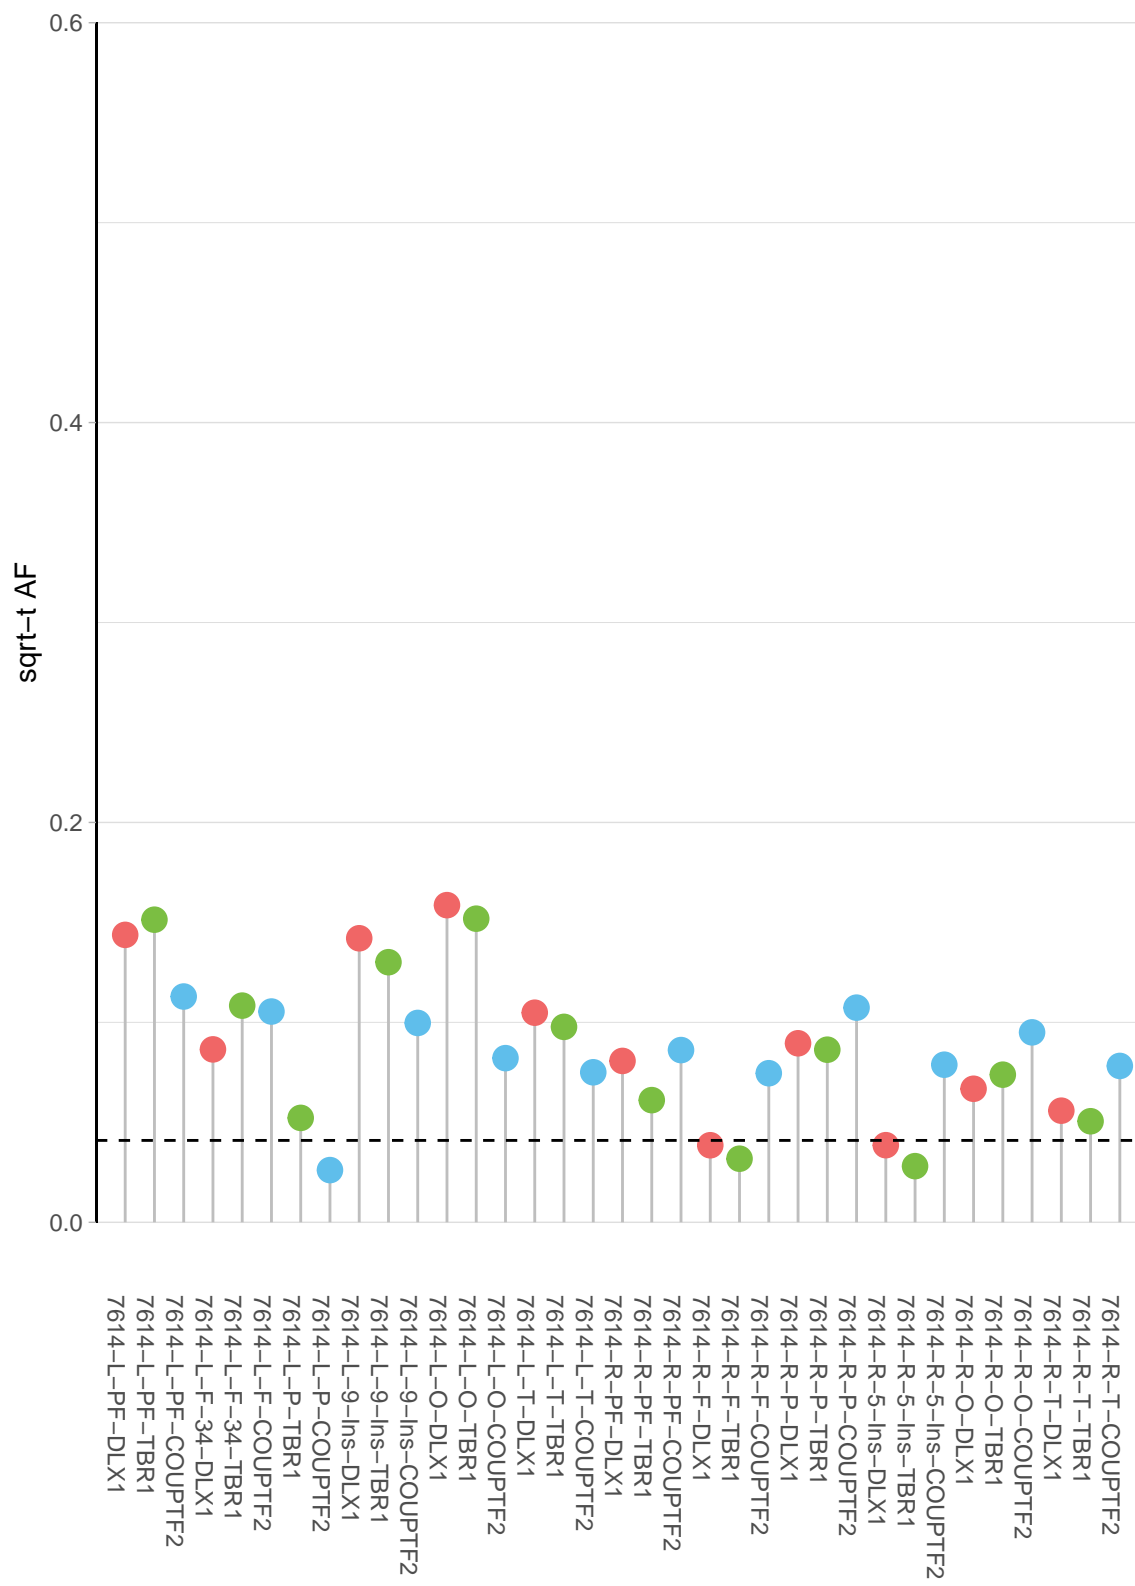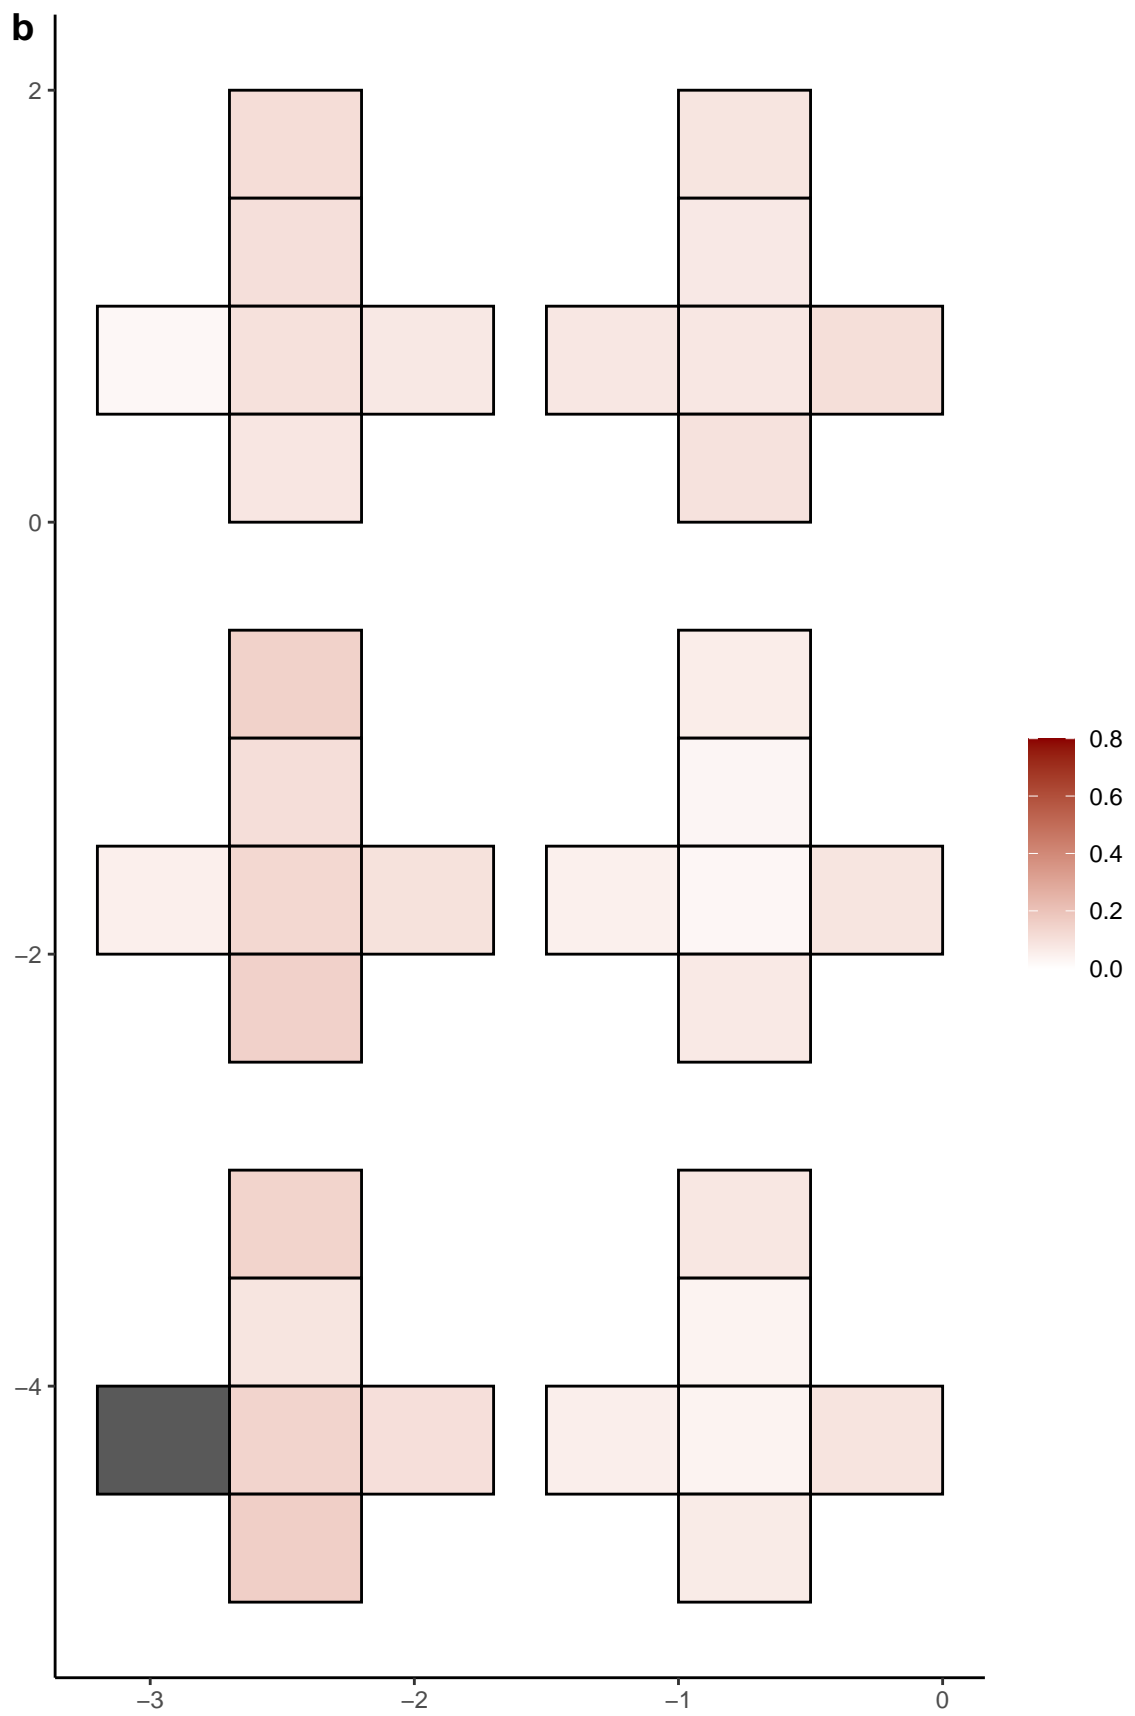

**a** ID01 11-8350555-G-A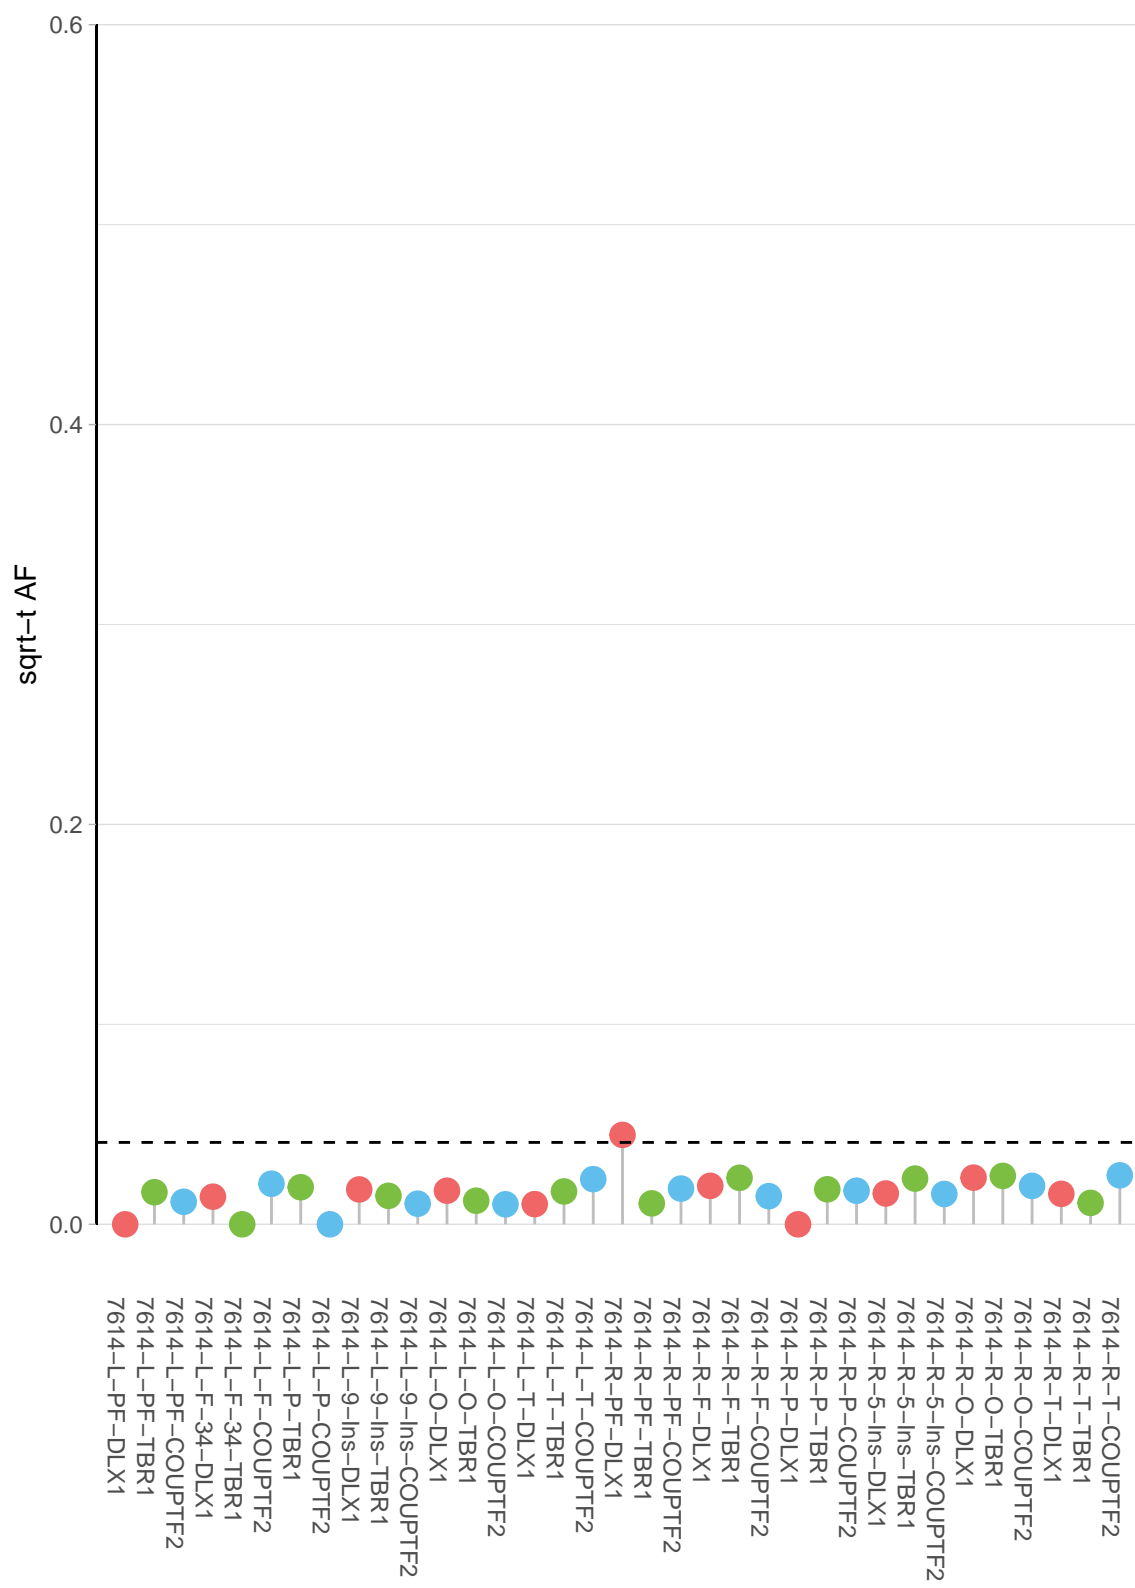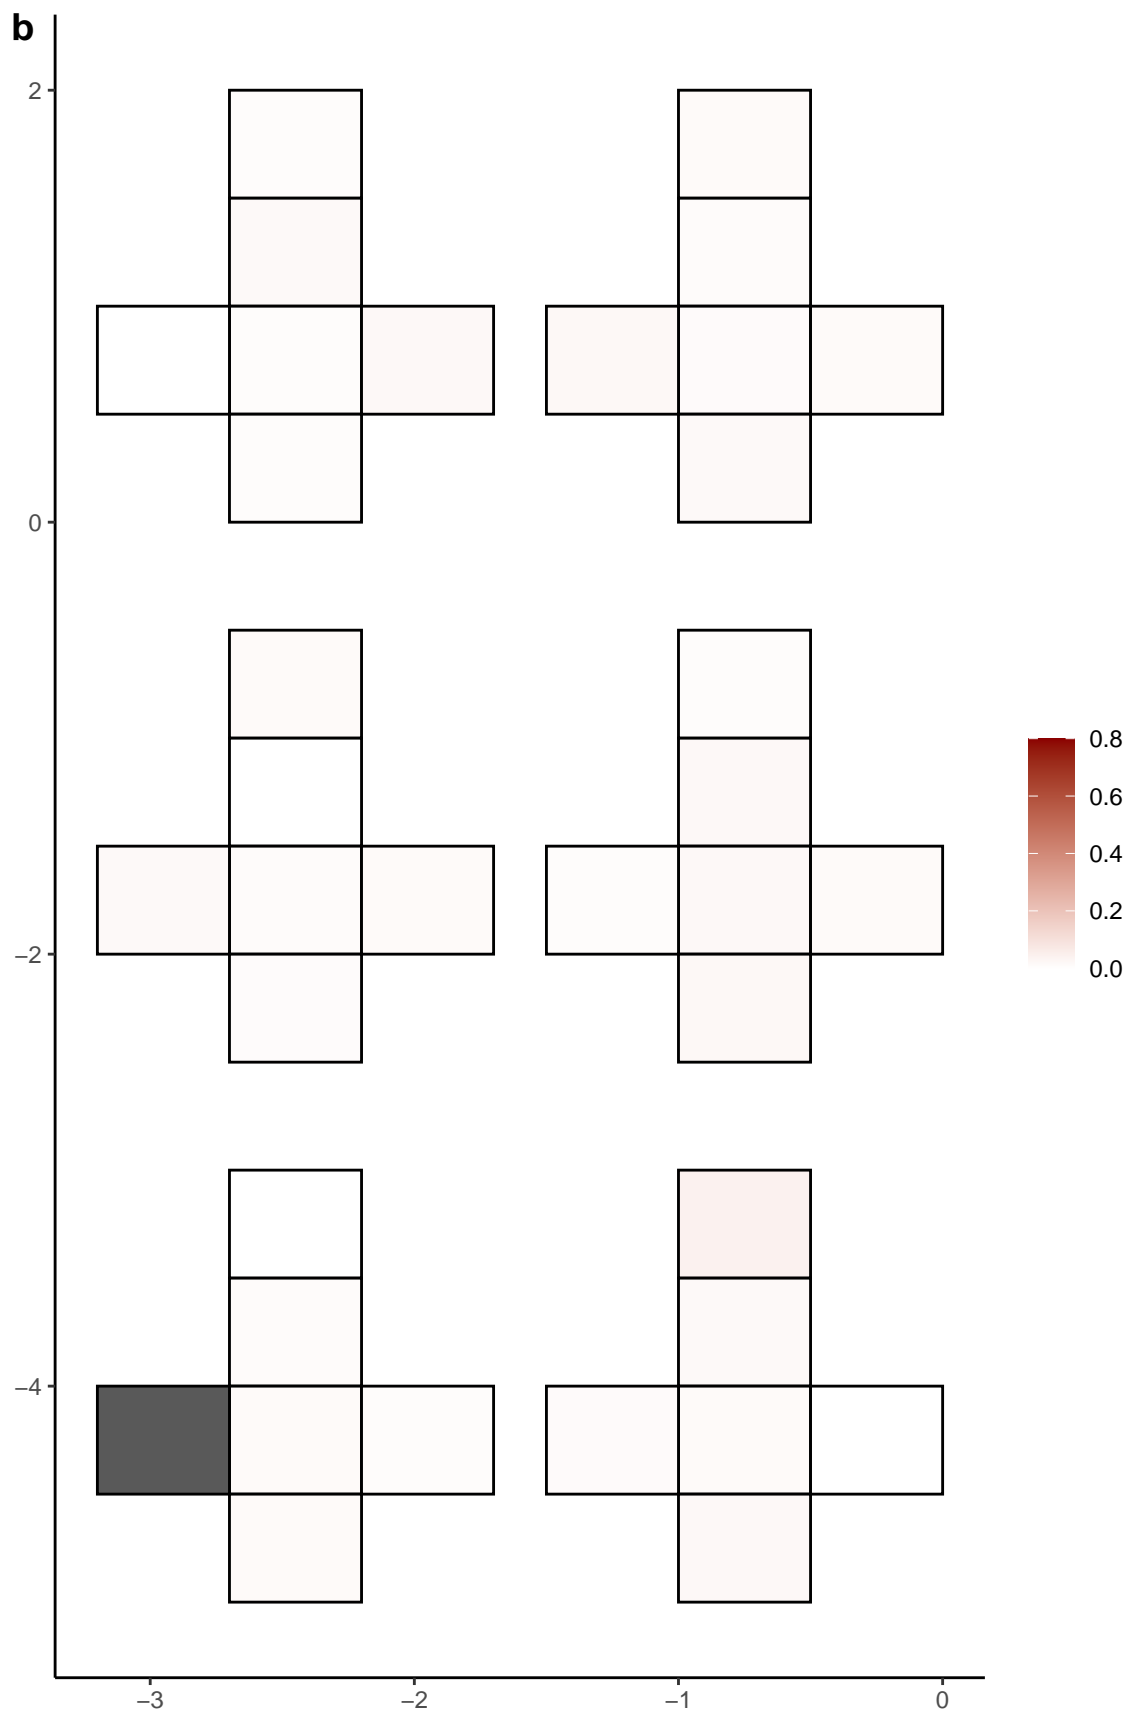

**a** ID01 11-84980734-G-A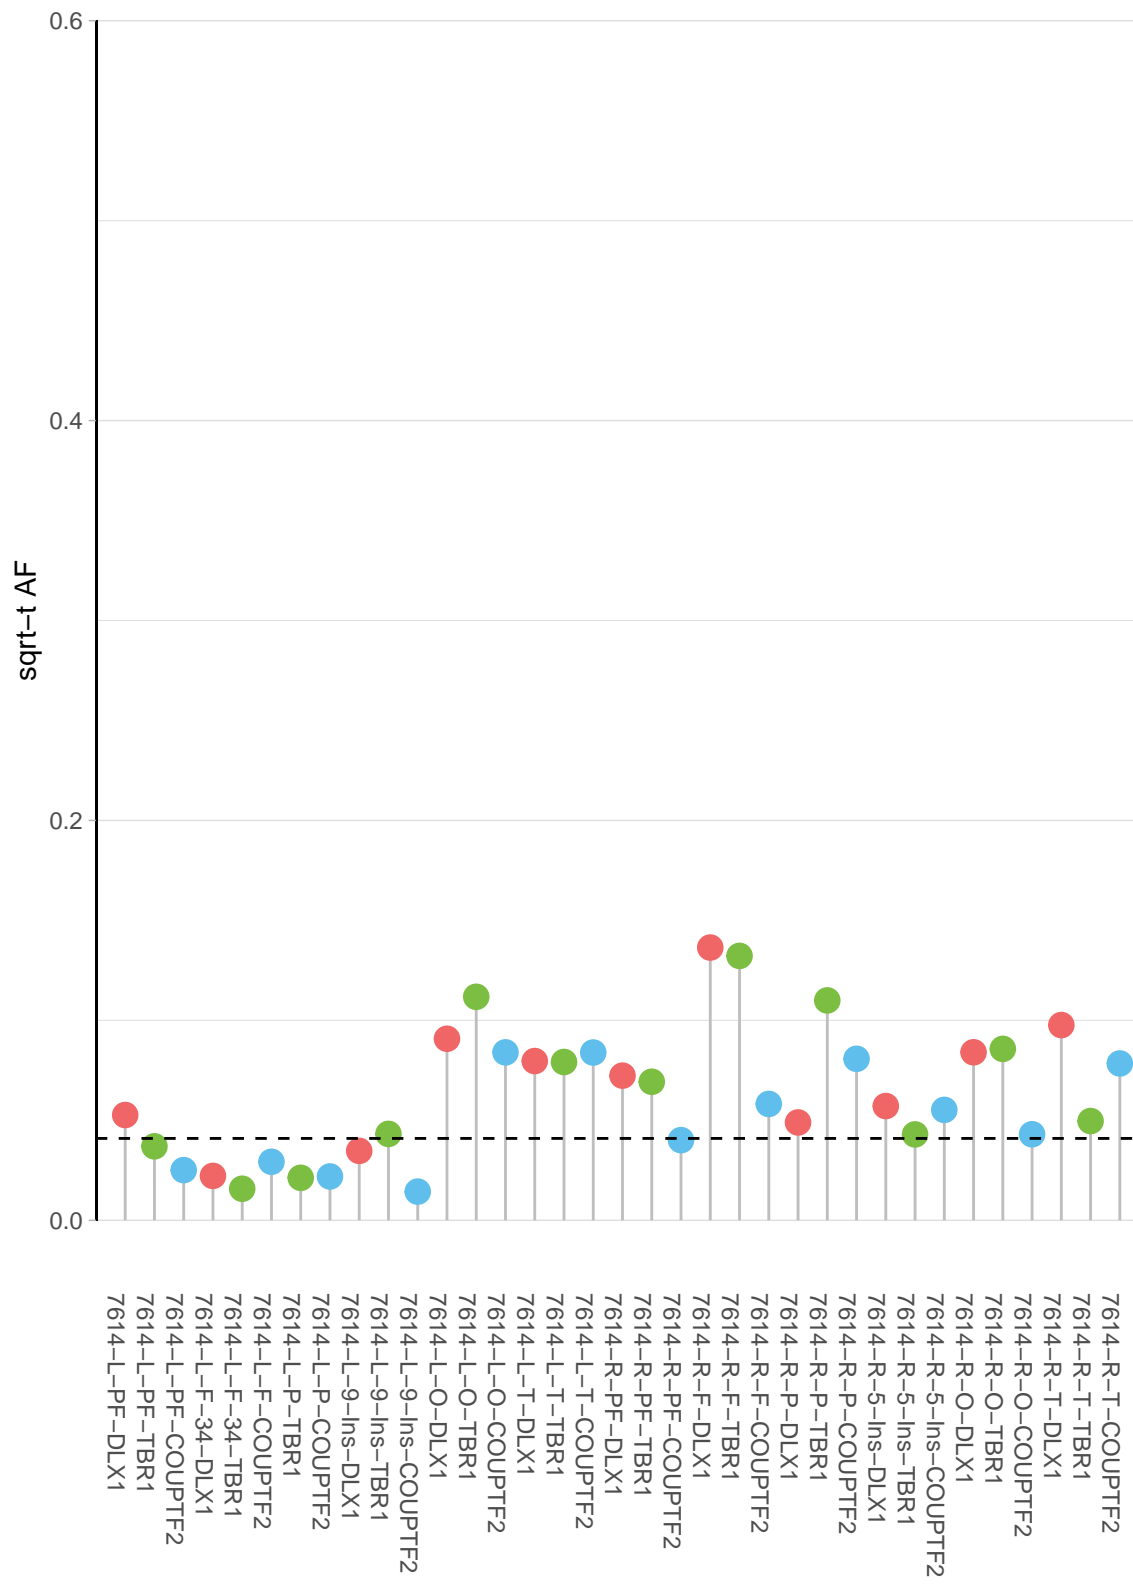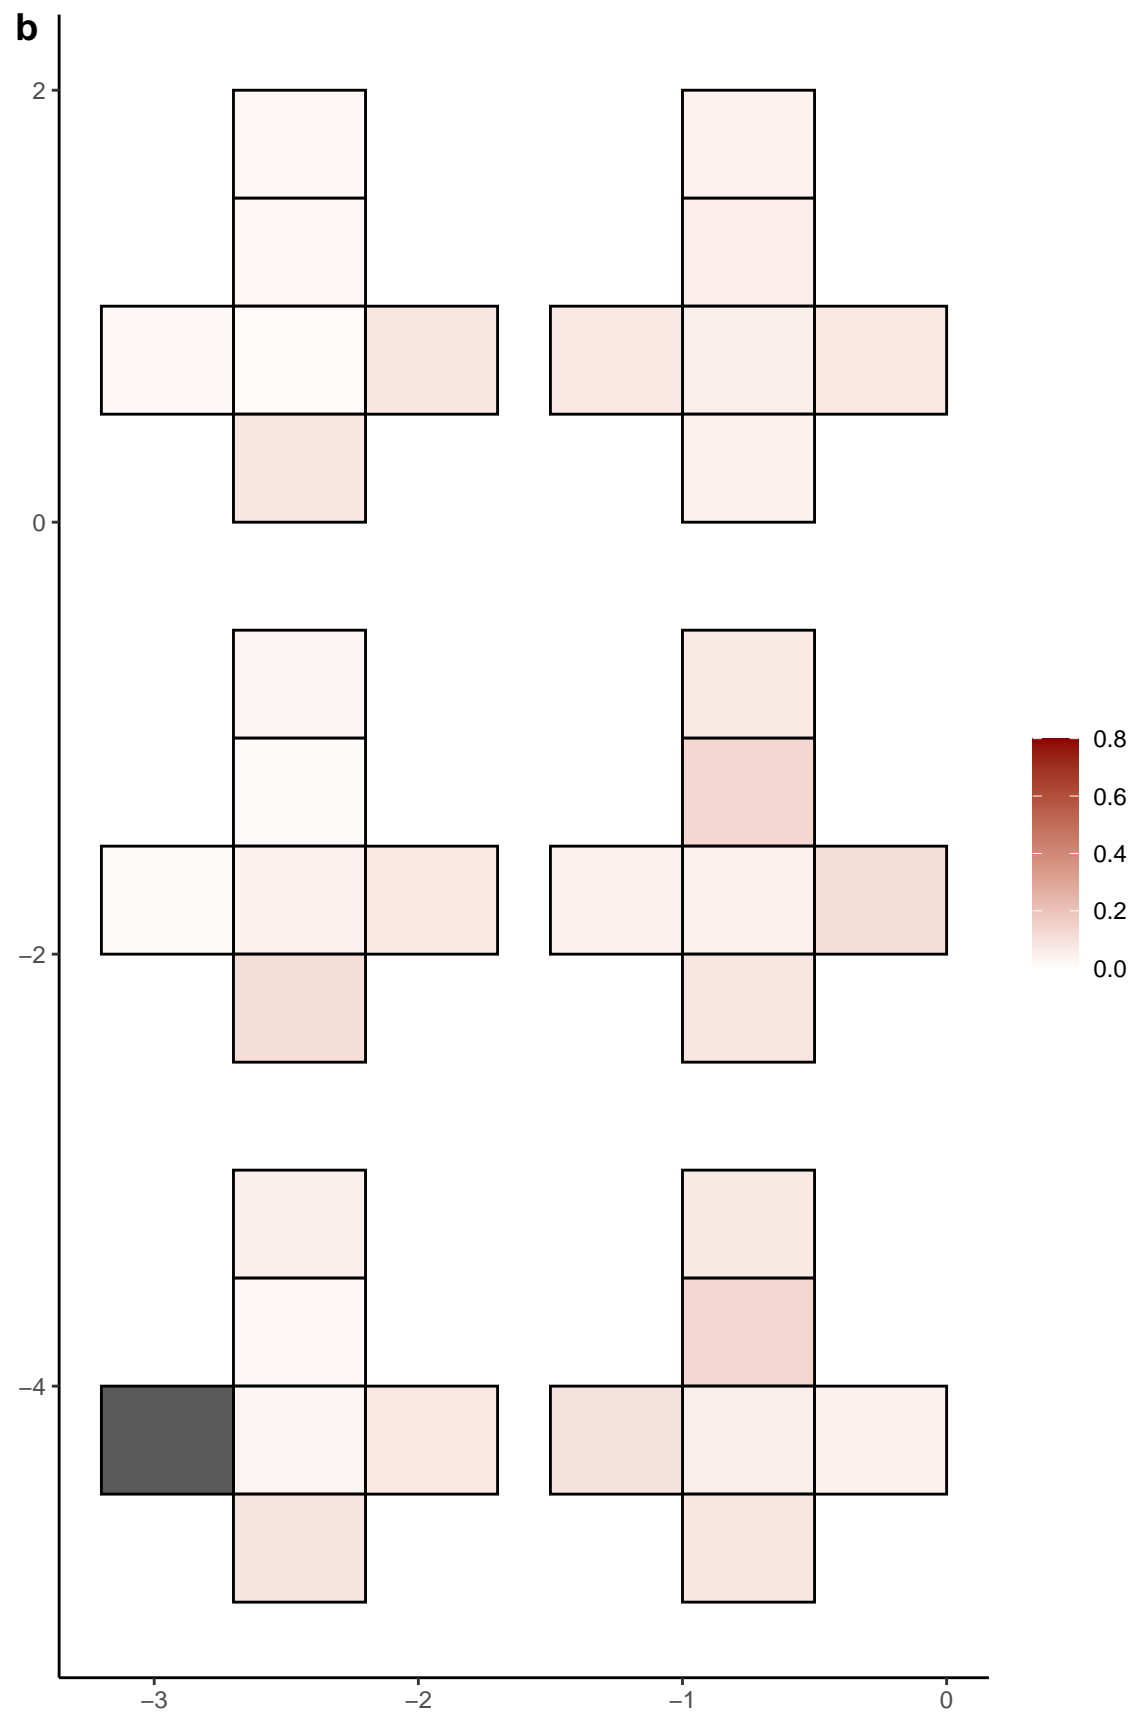

**a** ID01 11-88087255-A-C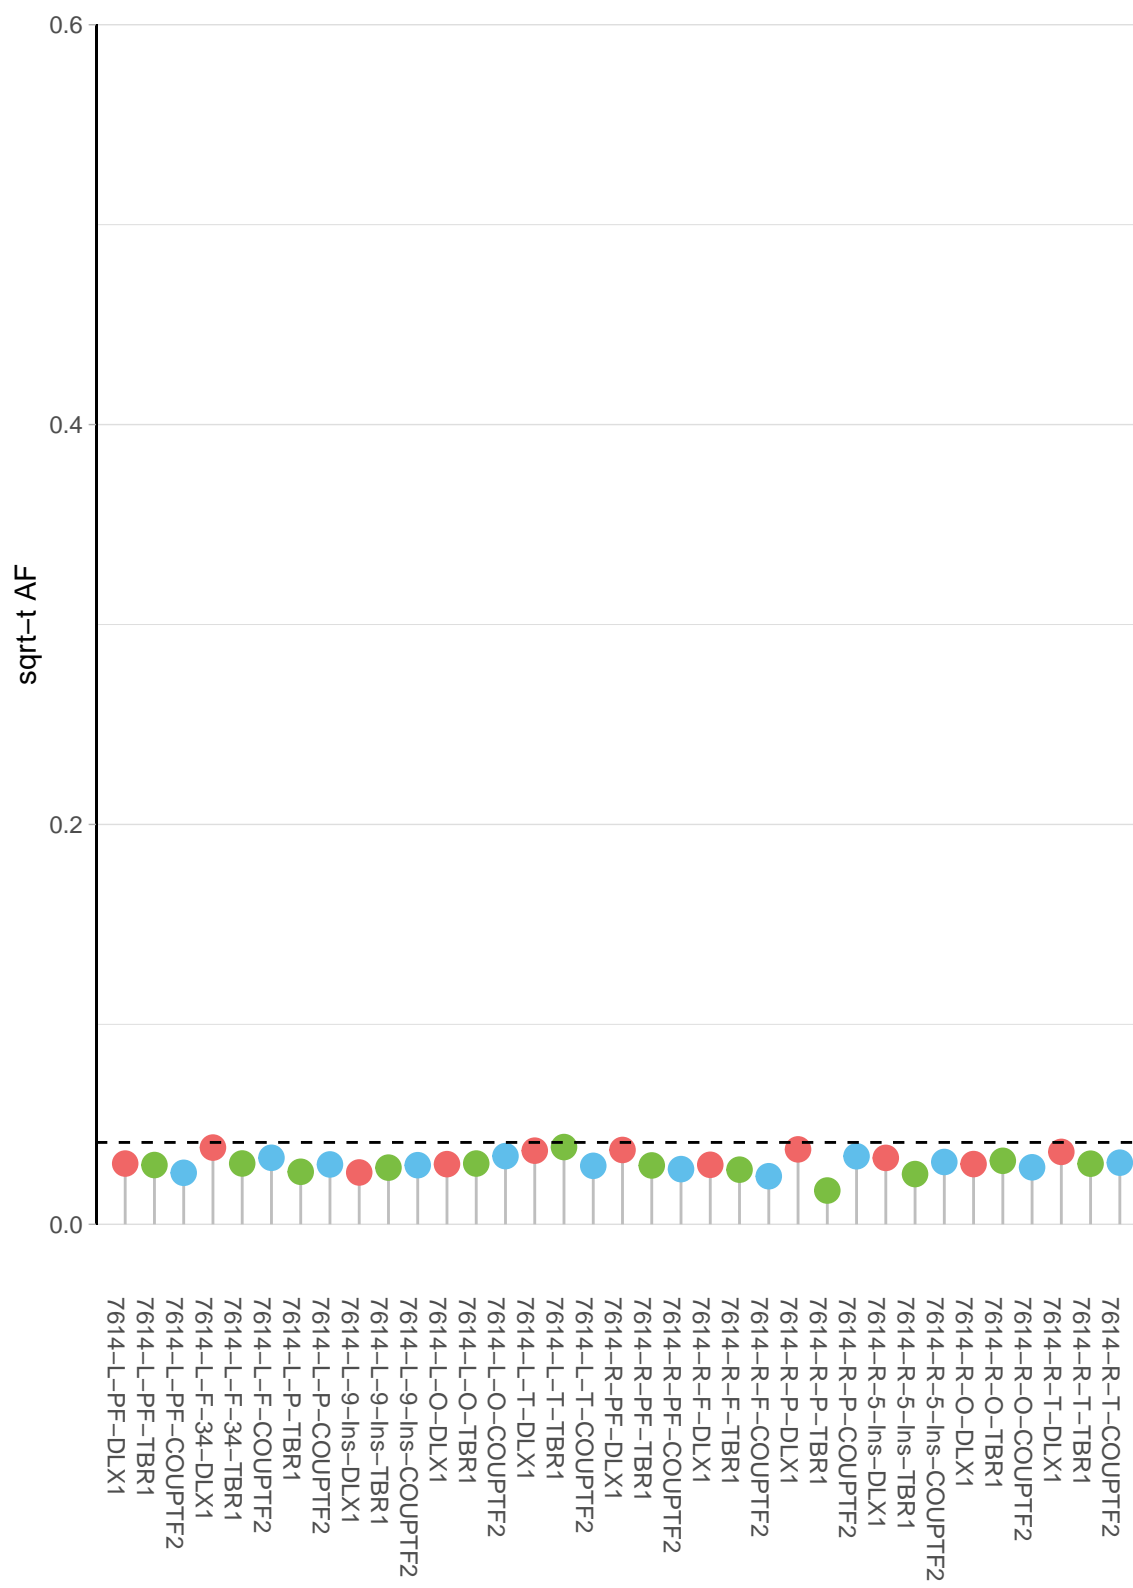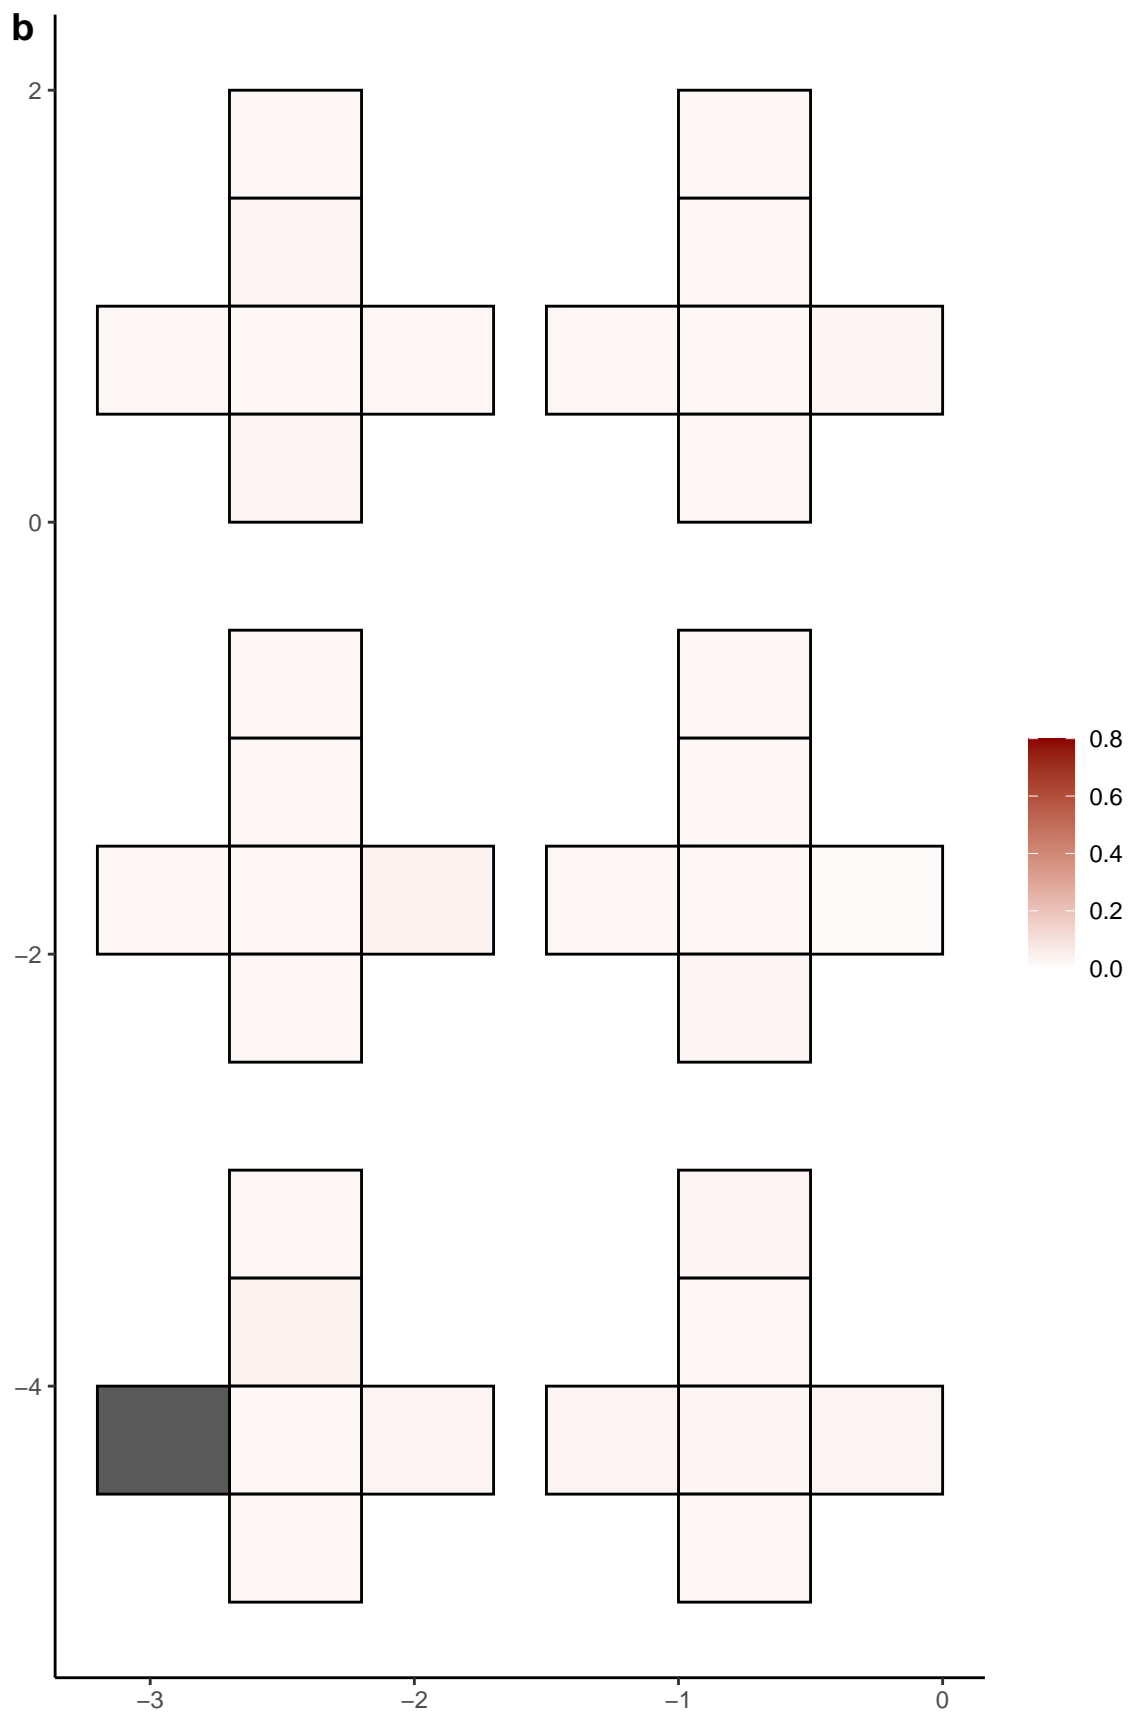

**a** ID01 11-92861647-G-A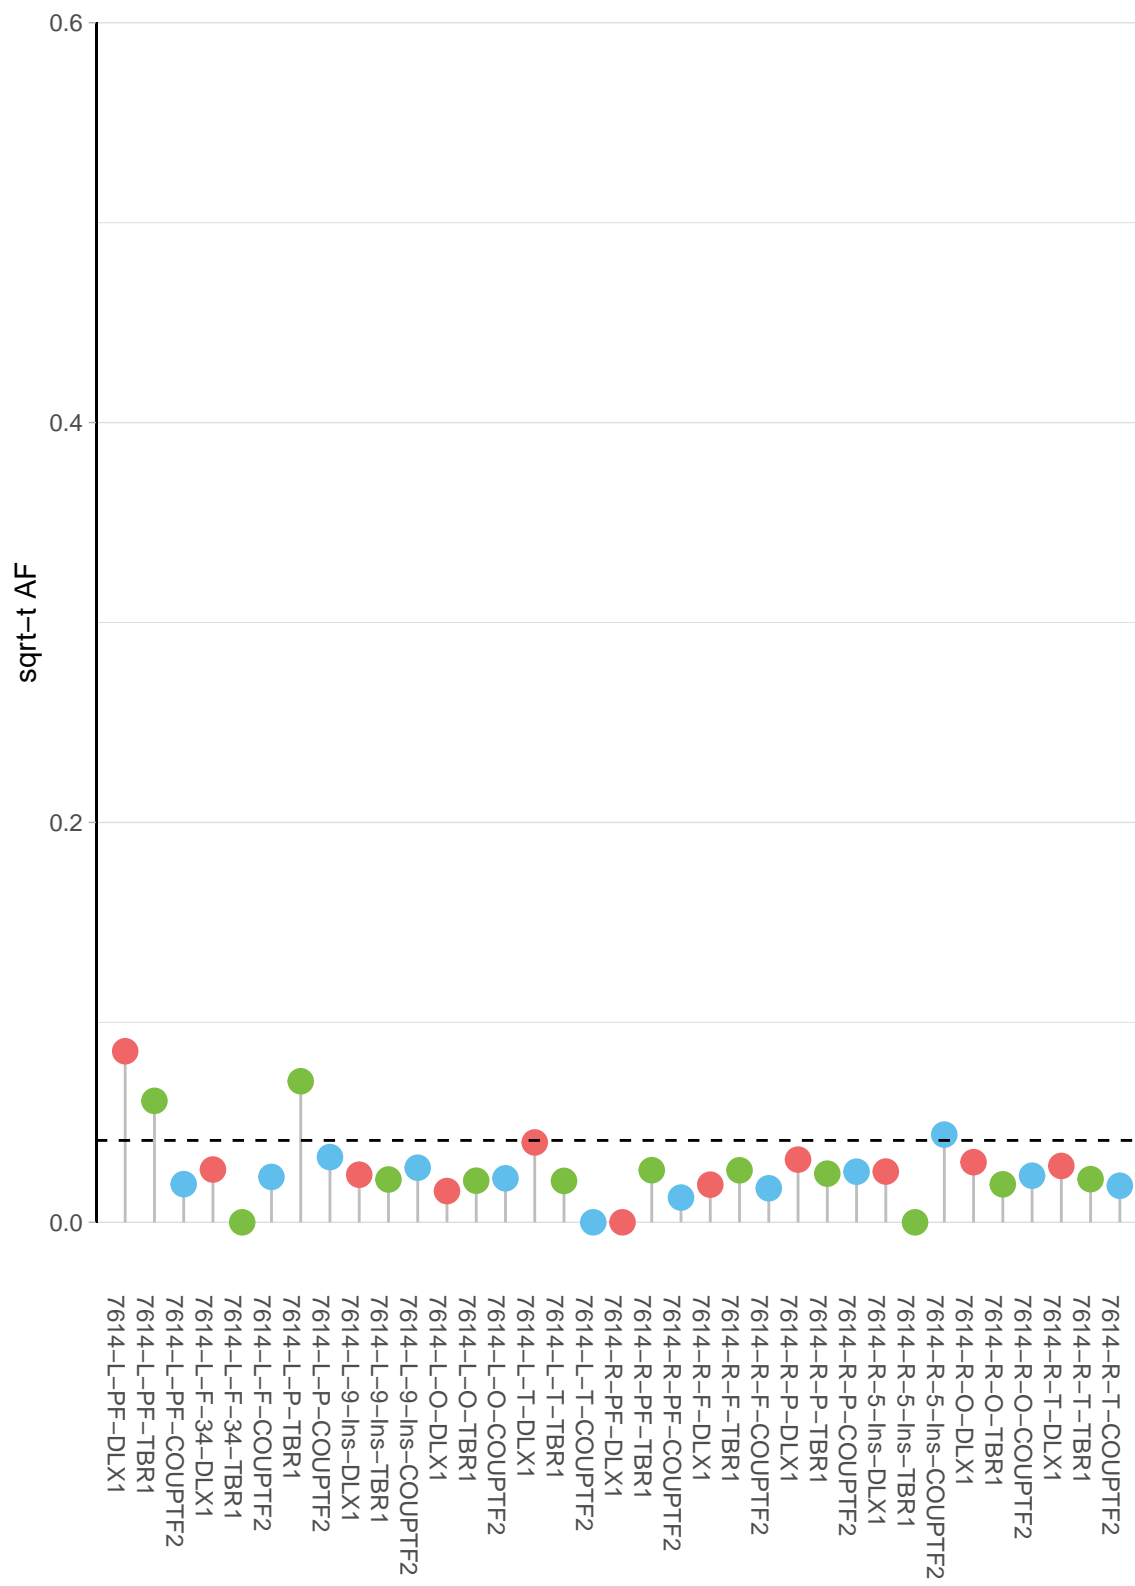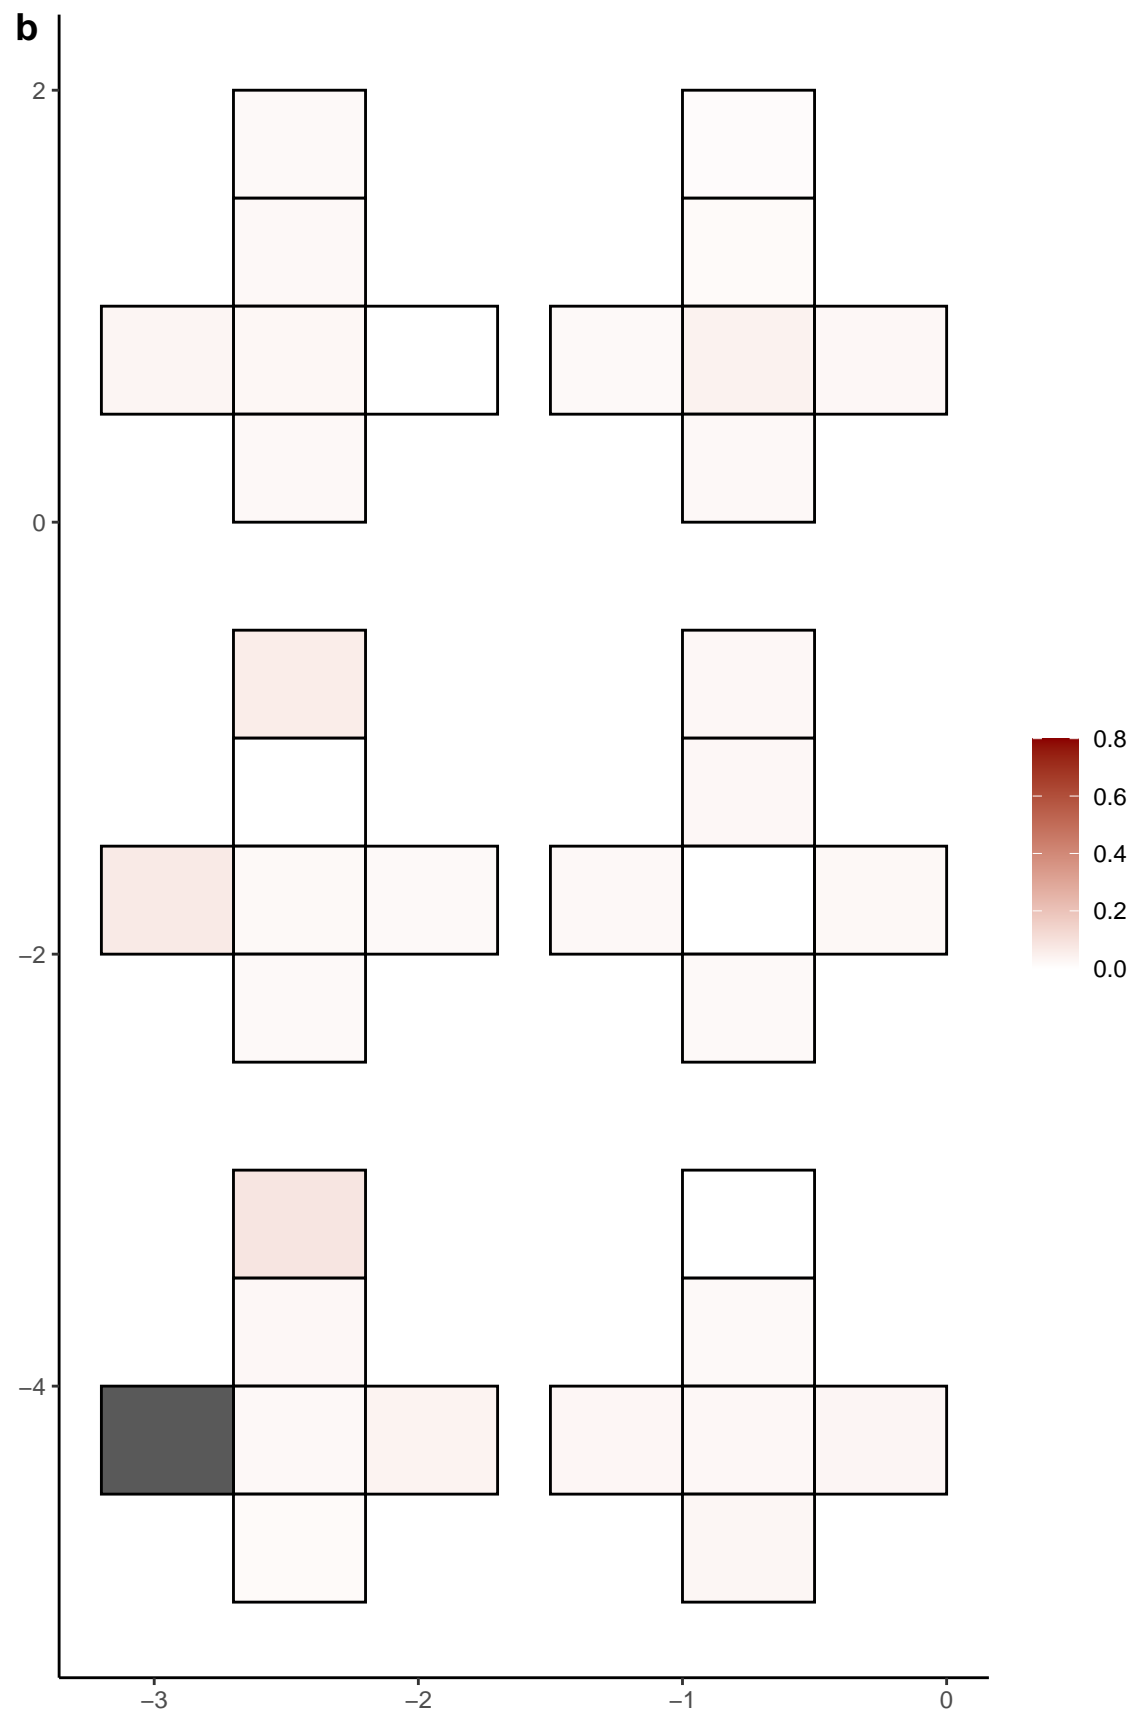

**a** ID01 11-94045731-T-C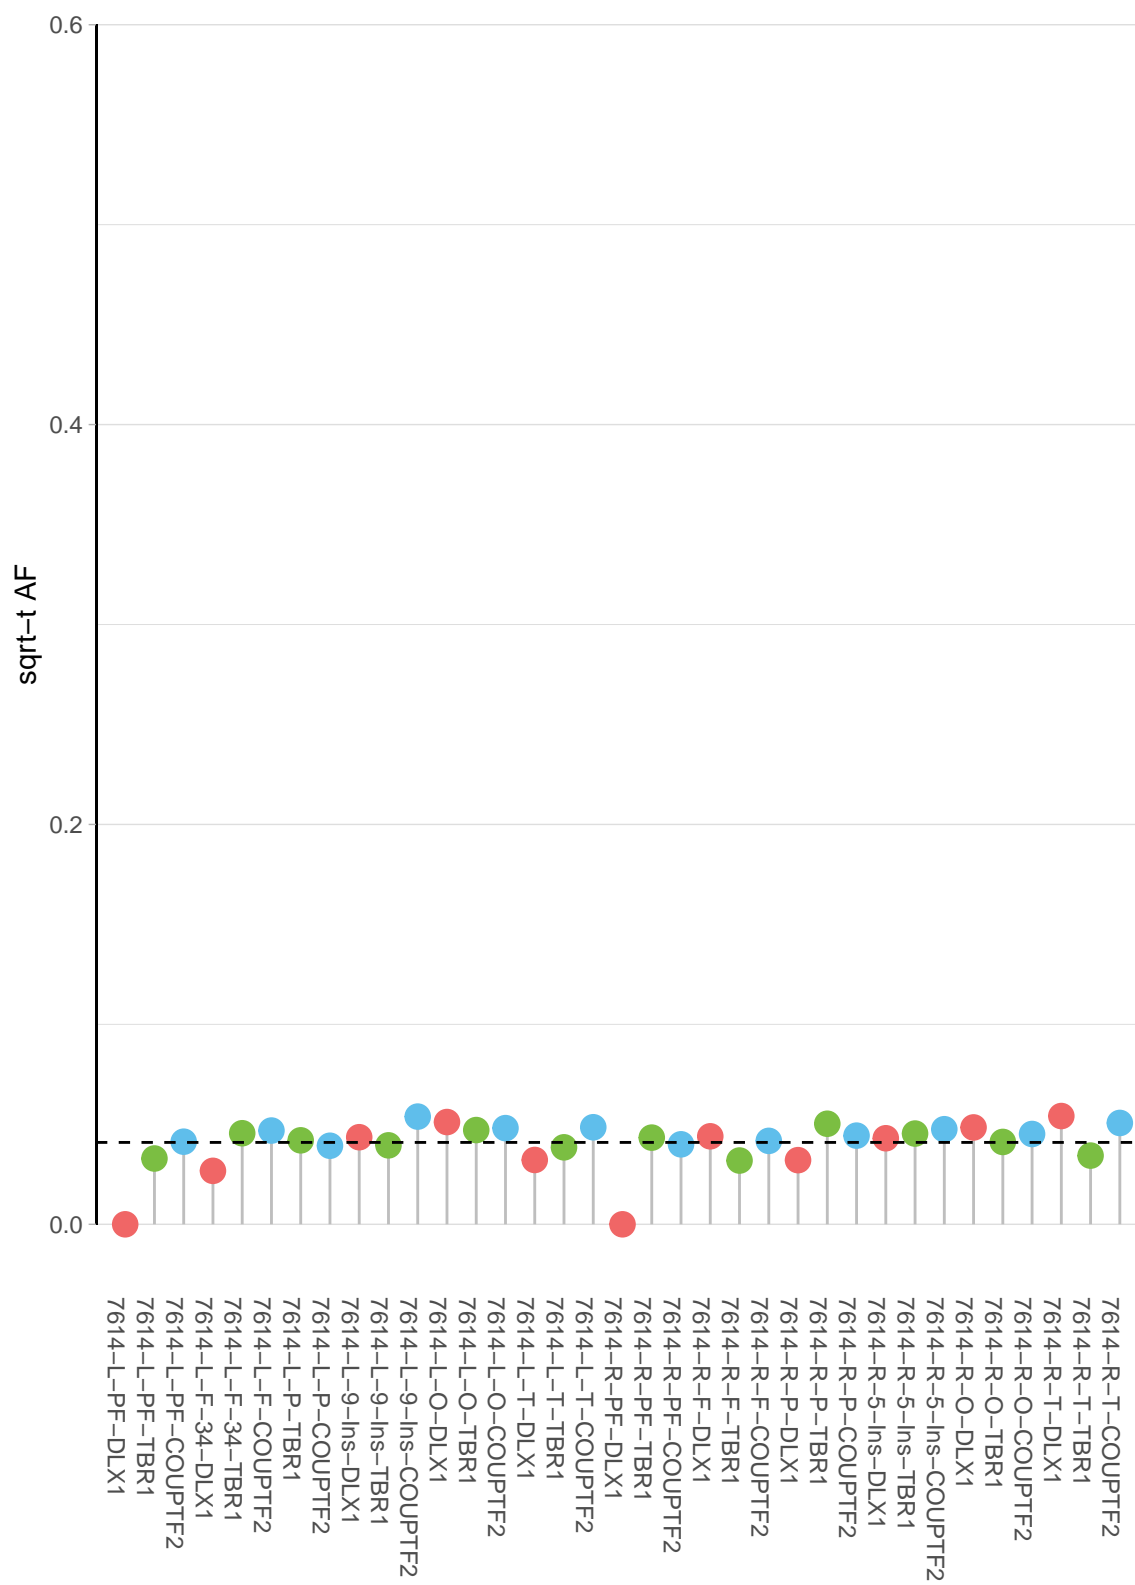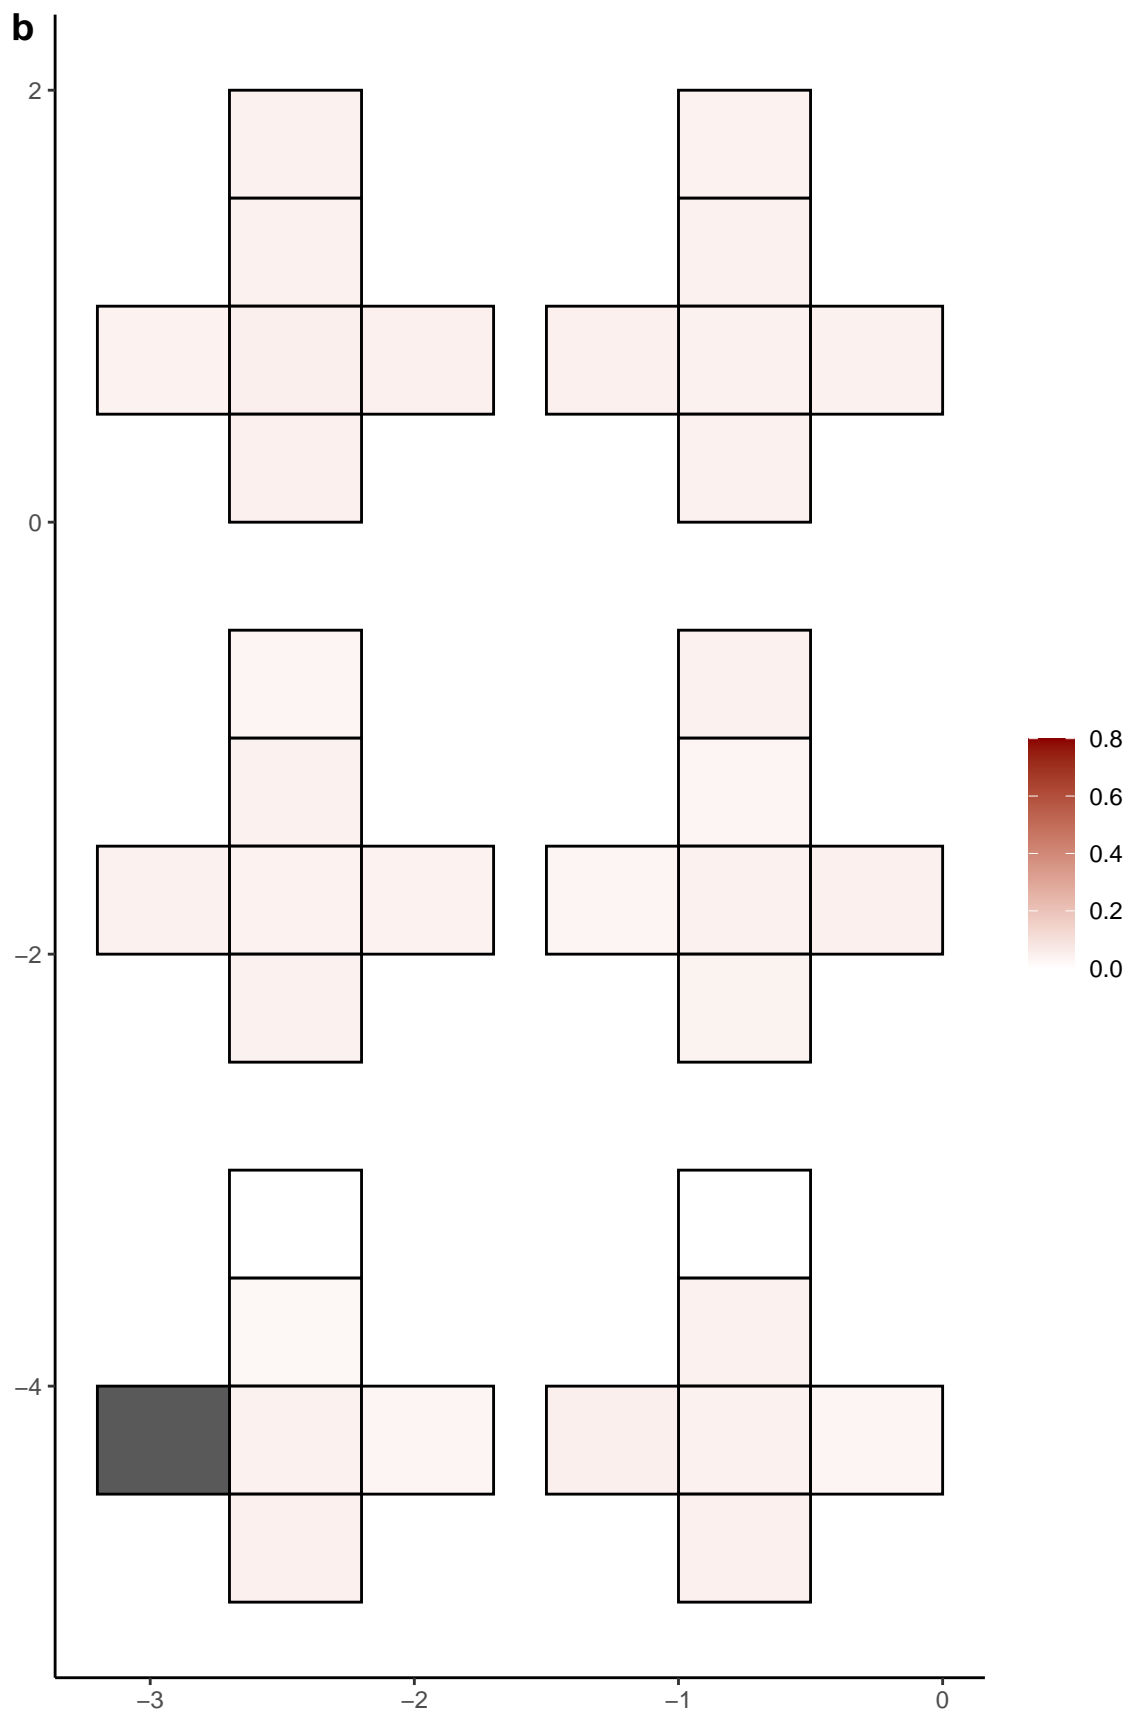

**a** ID01 11-94048896-G-A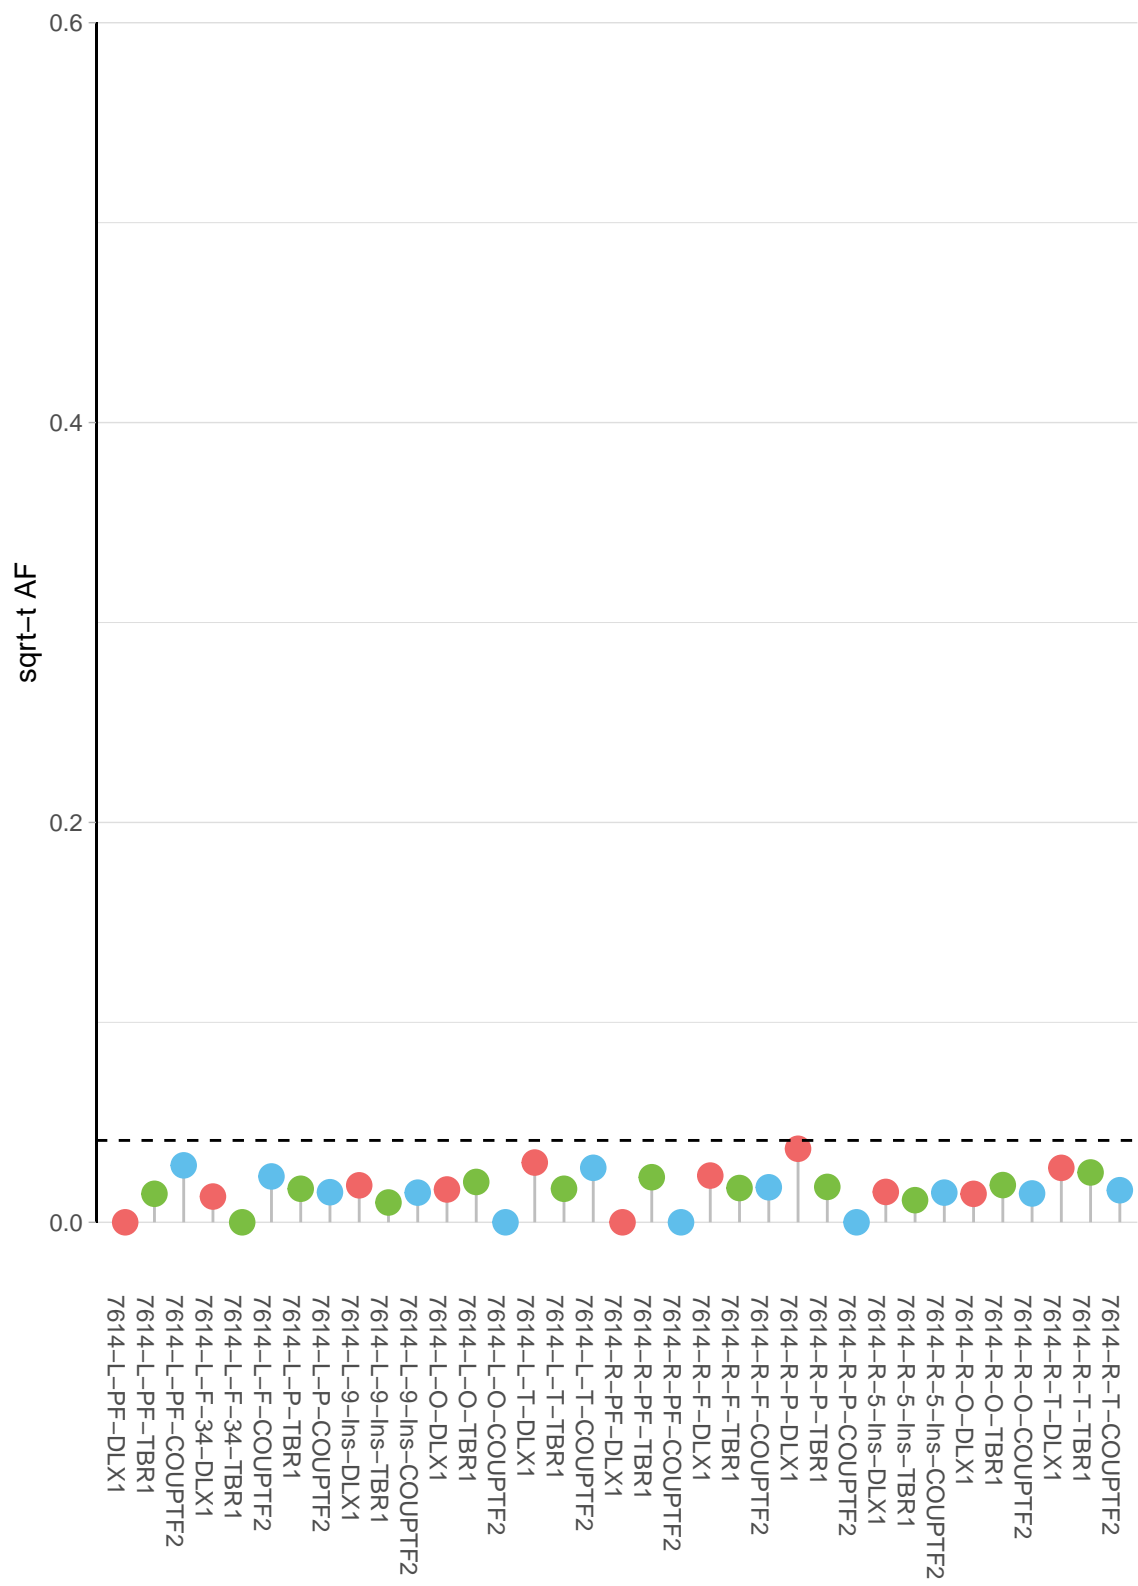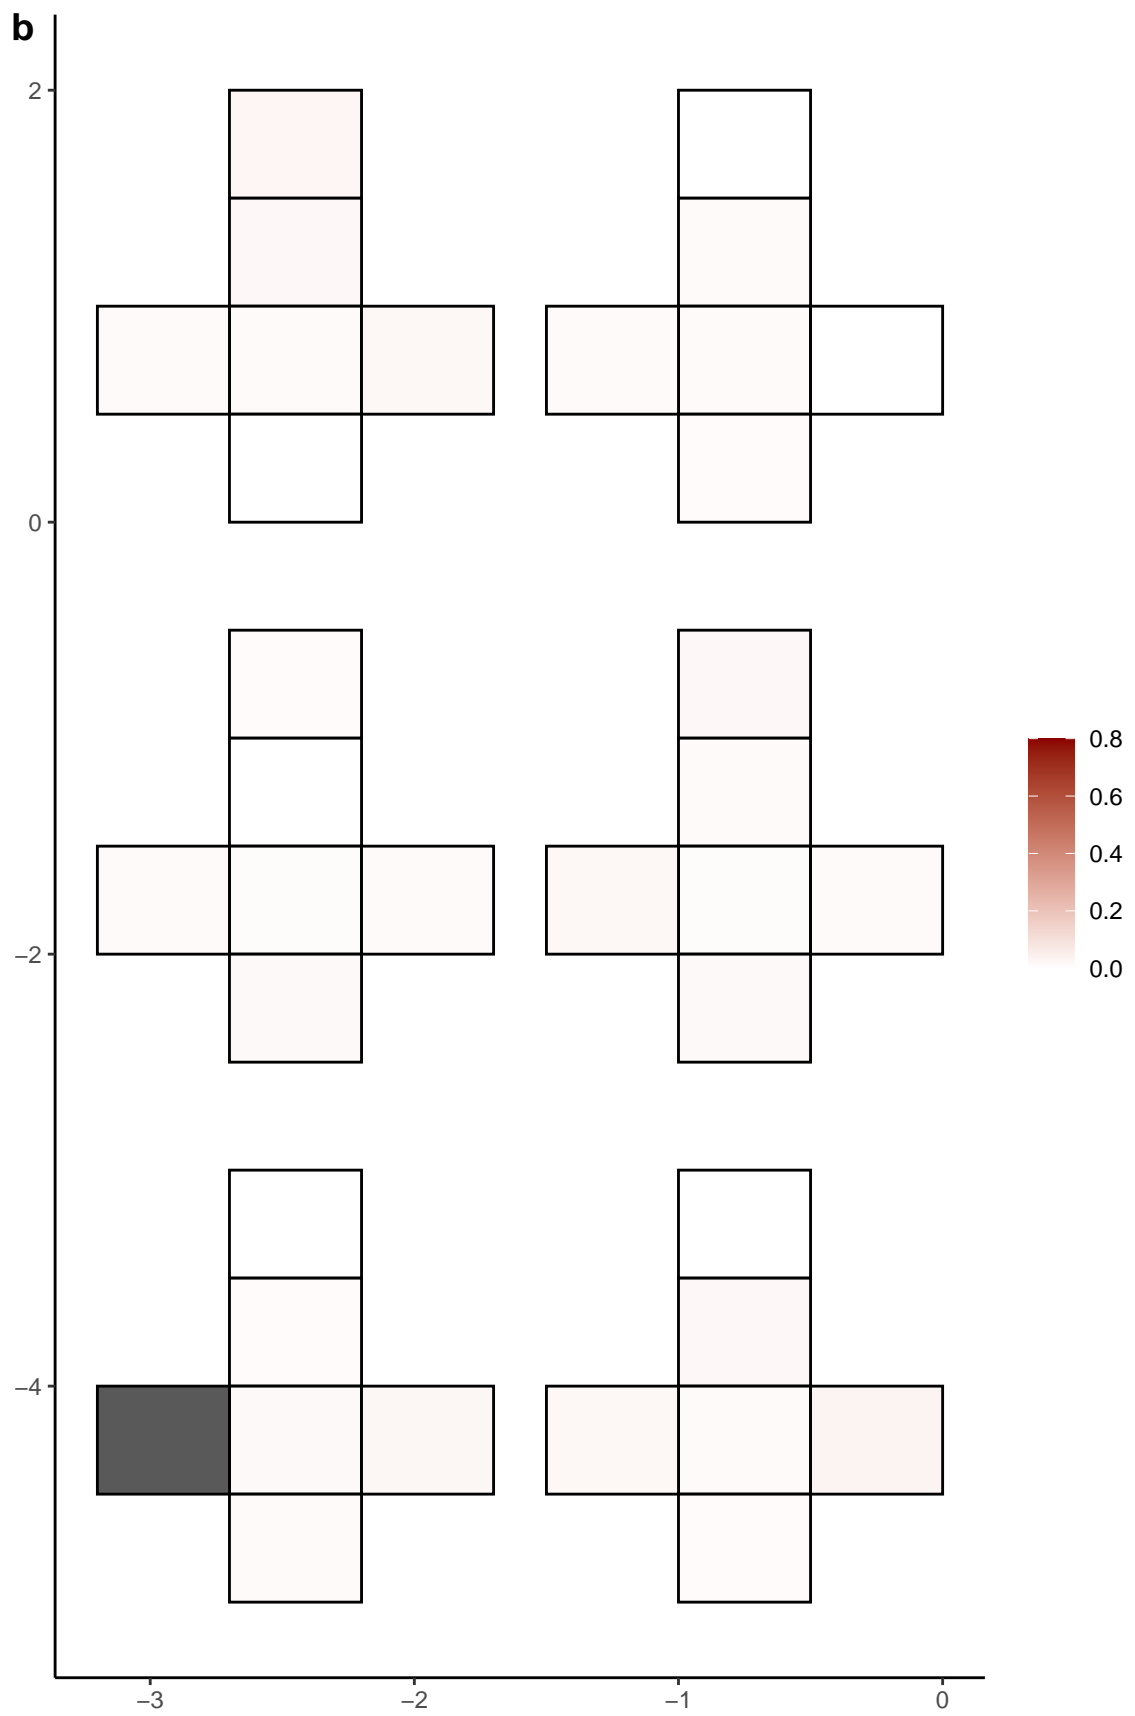

**a** ID01 11-97326785-G-A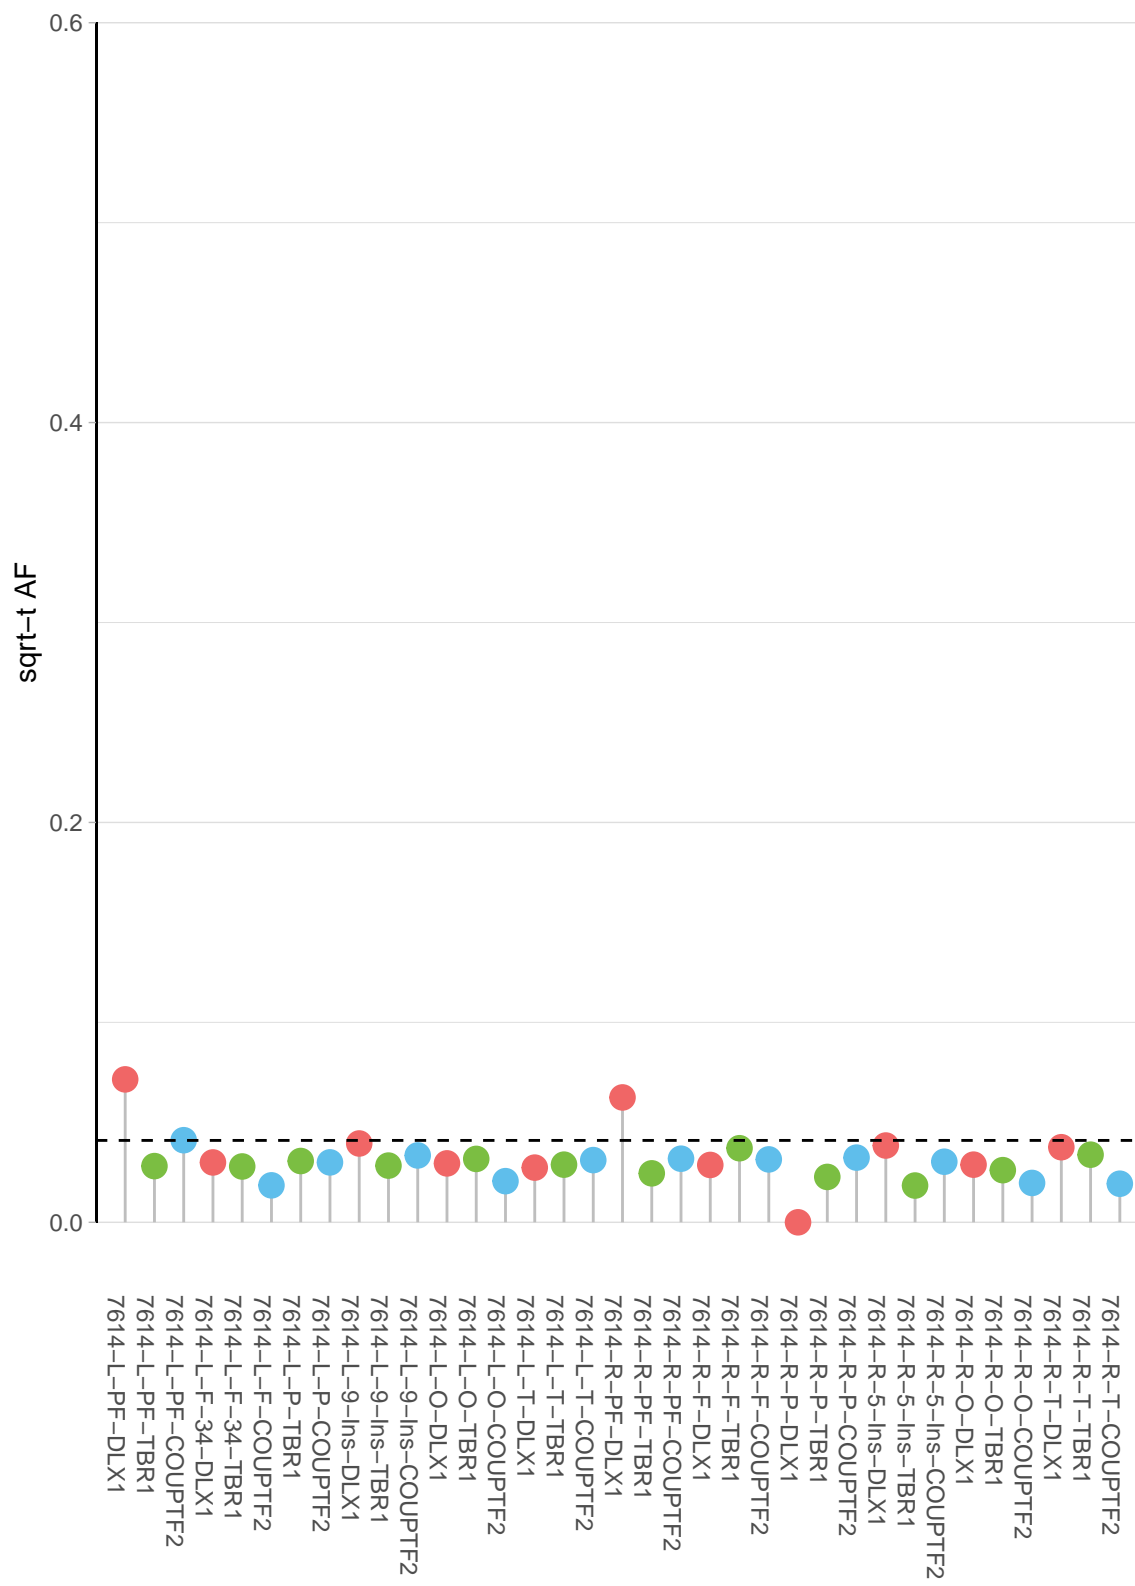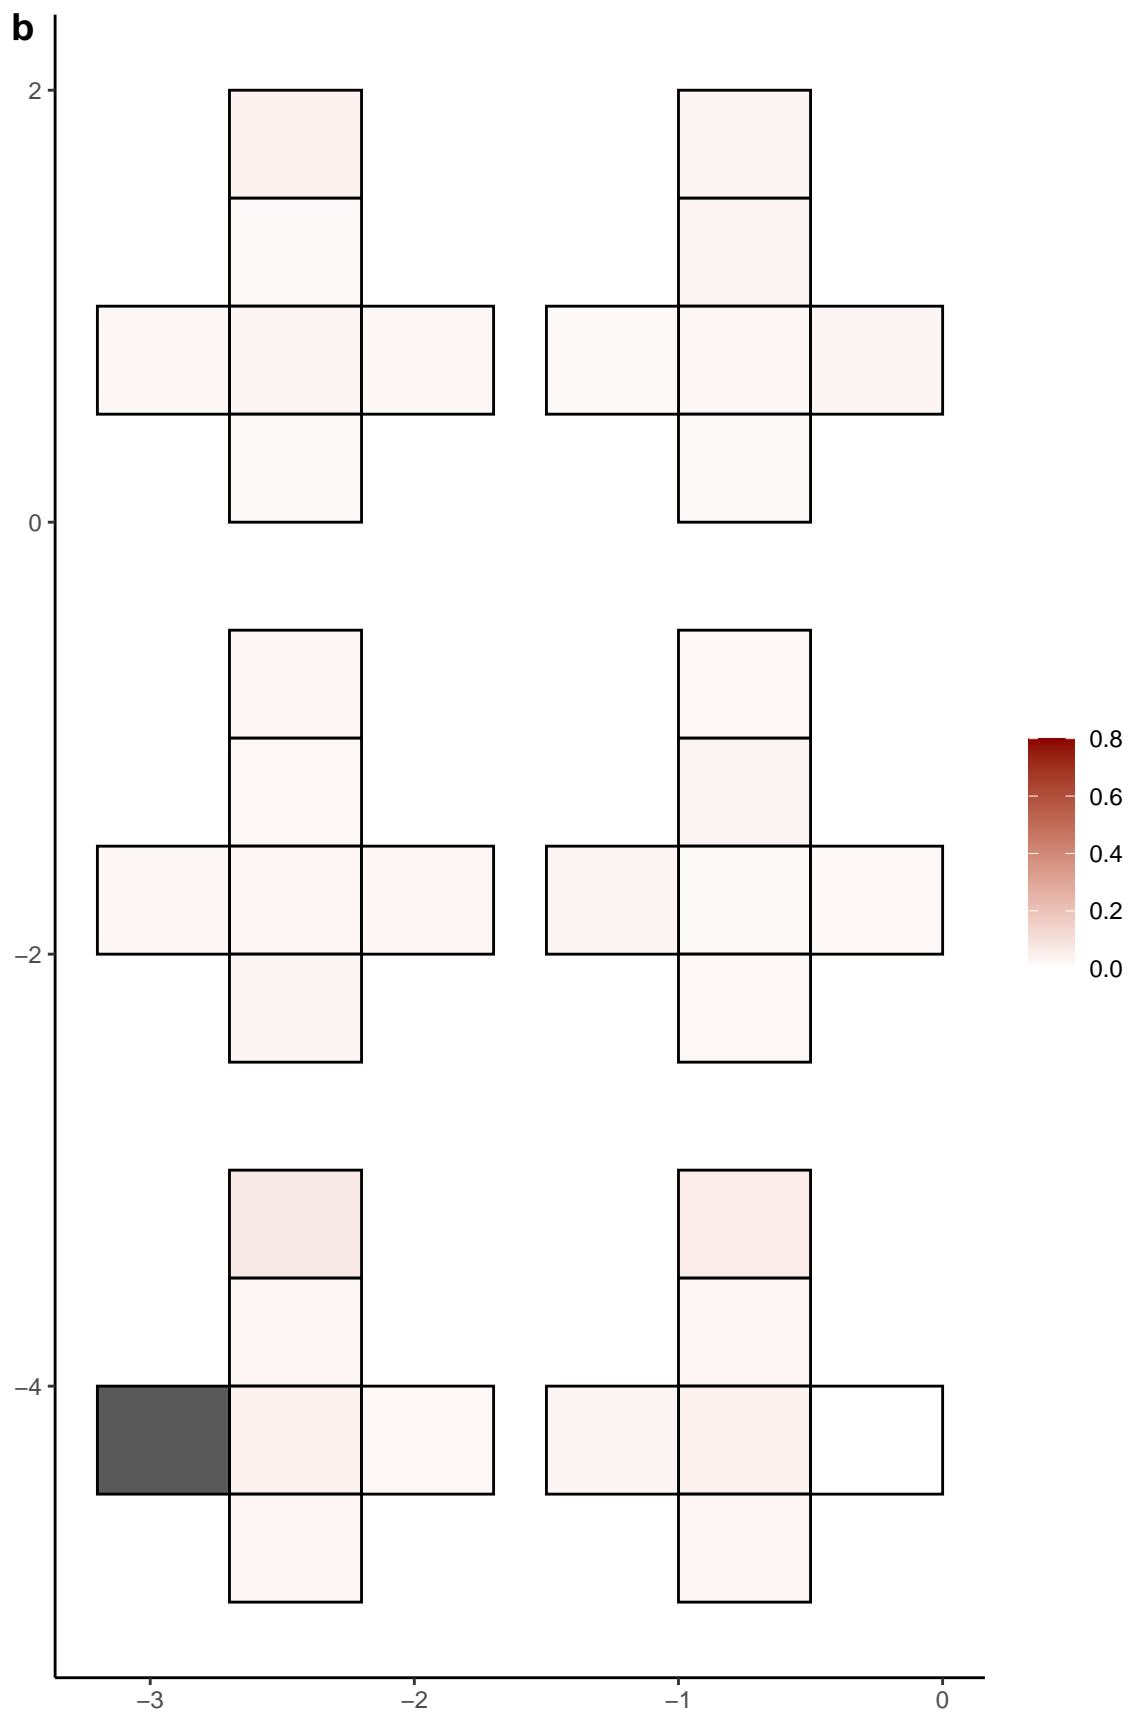



**a** ID01 11-99258149-G-A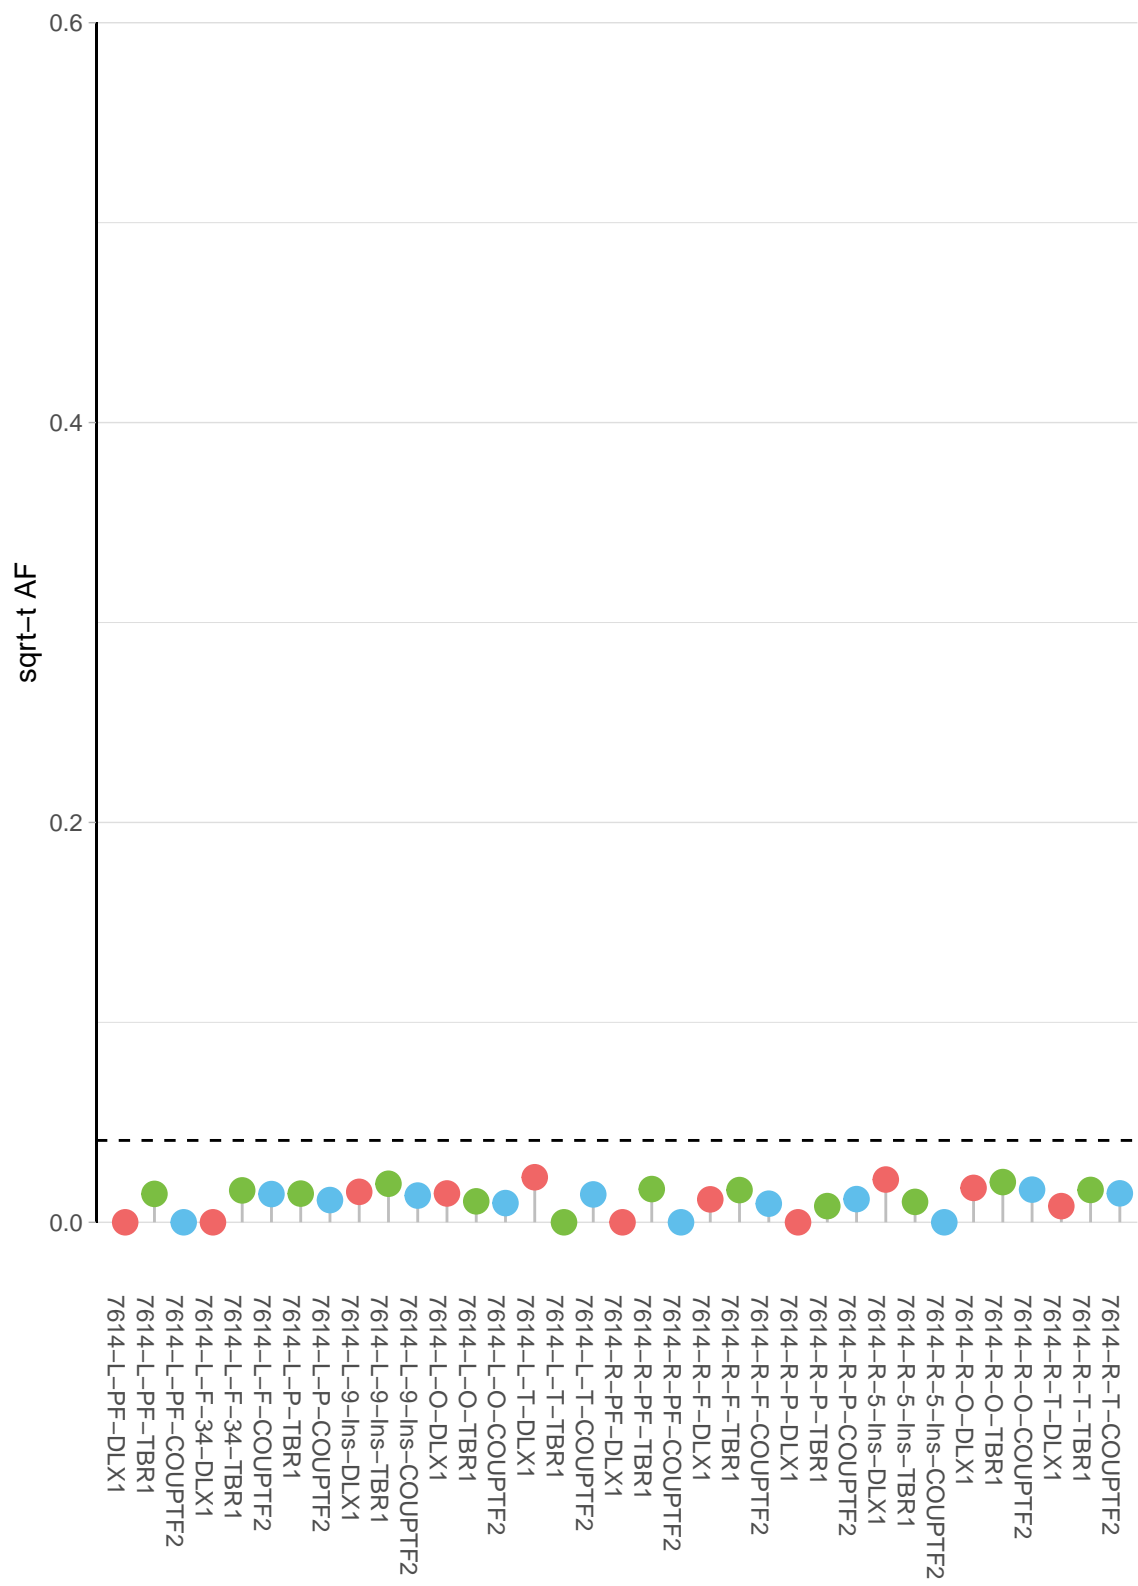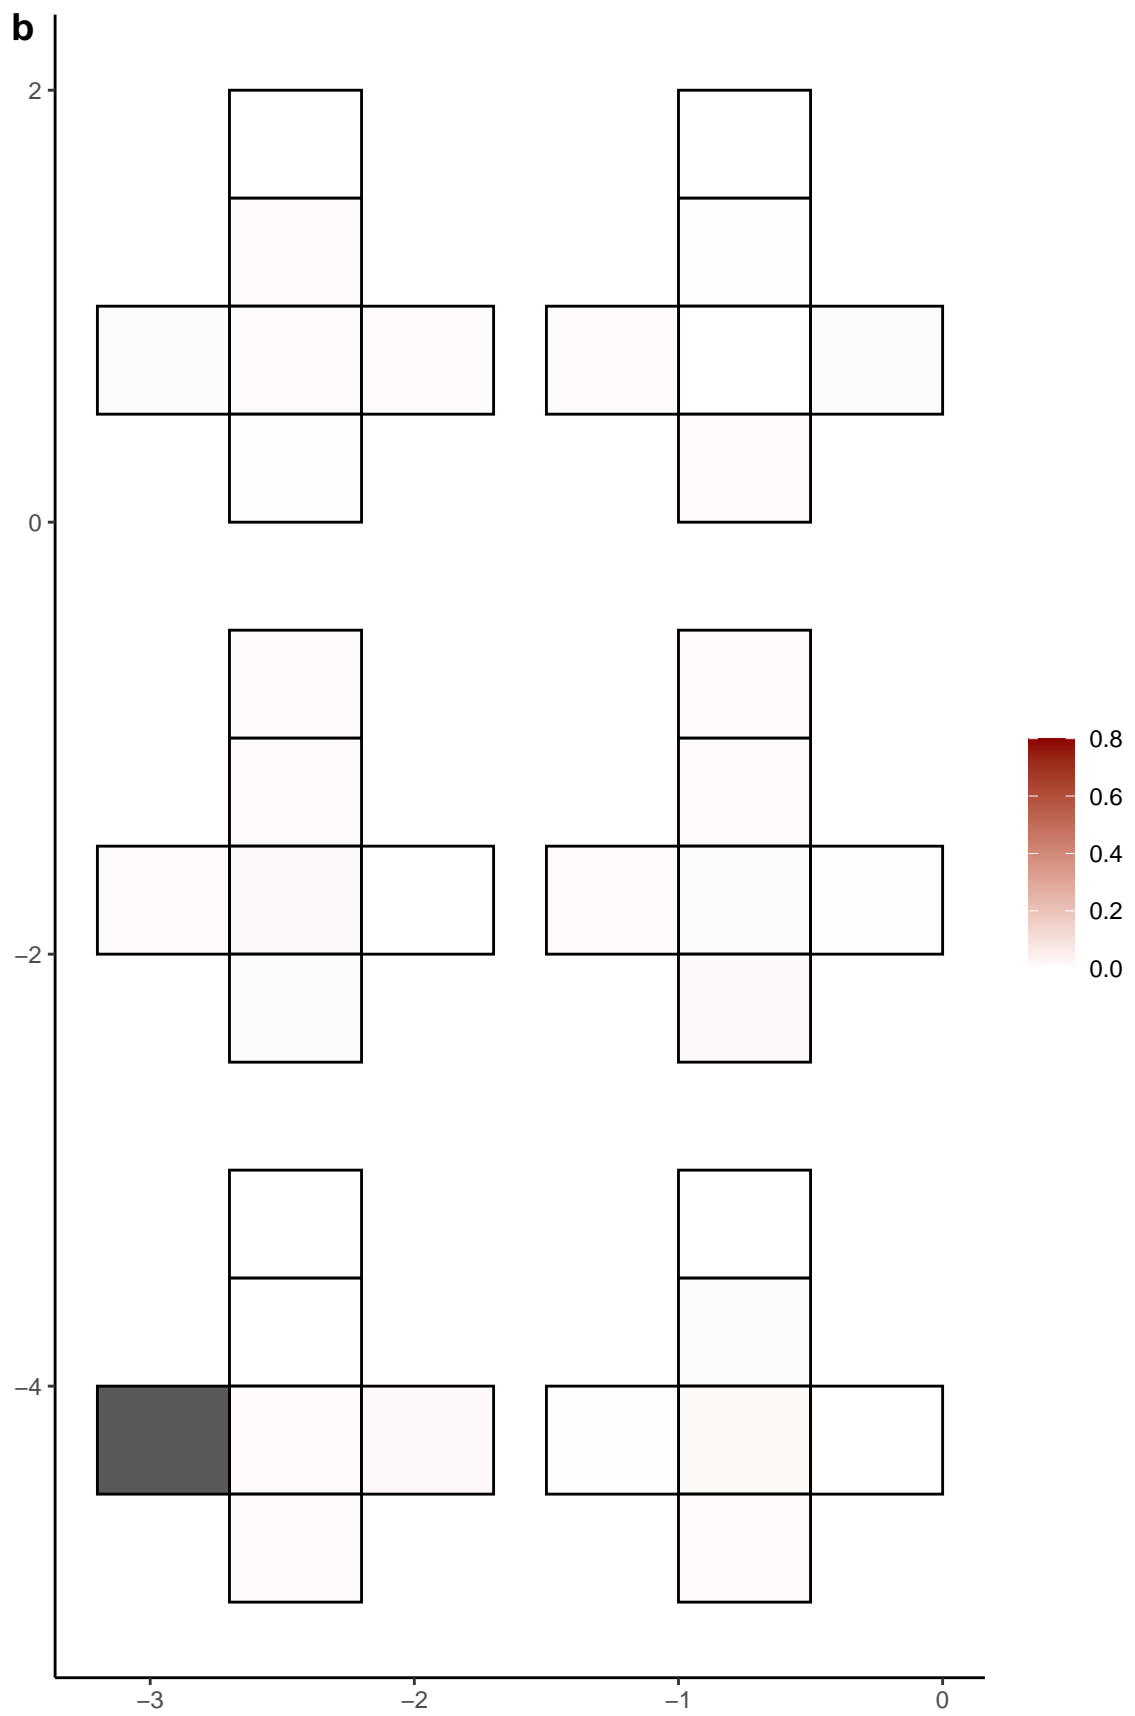

**a** ID01 12-107509134-G-A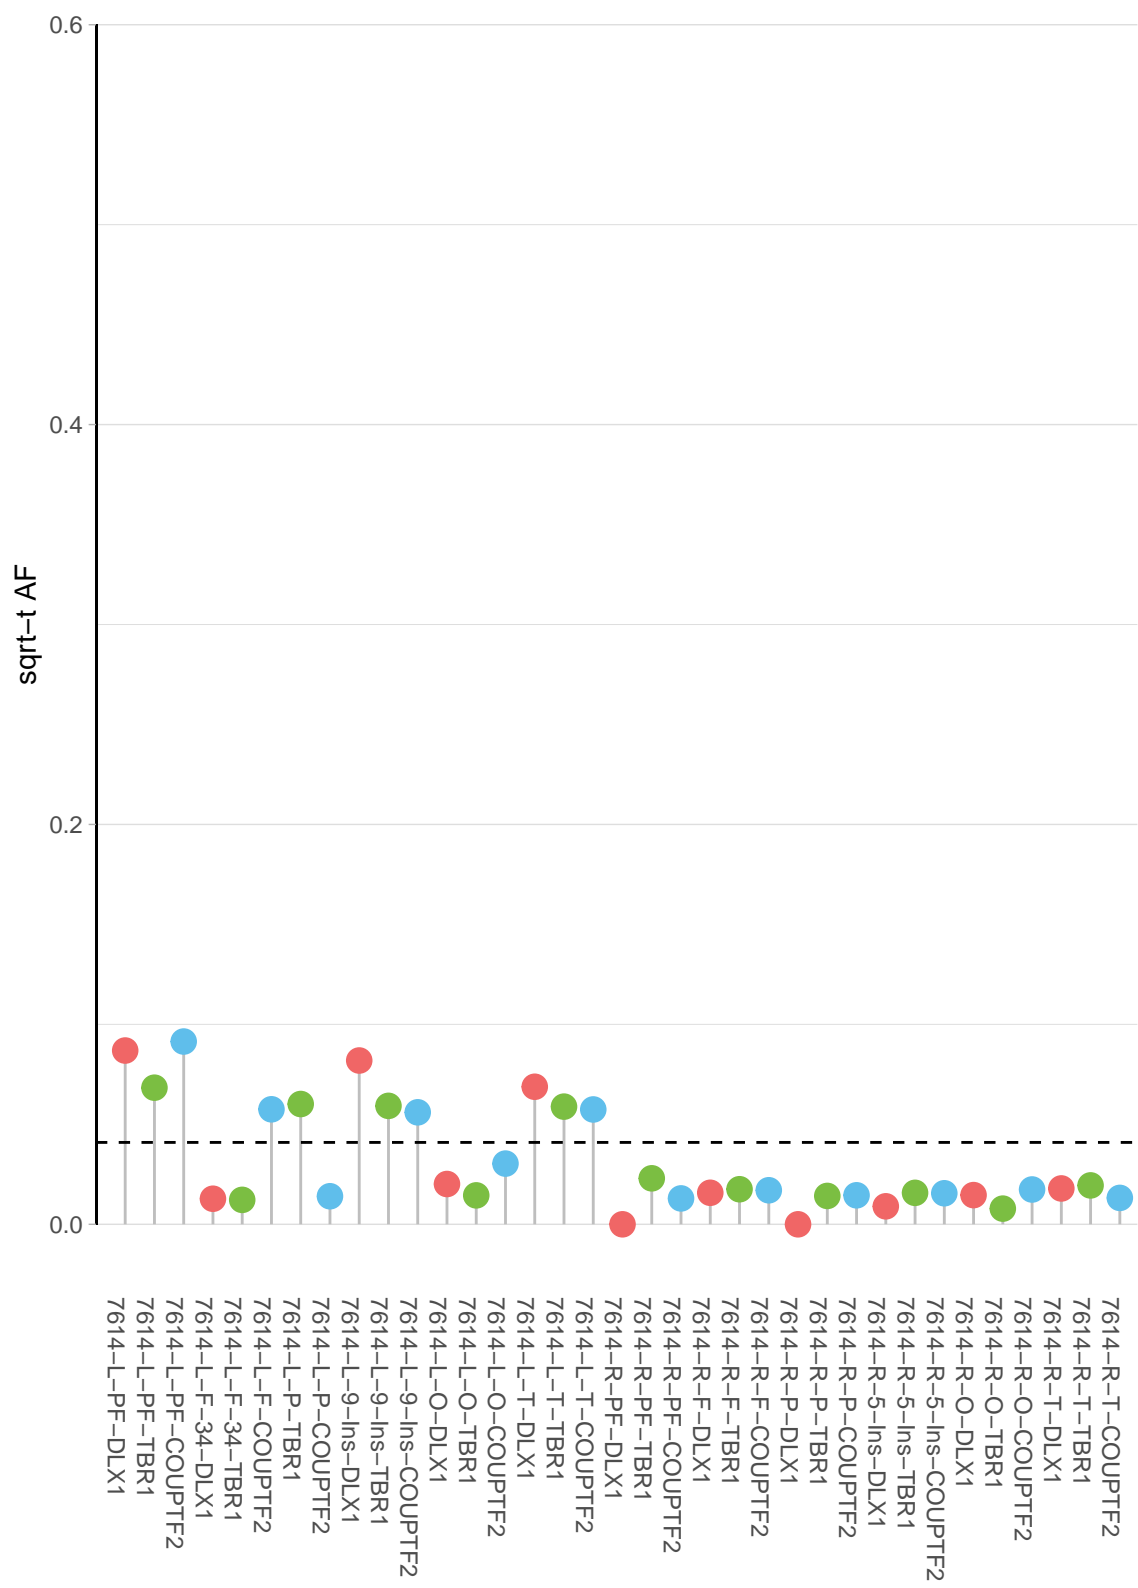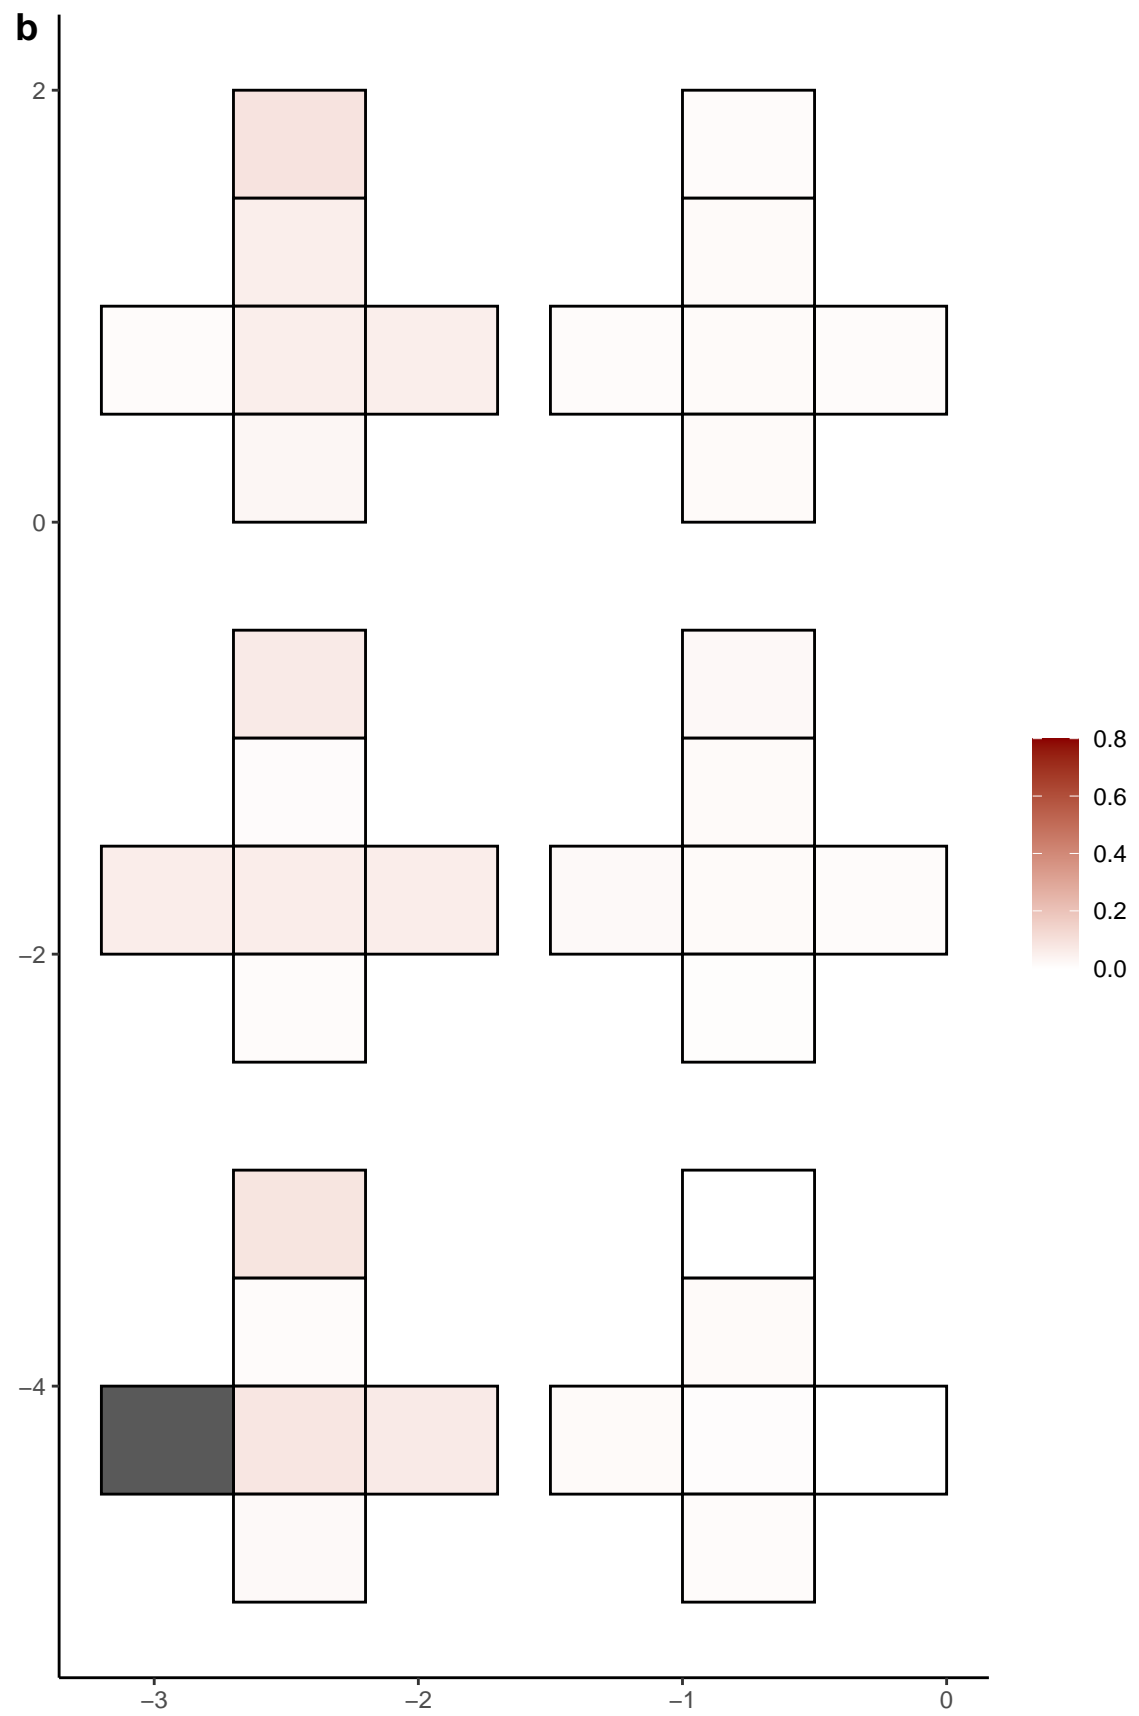

**a** ID01 12-116308531-A-G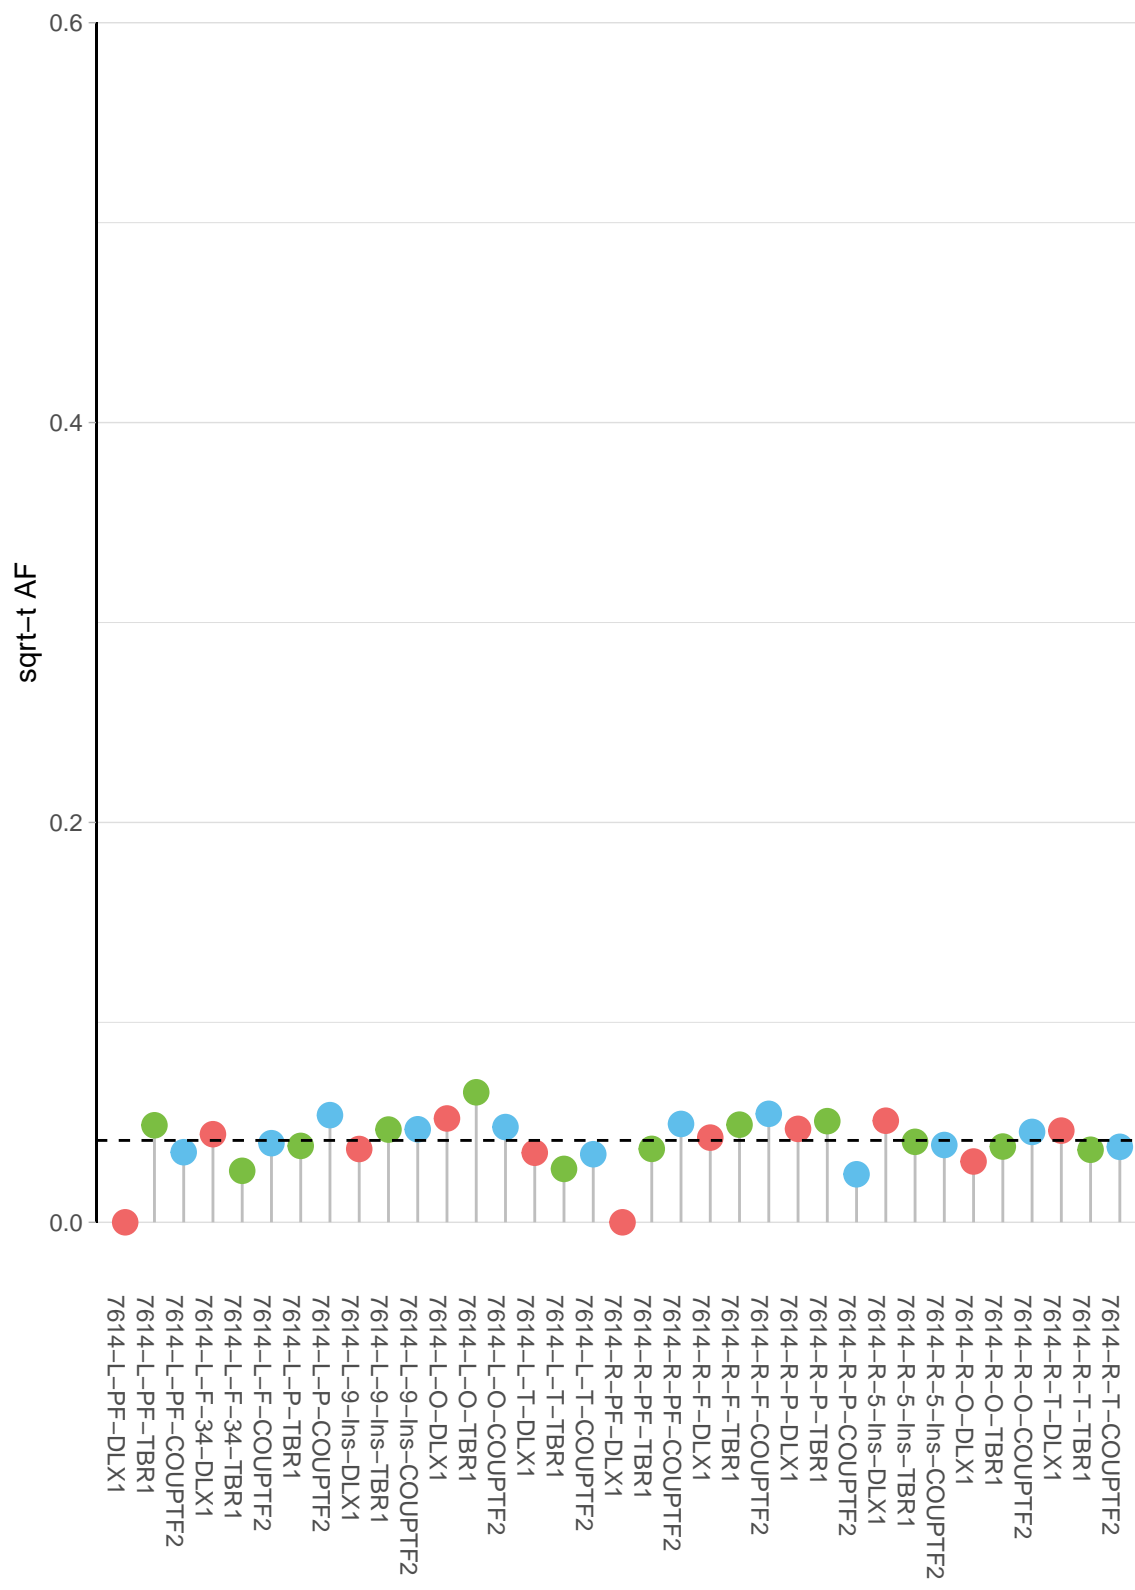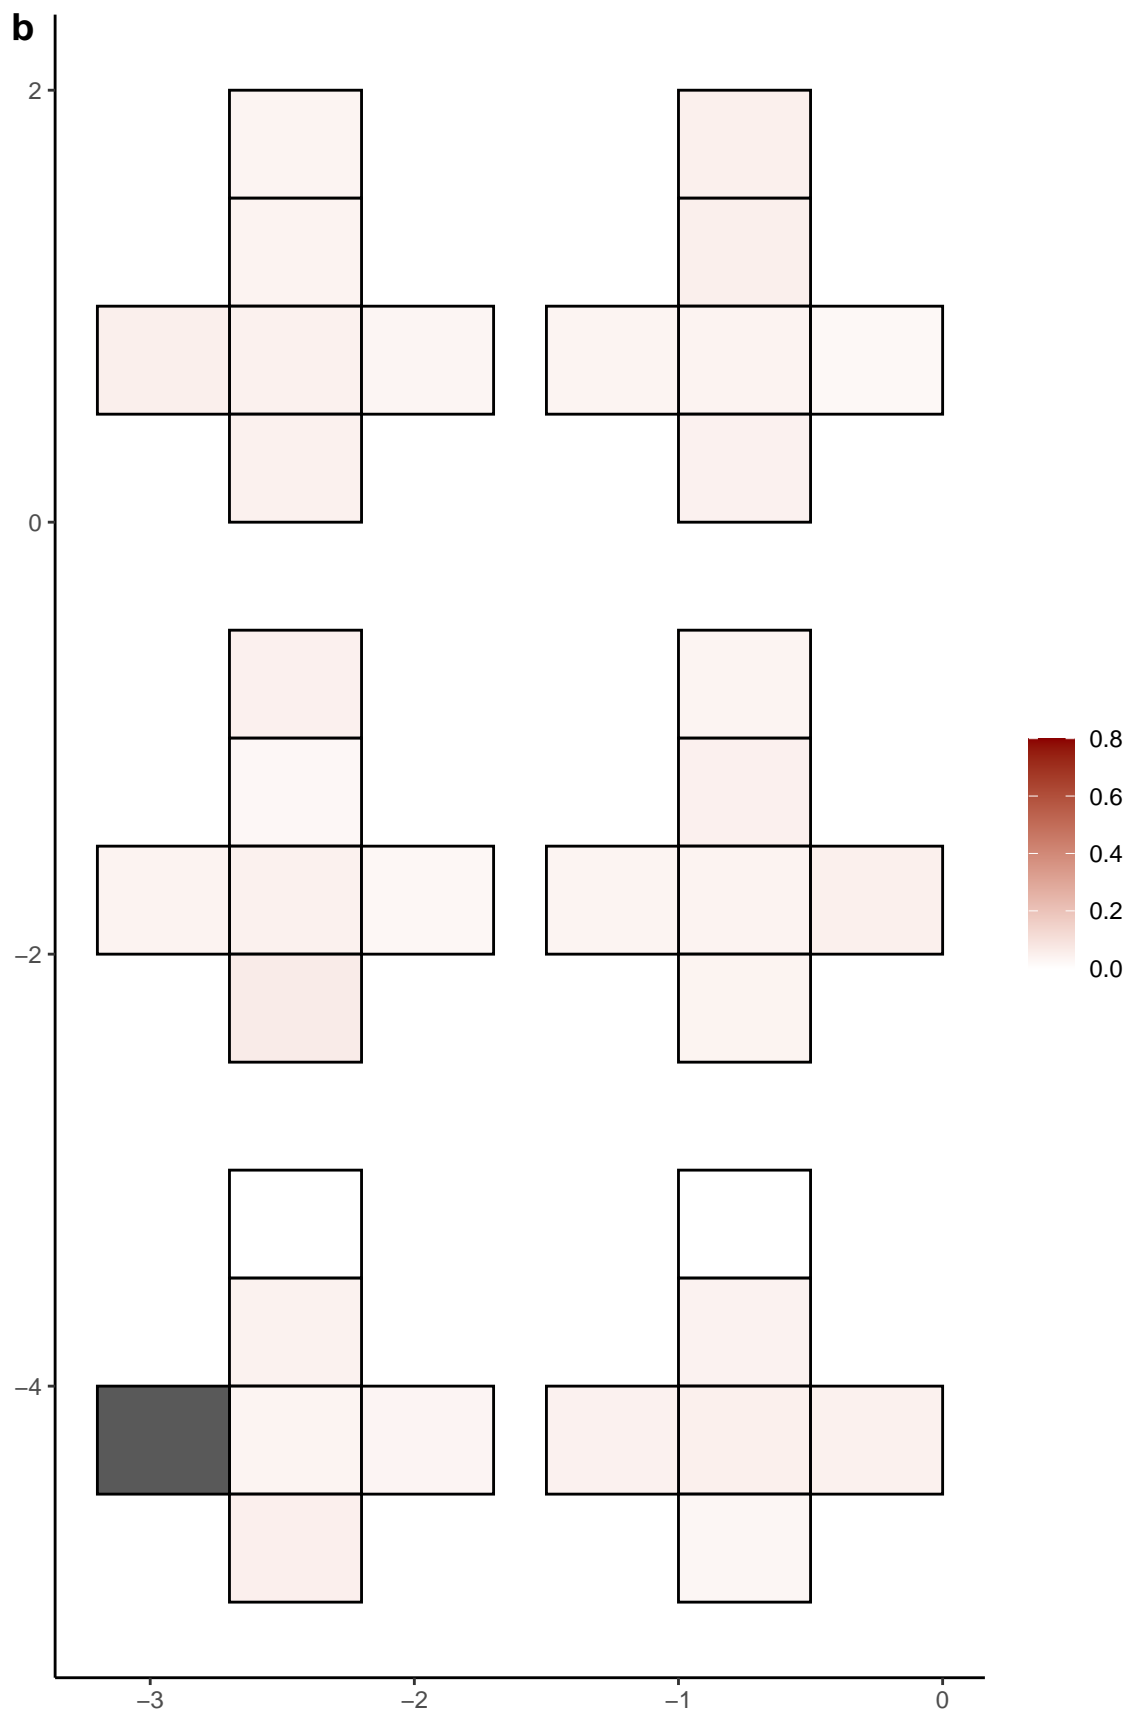

**a** ID01 12-30637099-C-G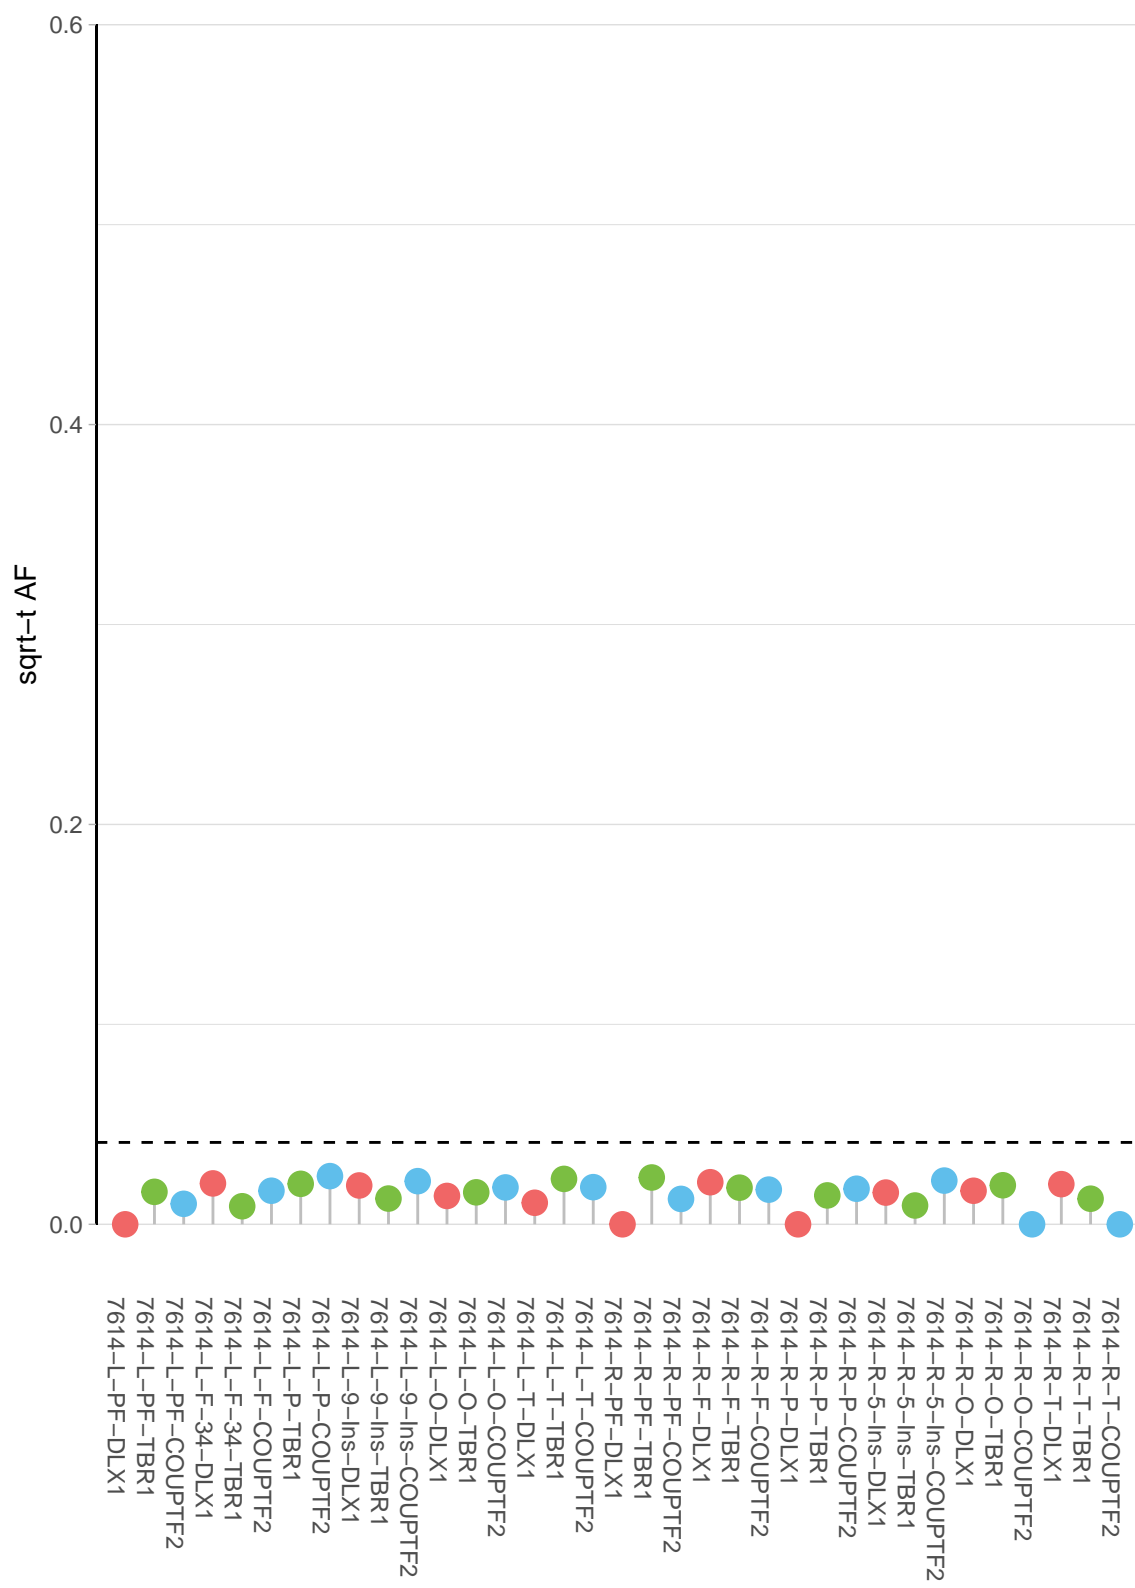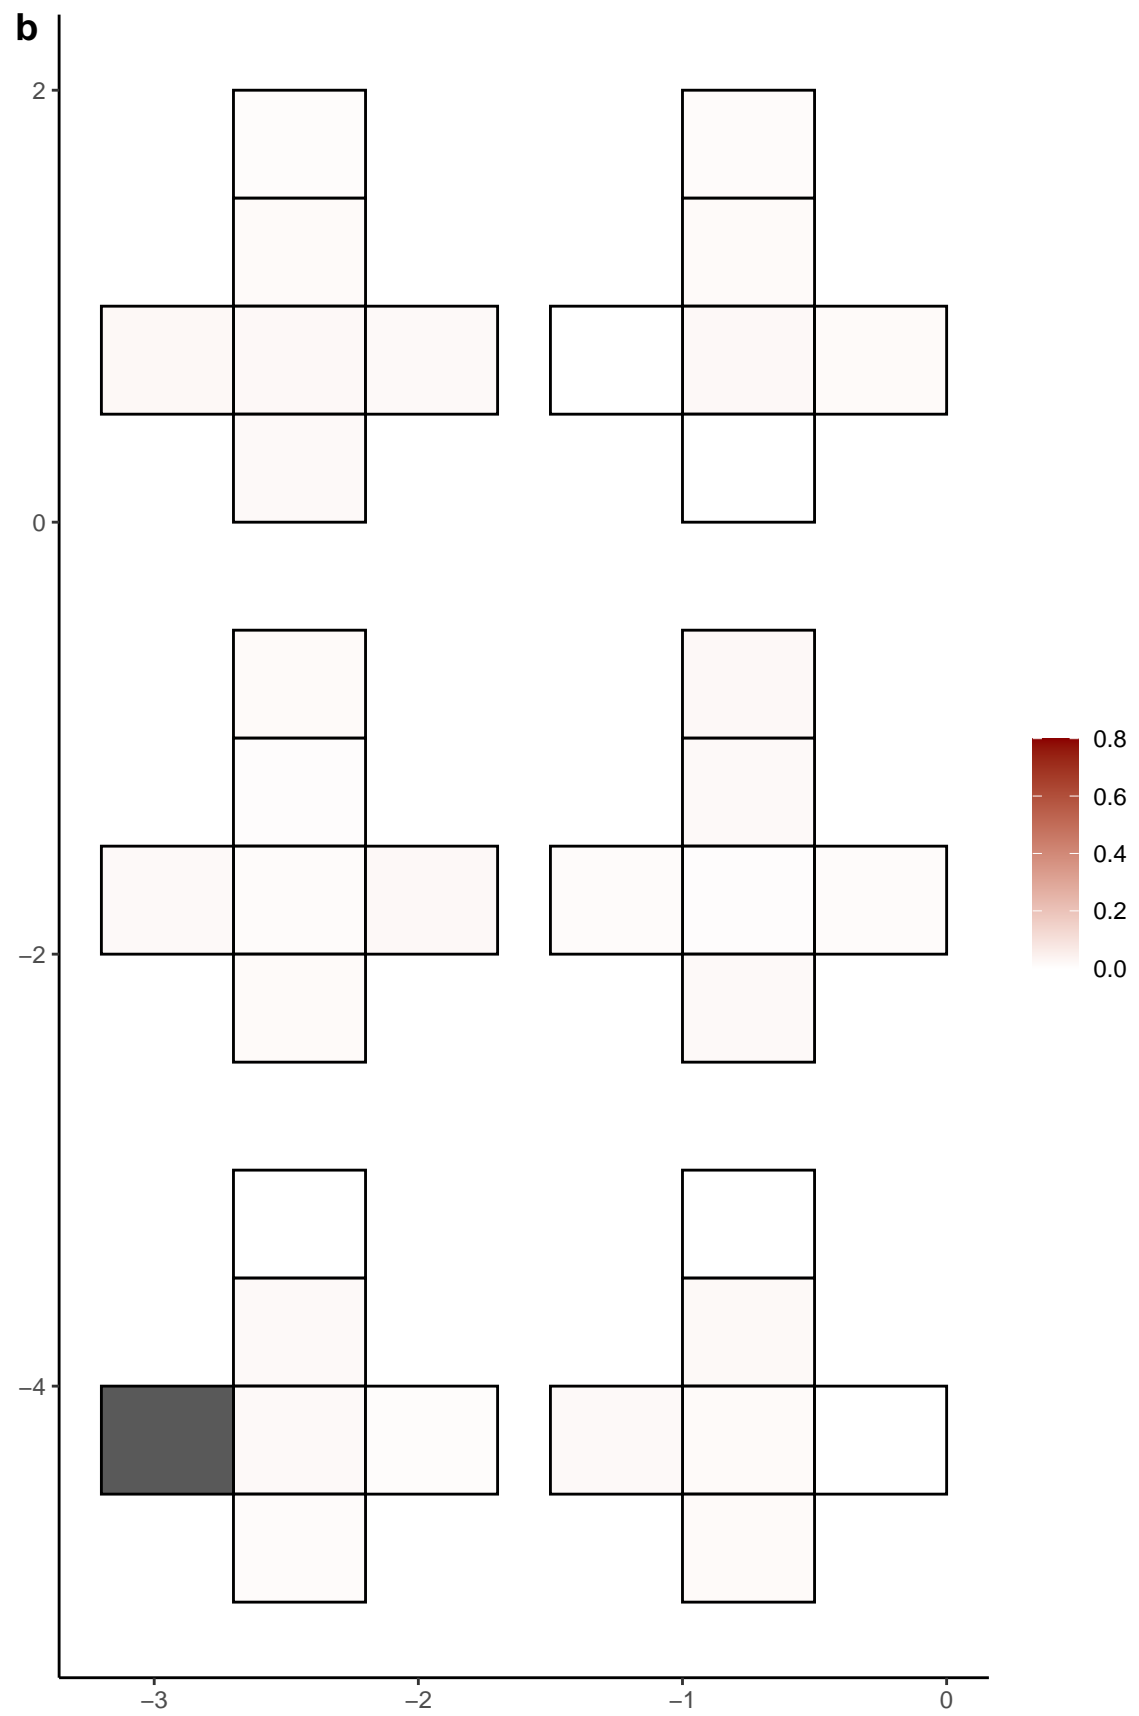

**a** ID01 12-30749782-G-T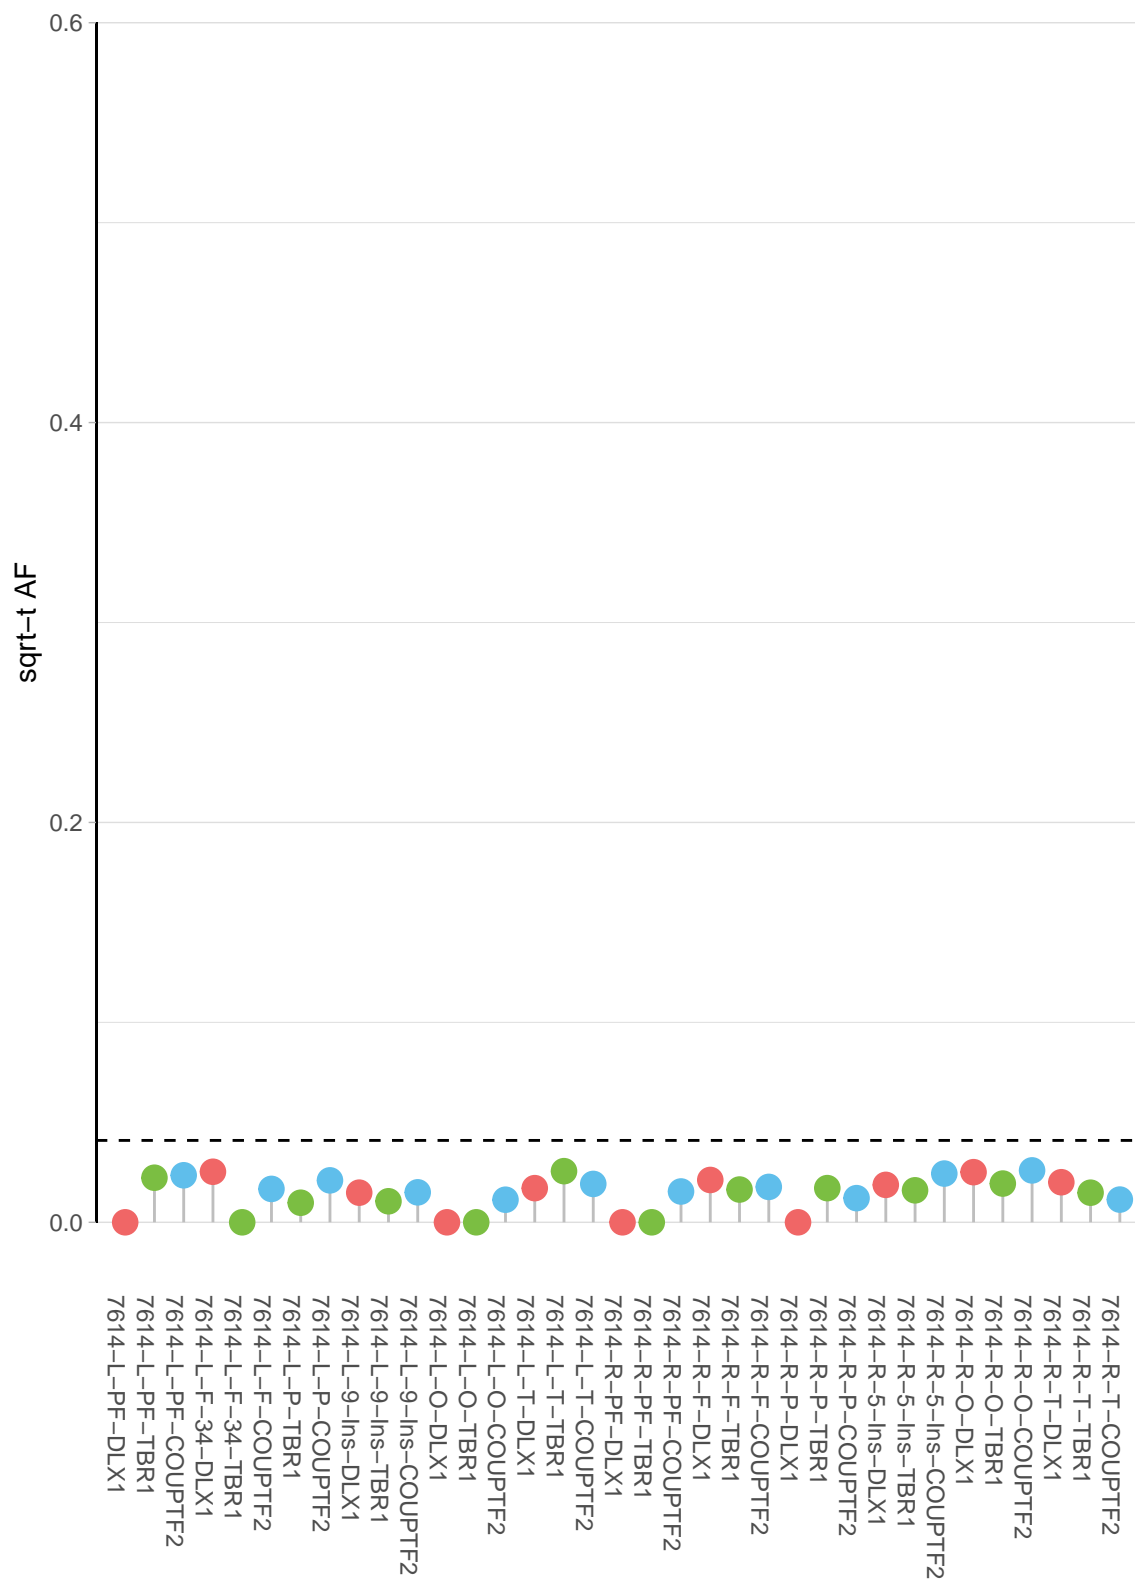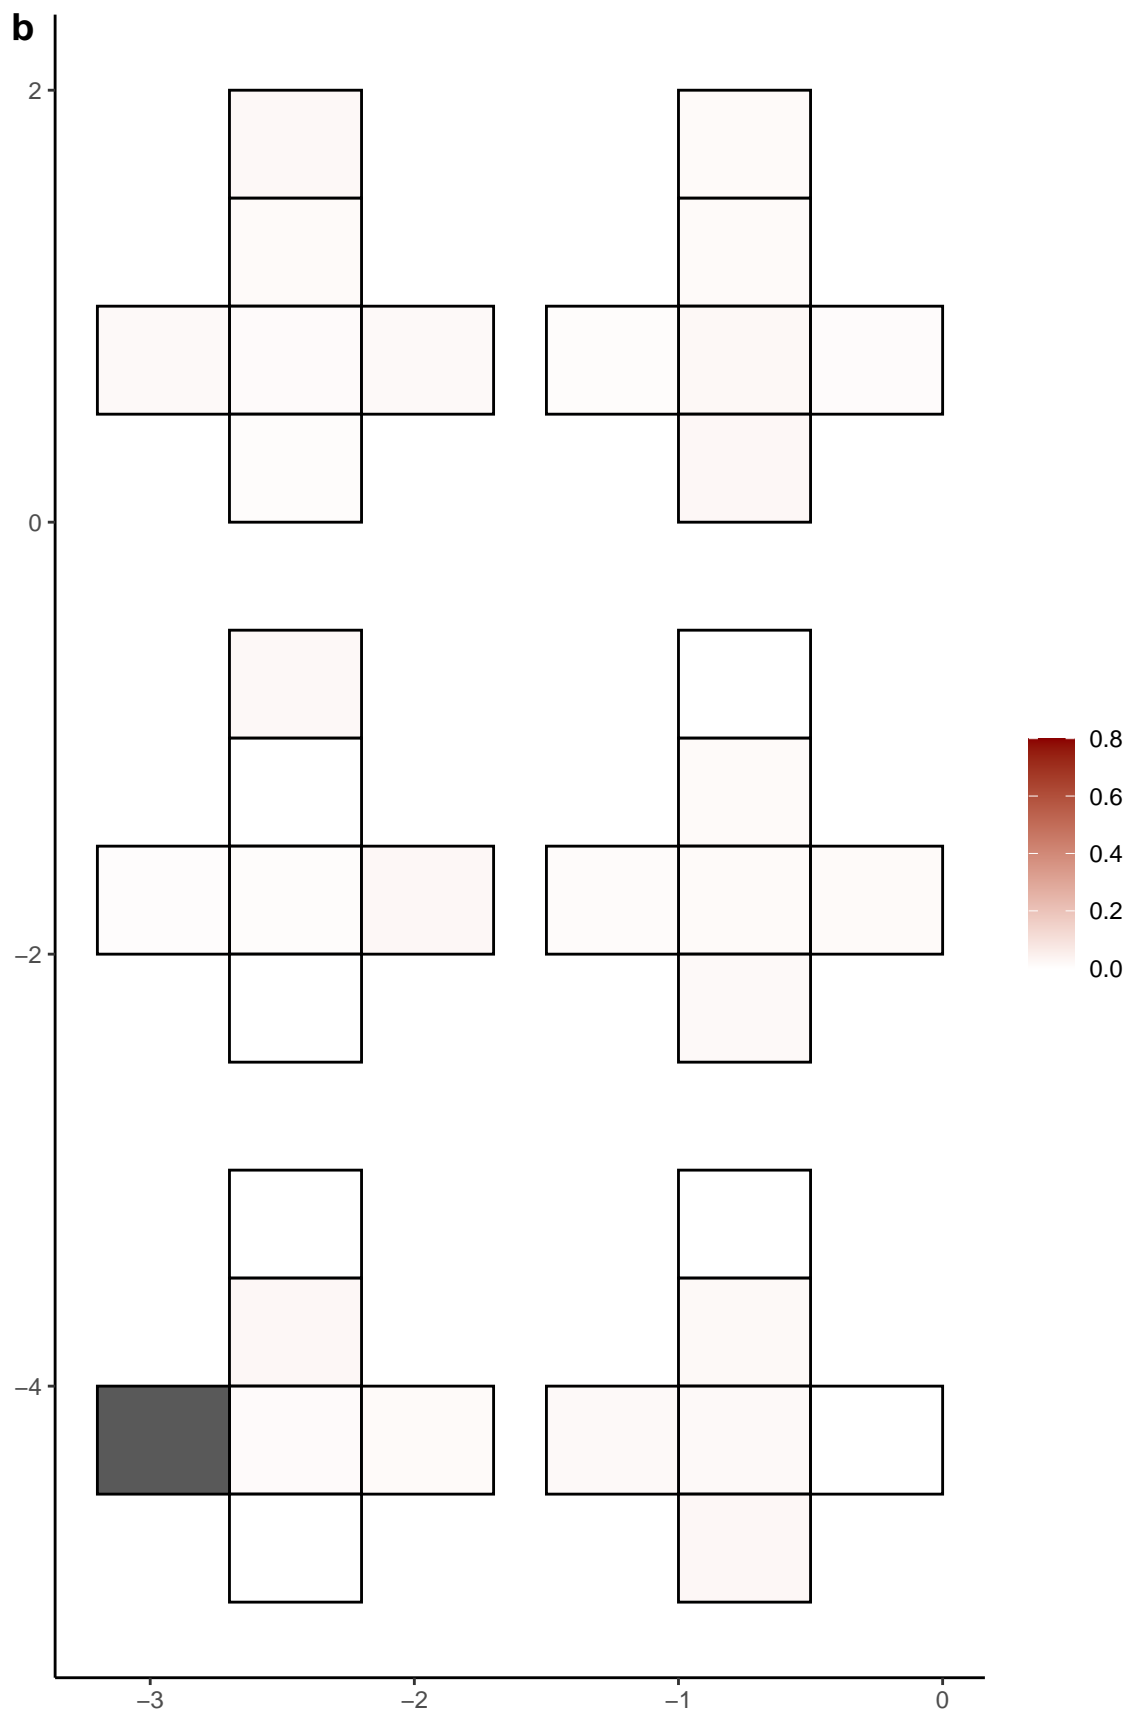

**a** ID01 12-40717911-G-A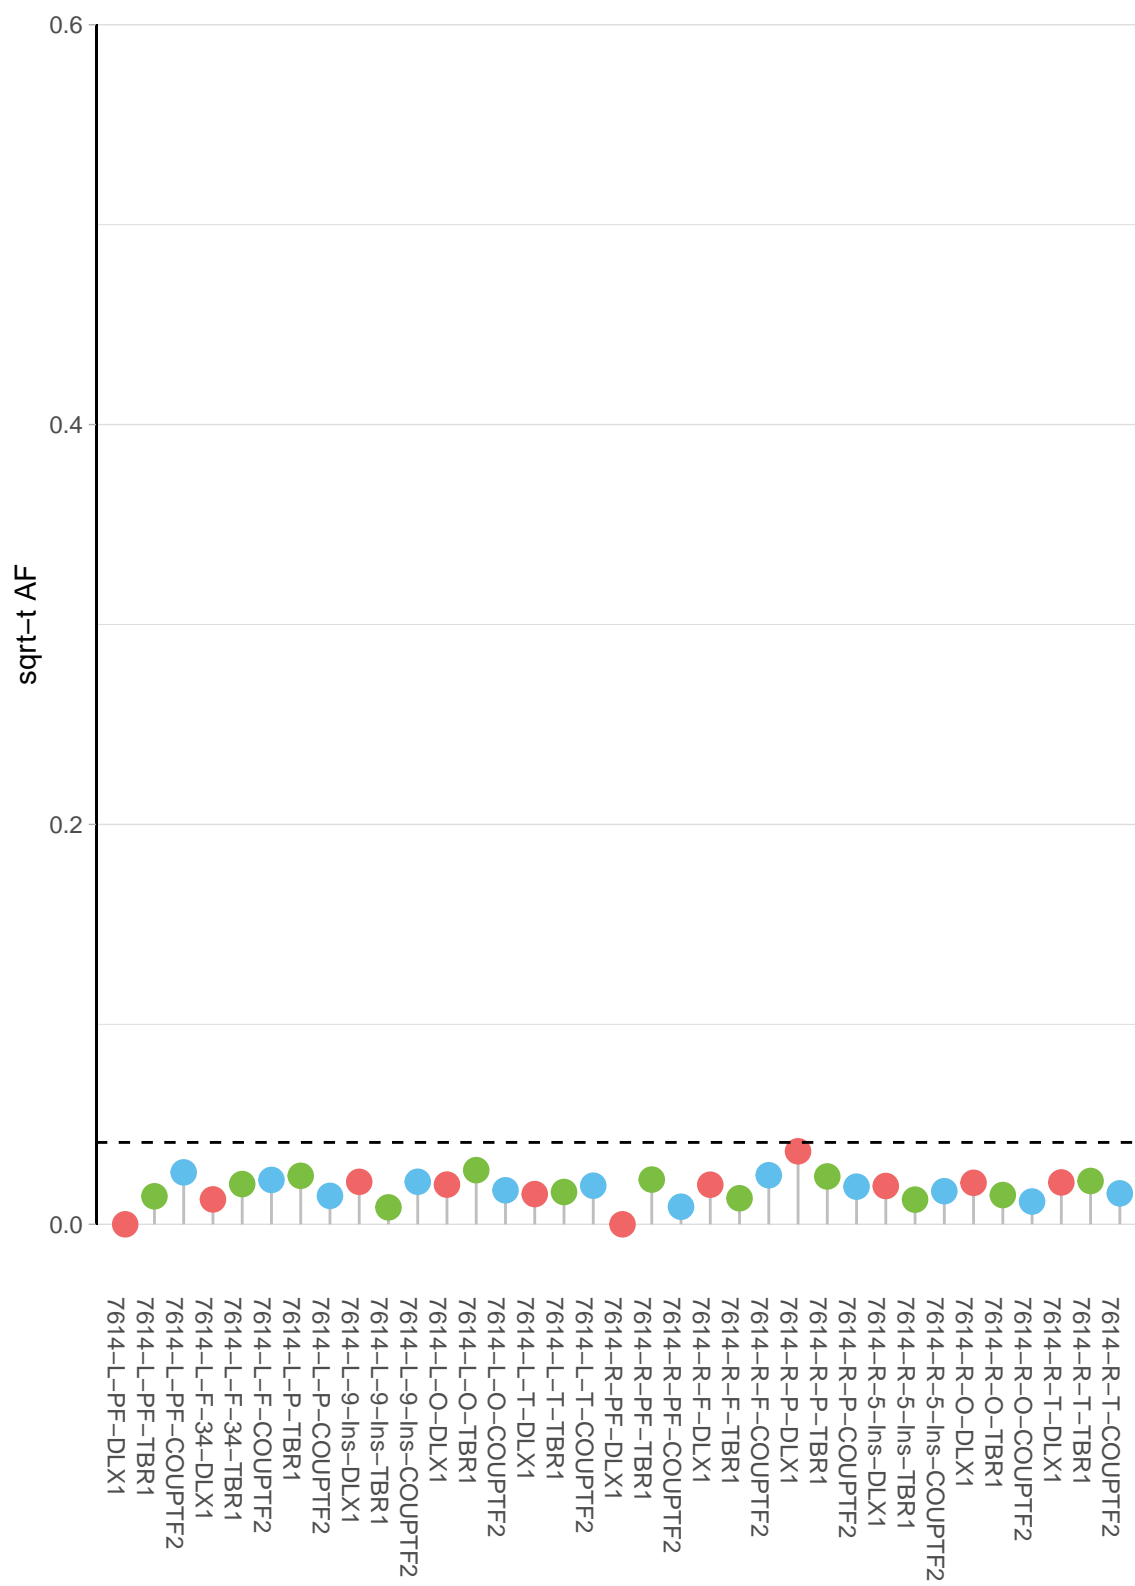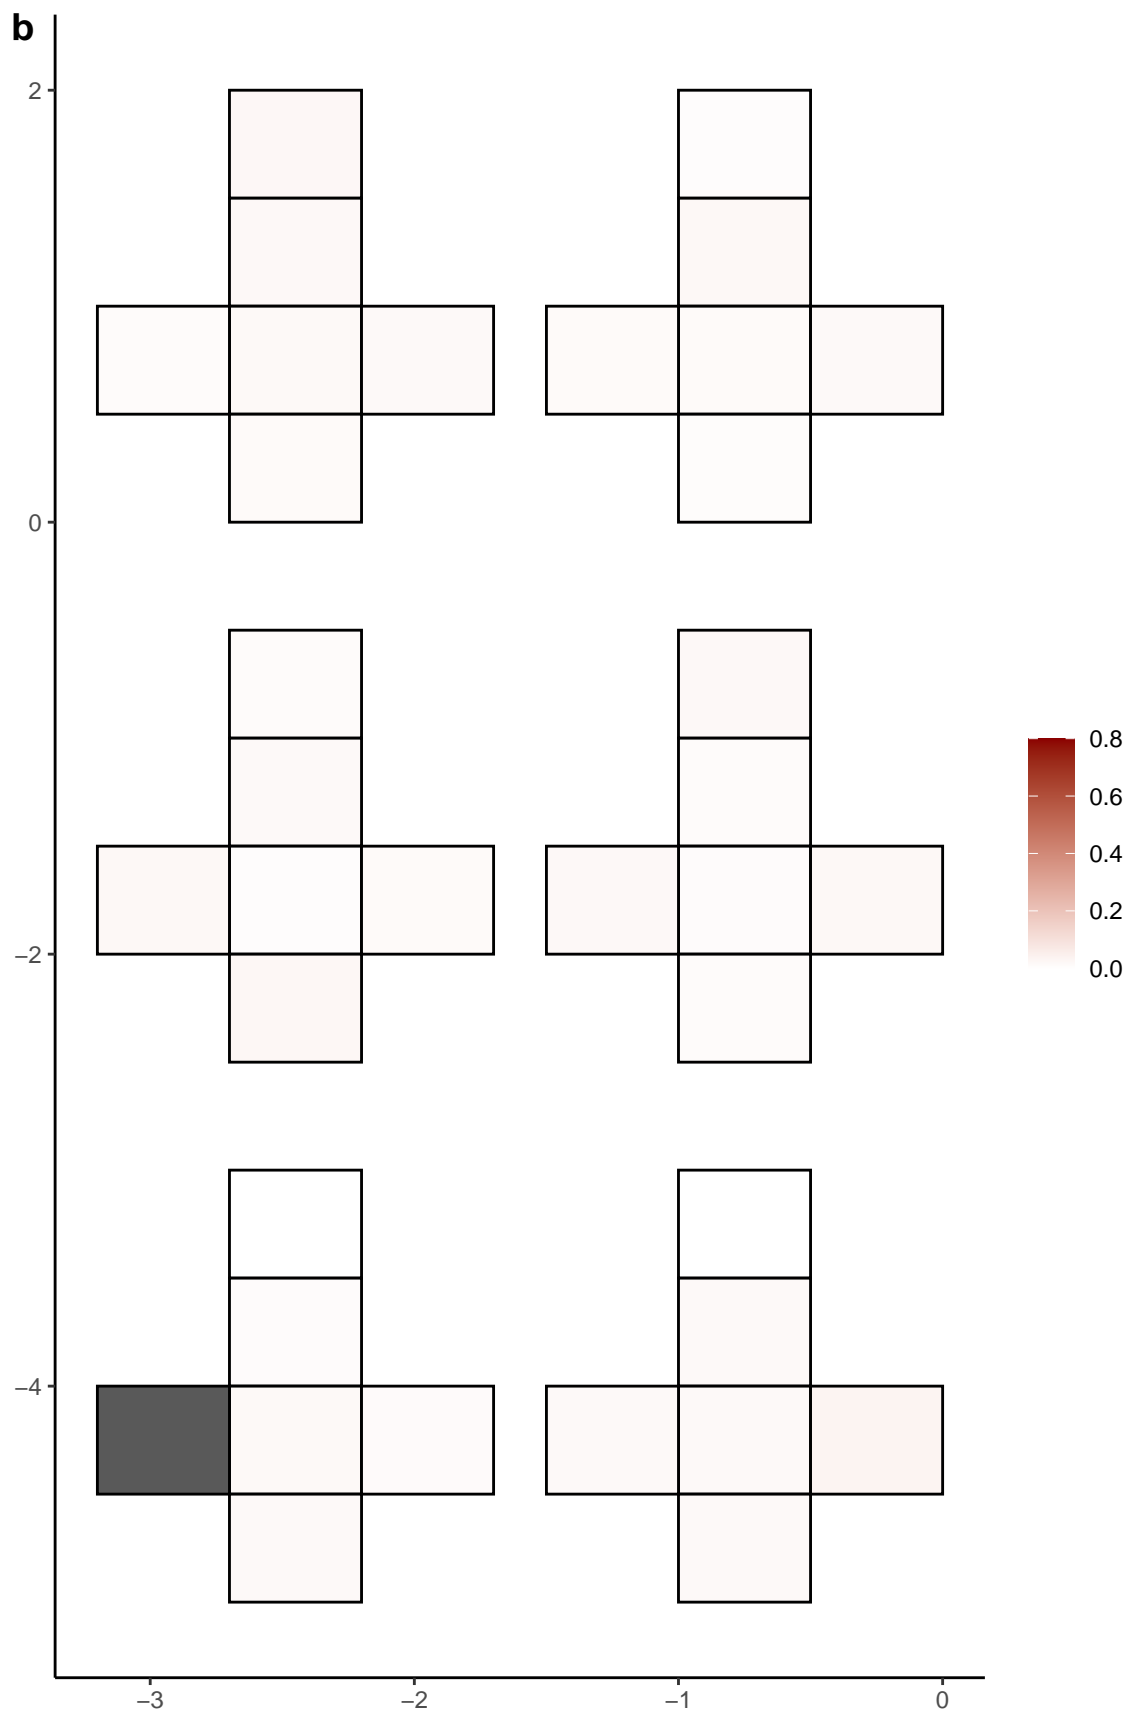

**a** ID01 12-42784039-A-G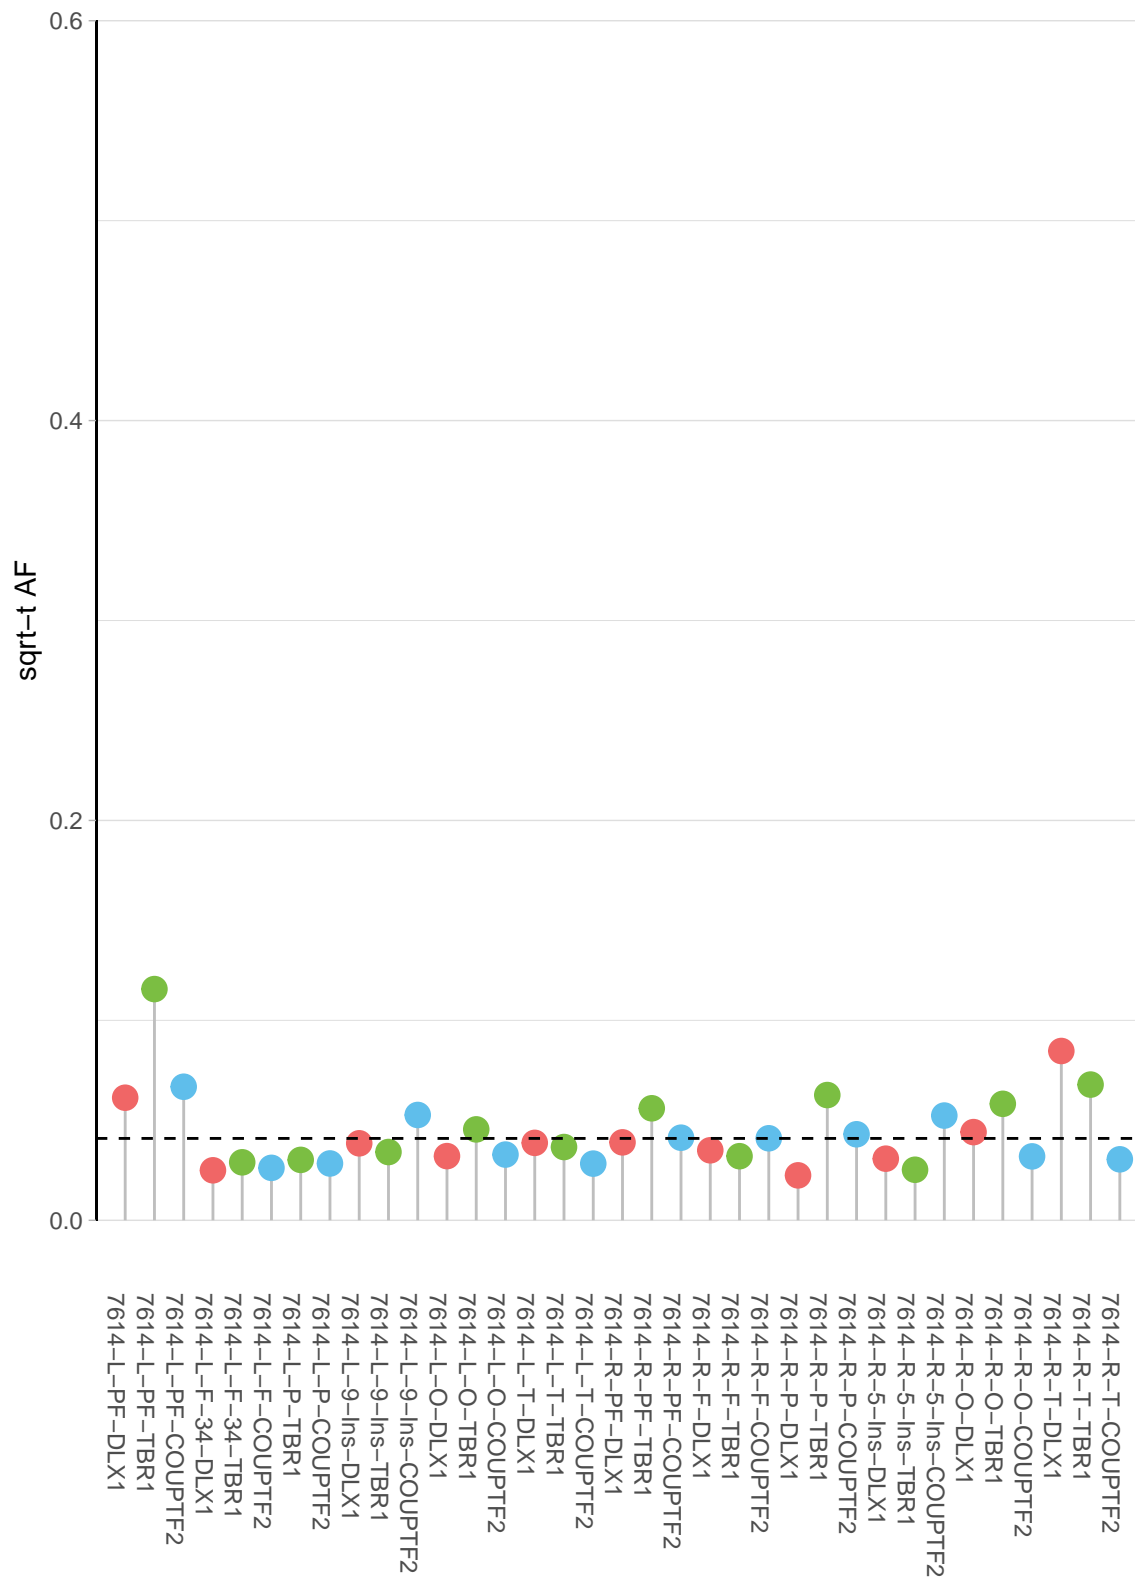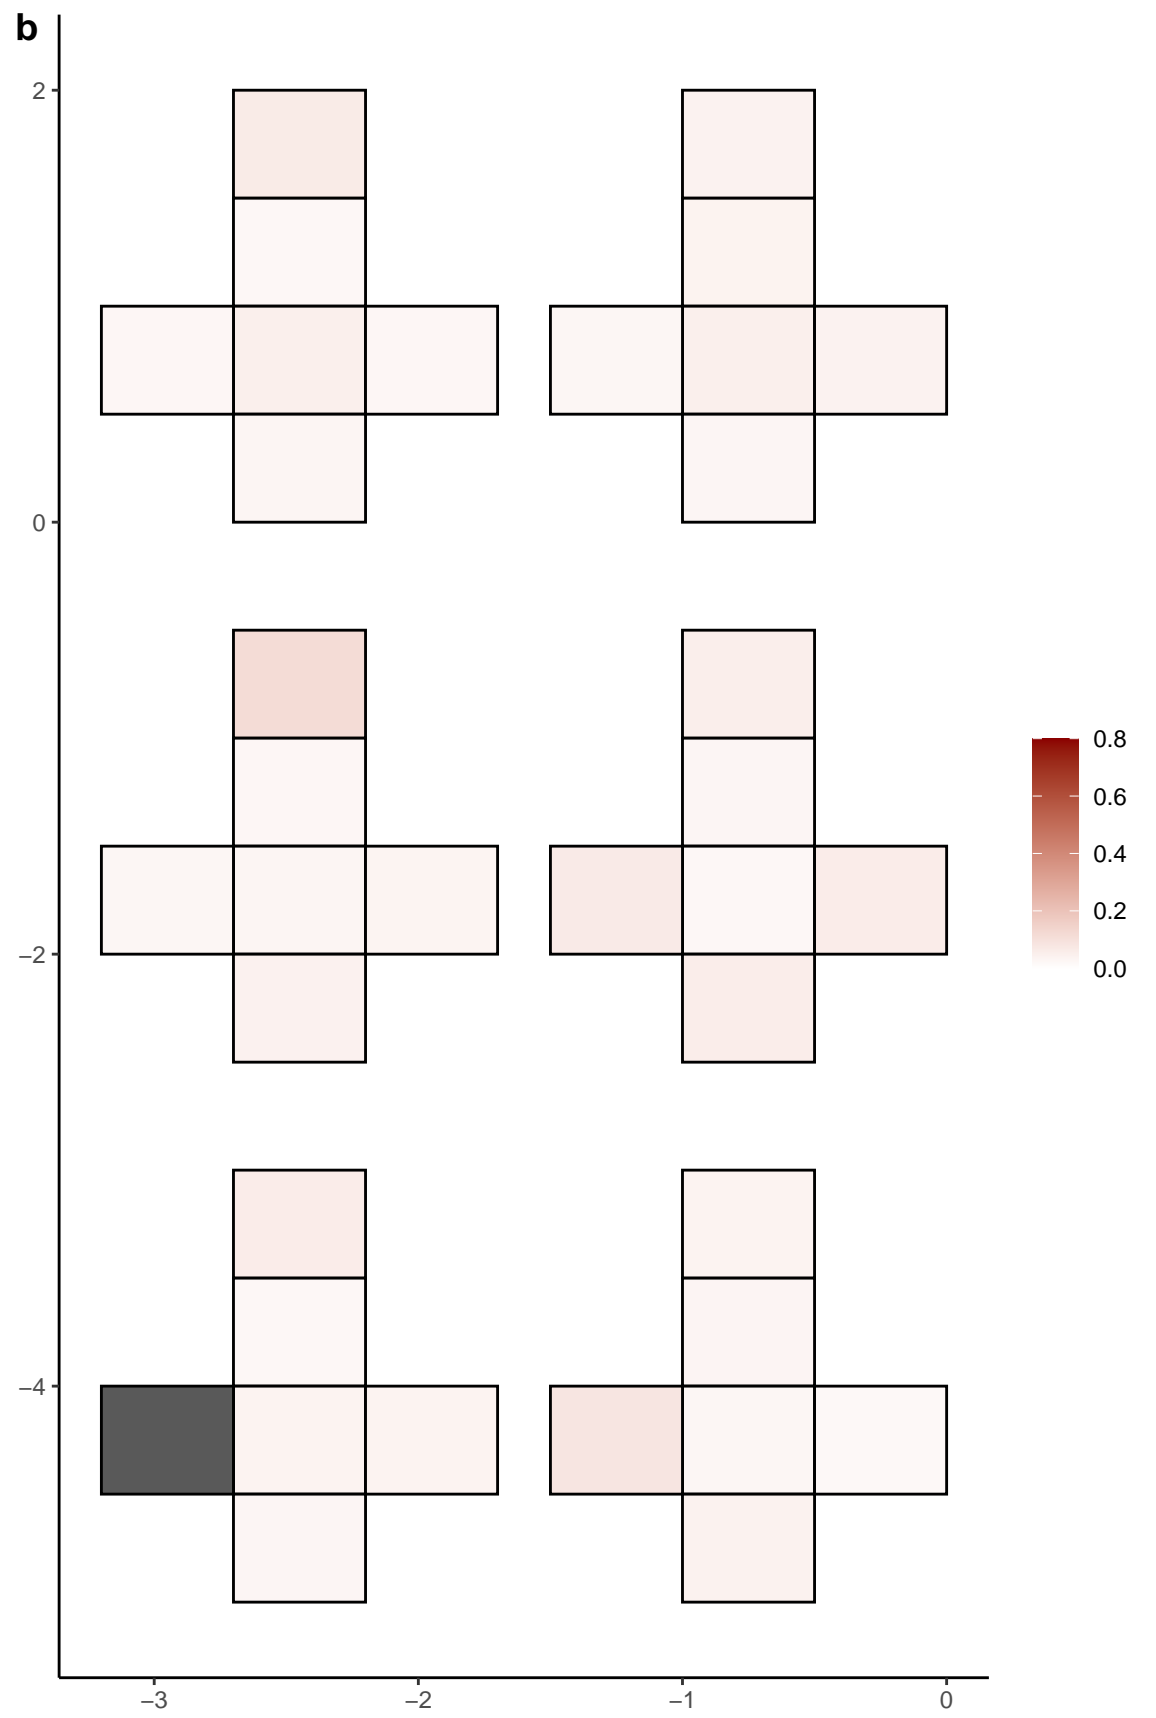

**a** ID01 12-99984882-G-A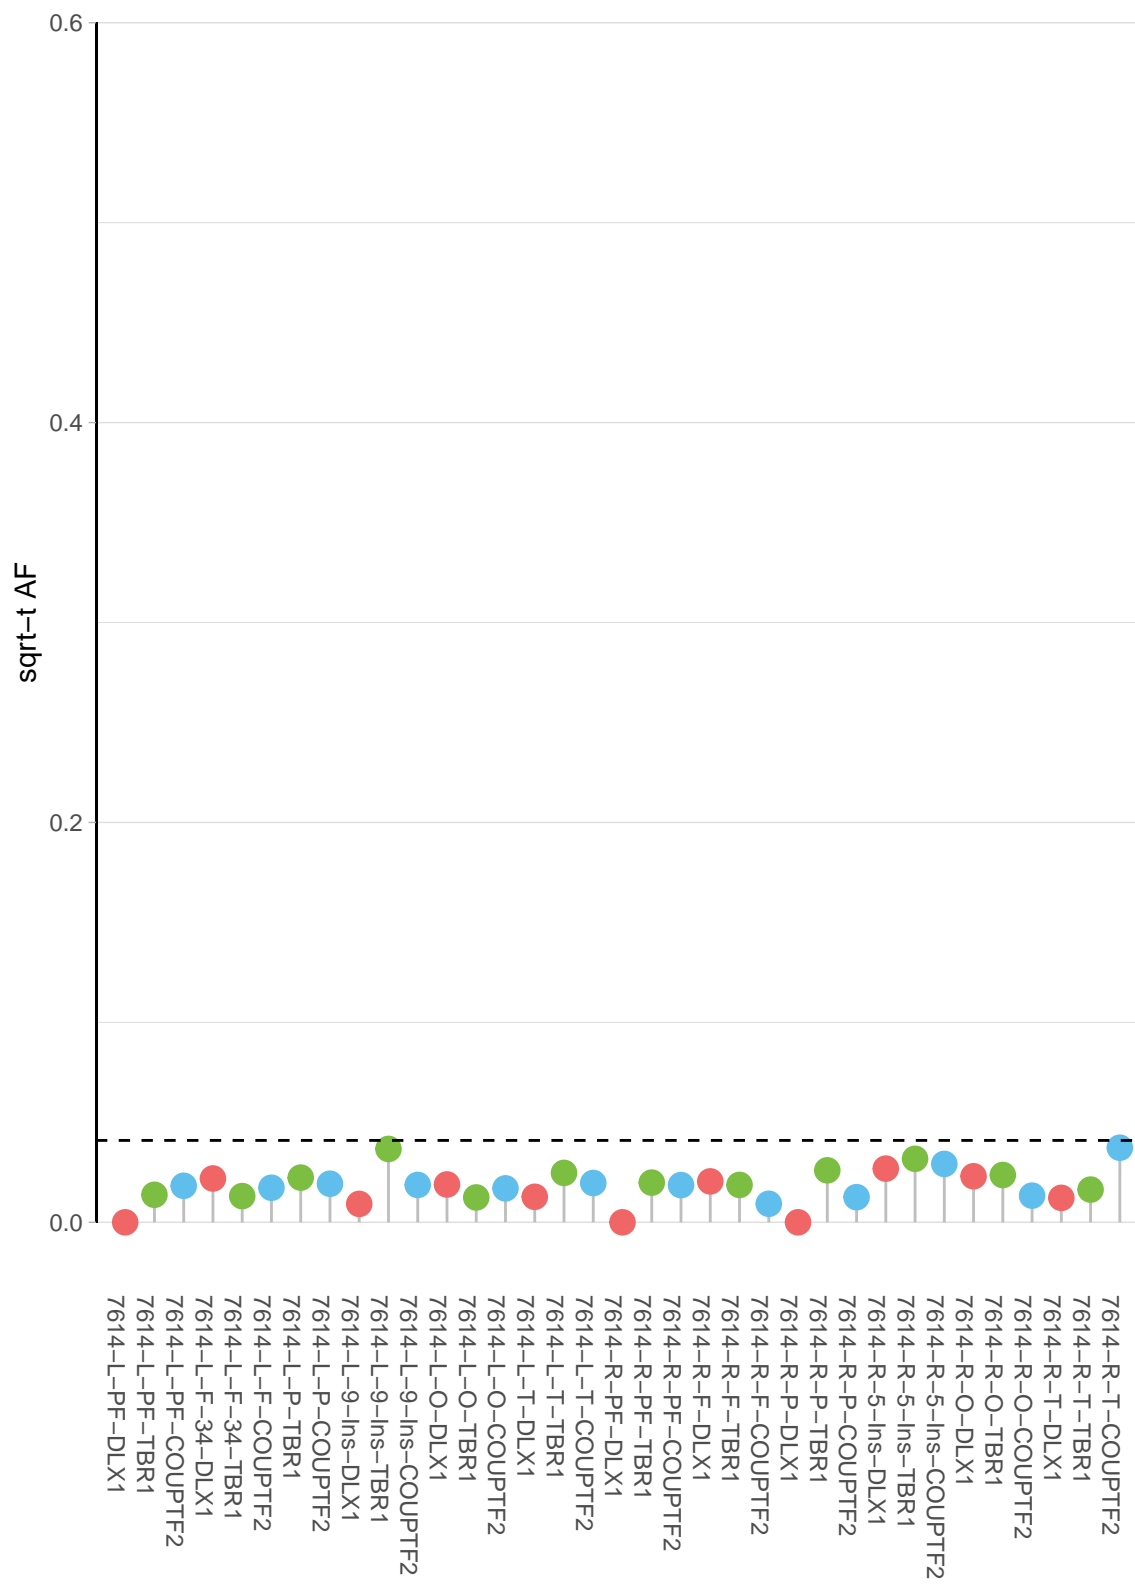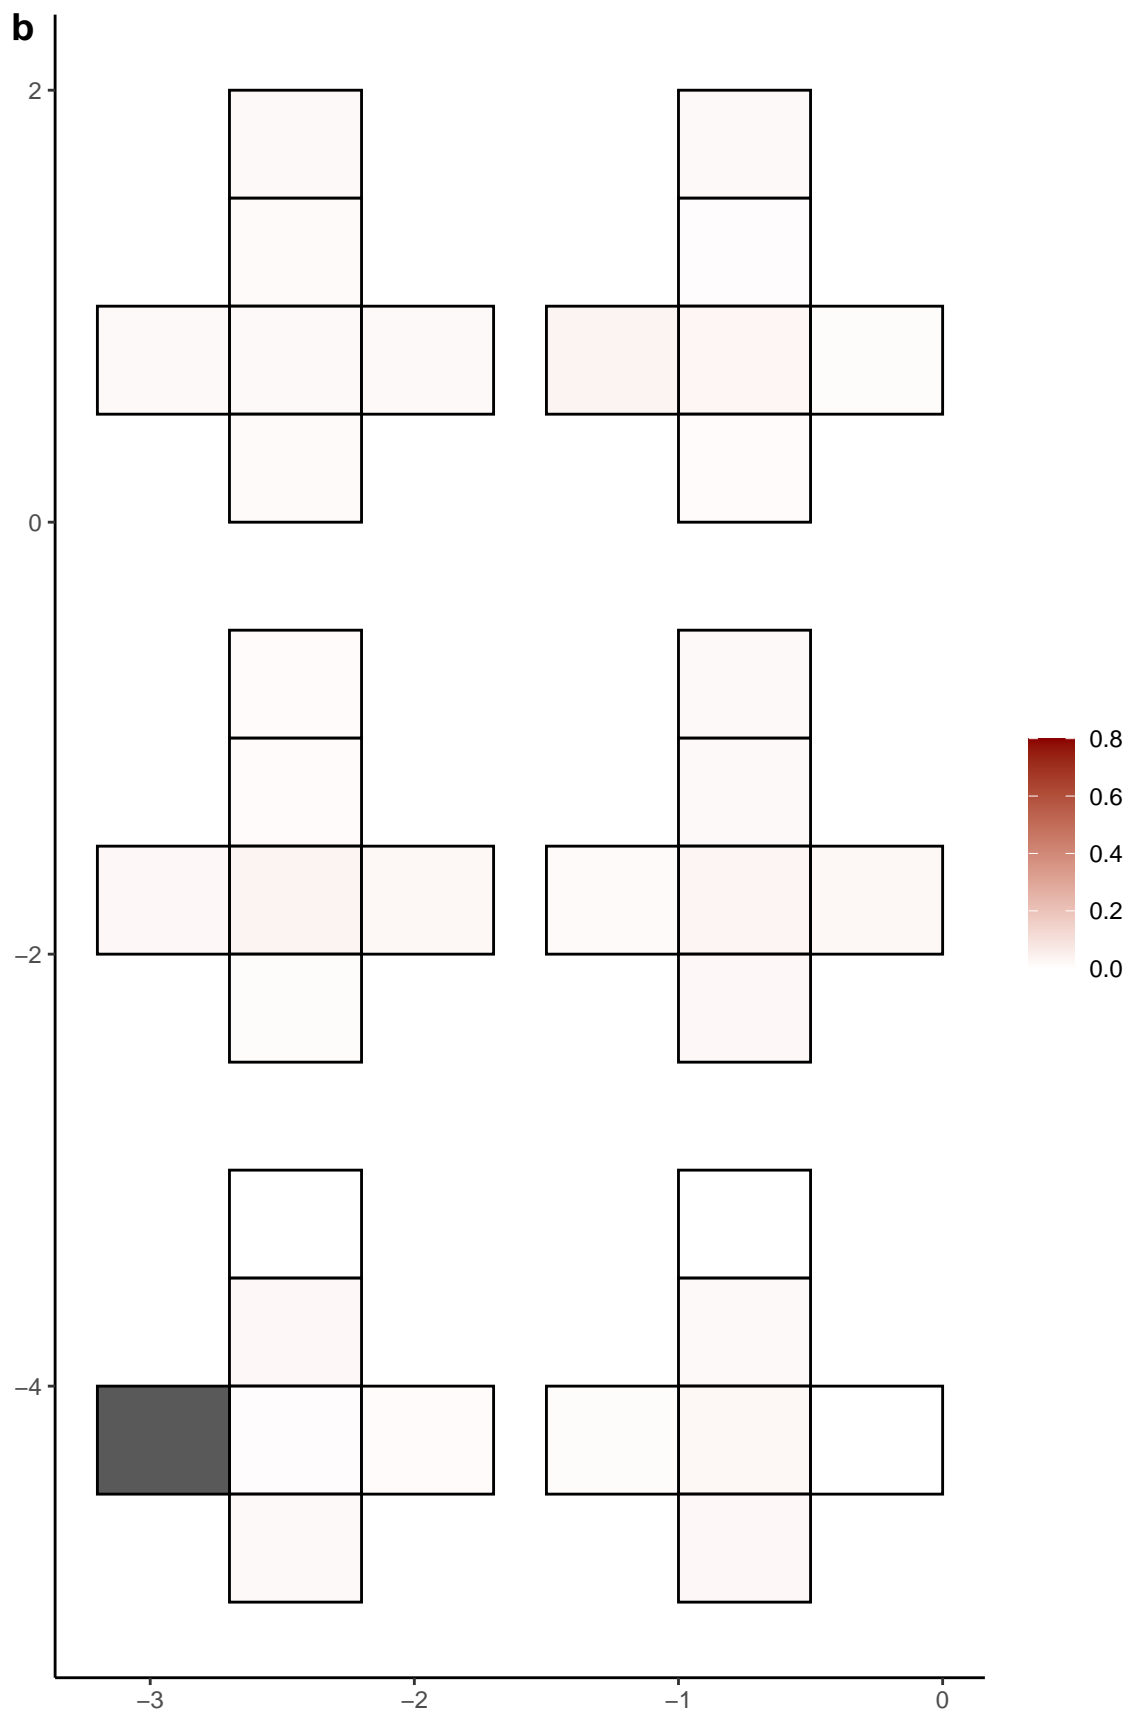



**a** ID01 13-104312064-G-A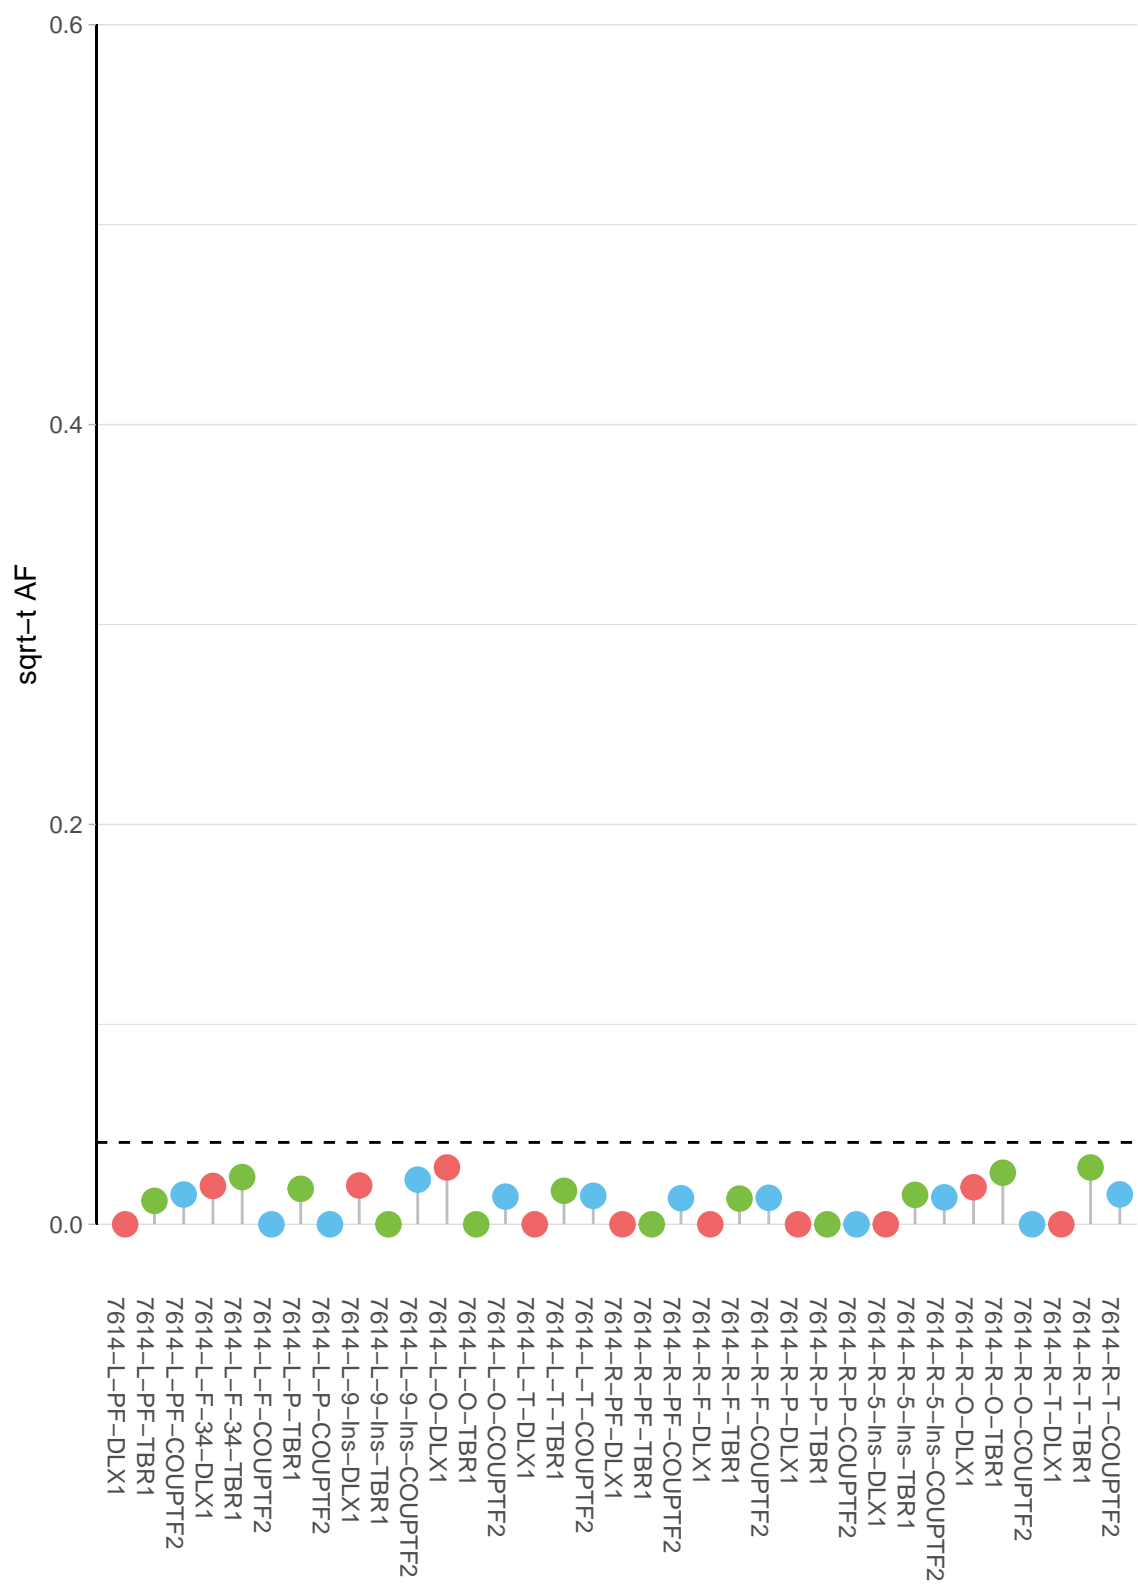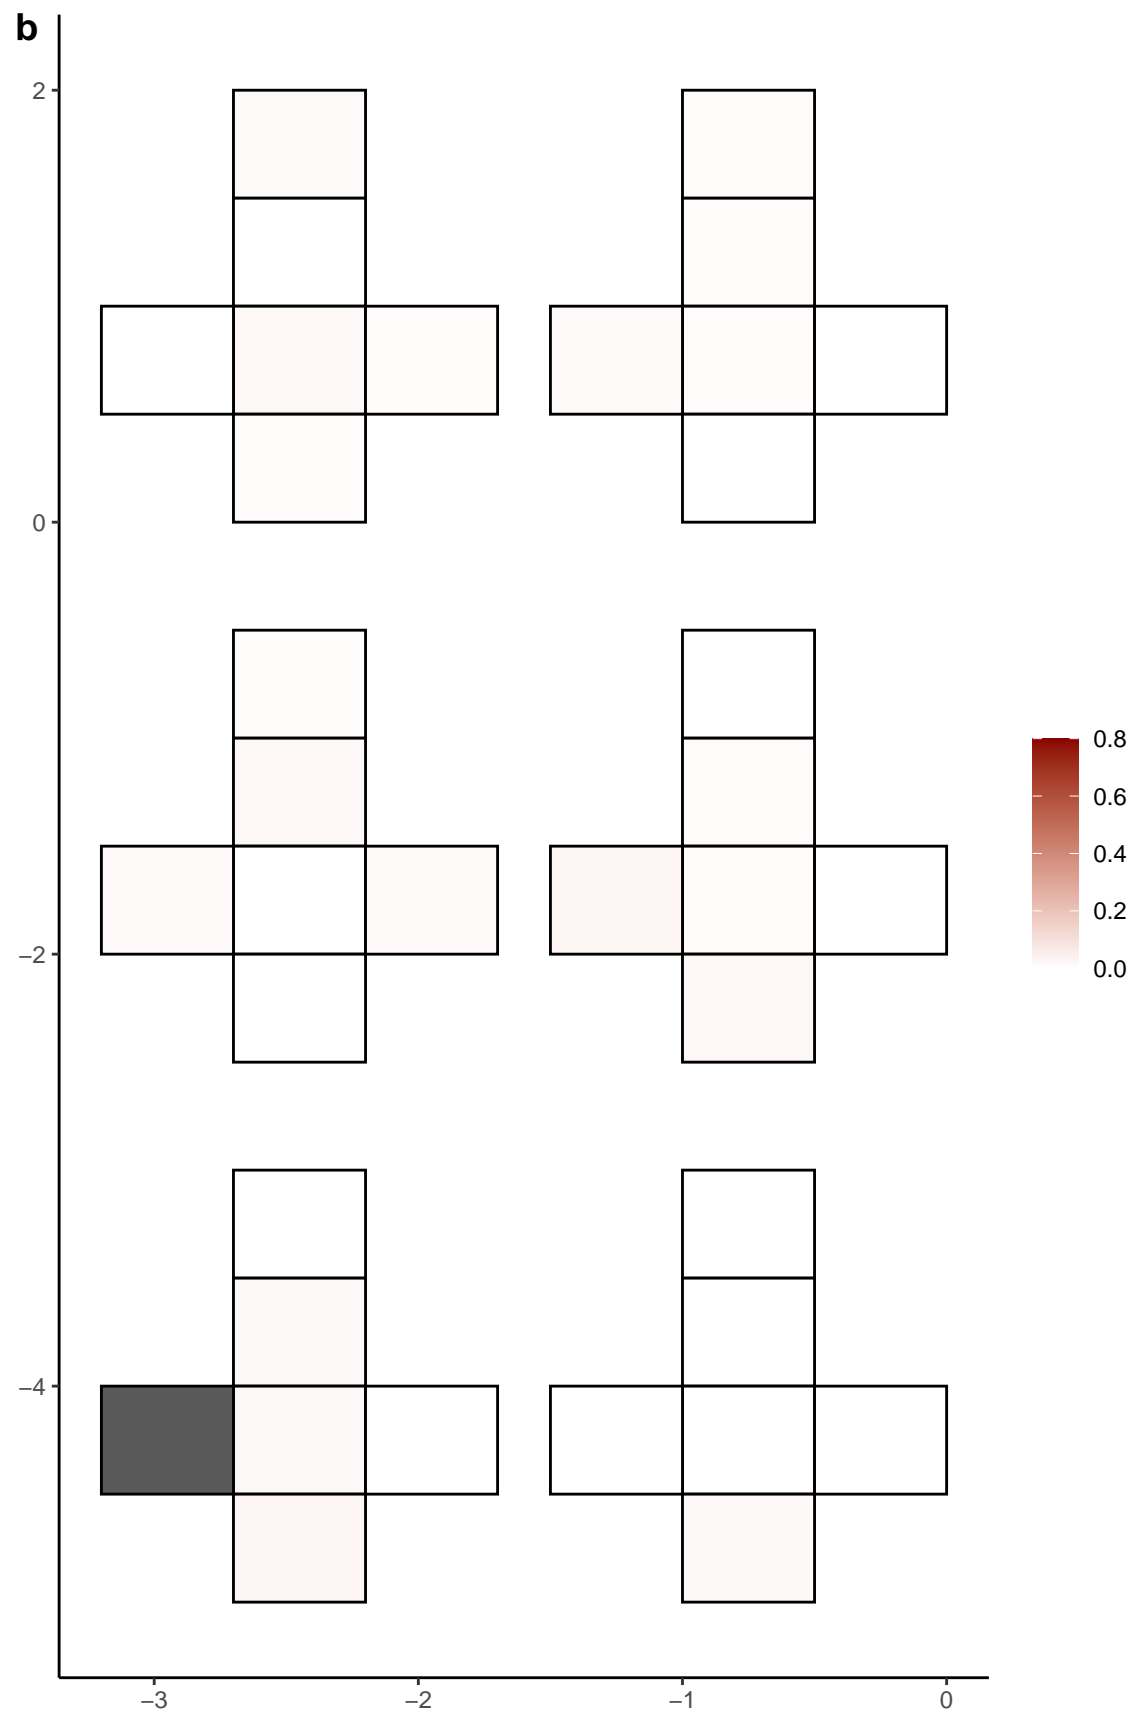

**a** ID01 13-104815490-G-A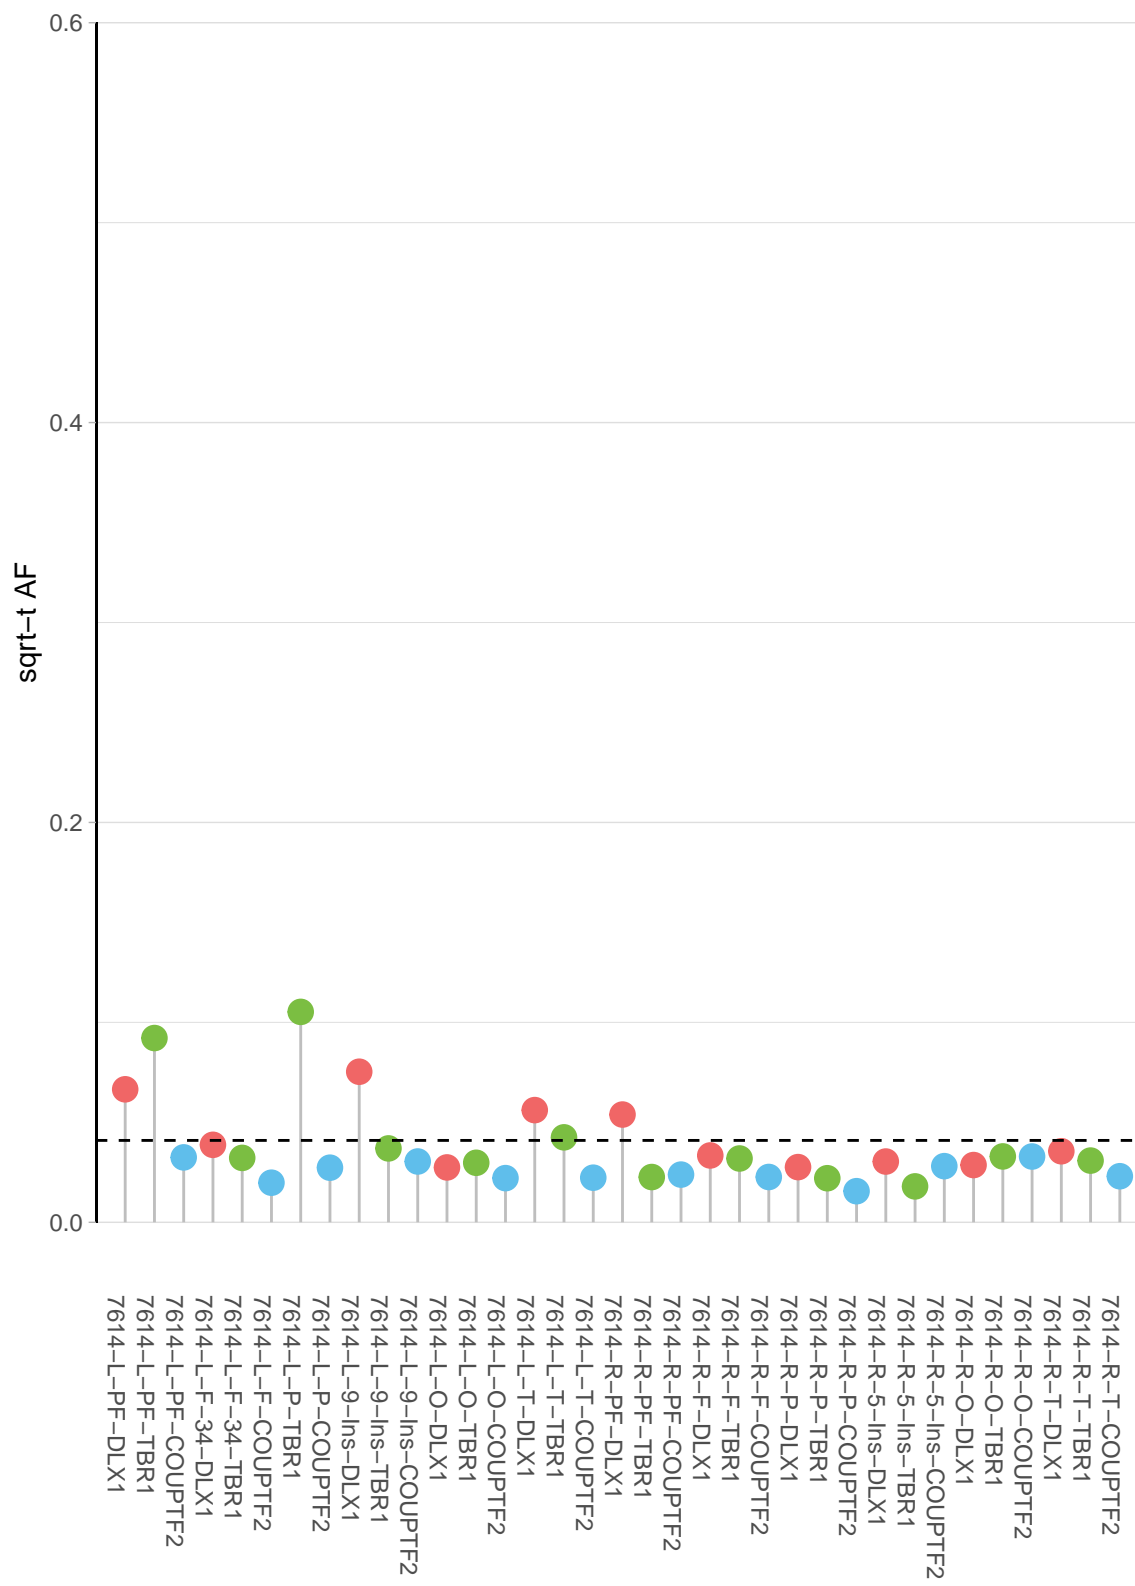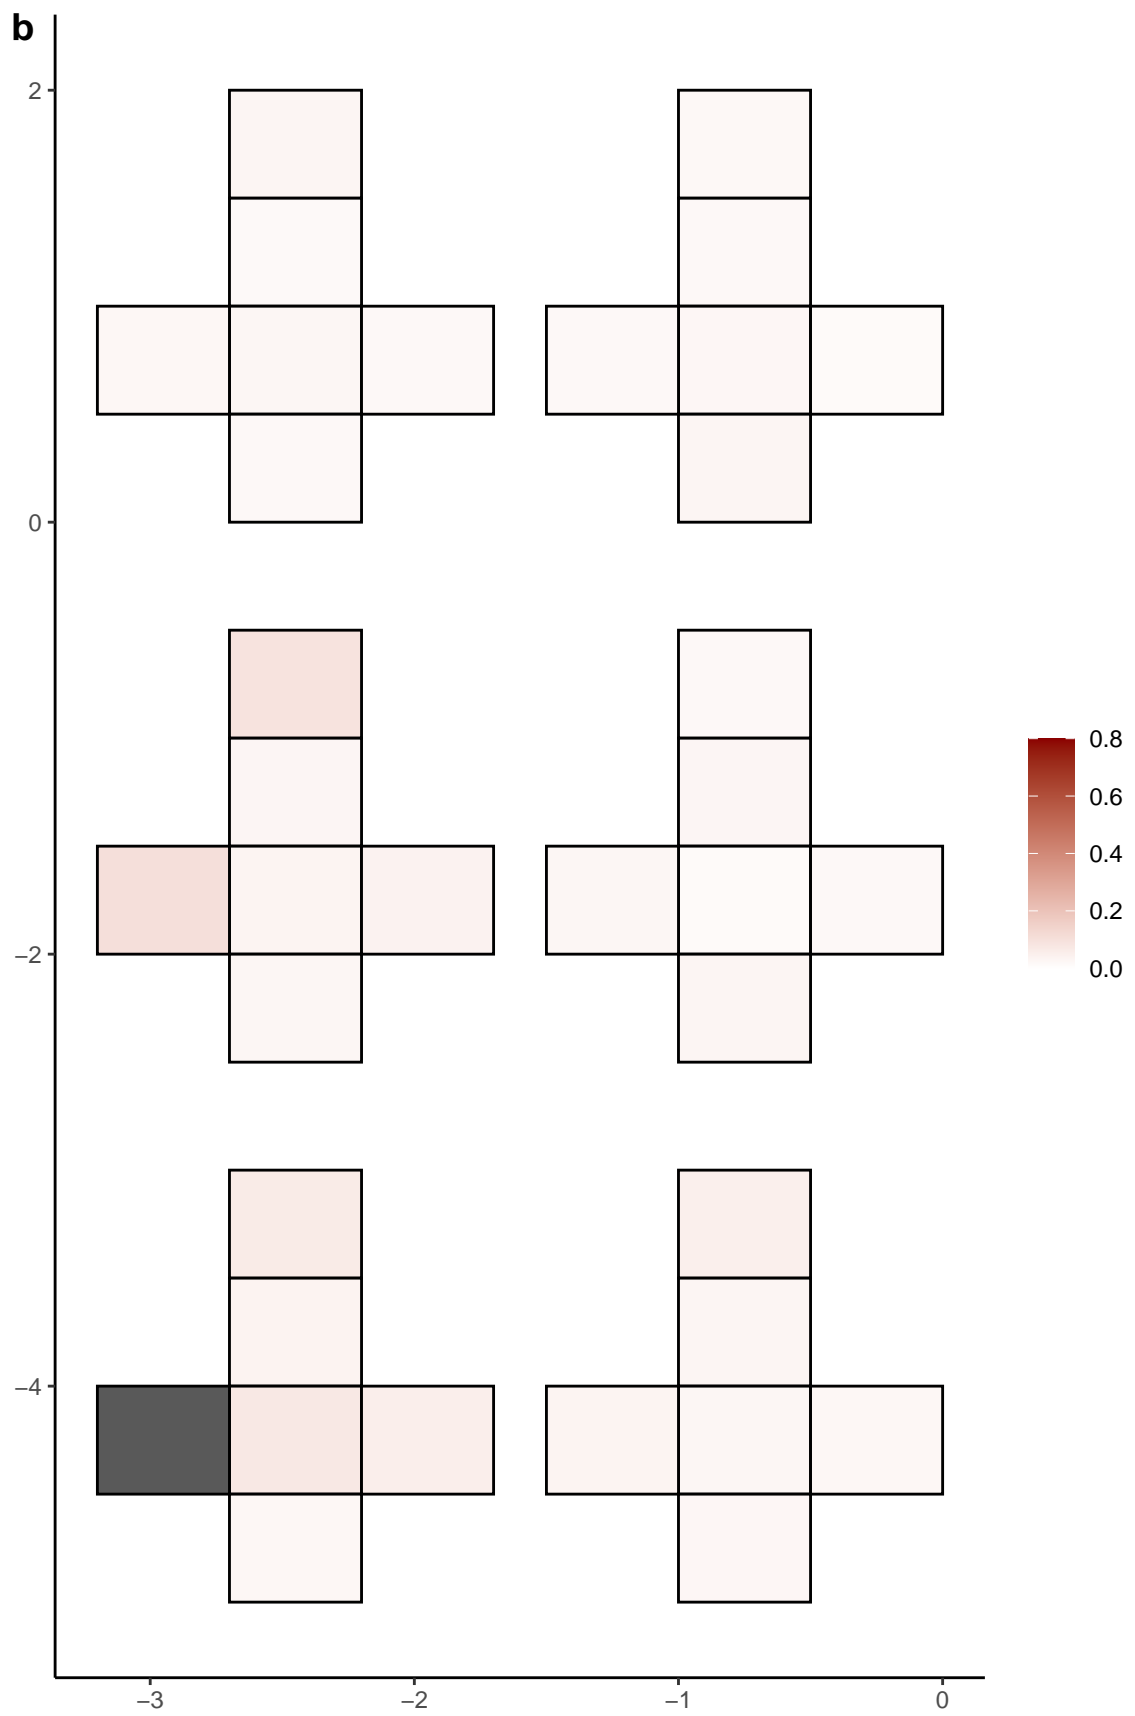

**a** ID01 13-113887705-CCAG-C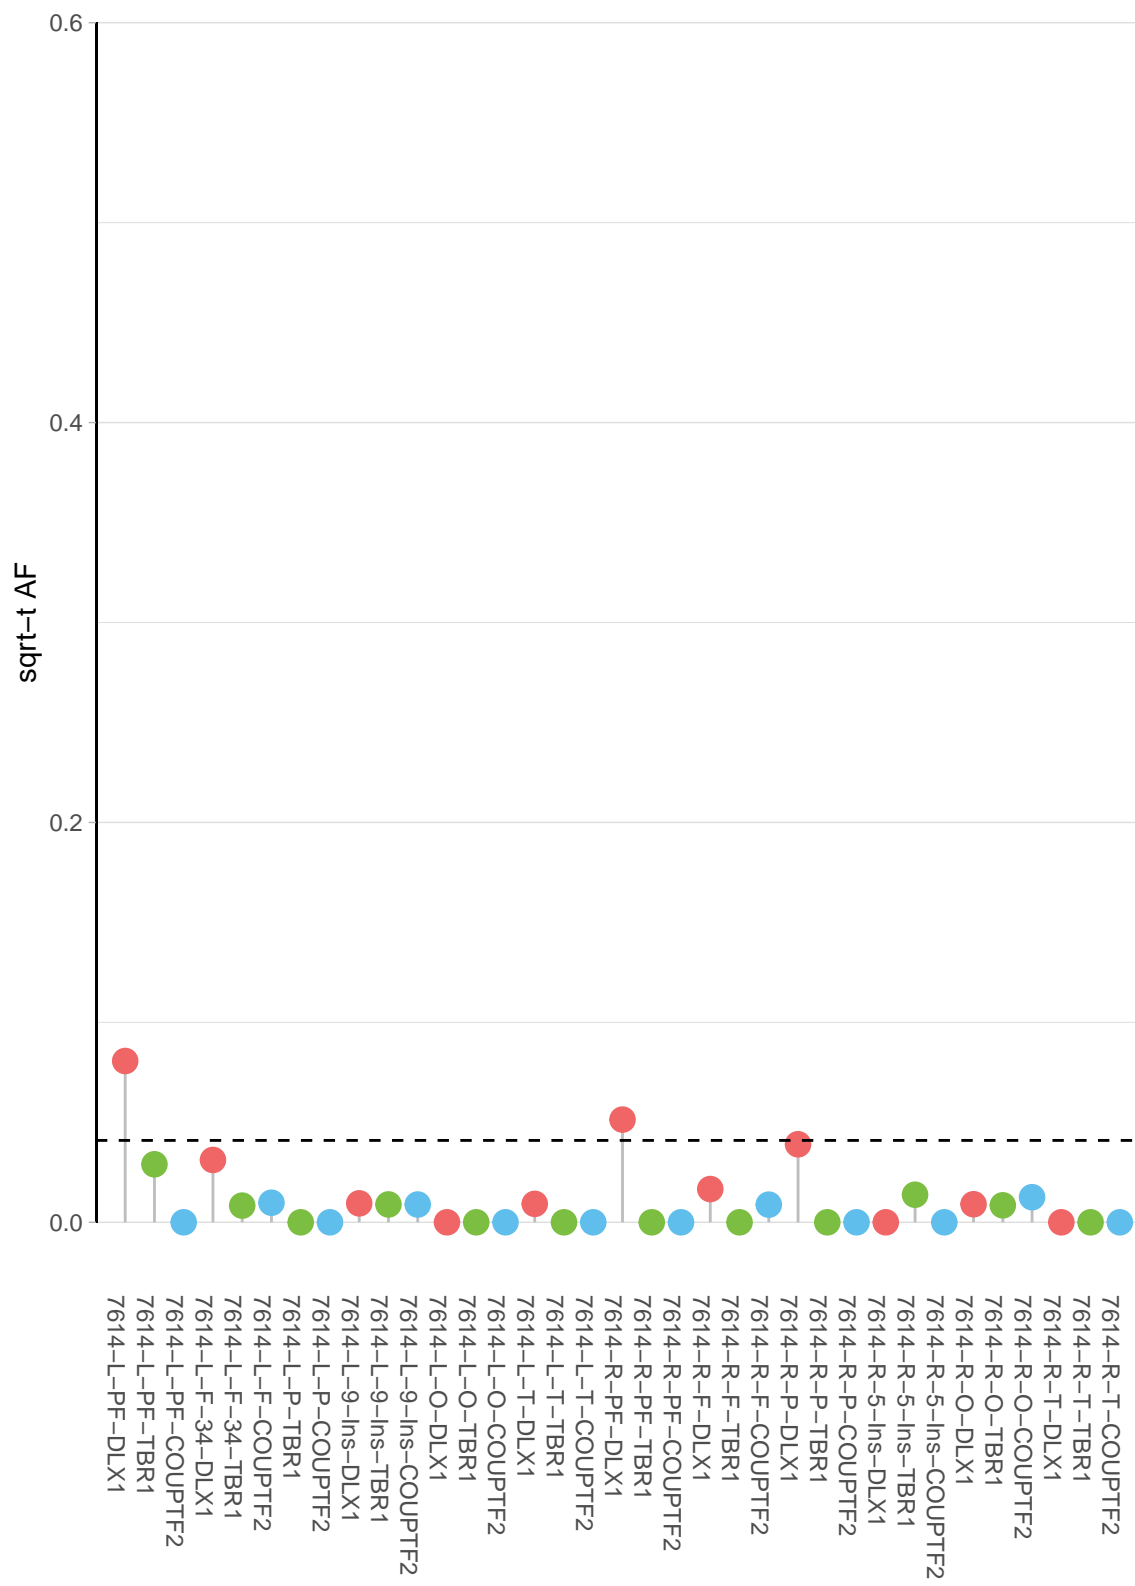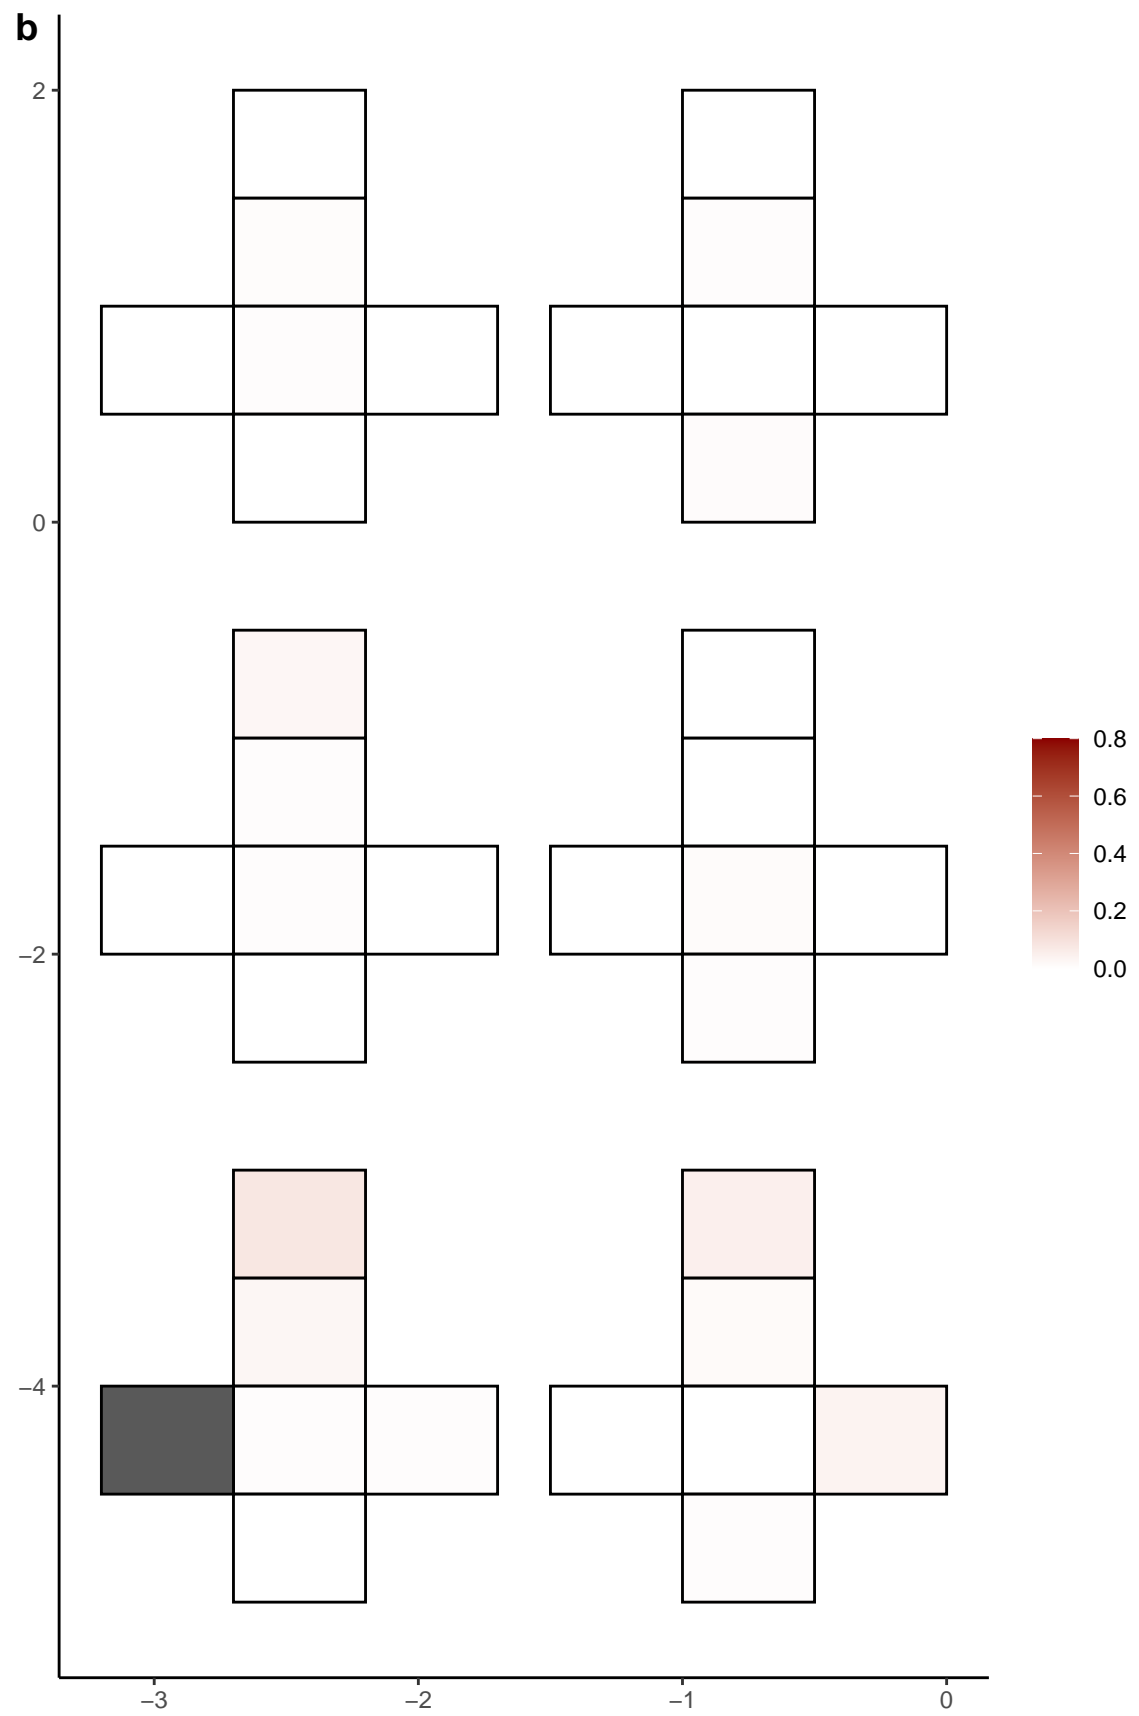

**a** ID01 13-29160961-C-A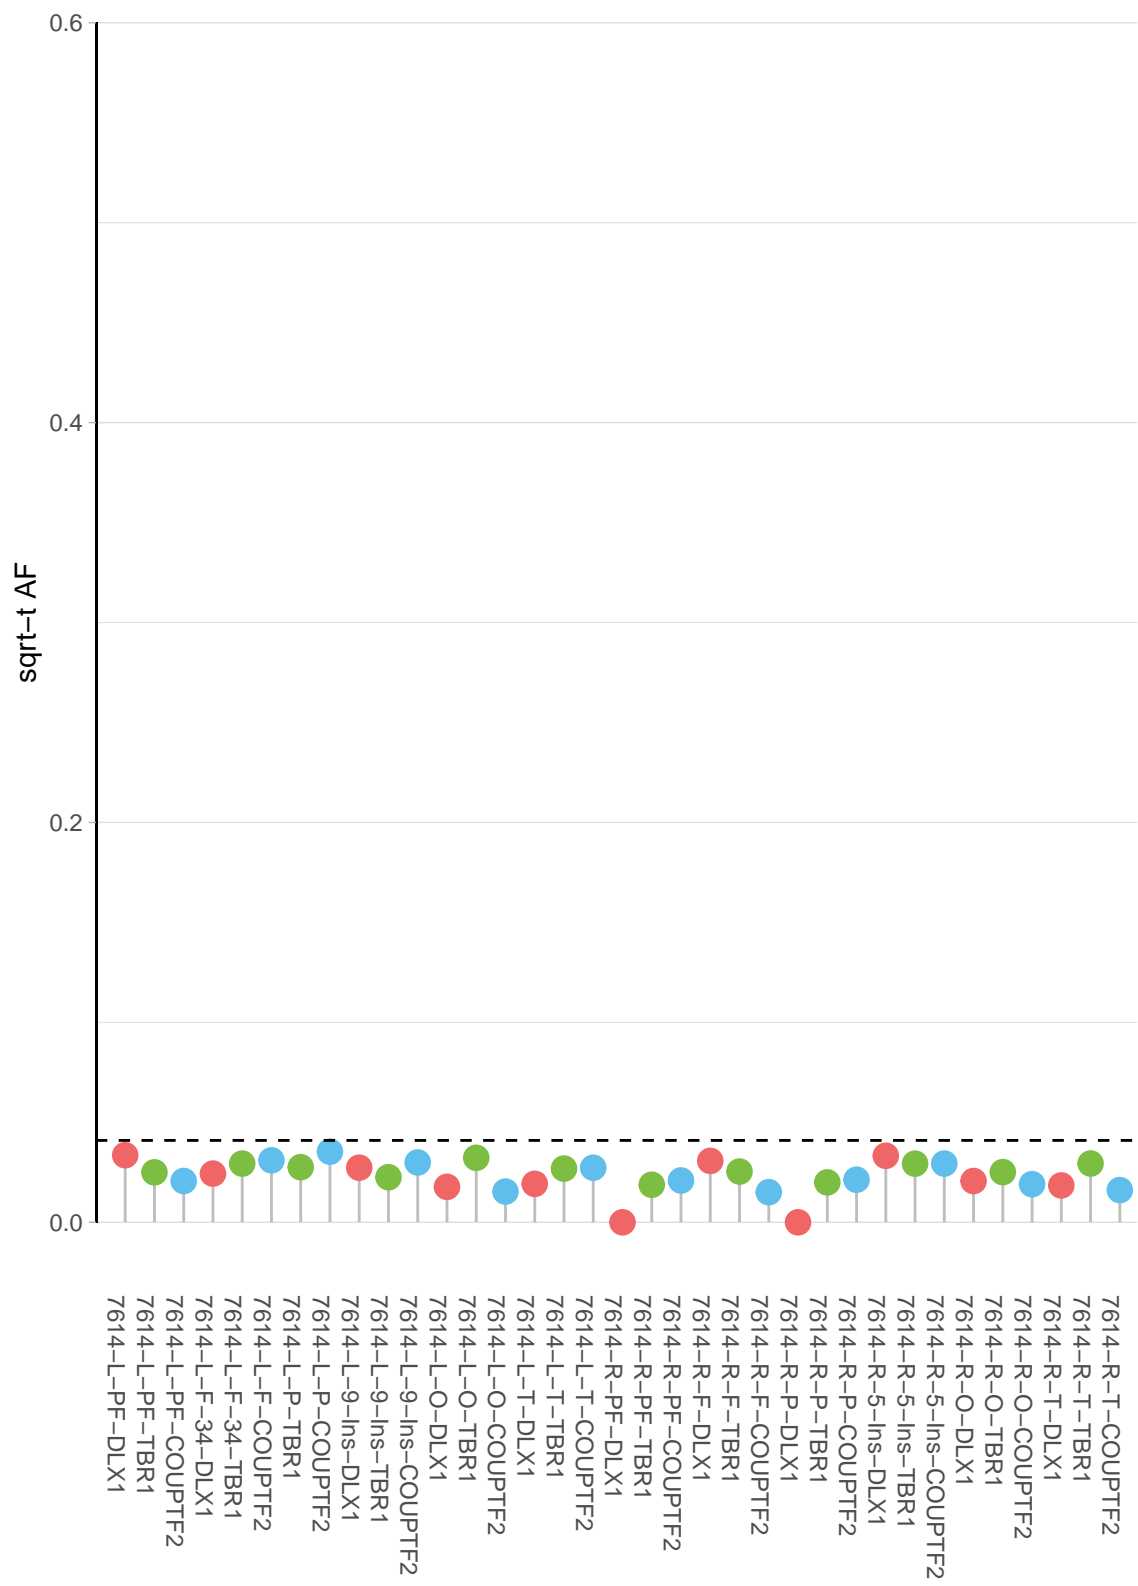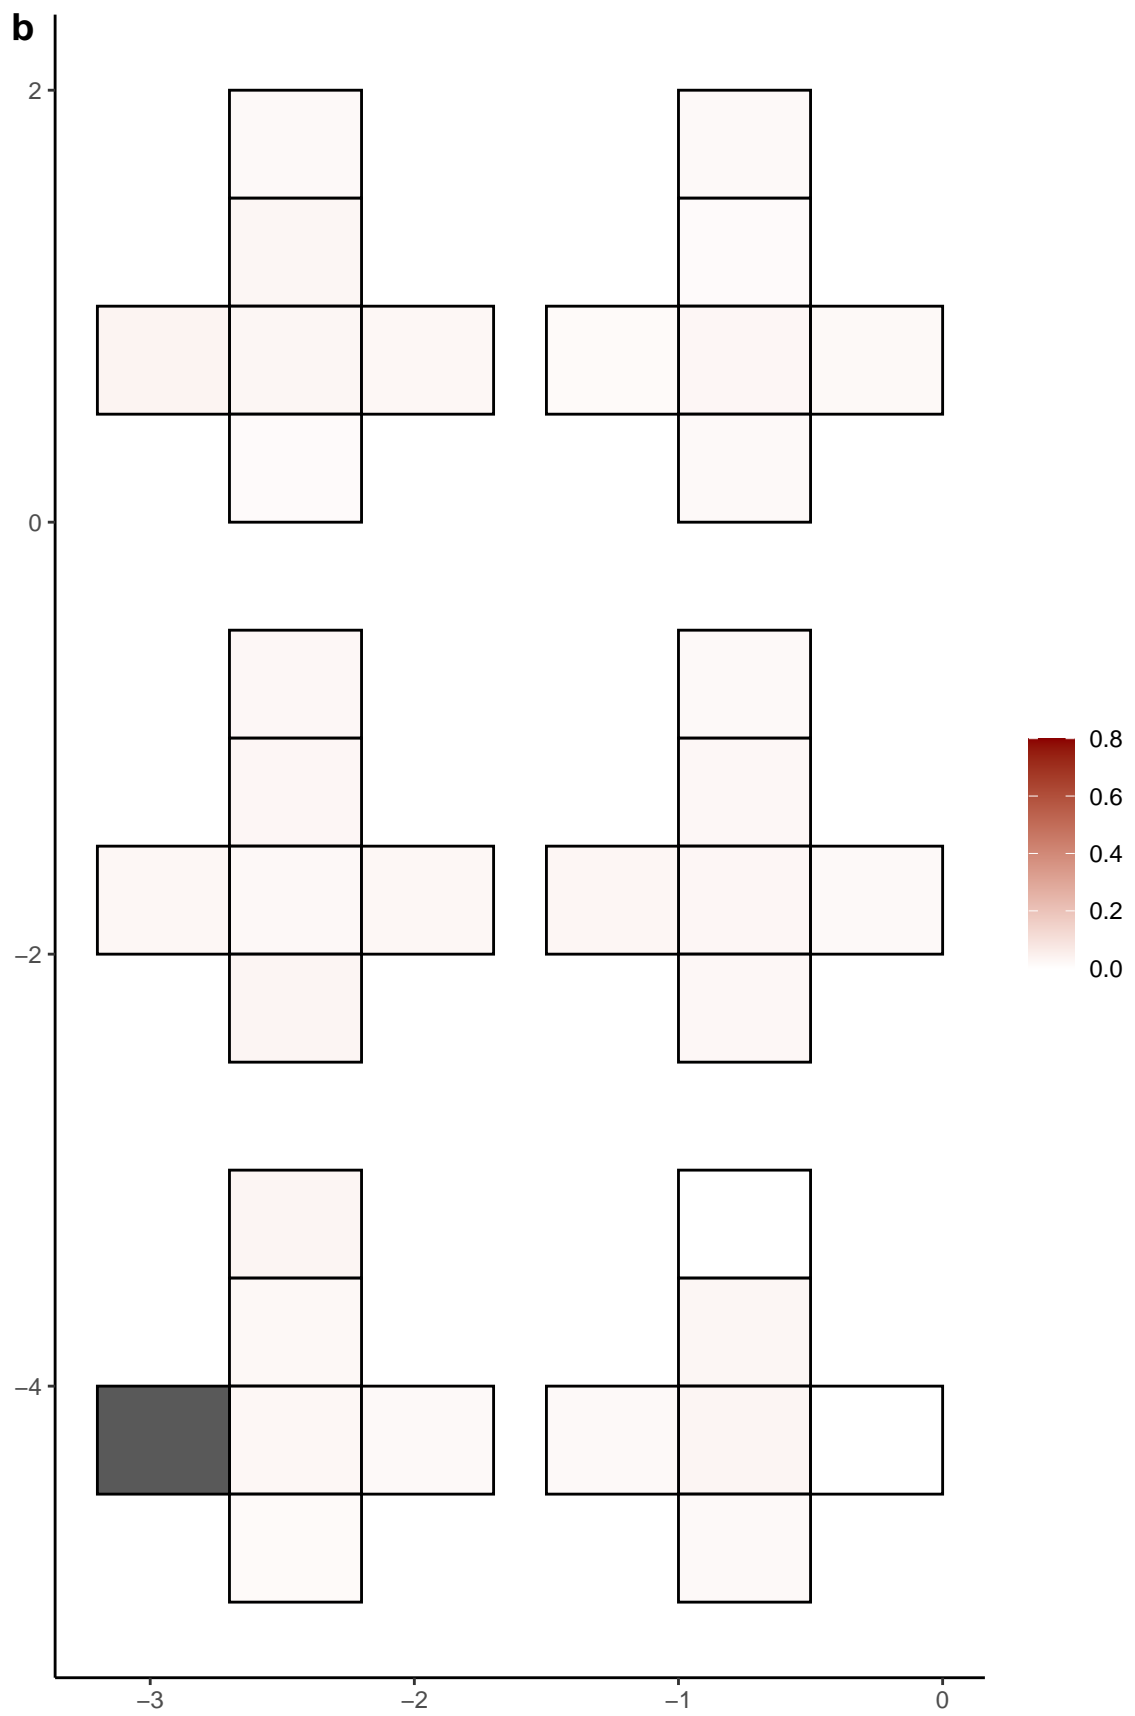

**a** ID01 13-40455905-T-C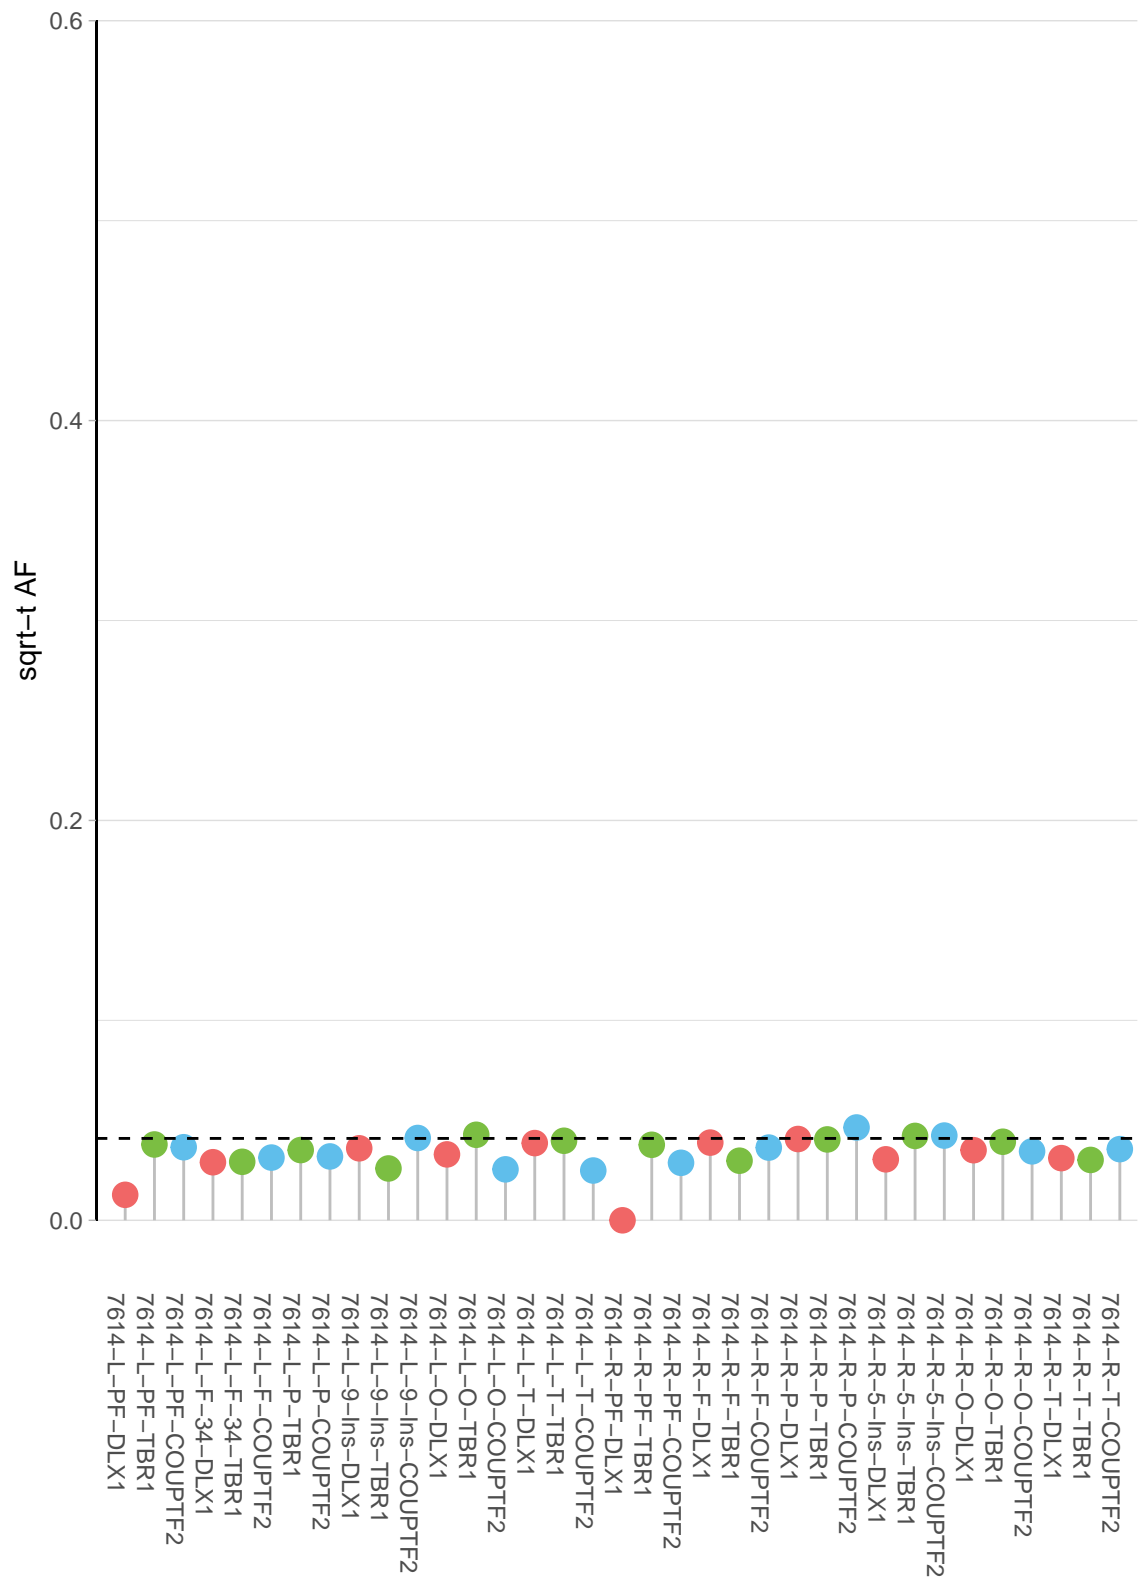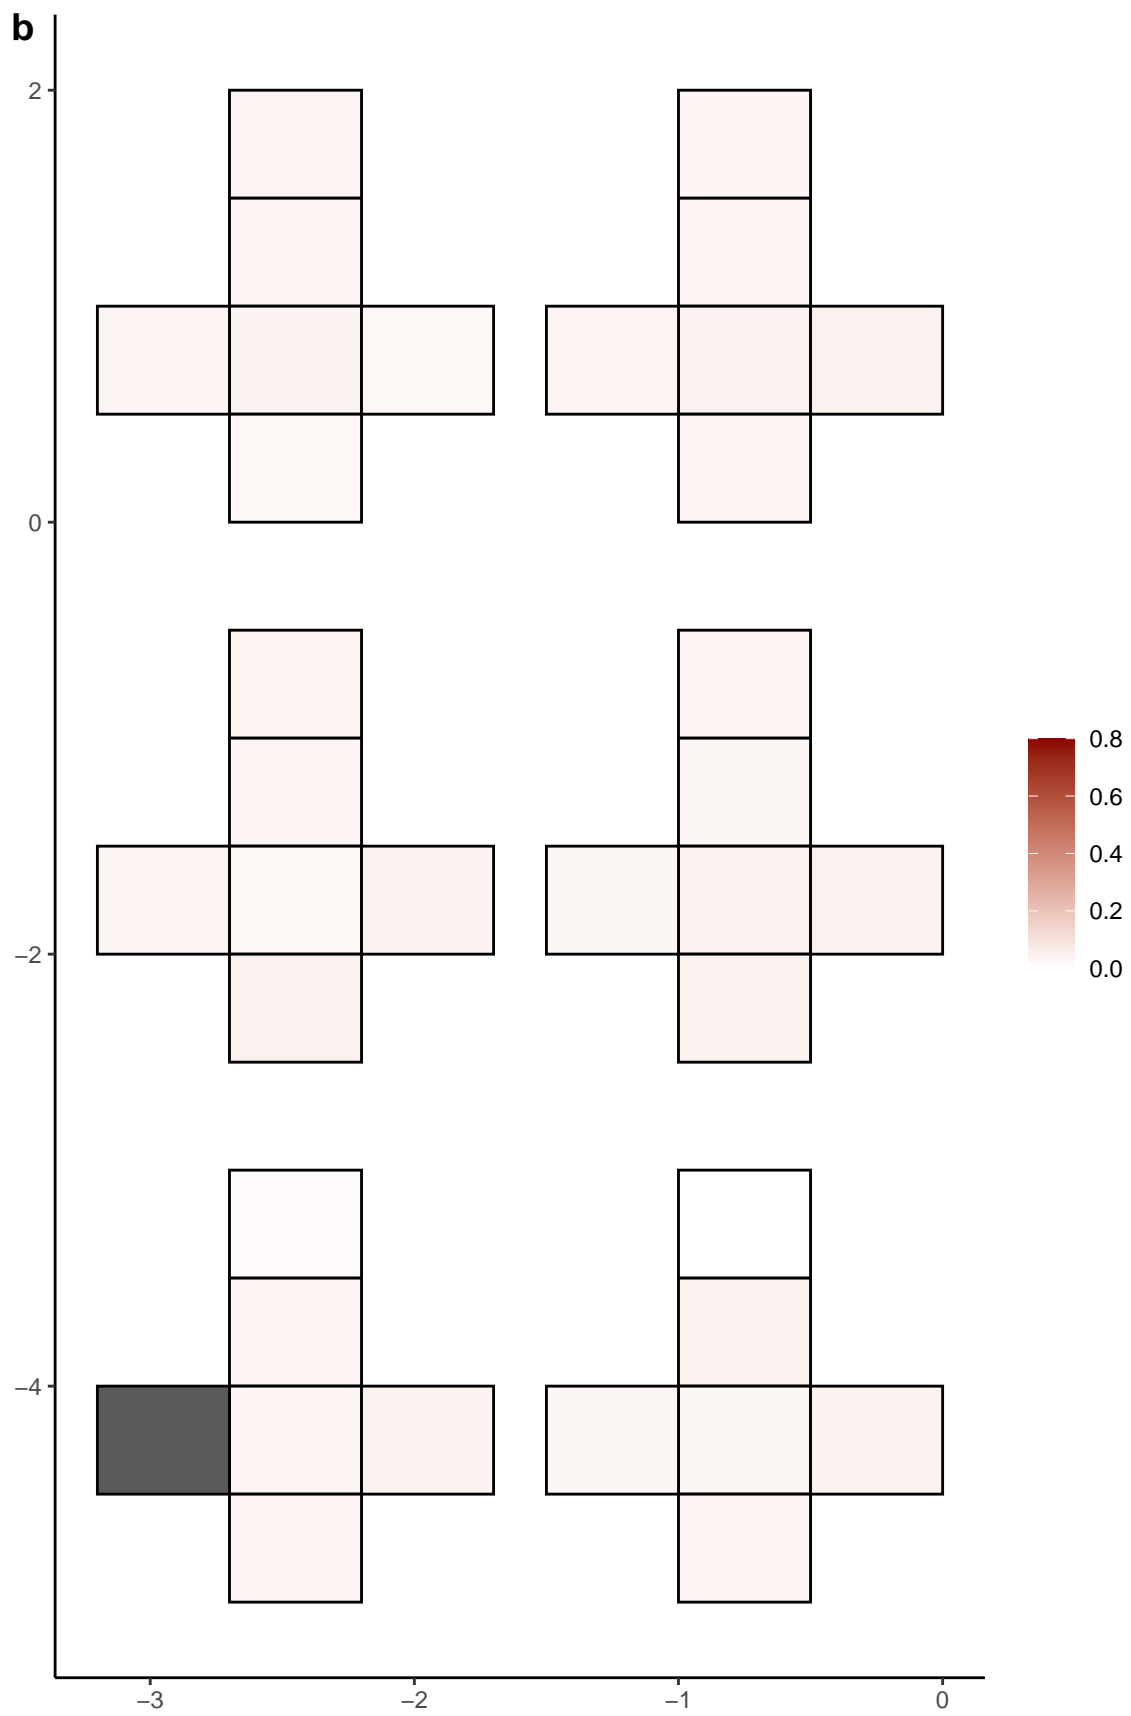

**a** ID01 13-47430361-C-T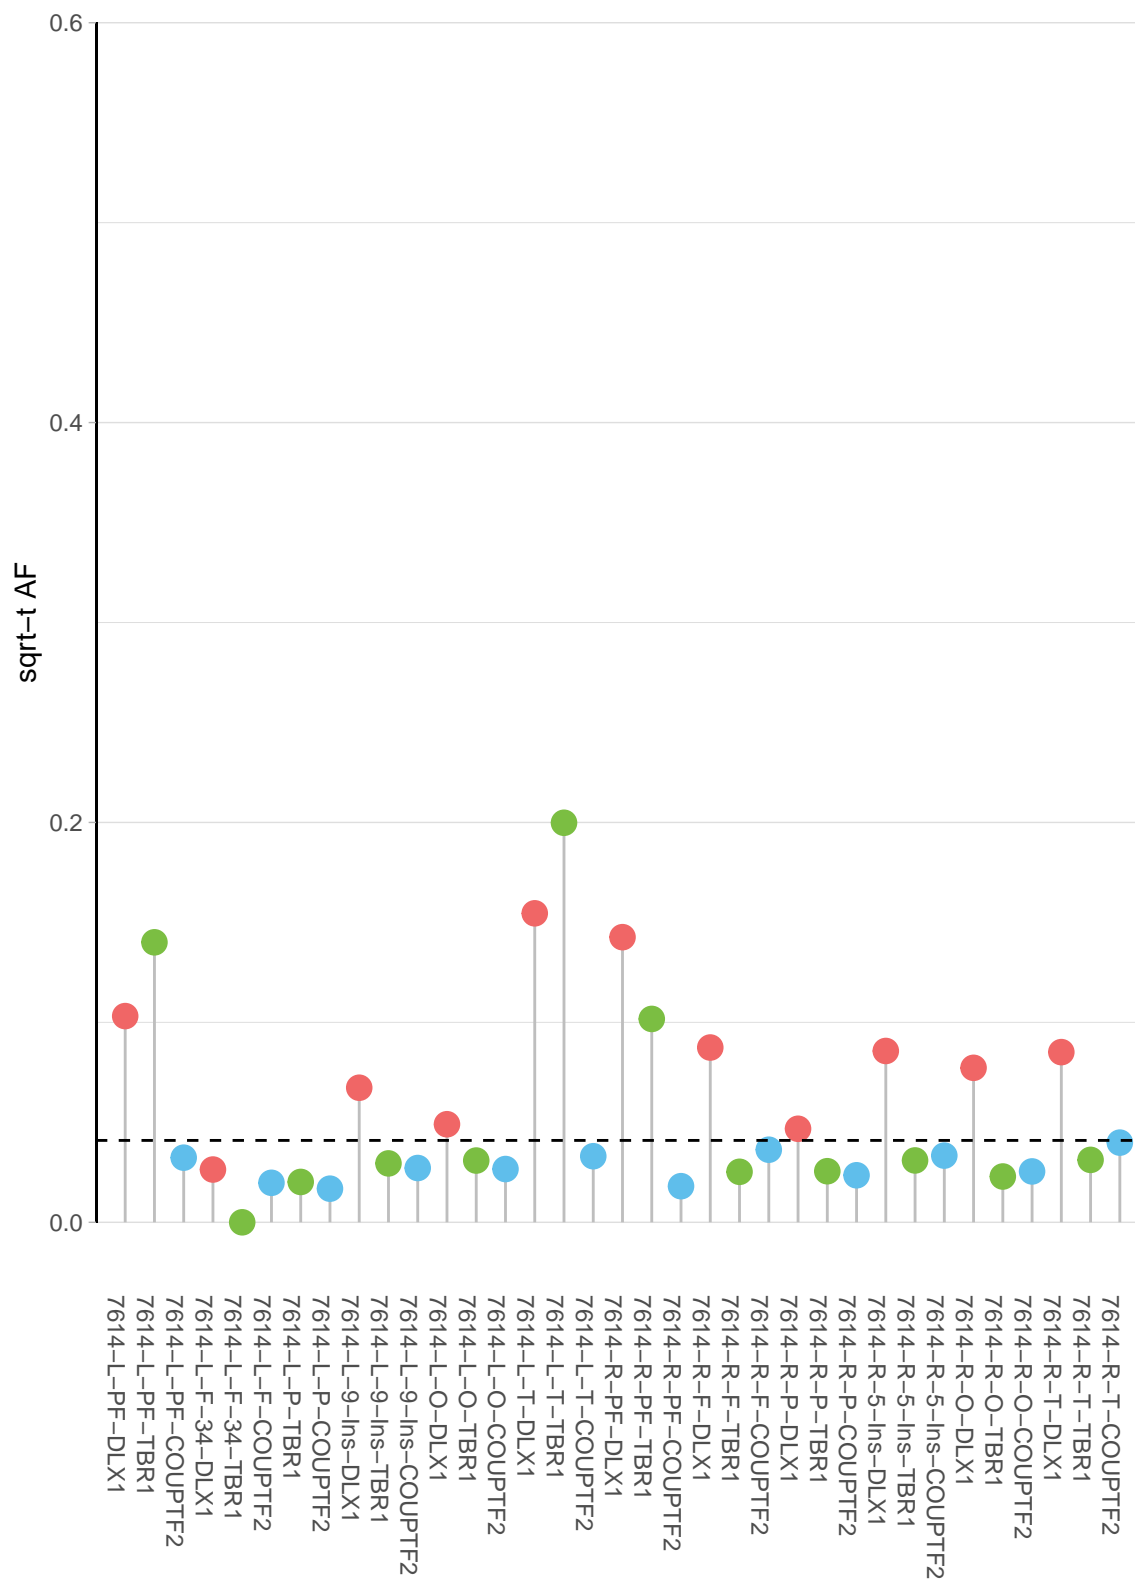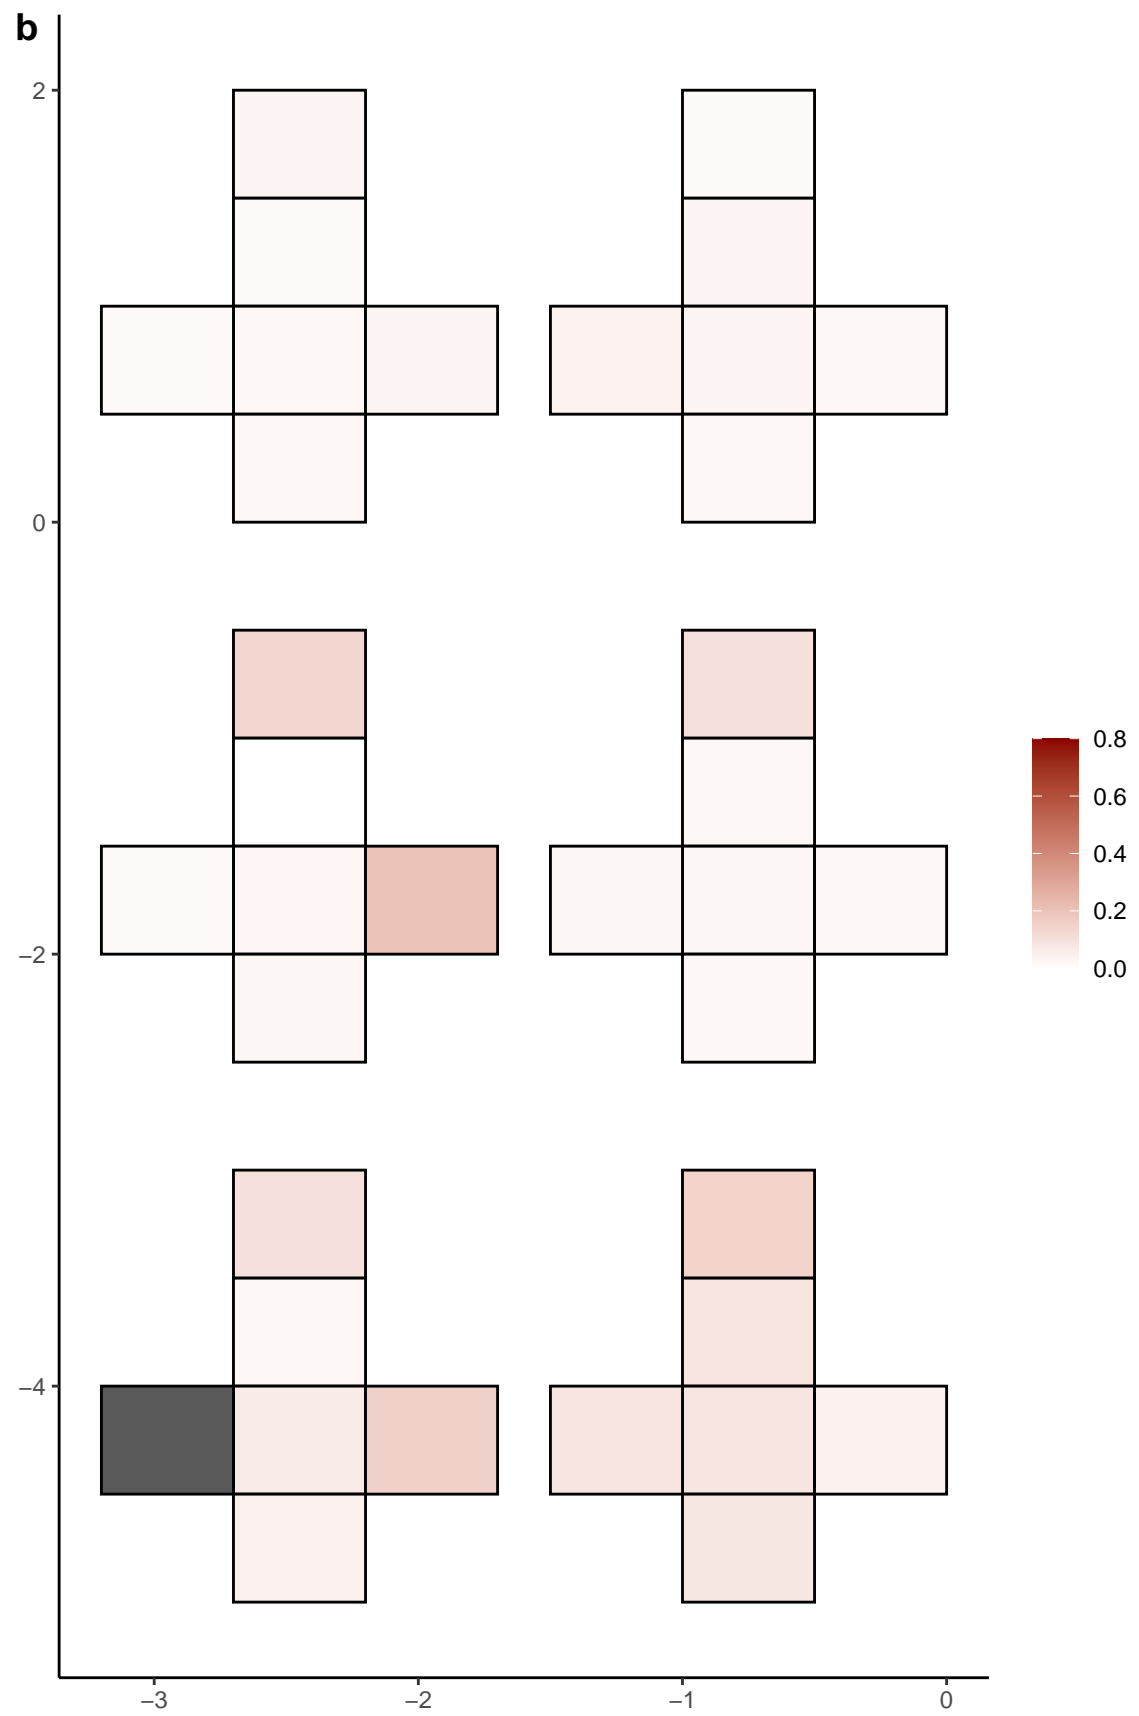

**a** ID01 13-66931942-G-A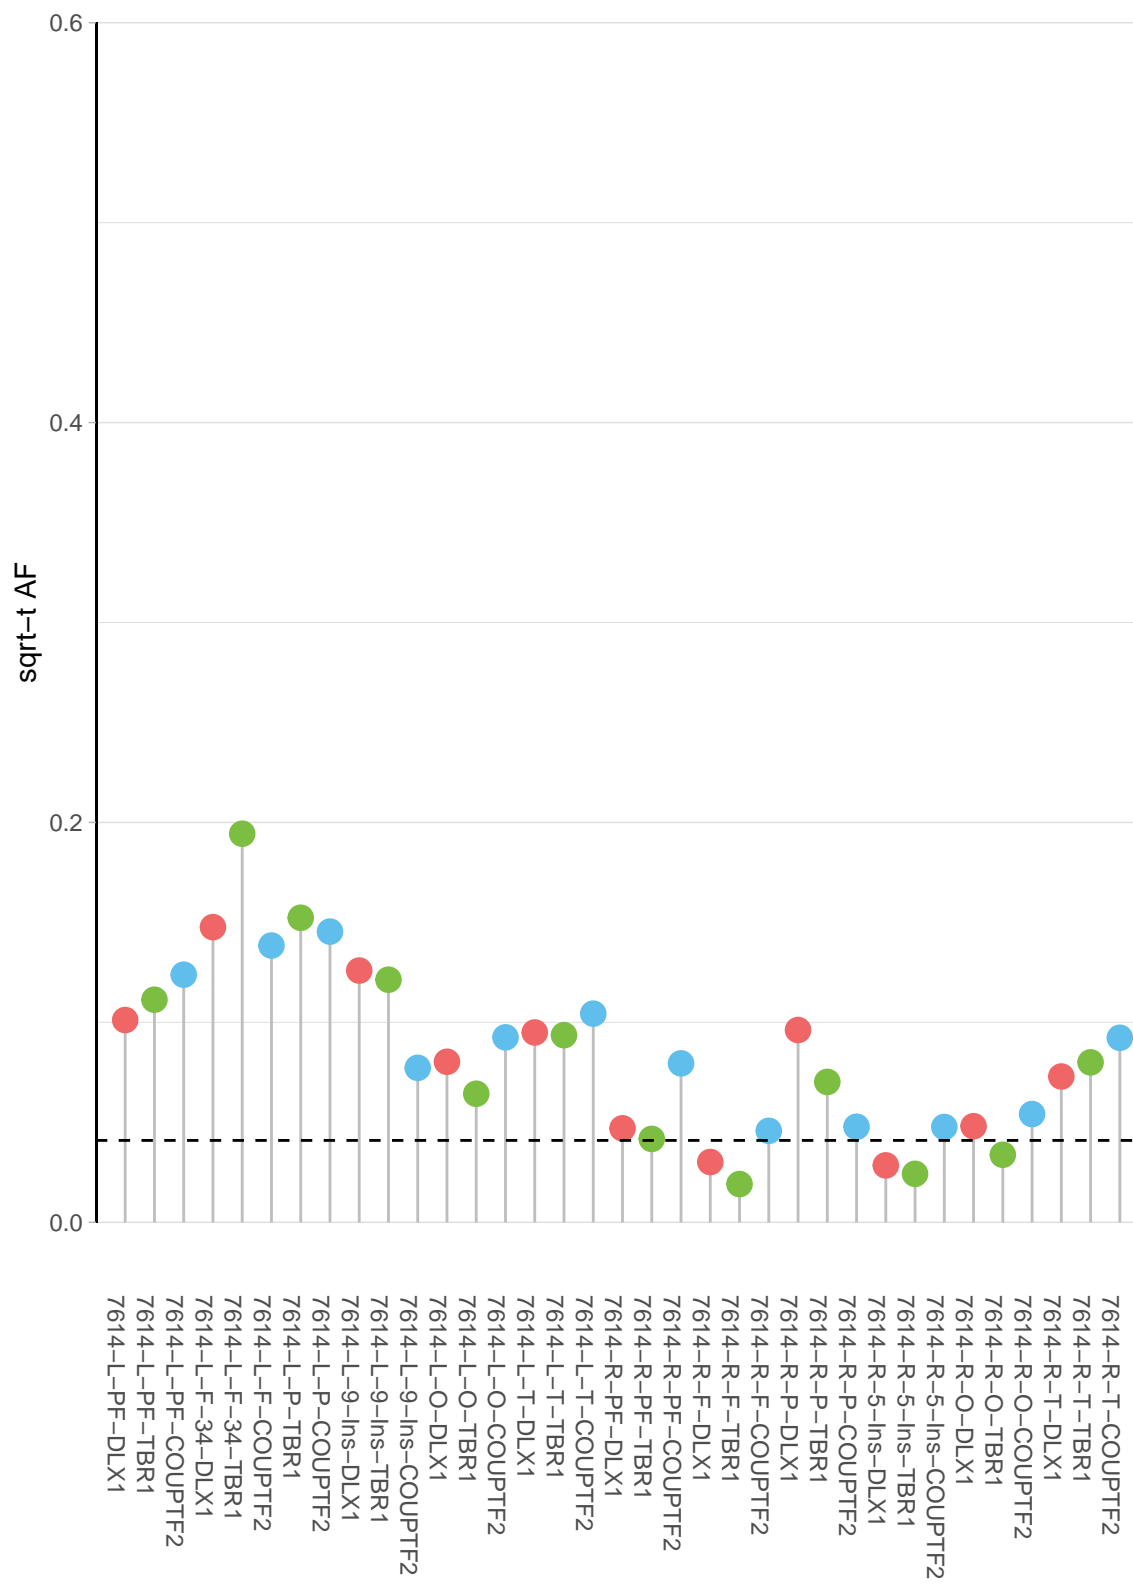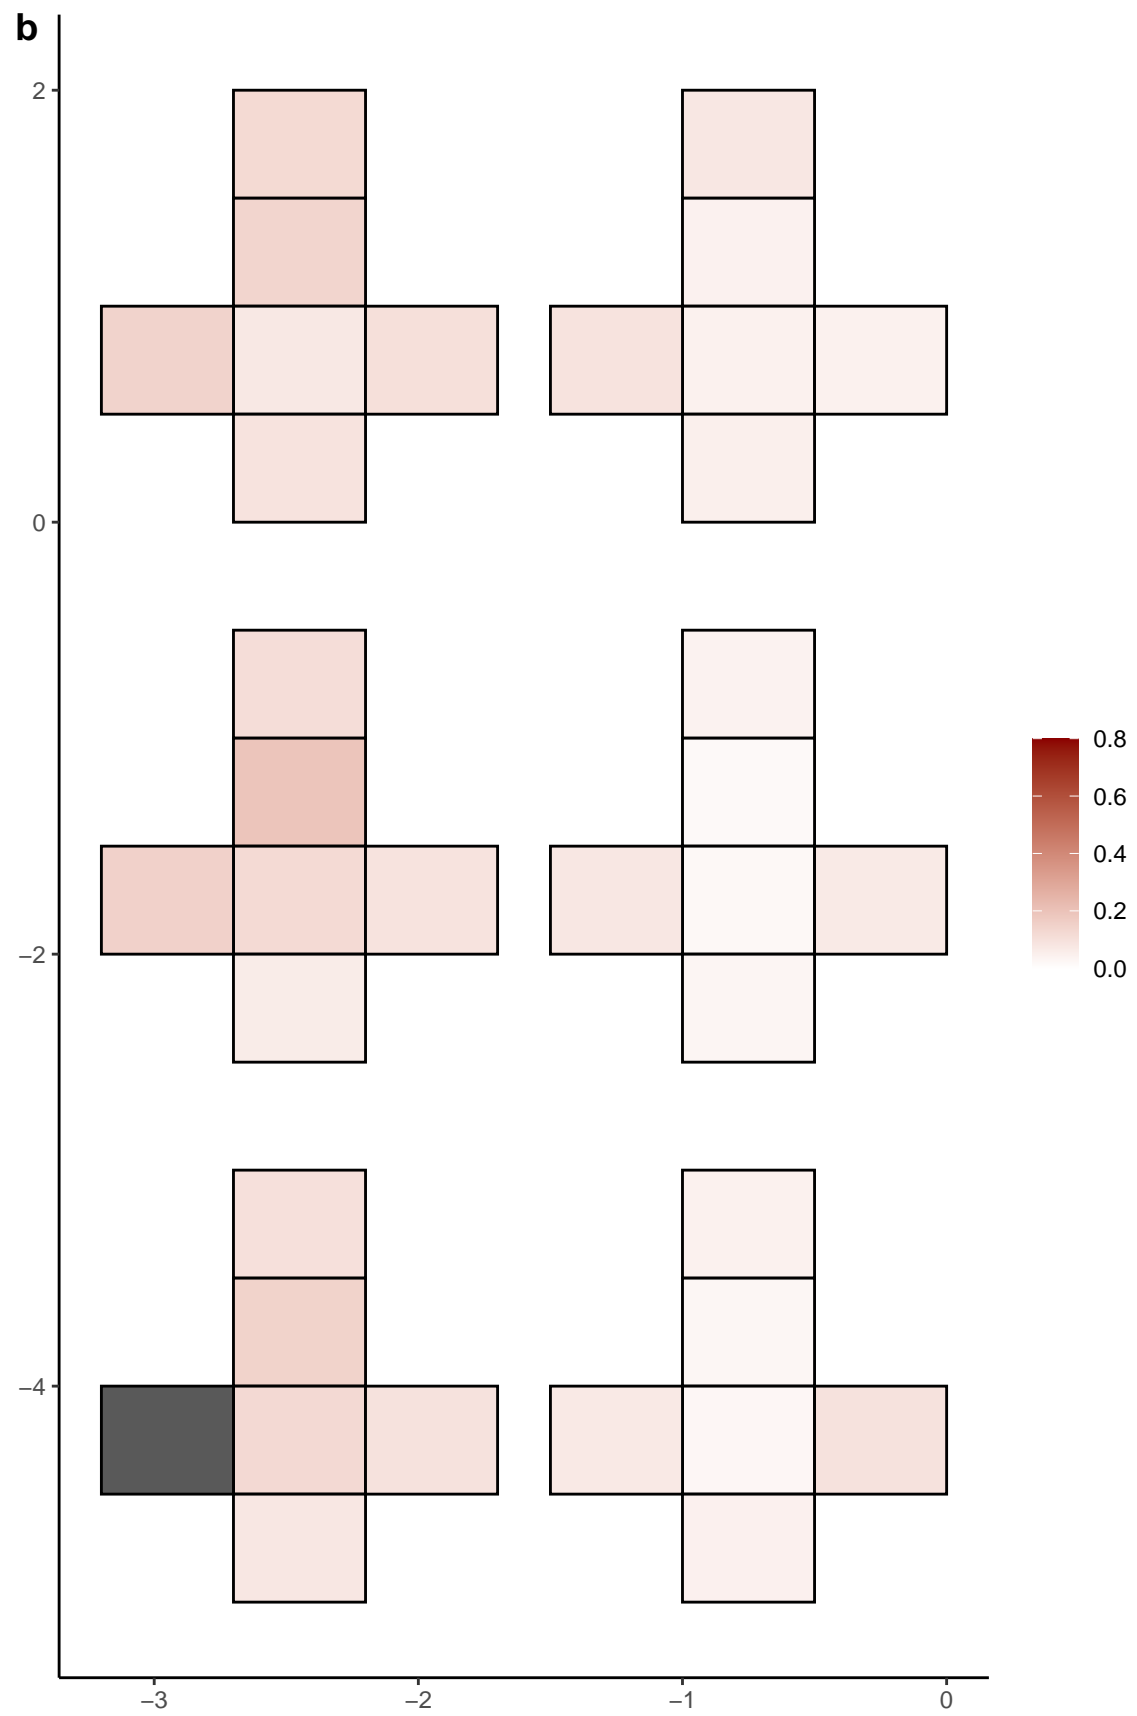

**a** ID01 13-79159985-T-C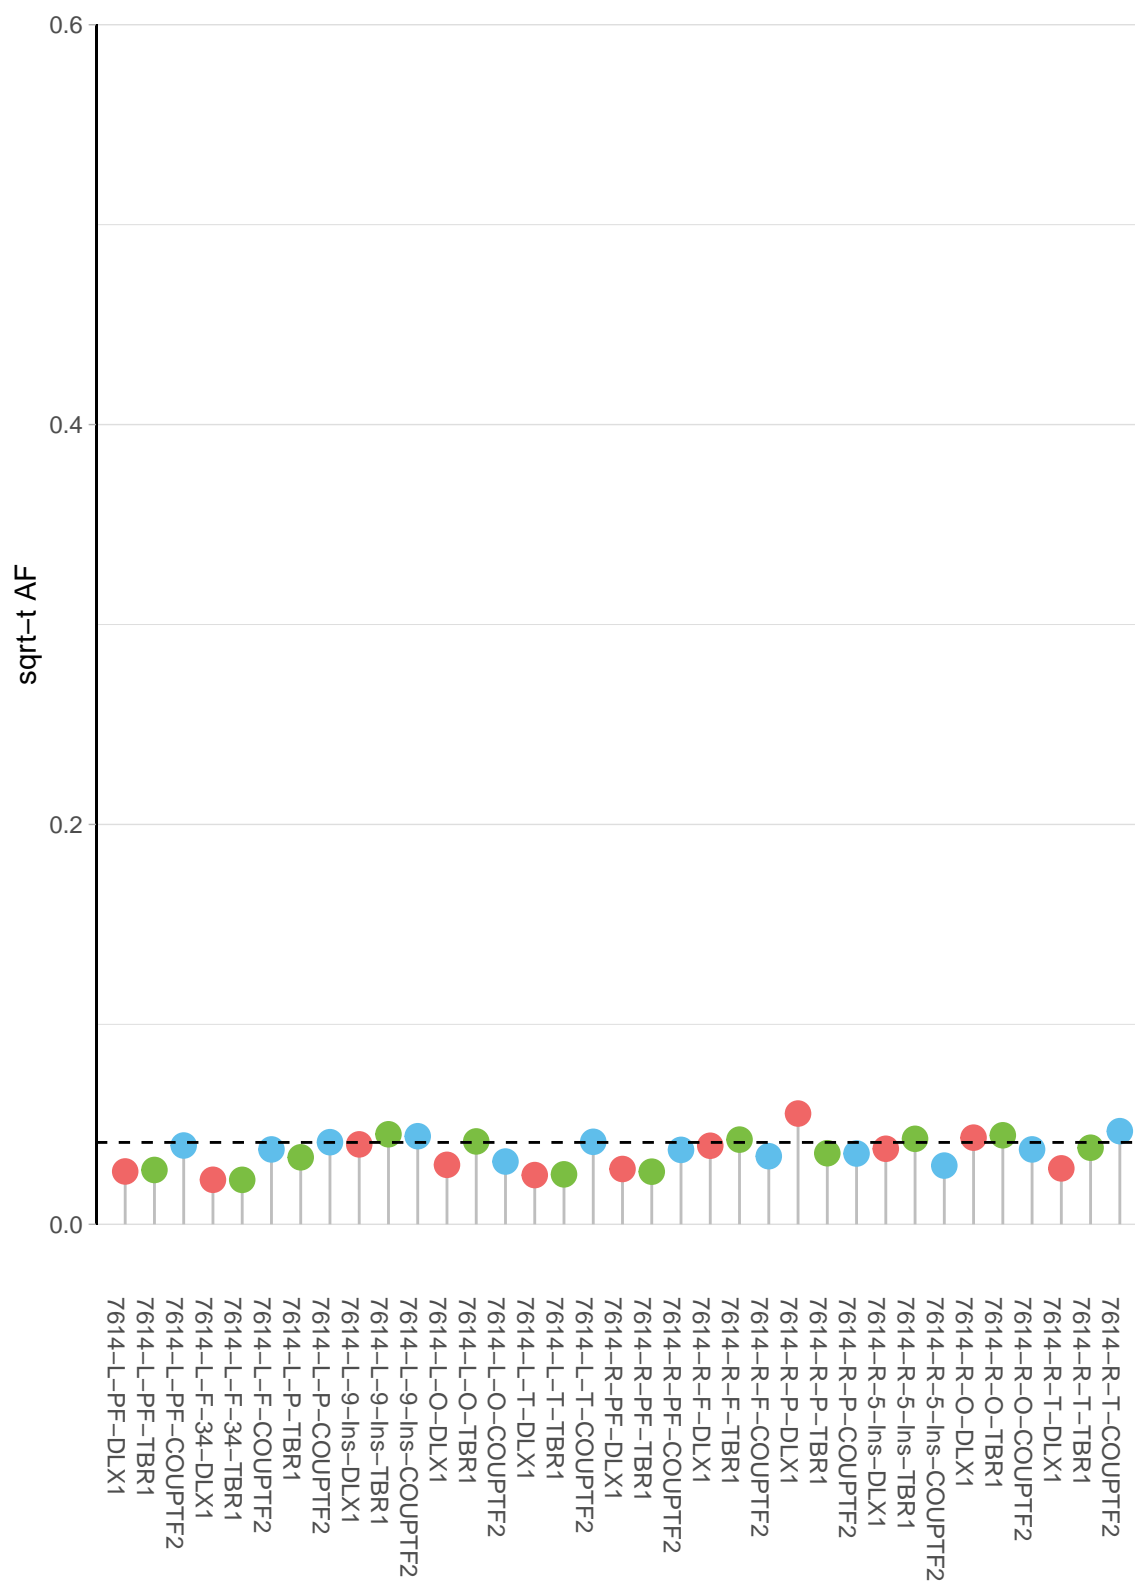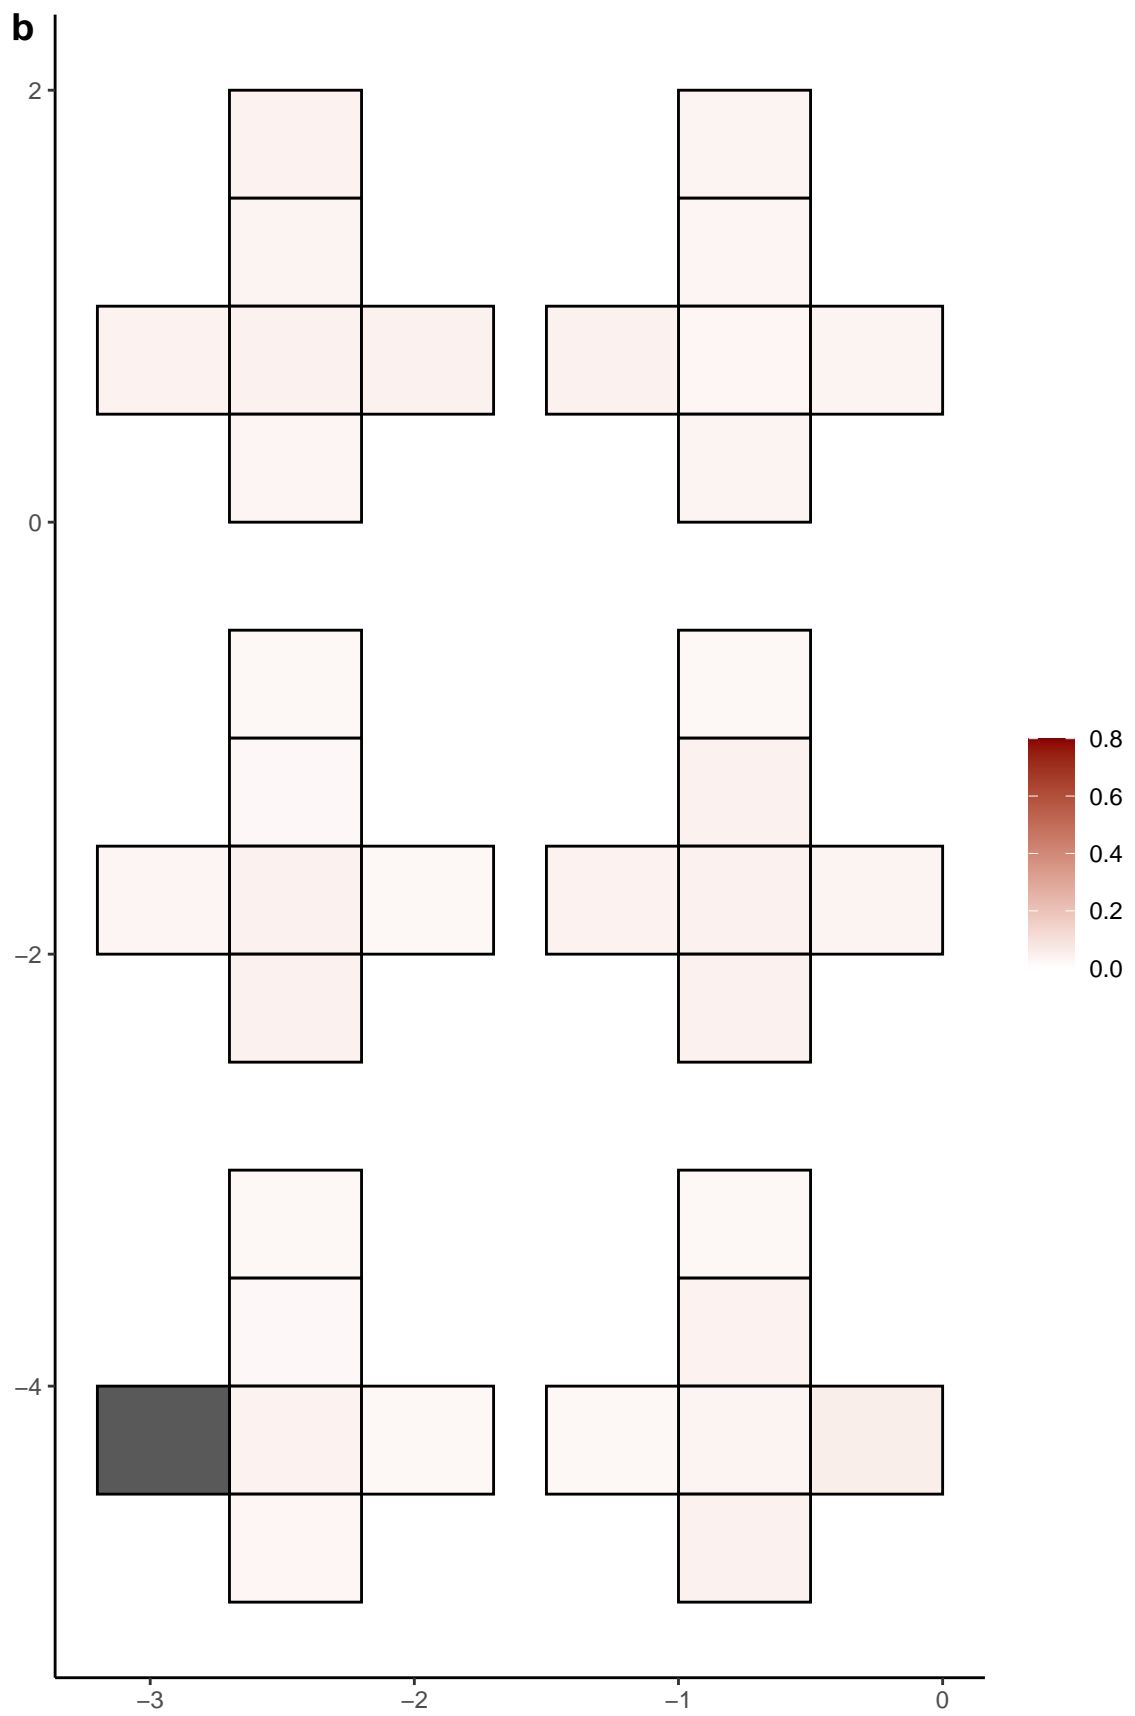



**a** ID01 13-84595018-A-G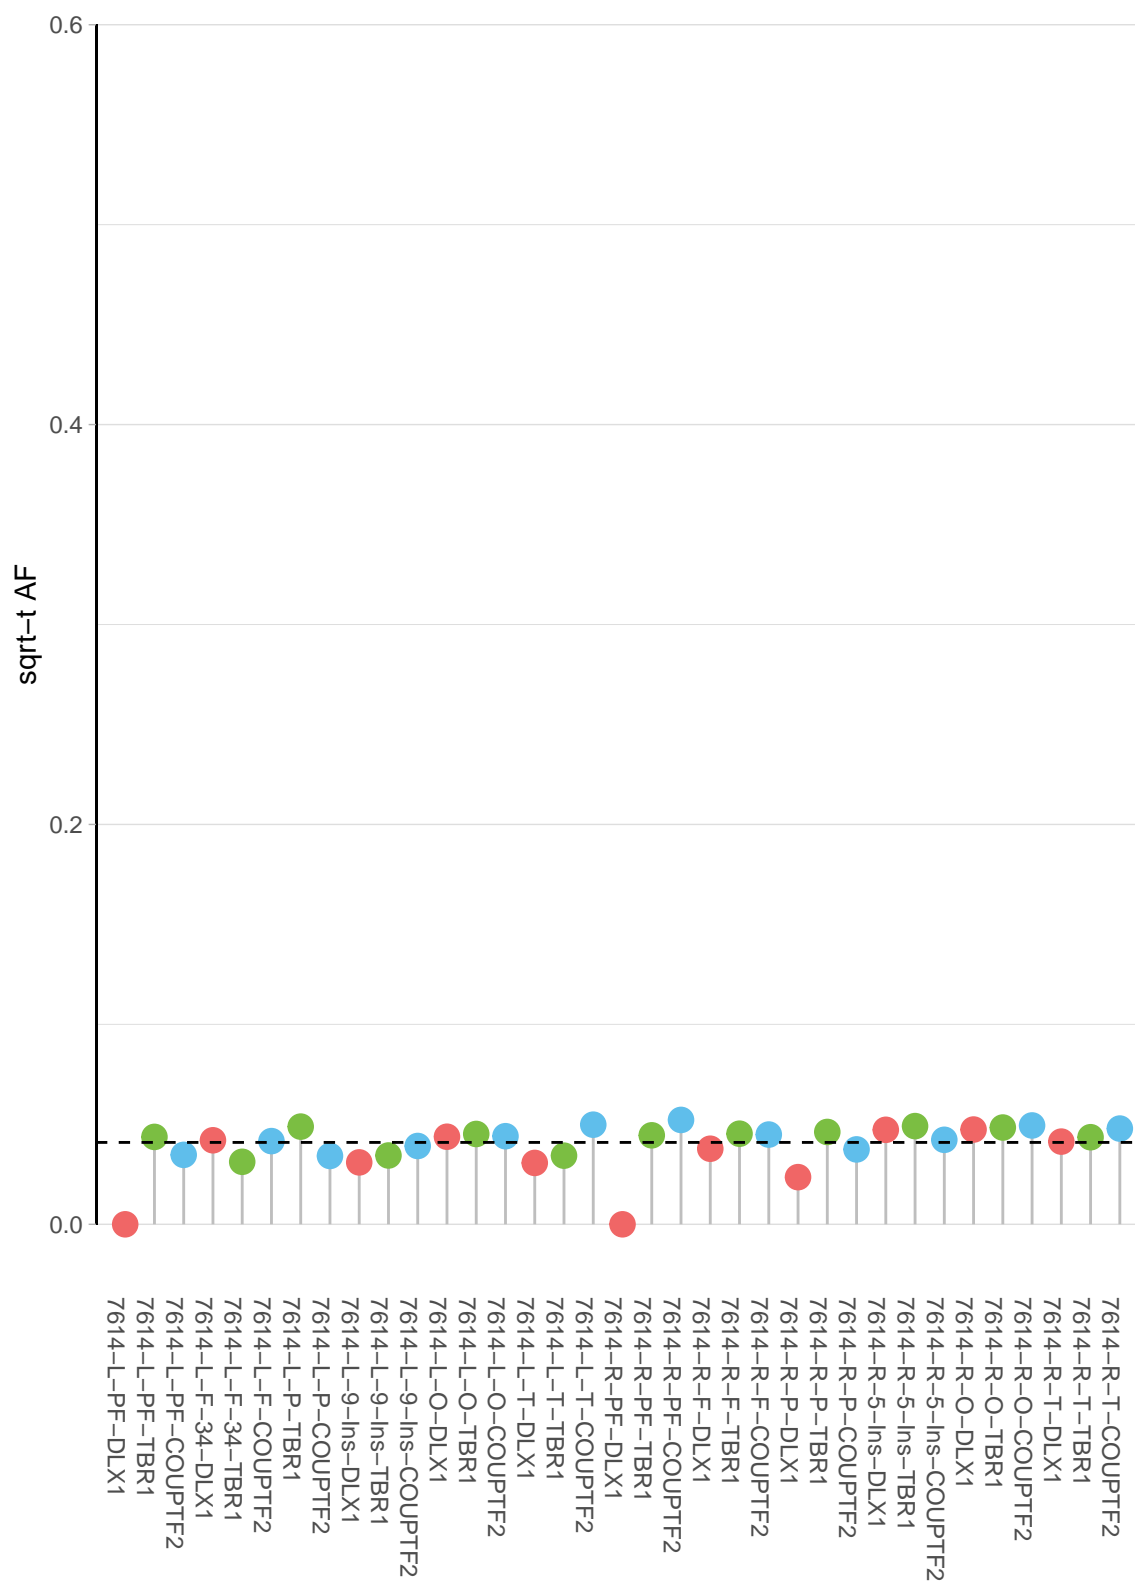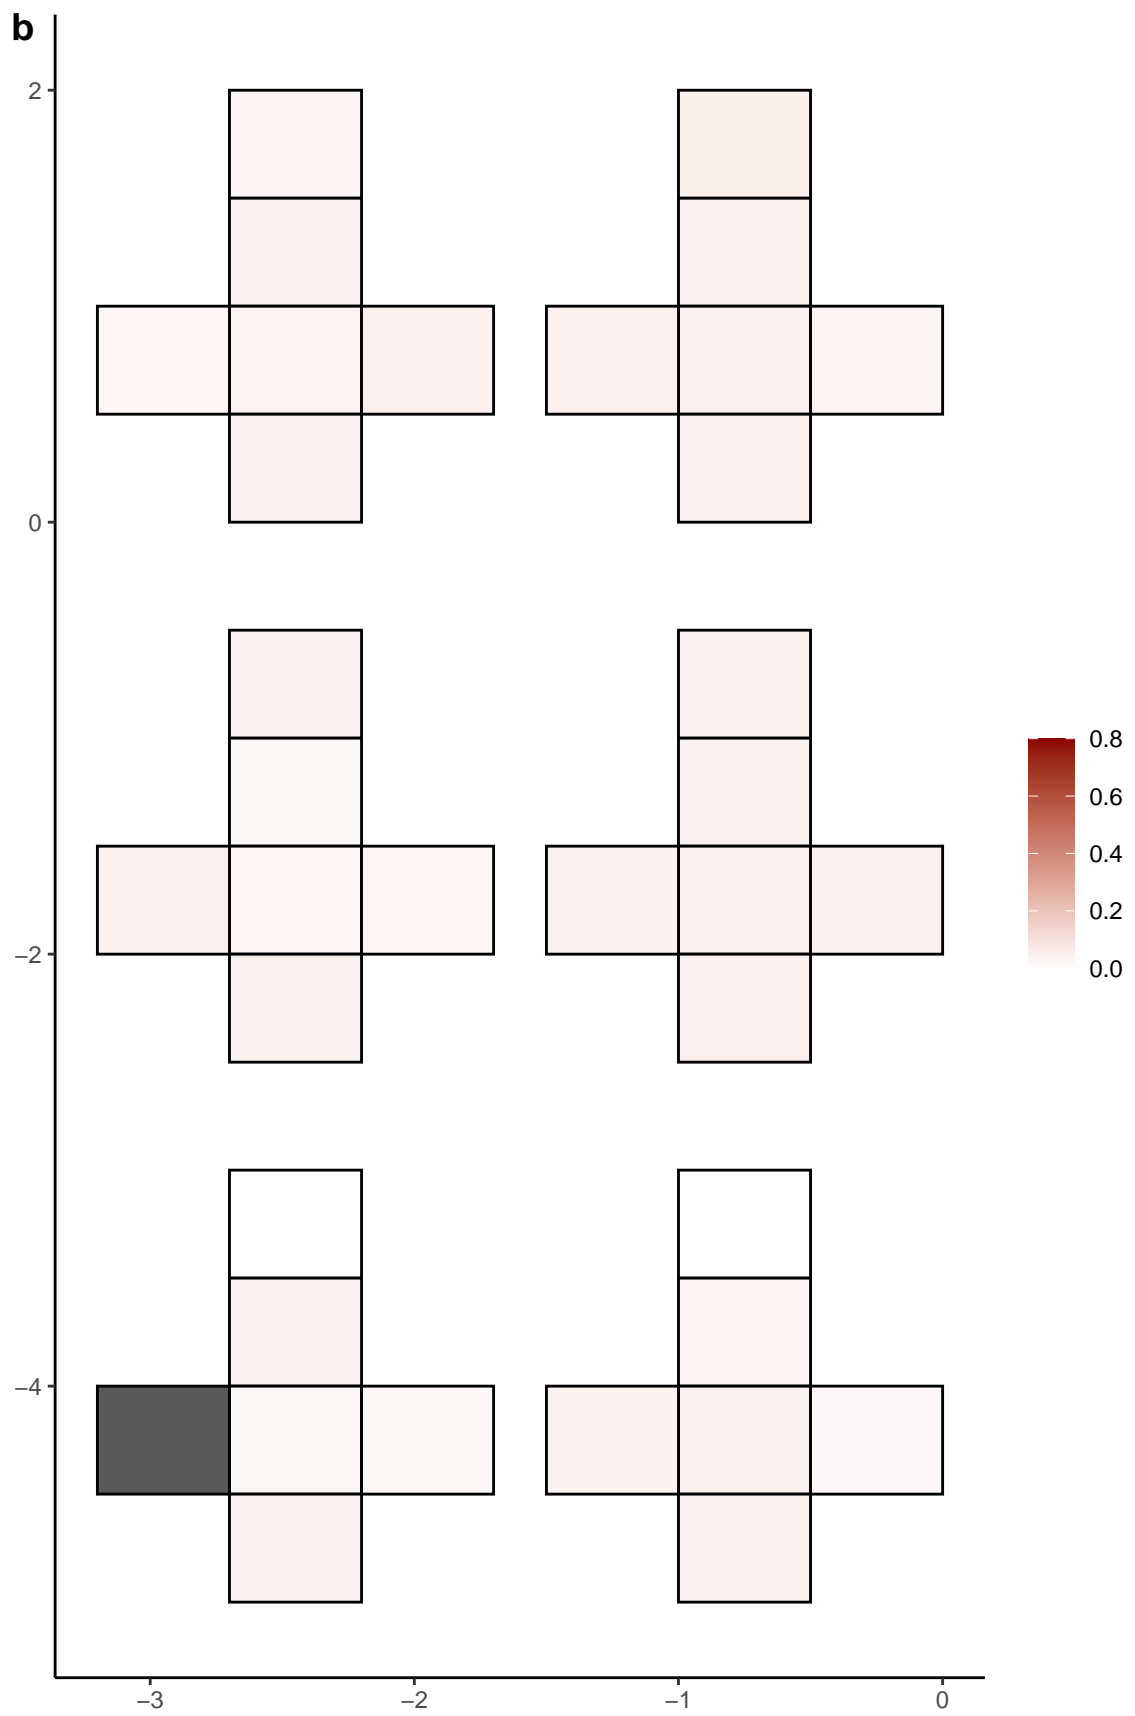

**a** ID01 13-92654445-A-T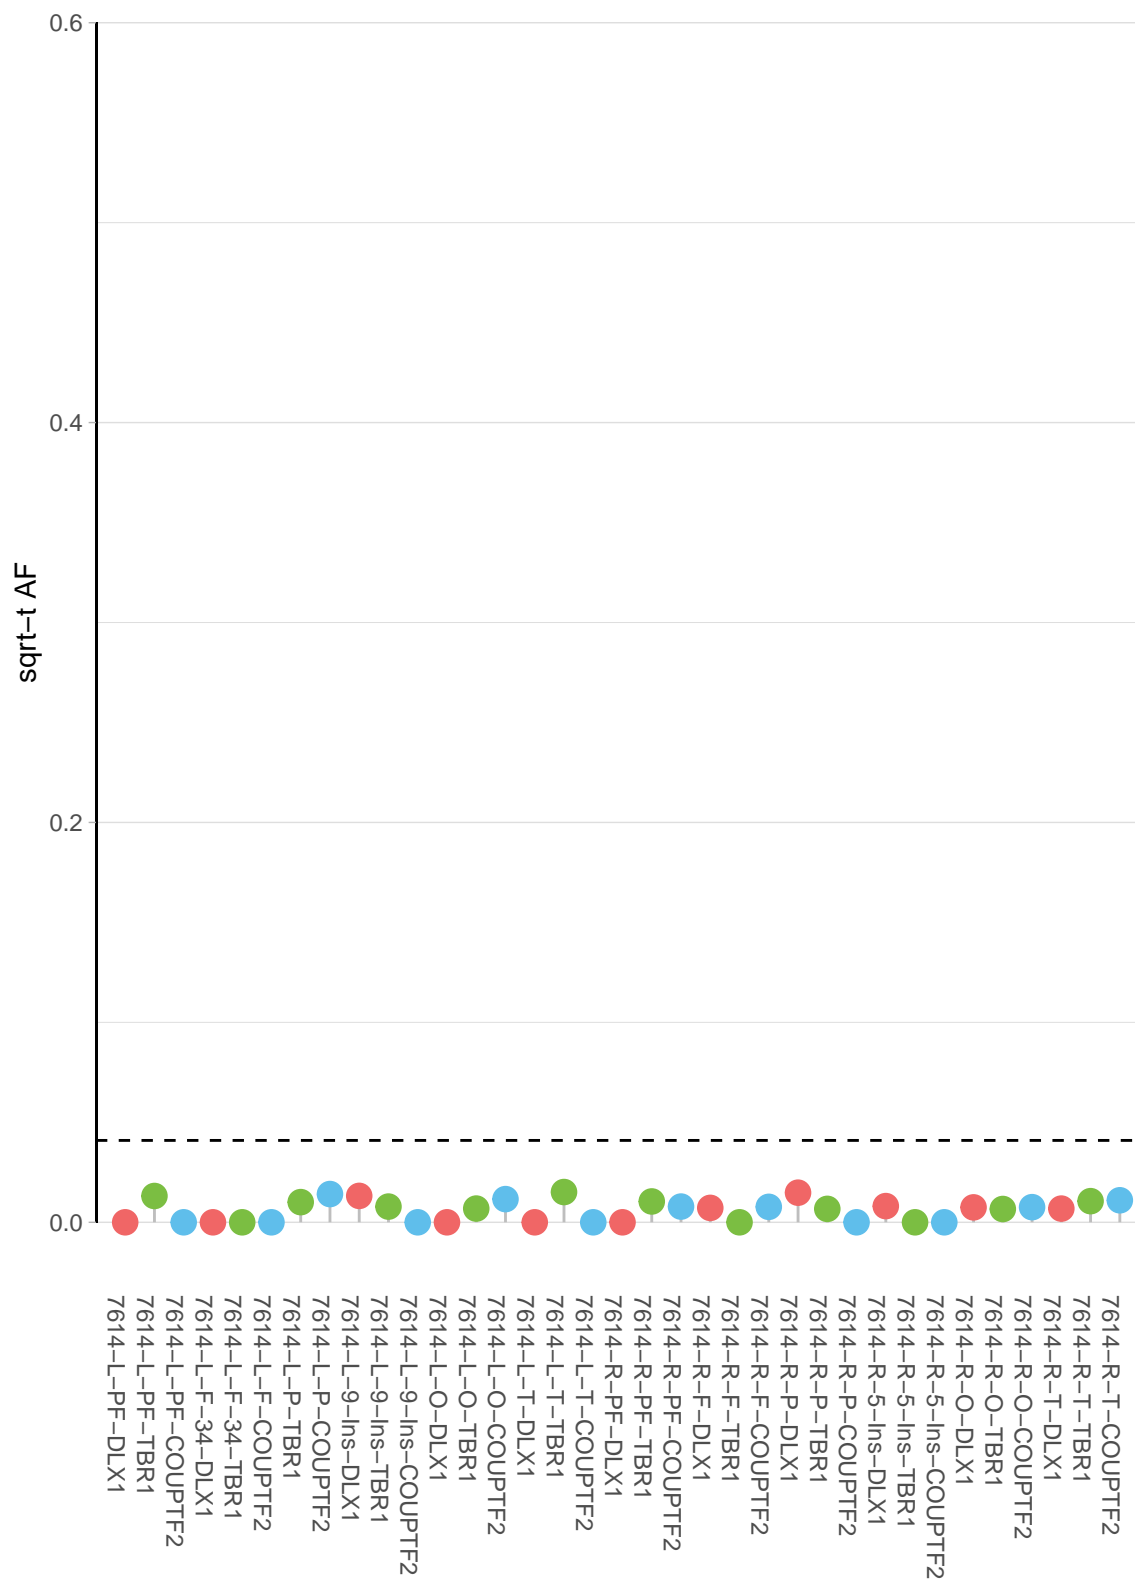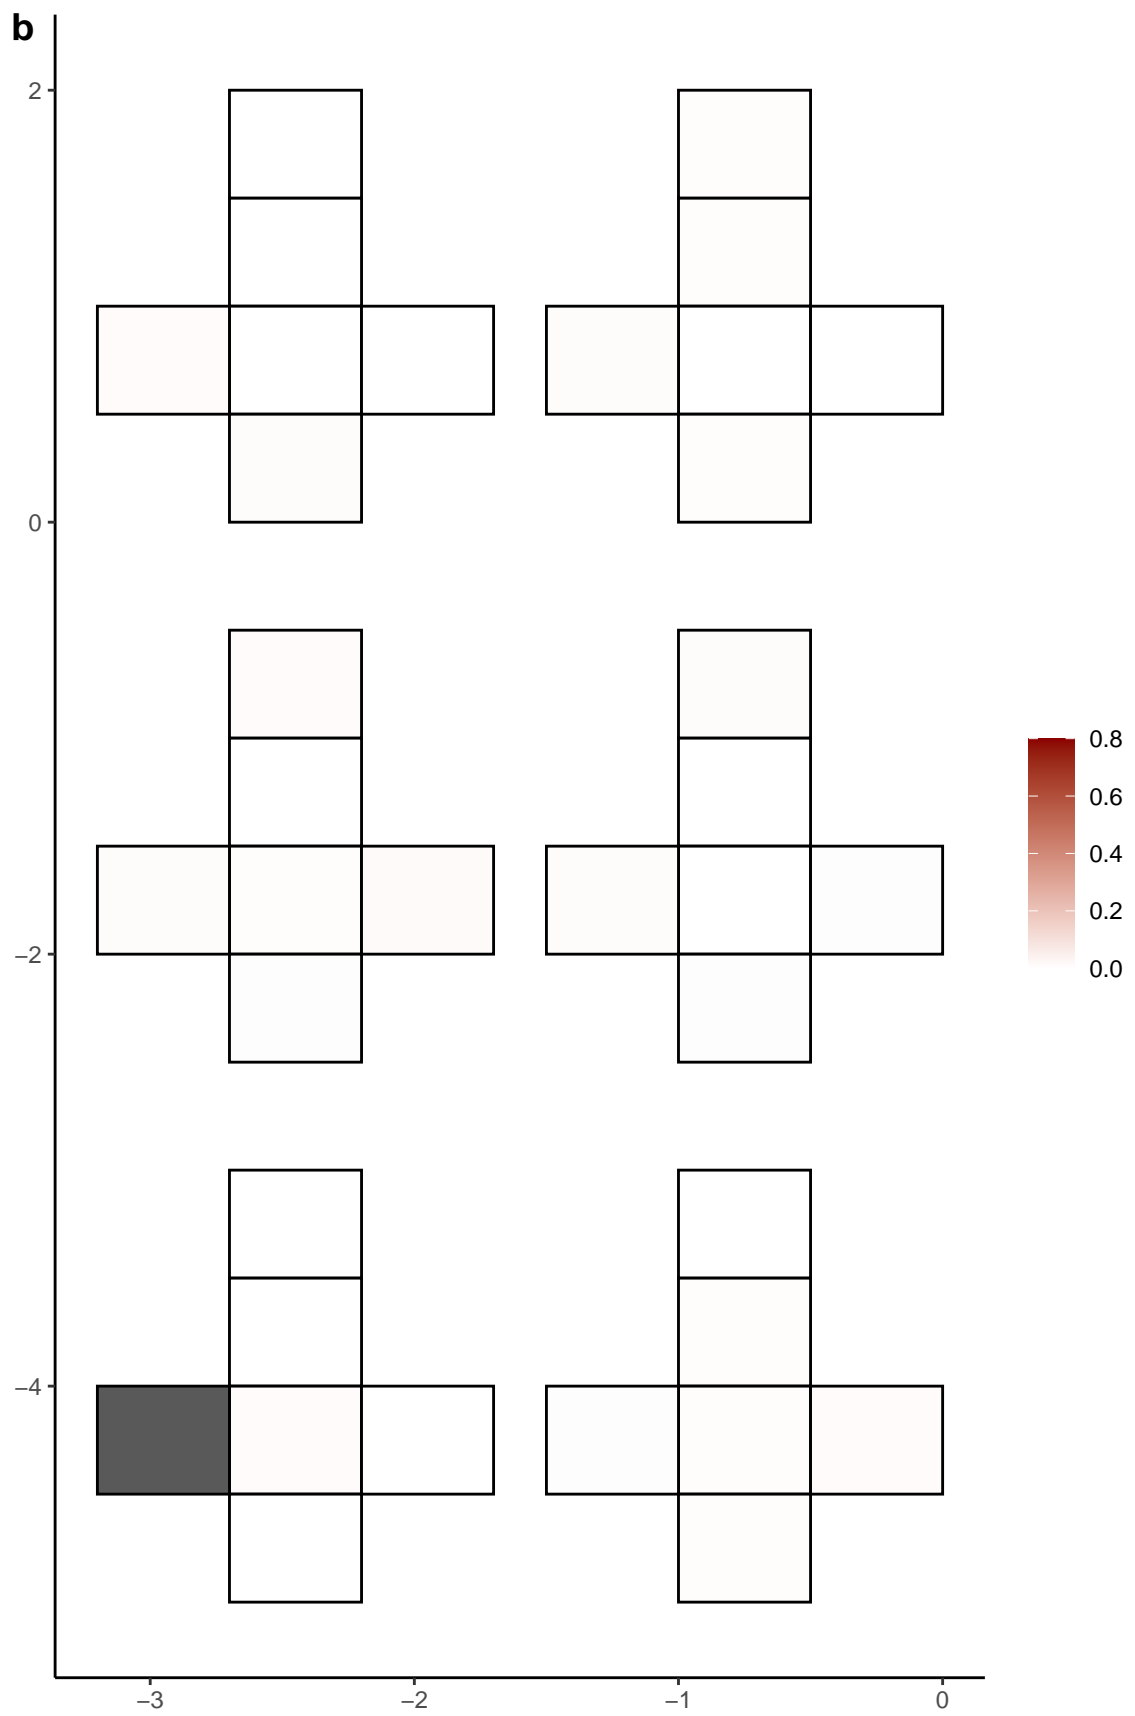

**a** ID01 13-95433485-C-T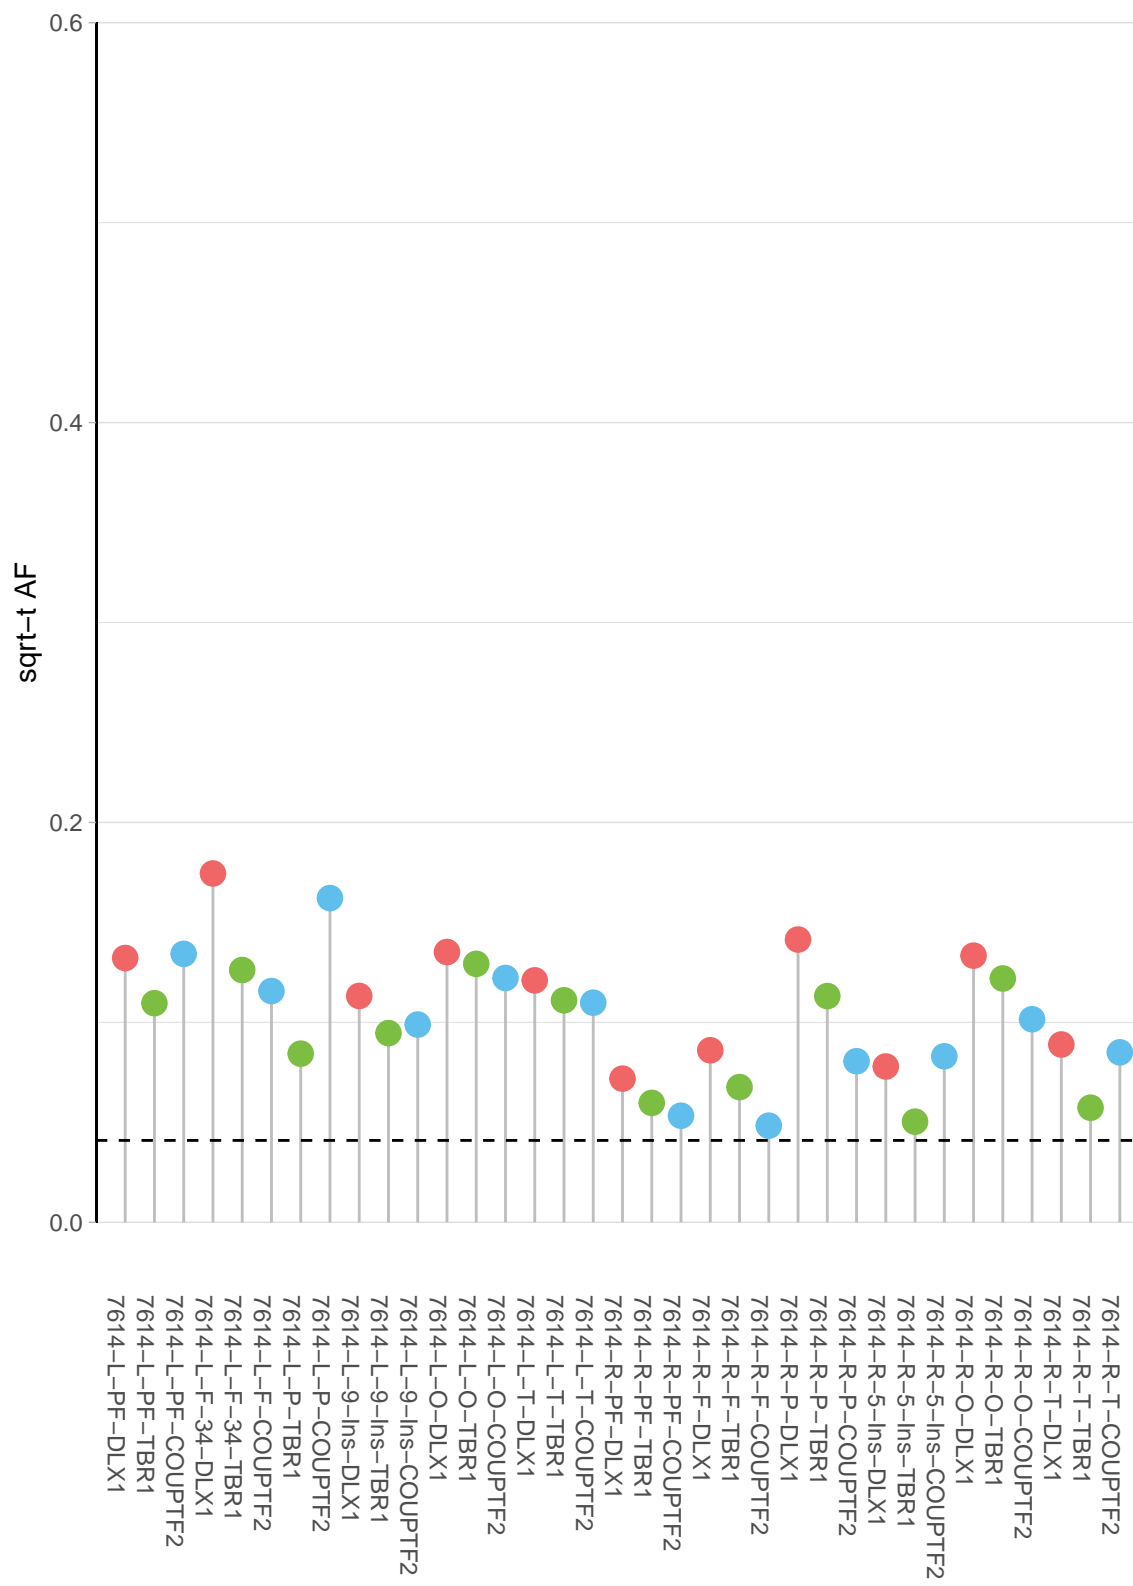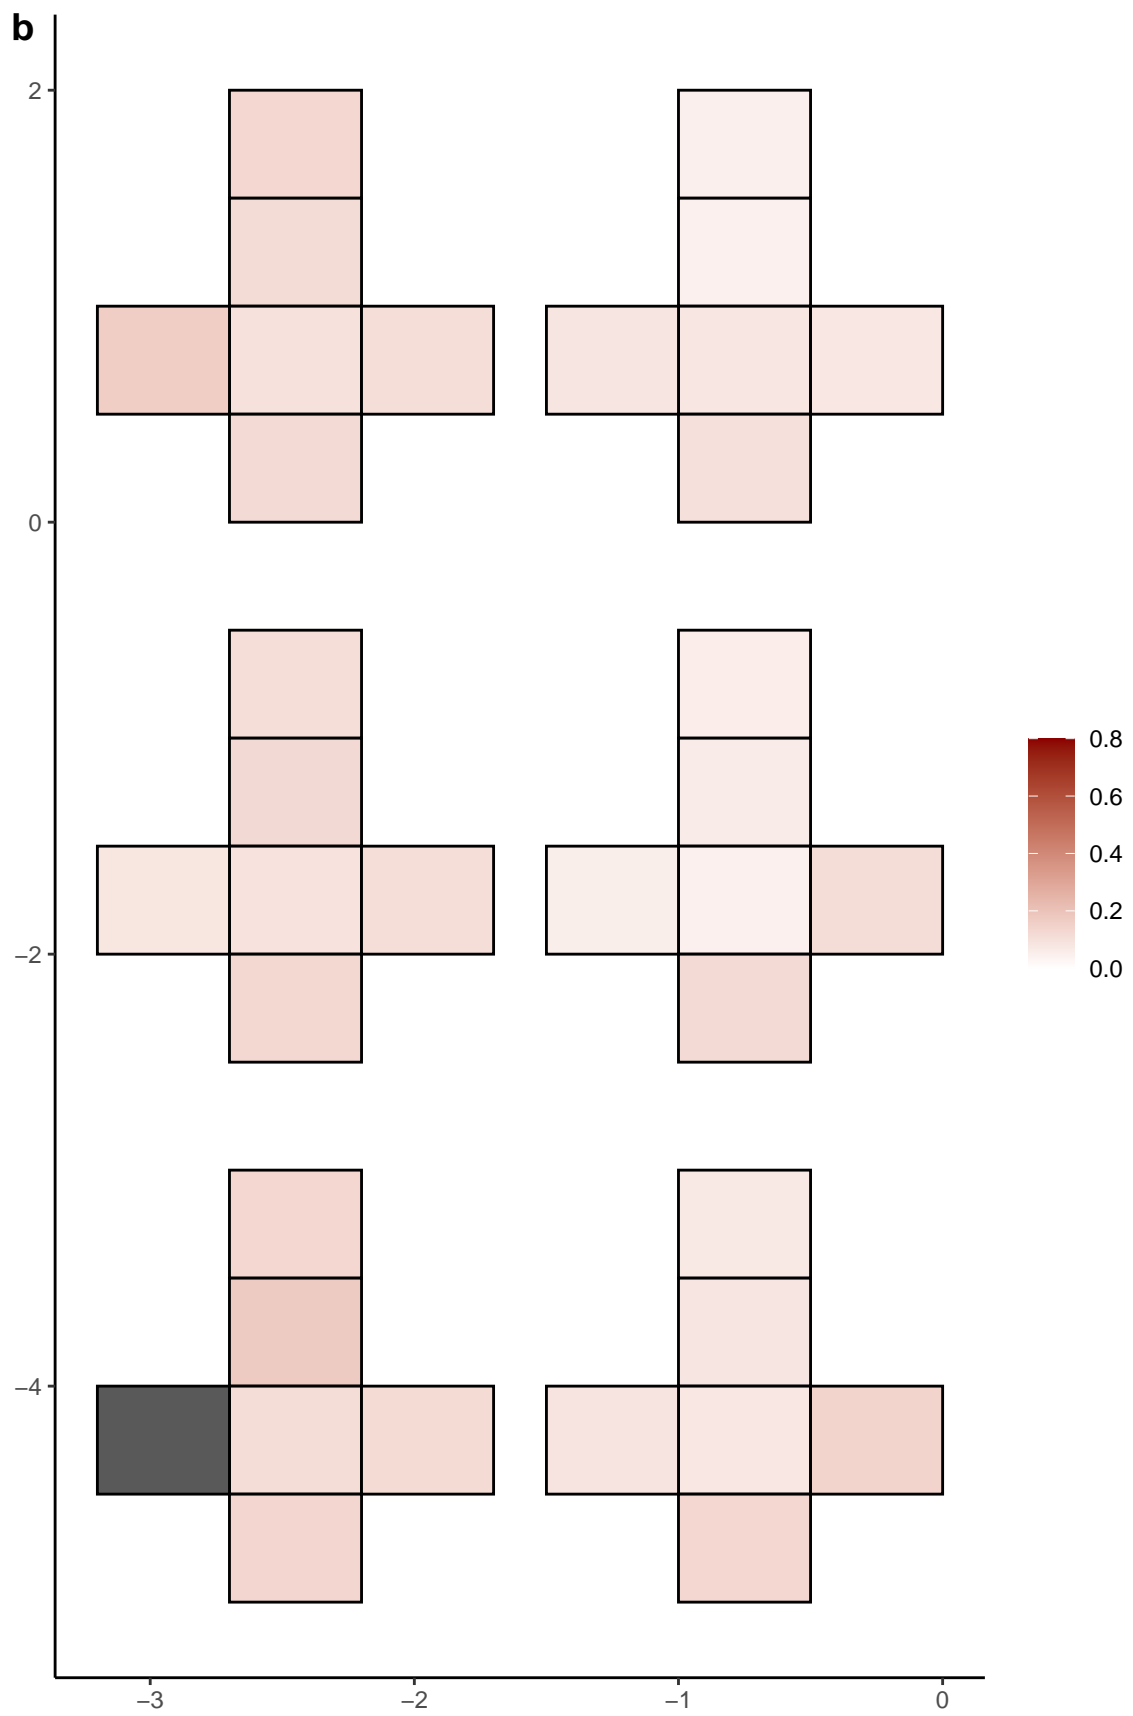

**a** ID01 13-97971976-C-T

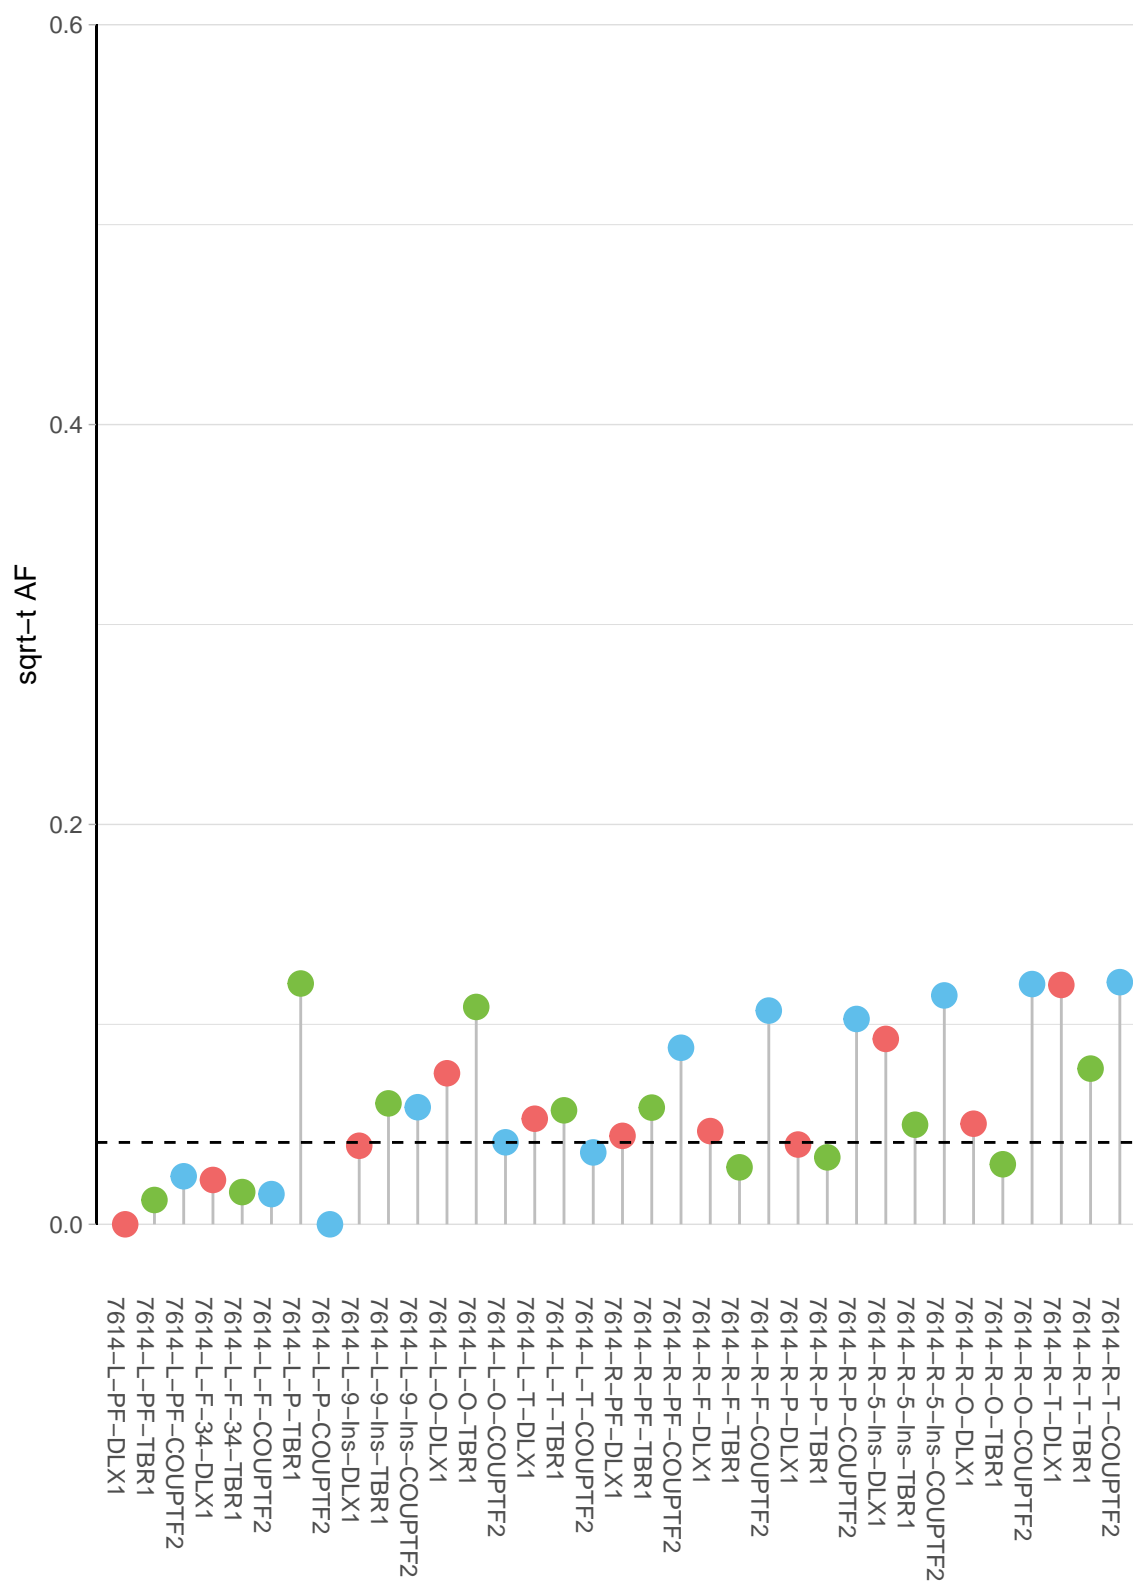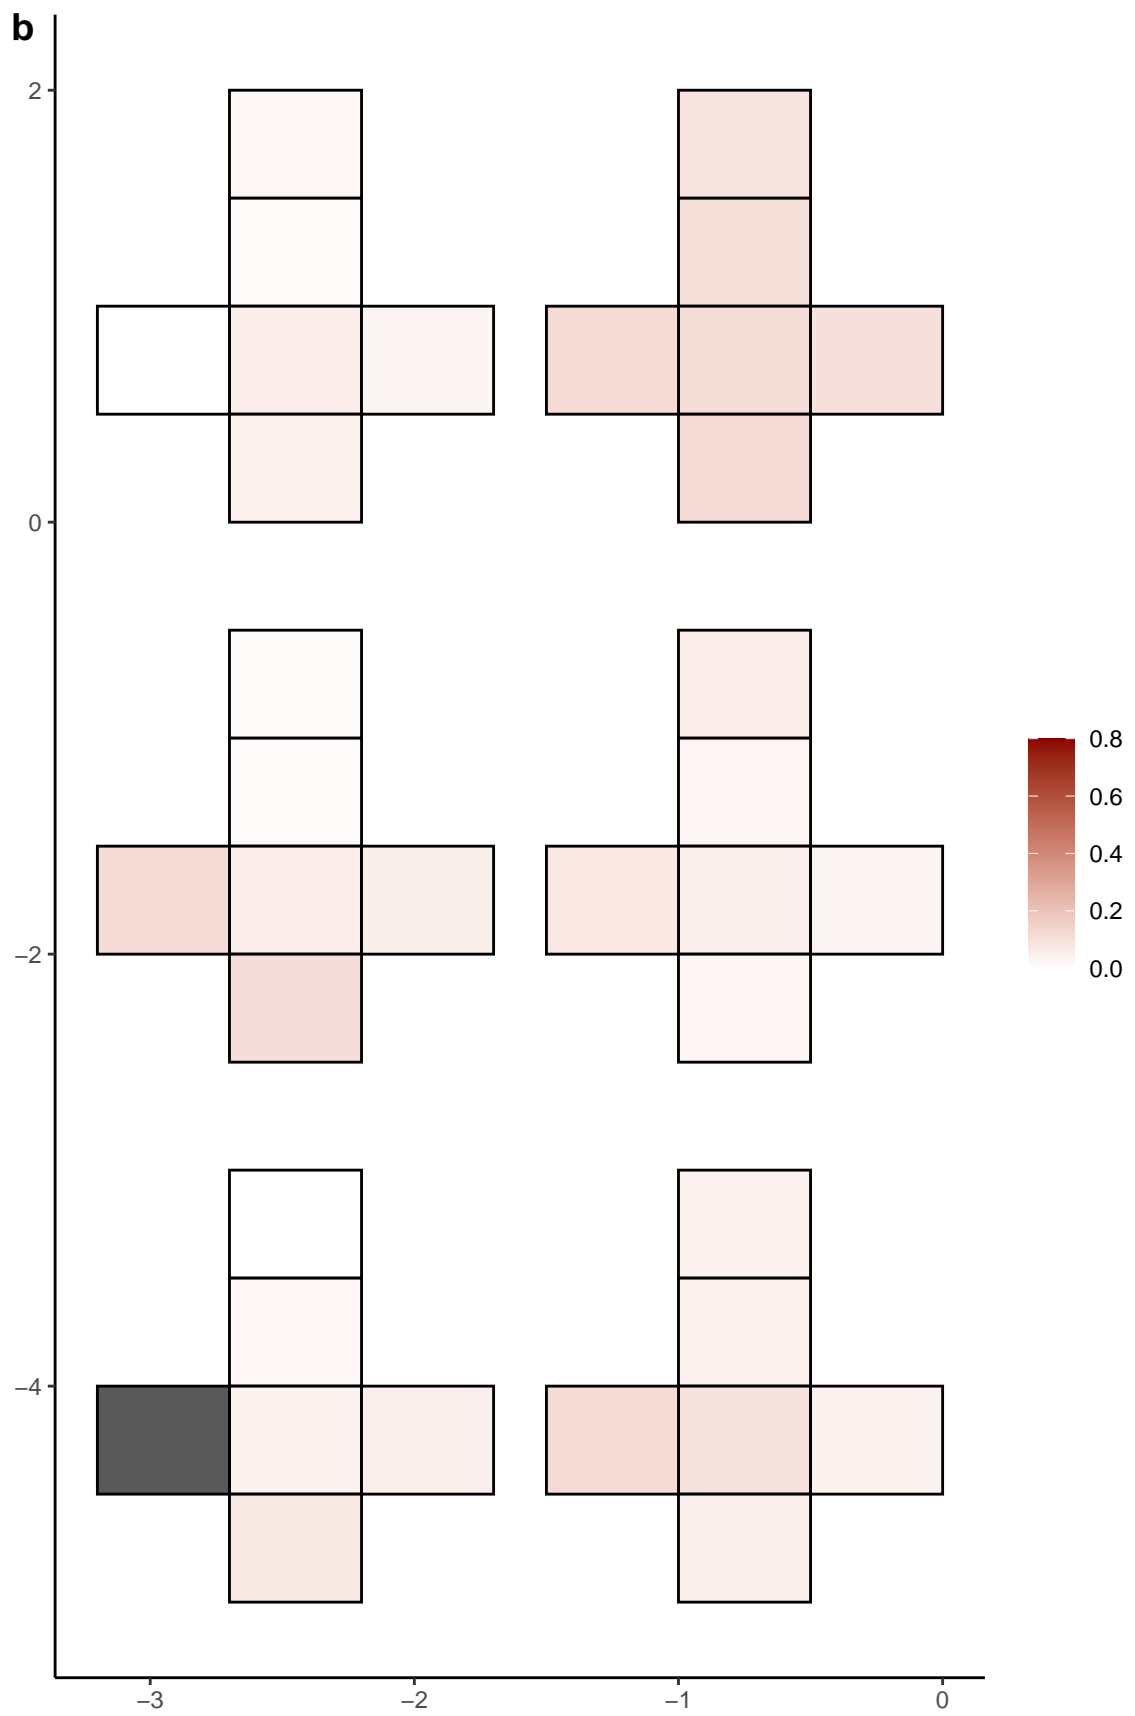

**a** ID01 14-38033902-G-T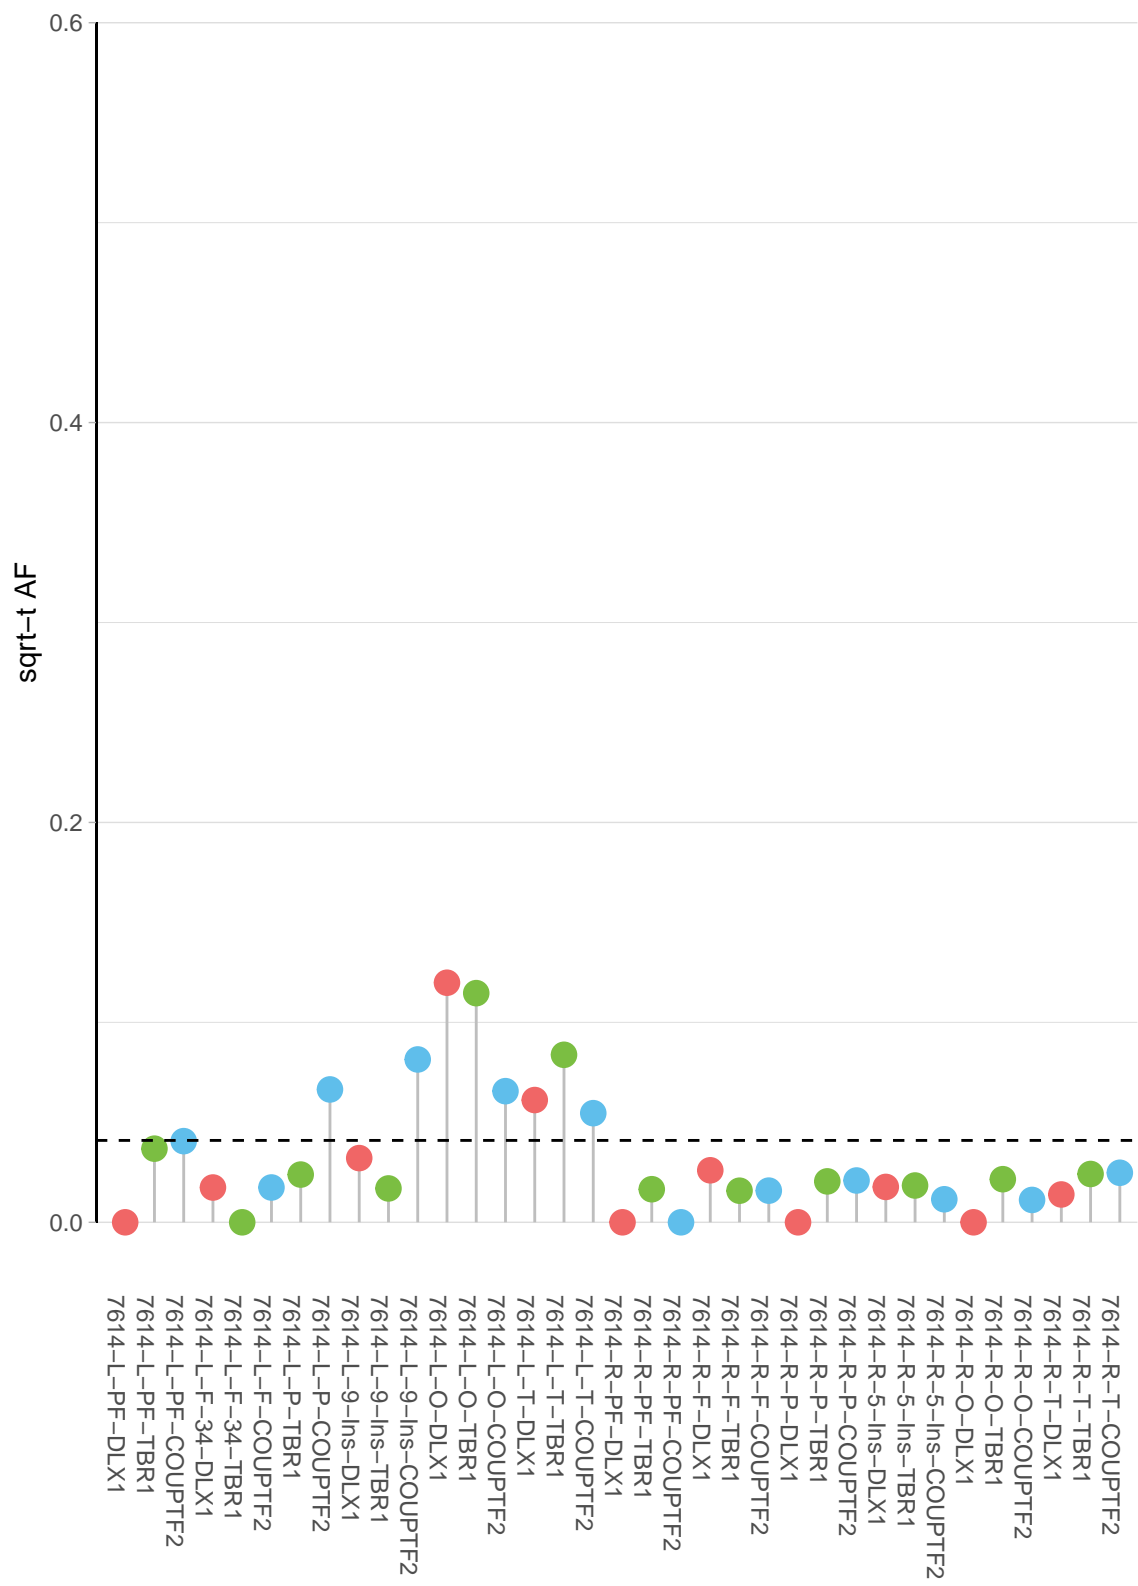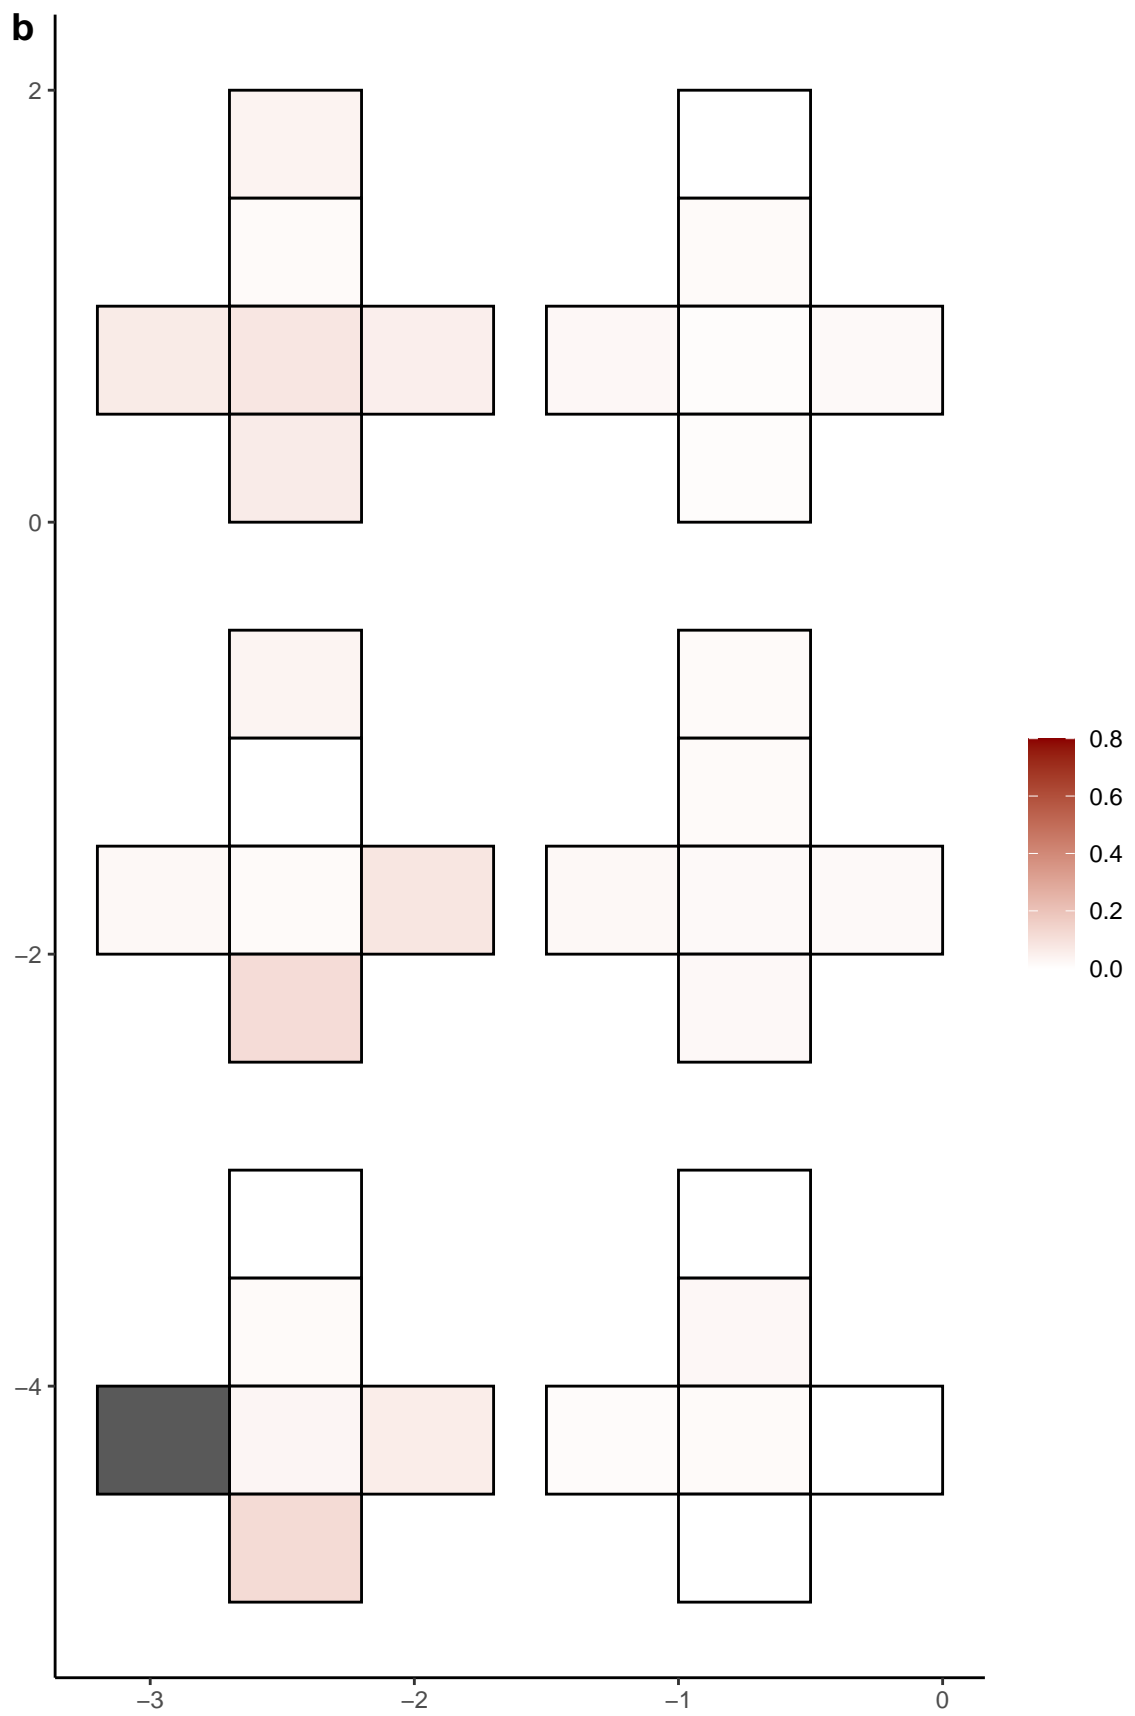

**a** ID01 14-44933484-T-C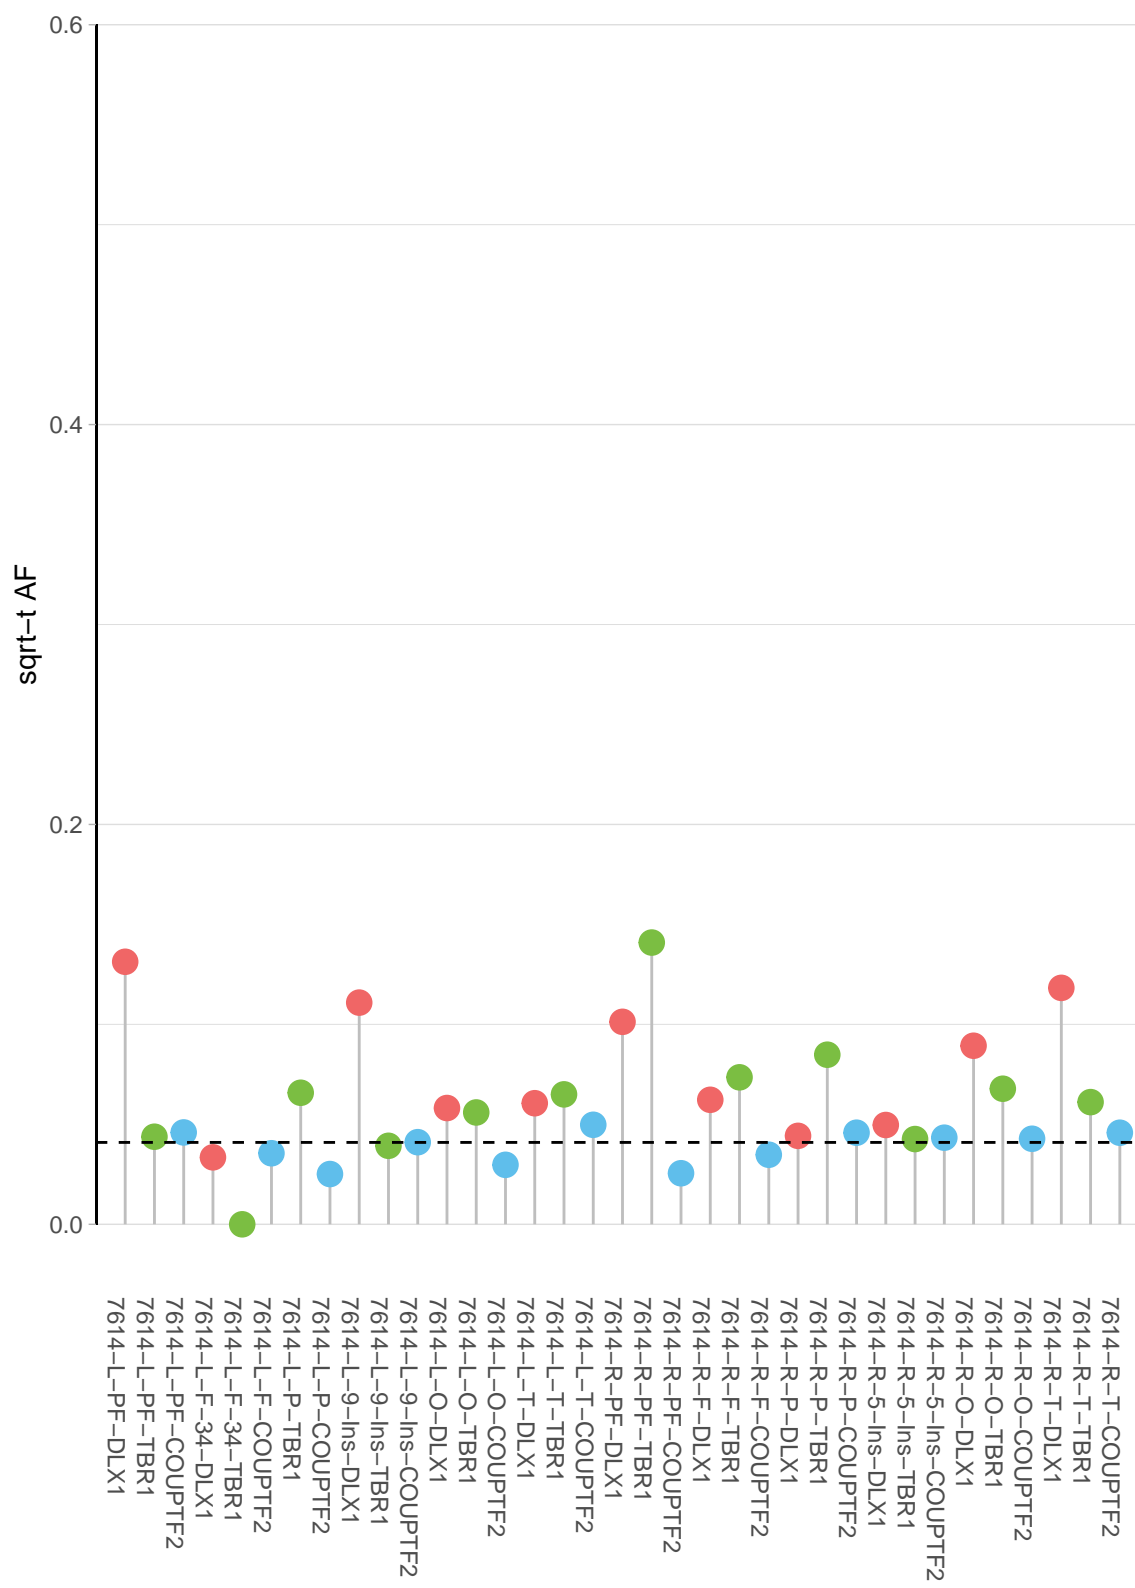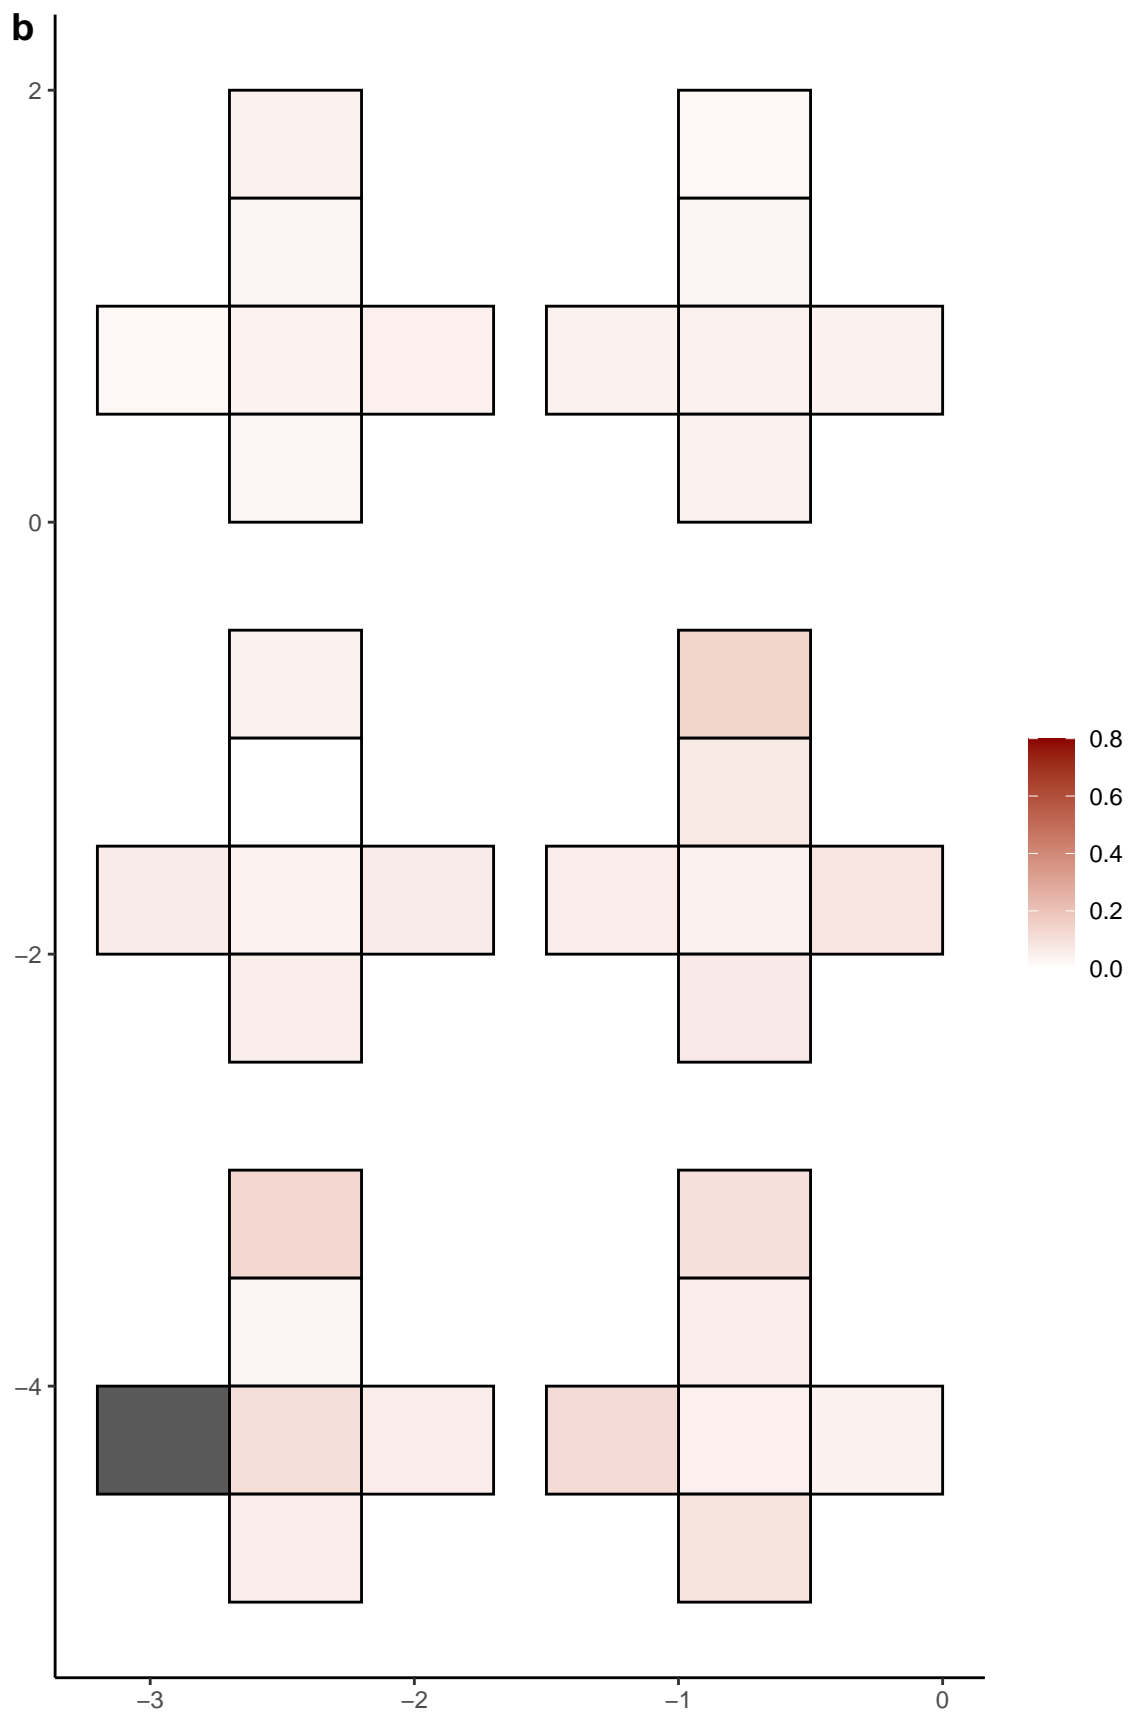

**a** ID01 14-48138164-C-G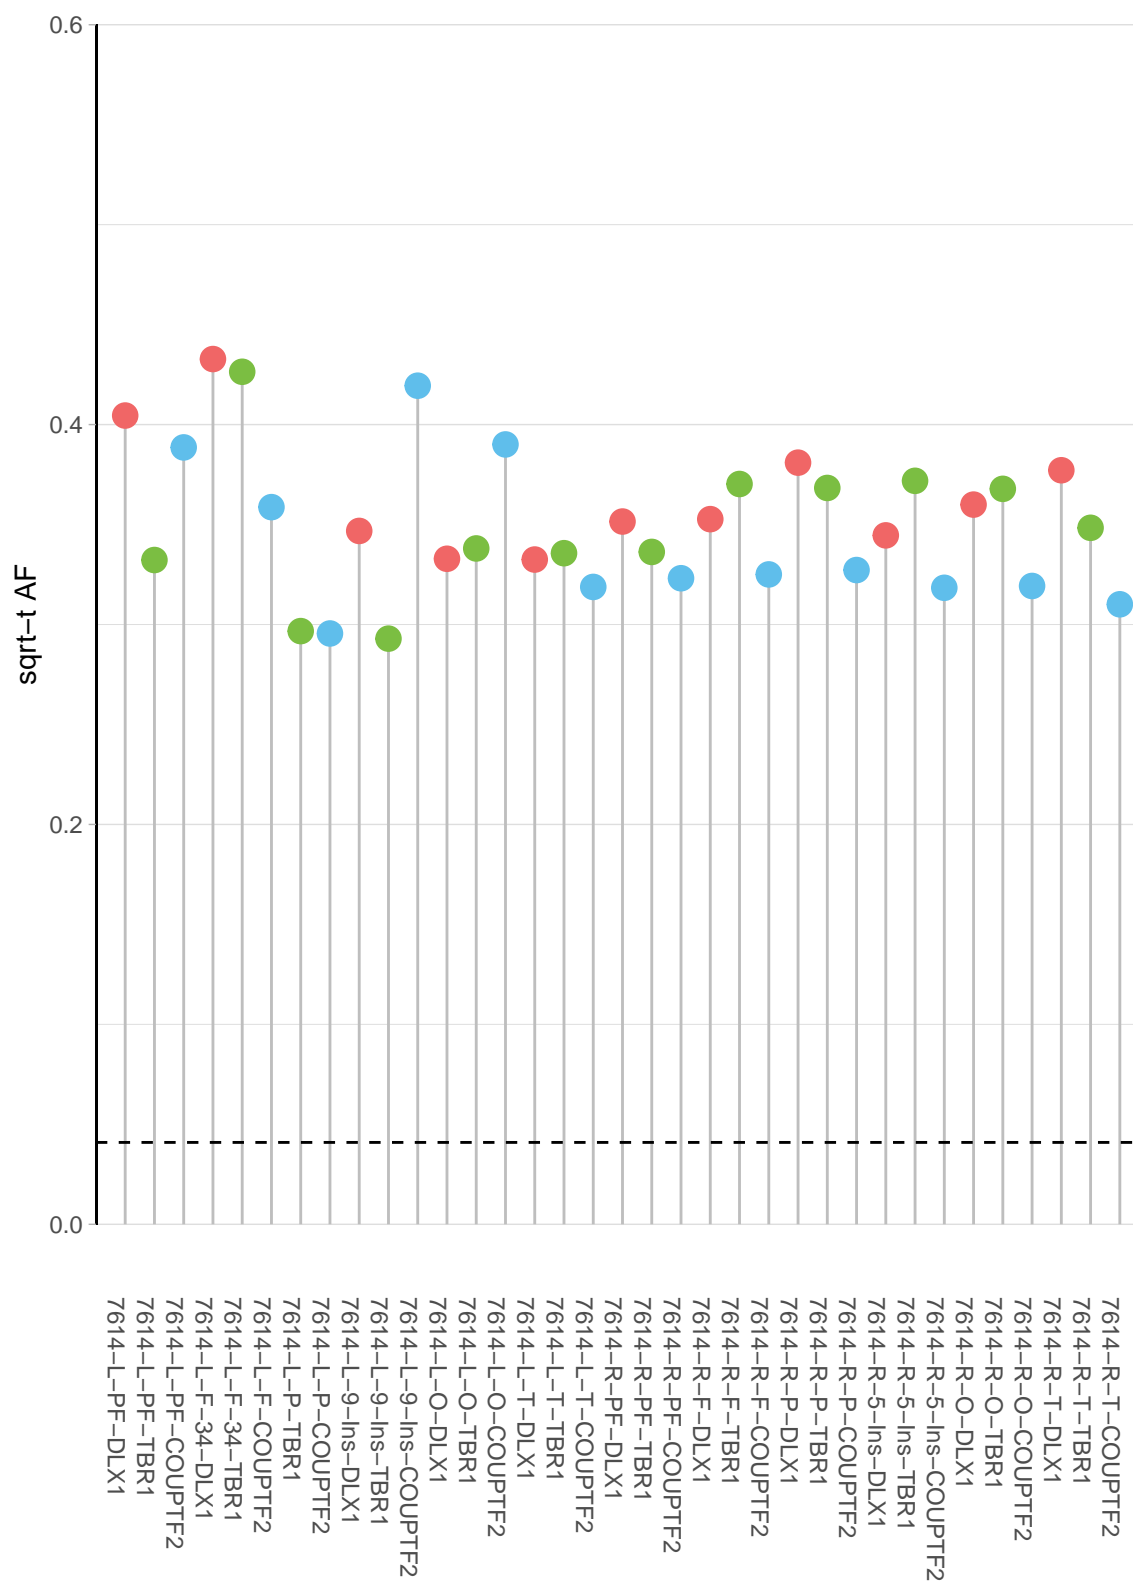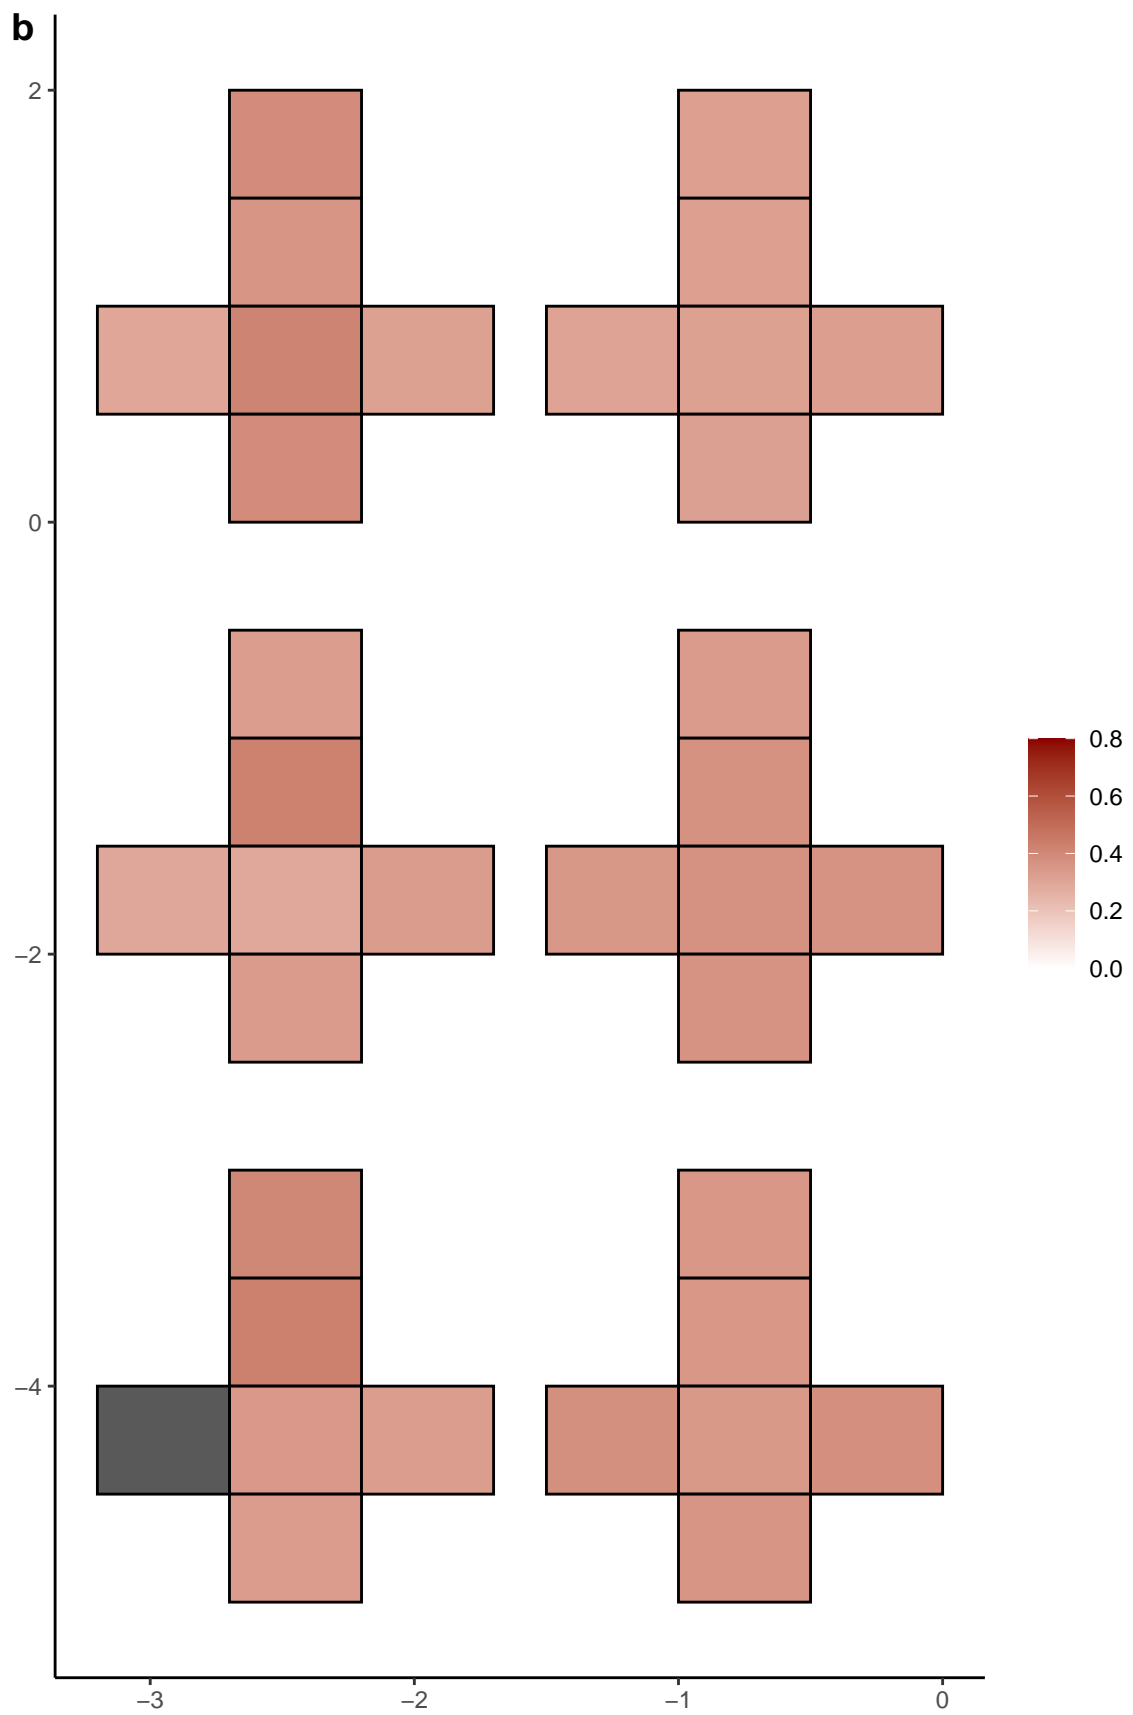

**a** ID01 14-48579727-C-T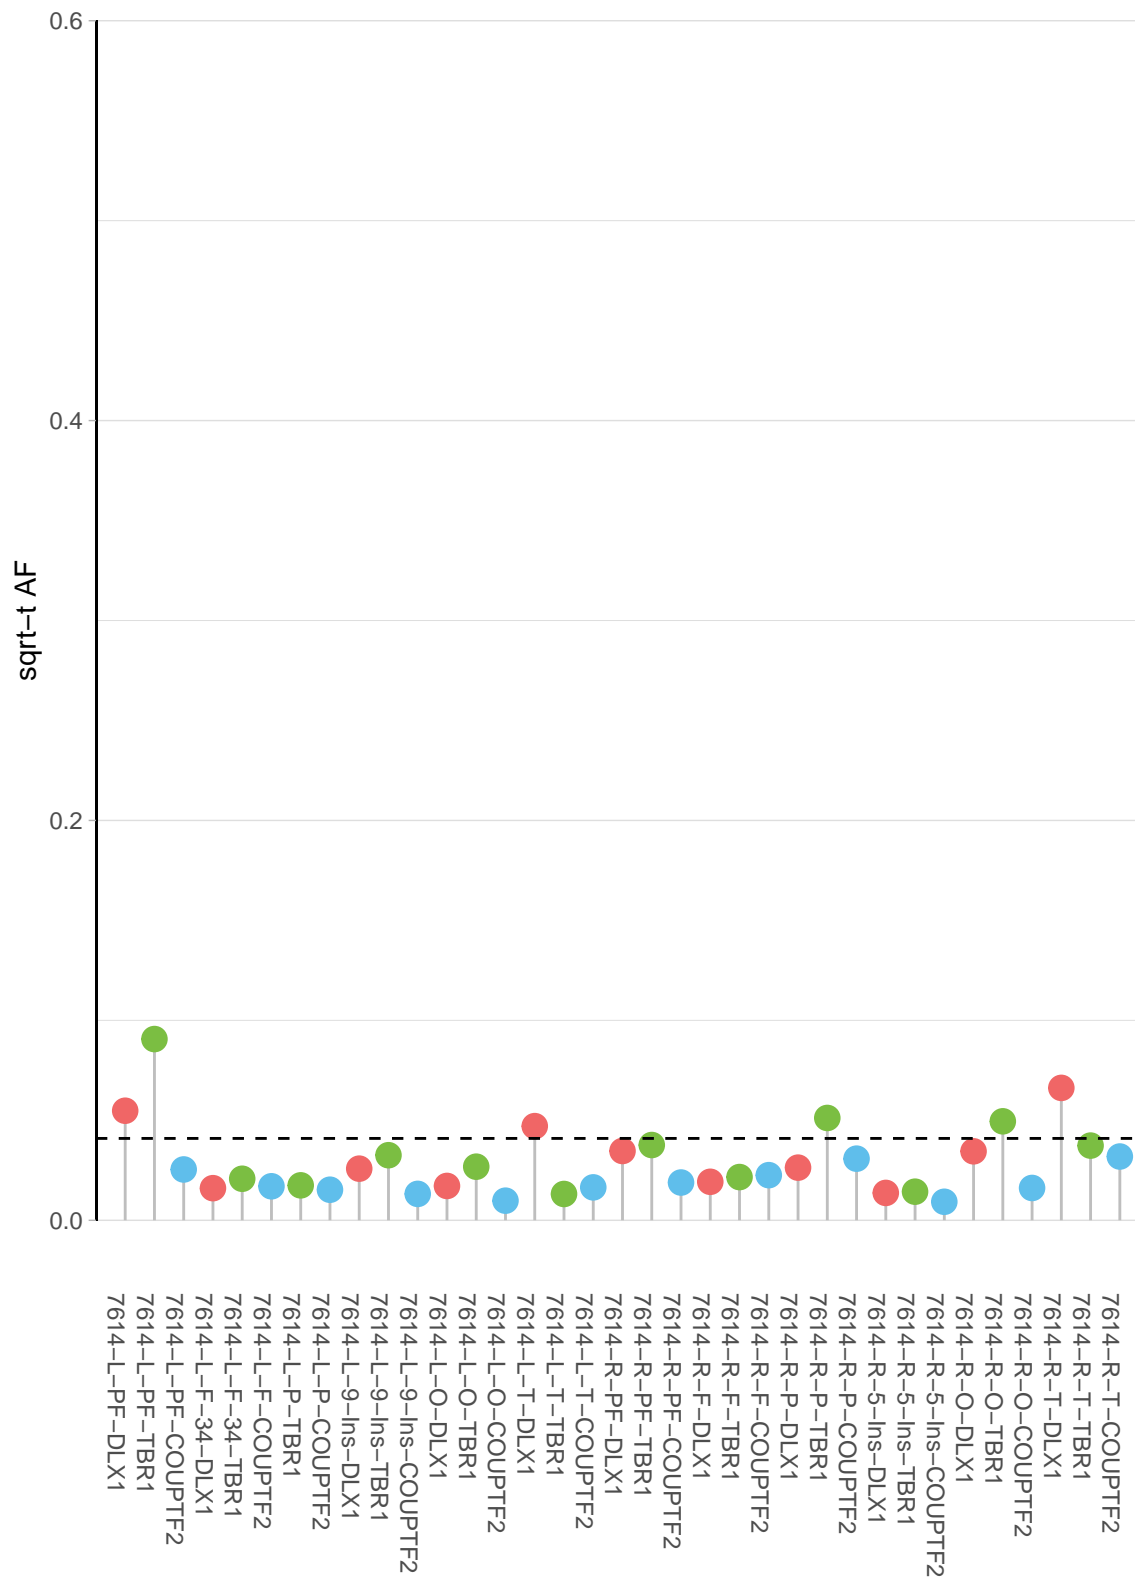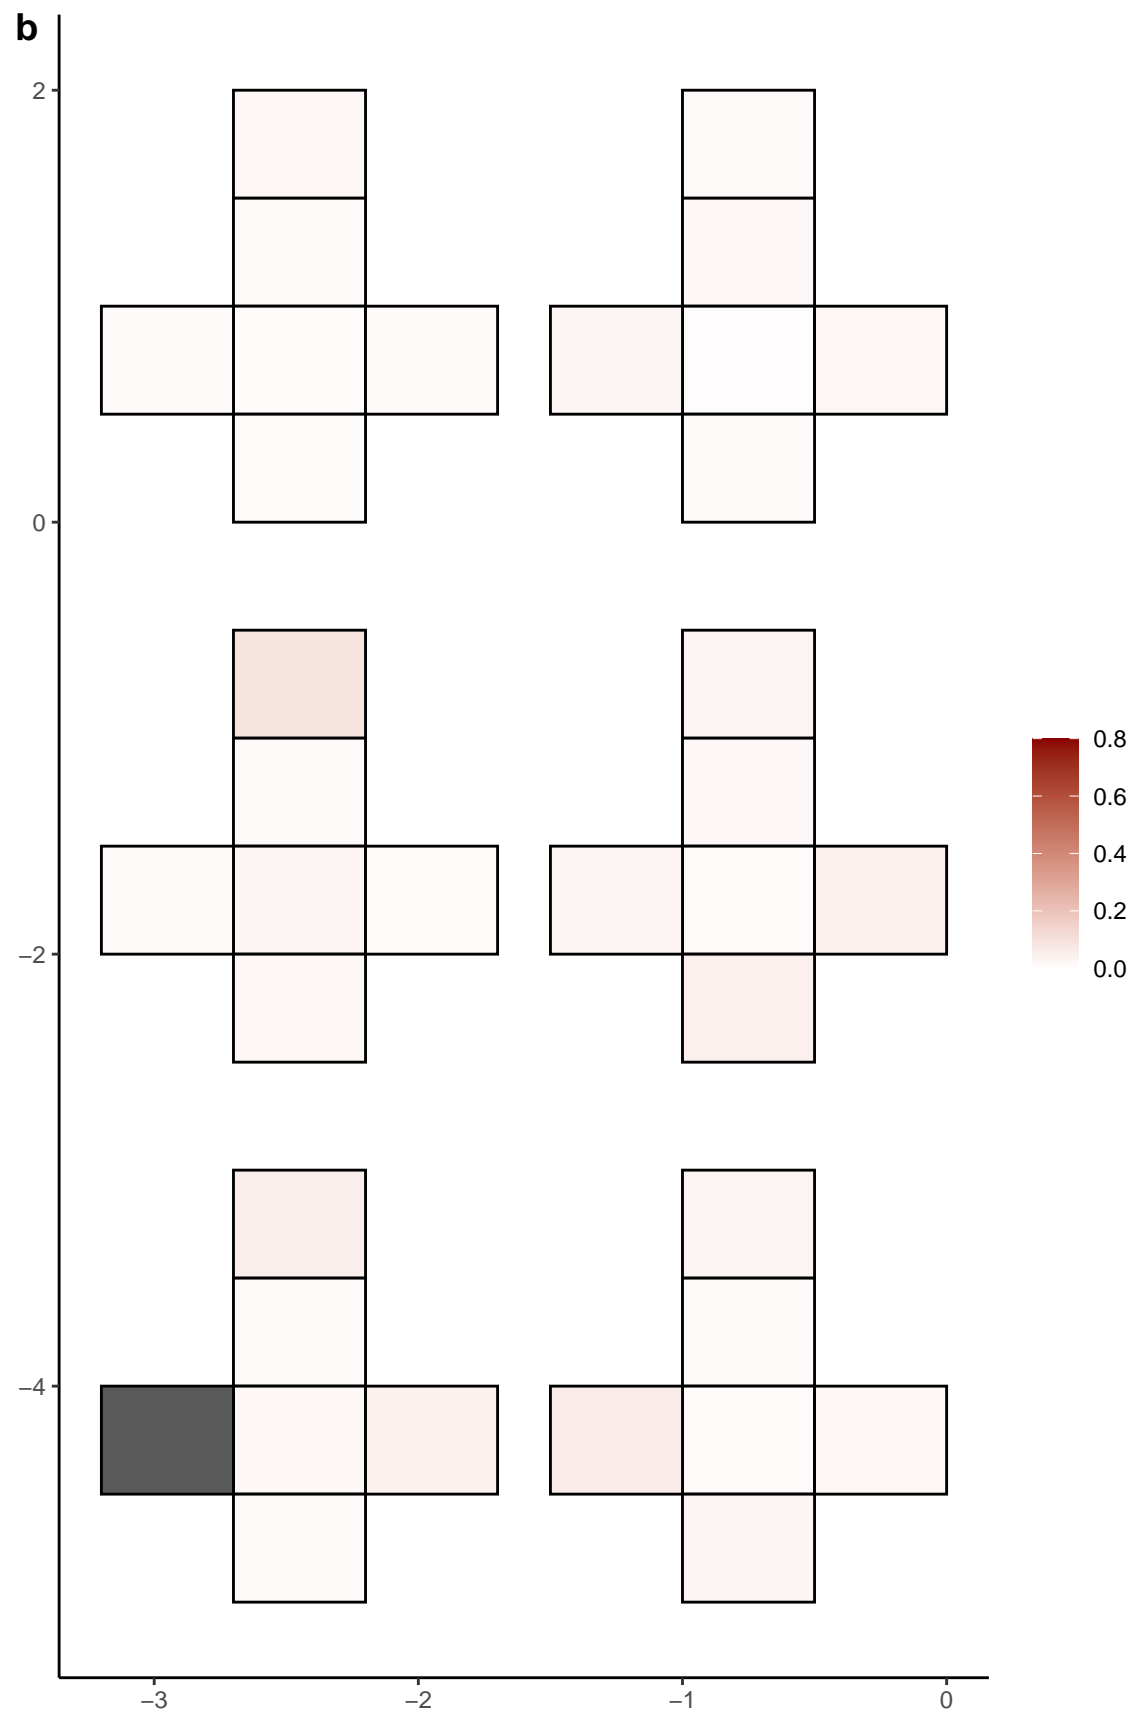



**a** ID01 14-54432218-C-T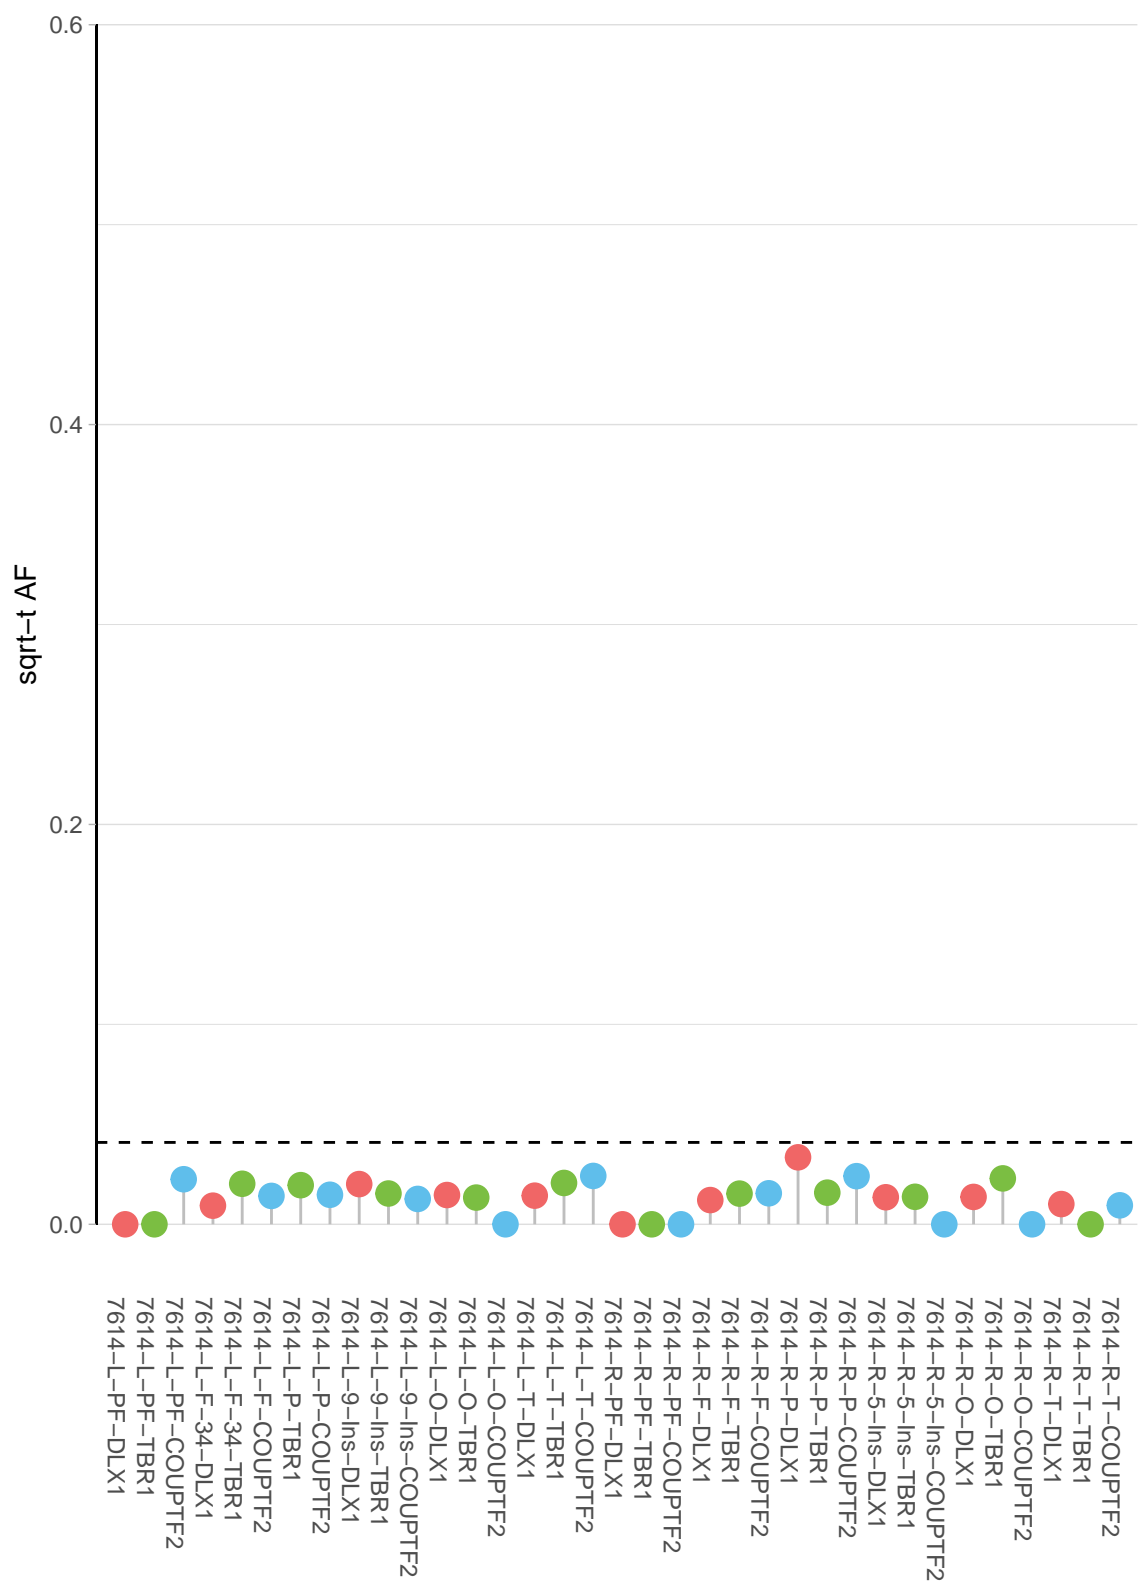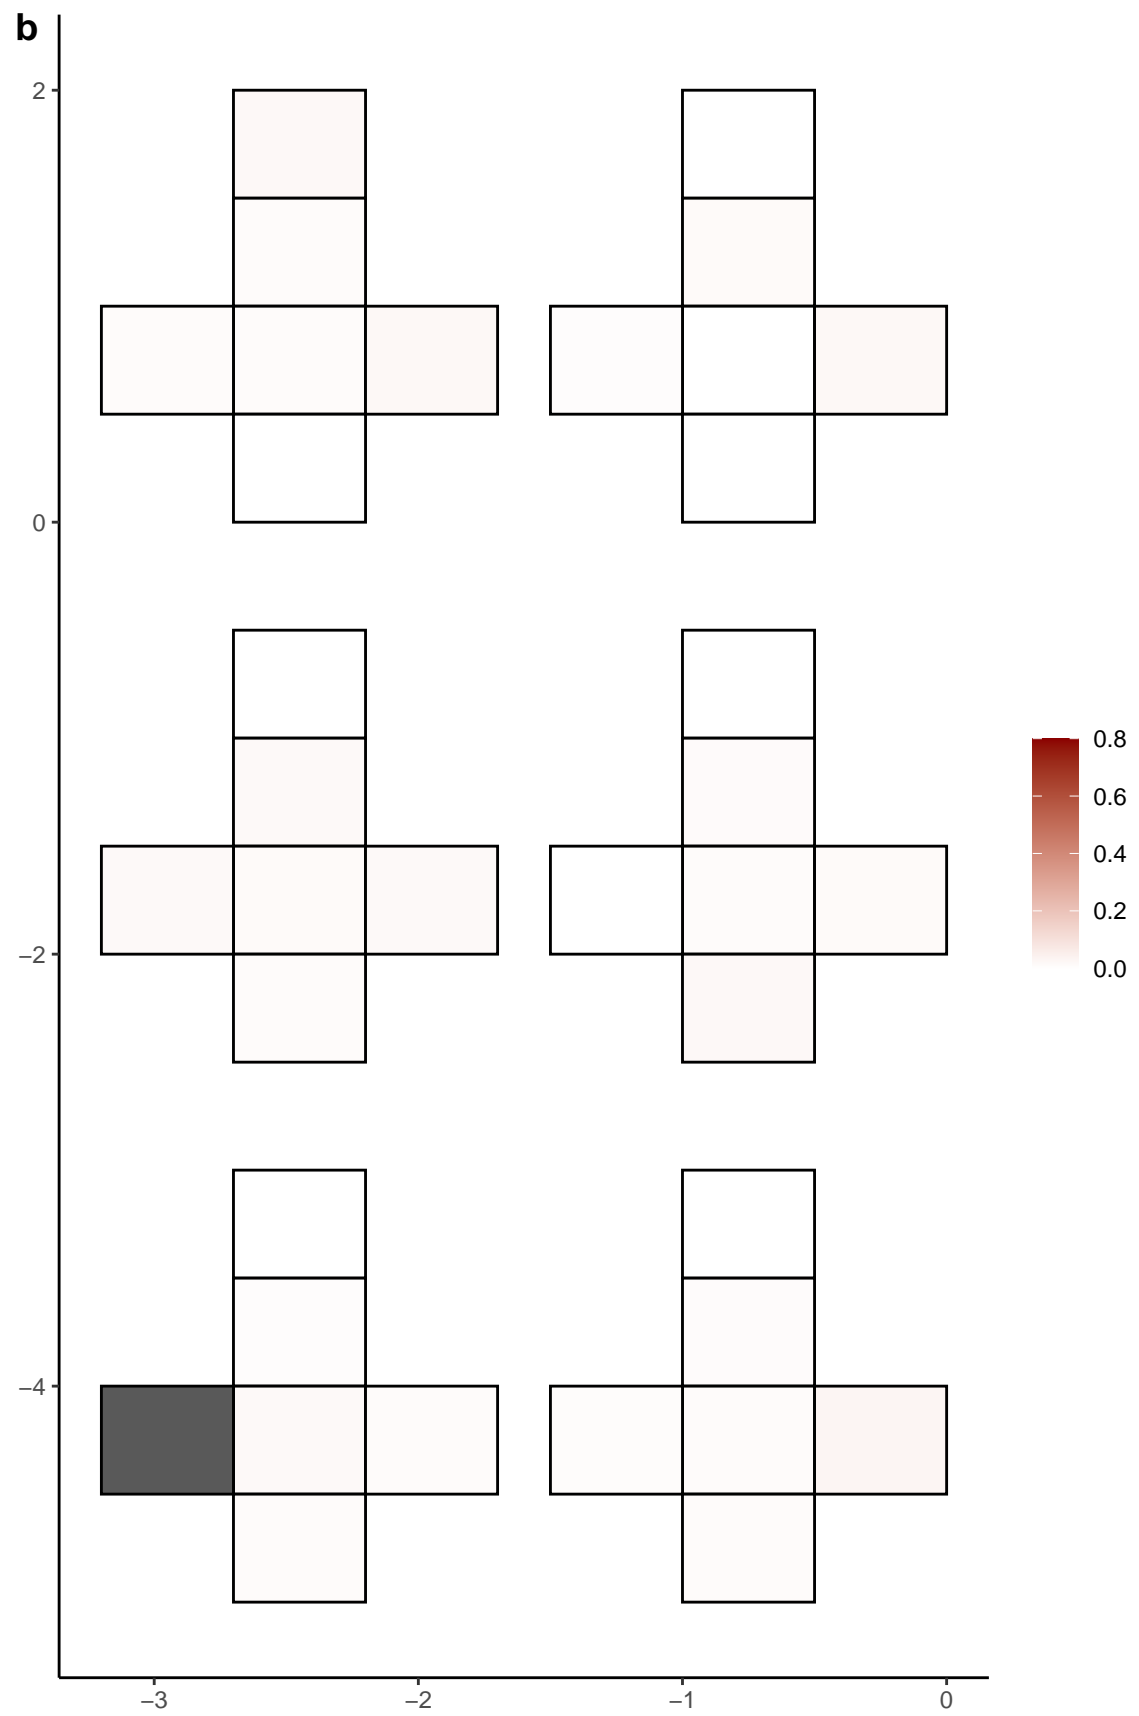

**a** ID01 14-57423222-C-T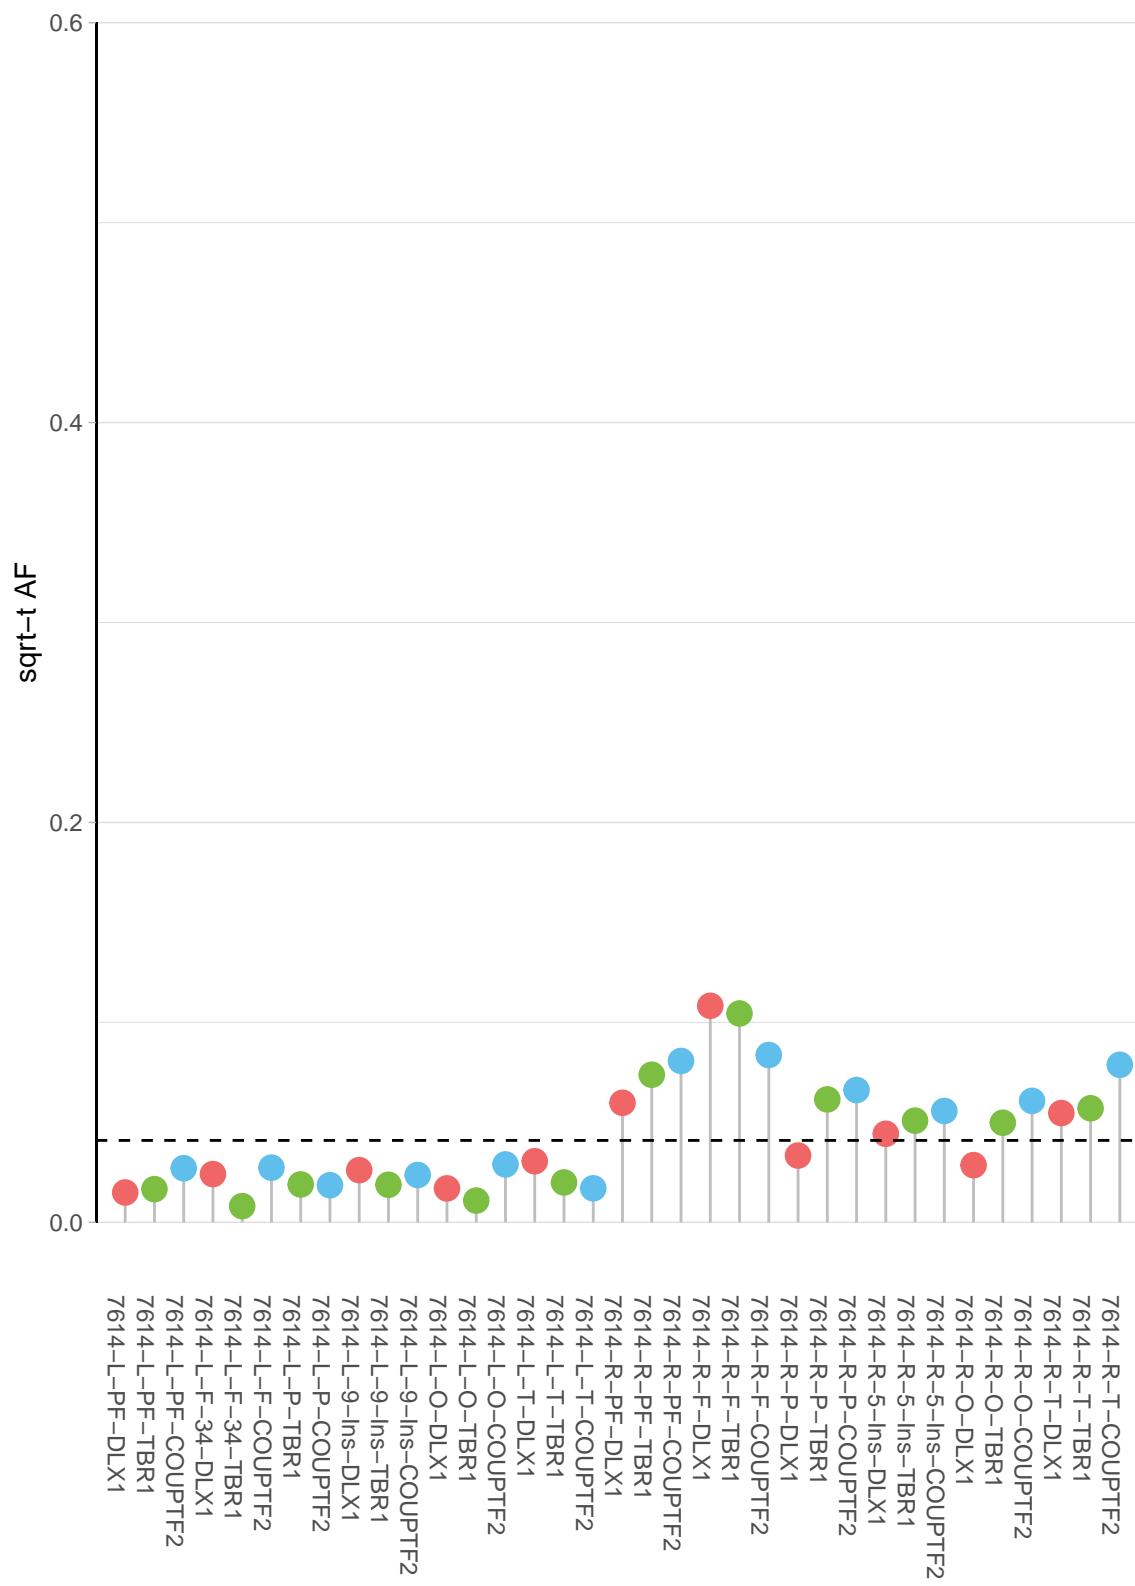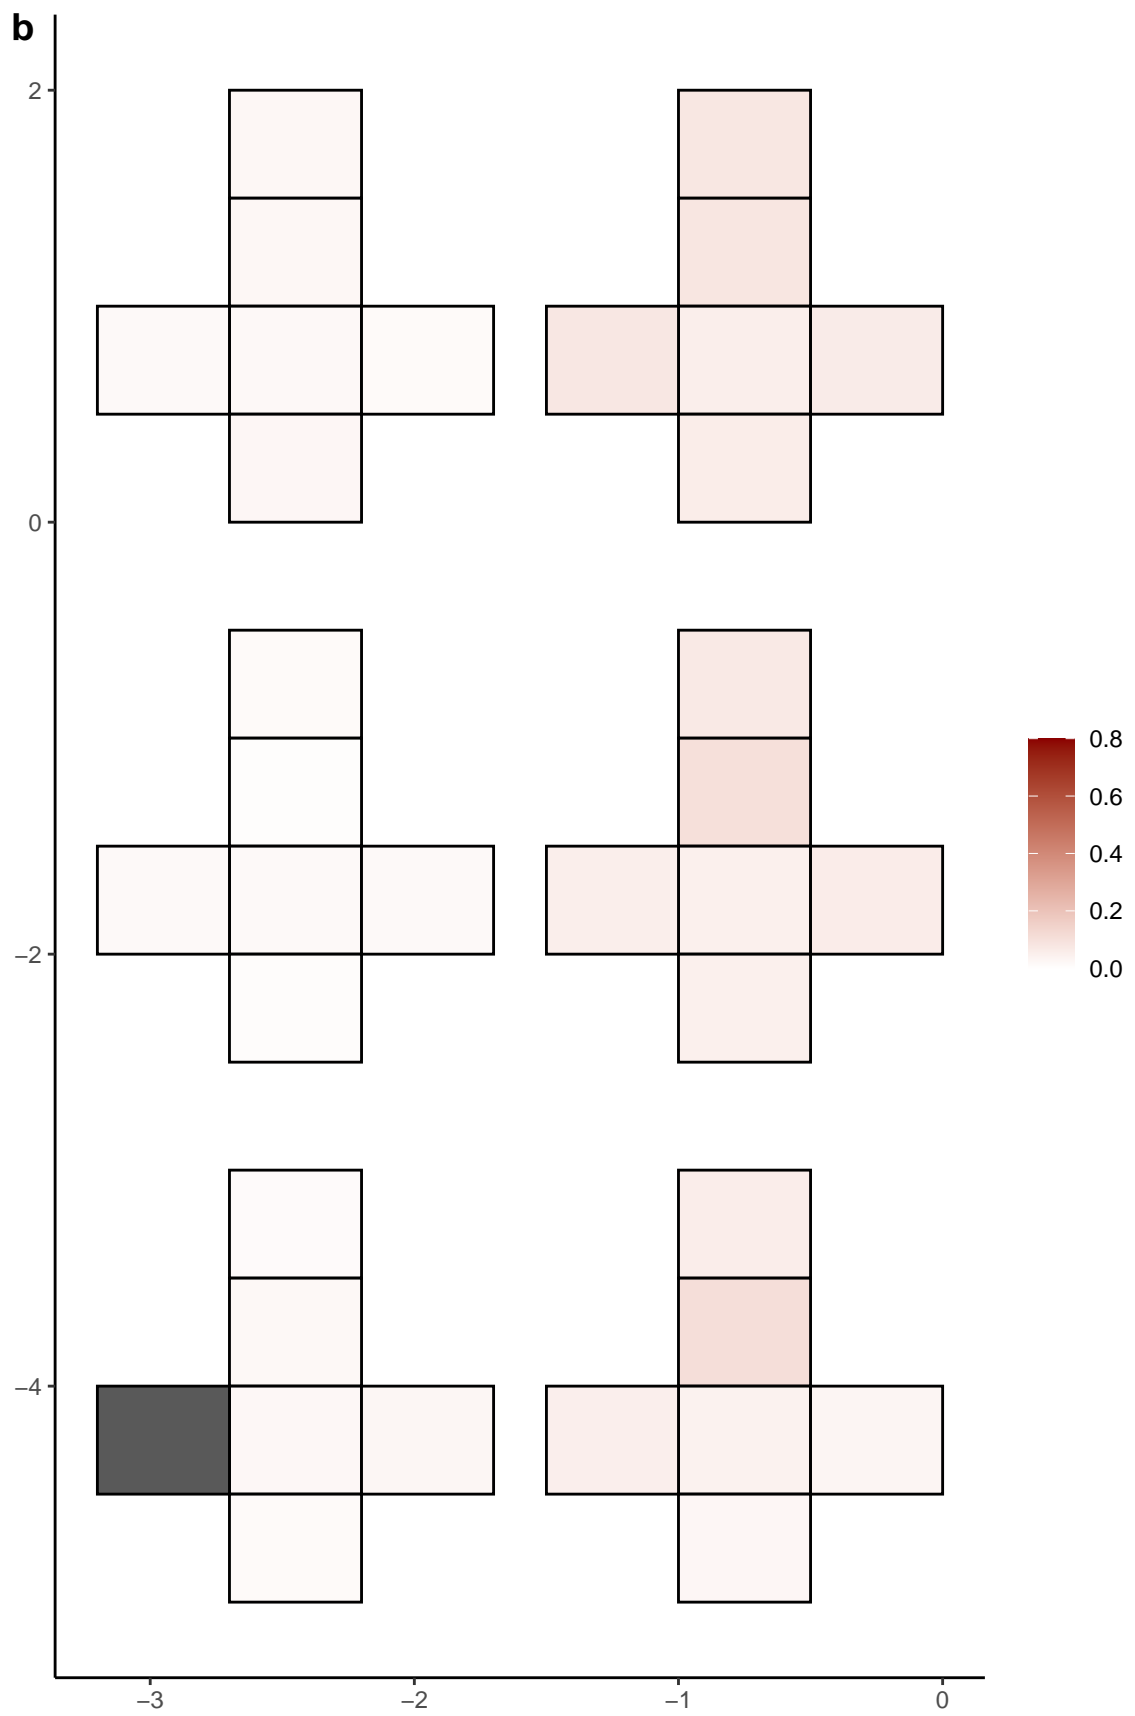

**a** ID01 14-59303124-G-A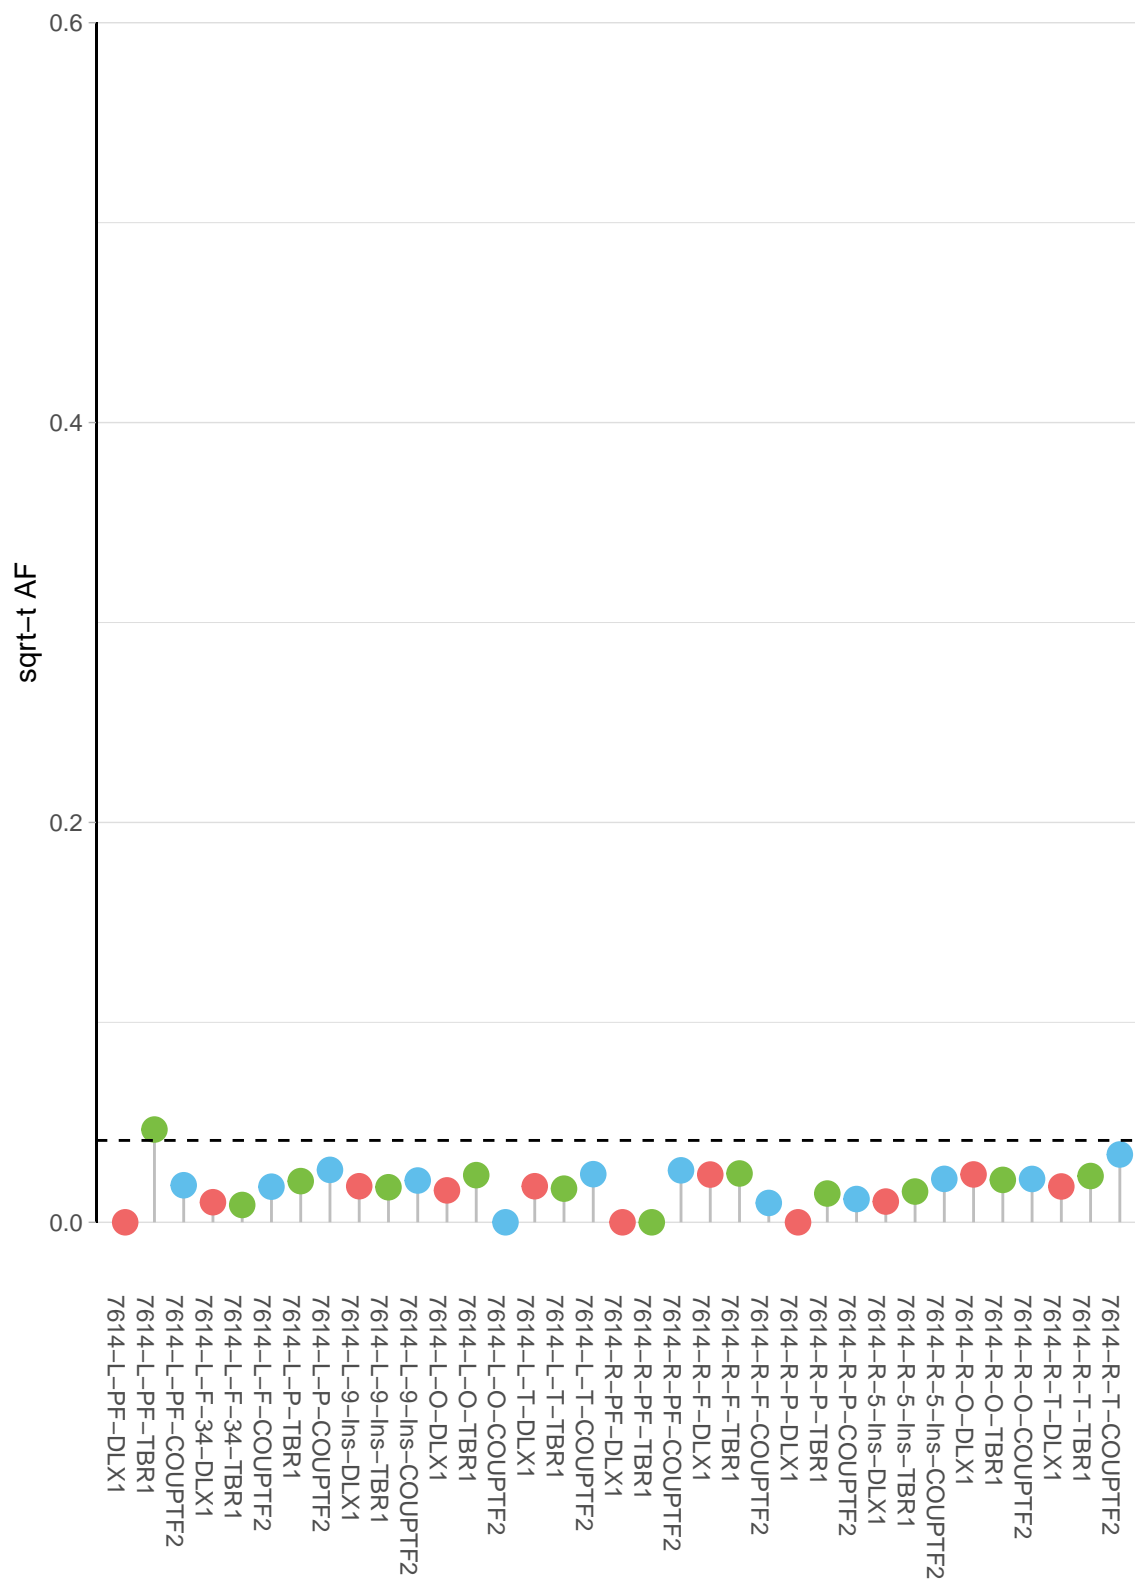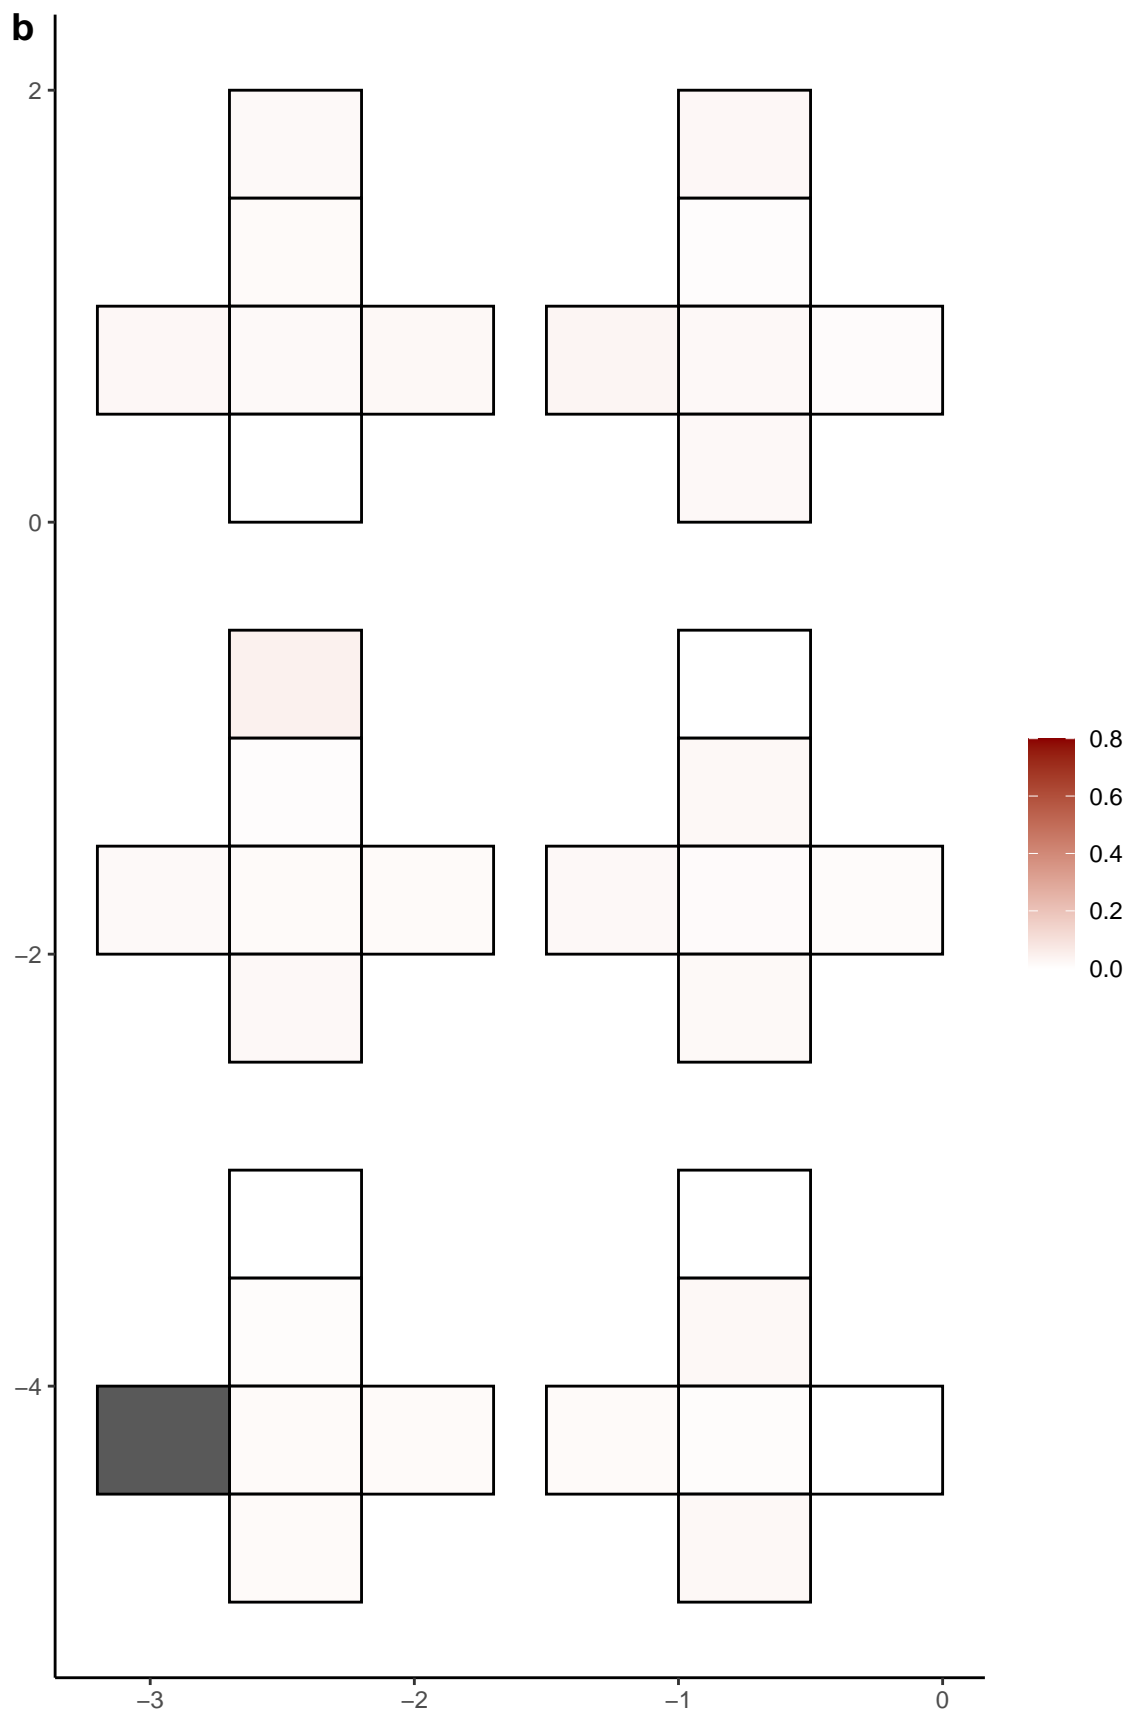

**a** ID01 14-59583360-A-G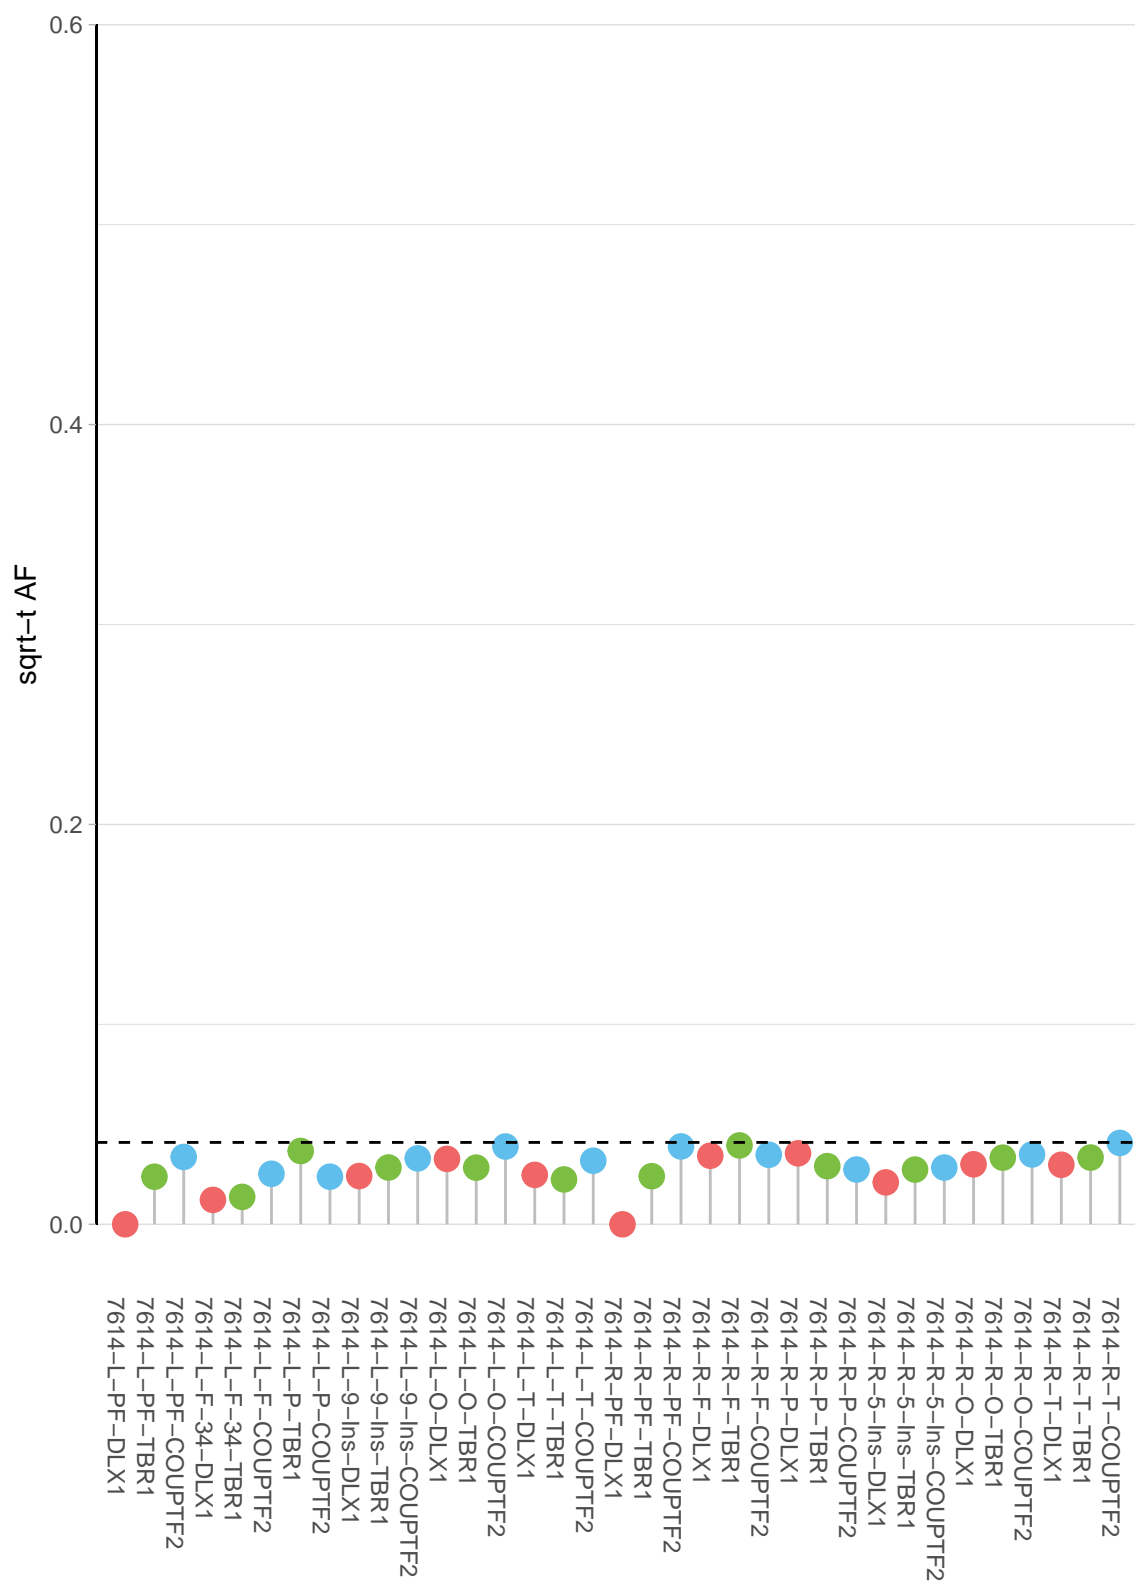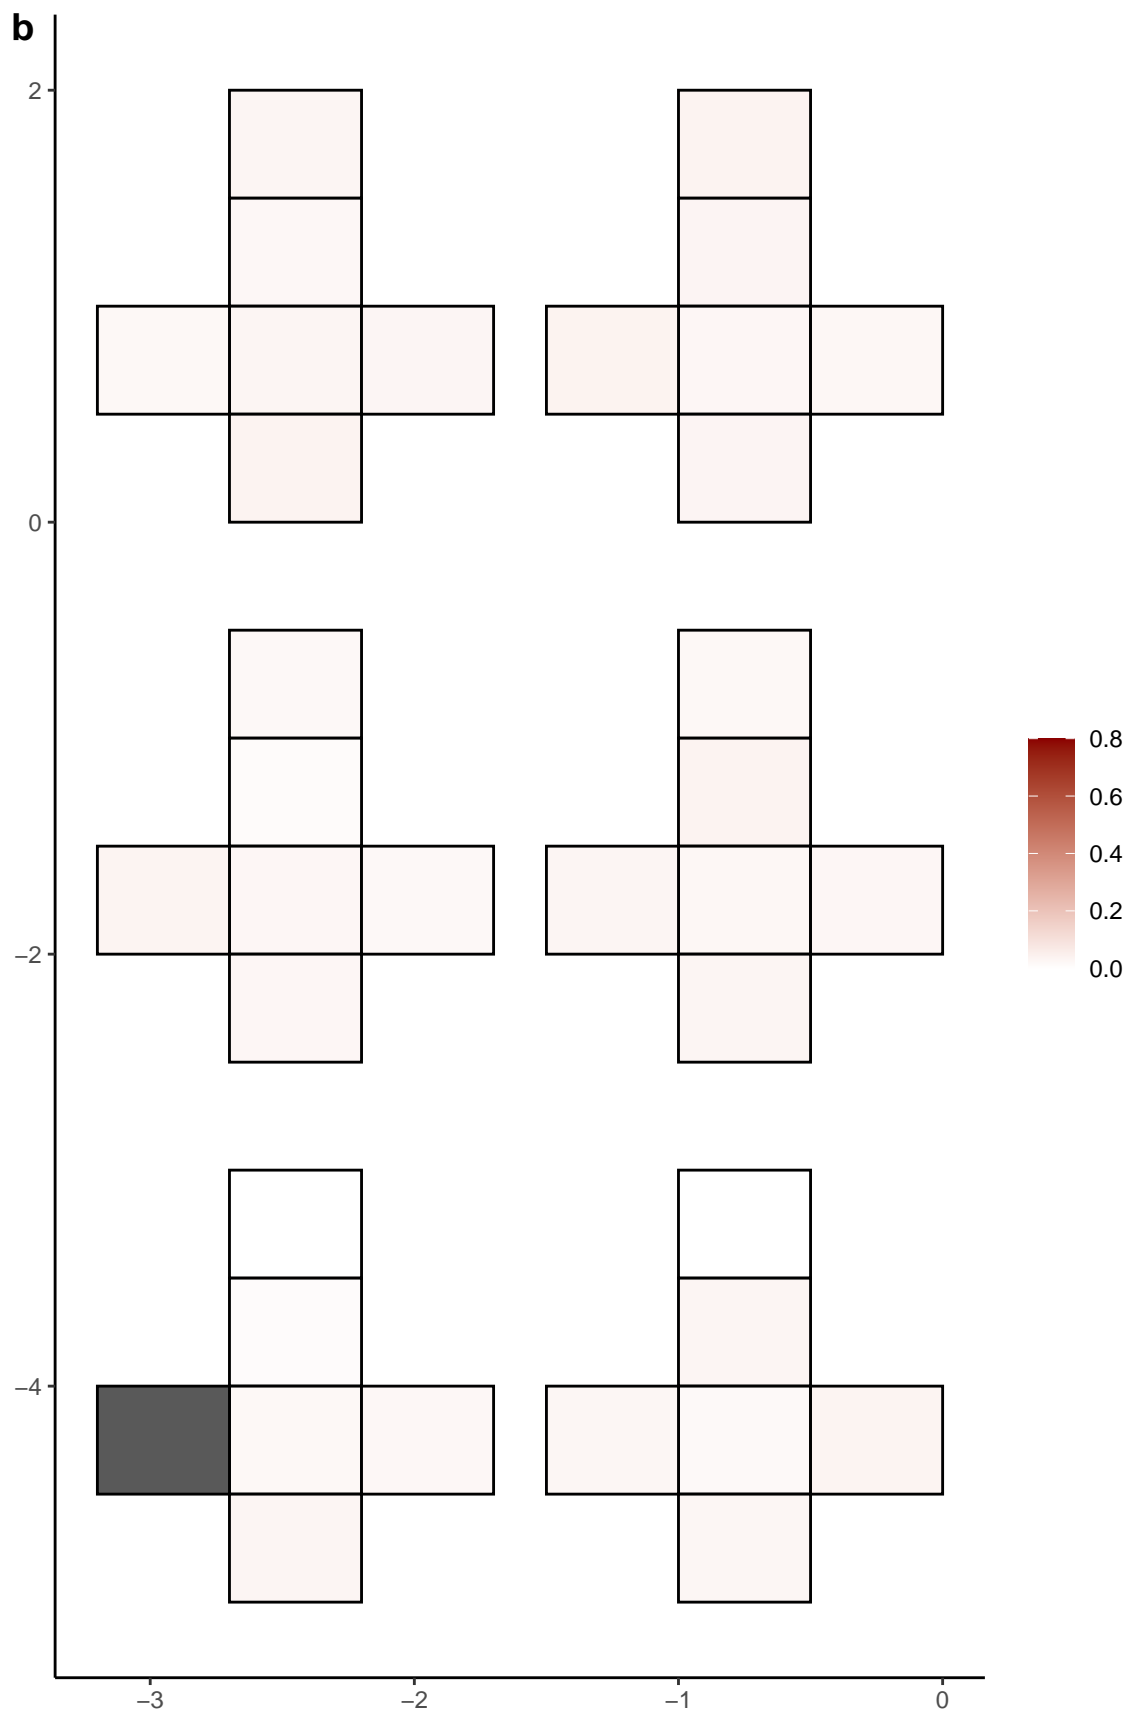

**a** ID01 14-65962309-A-C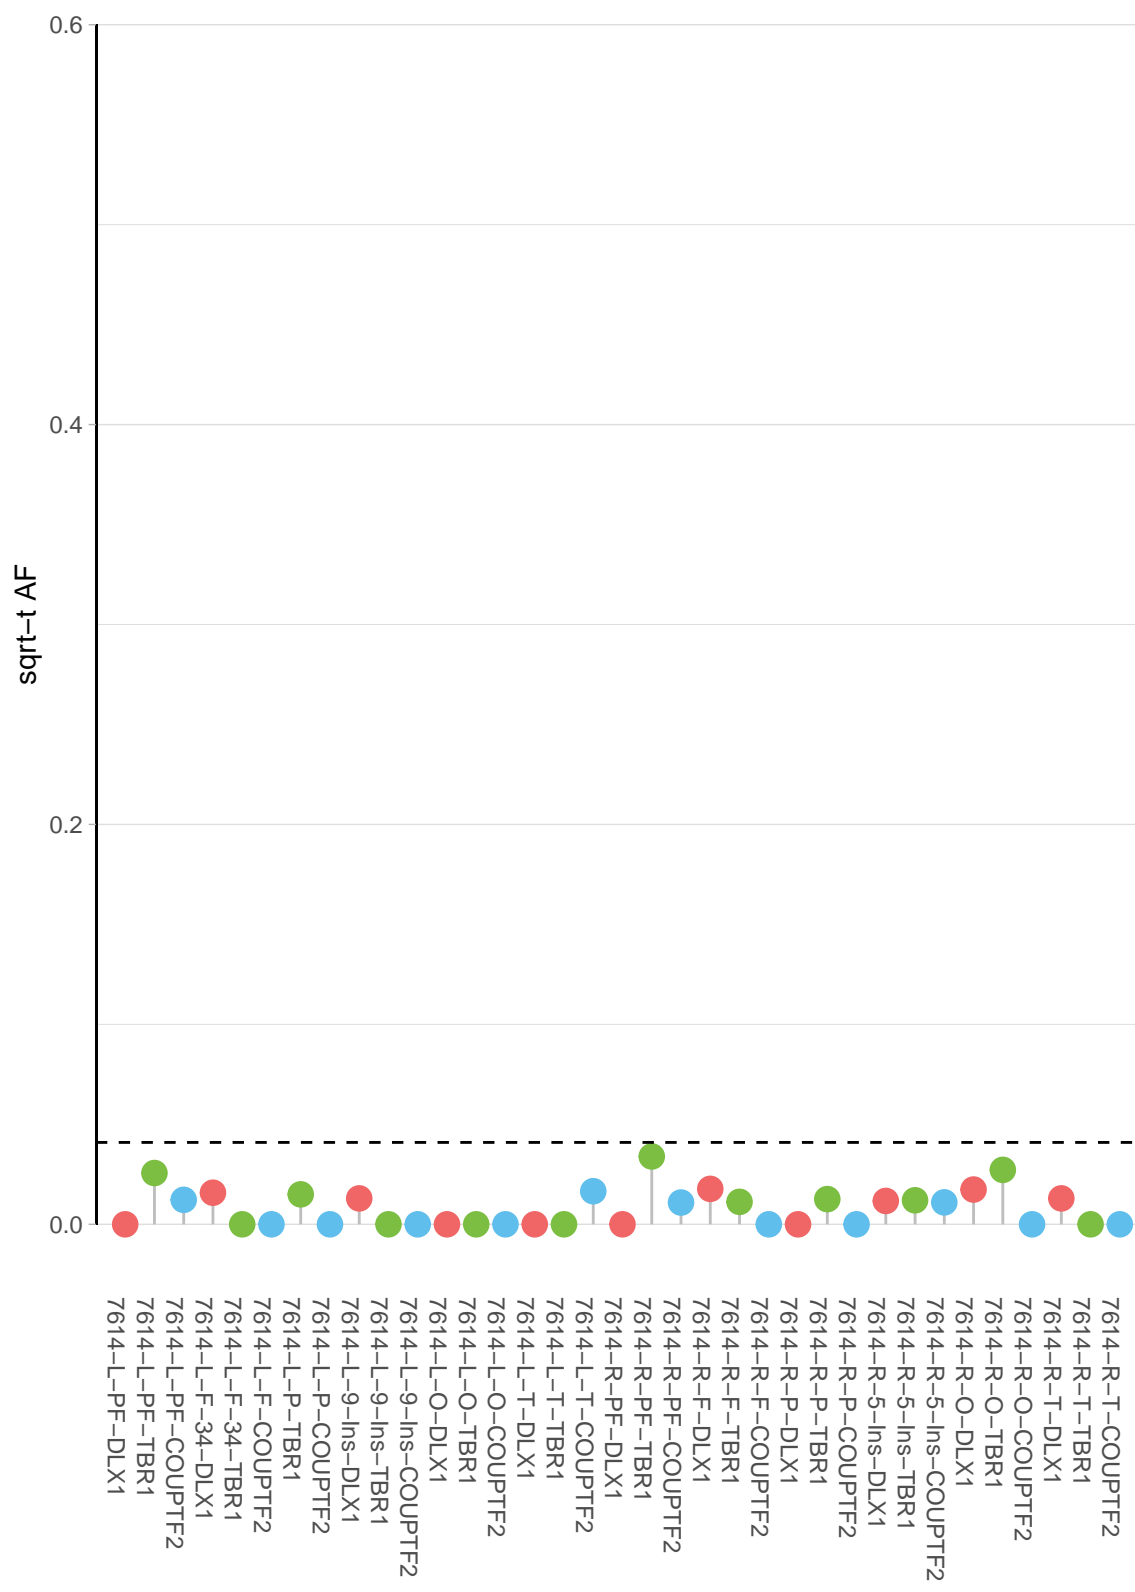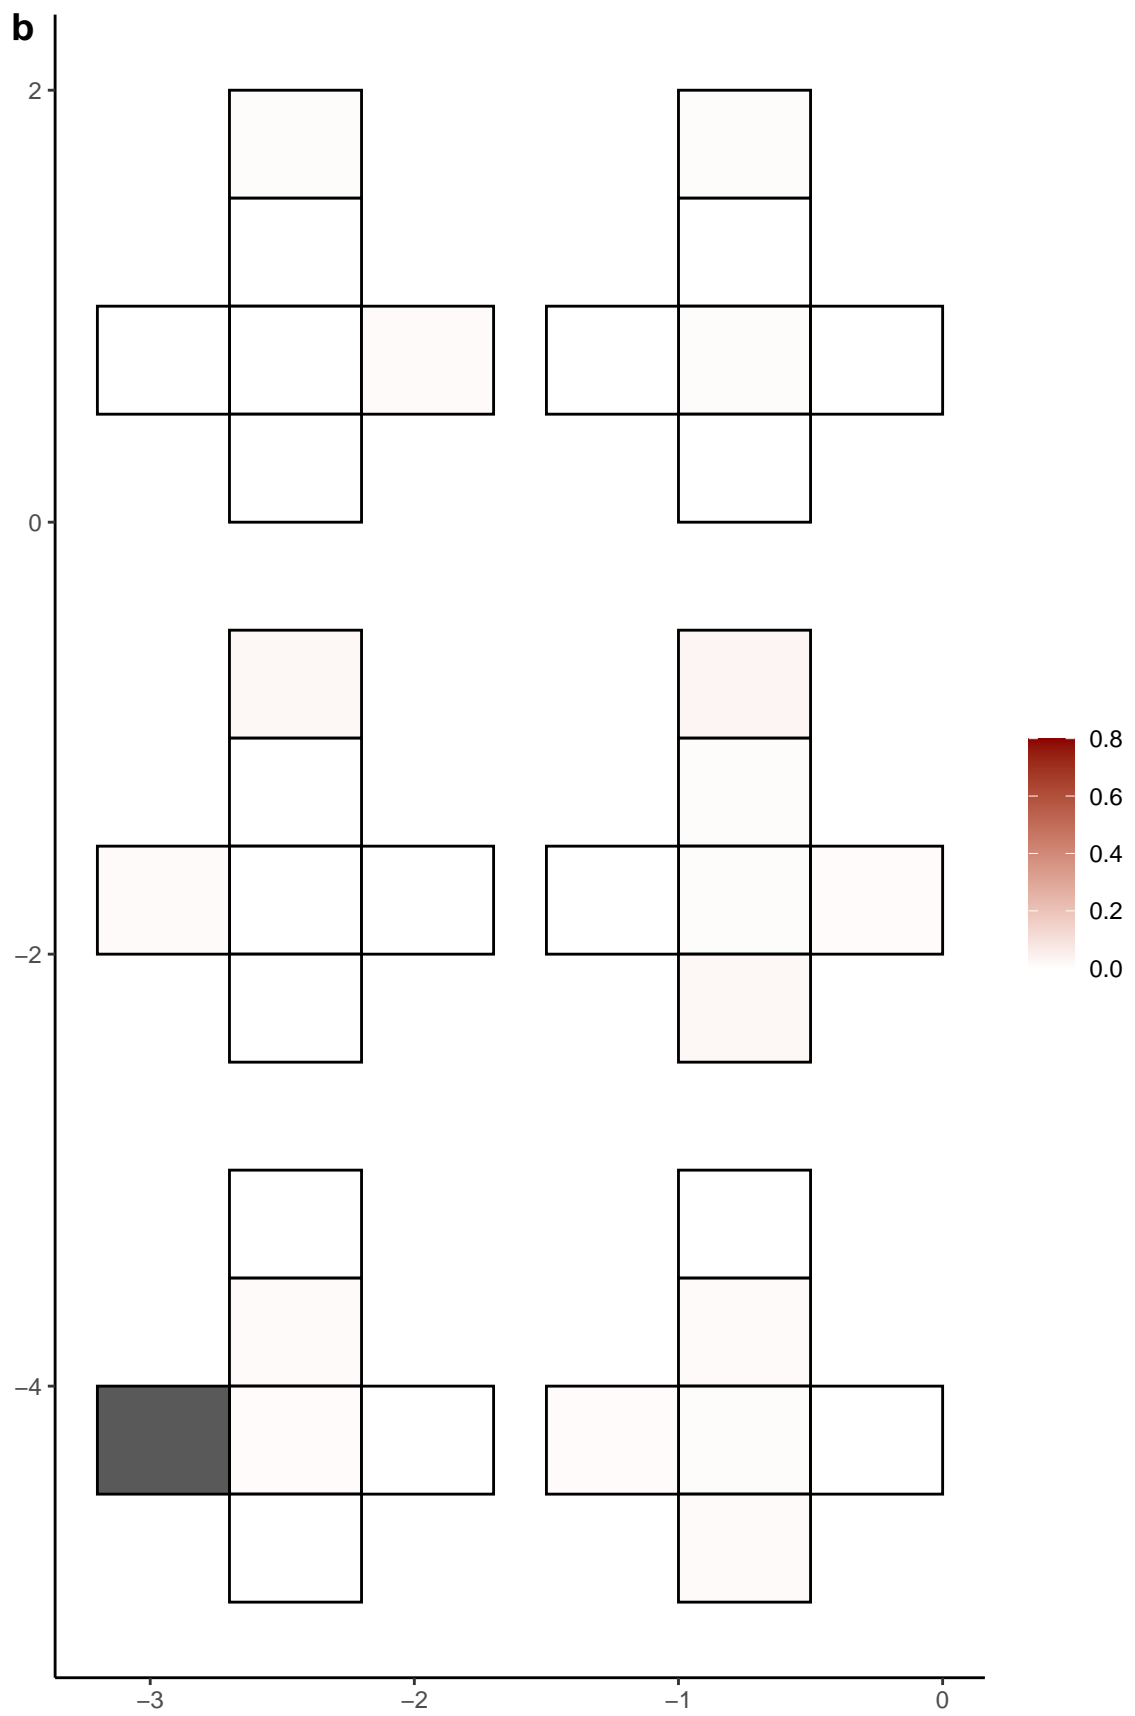



**a** ID01 14-82666170-G-A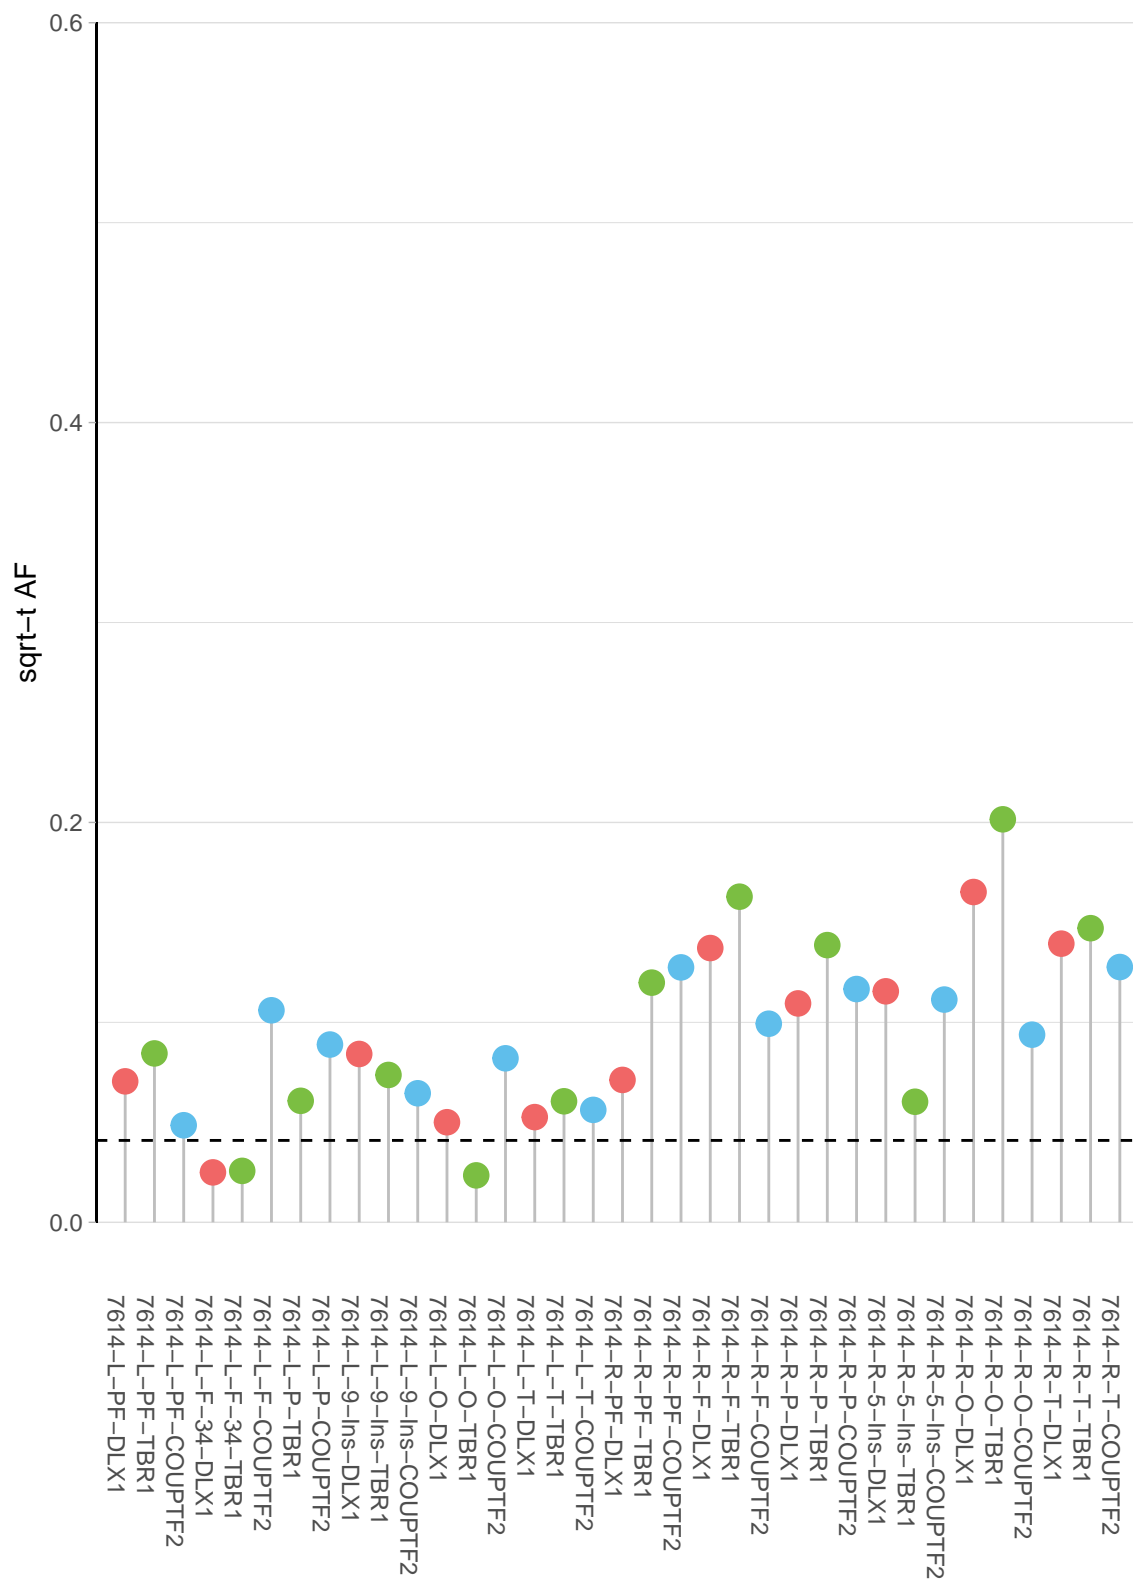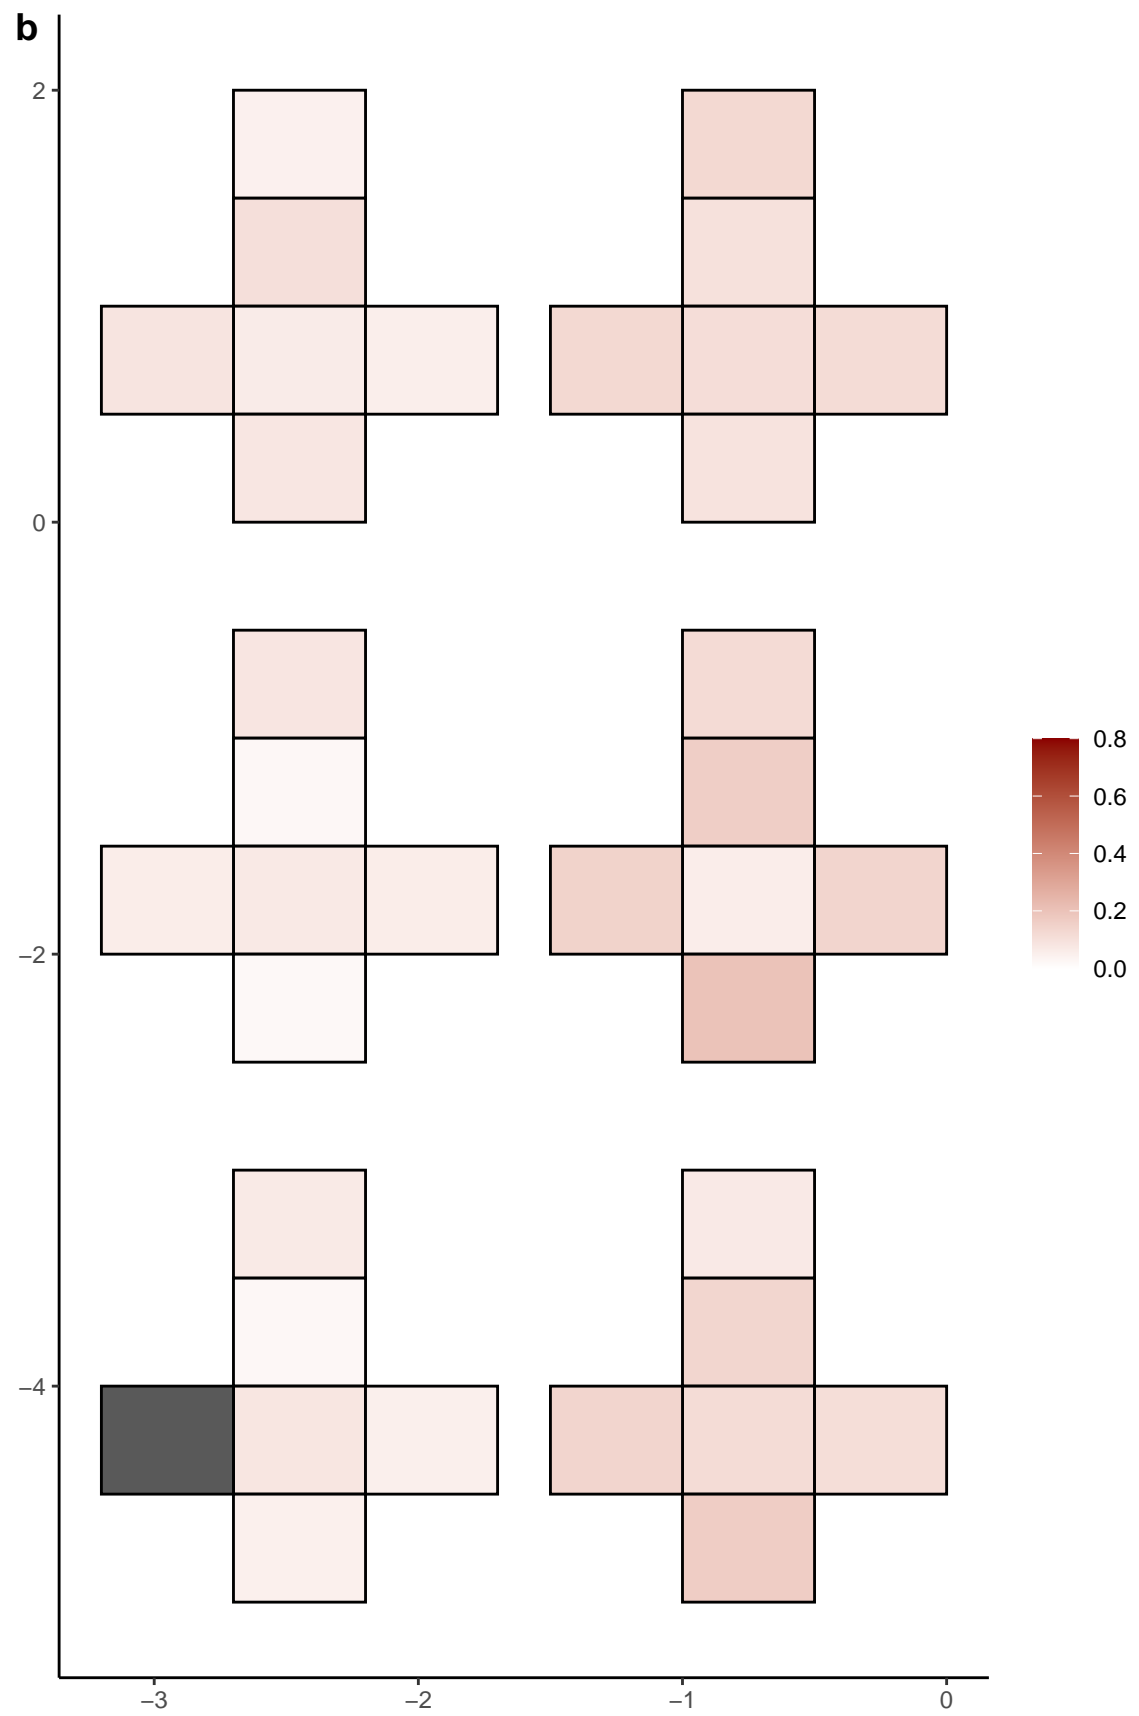

**a** ID01 15-42431069-T-C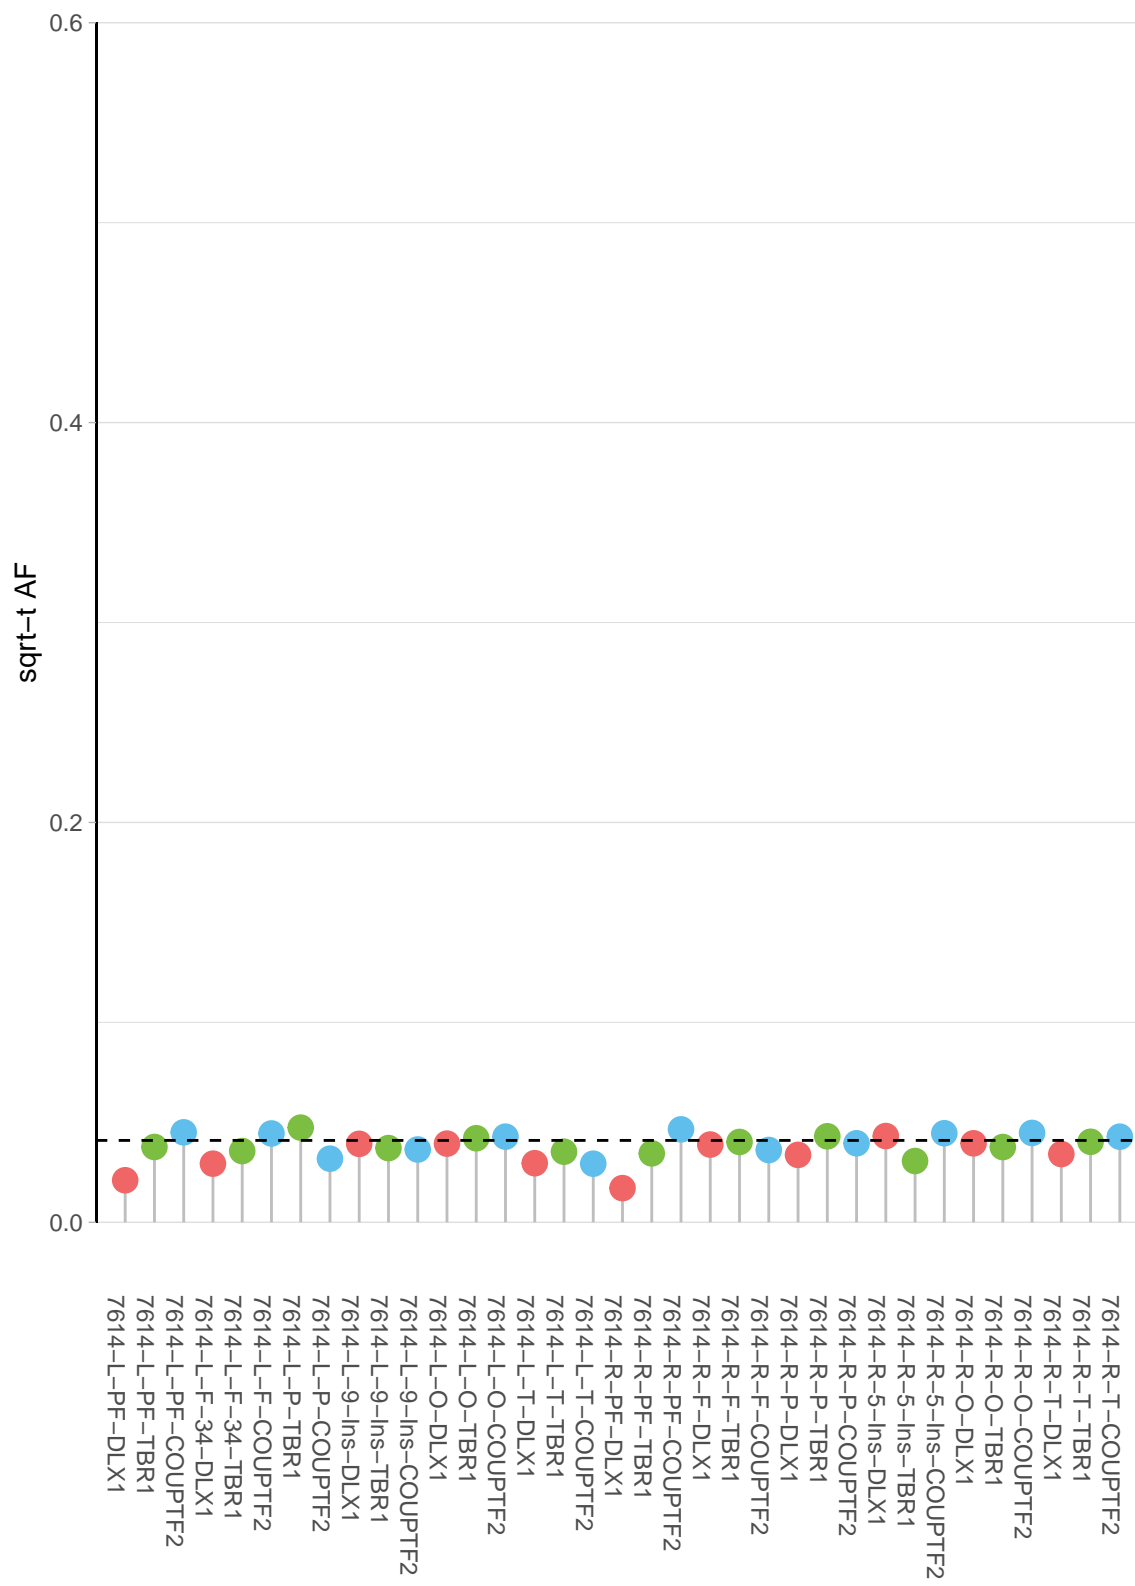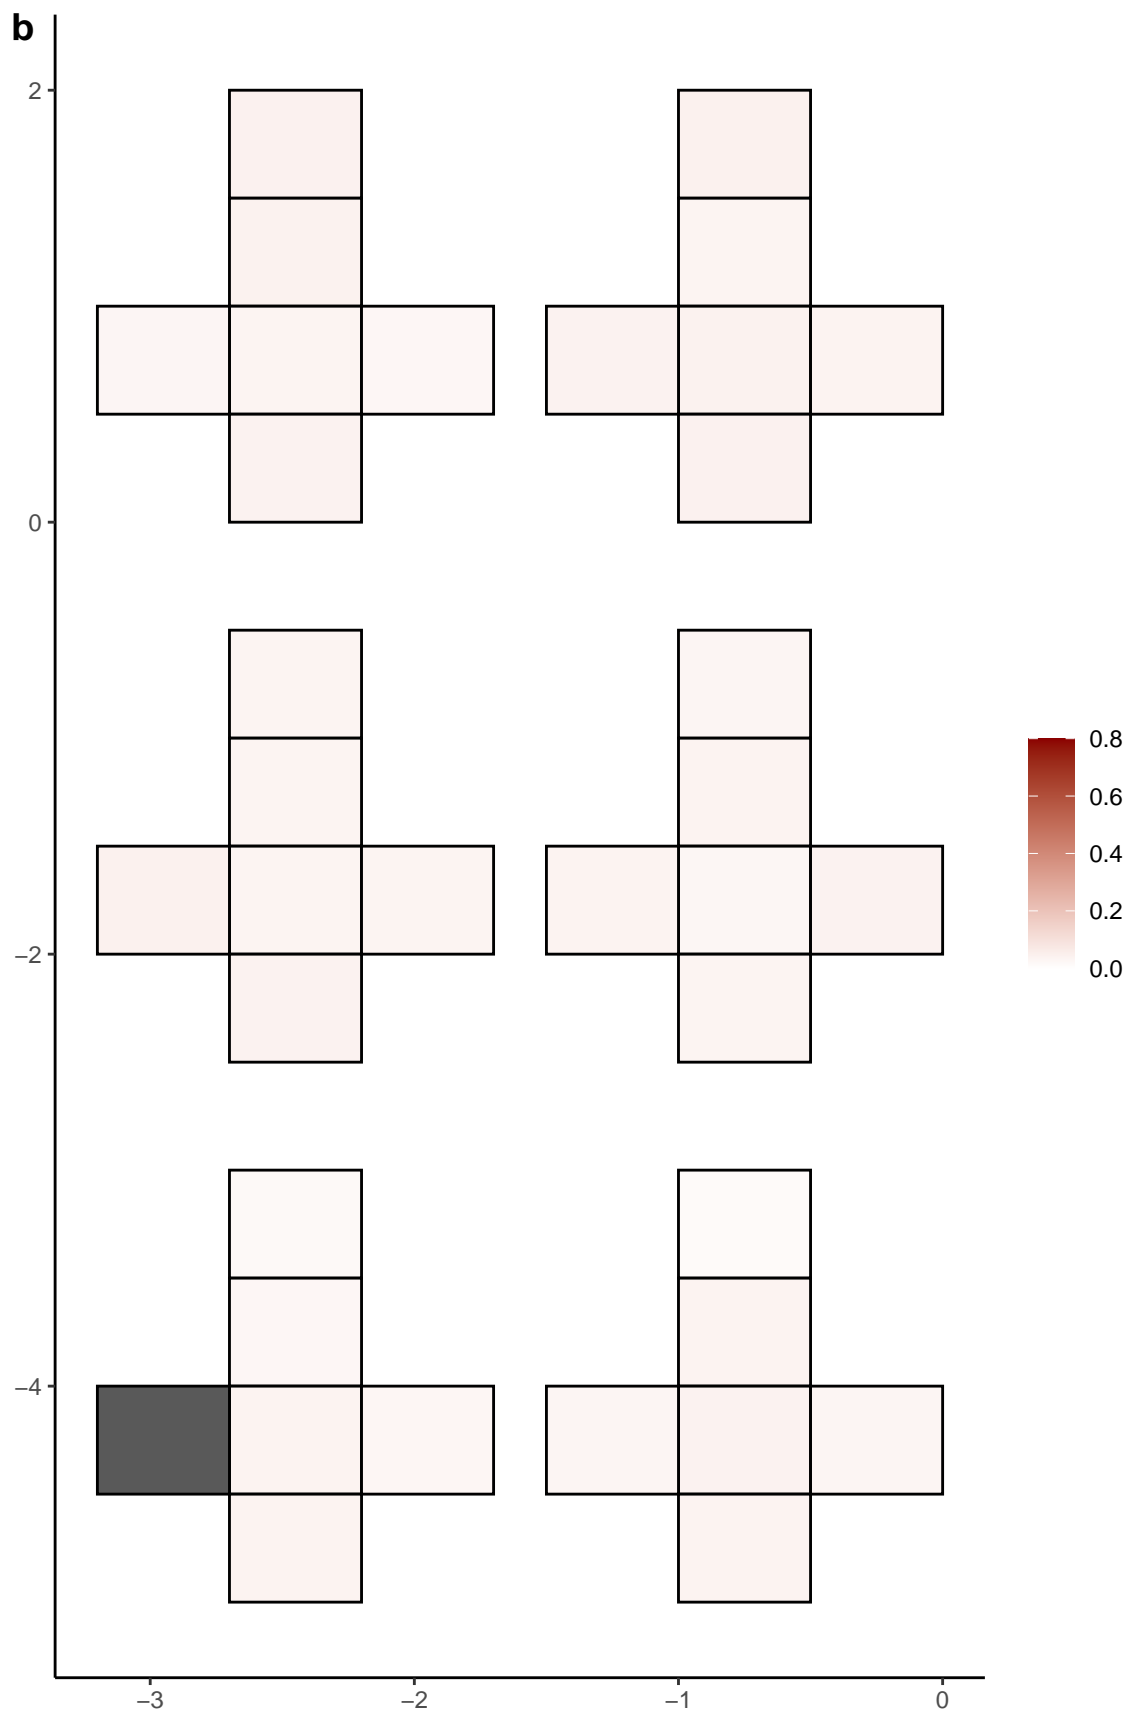



**a** ID01 15-65325135-G-A

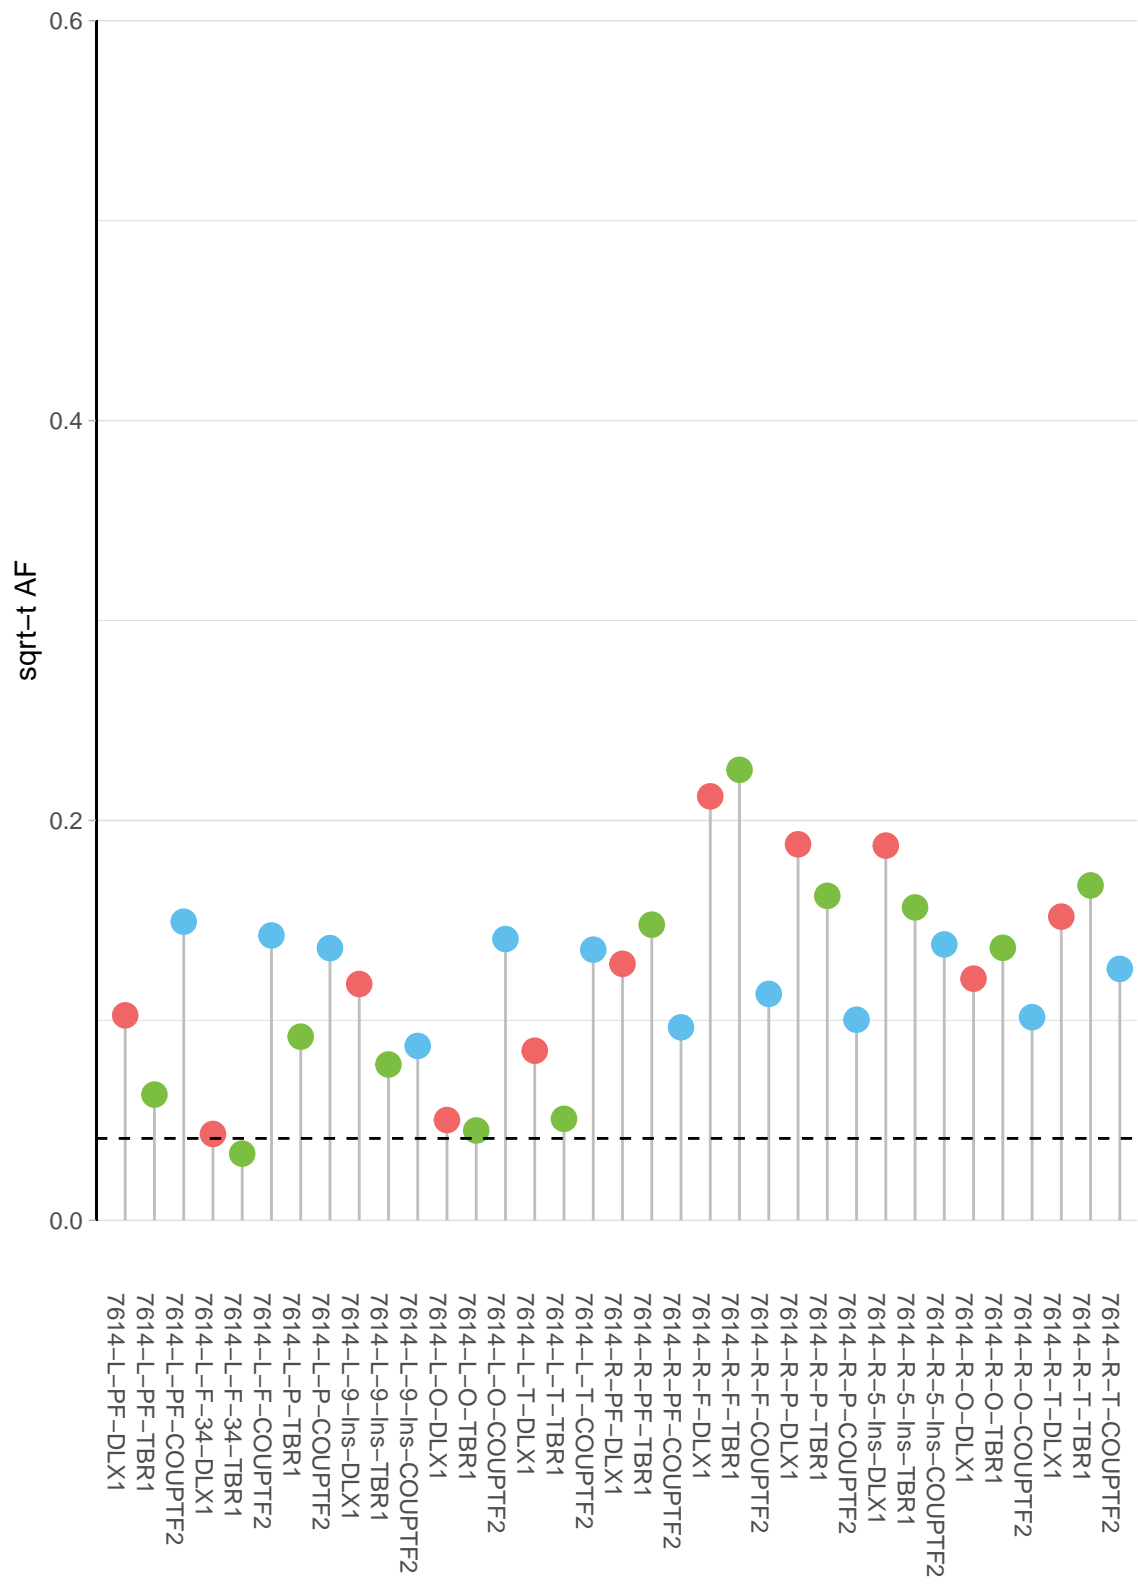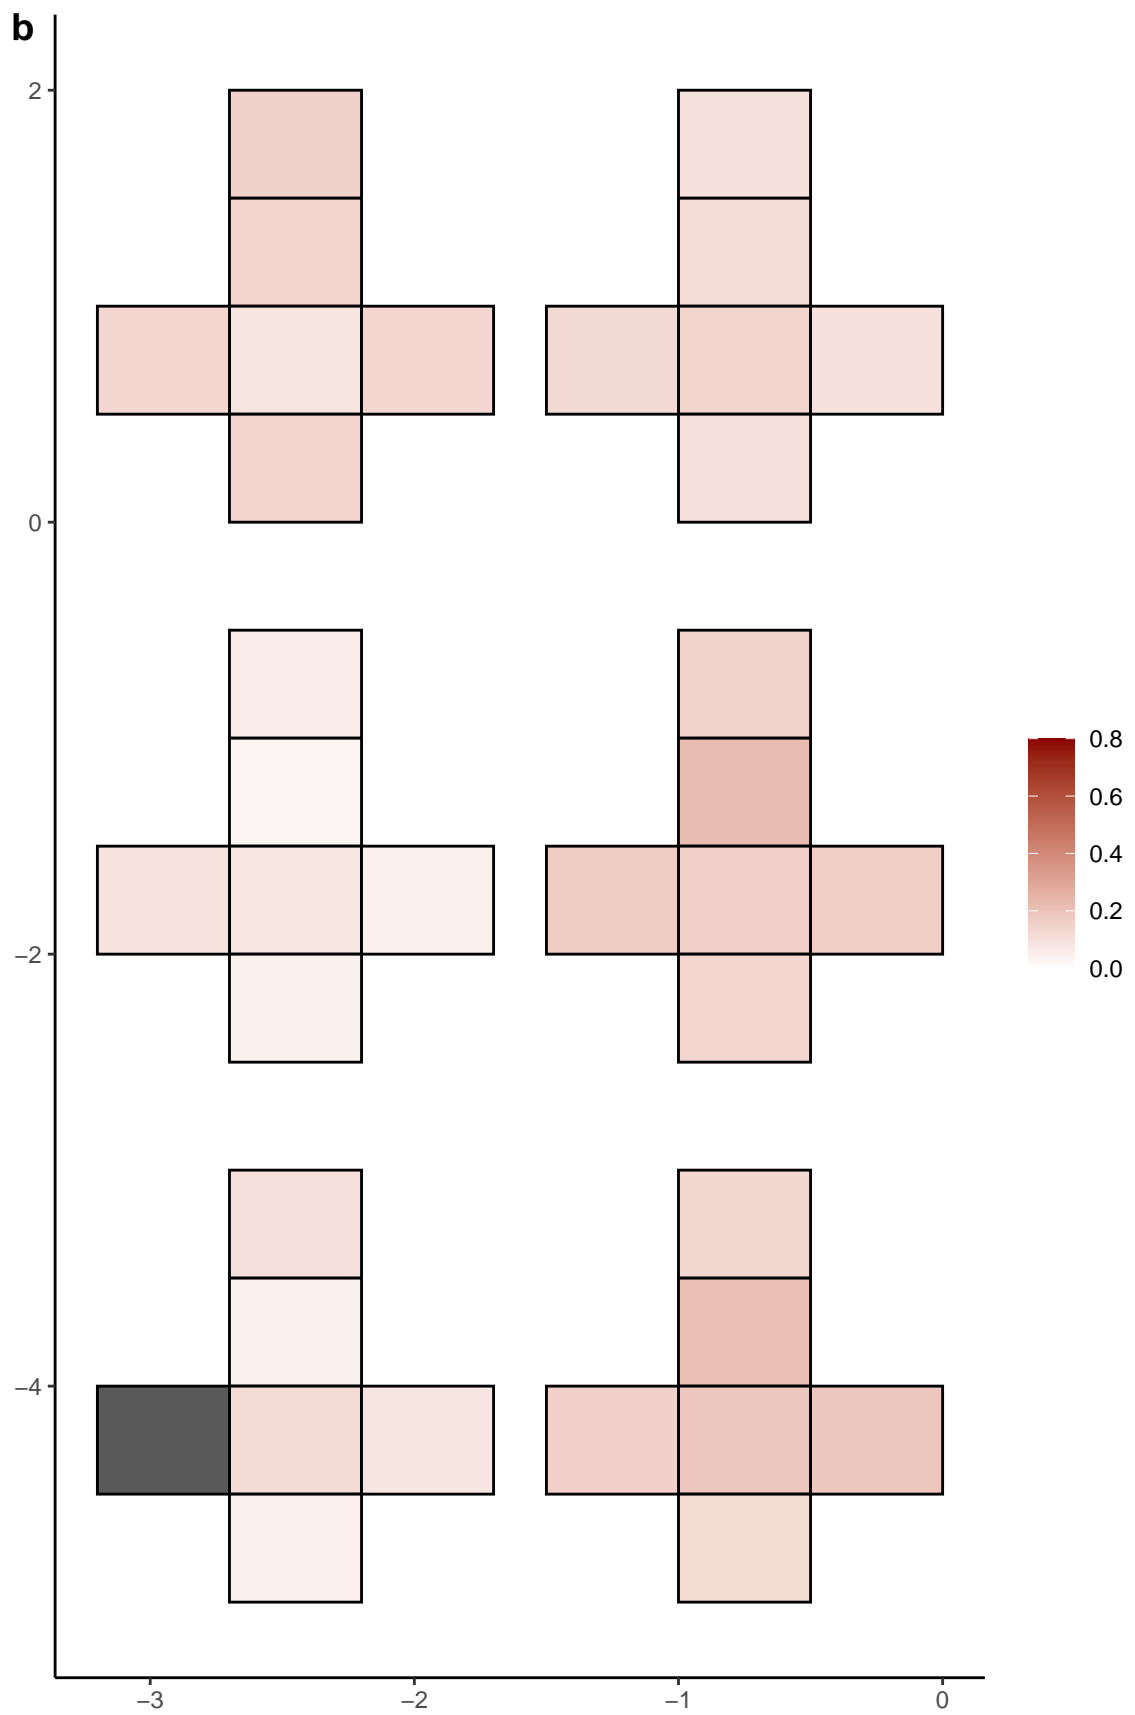

**a** ID01 15-89933068-T-G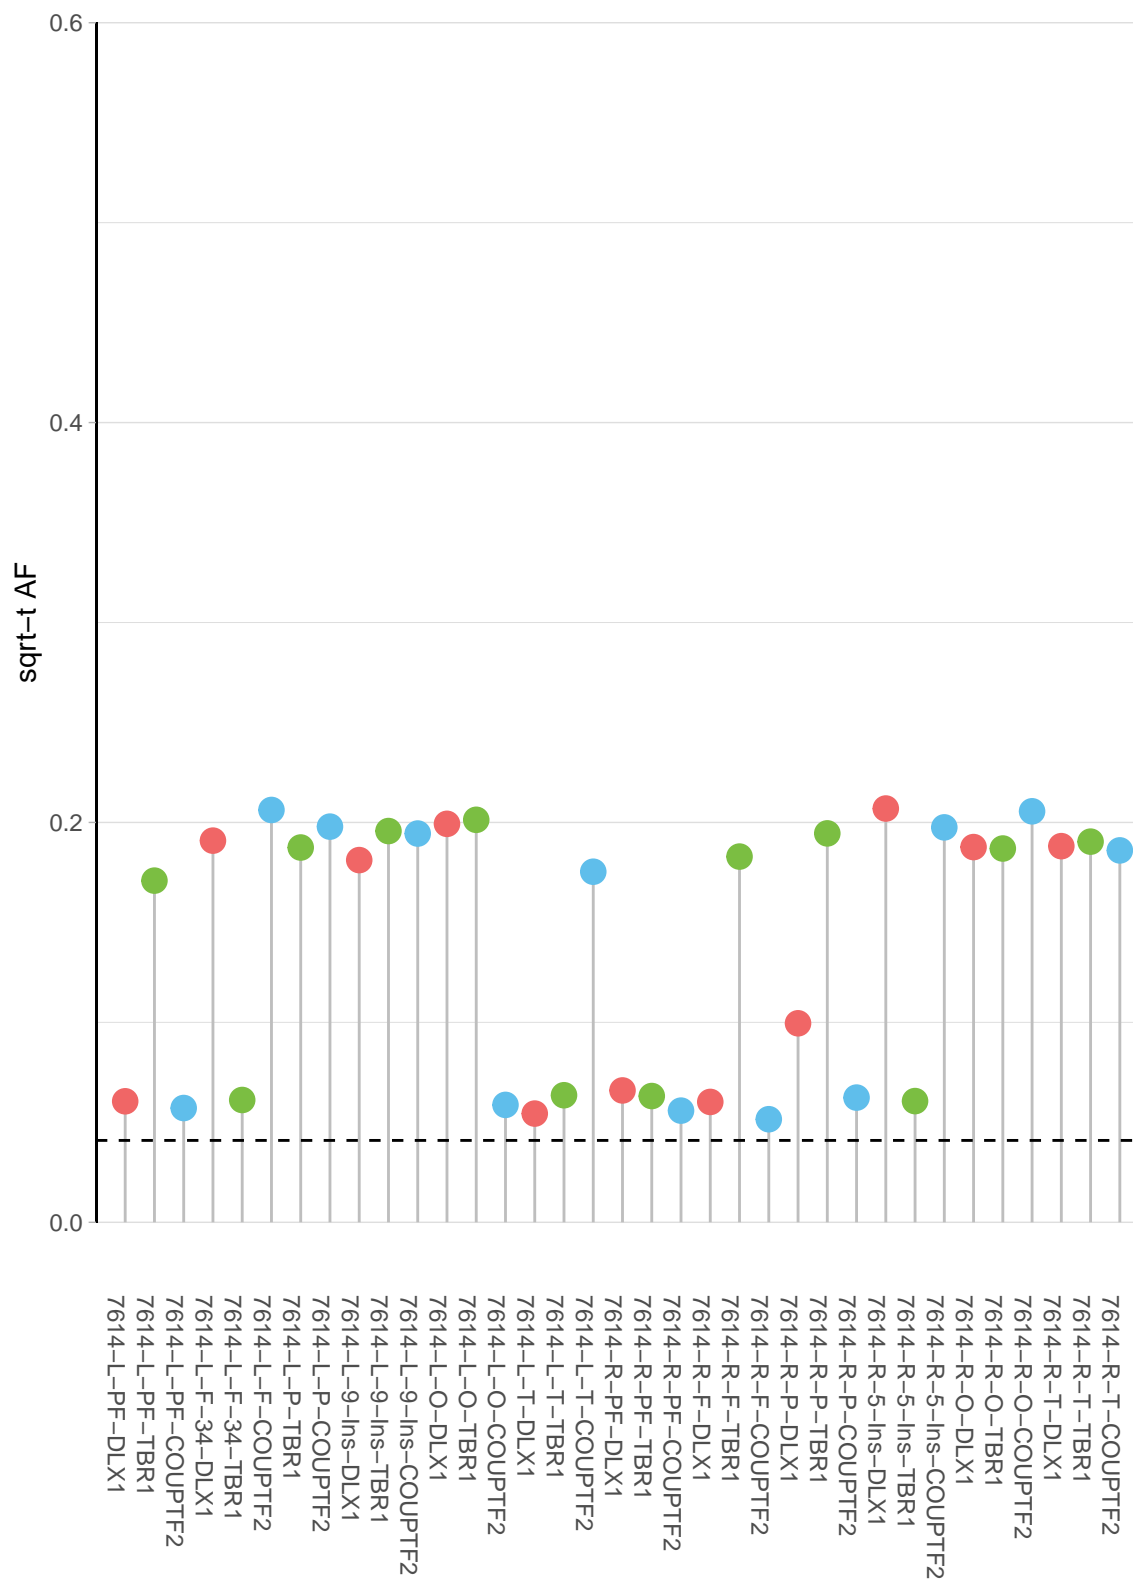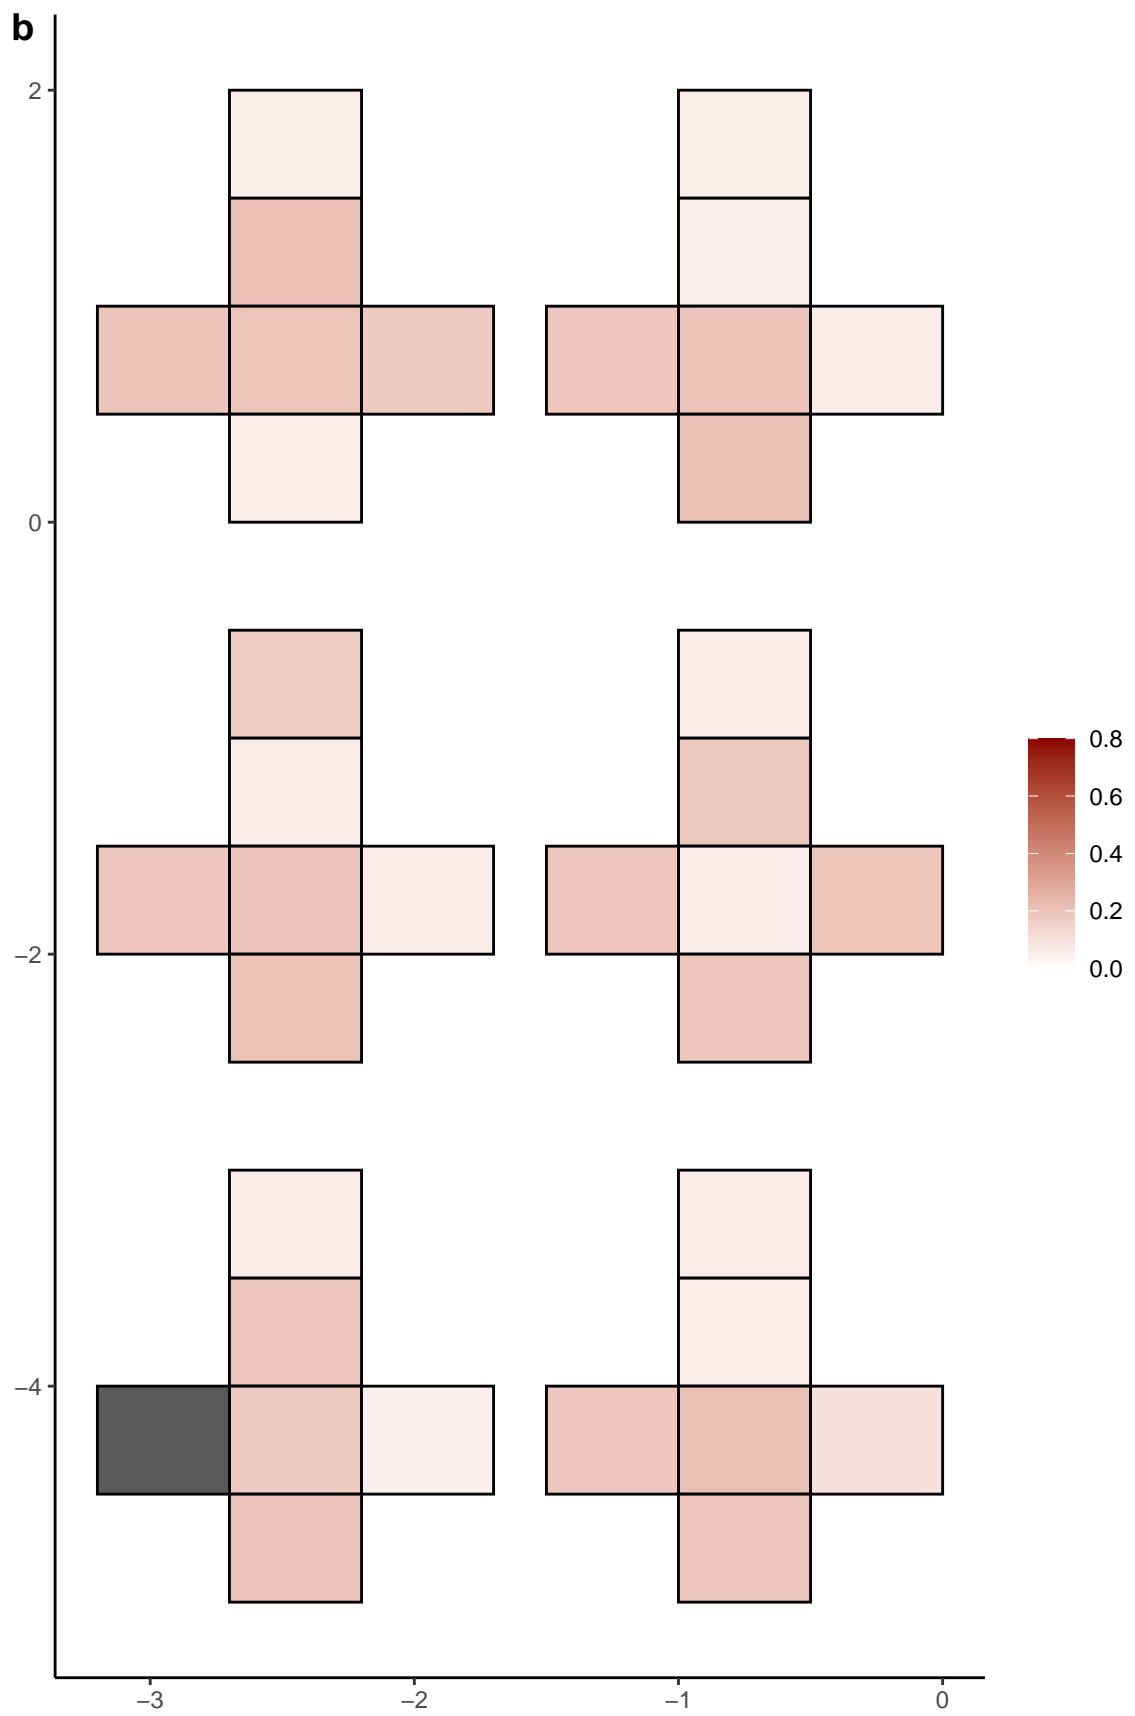

**a** ID01 15-93474236-T-G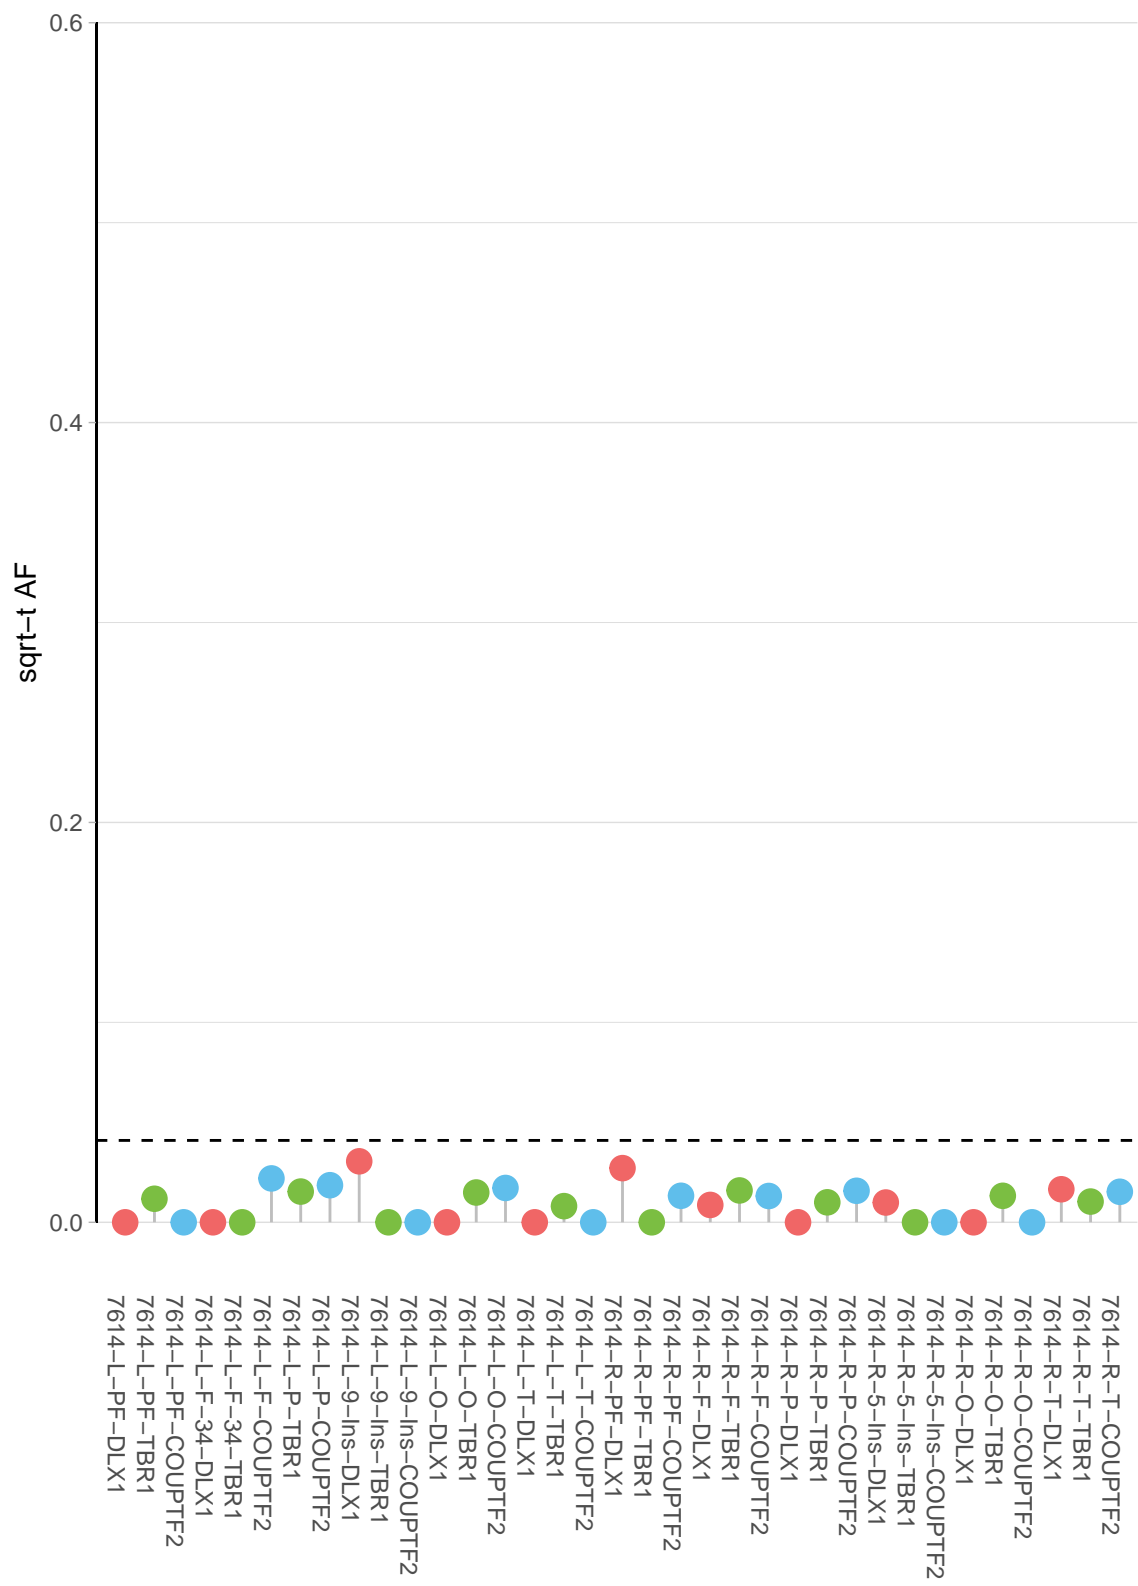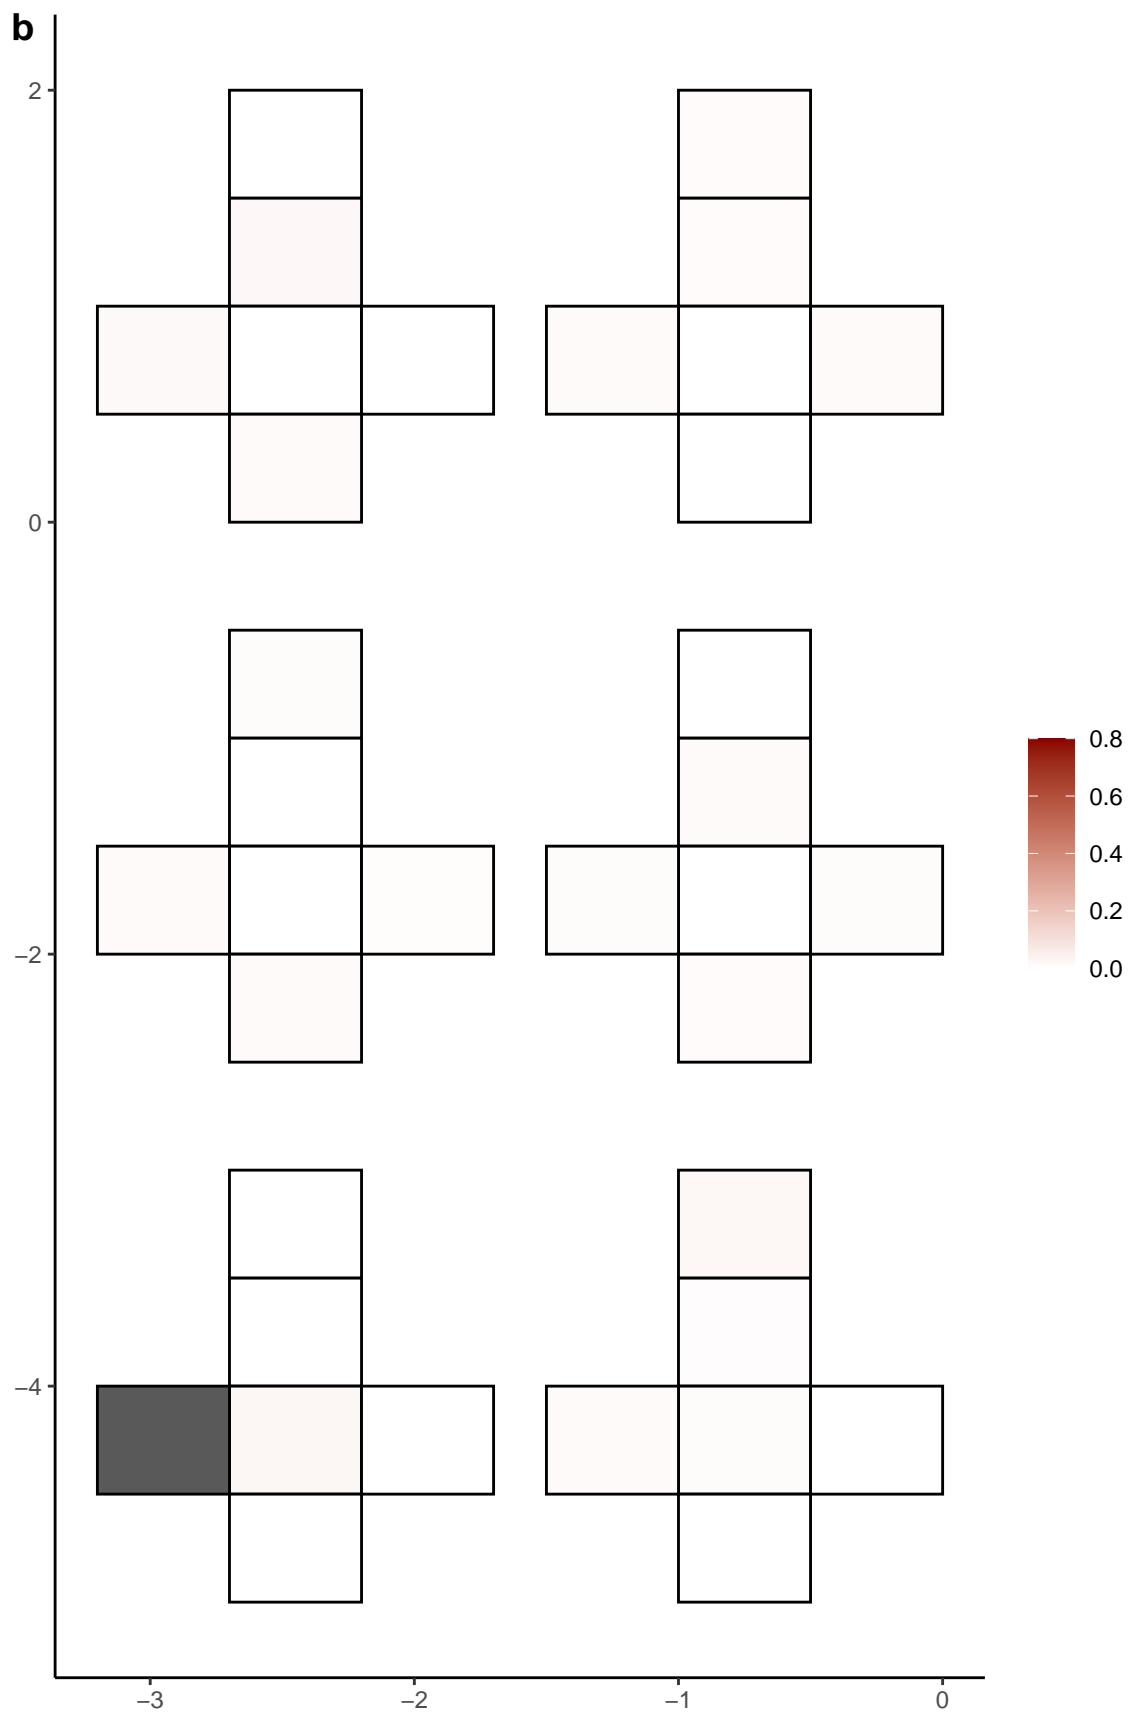

**a** ID01 16-27872227-G-A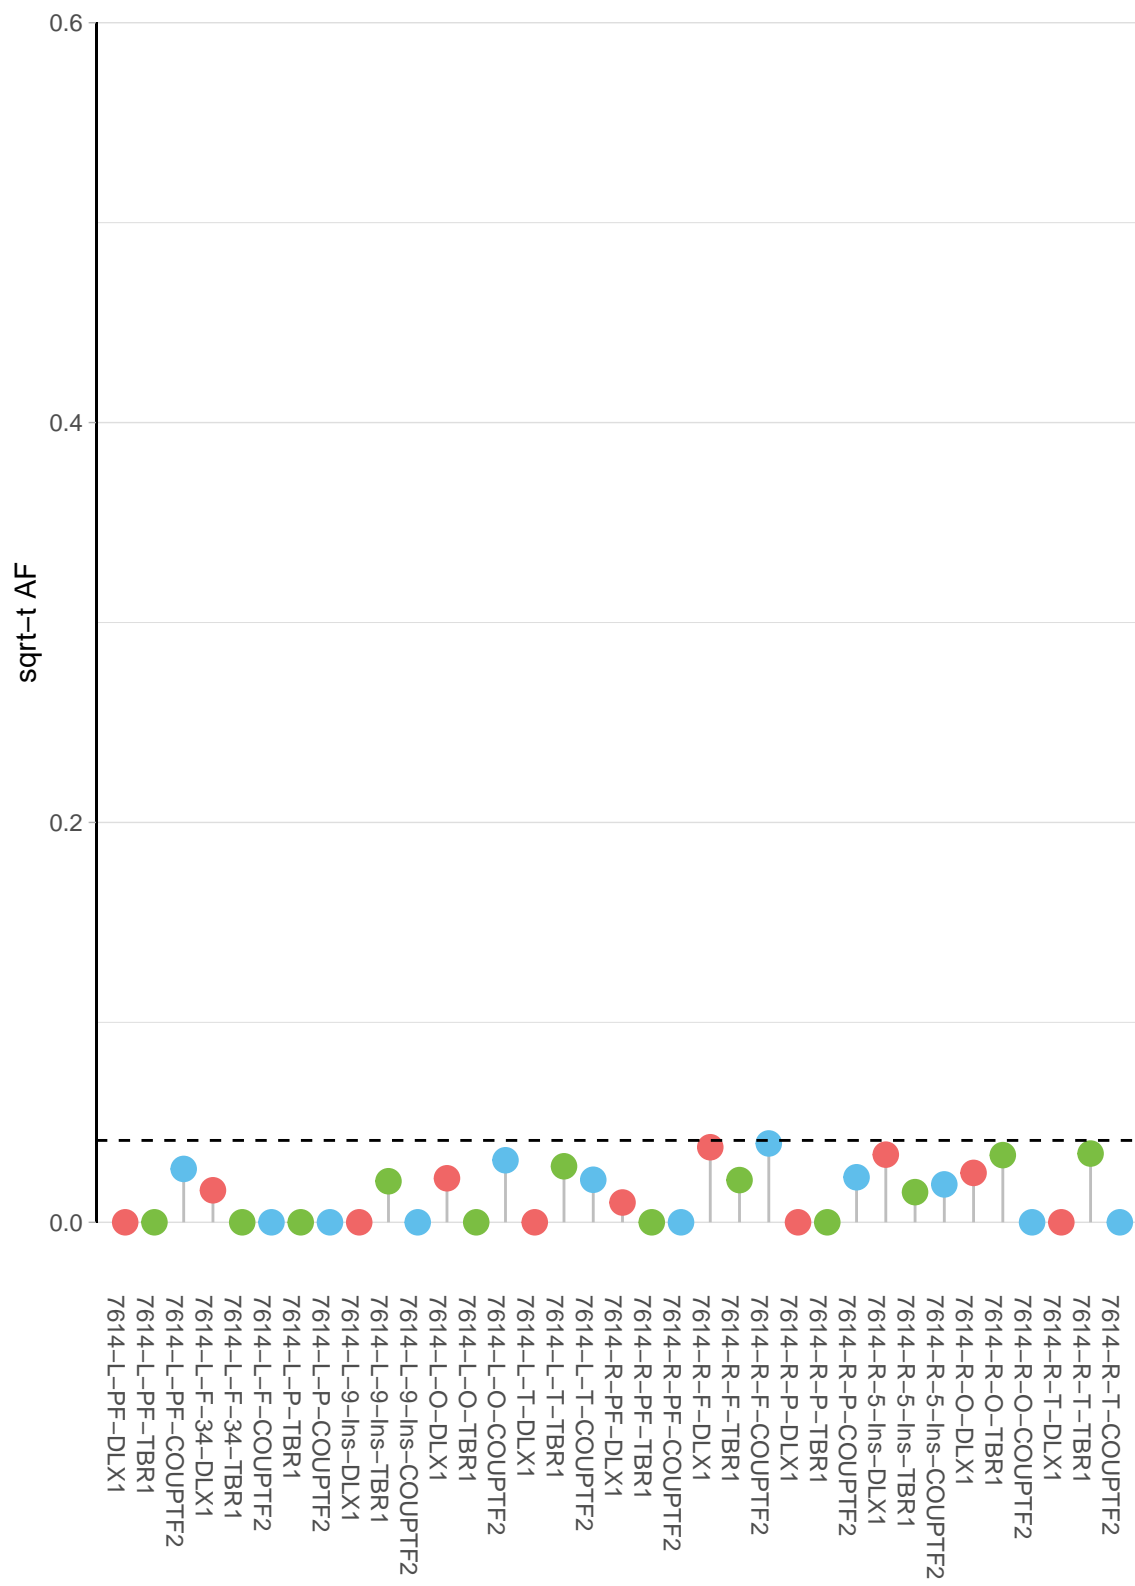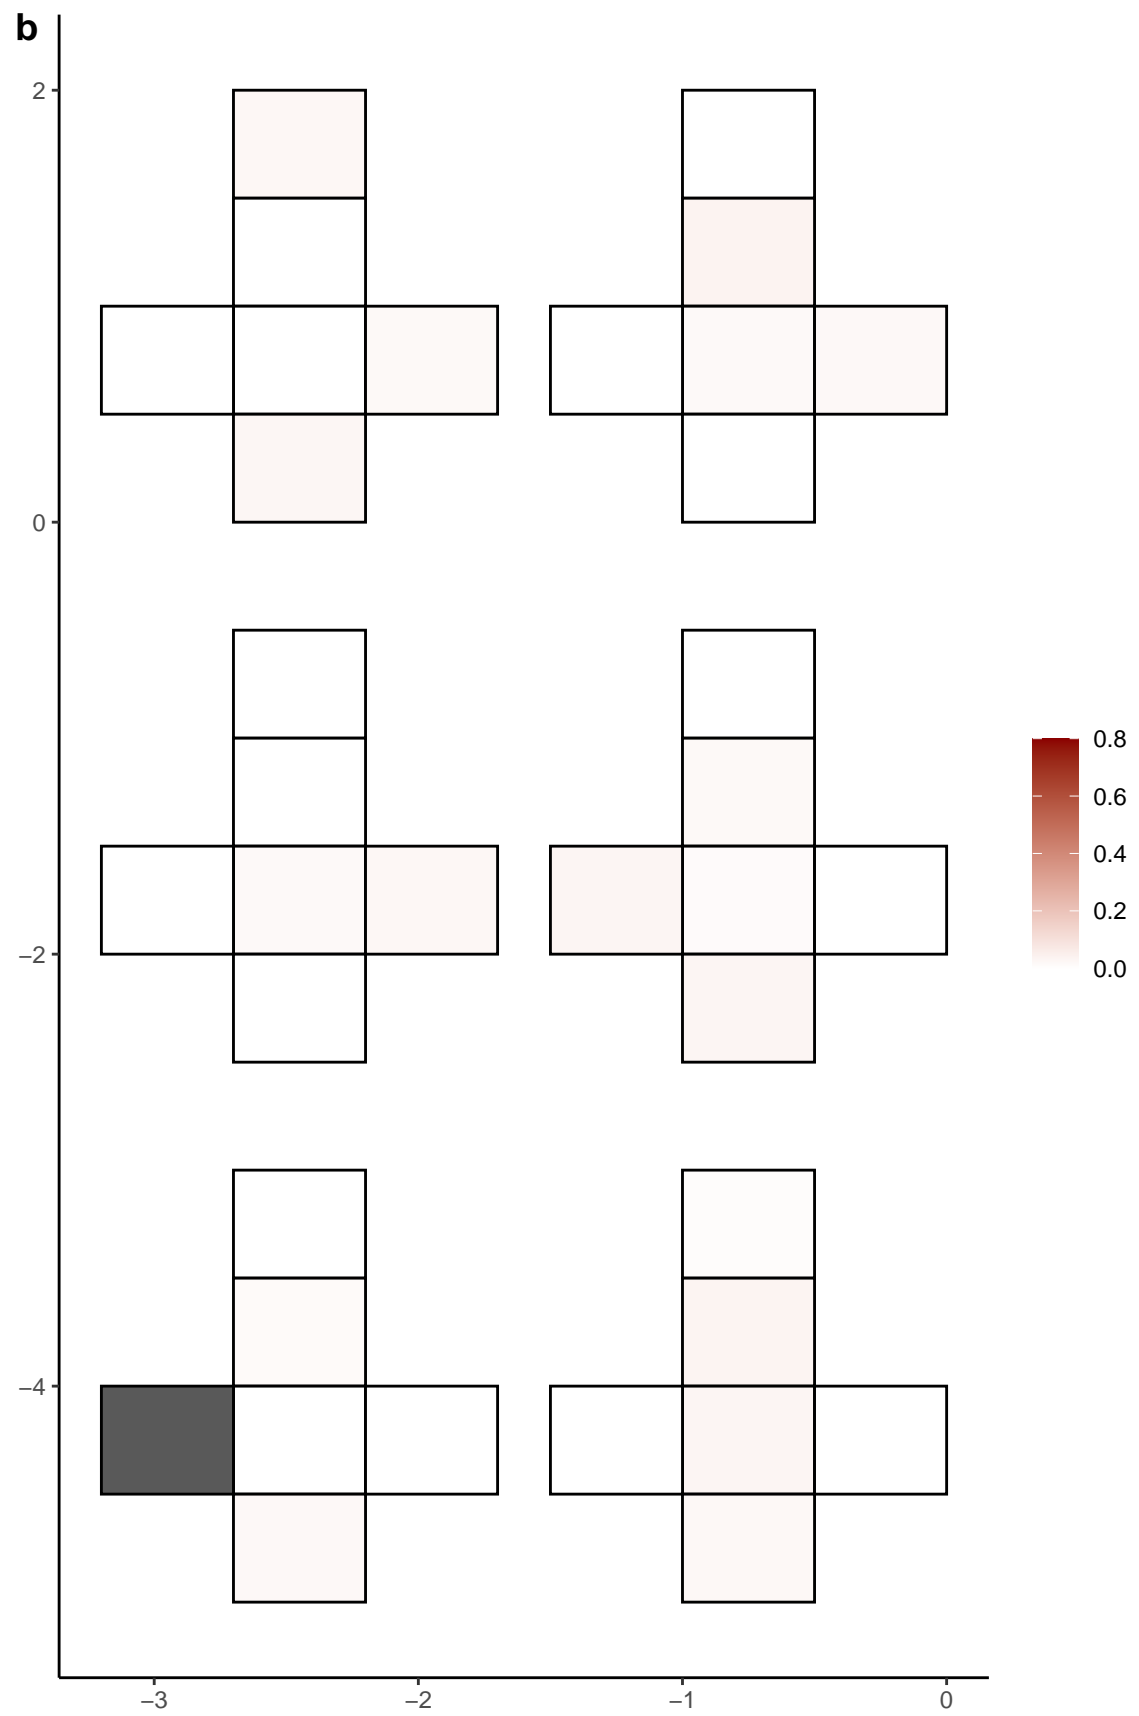

**a** ID01 16-27878370-C-T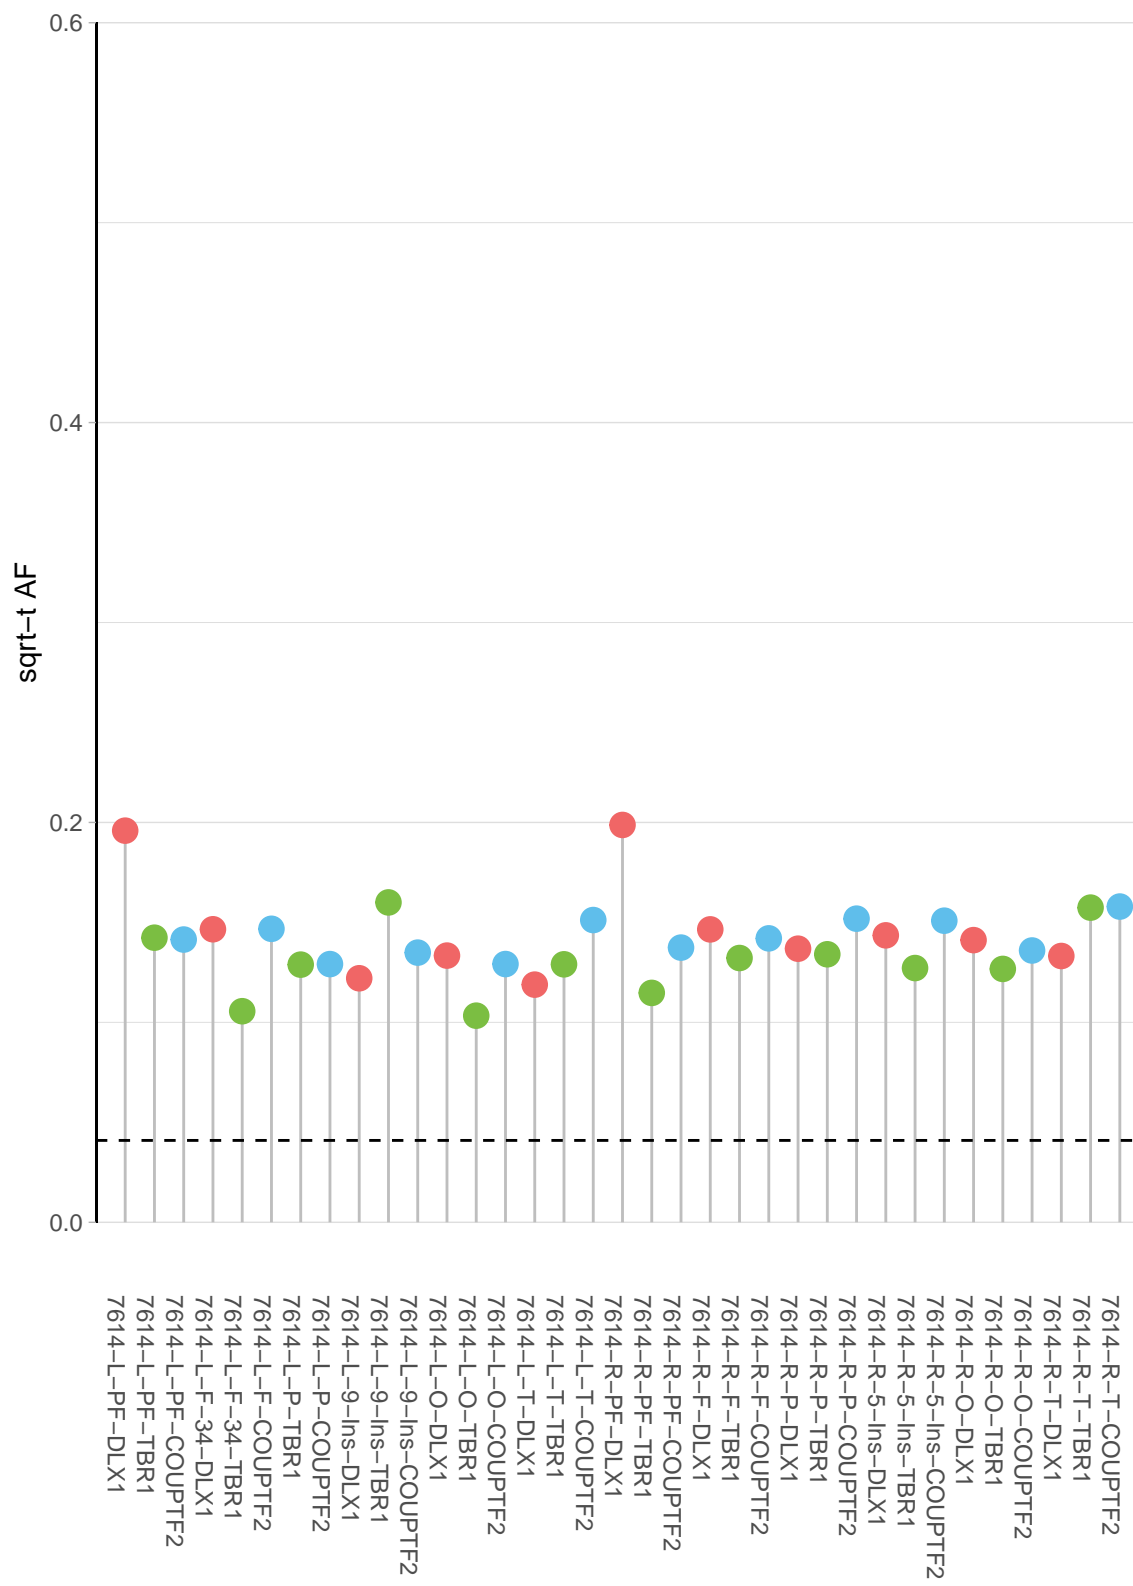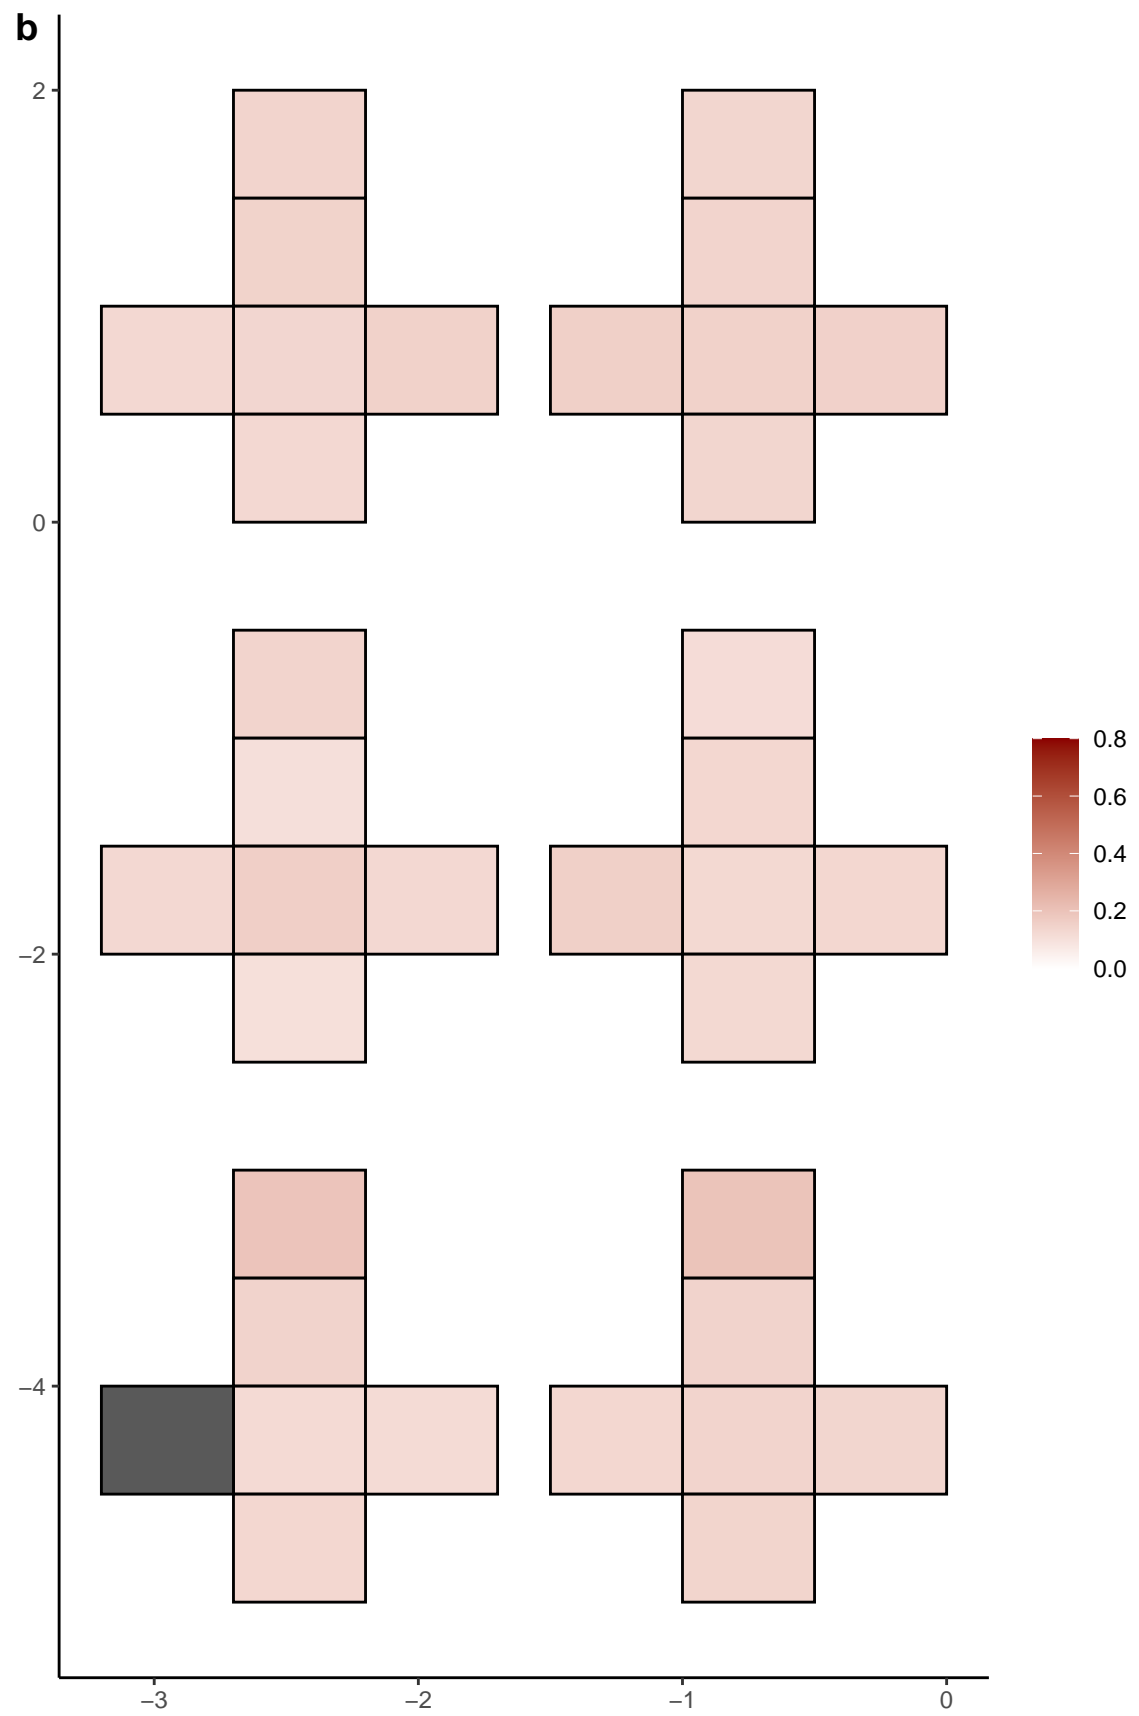

**a** ID01 16-27878380-T-C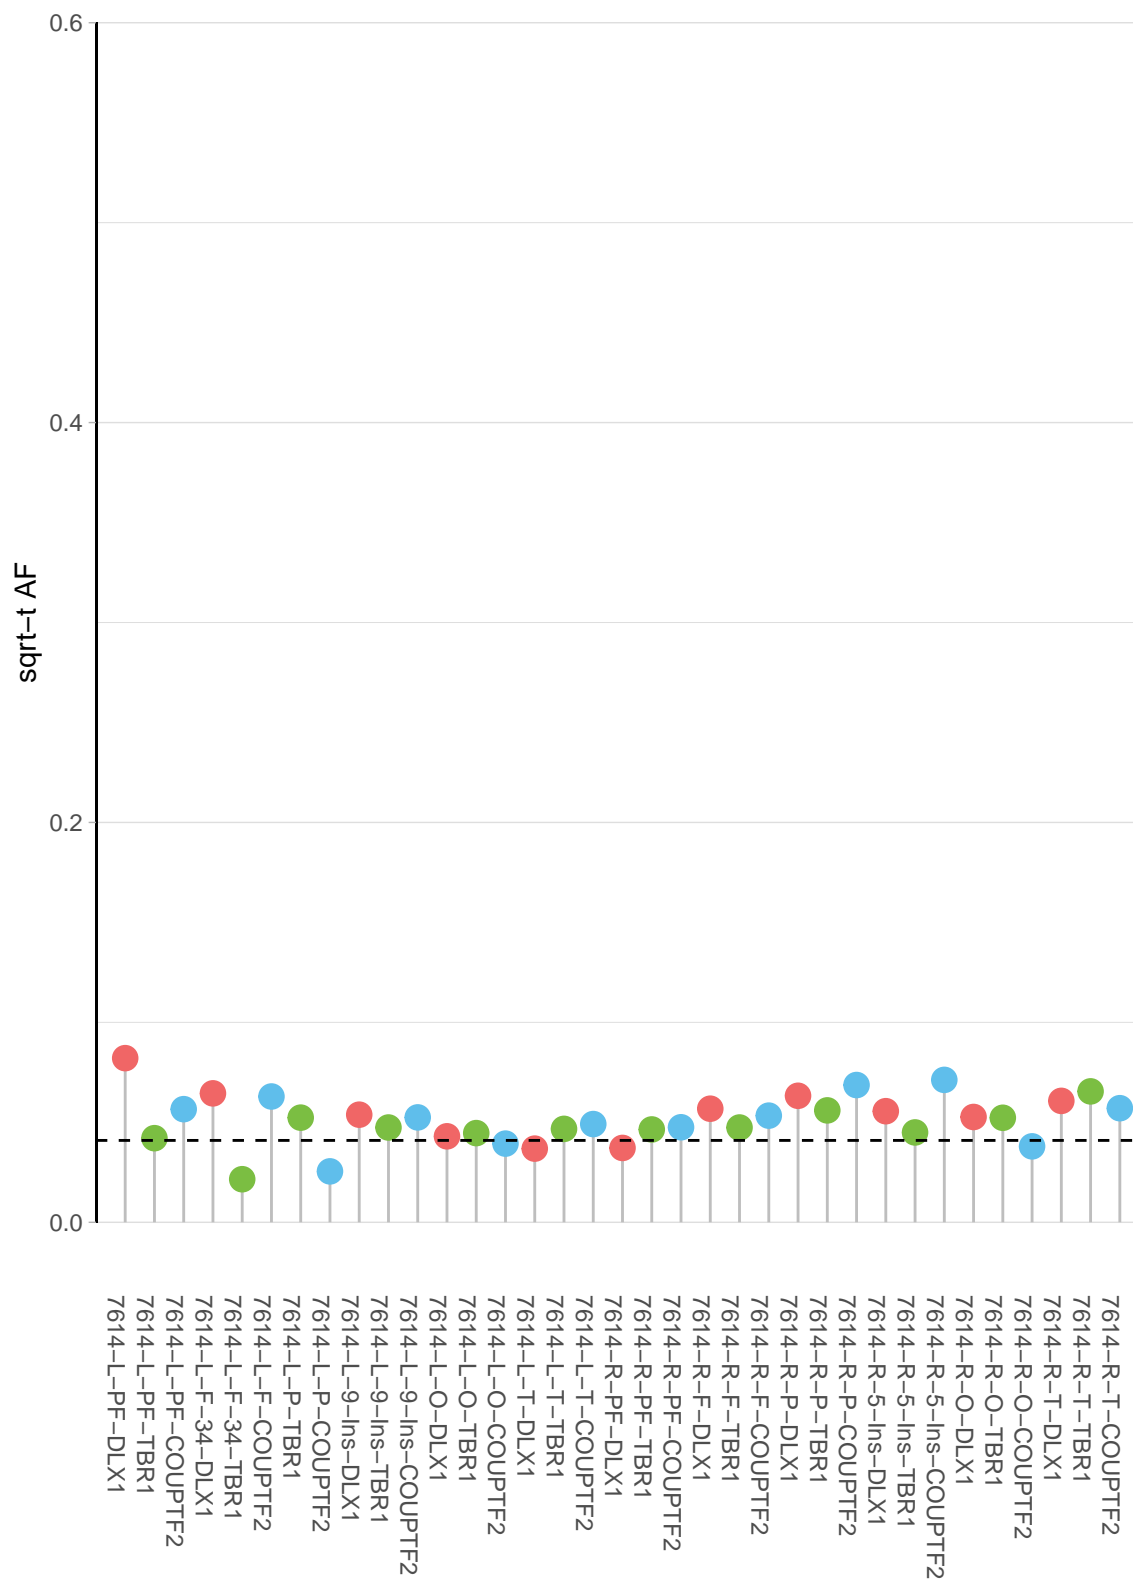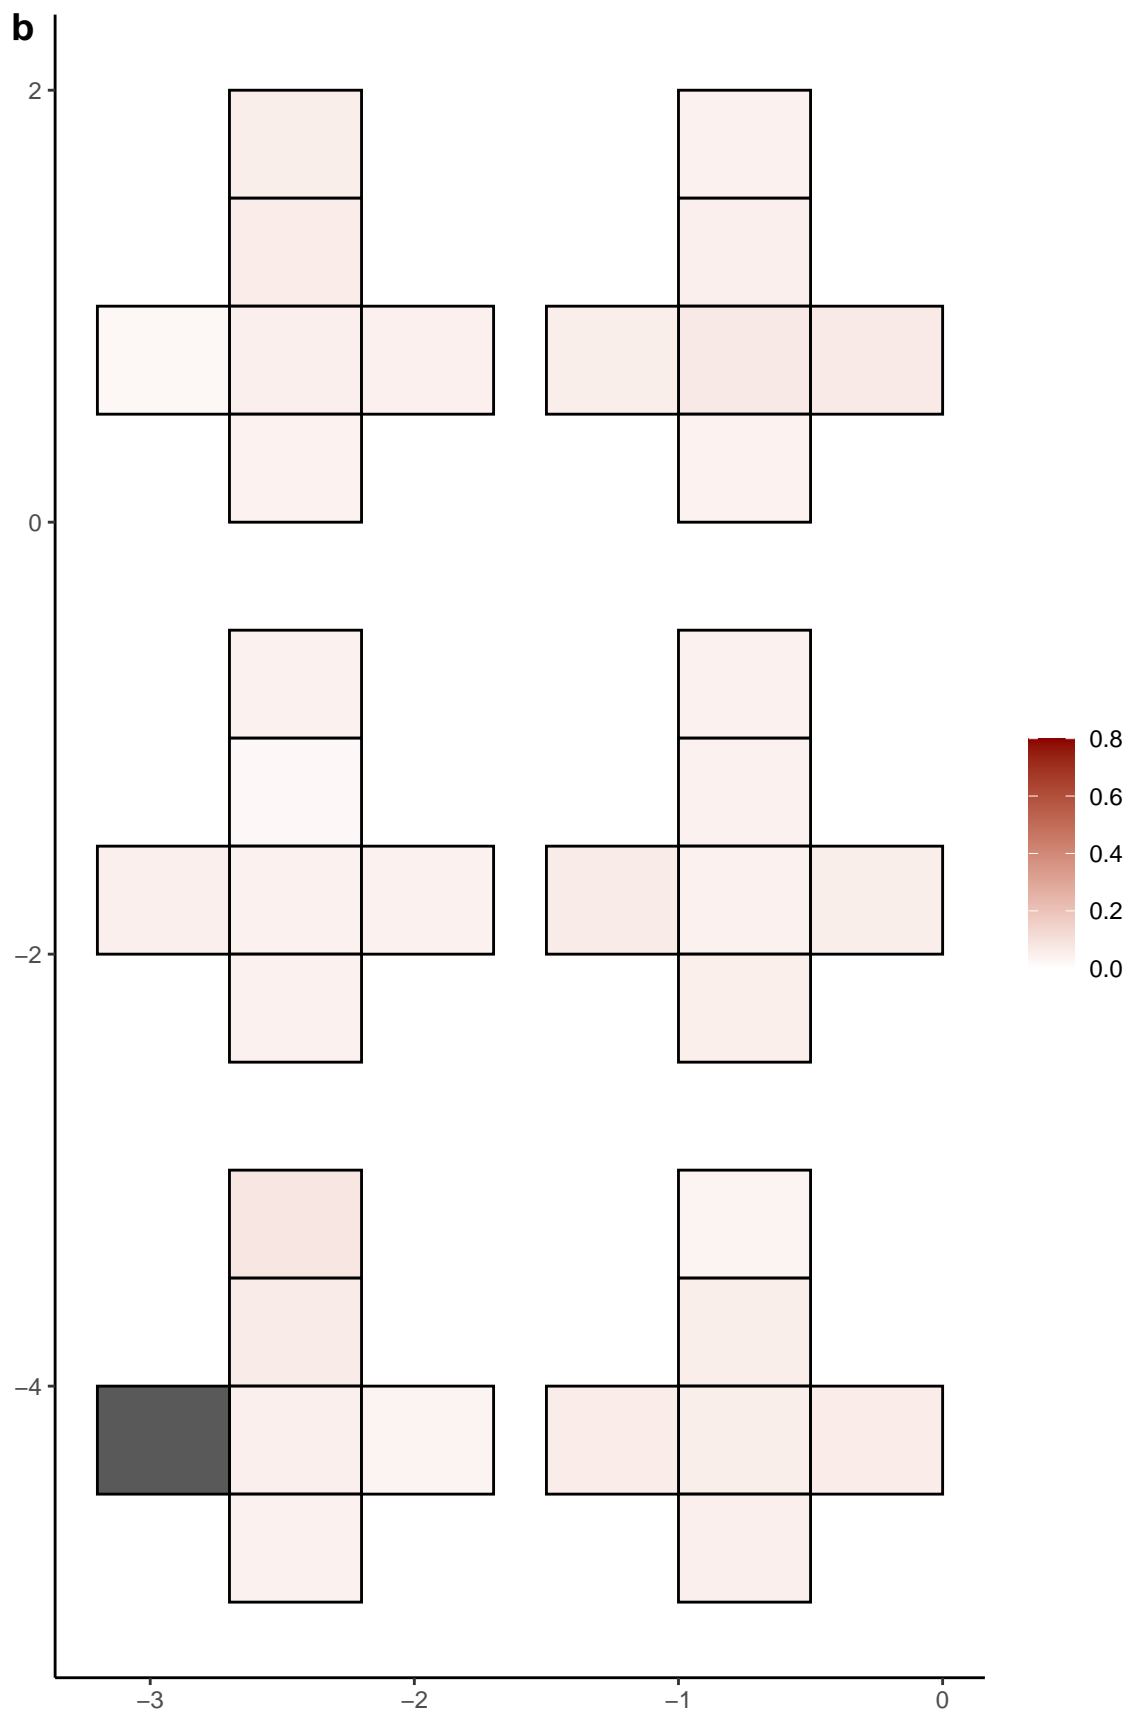

**a** ID01 16-28153814-G-A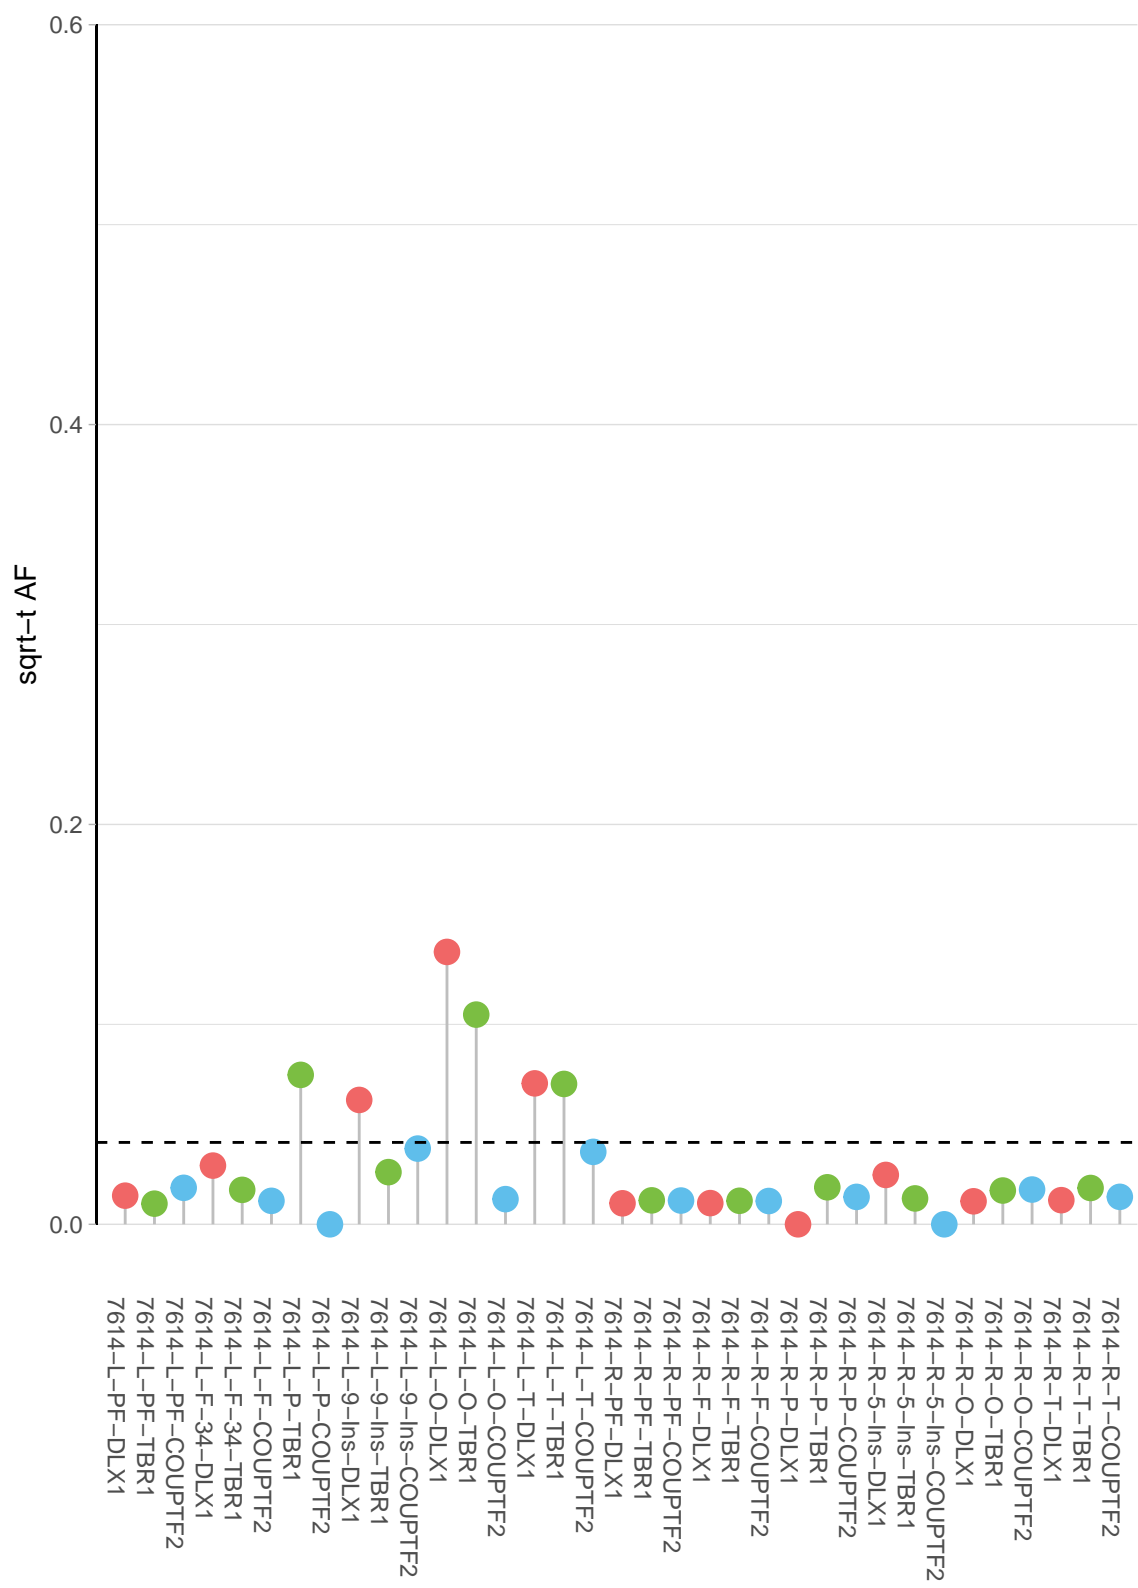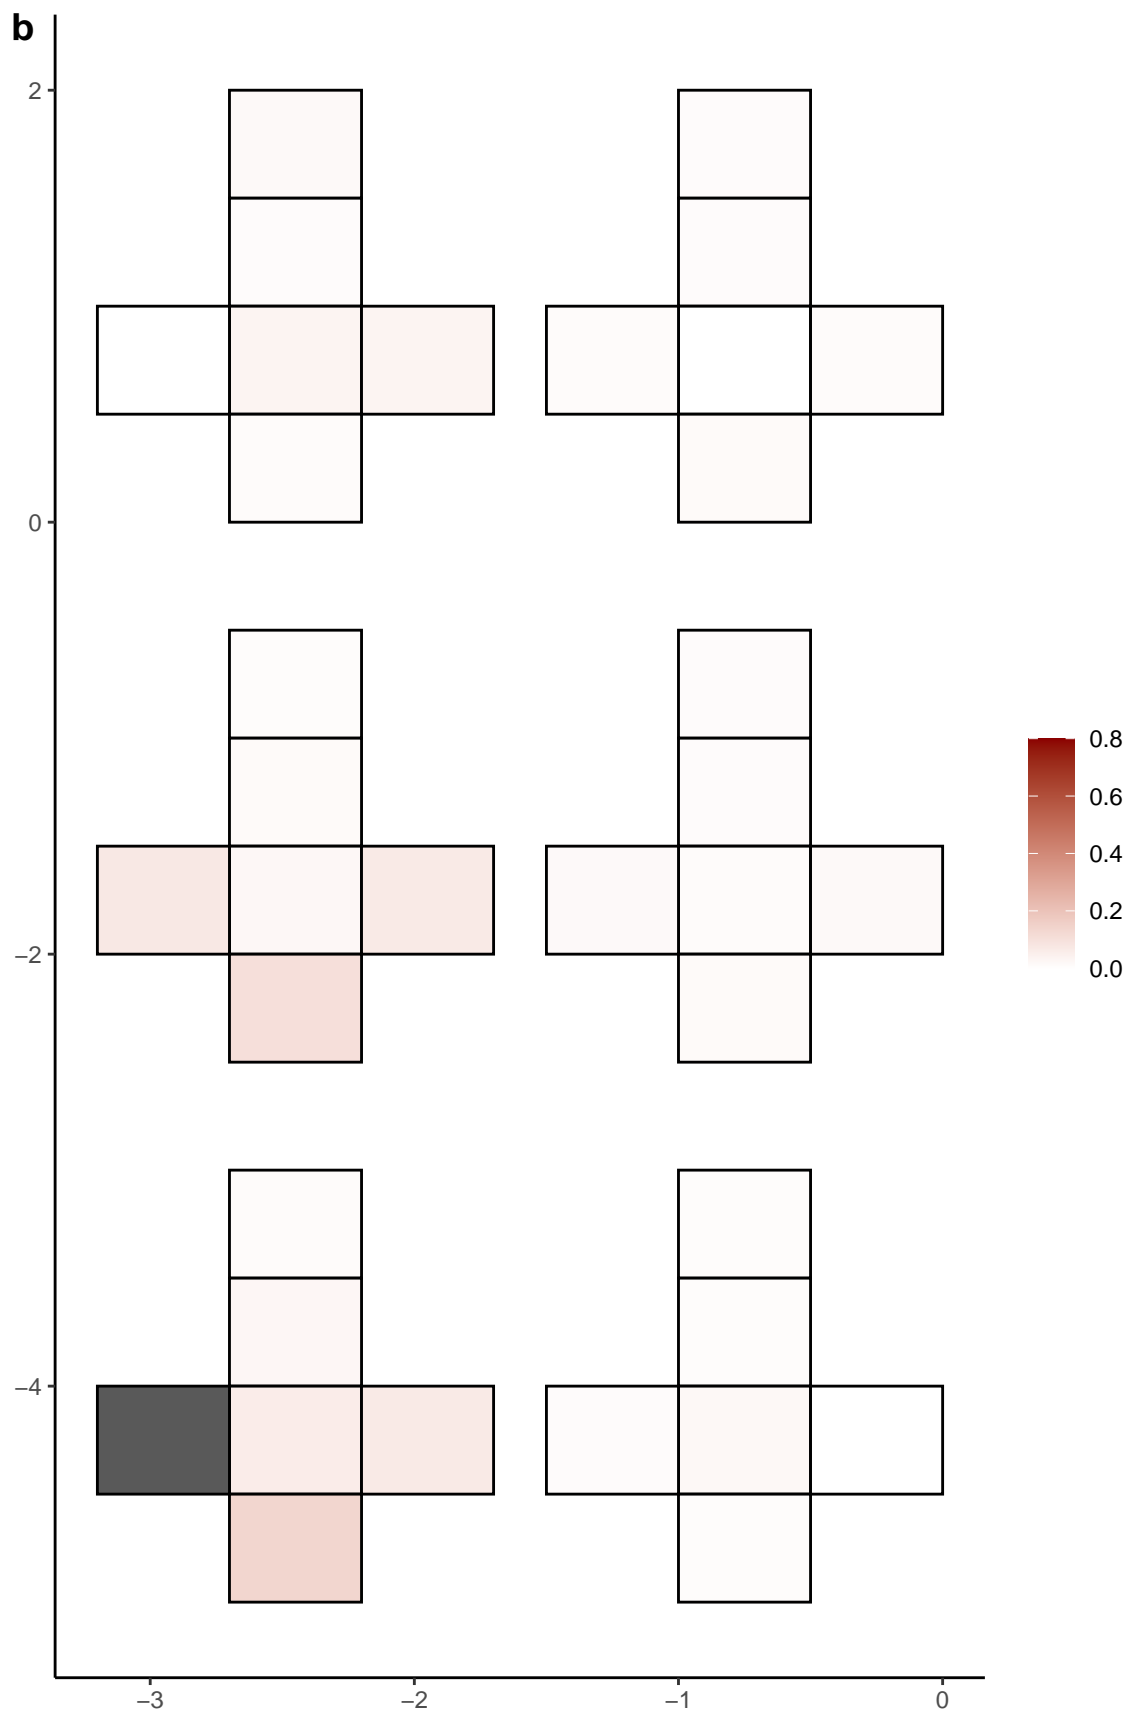

**a** ID01 16-58426889-C-A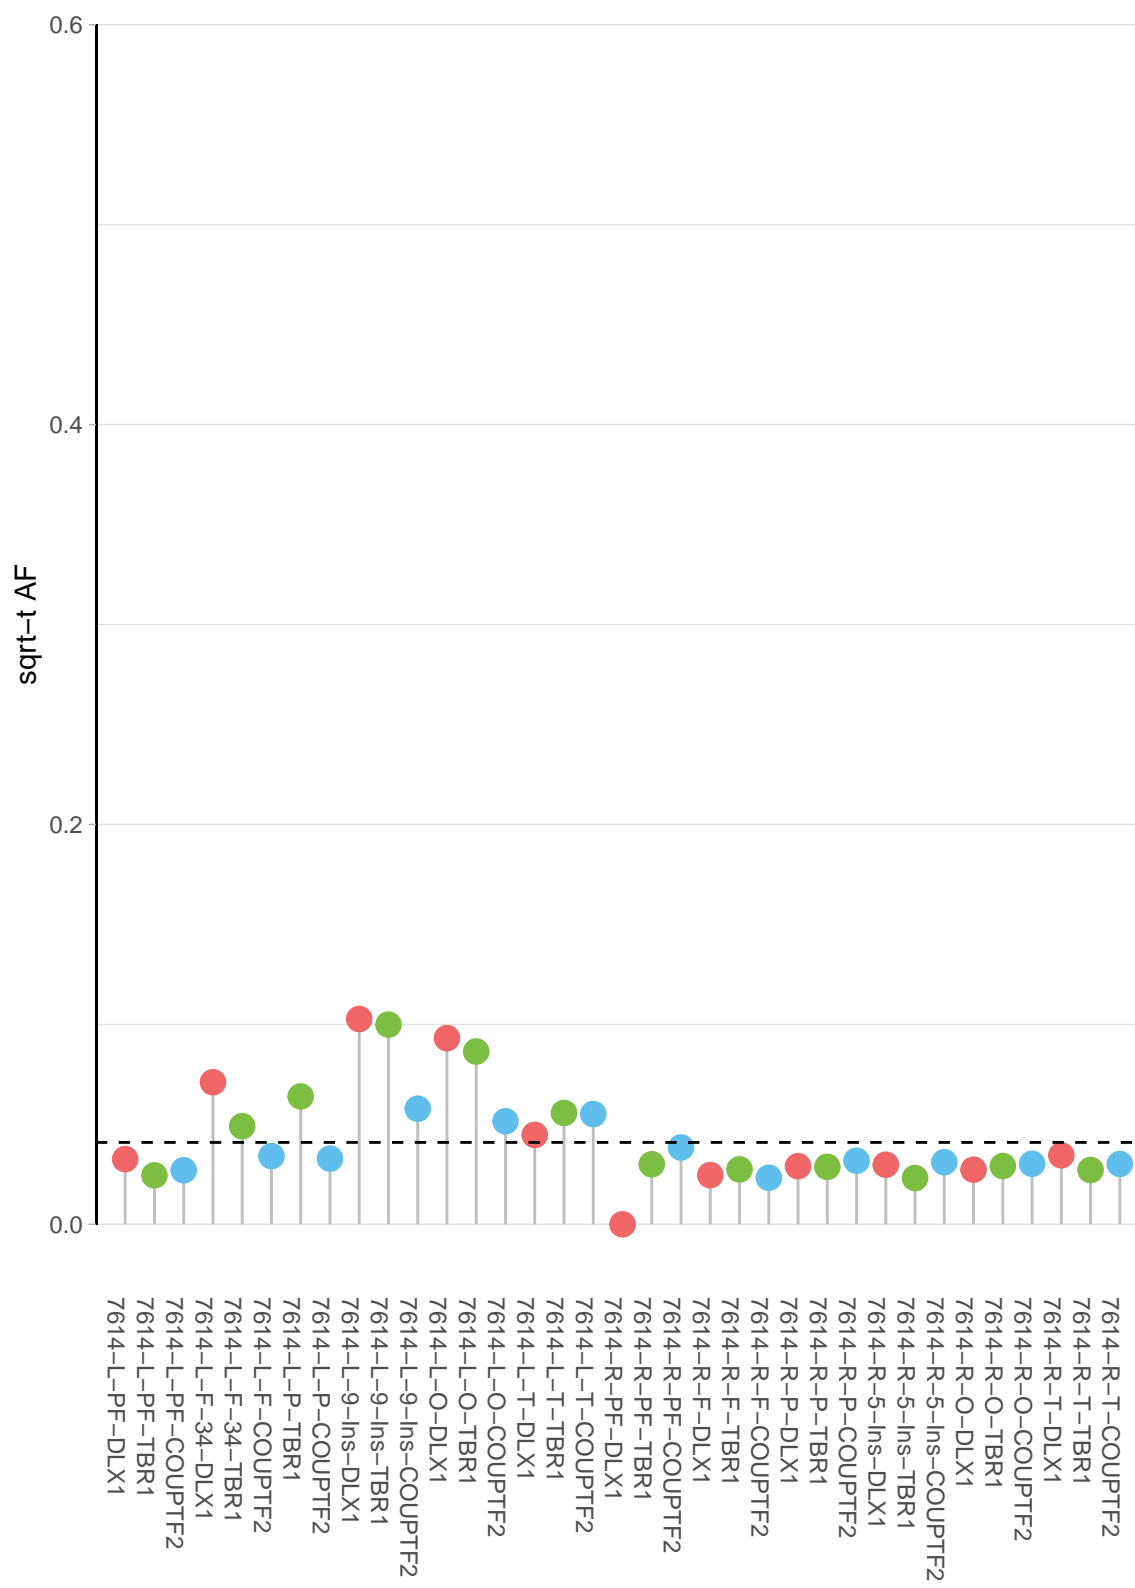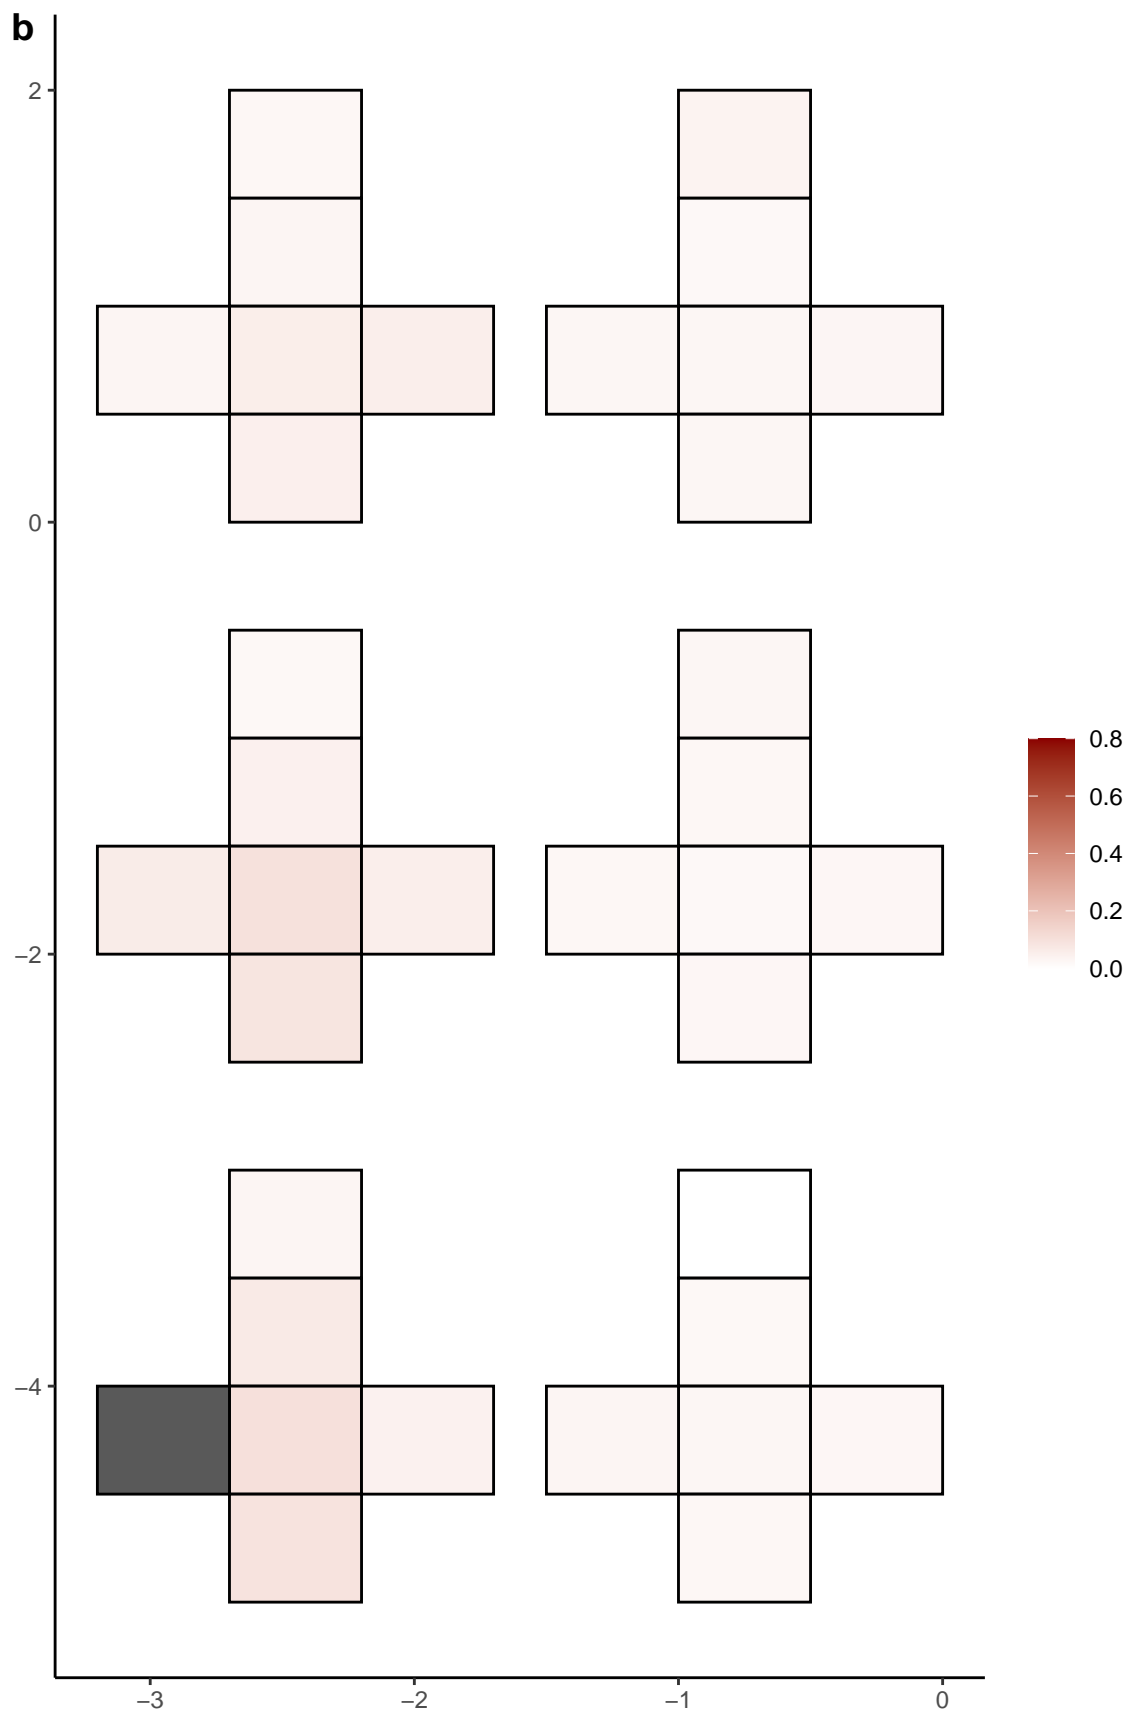



**a** ID01 16-69679204-G-C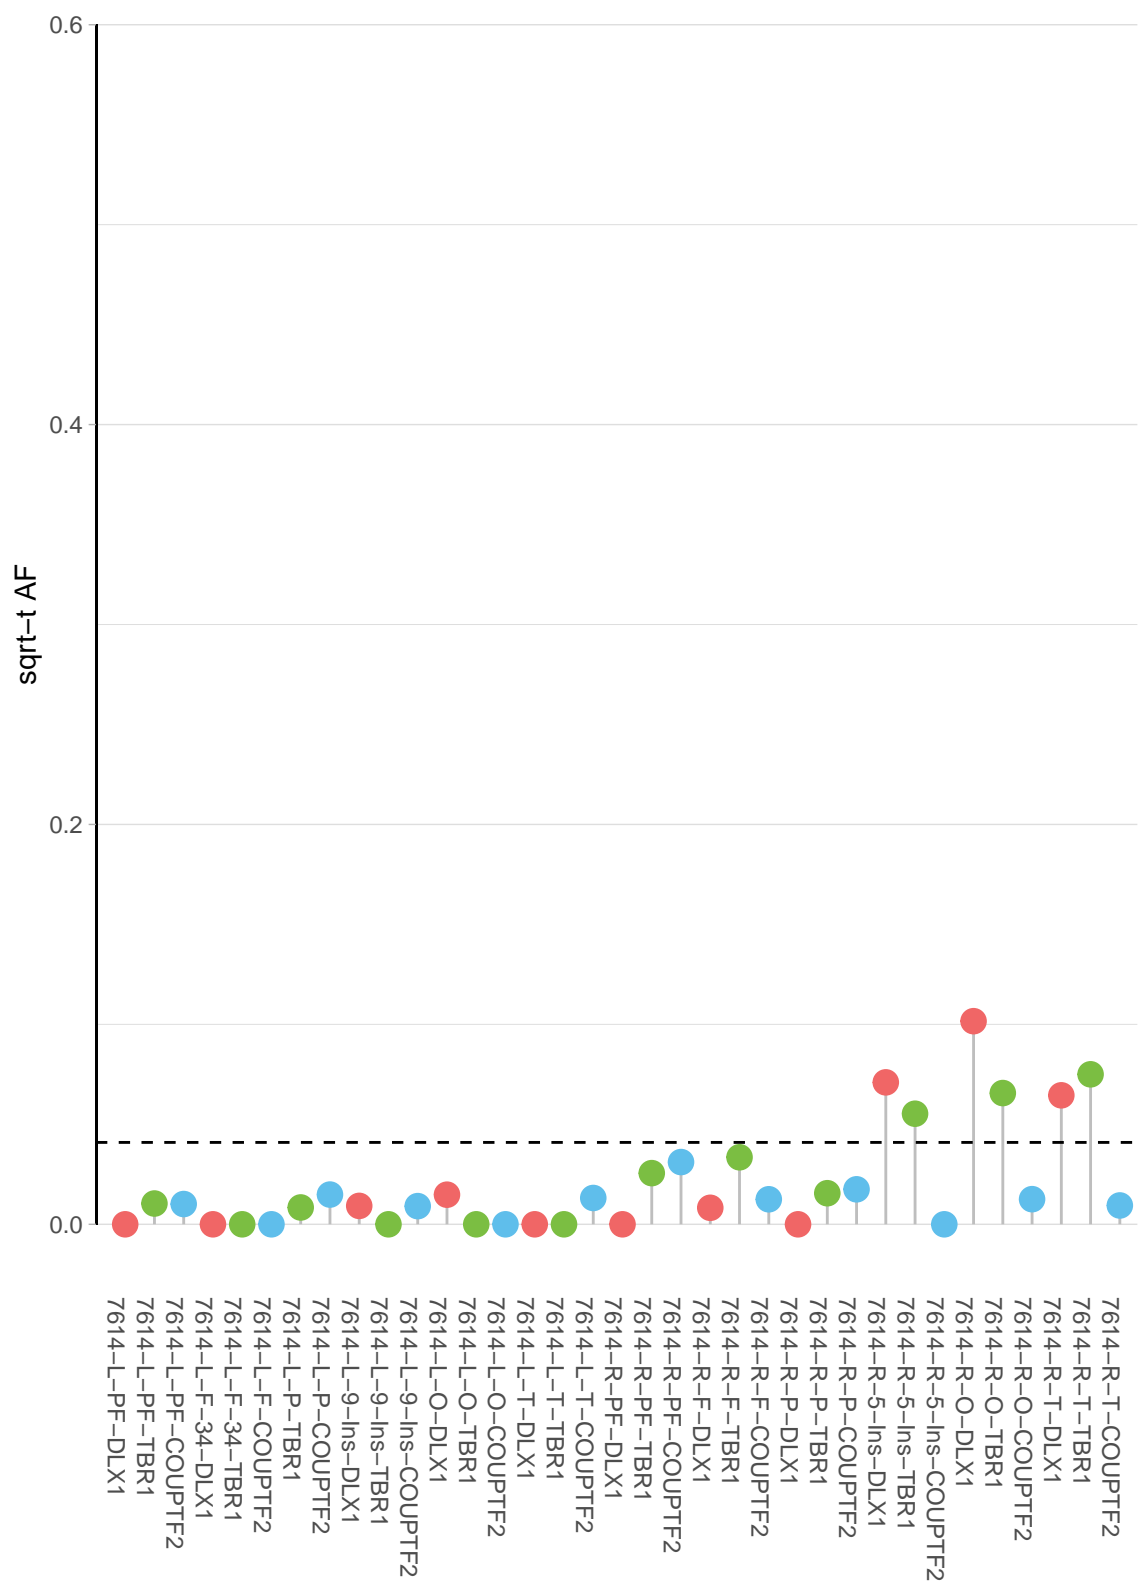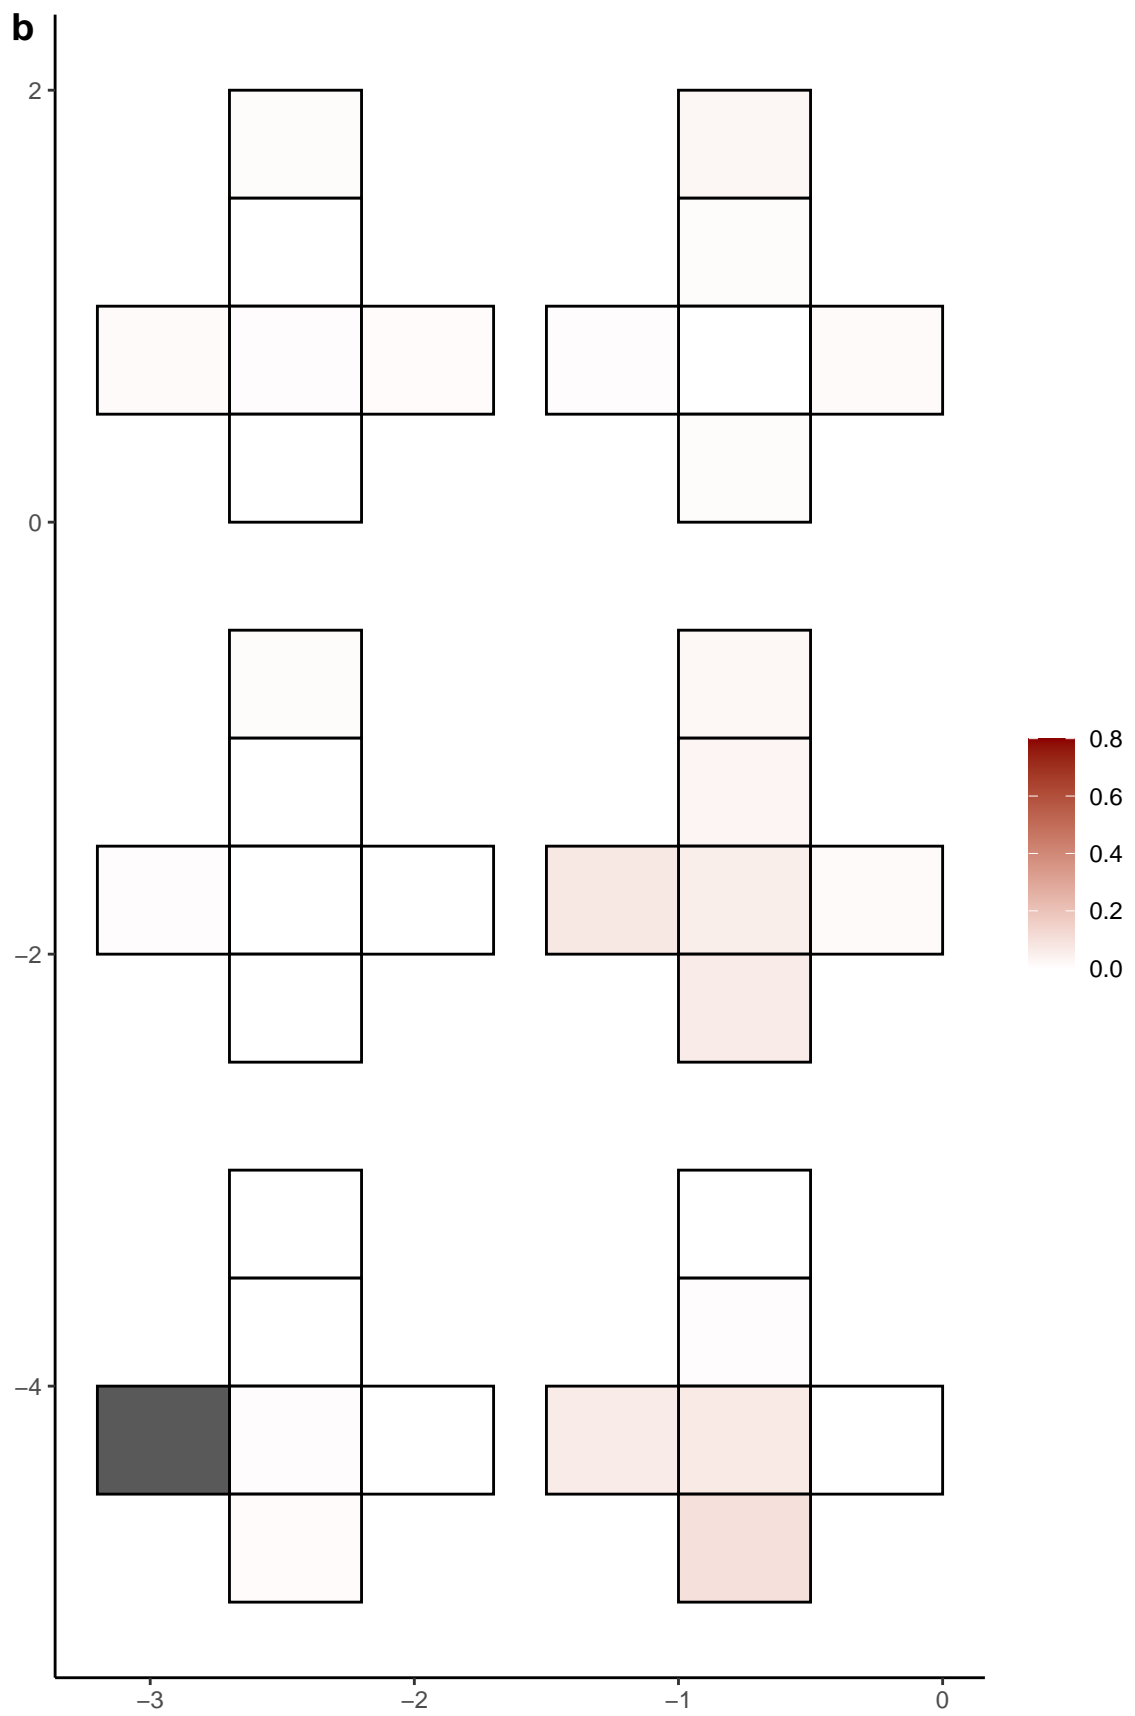

**a** ID01 16-73458900-G-A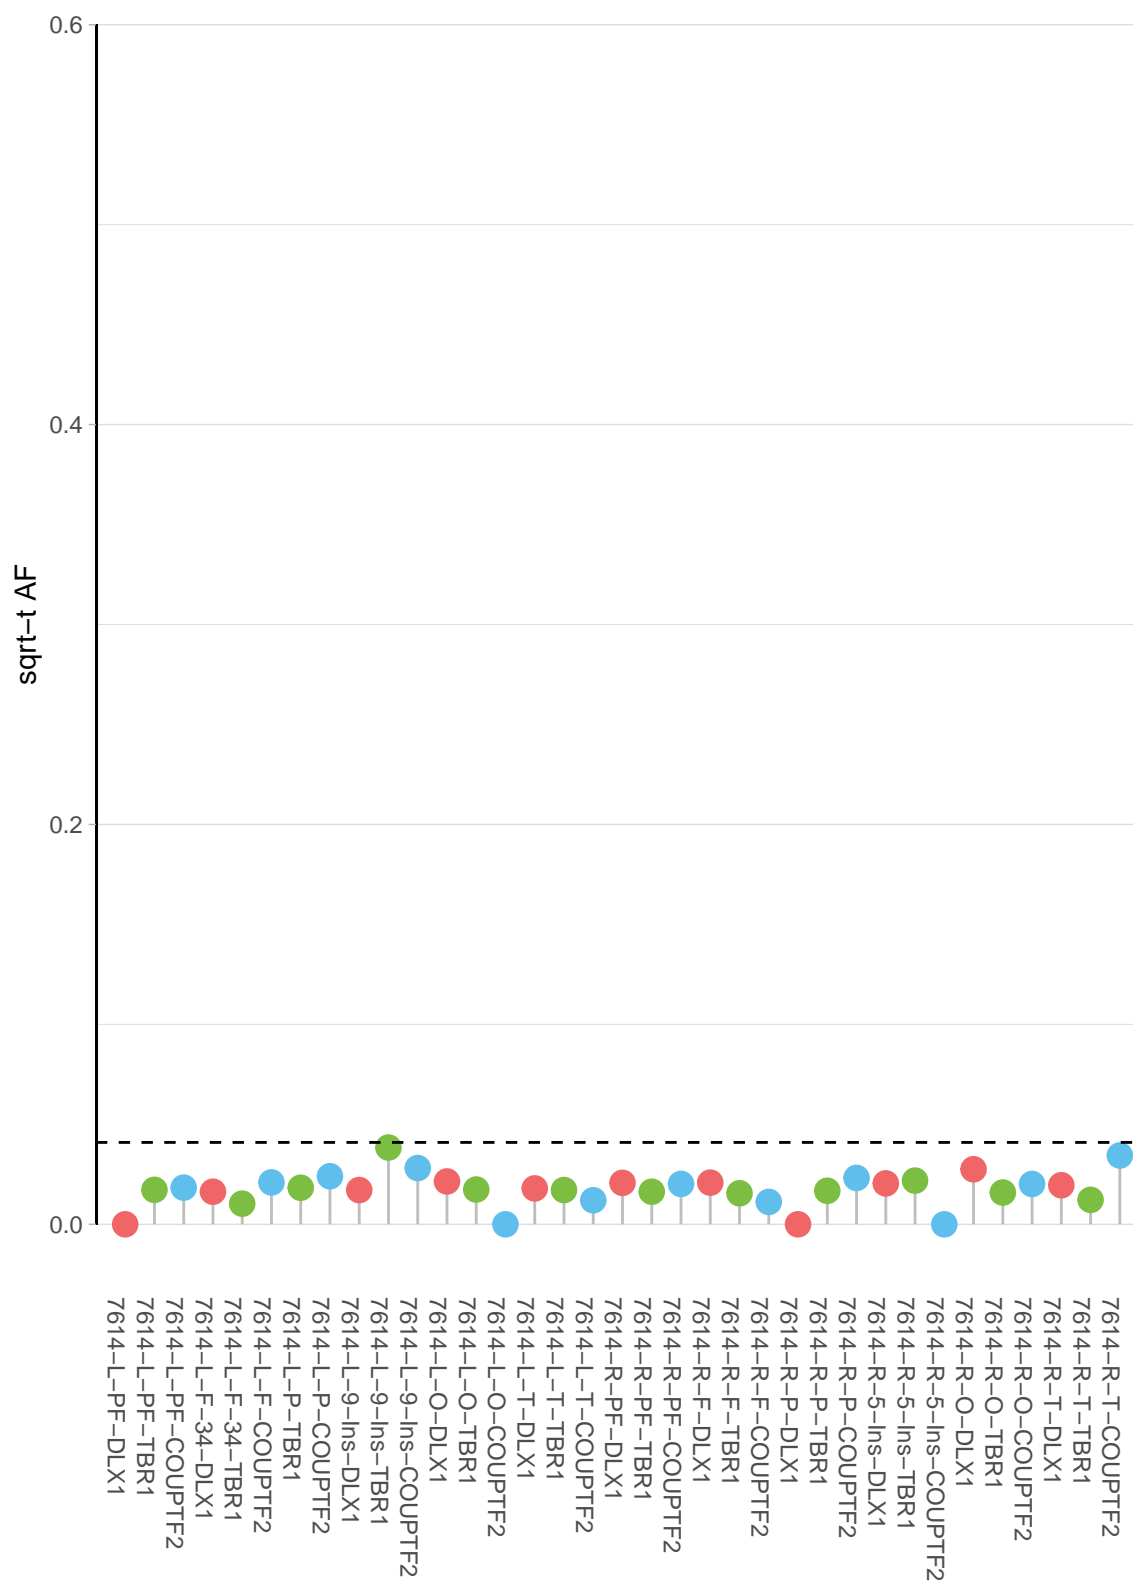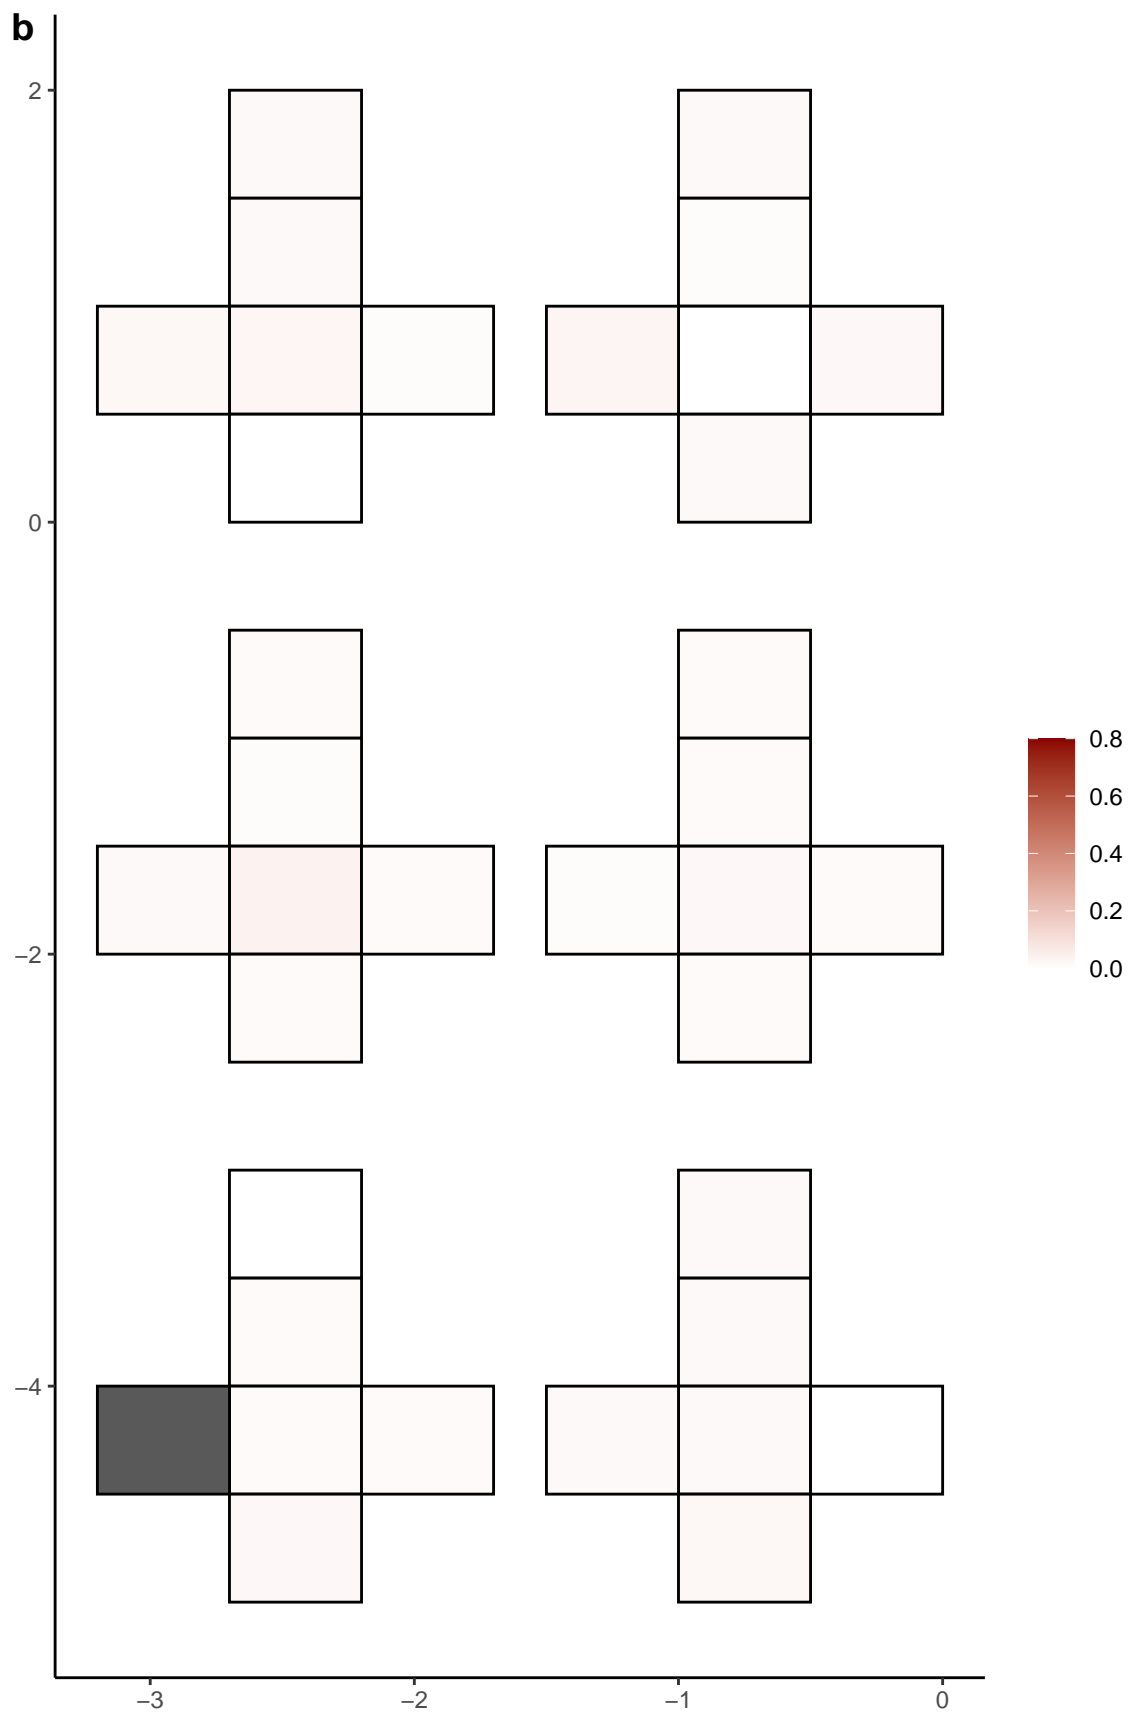

**a** ID01 16-73751747-A-G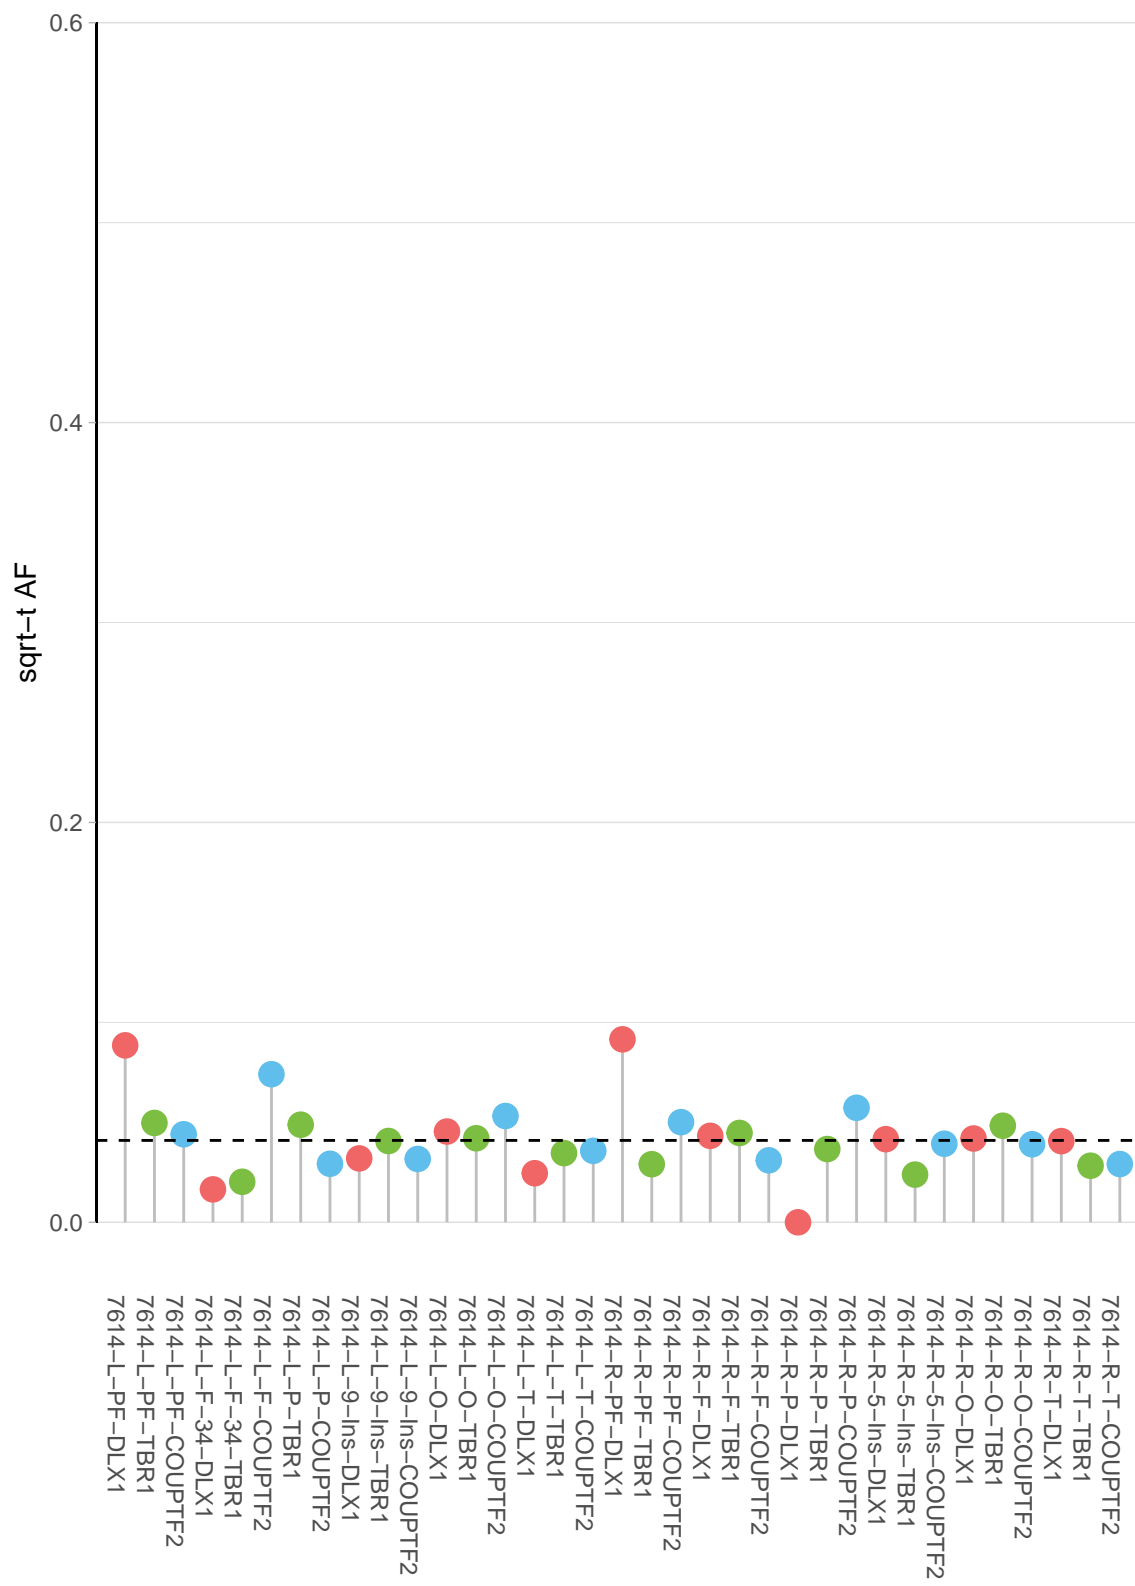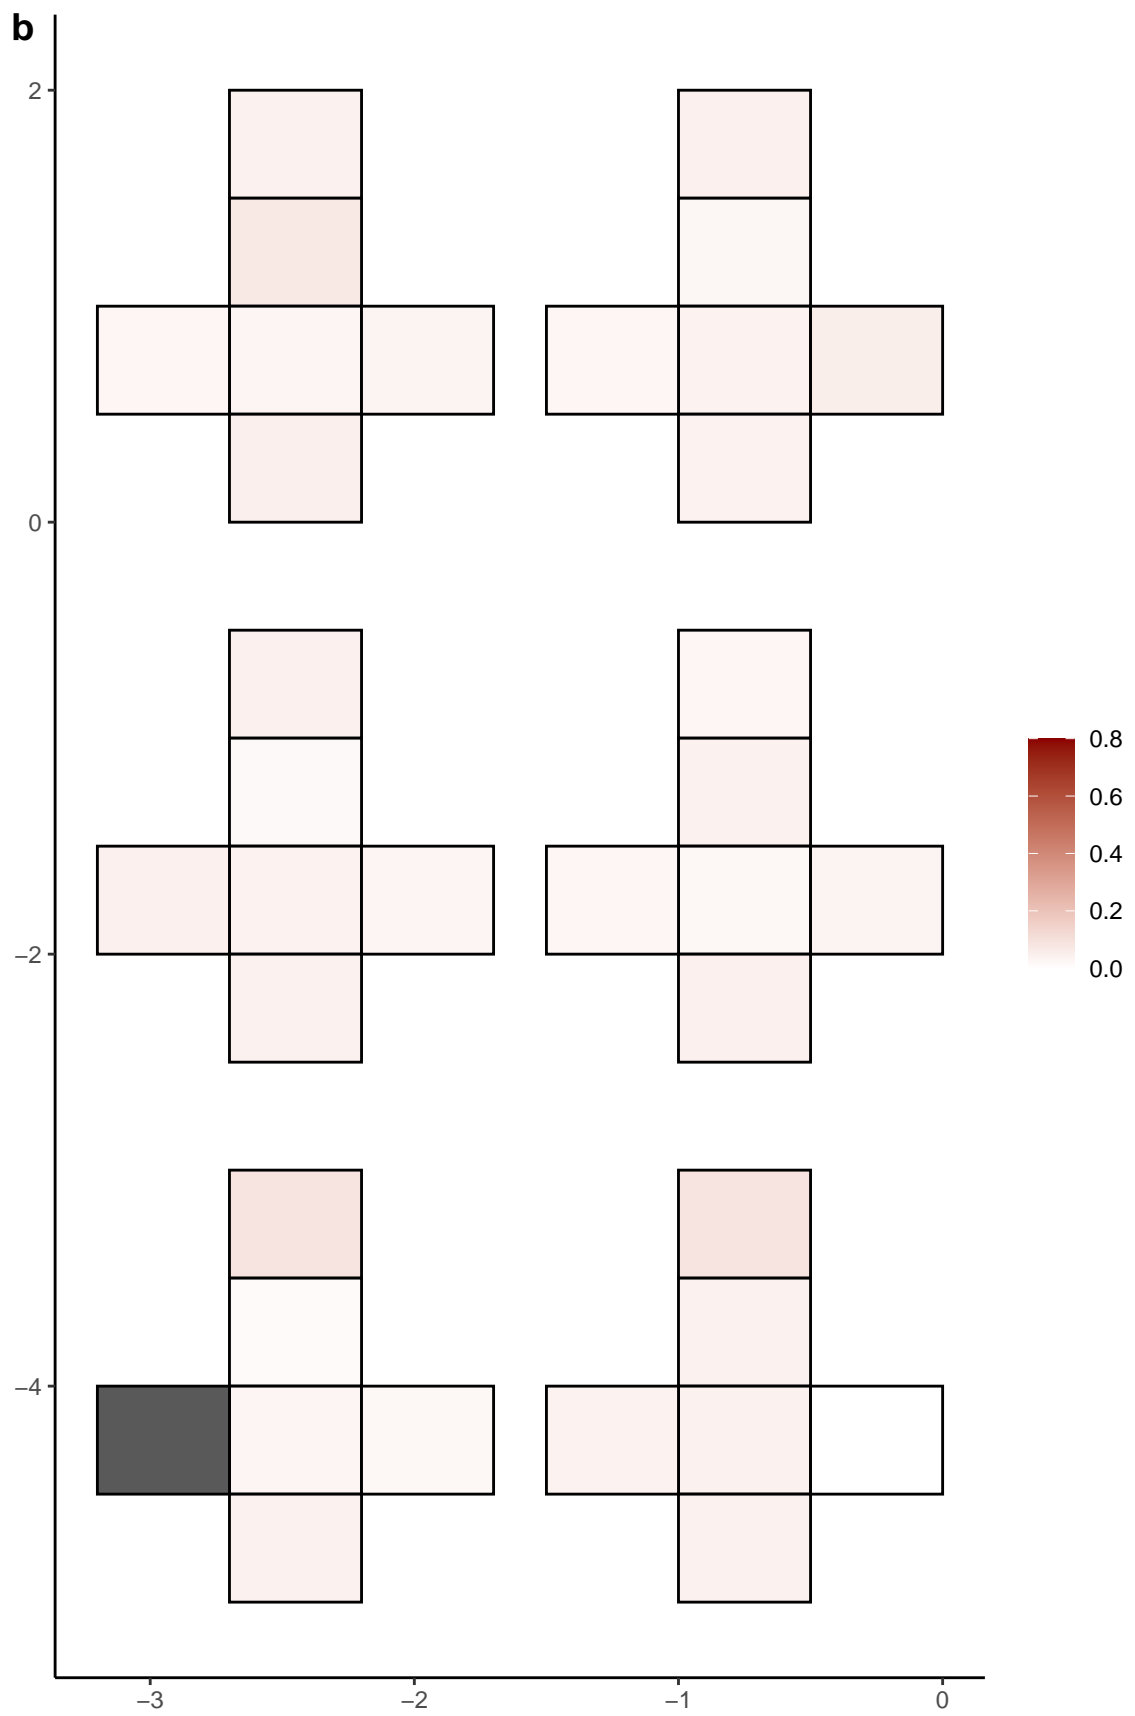

**a** ID01 16-78187280-G-A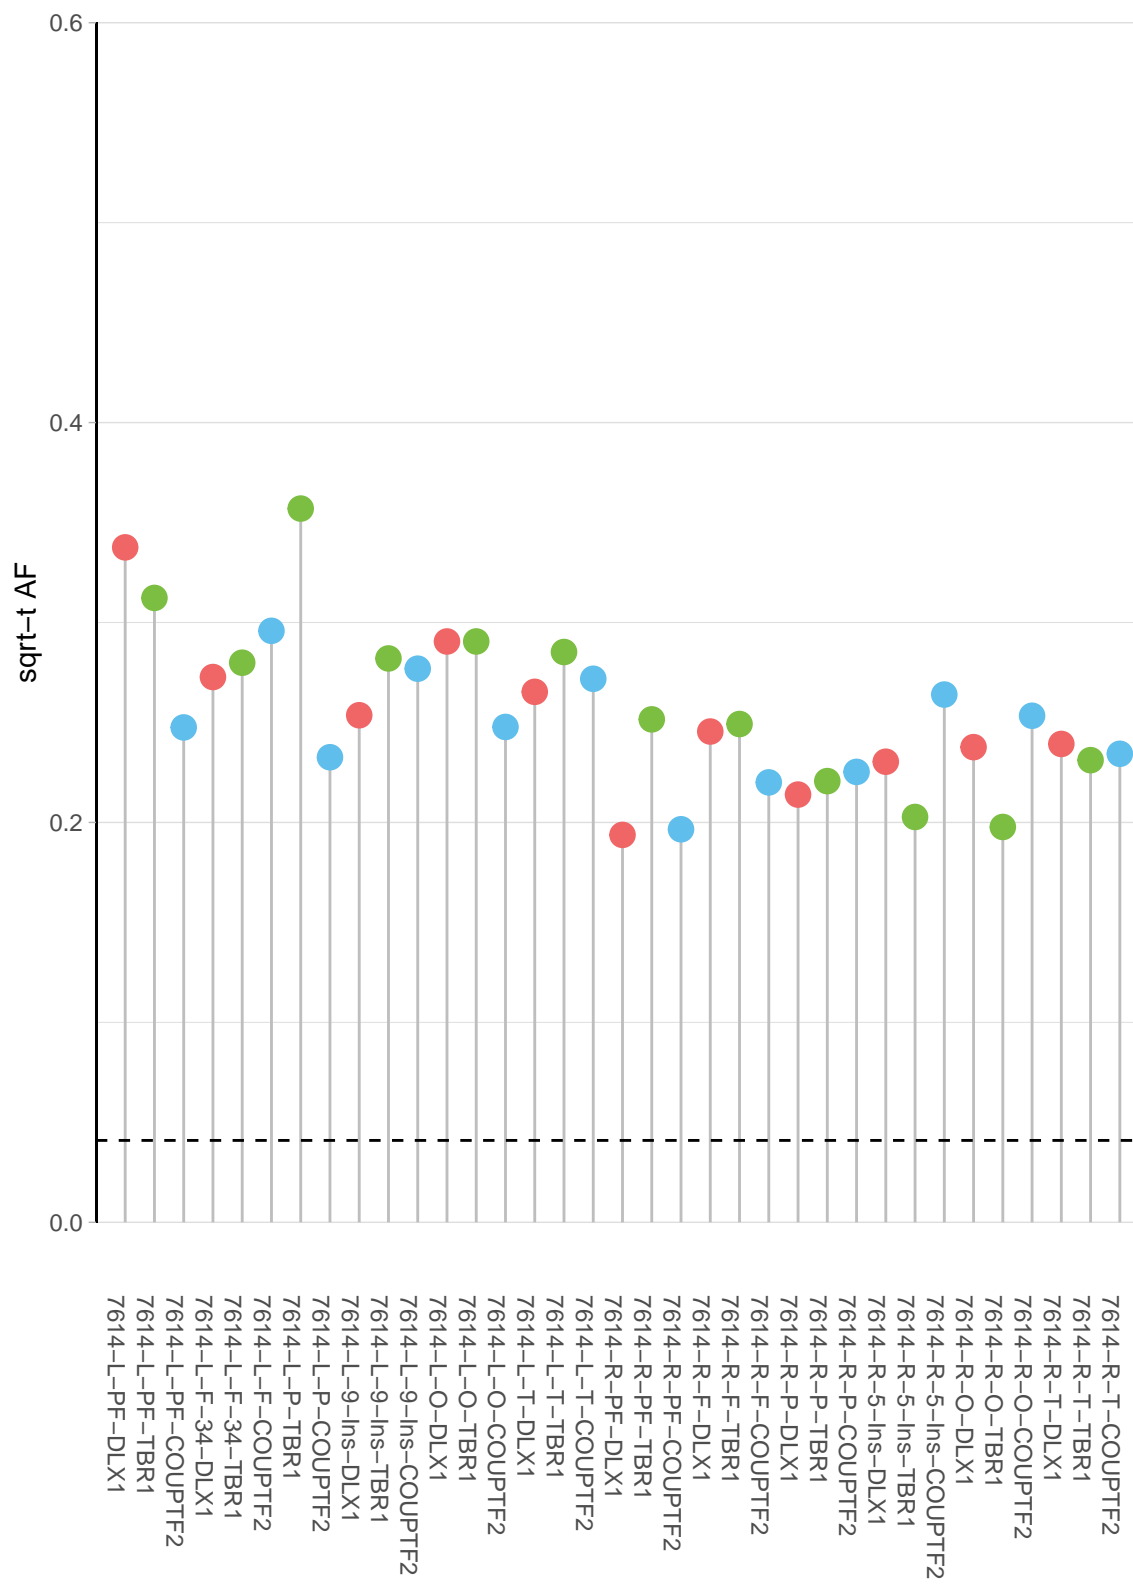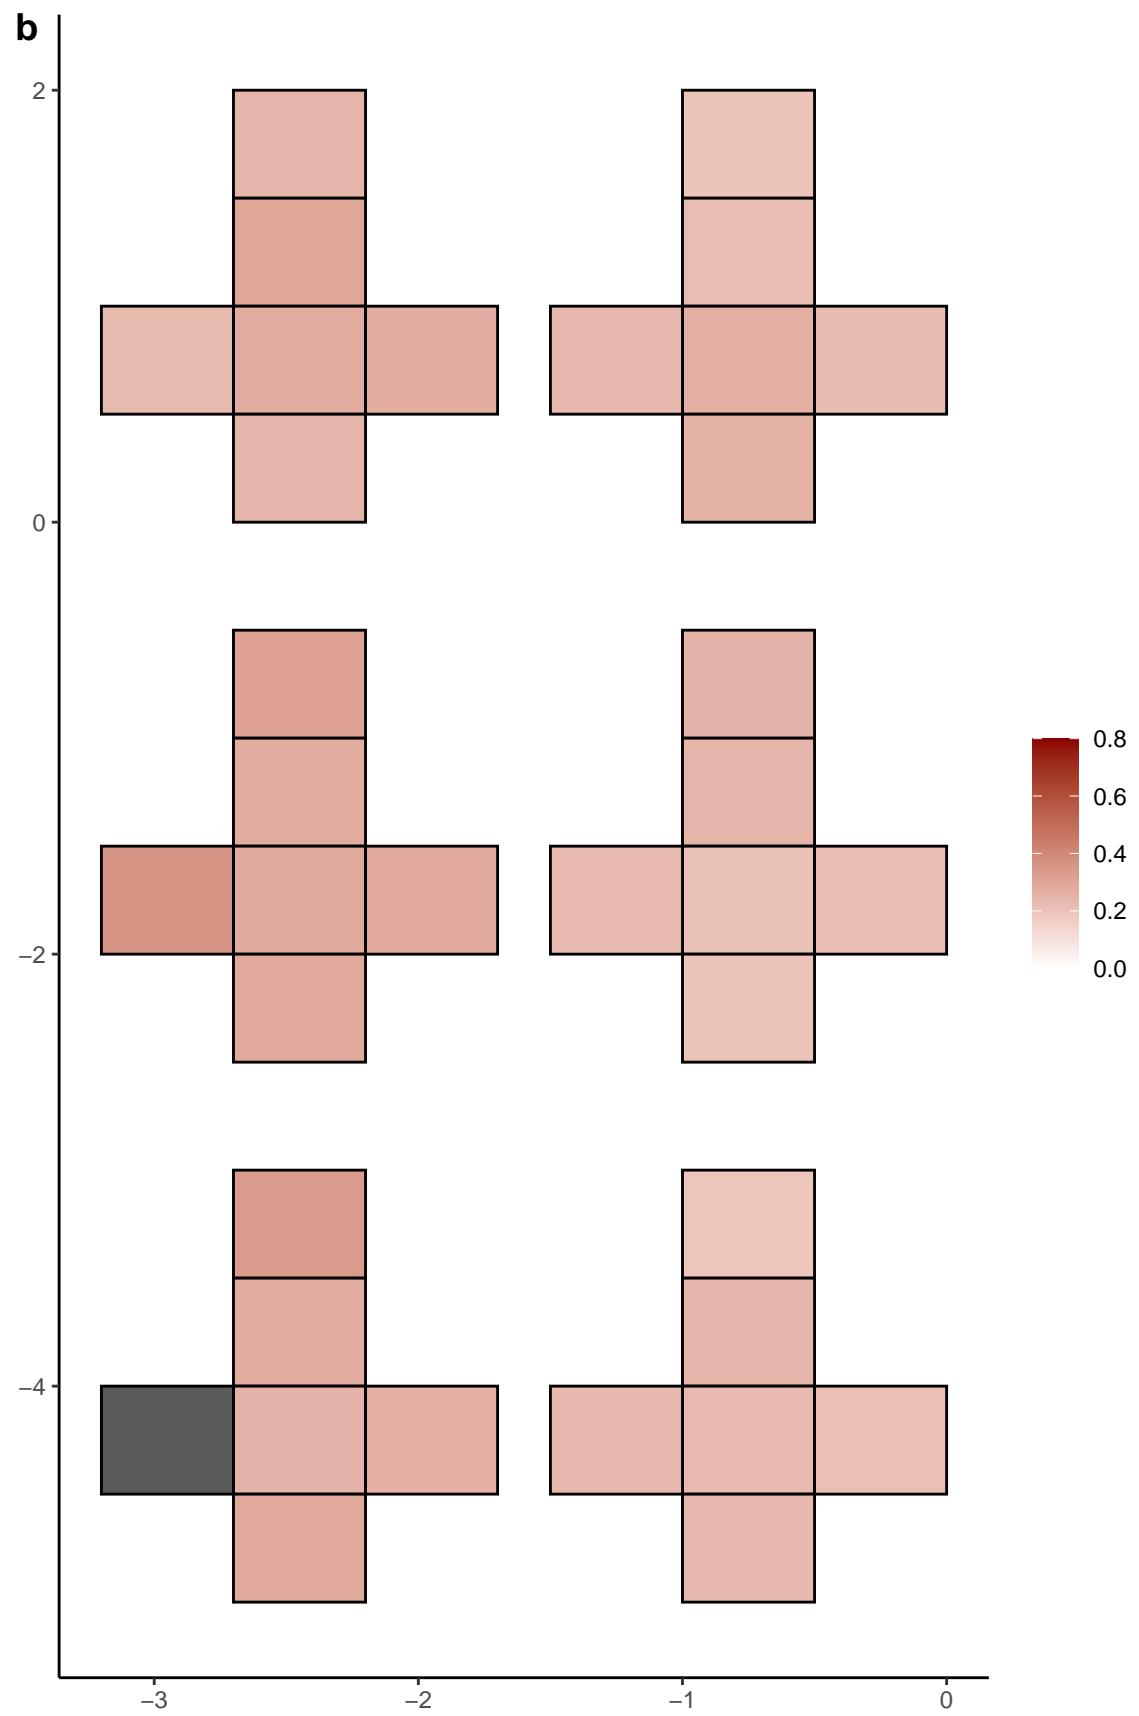

**a** ID01 16-78774167-C-T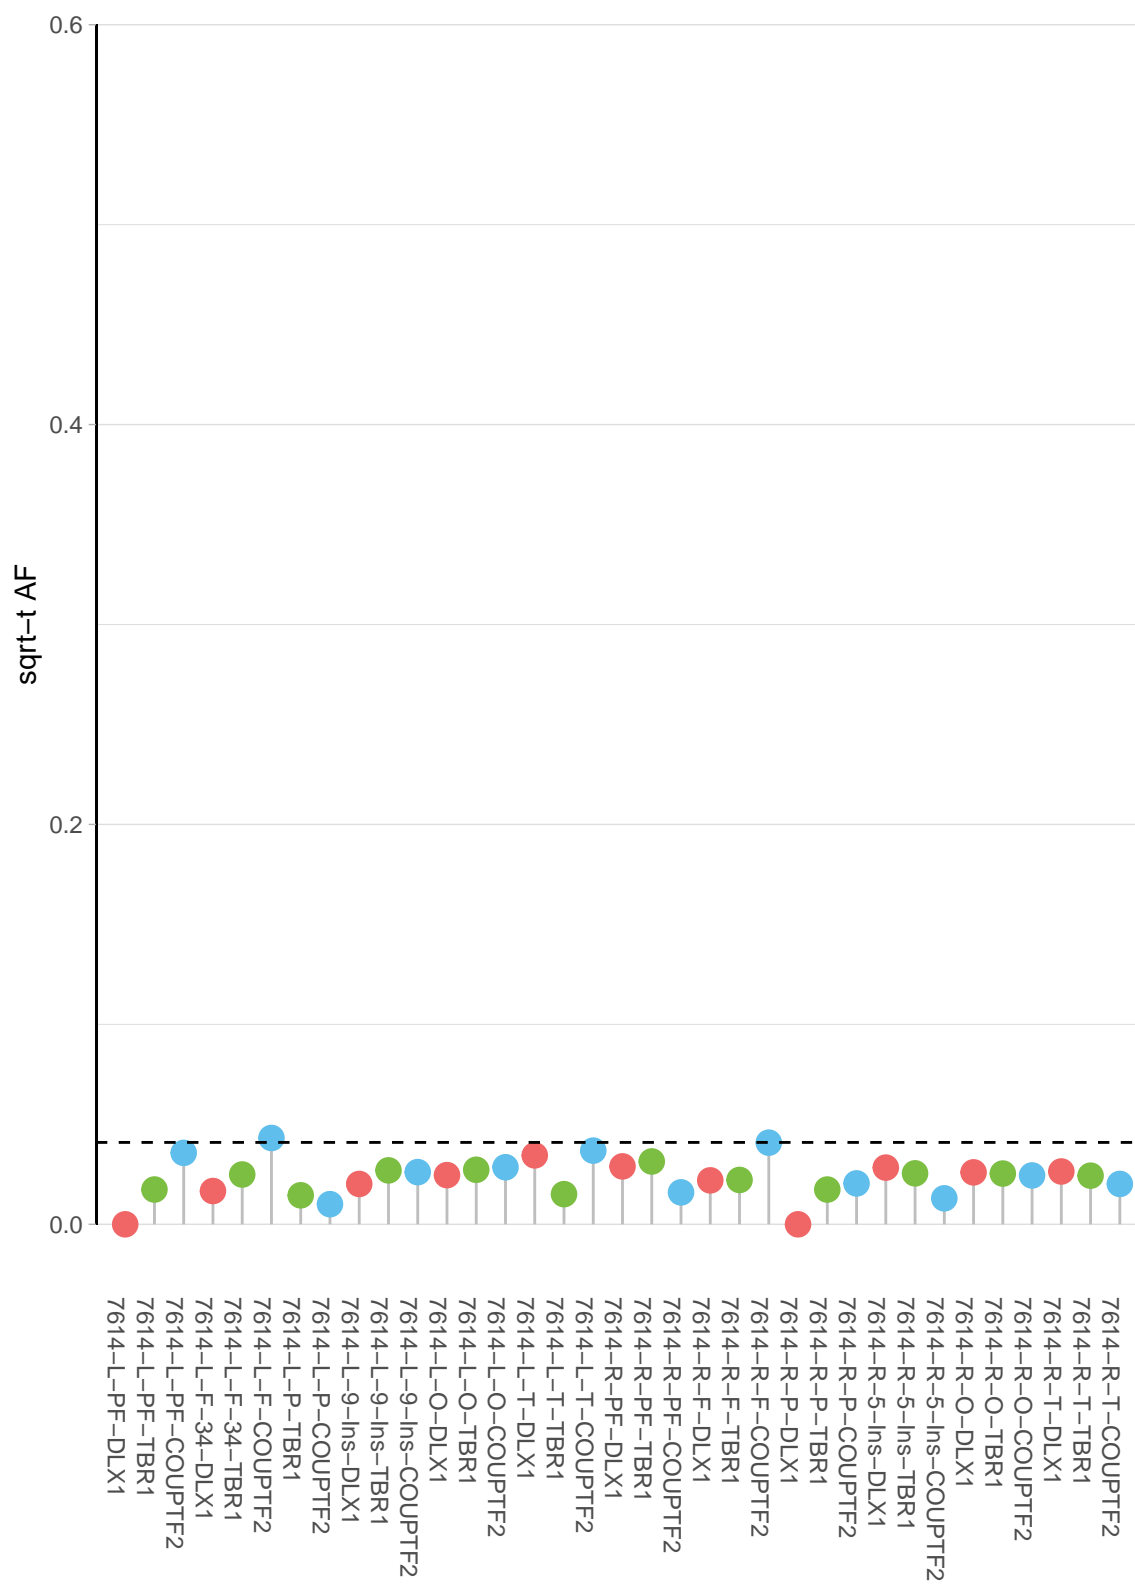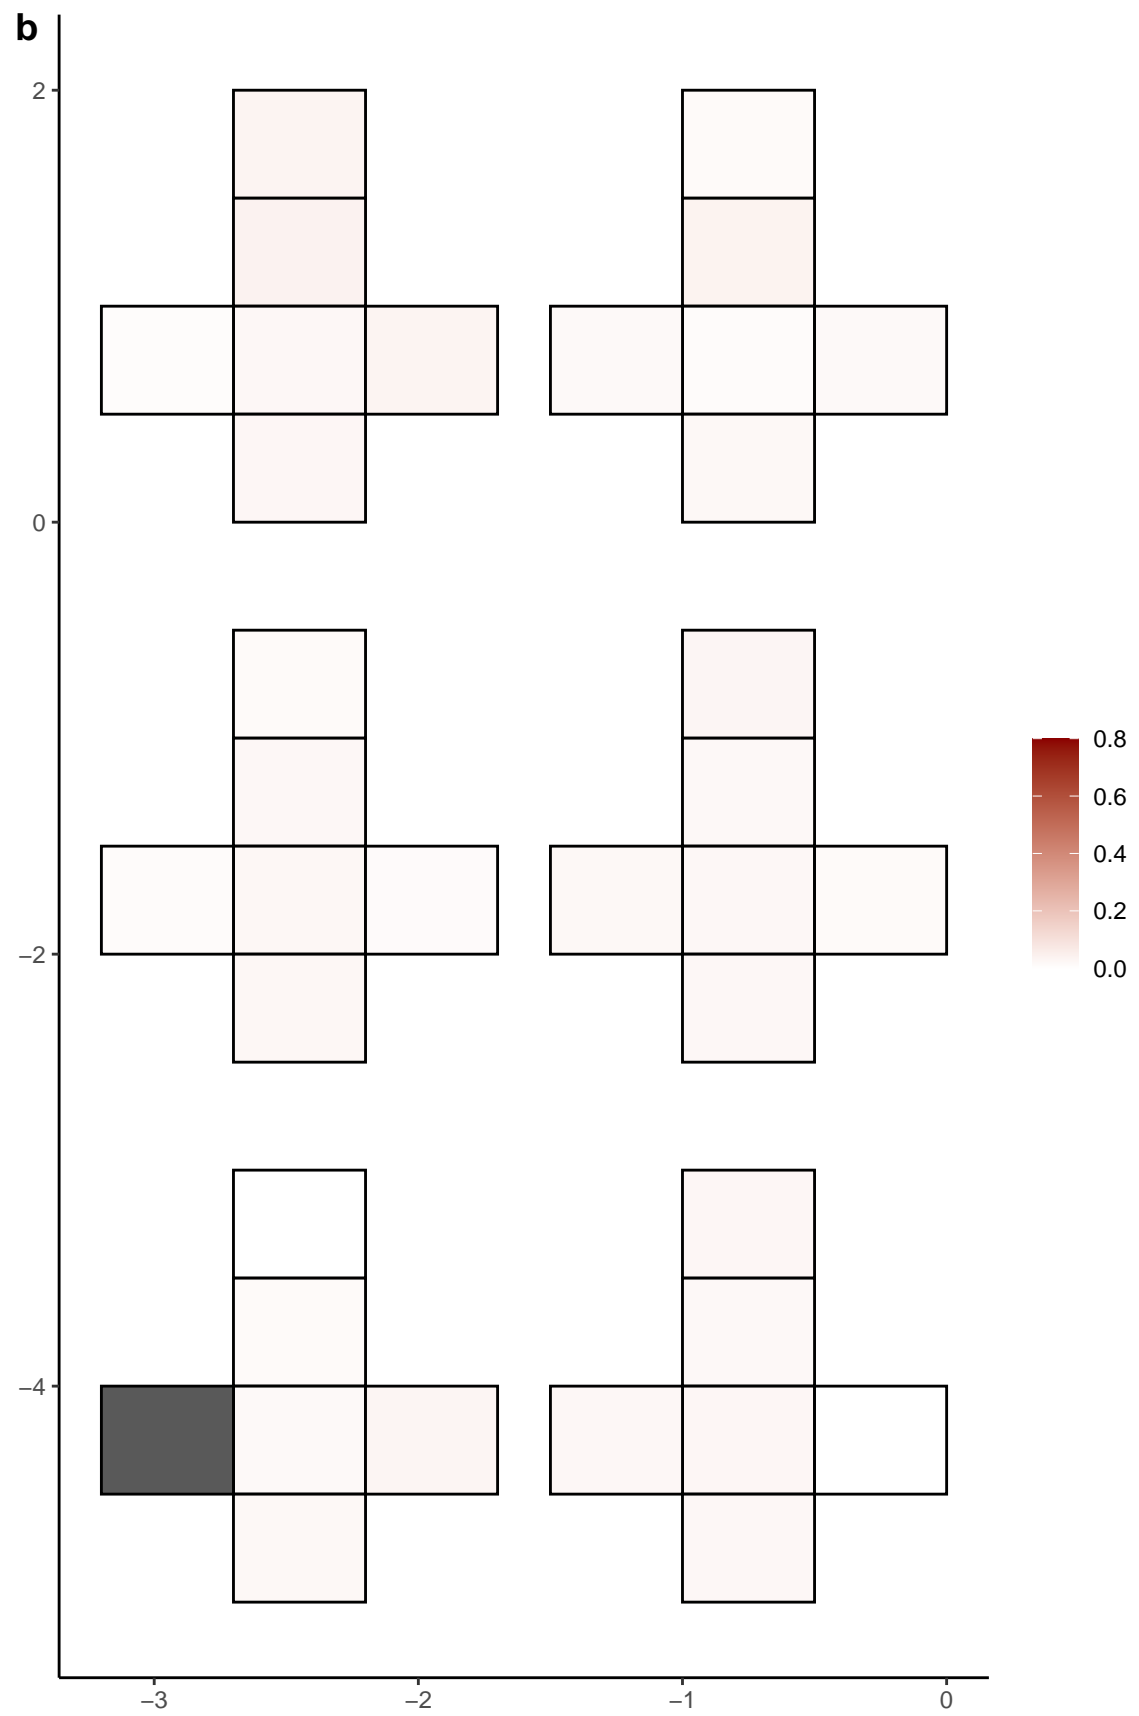

**a** ID01 16-80604095-C-T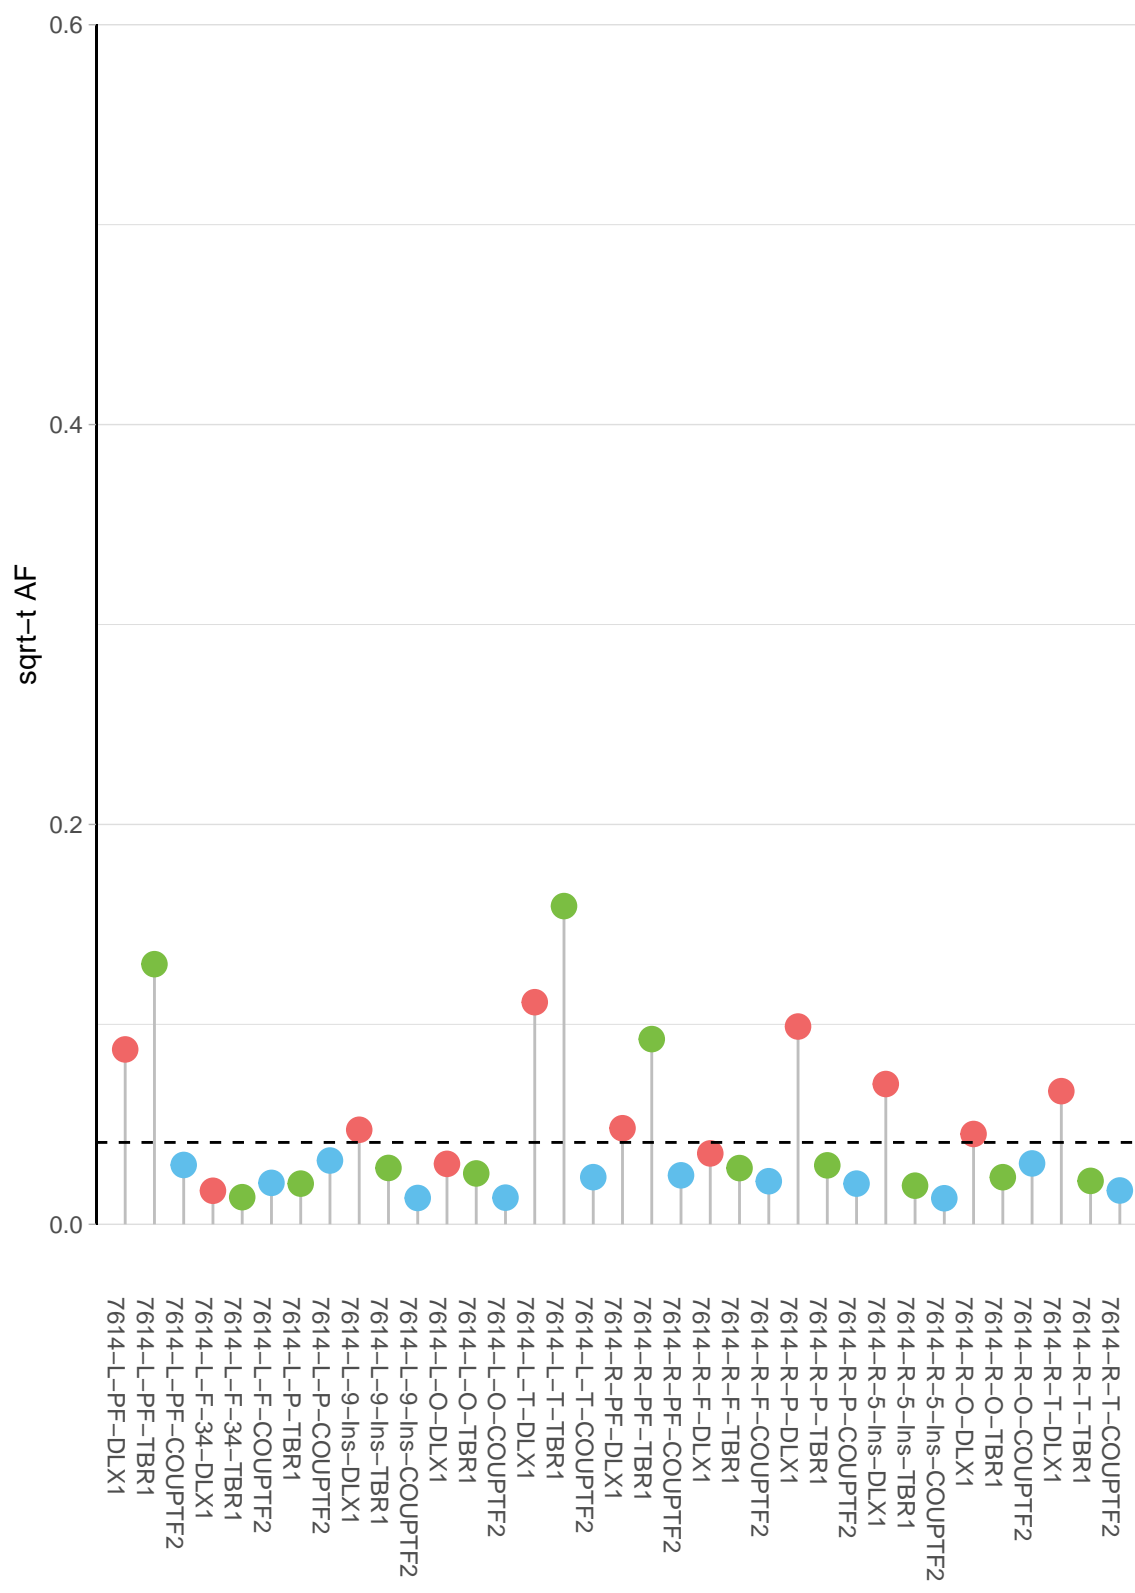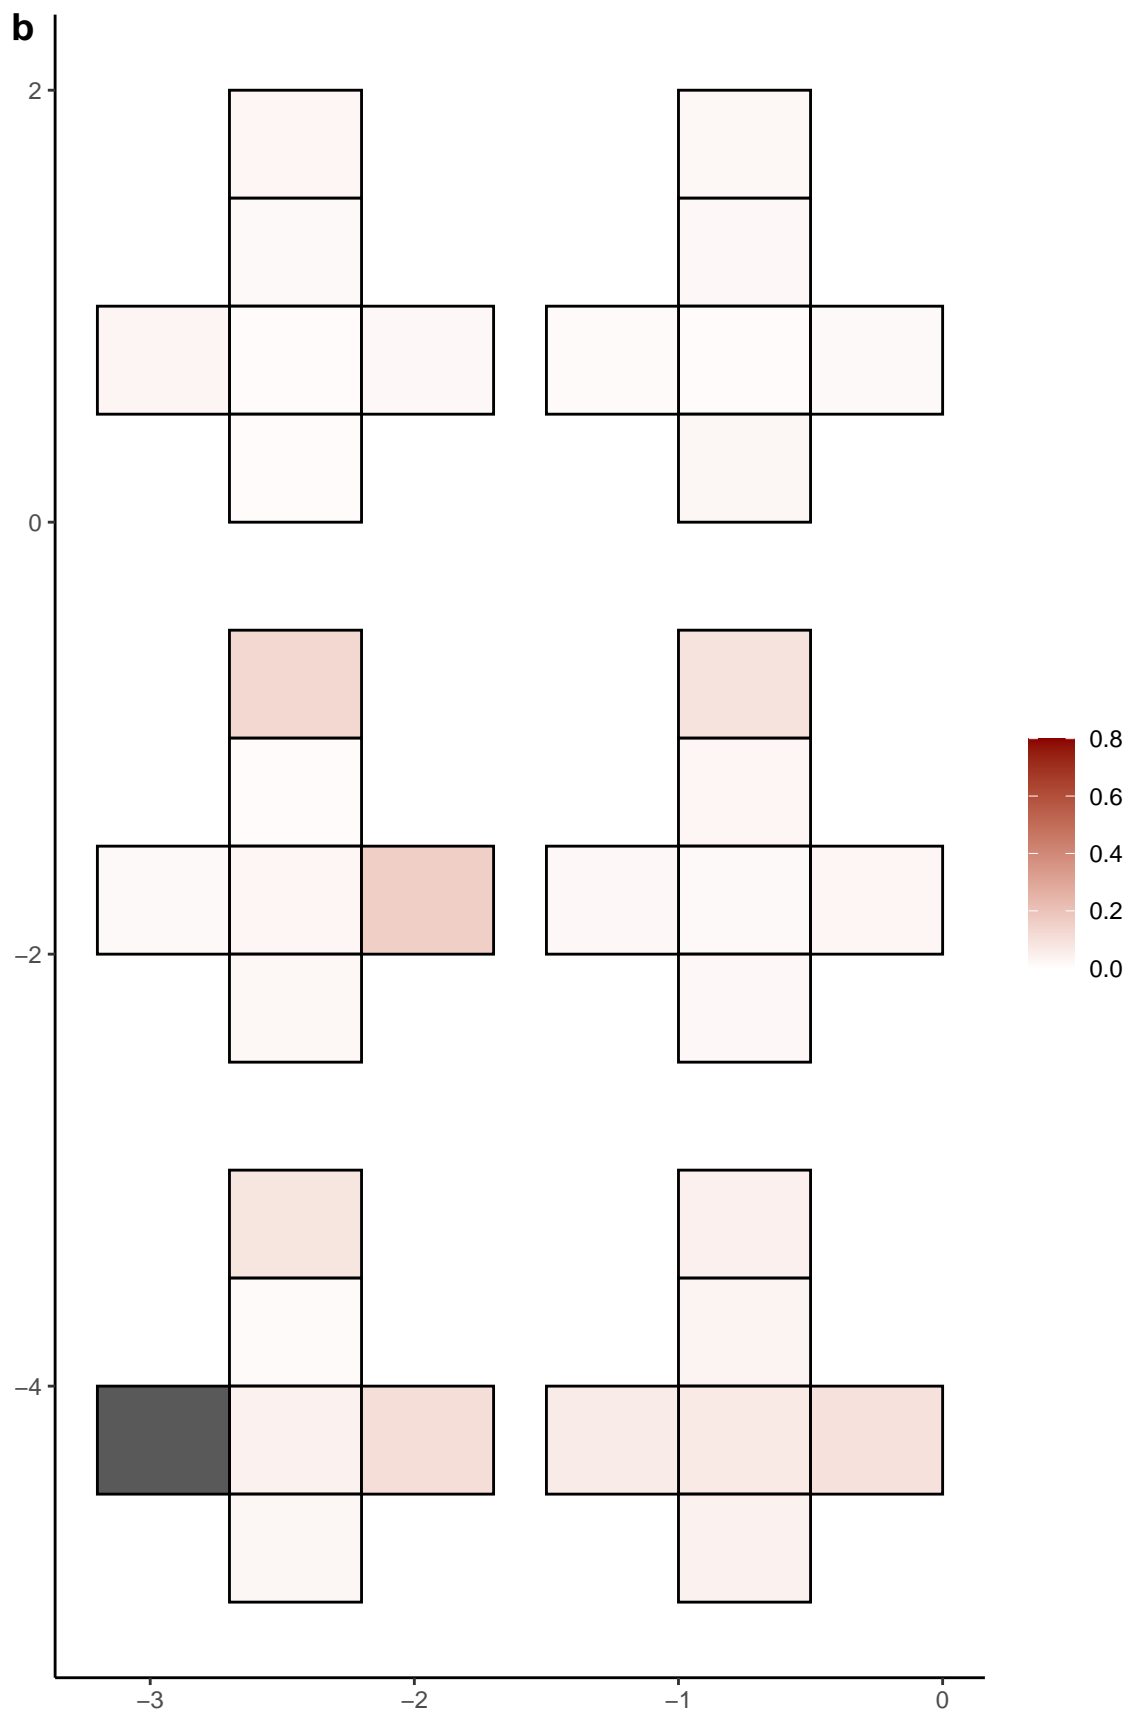



**a** ID01 17-30813389-C-G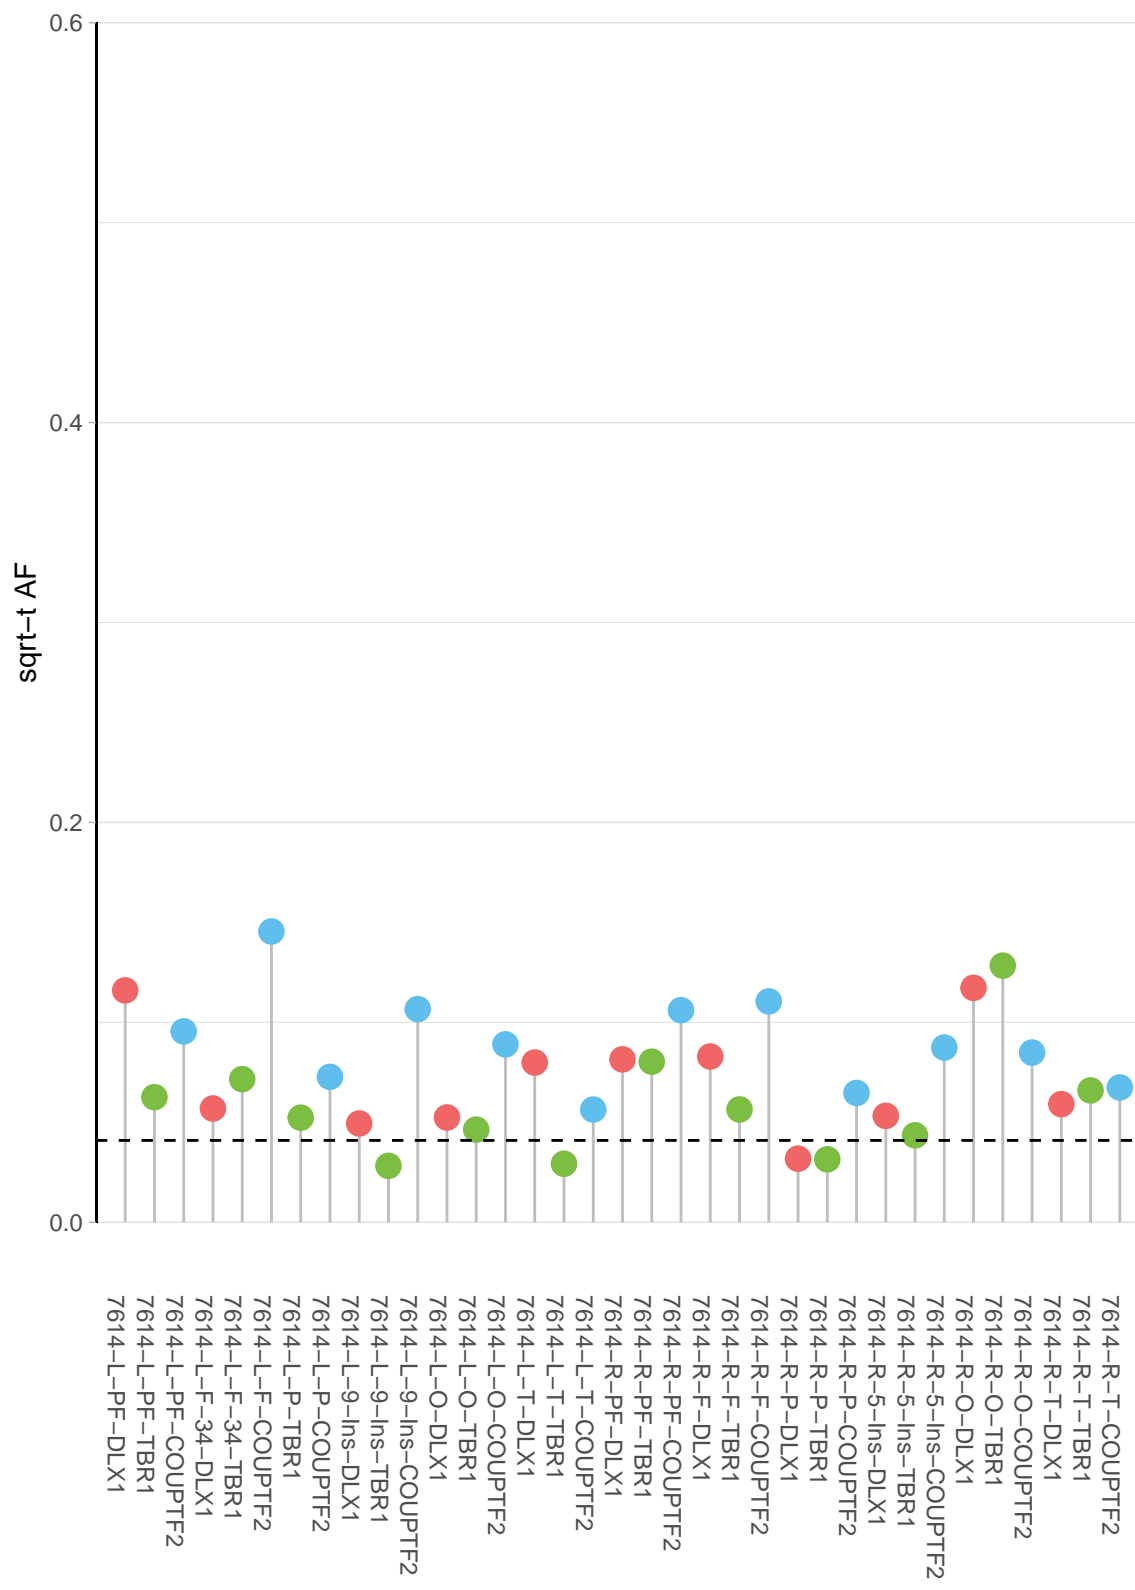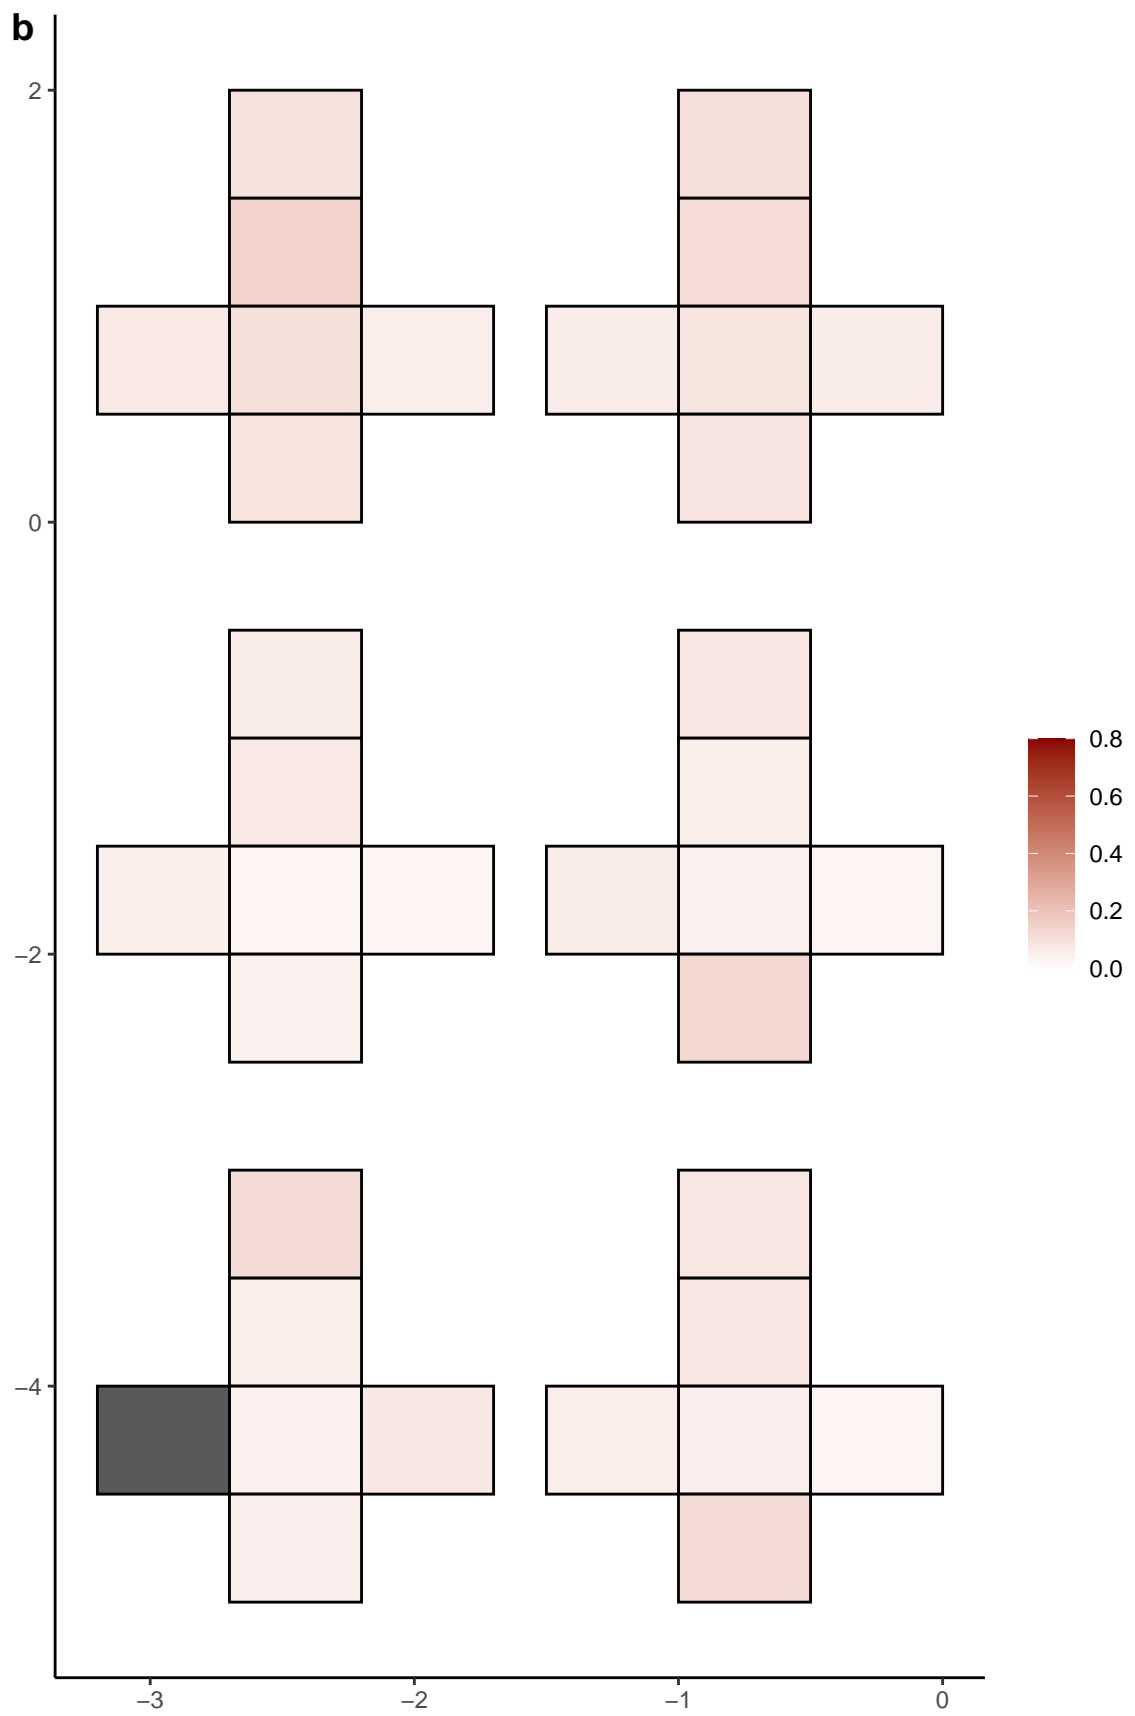



**a** ID01 17-31854088-G-A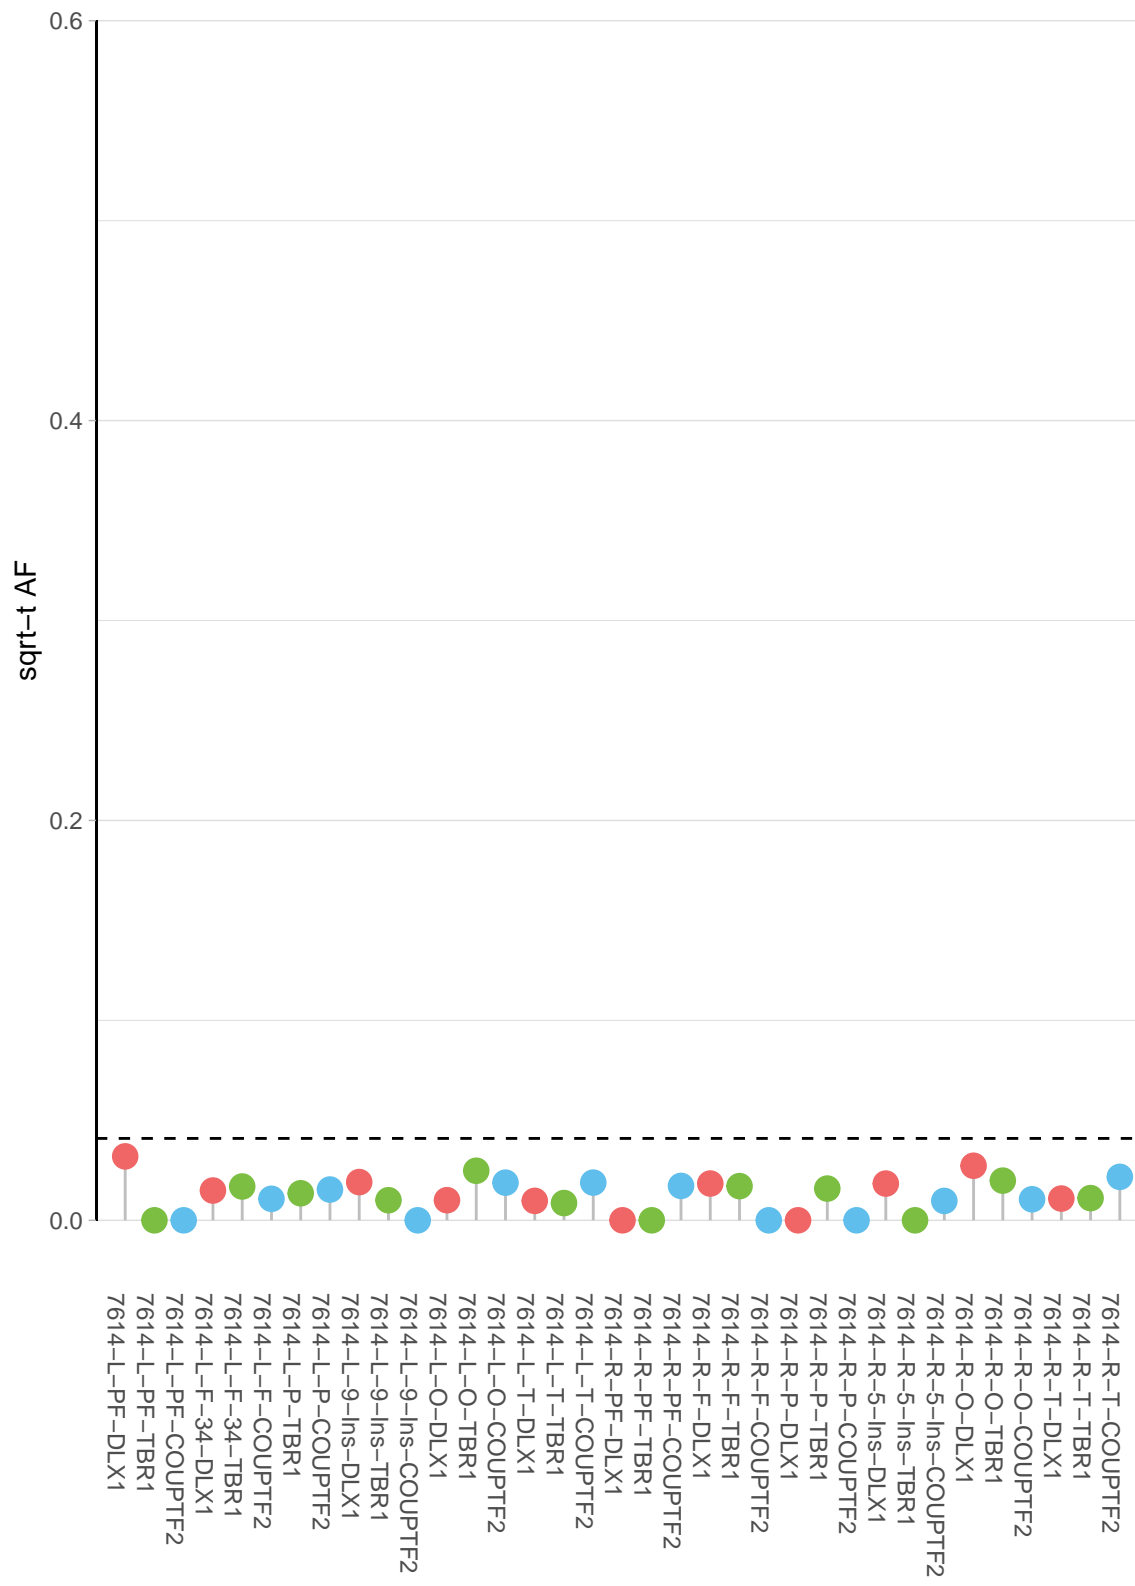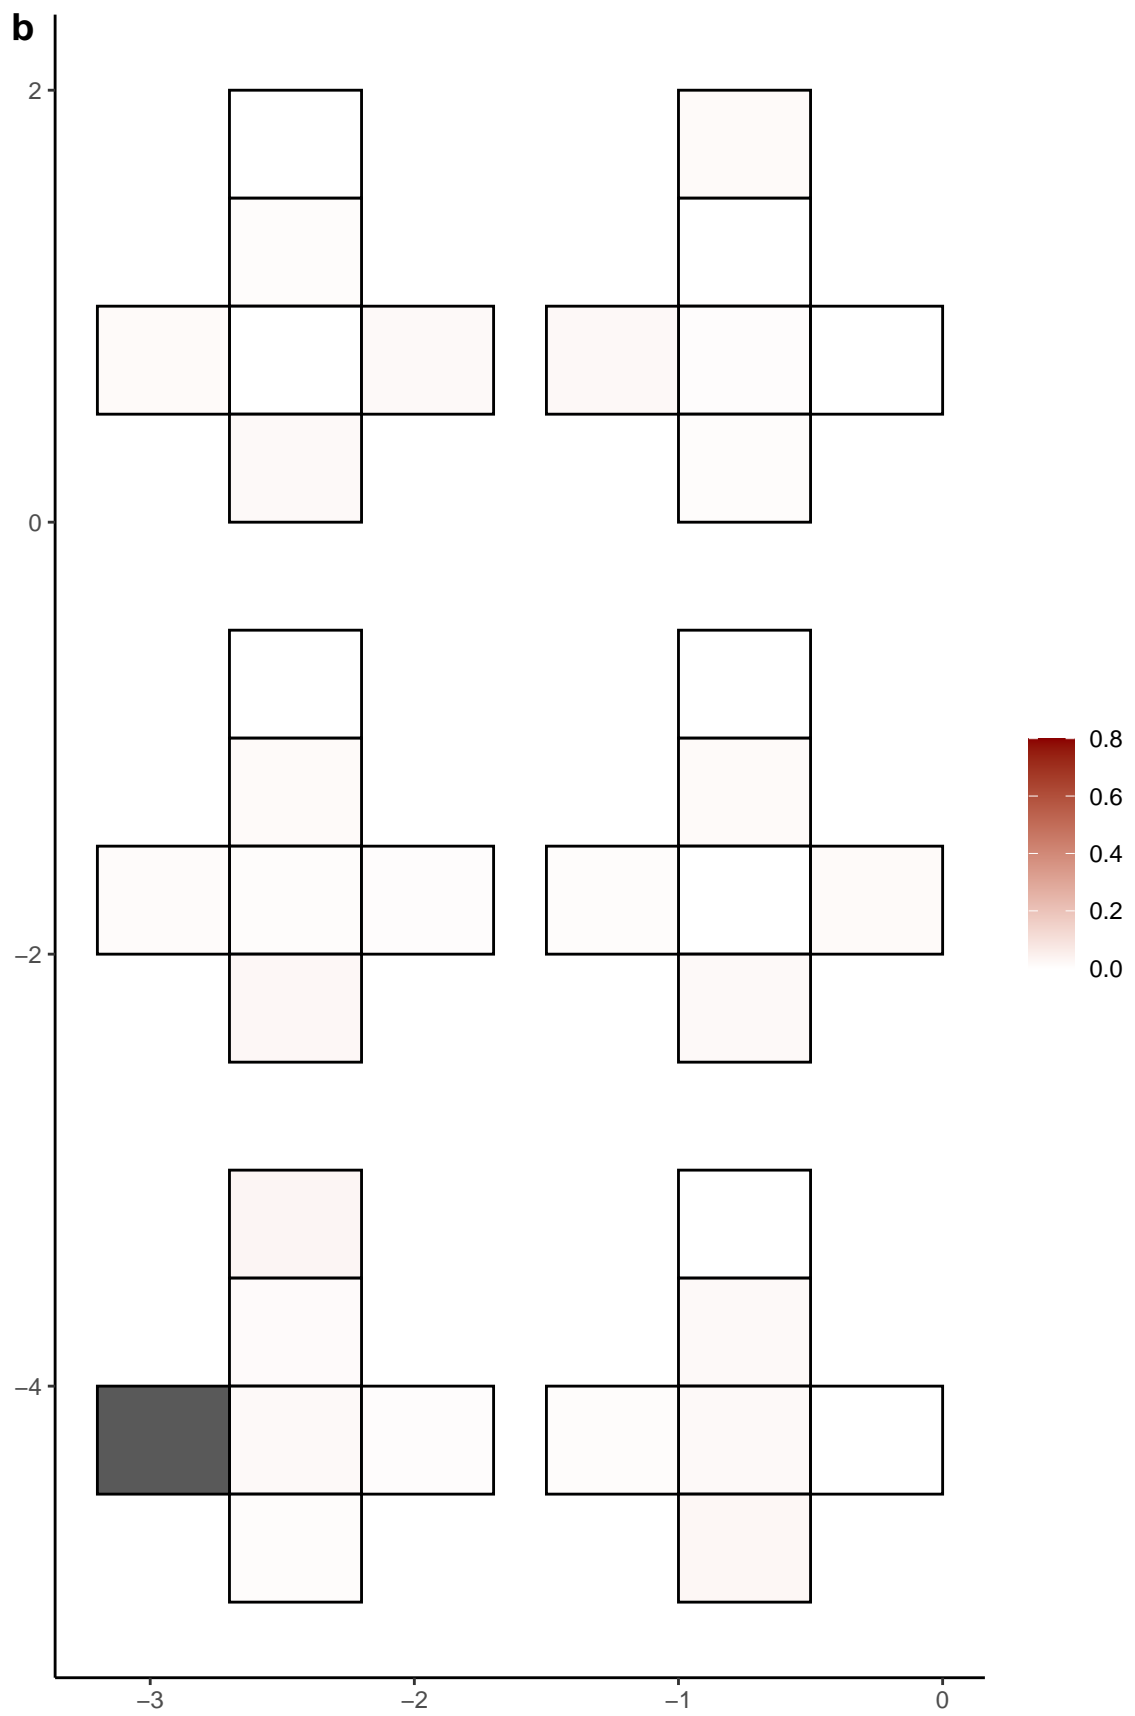





**a** ID01 17-56786985-T-C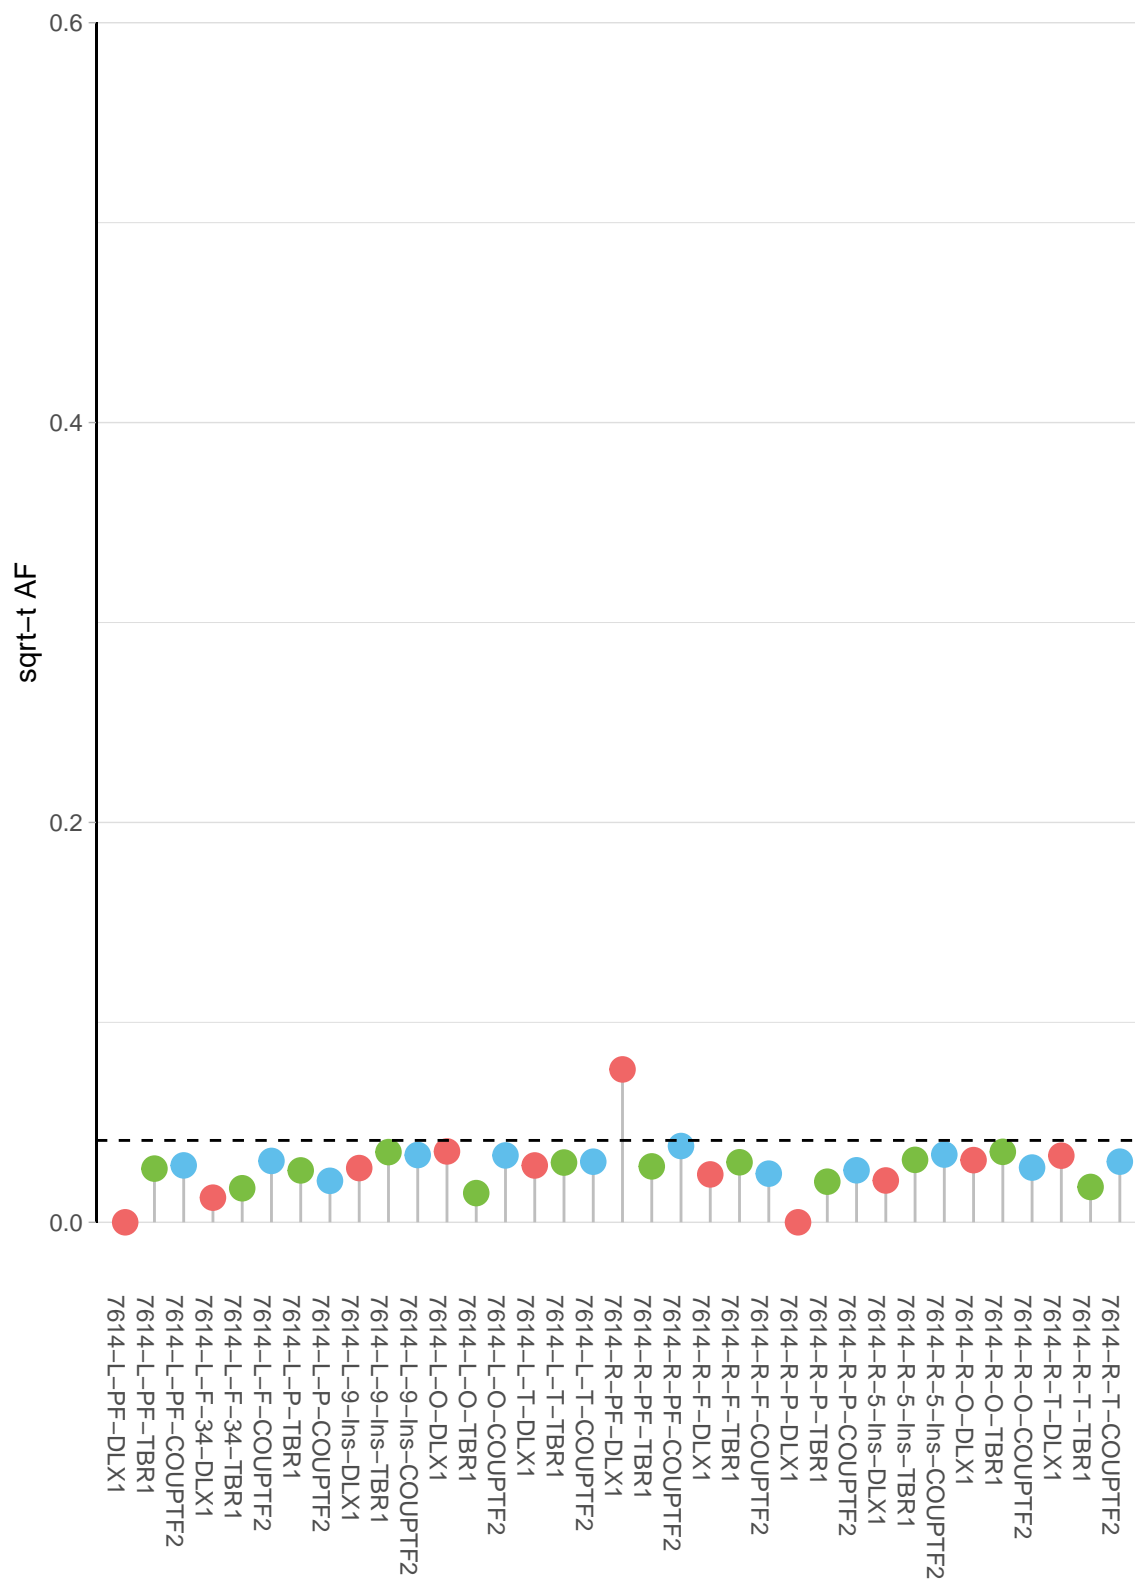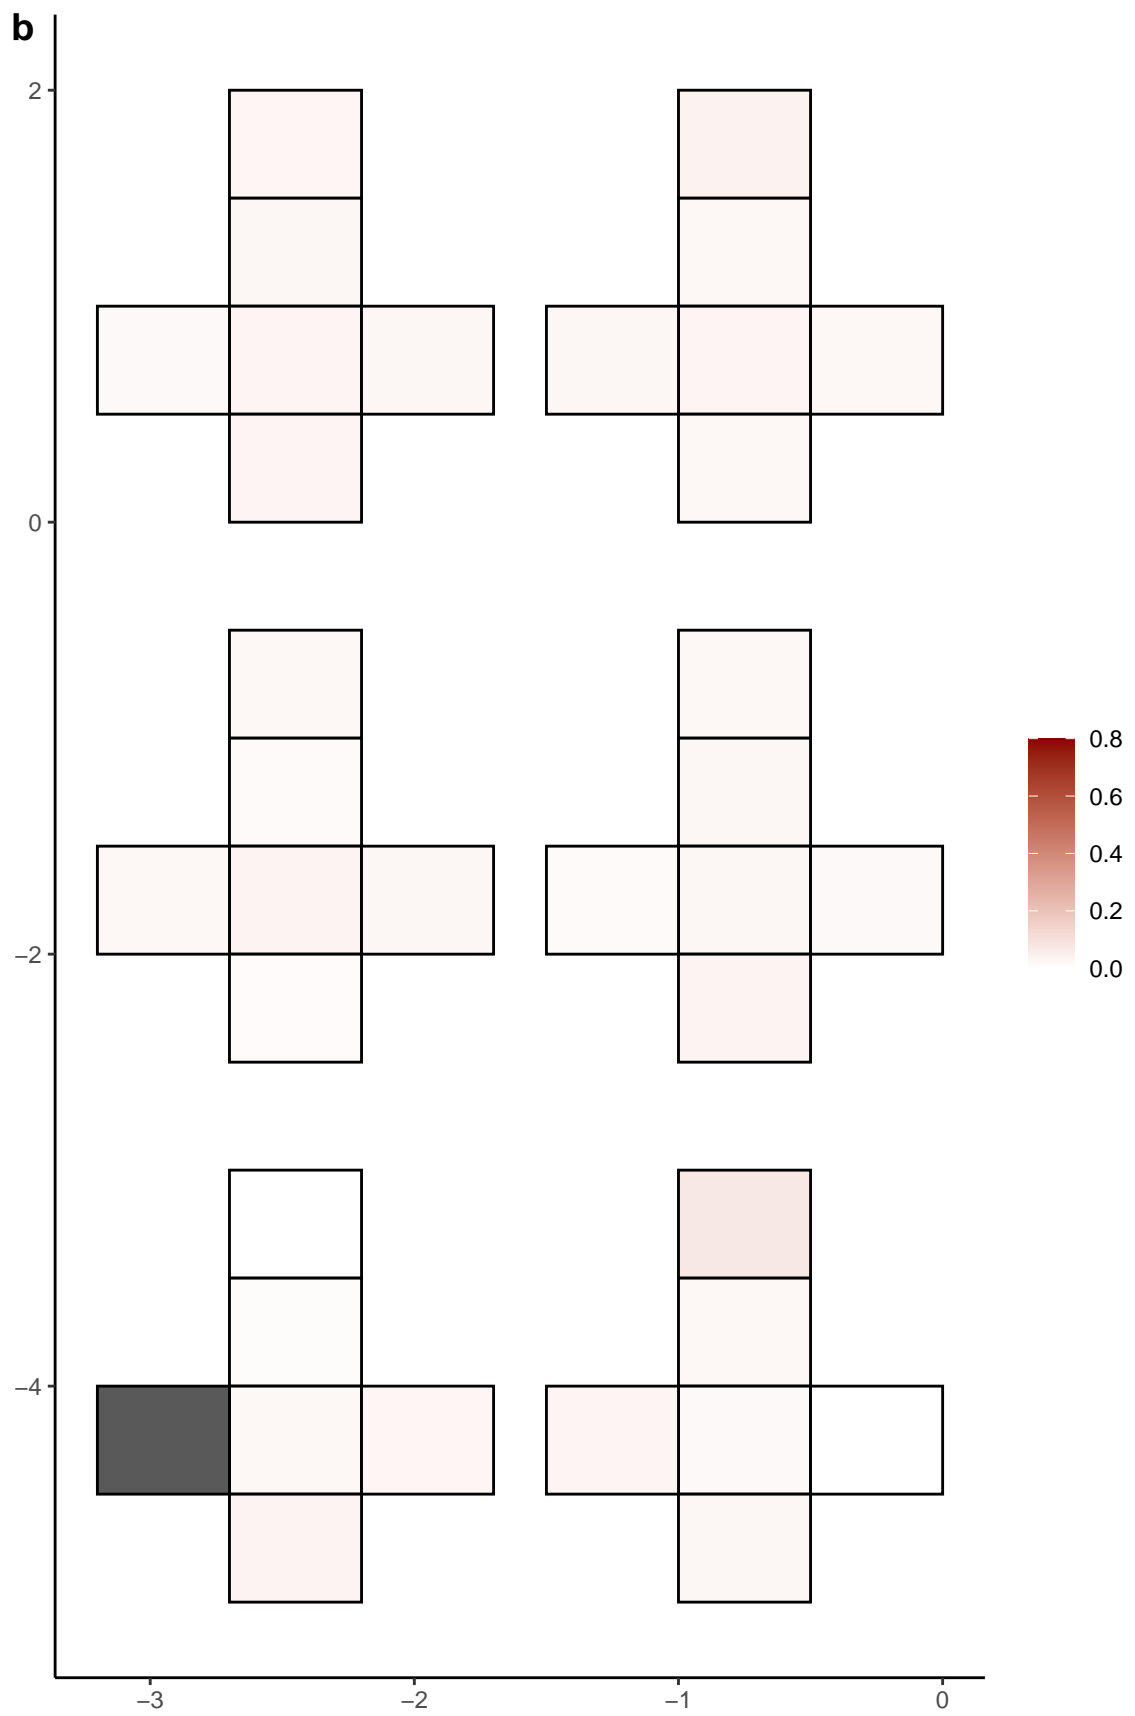

**a** ID01 18-12016169-T-C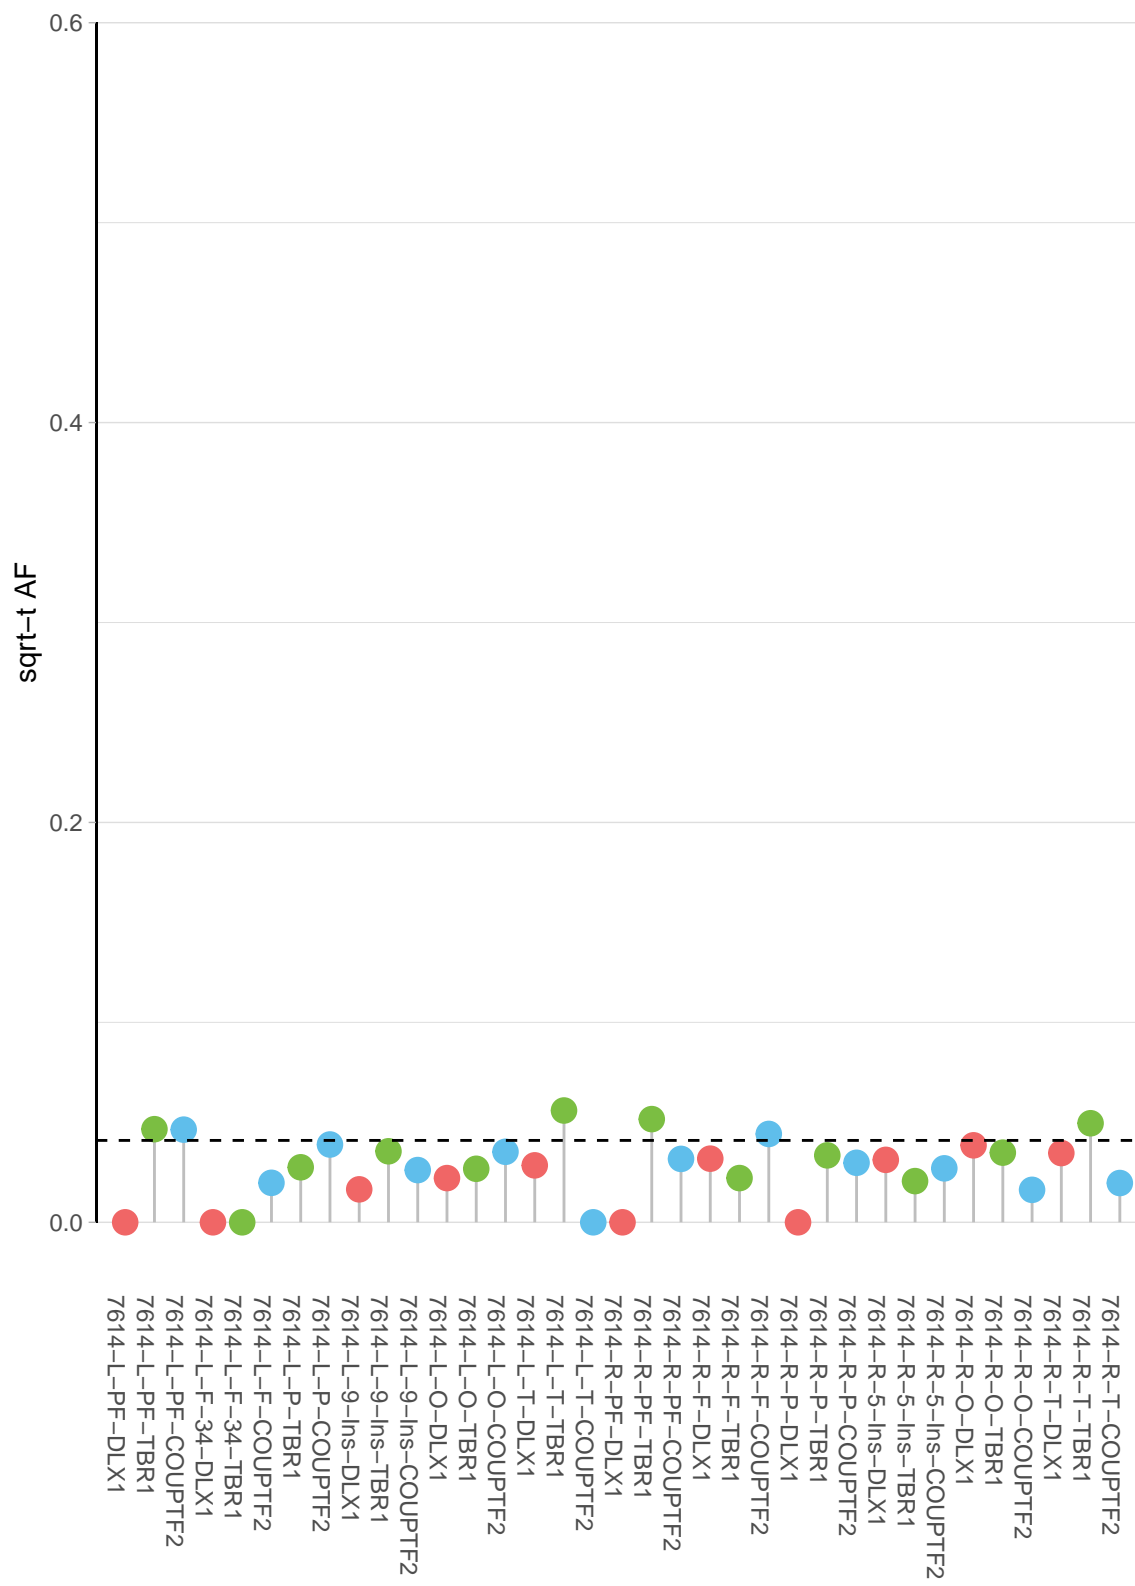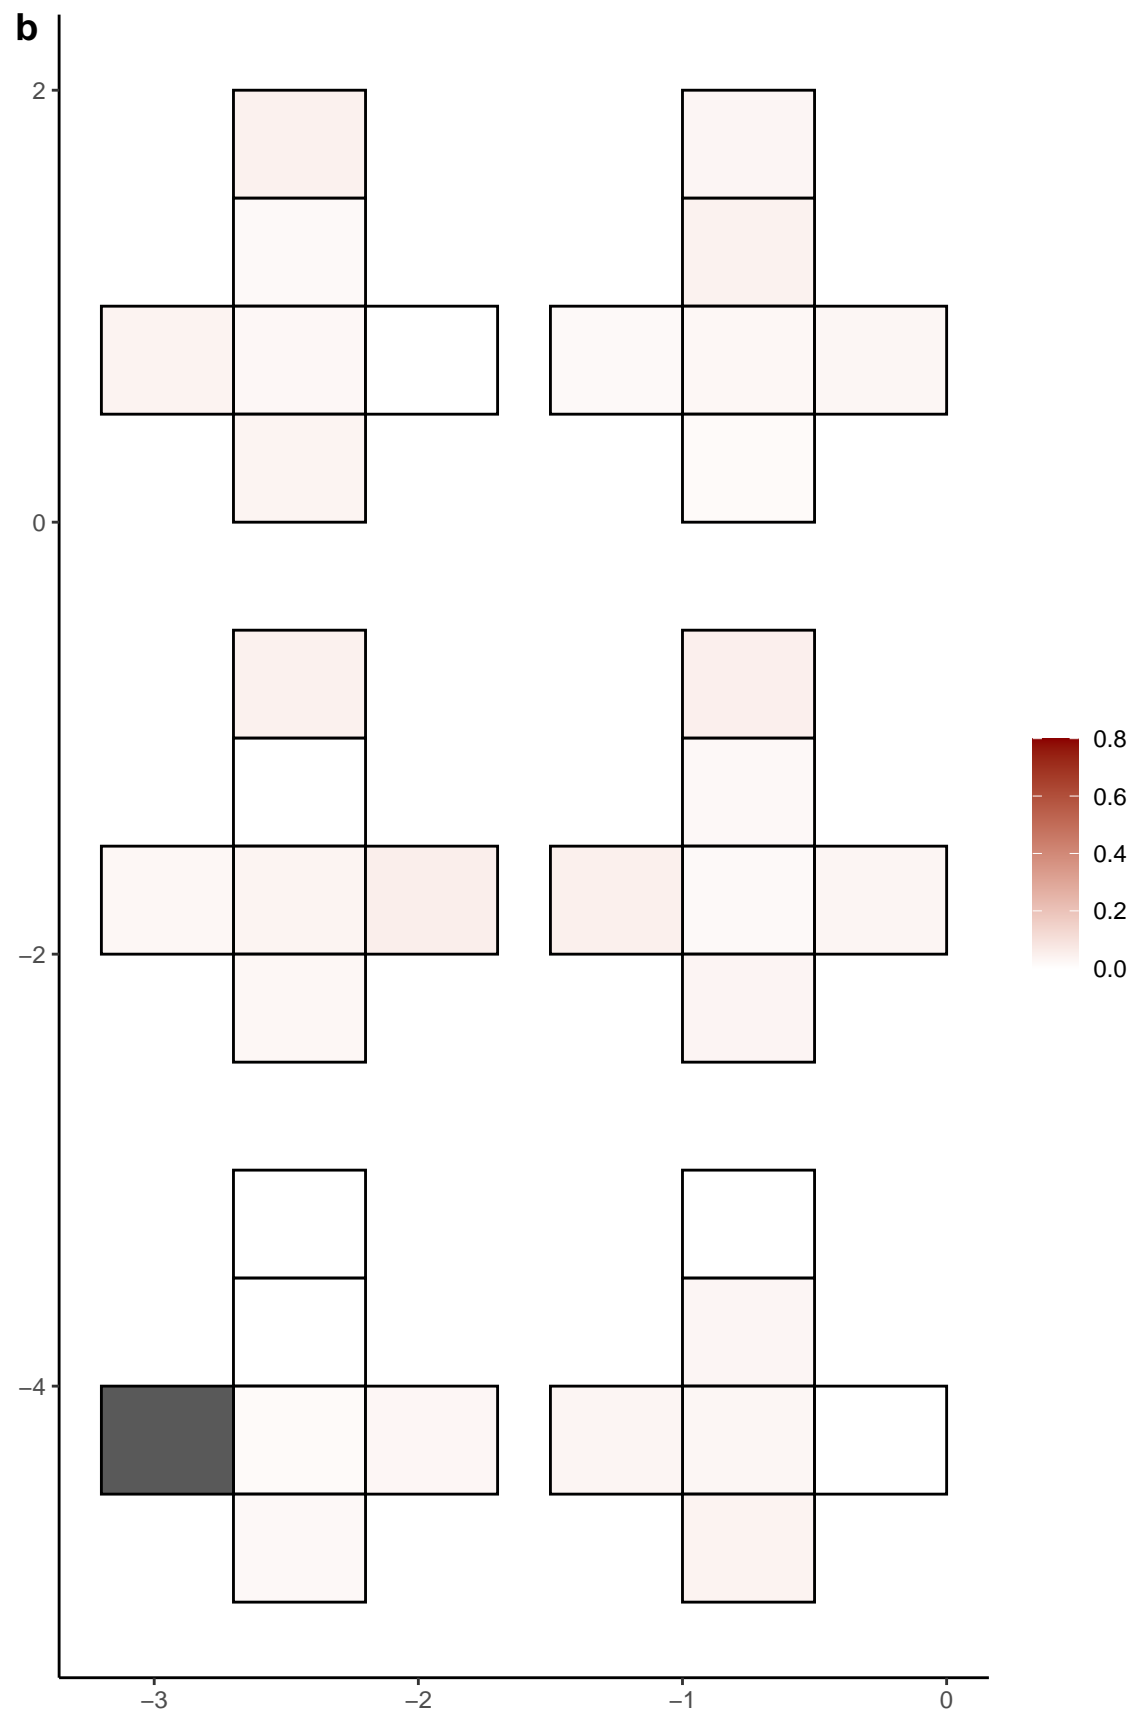

**a** ID01 18-27189441-TA-T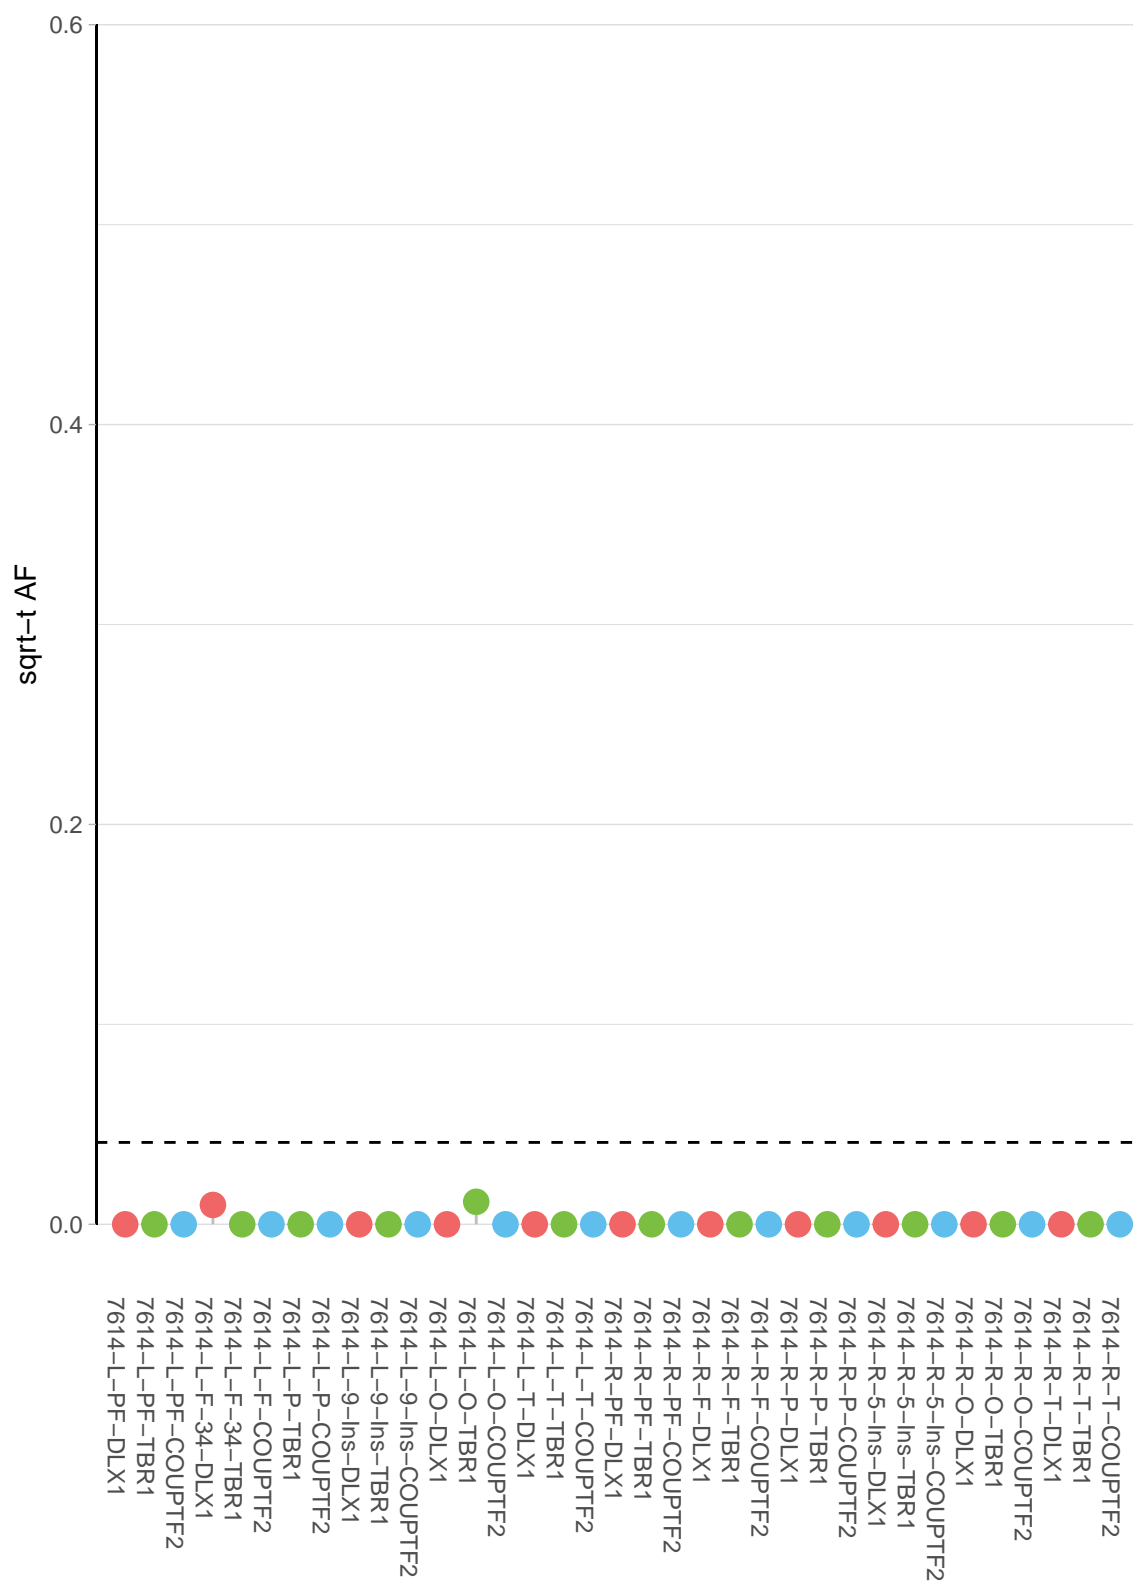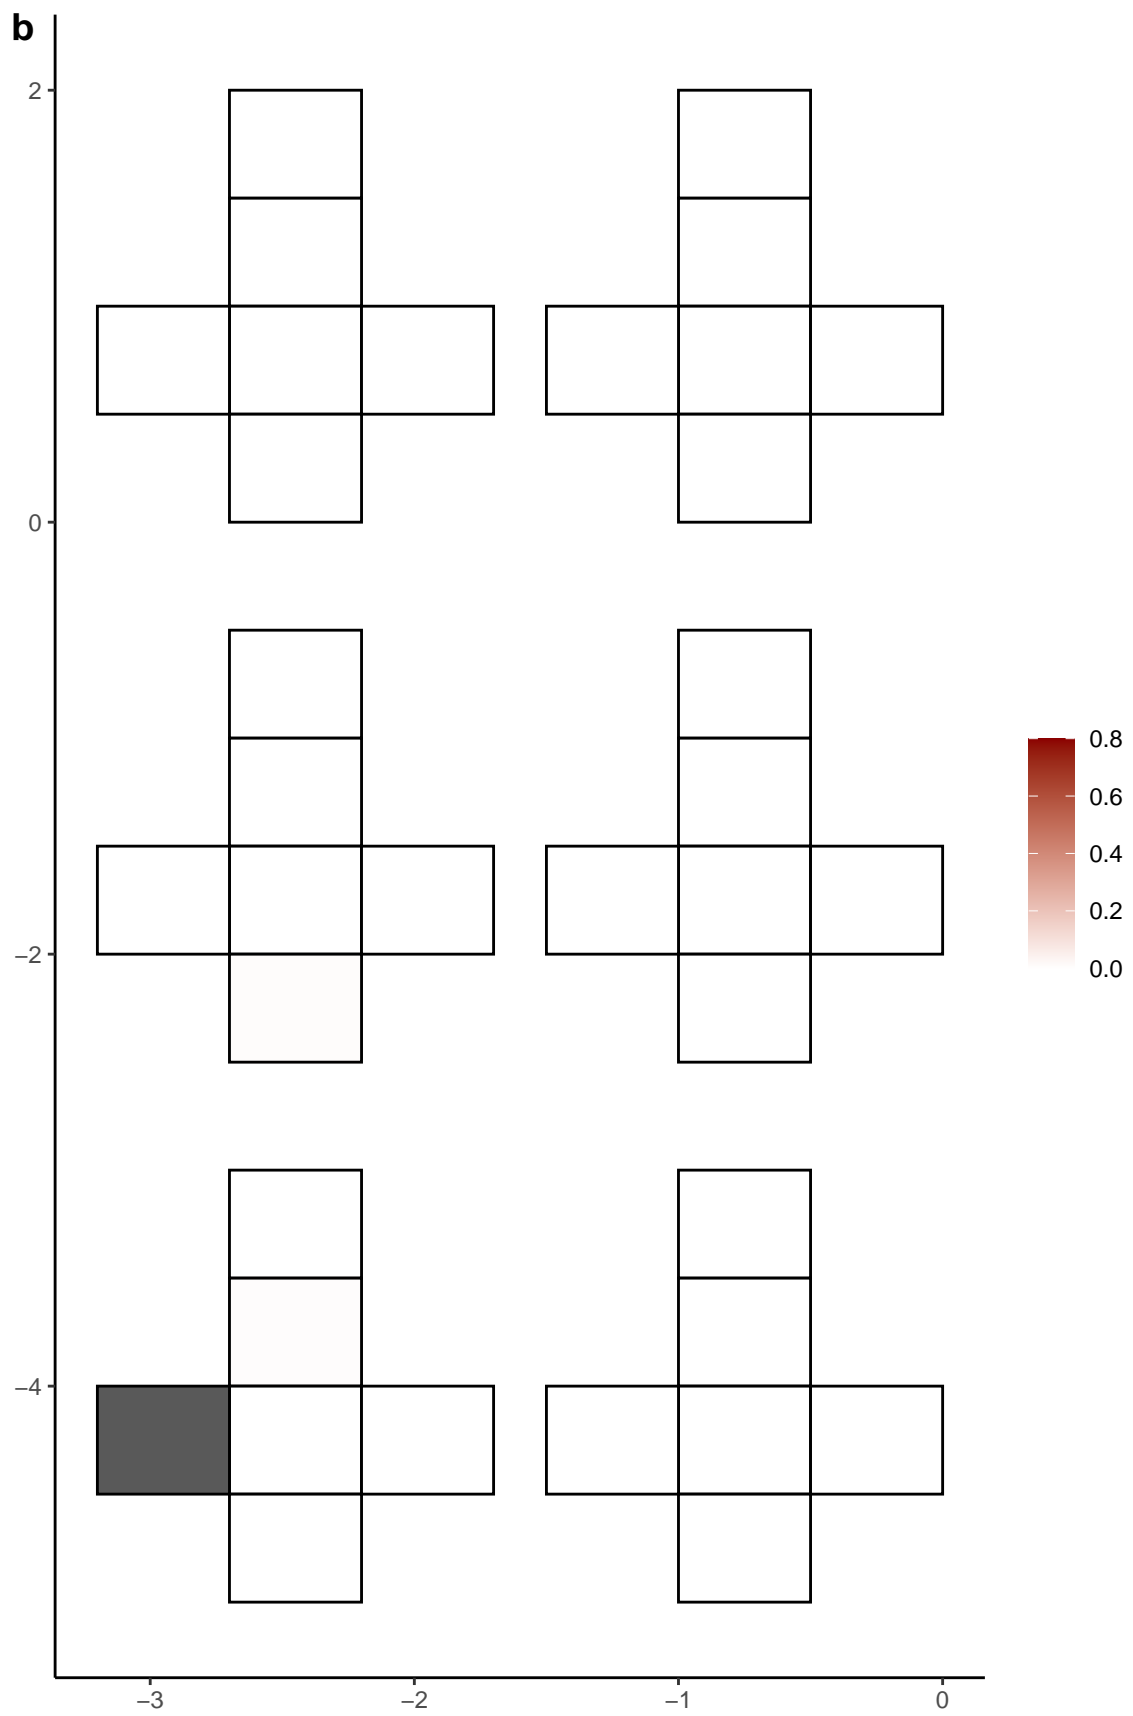

**a** ID01 18-39171826-C-G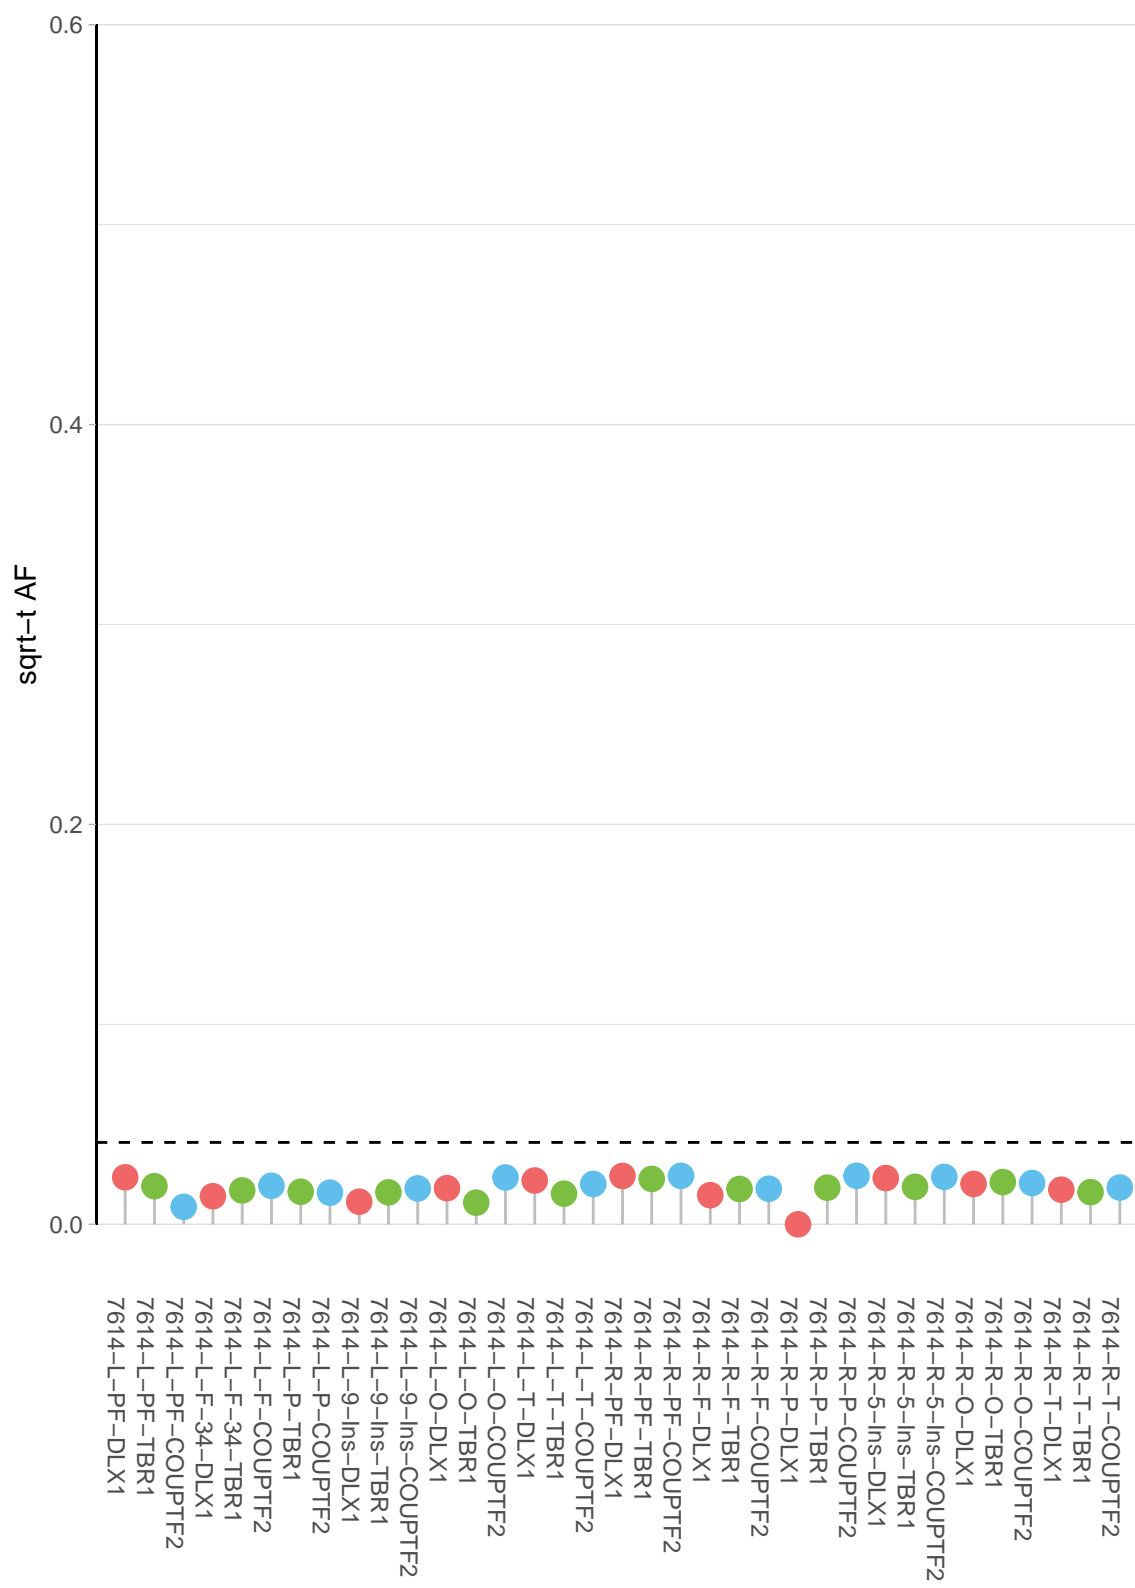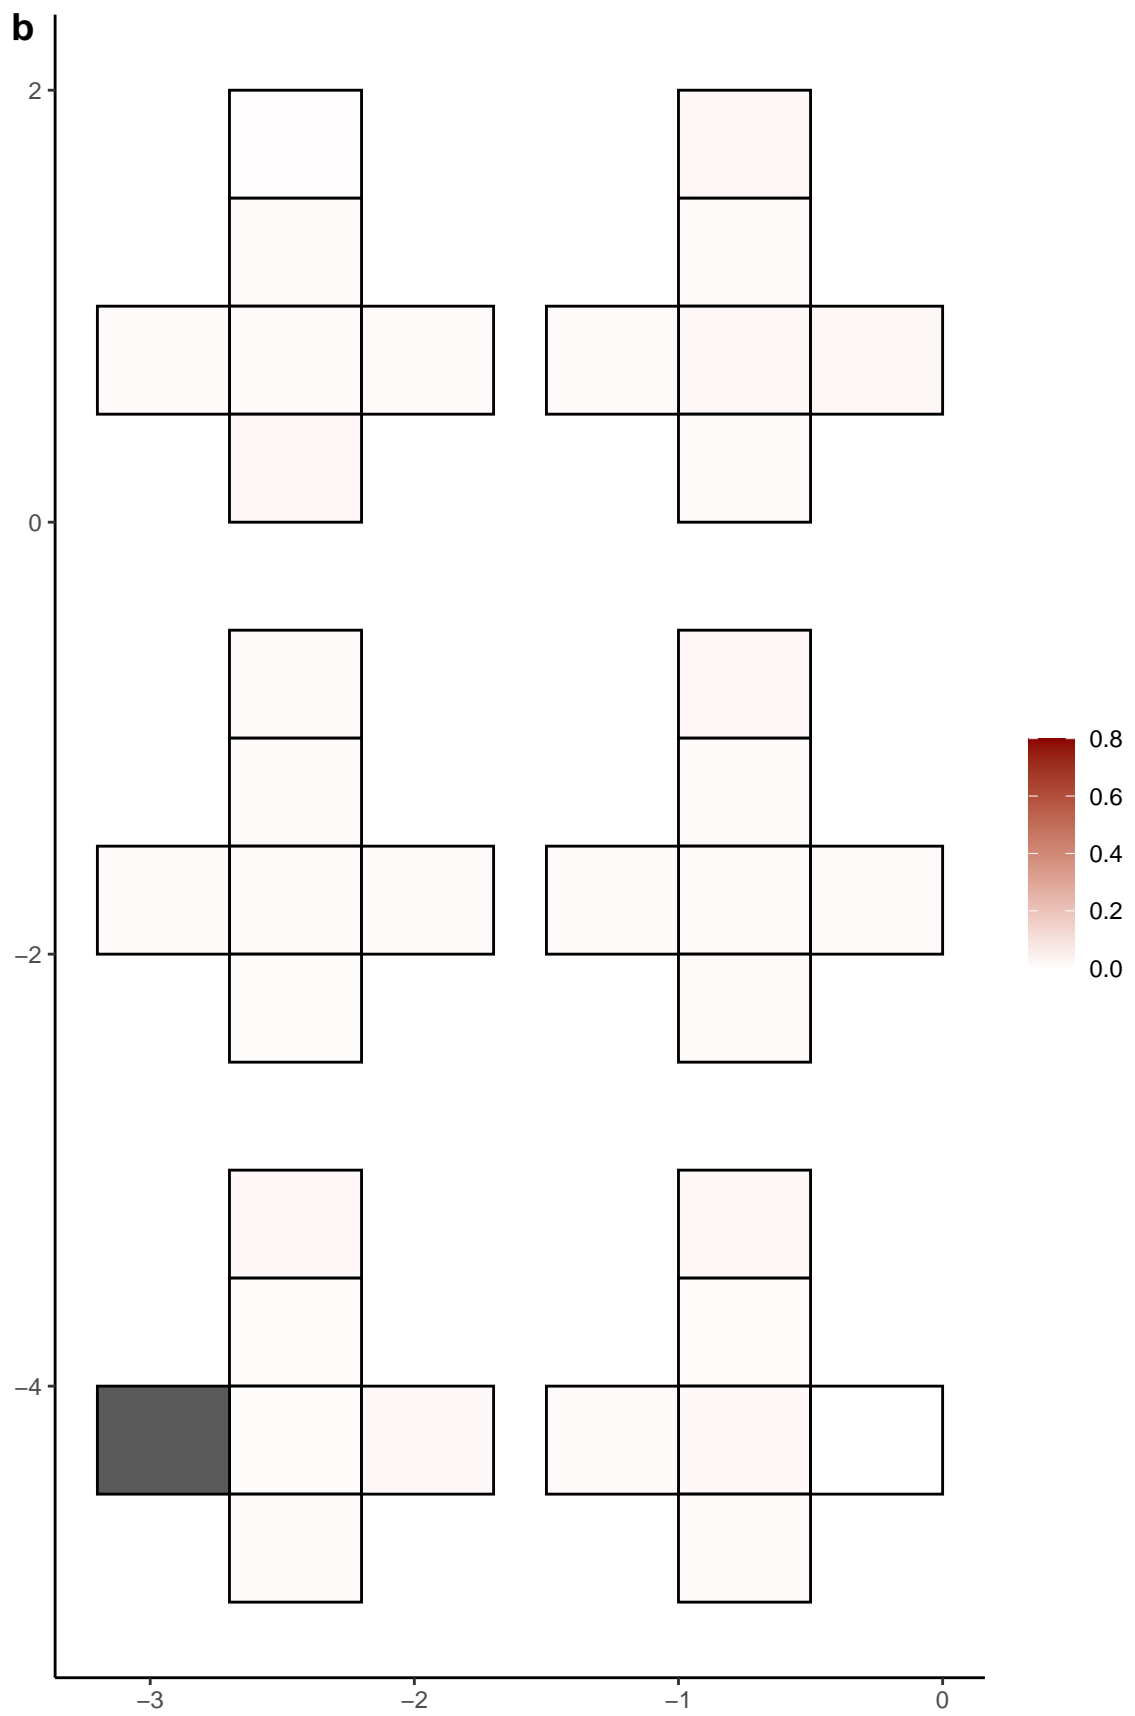

**a** ID01 18-40074413-T-C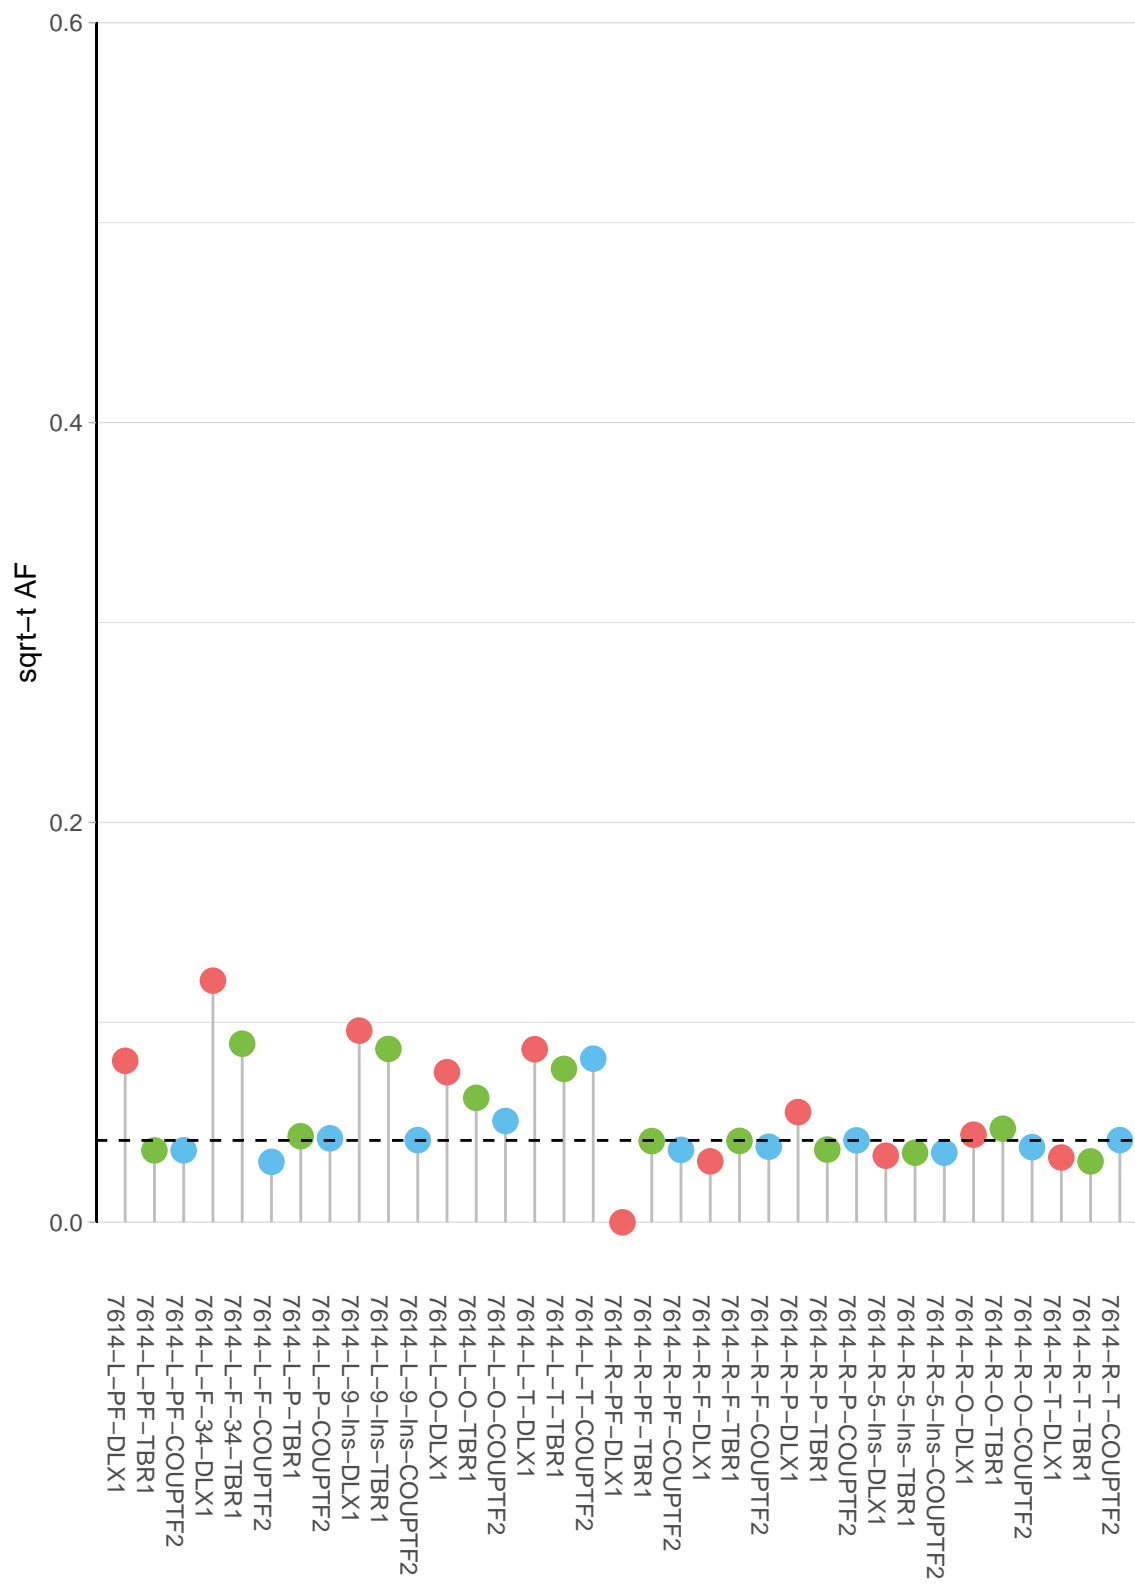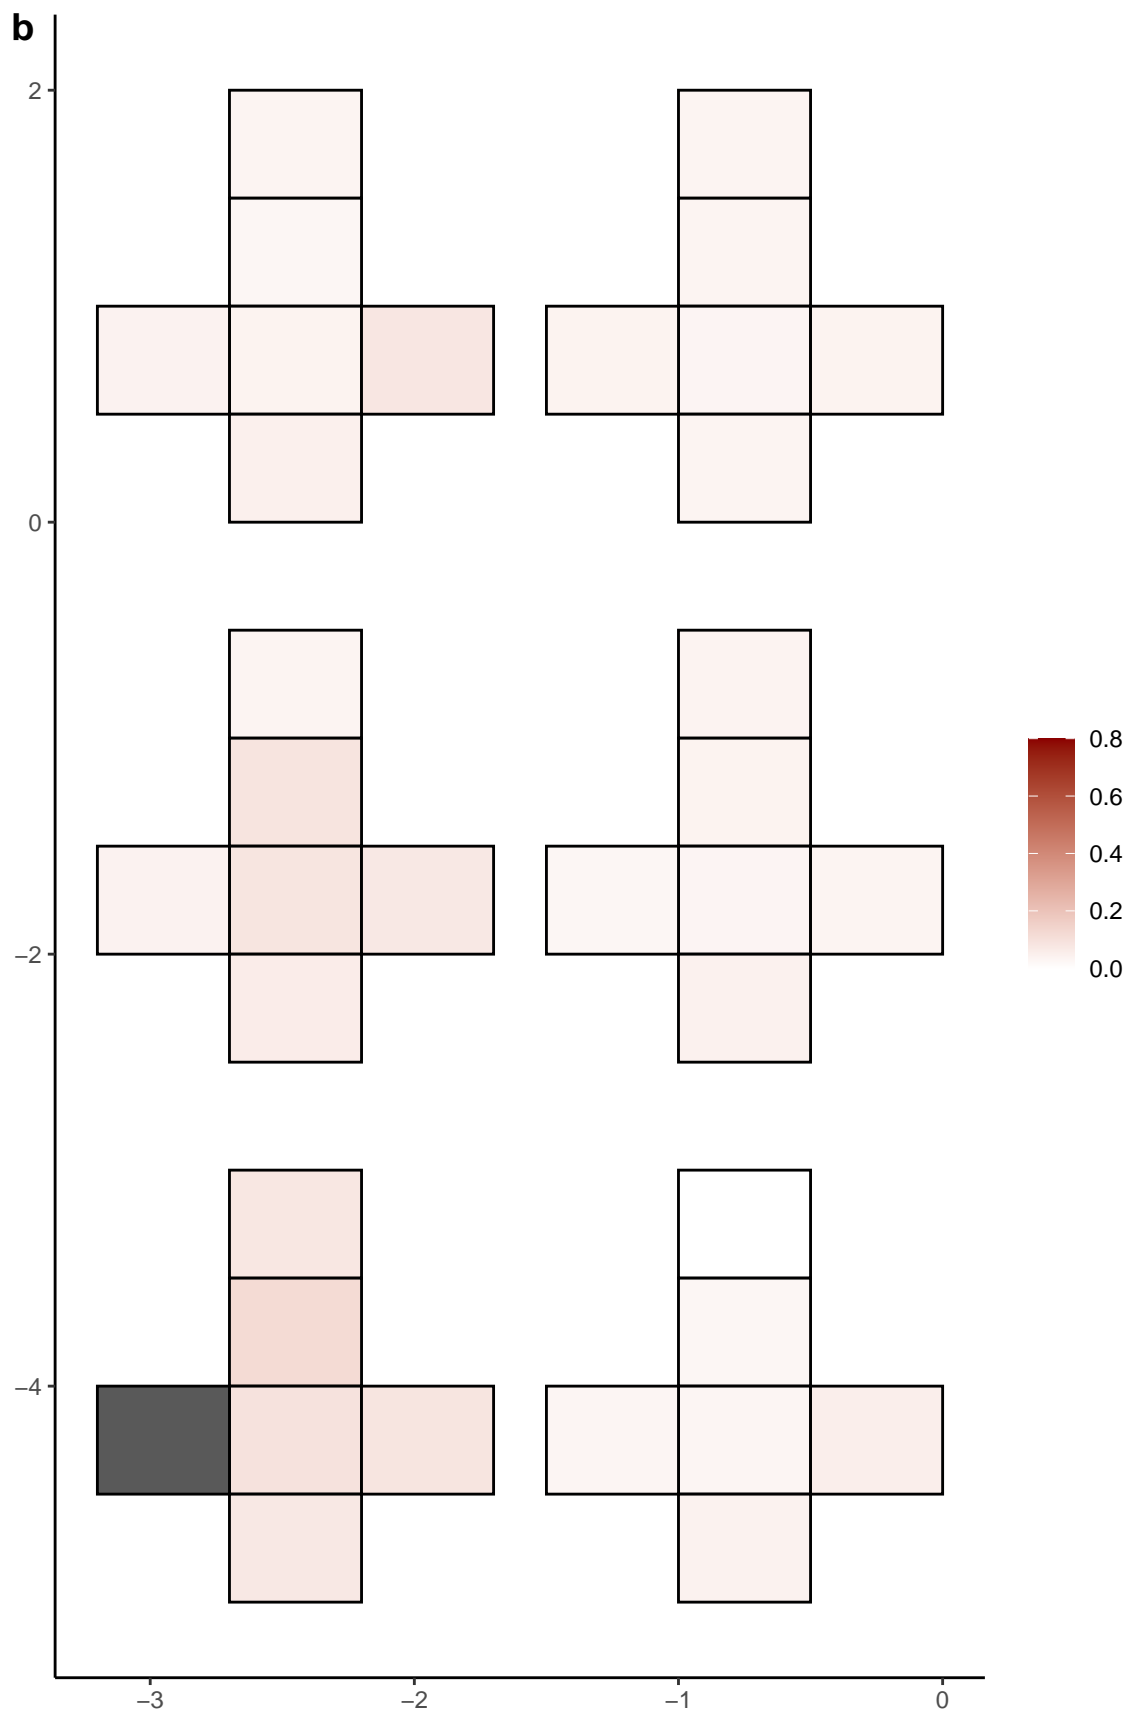



**a** ID01 18-56480516-G-A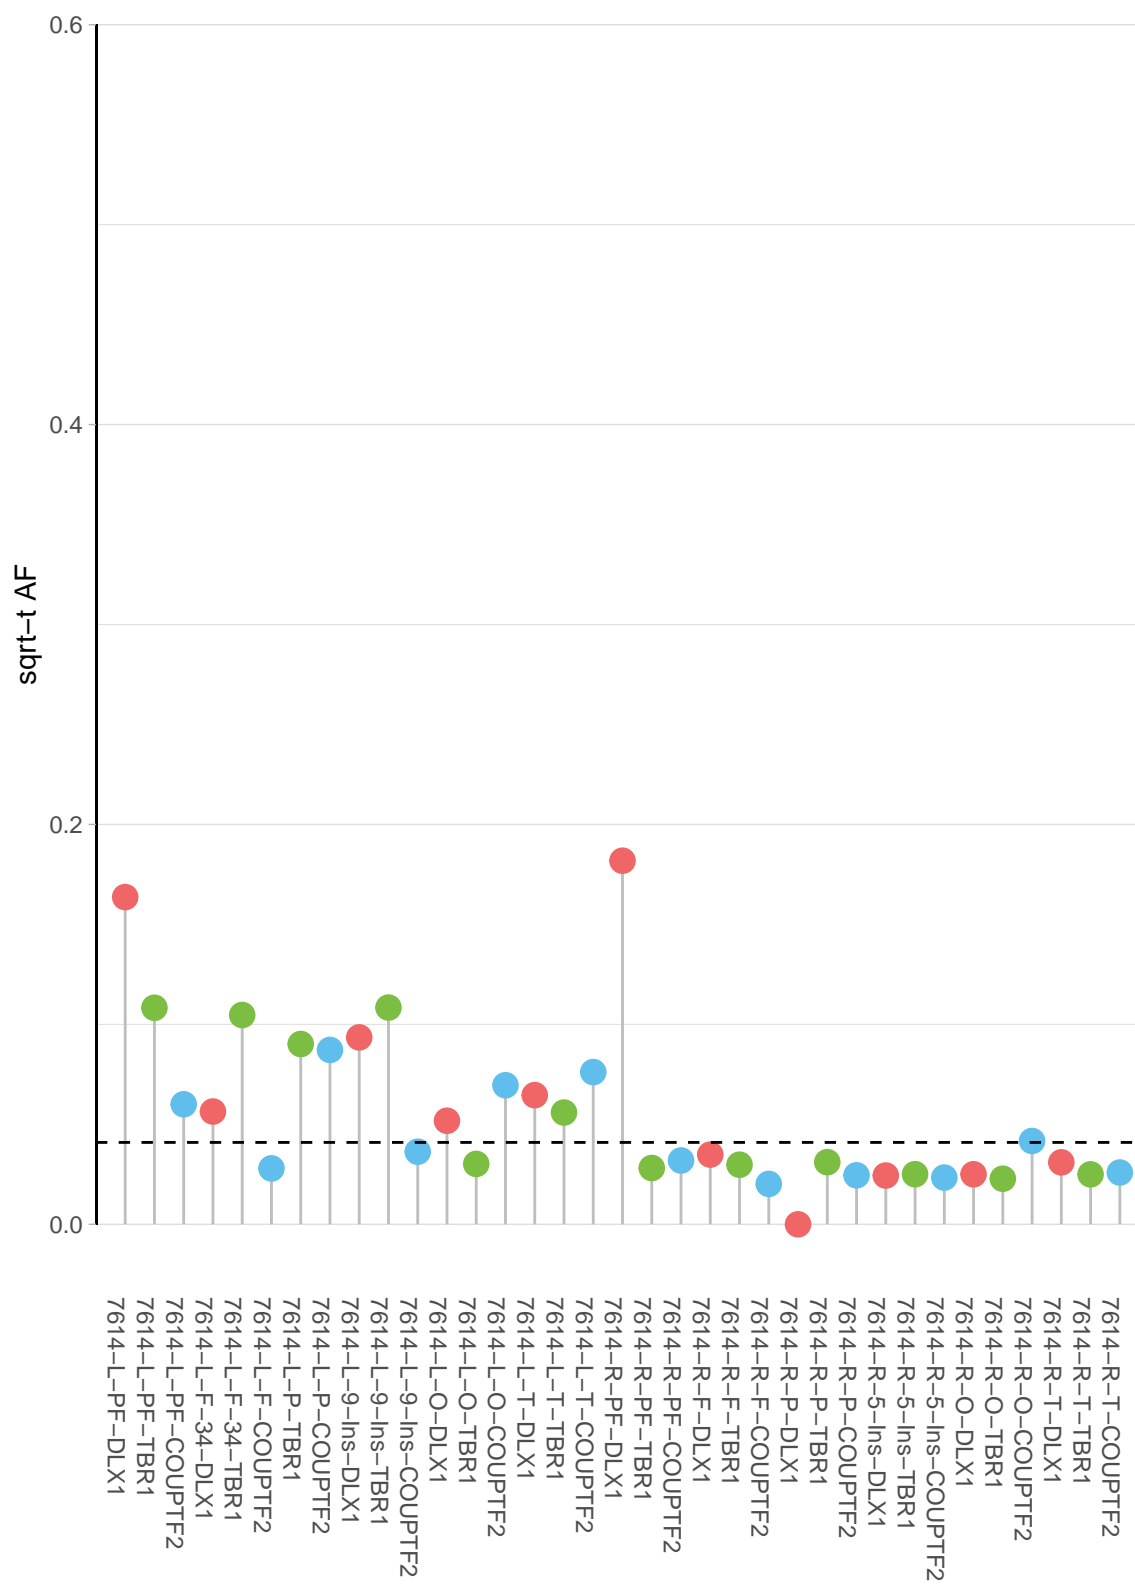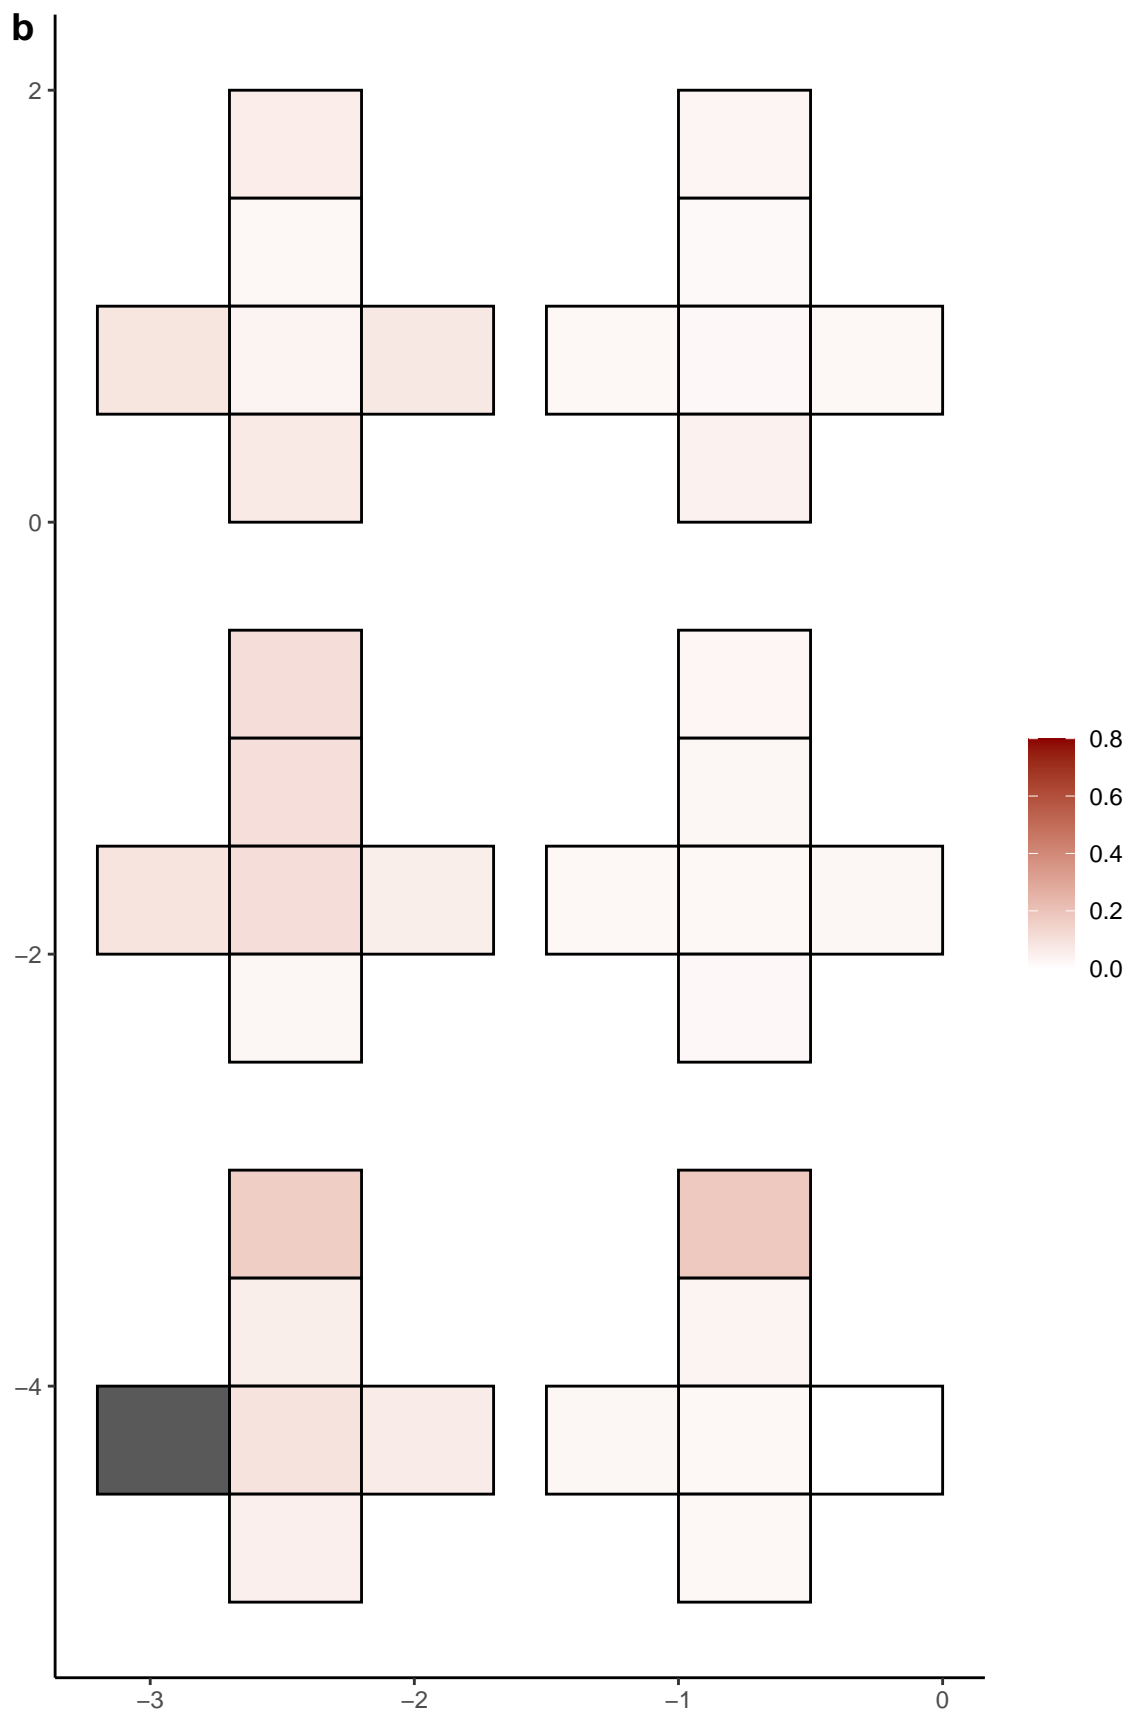

**a** ID01 18-62319203-G-A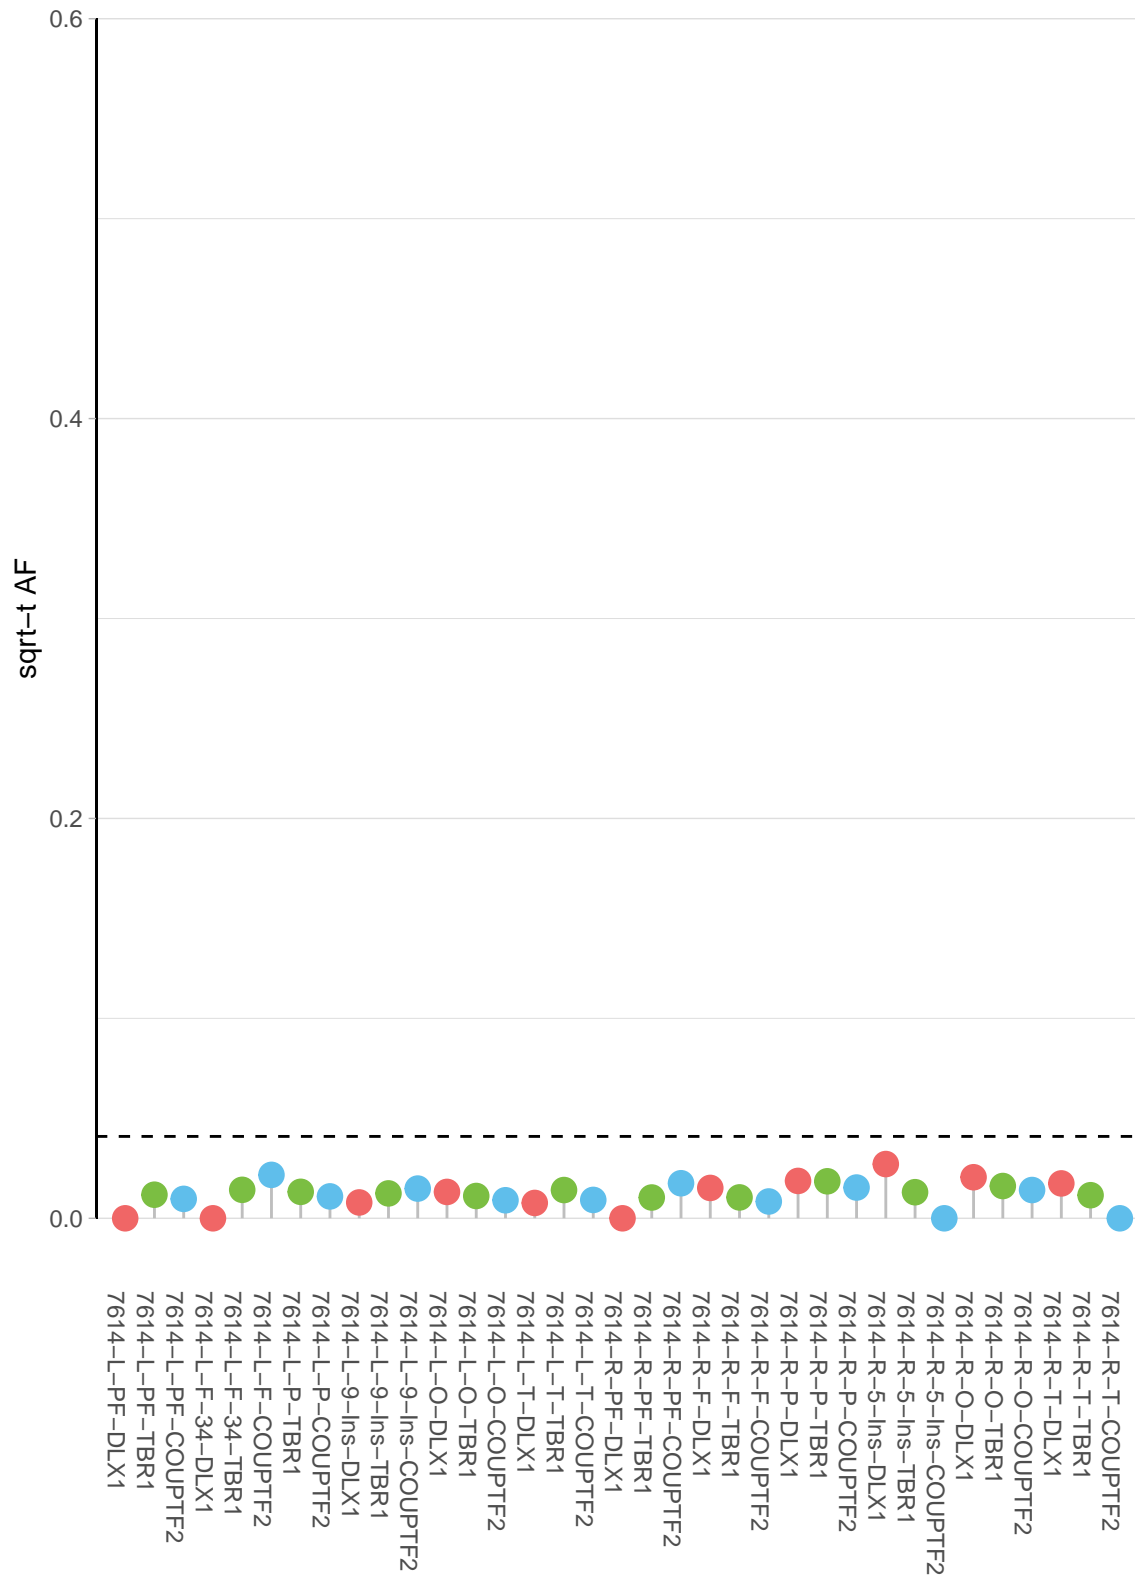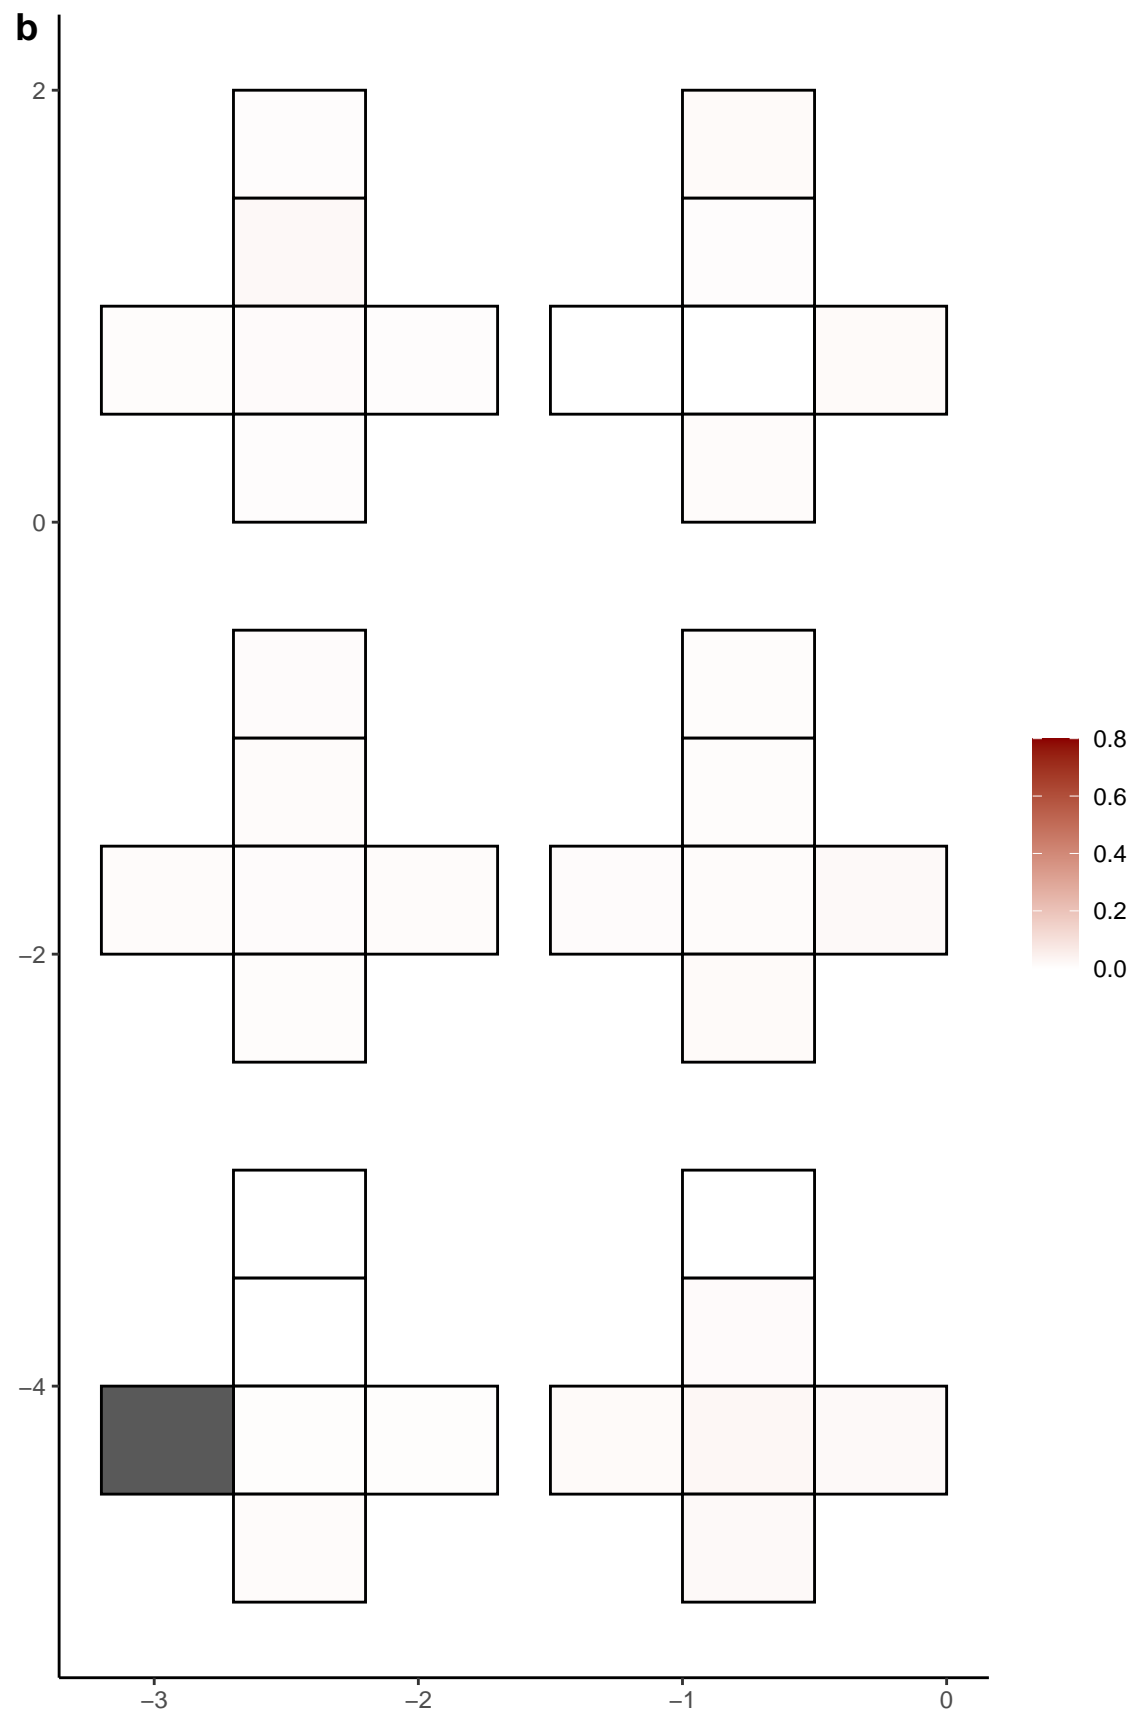

**a** ID01 18-6258630-G-A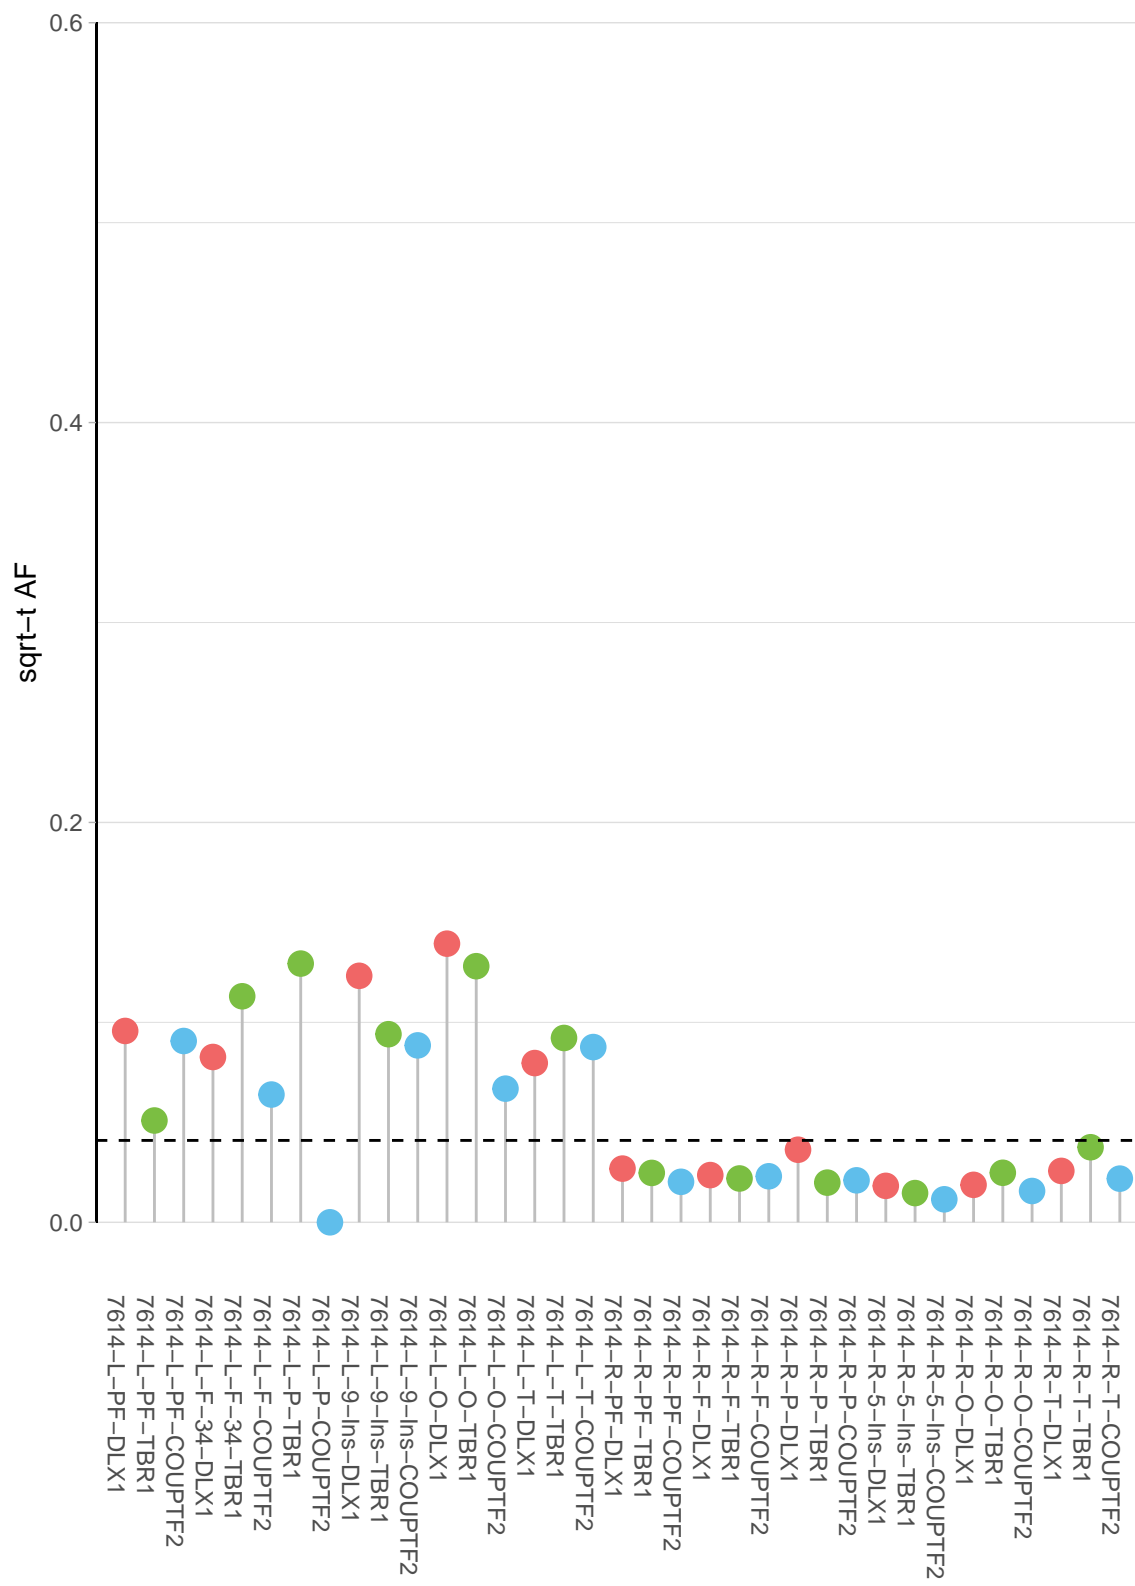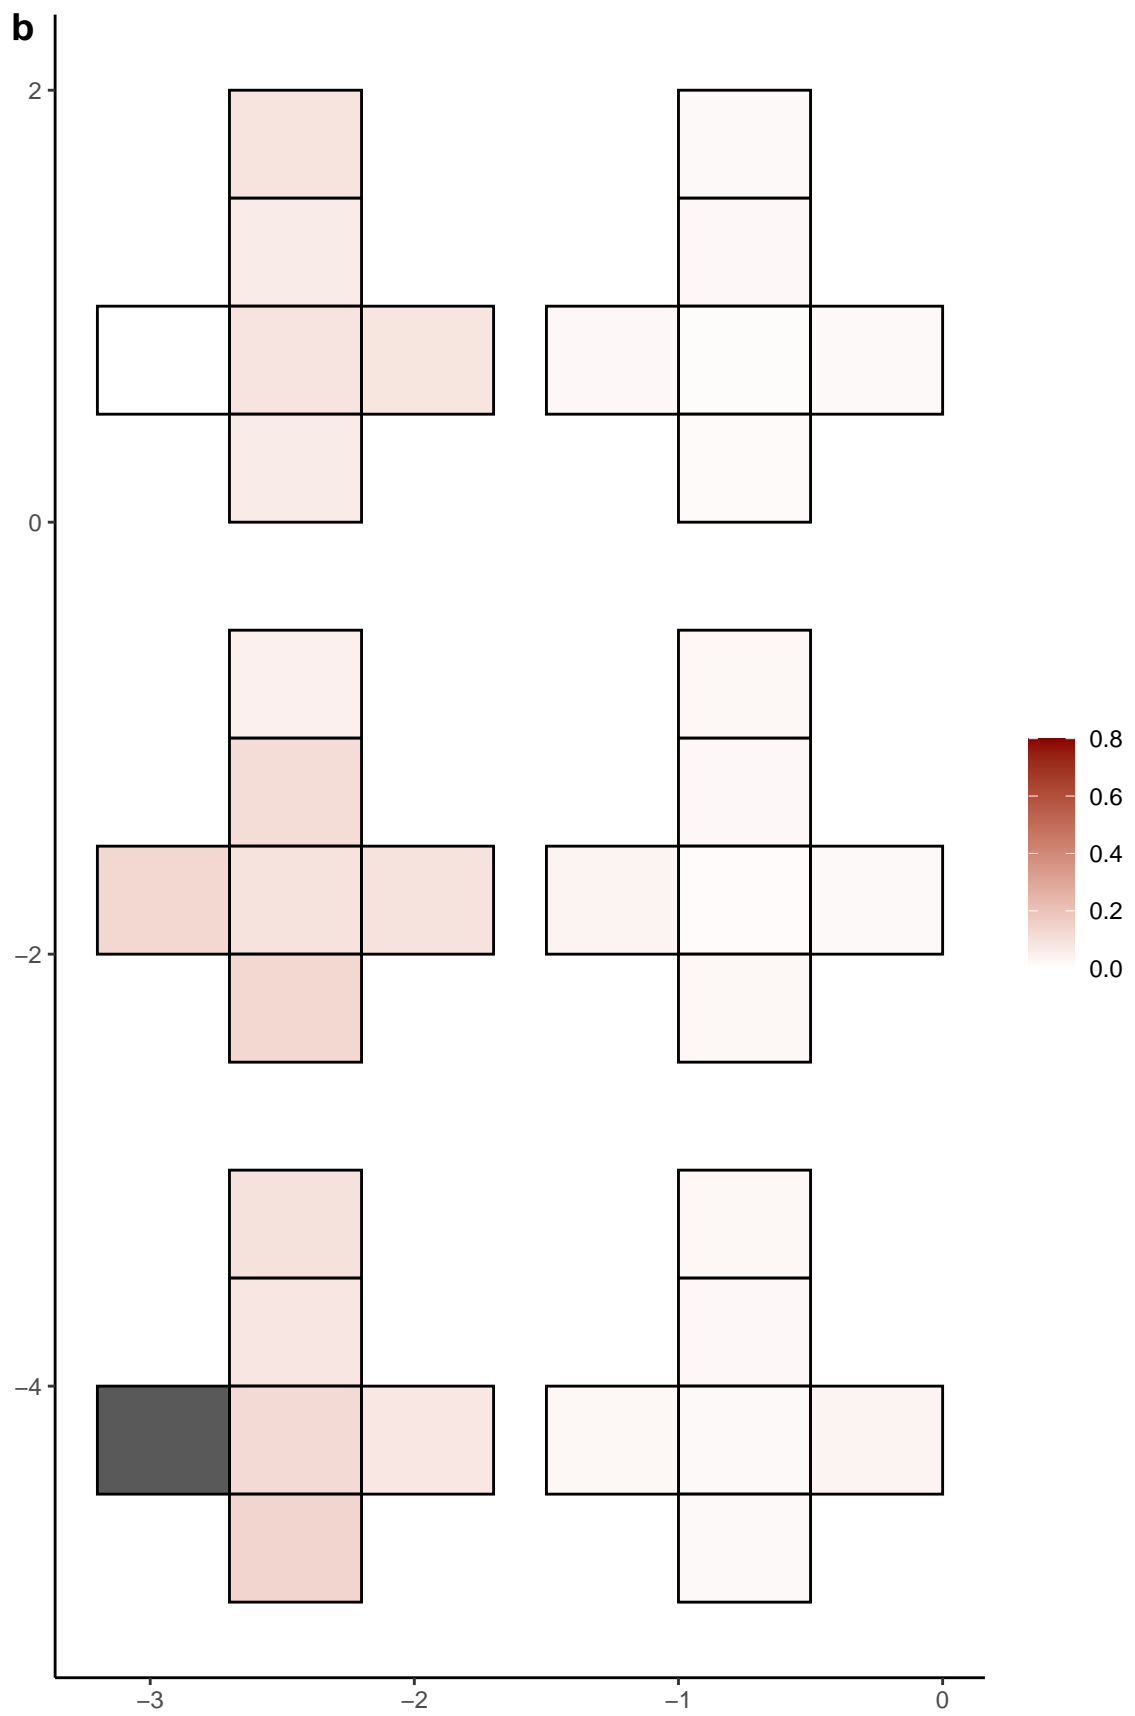

**a** ID01 18-65335071-G-A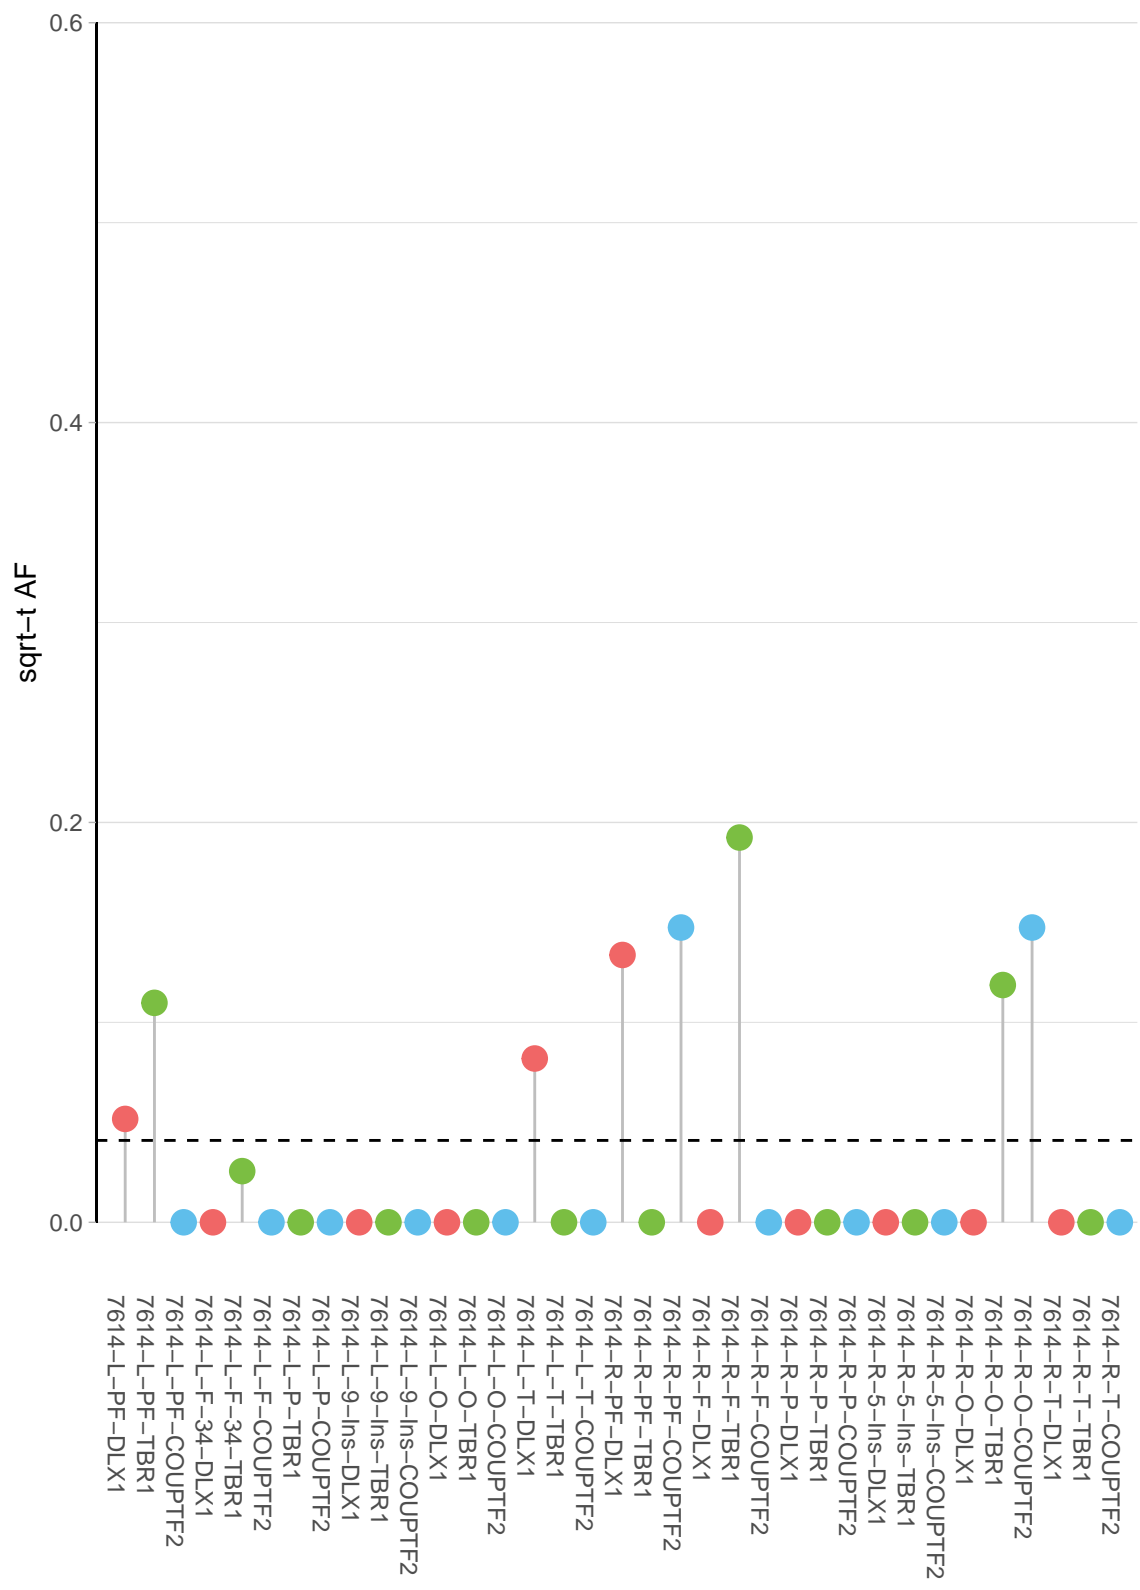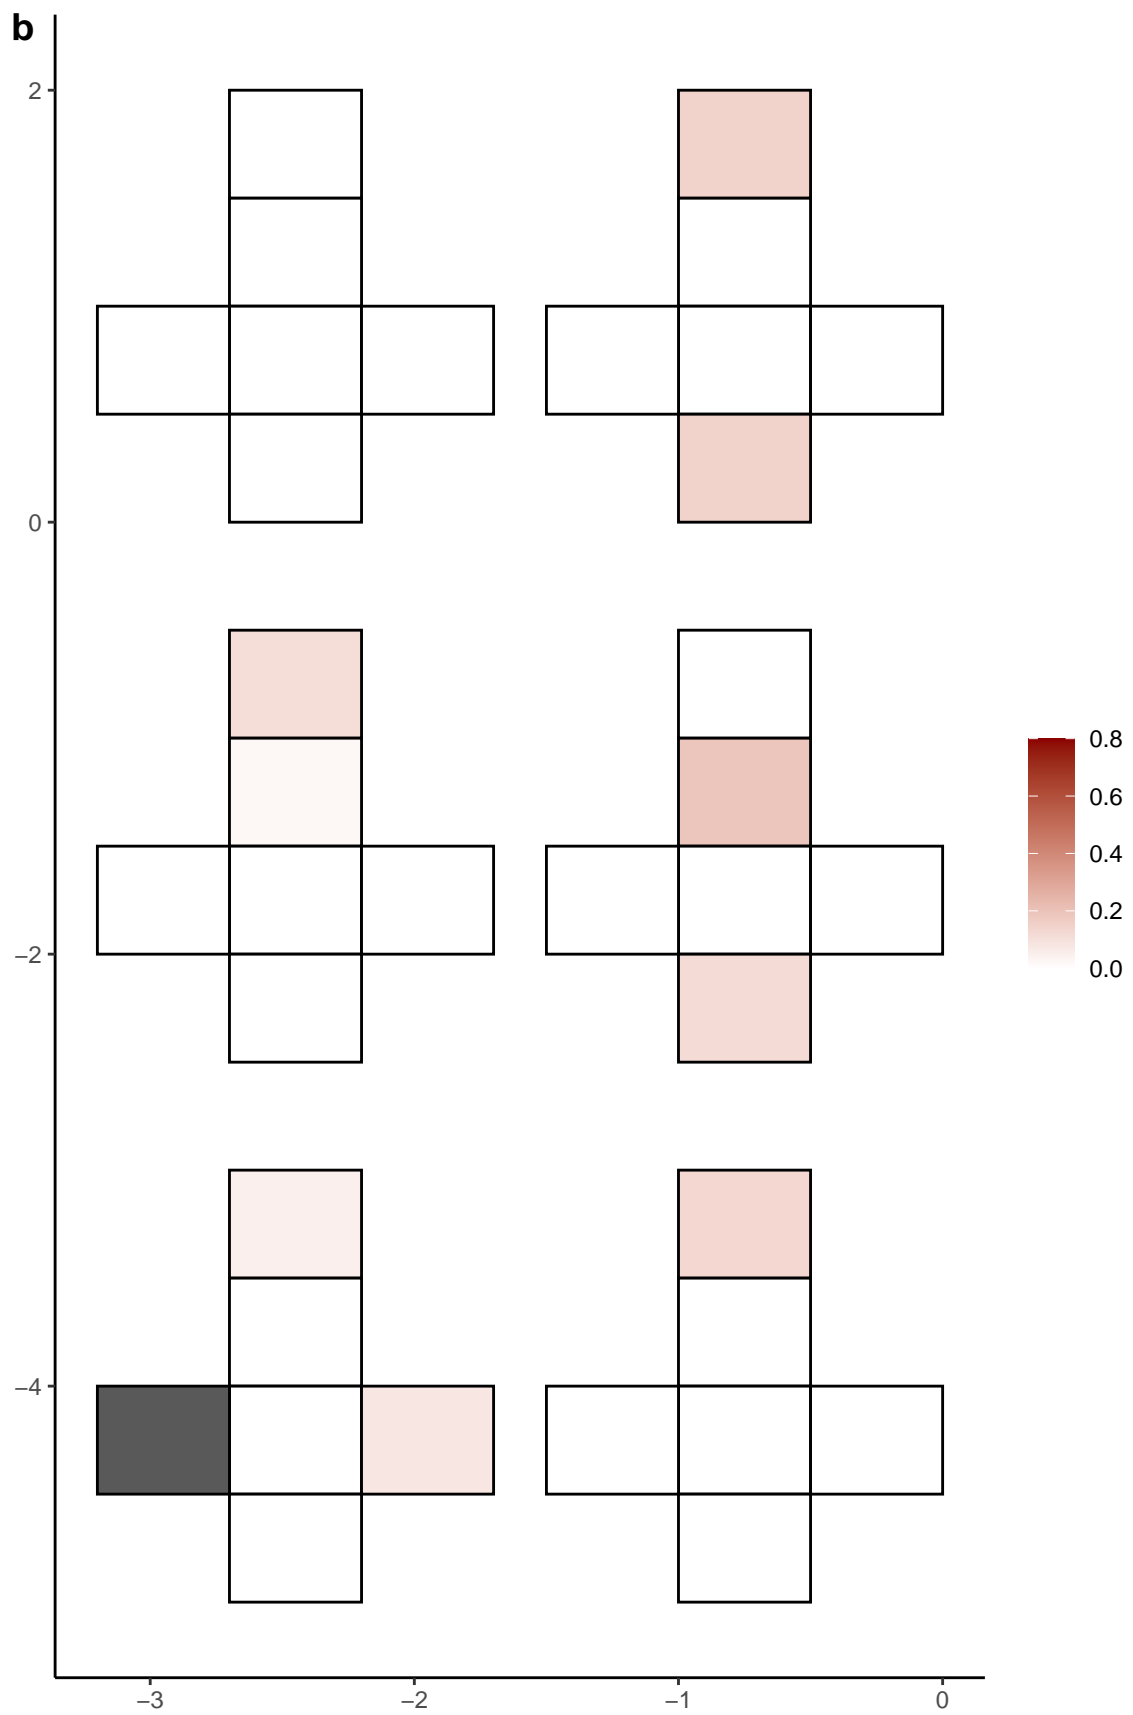

**a** ID01 18-72031228-C-T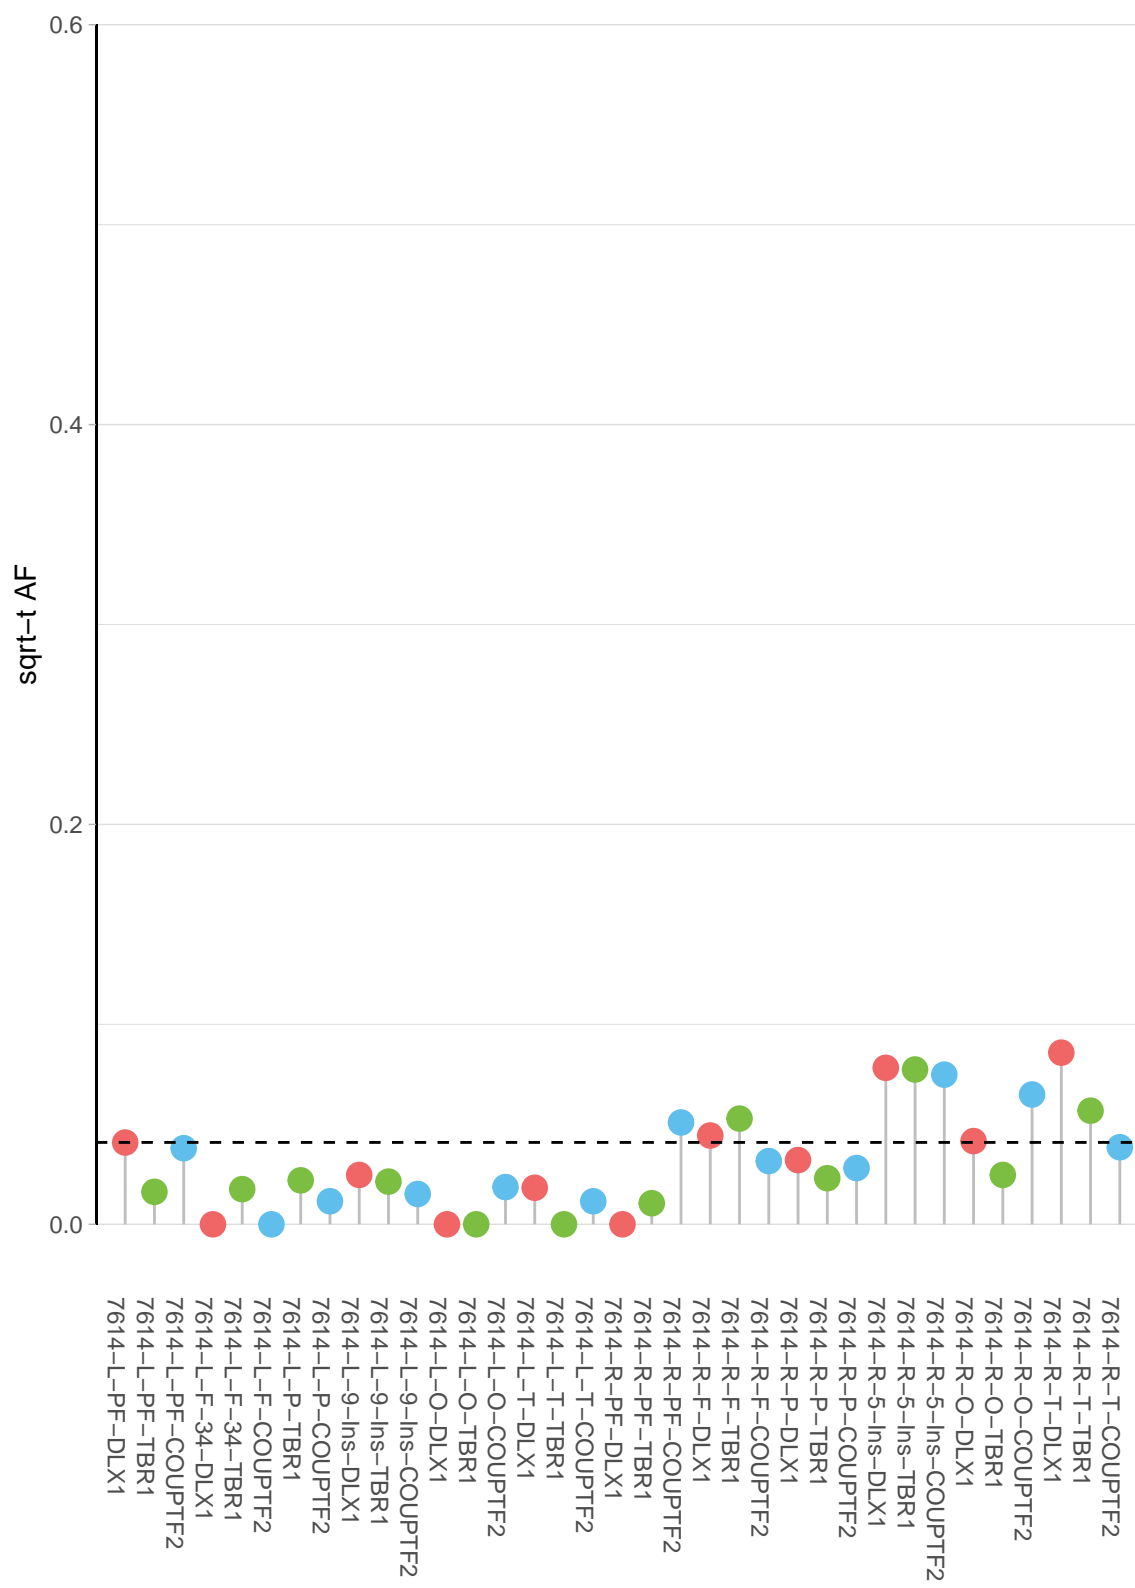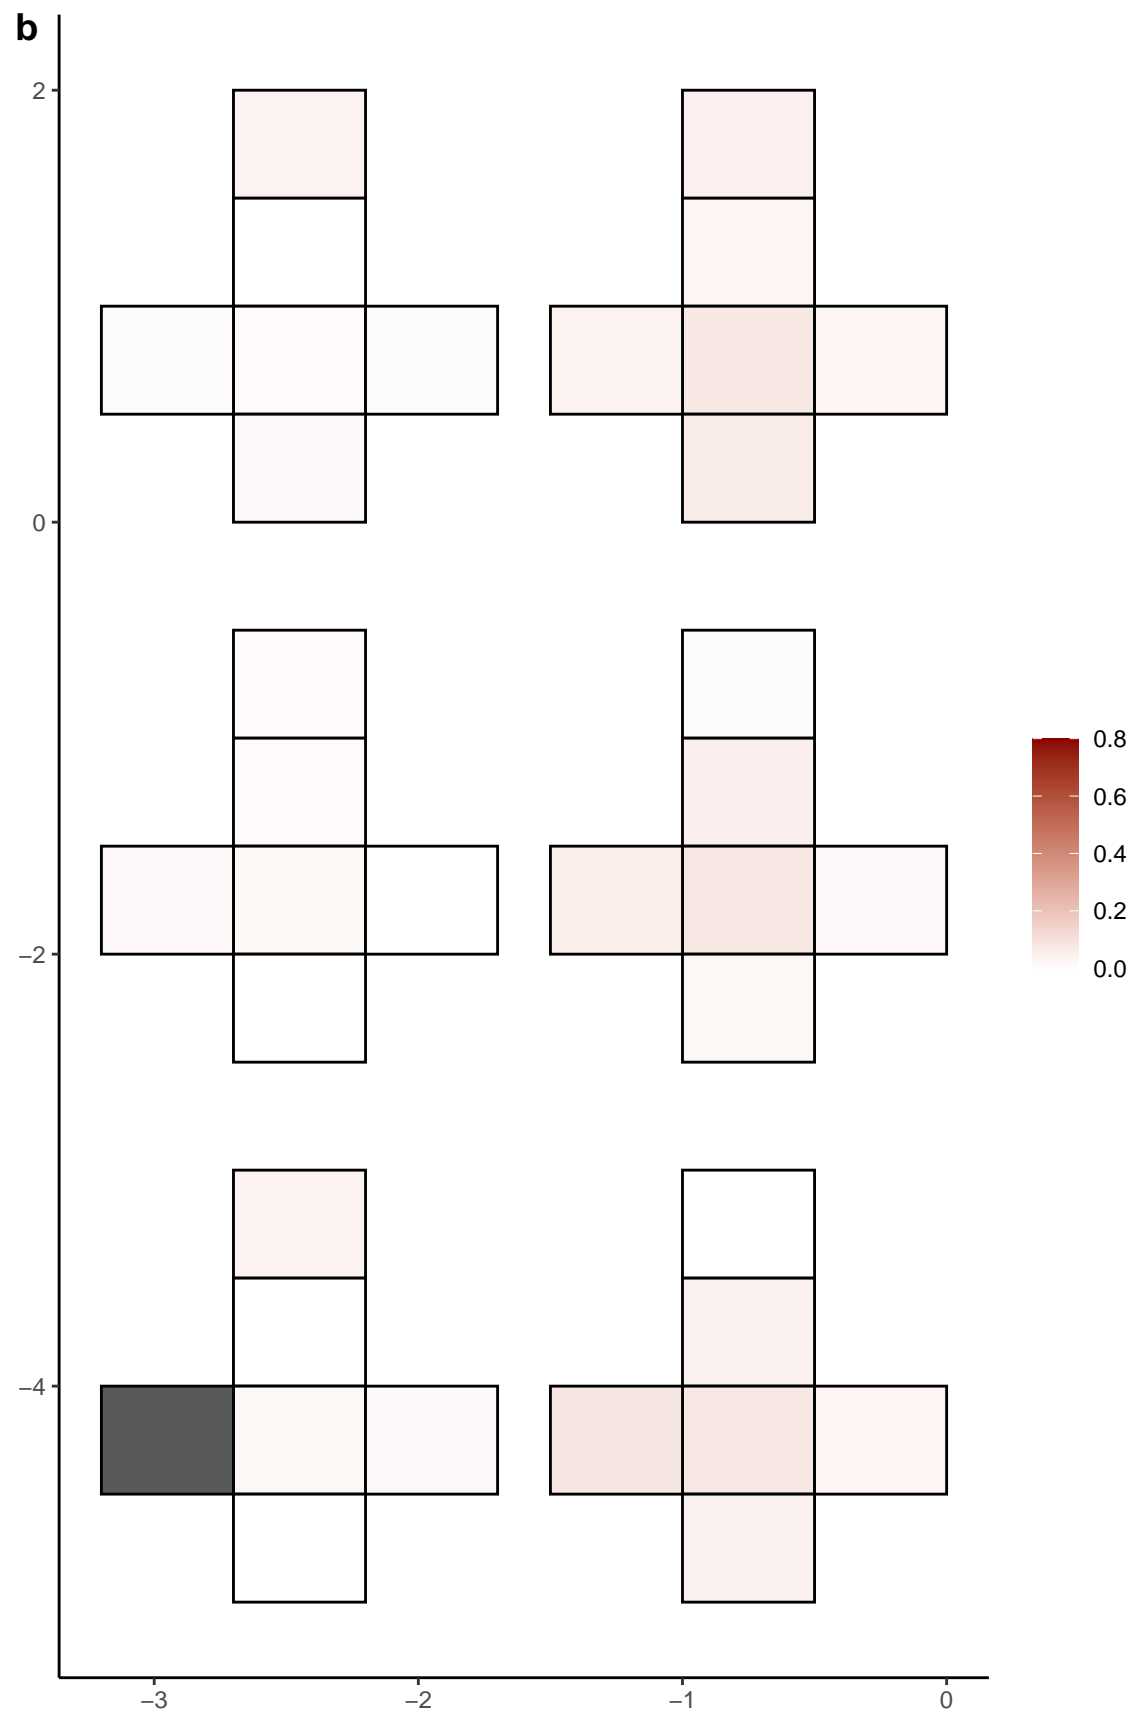

**a** ID01 18-73702872-A-C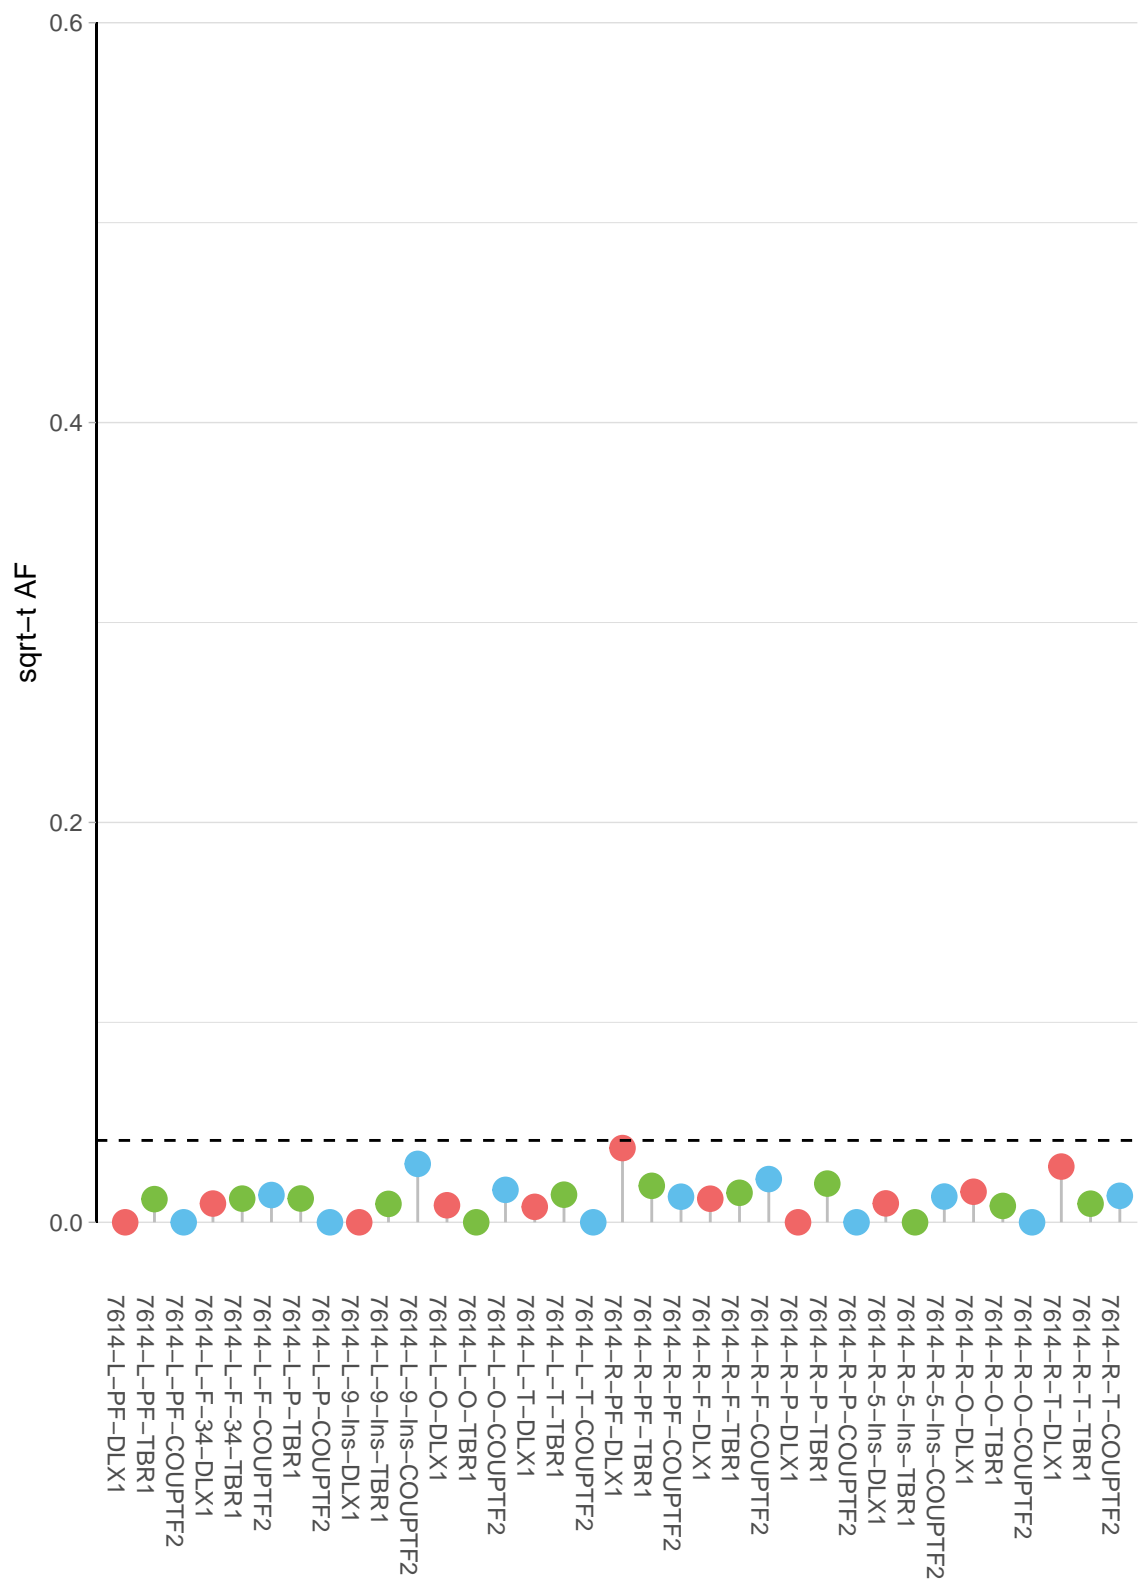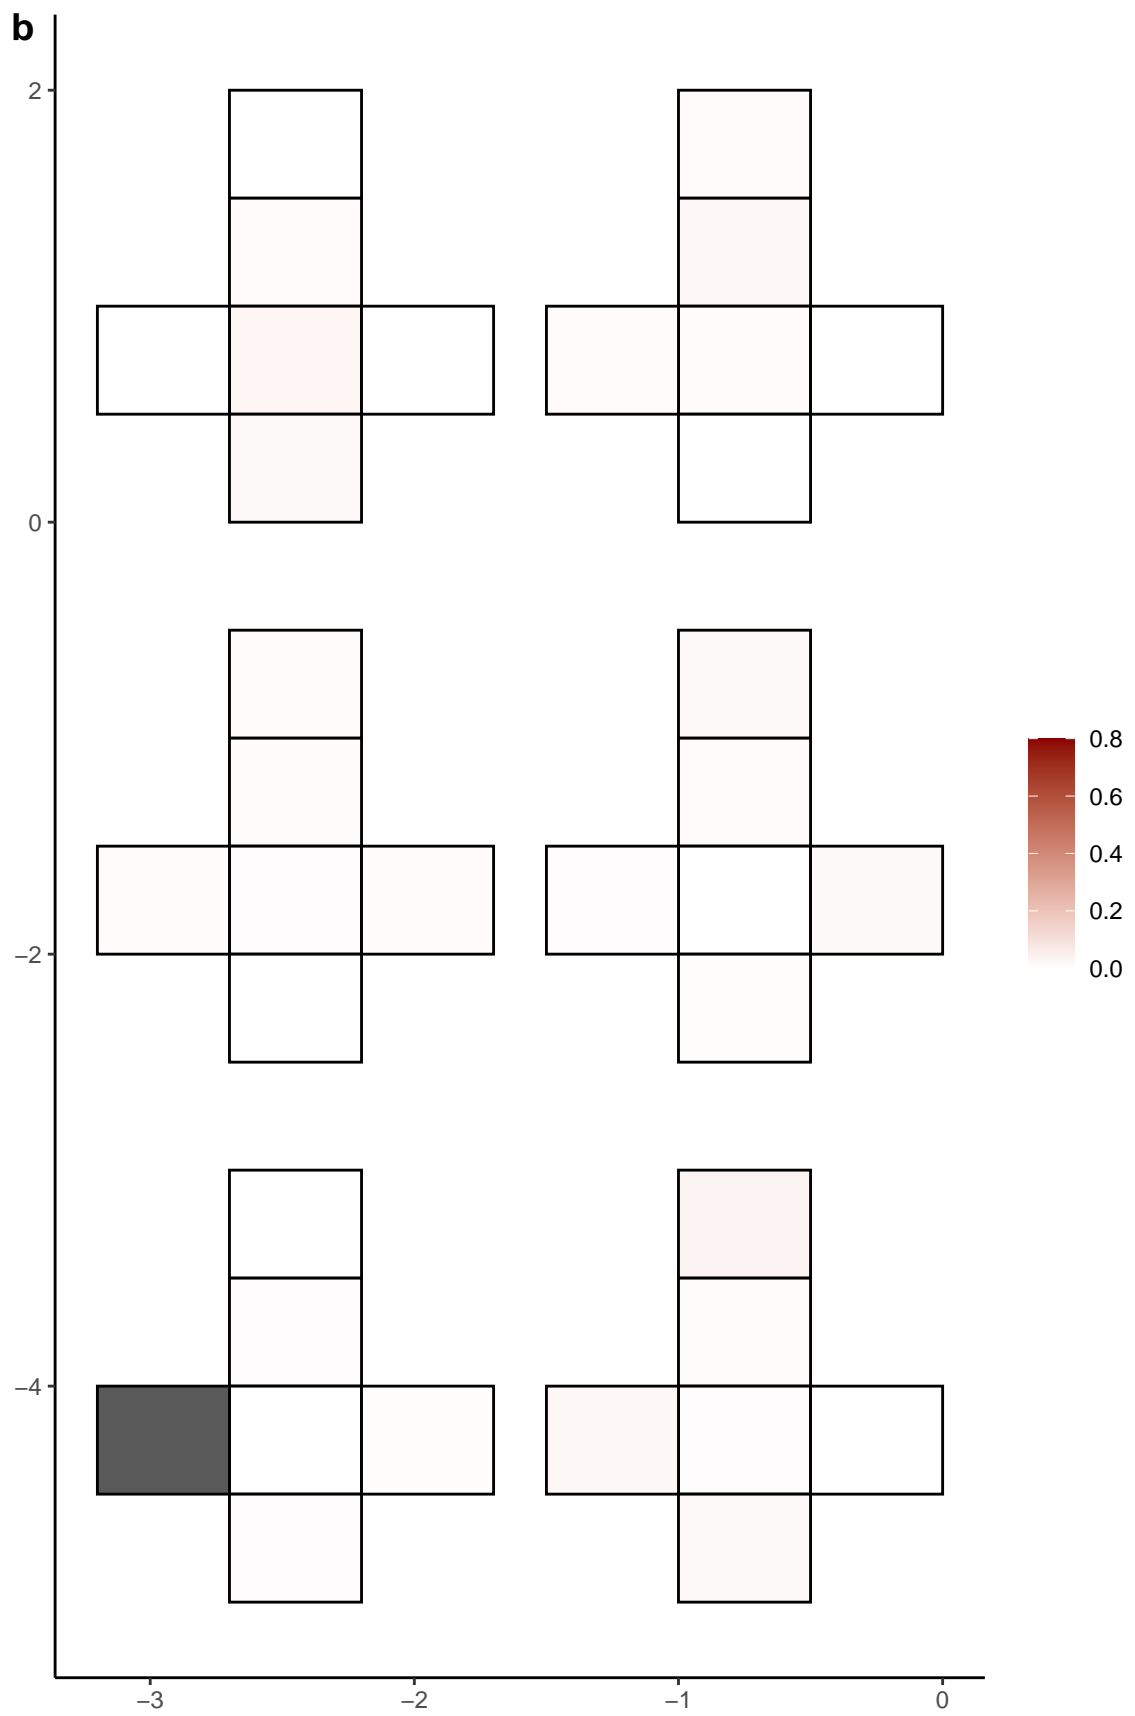

**a** ID01 19-23463606-T-C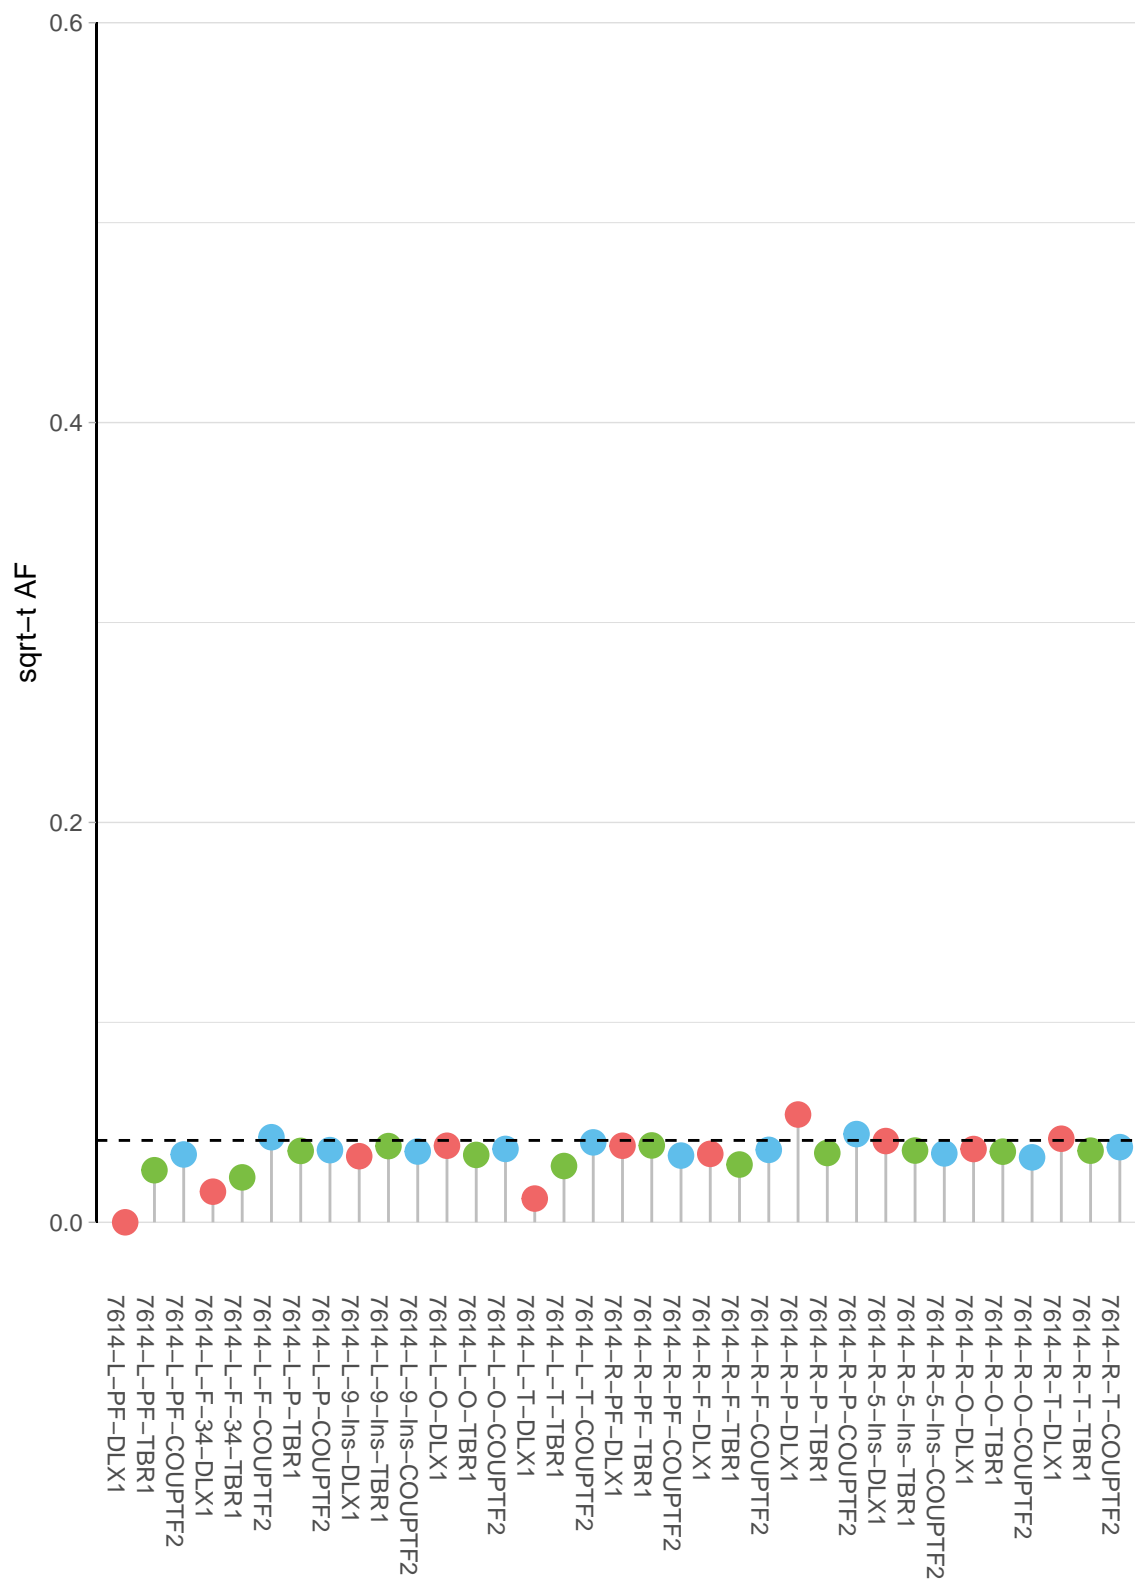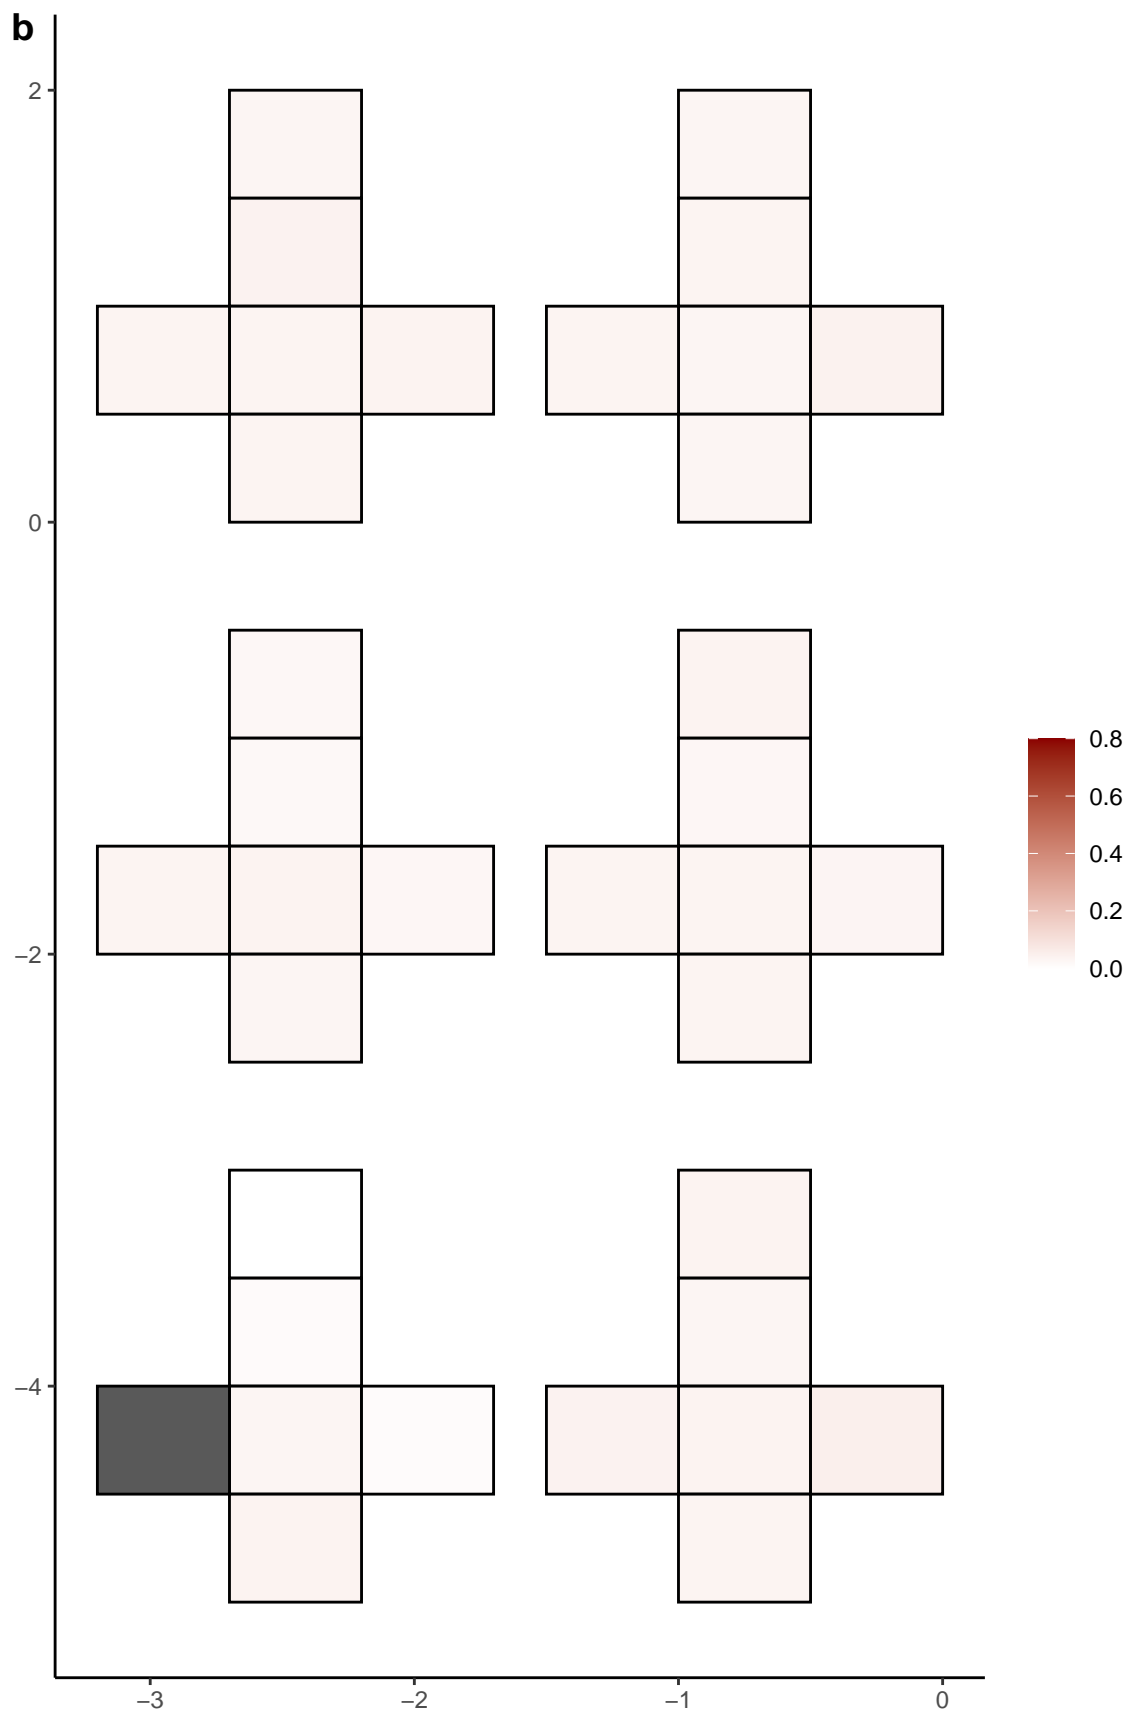

**a** ID01 19-29424630-G-T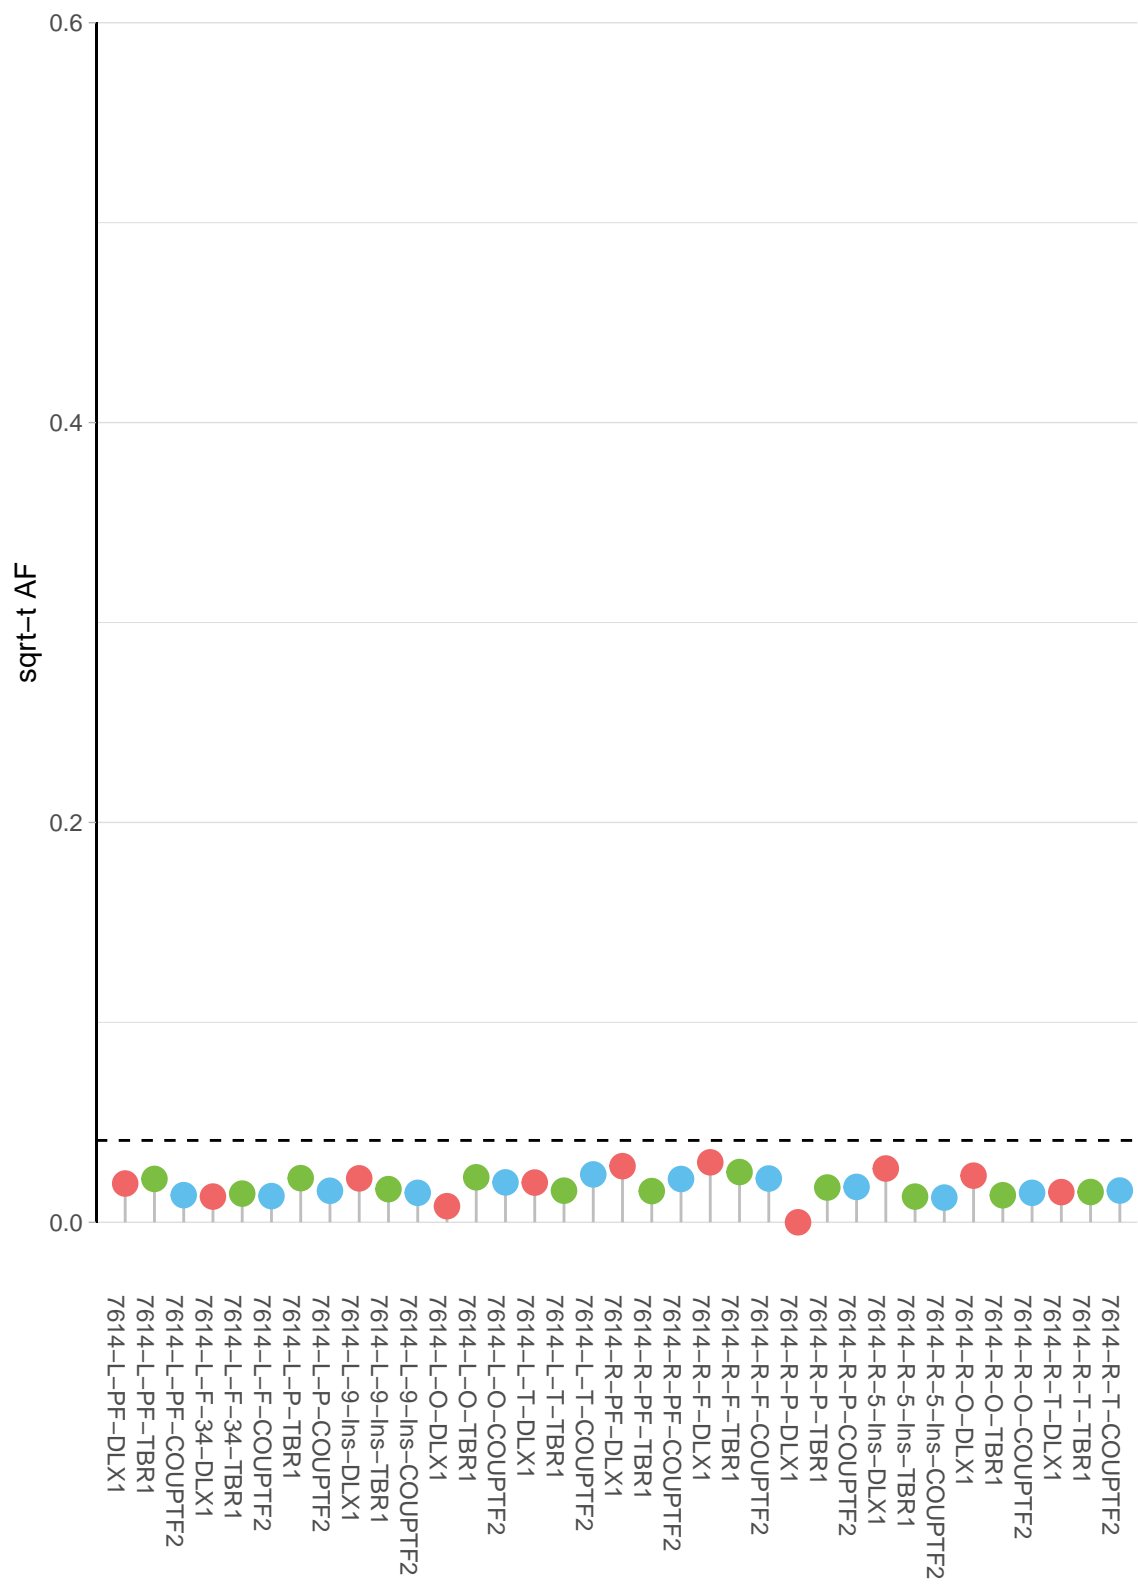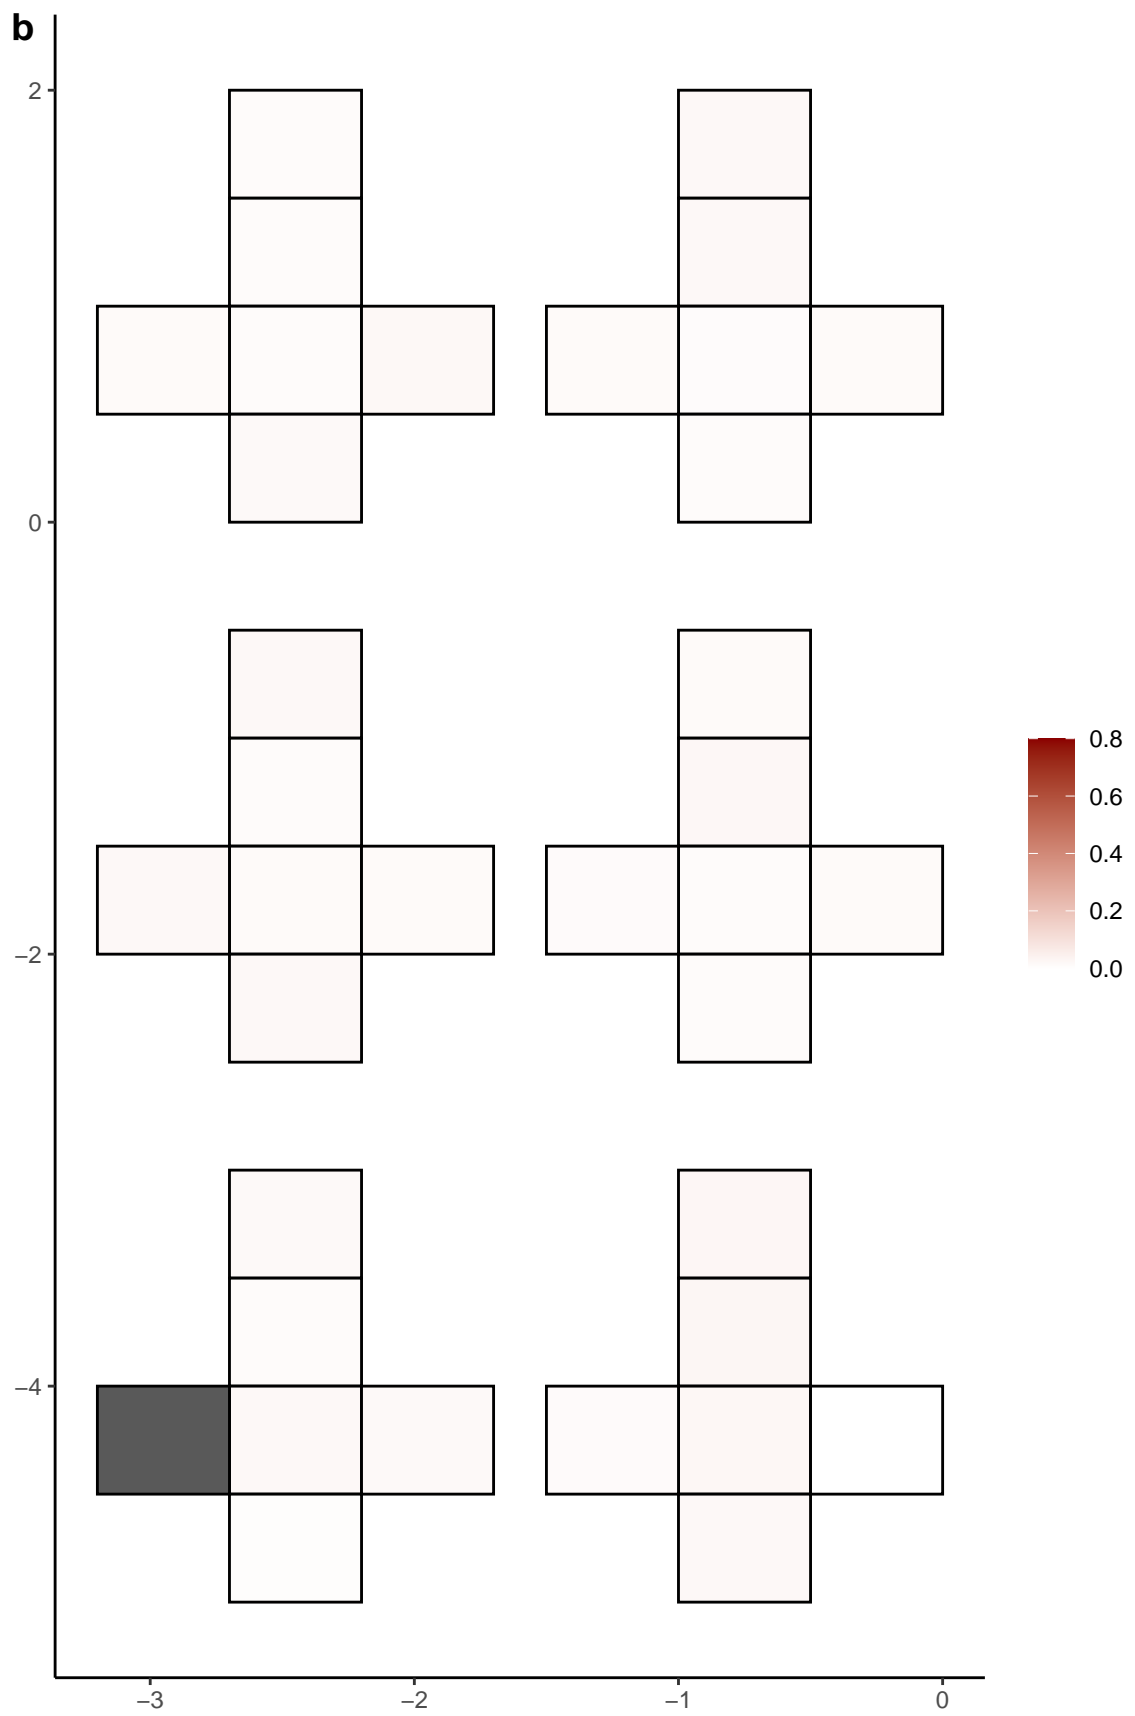



**a** ID01 19-31142255-G-A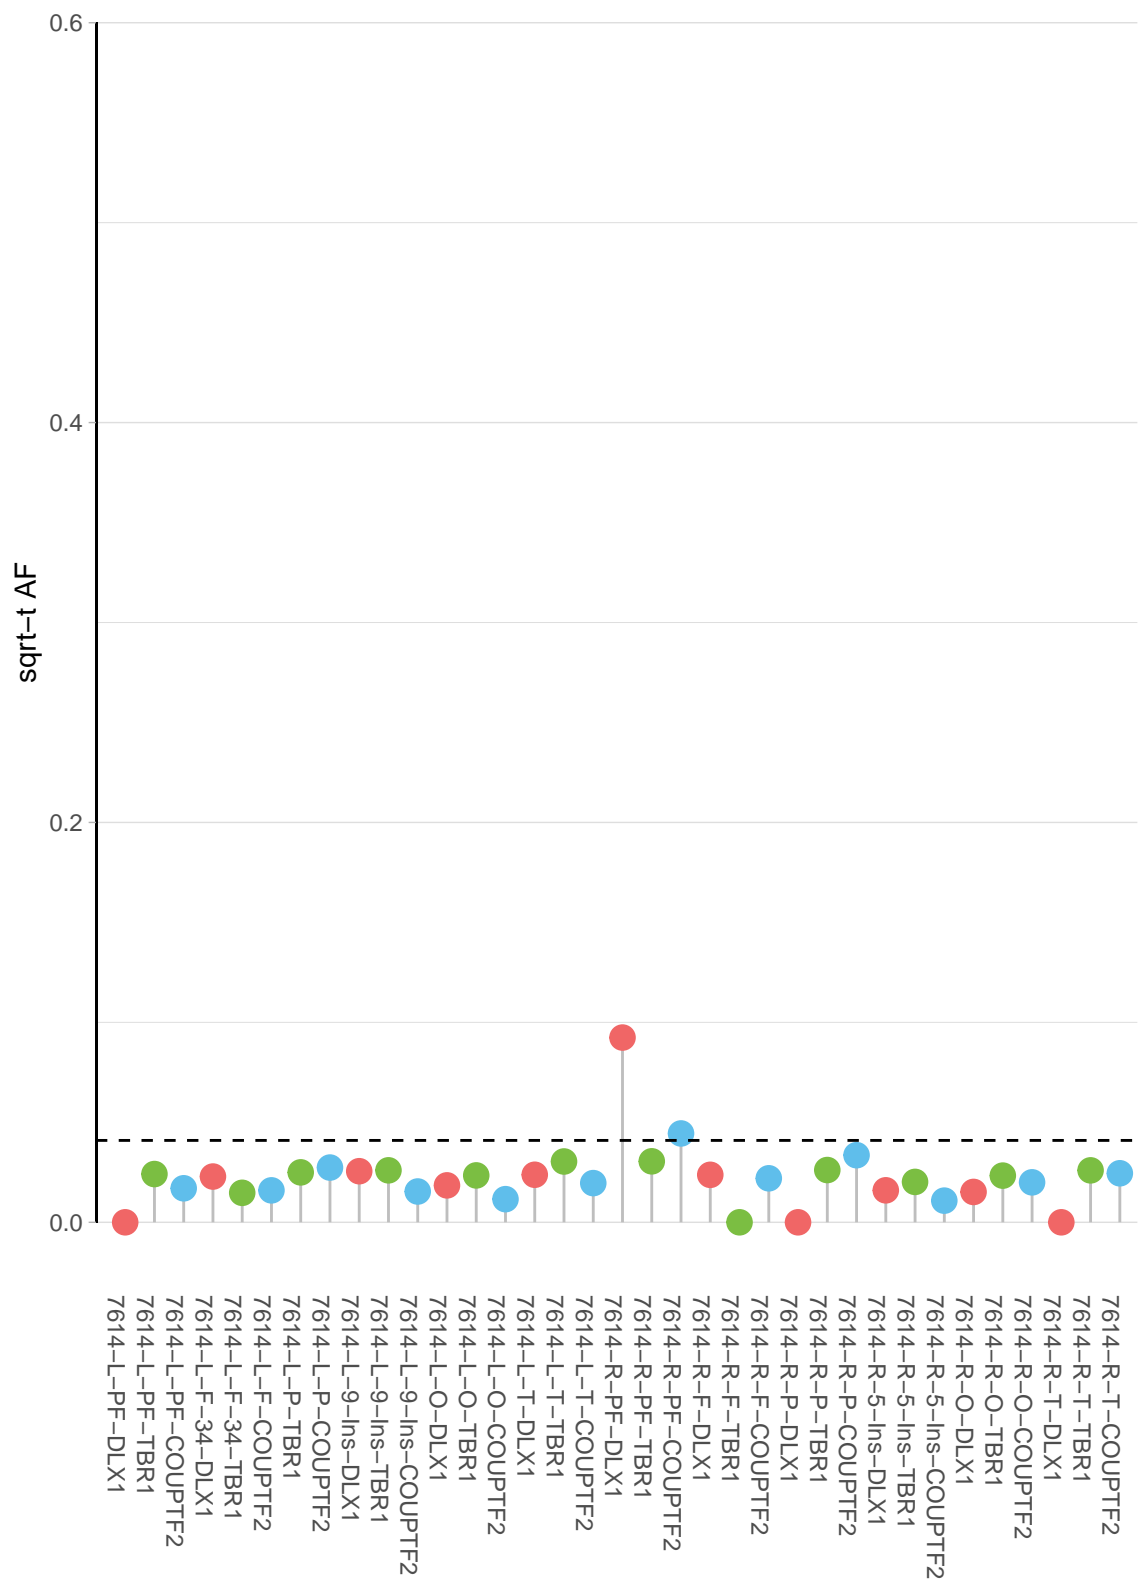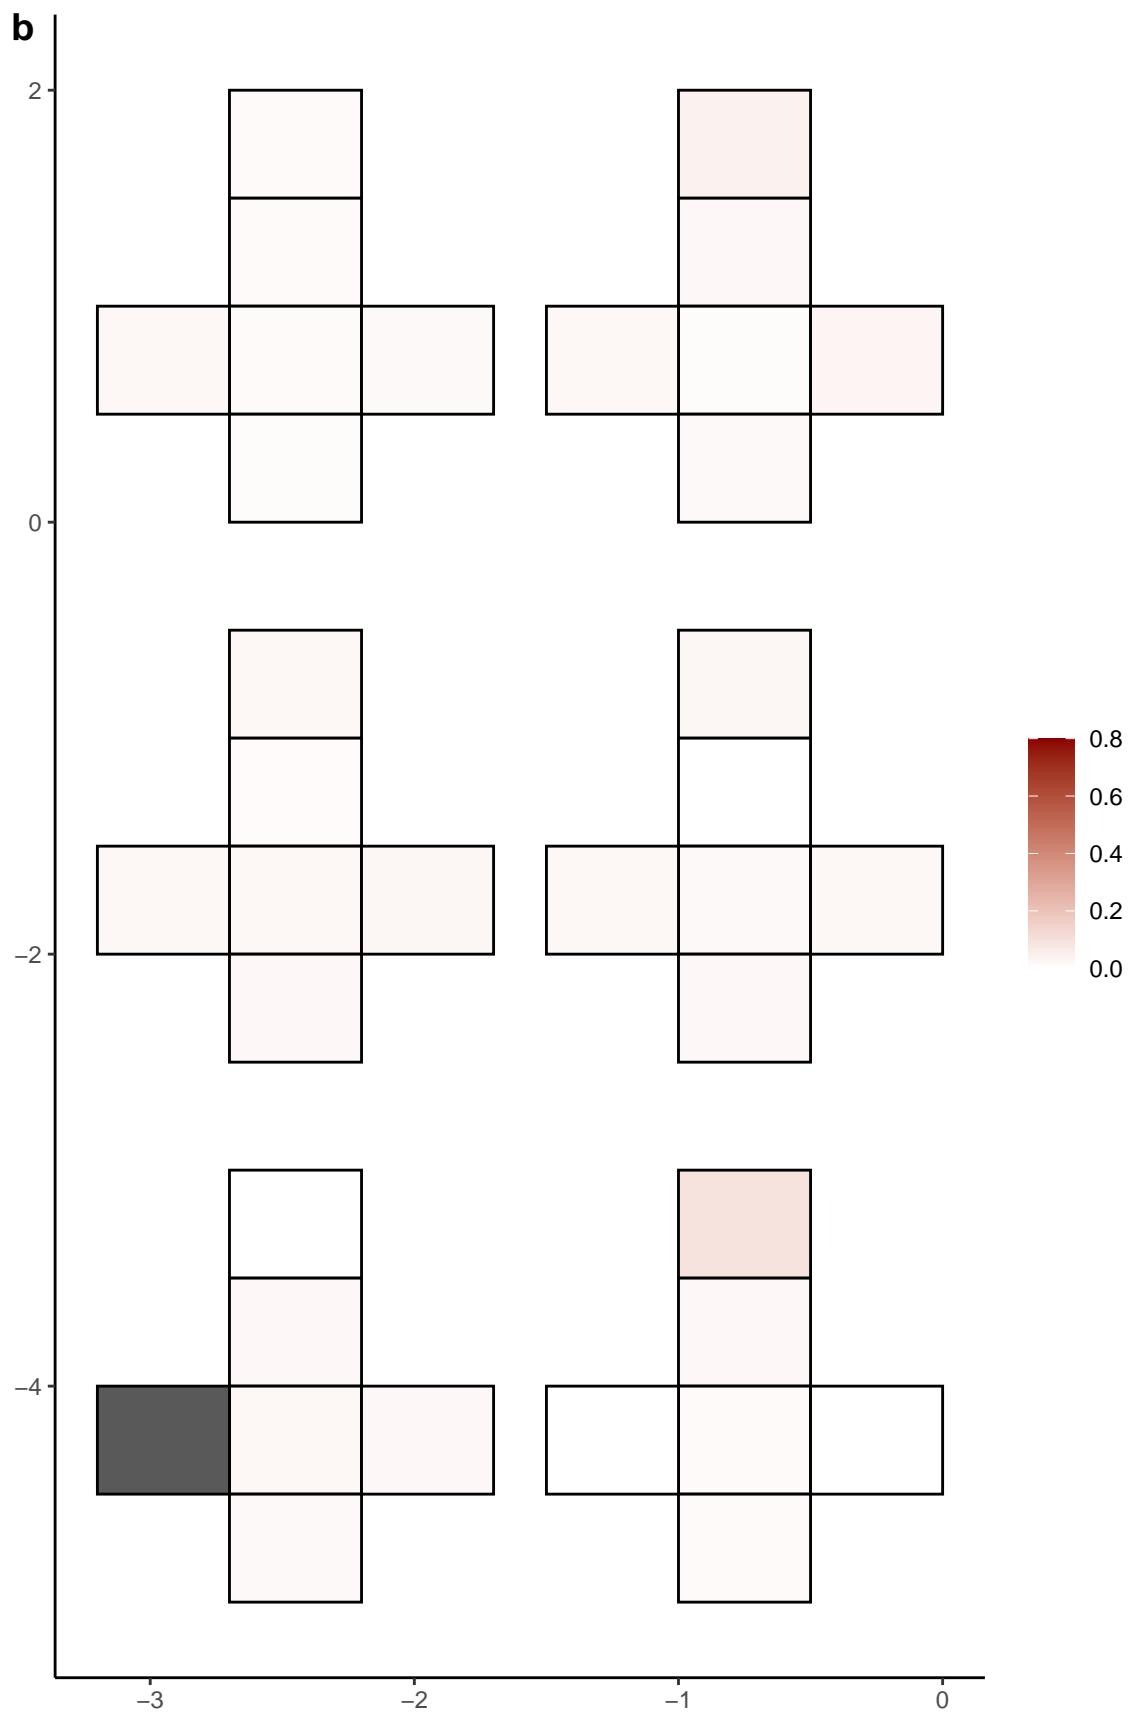

**a** ID01 19-39211568-A-G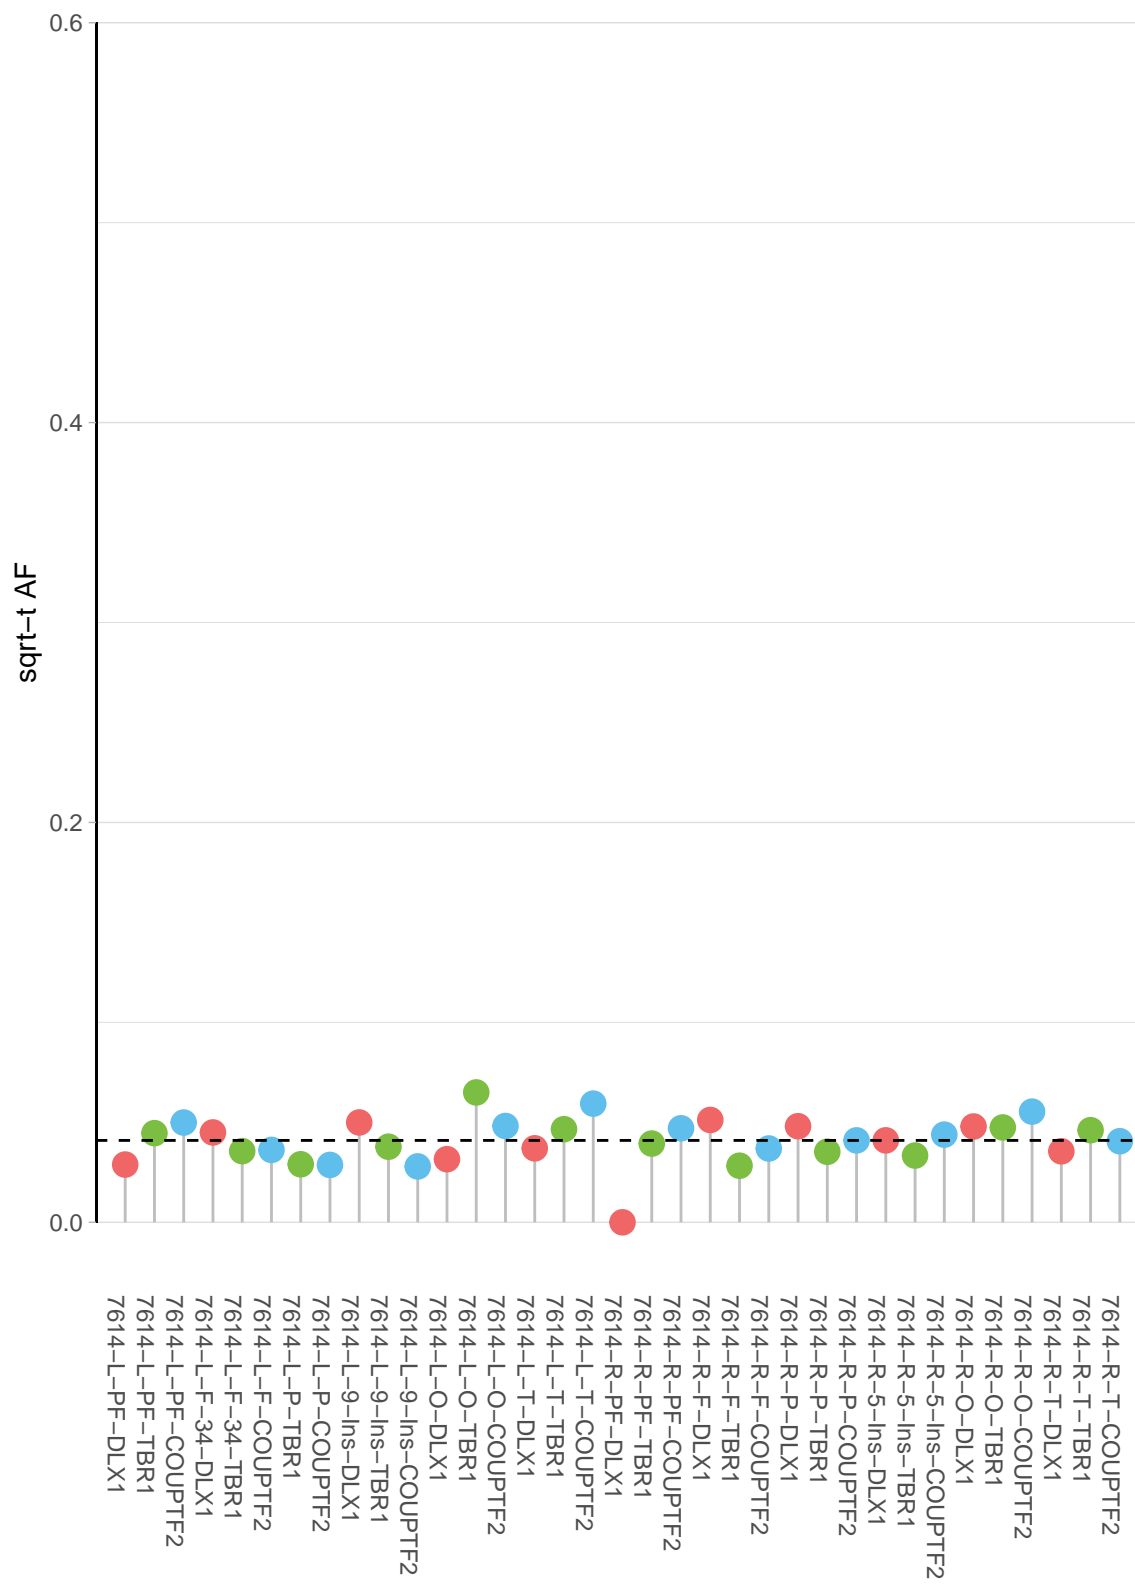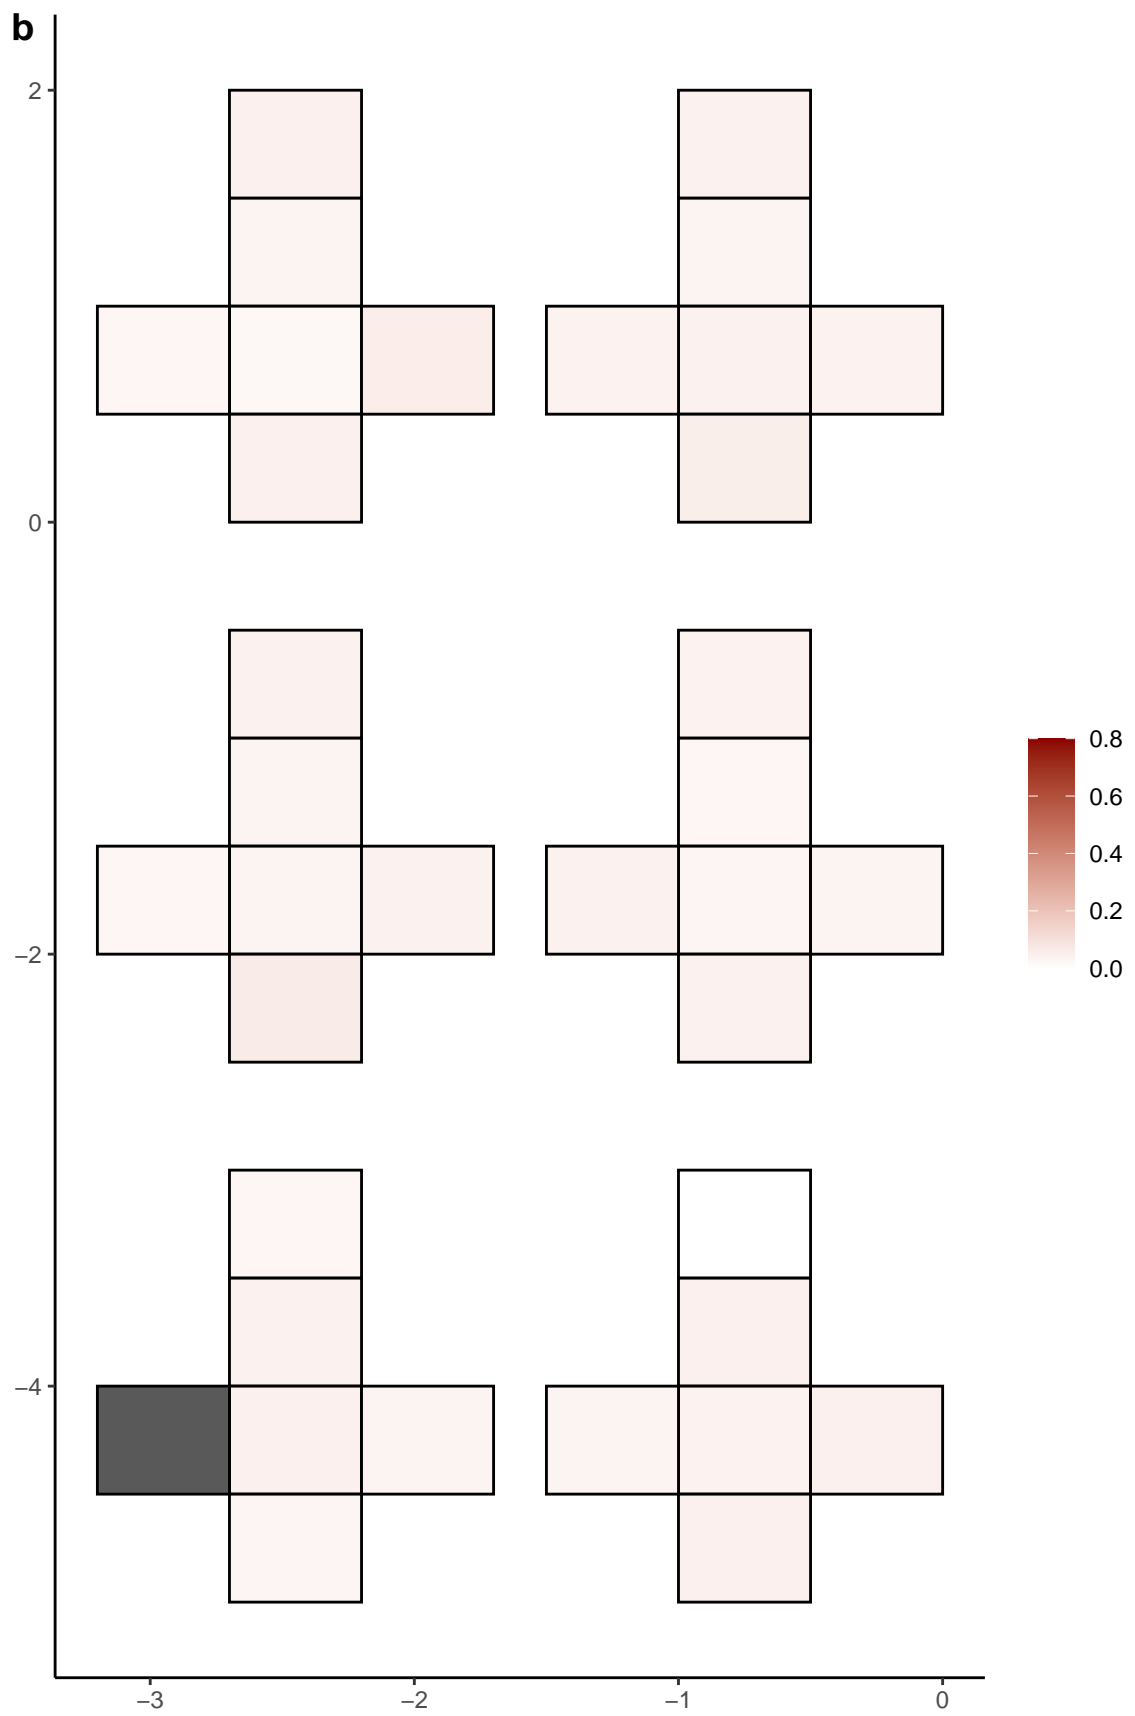

**a** ID01 19-47833717-G-A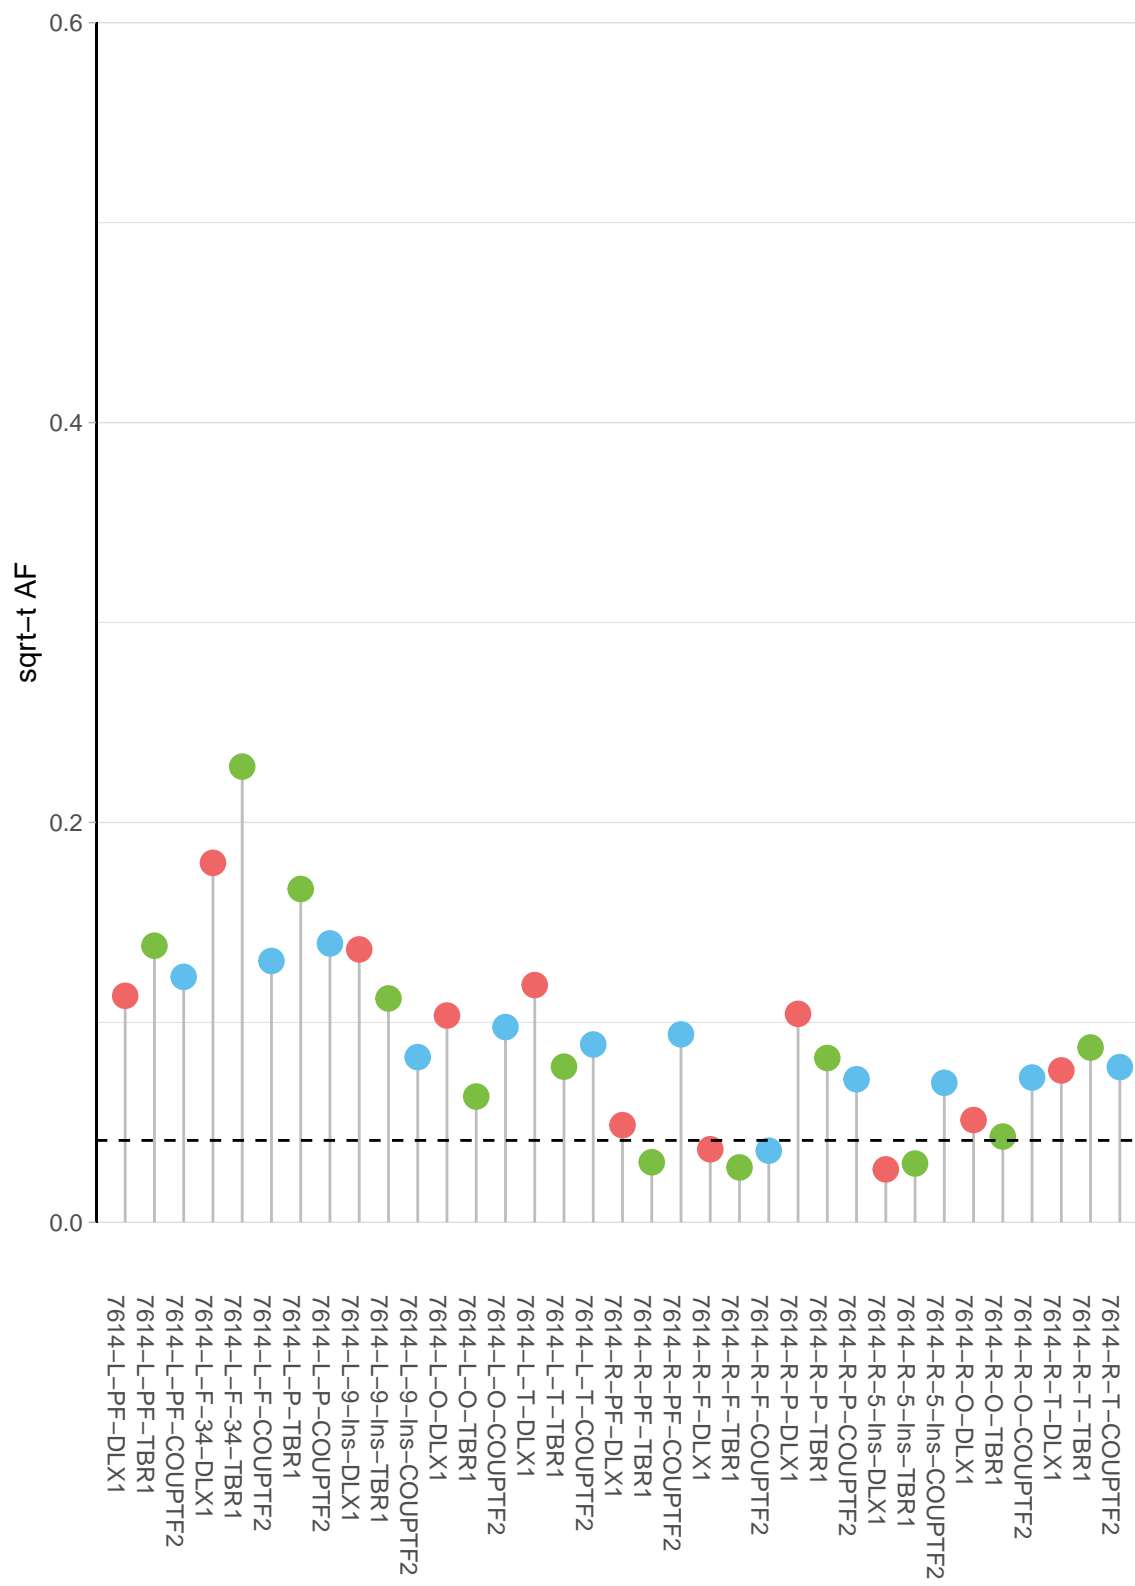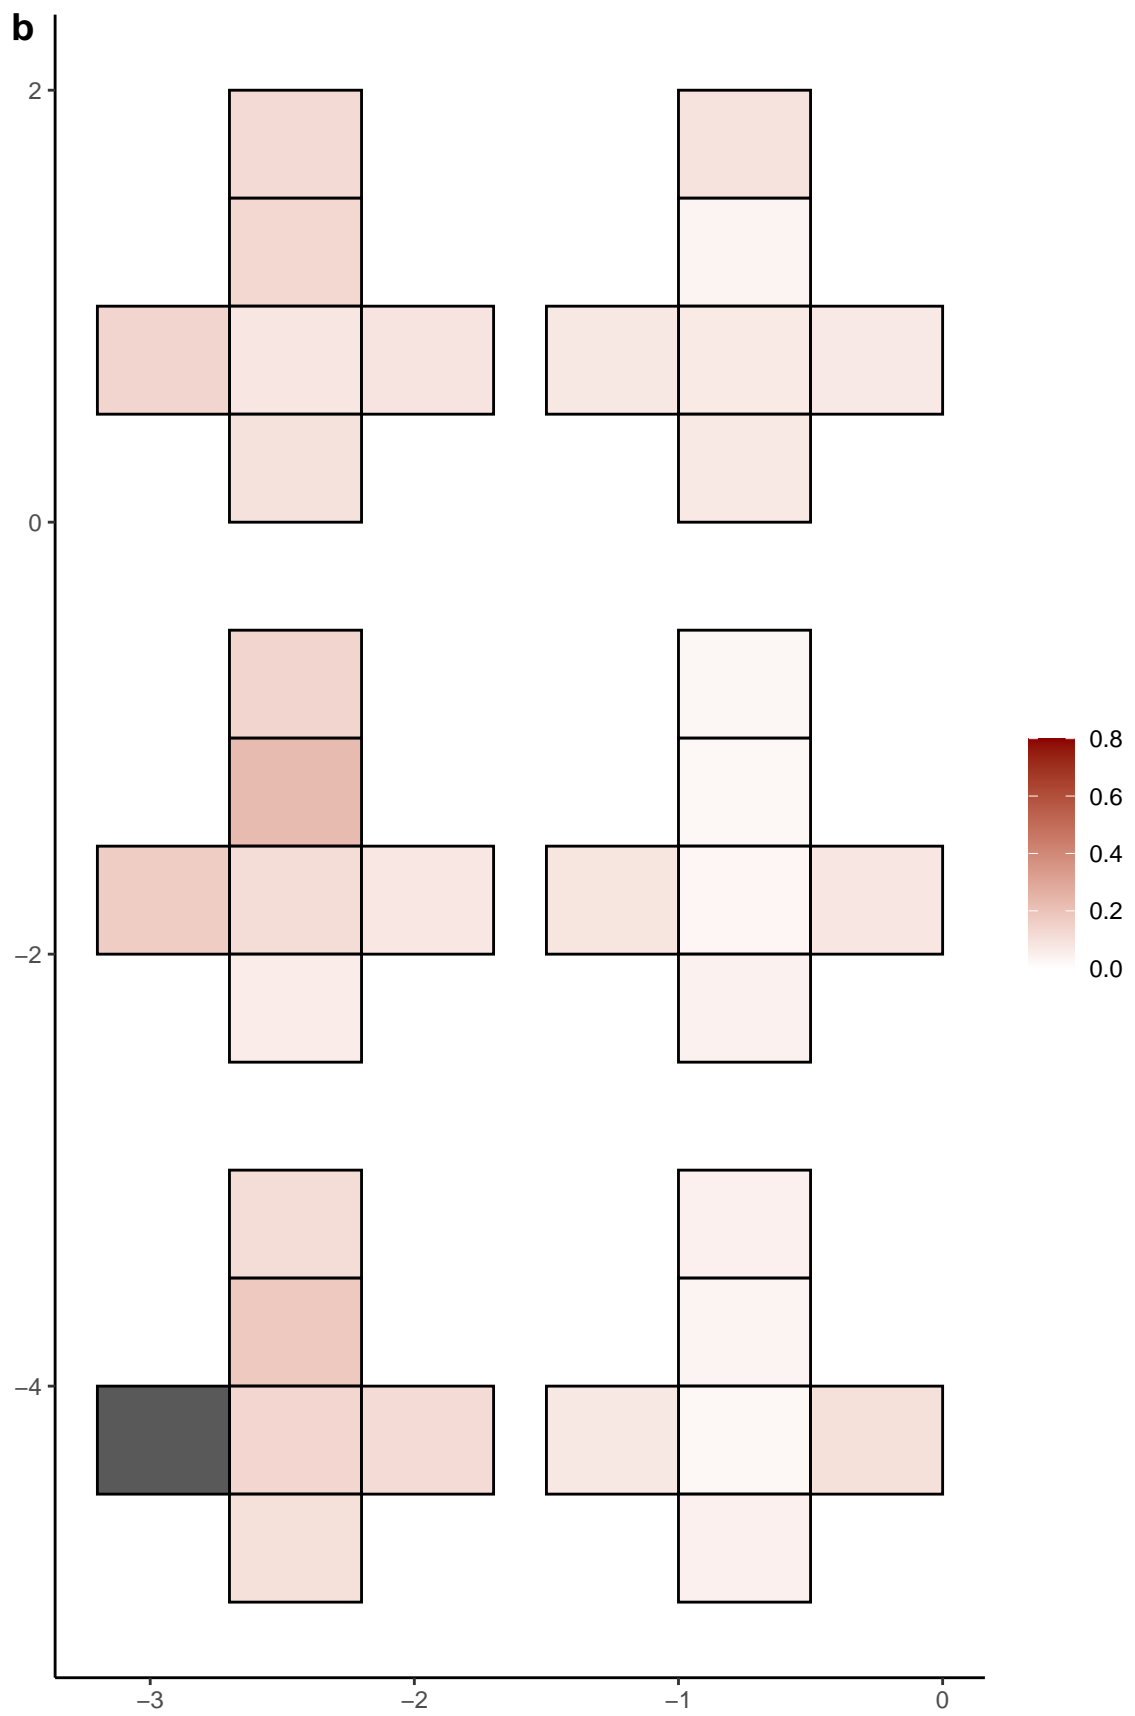

**a** ID01 19-58435948-C-A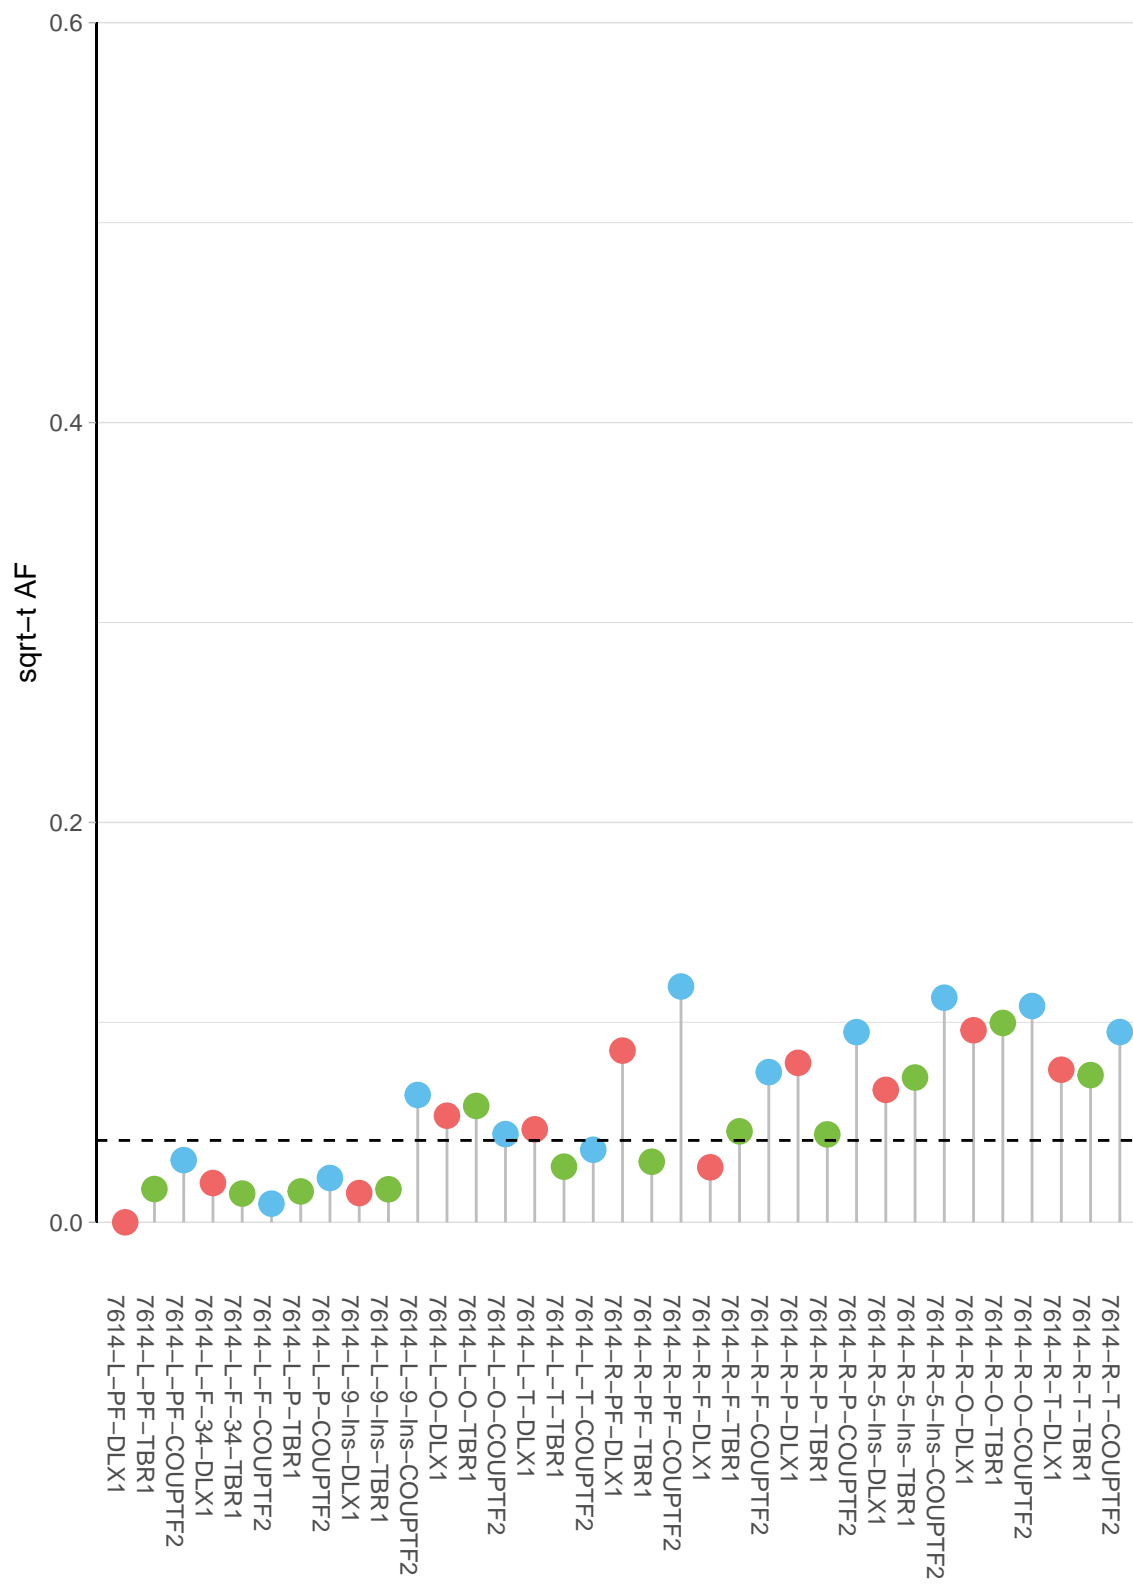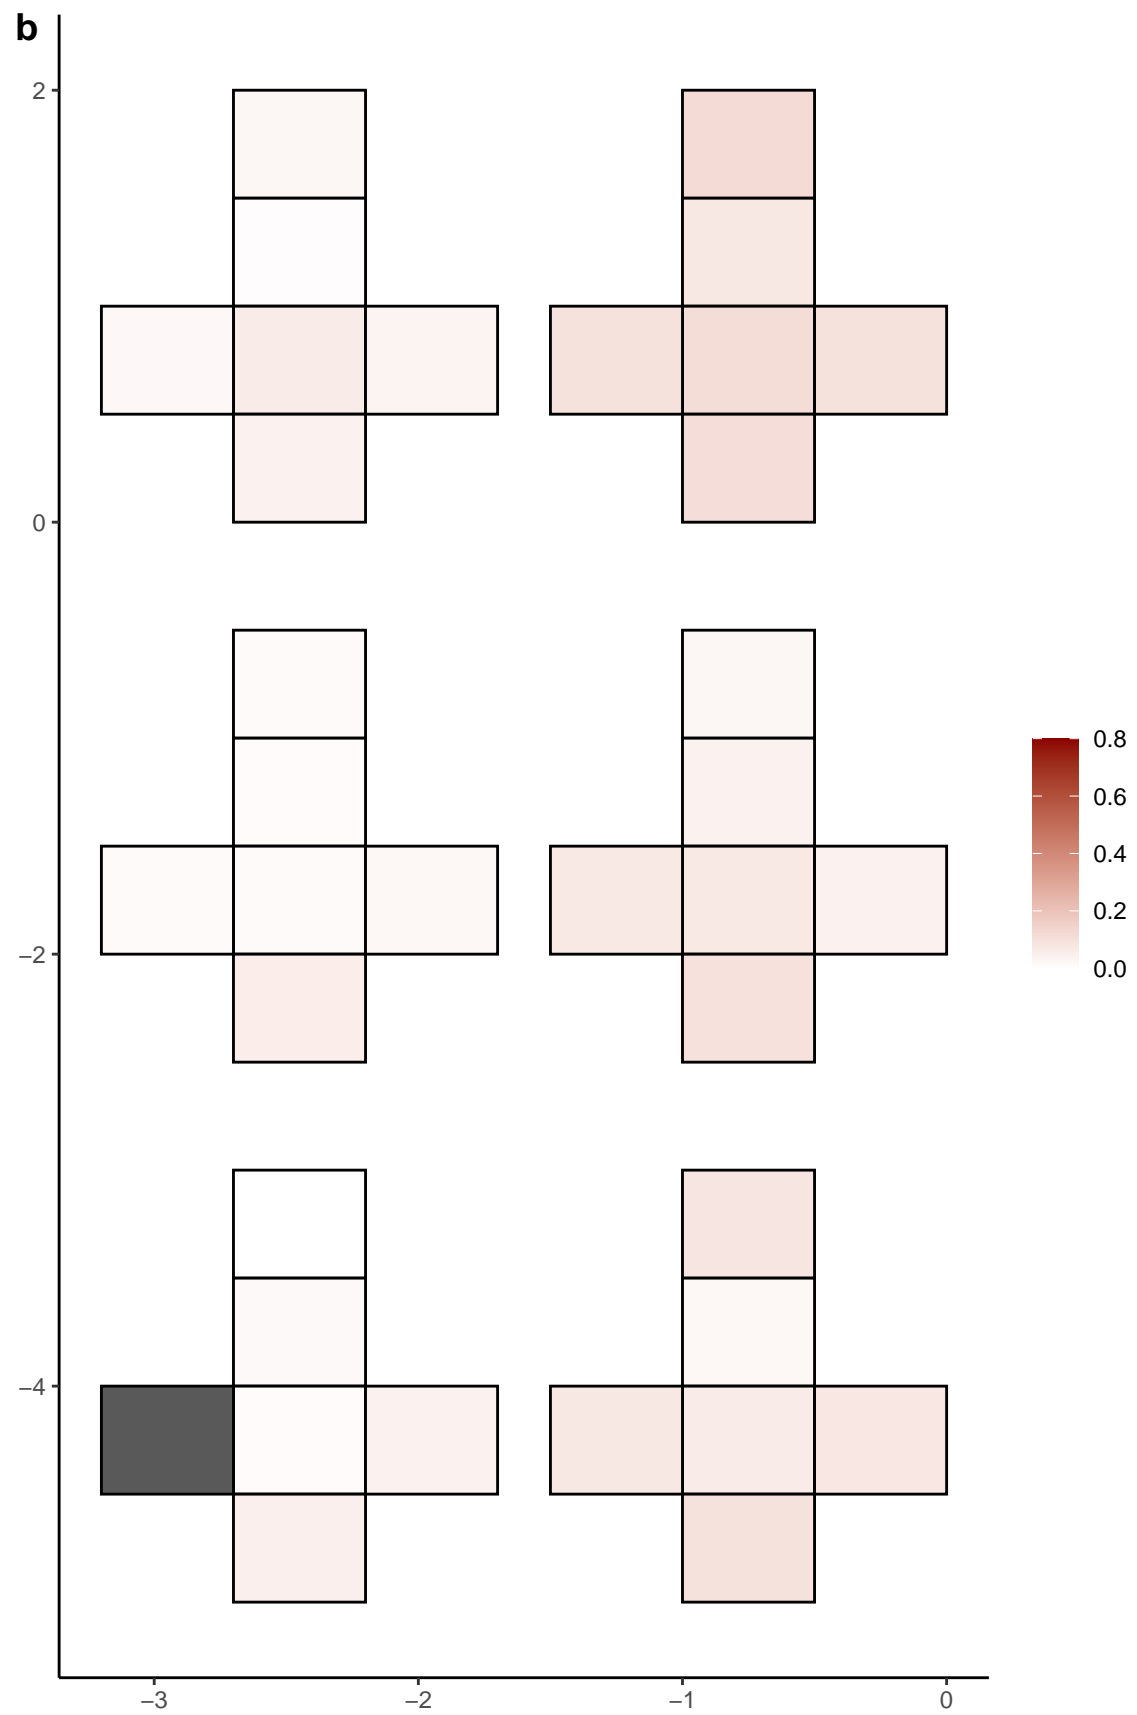

**a** ID01 2-101097017-C-T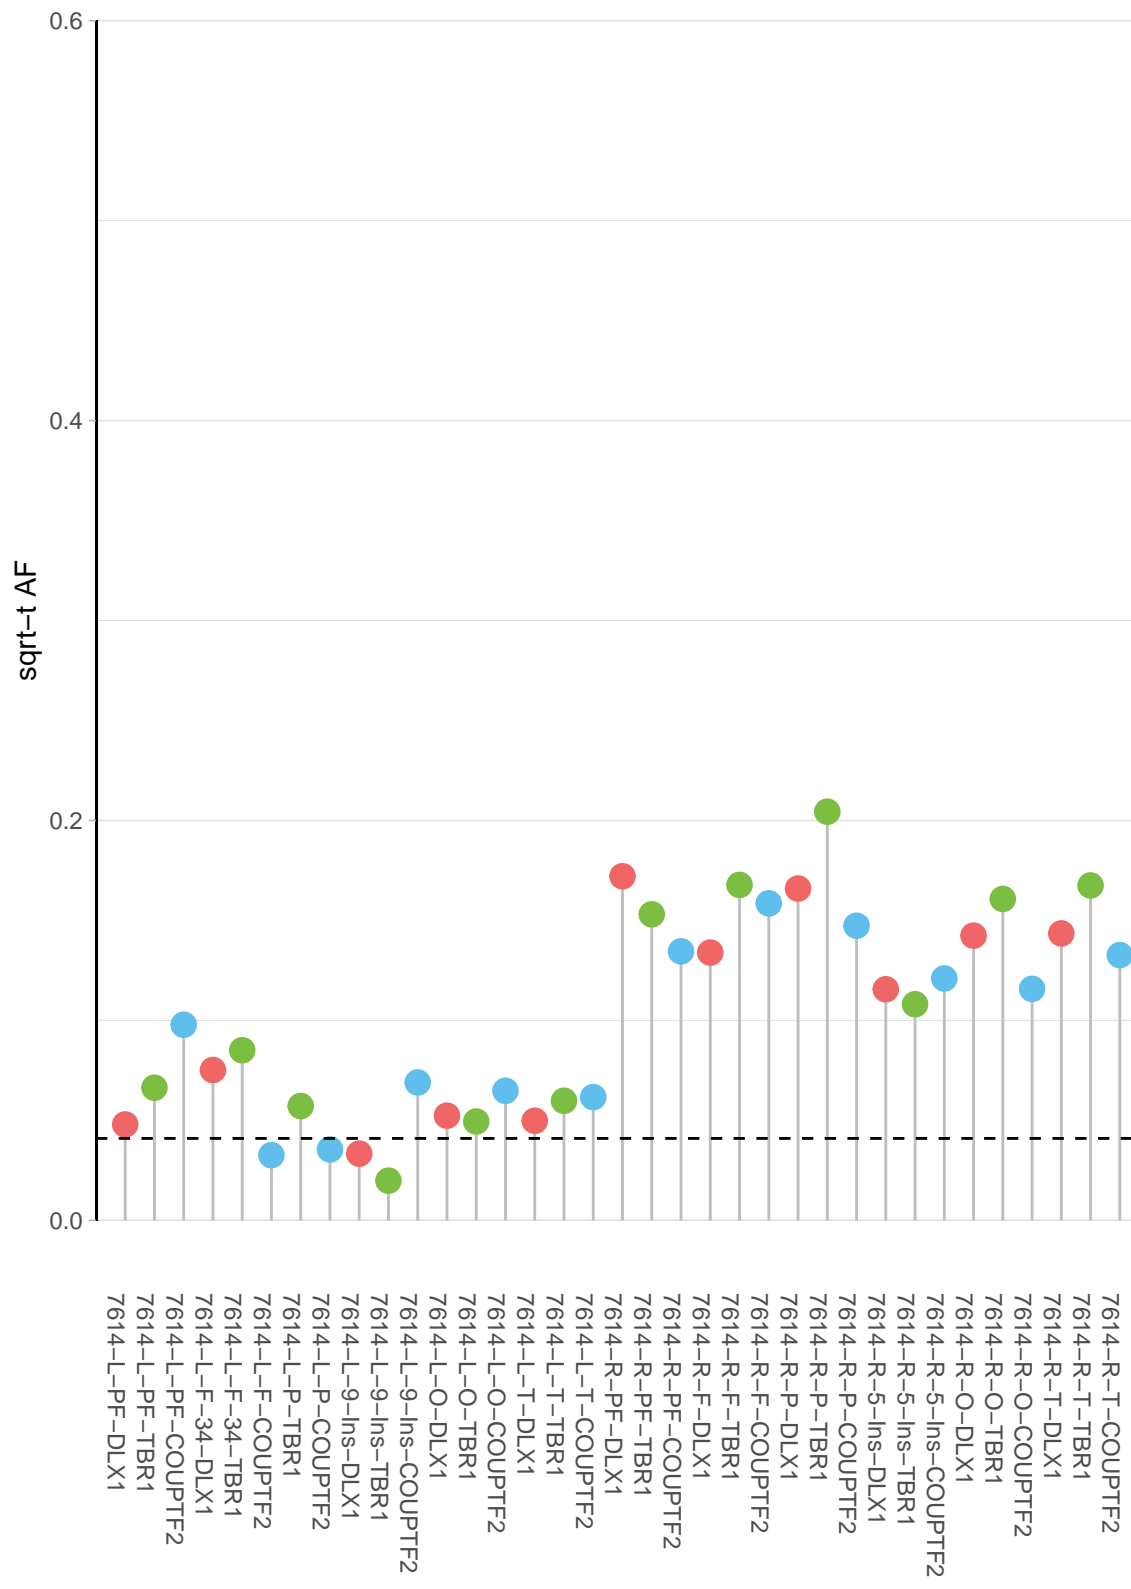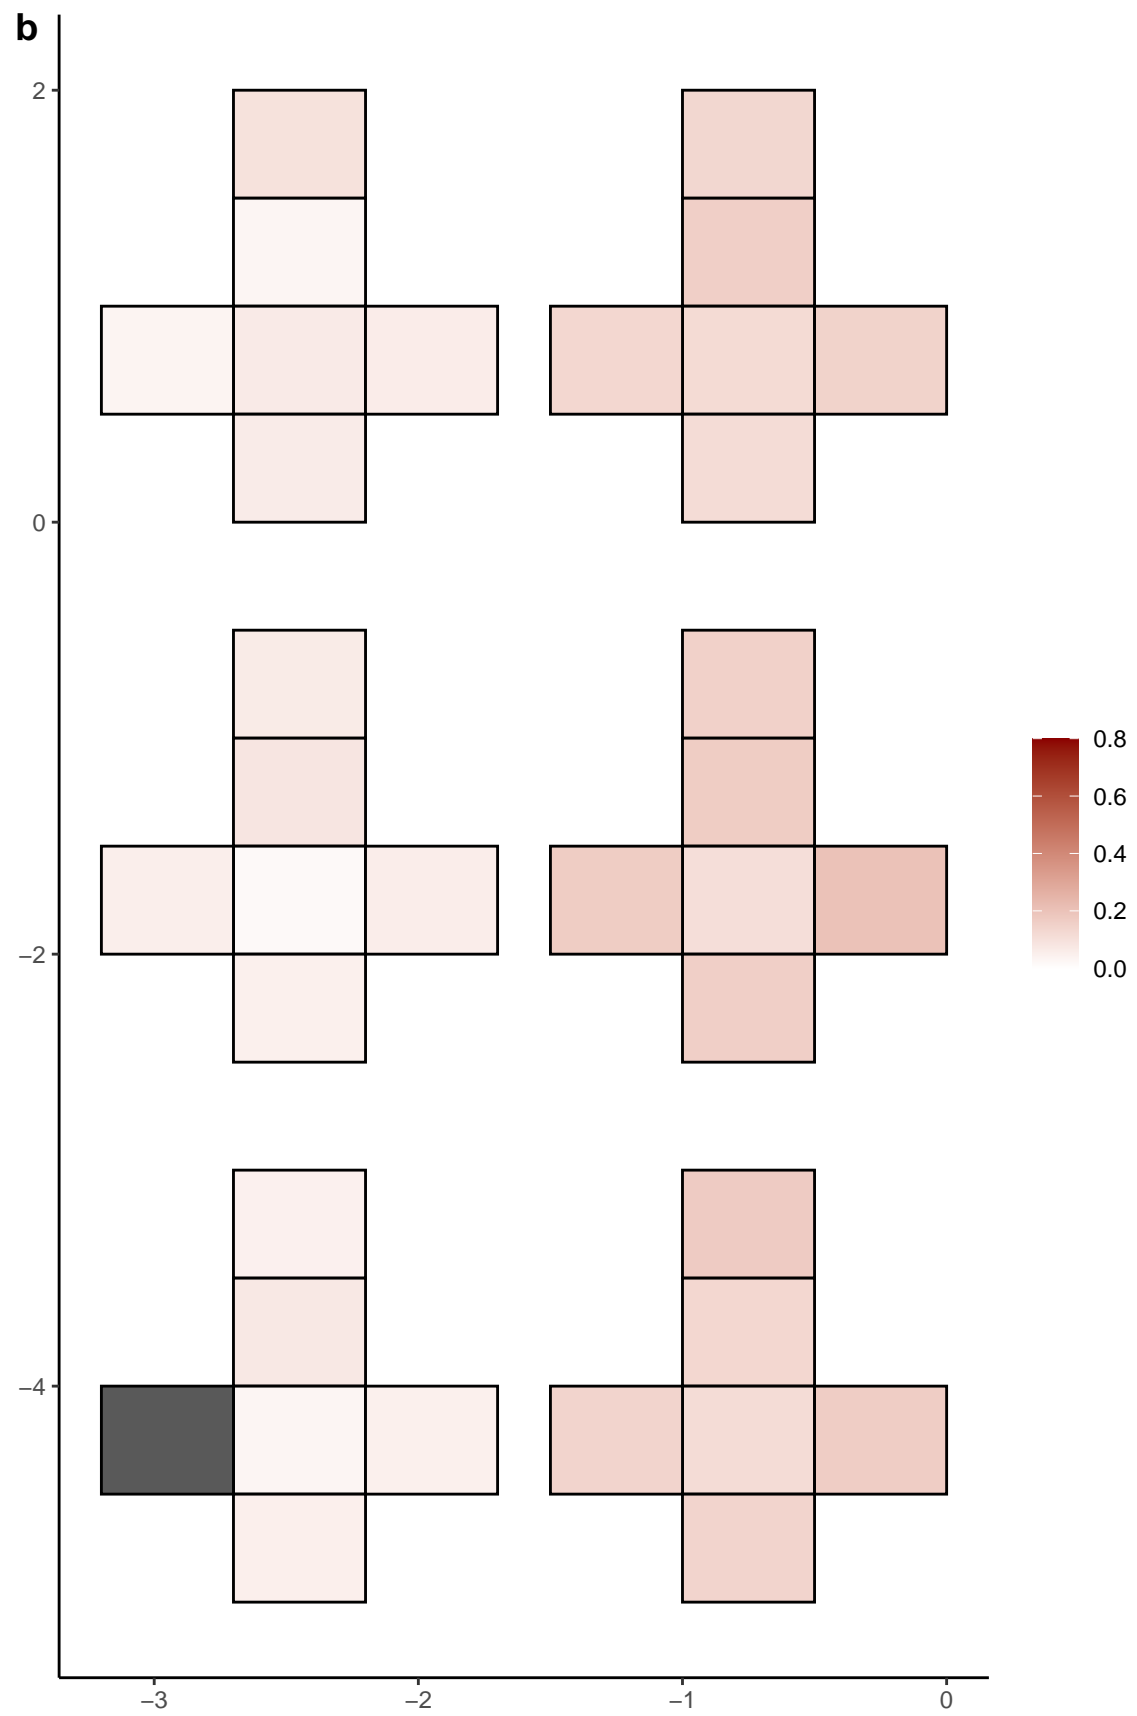

**a** ID01 2-119890951-G-A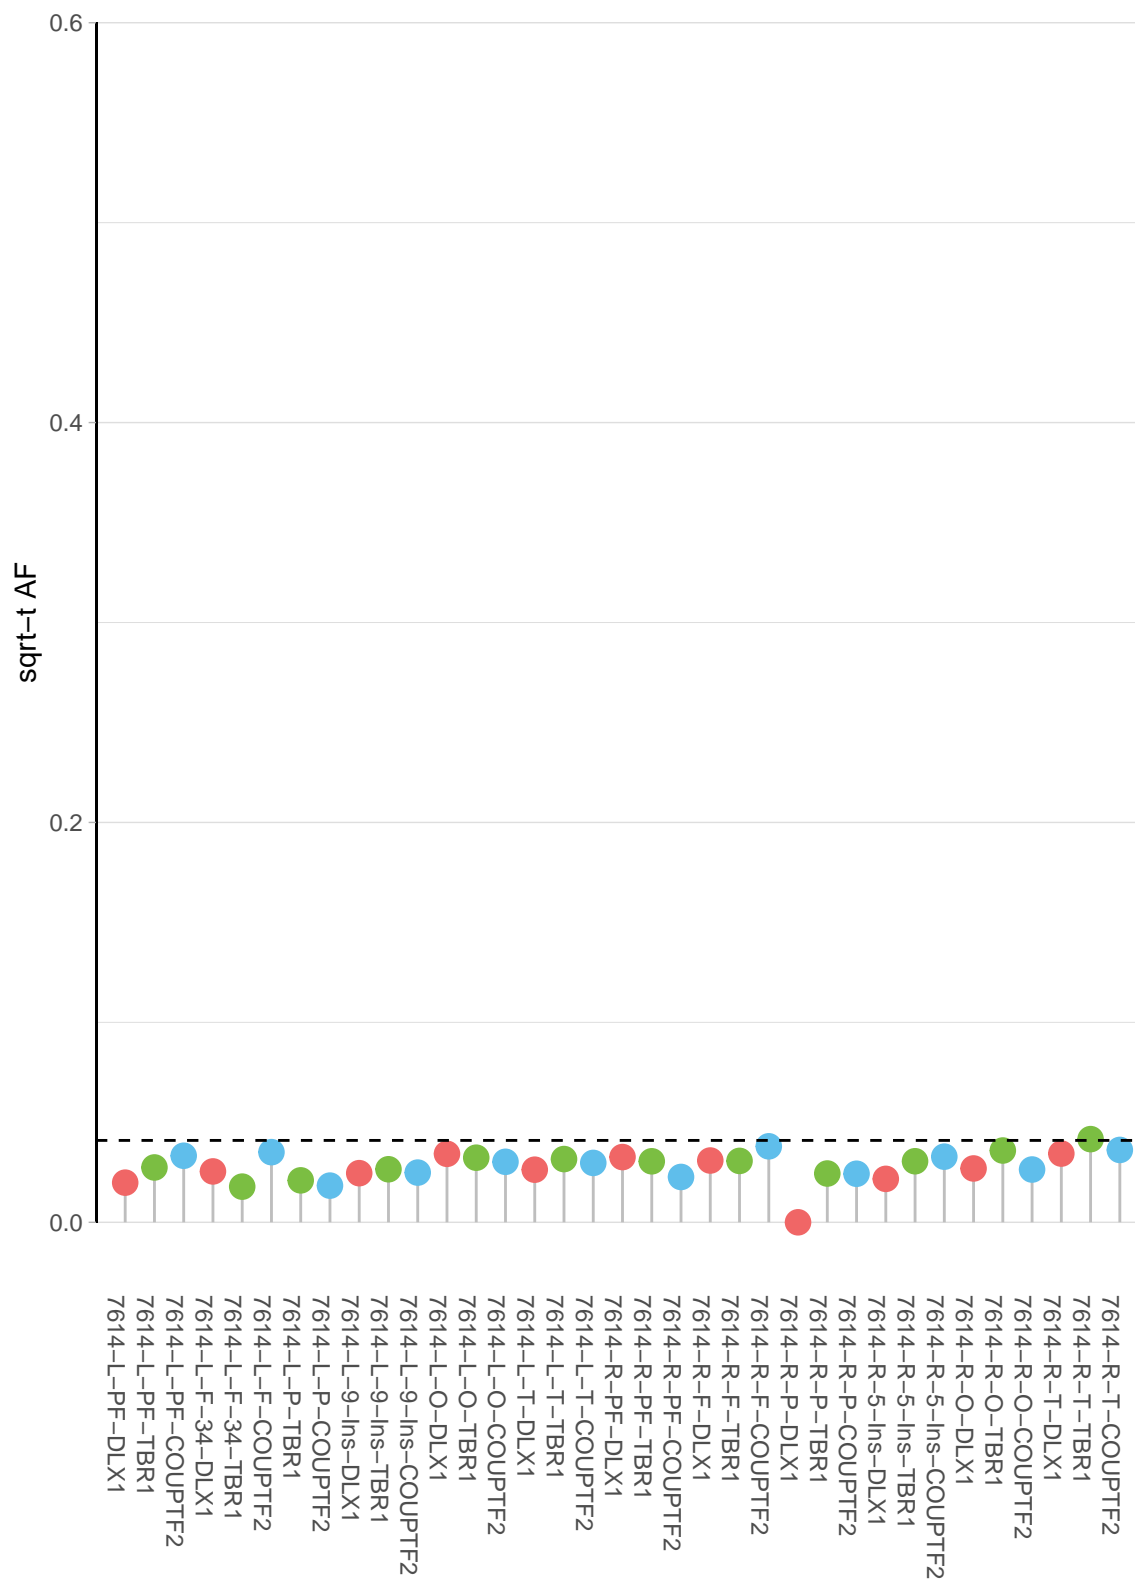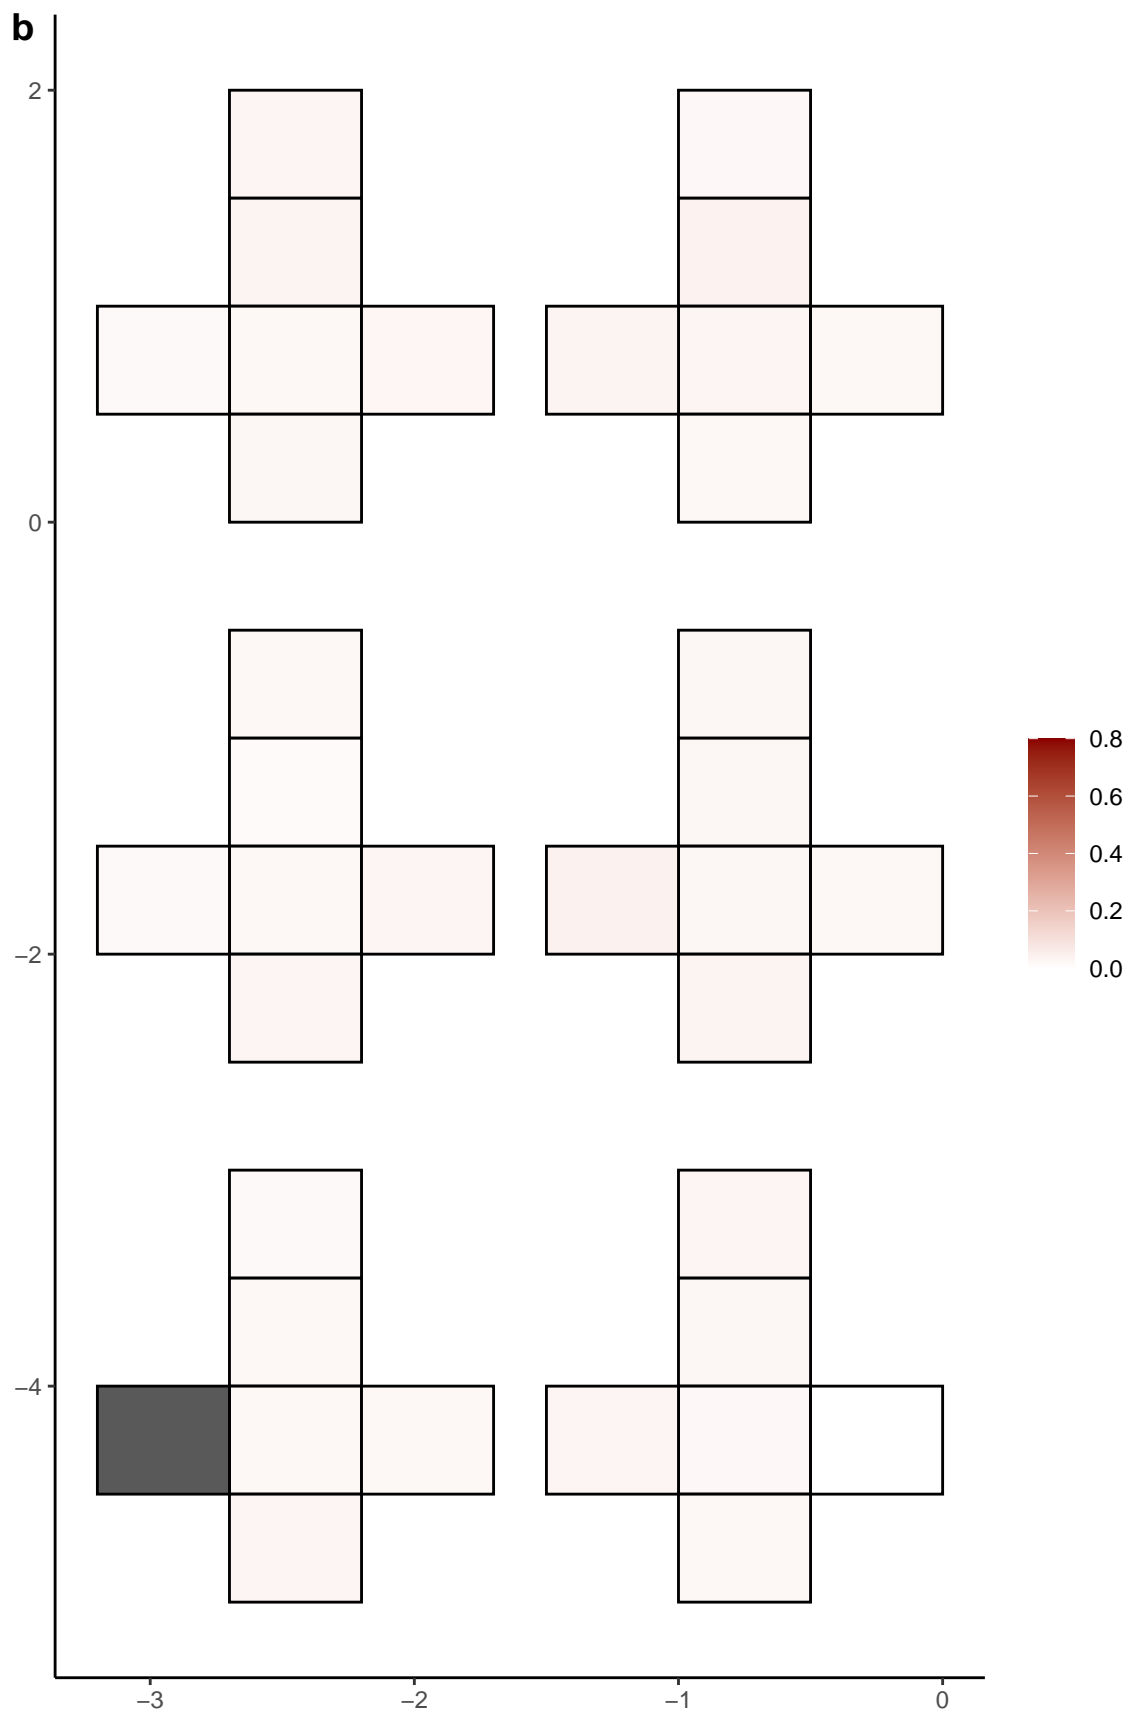

**a** ID01 2-138583113-G-A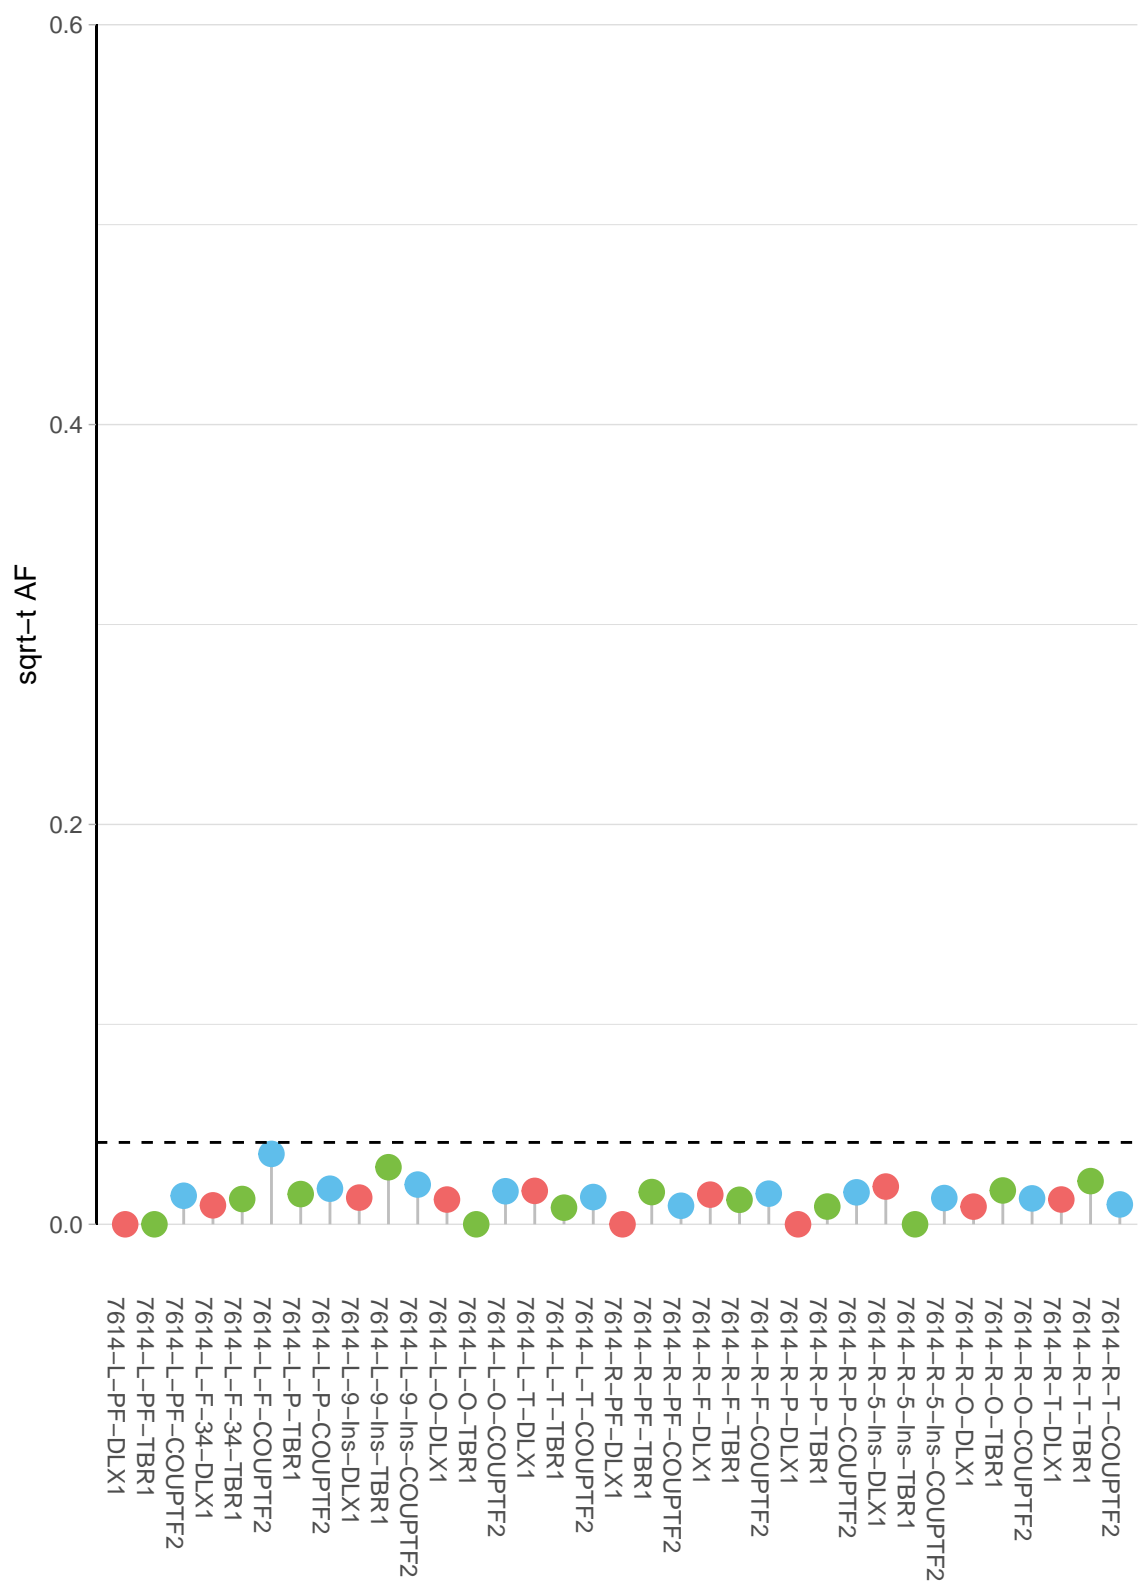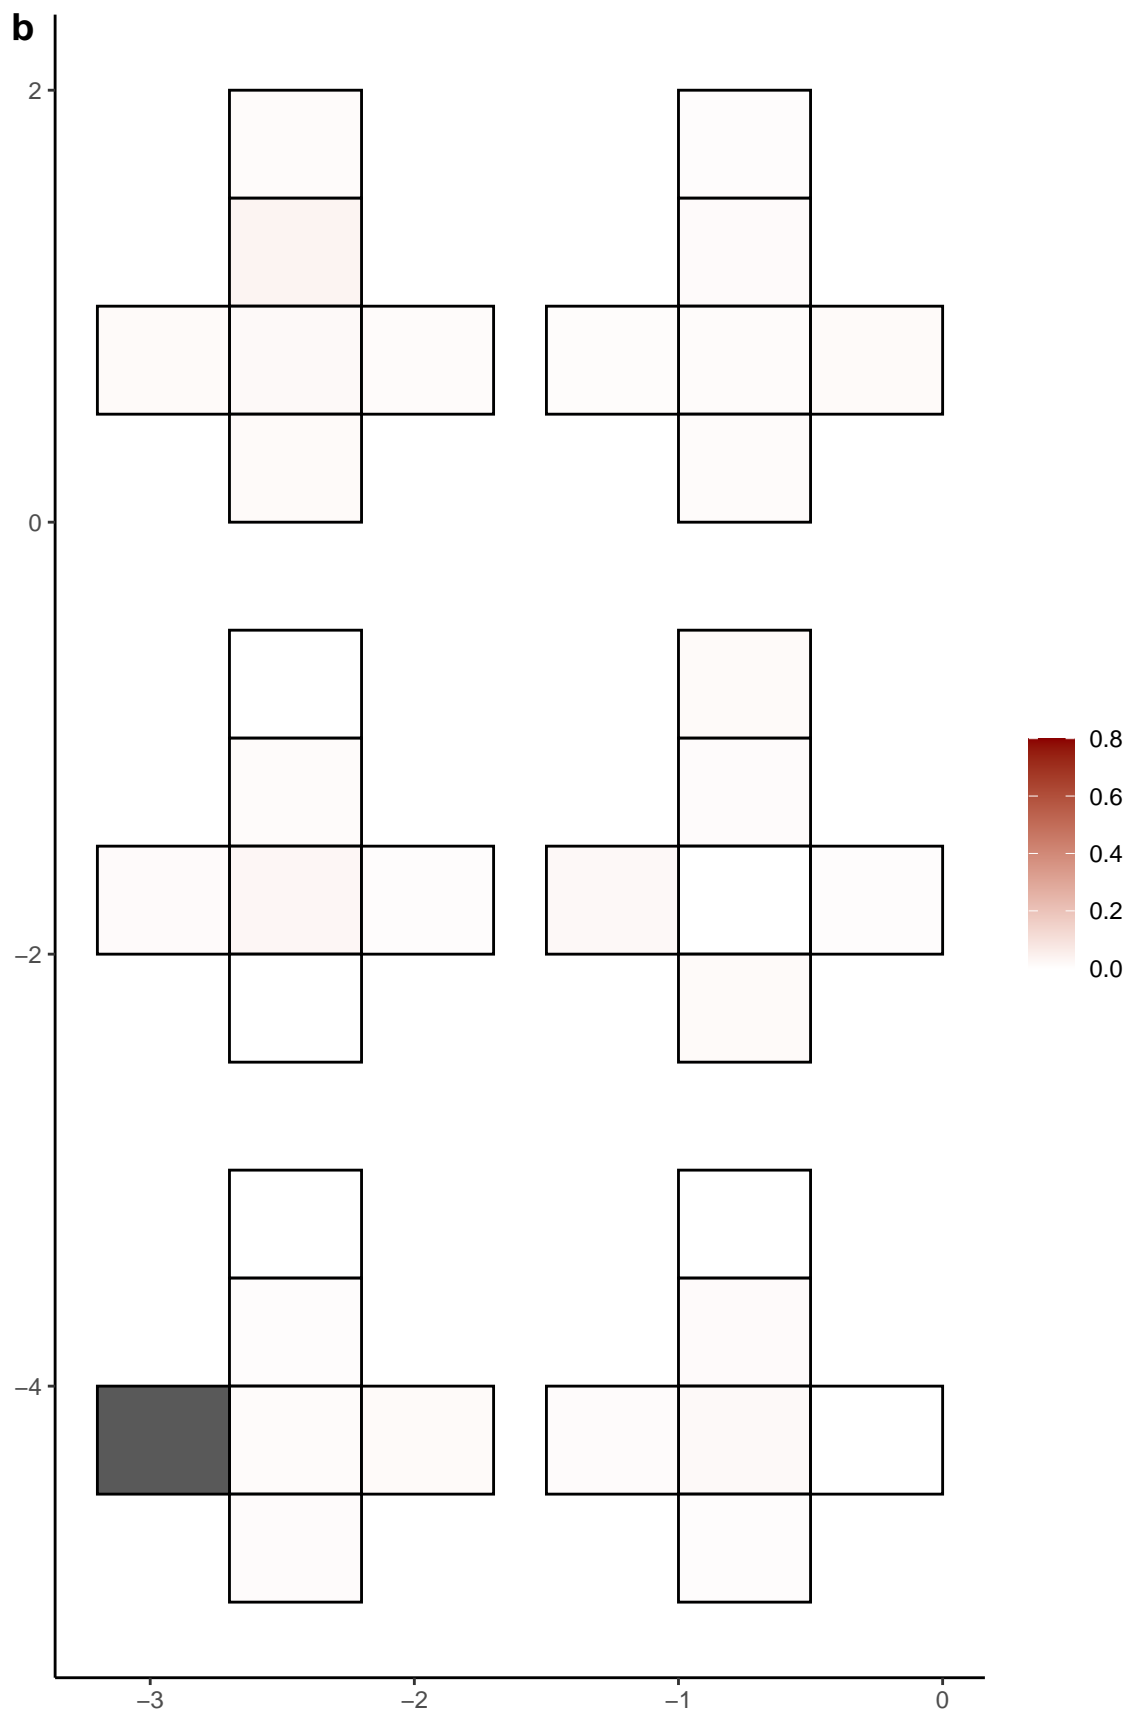

**a** ID01 2-139753954-C-T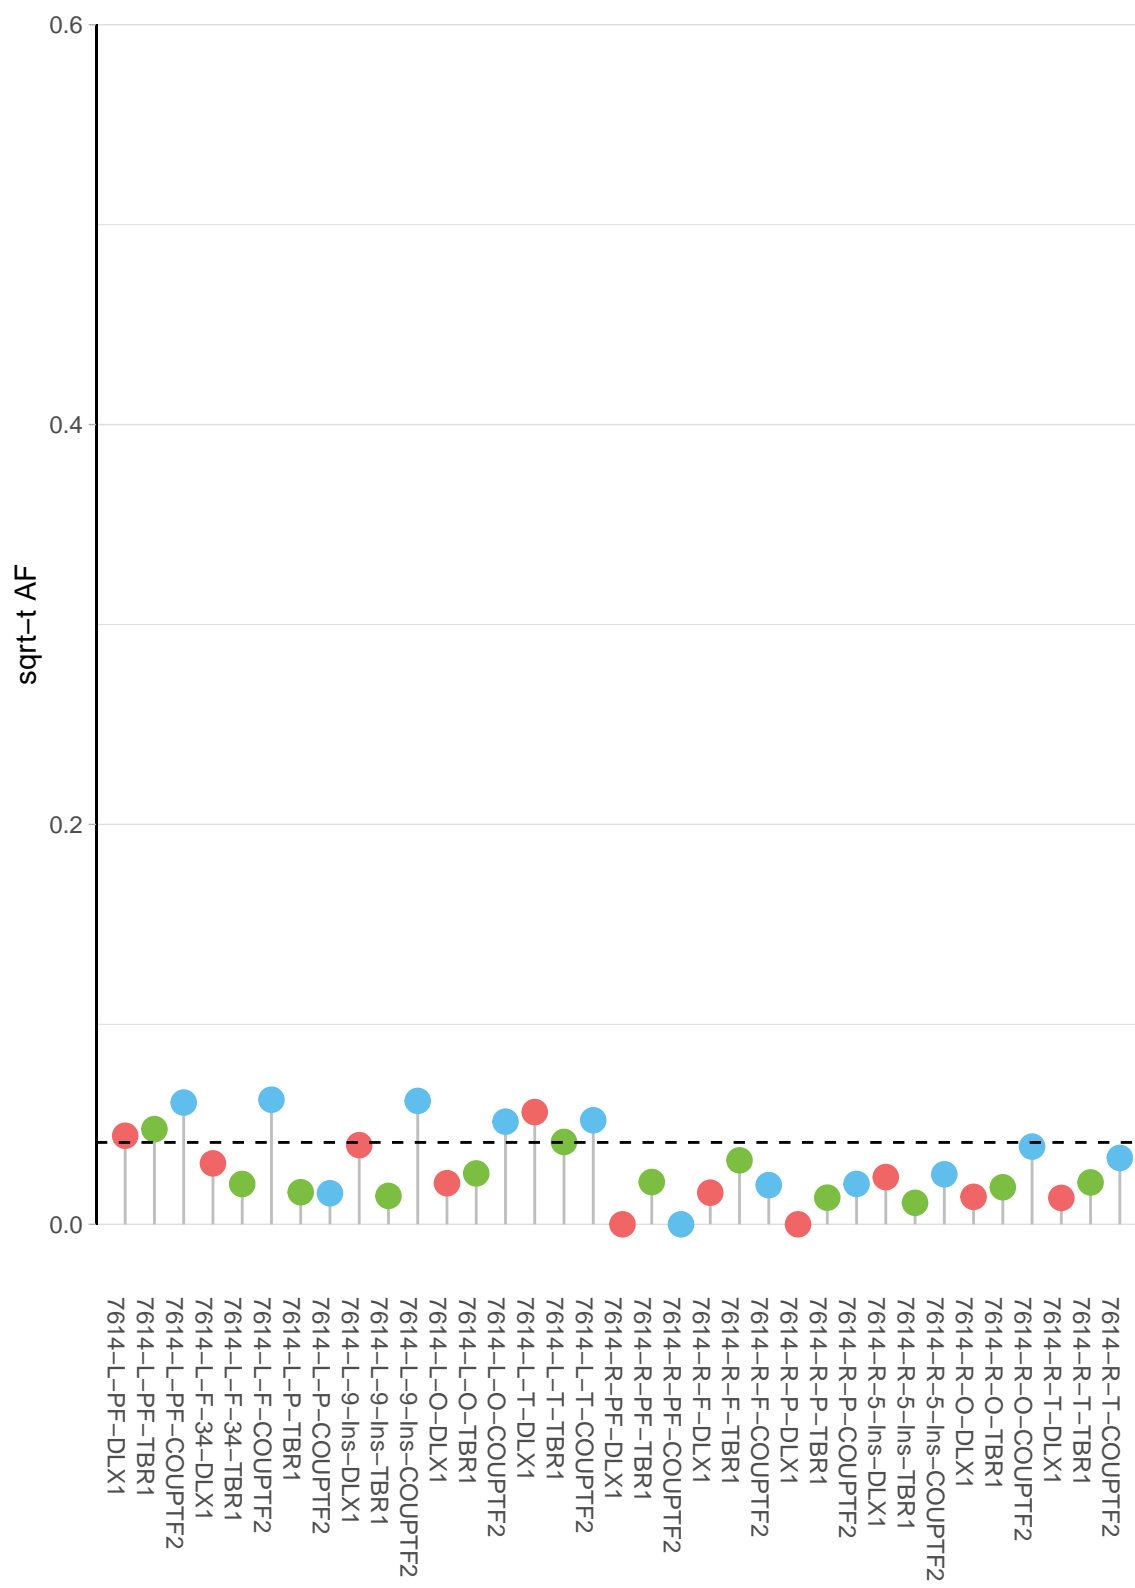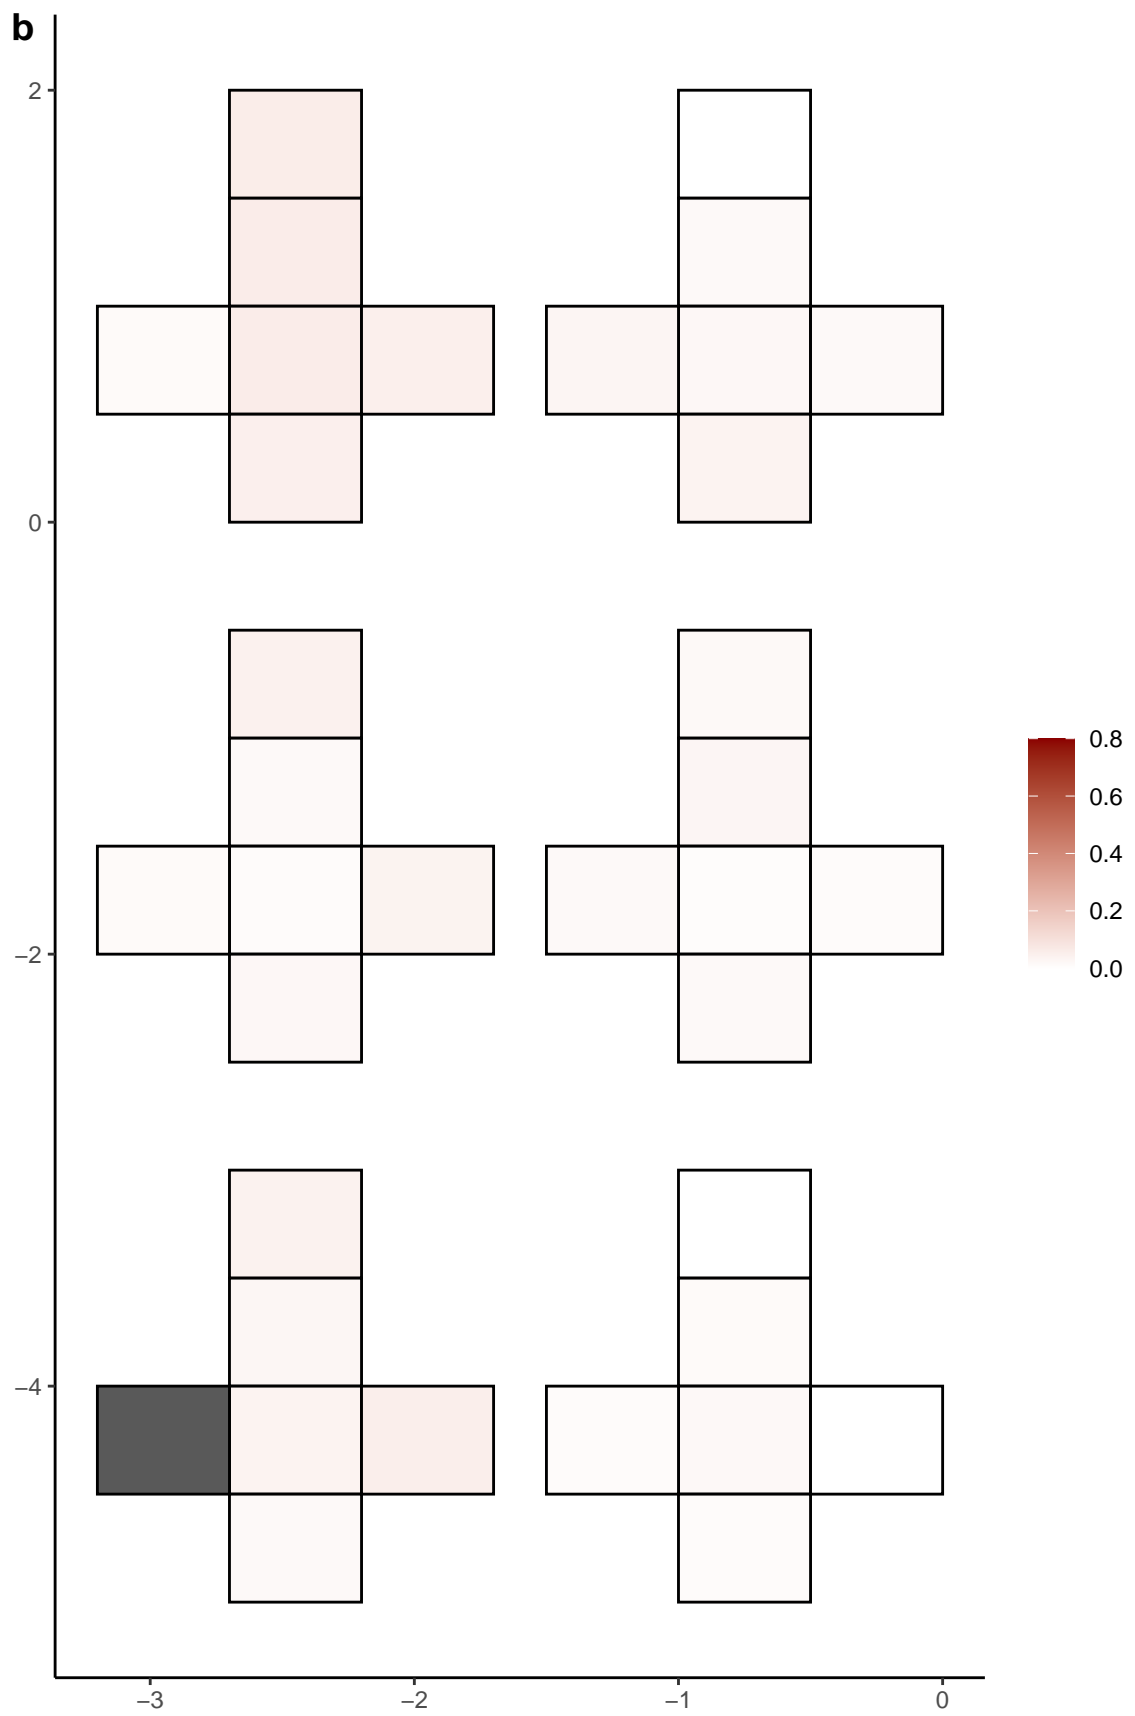



**a** ID01 2-142968696-G-T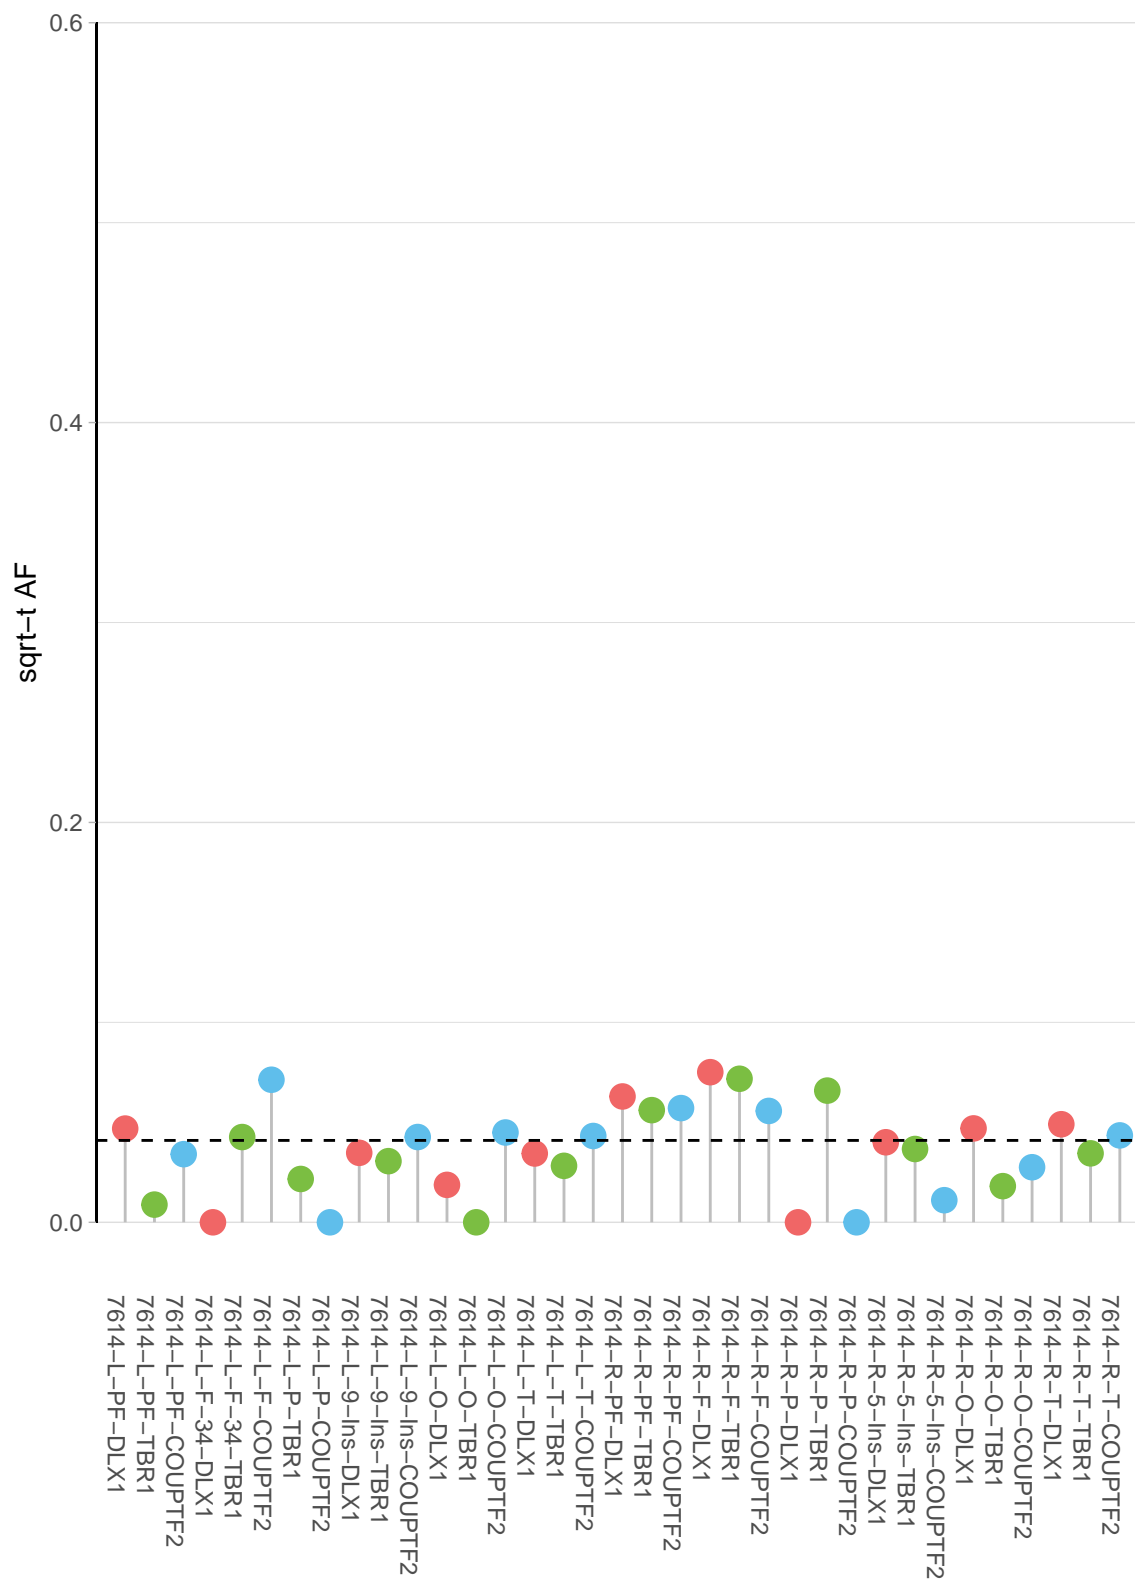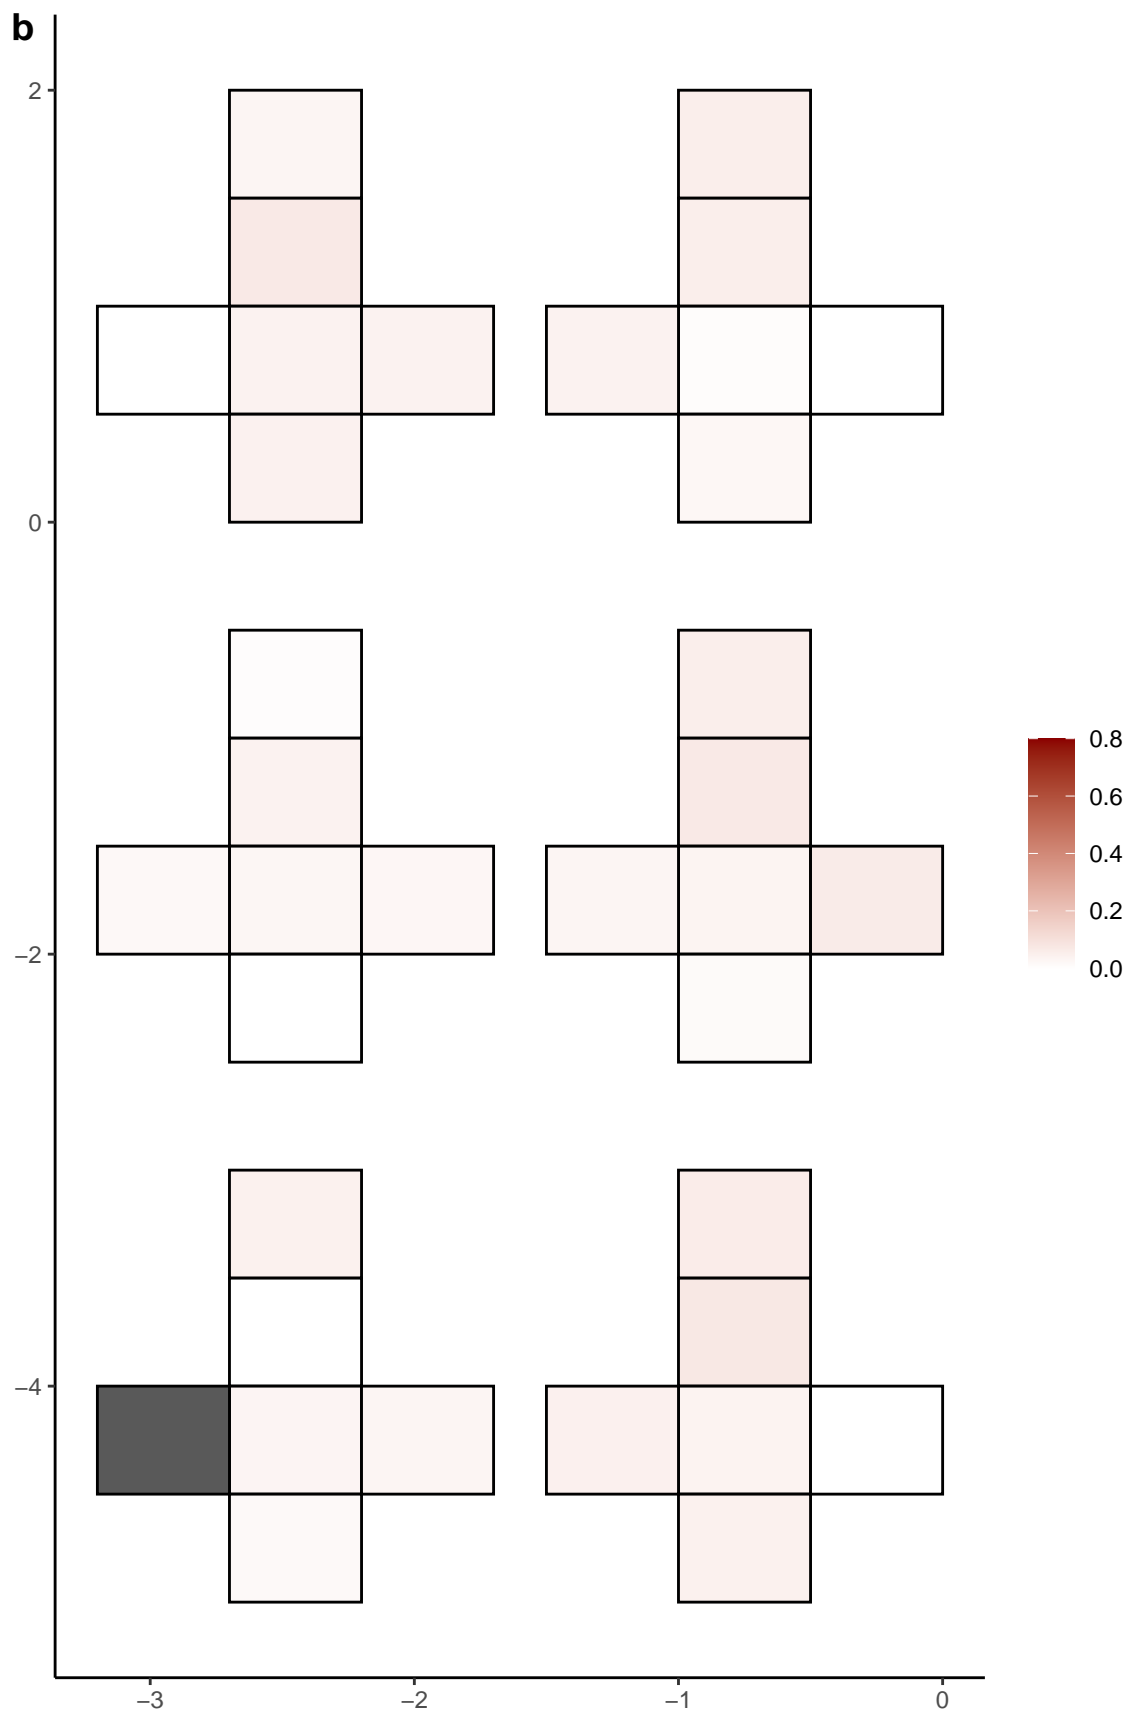

**a** ID01 2-143727379-C-T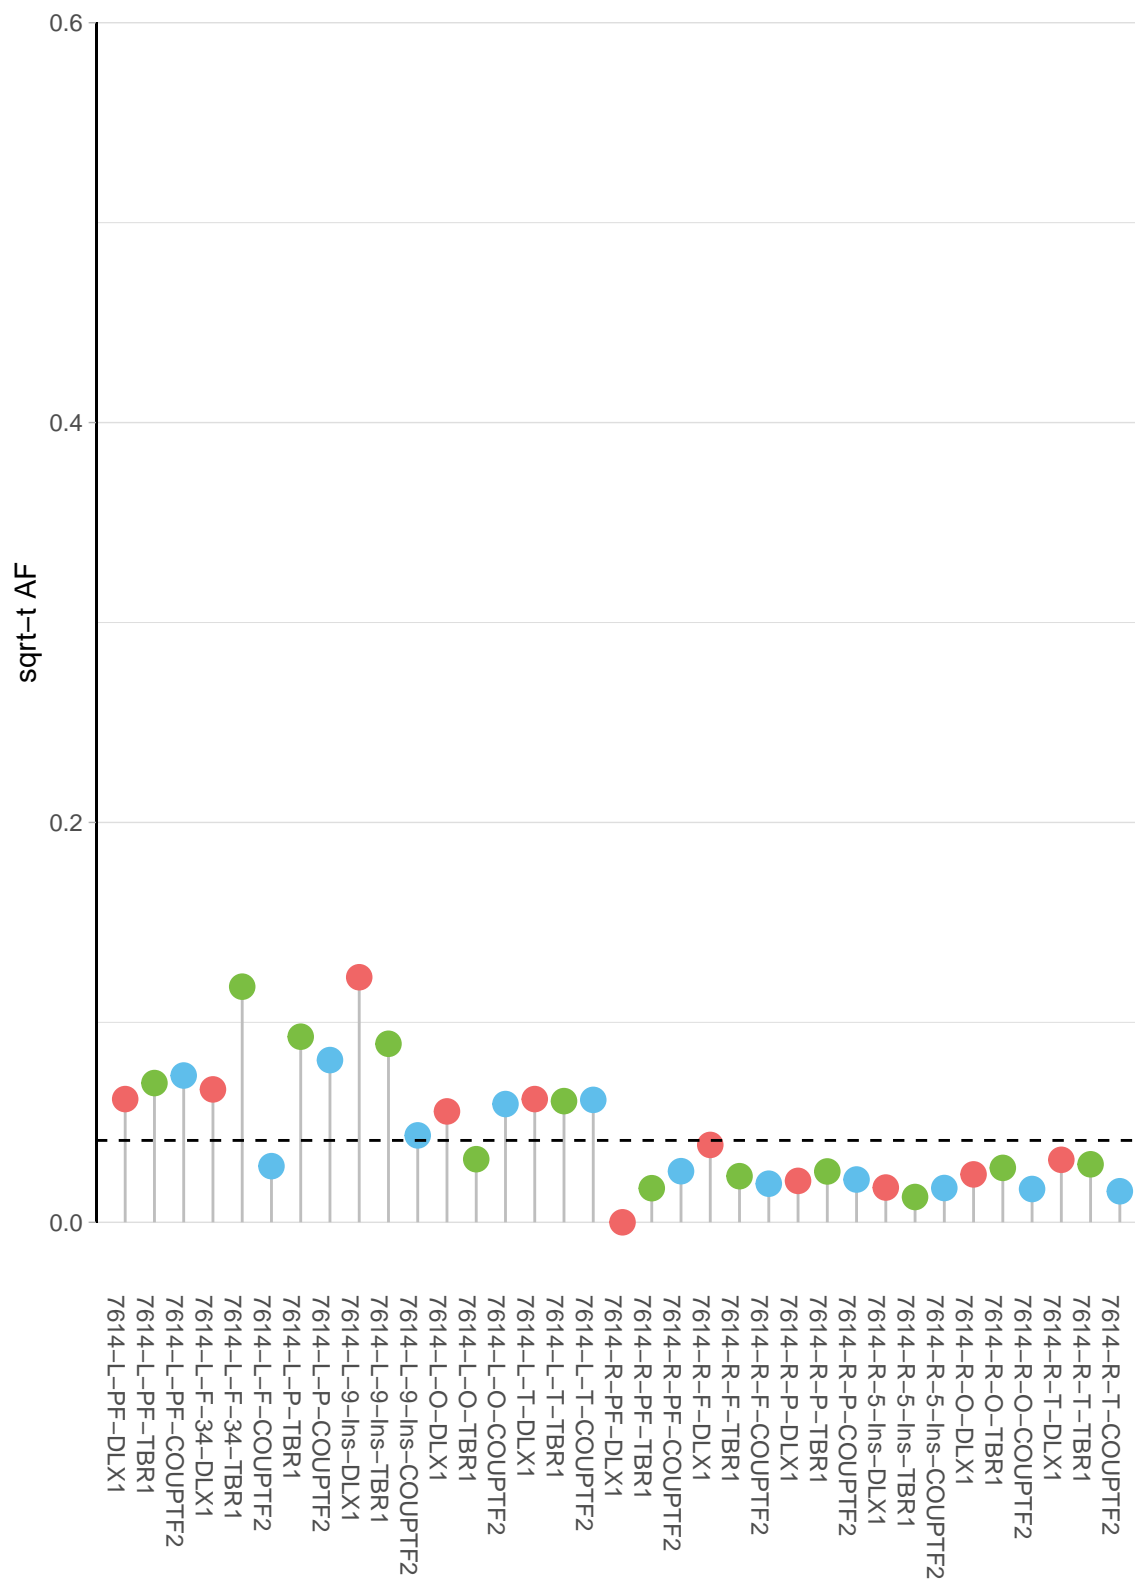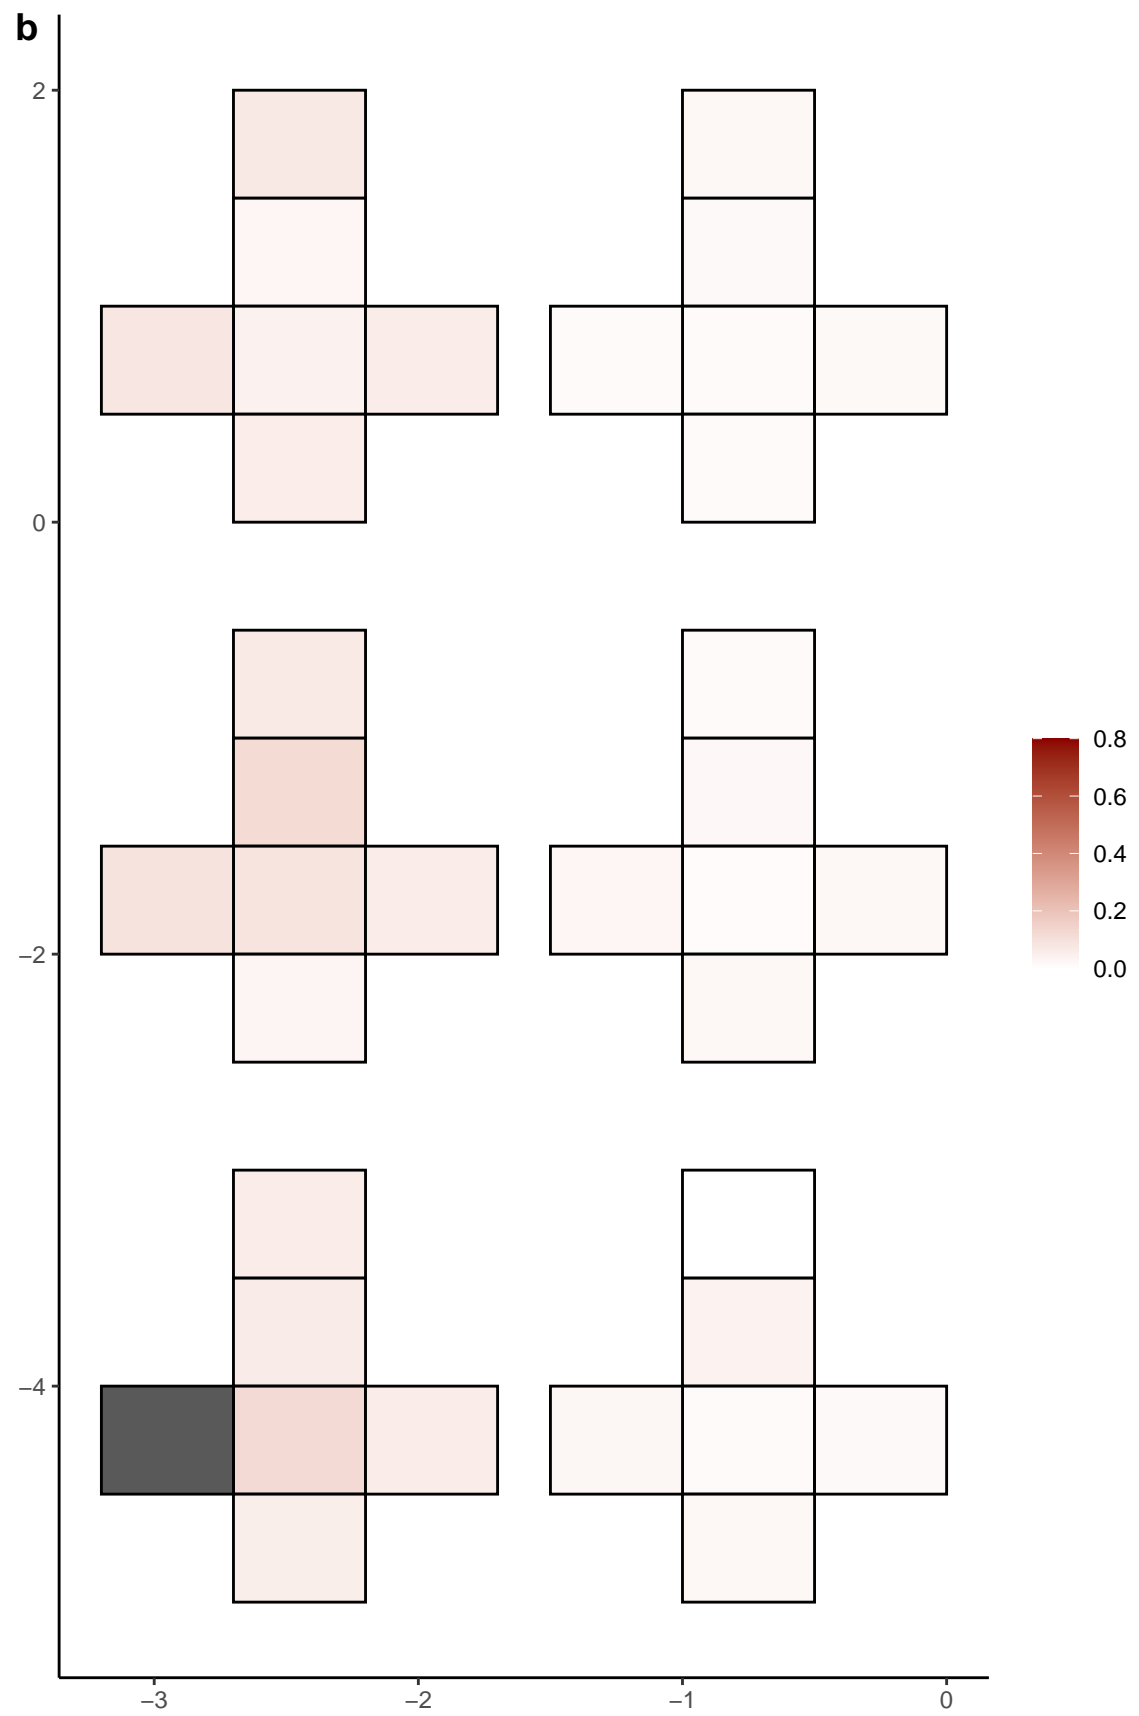

**a** ID01 2-1519264-AAC-A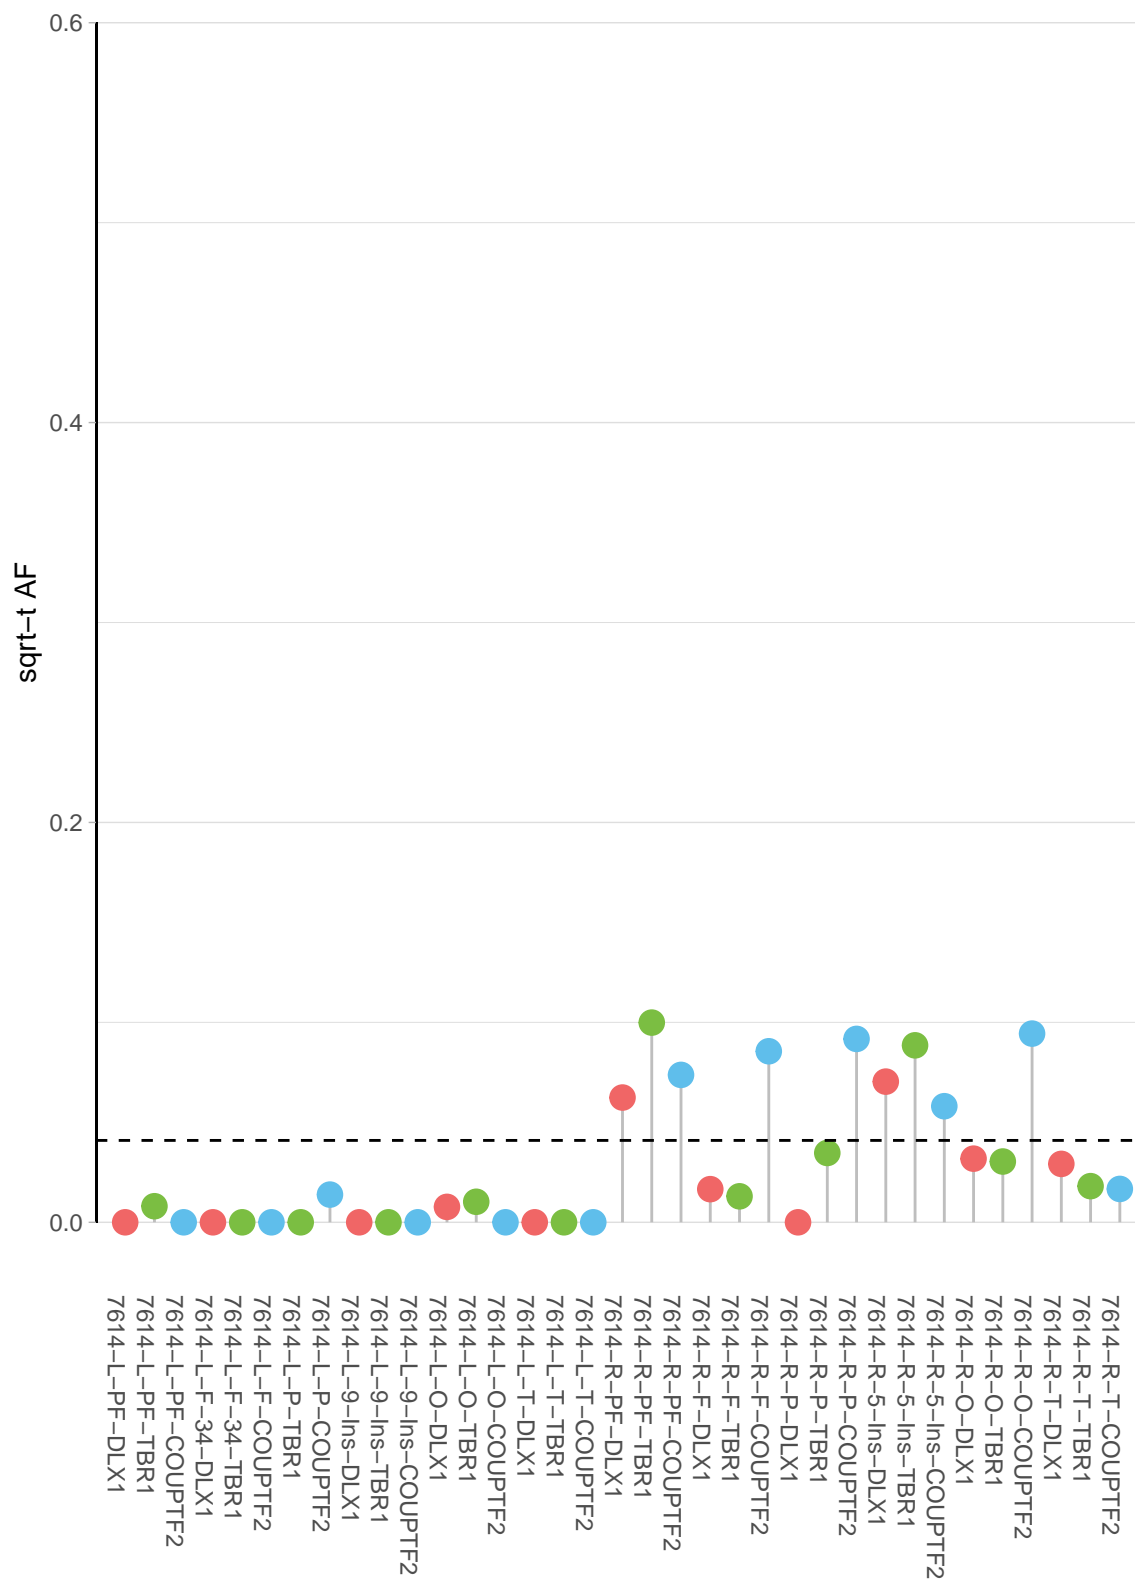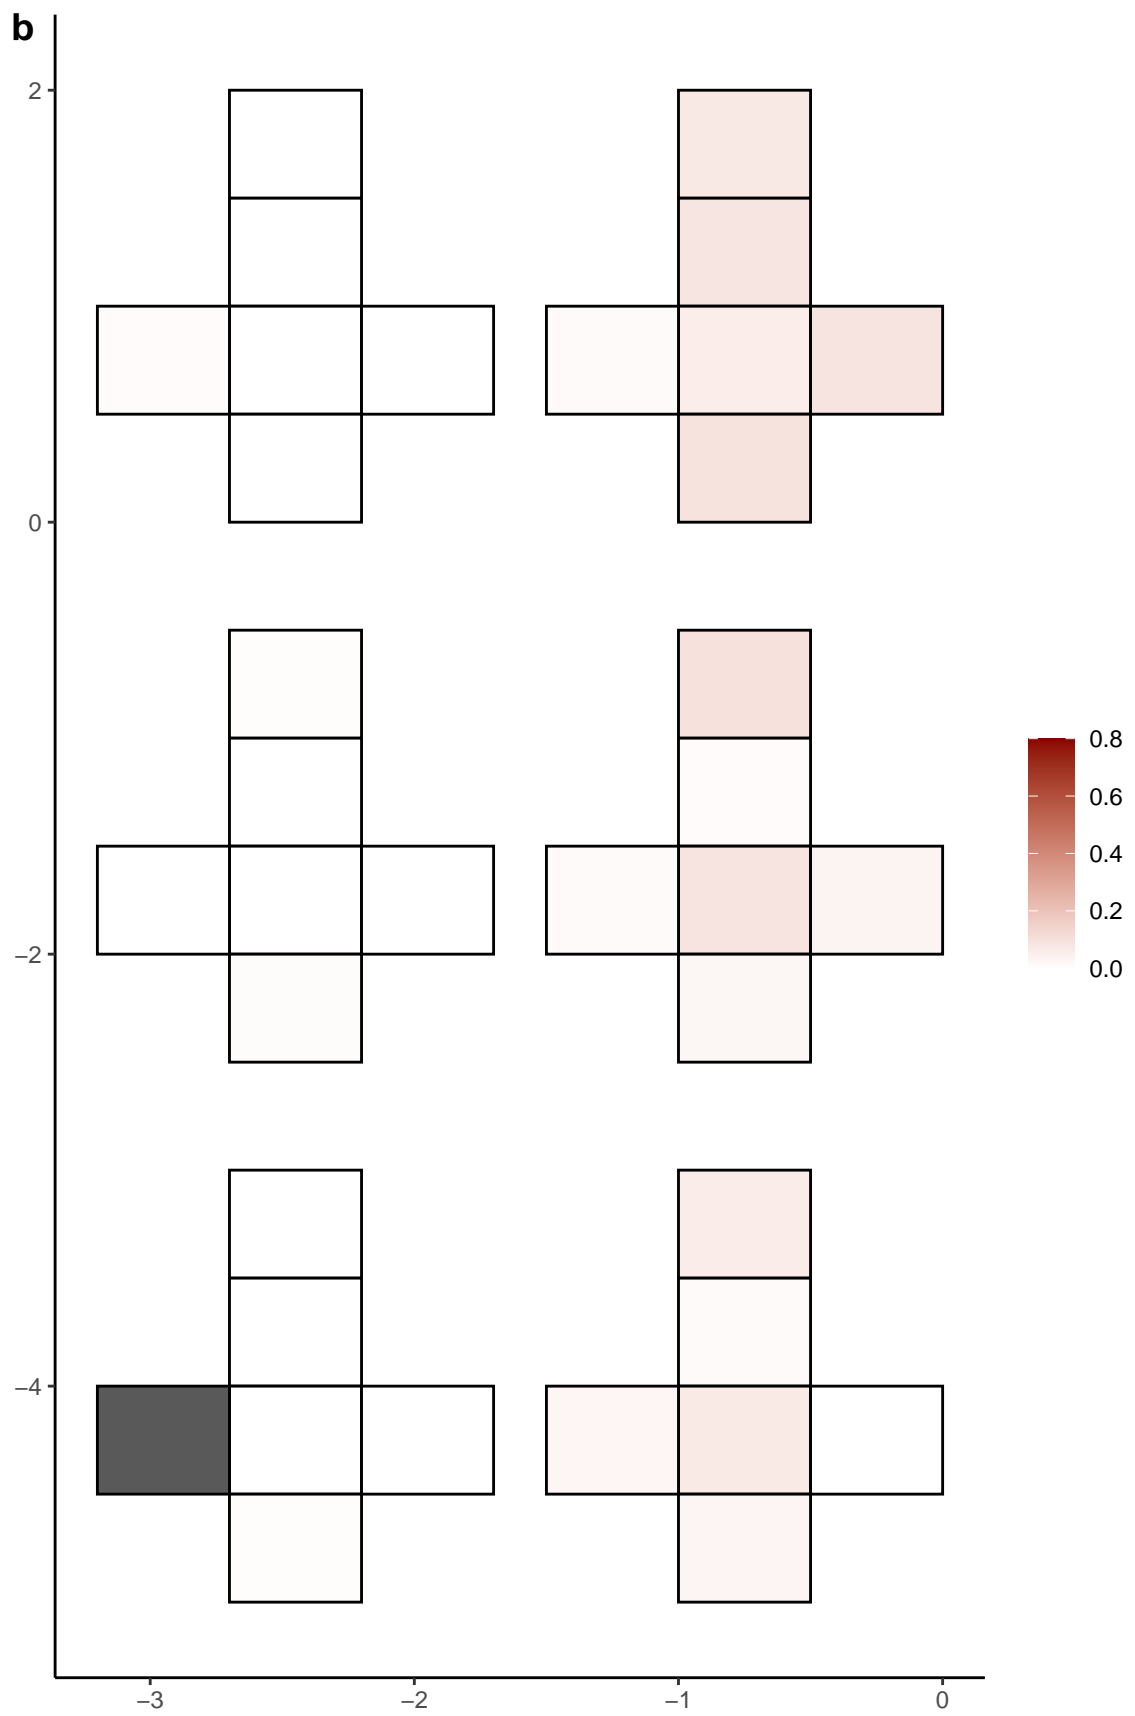

**a** ID01 2-170746611-A-G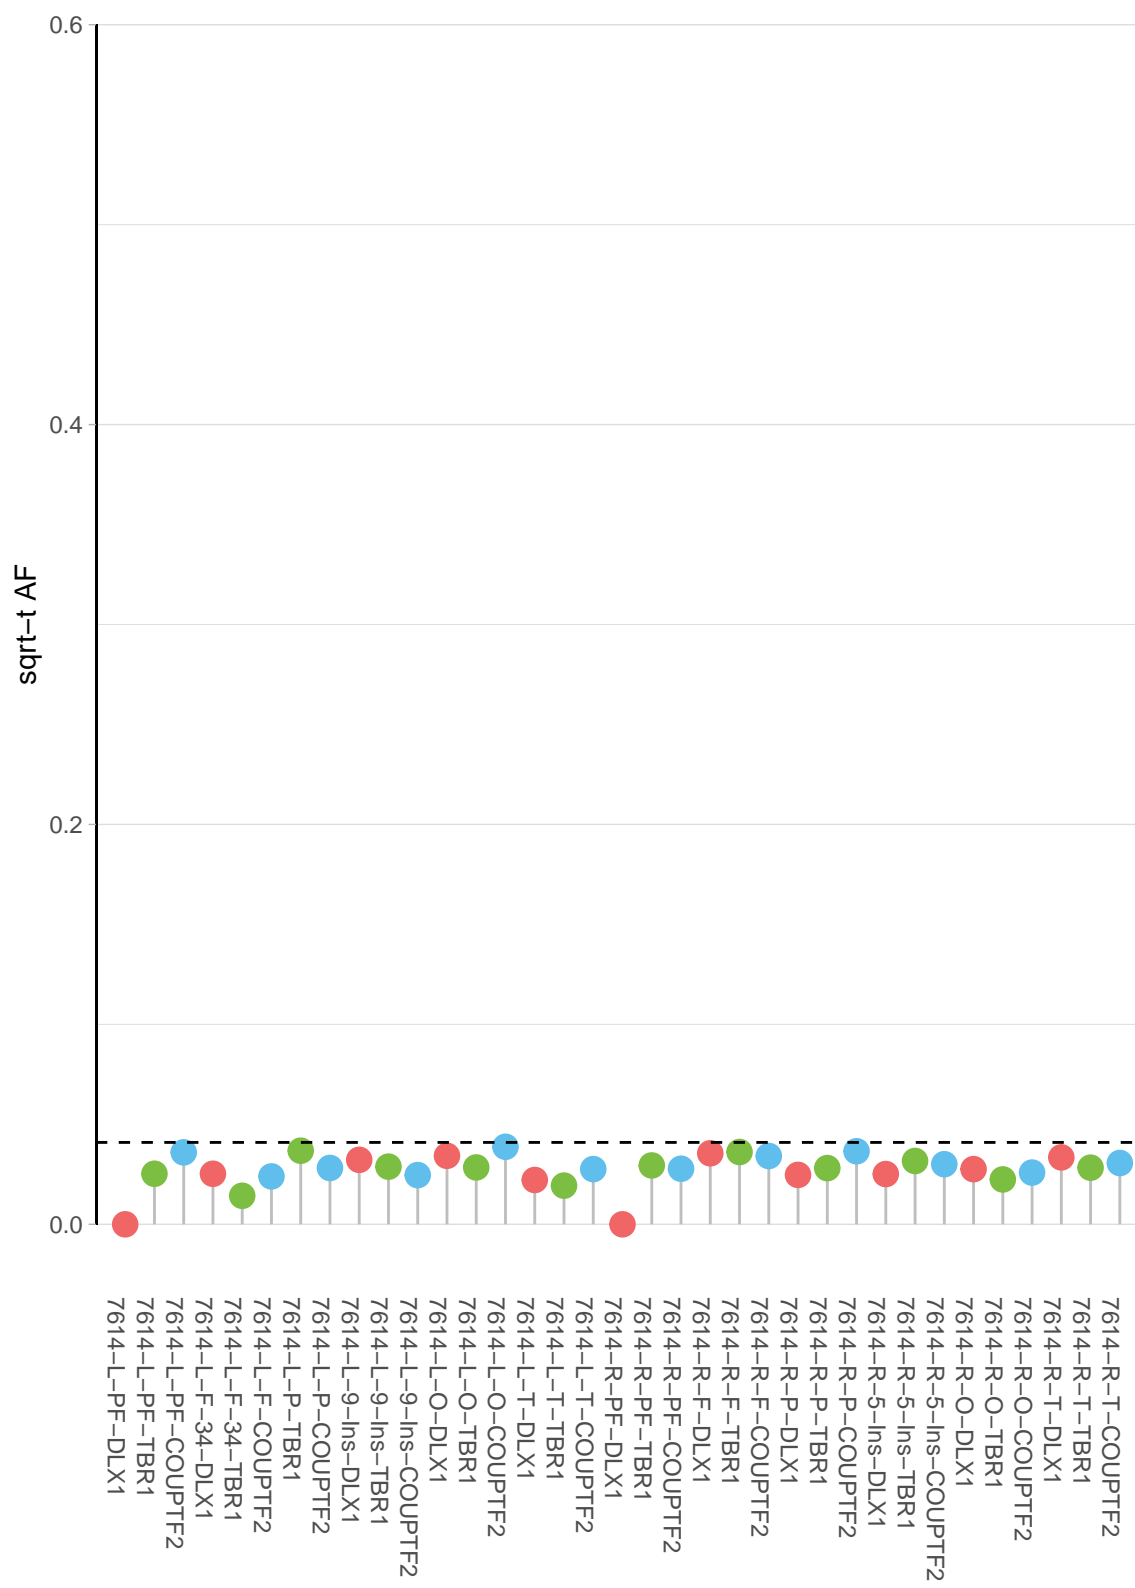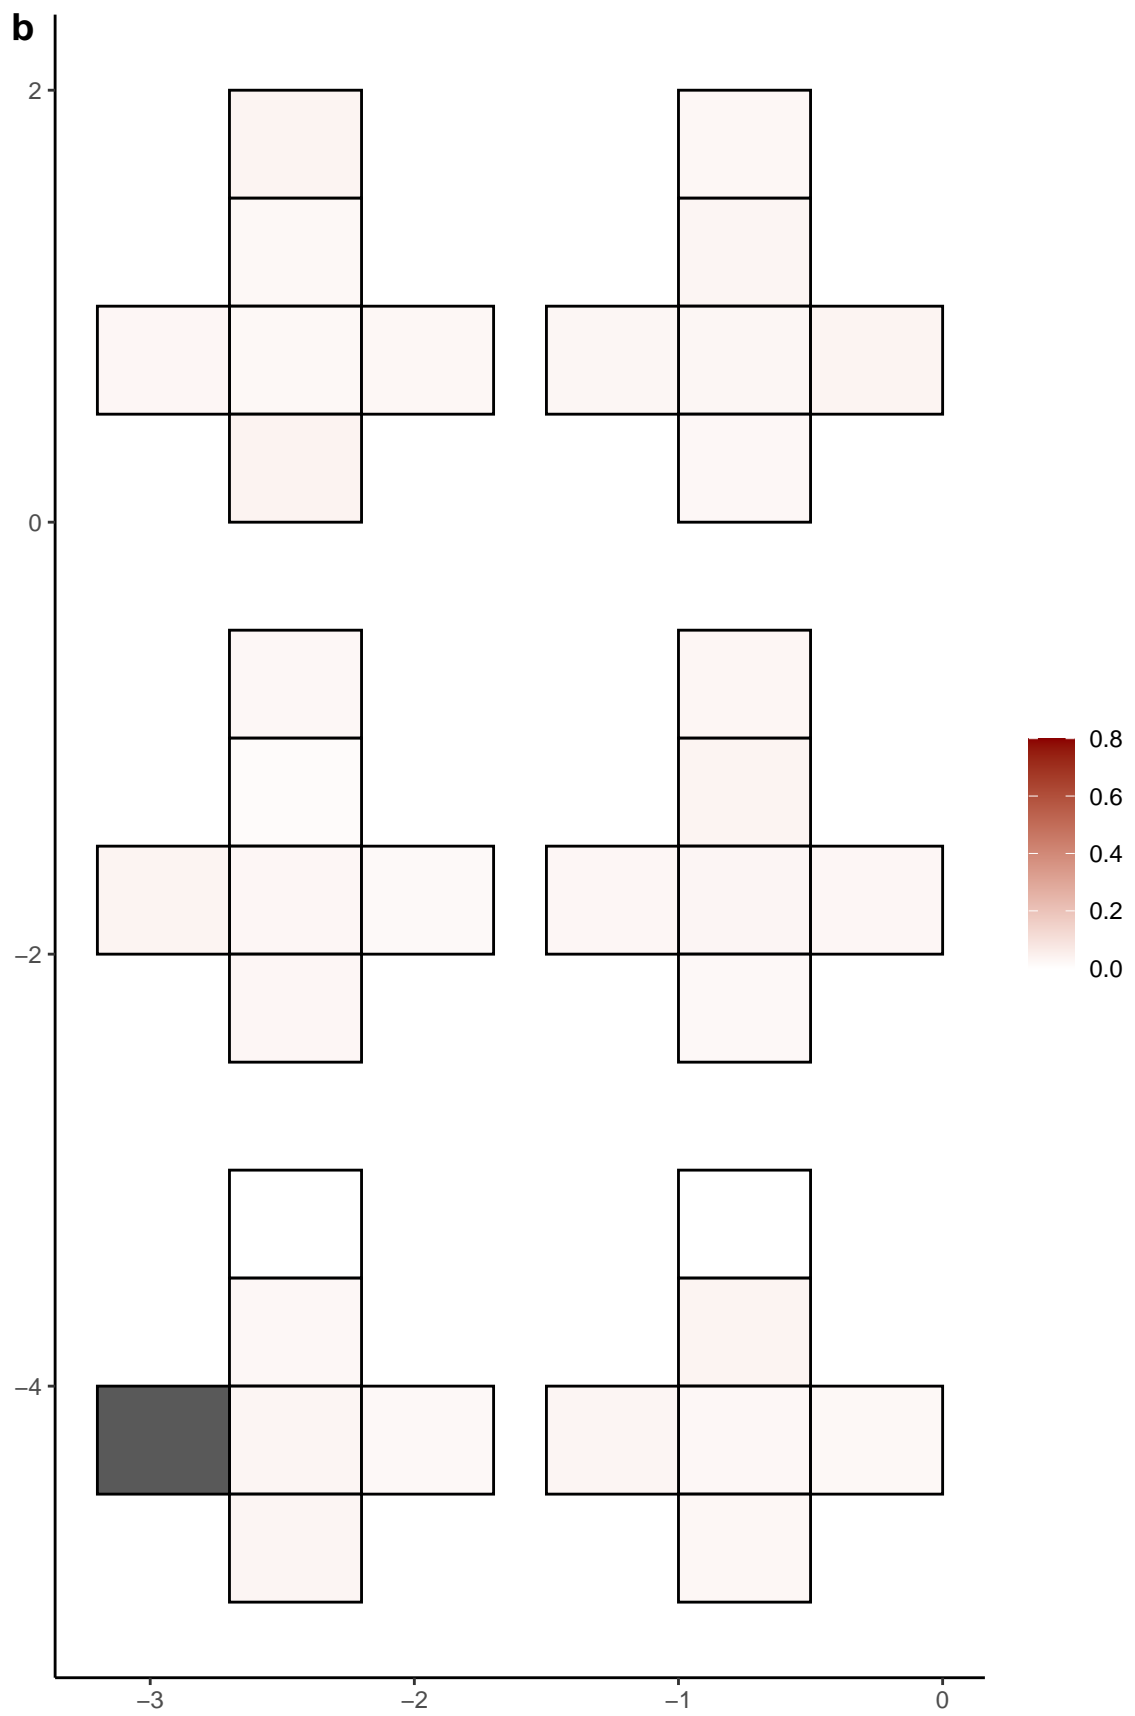

**a** ID01 2-189956910-G-A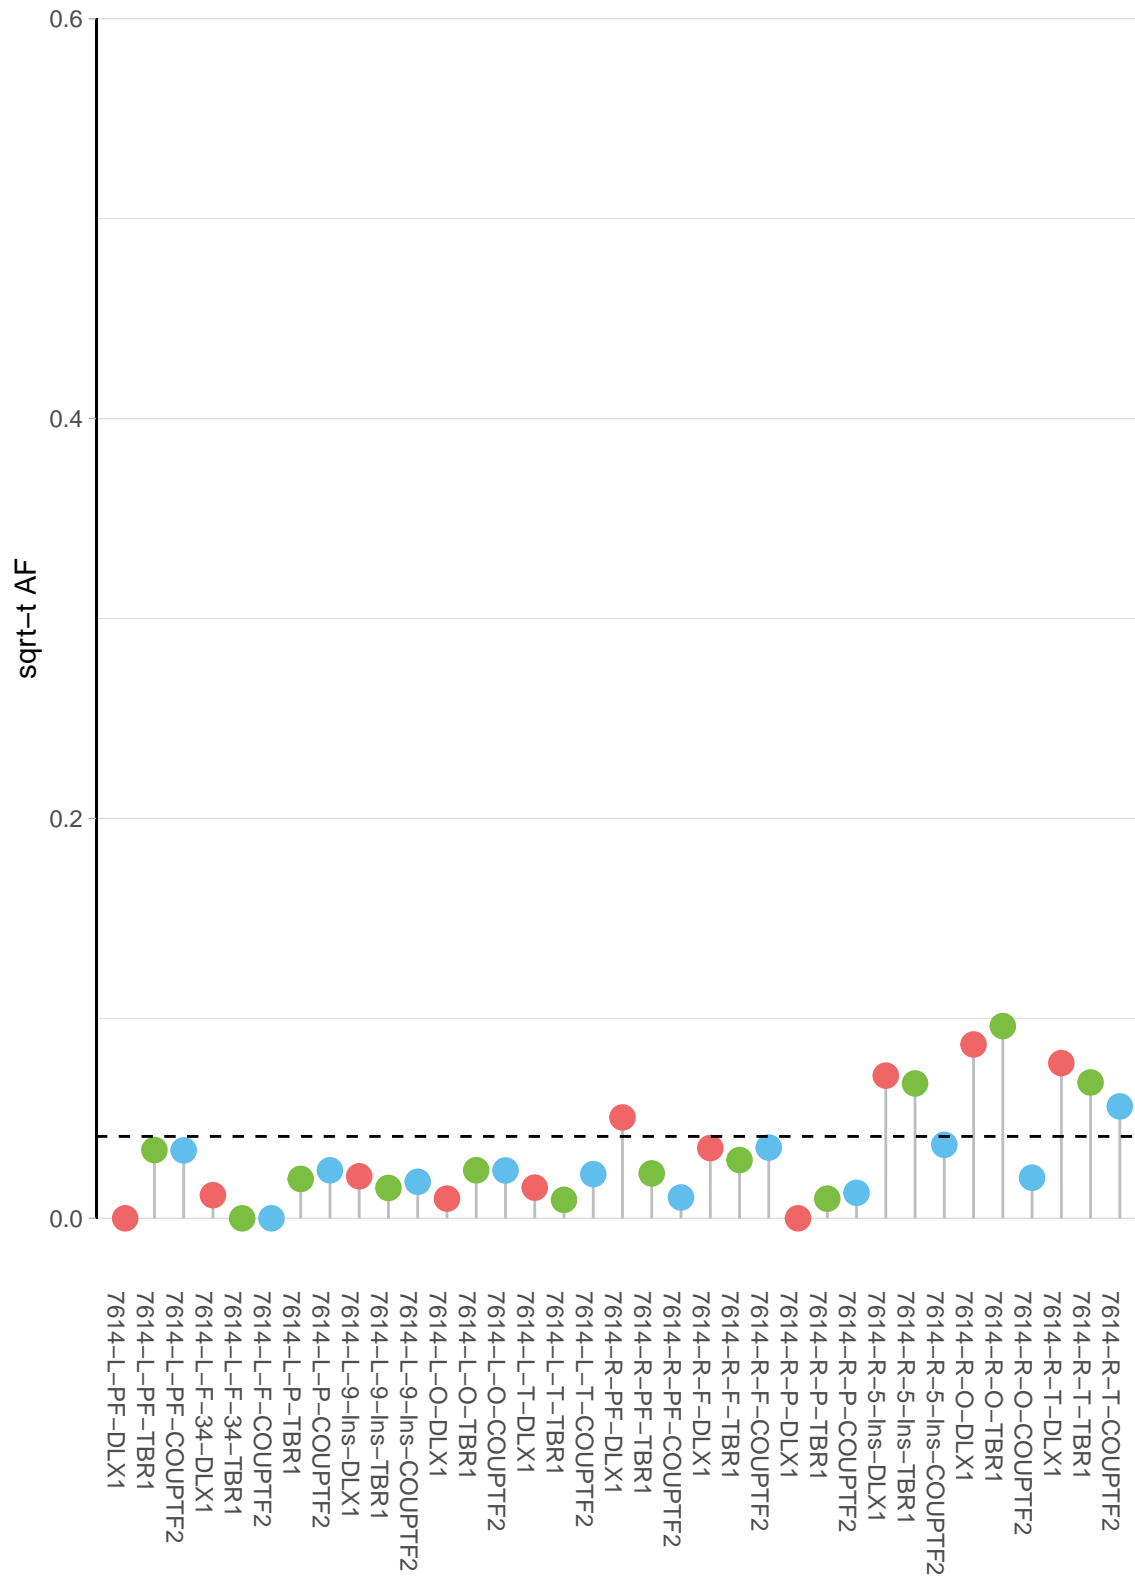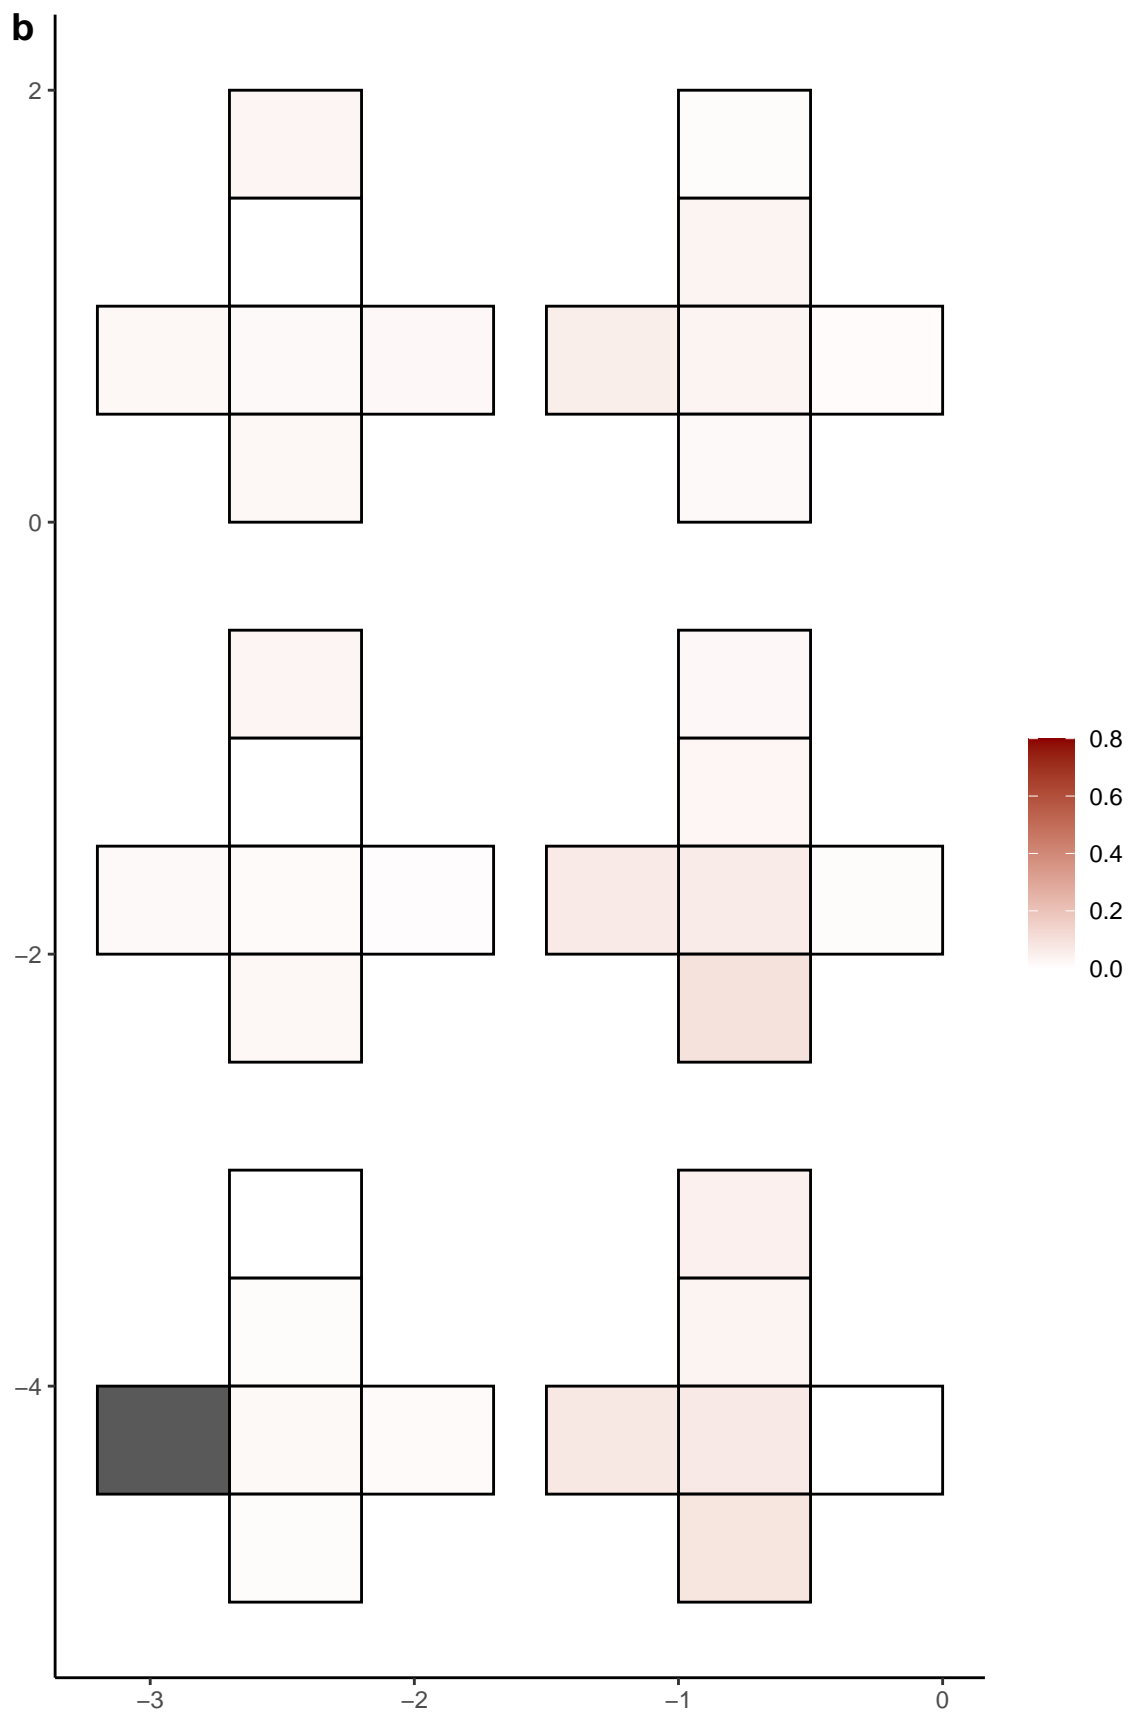

**a** ID01 2-194793292-CTT-C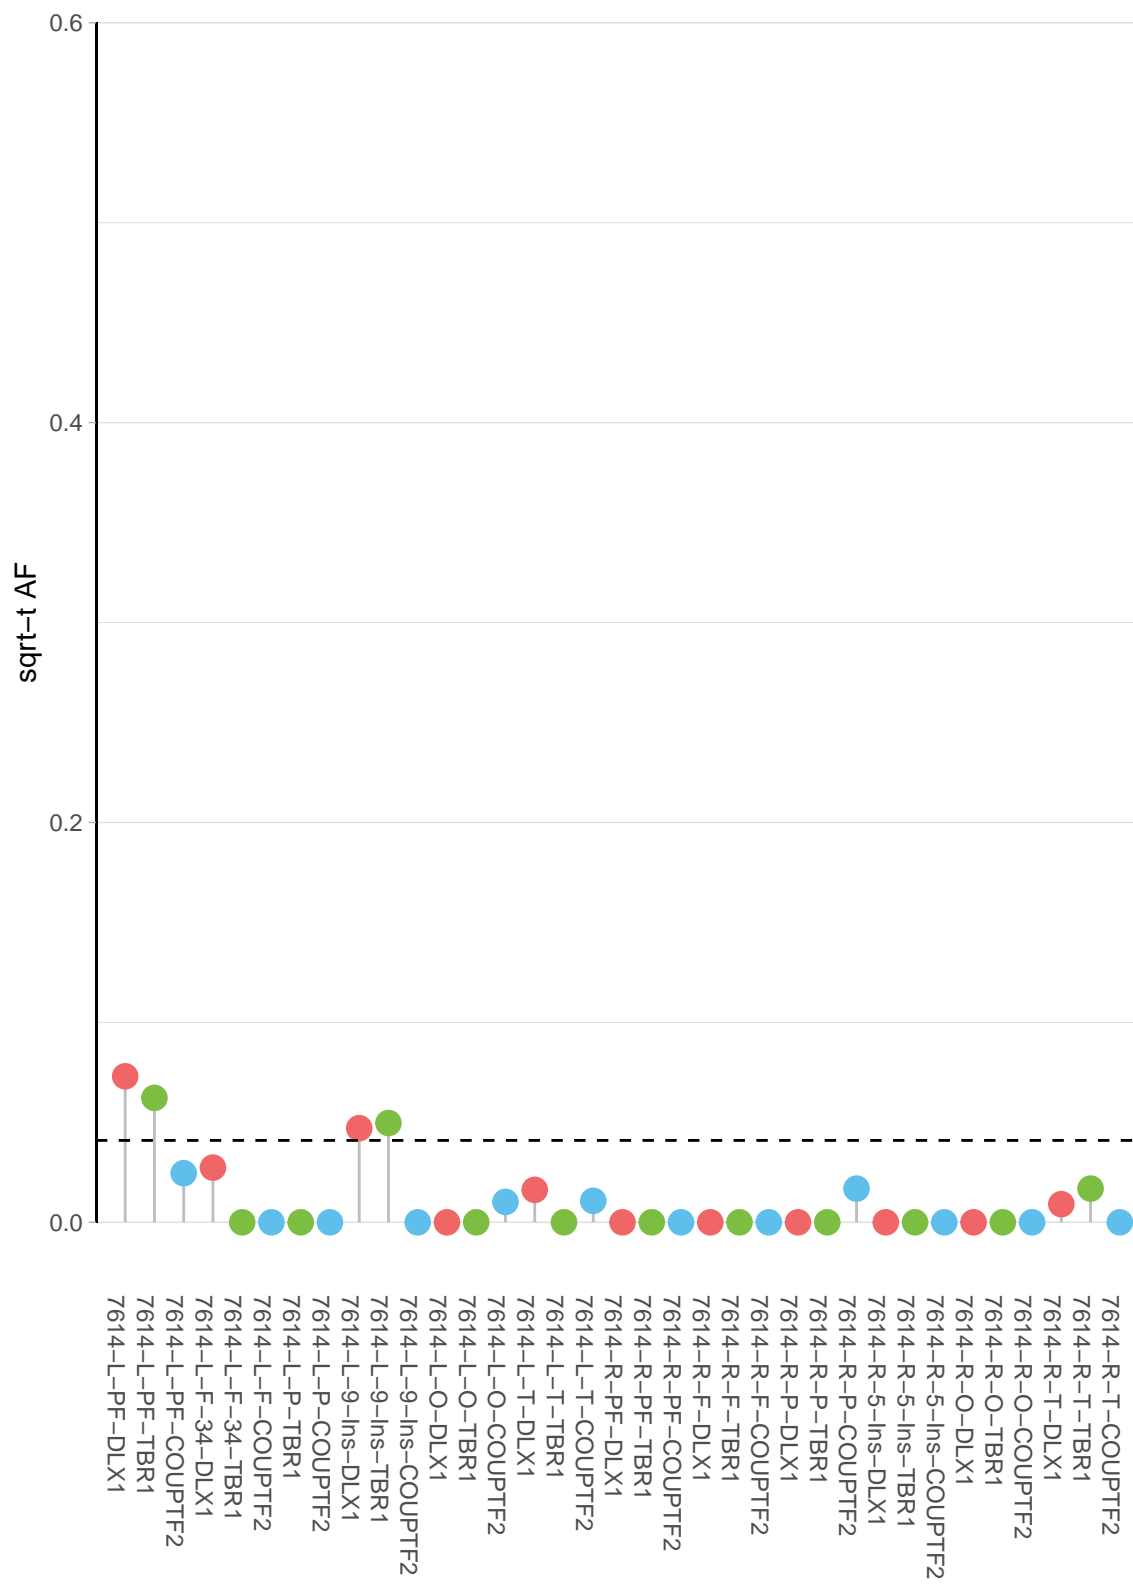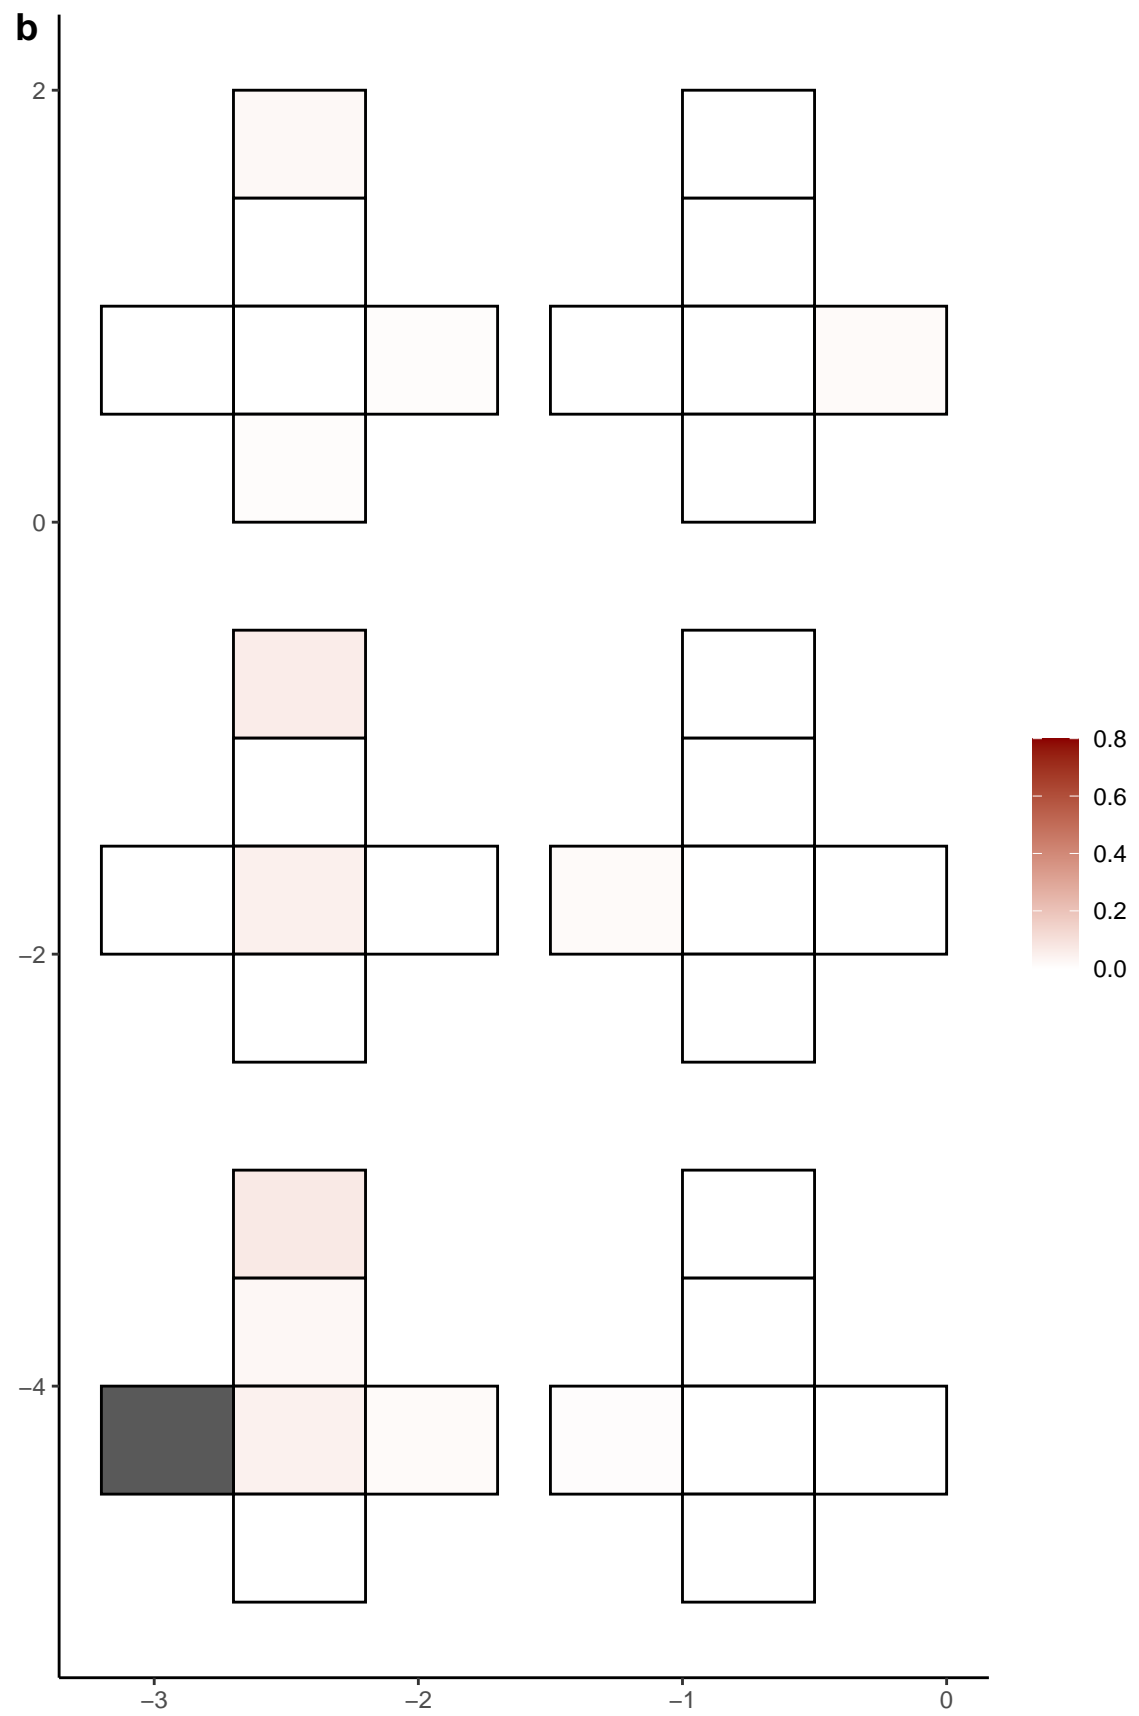

**a** ID01 2-195046625-G-A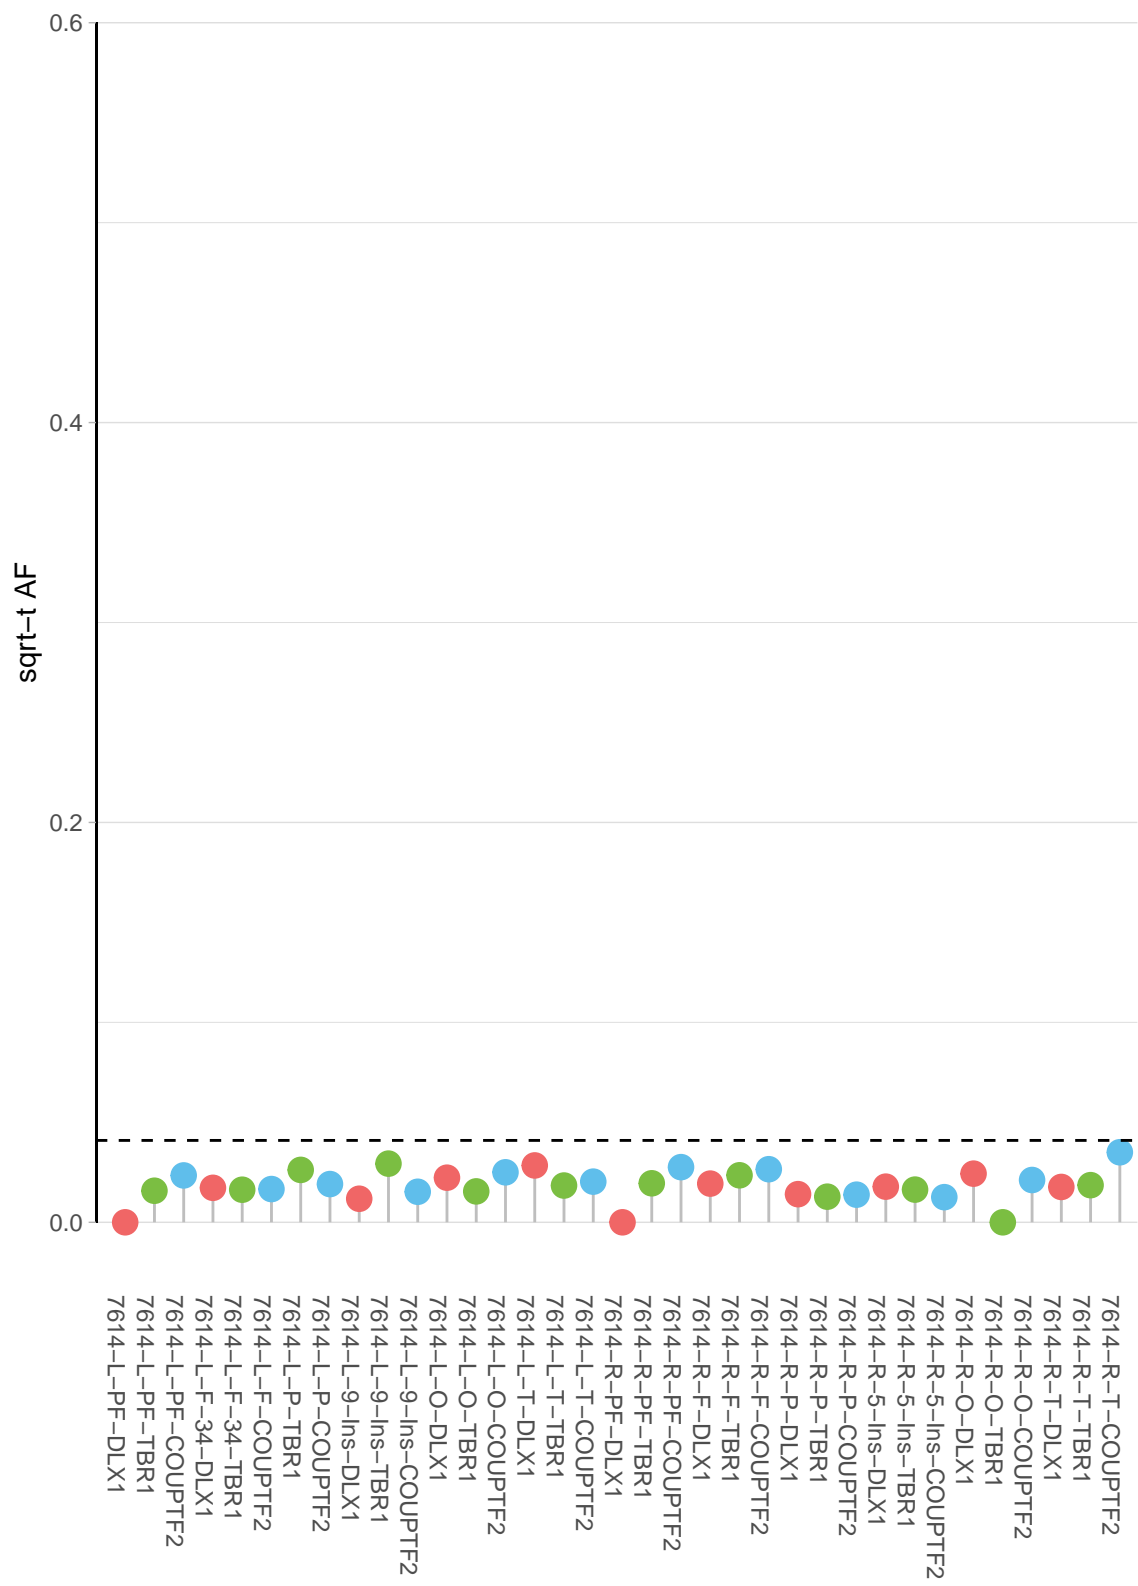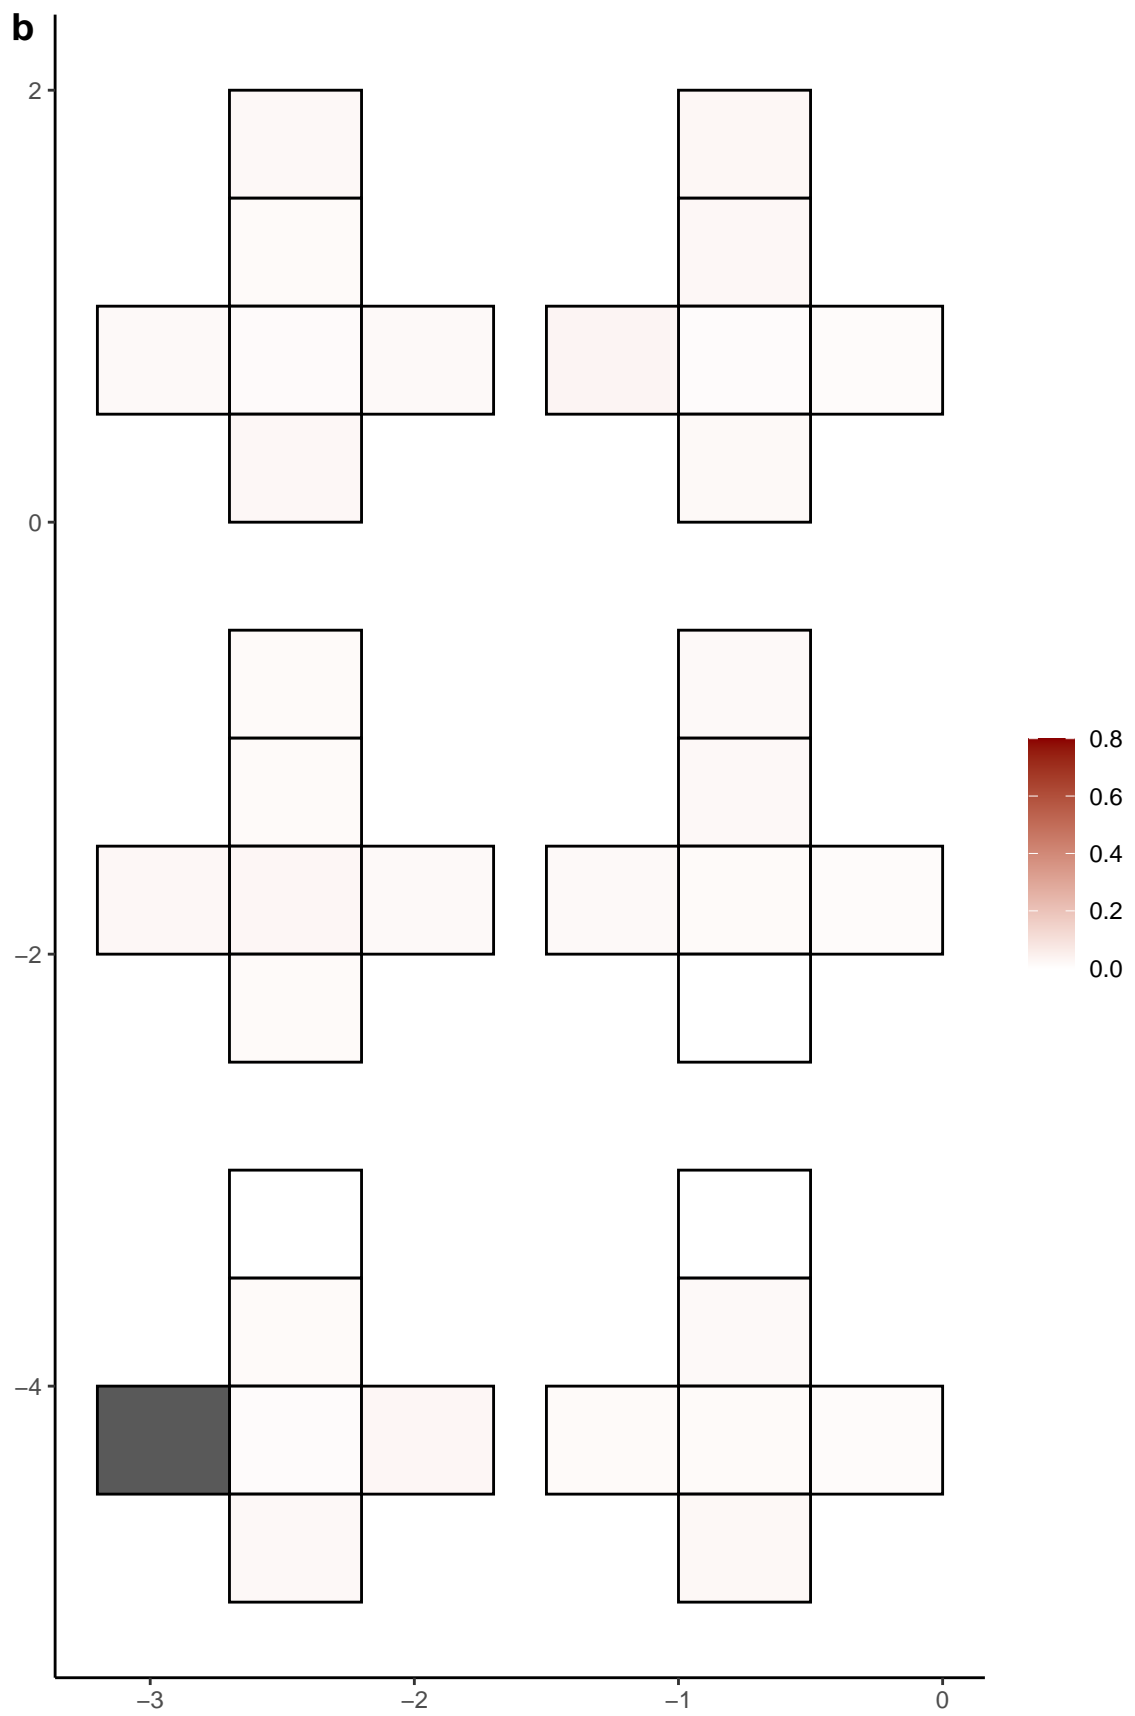

**a** ID01 2-200153645-G-T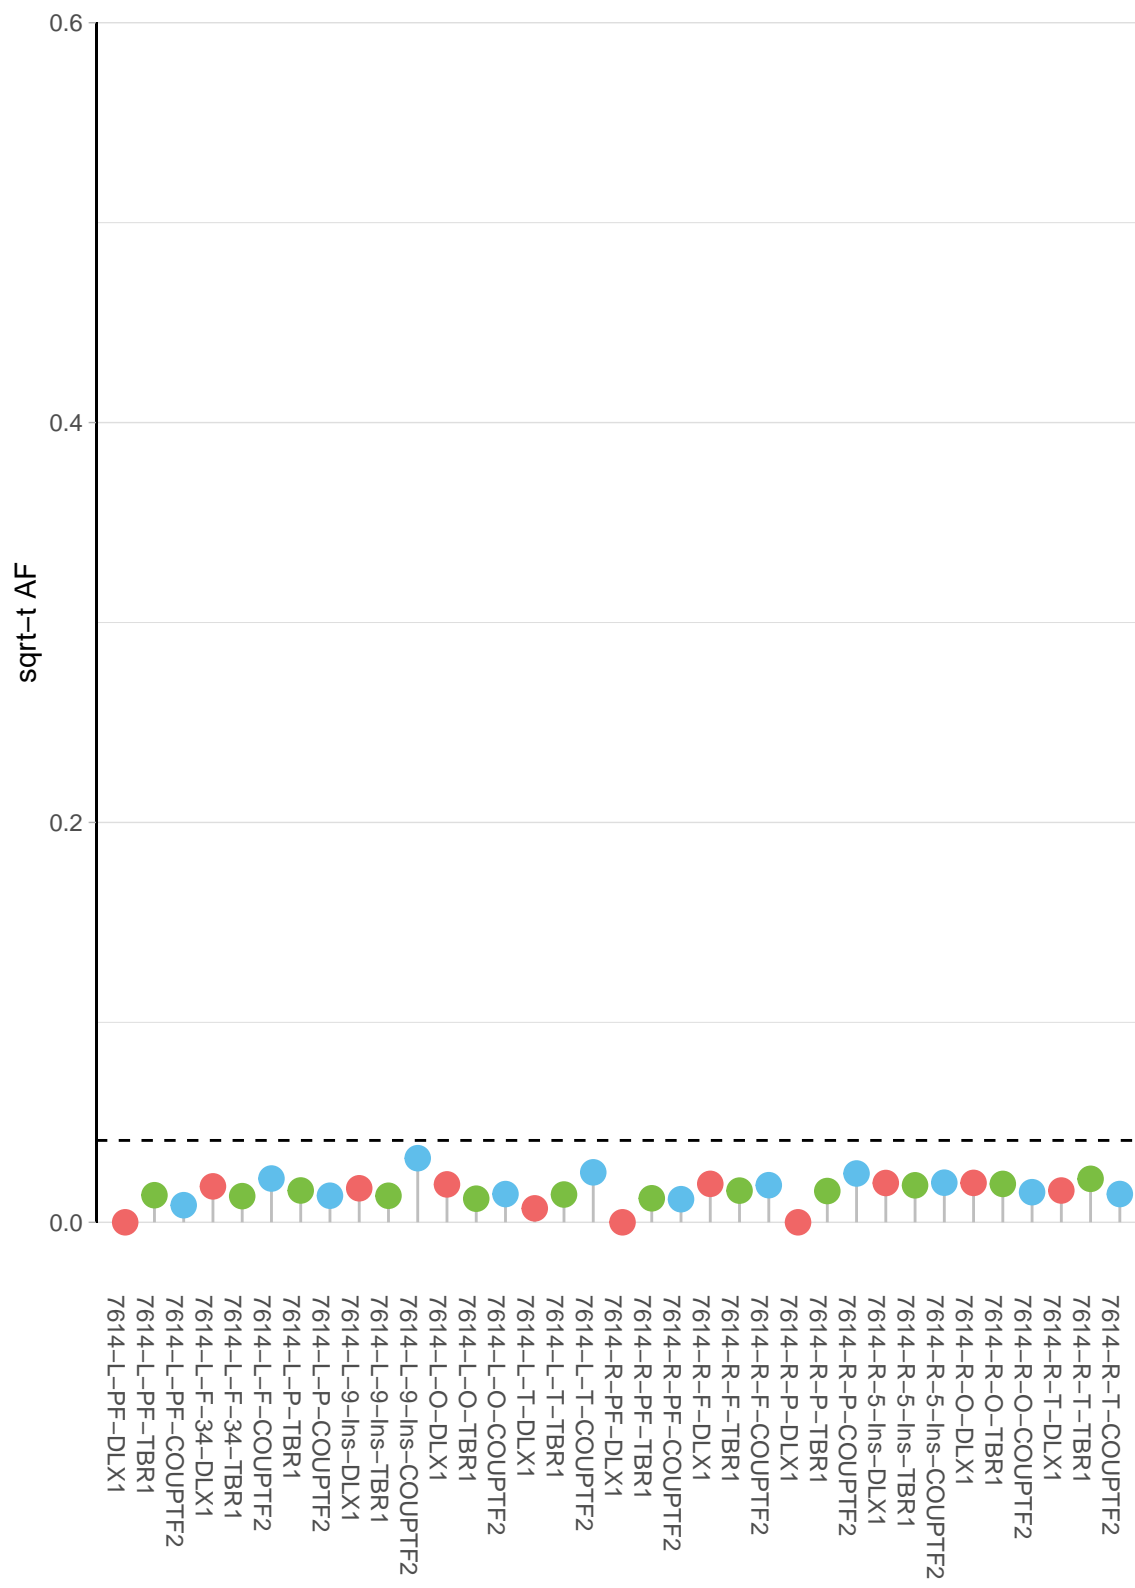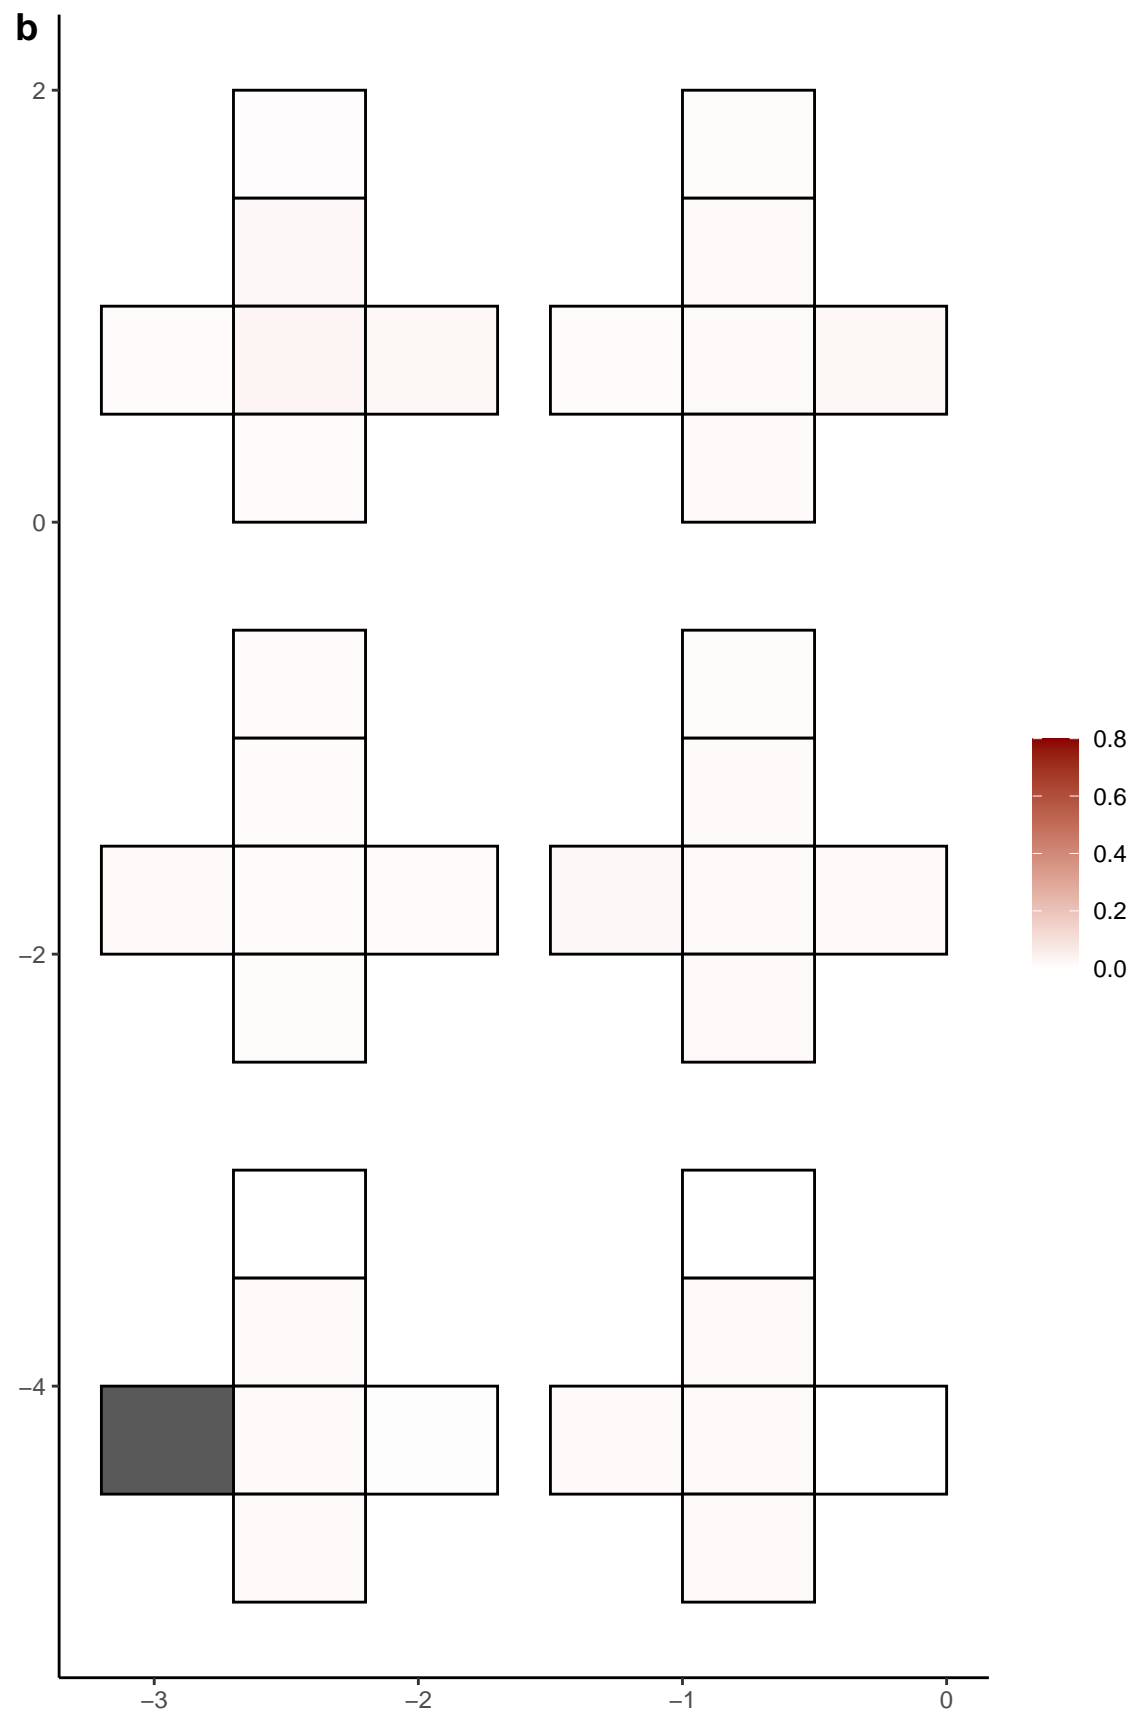



**a** ID01 2-209589692-G-A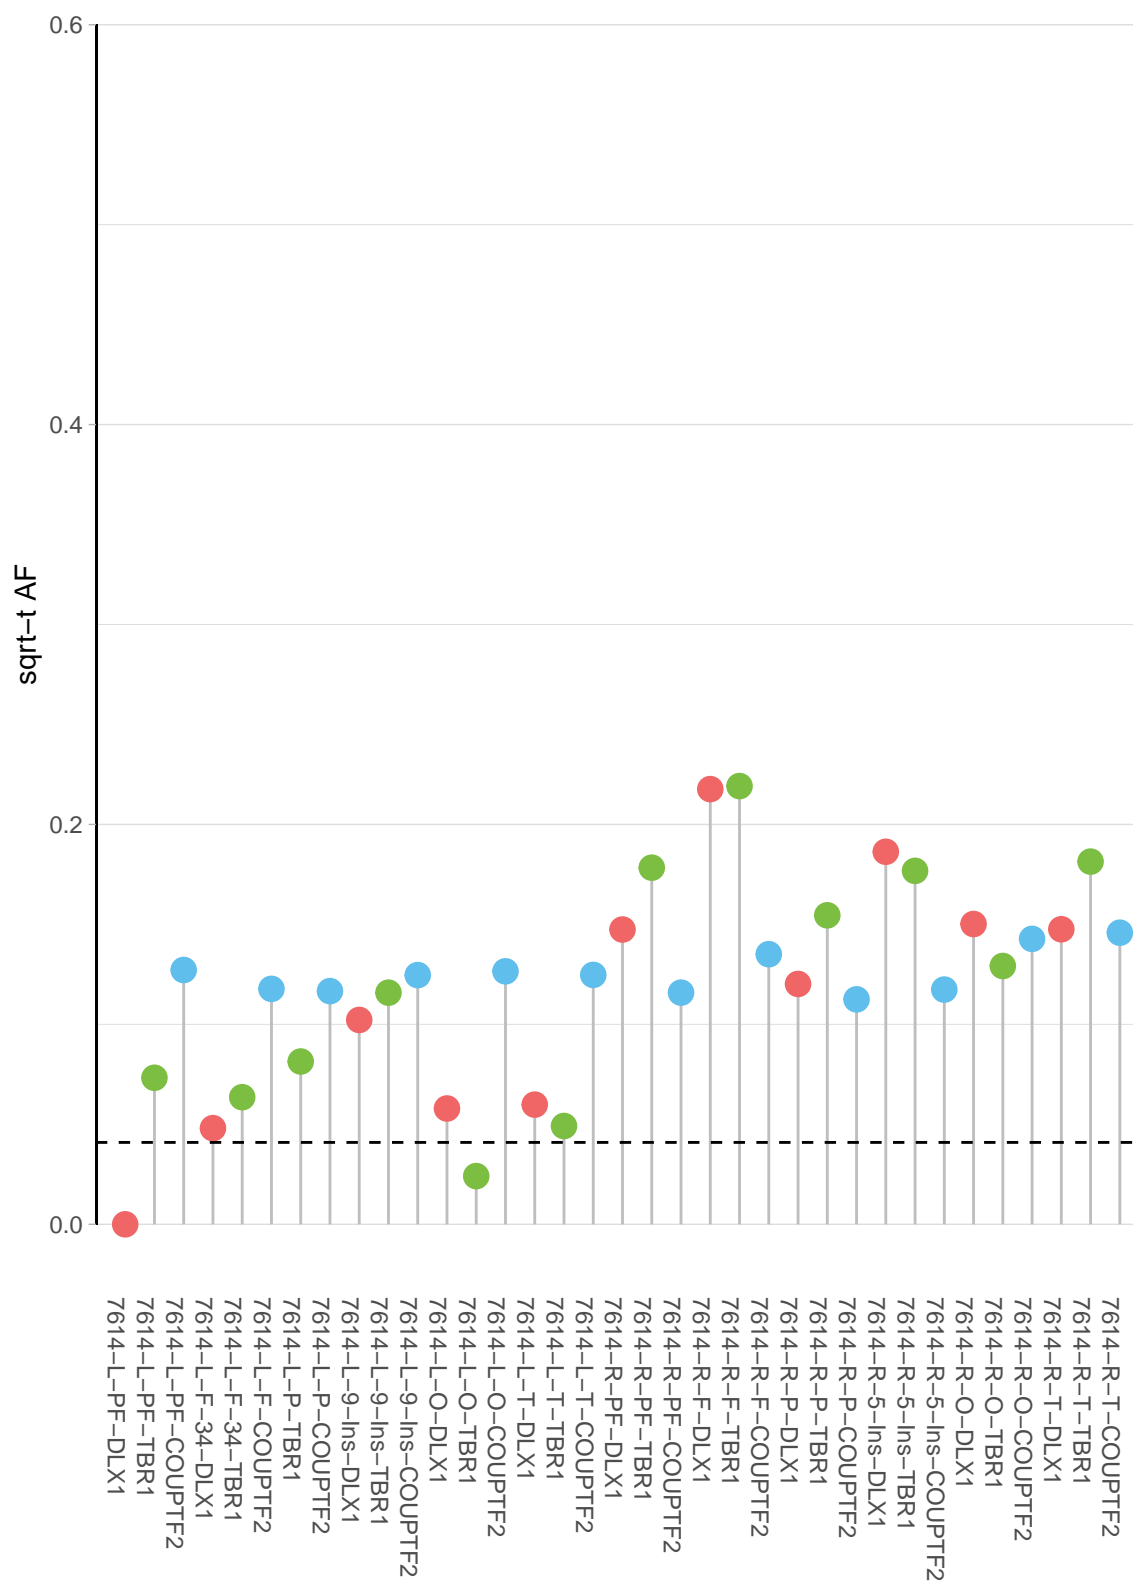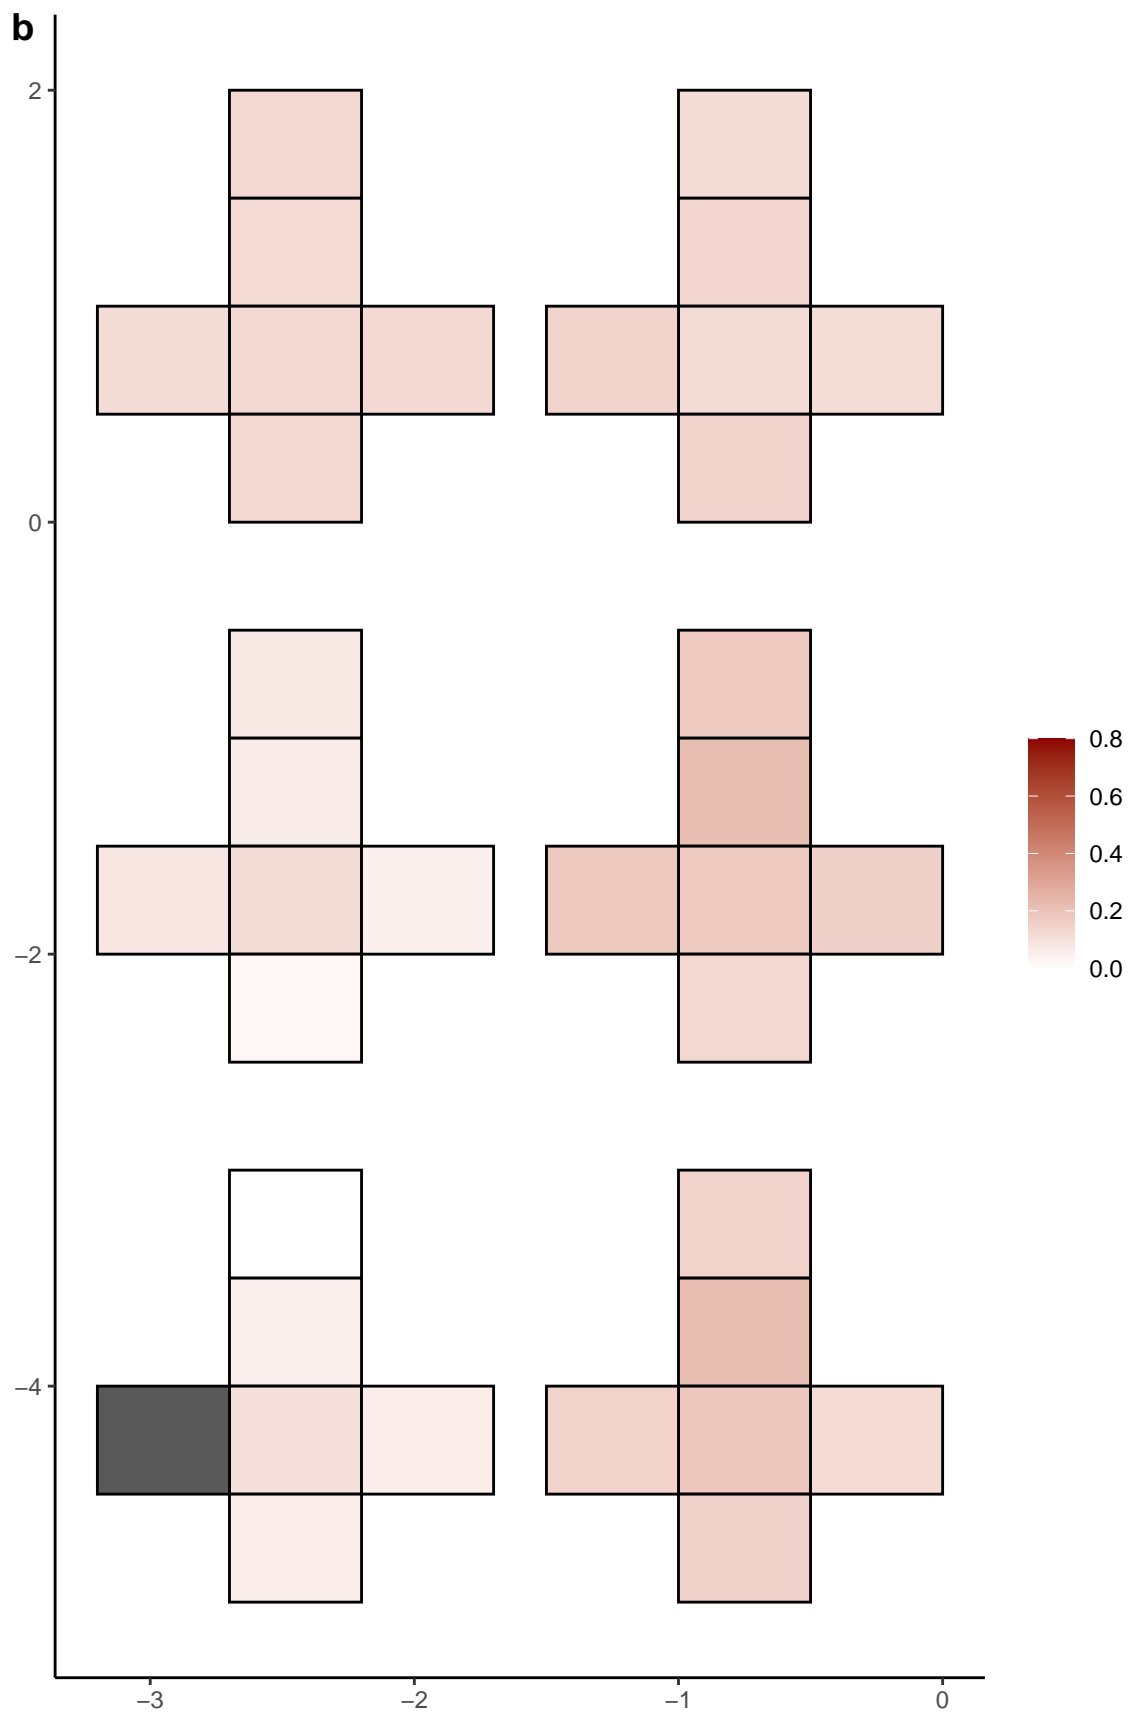

**a** ID01 2-231841419-C-T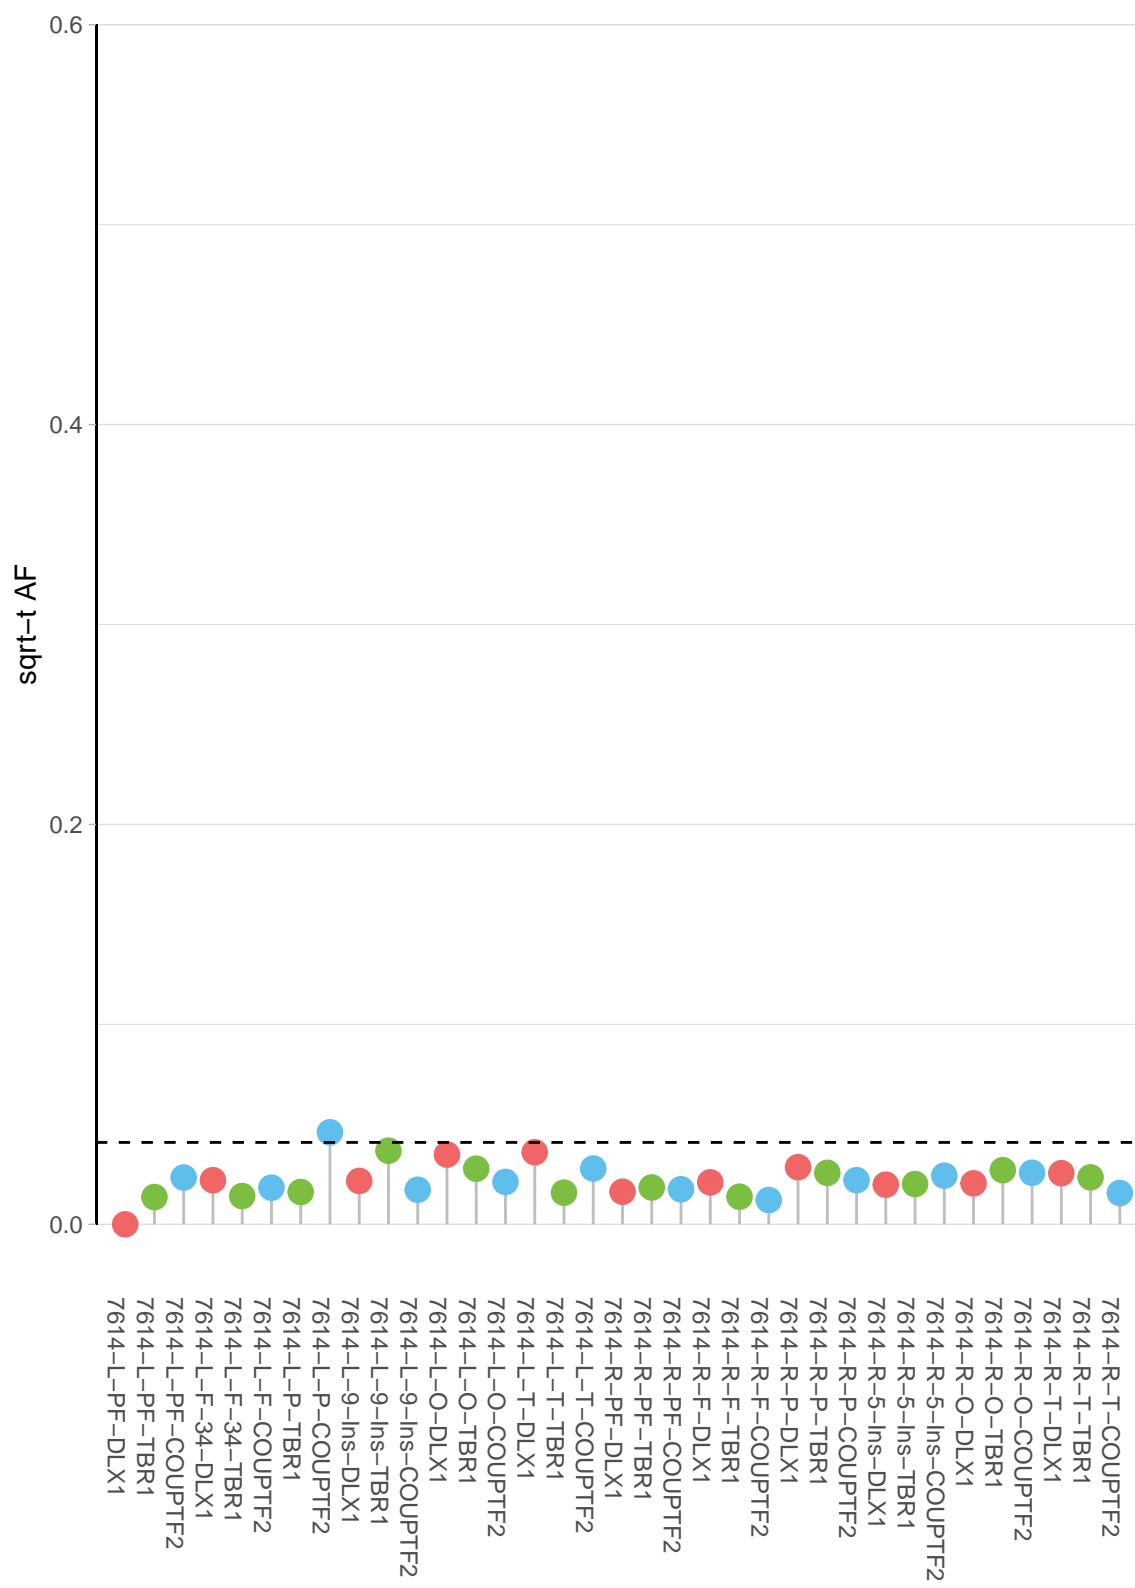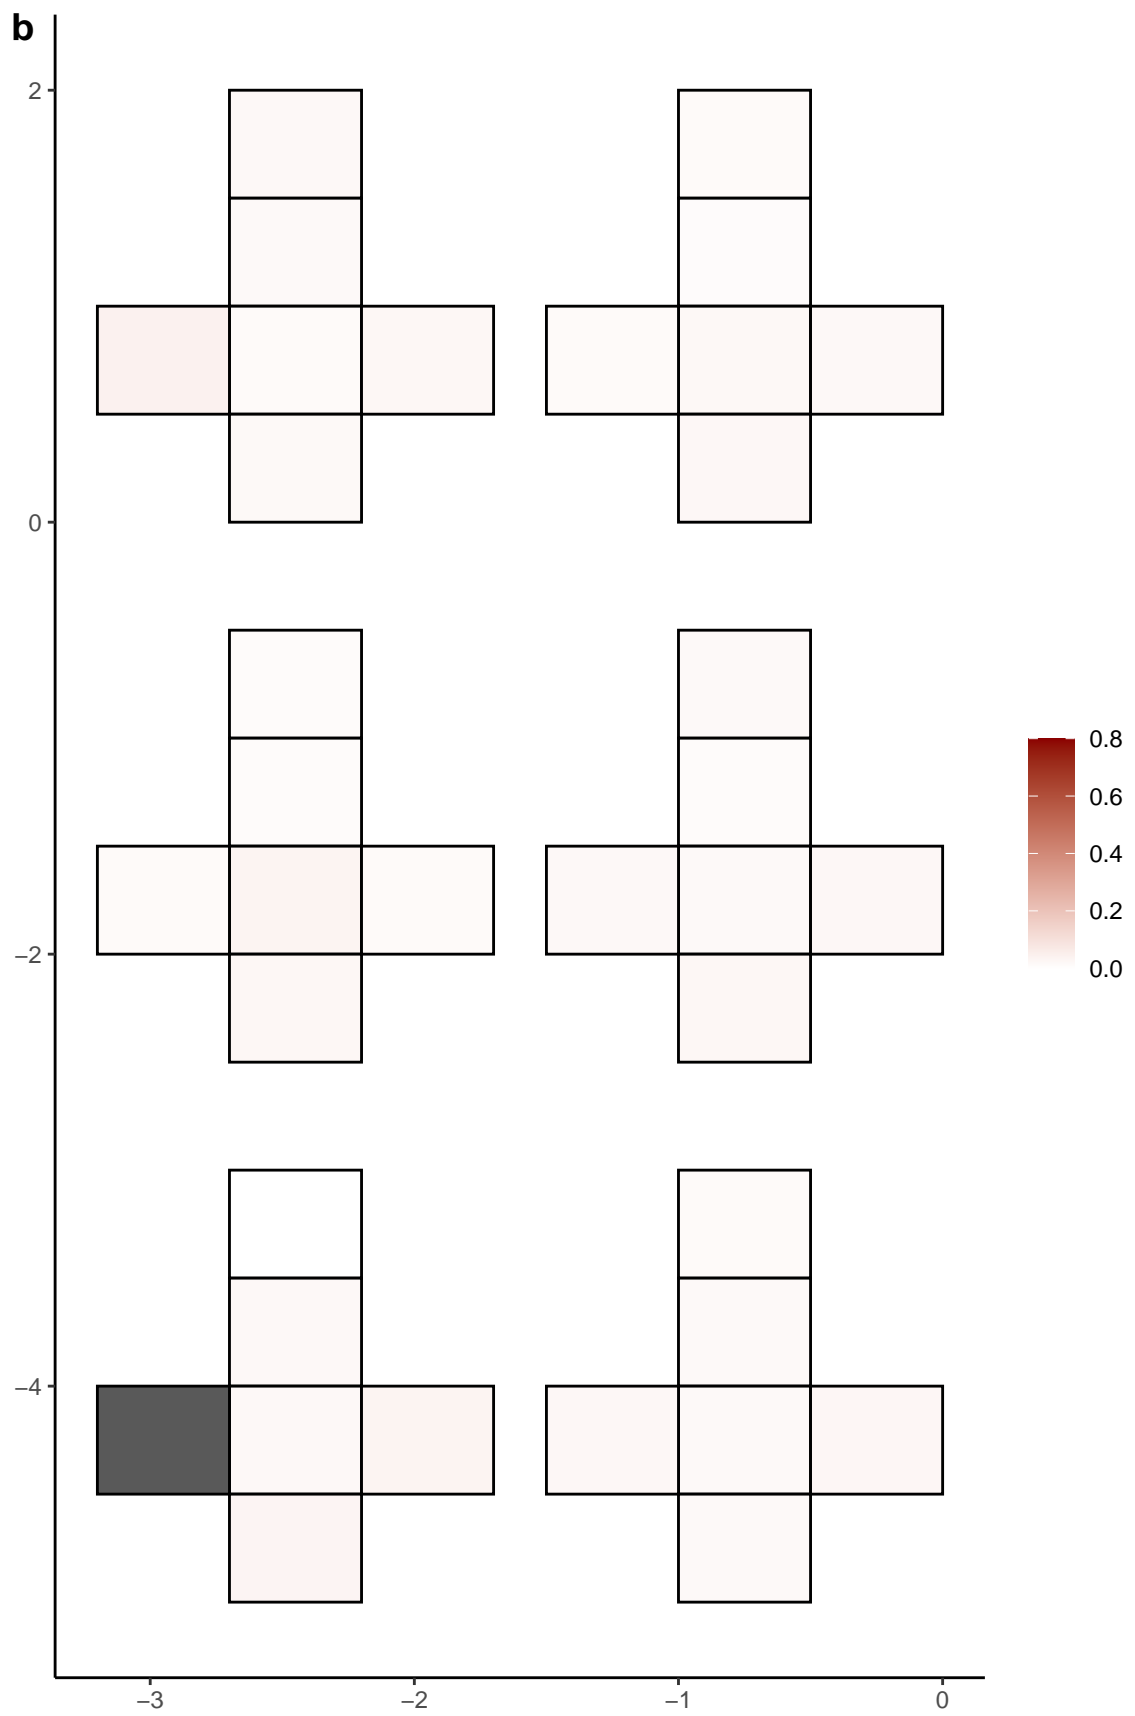

**a** ID01 2-235210131-C-T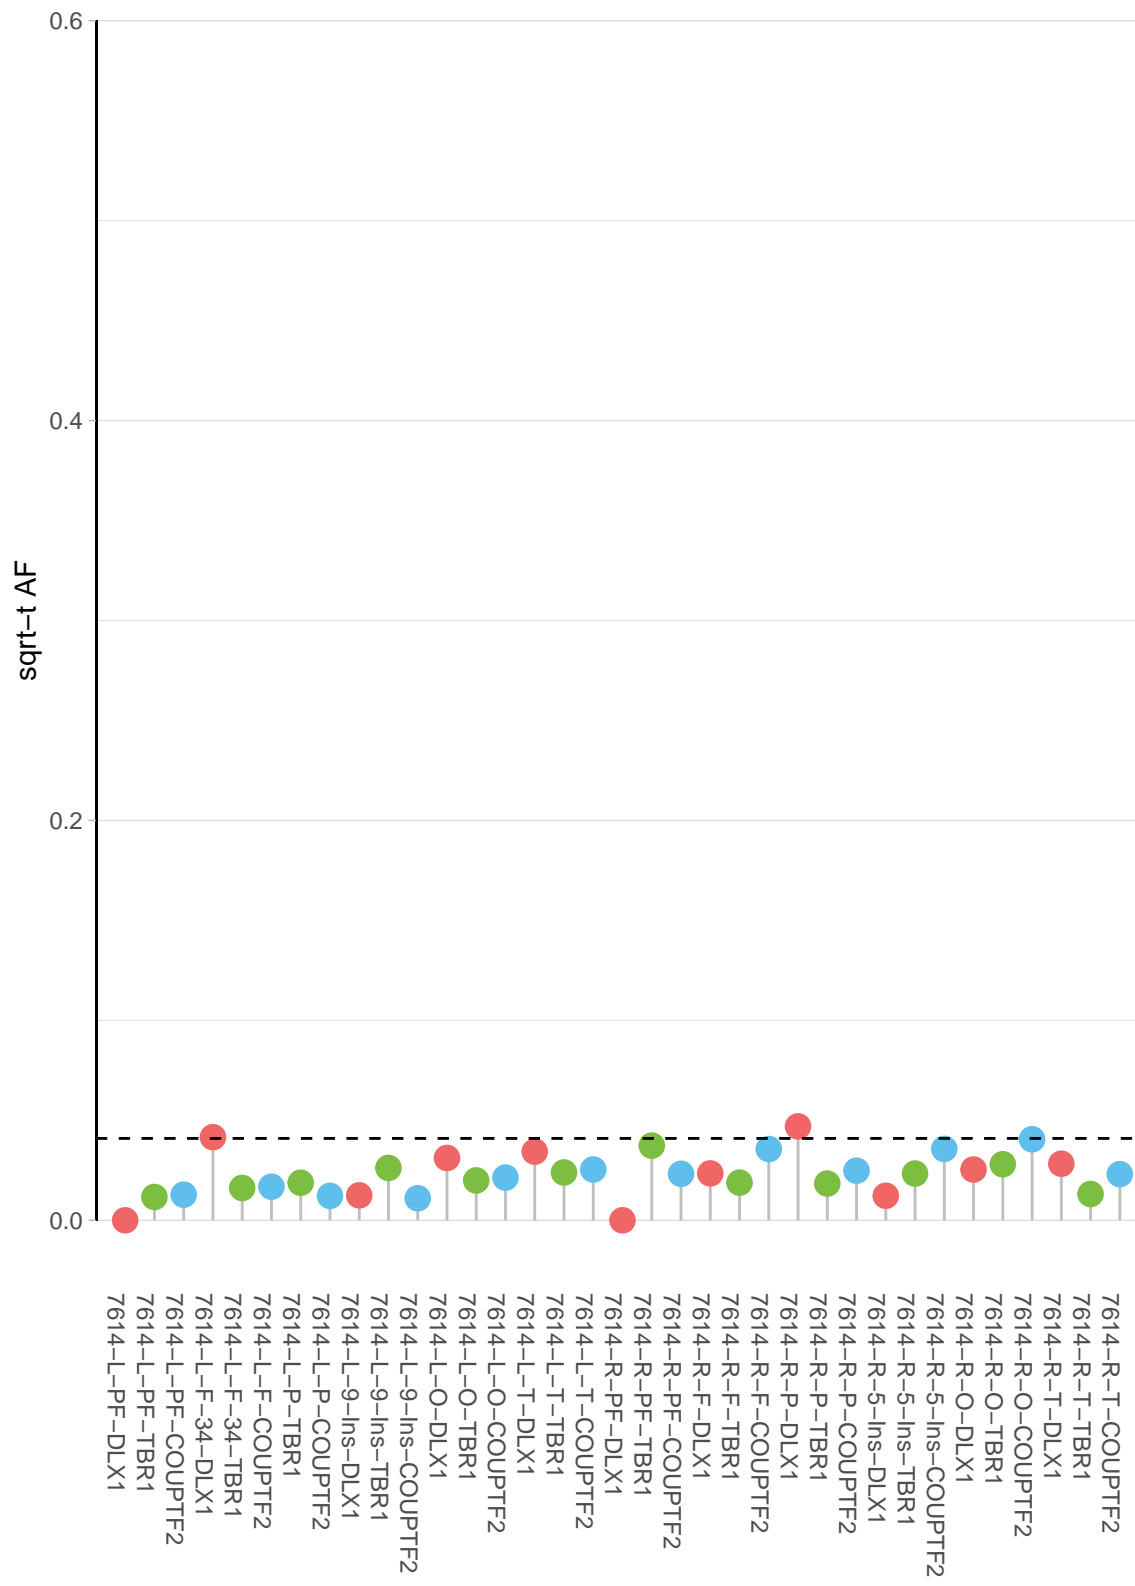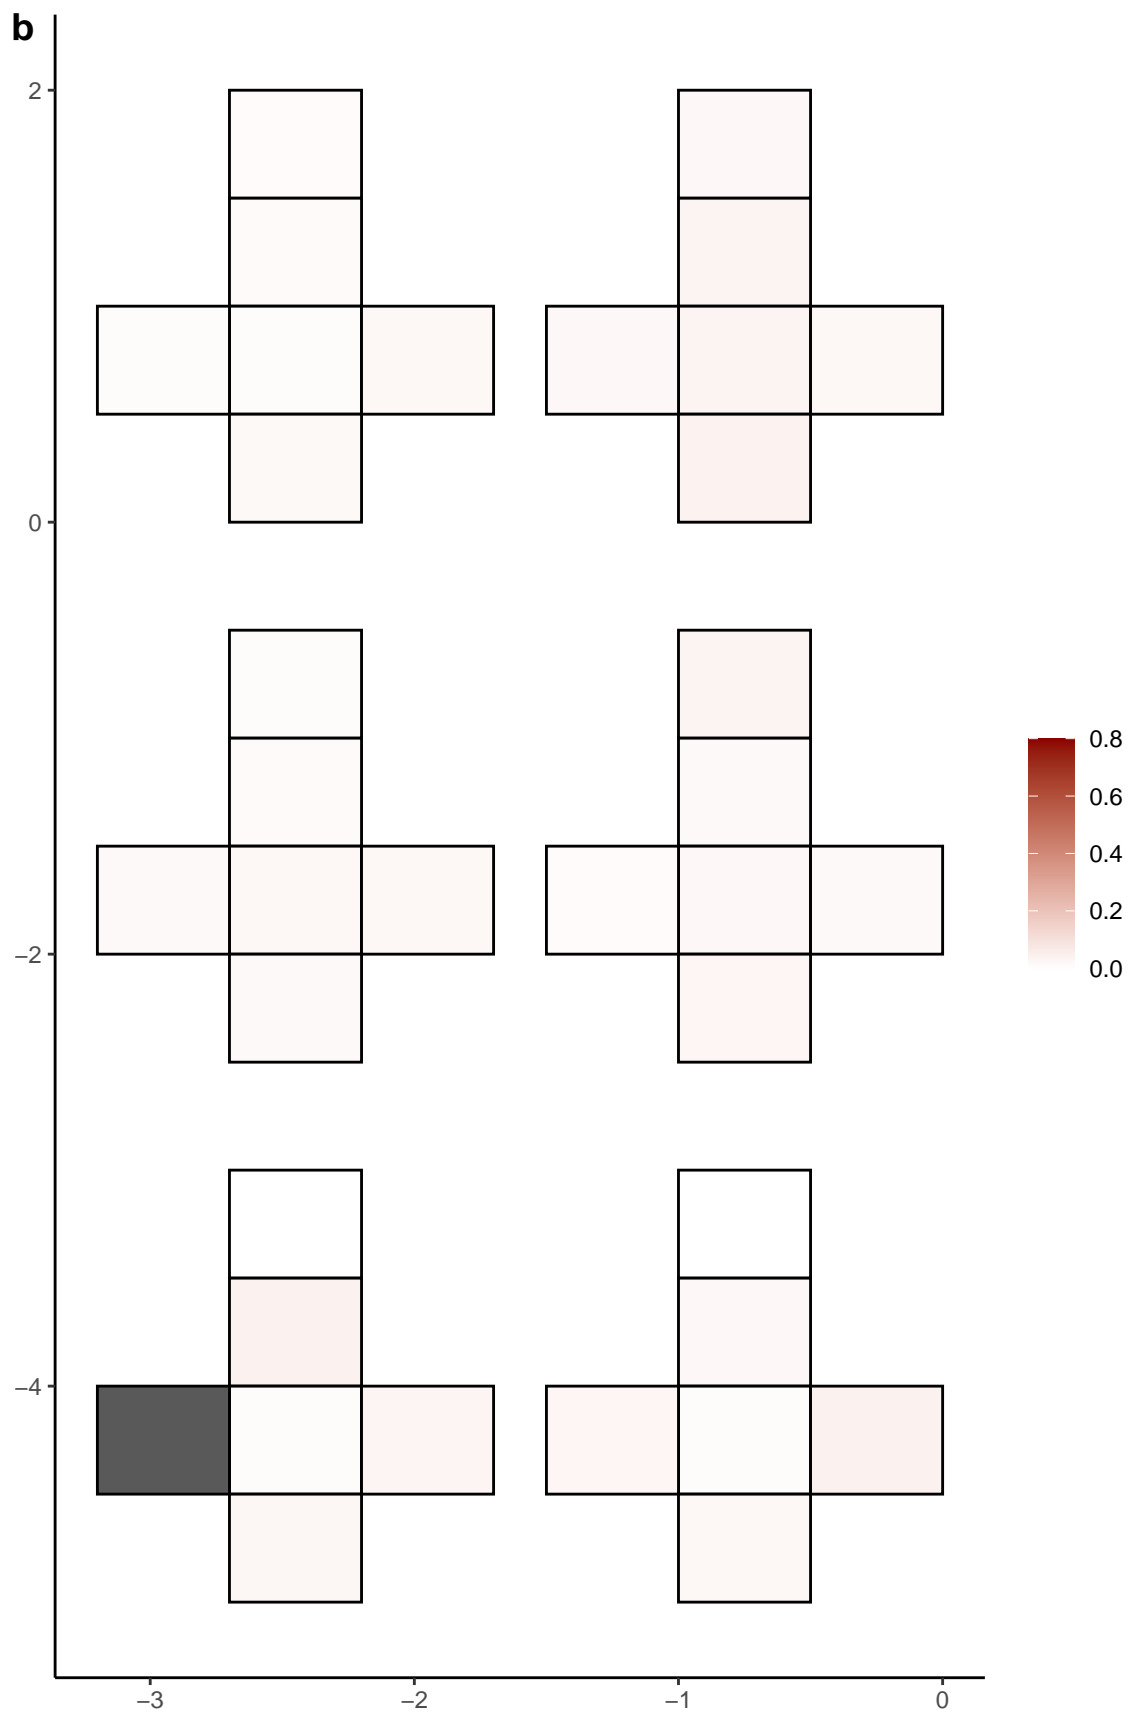

**a** ID01 2-241281331-C-A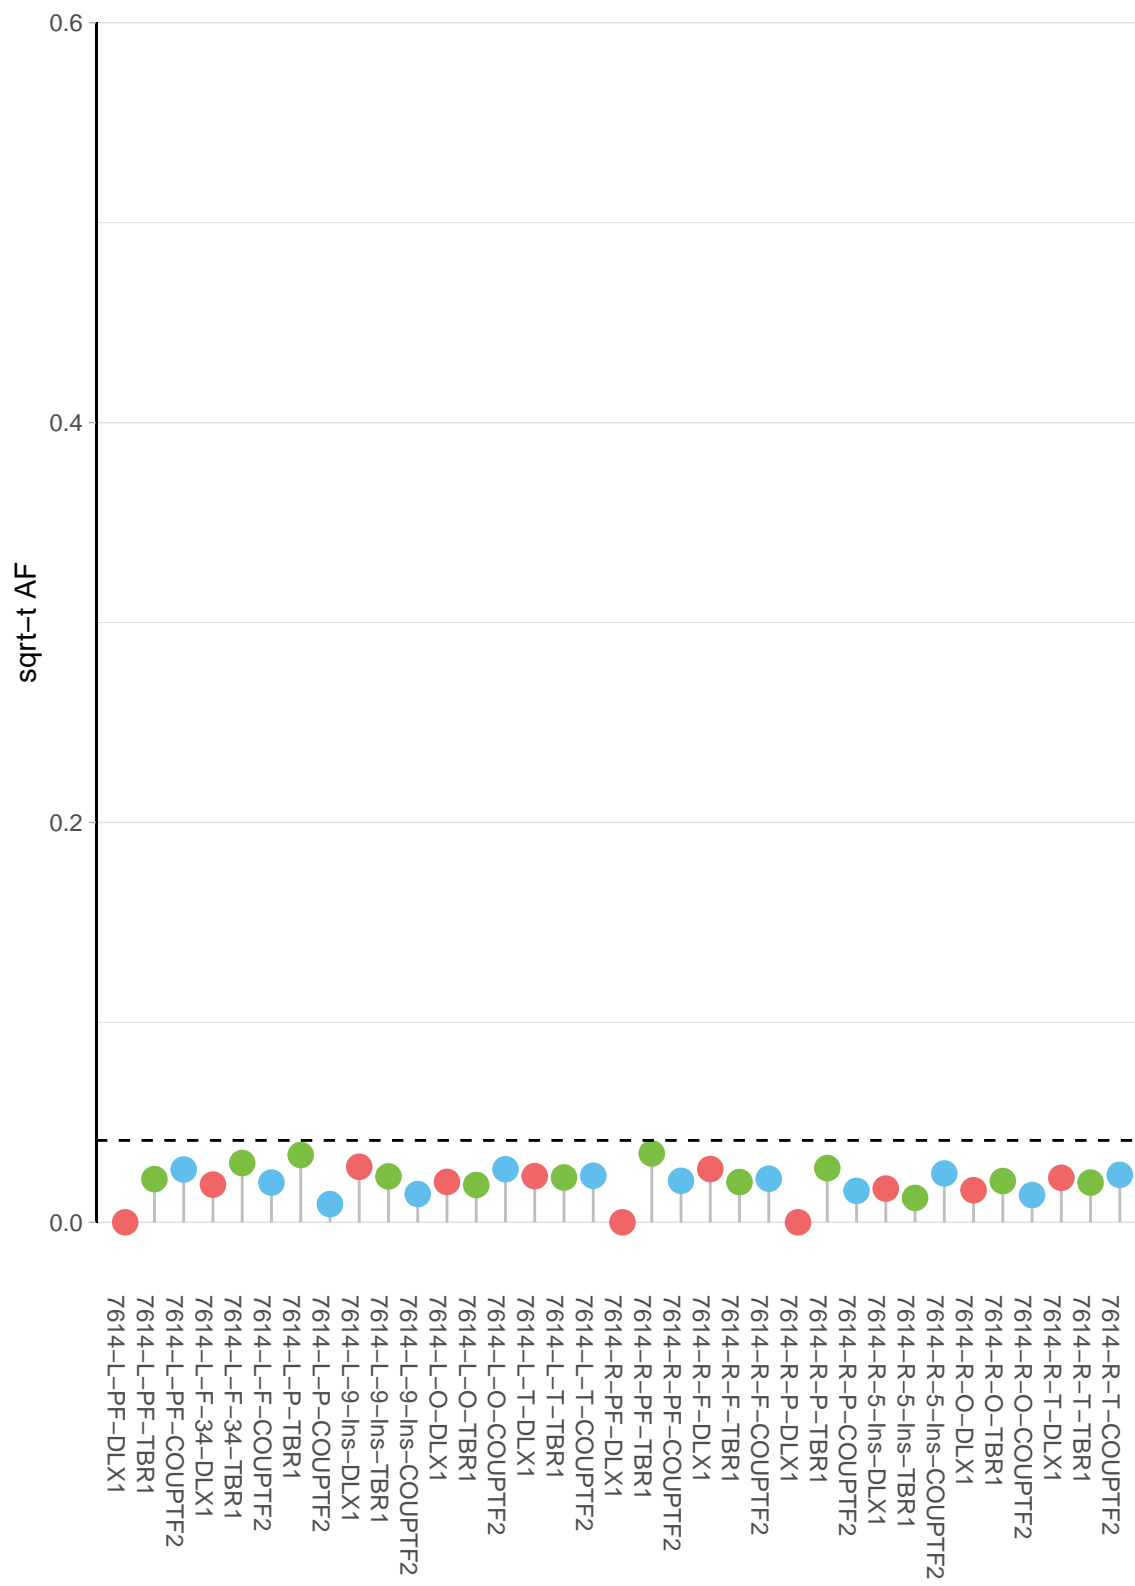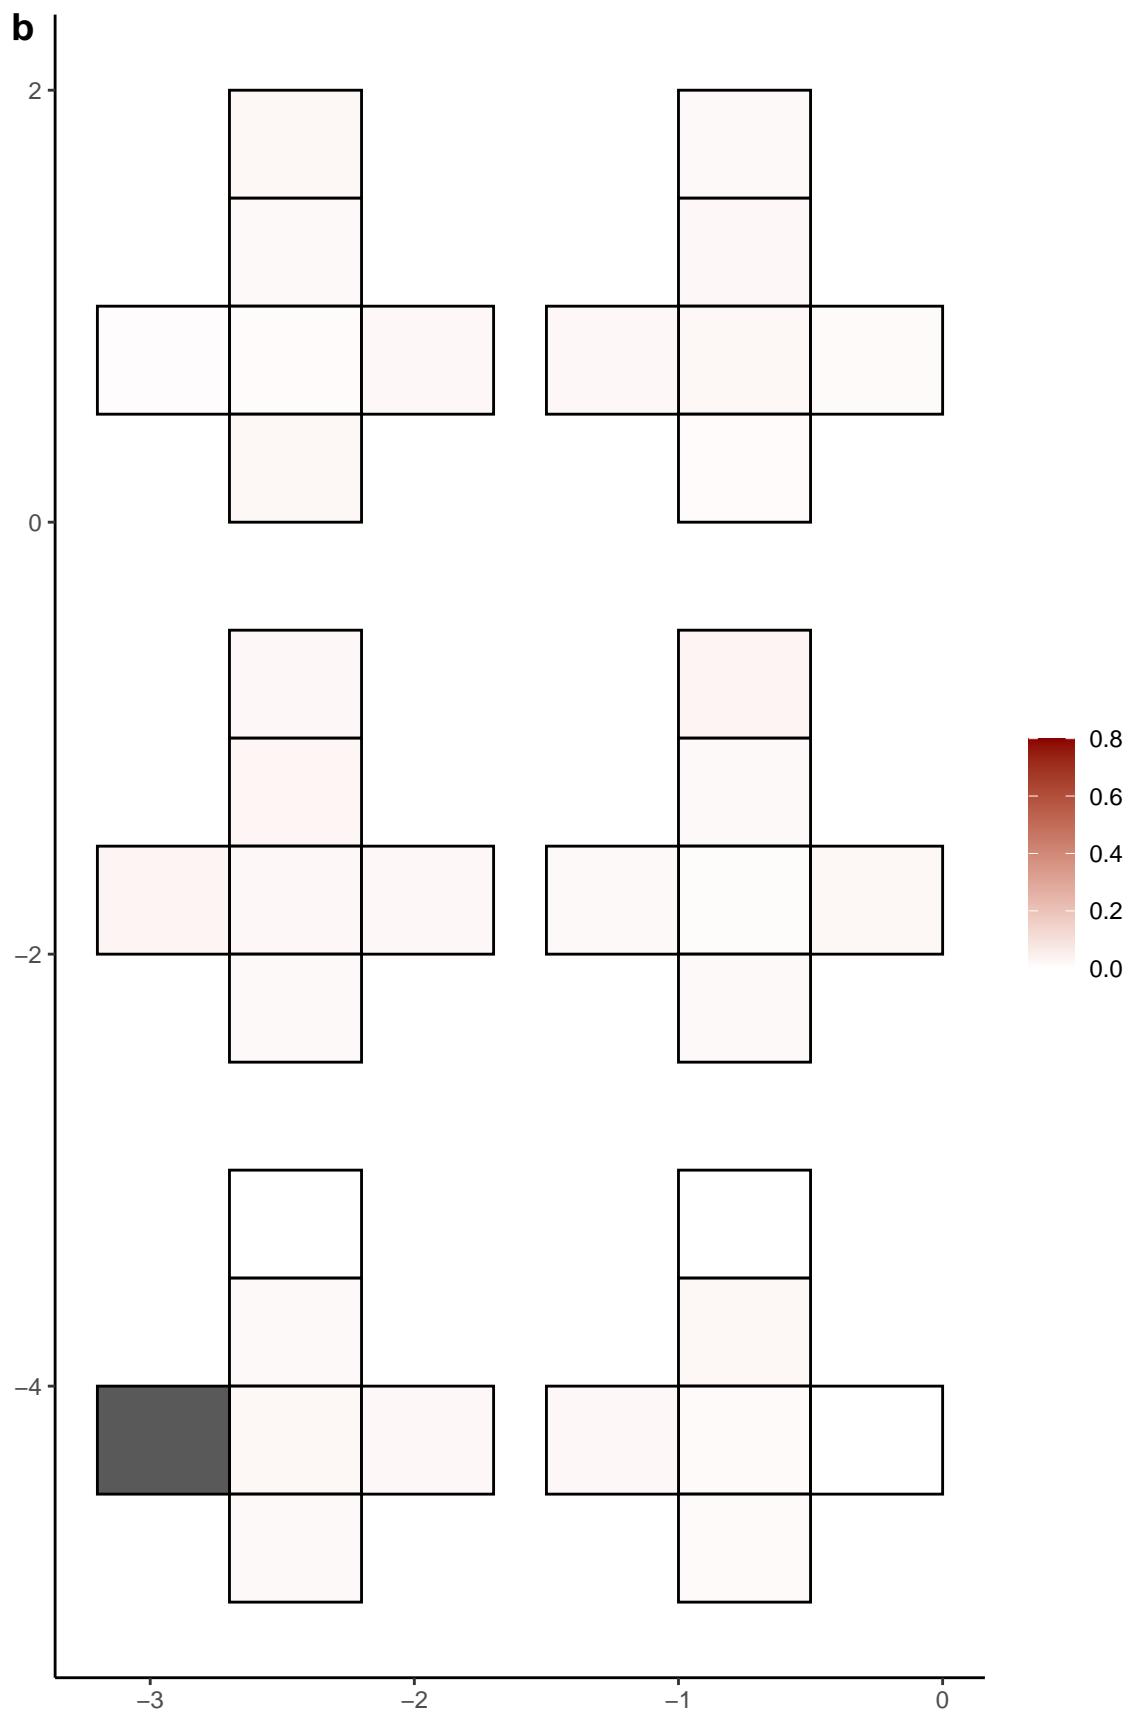

**a** ID01 2-24960206-G-A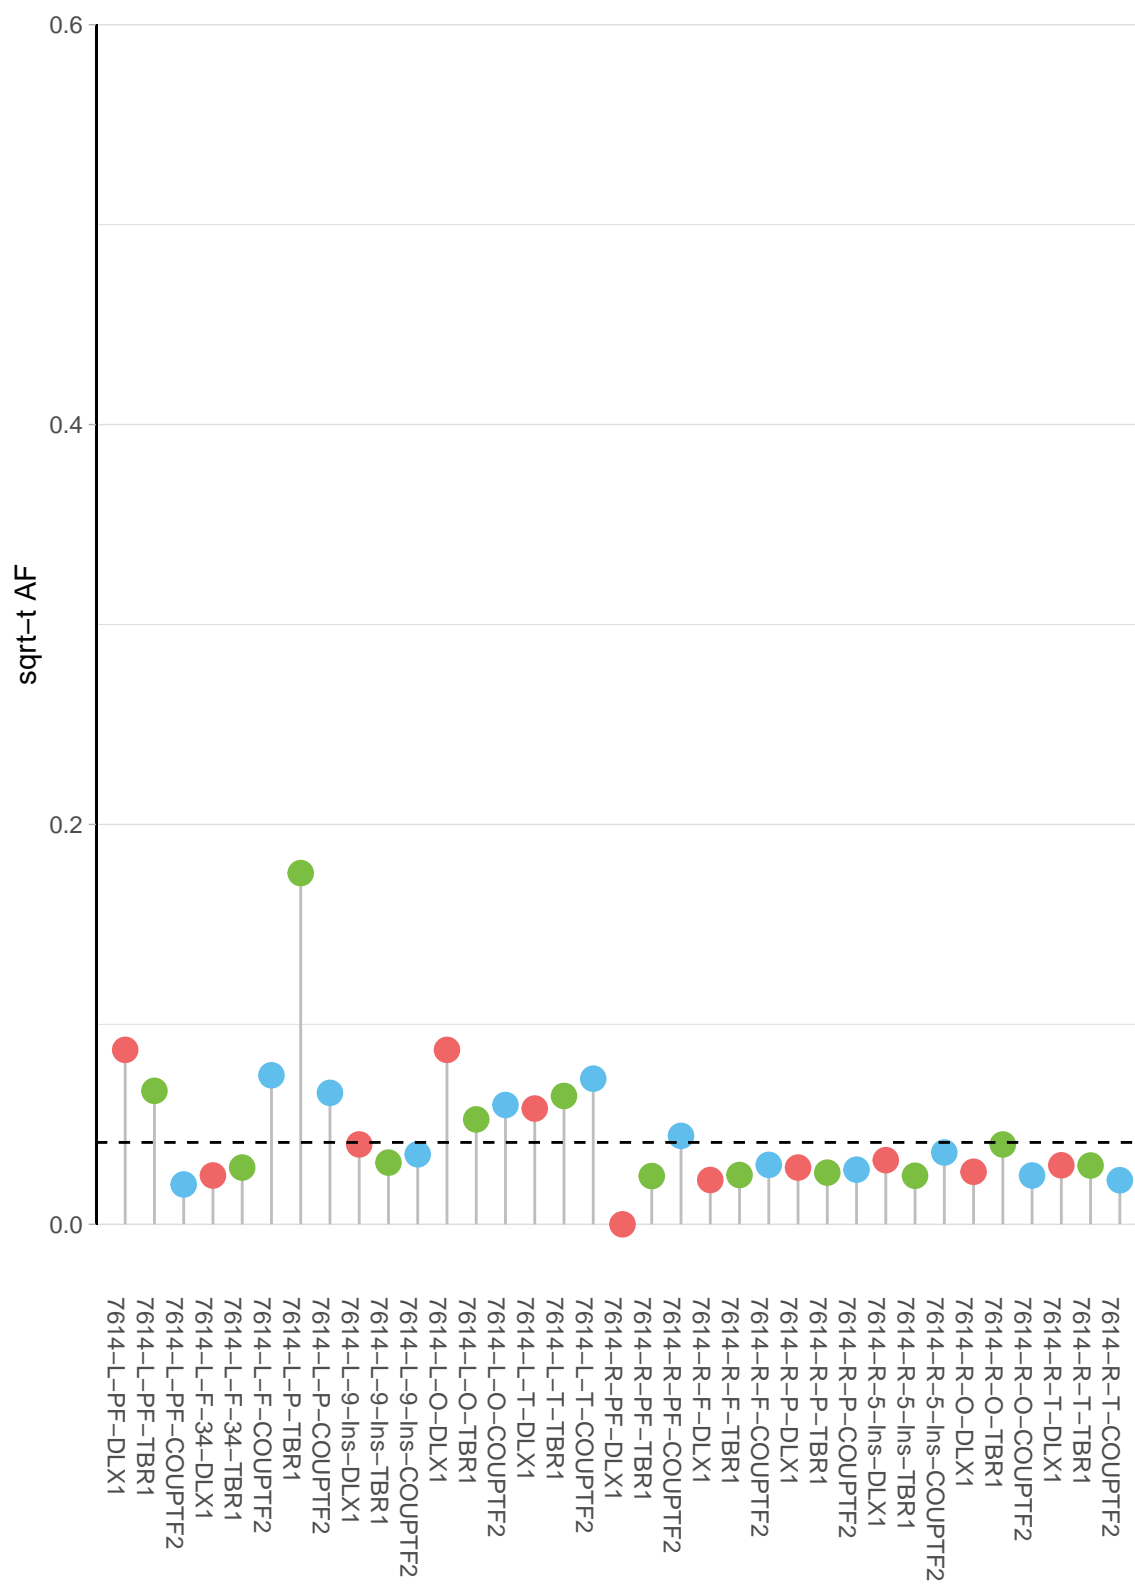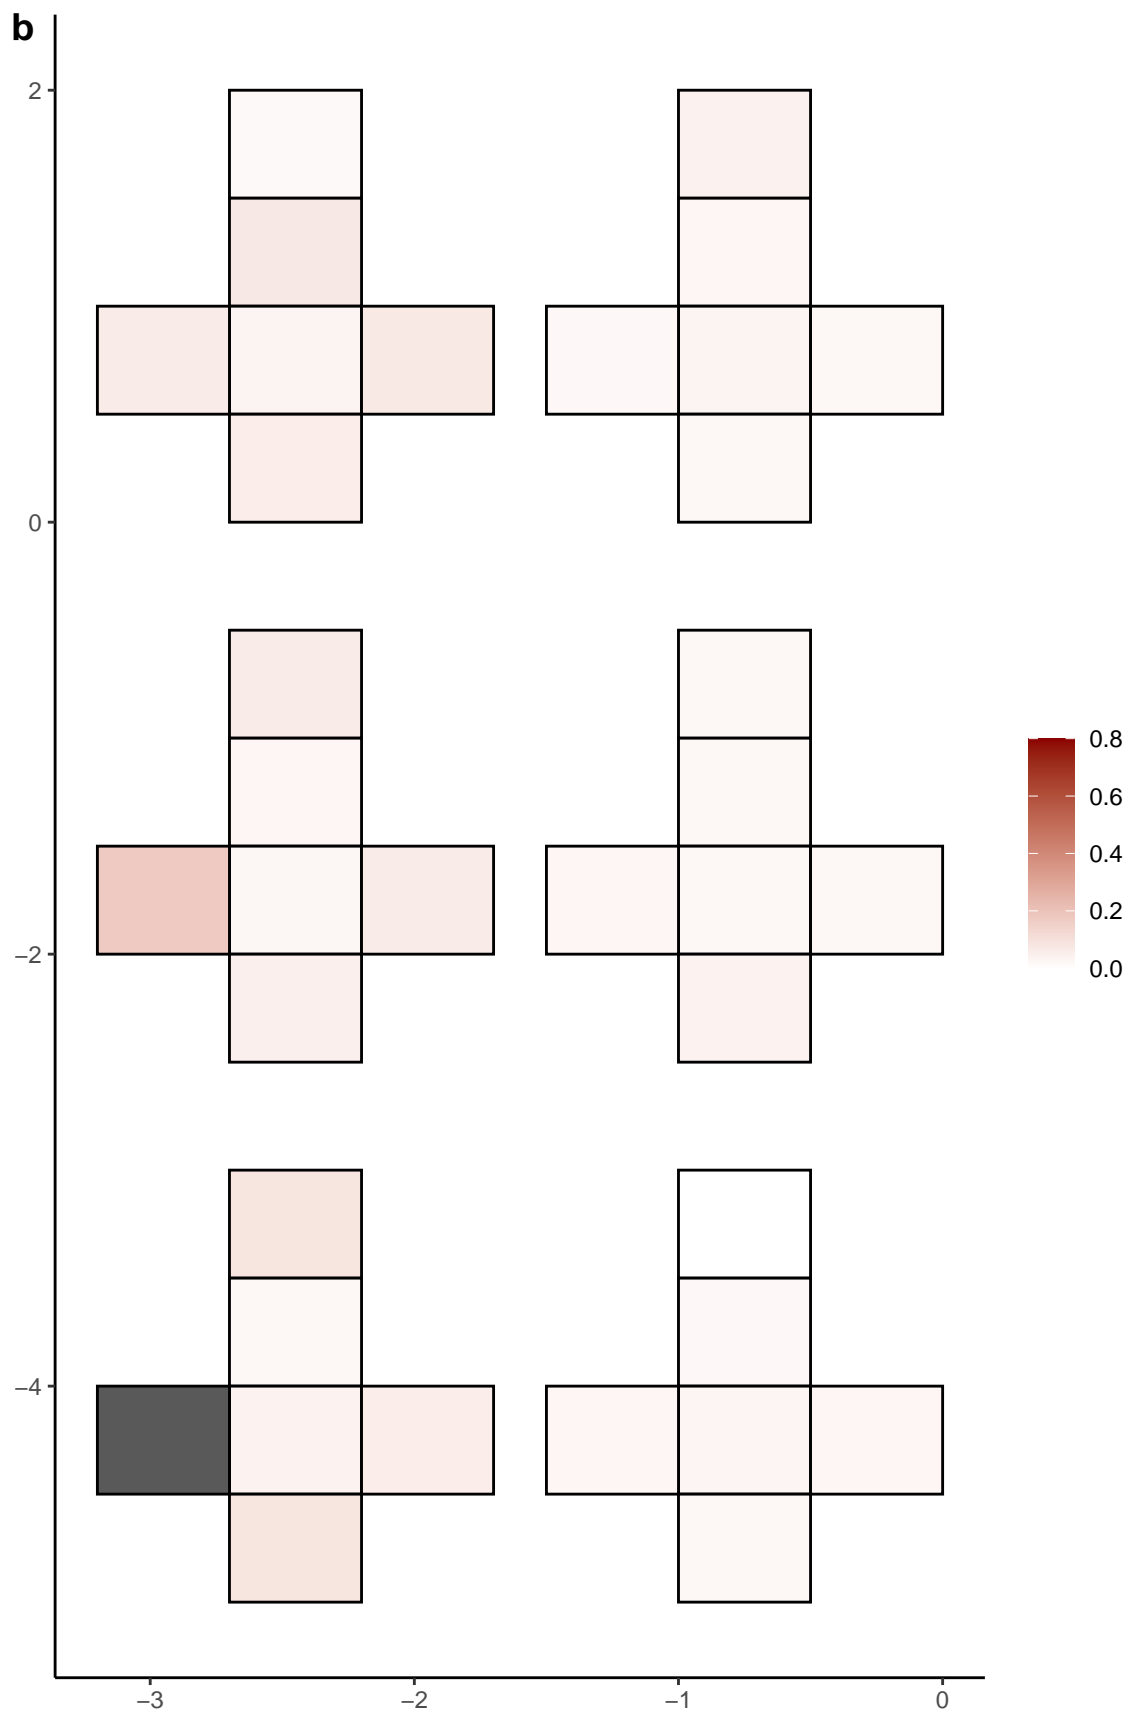

**a** ID01 2-34606921-T-A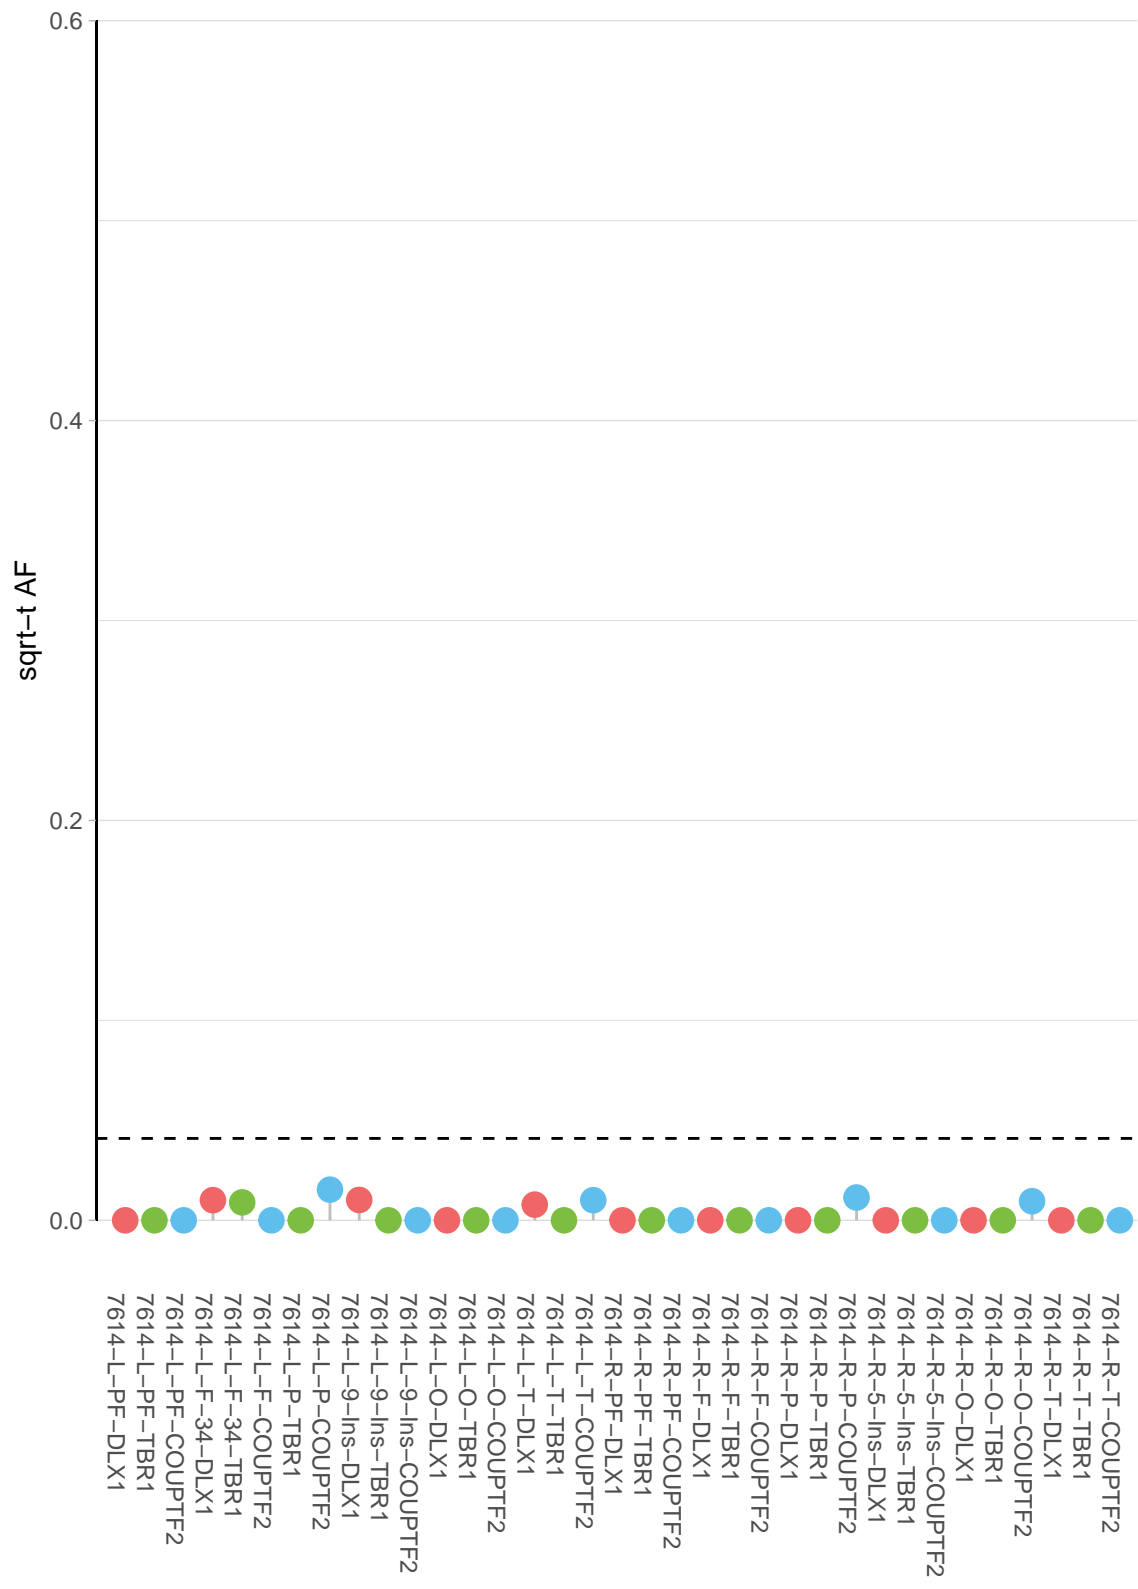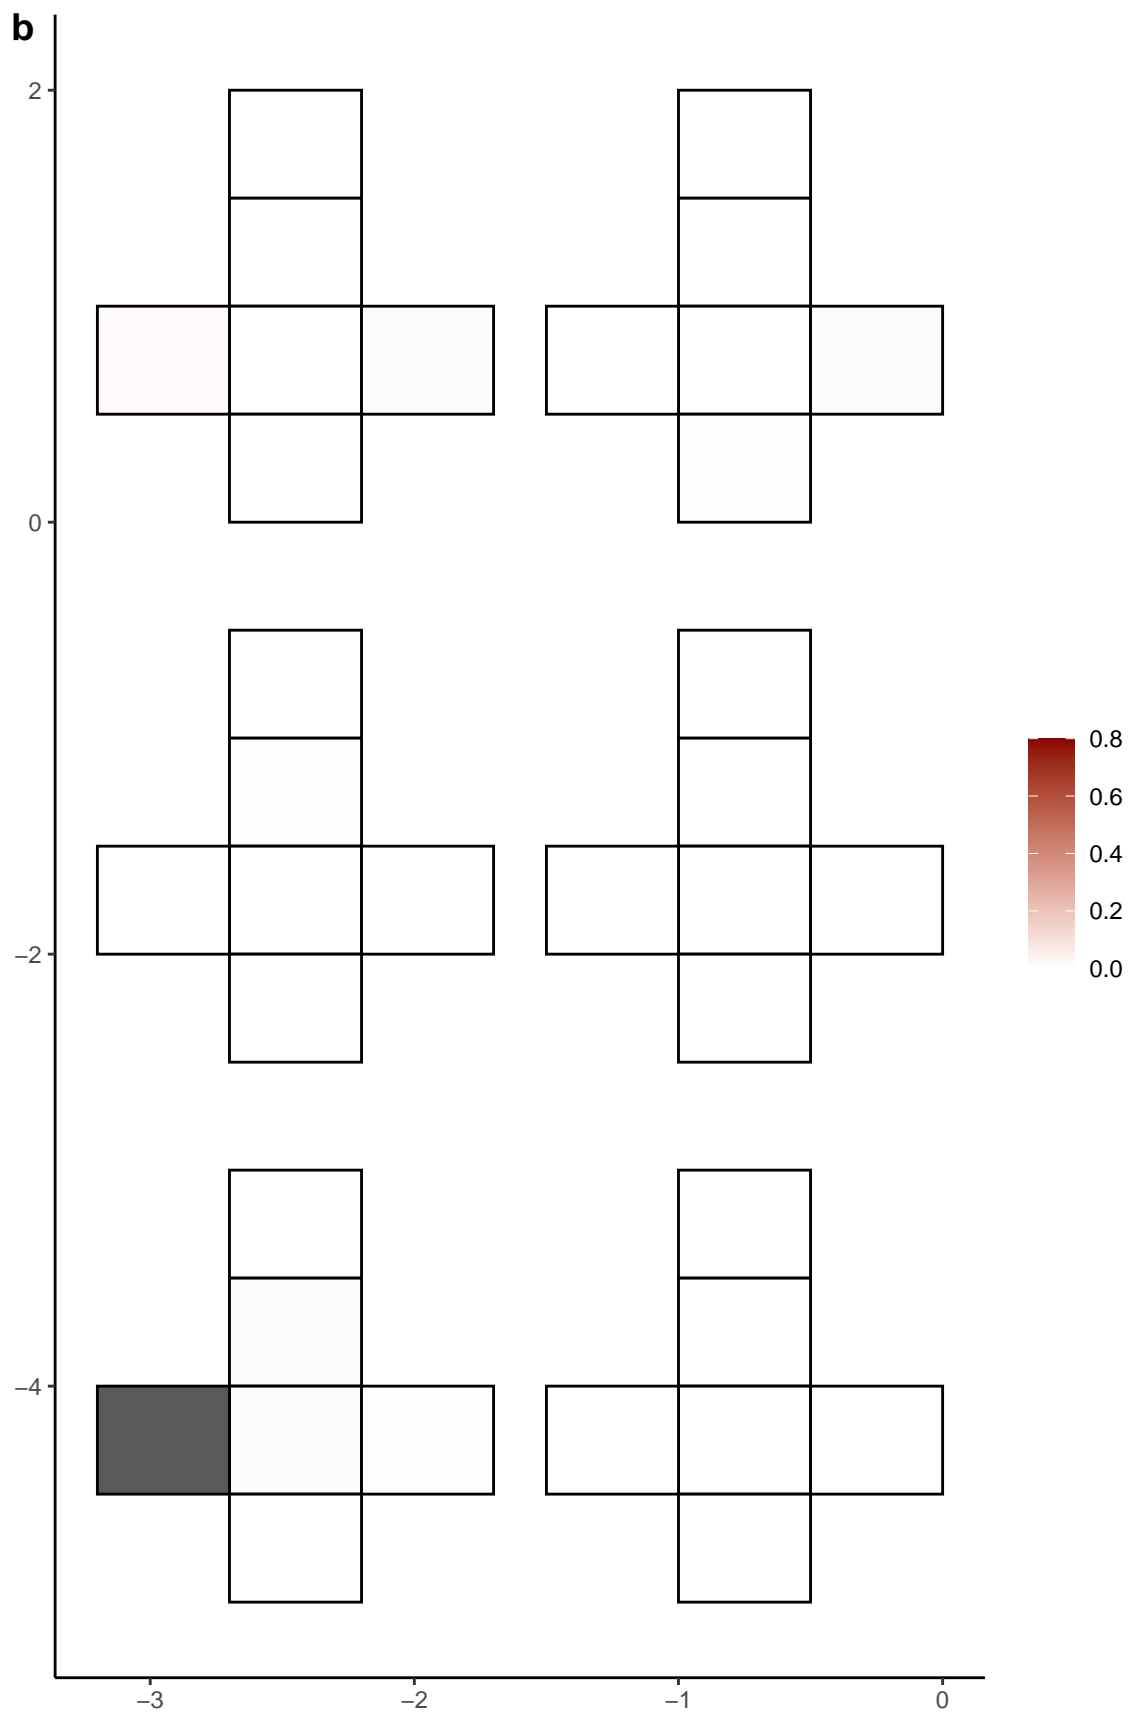

**a** ID01 2-49268814-A-C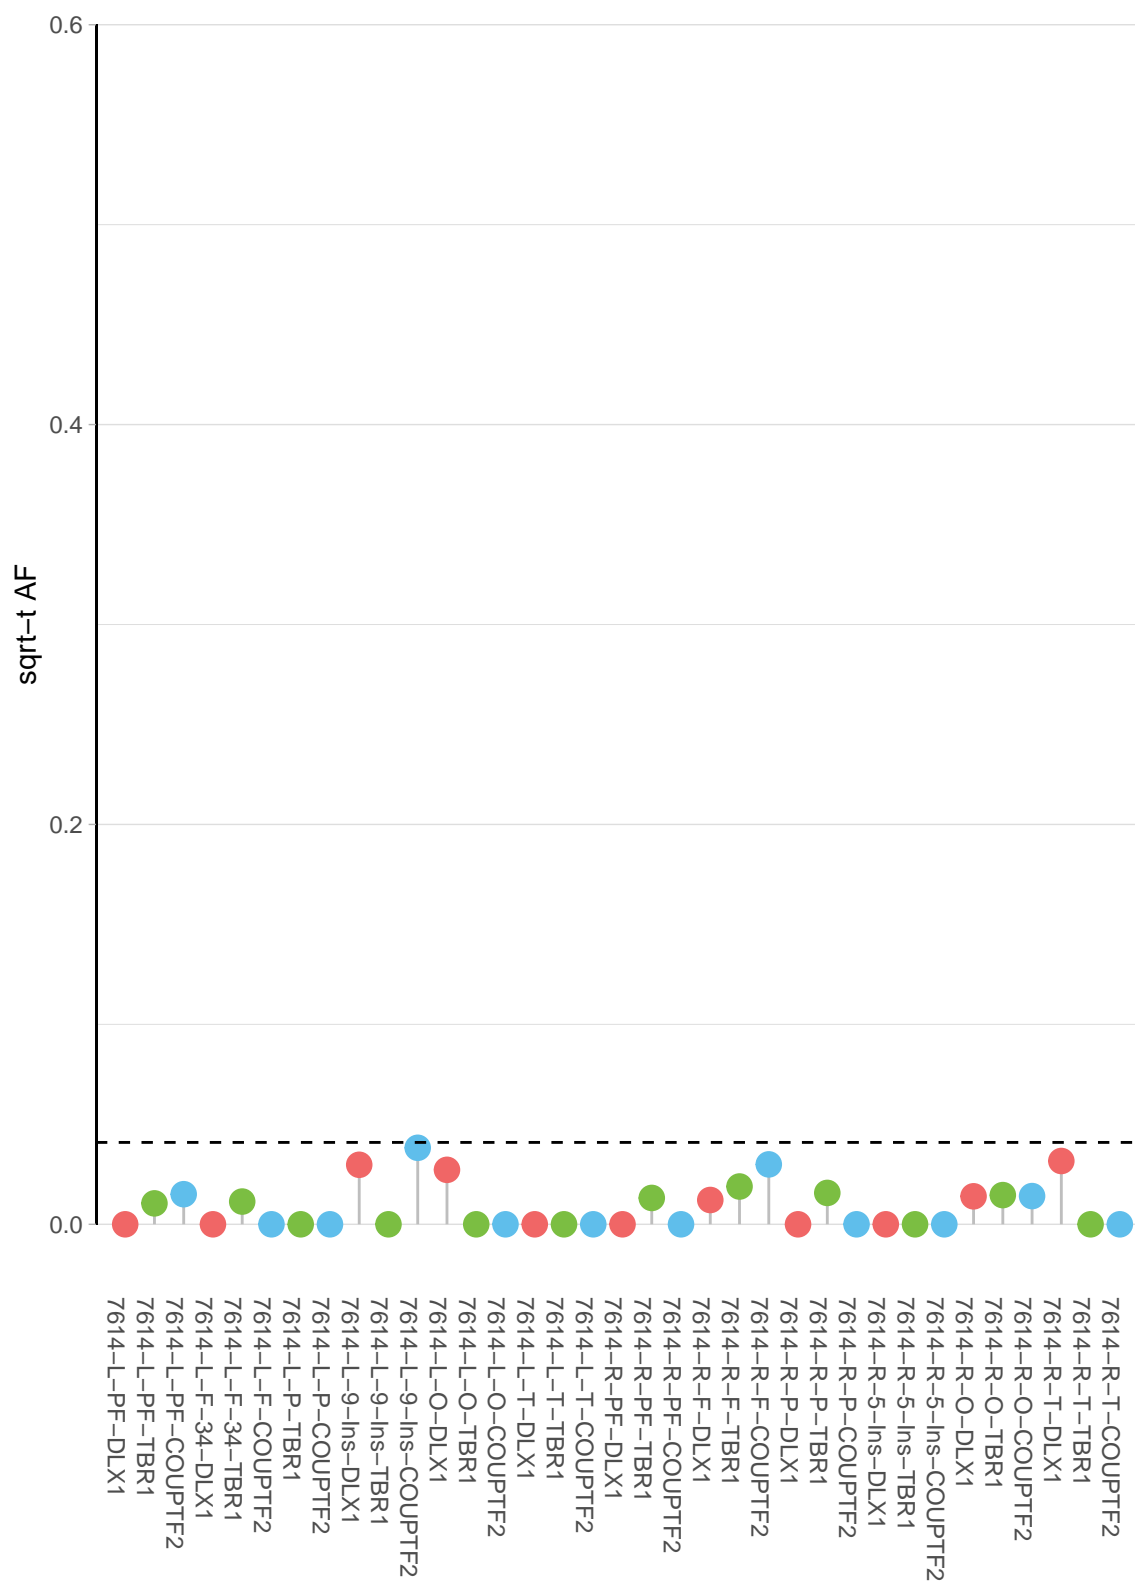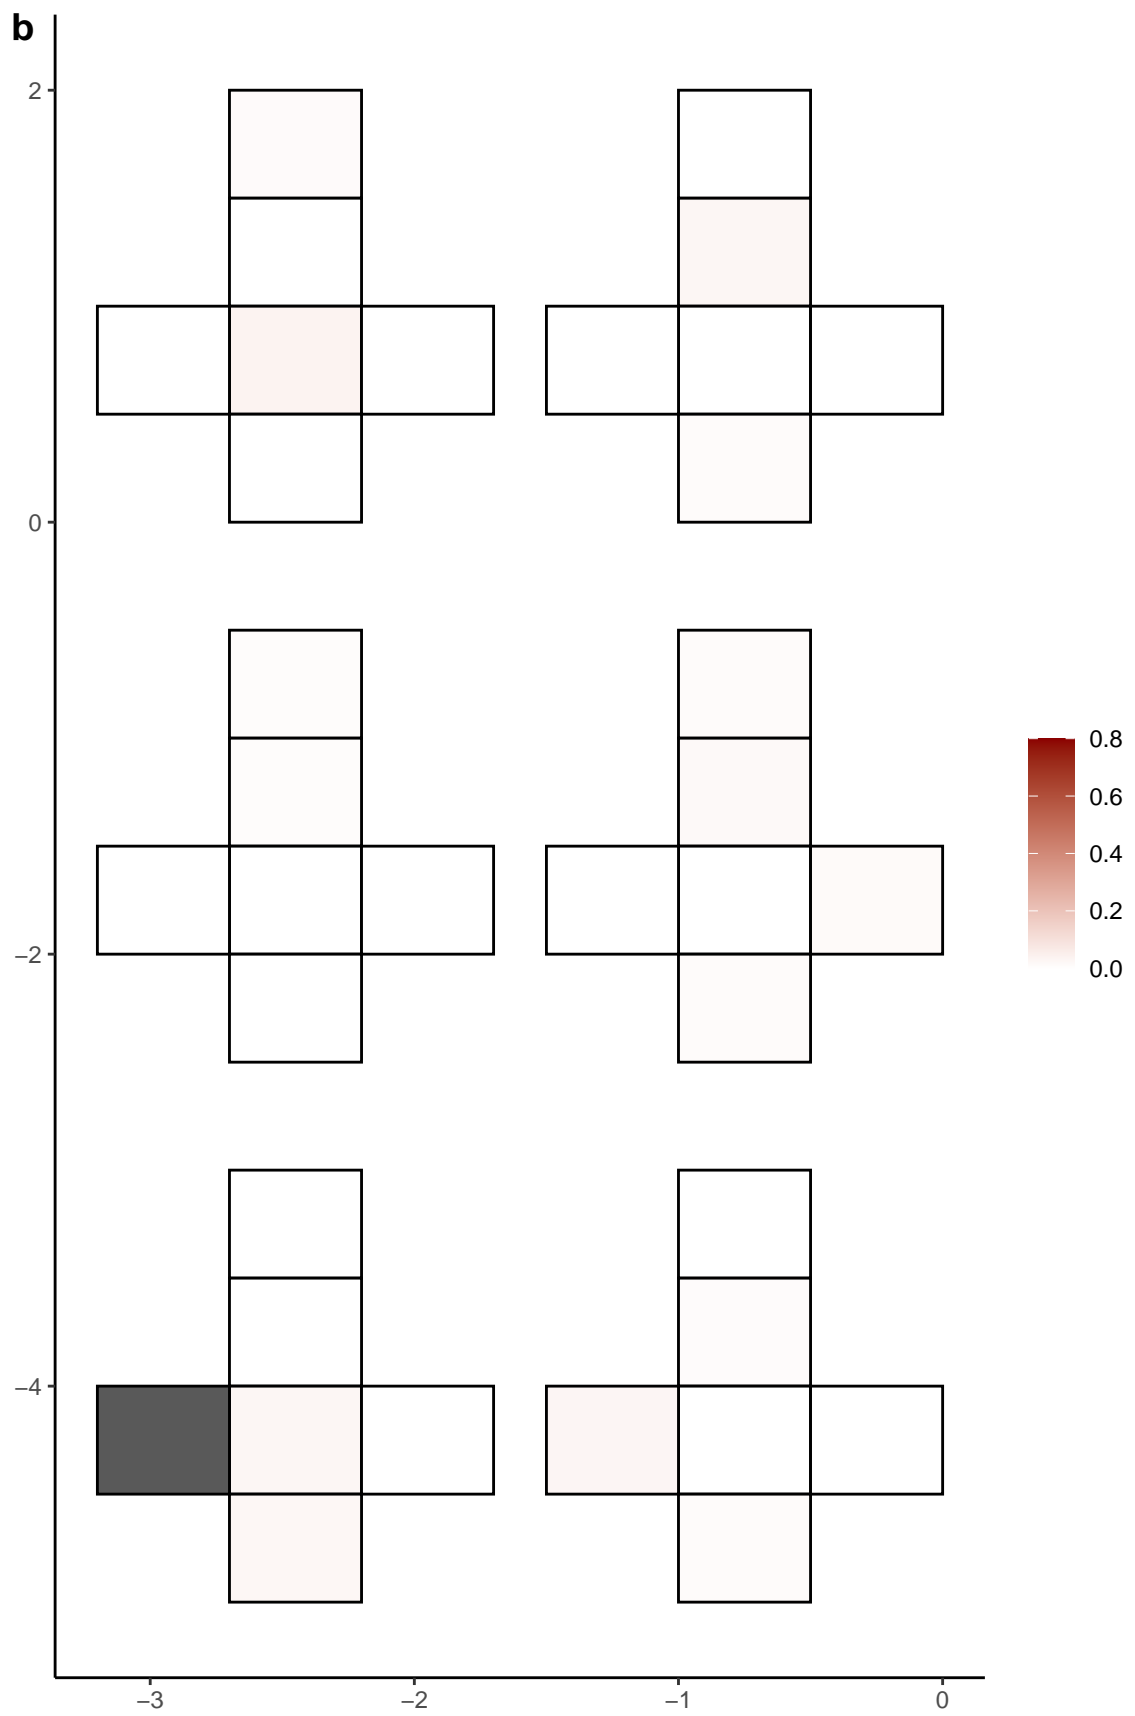

**a** ID01 2-53799113-A-T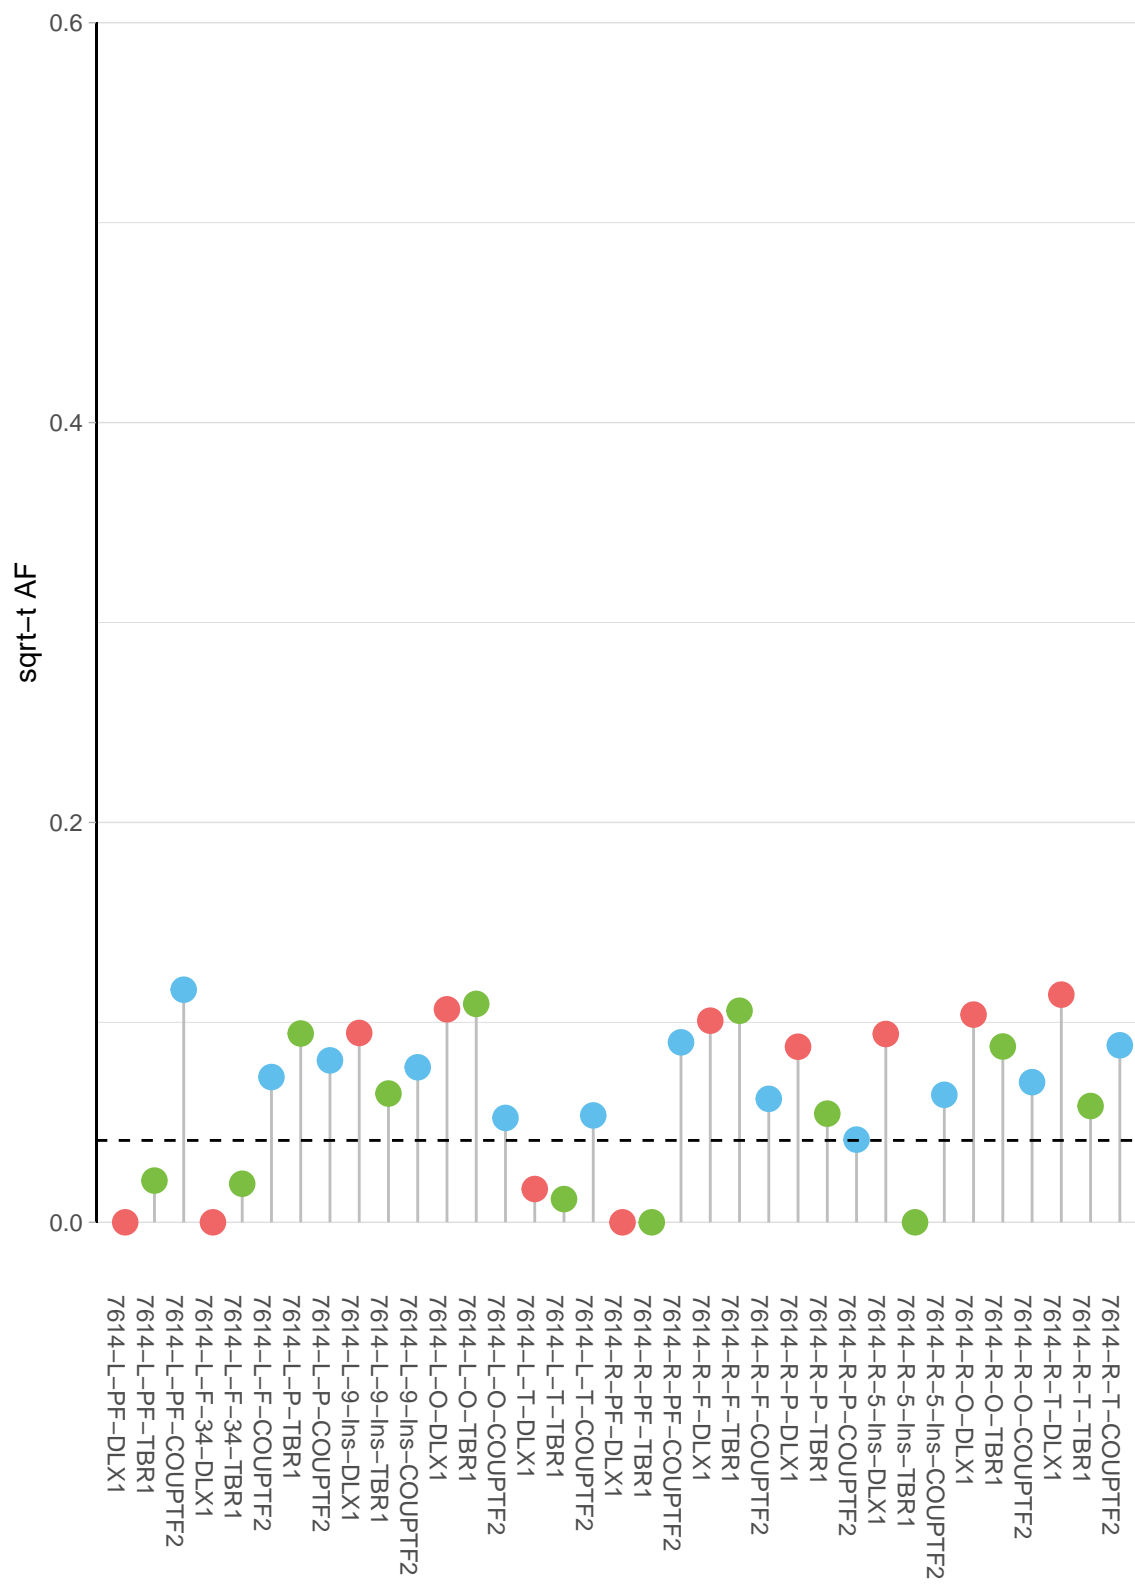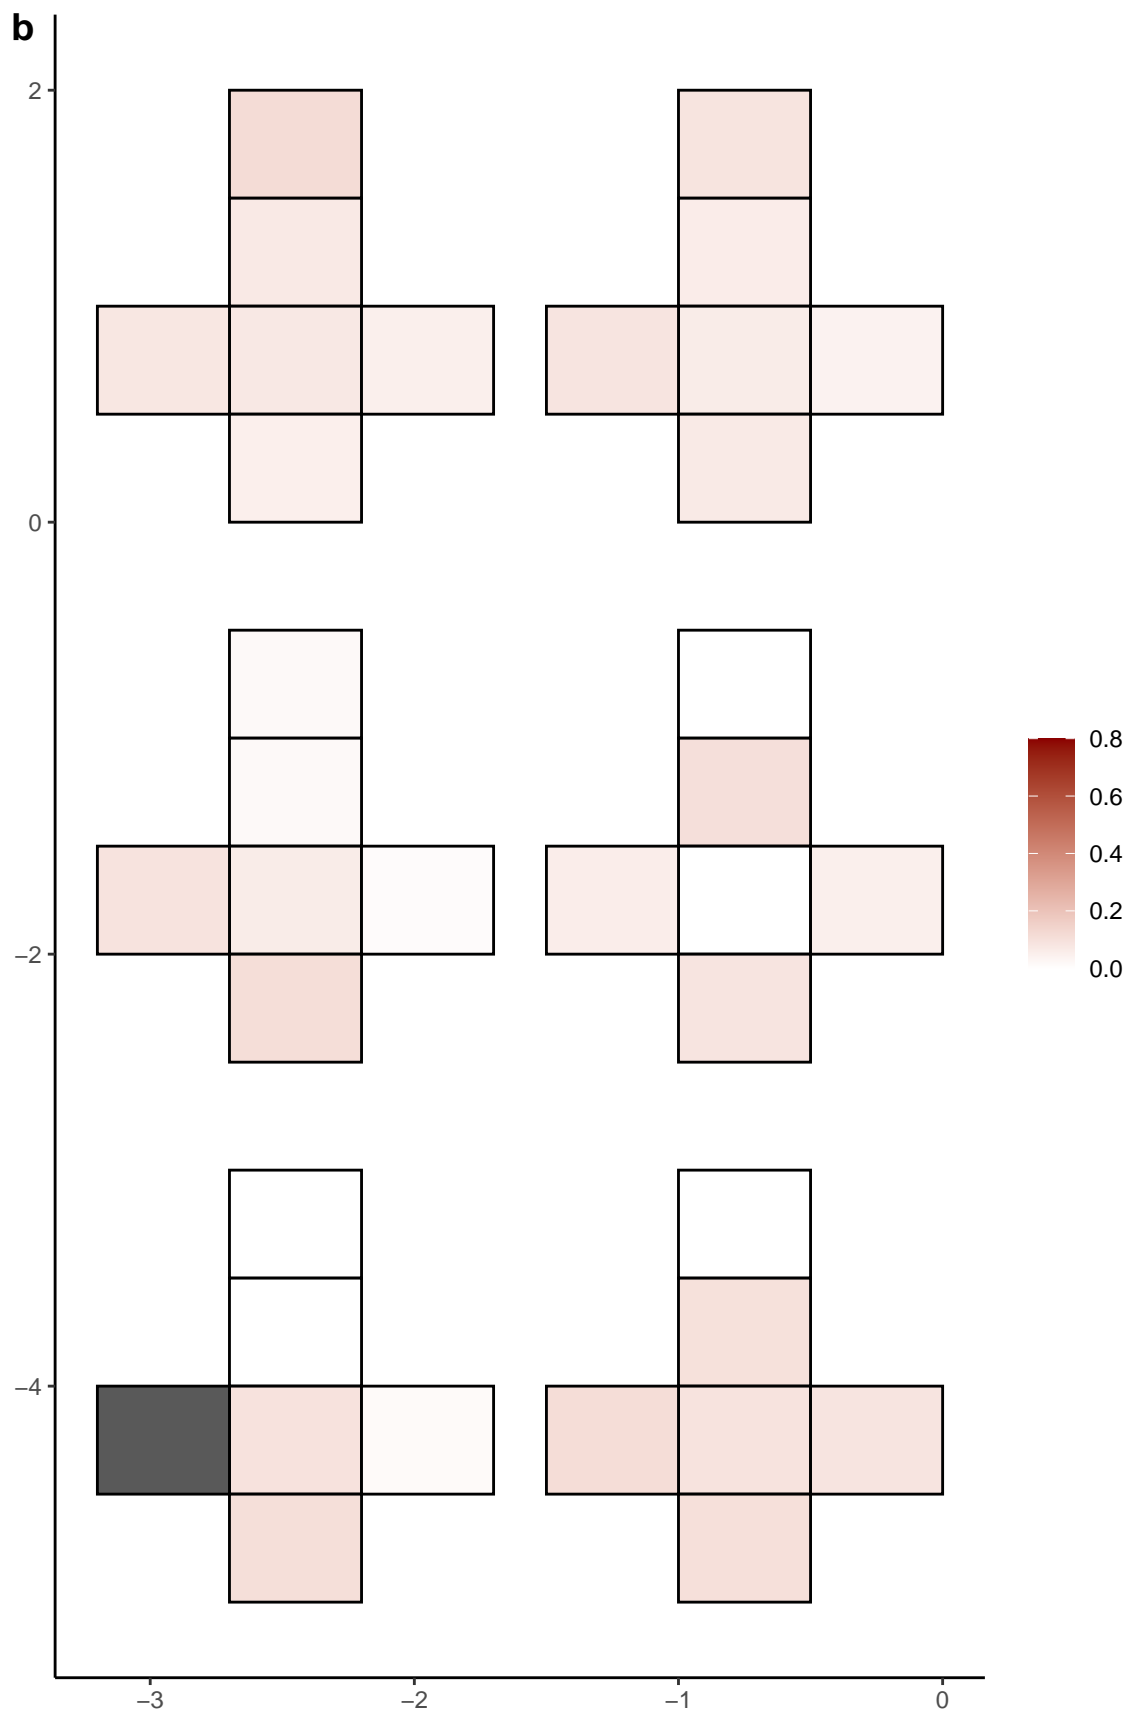



**a** ID01 2-56448245-G-A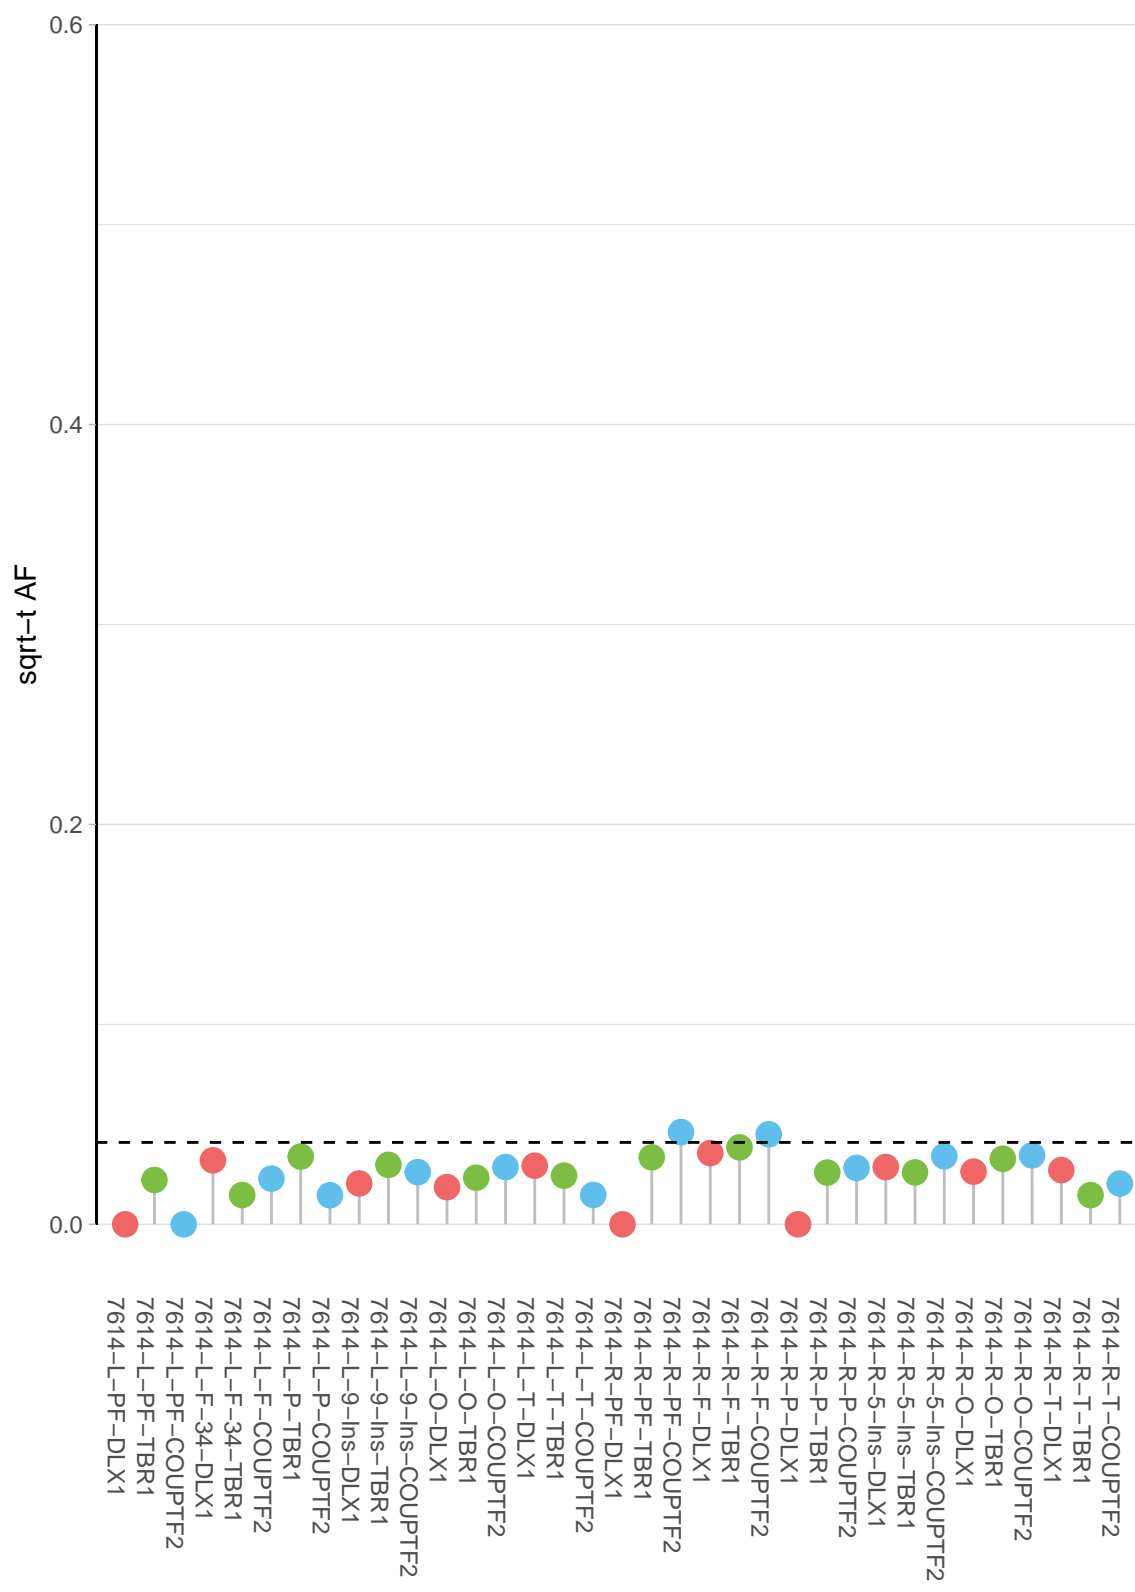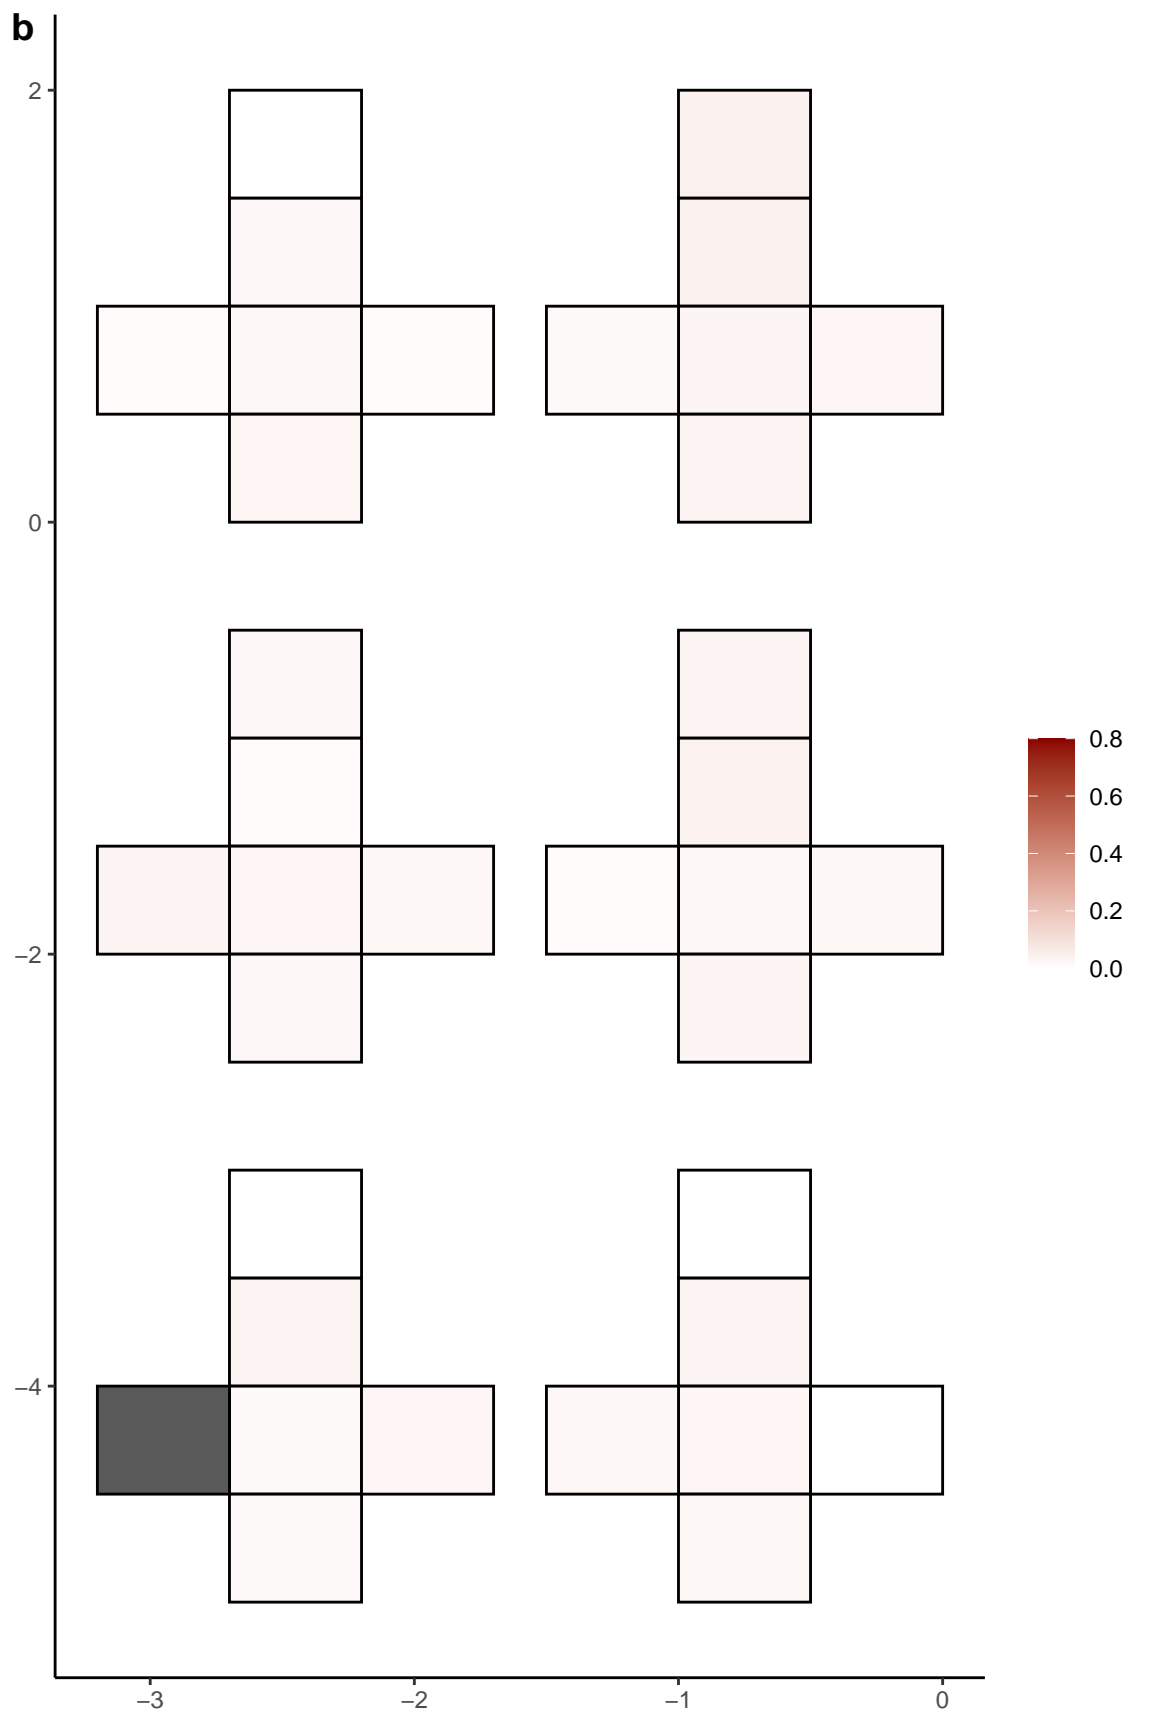

**a** ID01 2-5965706-G-A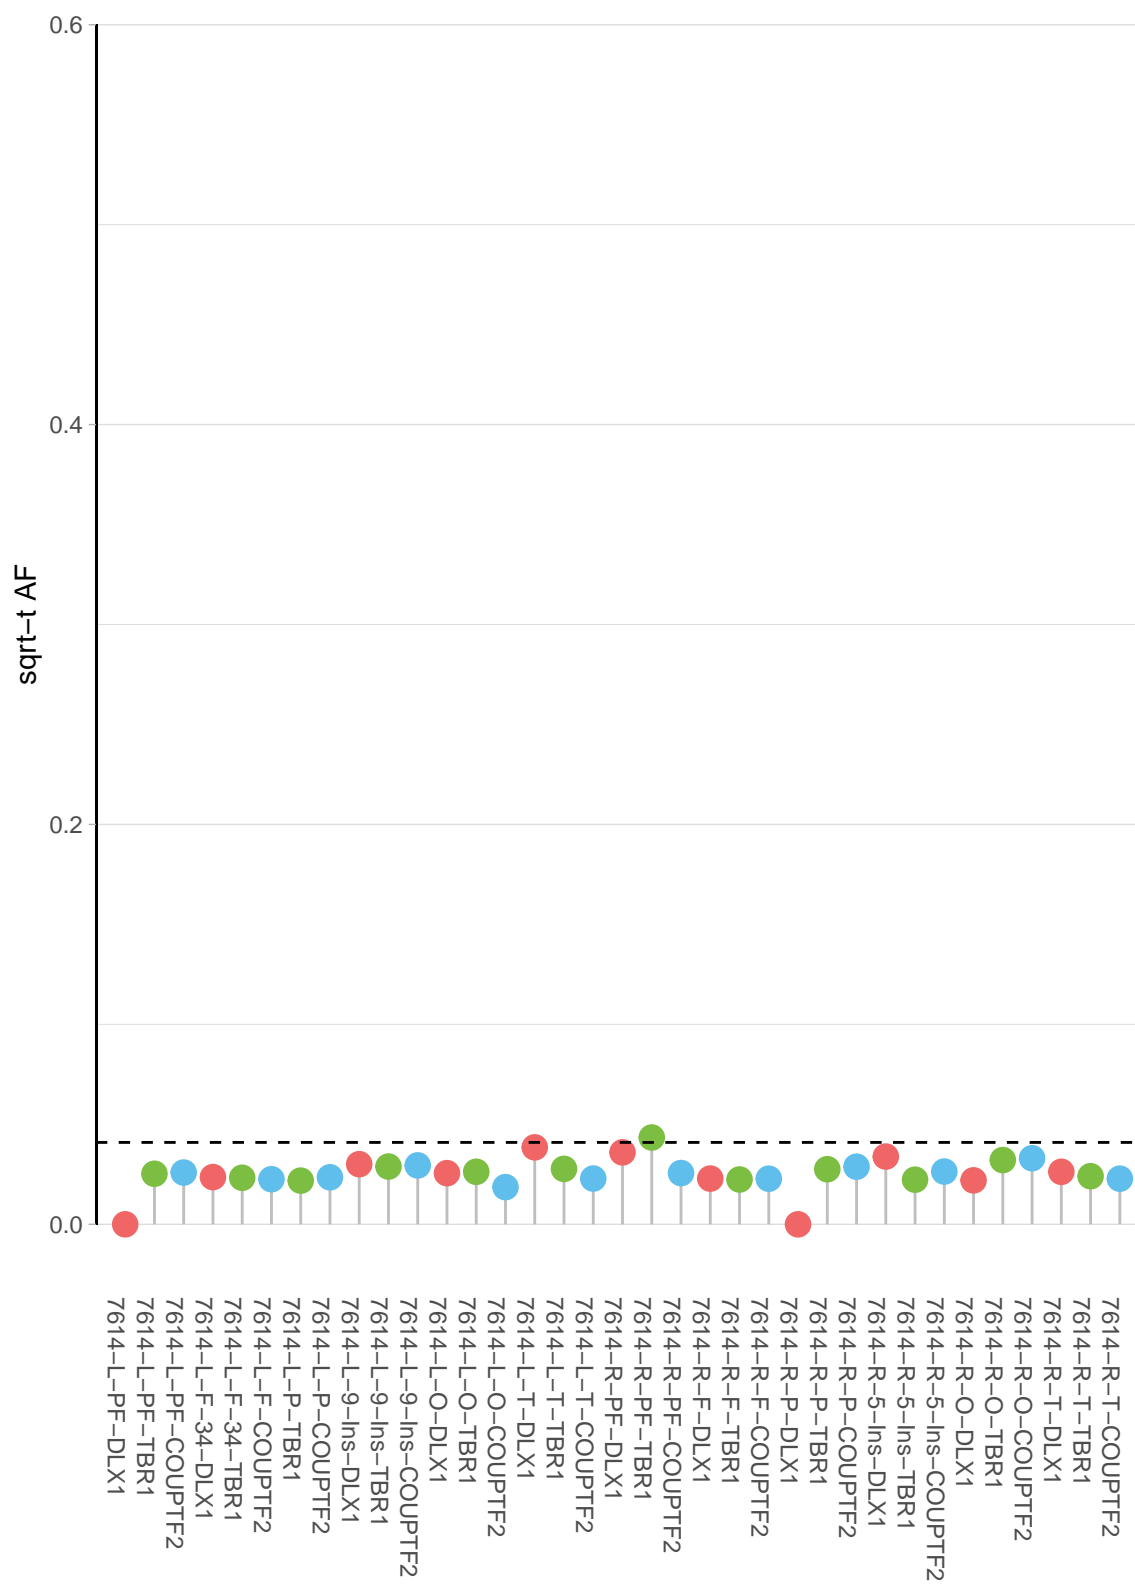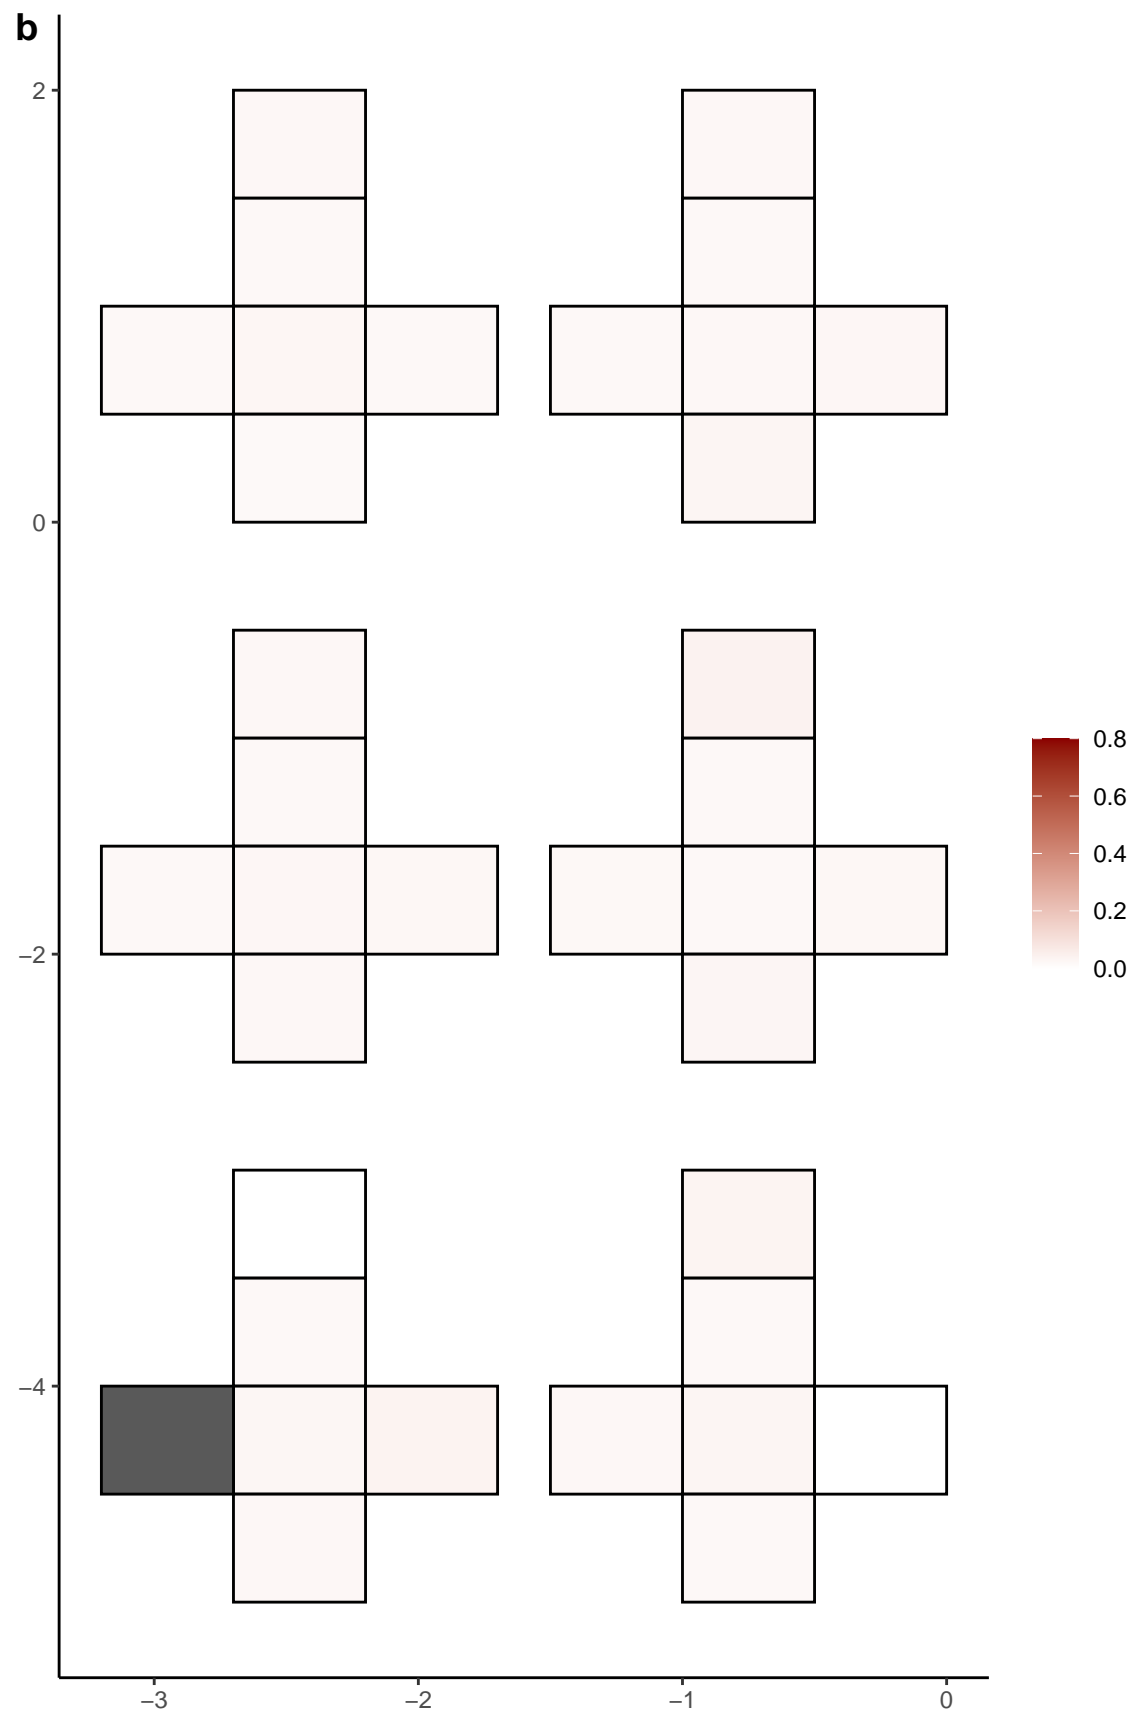

**a** ID01 2-71776656-C-A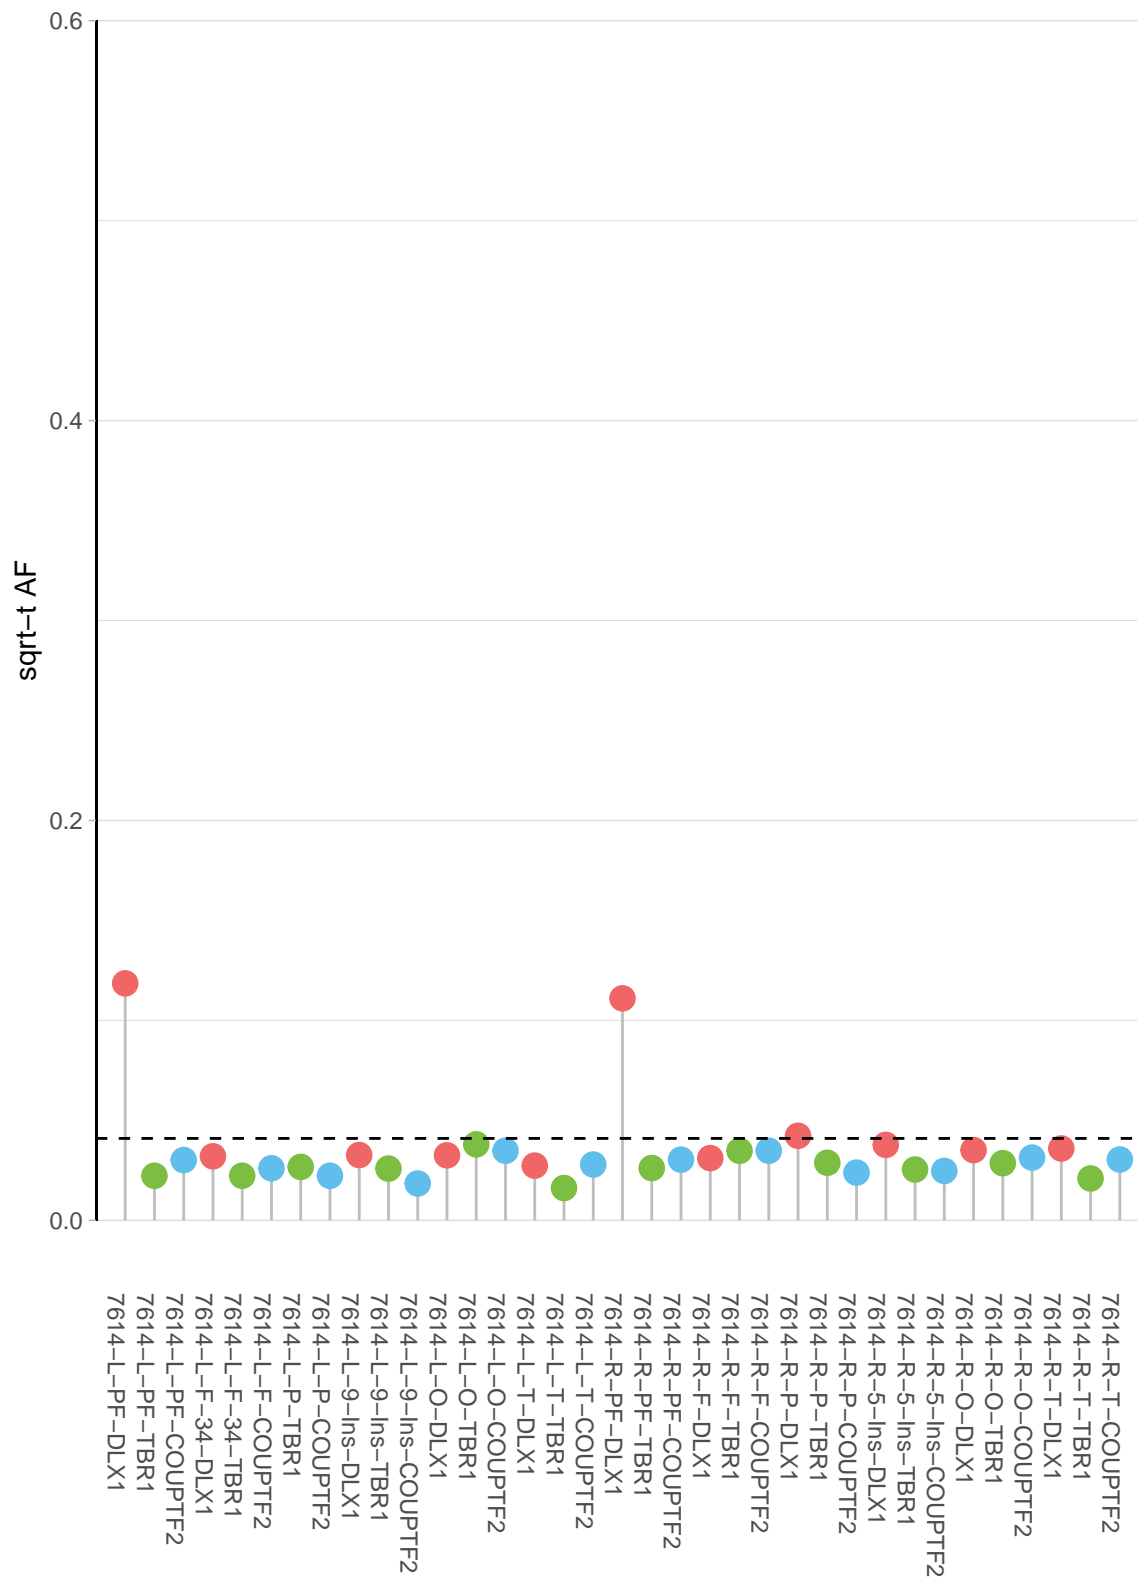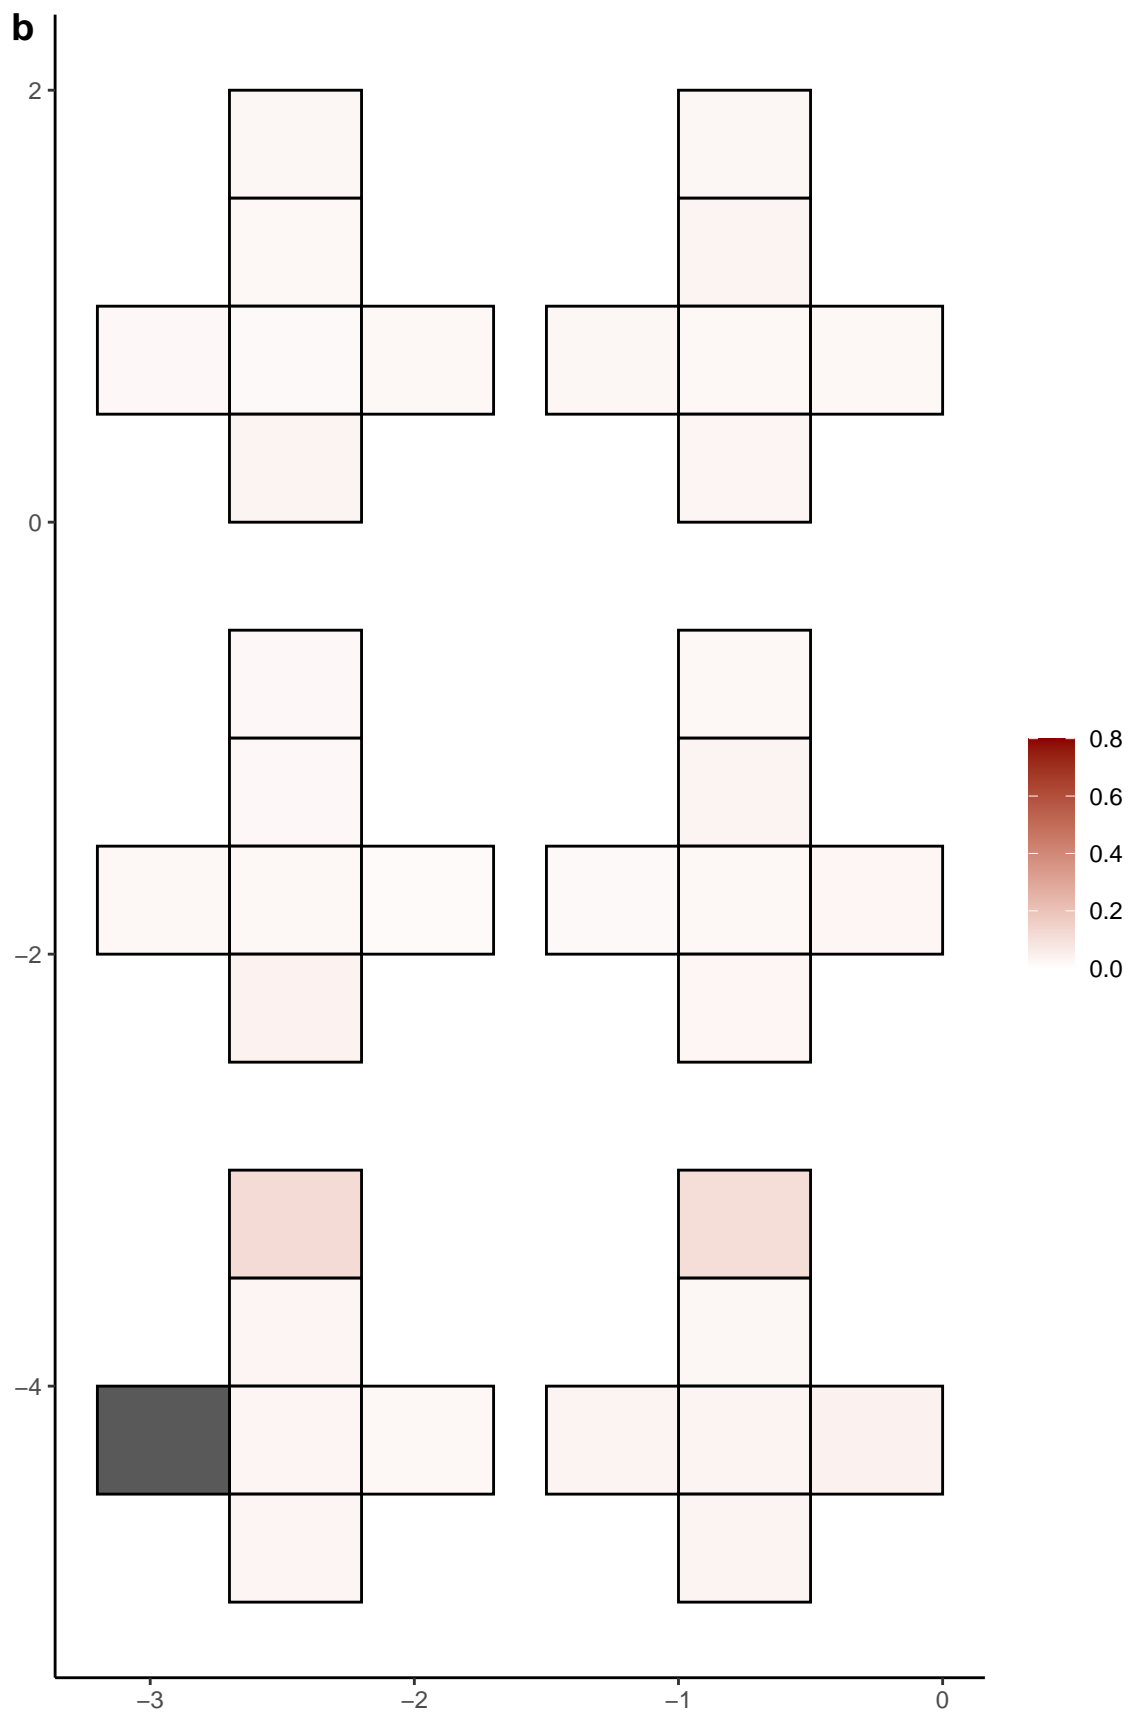

**a** ID01 2-8566334-G-T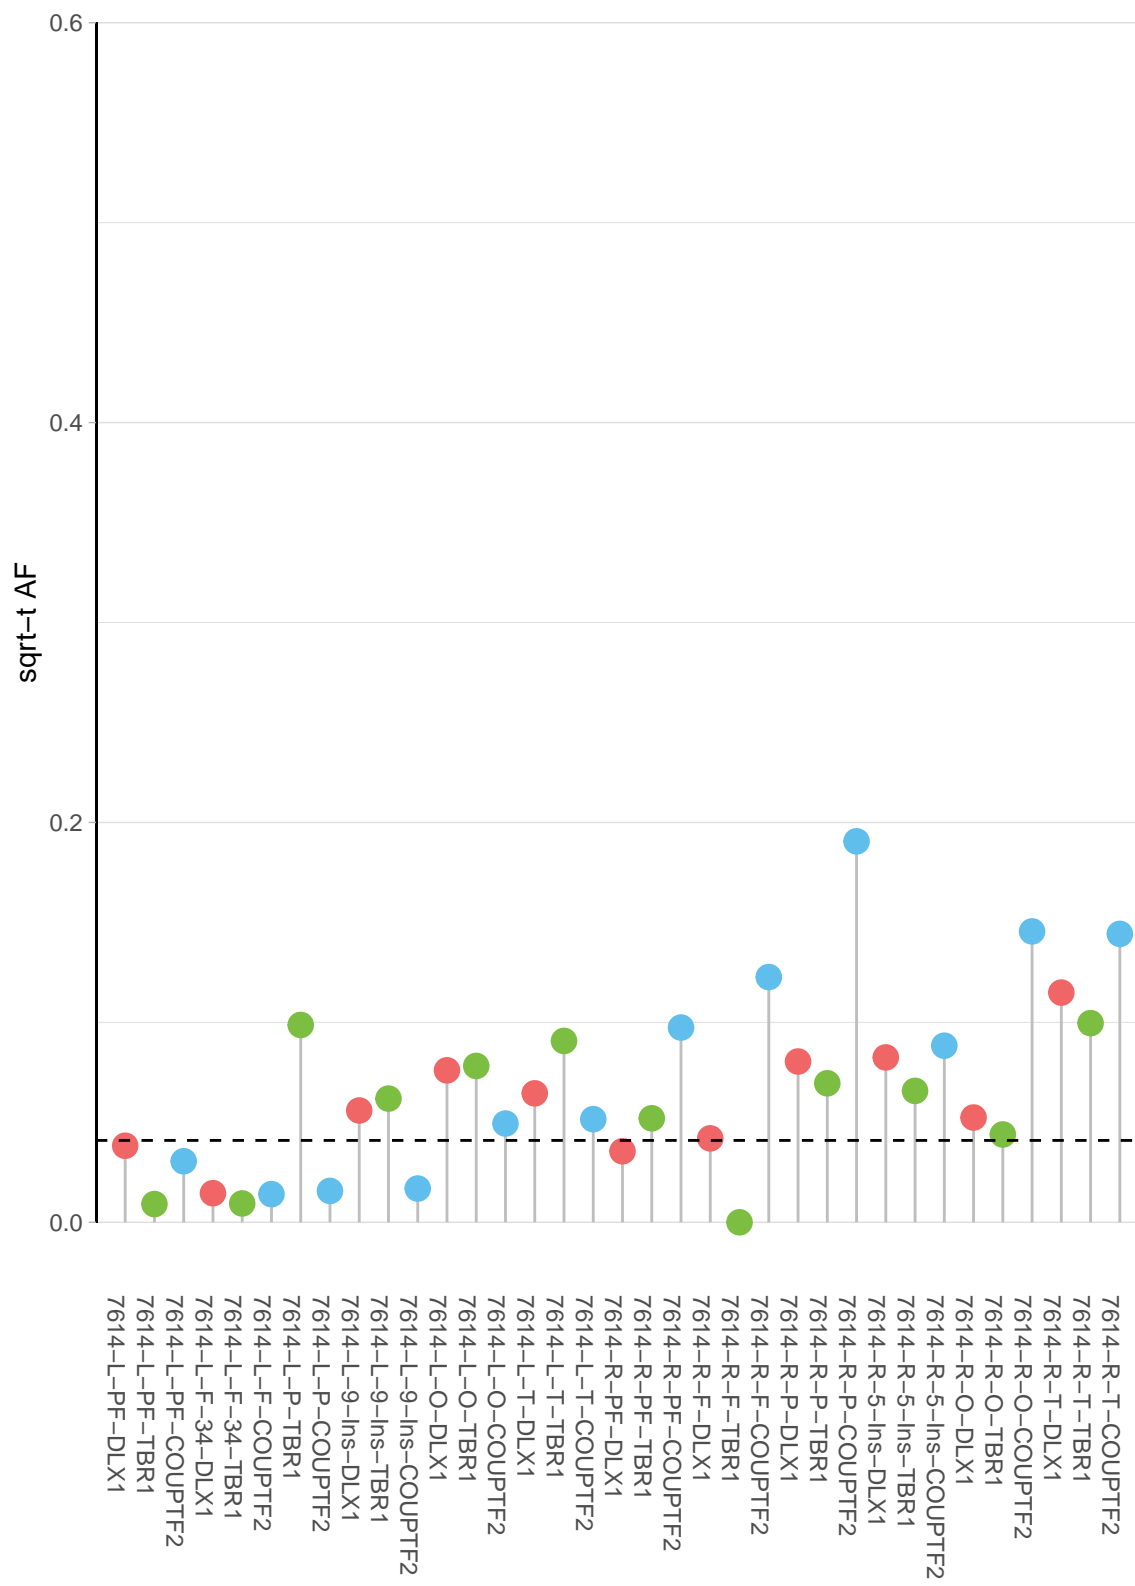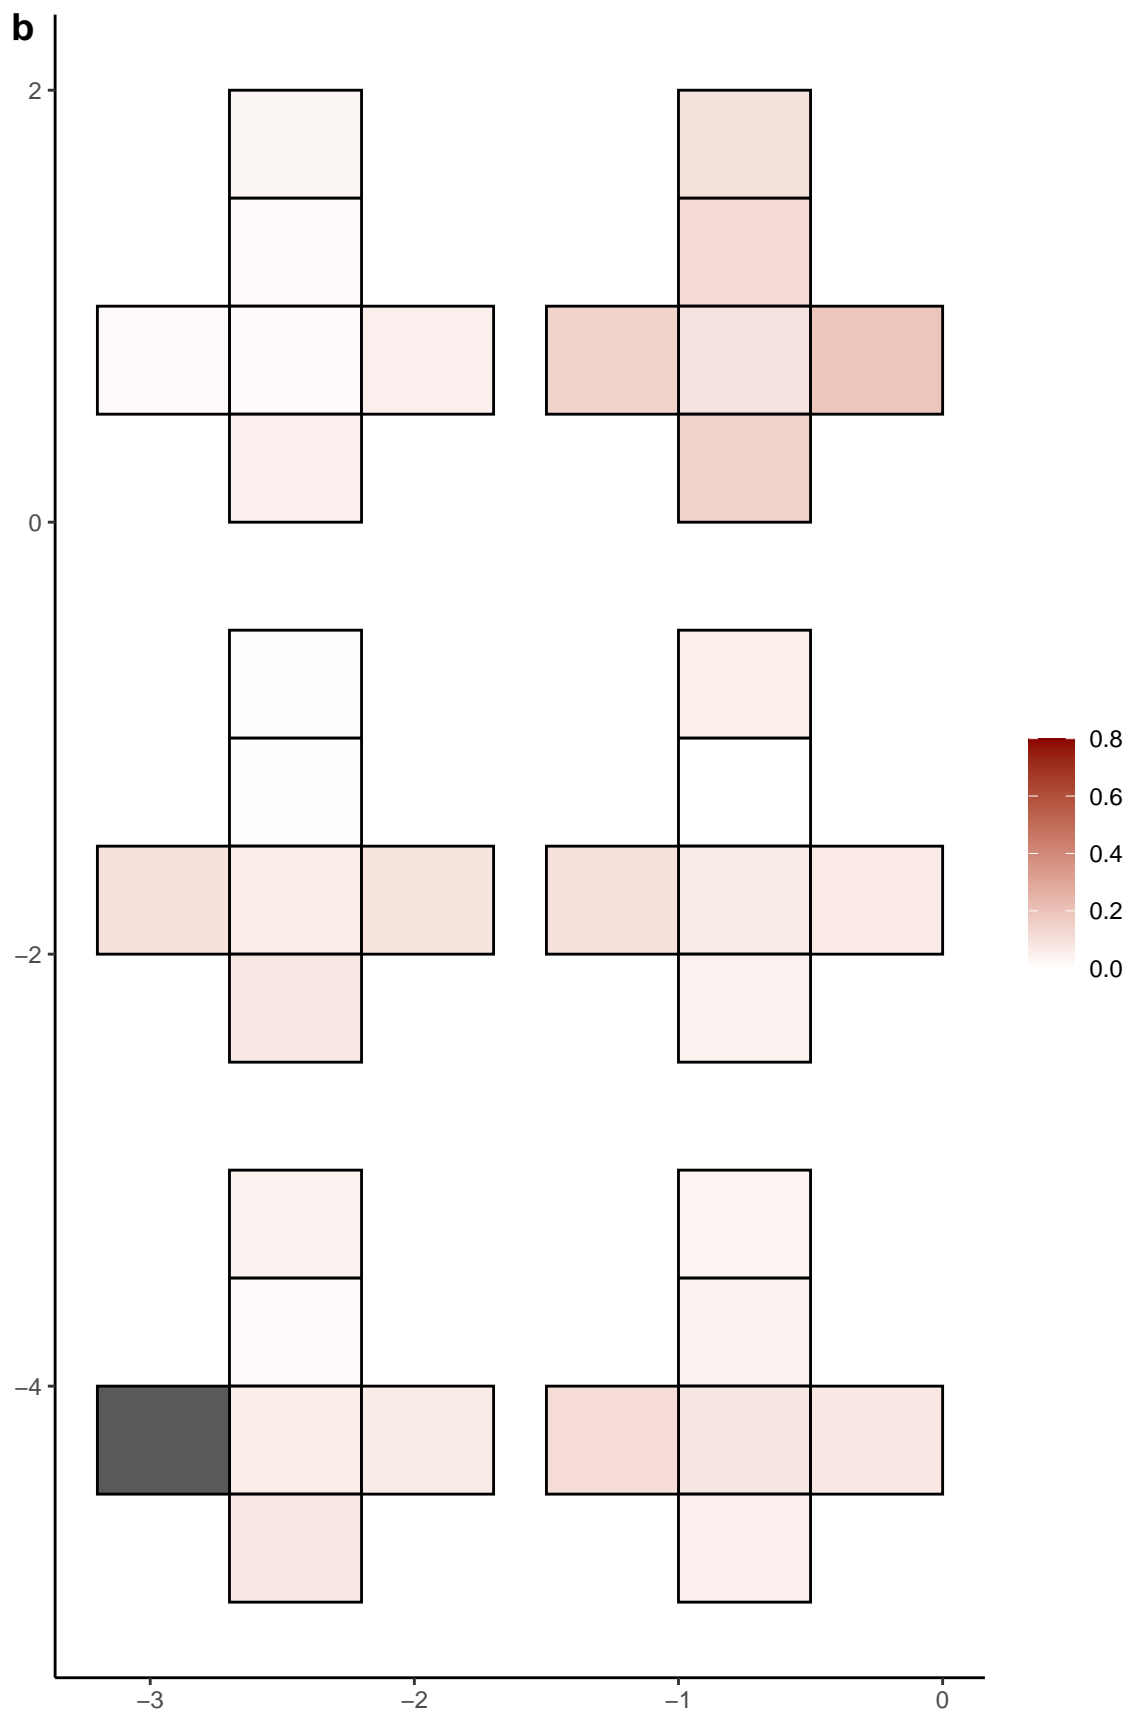

**a** ID01 2-90231584-G-T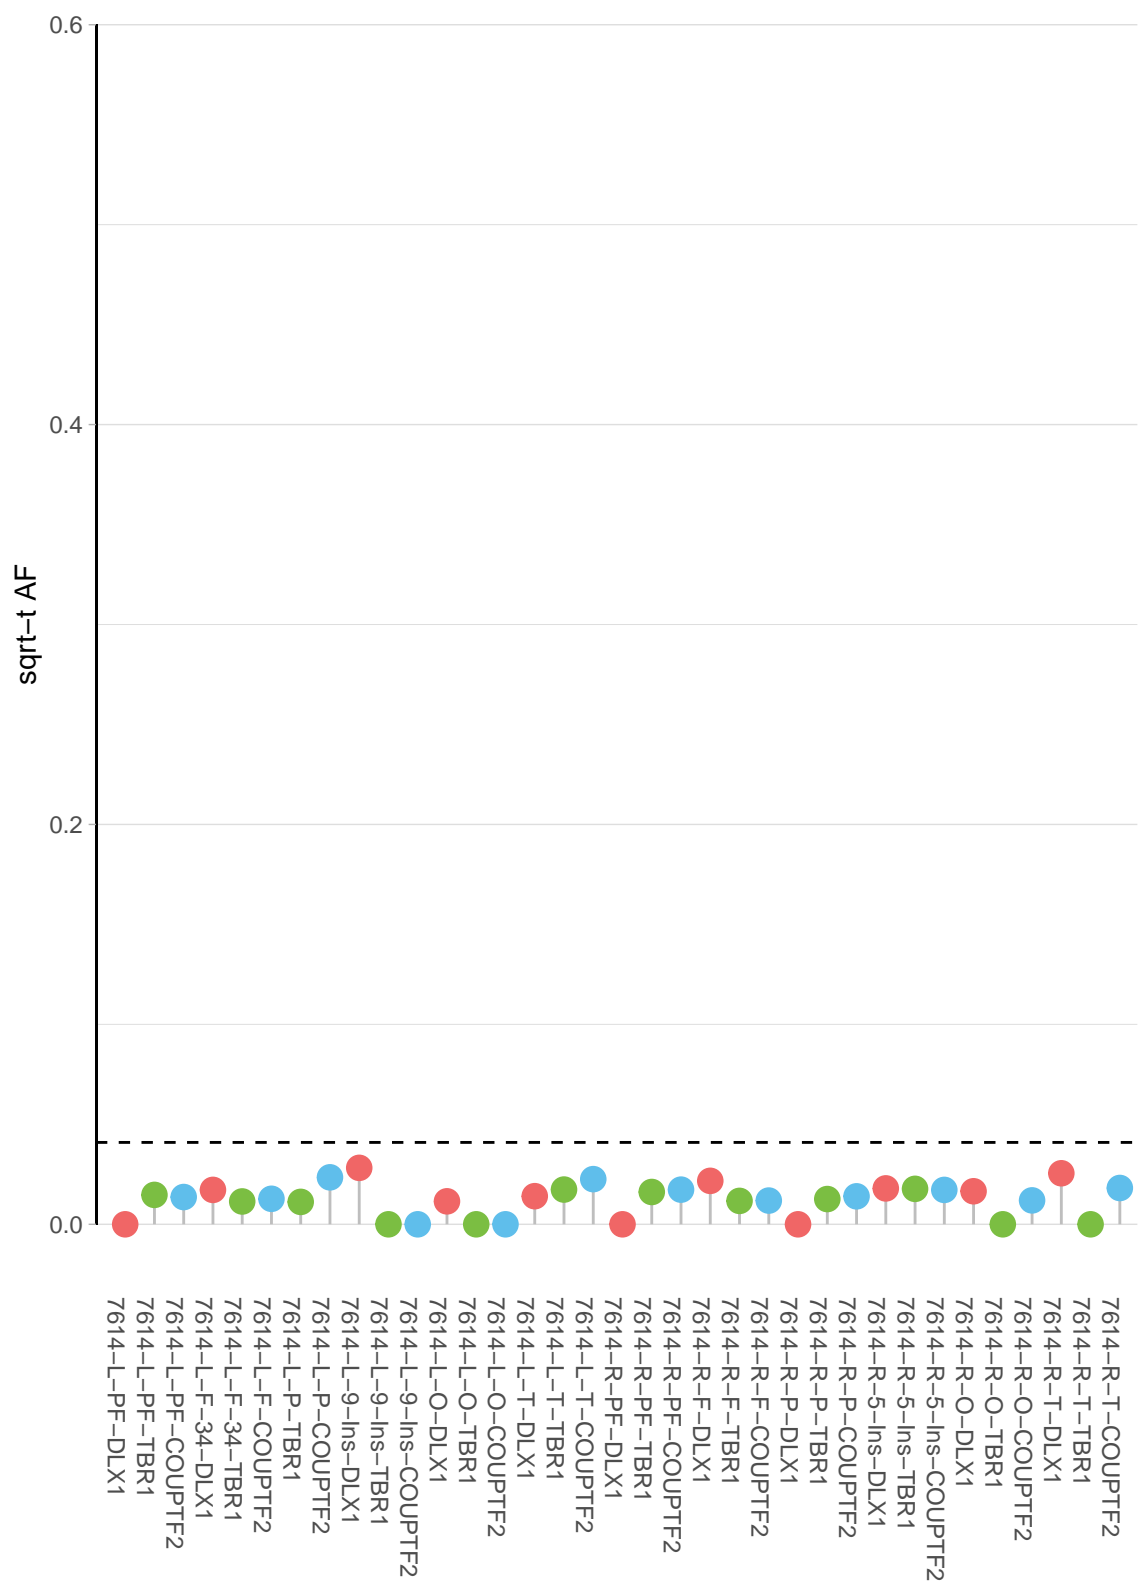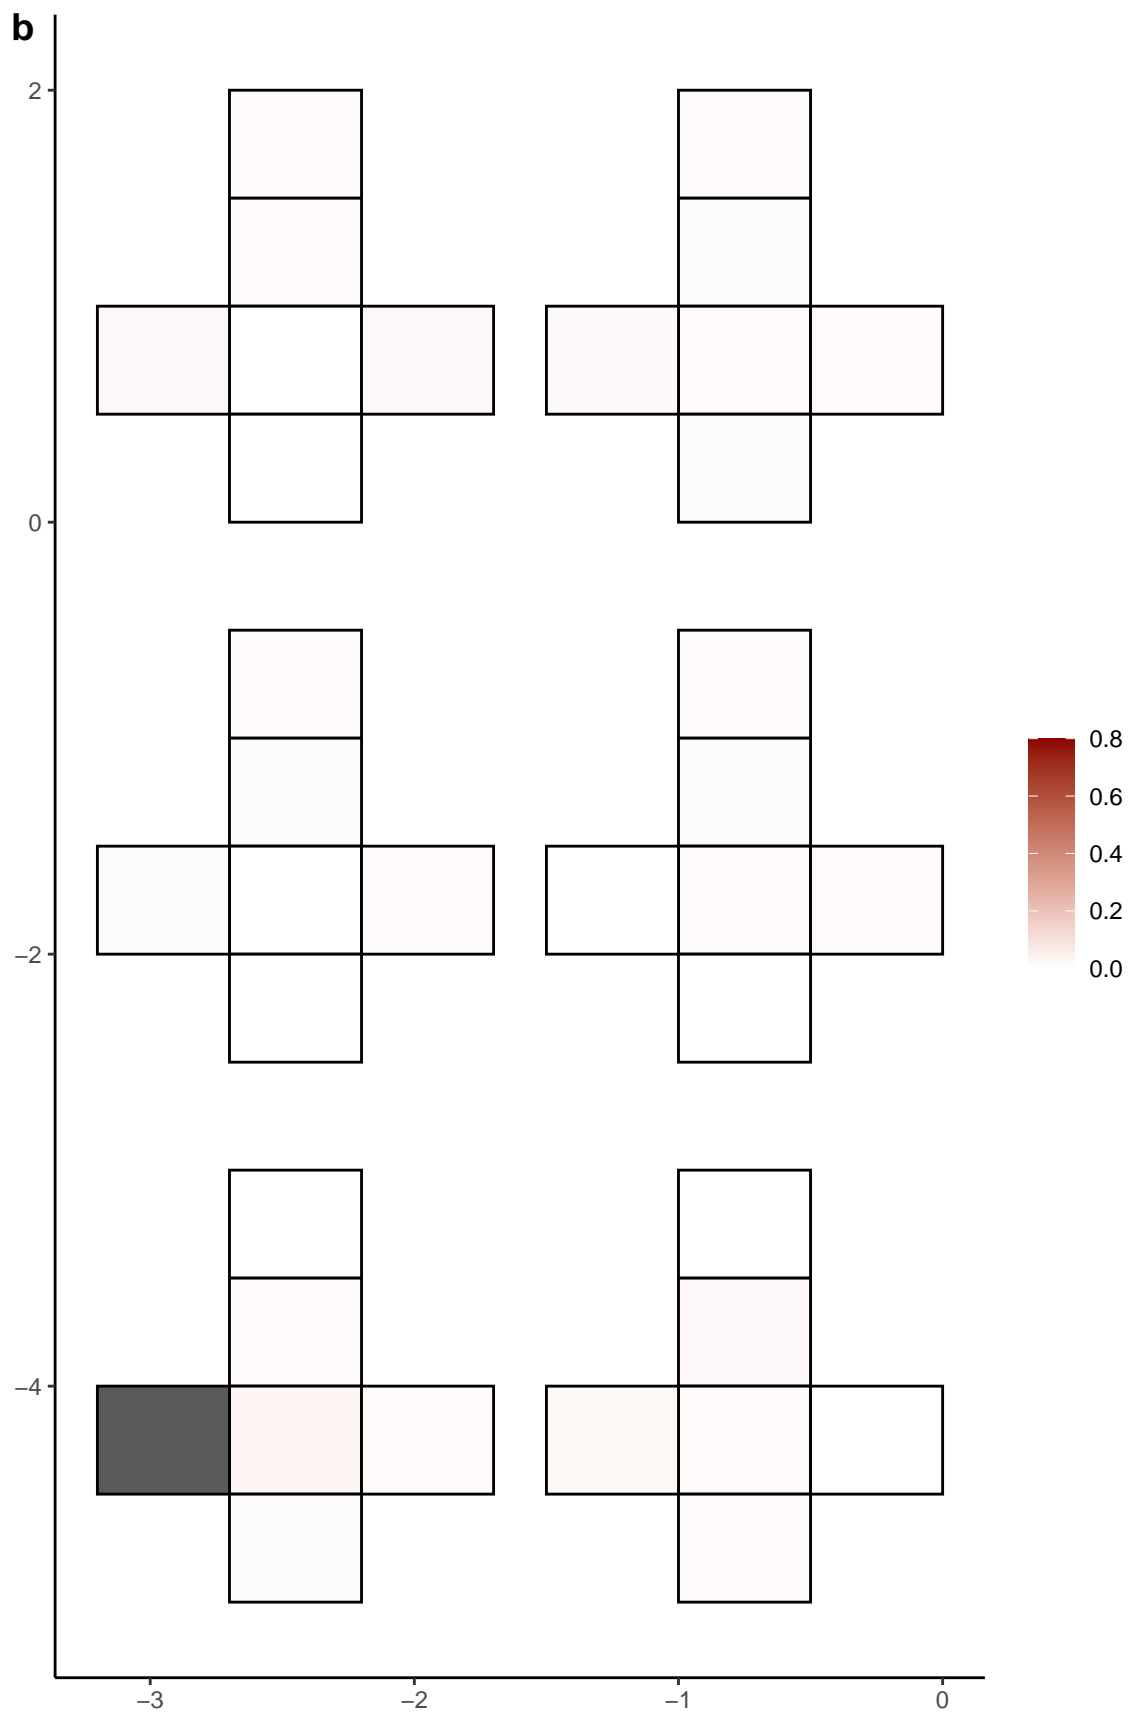

**a** ID01 2-97358394-C-T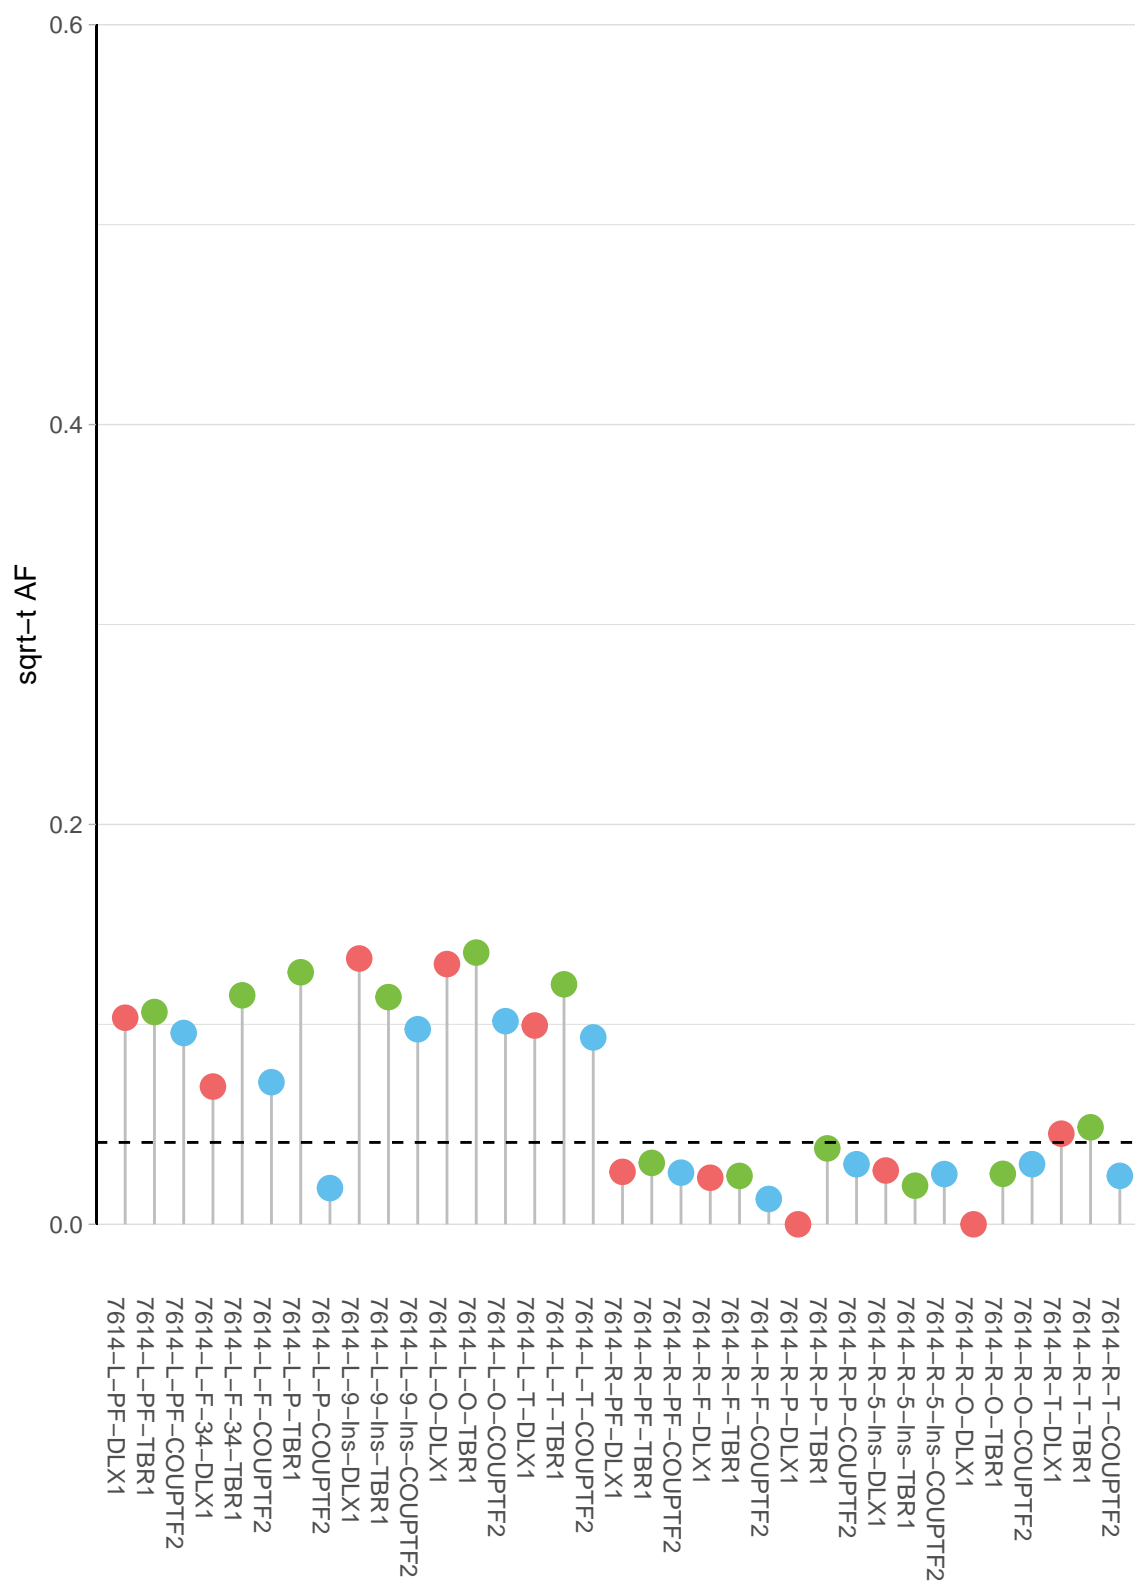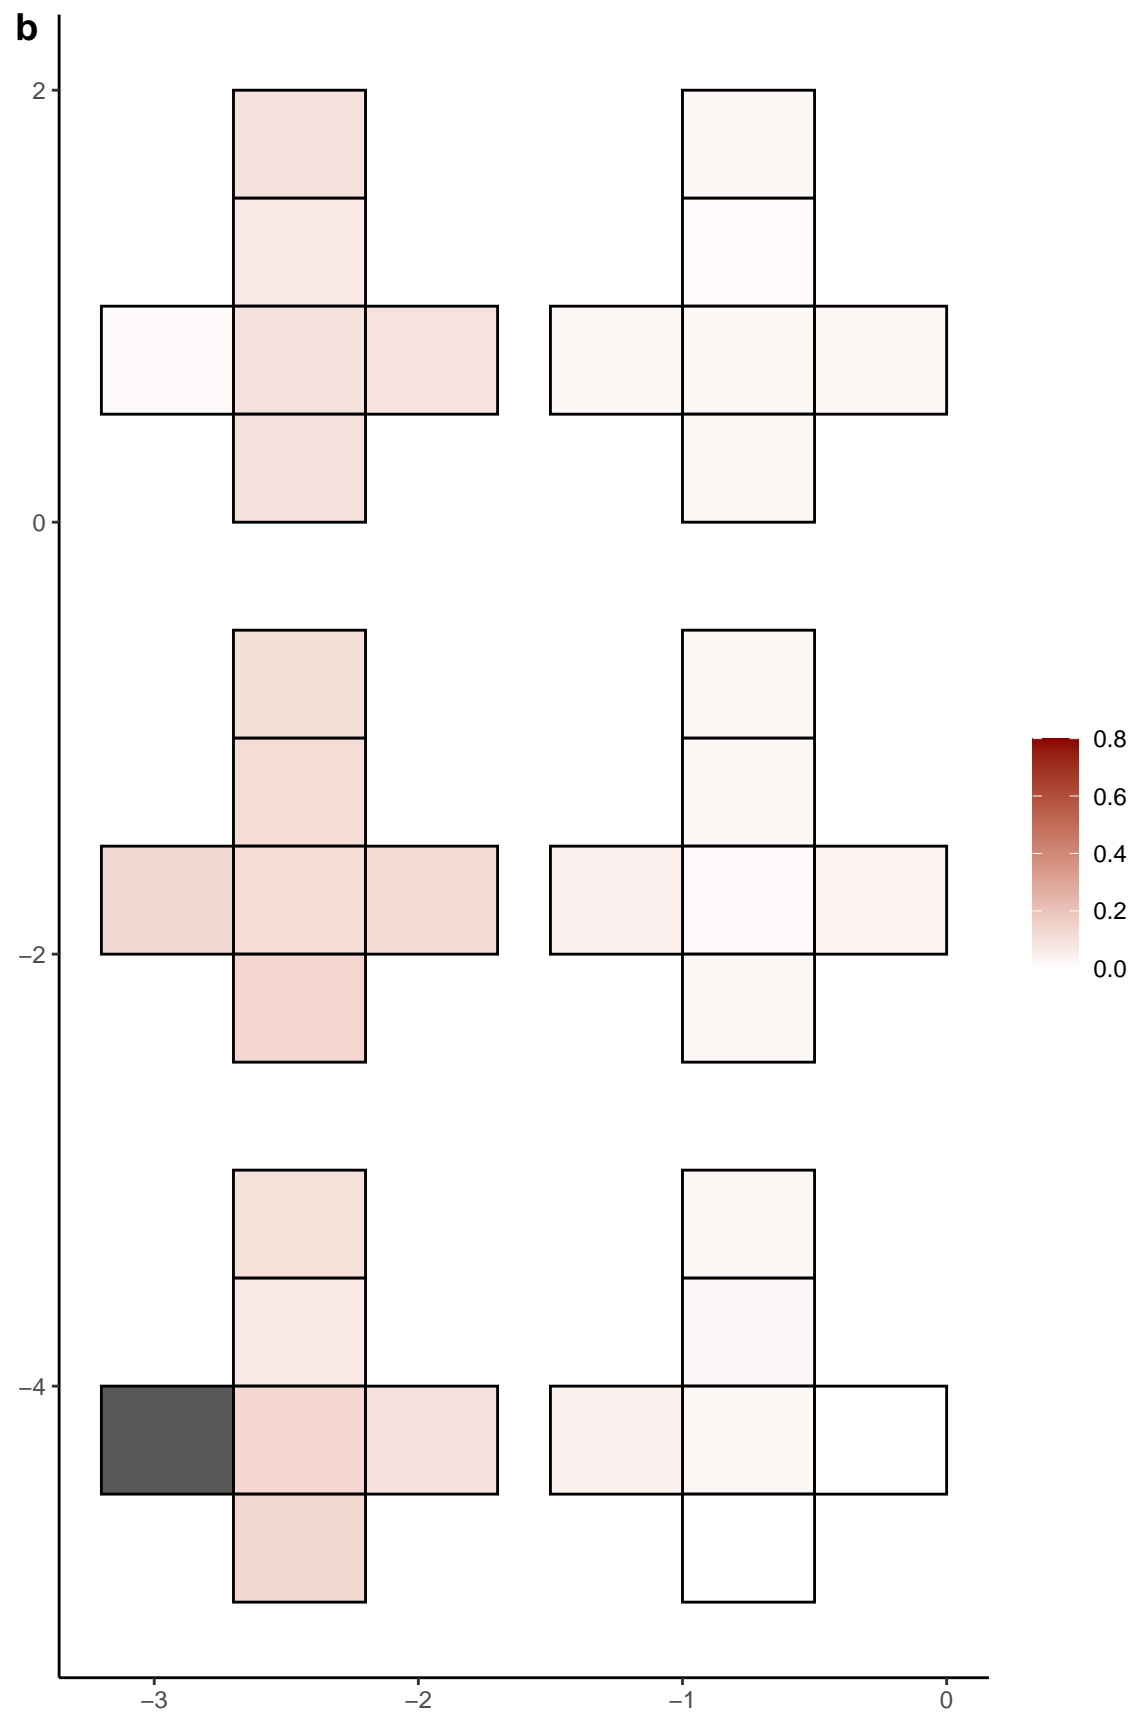

**a** ID01 2-99501908-C-T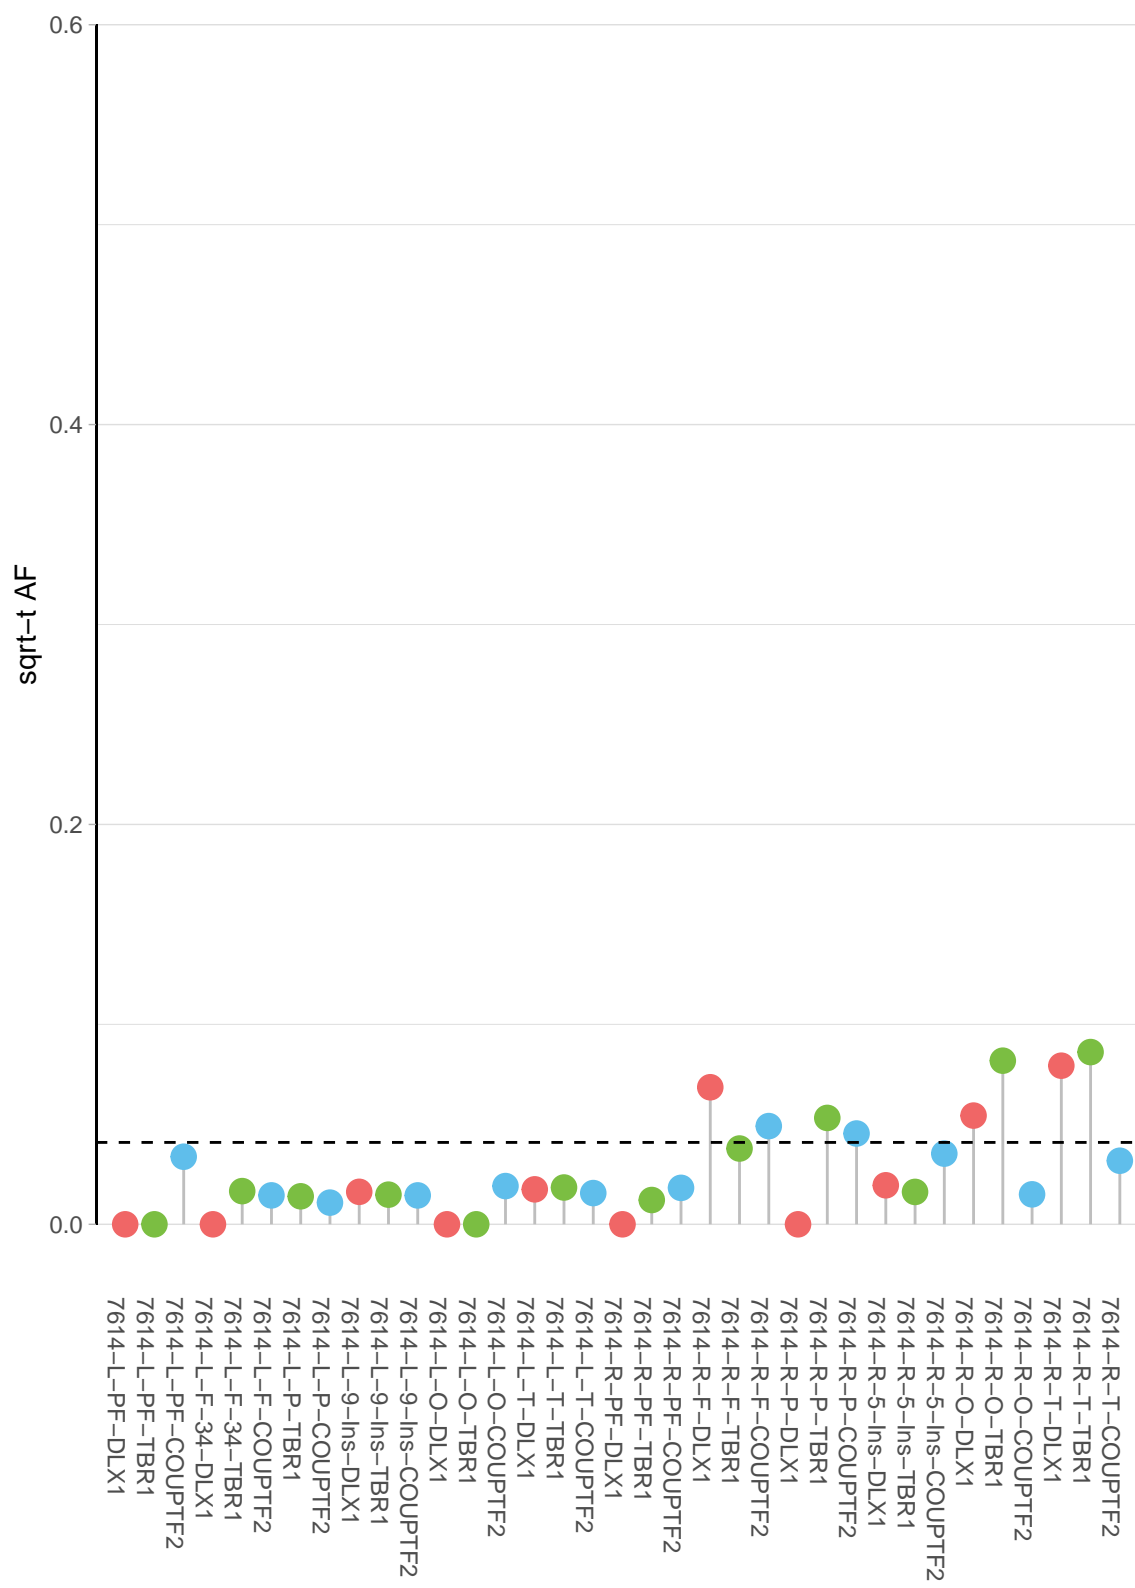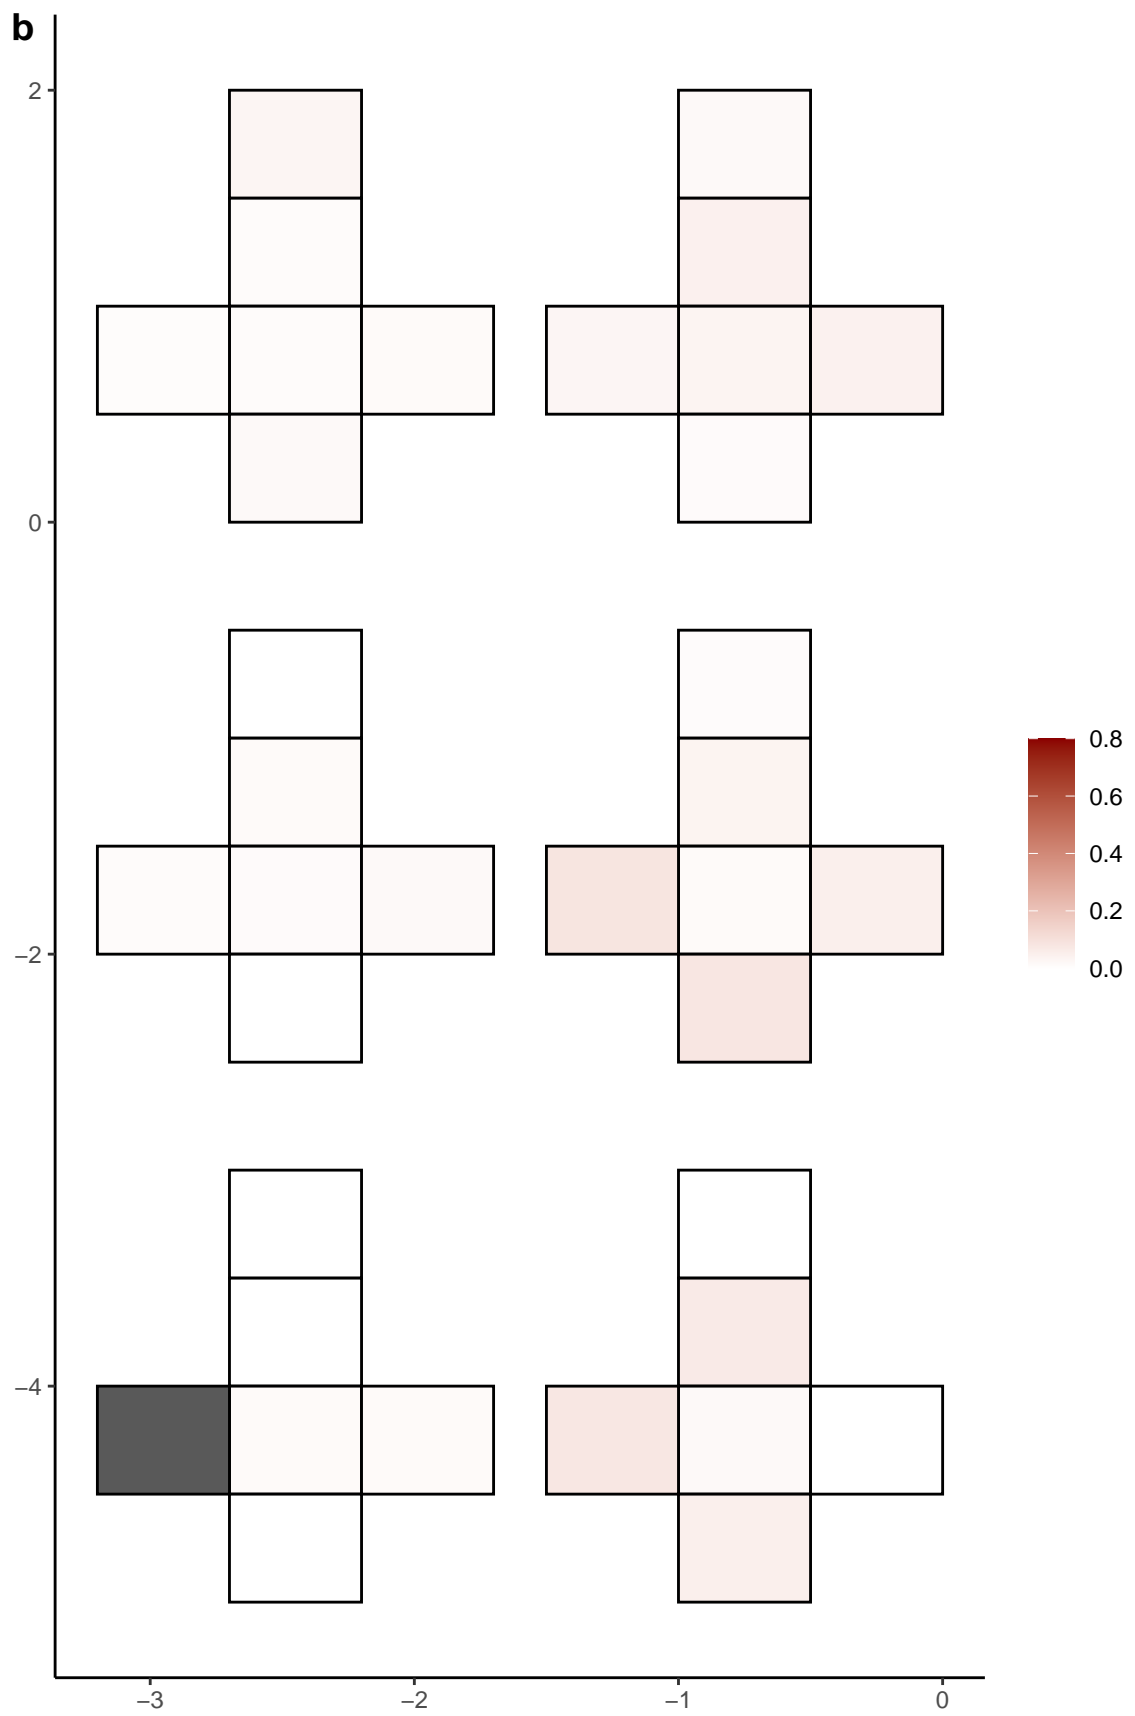

**a** ID01 20-13255185-C-A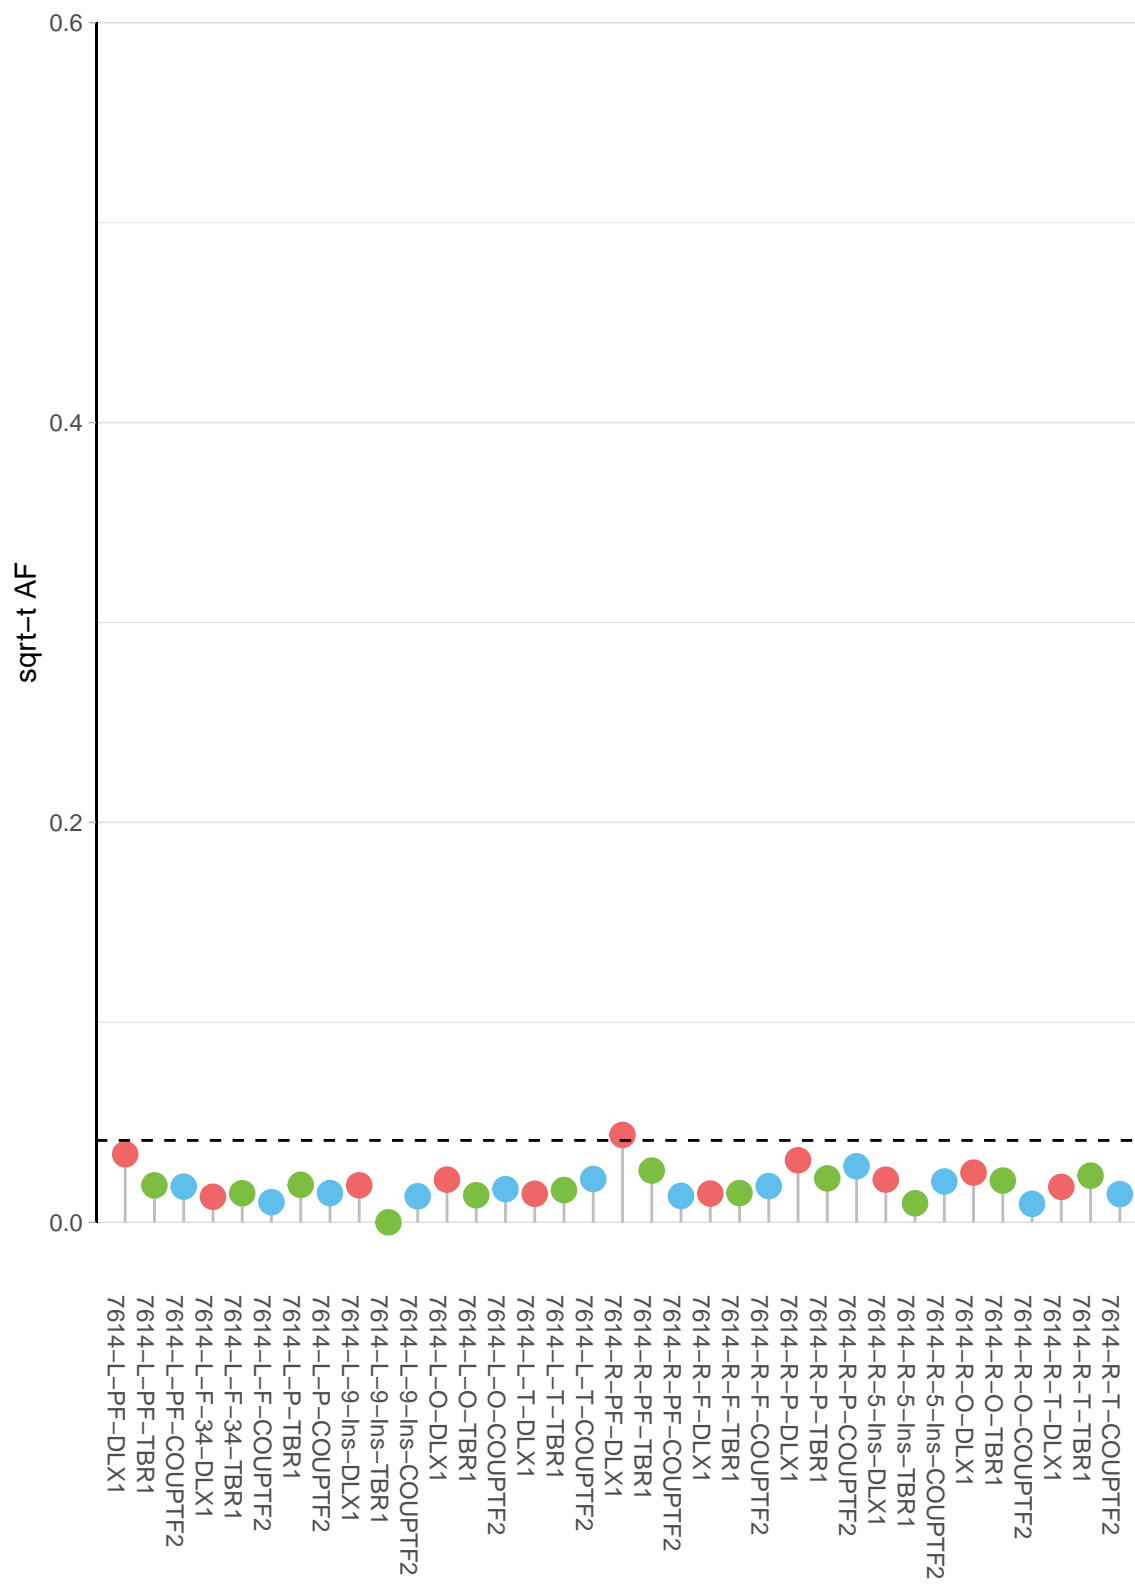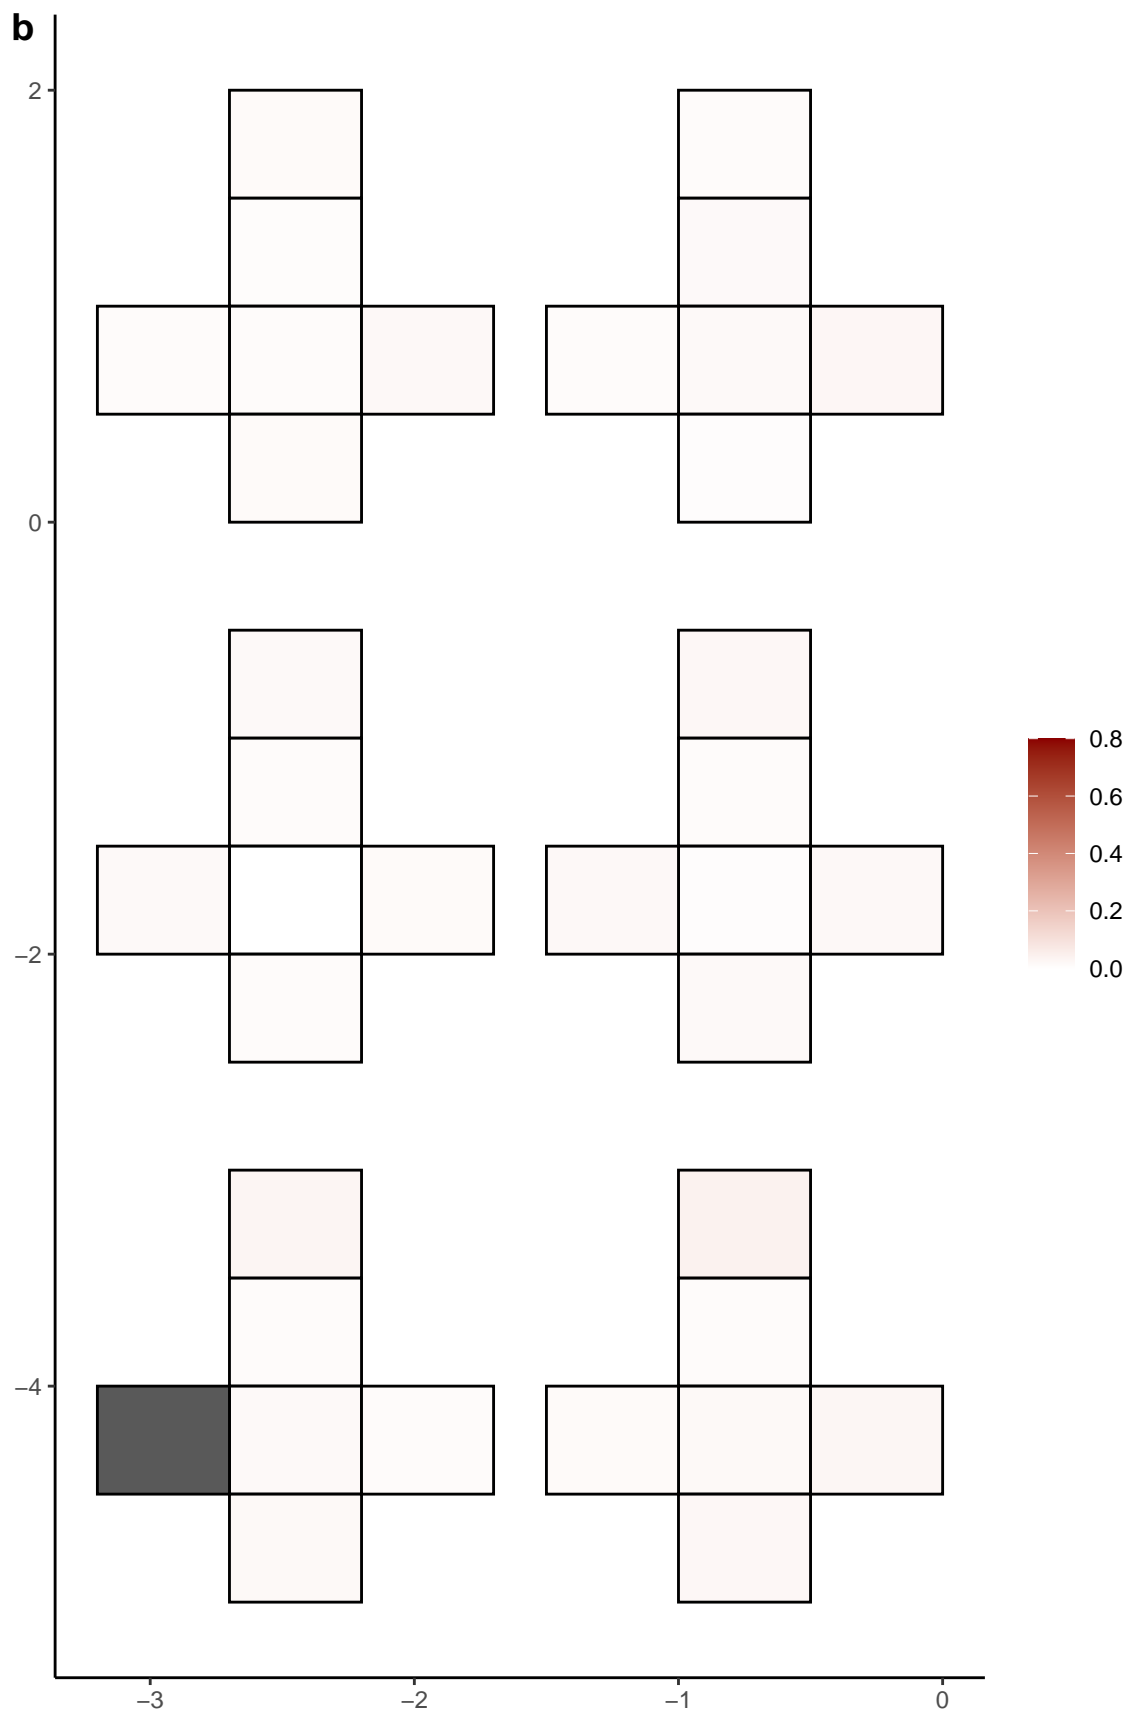



**a** ID01 20-13515886-C-T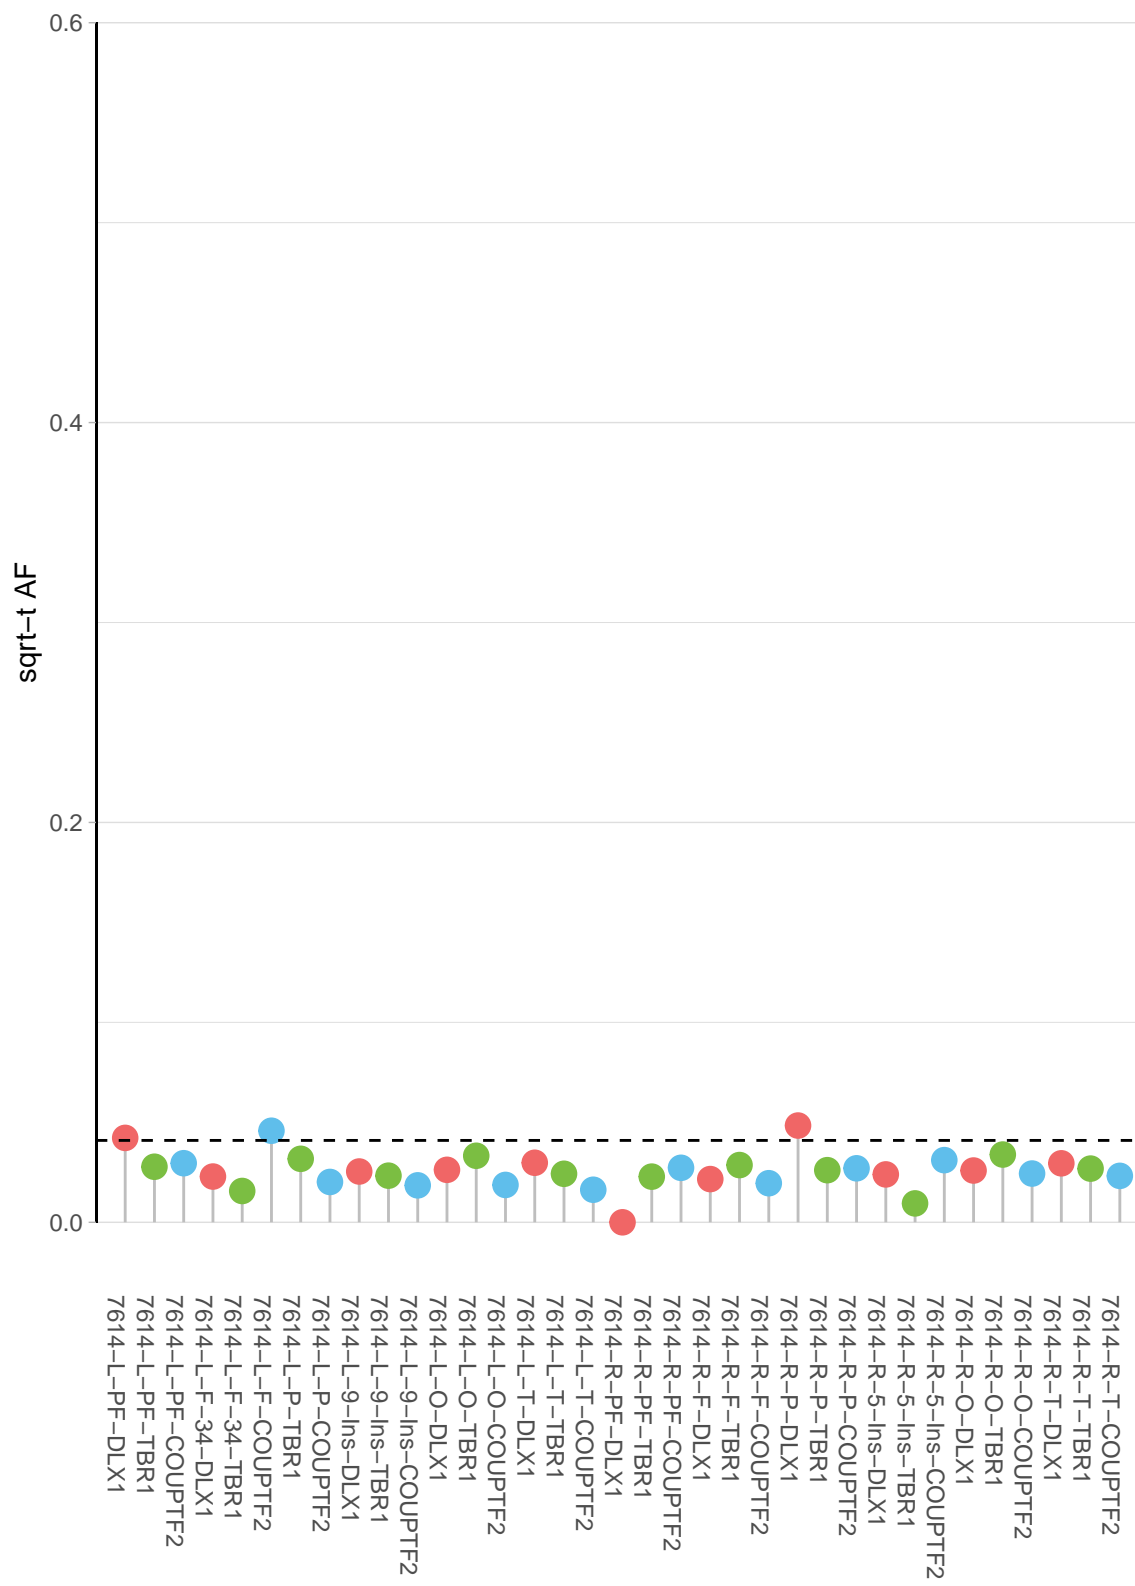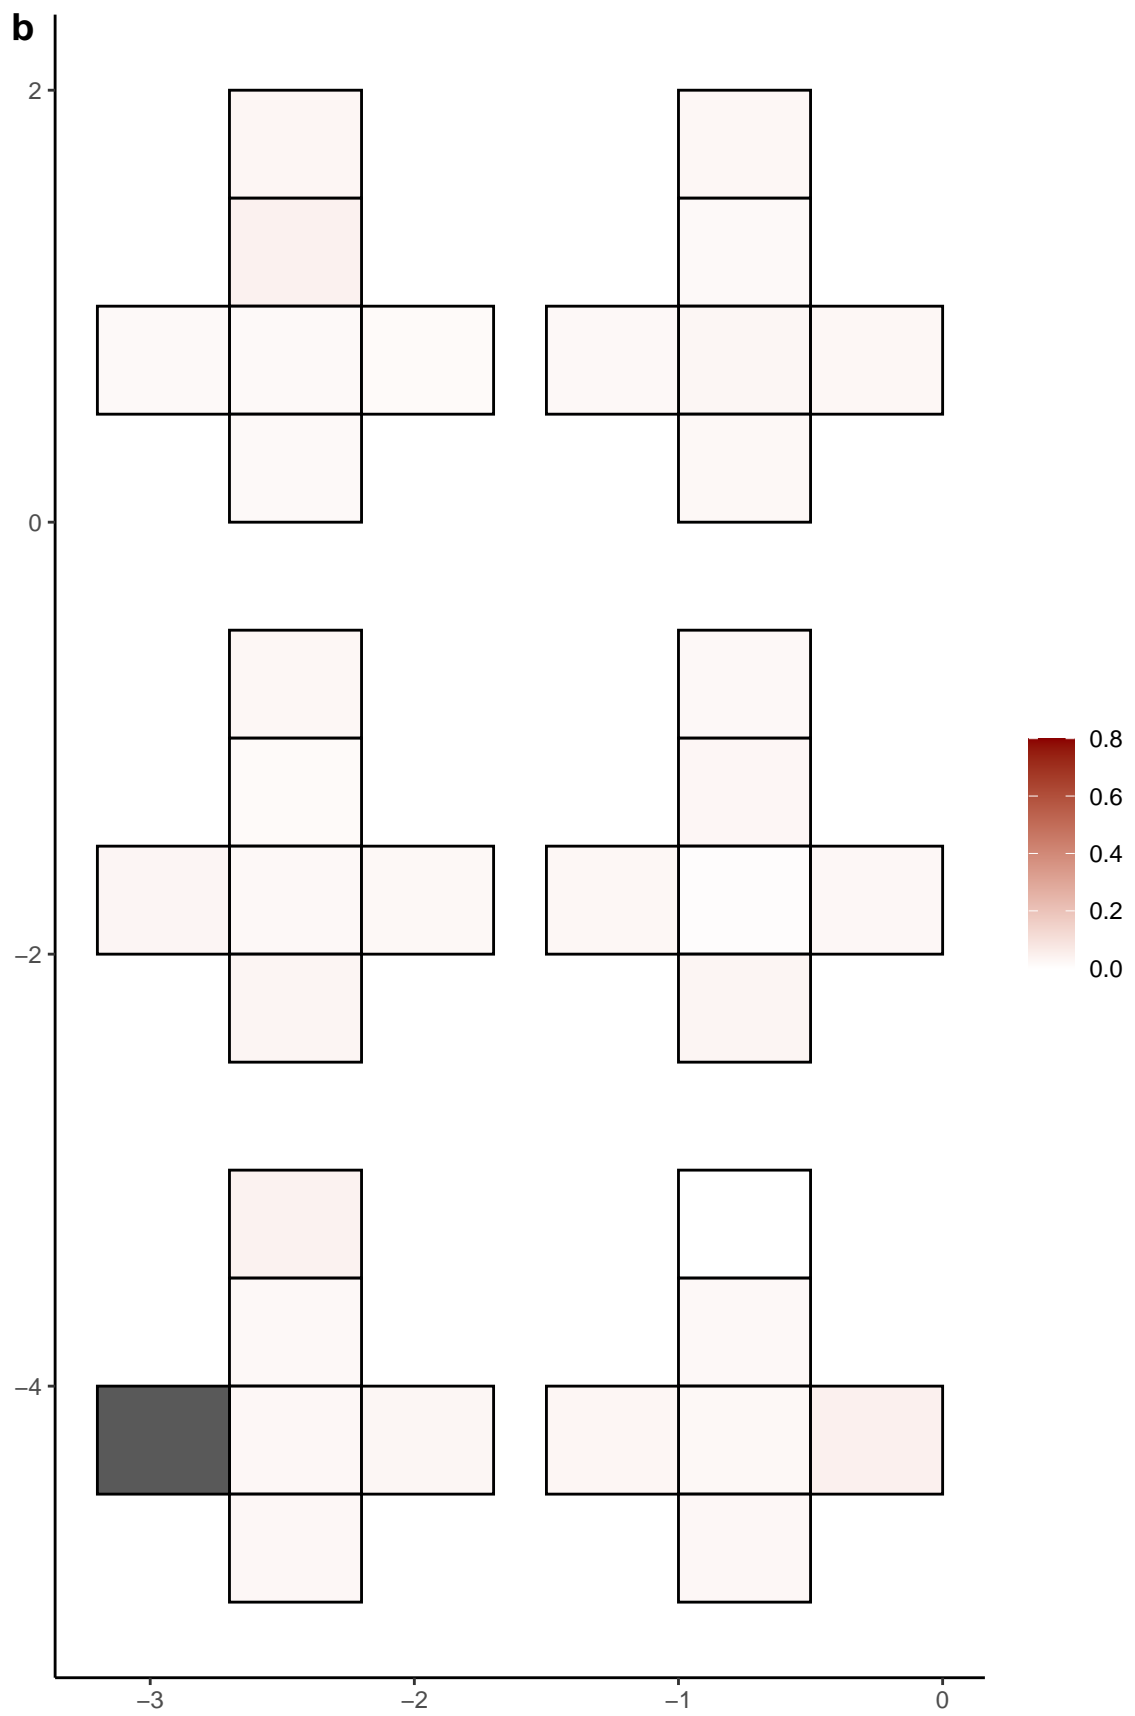

**a** ID01 20-1547810-C-T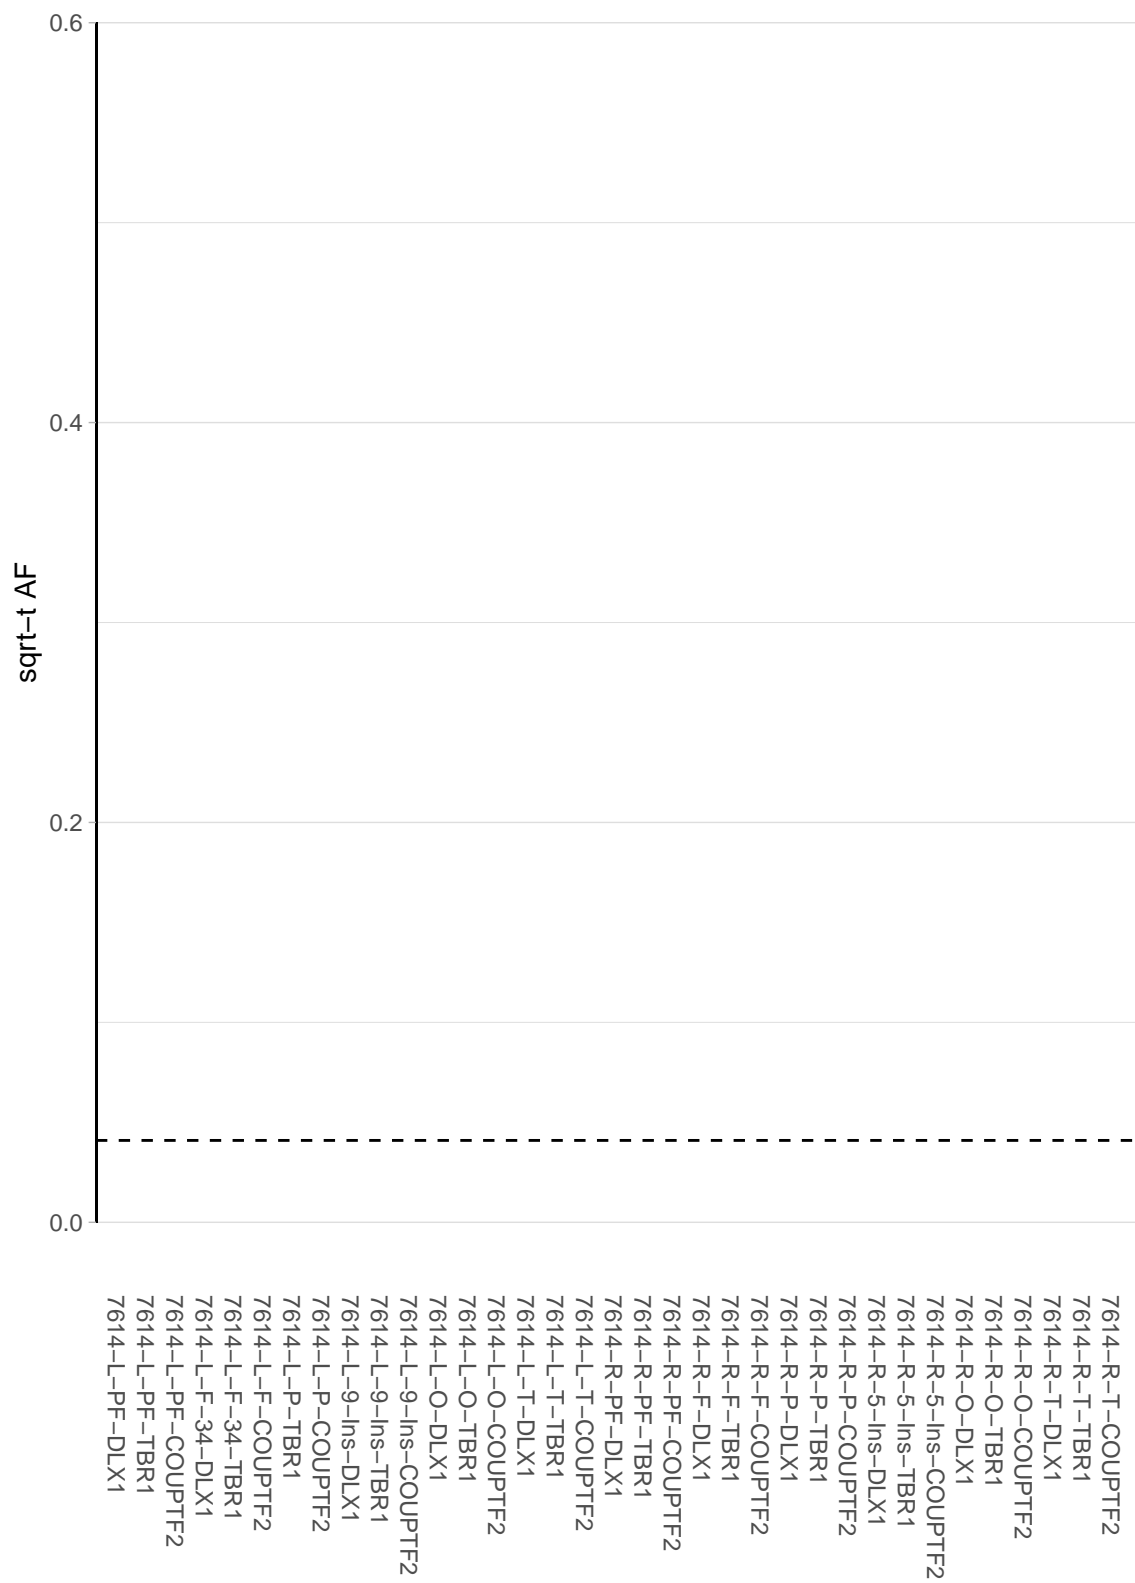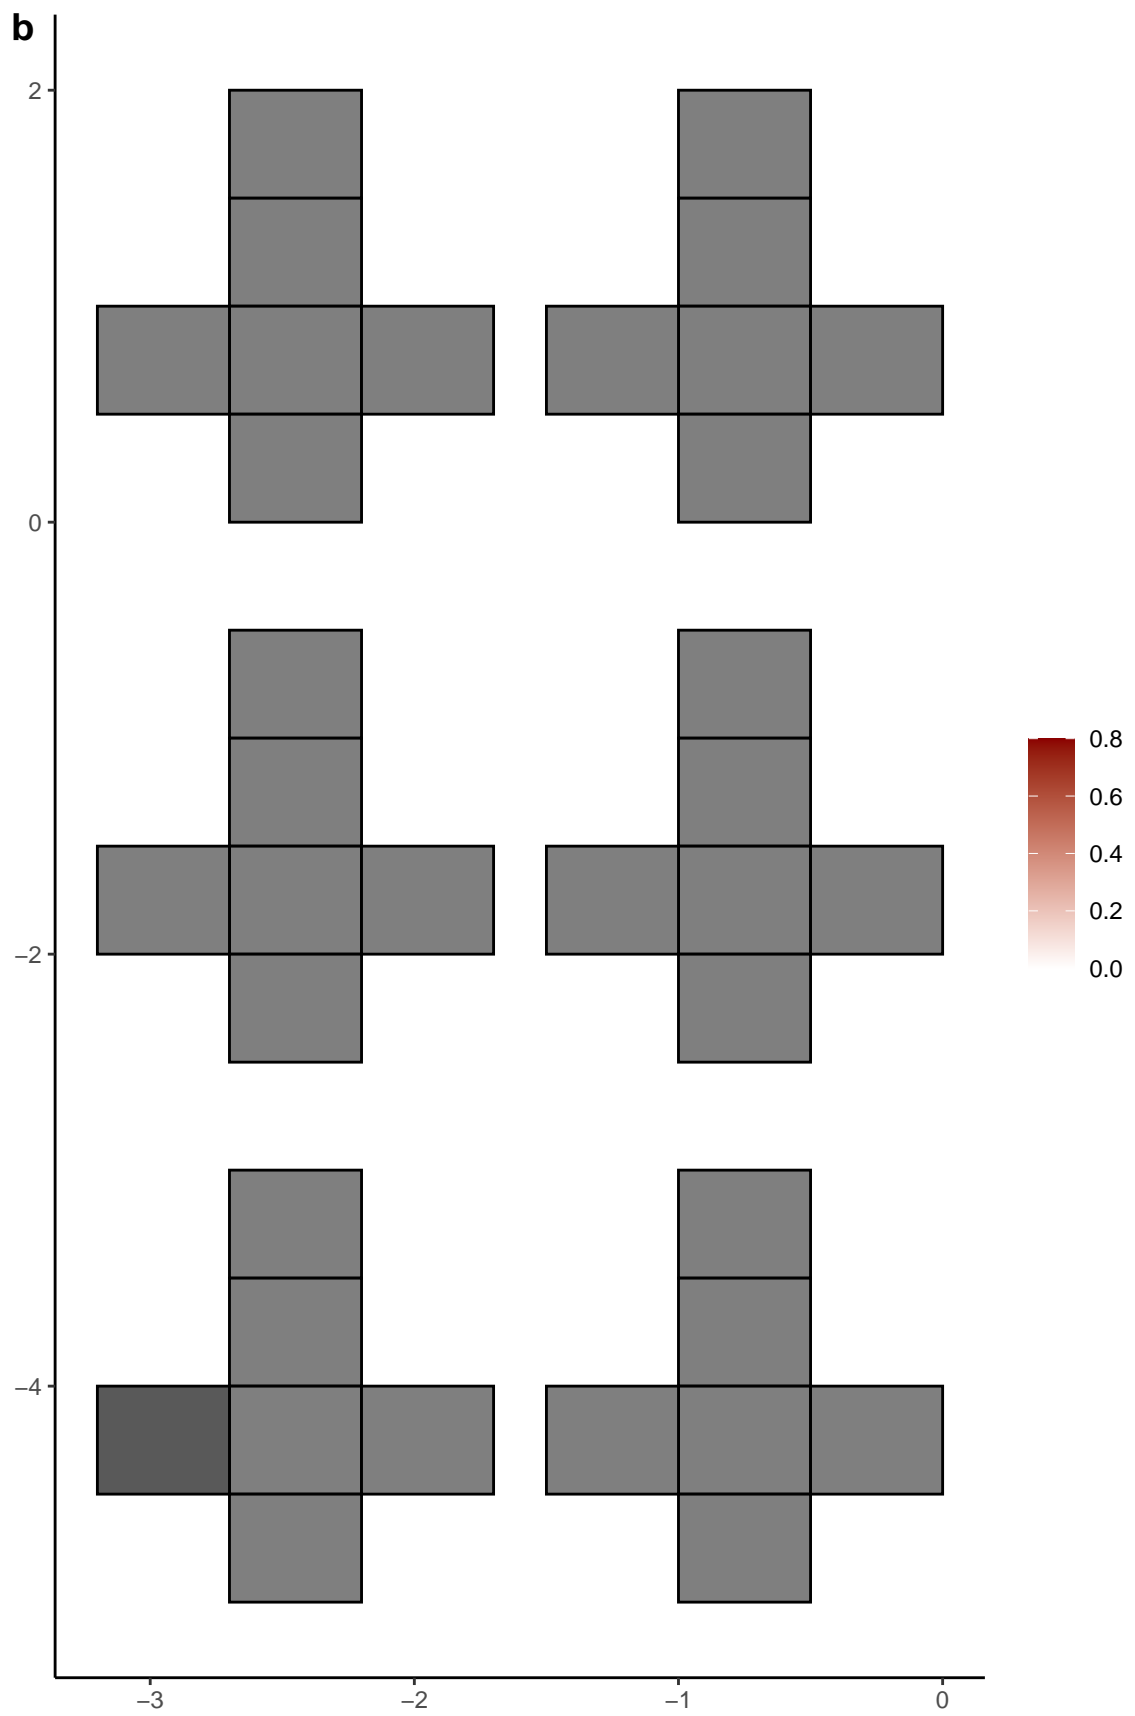

**a** ID01 20-29913114-C-T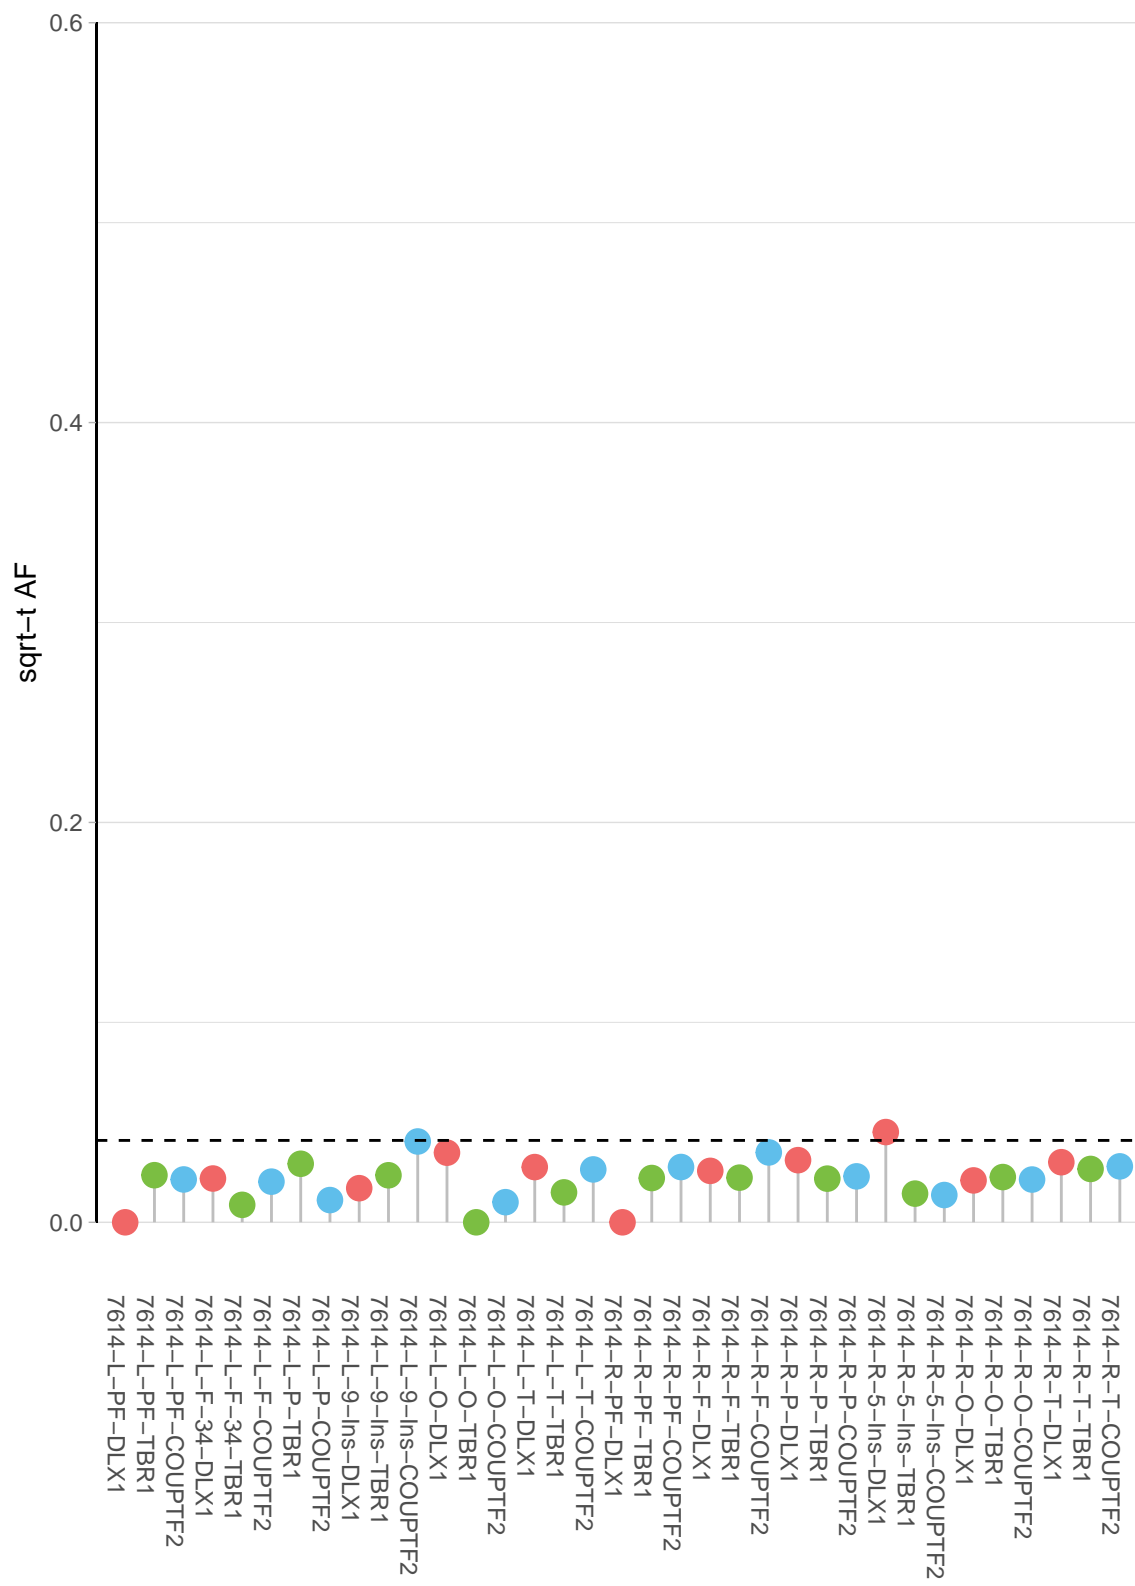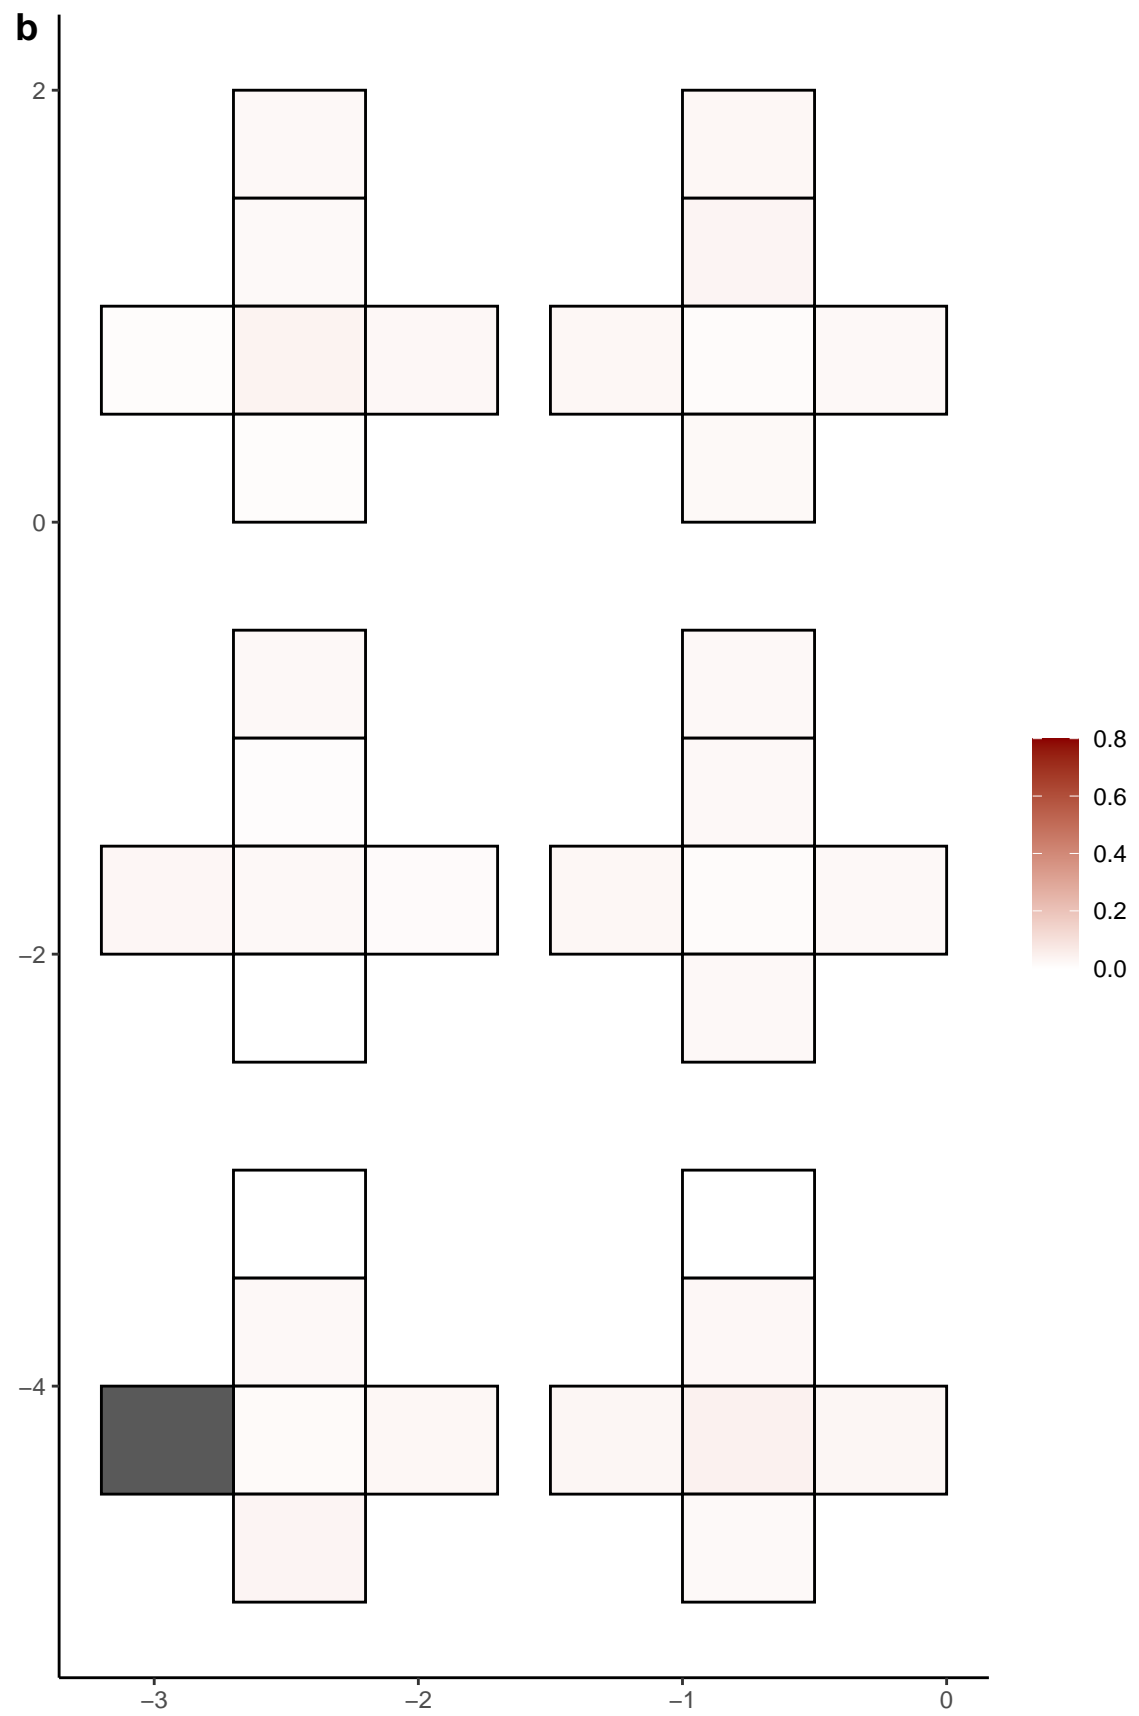

**a** ID01 20-52915779-G-T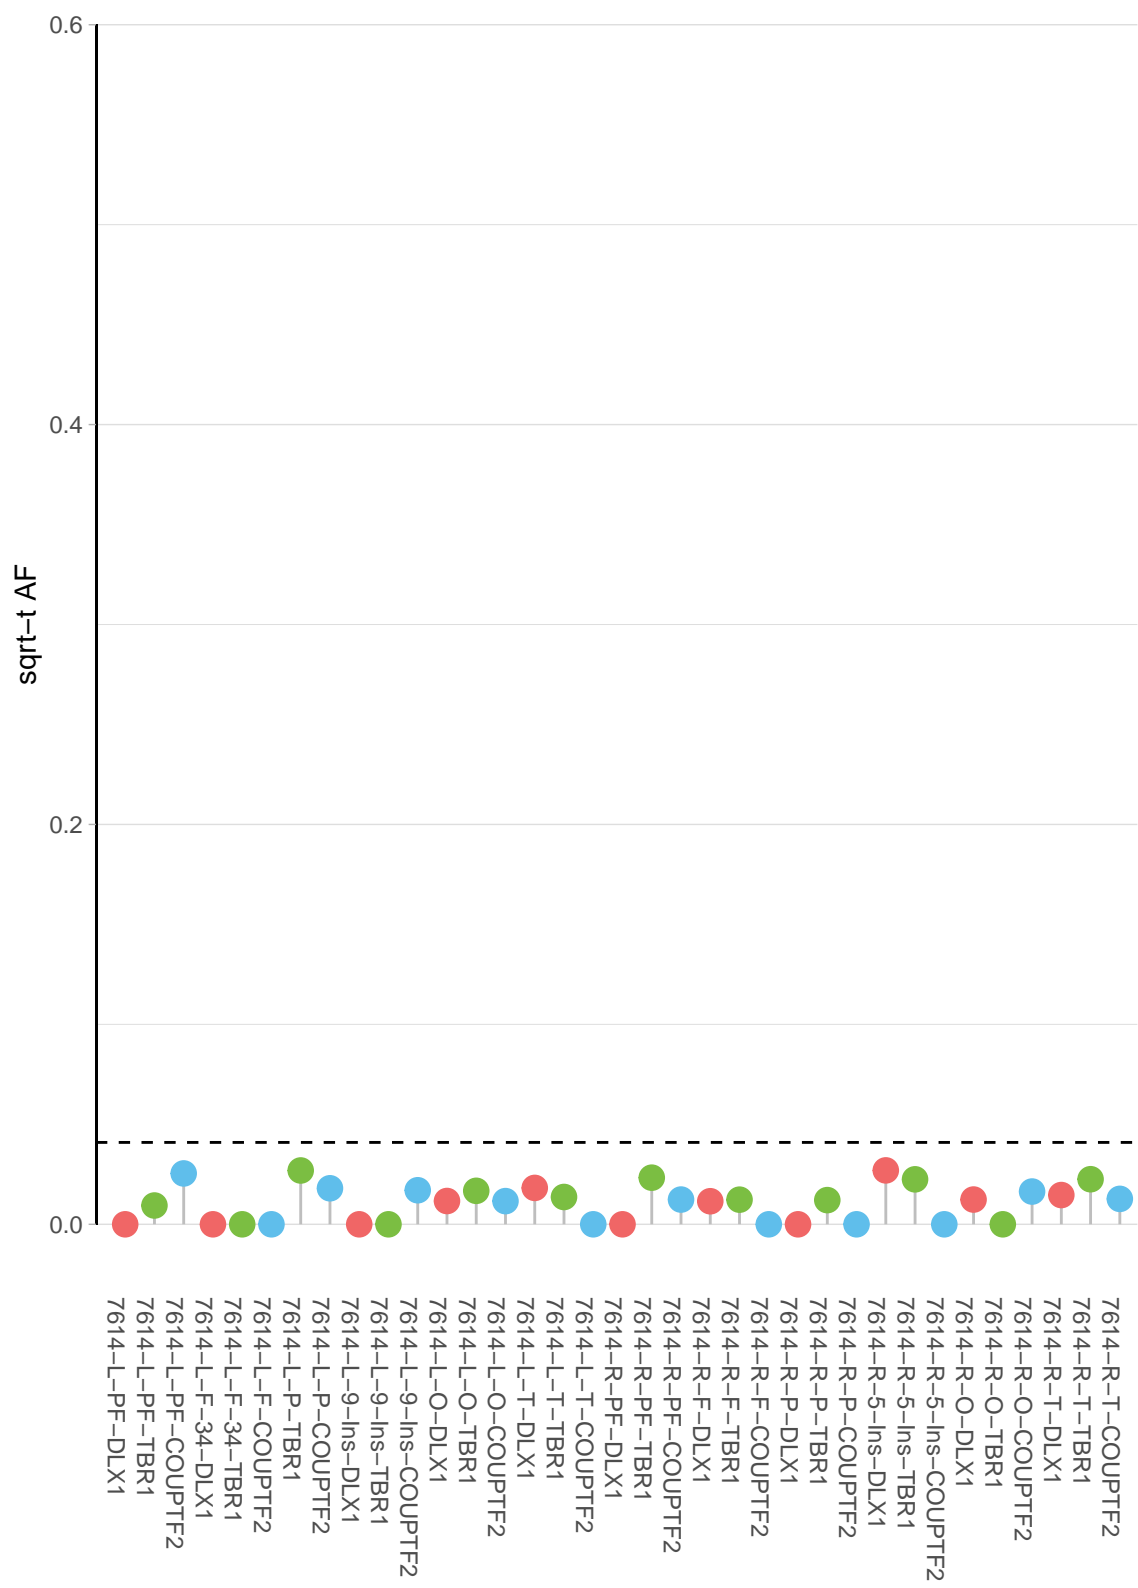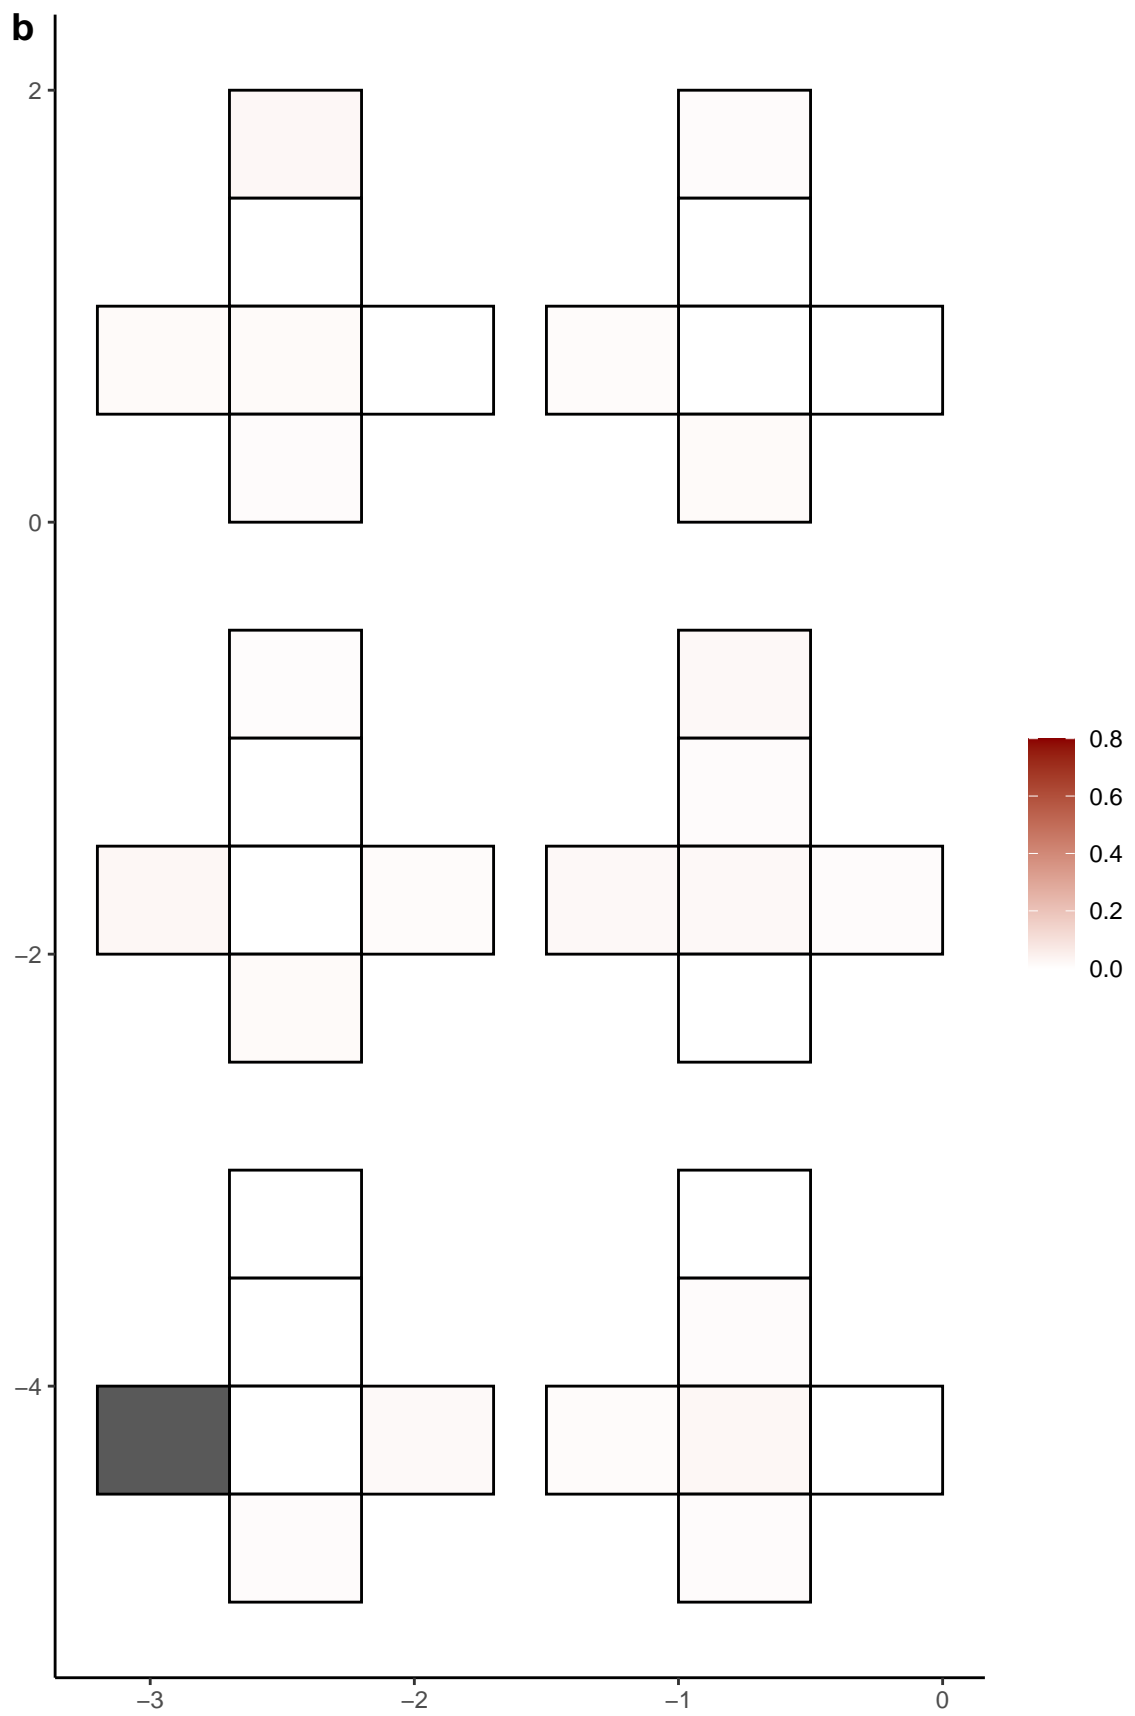

**a** ID01 20-52916352-A-C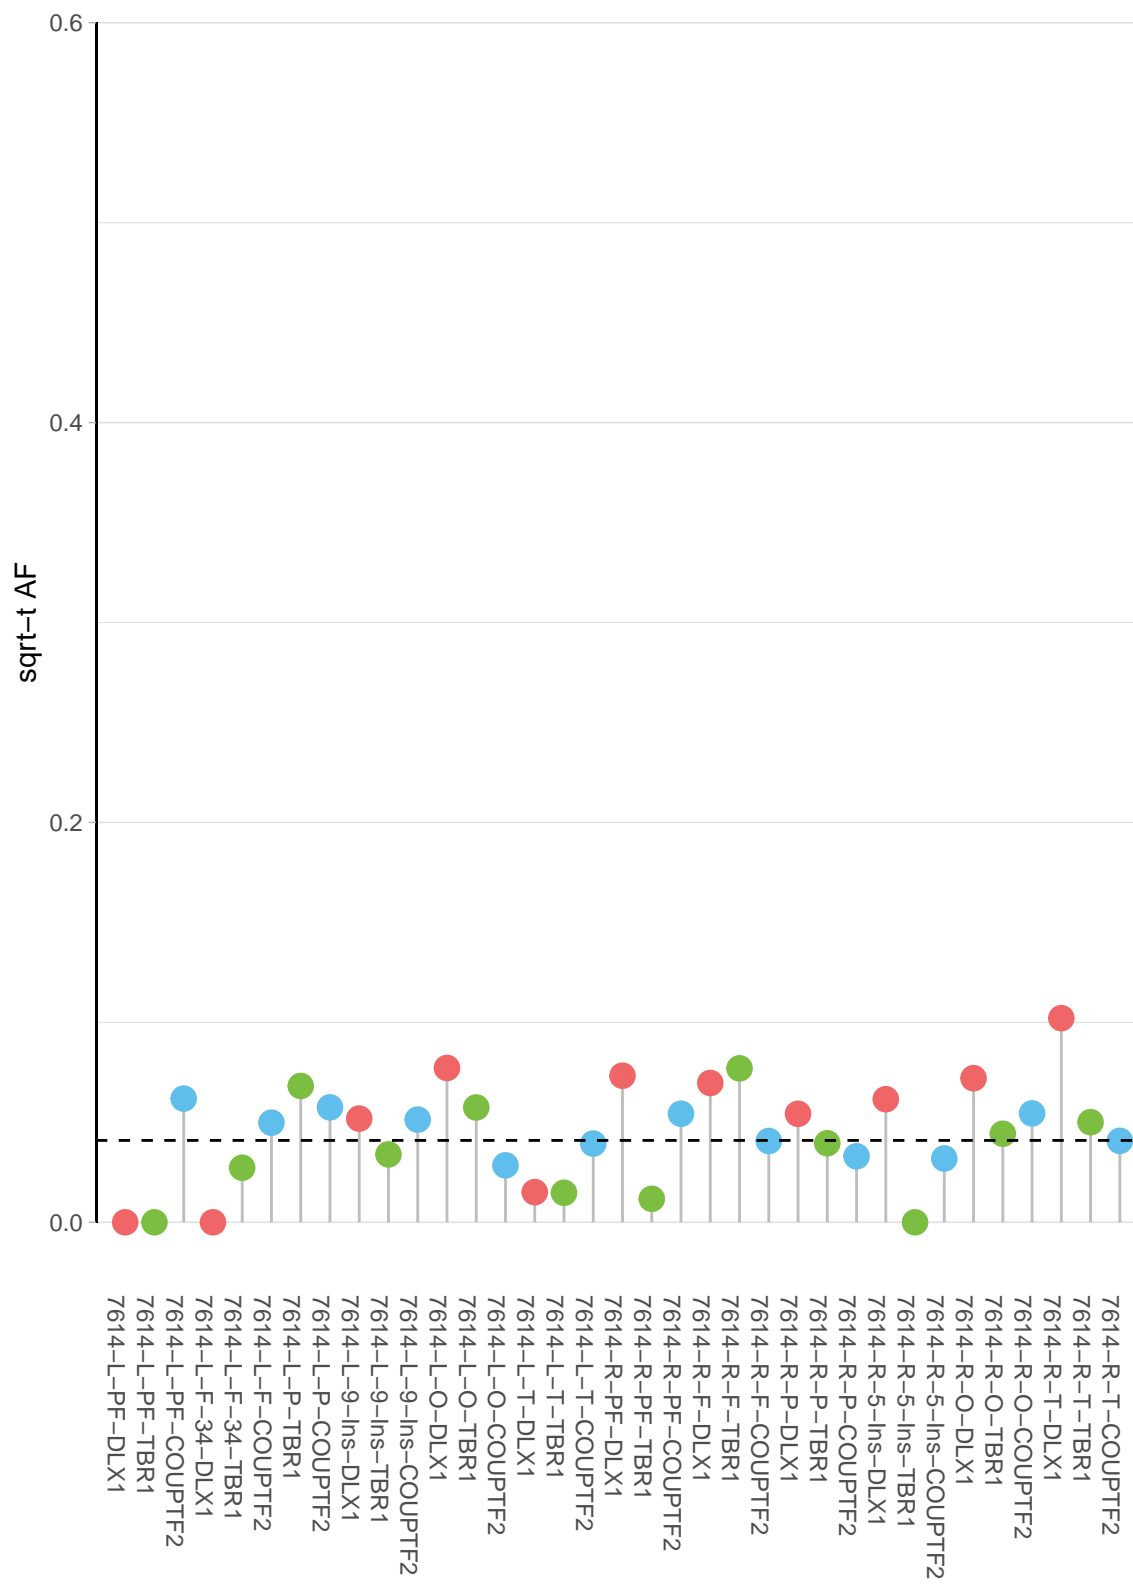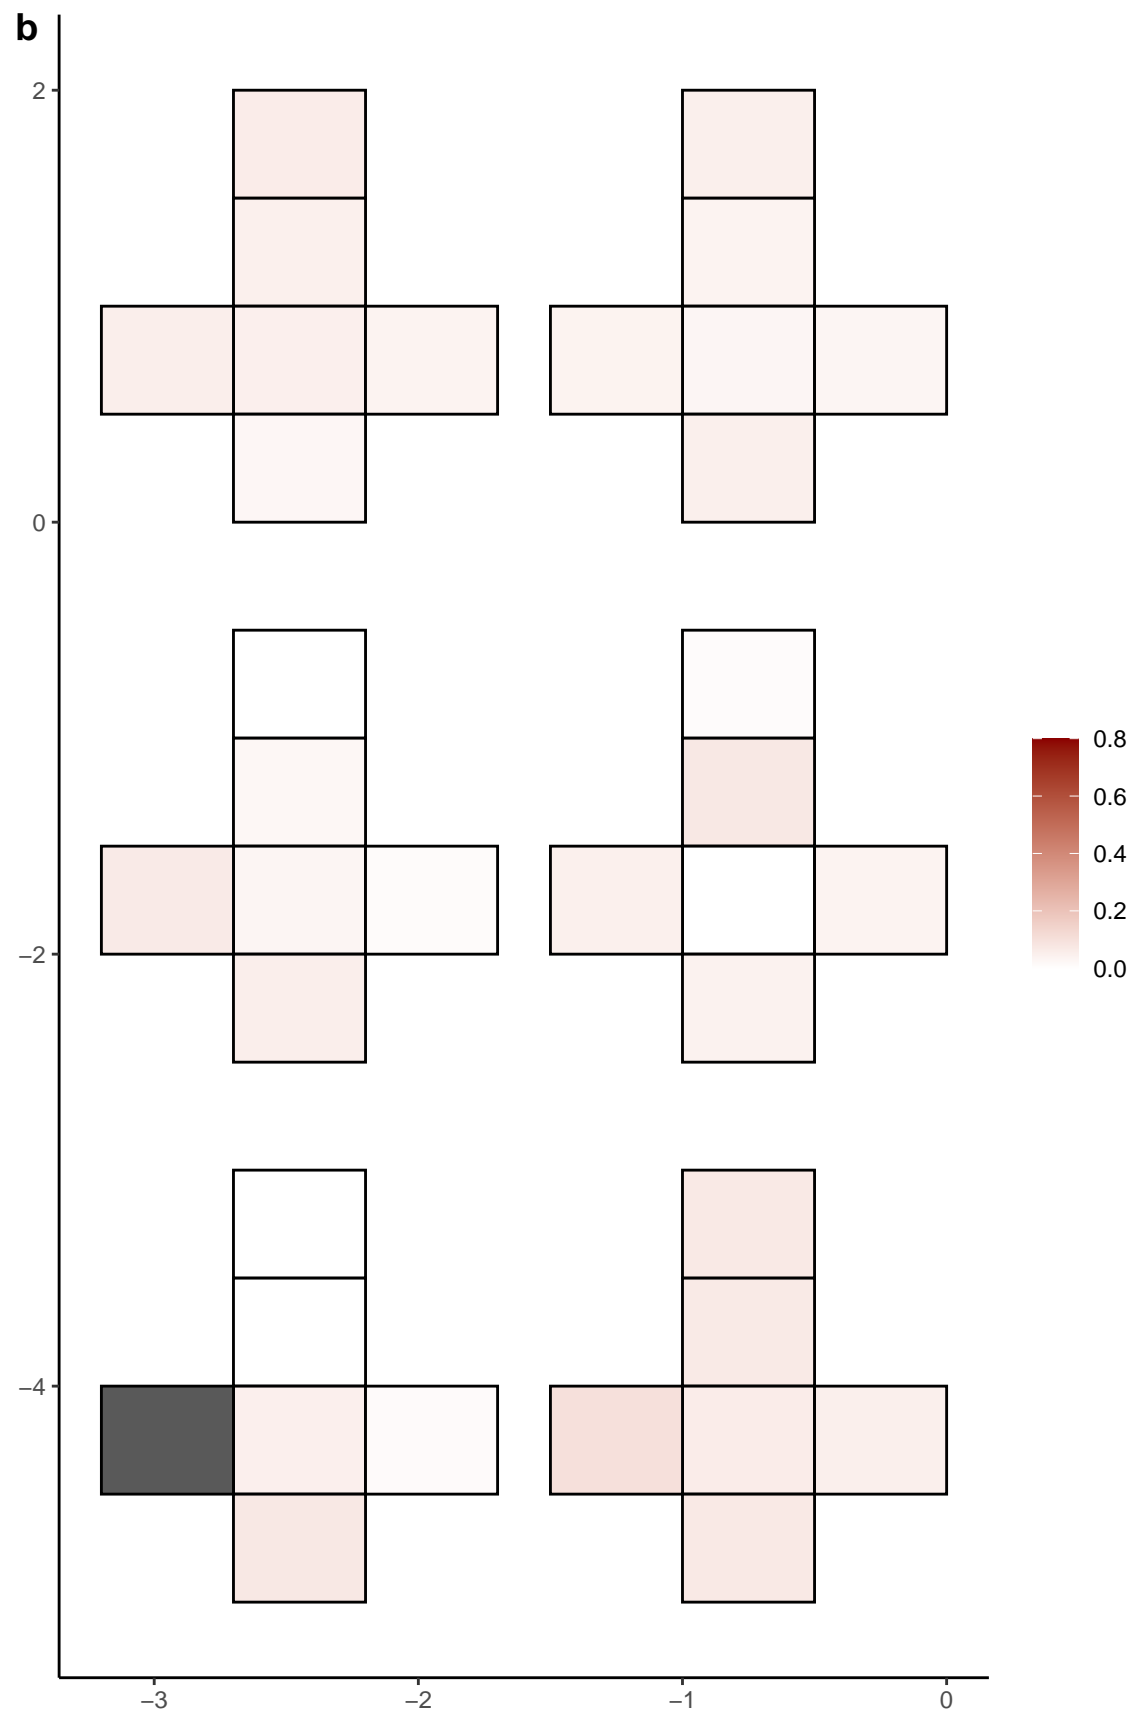

**a** ID01 20-53672093-T-A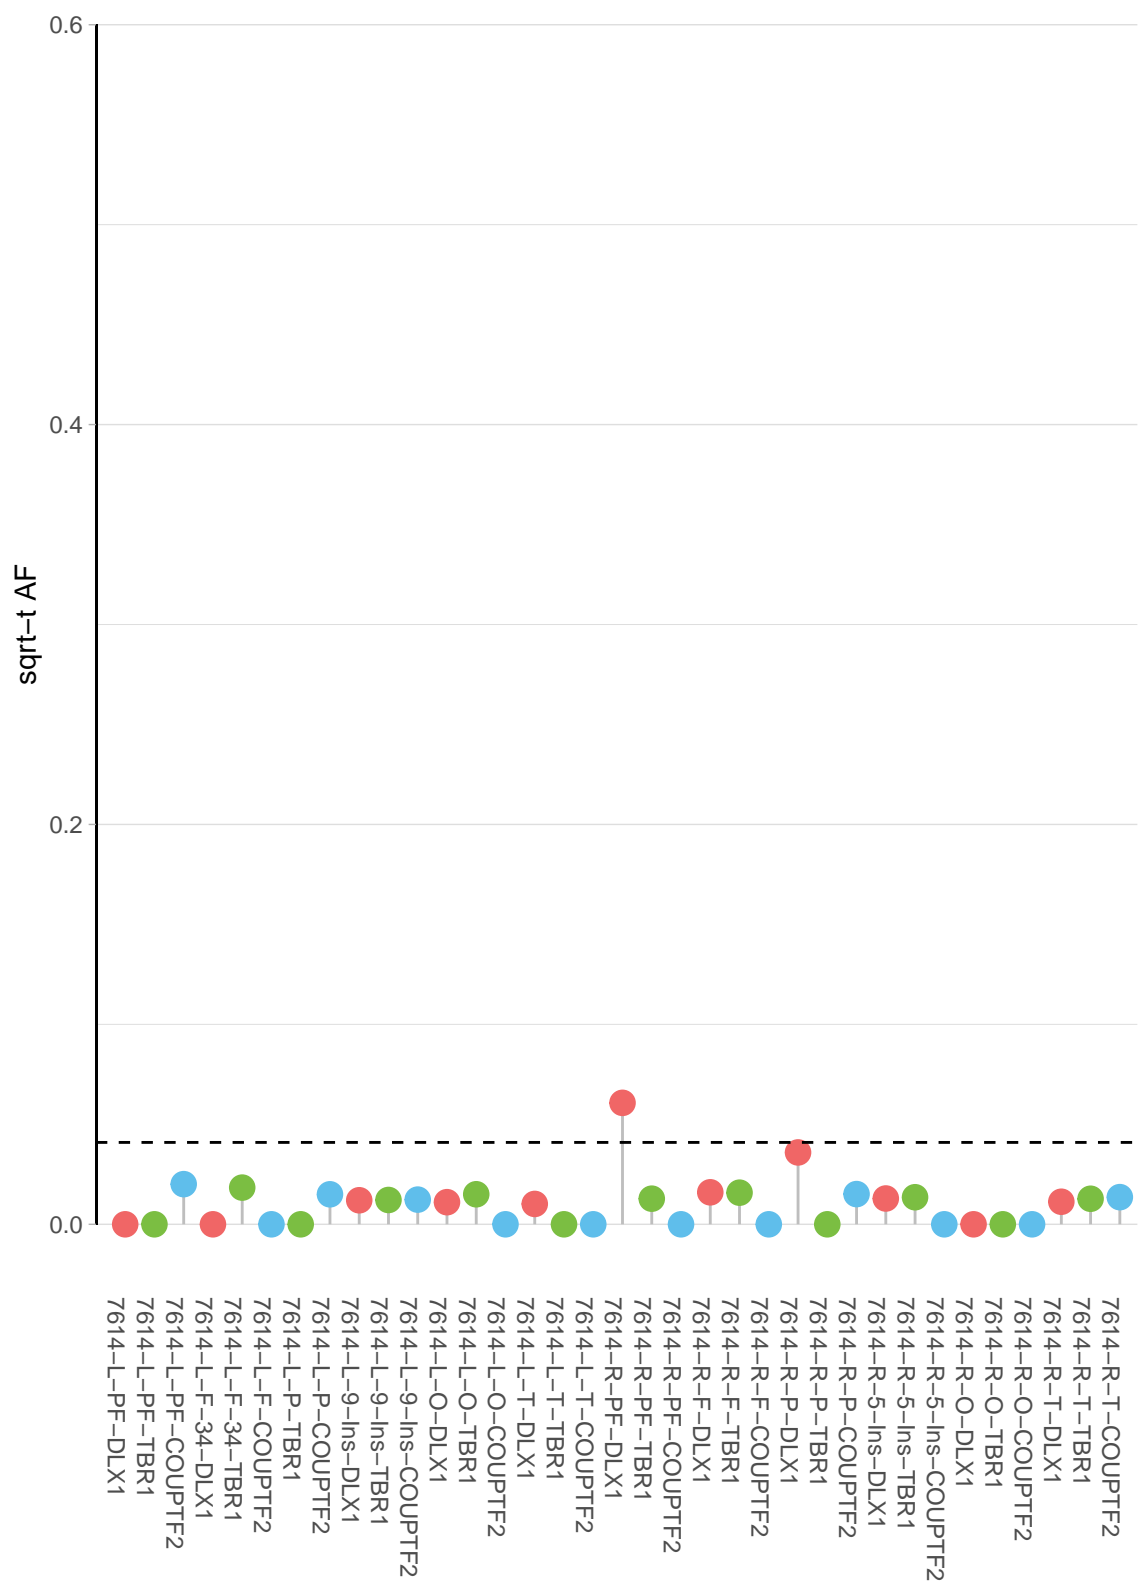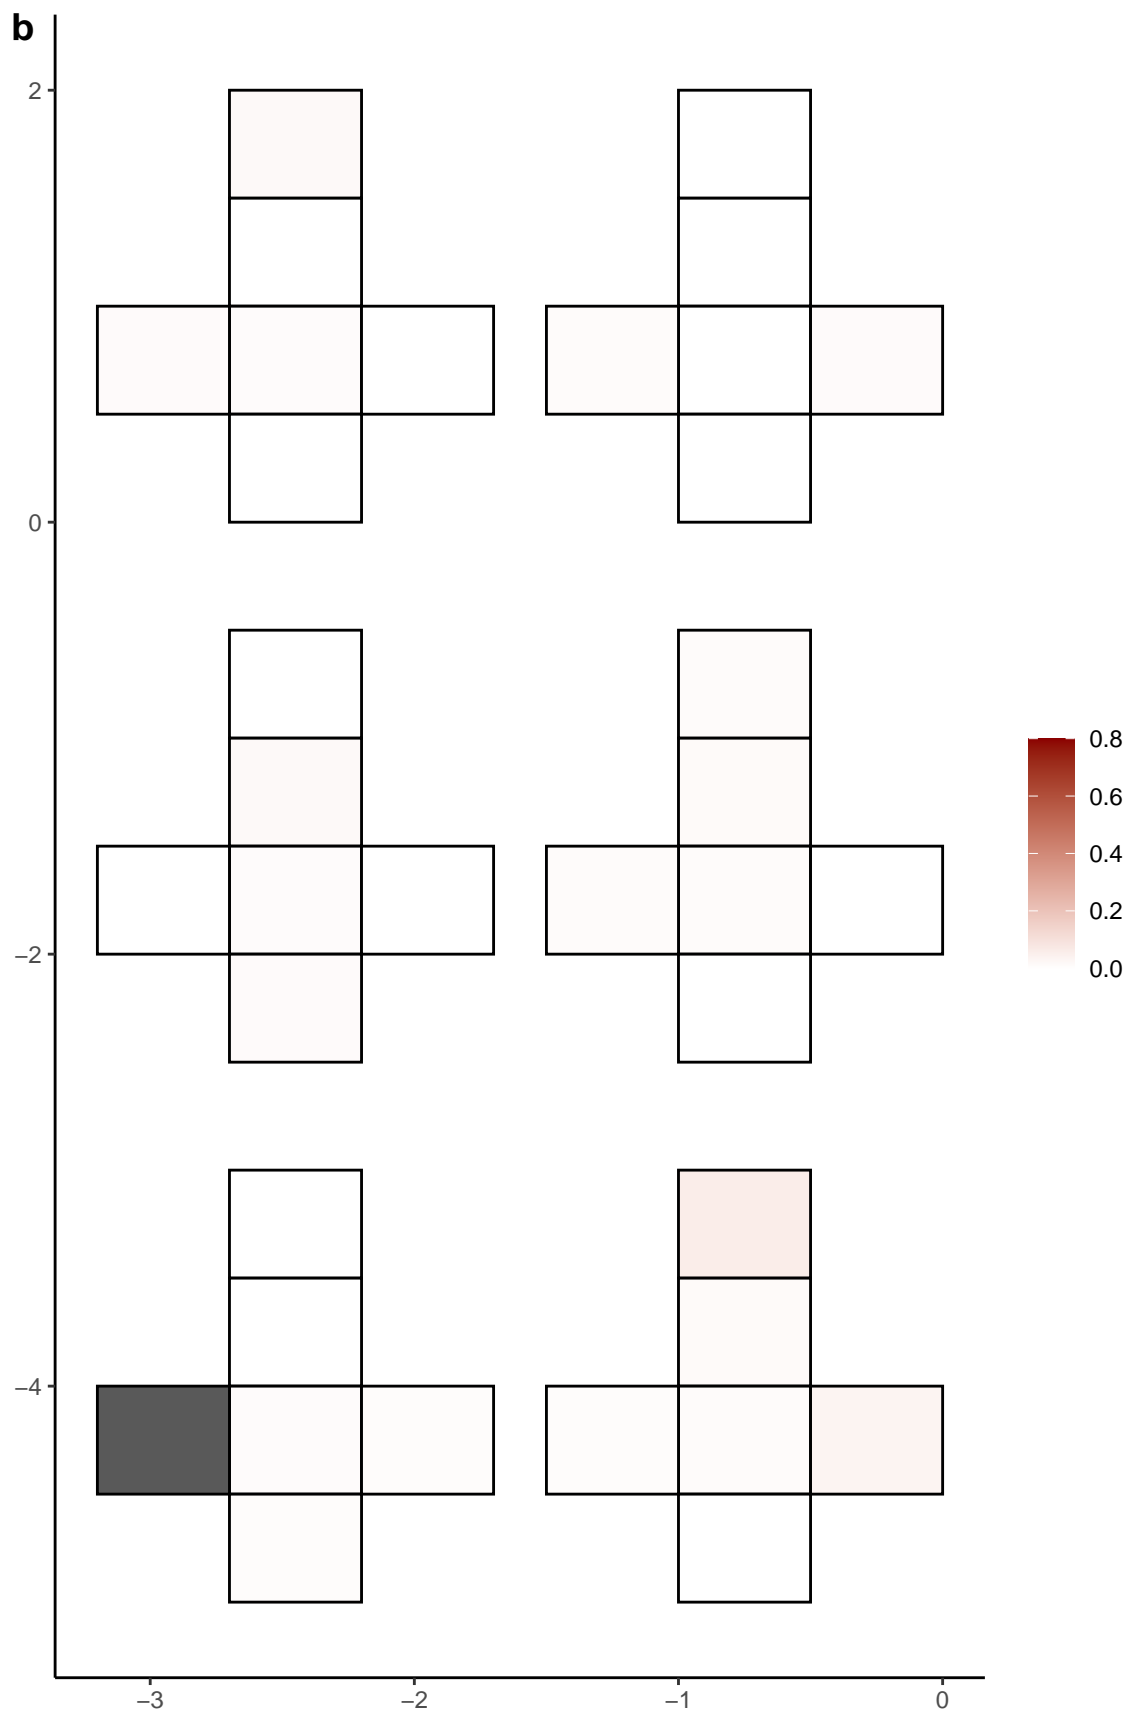

**a** ID01 20-56505887-G-A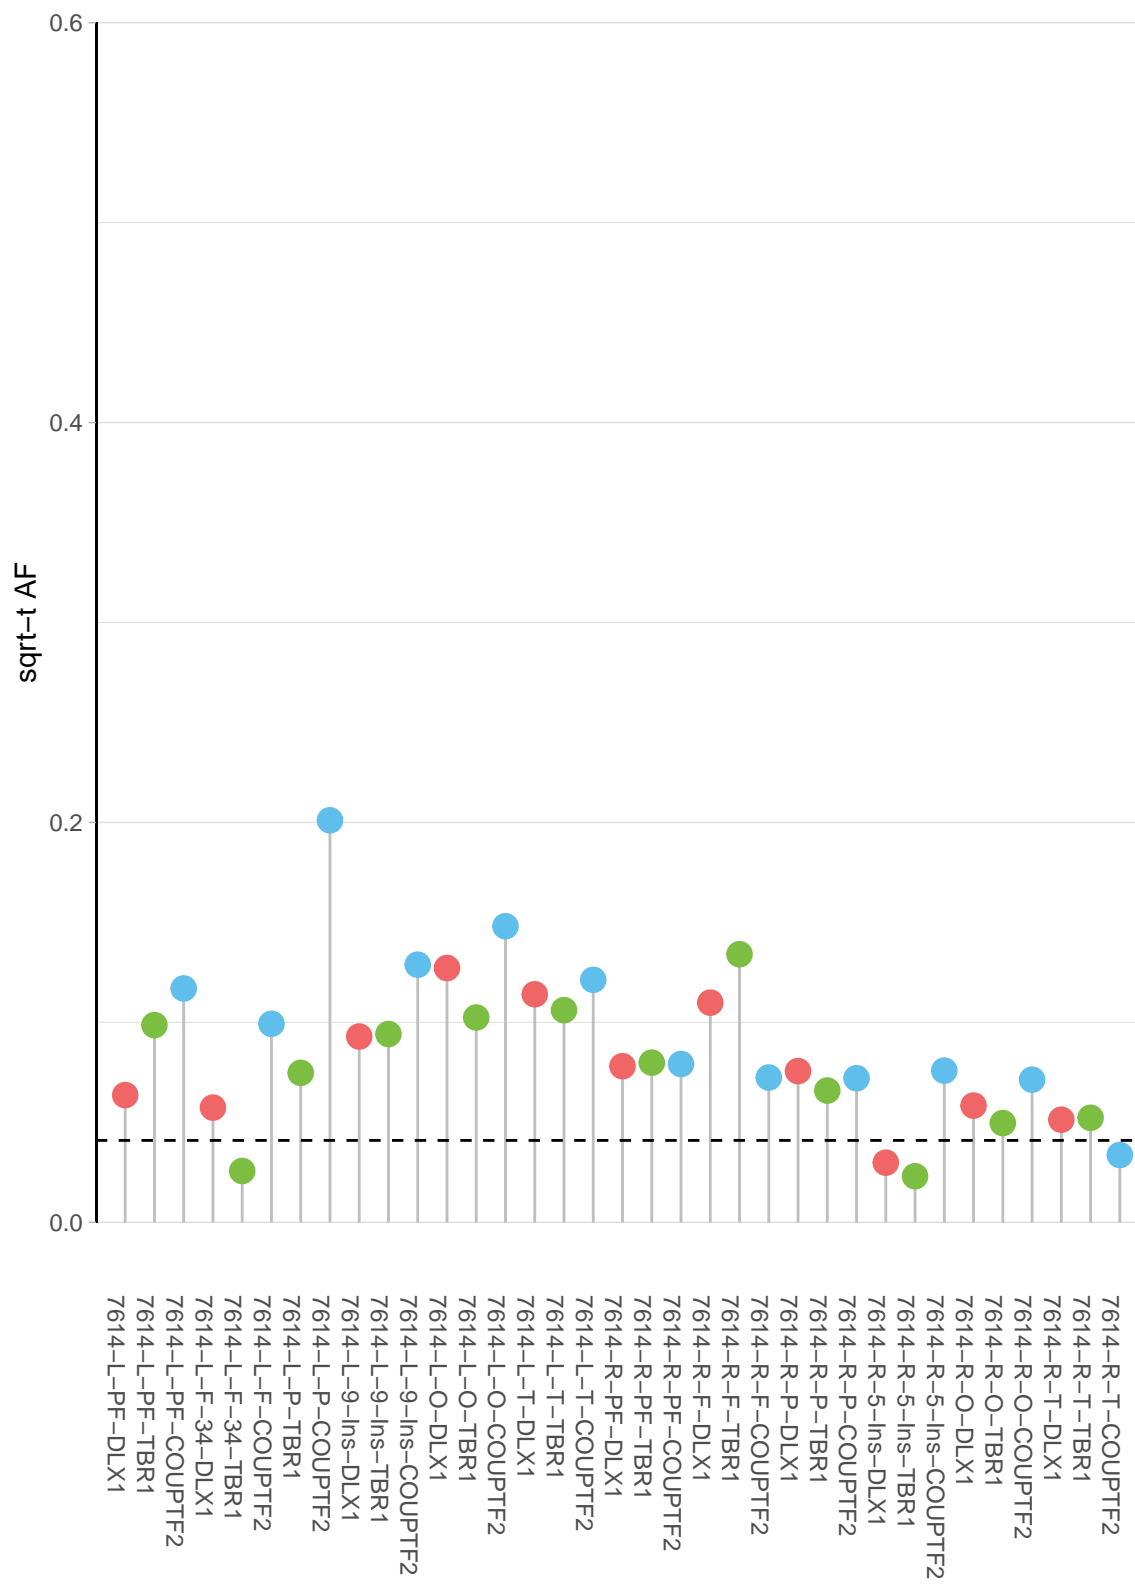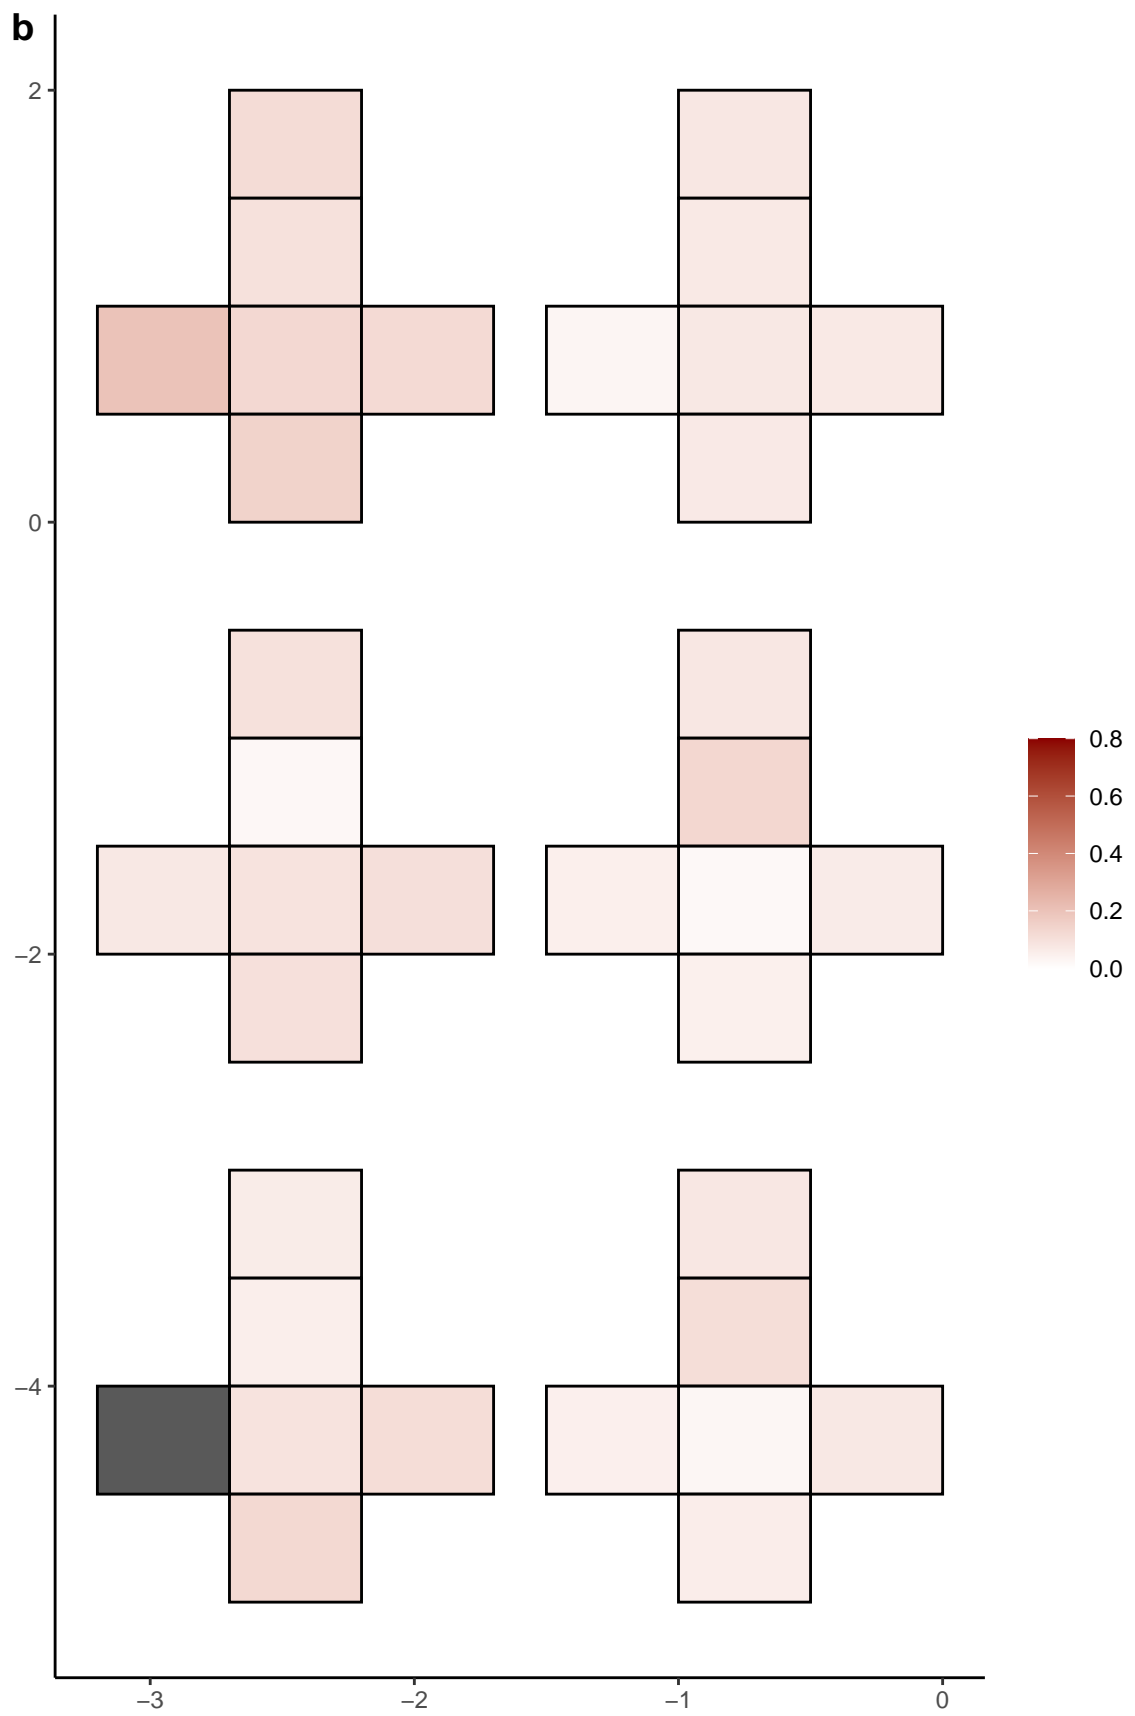

**a** ID01 20-61748407-G-A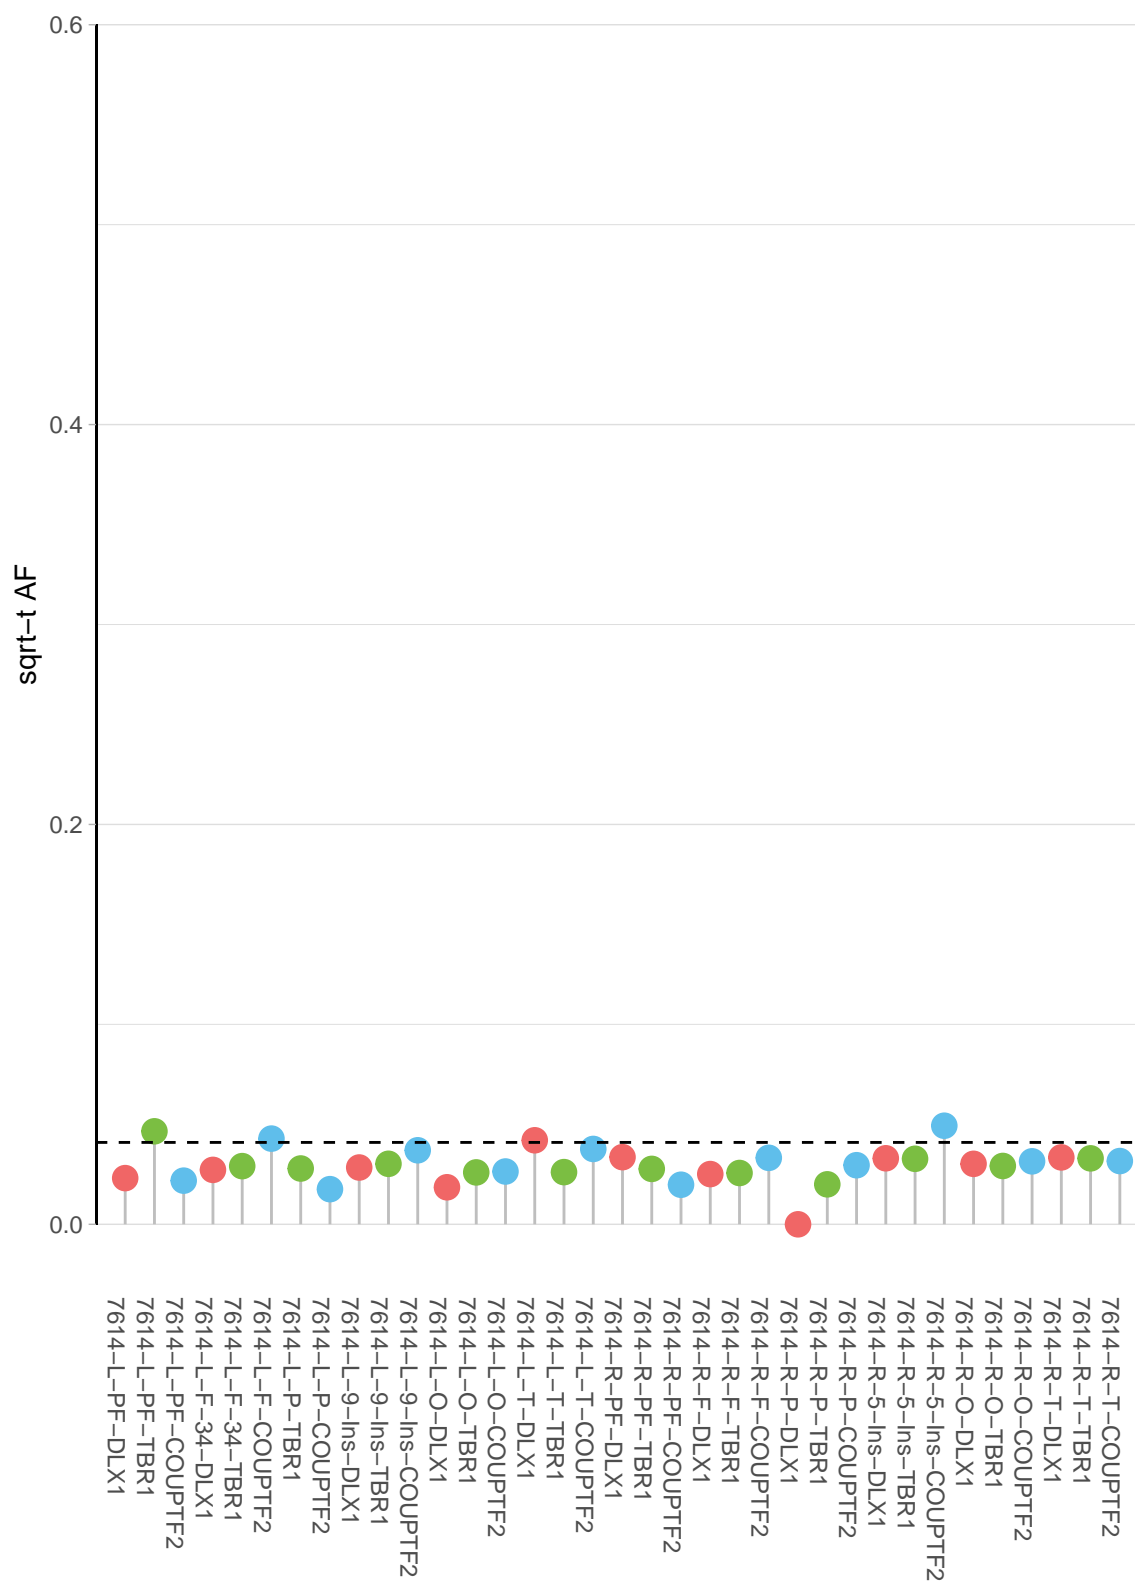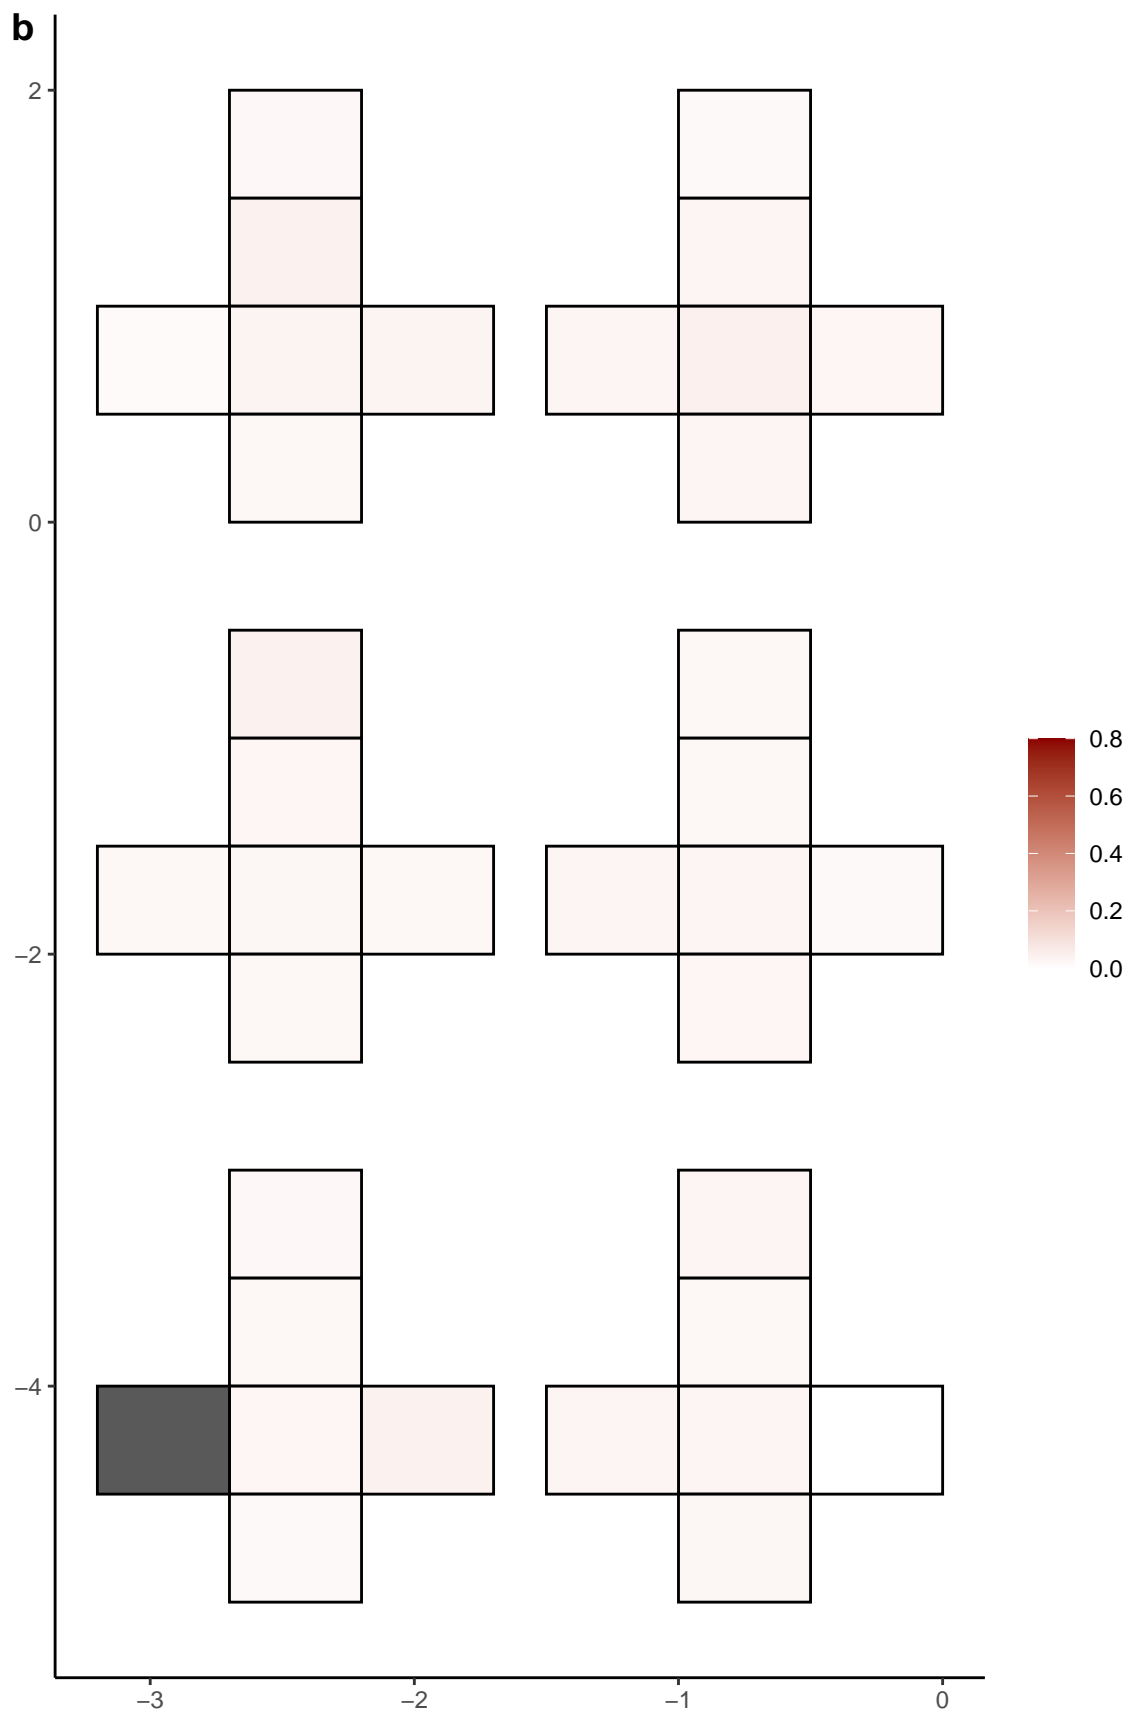



**a** ID01 21-17683648-TTA-T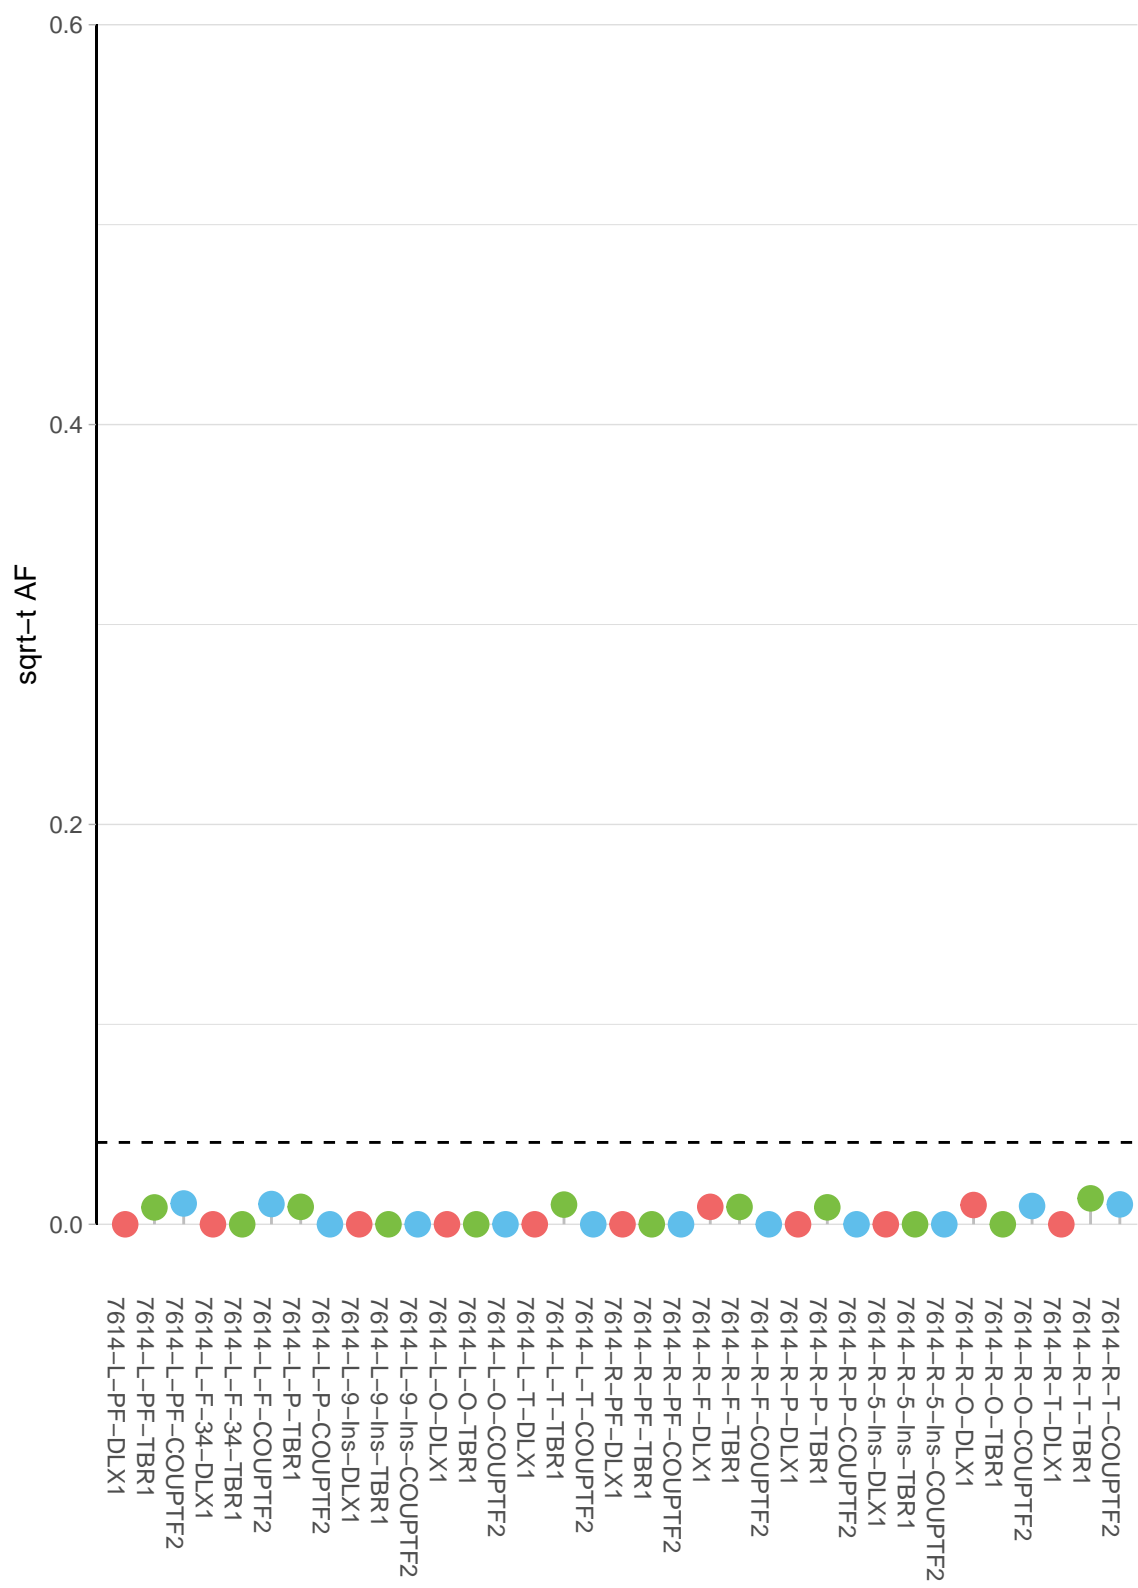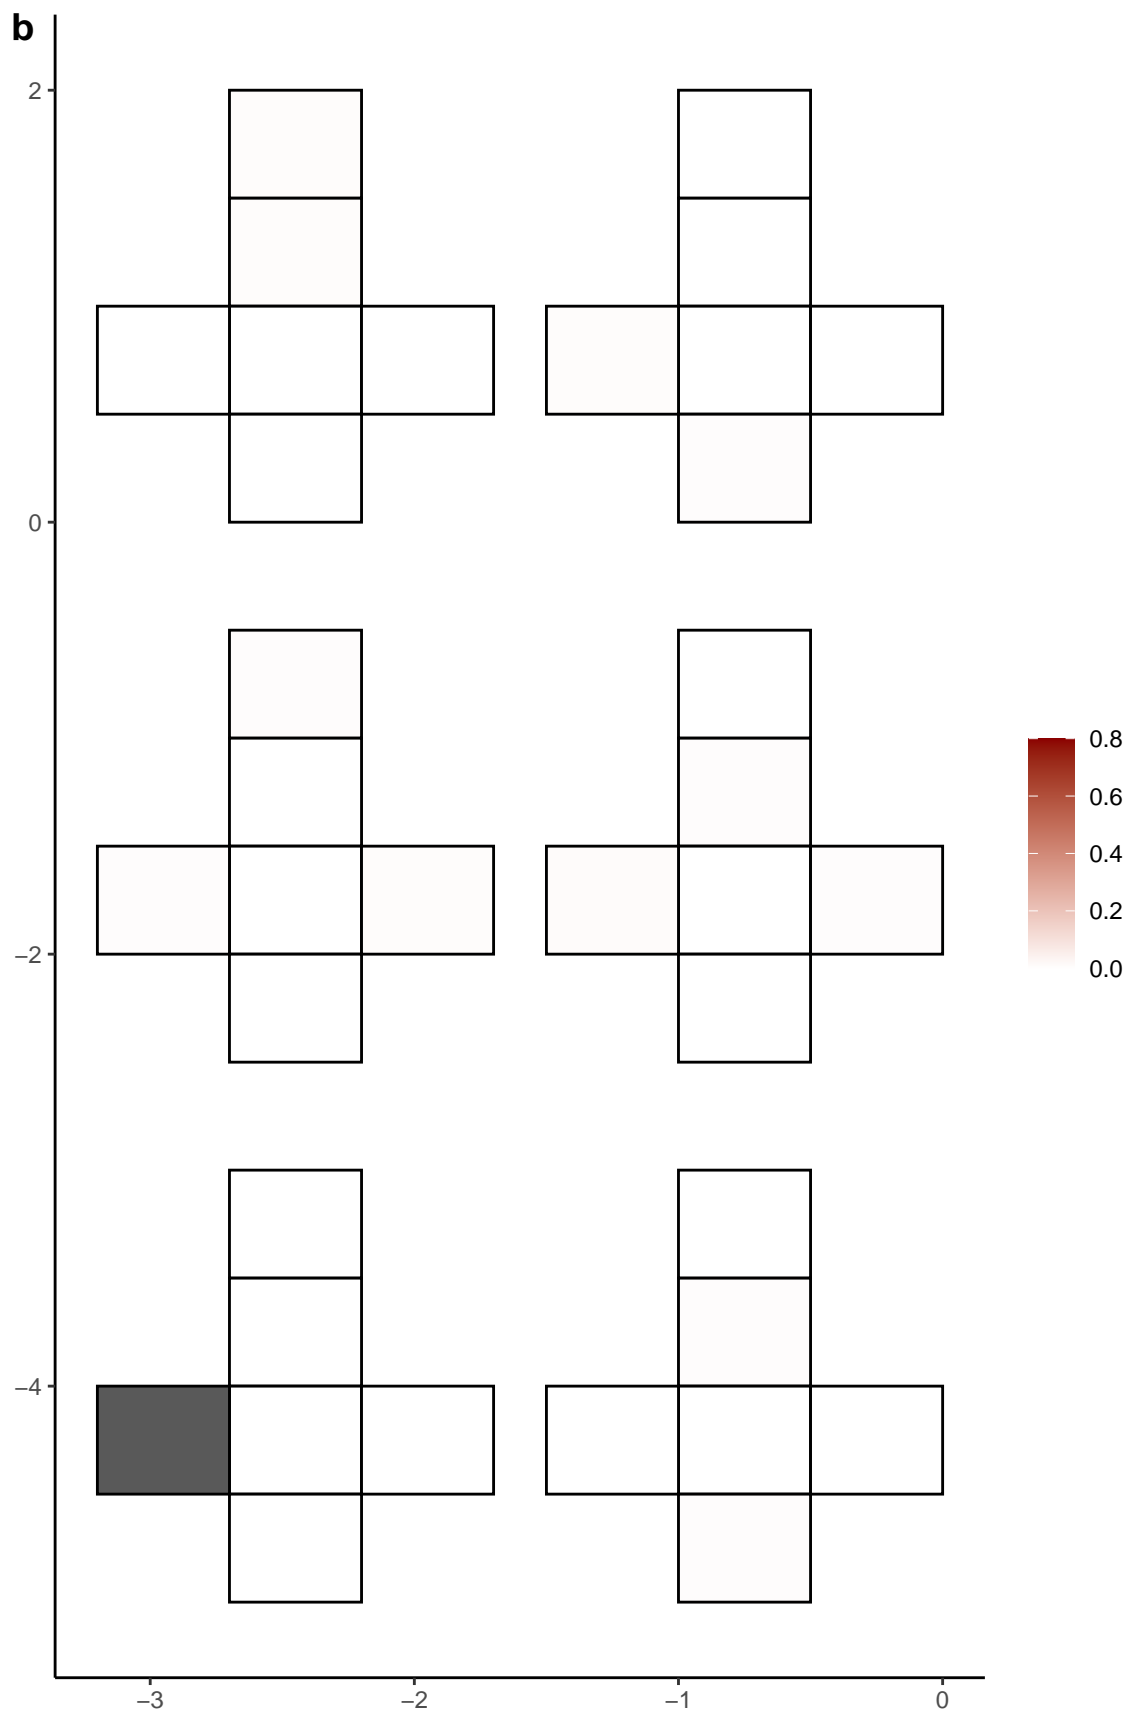

**a** ID01 21-35693543-G-A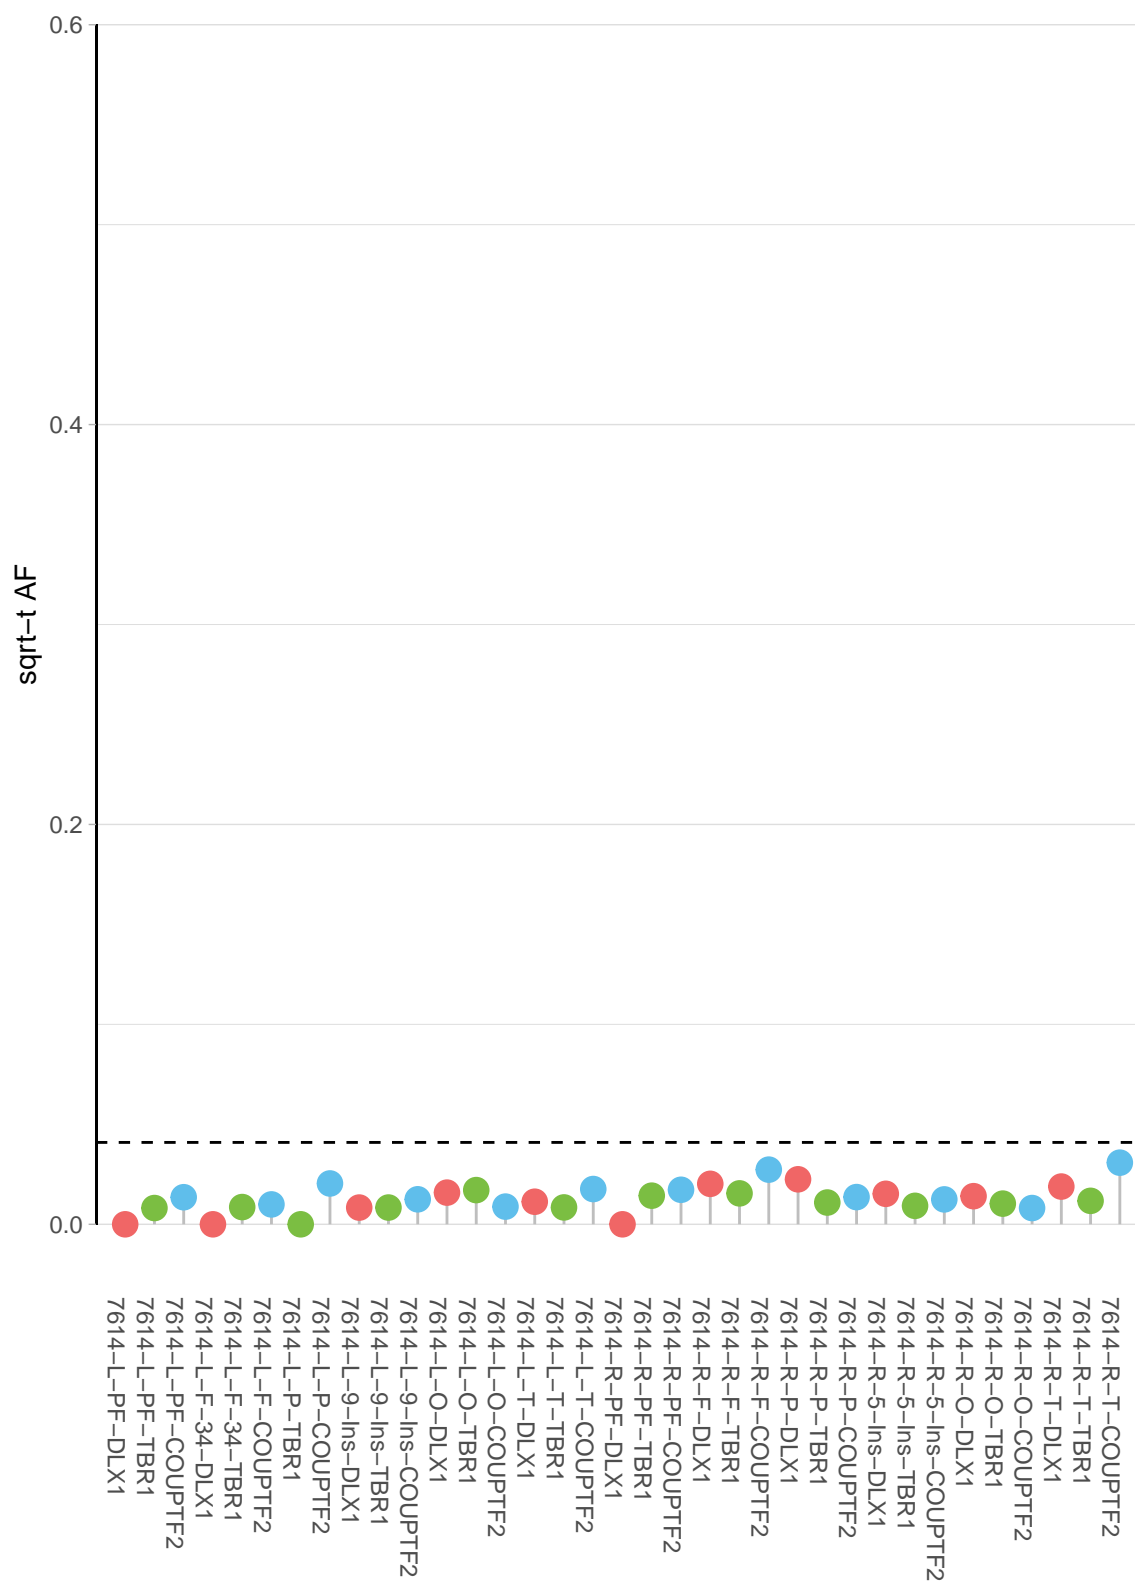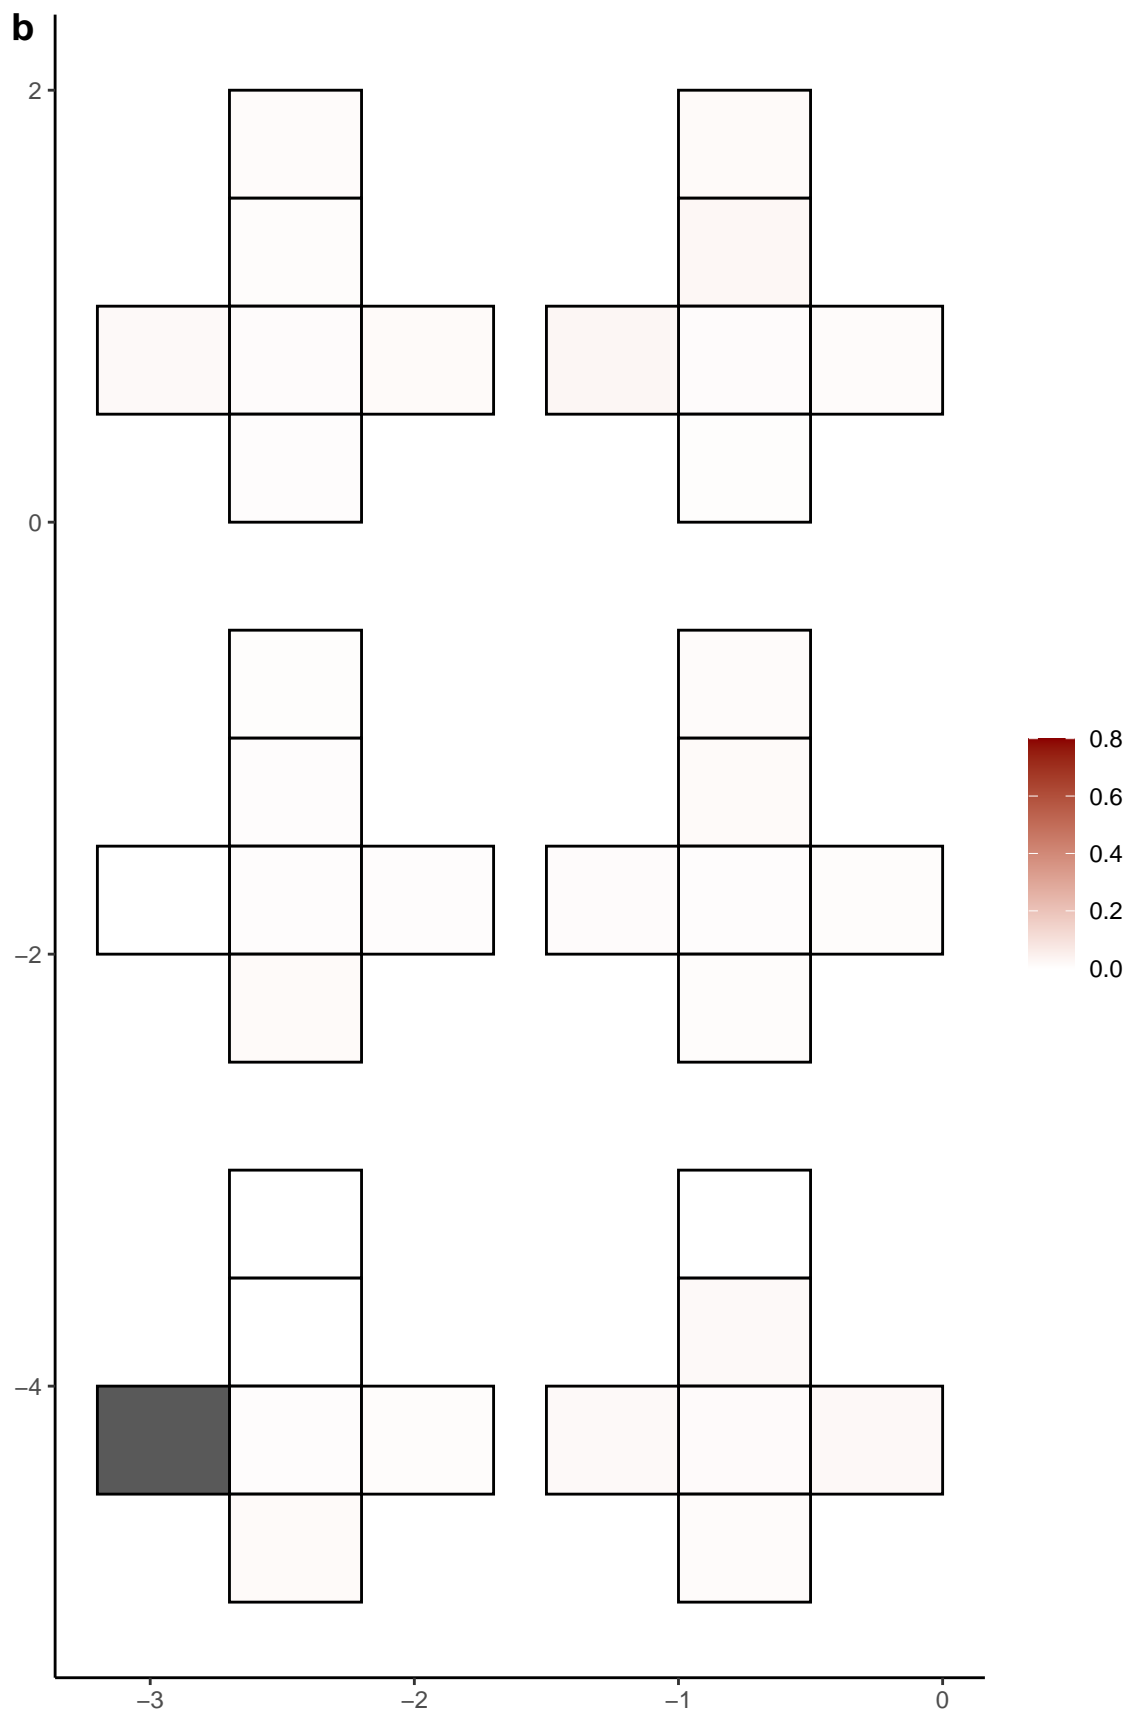

**a** ID01 21-42801460-G-A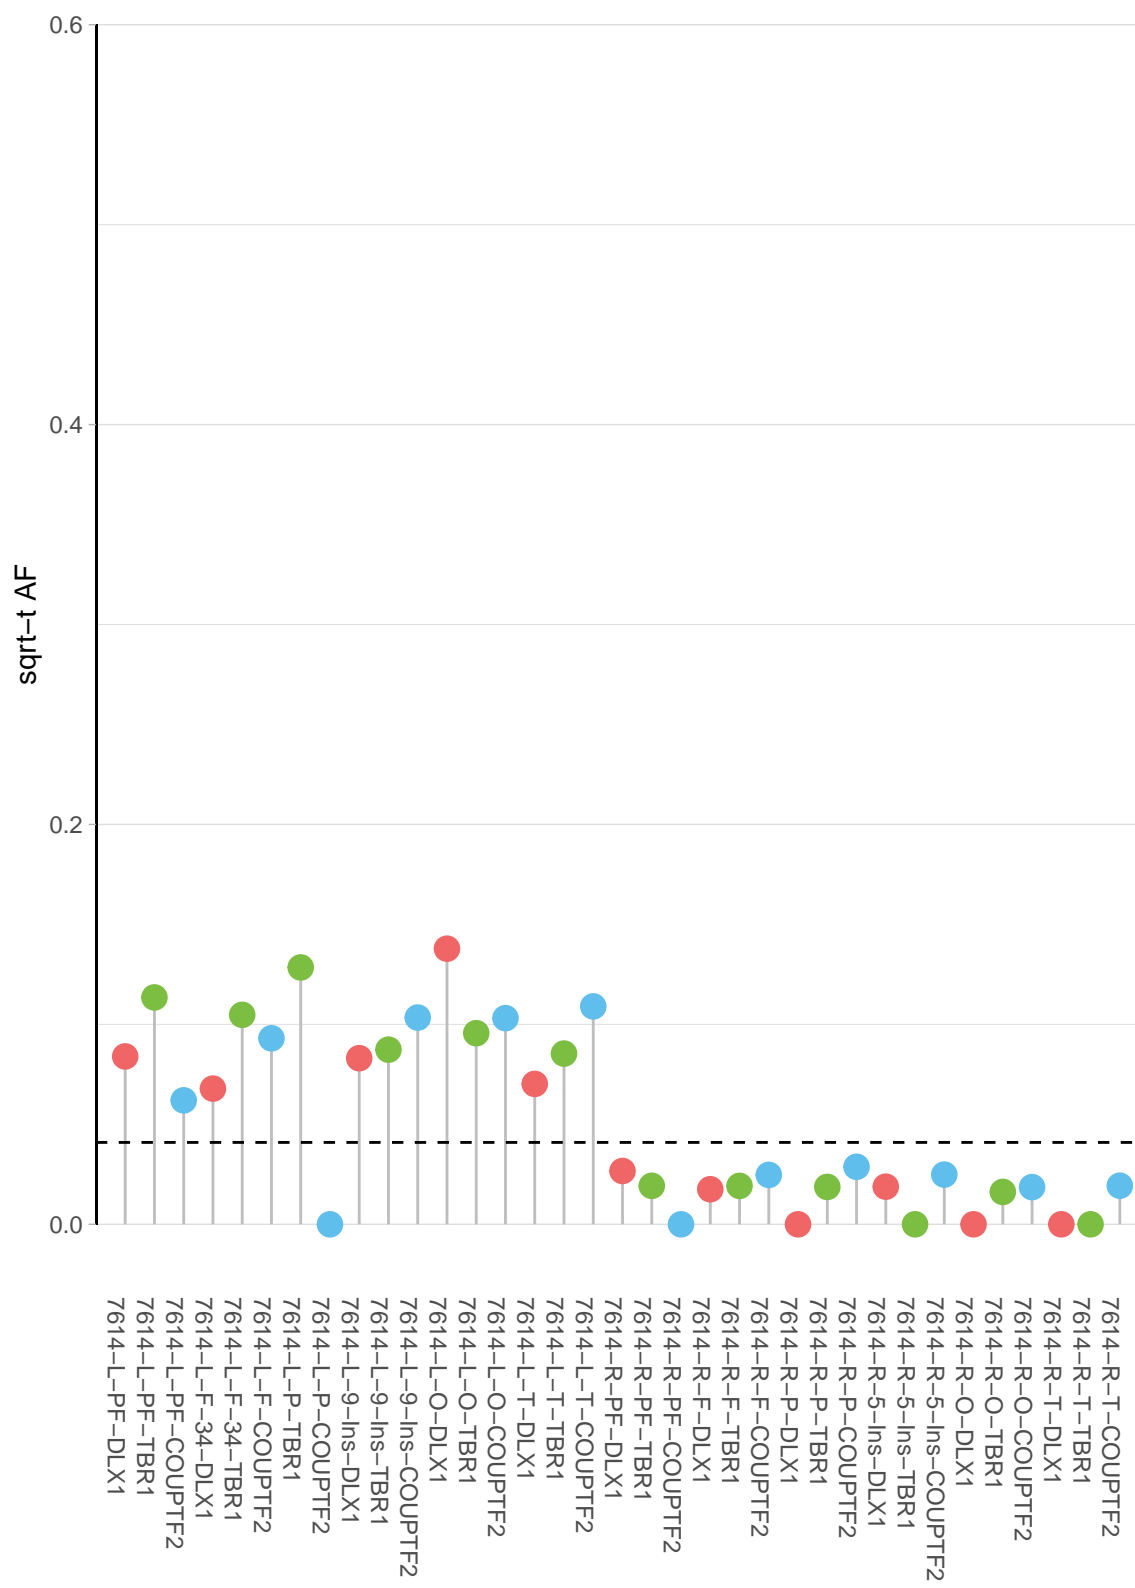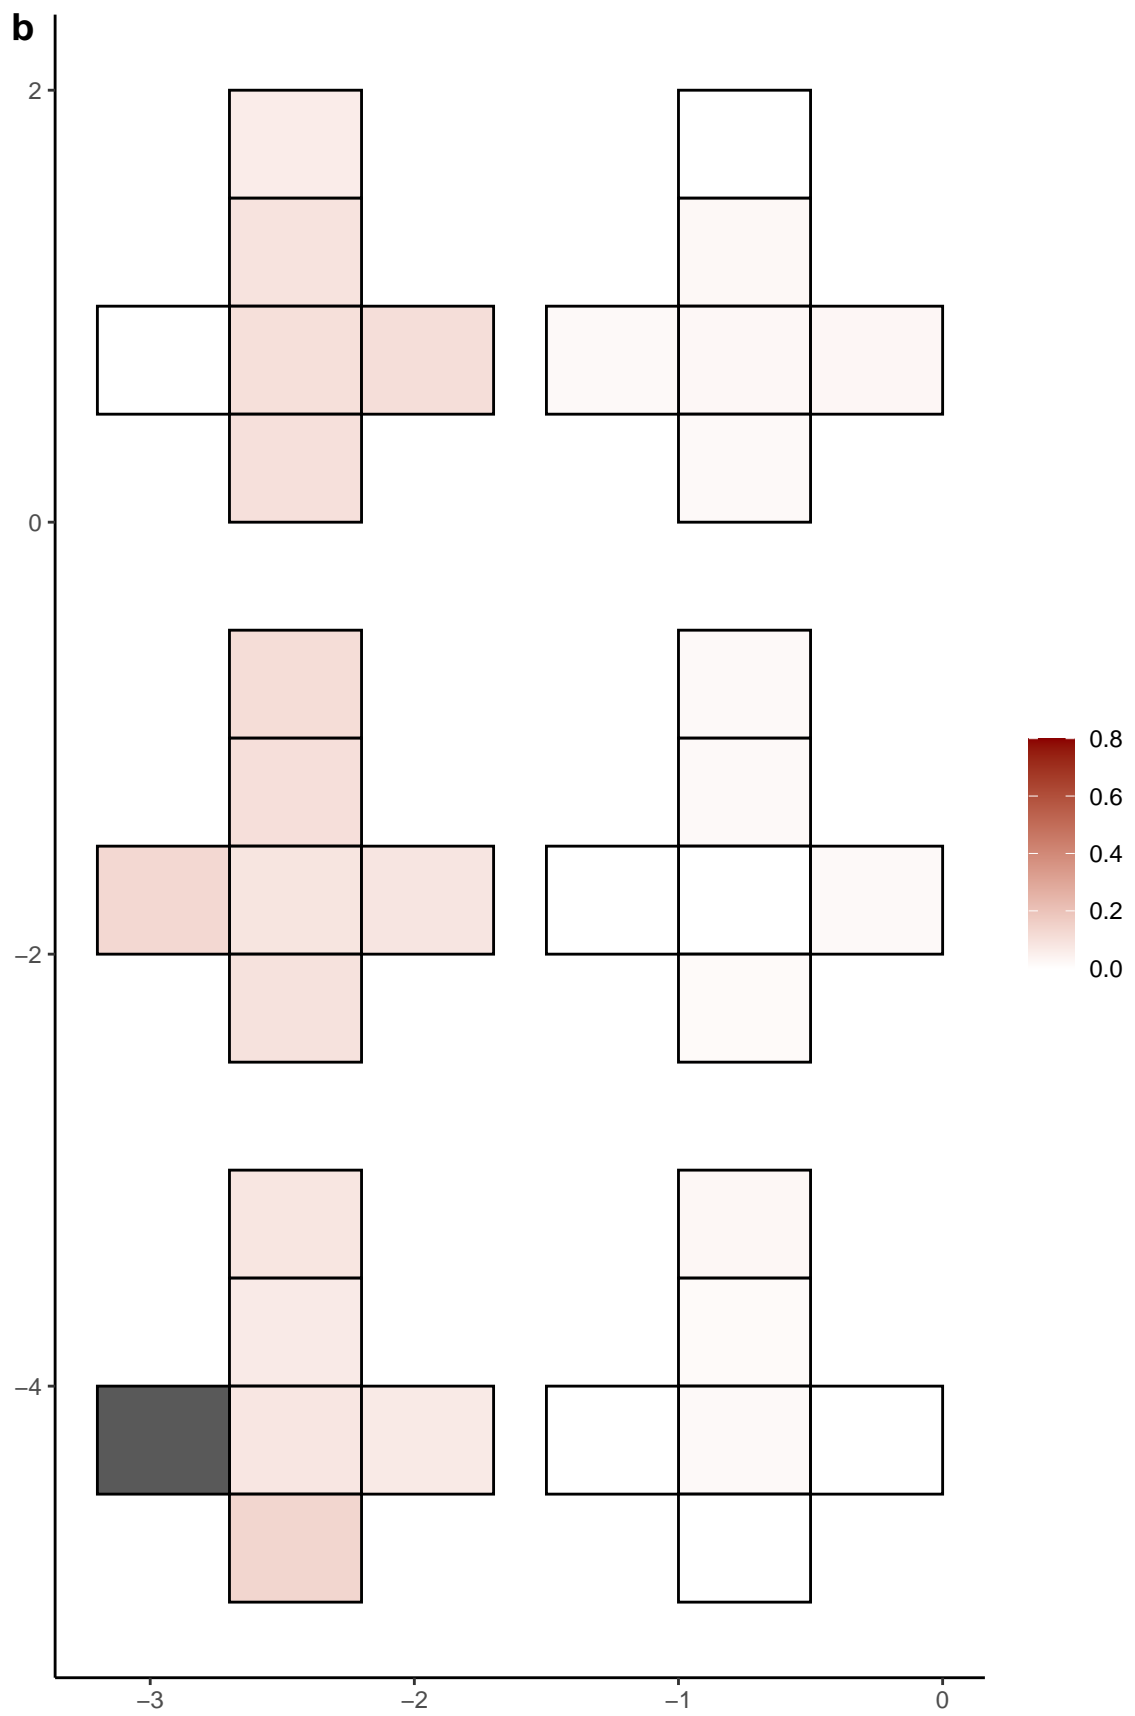

**a** ID01 21-43101791-G-A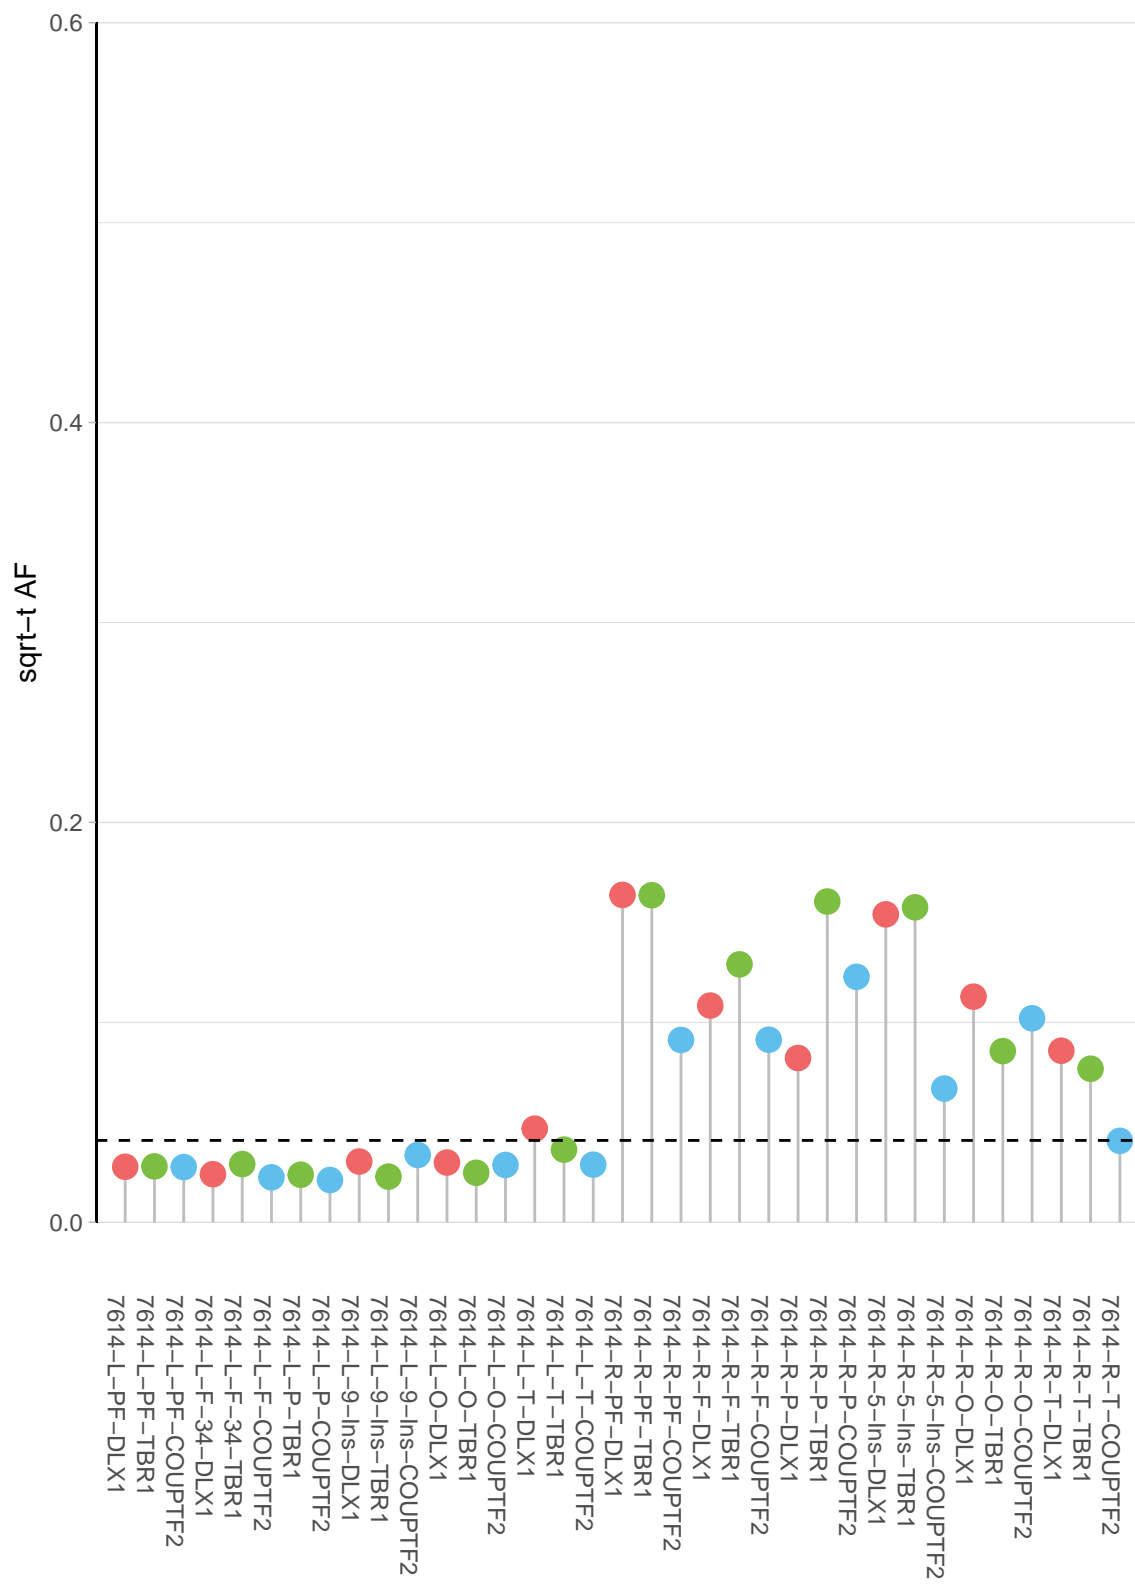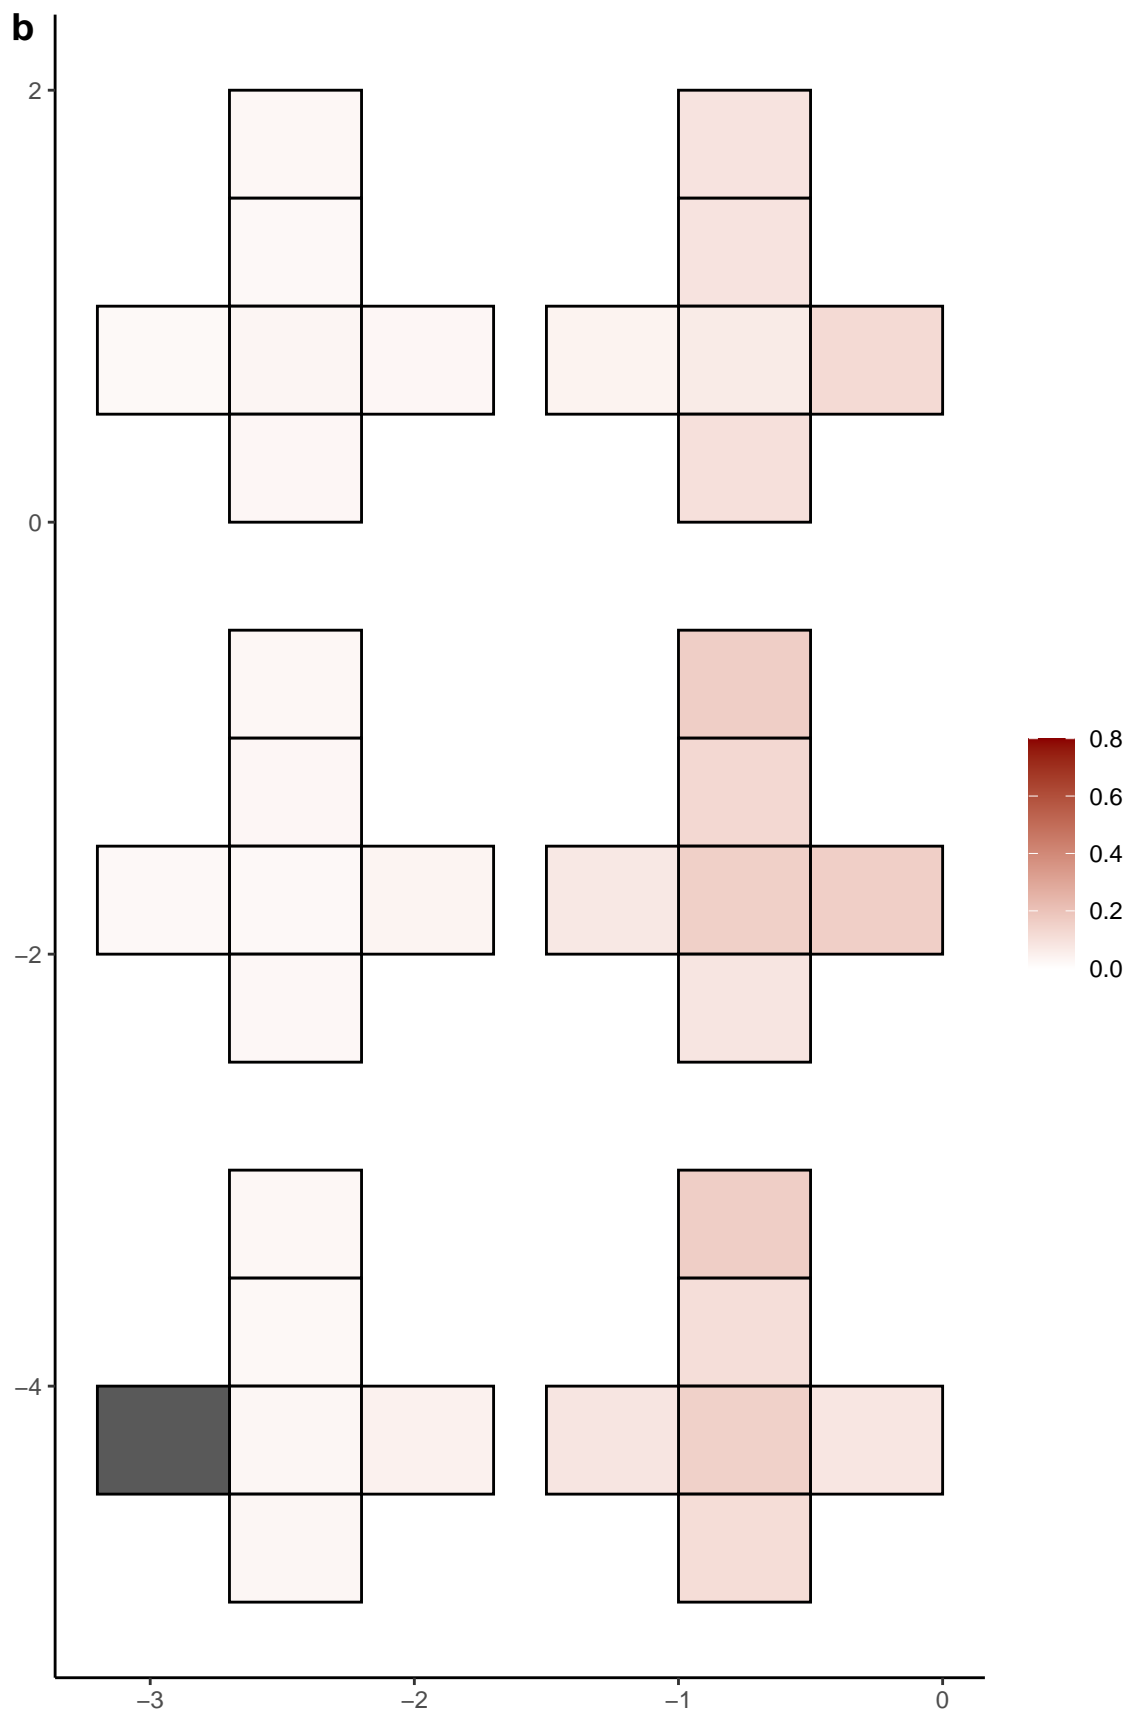

**a** ID01 22-18444369-T-C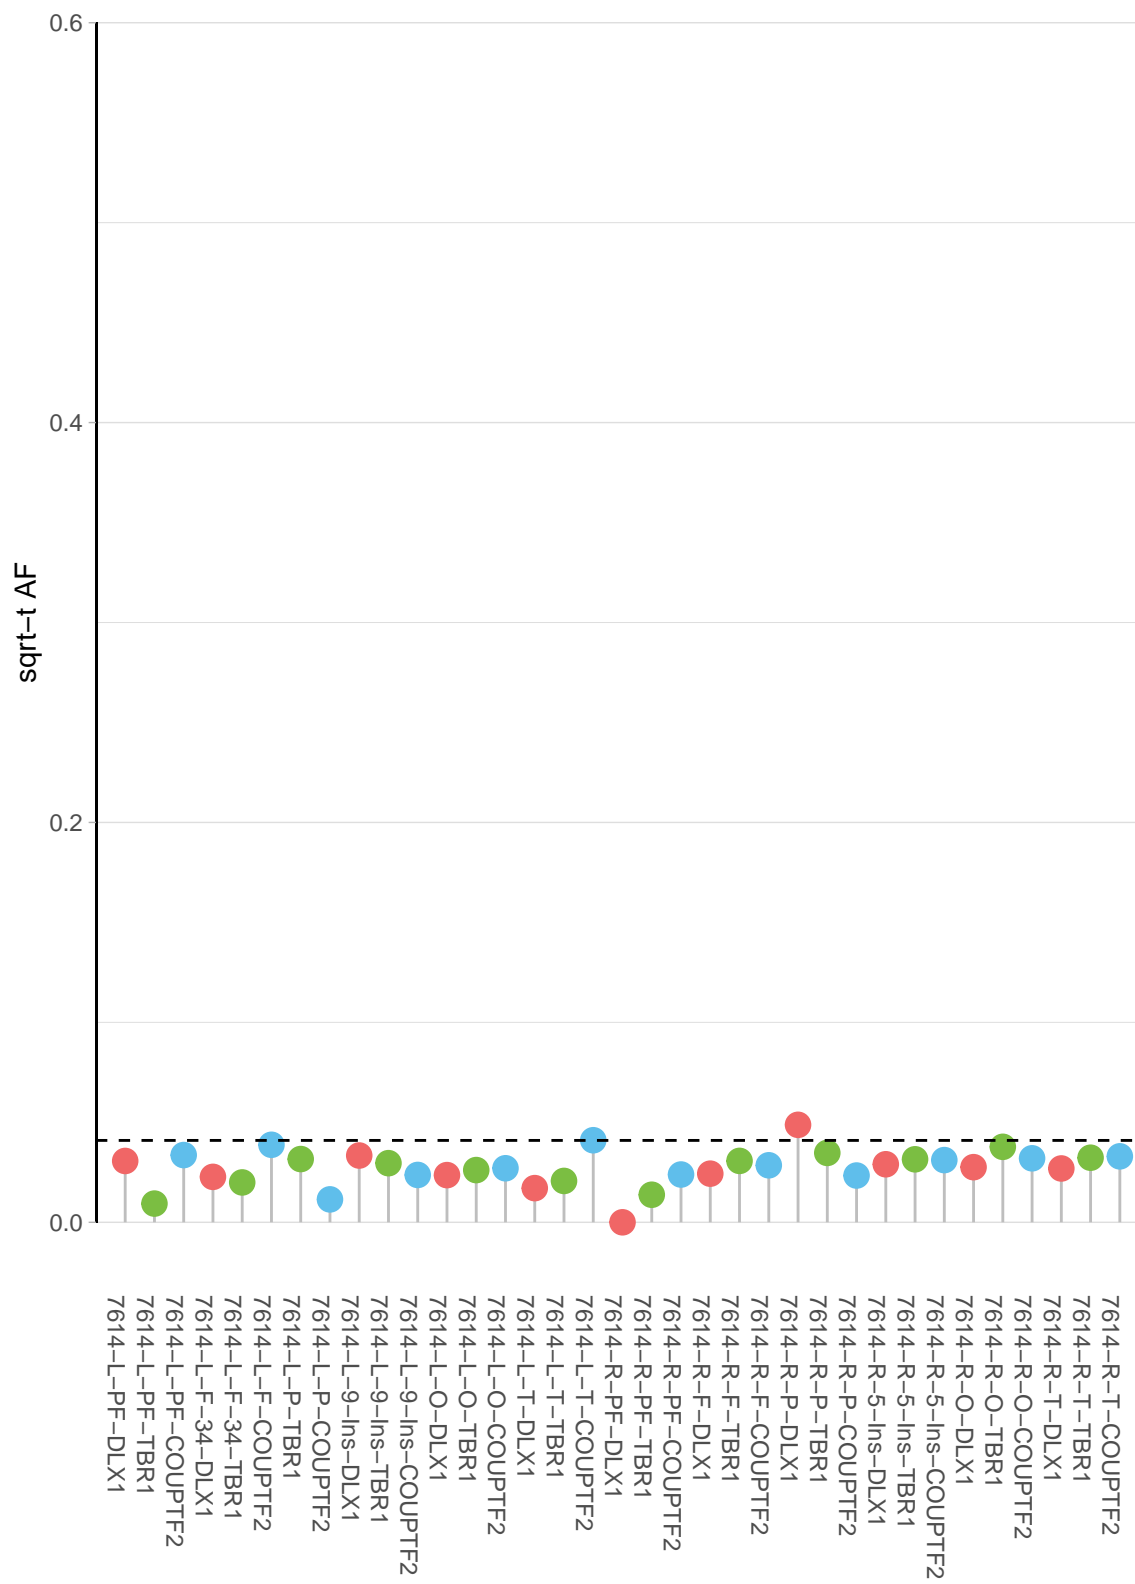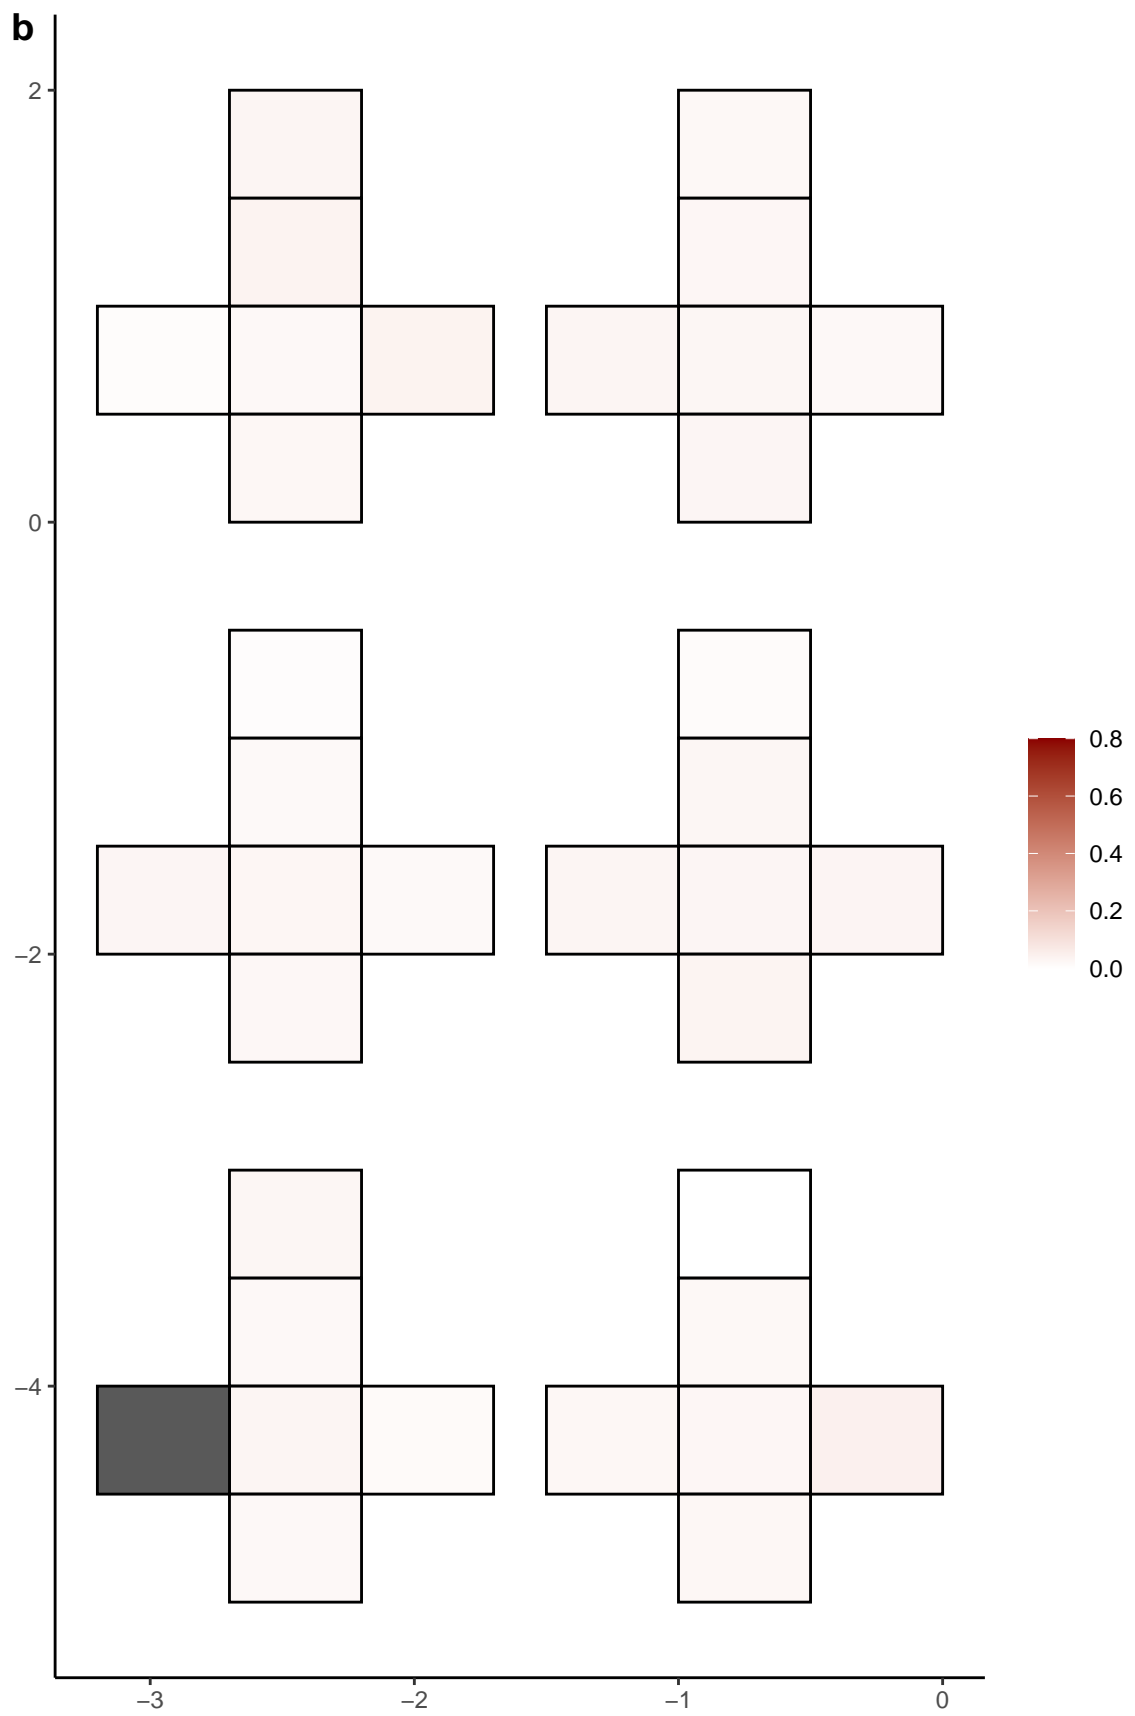

**a** ID01 22-19049947-T-TCCTC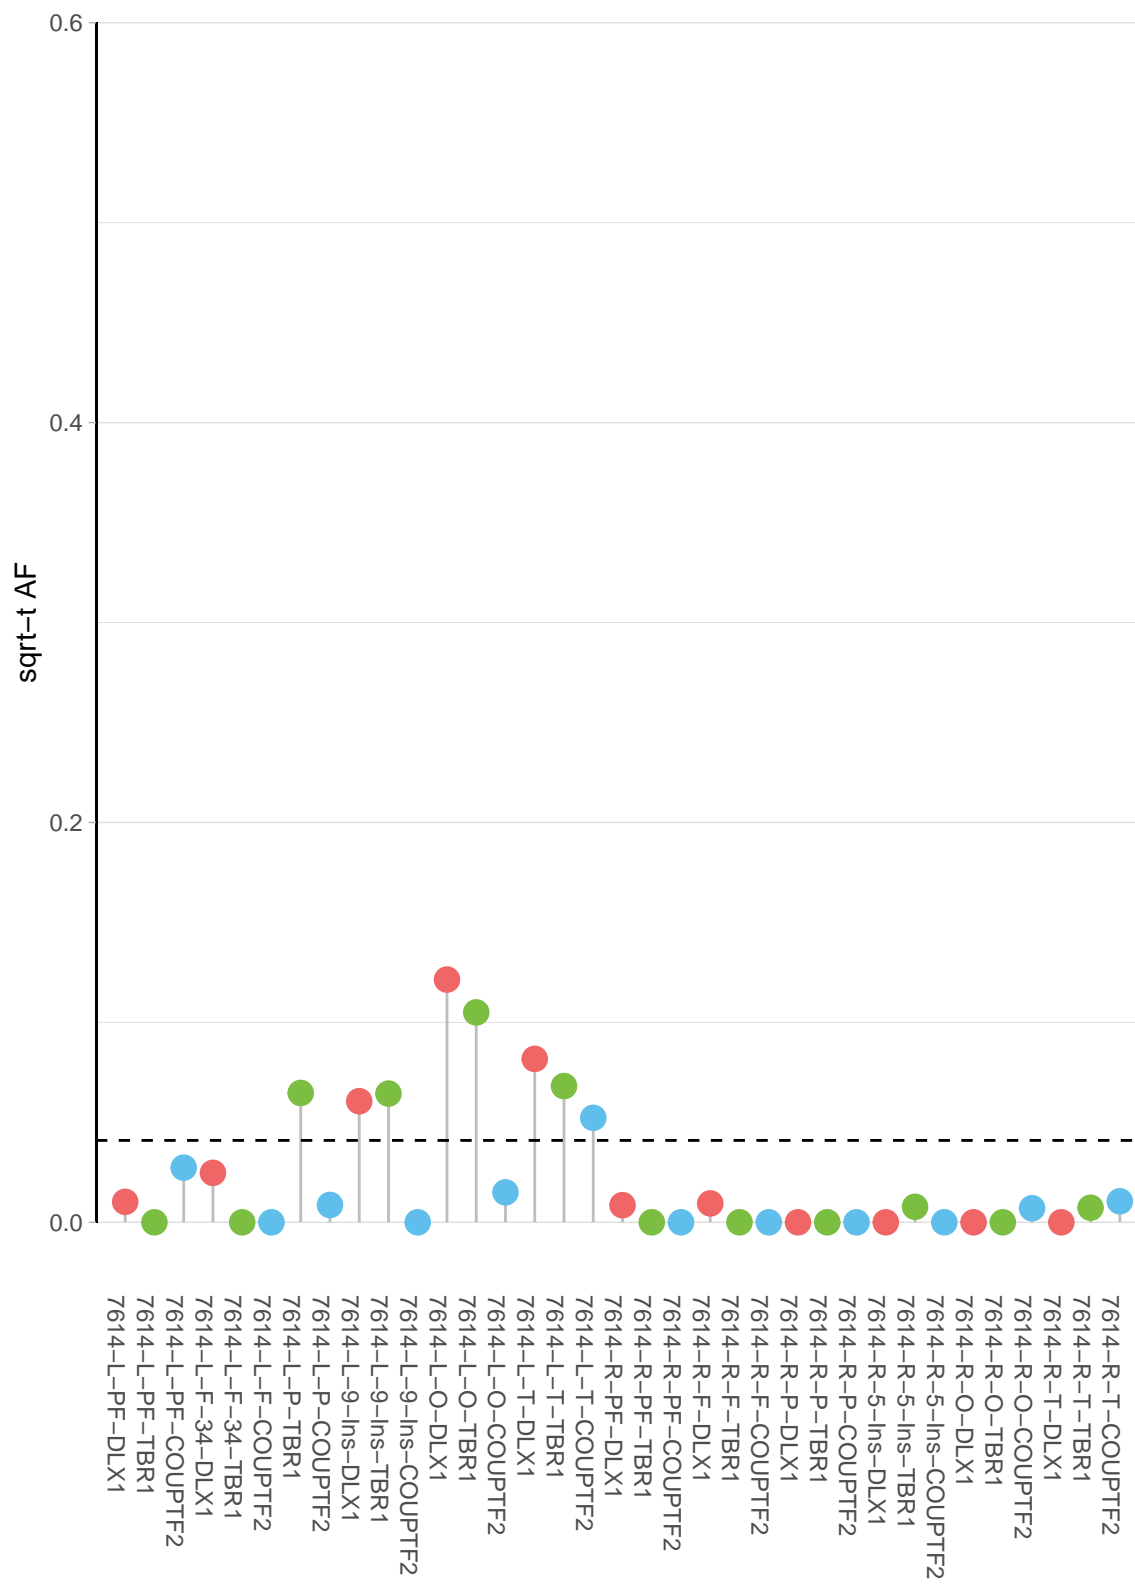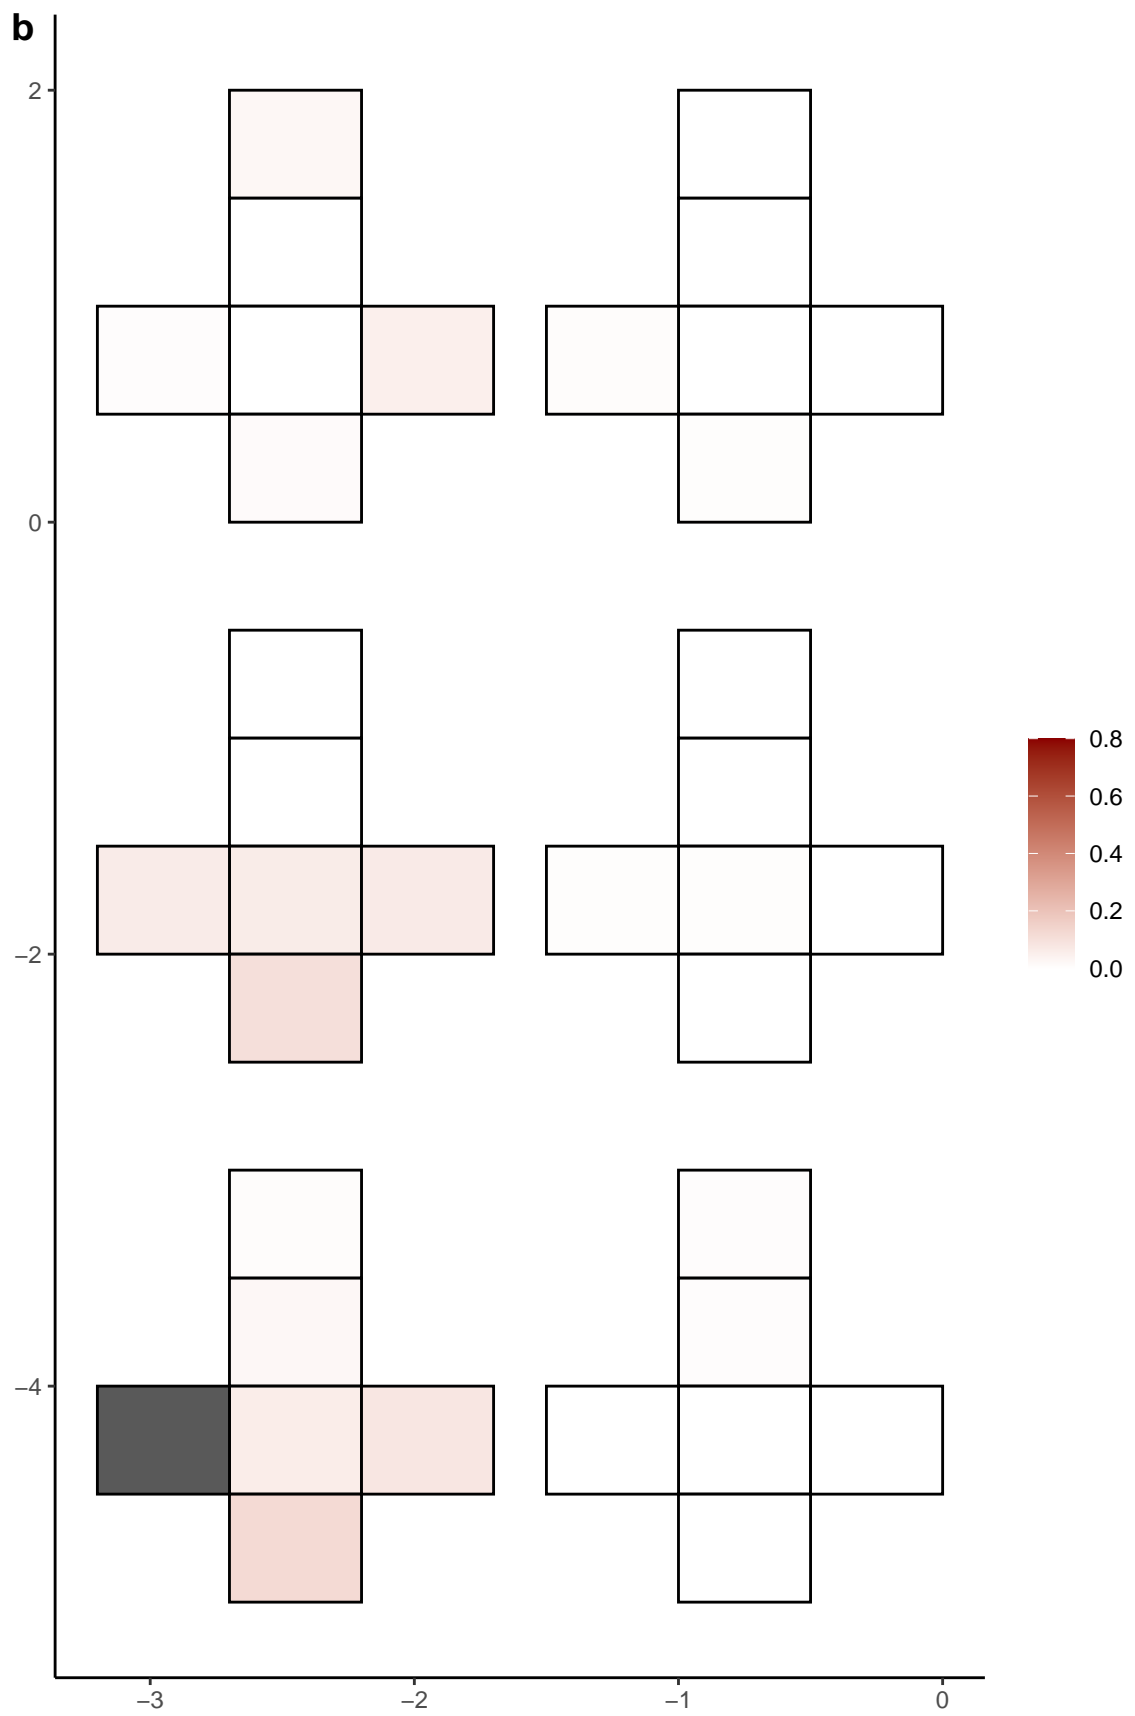

**a** ID01 22-35279008-G-A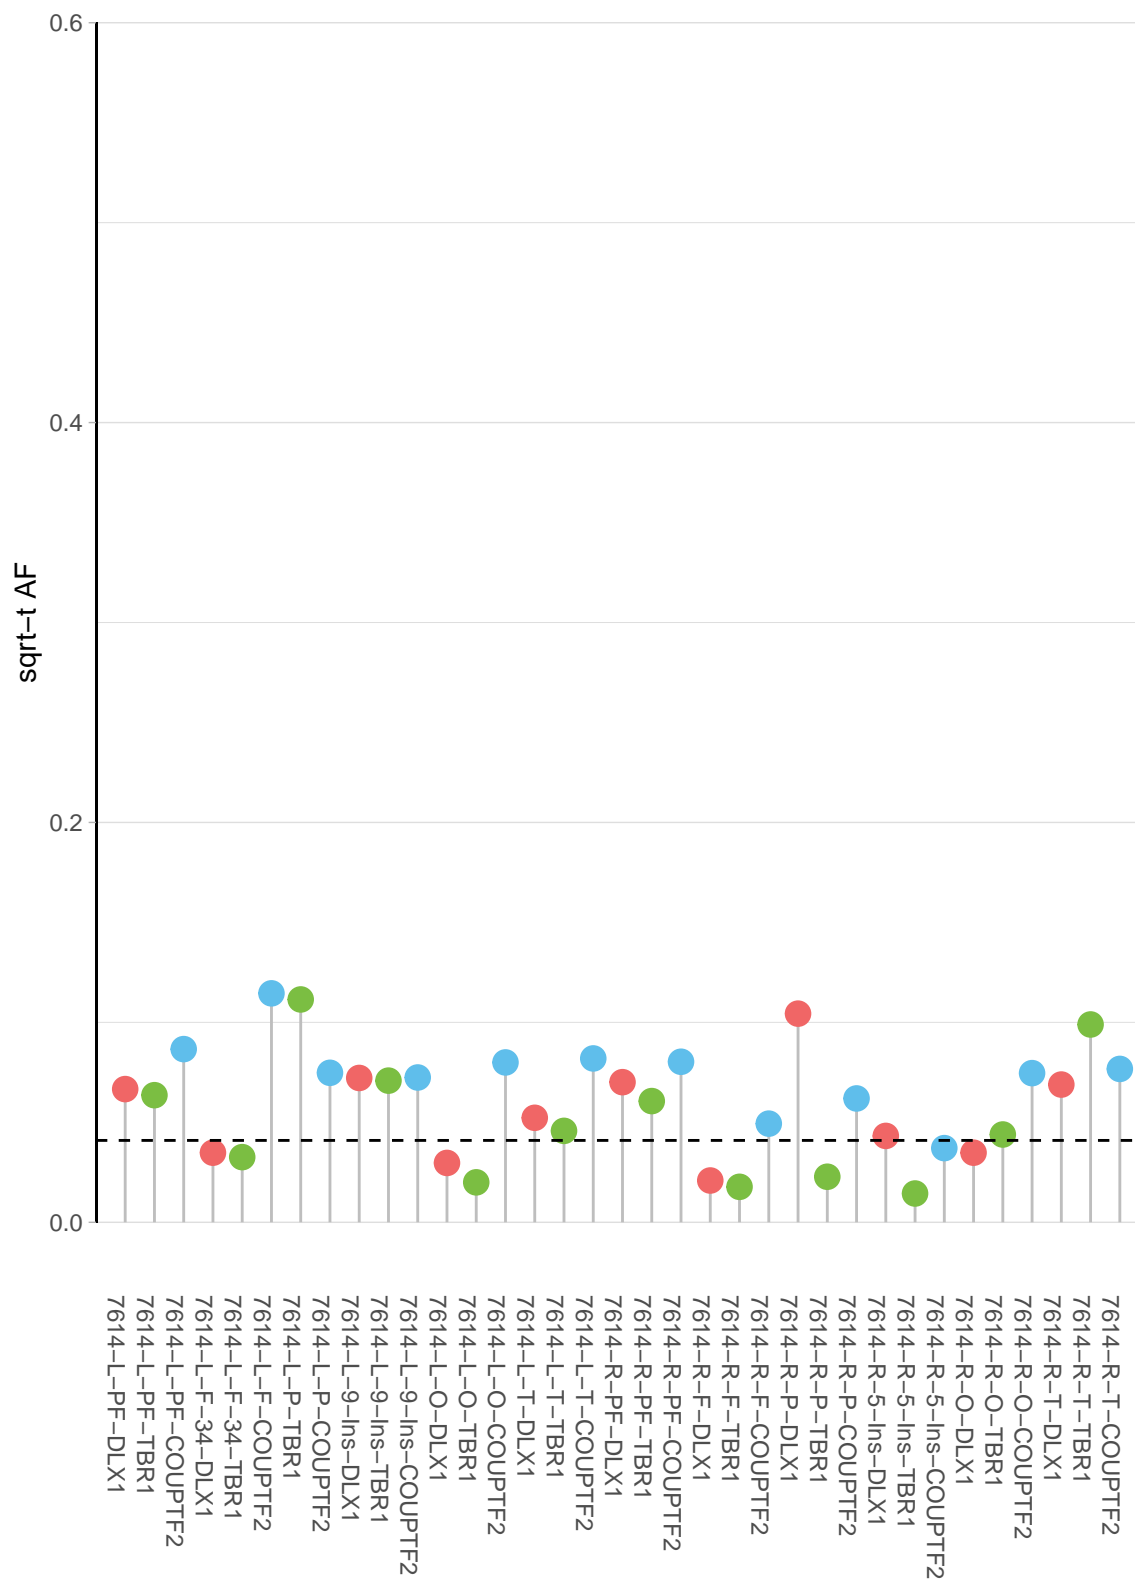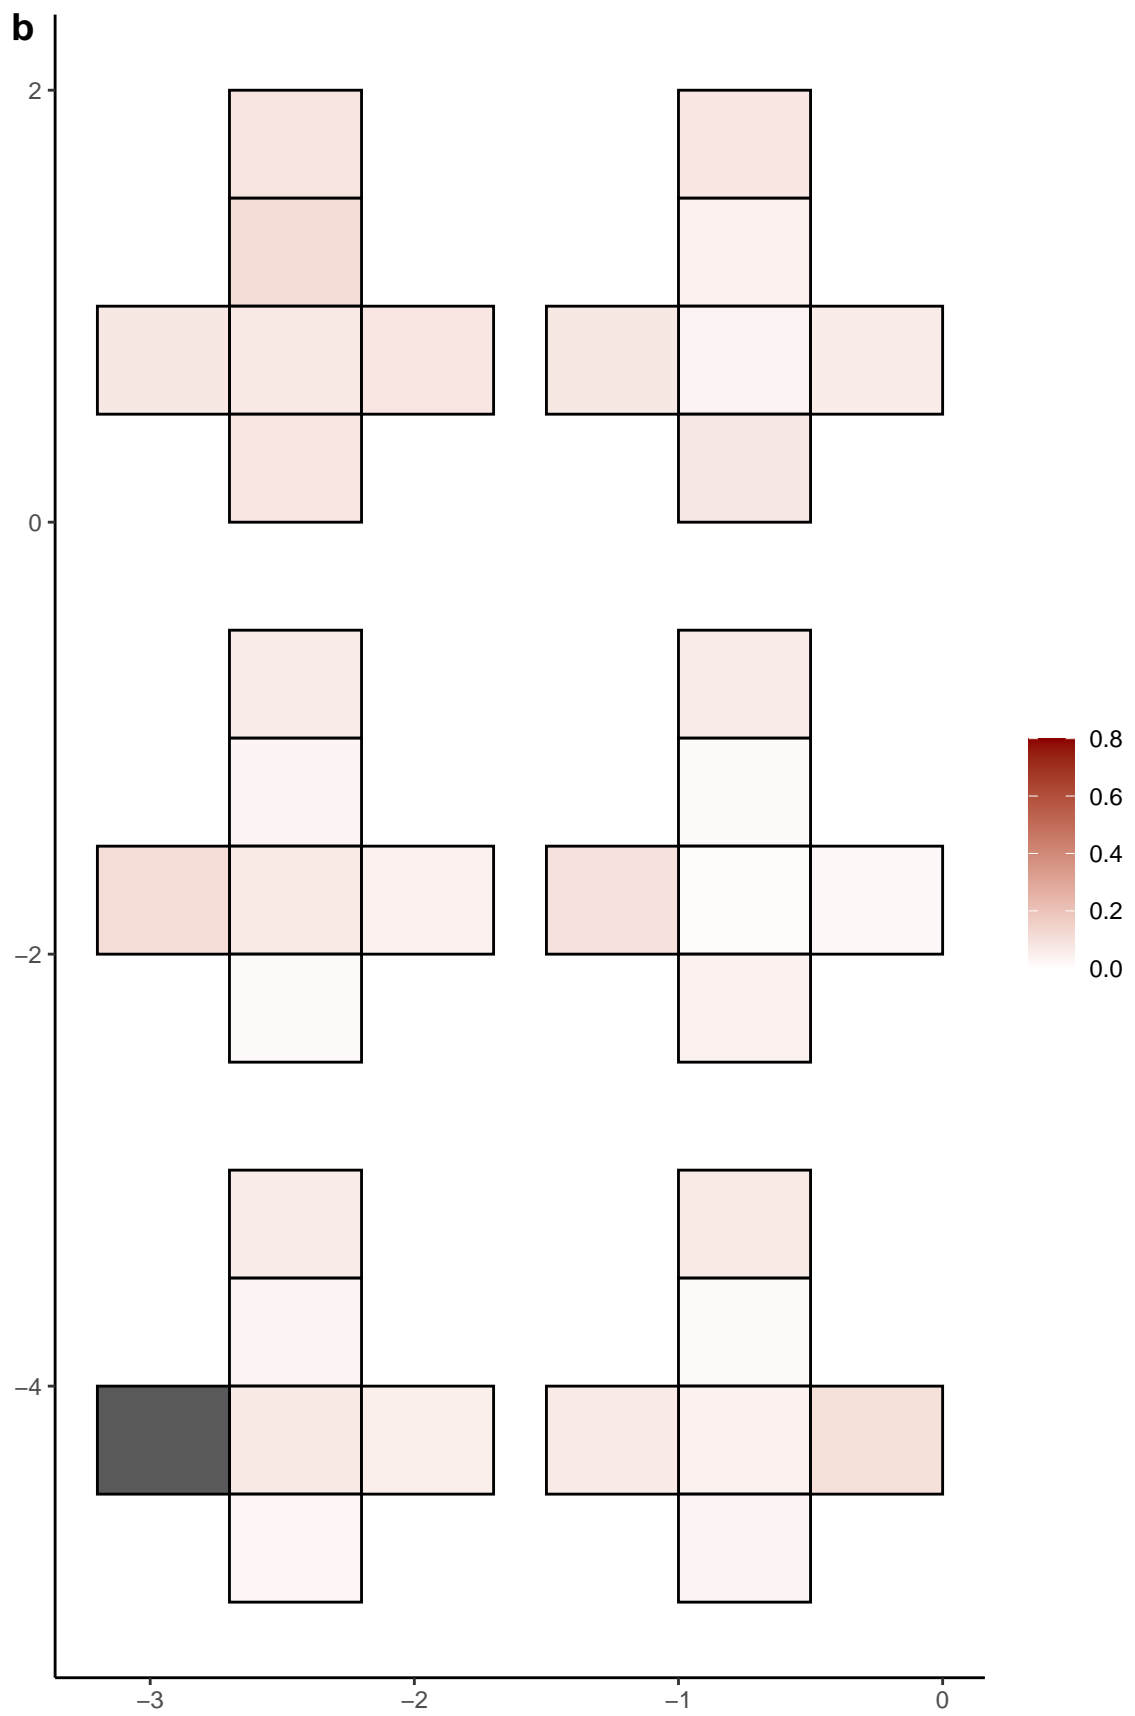

**a** ID01 22-46947808-G-A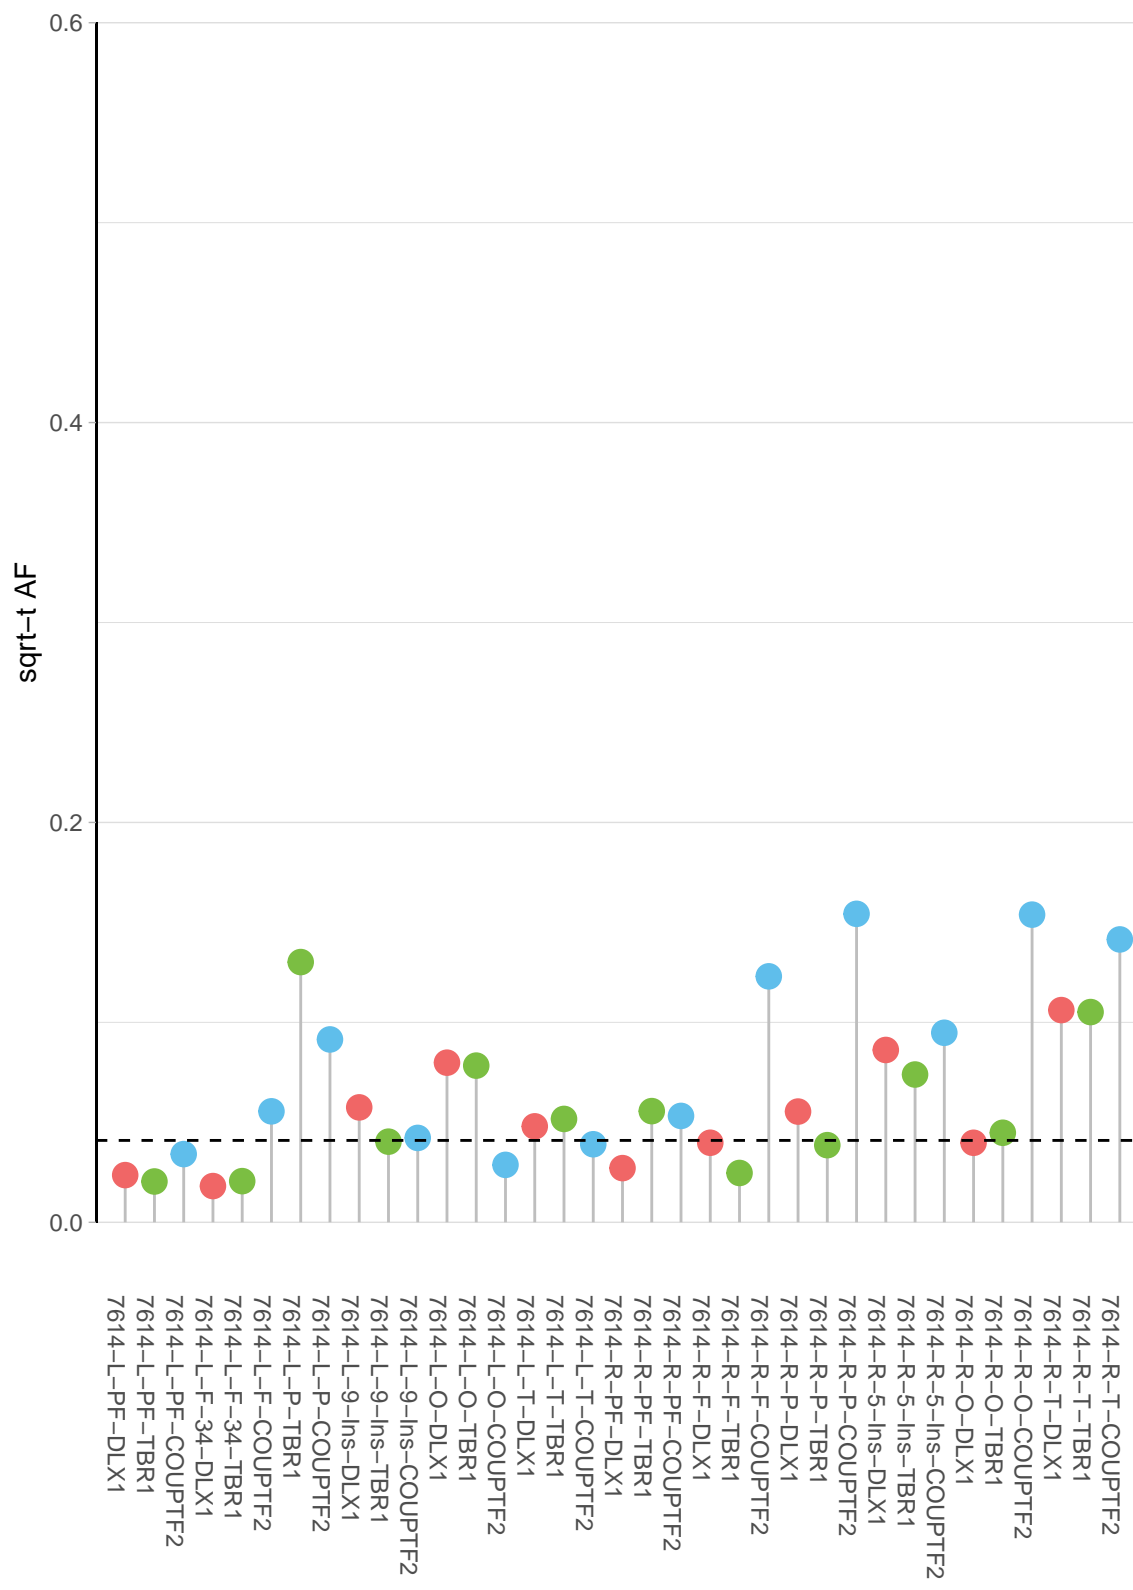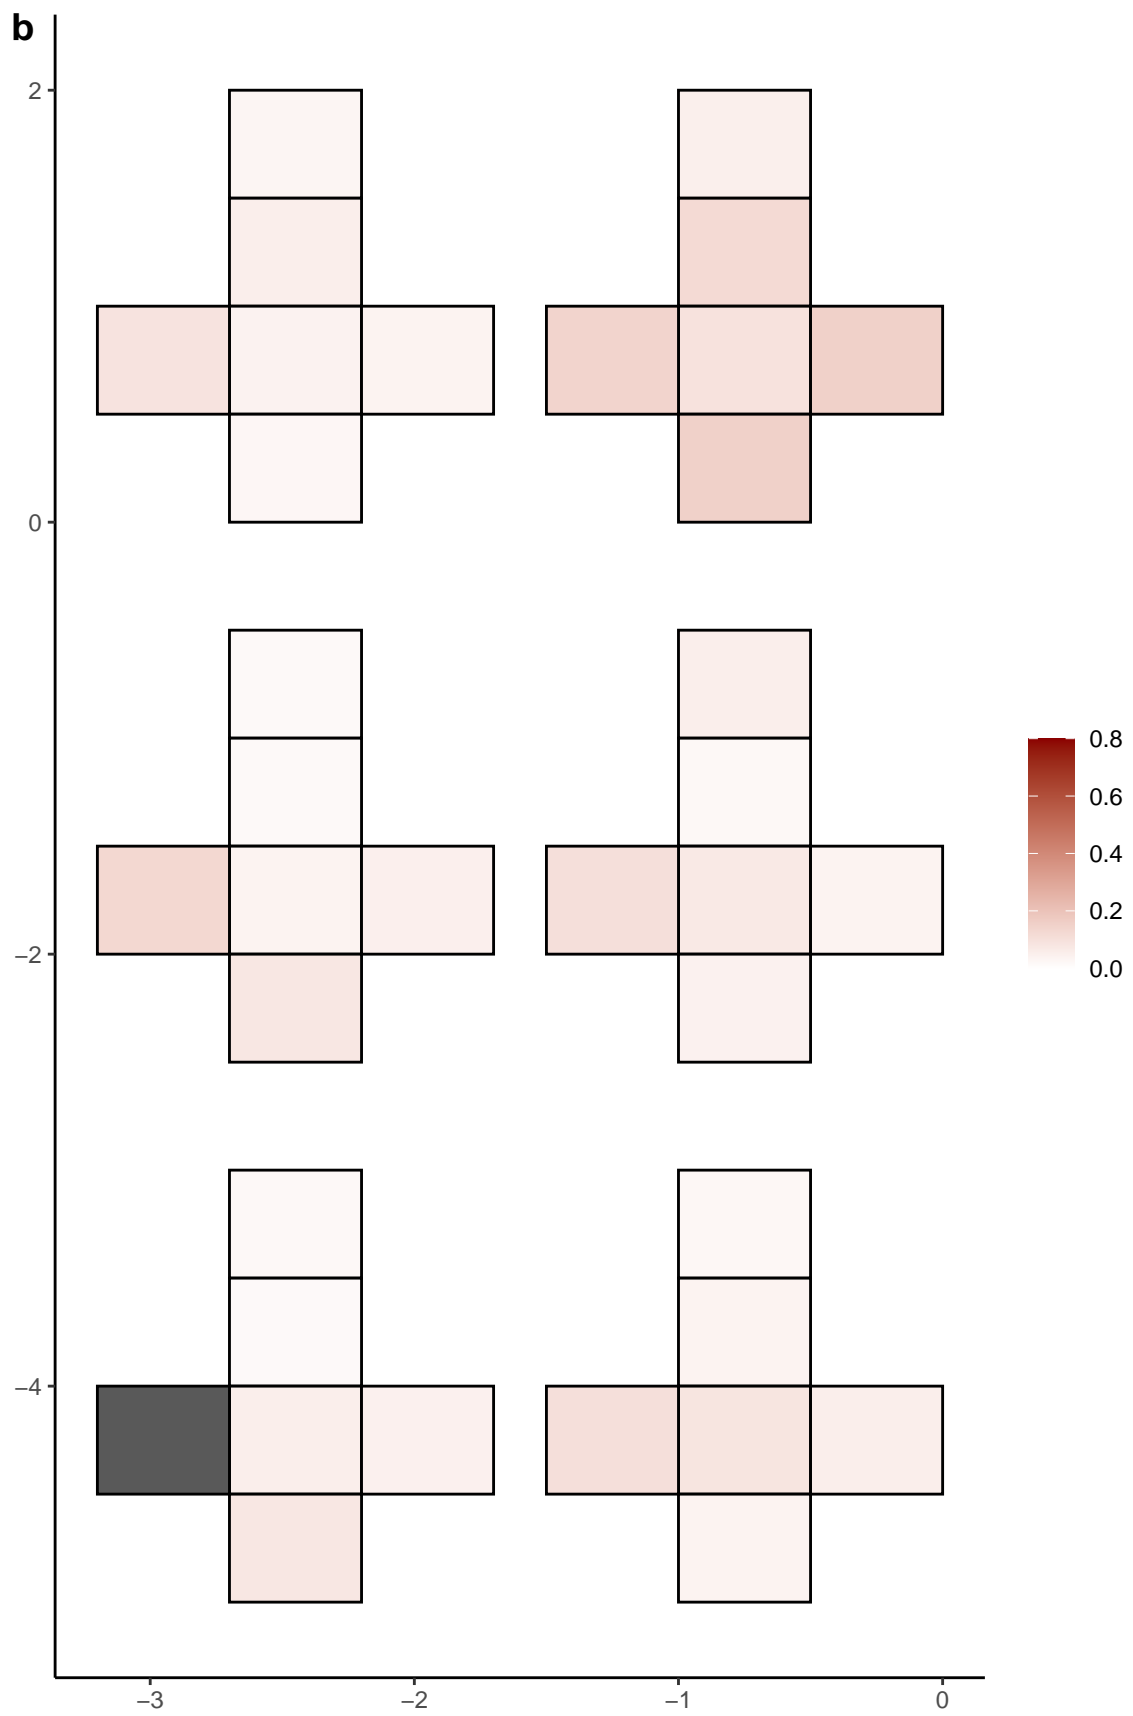



**a** ID01 3-107731469-C-T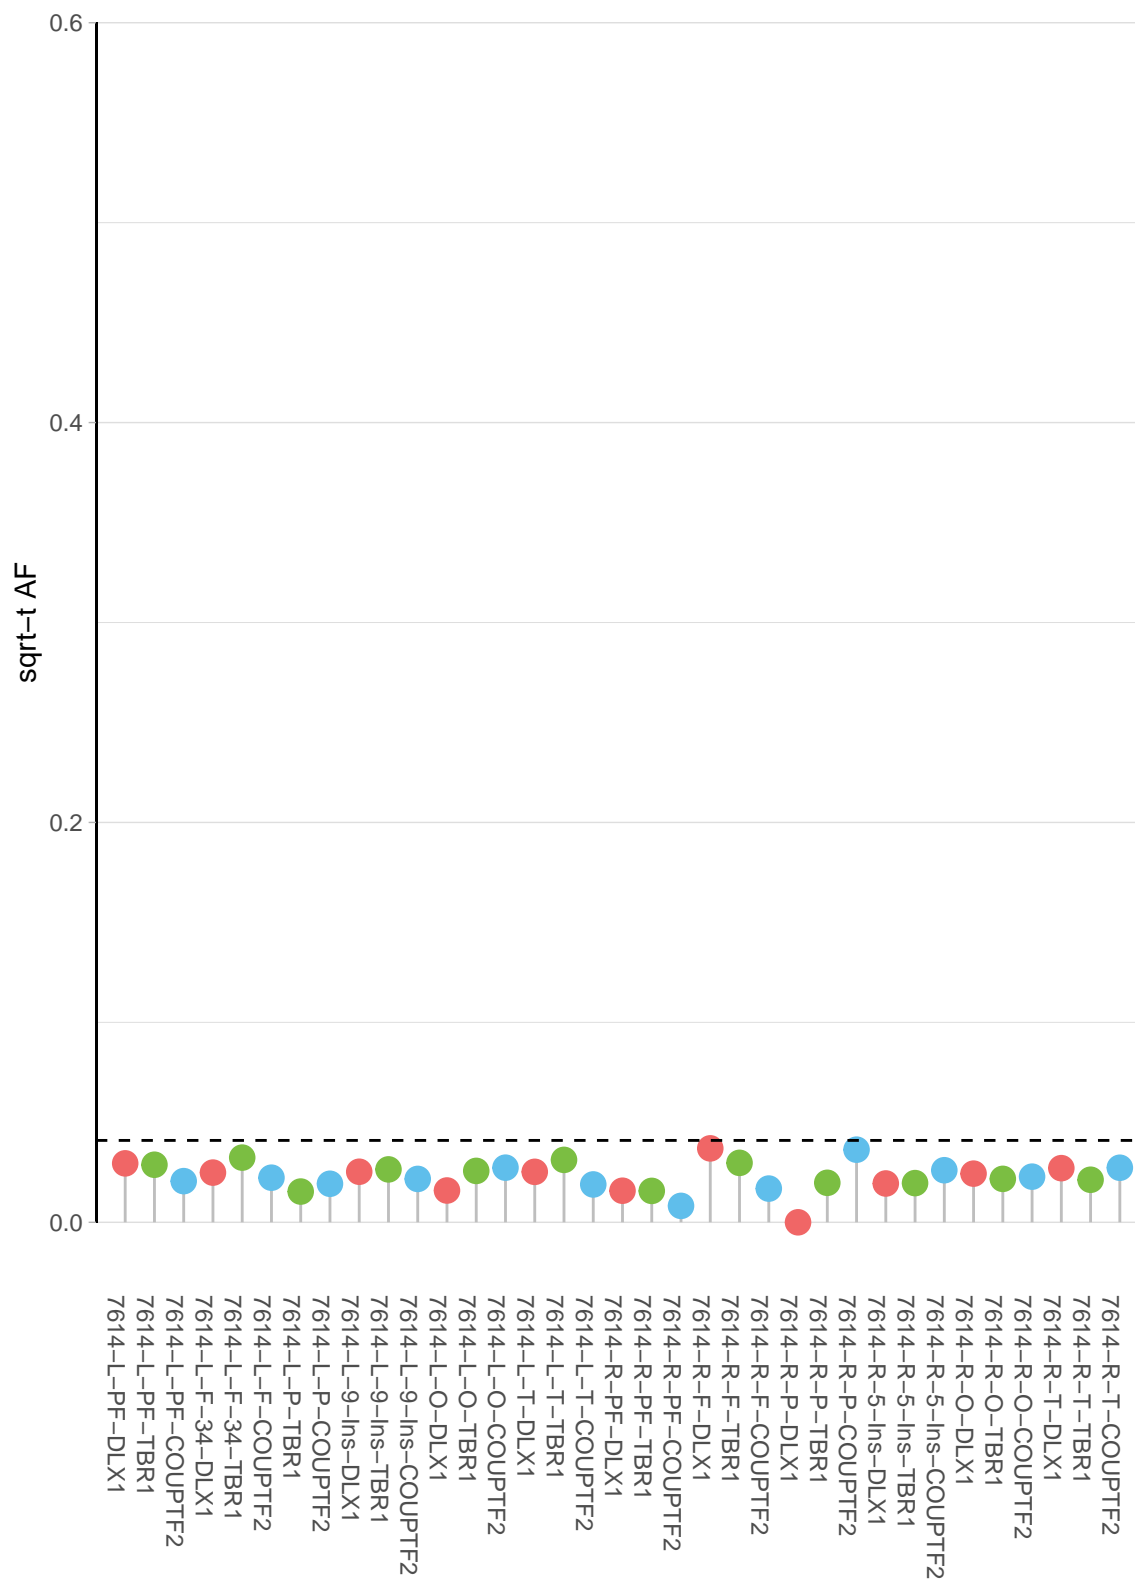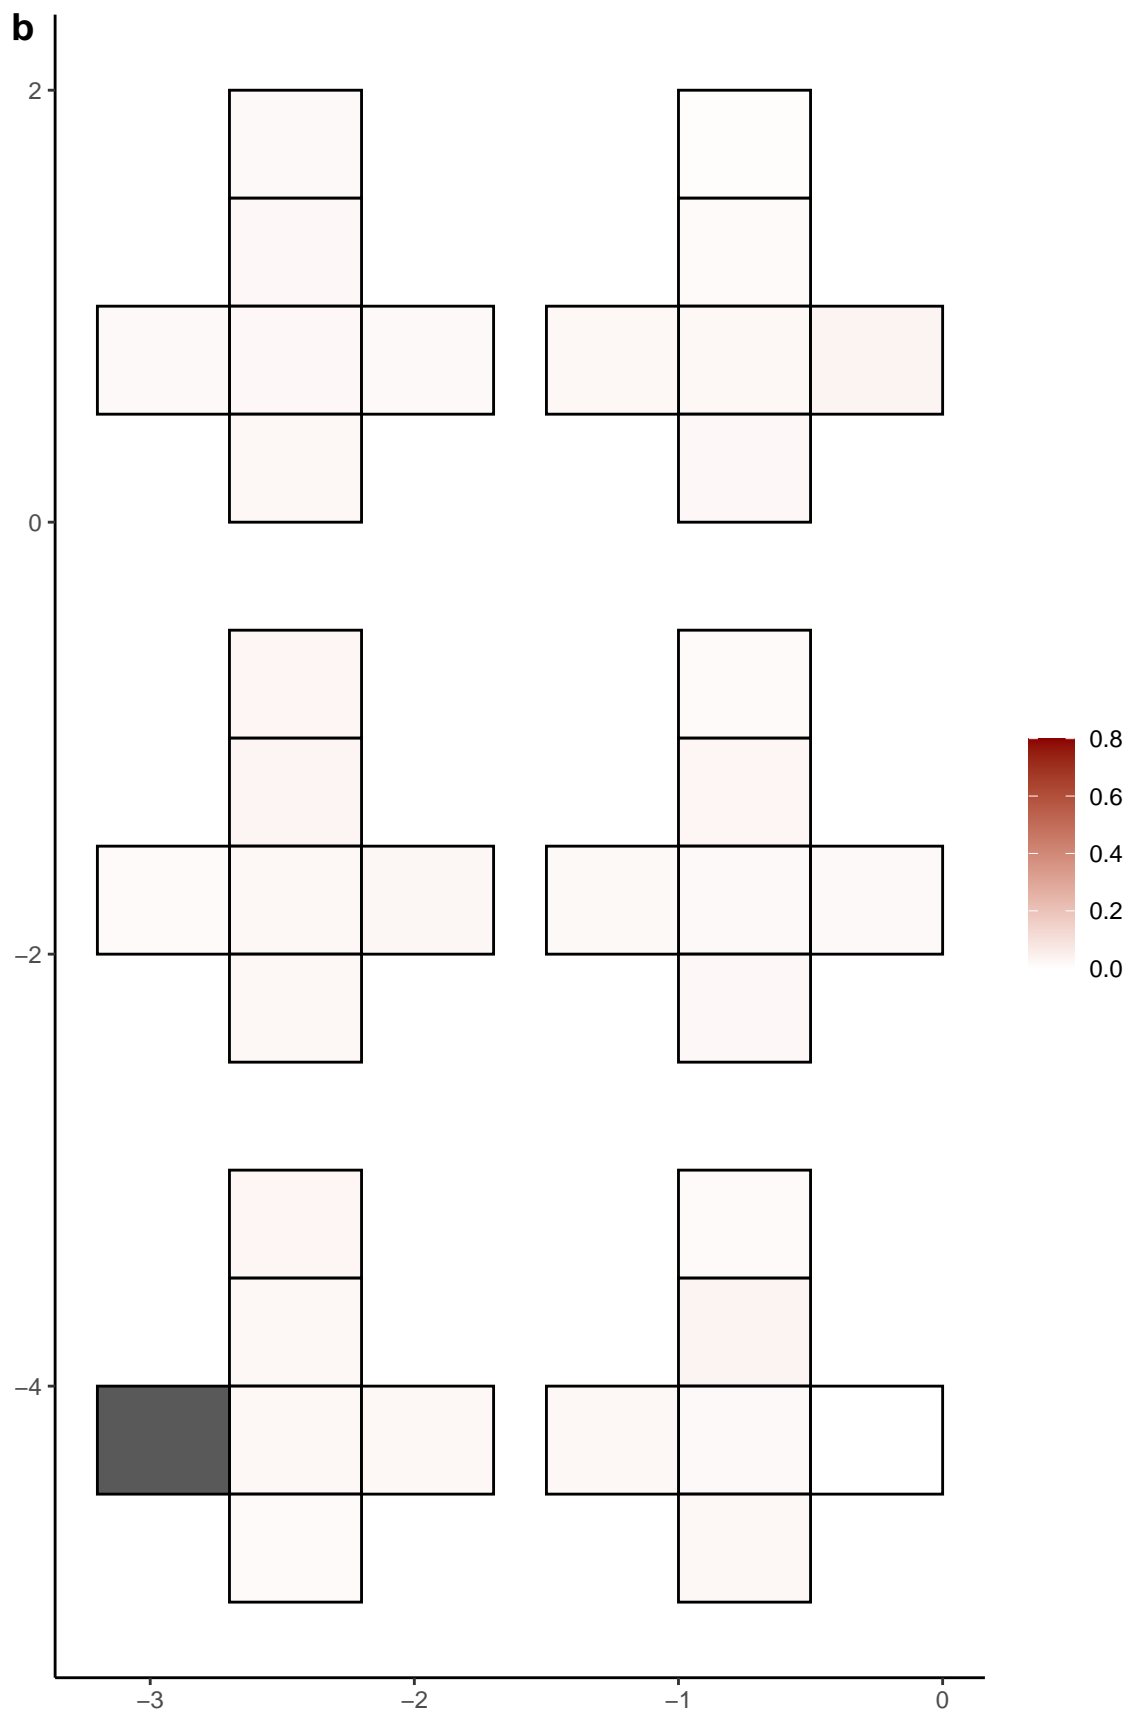

**a** ID01 3-111155080-C-T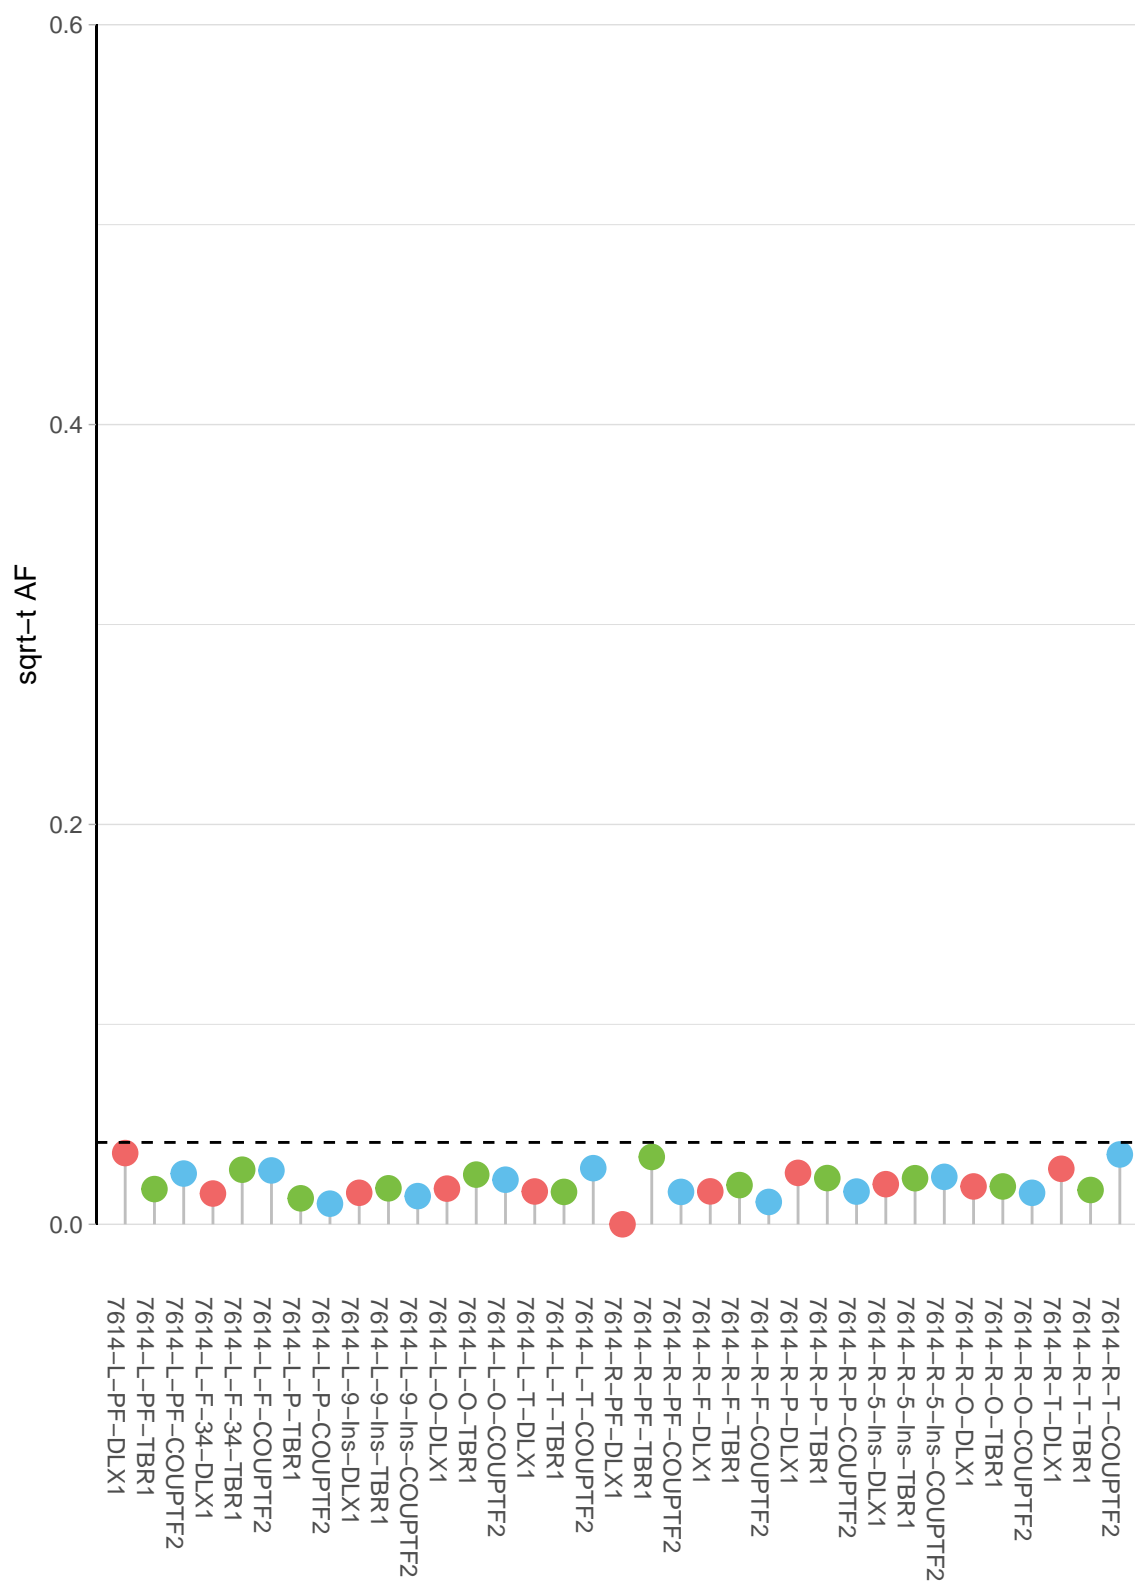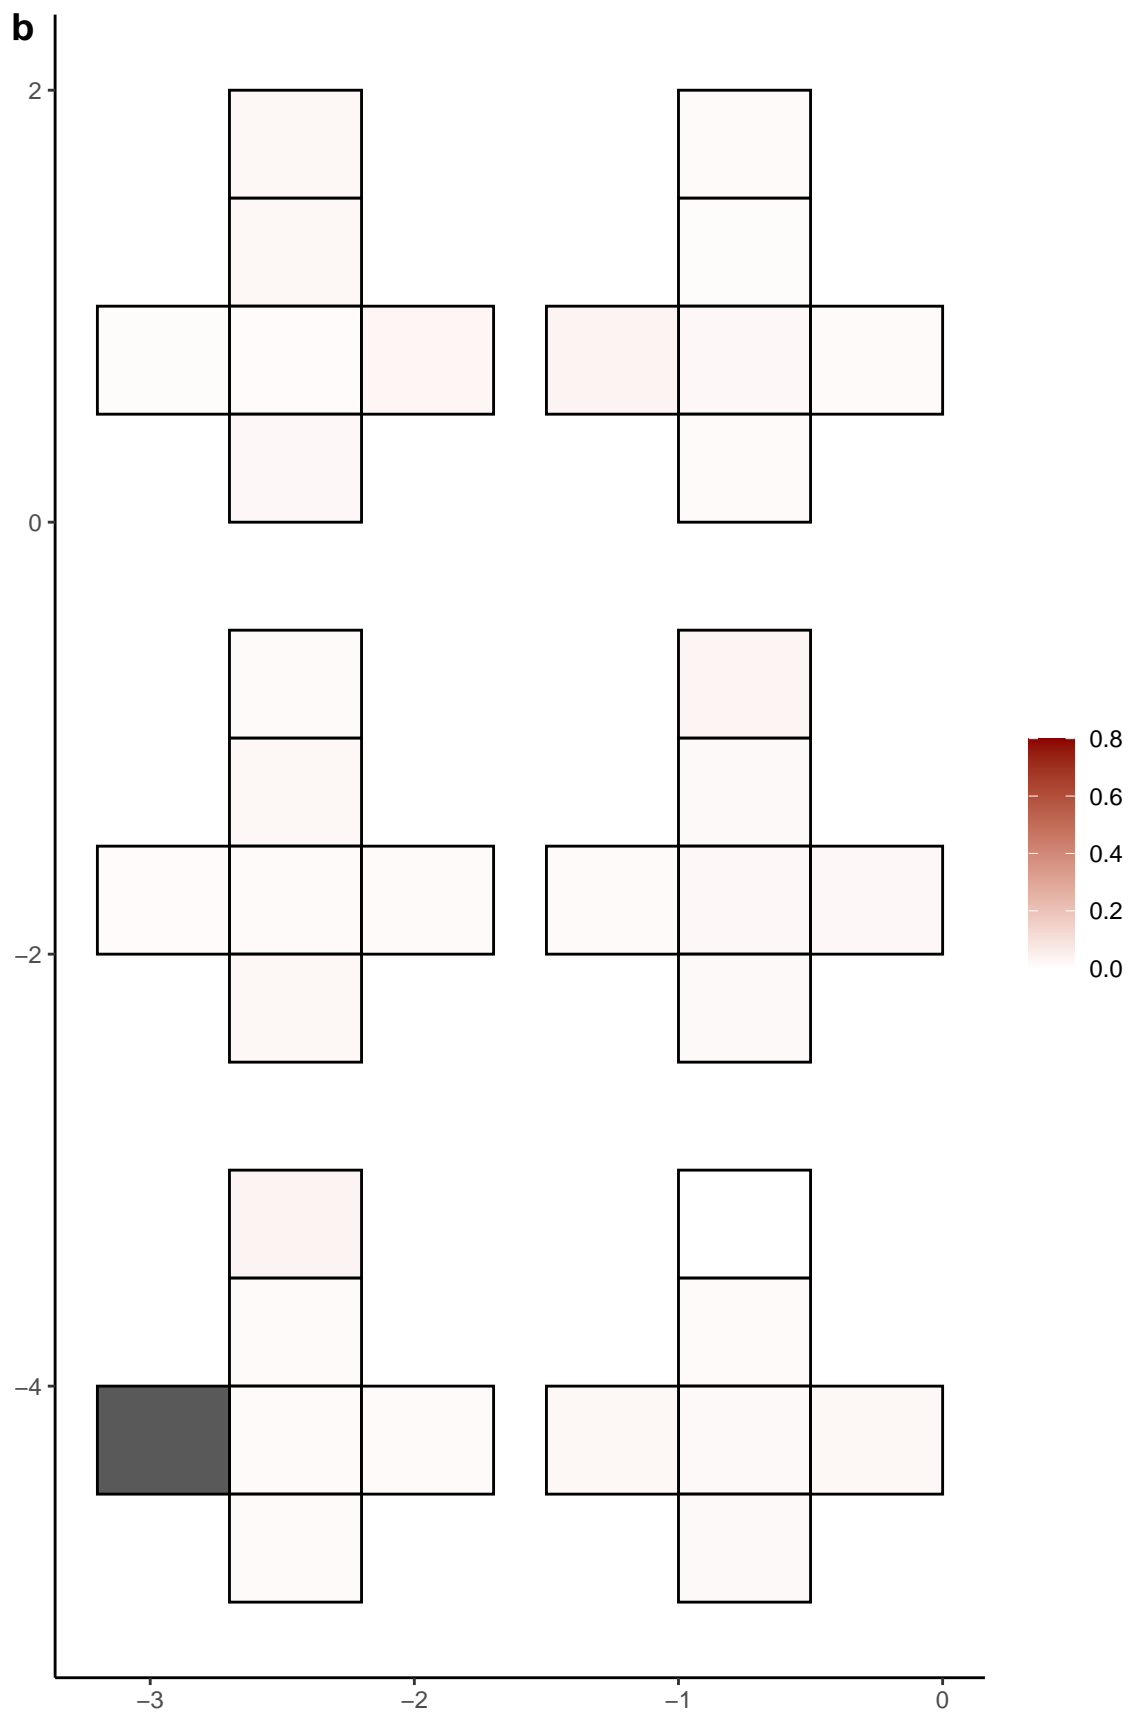

**a** ID01 3-112163628-C-T

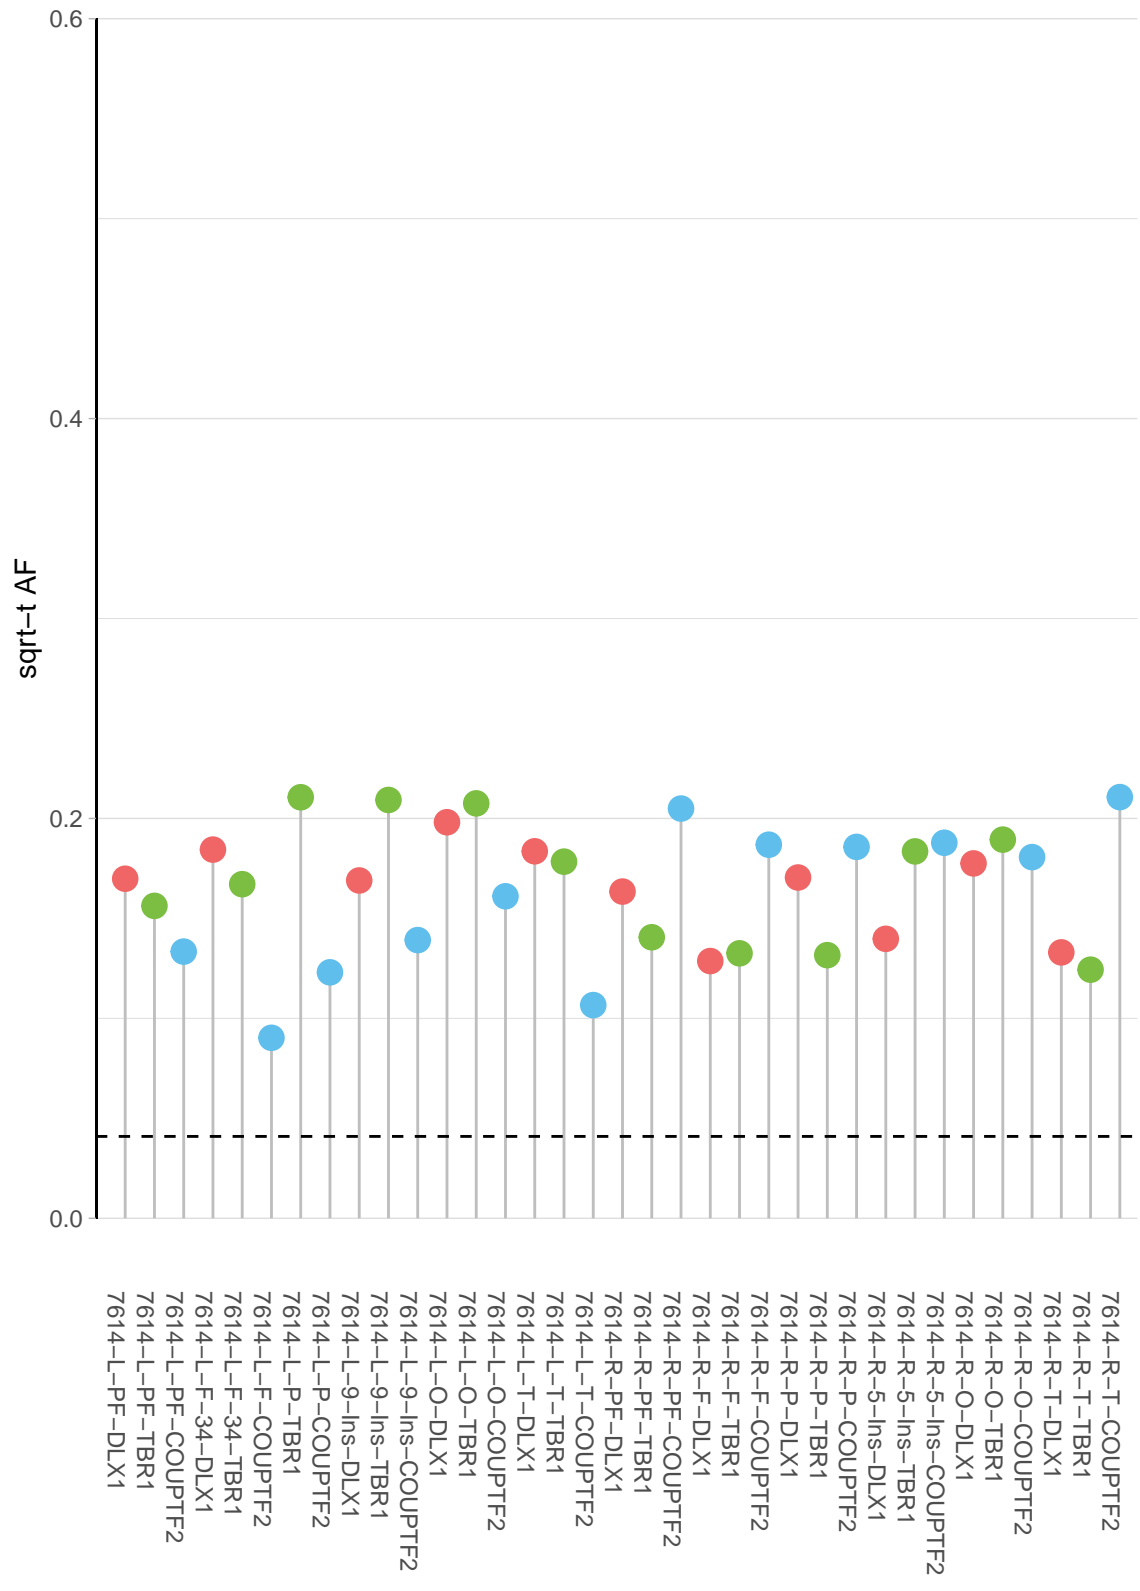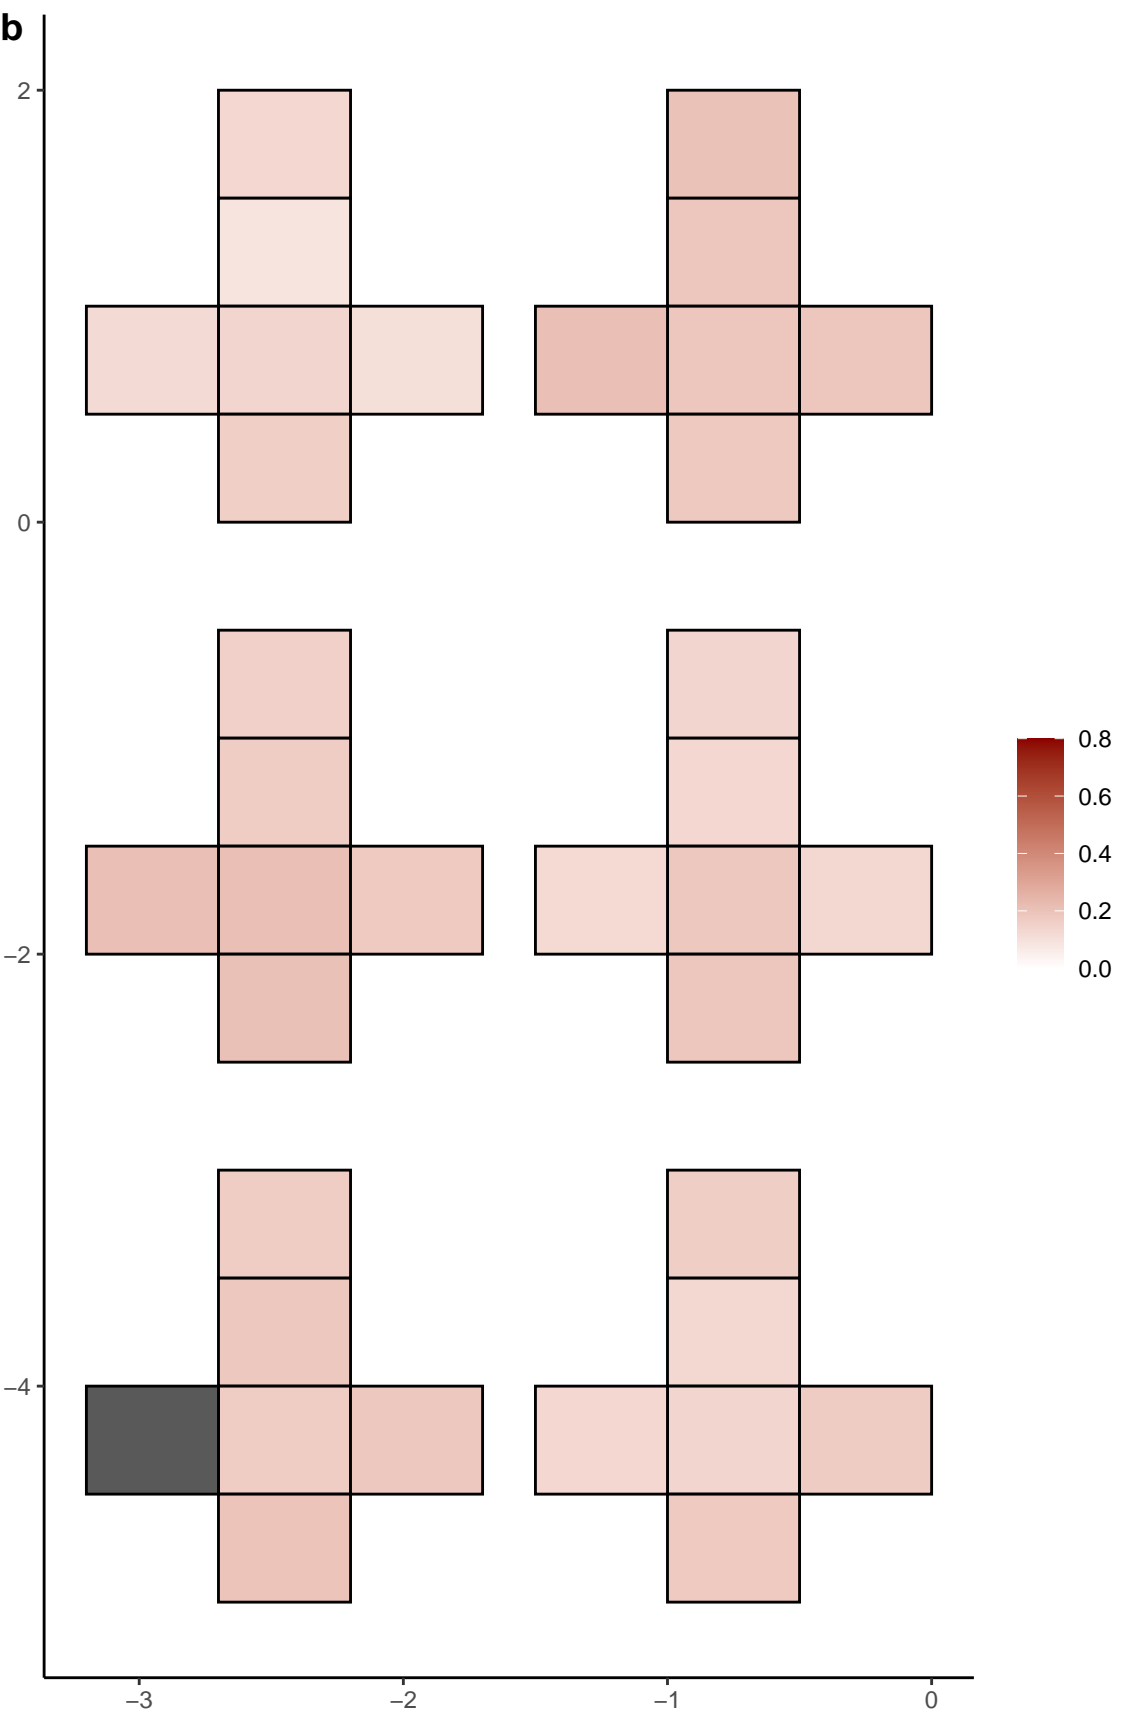

**a** ID01 3-152697890-C-T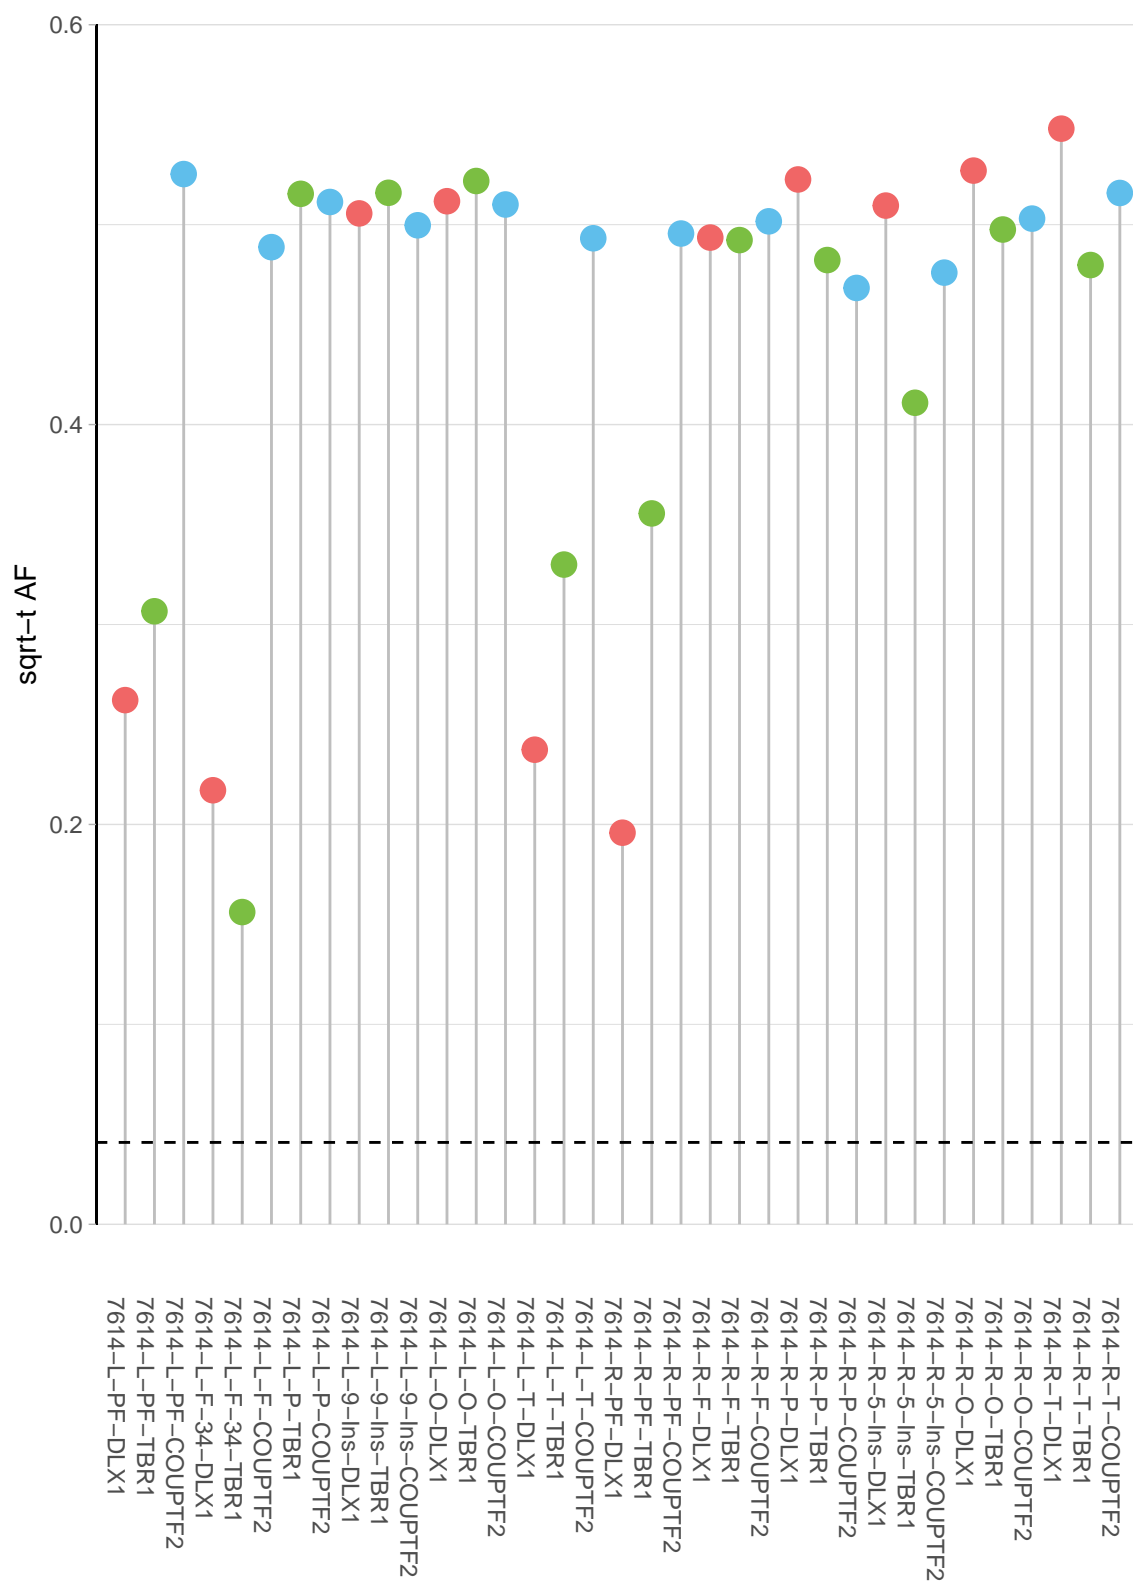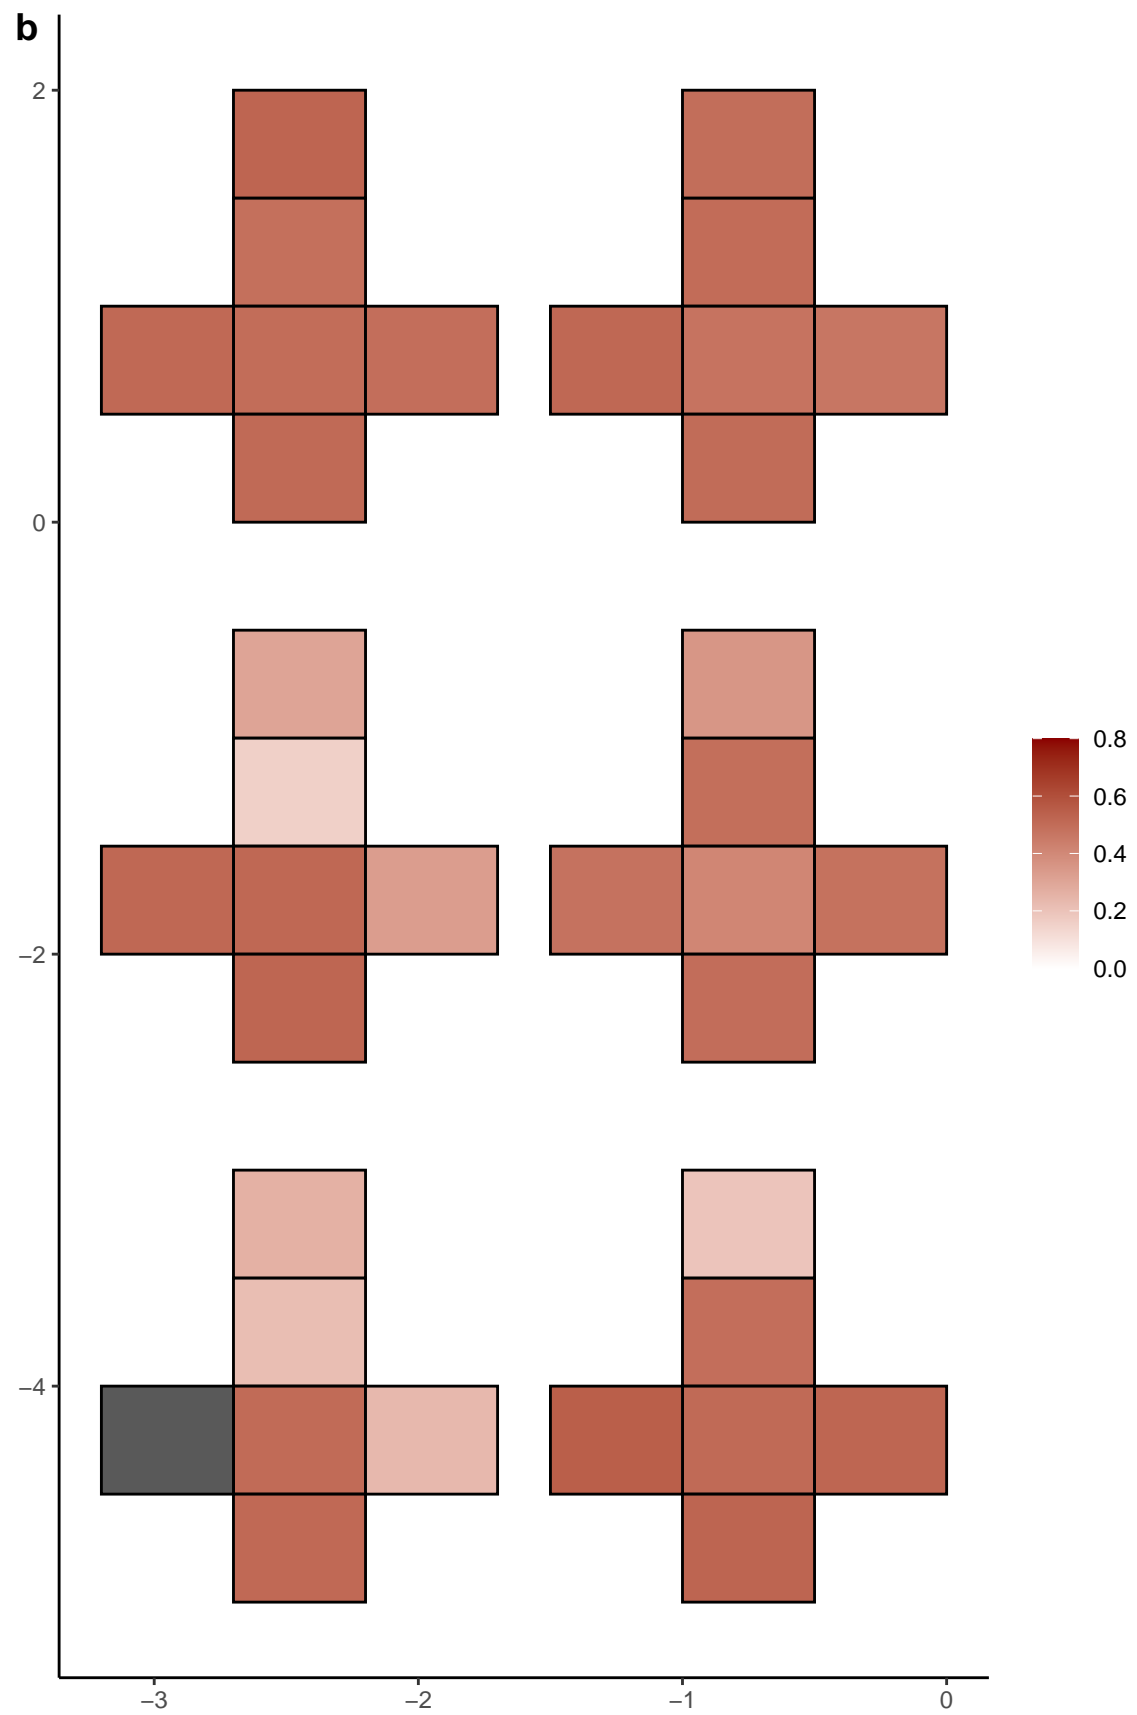

**a** ID01 3-162456631-G-A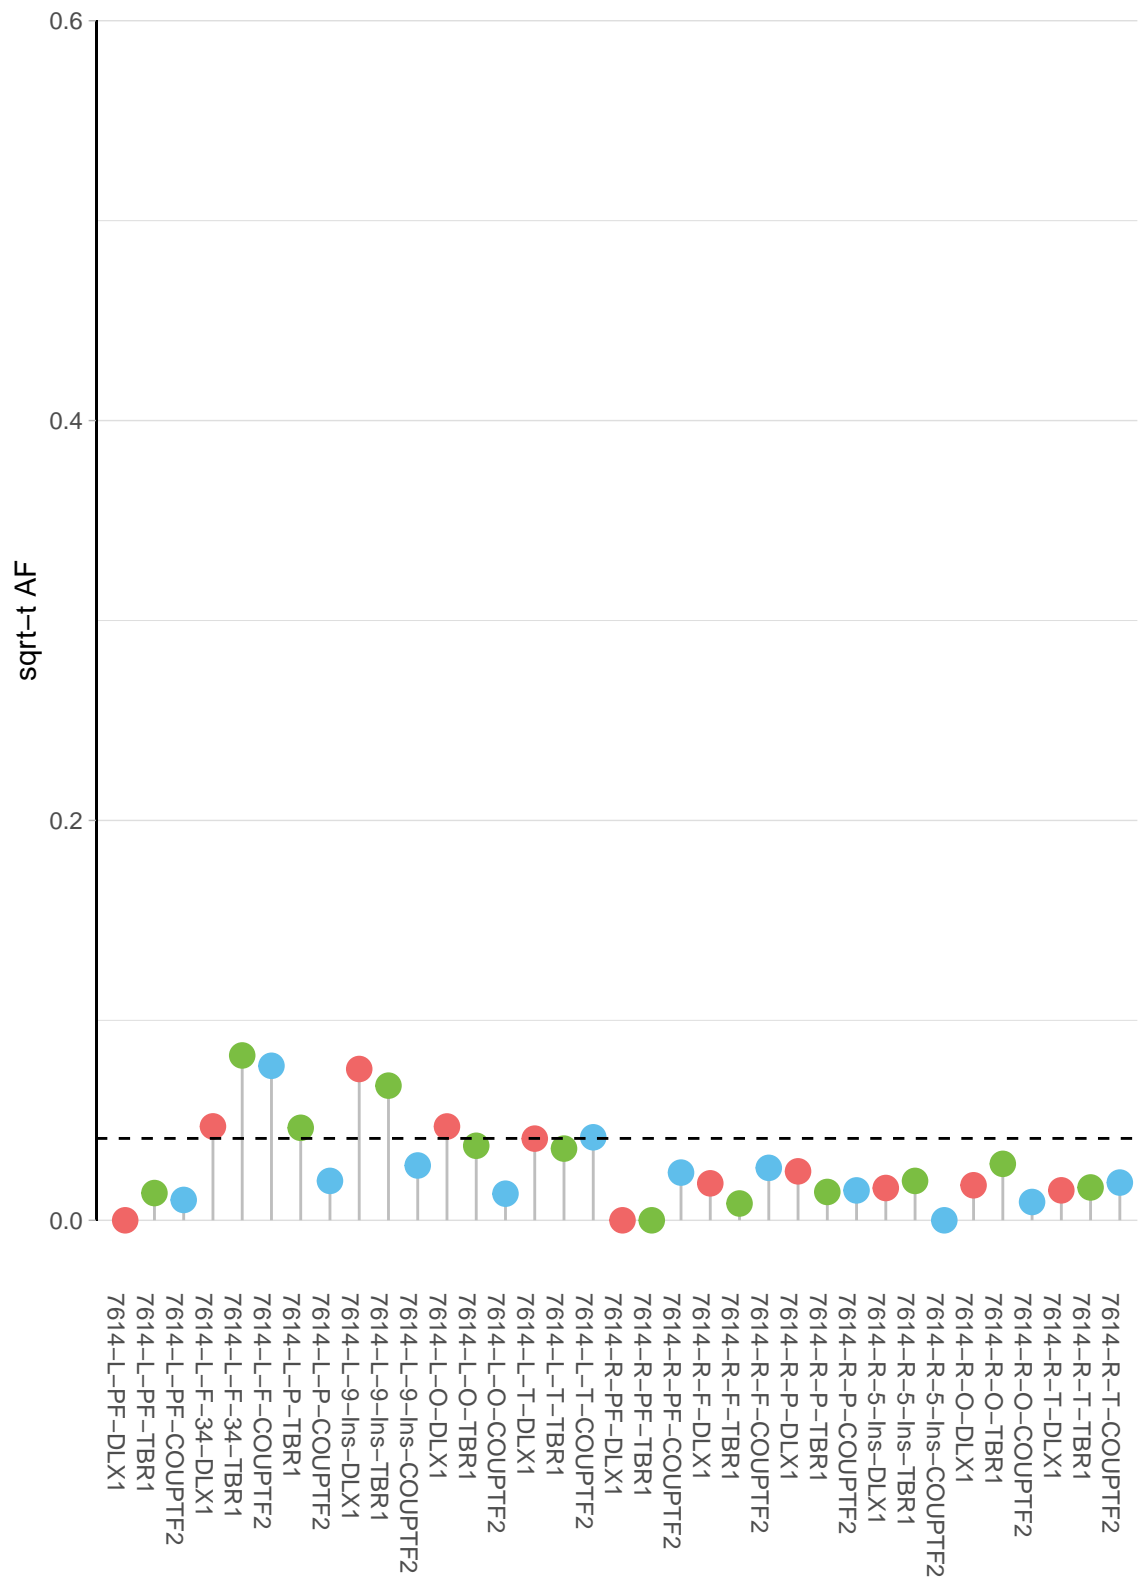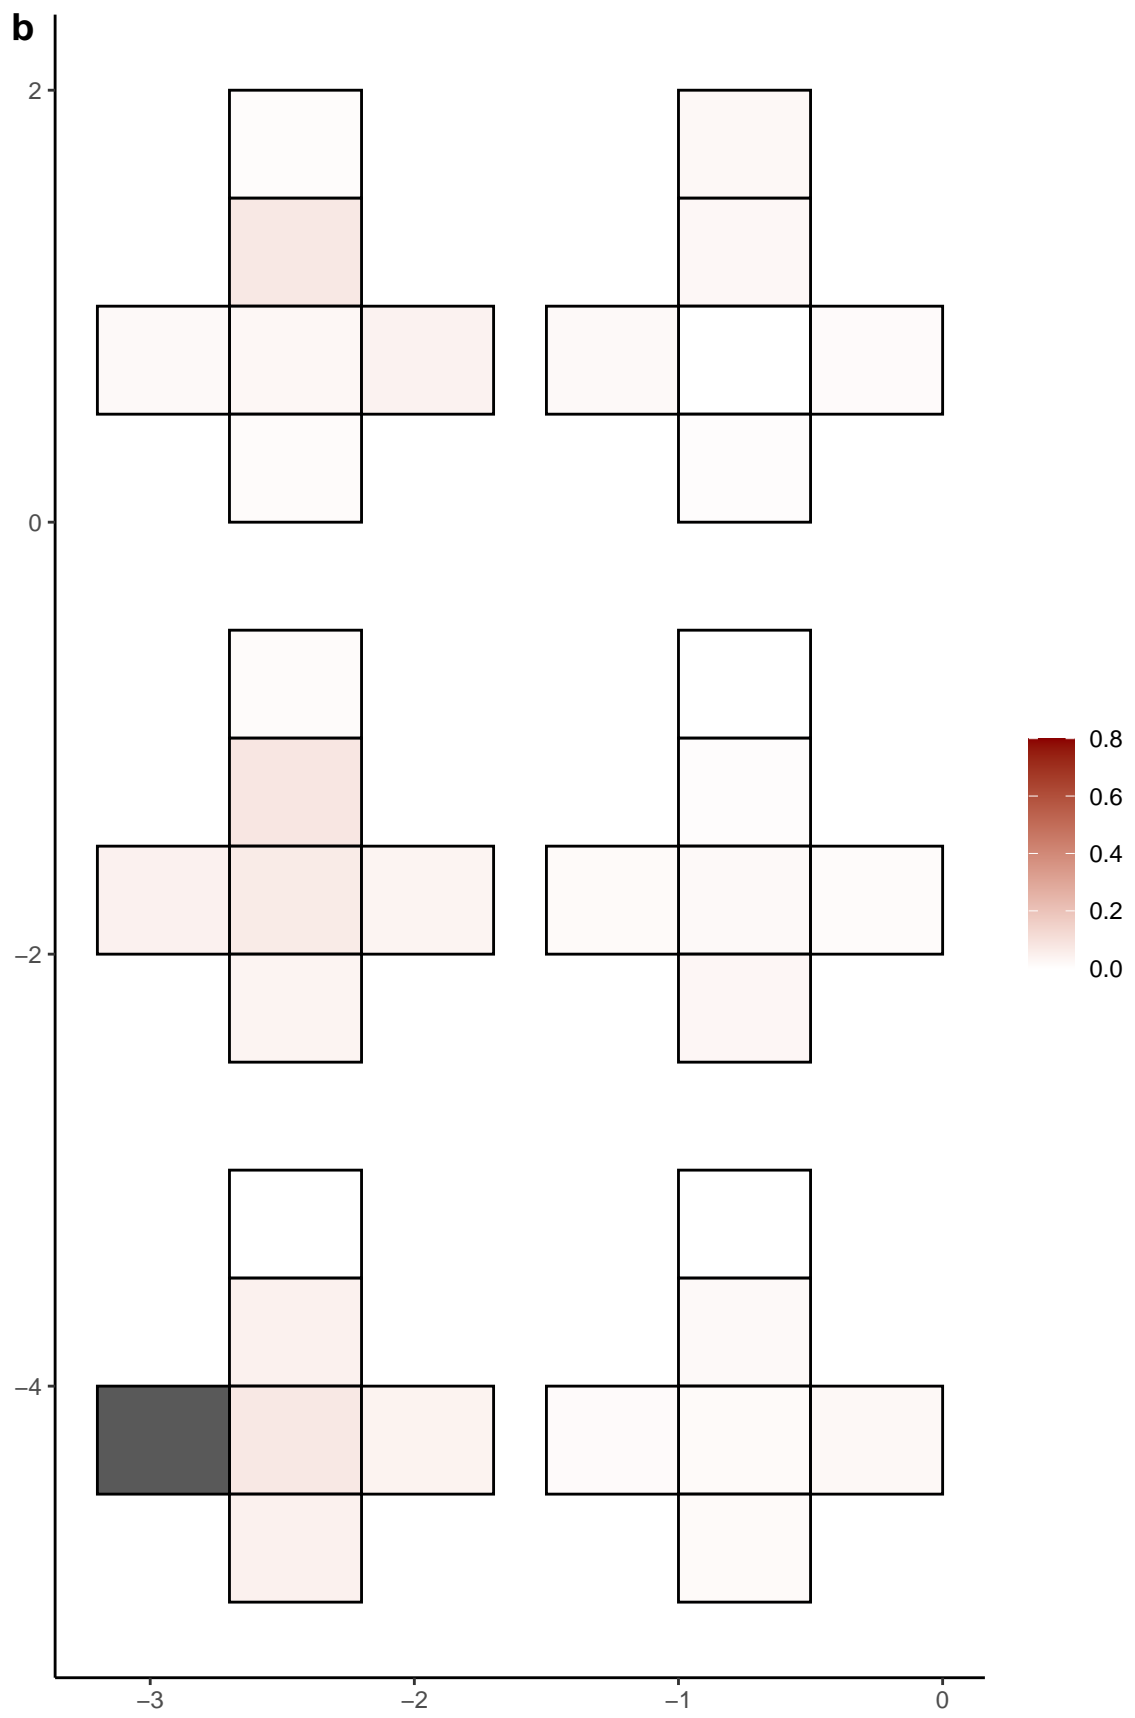

**a** ID01 3-184022071-G-A

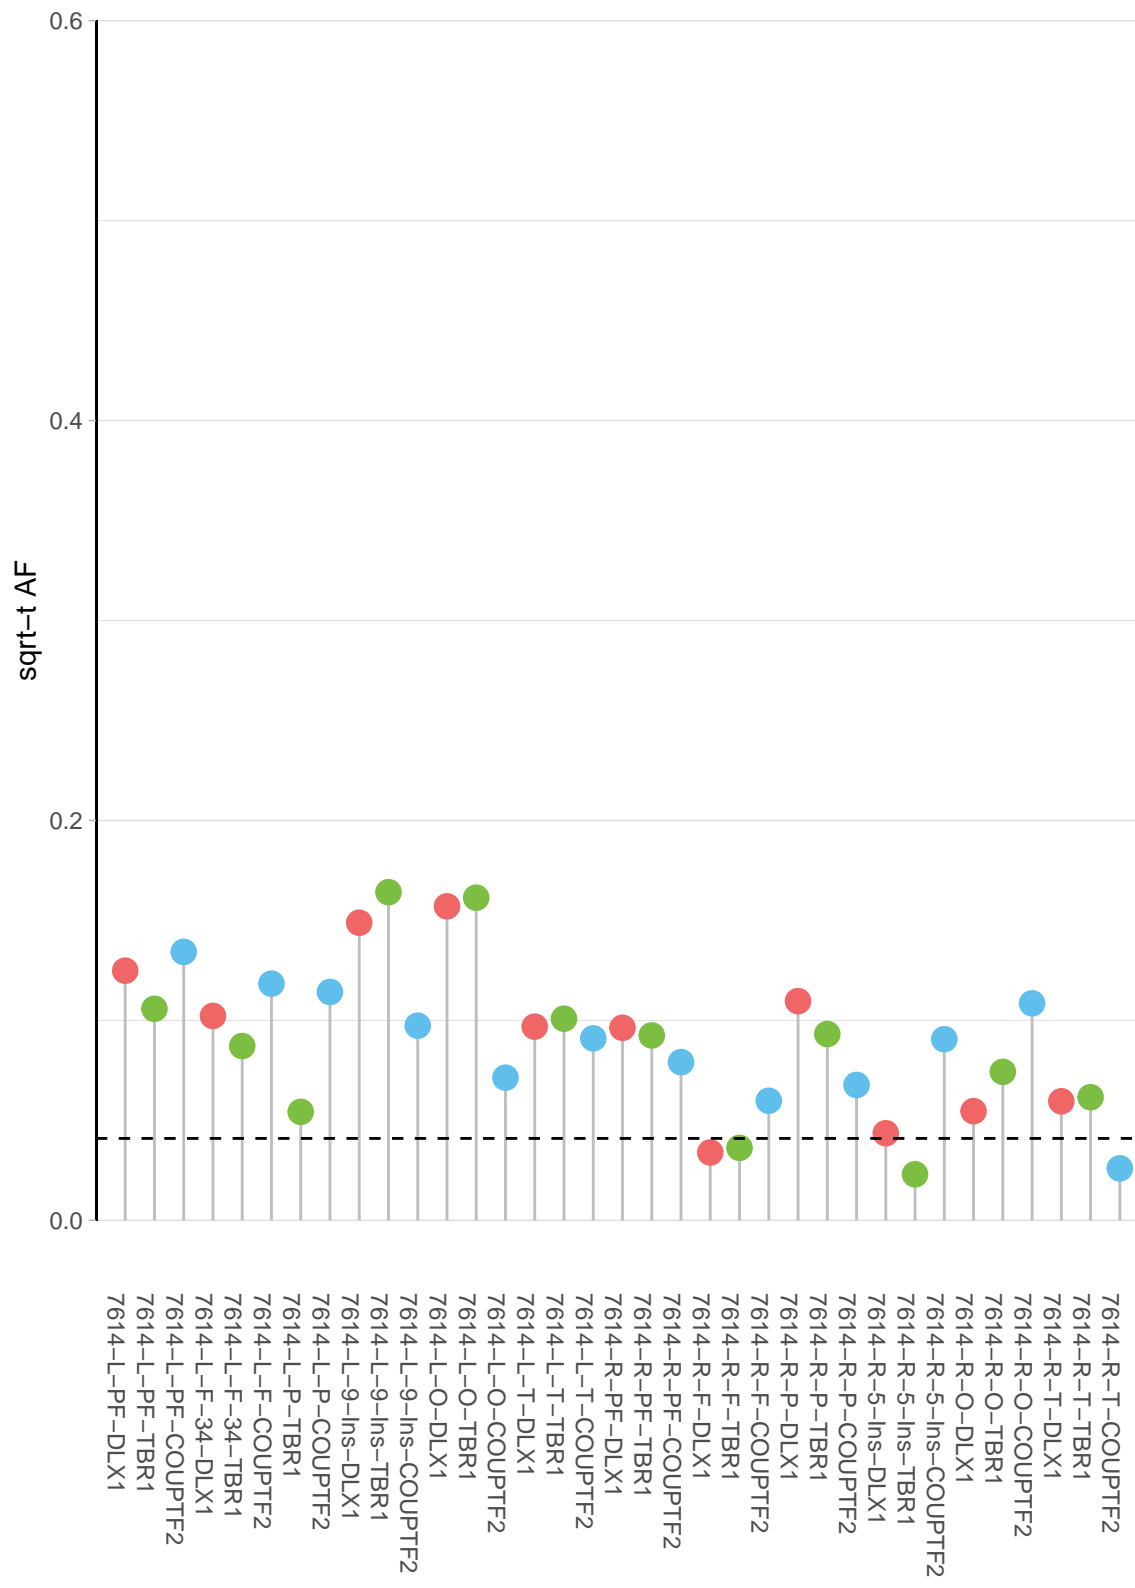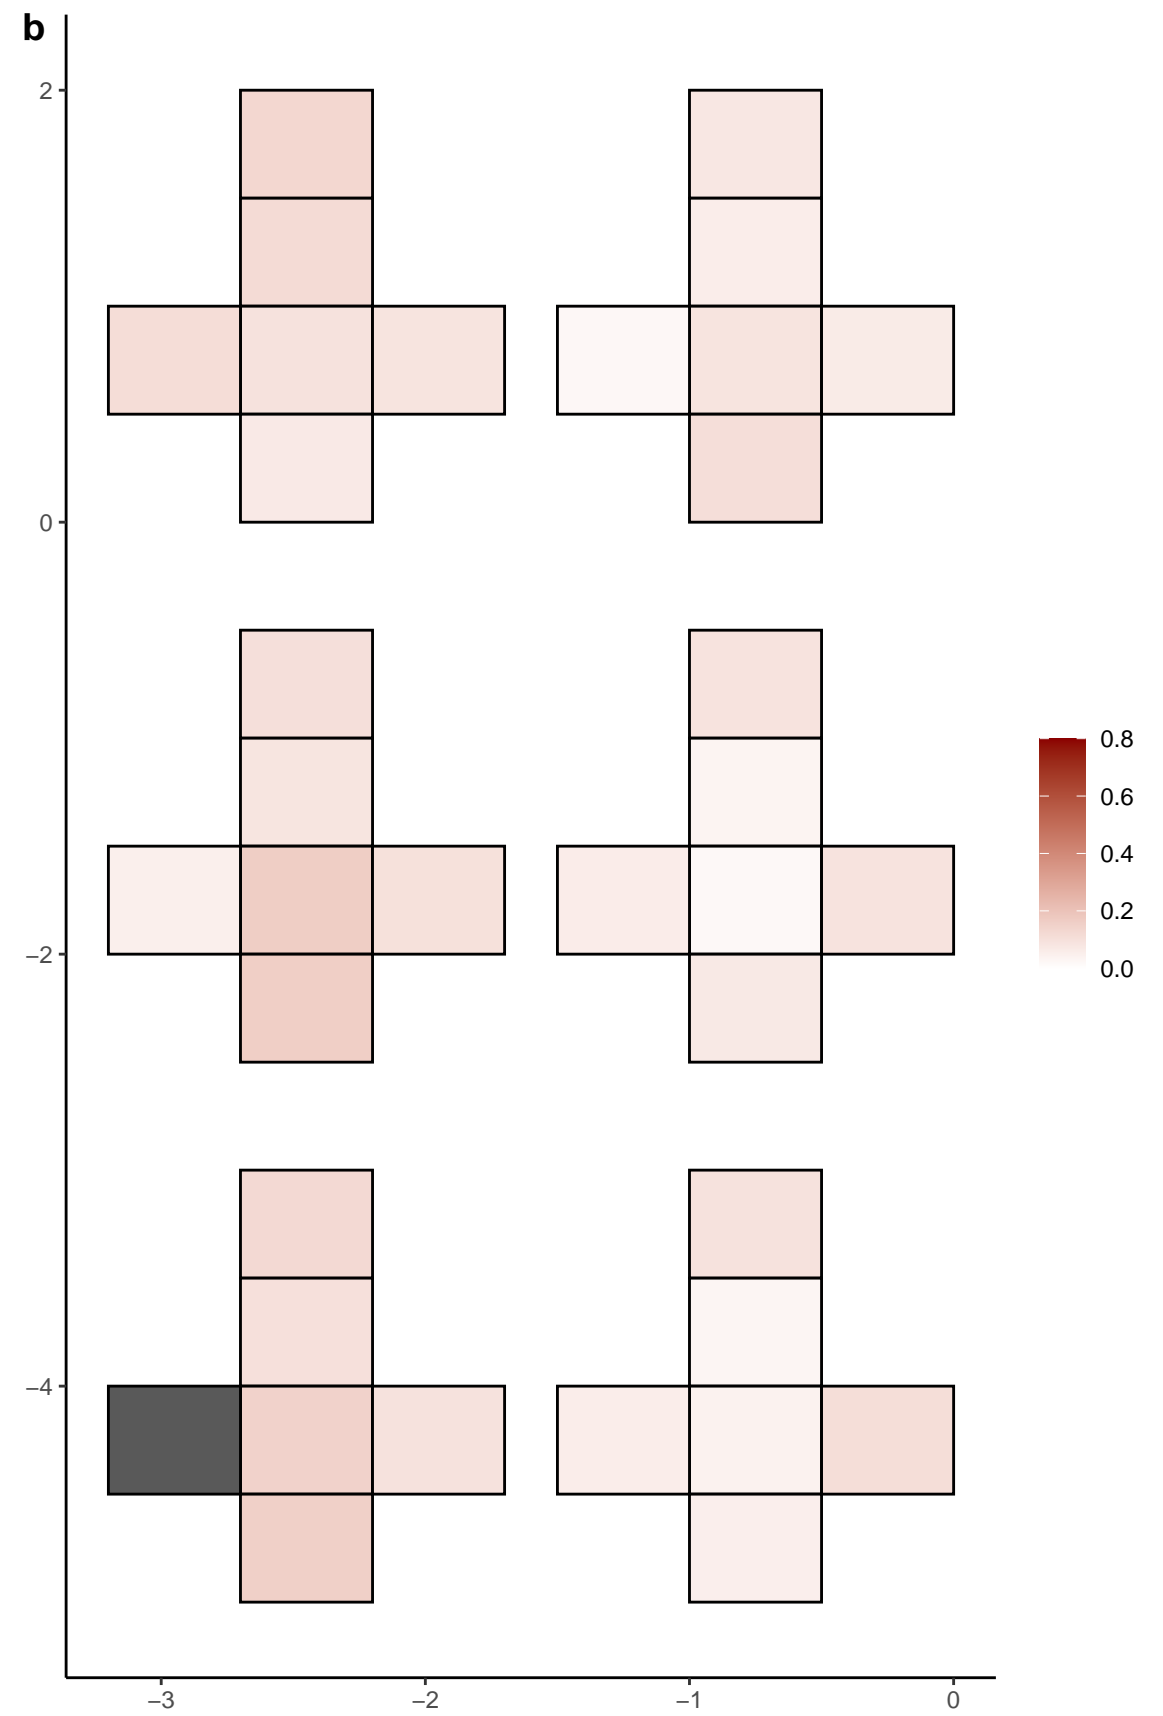

**a** ID01 3-196886773-C-T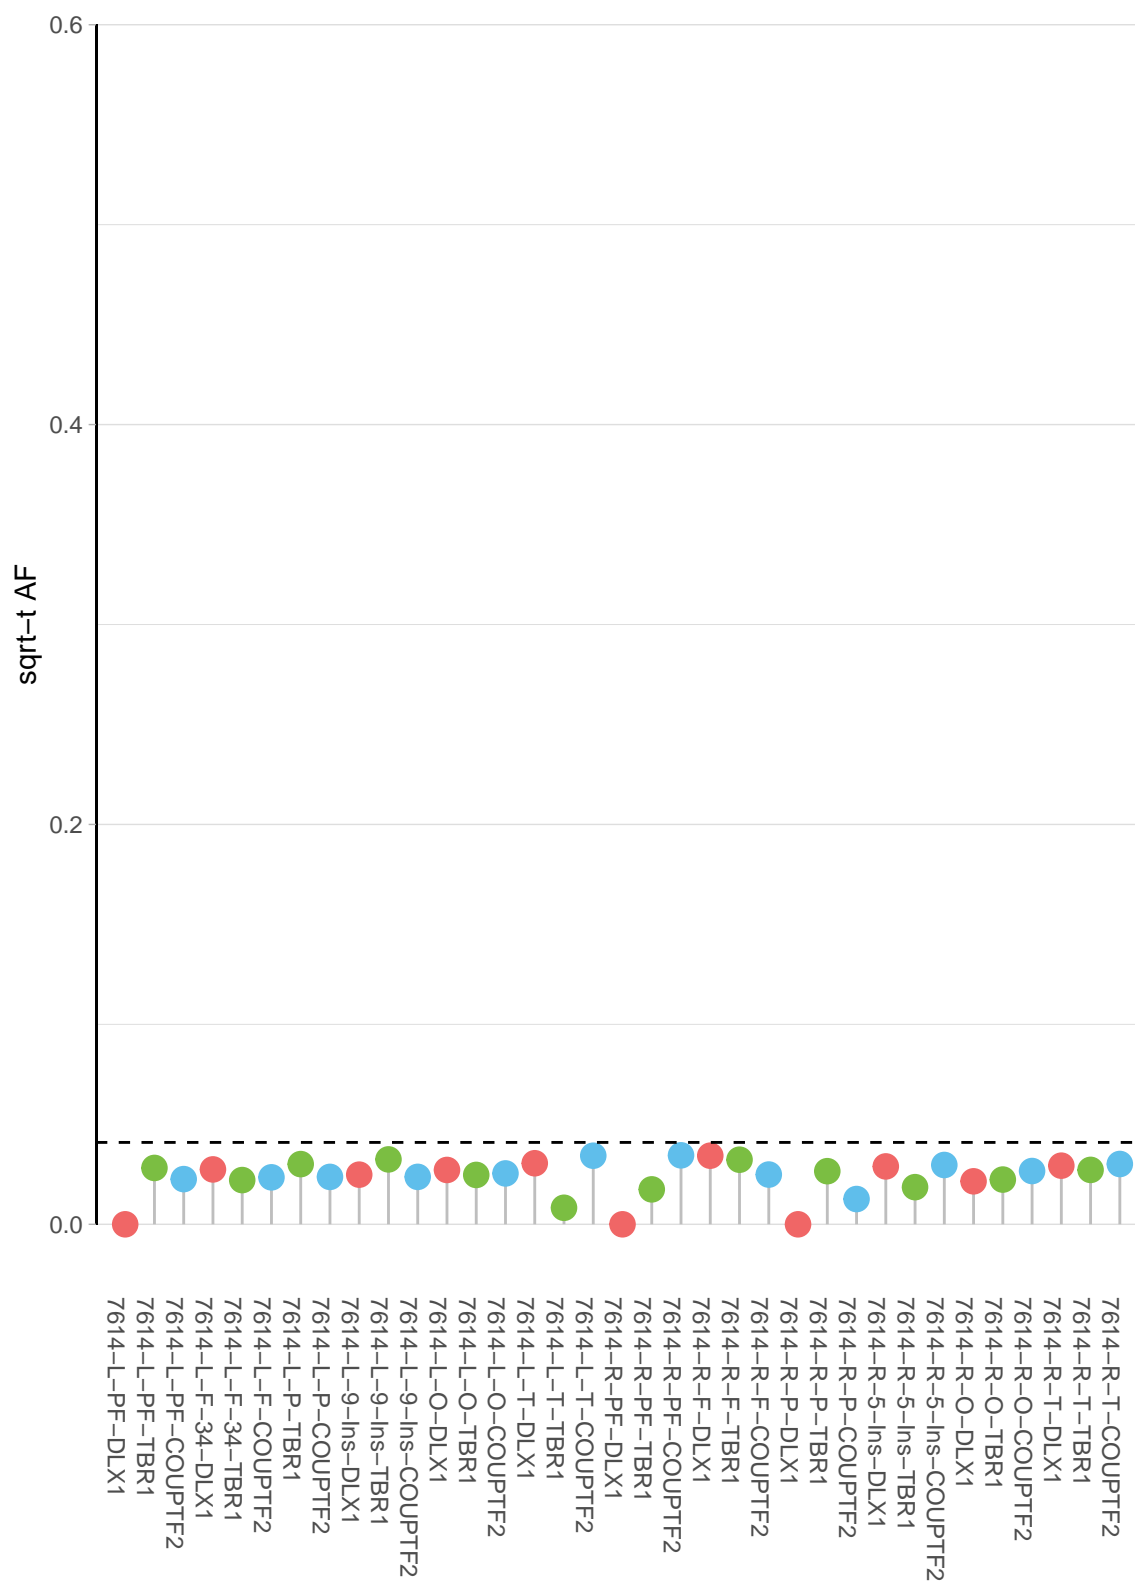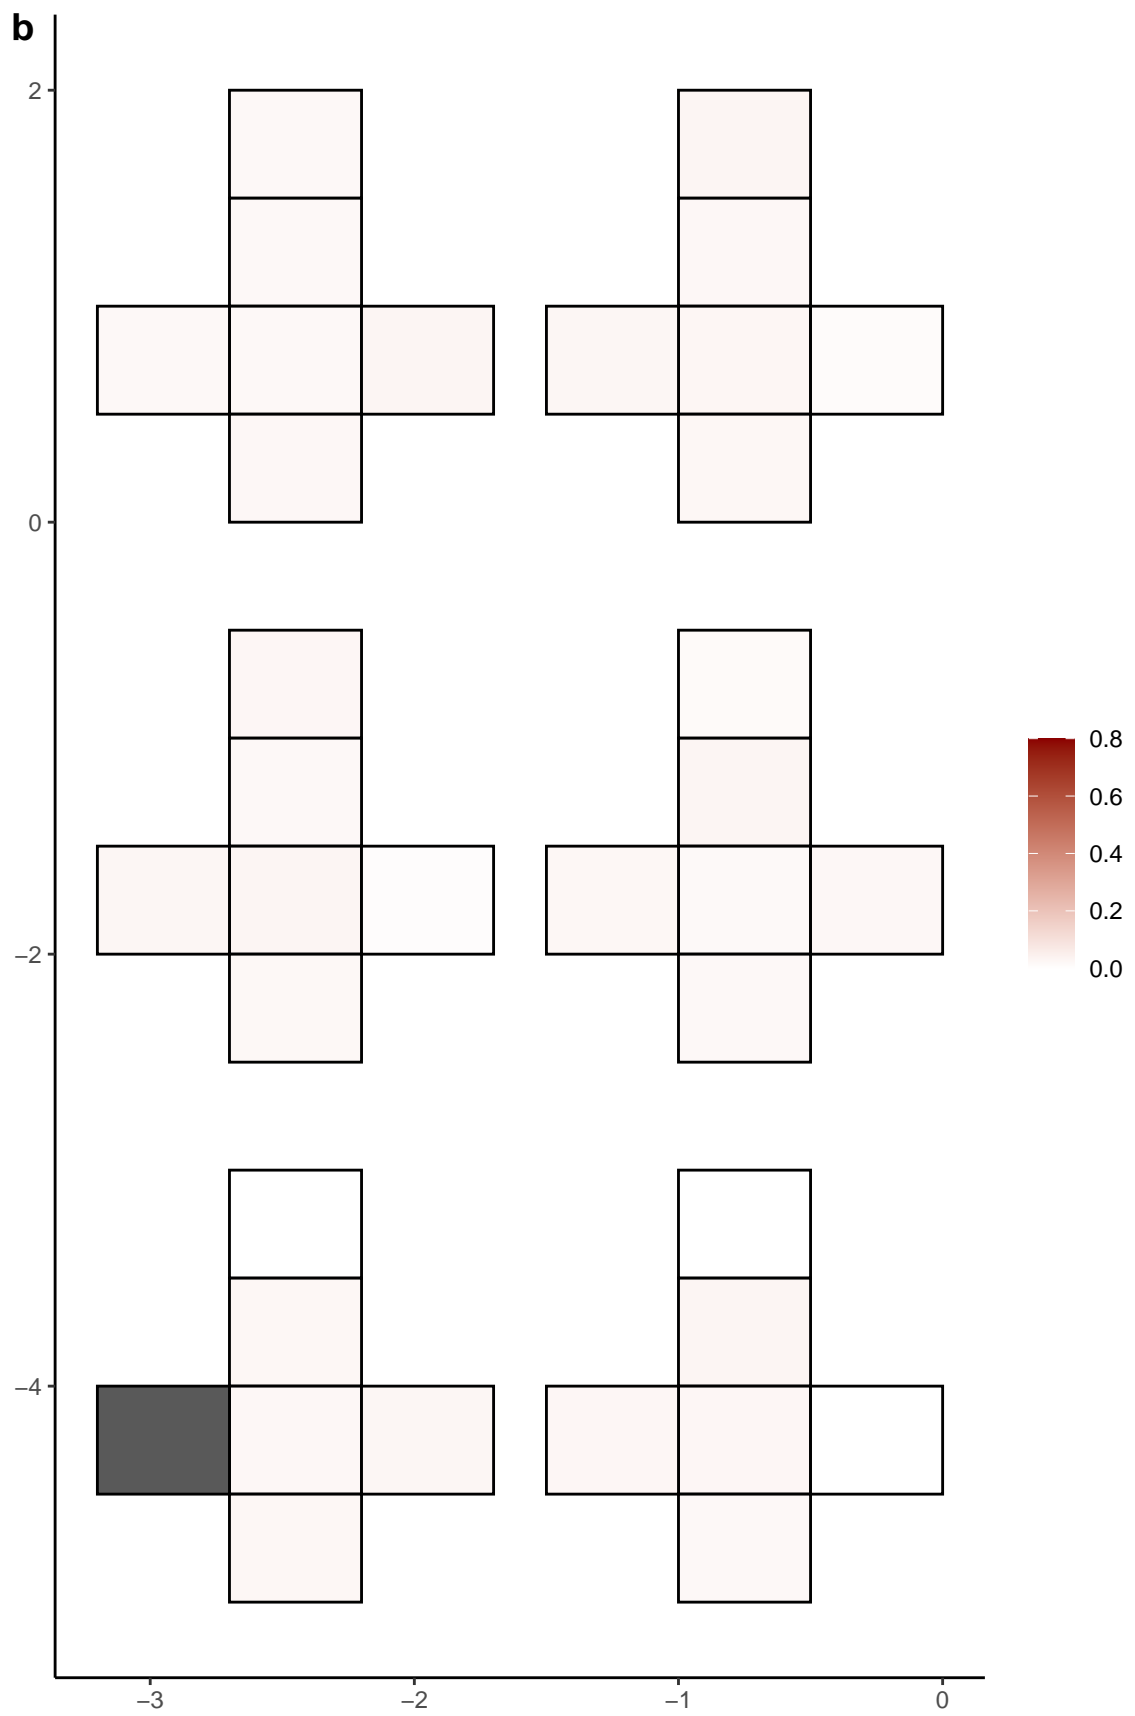

**a** ID01 3-23502134-AGAAAG-A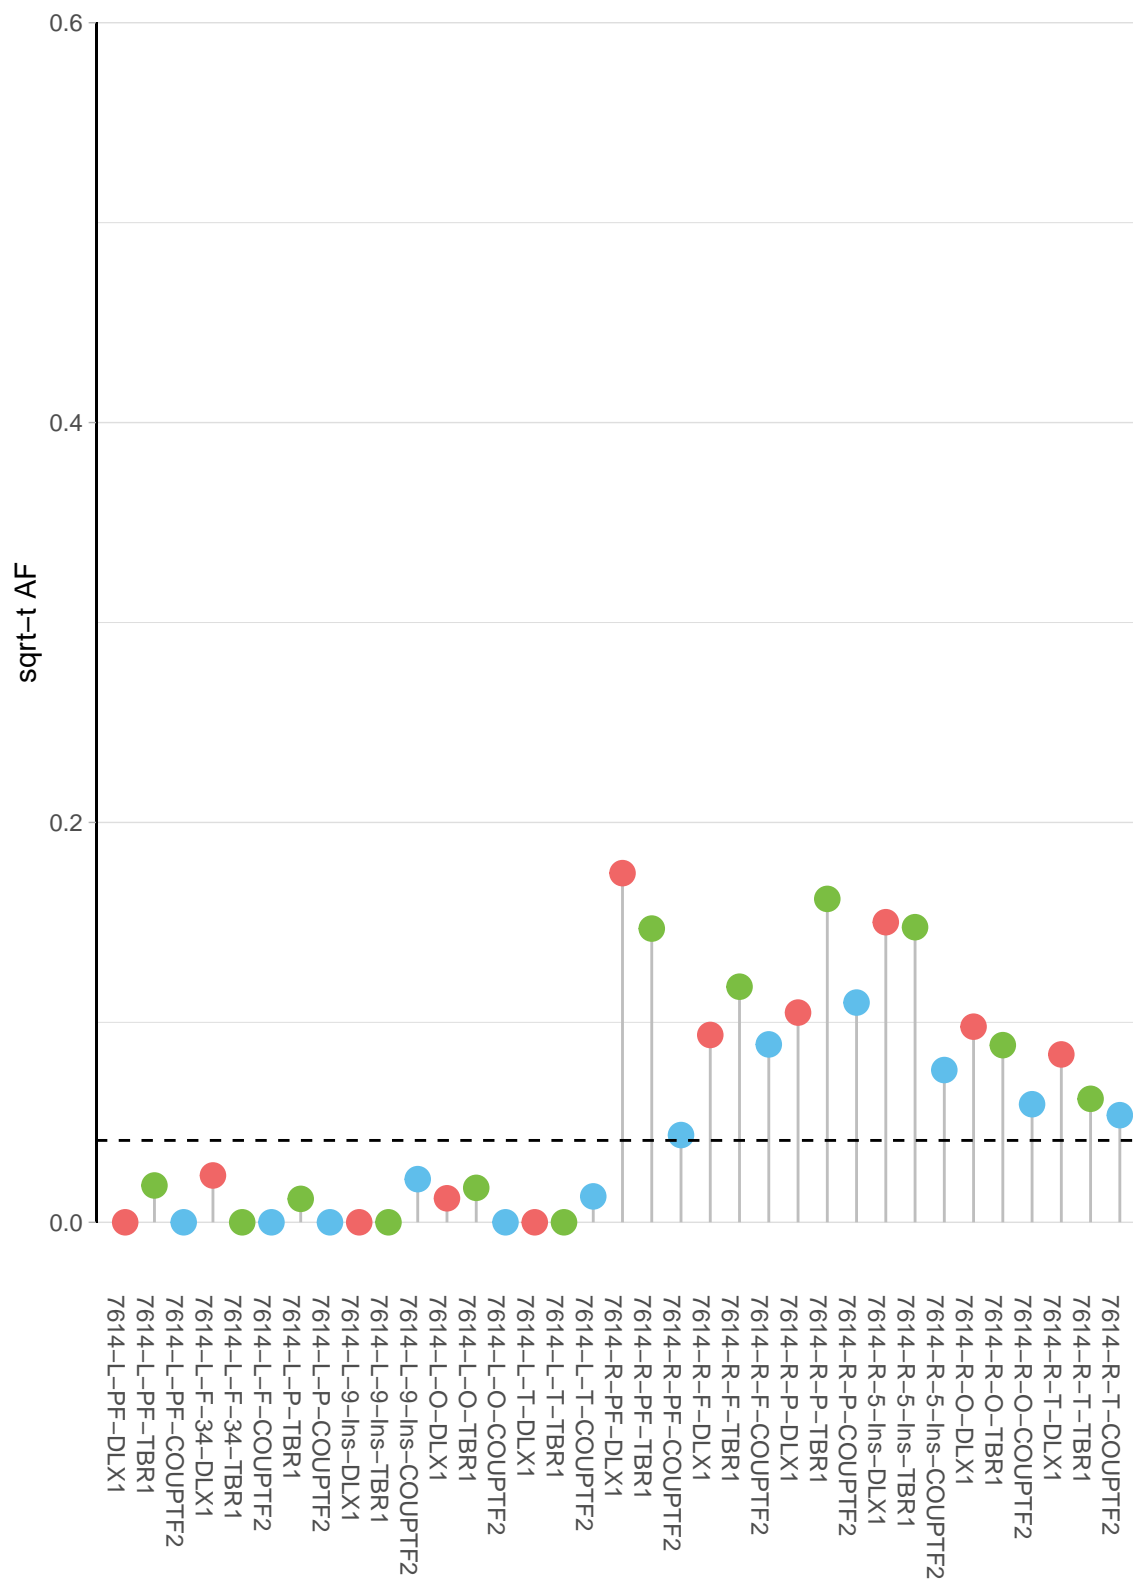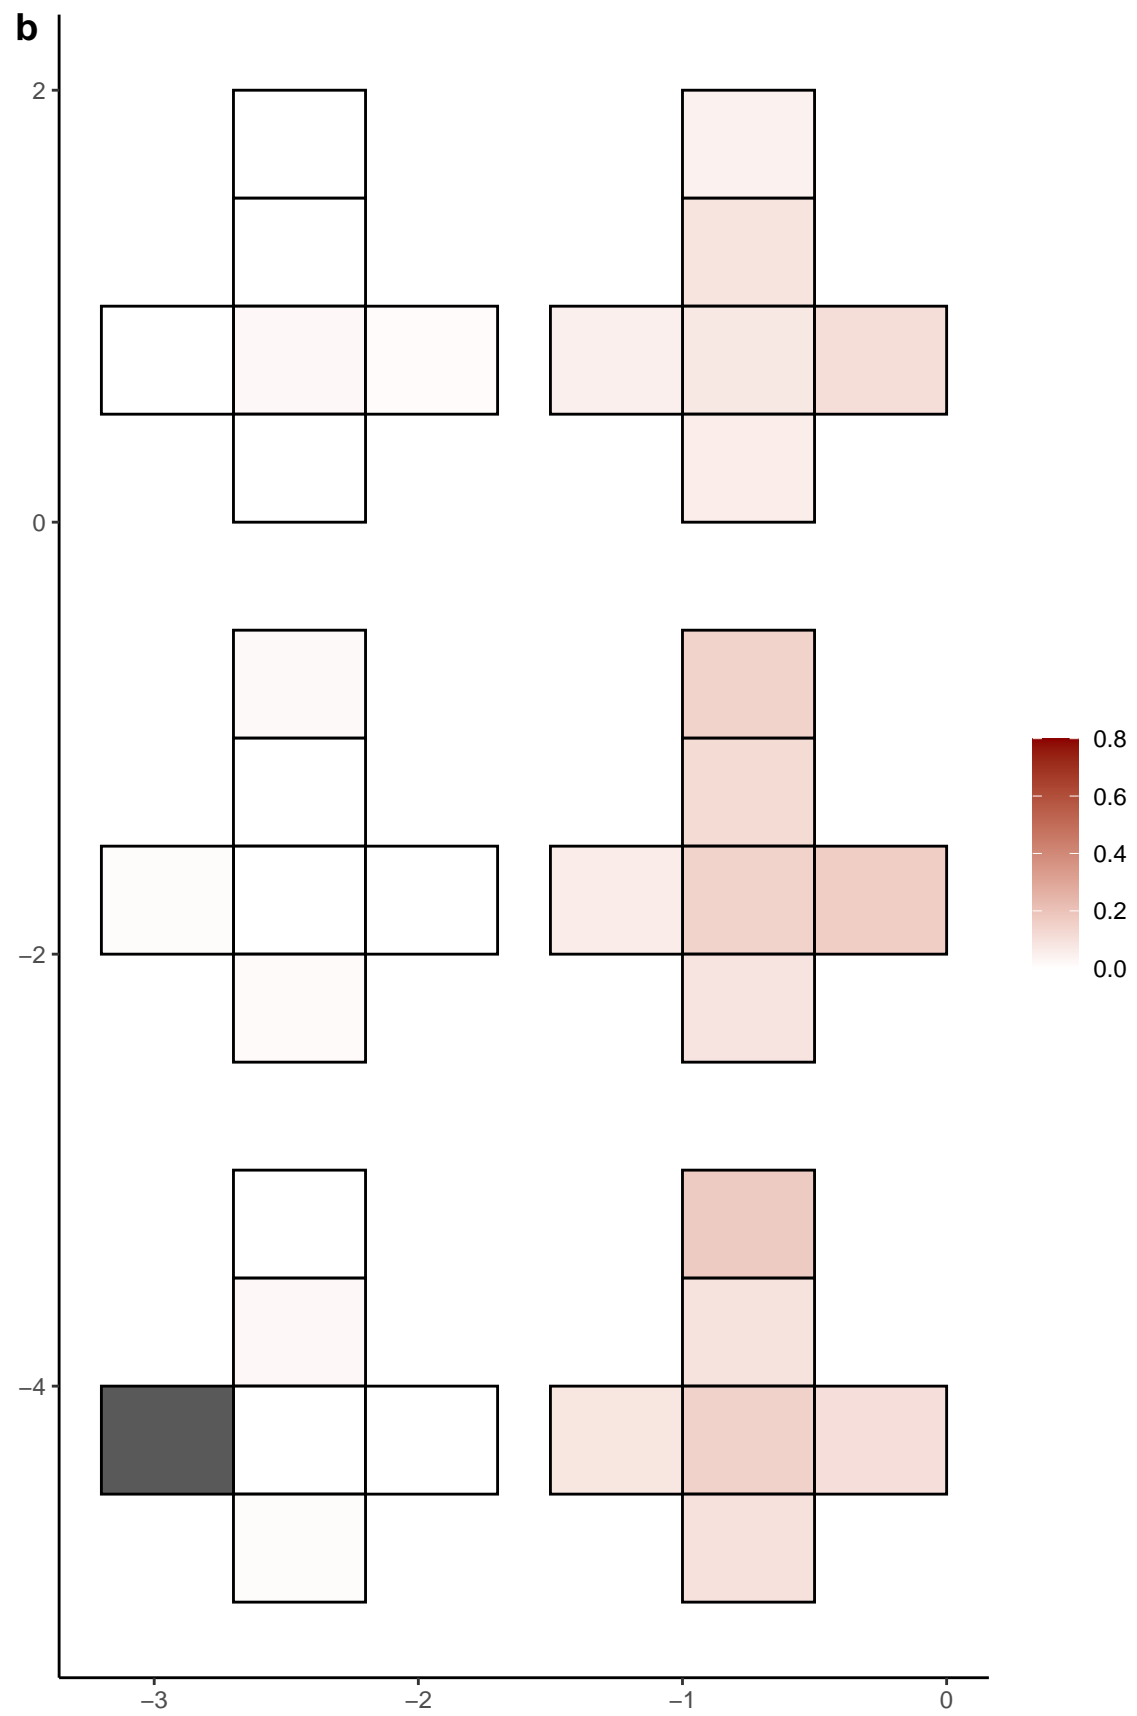



**a** ID01 3-25576791-C-T

**a** ID01 3-31854915-A-C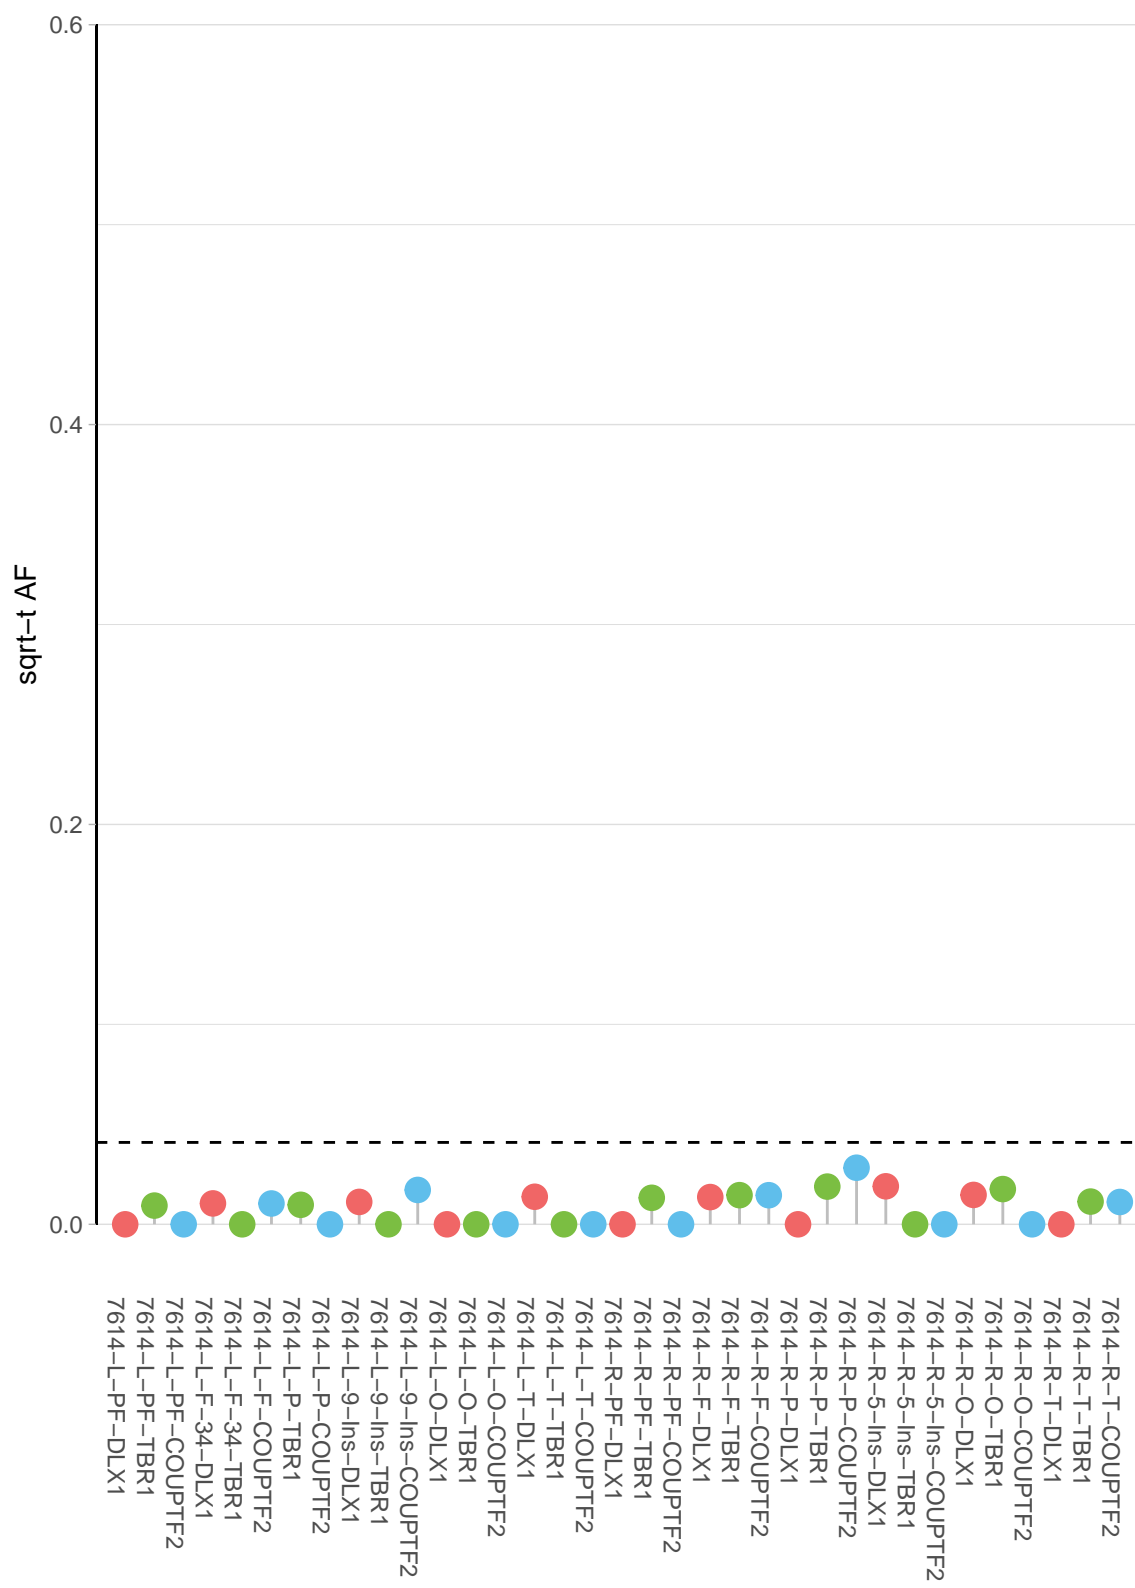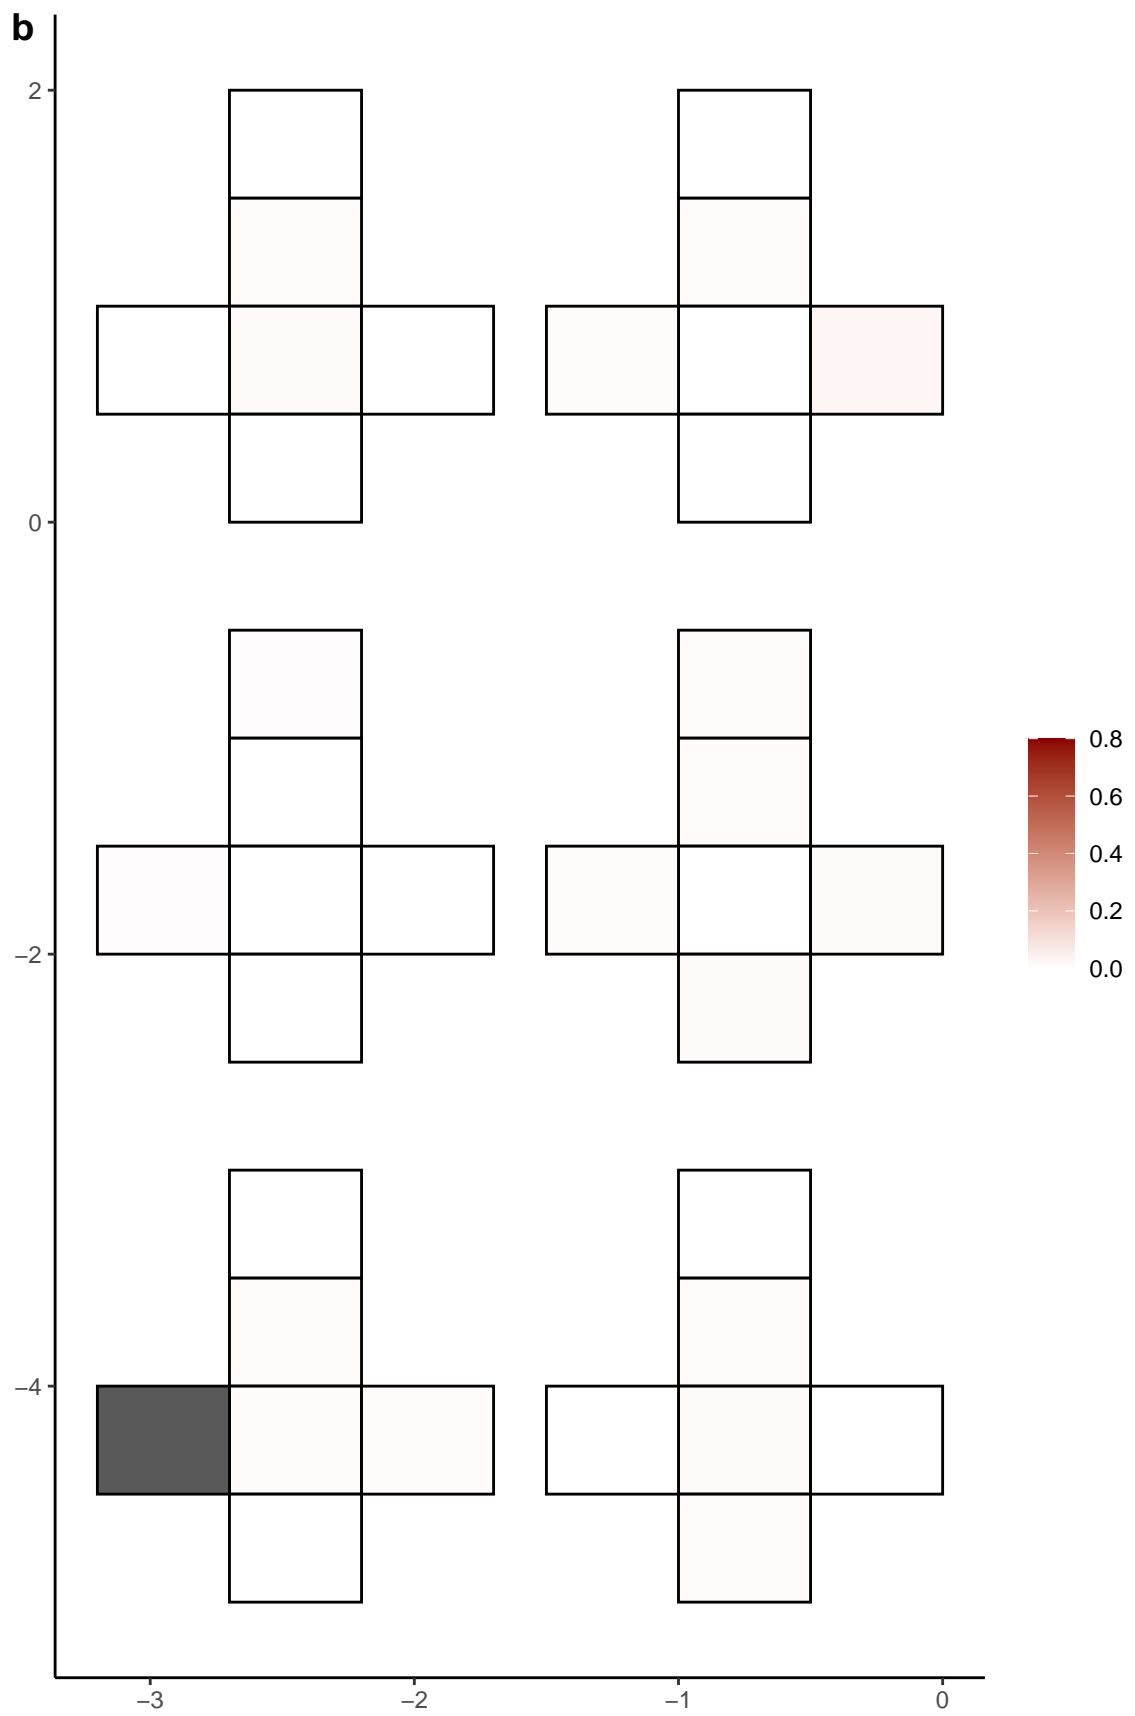

**a** ID01 3-34583283-C-T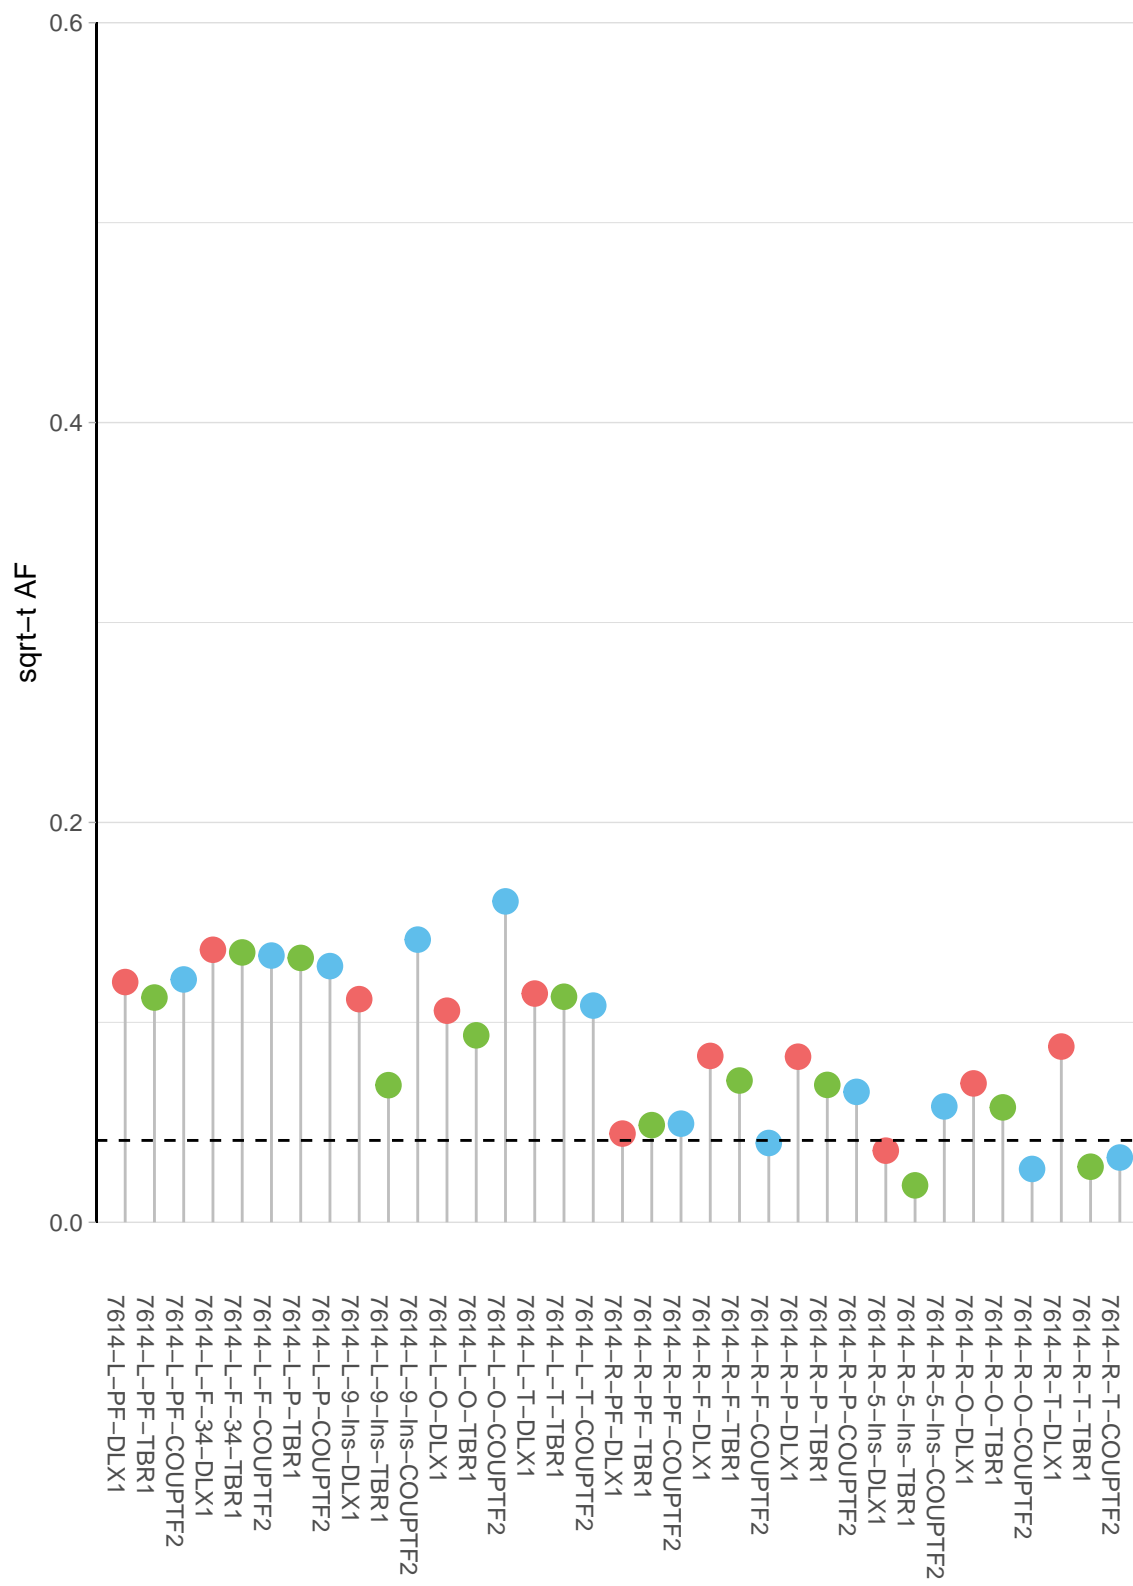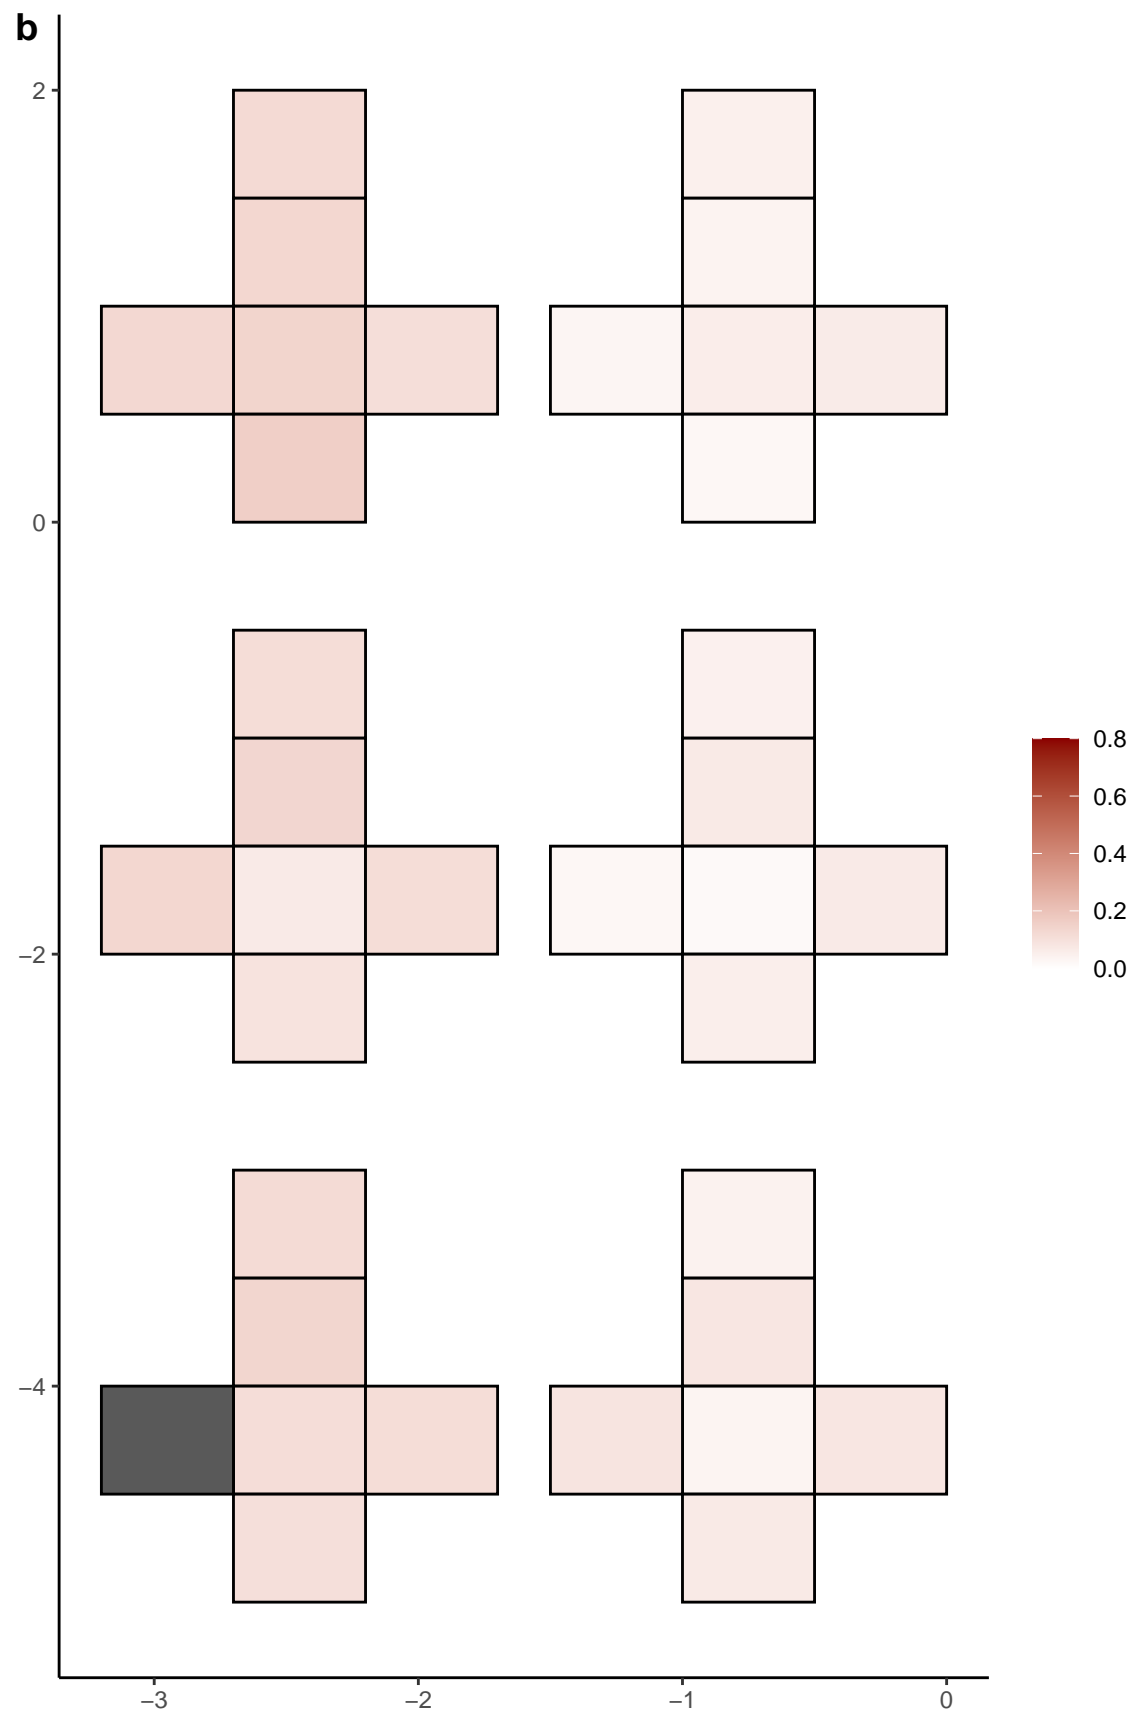

**a** ID01 3-36132231-T-G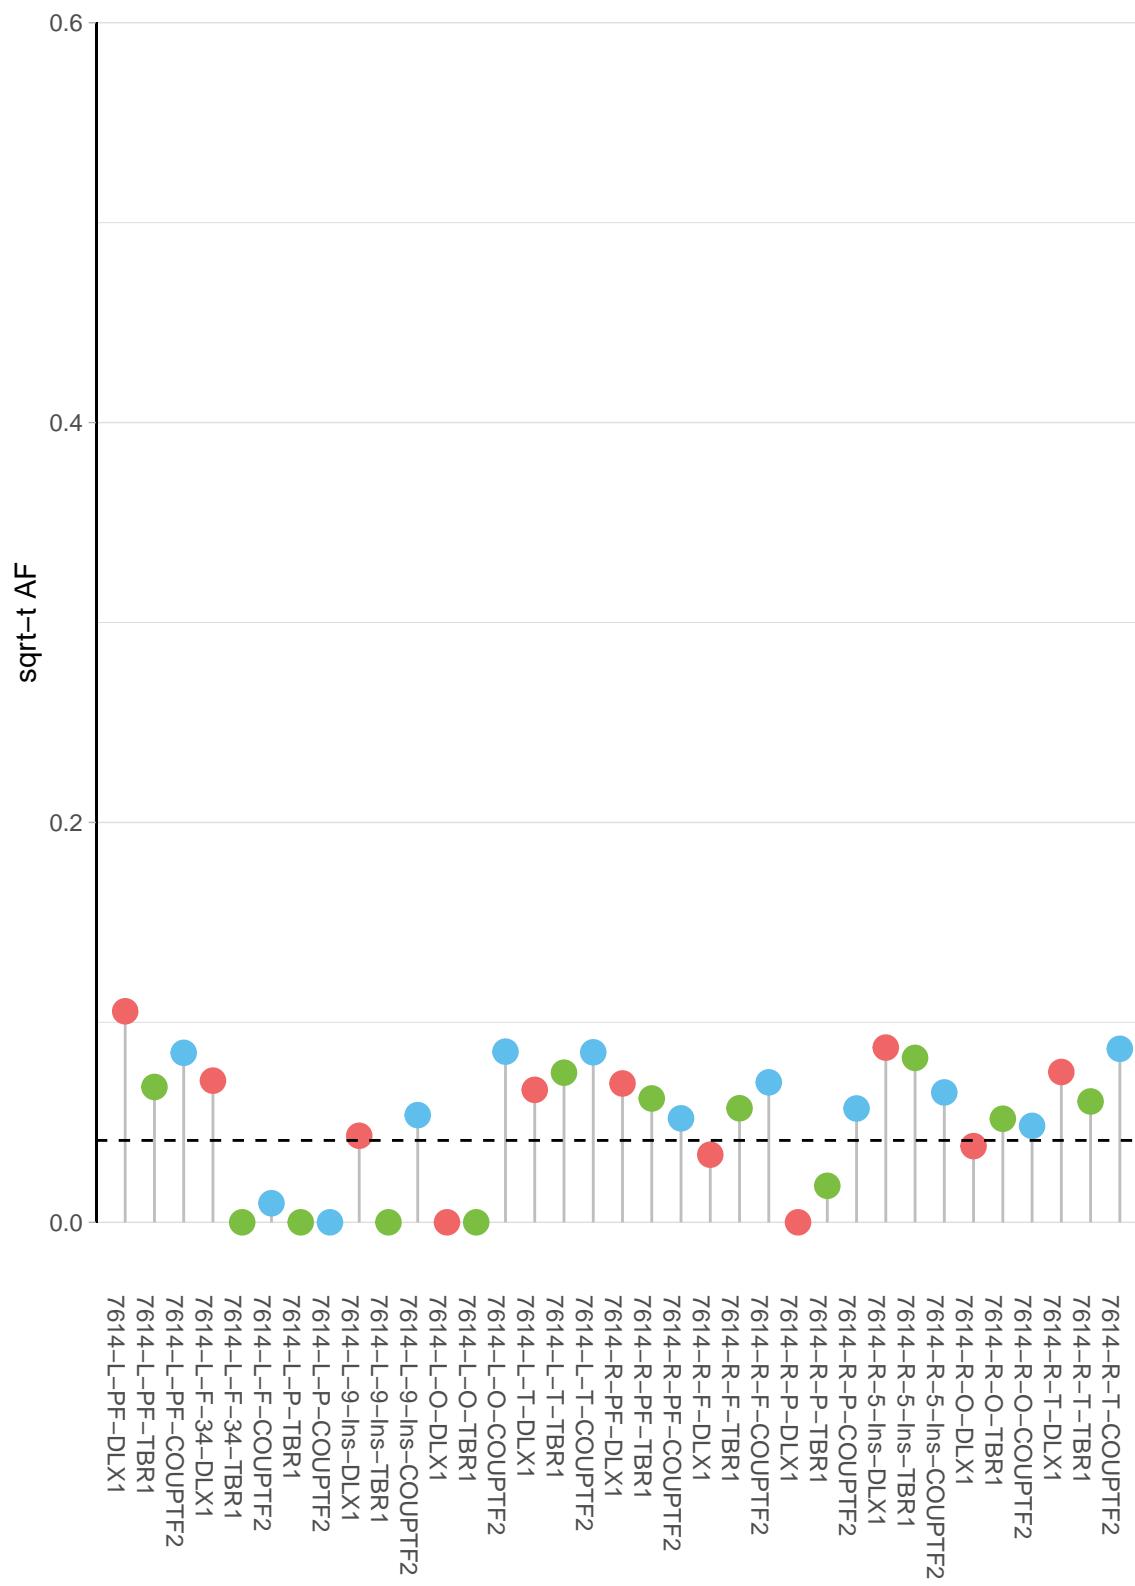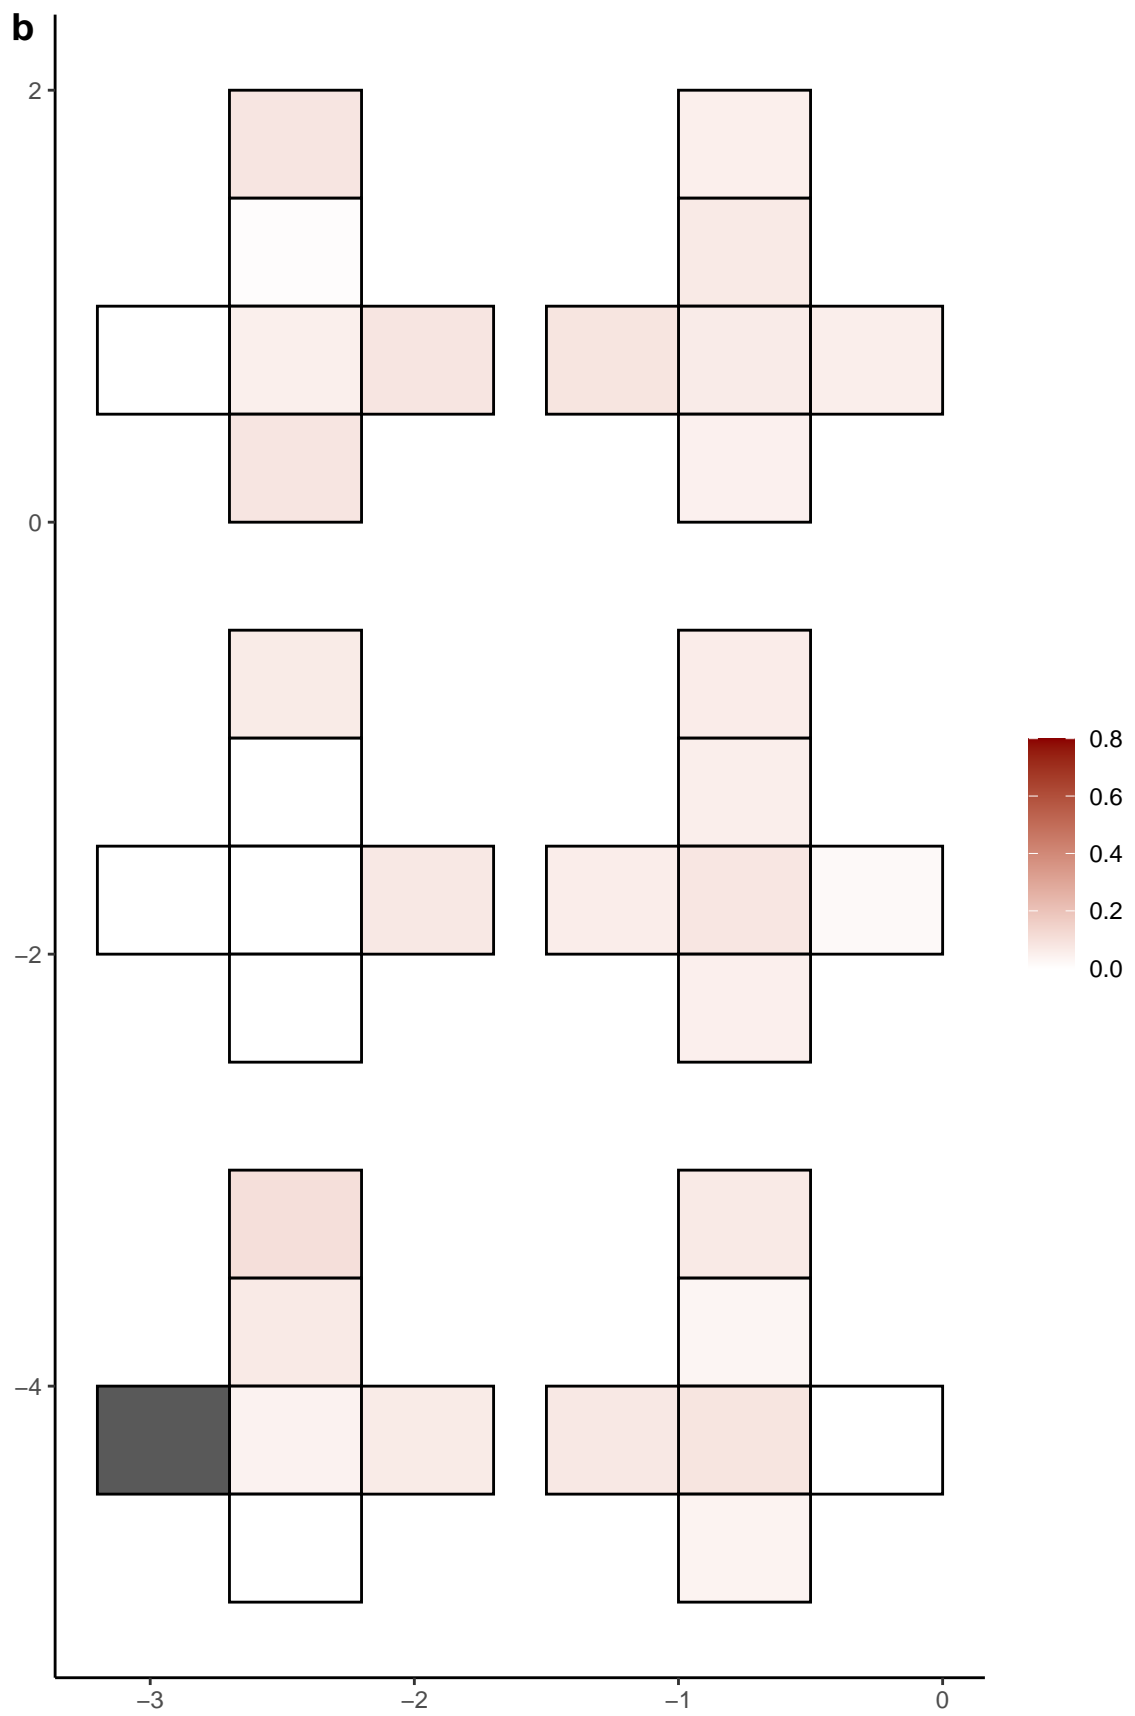

**a** ID01 3-49012324-G-T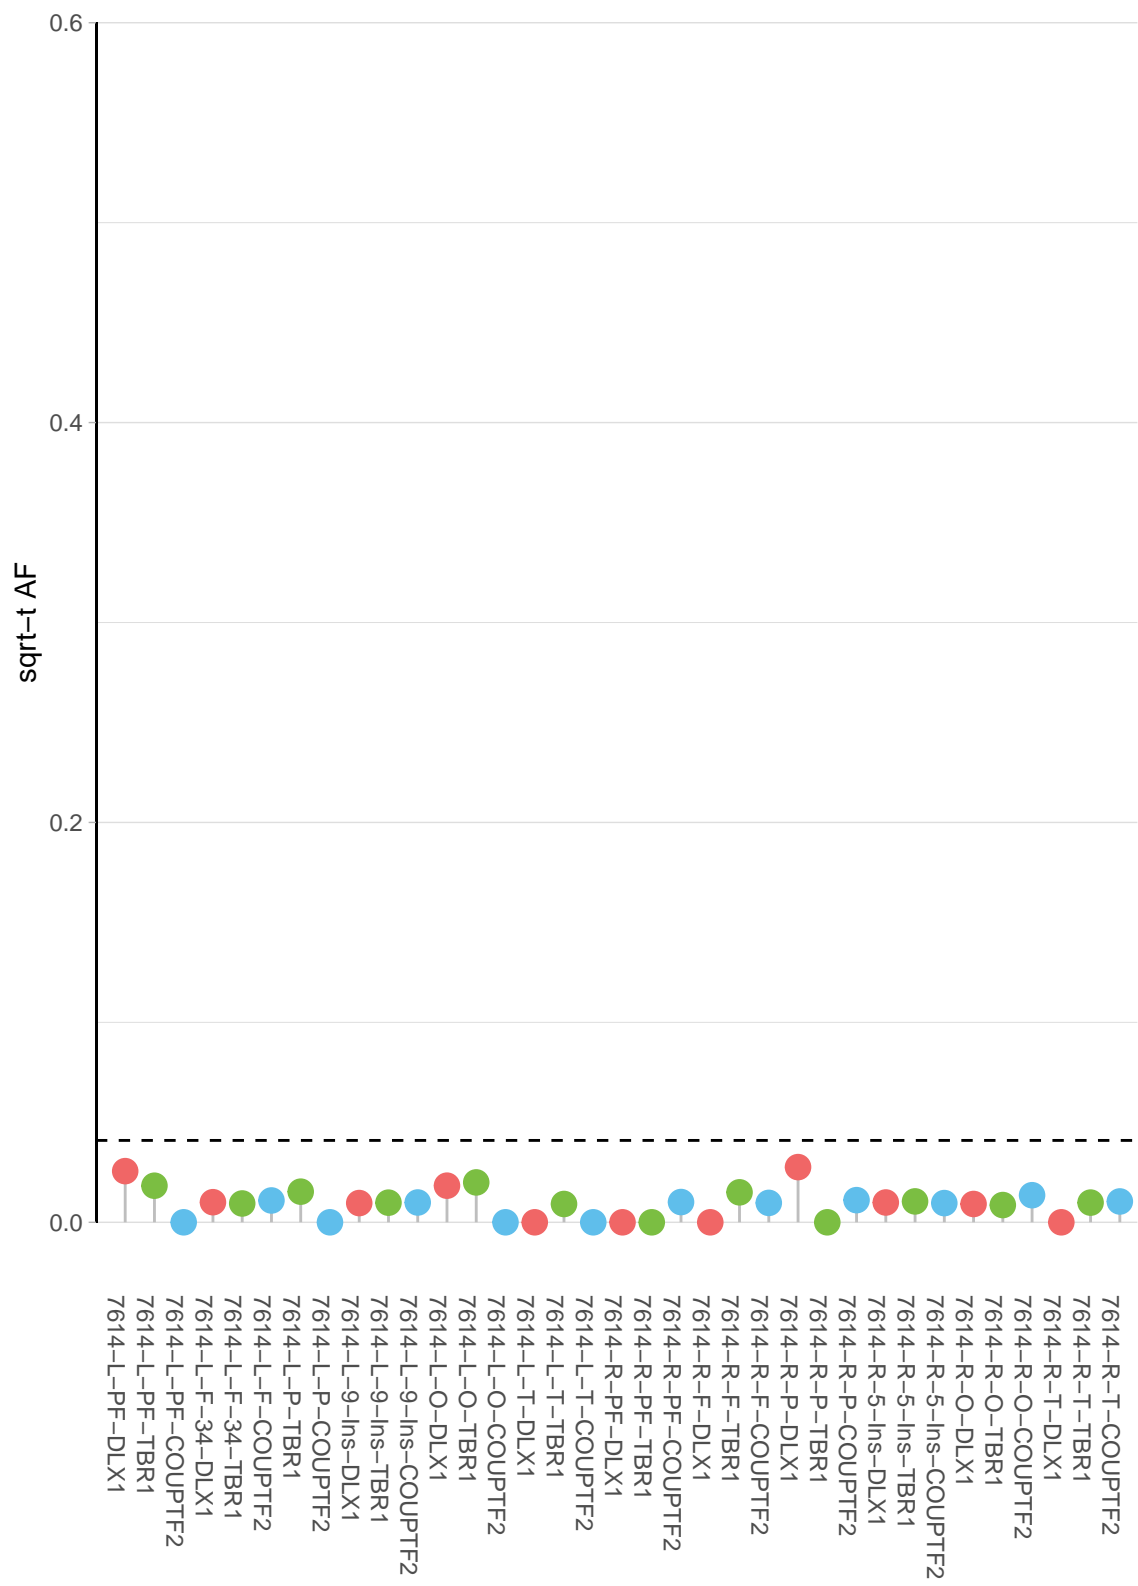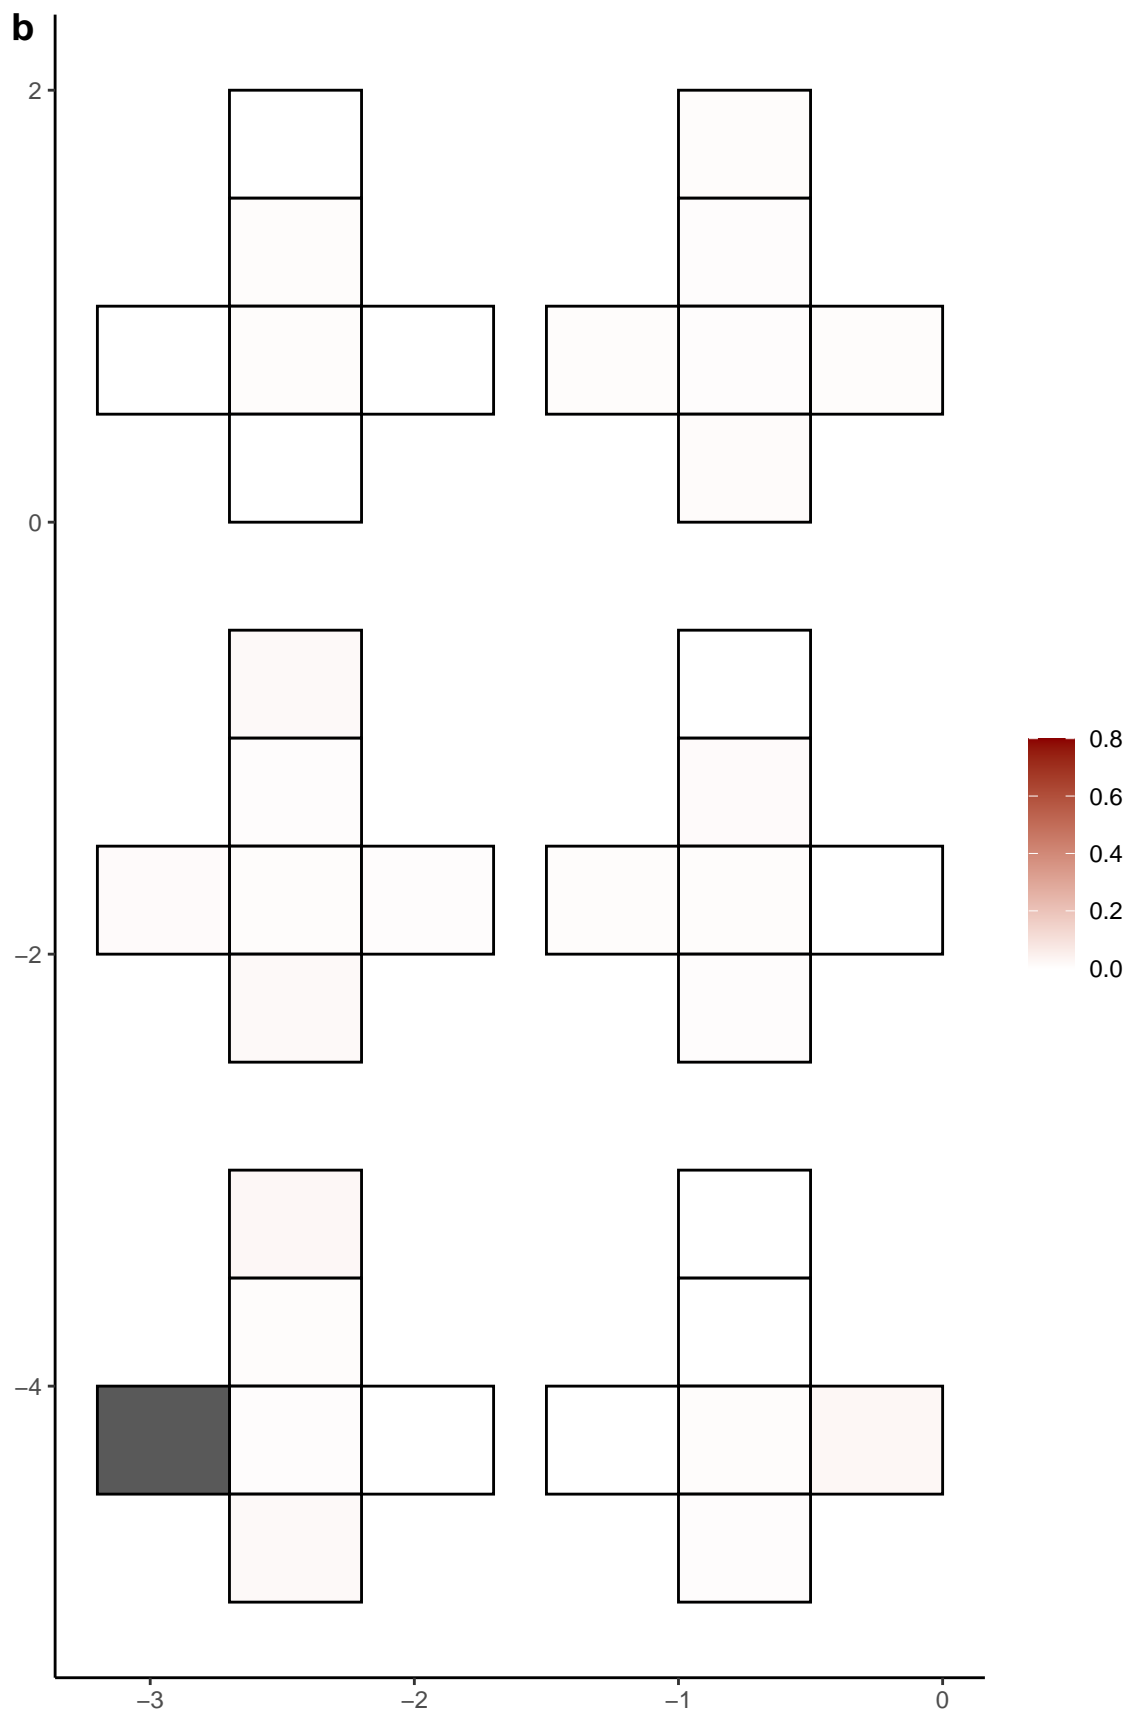

**a** ID01 3-53696469-T-C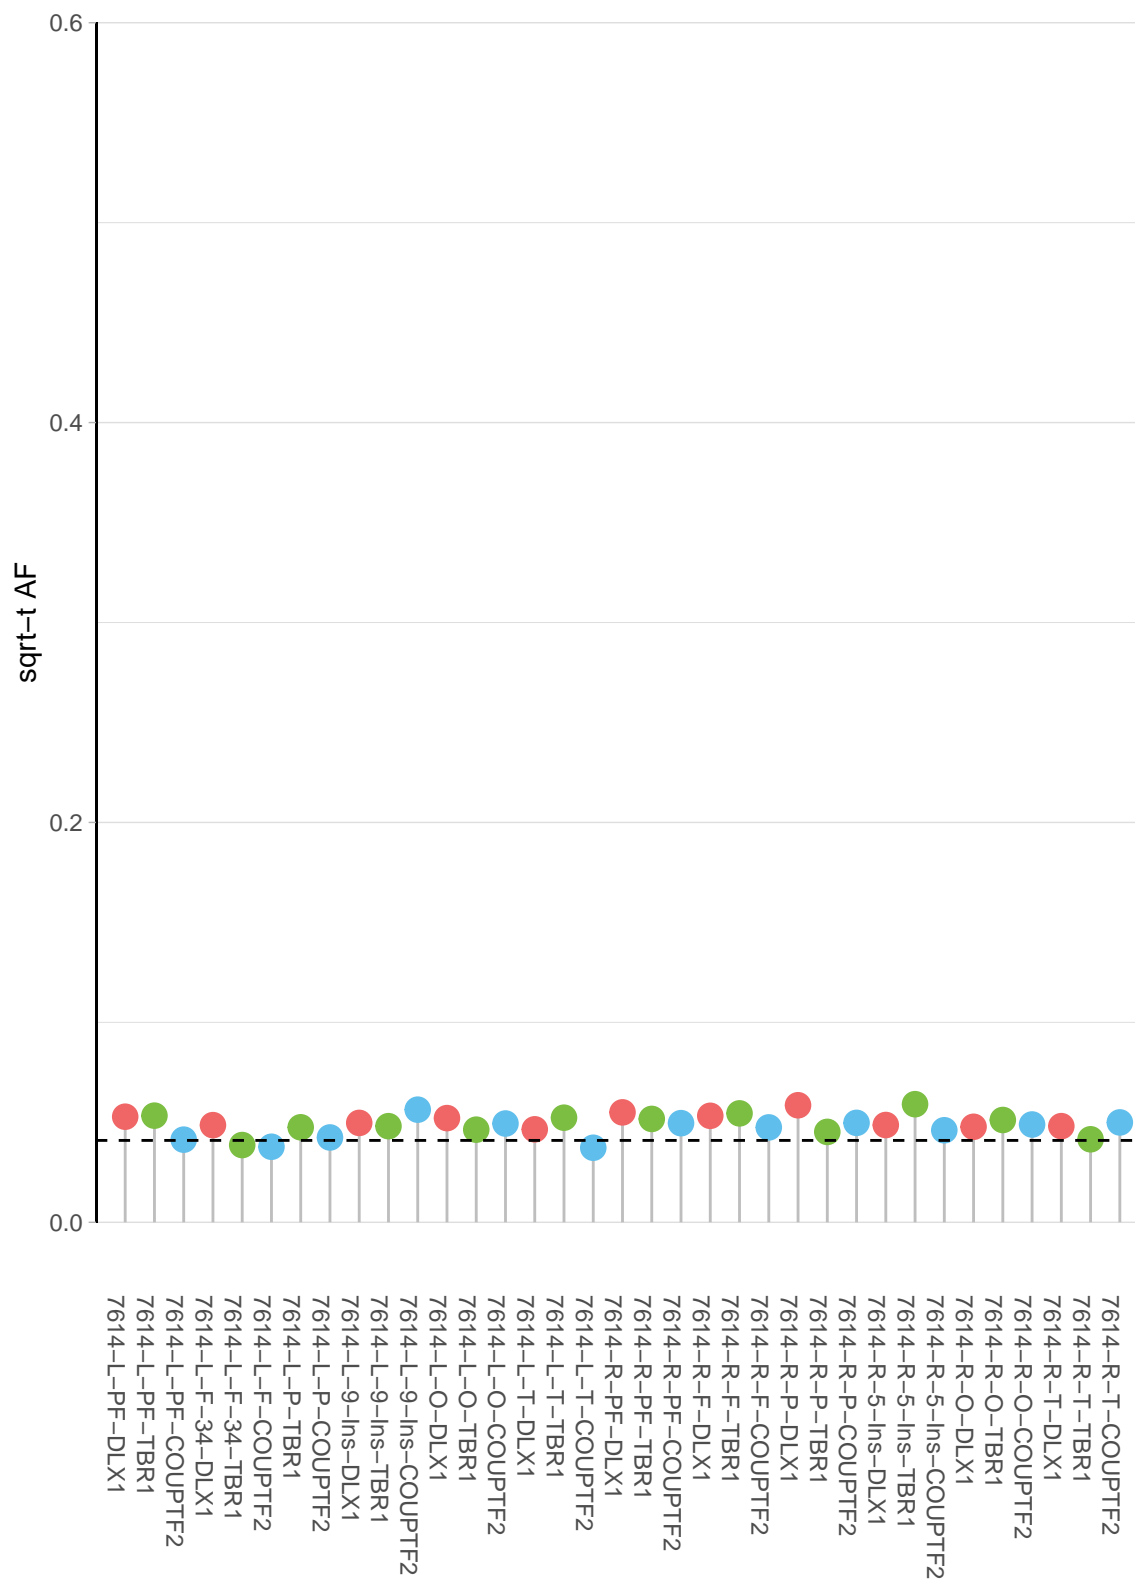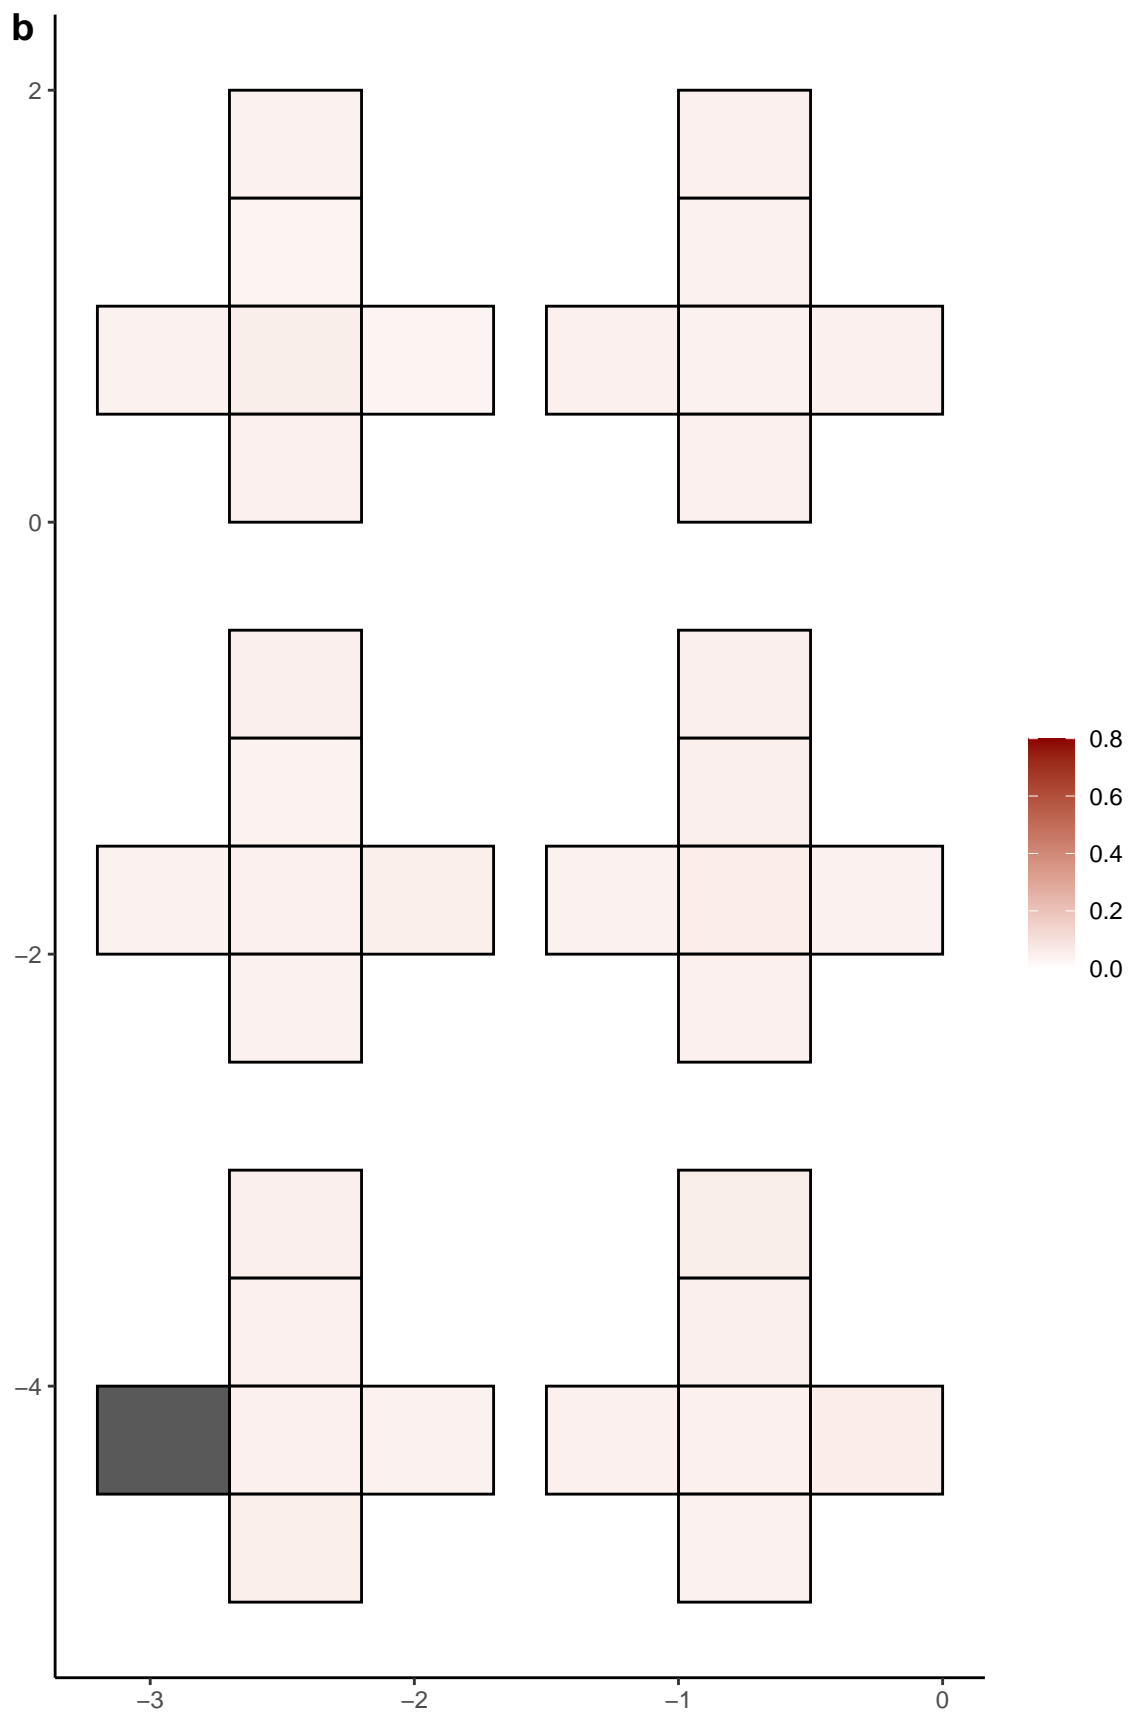

**a** ID01 3-6341933-TATC-T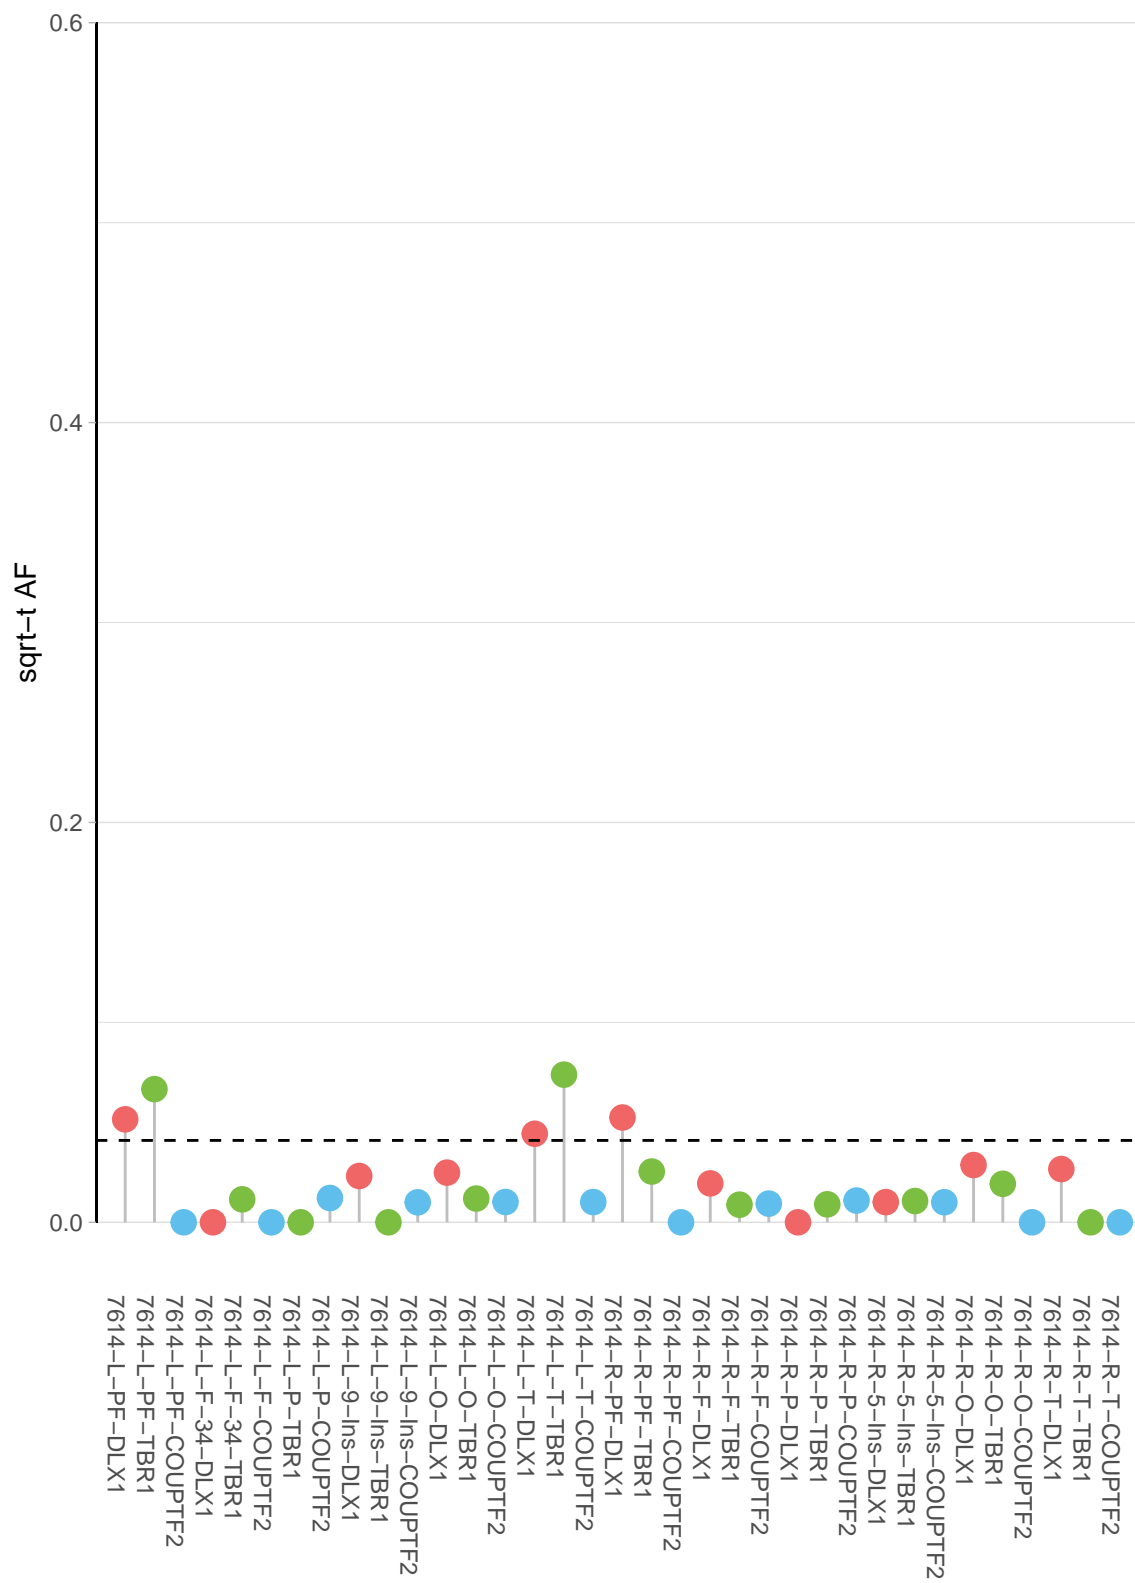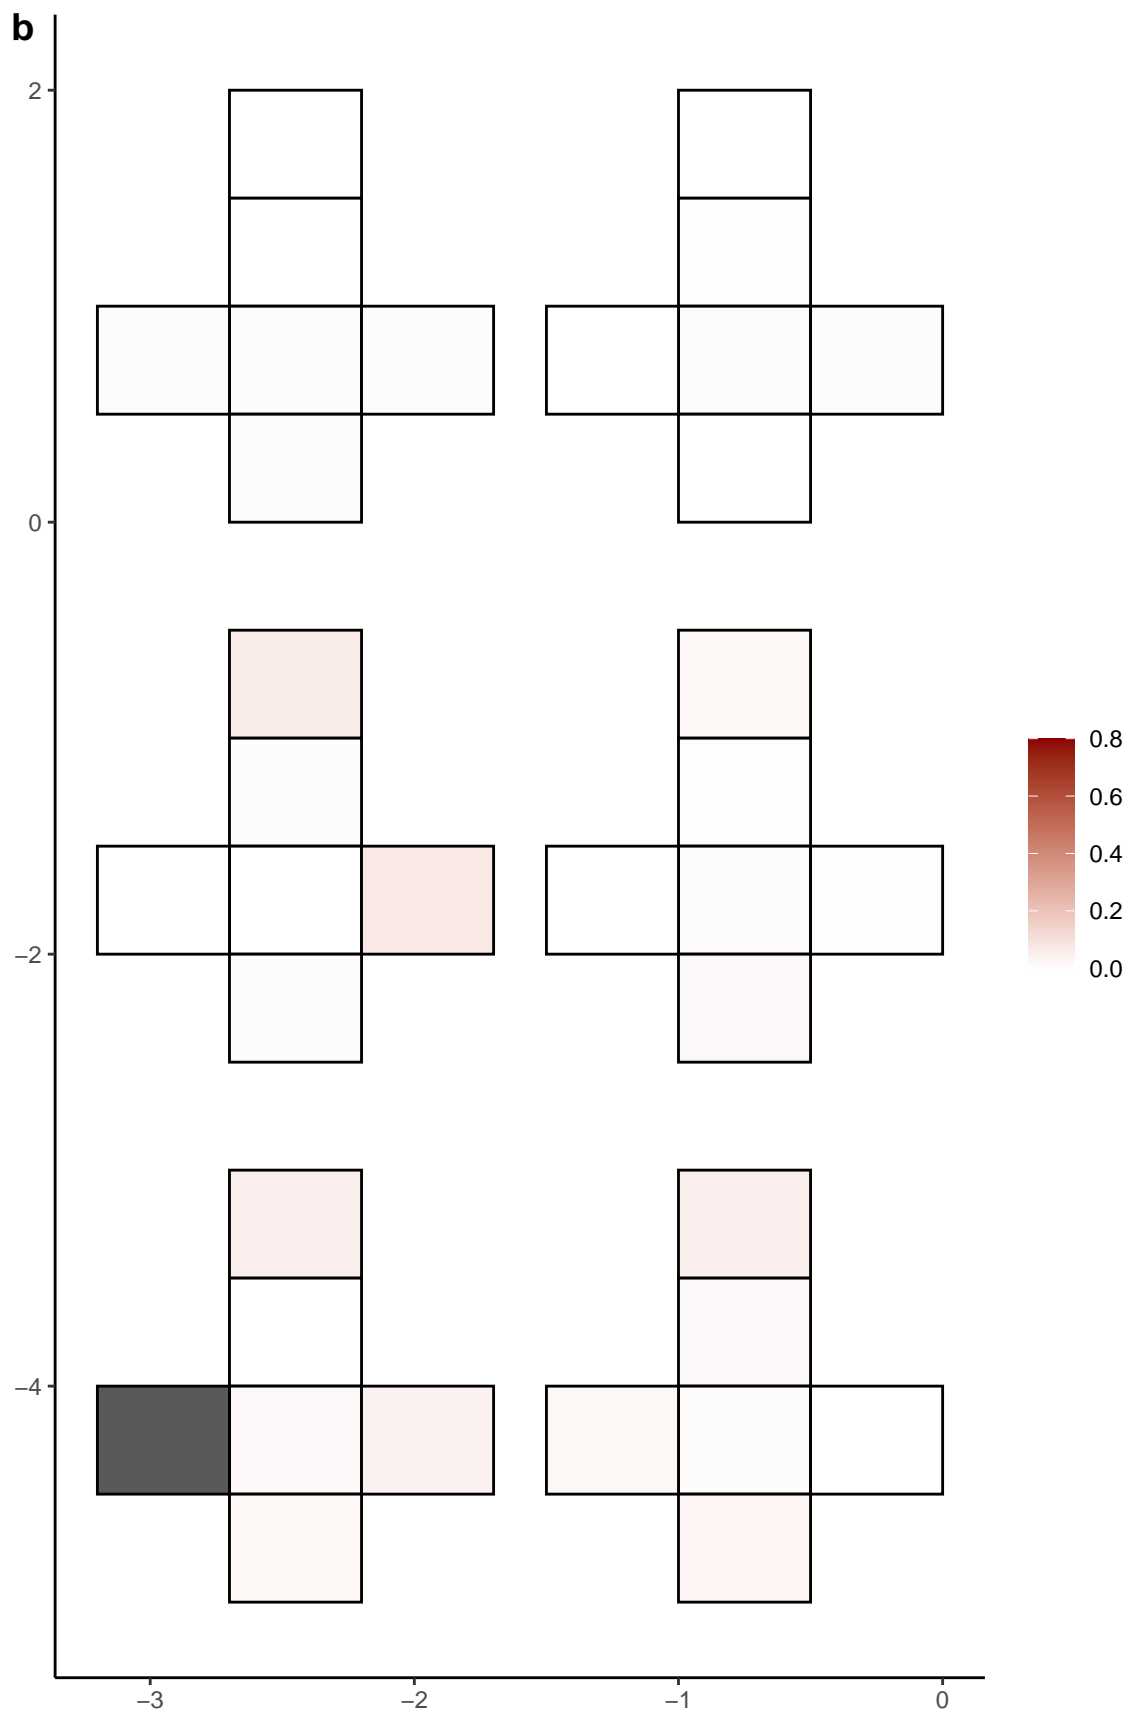

**a** ID01 3-63769495-C-T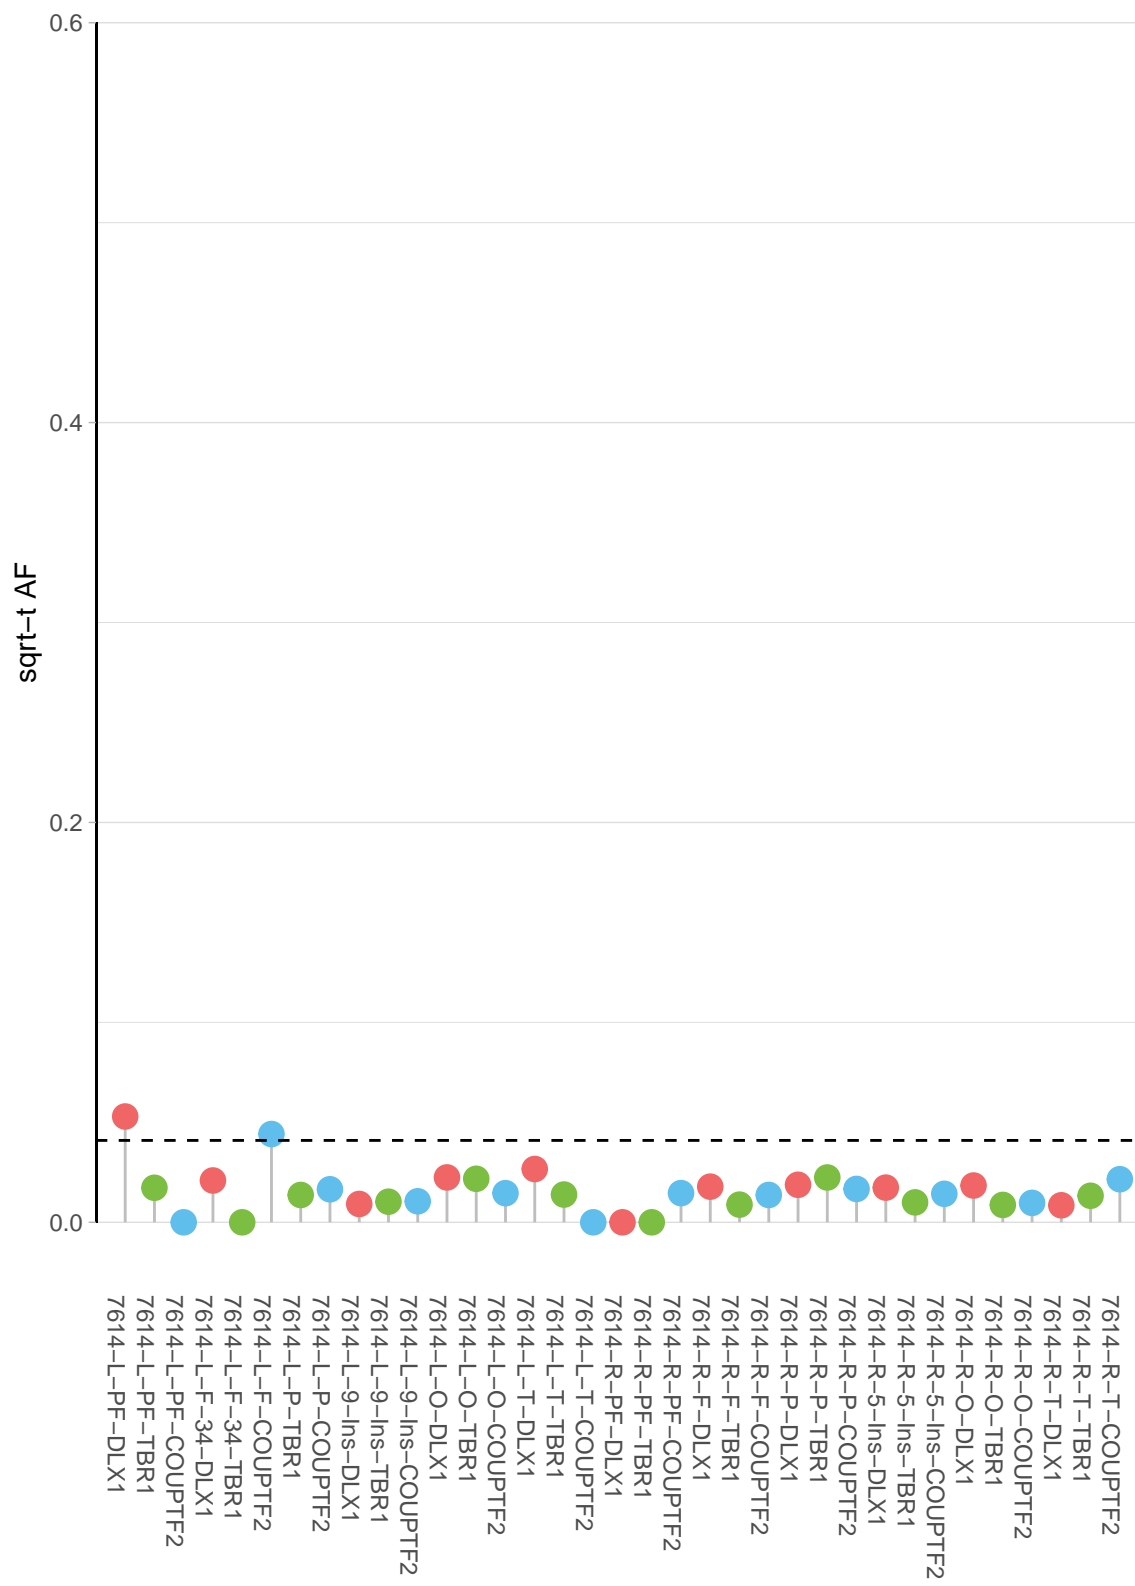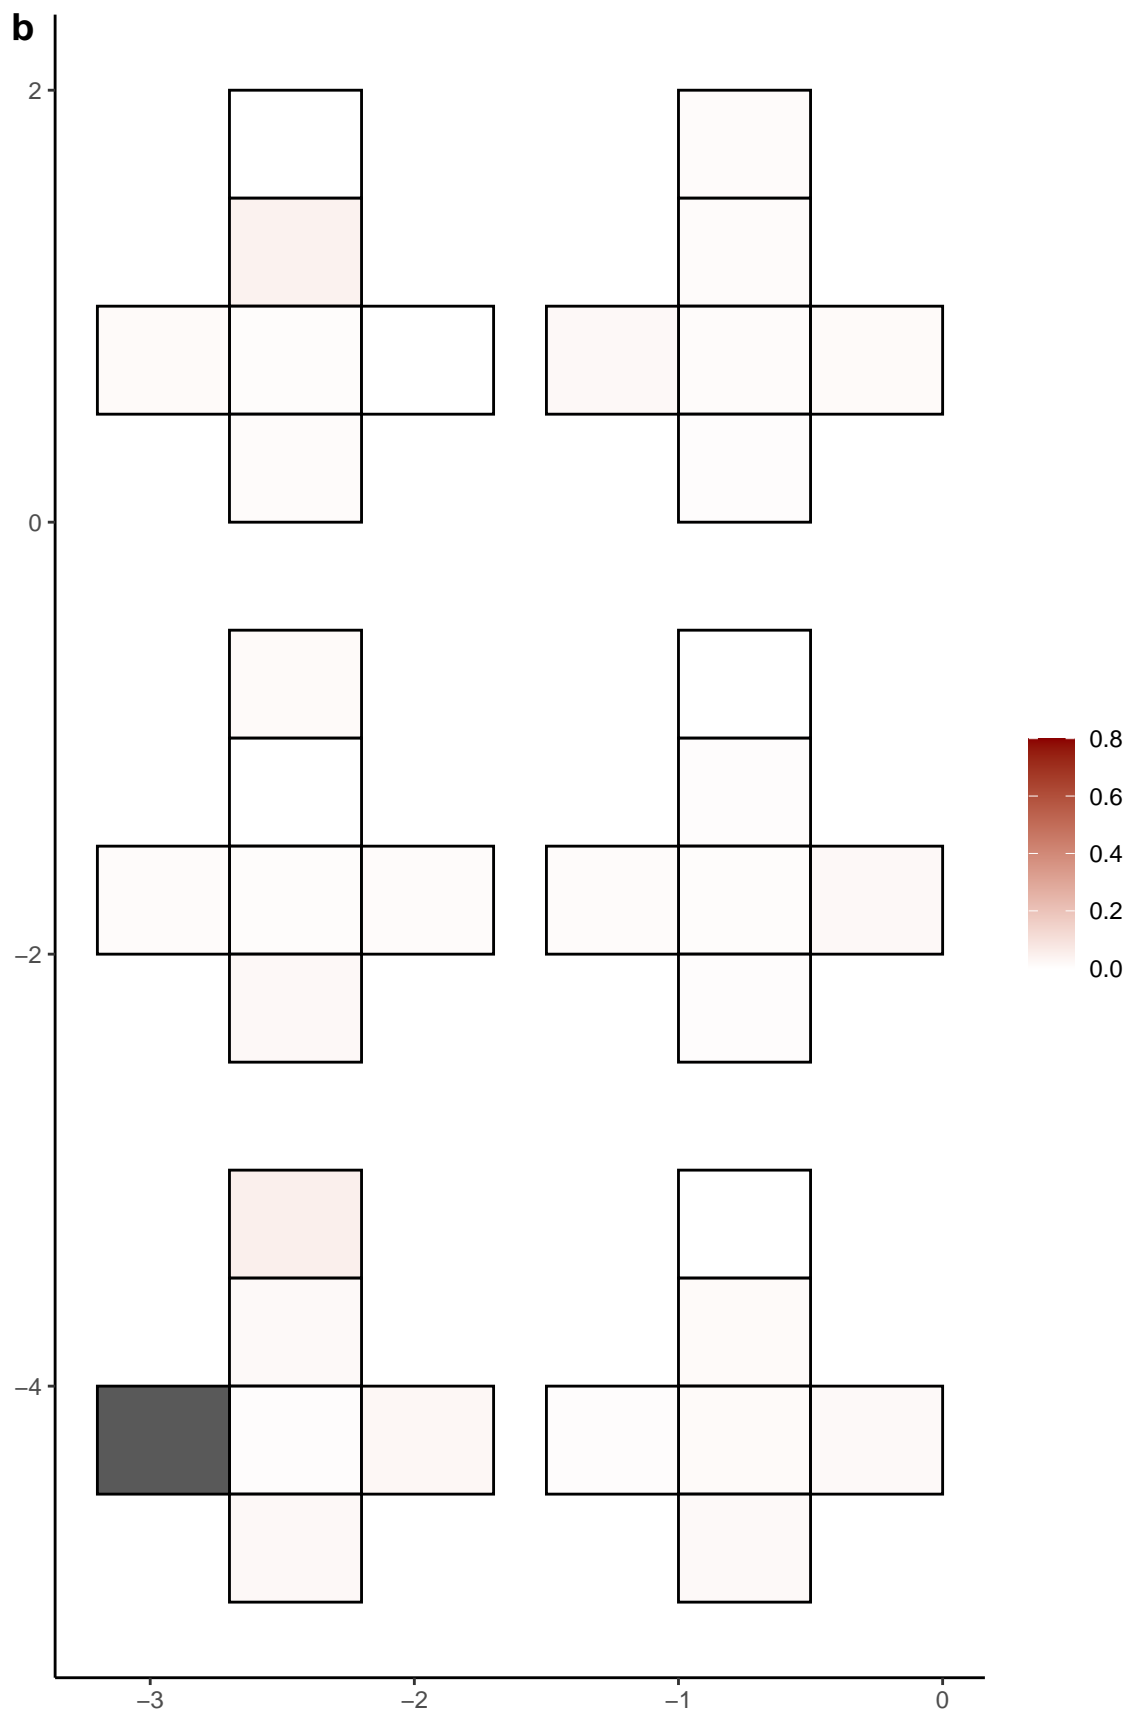



**a** ID01 3-70199639-G-C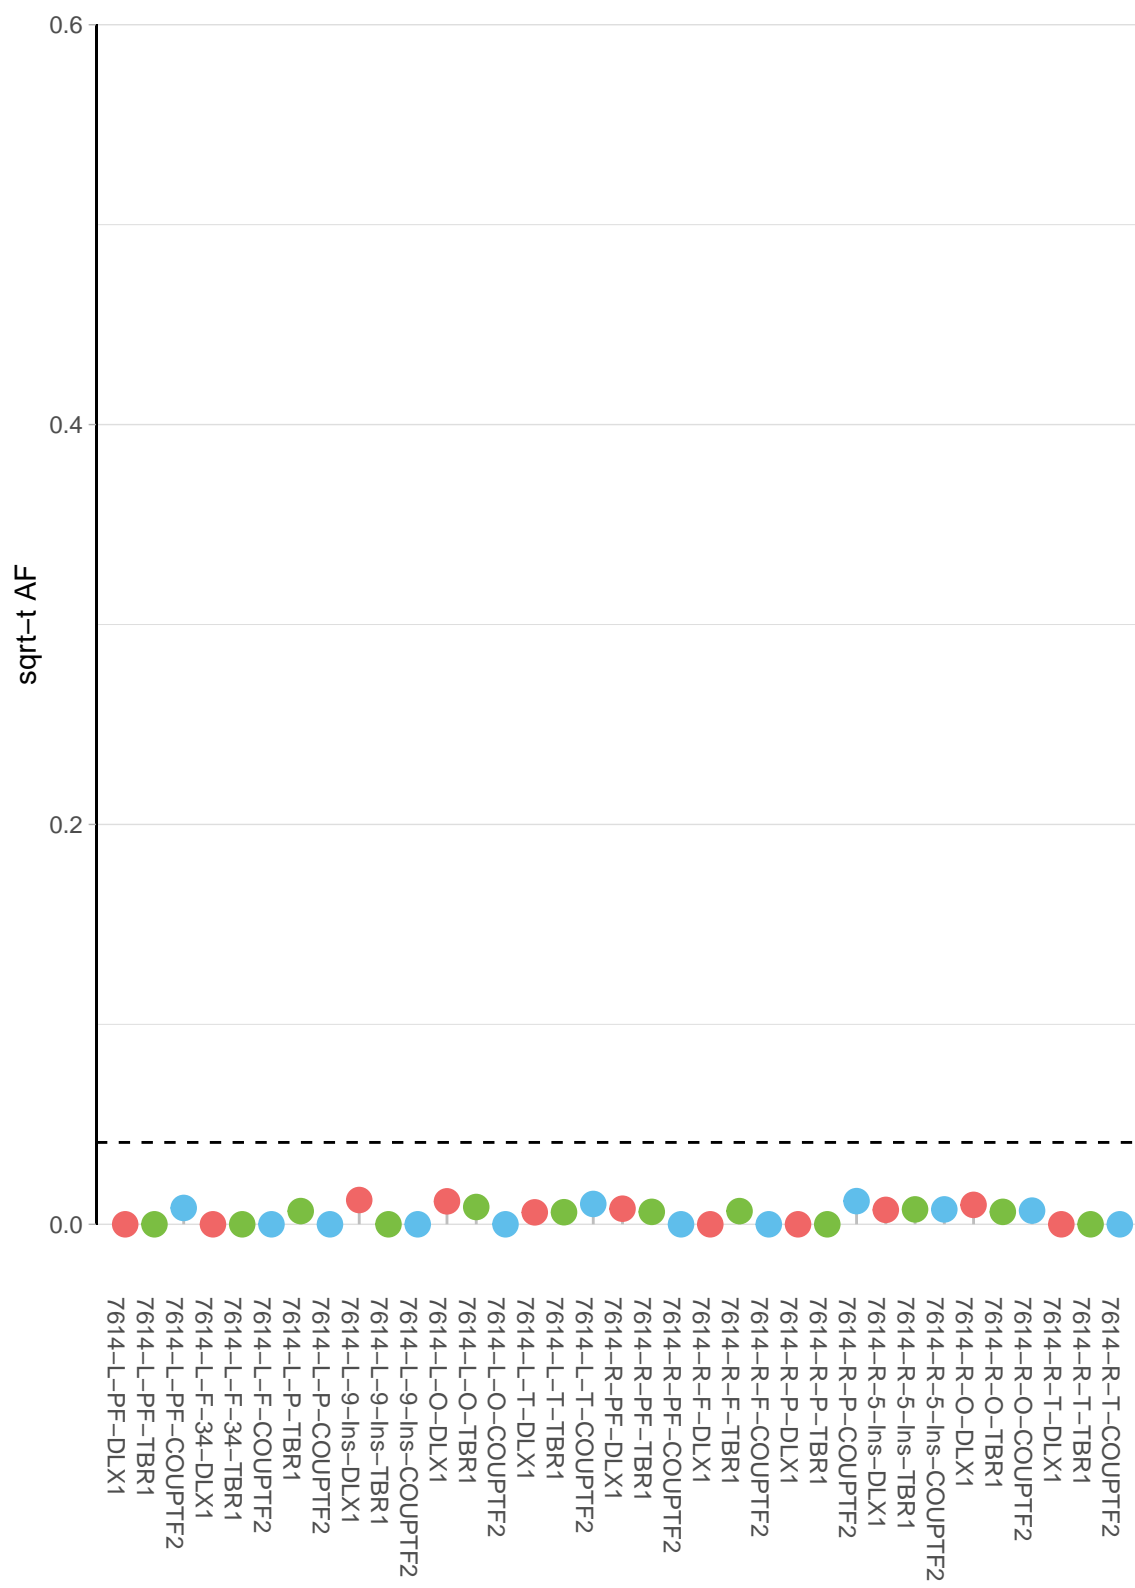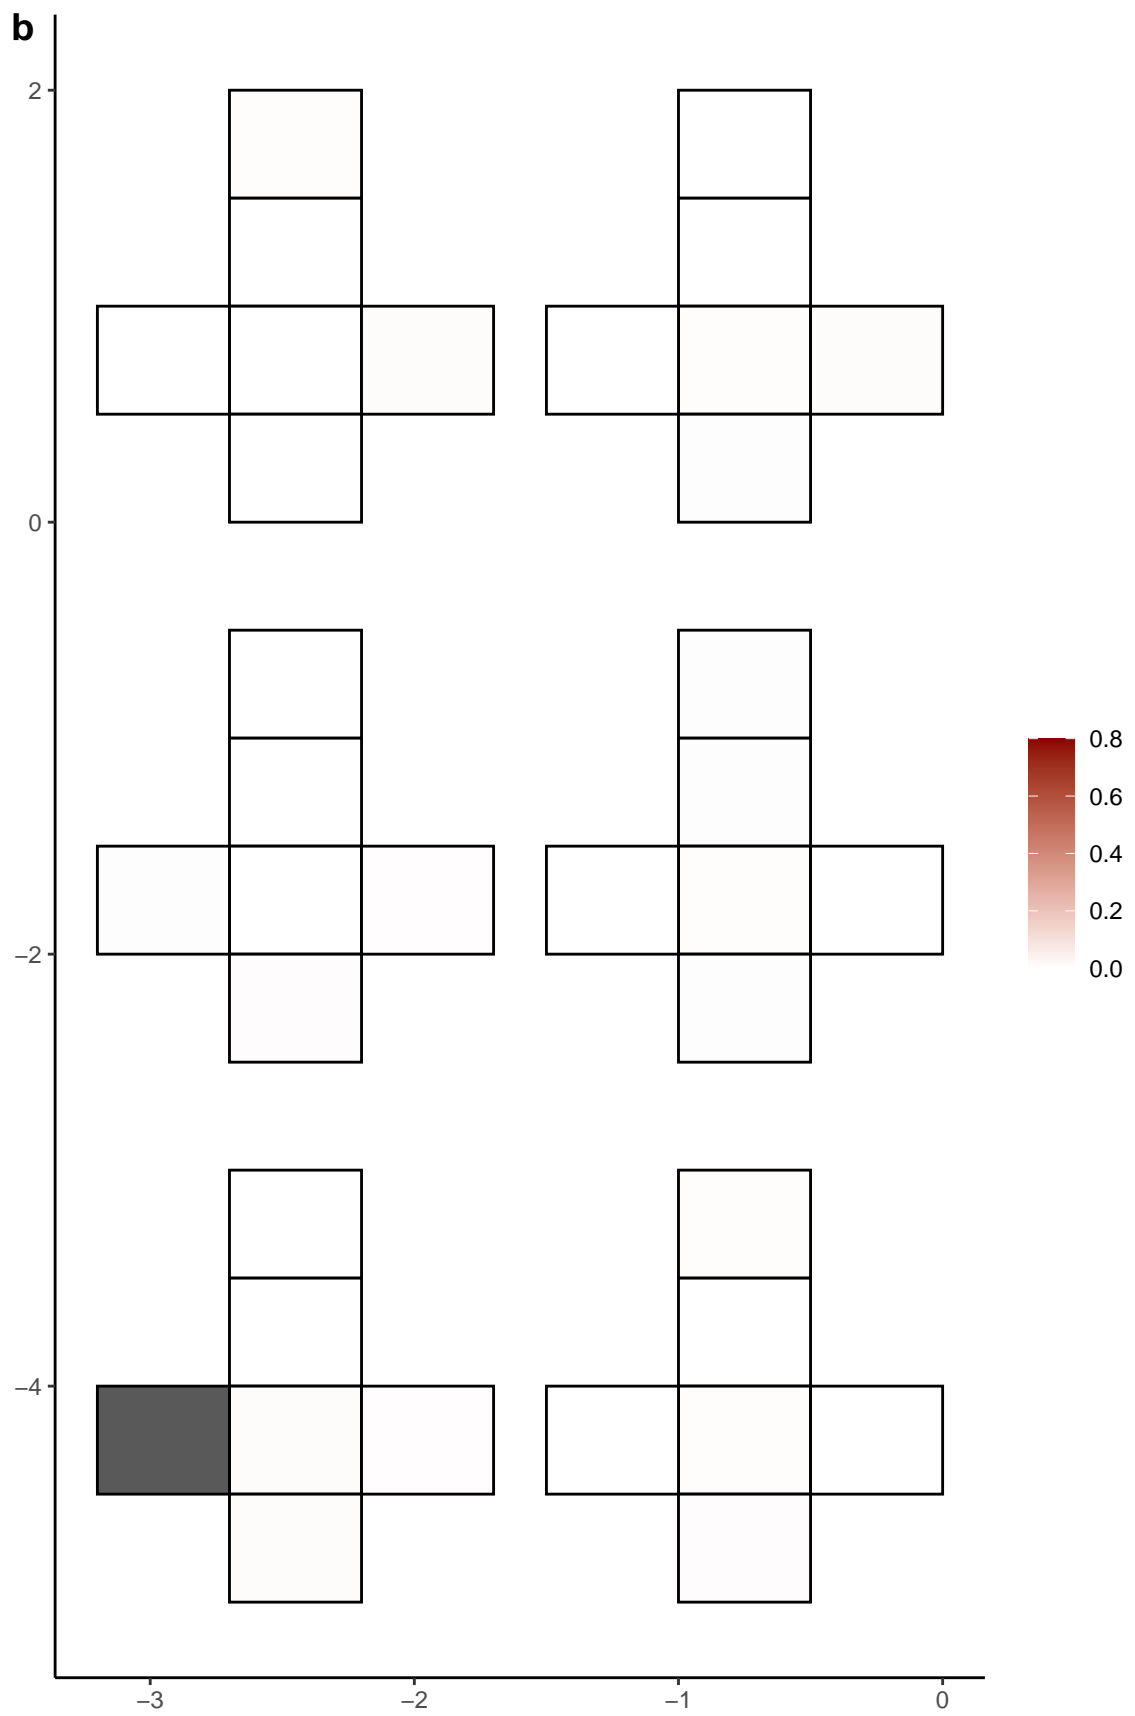

**a** ID01 3-83951534-A-G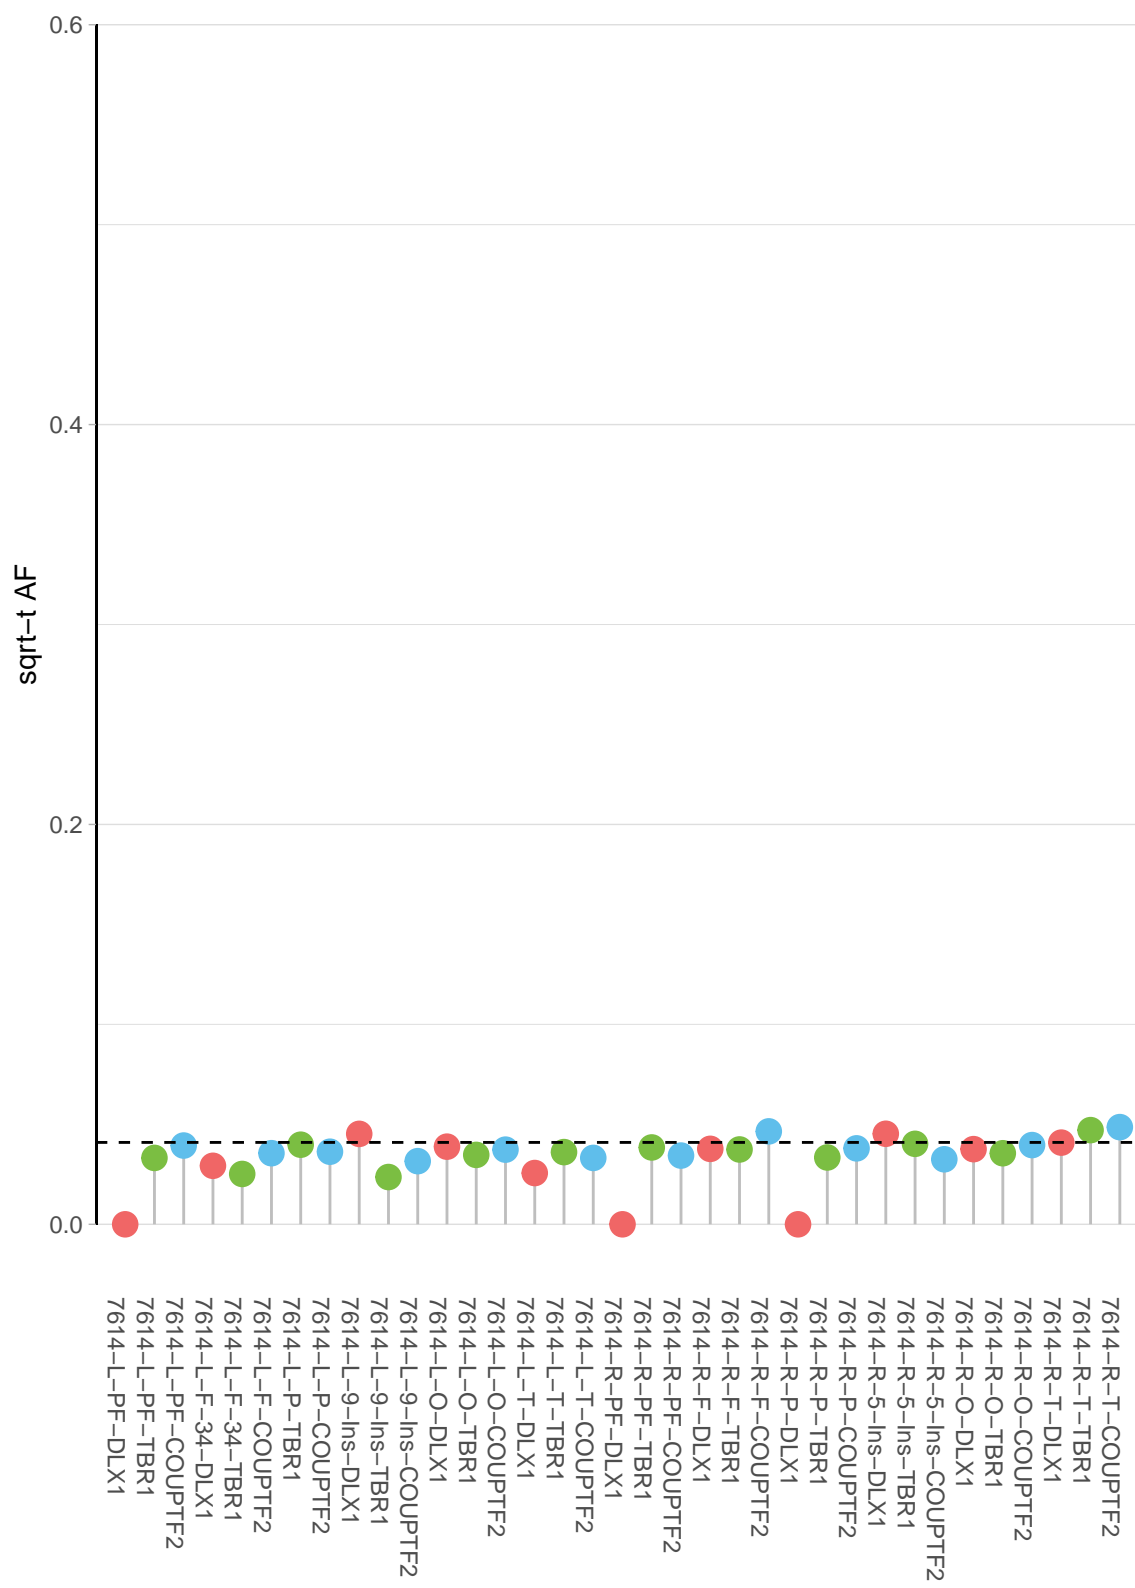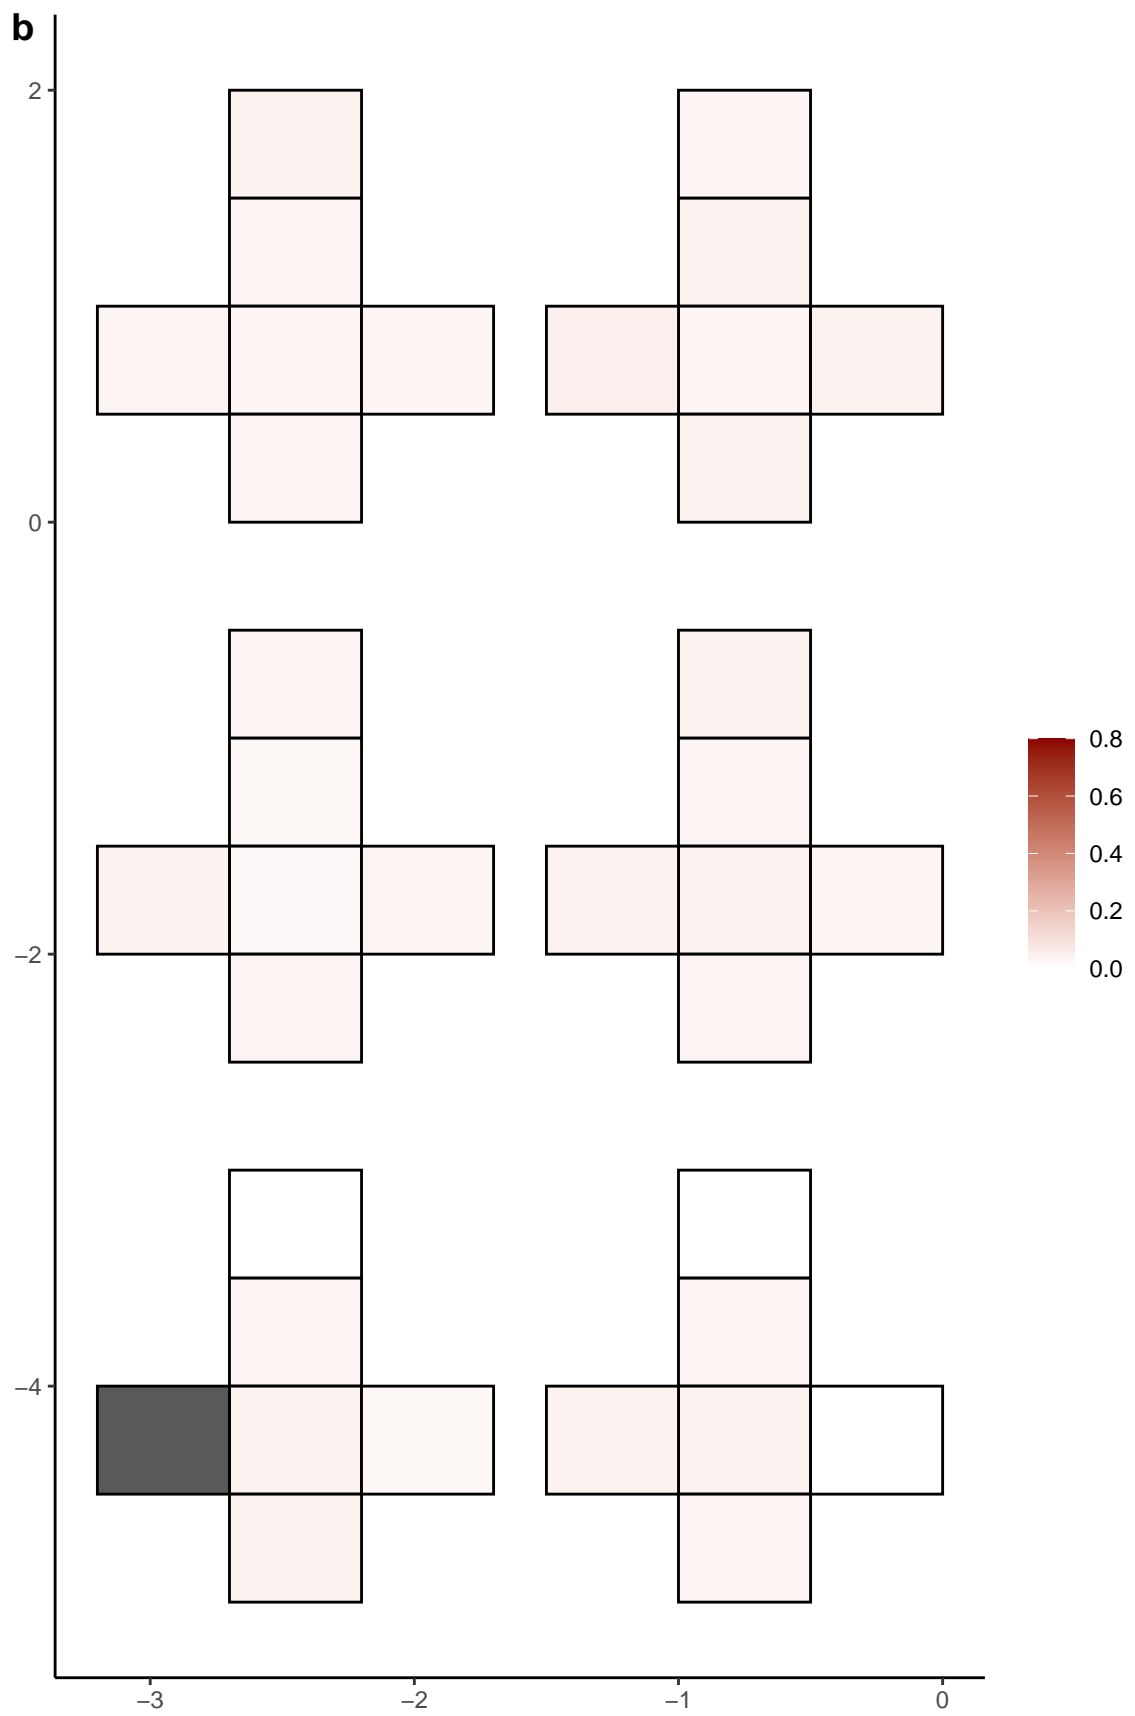

**a** ID01 3-84719043-C-T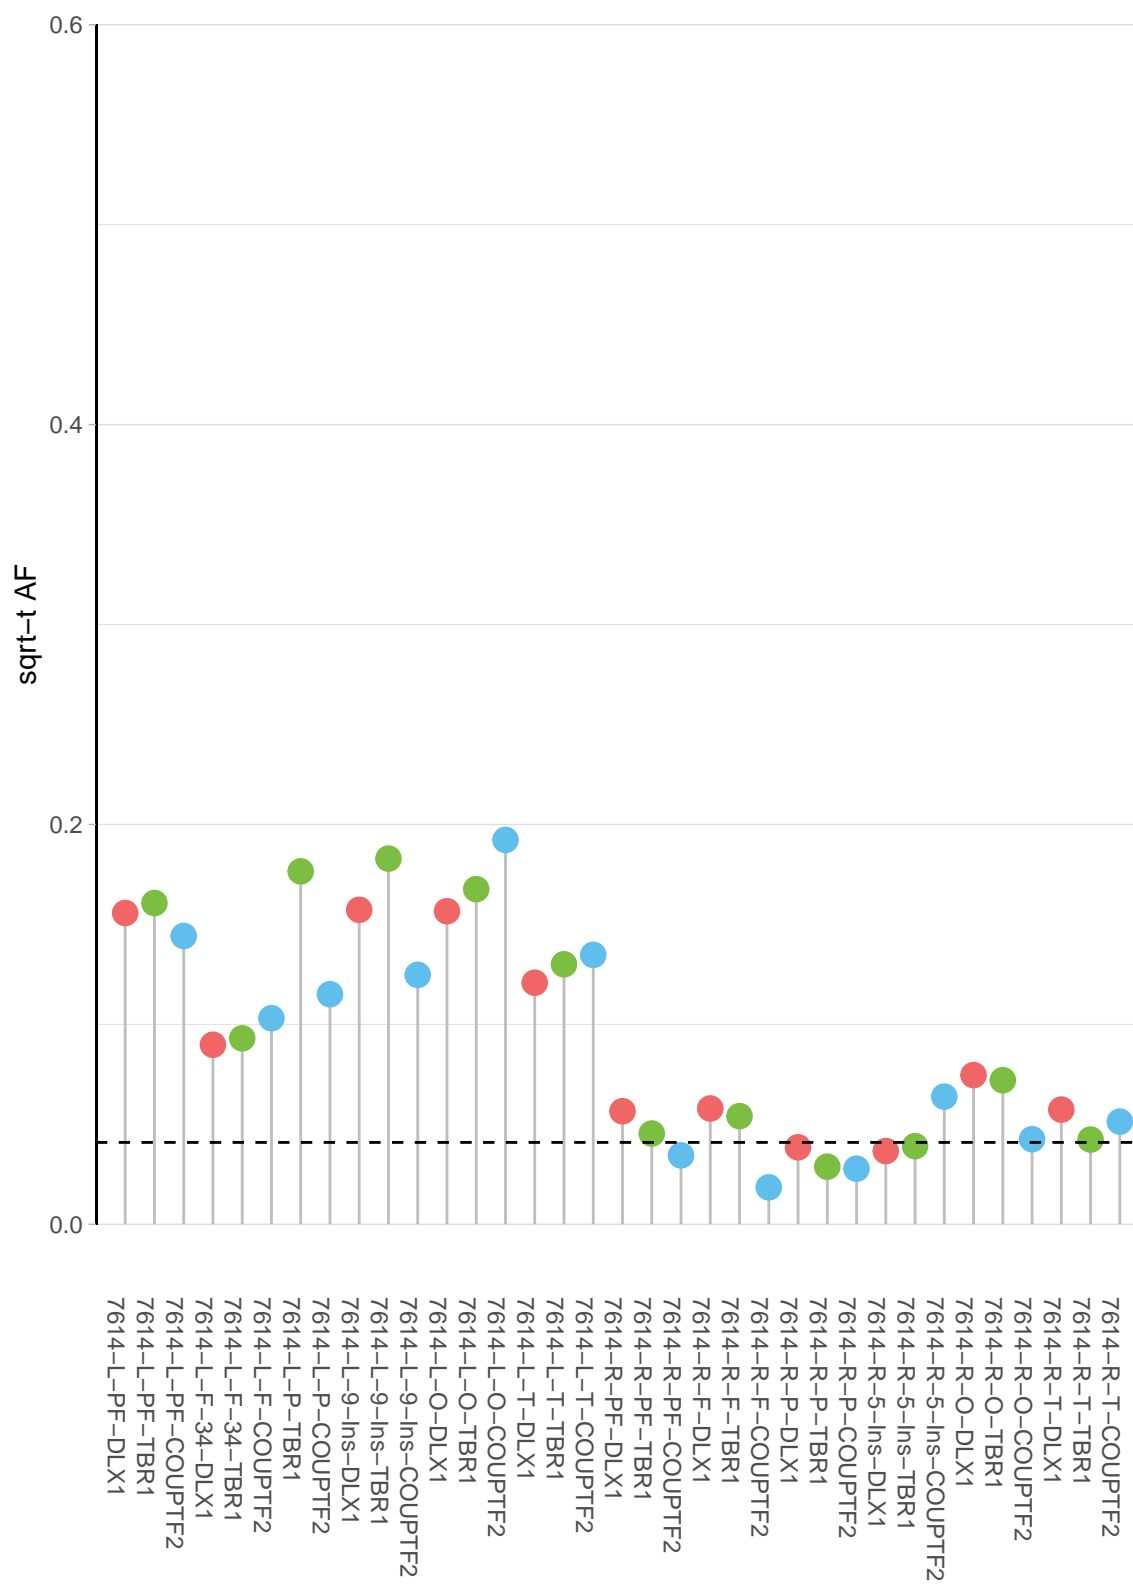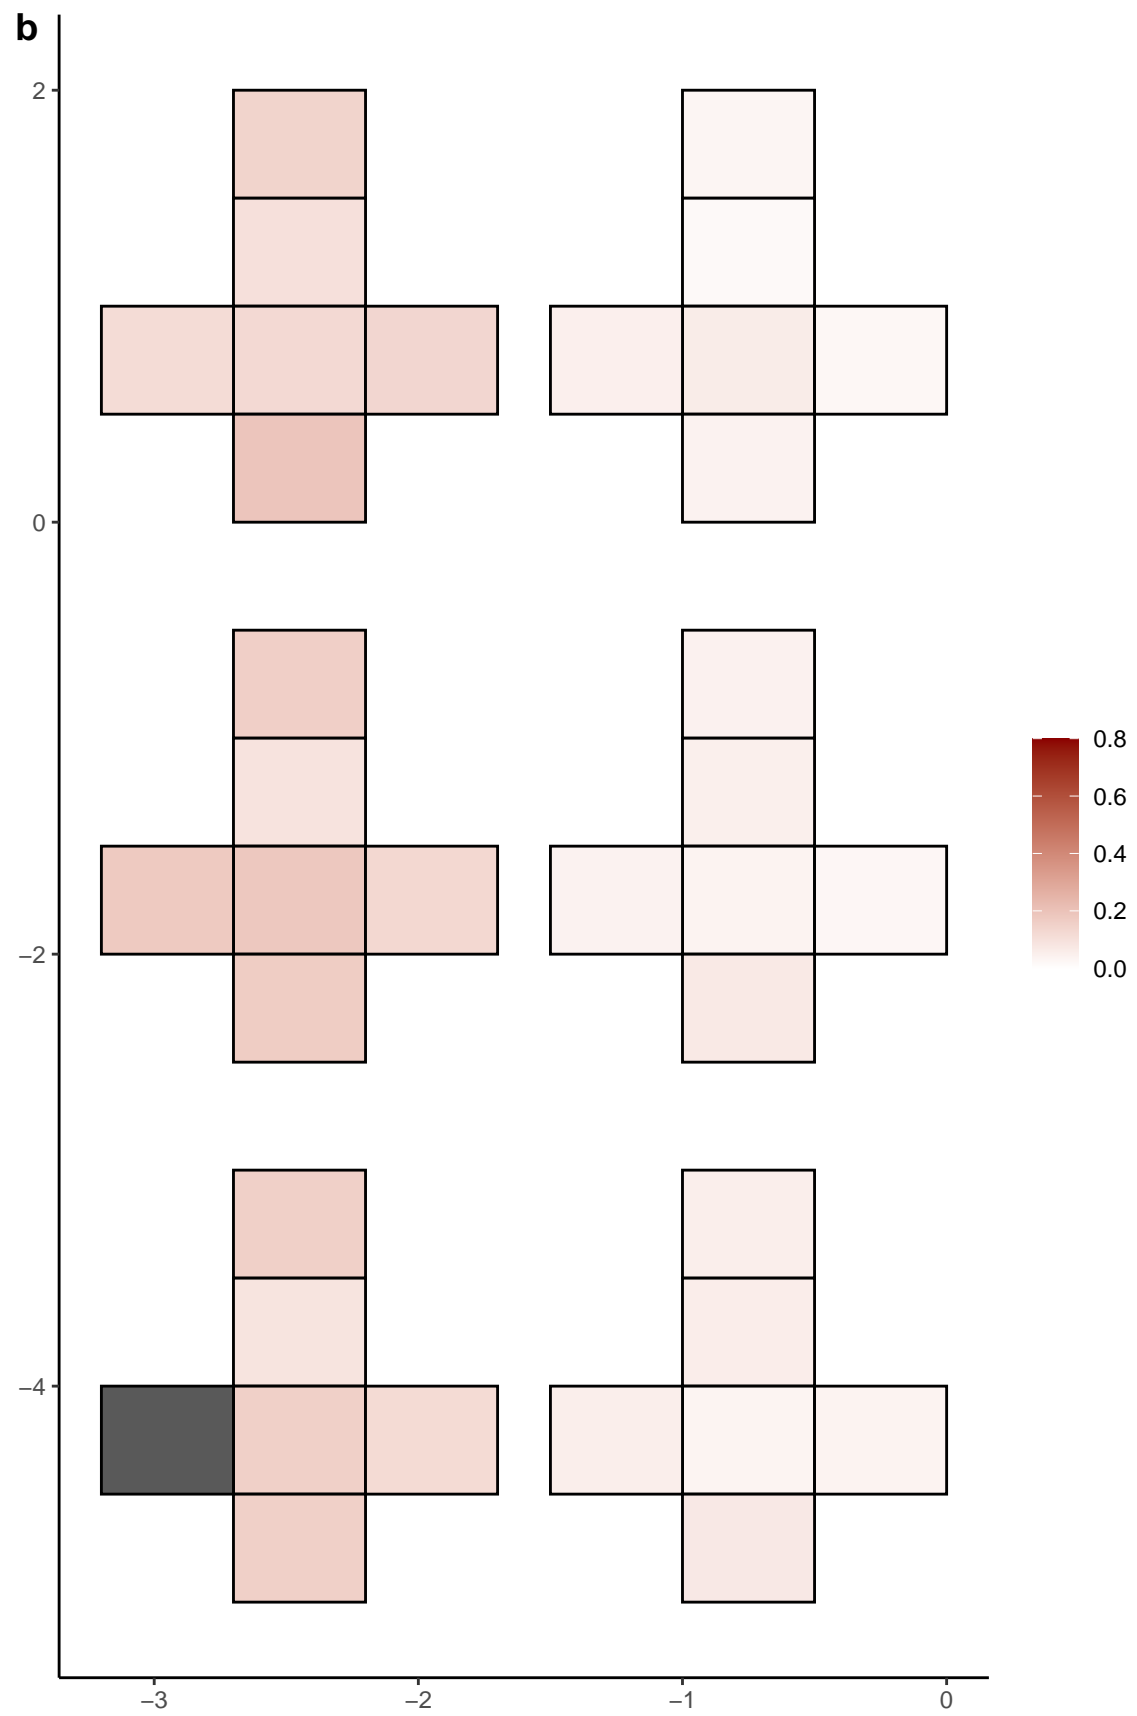

**a** ID01 3-84856980-T-A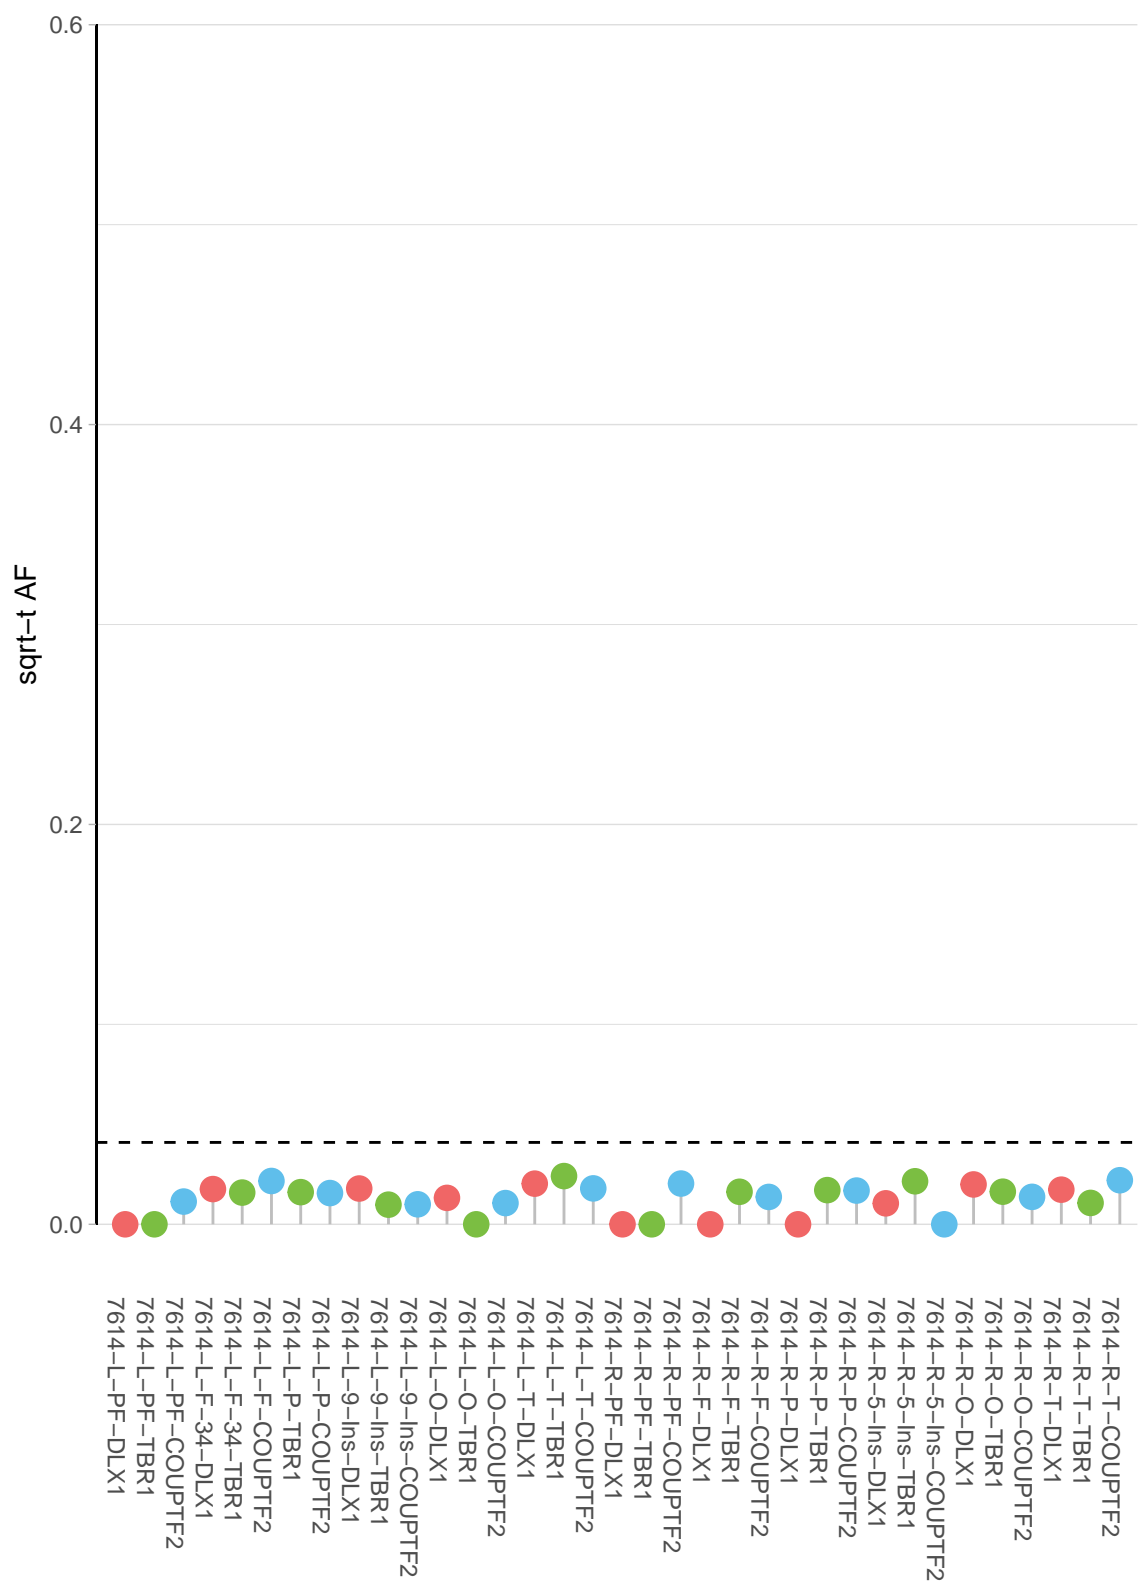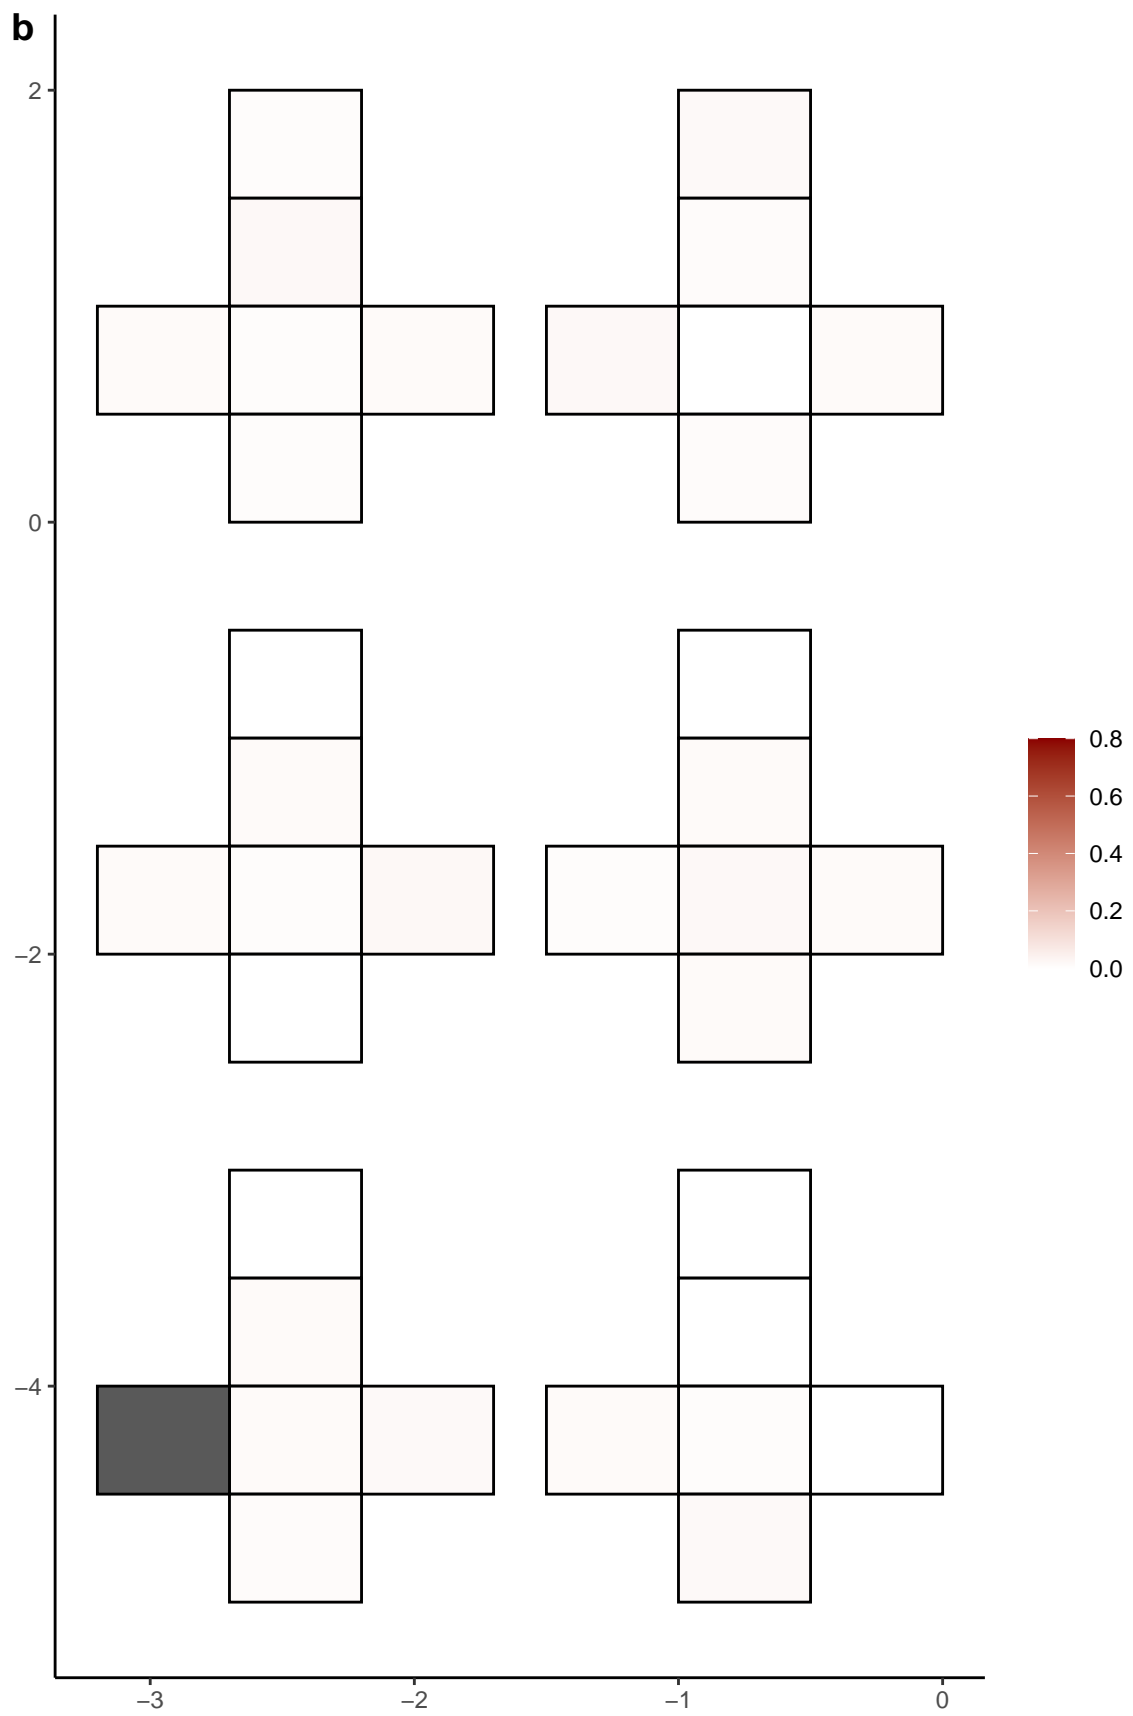

**a** ID01 3-85794290-A-C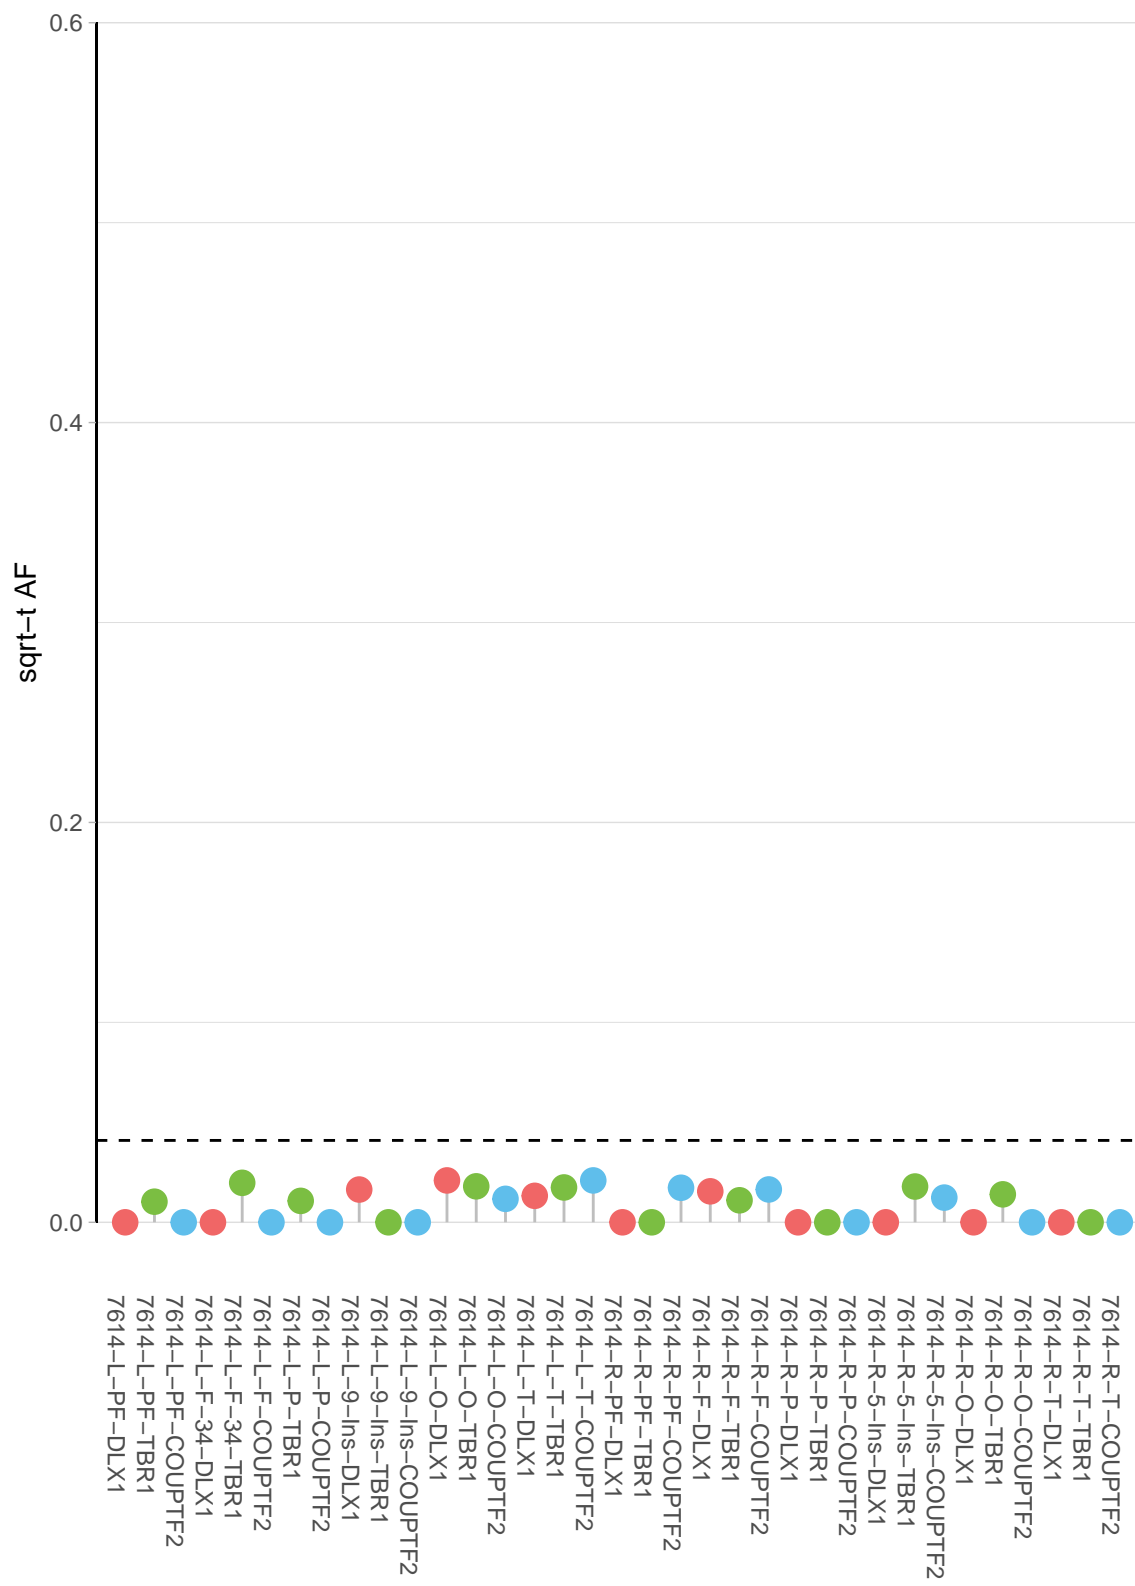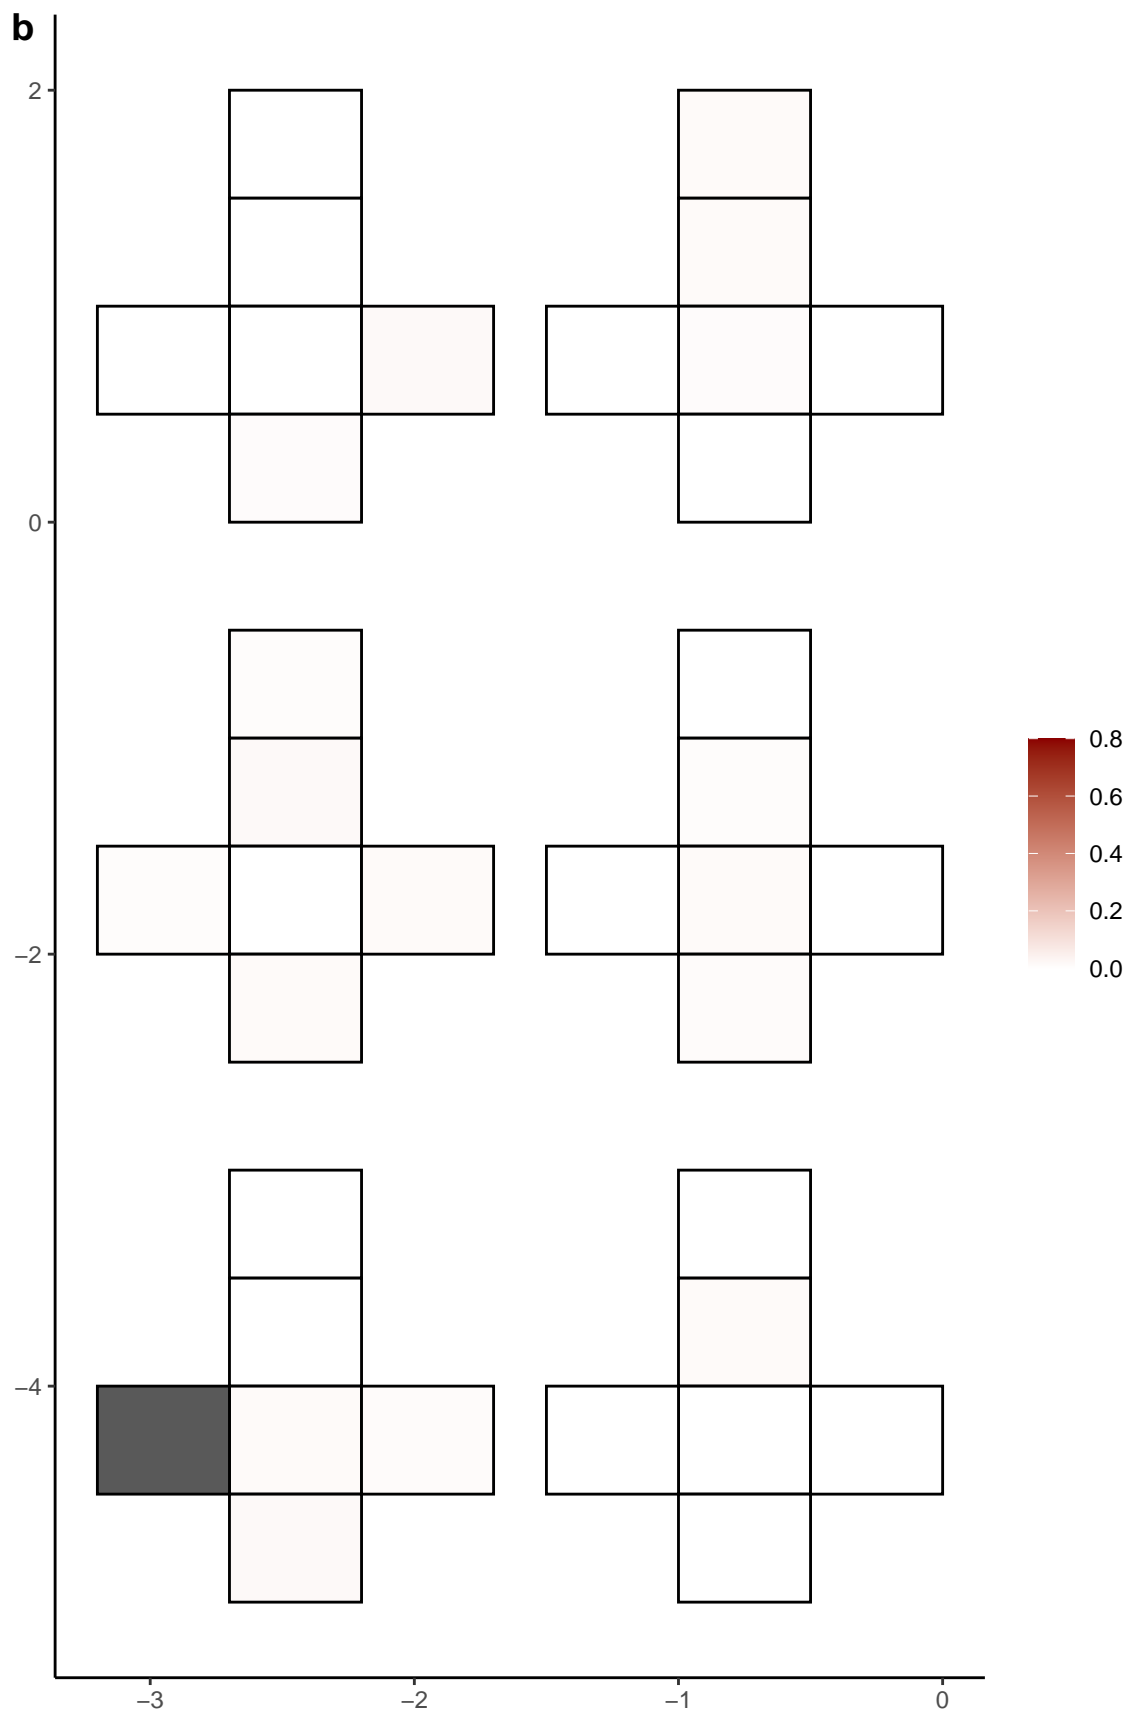

**a** ID01 3-94668508-A-C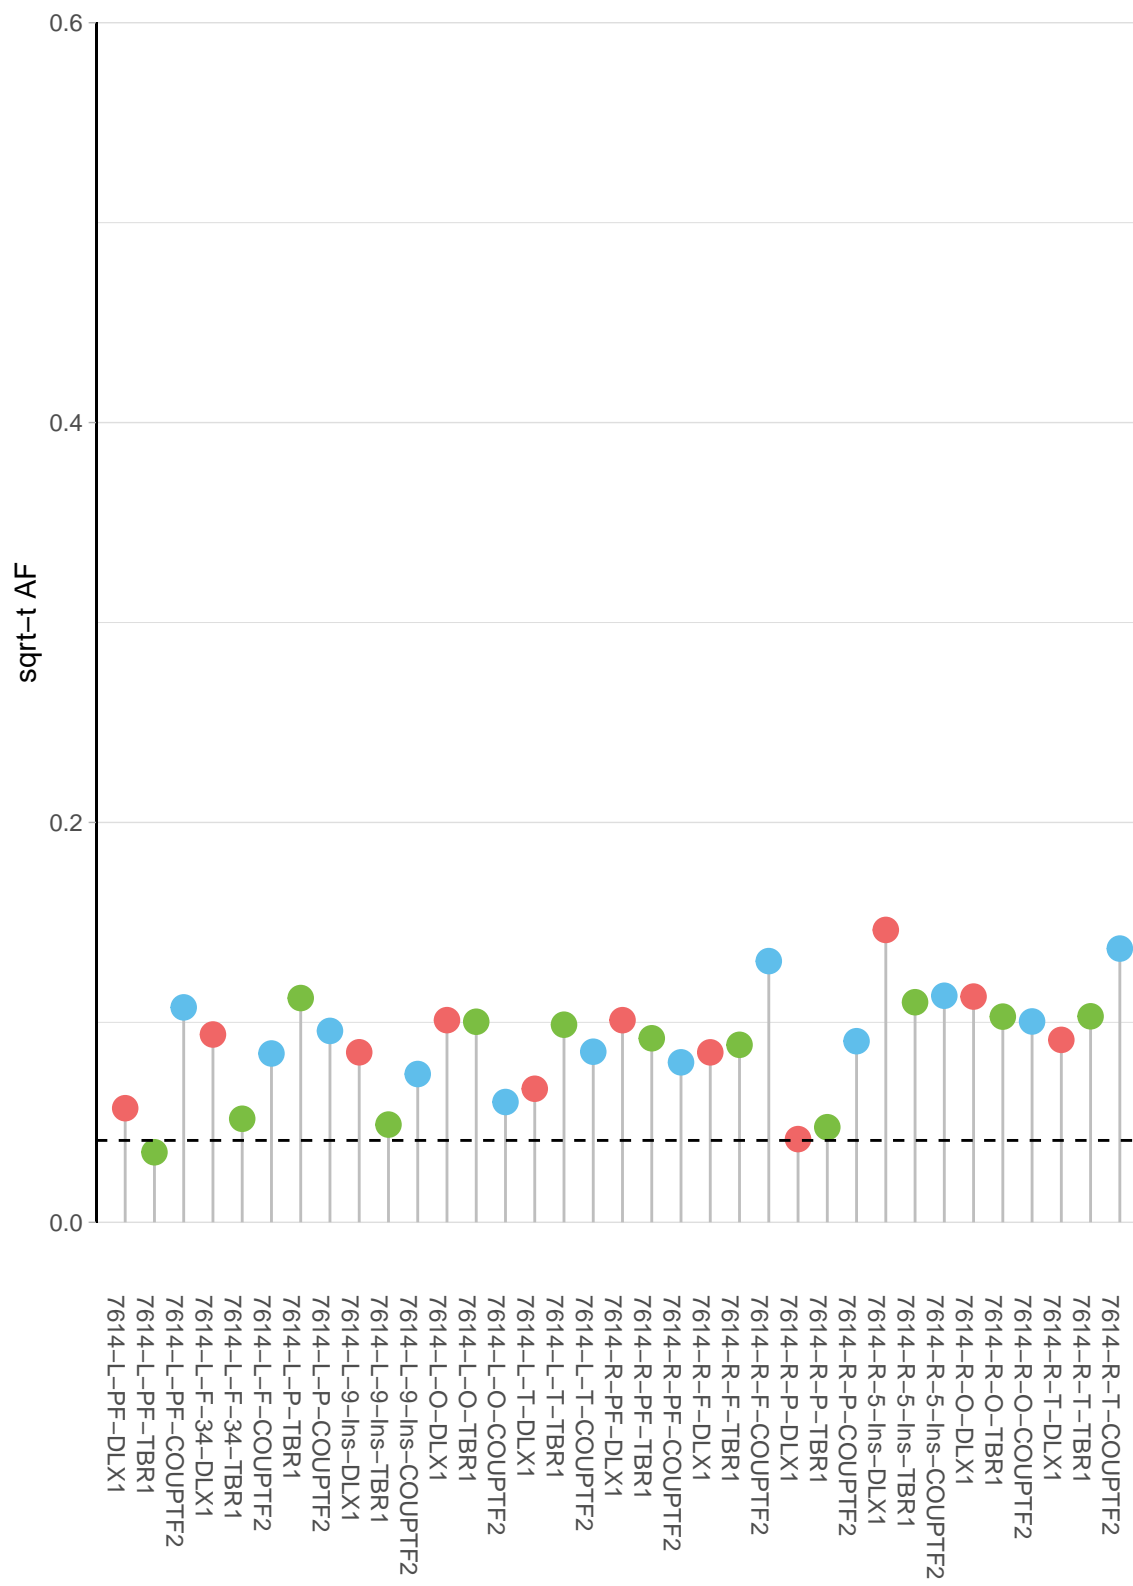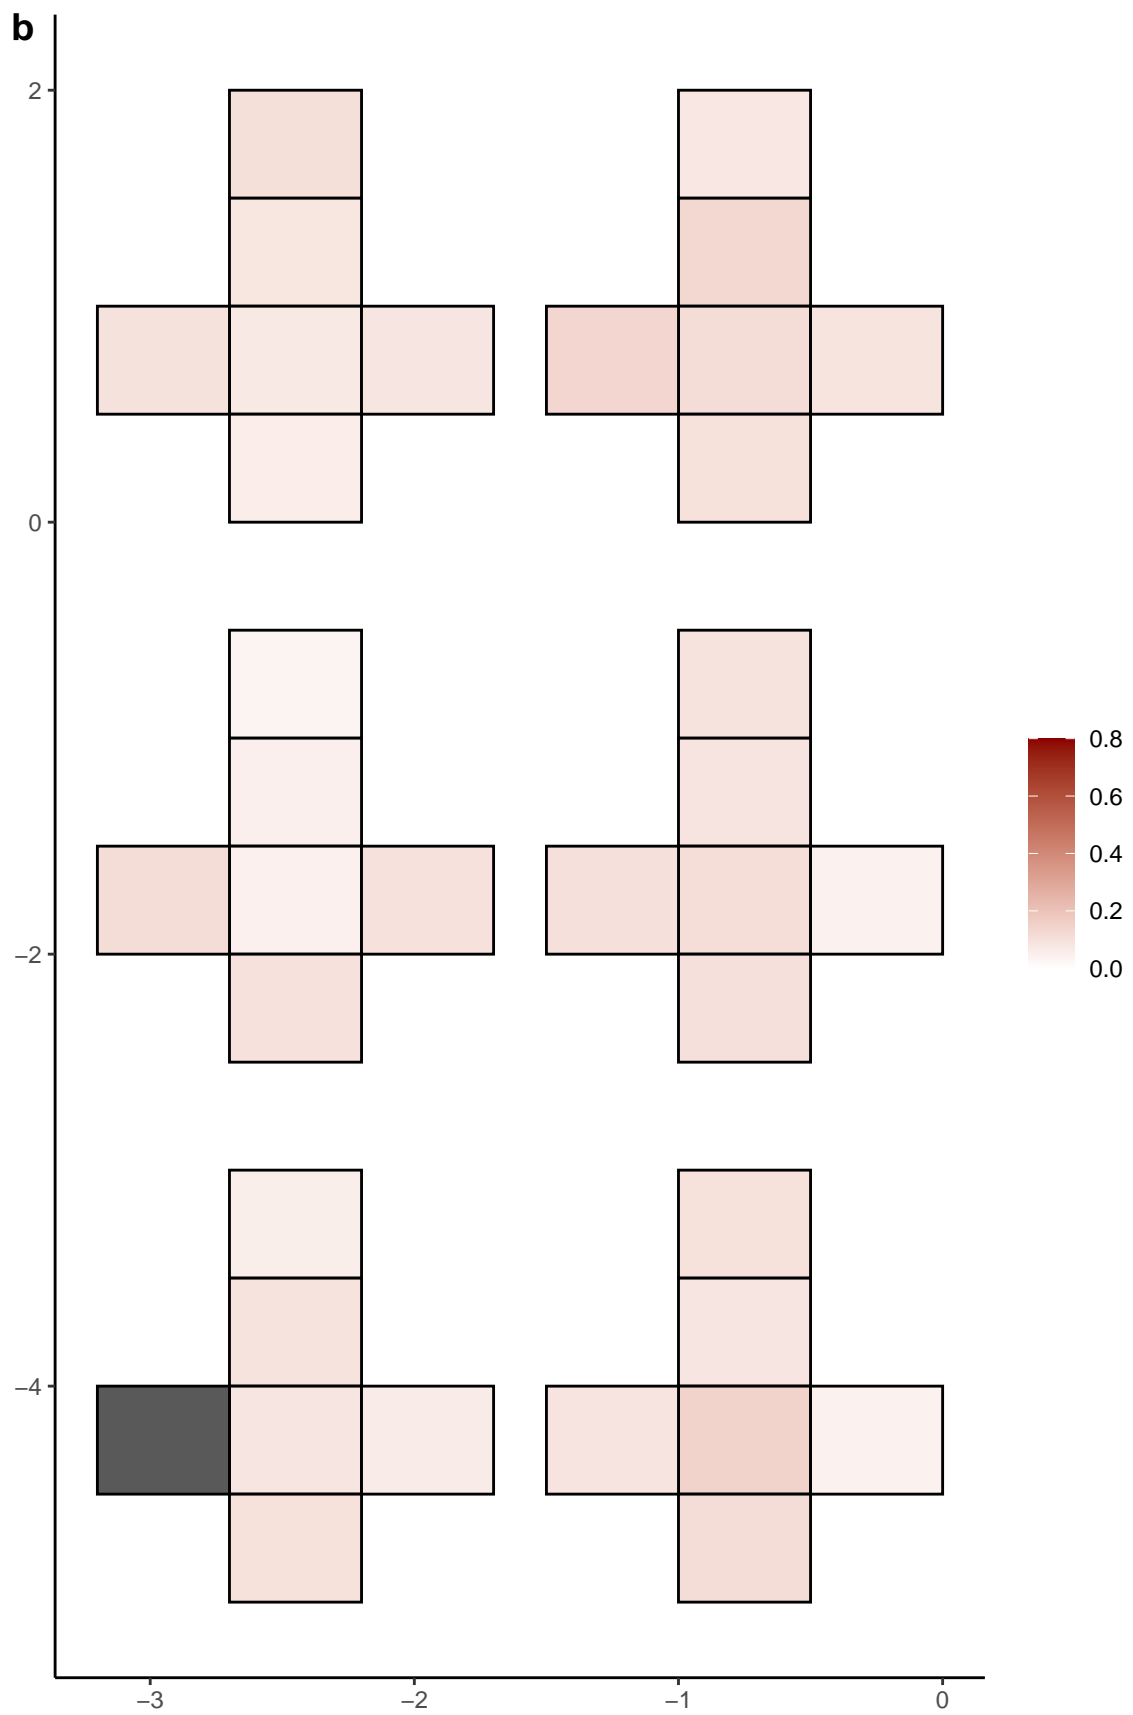

**a** ID01 3-96090255-C-T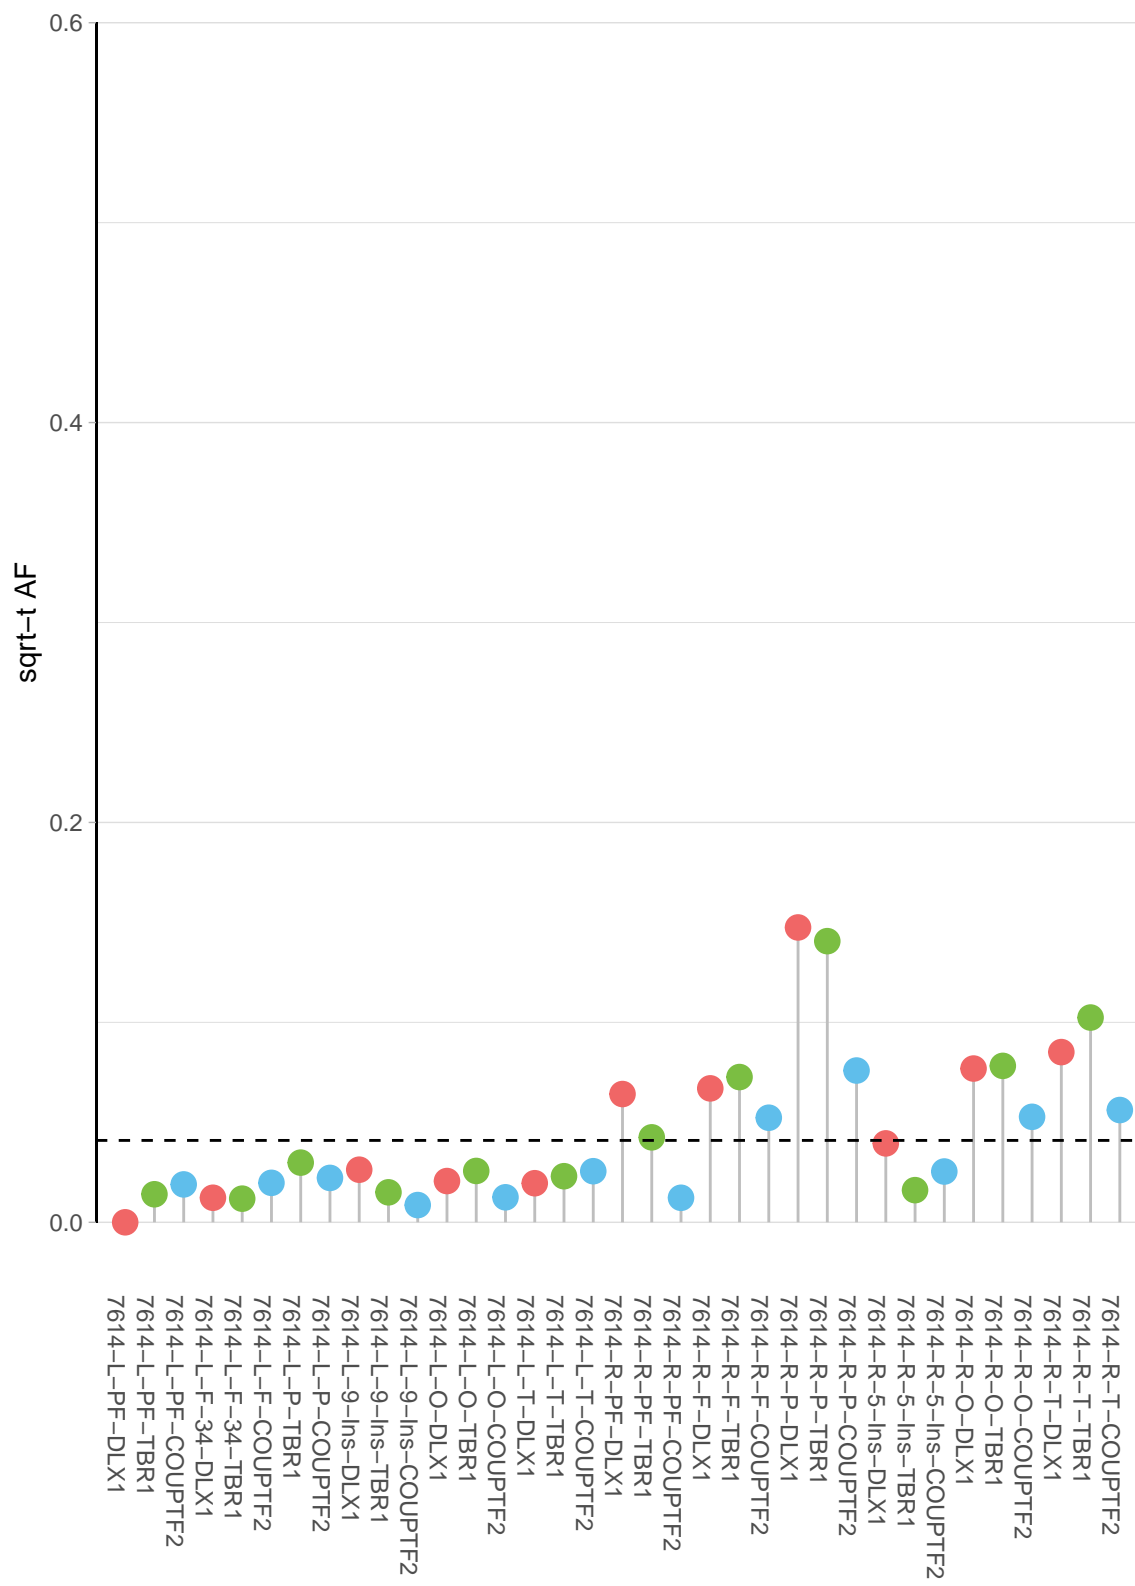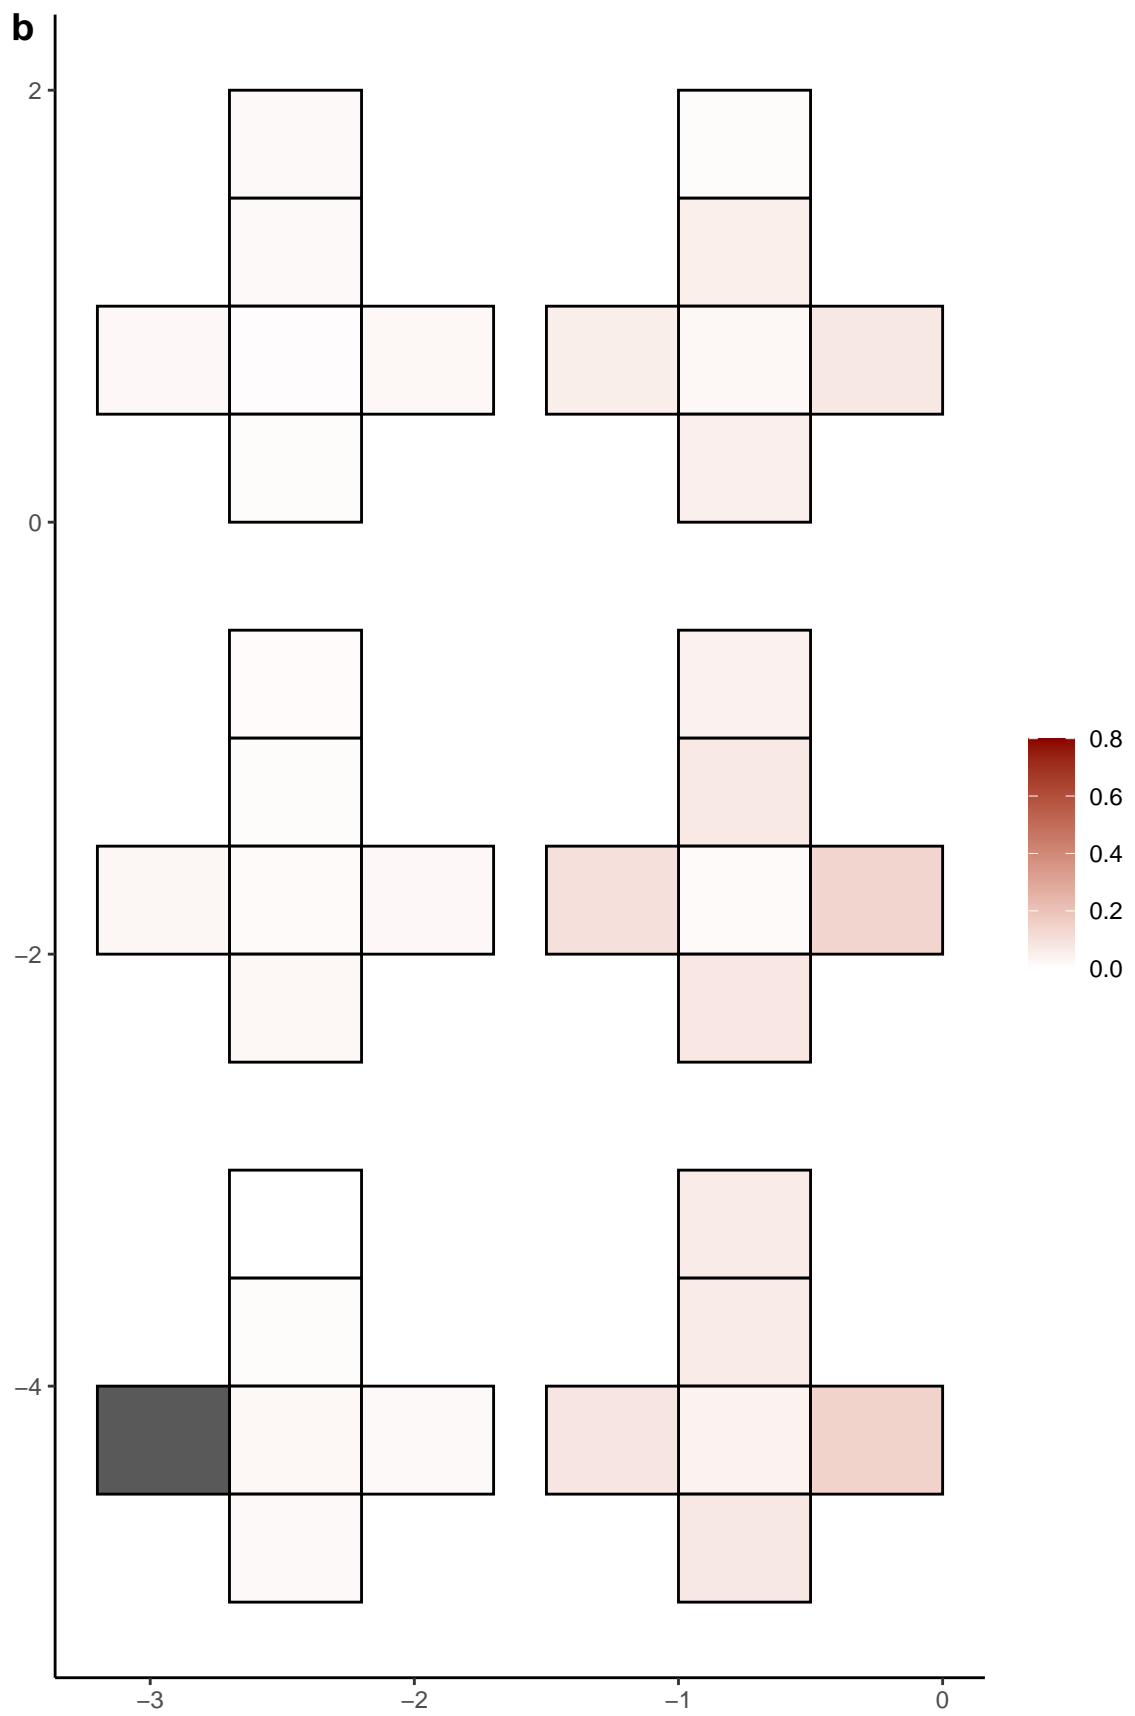

**a** ID01 4-130387276-A-G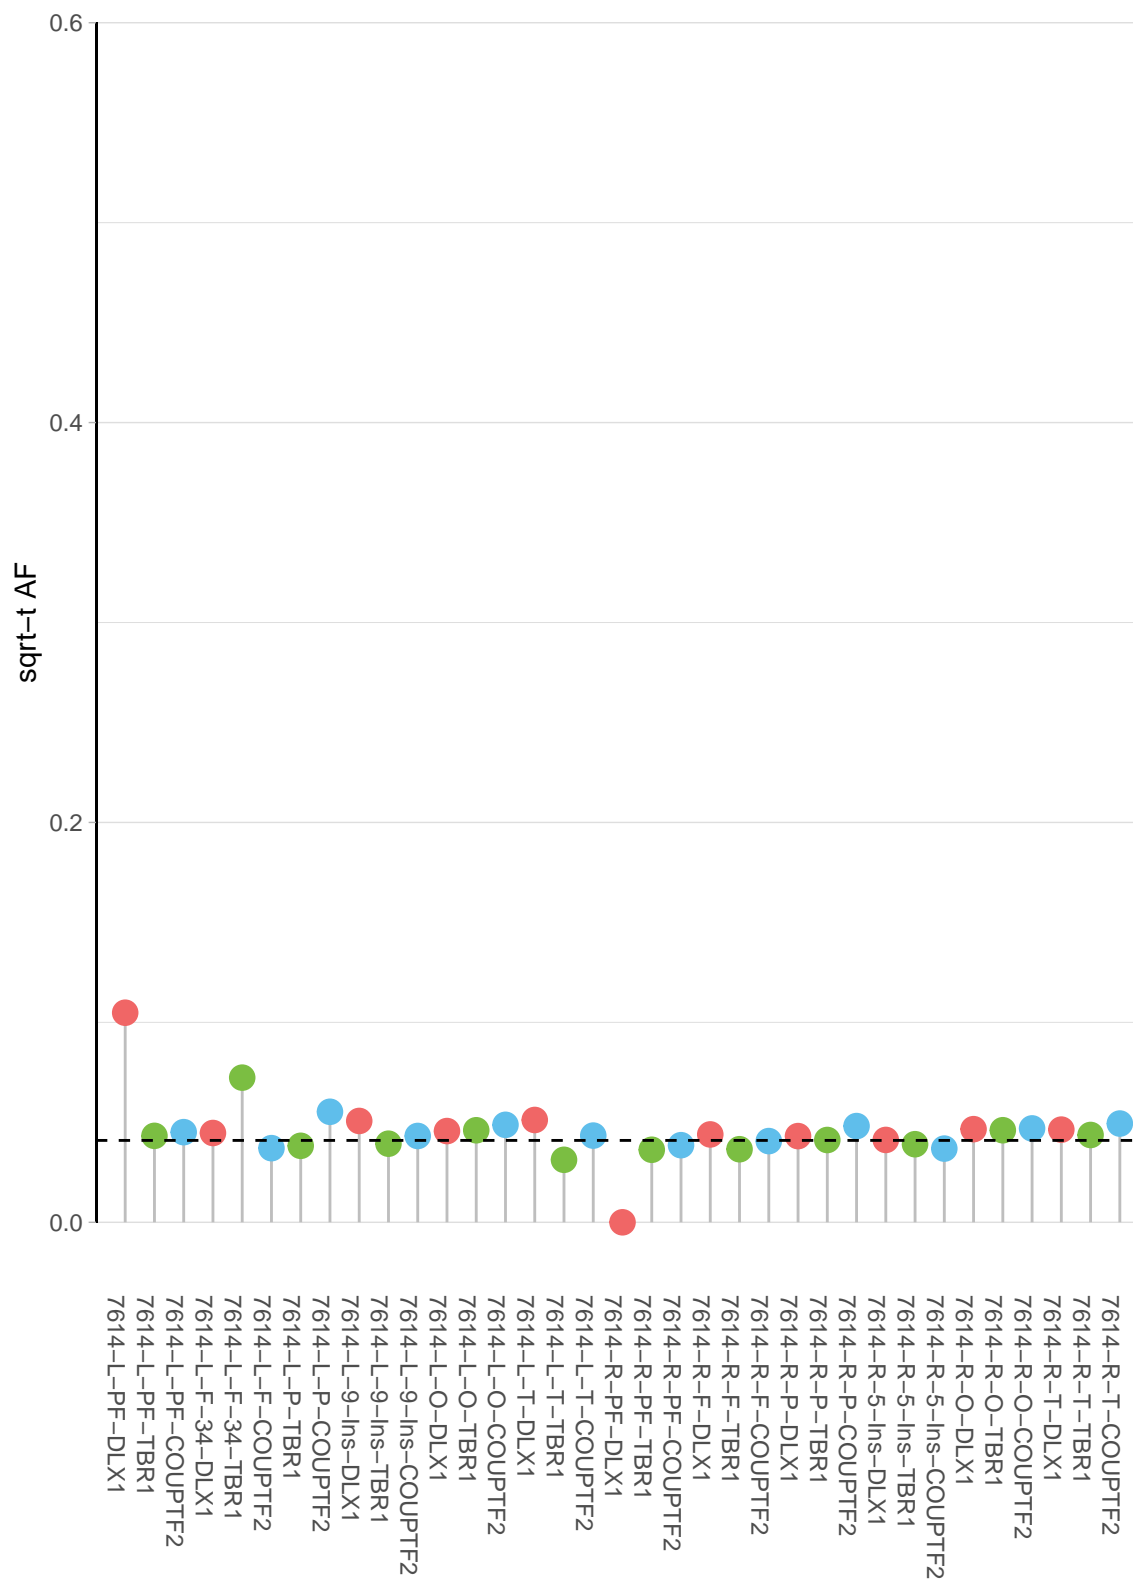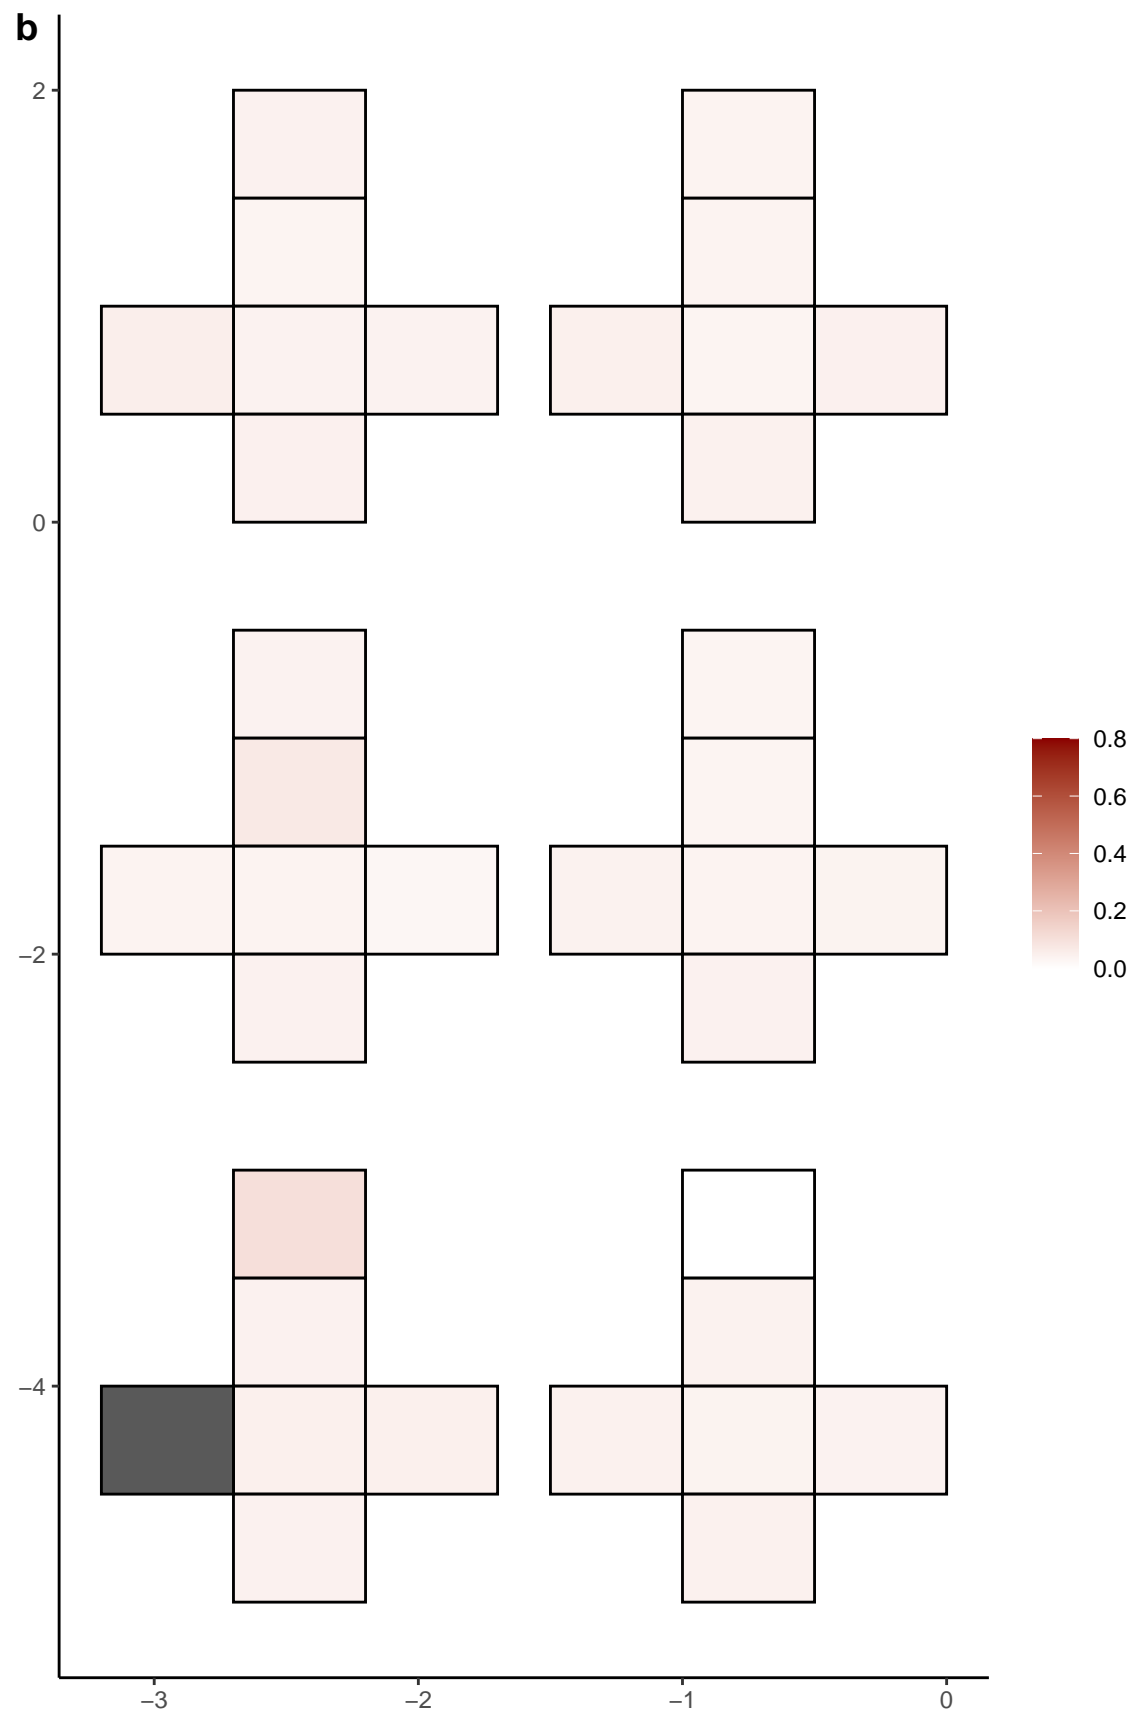



**a** ID01 4-149096018-G-A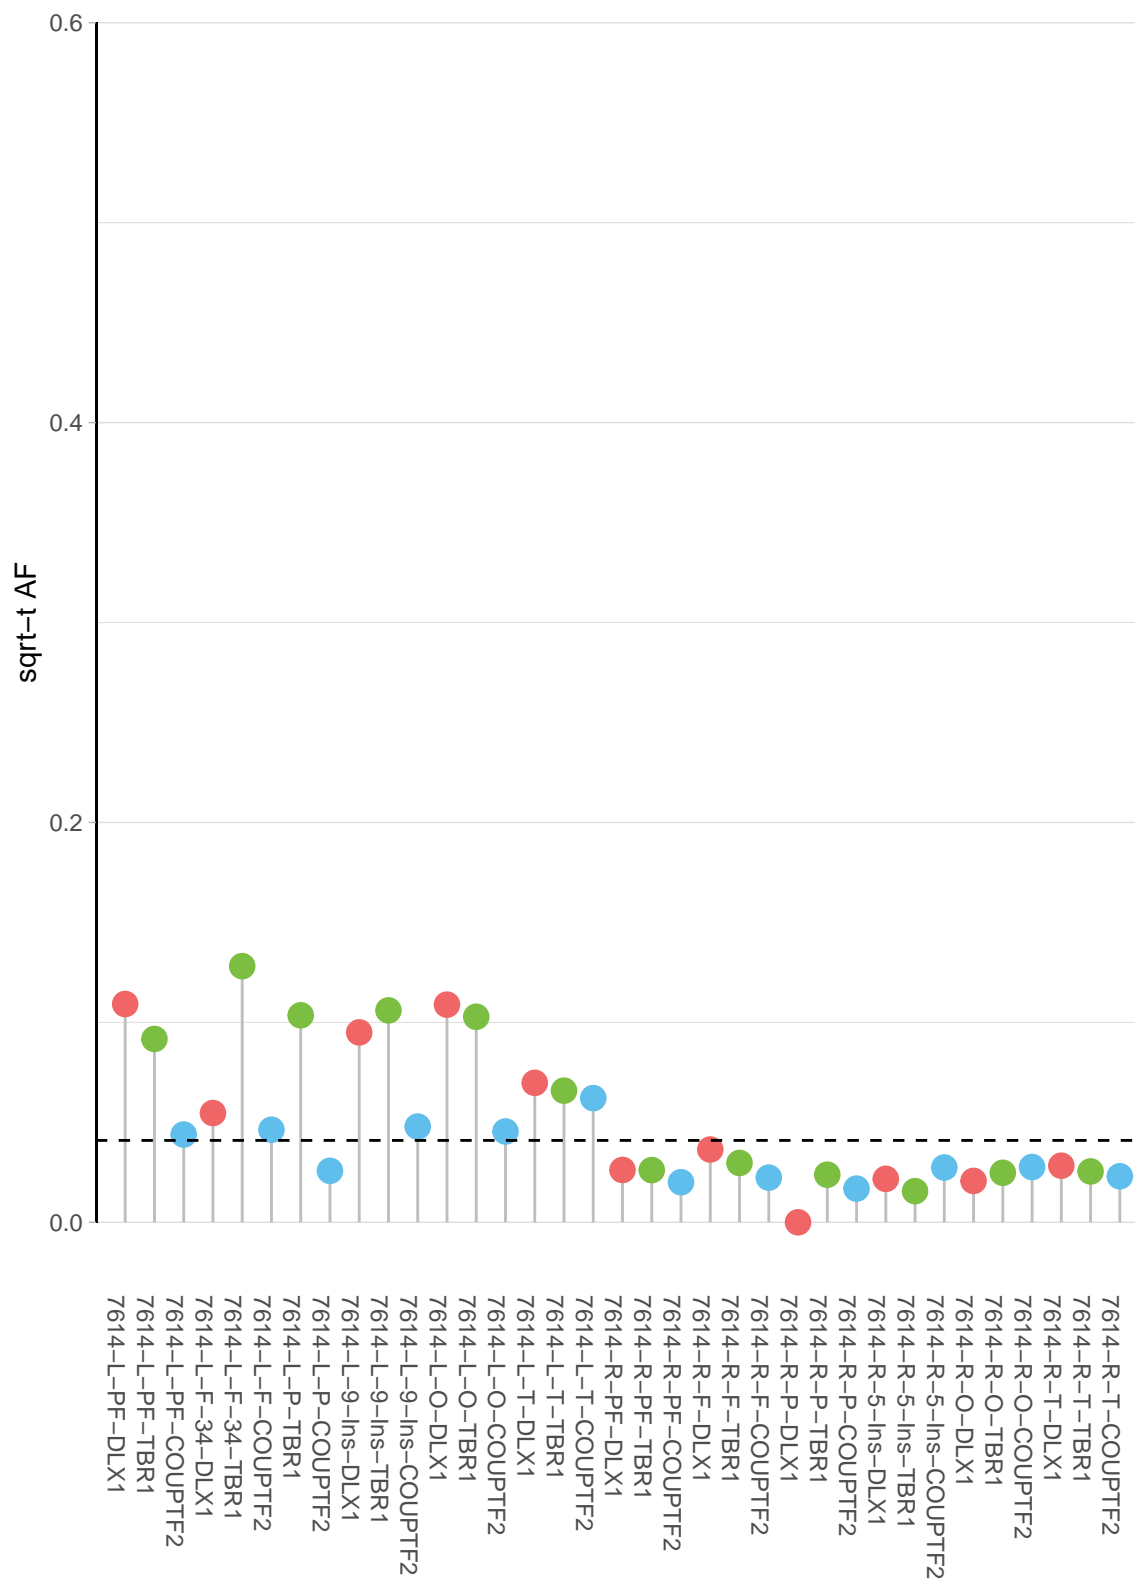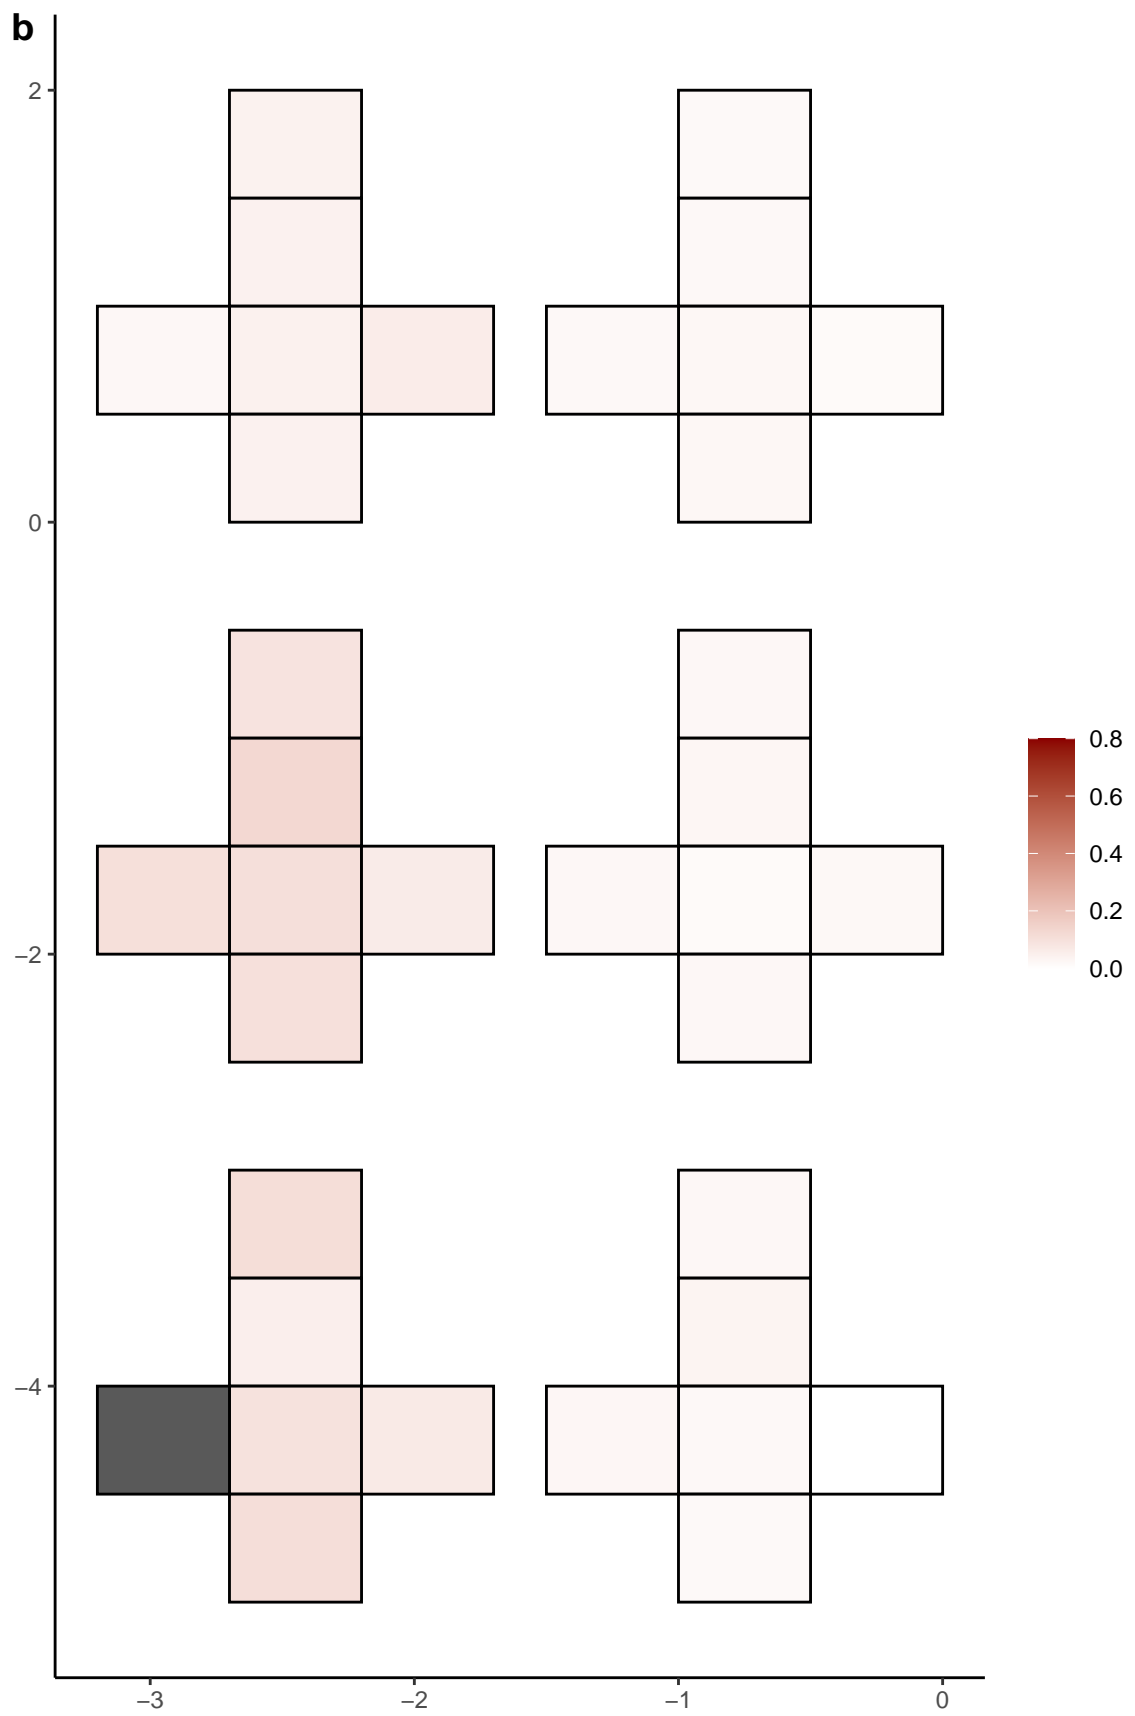

**a** ID01 4-149368759-C-T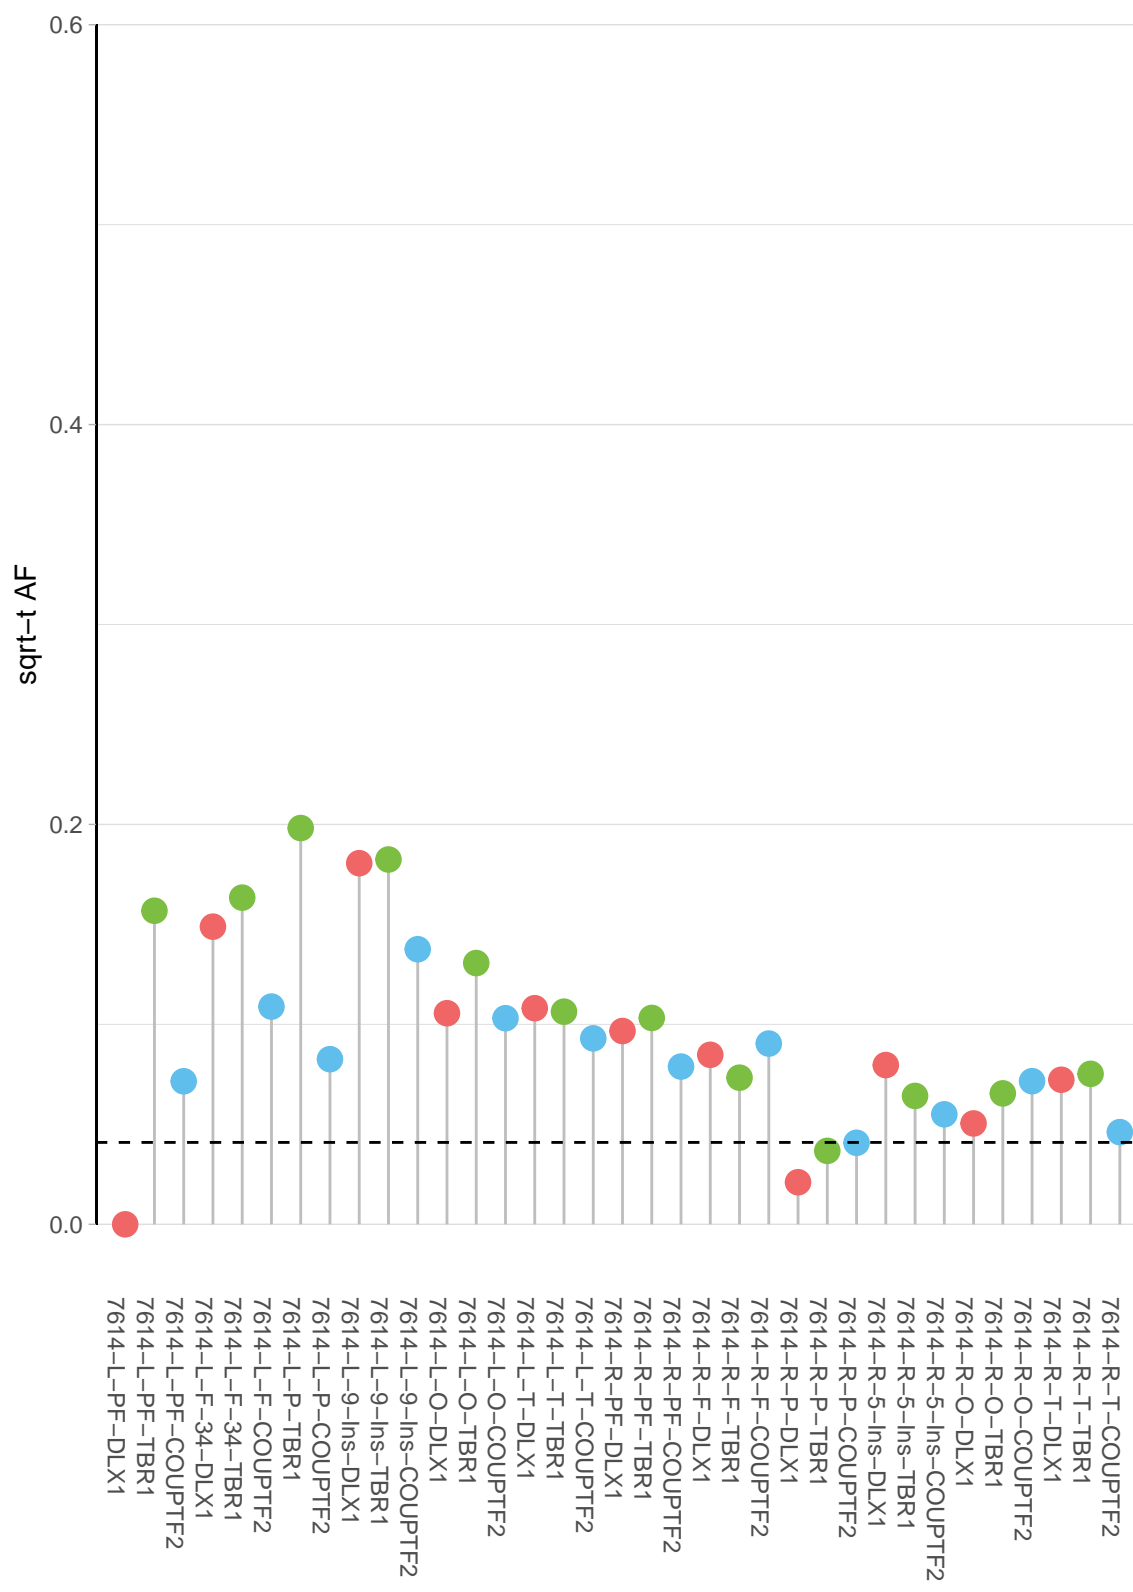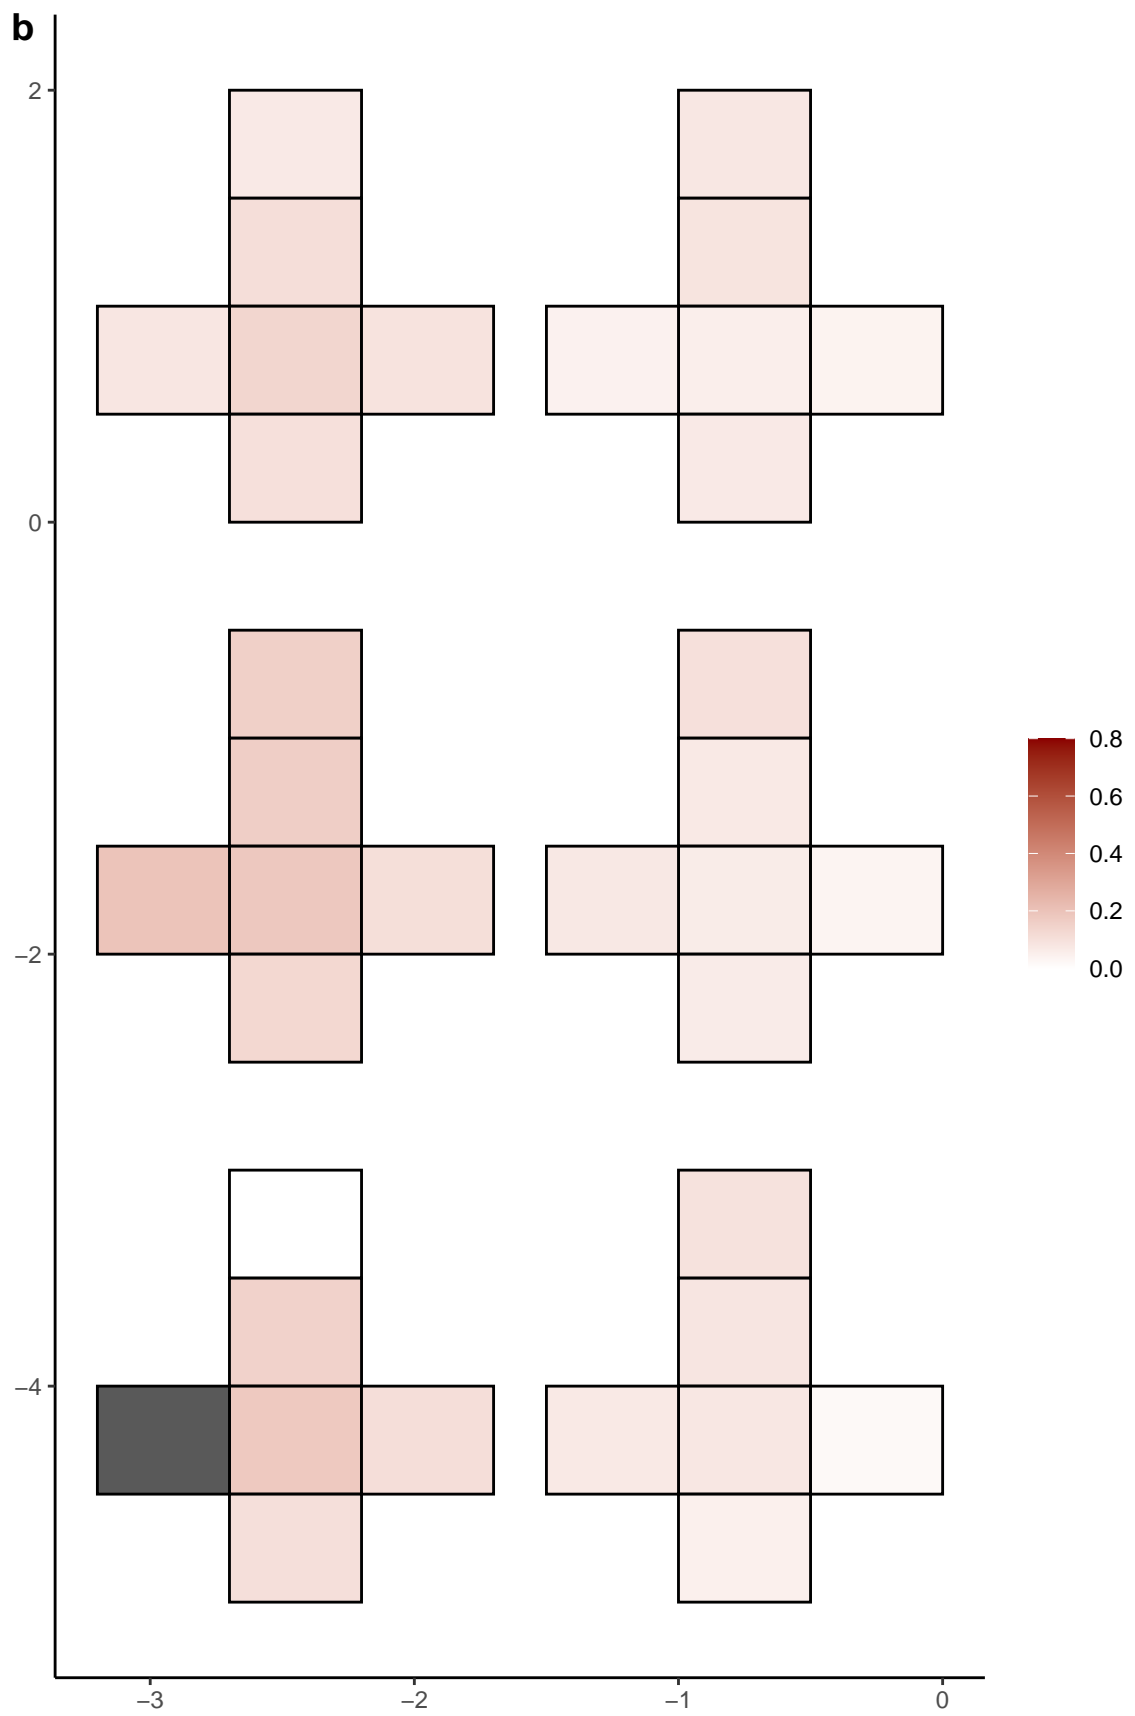

**a** ID01 4-159172058-G-A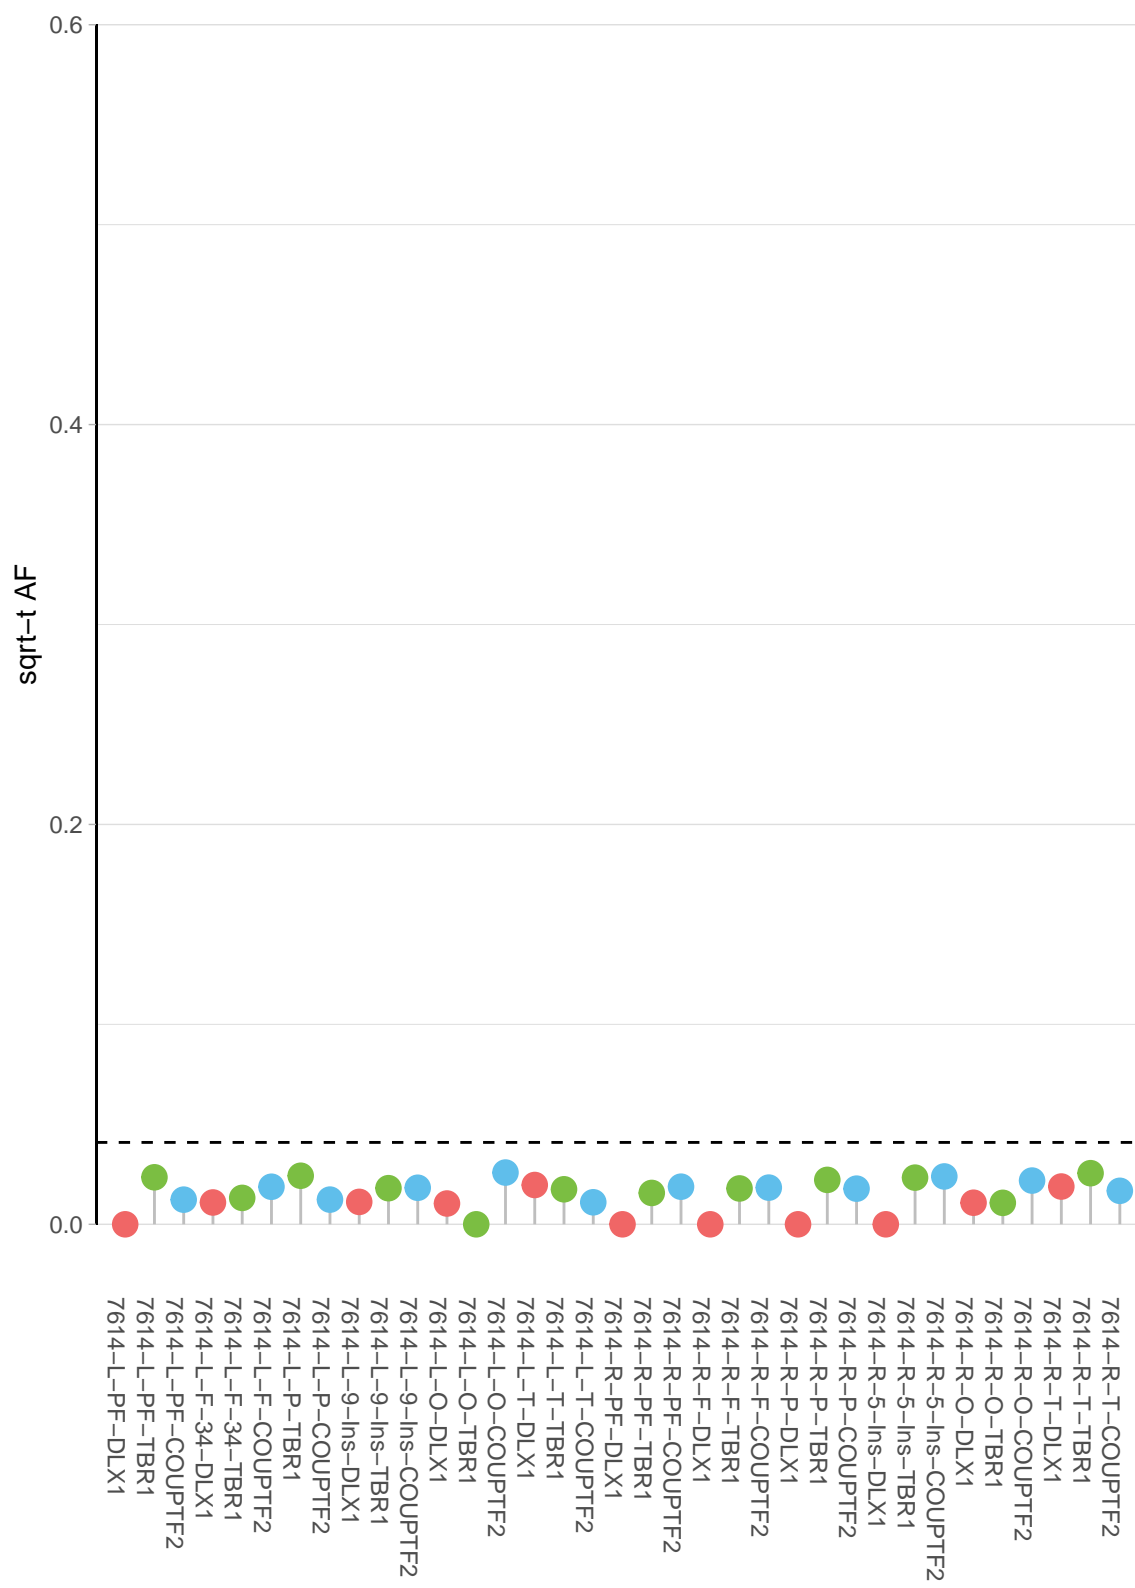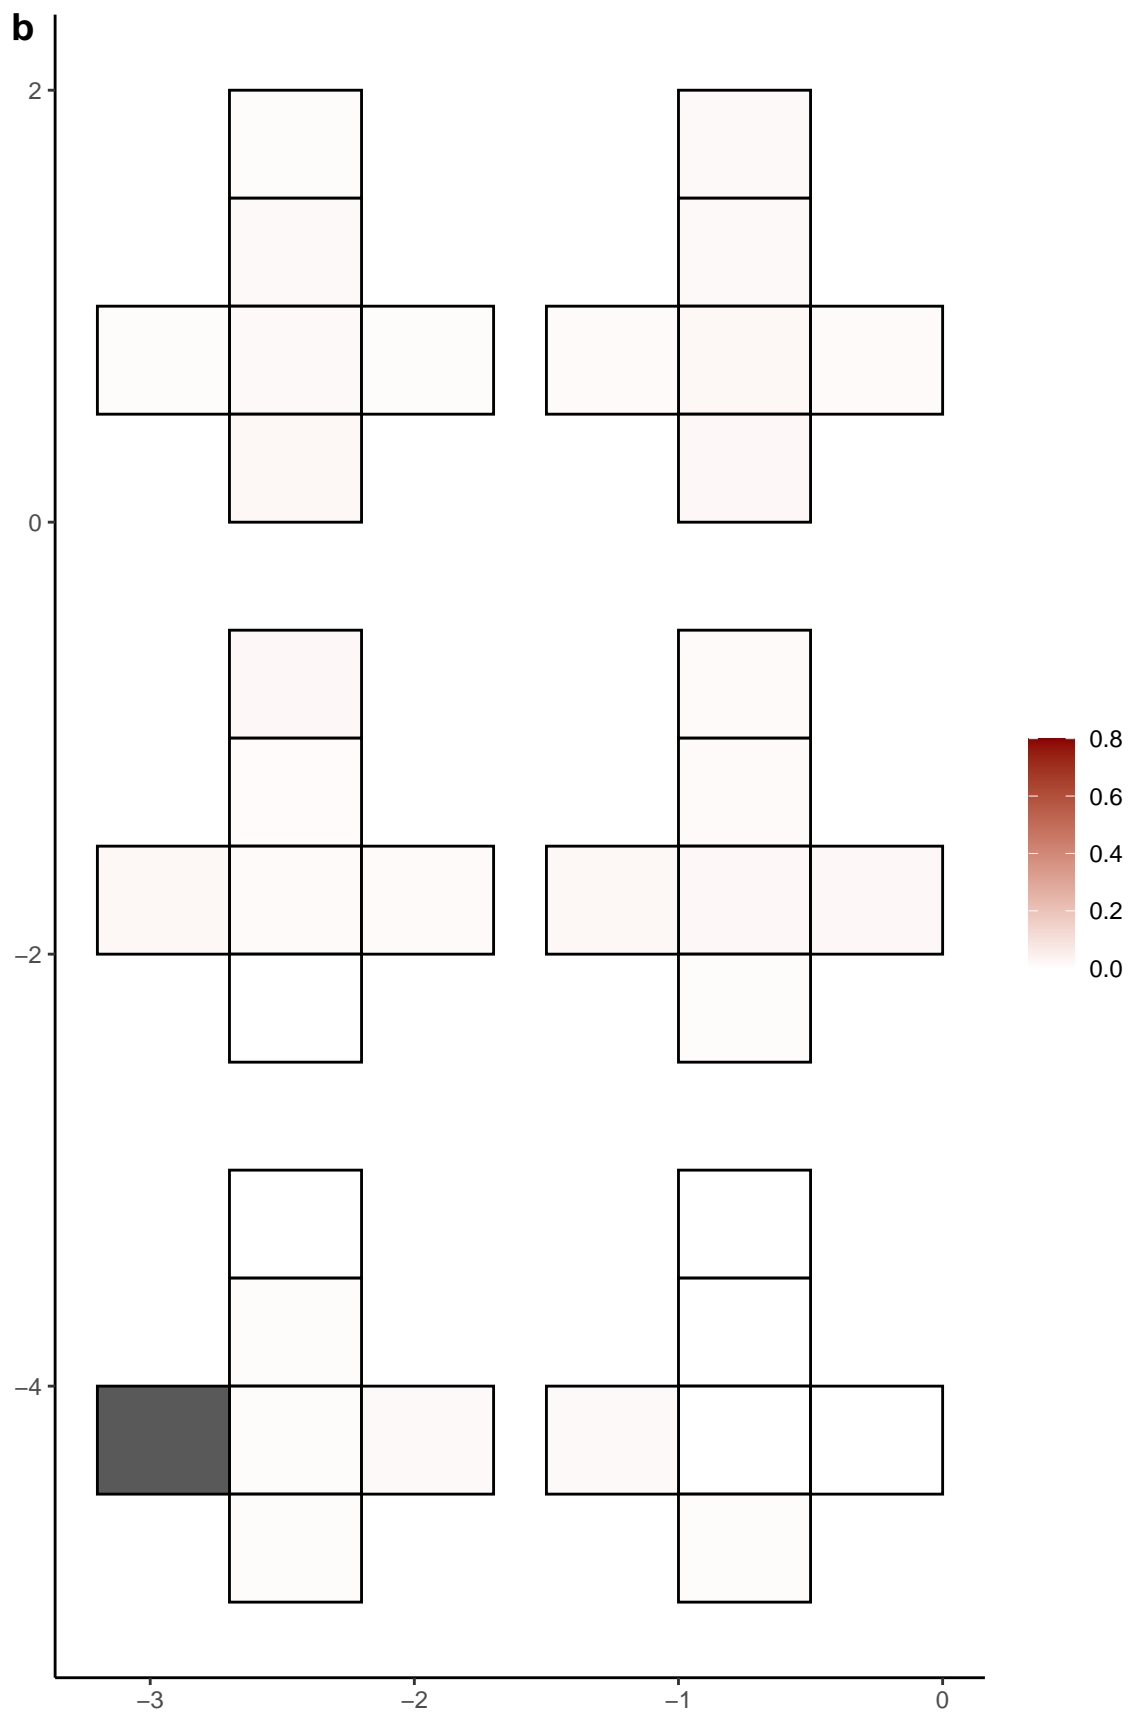

**a** ID01 4-163244475-A-T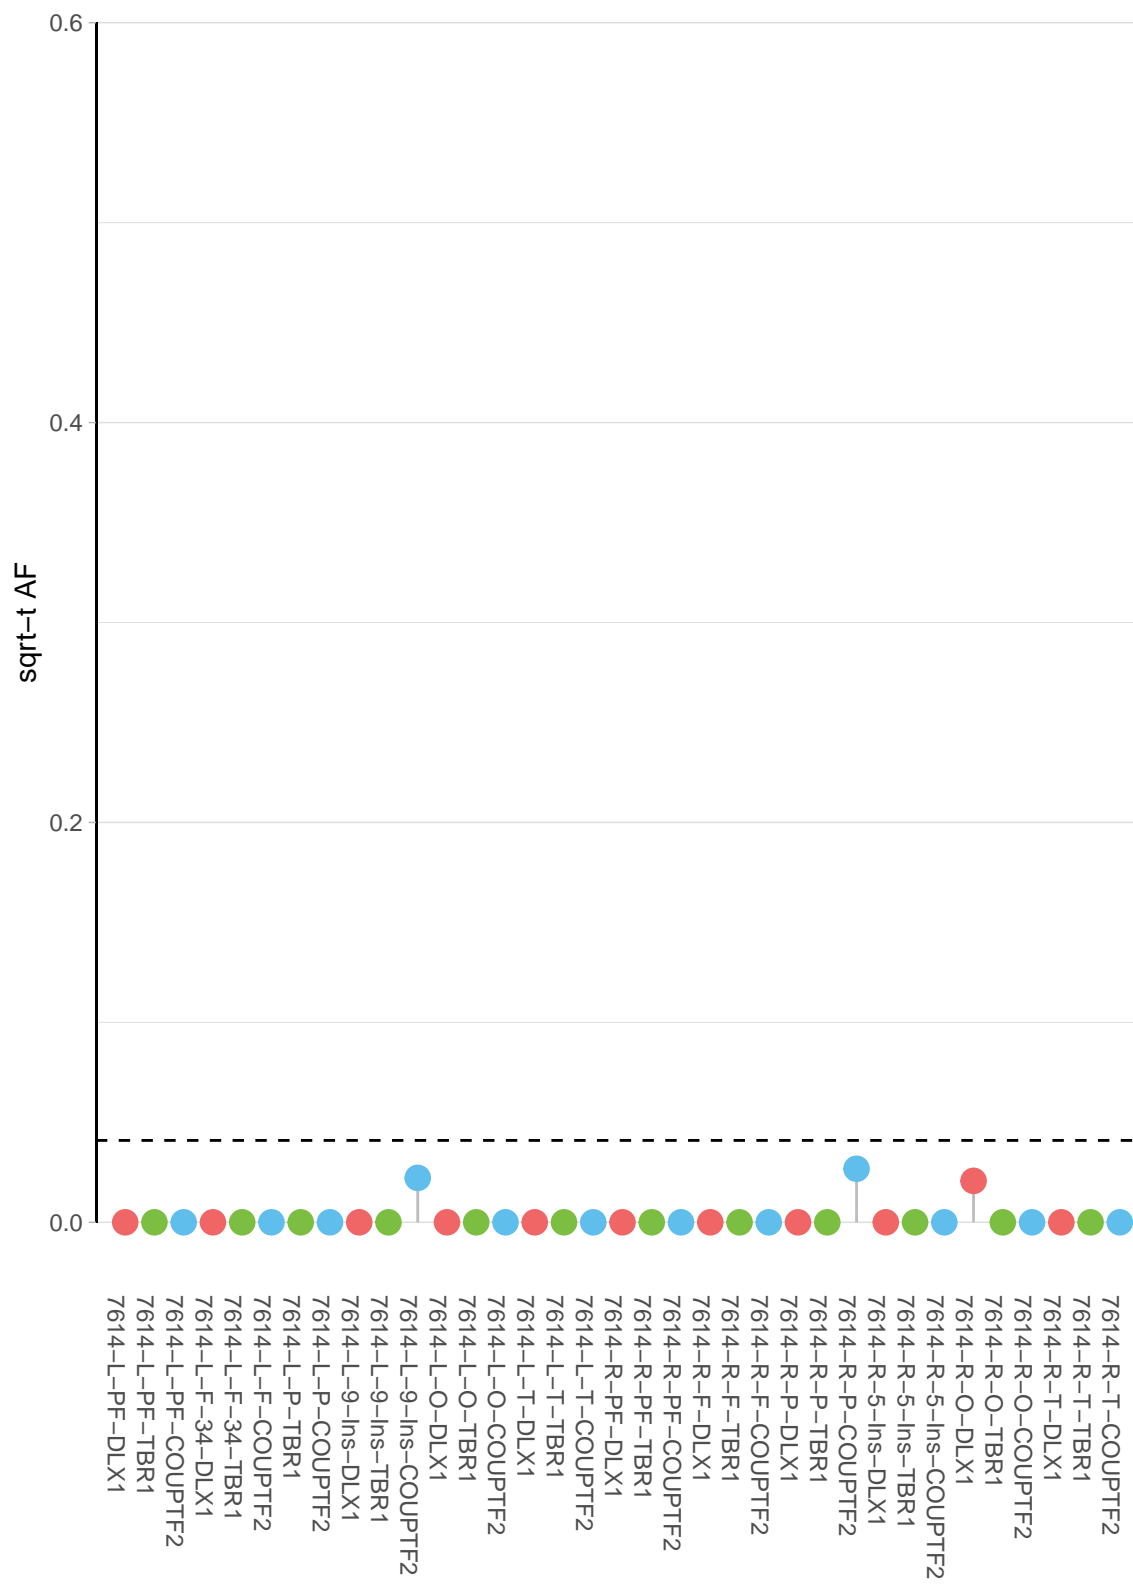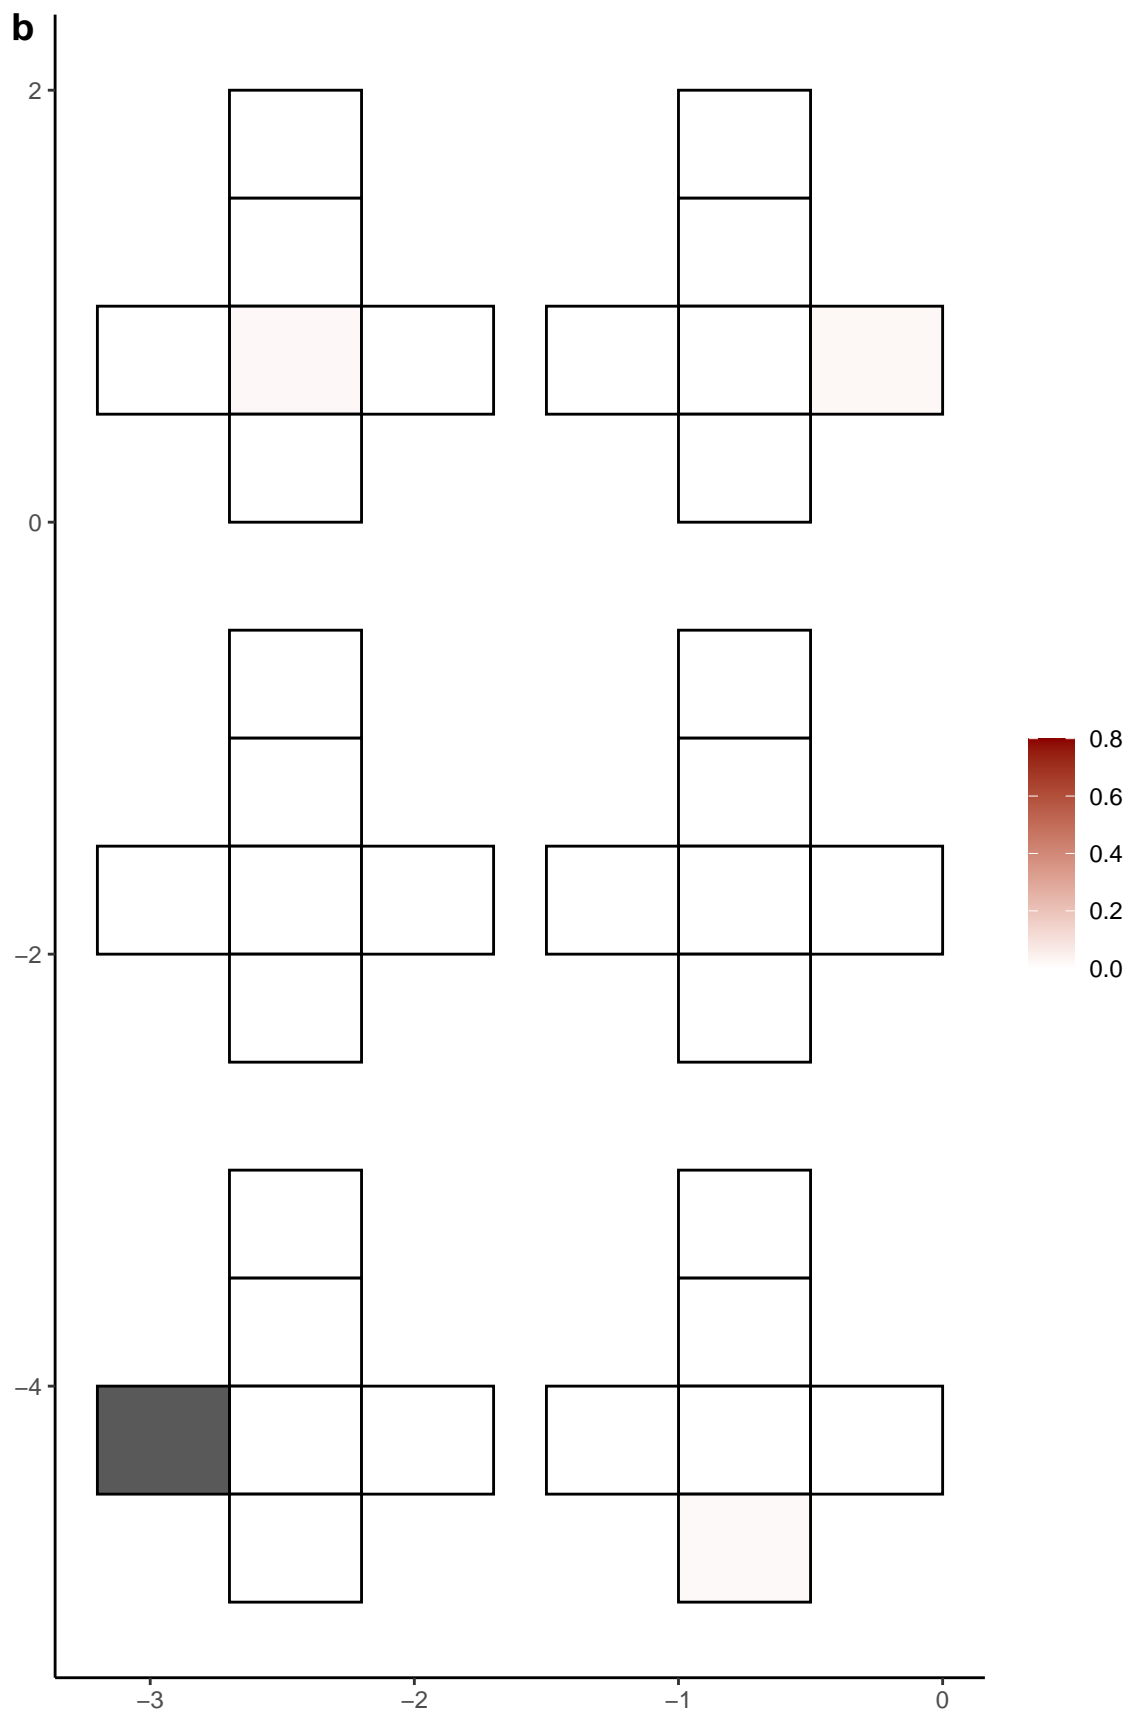

**a** ID01 4-16800988-T-A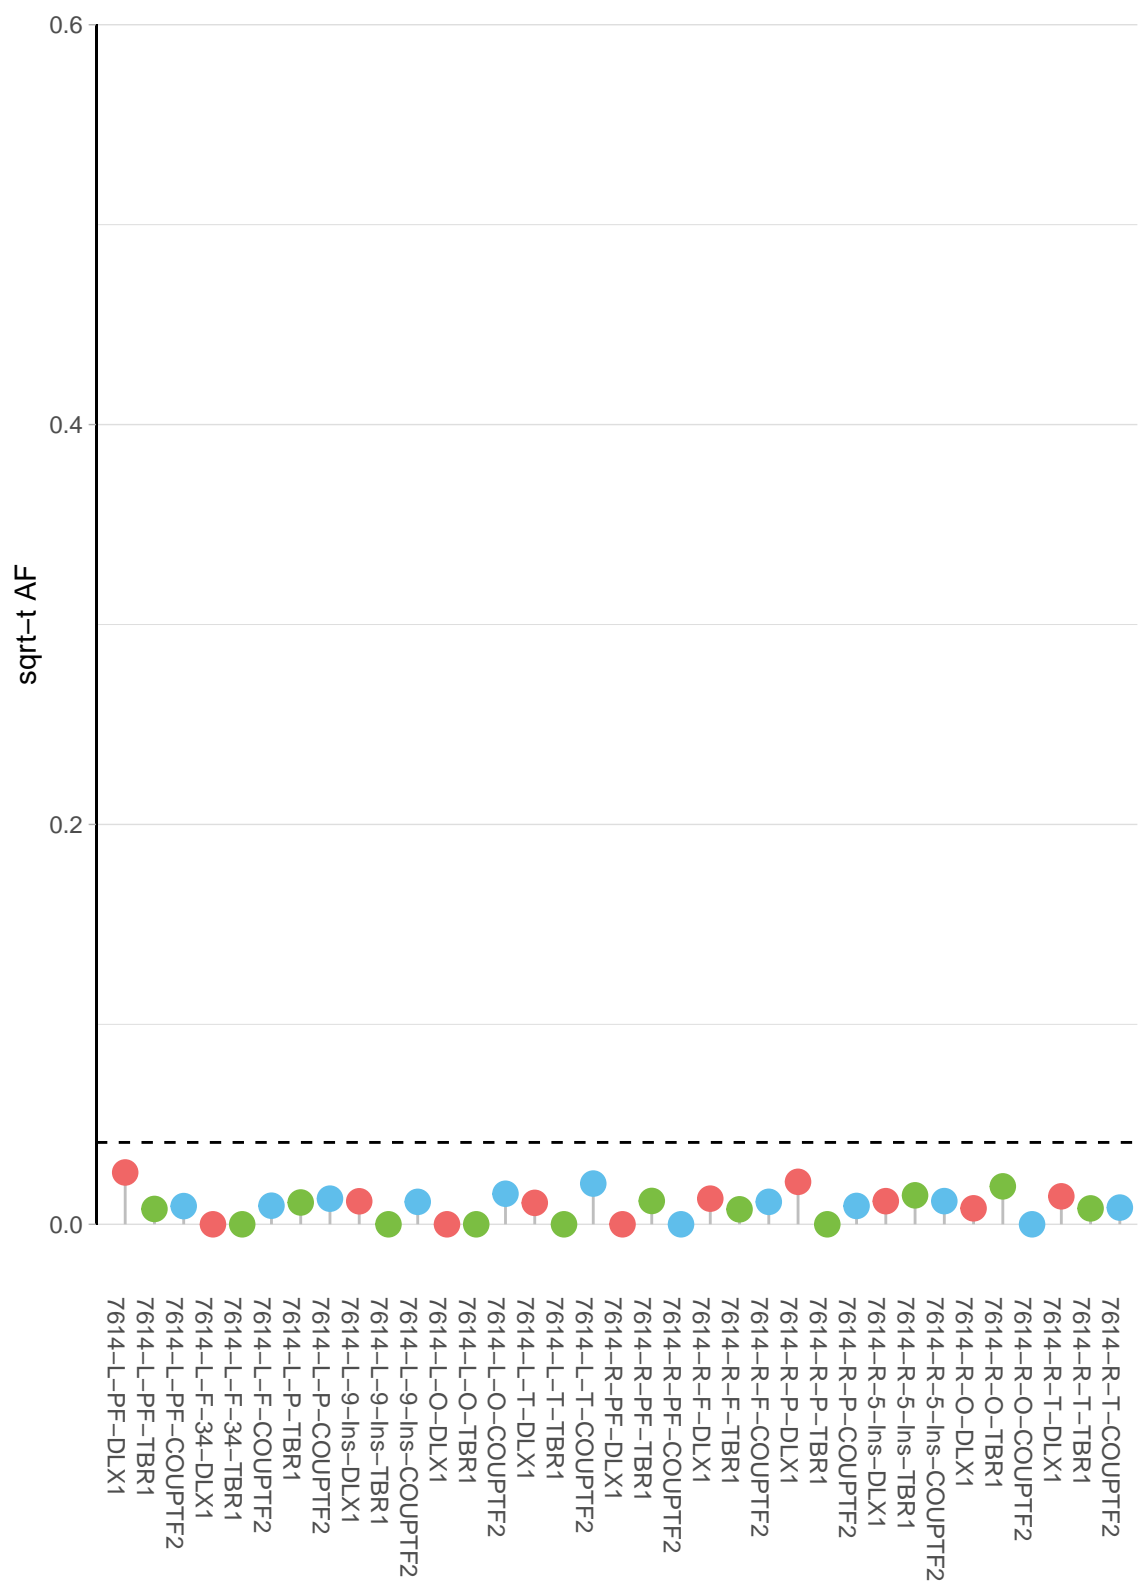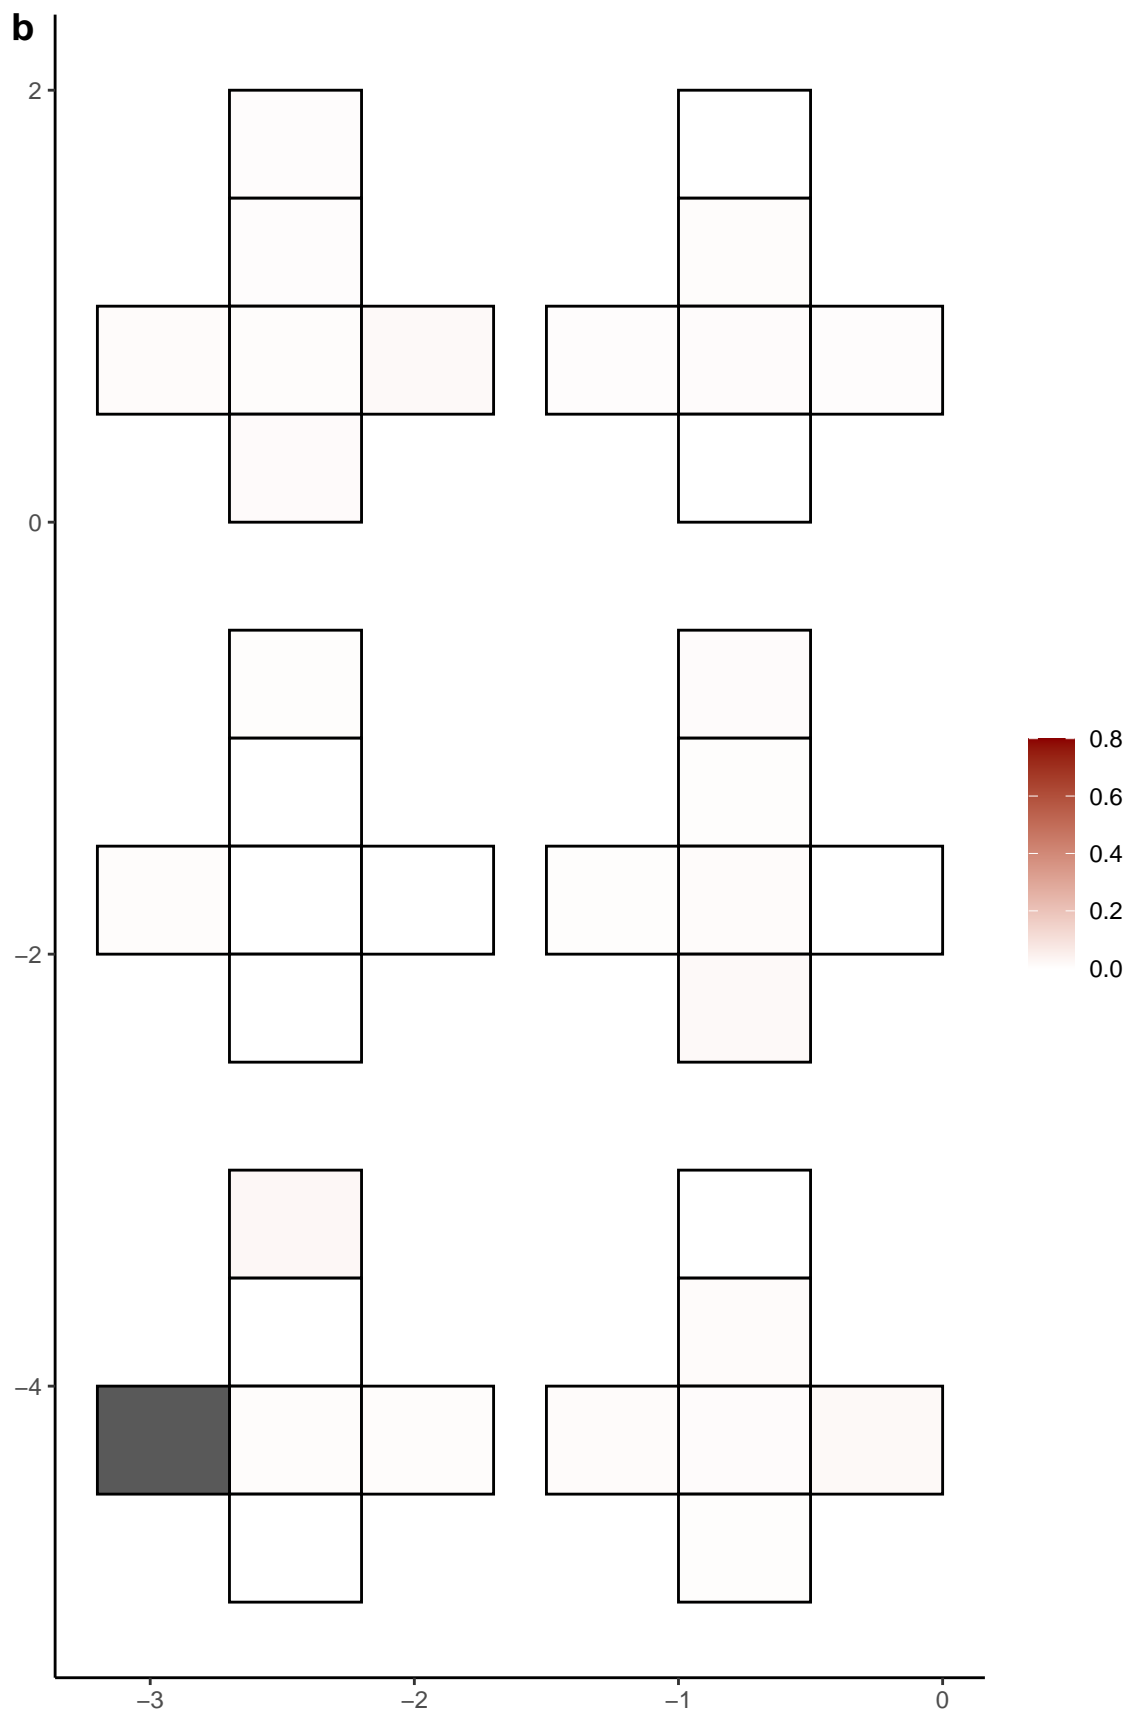

**a** ID01 4-176659497-G-A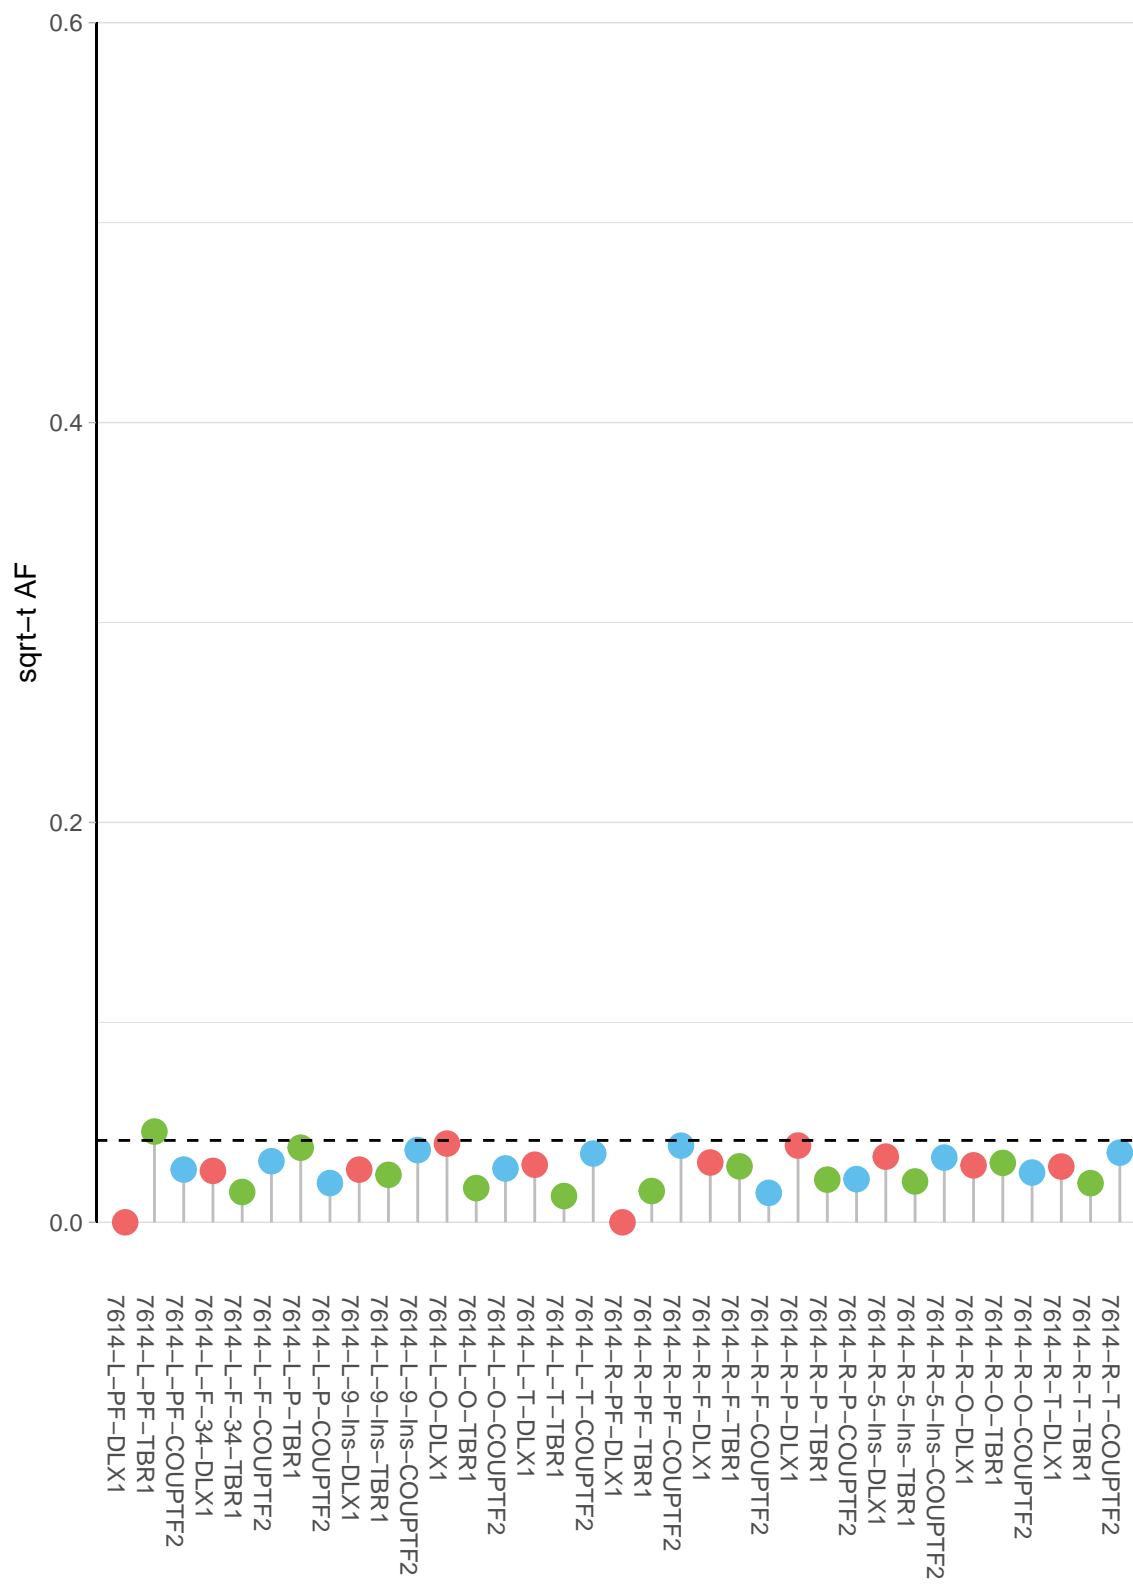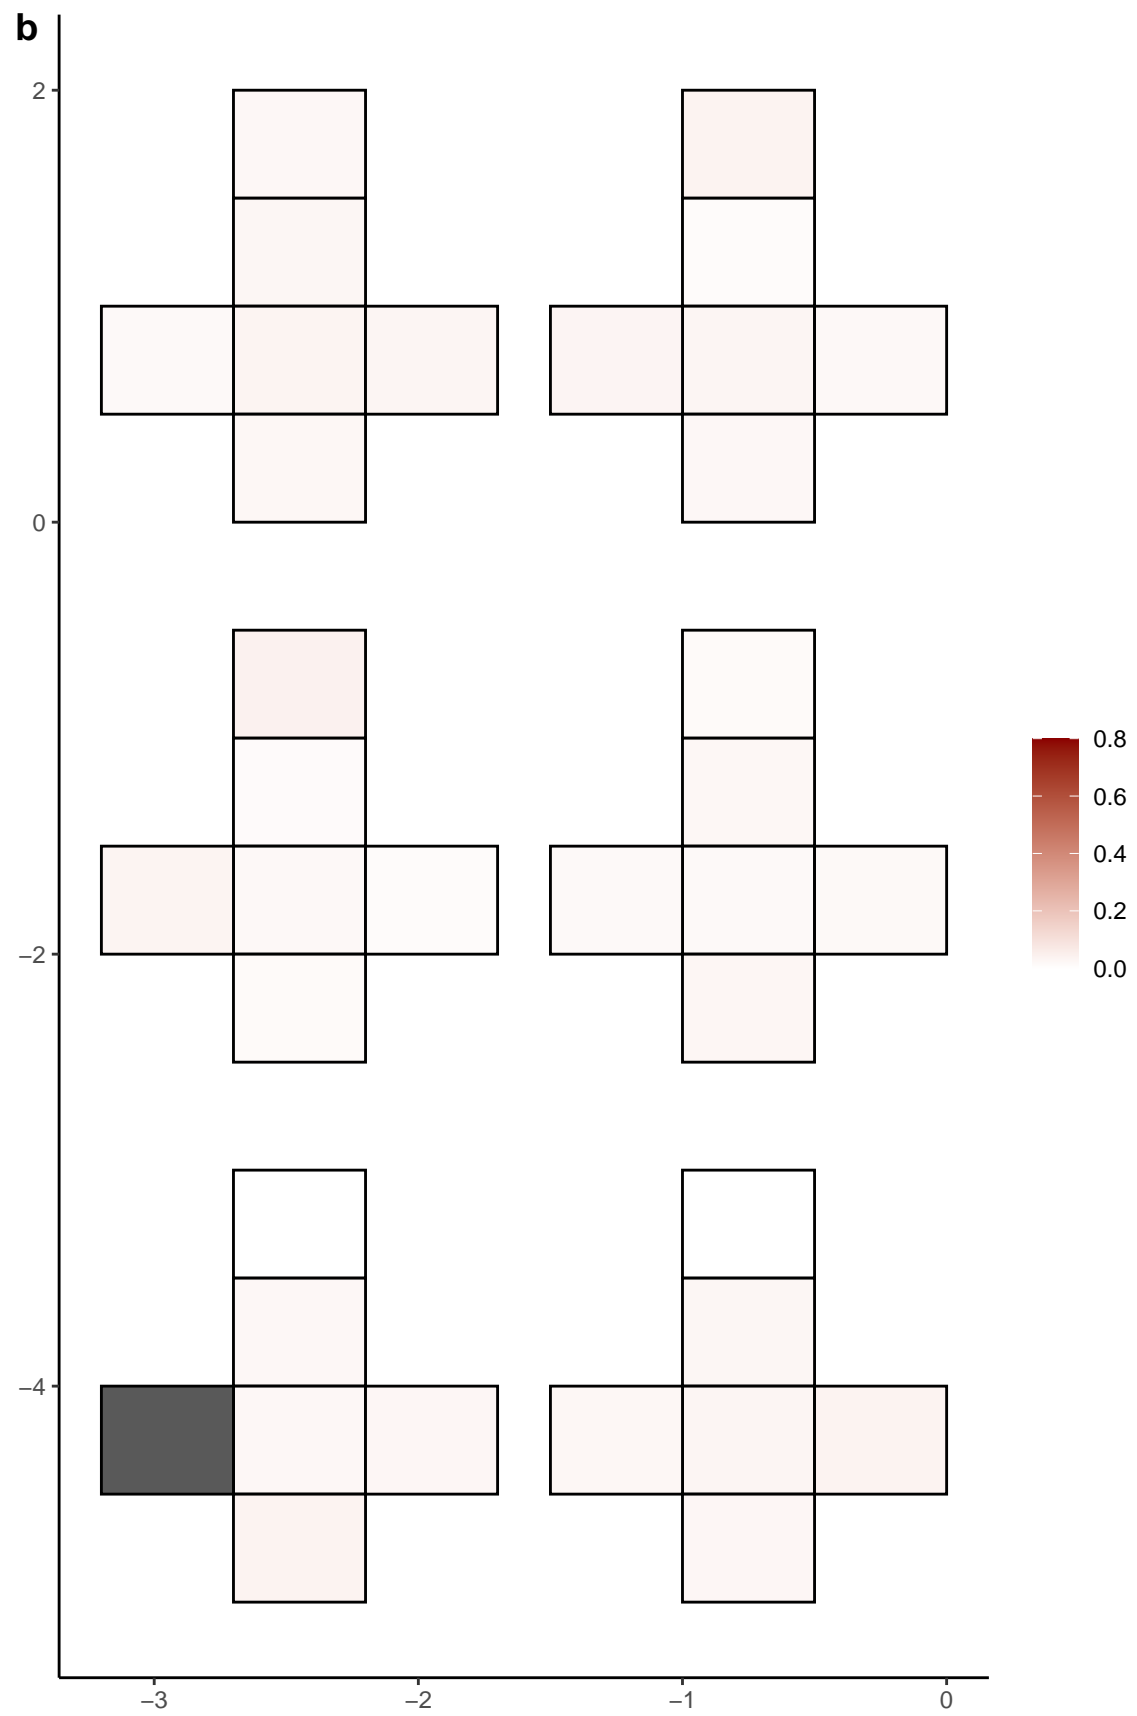

**a** ID01 4-181698552-T-C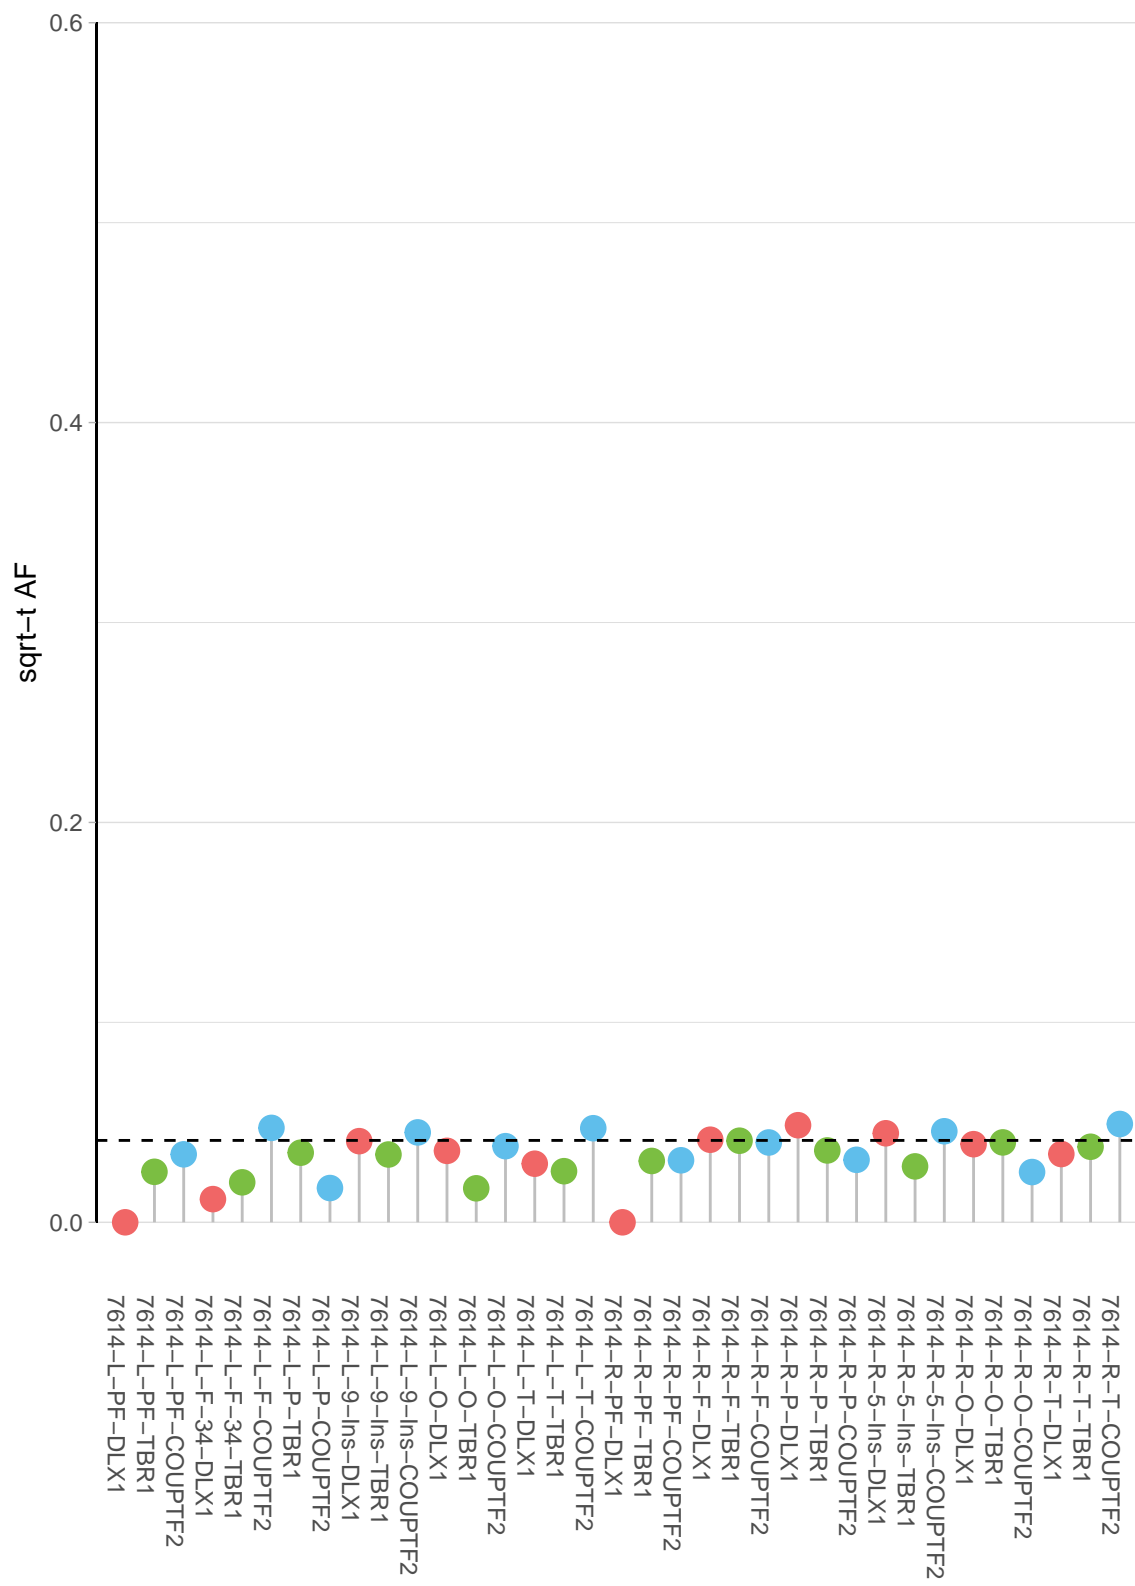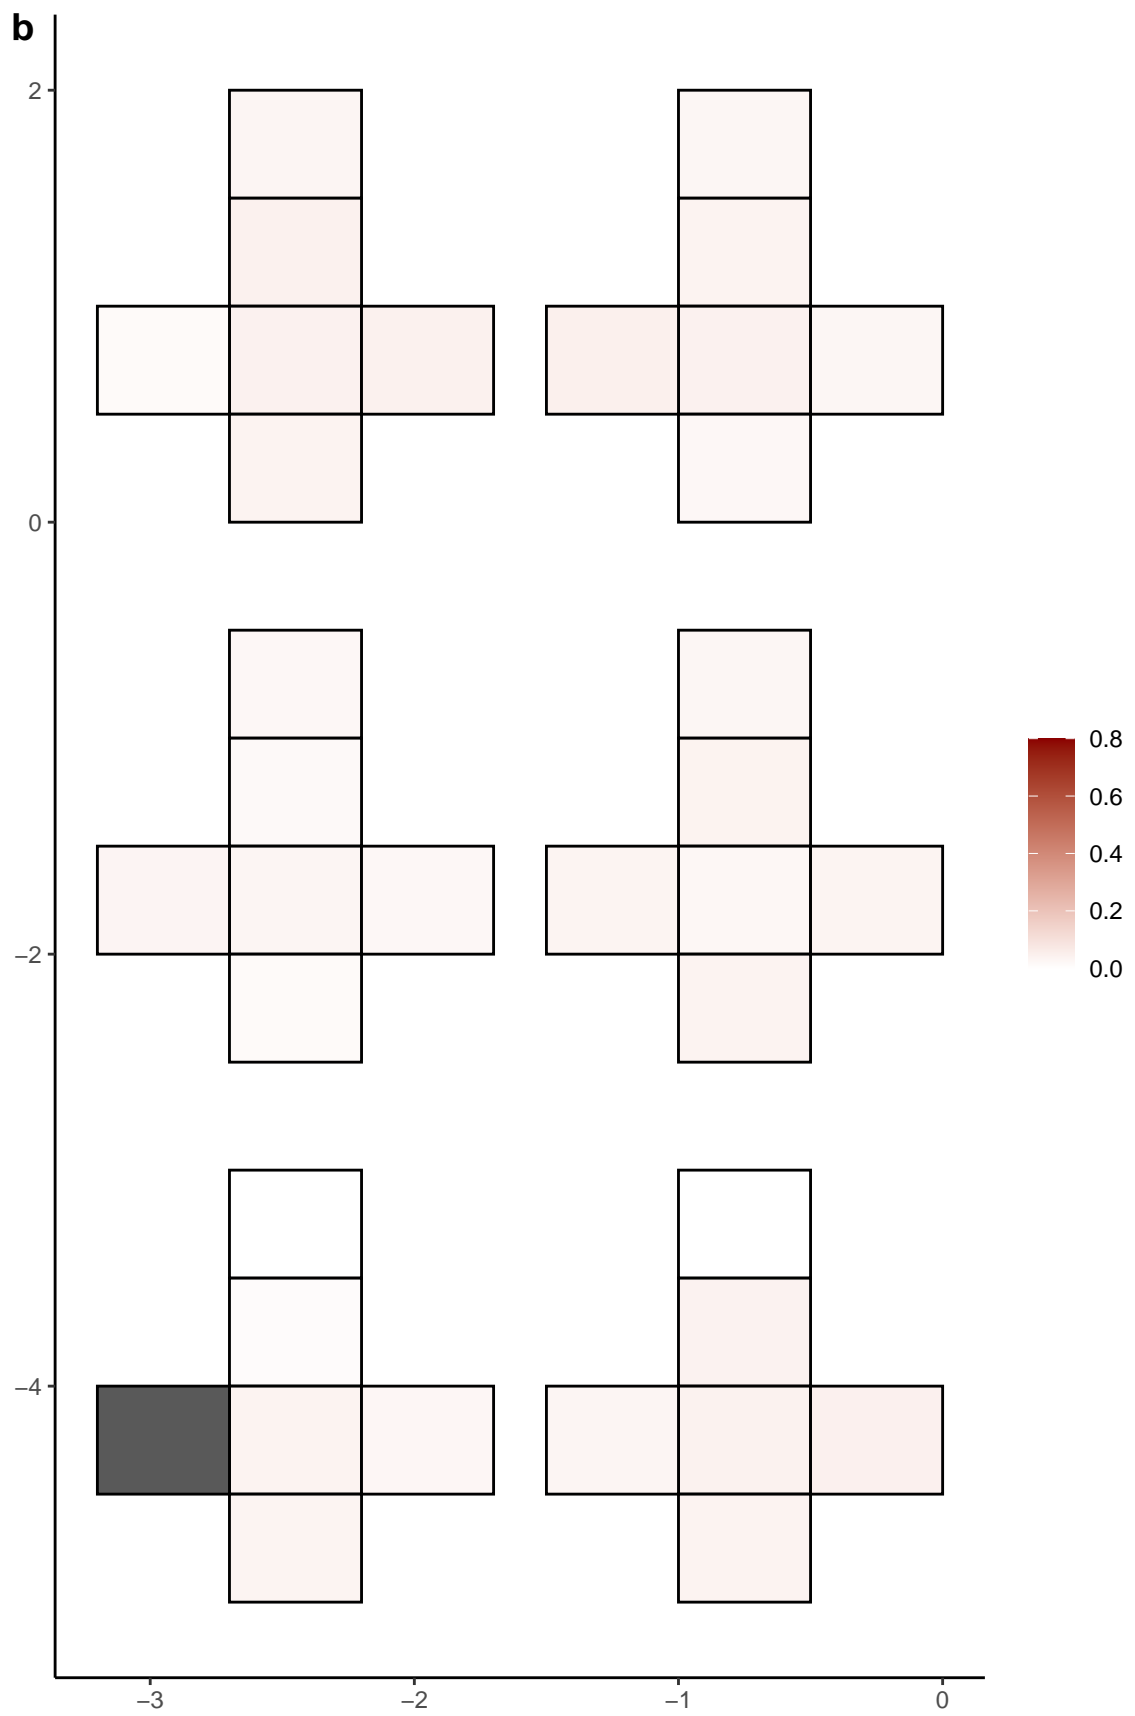

**a** ID01 4-184808022-A-G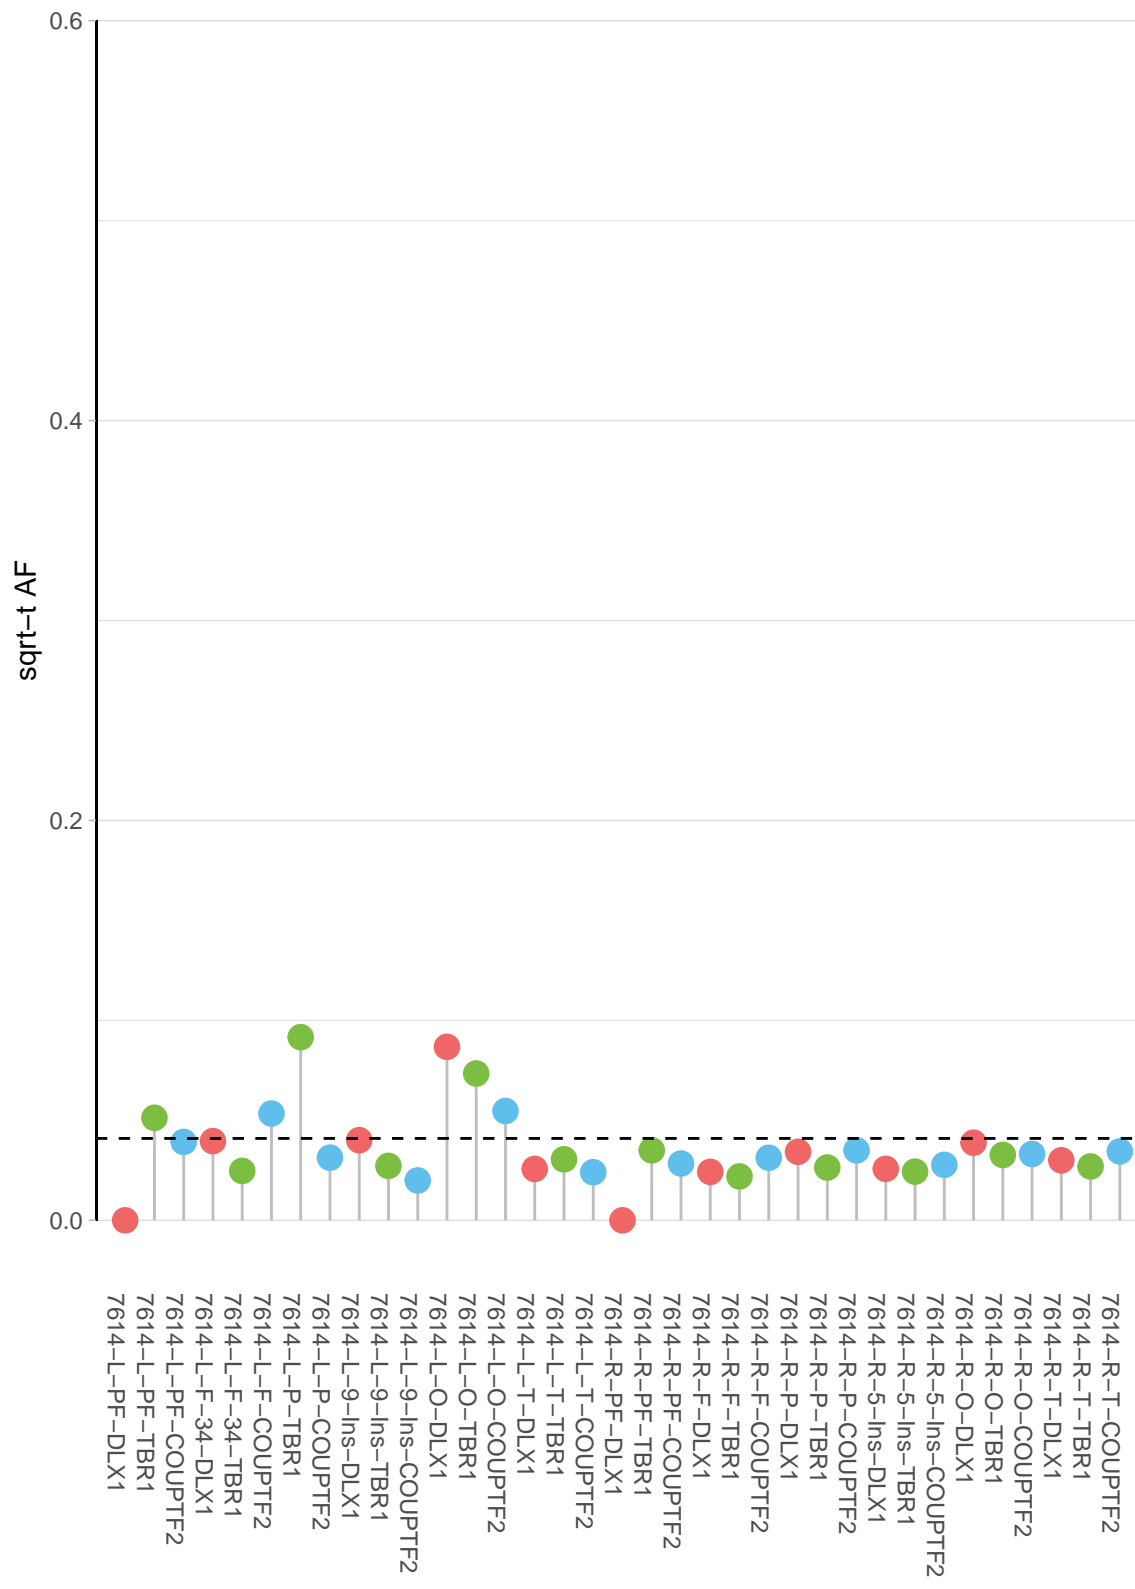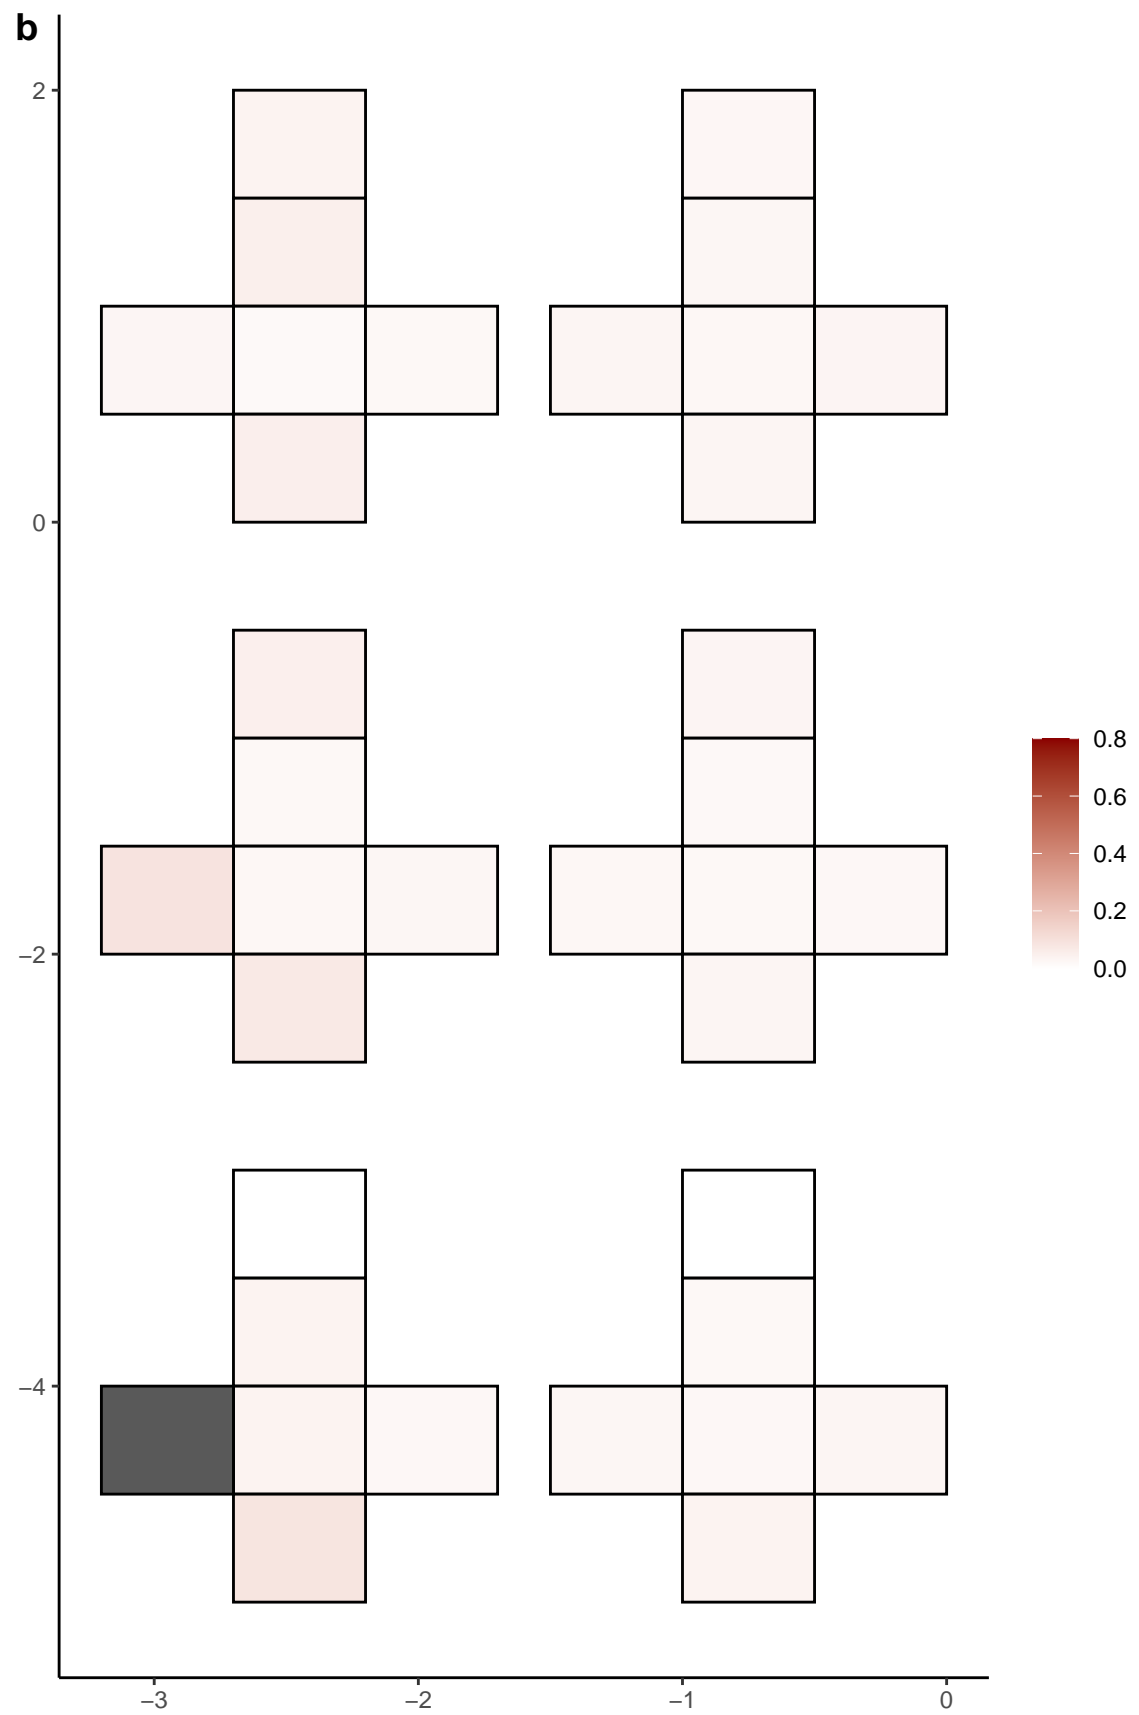



**a** ID01 4-185375793-C-T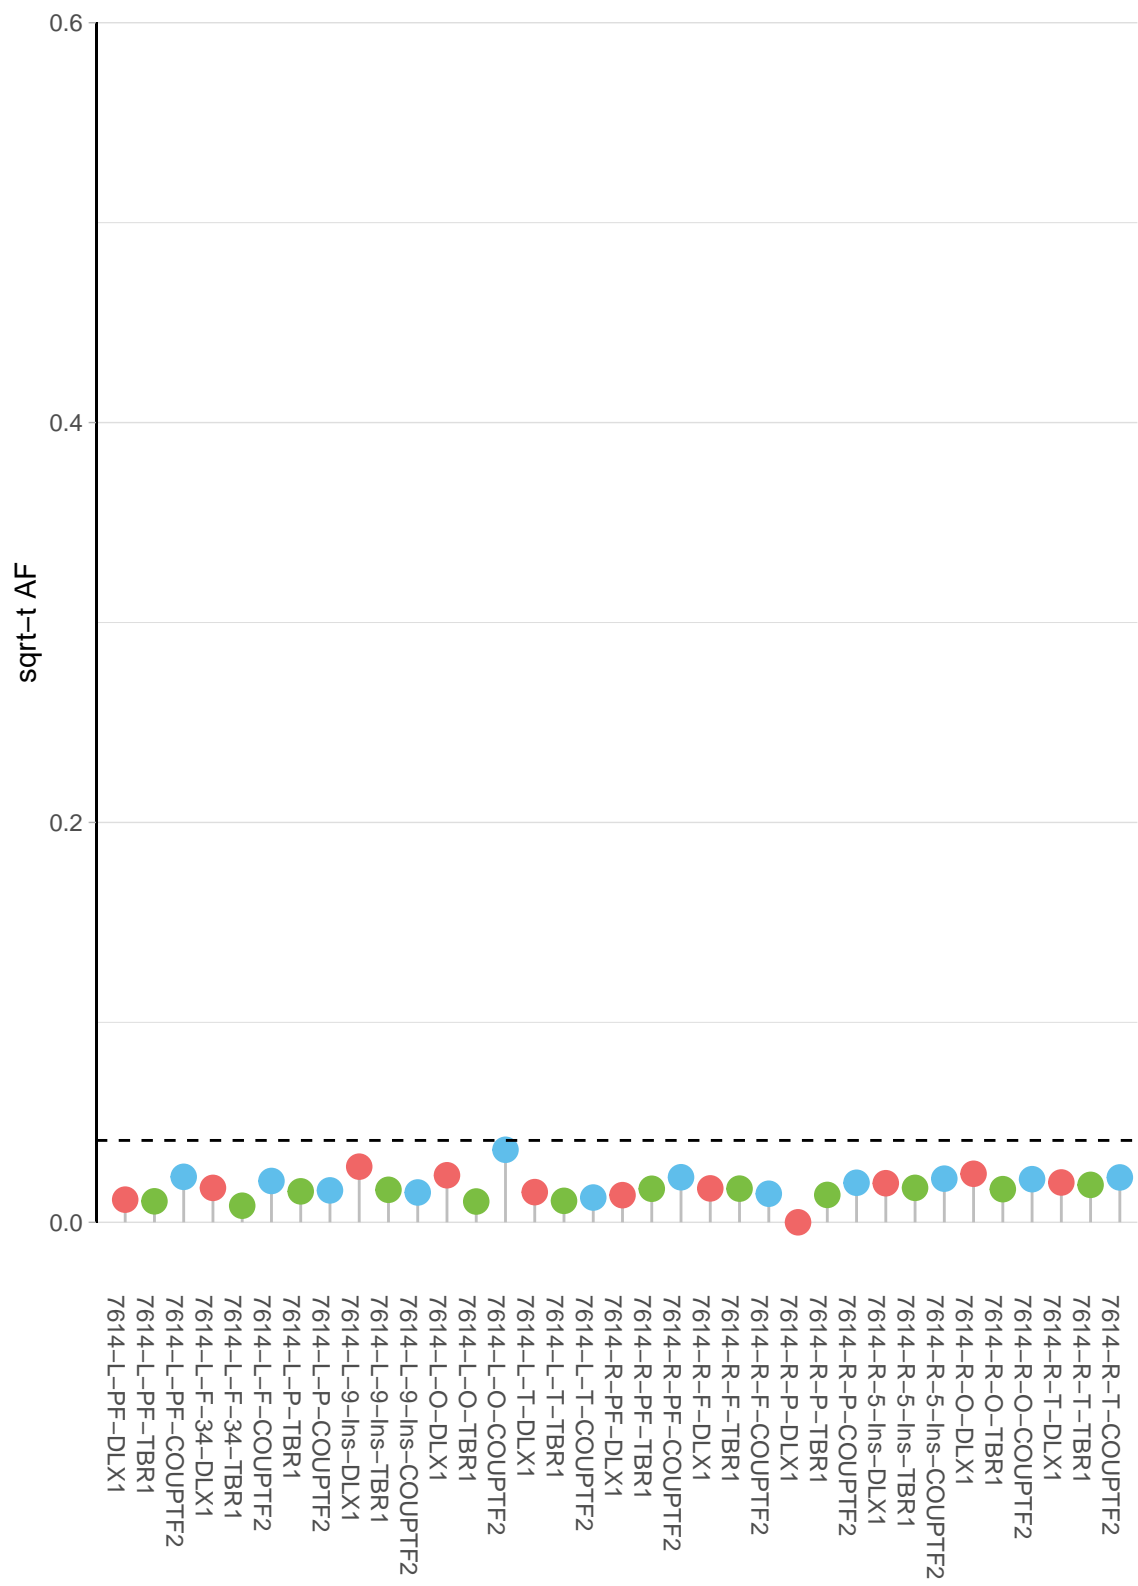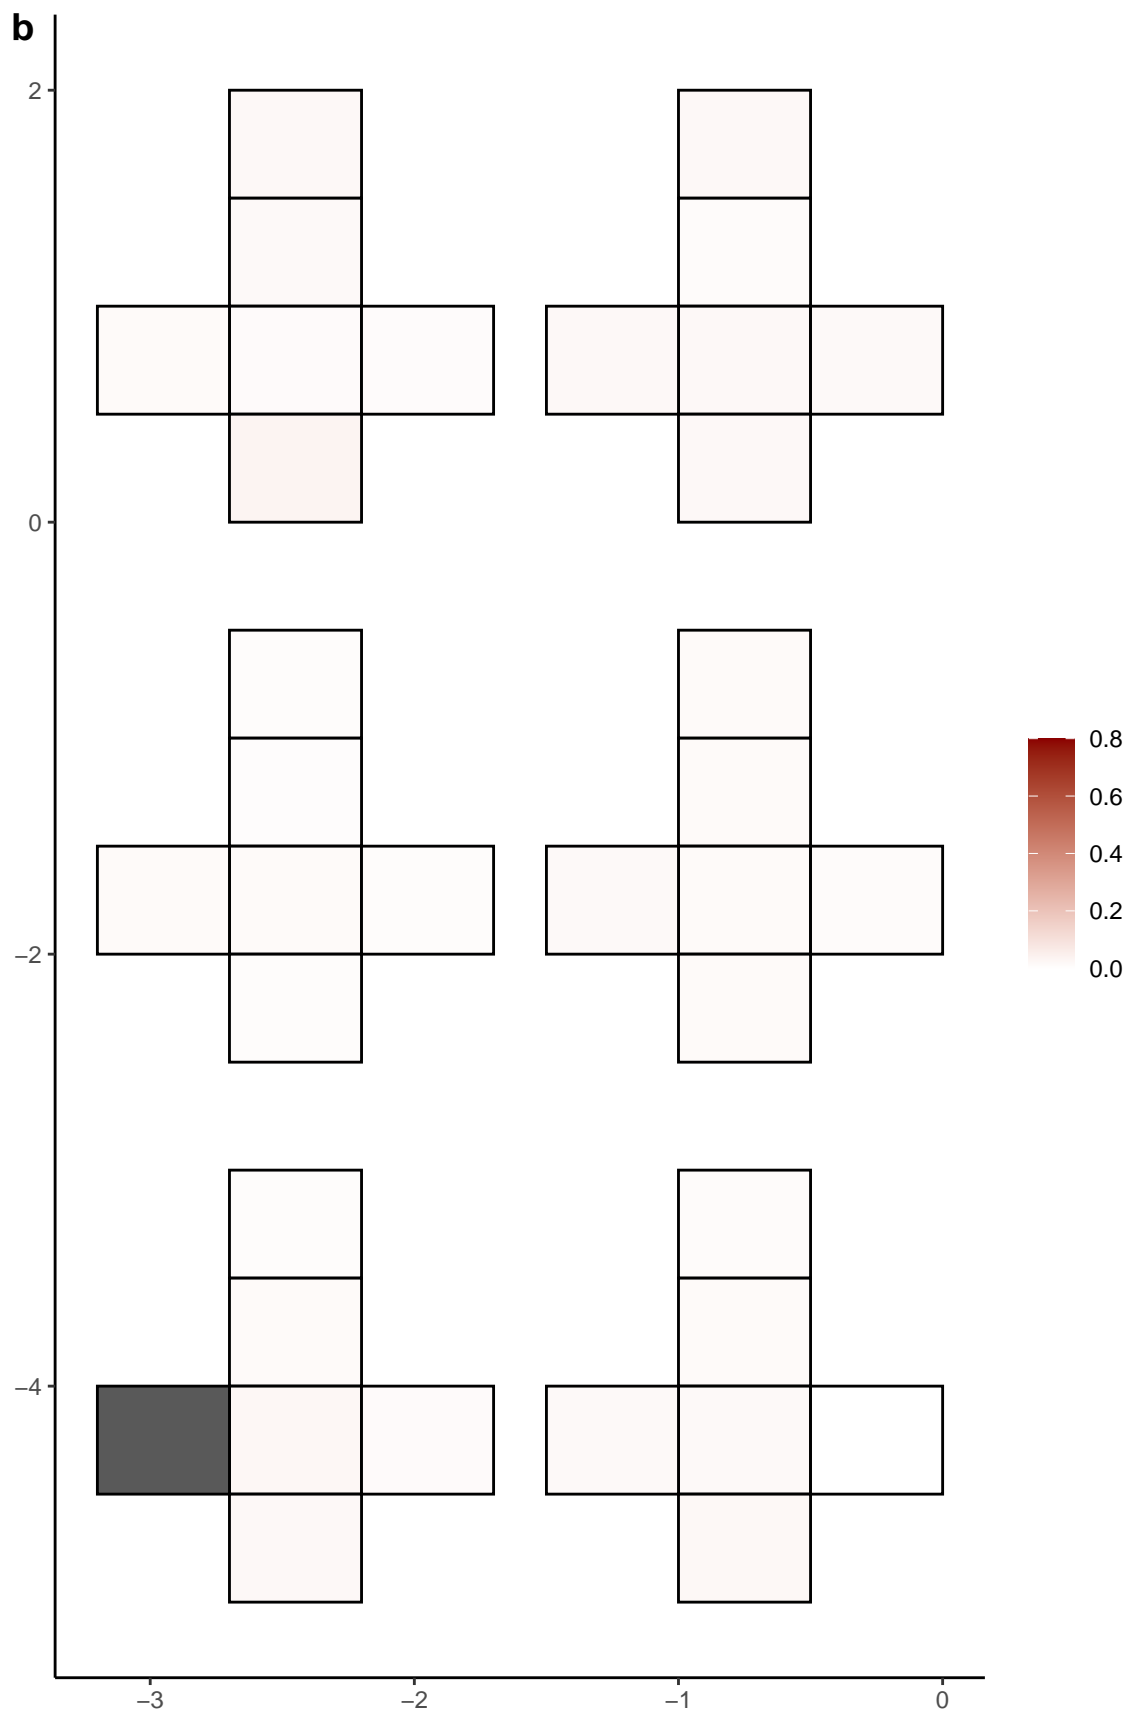

**a** ID01 4-189162568-G-A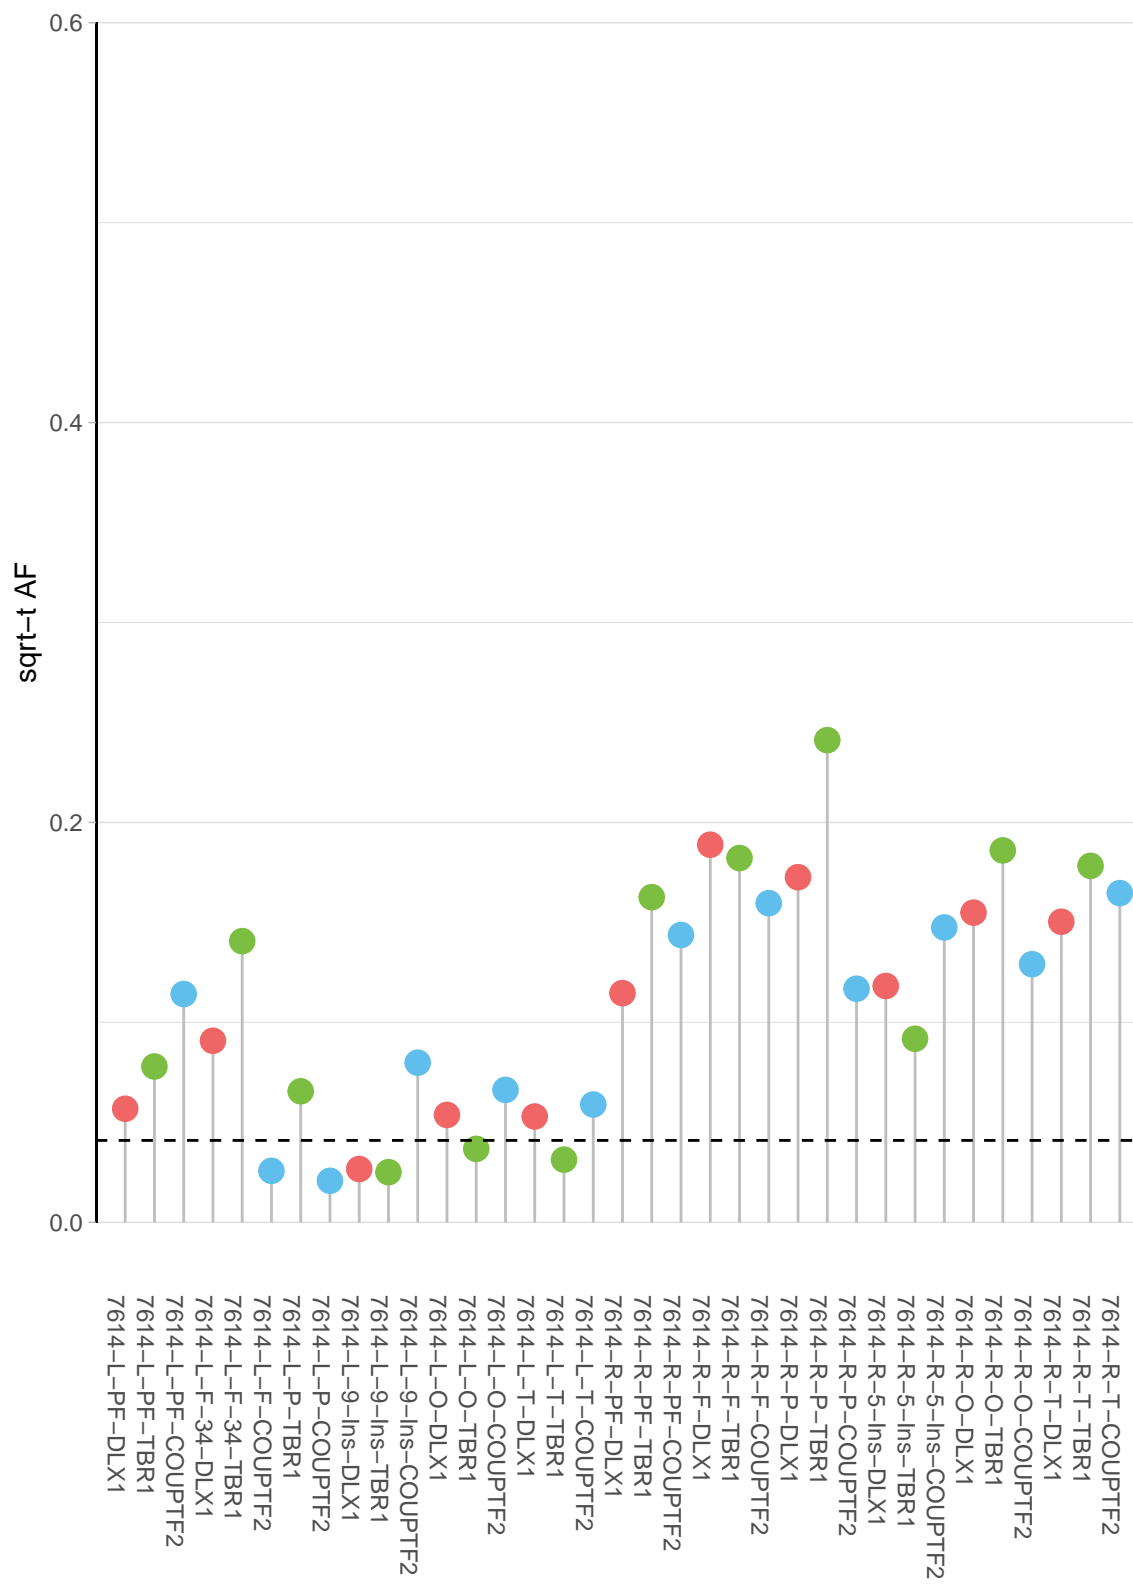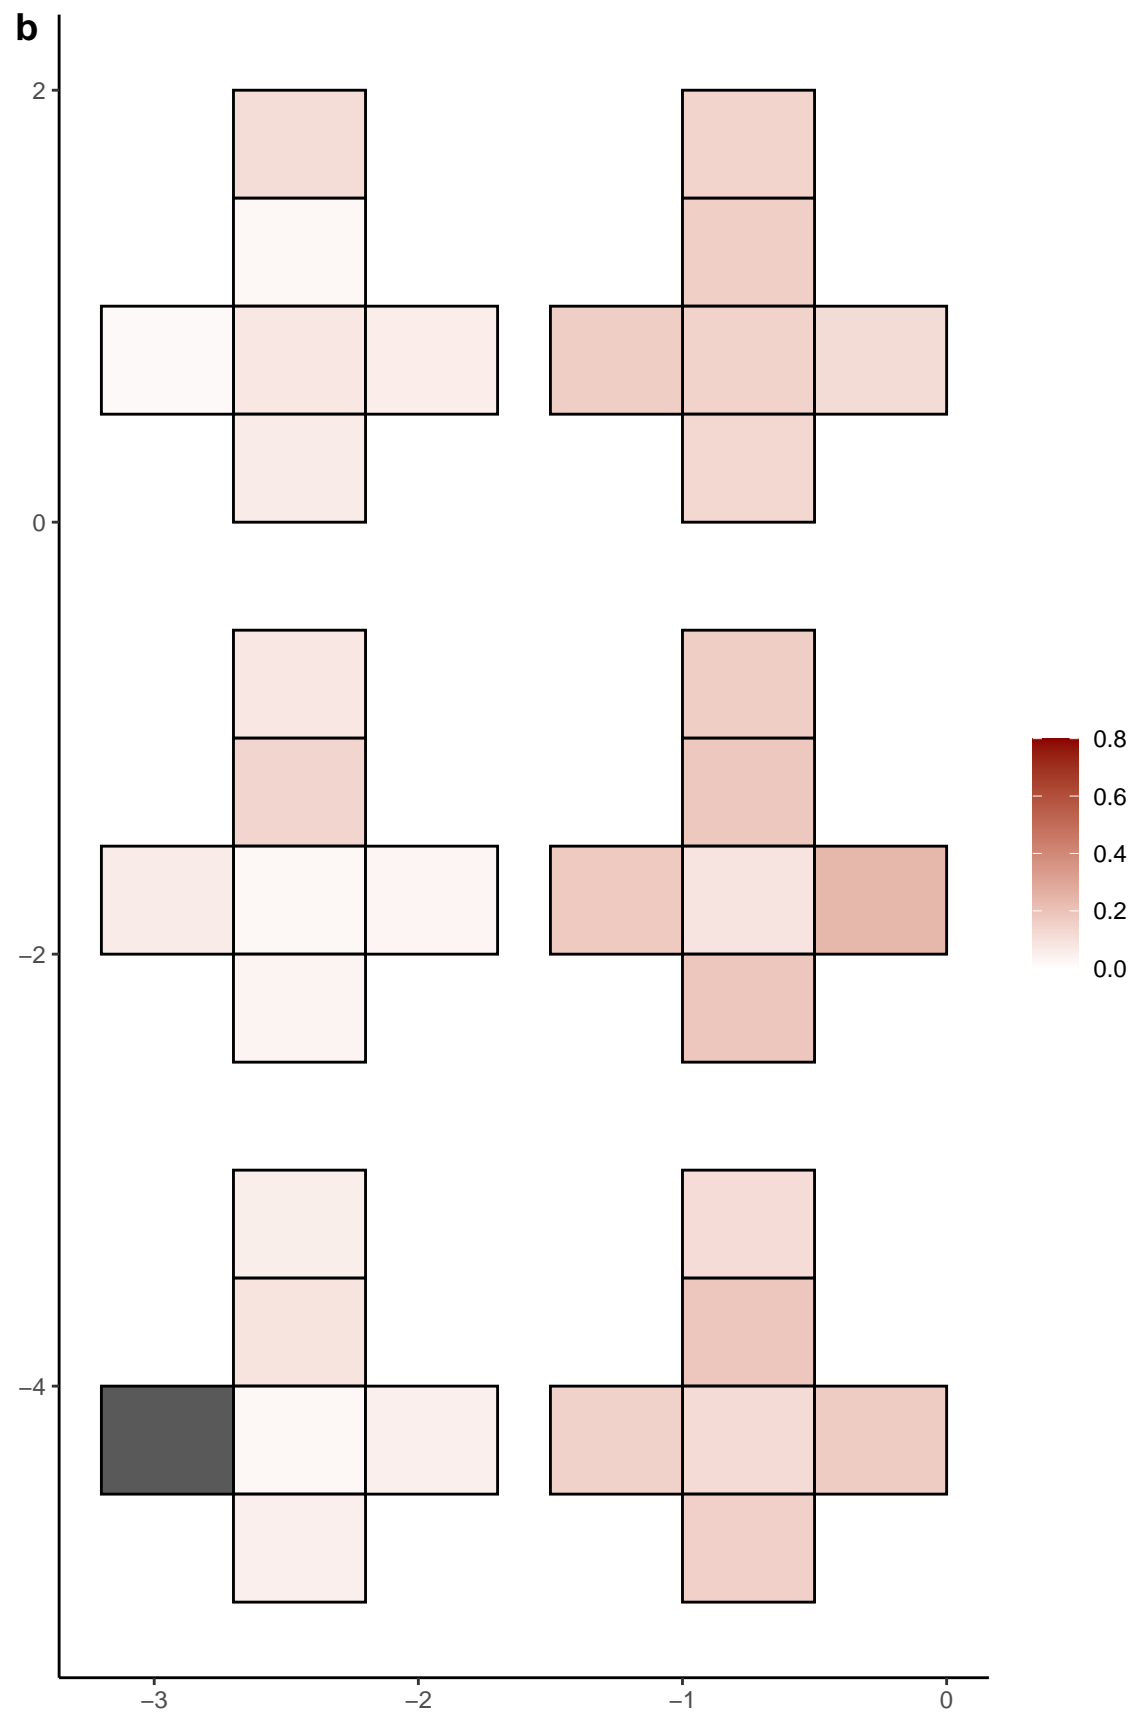

**a** ID01 4-28629401-C-T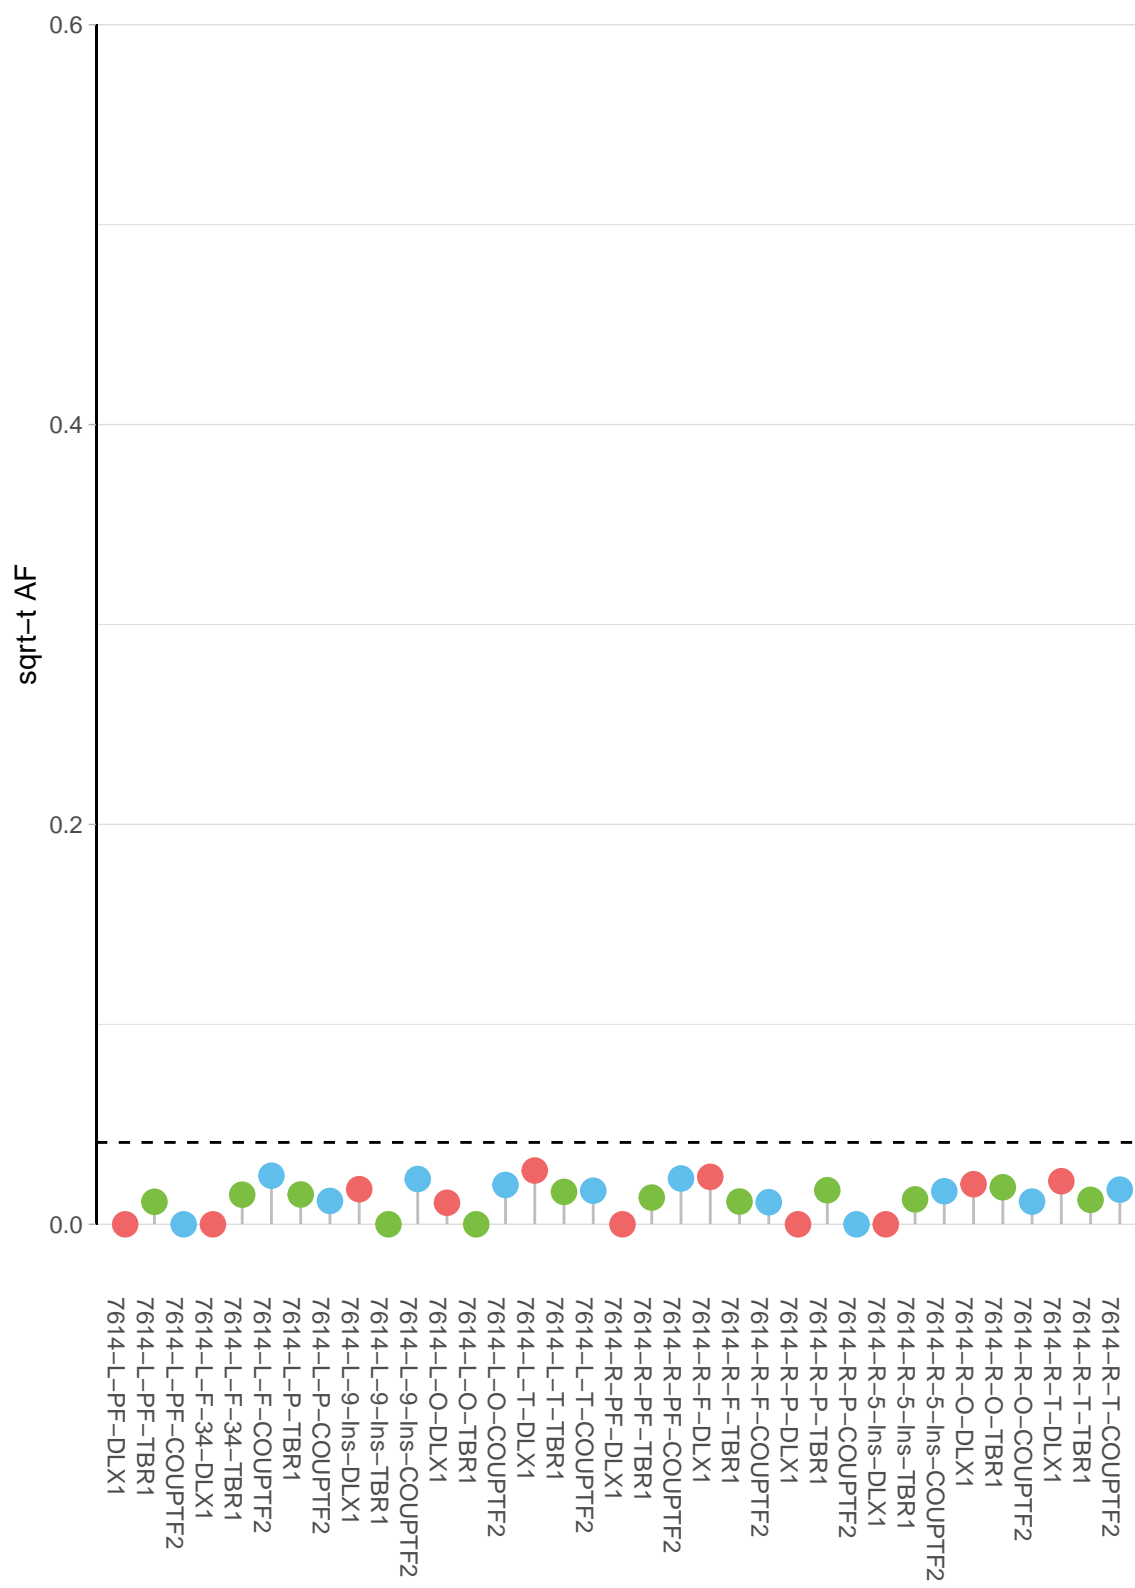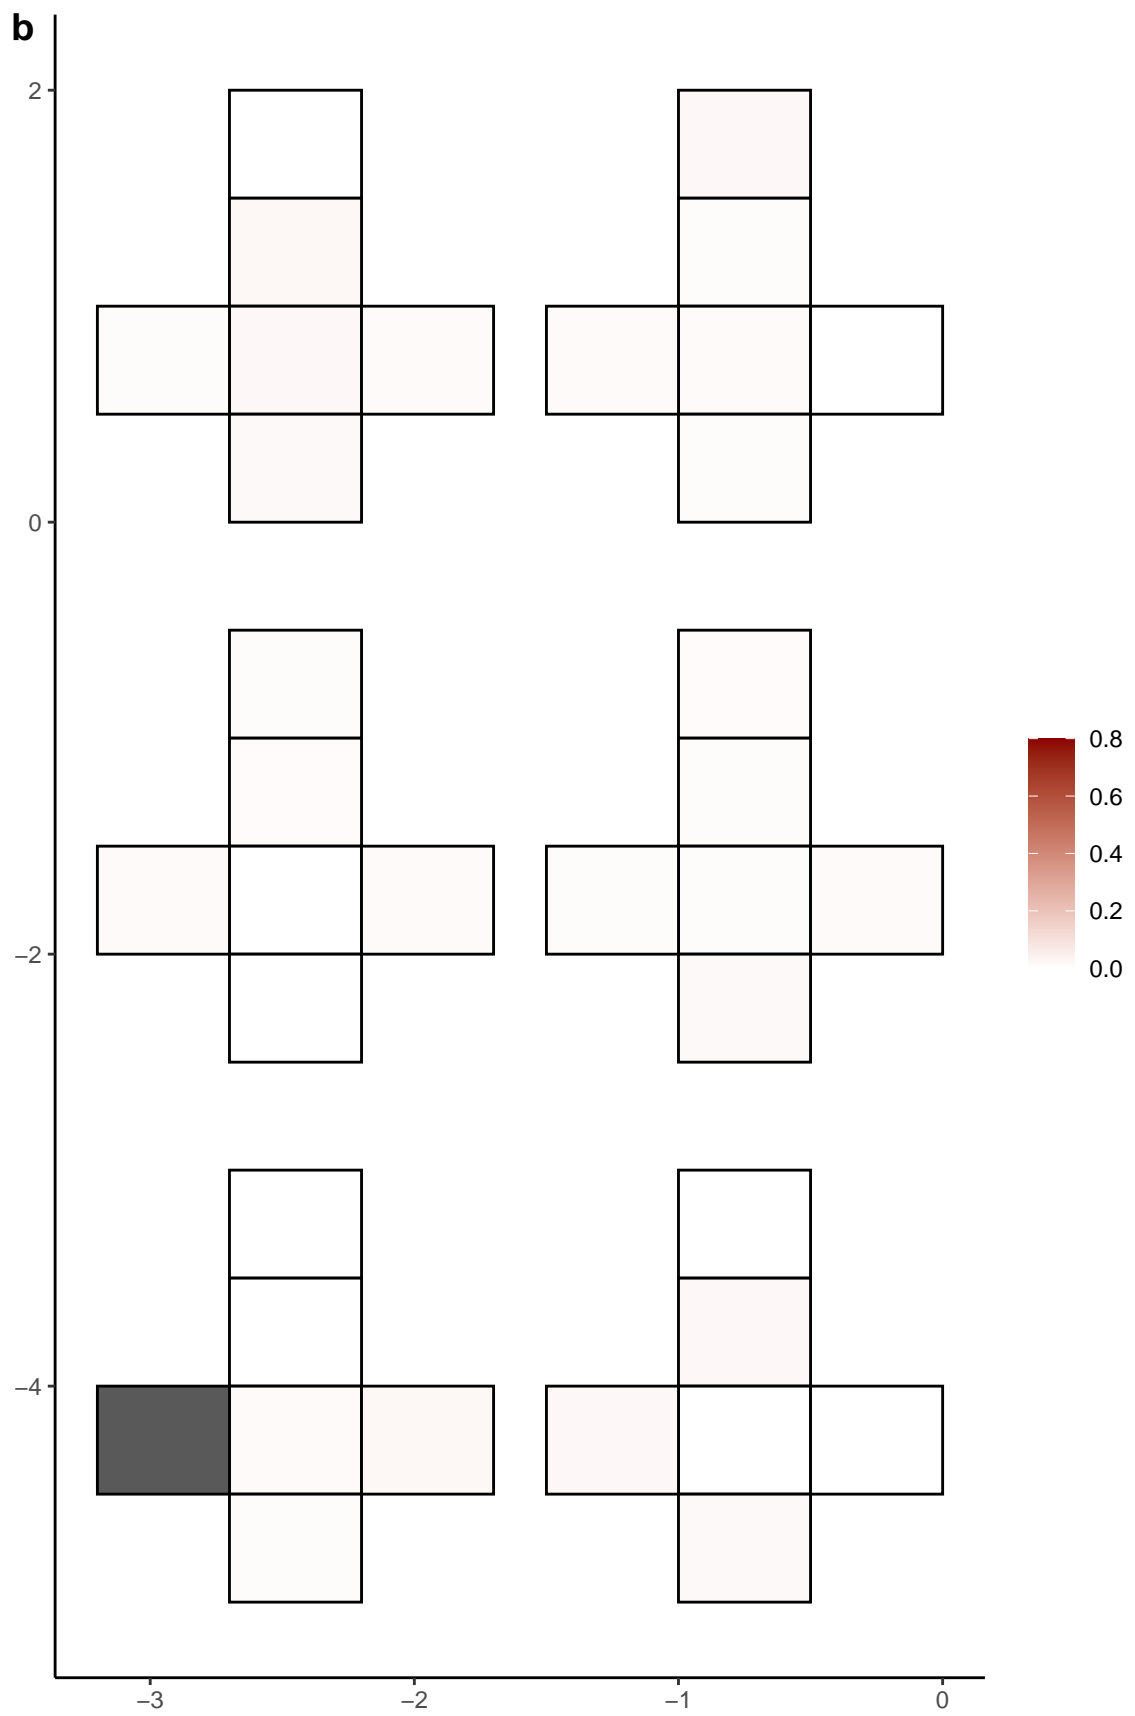

**a** ID01 4-33192479-C-A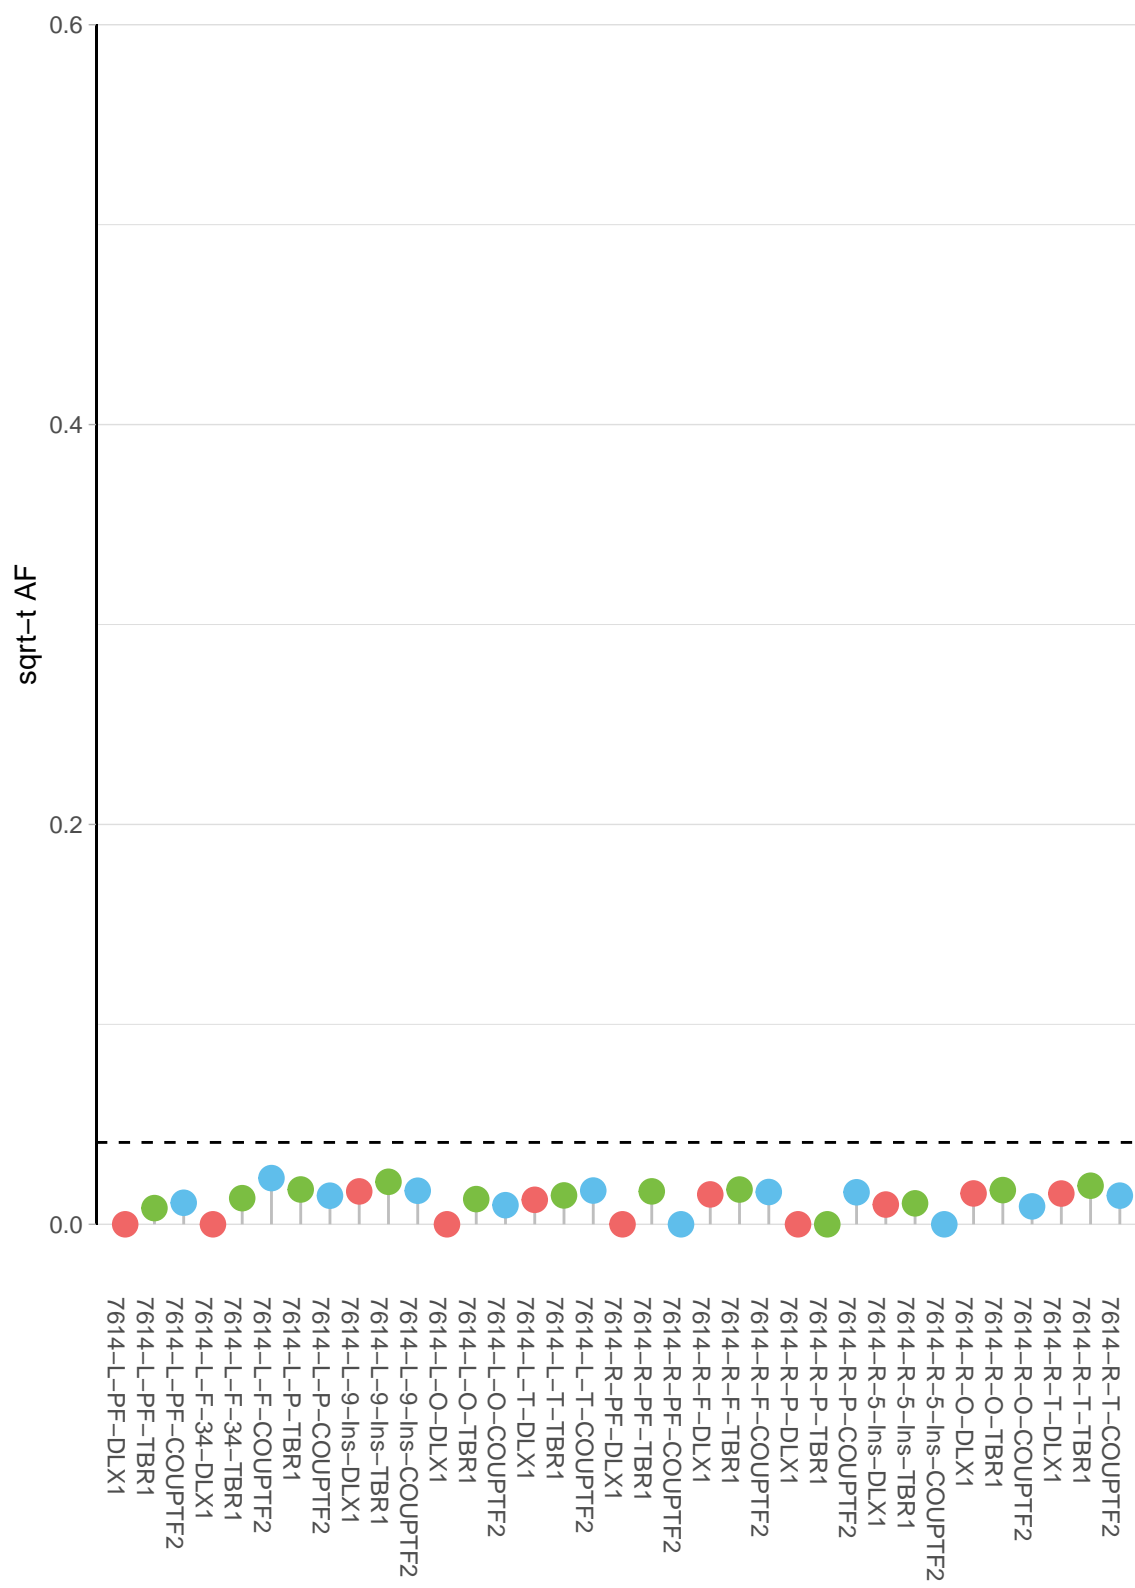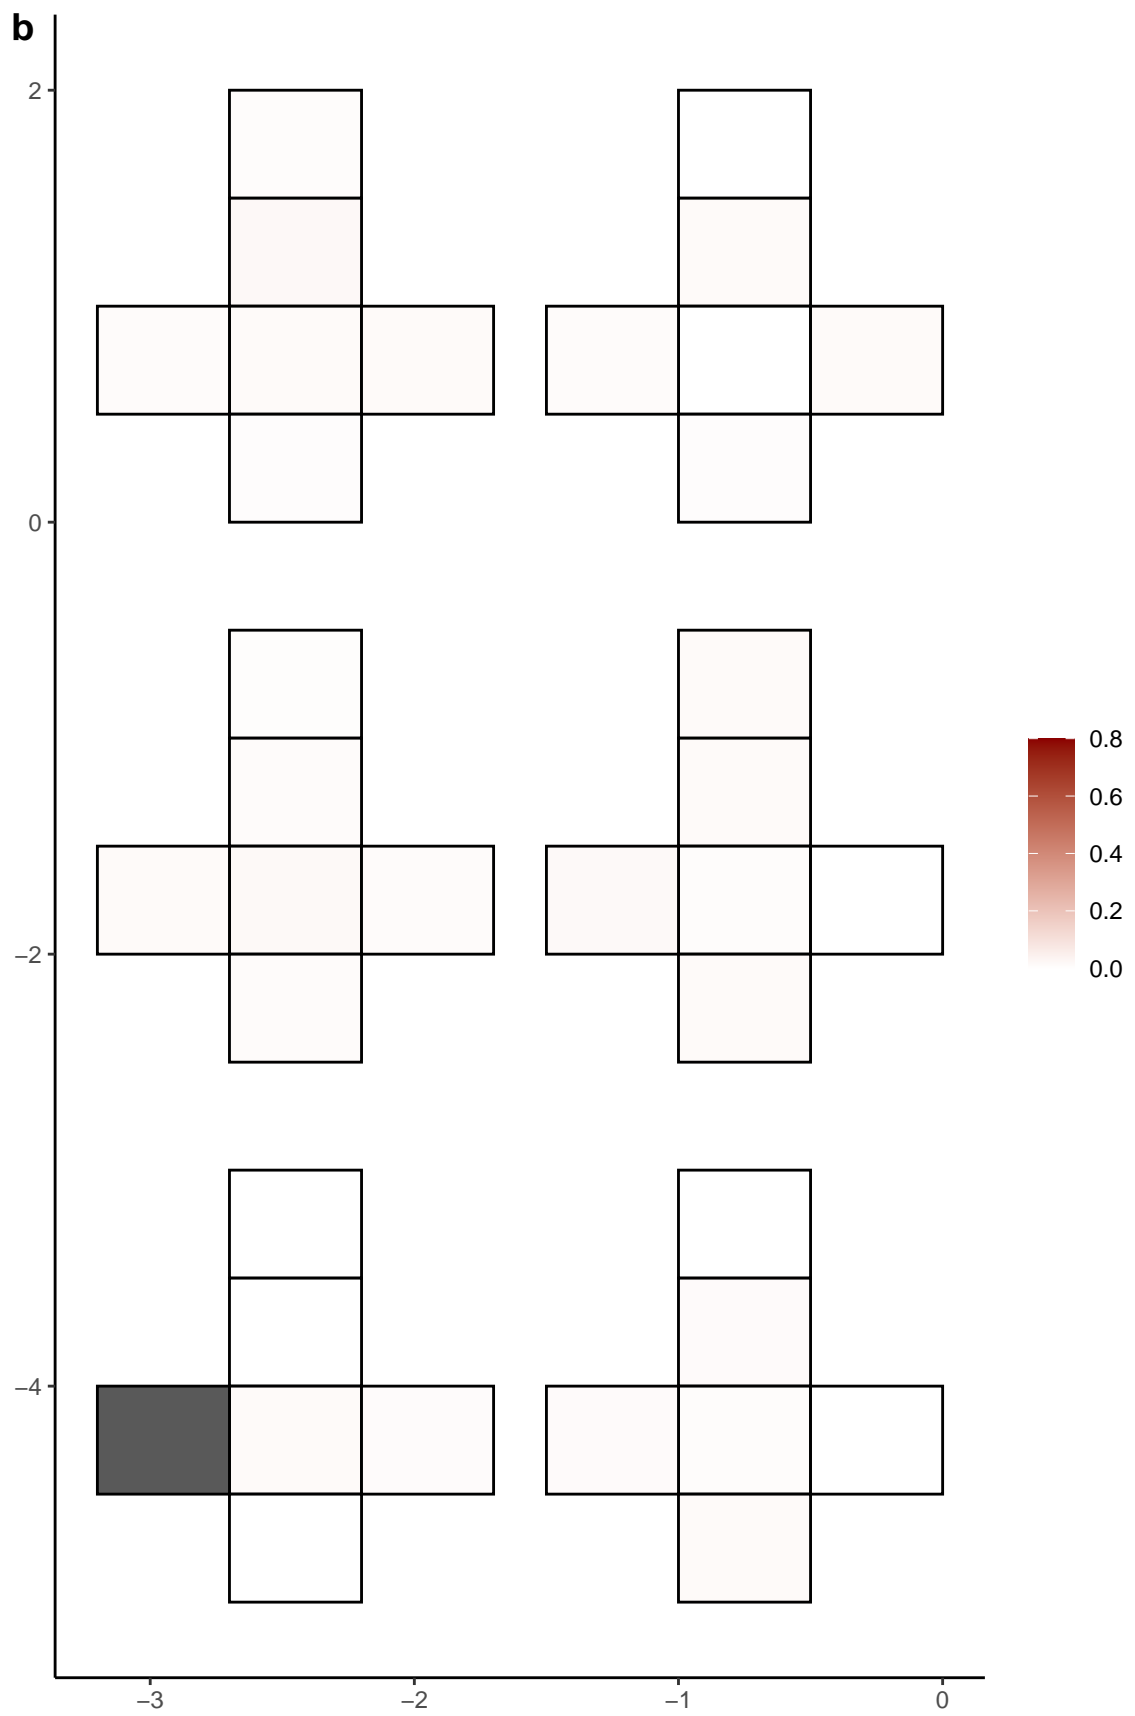

**a** ID01 4-55310609-G-A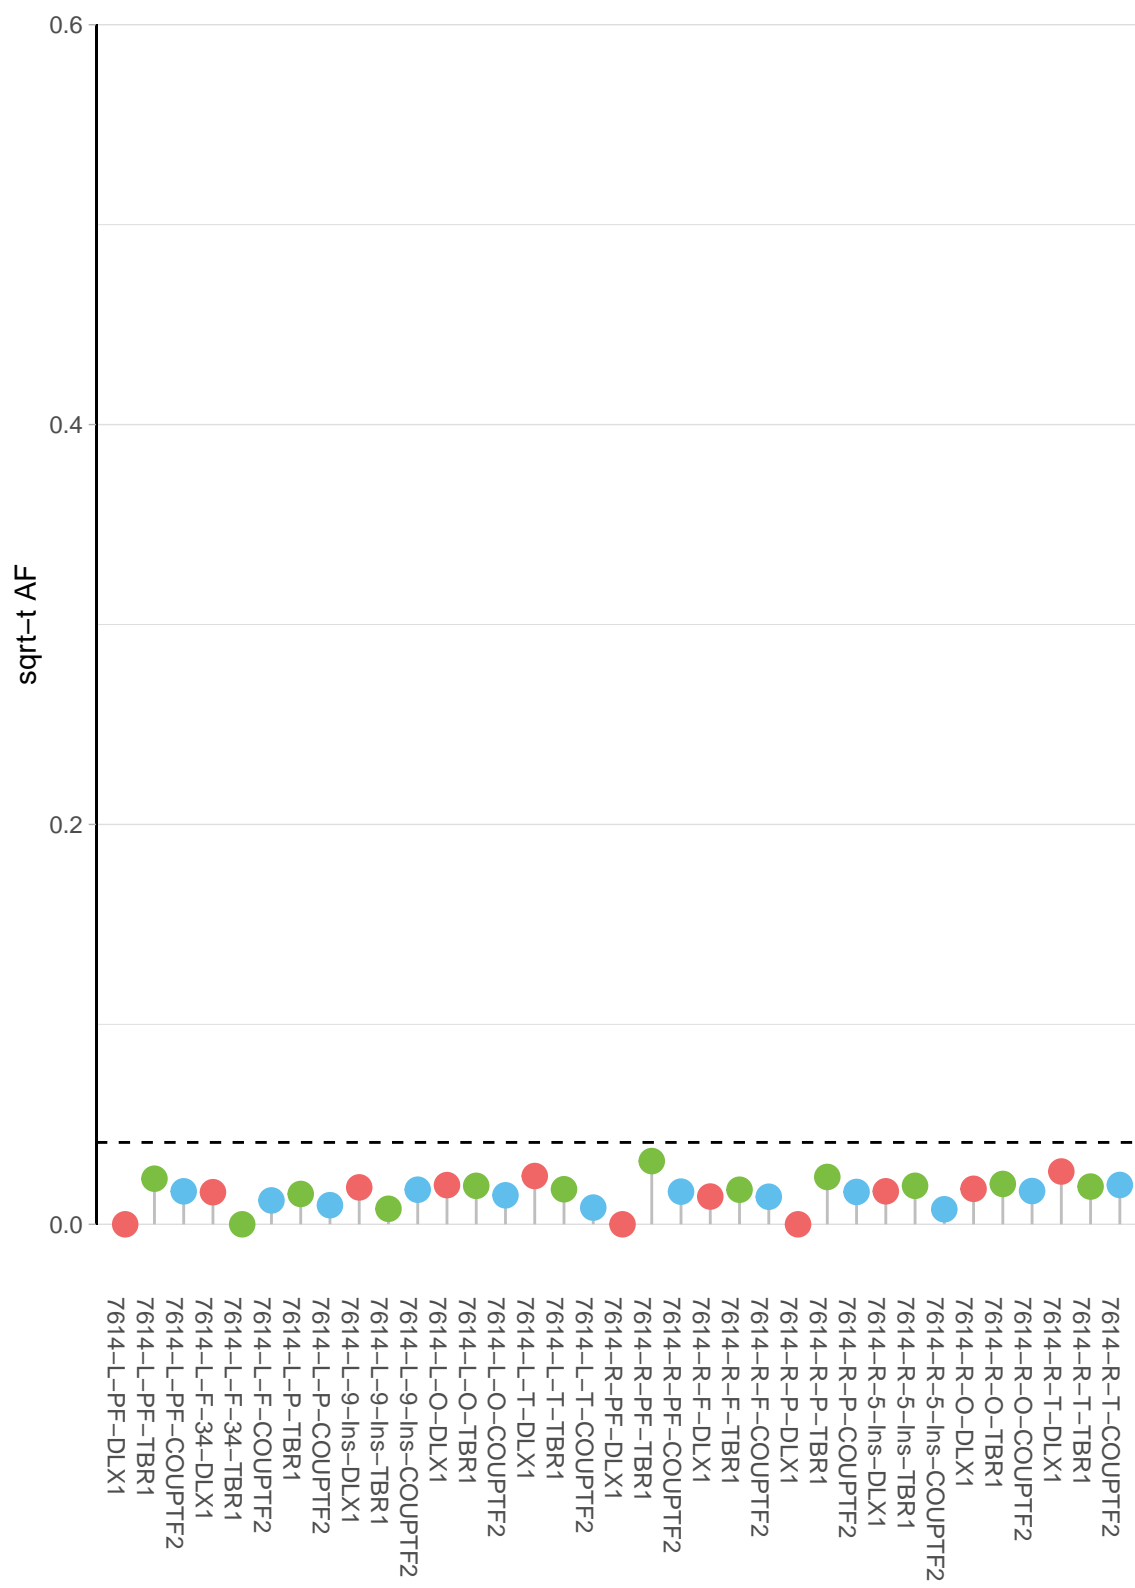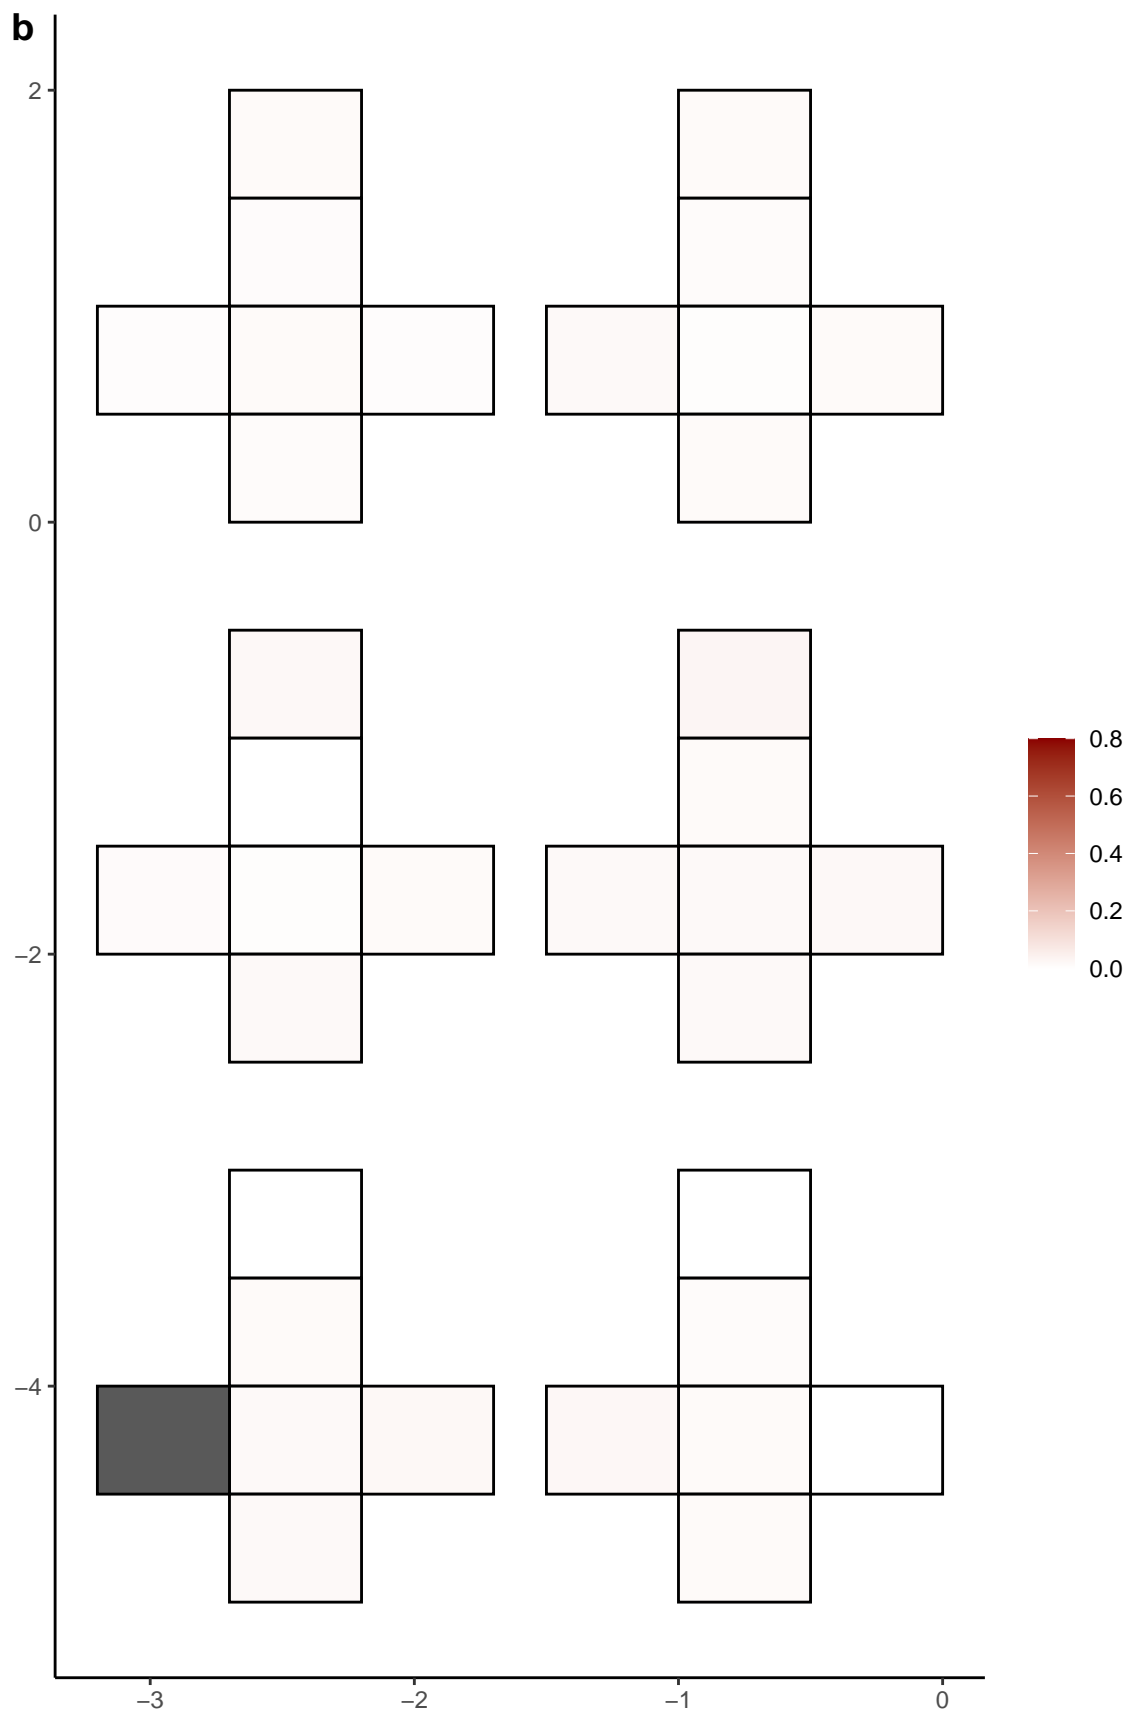

**a** ID01 4-55312148-T-C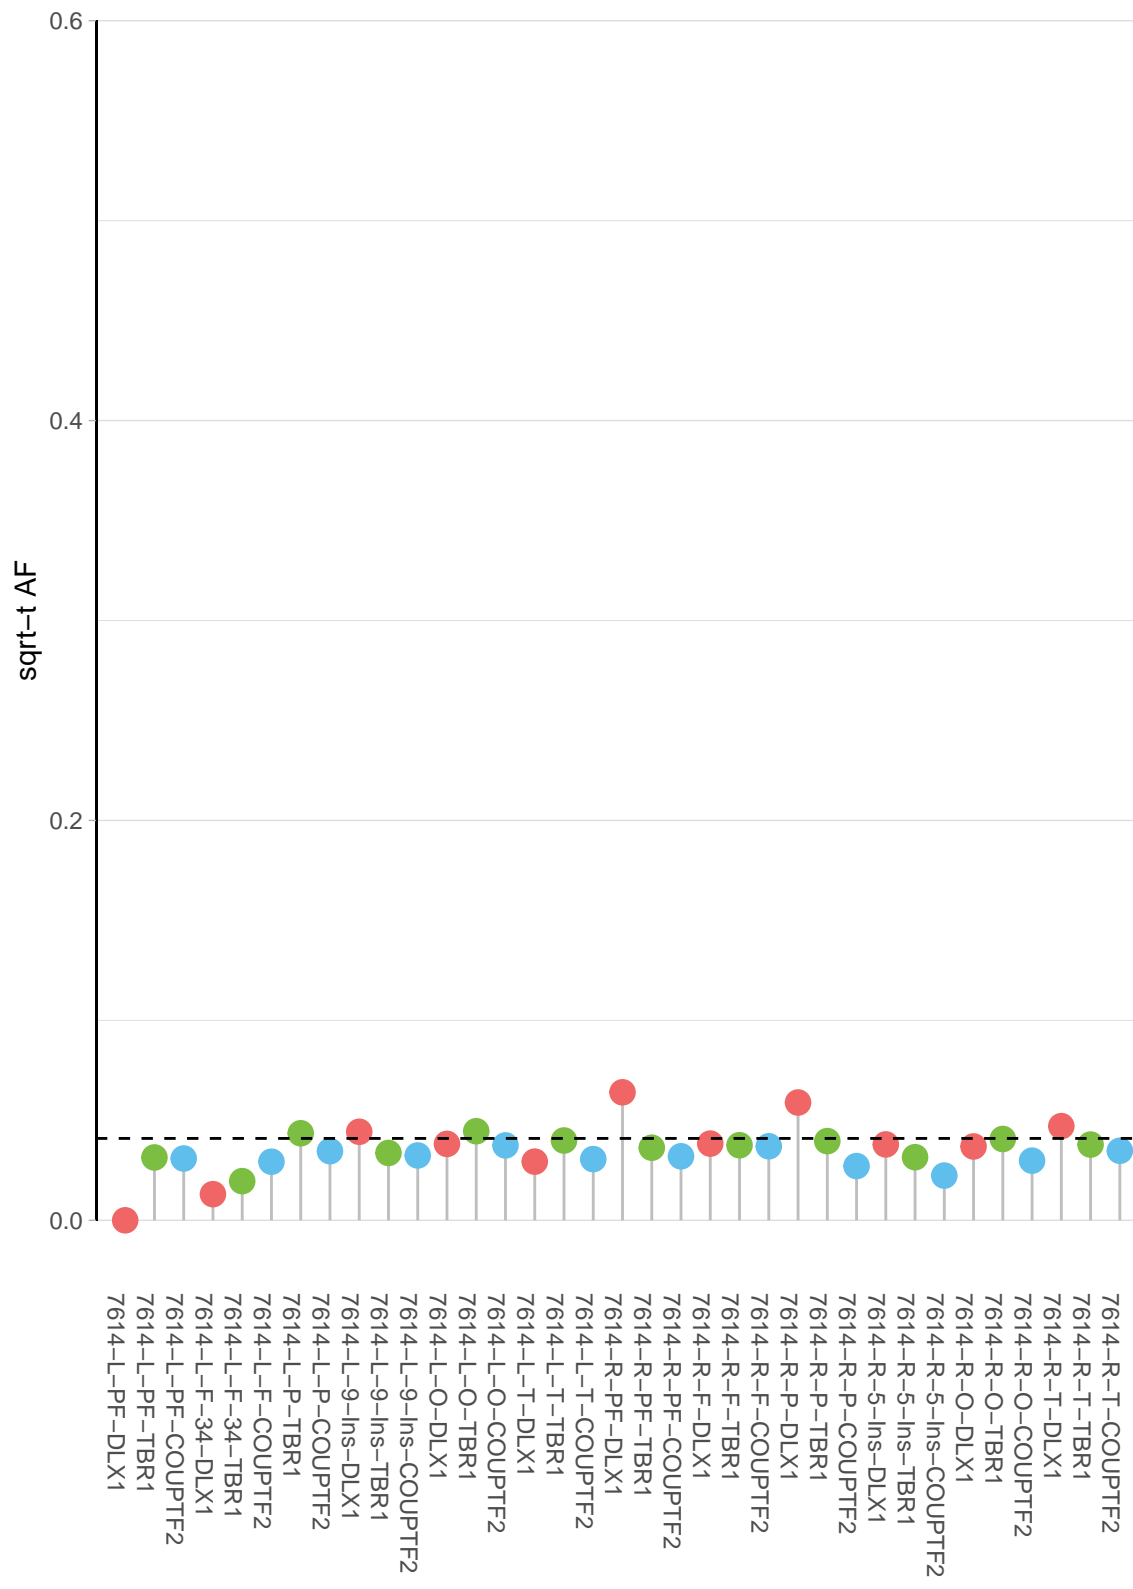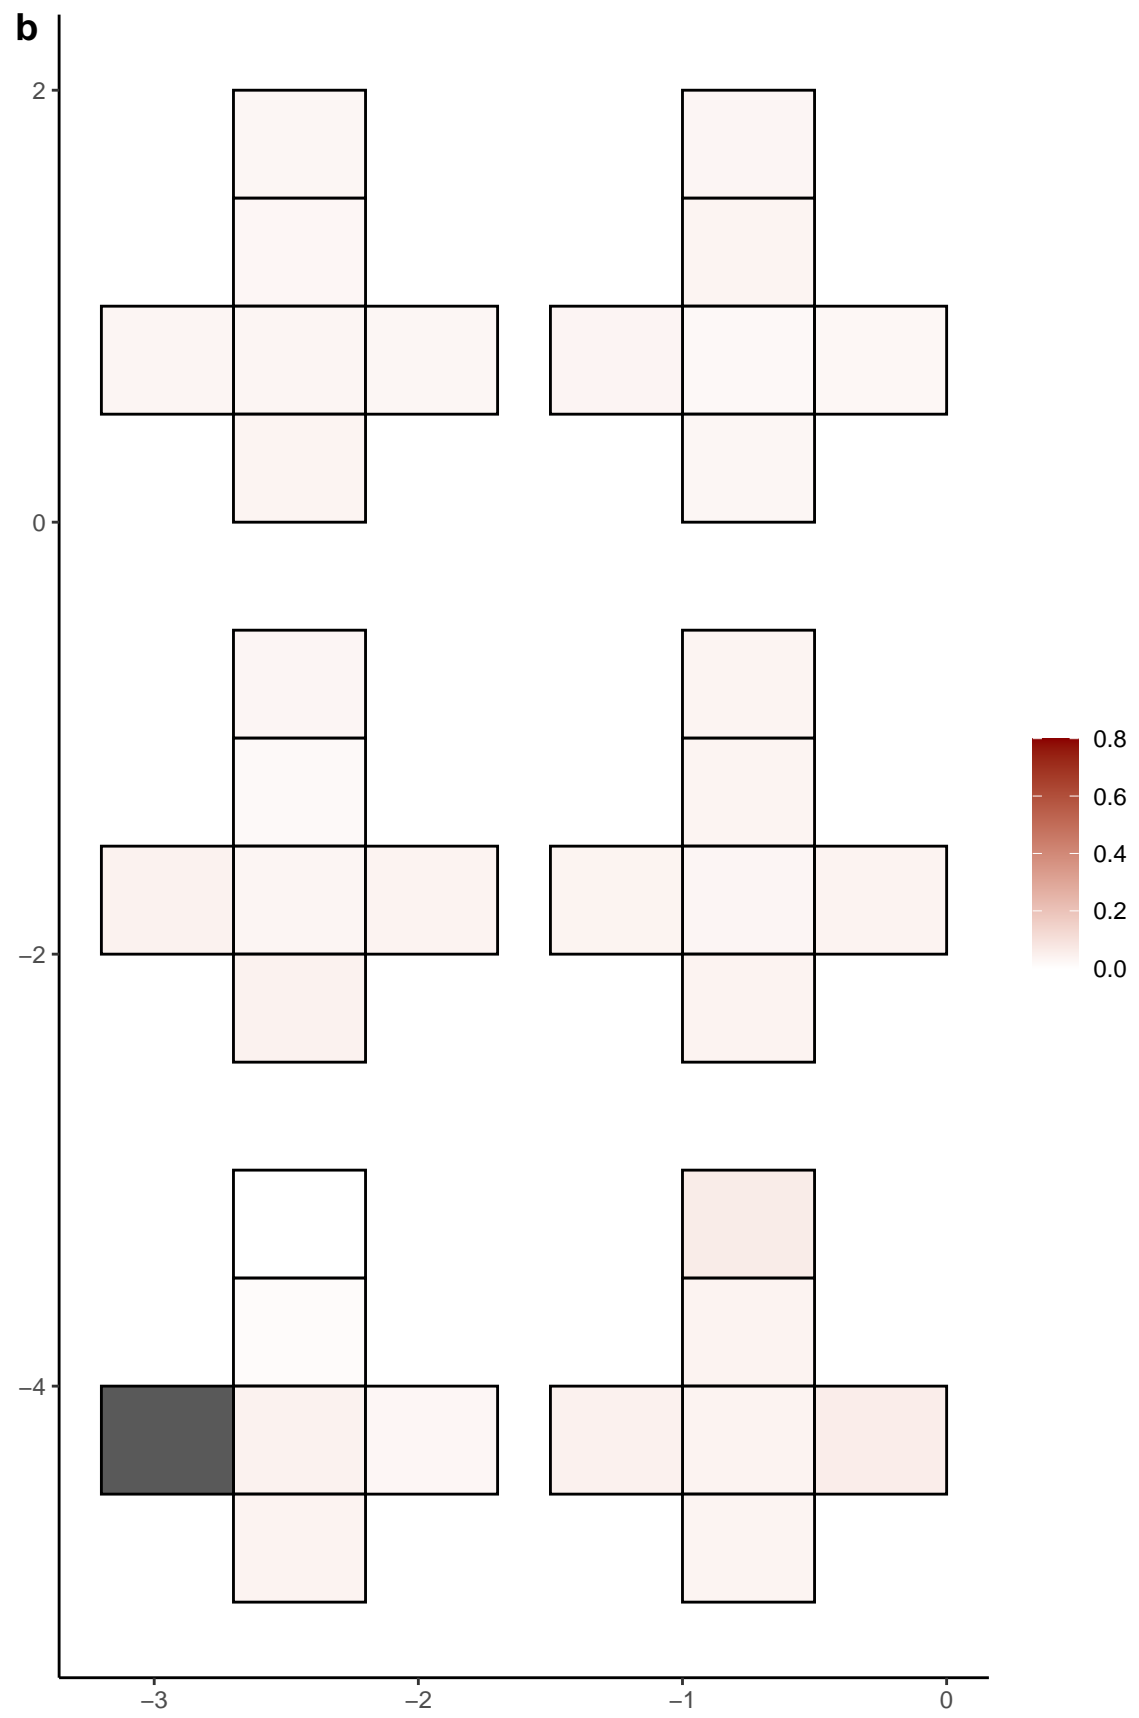

**a** ID01 4-66130457-C-T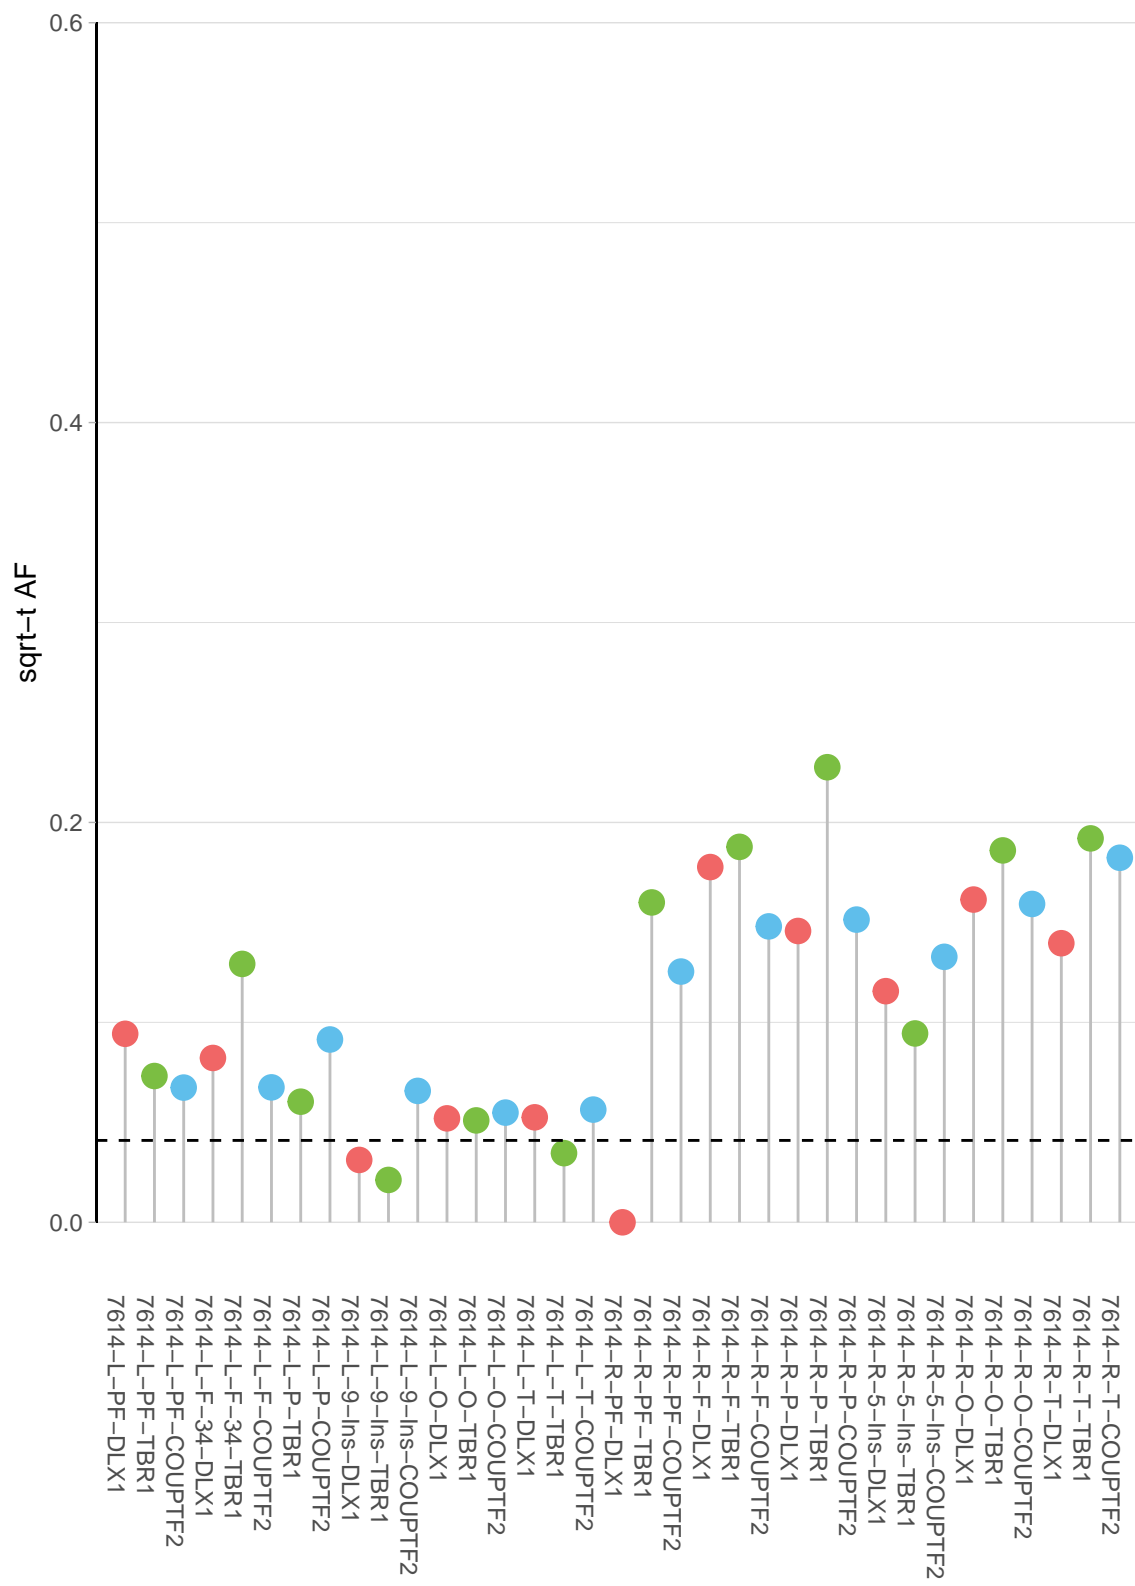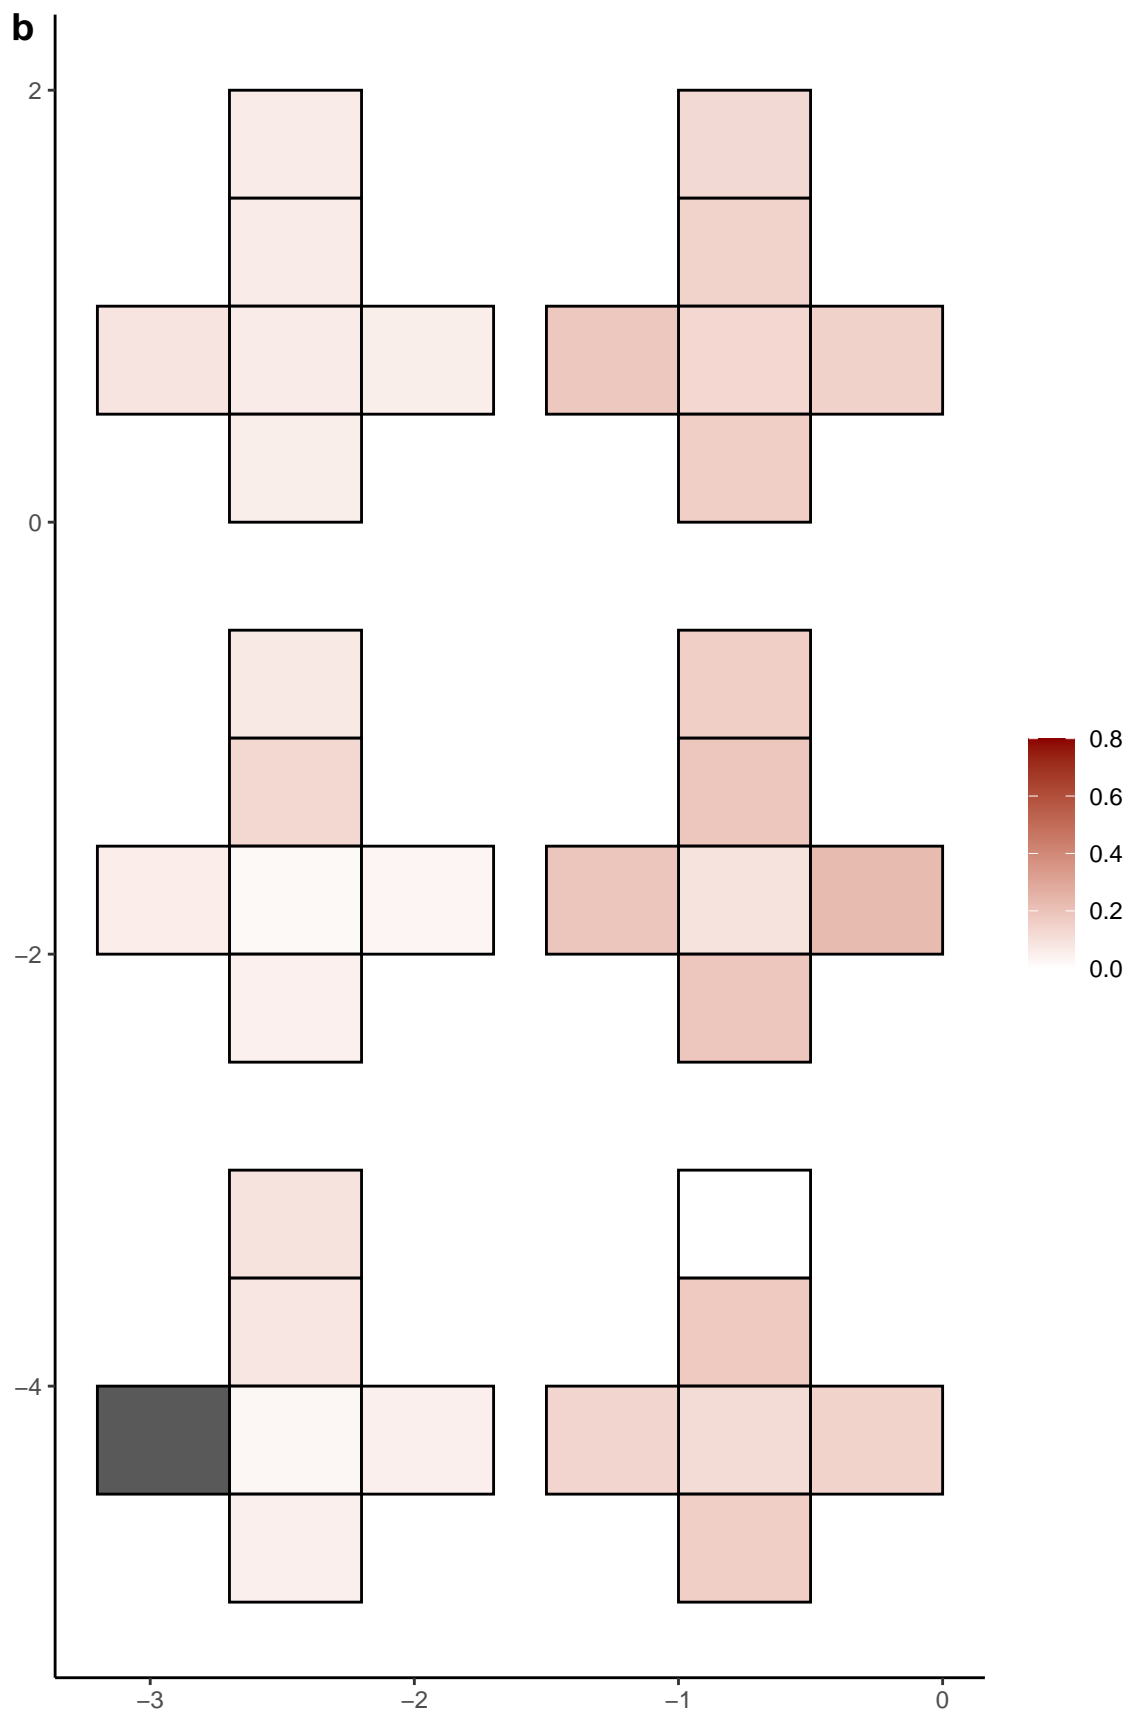

**a** ID01 4-67714666-G-A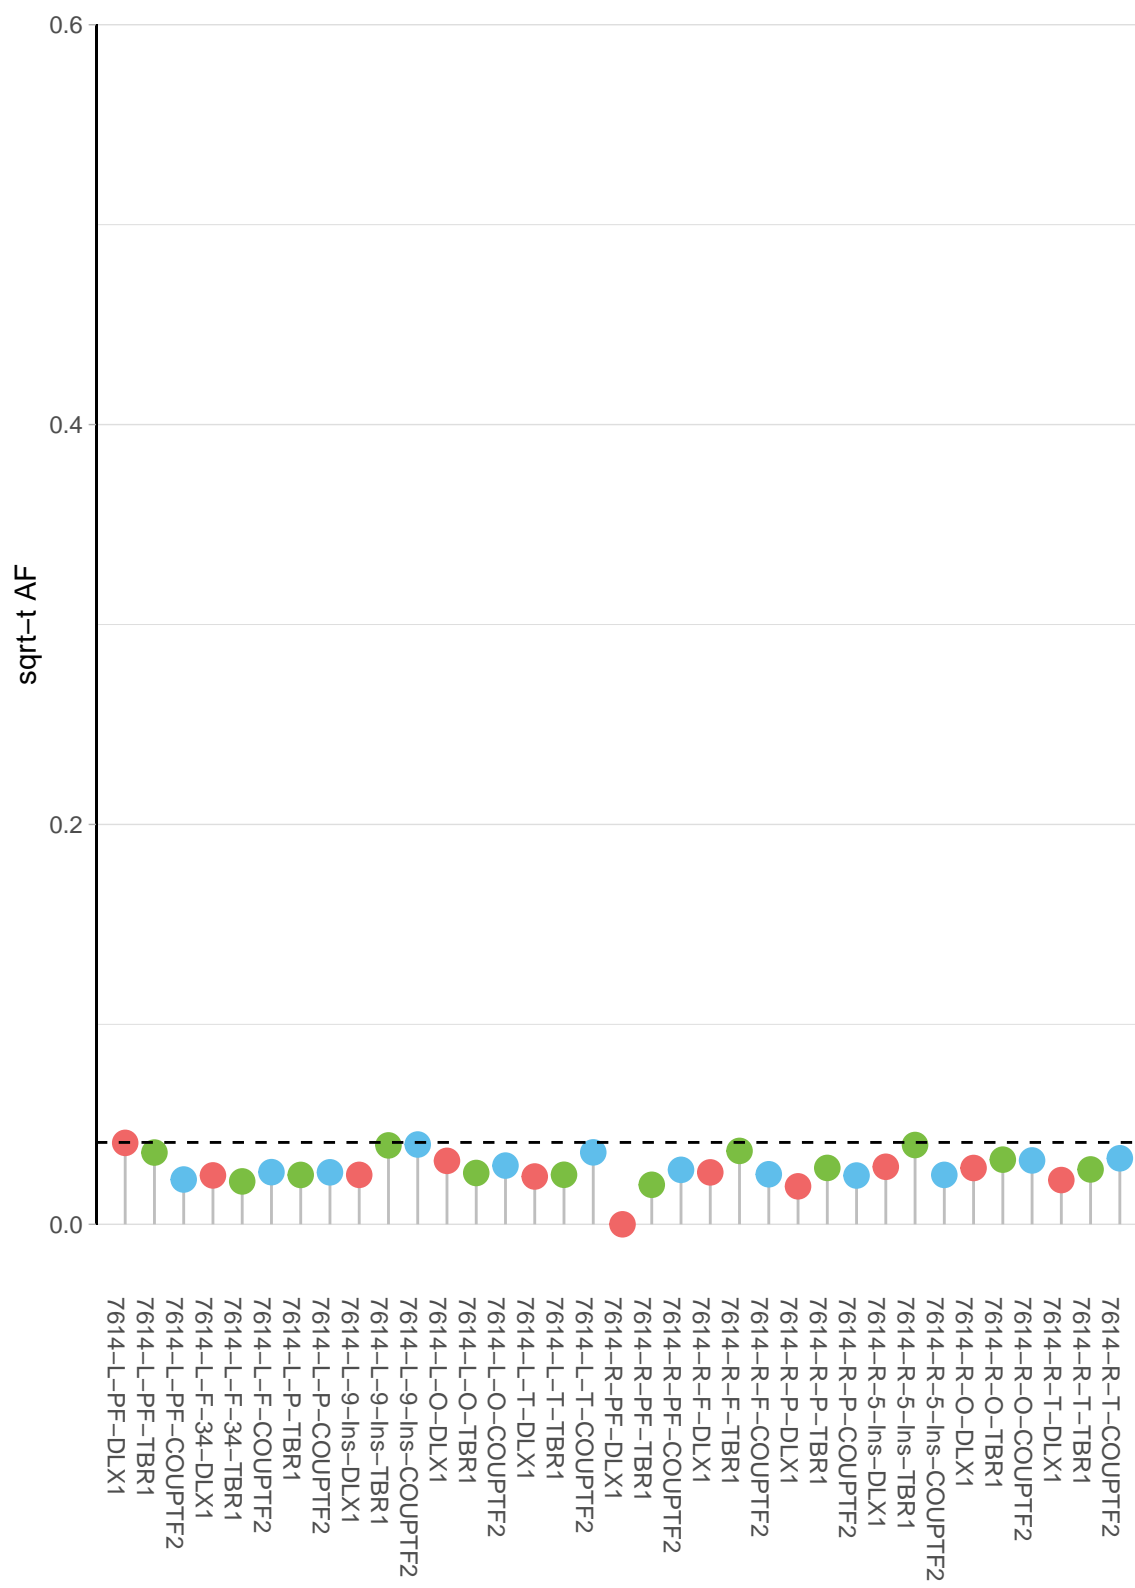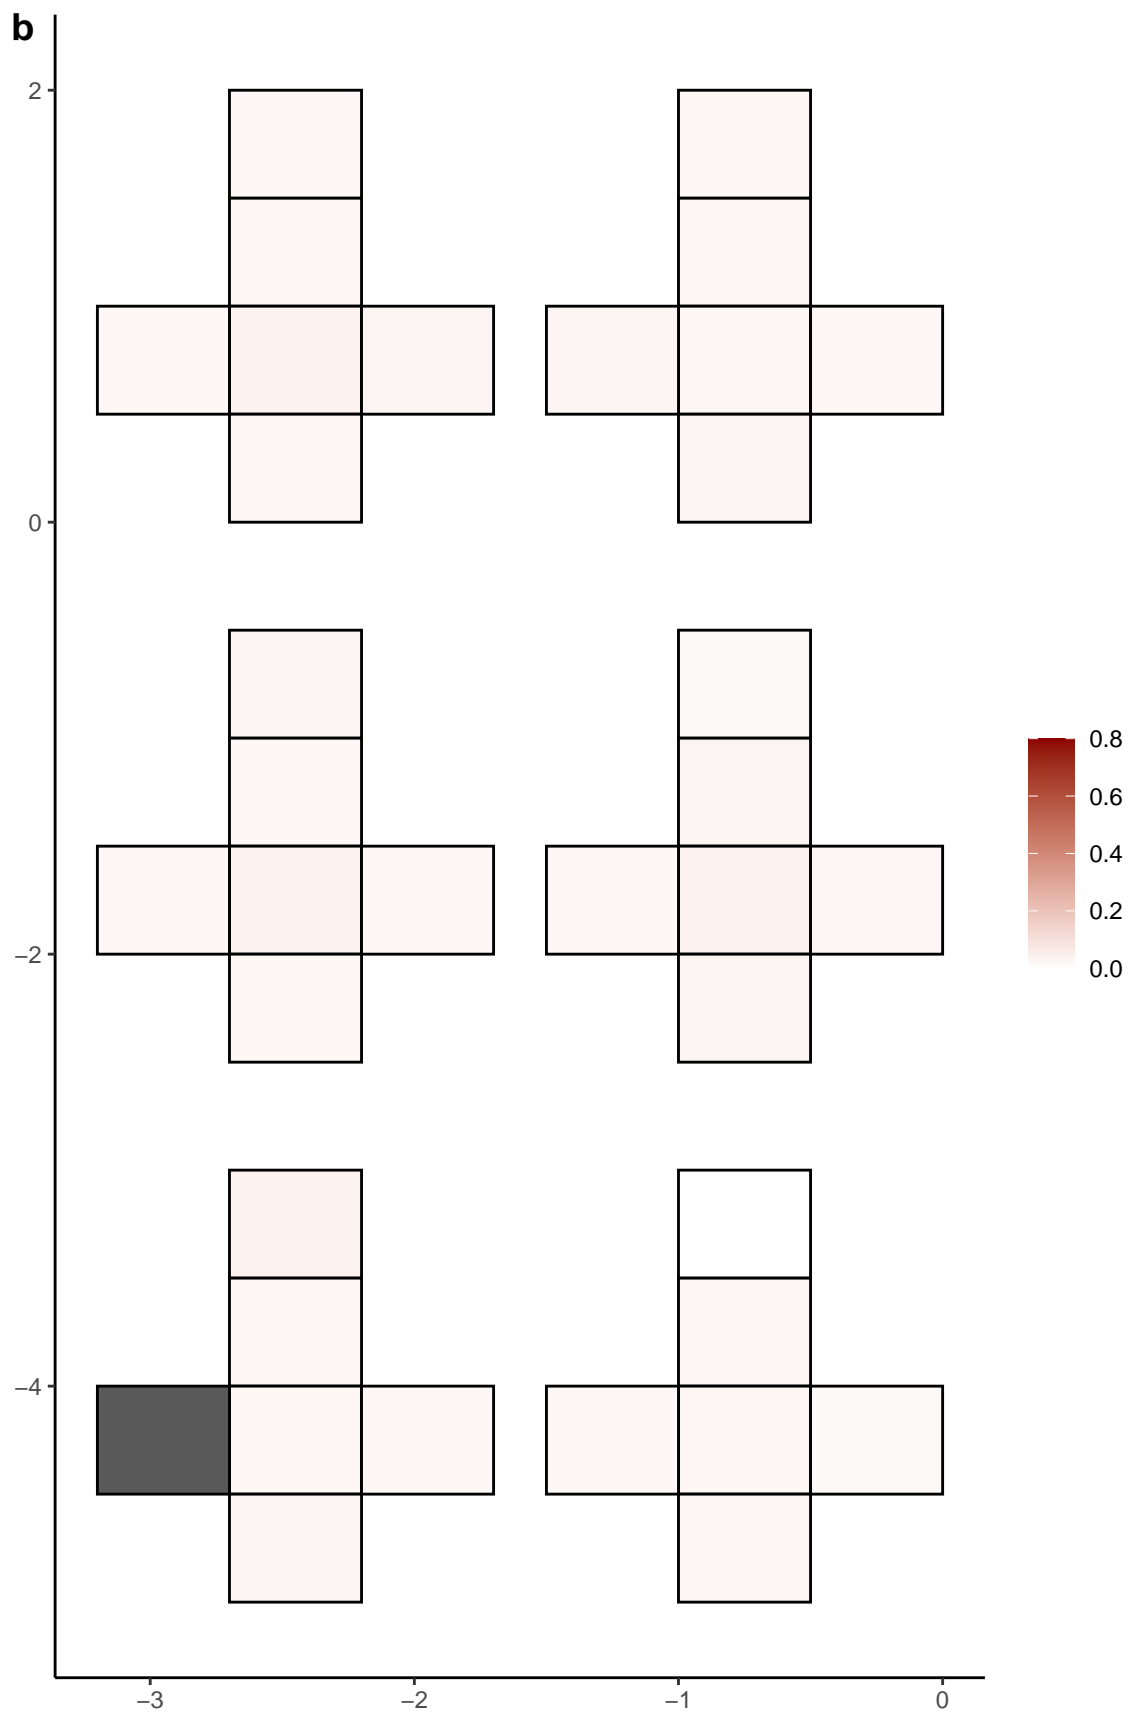



**a** ID01 4-71105167-A-T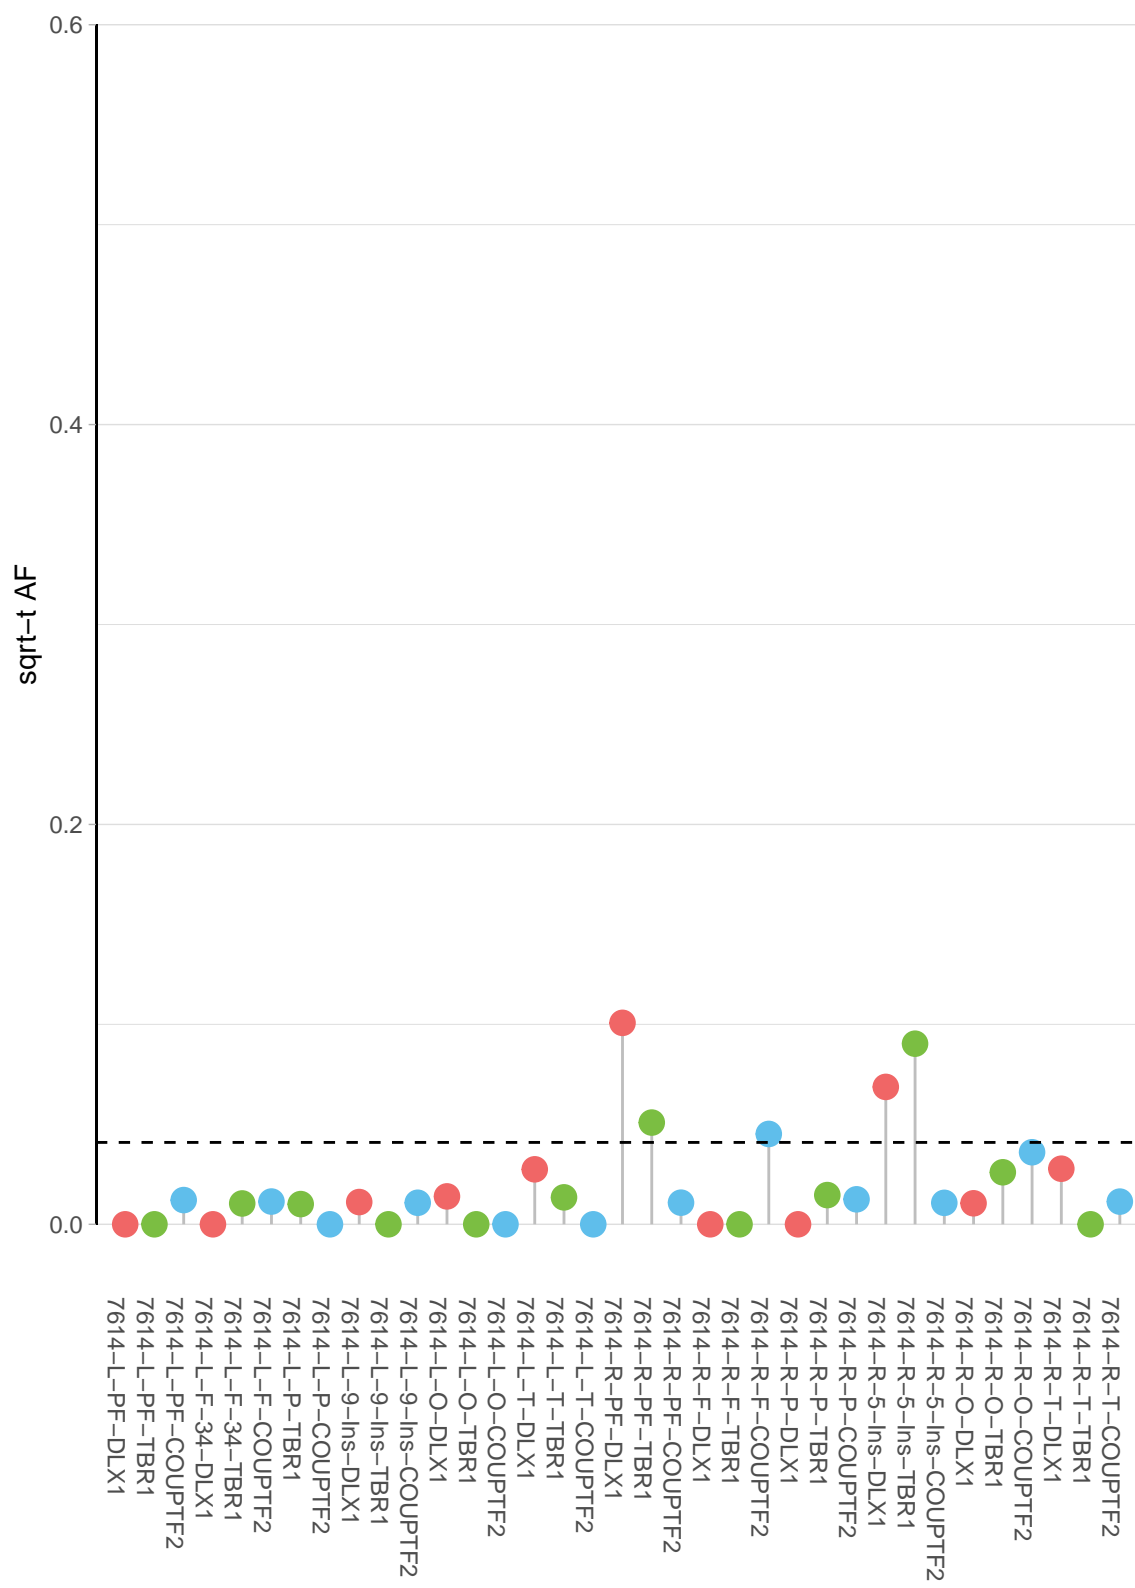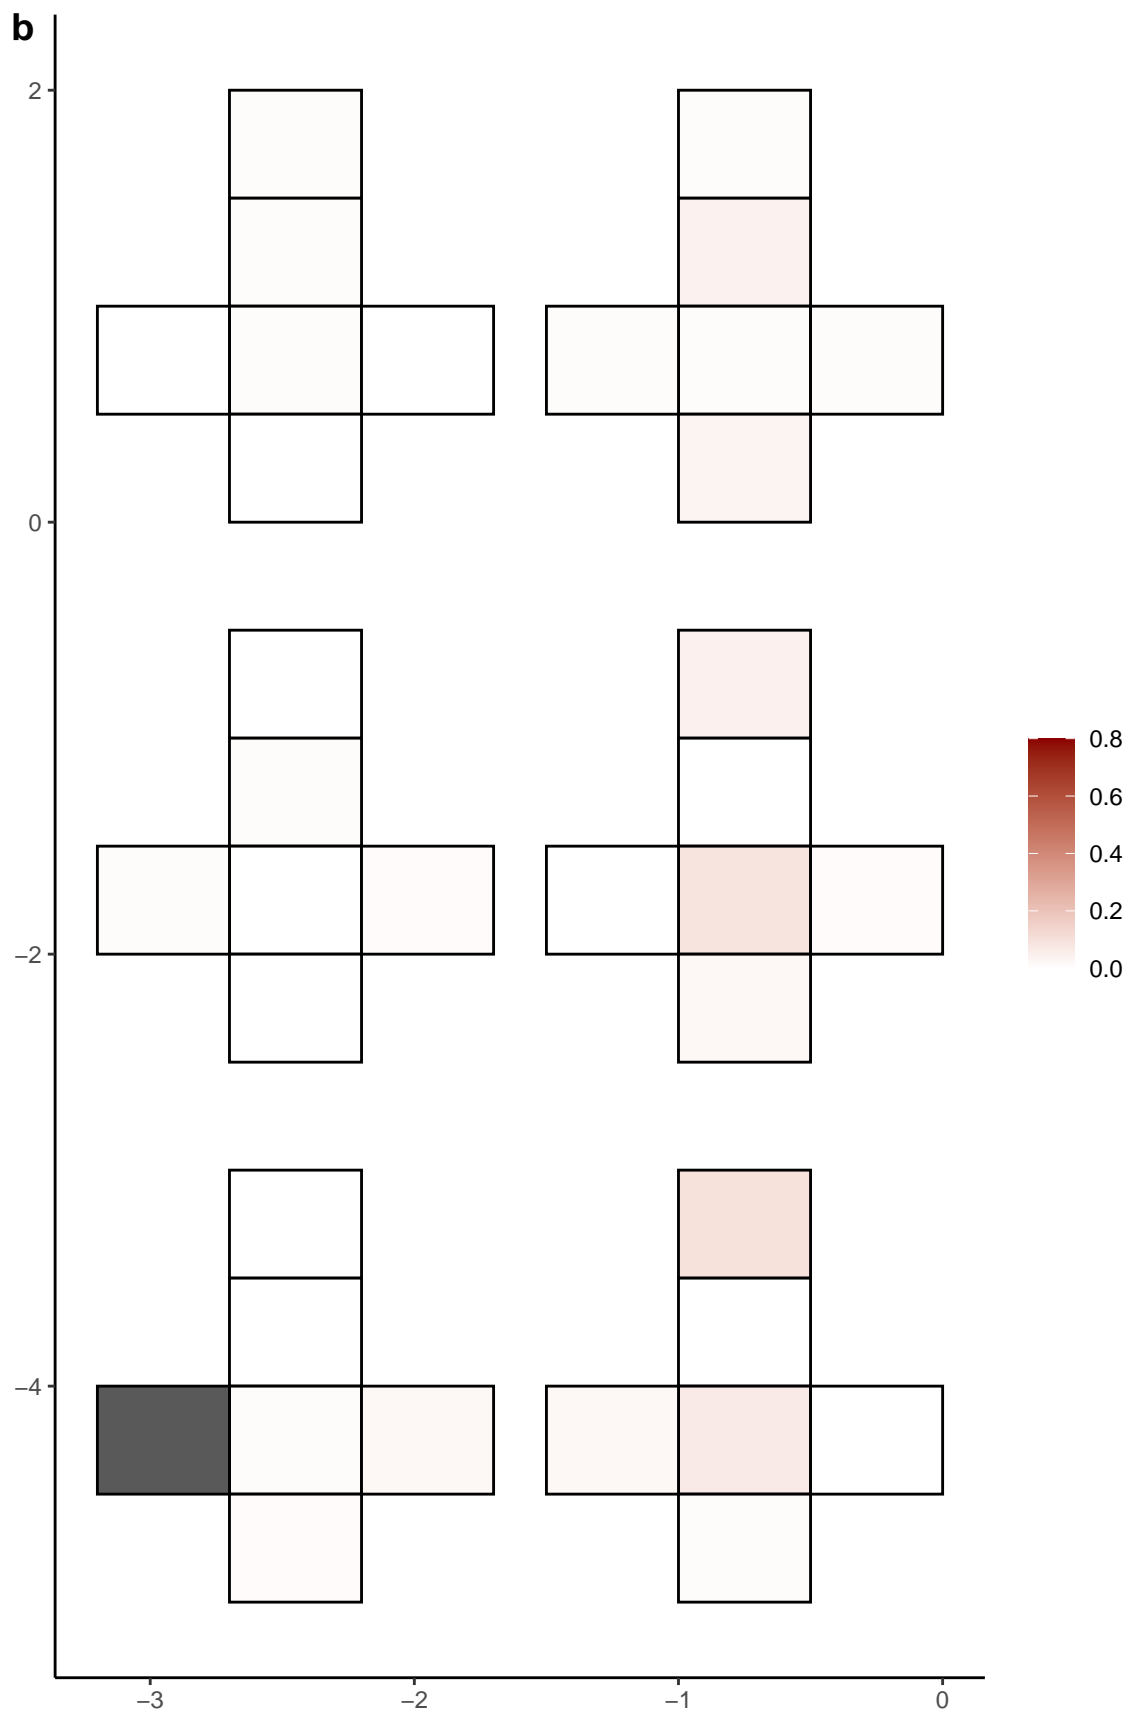

**a** ID01 4-74314197-C-G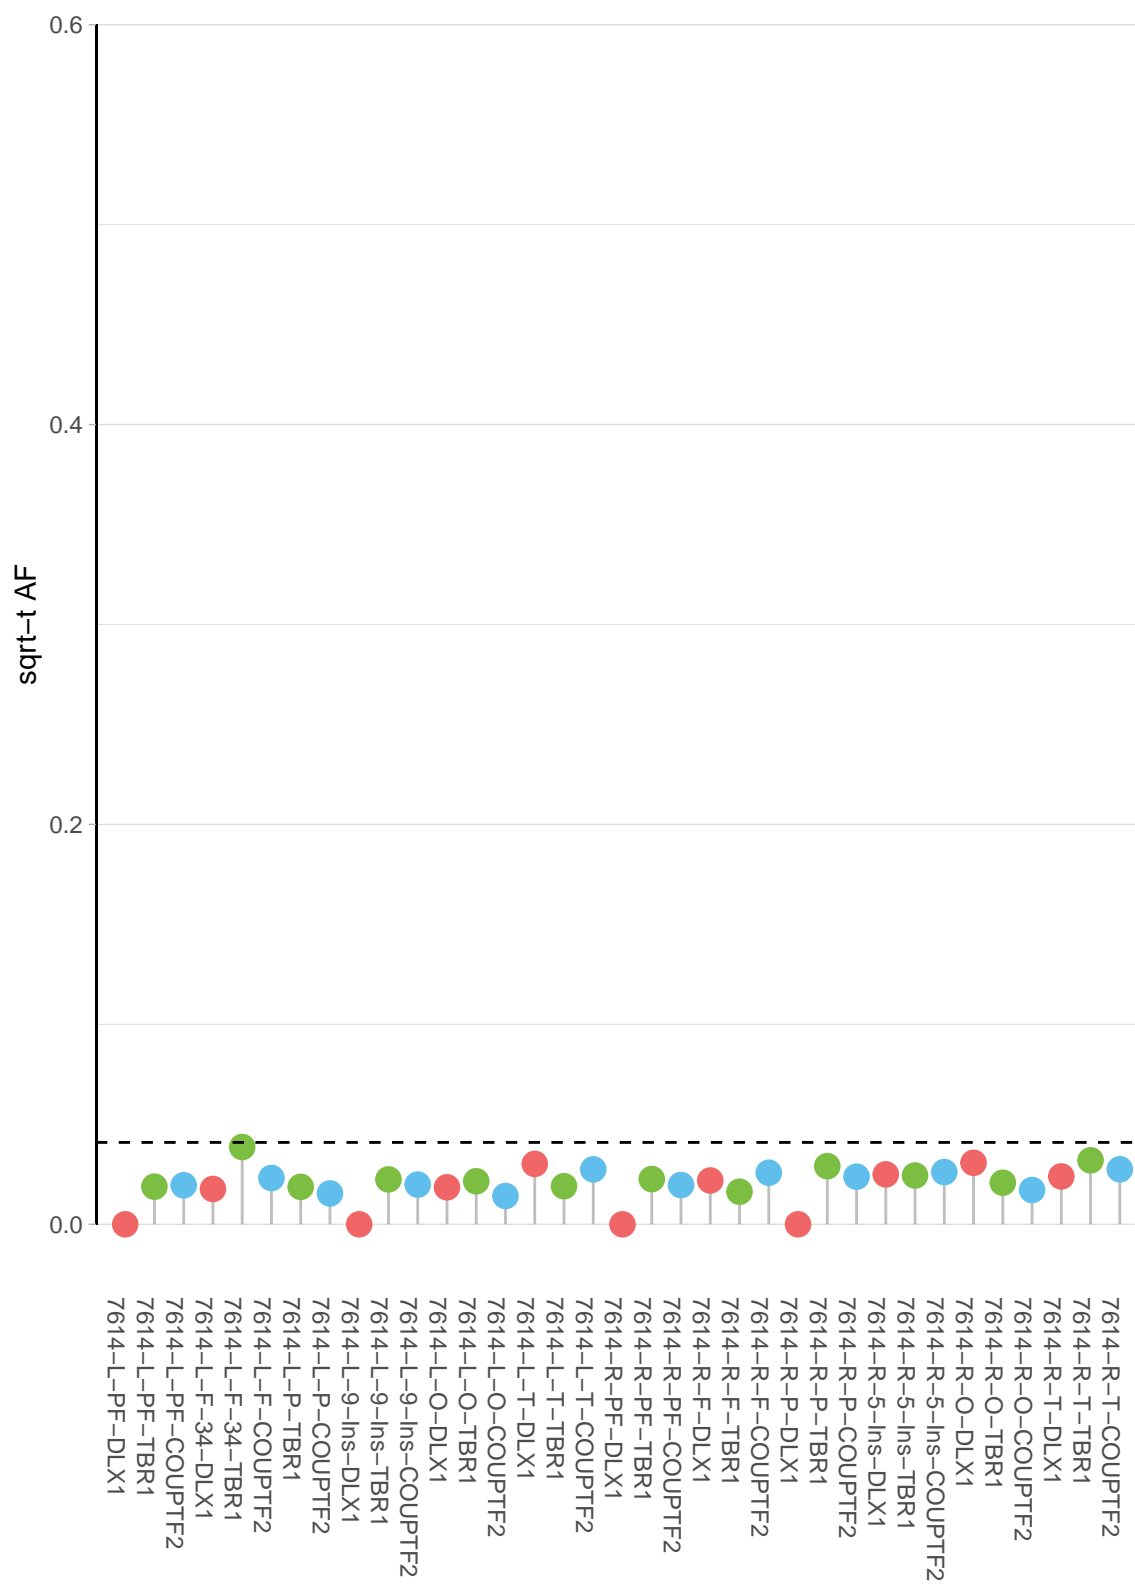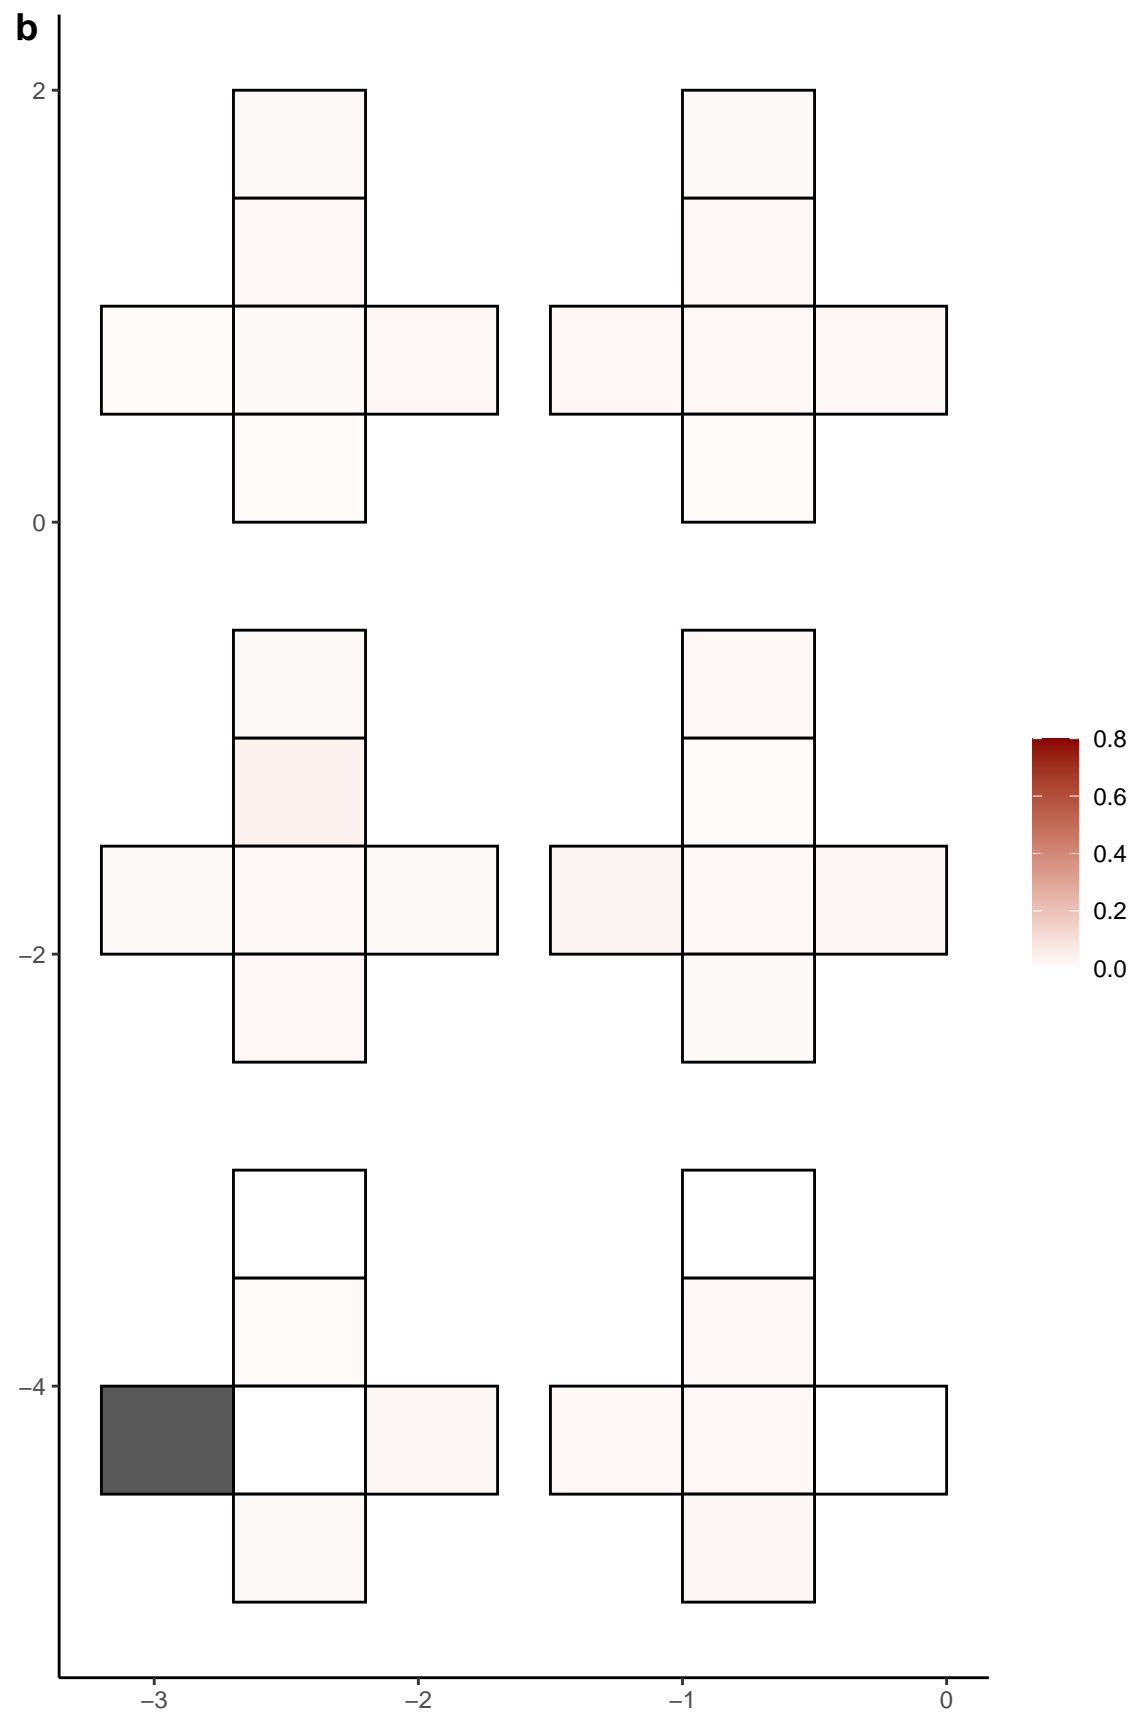



**a** ID01 4-93868224-A-C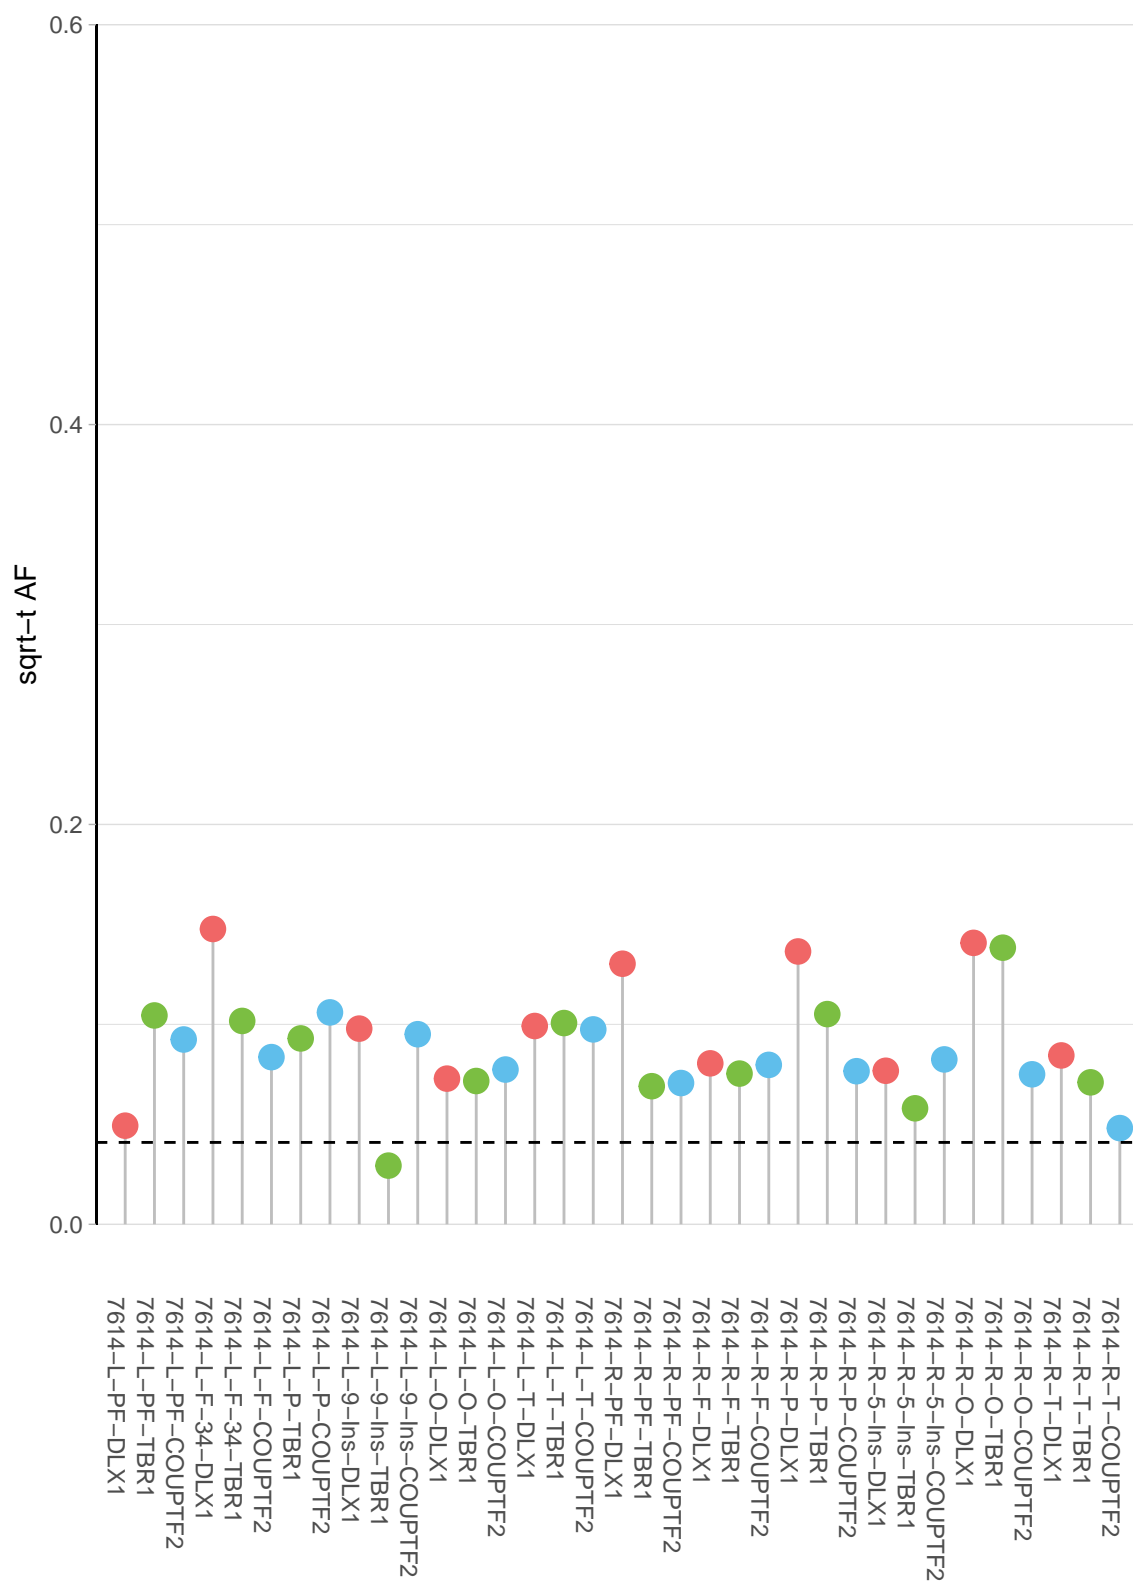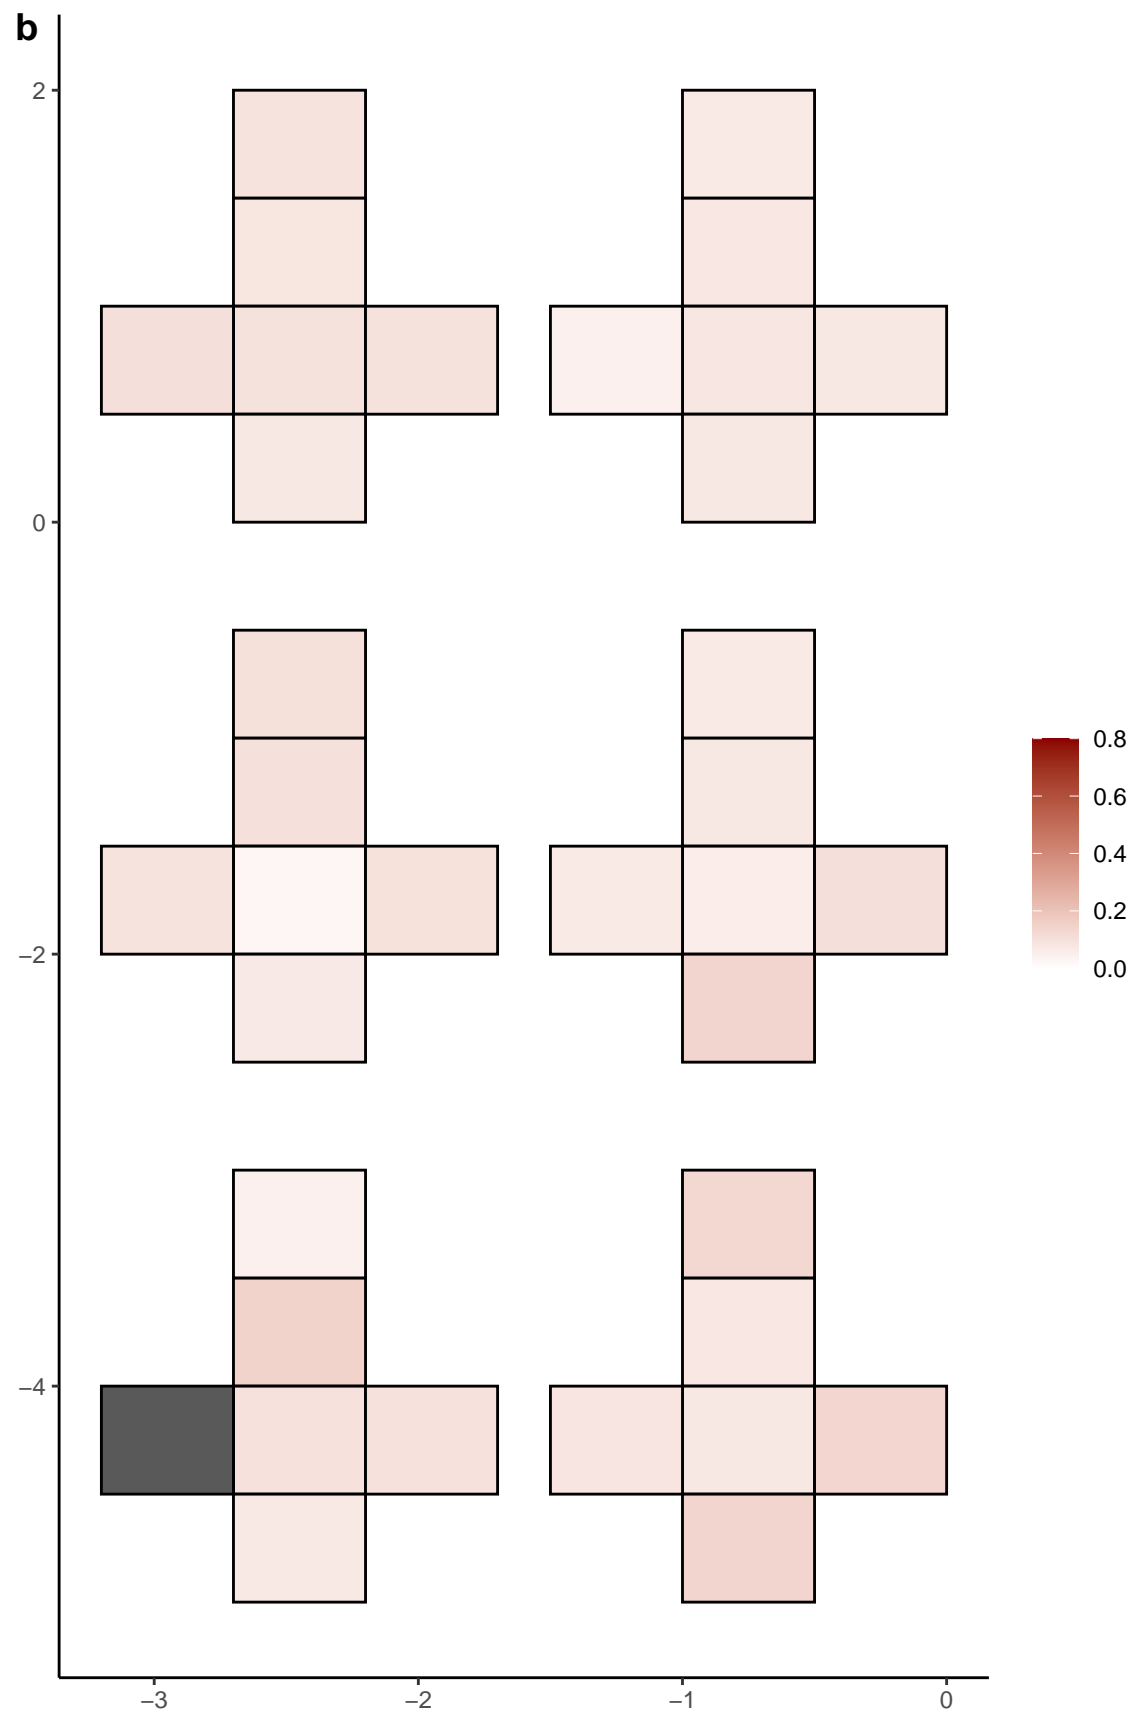

**a** ID01 5-109537368-T-C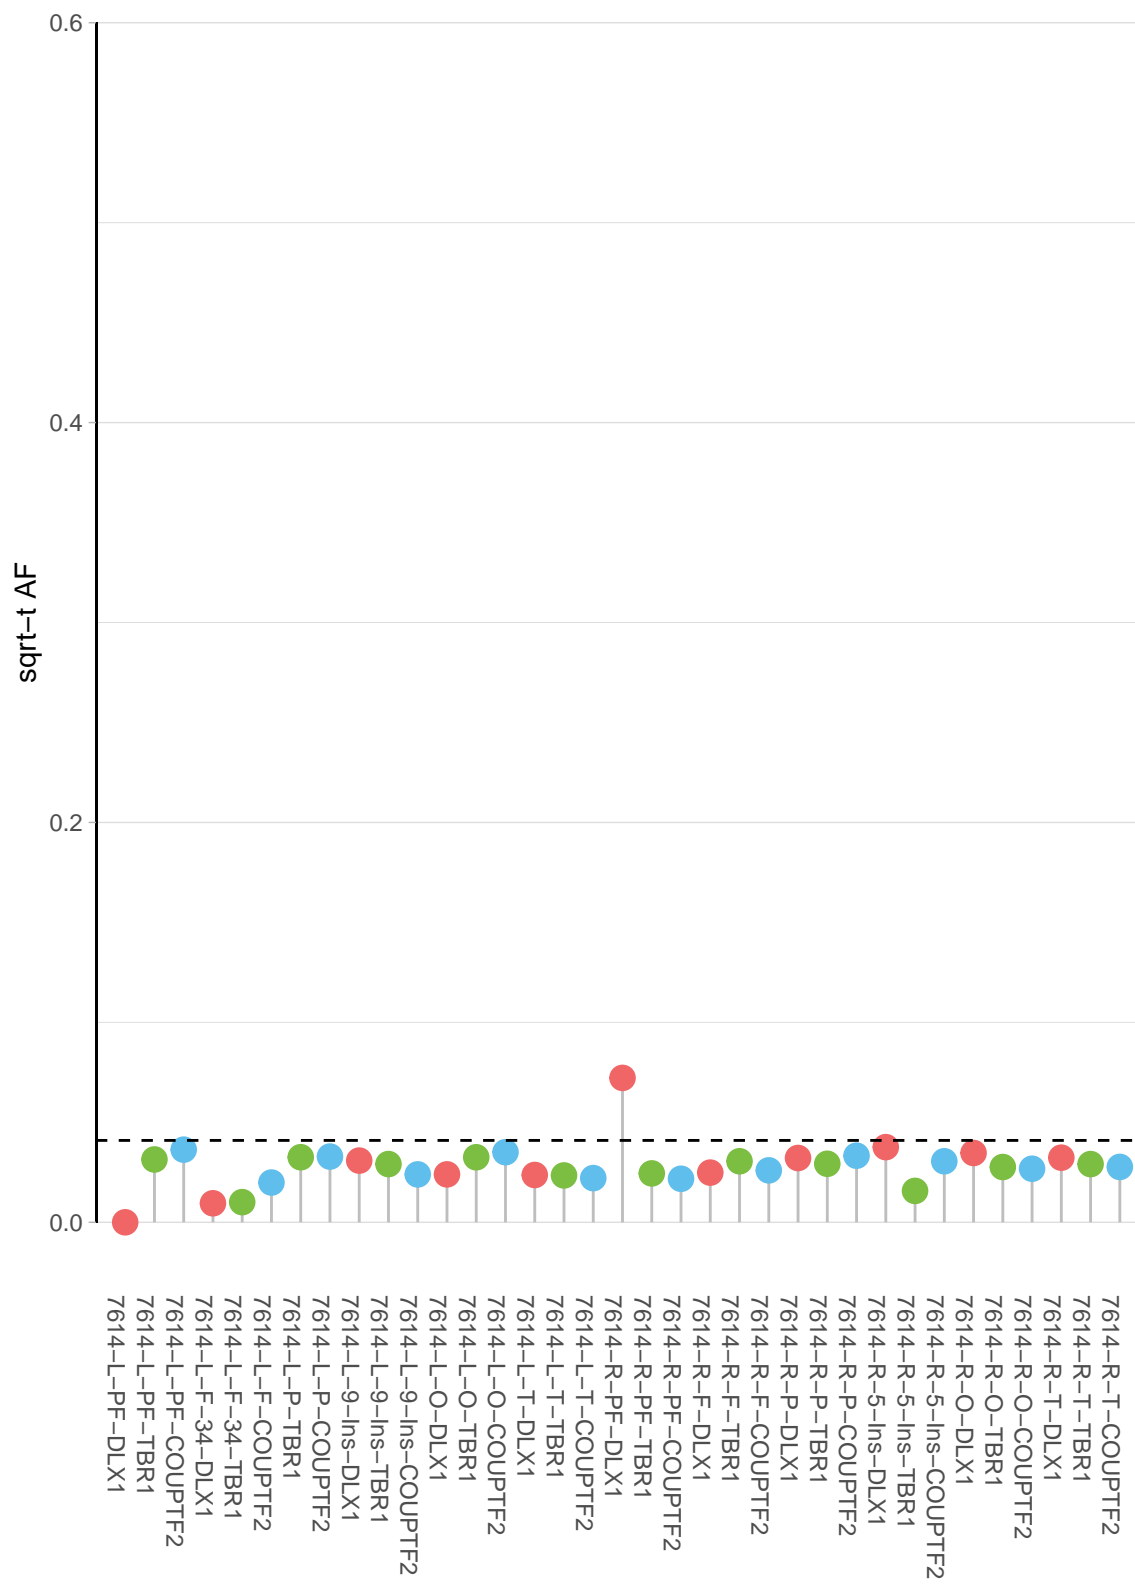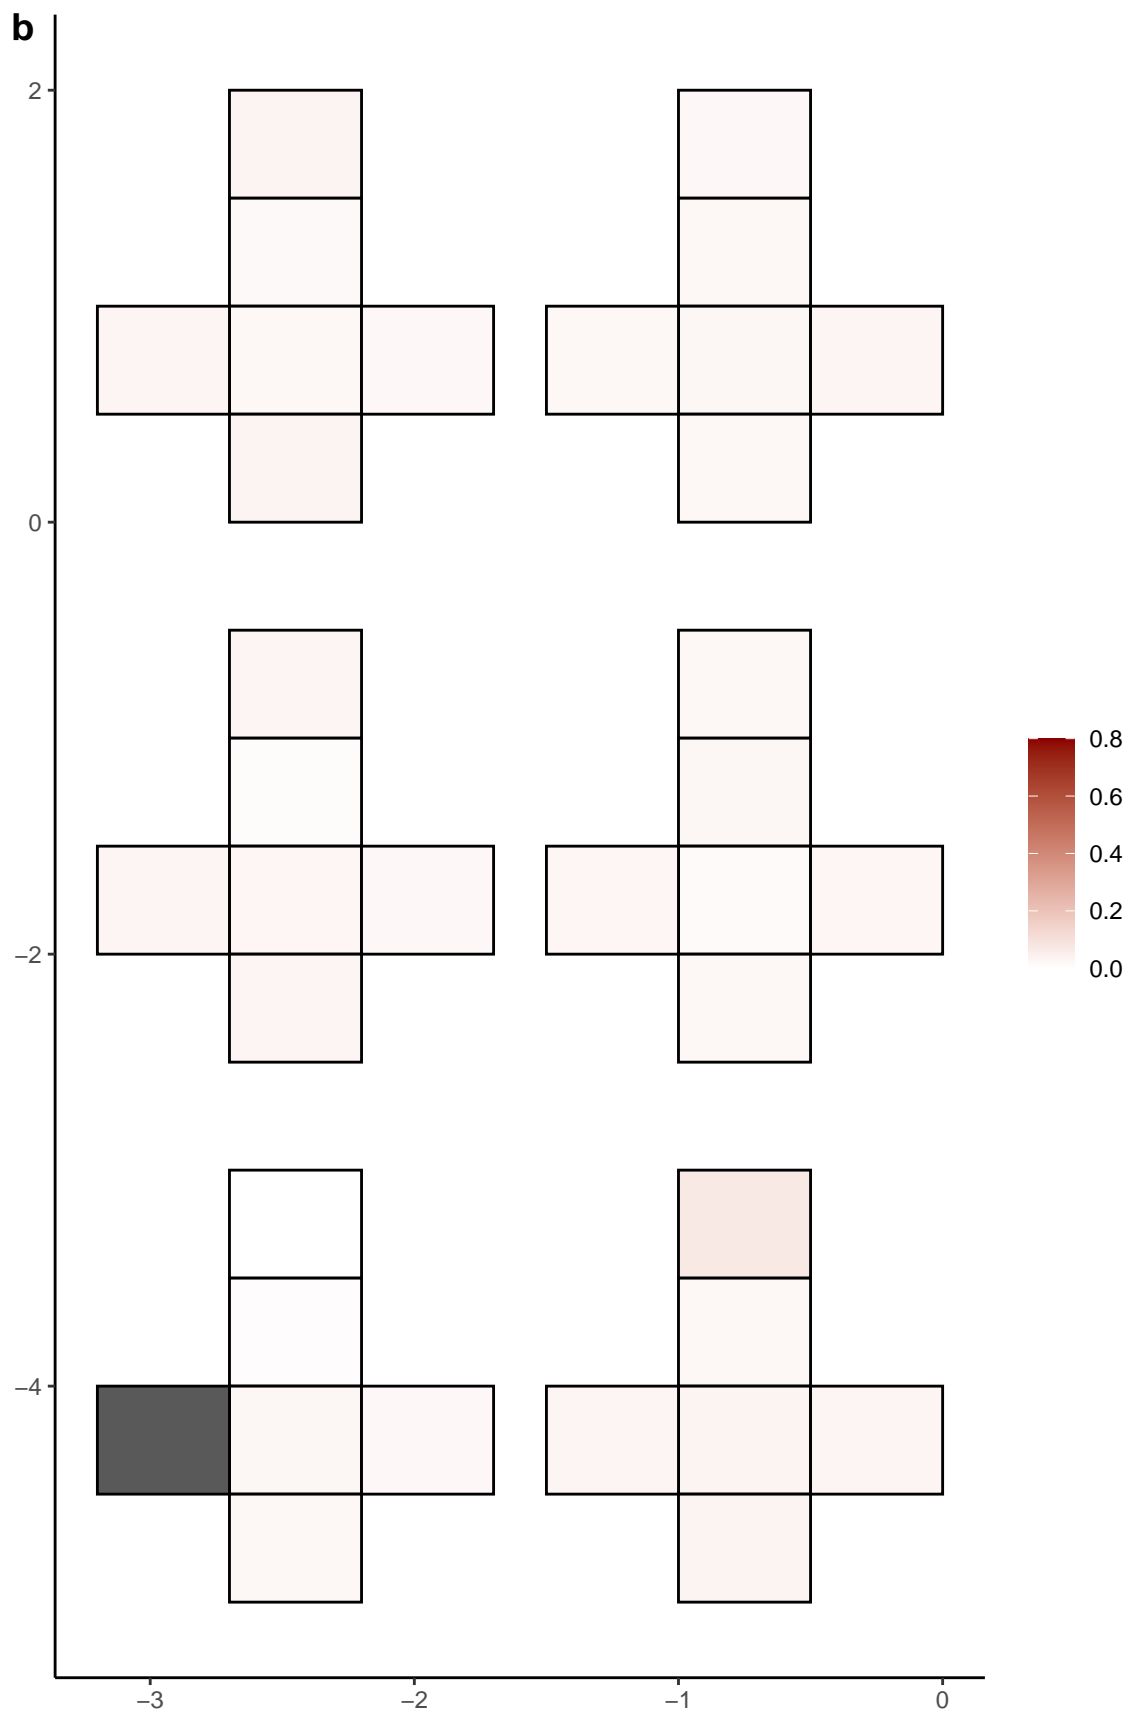

**a** ID01 5-132659937-G-A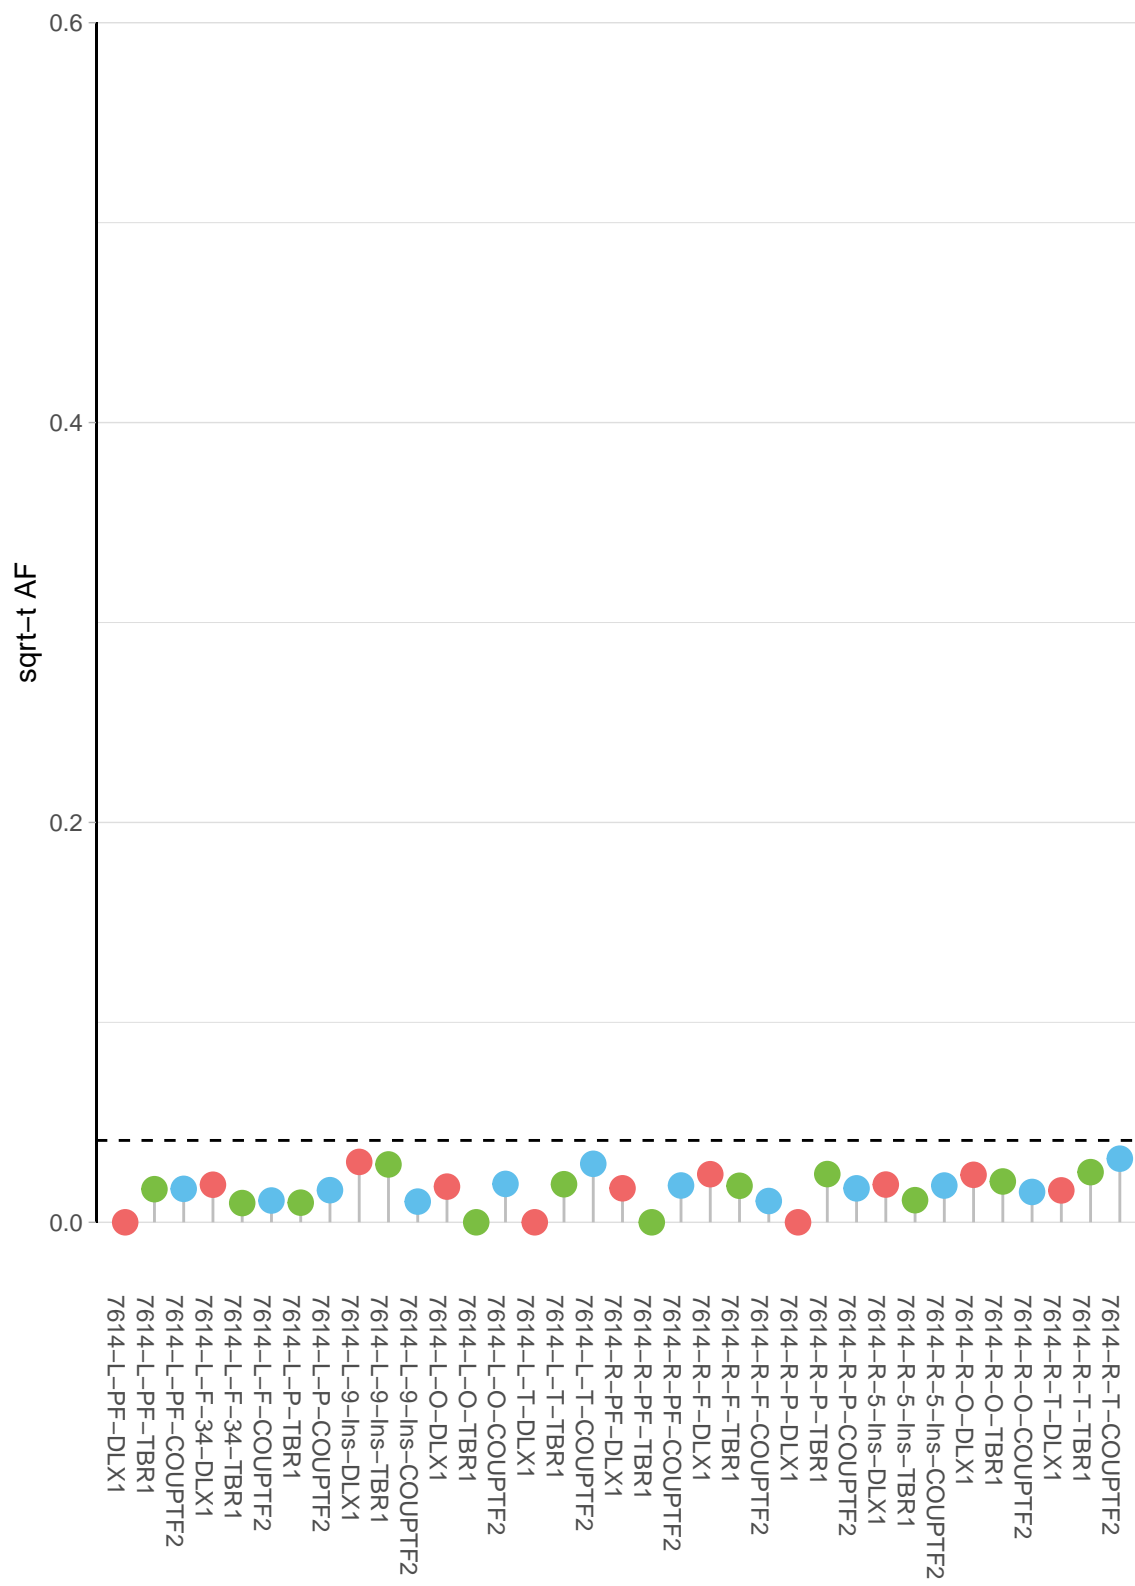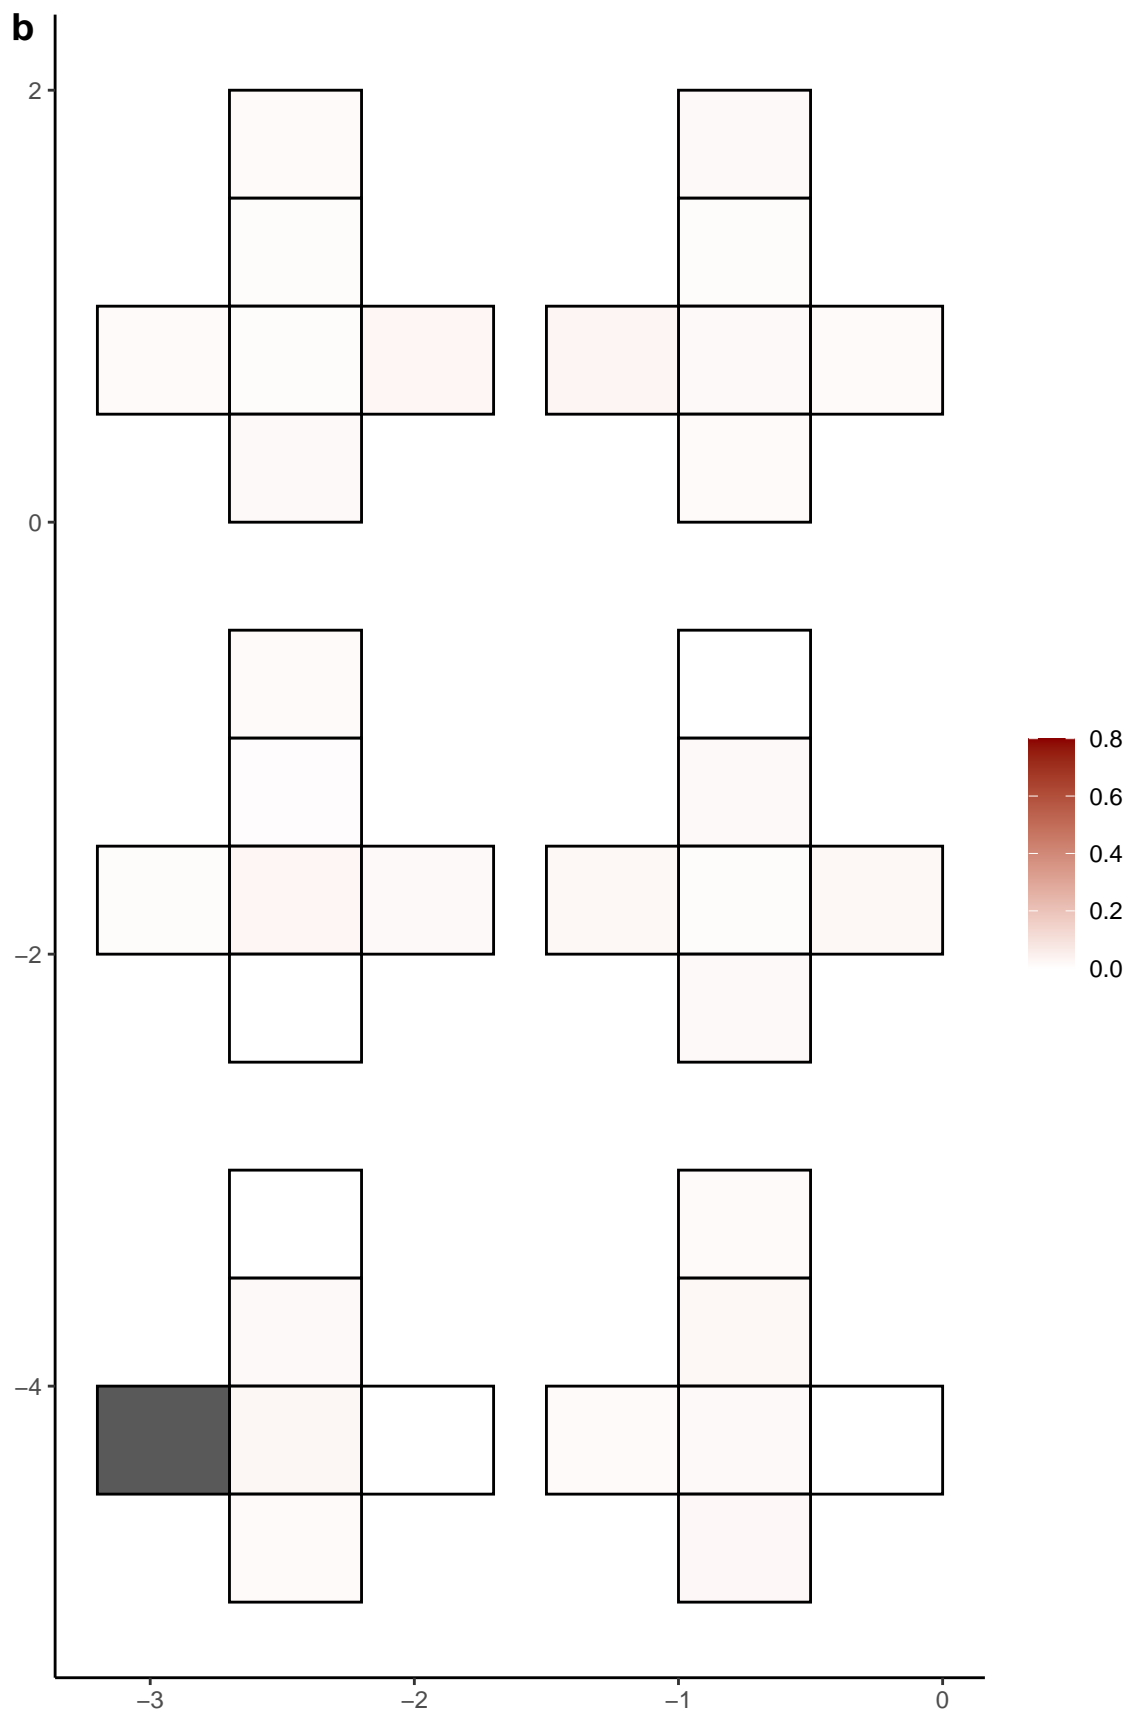

**a** ID01 5-146867769-A-G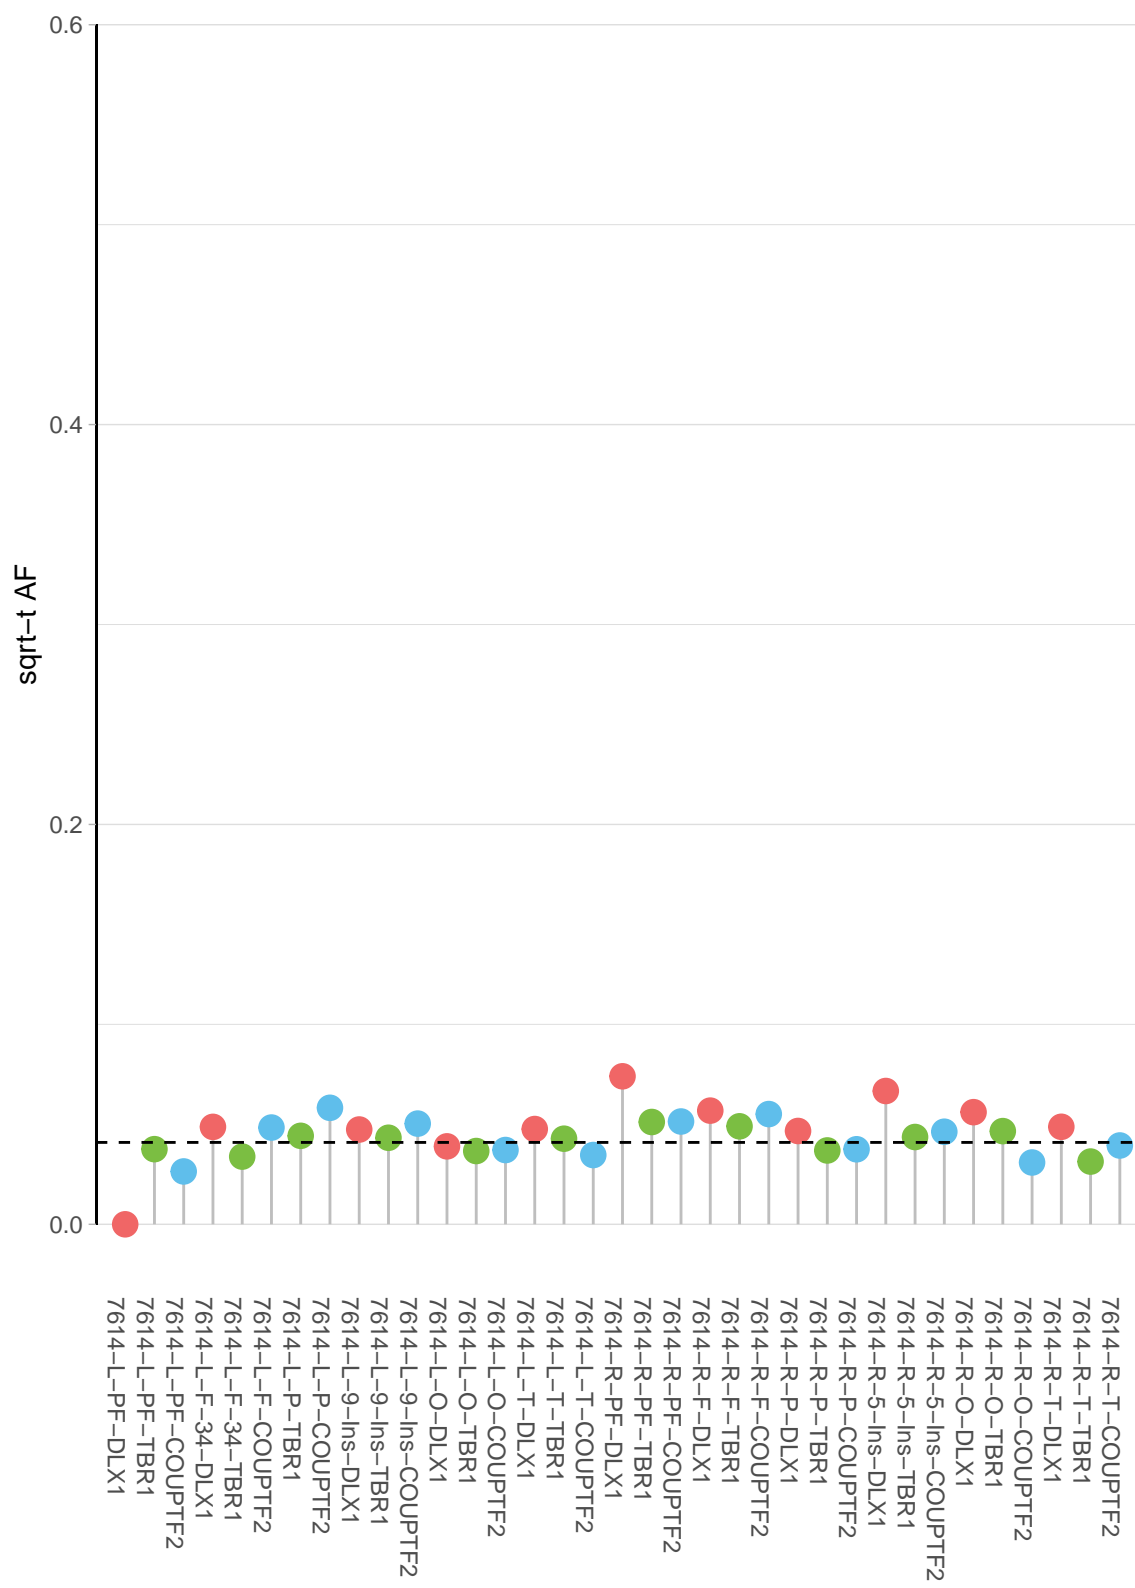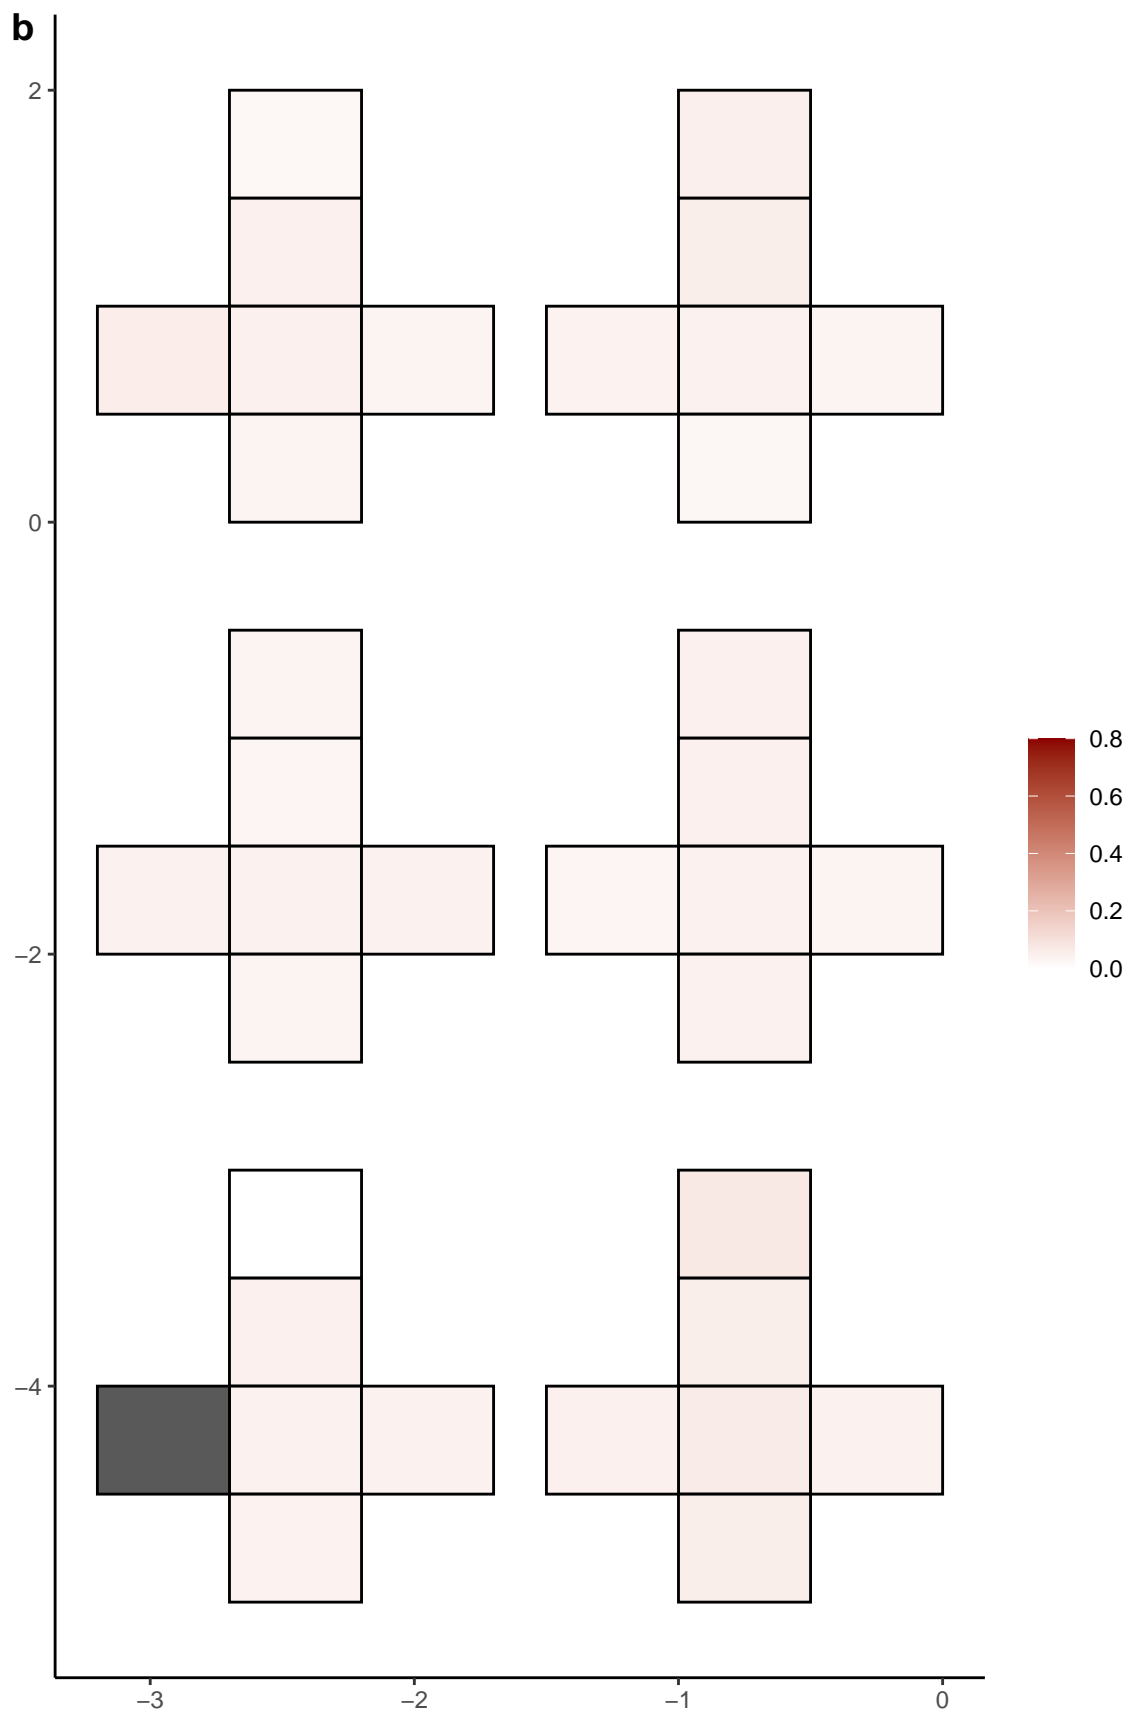

**a** ID01 5-160411647-T-G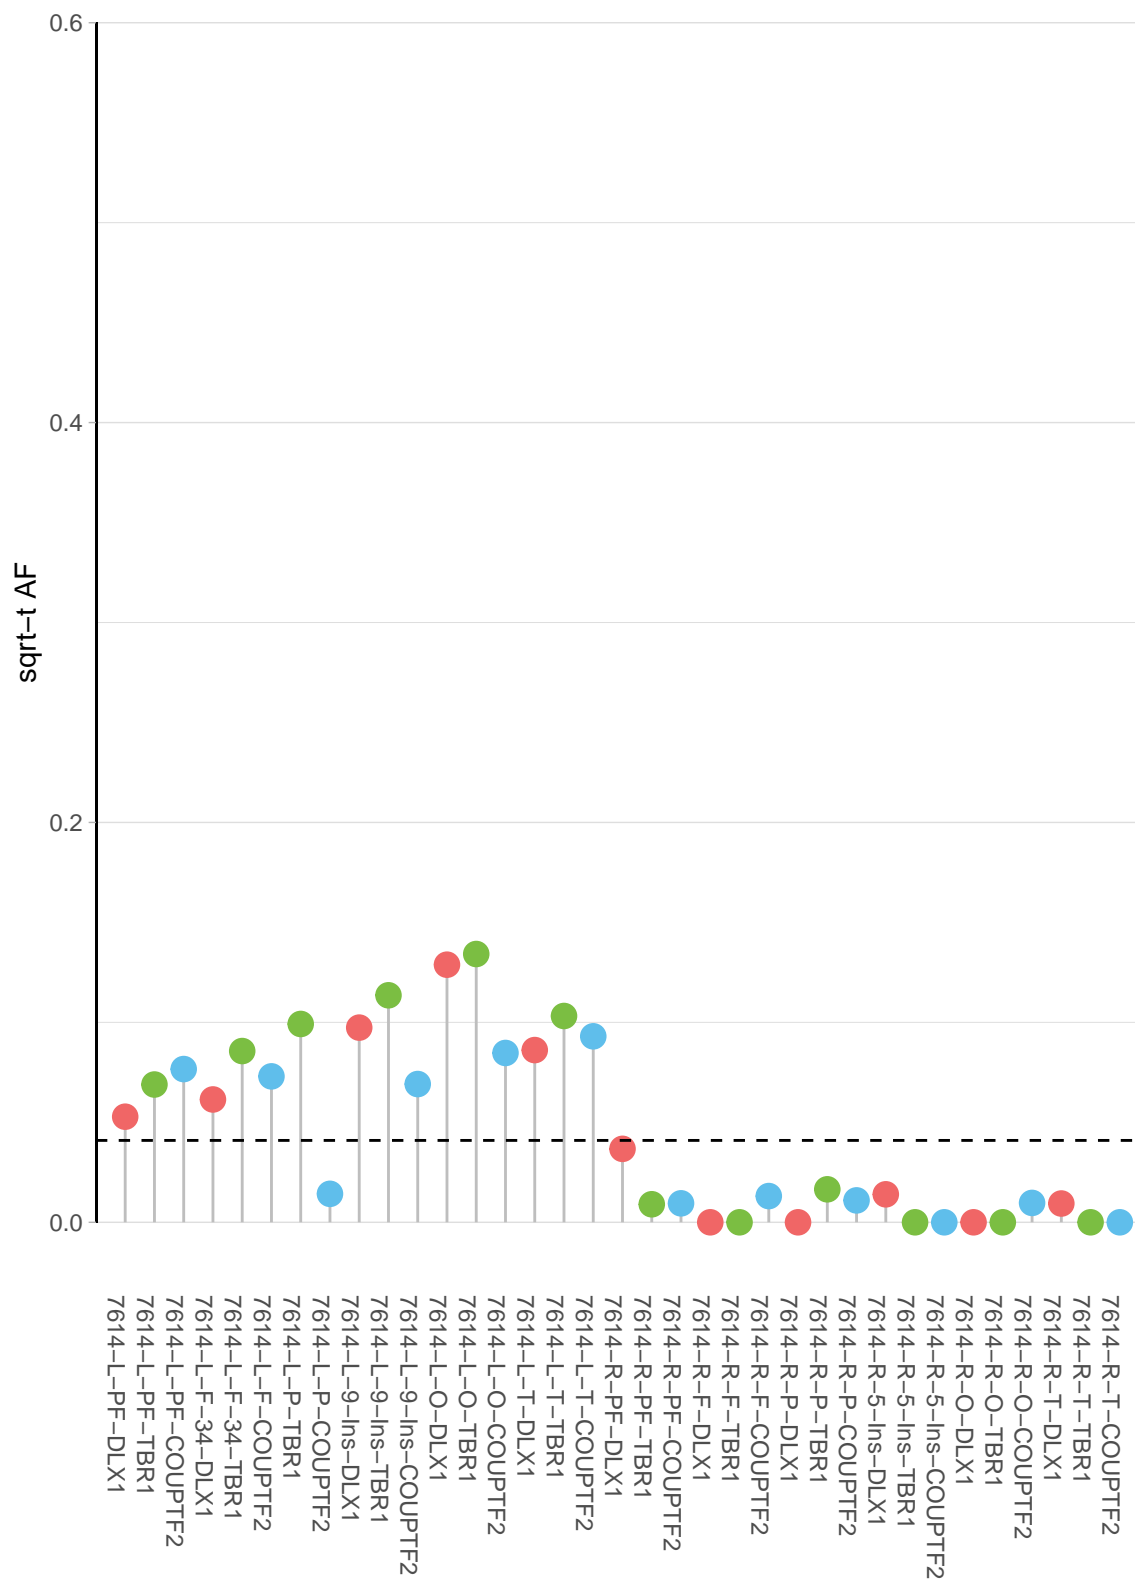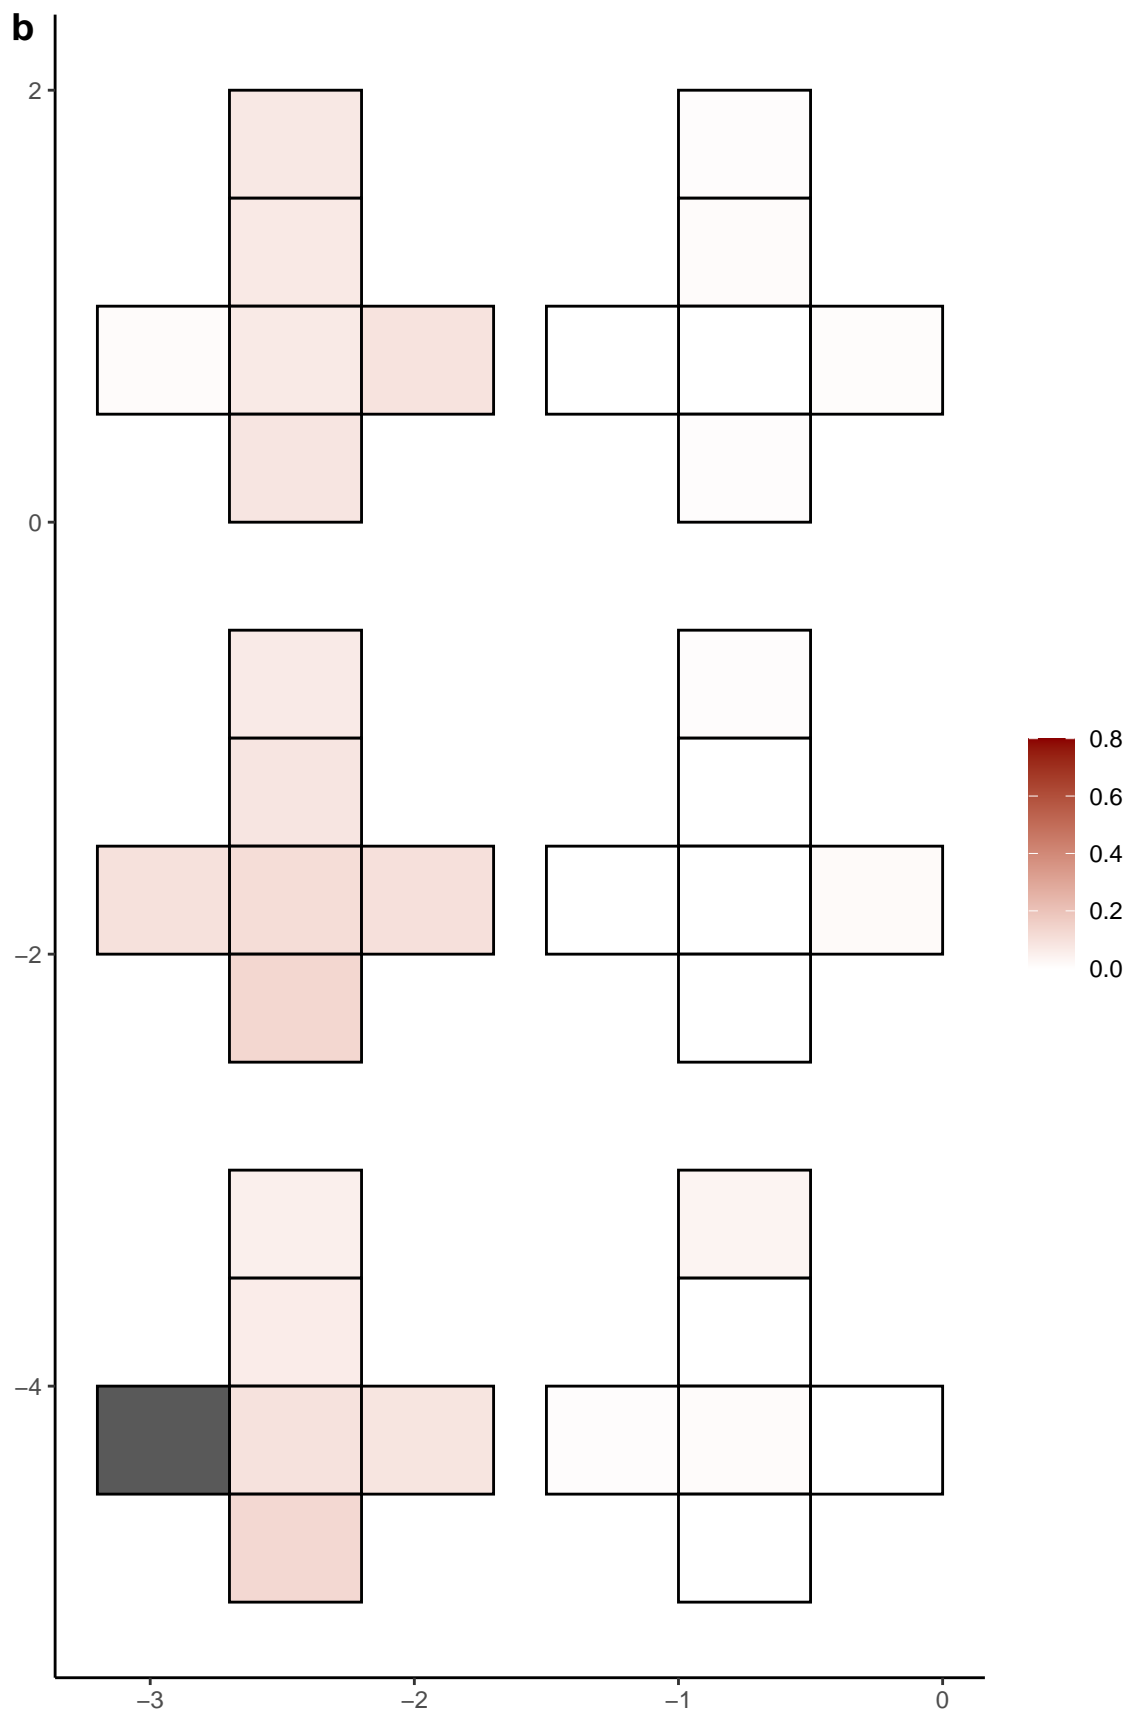



**a** ID01 5-17226551-A-G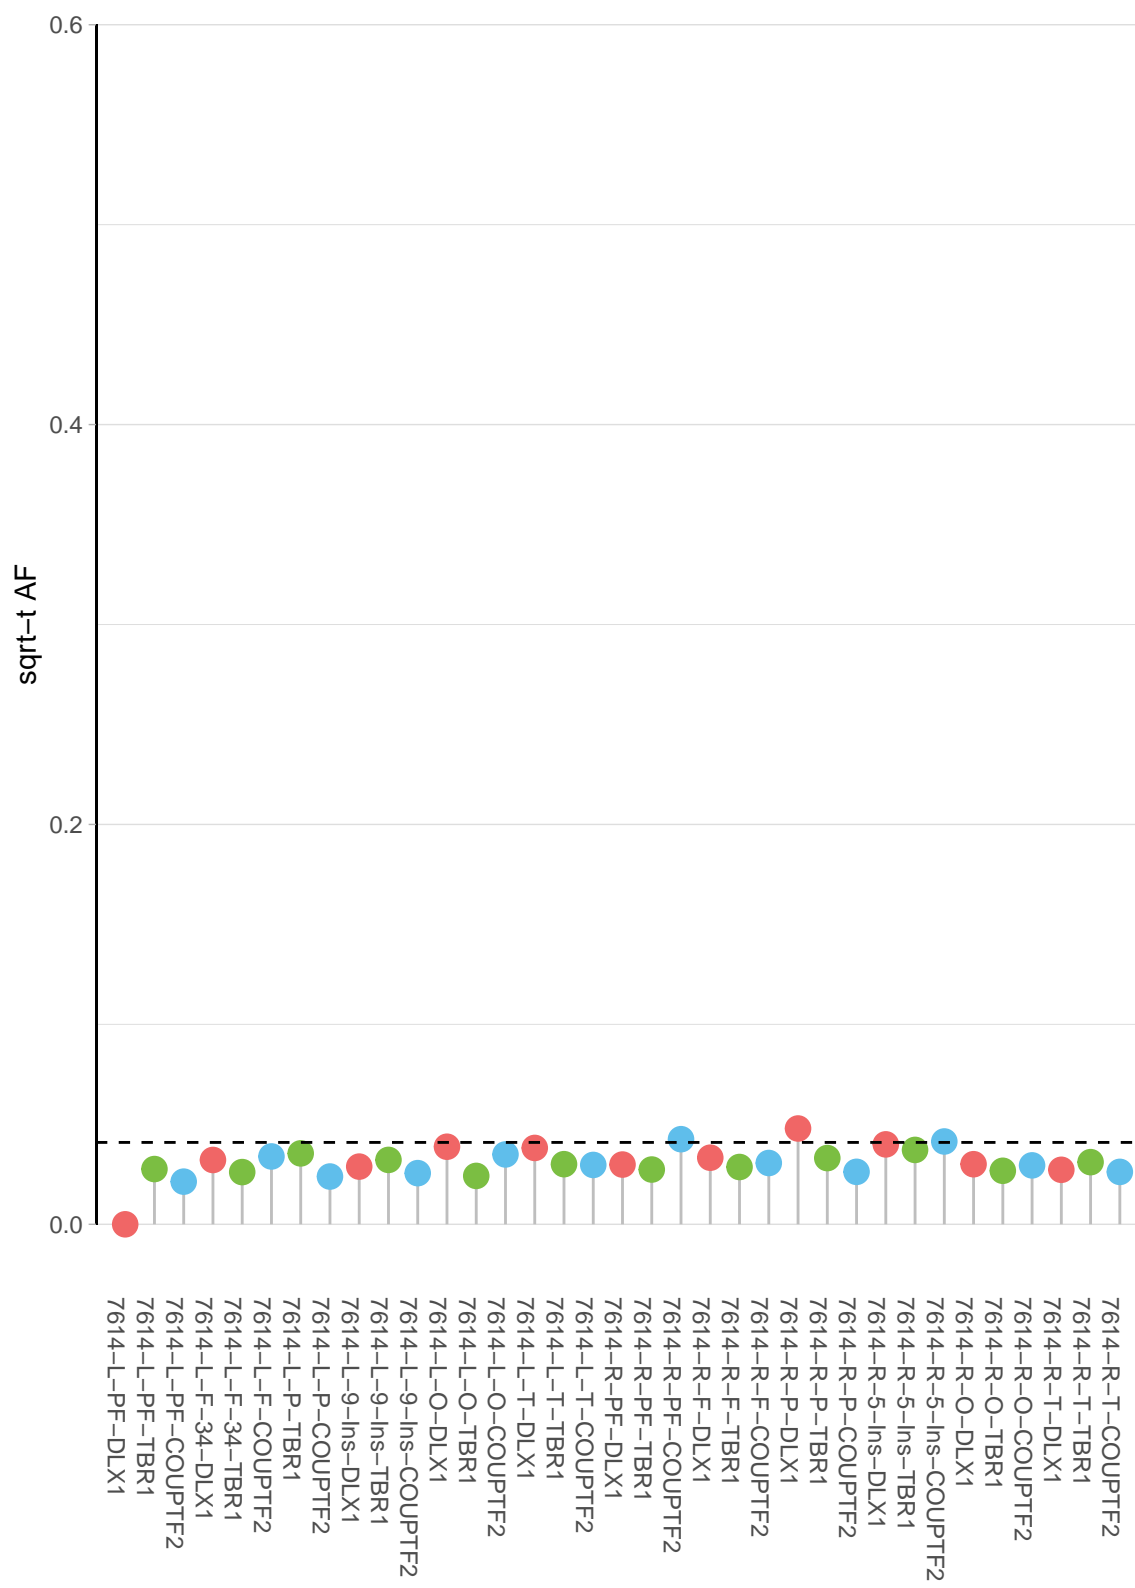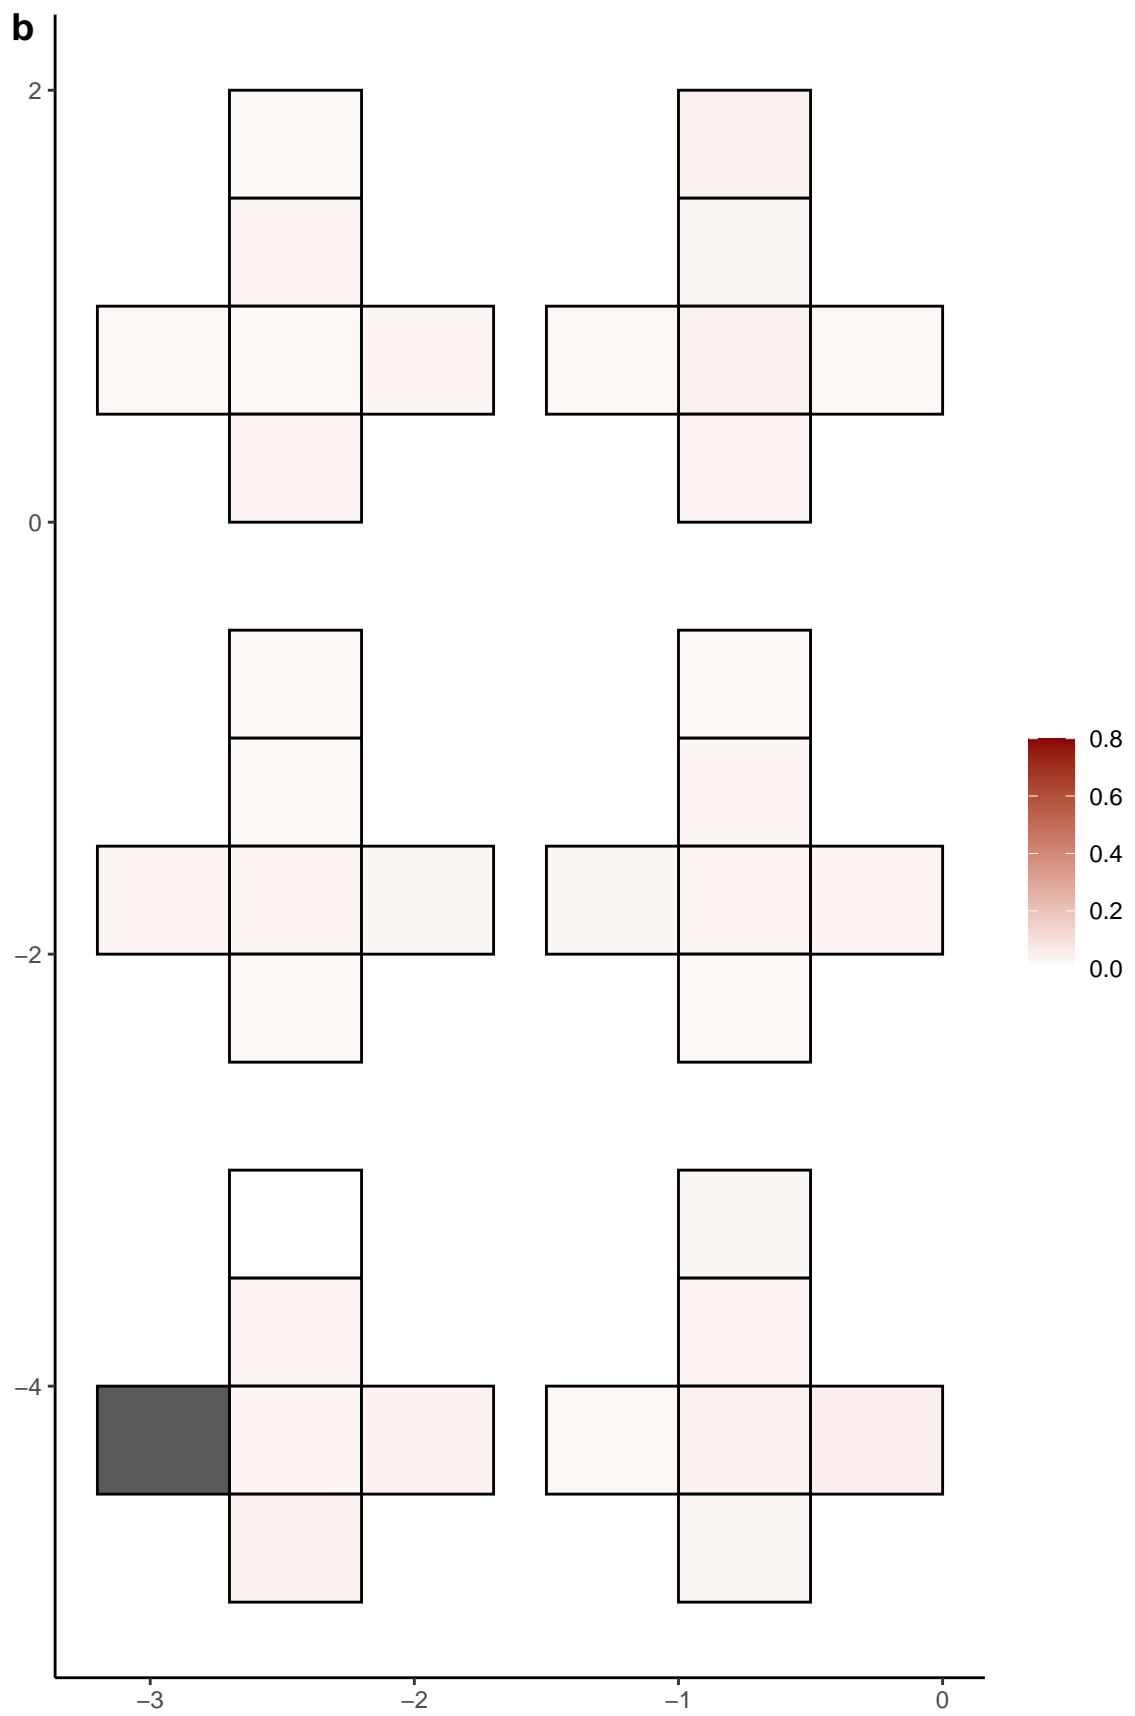

**a** ID01 5-172837236-C-T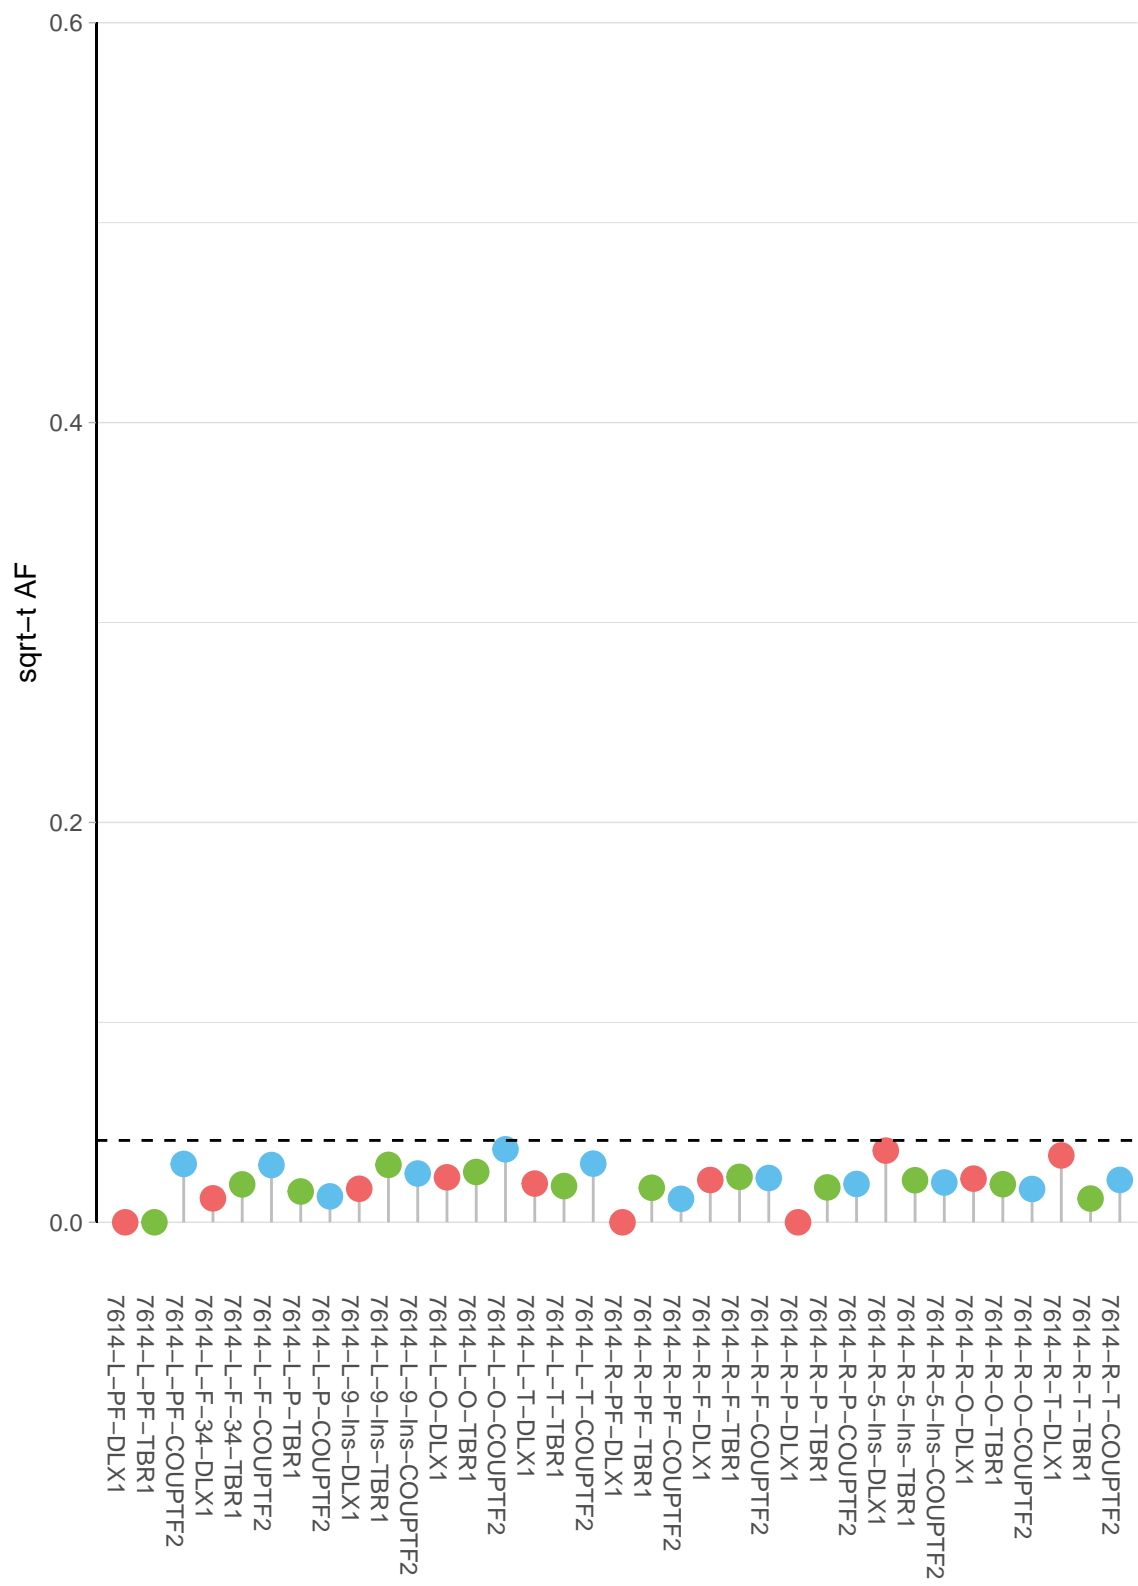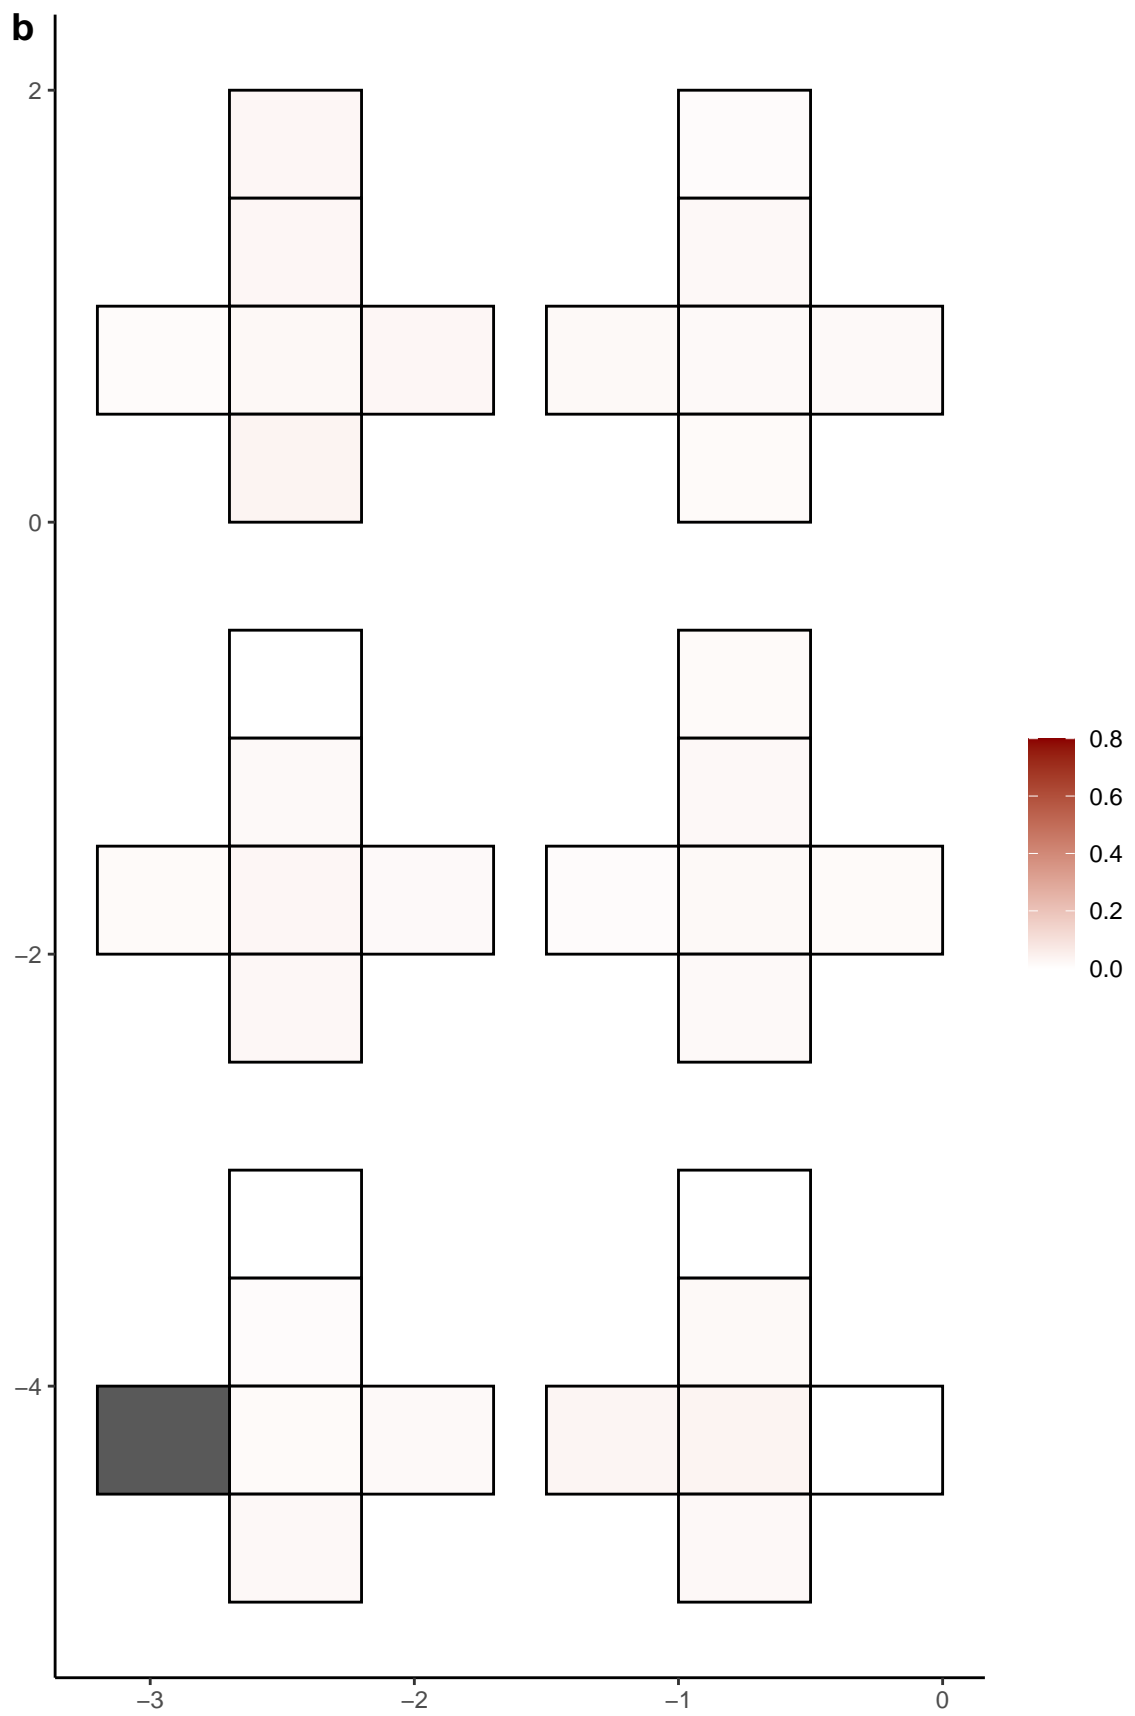

**a** ID01 5-179557321-C-A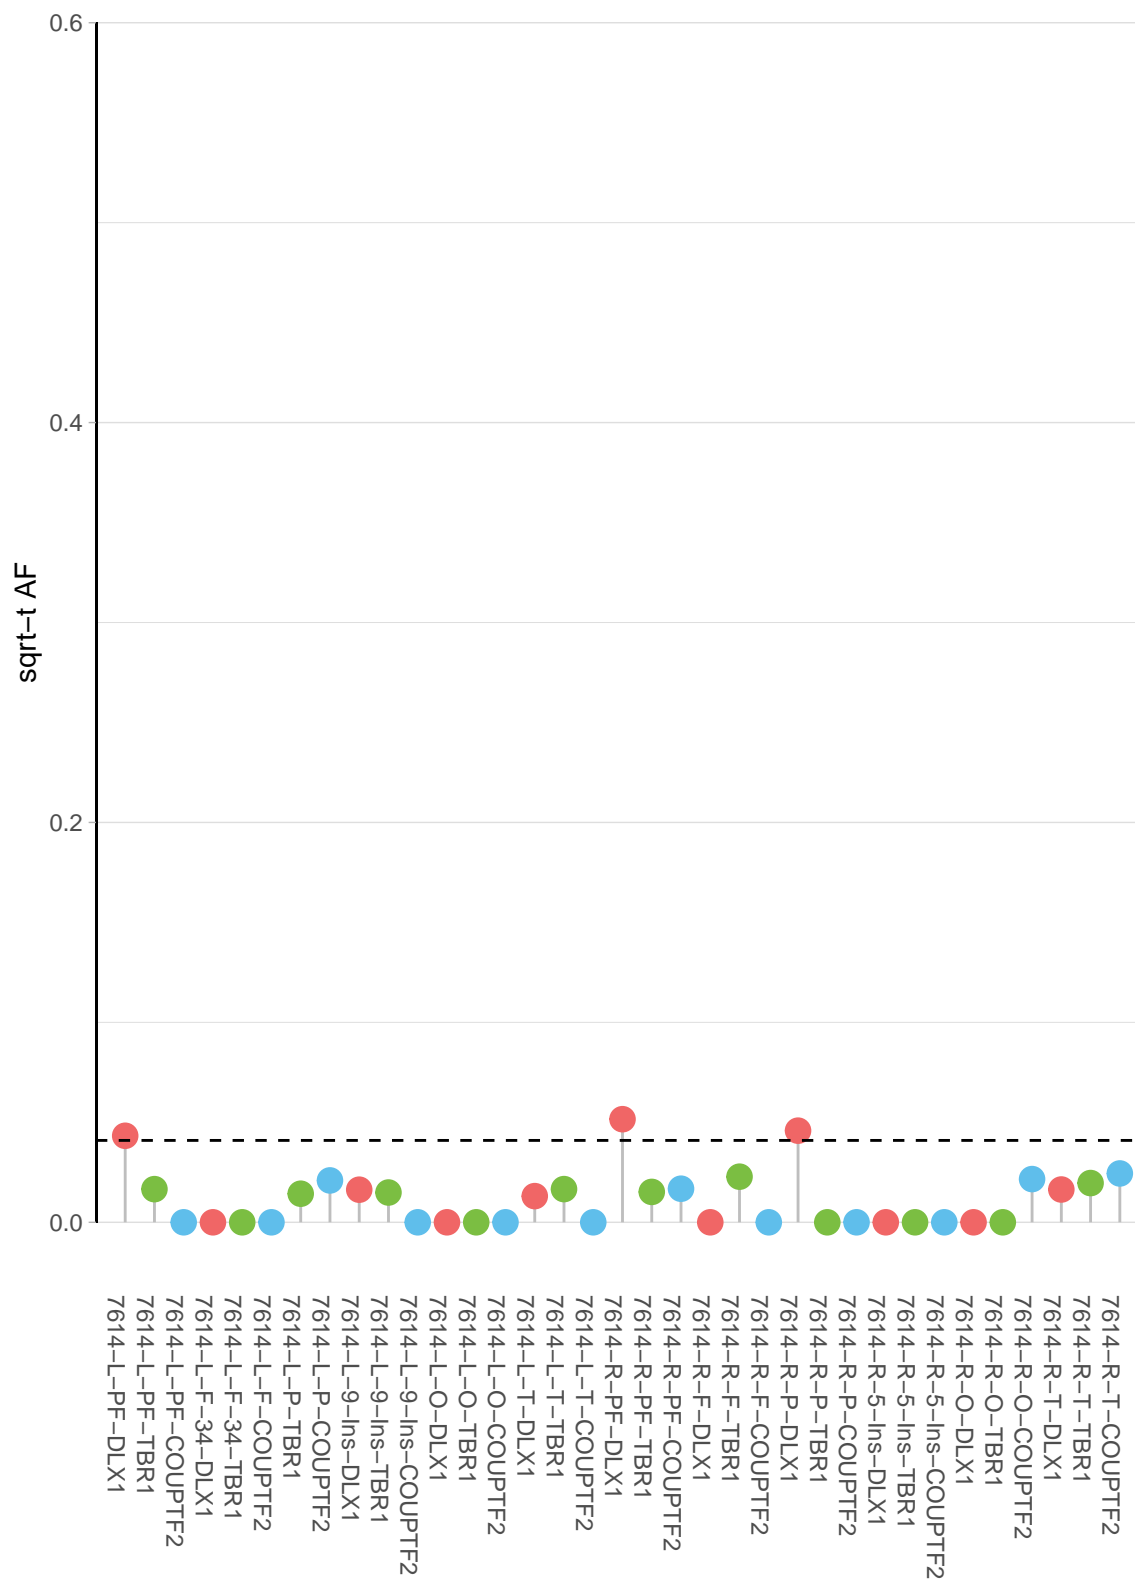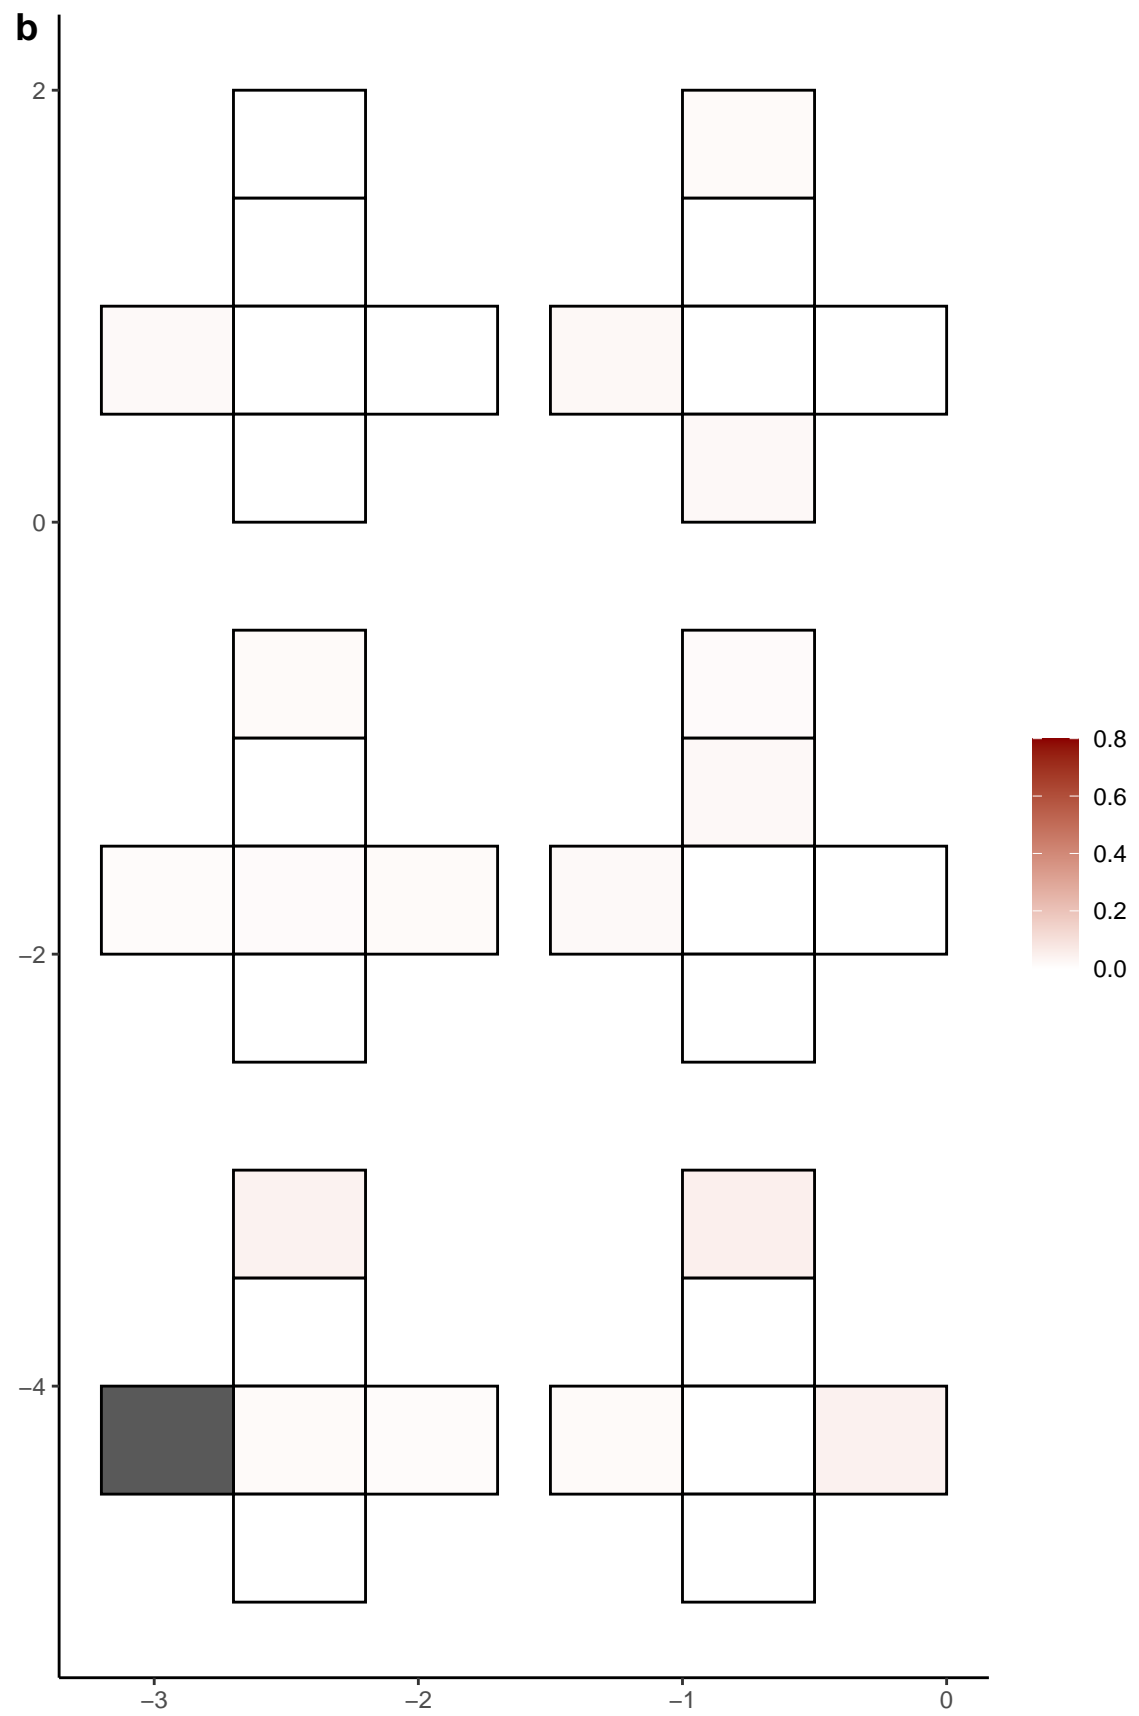

**a** ID01 5-44770209-G-A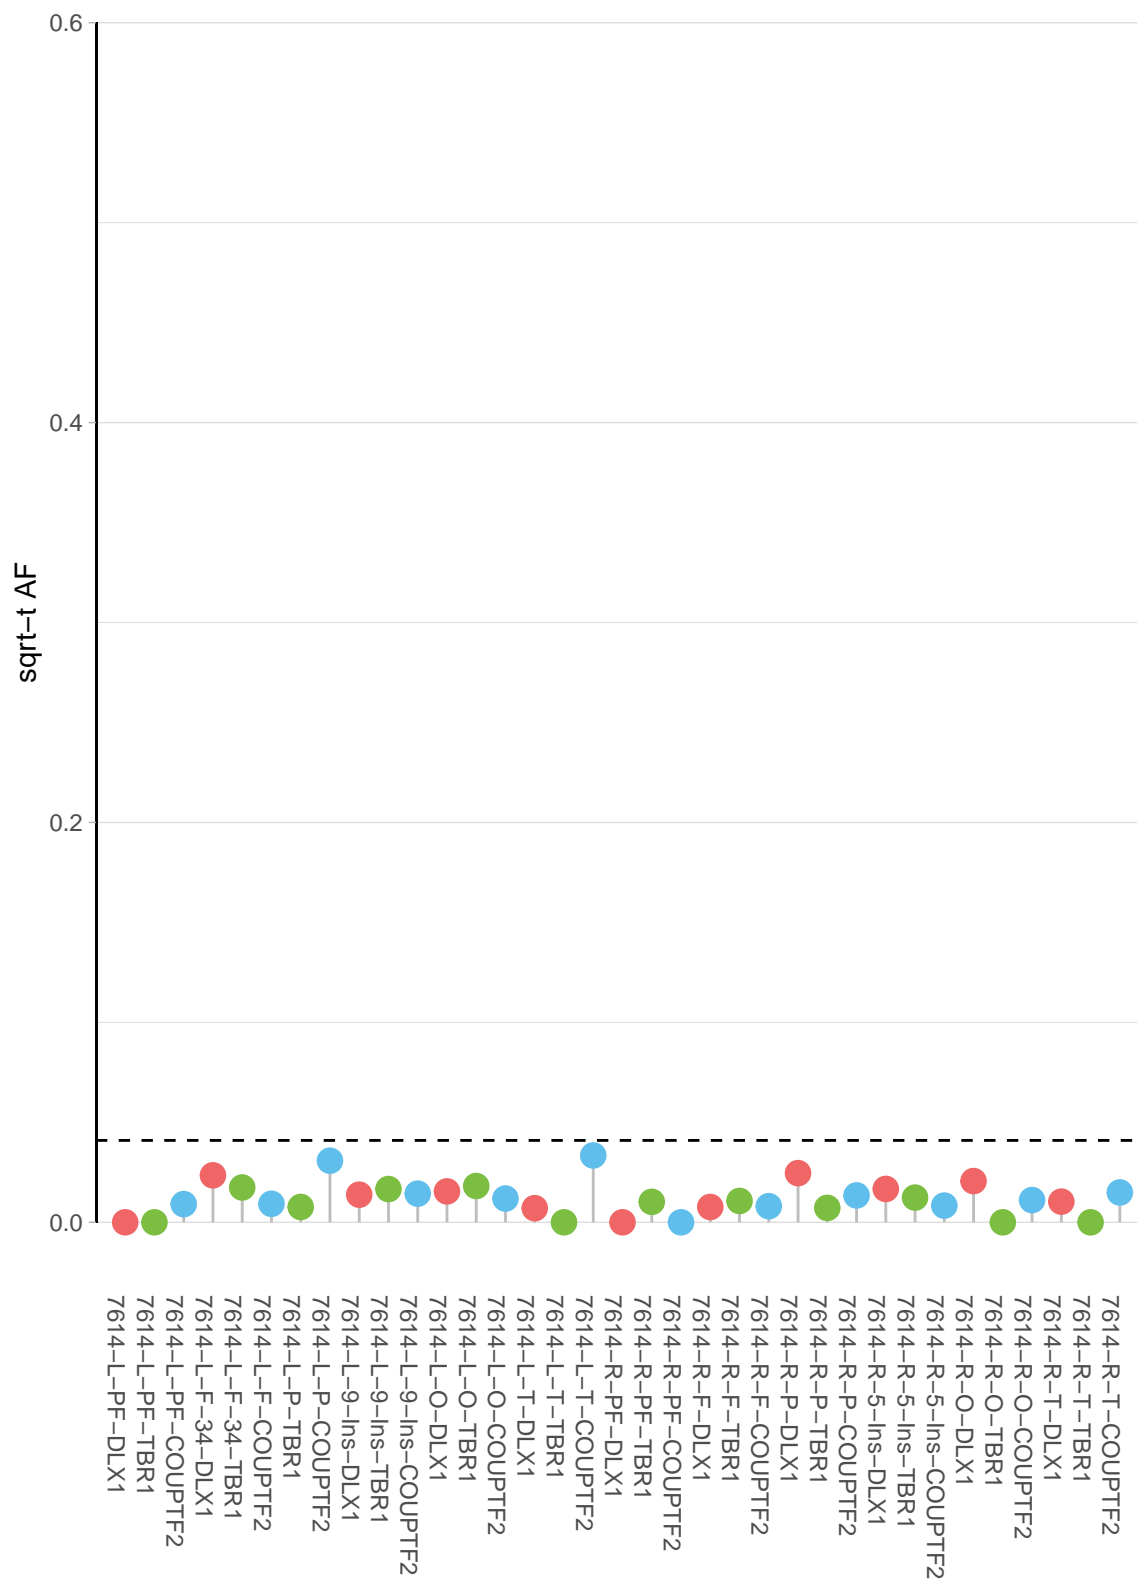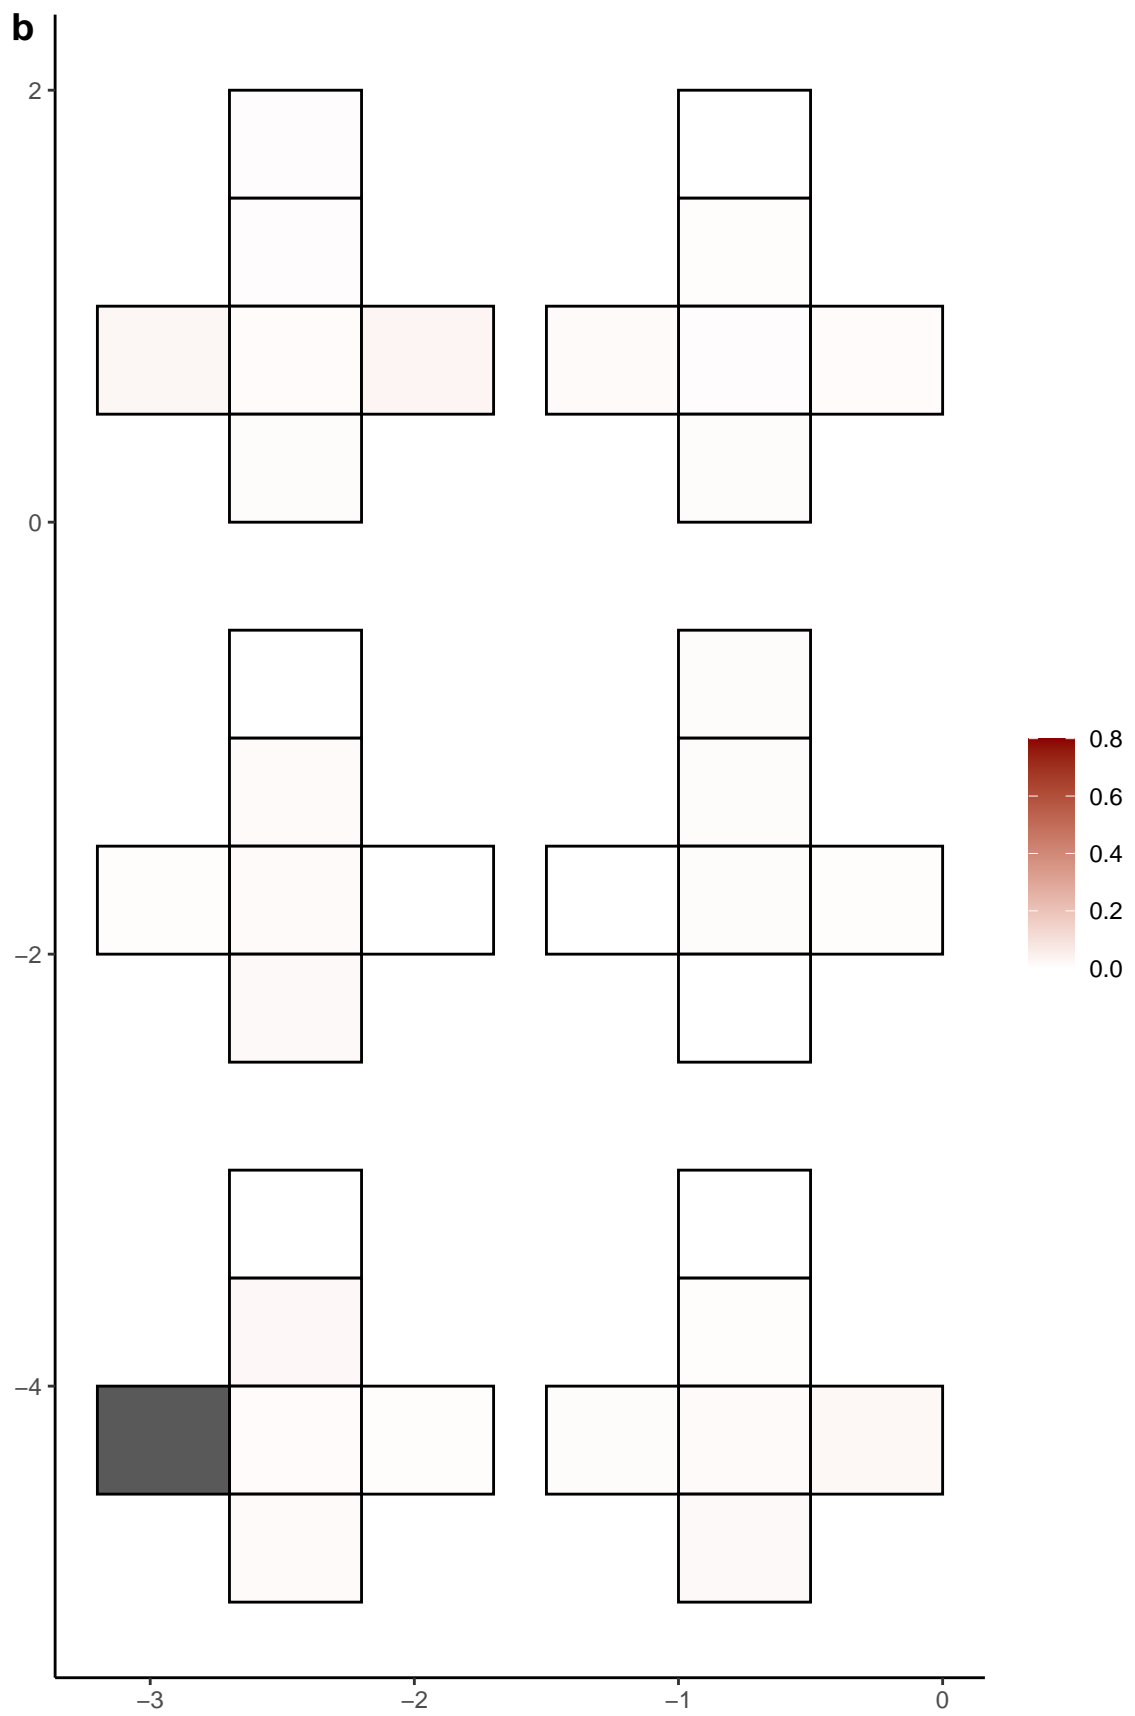

**a** ID01 5-51128677-C-A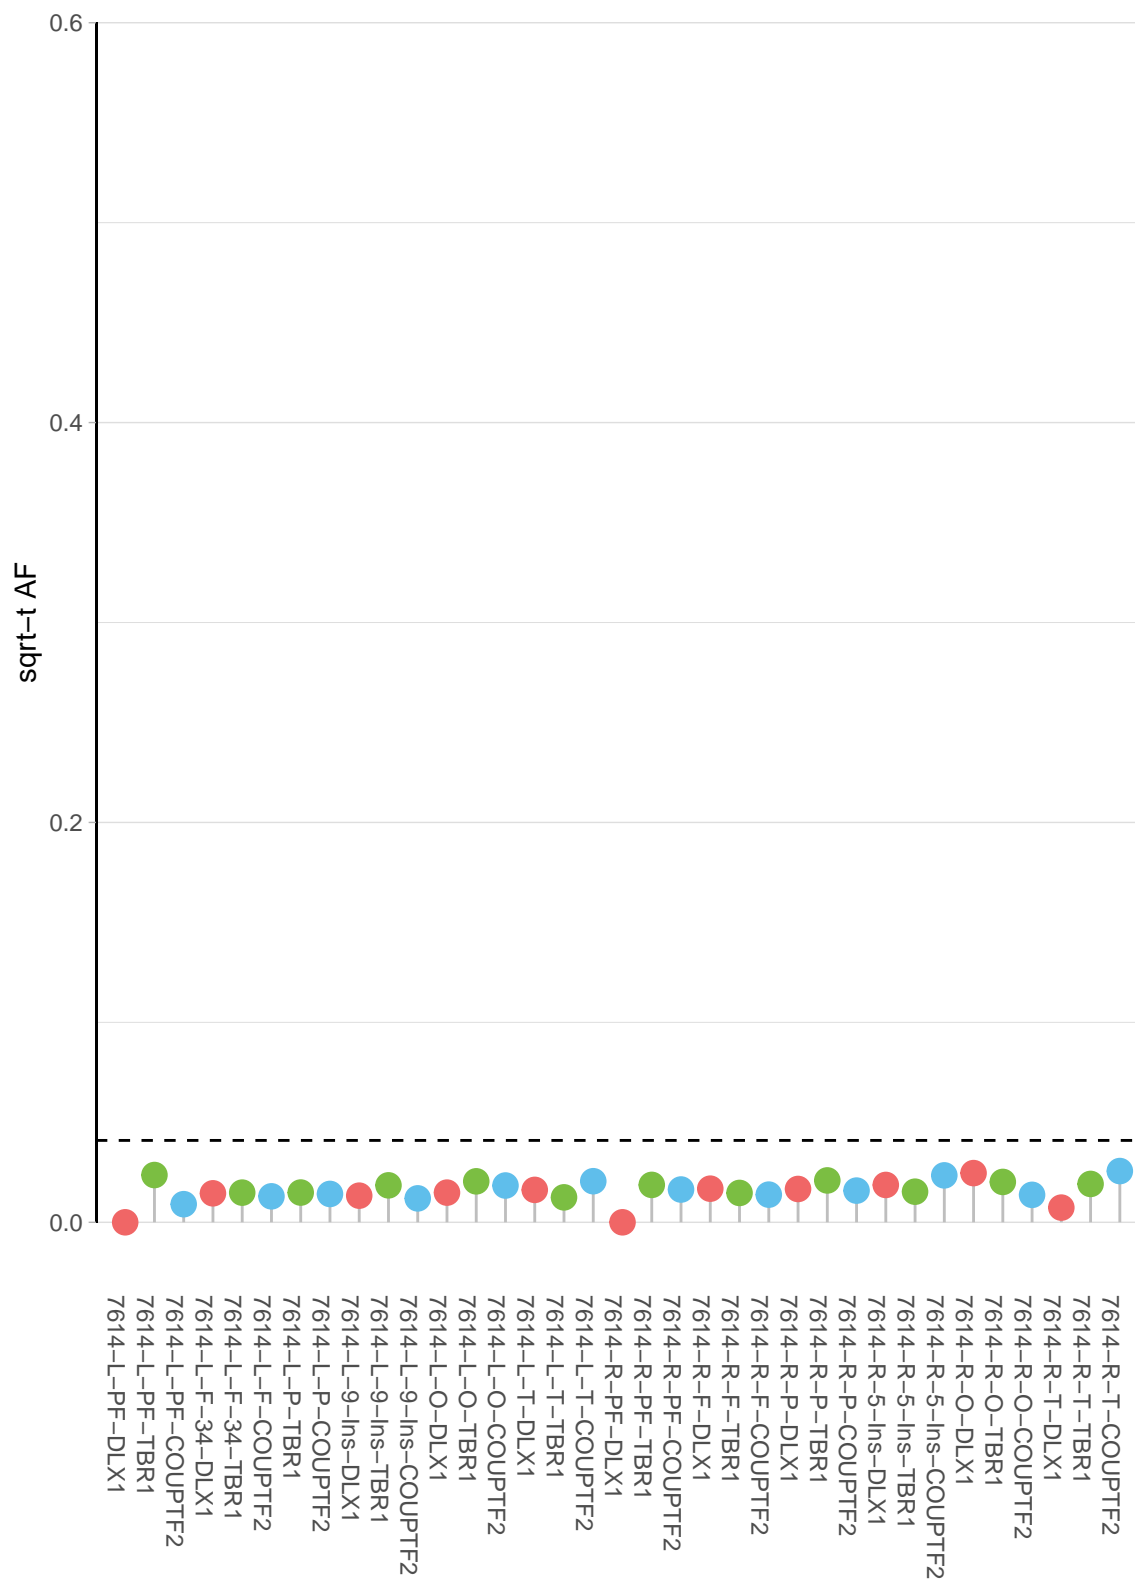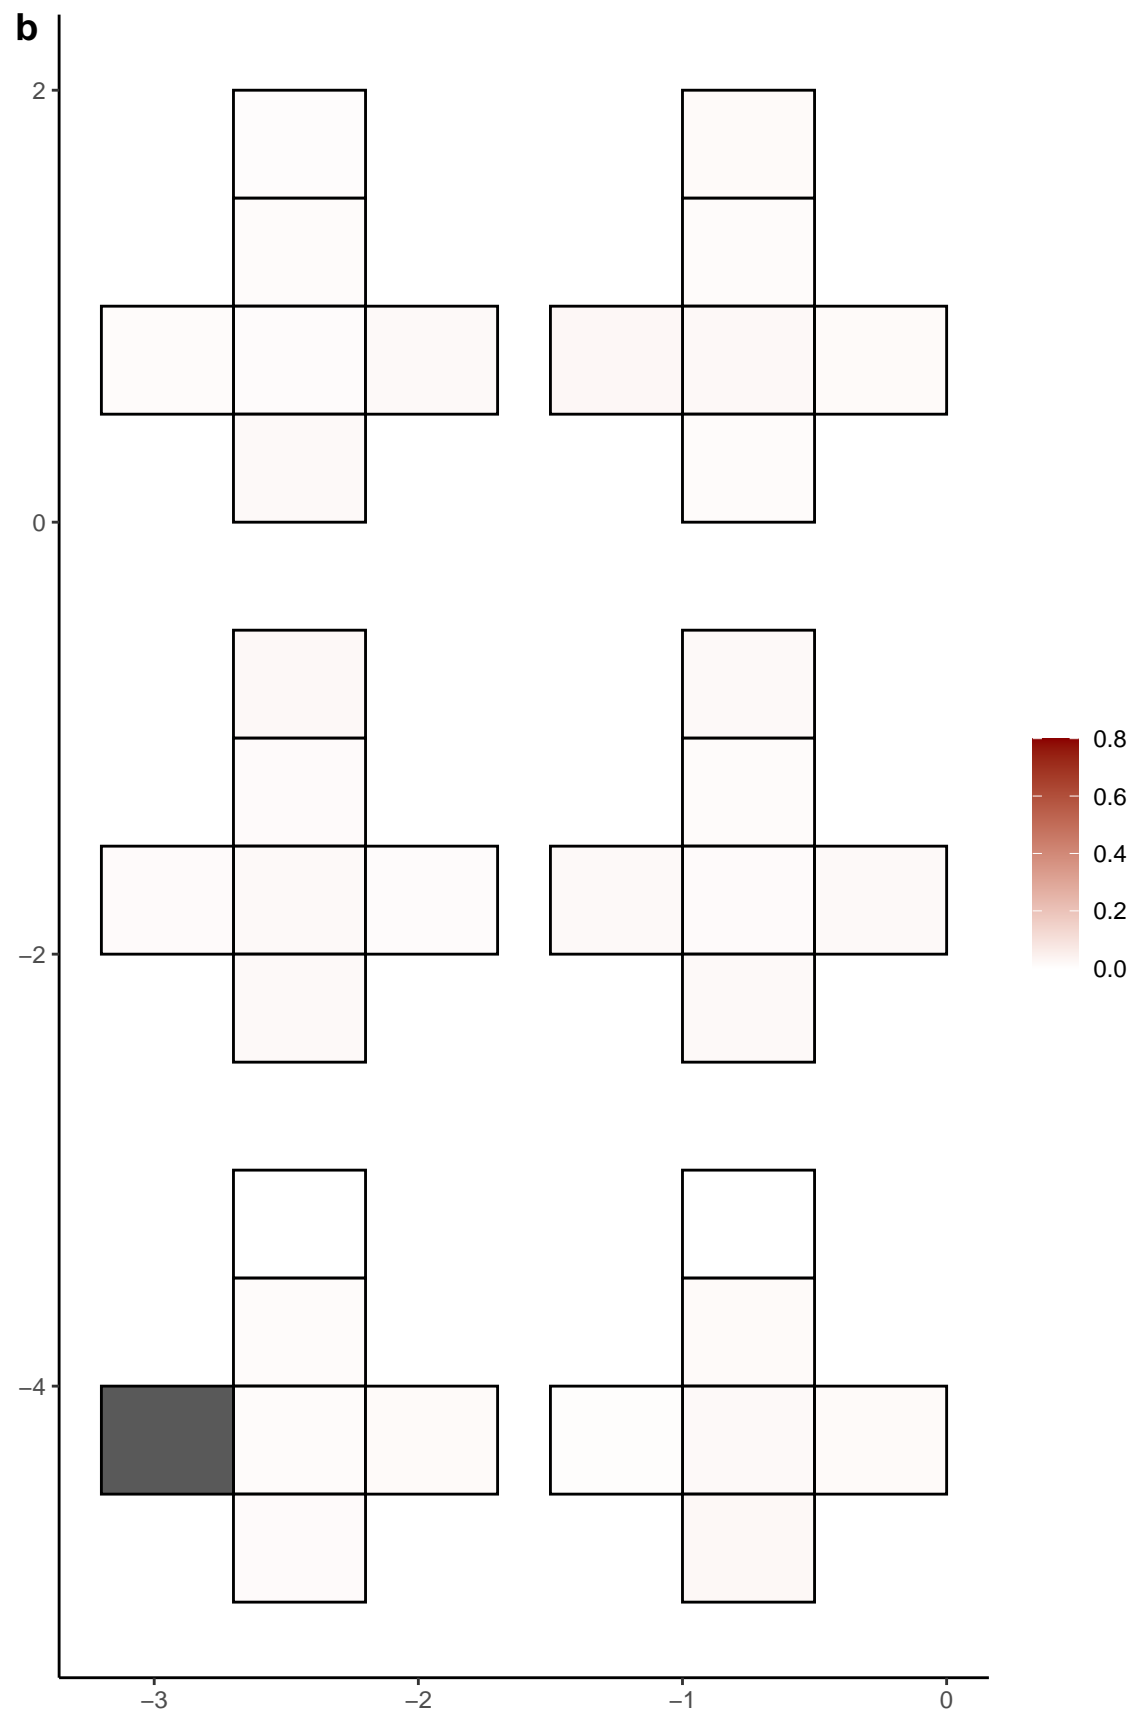

**a** ID01 5-65315424-G-A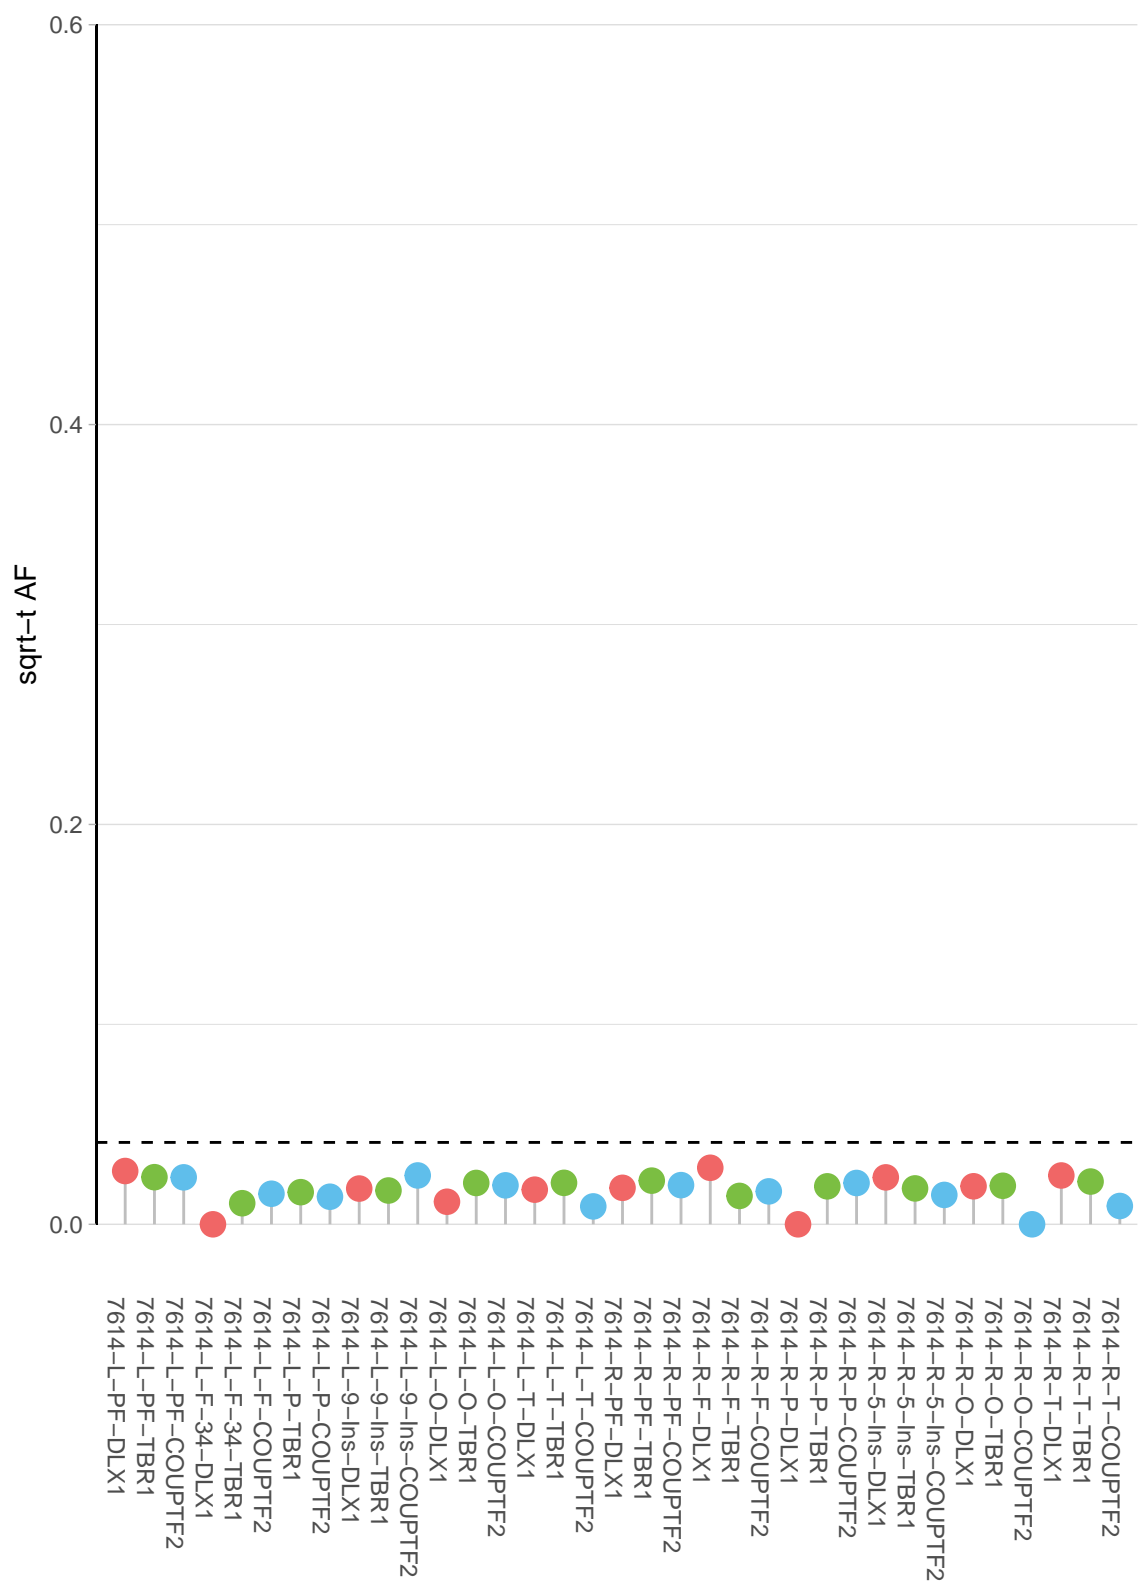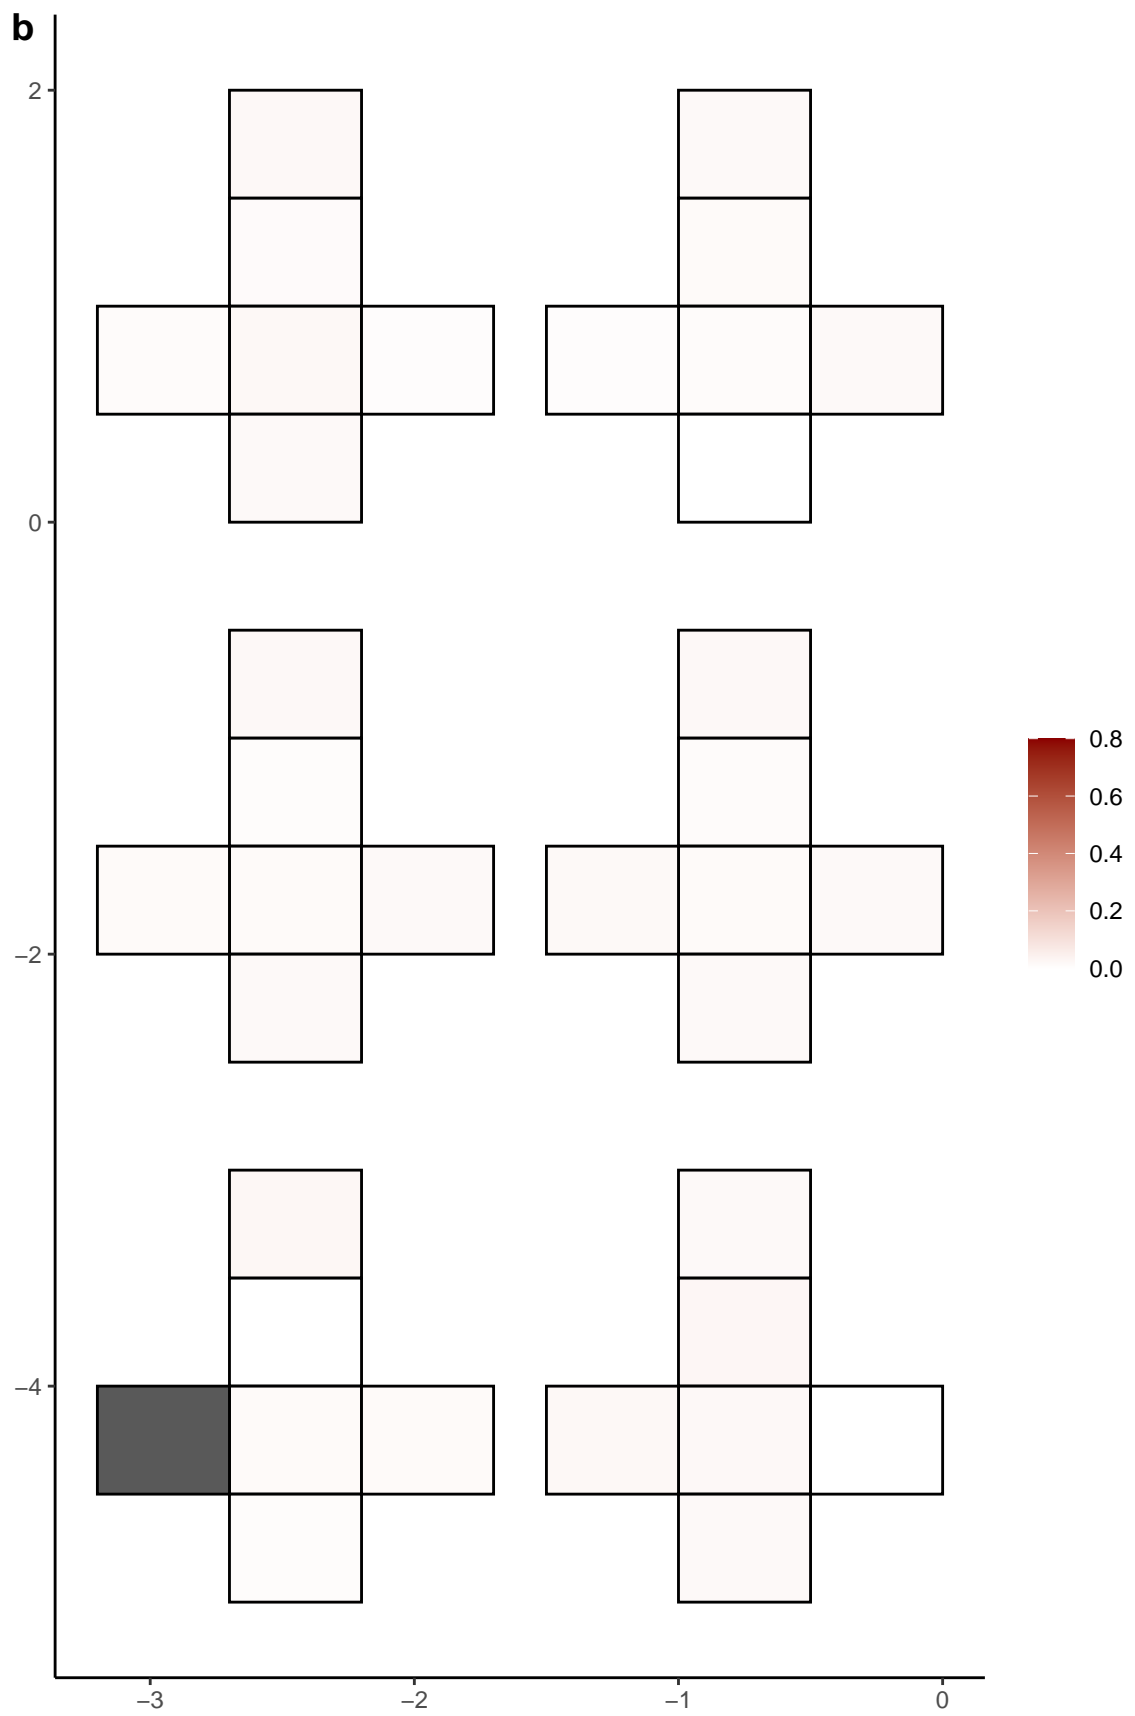

**a** ID01 5-72178944-ACG-A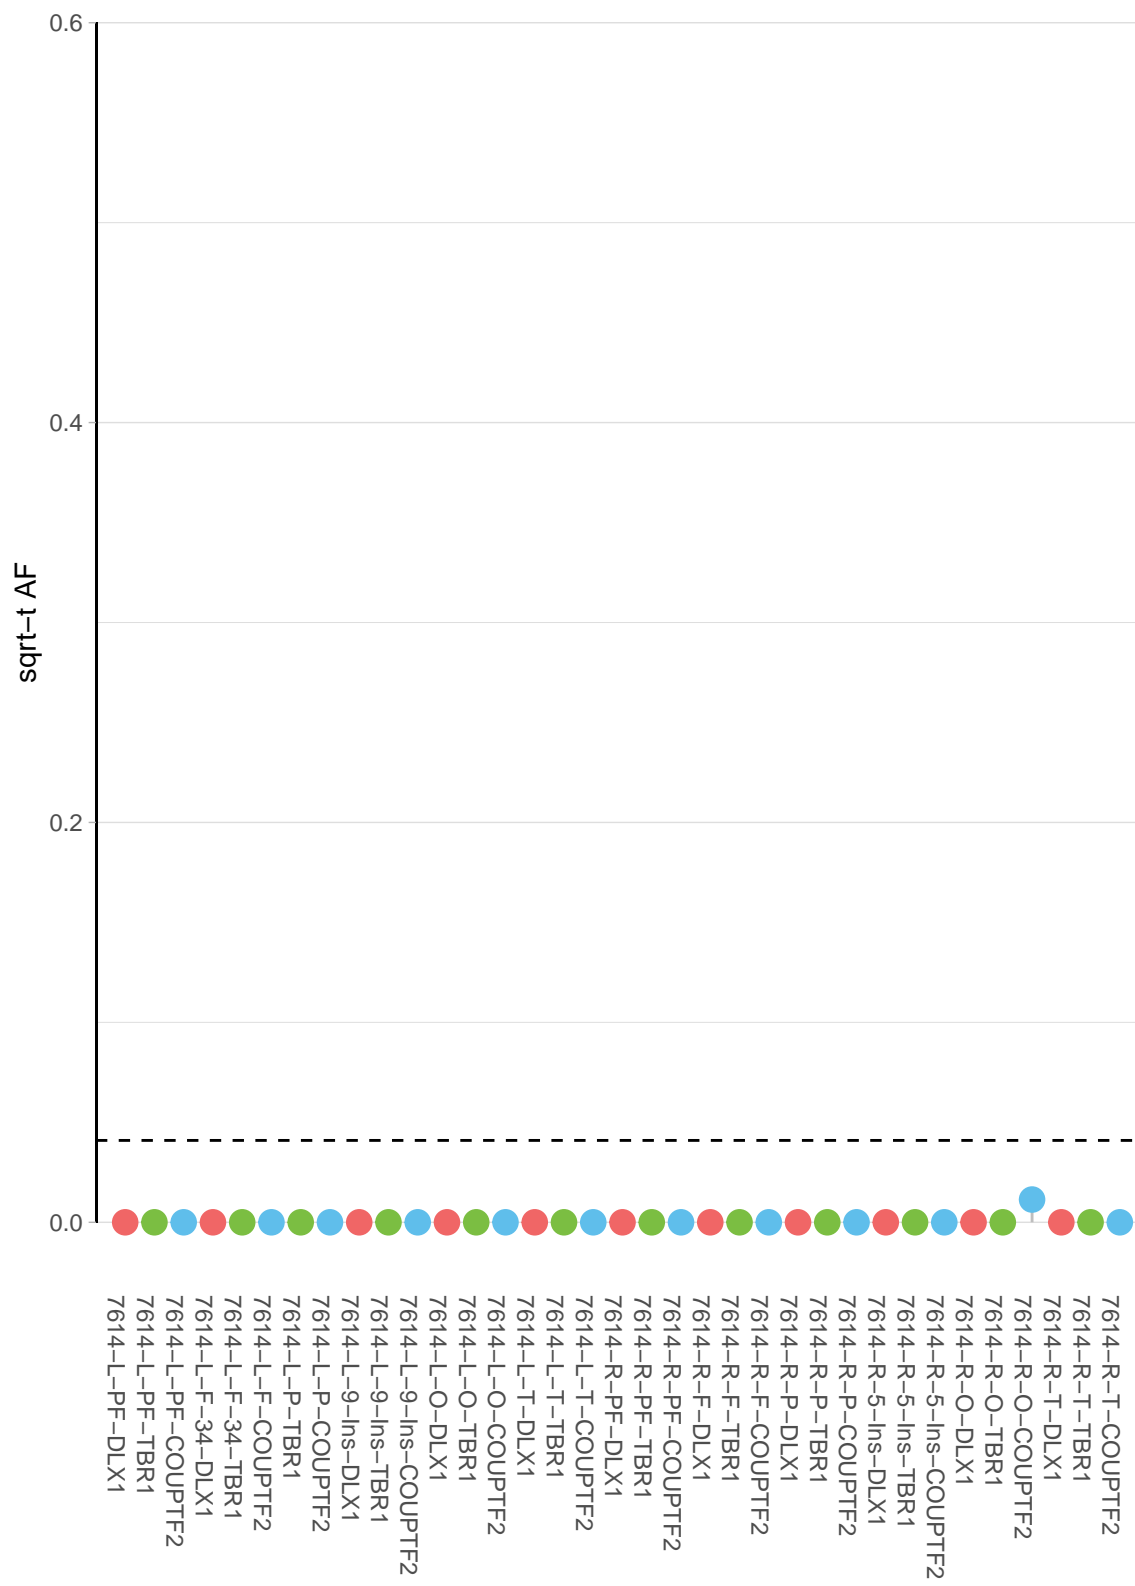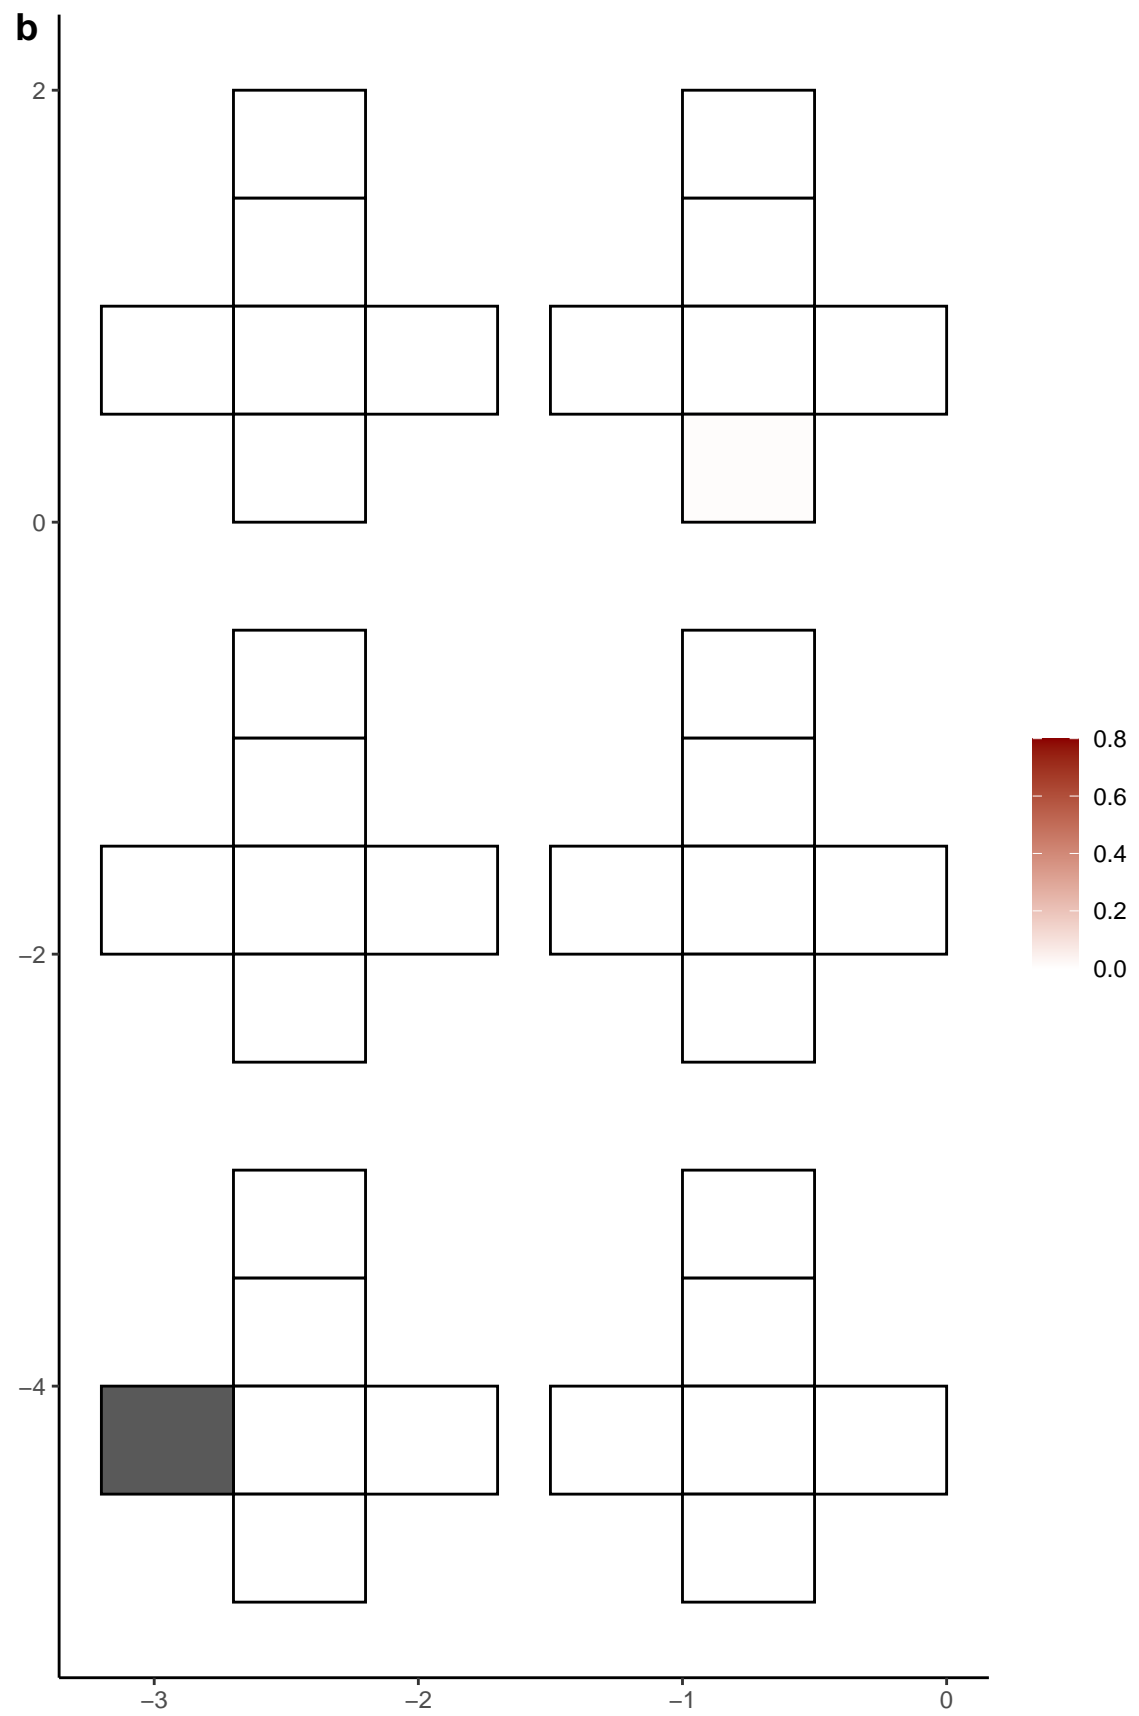

**a** ID01 5-72392587-A-G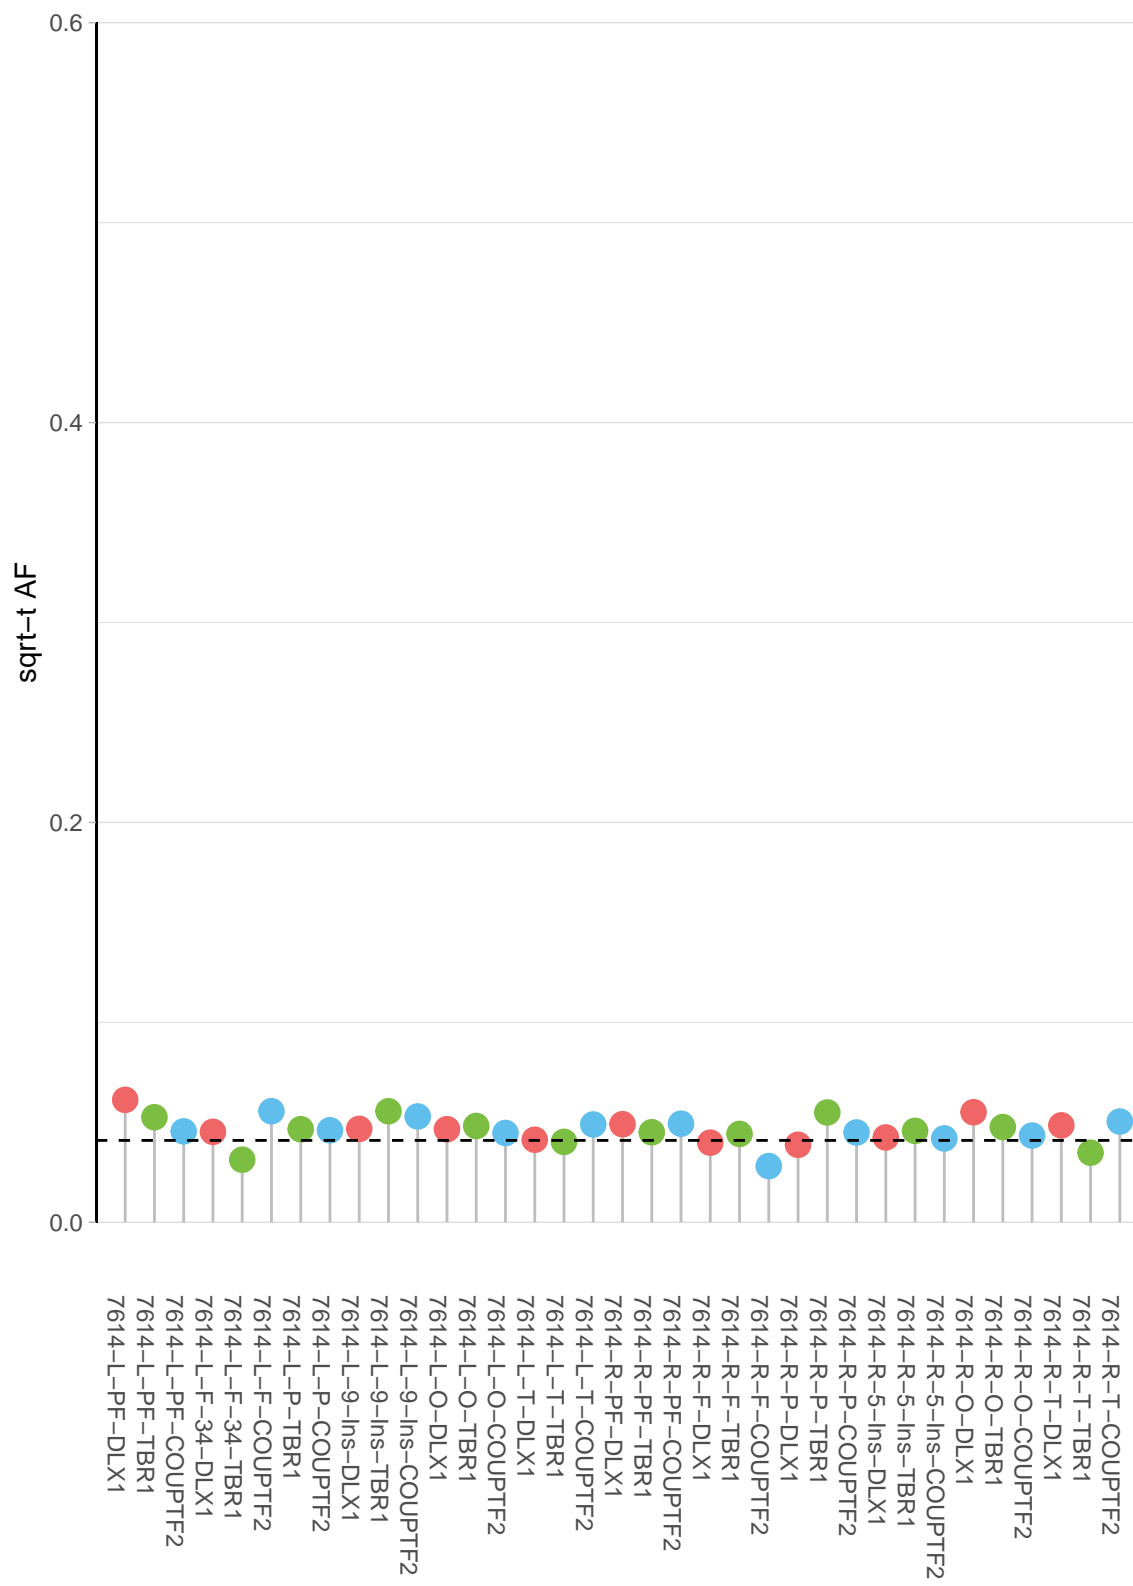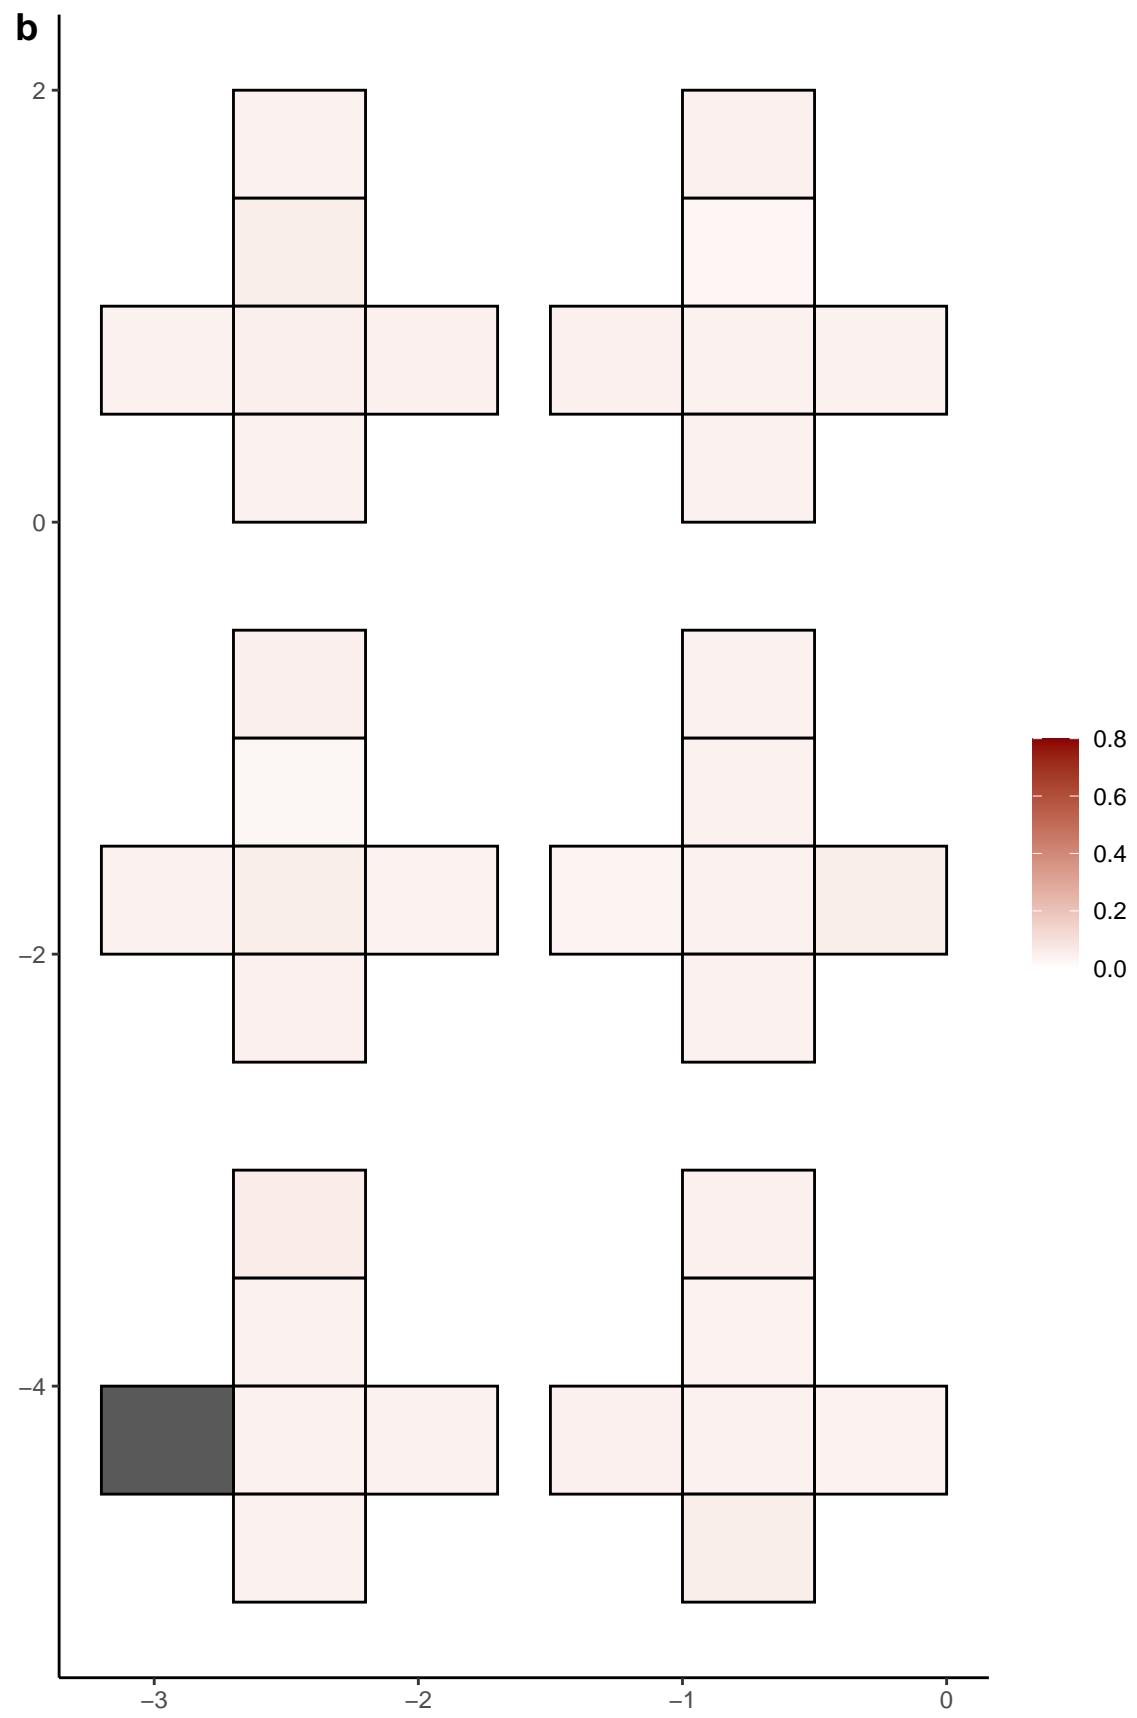



**a** ID01 5-85460580-G-T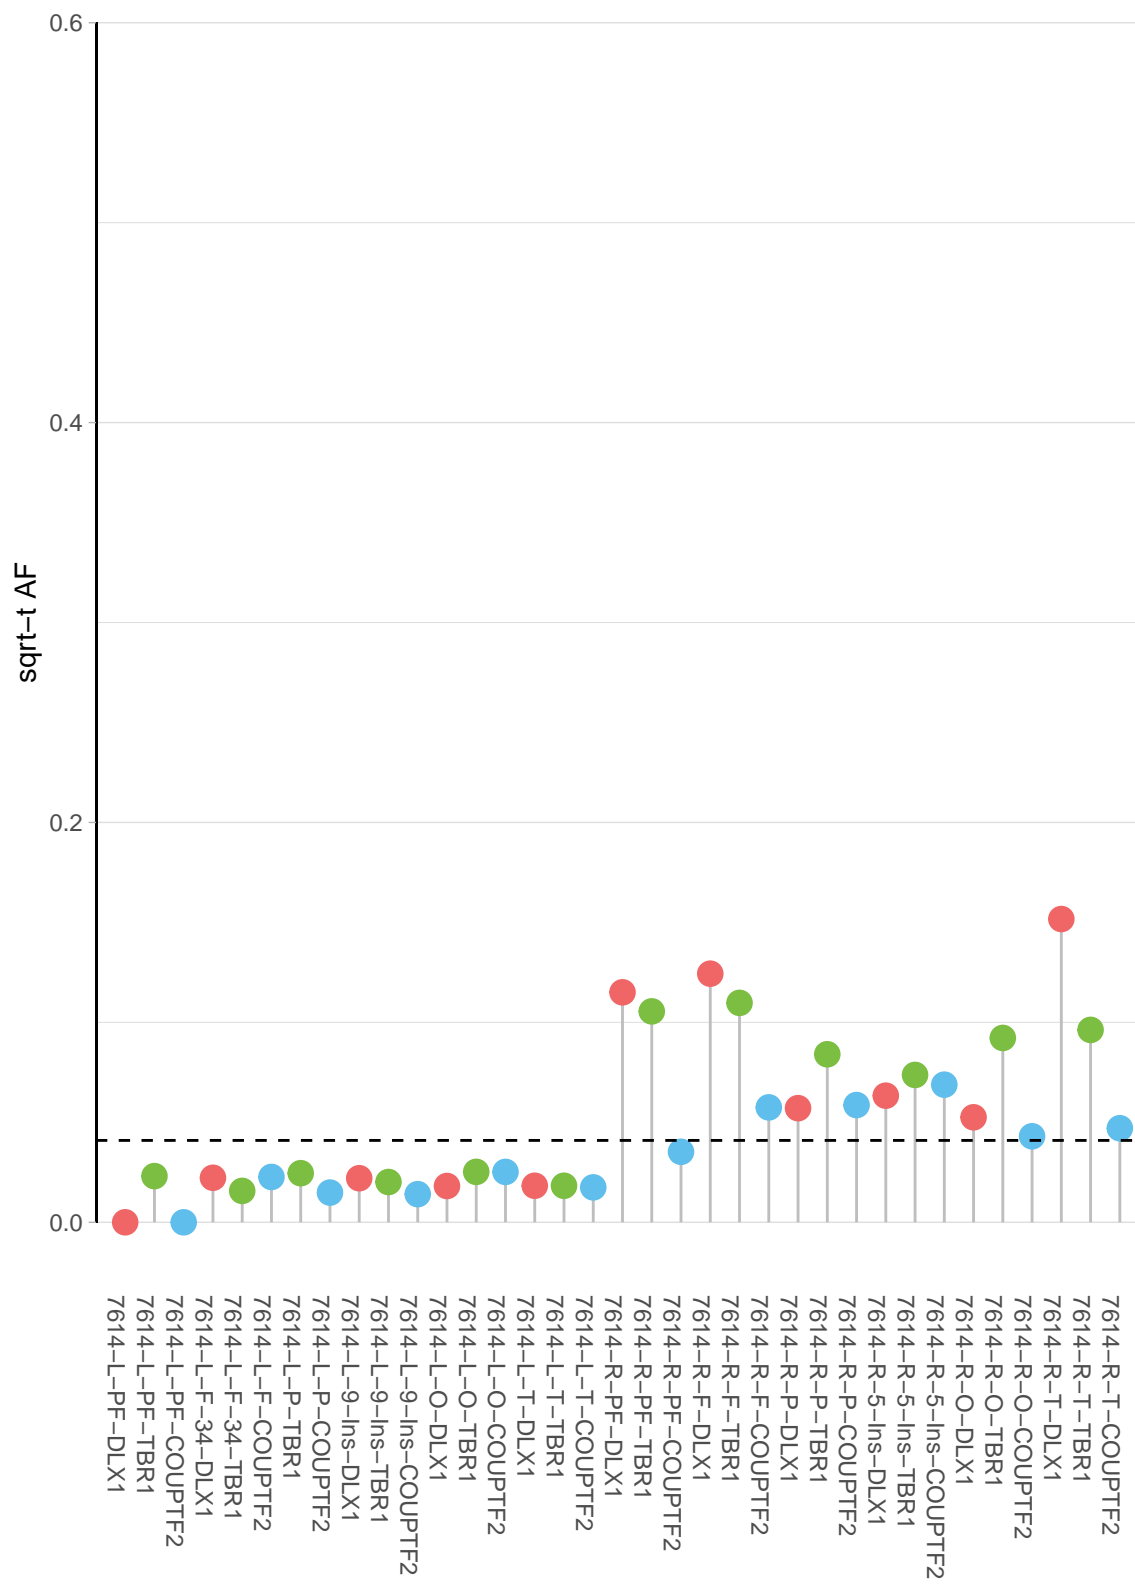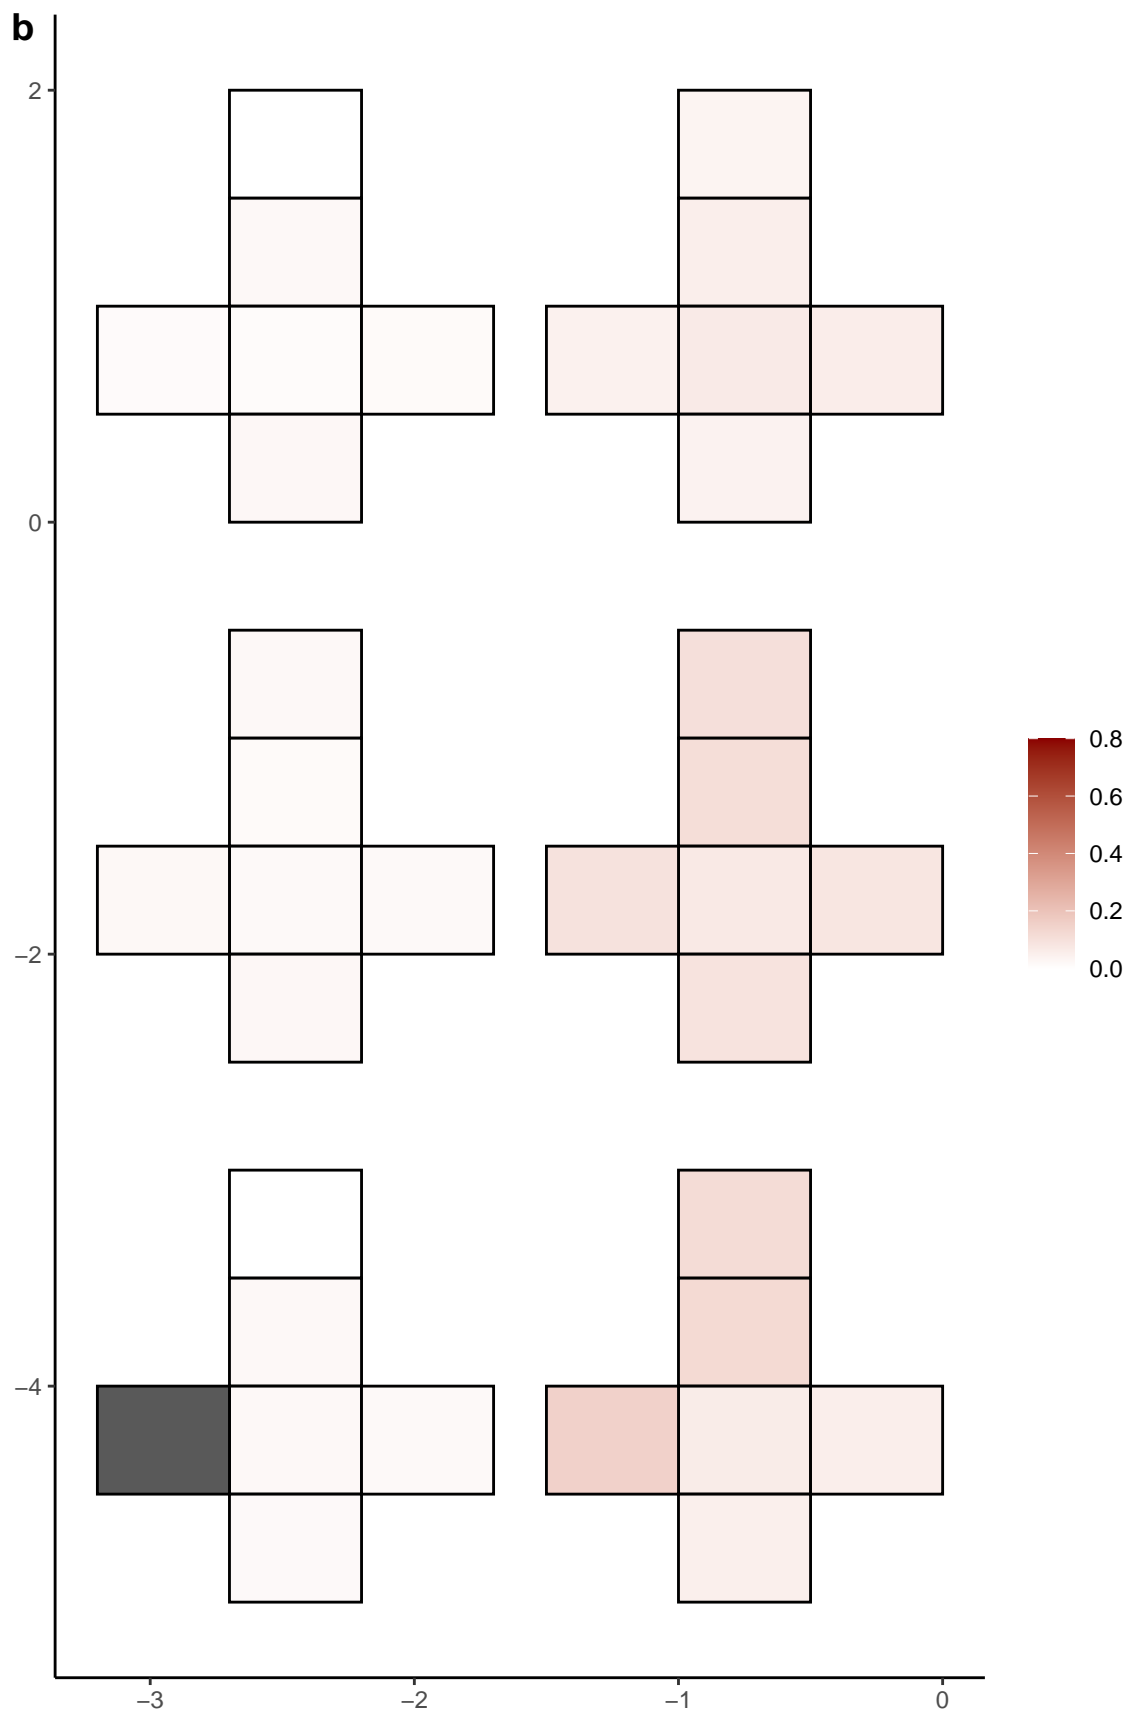

**a** ID01 6-101898717-G-A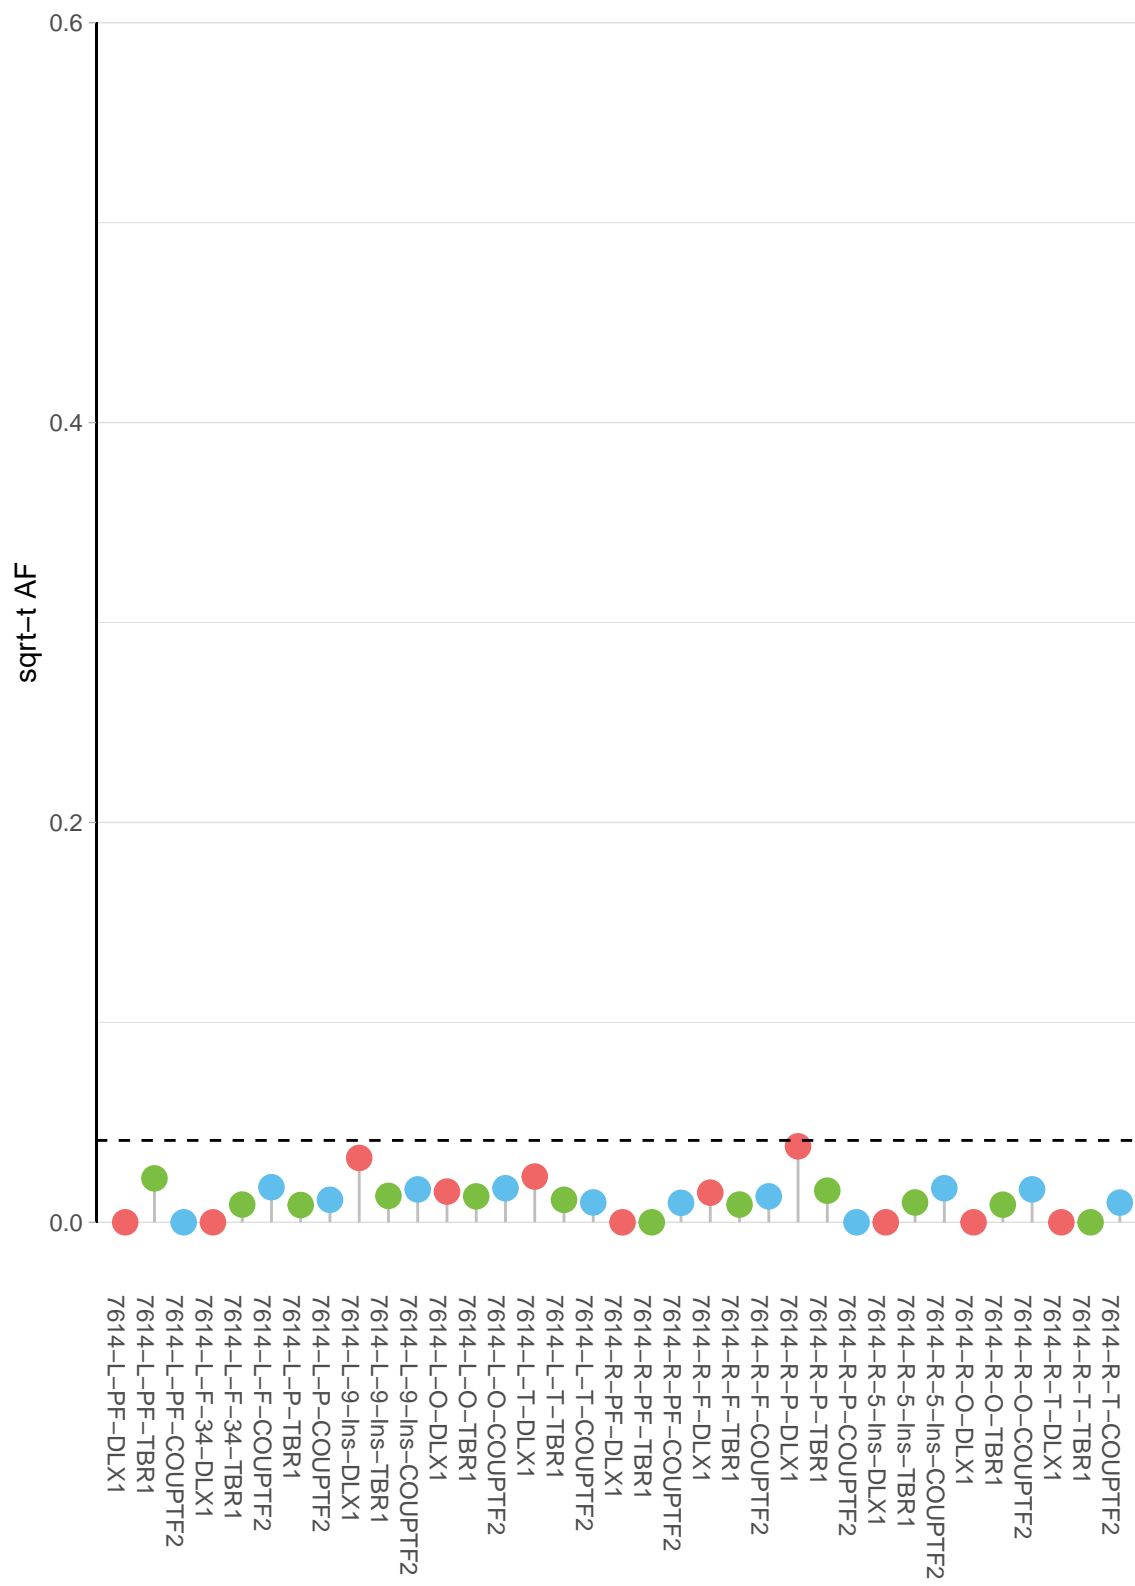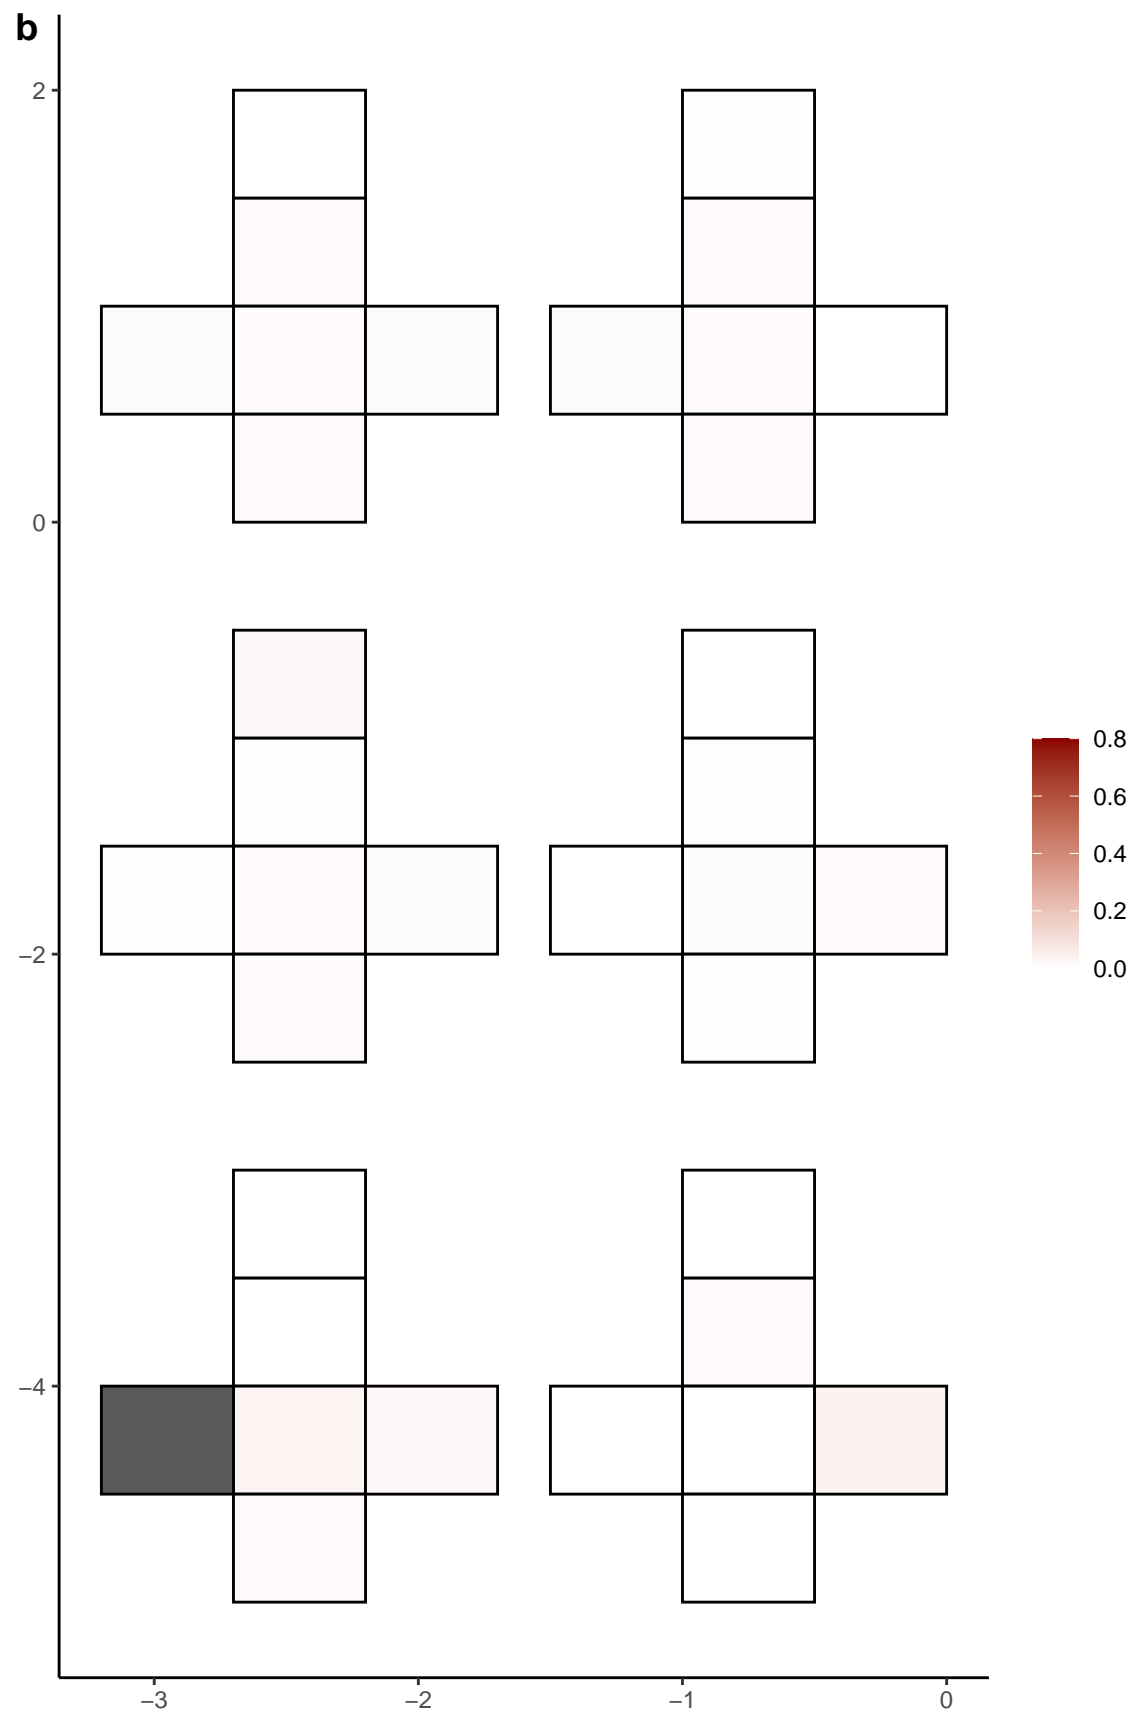

**a** ID01 6-110014503-C-T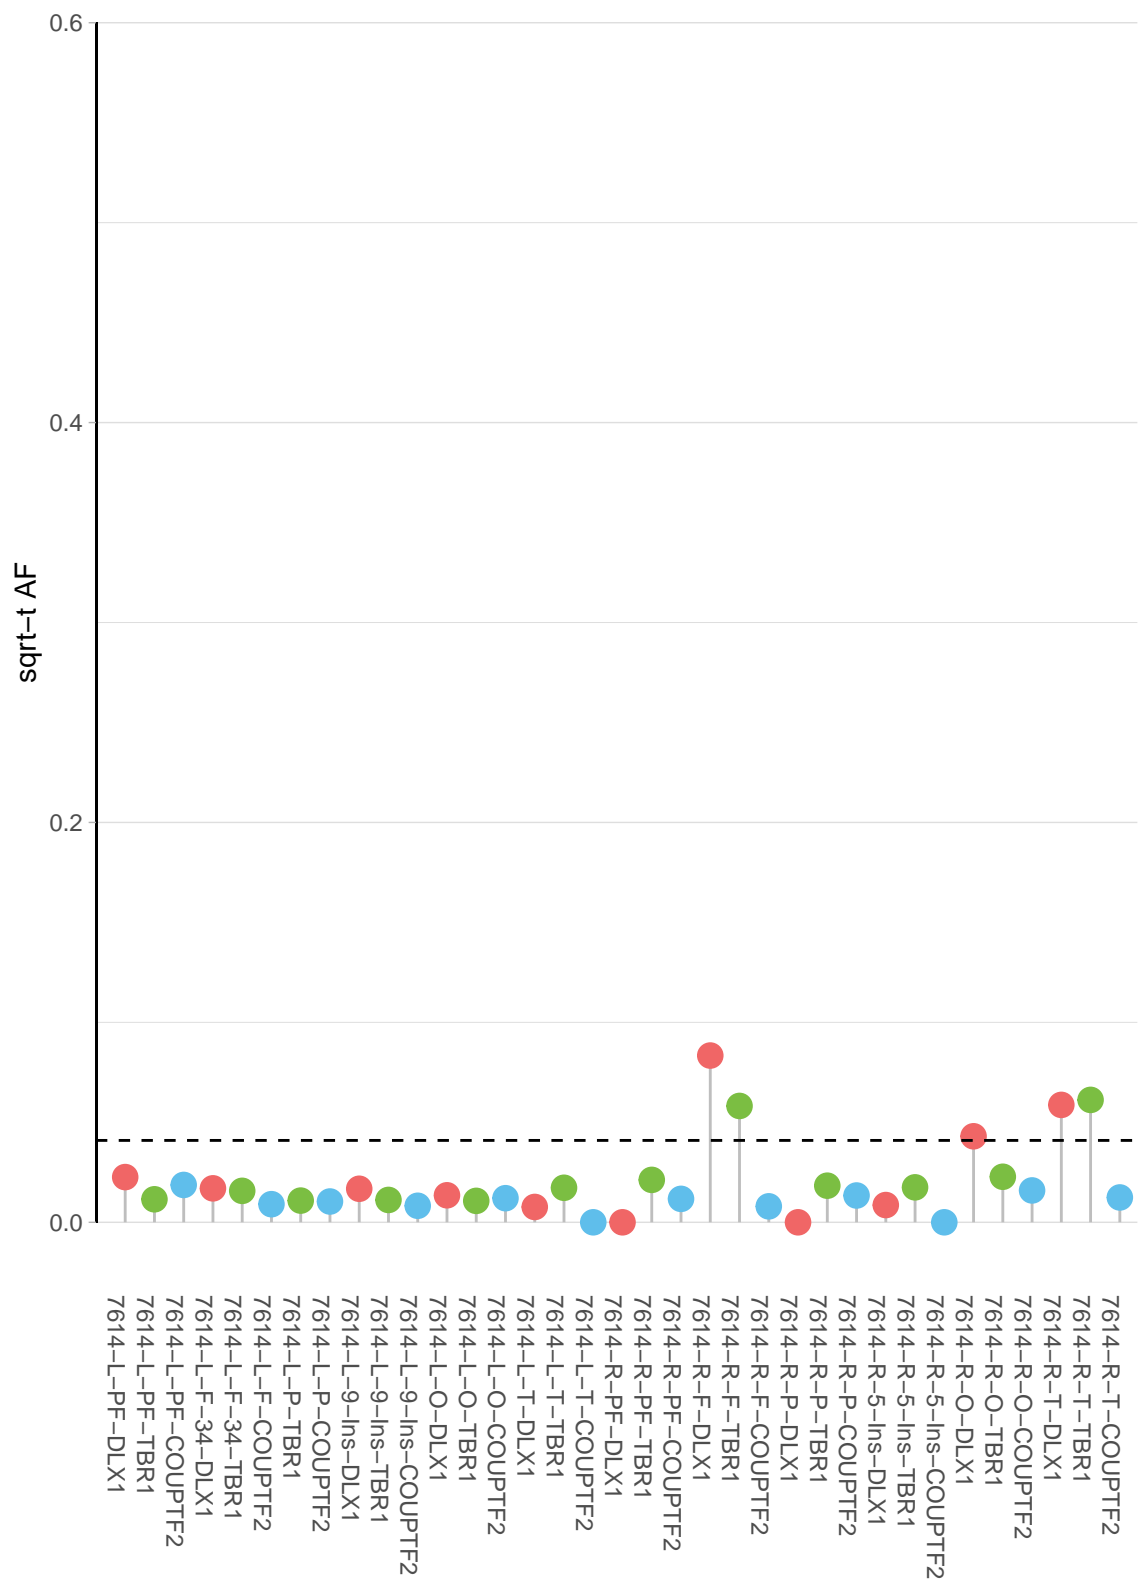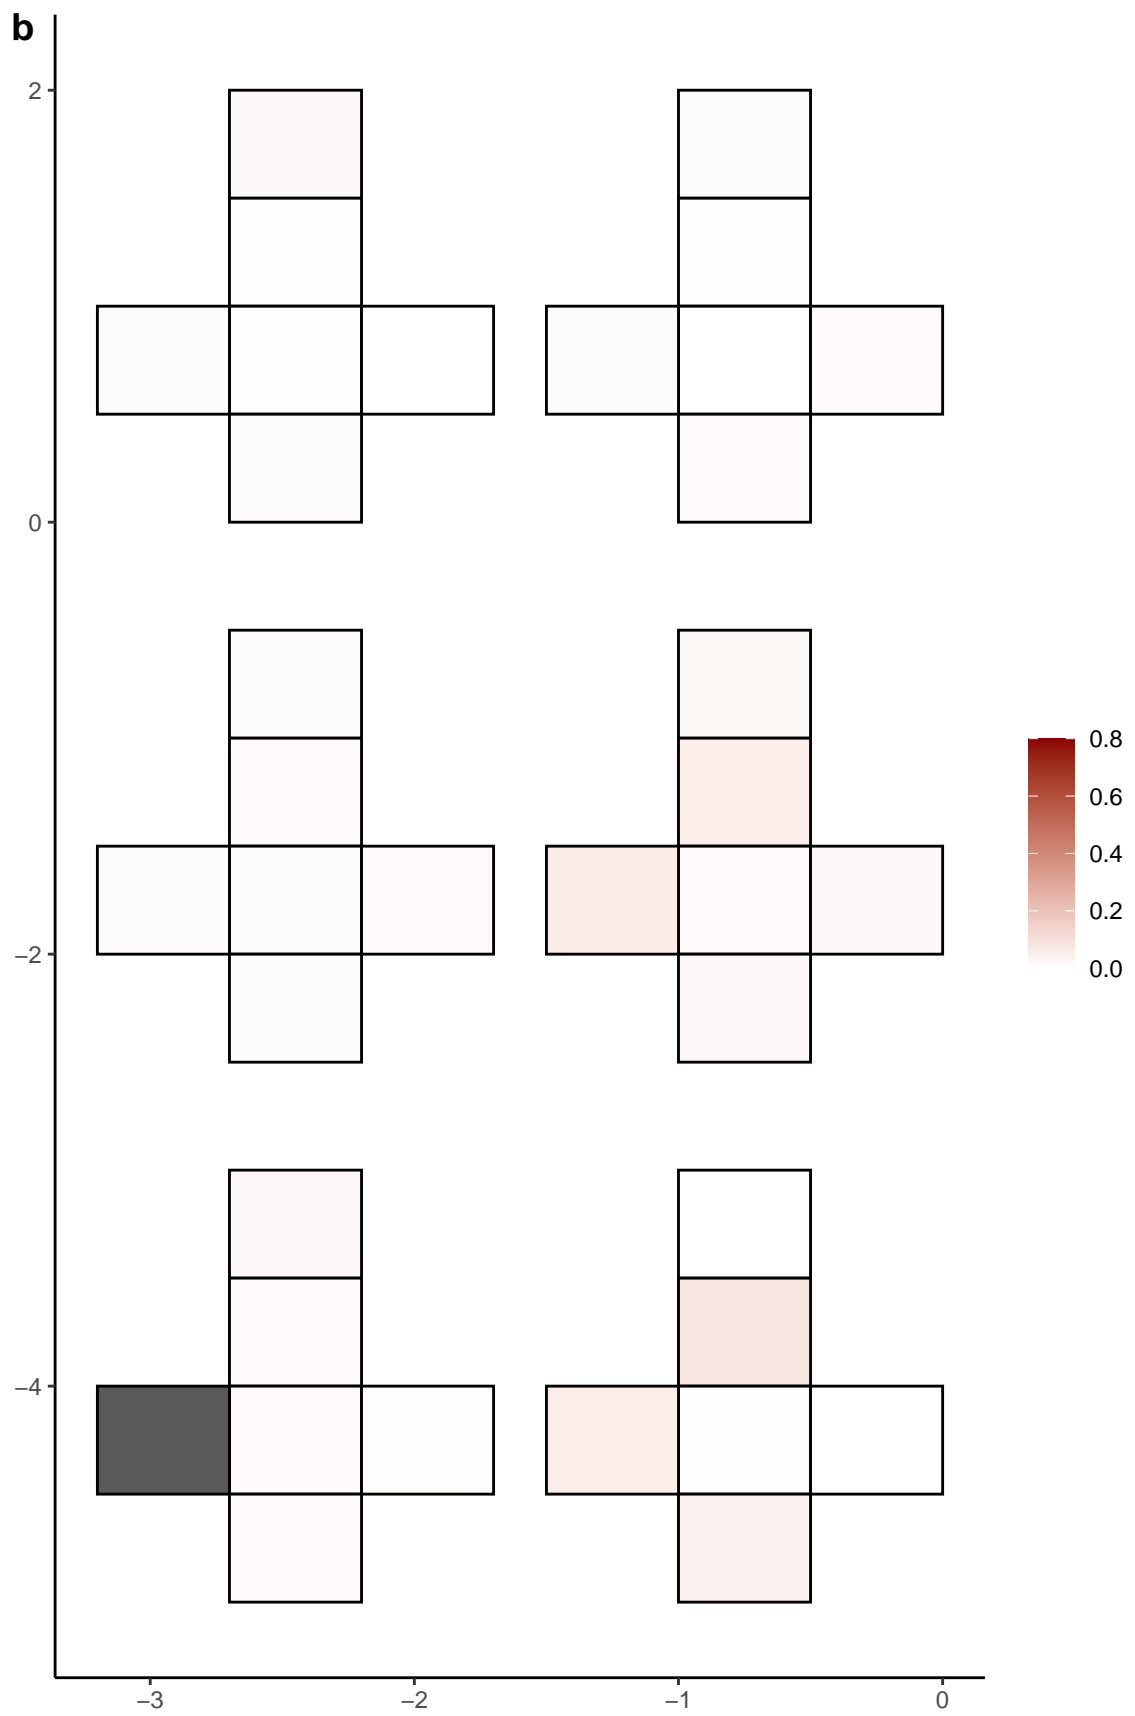

**a** ID01 6-114610552-GAACA-G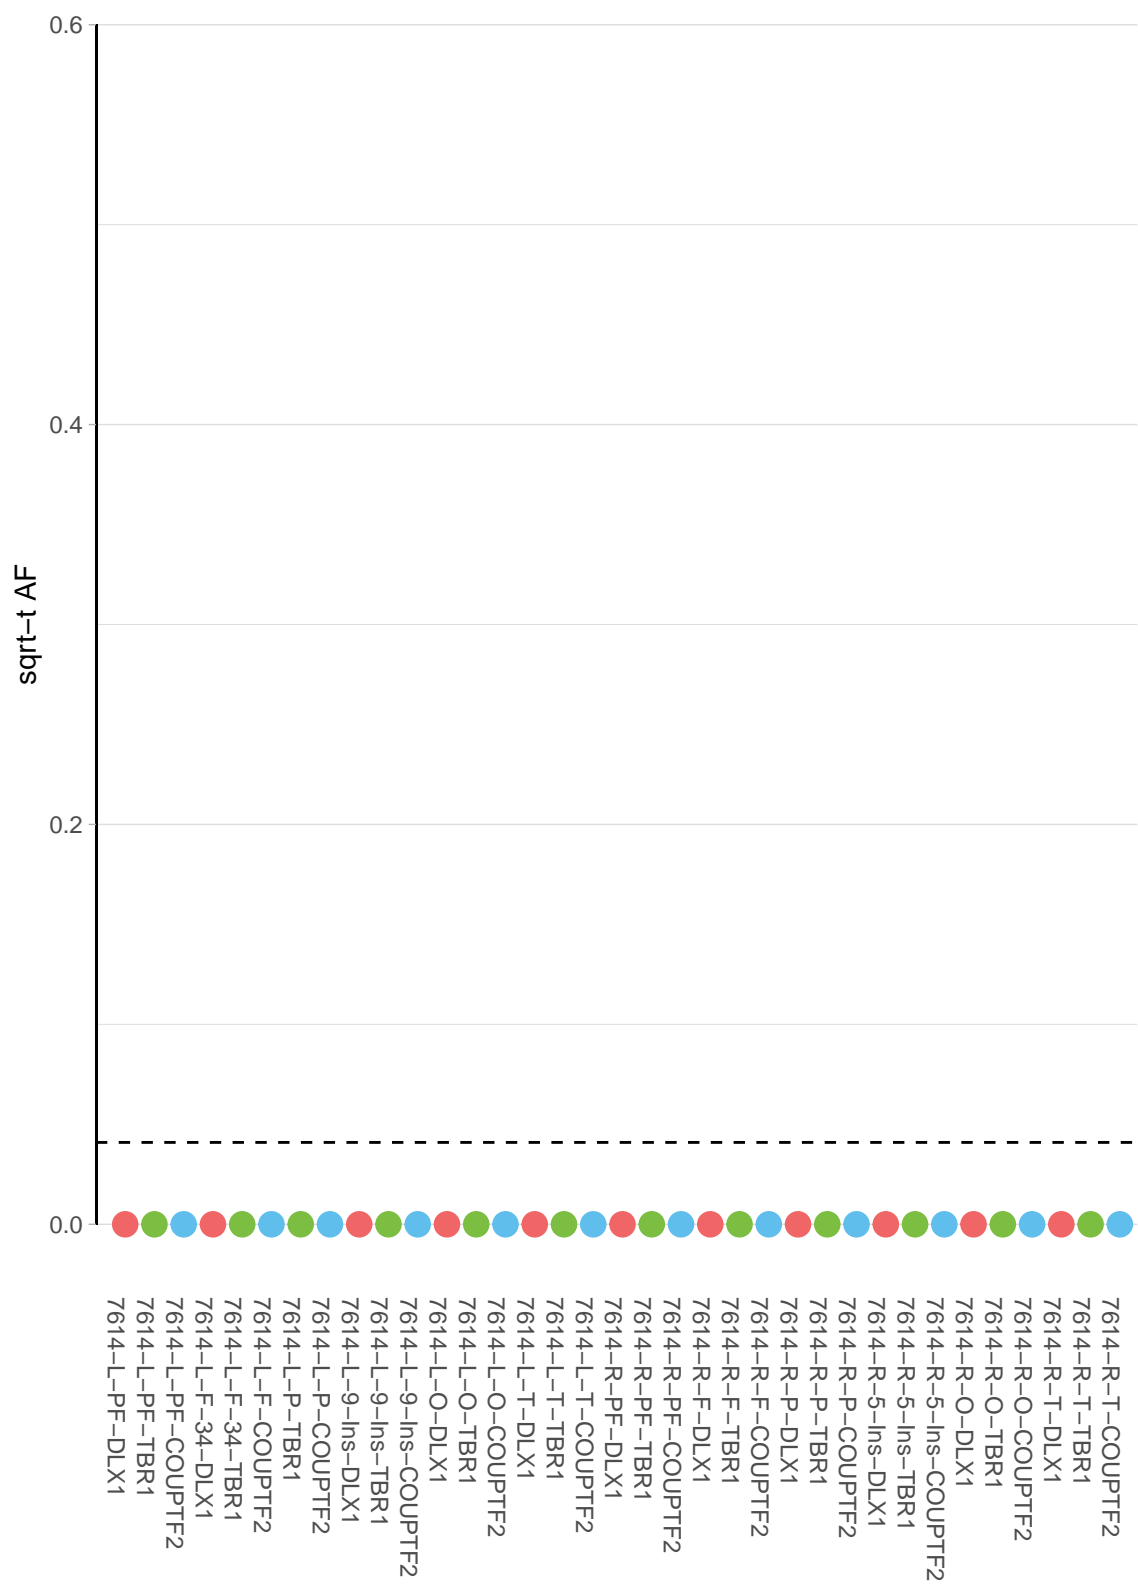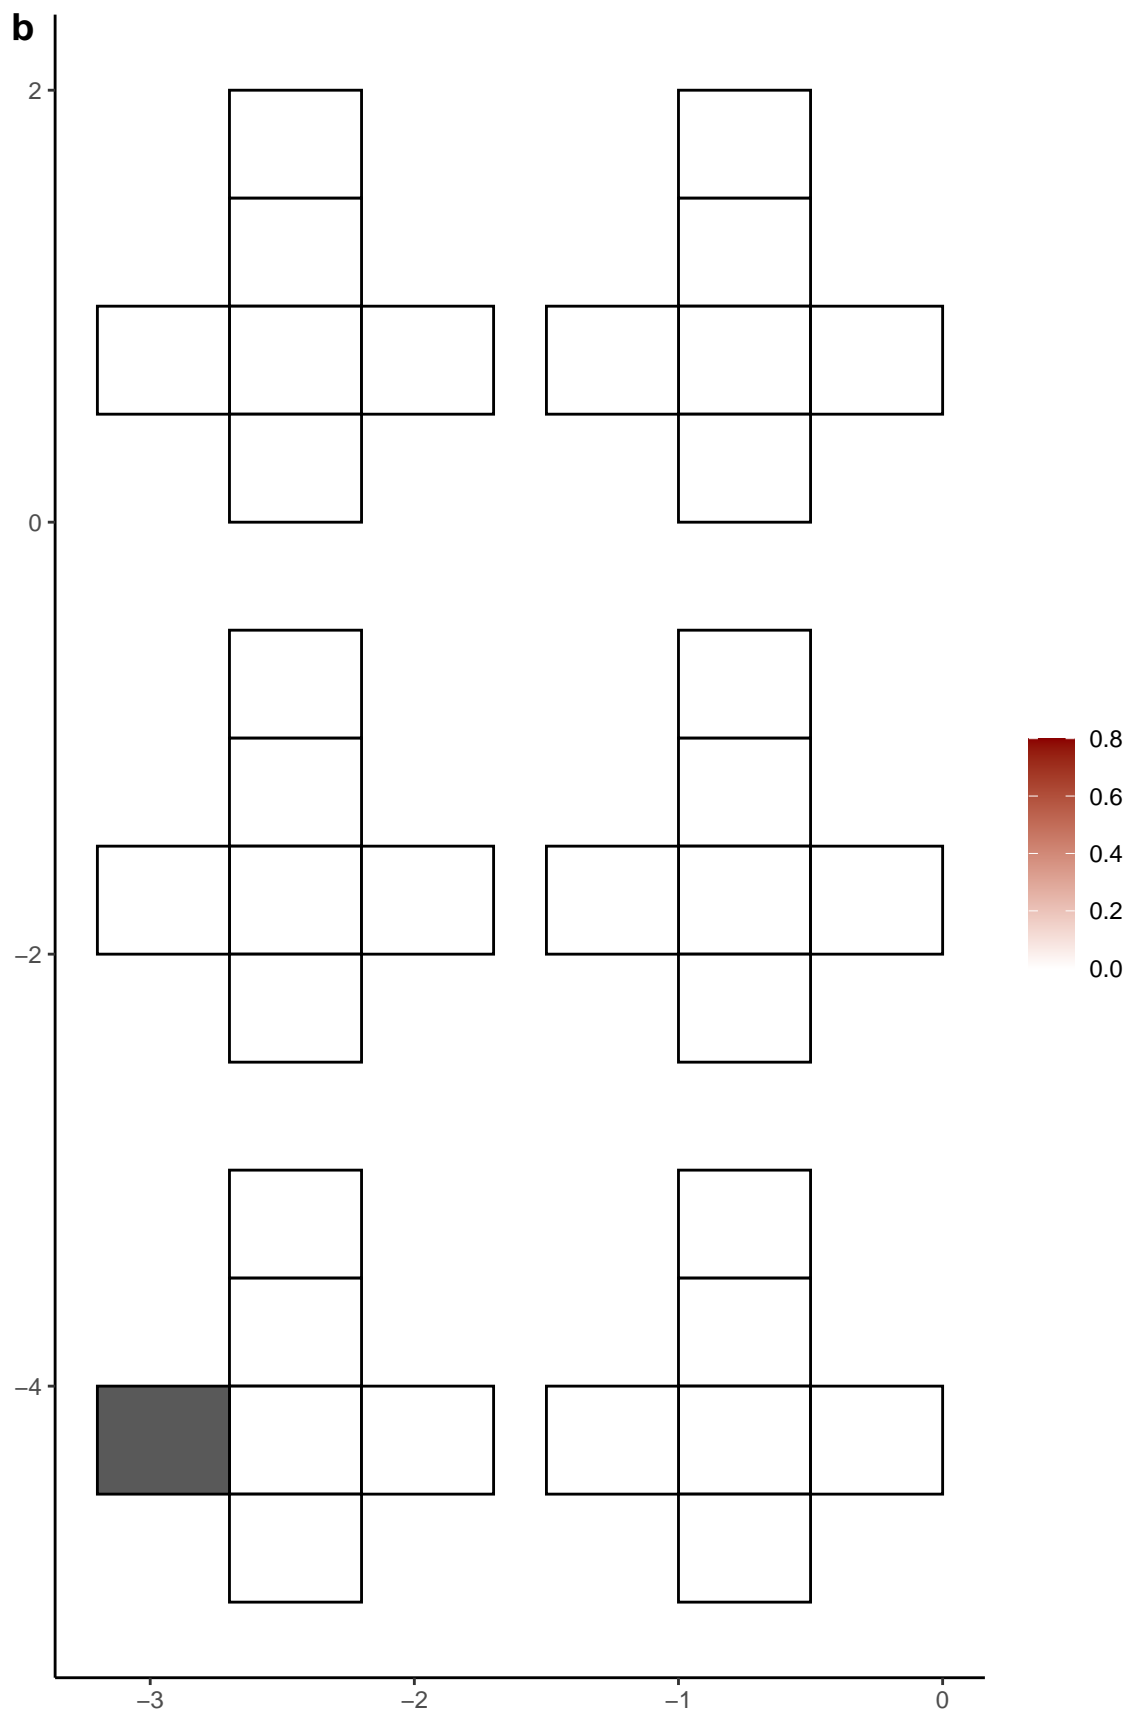

**a** ID01 6-121420086-C-T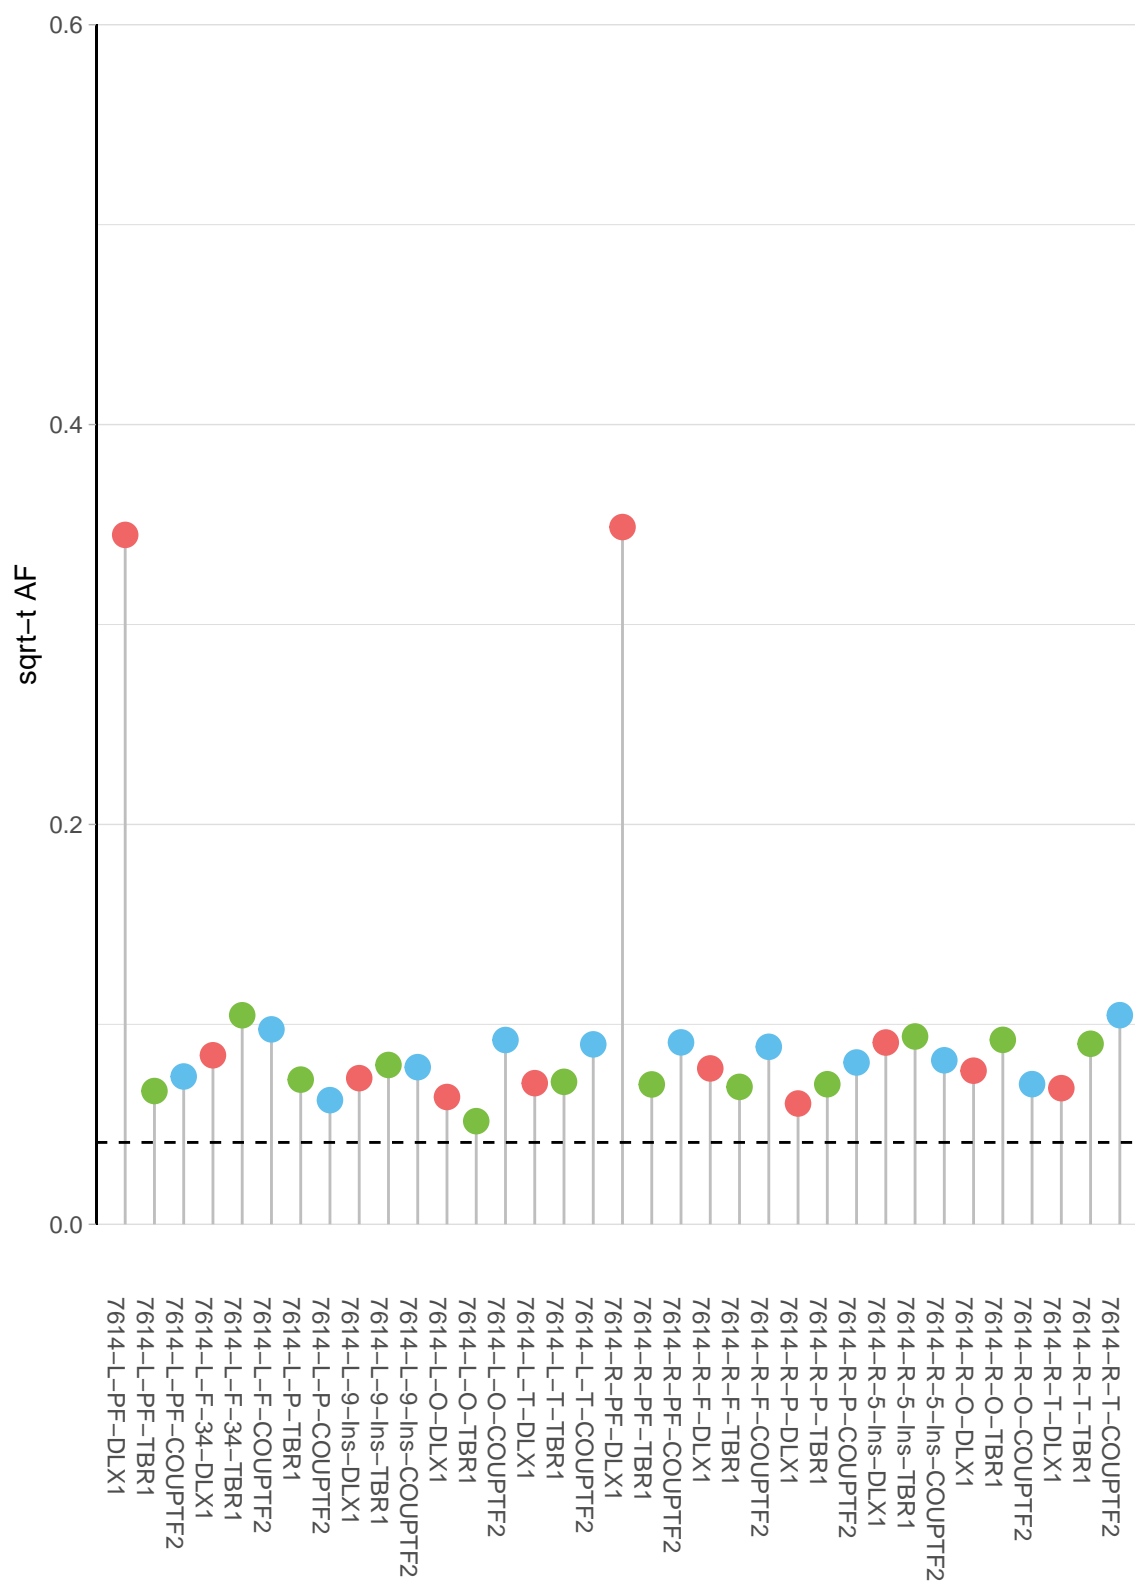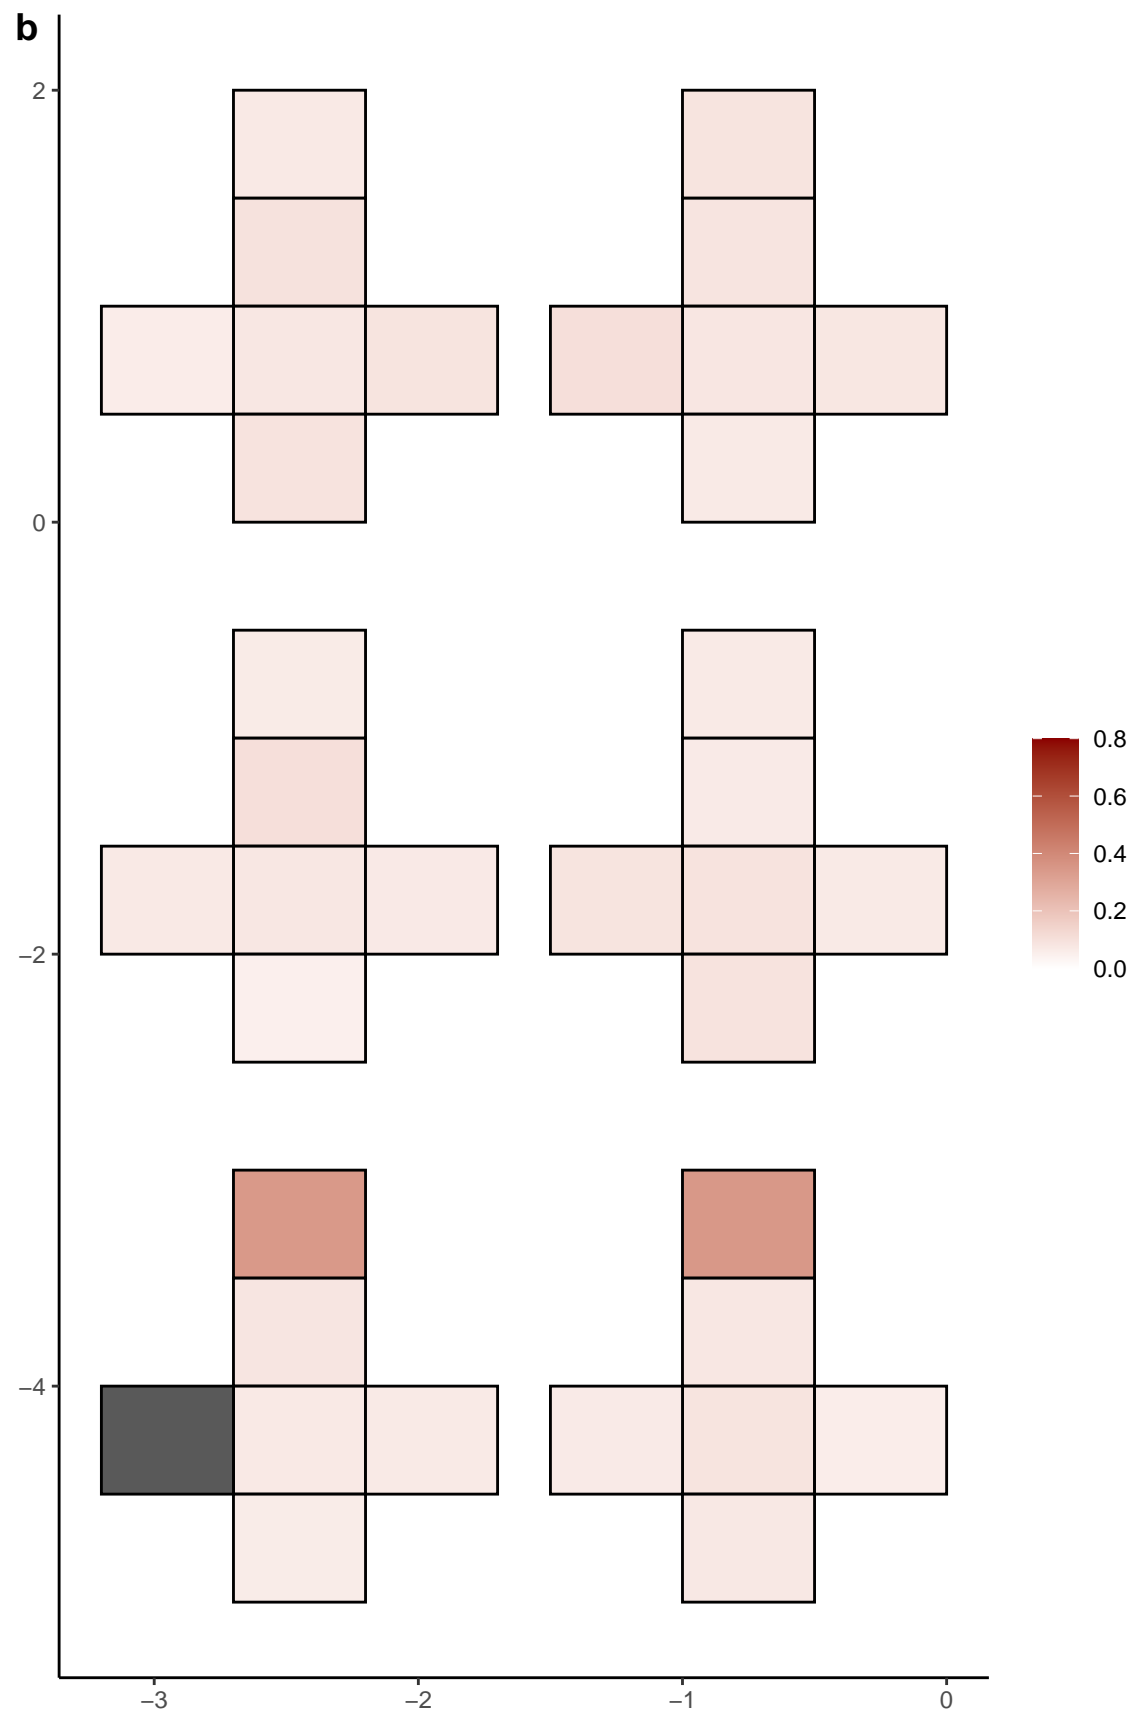

**a** ID01 6-122610884-C-T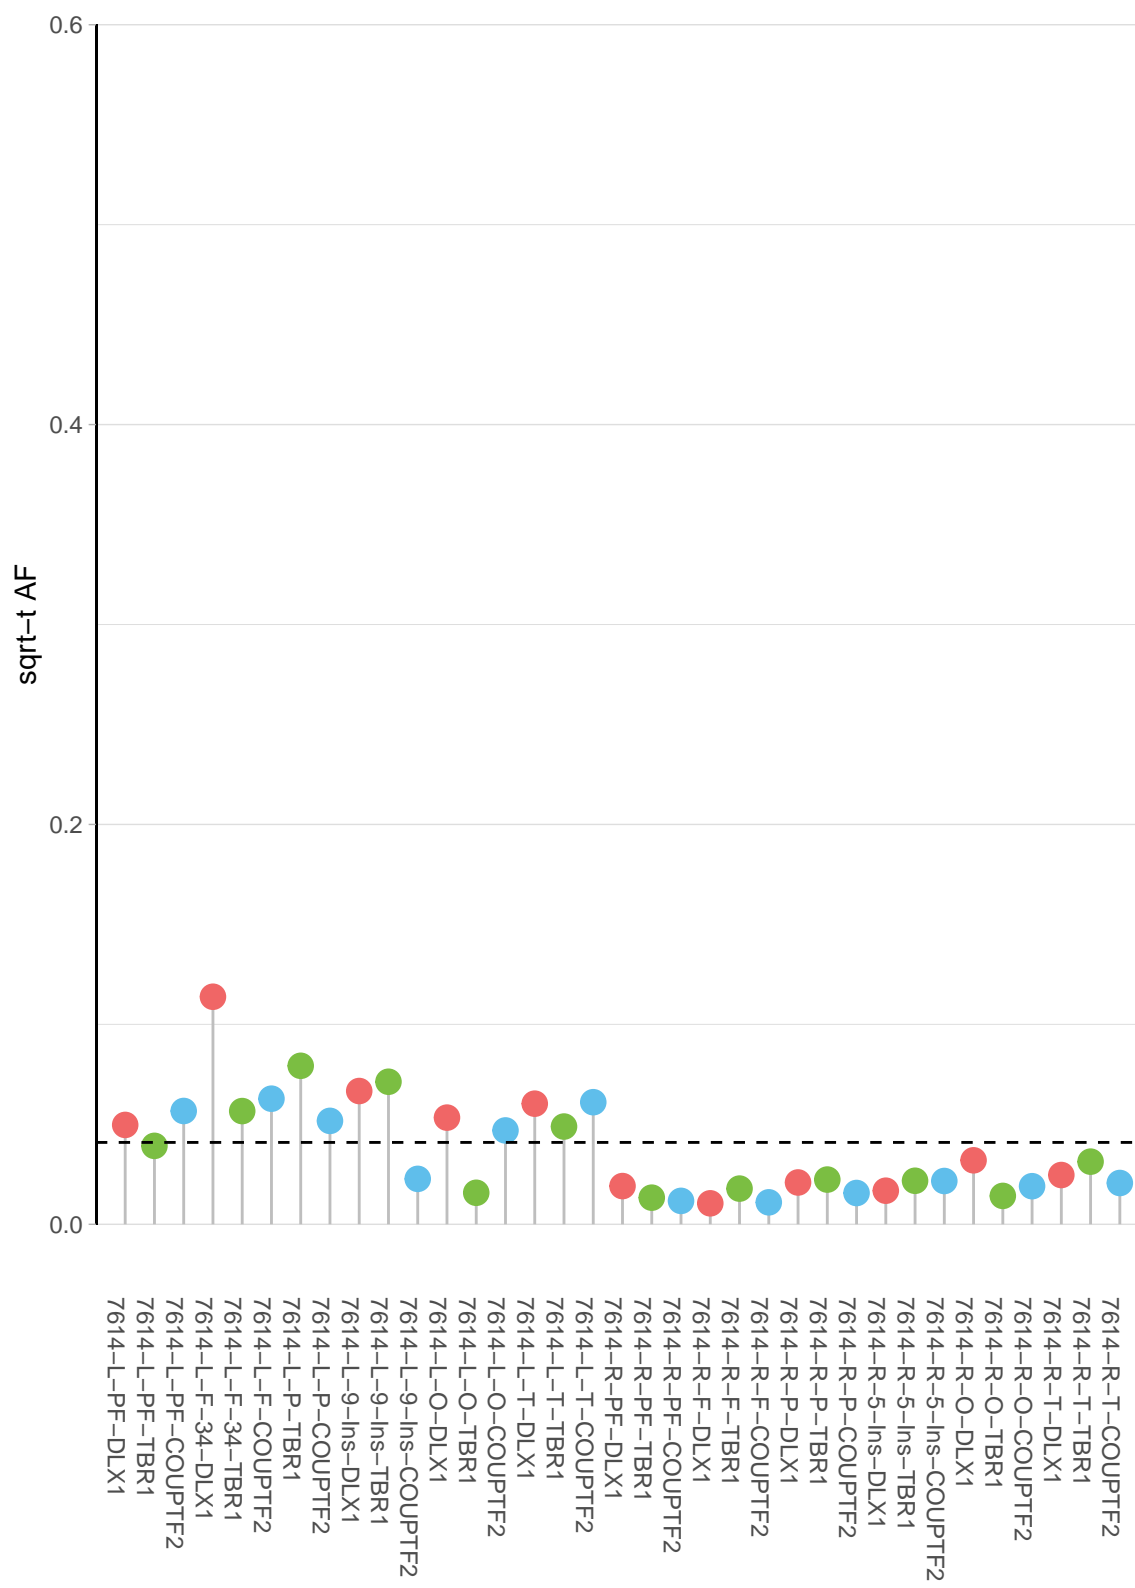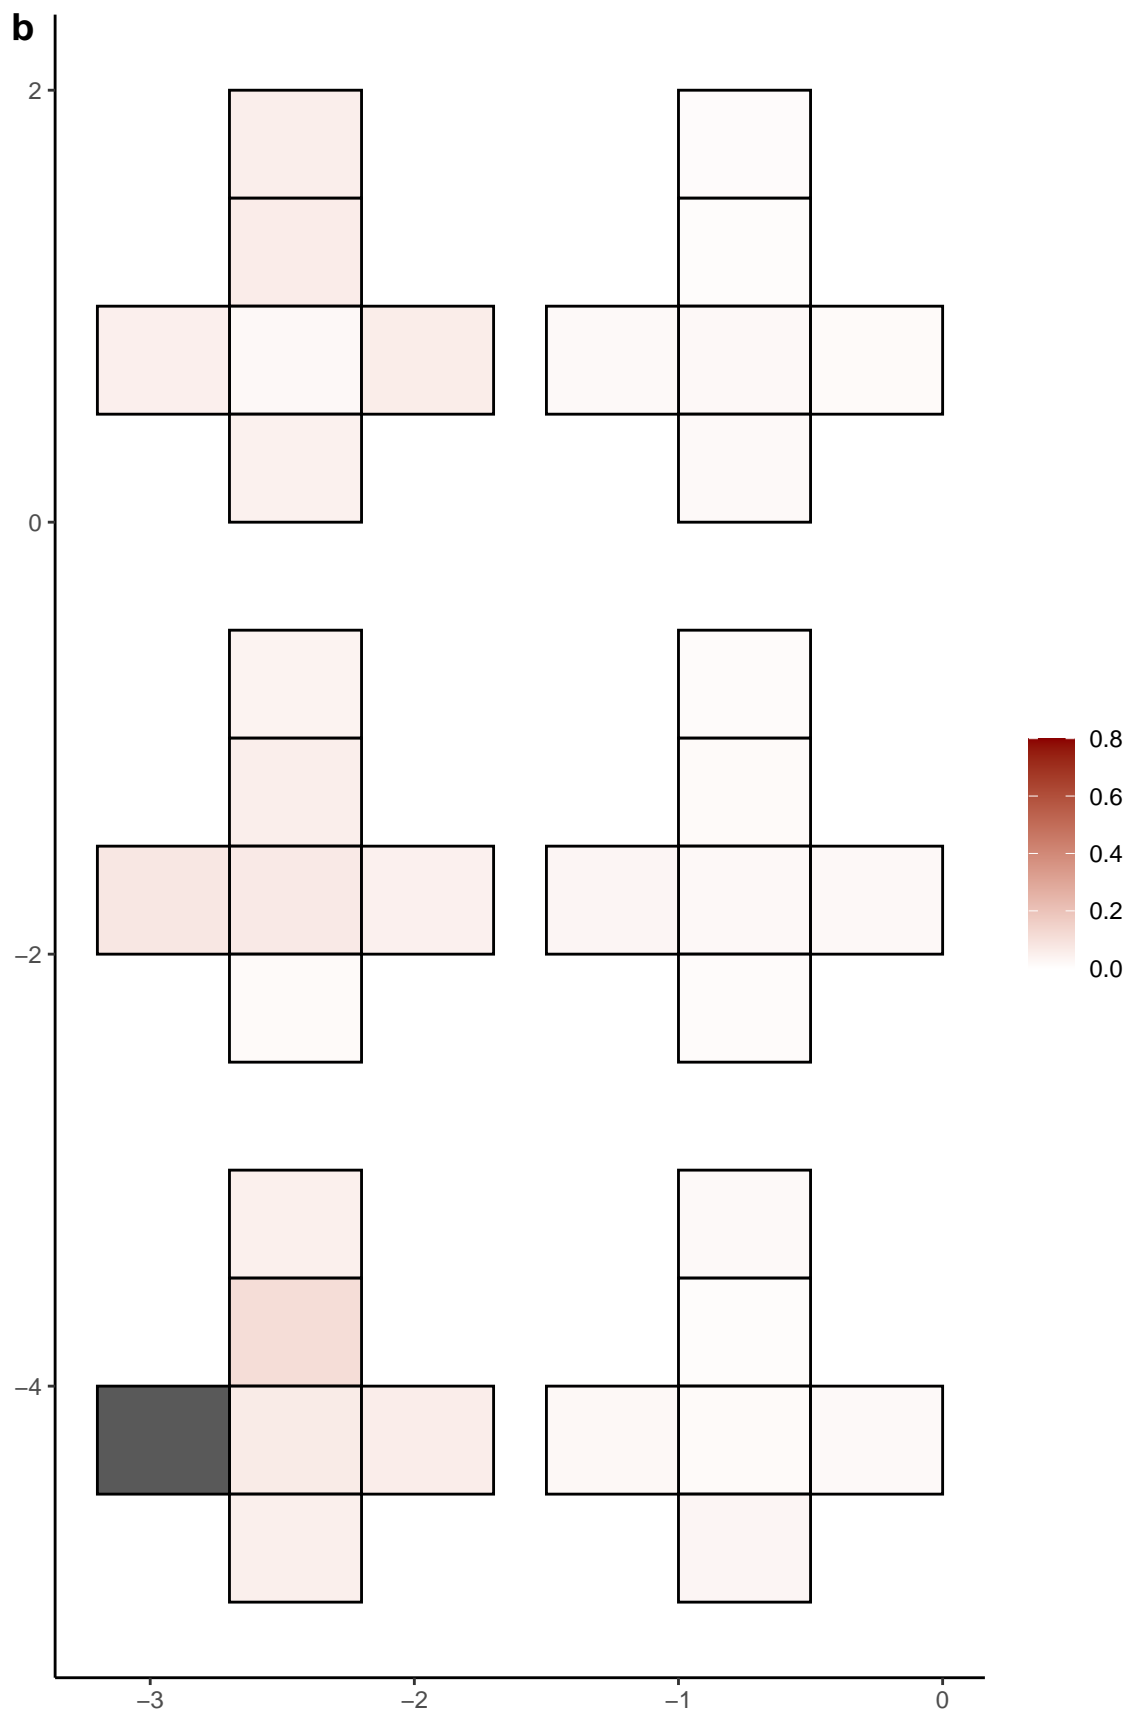

**a** ID01 6-125153224-A-C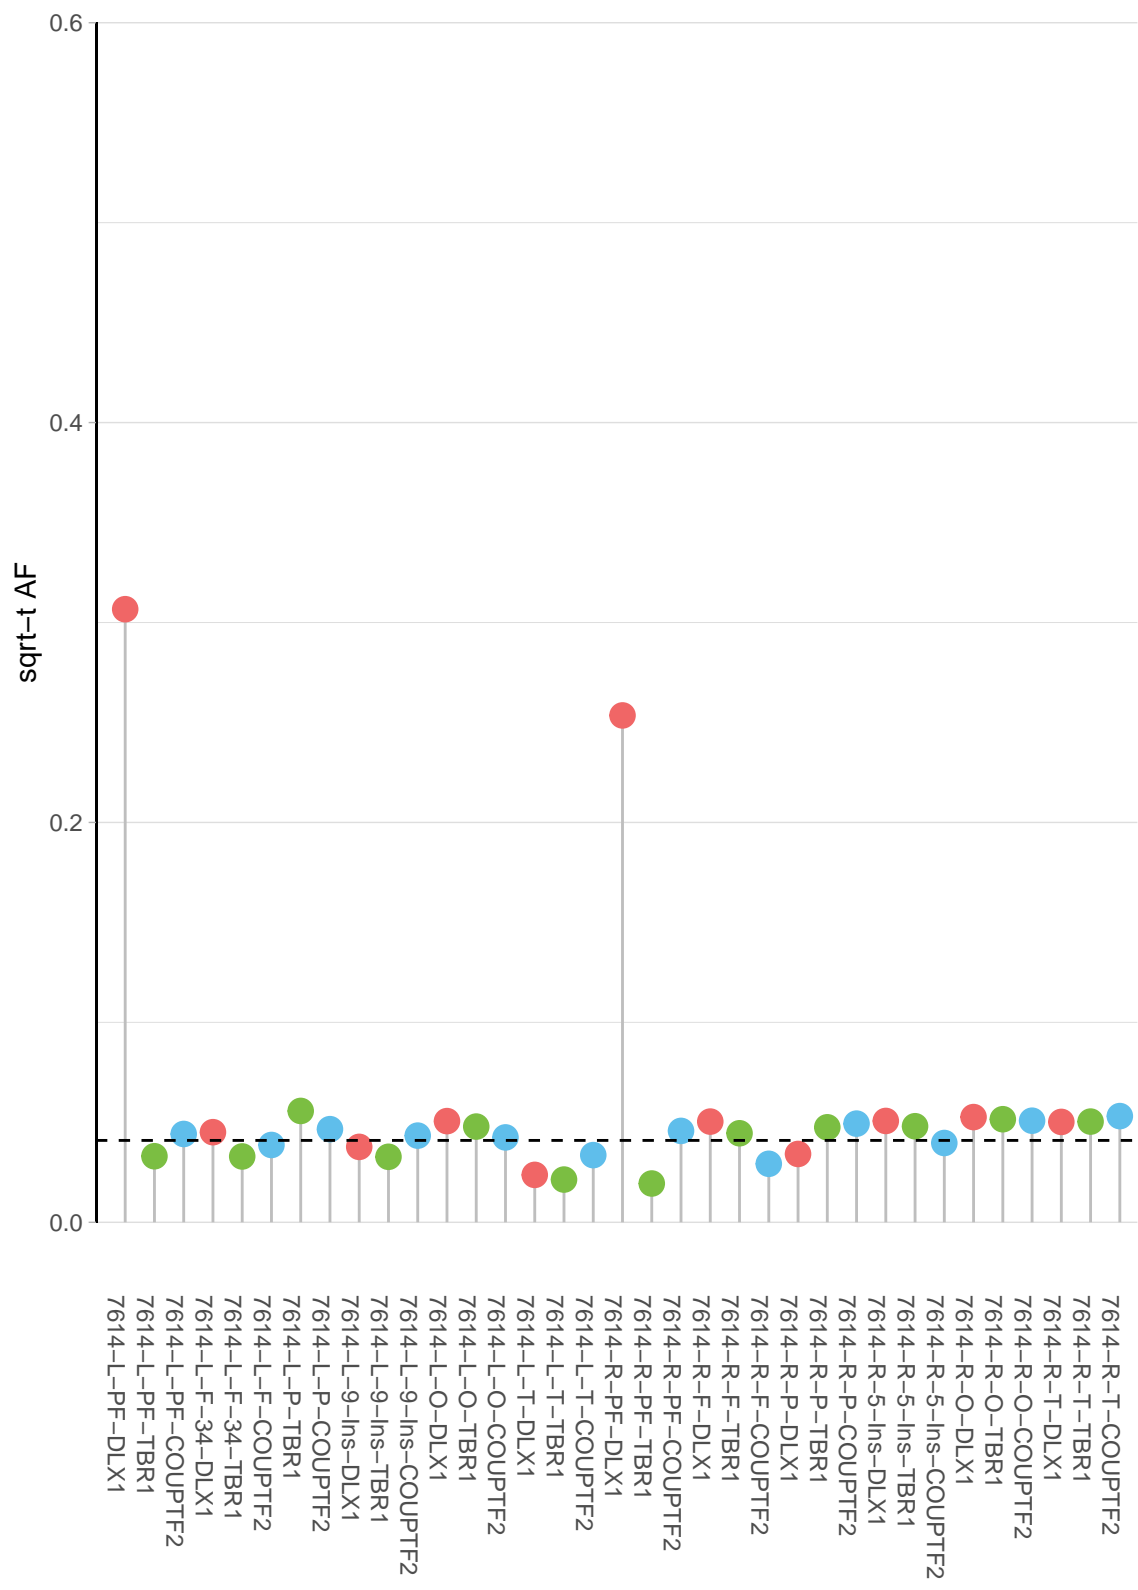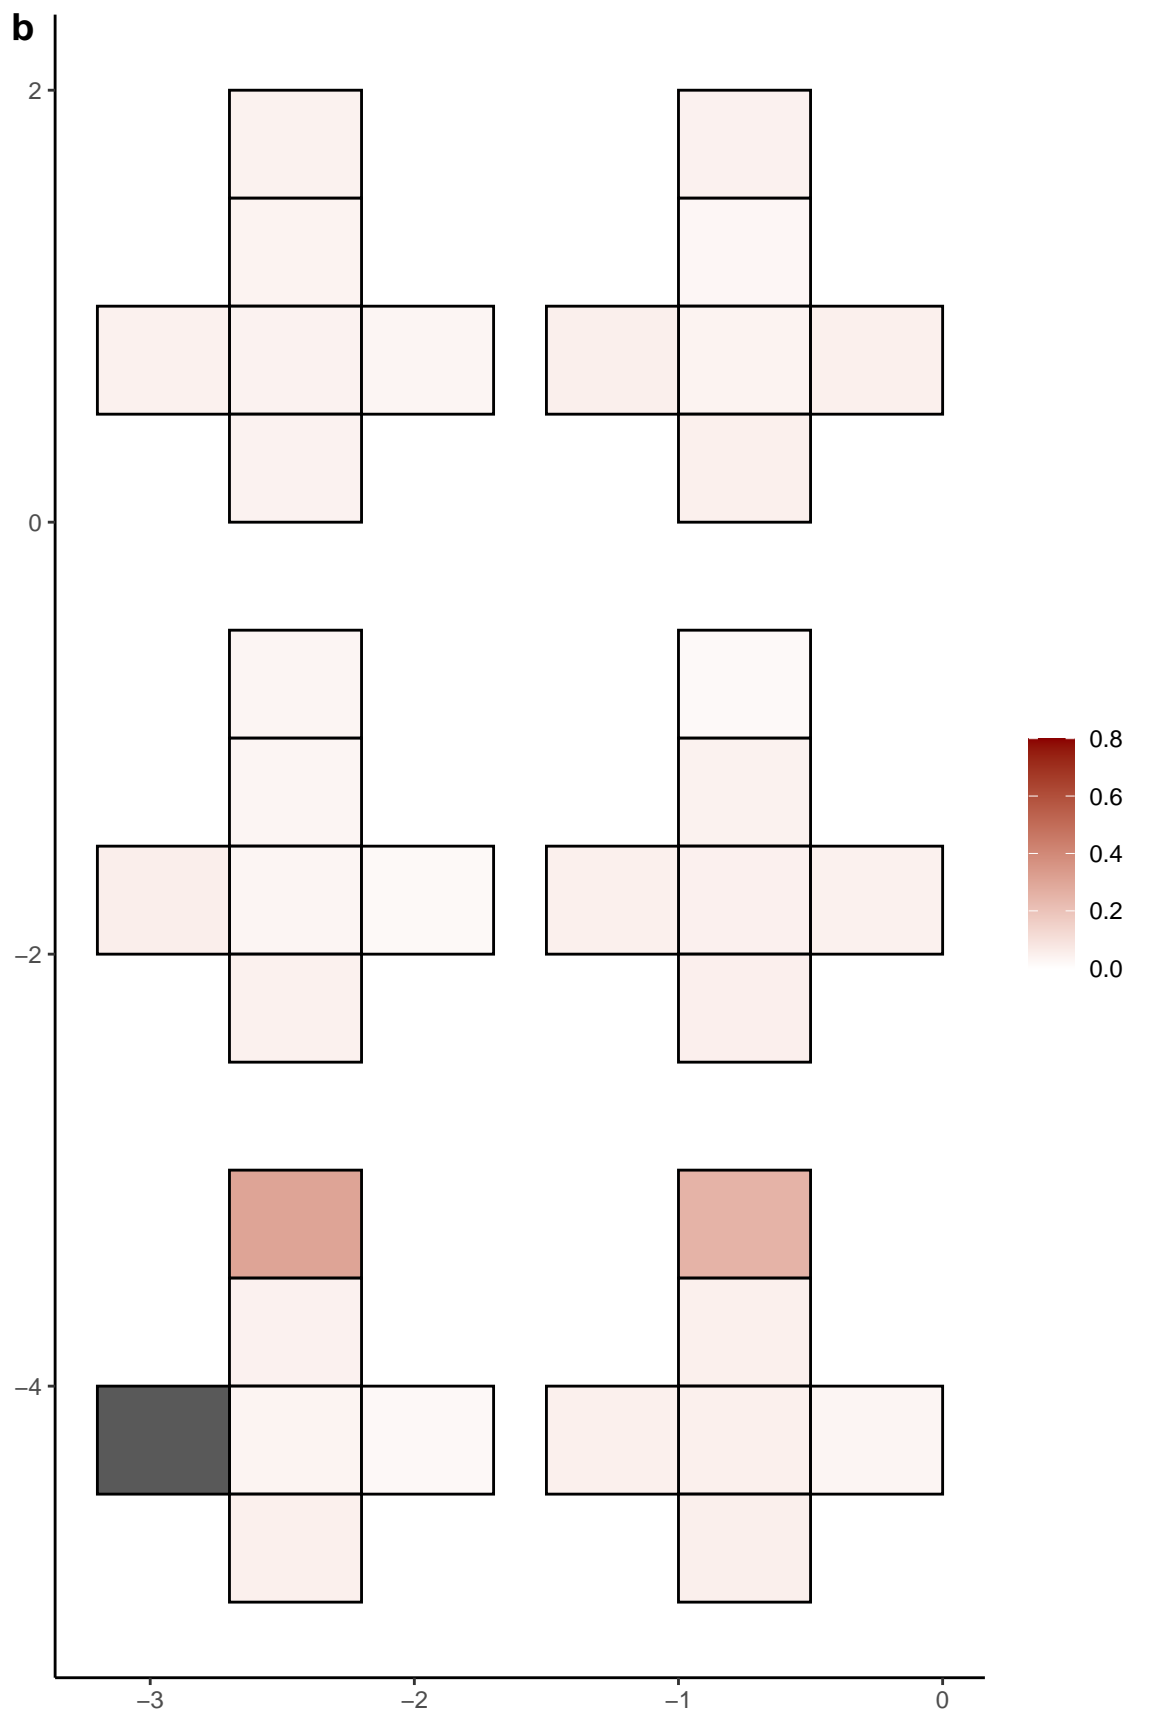

**a** ID01 6-125153225-G-T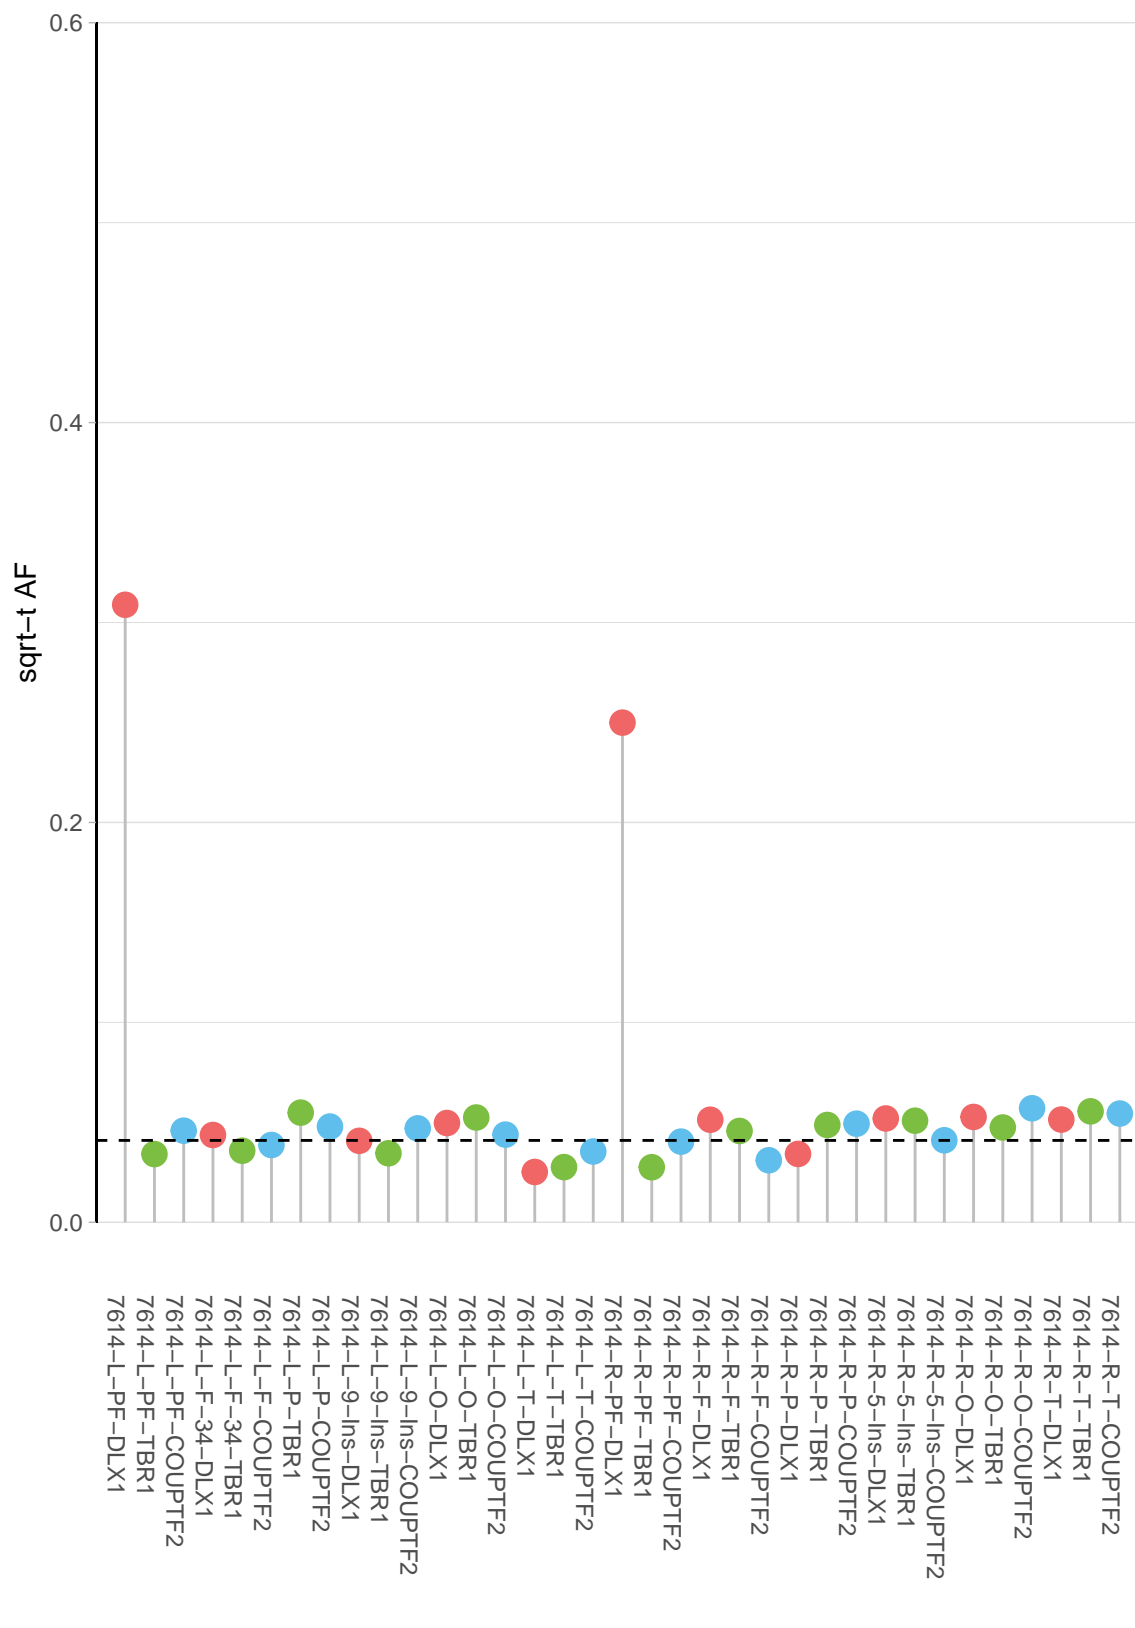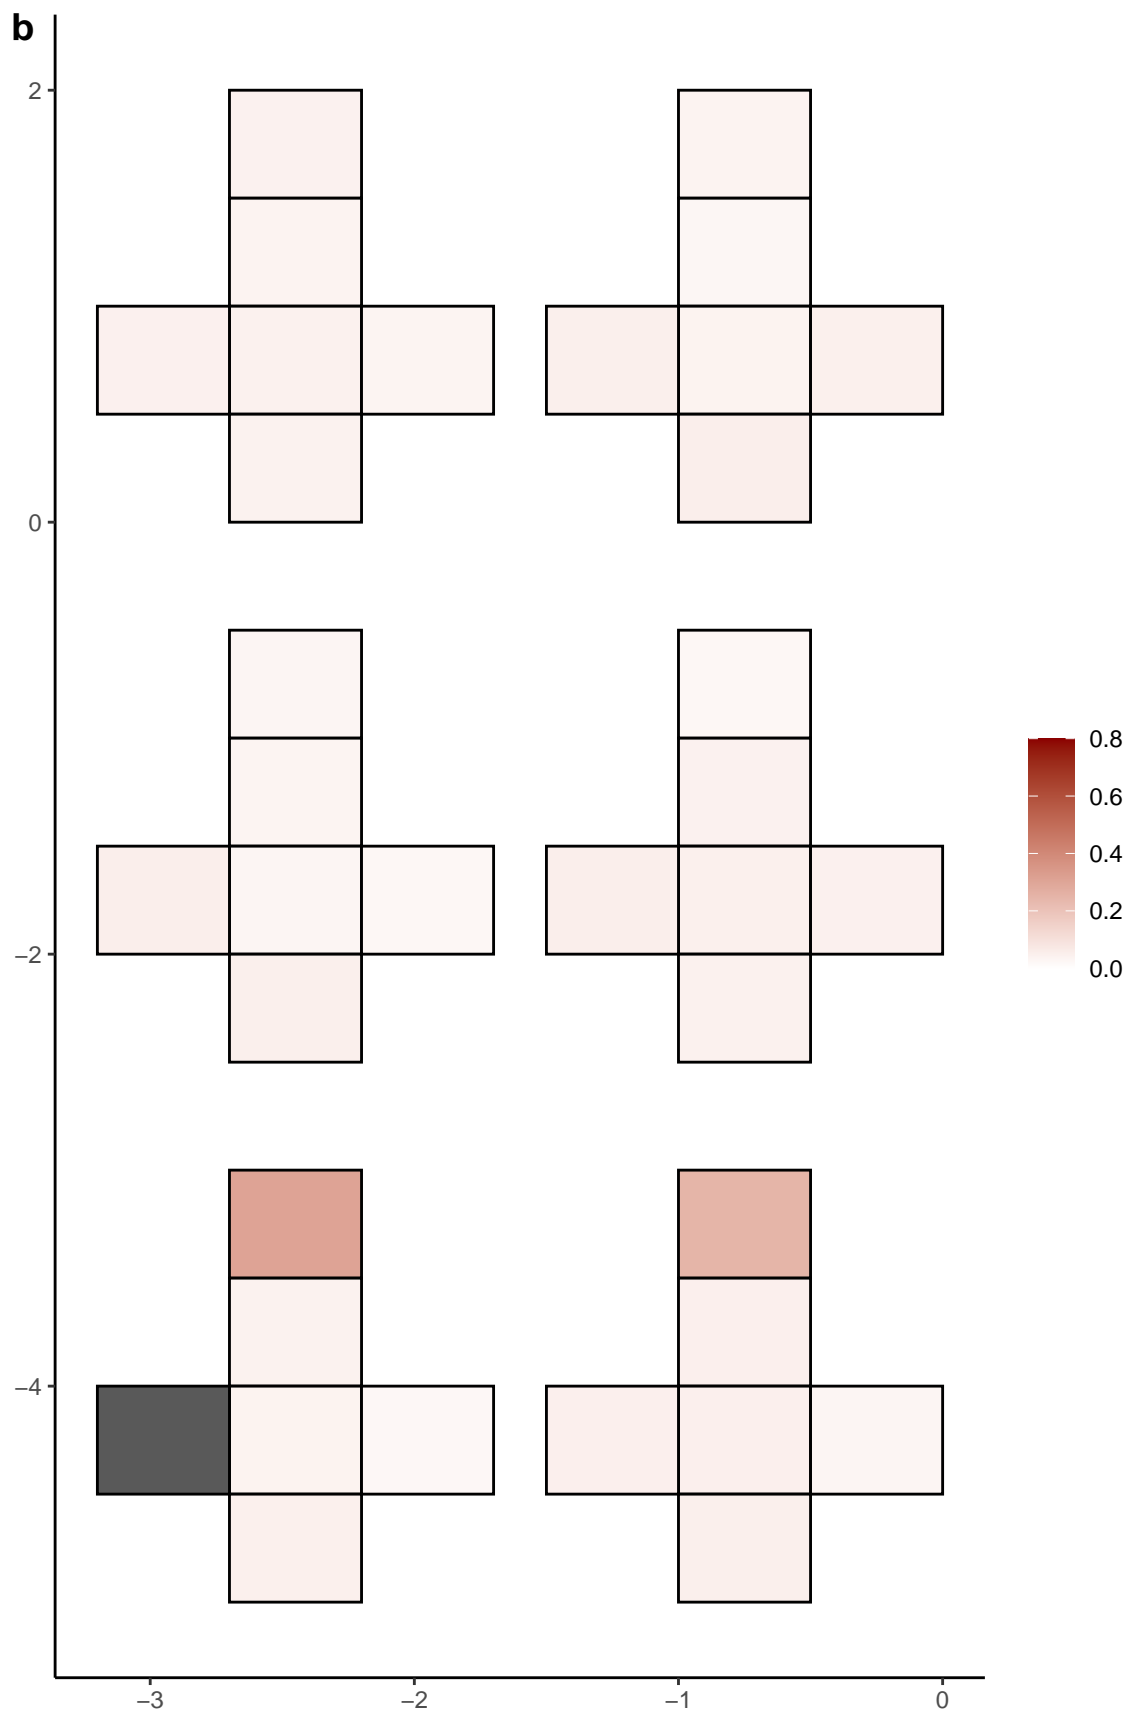



**a** ID01 6-131367555-G-A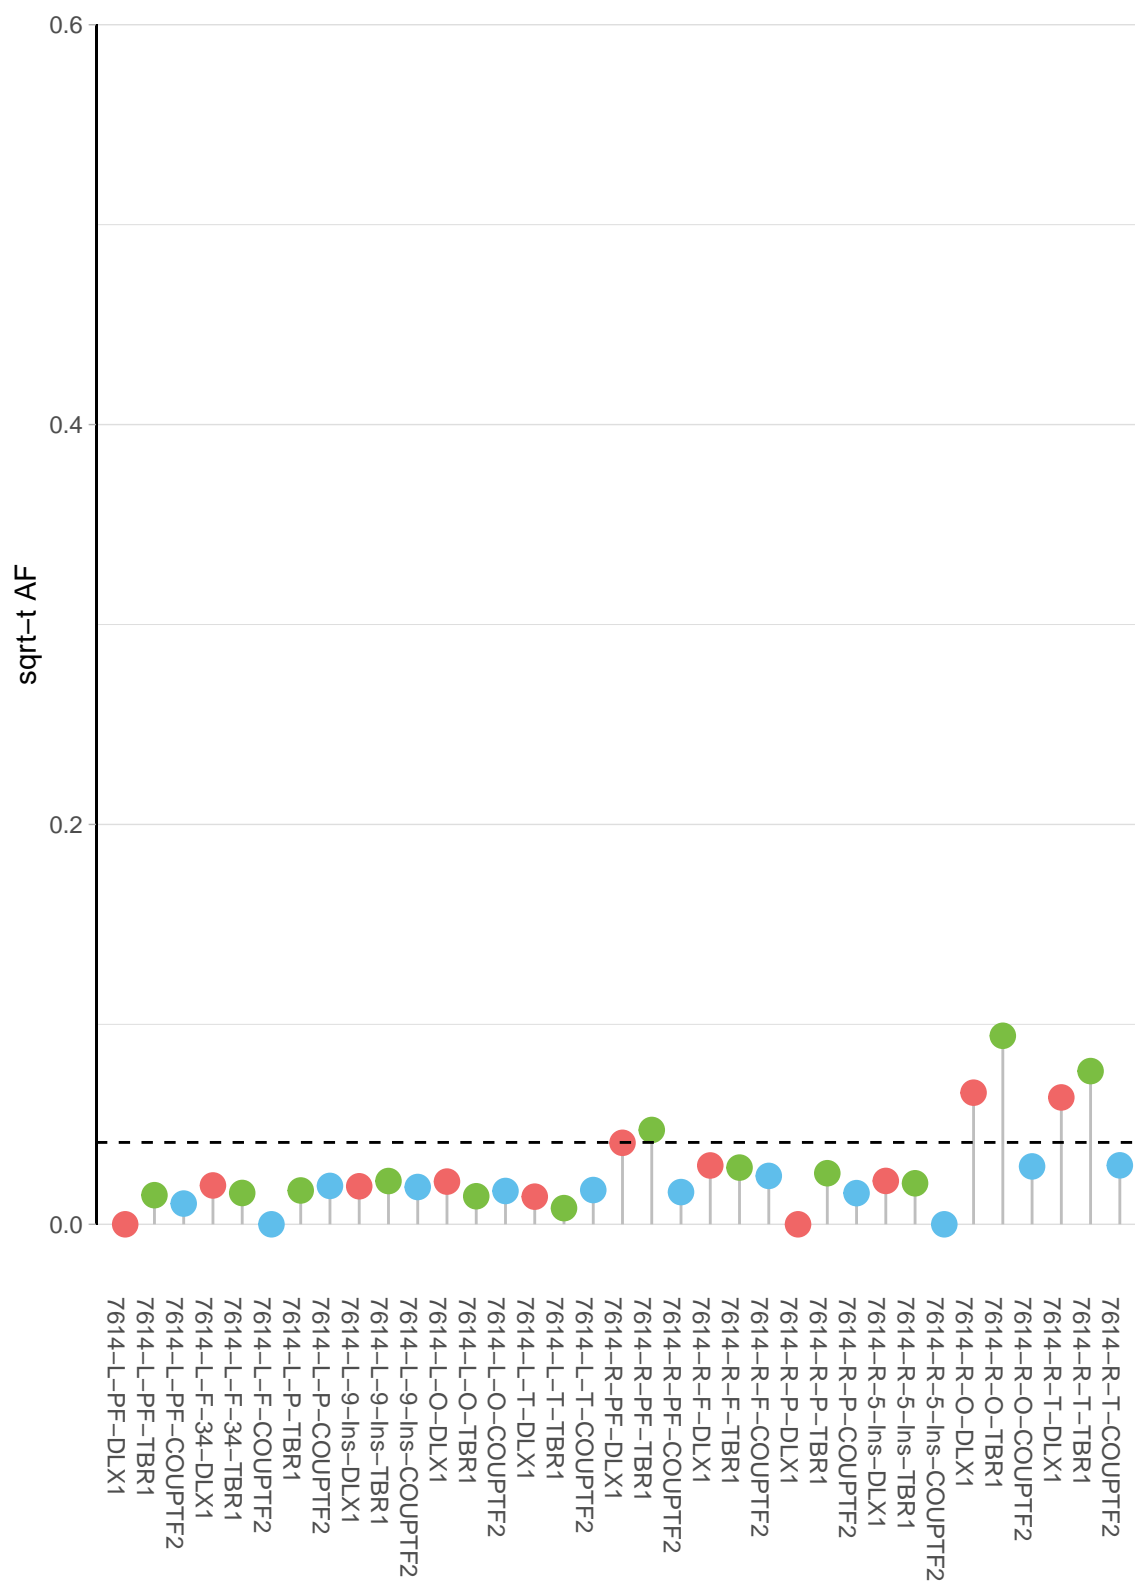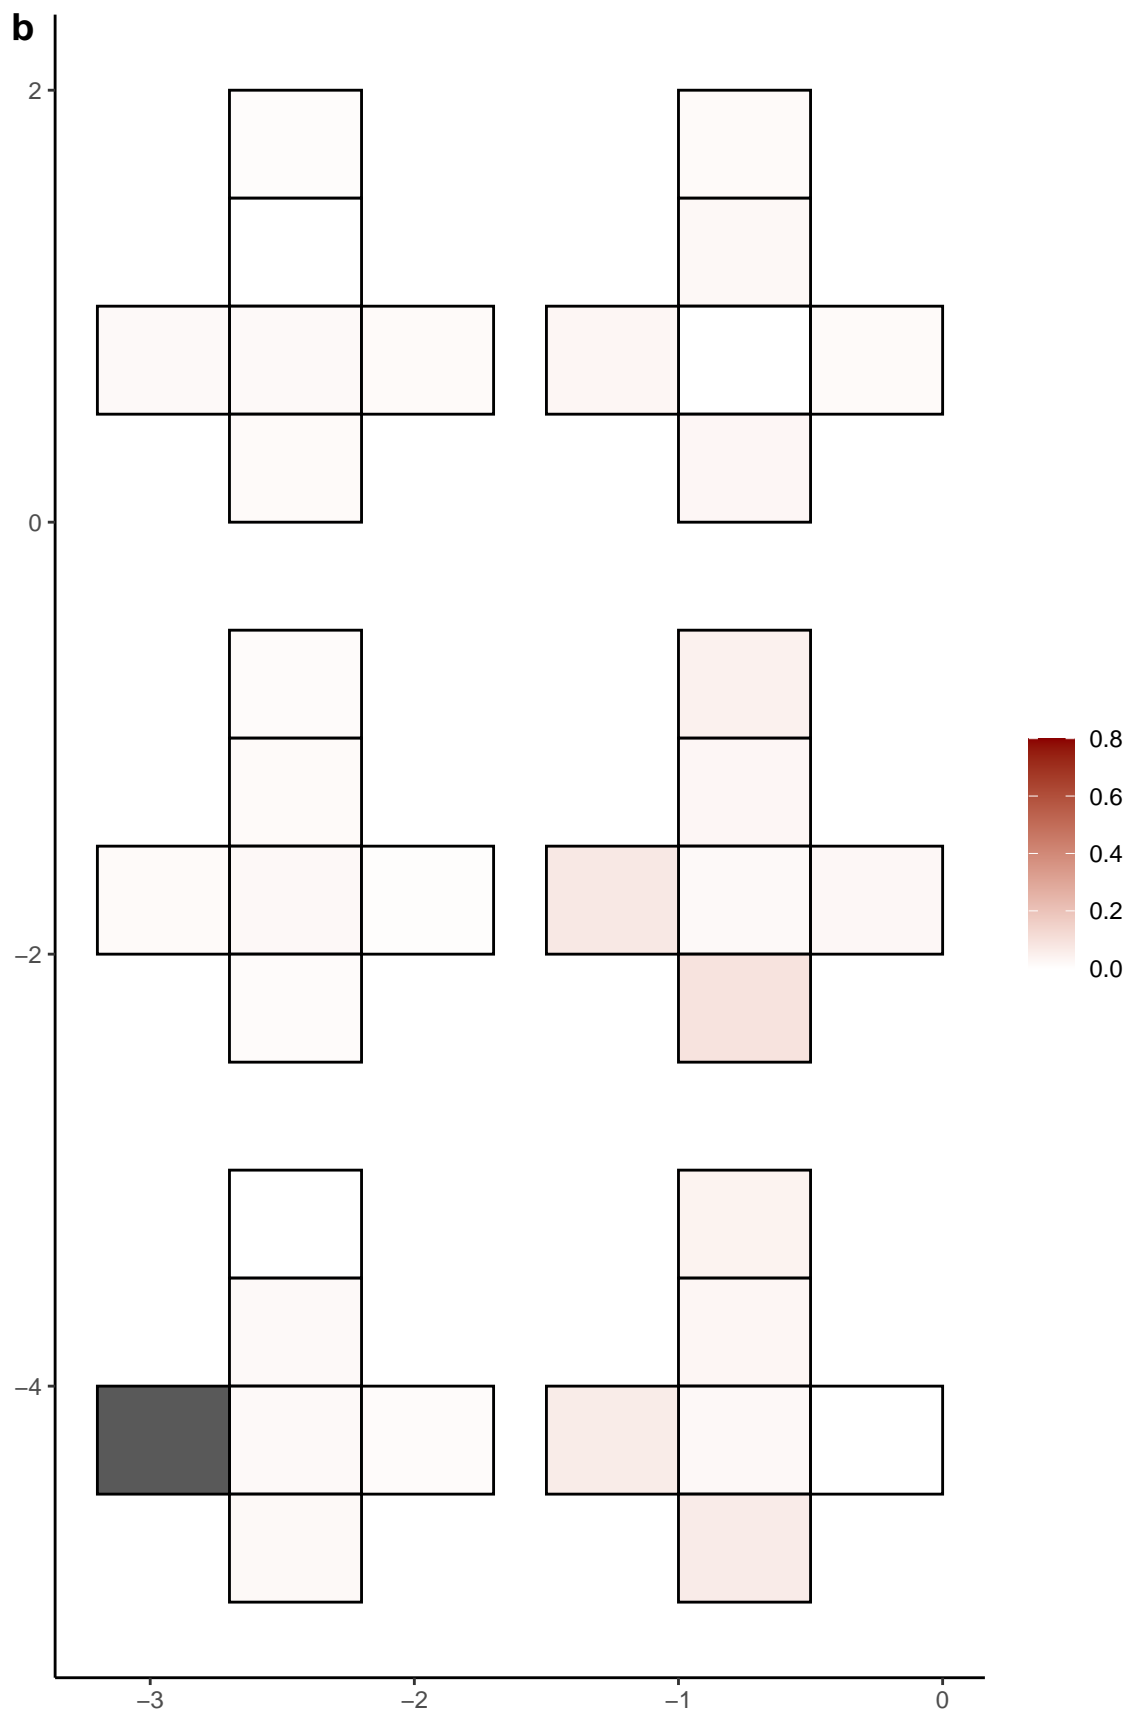

**a** ID01 6-154659392-C-T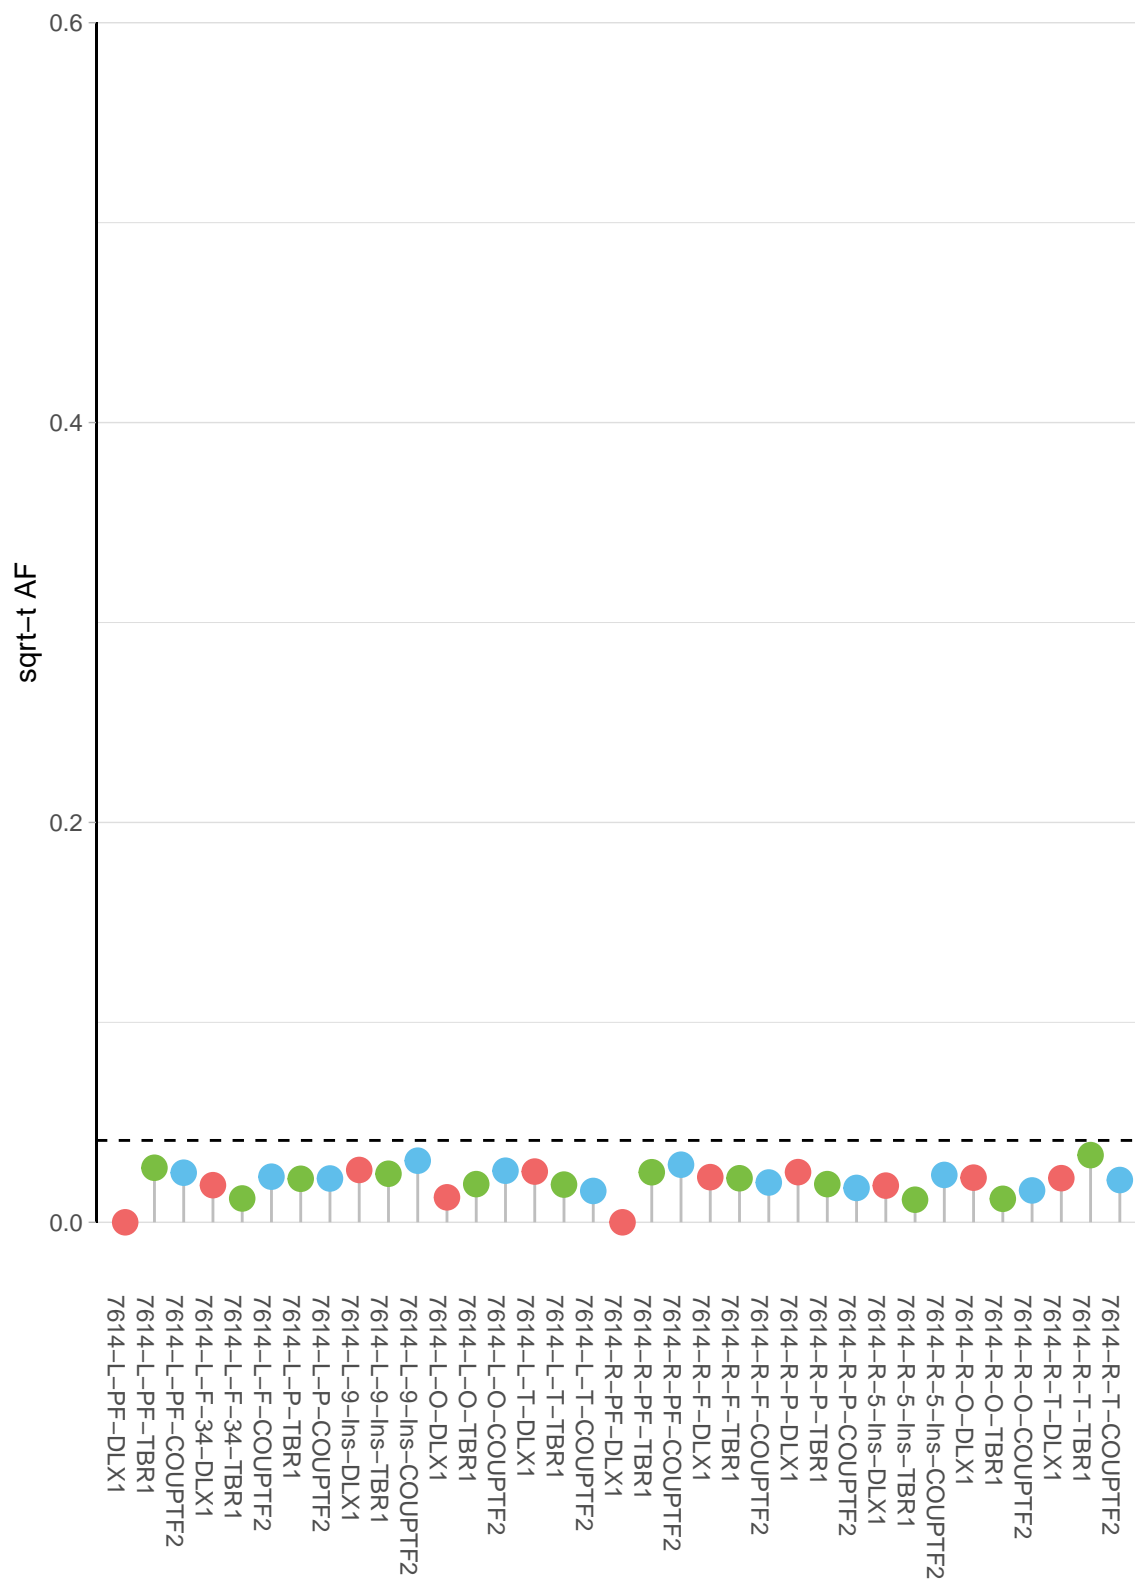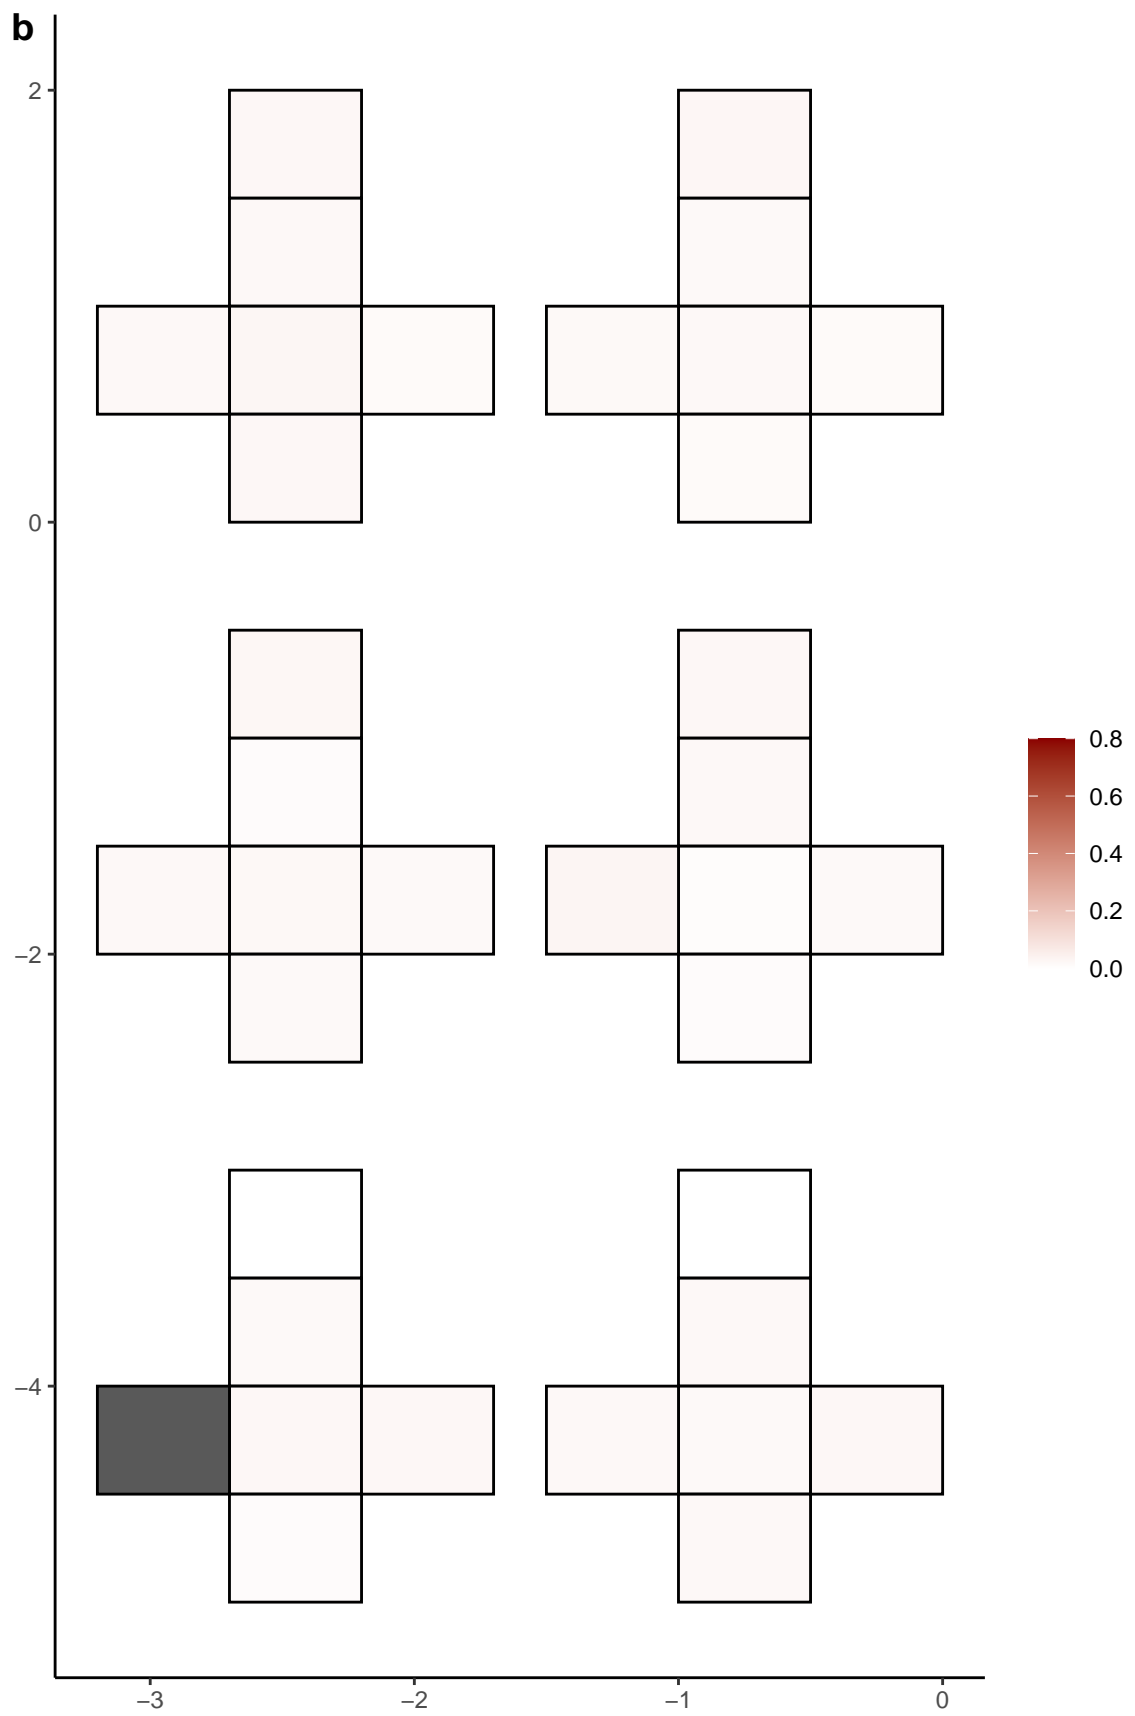

**a** ID01 6-156279892-A-G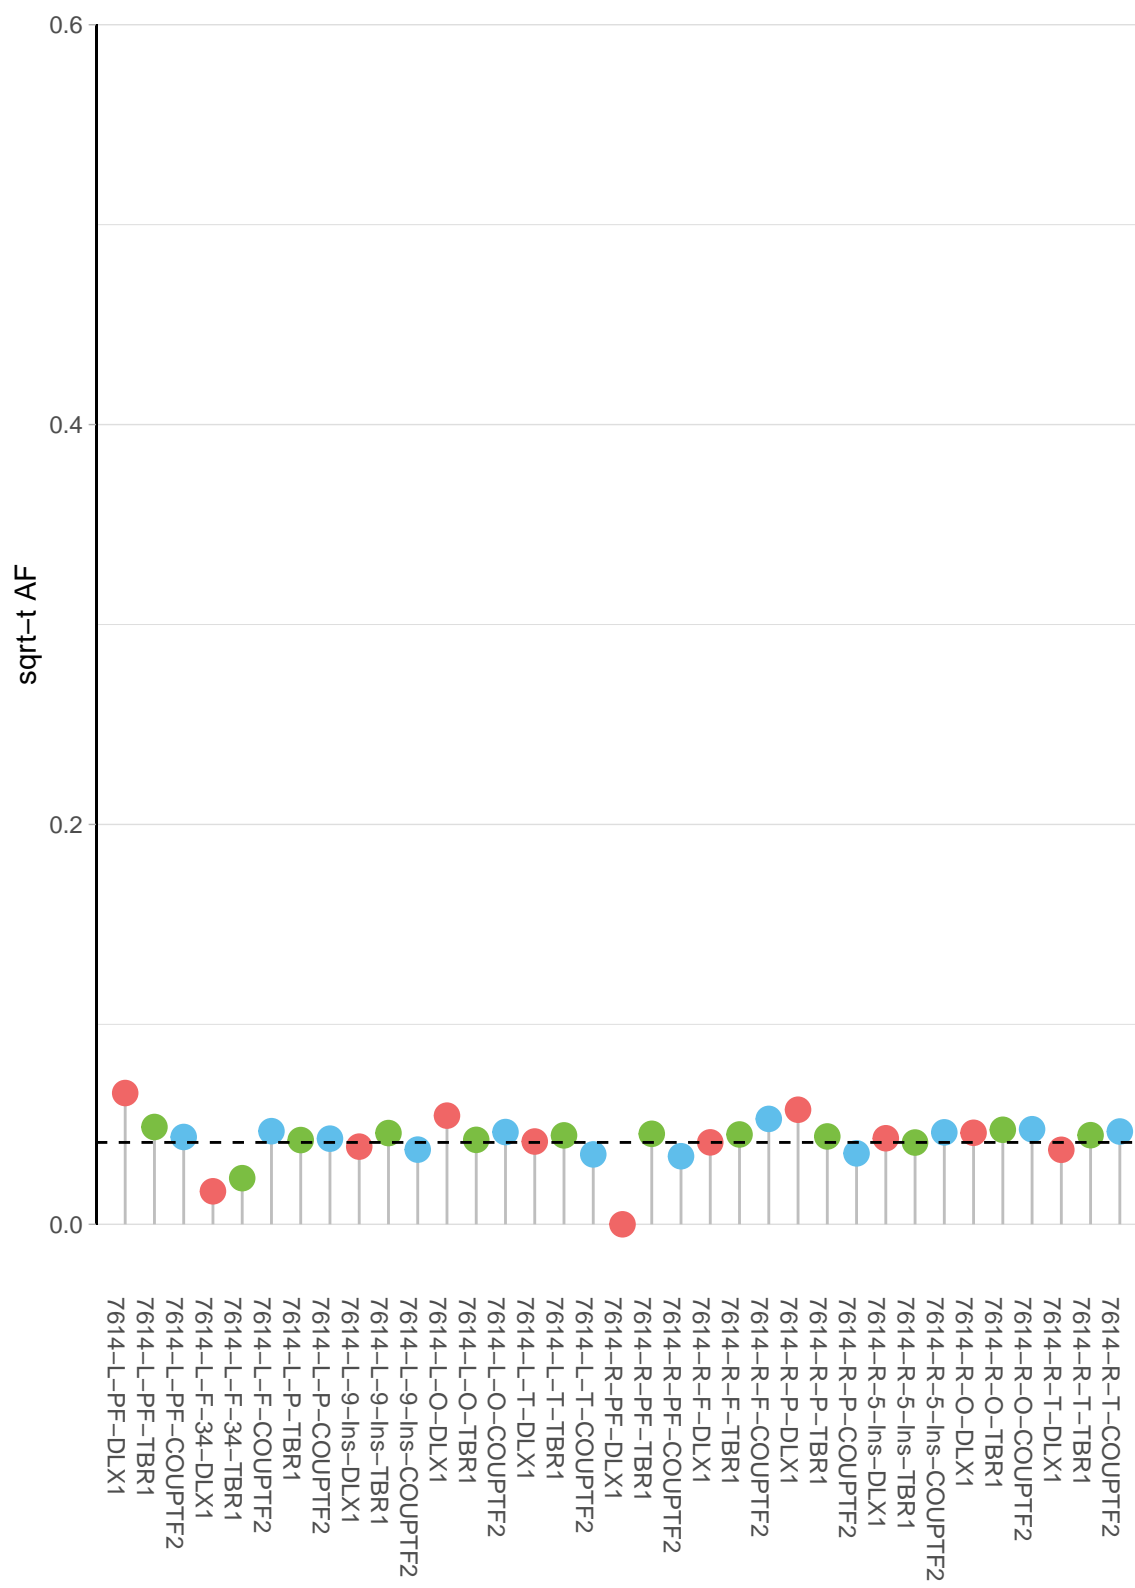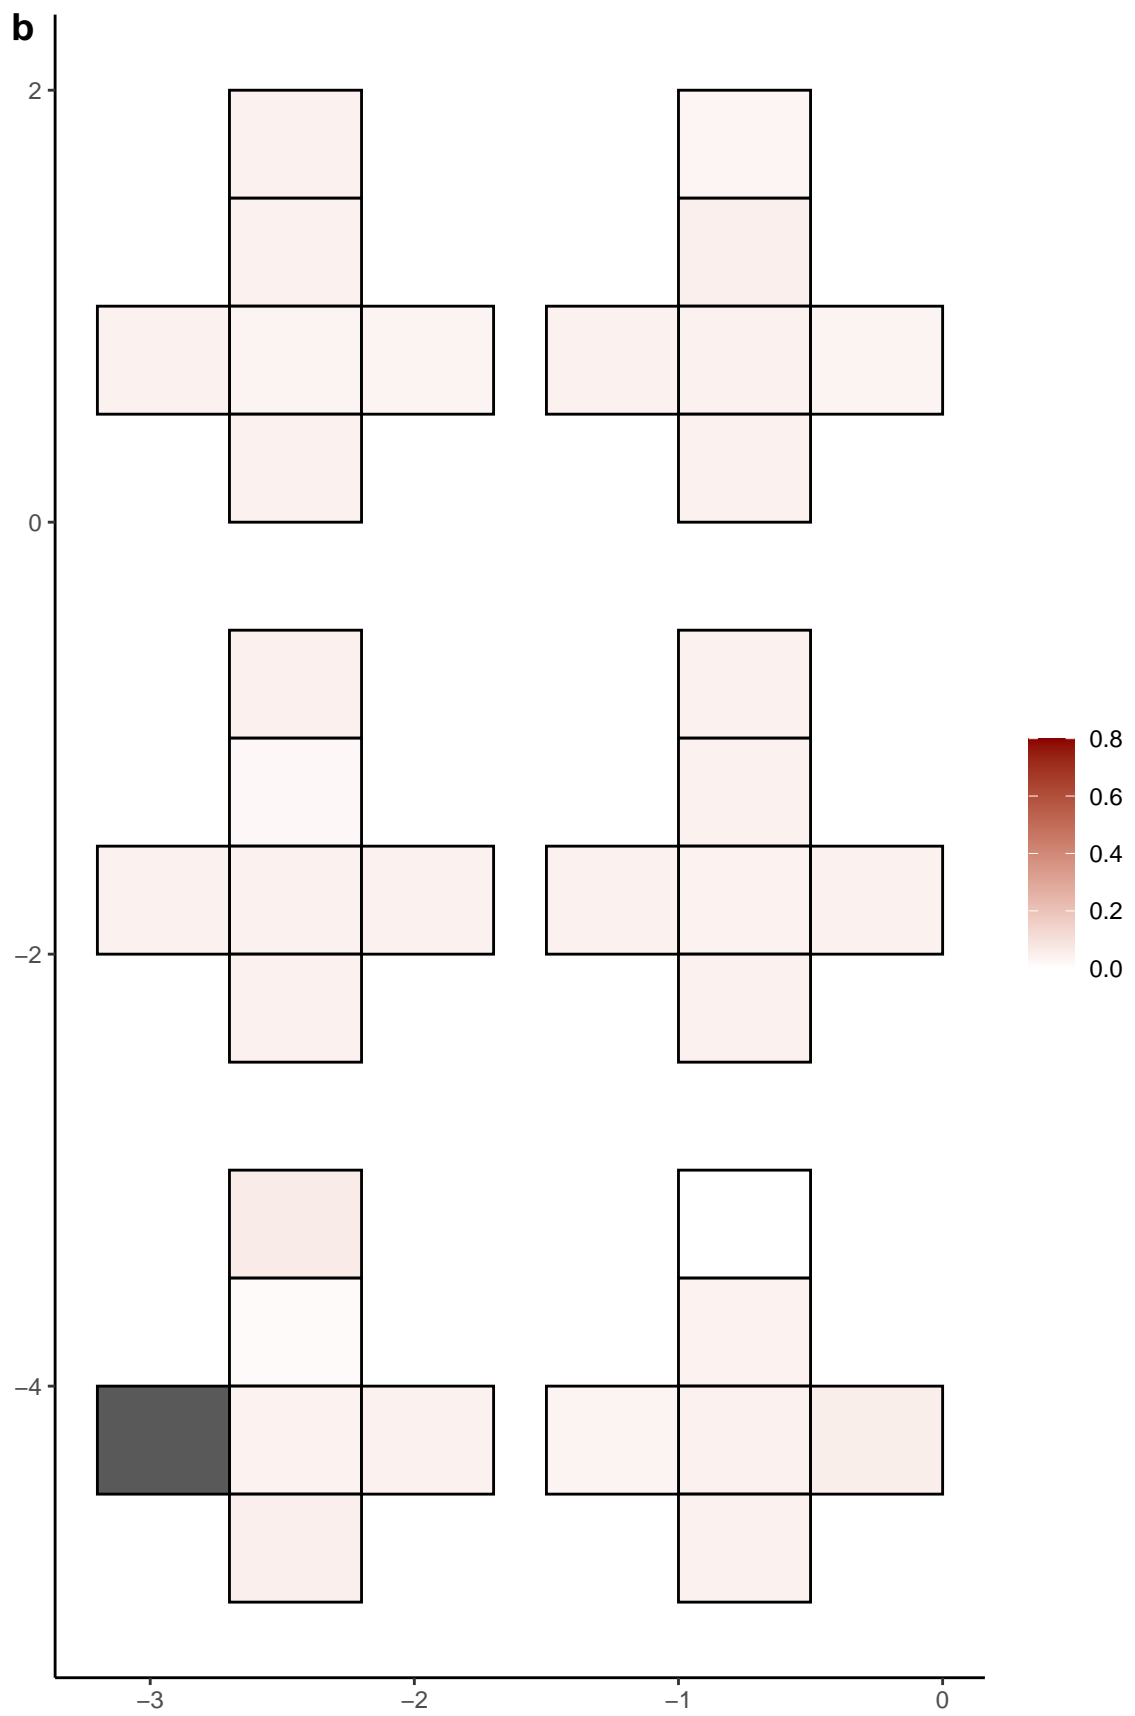

**a** ID01 6-164367726-C-T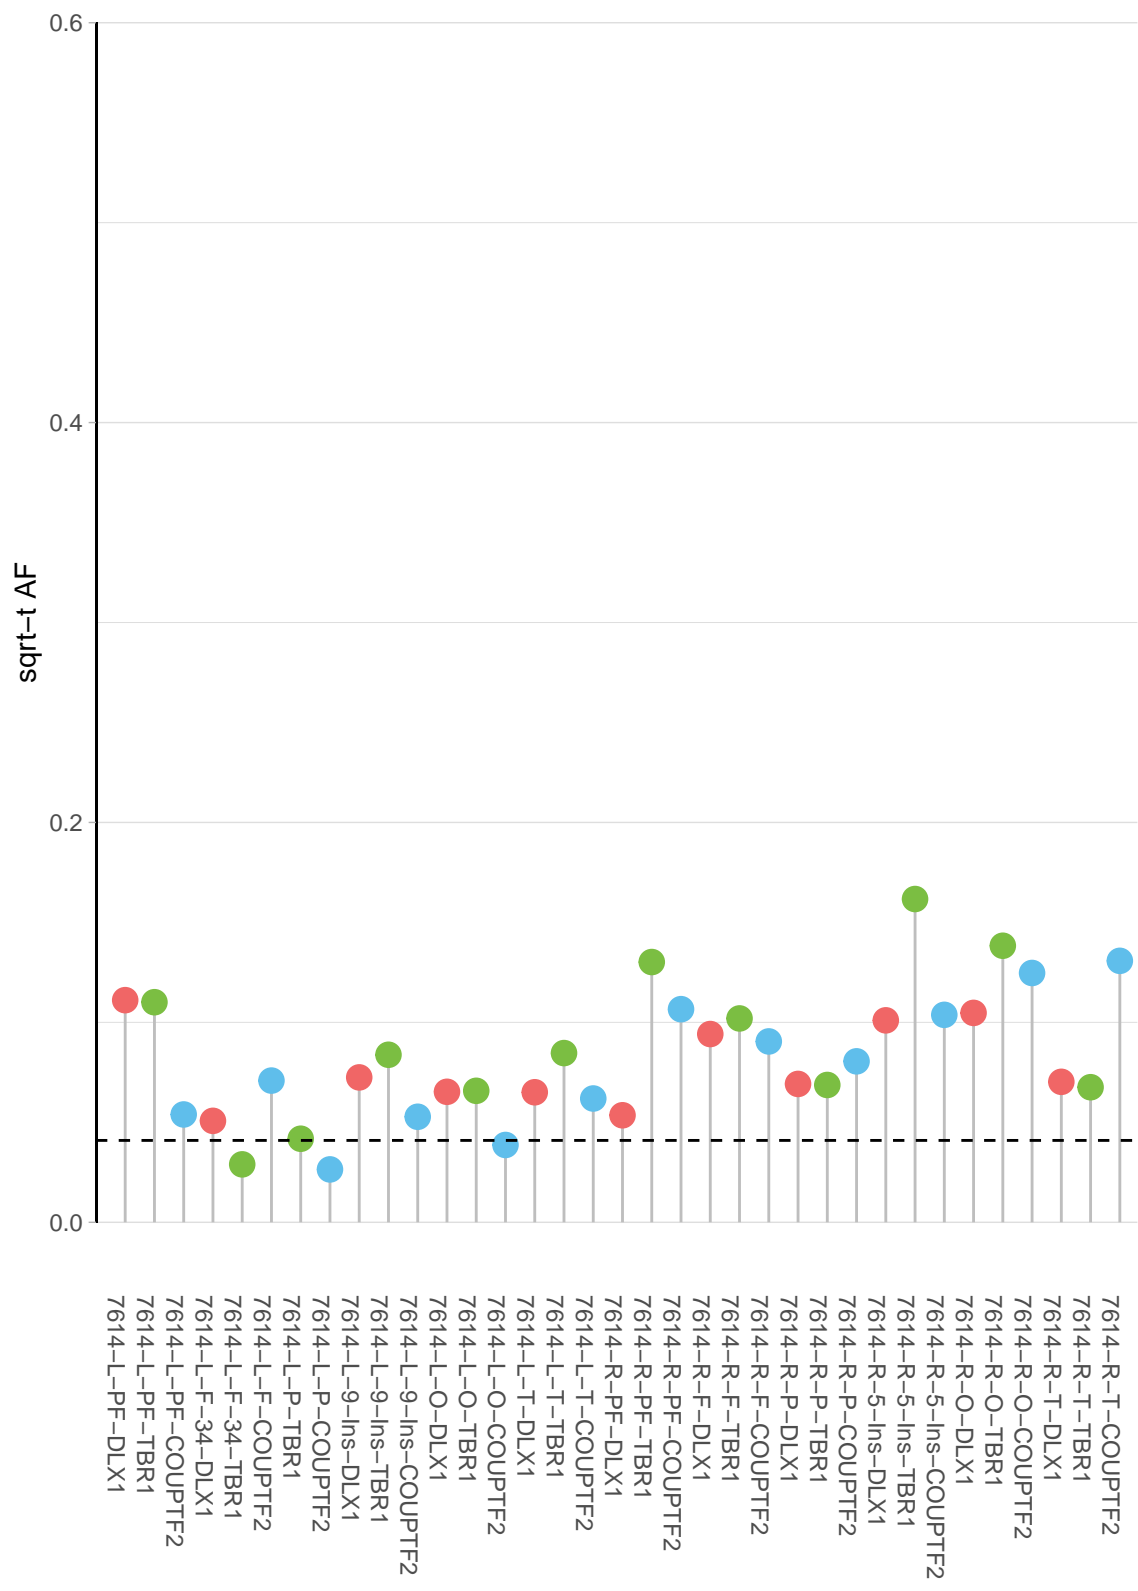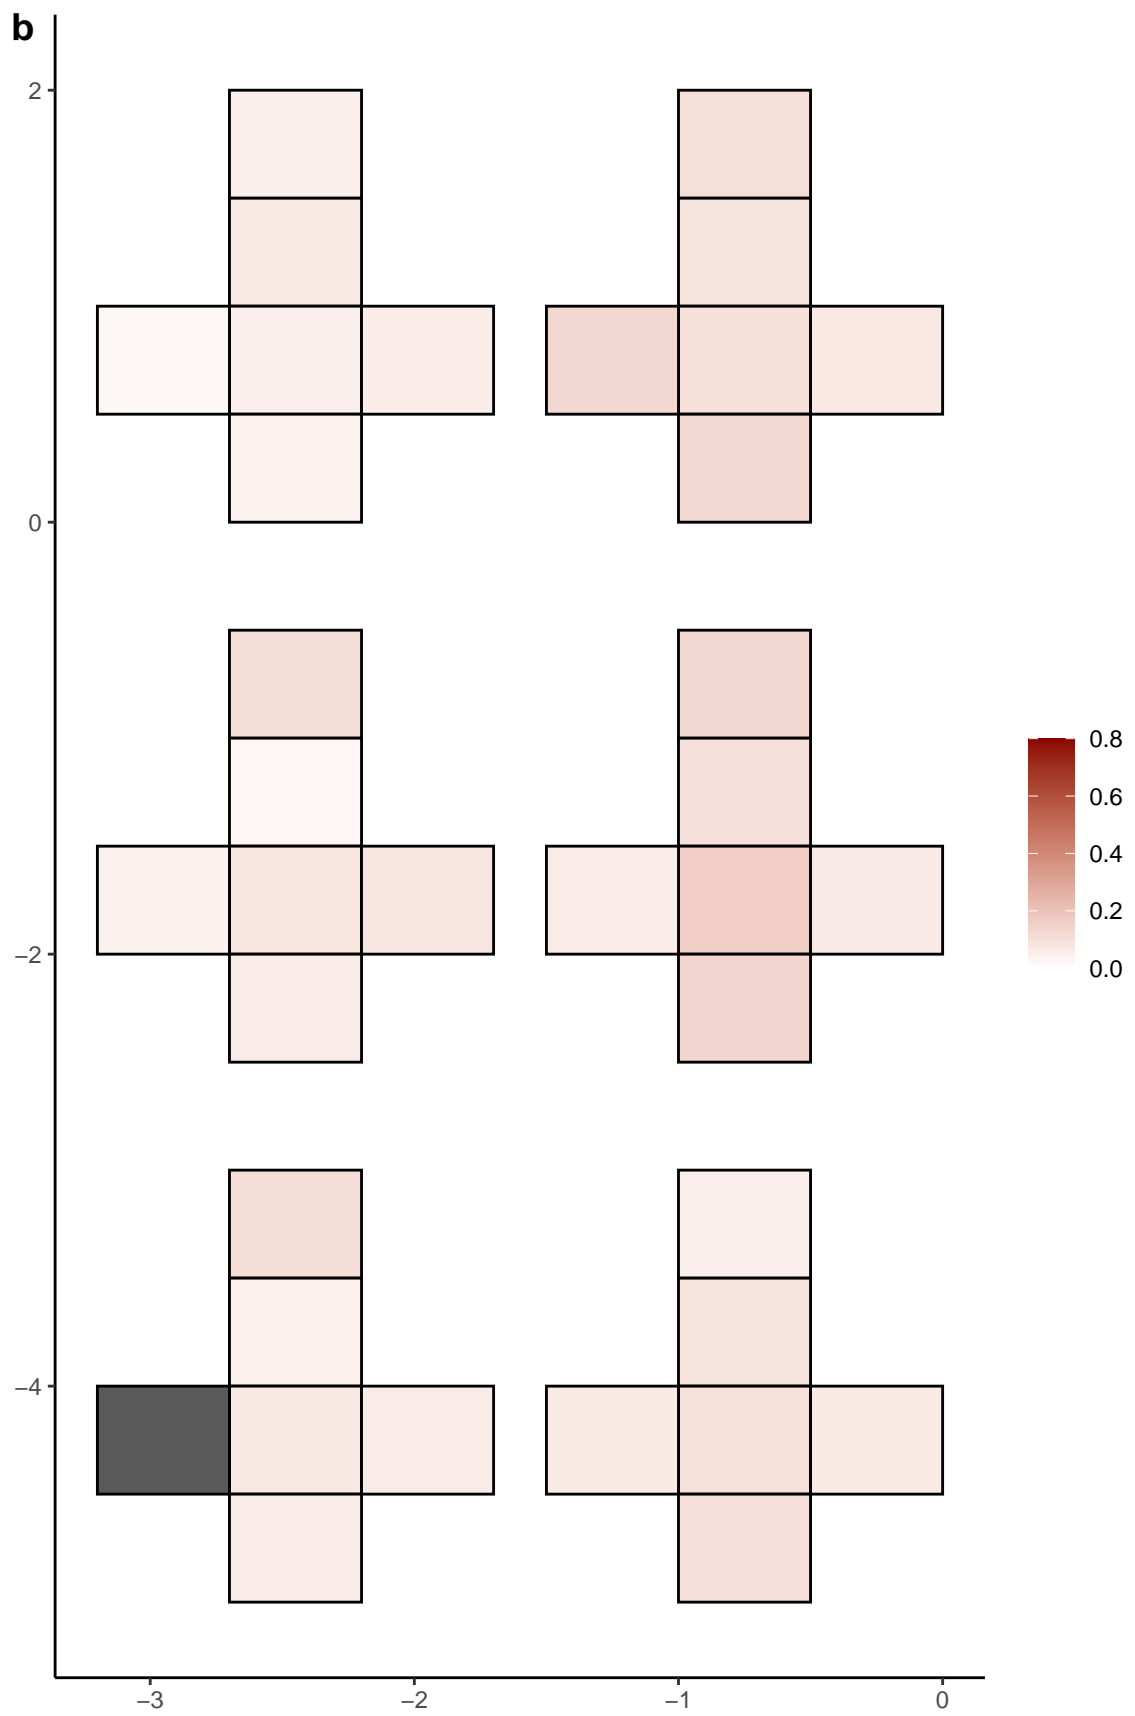

**a** ID01 6-21159973-A-C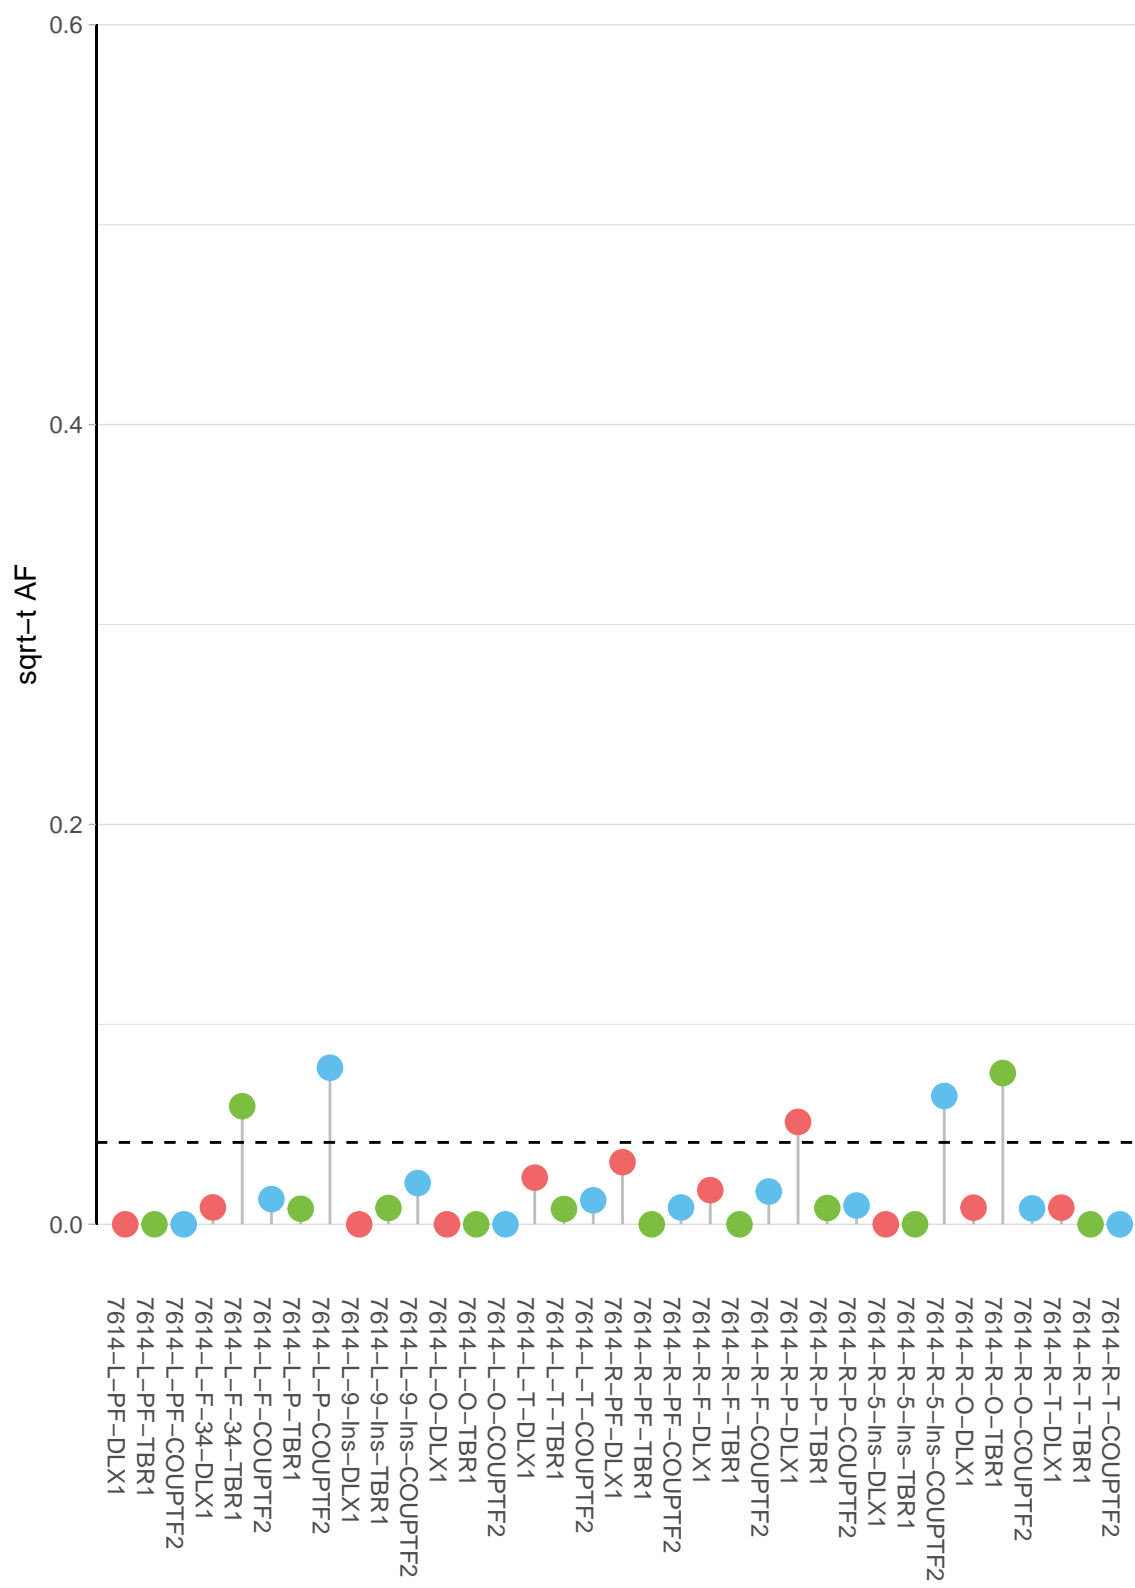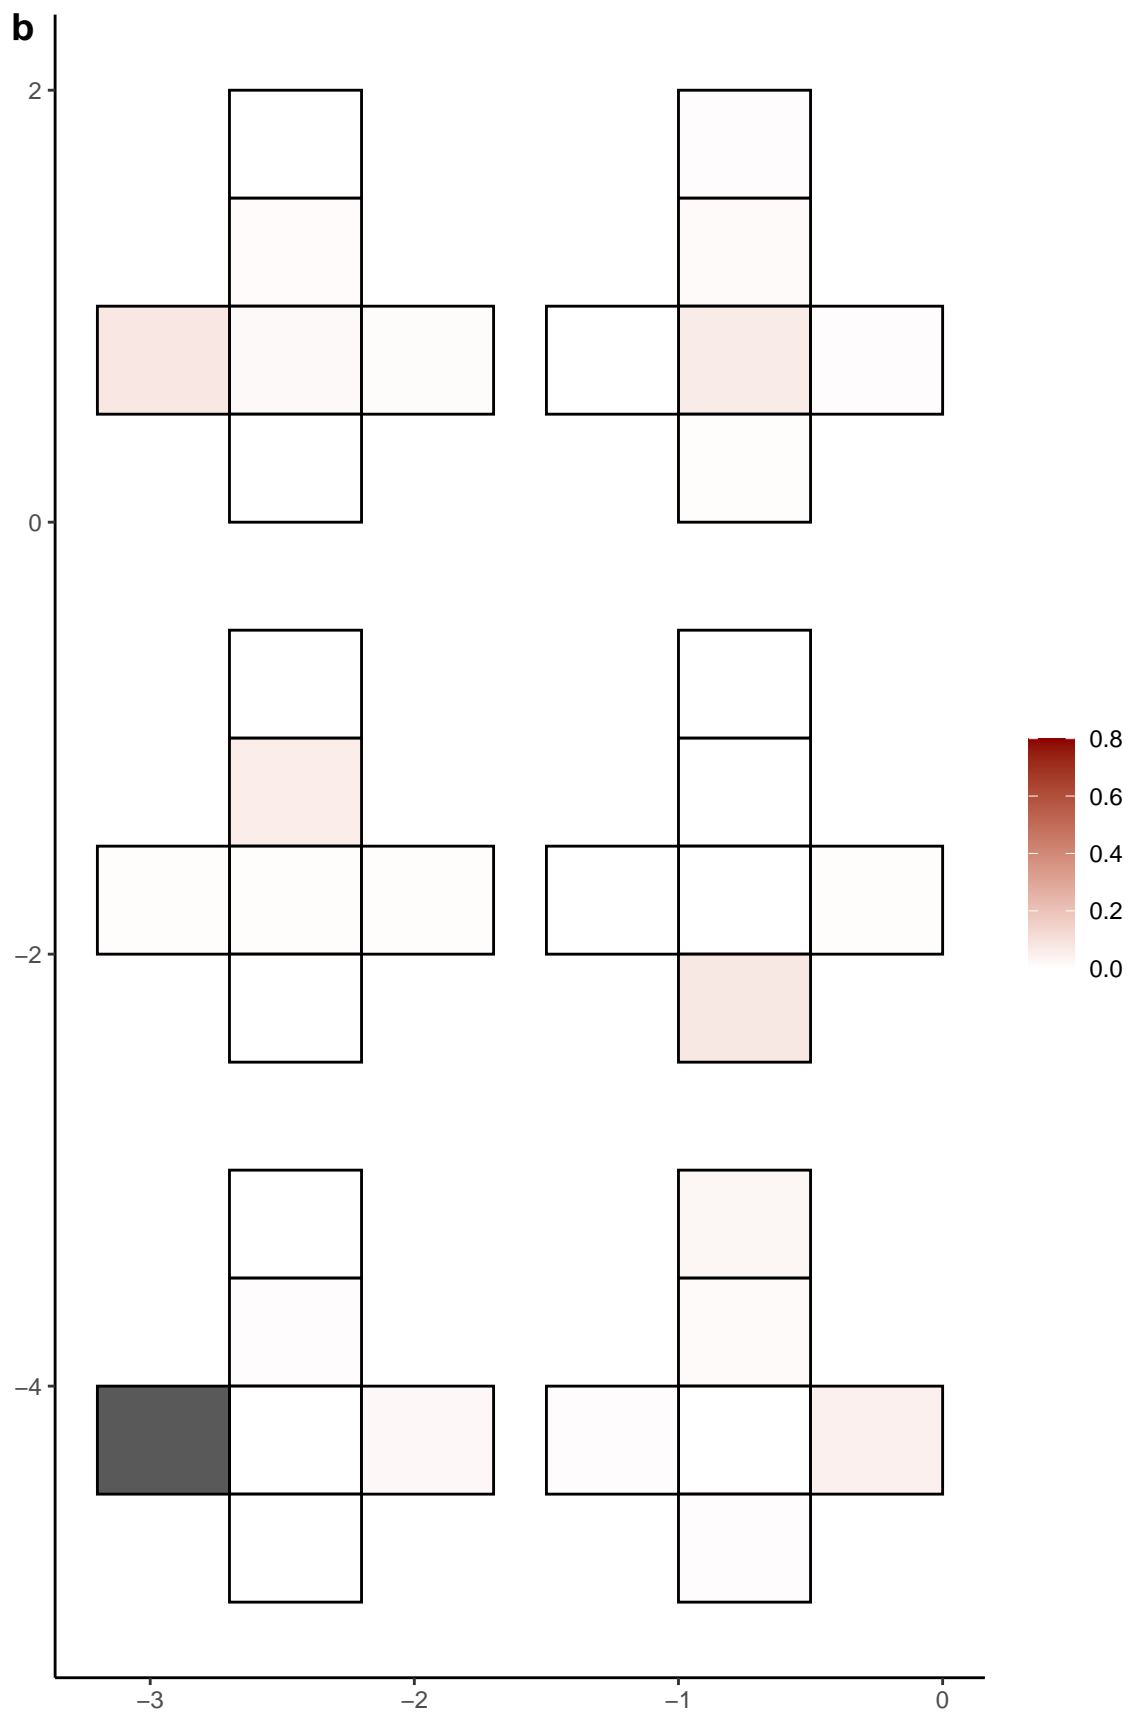

**a** ID01 6-23944712-G-T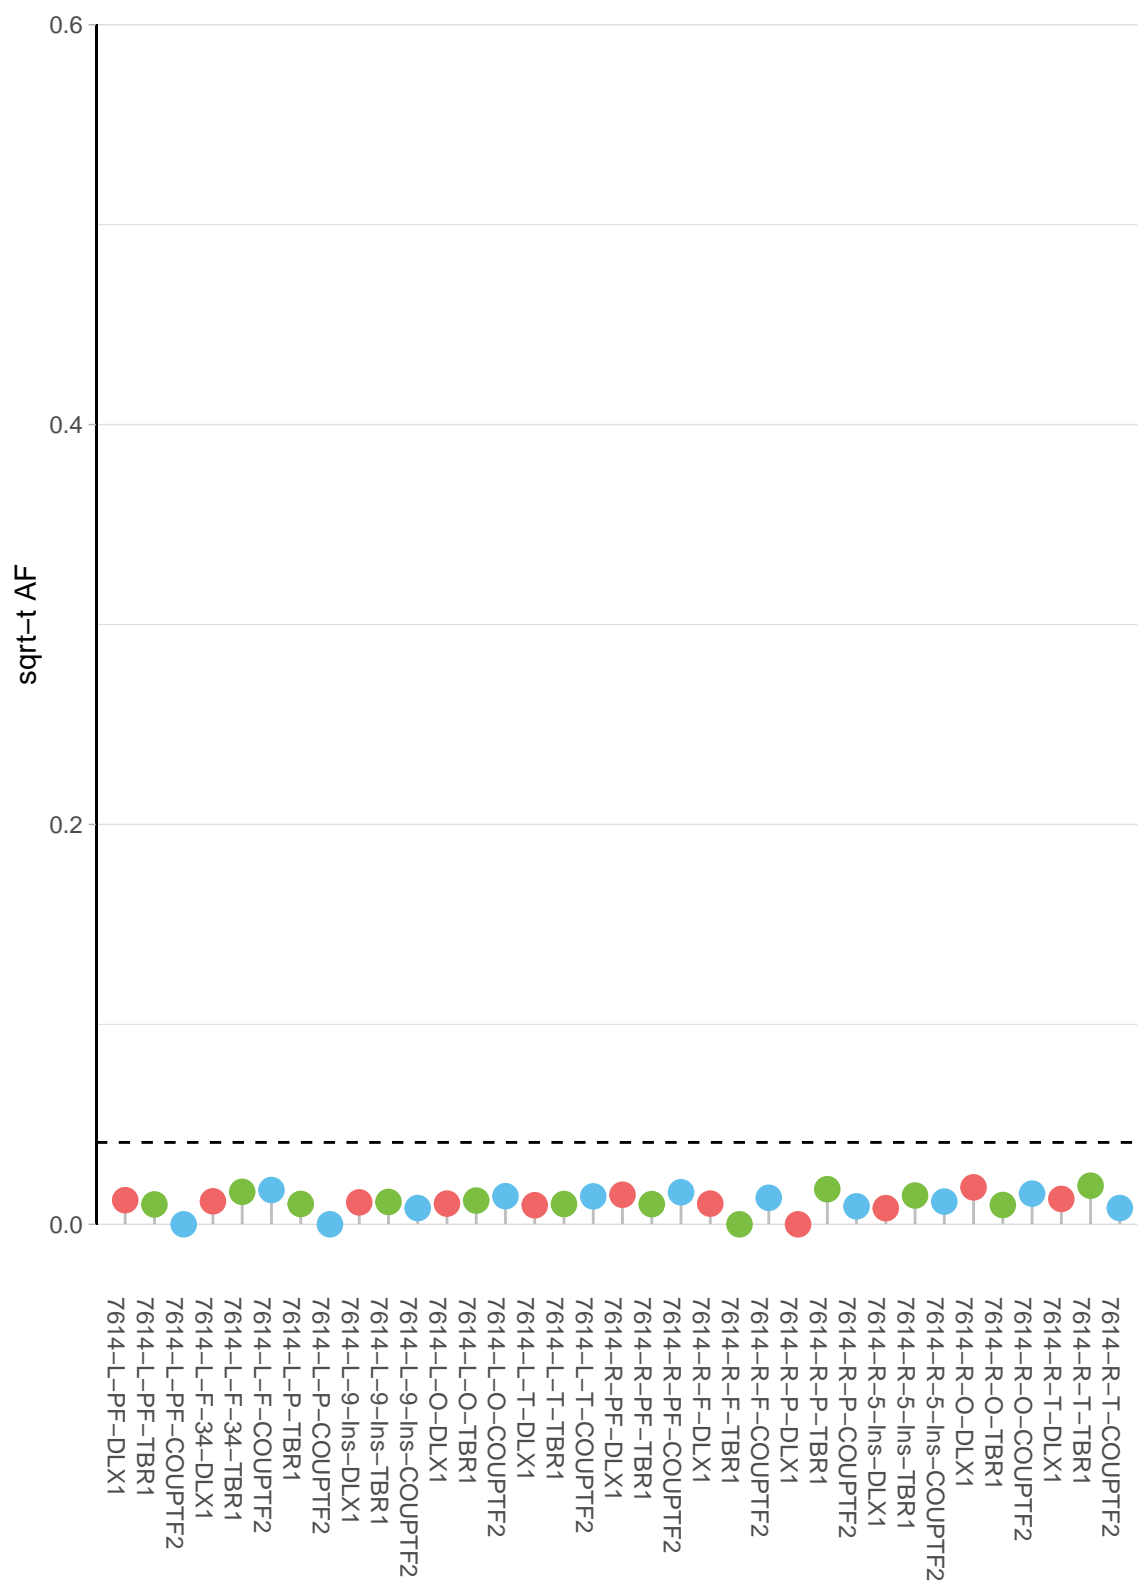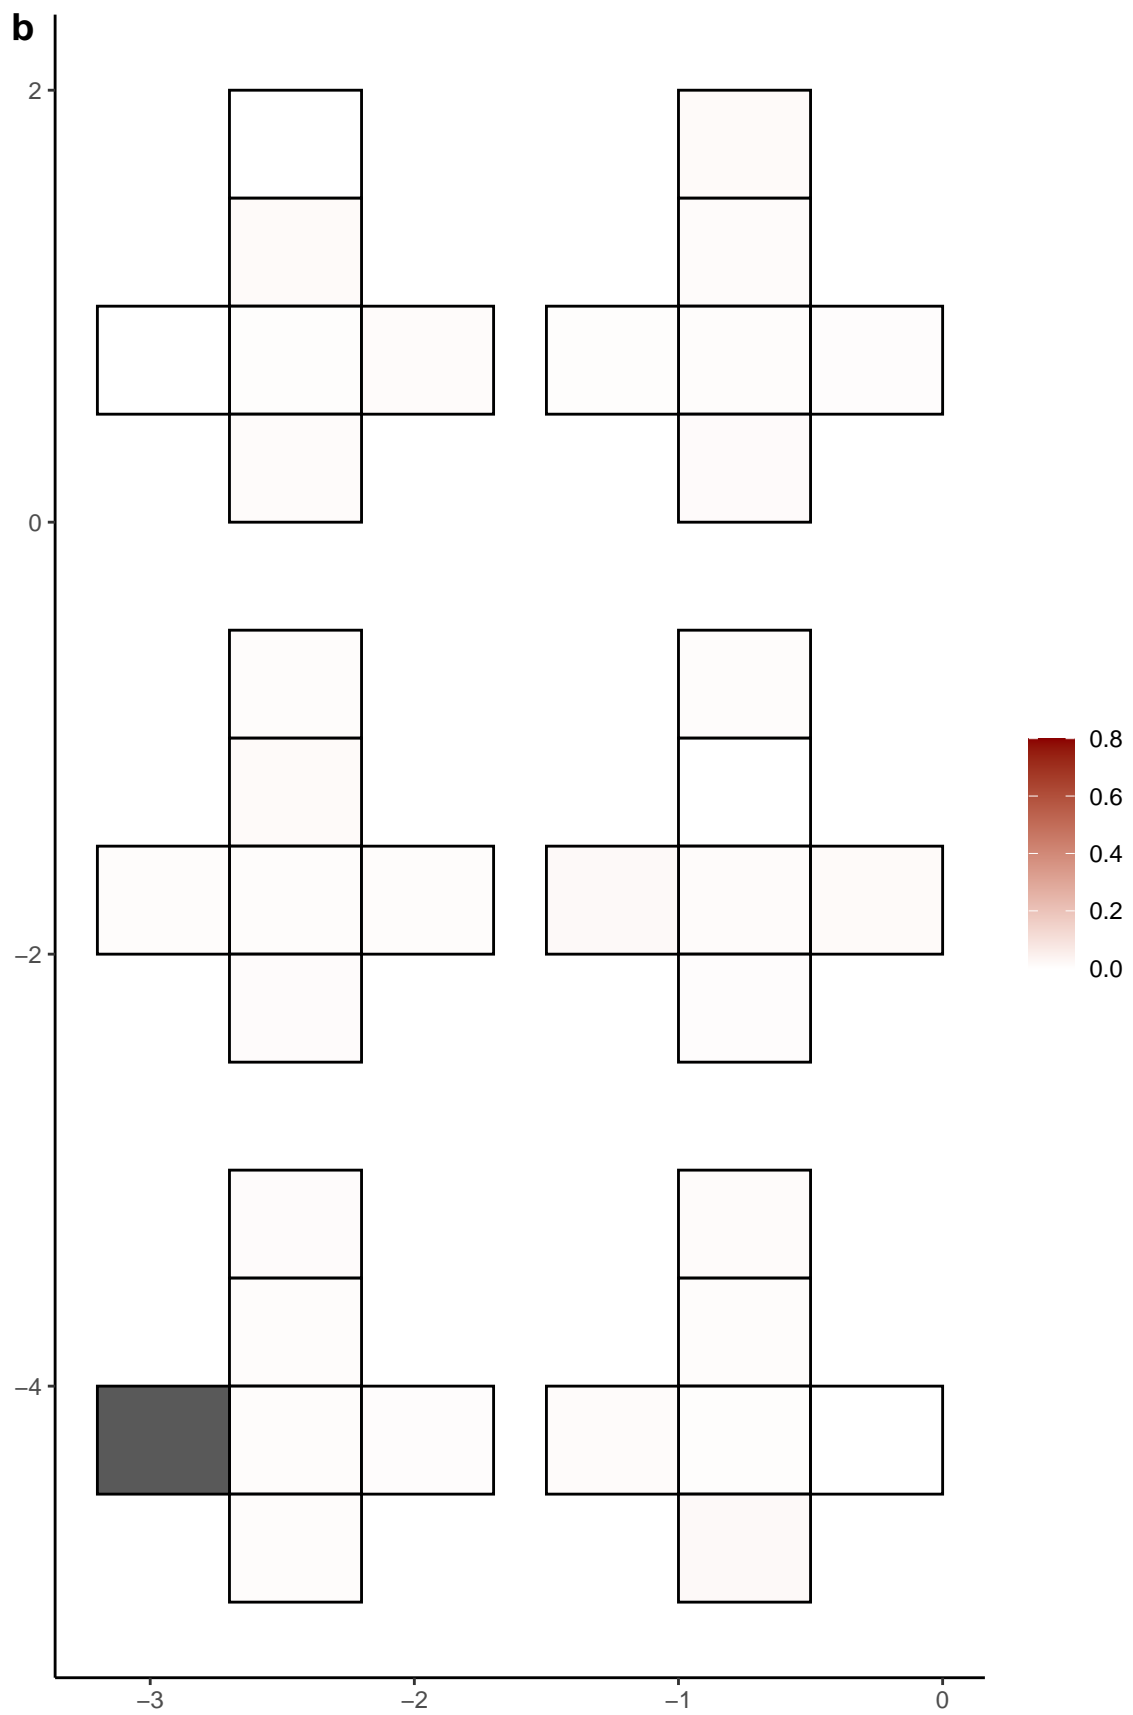

**a** ID01 6-27985938-C-T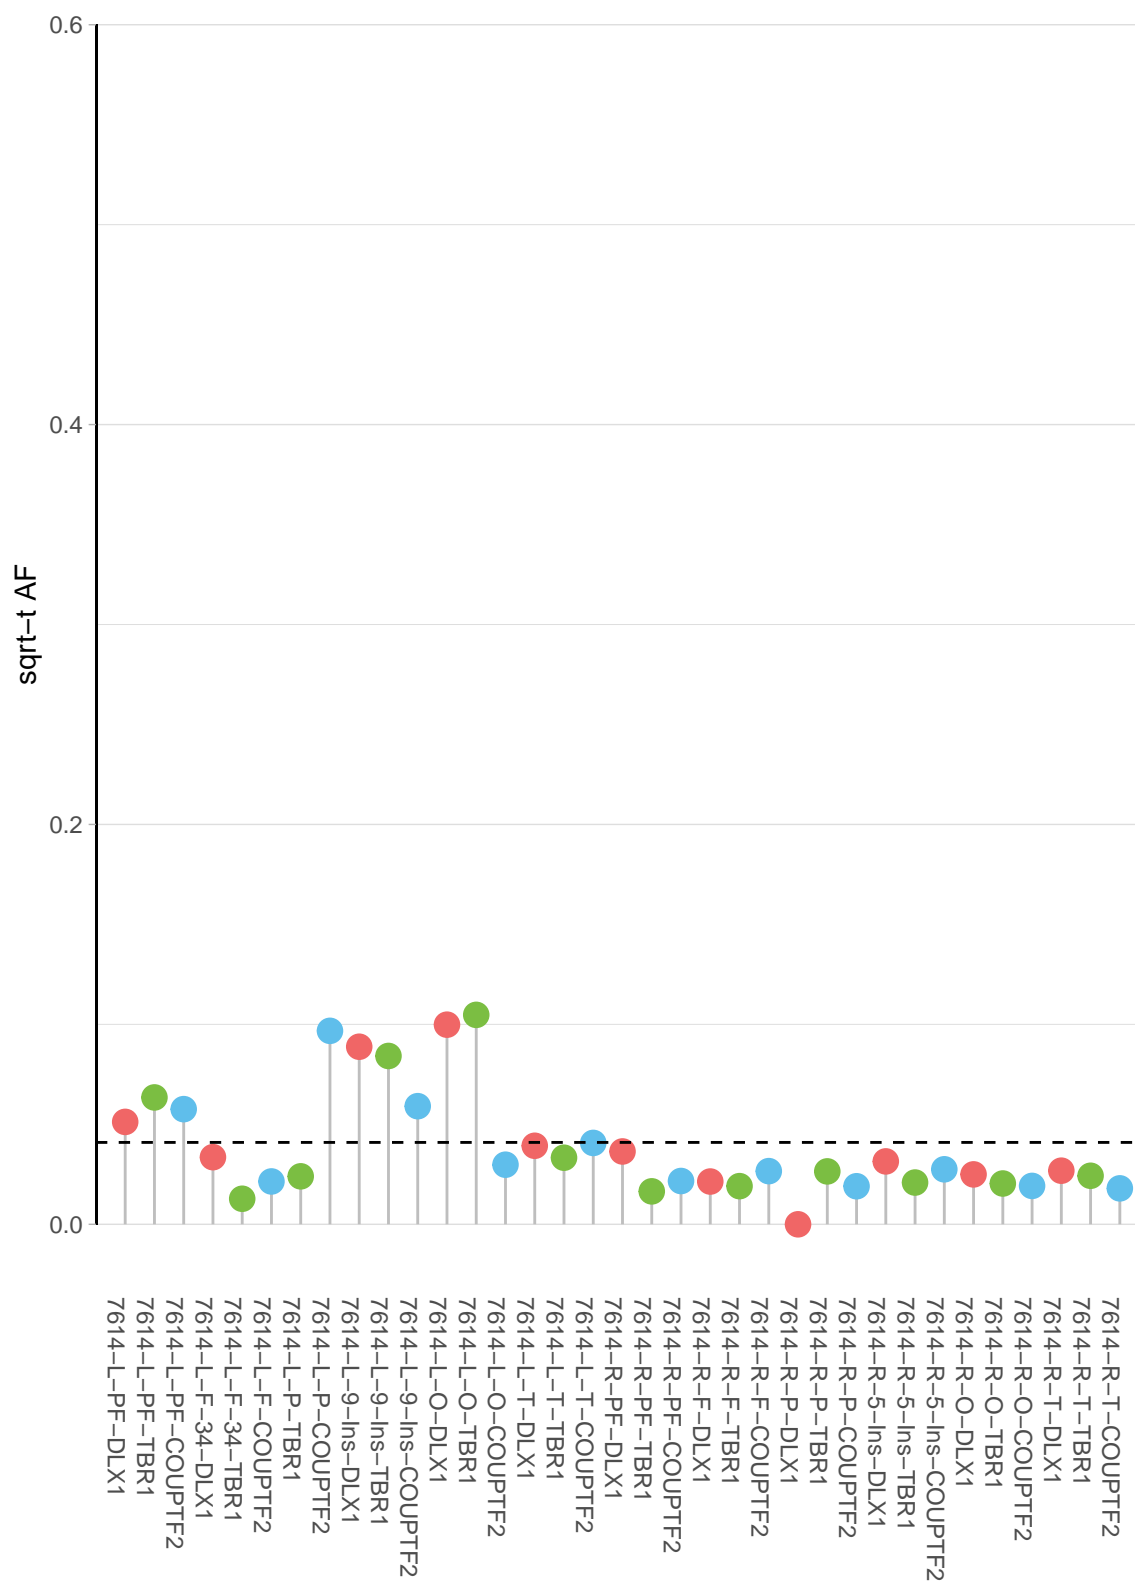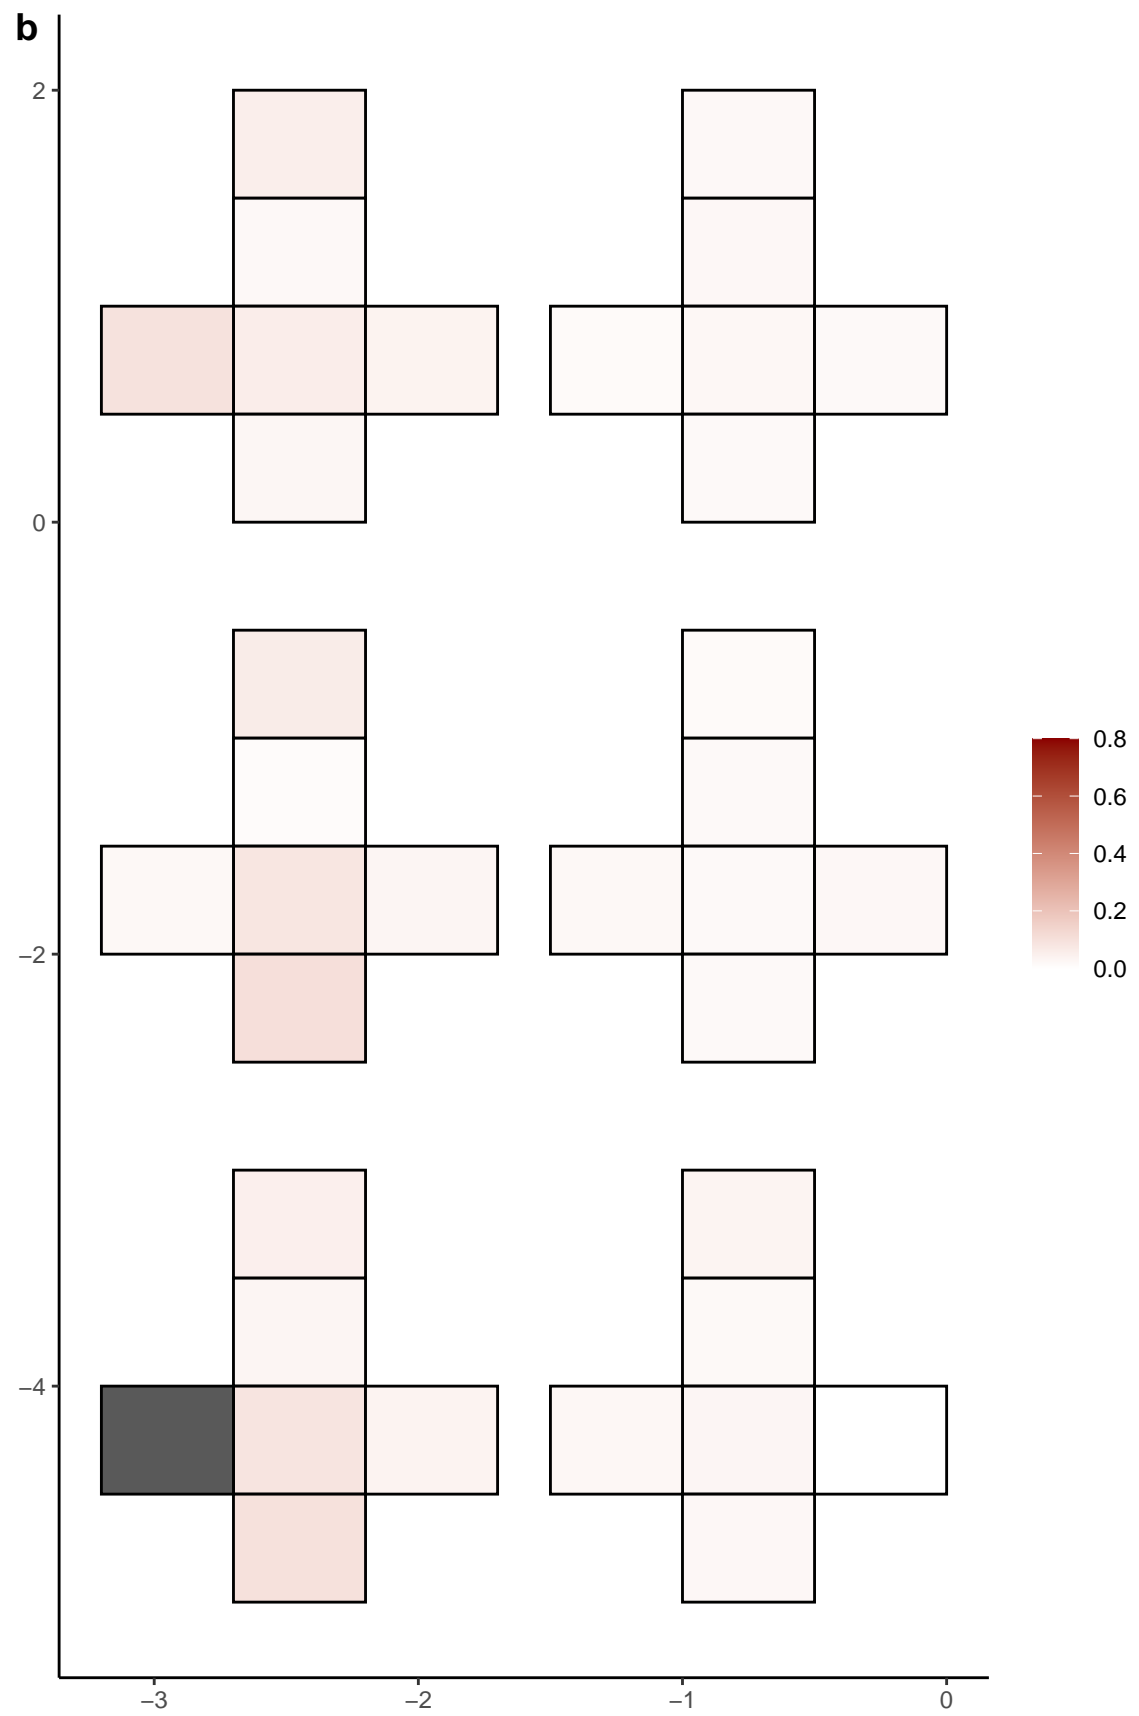

**a** ID01 6-40371400-C-T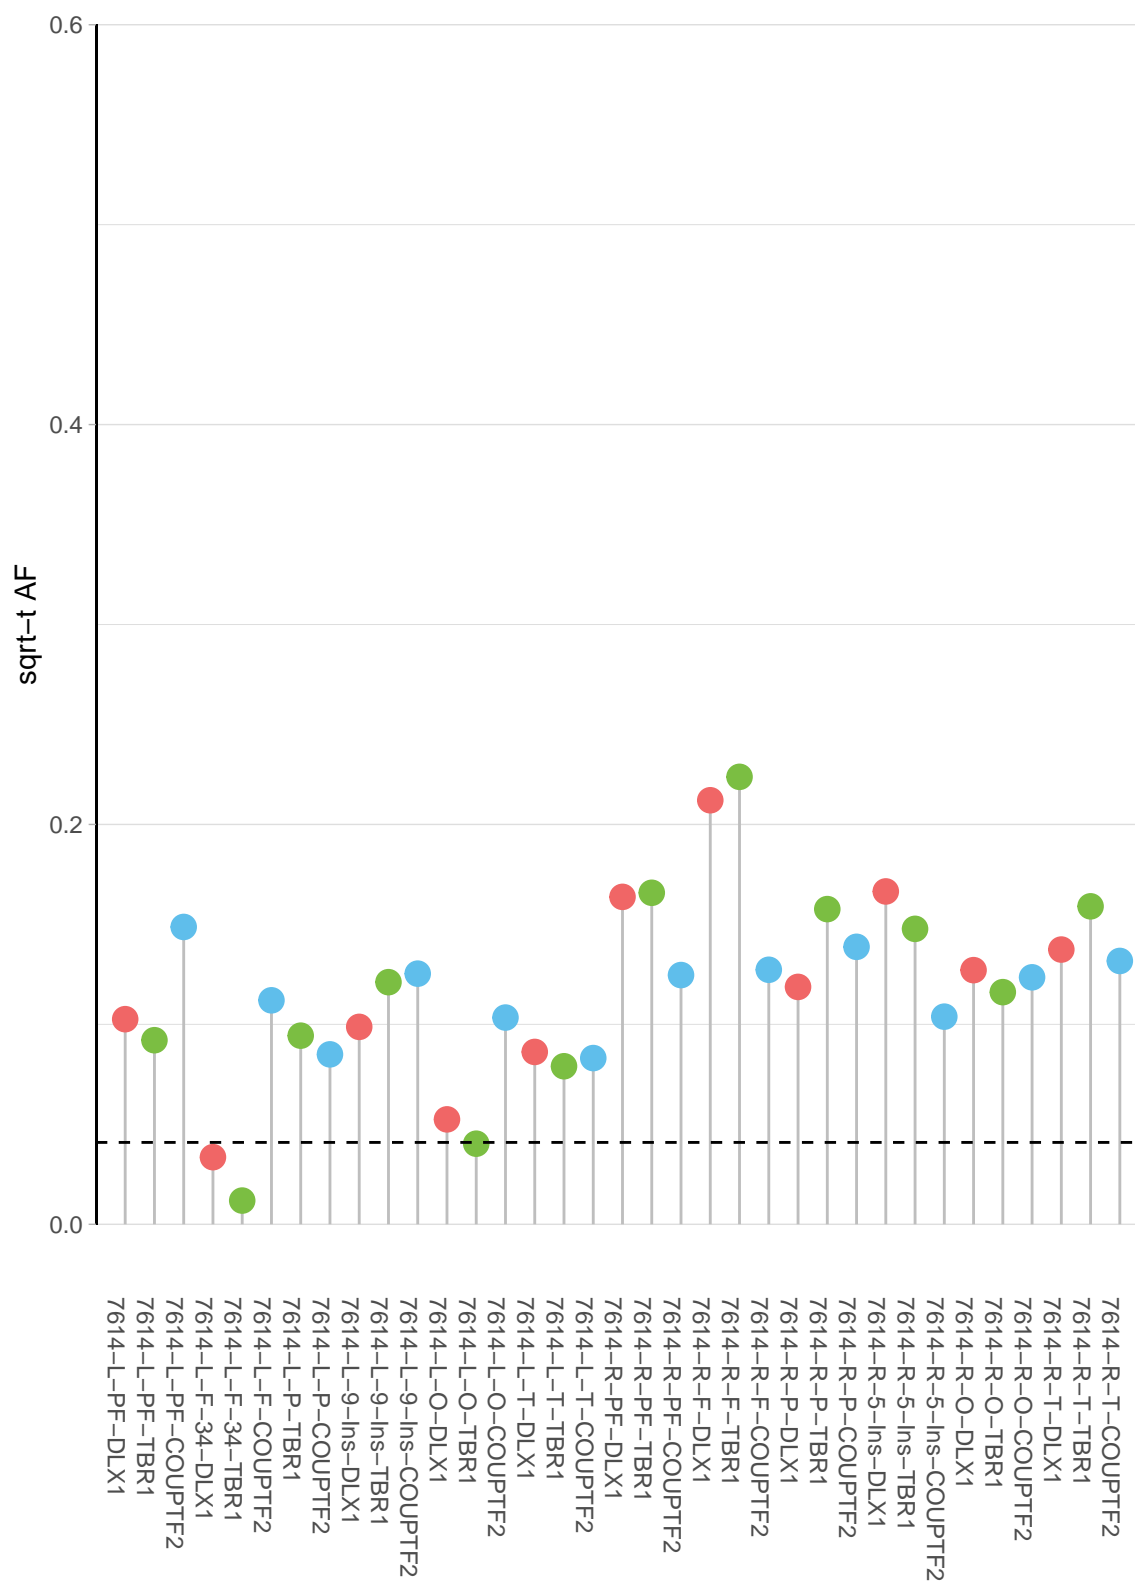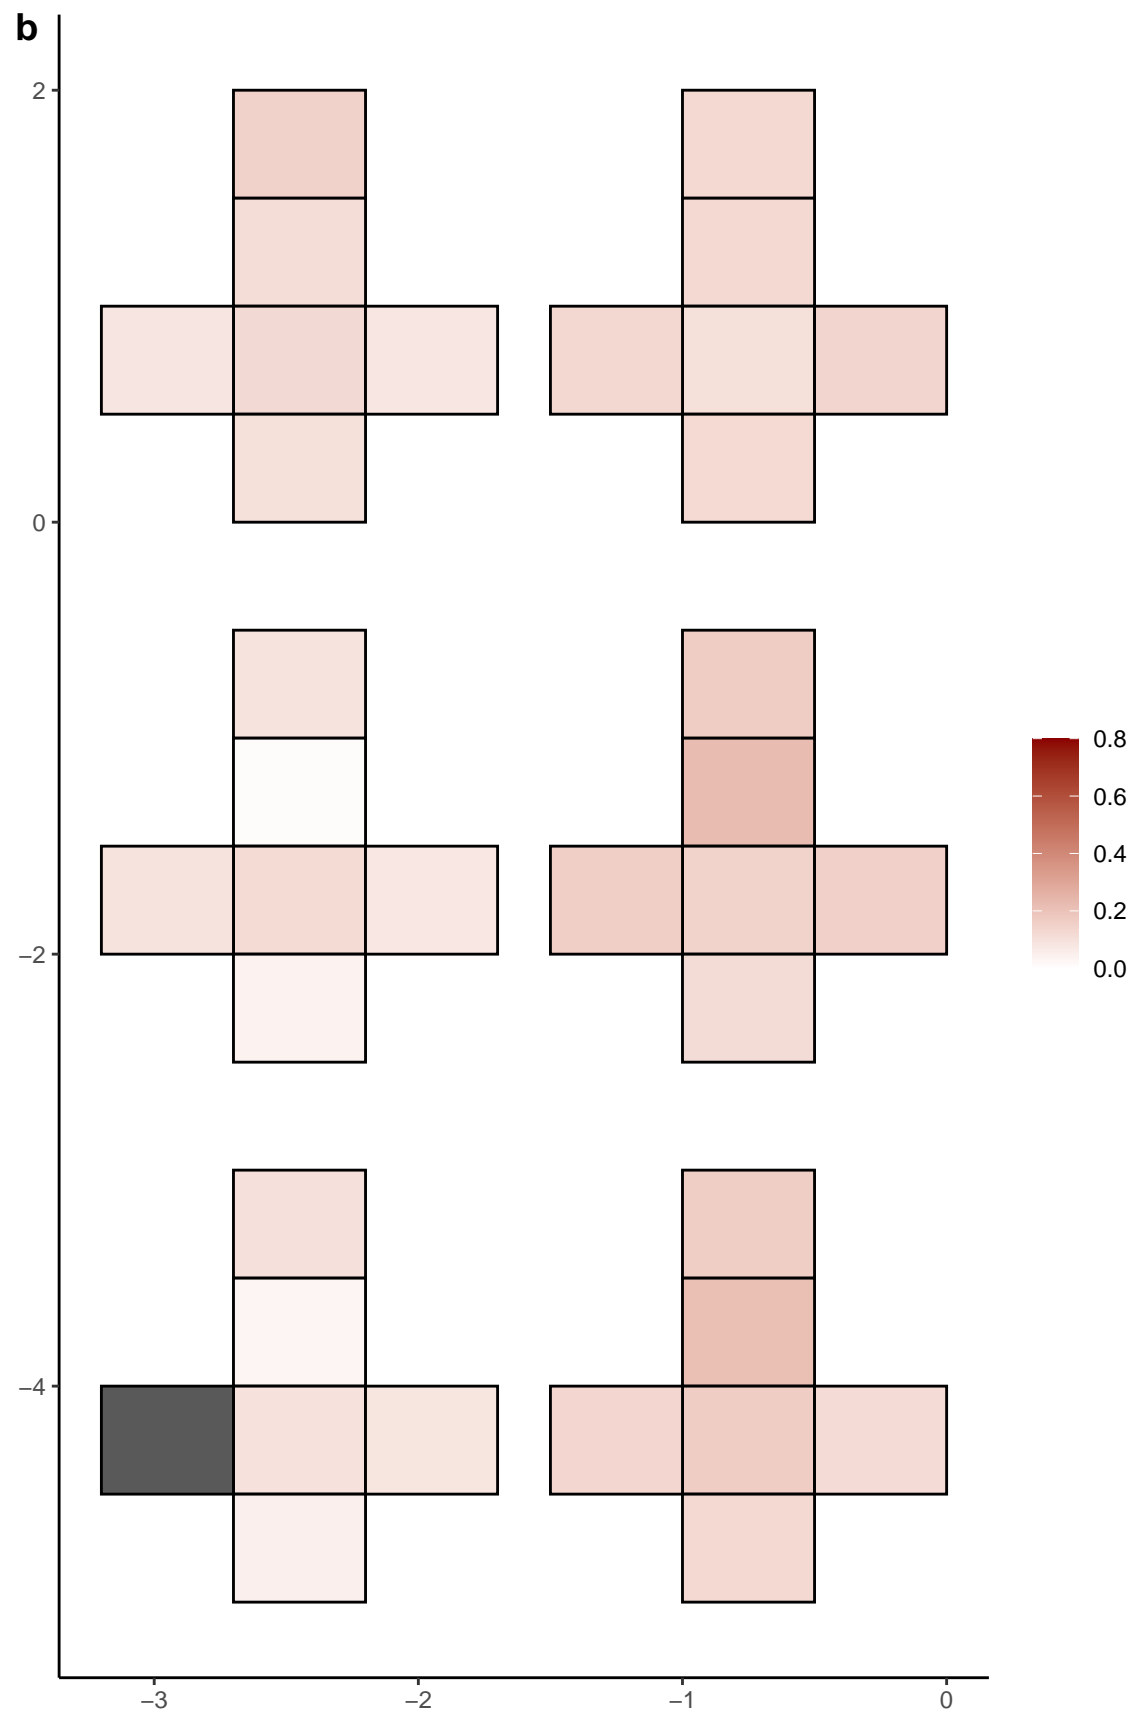



**a** ID01 6-45630553-G-A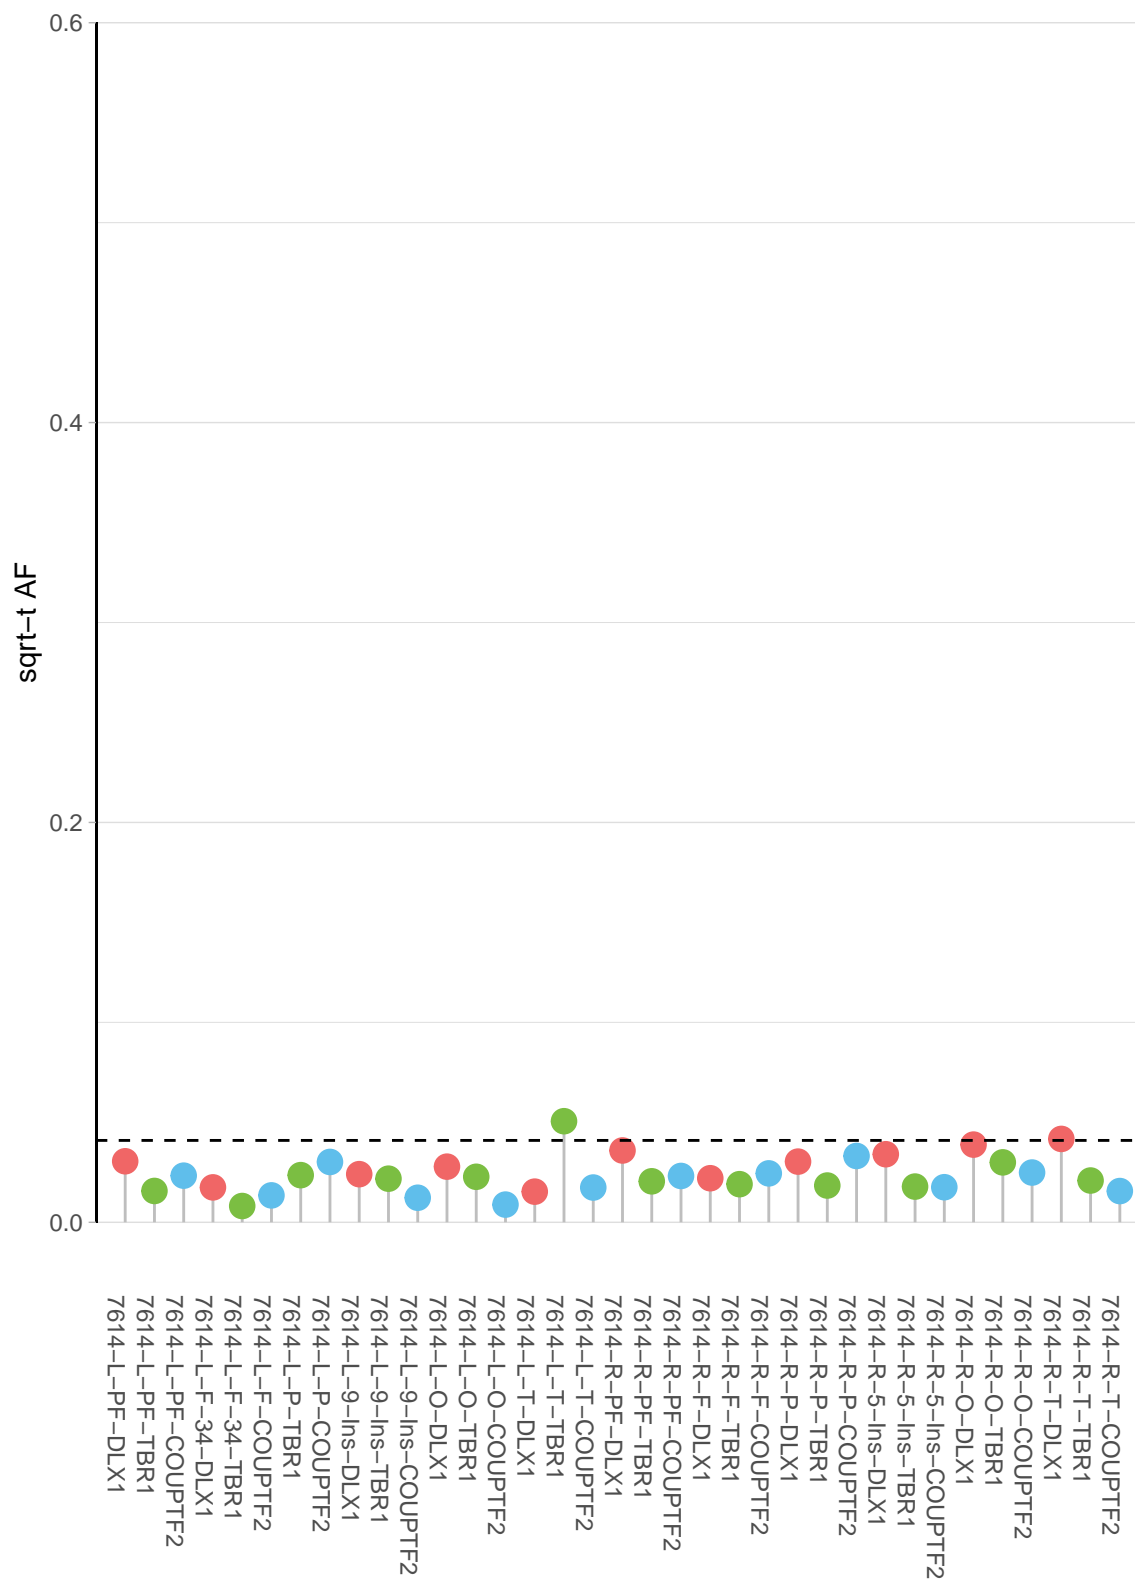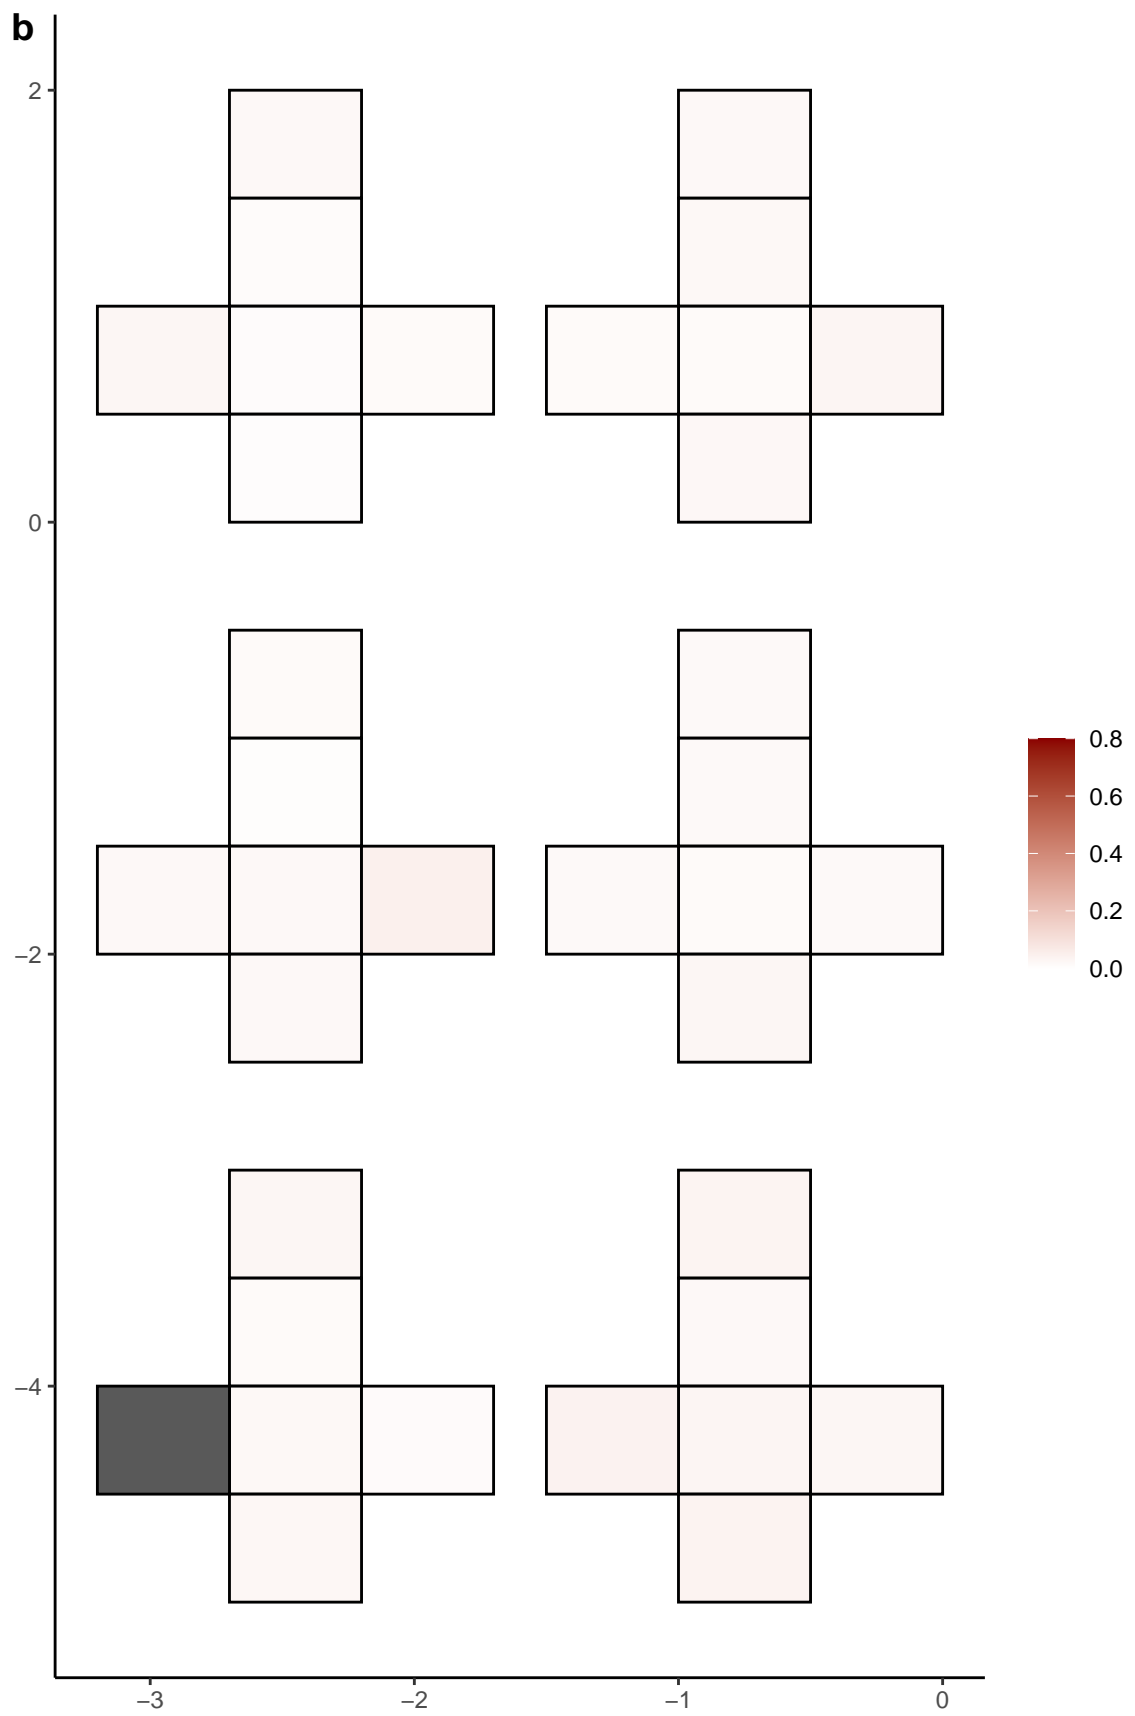

**a** ID01 6-55394736-C-T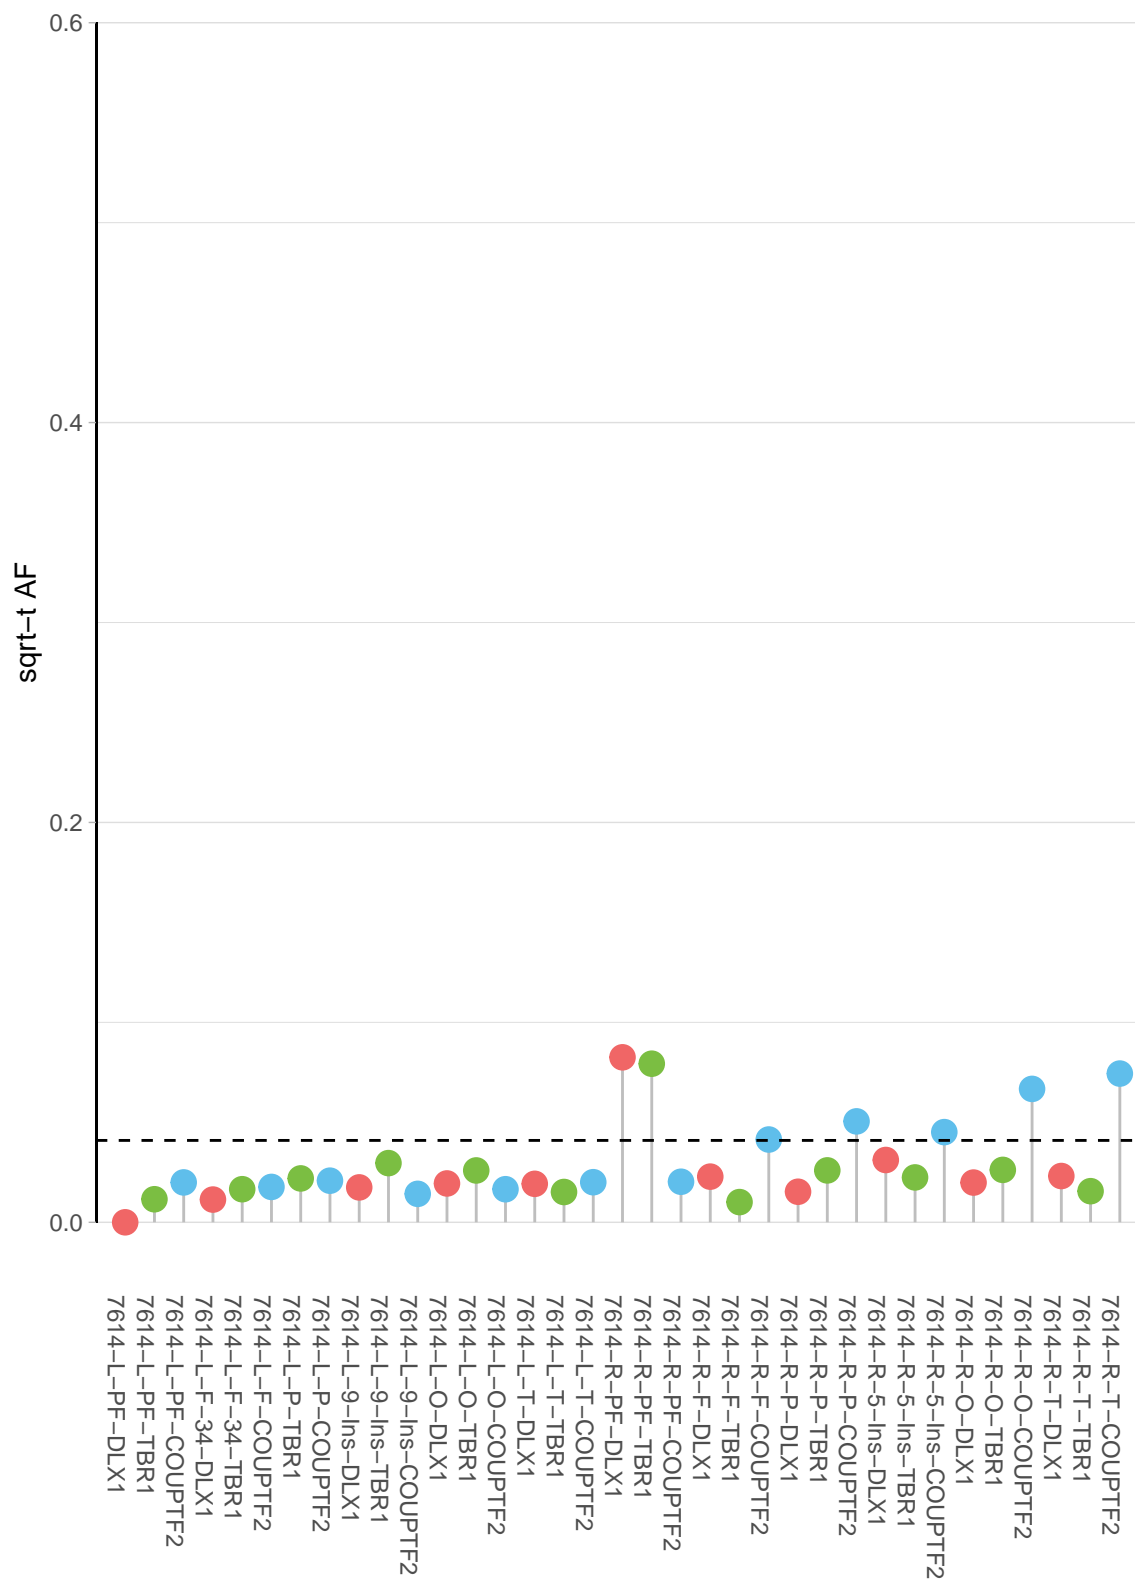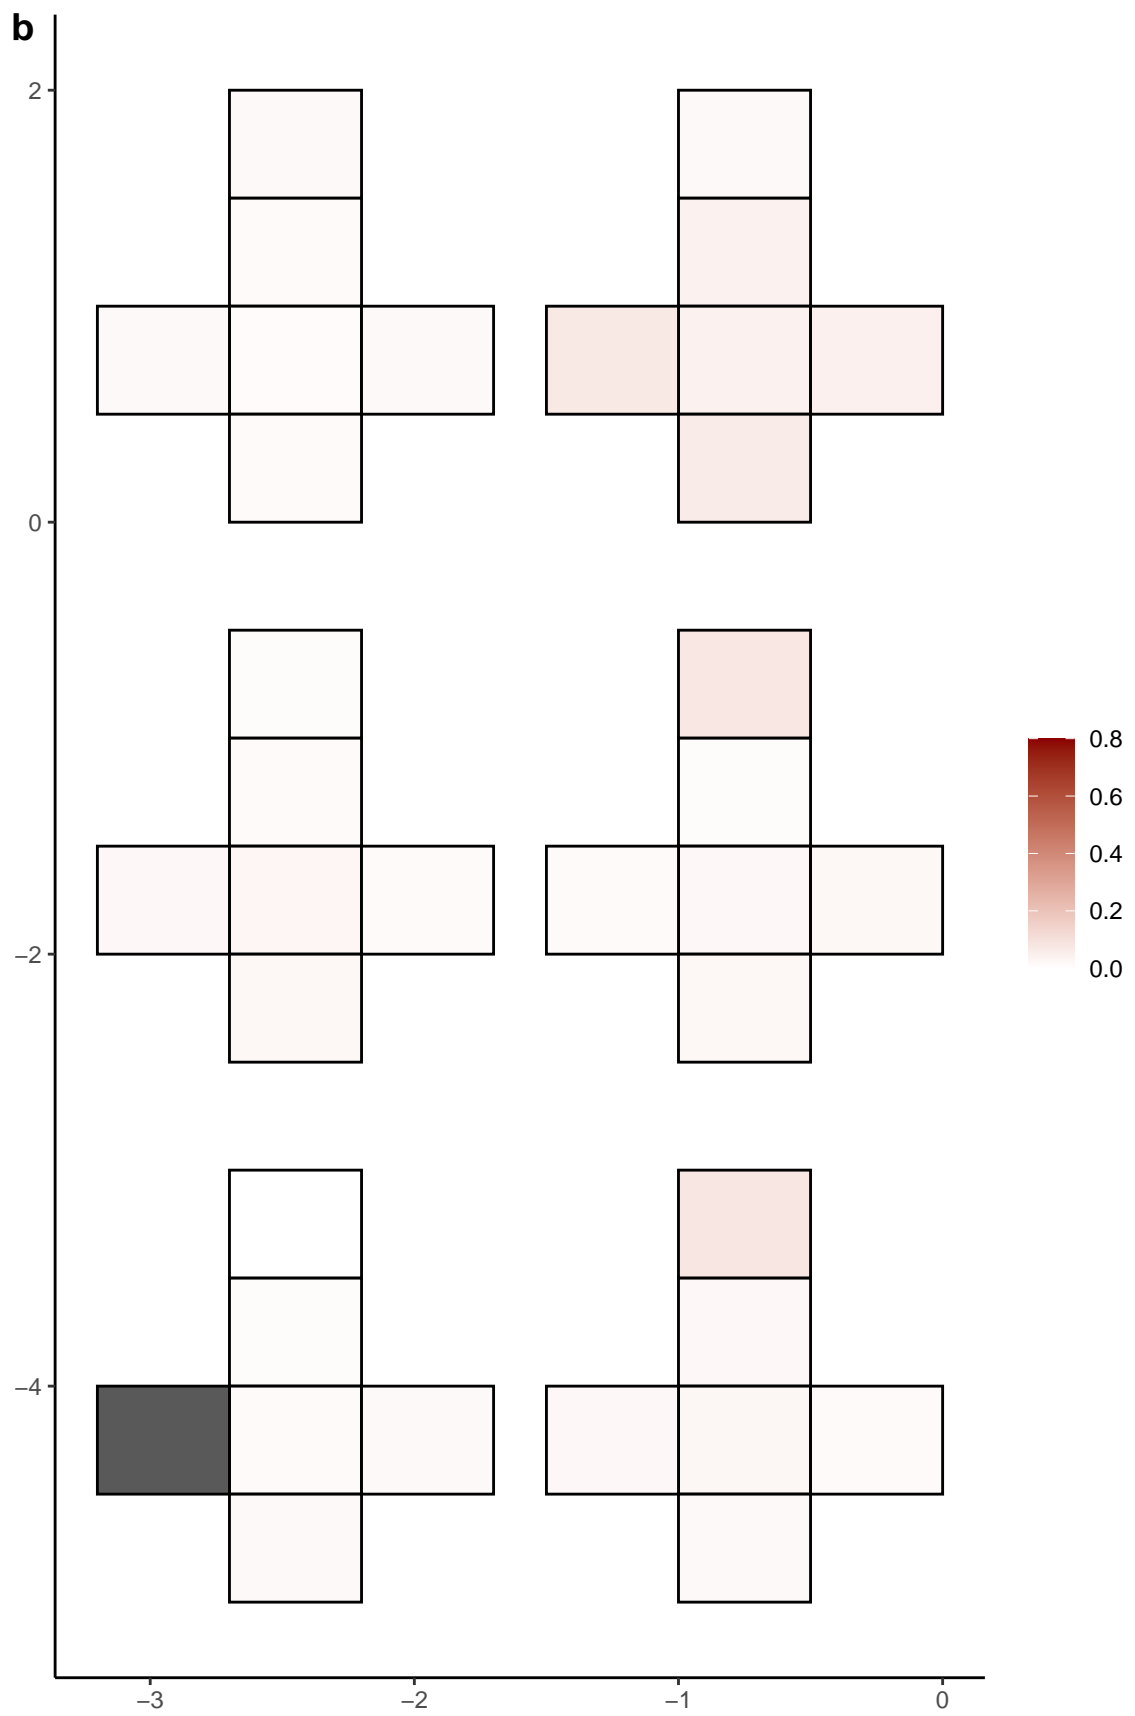

**a** ID01 6-57218601-A-G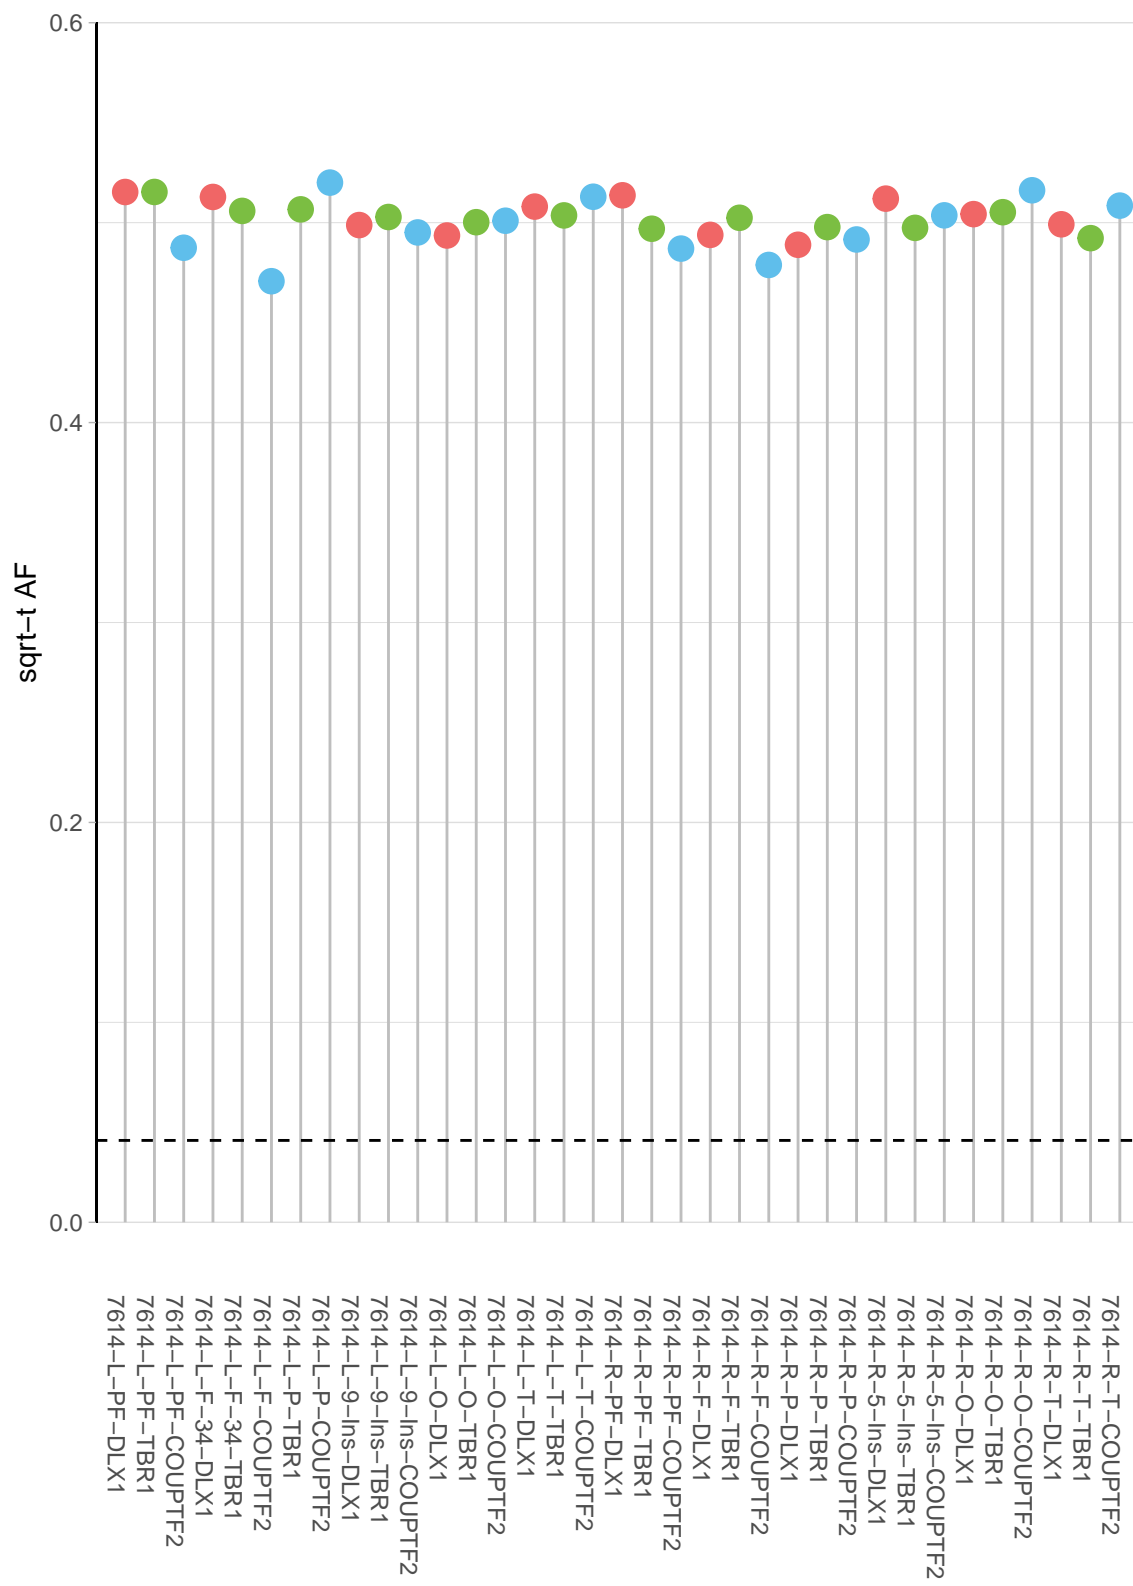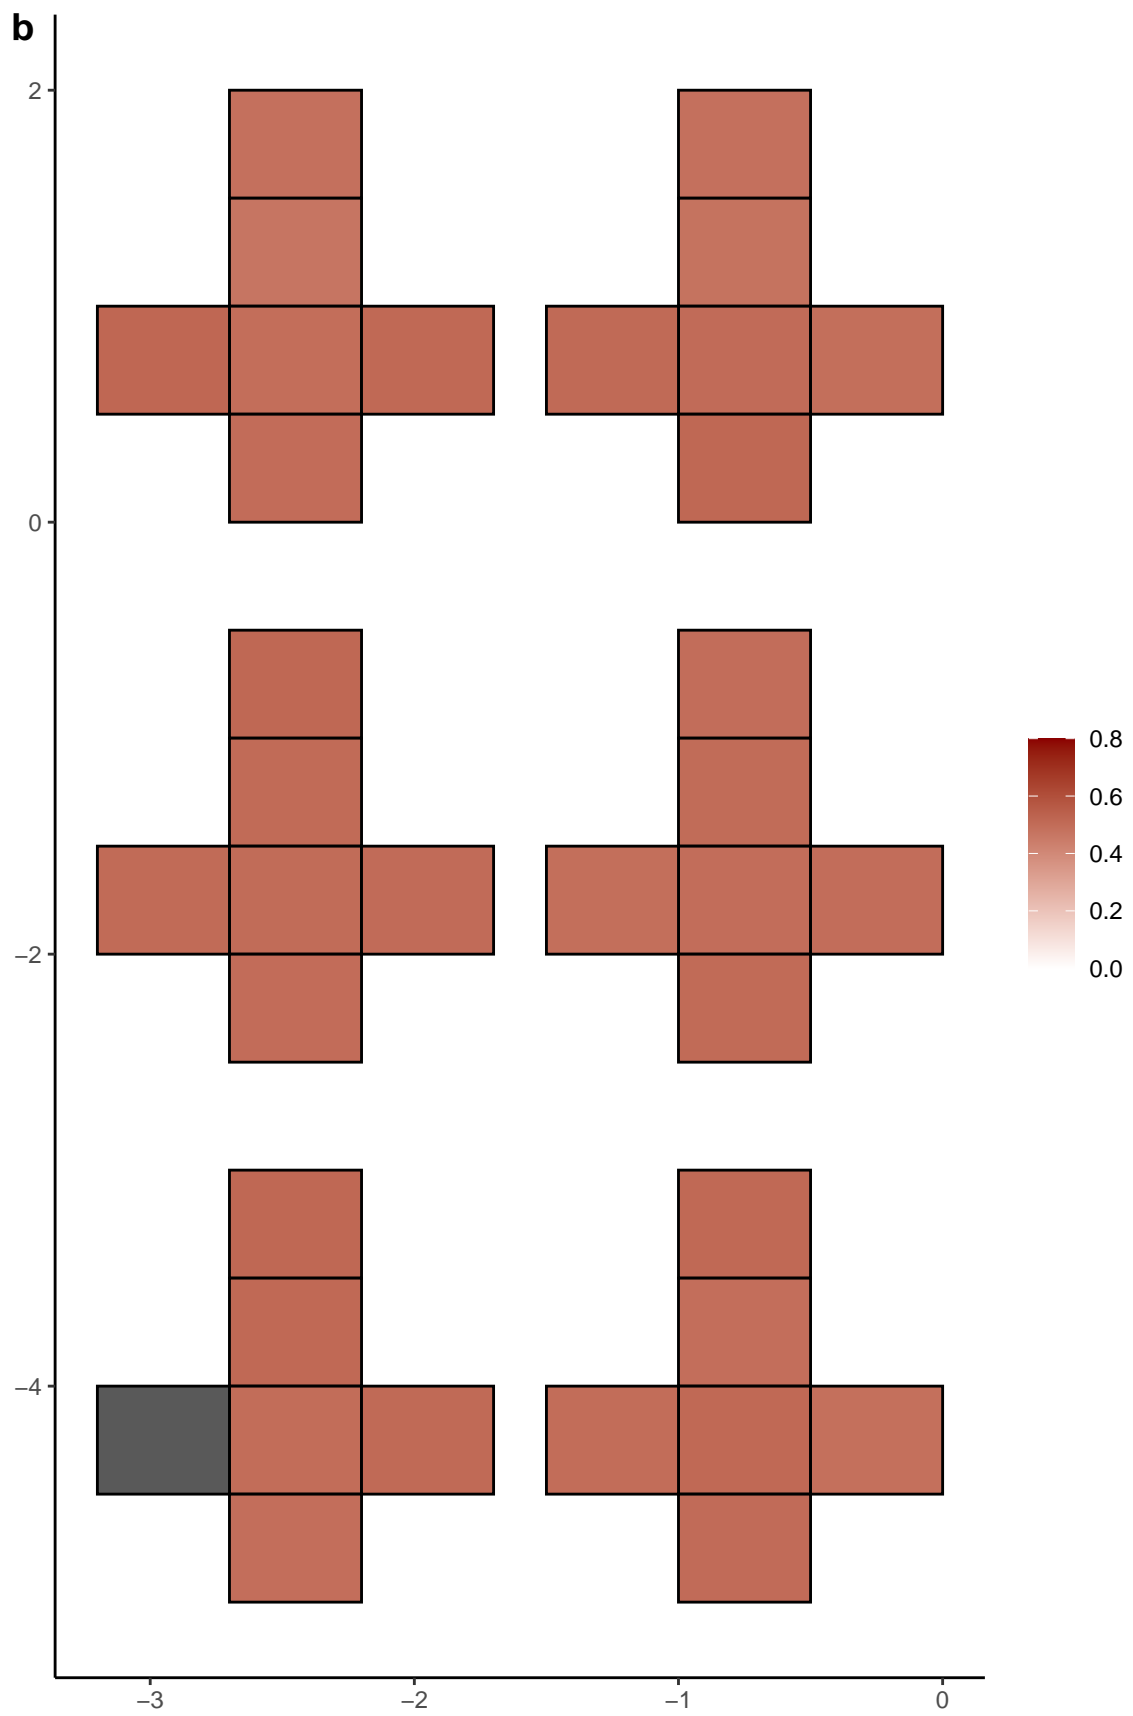

**a** ID01 6-57411198-G-T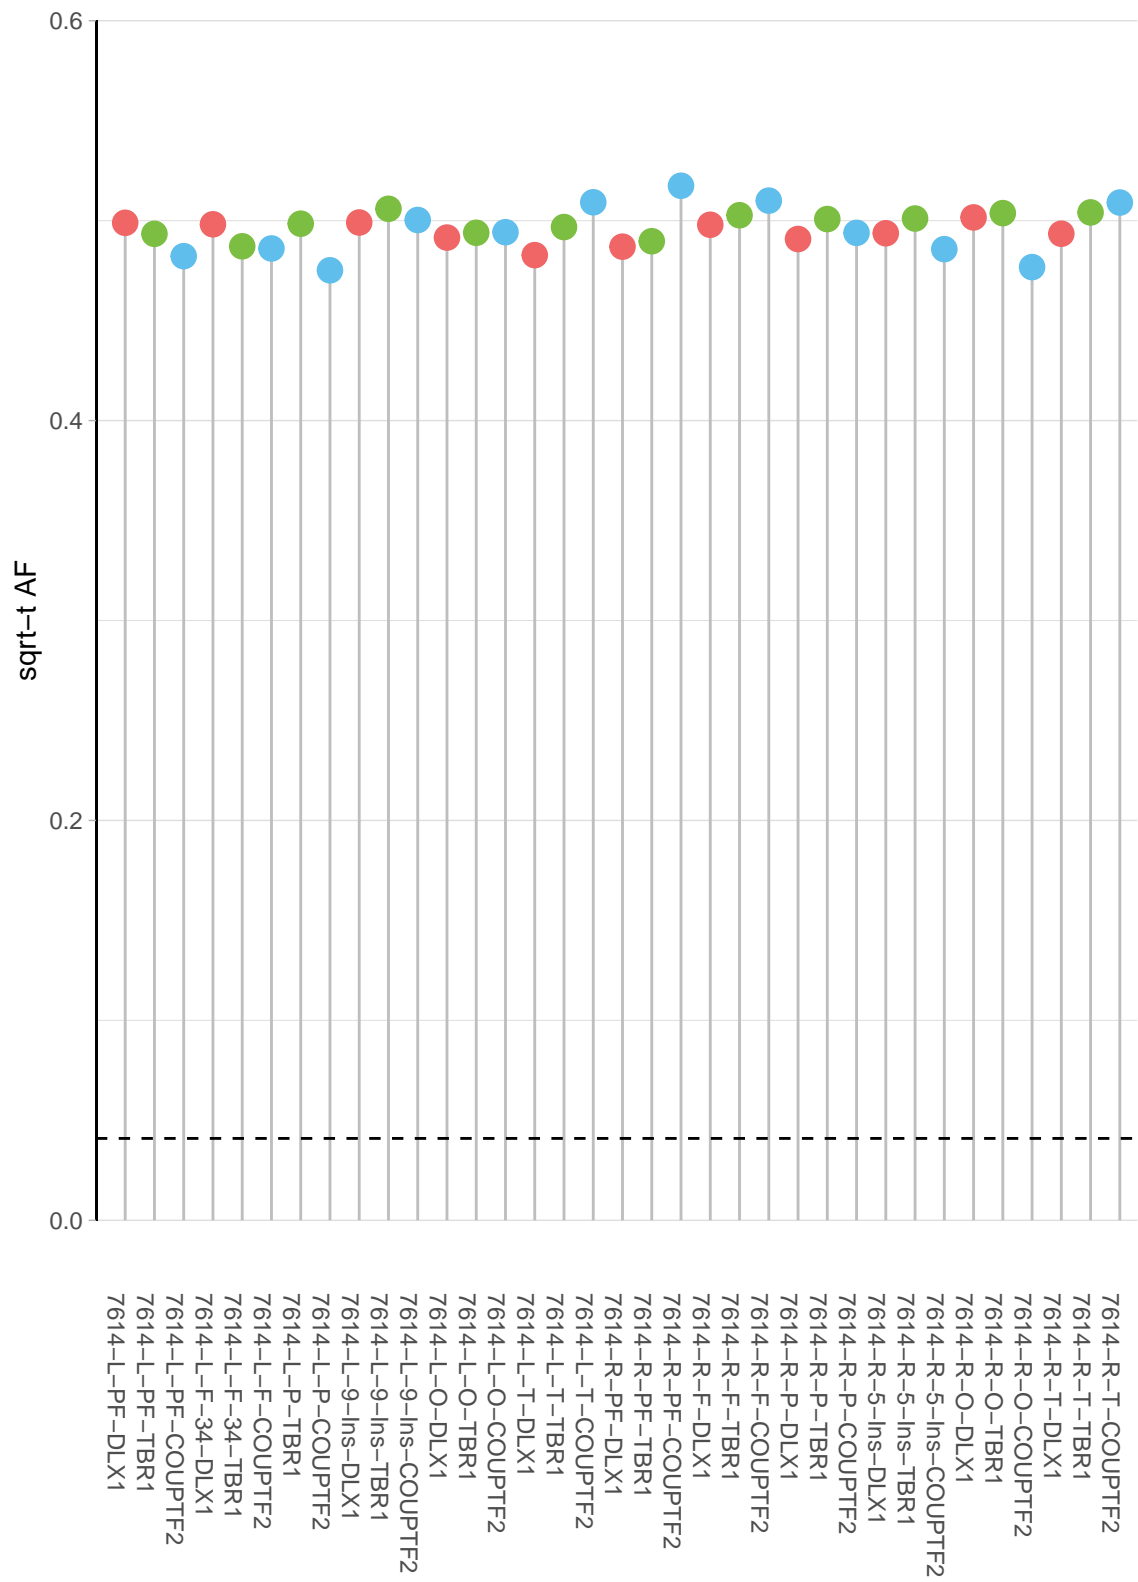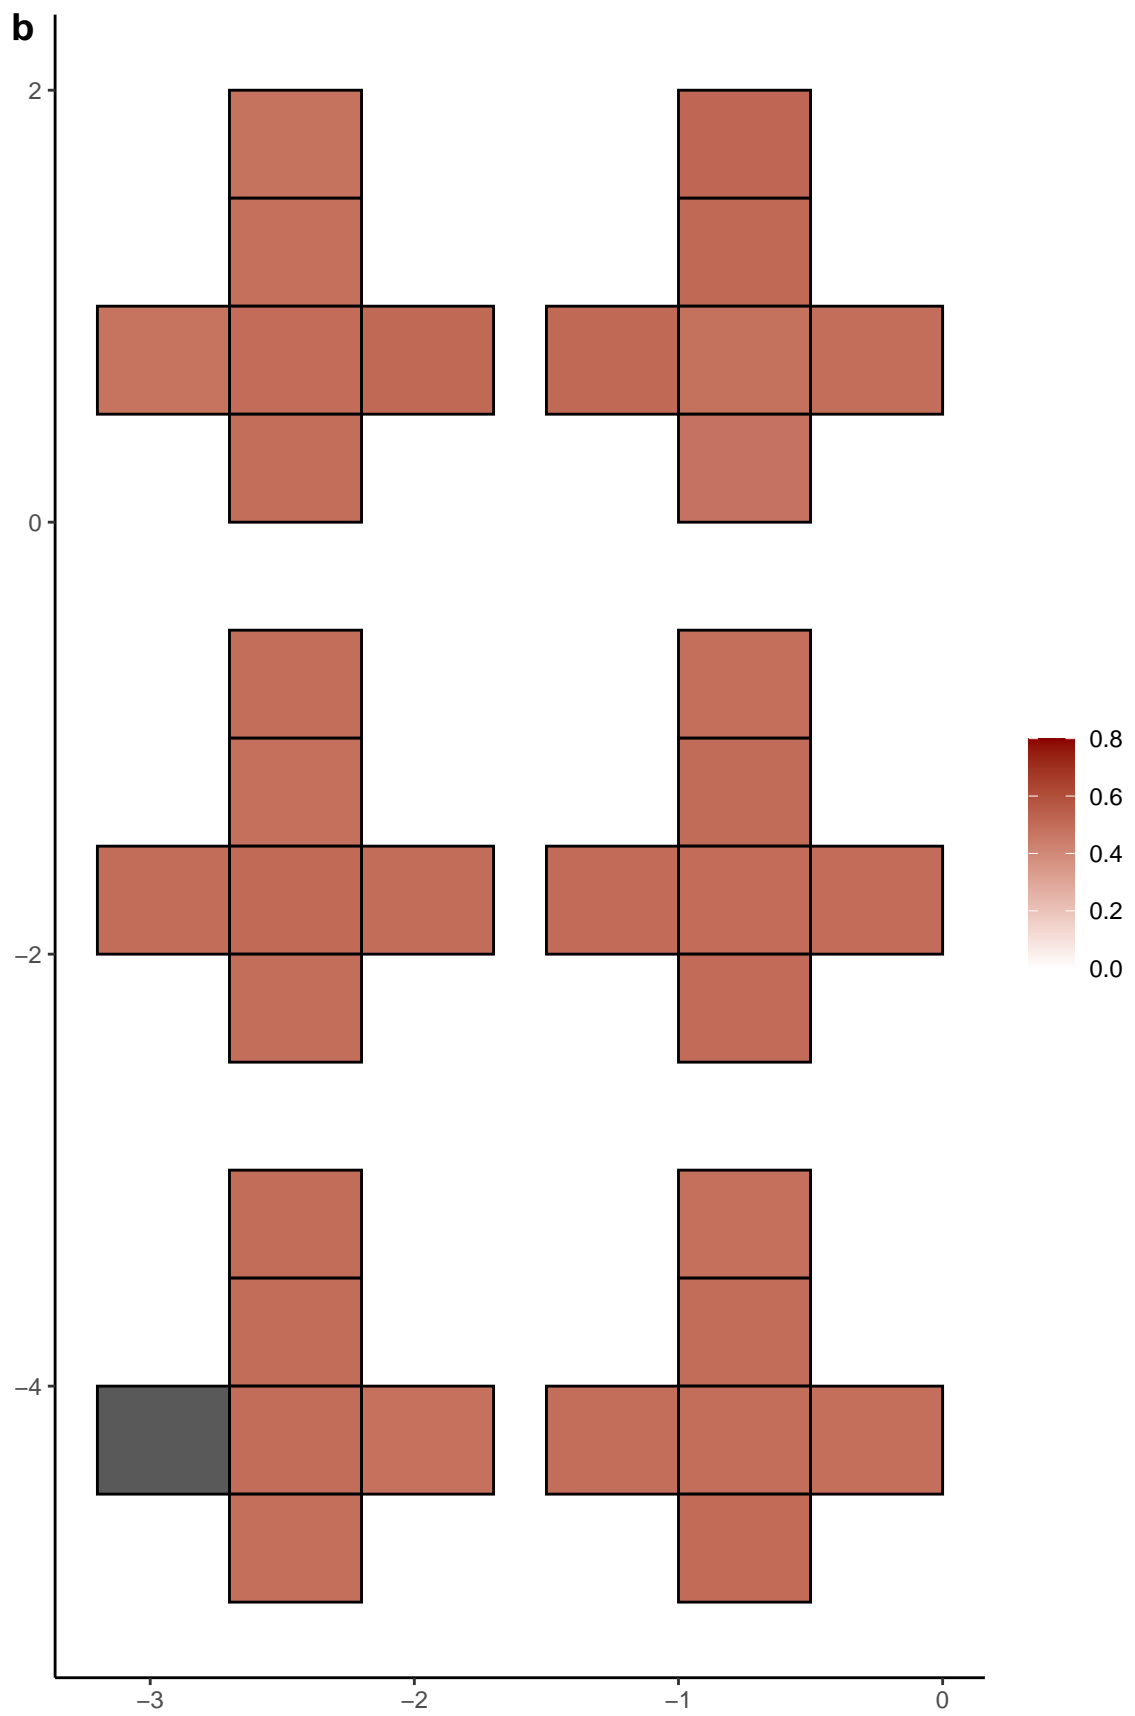

**a** ID01 6-7569605-G-A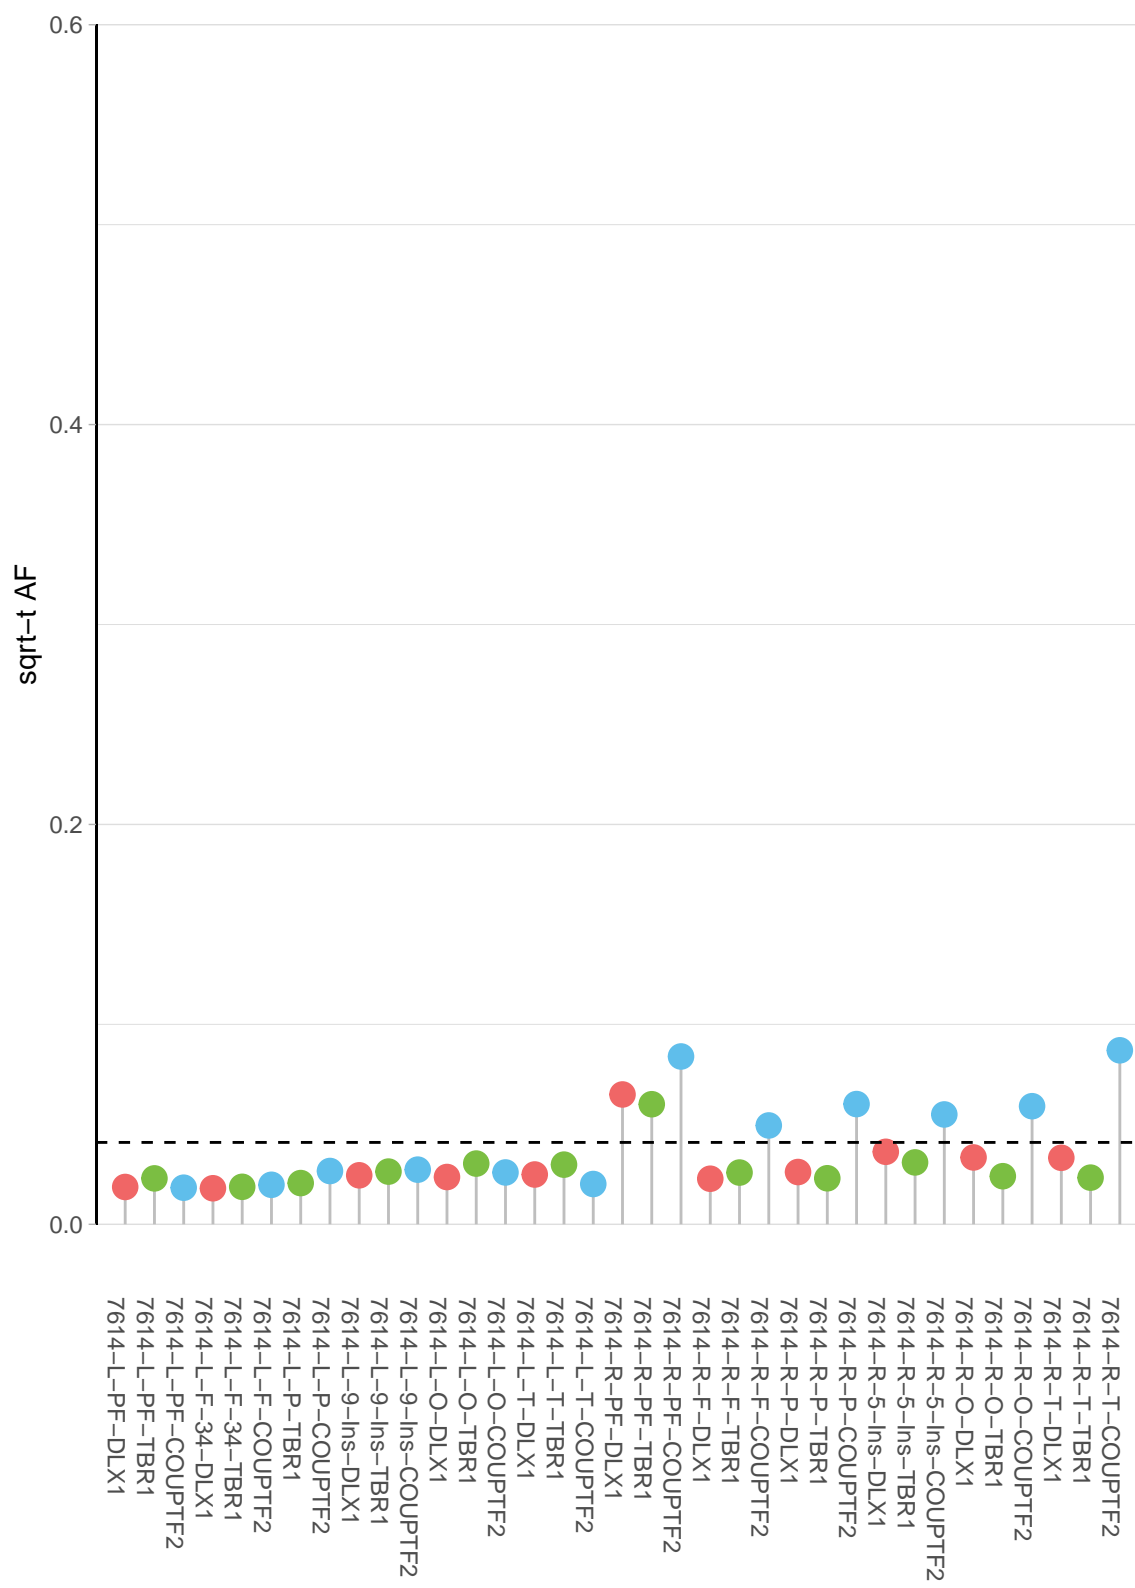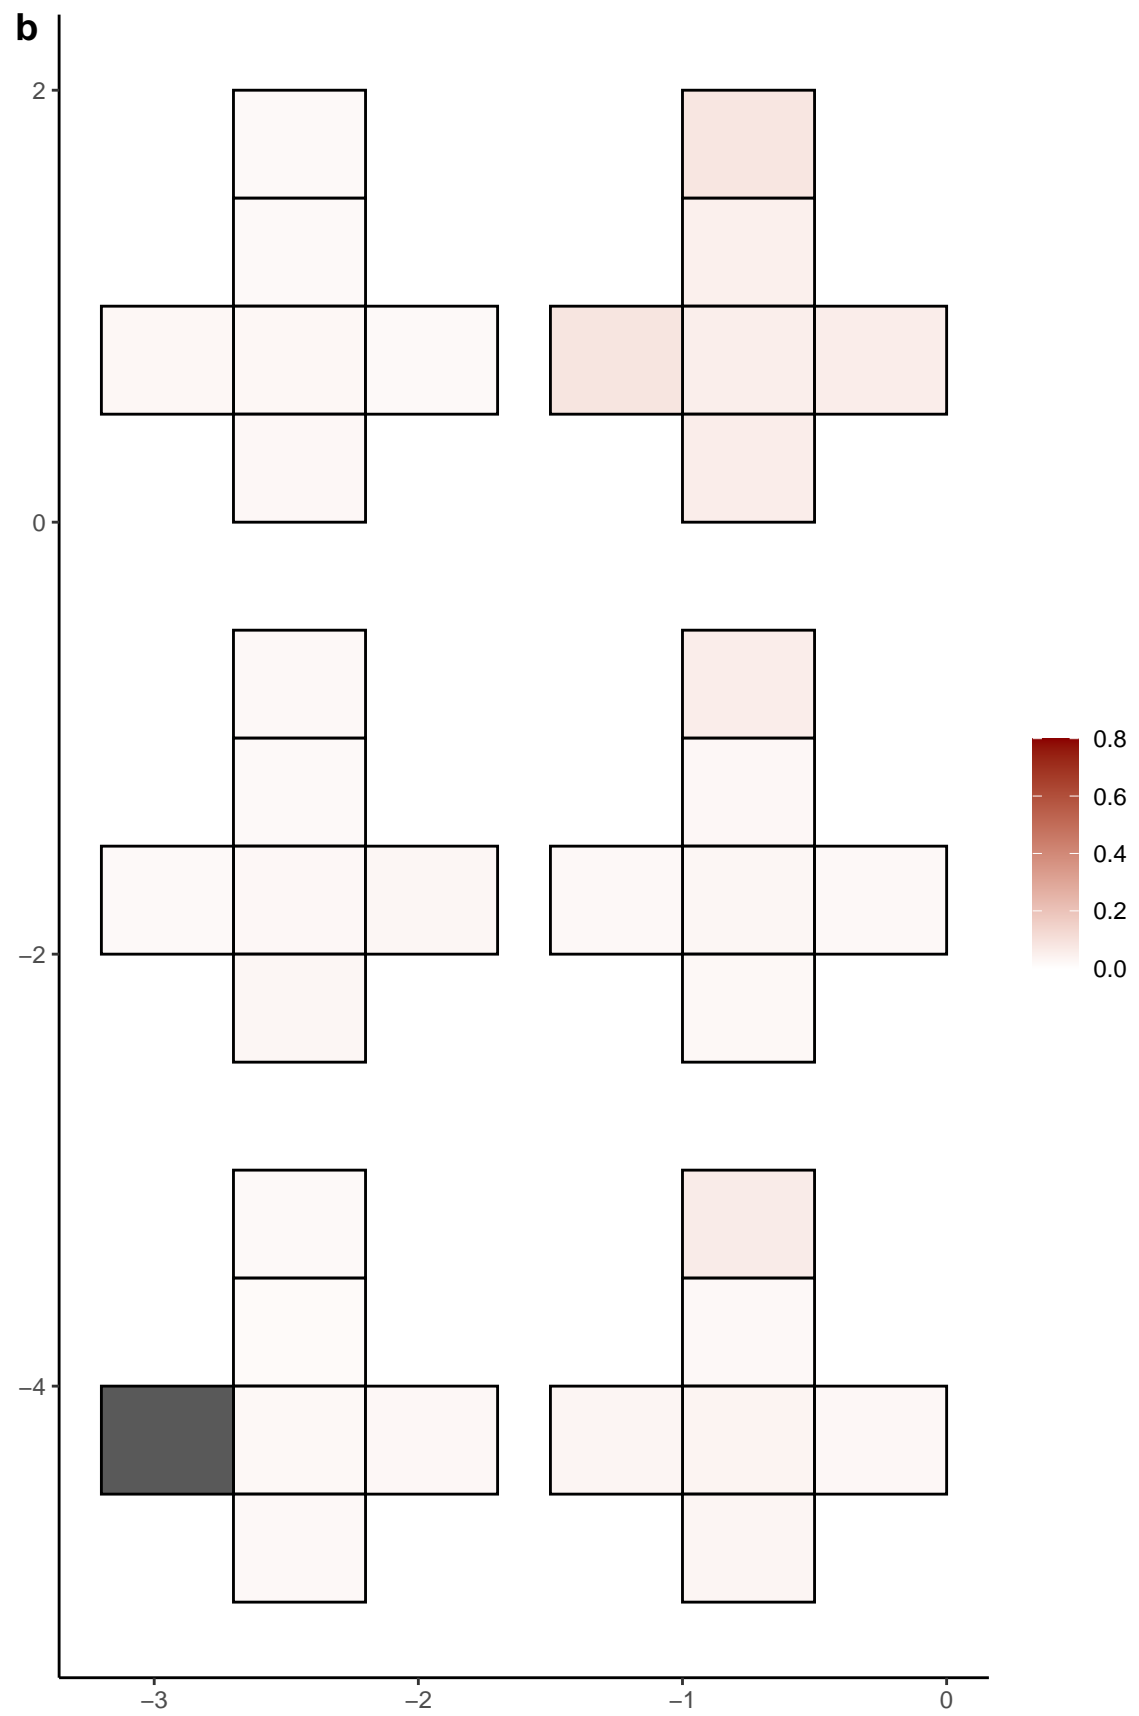

**a** ID01 6-80796617-T-G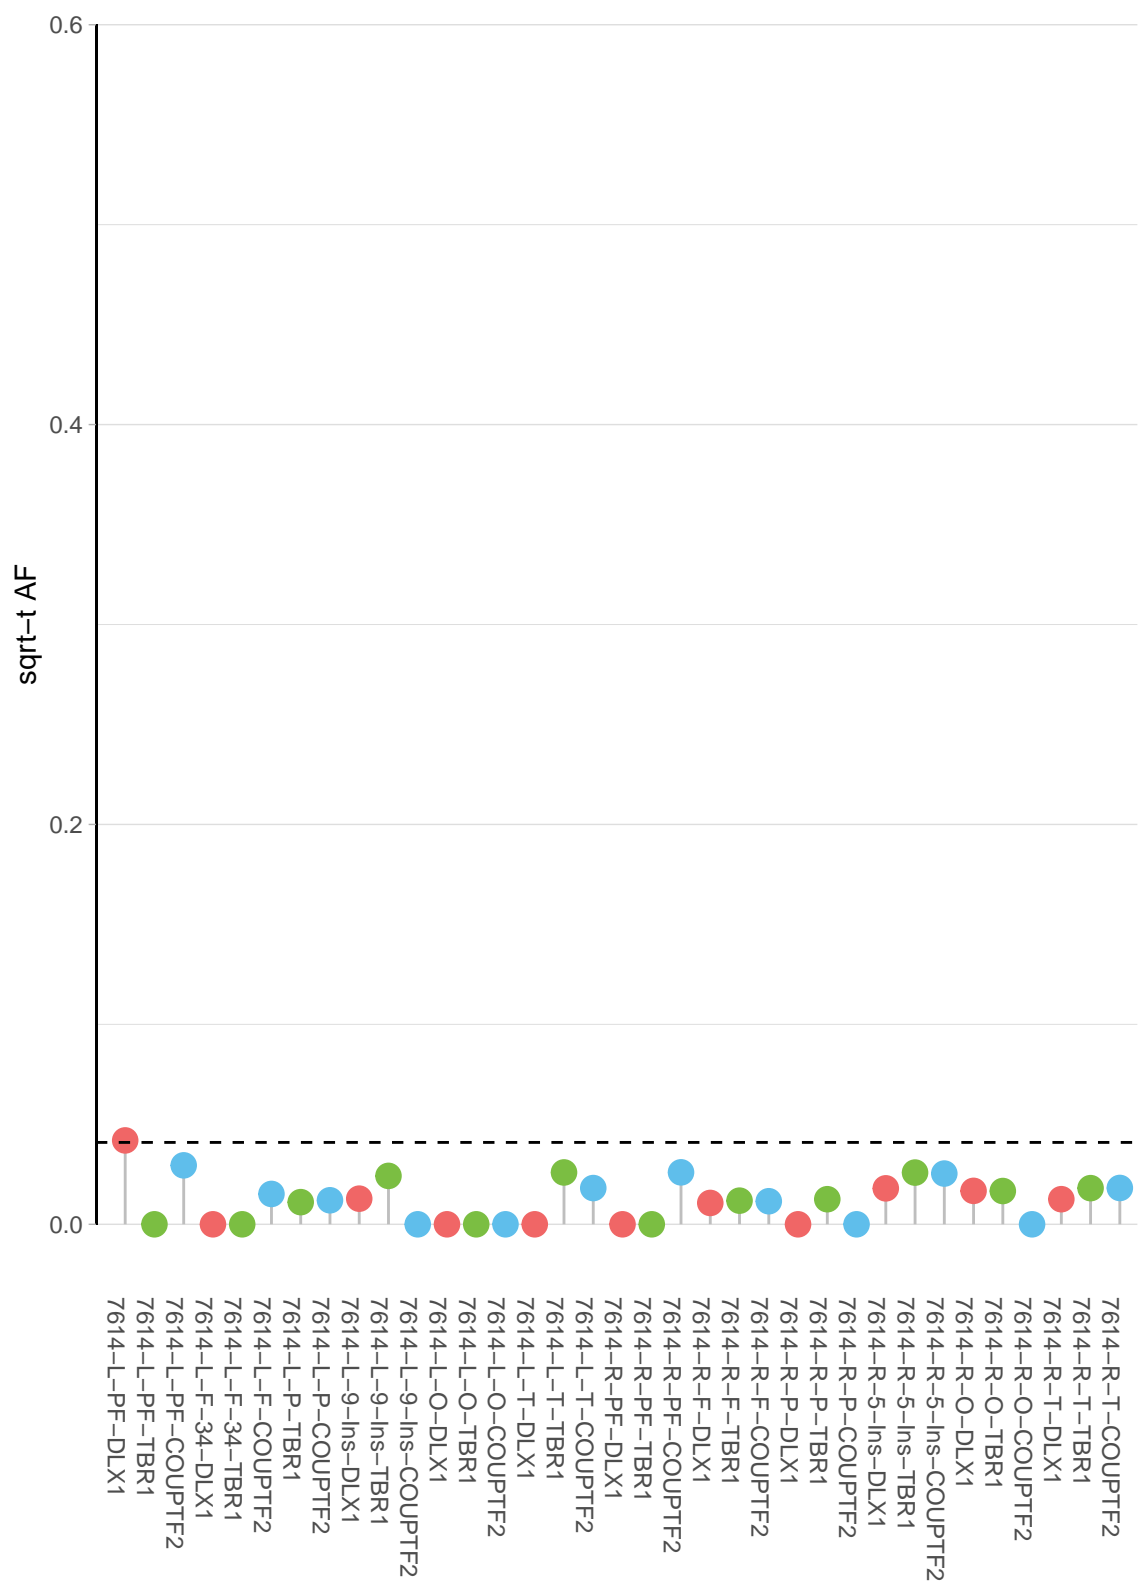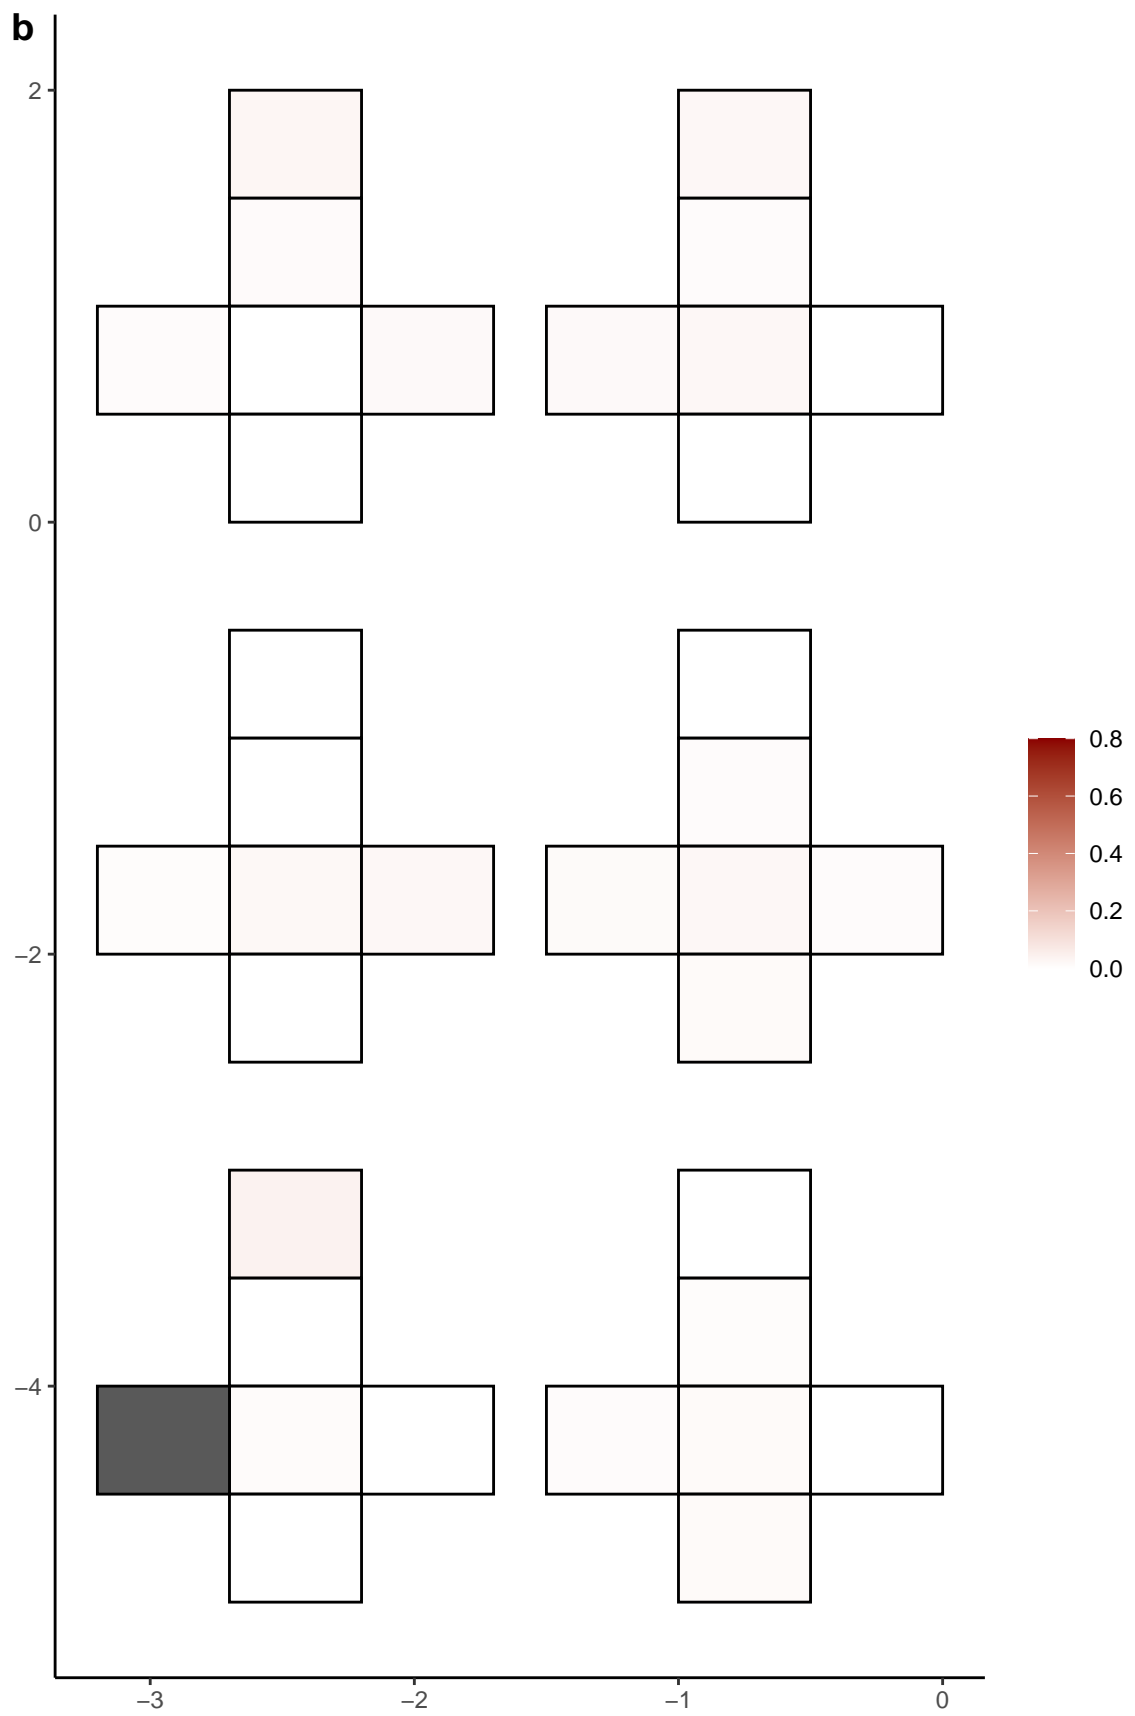

**a** ID01 7-121347585-T-G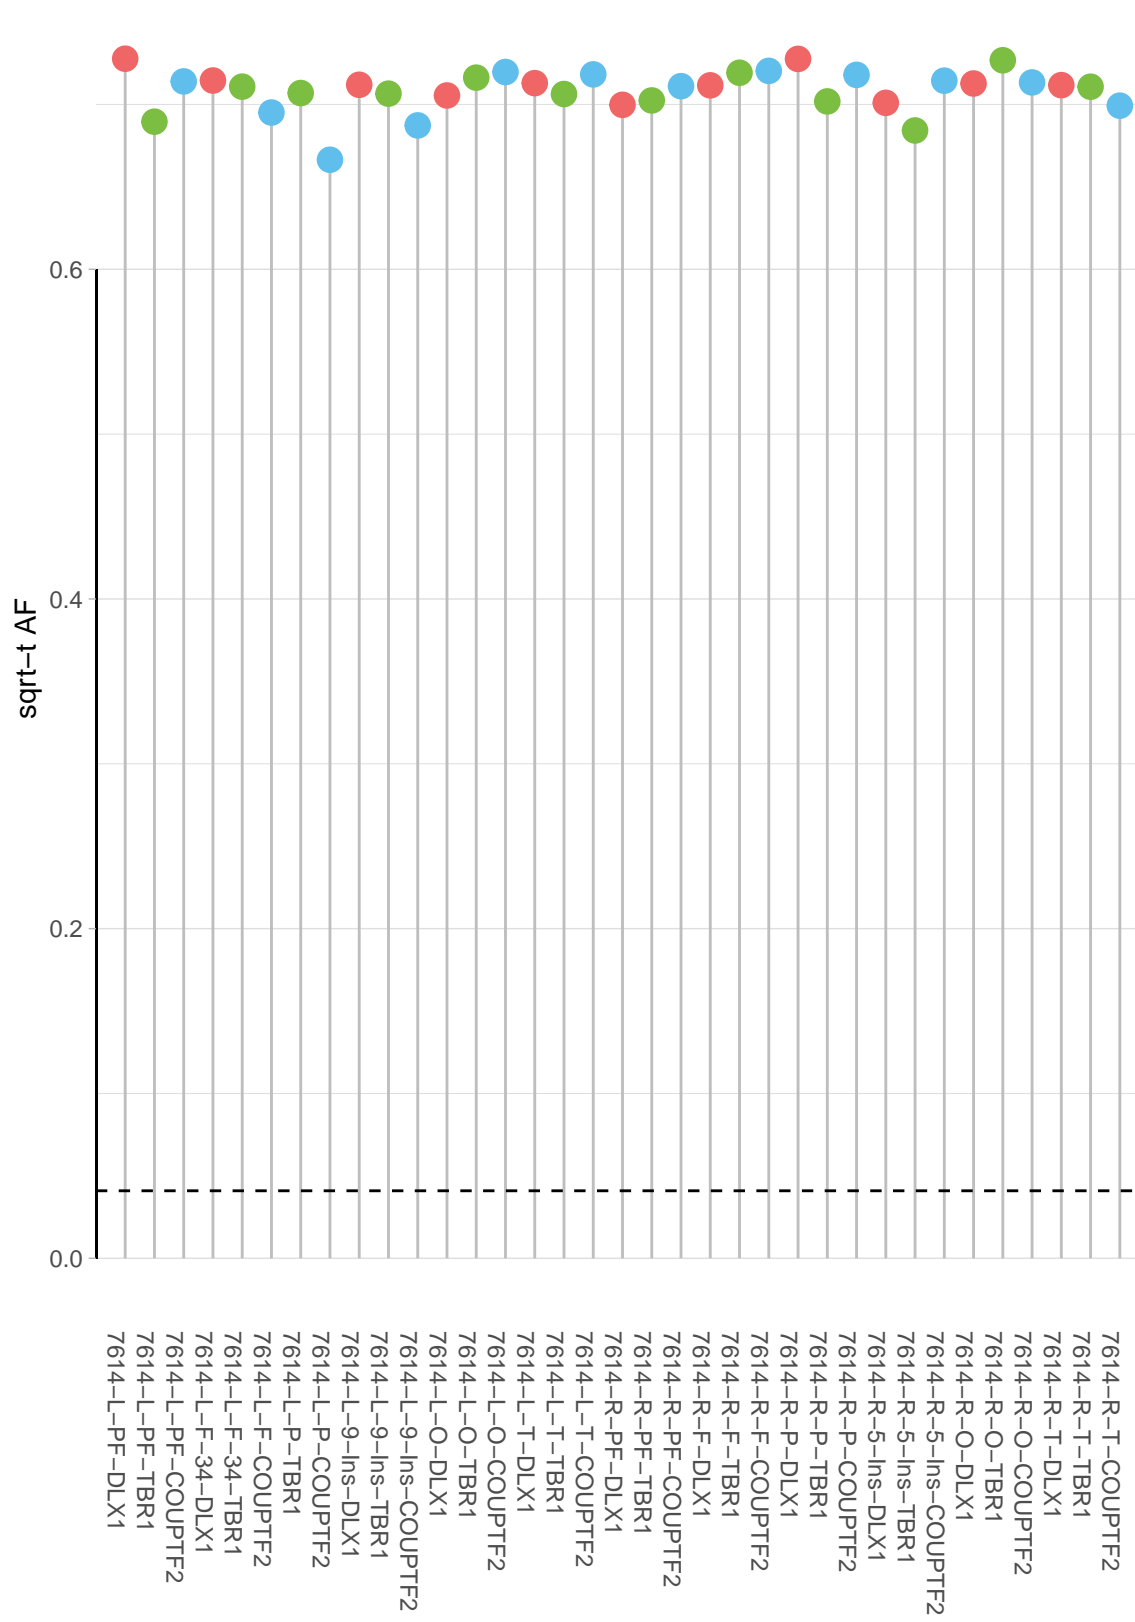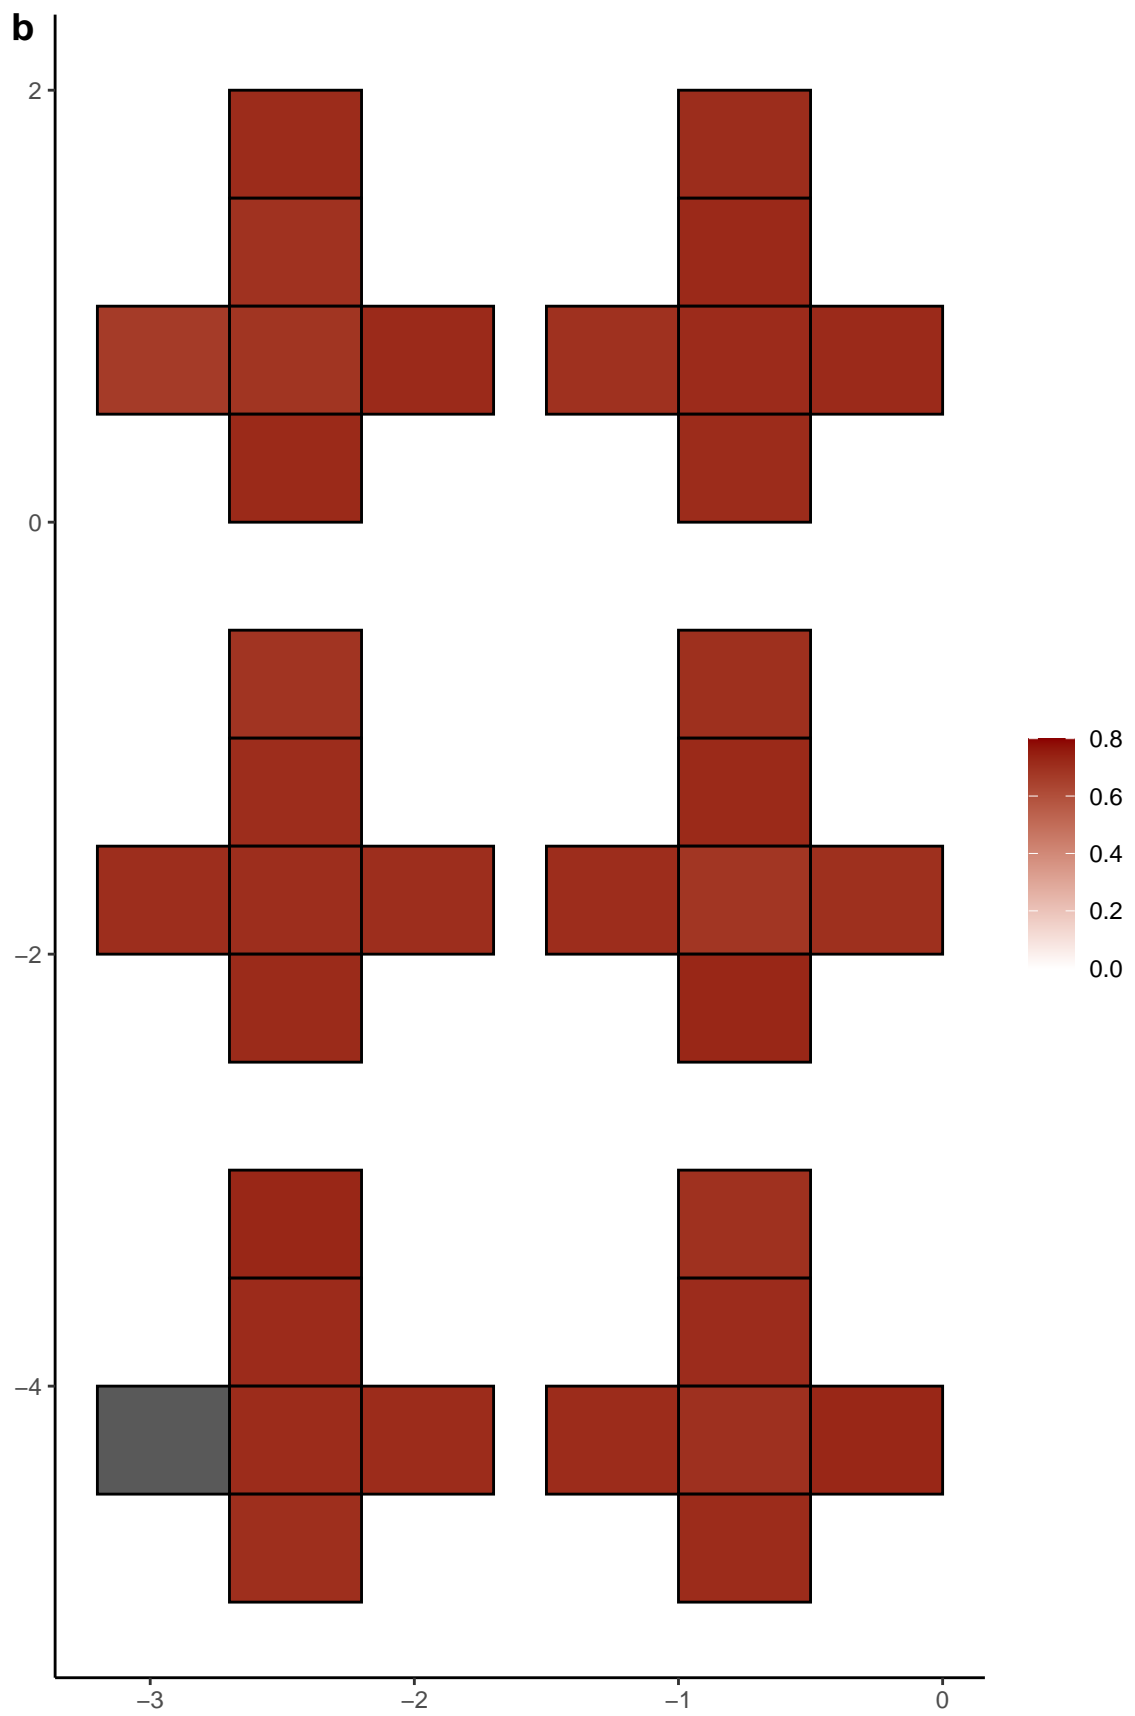

**a** ID01 7-121766164-G-A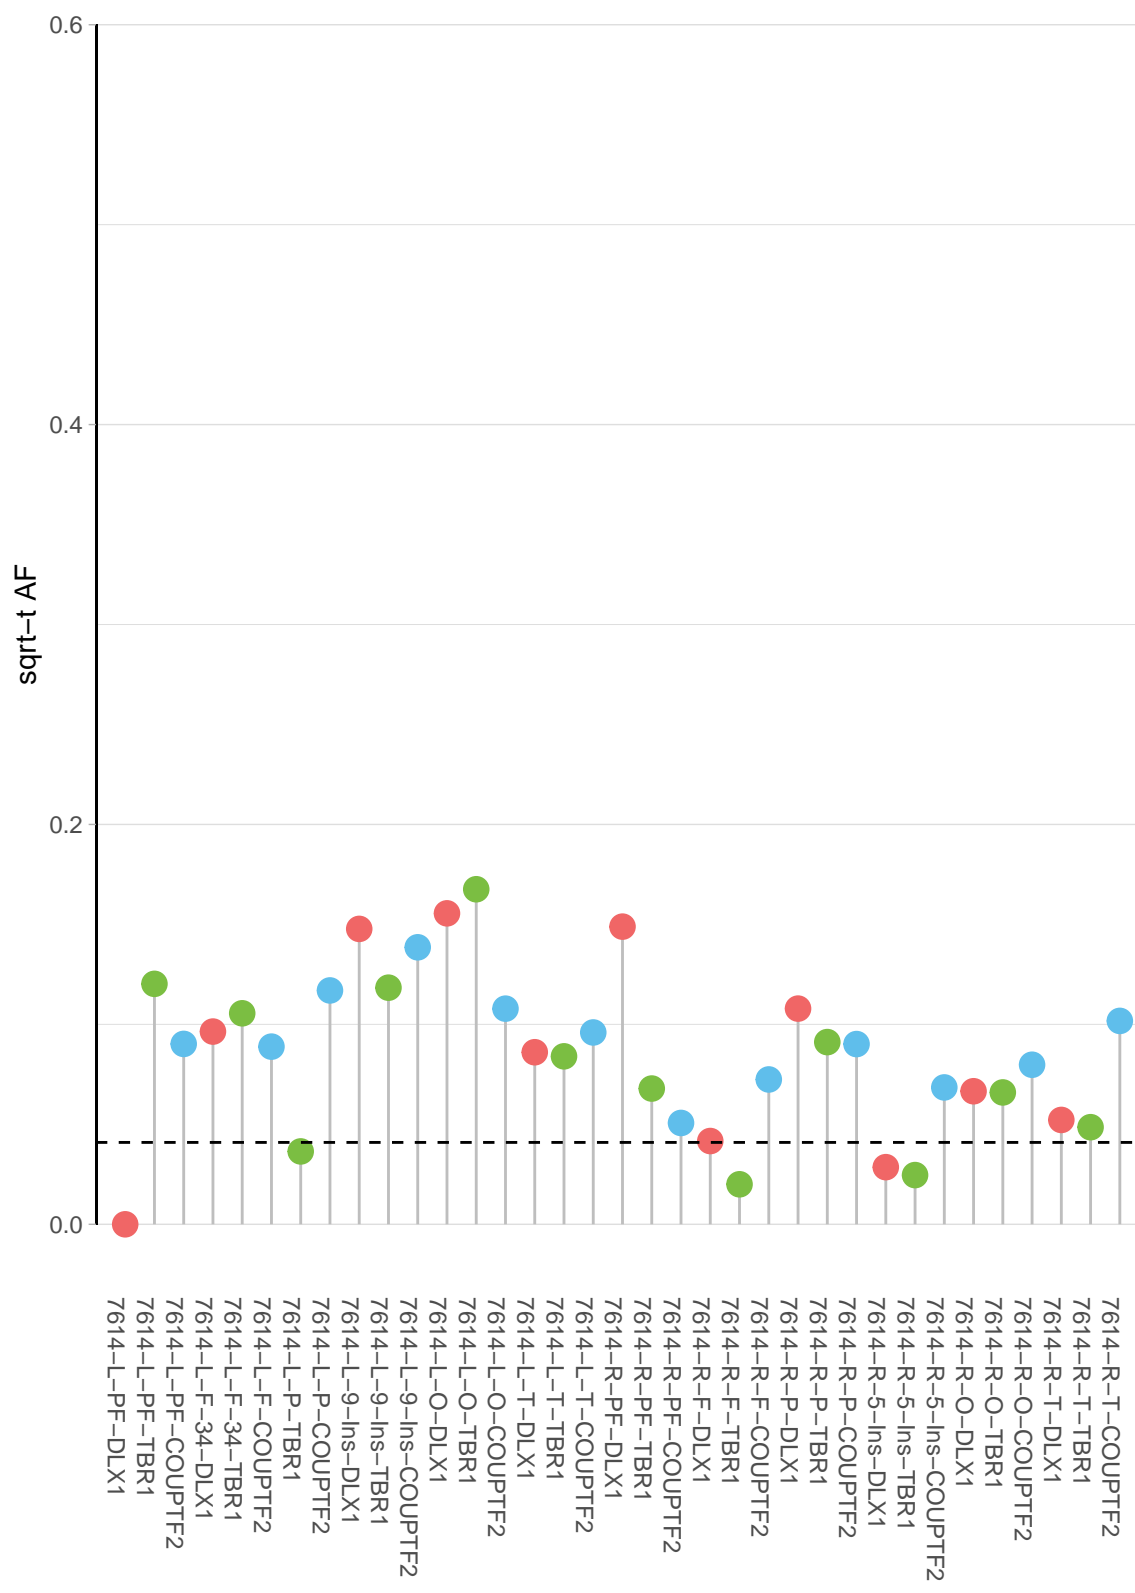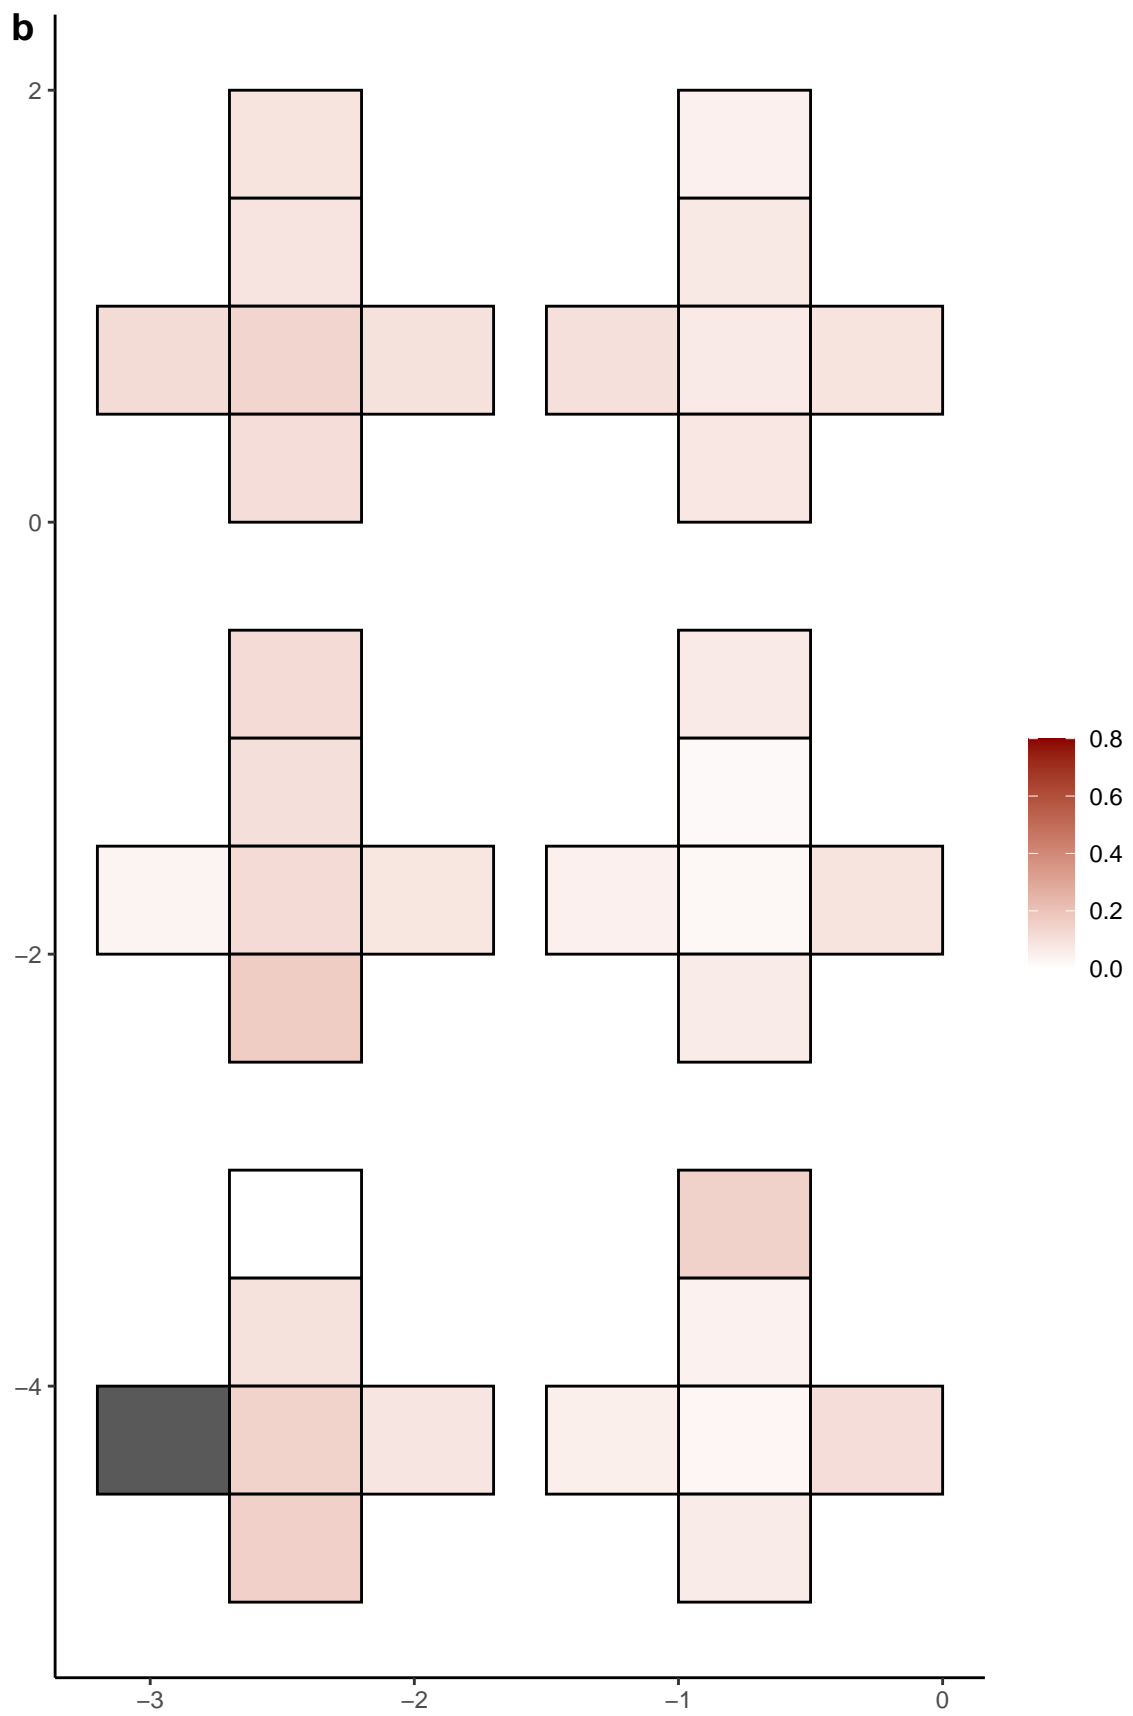



**a** ID01 7-127054212-T-G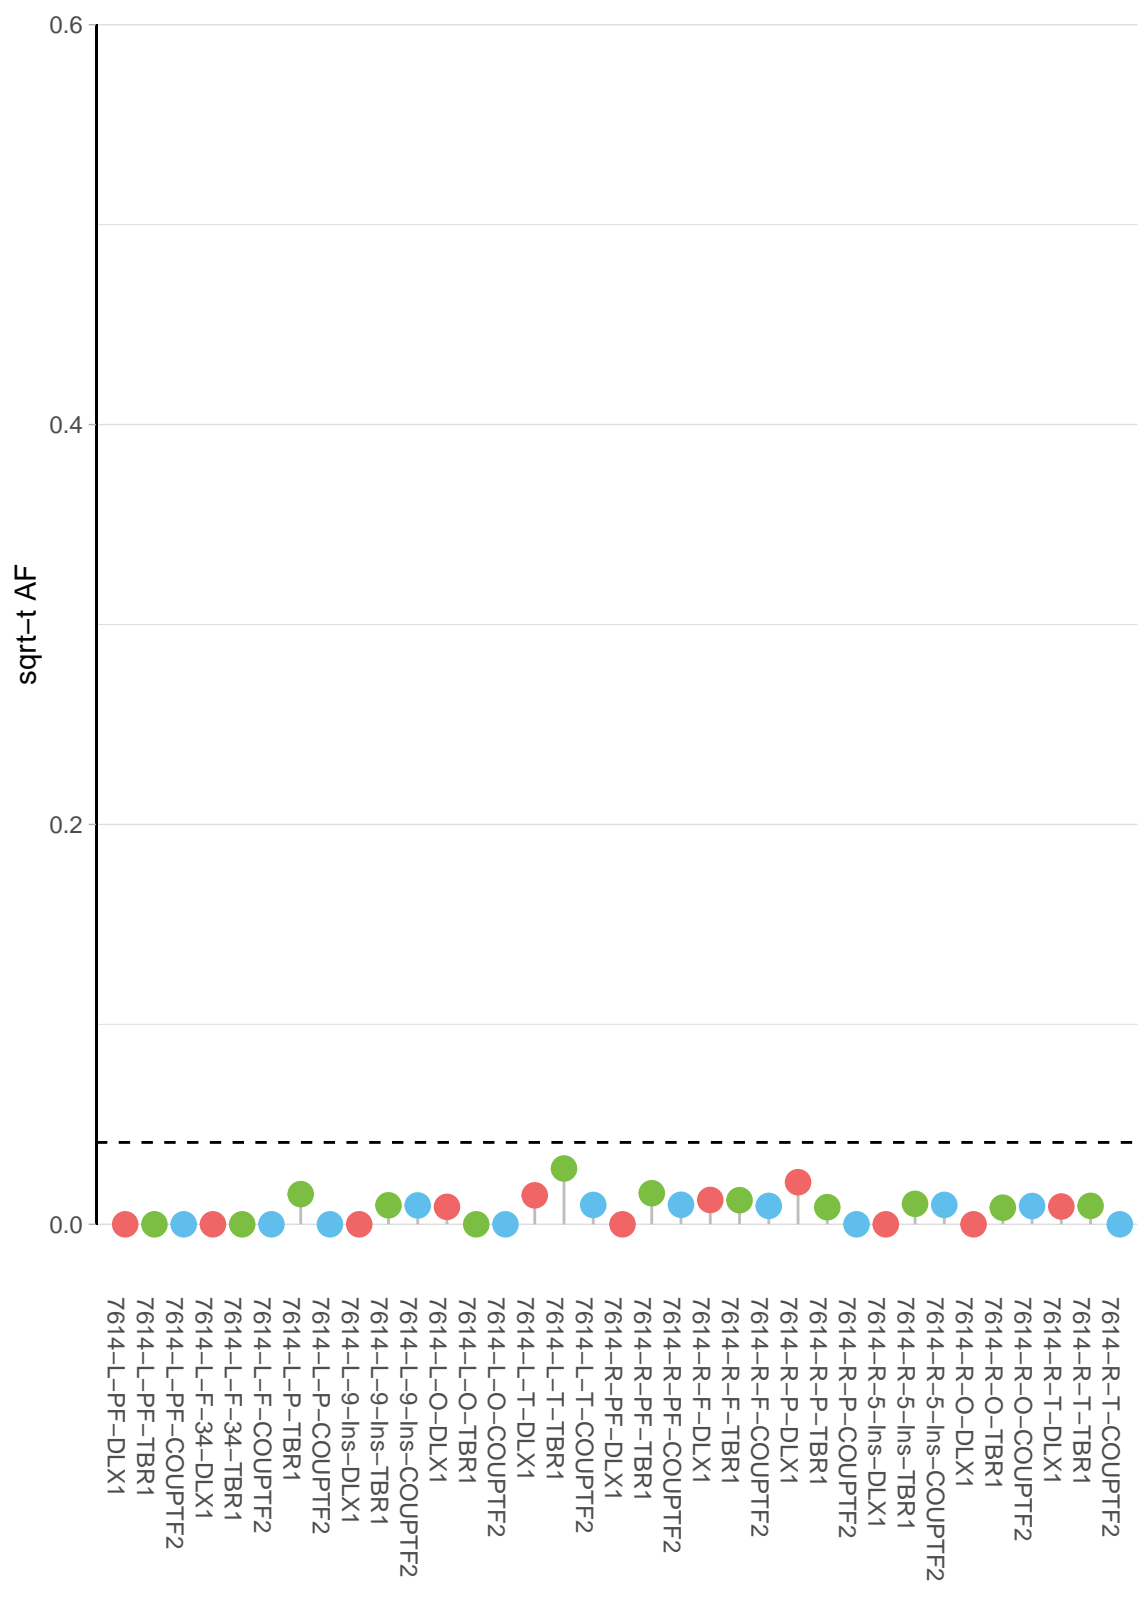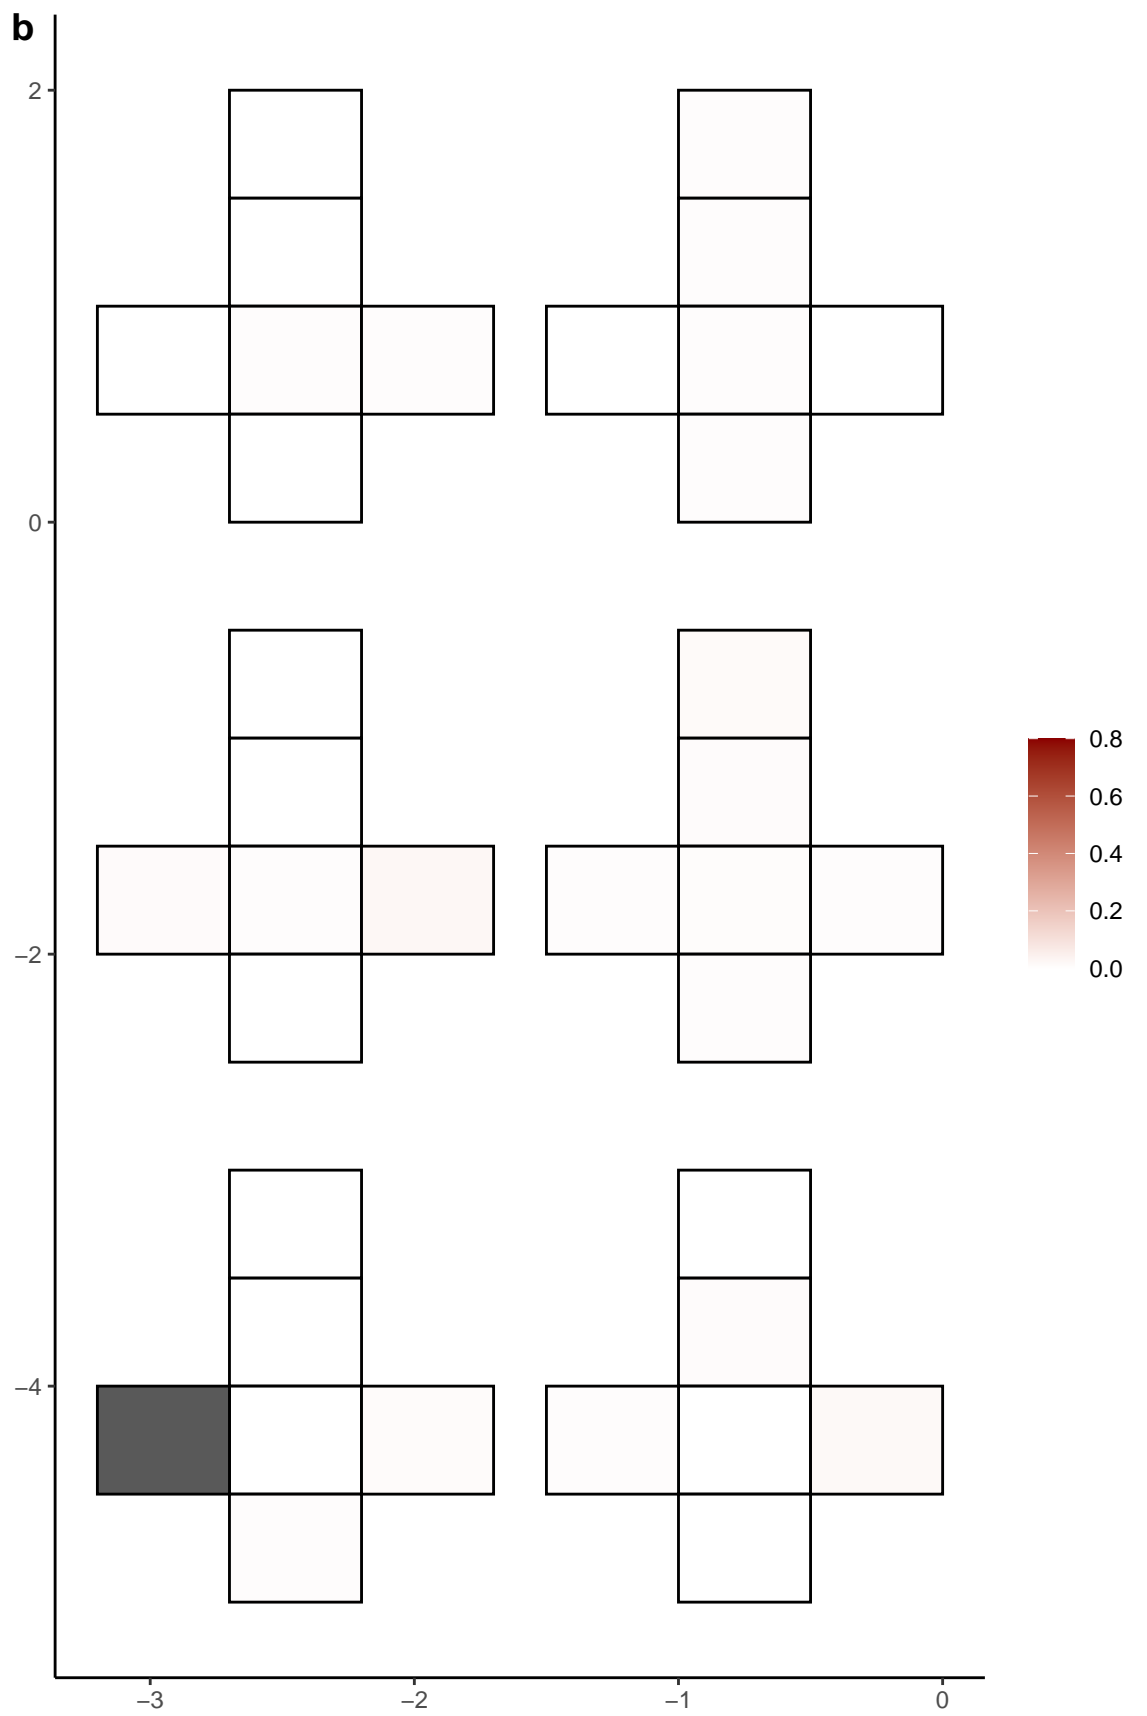

**a** ID01 7-131427177-ATTTTC-A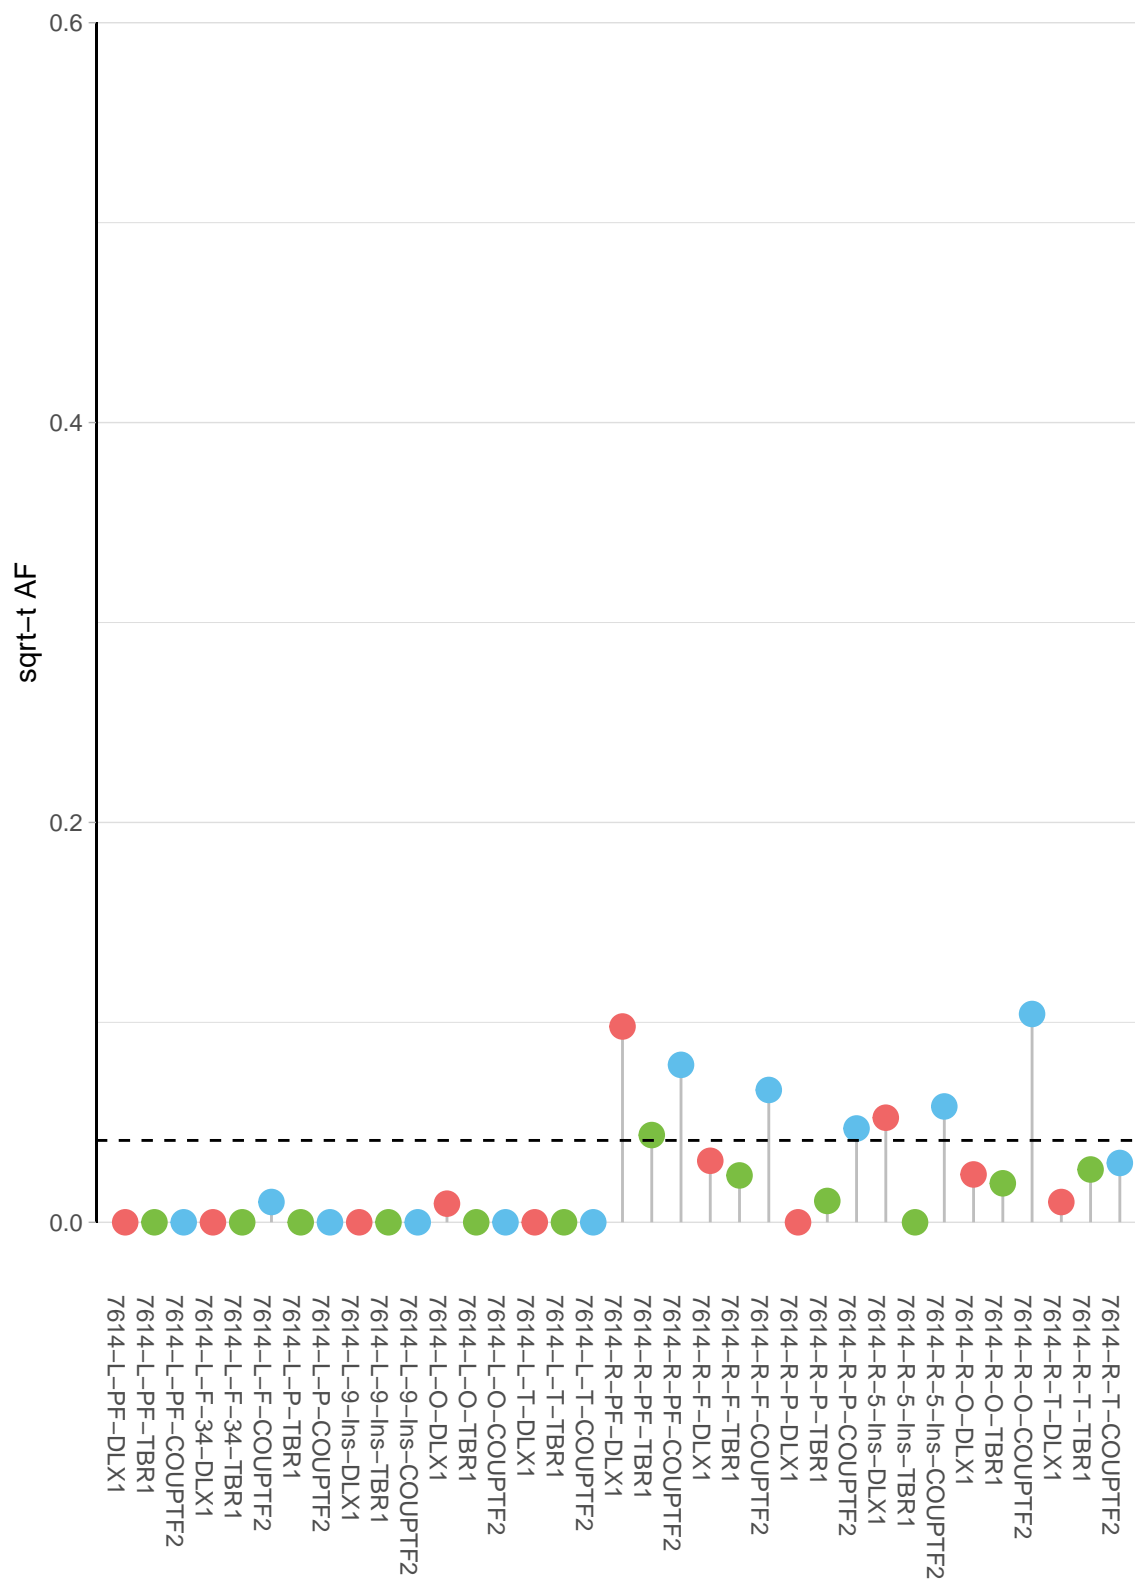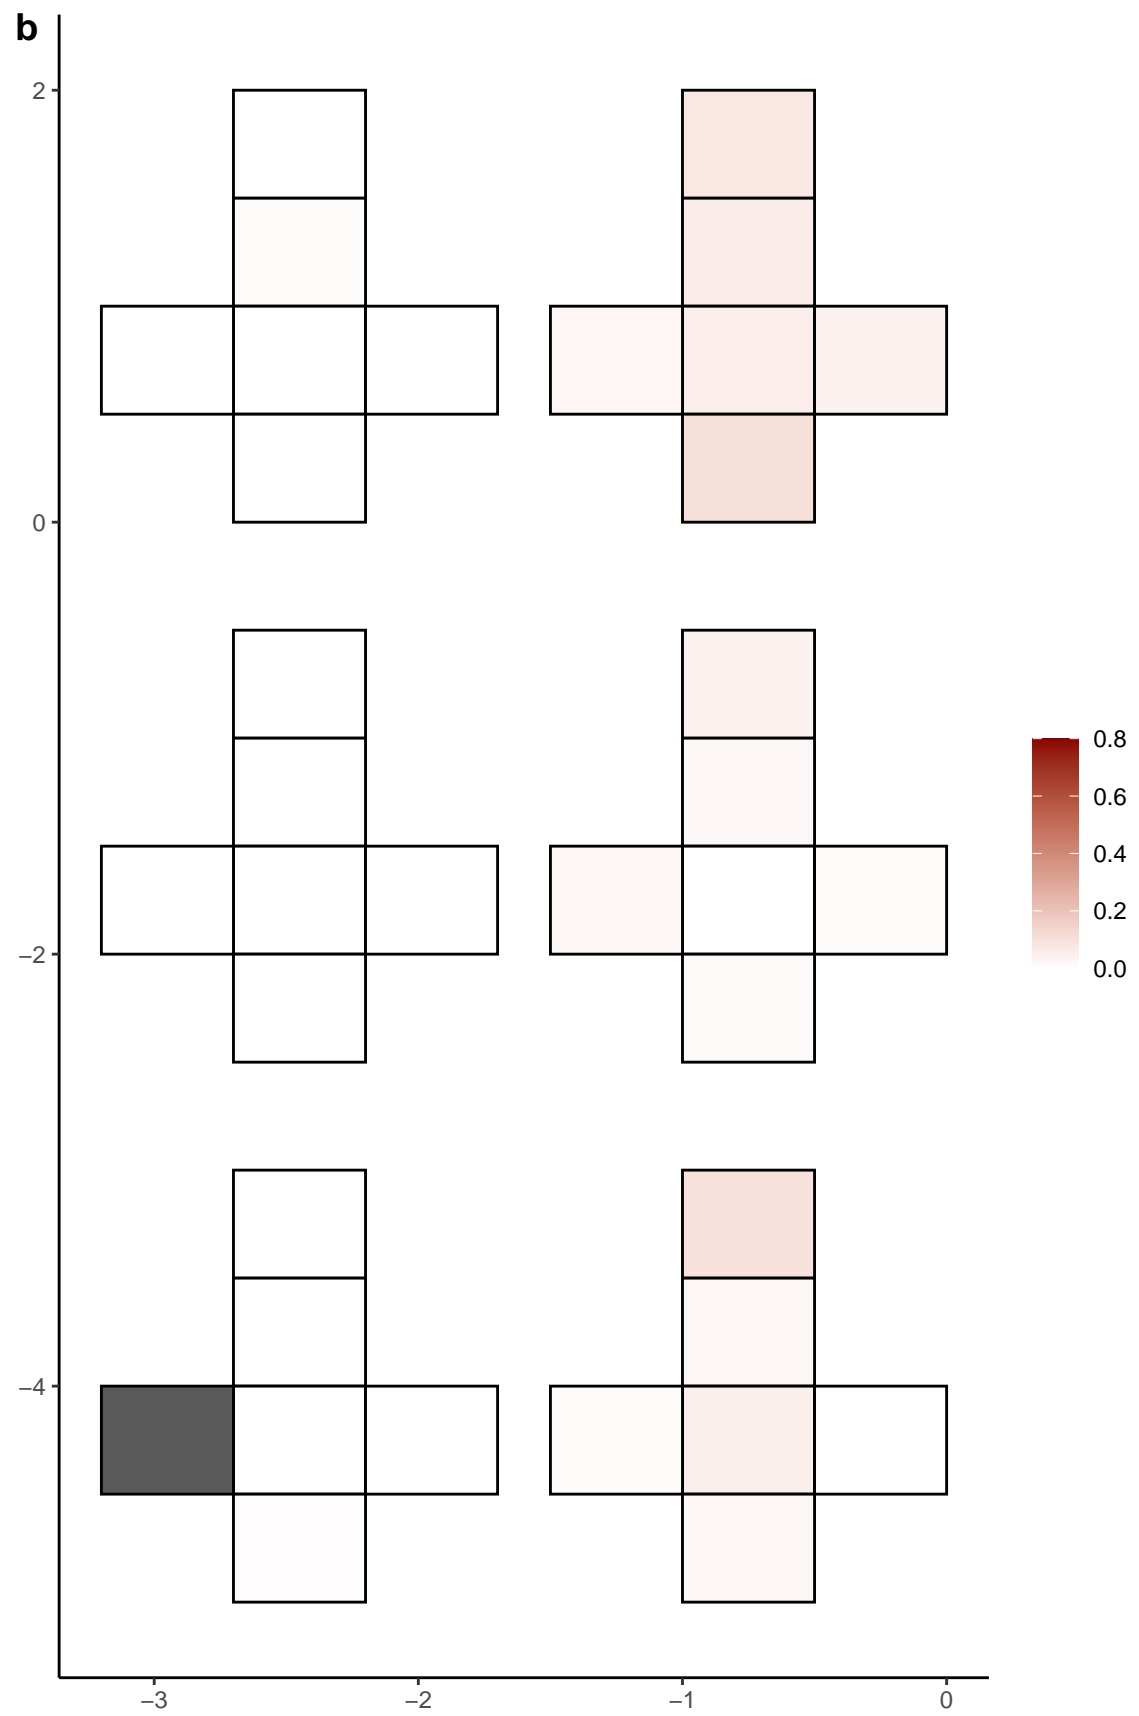

**a** ID01 7-141222076-G-A

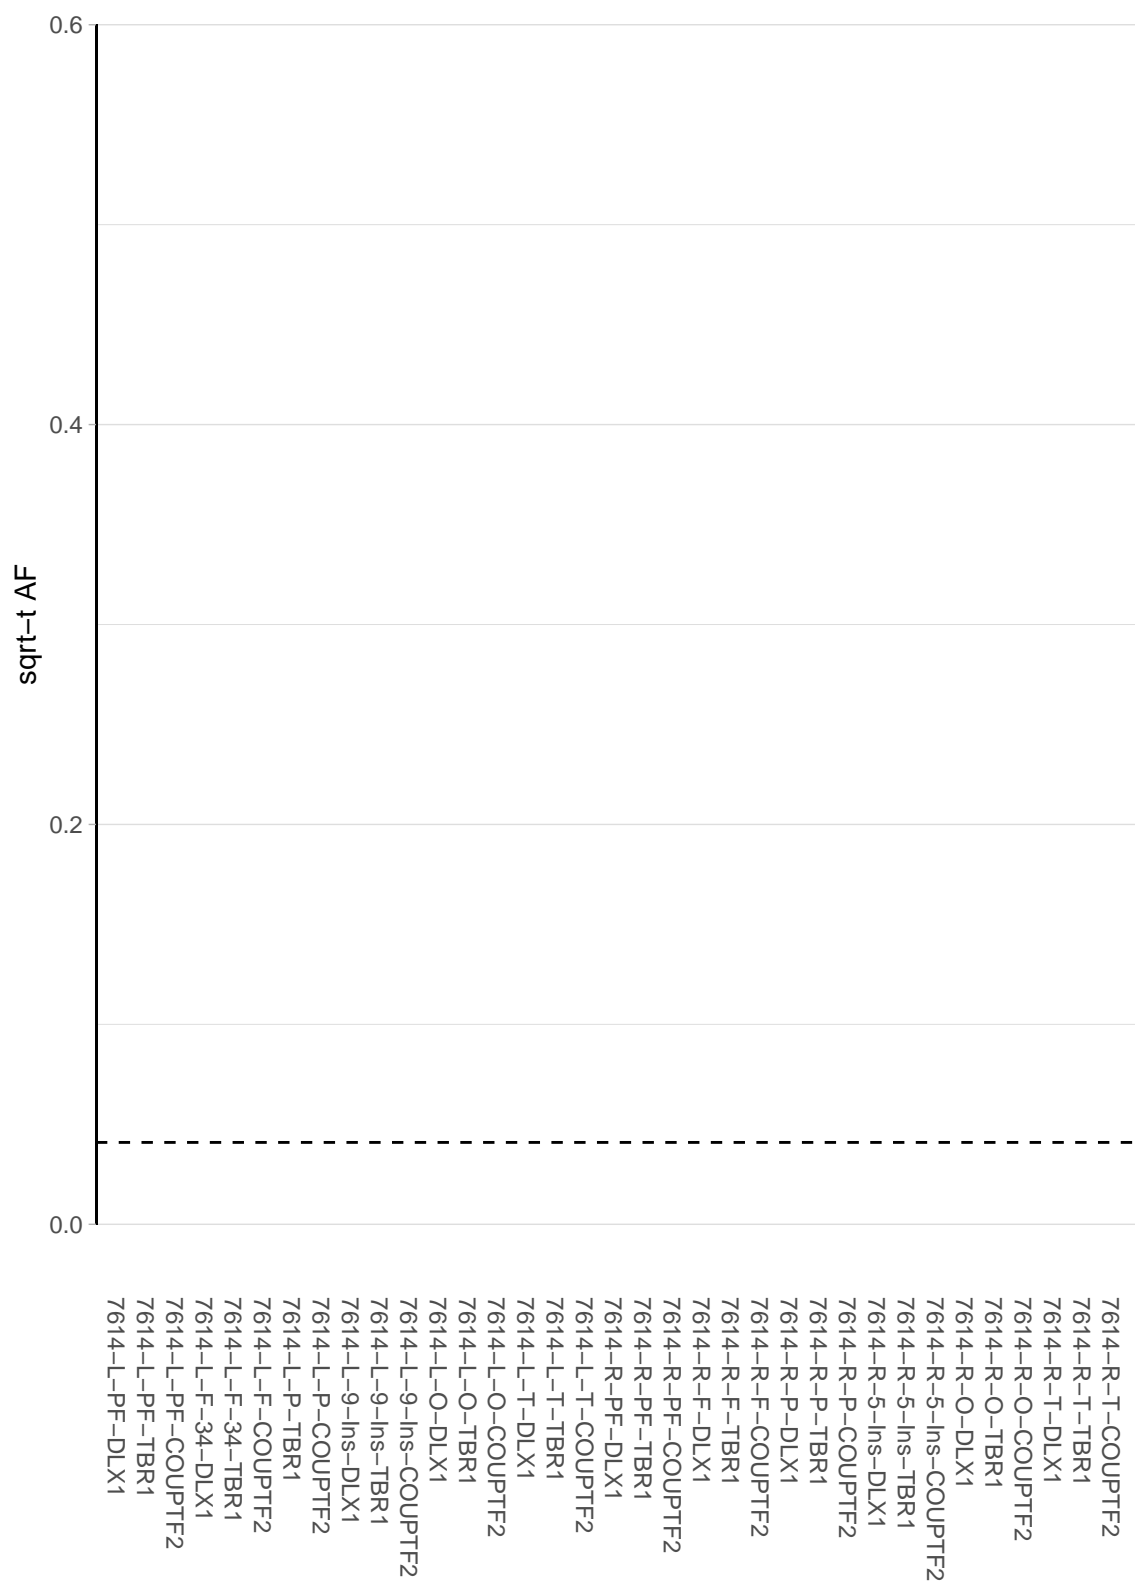

**a** ID01 7-150175576-A-C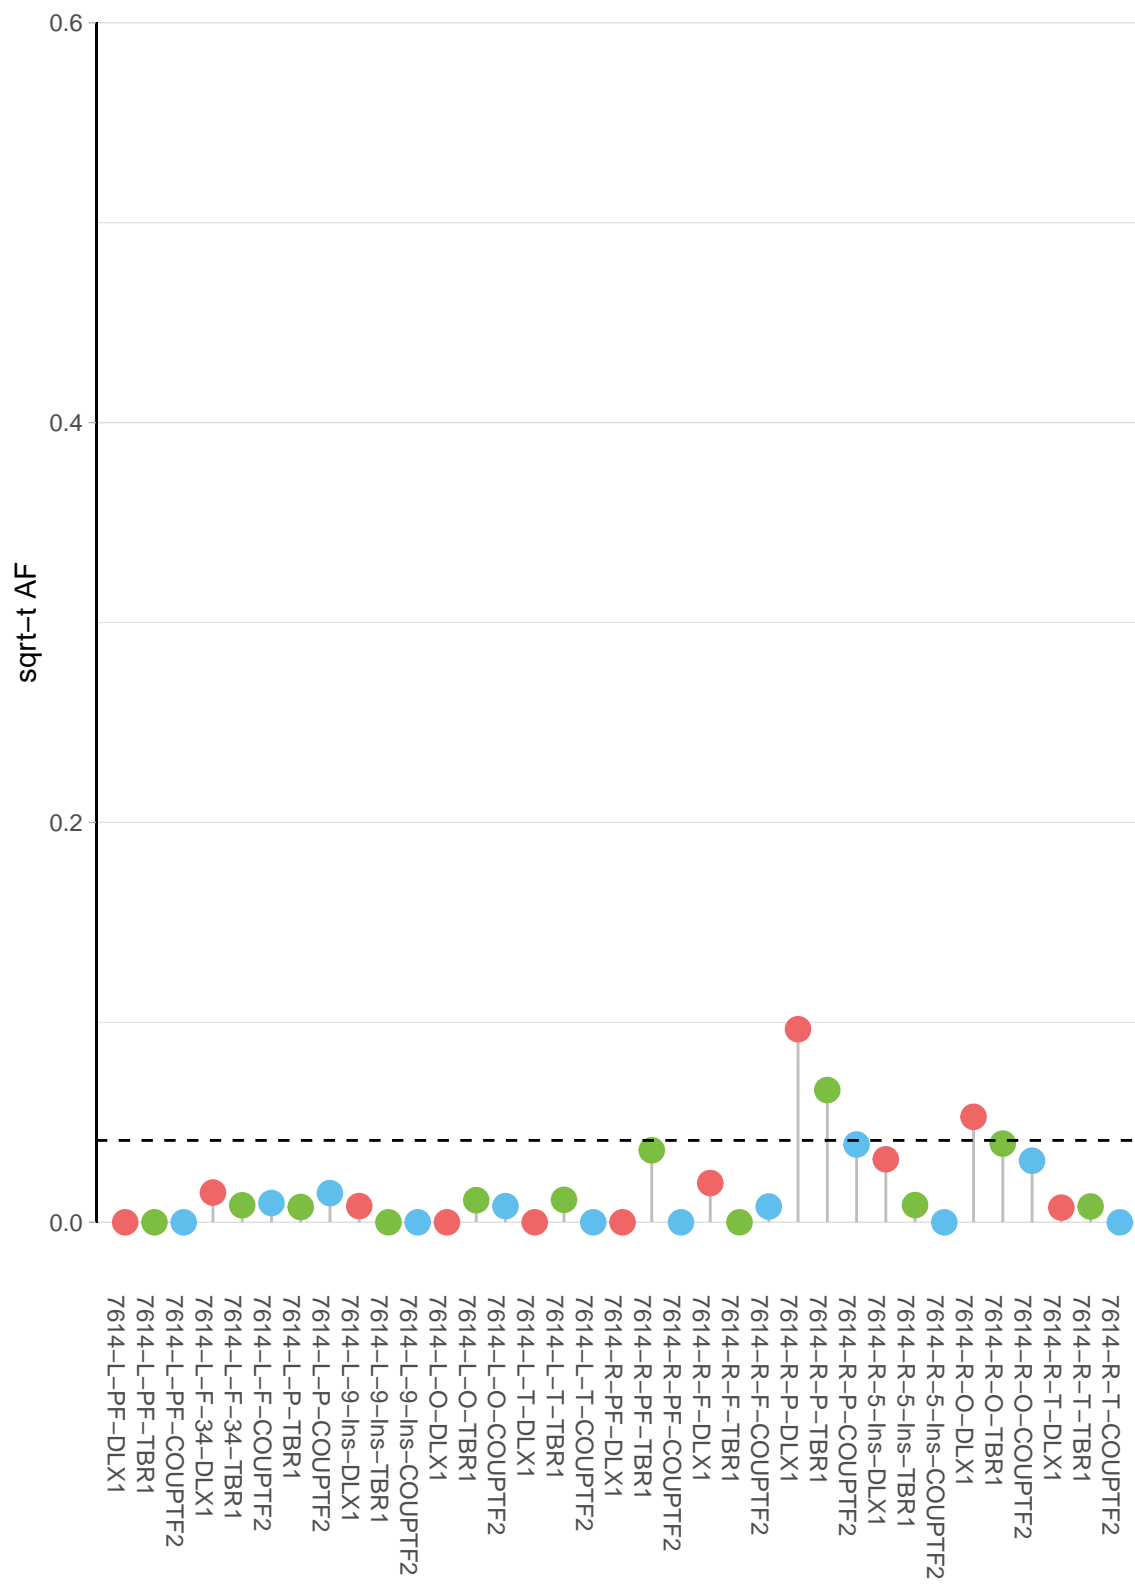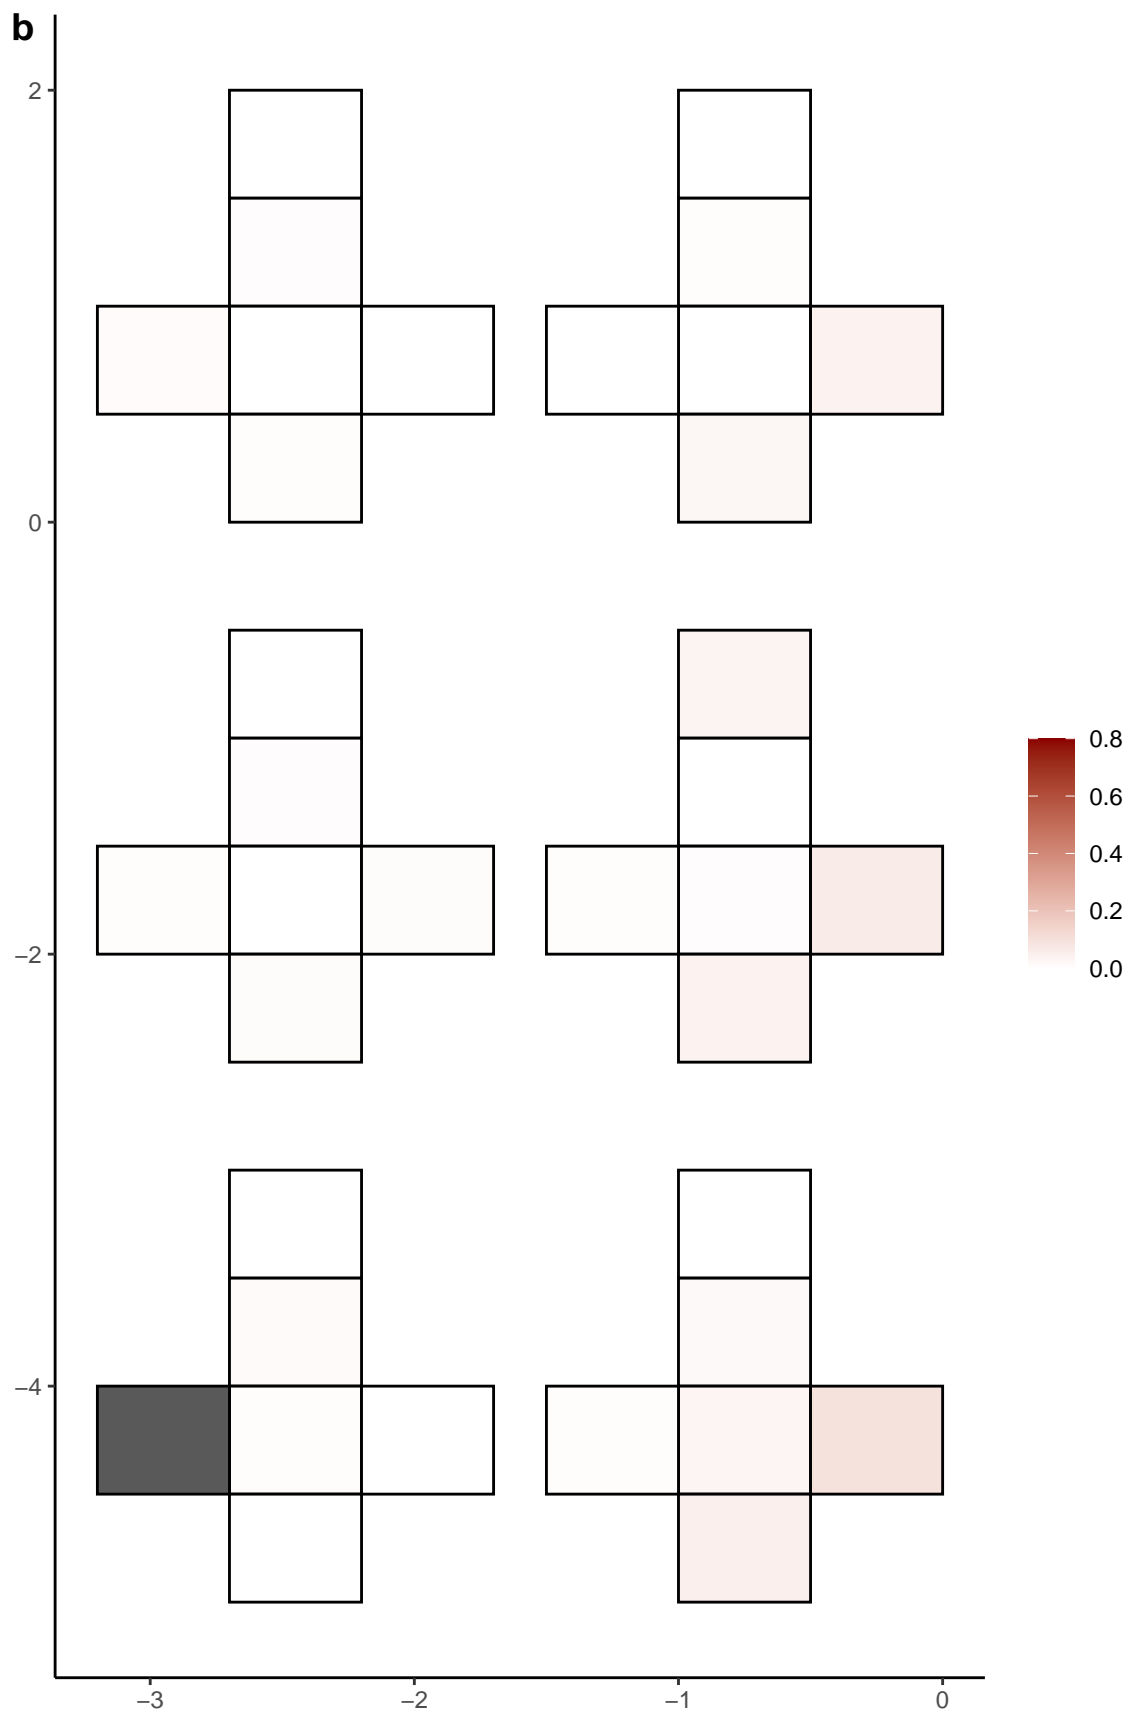

**a** ID01 7-31796412-T-G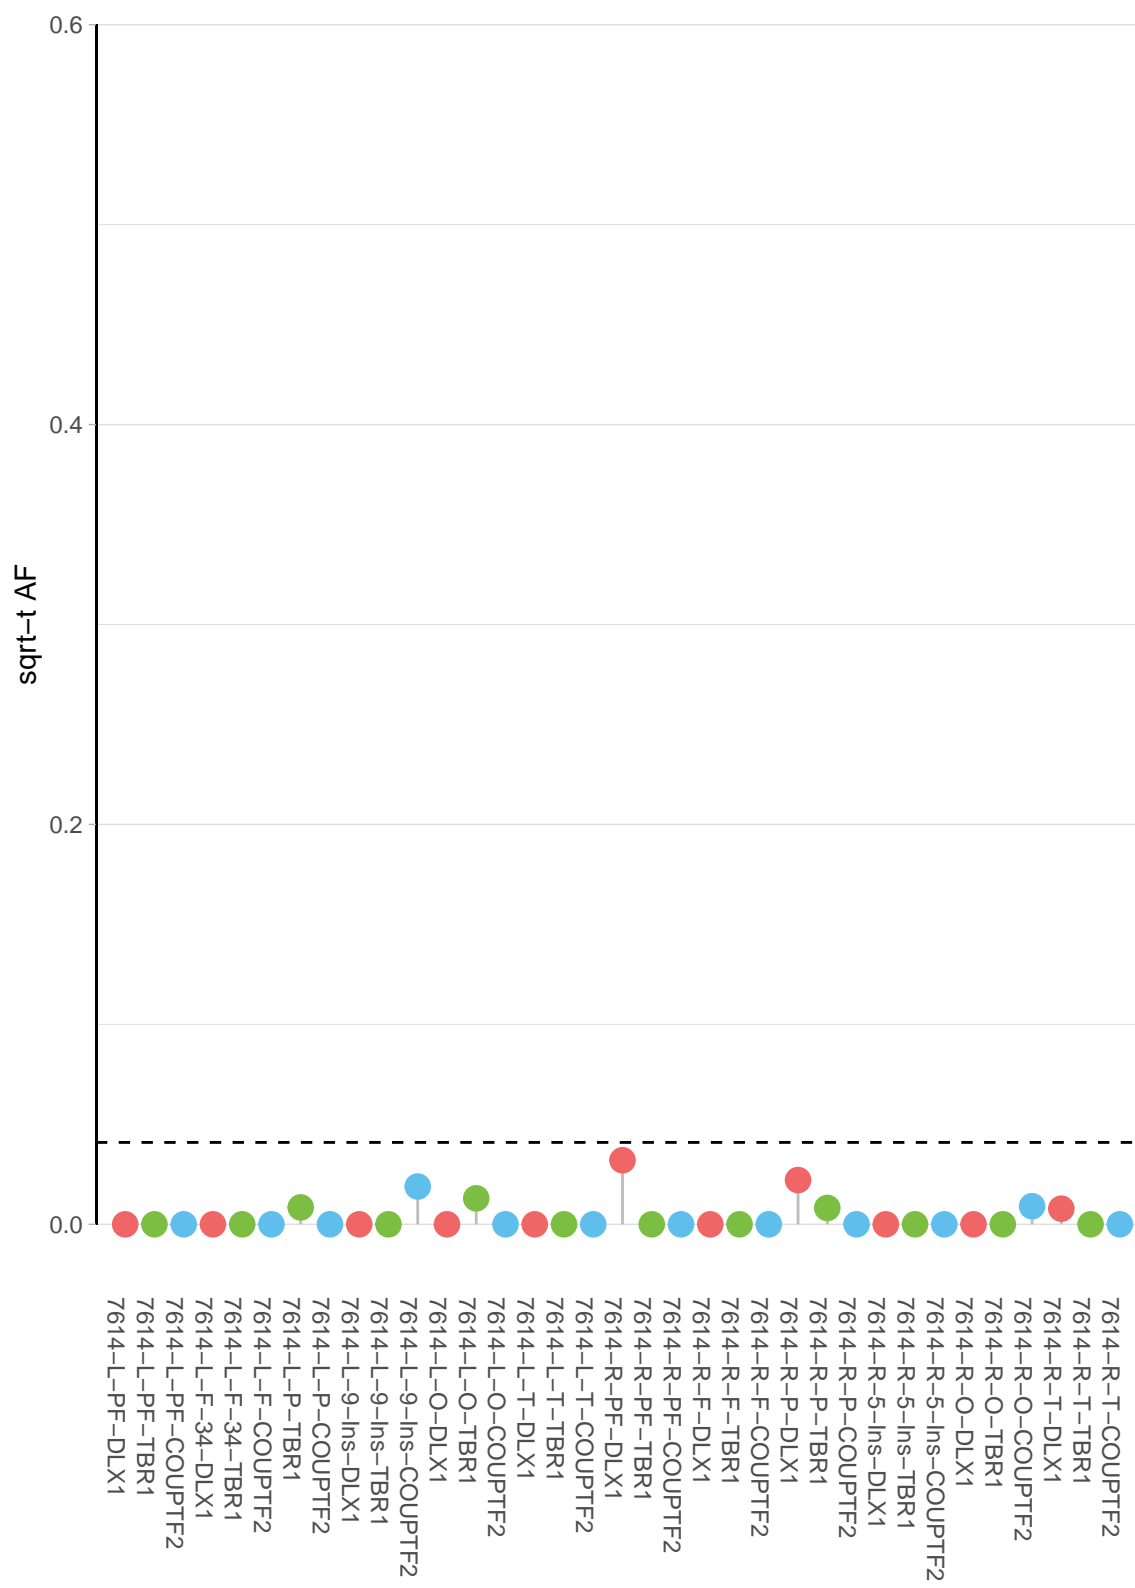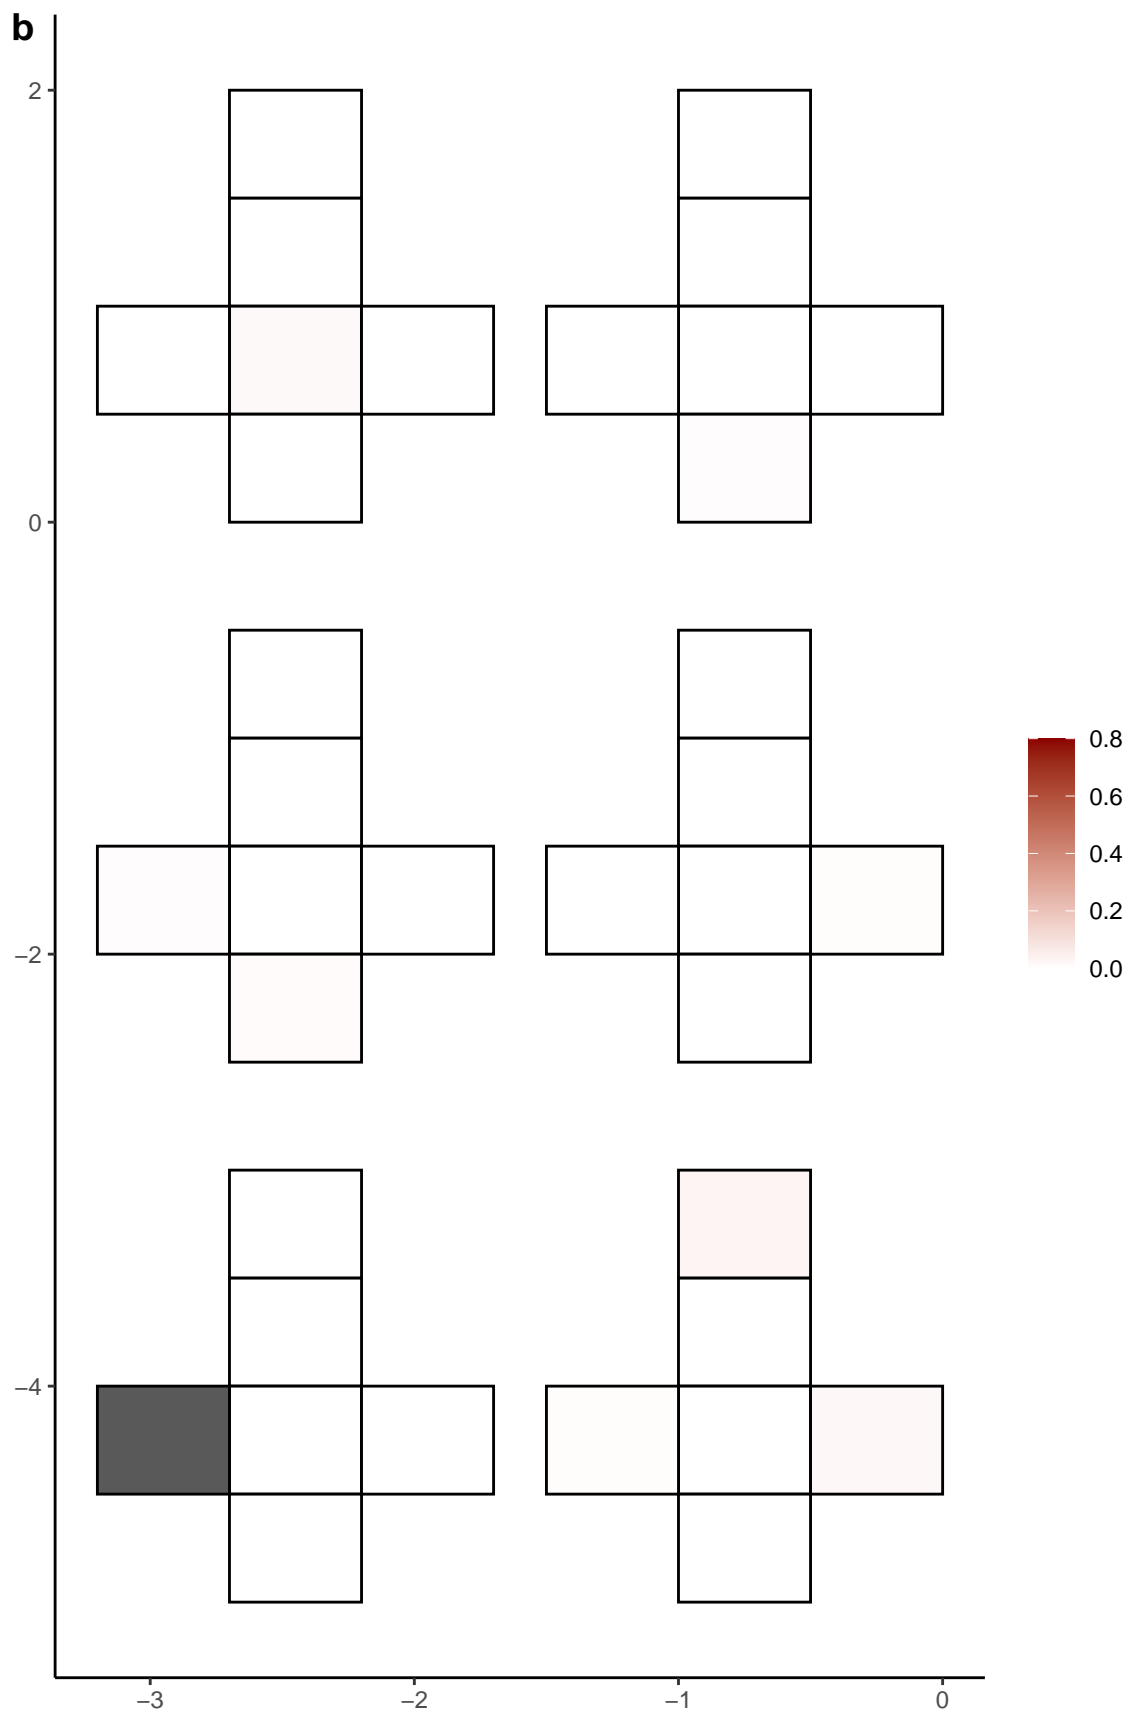

**a** ID01 7-33765368-A-G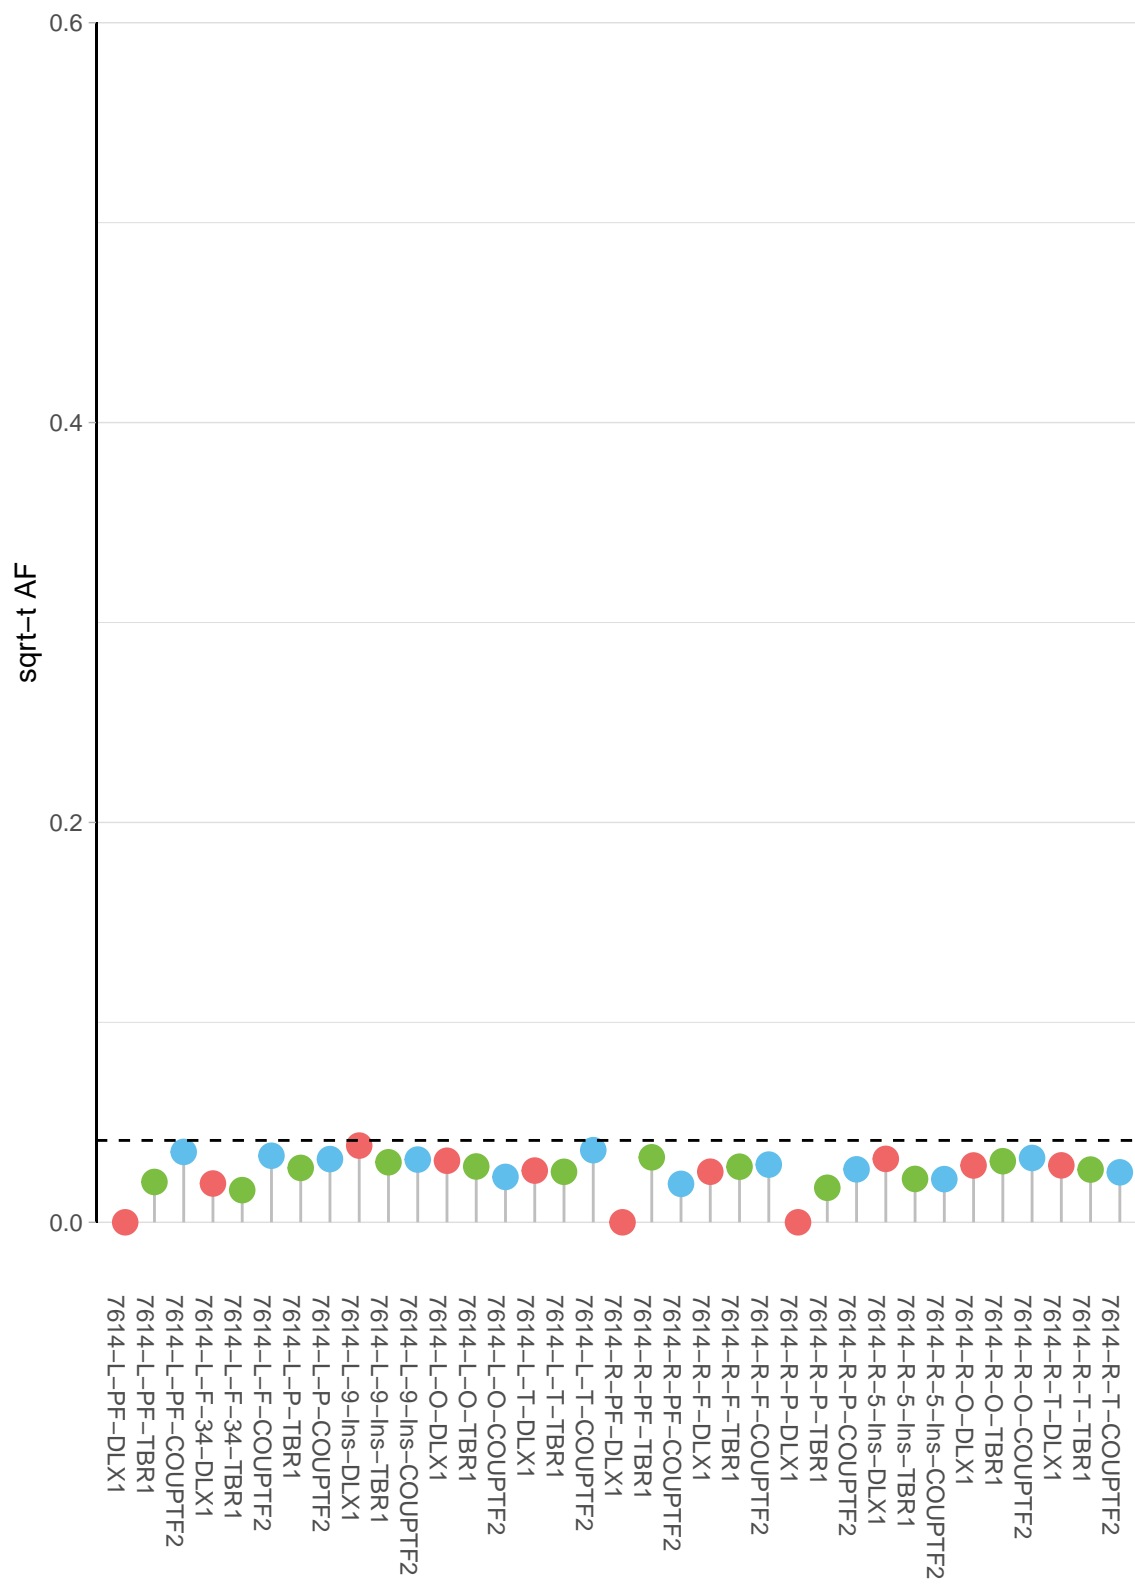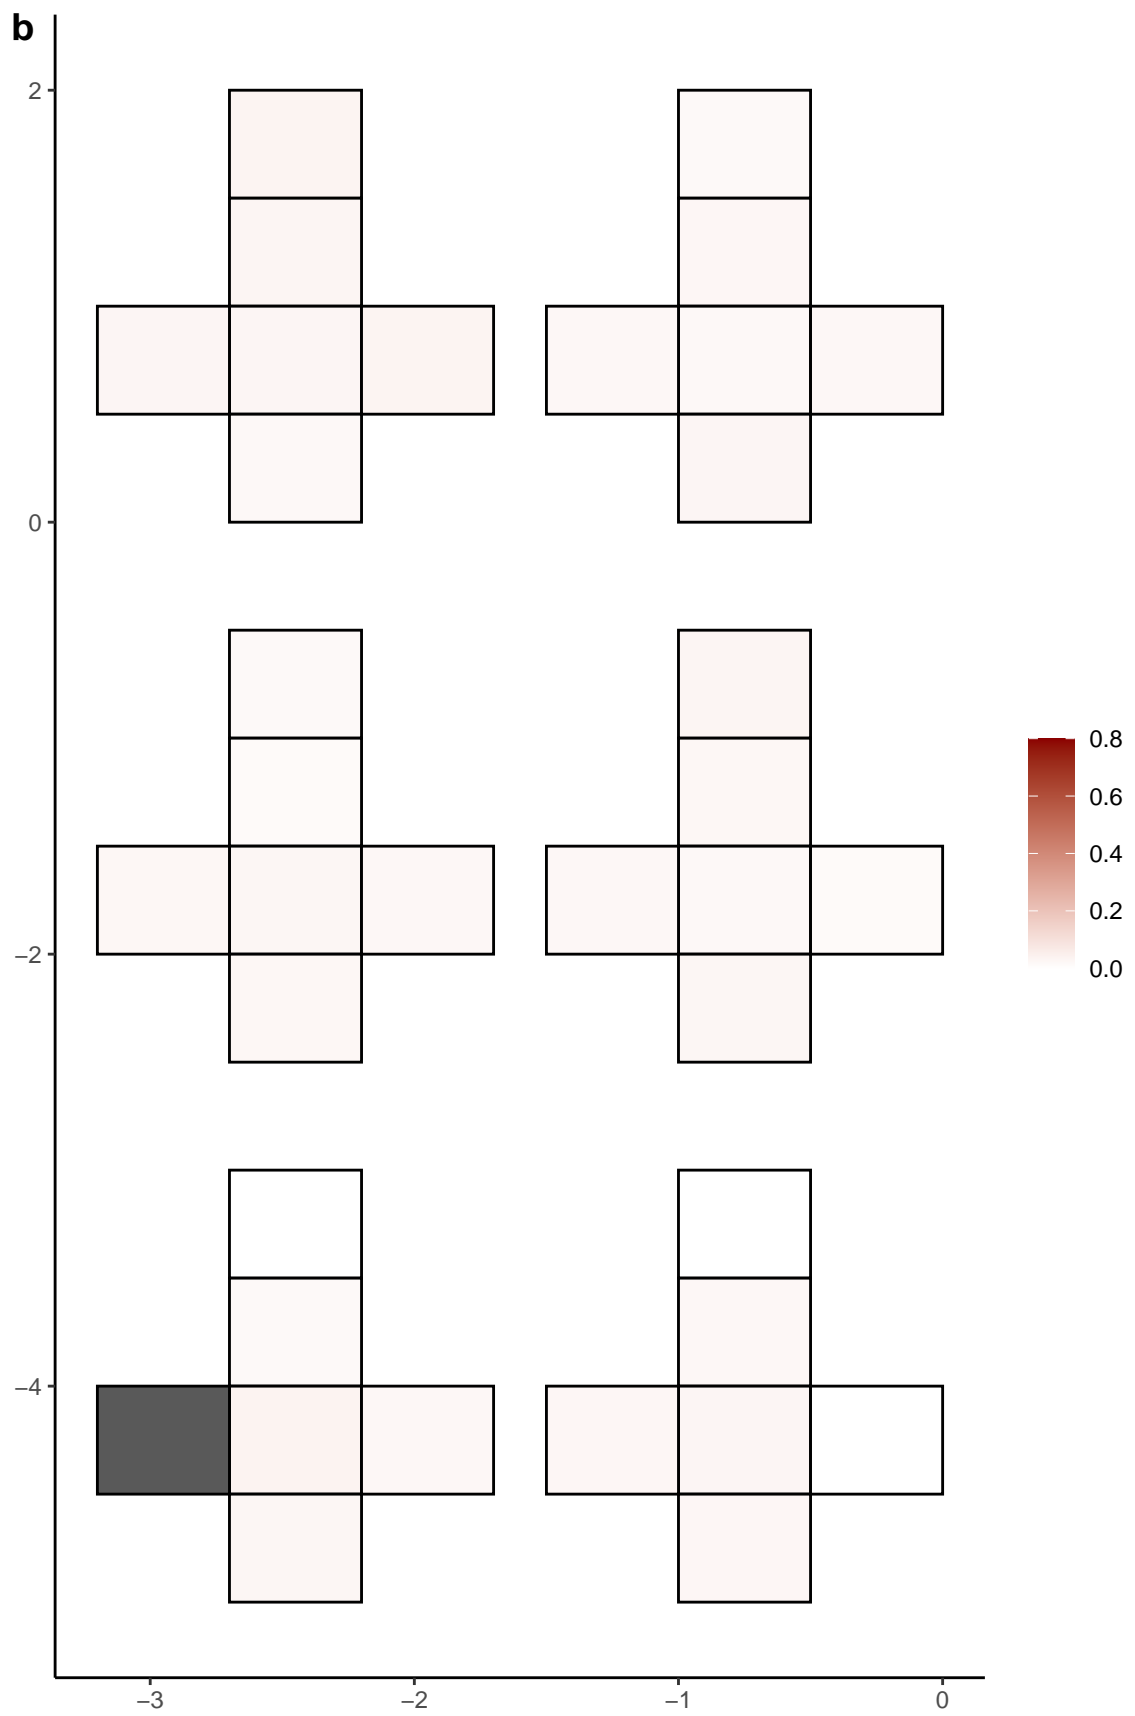



**a** ID01 7-43766364-T-G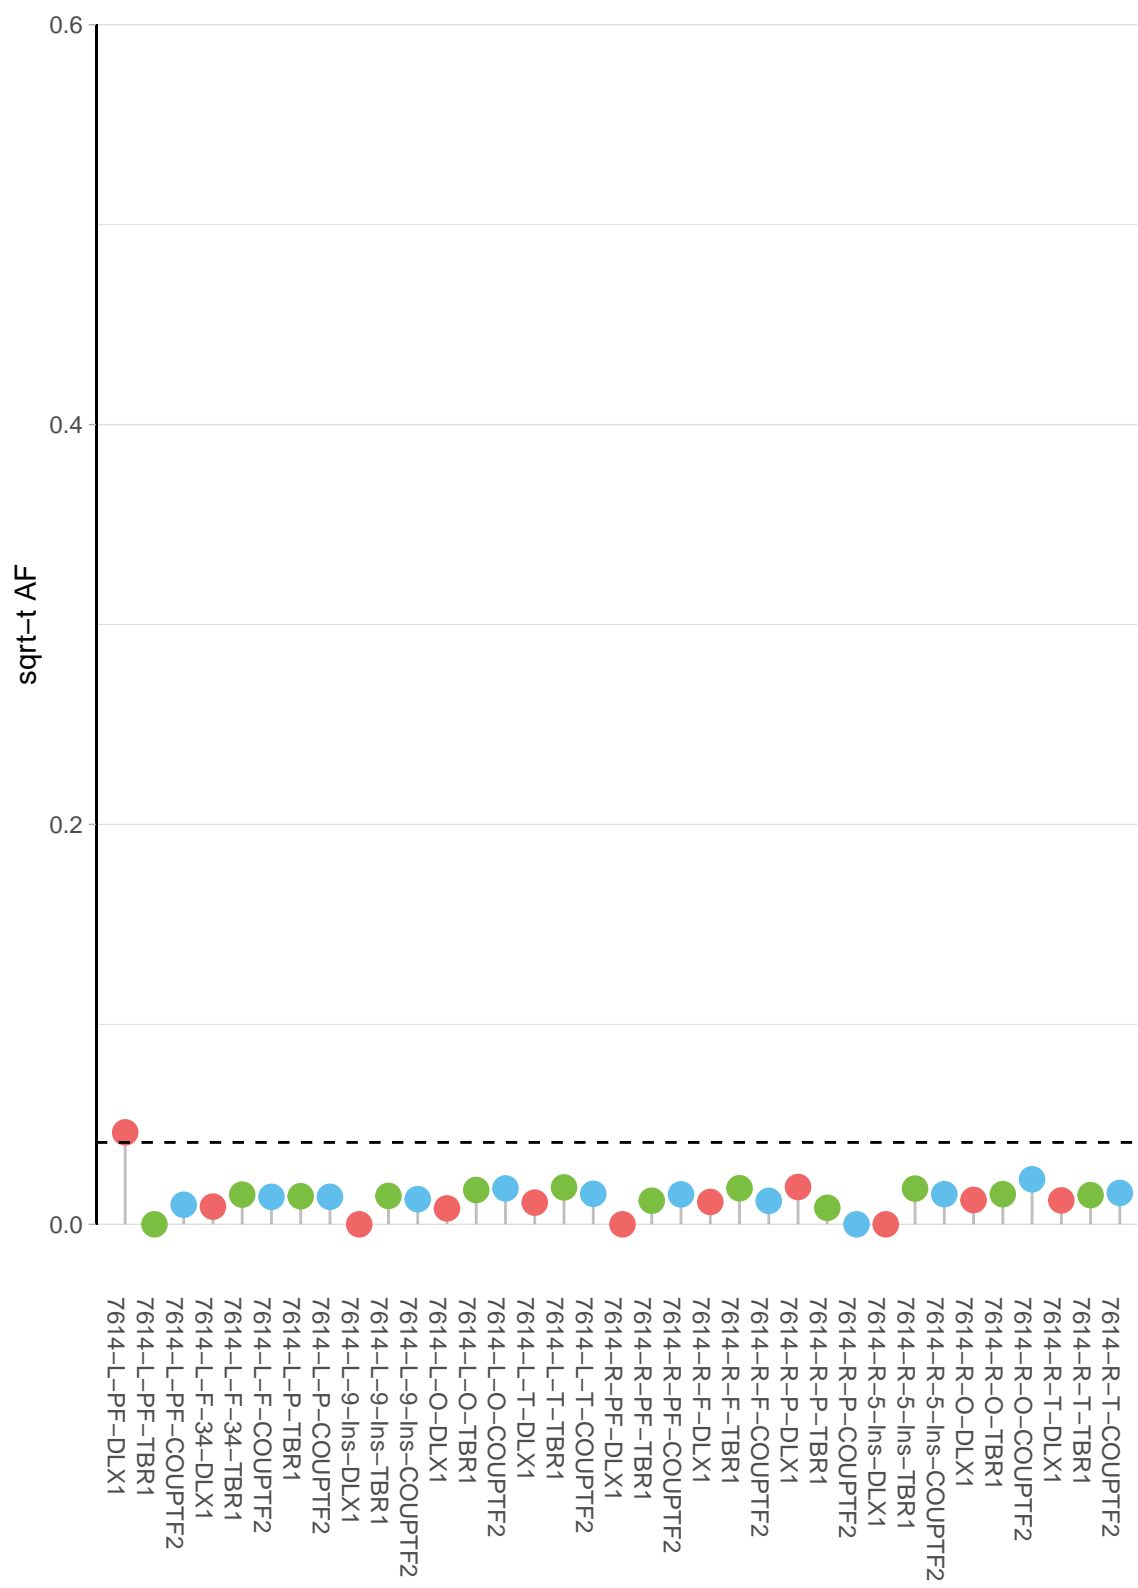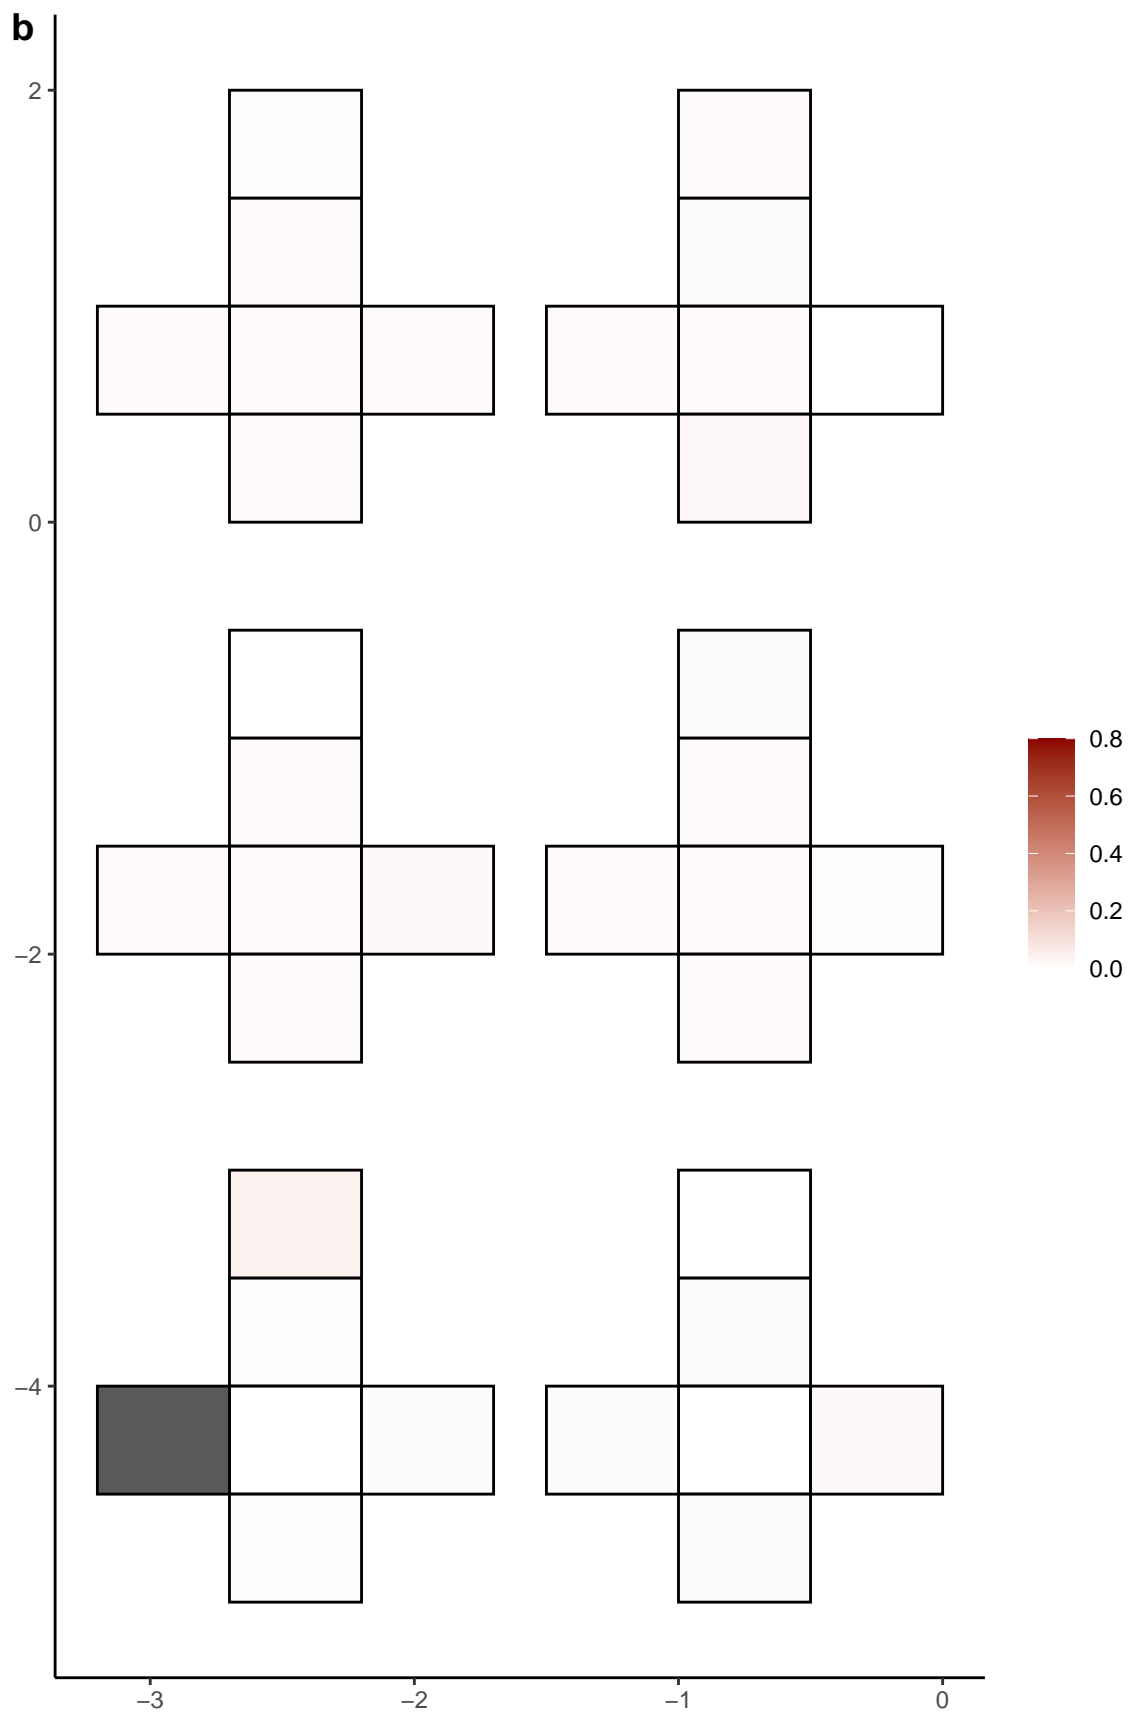





**a** ID01 7-80017095-C-T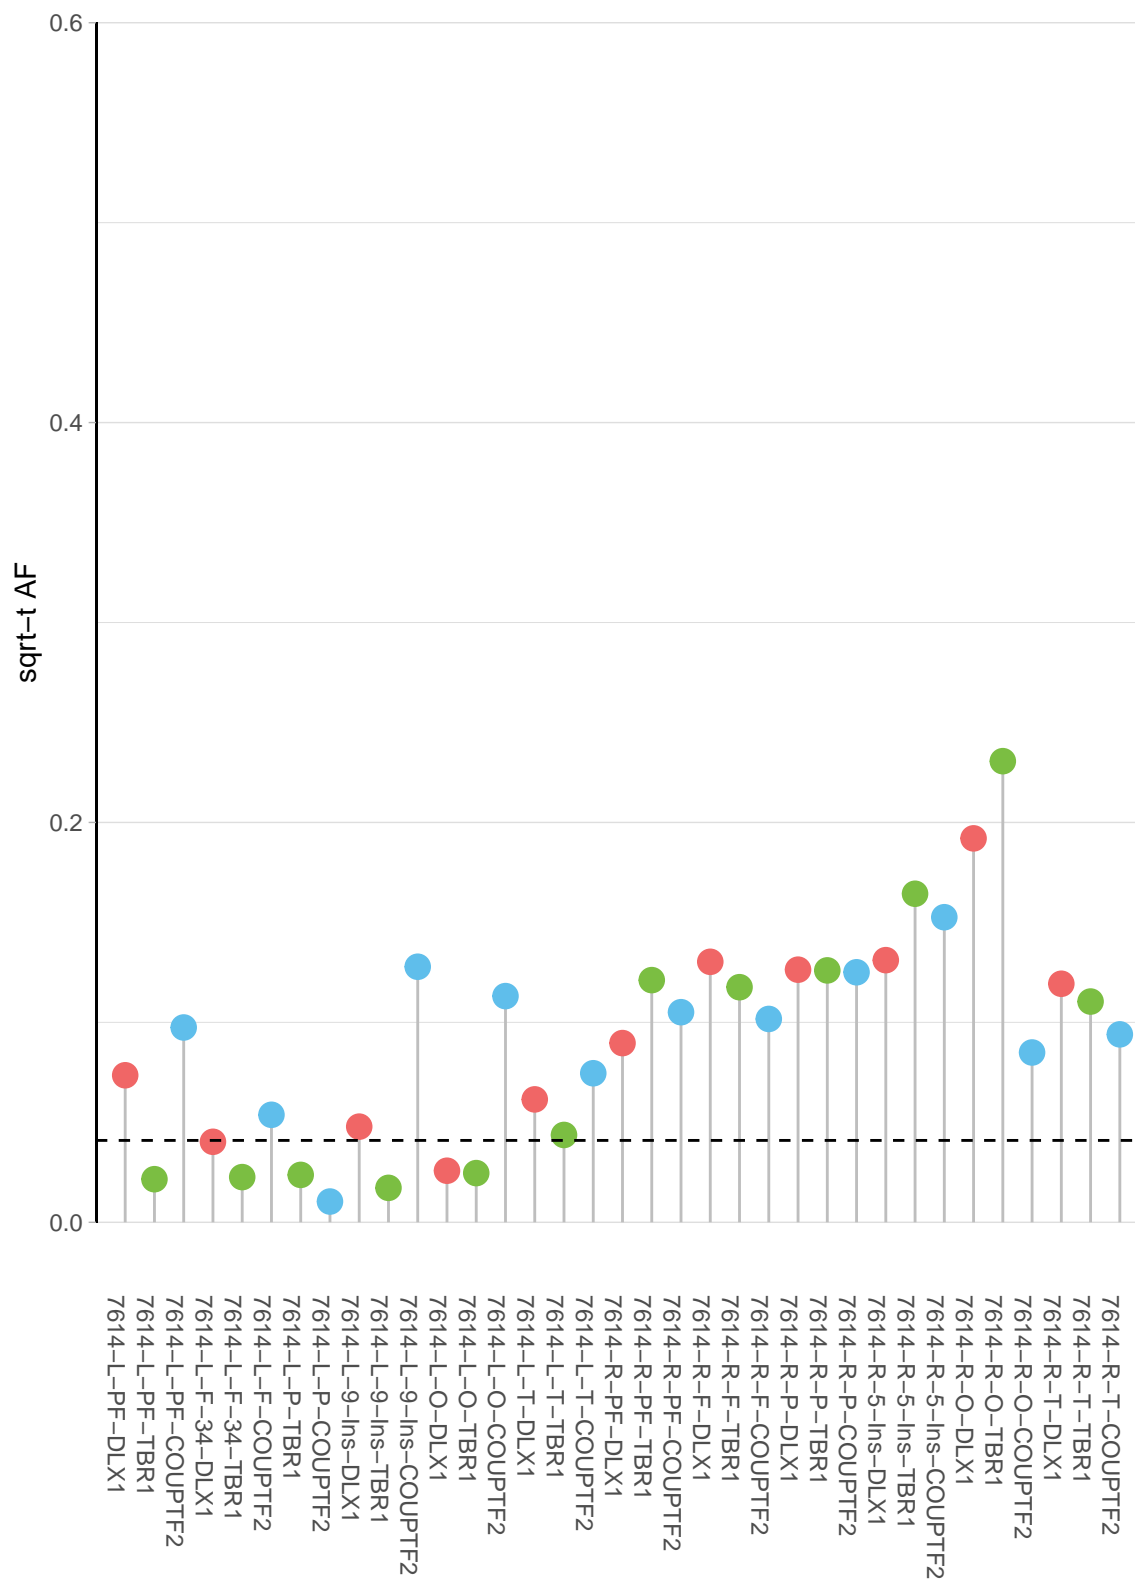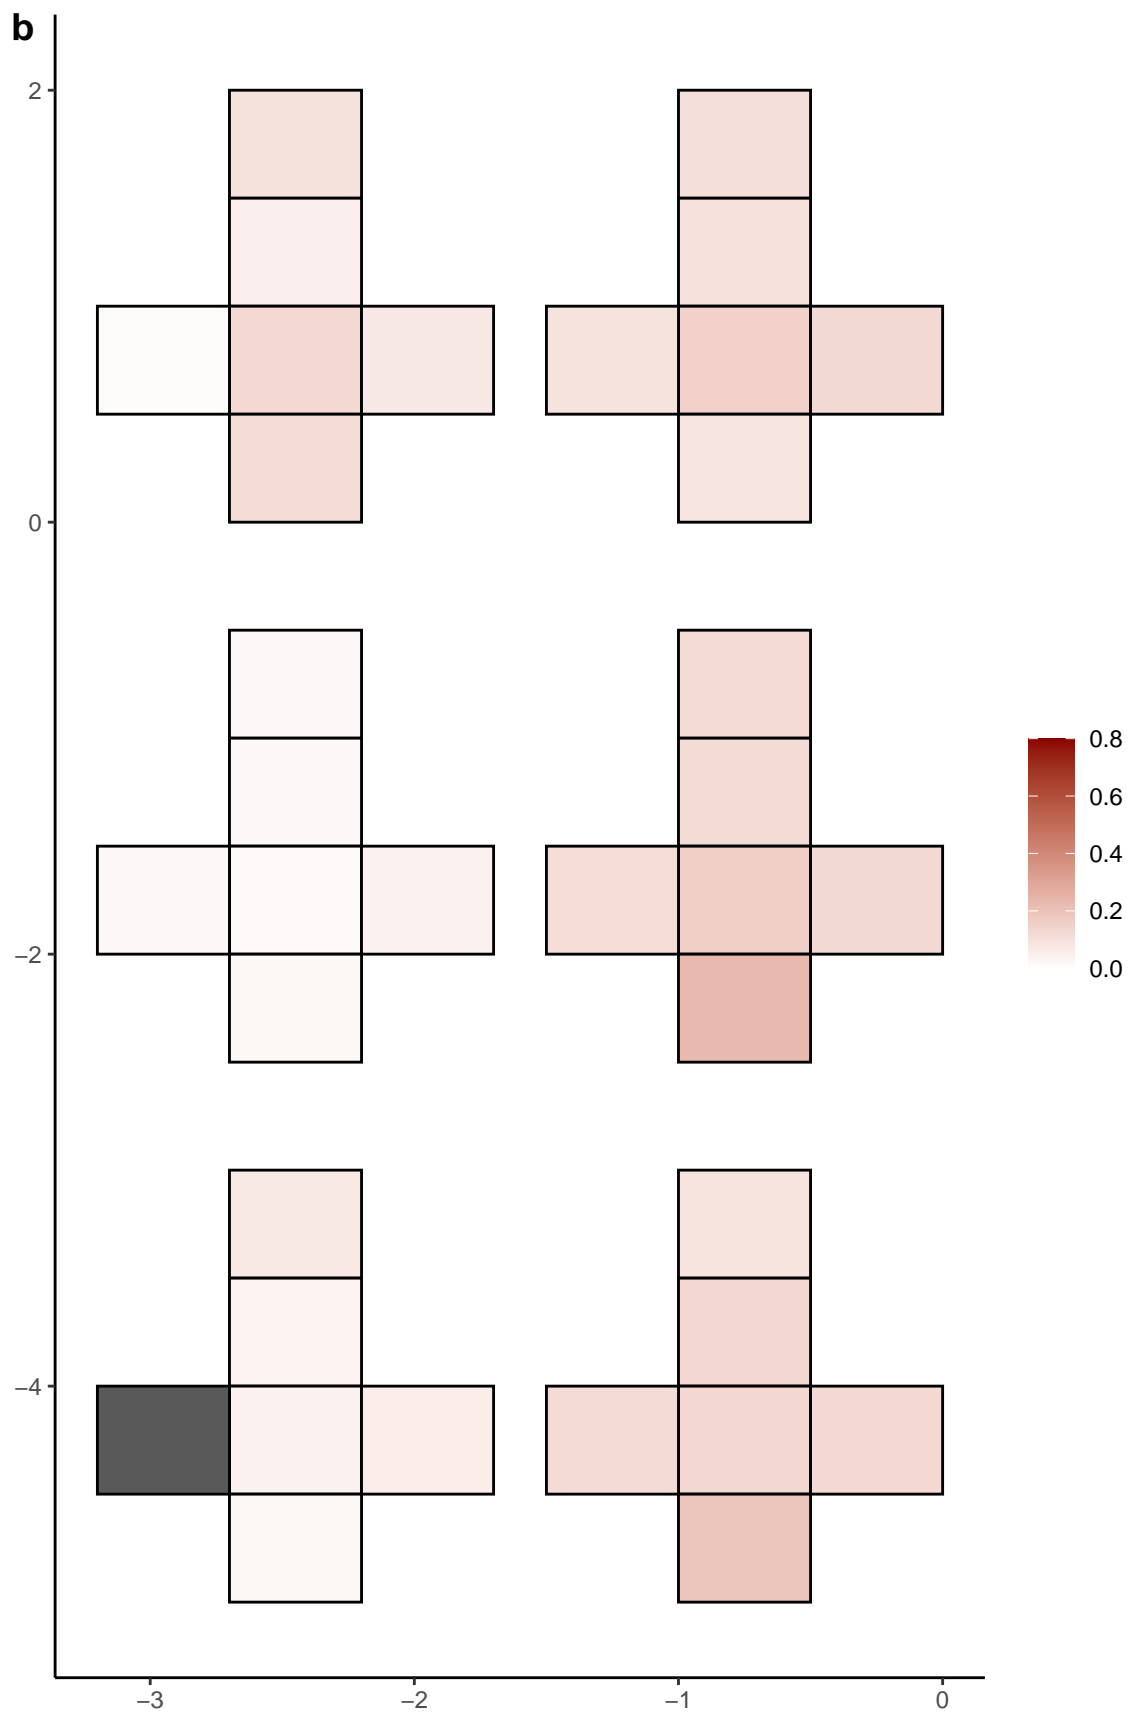

**a** ID01 7-87518026-C-T

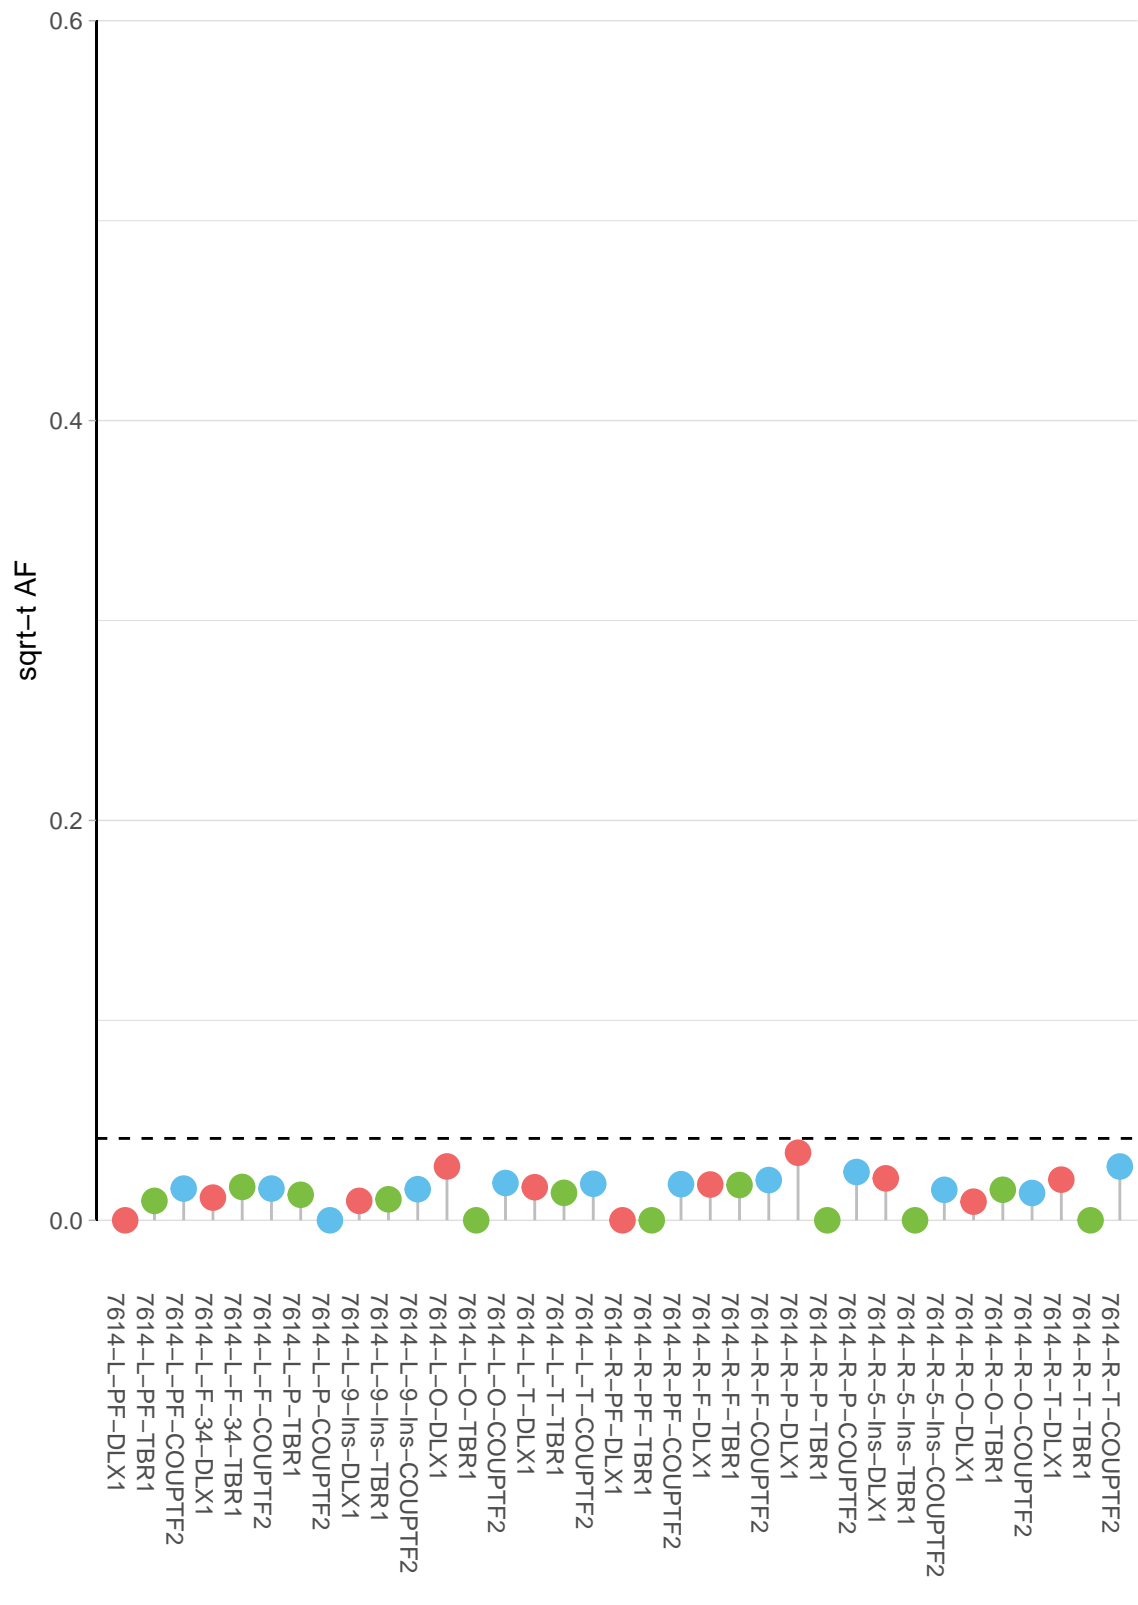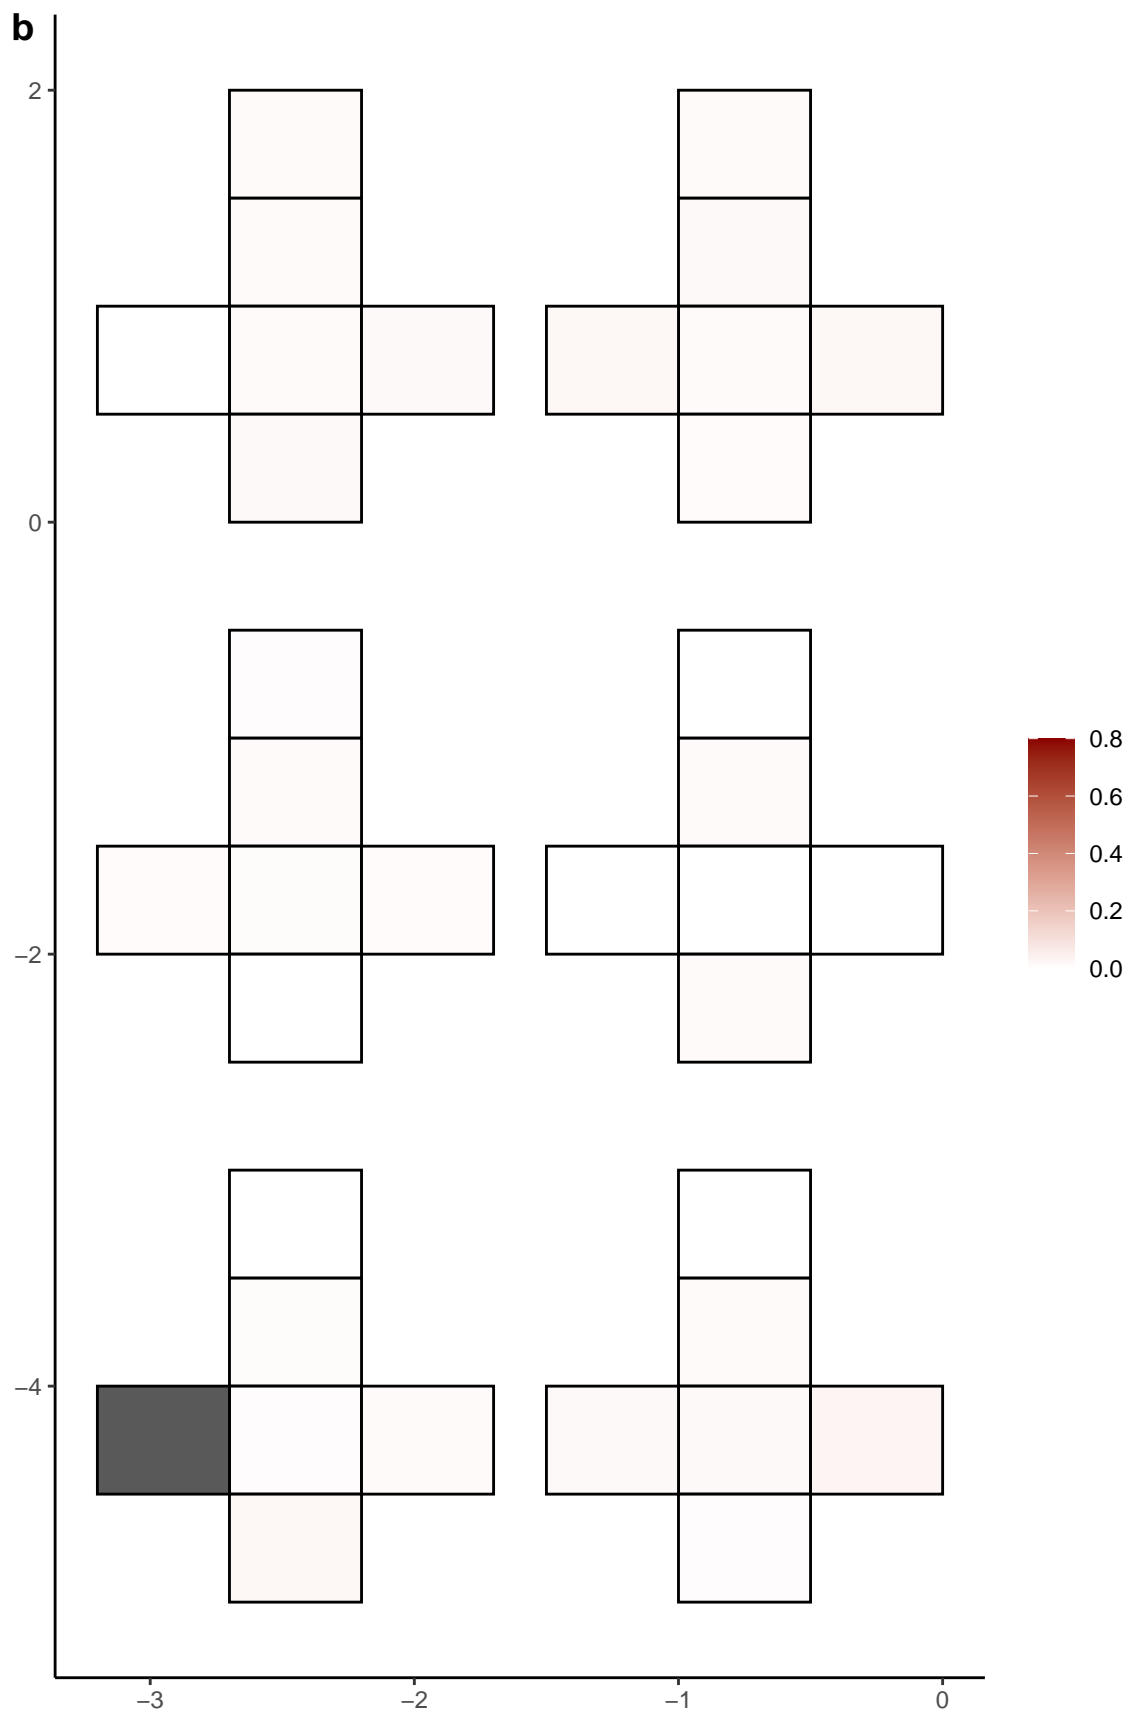

**a** ID01 8-100847587-A-AATGTGT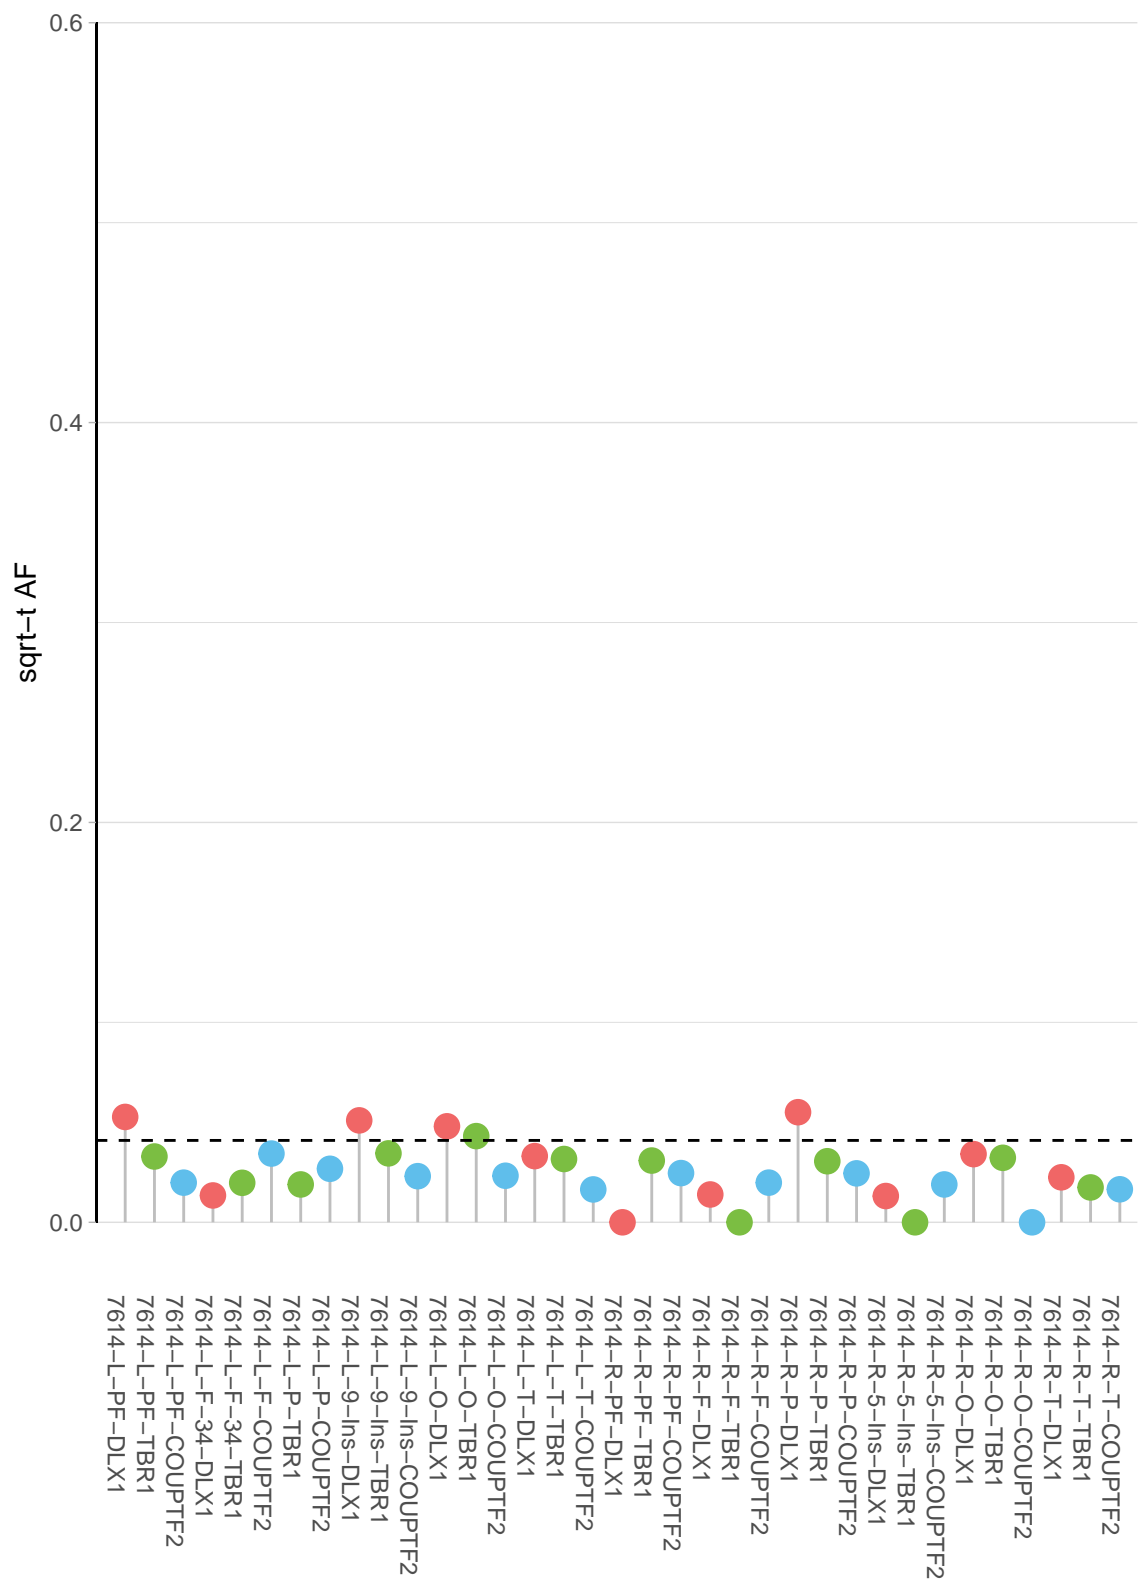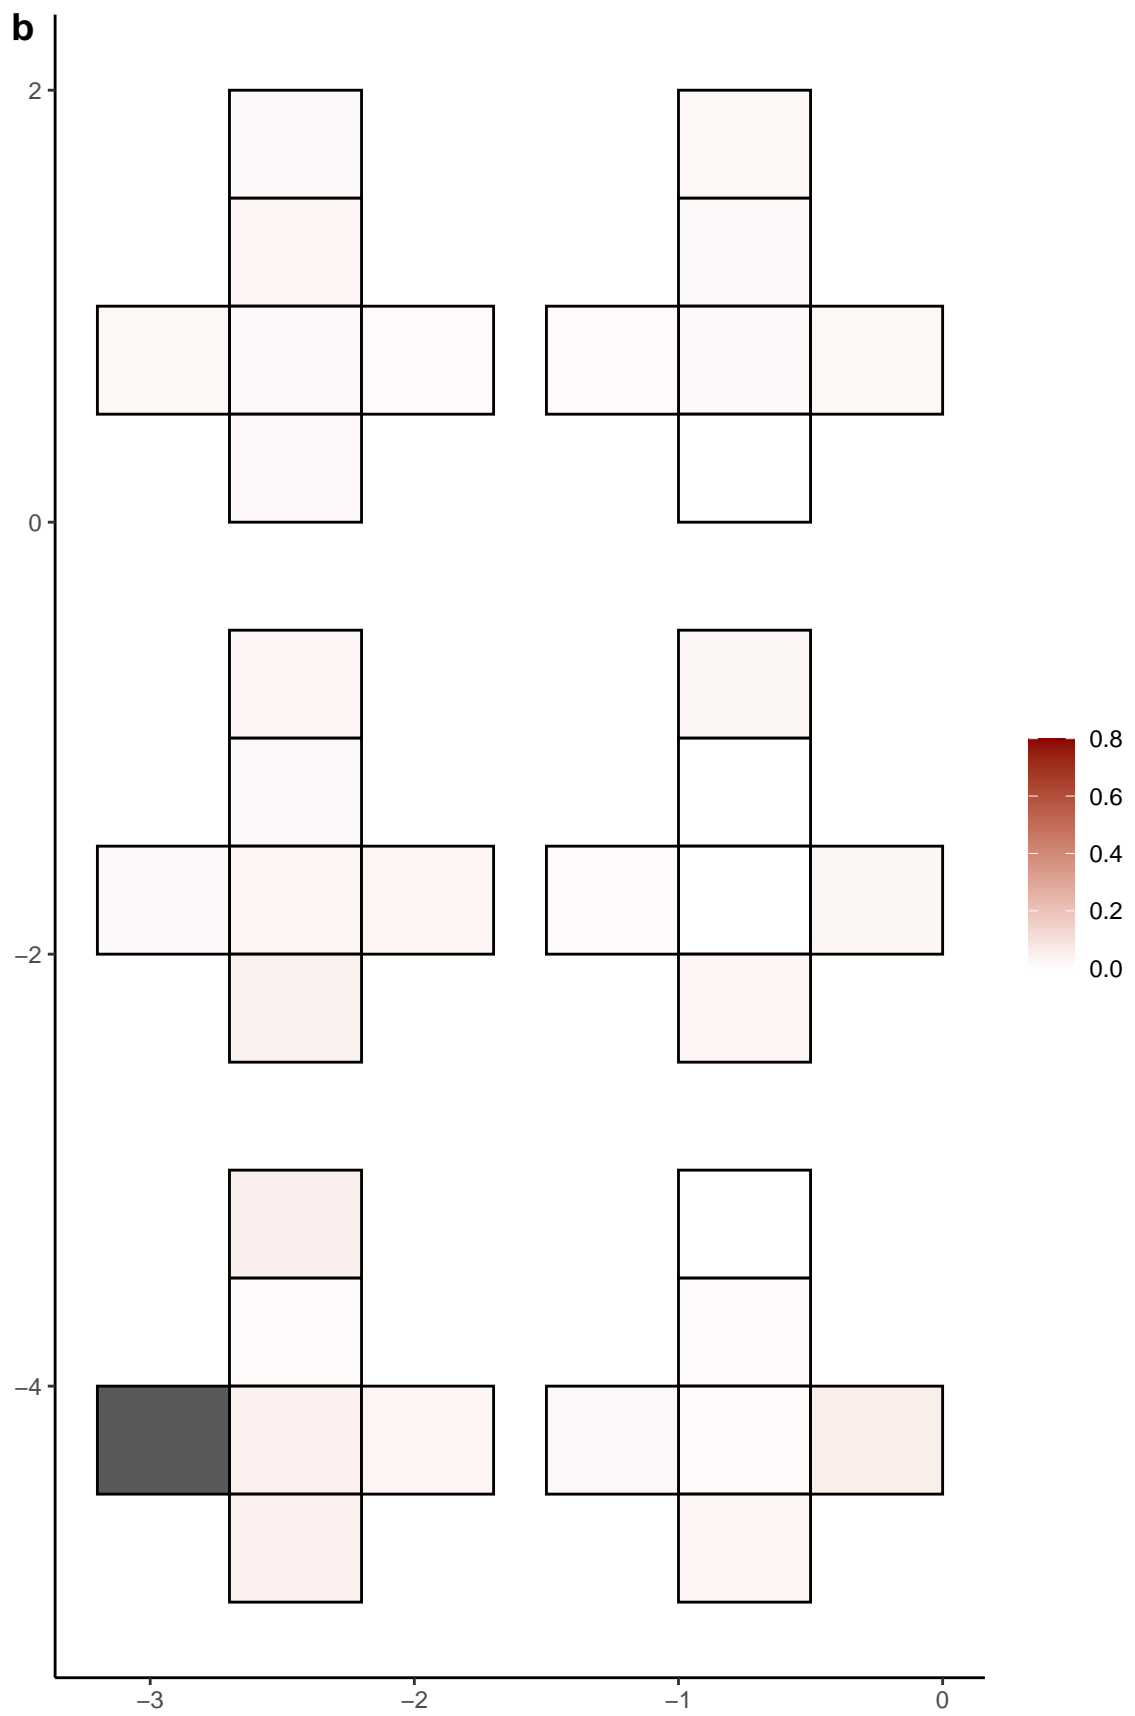

**a** ID01 8-116848693-T-A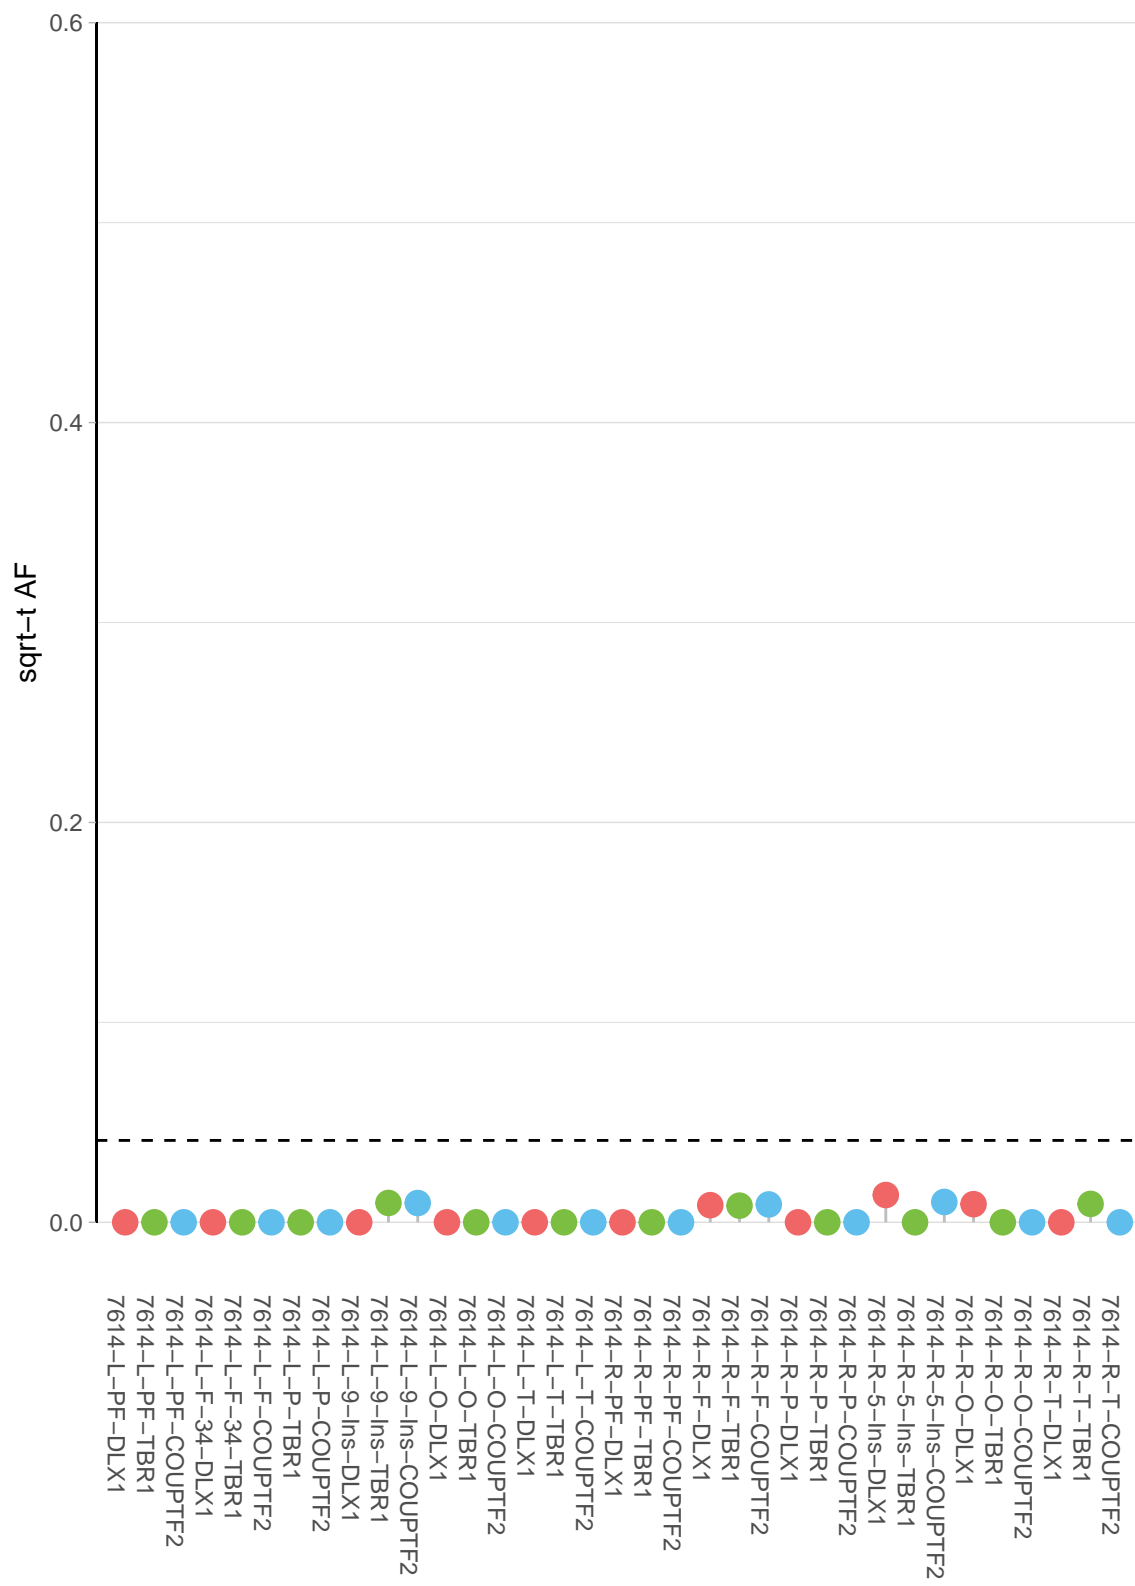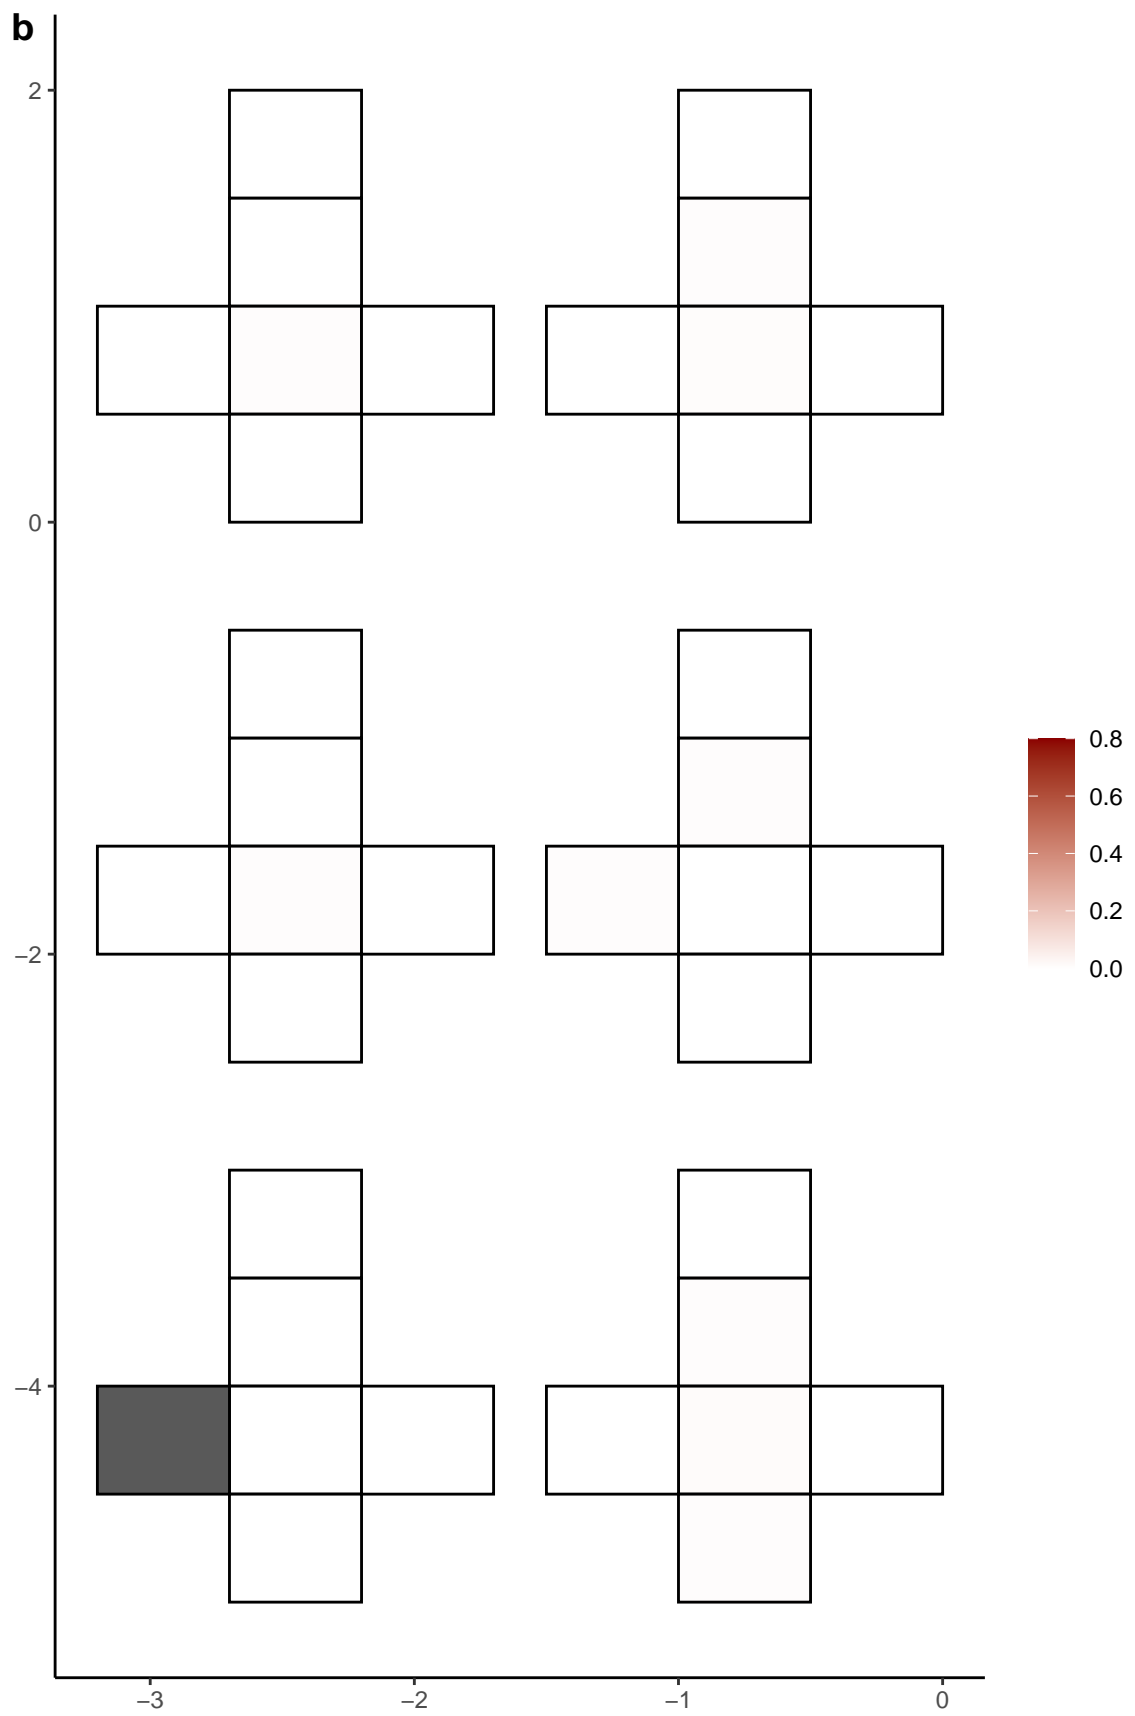

**a** ID01 8-121214447-G-A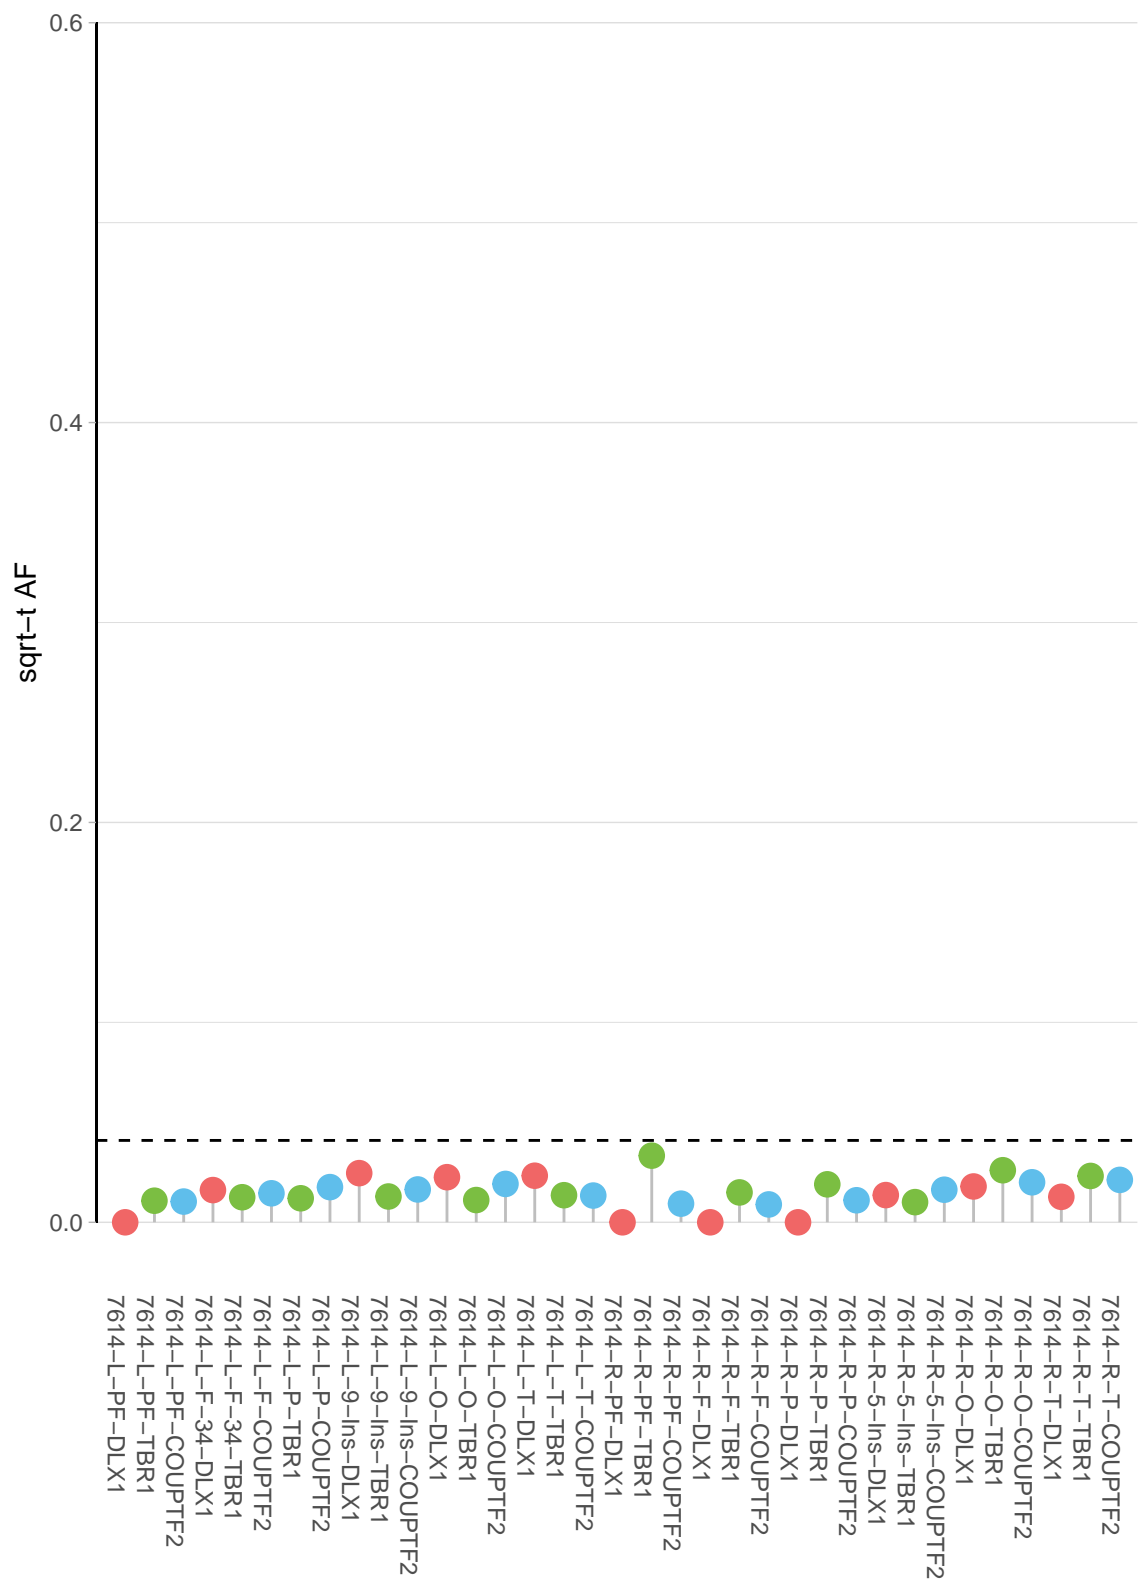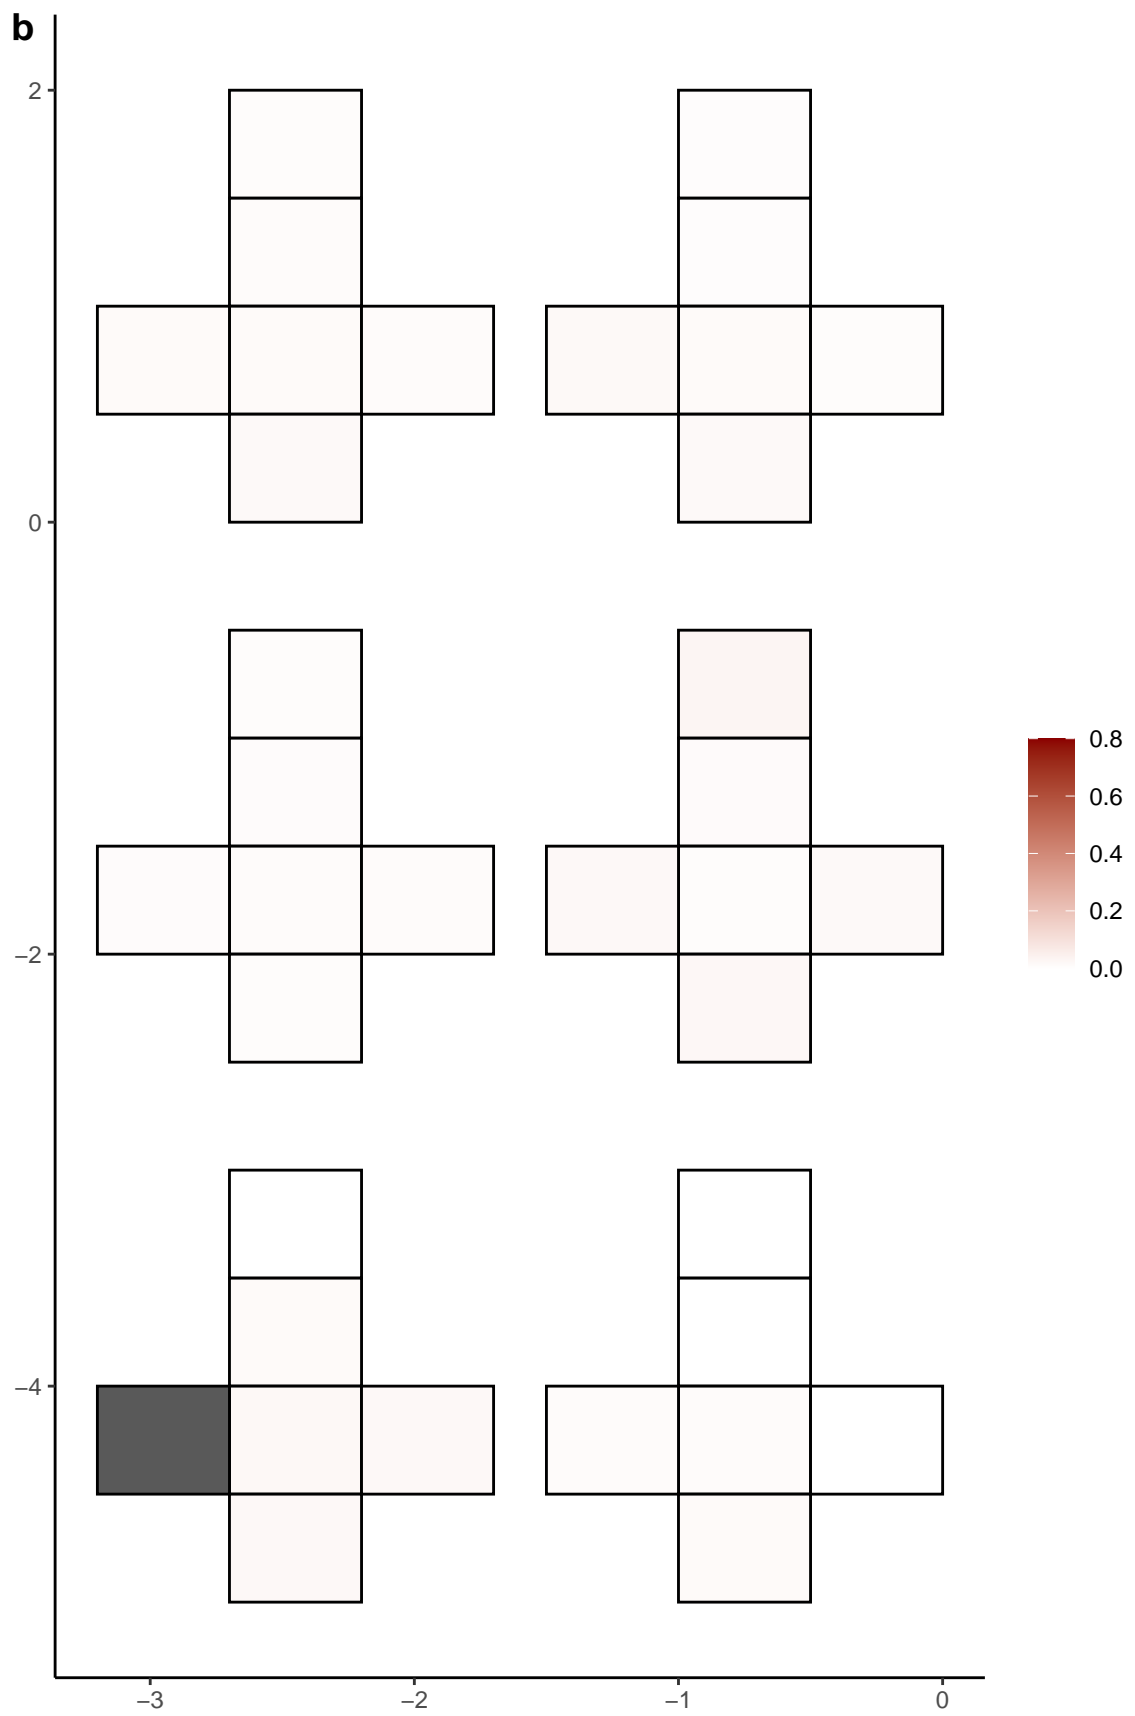

**a** ID01 8-122651370-C-A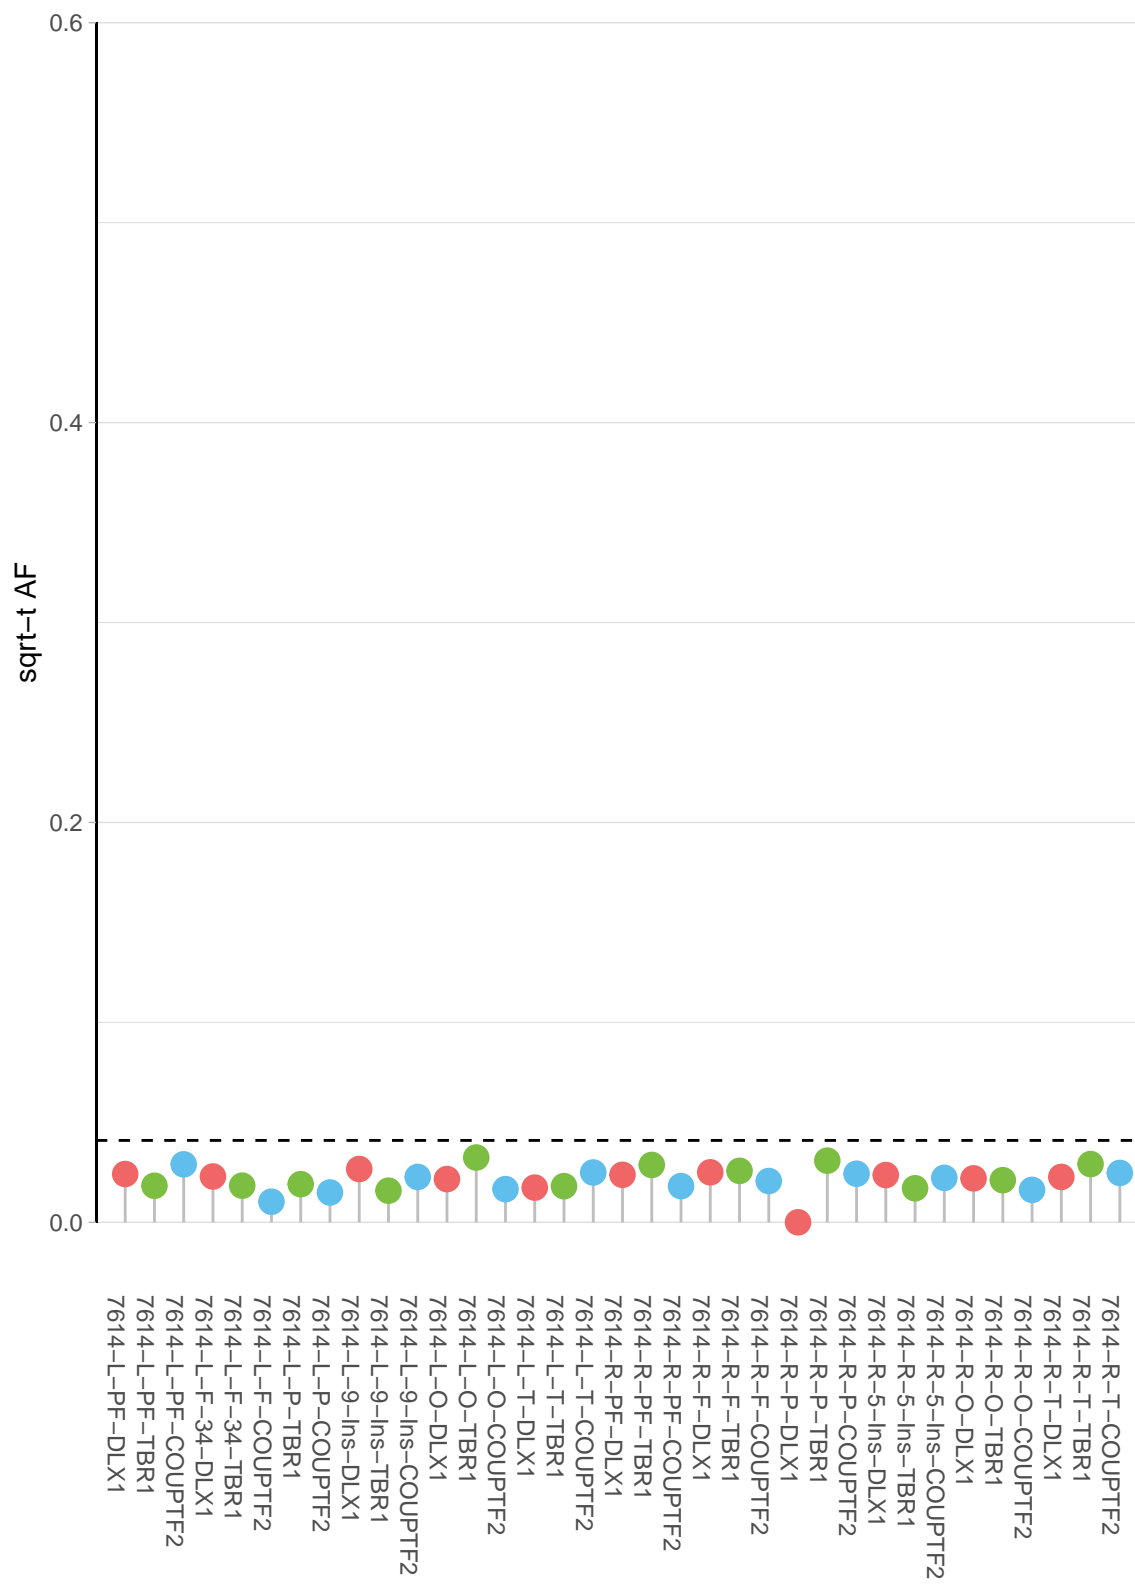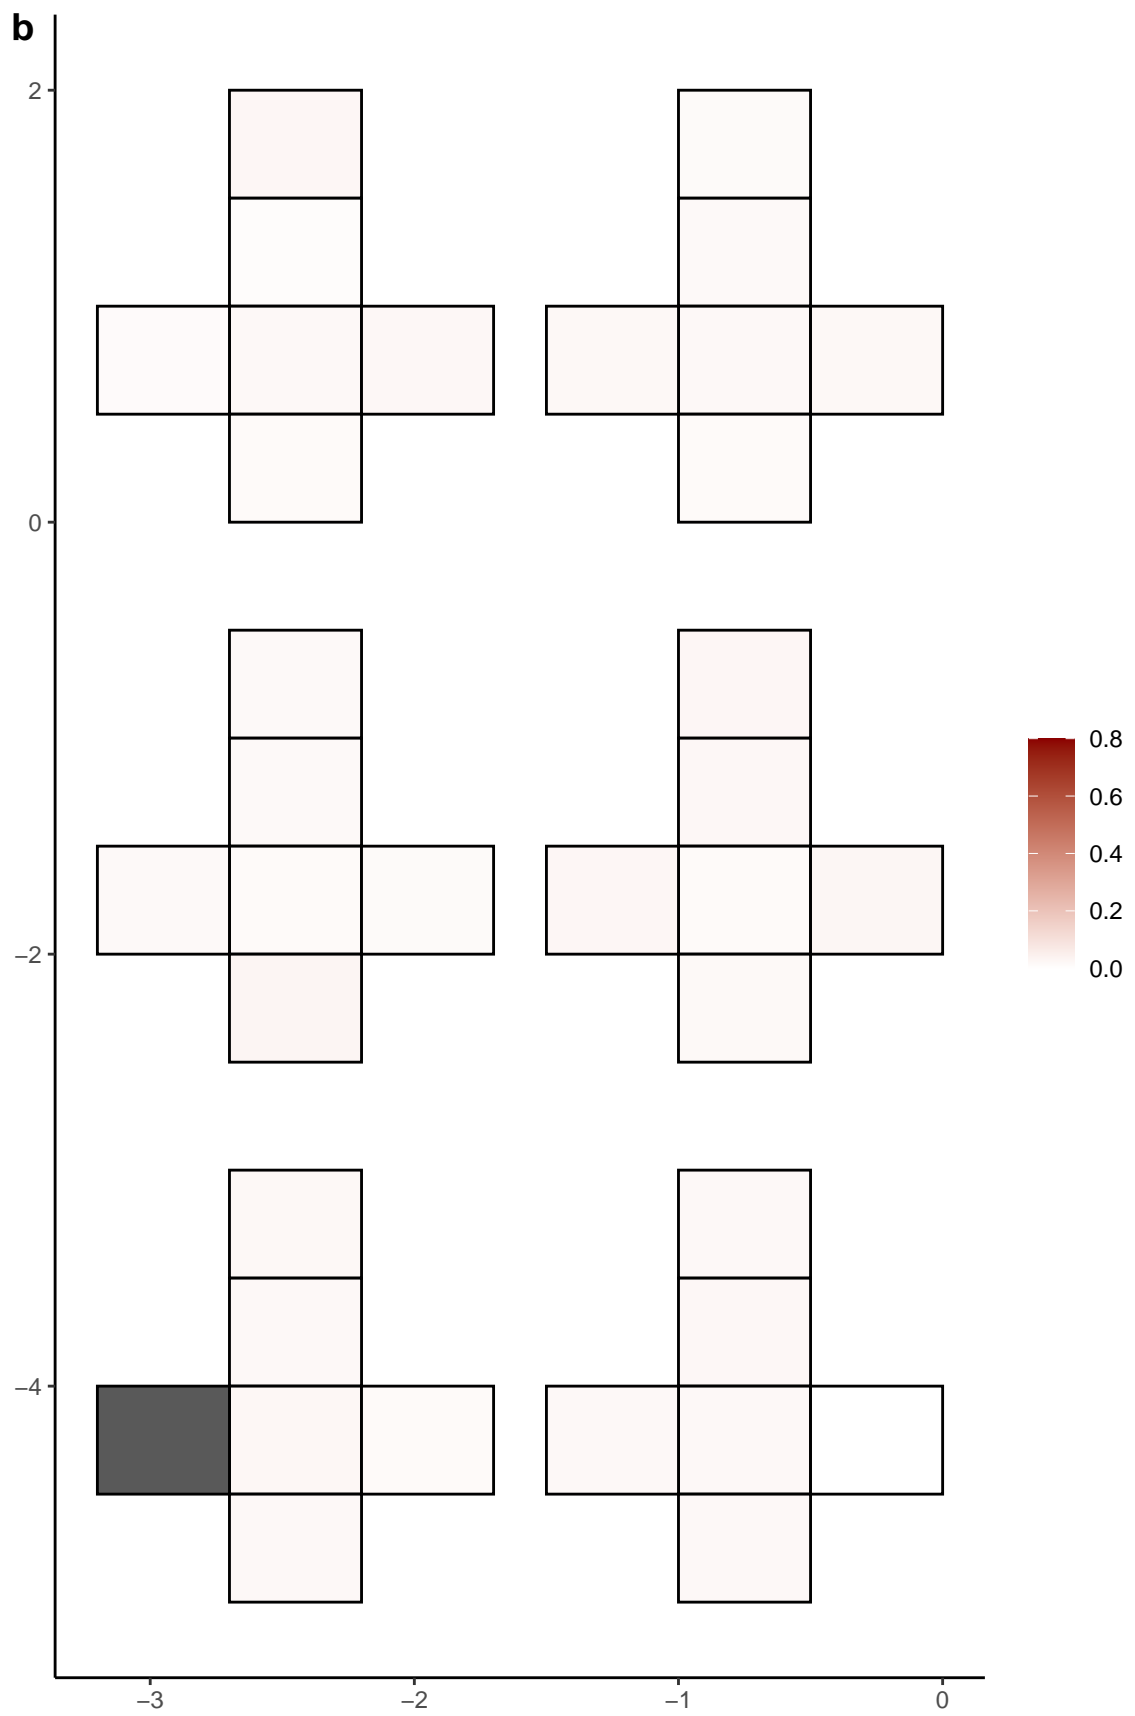

**a** ID01 8-126661188-T-C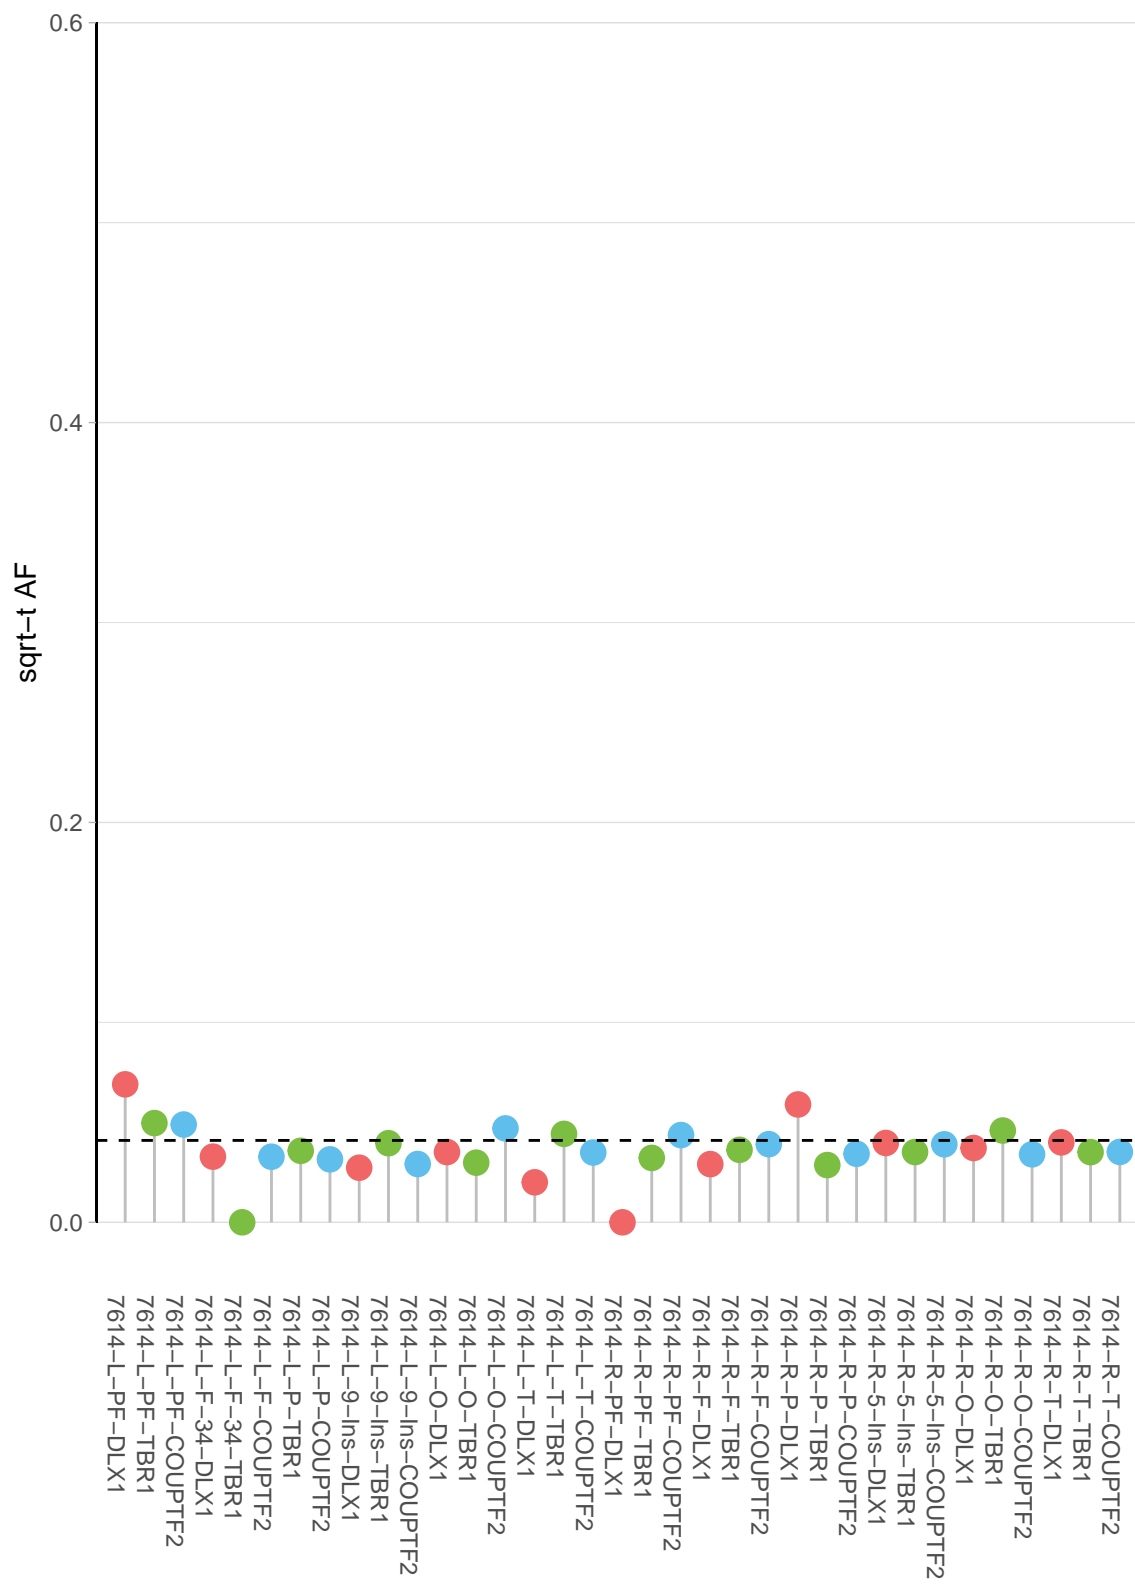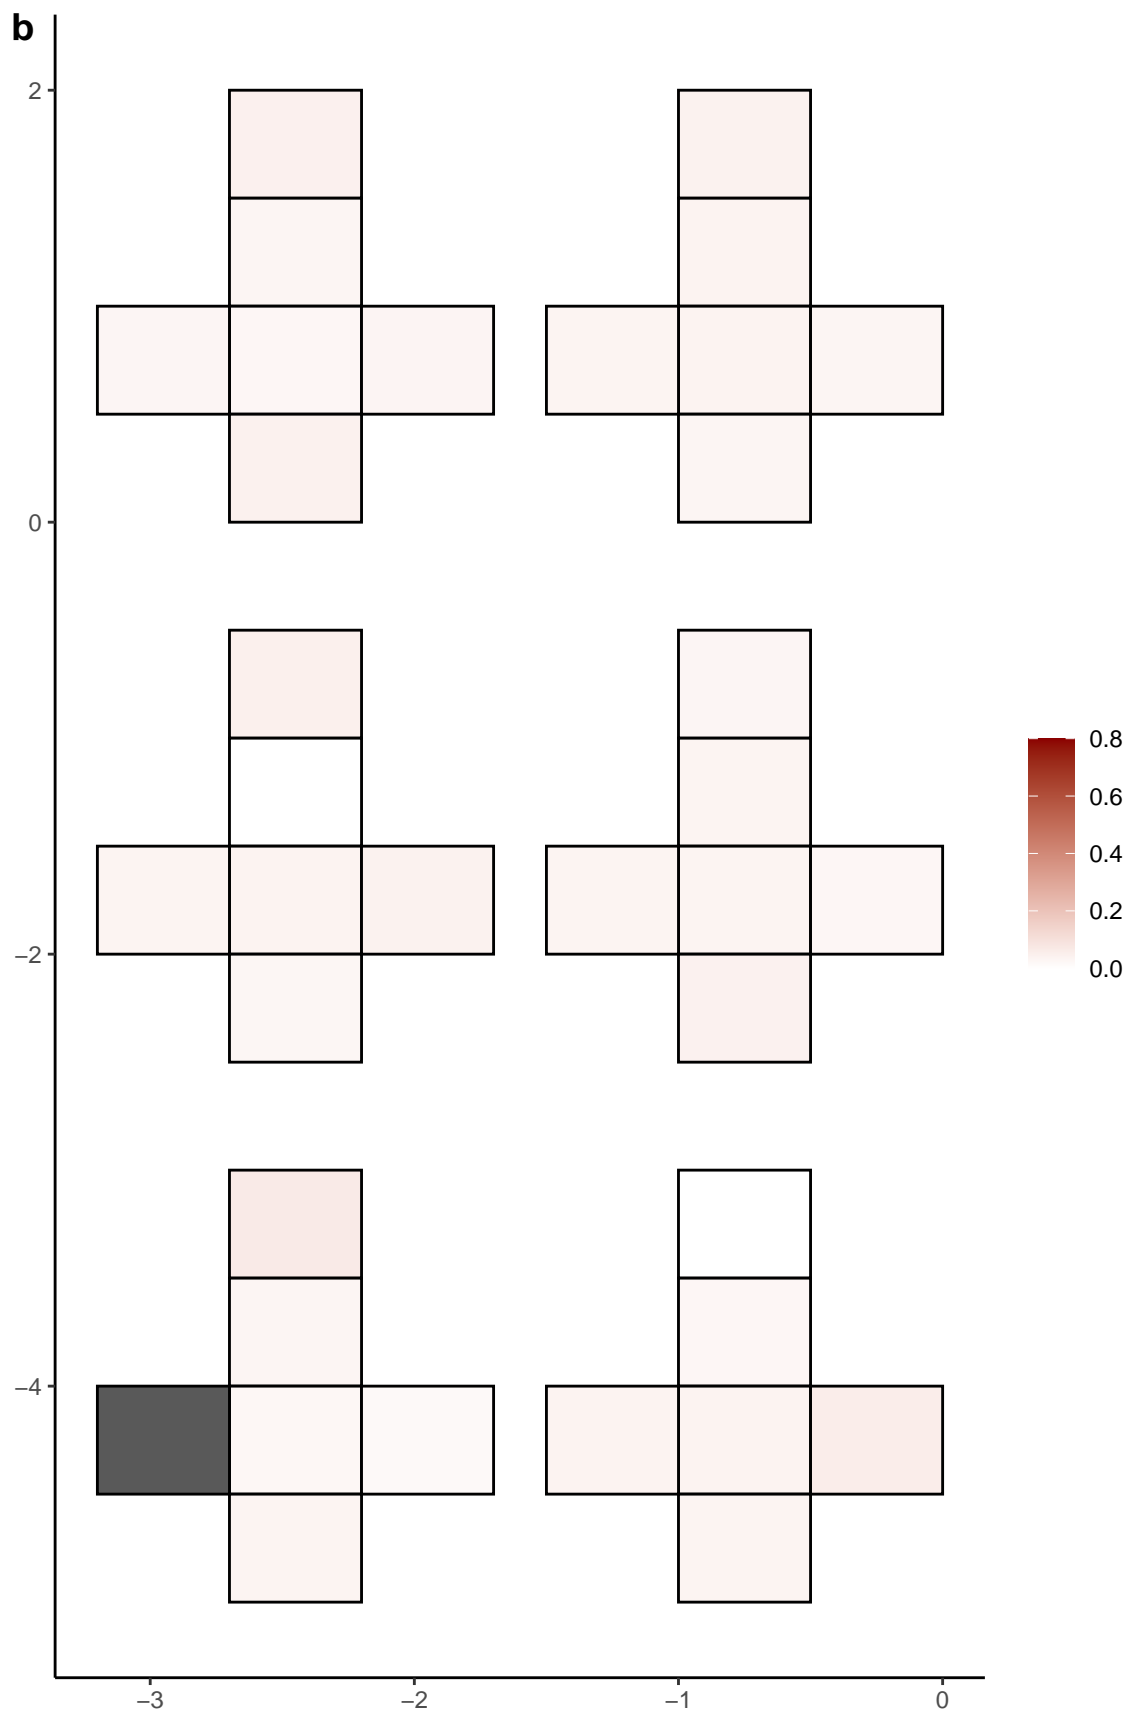



**a** ID01 8-138116363-A-G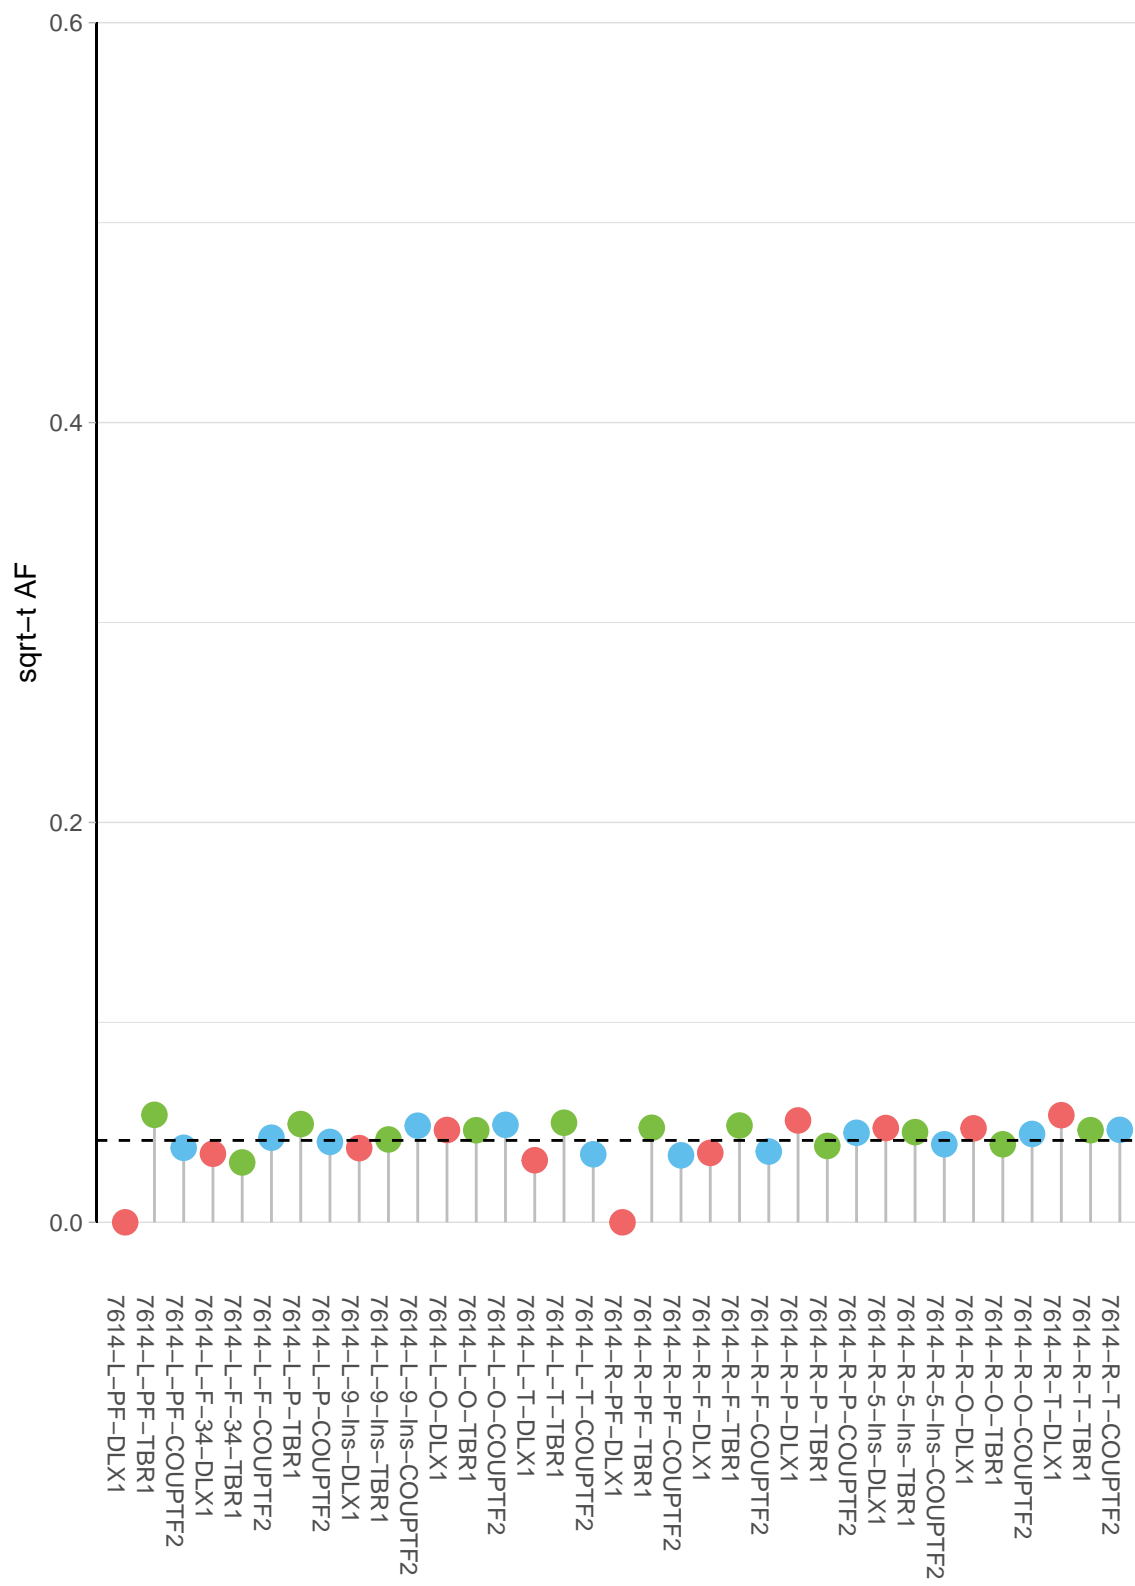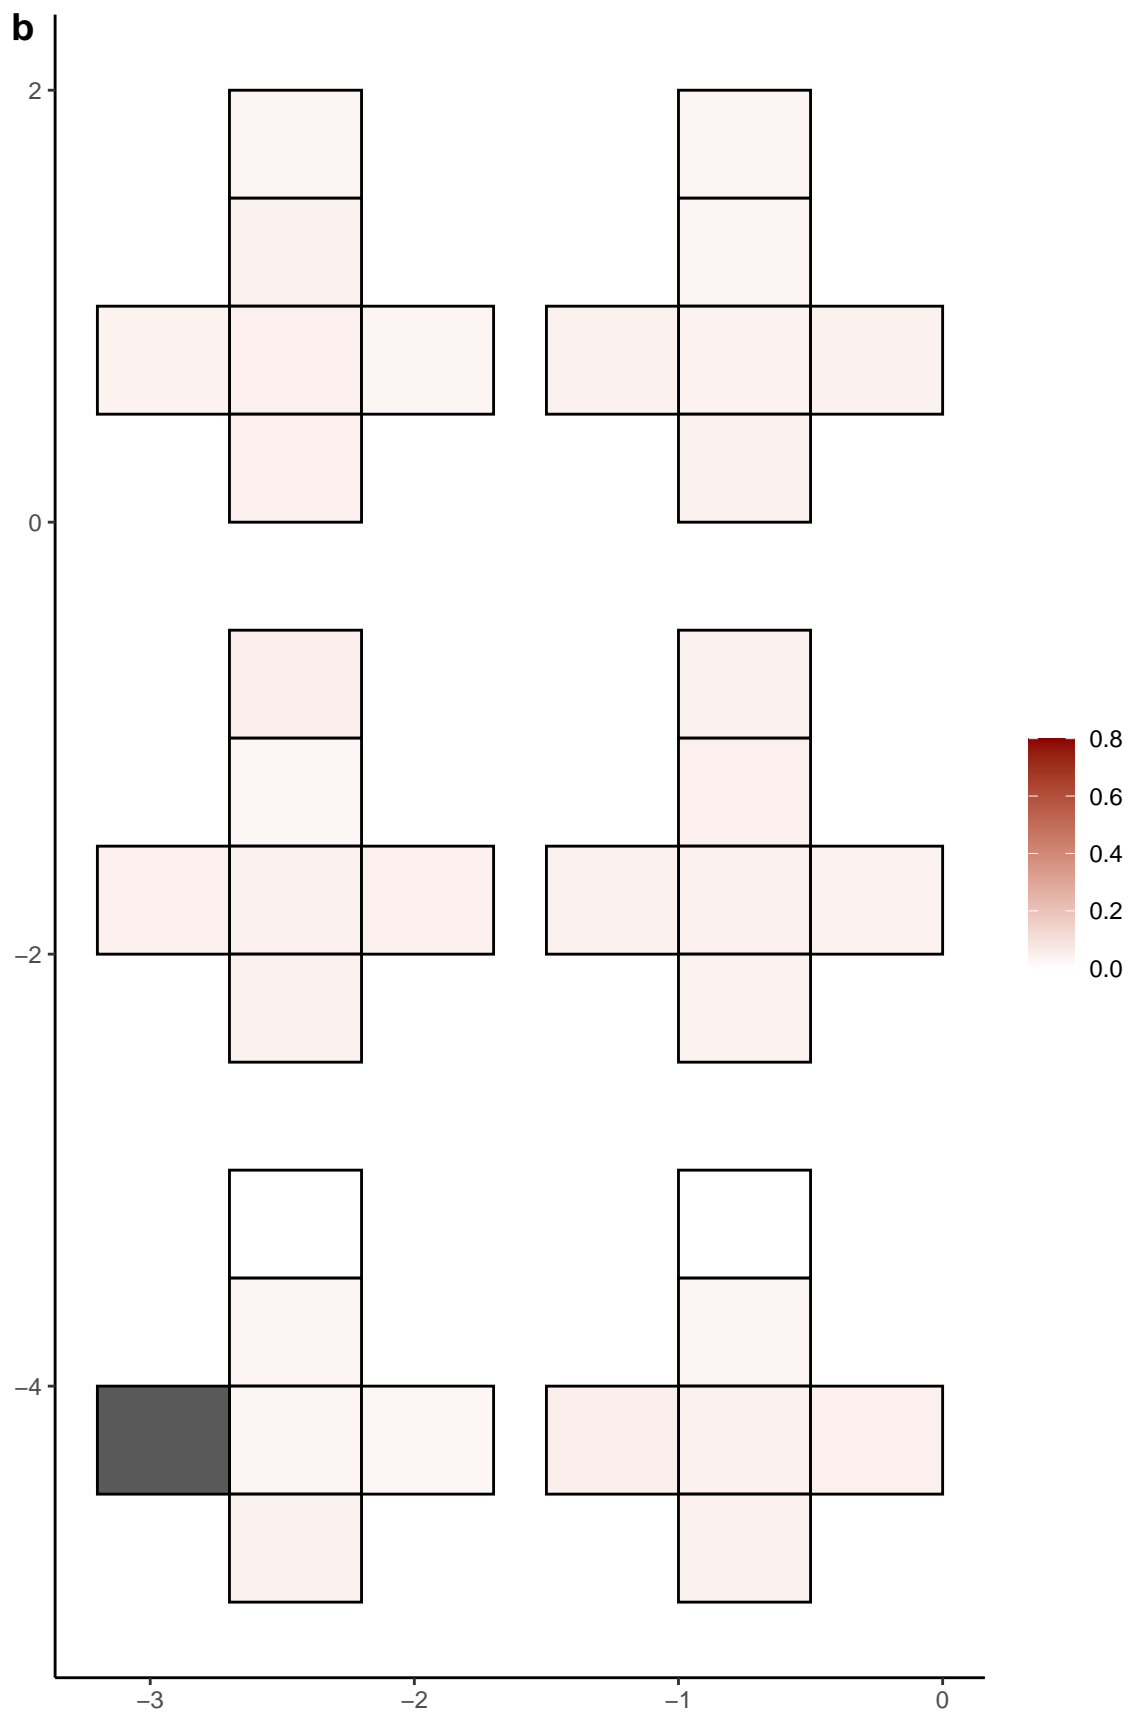

**a** ID01 8-13840424-T-C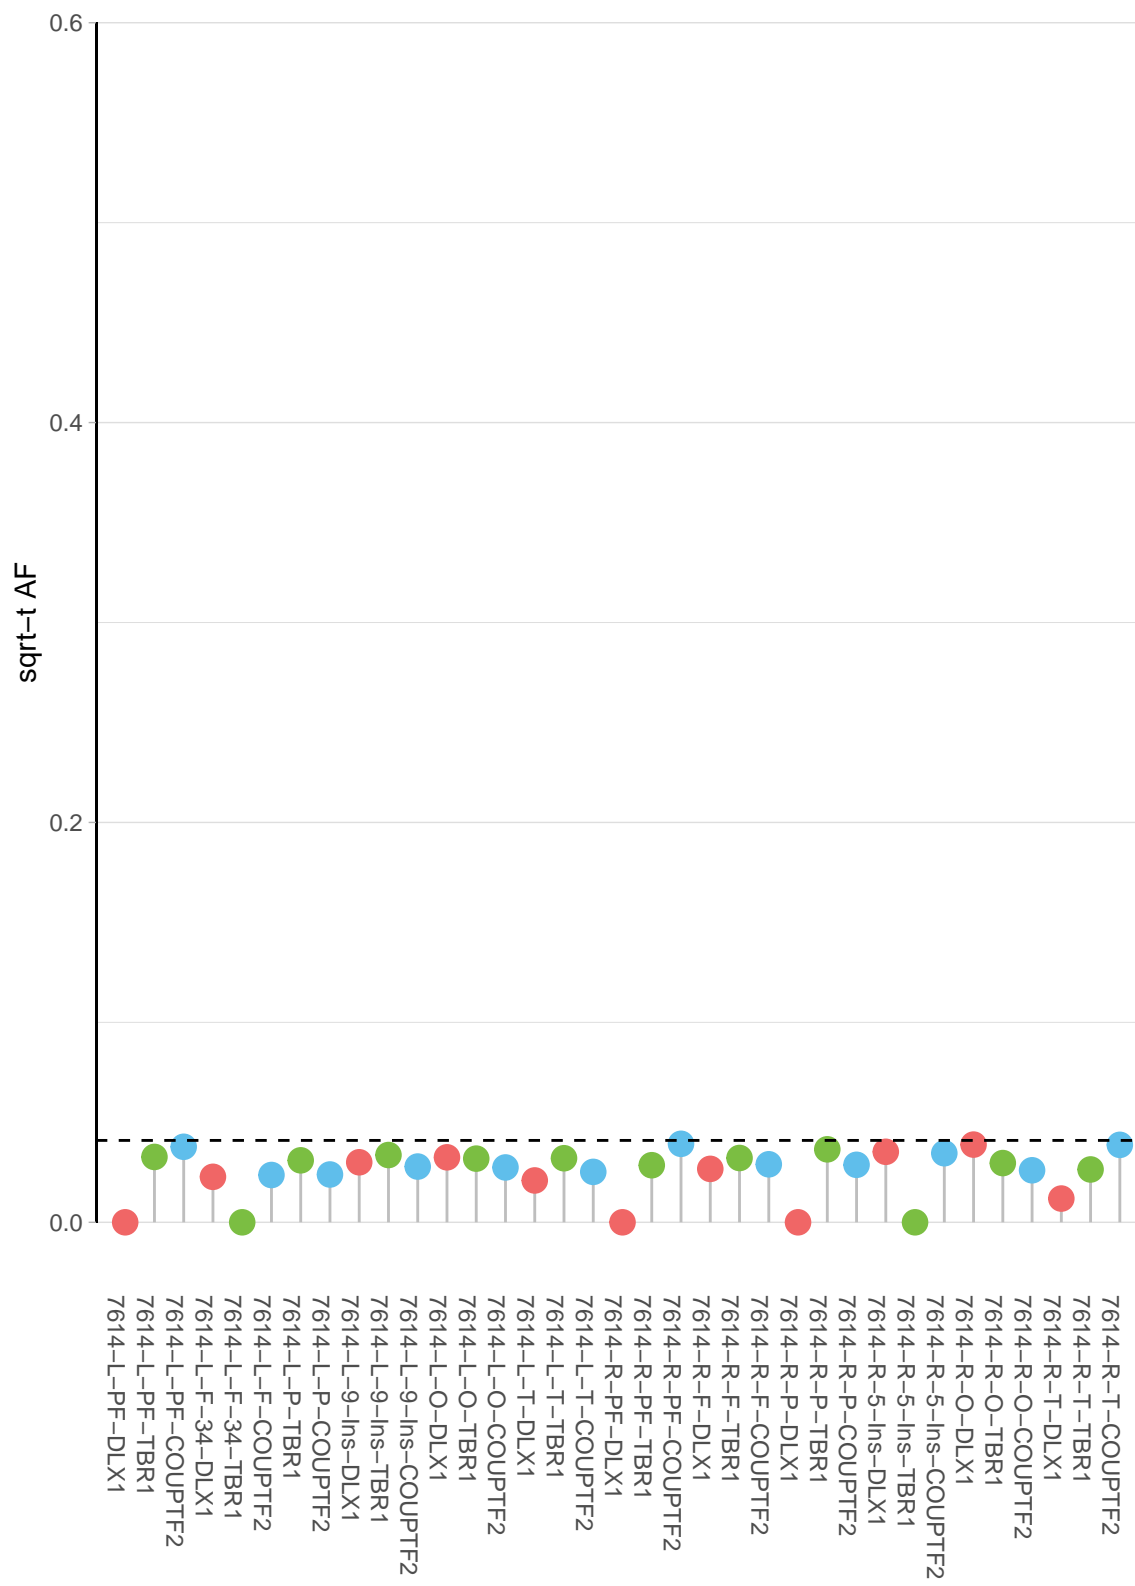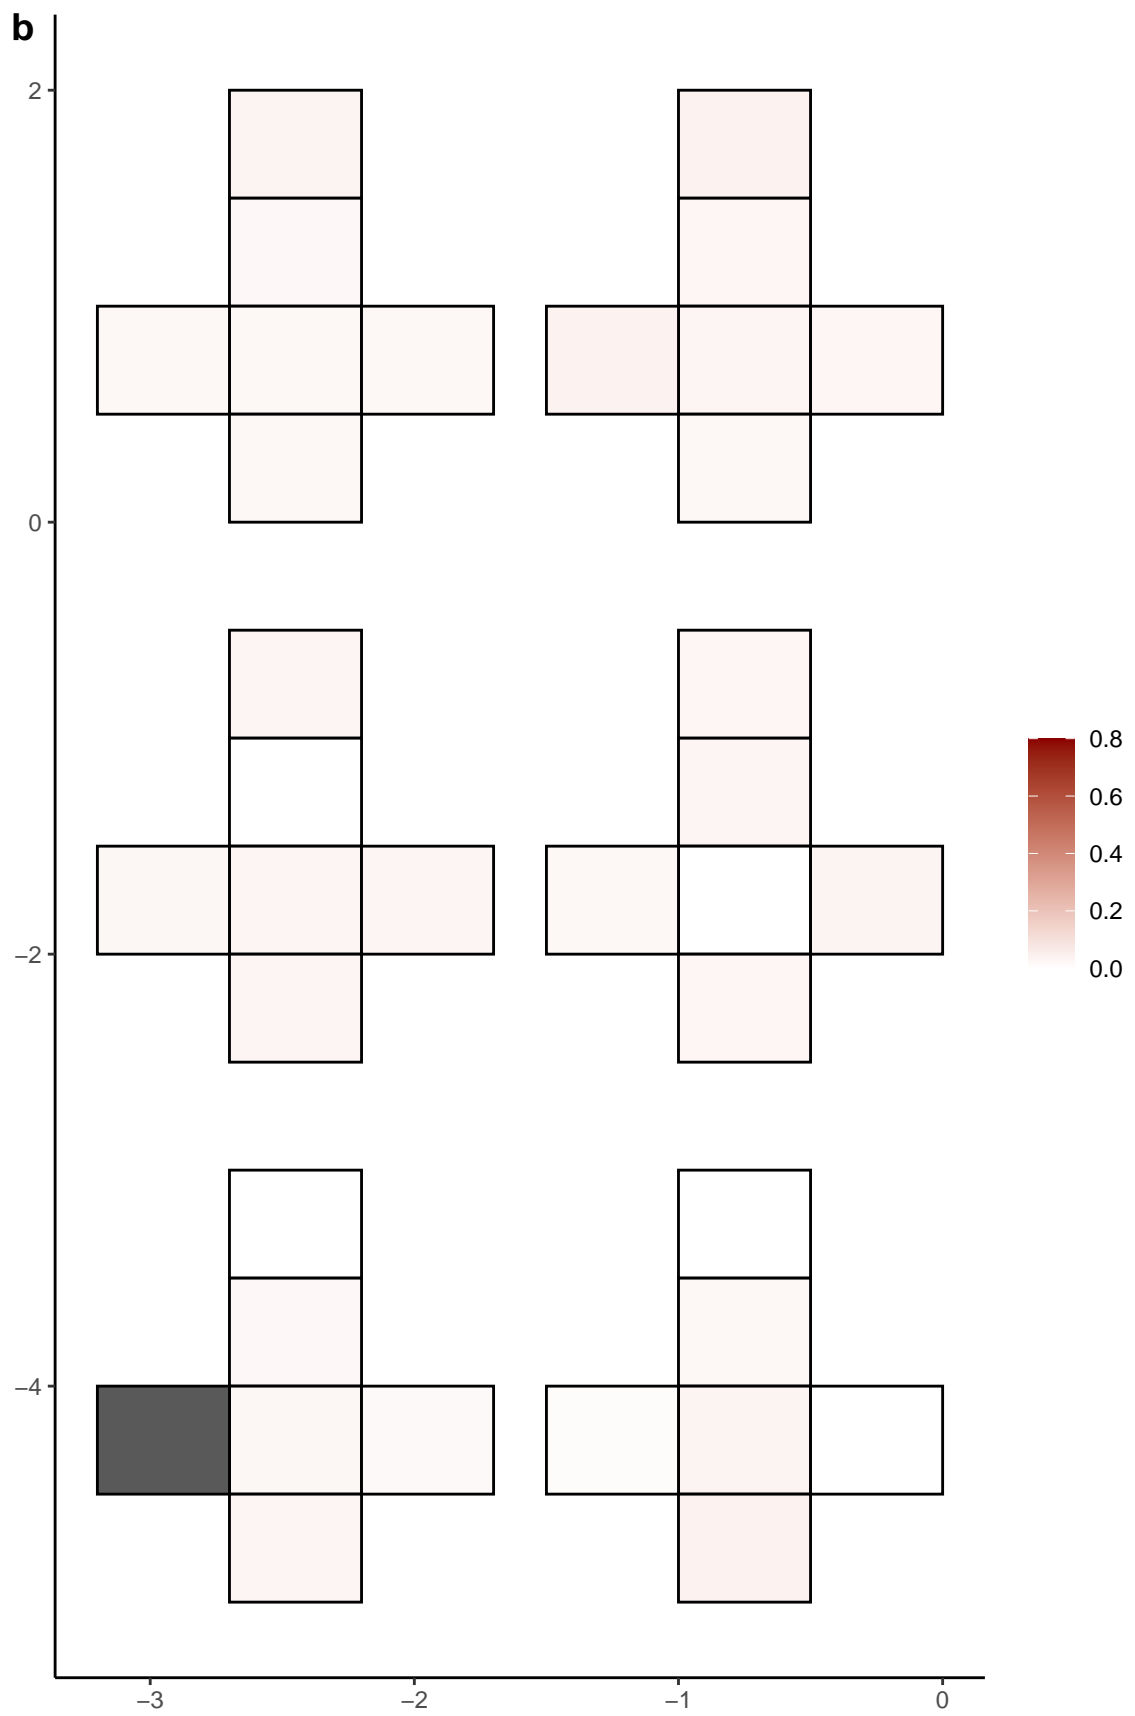

**a** ID01 8-14166252-C-T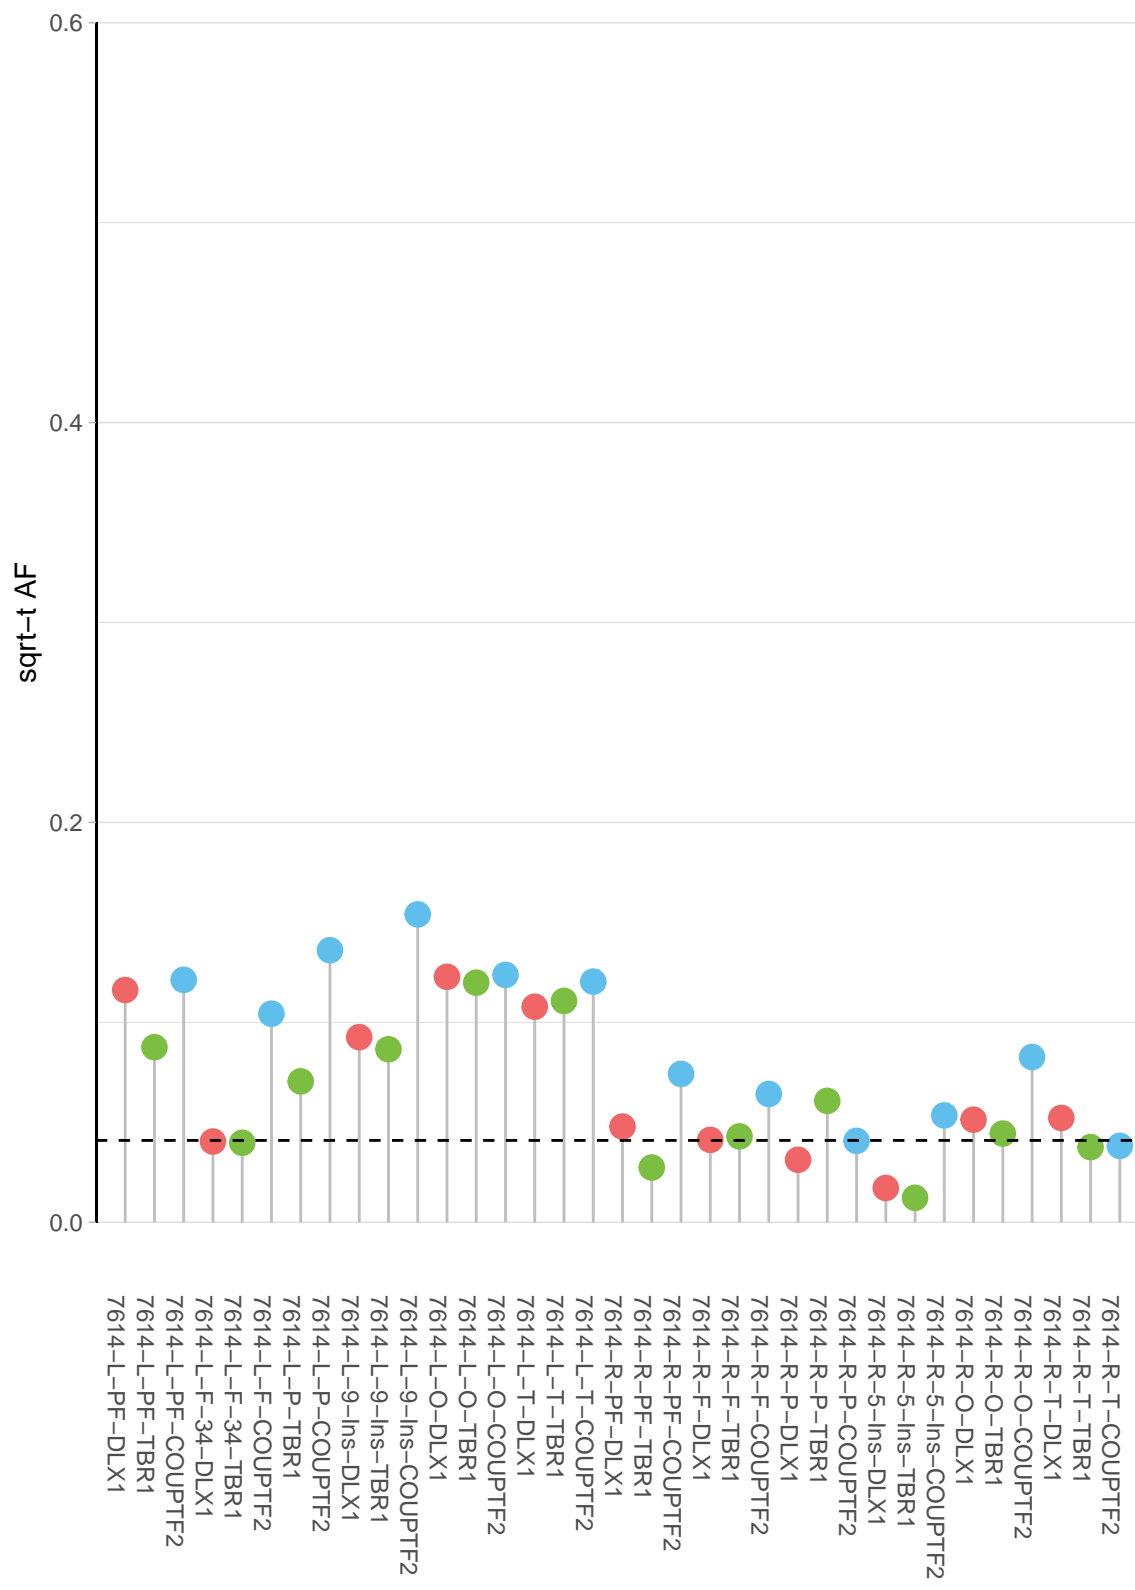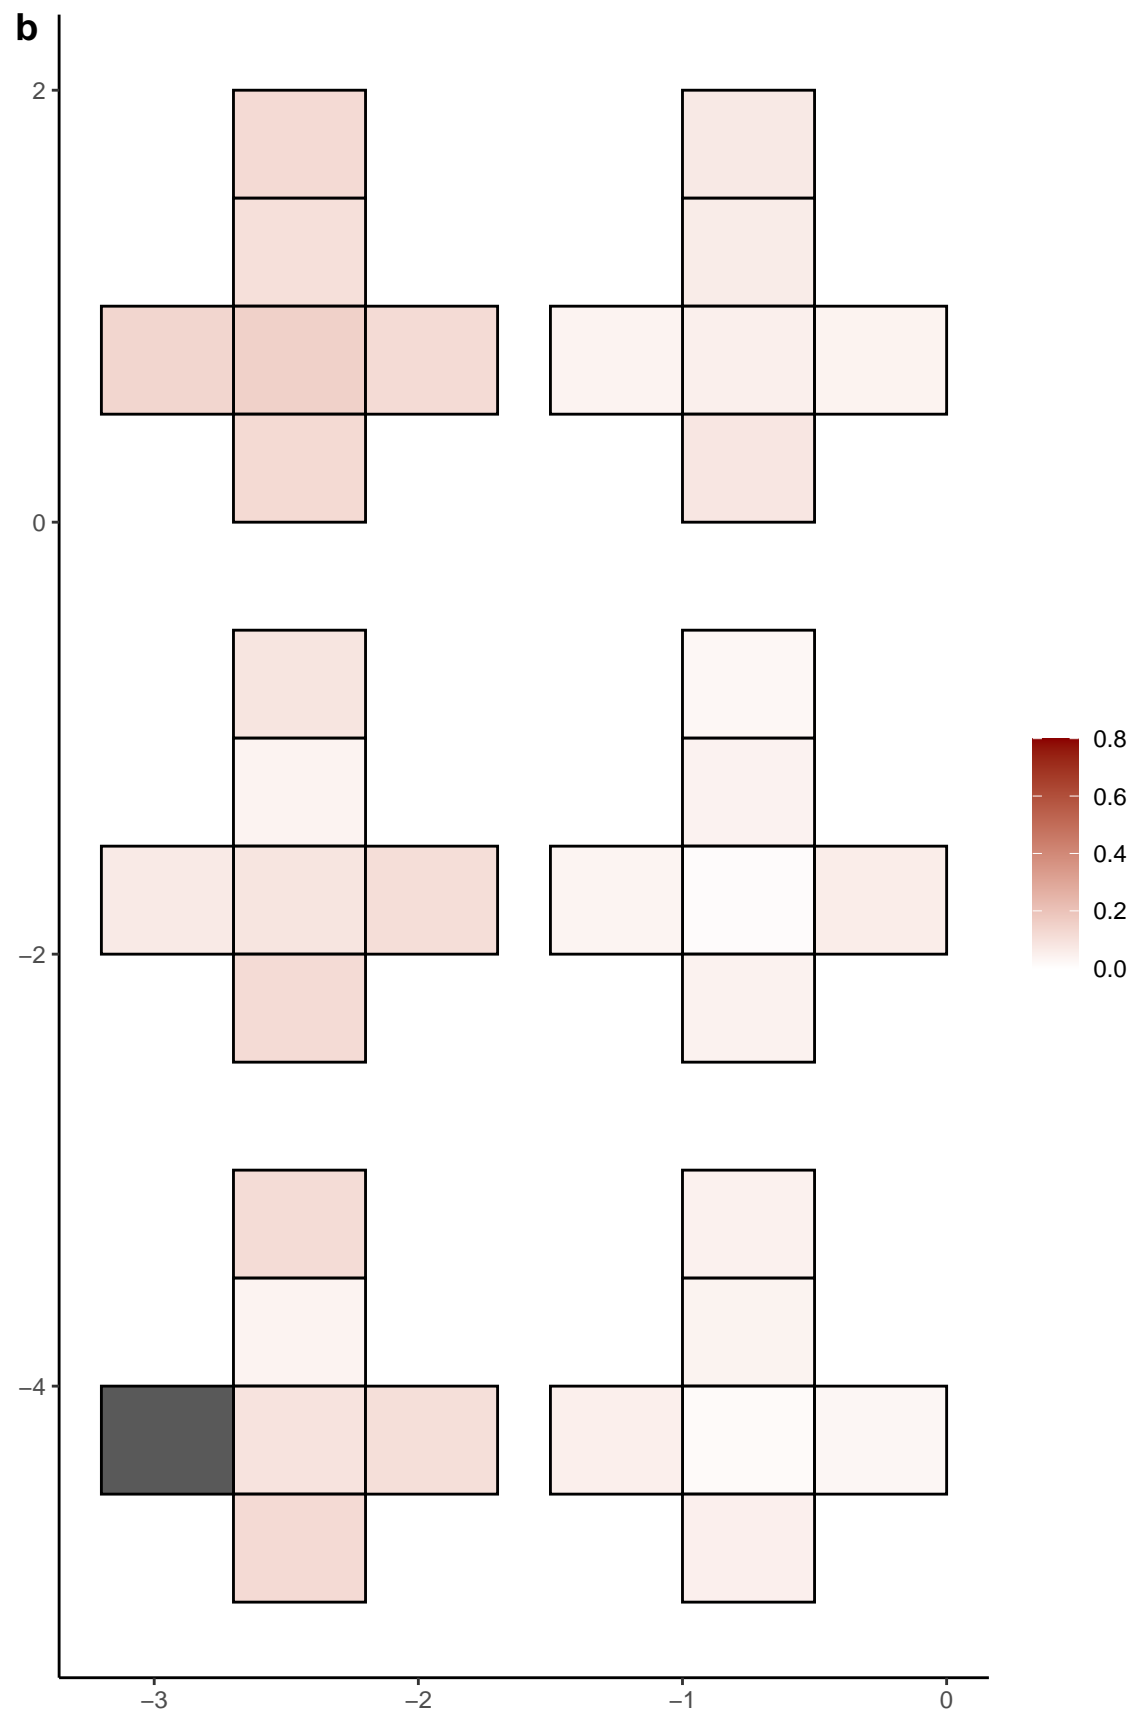

**a** ID01 8-14411299-CTT-C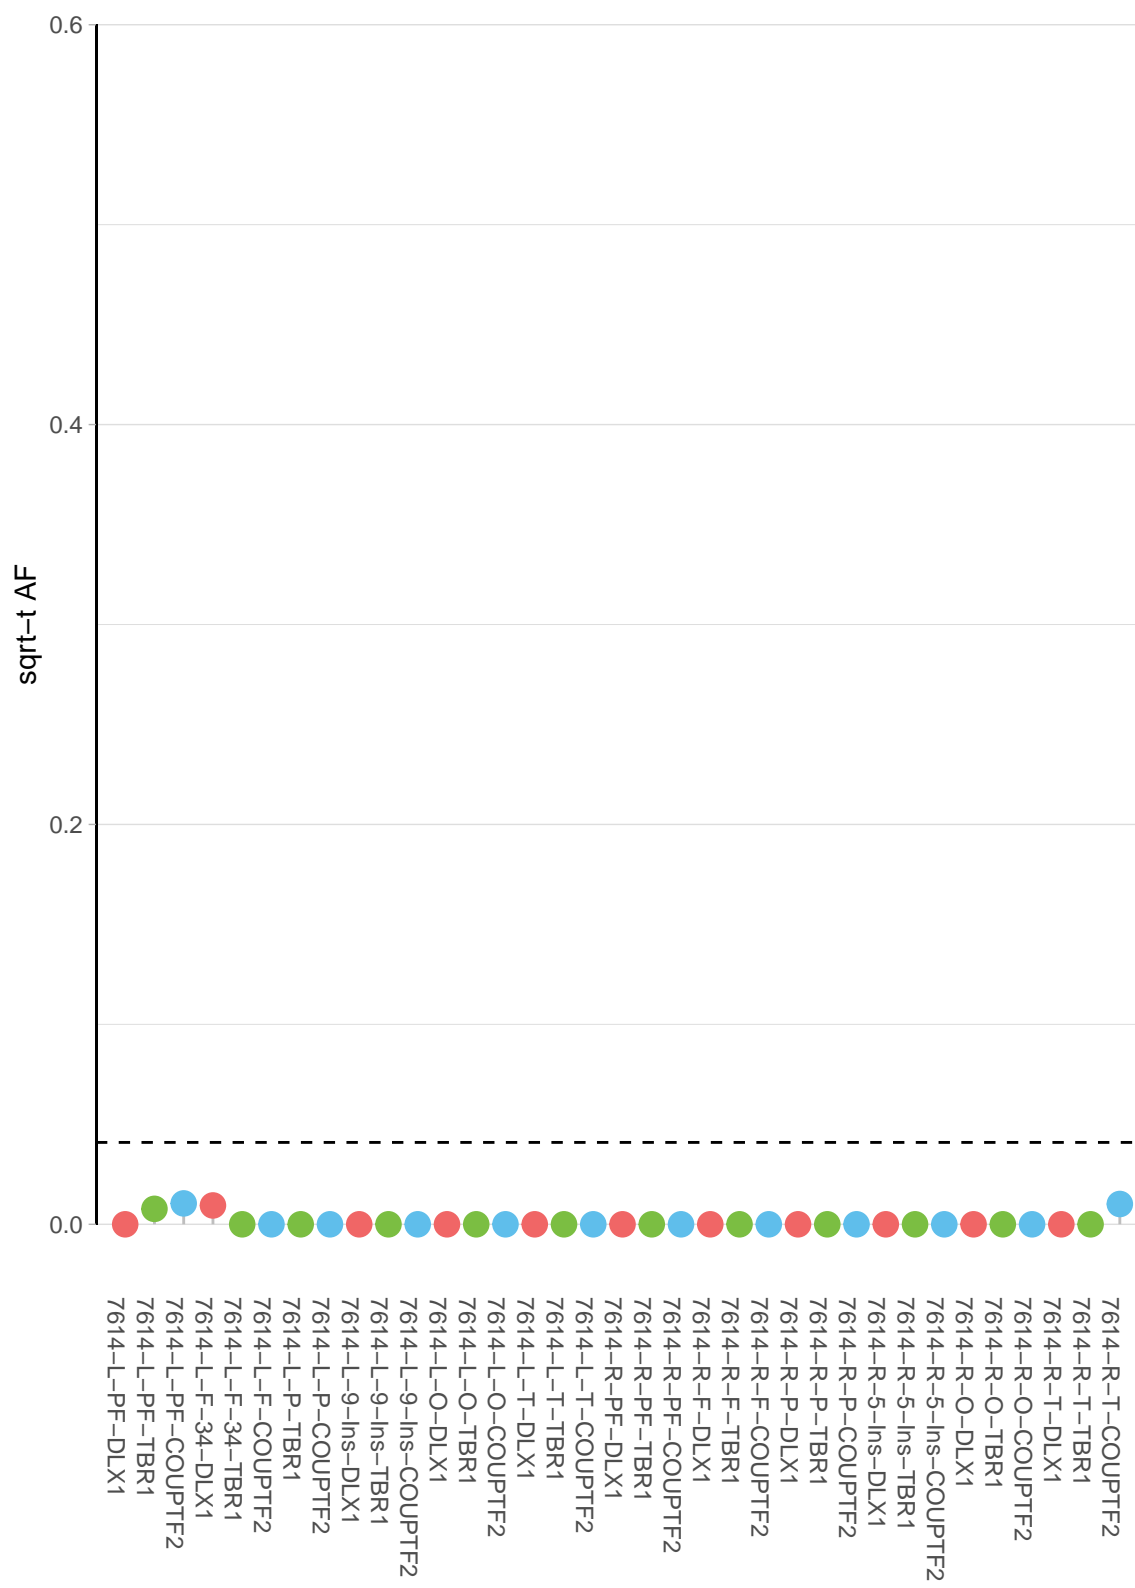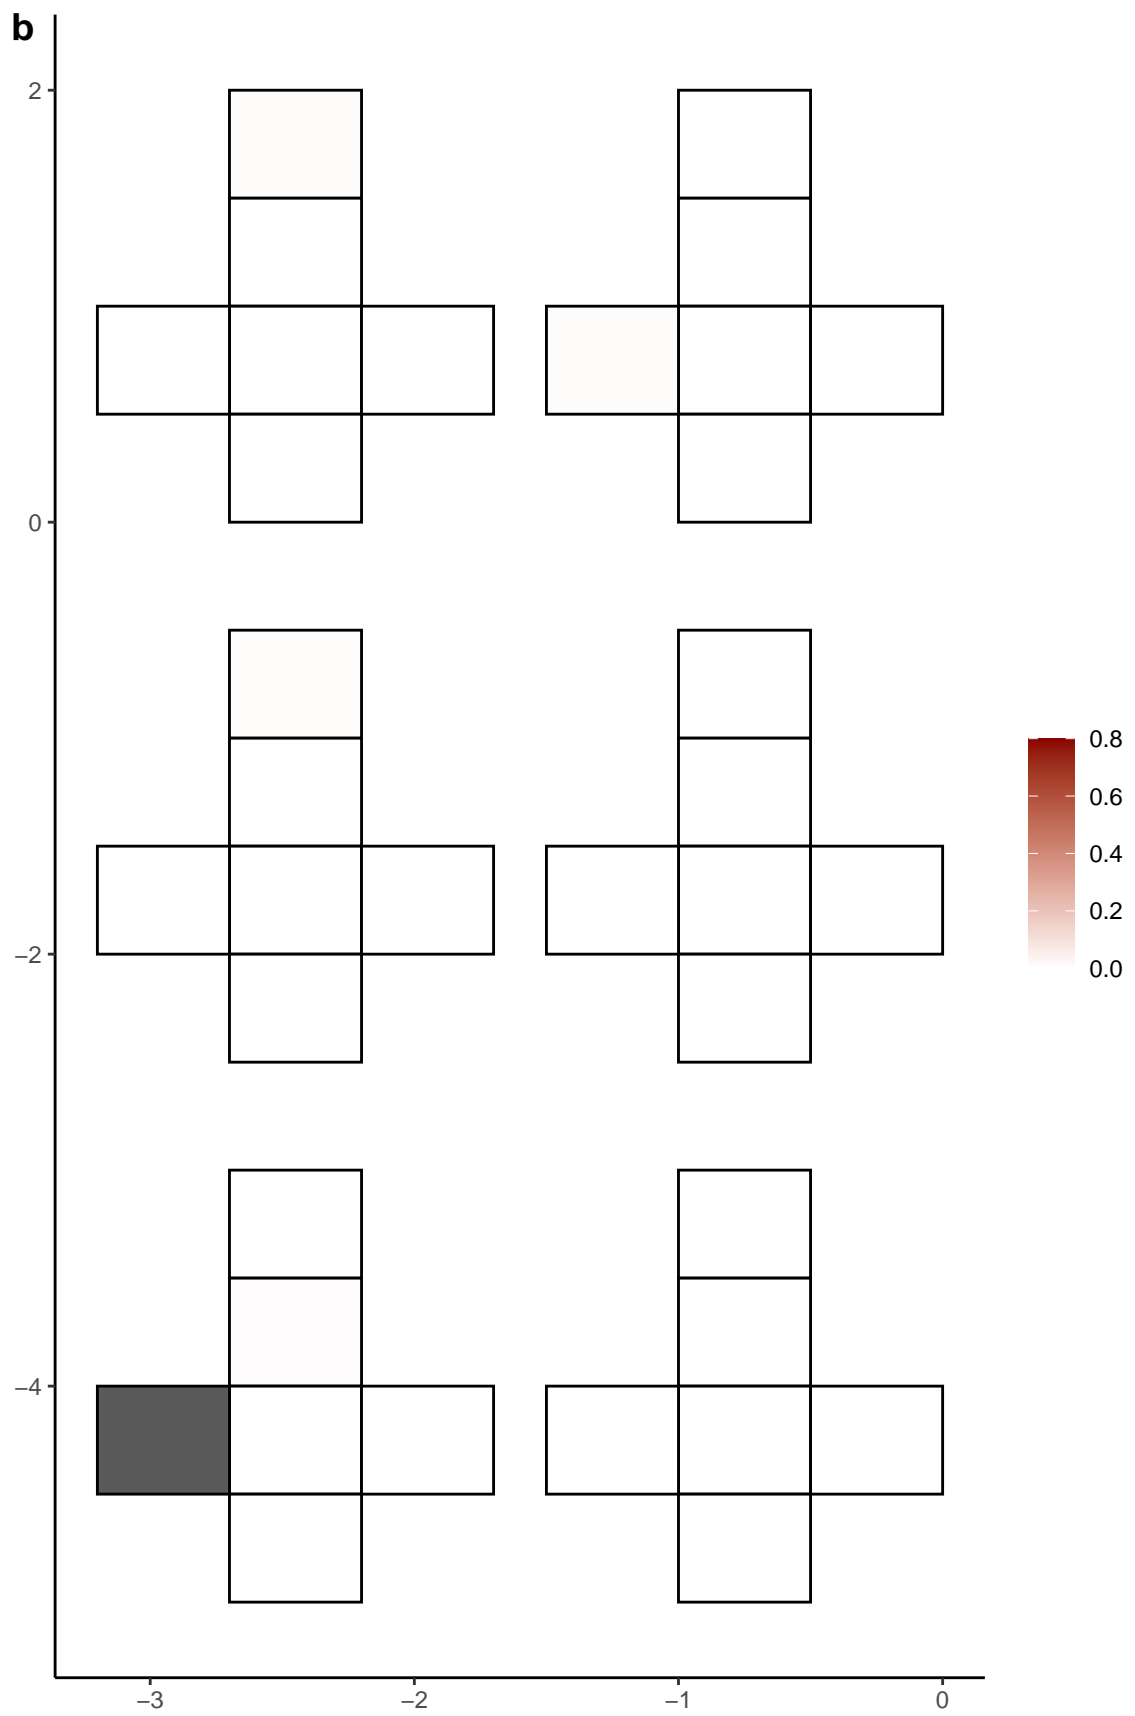

**a** ID01 8-144210812-G-A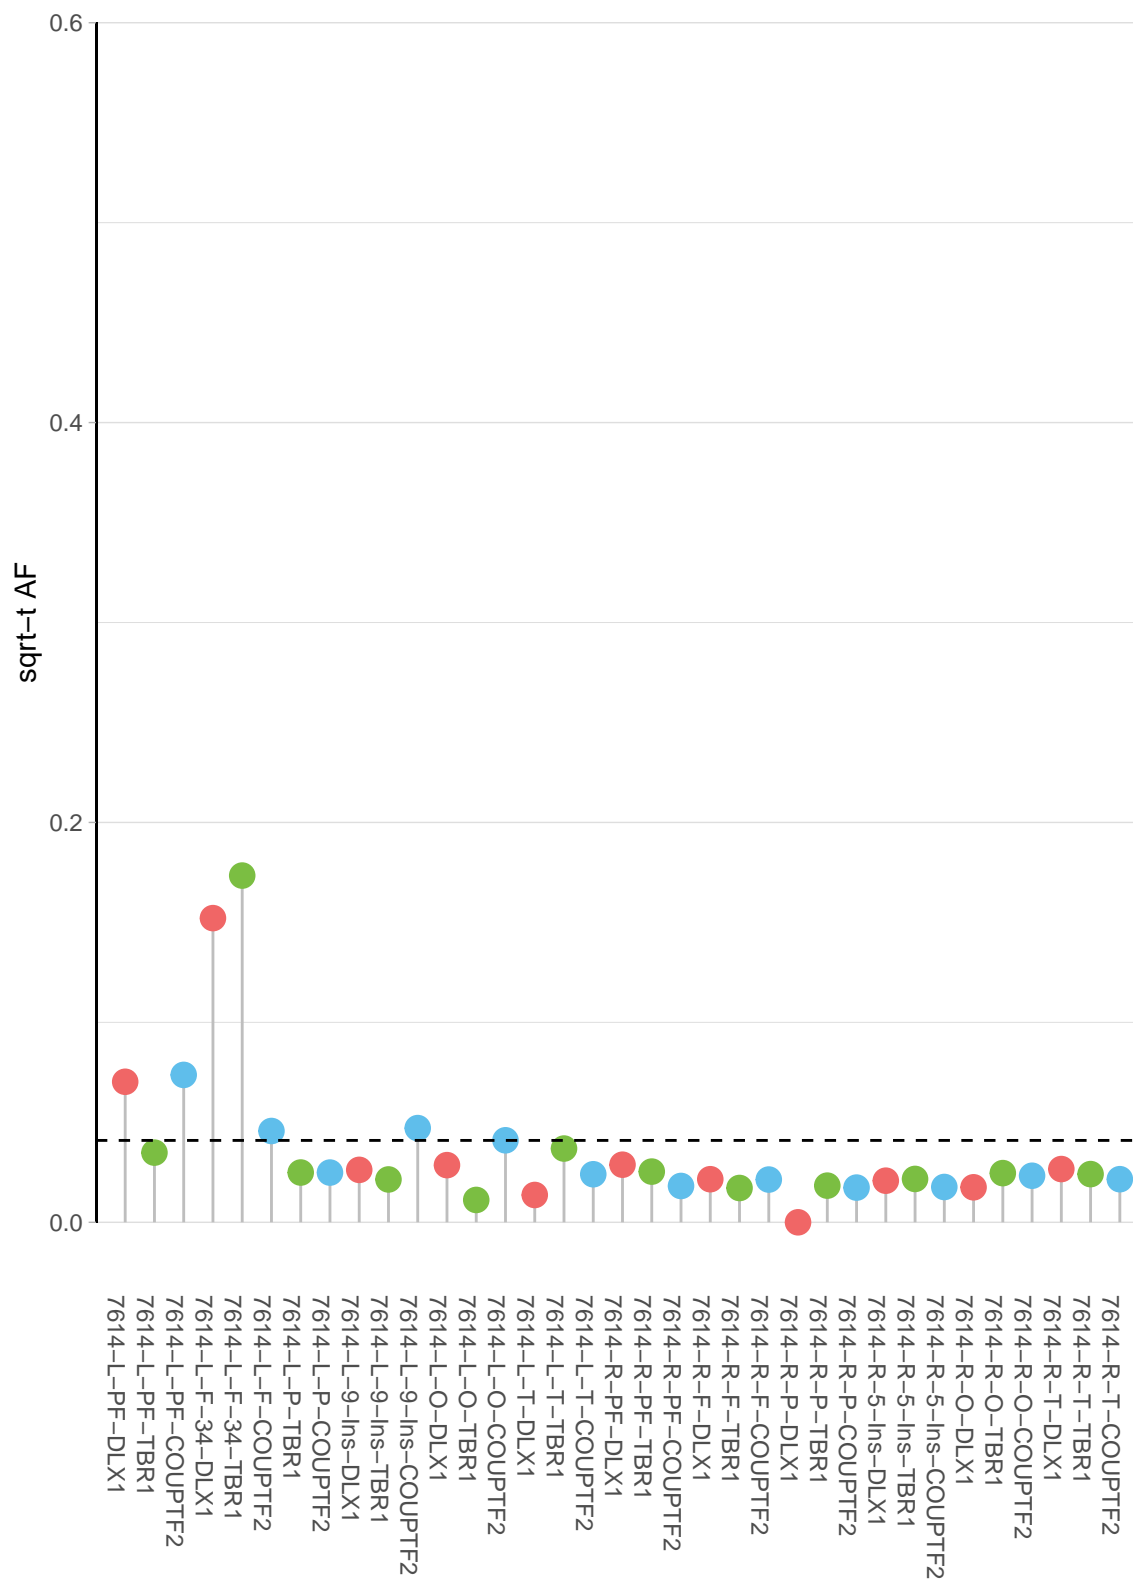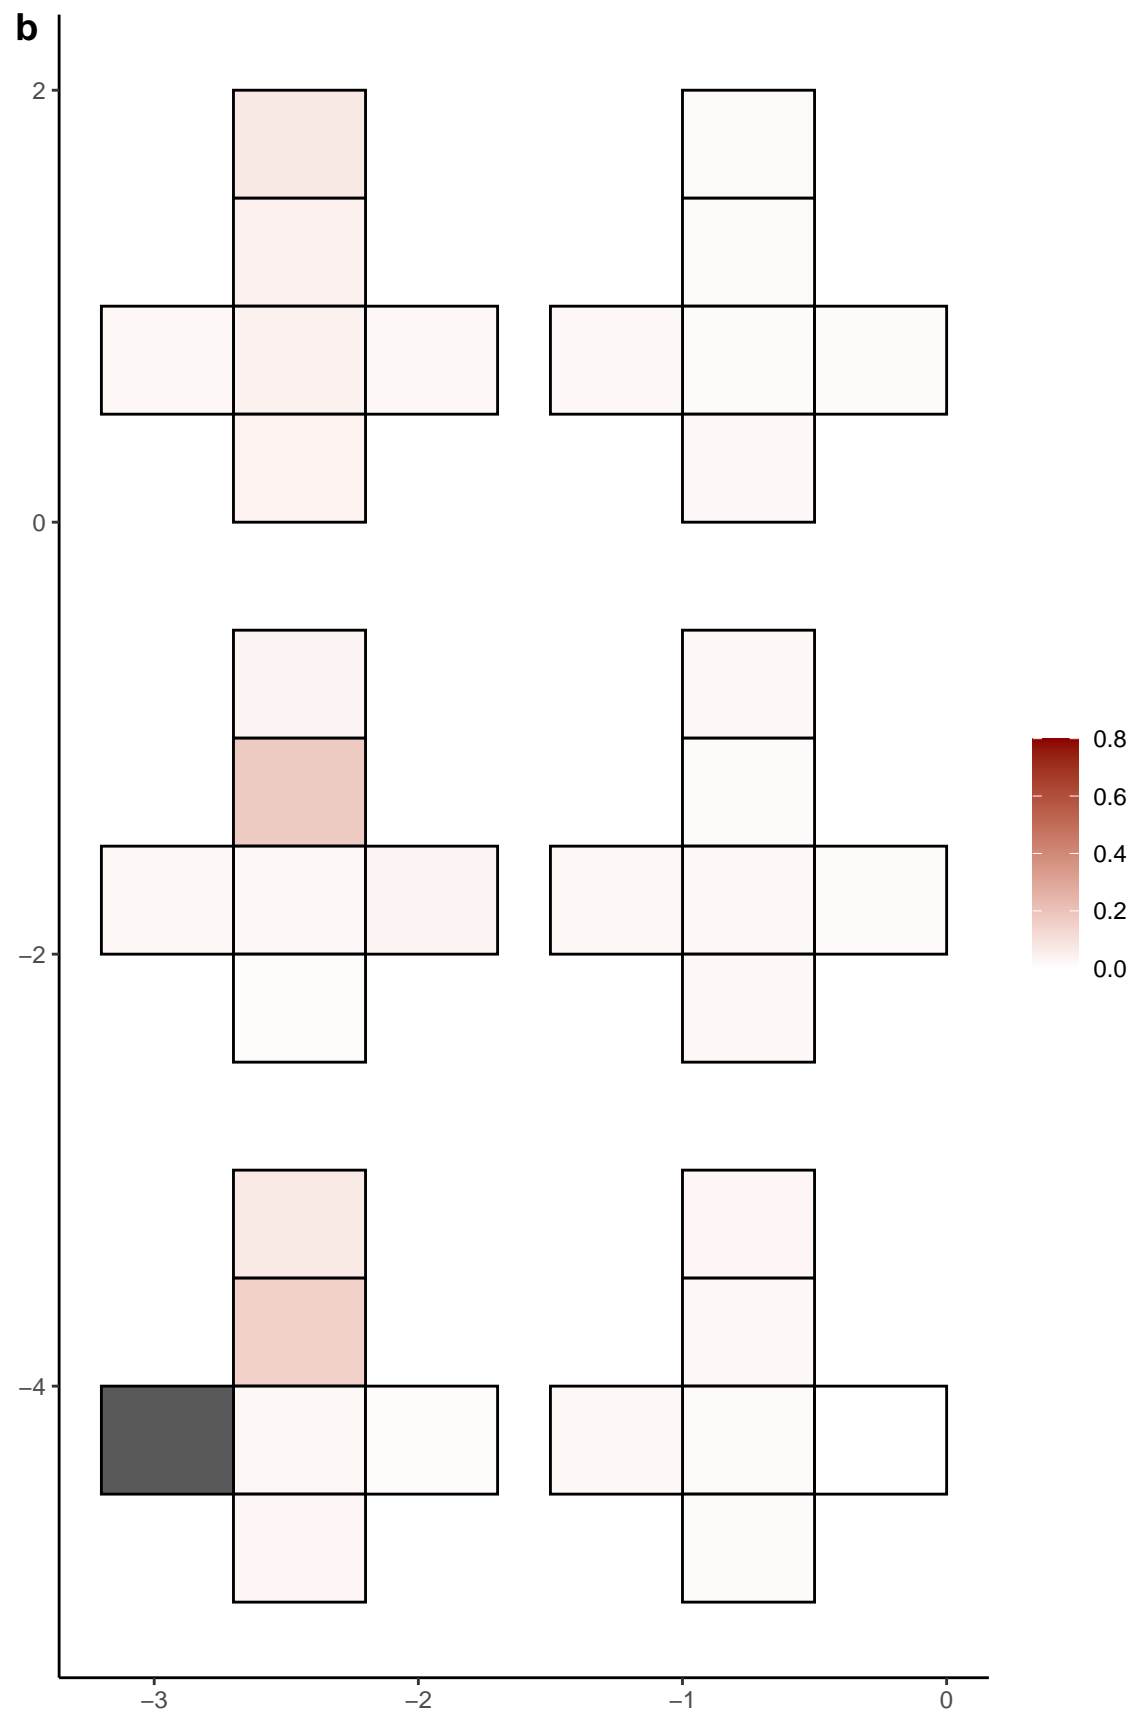

**a** ID01 8-2199684-G-A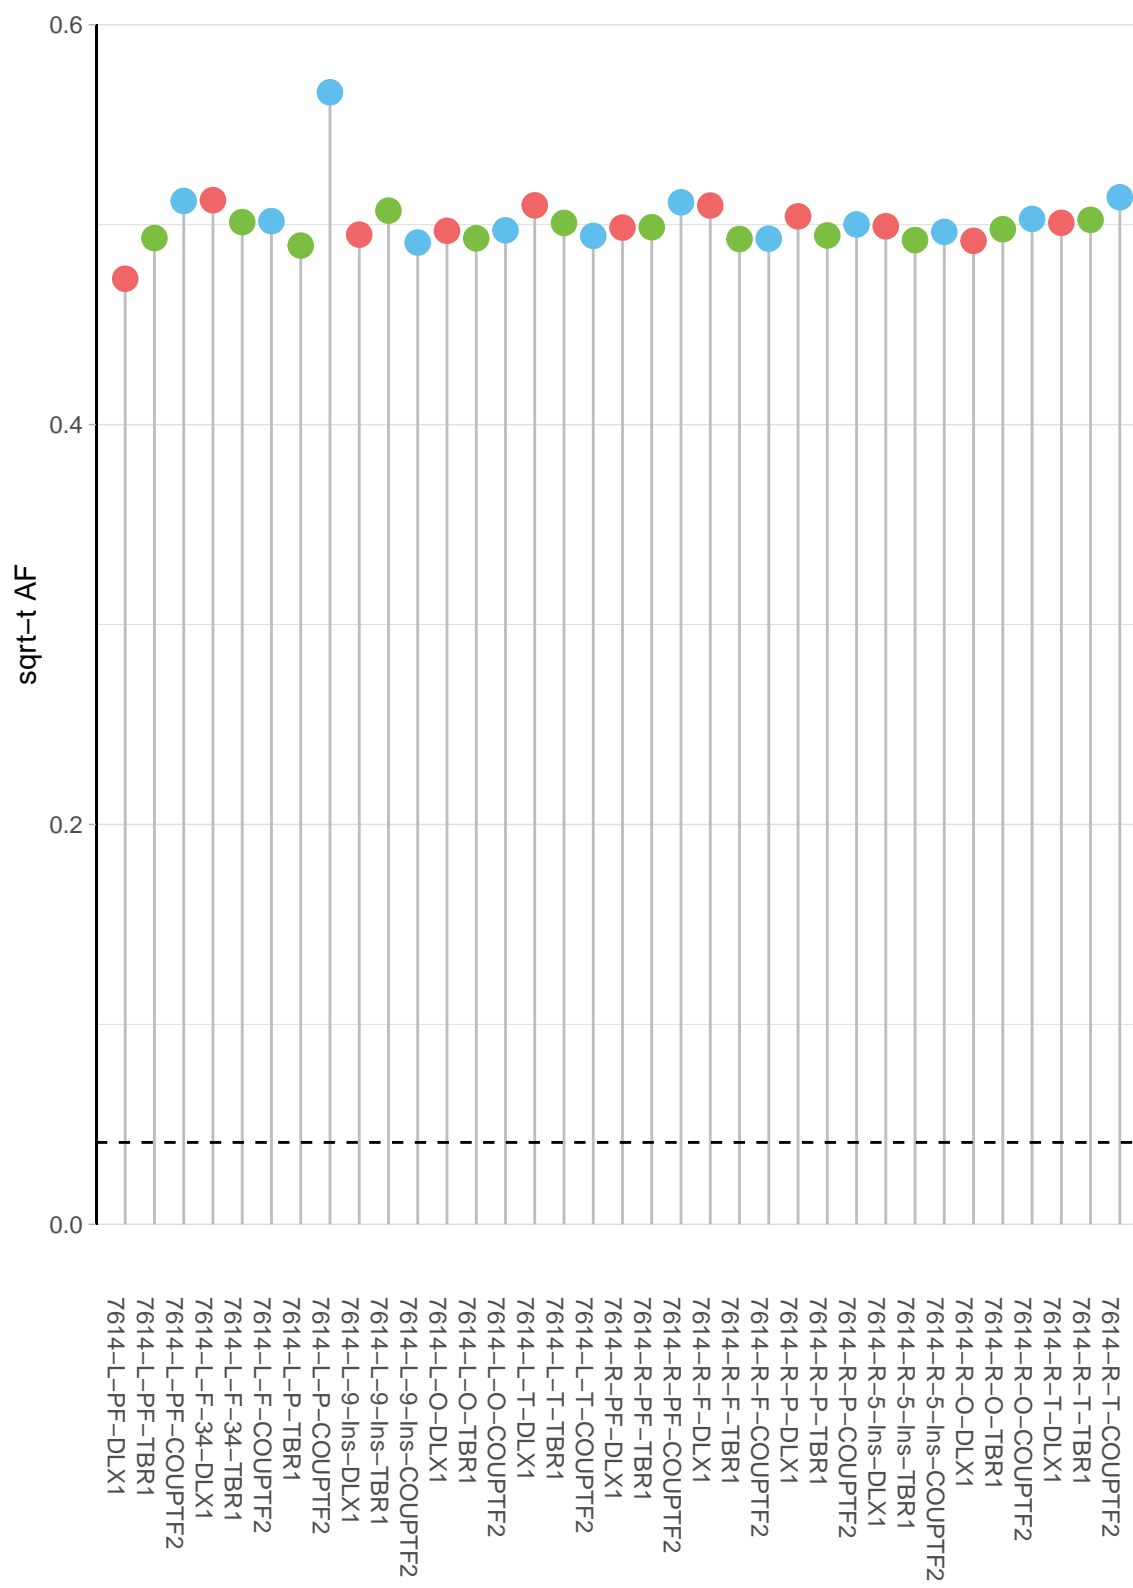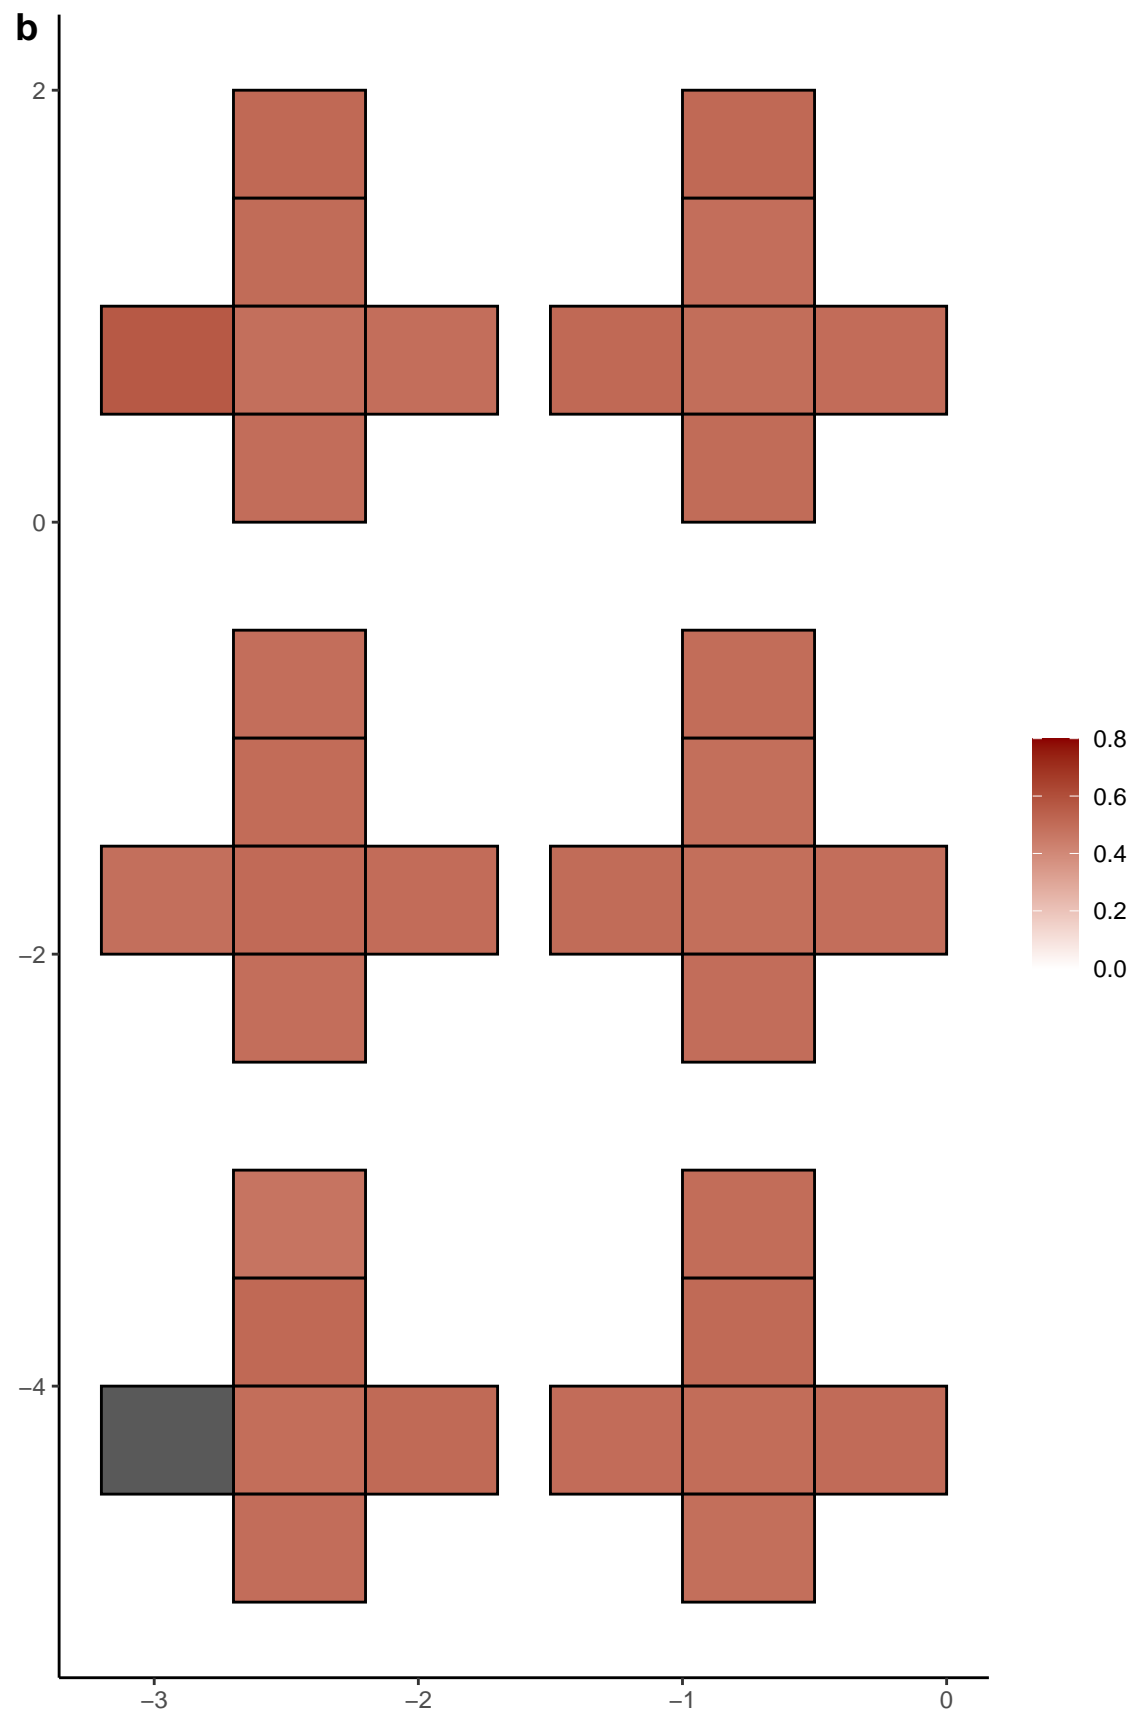

**a** ID01 8-2211118-T-C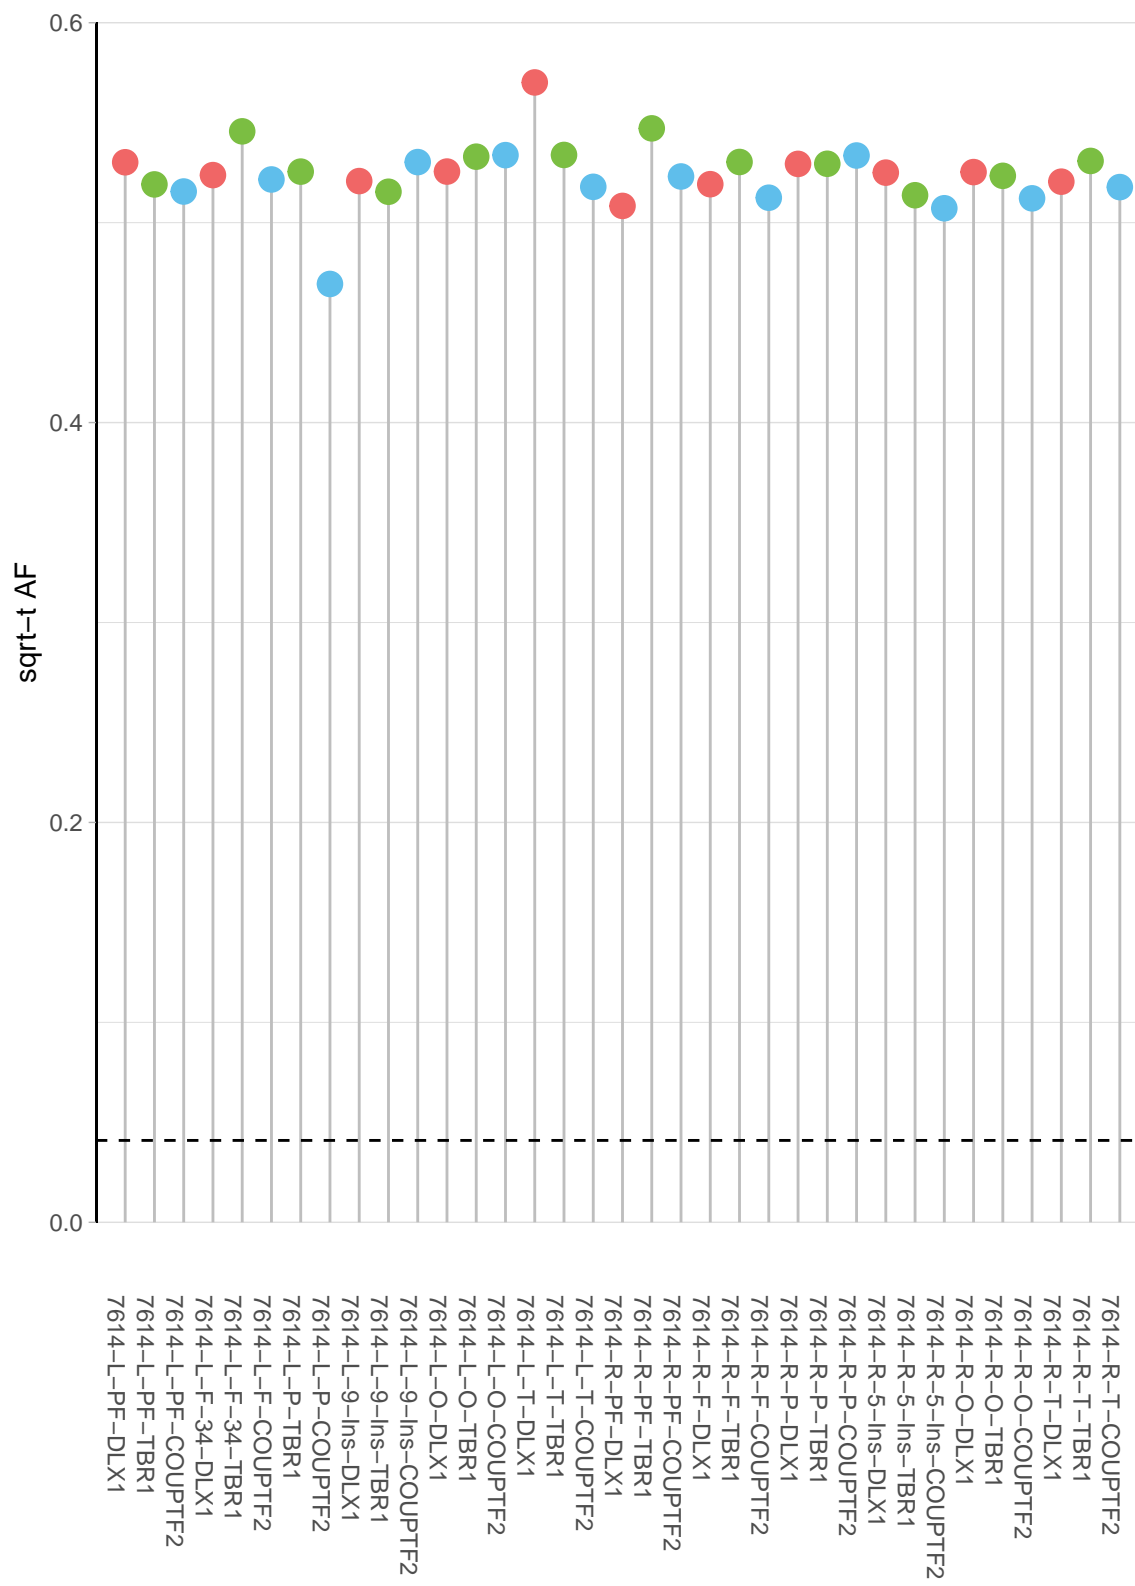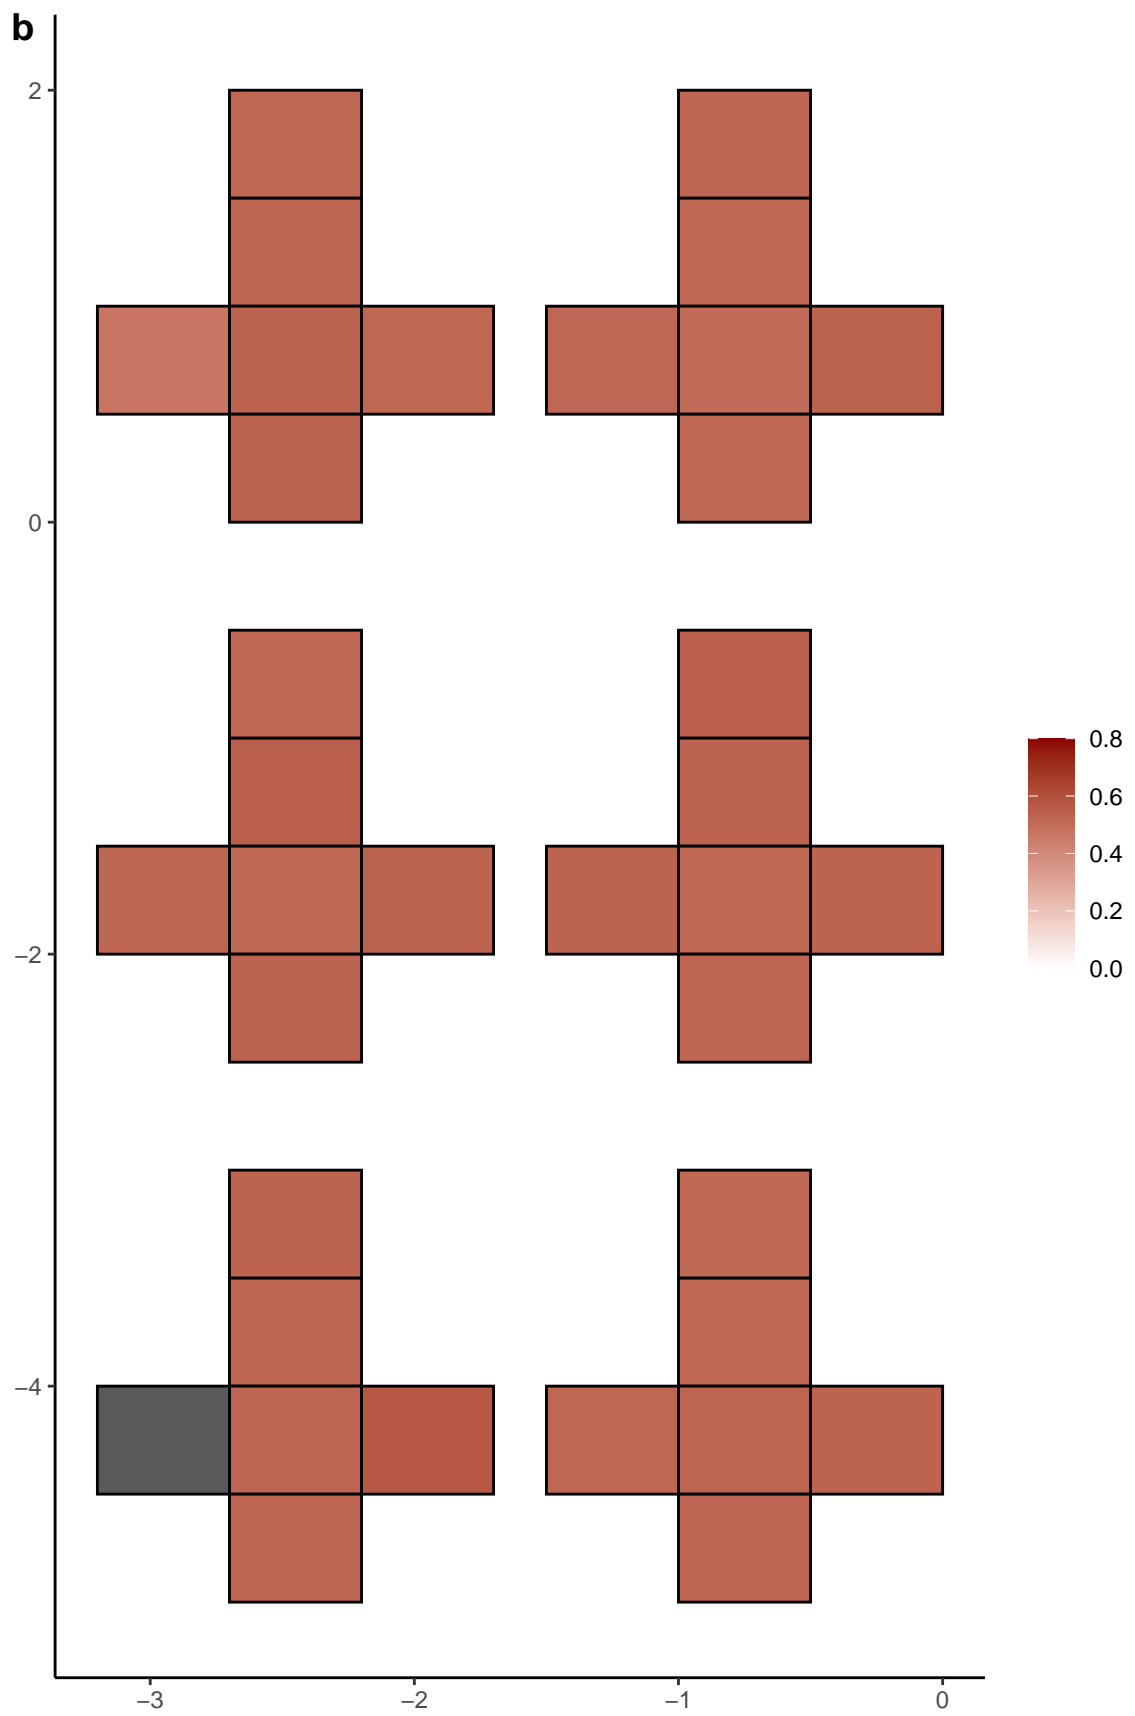

**a** ID01 8-2270450-T-C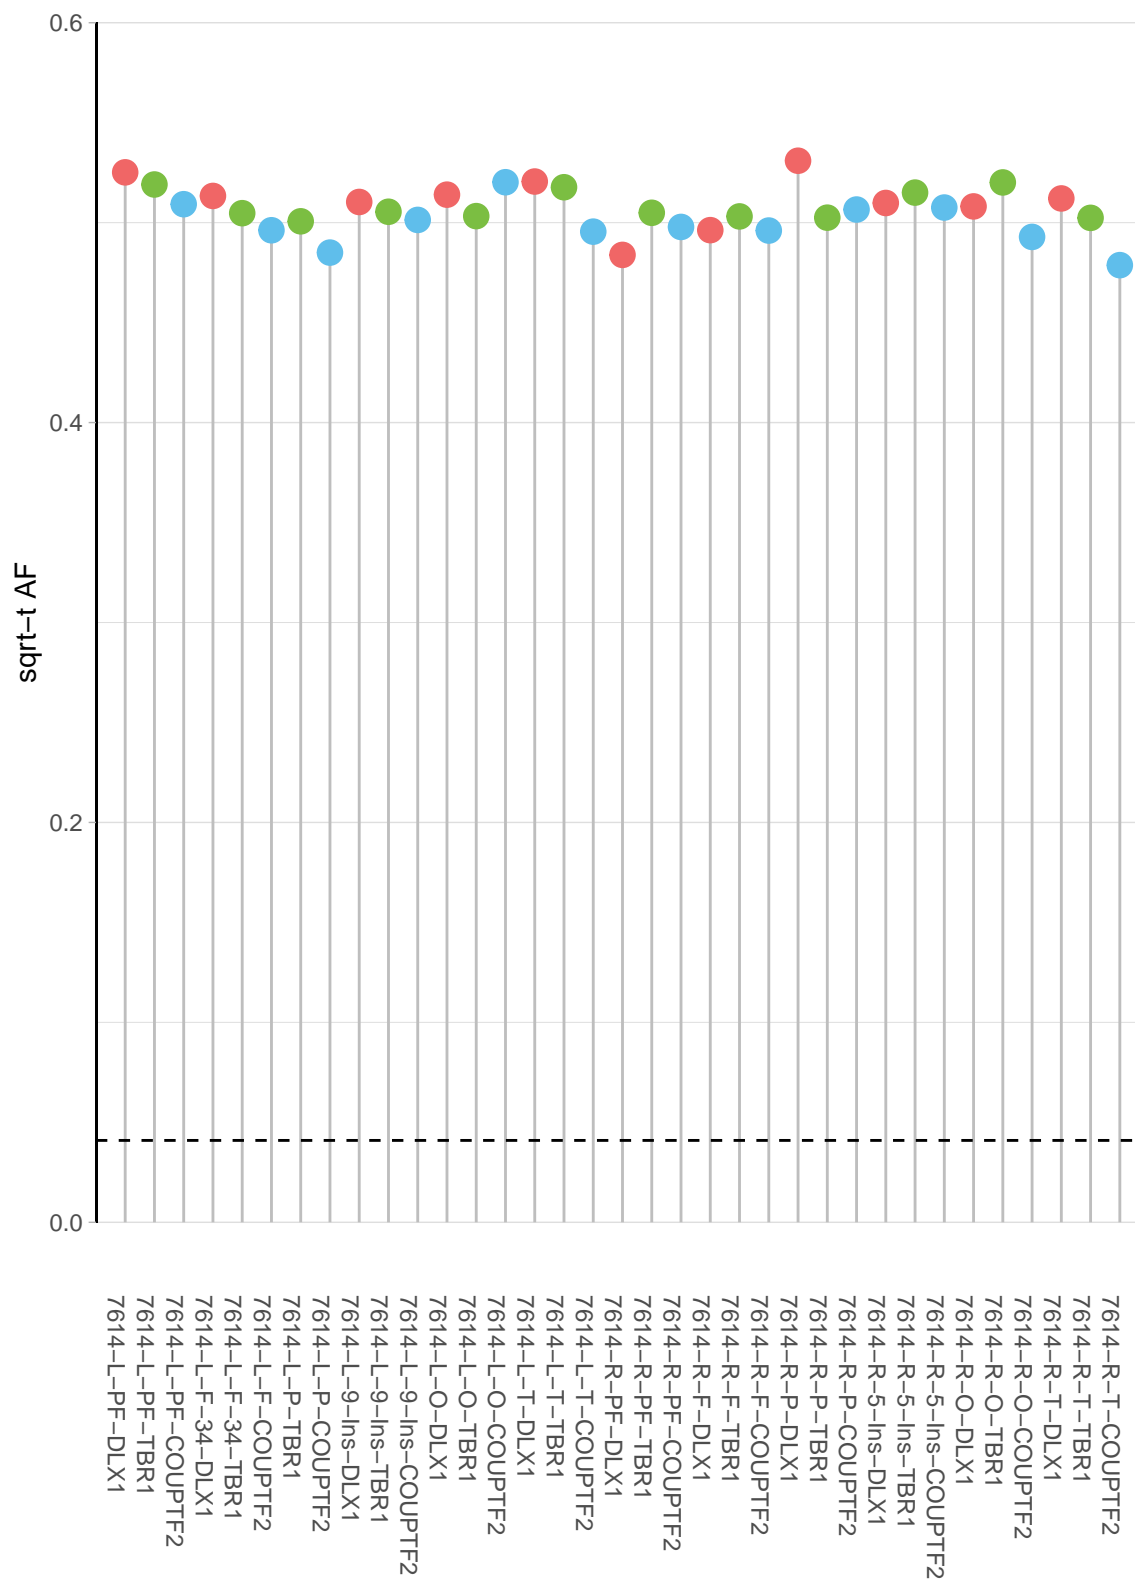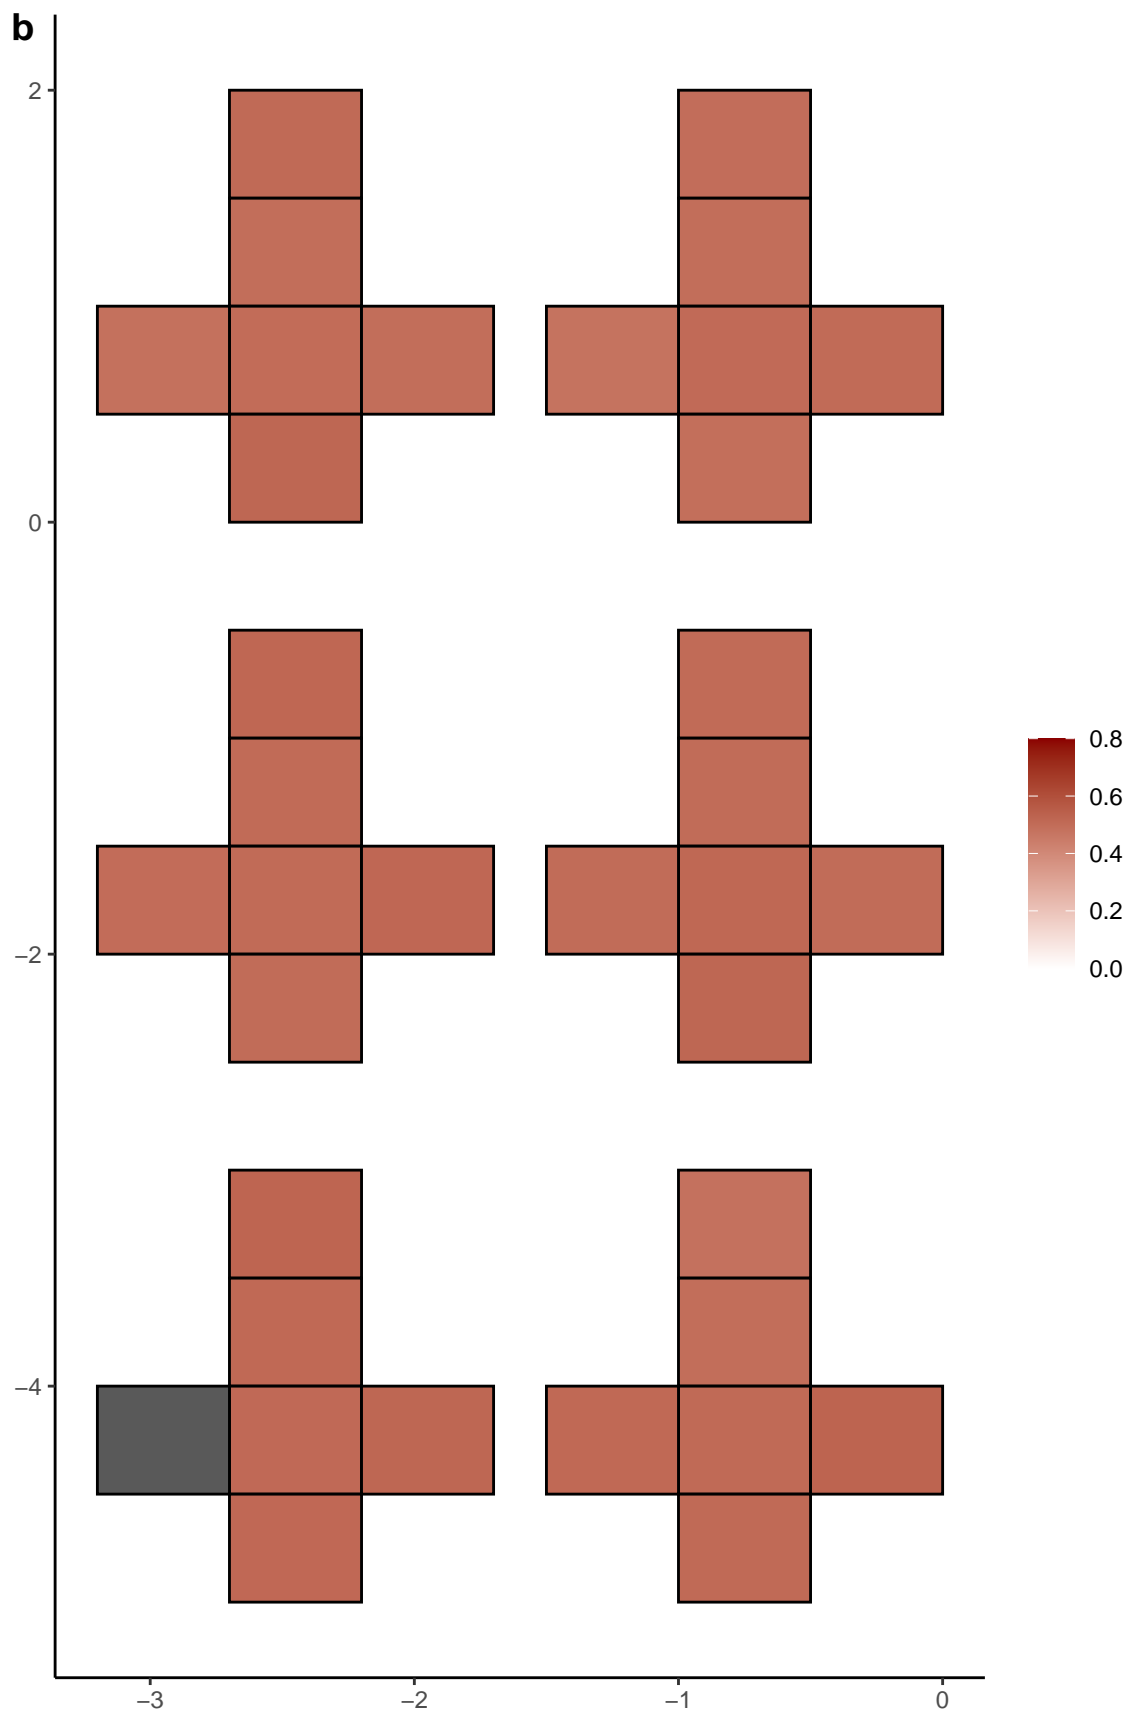



**a** ID01 8-25735478-CATA-C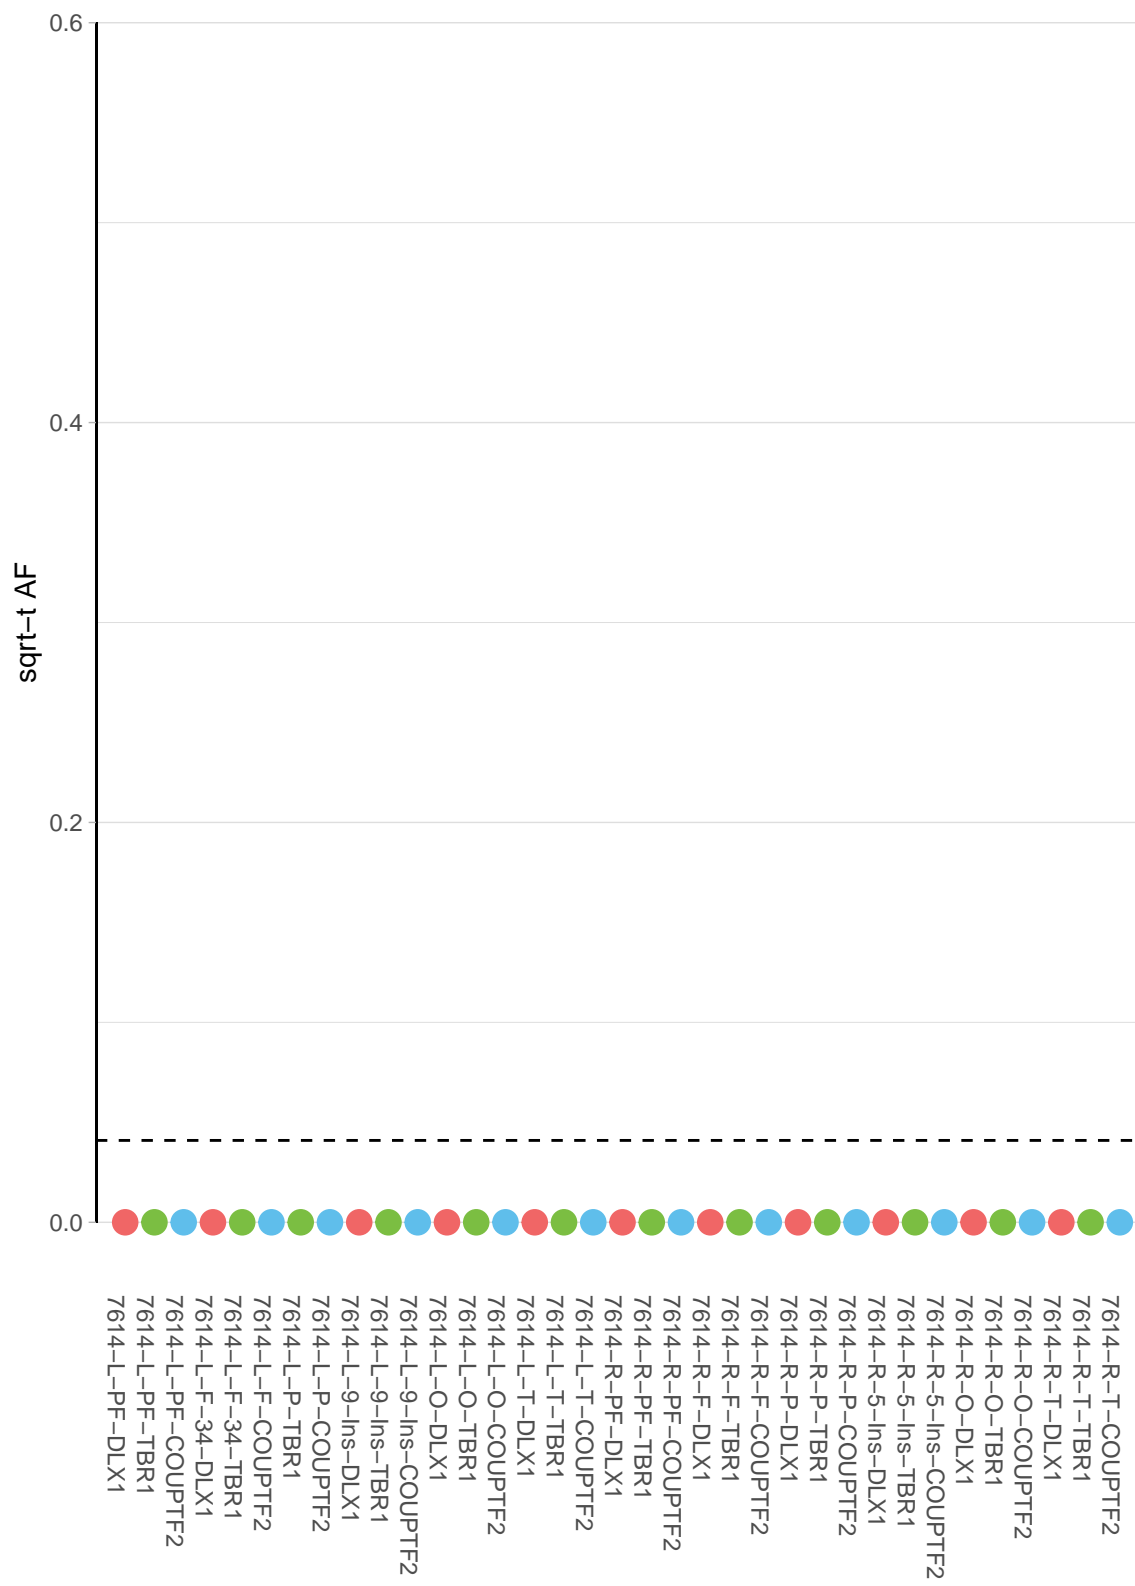

**a** ID01 8-27531157-G-A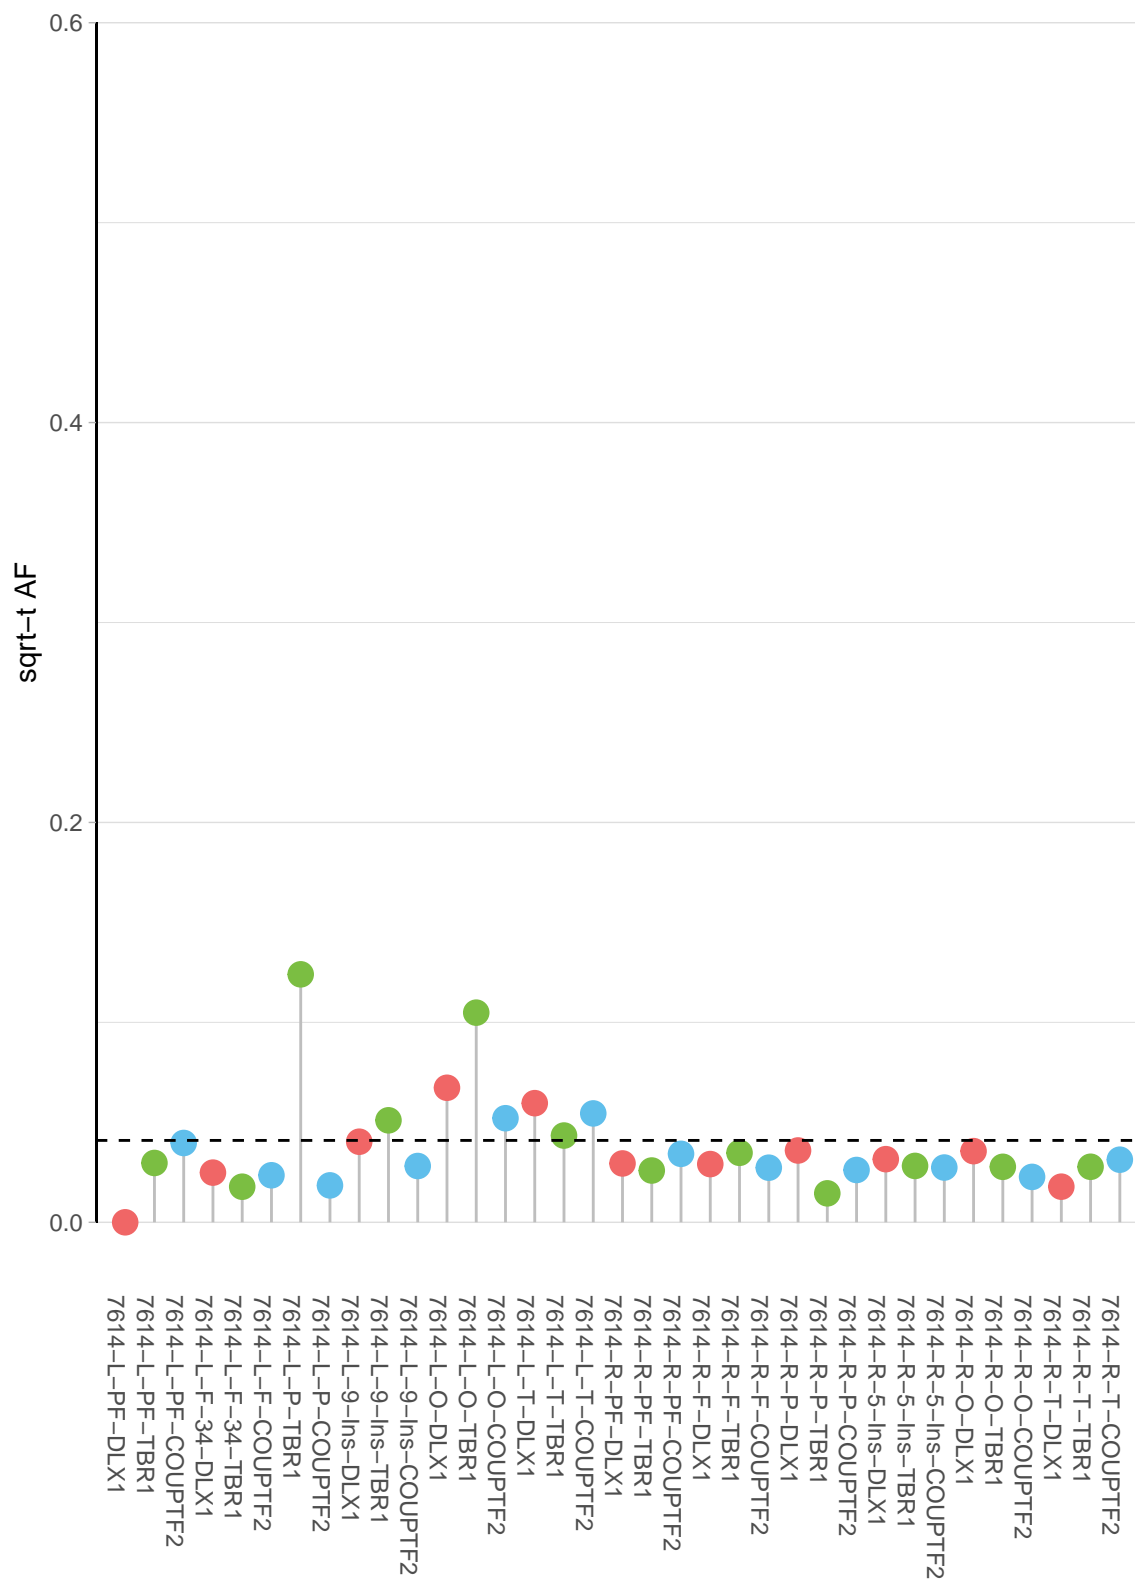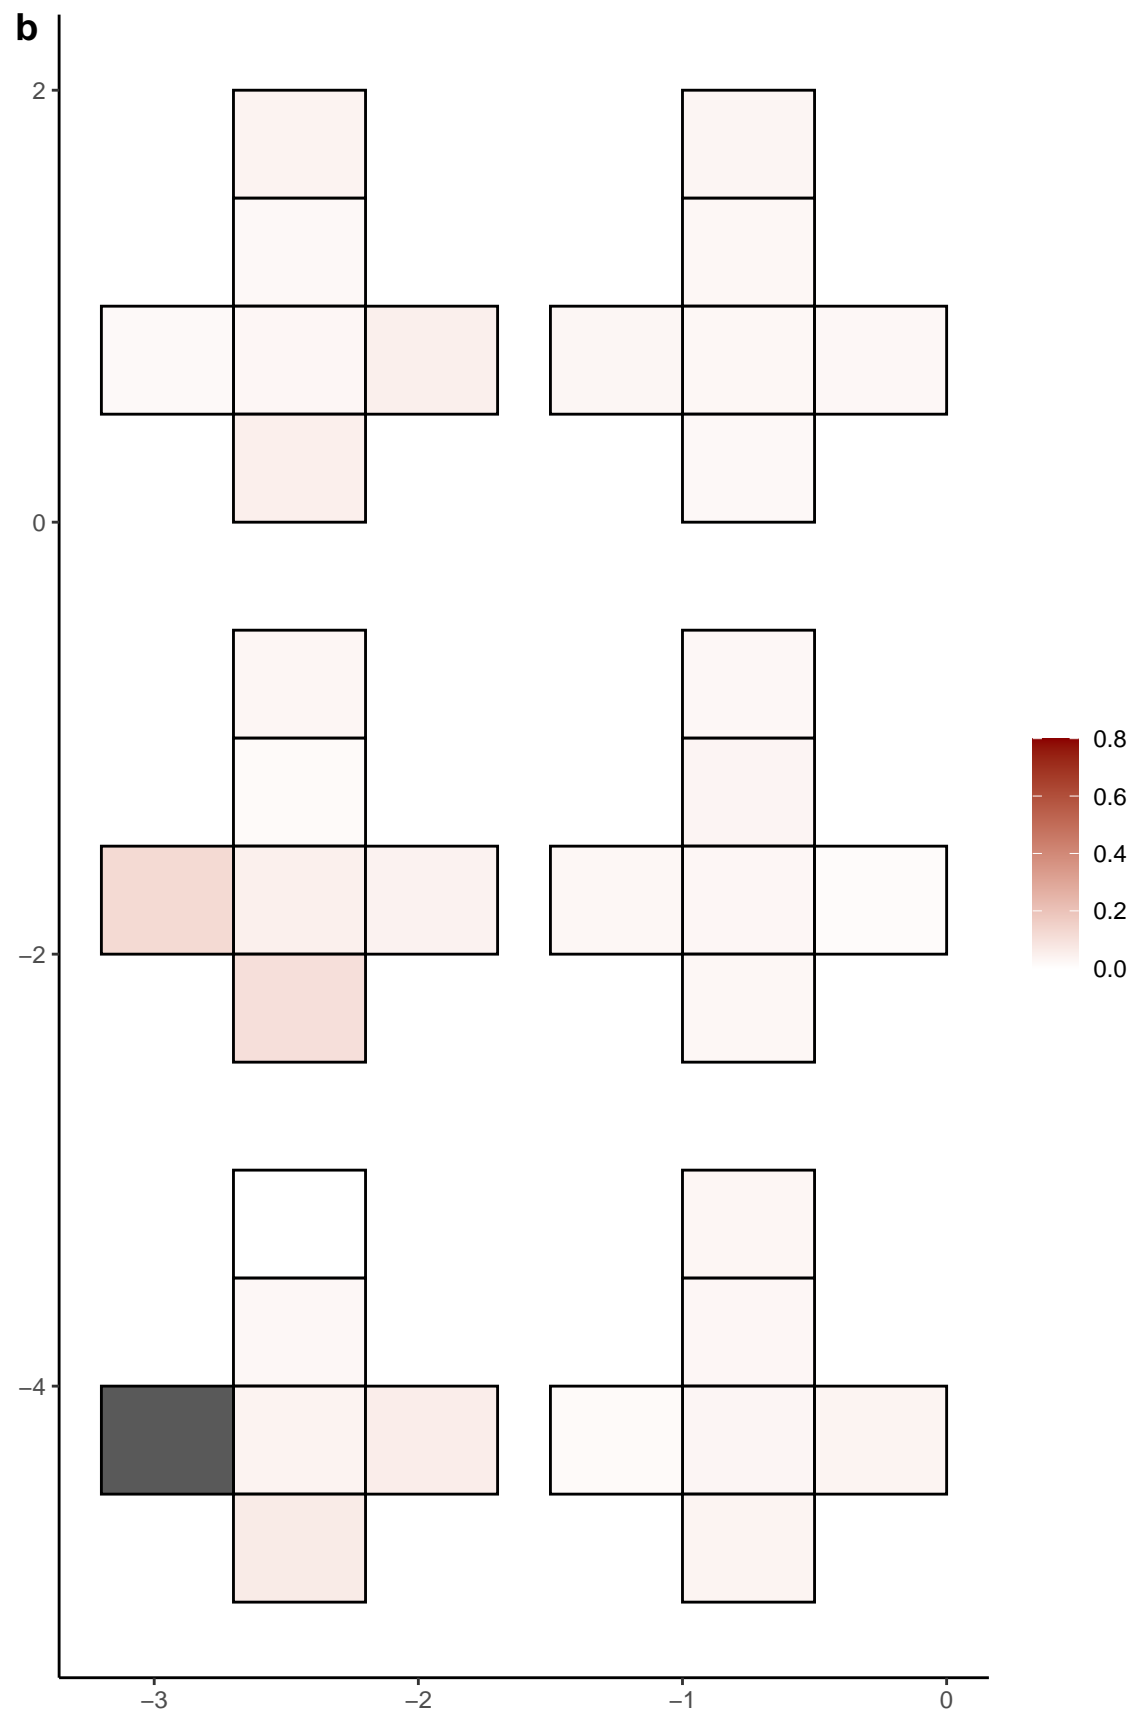

**a** ID01 8-28894088-T-G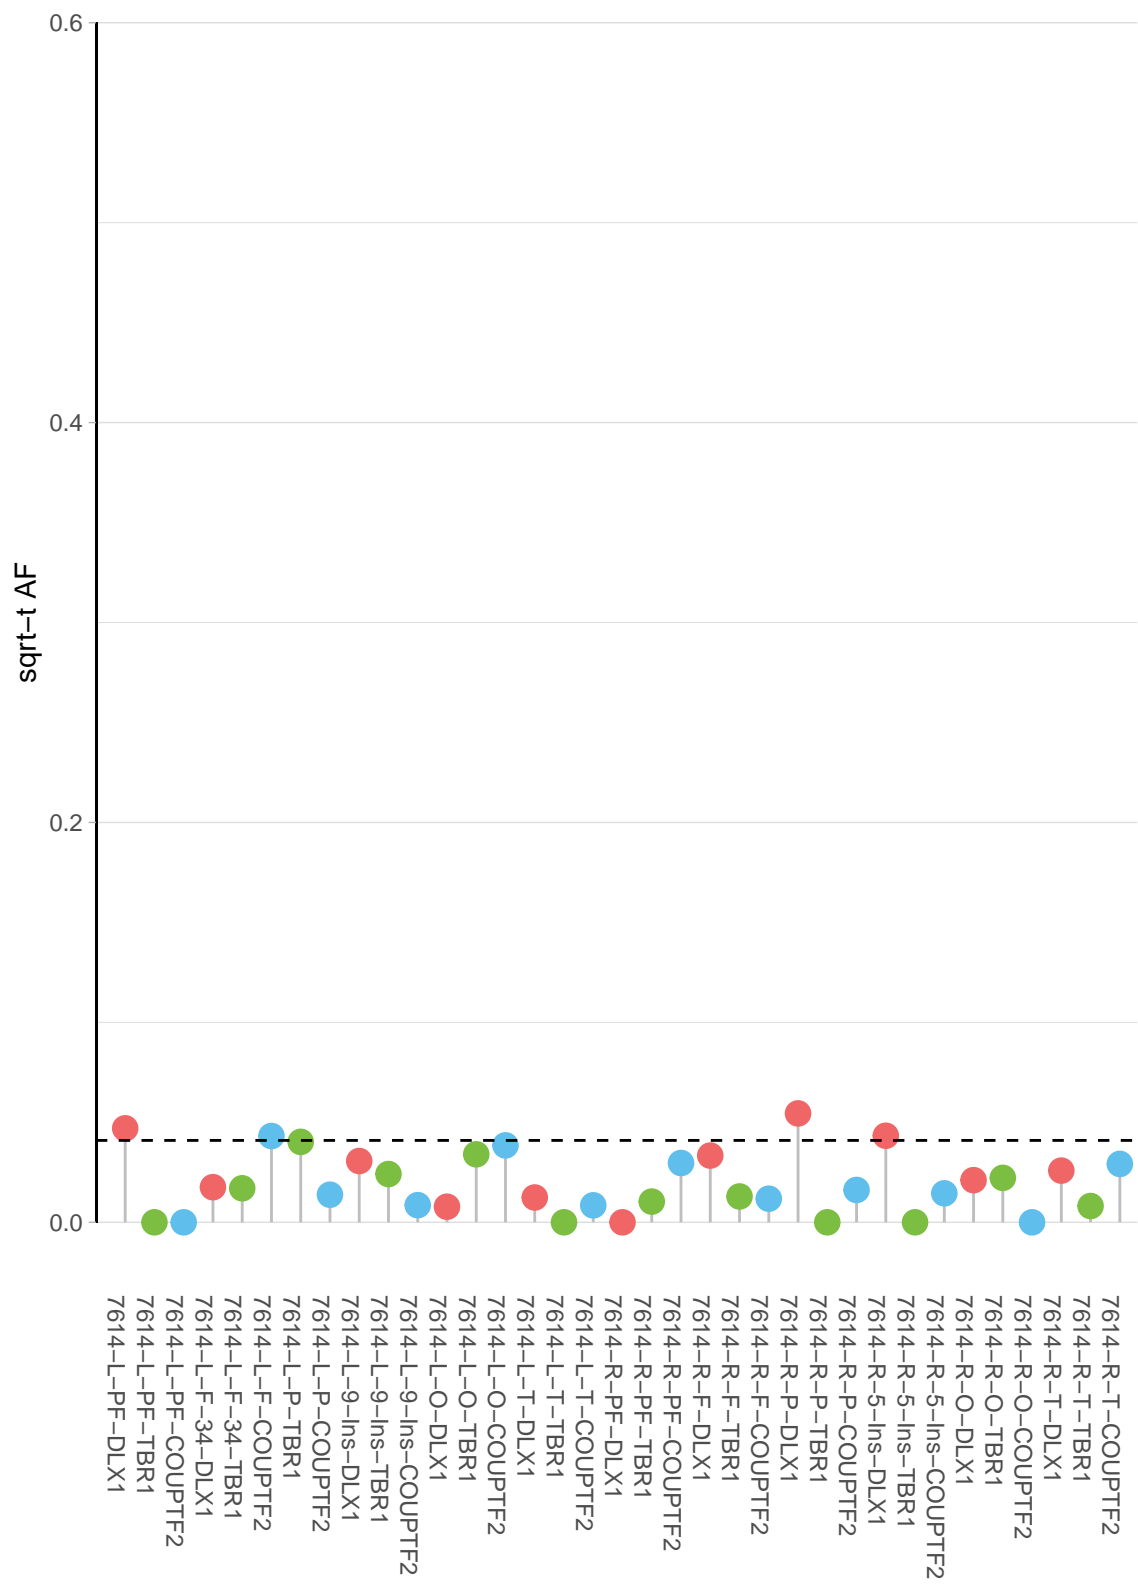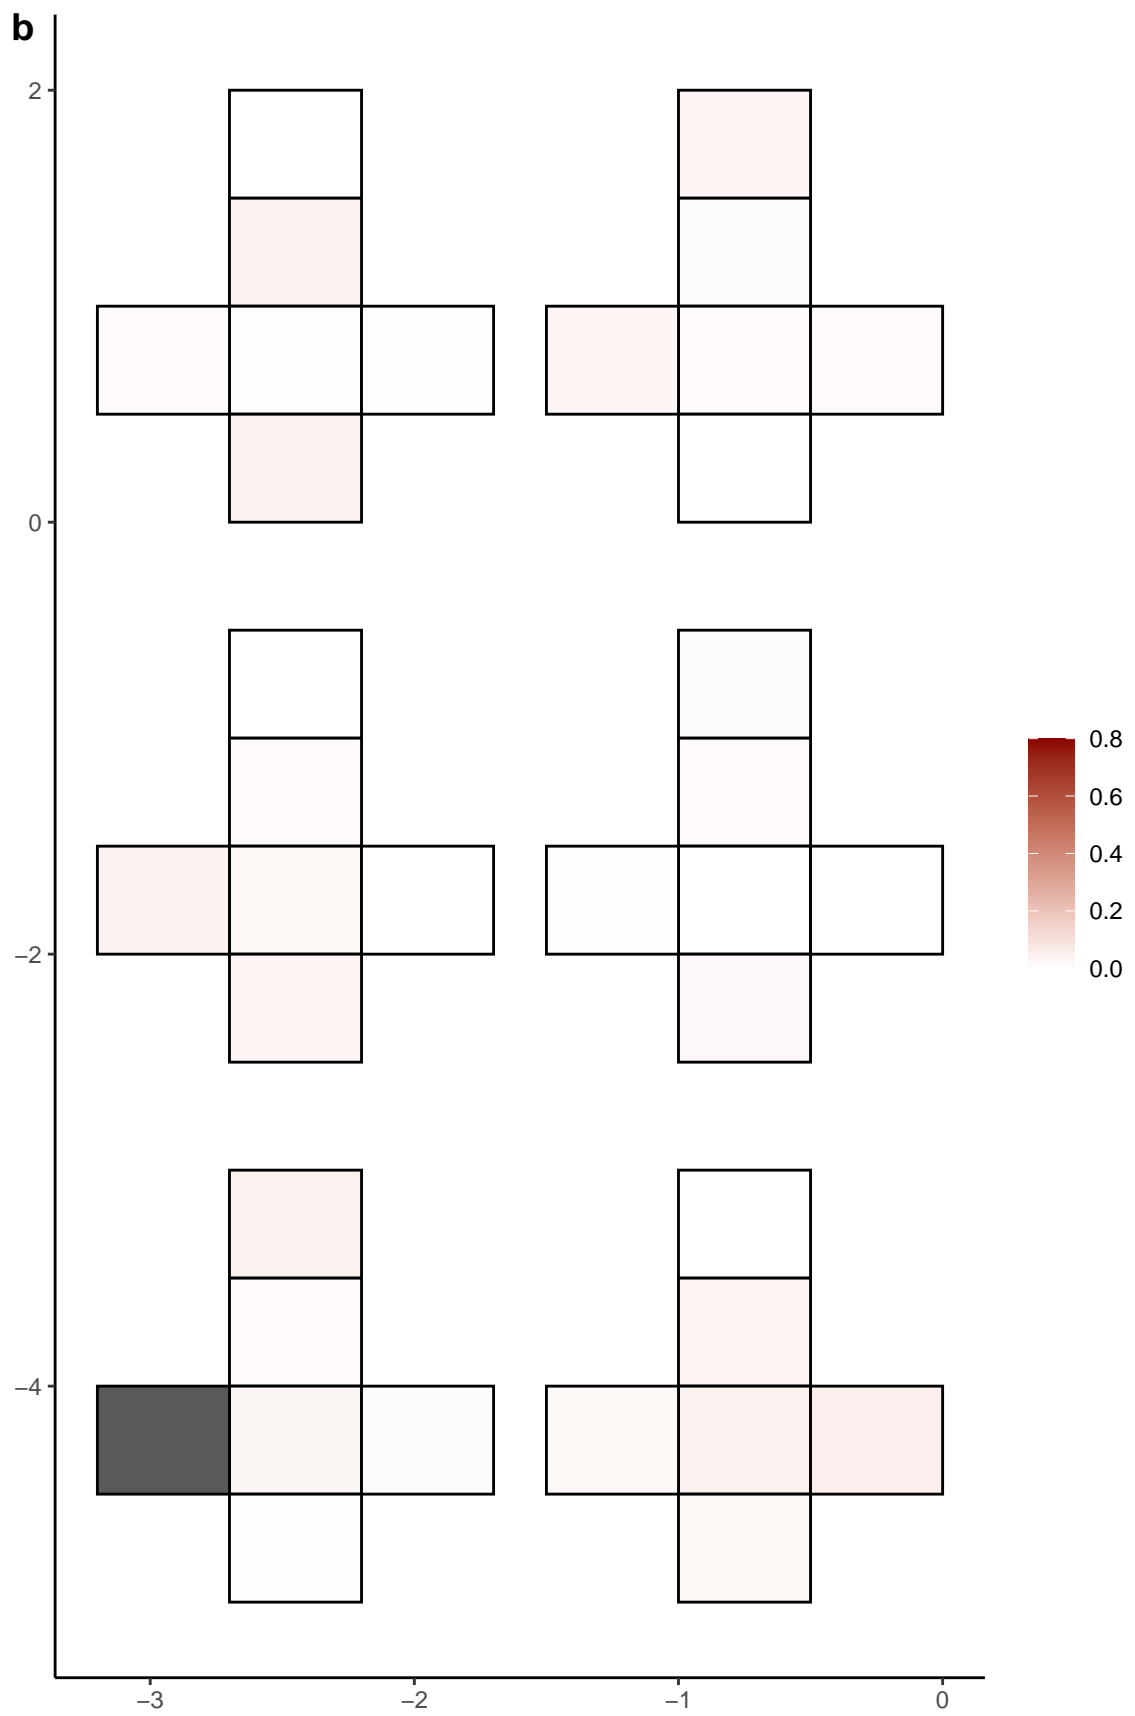

**a** ID01 8-63618020-A-C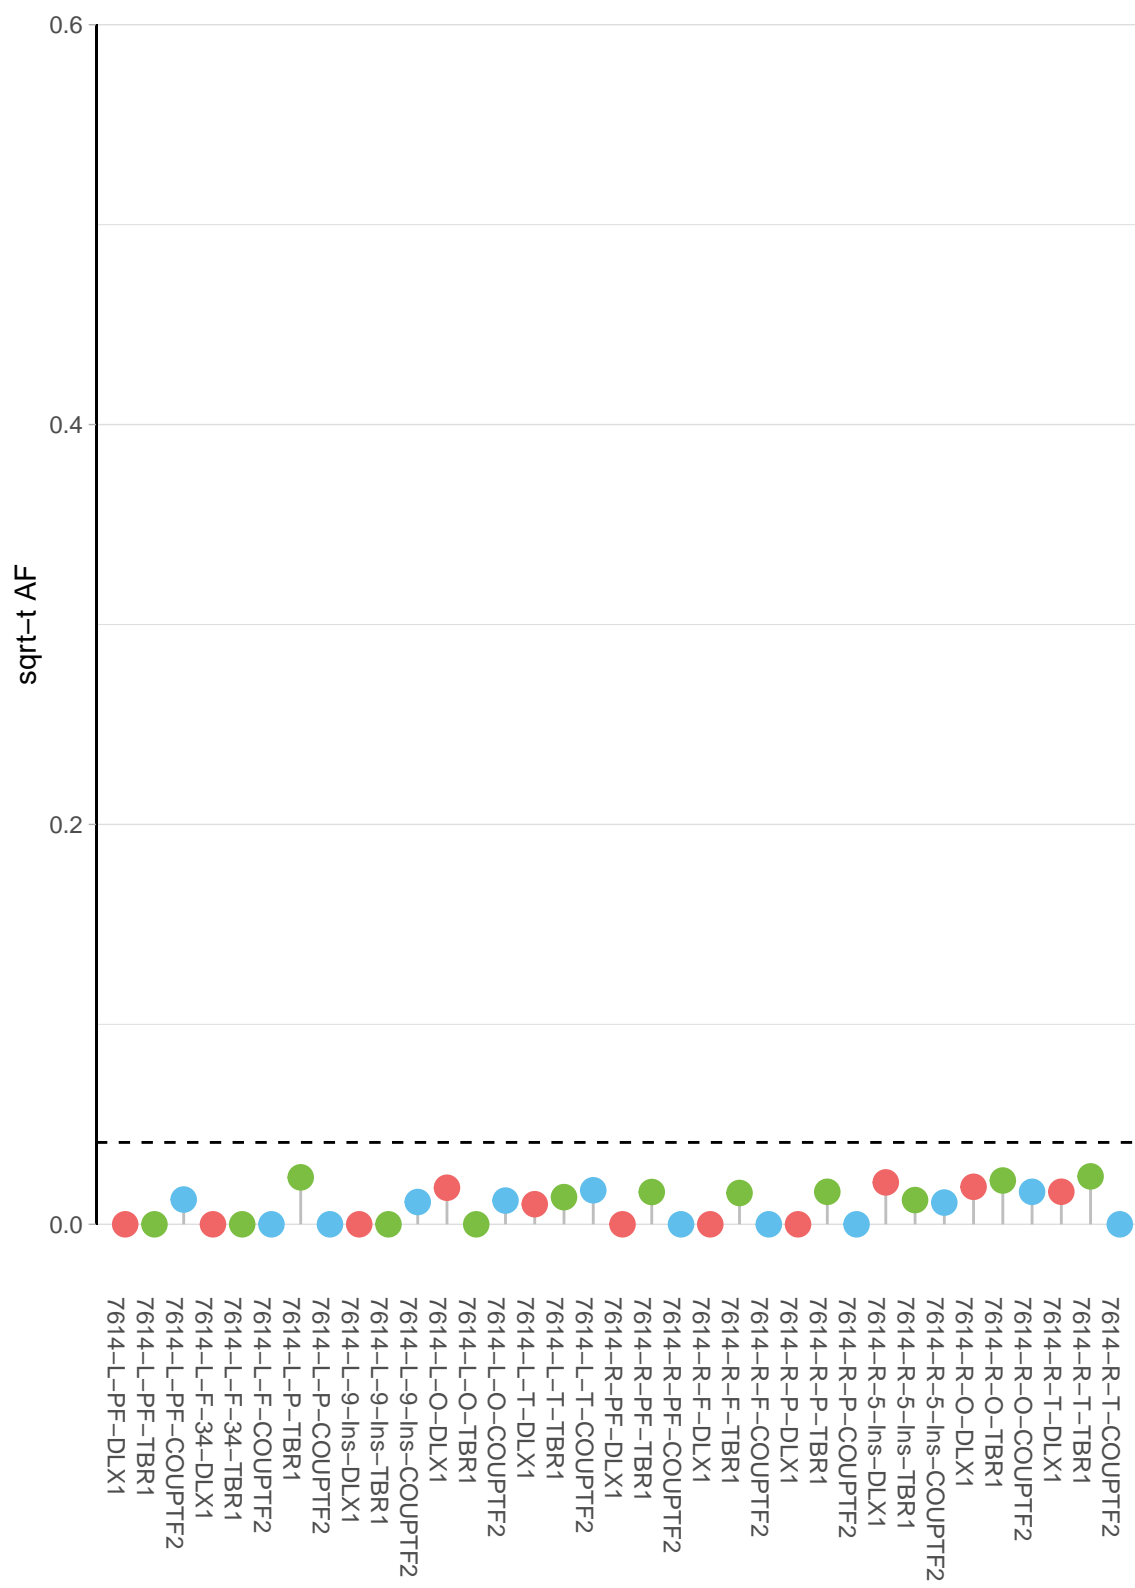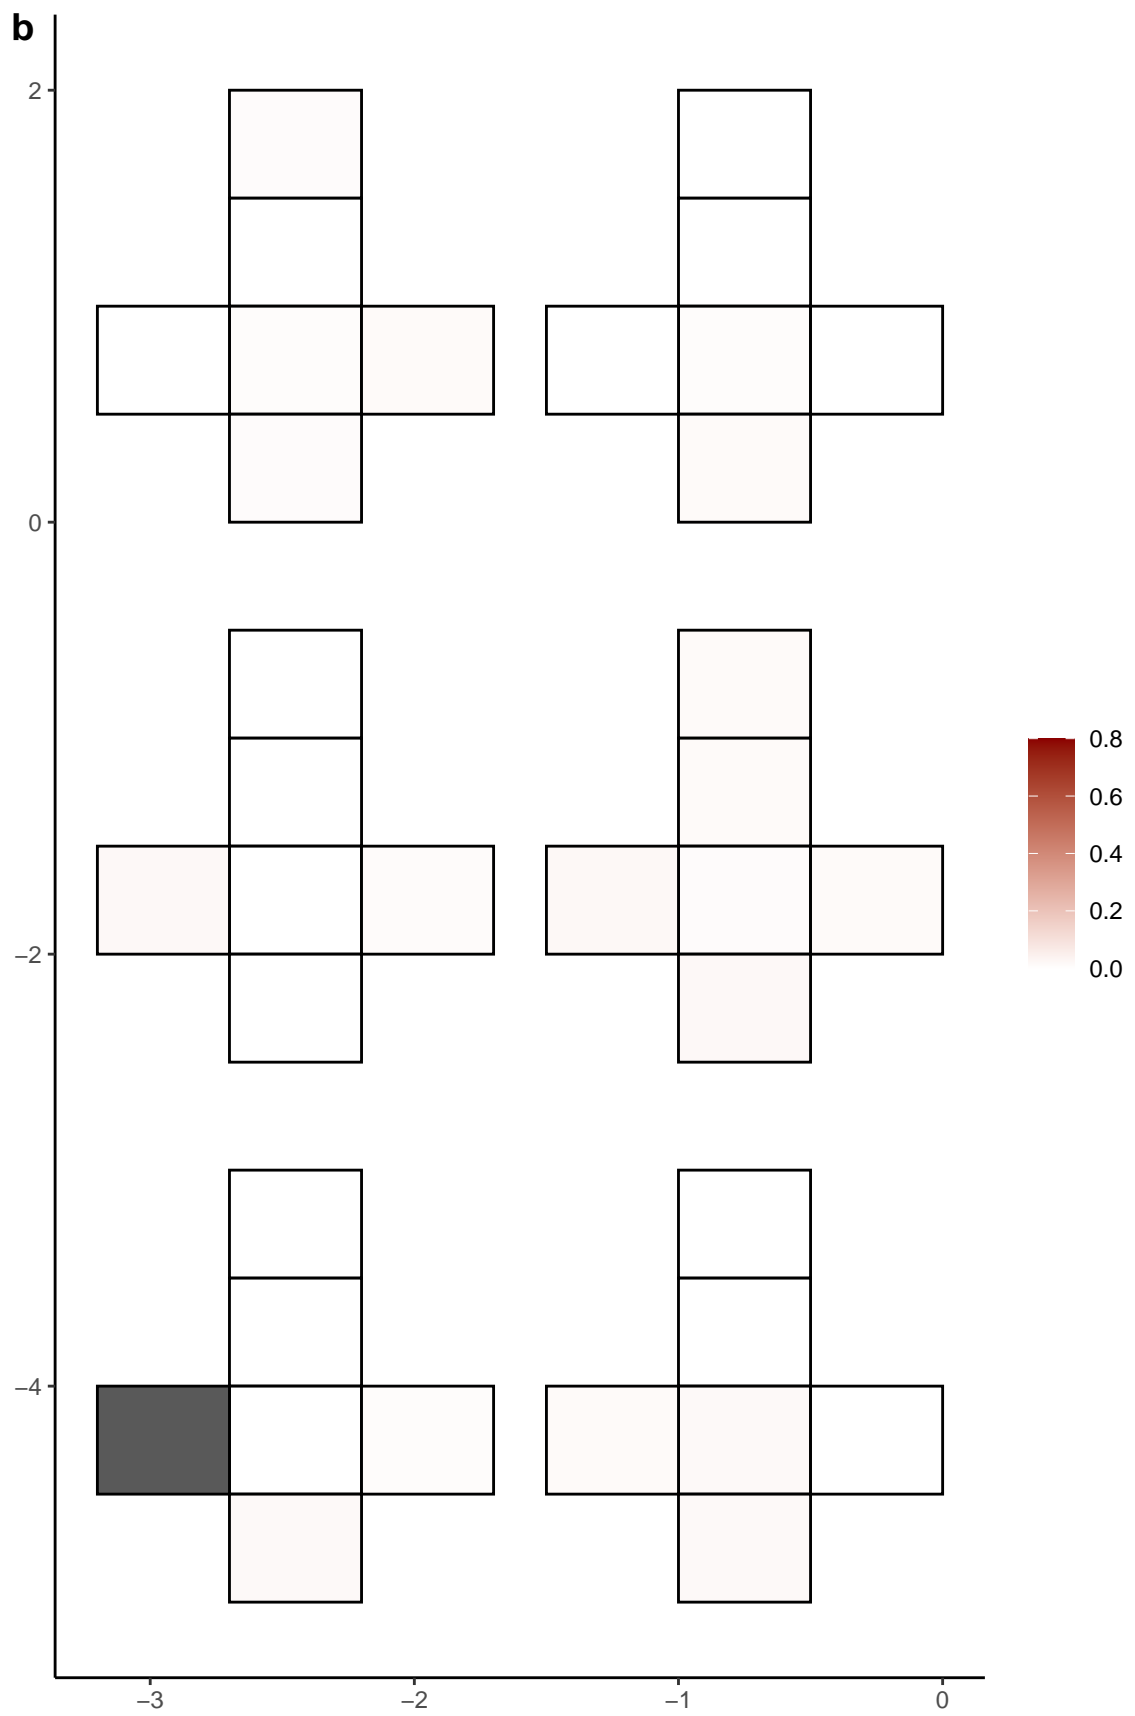

**a** ID01 8-72947366-G-A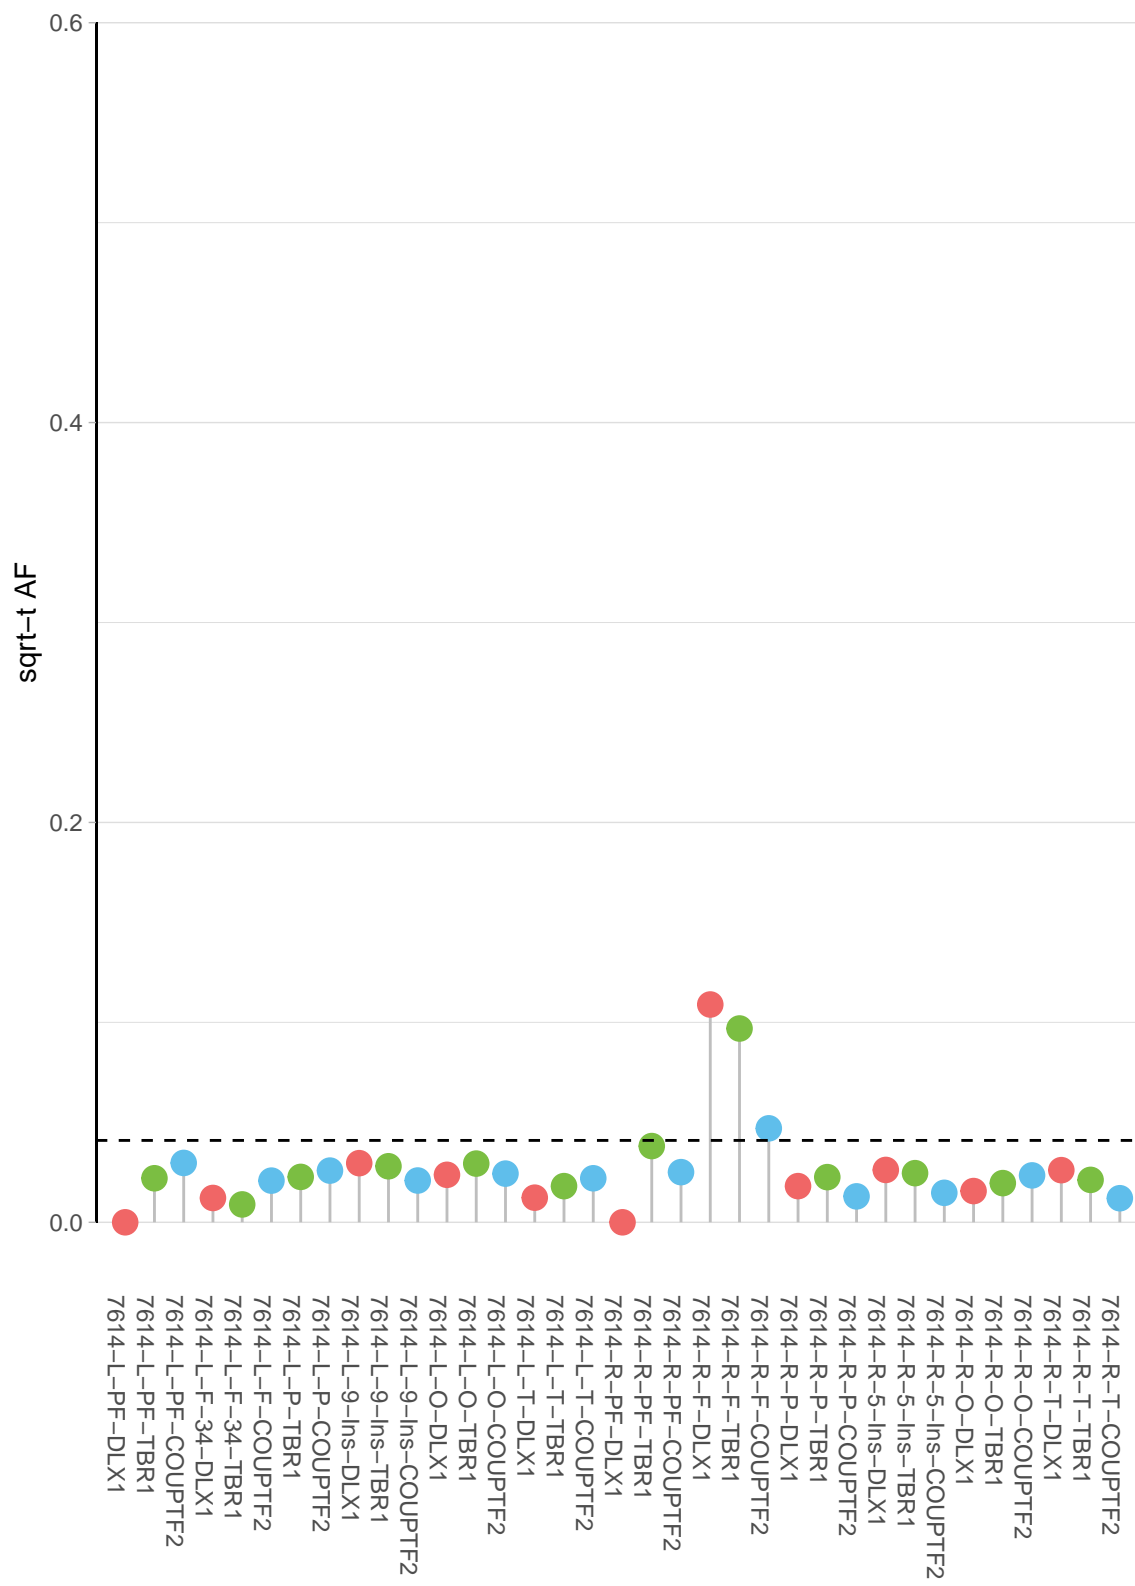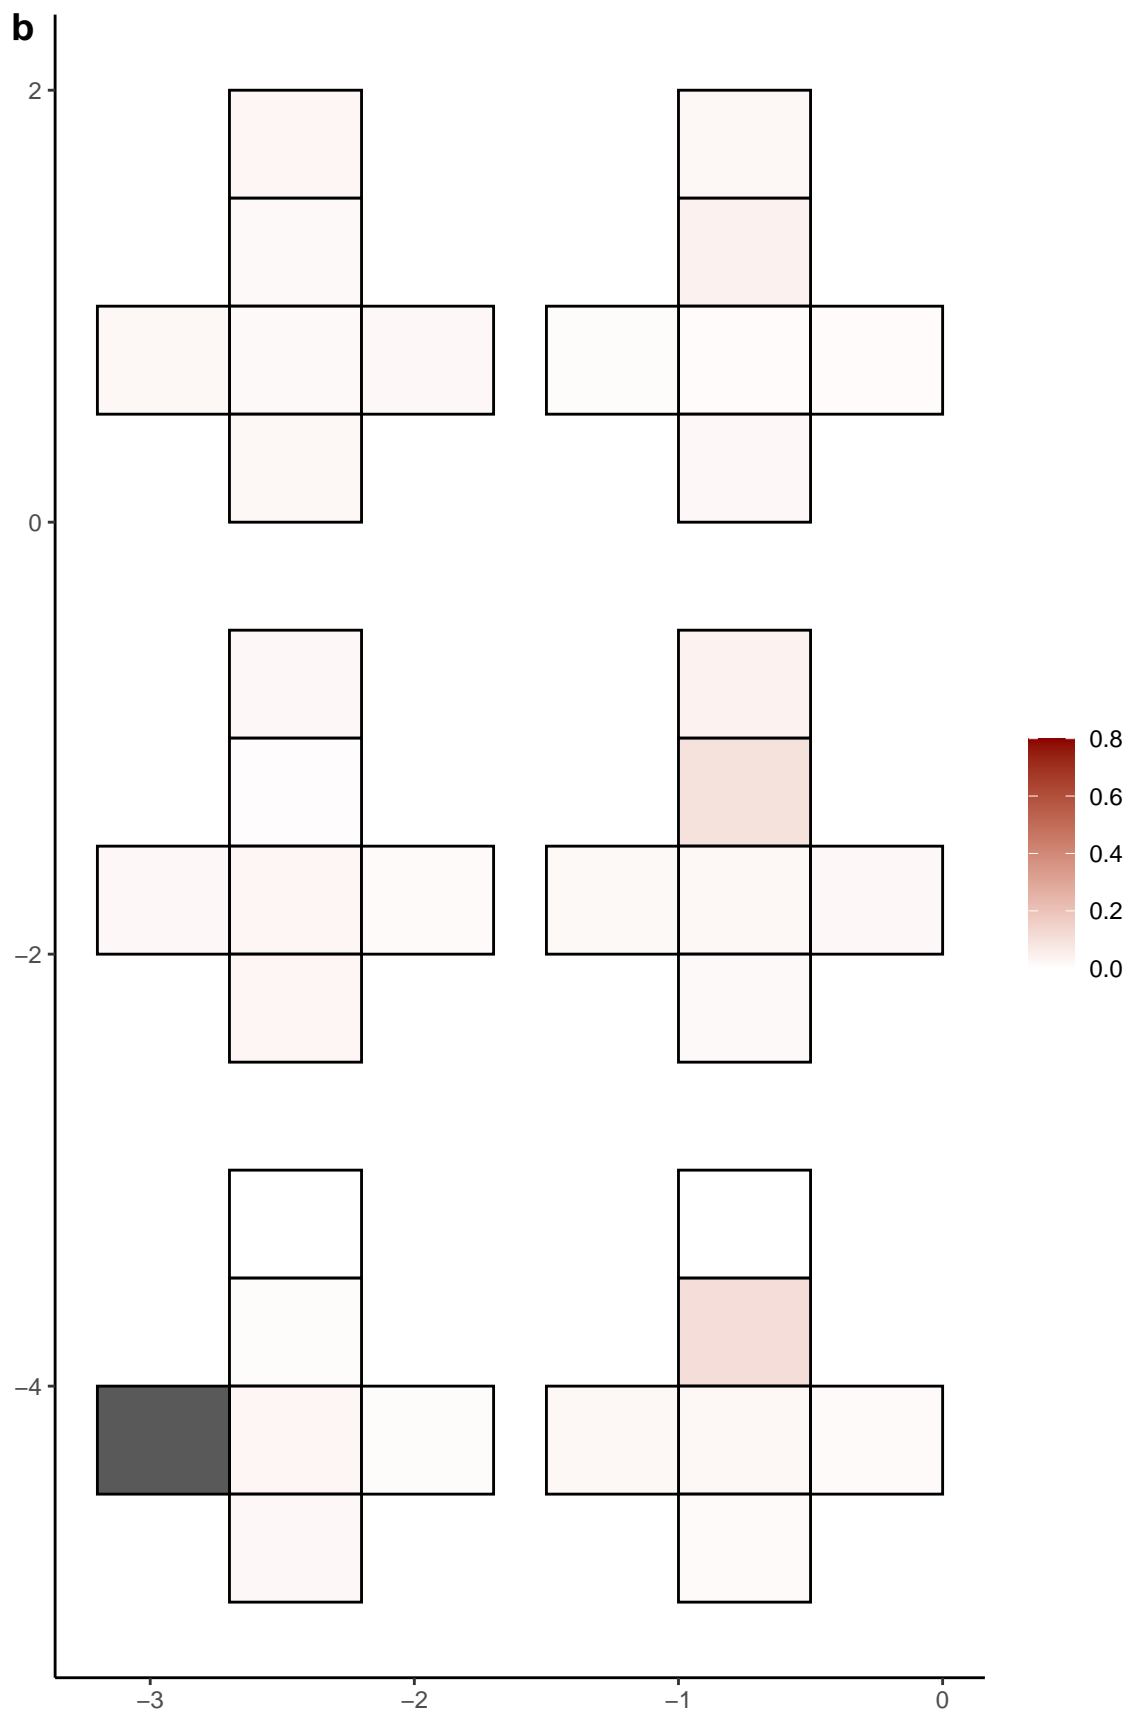

**a** ID01 8-73826564-G-A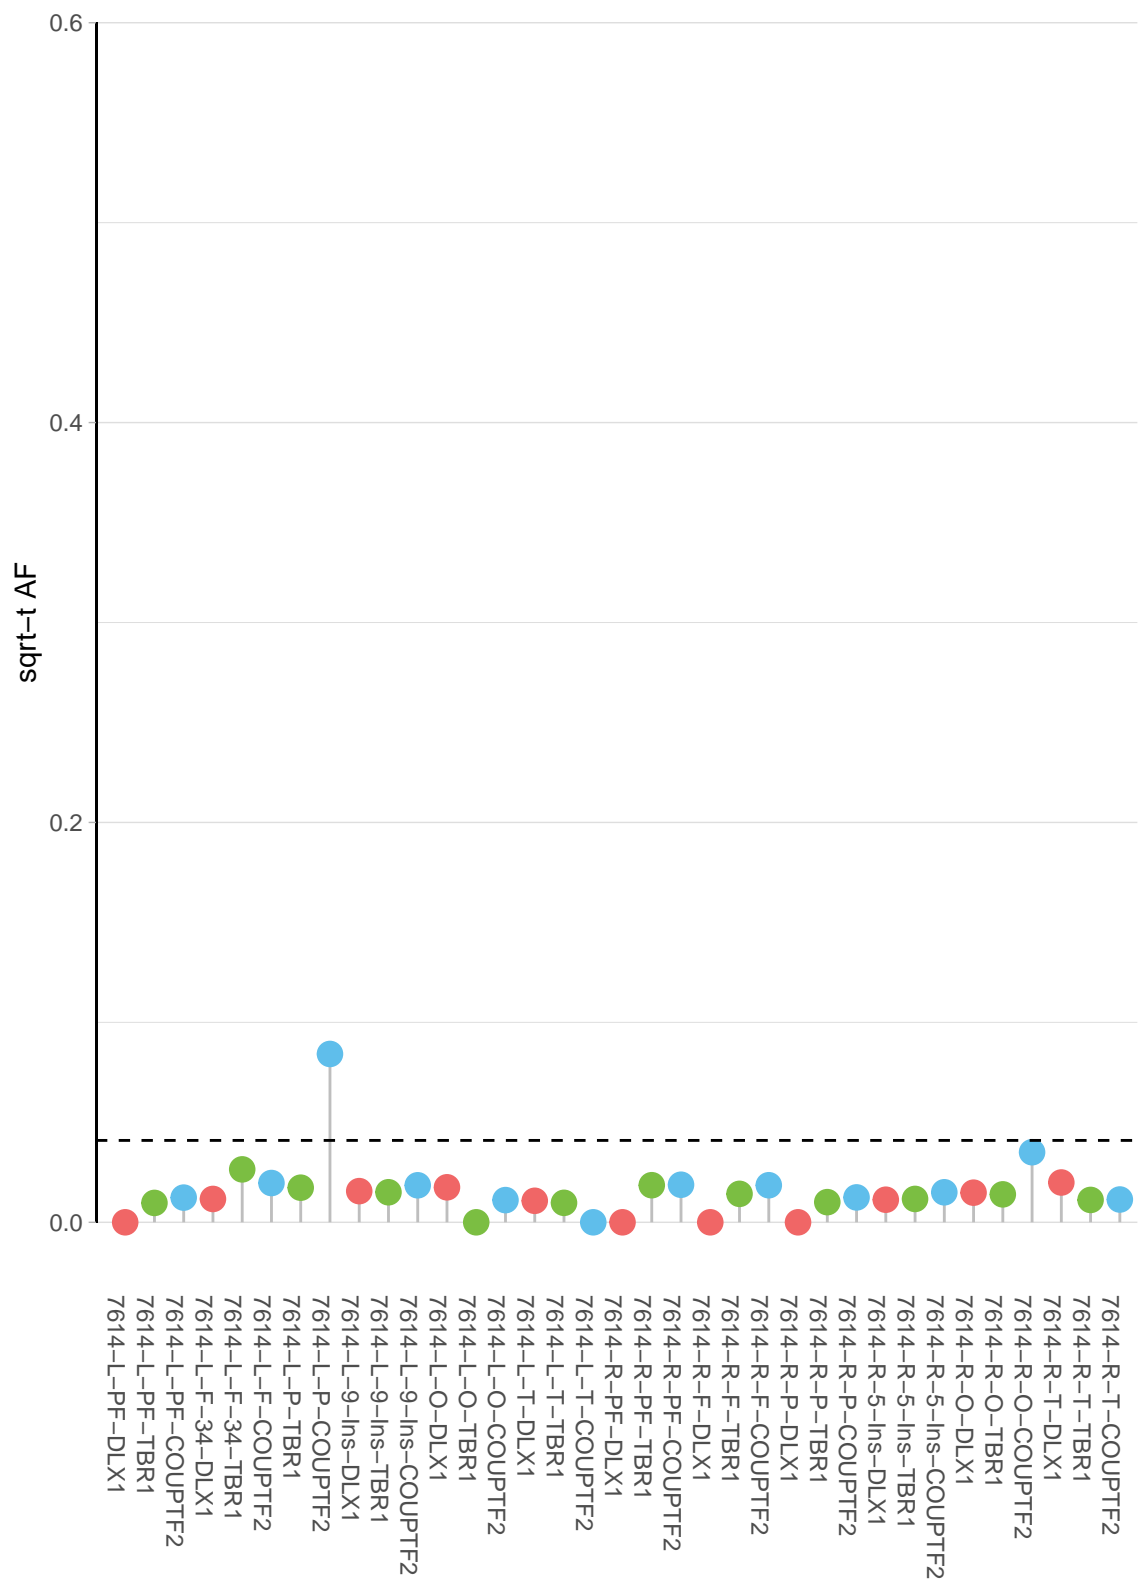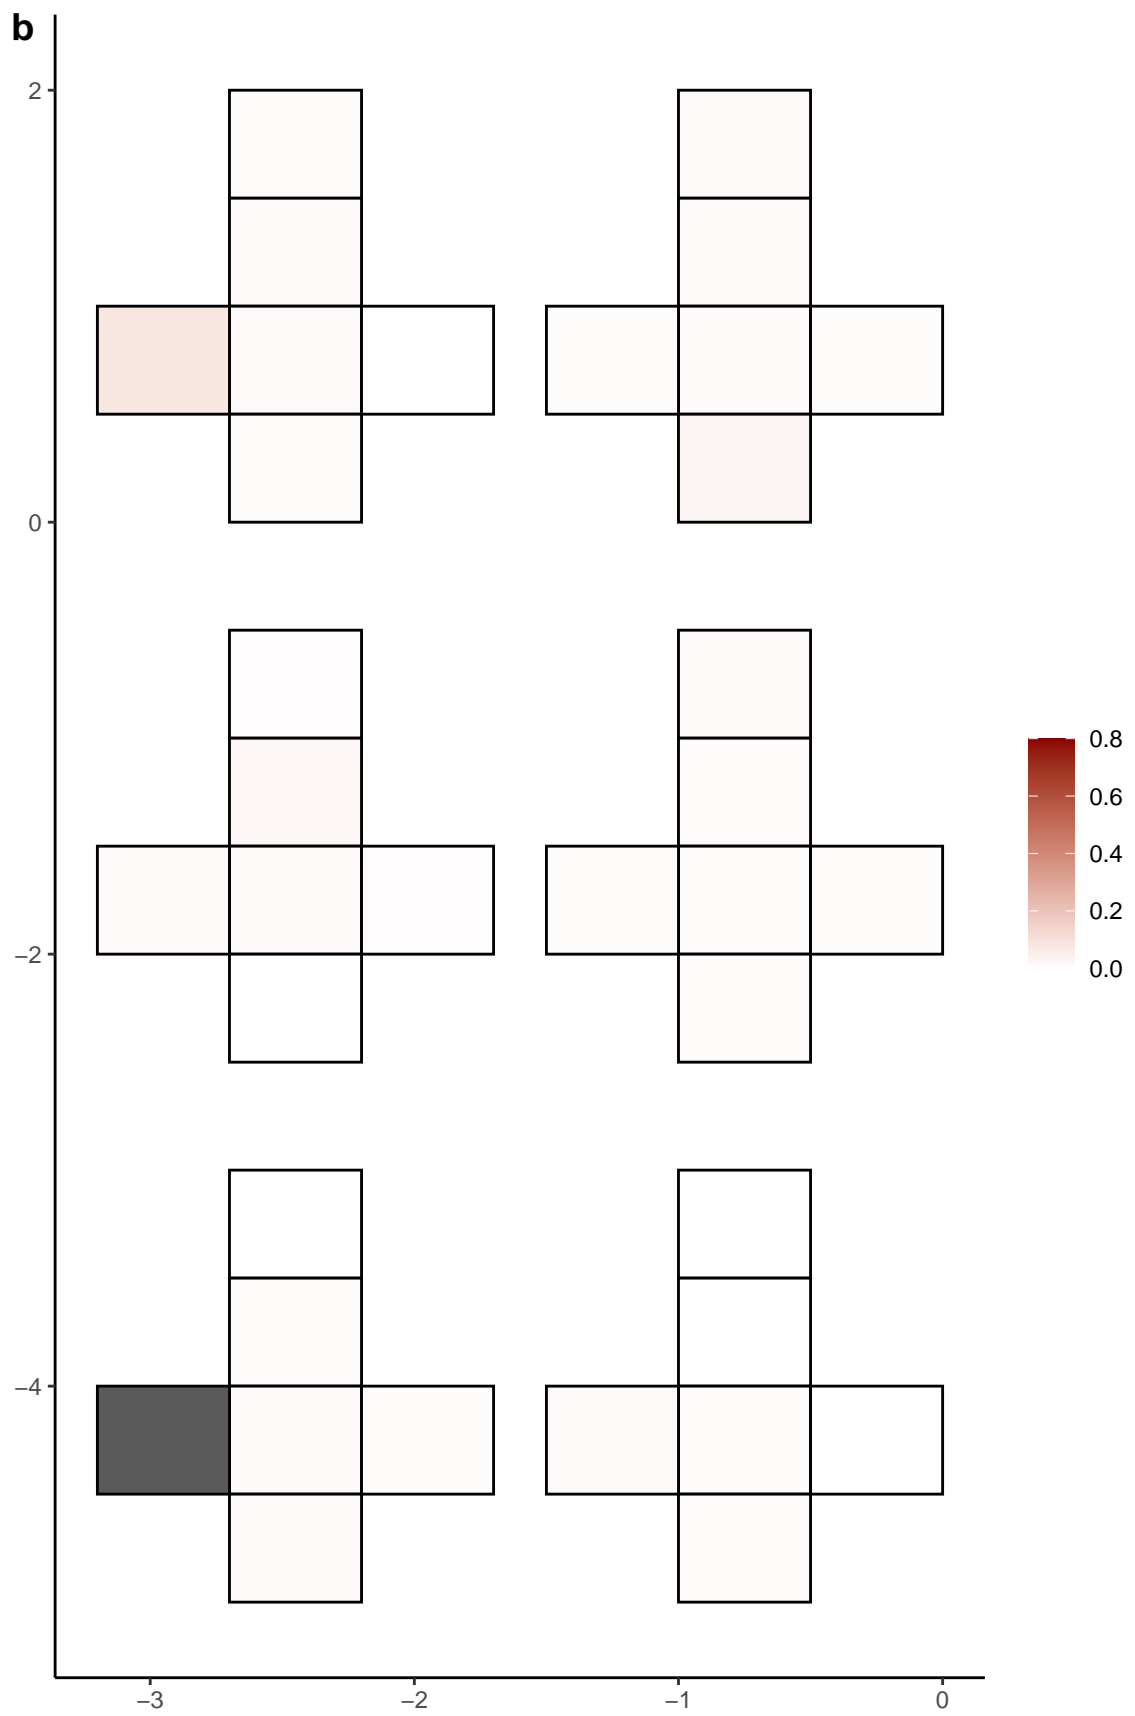

**a** ID01 8-81399897-C-T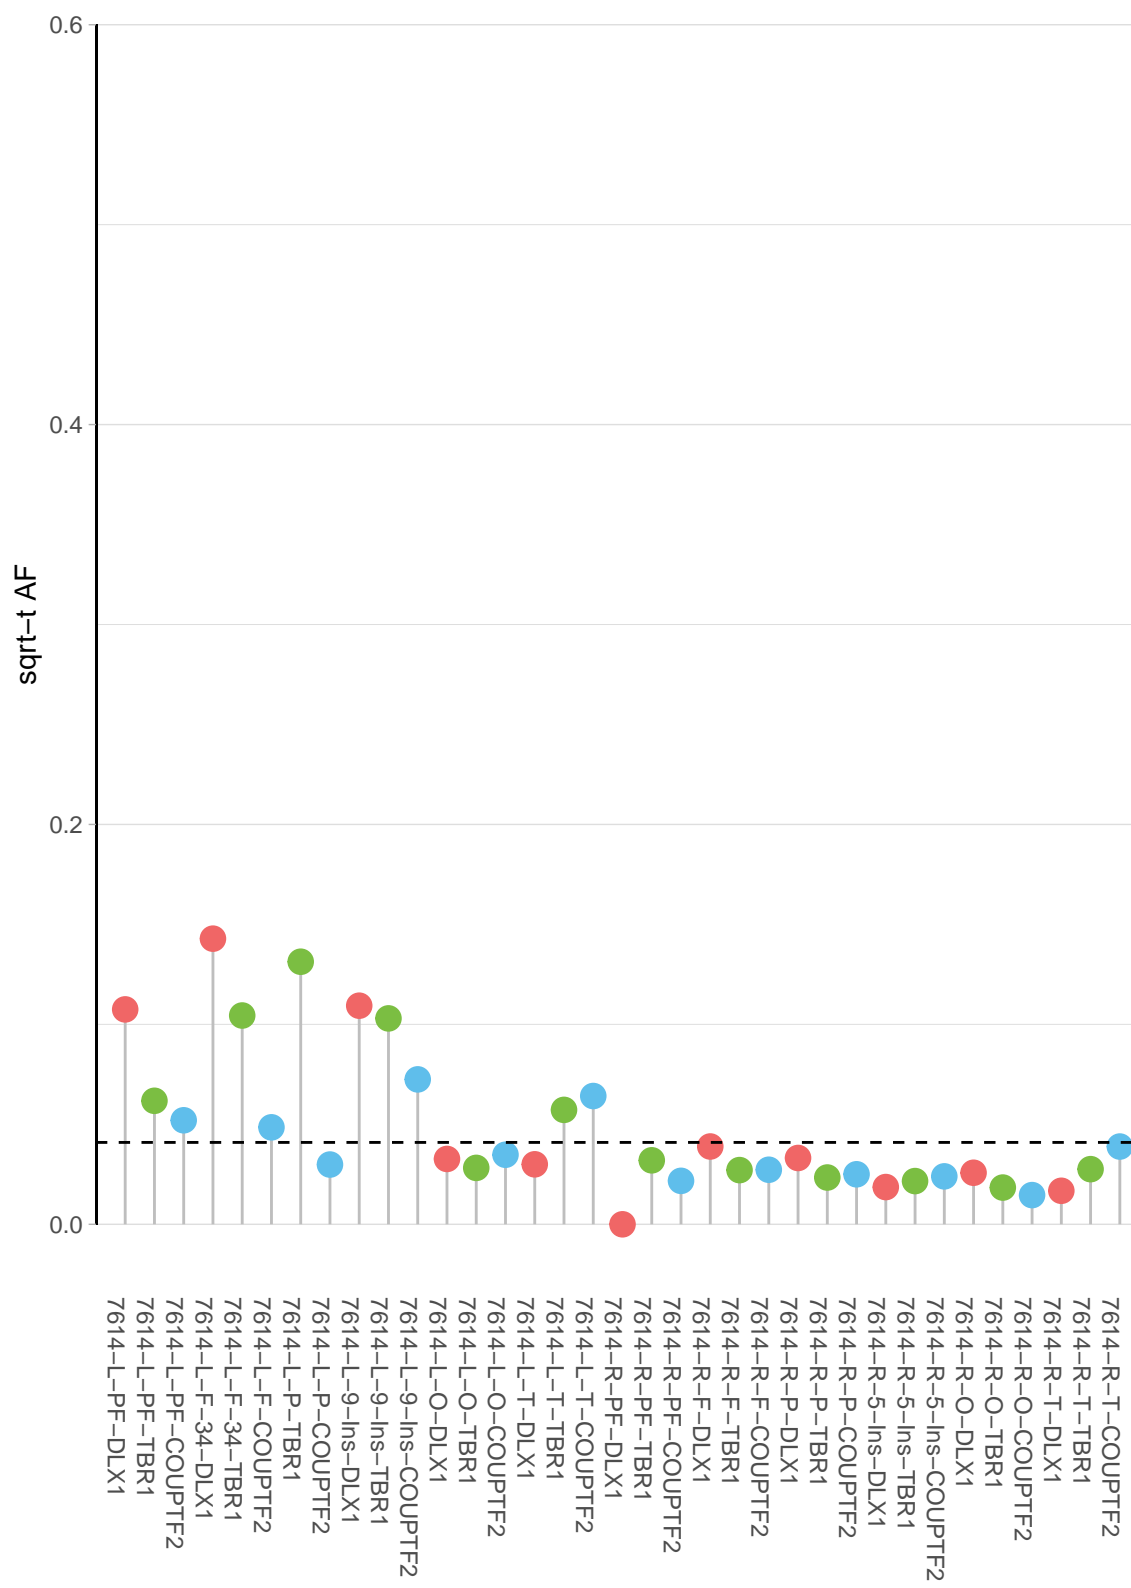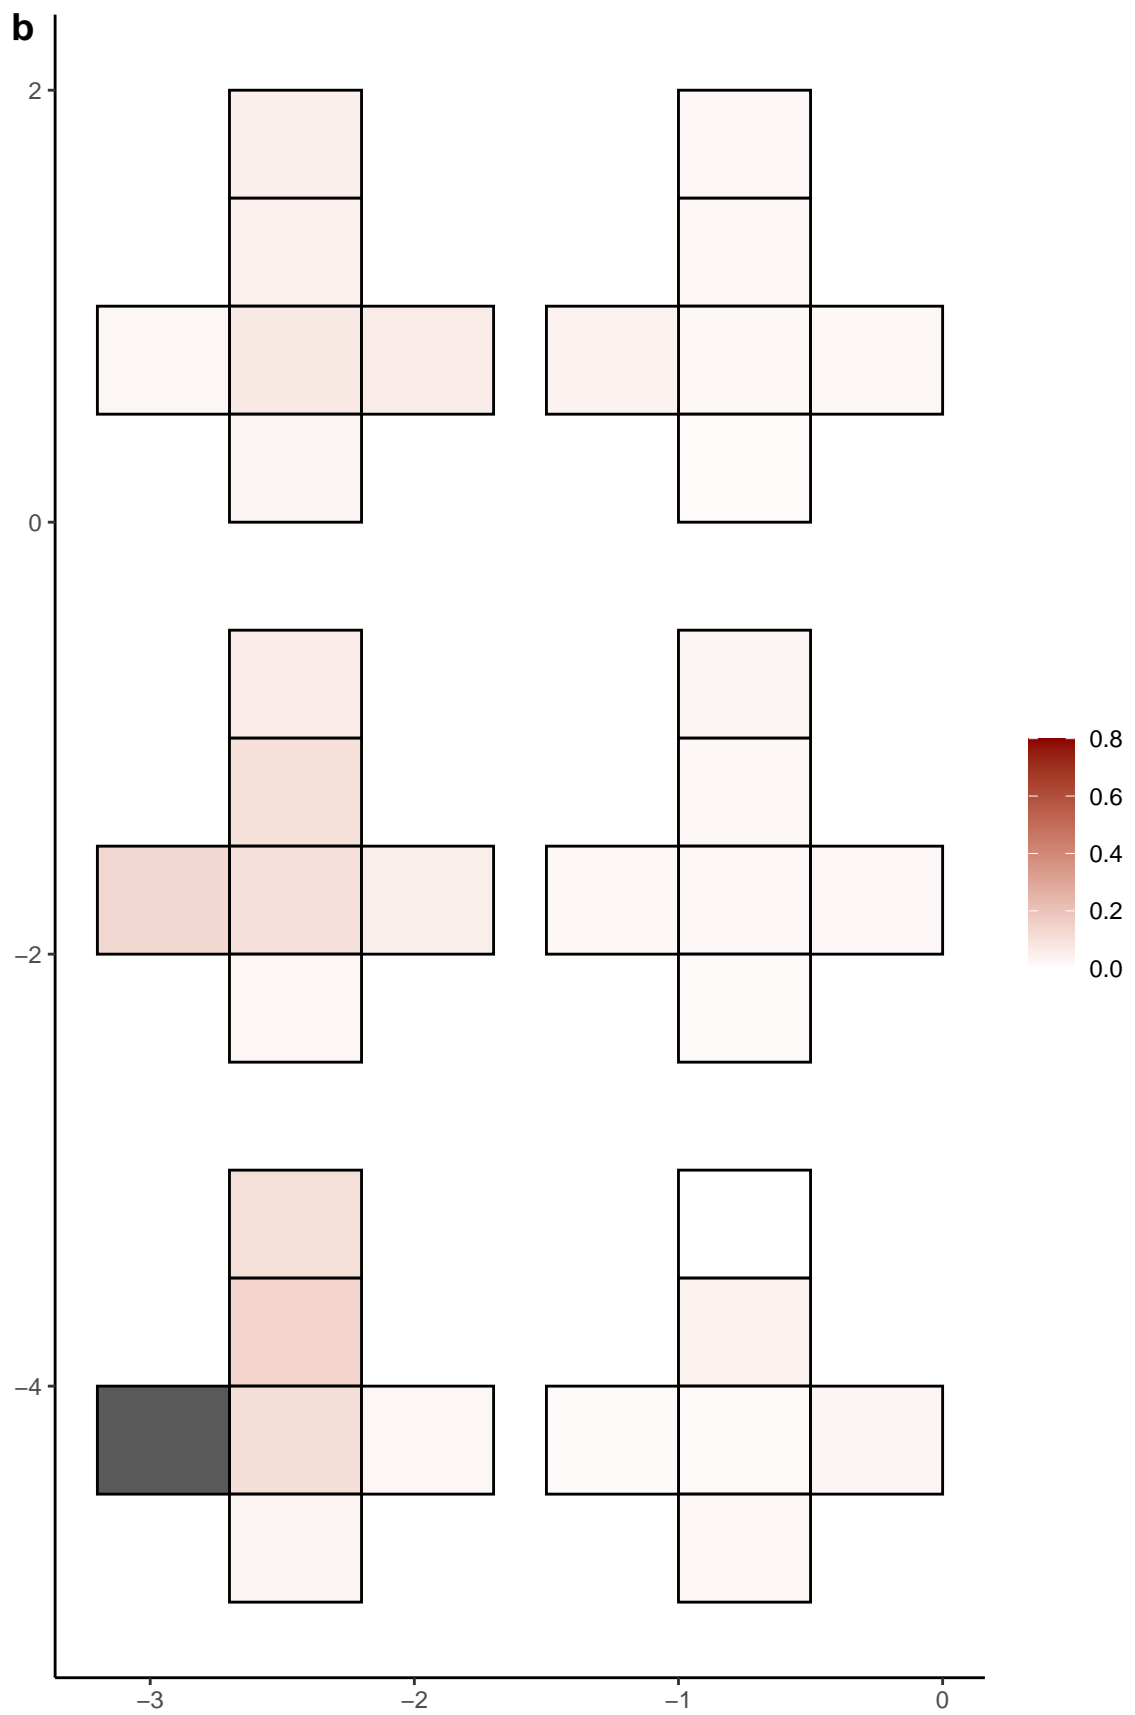

**a** ID01 9-133760767-C-T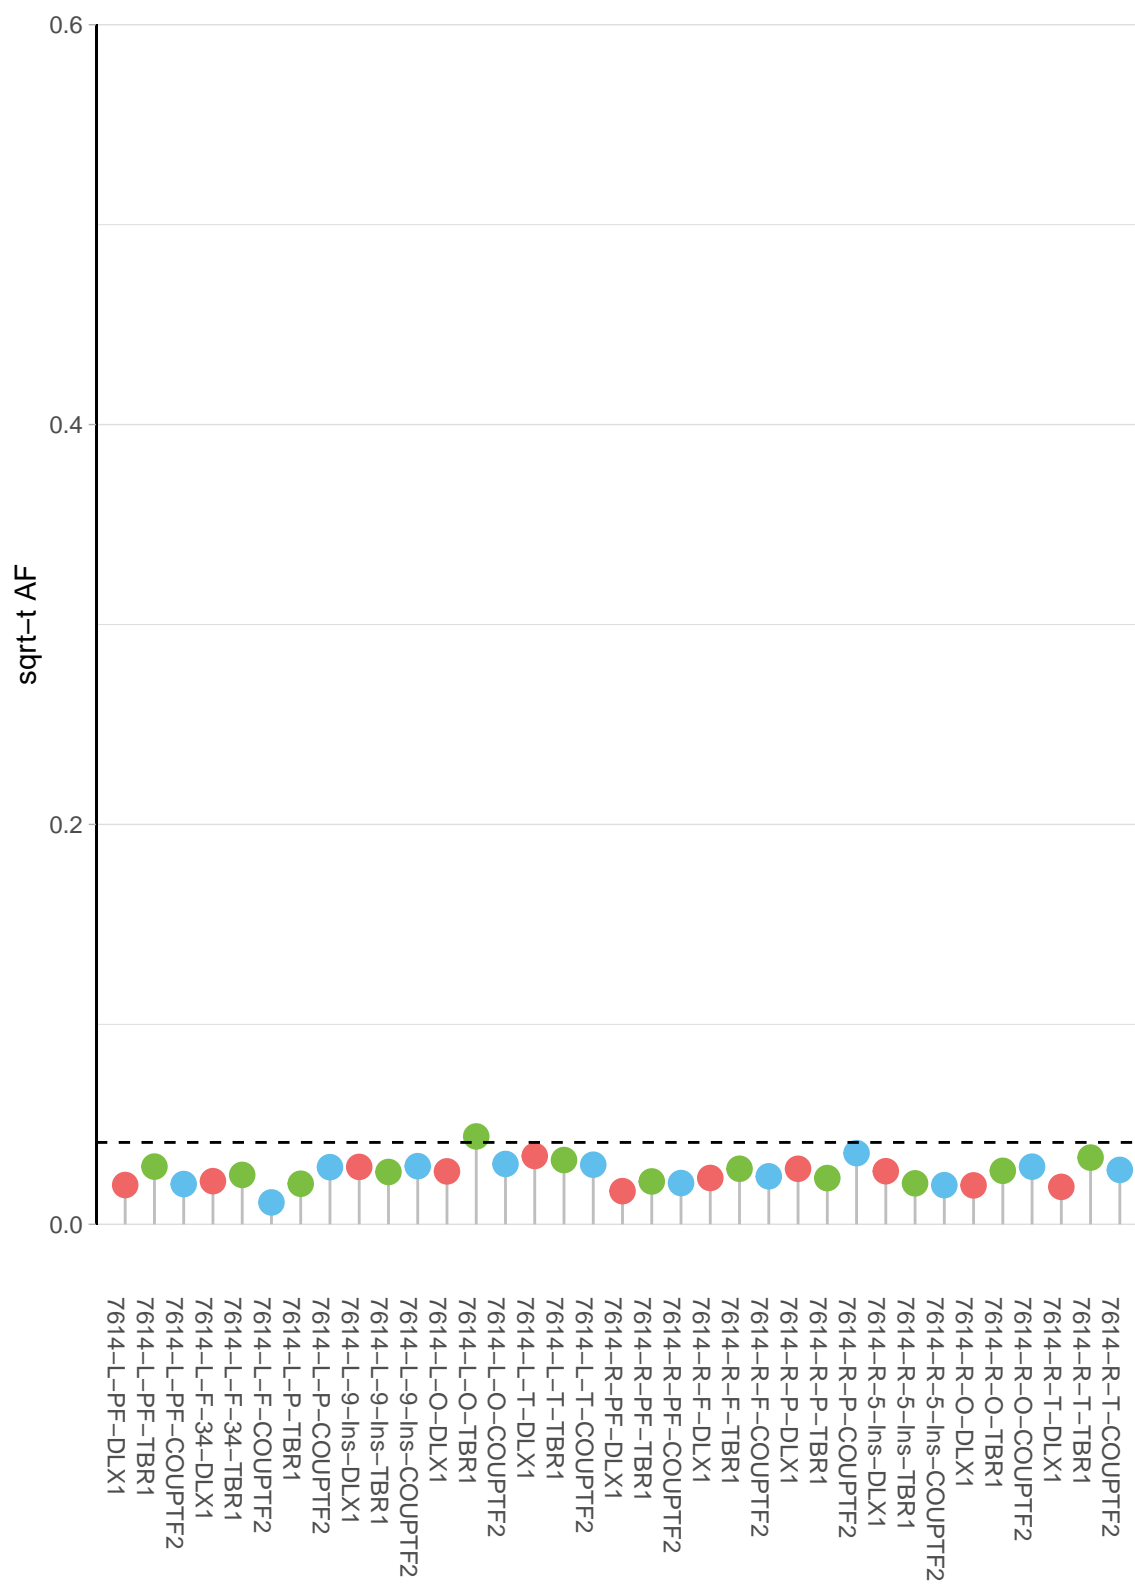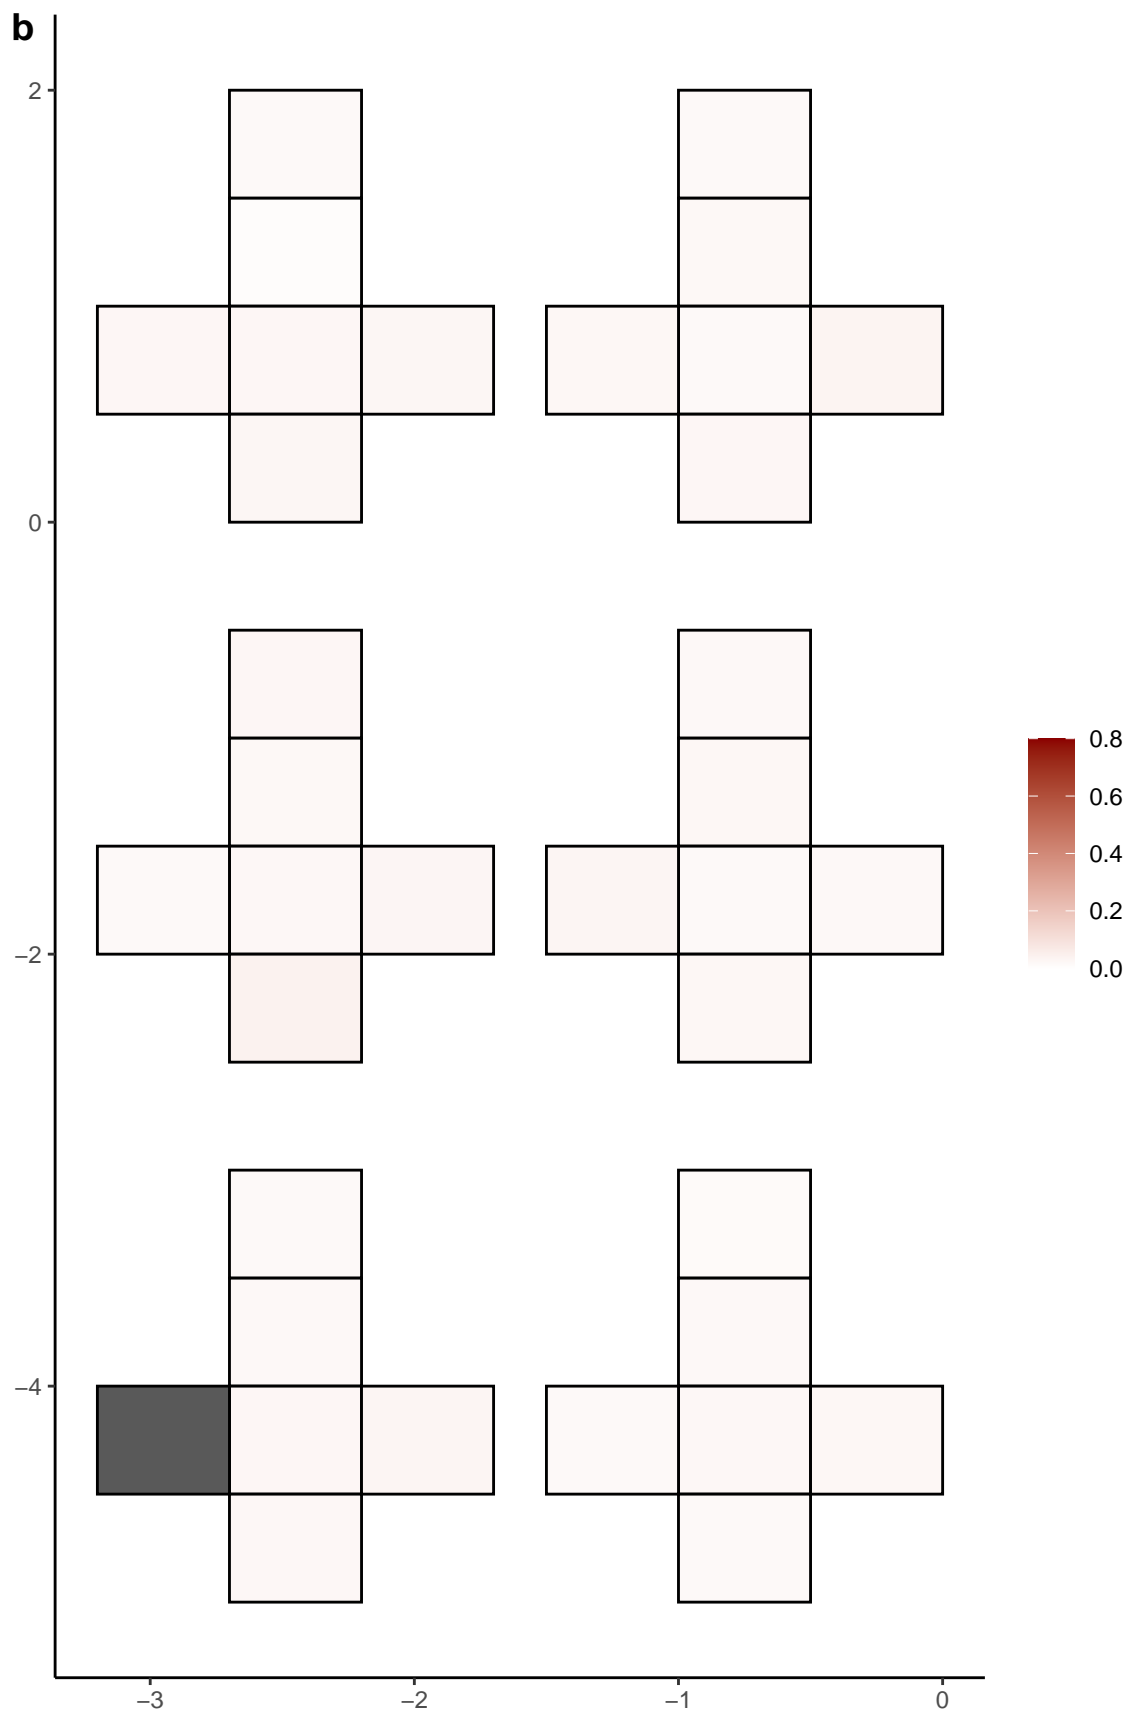



**a** ID01 9-134665838-G-A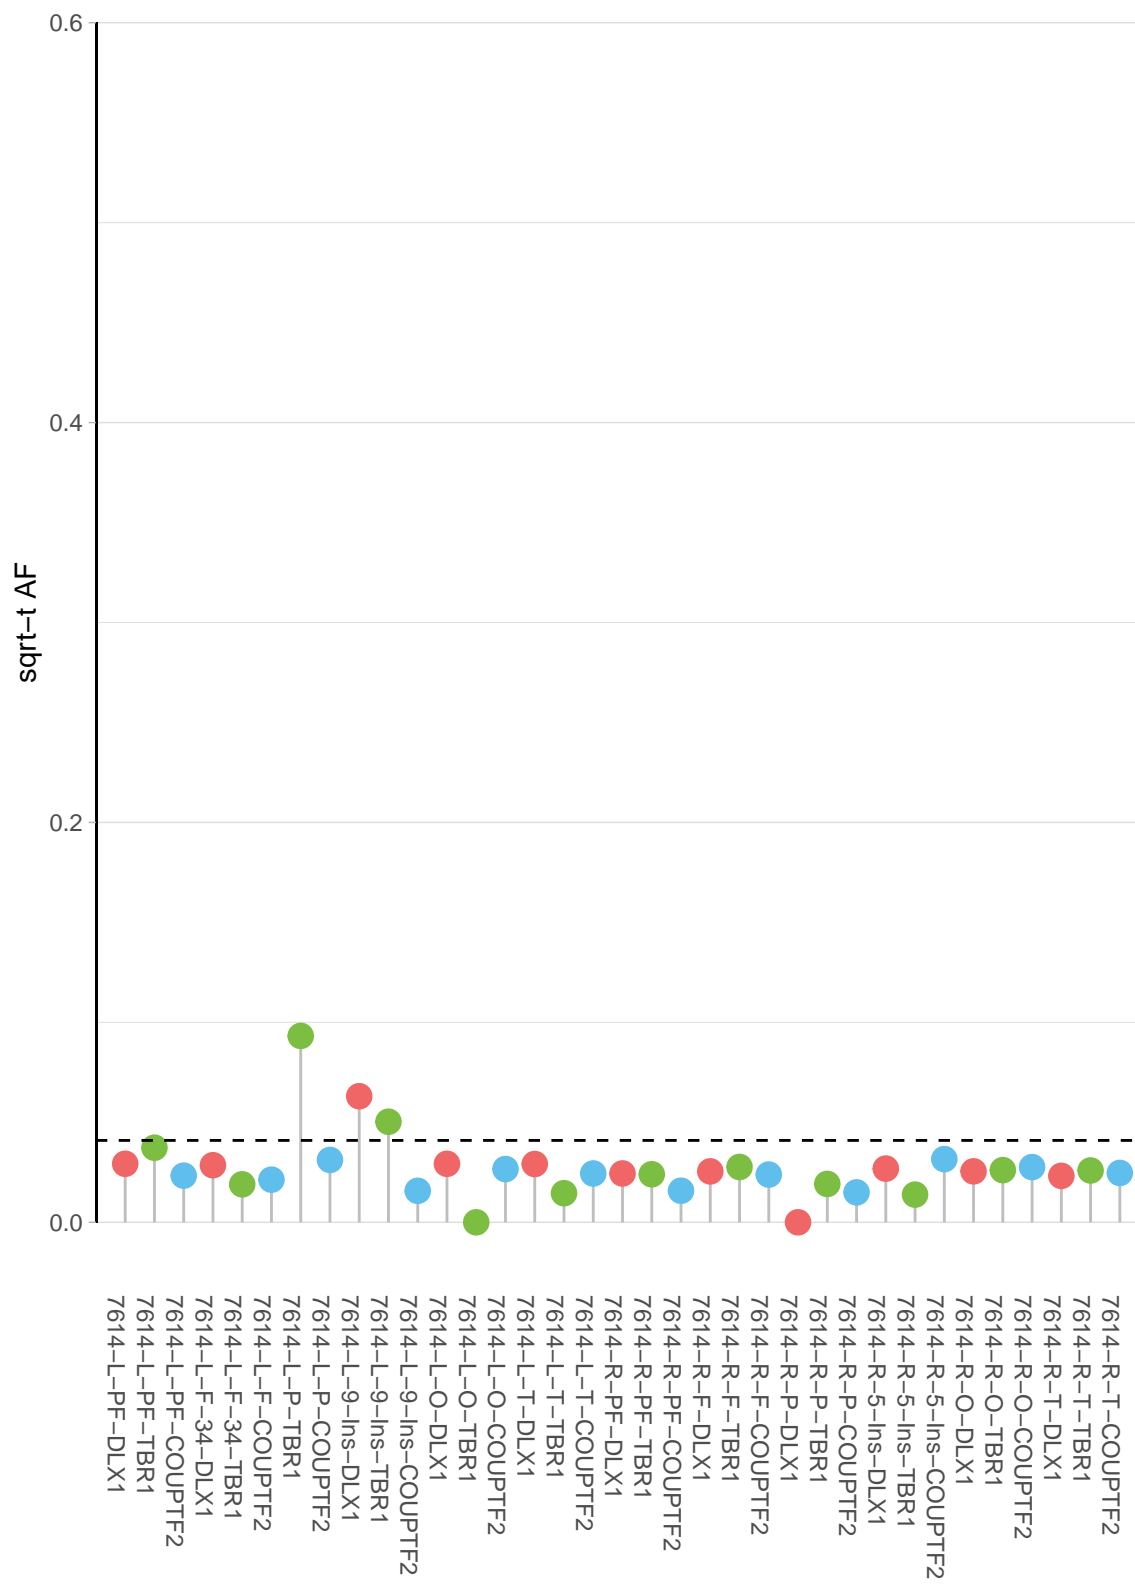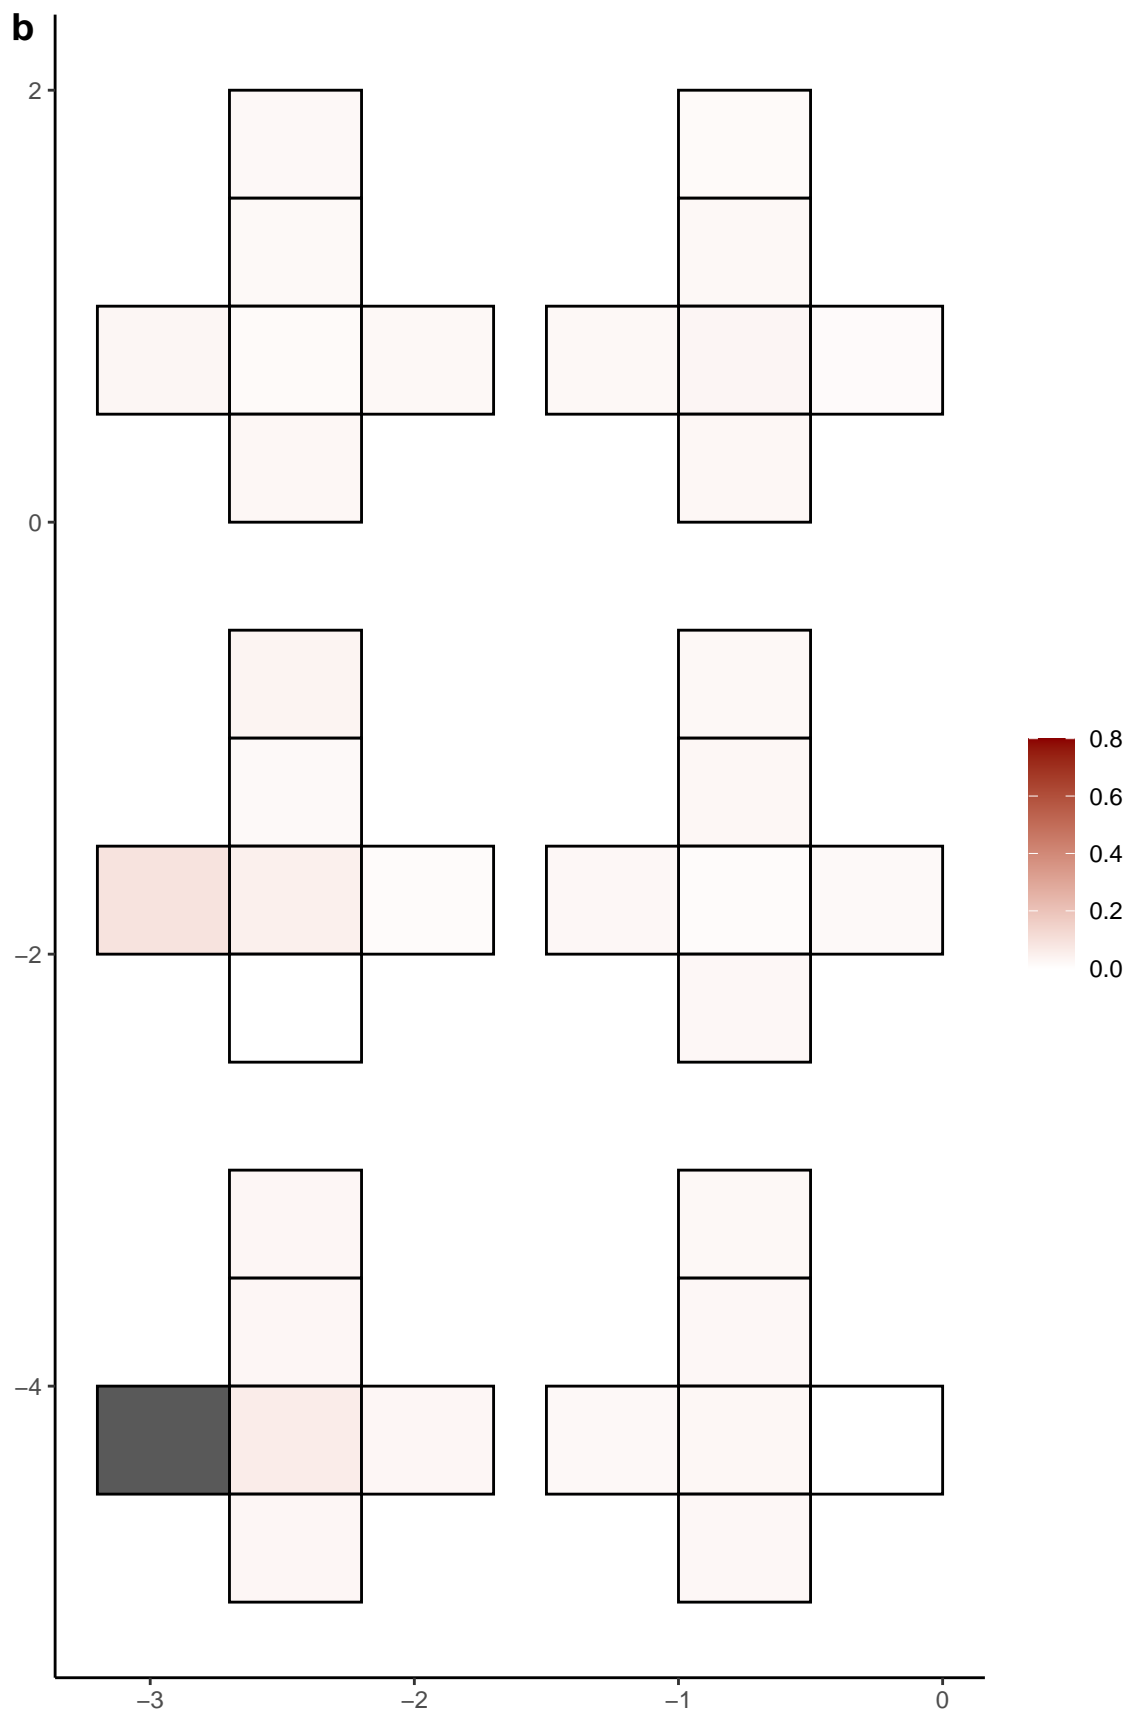

**a** ID01 9-134950488-G-T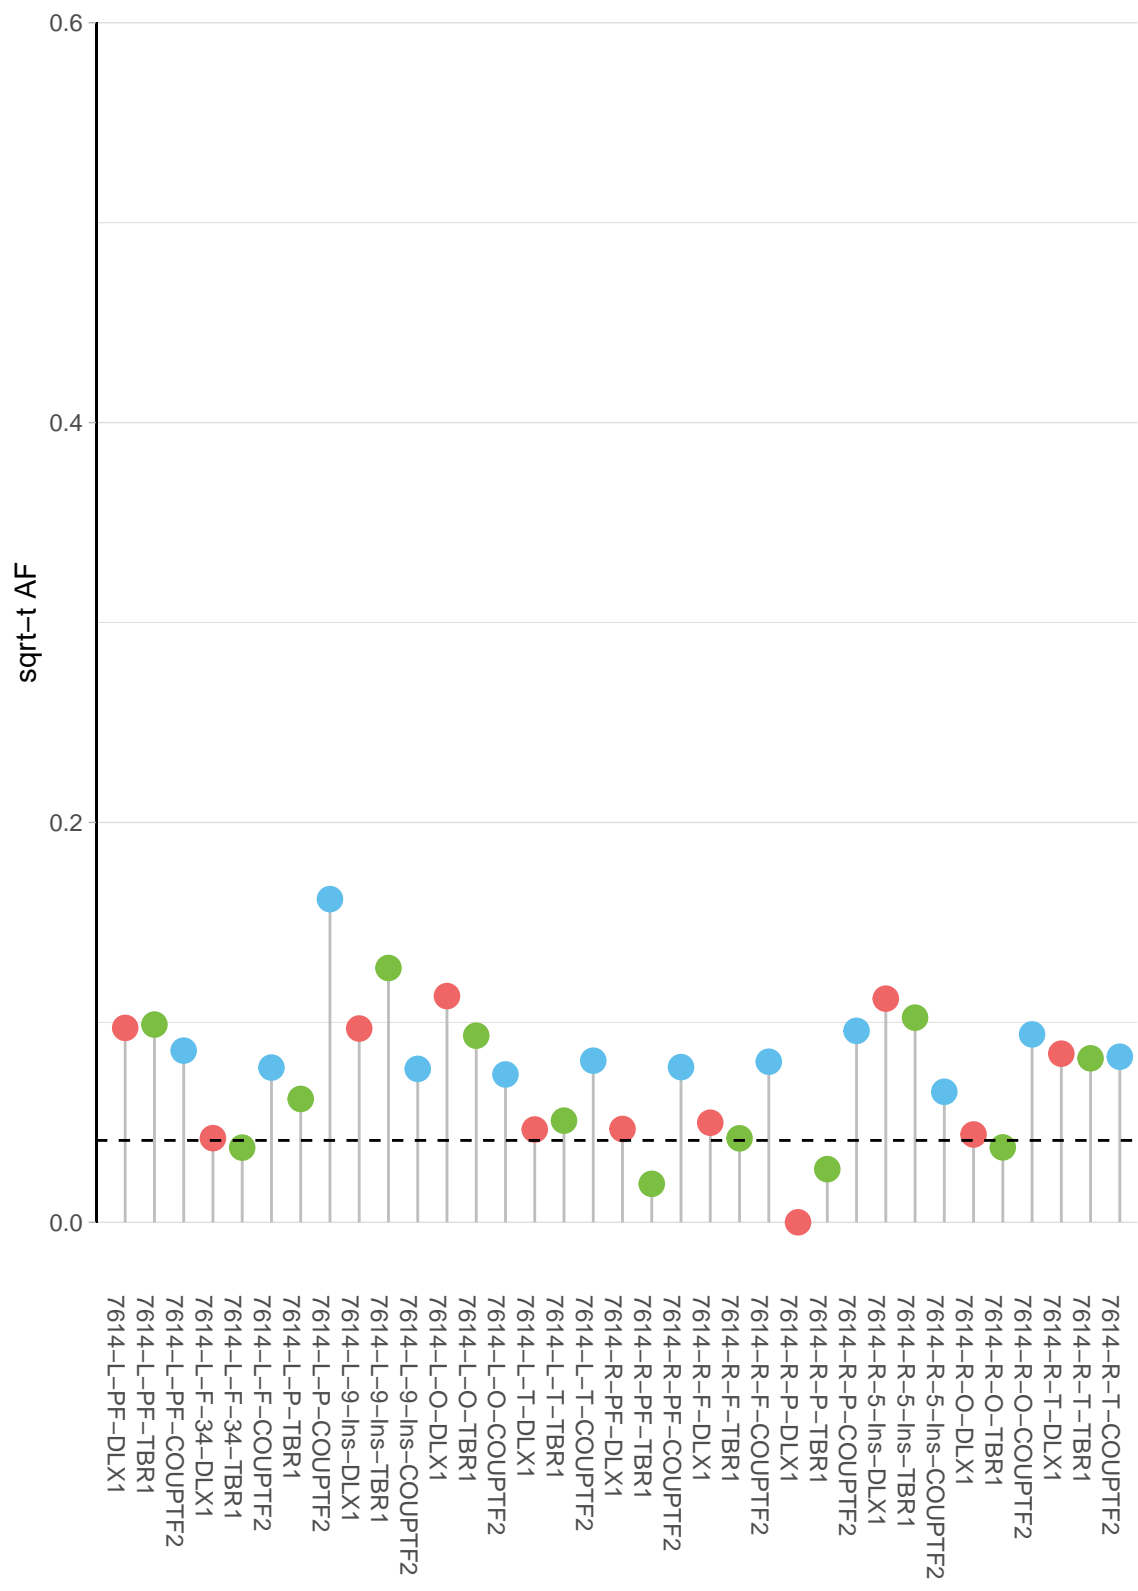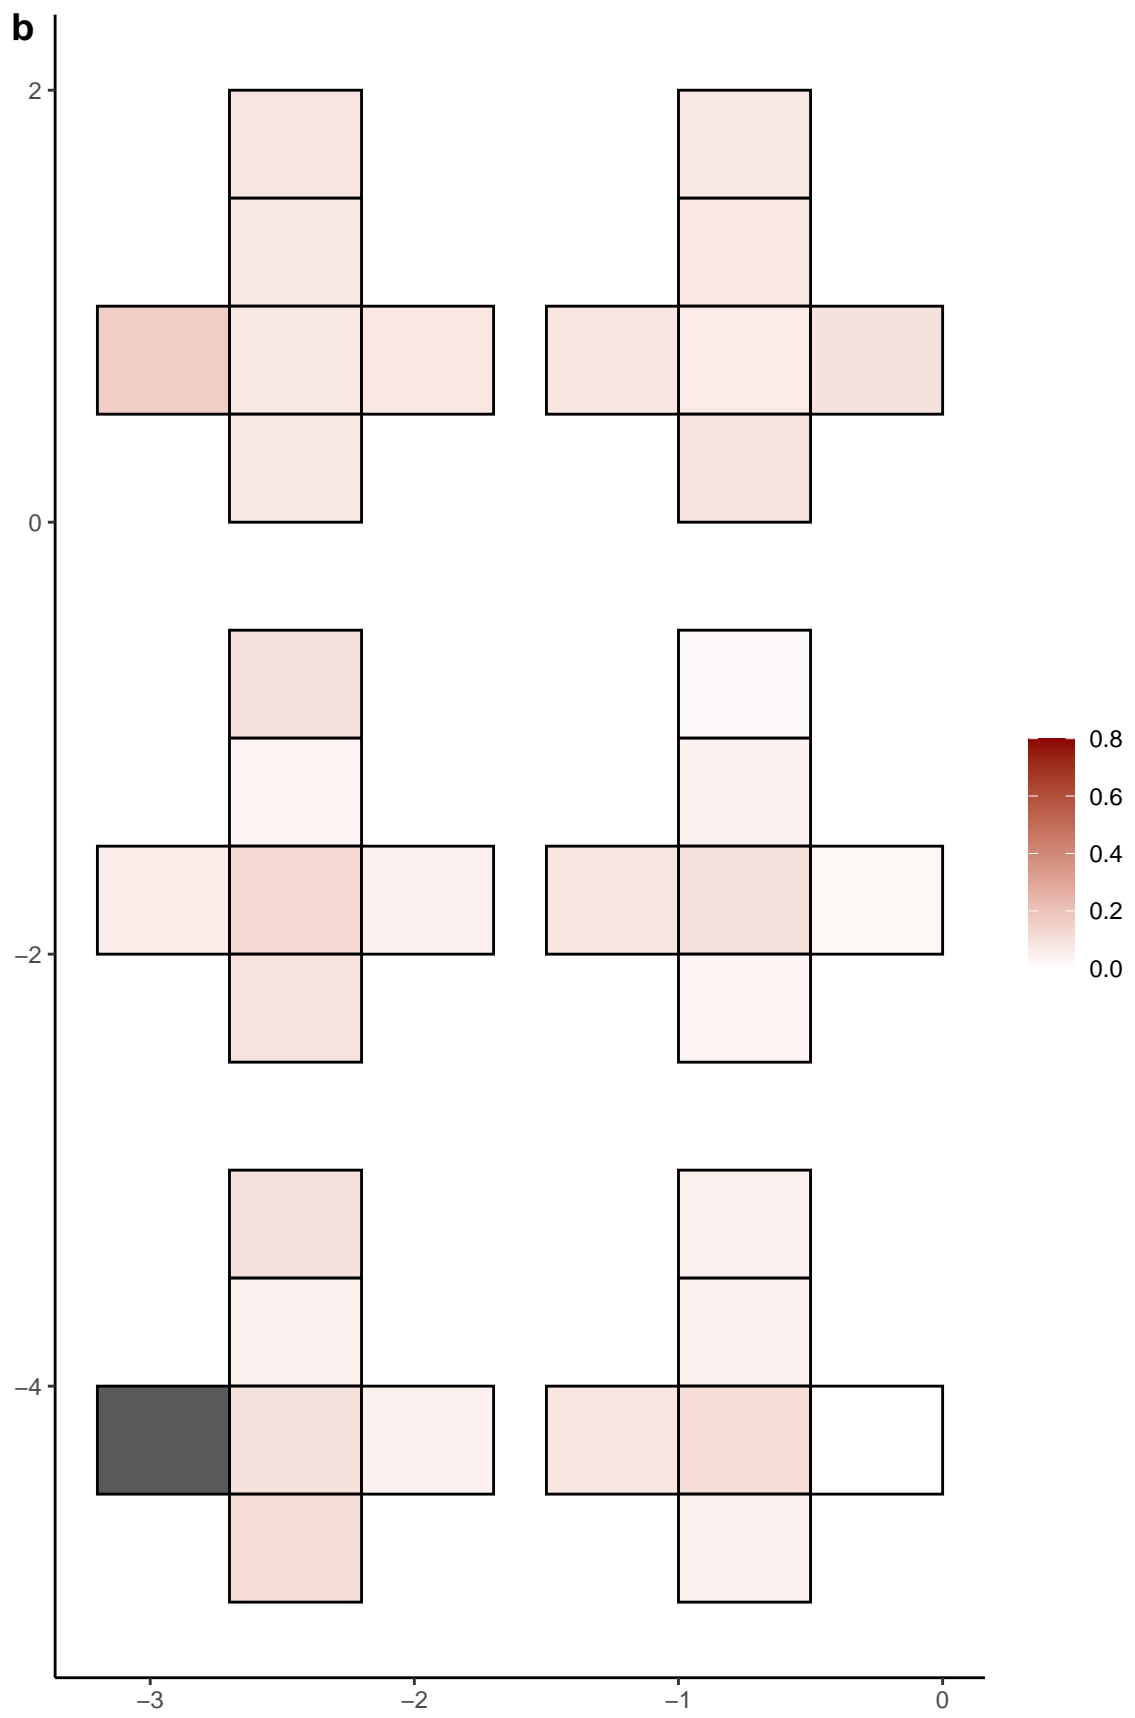

**a** ID01 9-1722340-A-G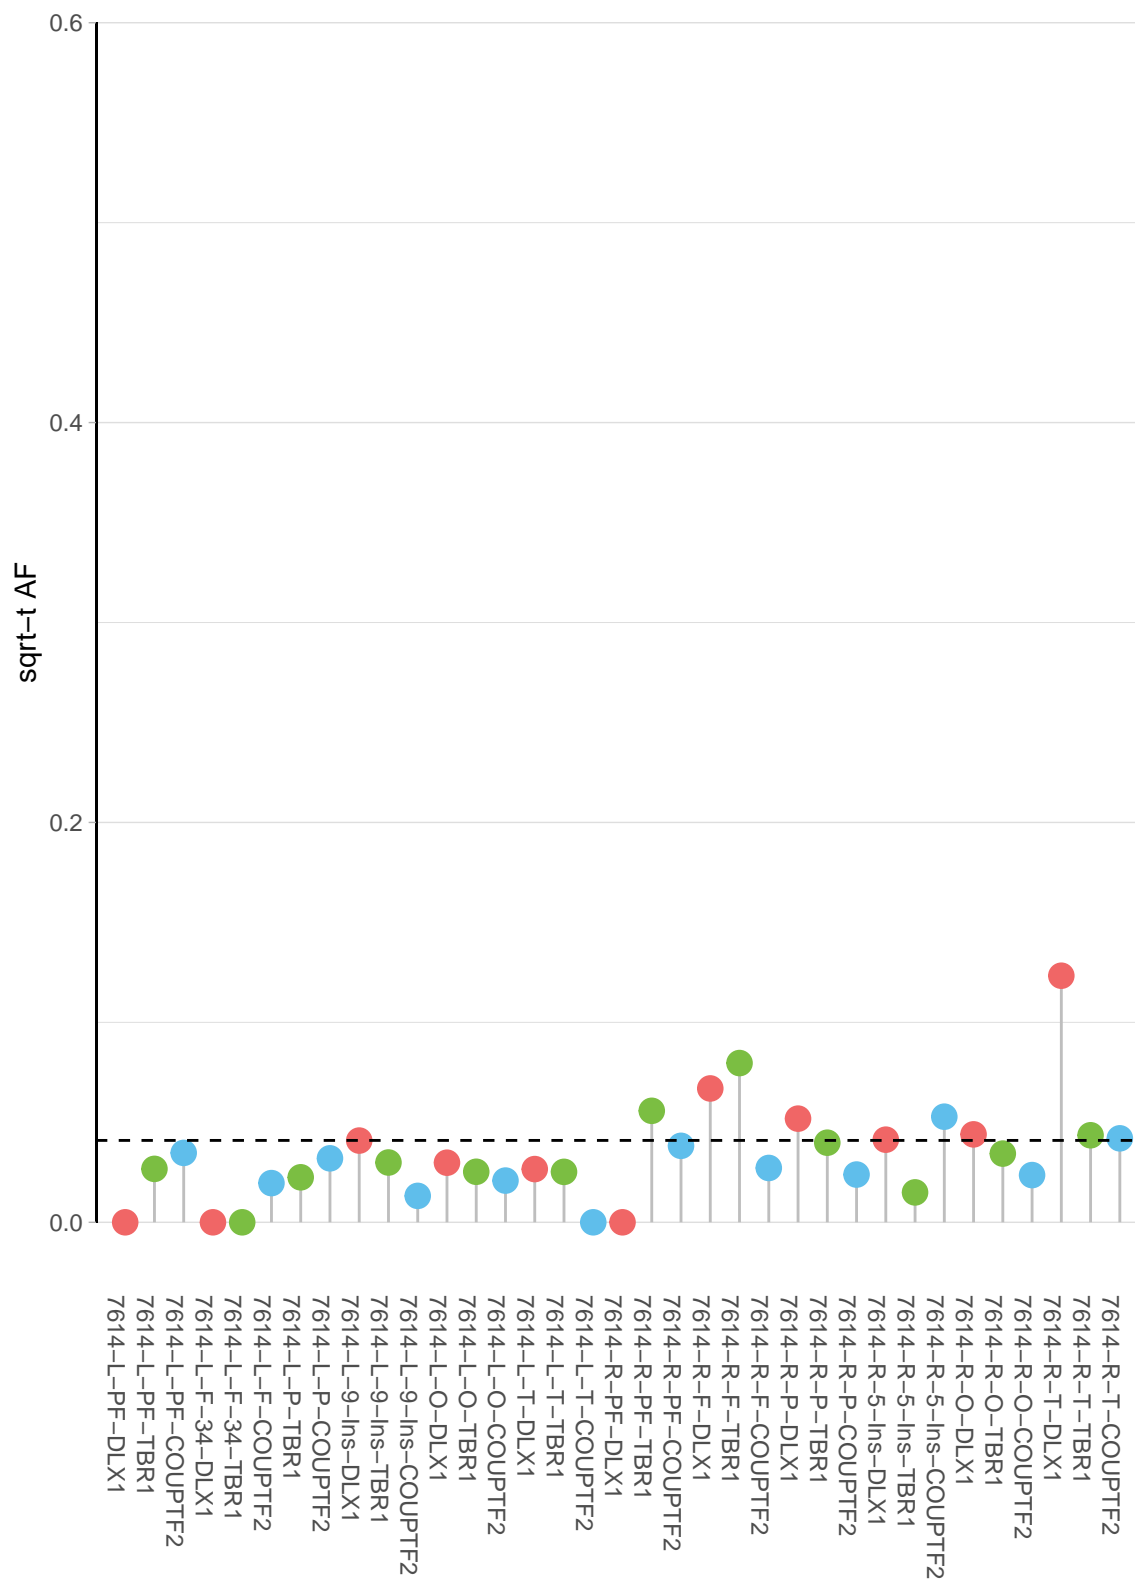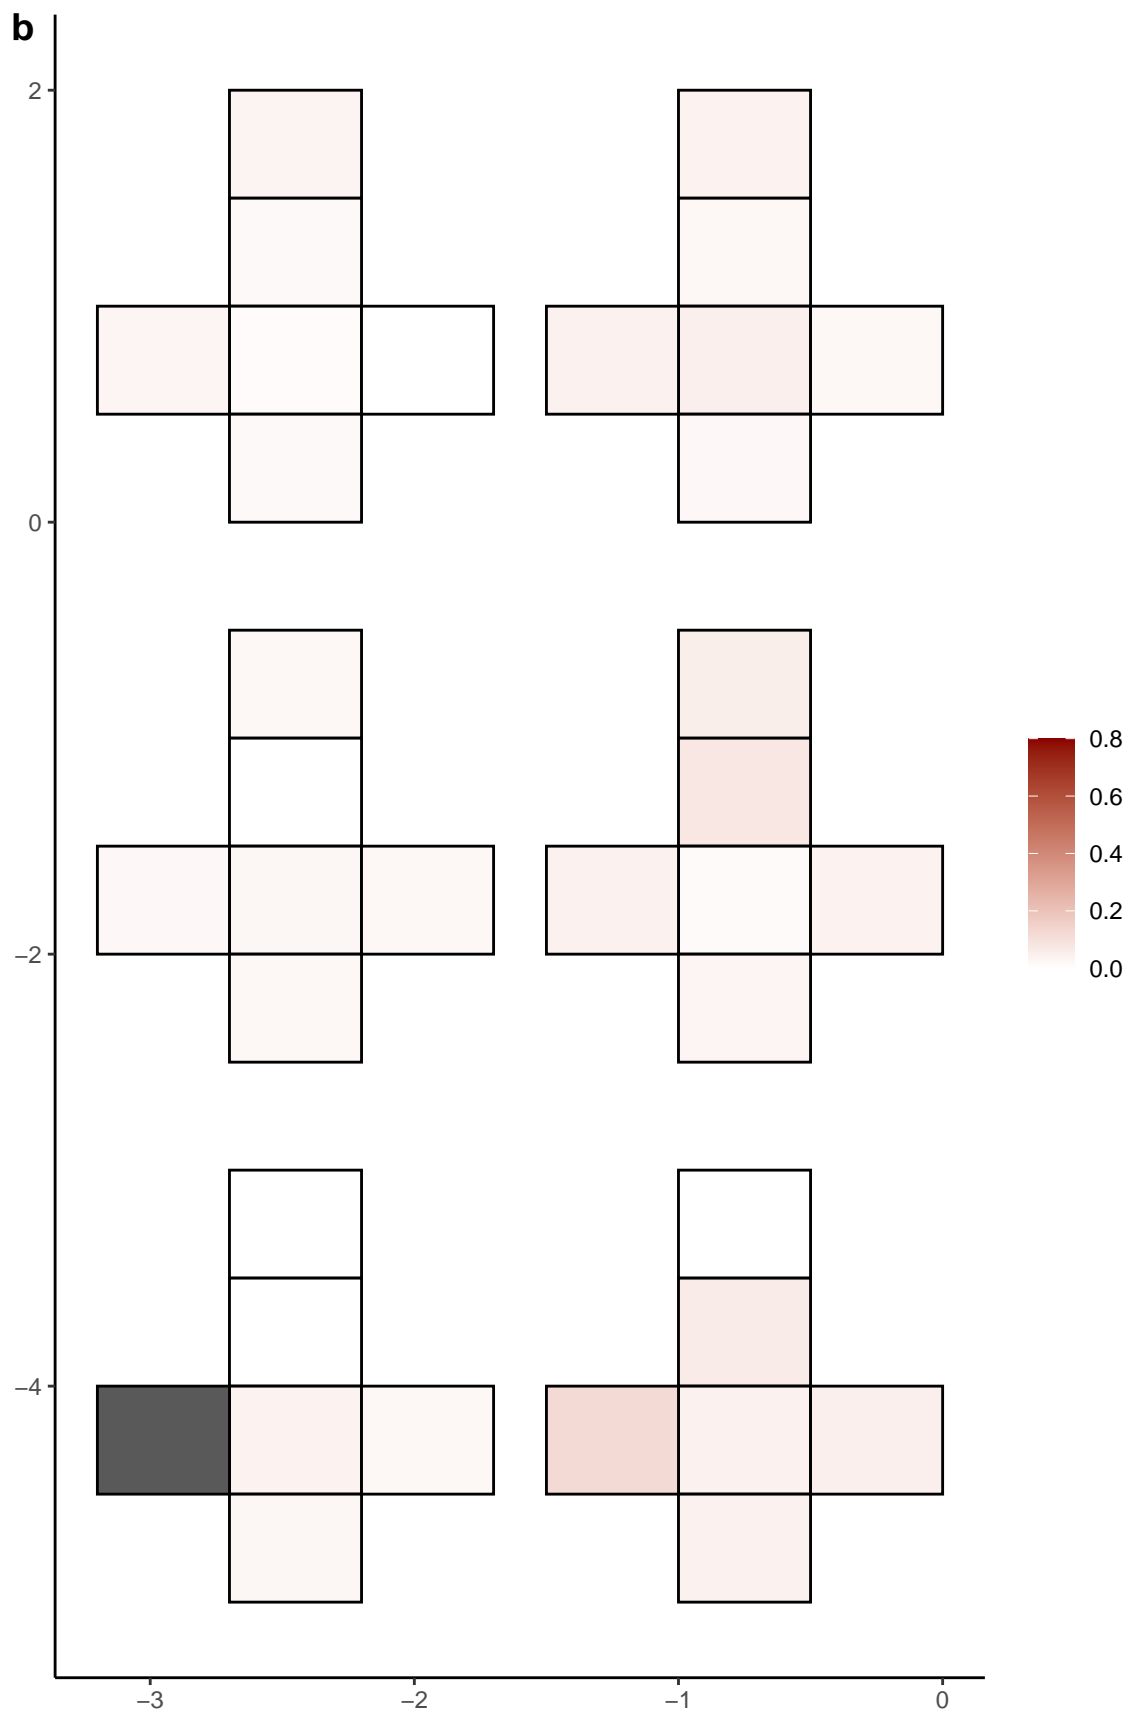

**a** ID01 9-38668272-C-T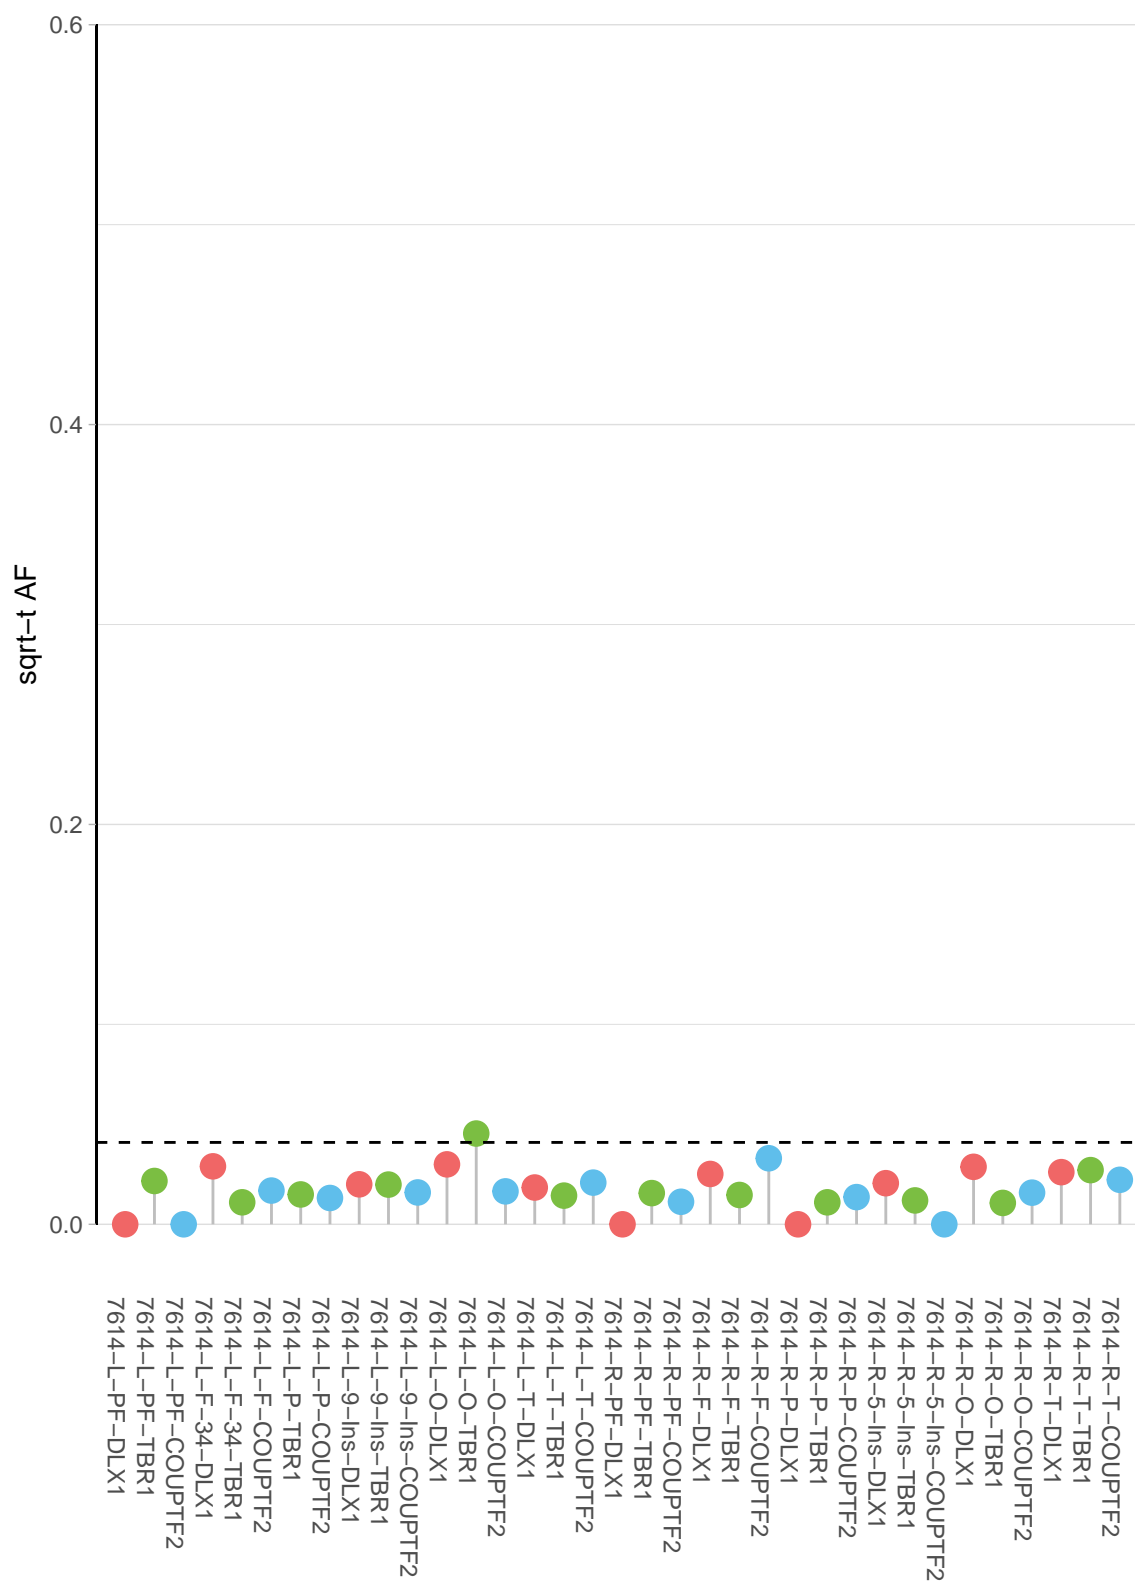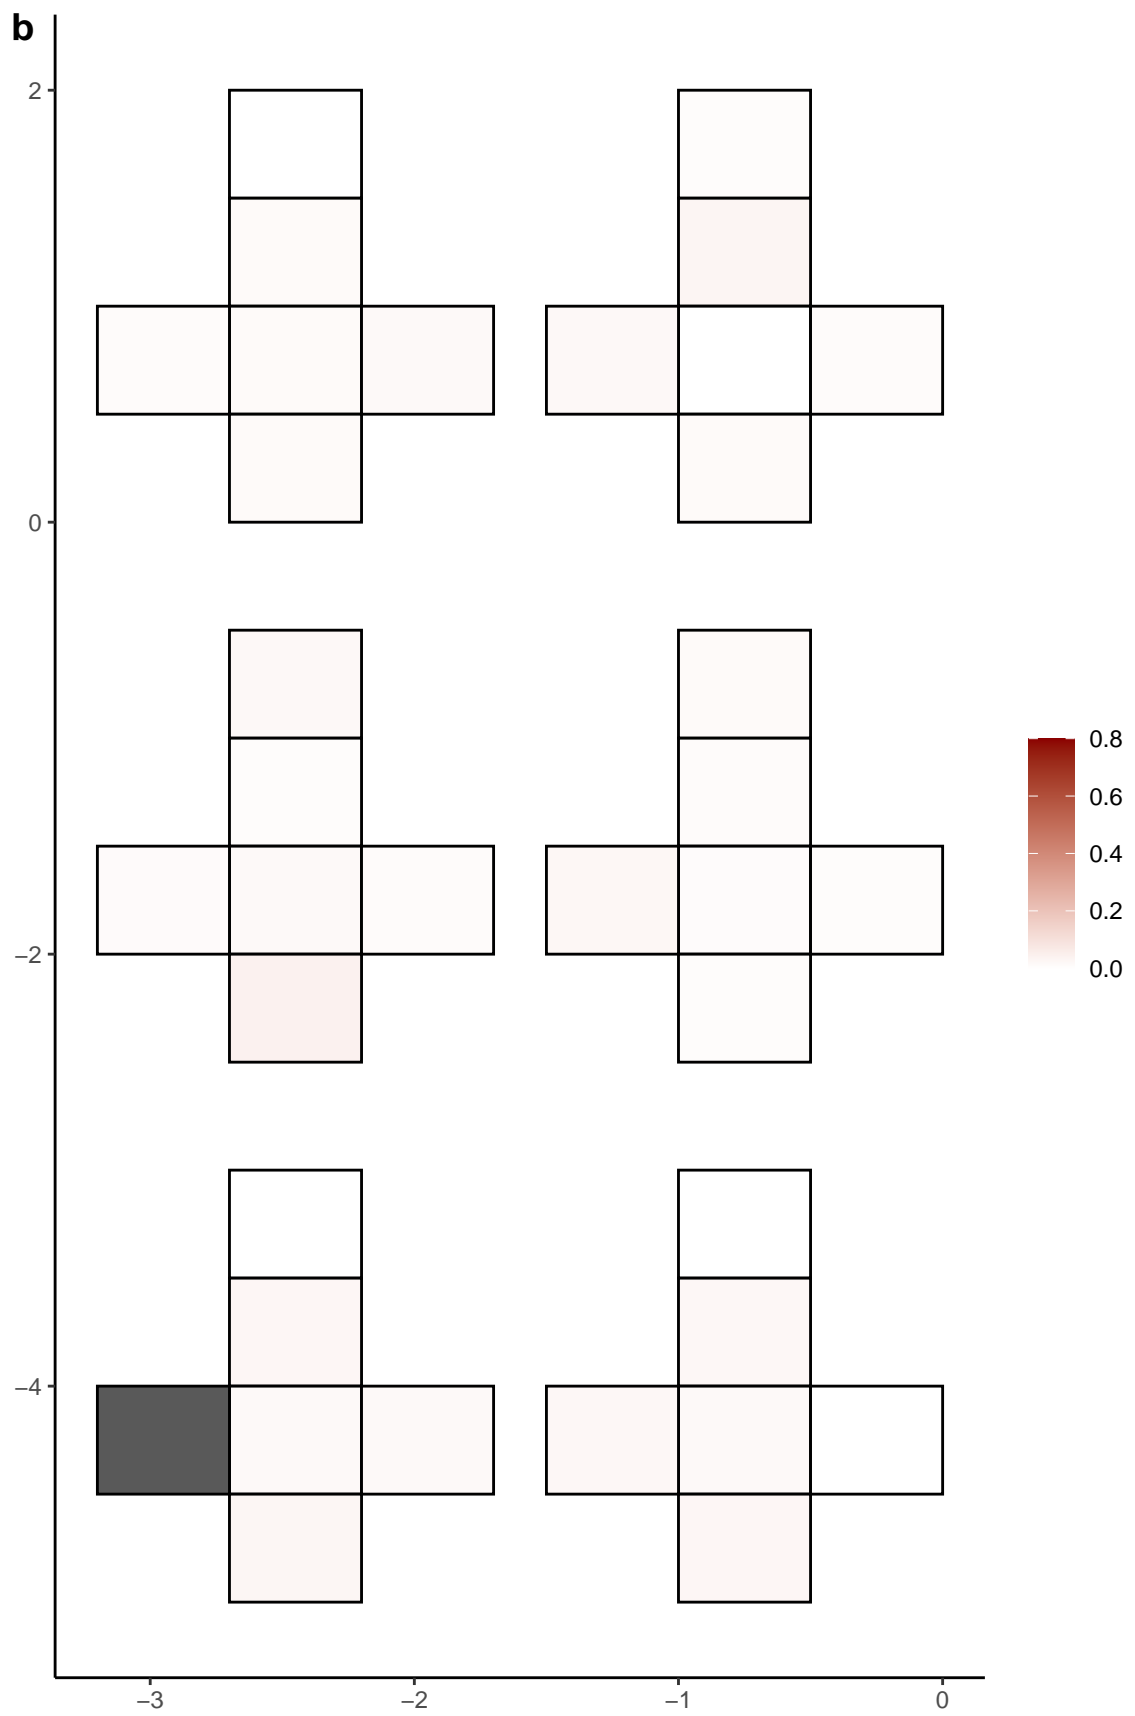

**a** ID01 9-76576921-A-G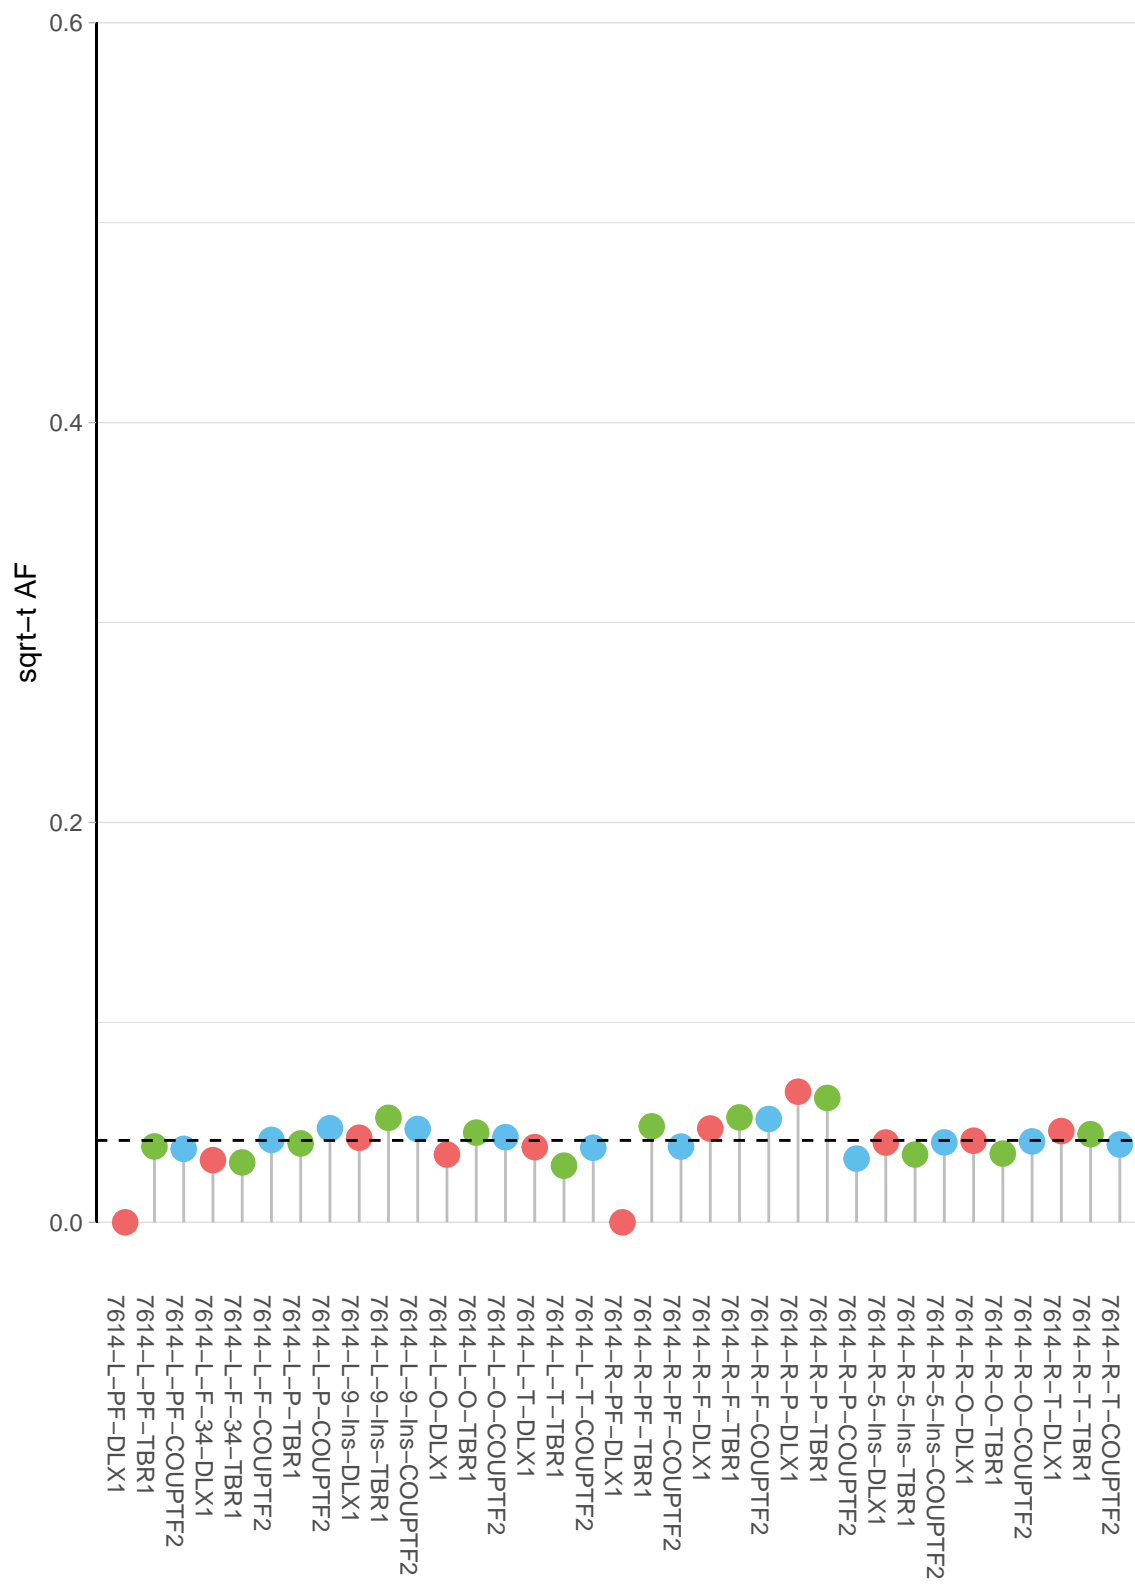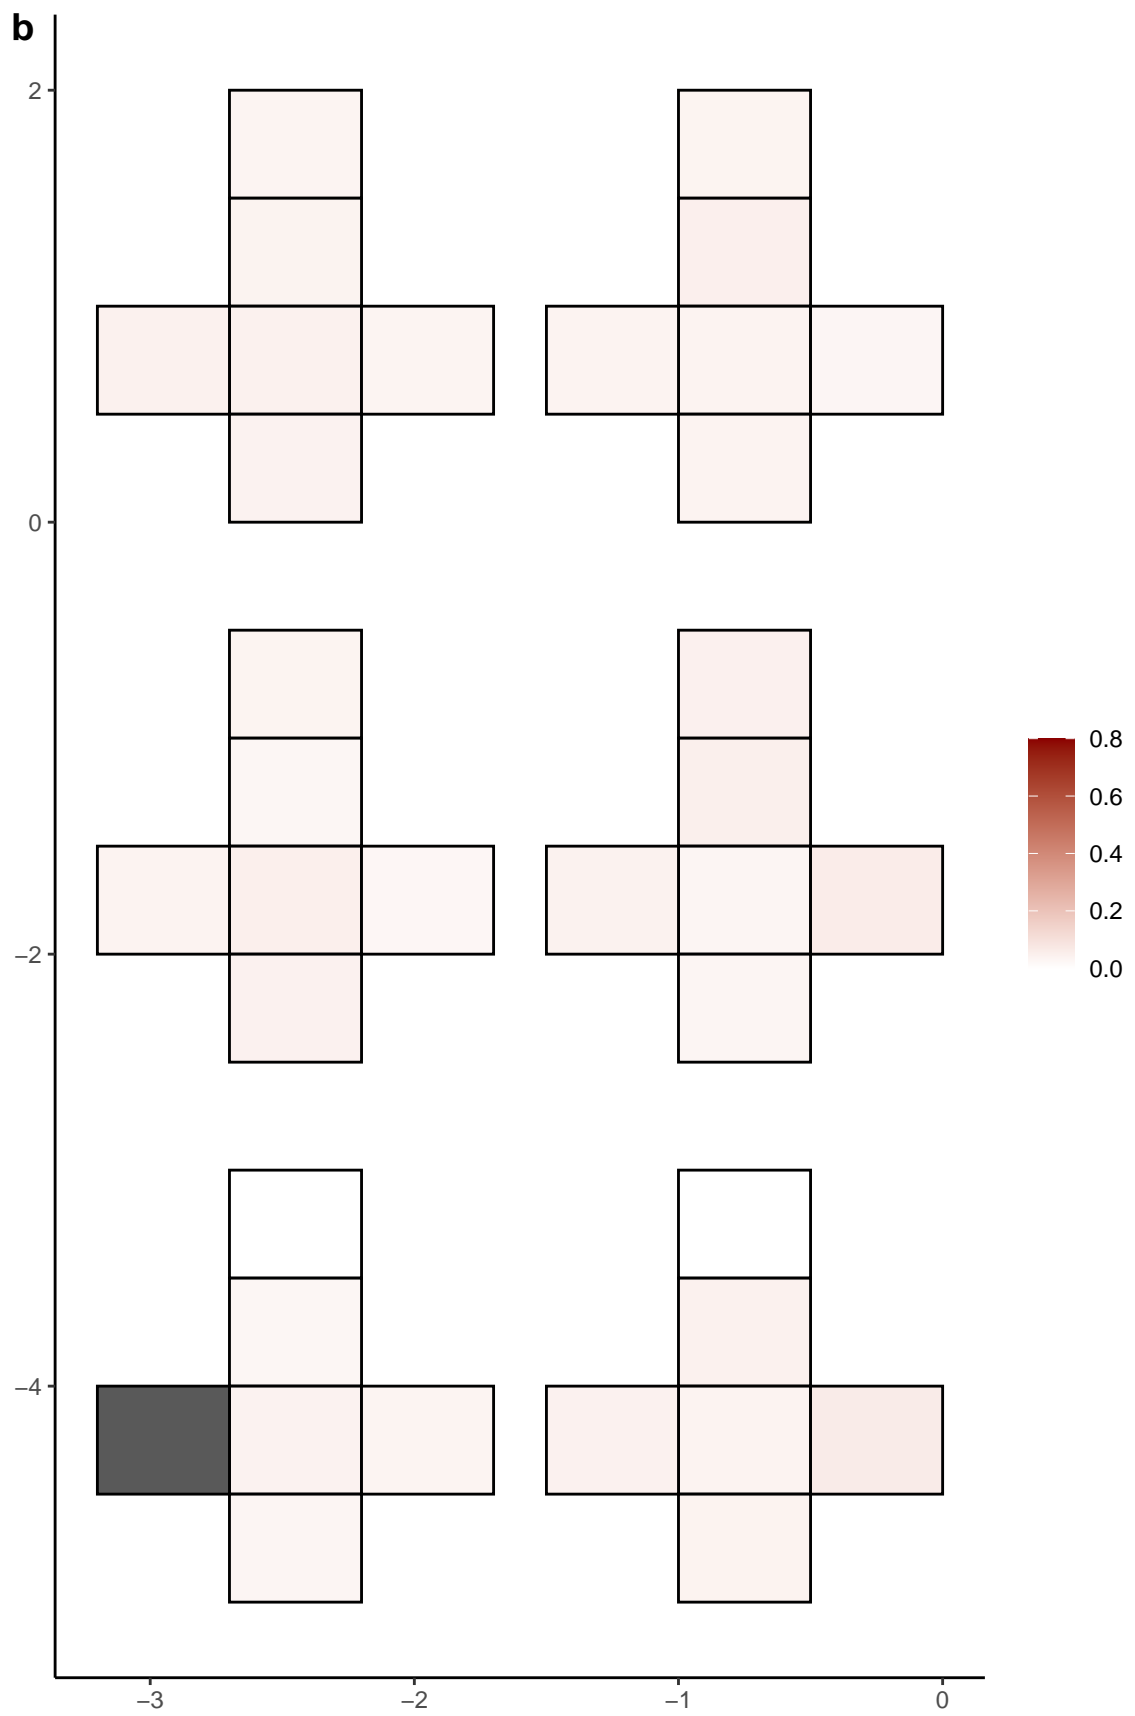

**a** ID01 9-78228121-C-G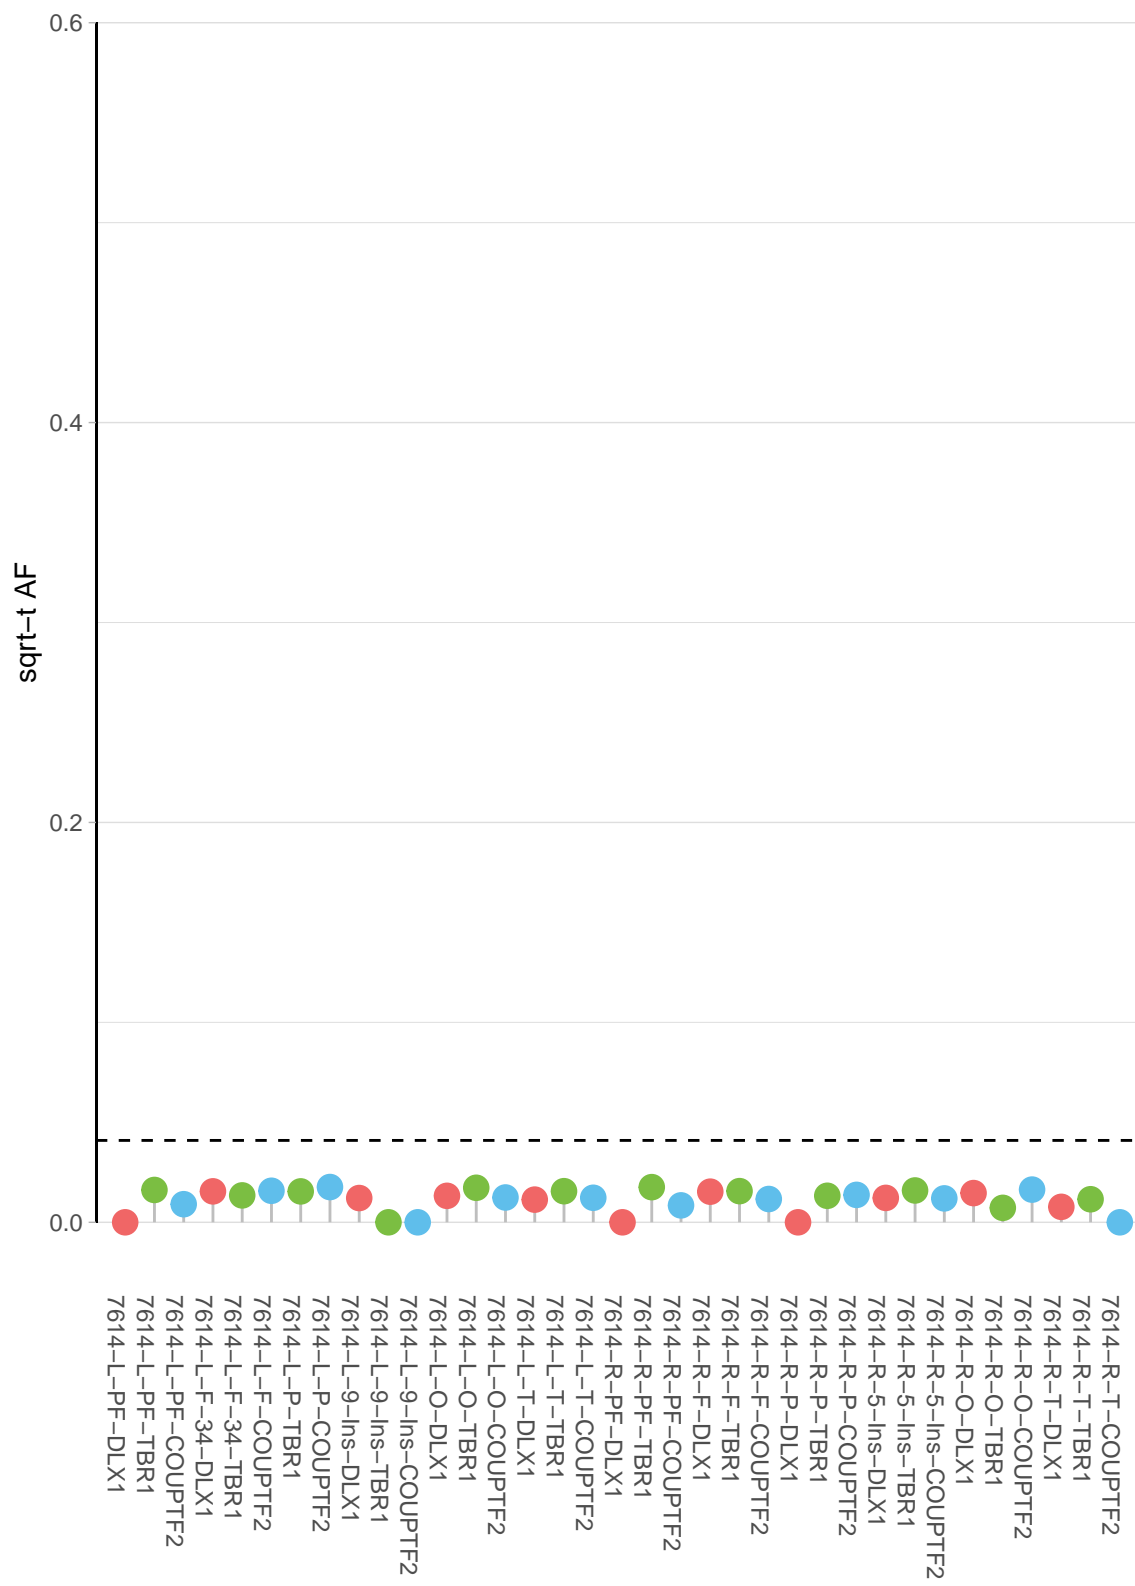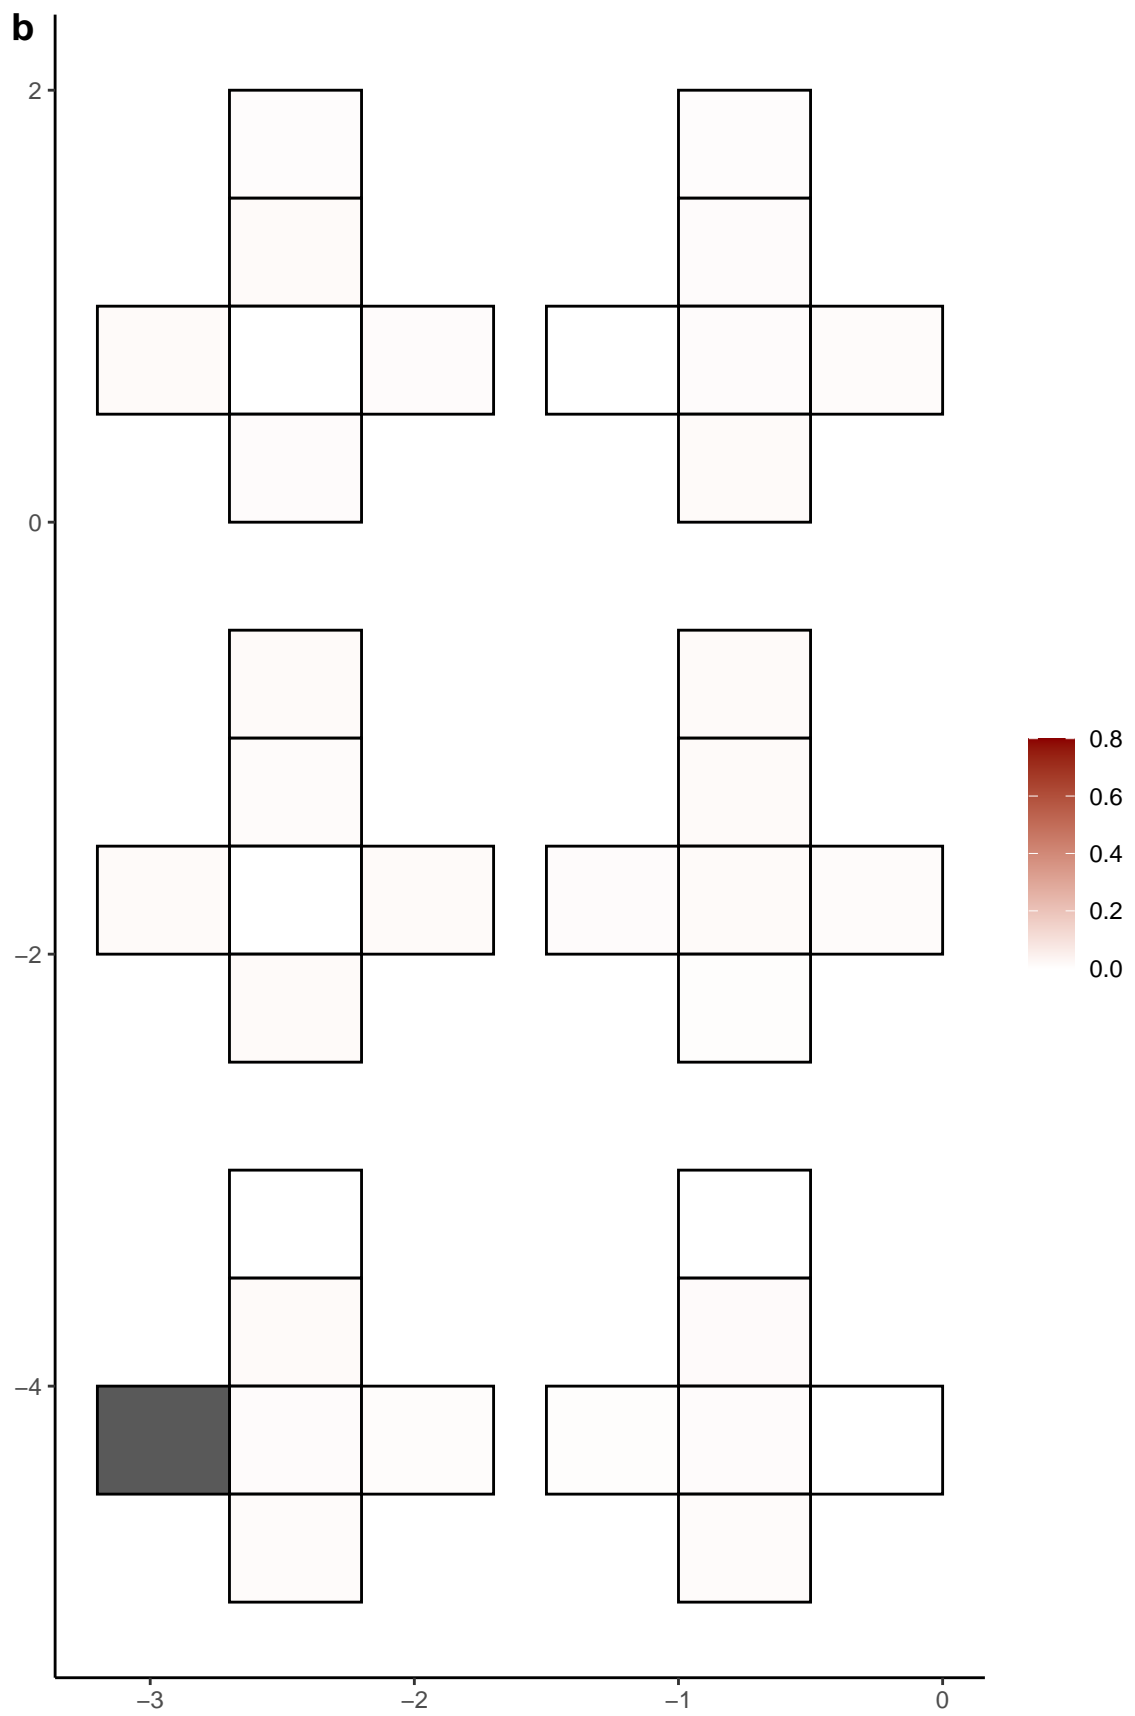

**a** ID01 9-7860755-C-T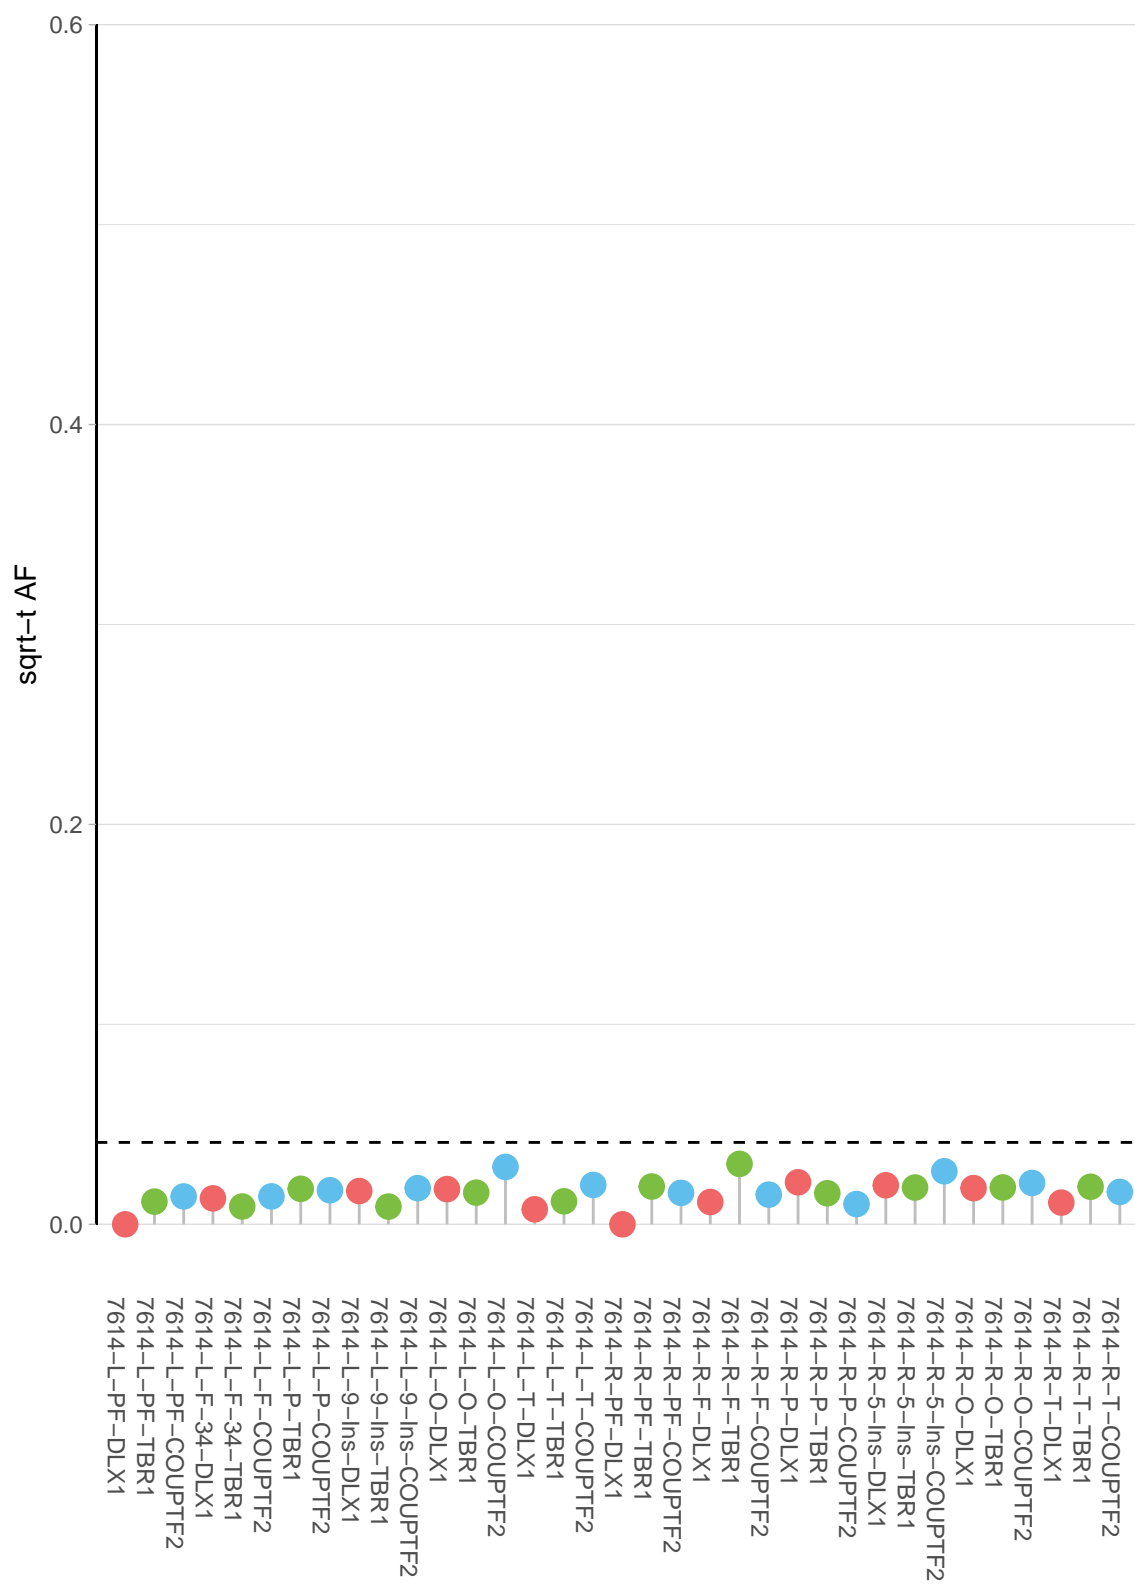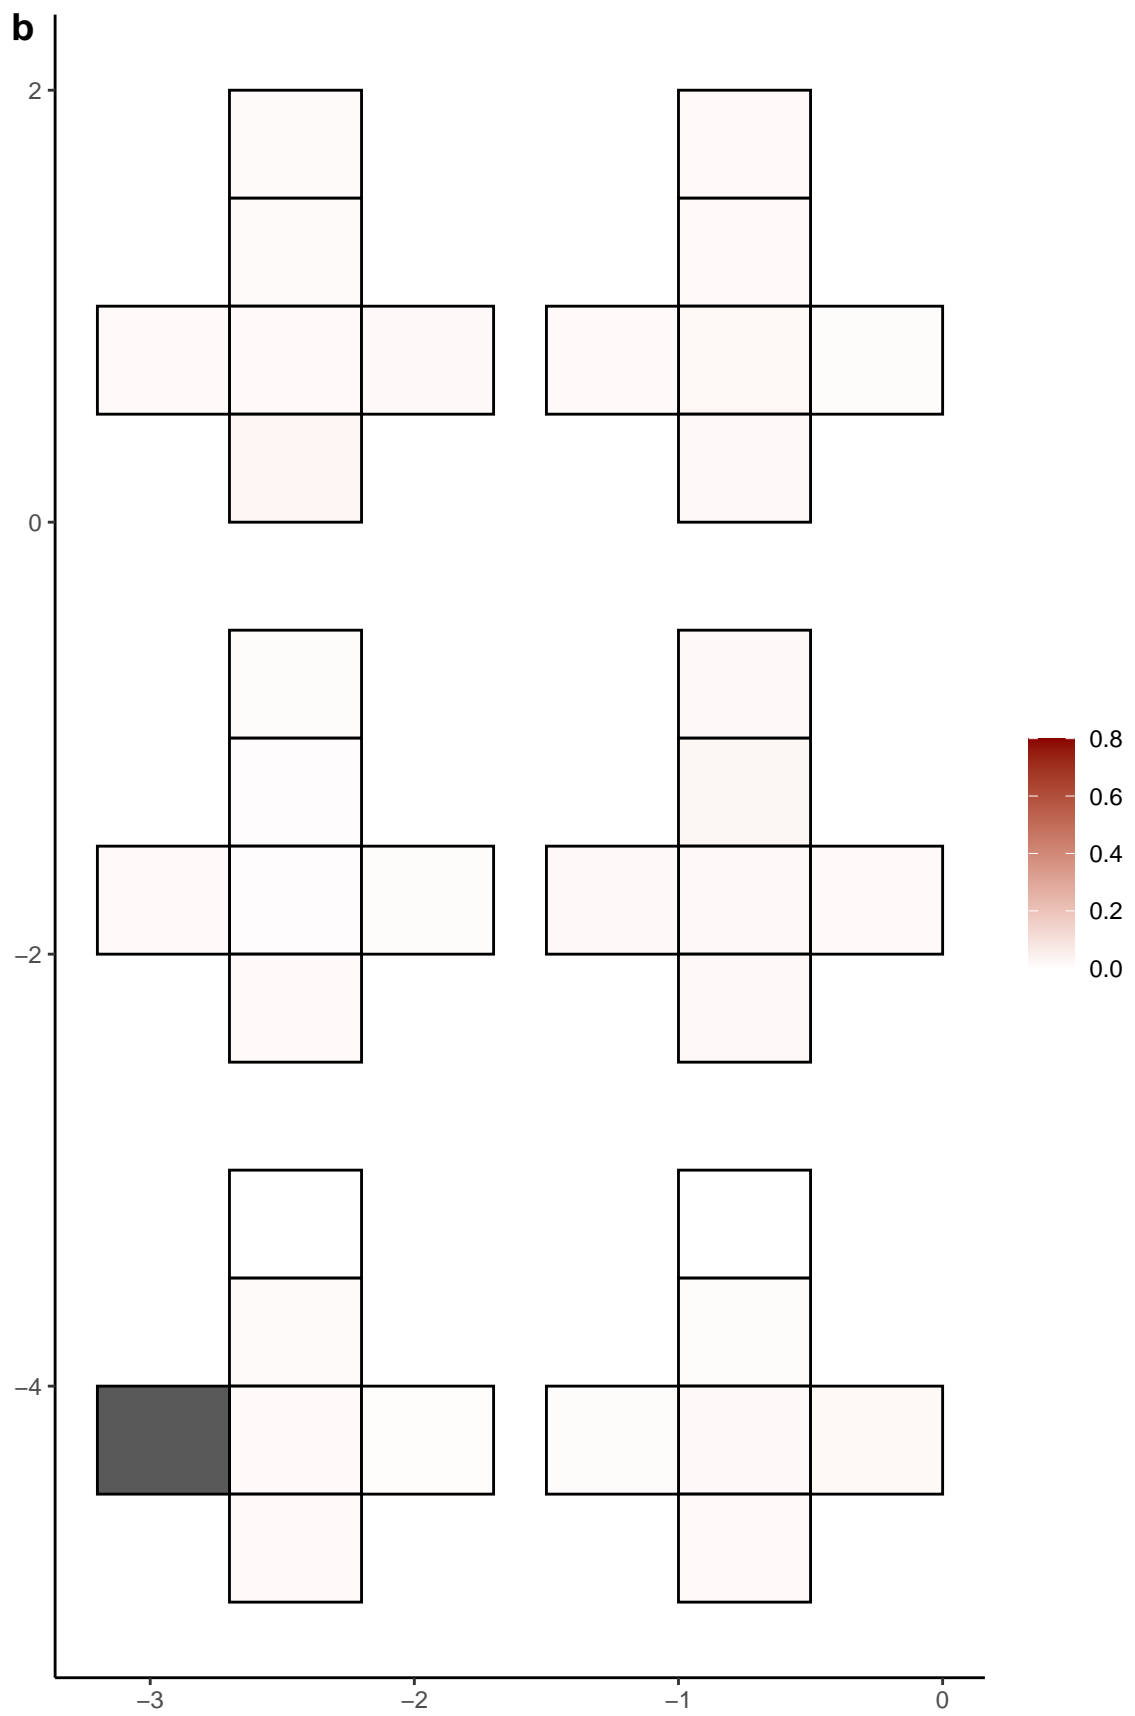

**a** ID01 9-78848802-T-G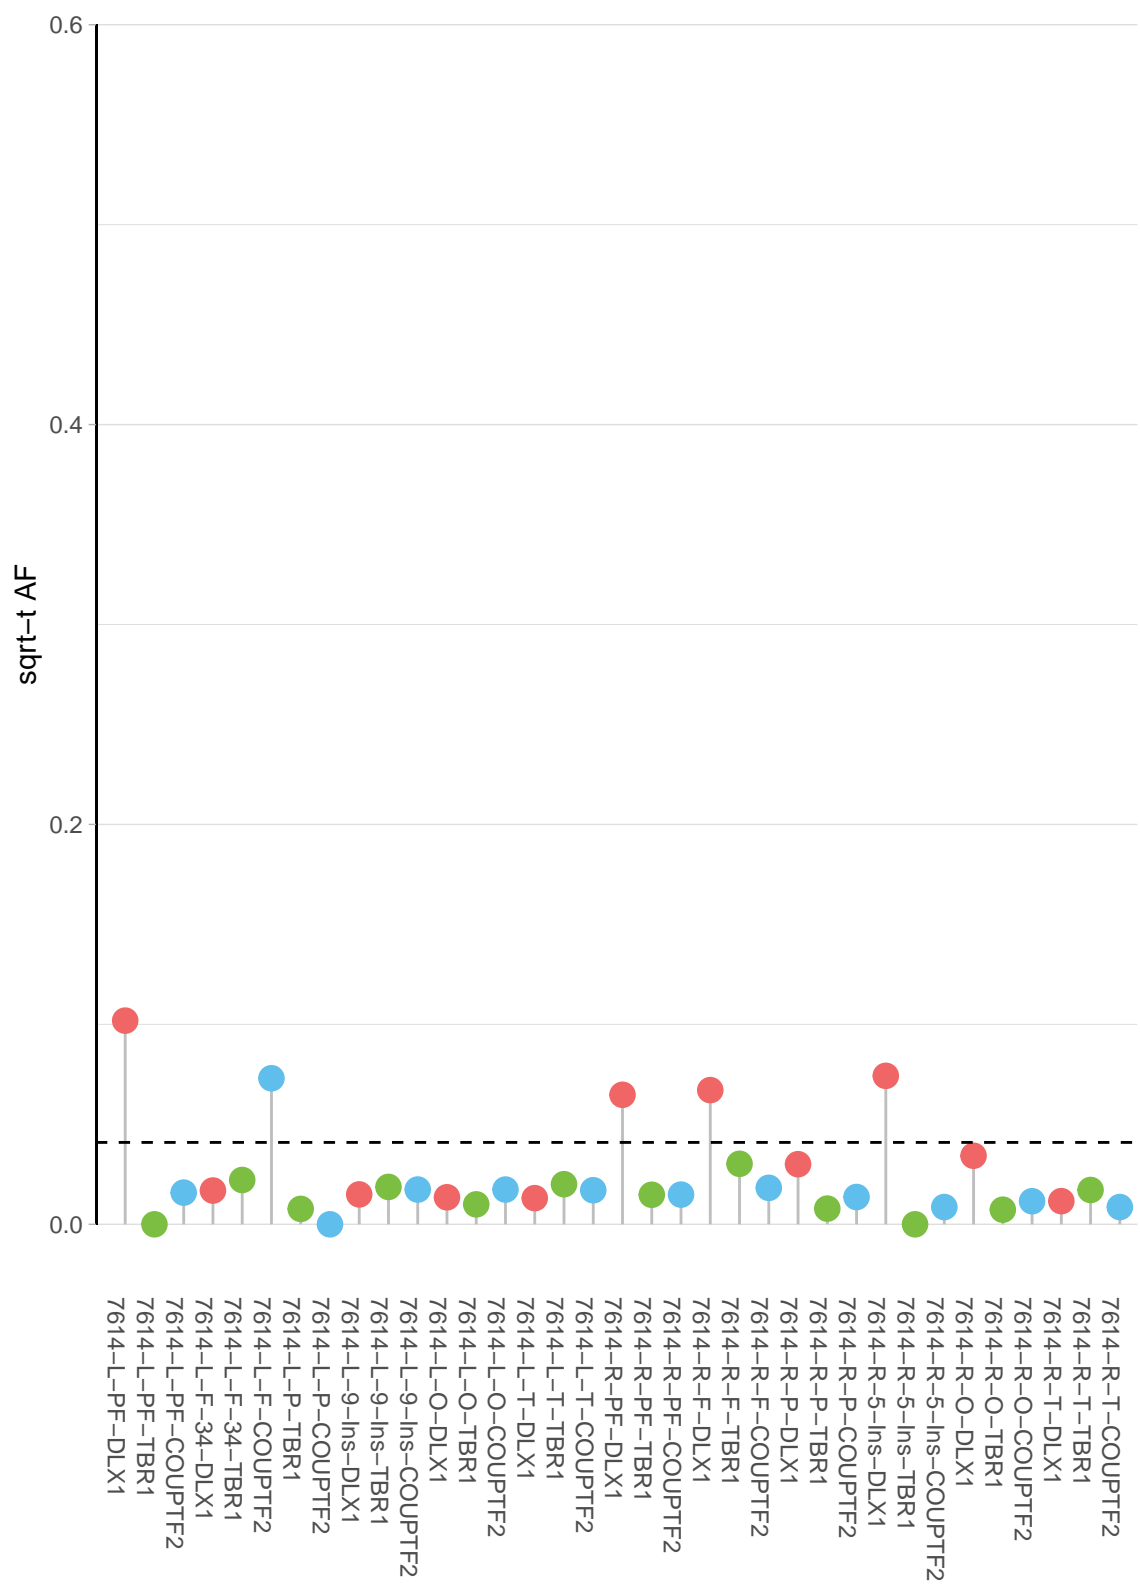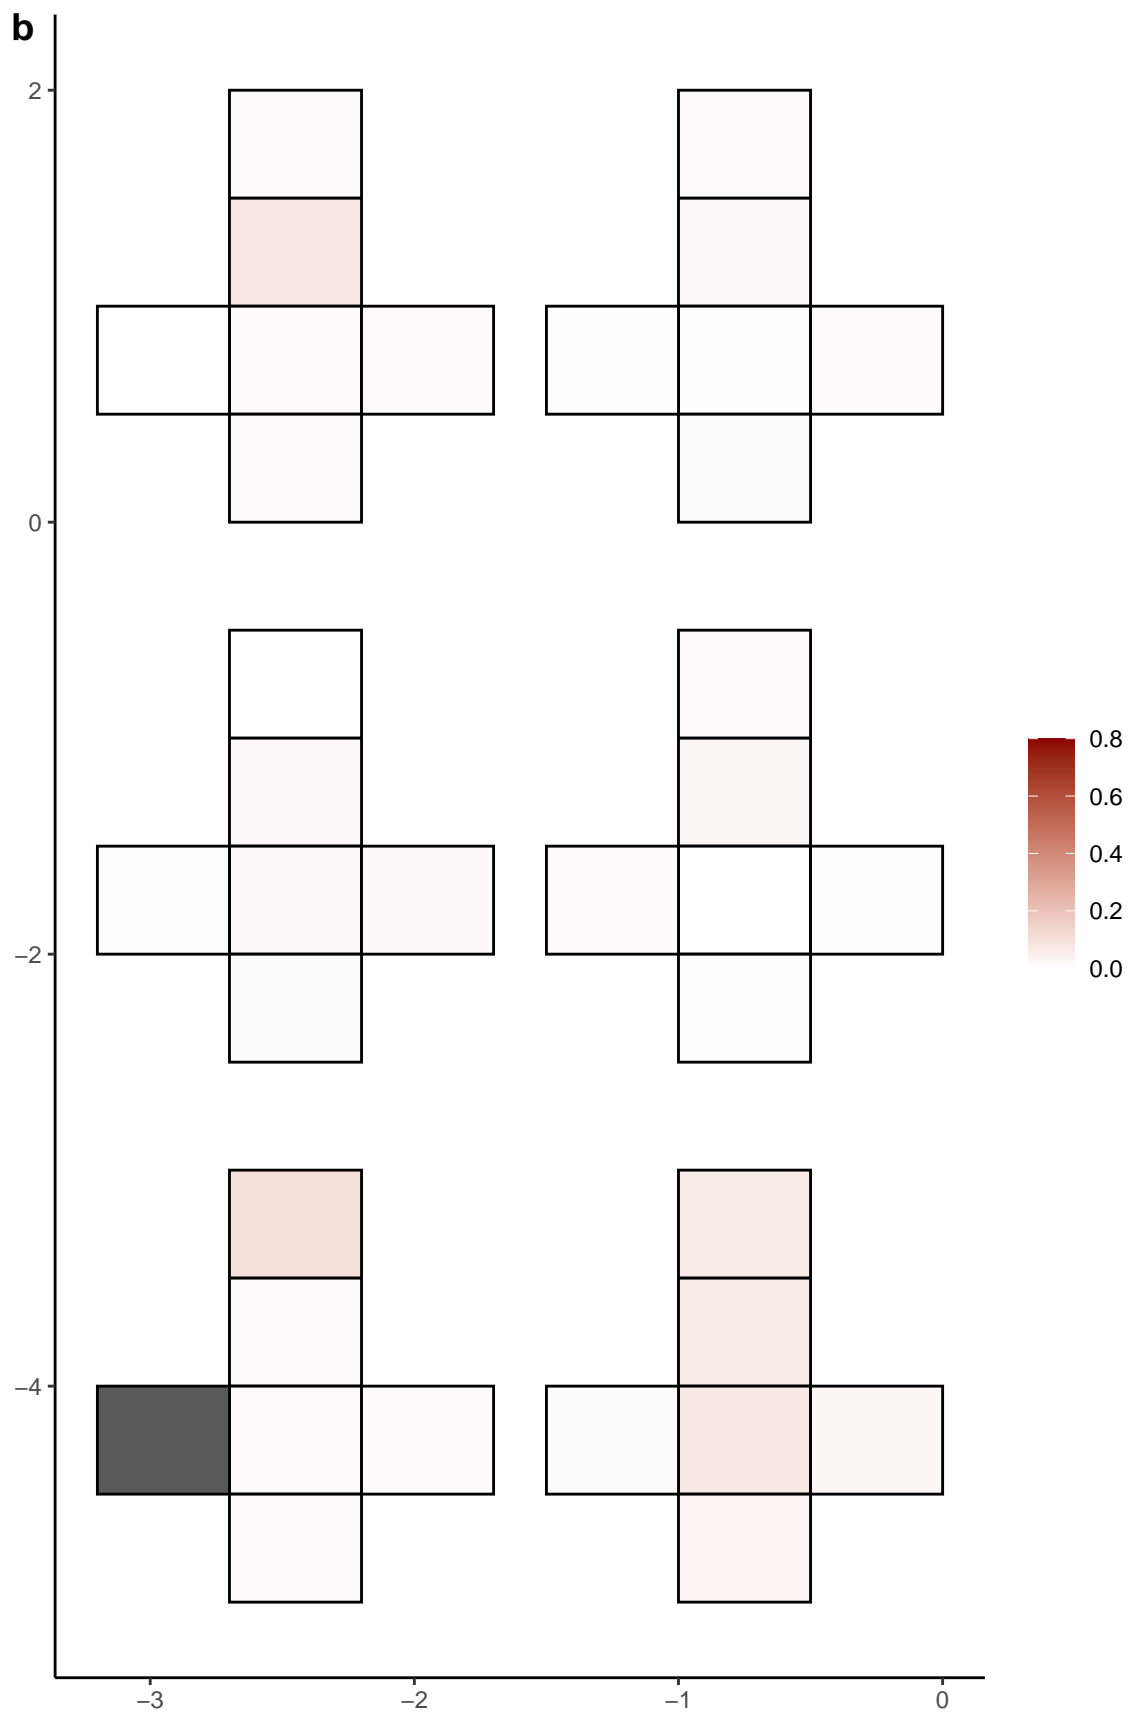



**a** ID01 9-88011667-A-C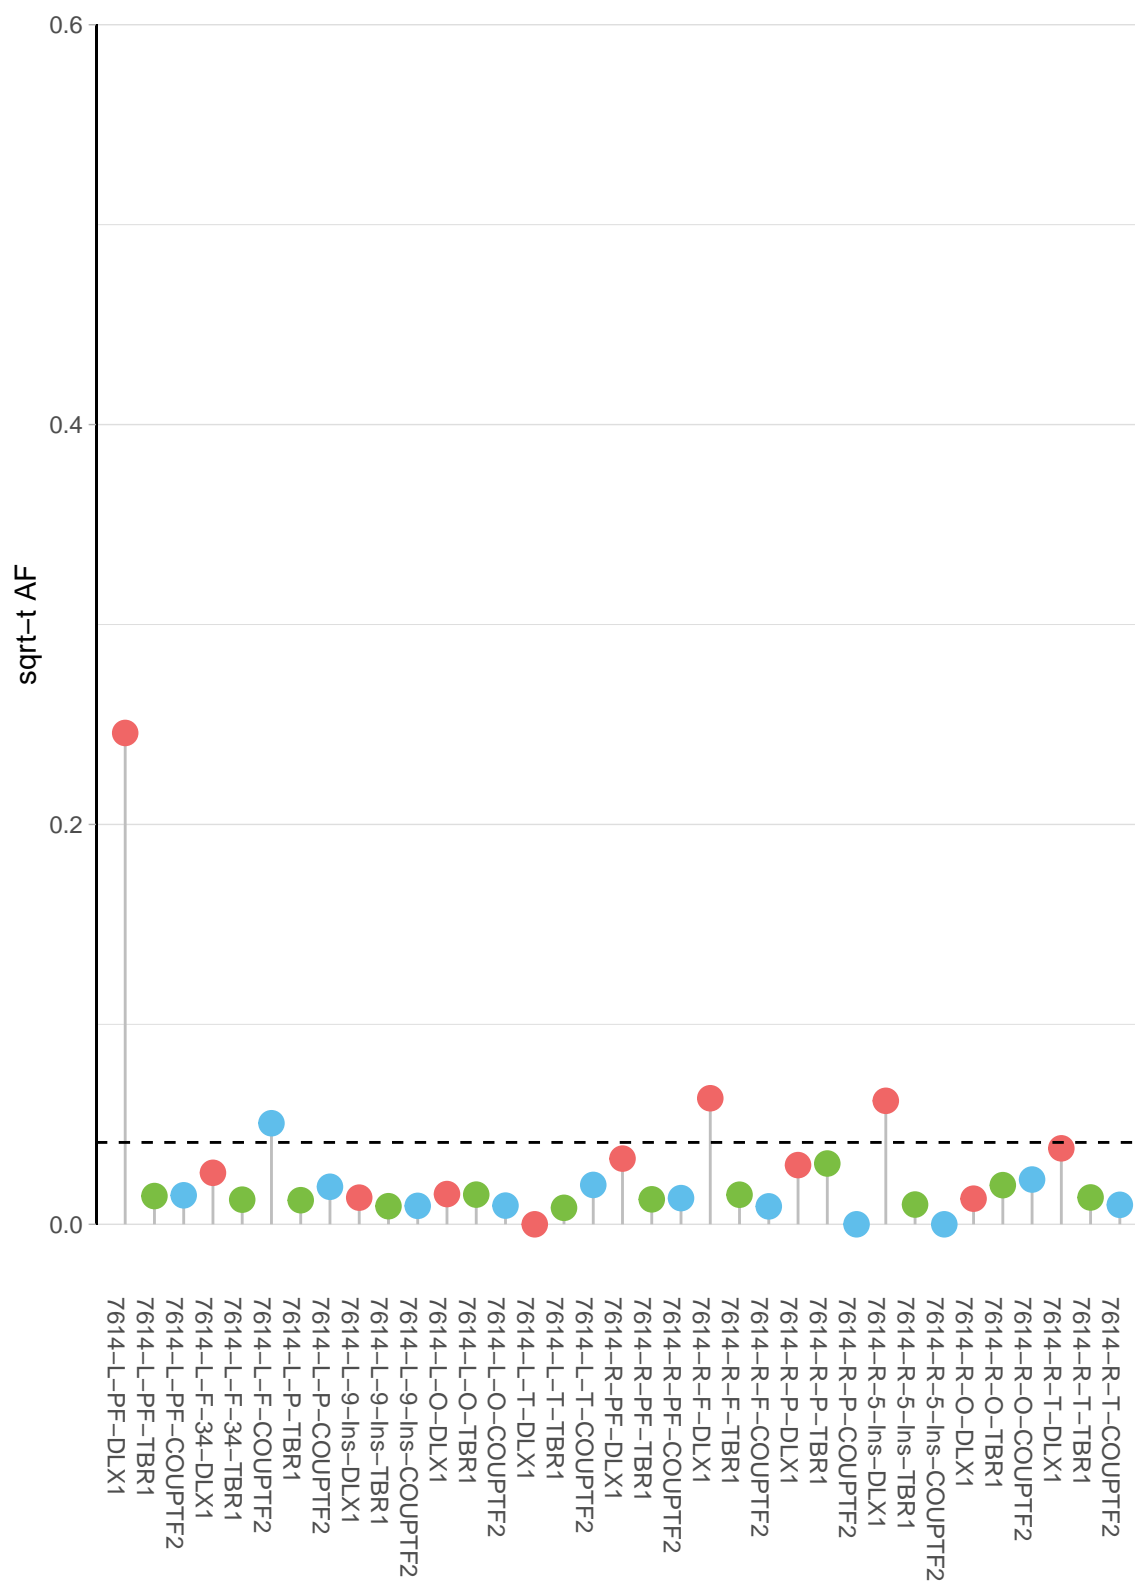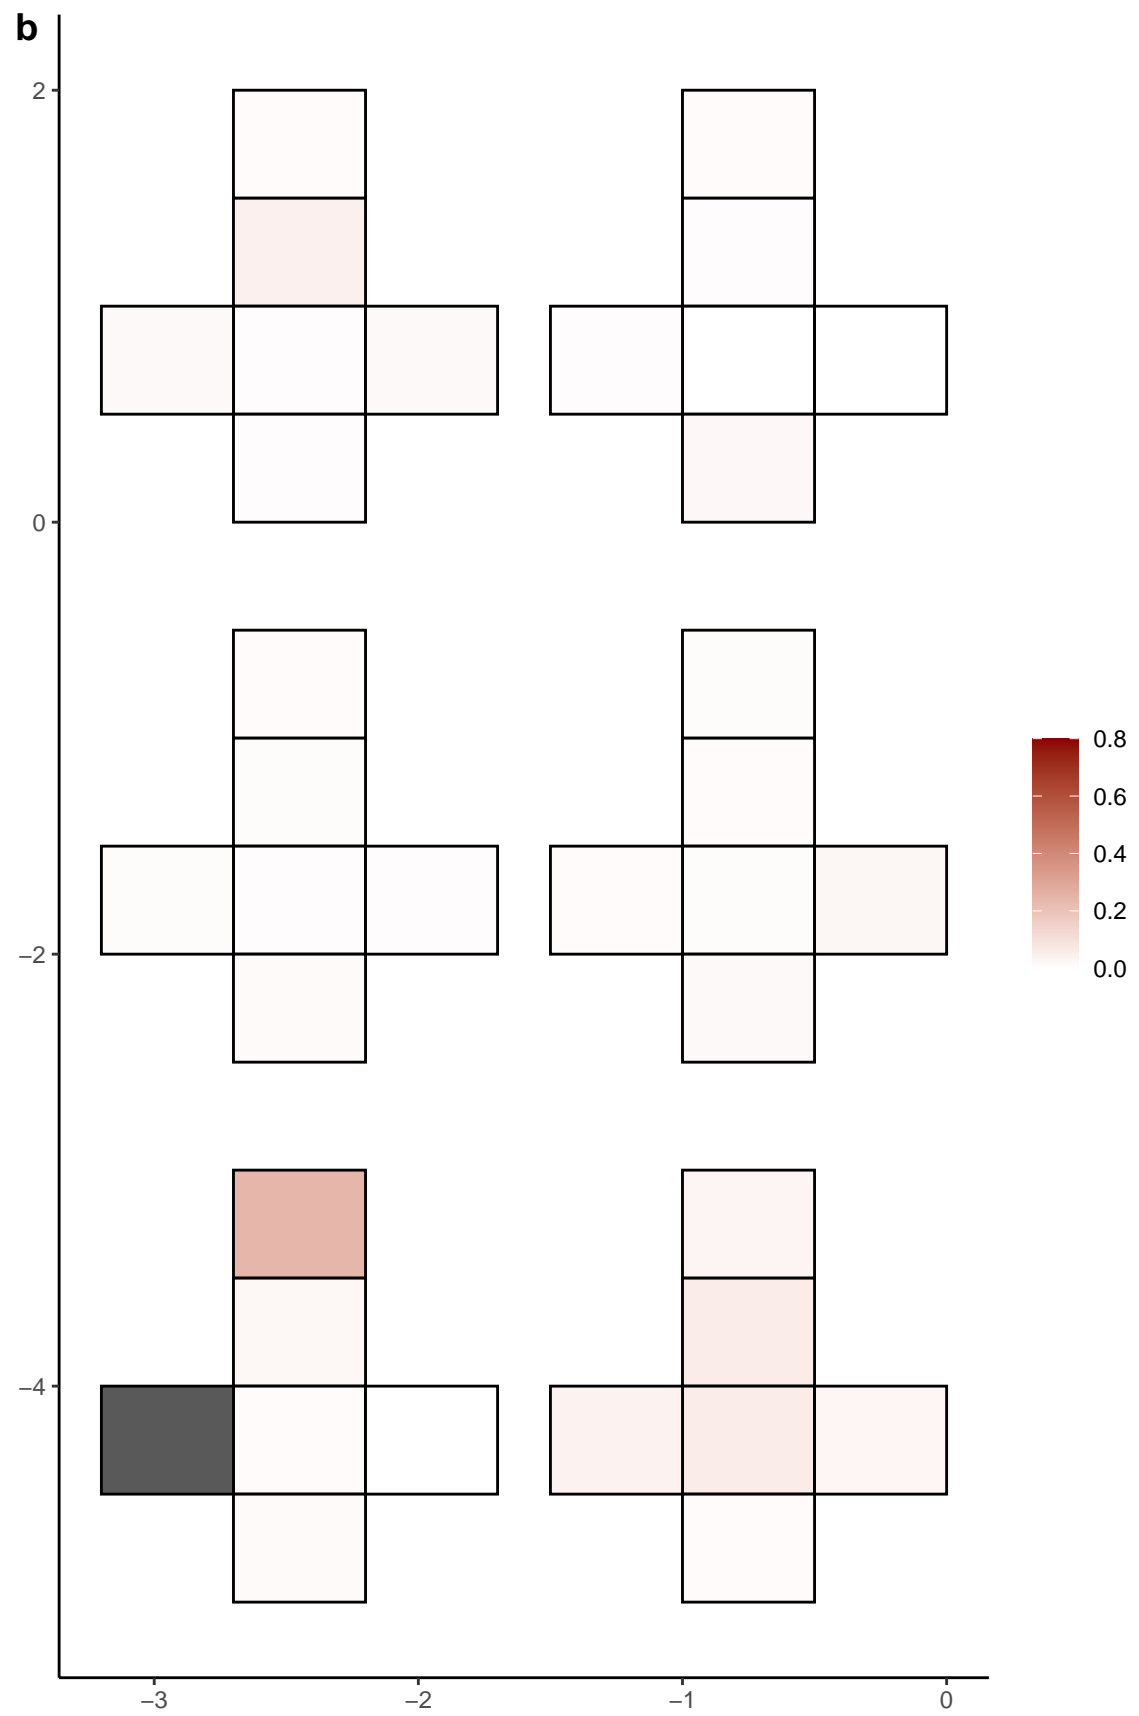

**a** ID01 9-9457115-T-A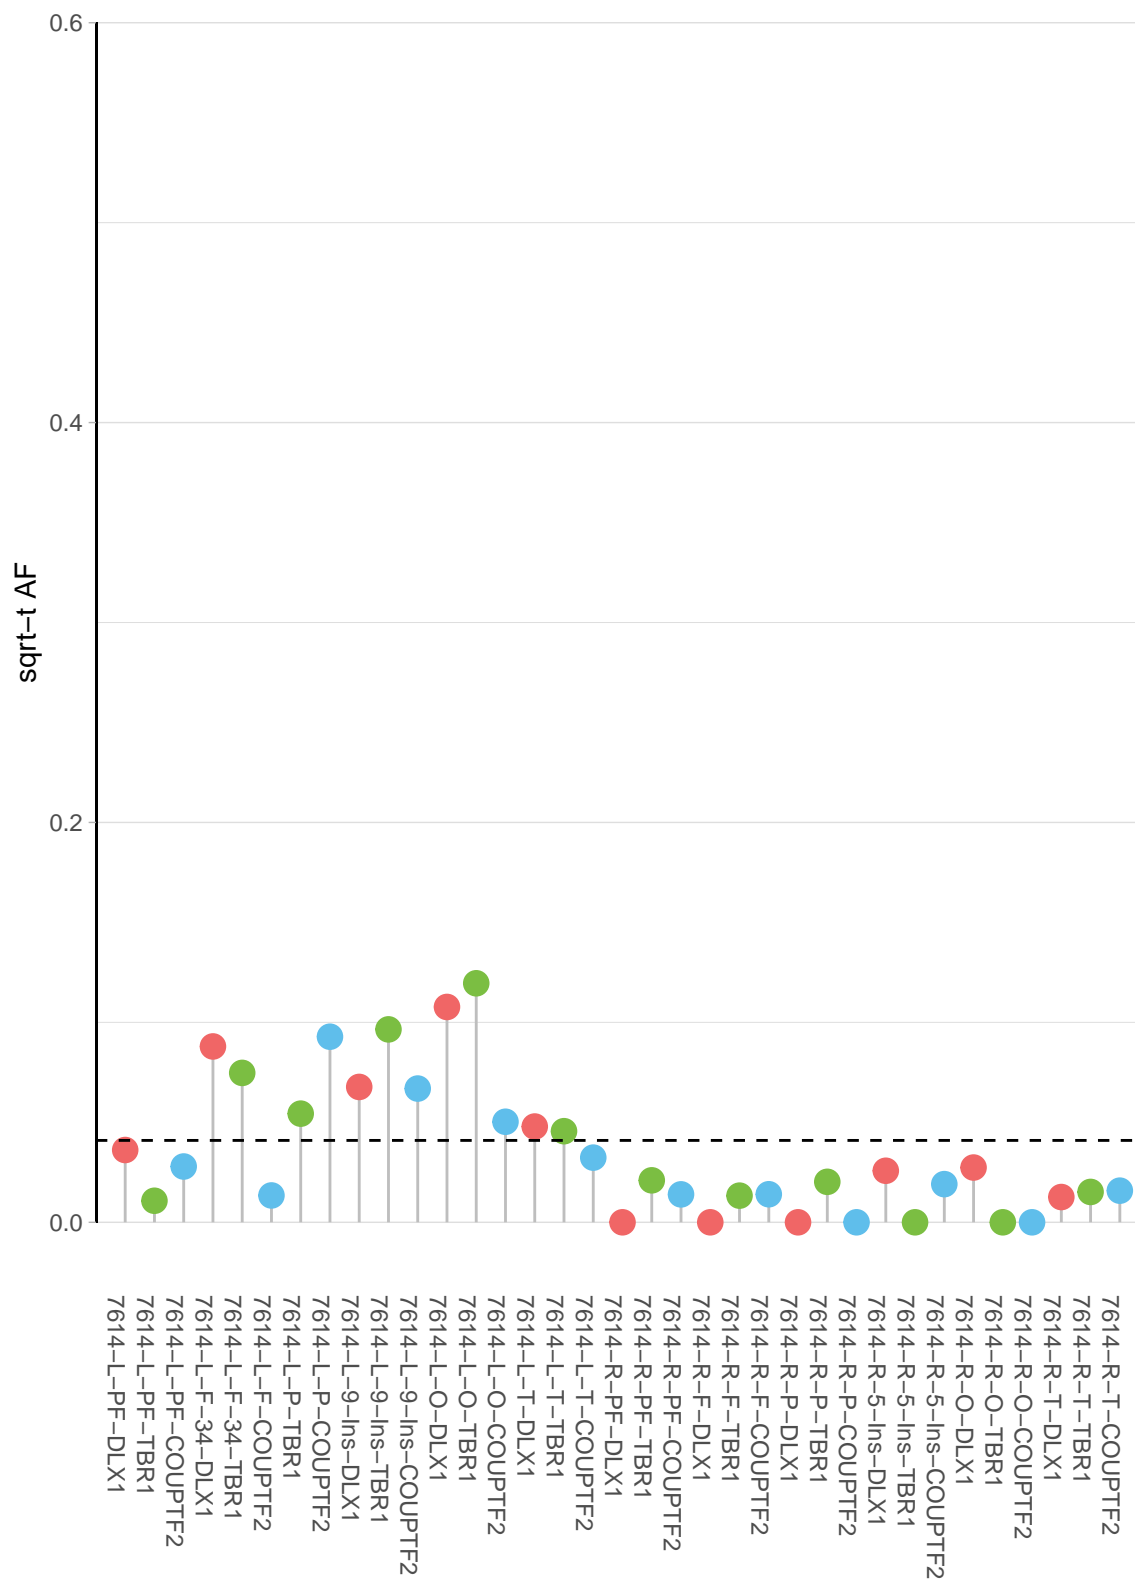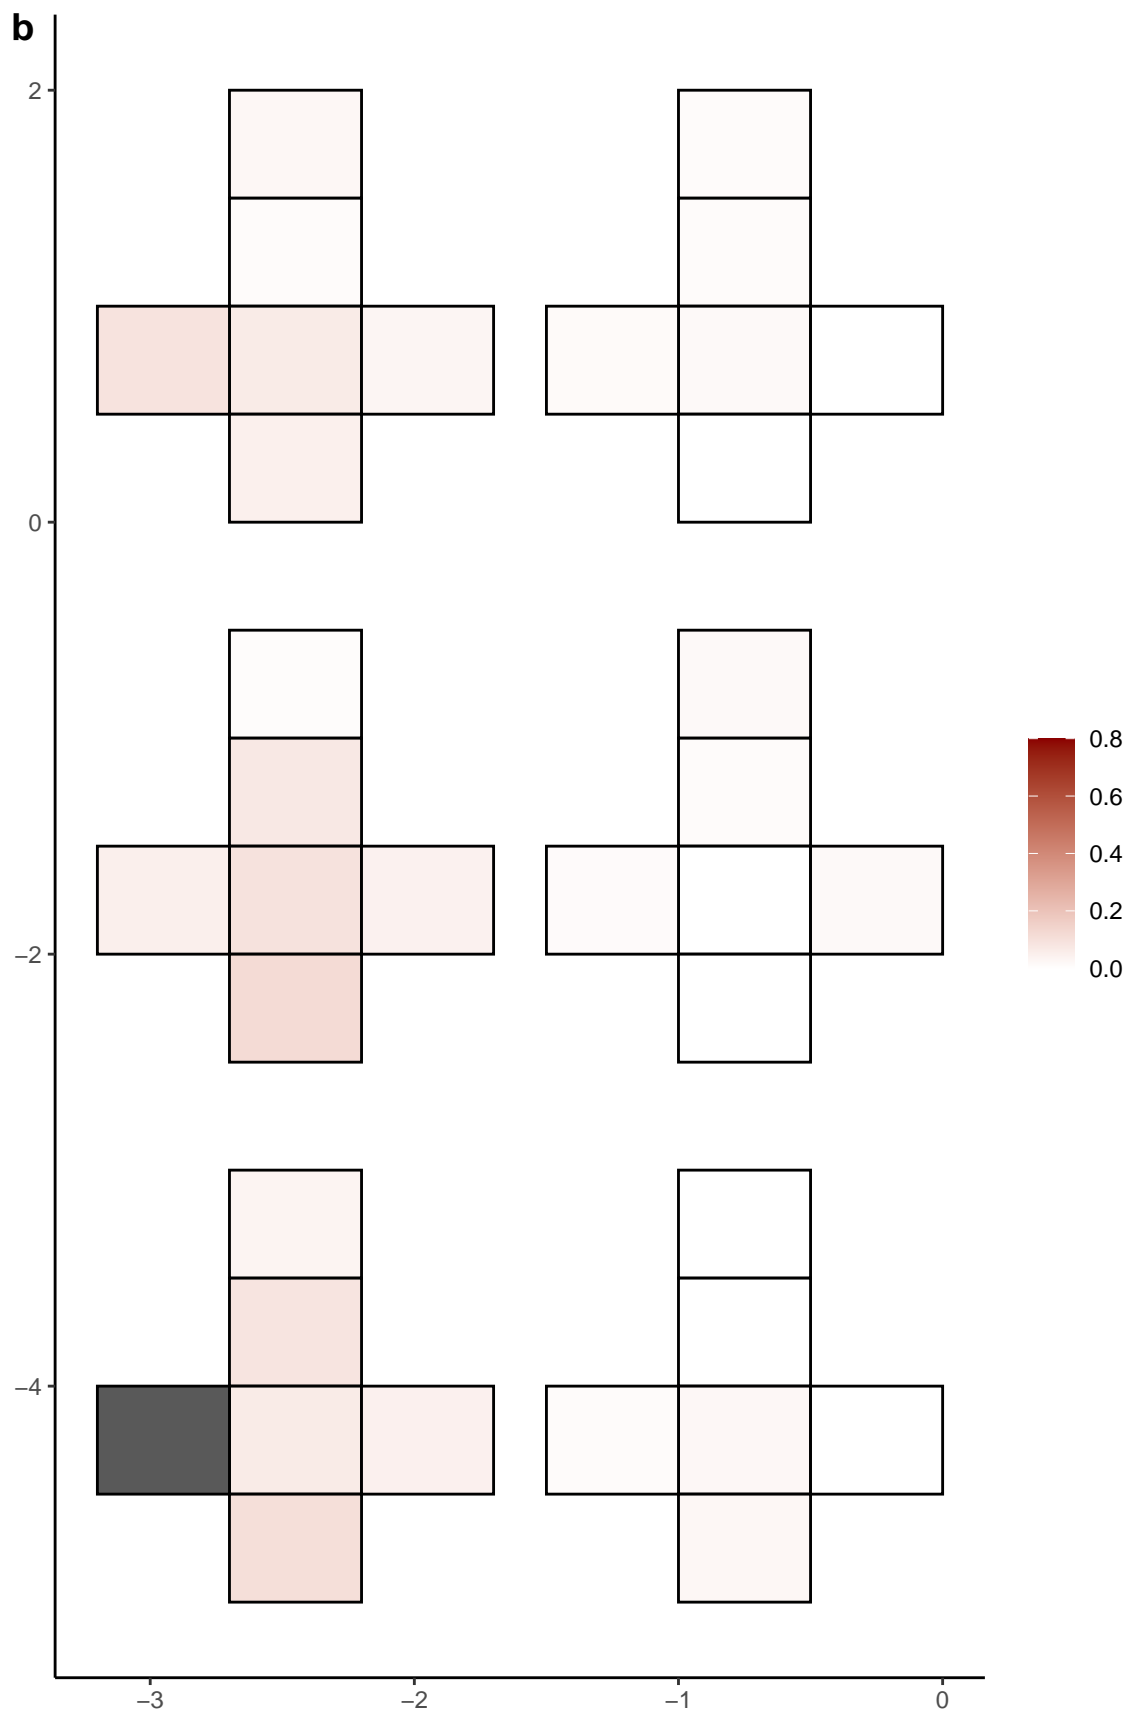

**a** ID01 X-10480747-T-A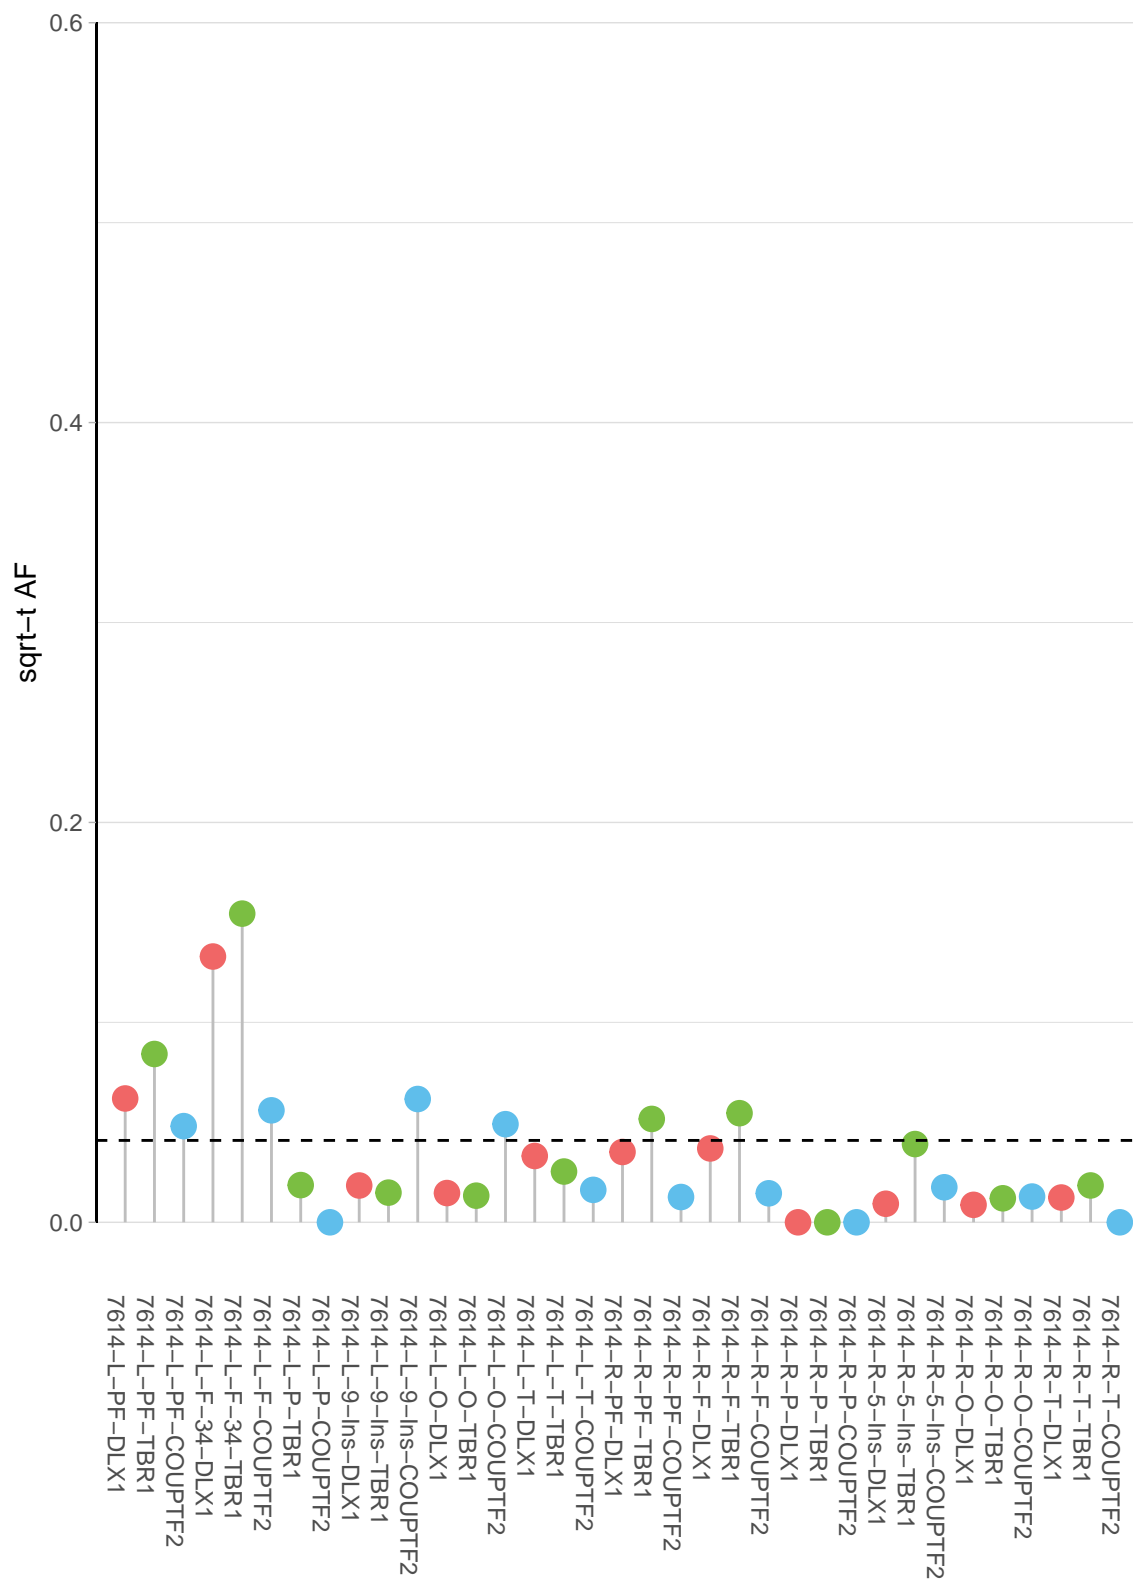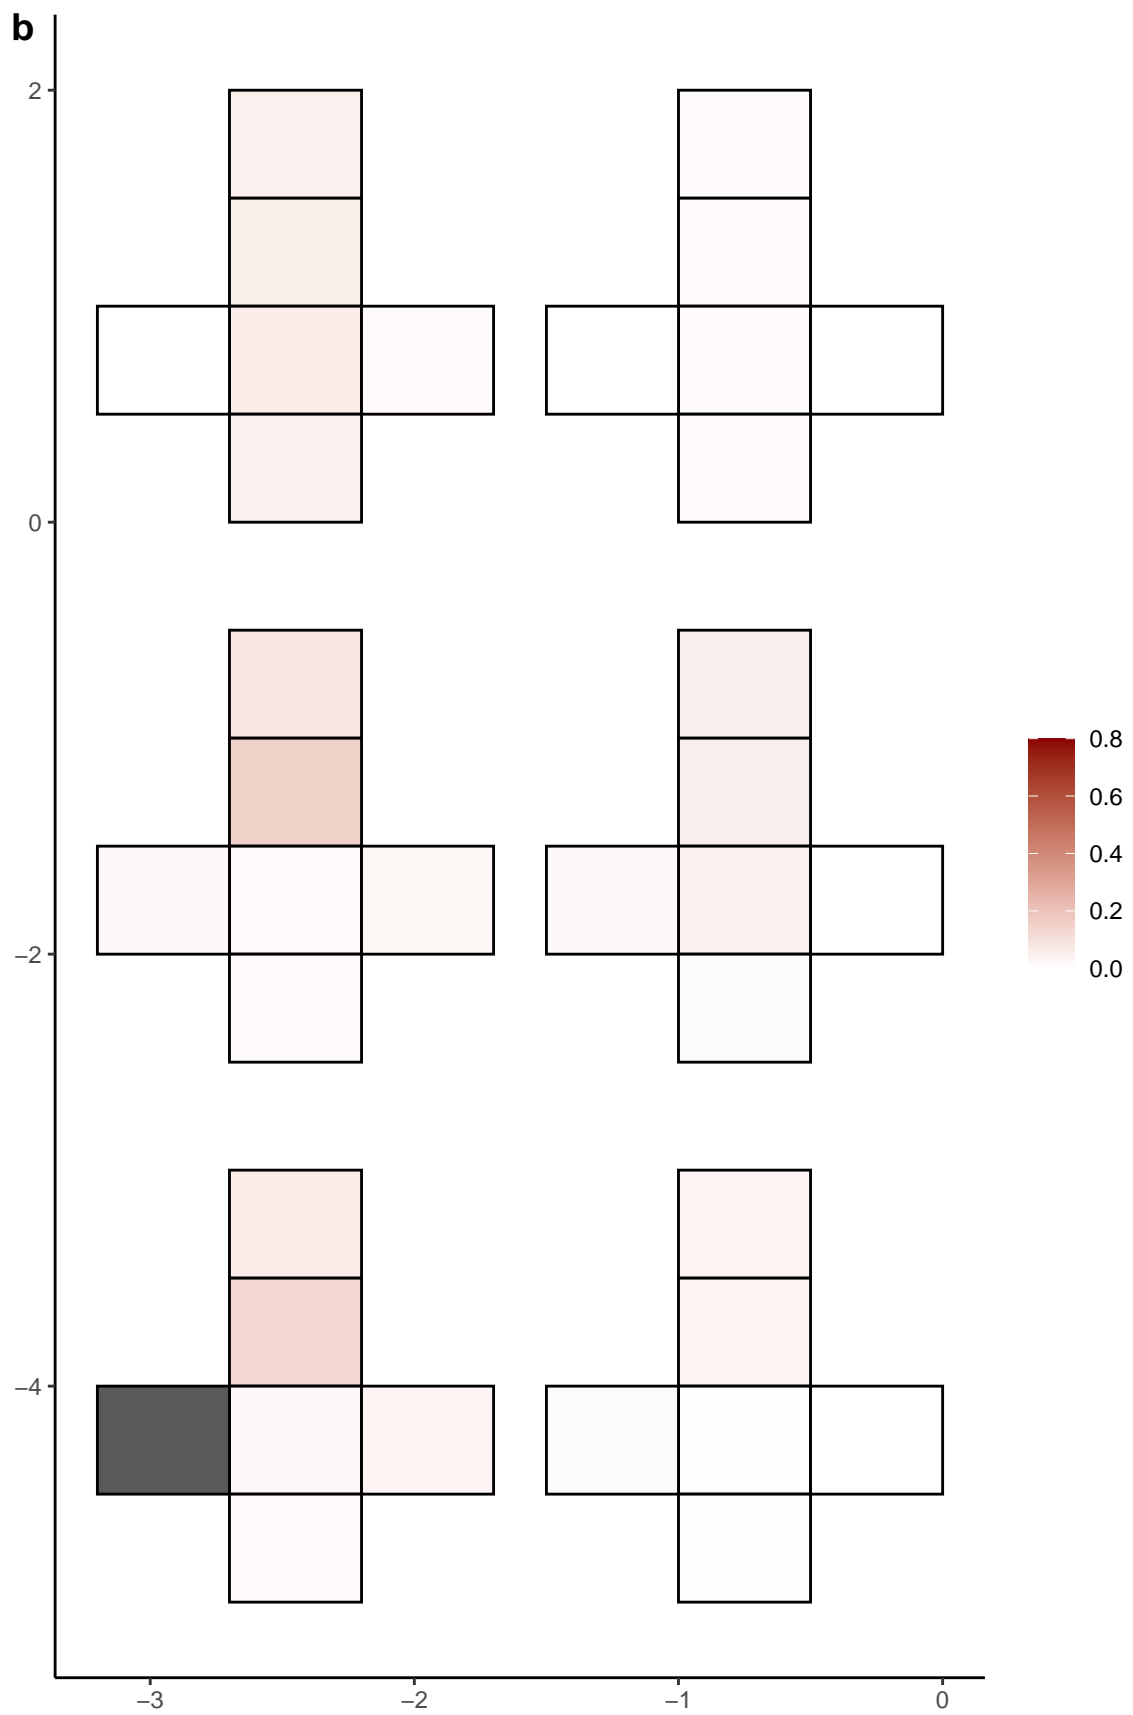

**a** ID01 X-117352547-A-T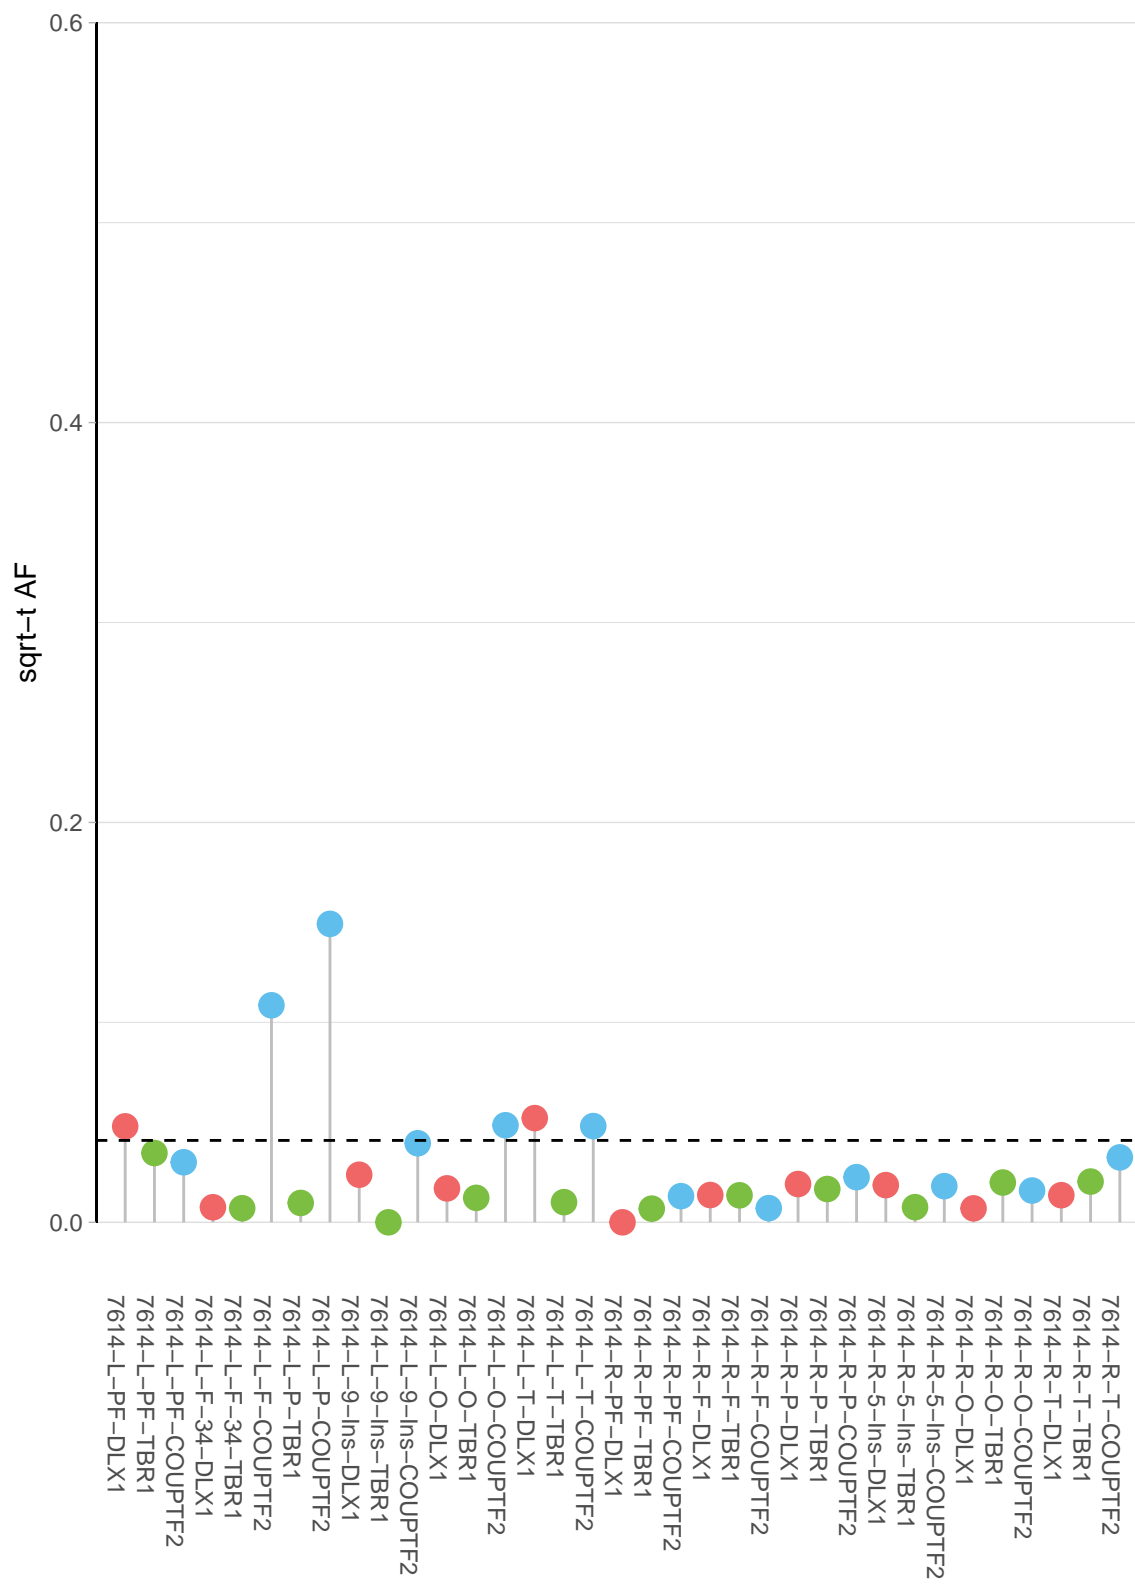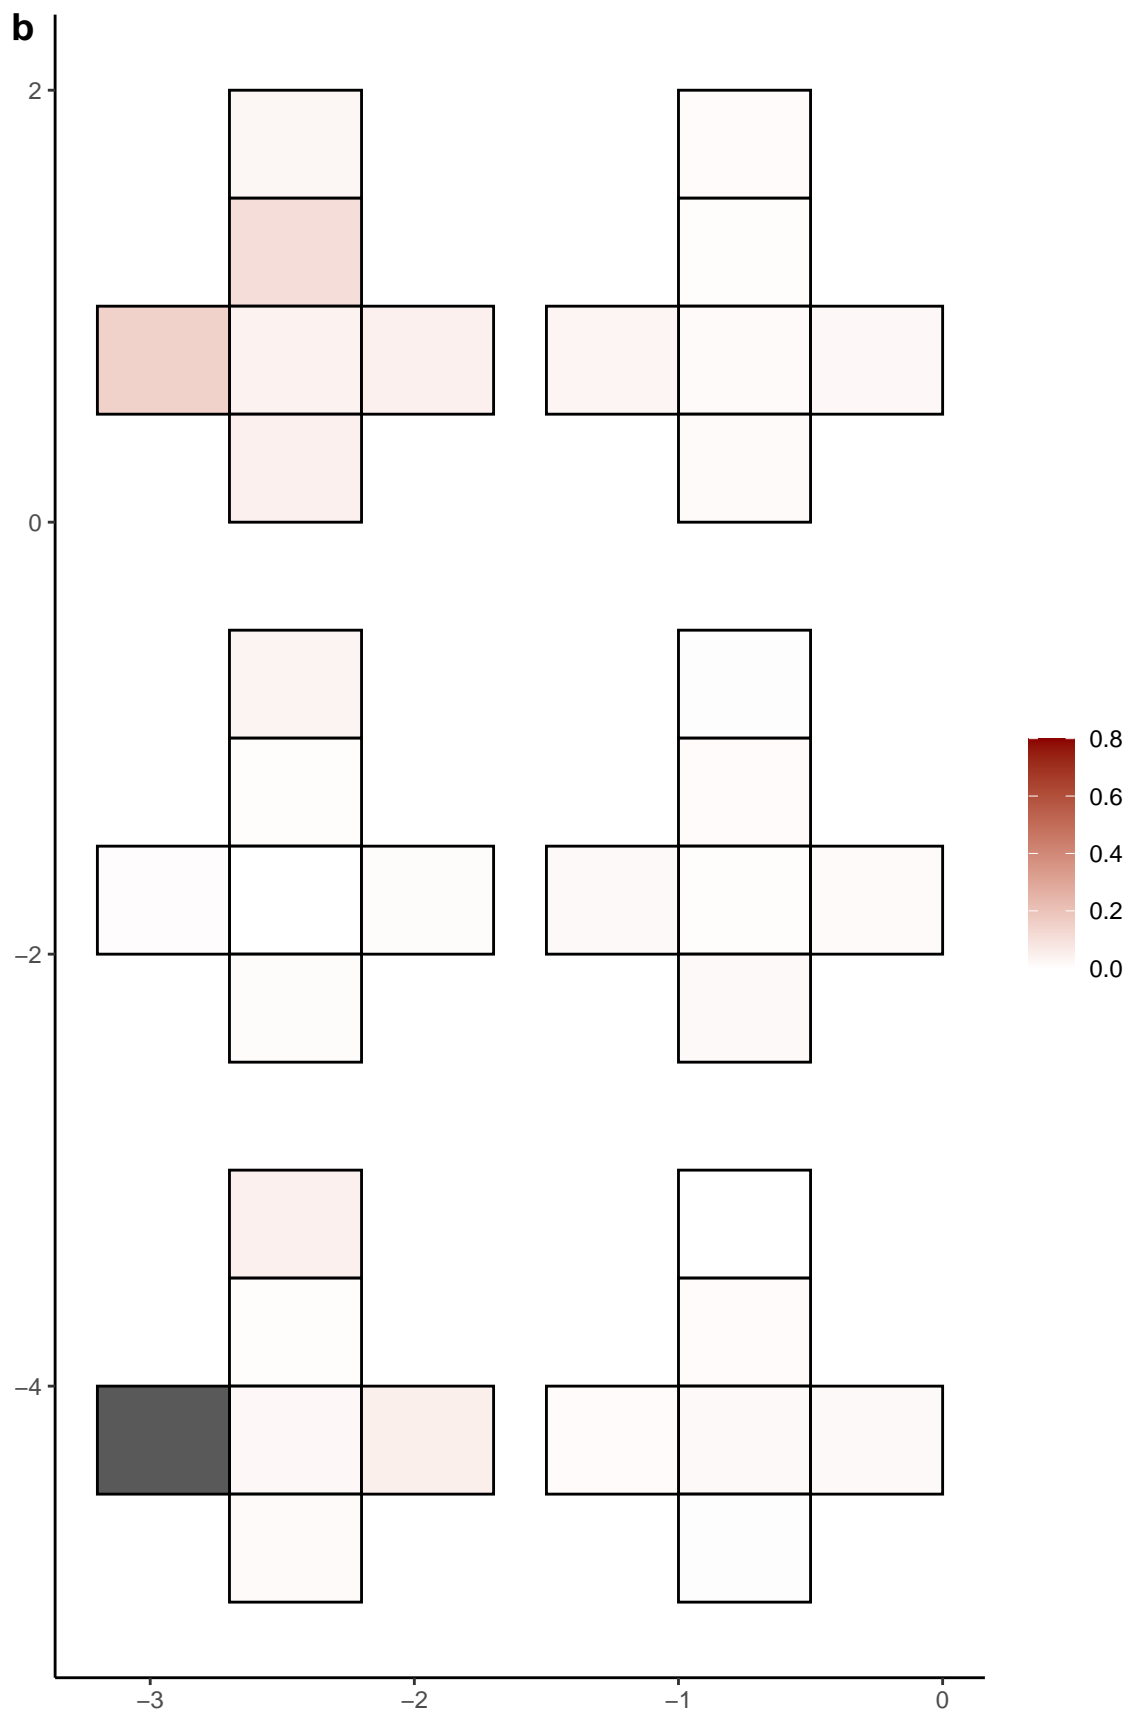

**a** ID01 X-124310752-C-T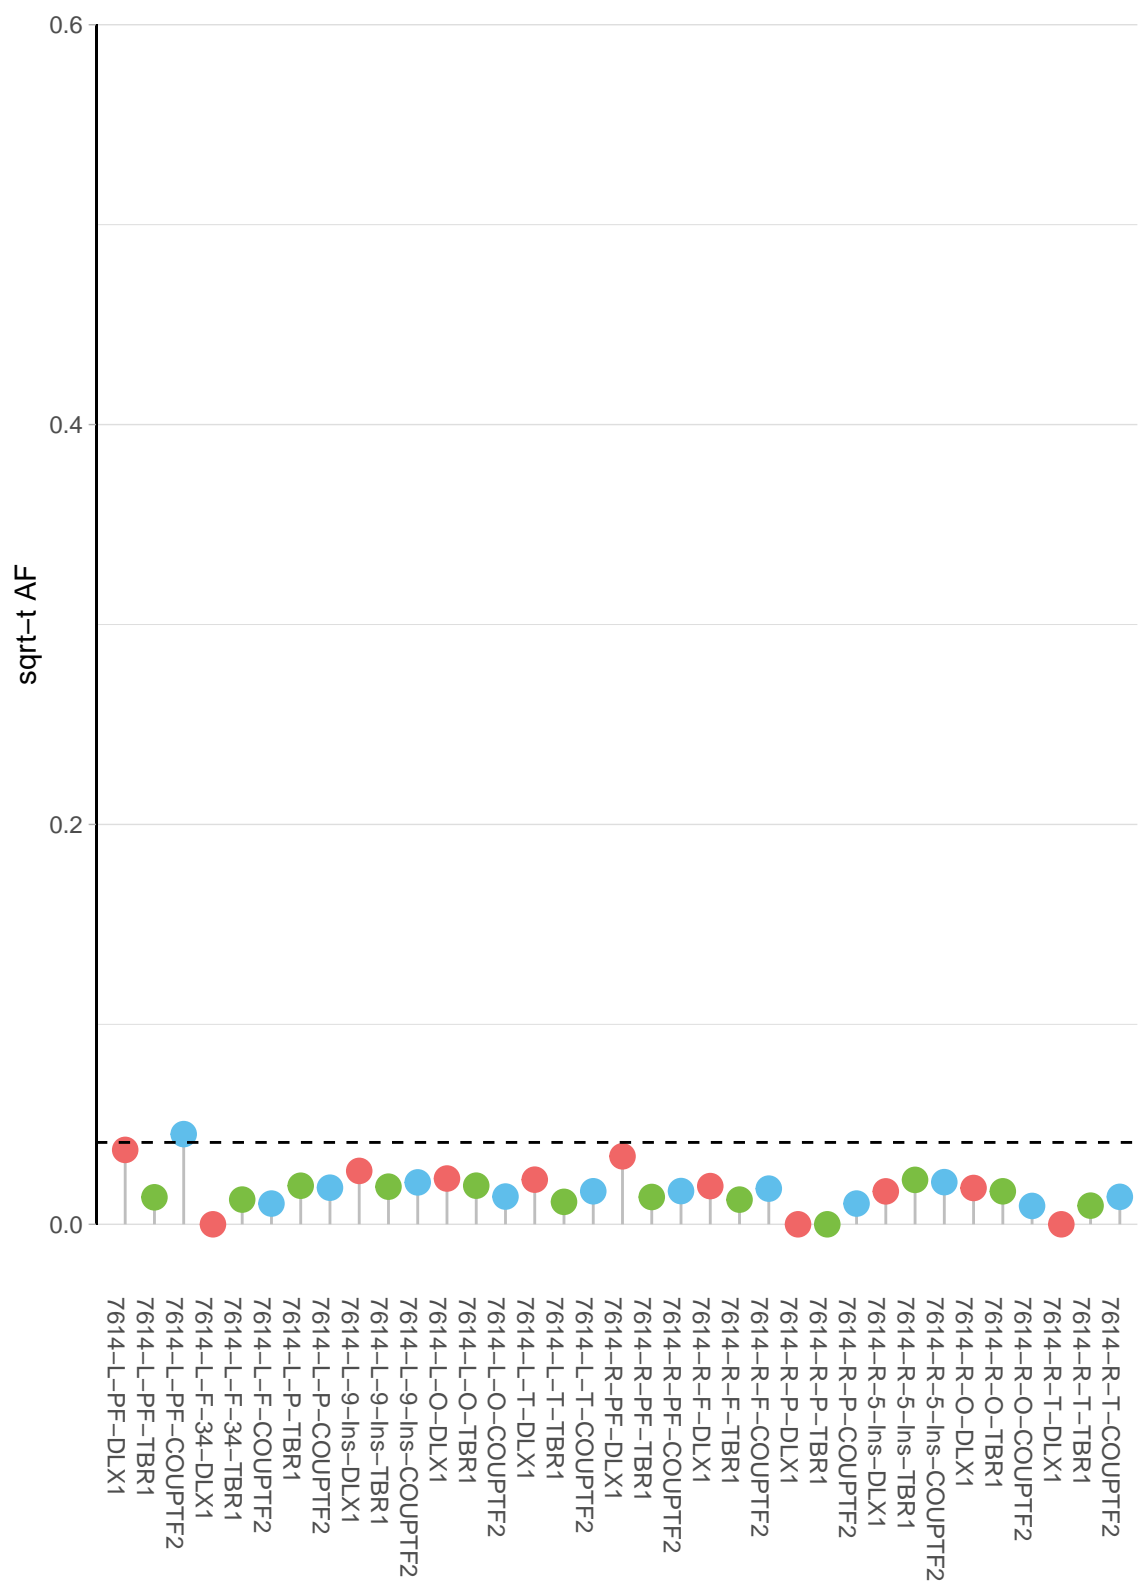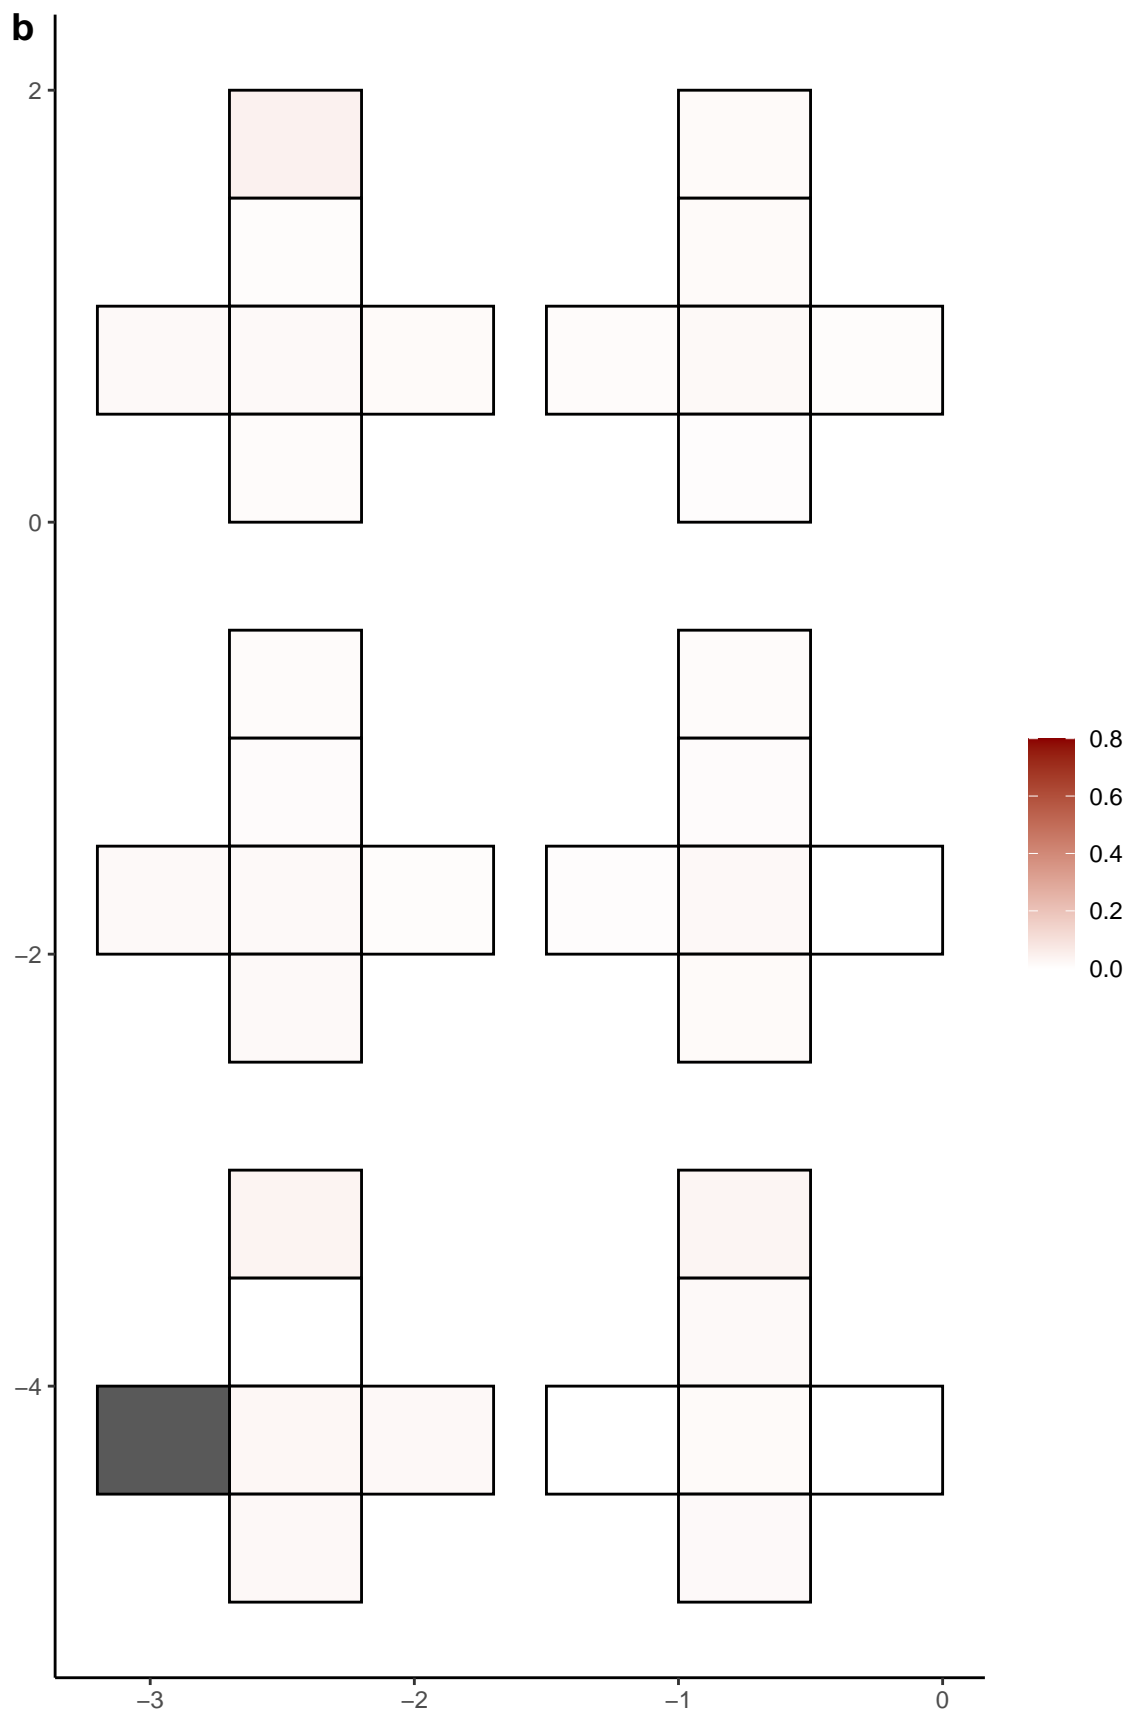

**a** ID01 X-130898293-A-G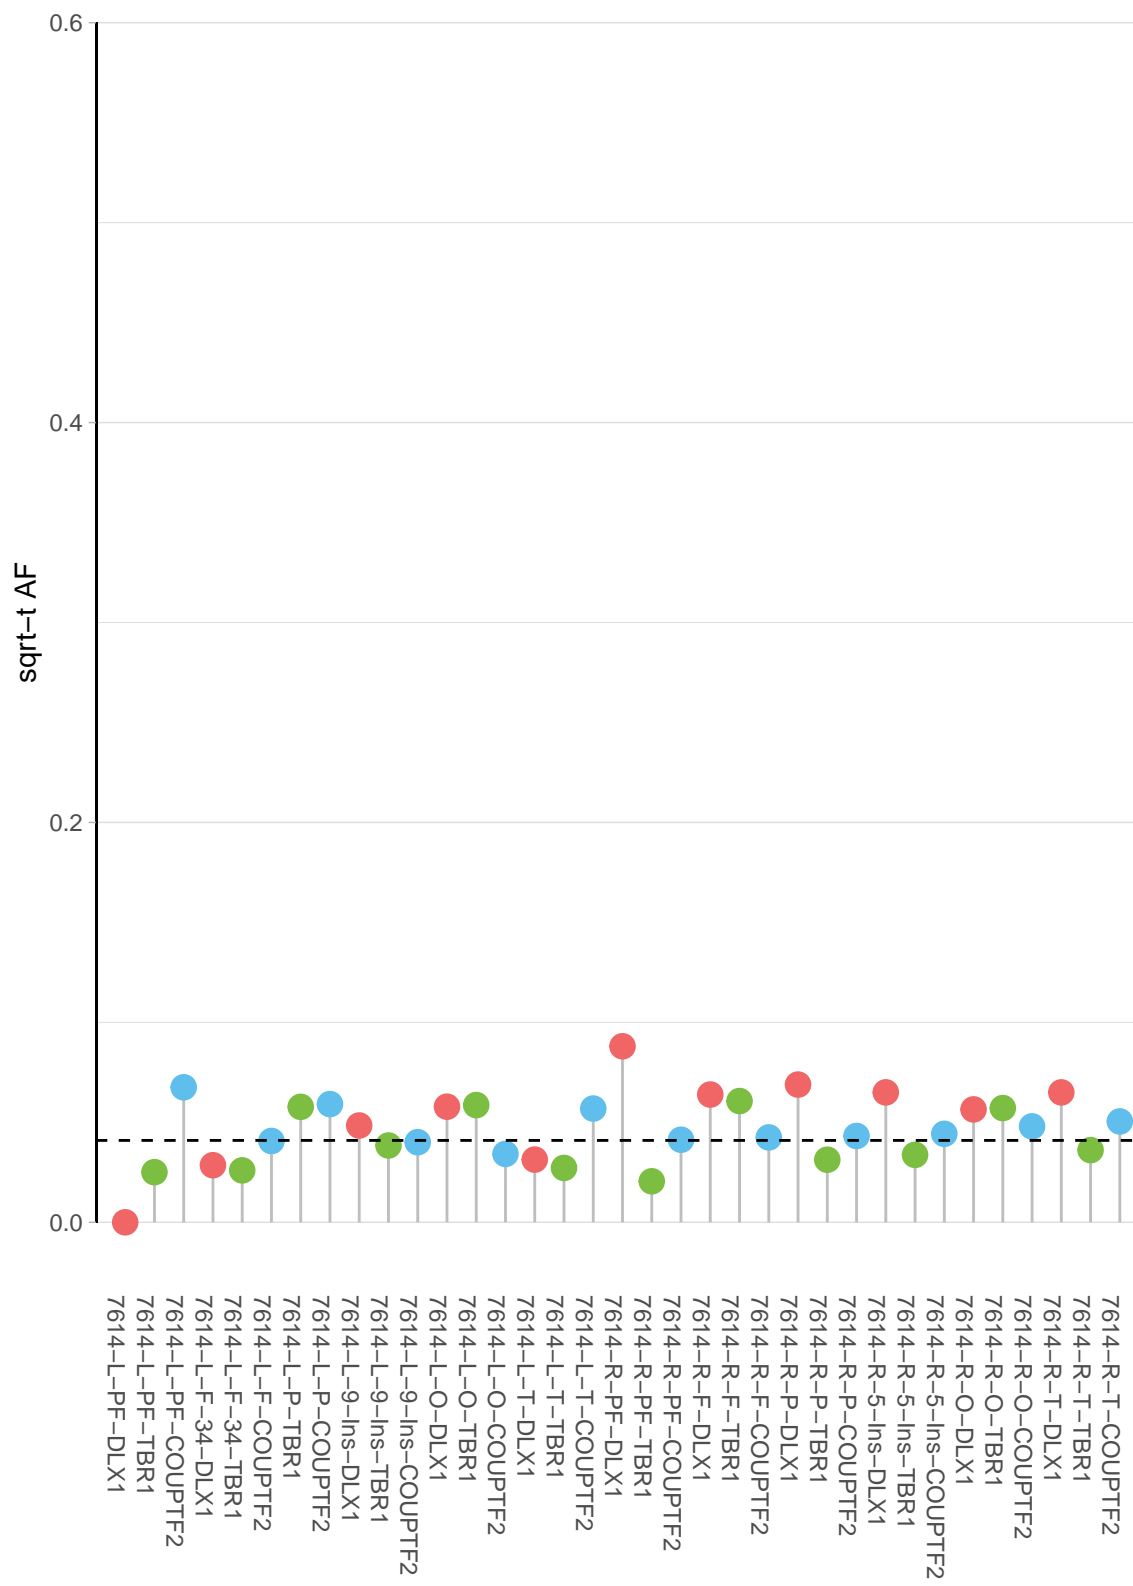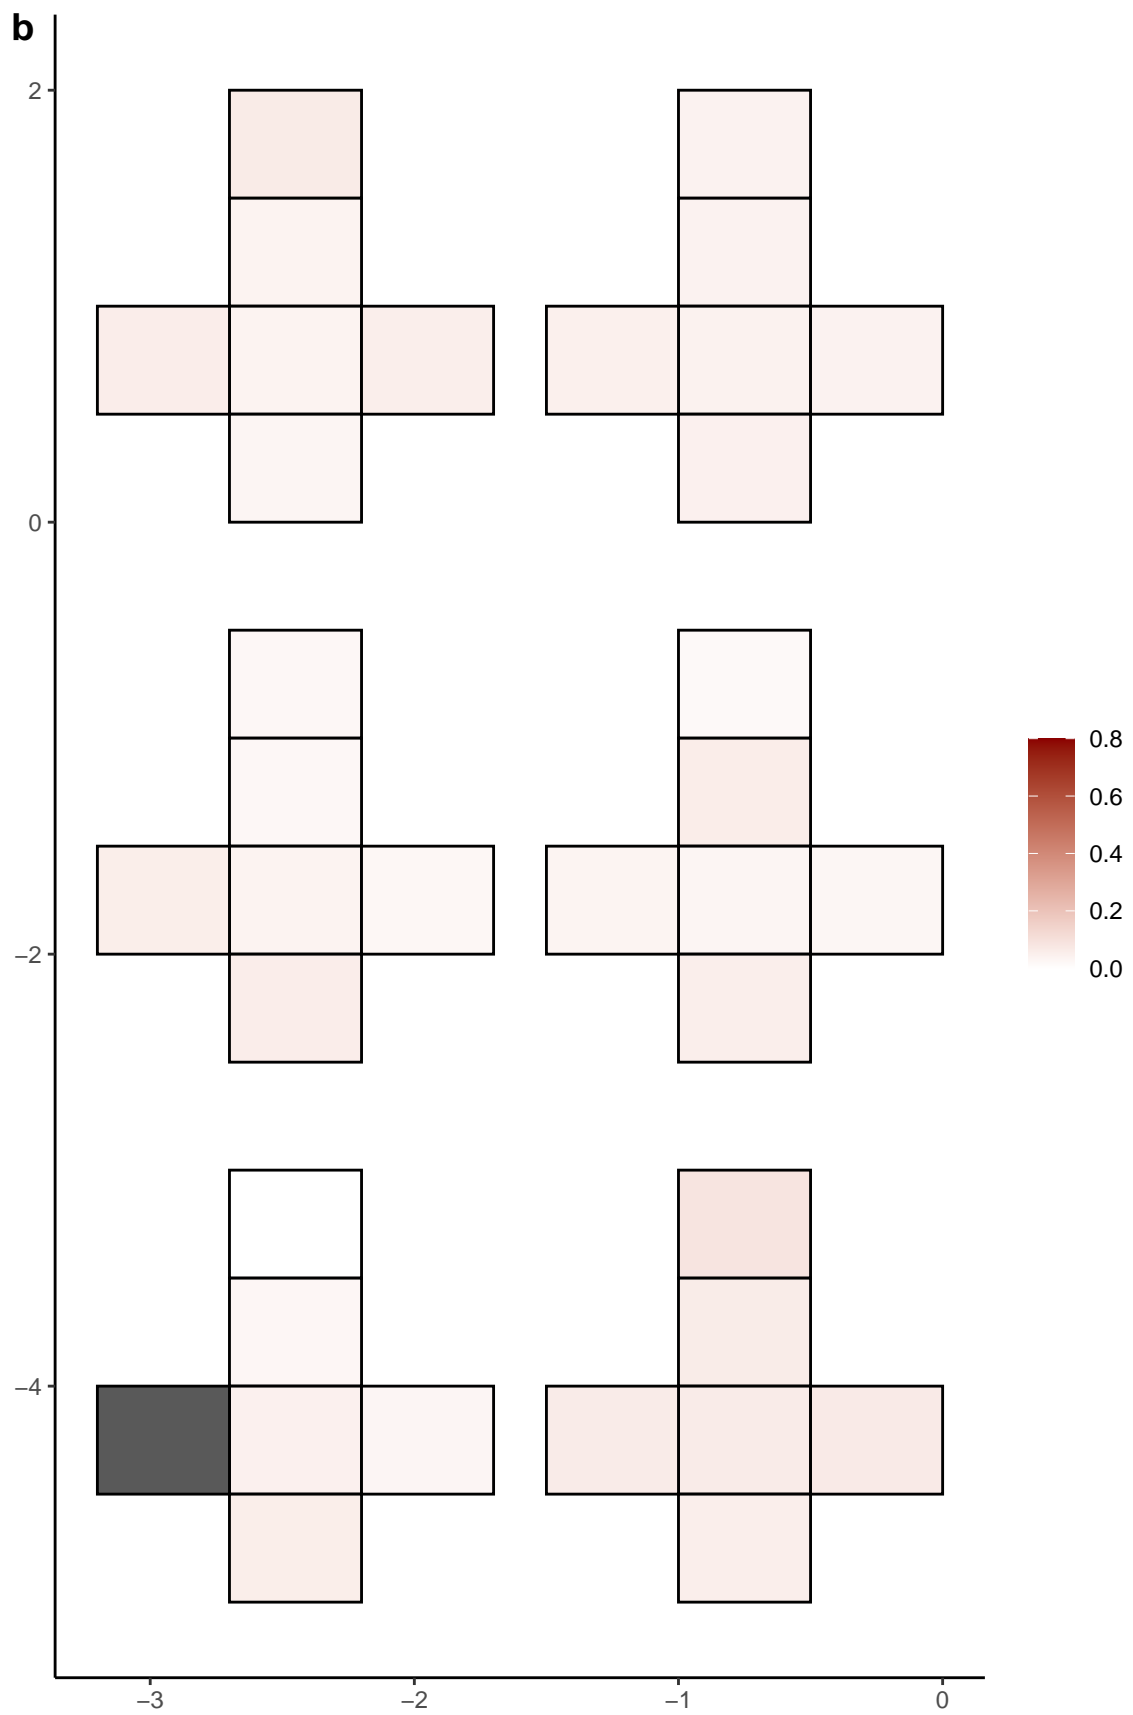

**a** ID01 X-130898294-C-T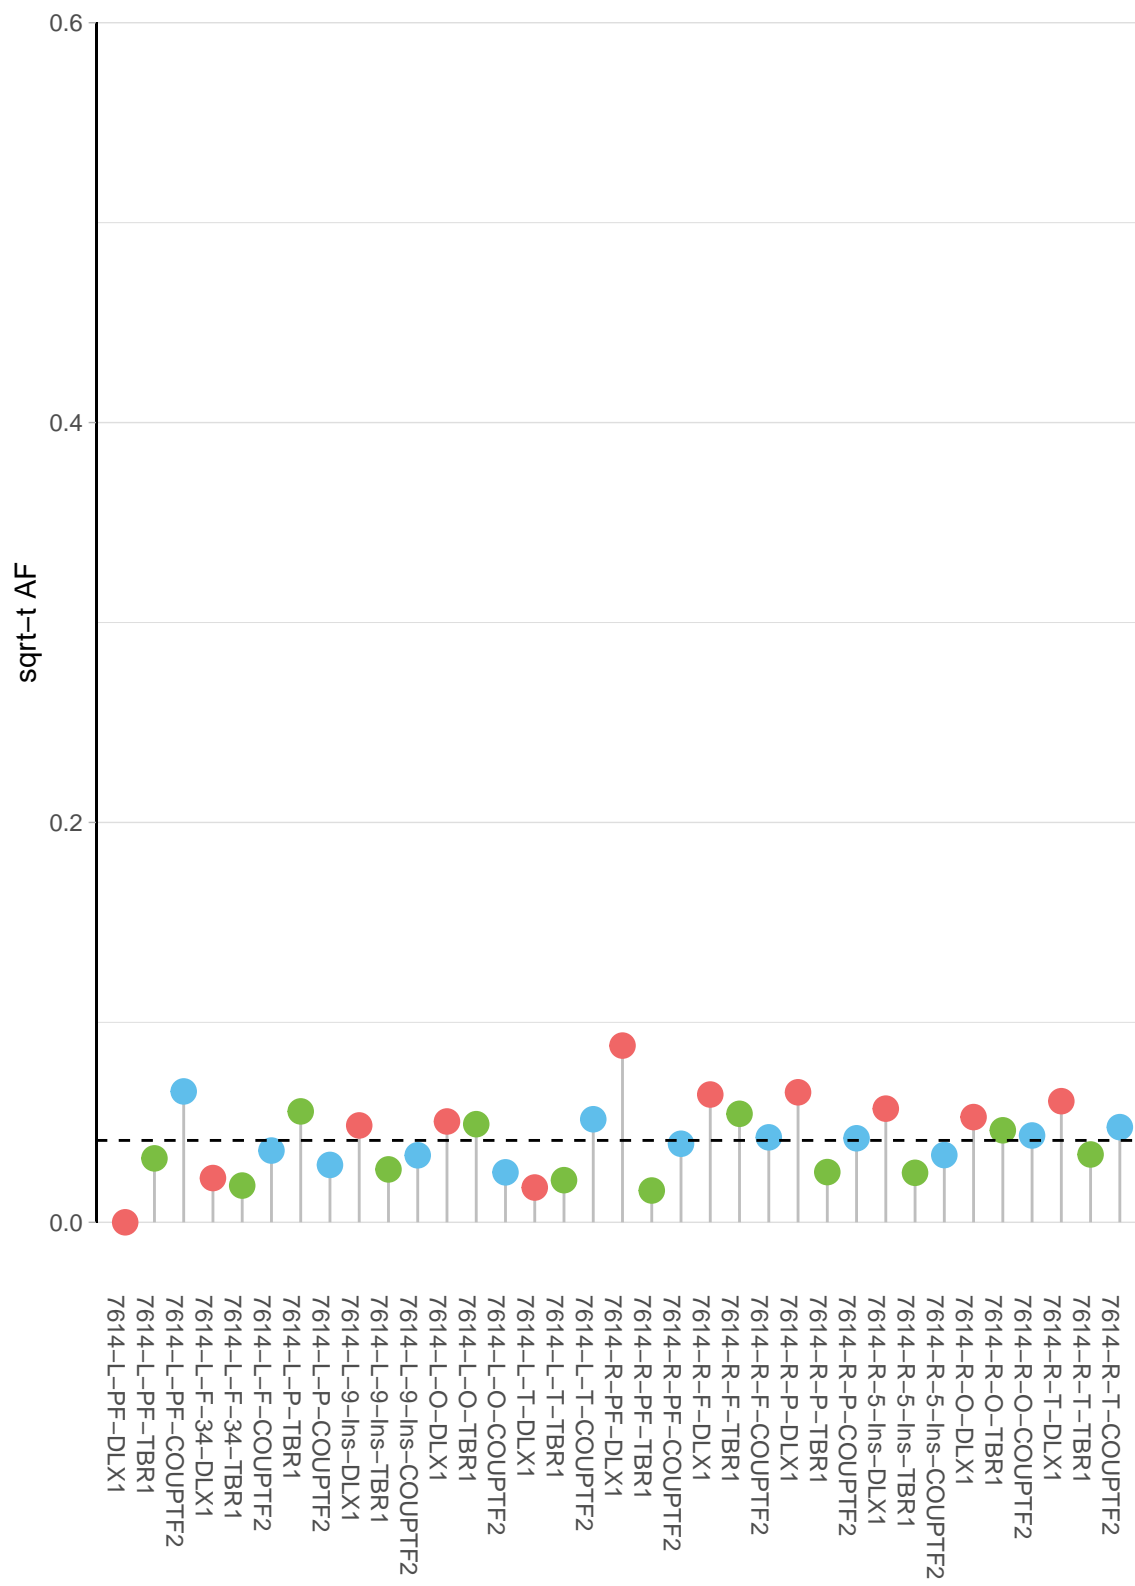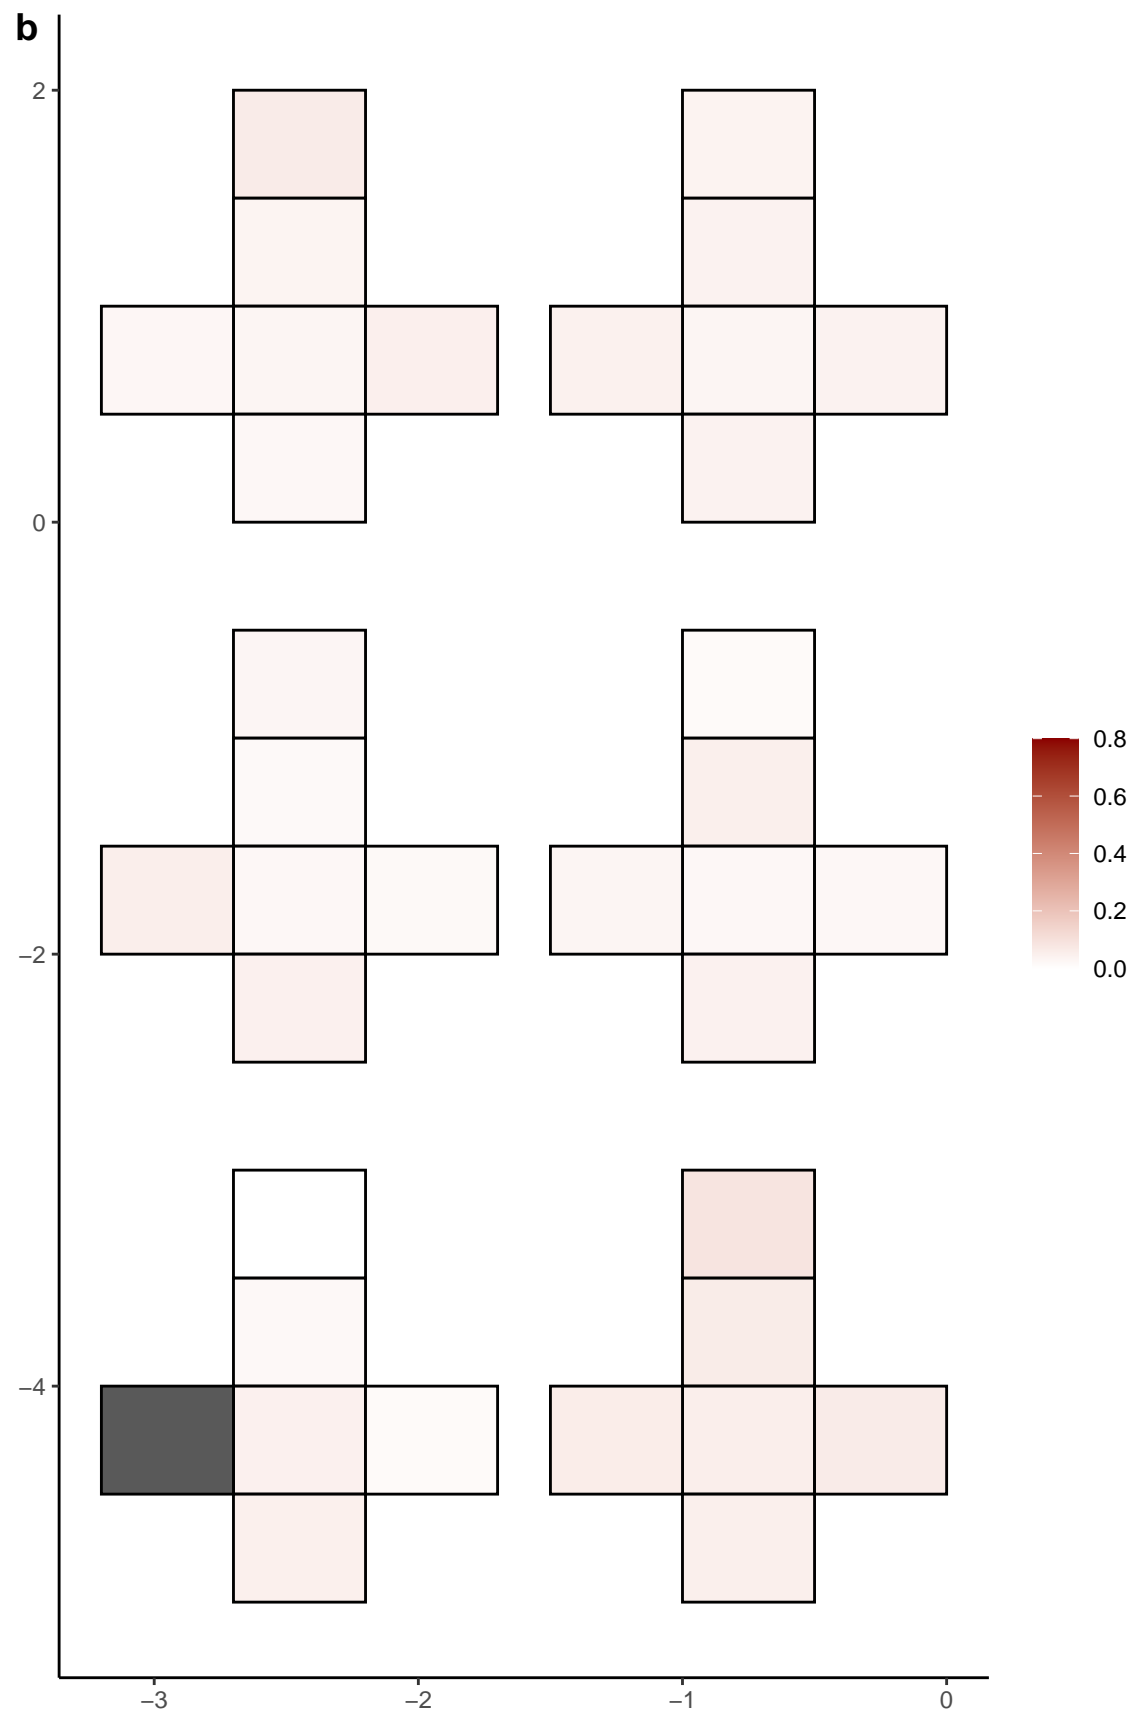

**a** ID01 X-138175923-C-T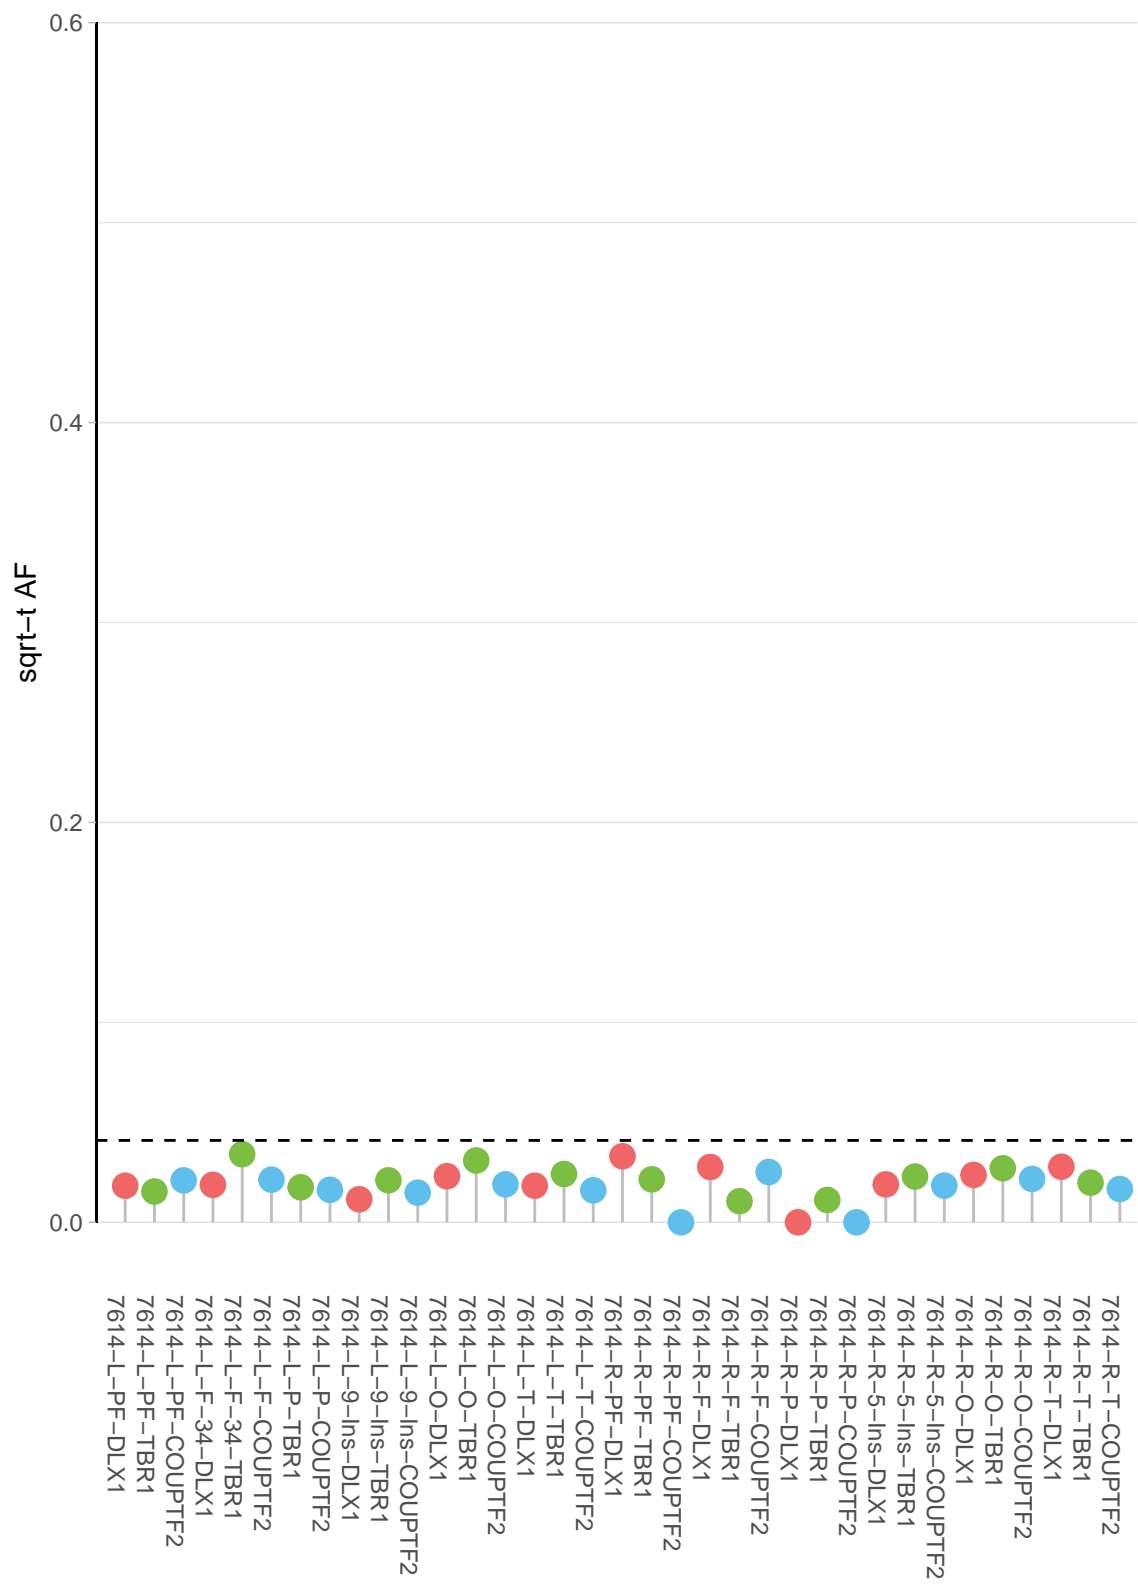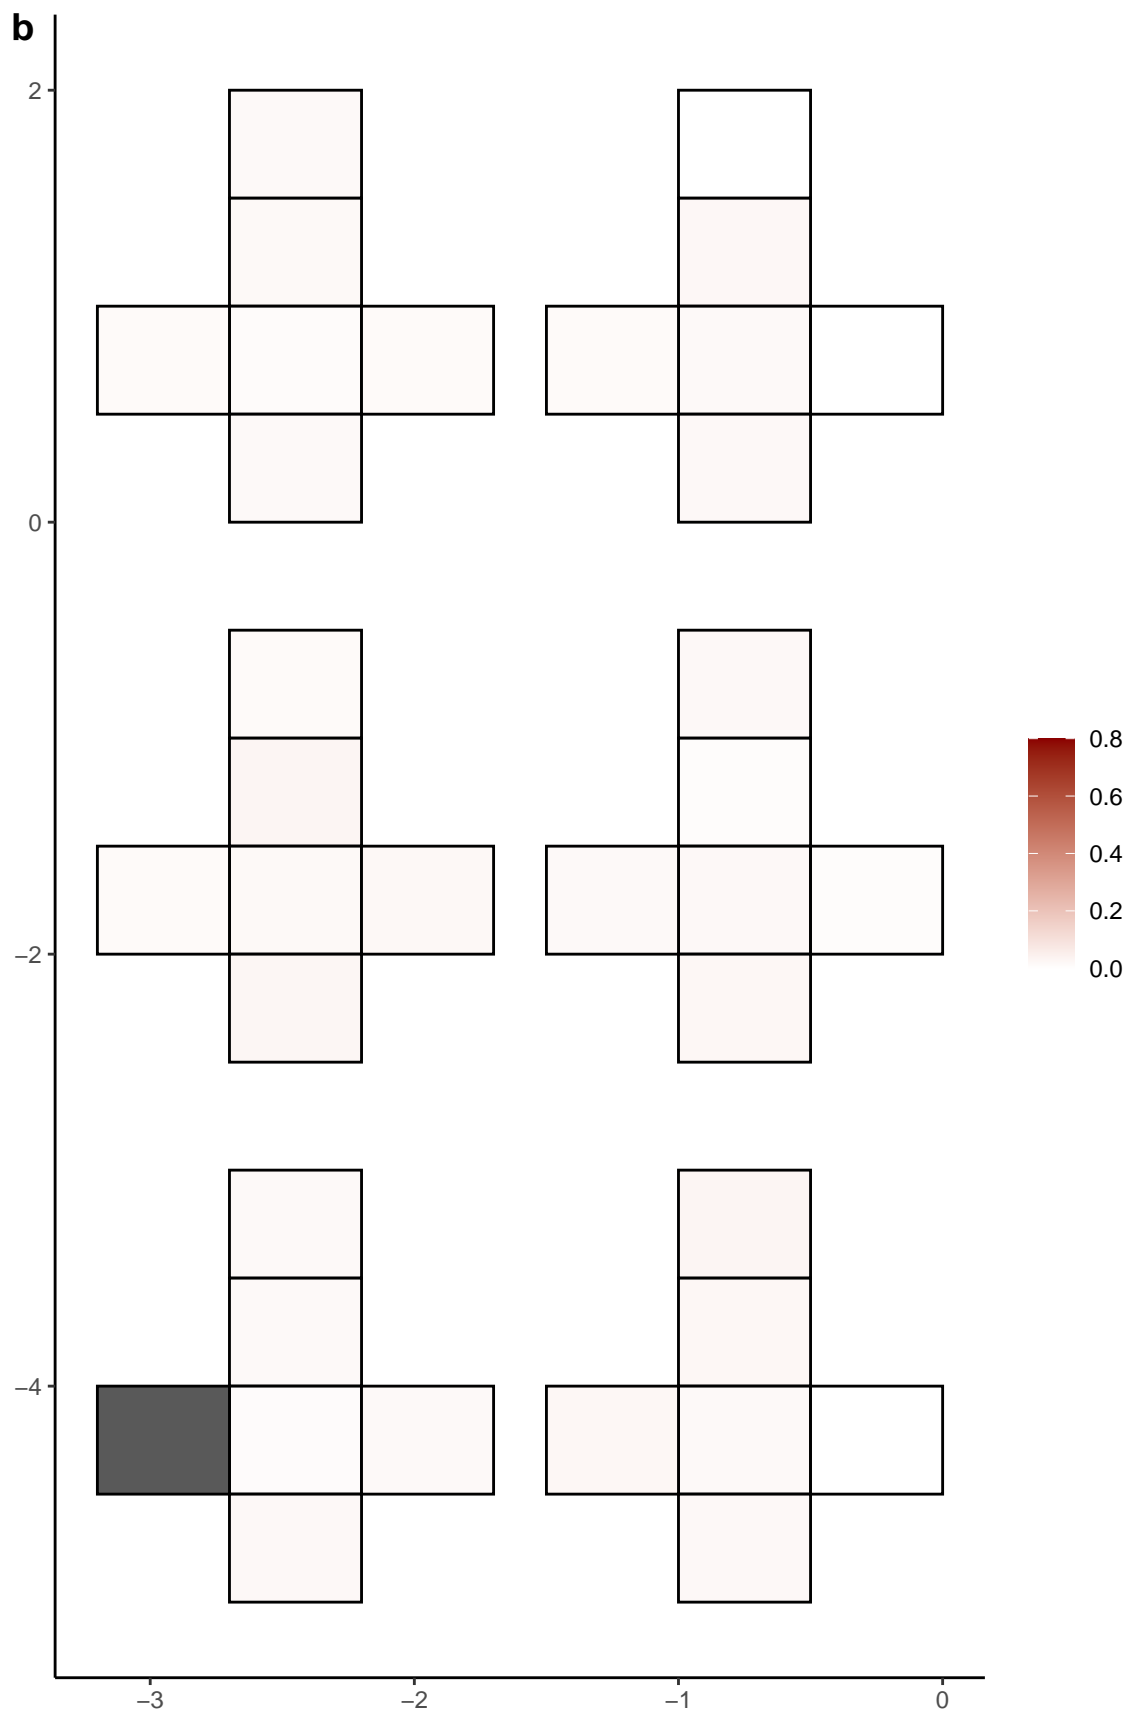



**a** ID01 X-139853112-G-A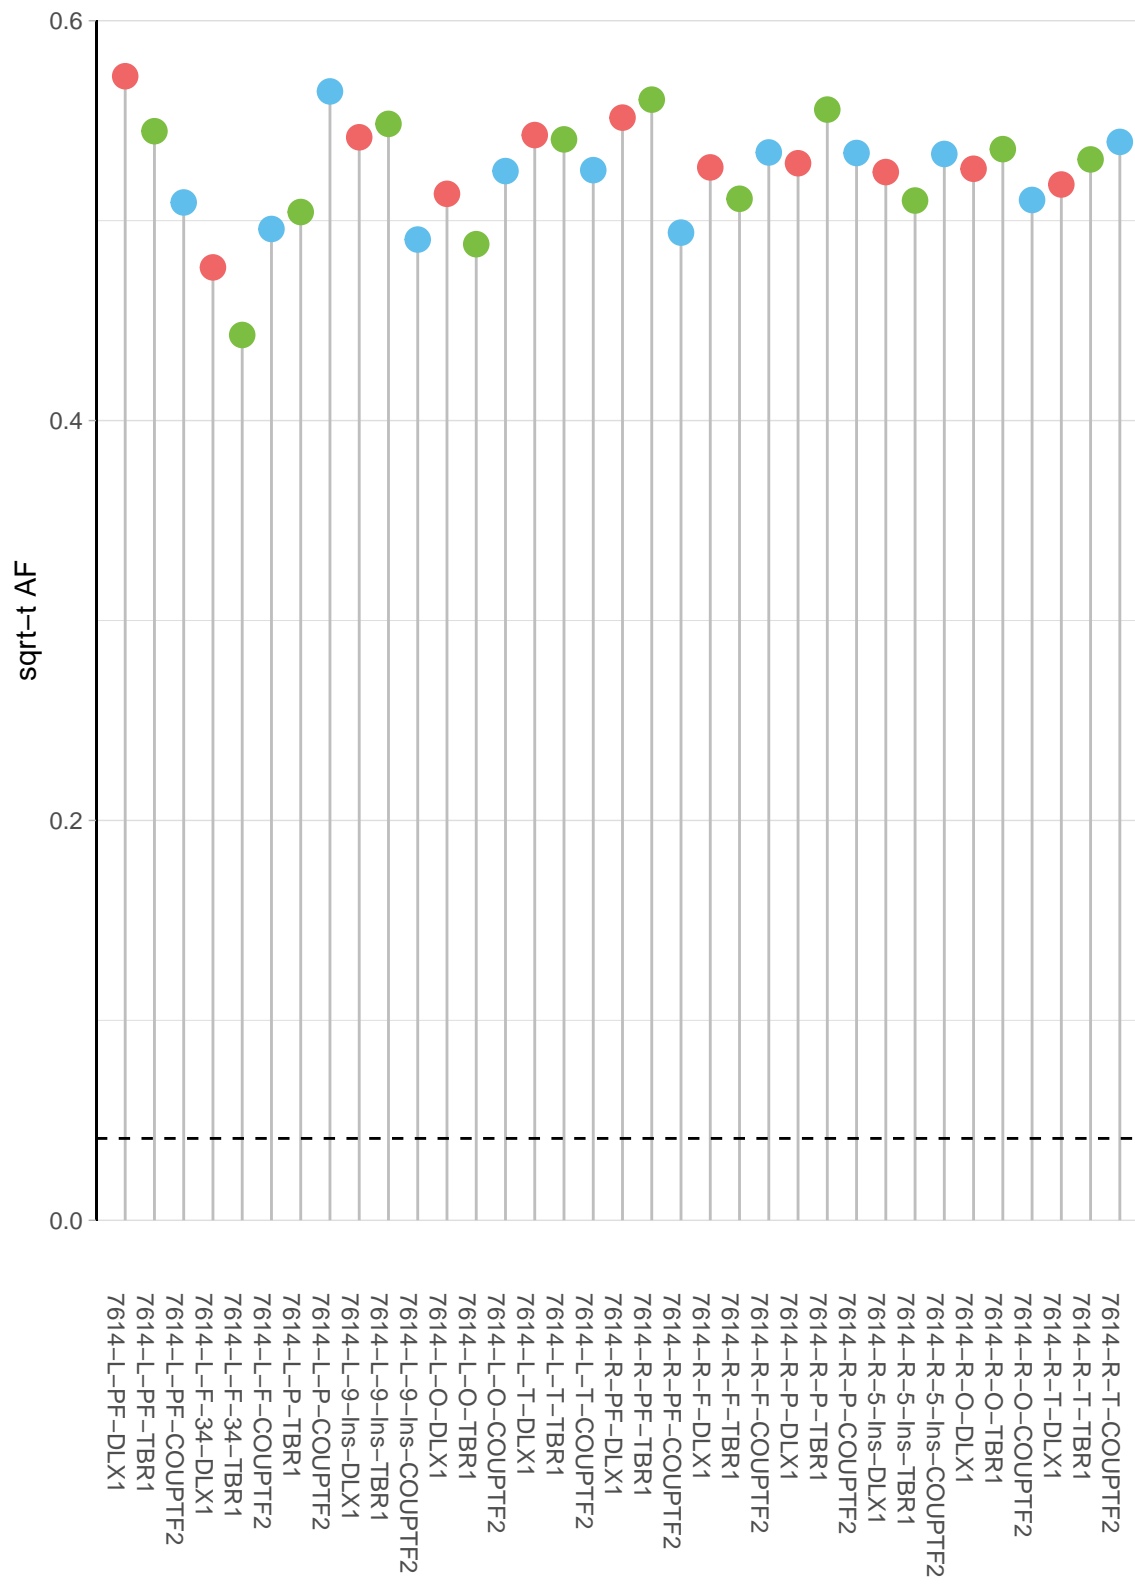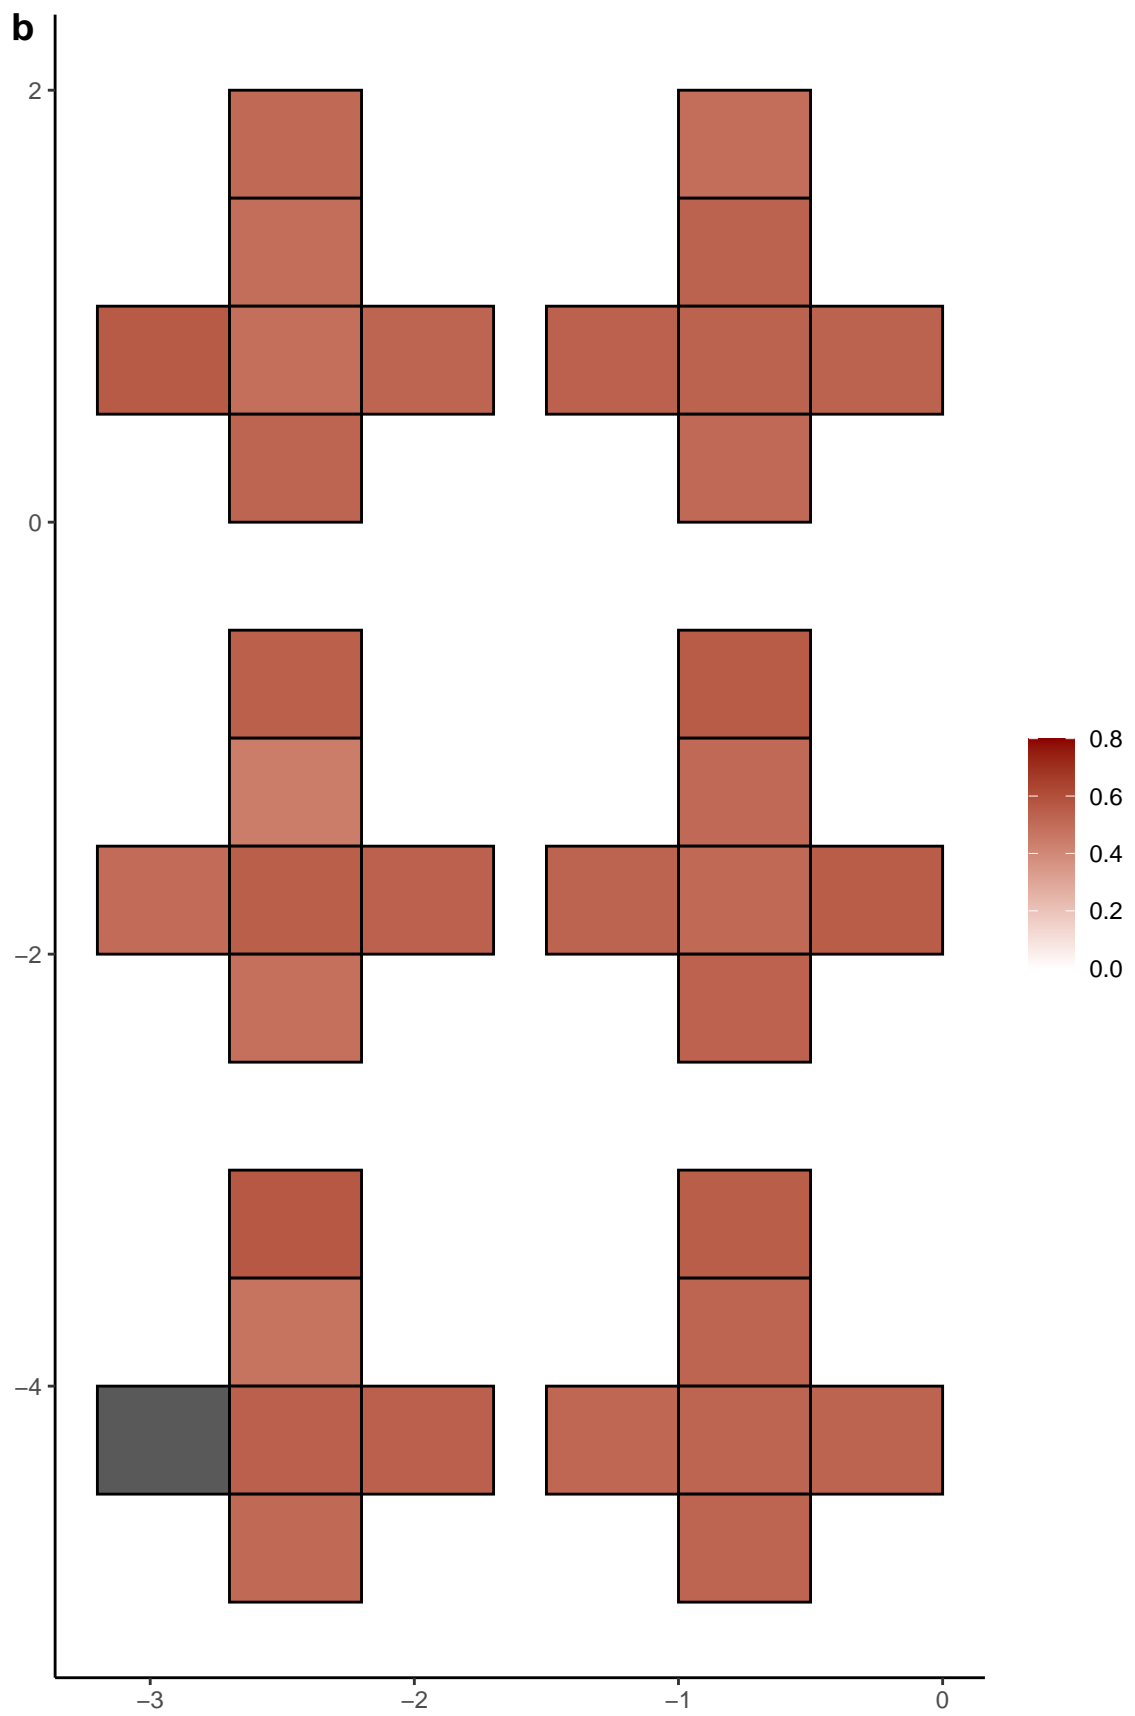

**a** ID01 X-141420247-C-G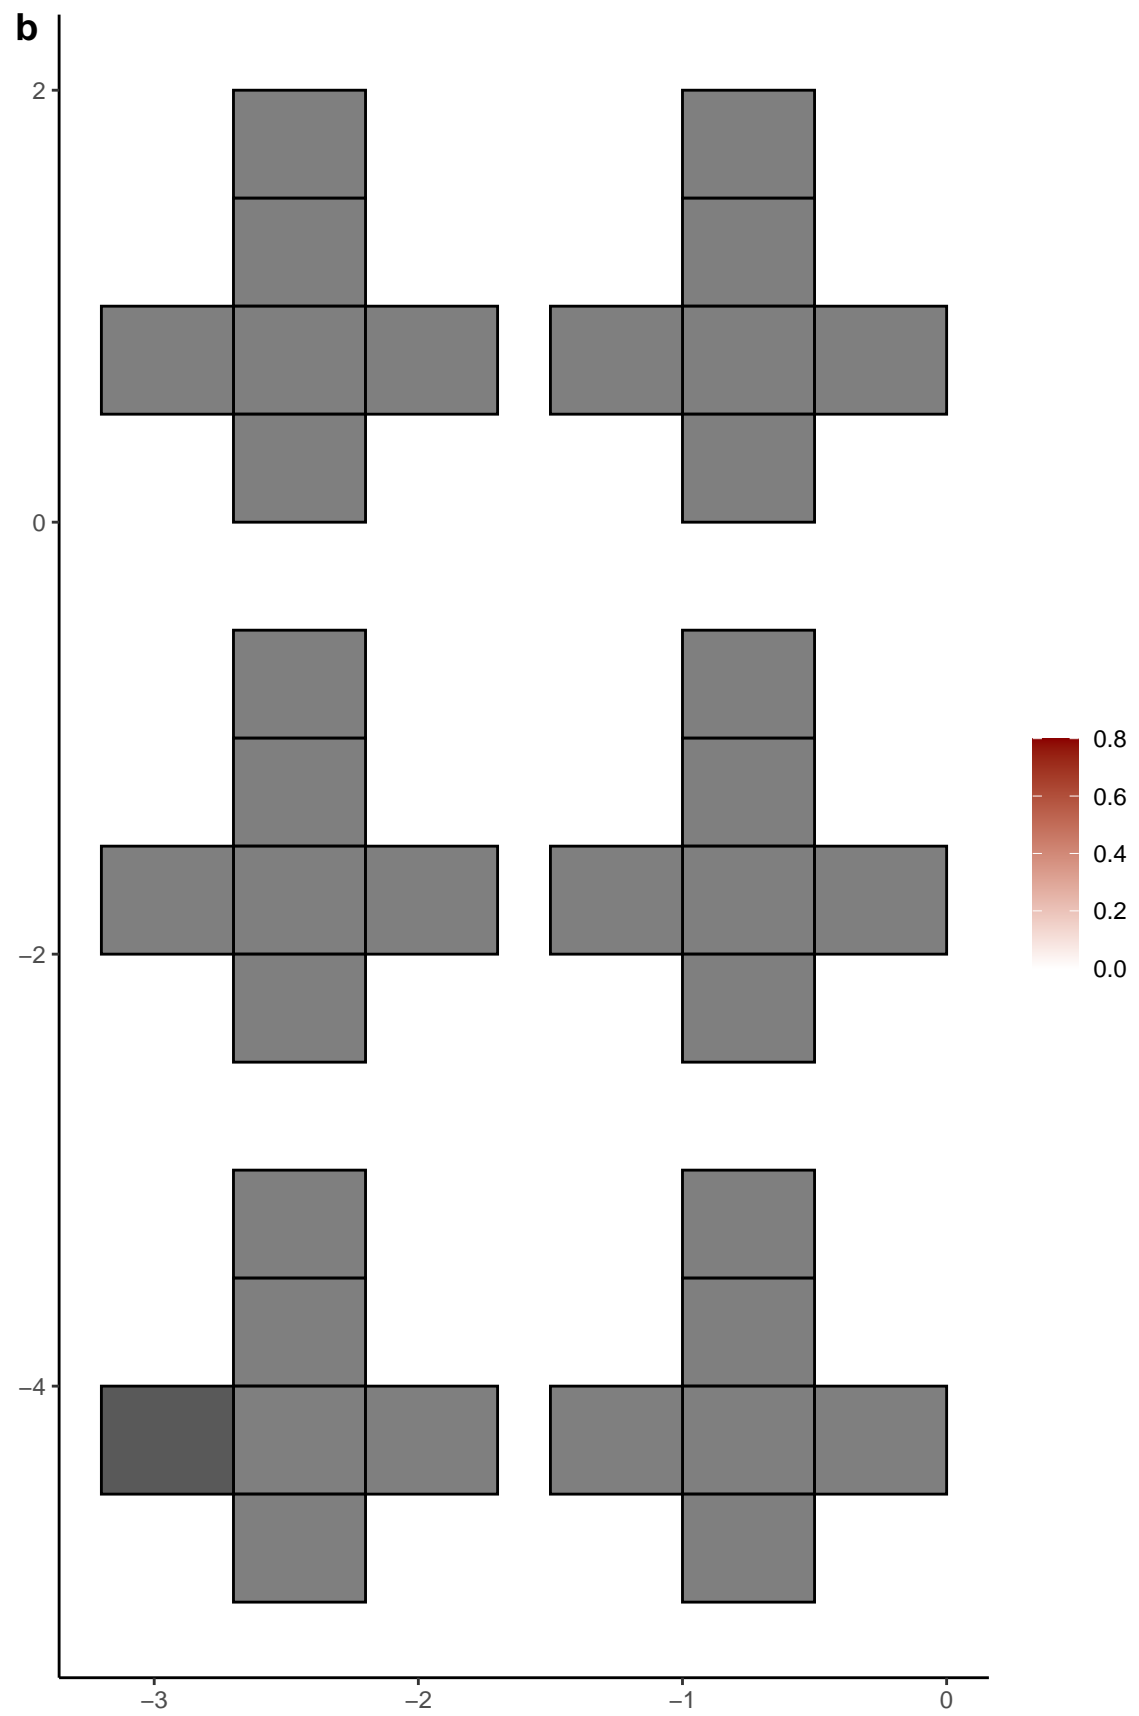

**a** ID01 X-141942973-G-A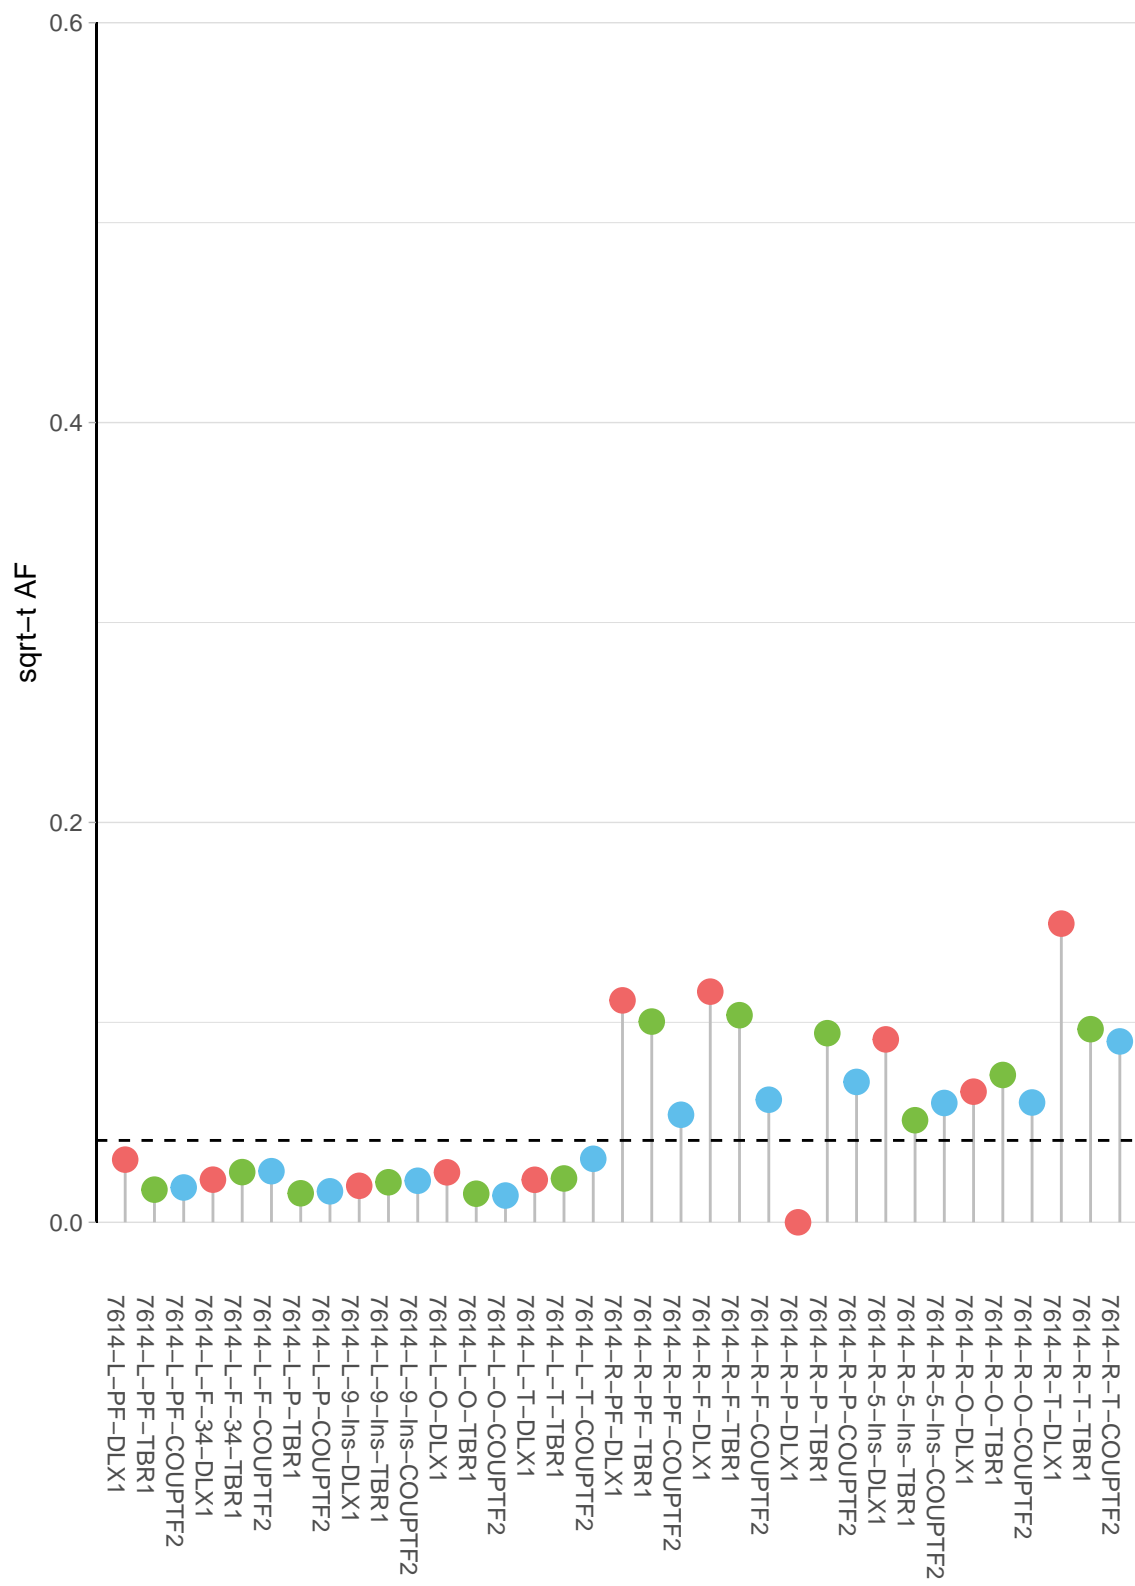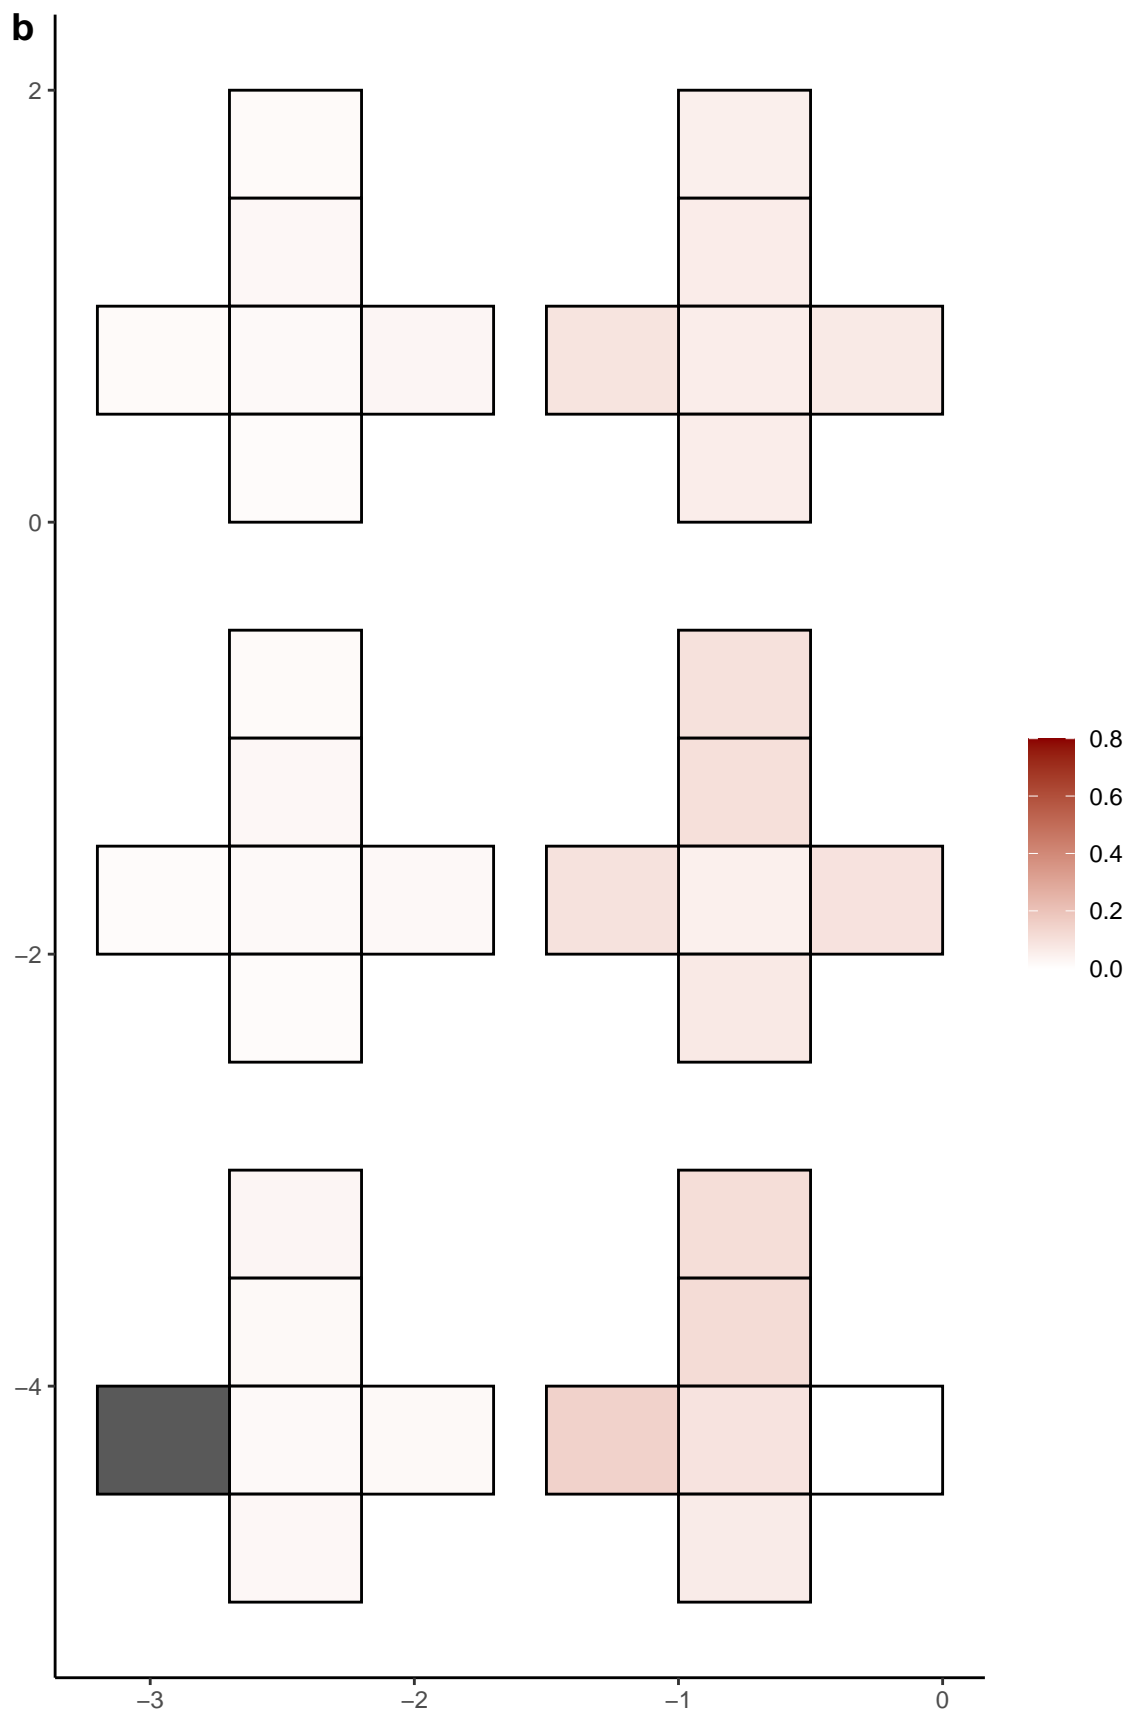

**a** ID01 X-51984755-C-T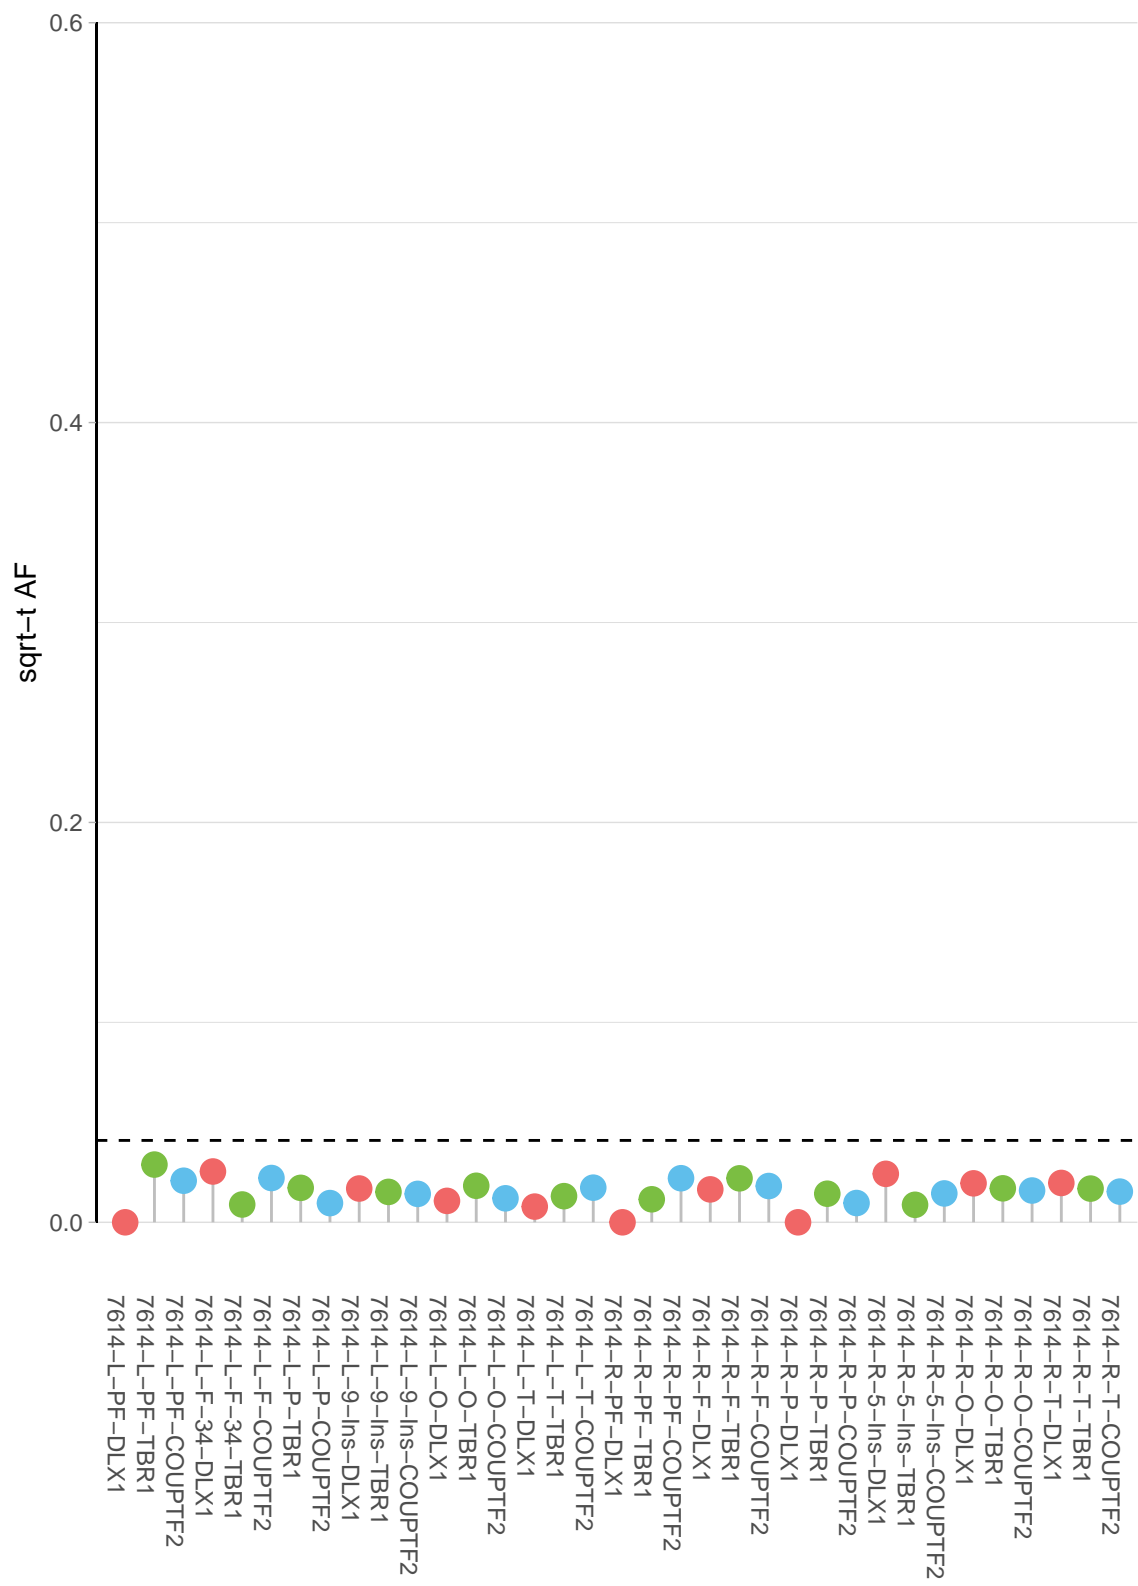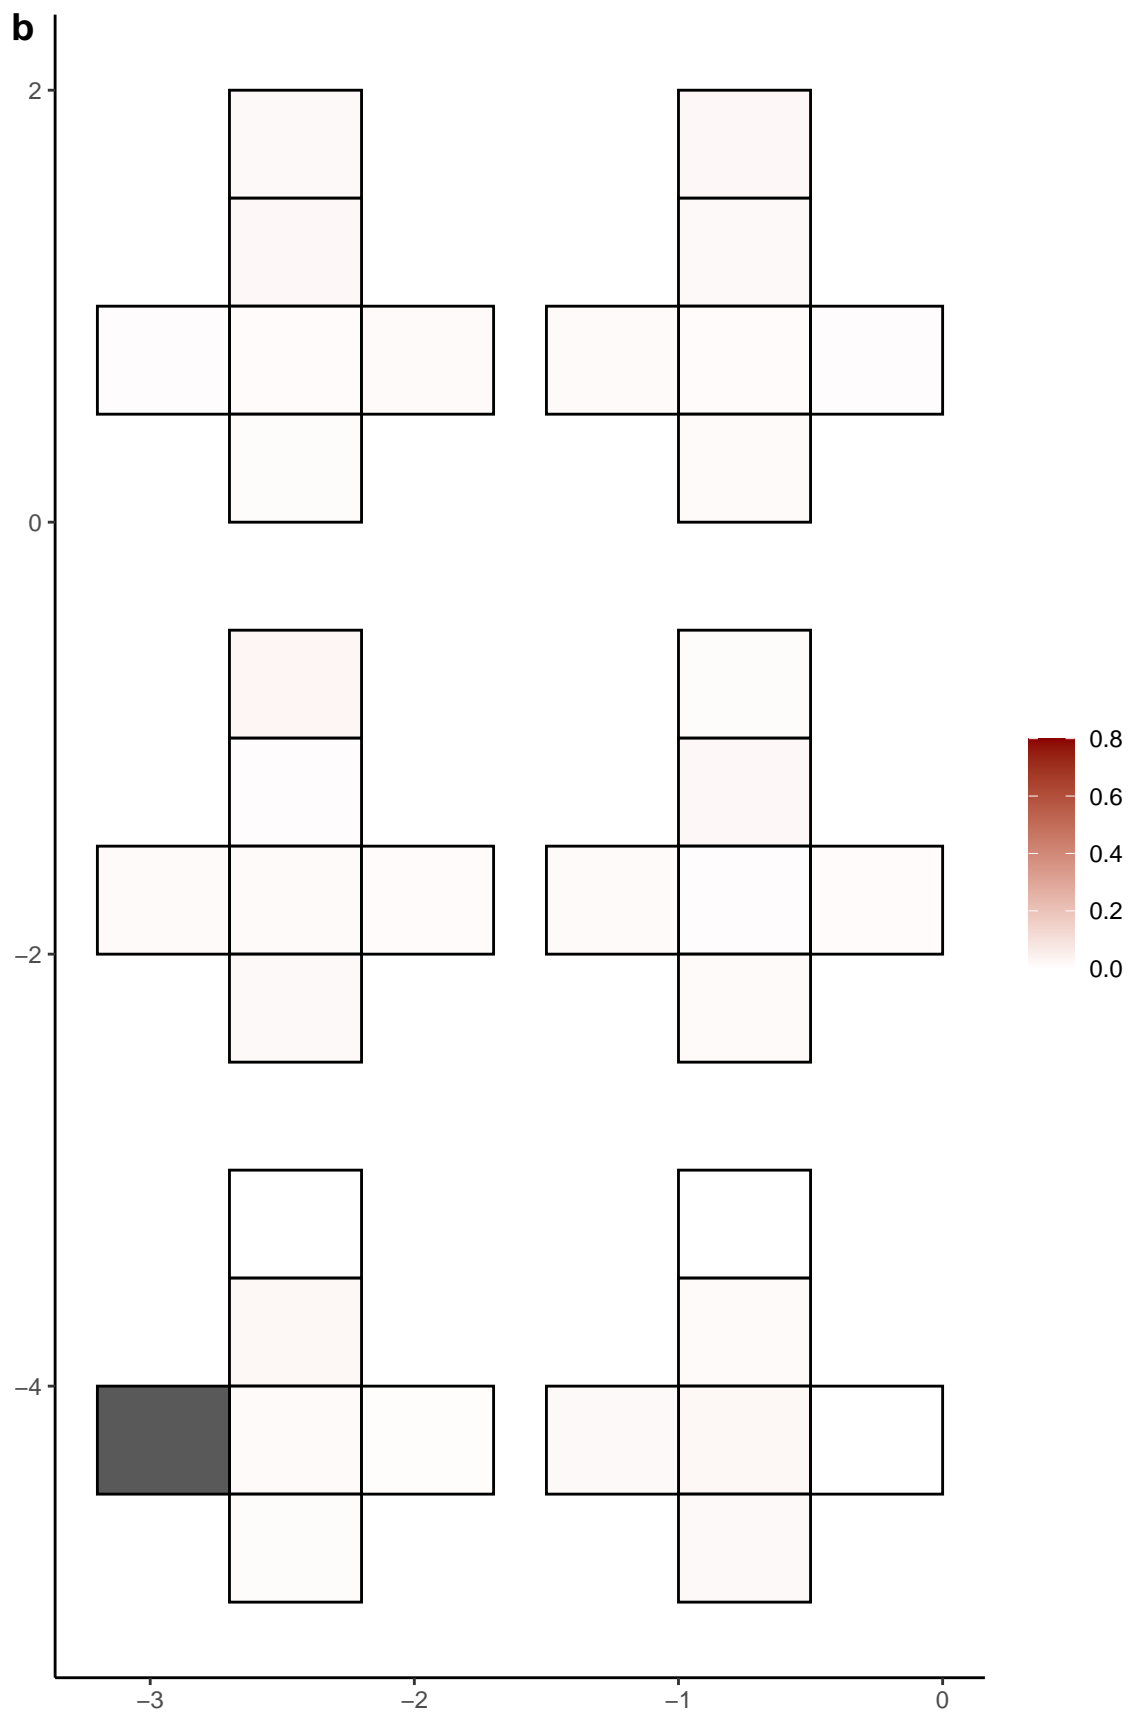

**a** ID01 X-54739596-C-G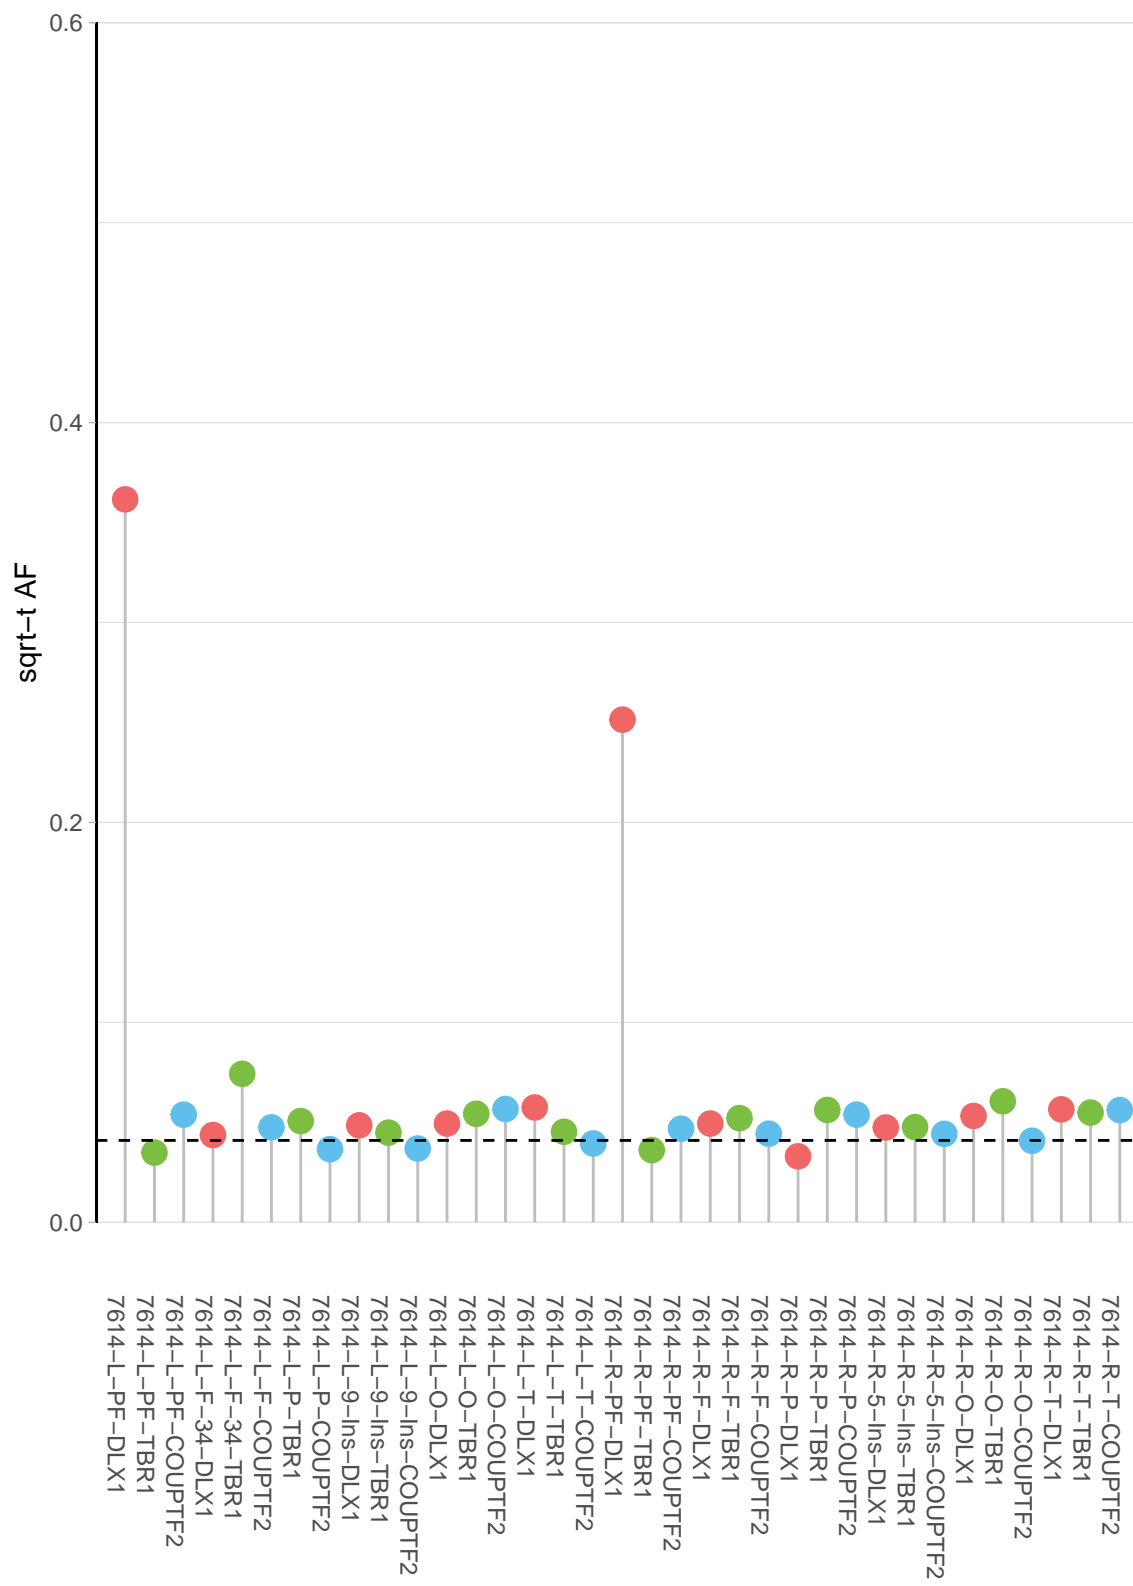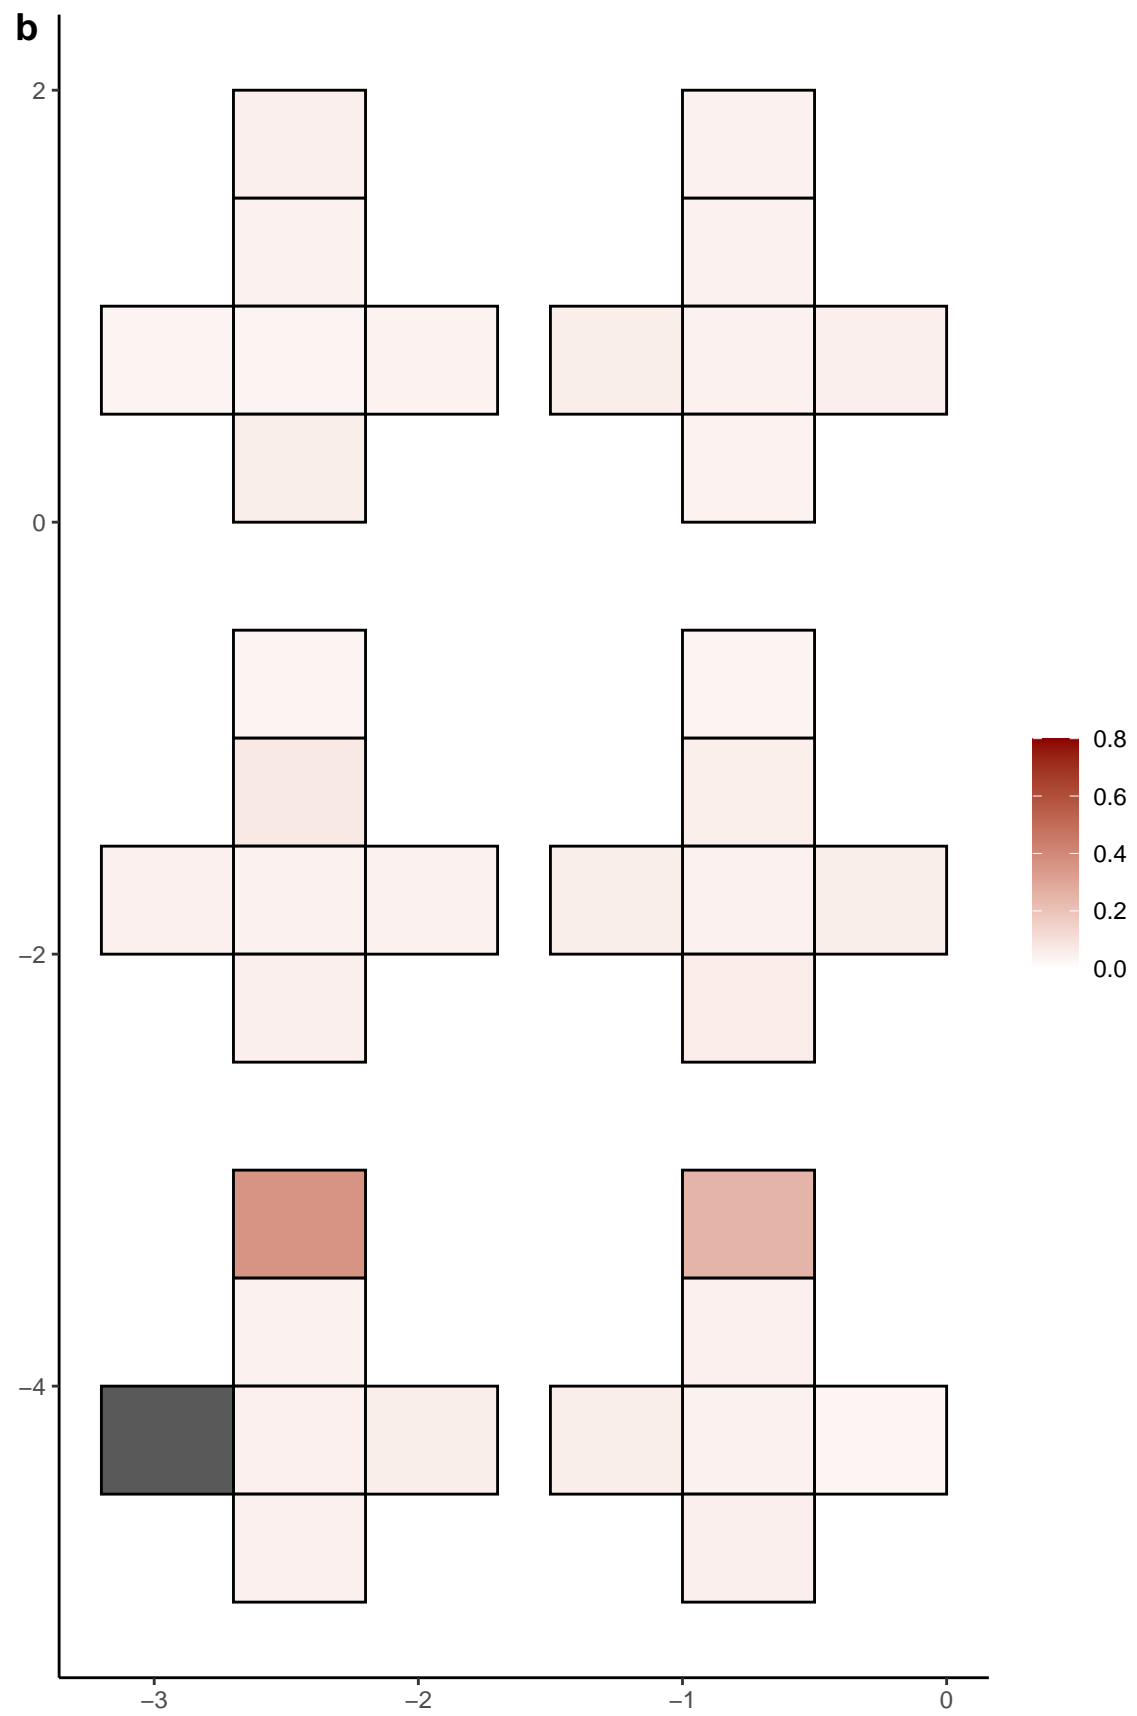

**a** ID01 X-62980946-T-C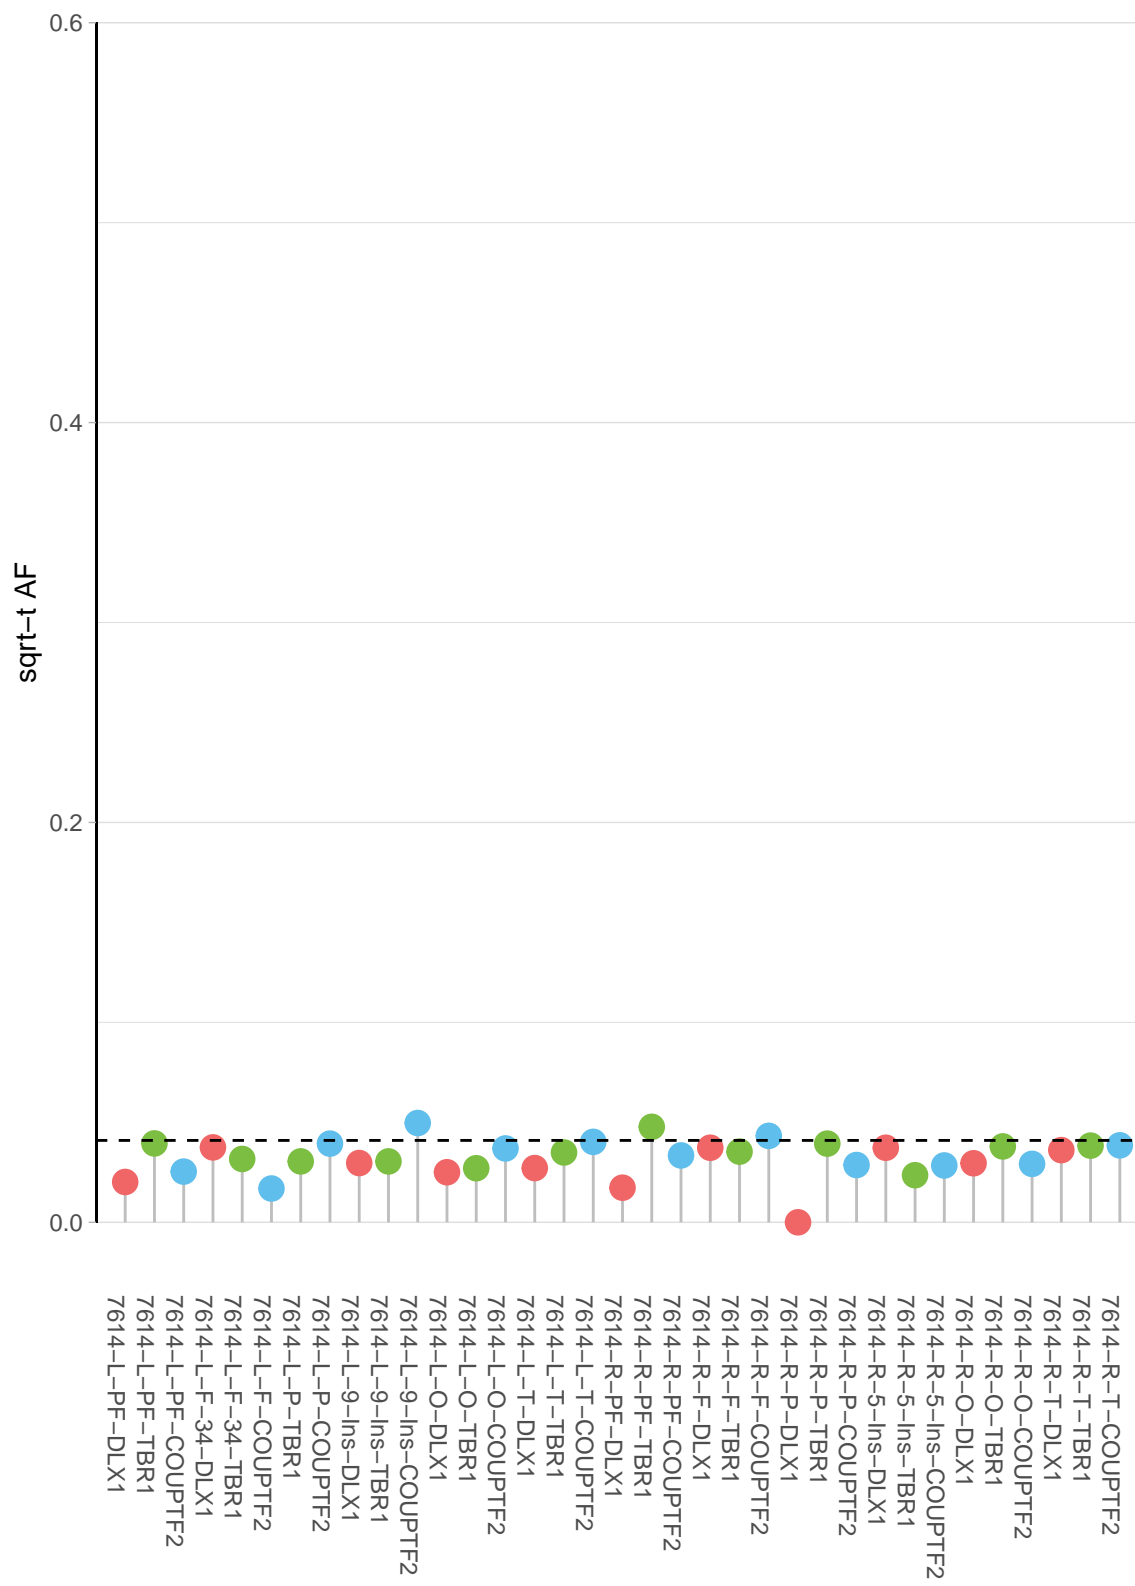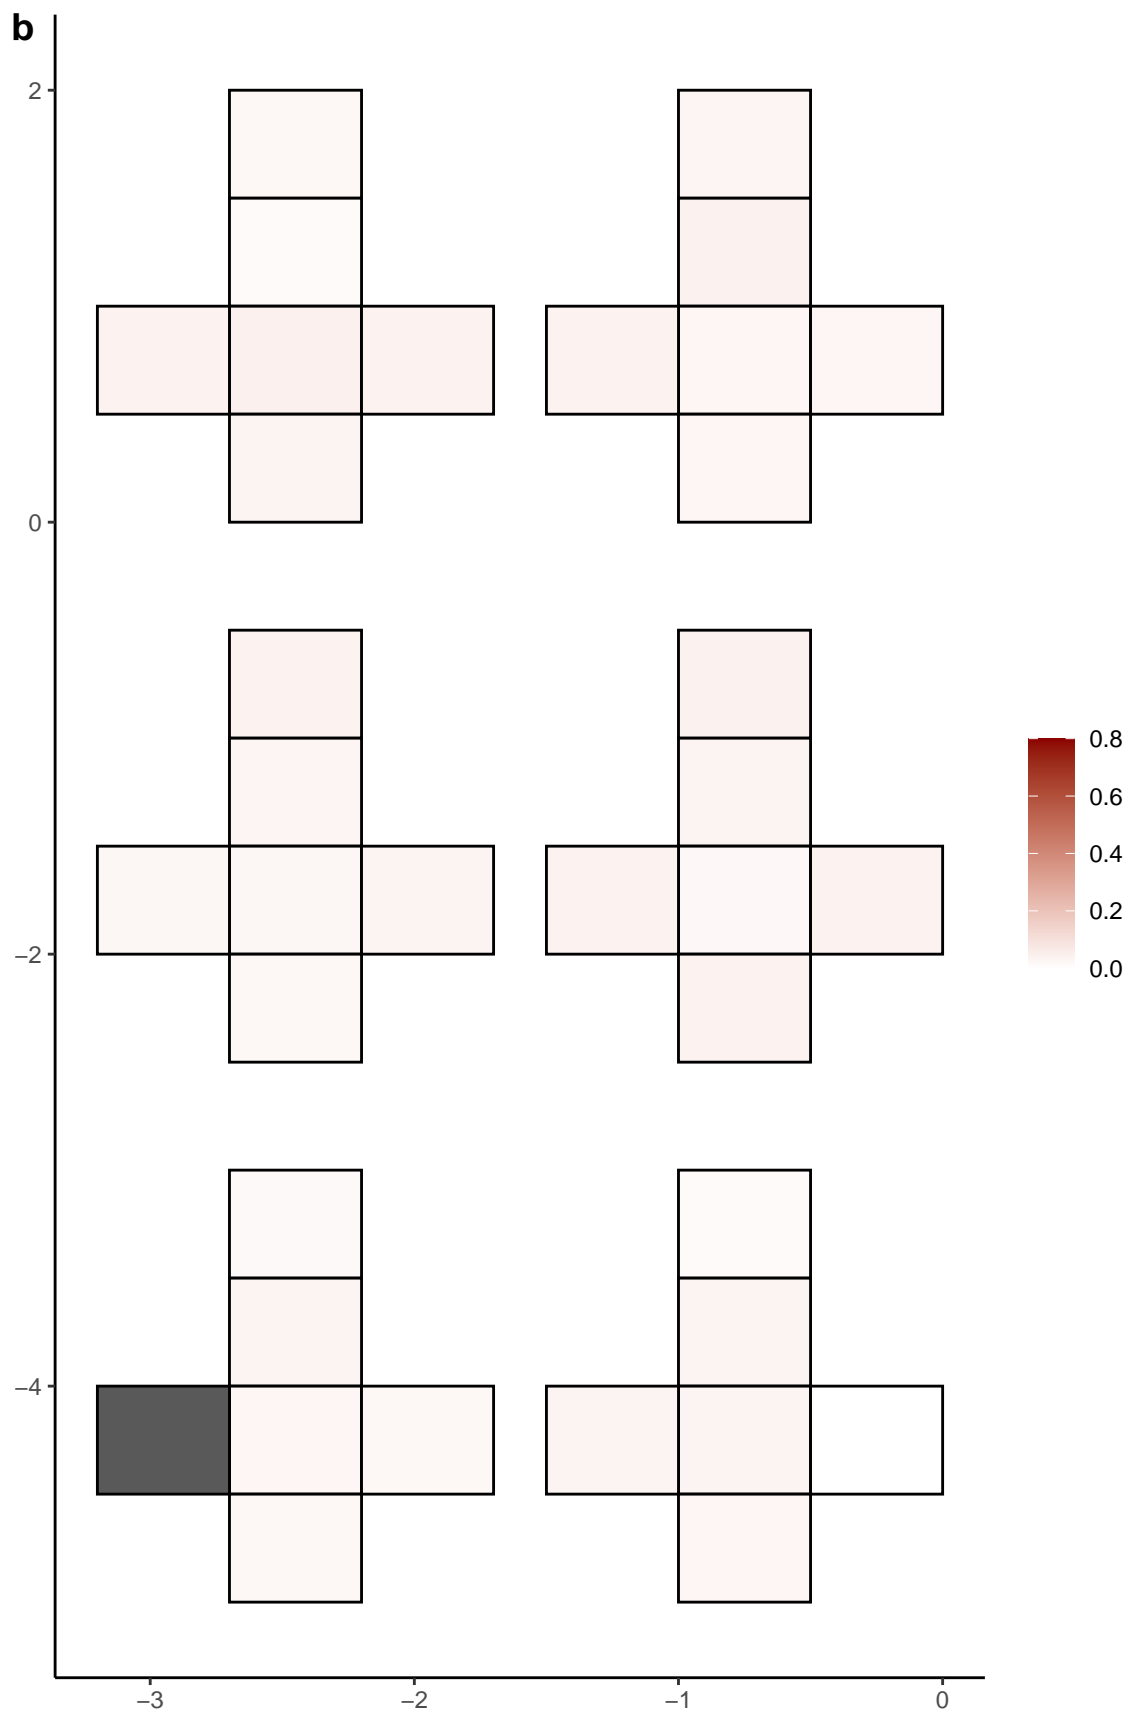

**a** ID01 X-77453233-C-T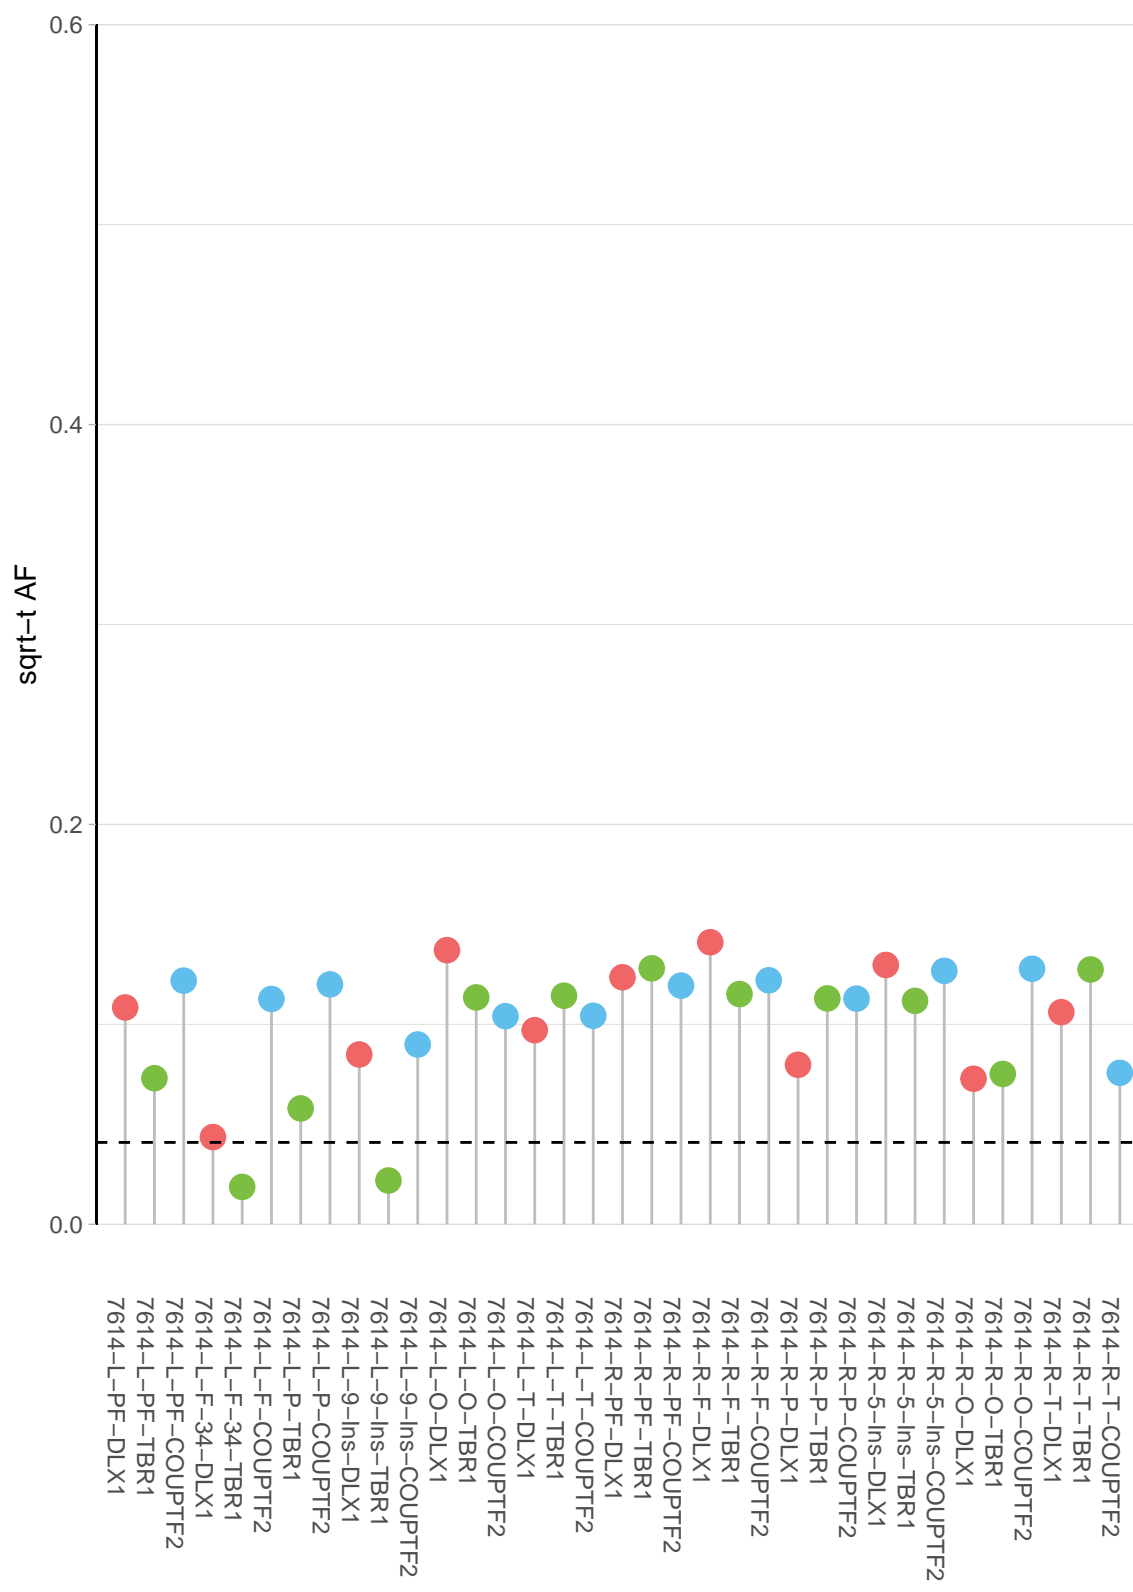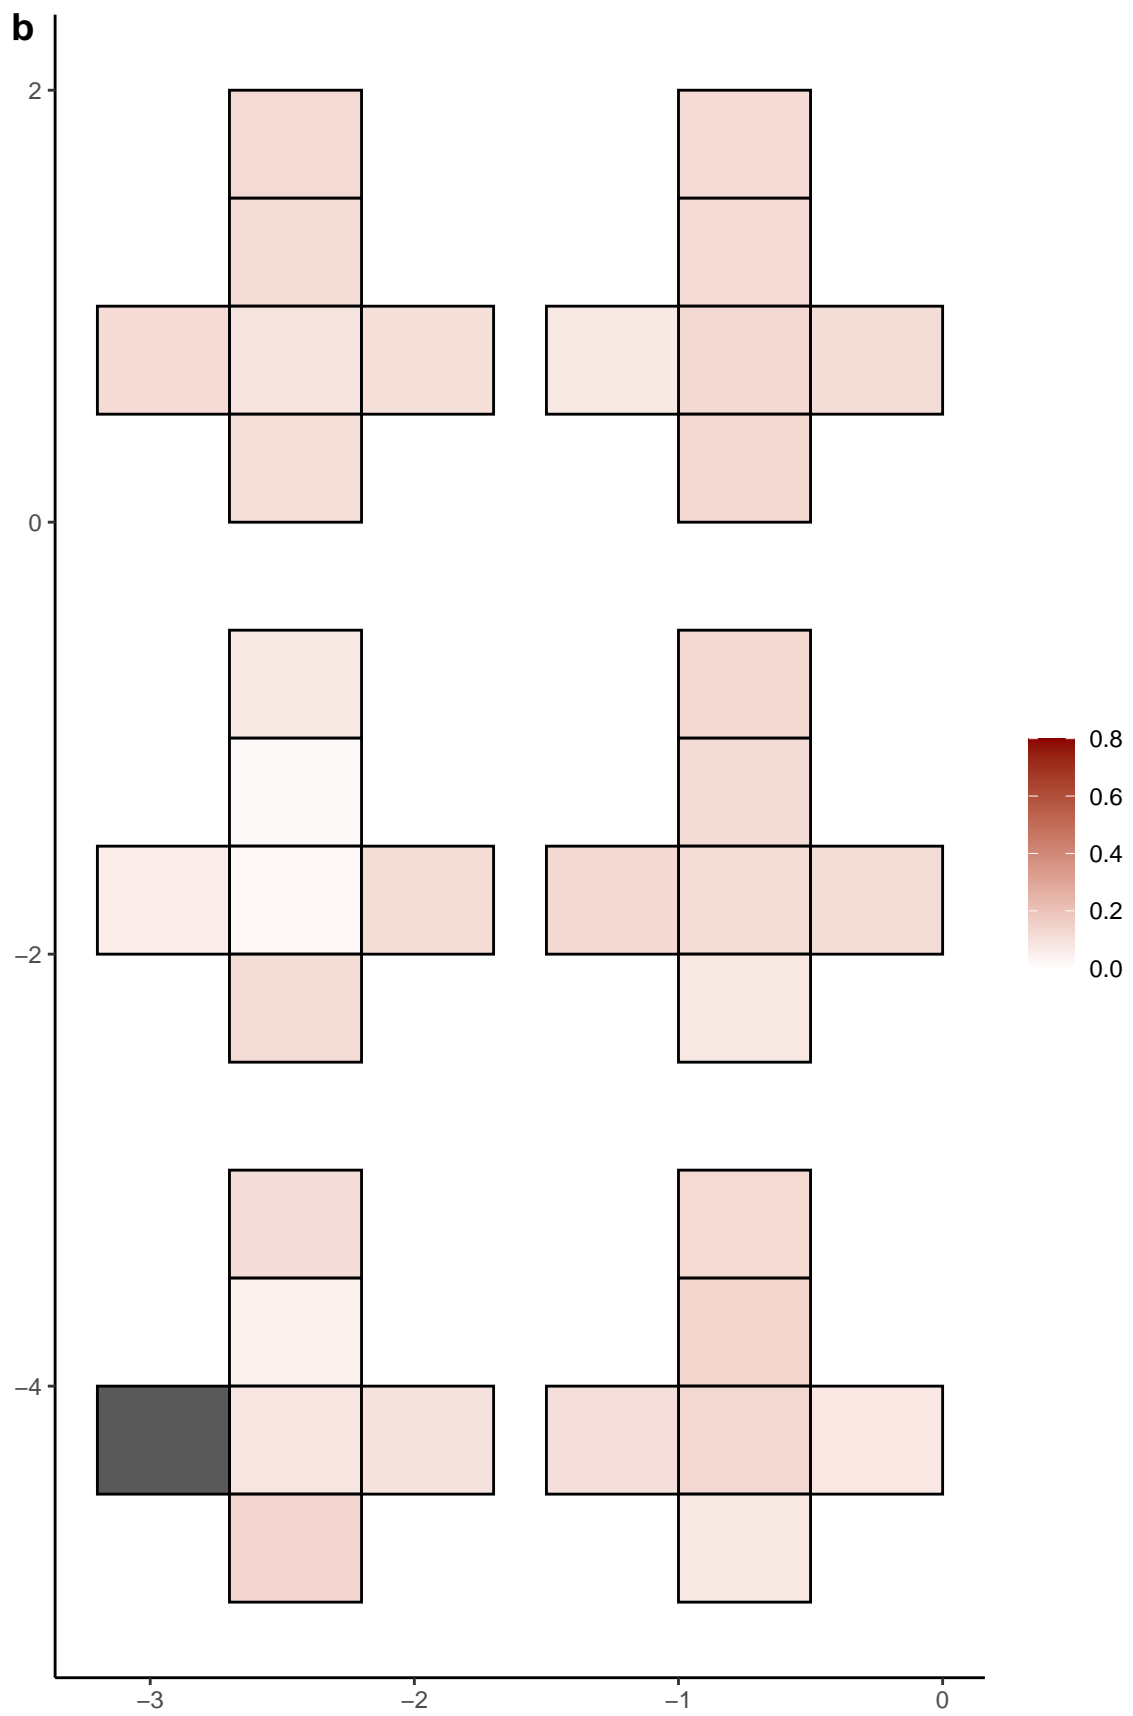

**a** ID05 1-102152318-C-T

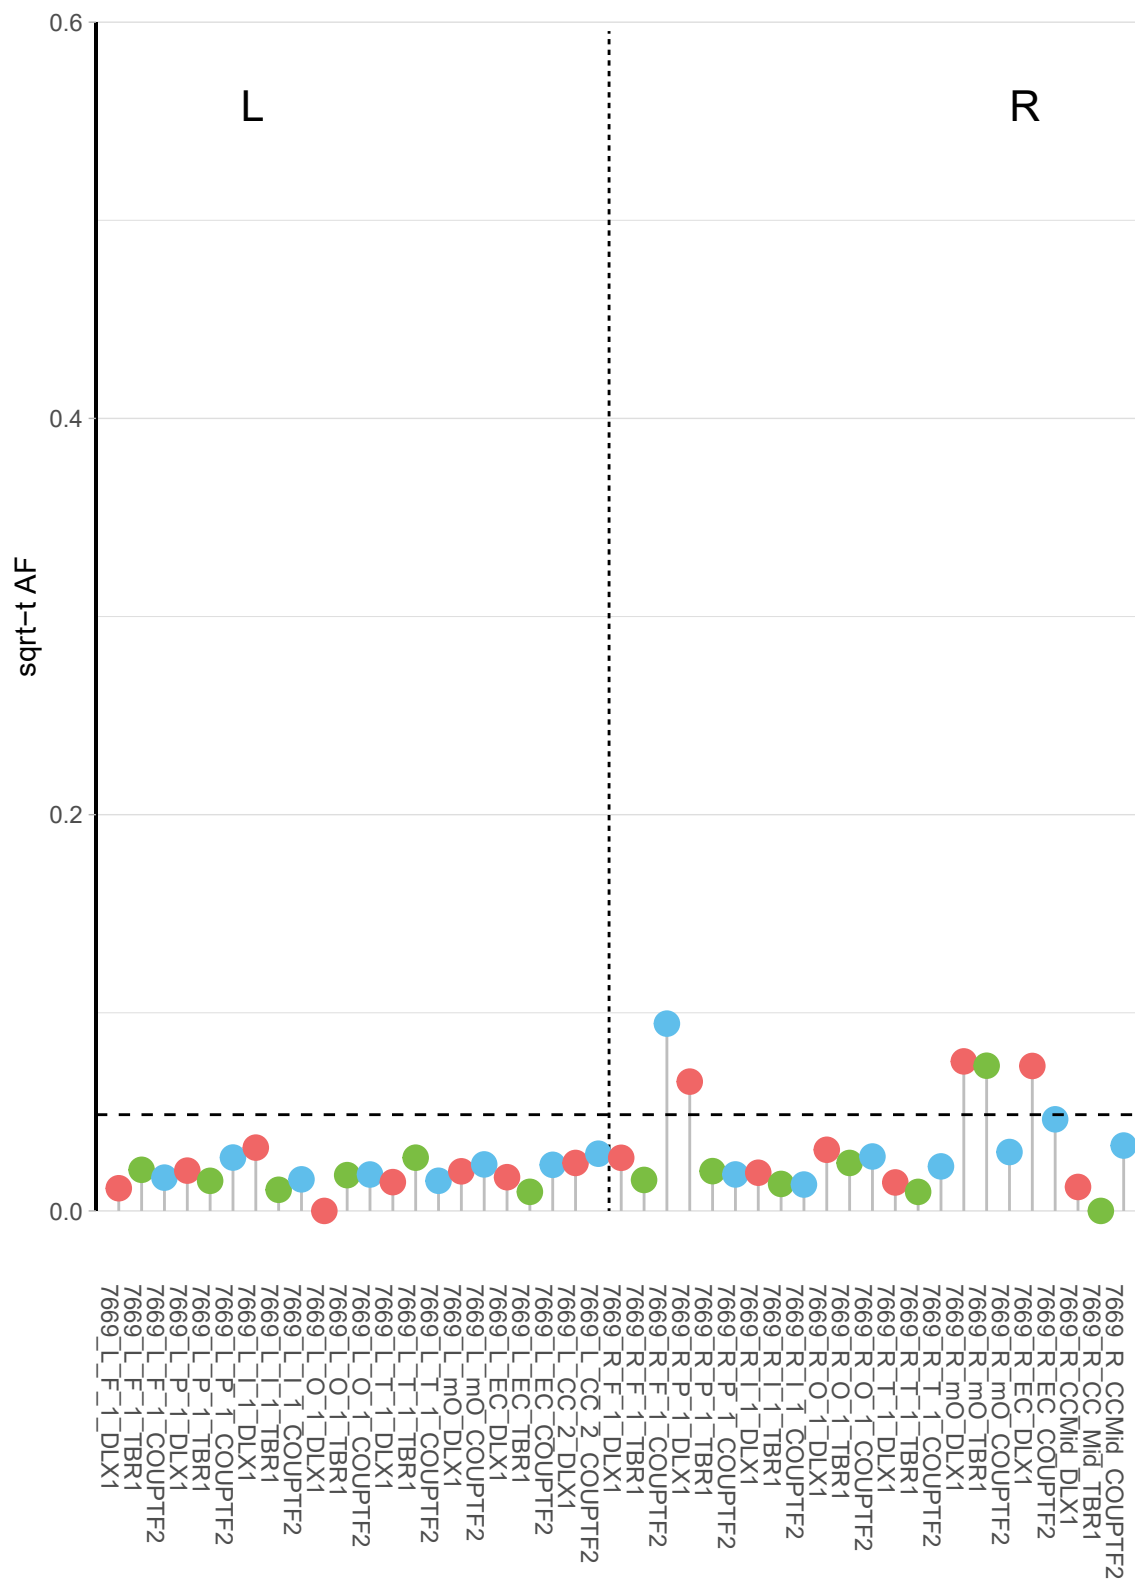

**b**

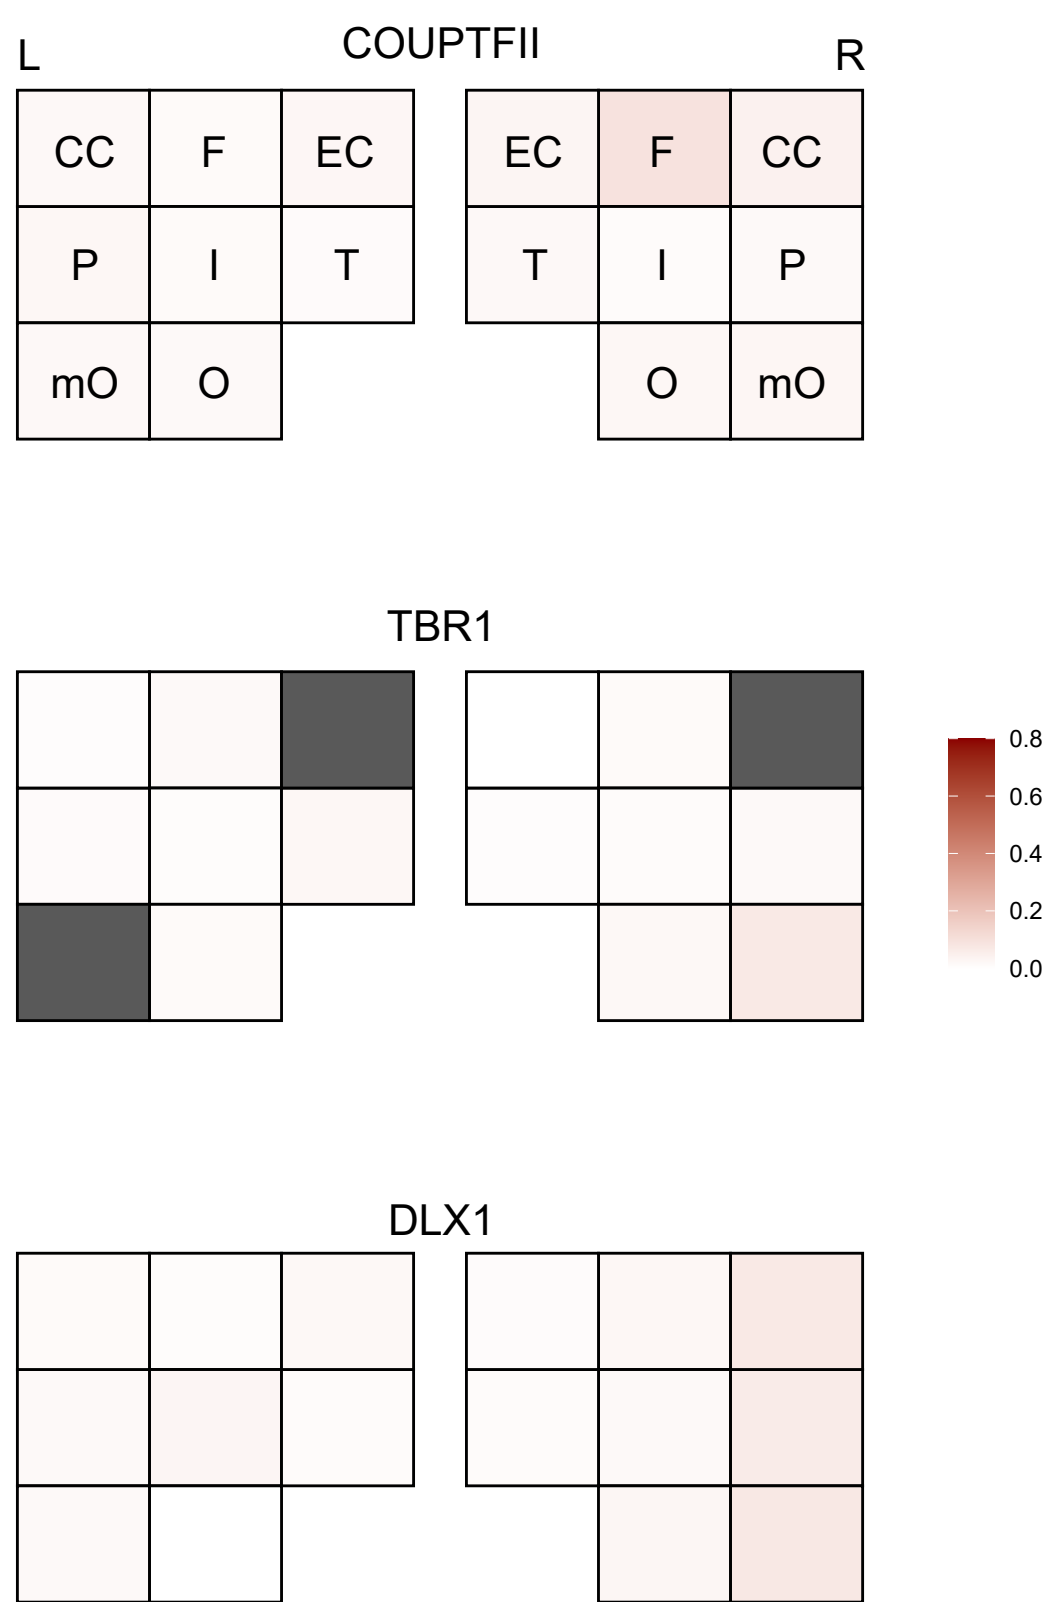





**a** ID05 1-103746984-A-T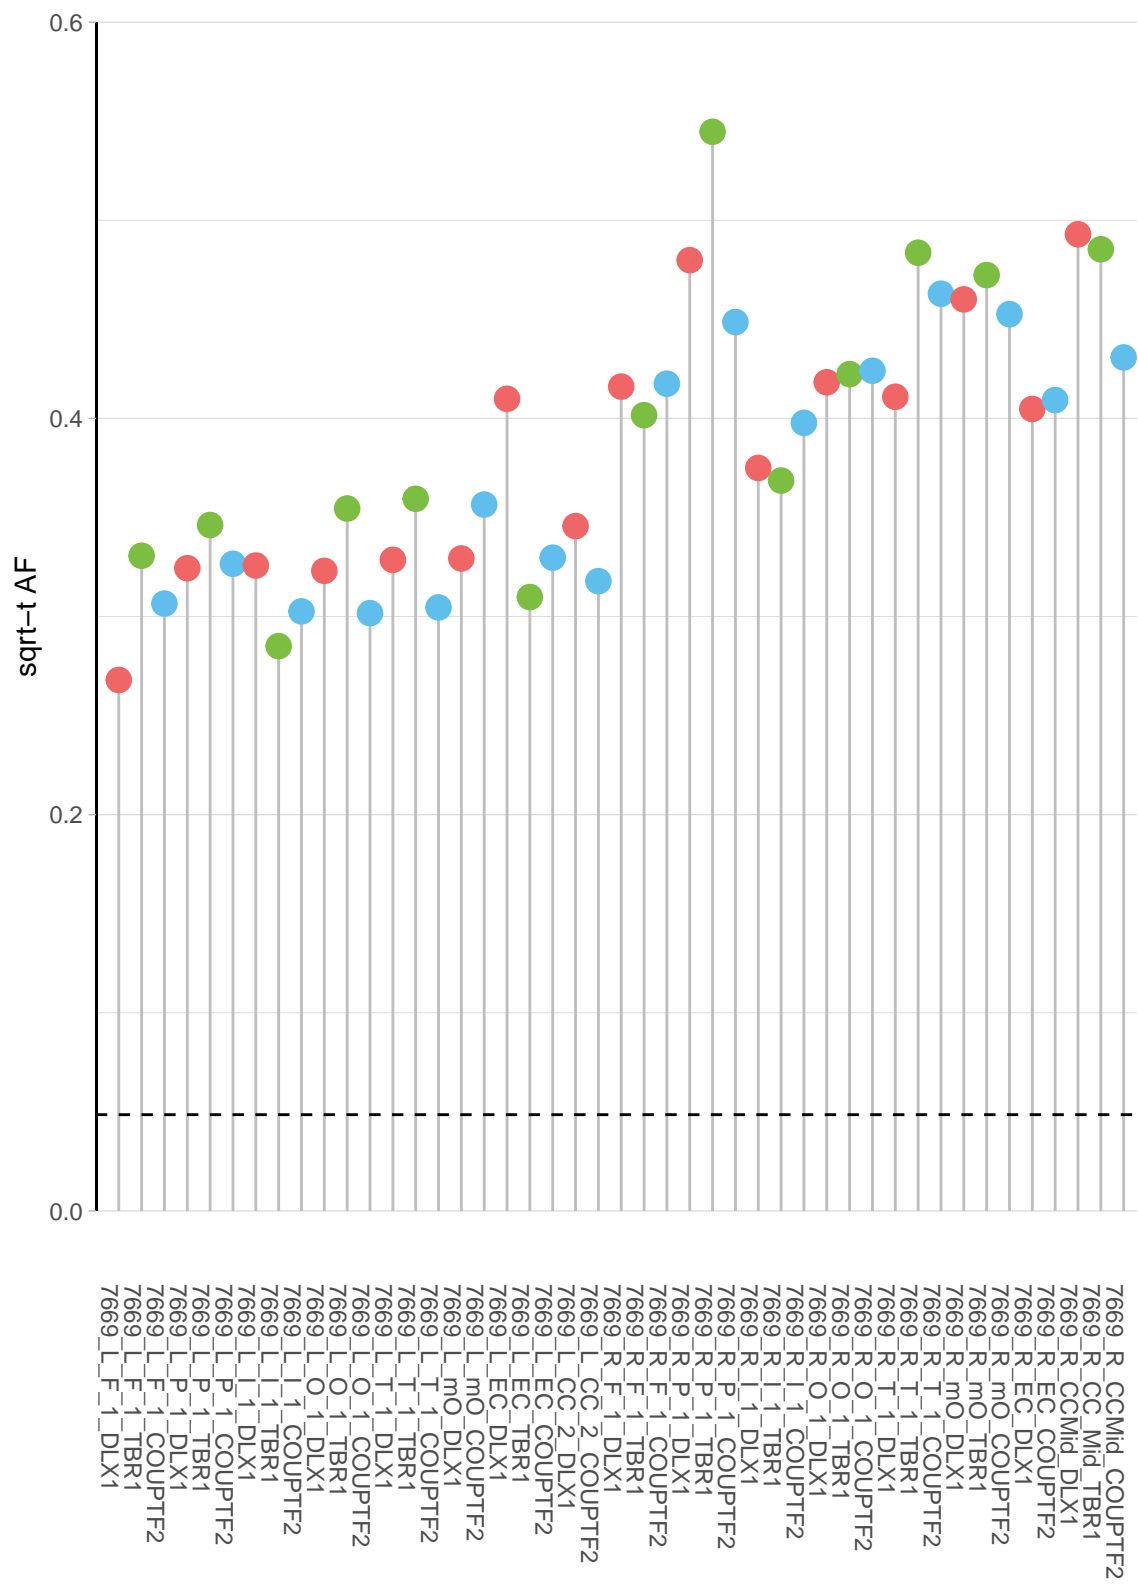**b**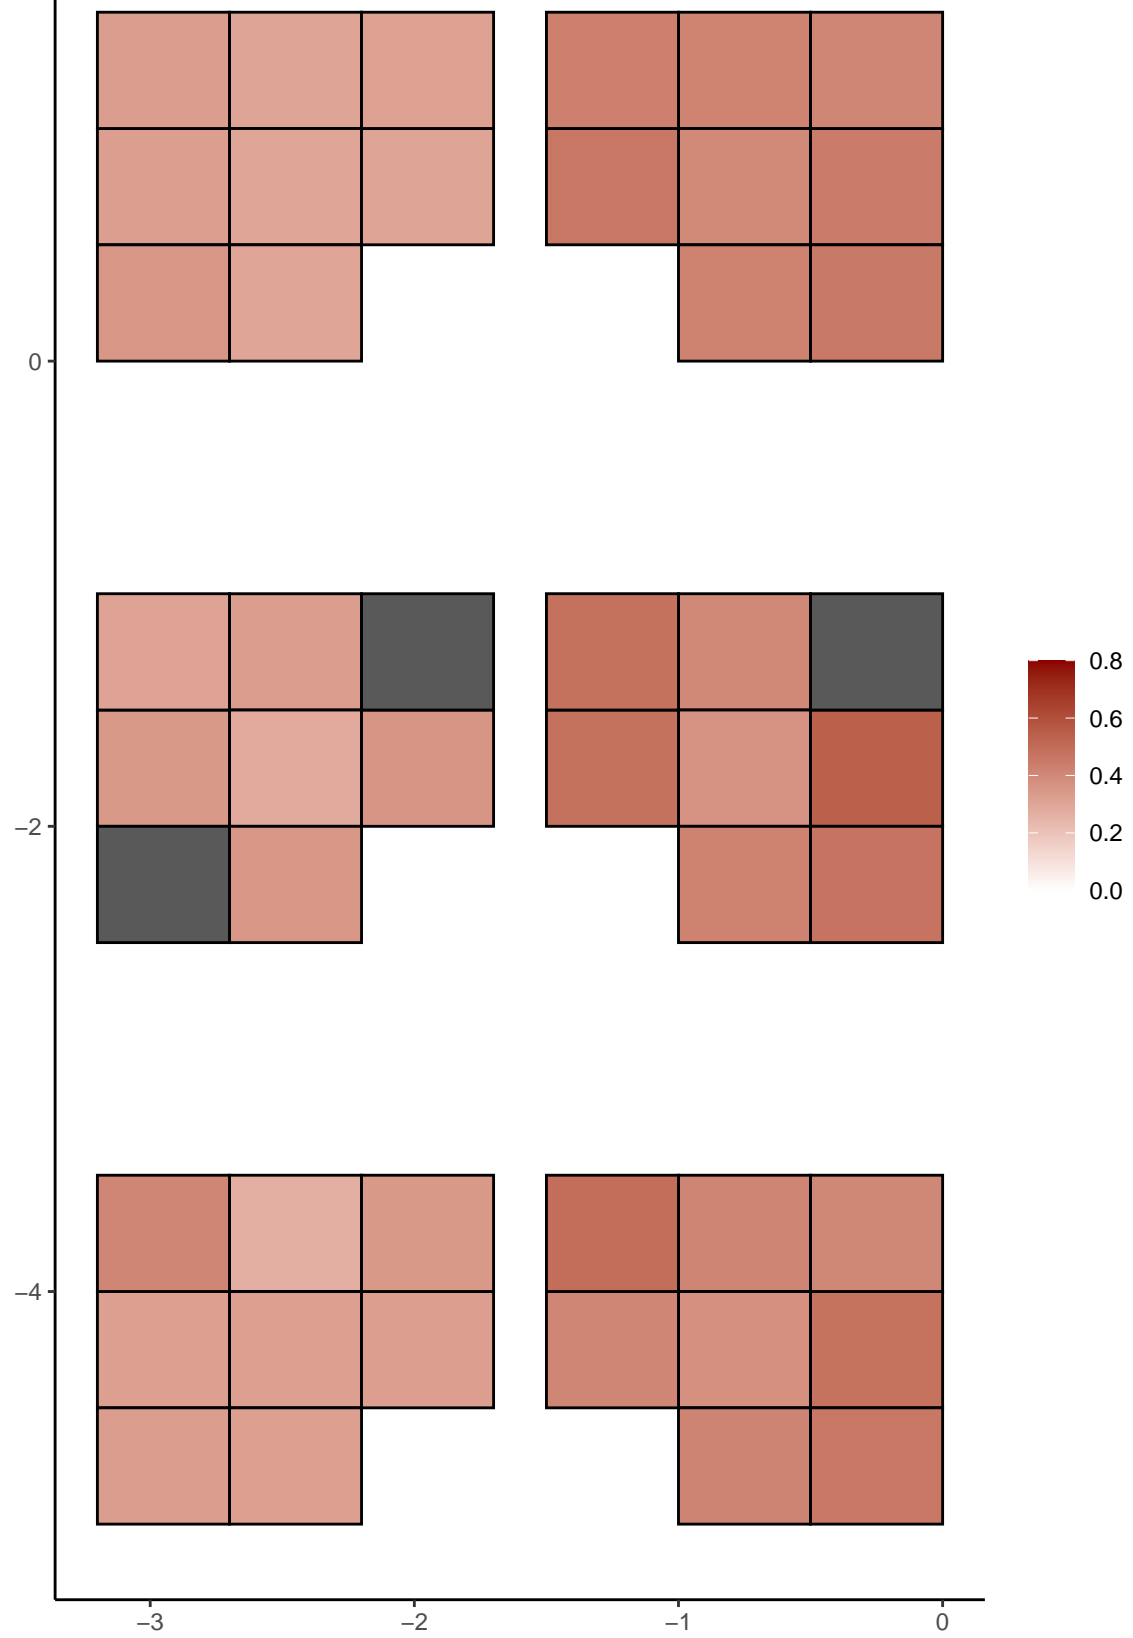

**a** ID05 1-104816417-G-A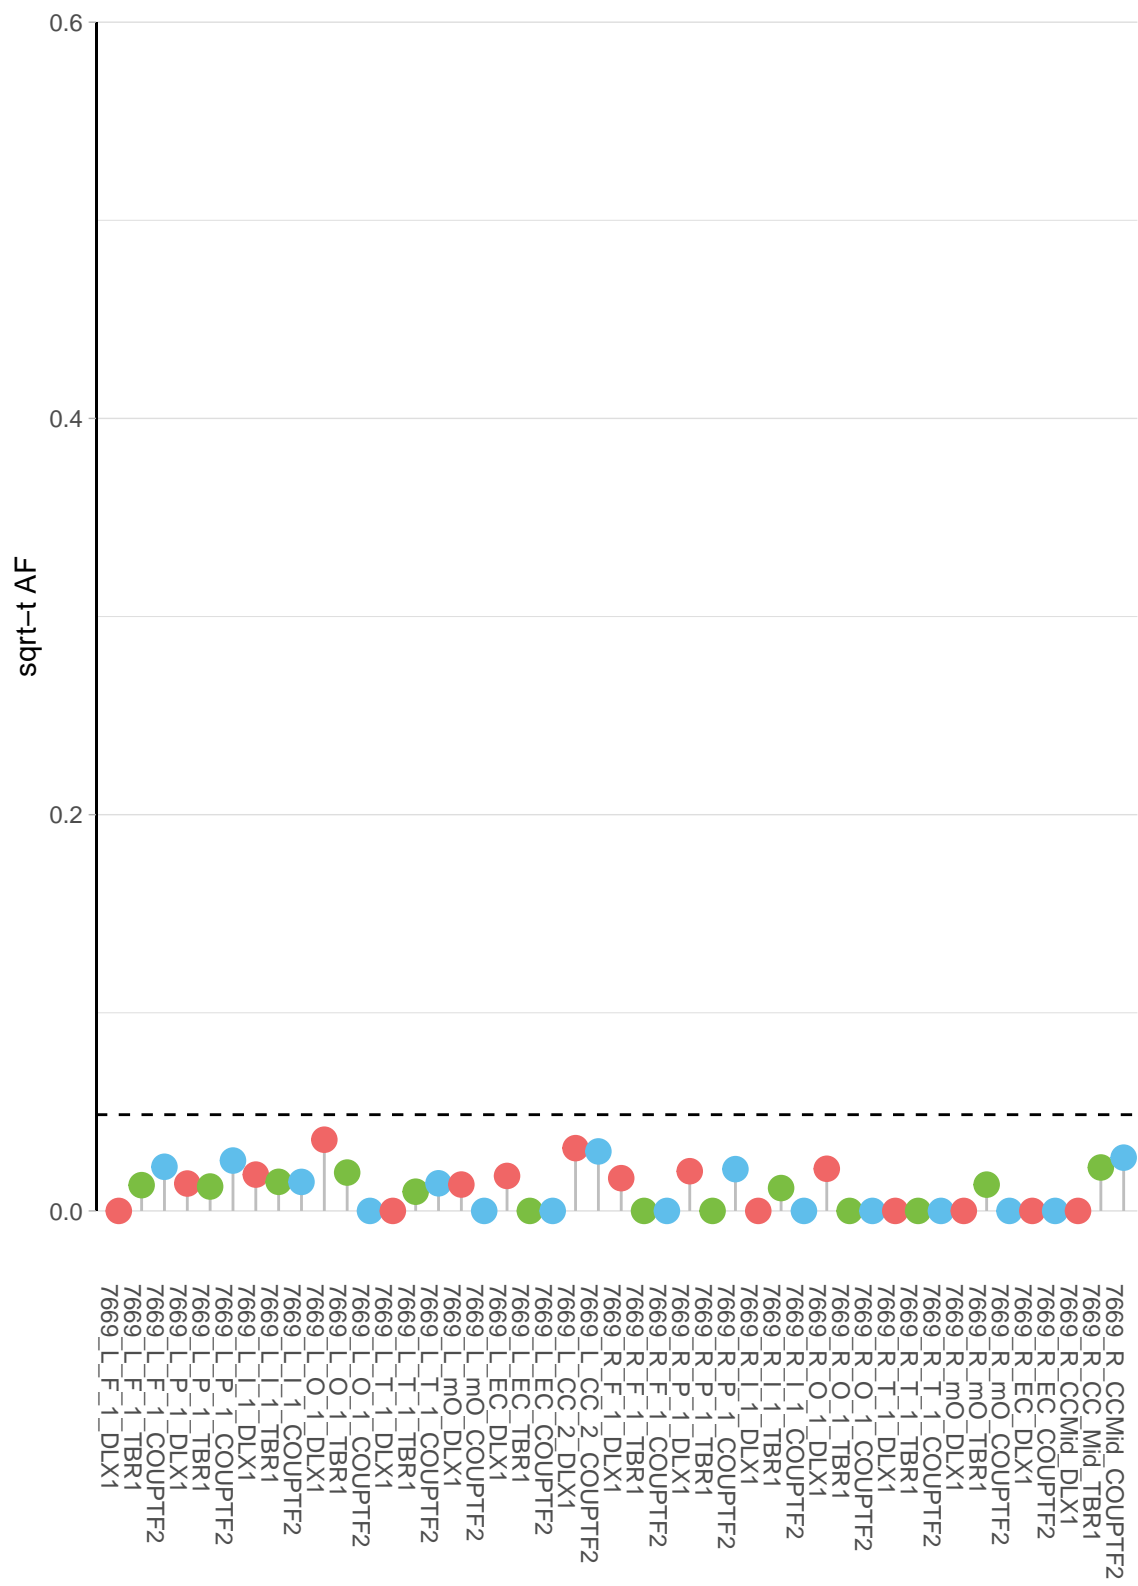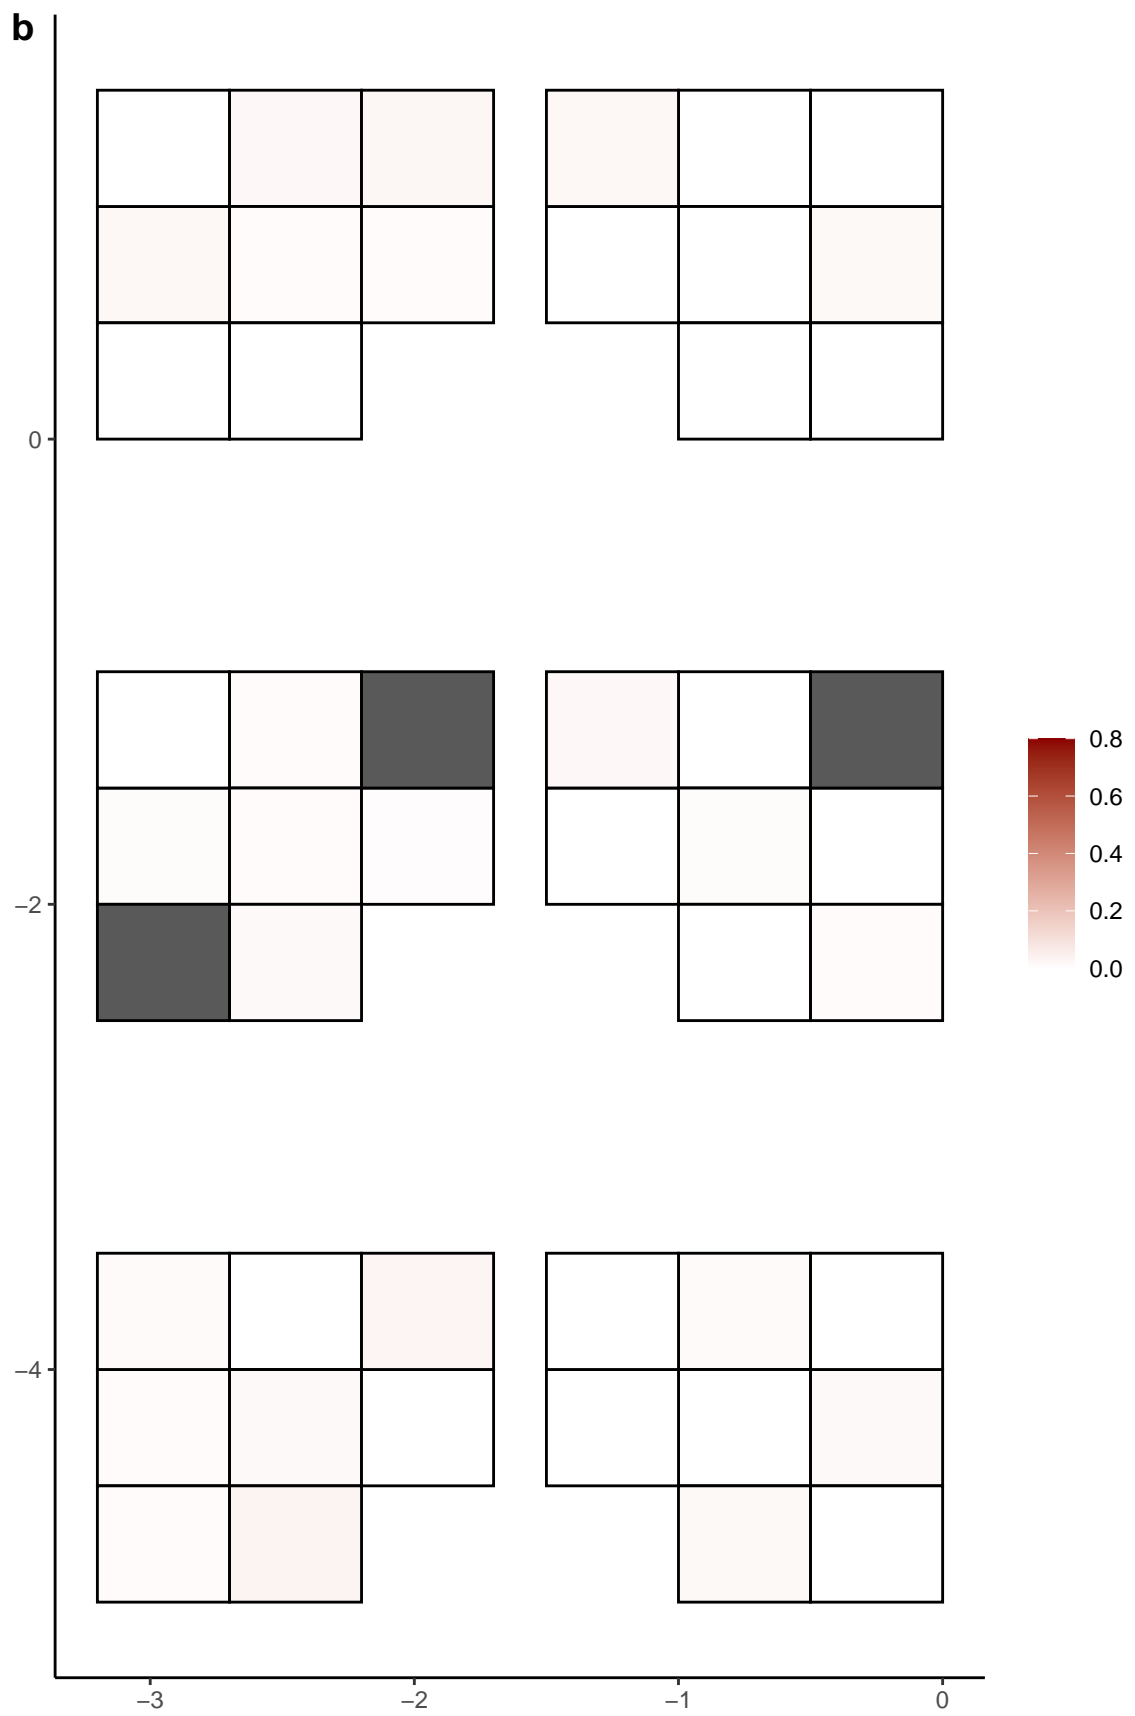

**a** ID05 1-105448120-C-T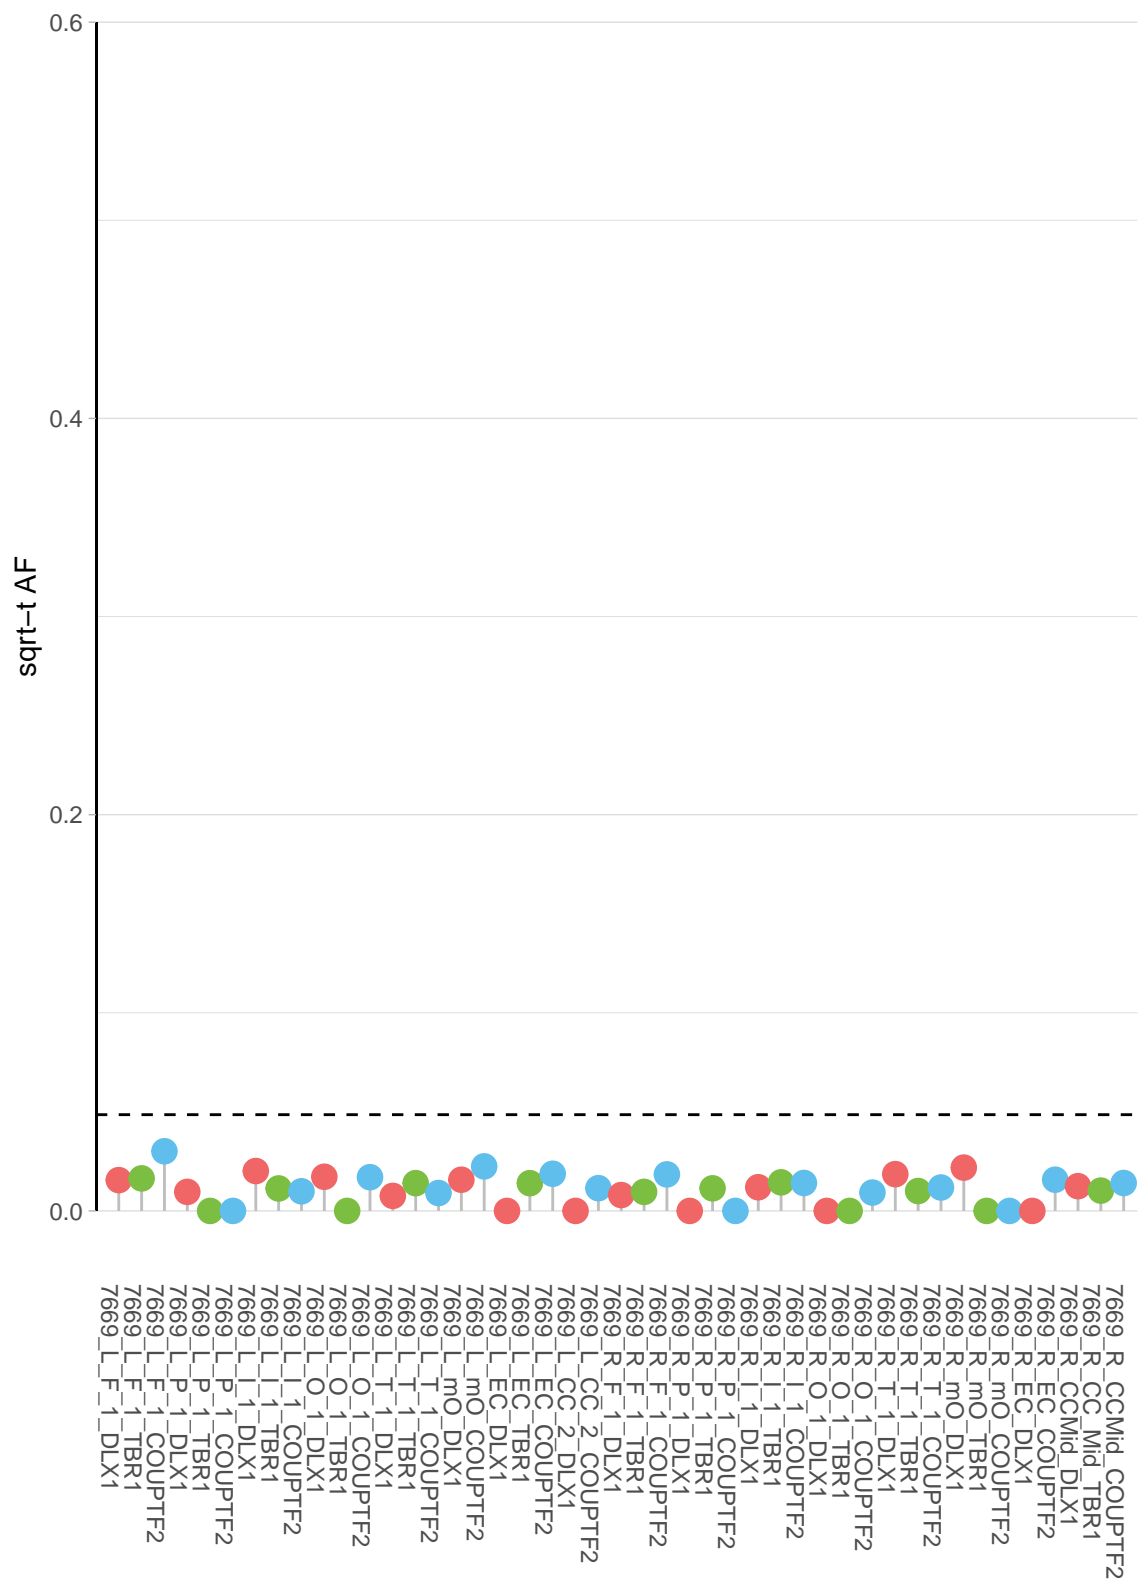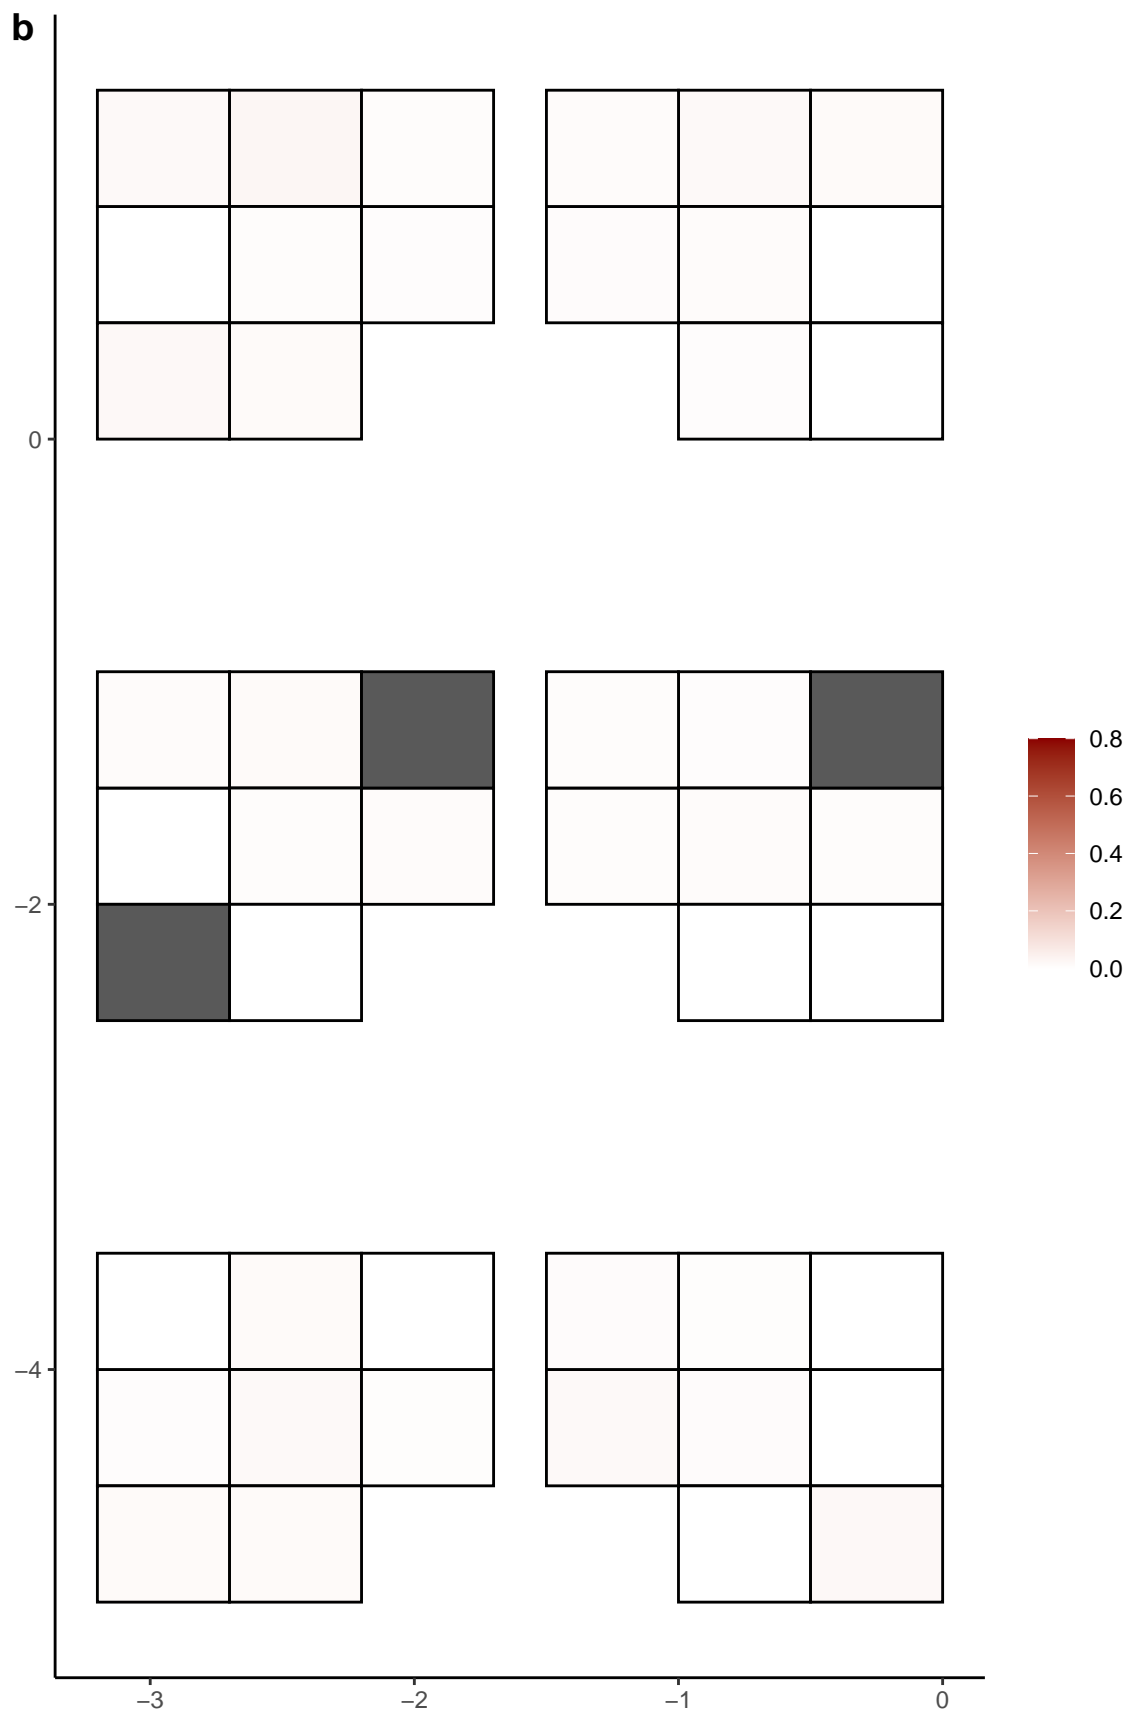

**a** ID05 1-113168020-C-T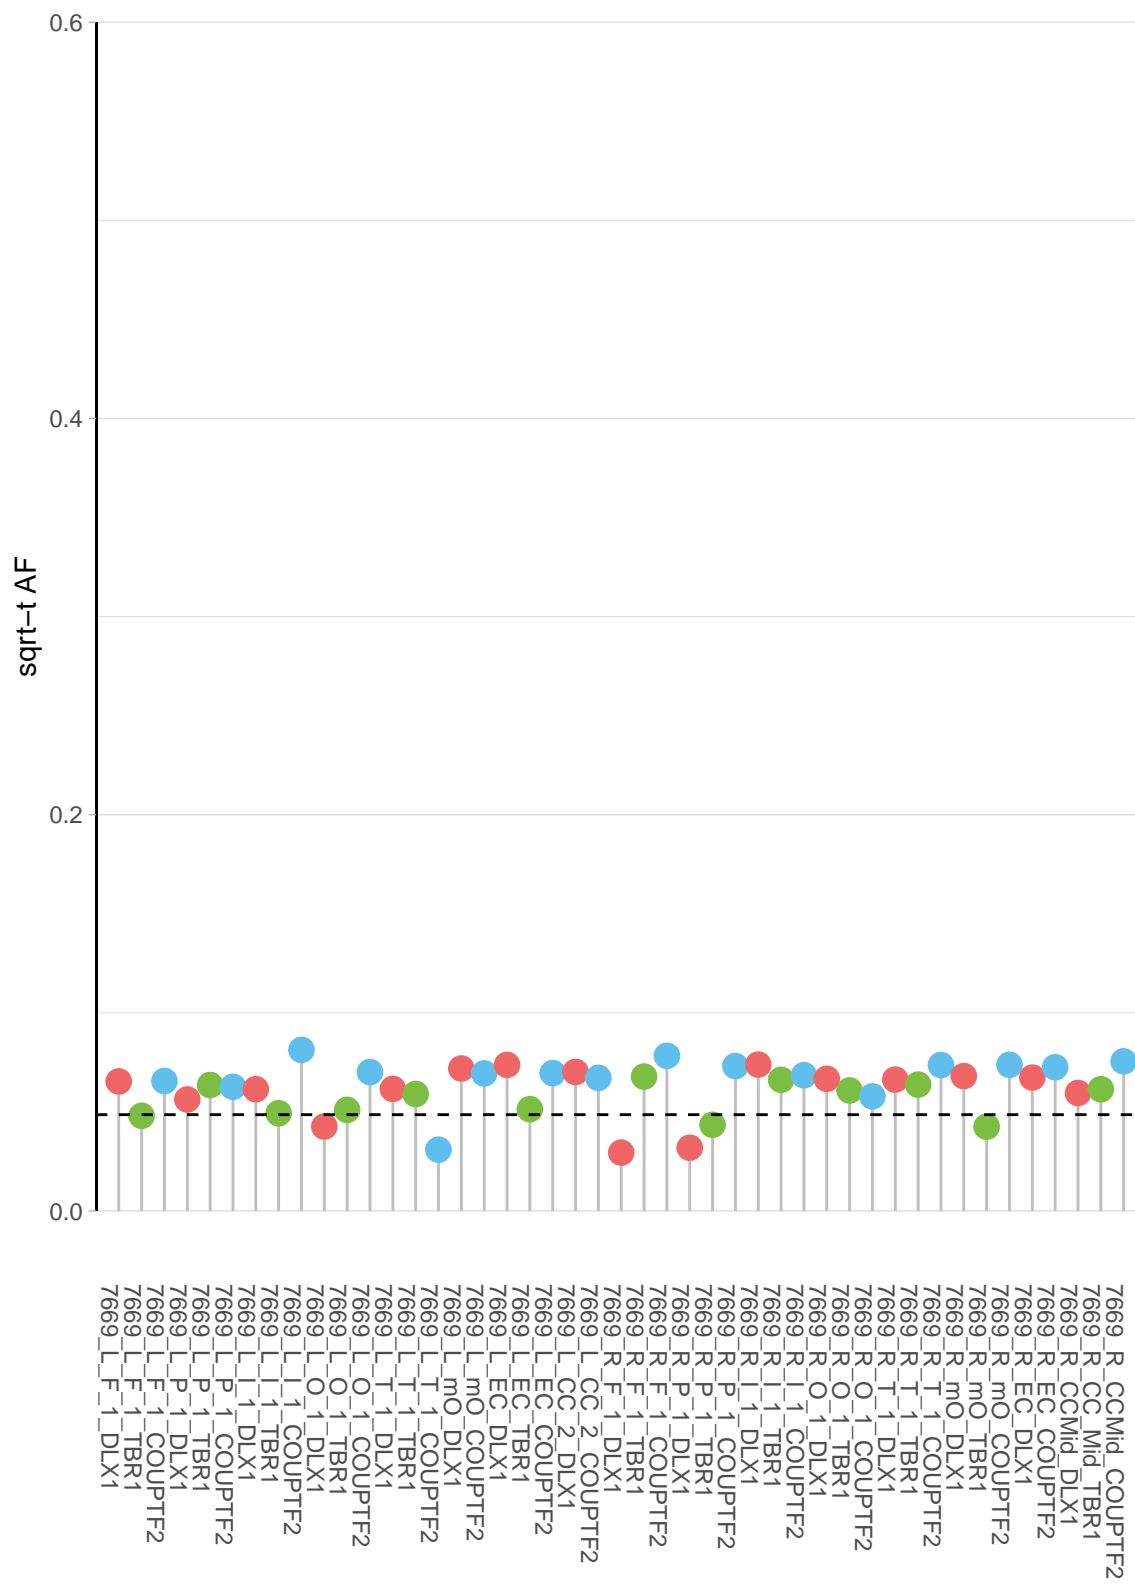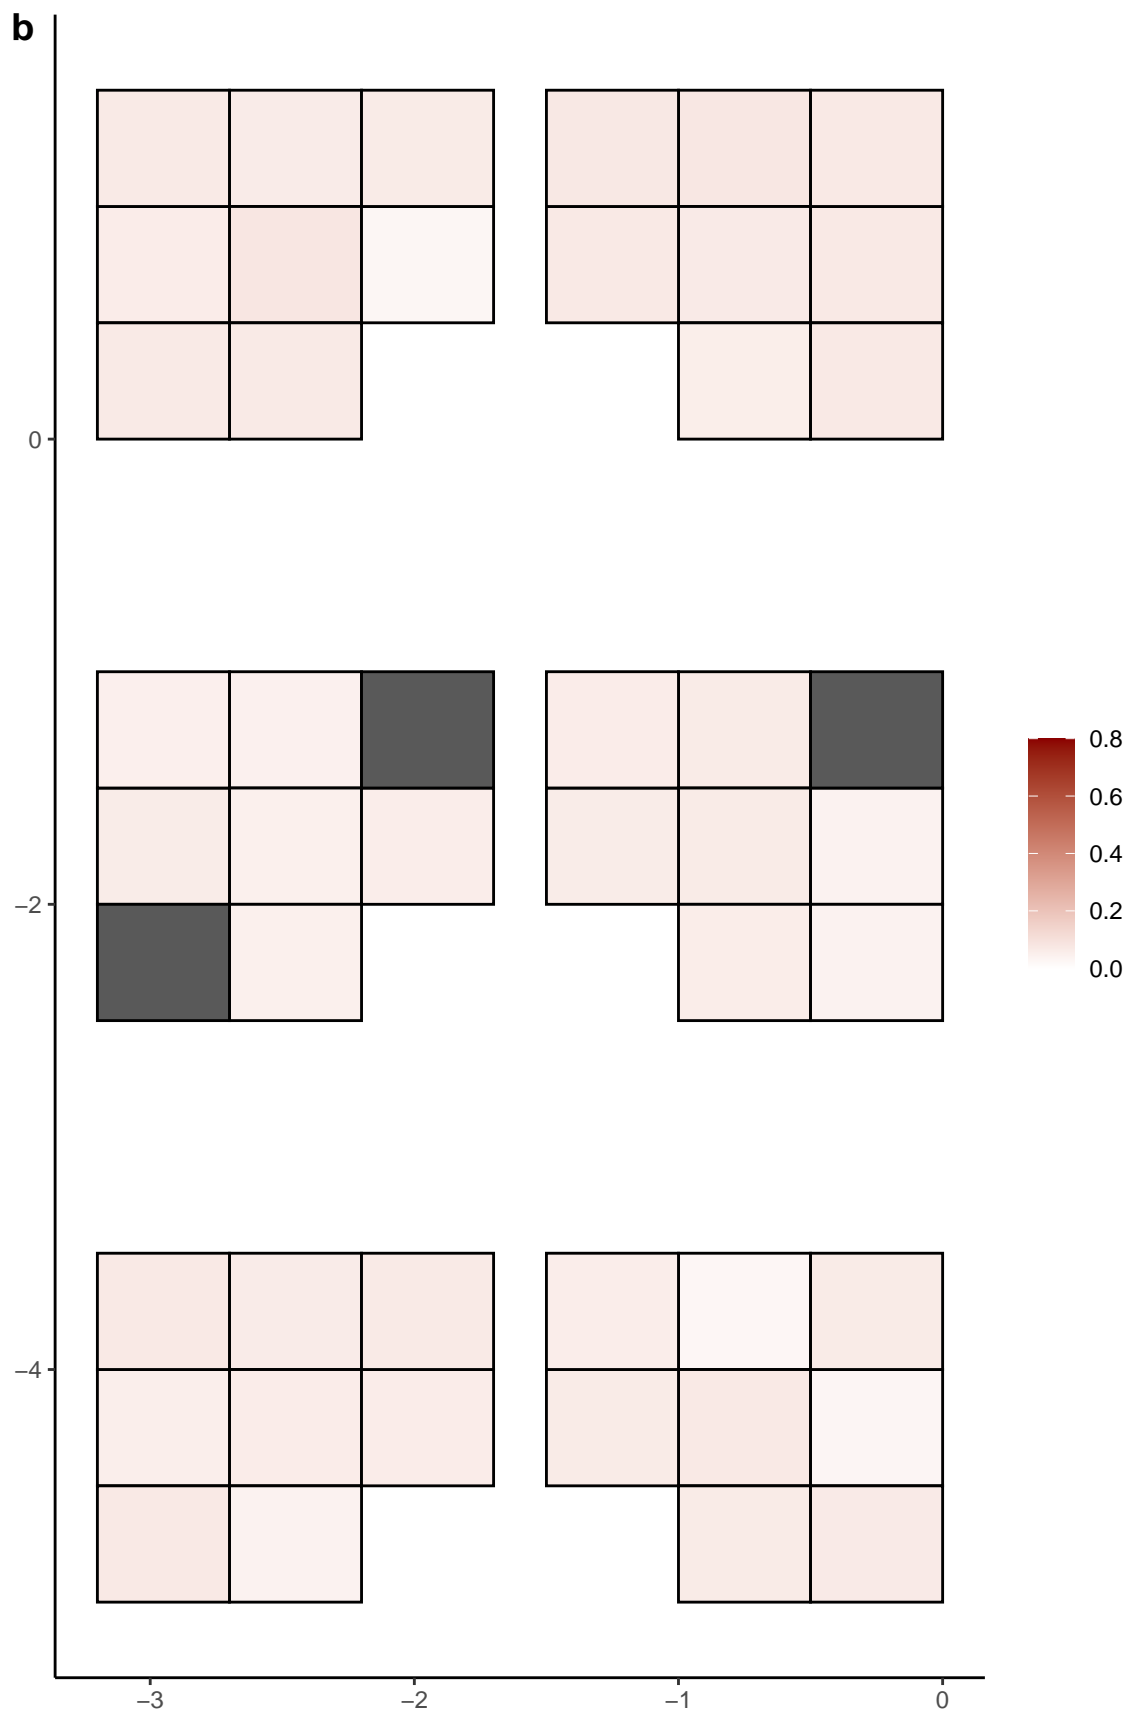

**a** ID05 1-113168021-A-G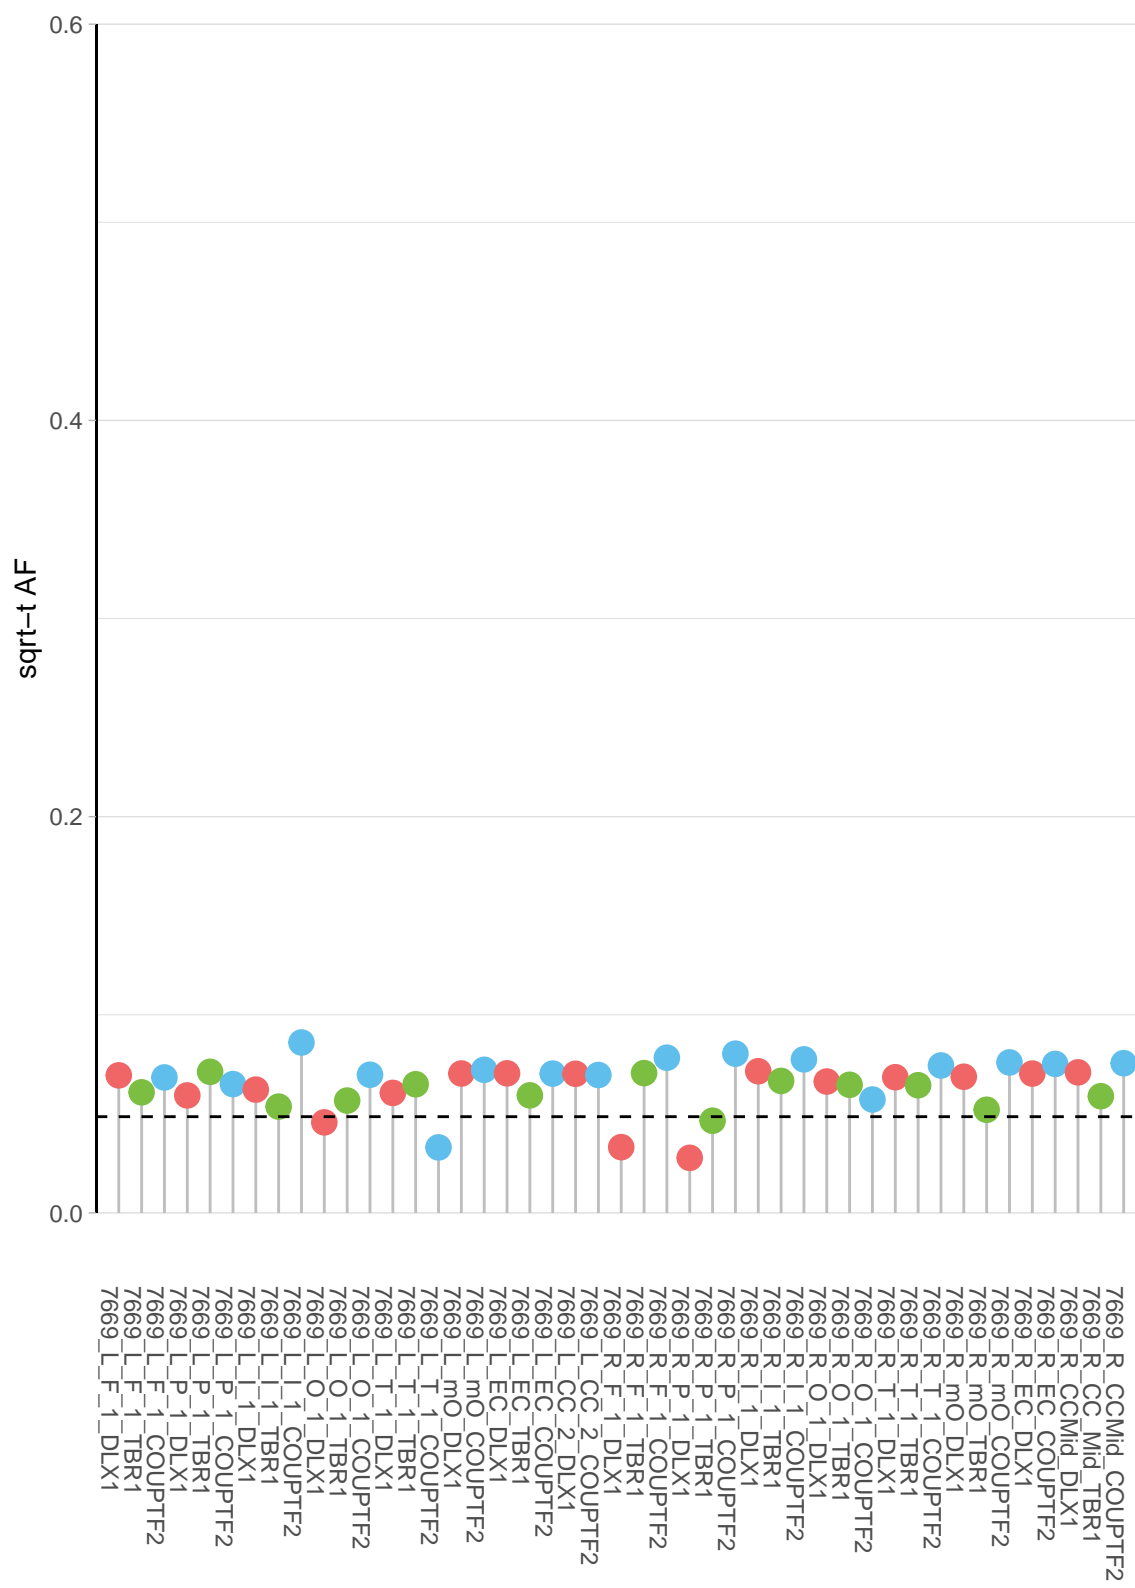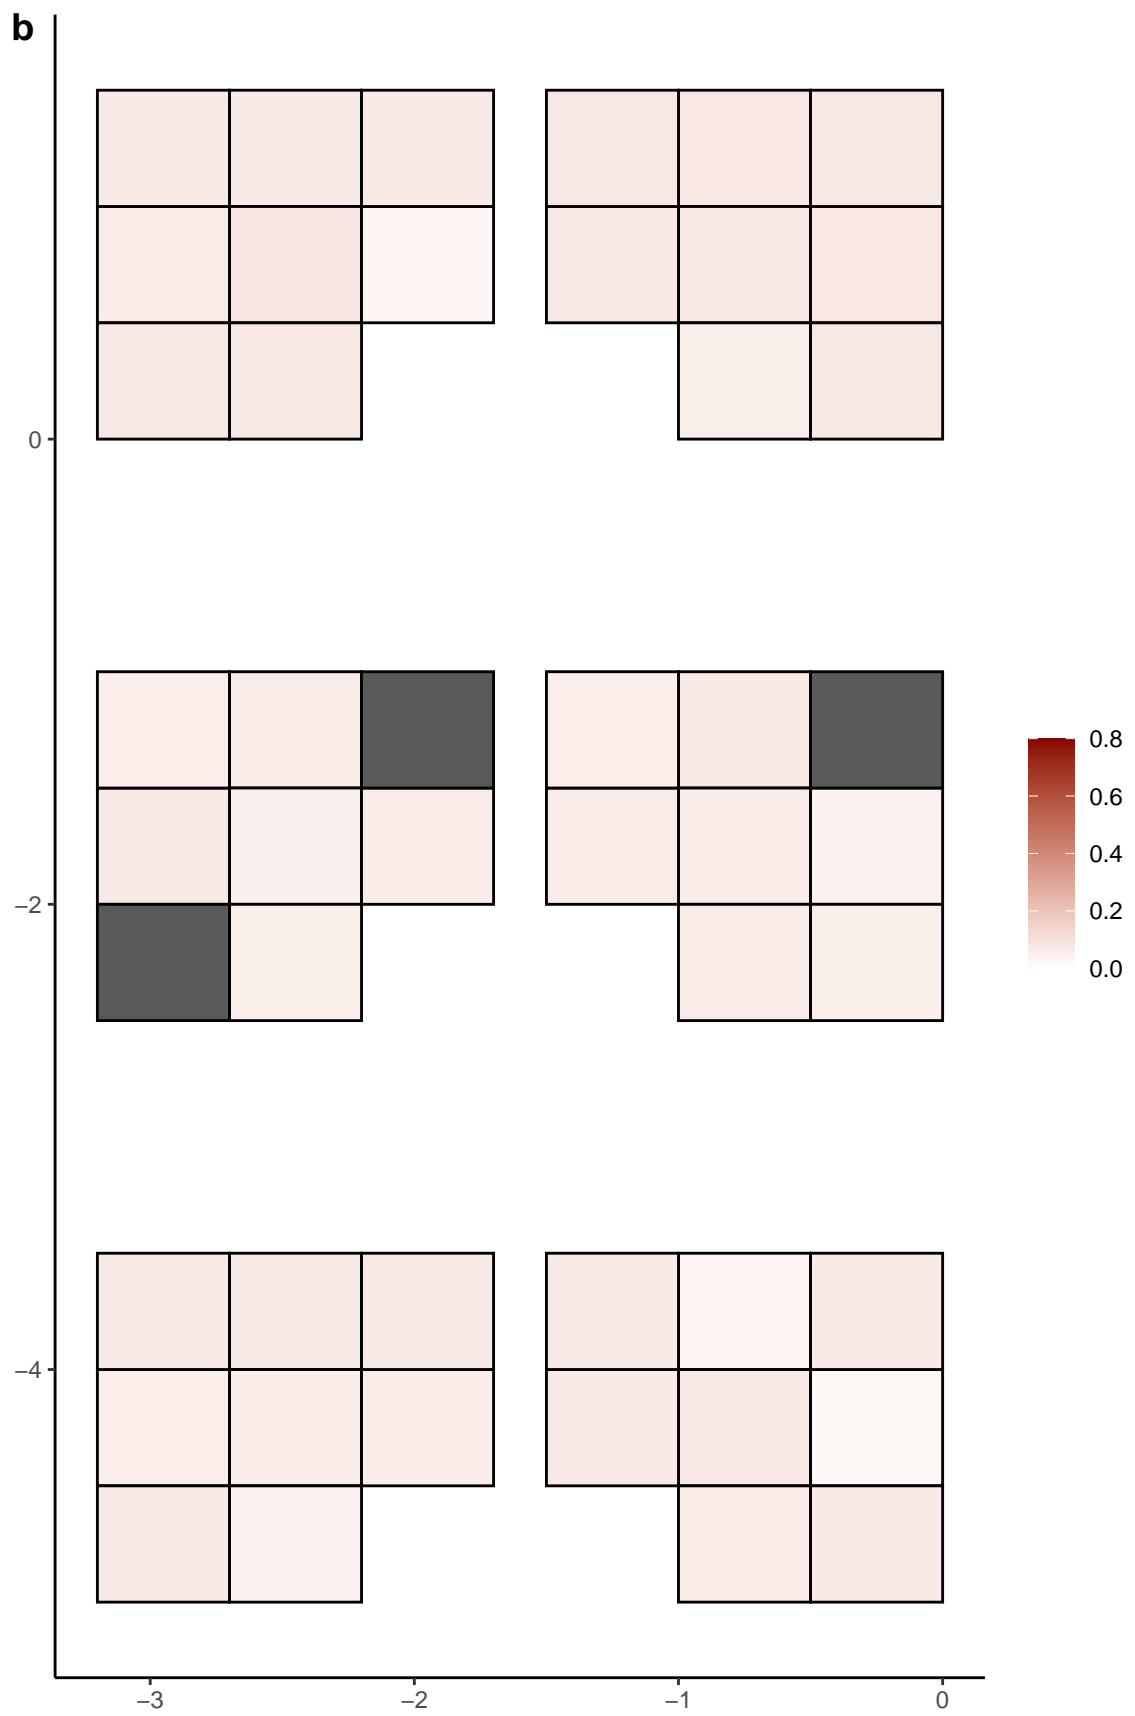

**a** ID05 1-116835962-G-A
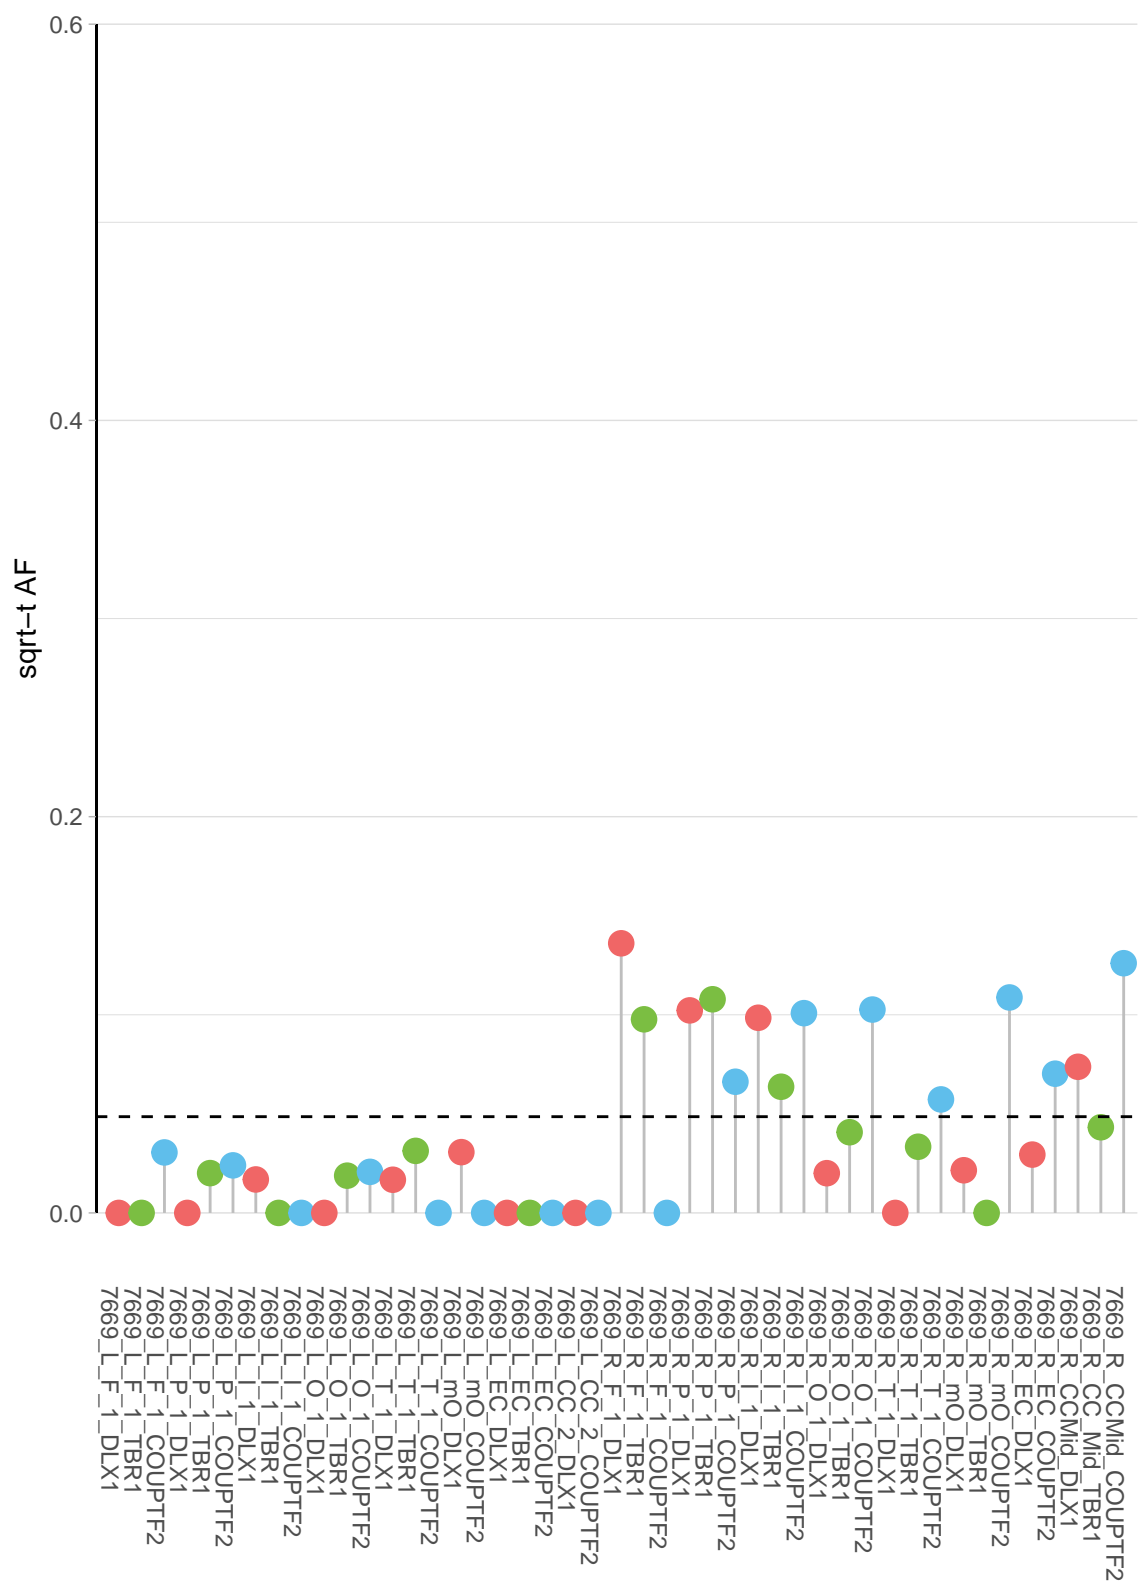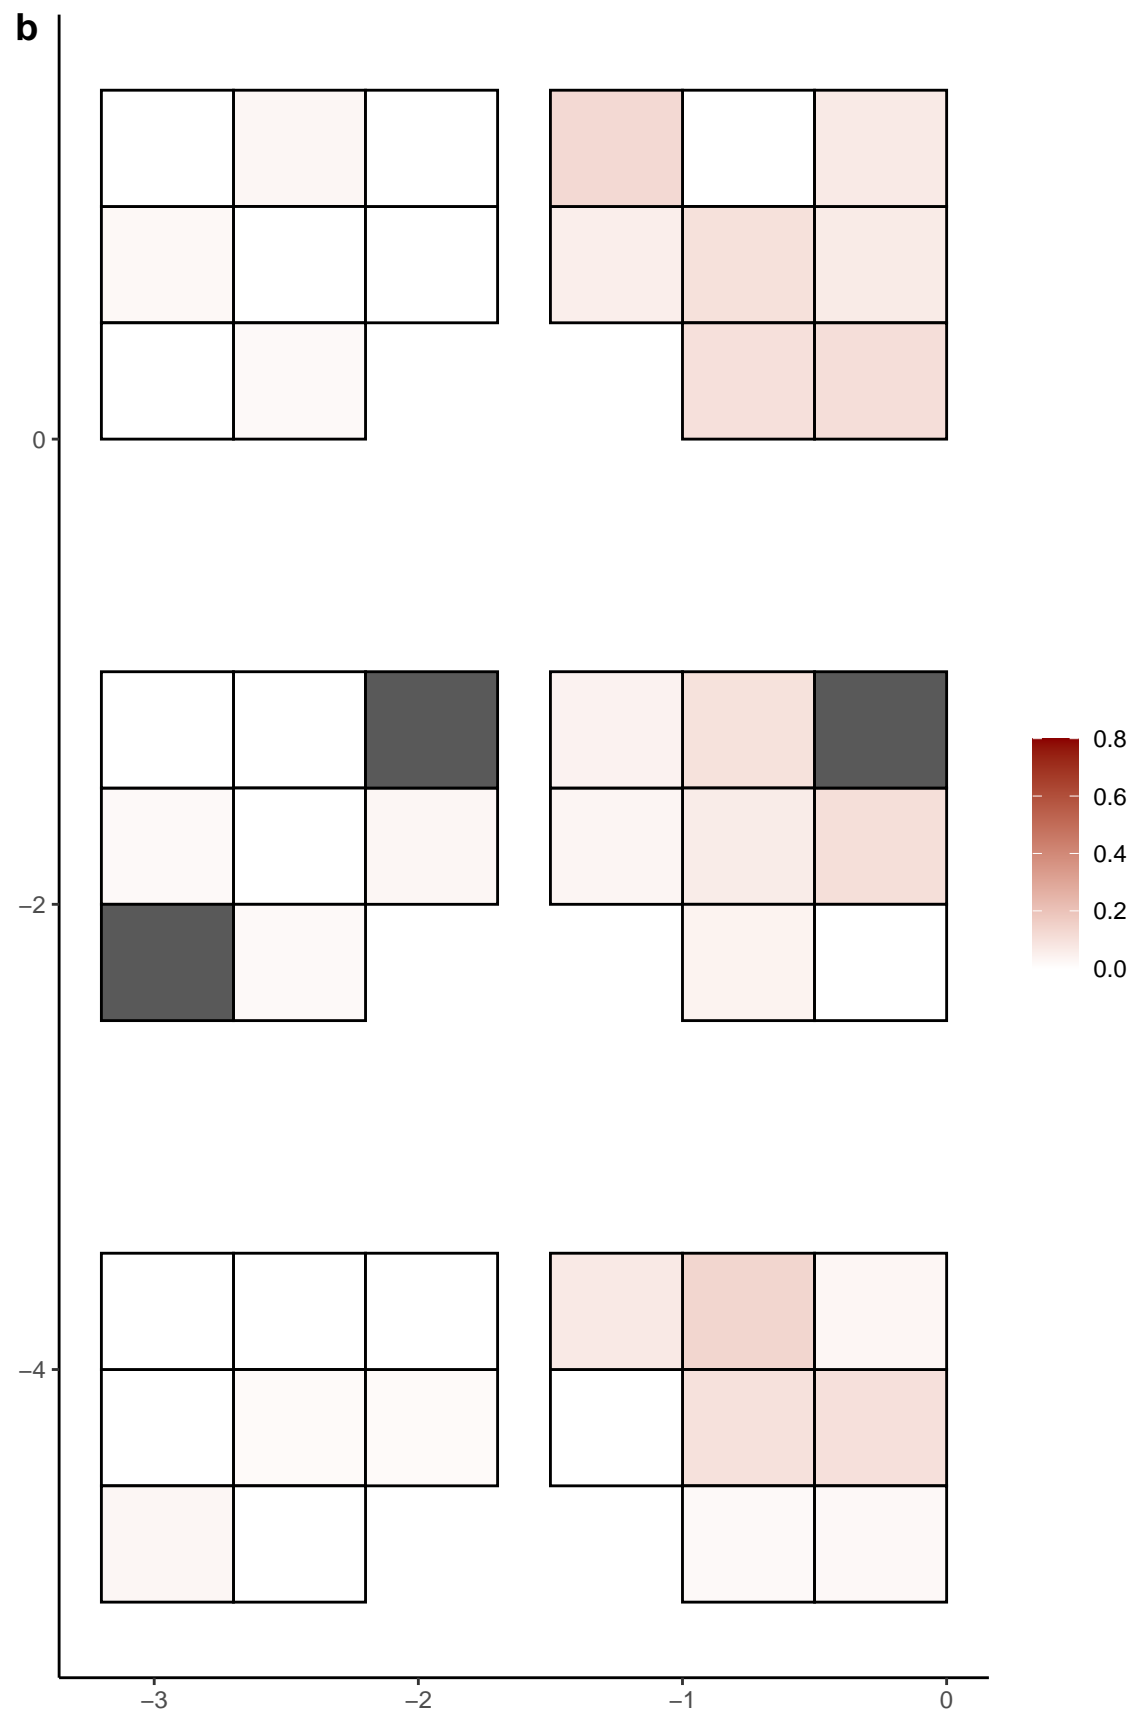

**a** ID05 1-117129159-C-T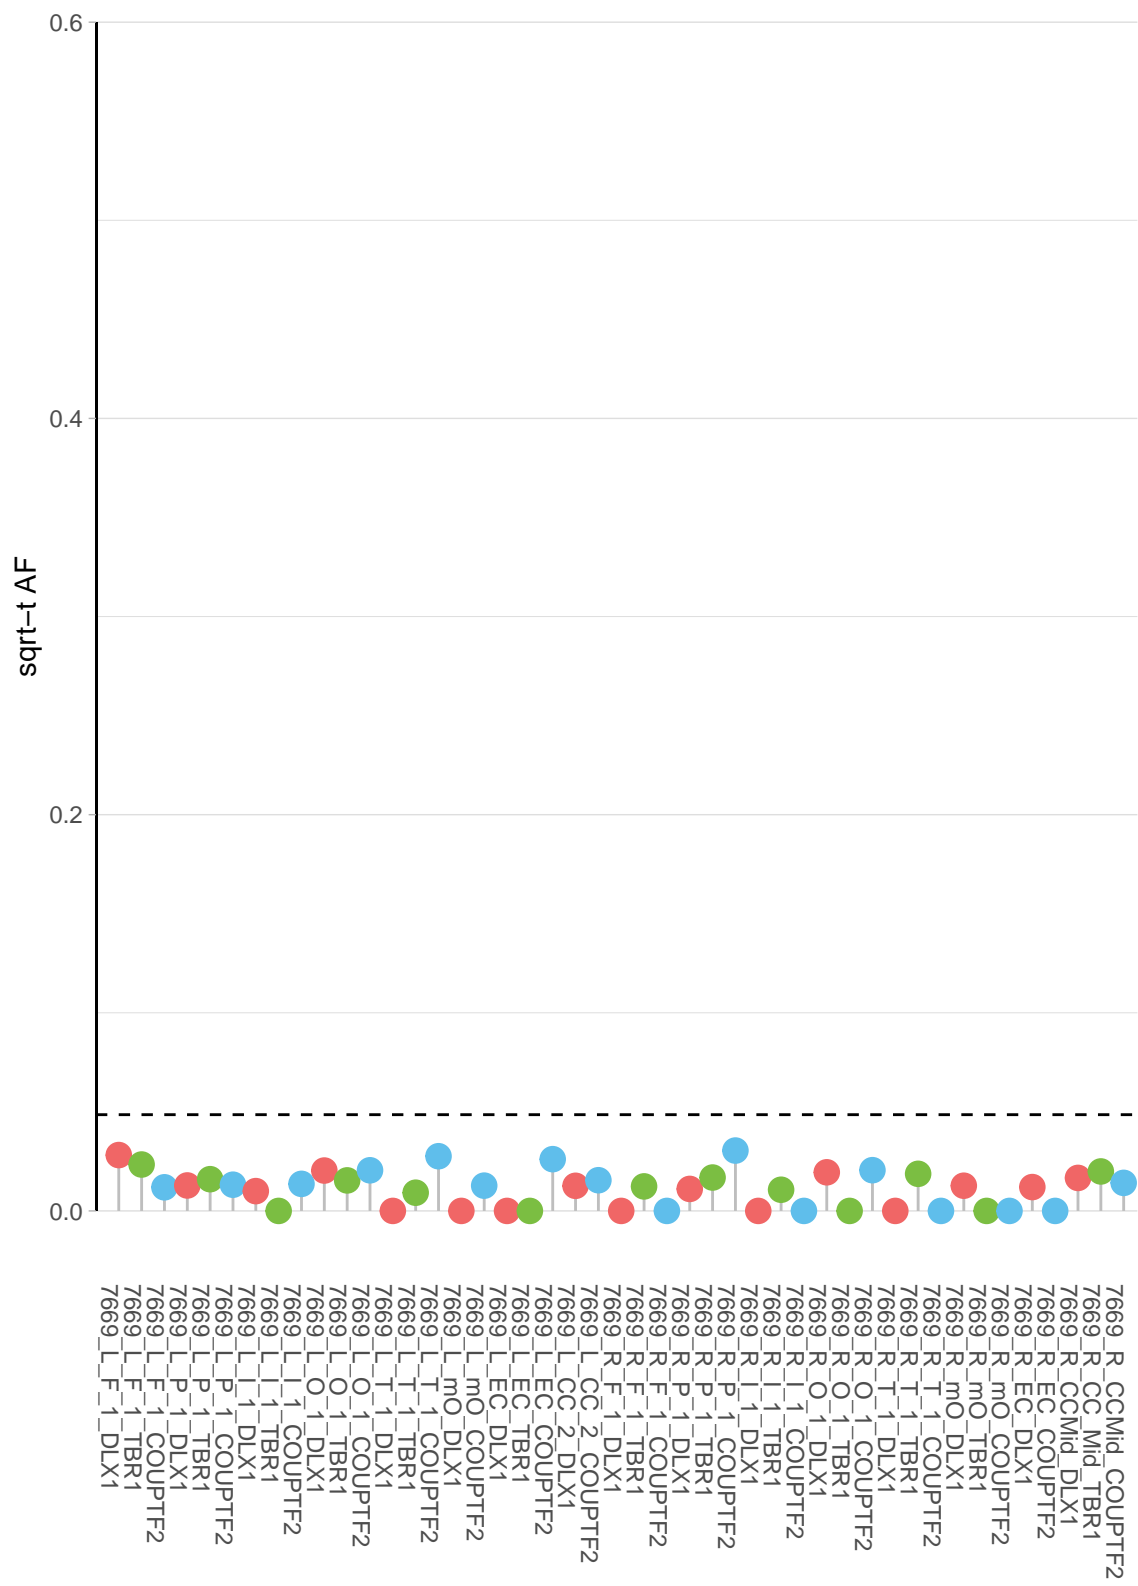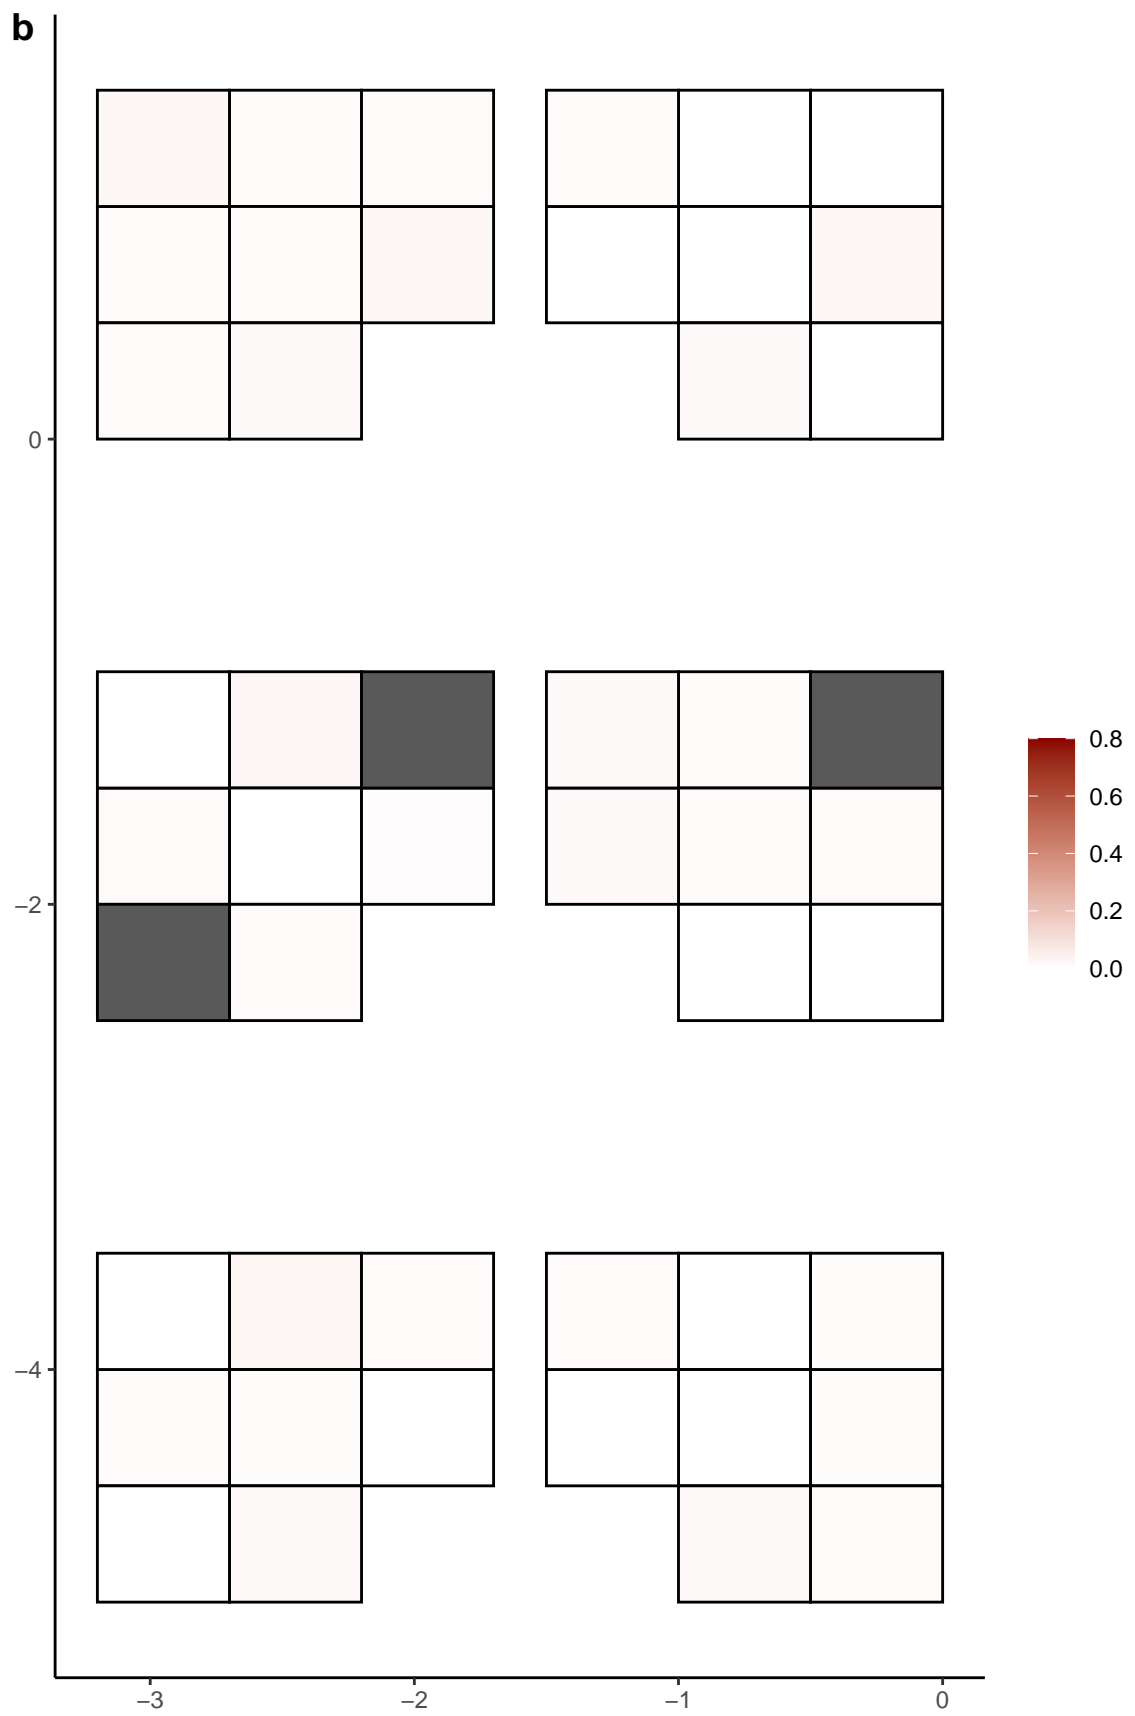



**a** ID05 1-117326750-G-T
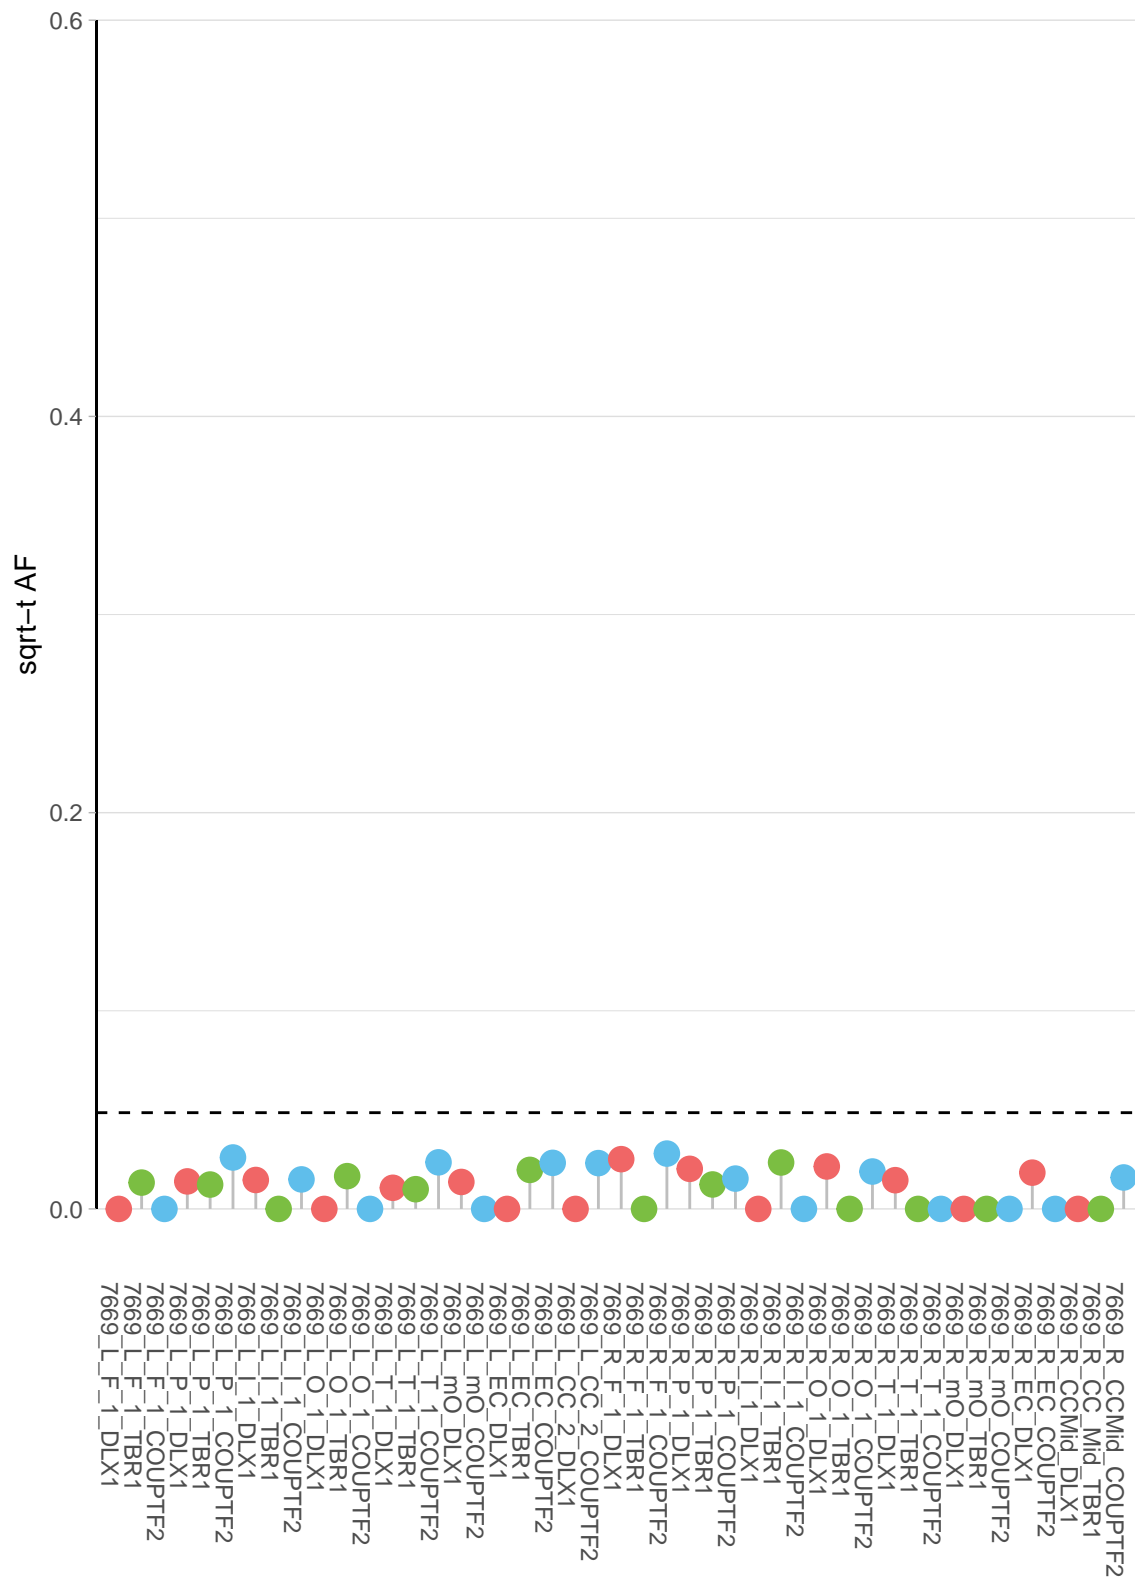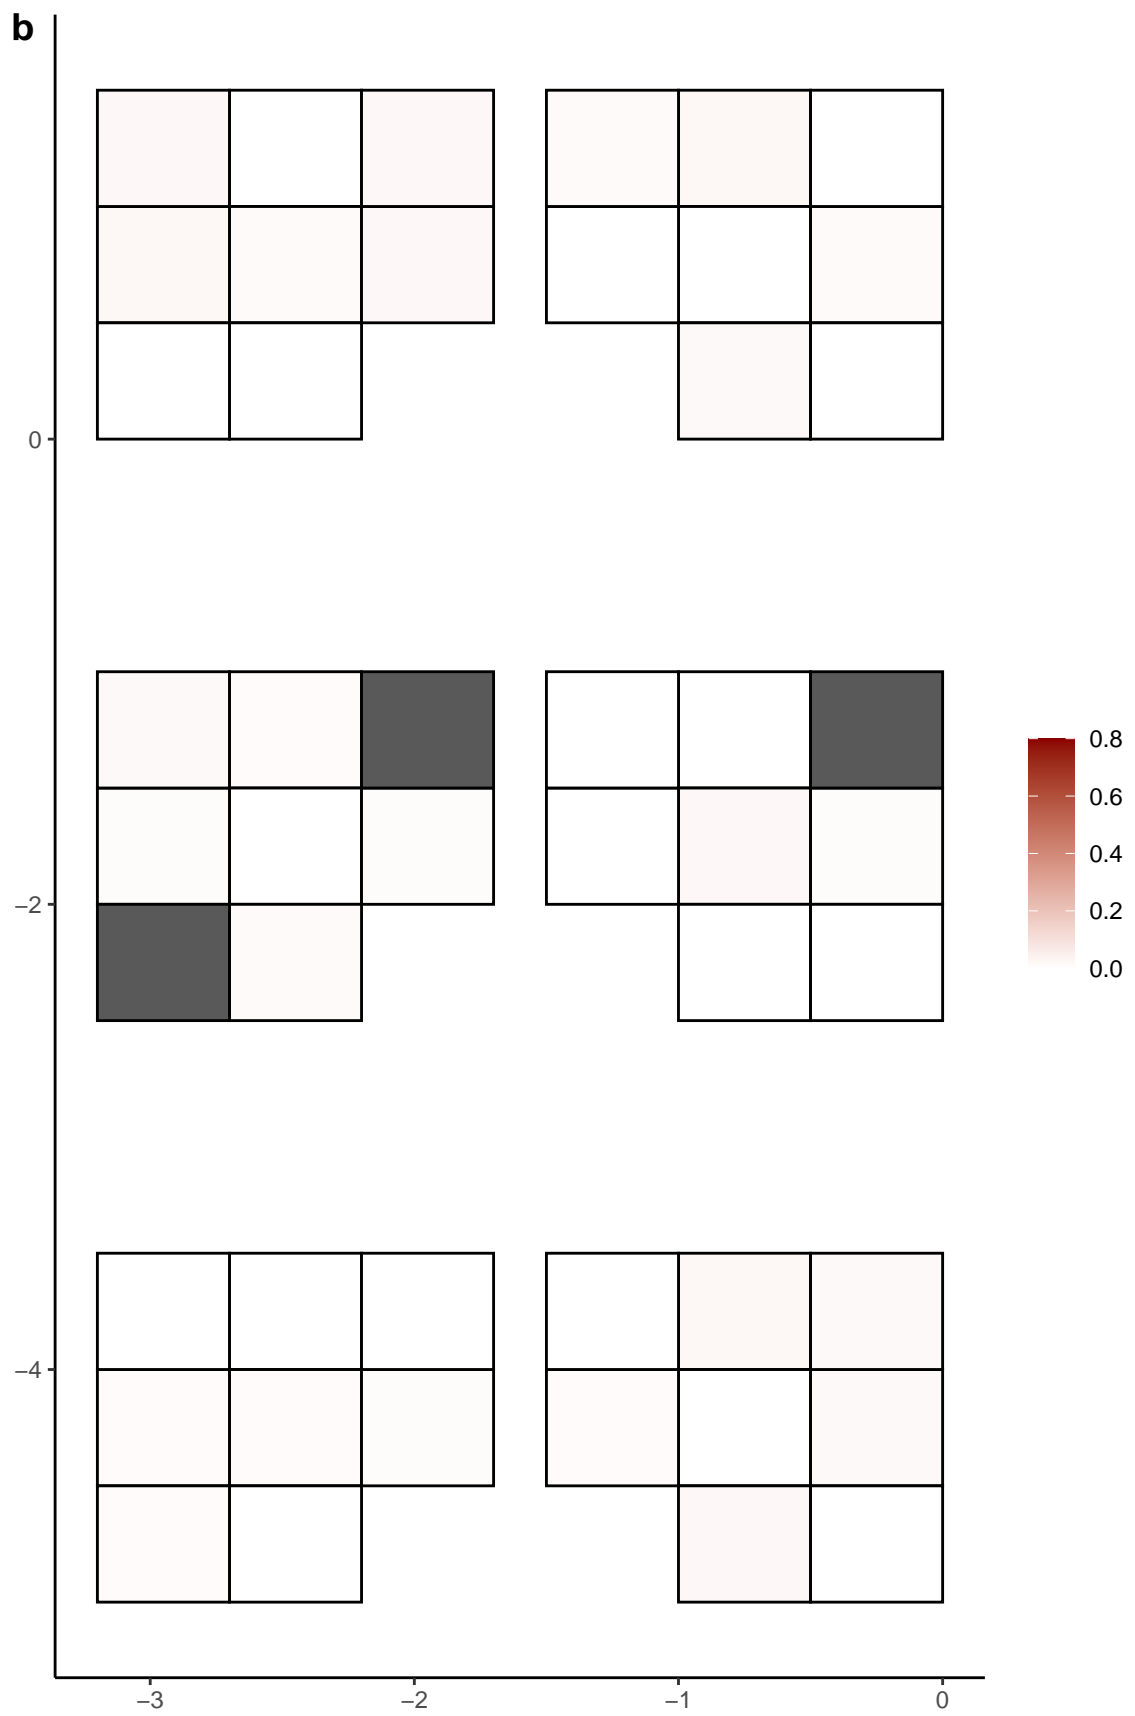

**a** ID05 1-1196724-A-T

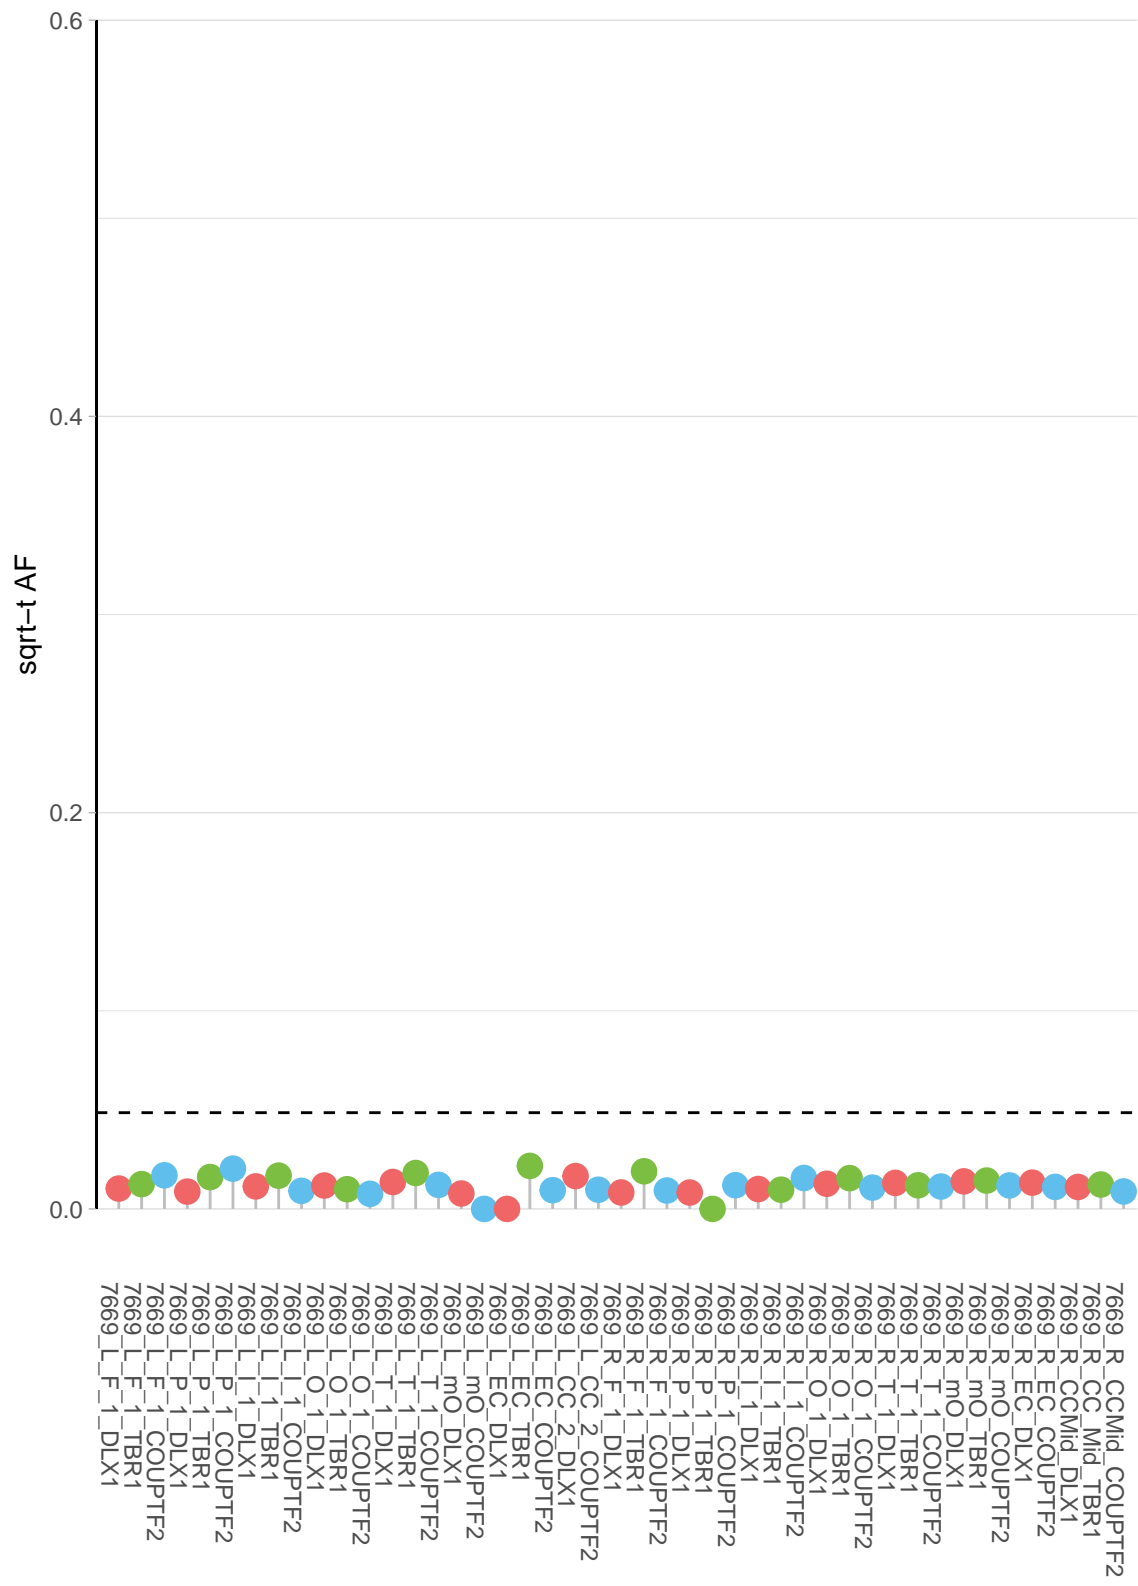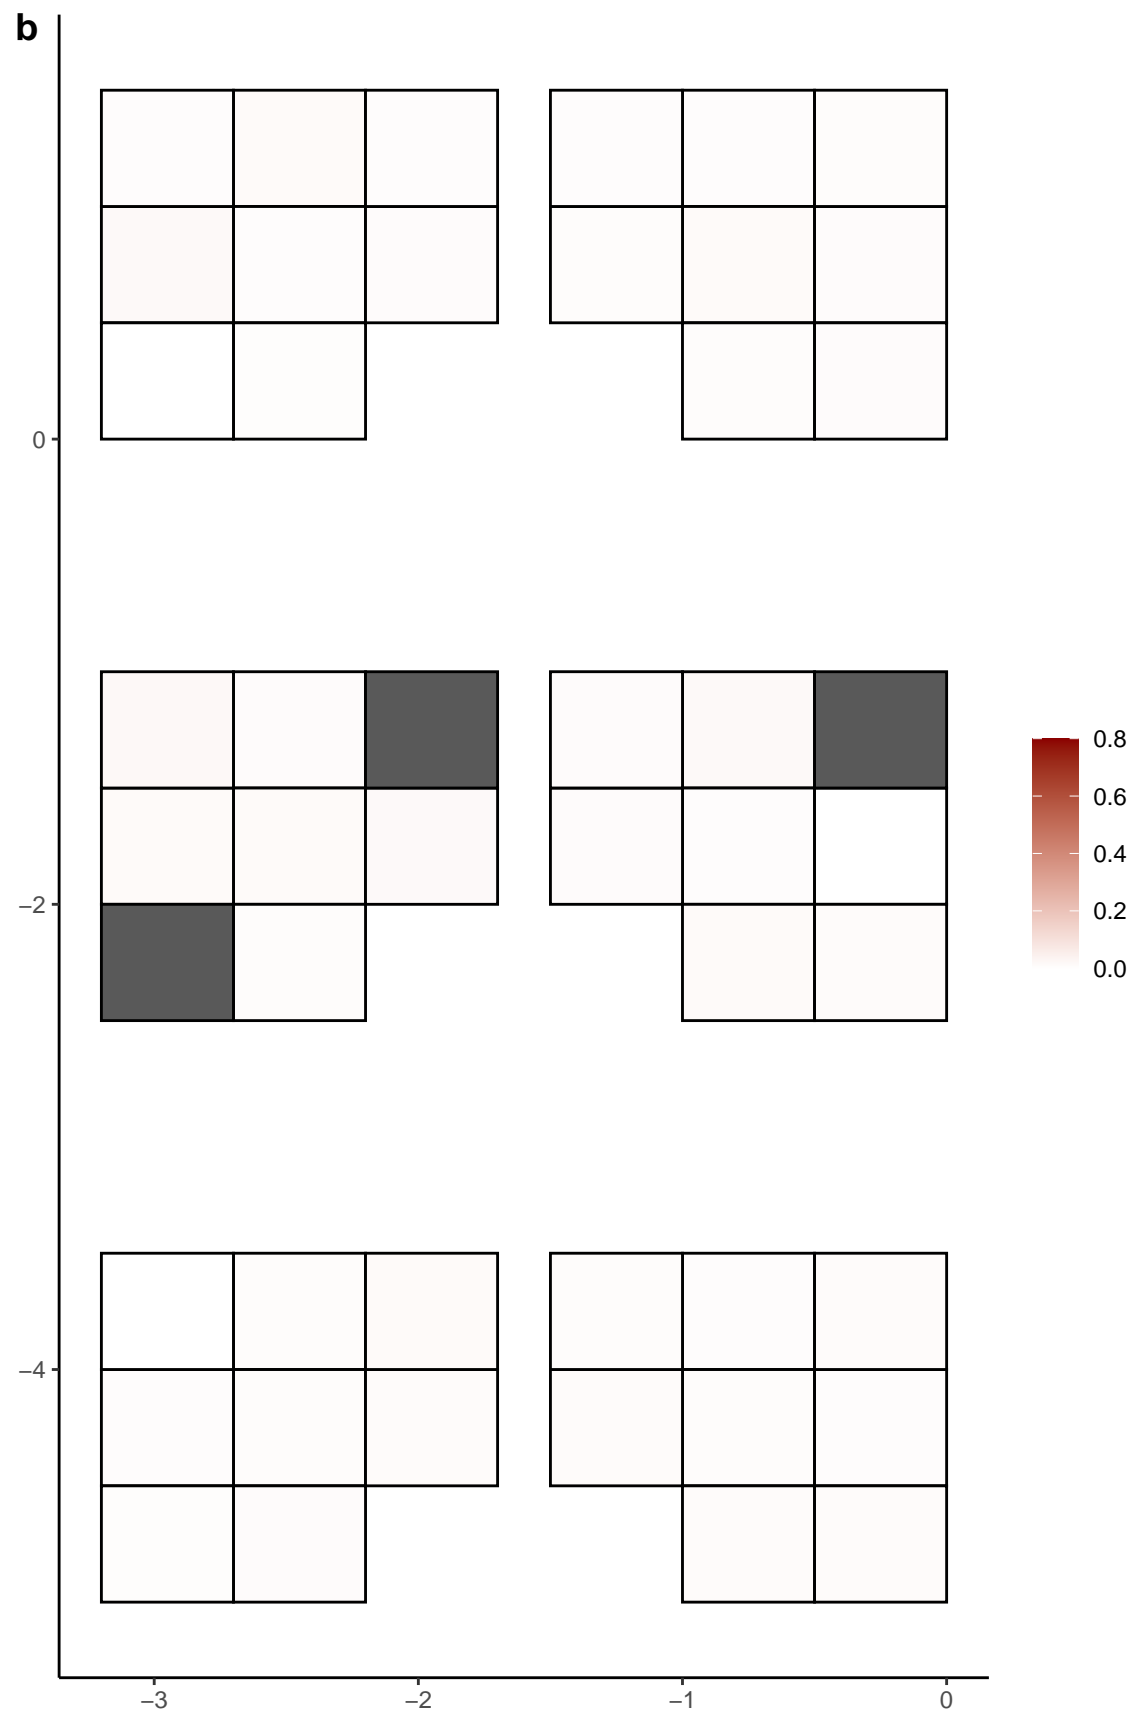

**a** ID05 1-154786631-G-A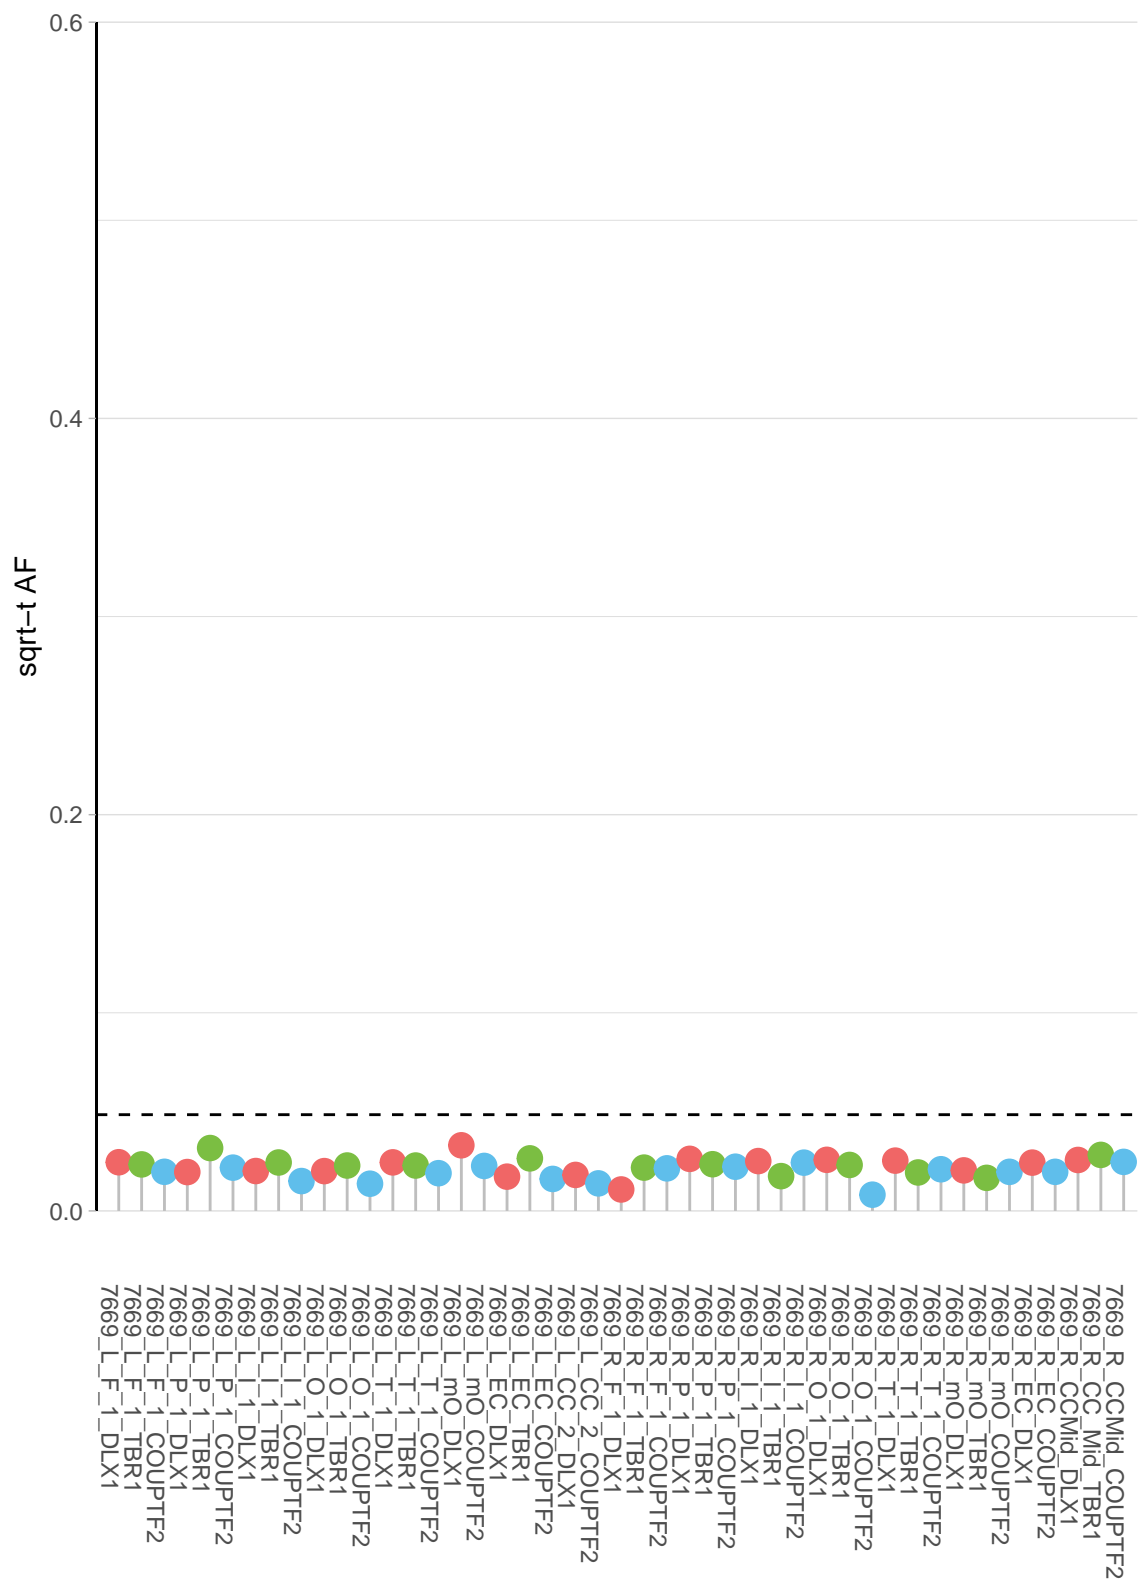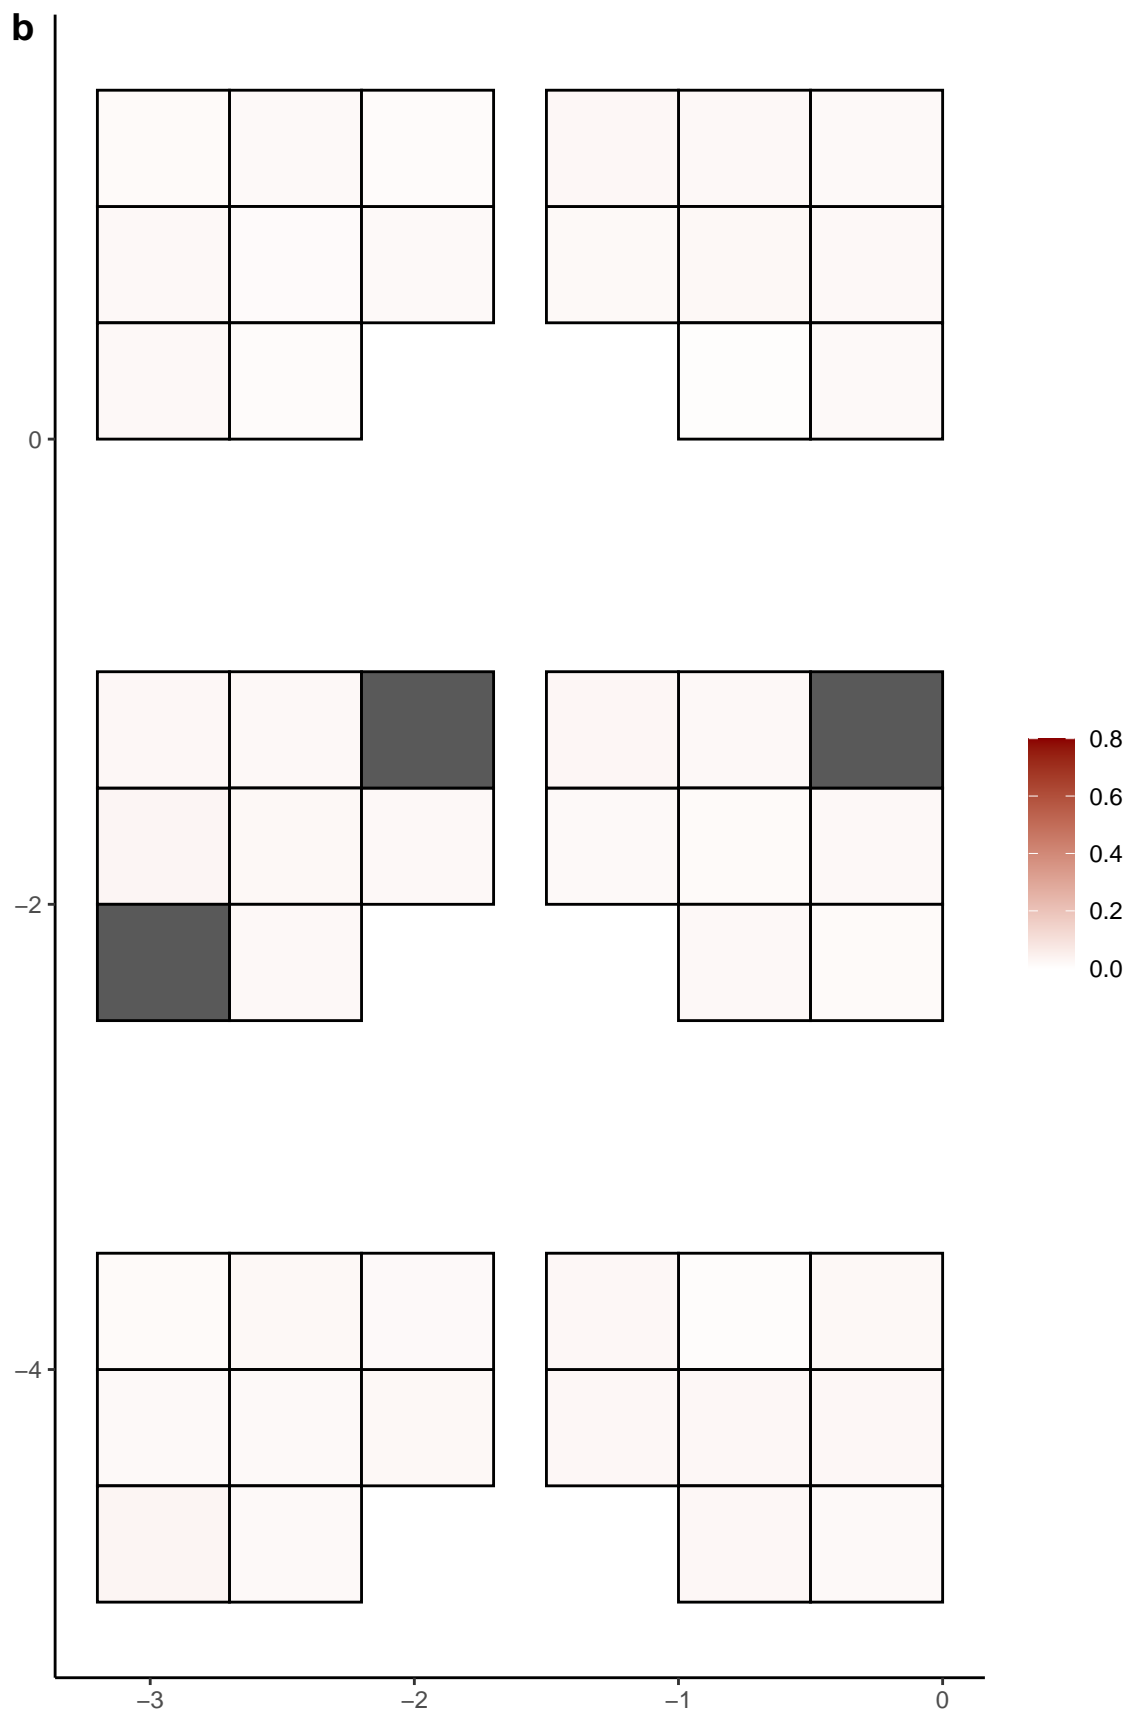

**a** ID05 1-159646818-C-T

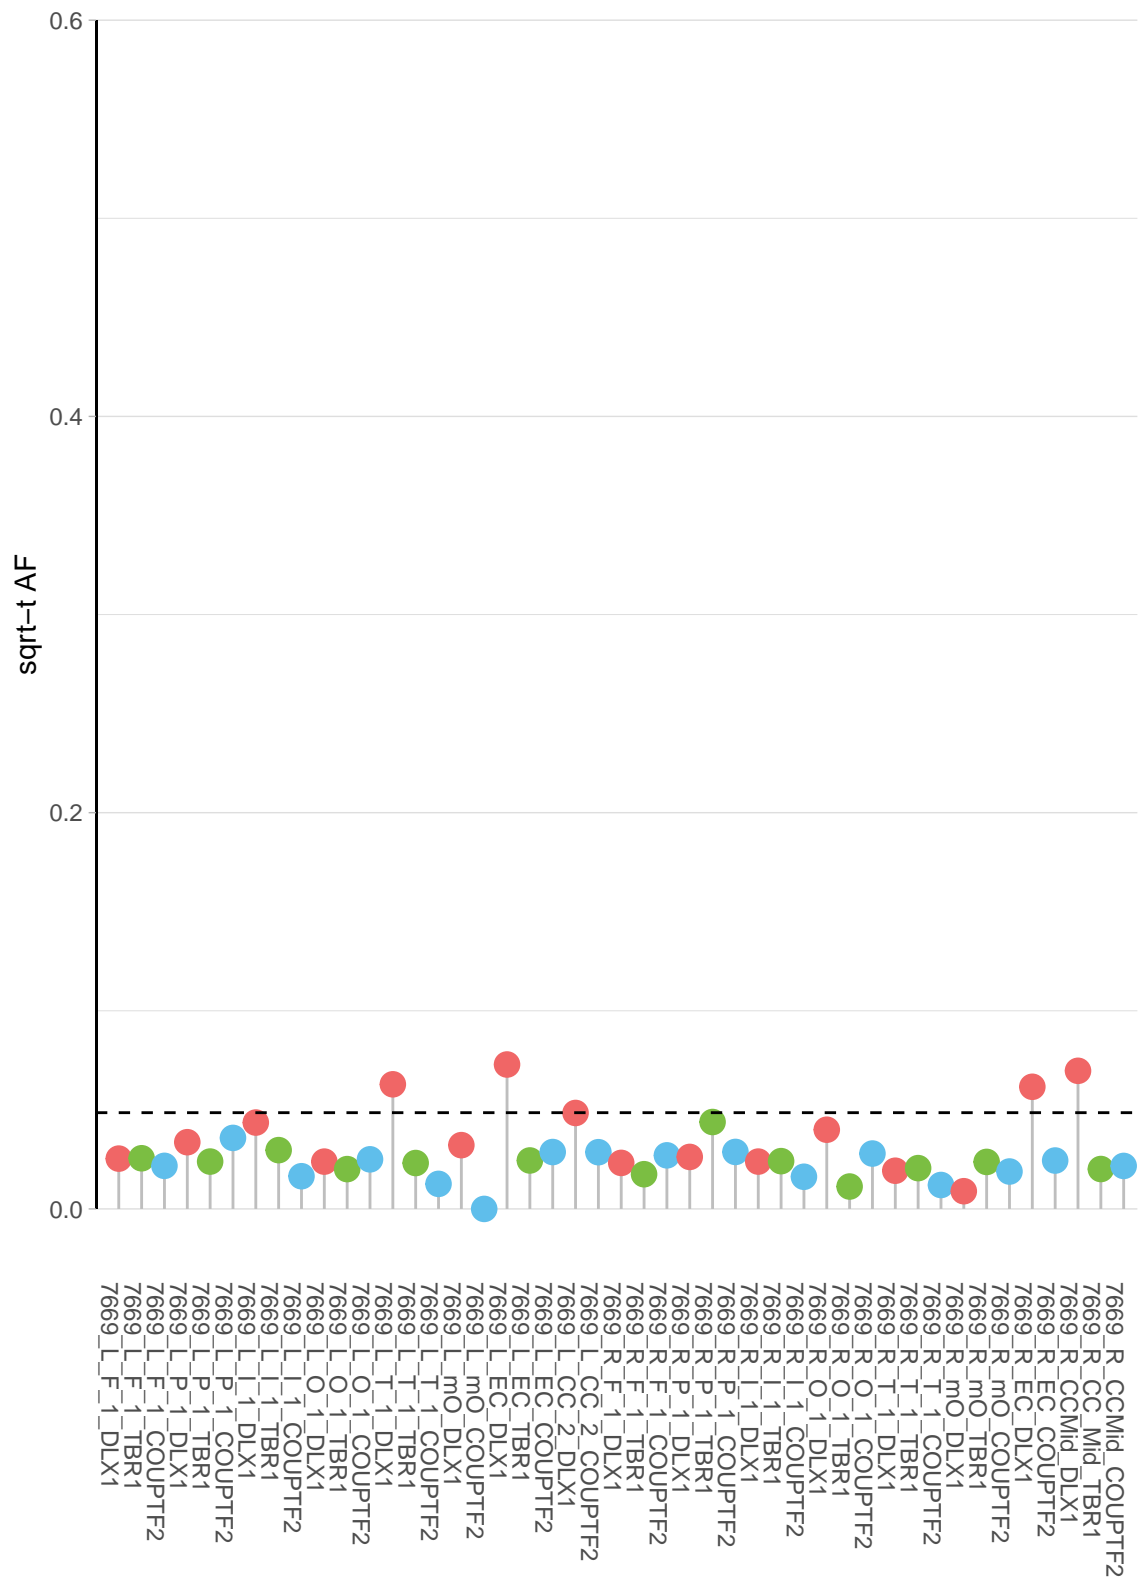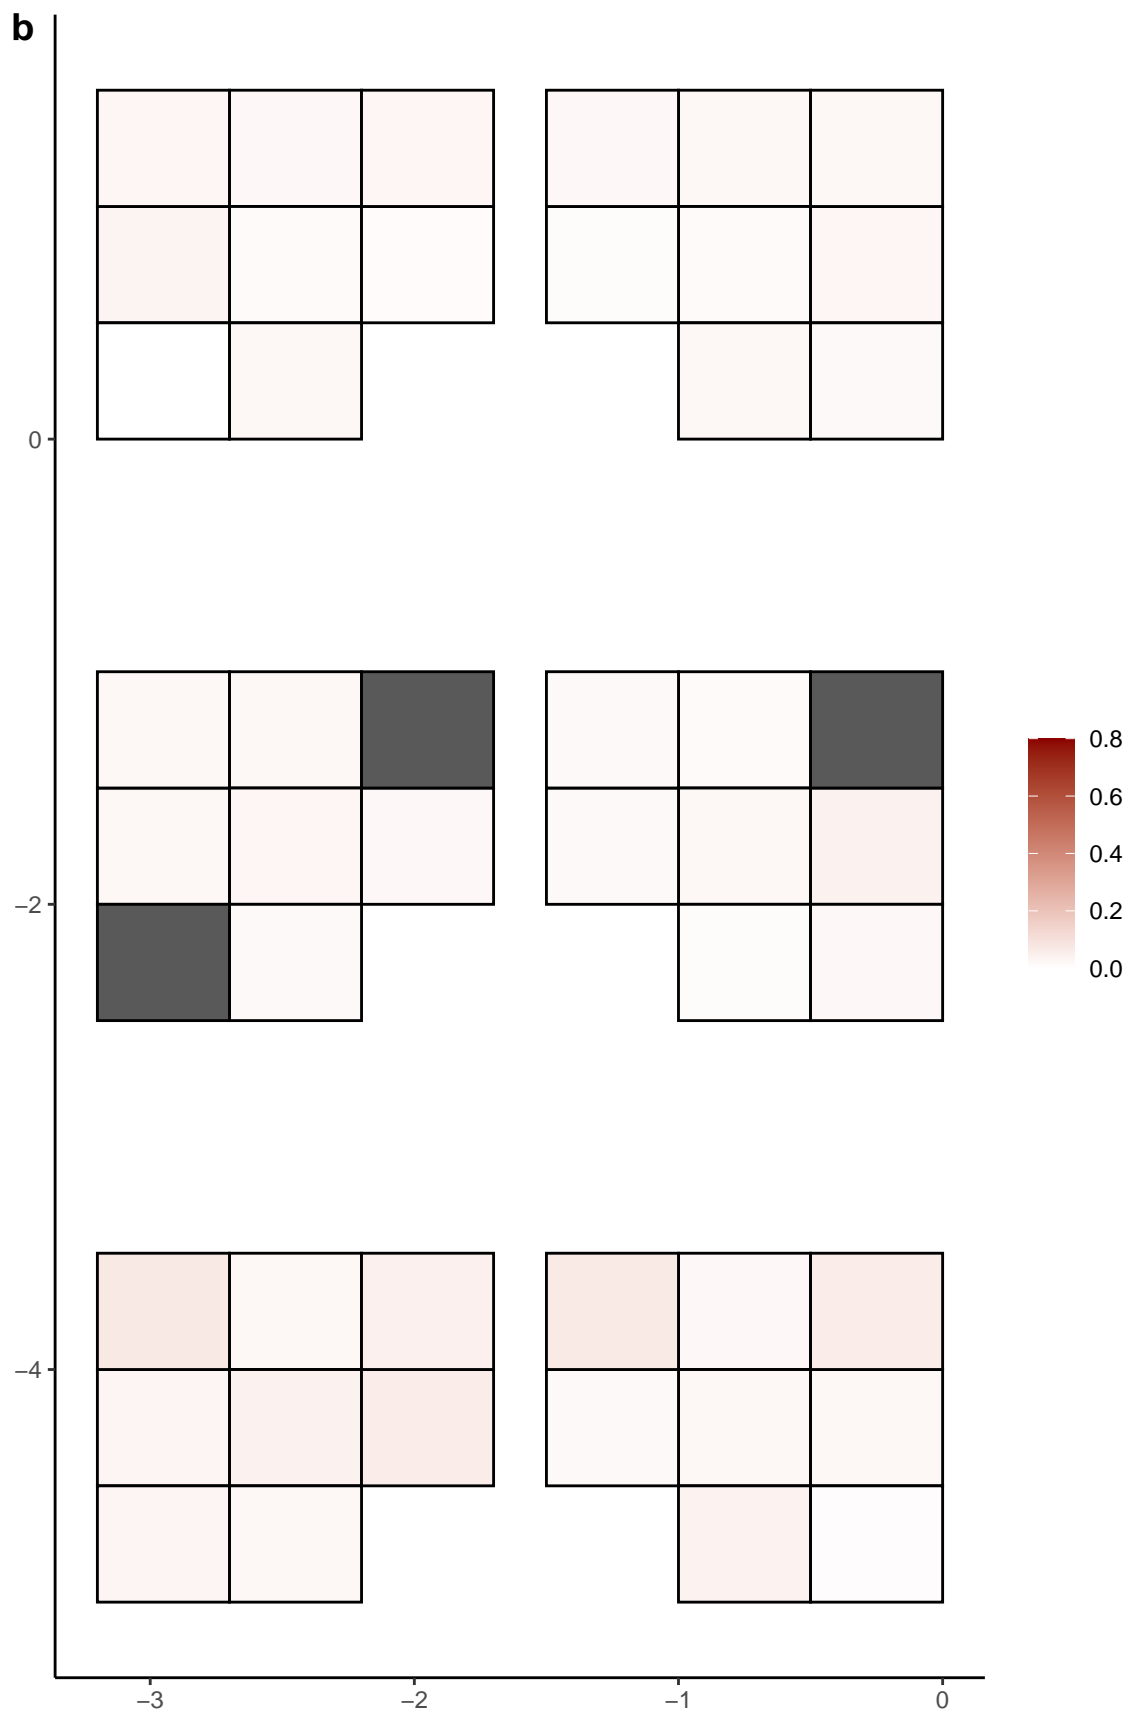

**a** ID05 1-163766298-T-C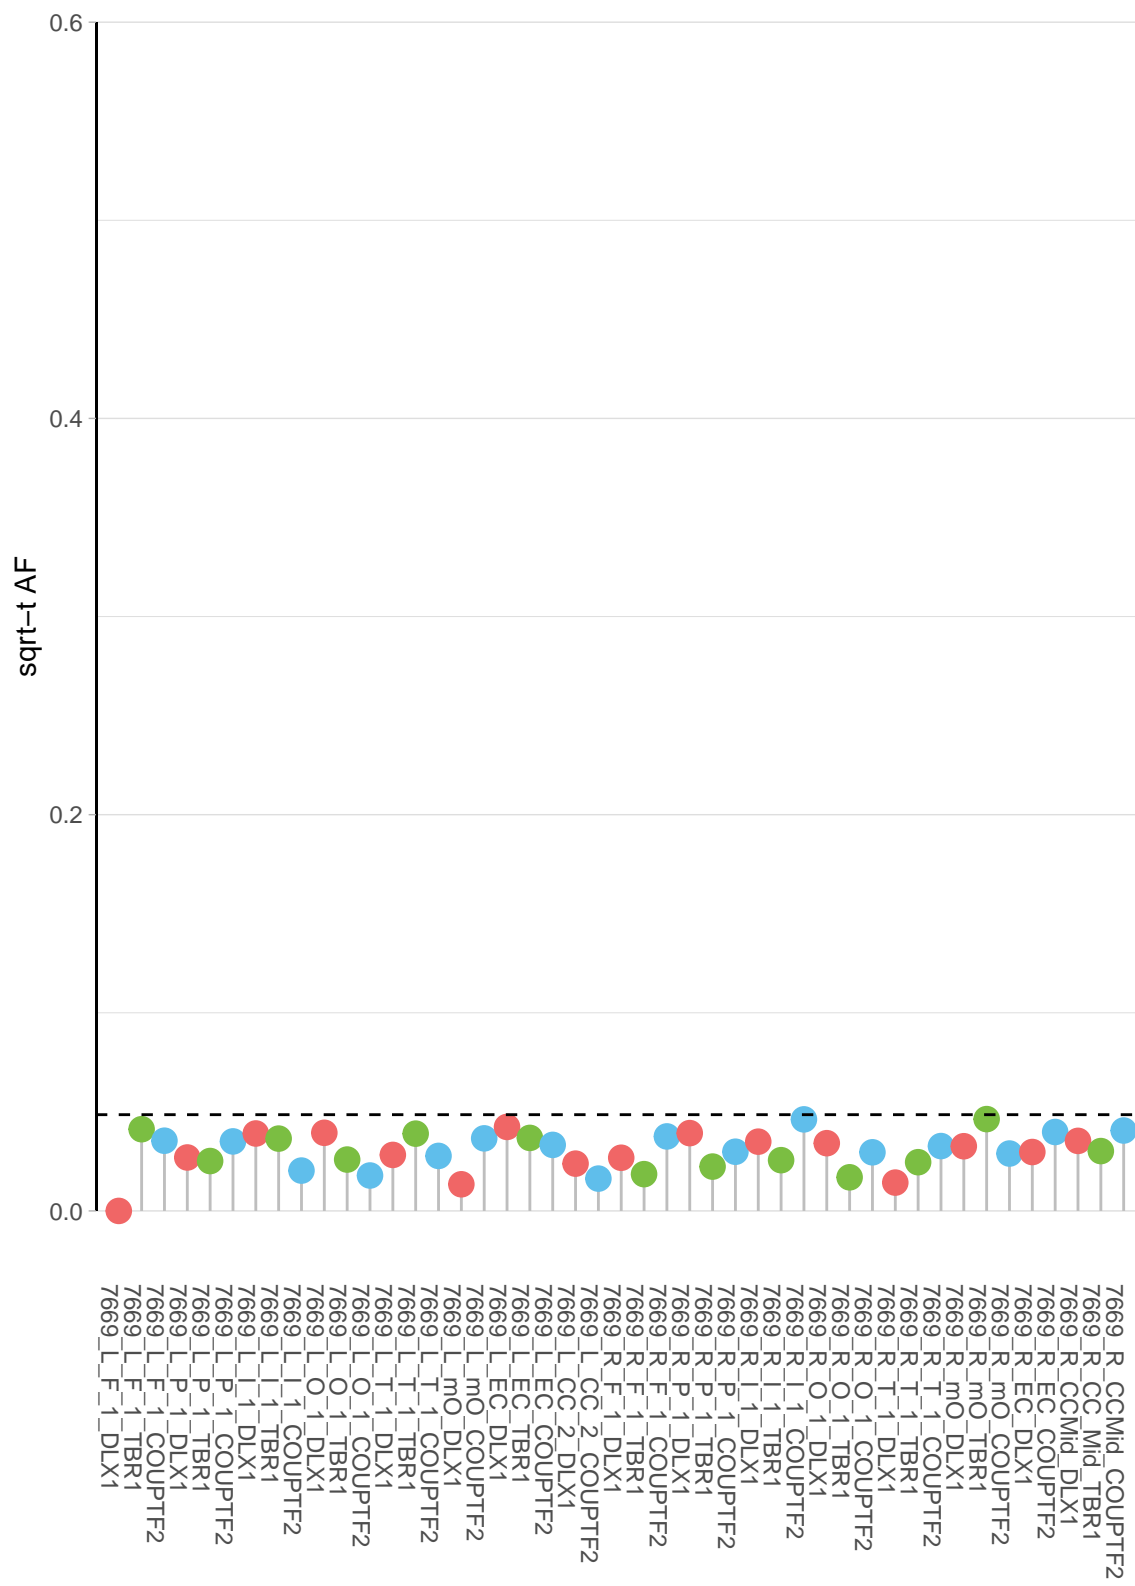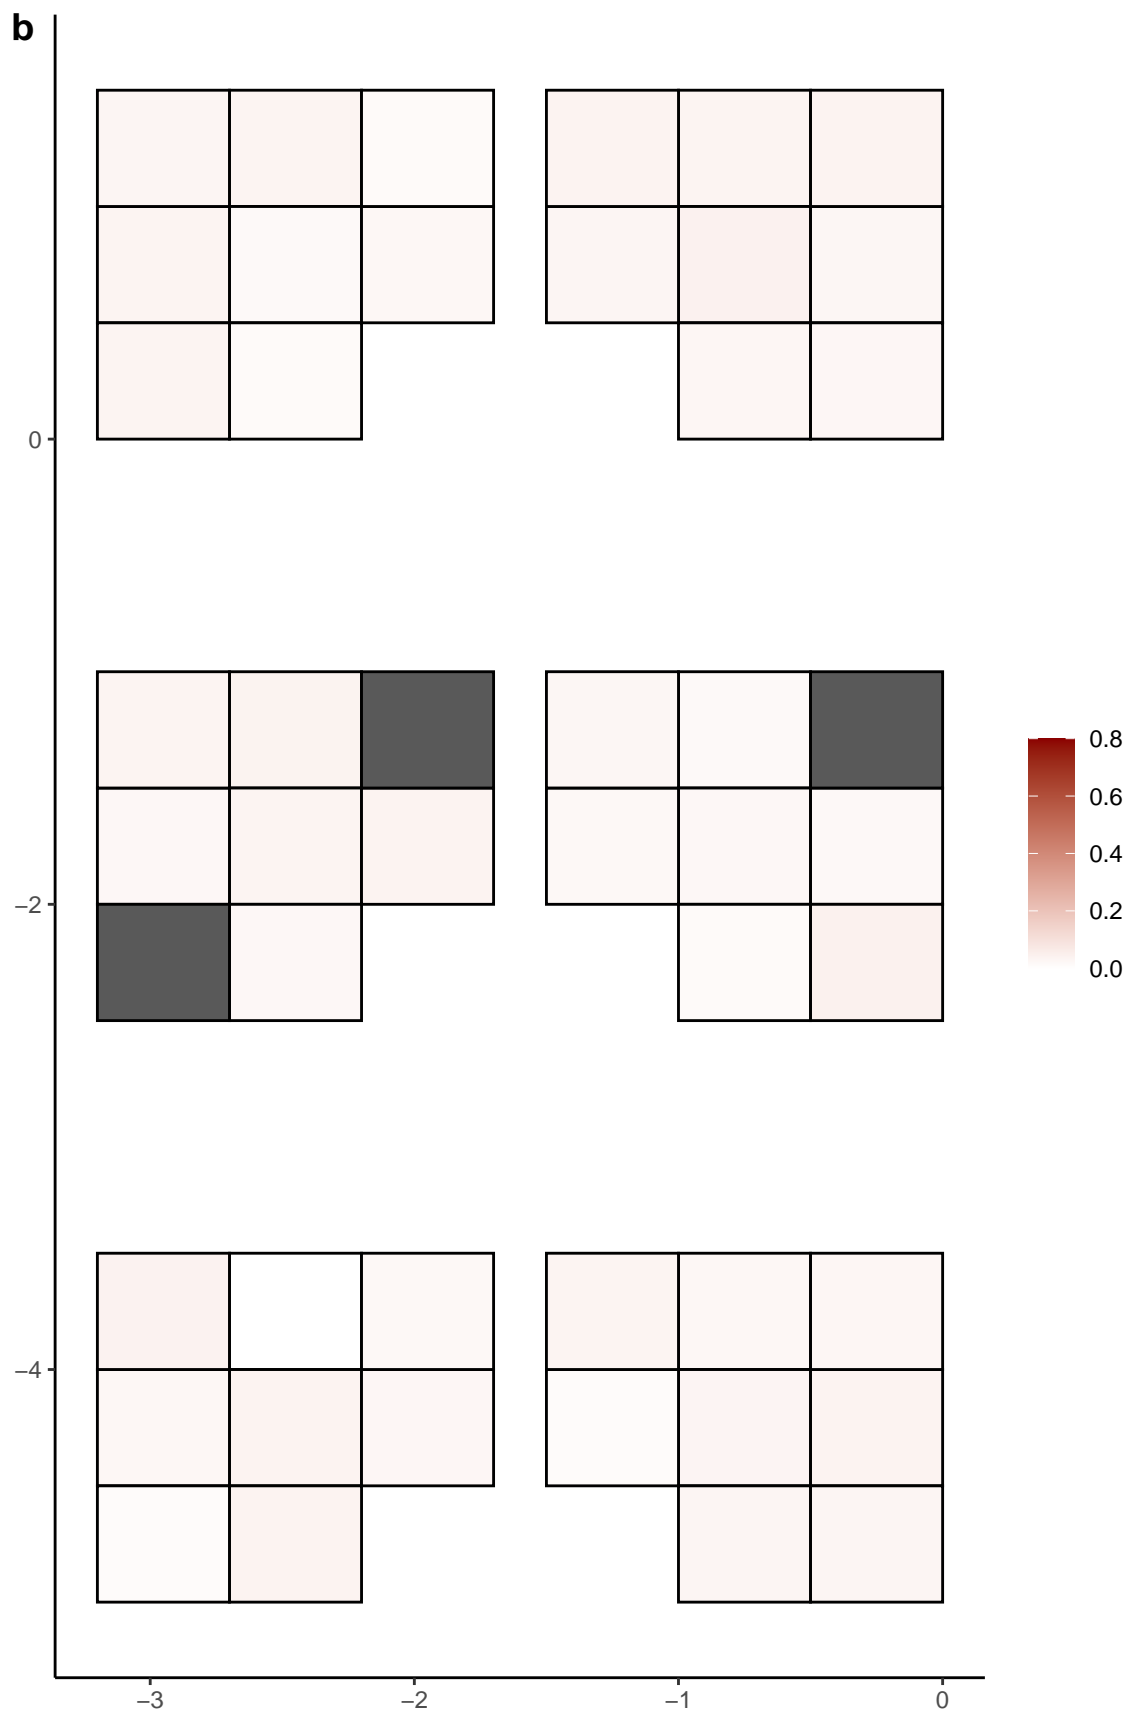

**a** ID05 1-163770532-T-A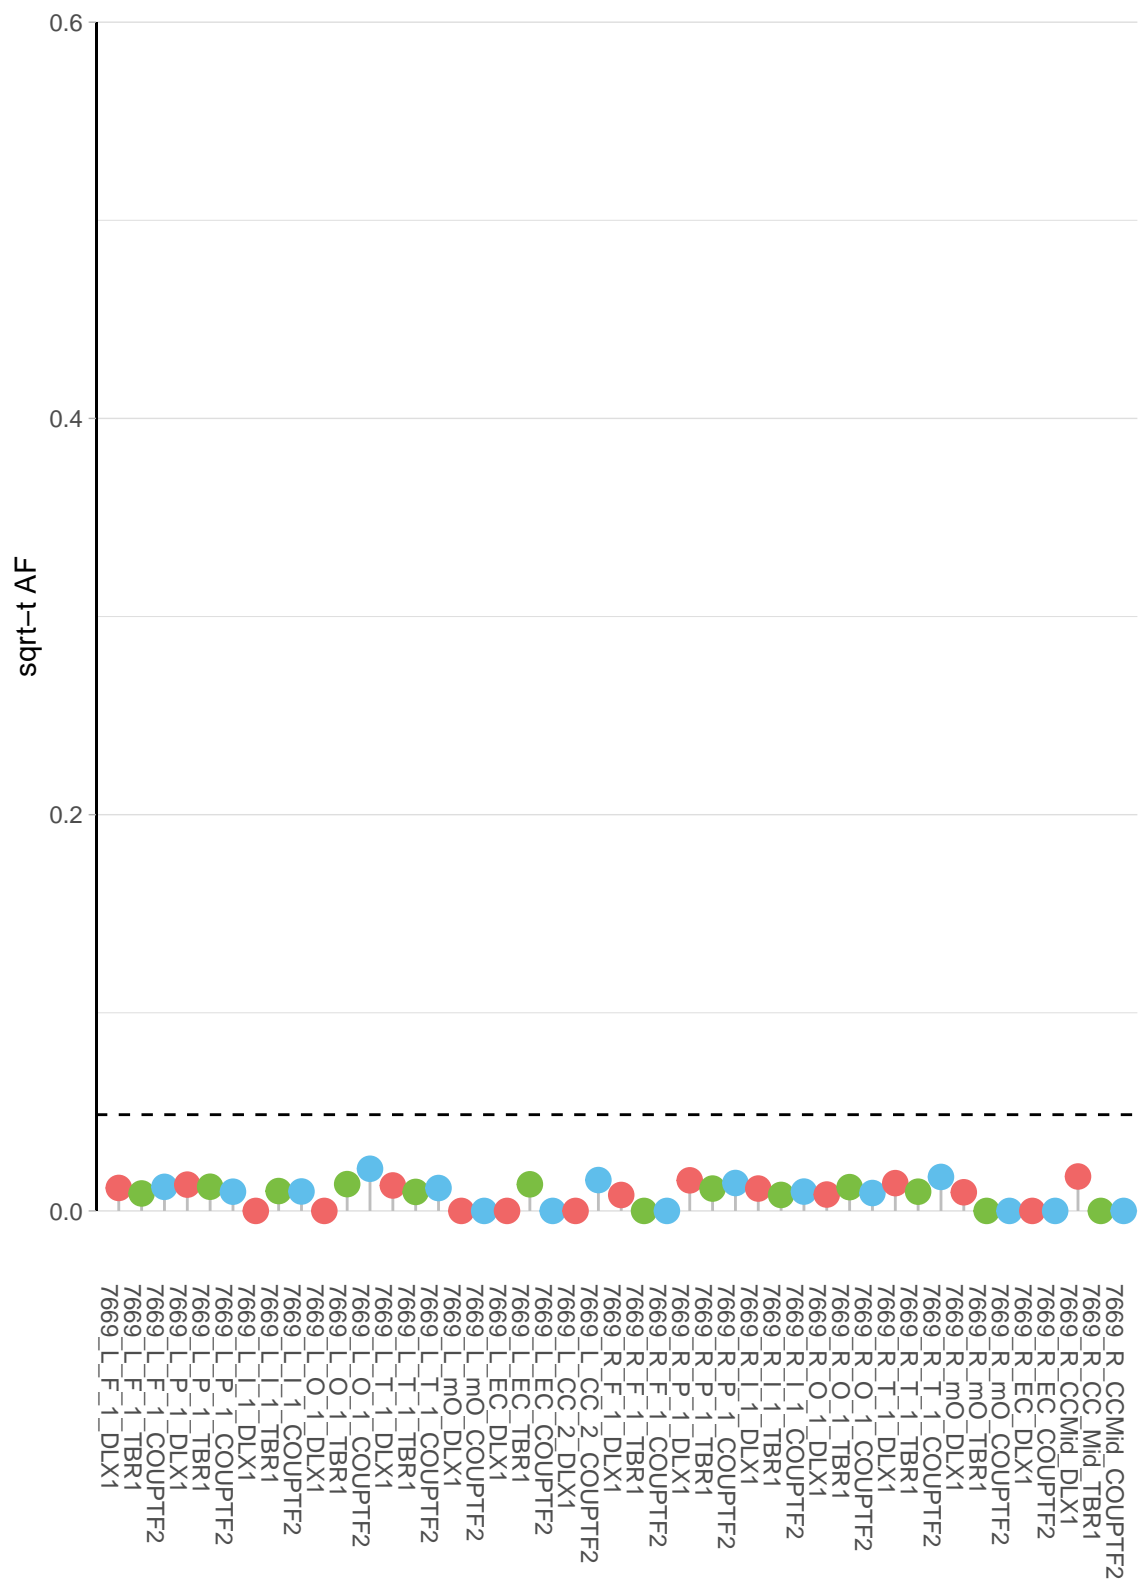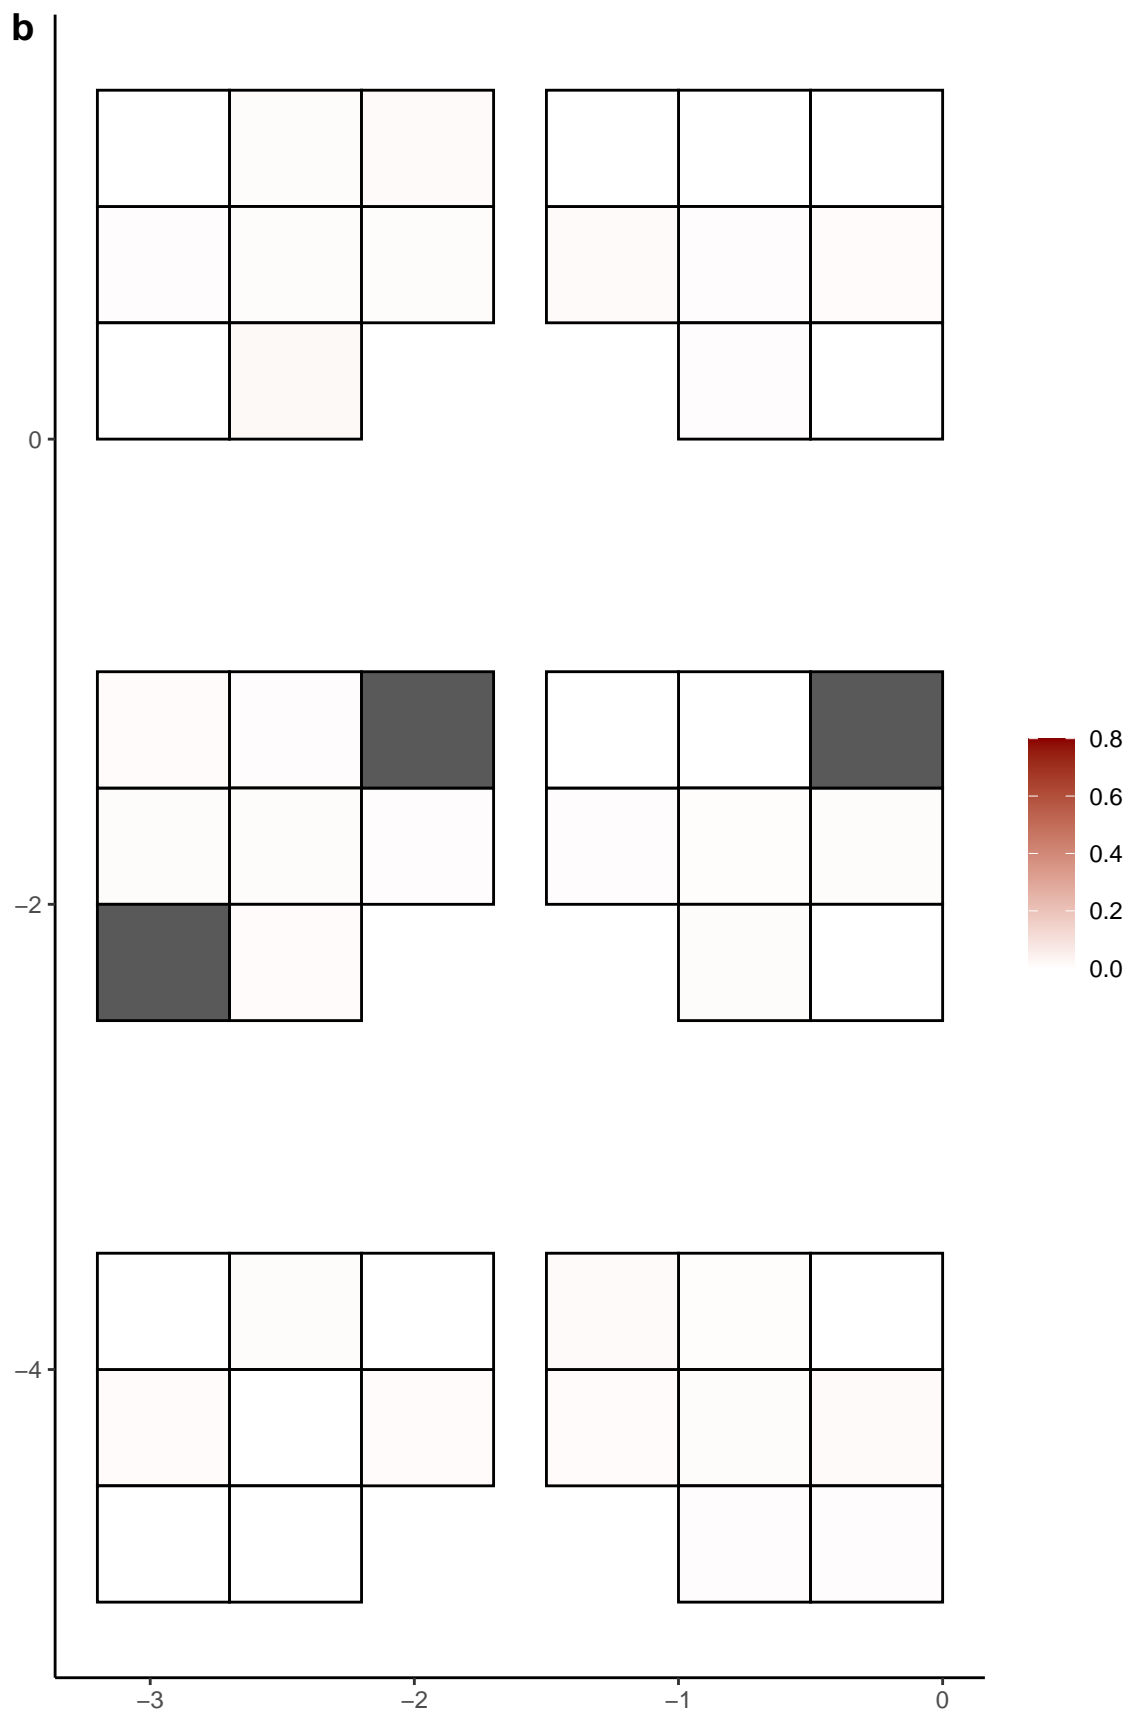

**a** ID05 1-177430967-T-C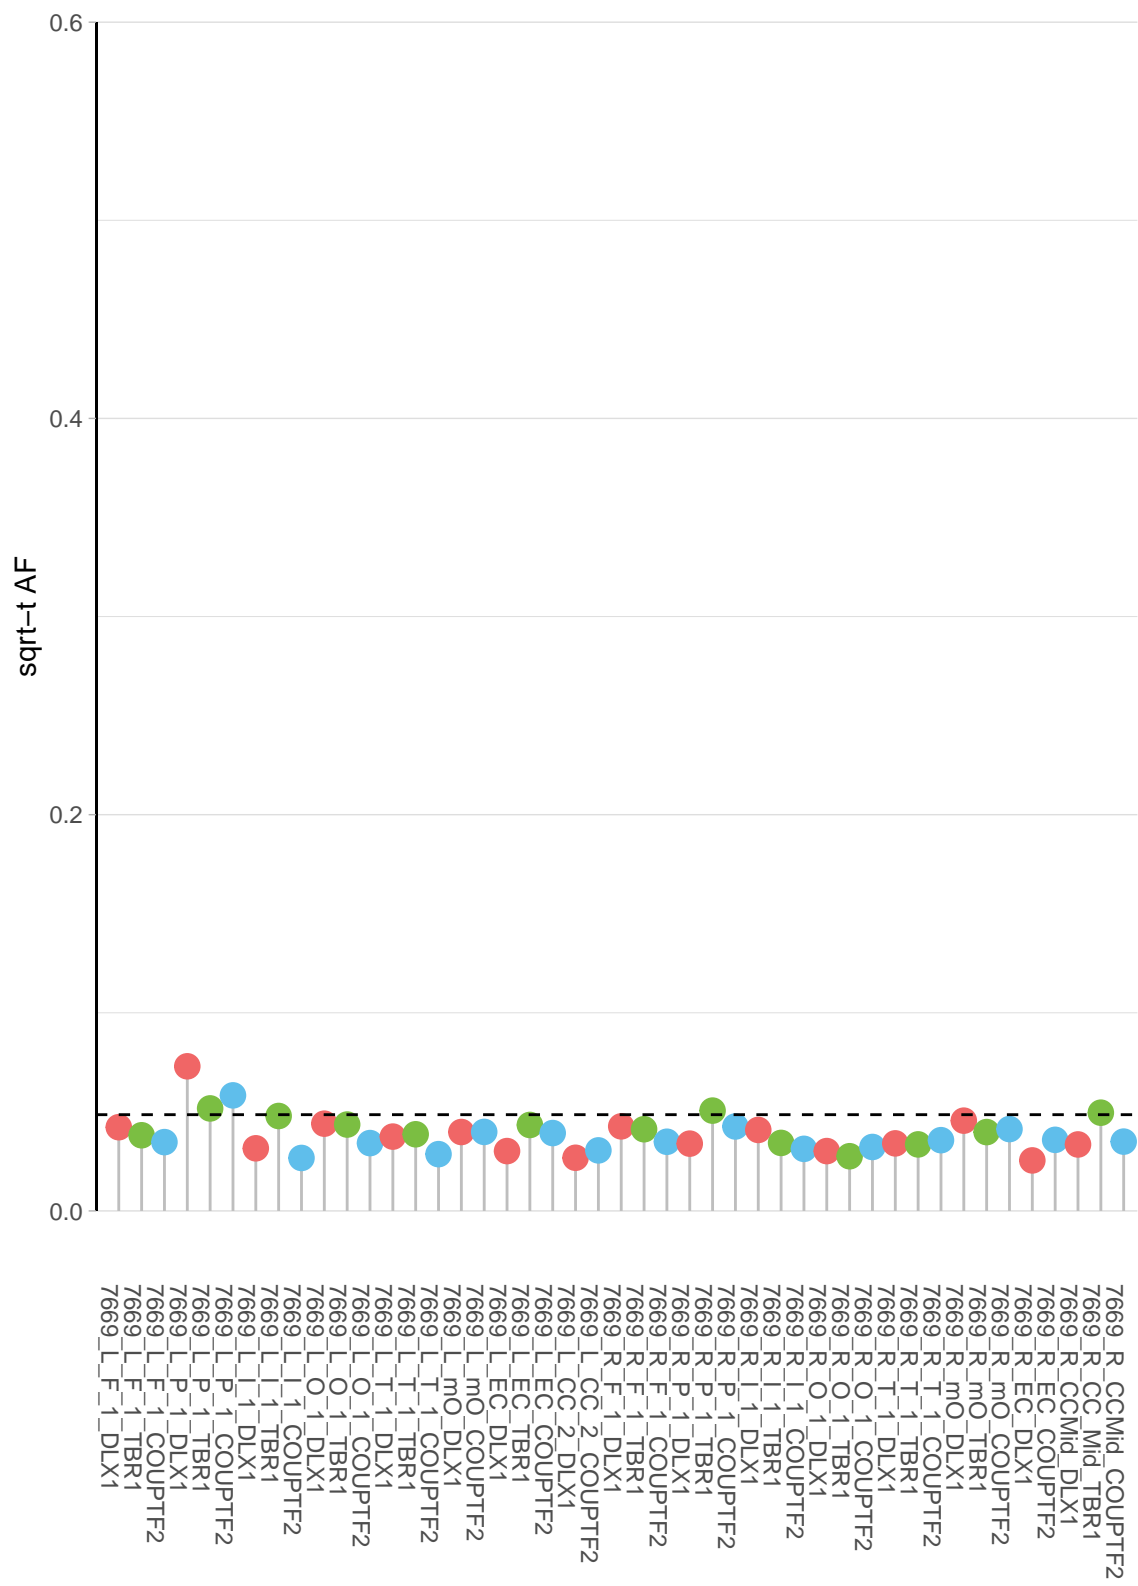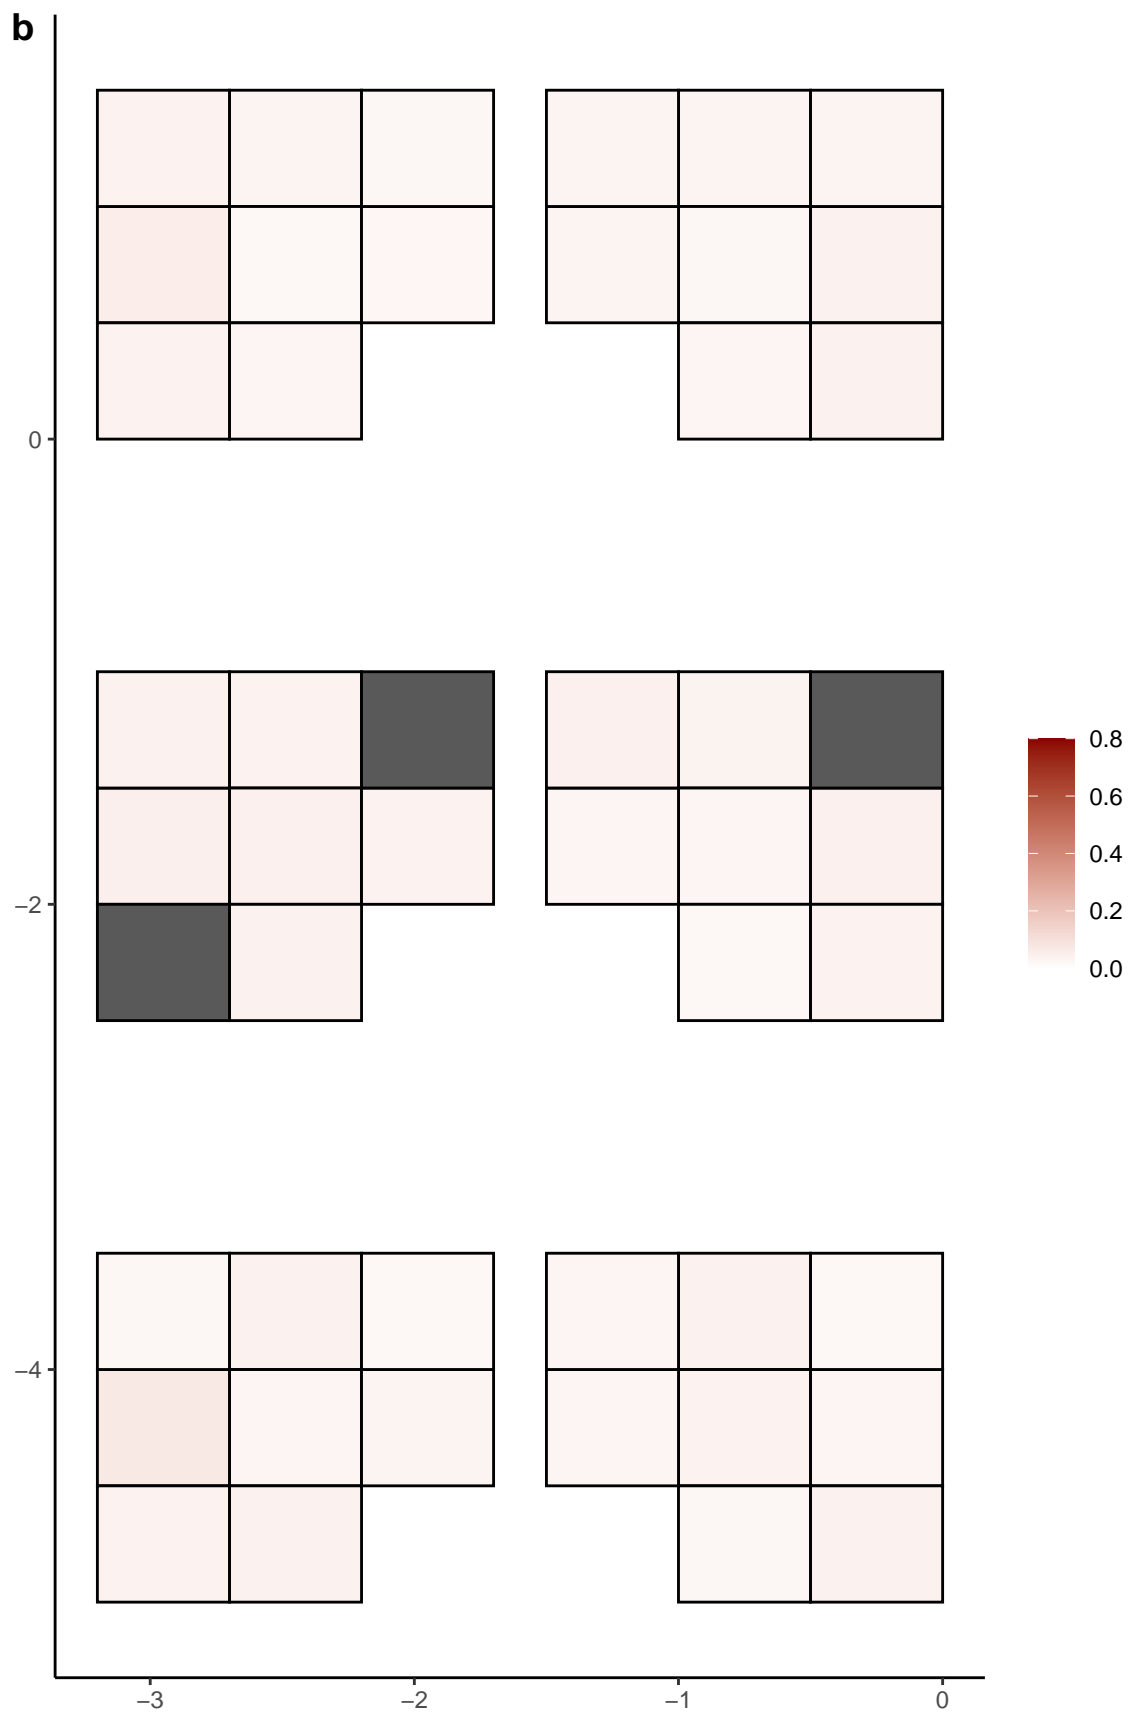

**a** ID05 1-18387130-C-T

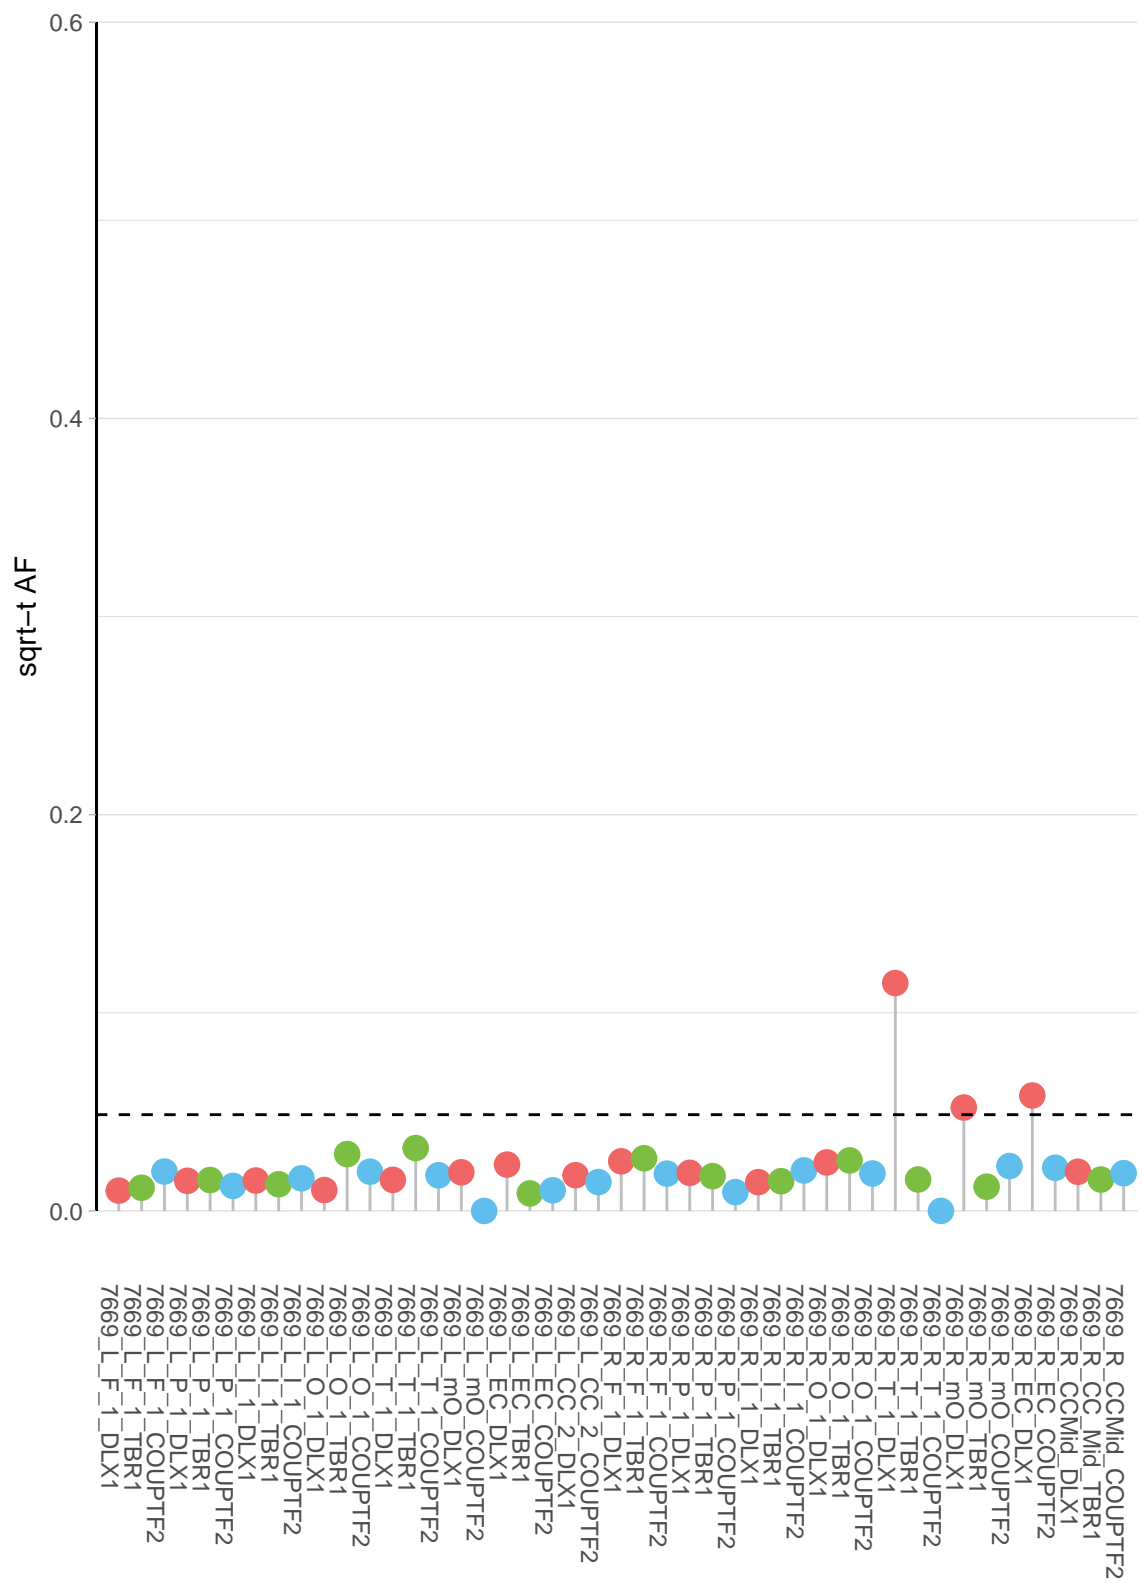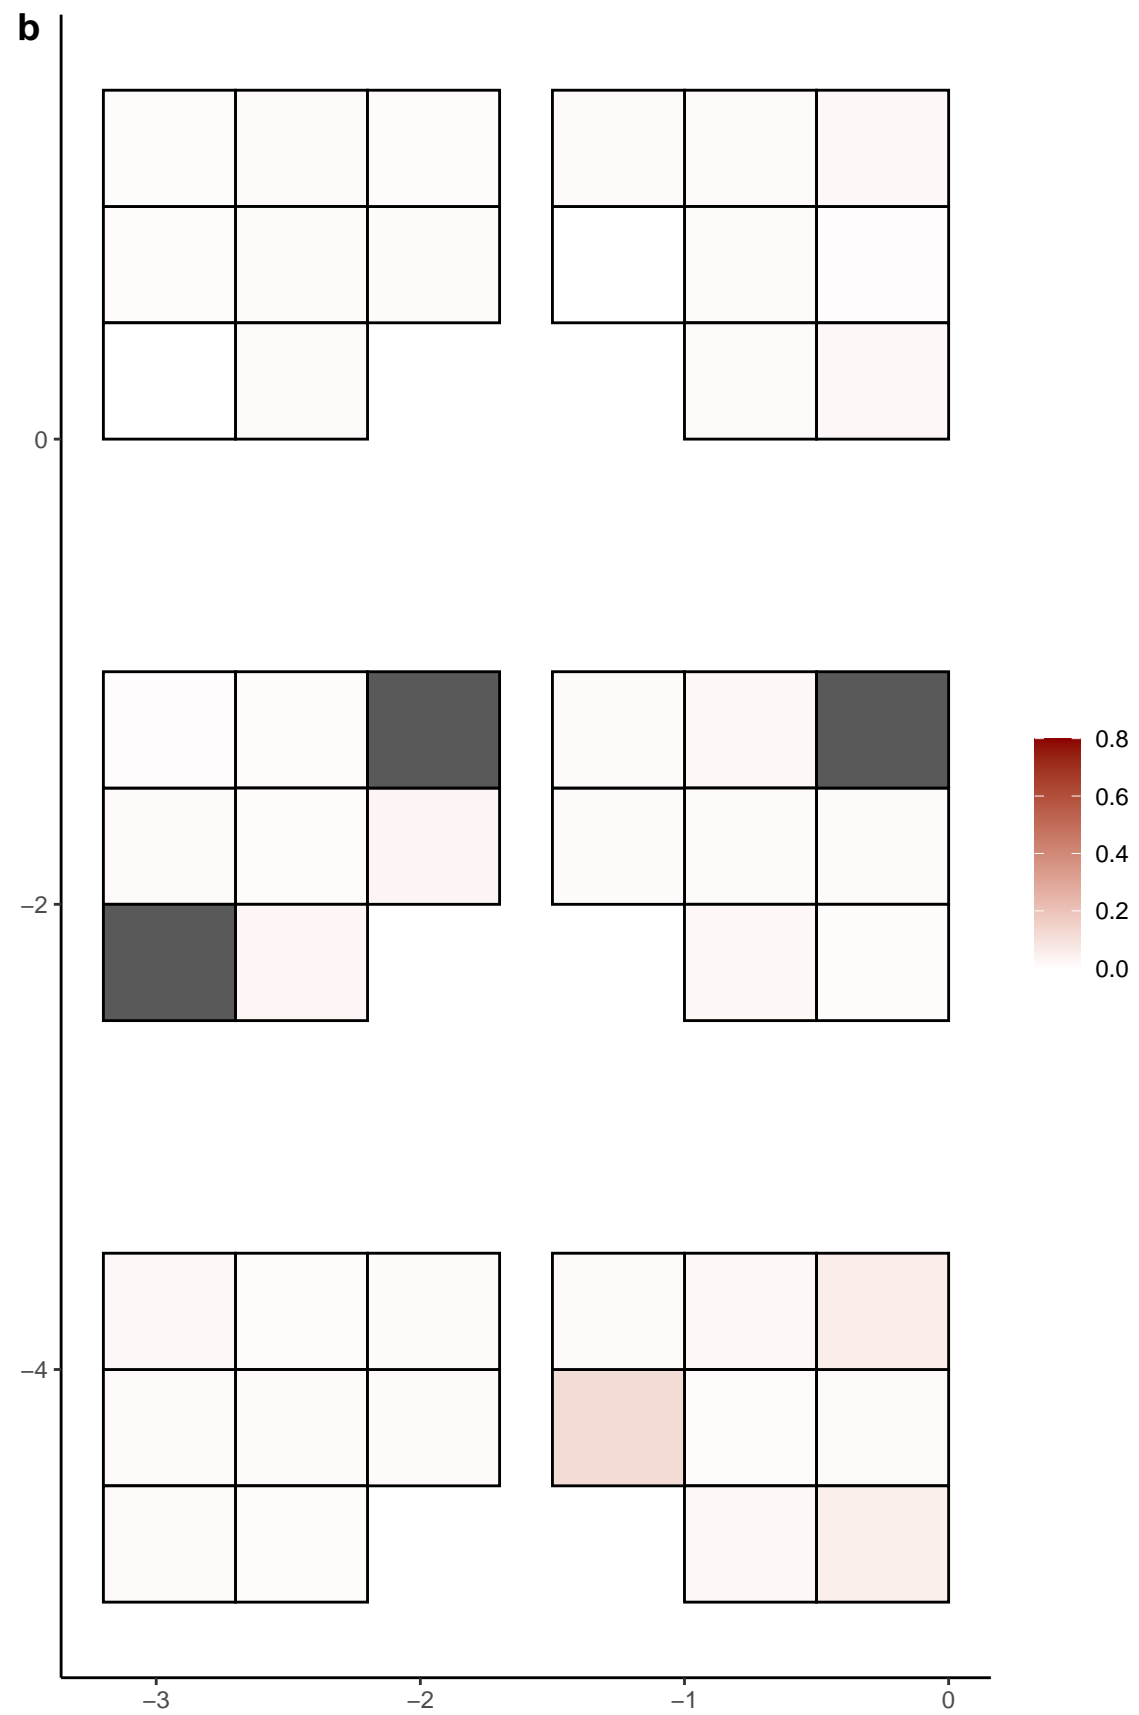





**a** ID05 1-188074317-T-C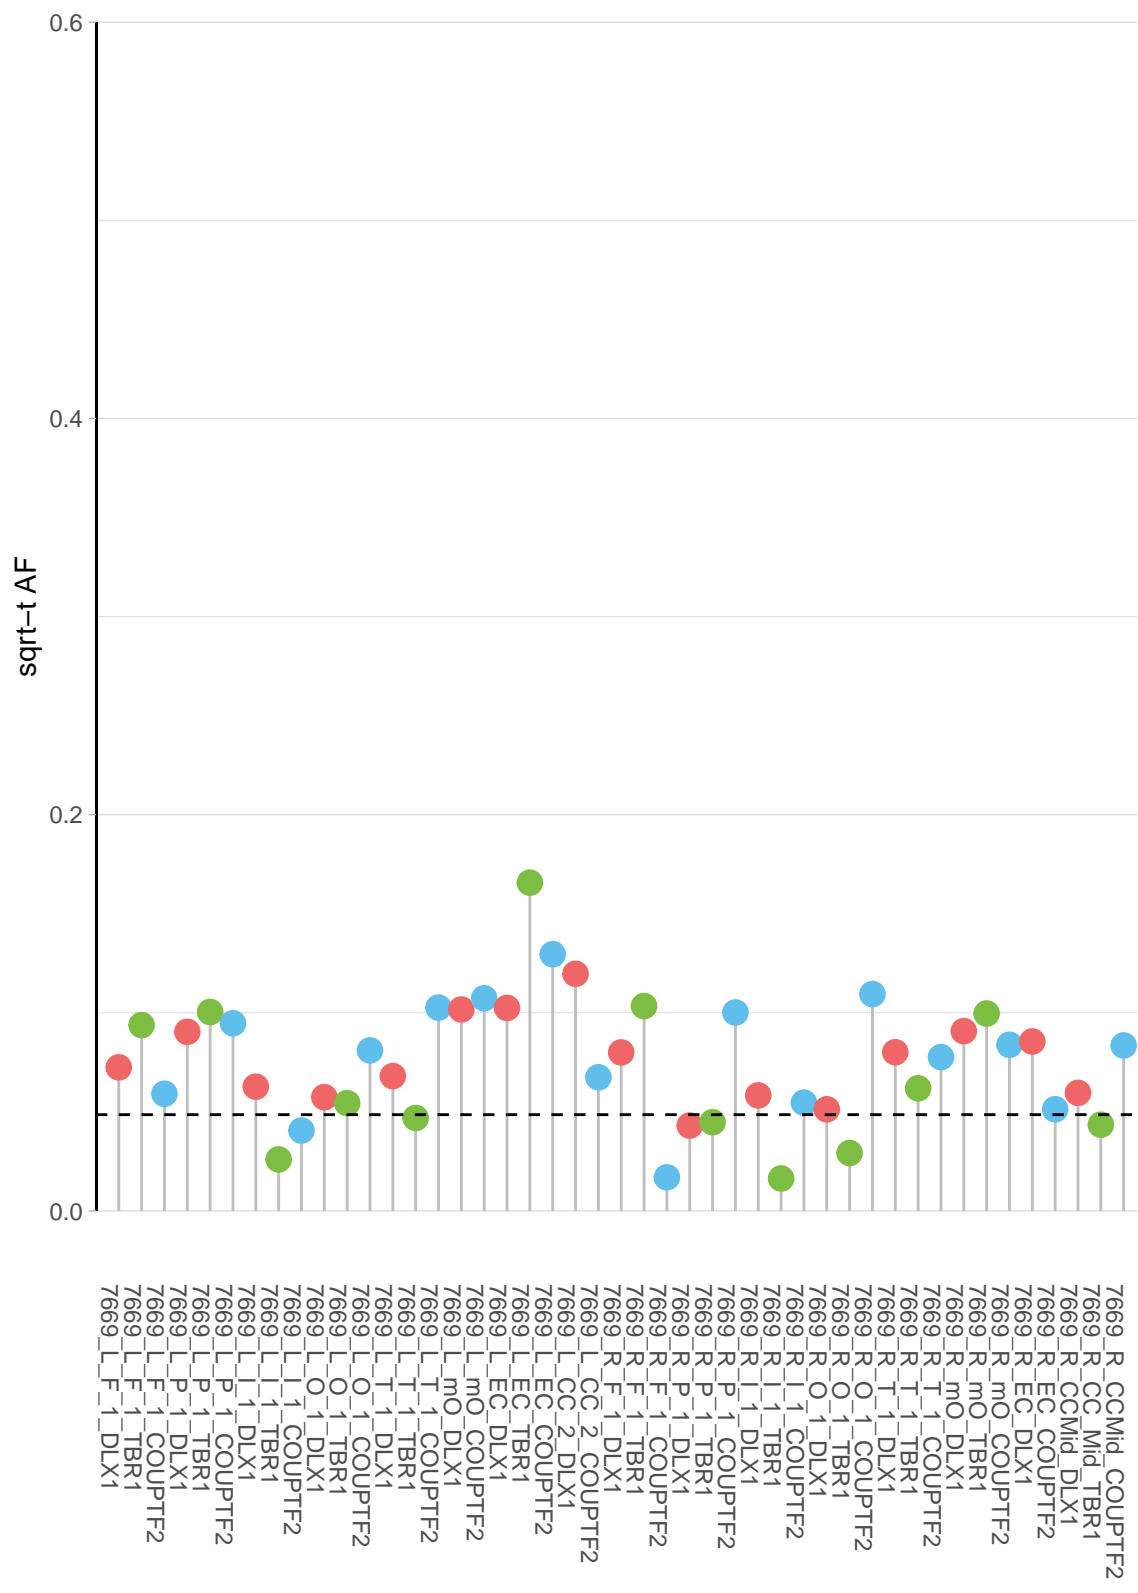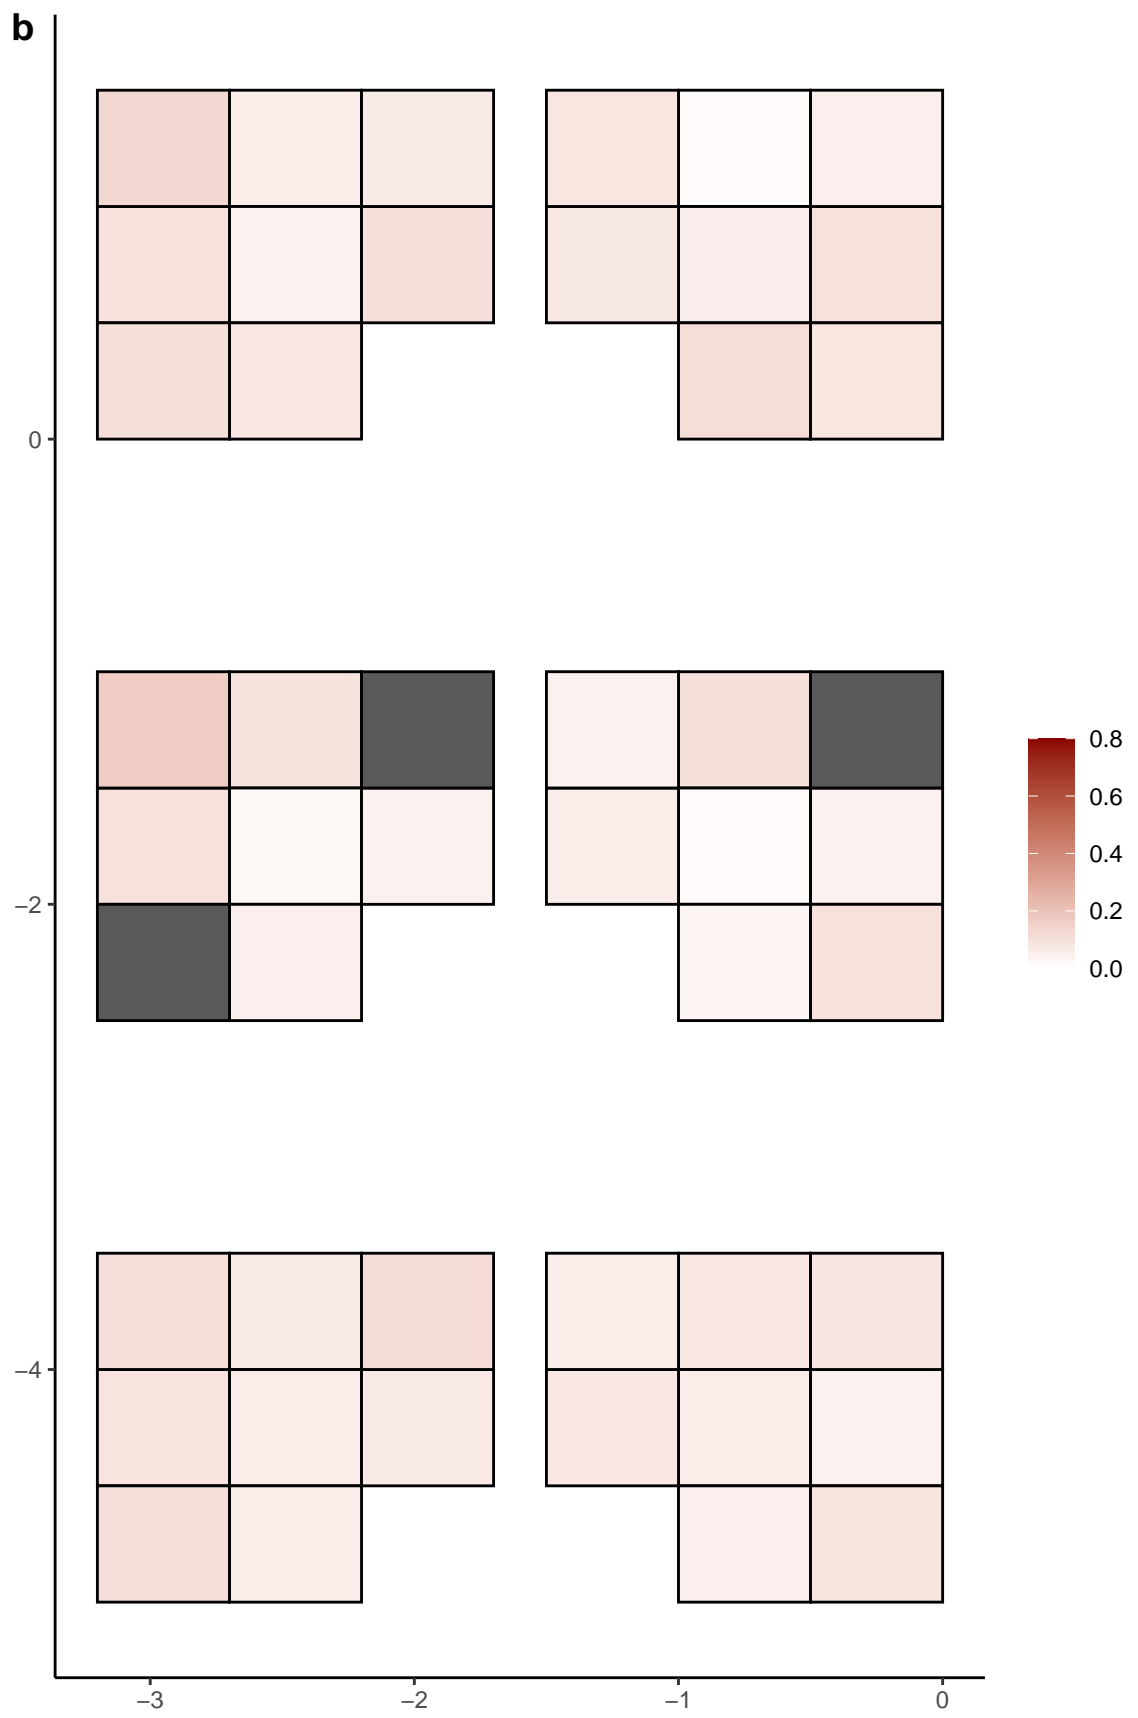

**a** ID05 1-191248571-G-A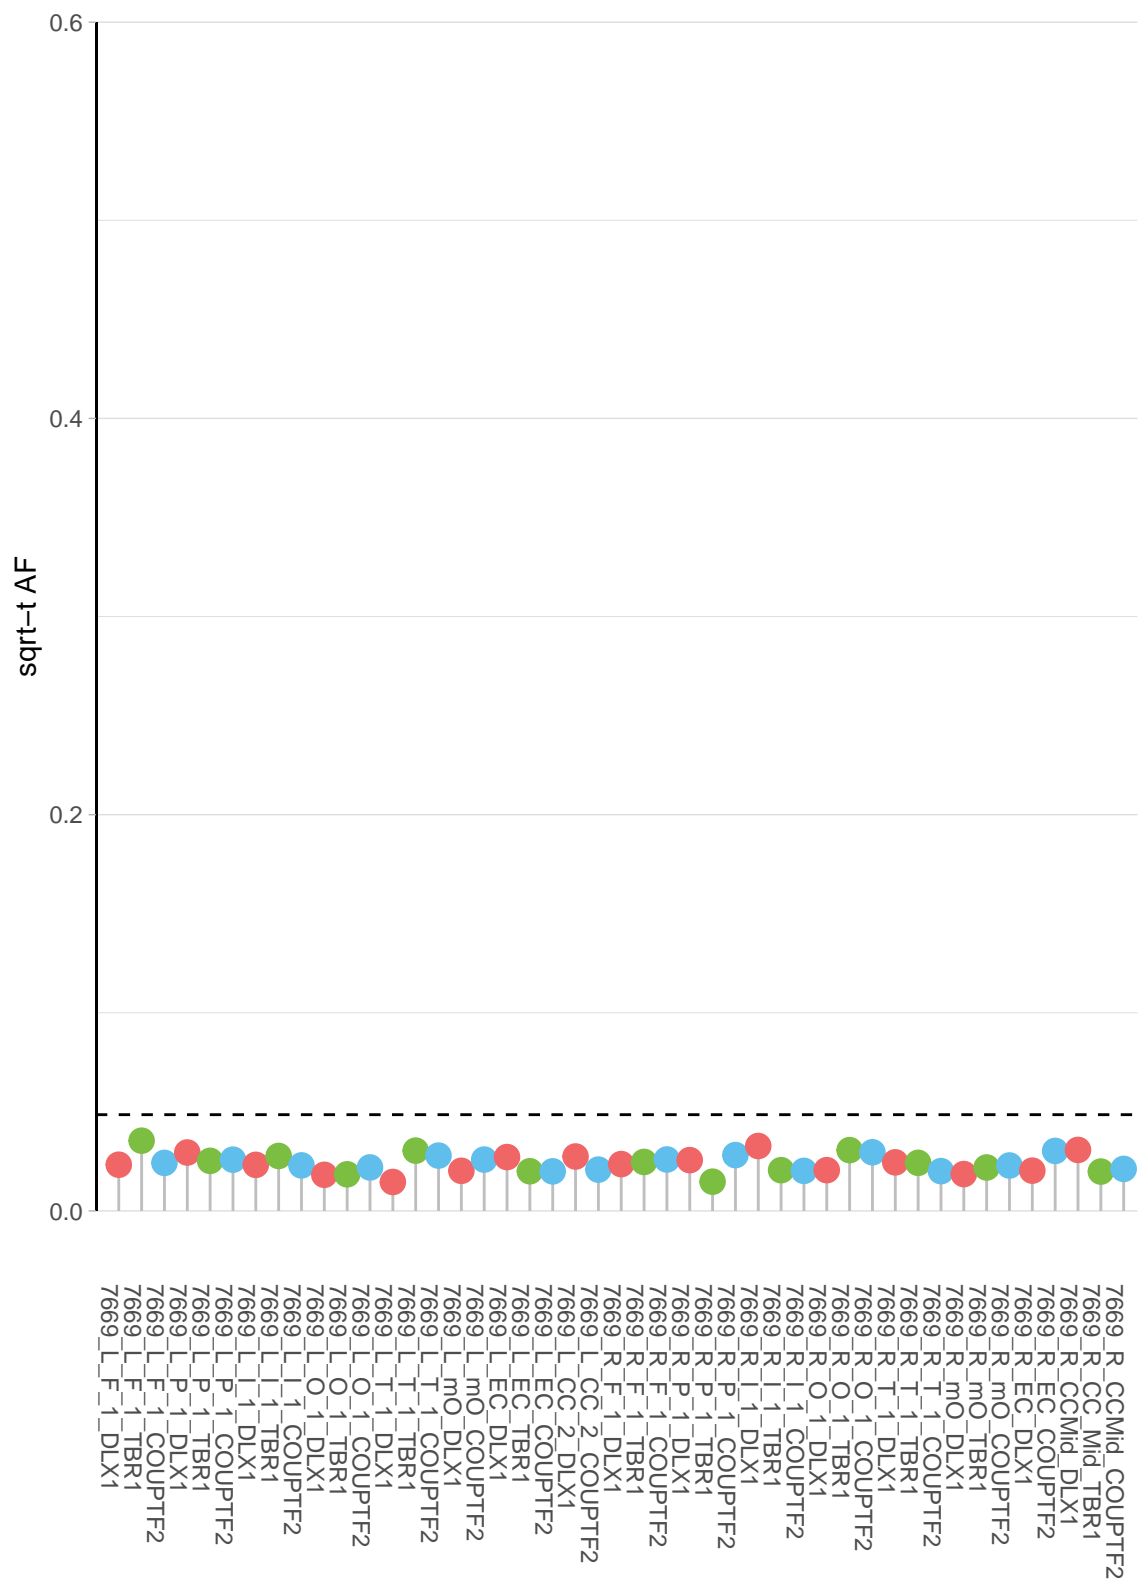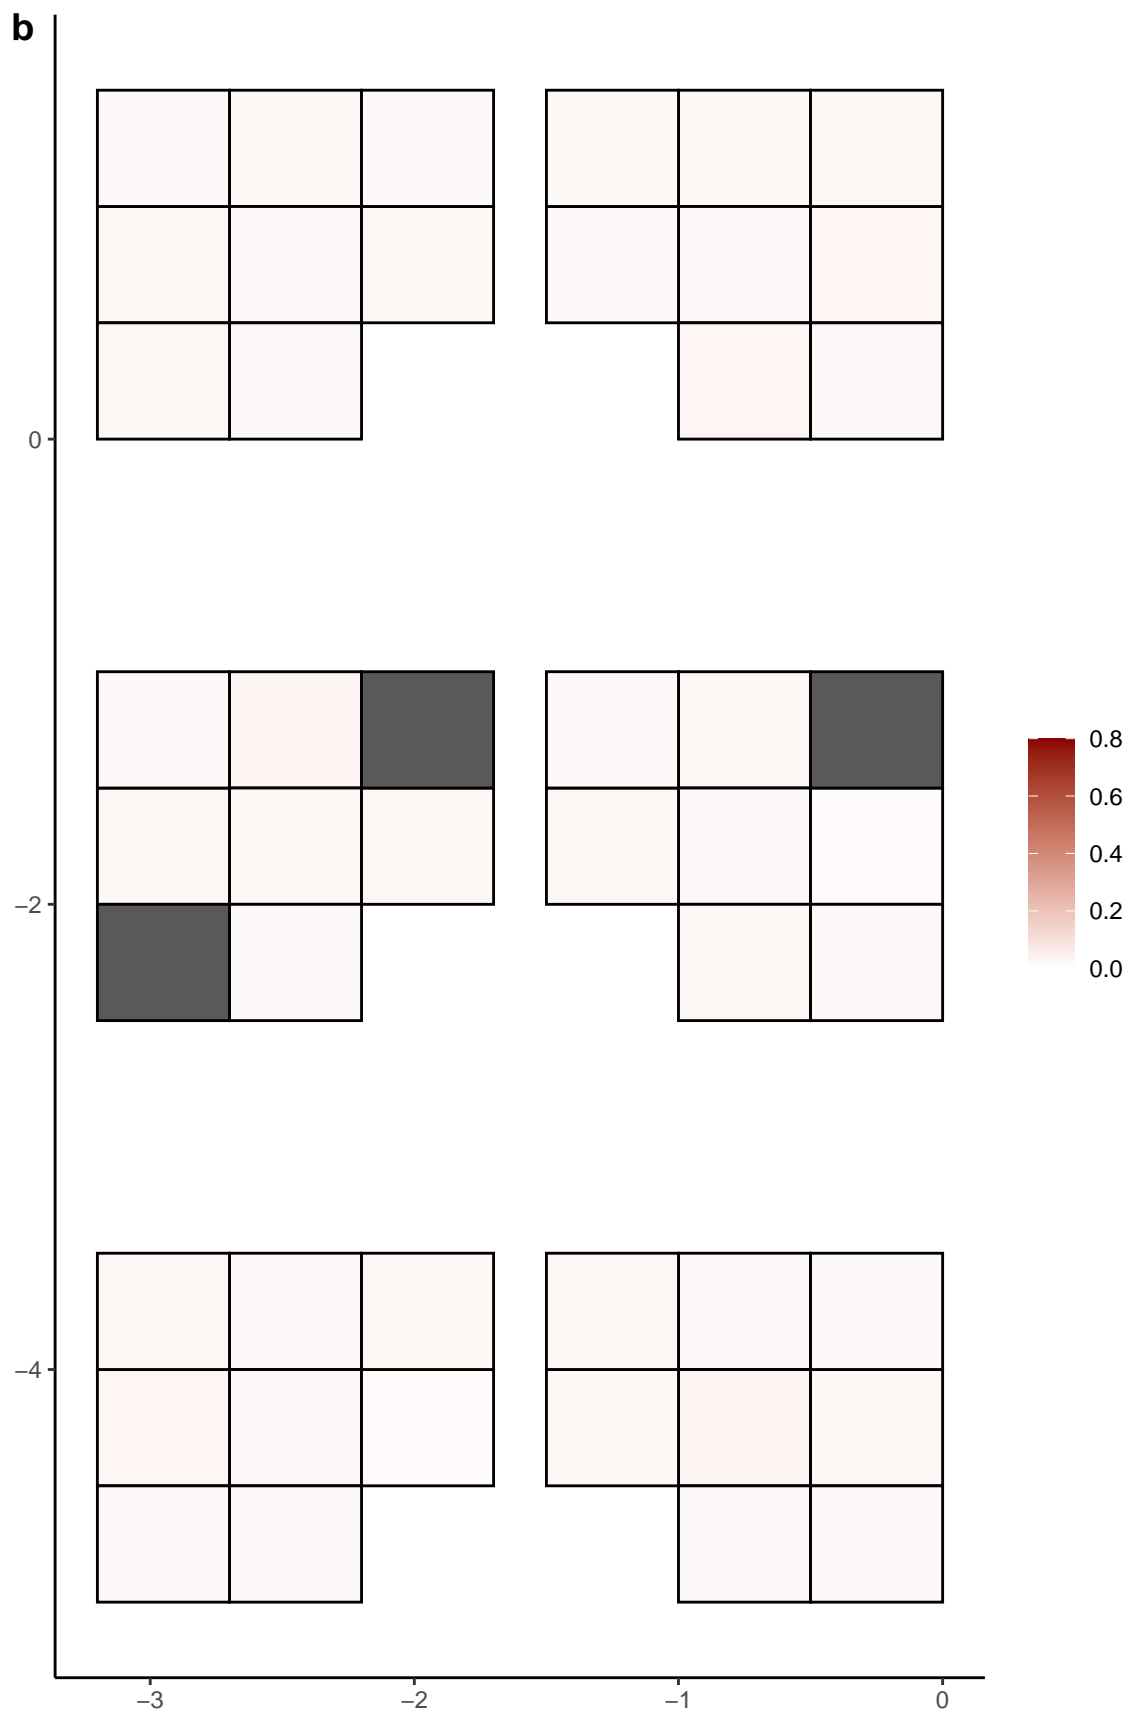

**a** ID05 1-192646091-A-G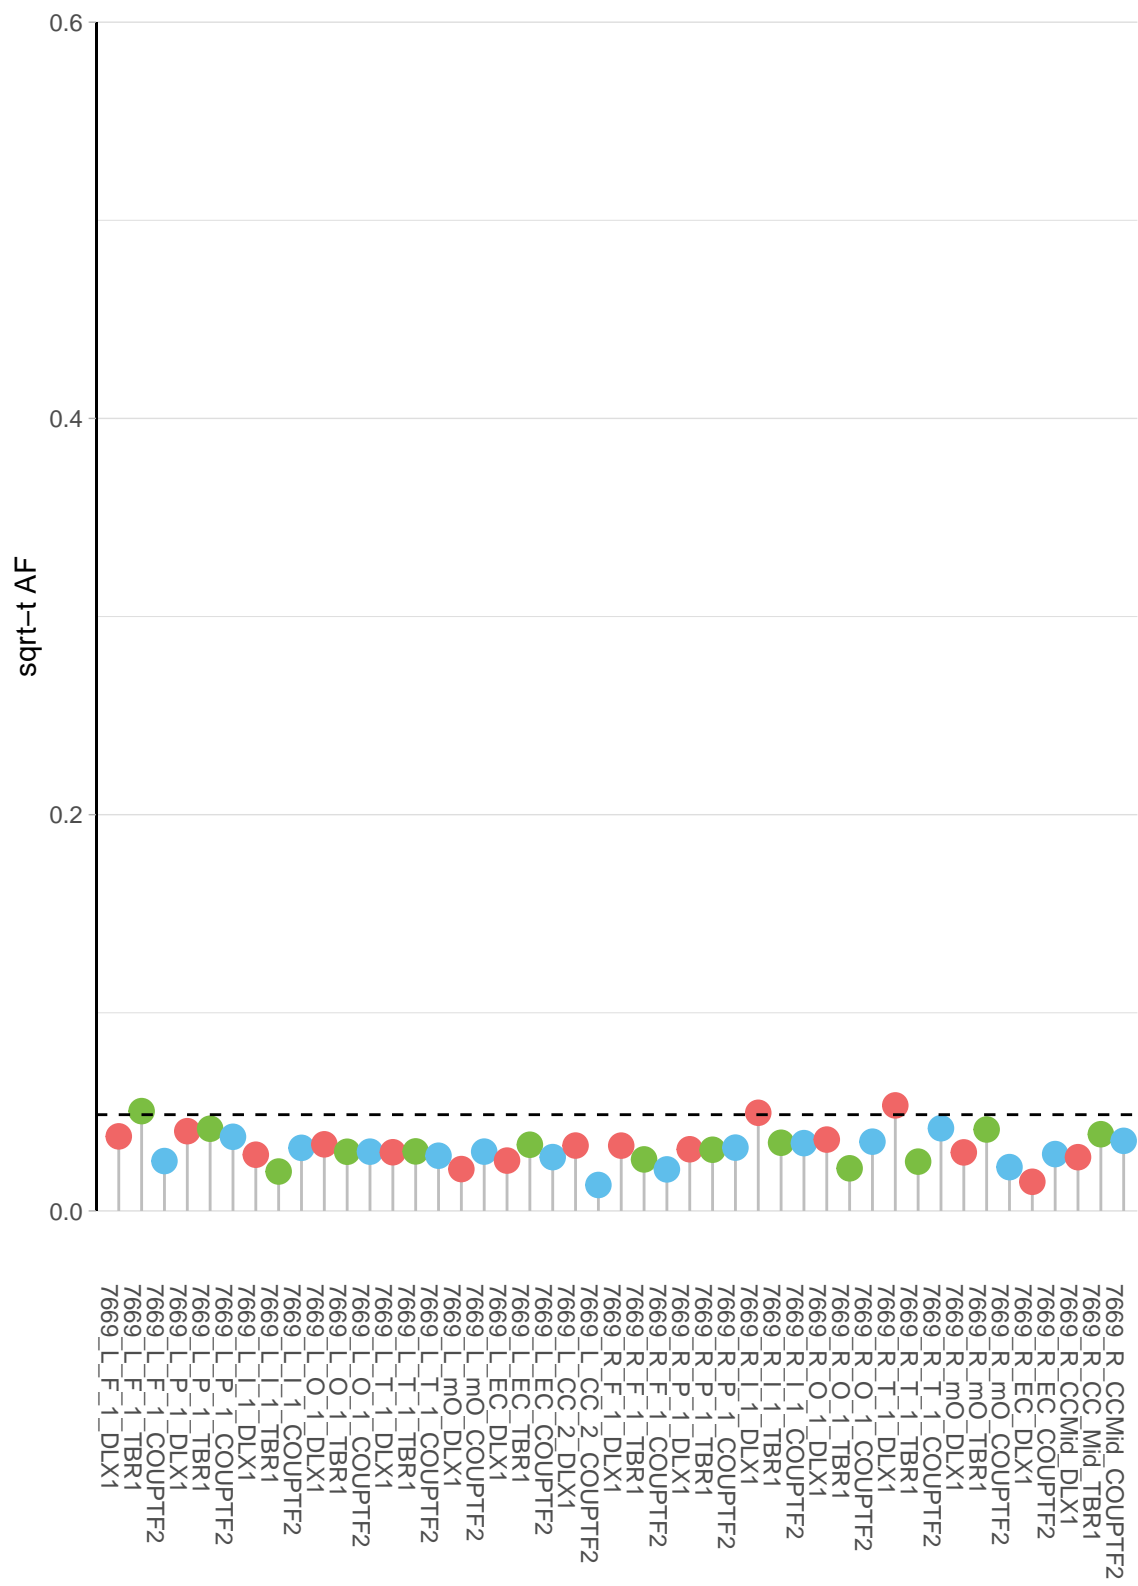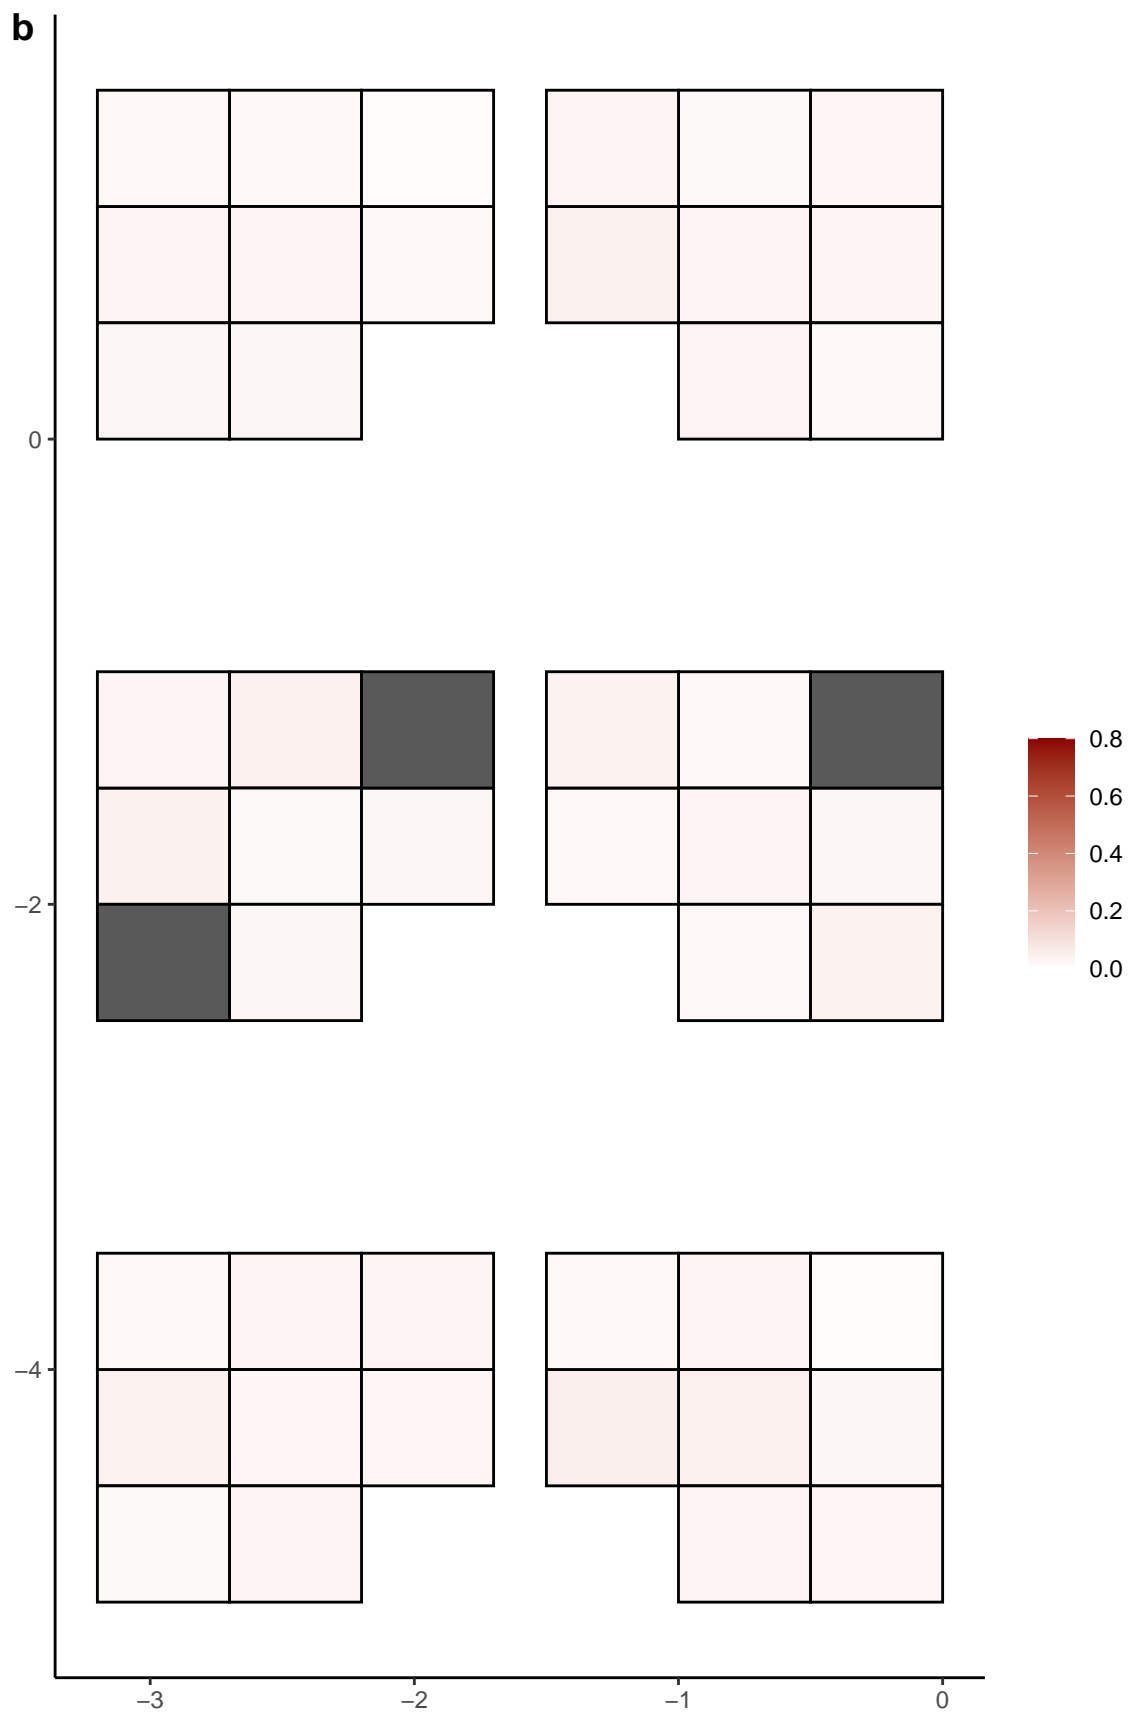





**a** ID05 1-206627079-G-A

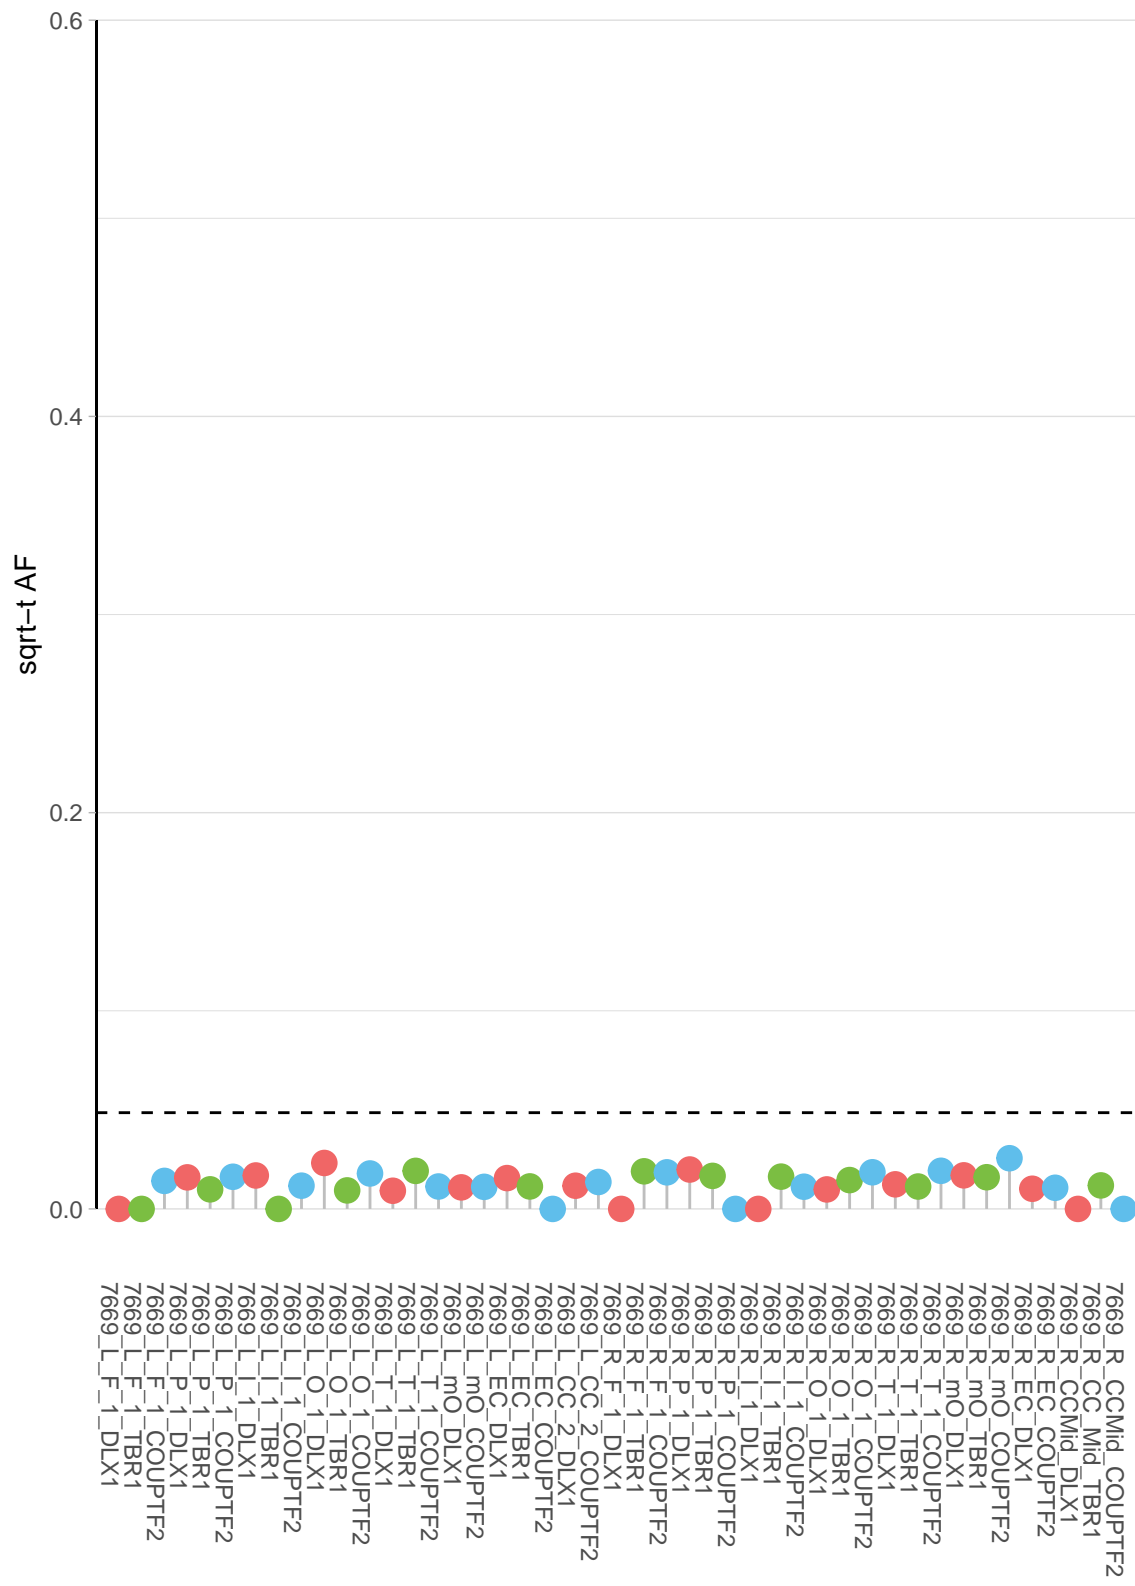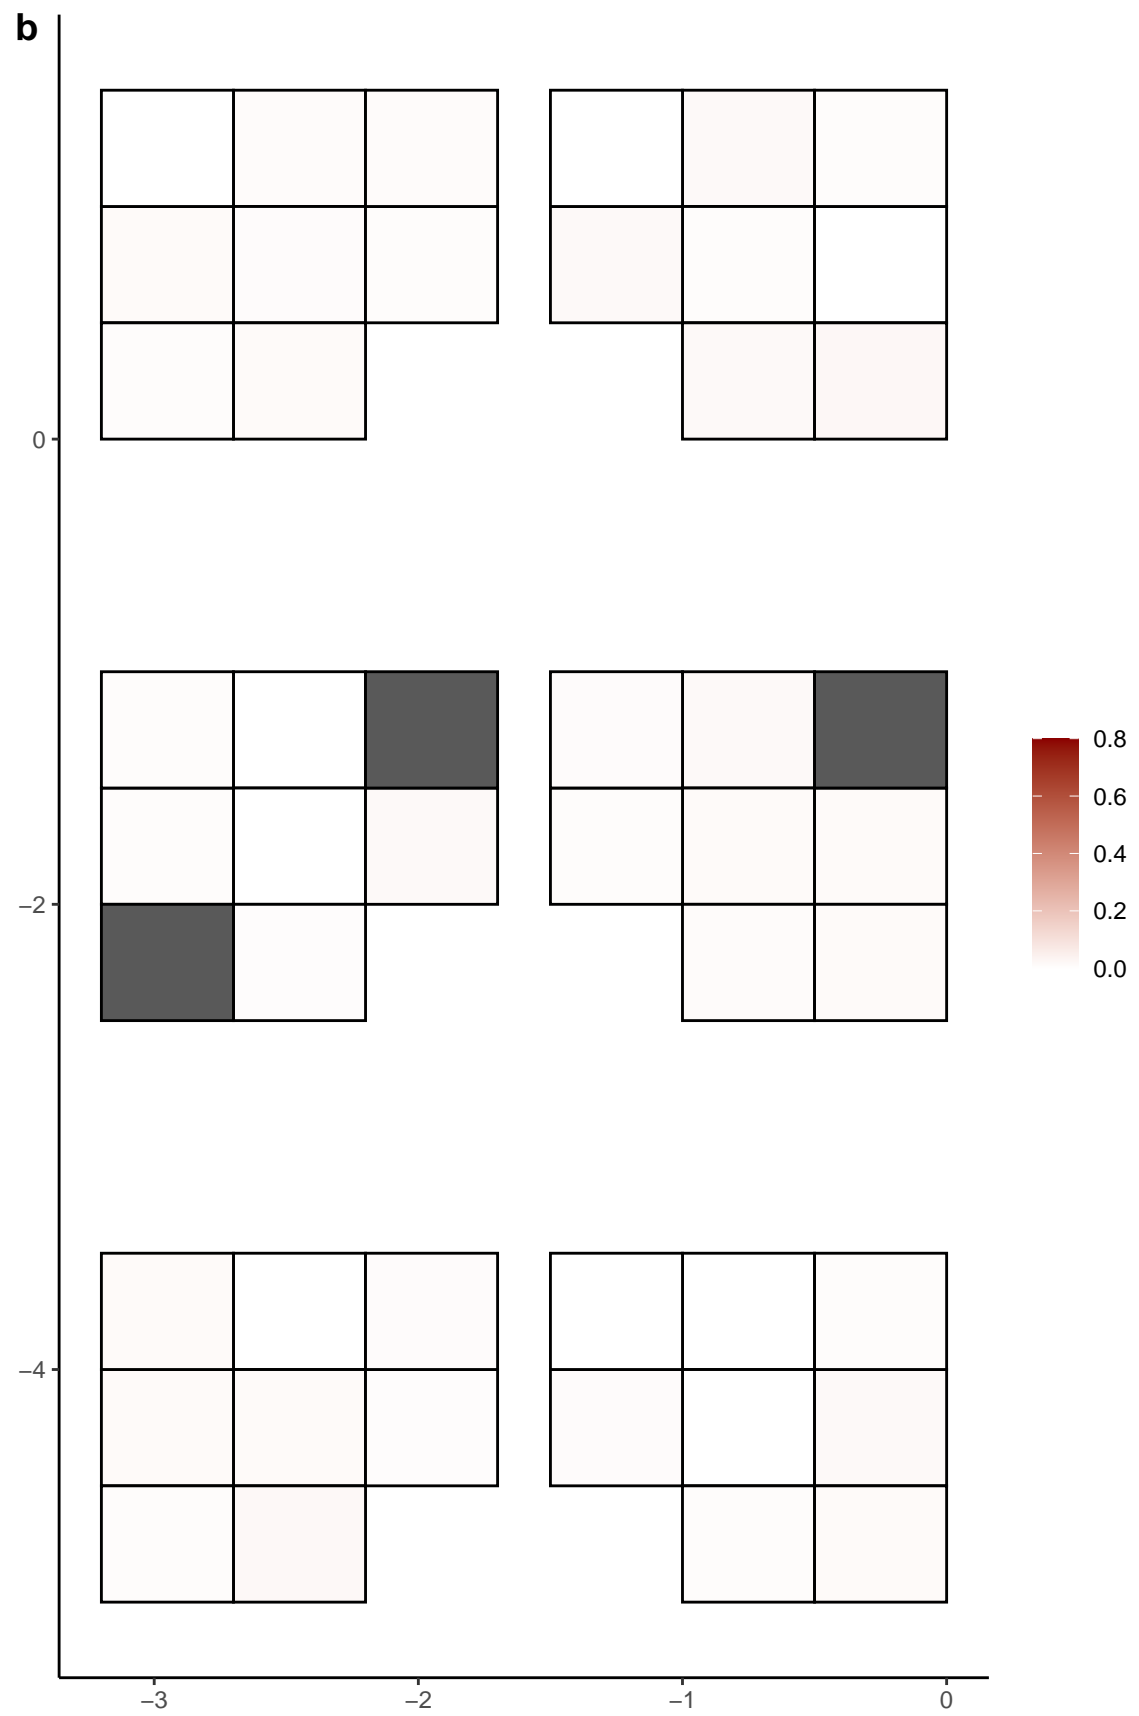

**a** ID05 1-207759144-C-T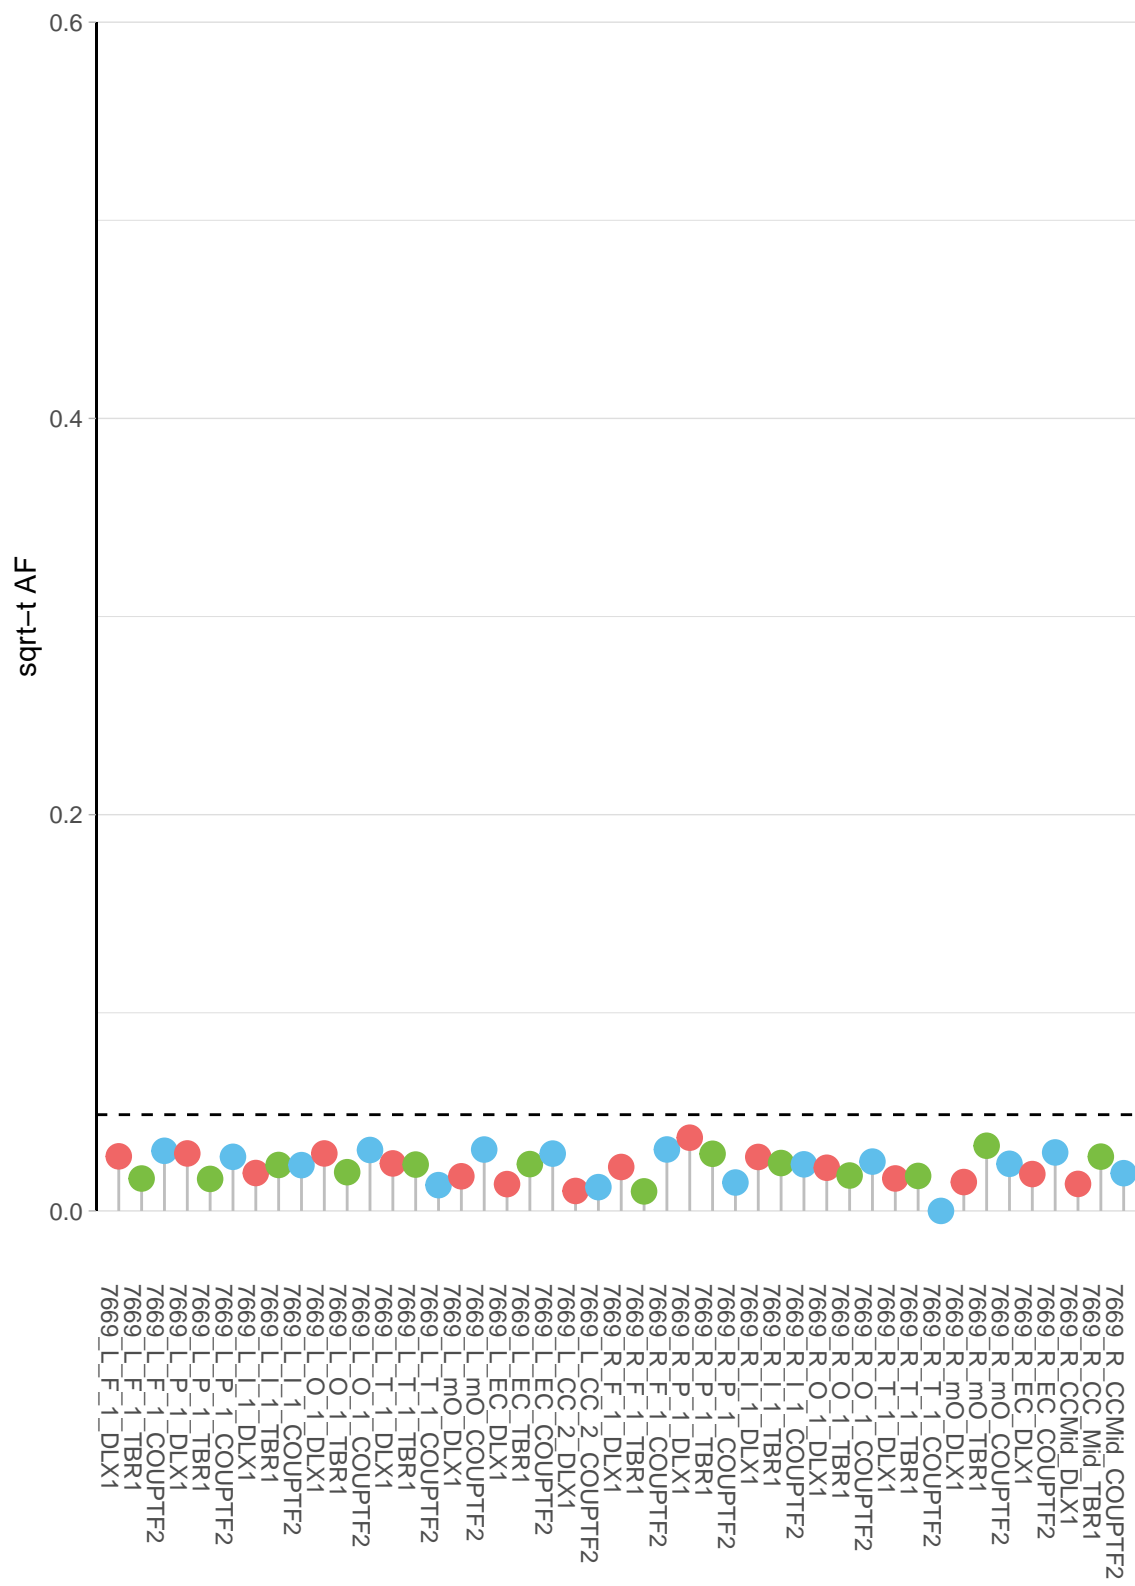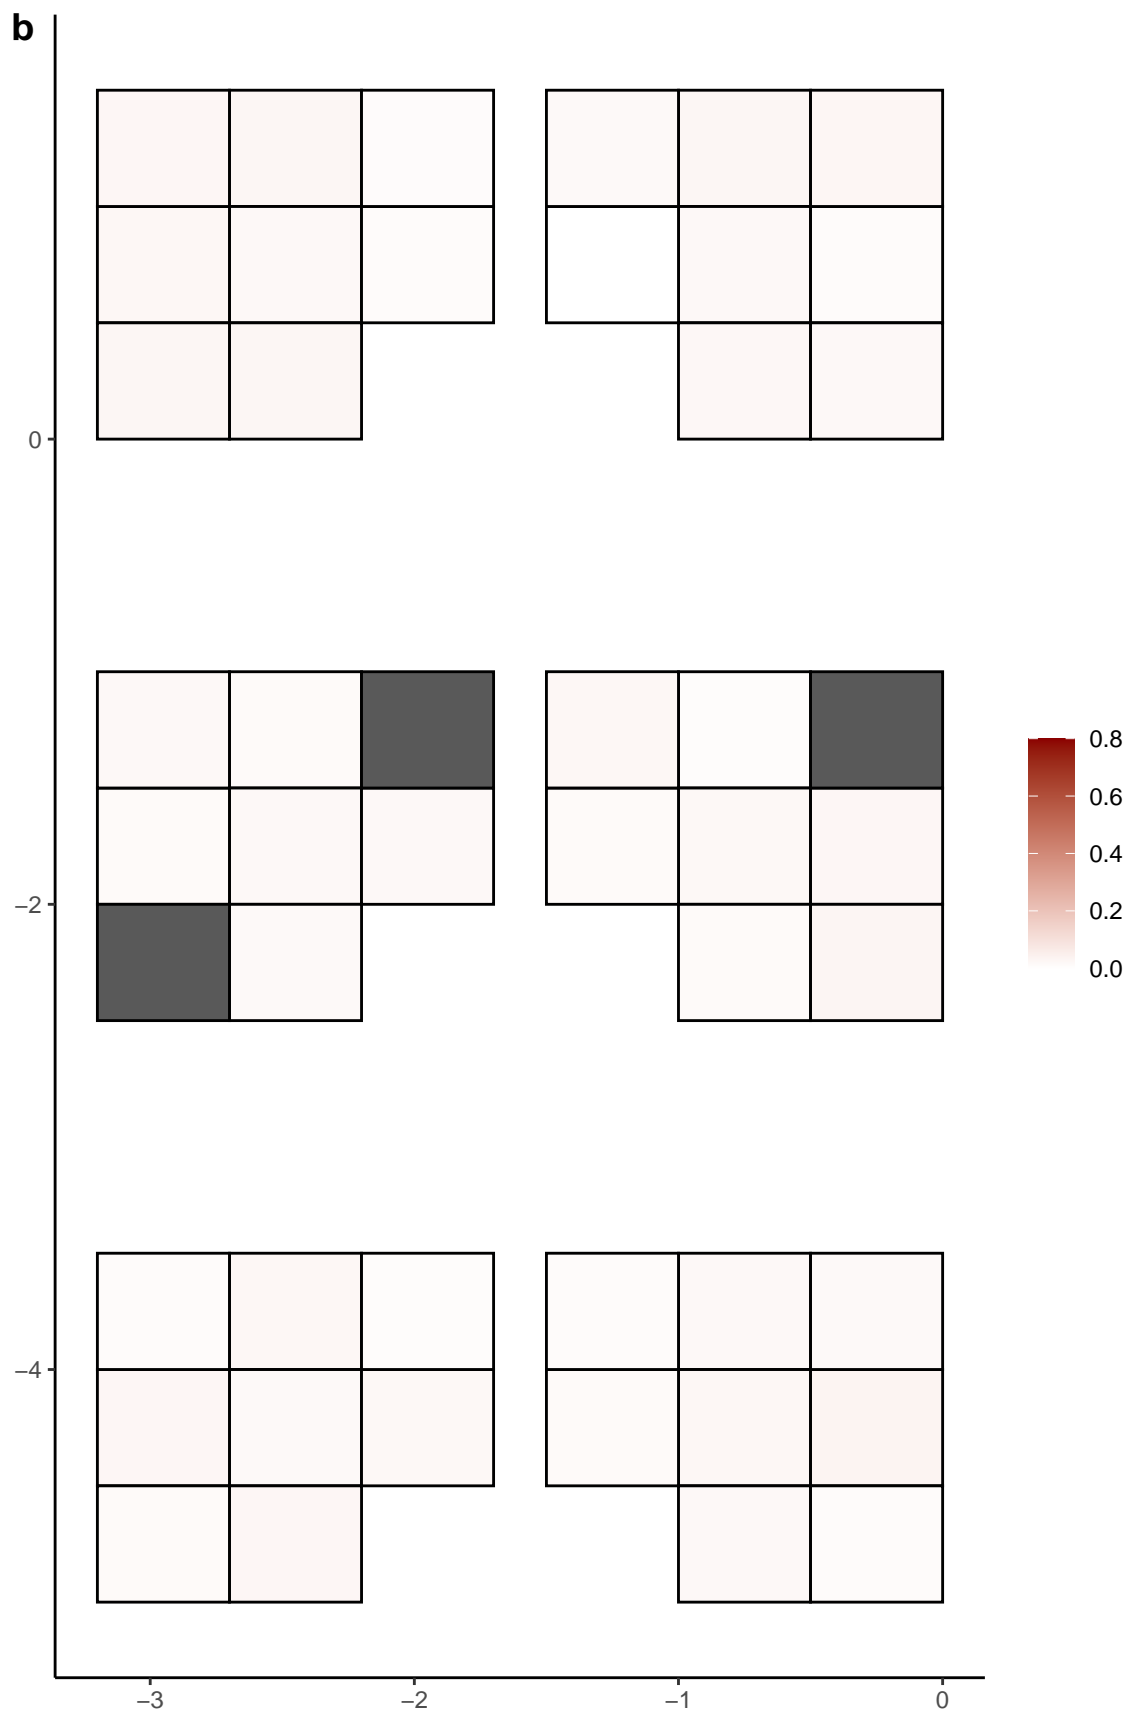



**a** ID05 1-210808944-G-A

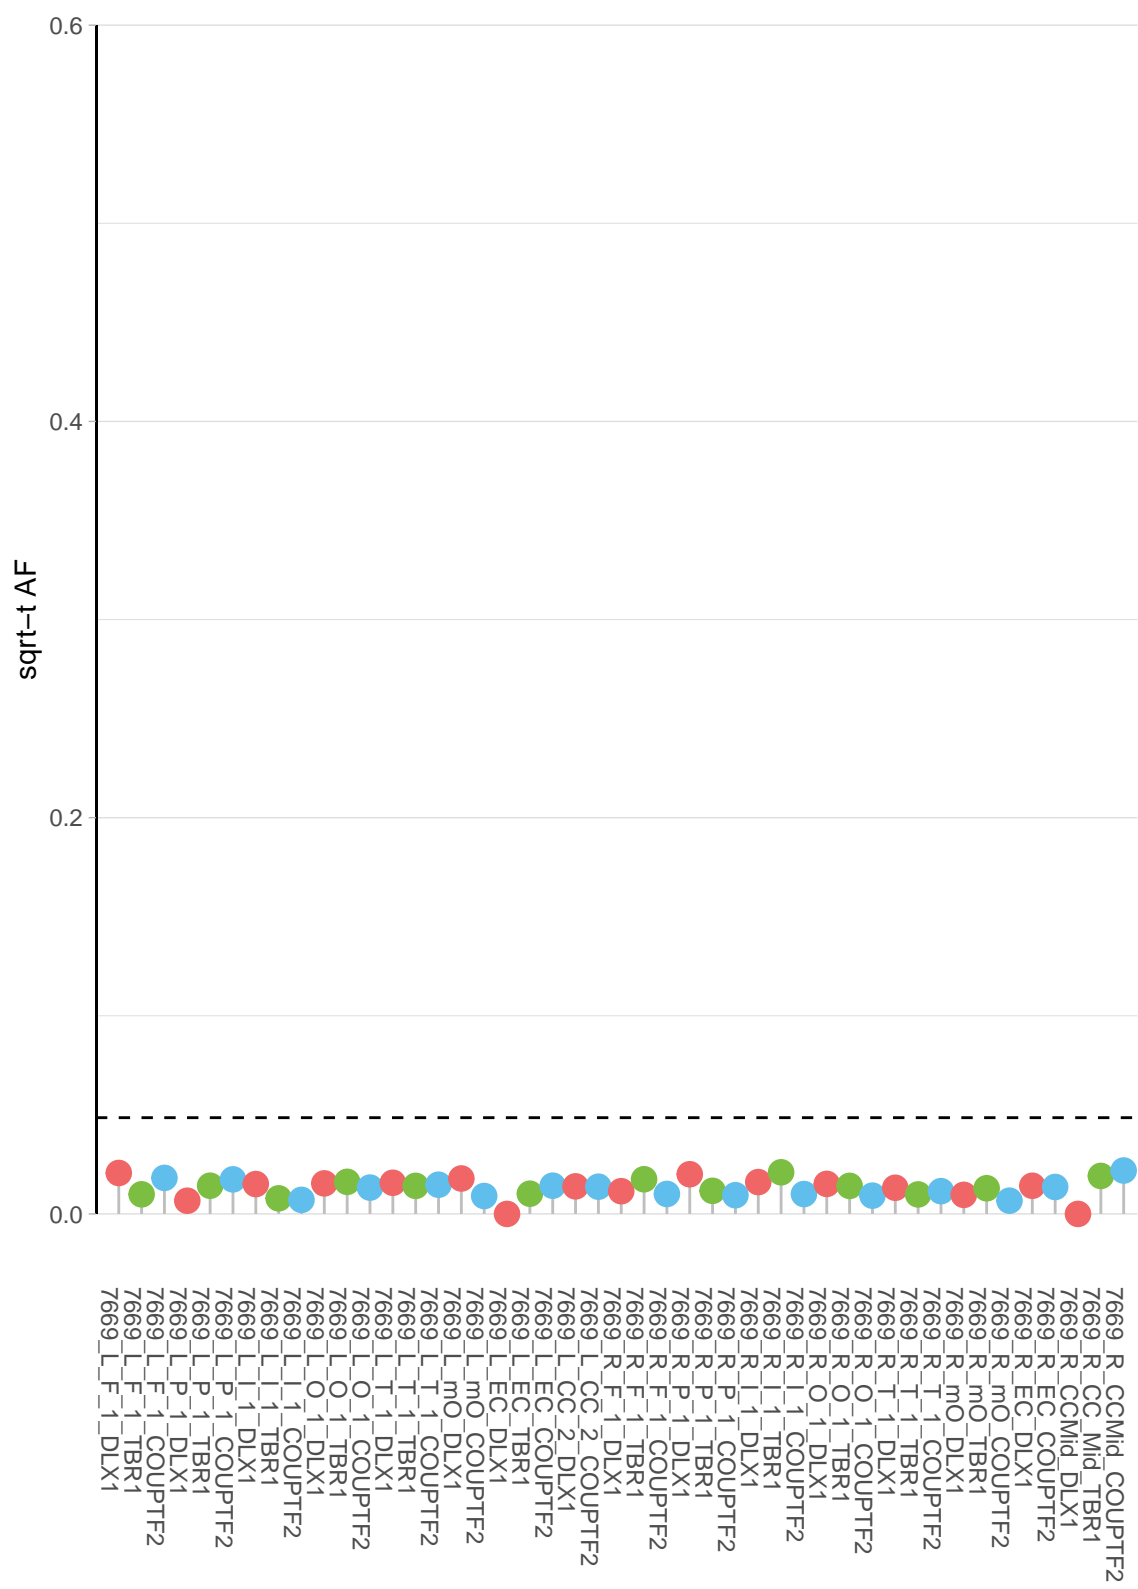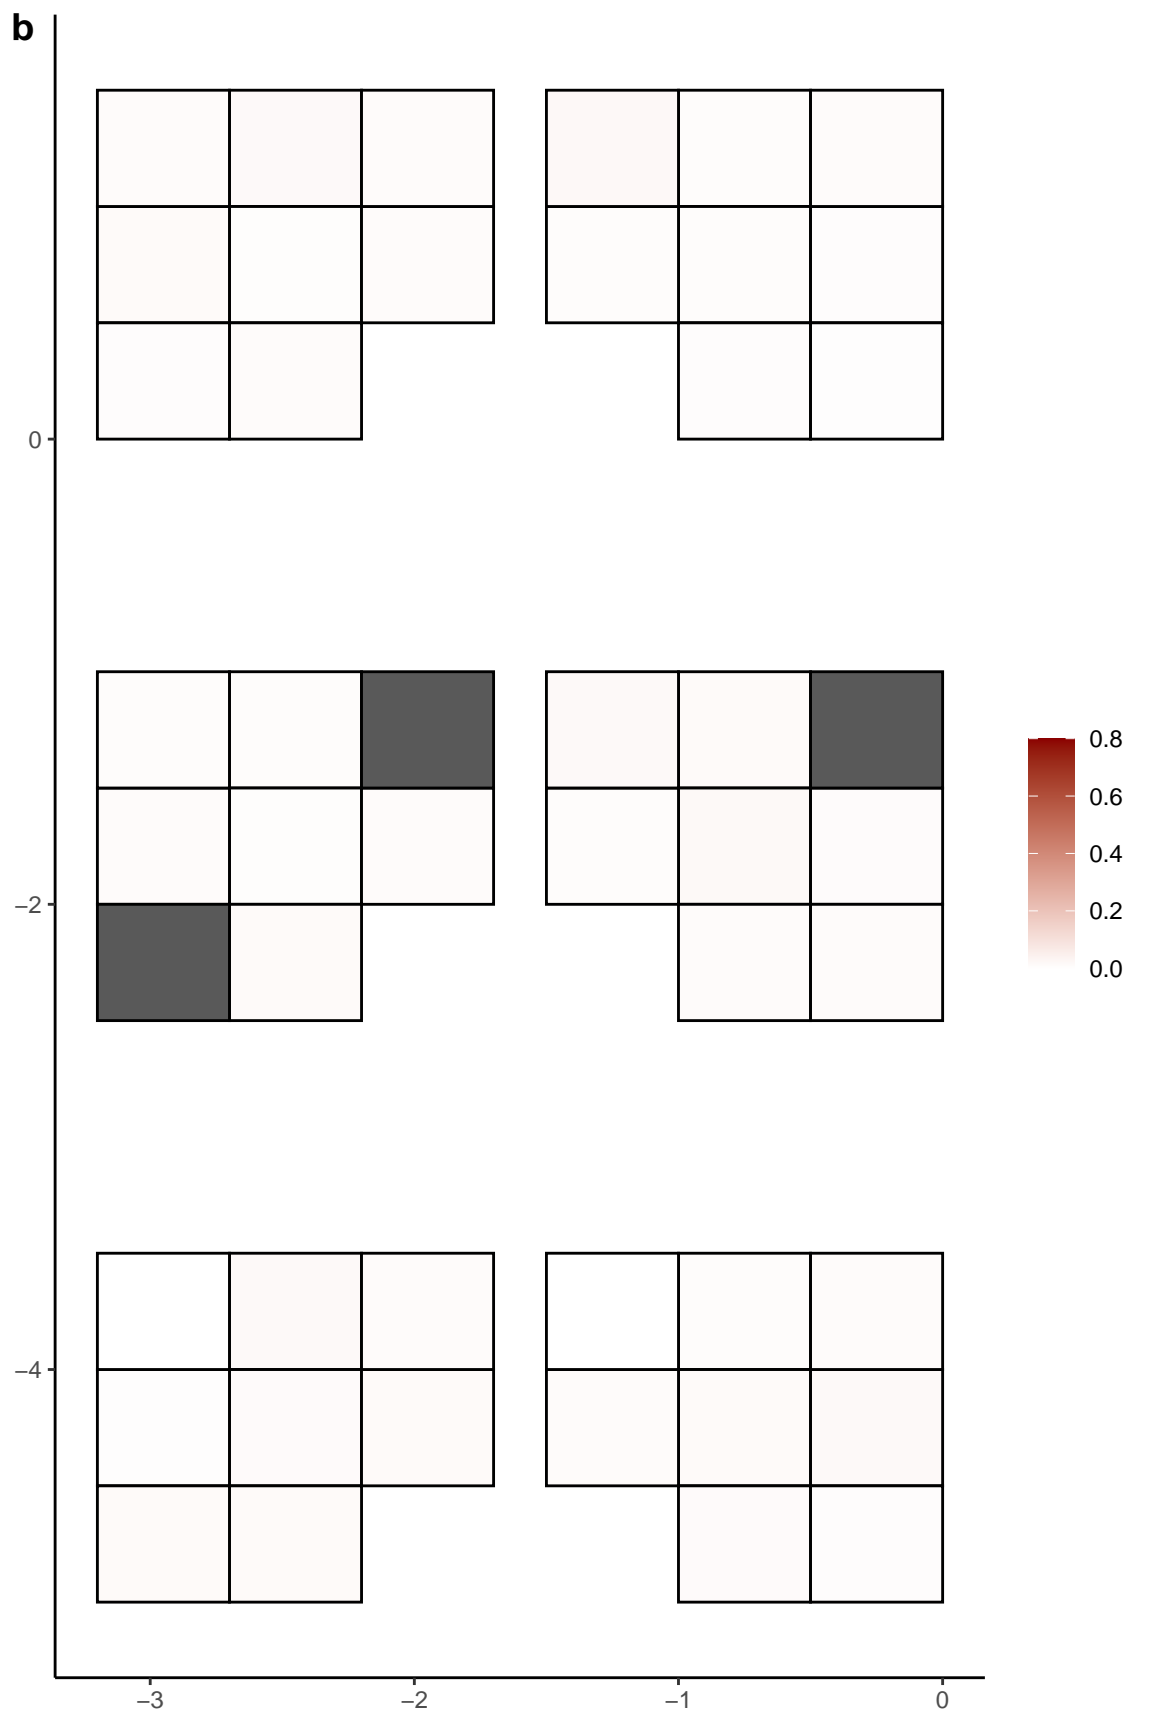

**a** ID05 1-237812348-C-T
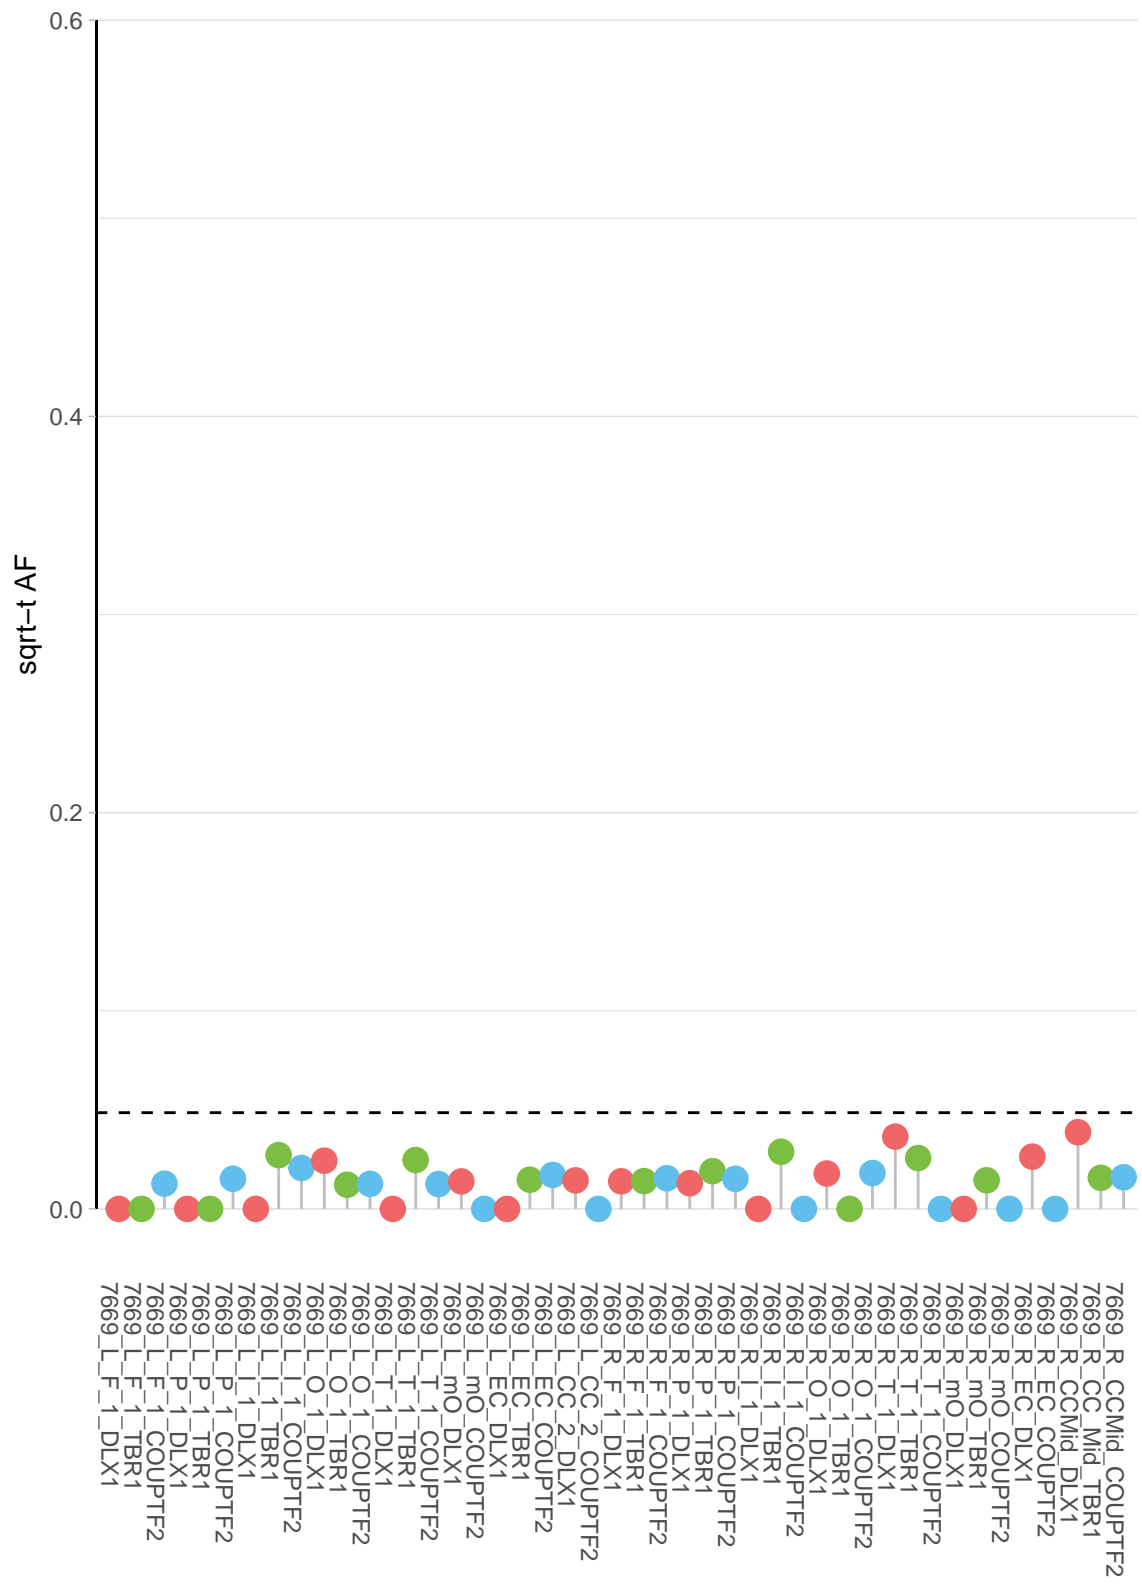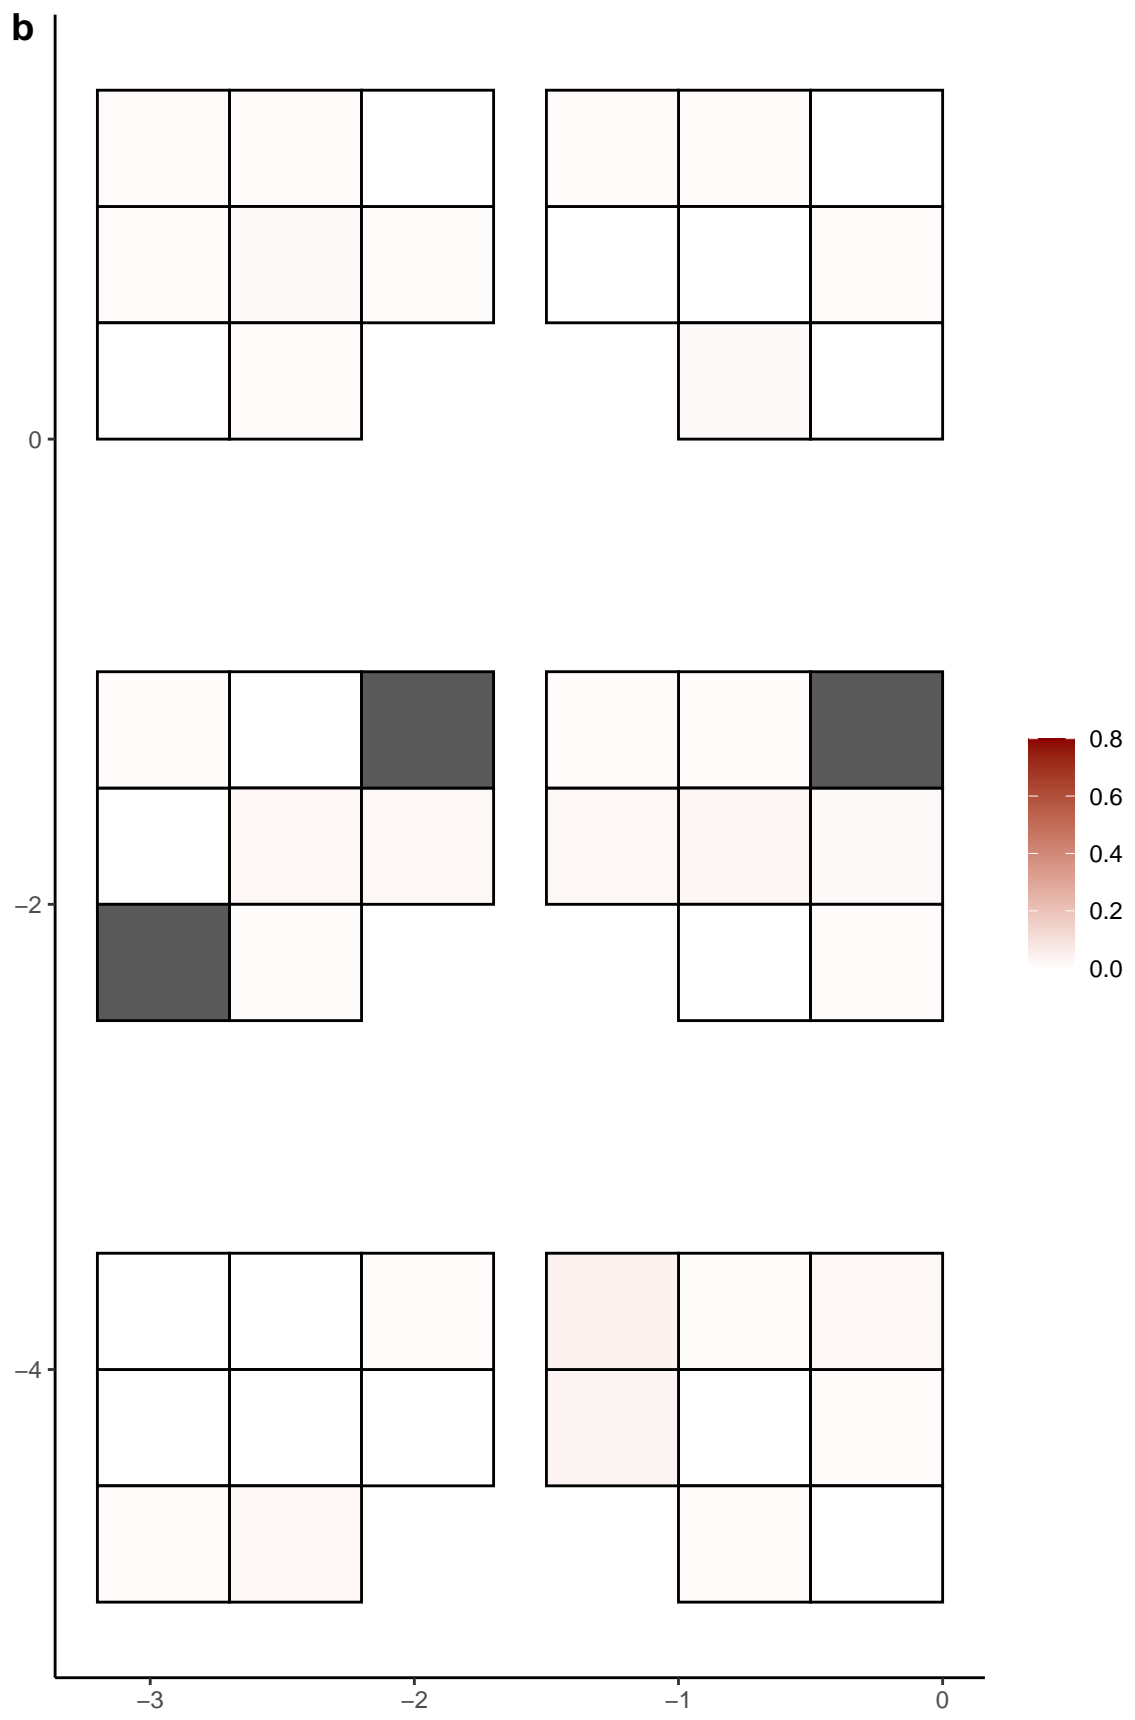

**a** ID05 1-245457480-G-A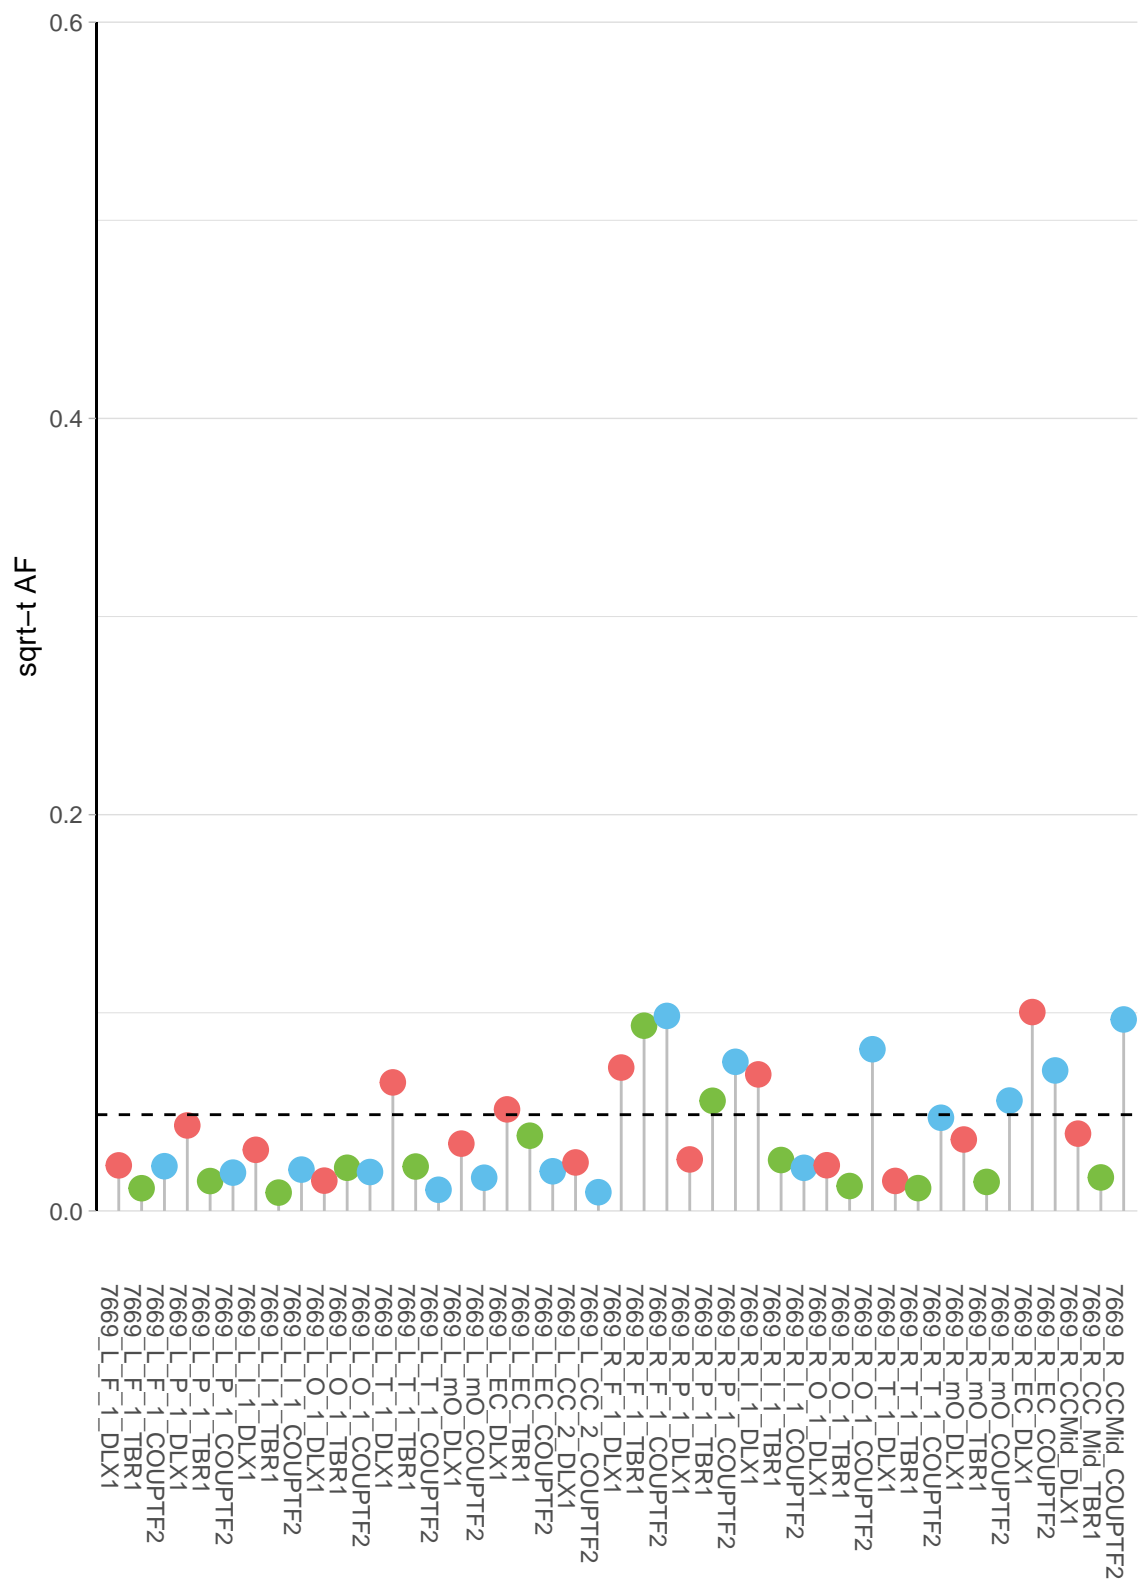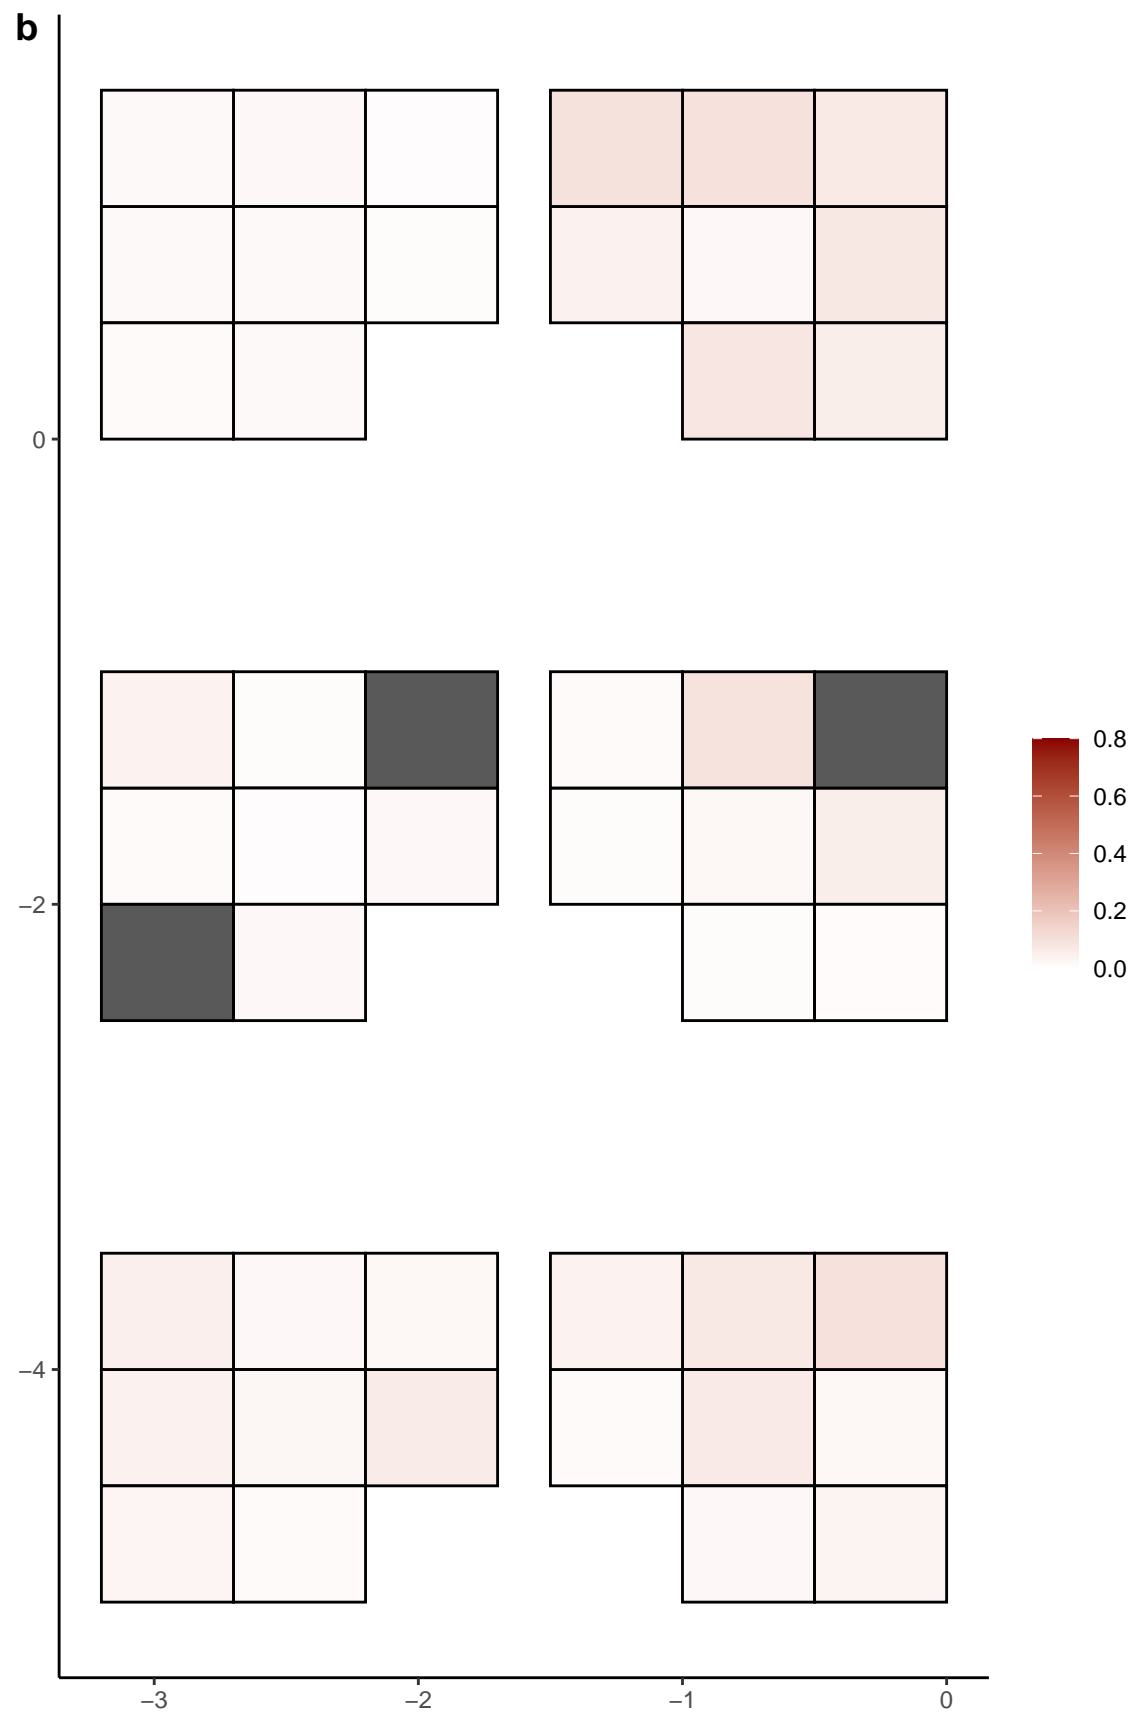

**a** ID05 1-248261416-C-T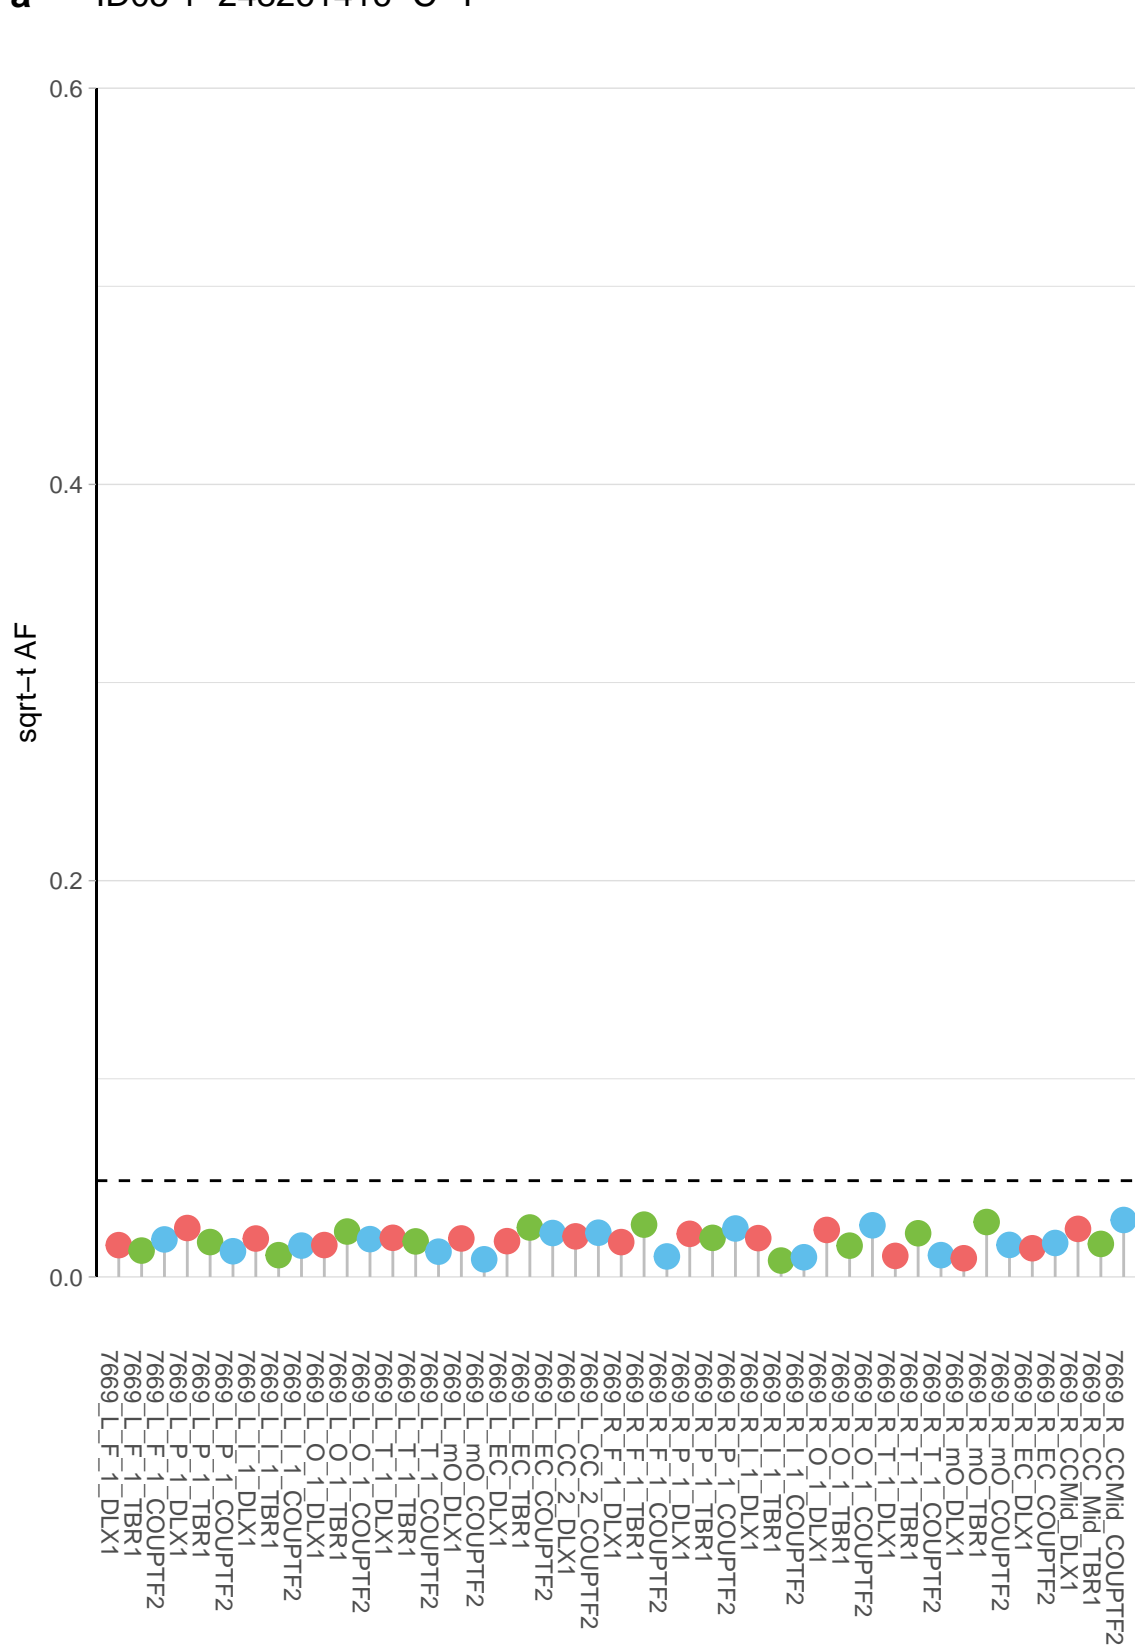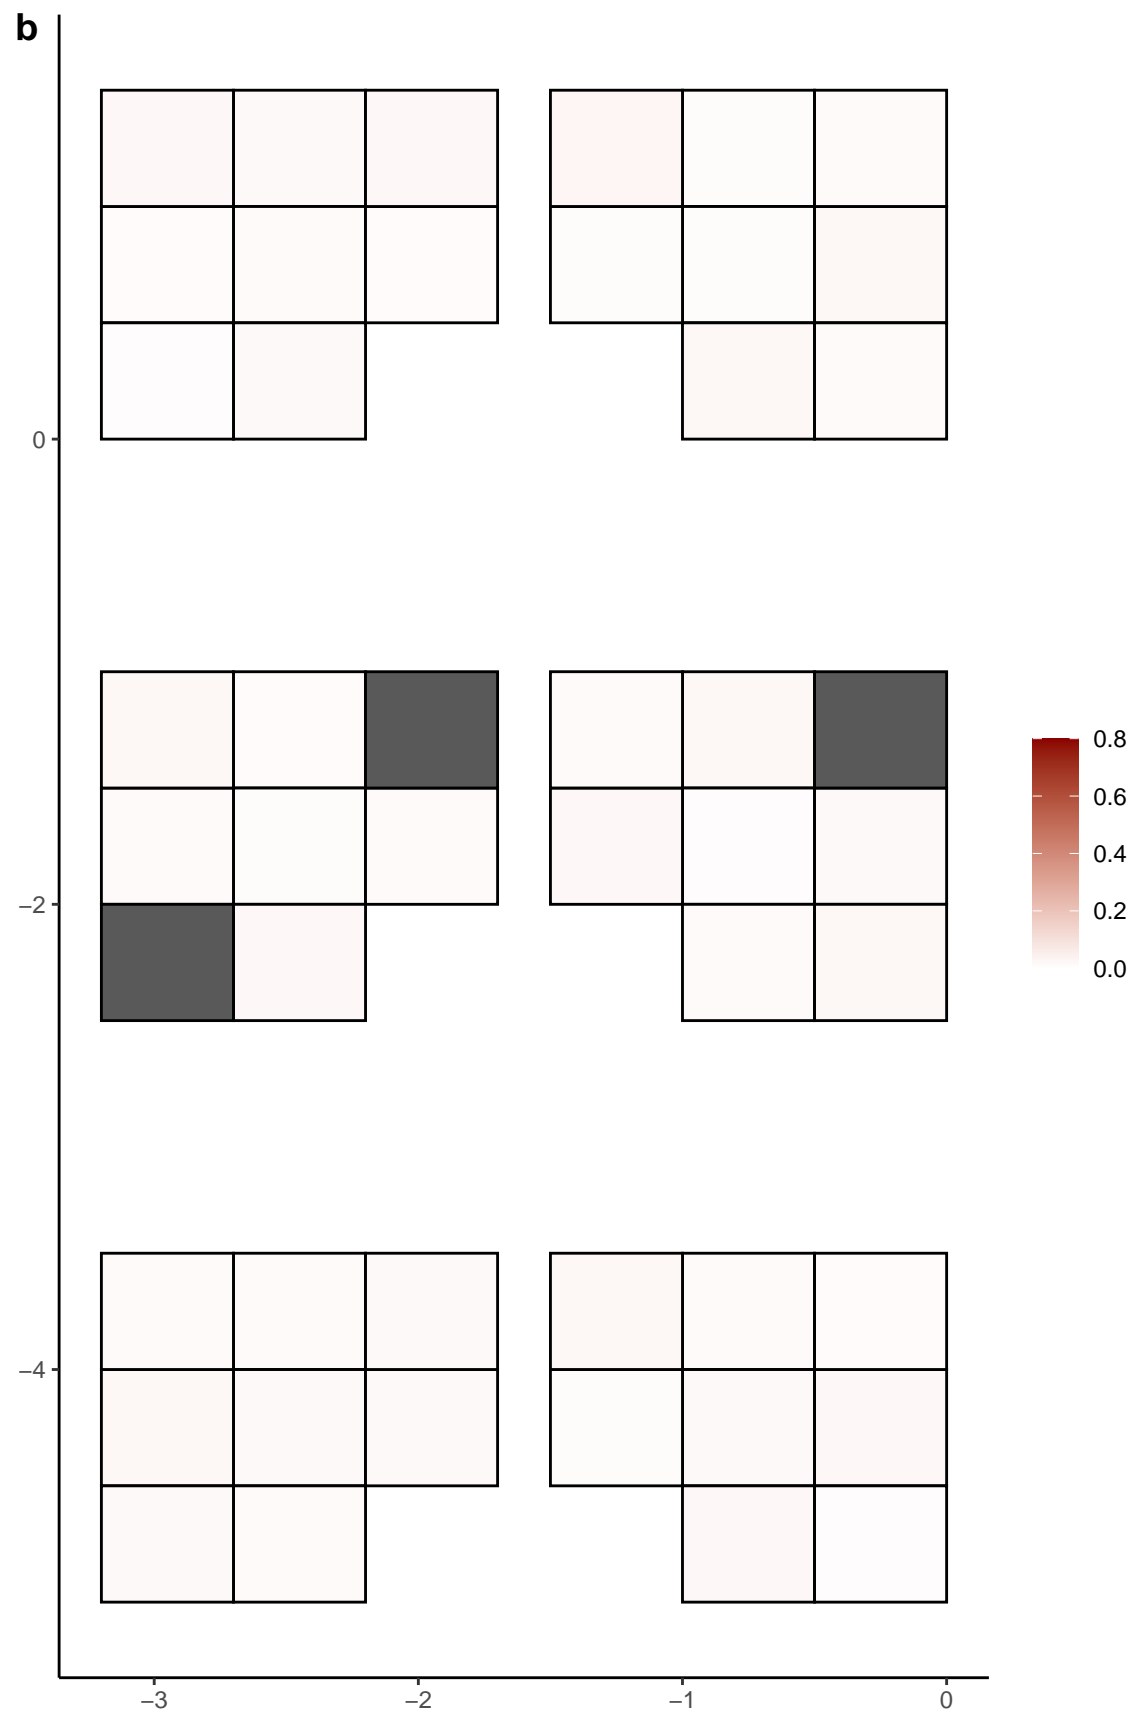











**a** ID05 1-53912650-G-A

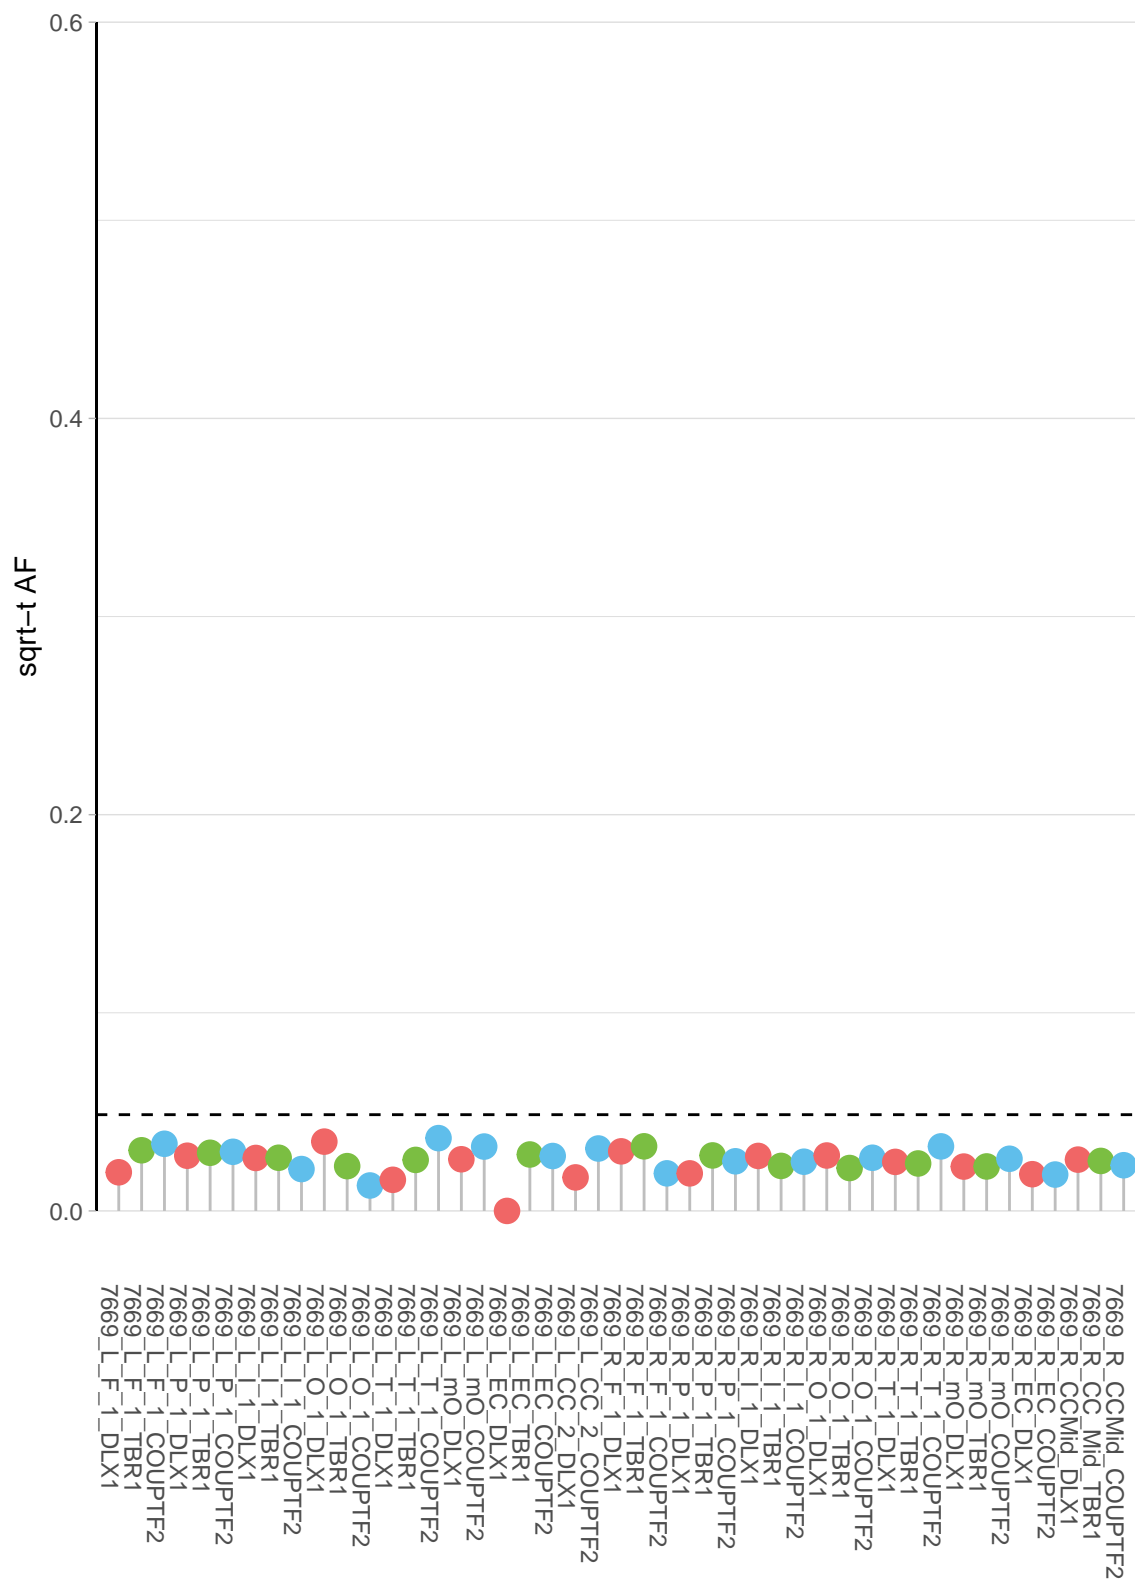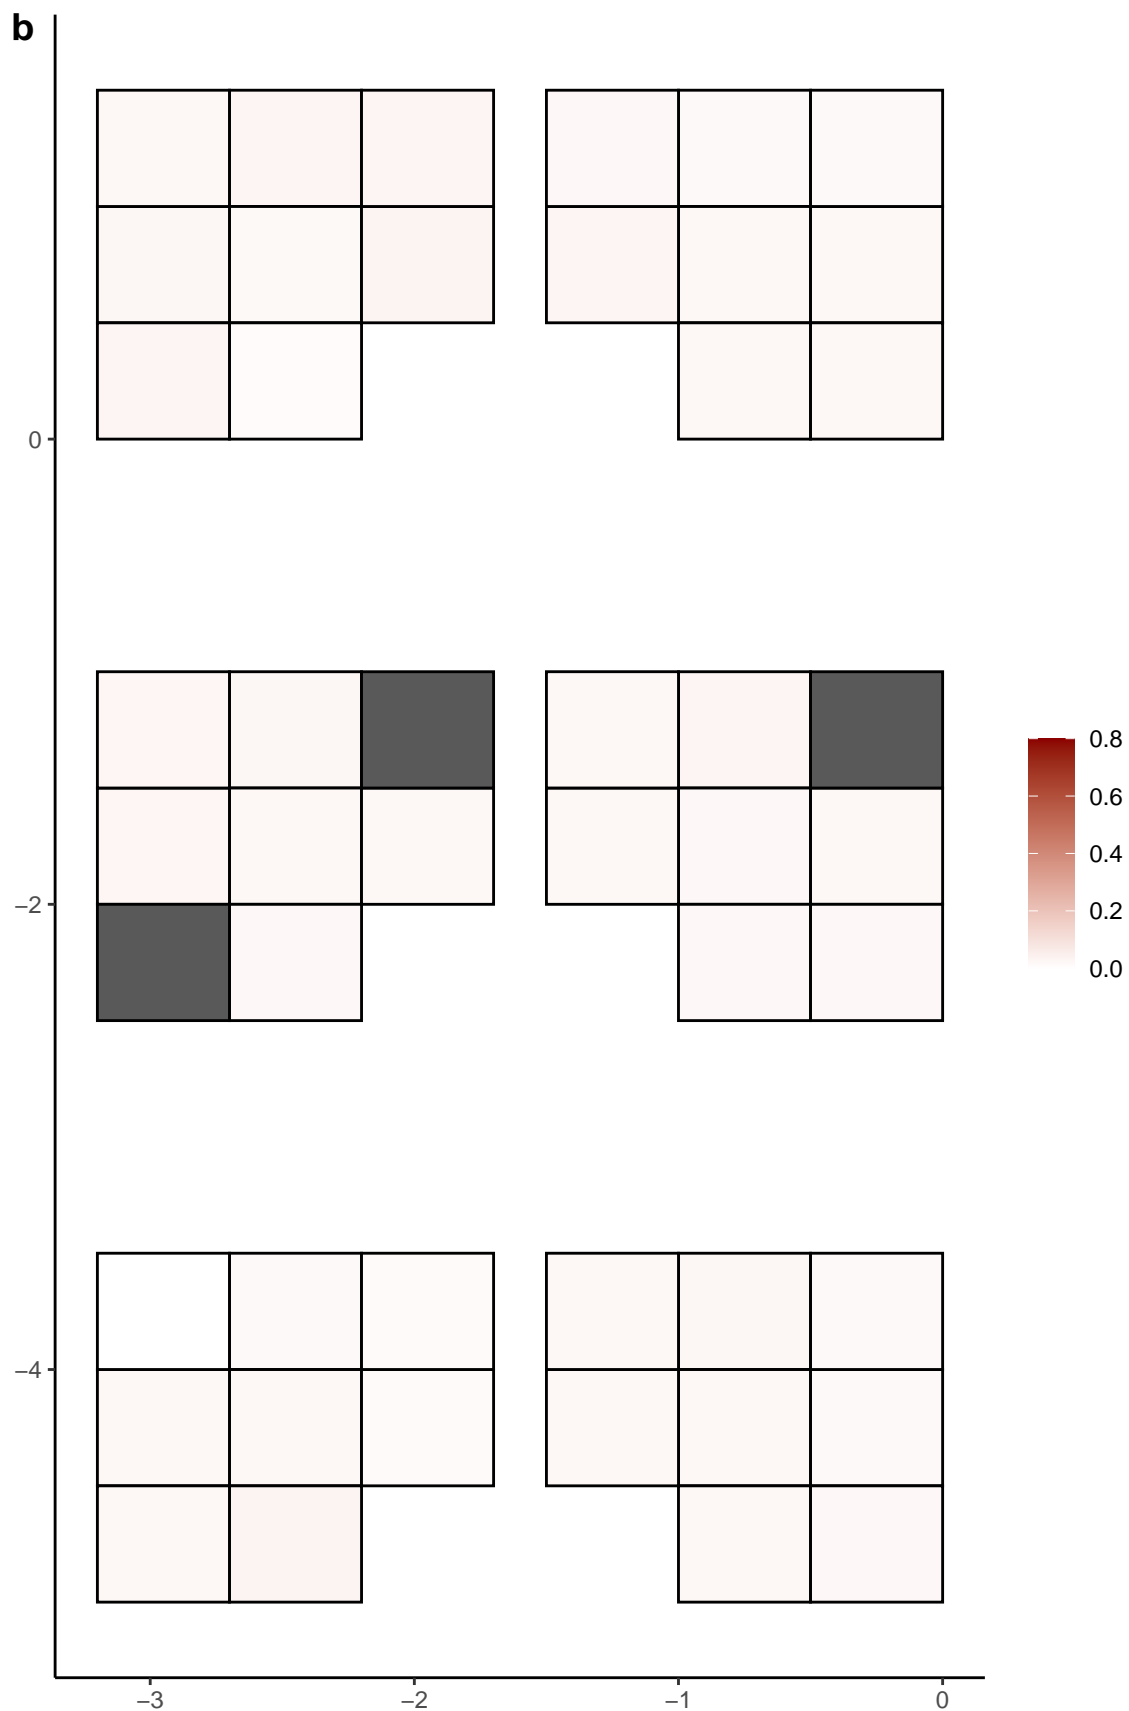

**a** ID05 1-55567901-G-T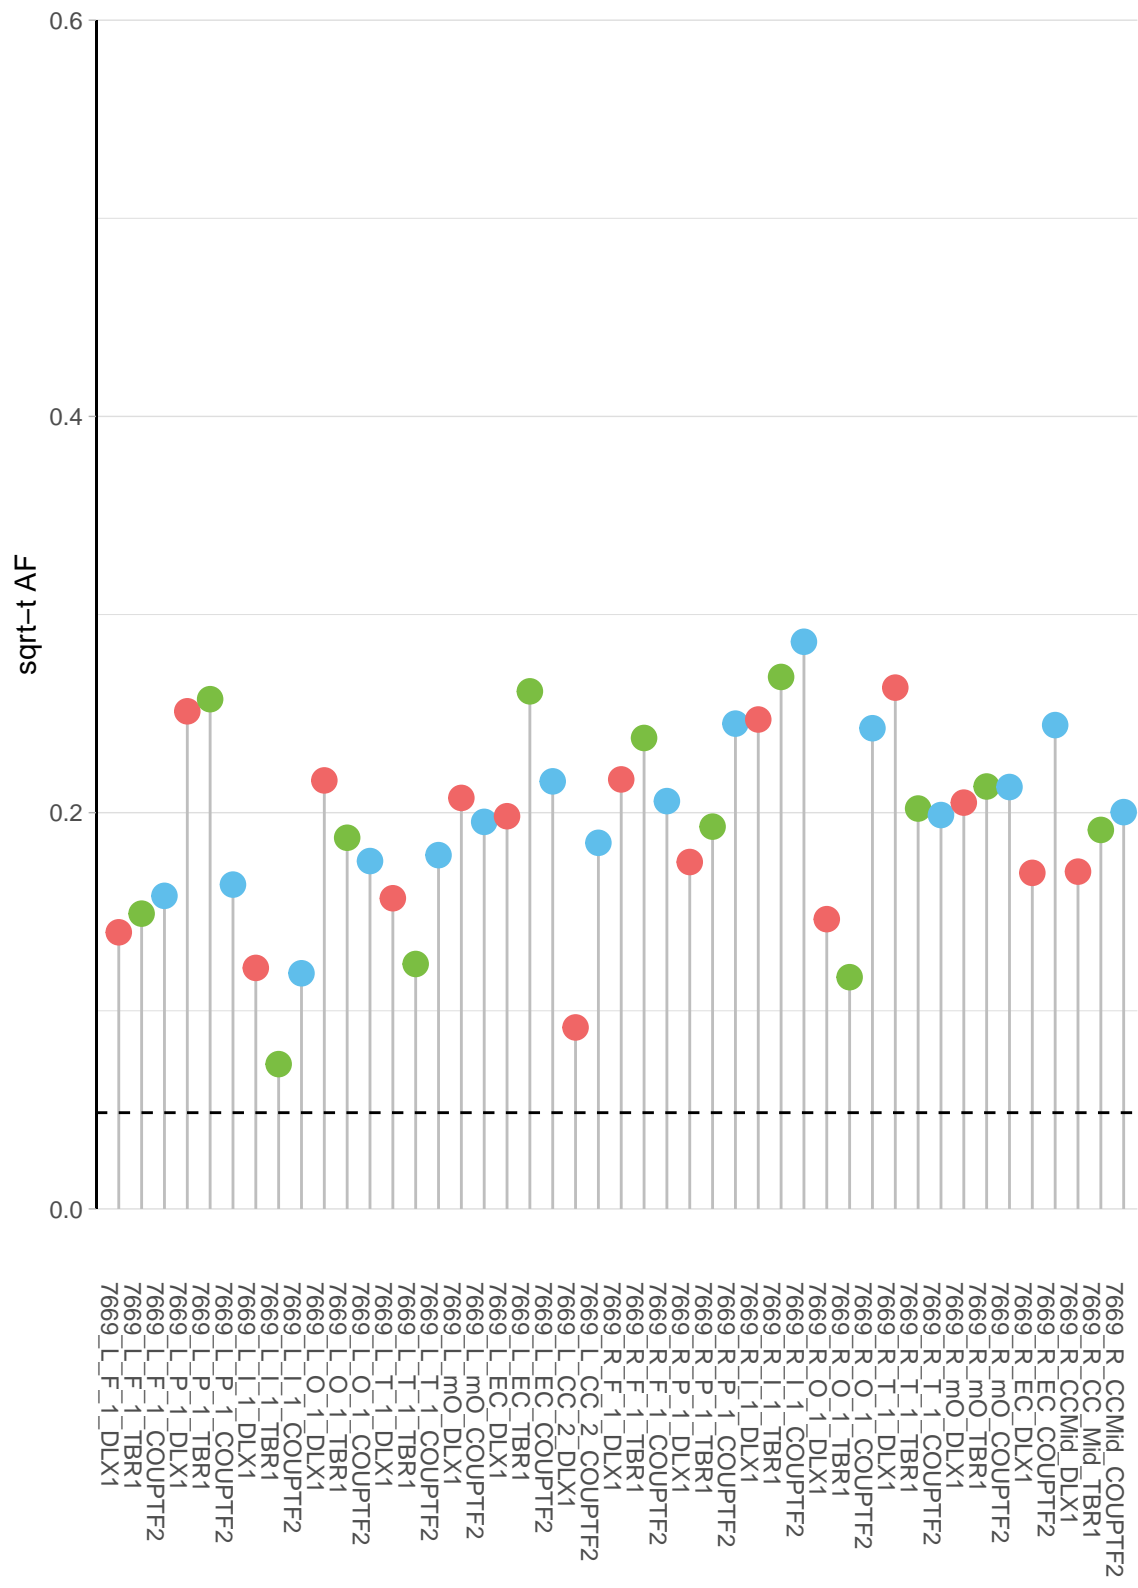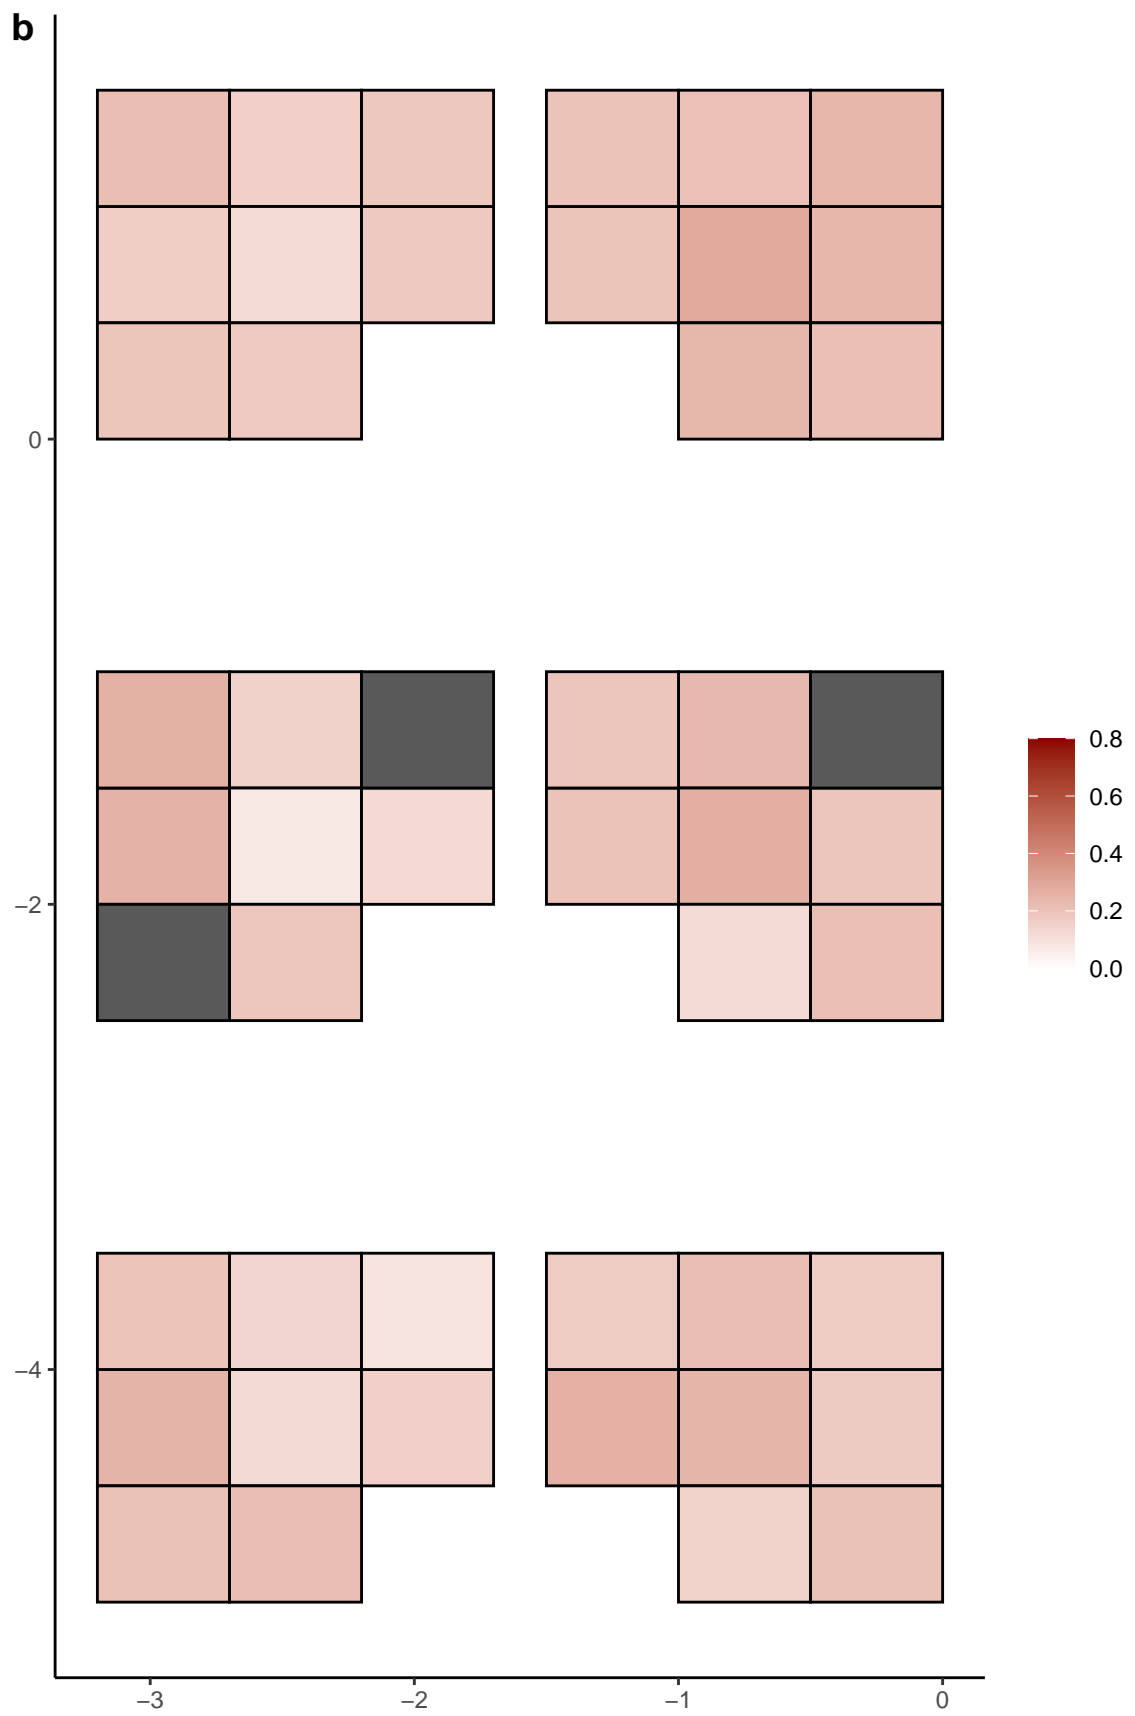

**a** ID05 1-57886702-C-T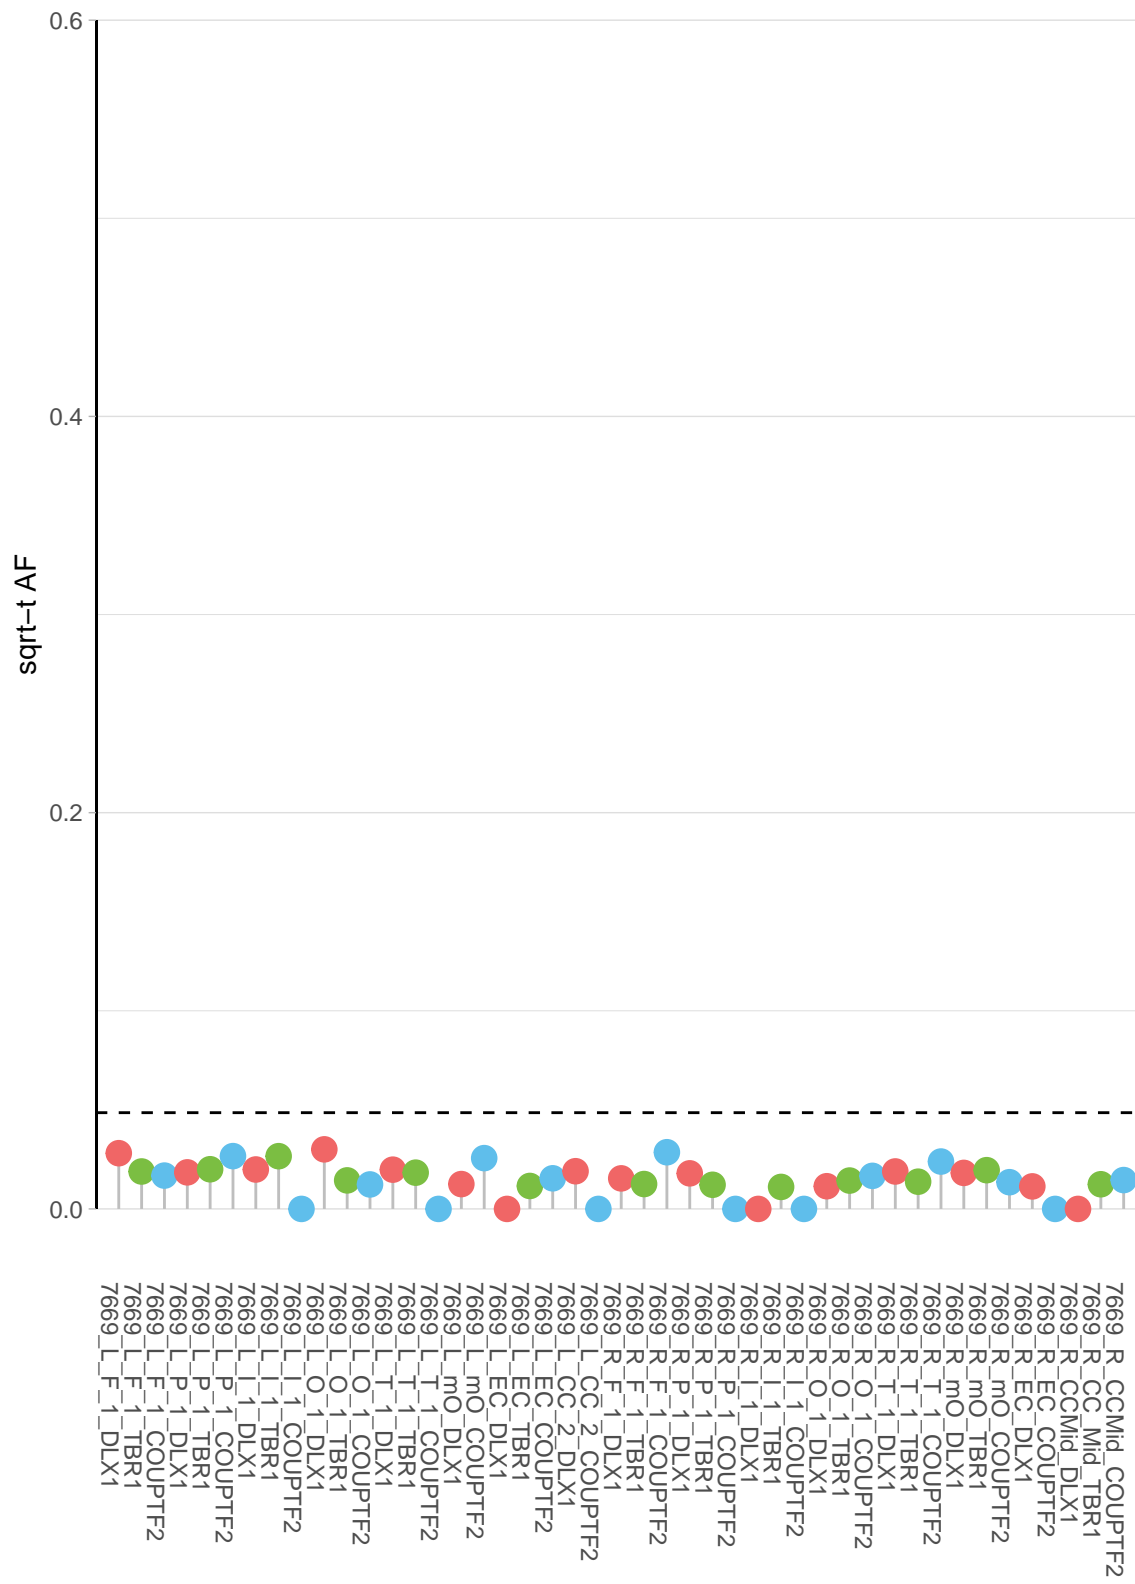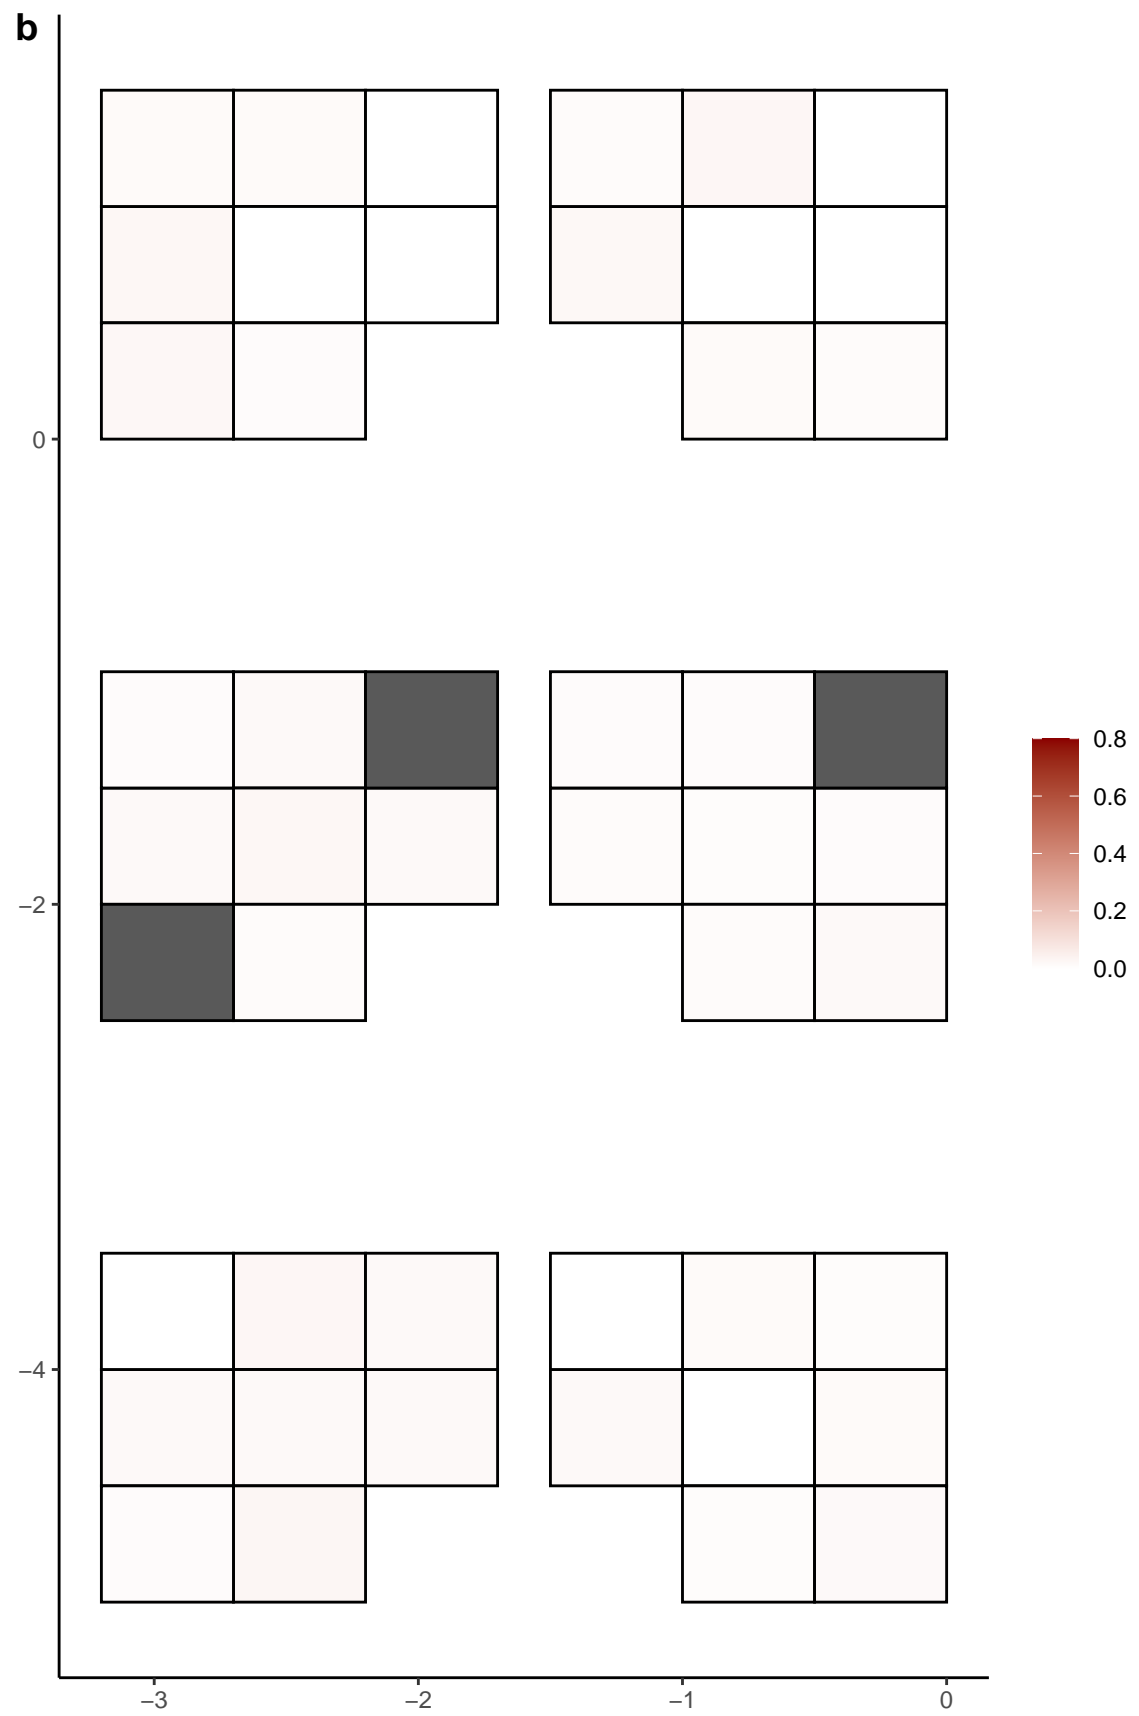

**a** ID05 1-62675365-T-TTA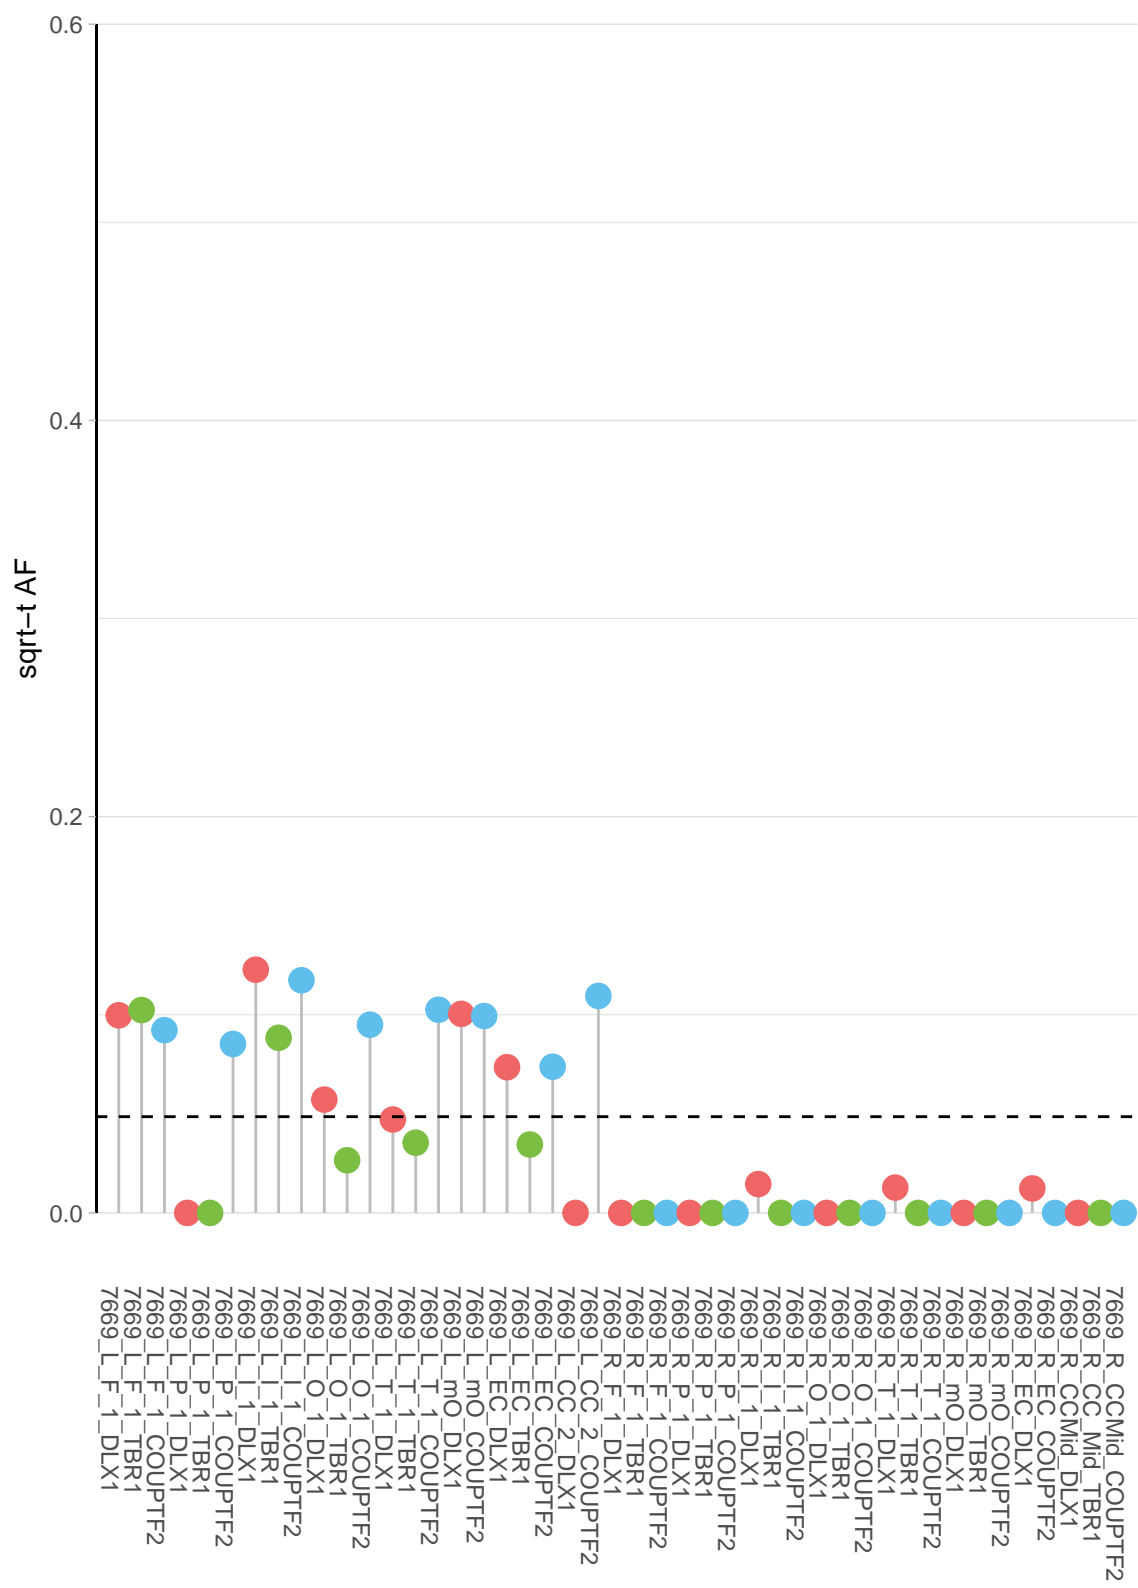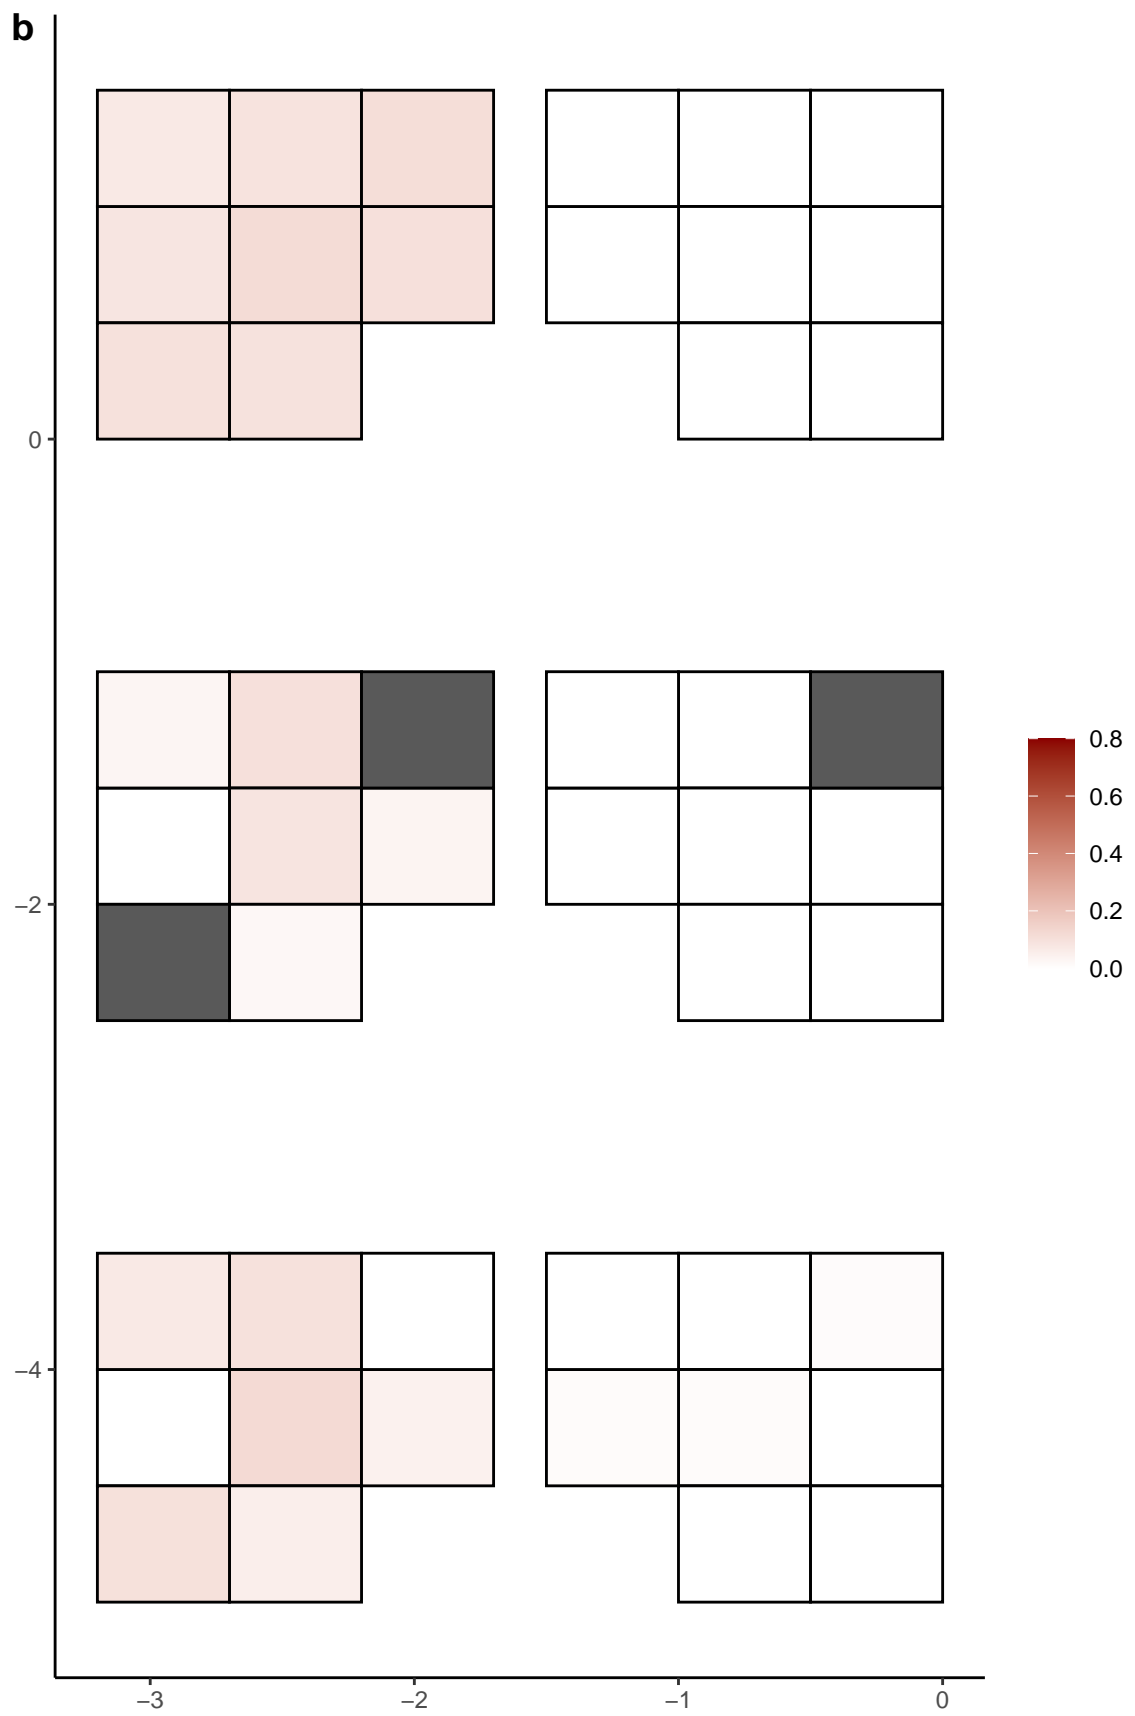

**a** ID05 1-66719051-G-A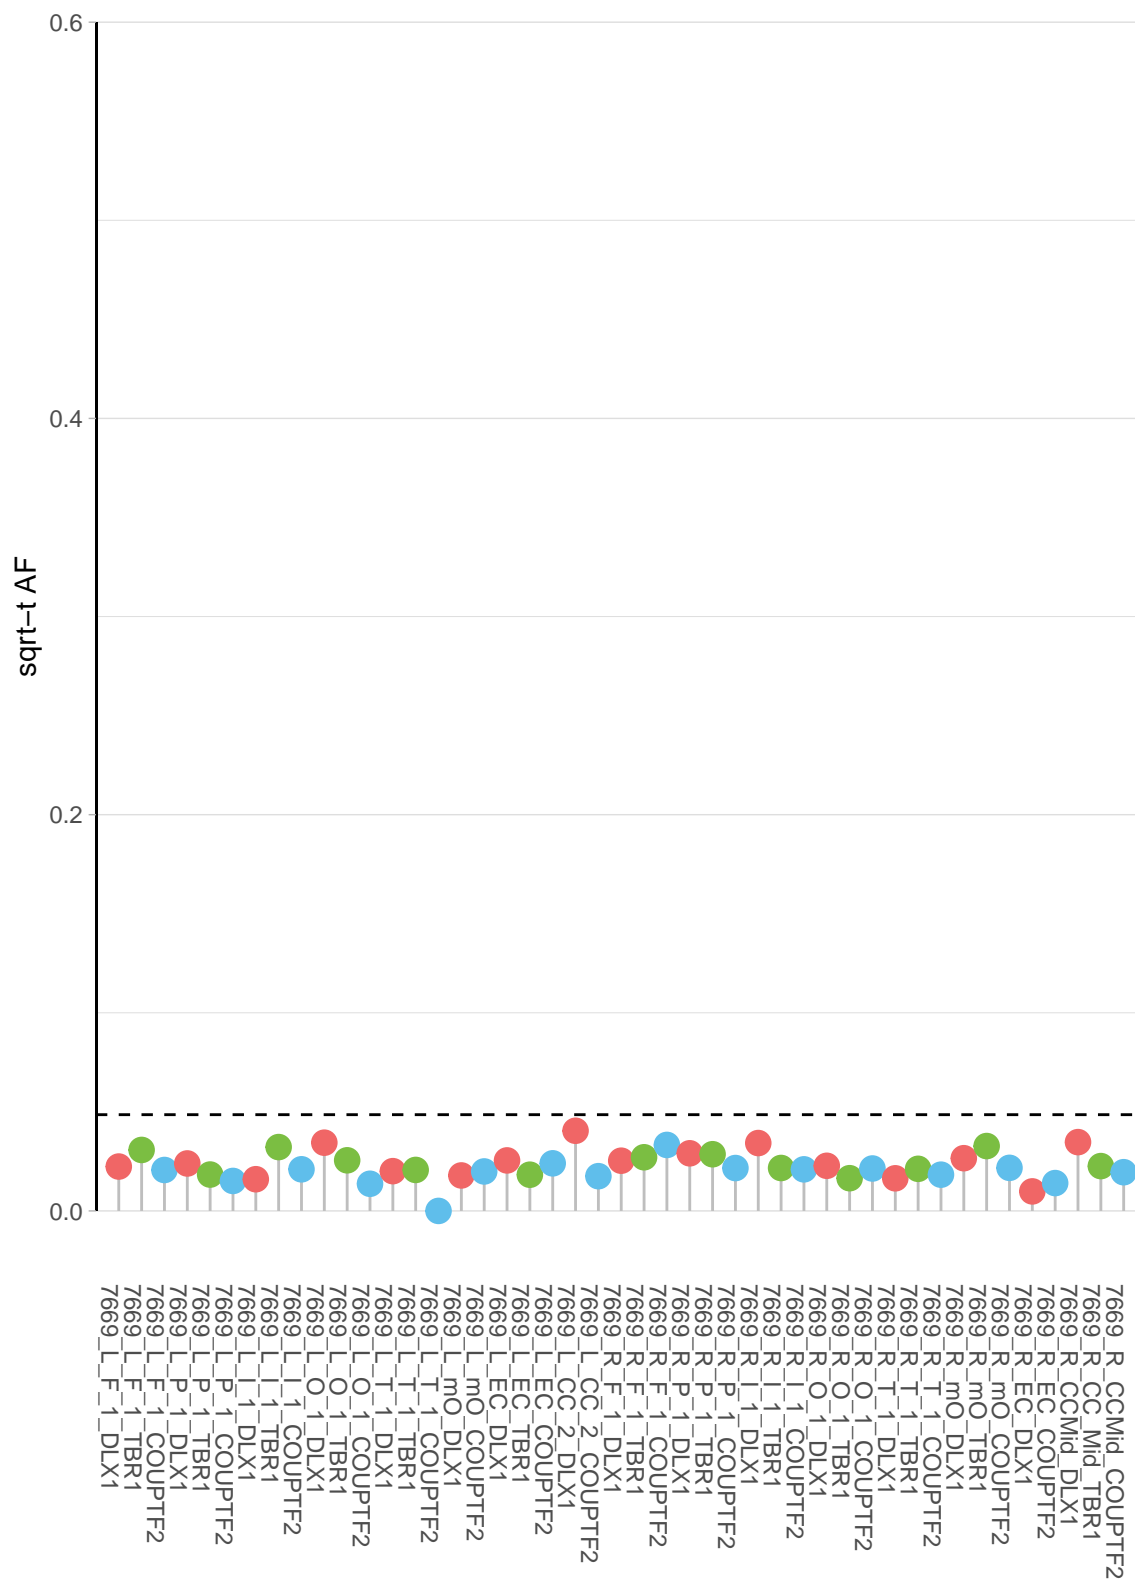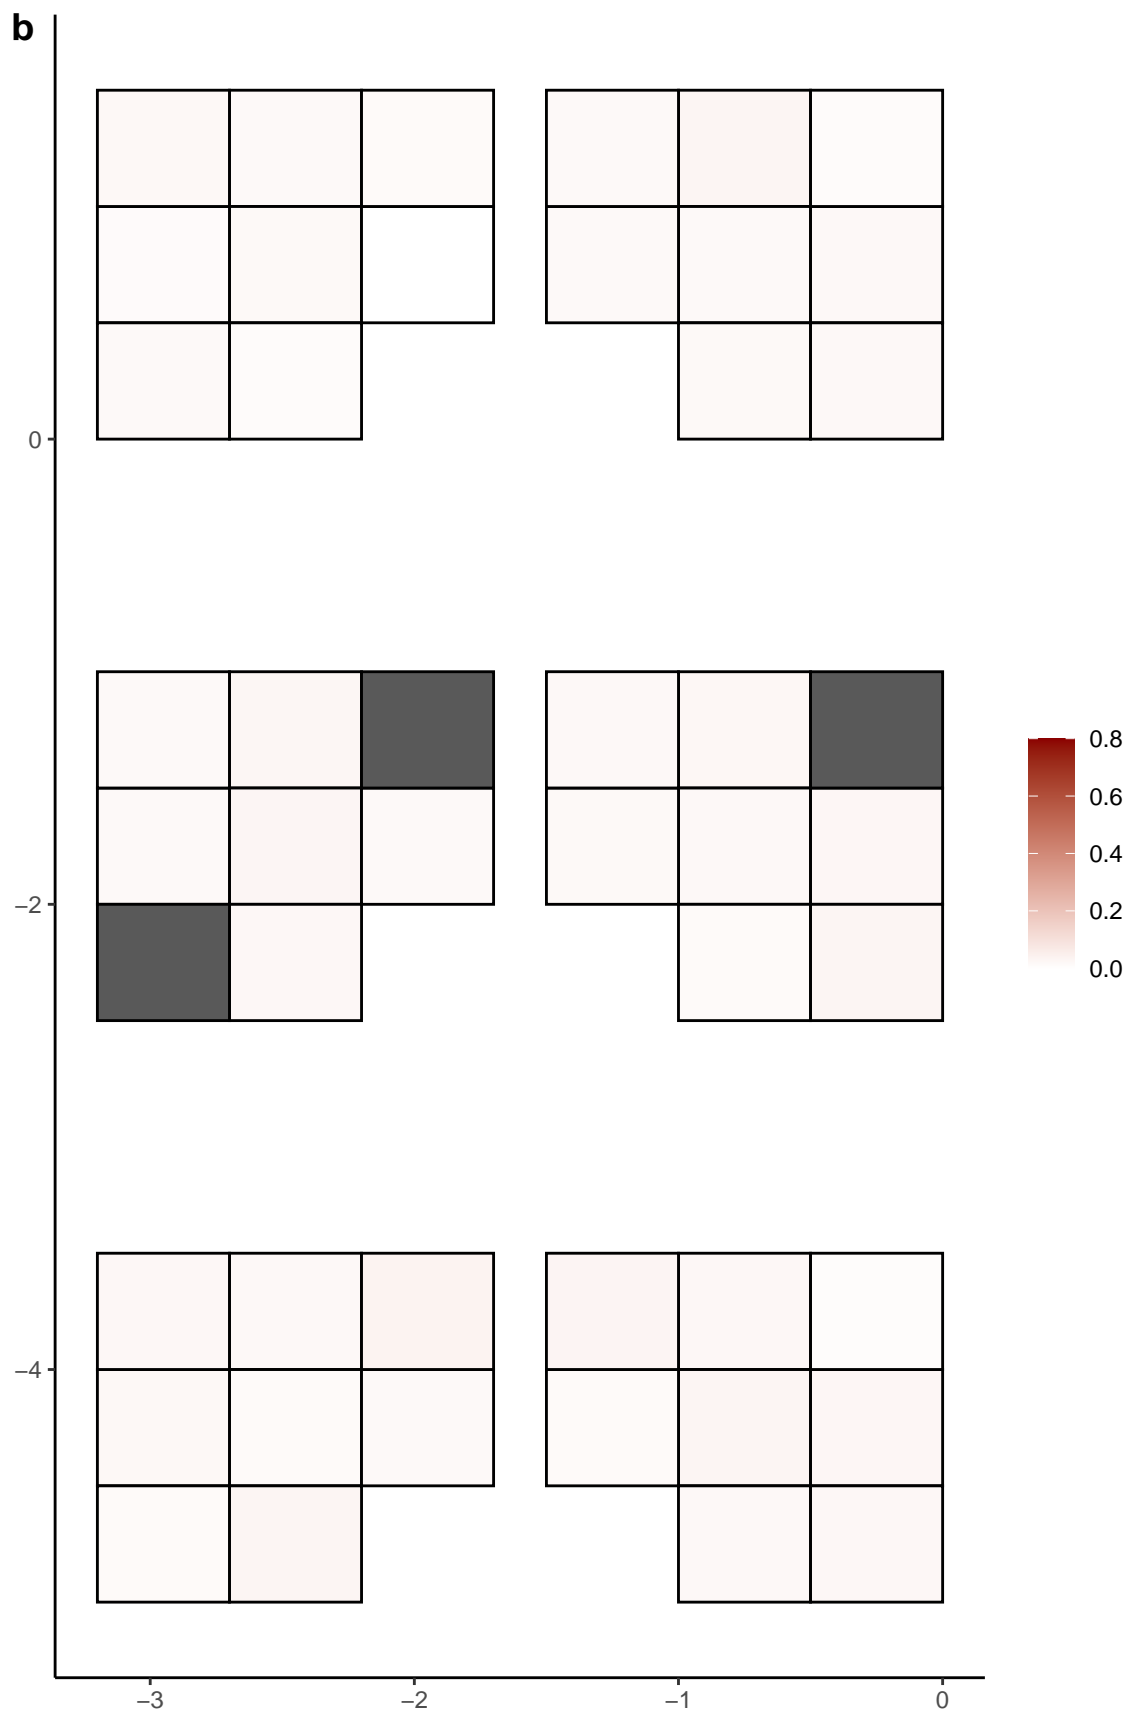

**a** ID05 1-67722227-C-A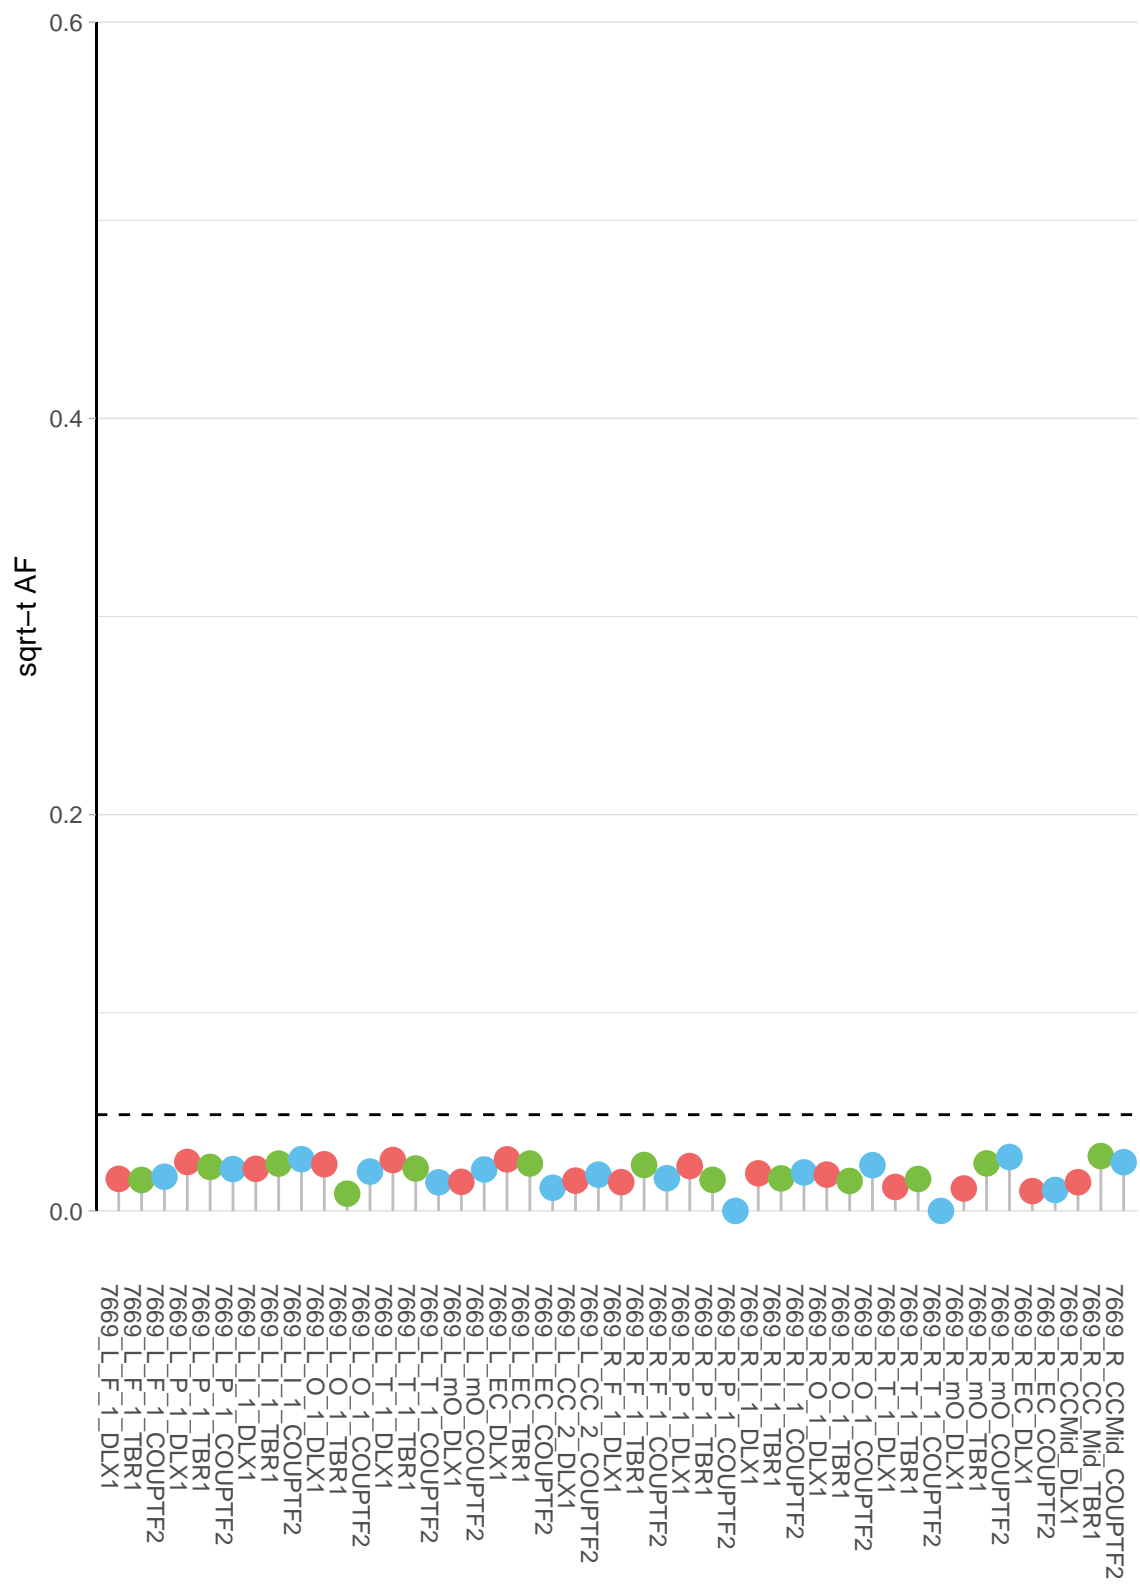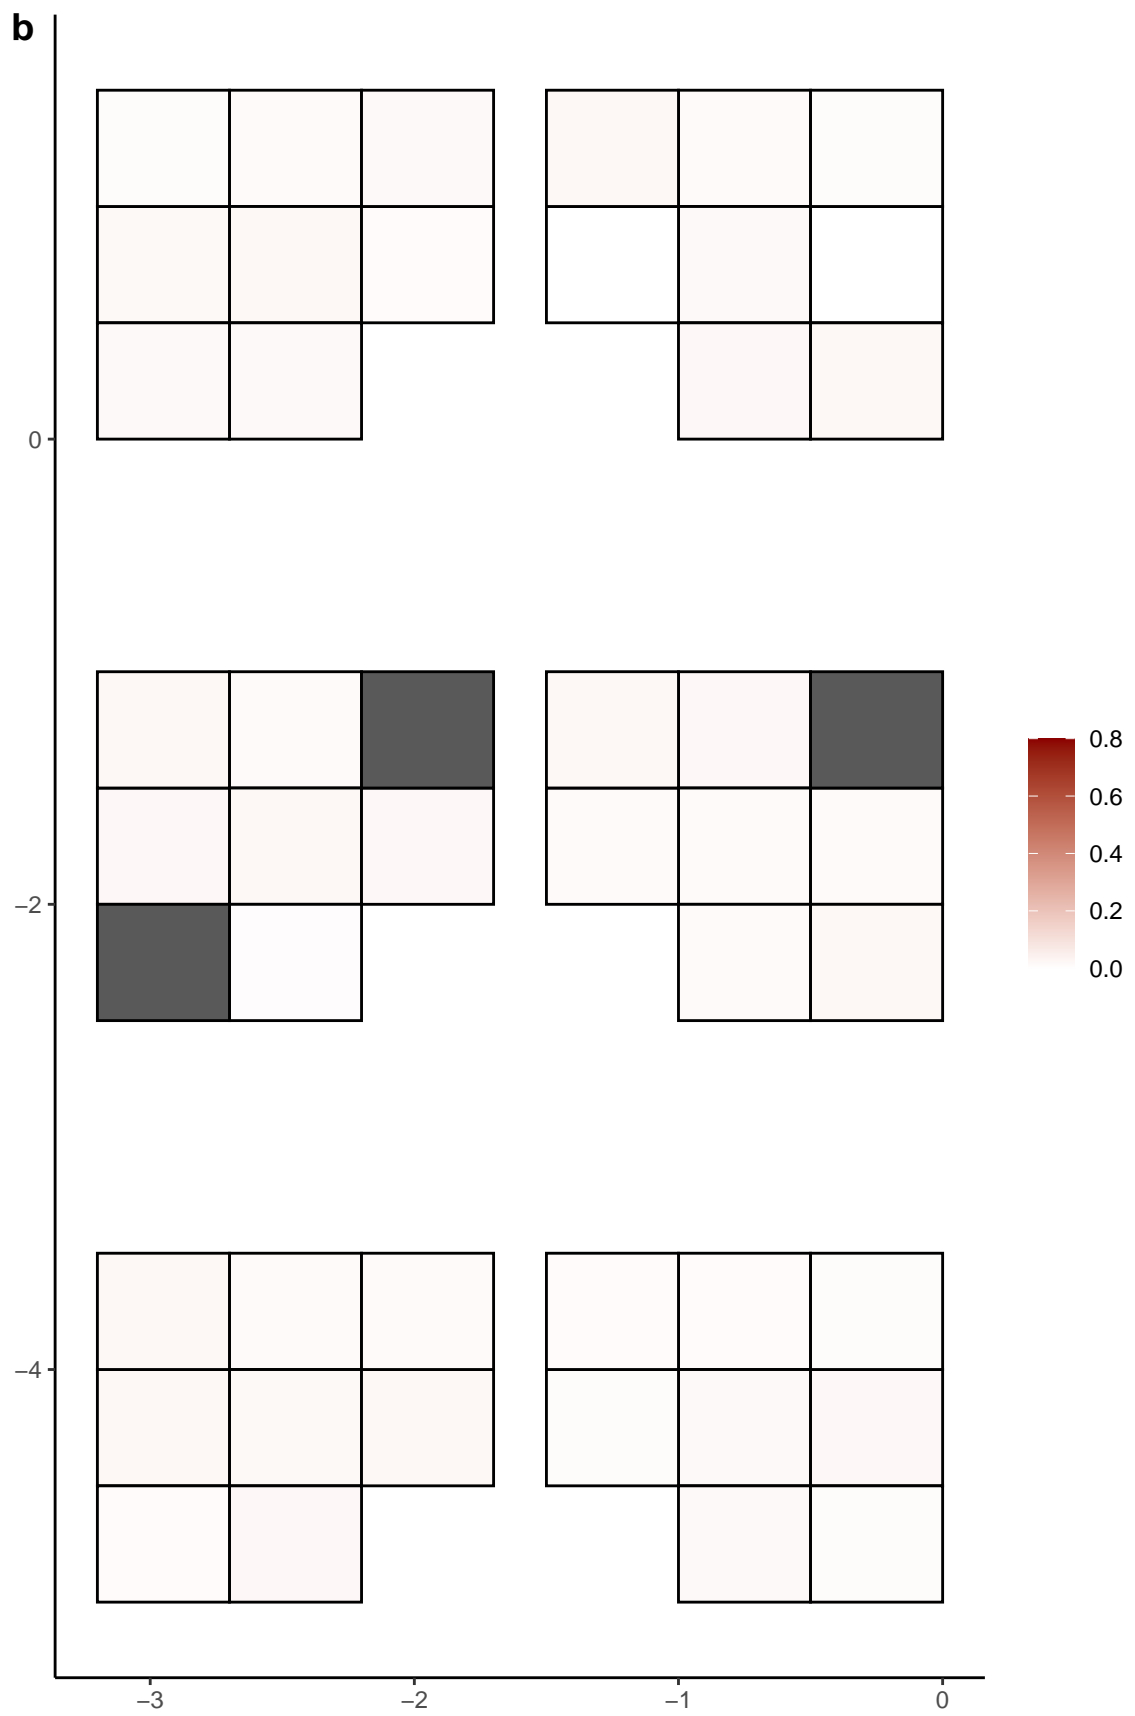

**a** ID05 1-72003630-G-T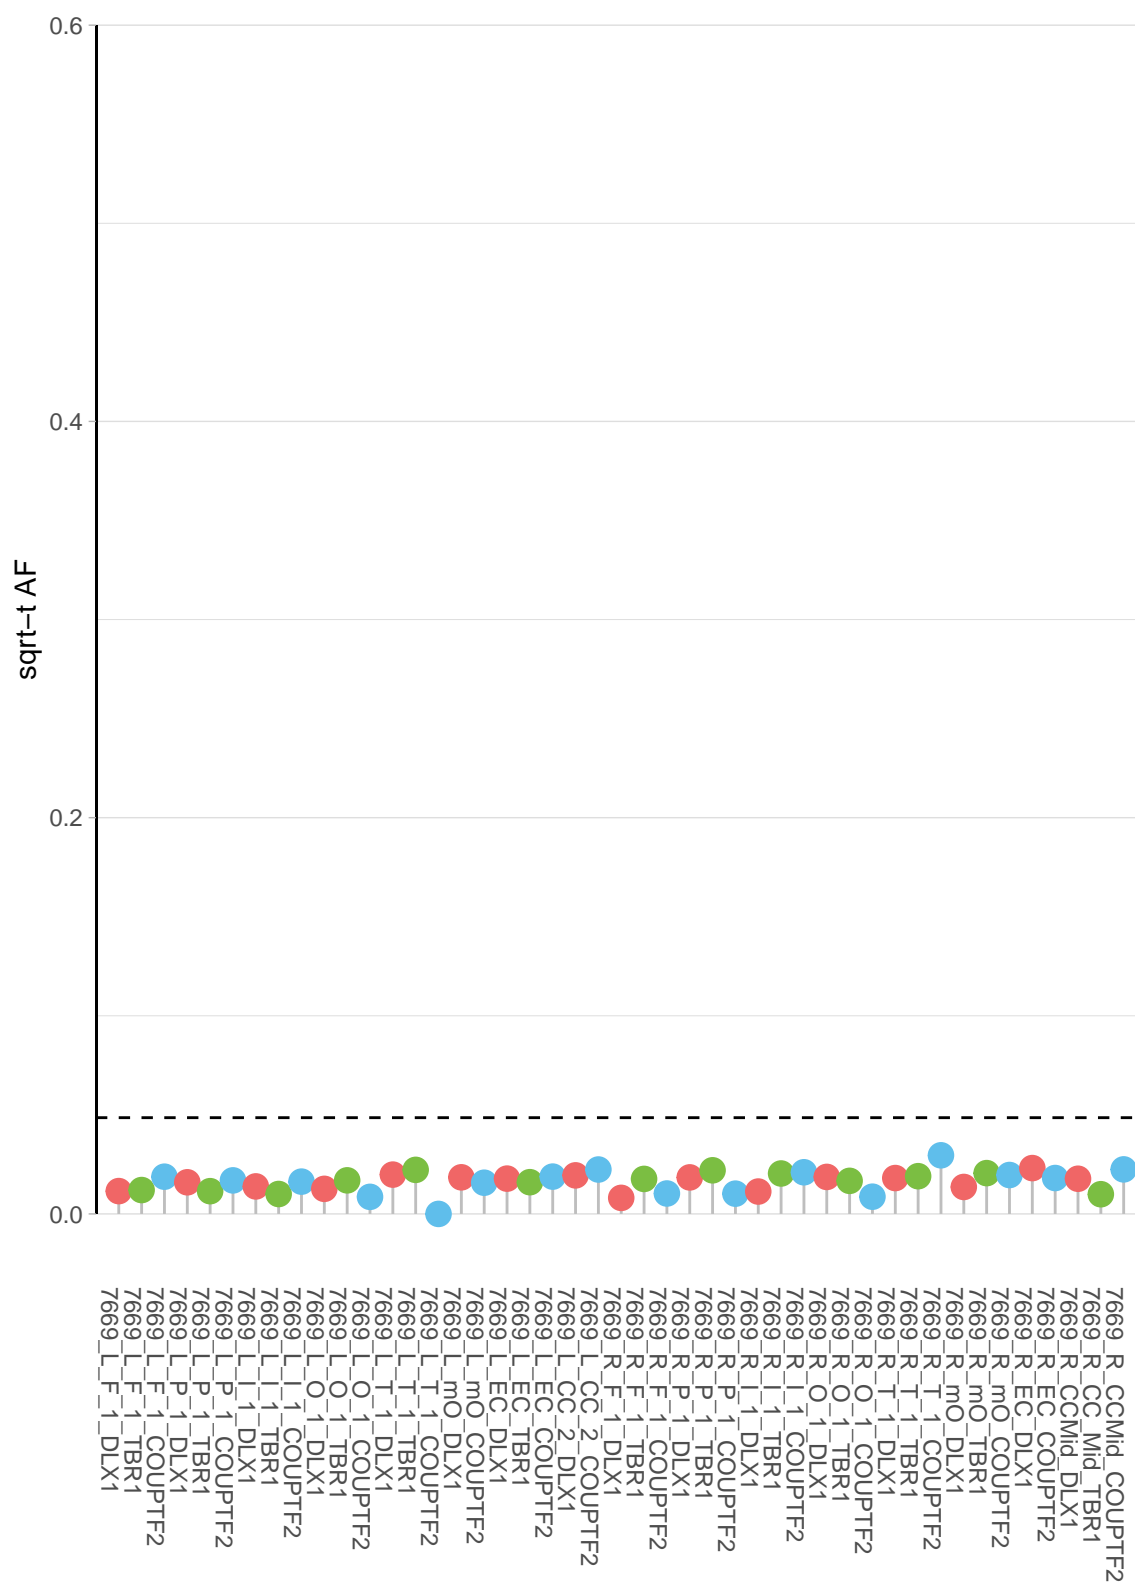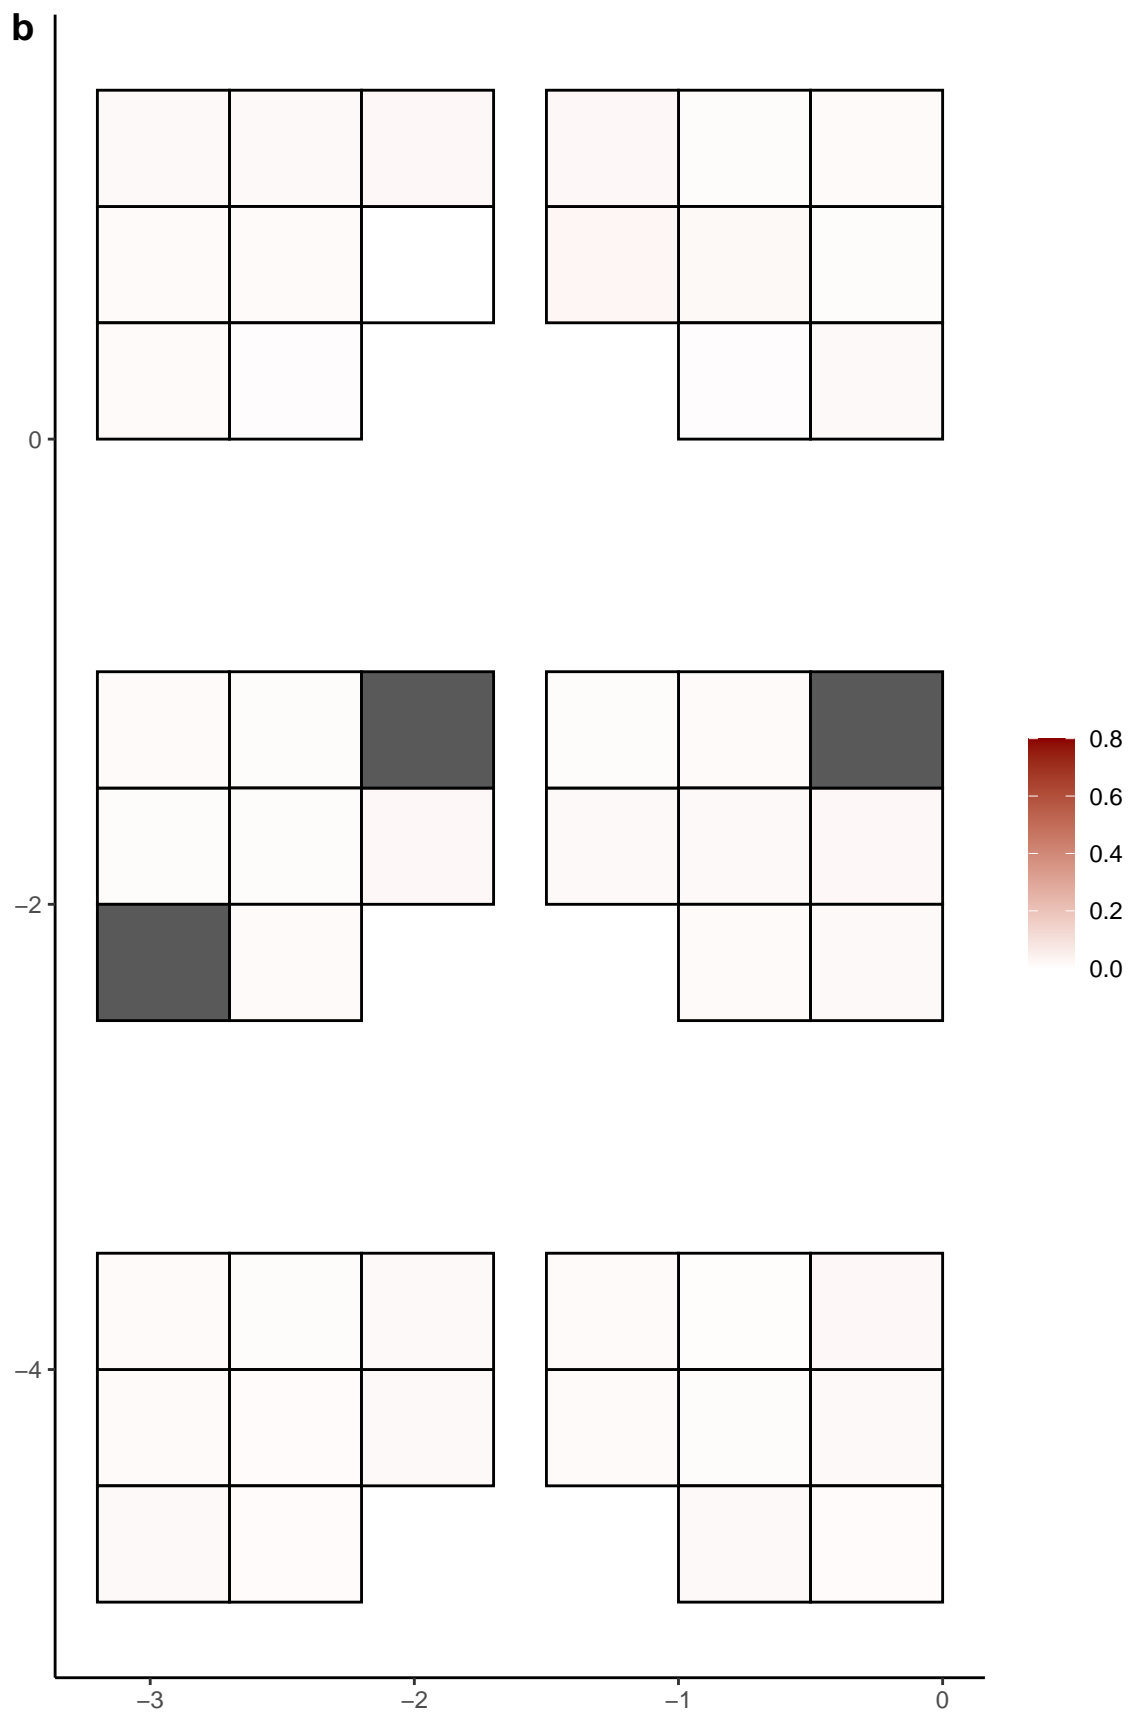





**a** ID05 1-79102619-G-A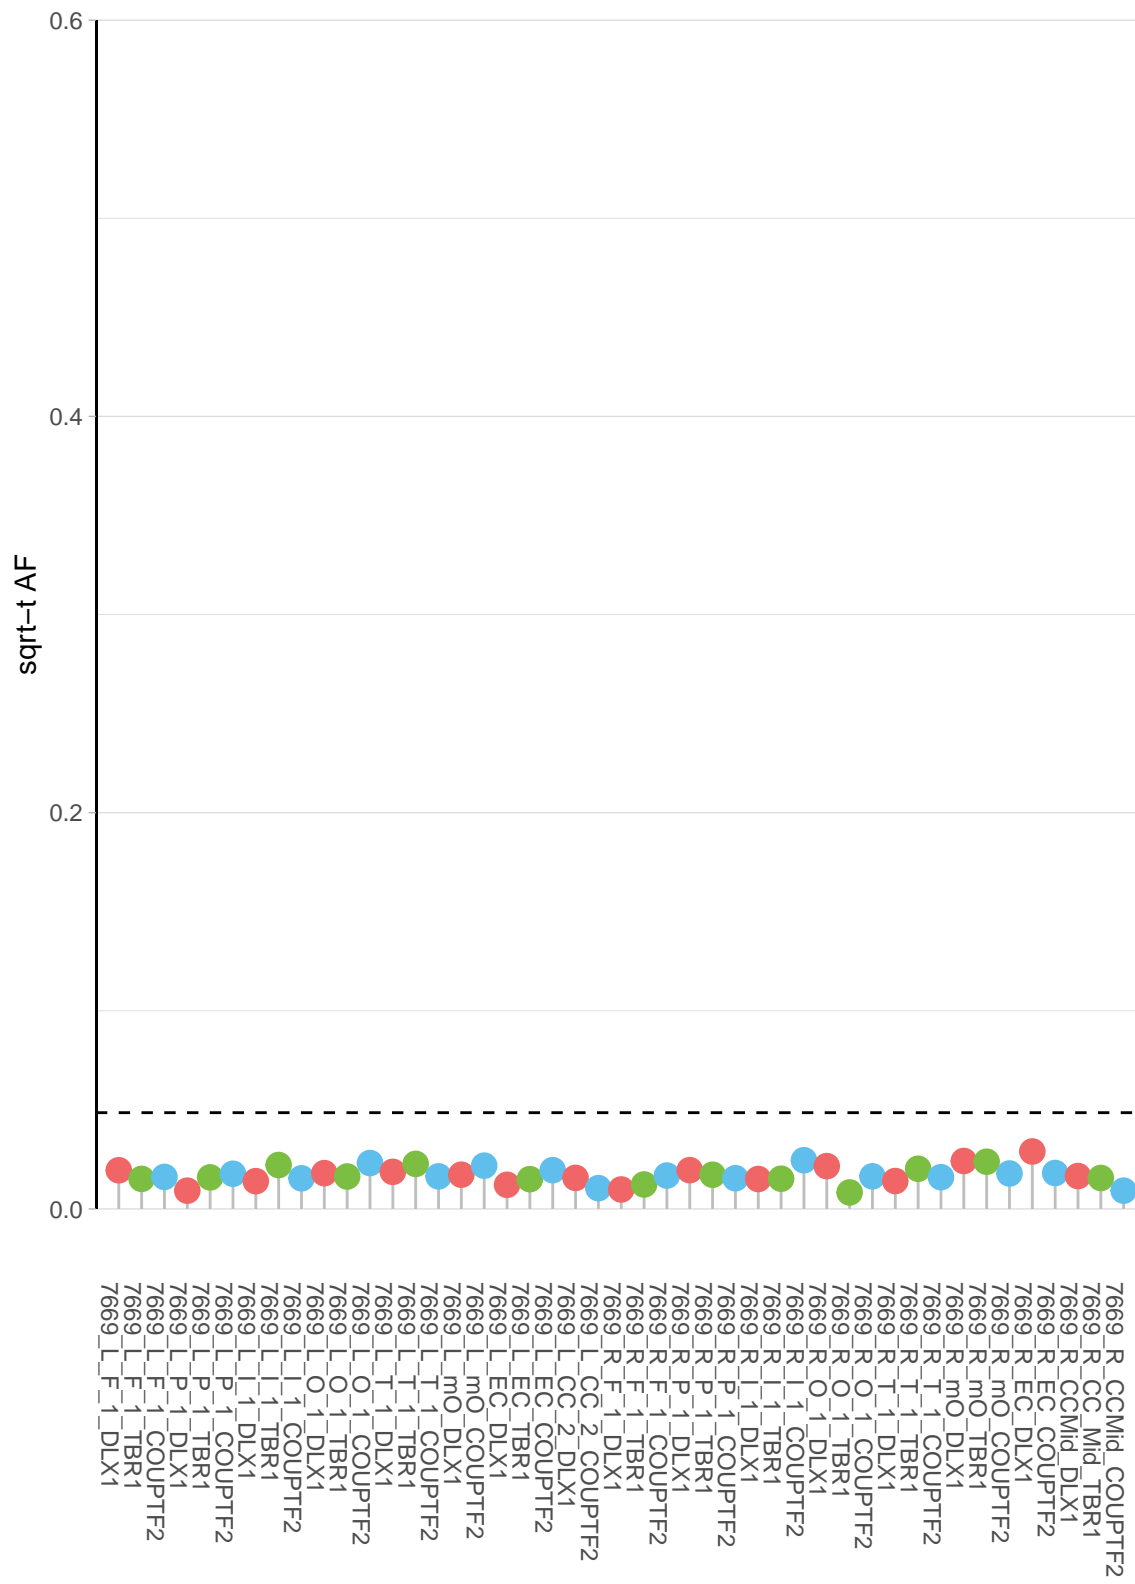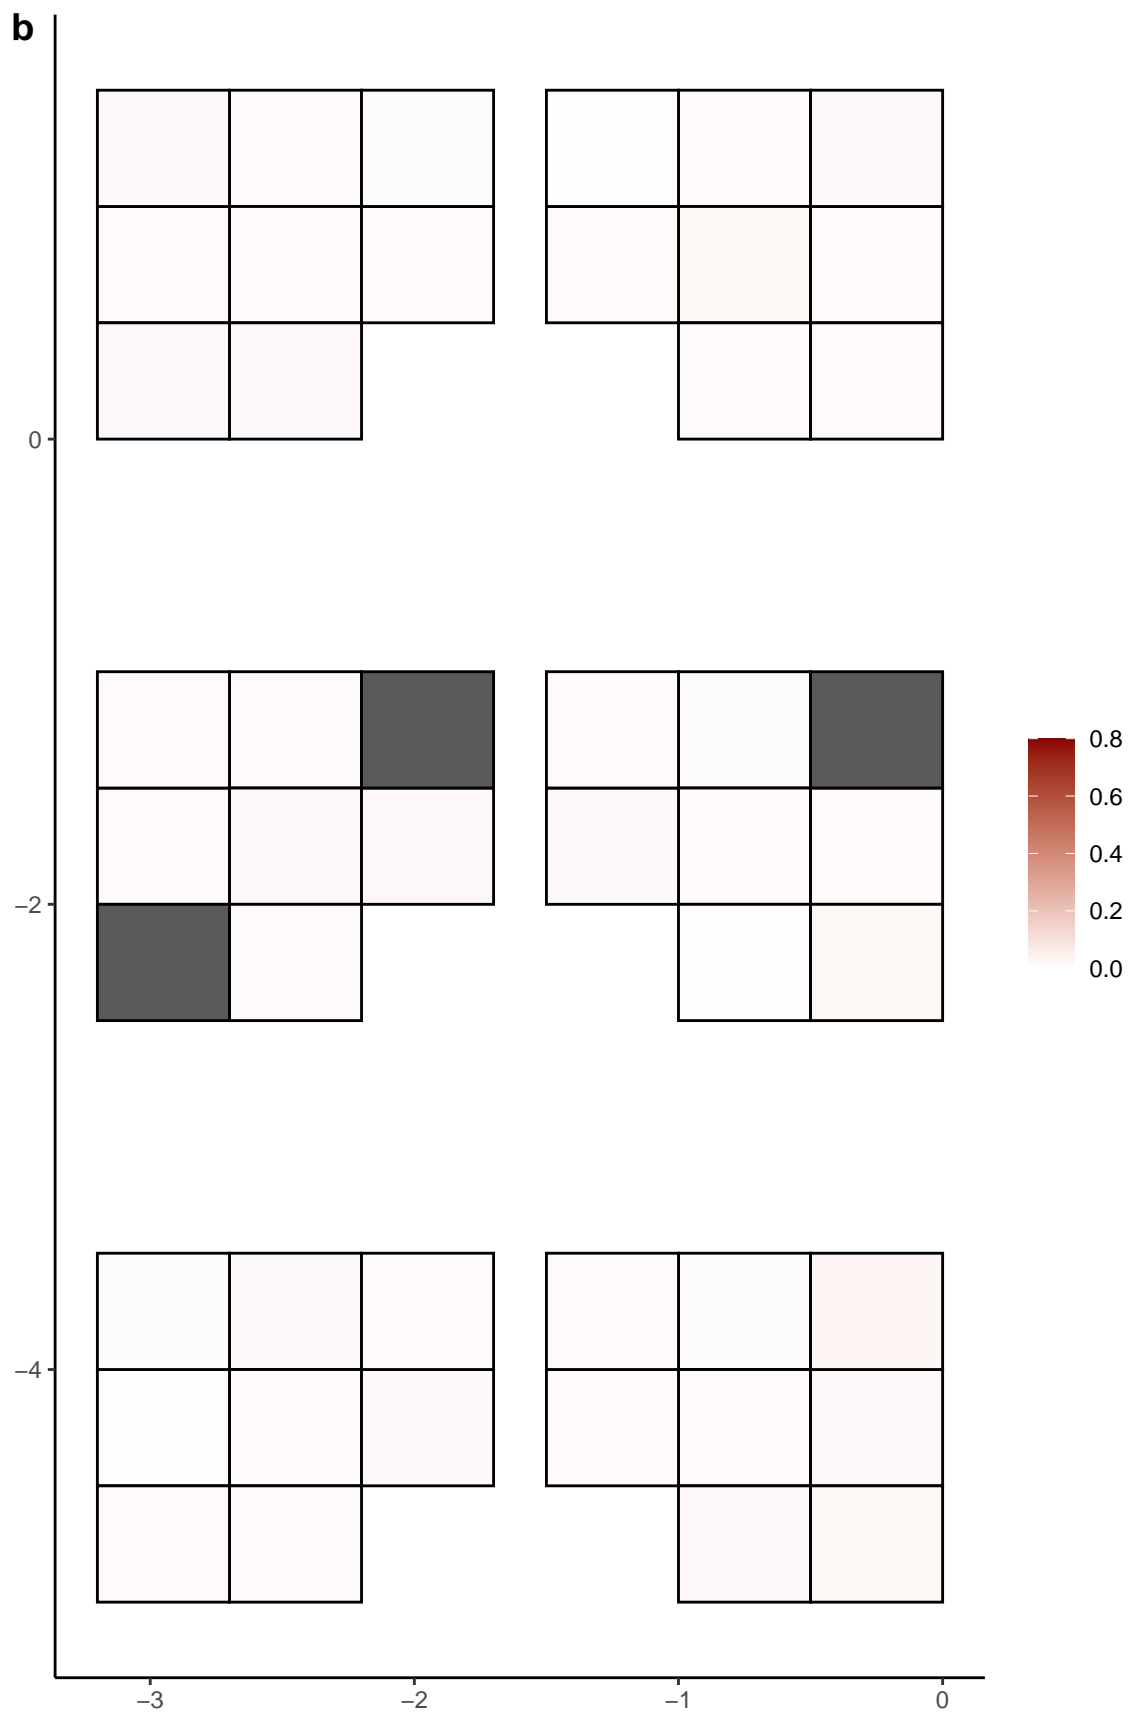



**a** ID05 1-9049289-T-C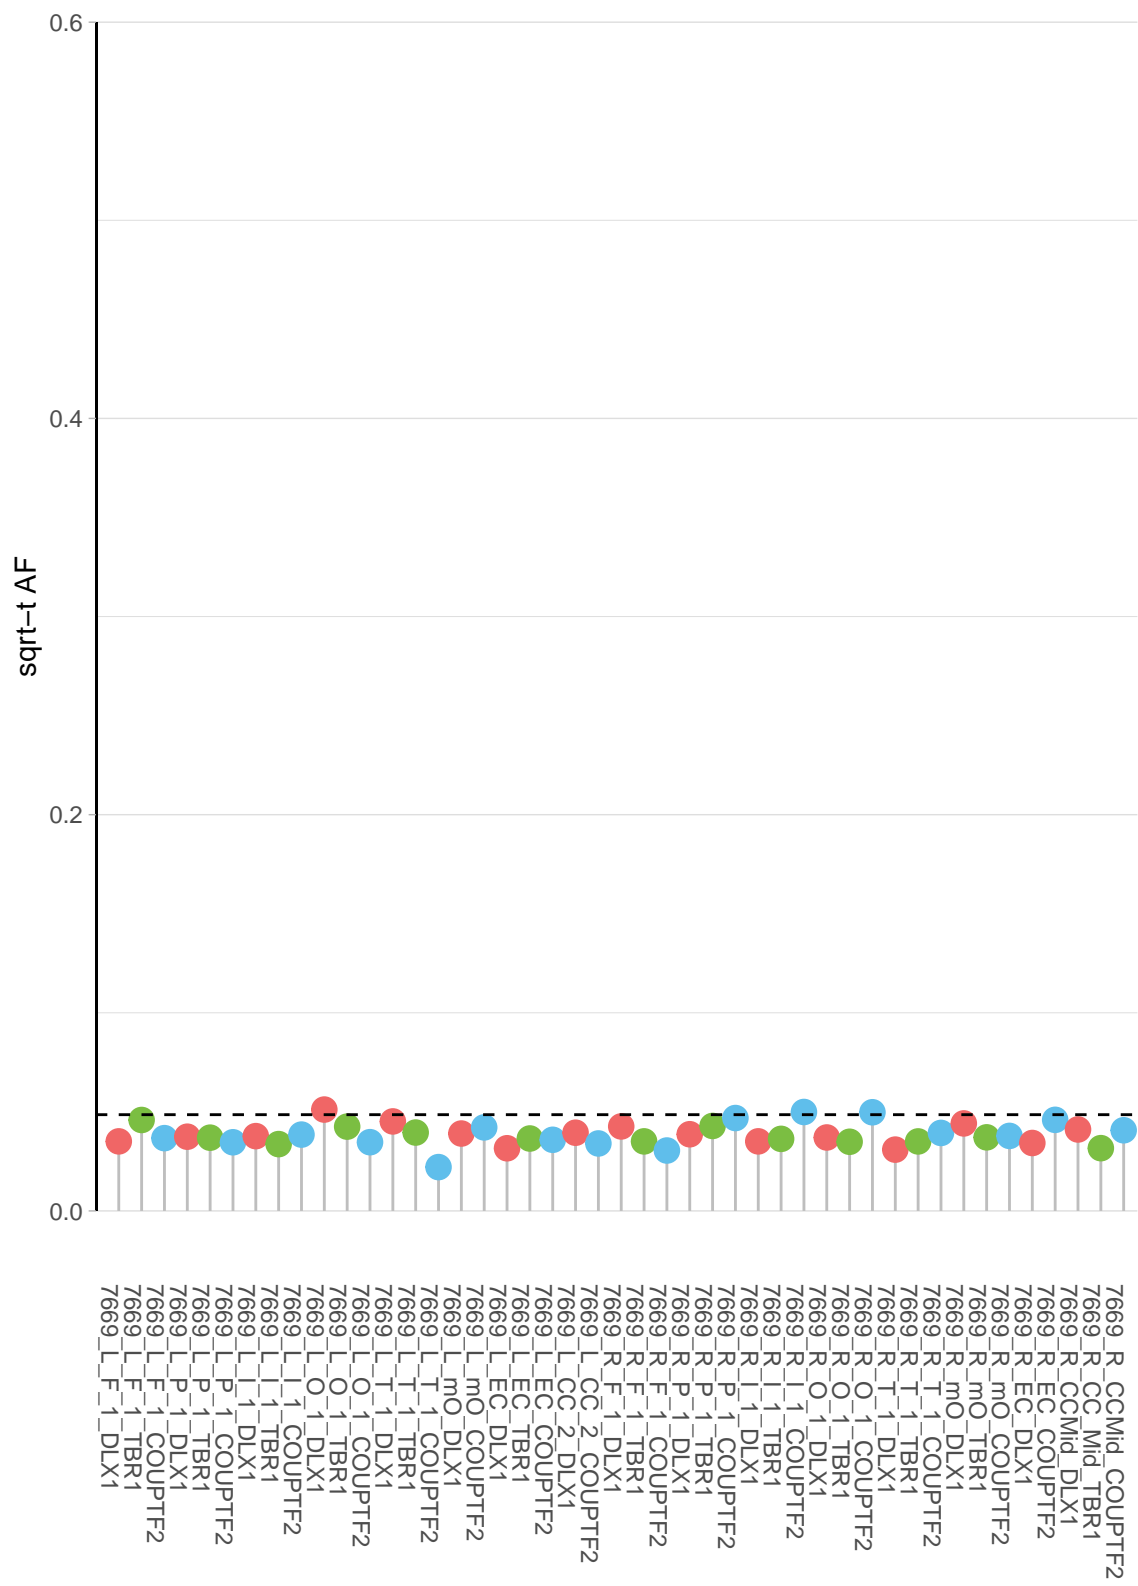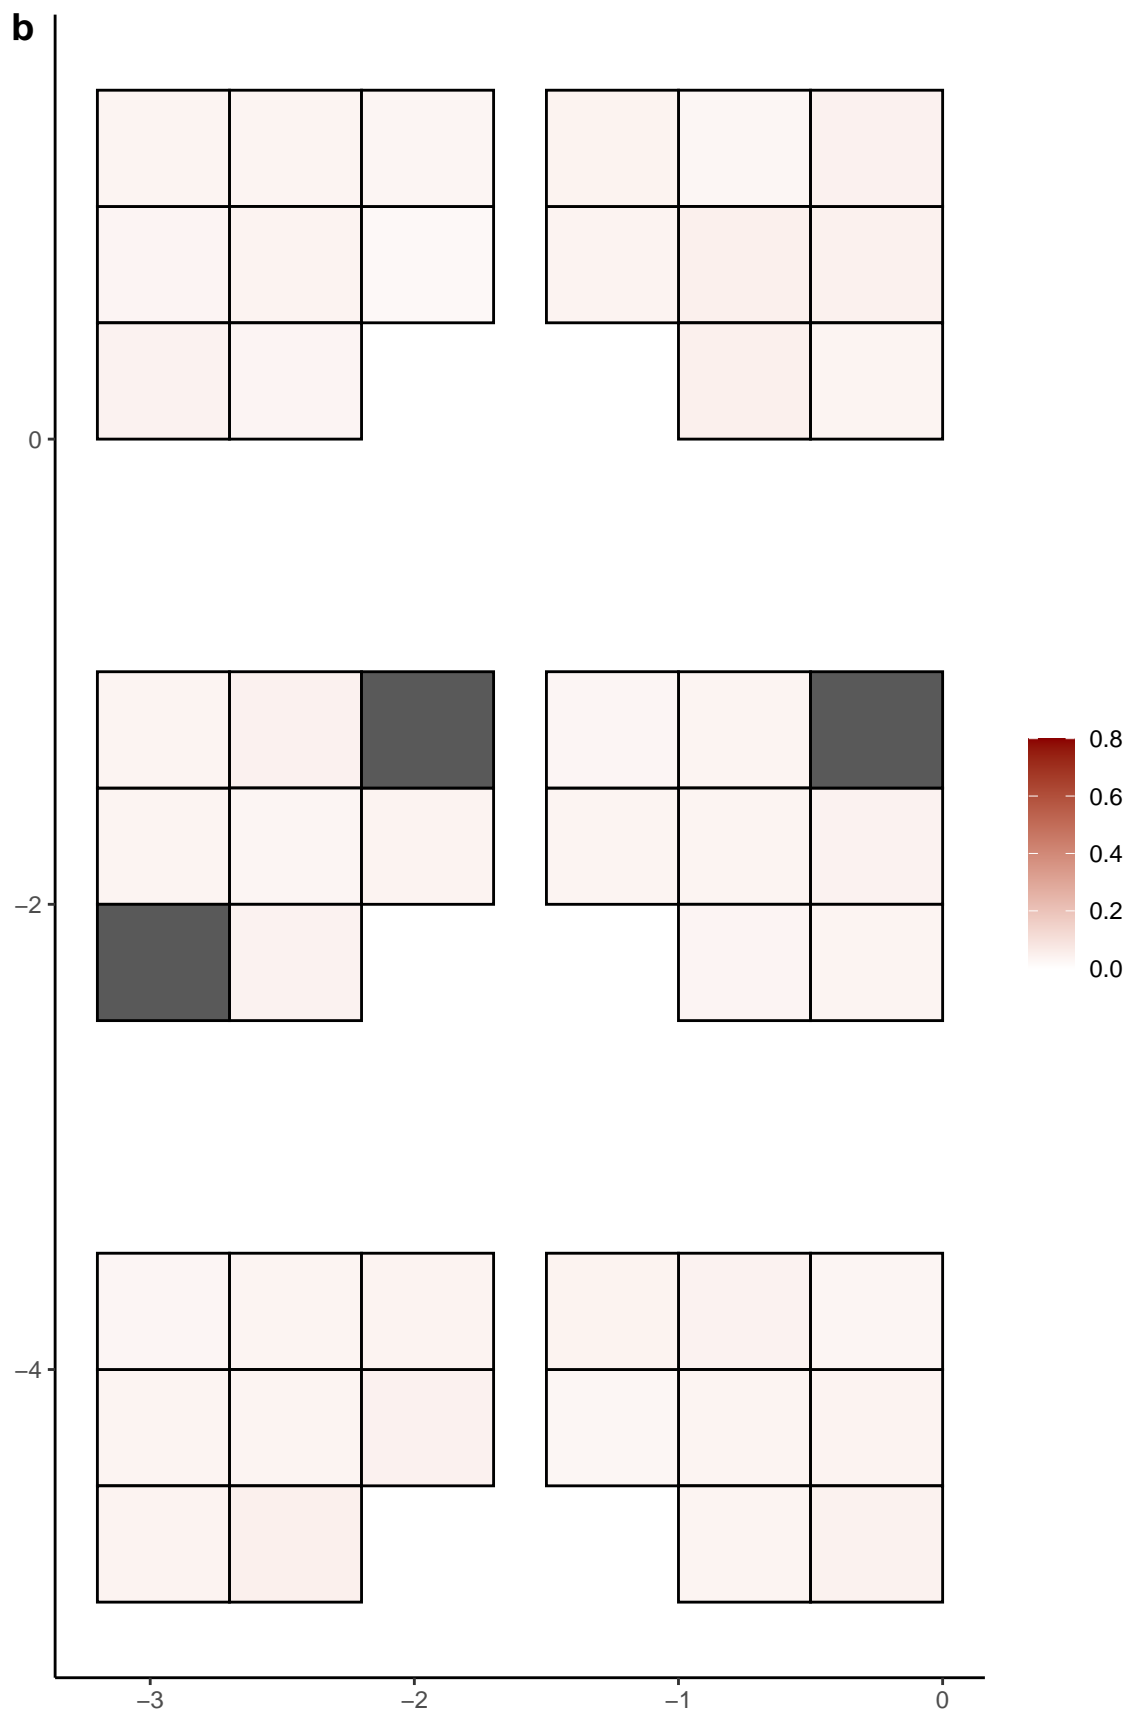

**a** ID05 1-93387994-G-A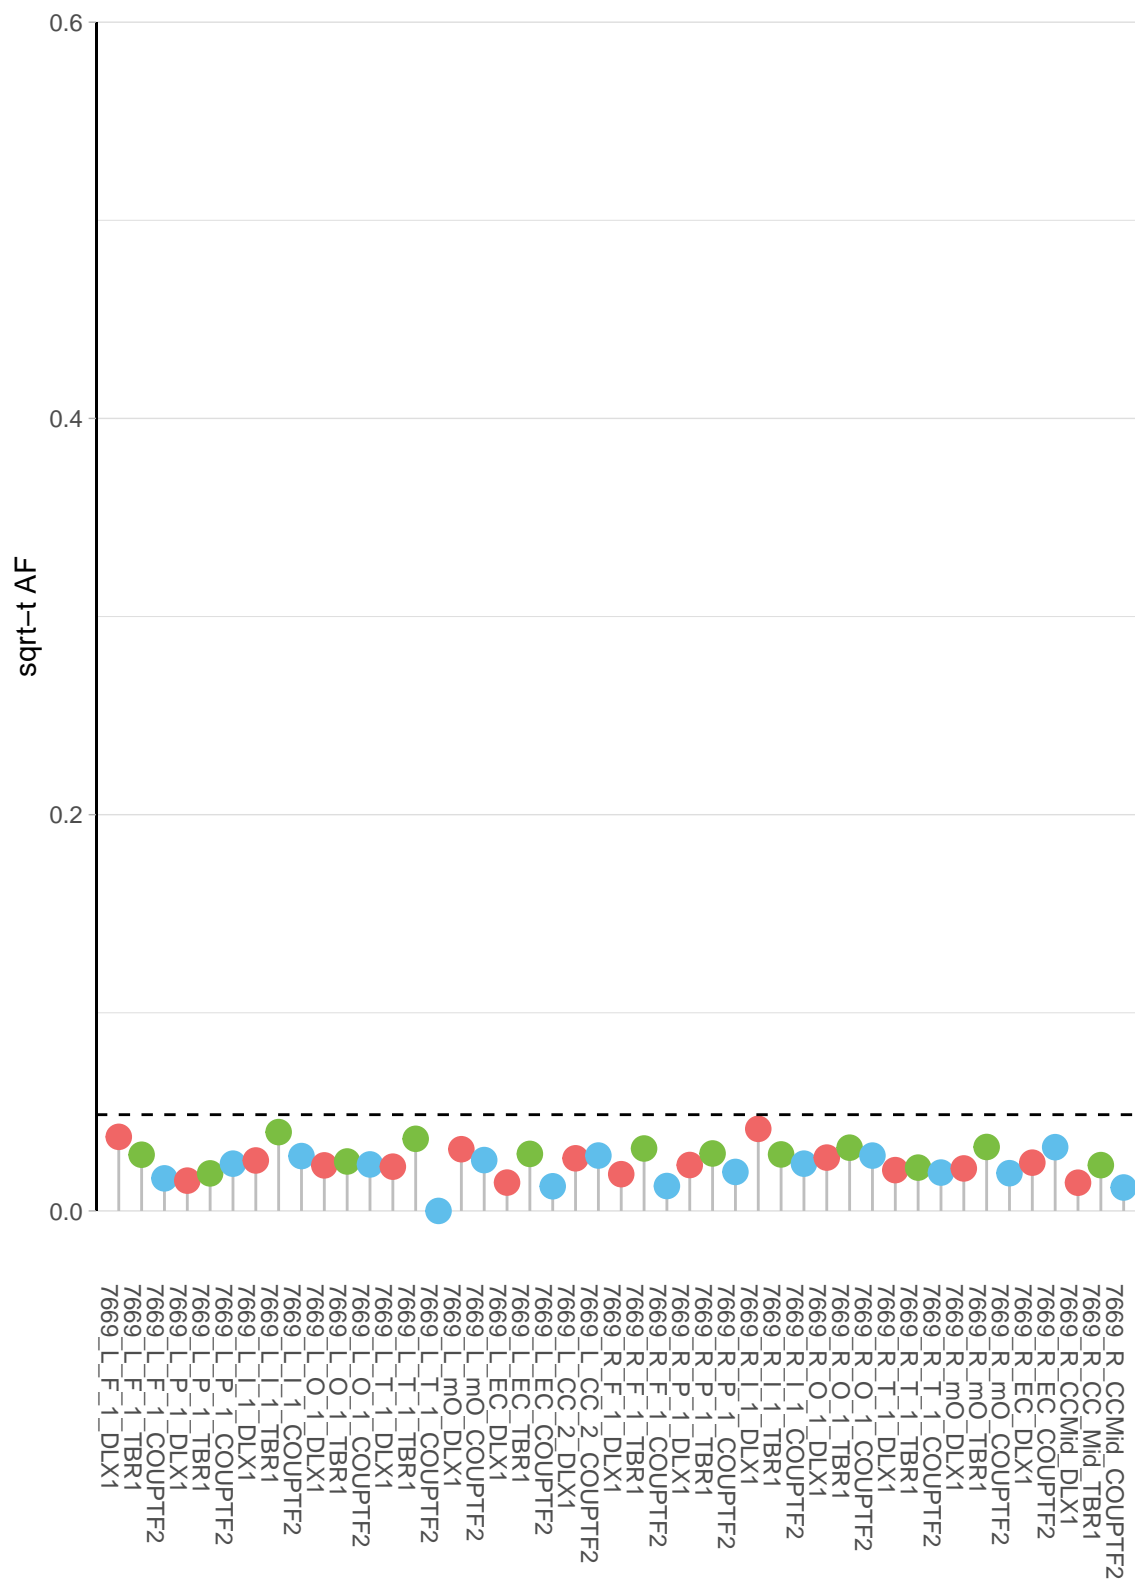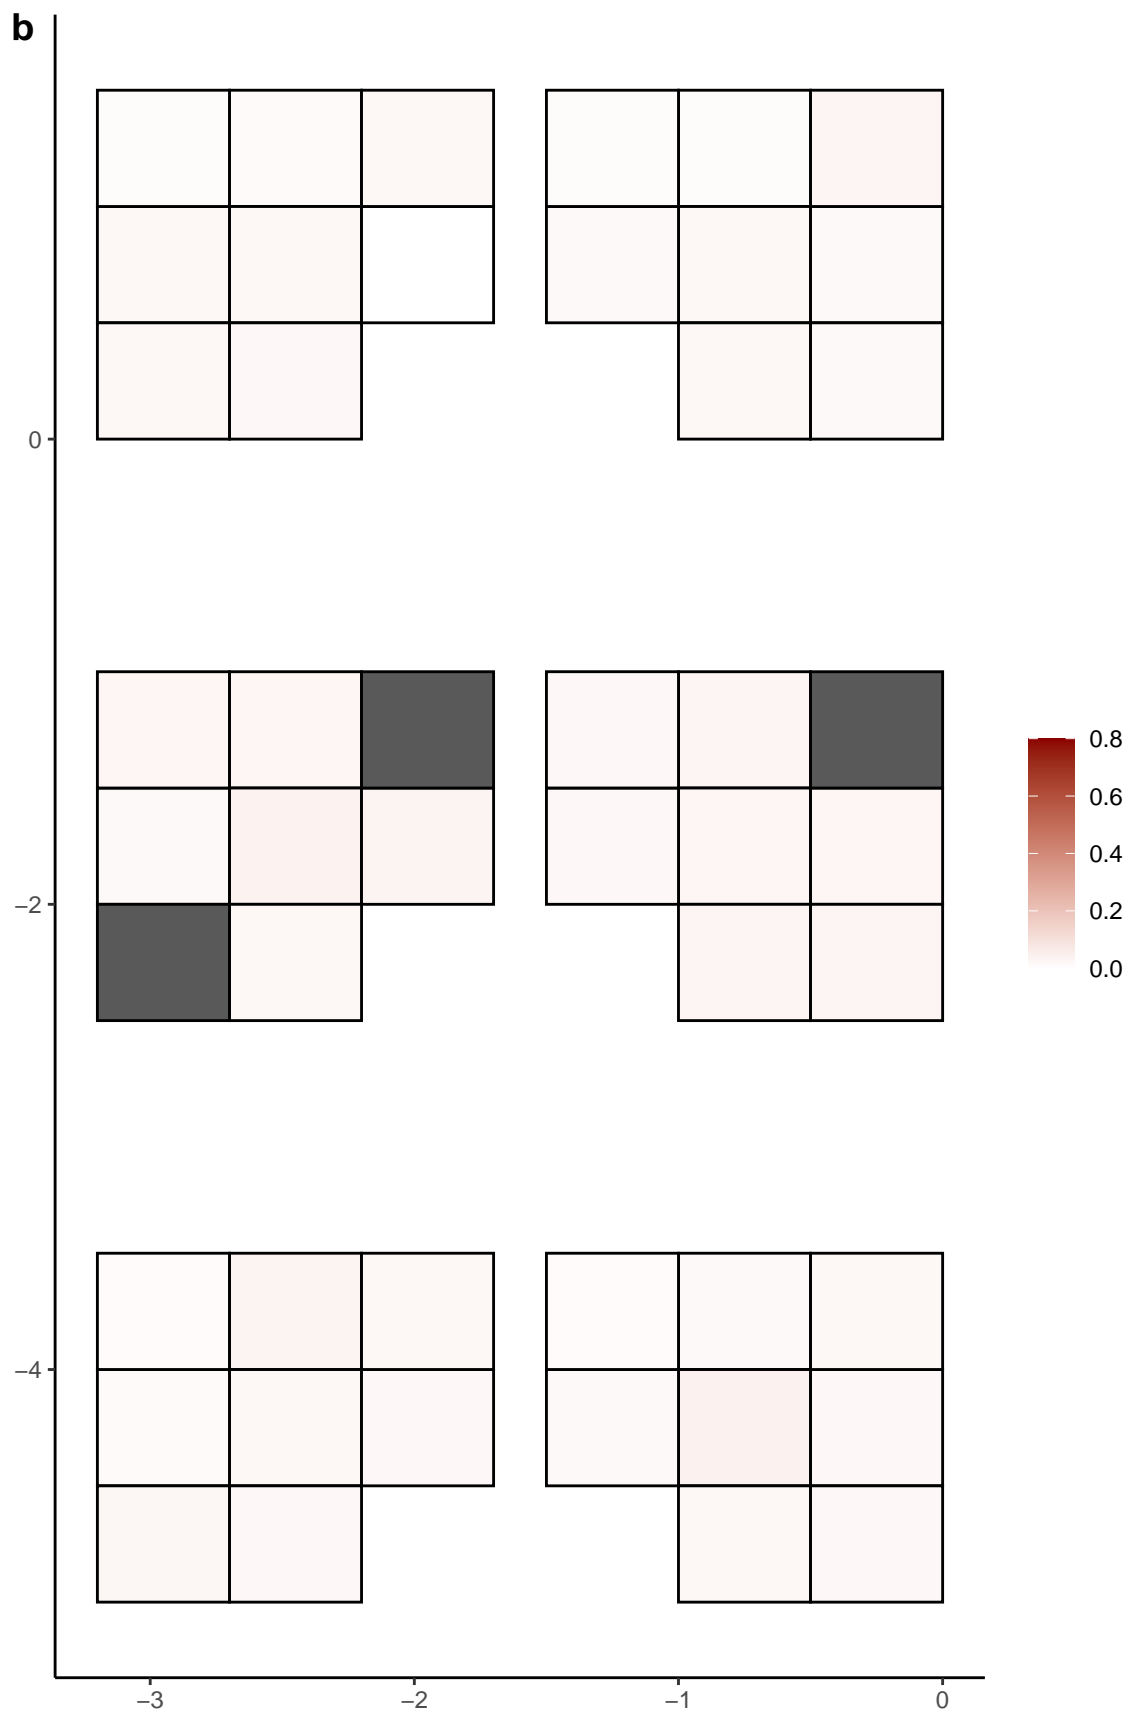

**a** ID05 1-94219312-G-A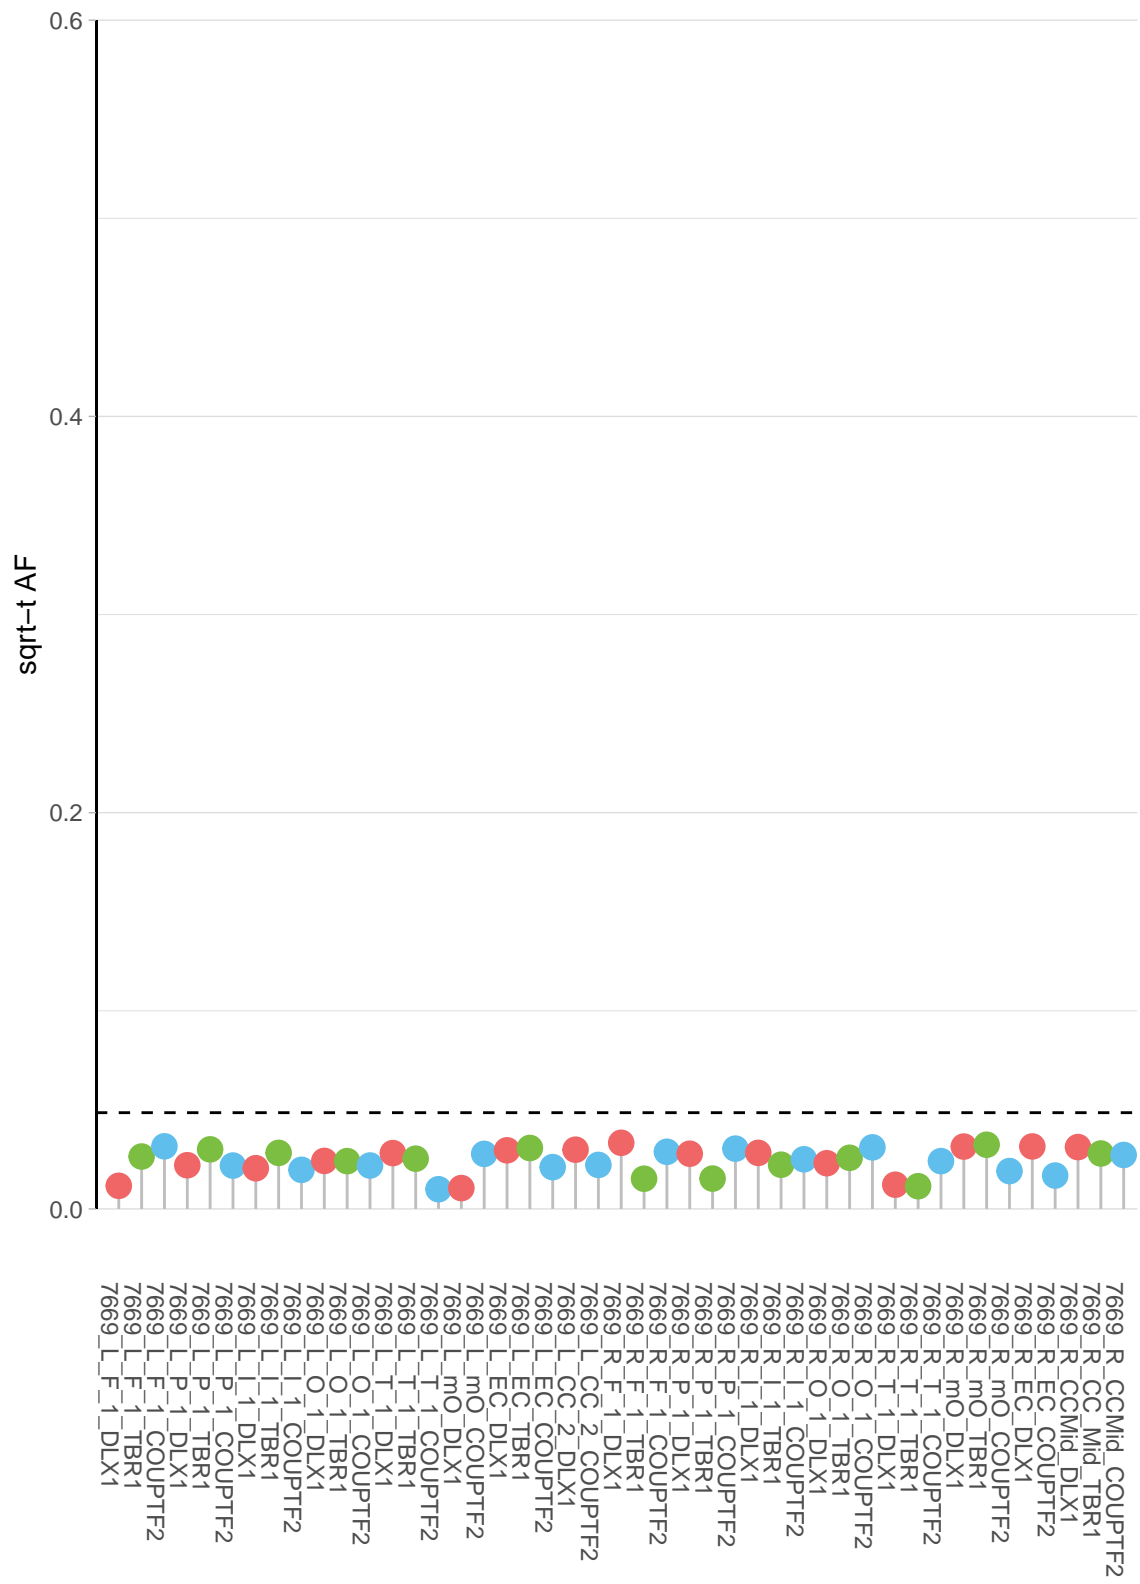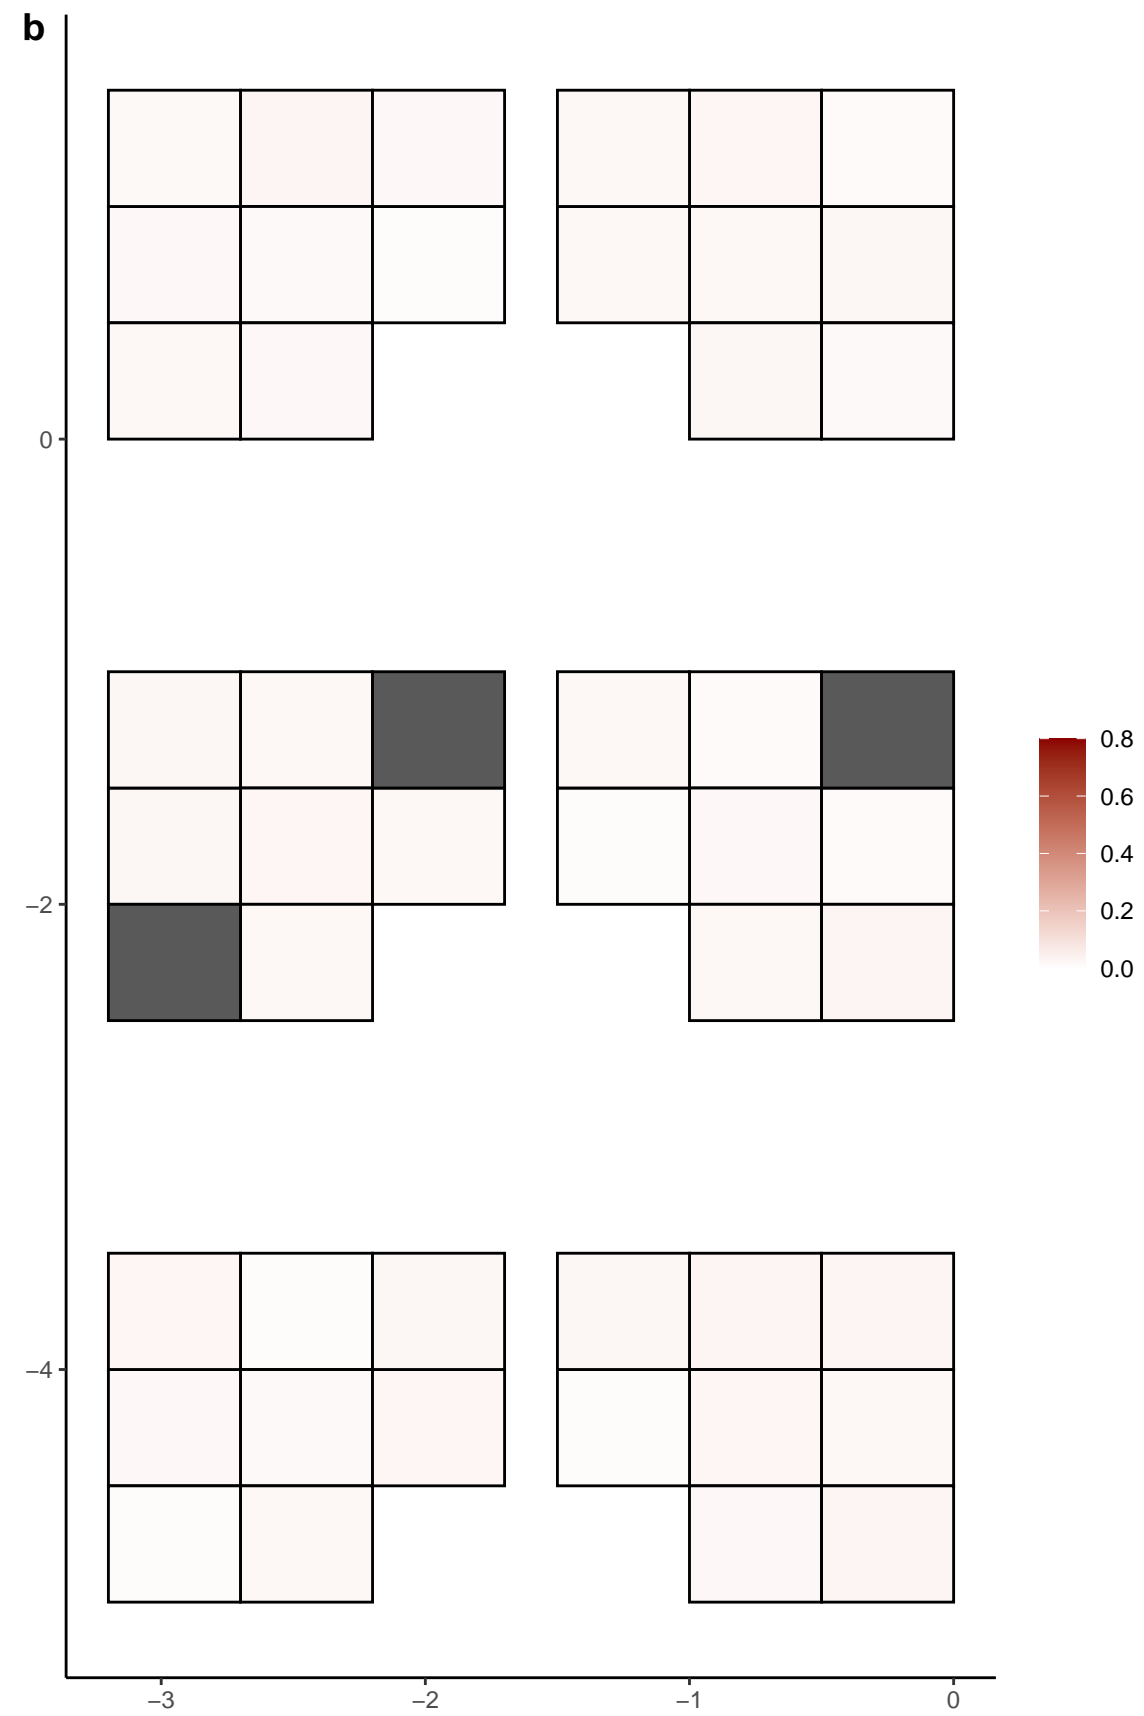

**a** ID05 1-9516326-C-T

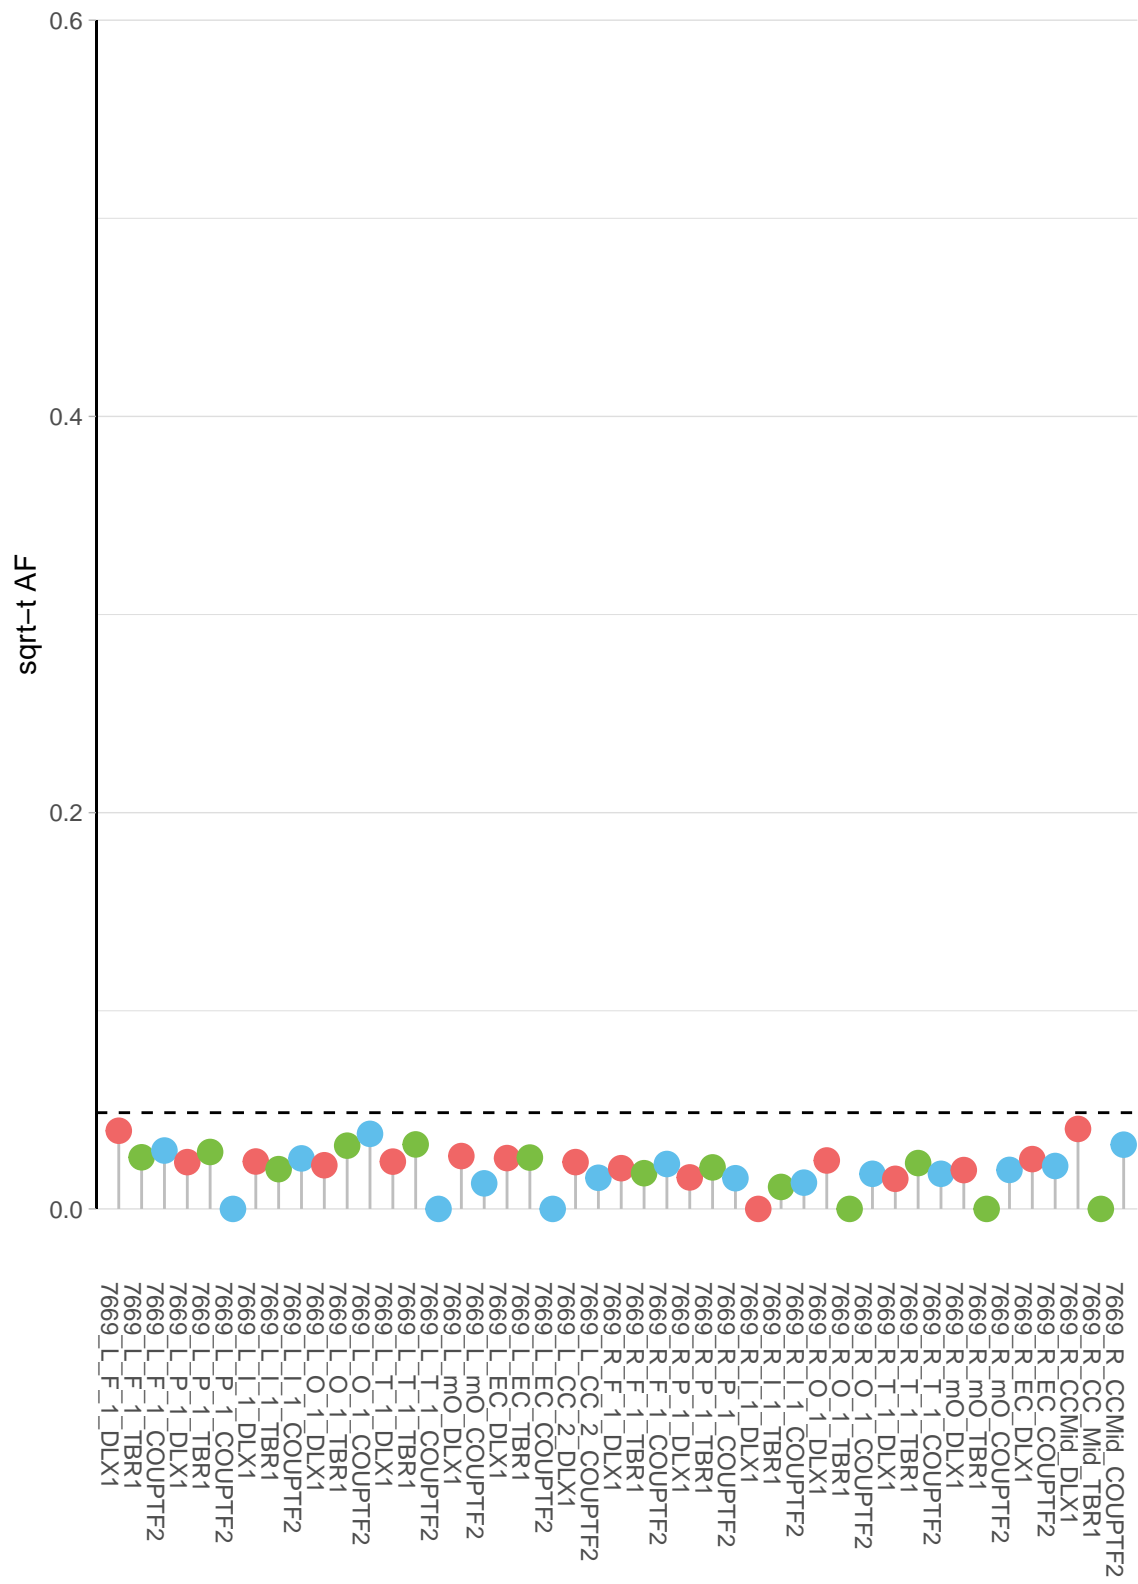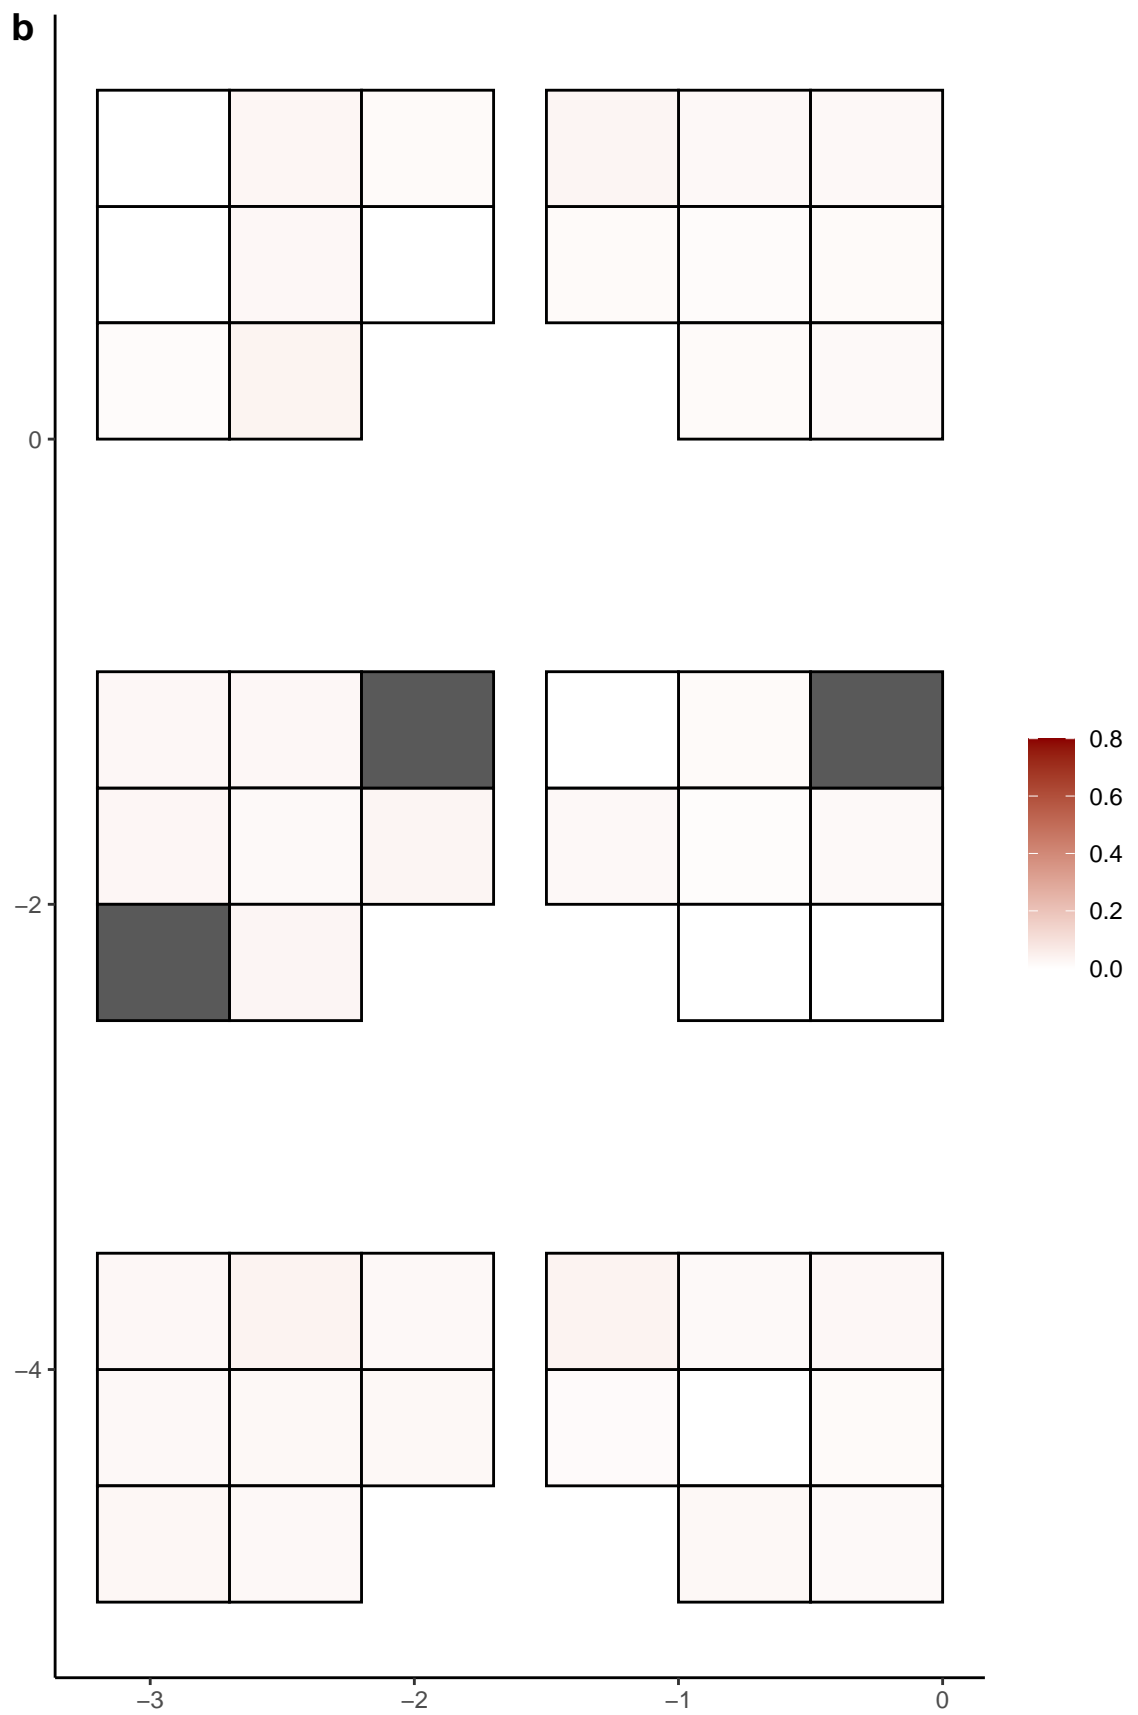







**a** ID05 1-98301896-T-C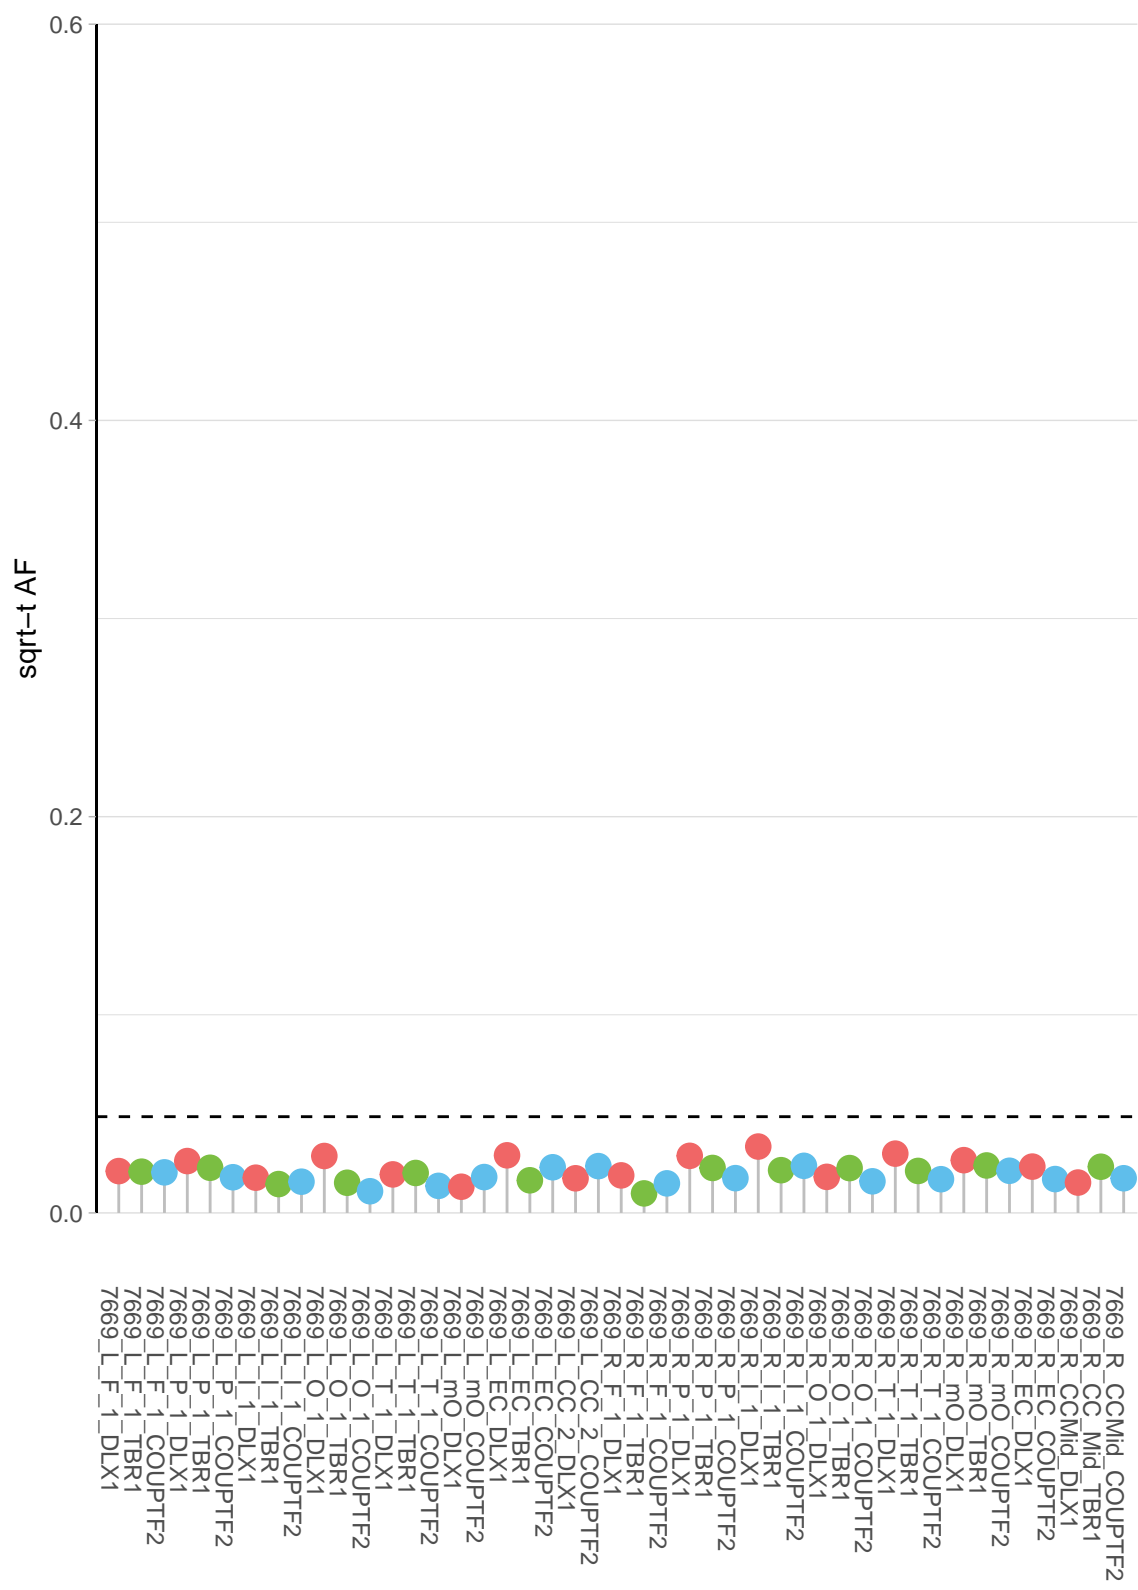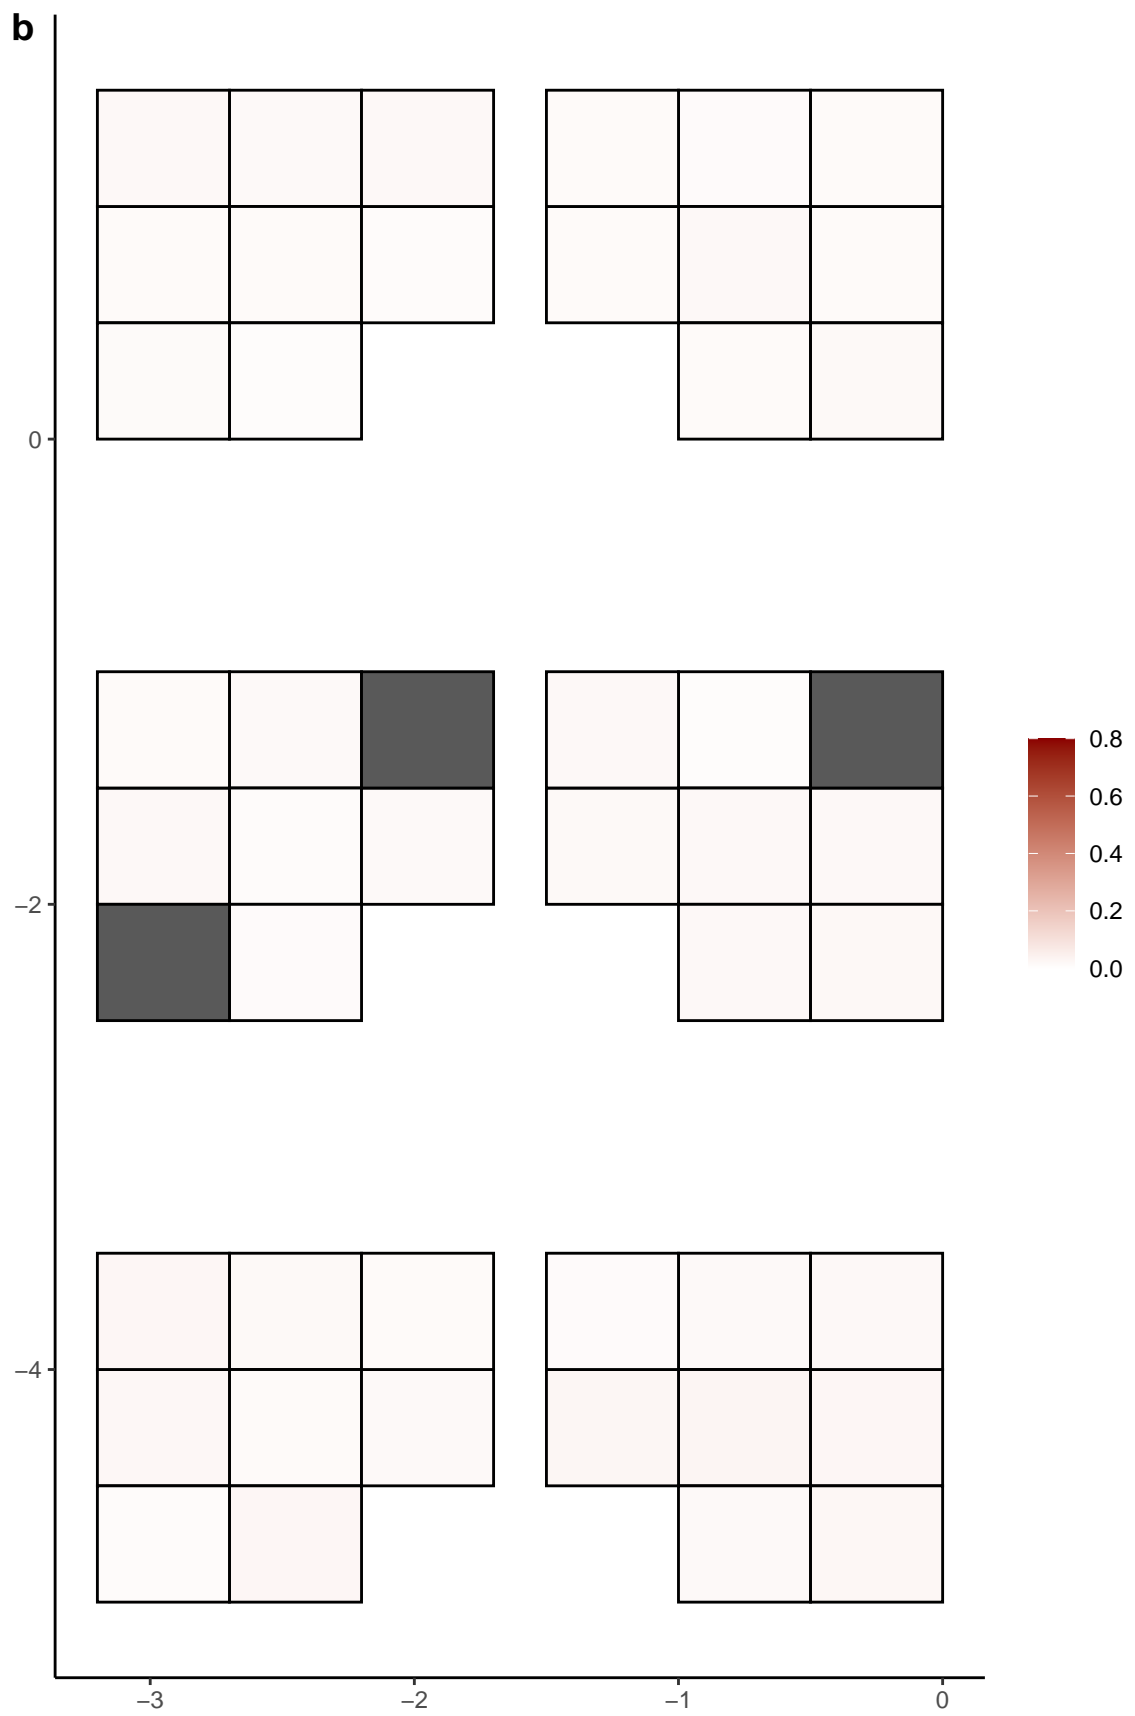

**a** ID05 10-105764174-A-G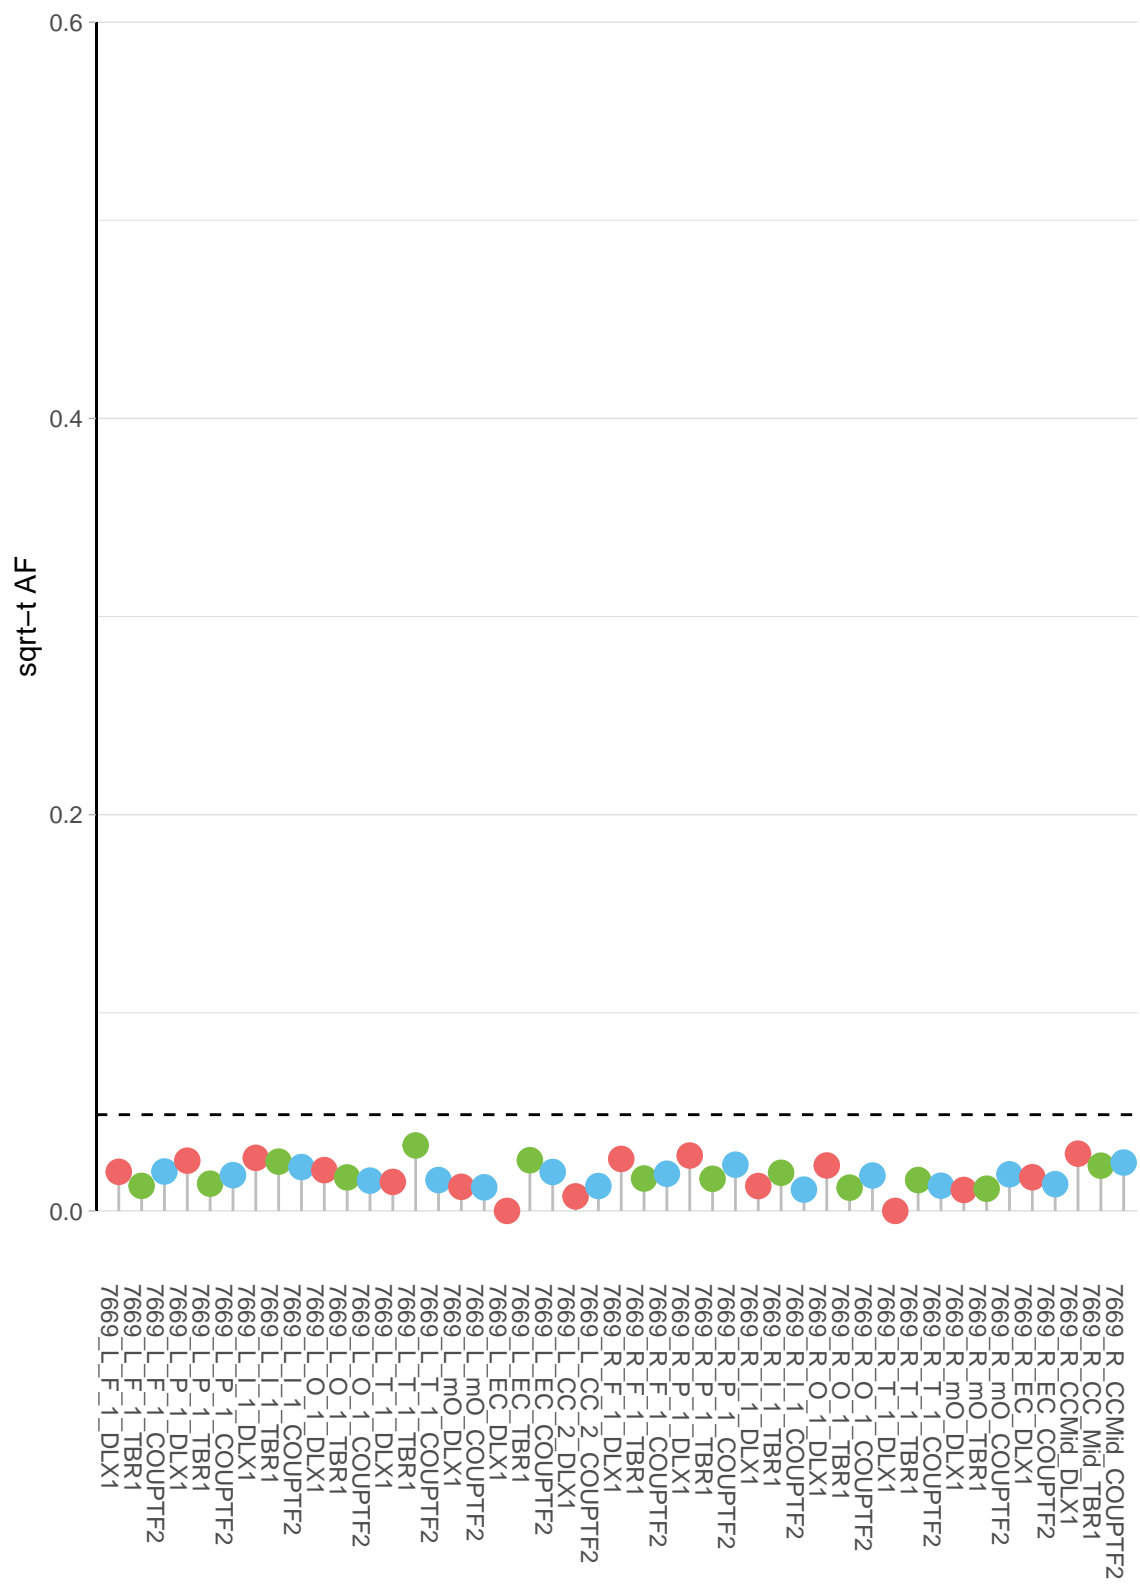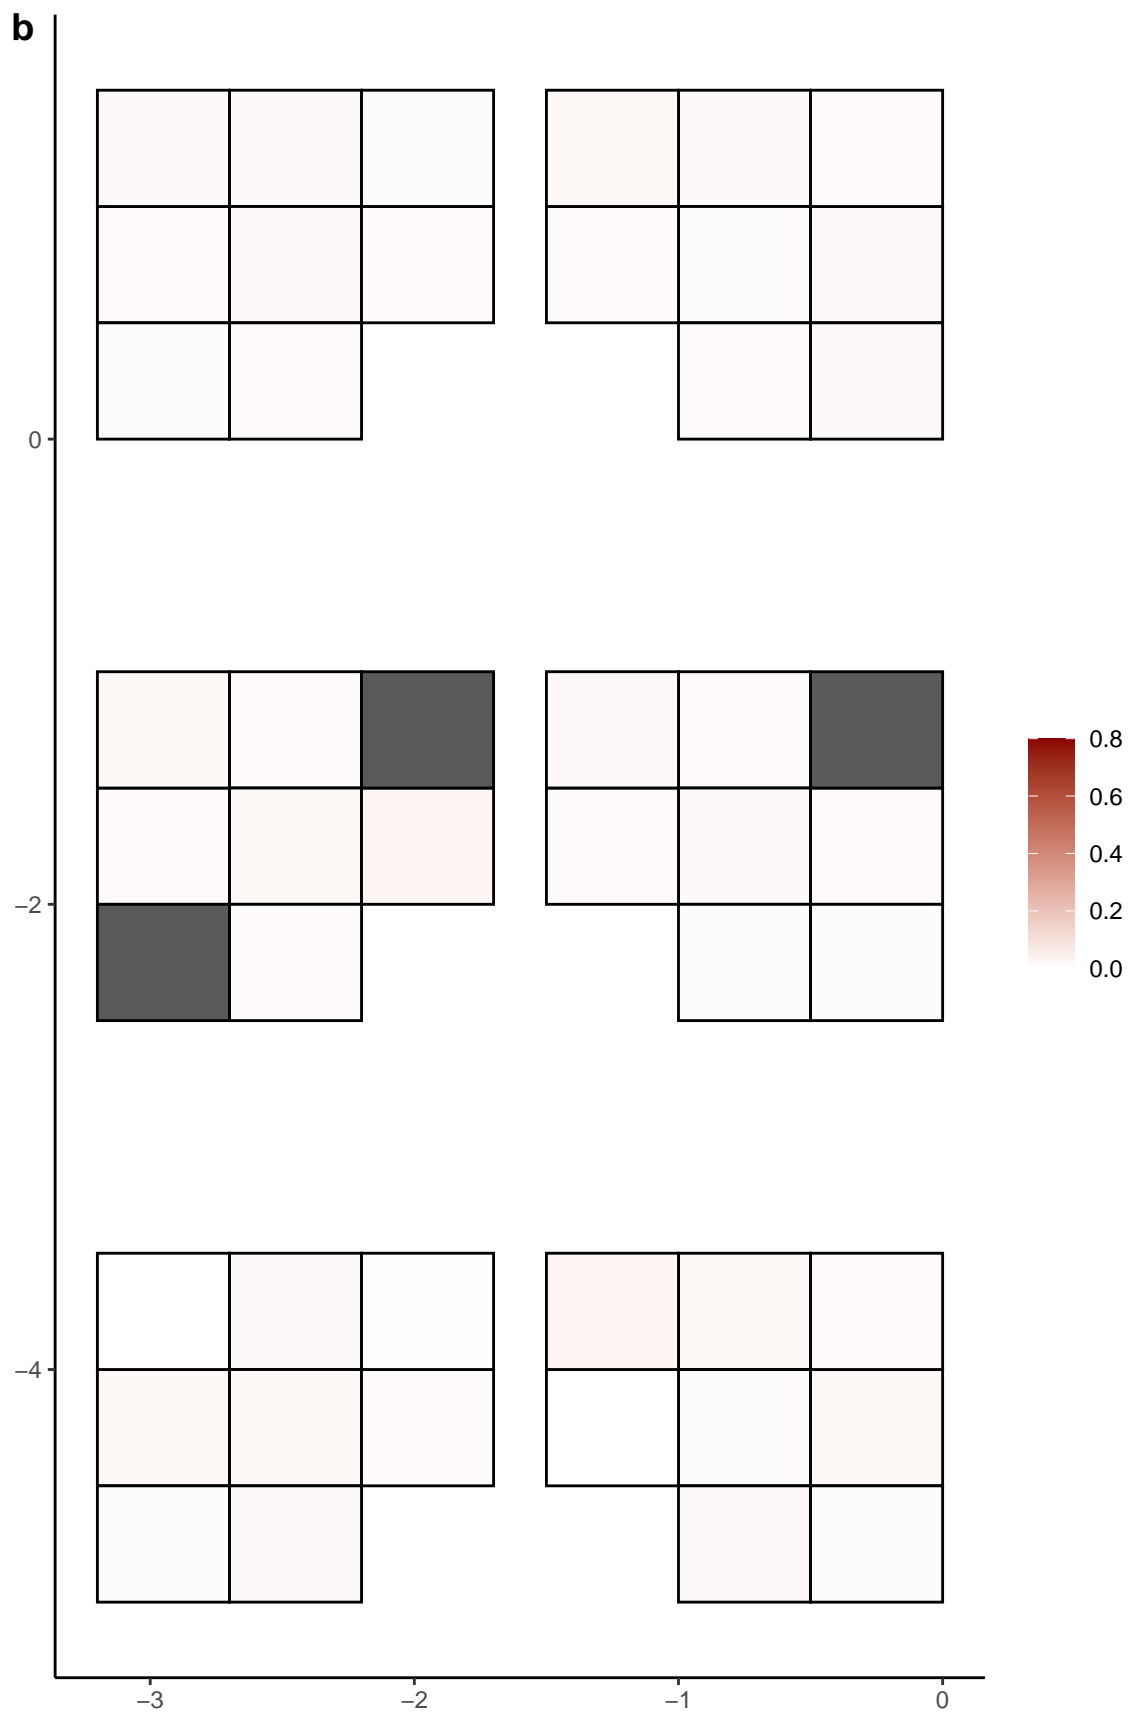

**a** ID05 10-107355222-C-A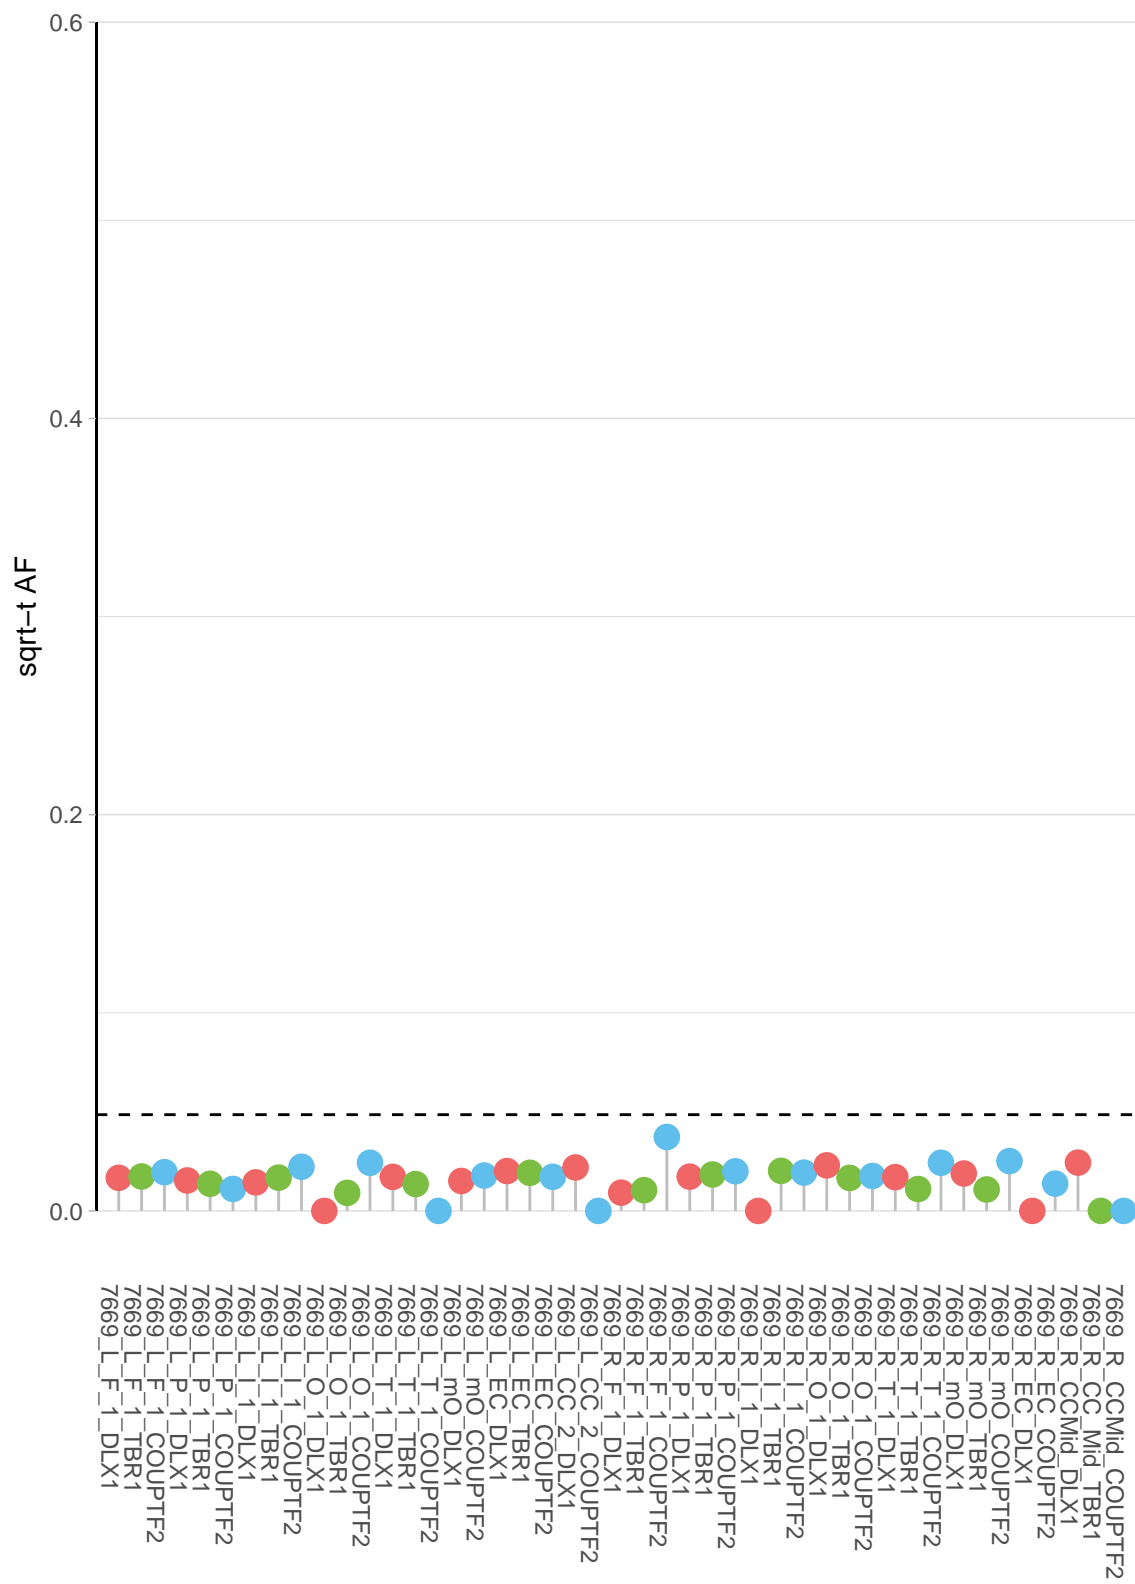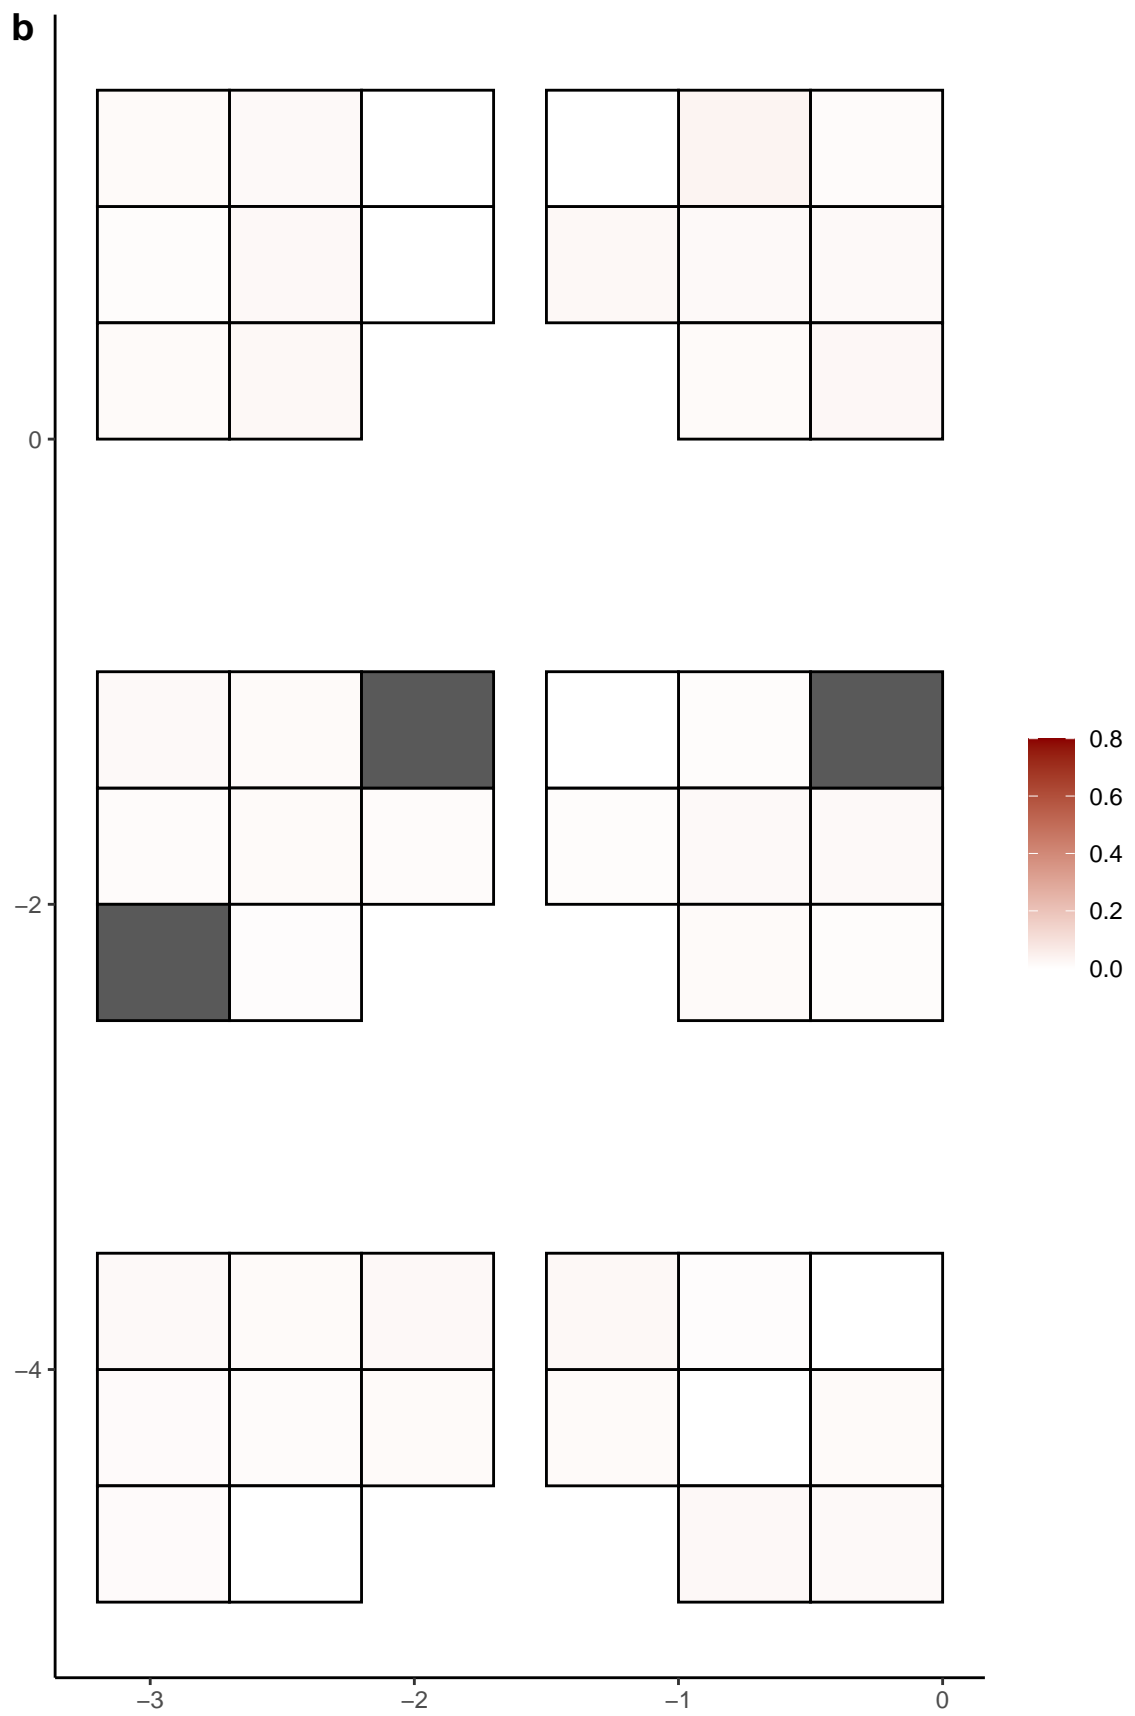

**a** ID05 10-108671103-C-T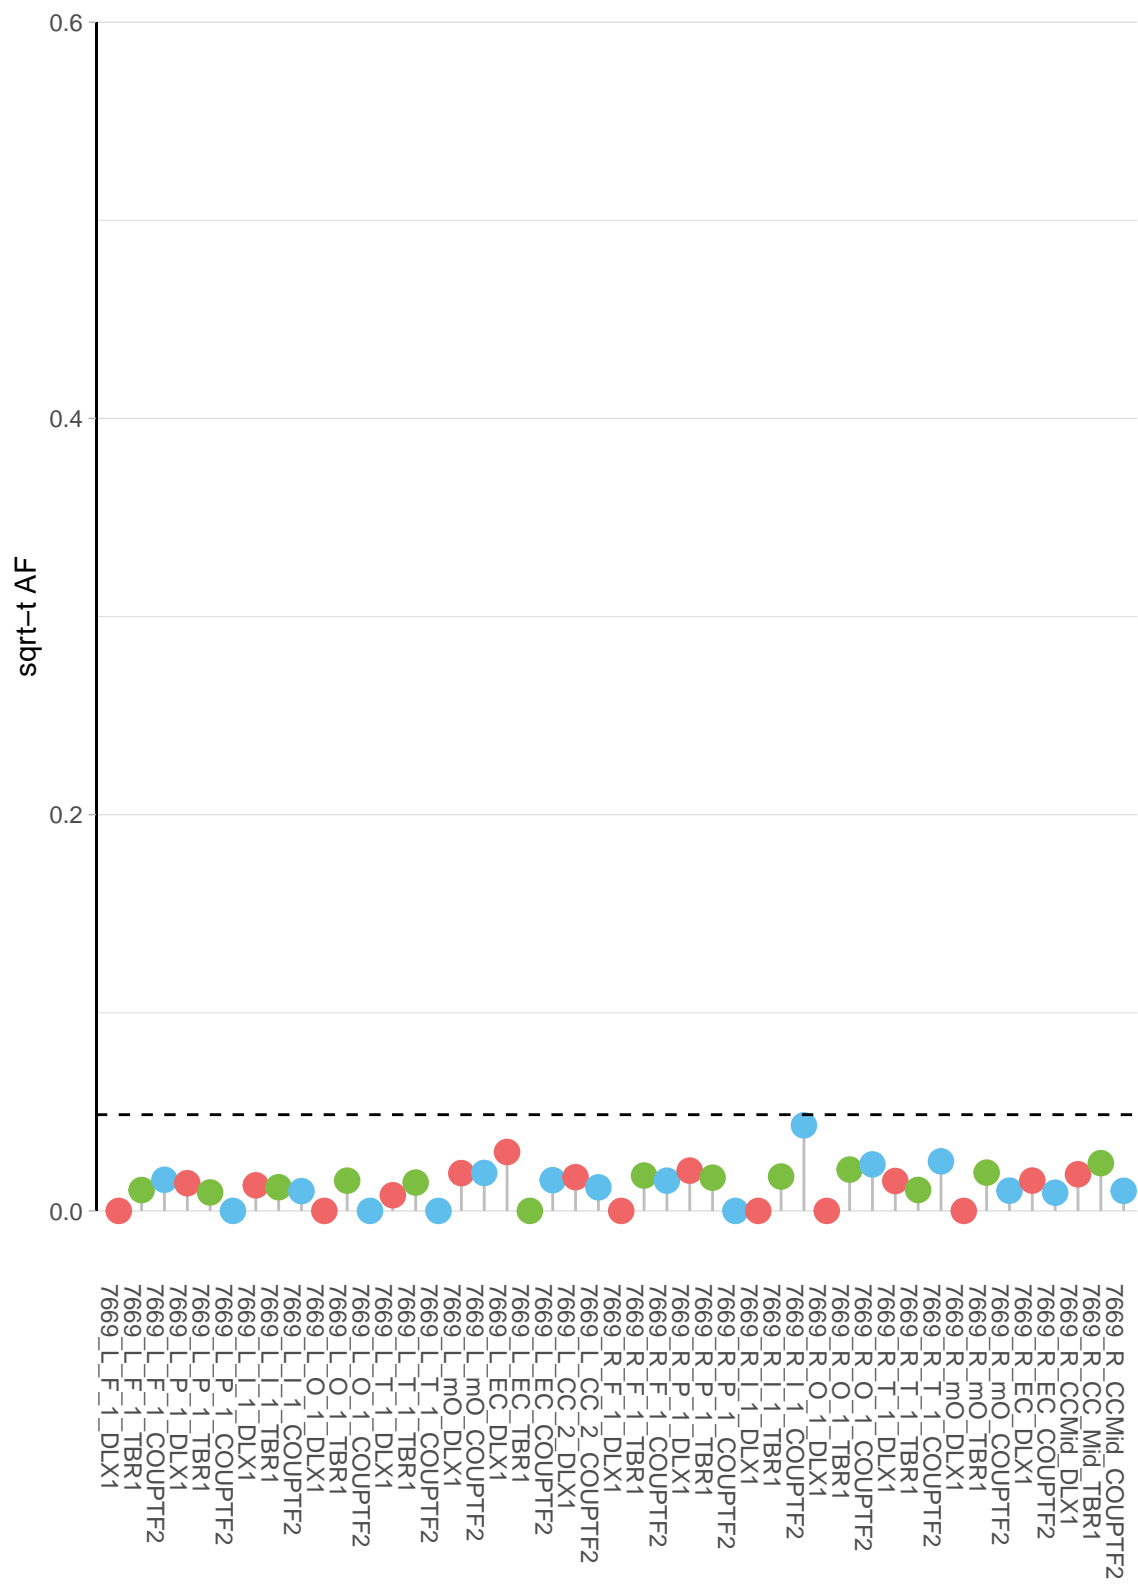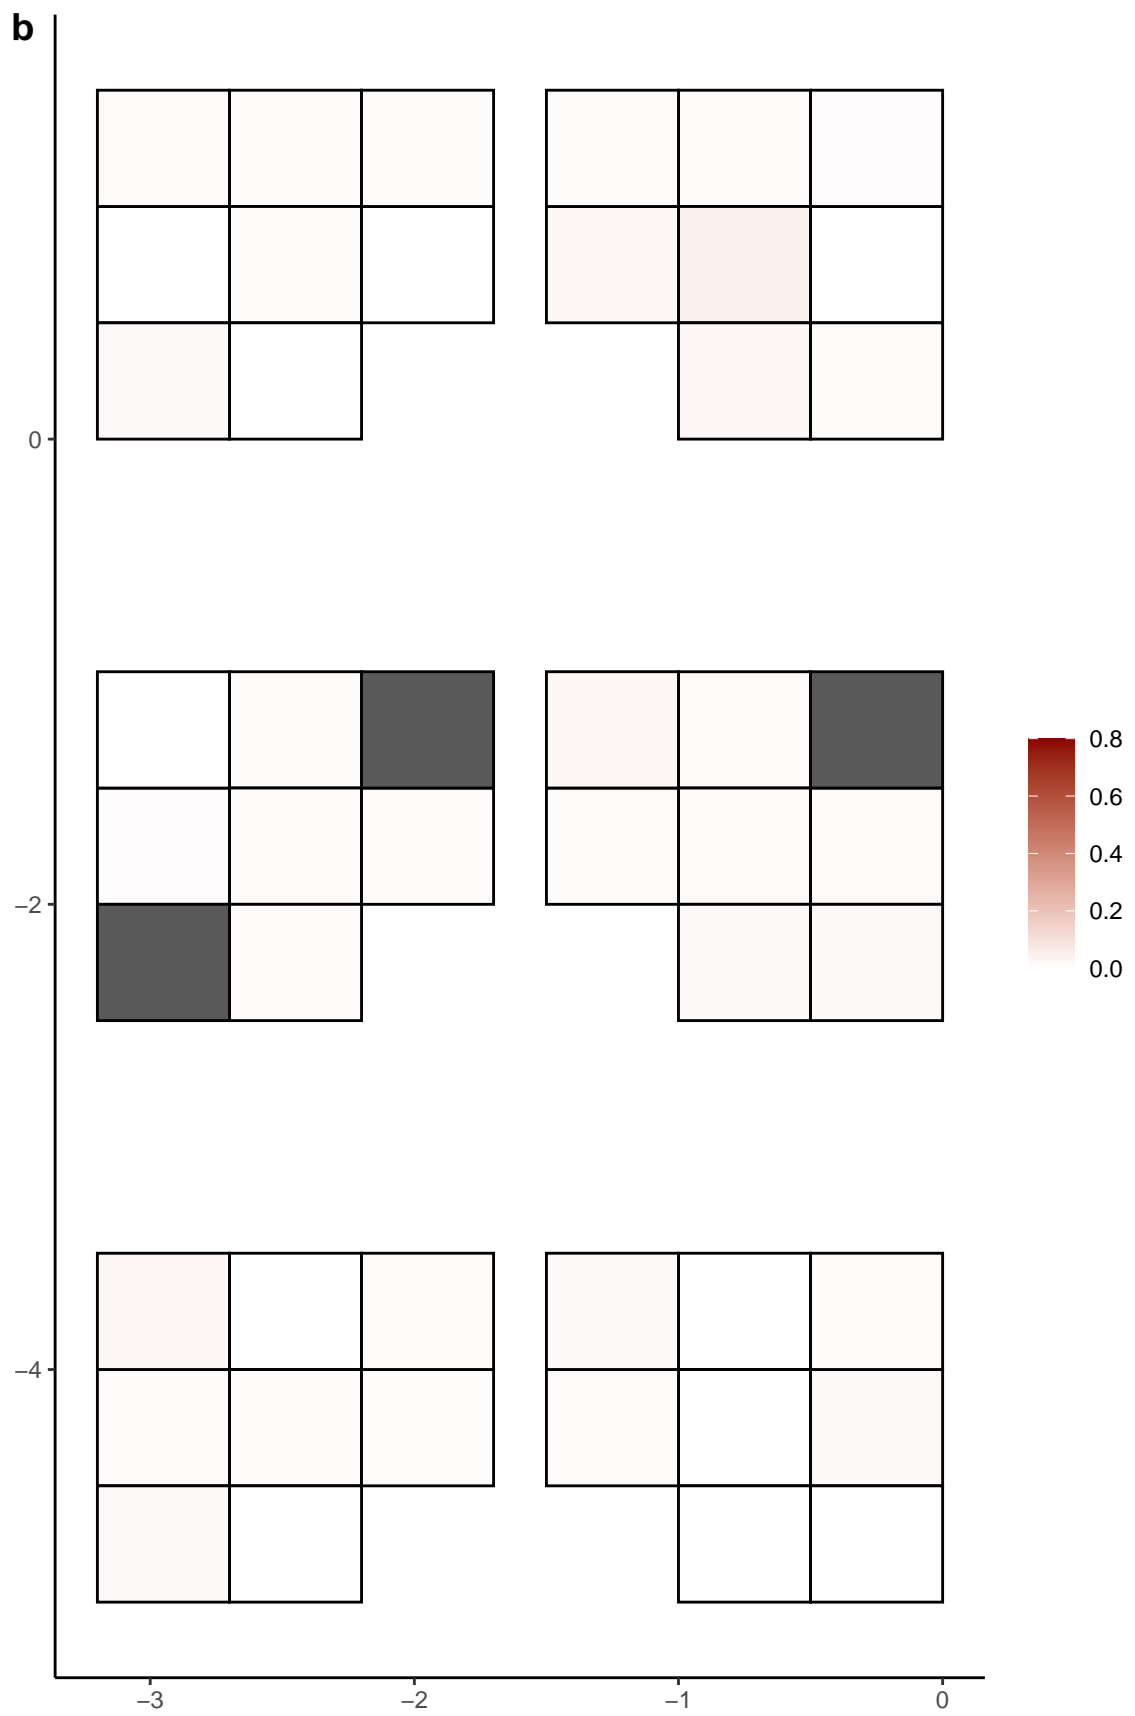

**a** ID05 10-109795130-C-G

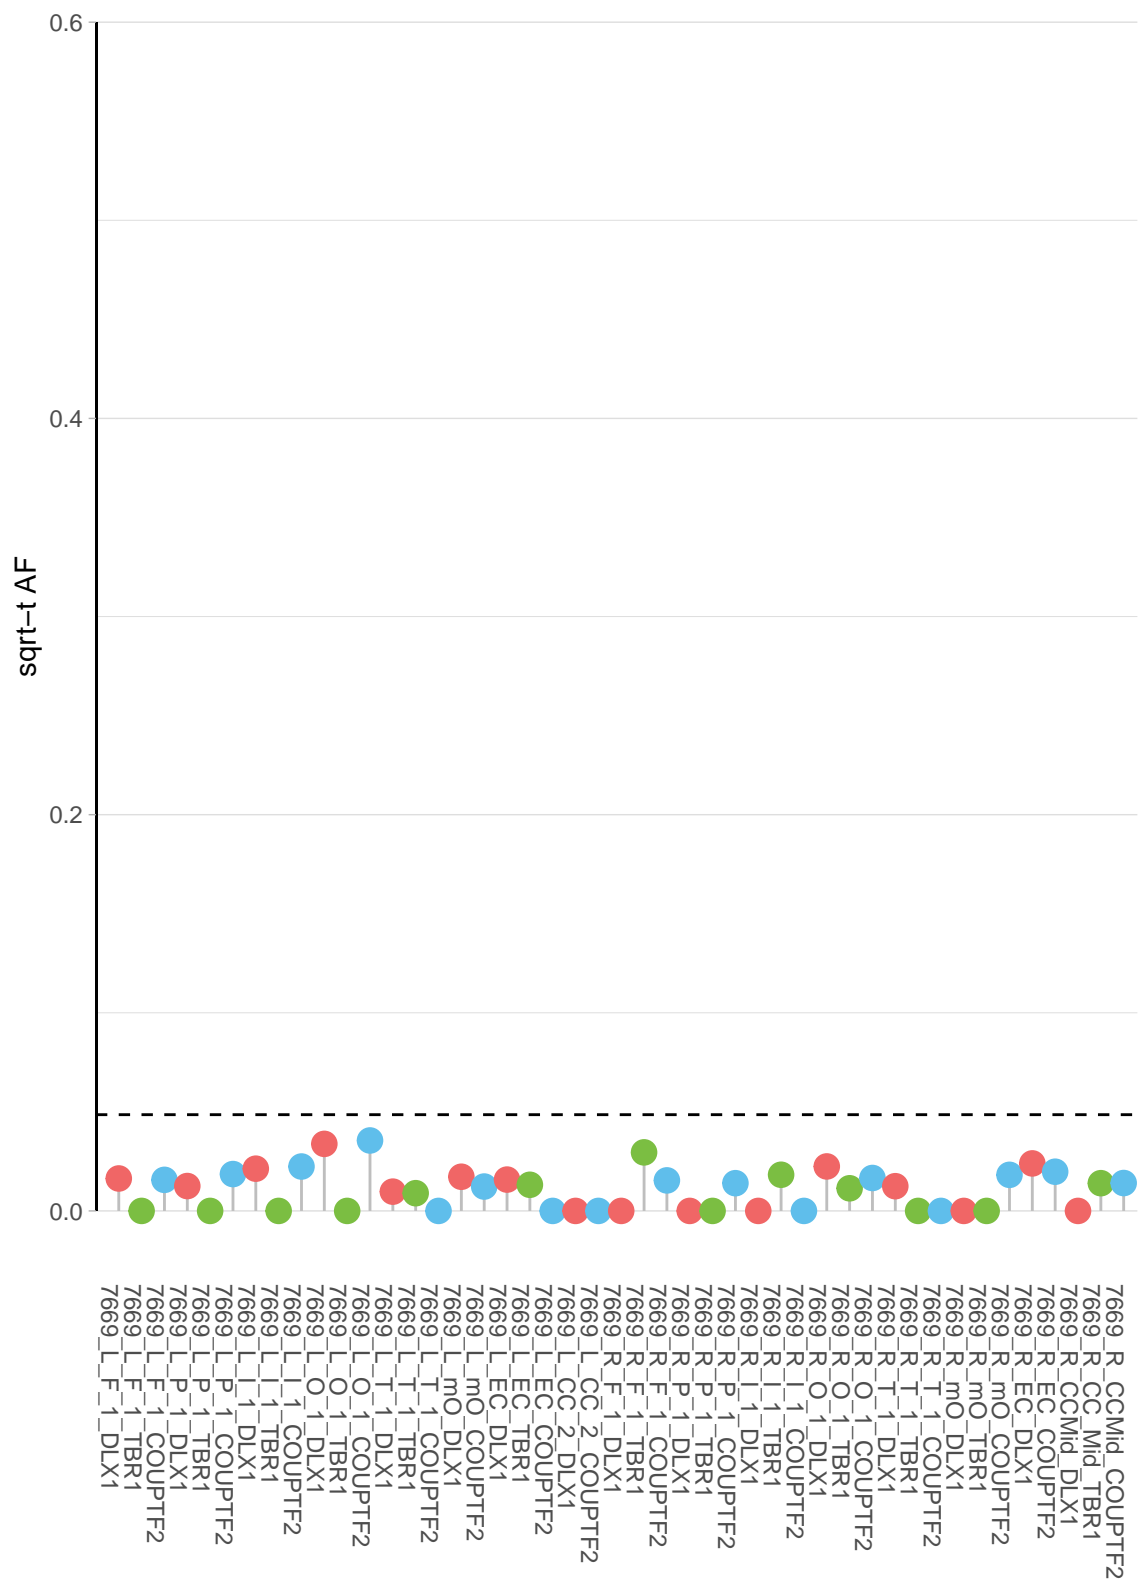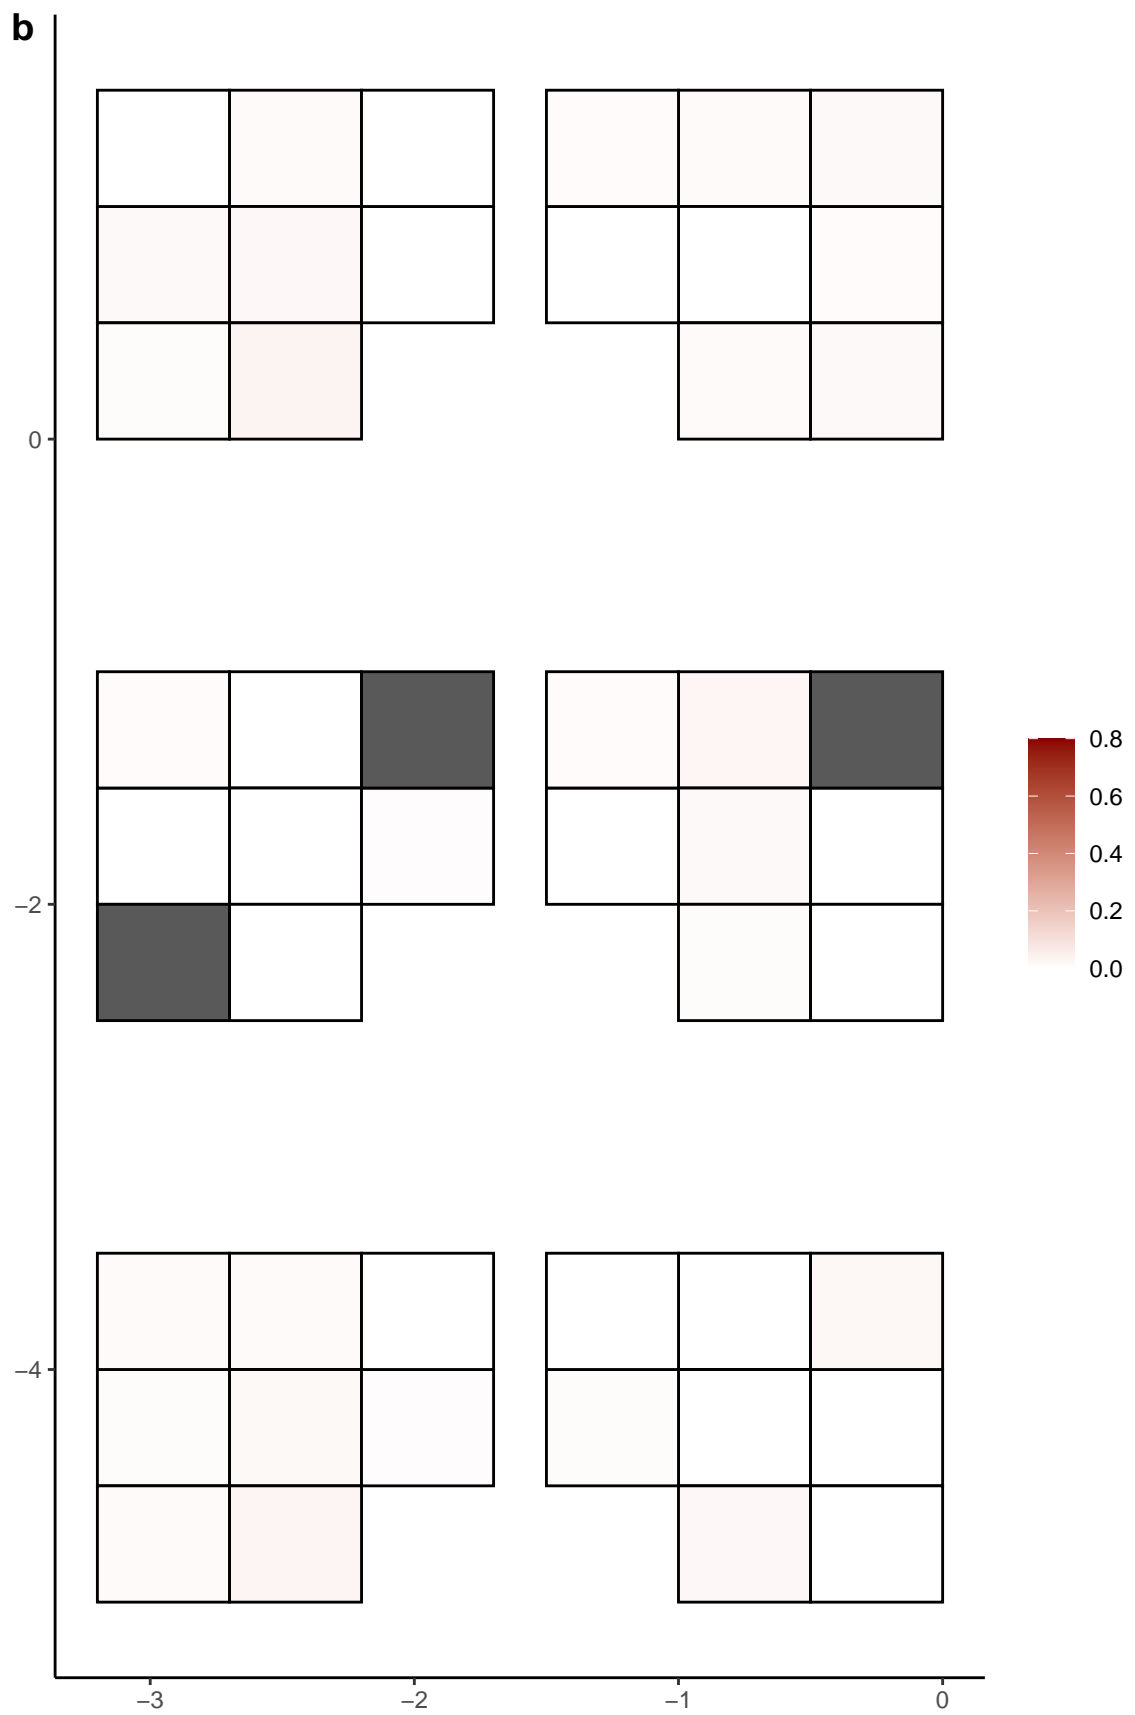

**a** ID05 10-113404344-G-A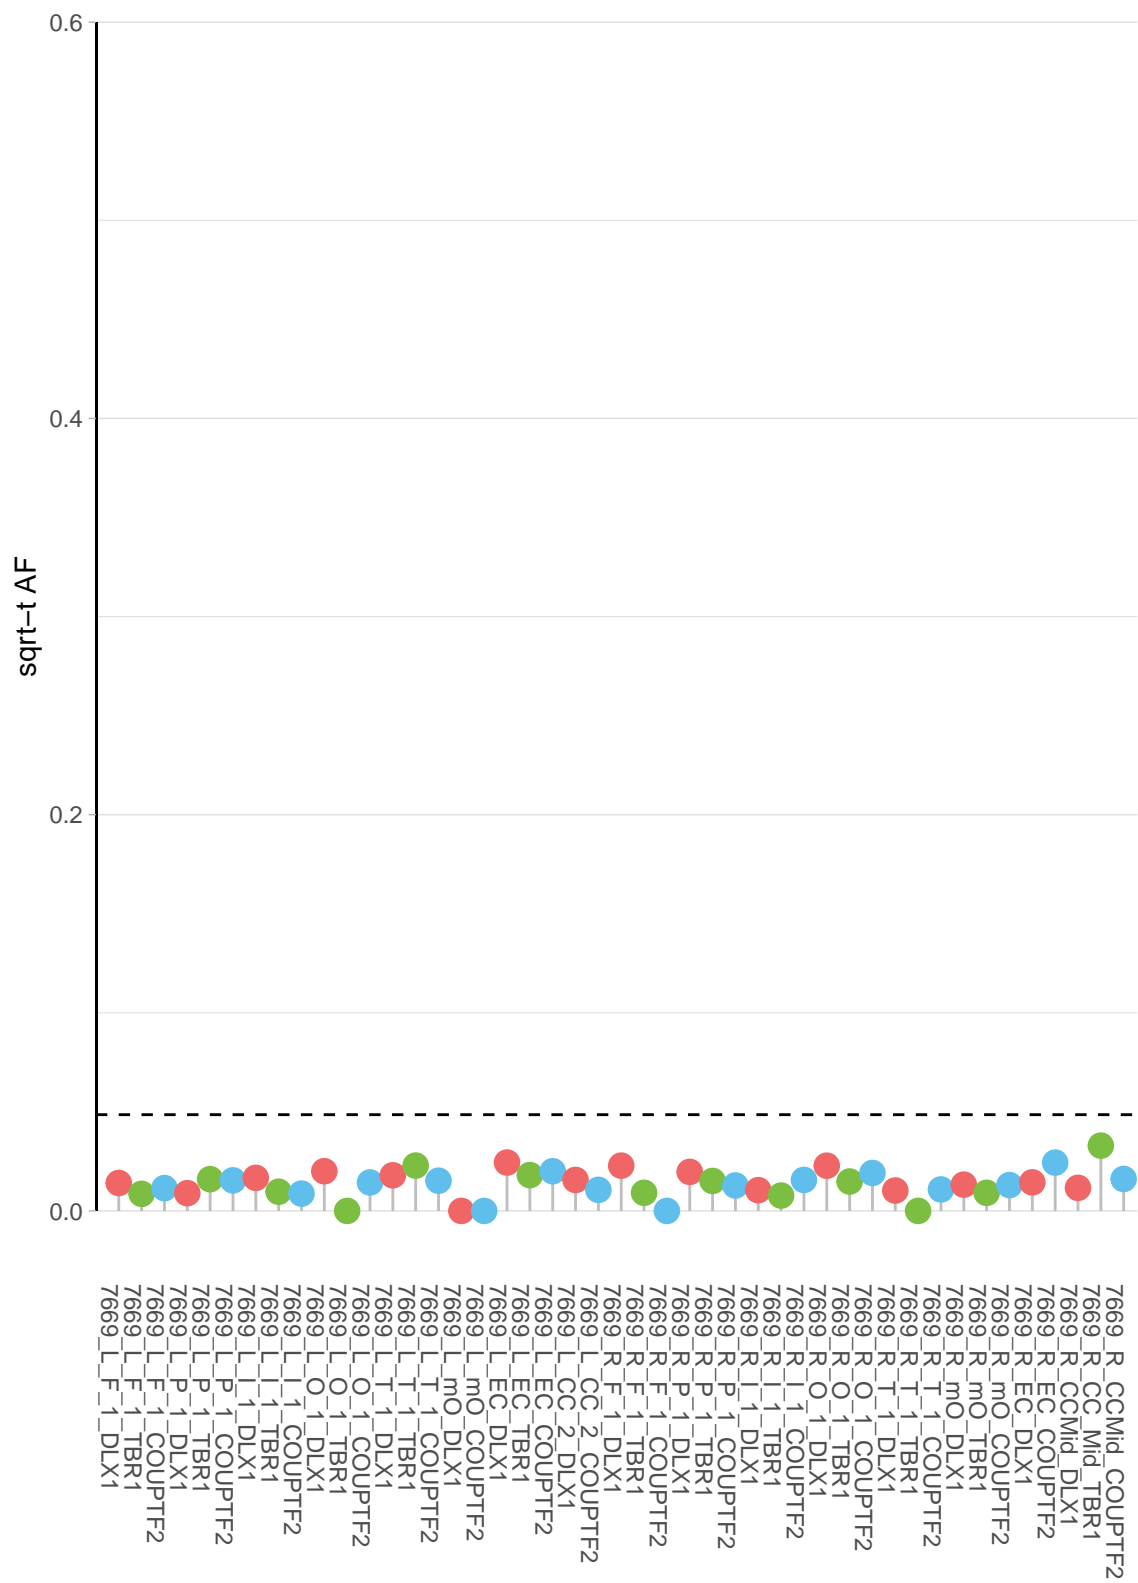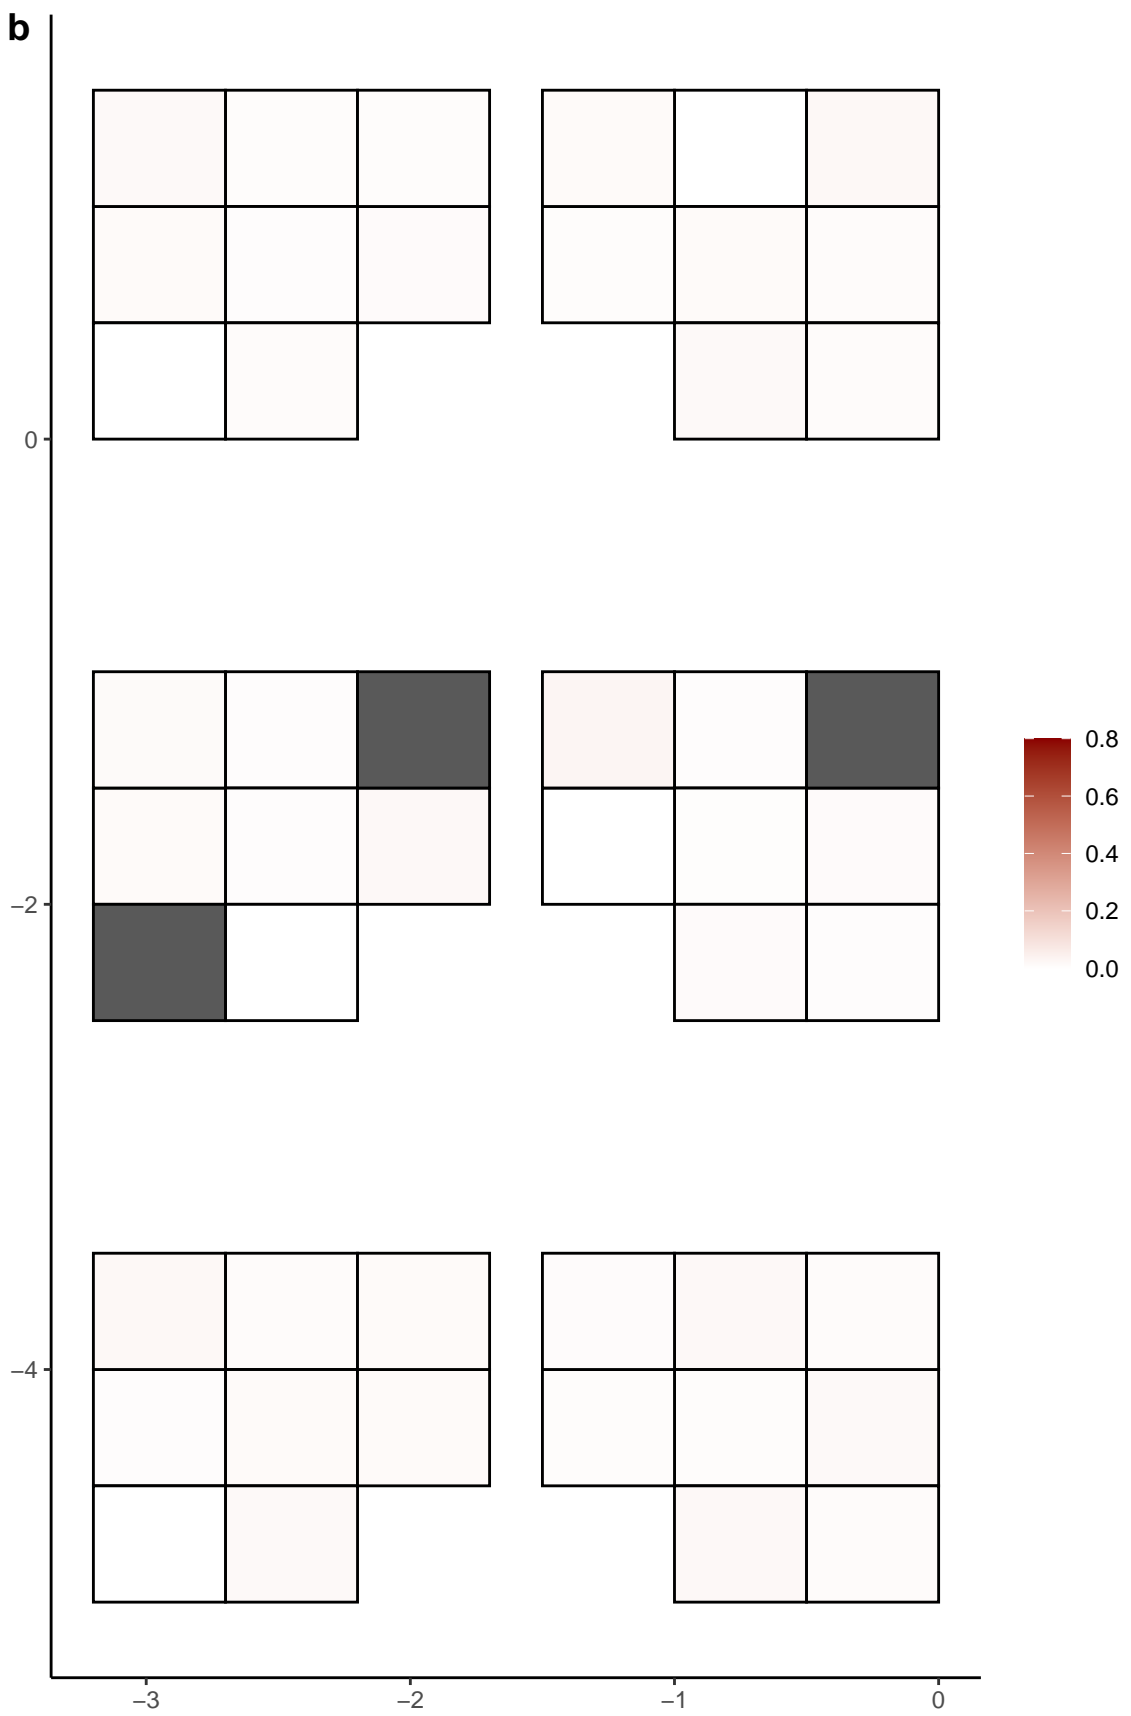

**a** ID05 10-116677604-C-T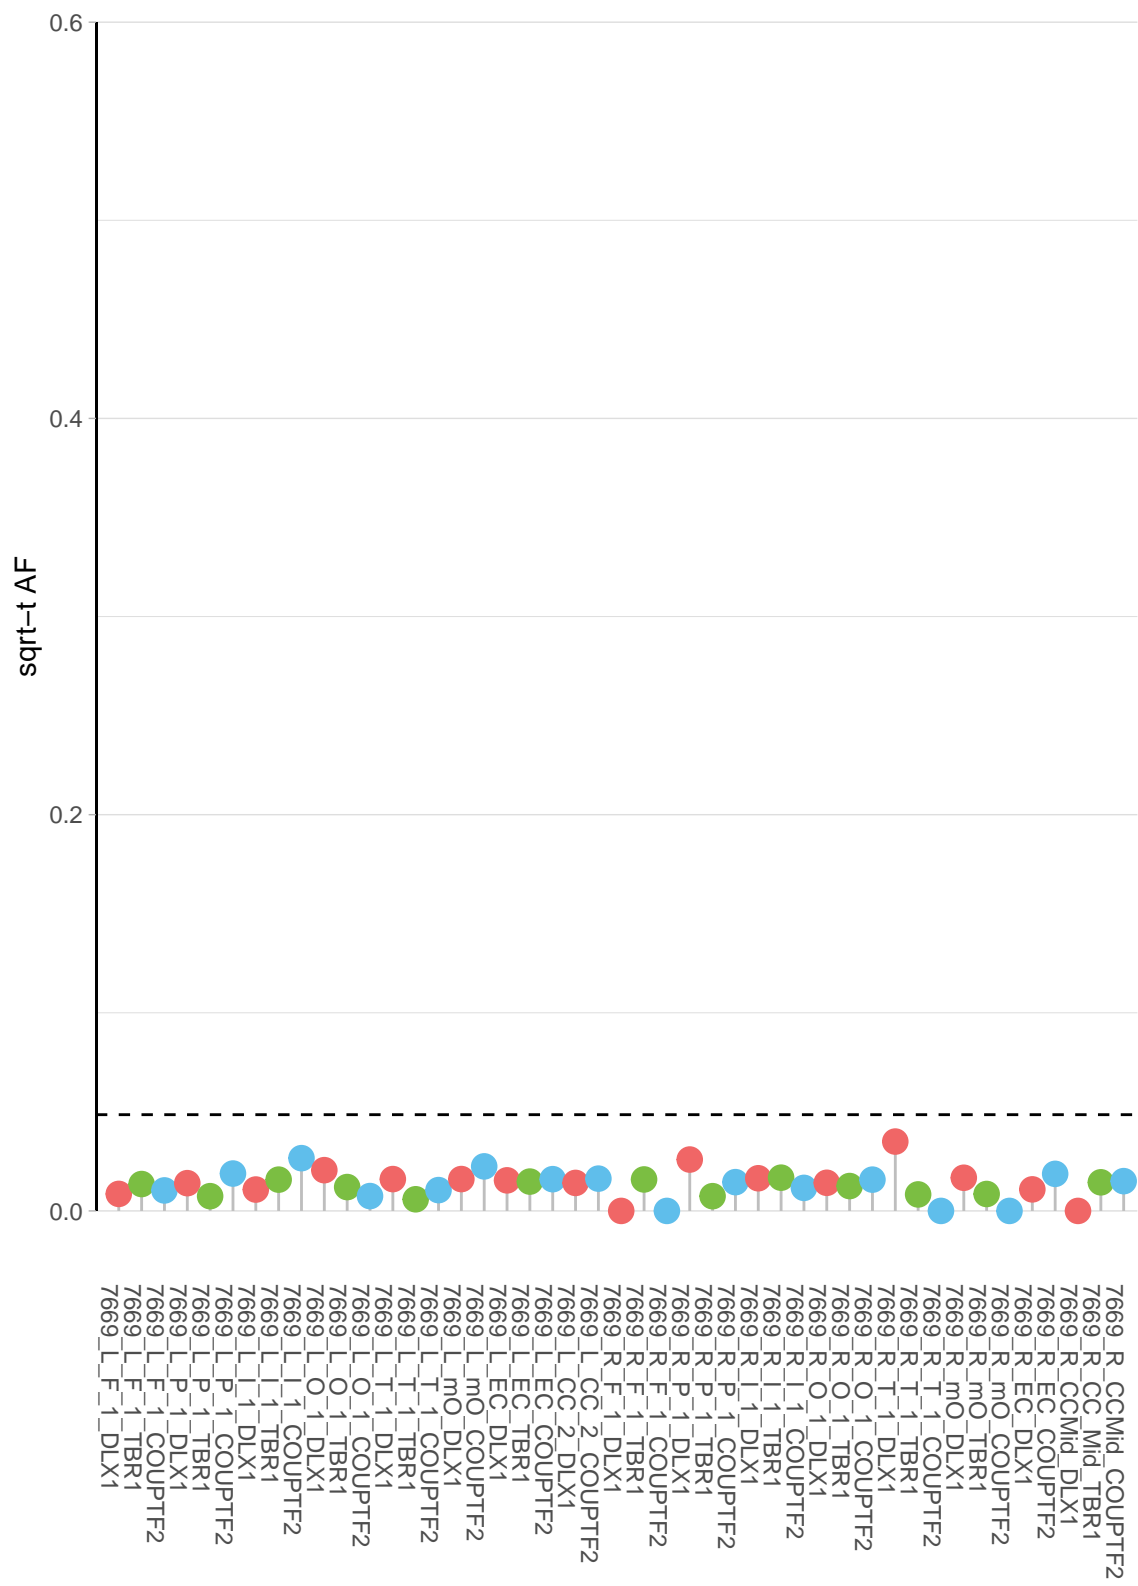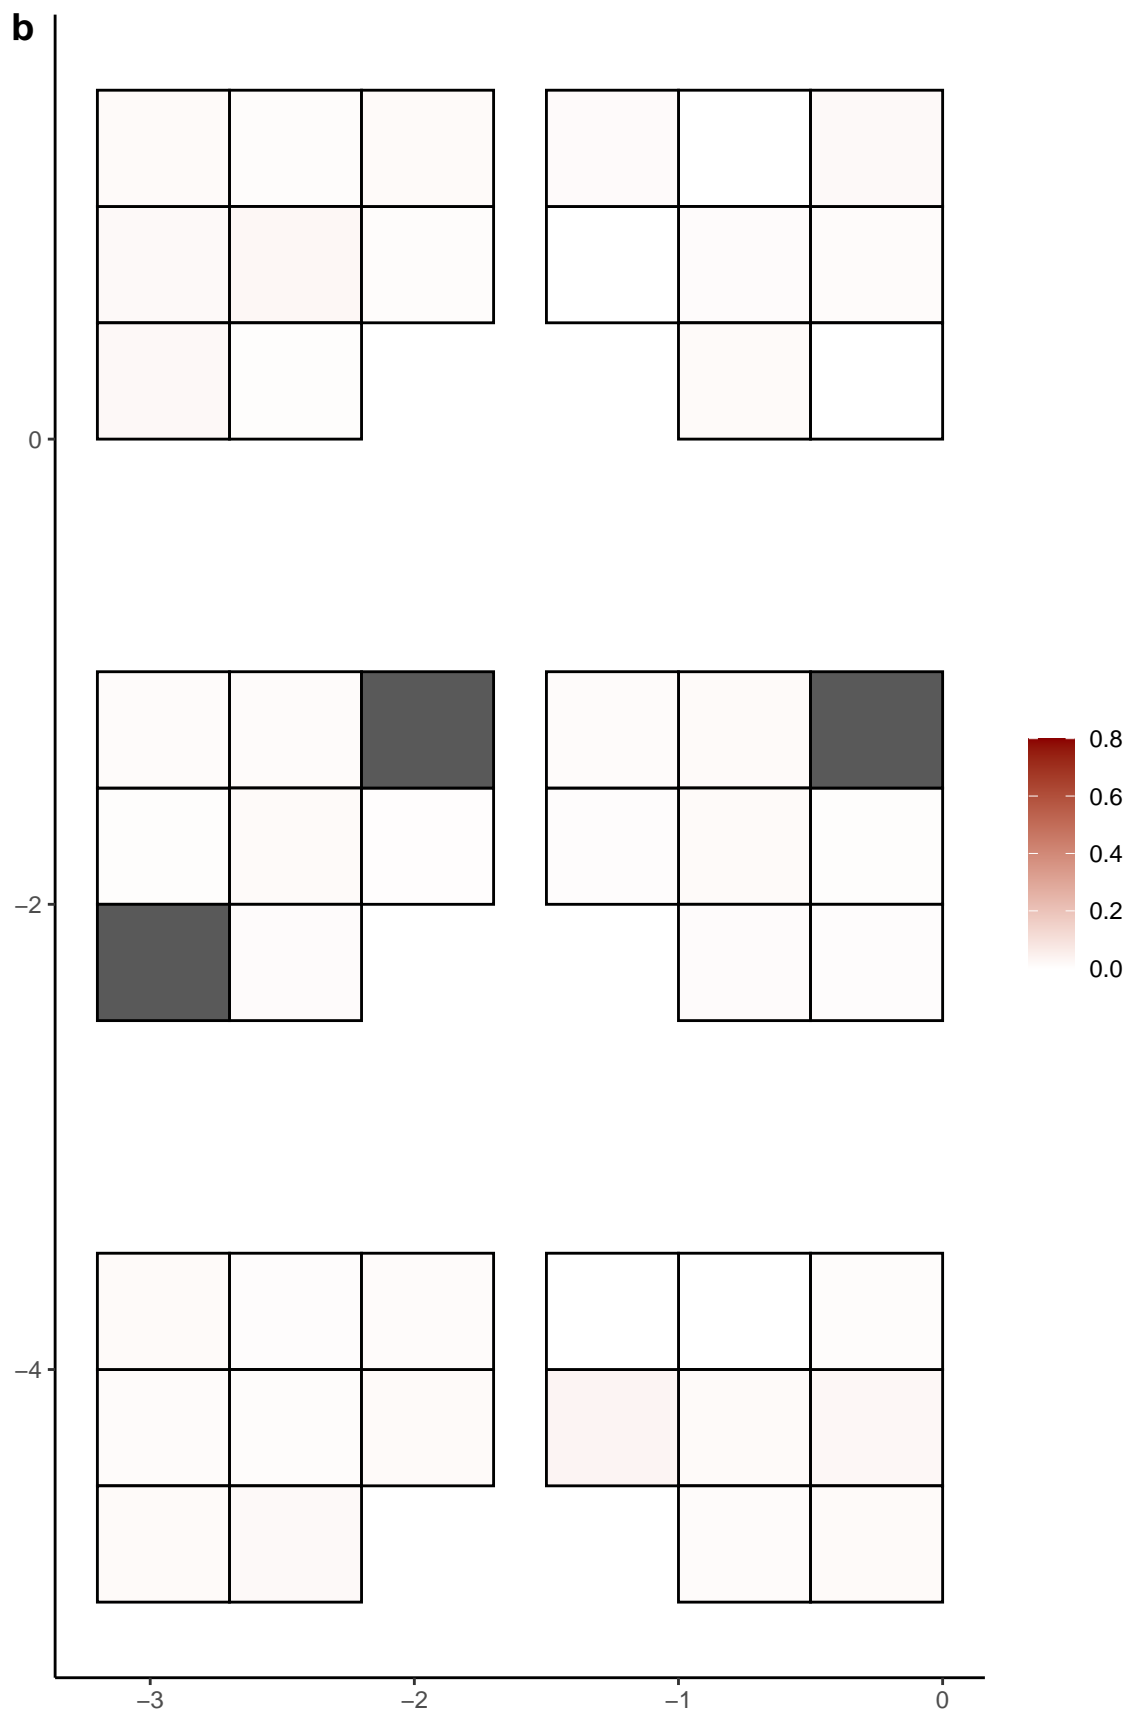





**a** ID05 10-121073761-C-T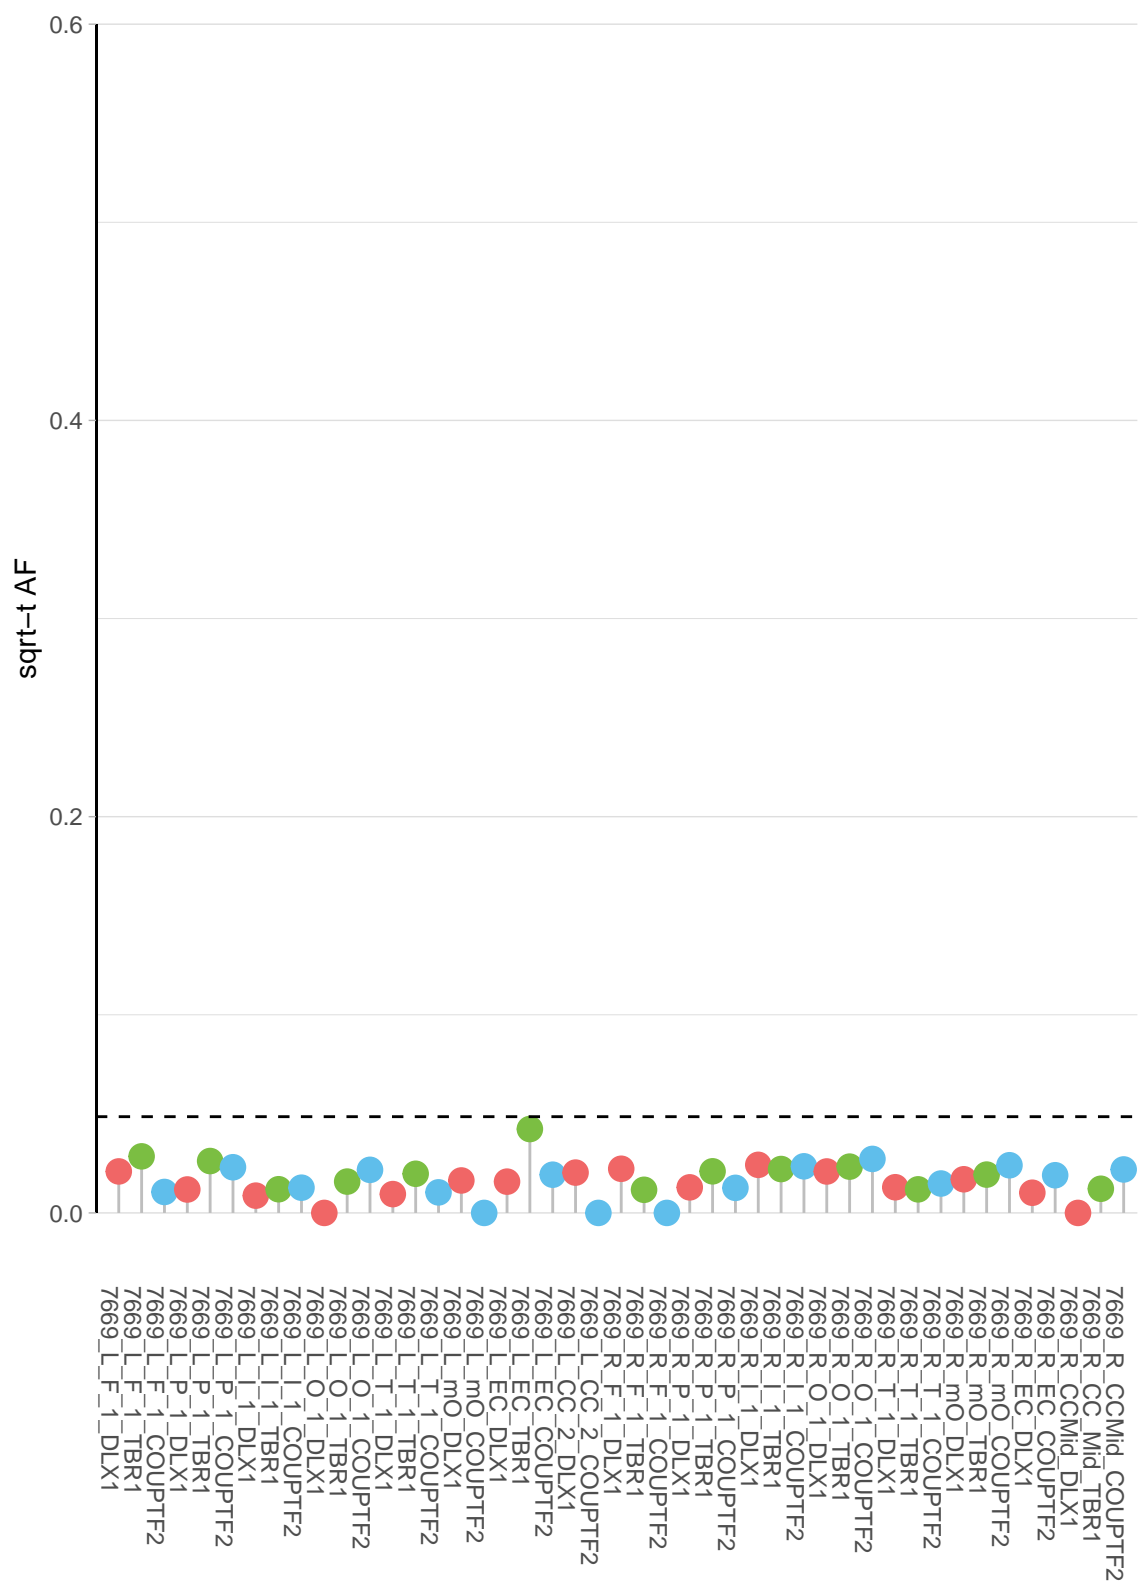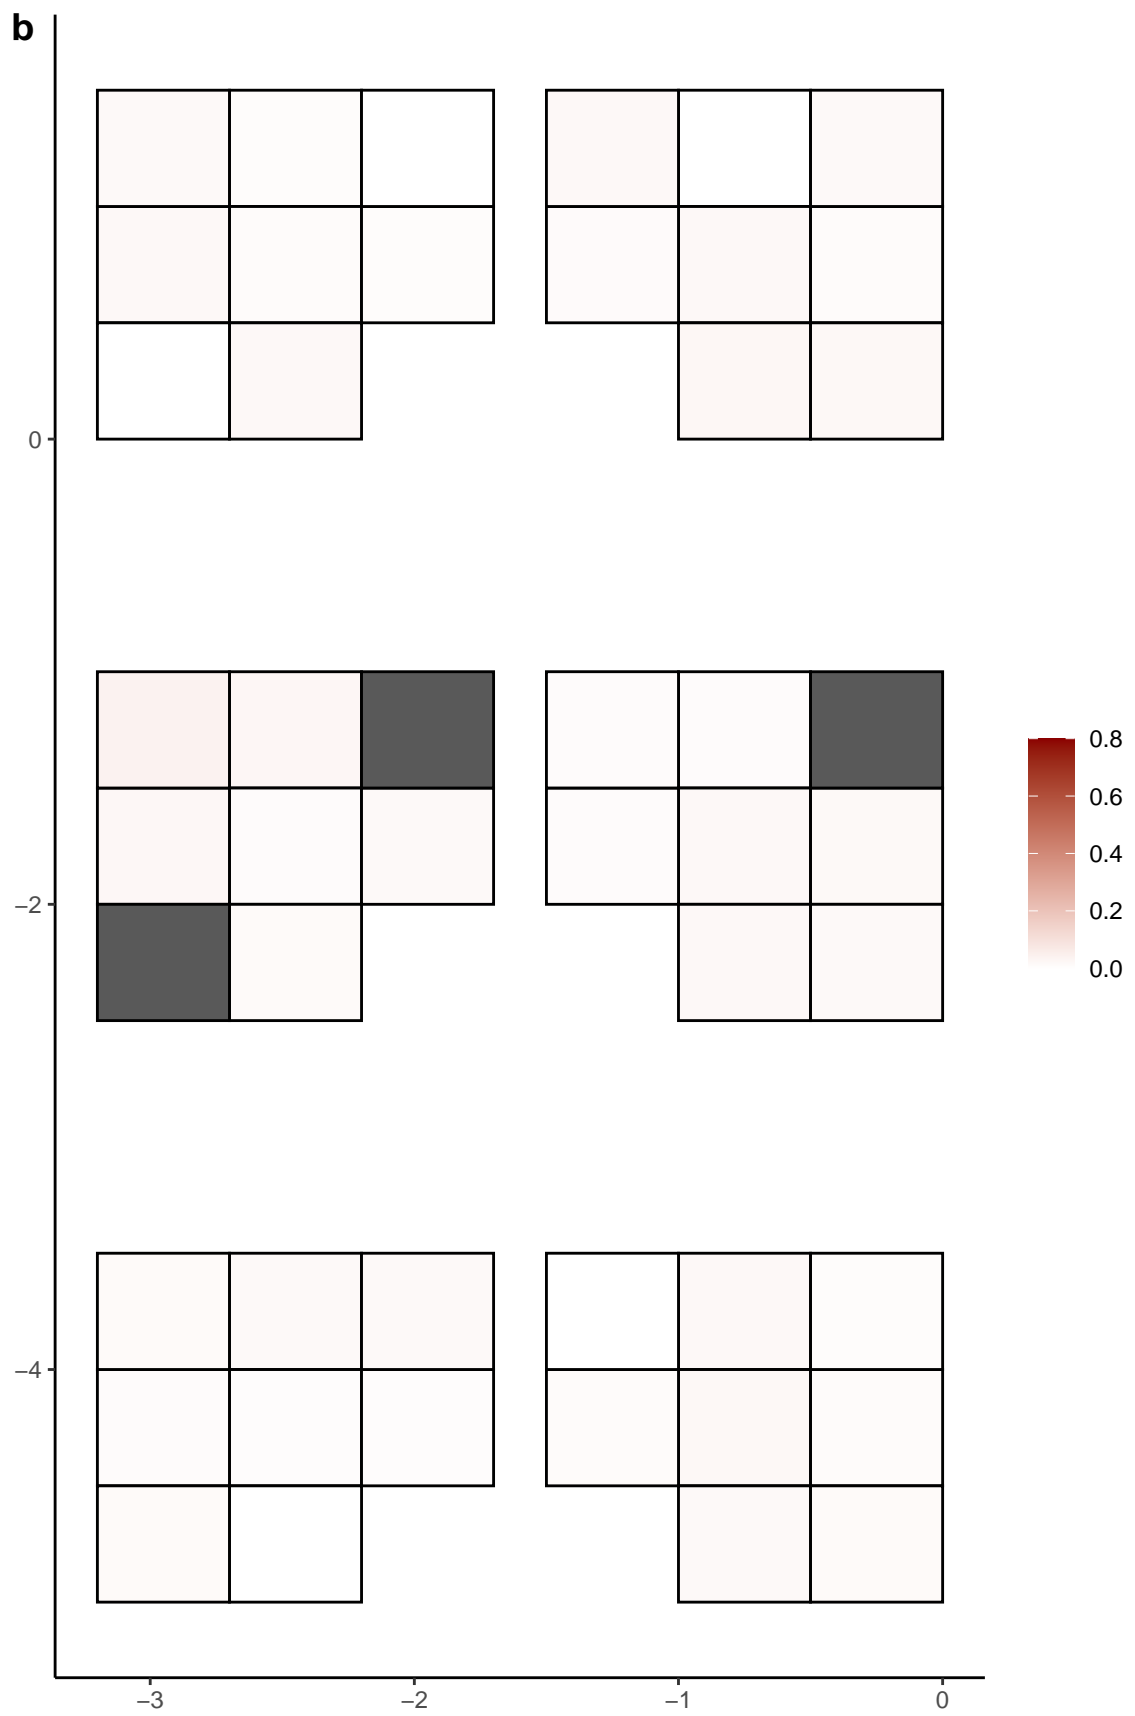

**a** ID05 10-123873718-C-T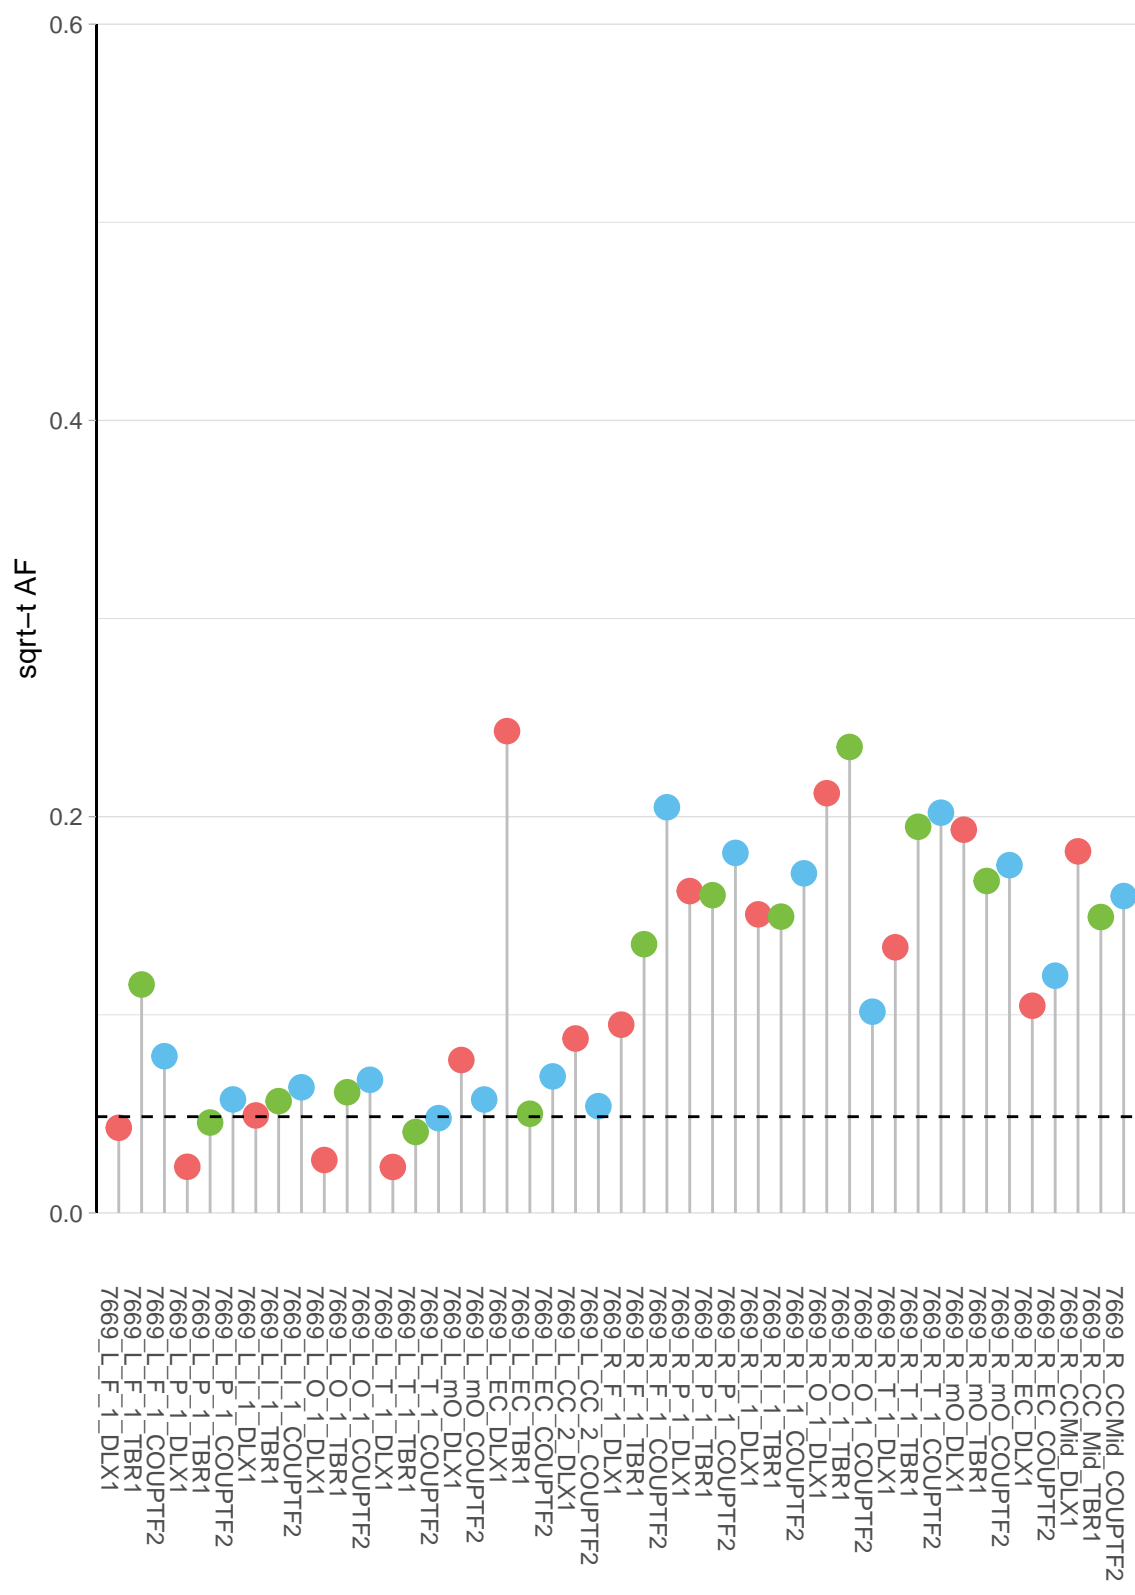**b**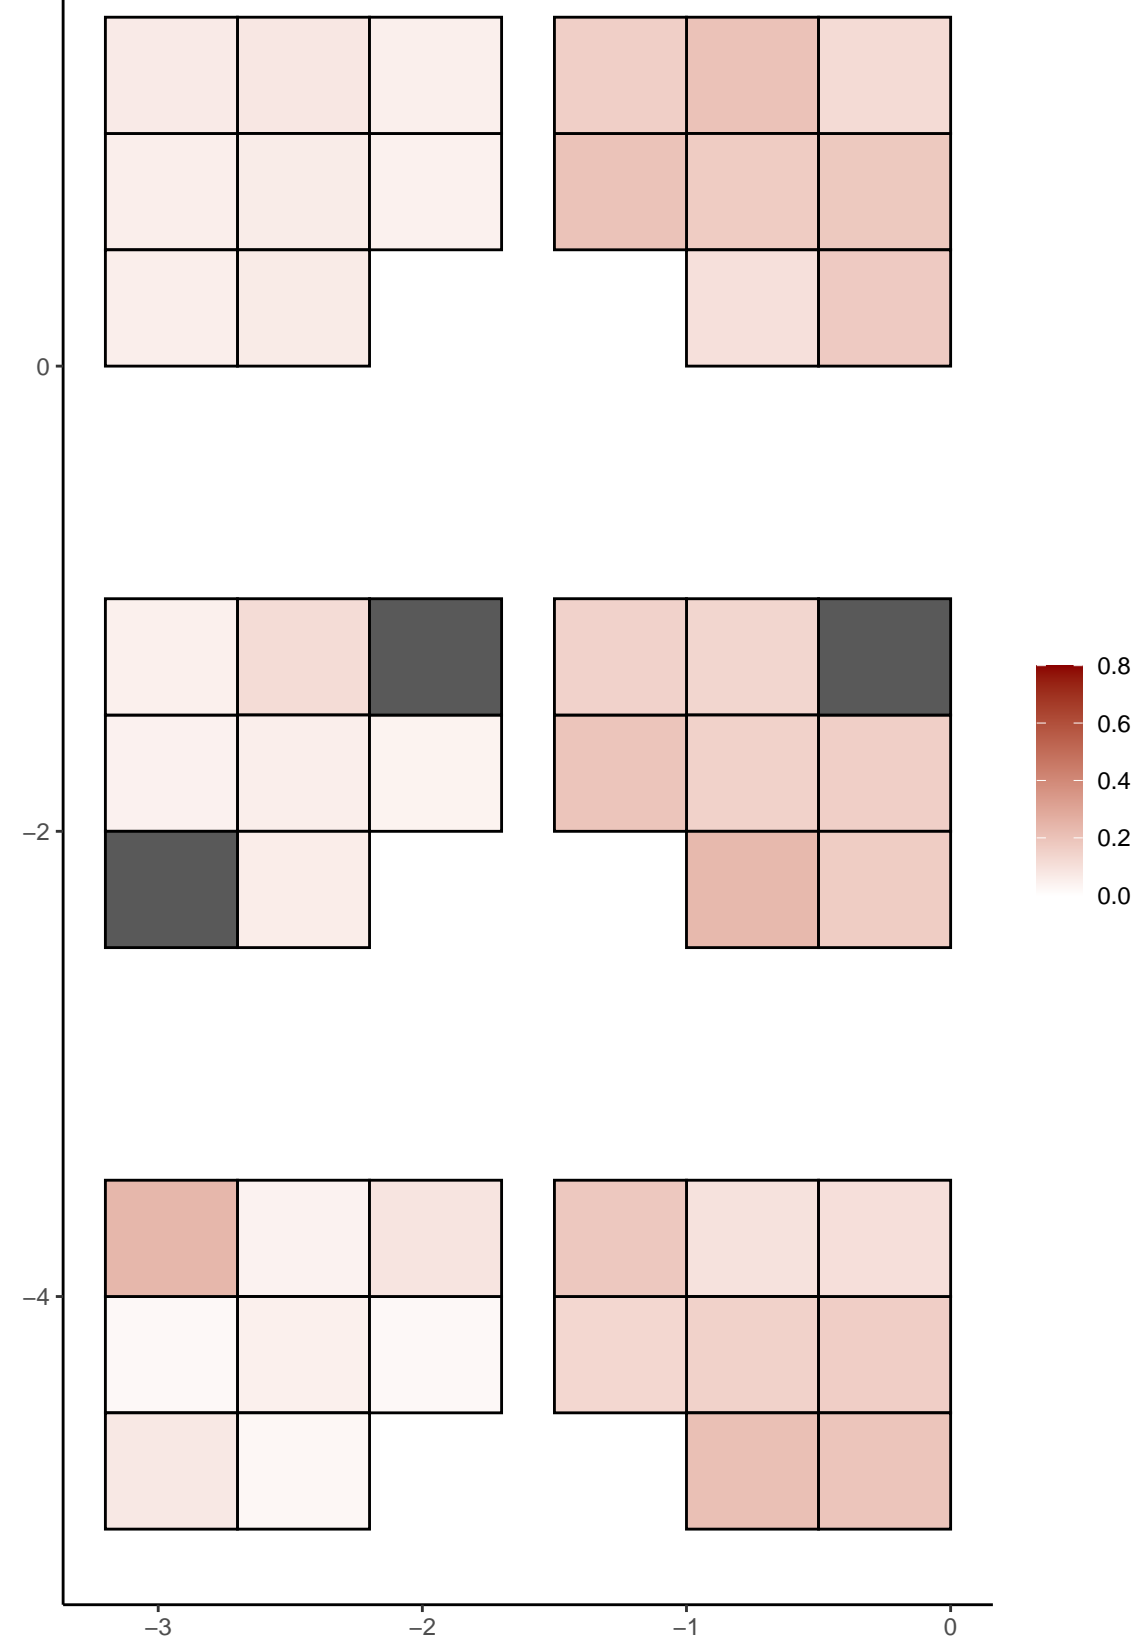

**a** ID05 10-125075590-G-A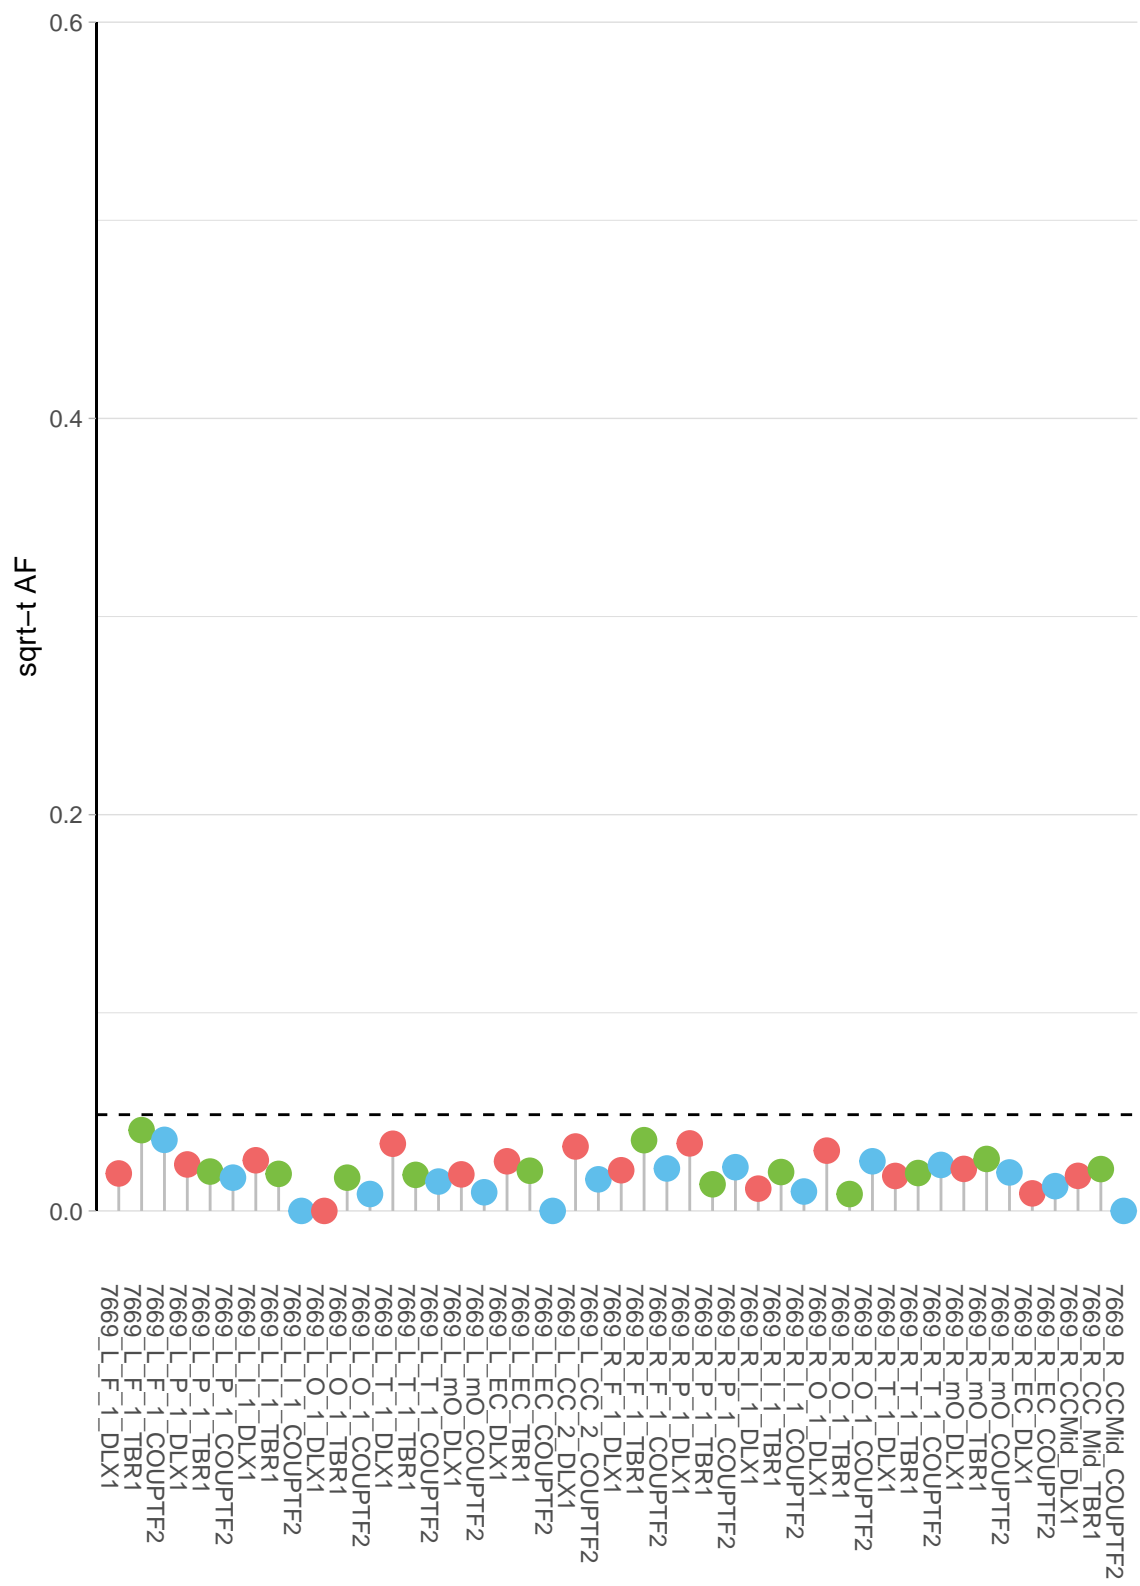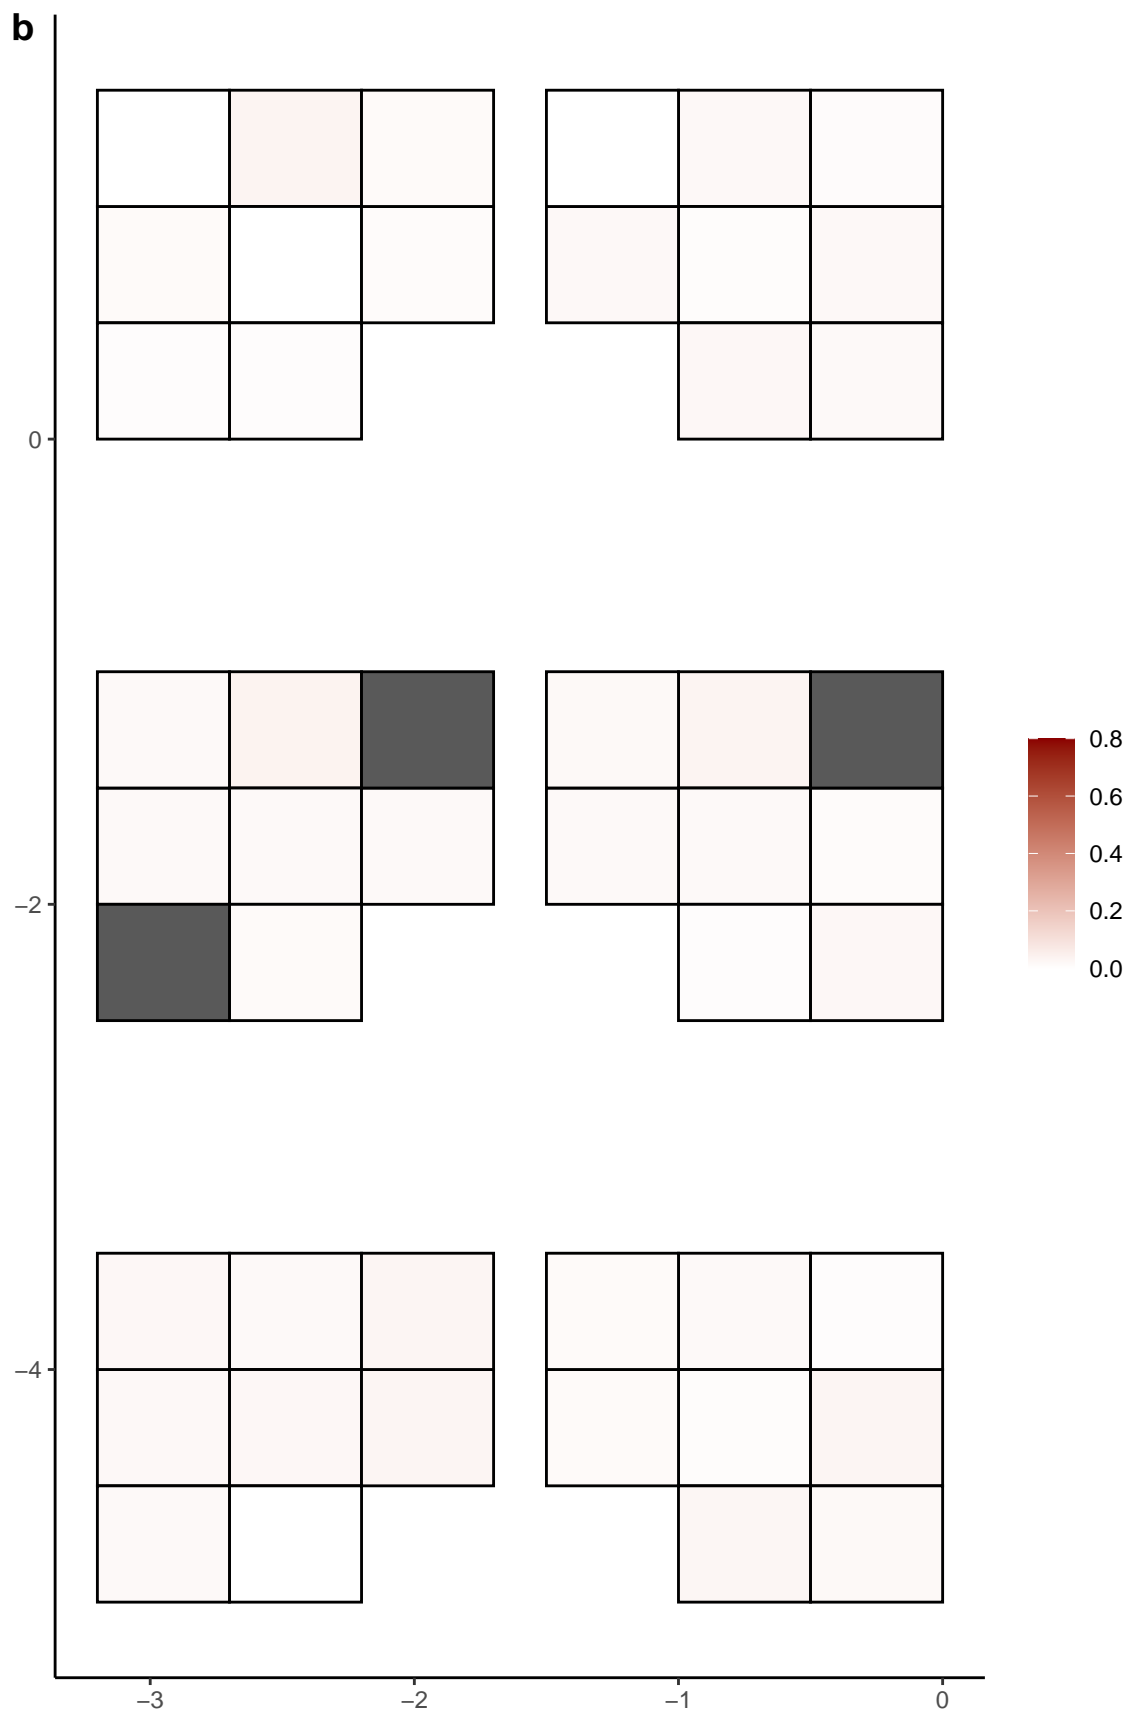

**a** ID05 10-126824209-G-A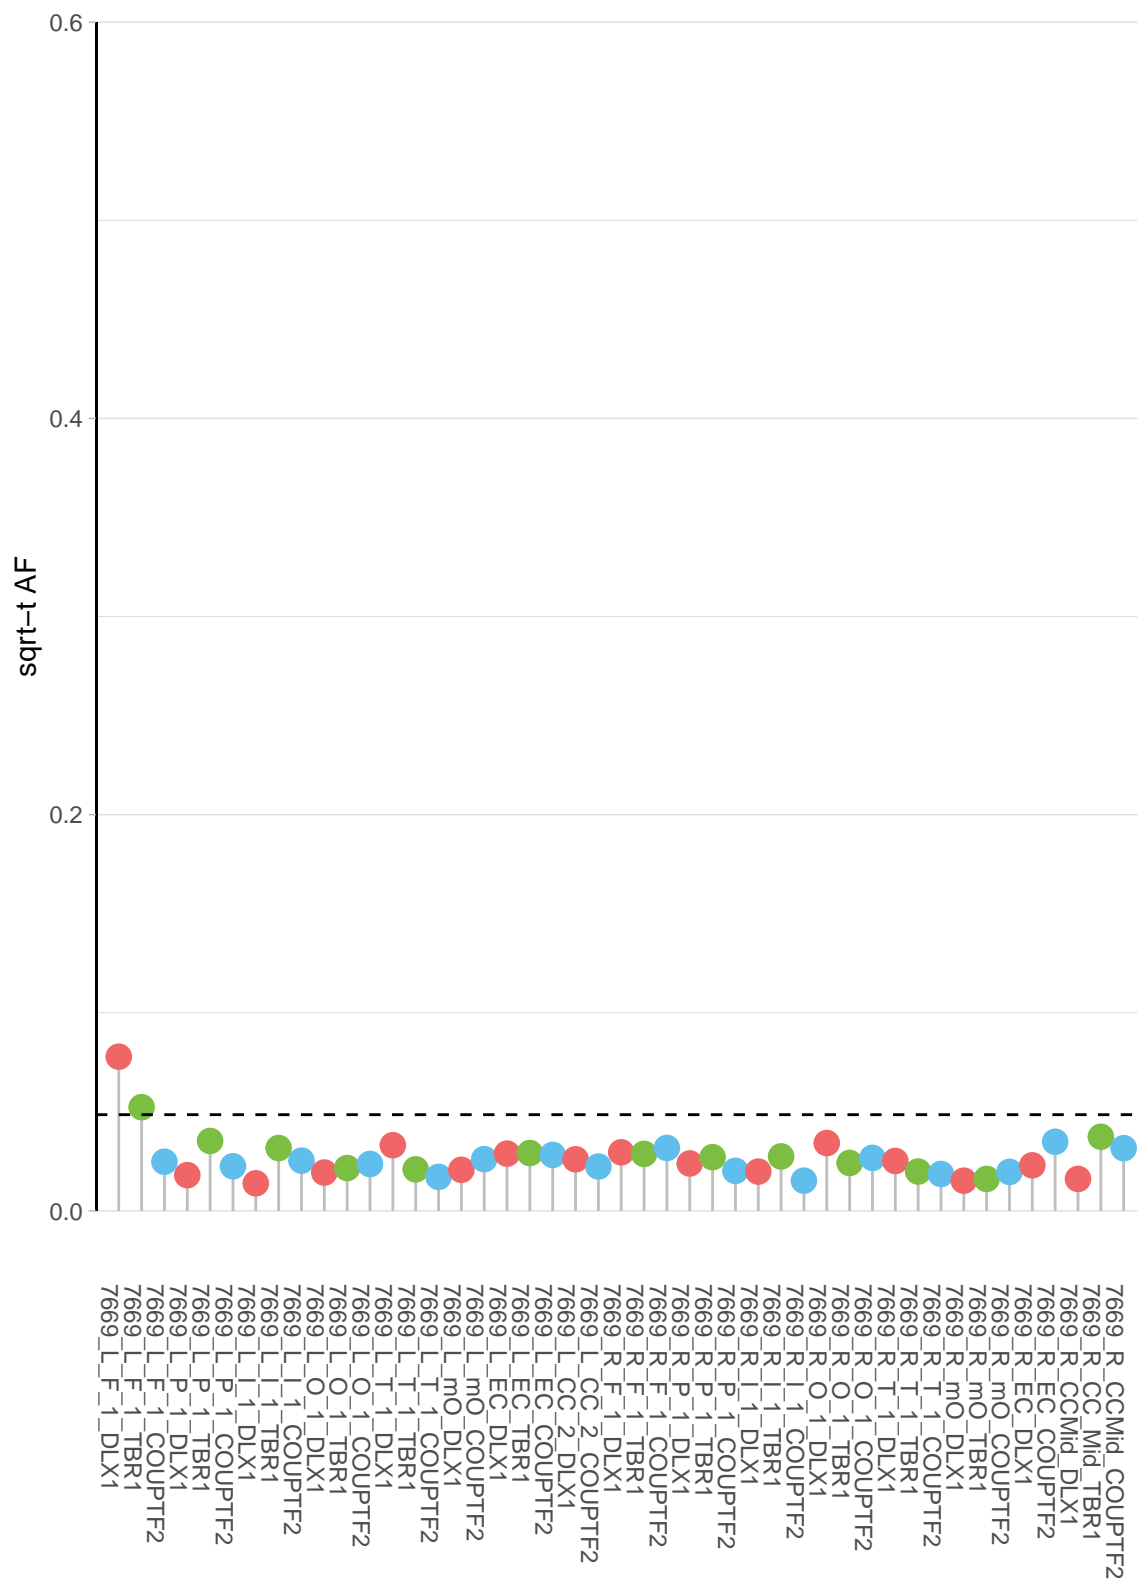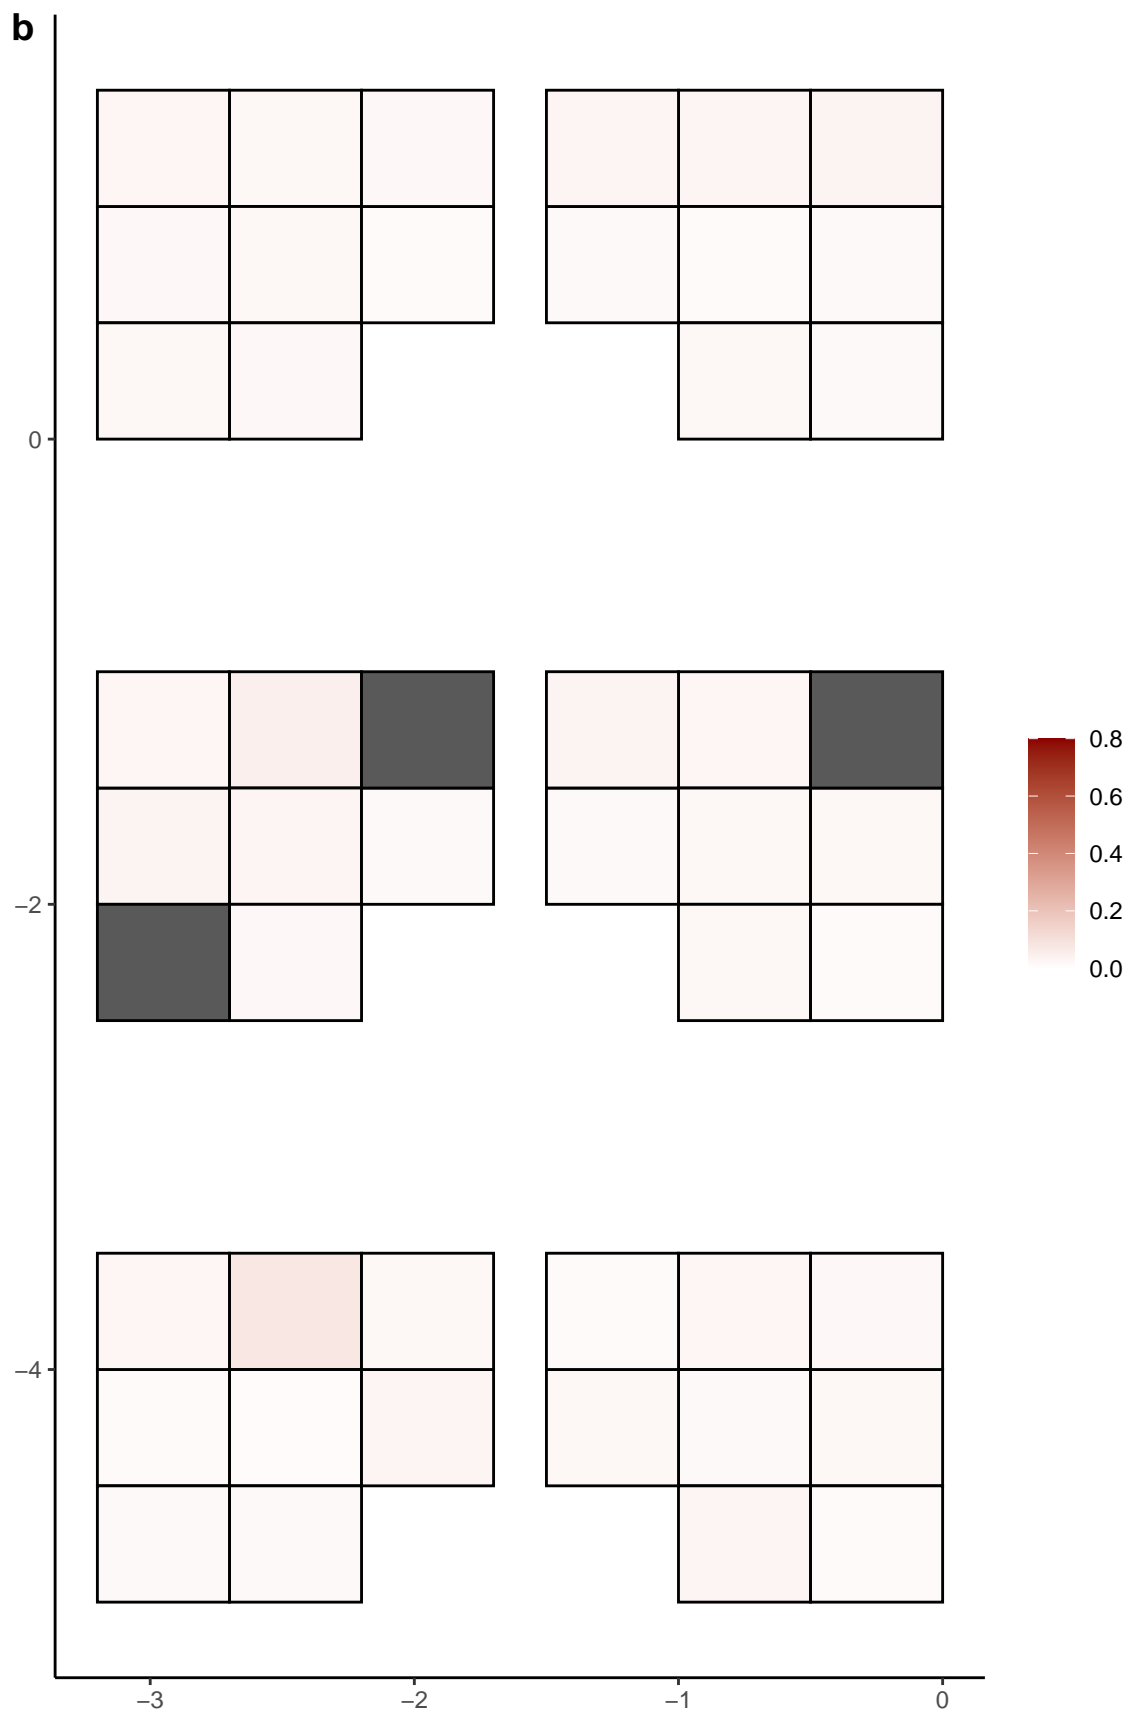

**a** ID05 10-12696593-A-G

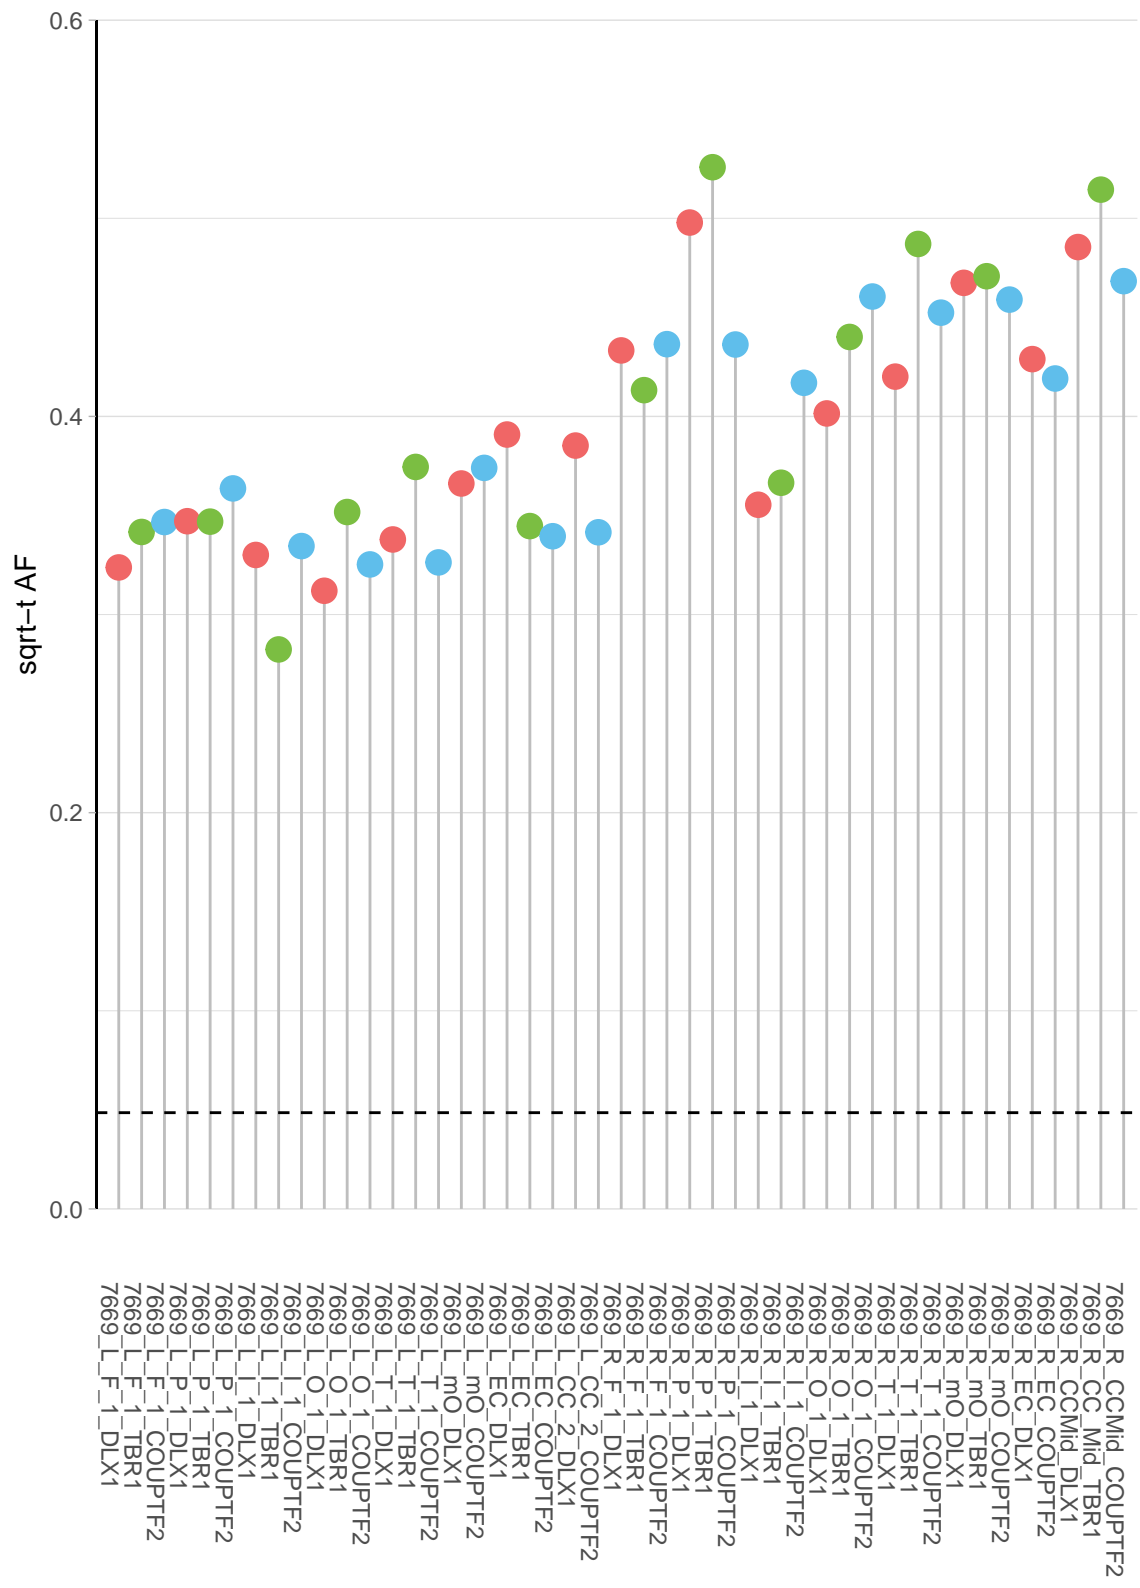

**b**

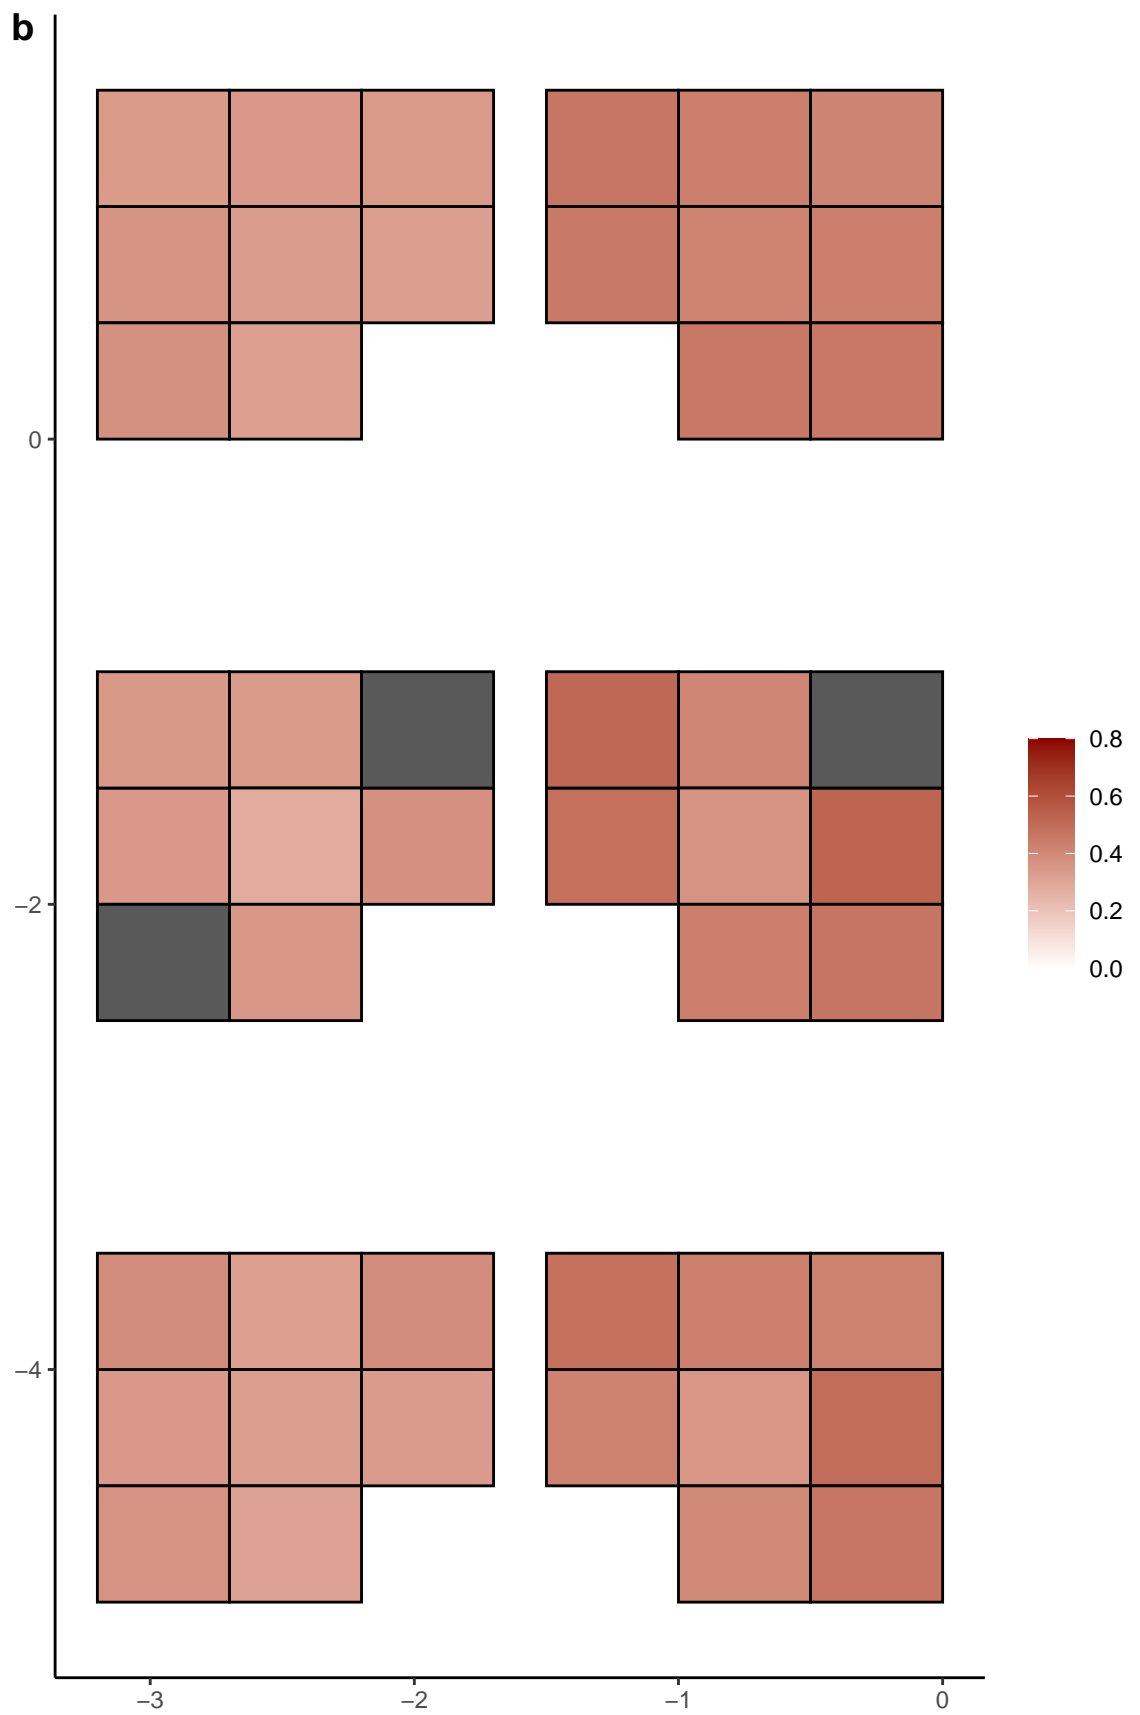

**a** ID05 10-128097755-C-T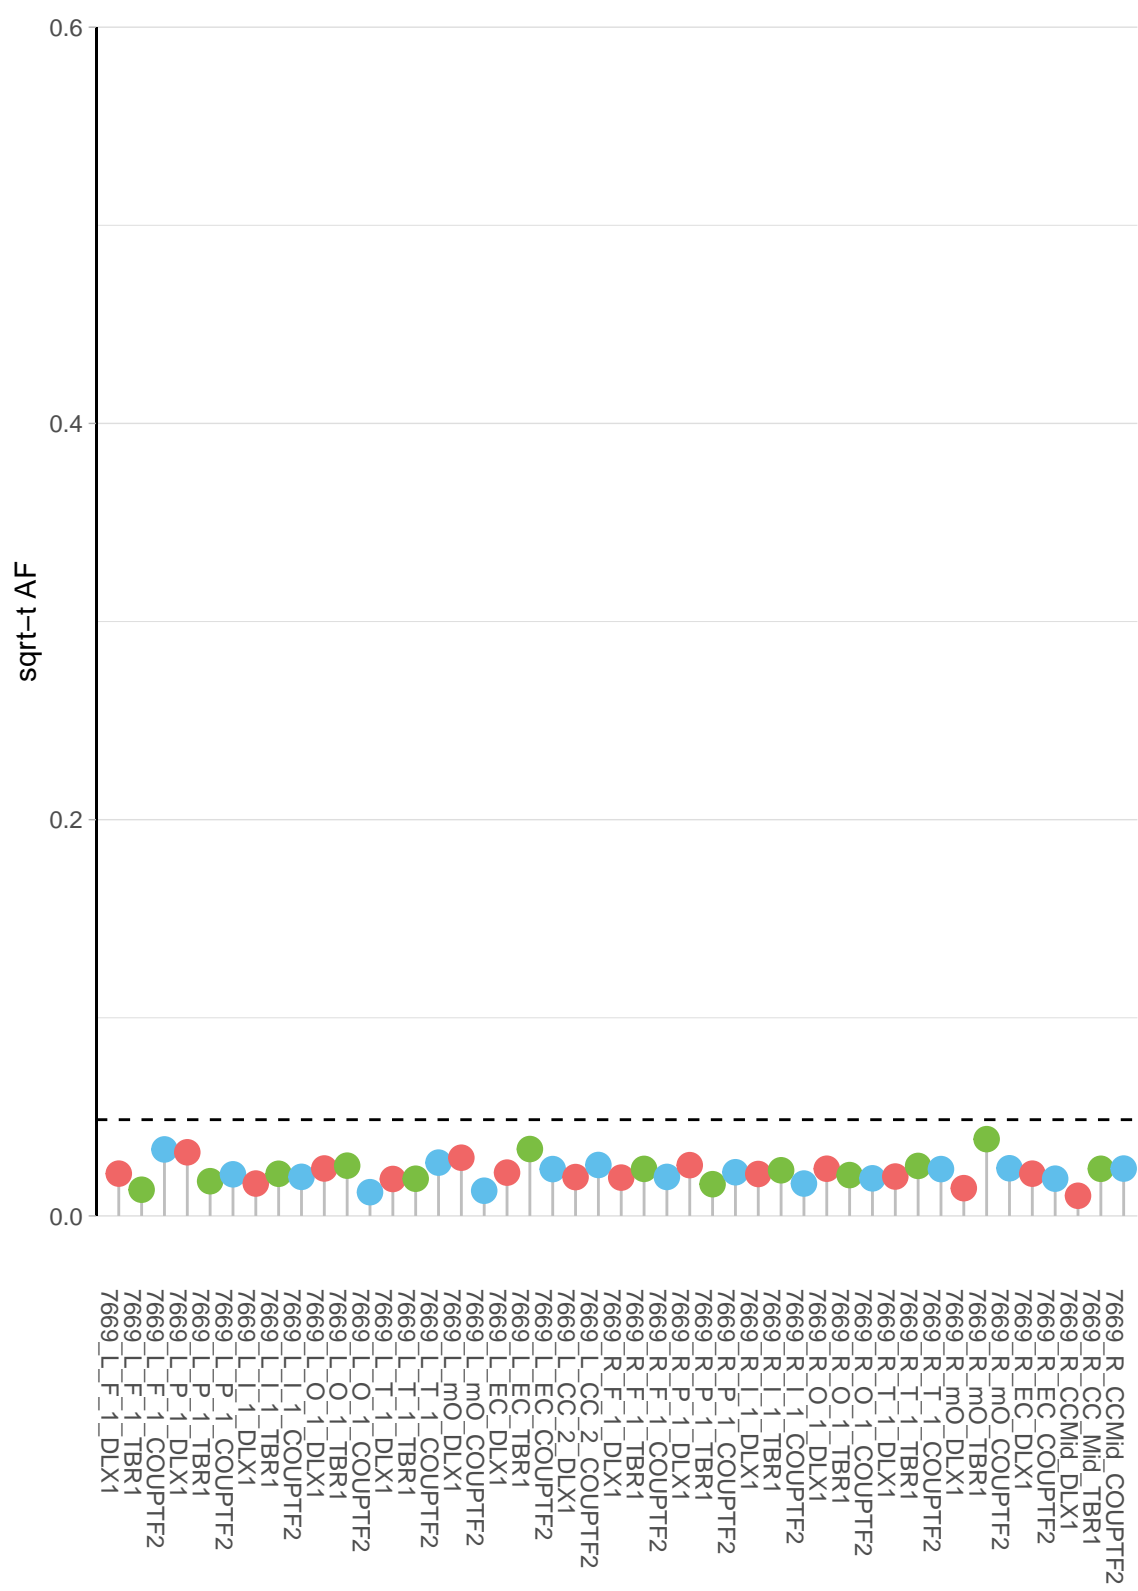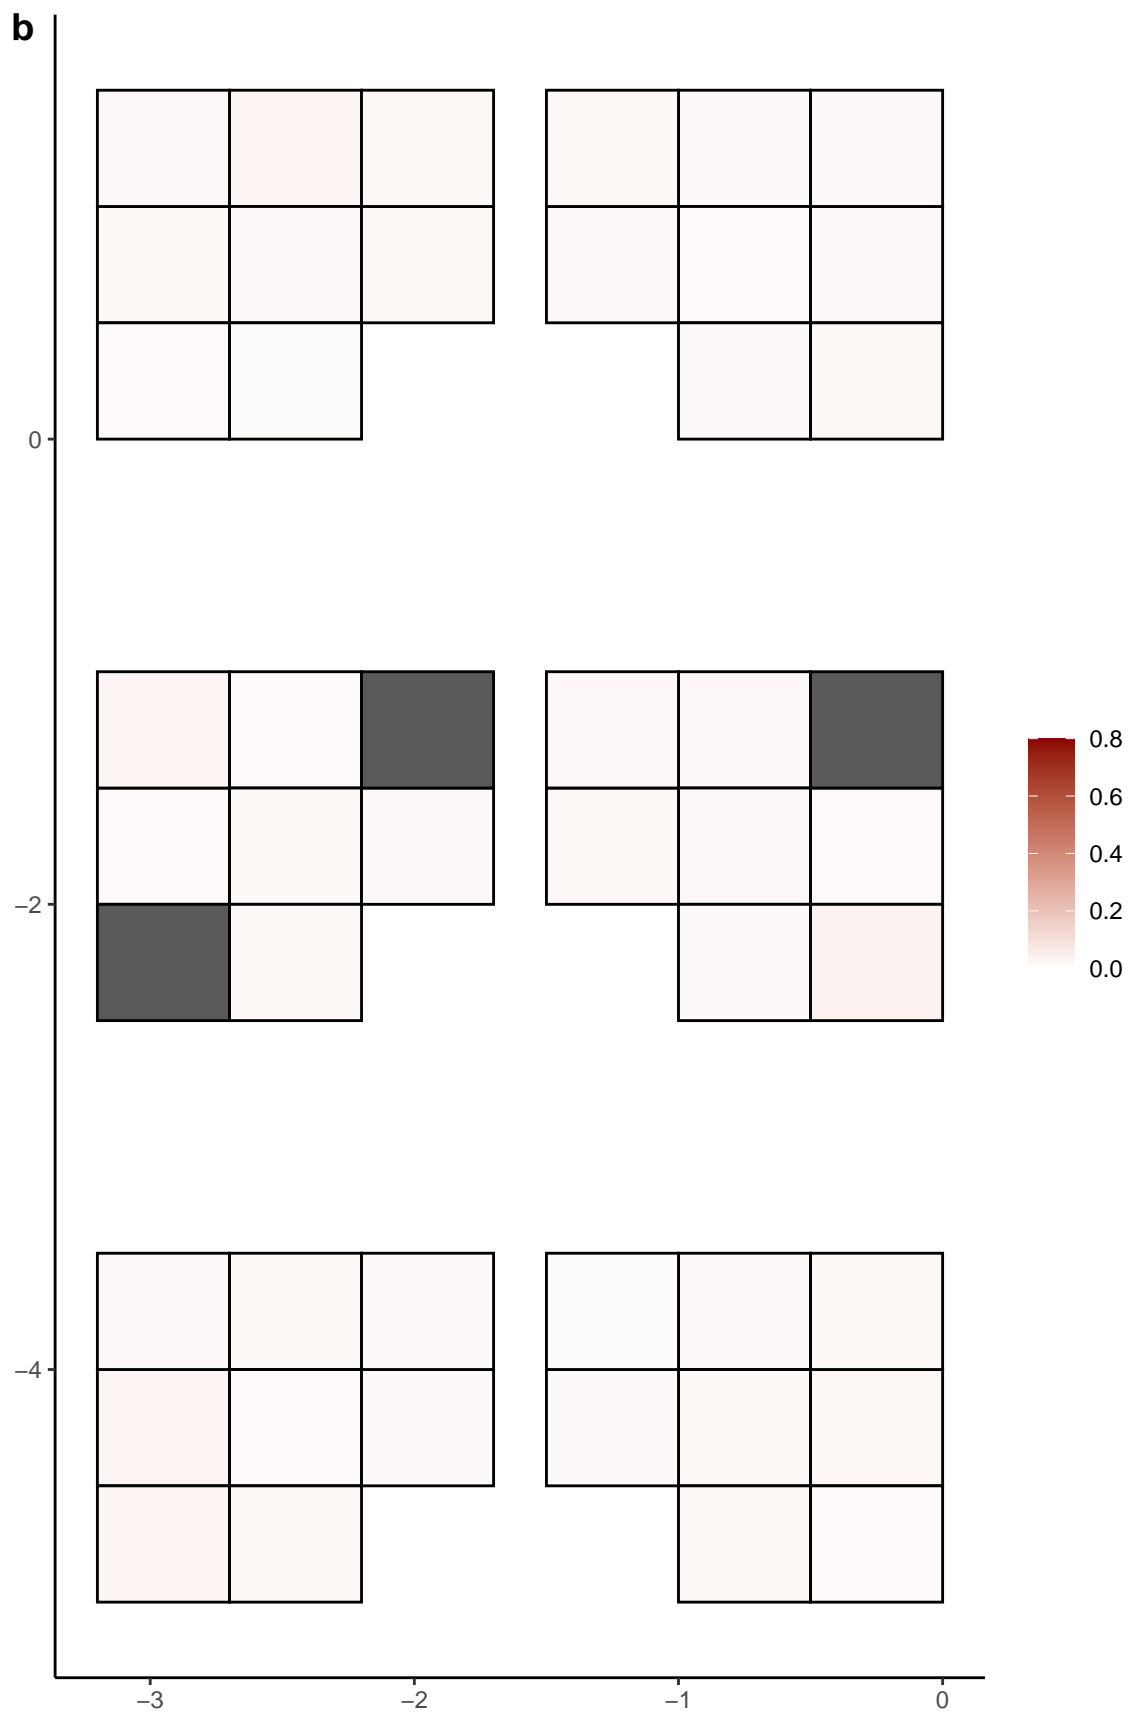

**a** ID05 10-128228322-C-T

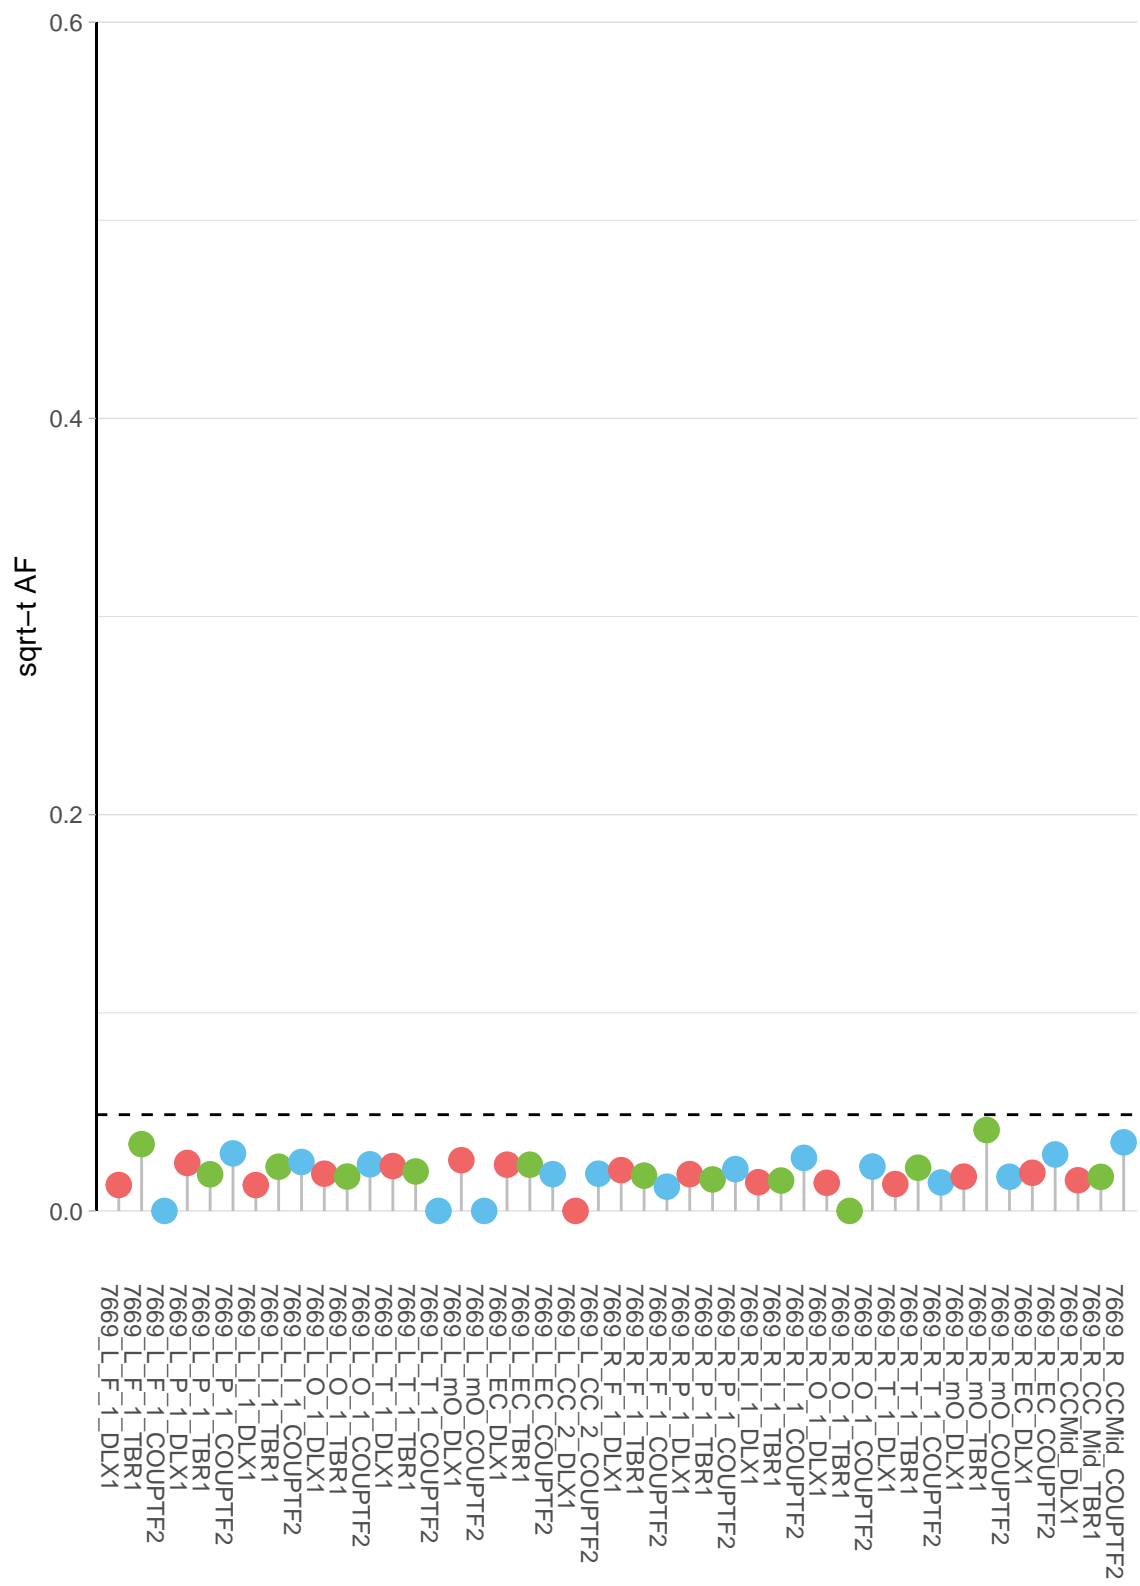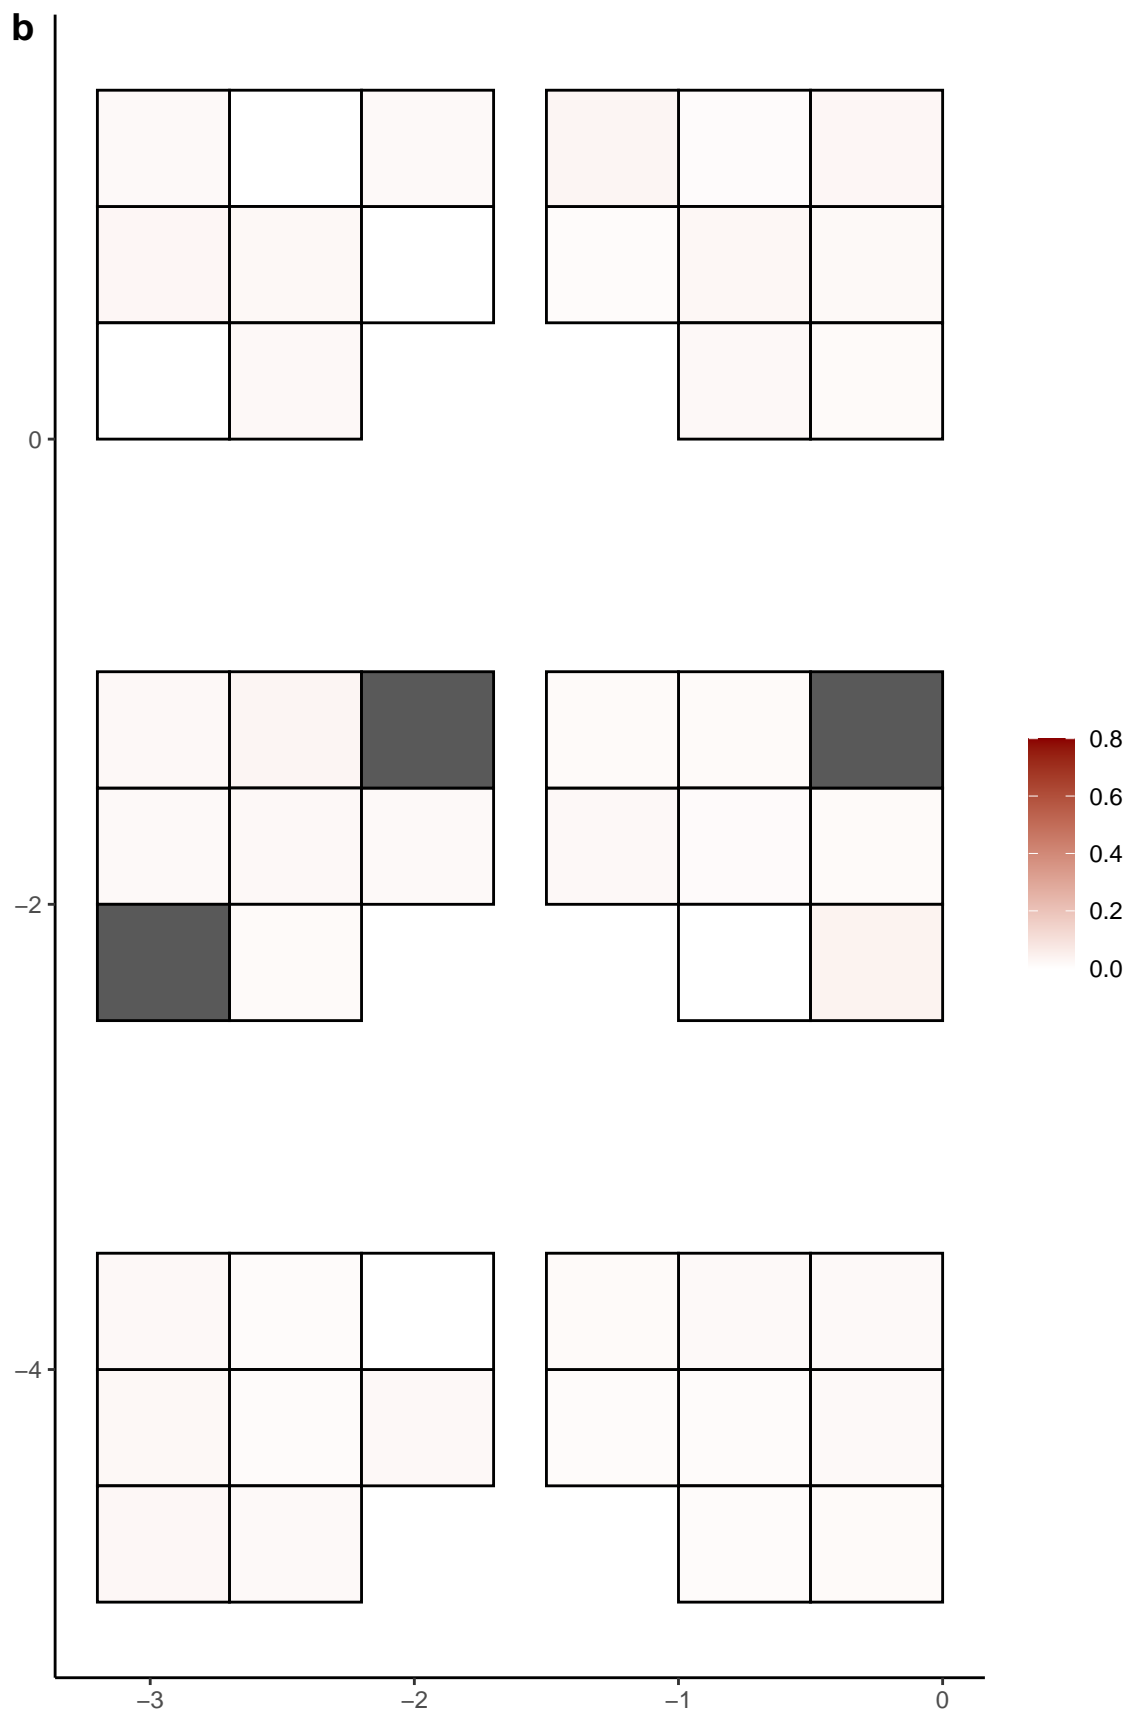

**a** ID05 10-129376060-T-G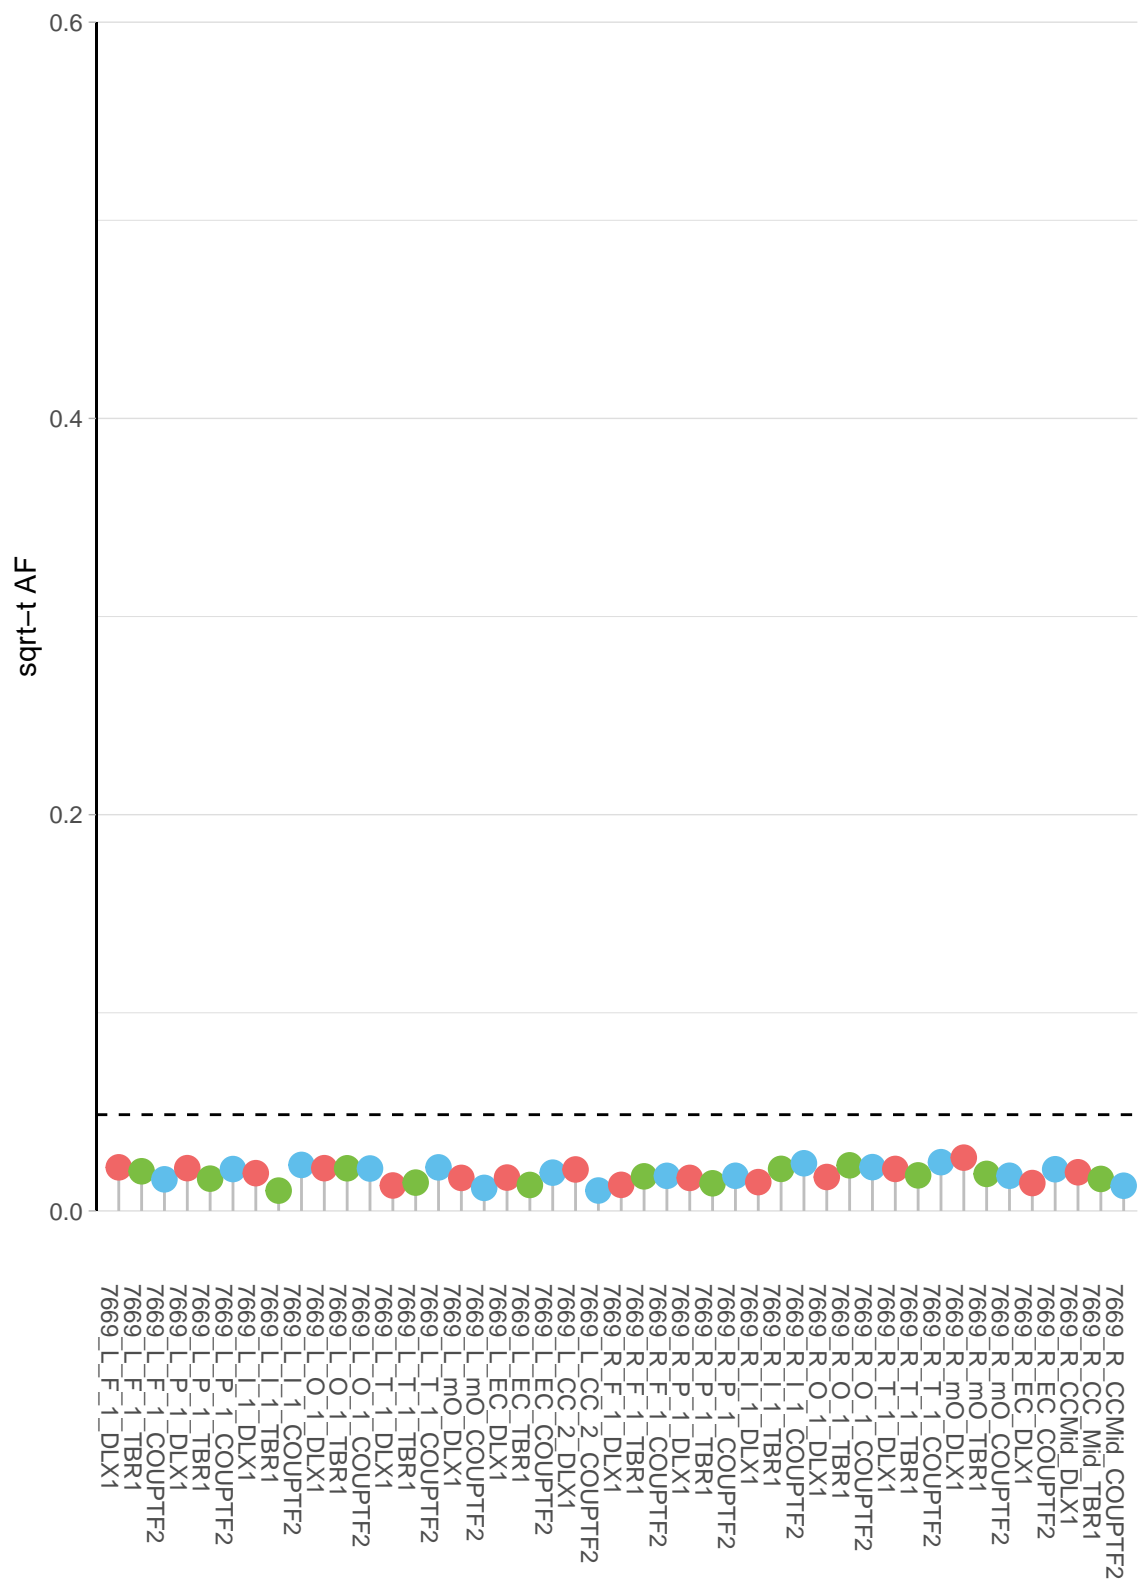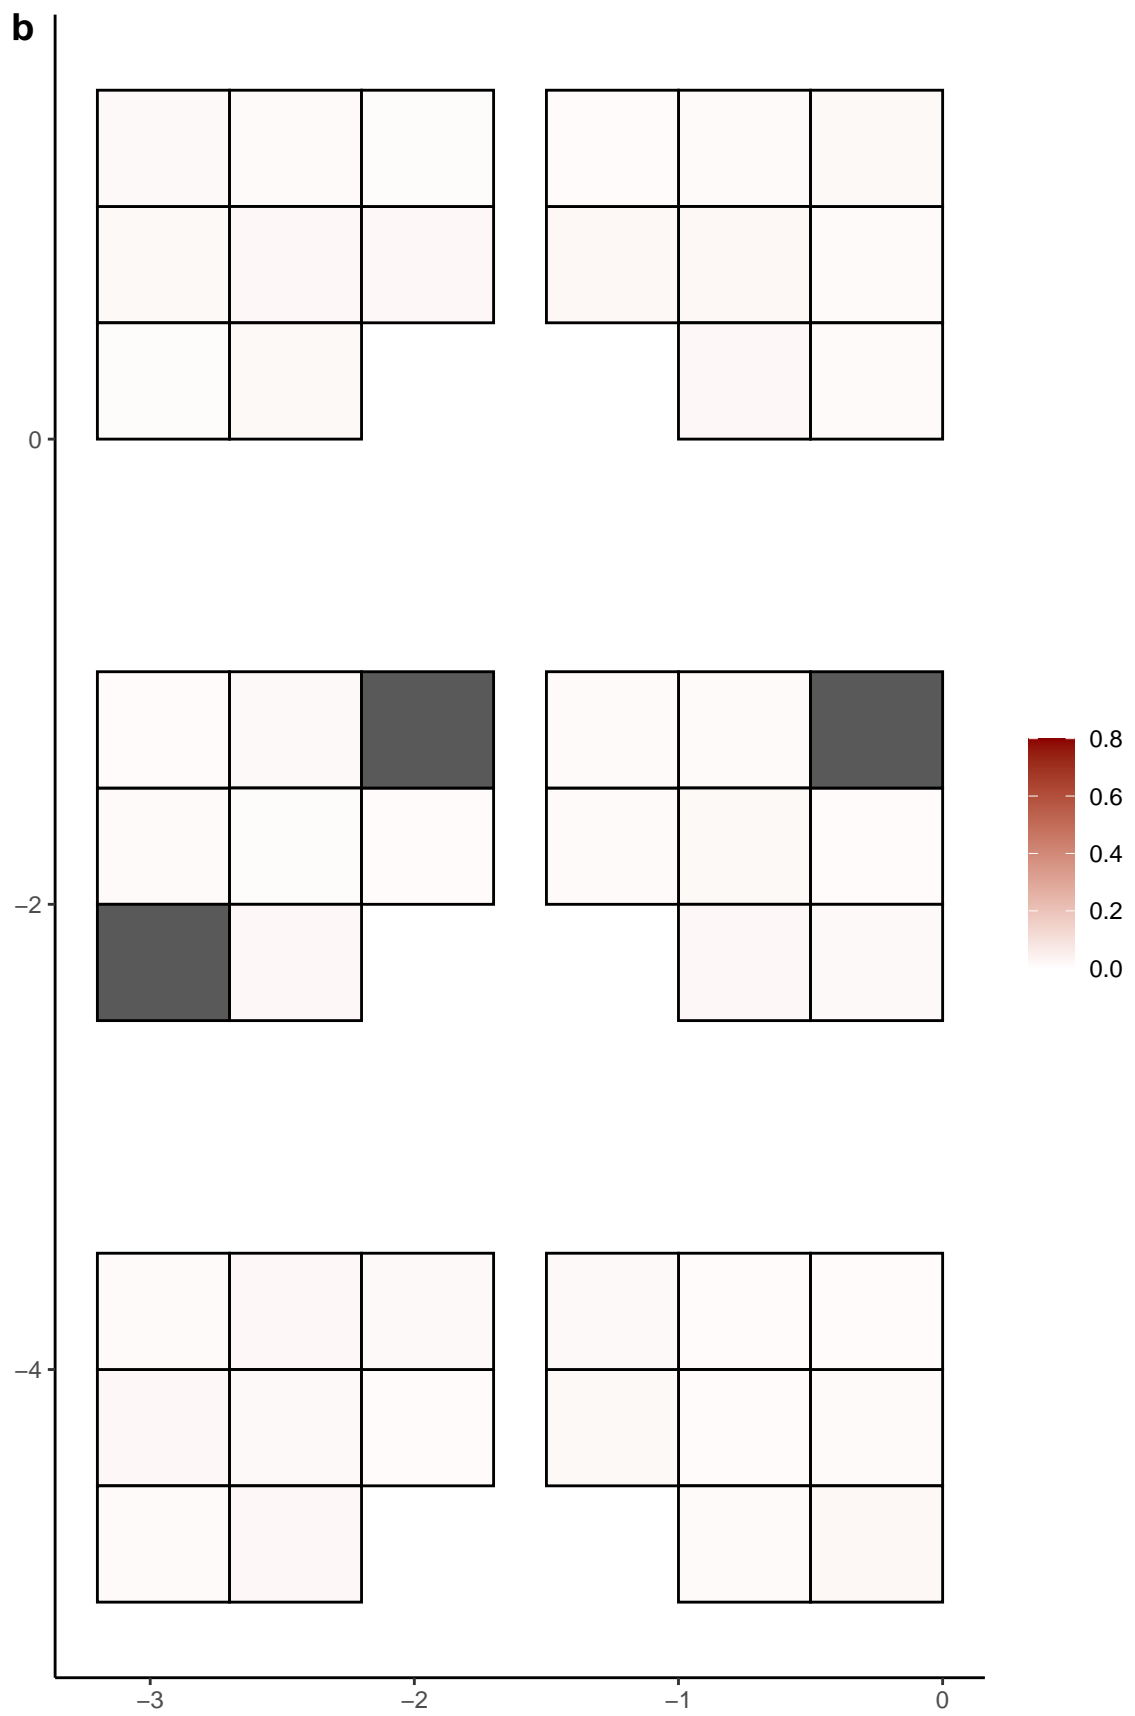



**a** ID05 10-133221443-A-T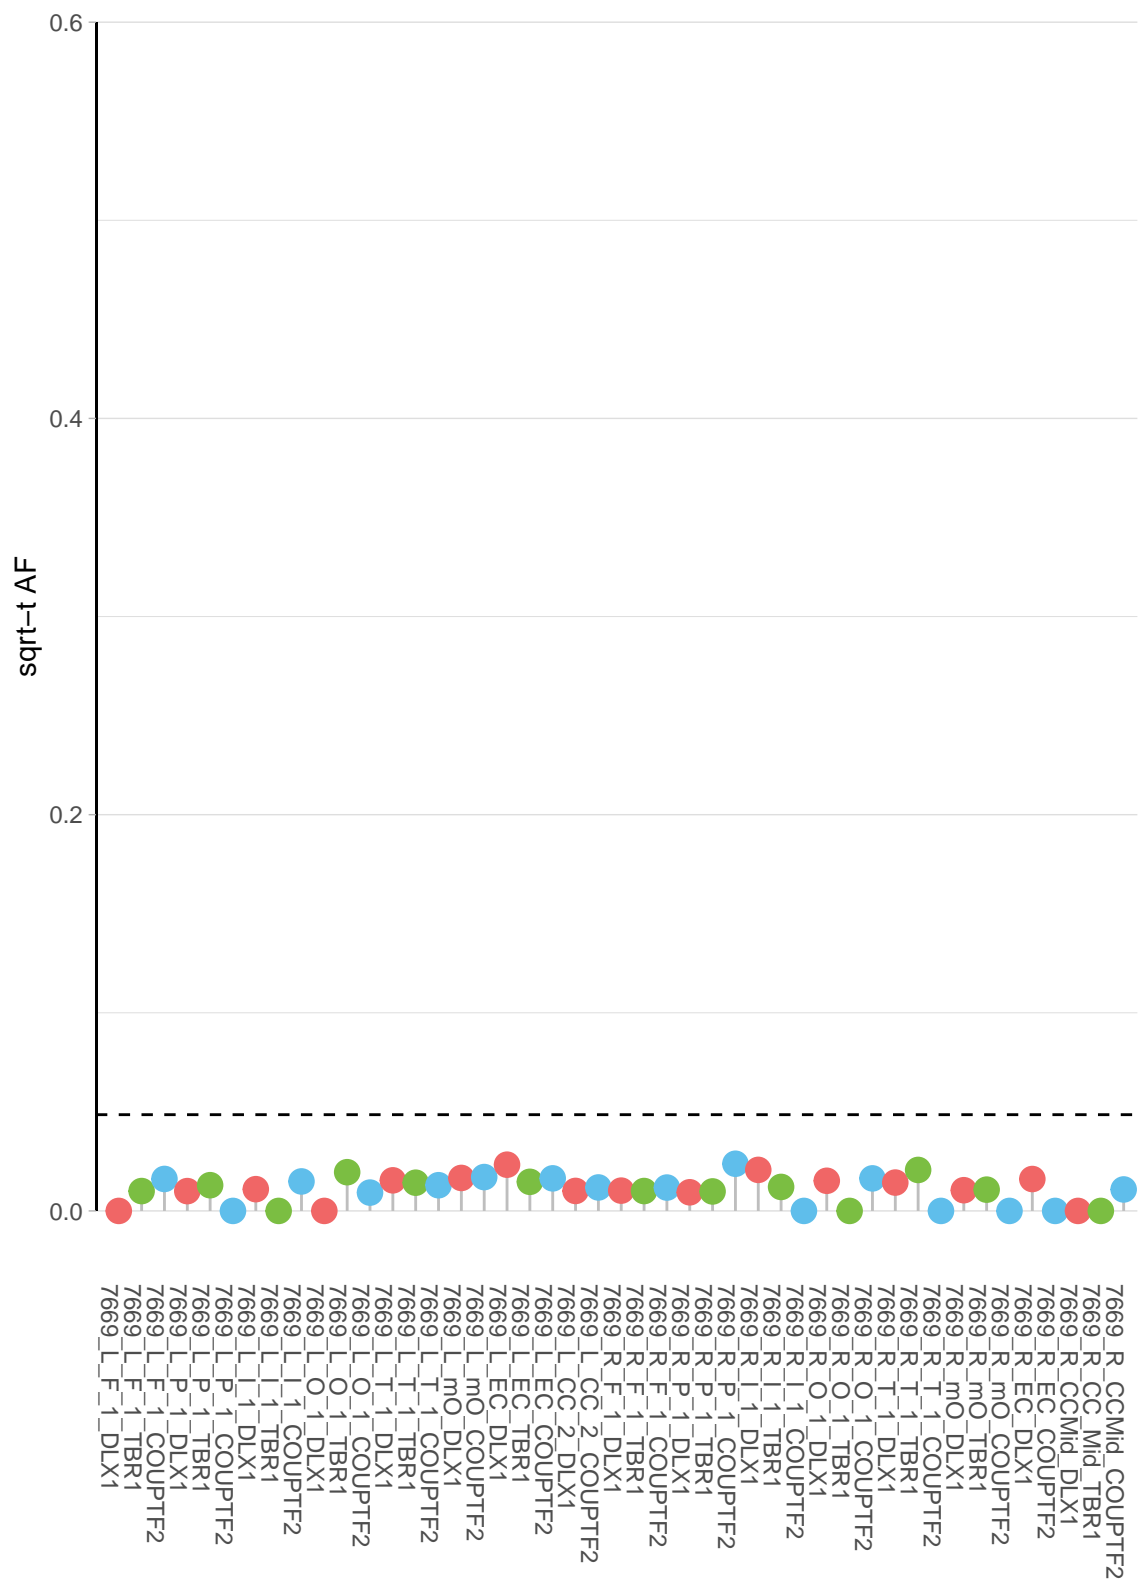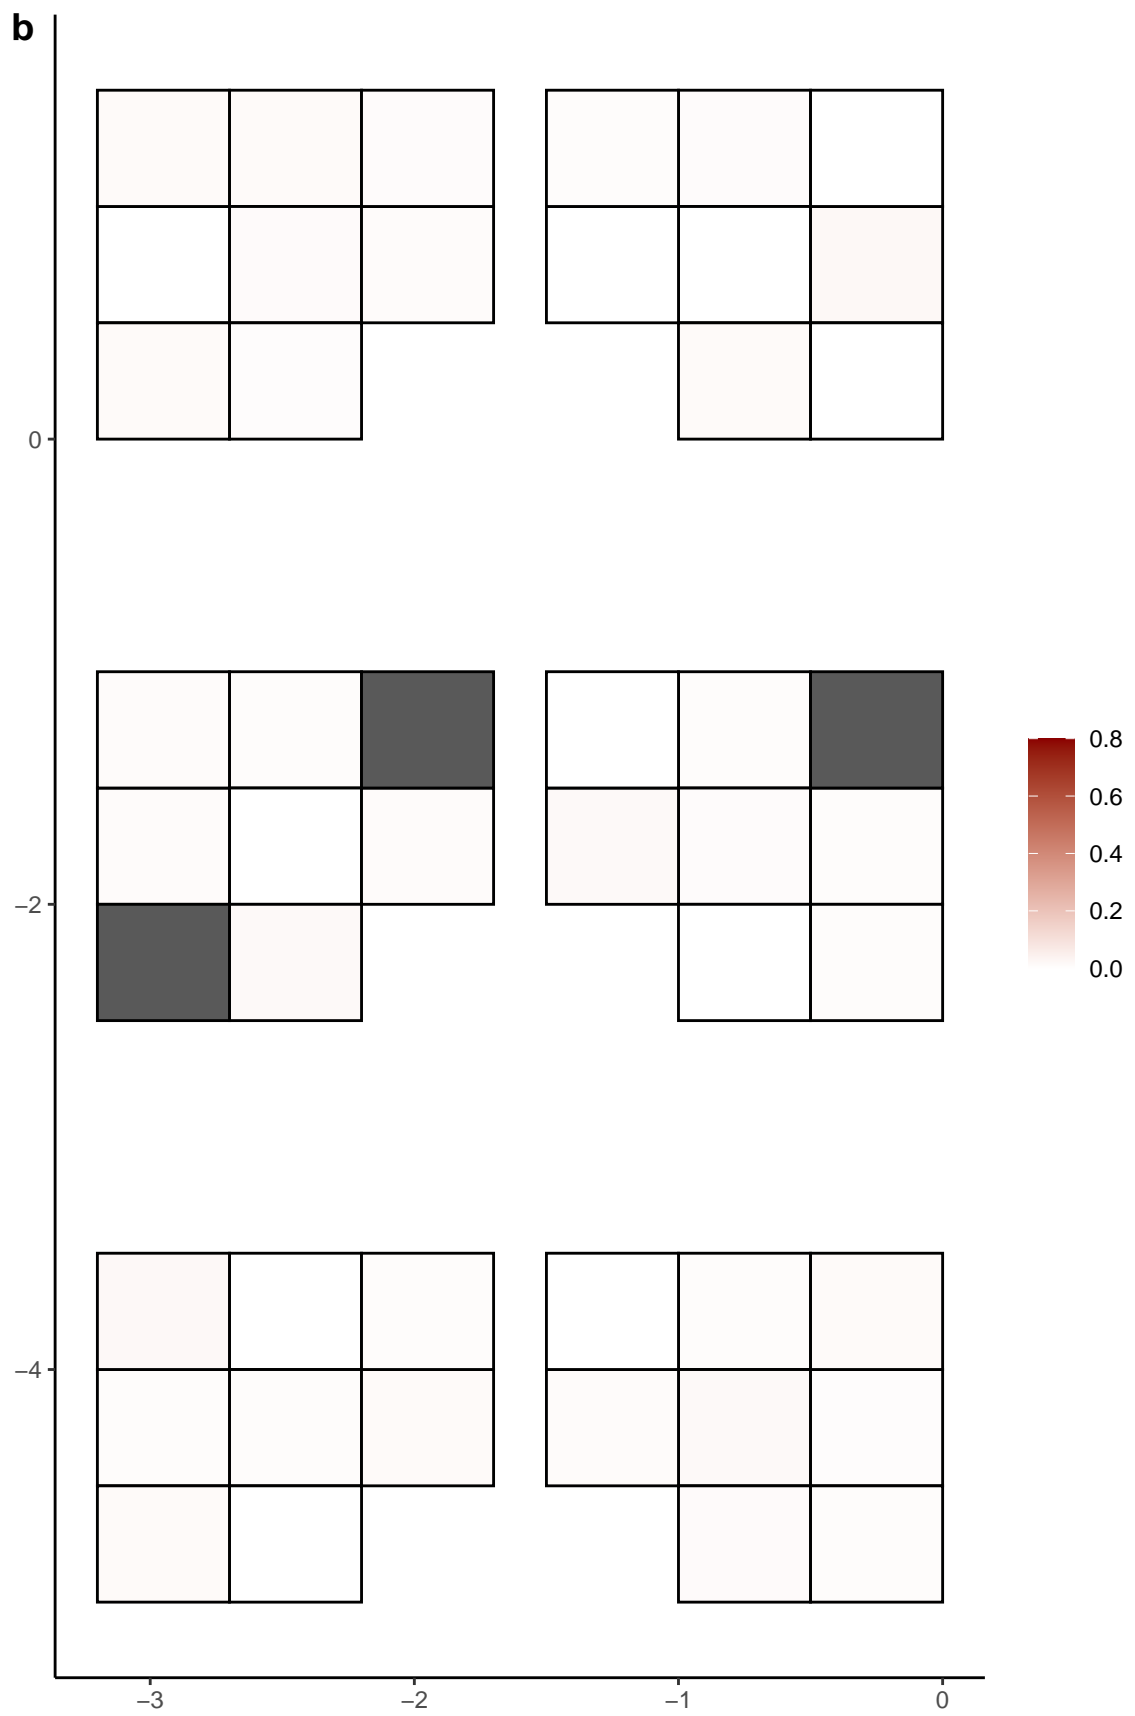

**a** ID05 10-134211625-C-T

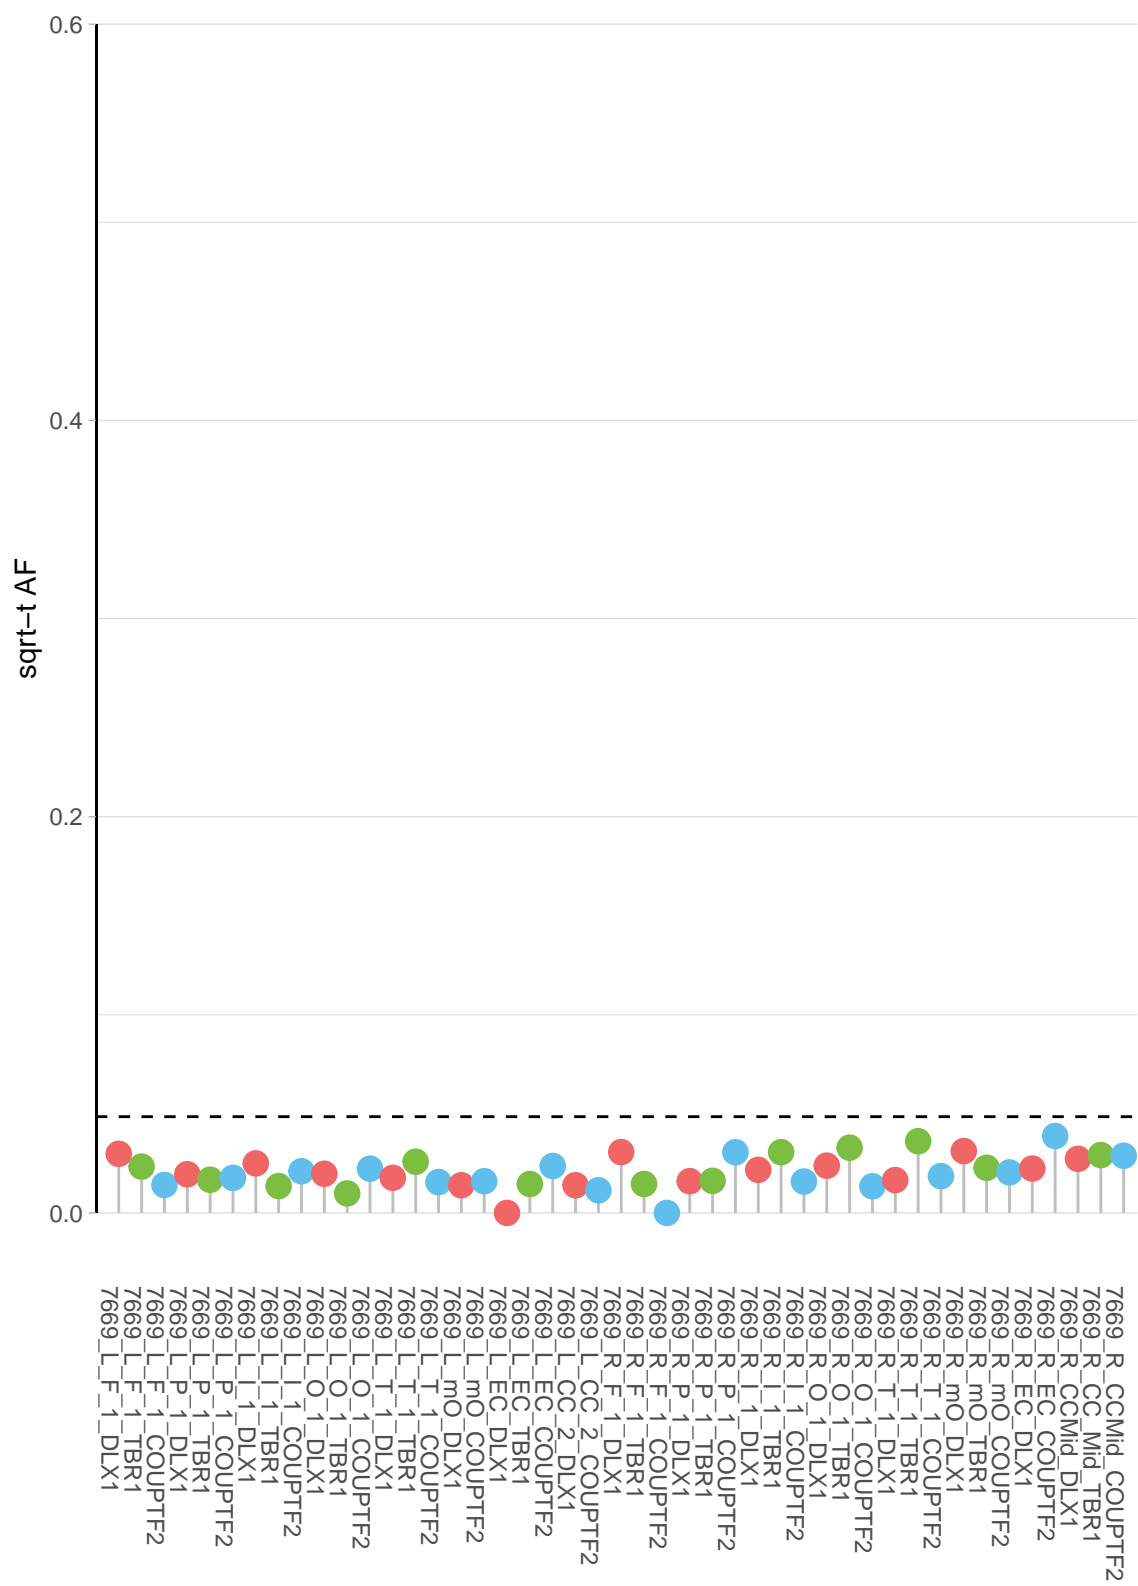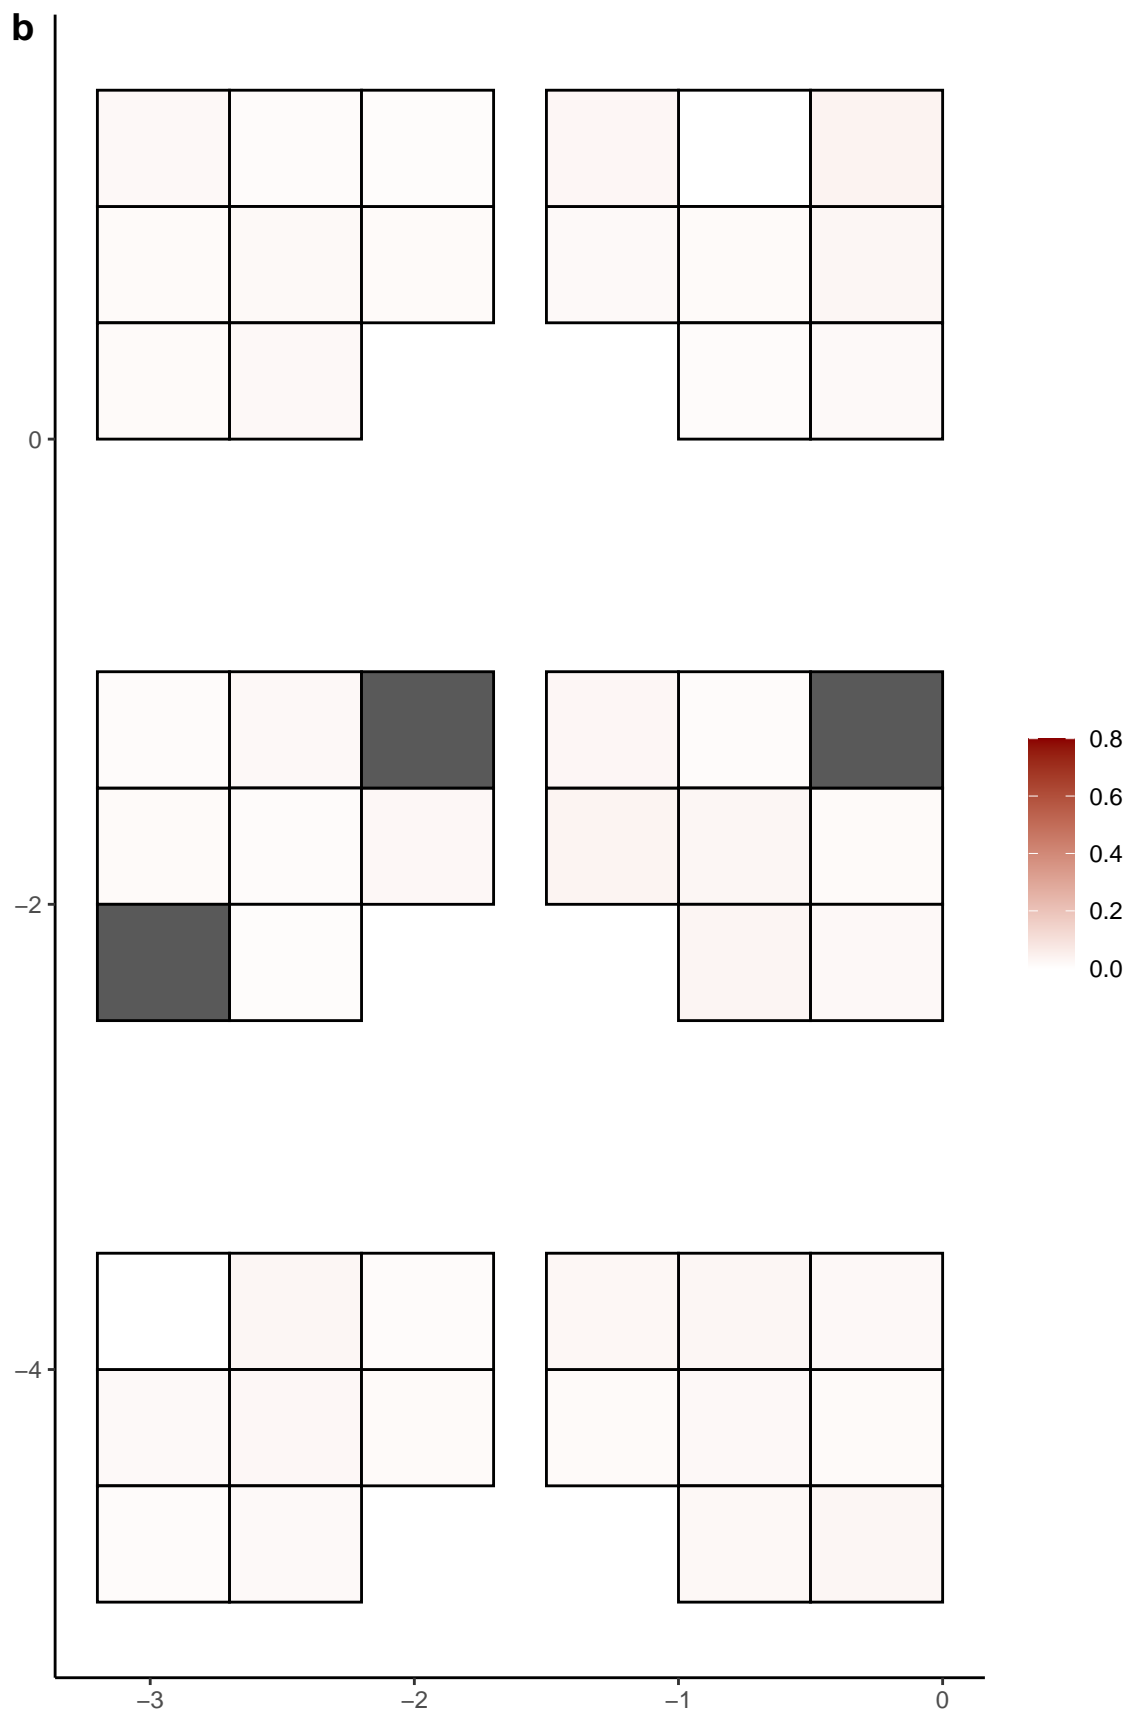

**a** ID05 10-134280713-A-G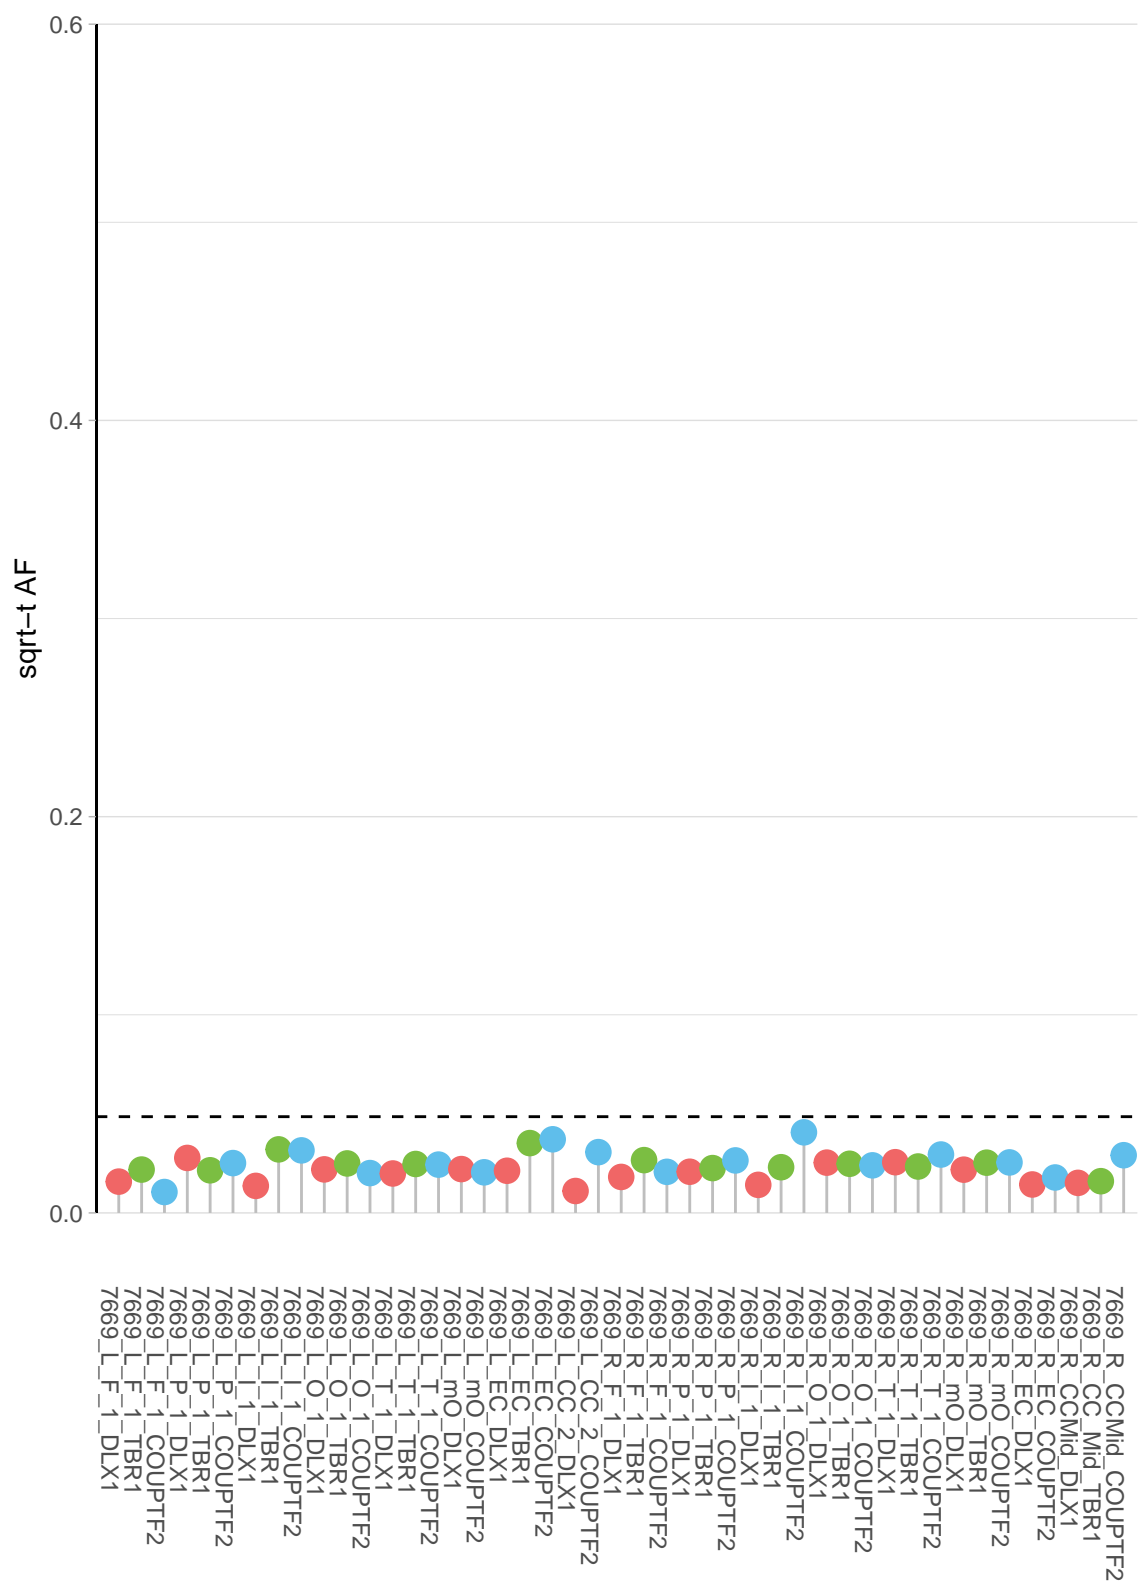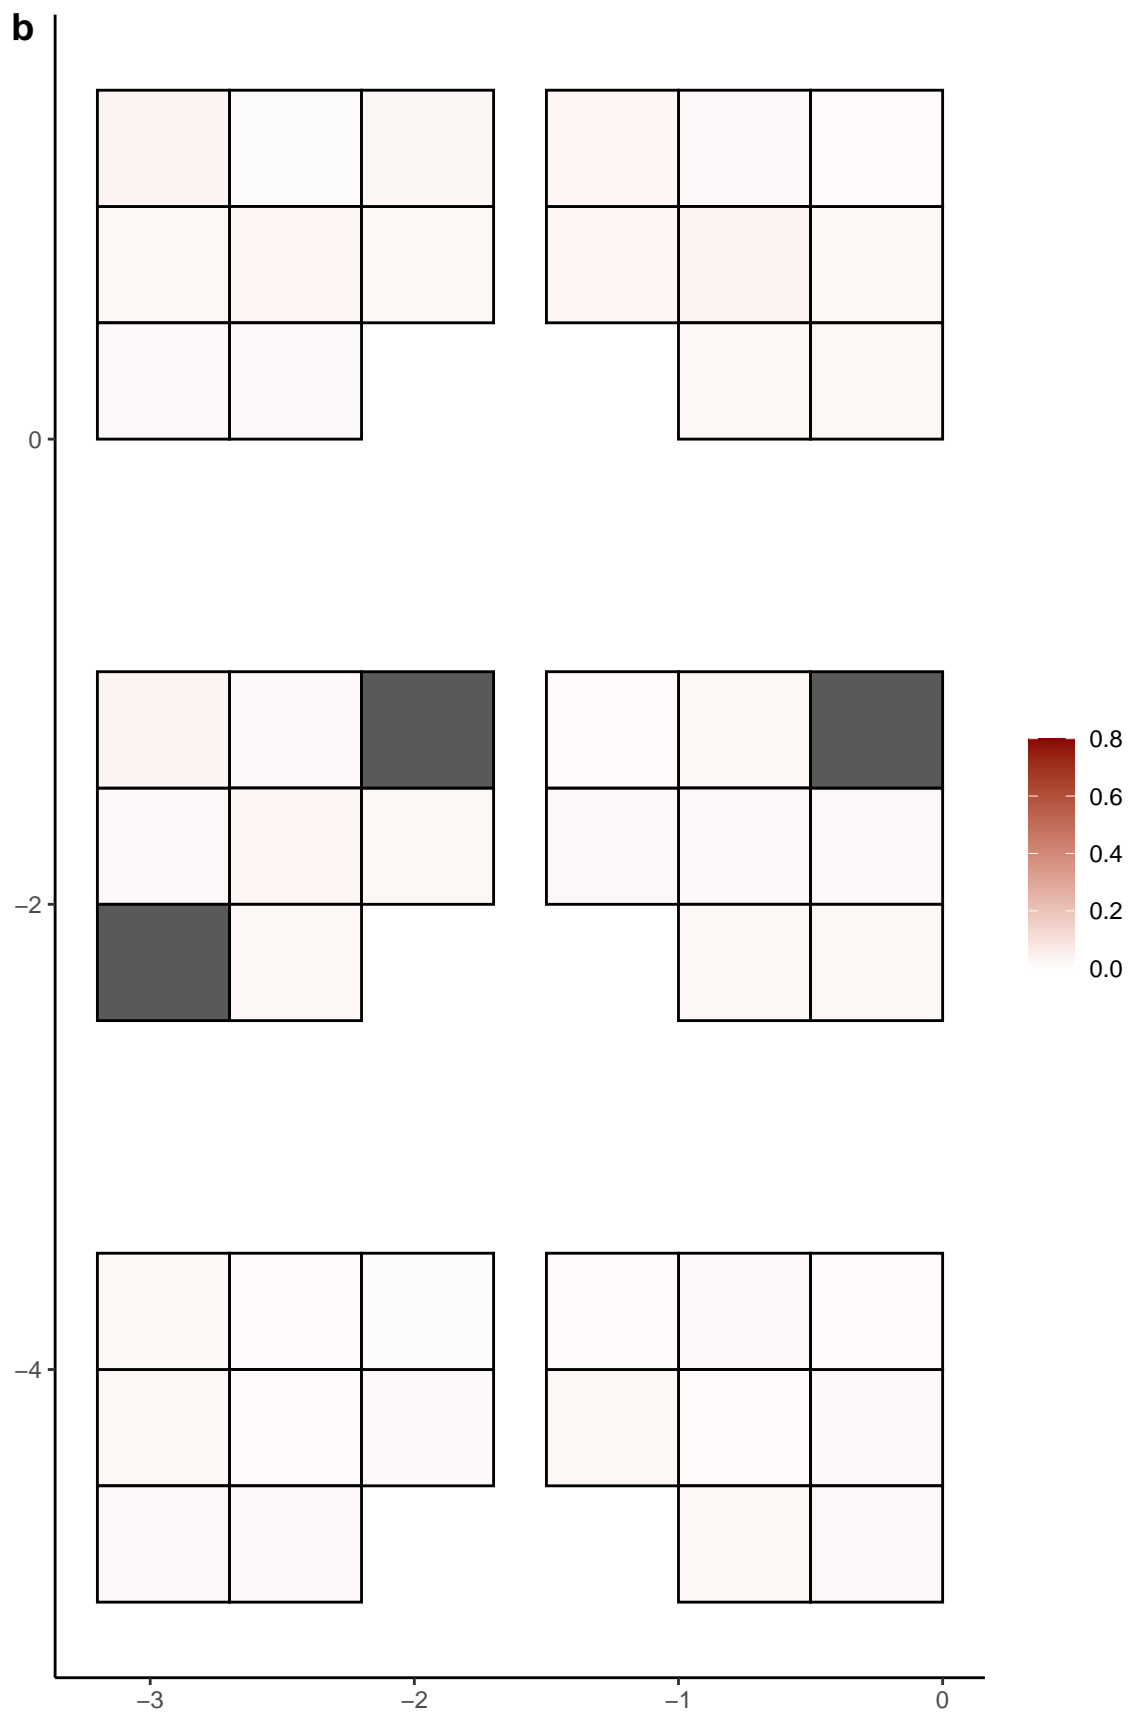



**a** ID05 10-14490737-G-A

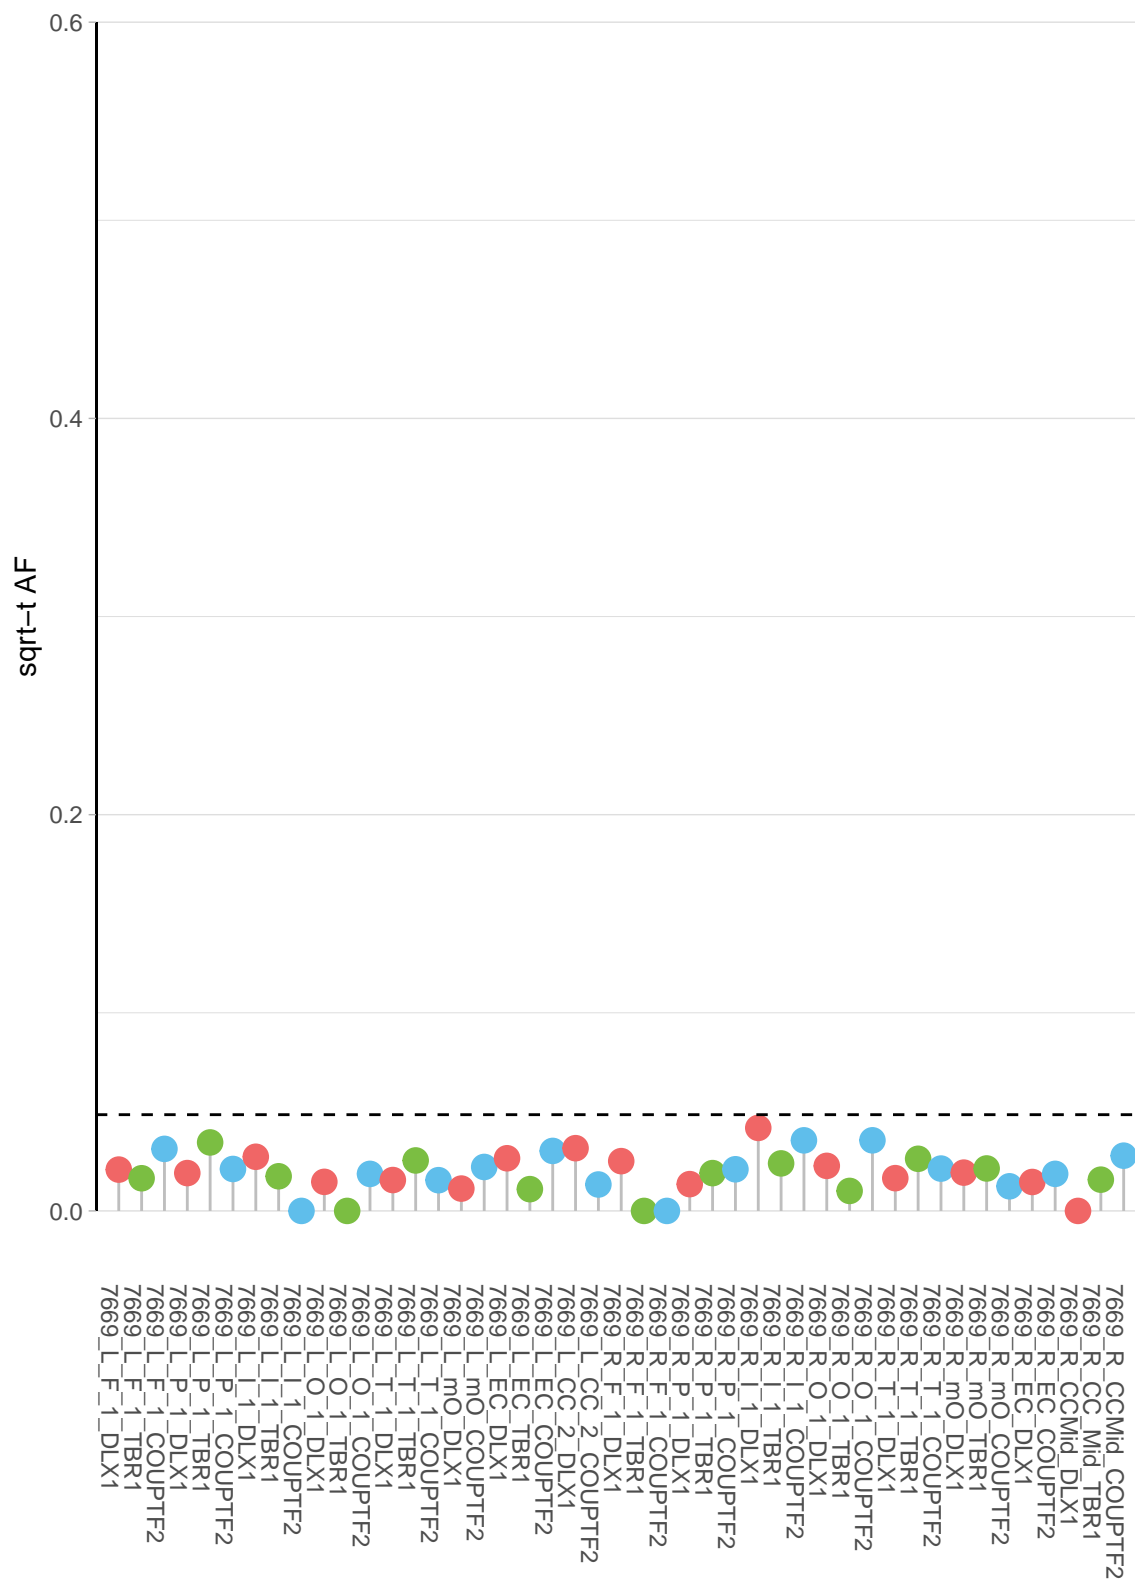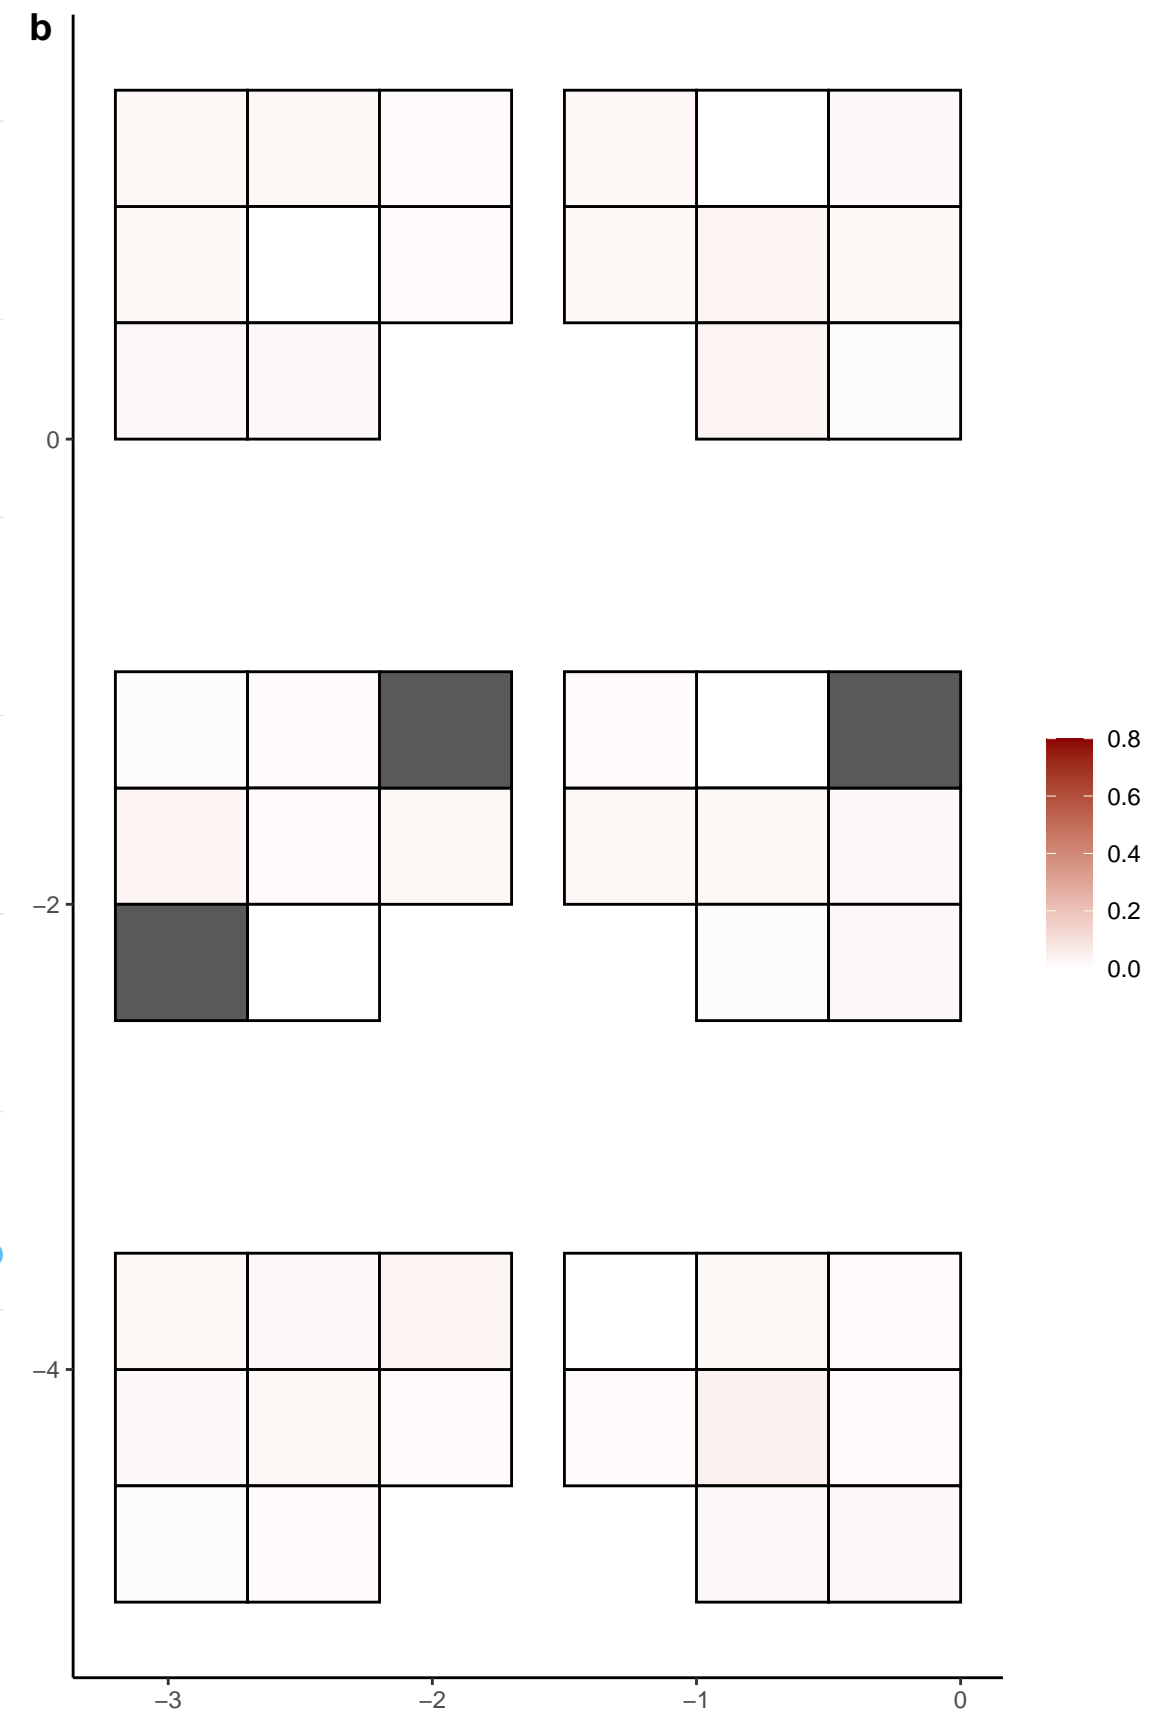



**a** ID05 10-18760480-C-T

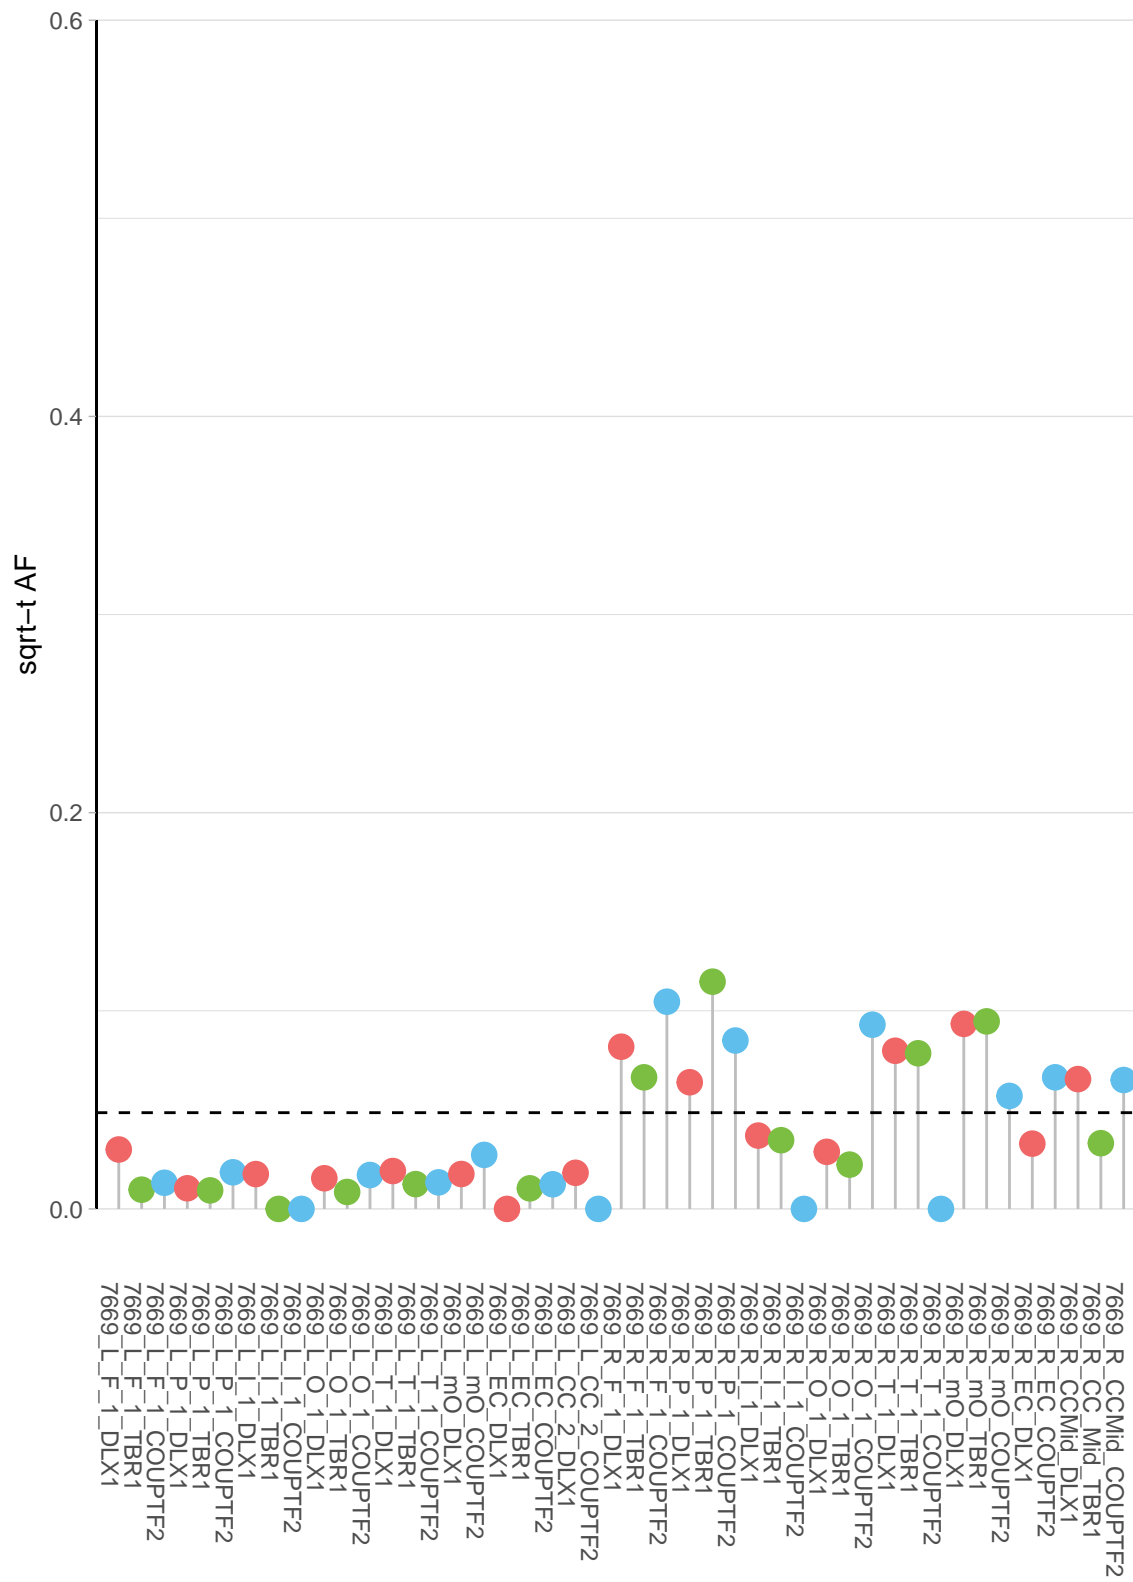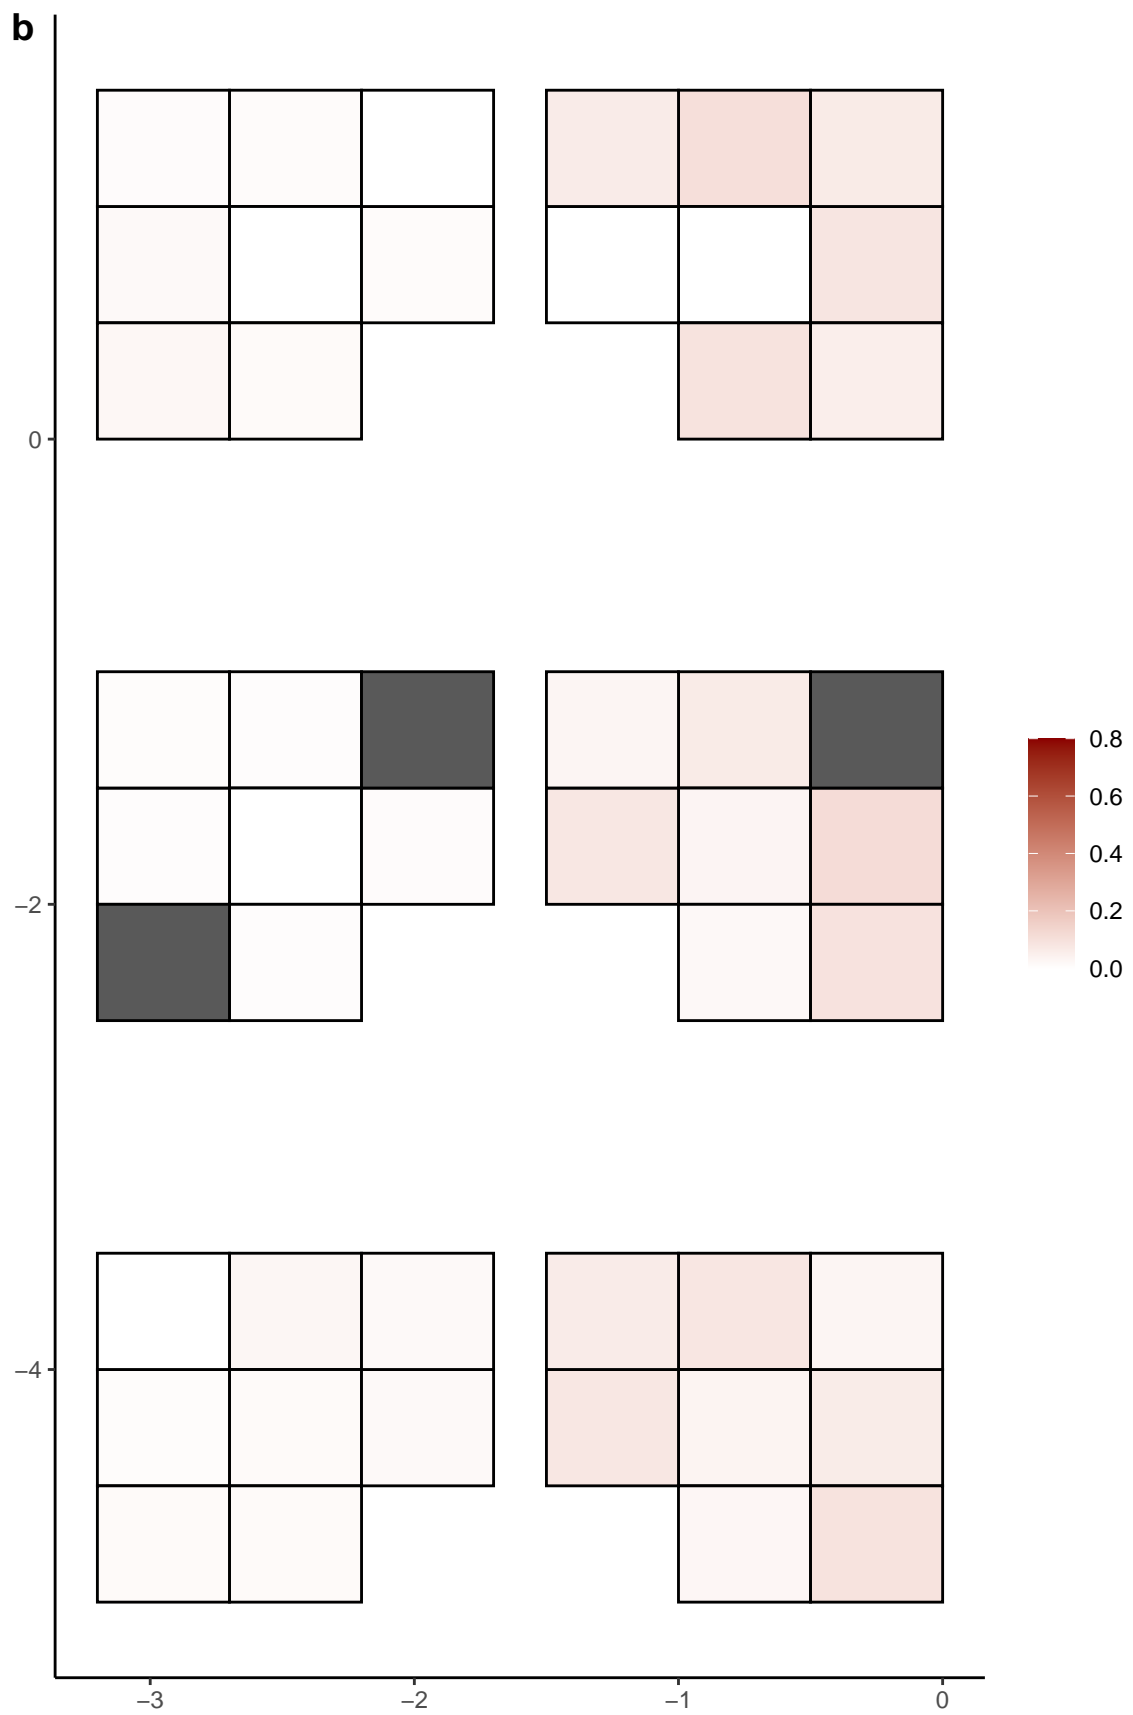

**a** ID05 10-2261697-A-C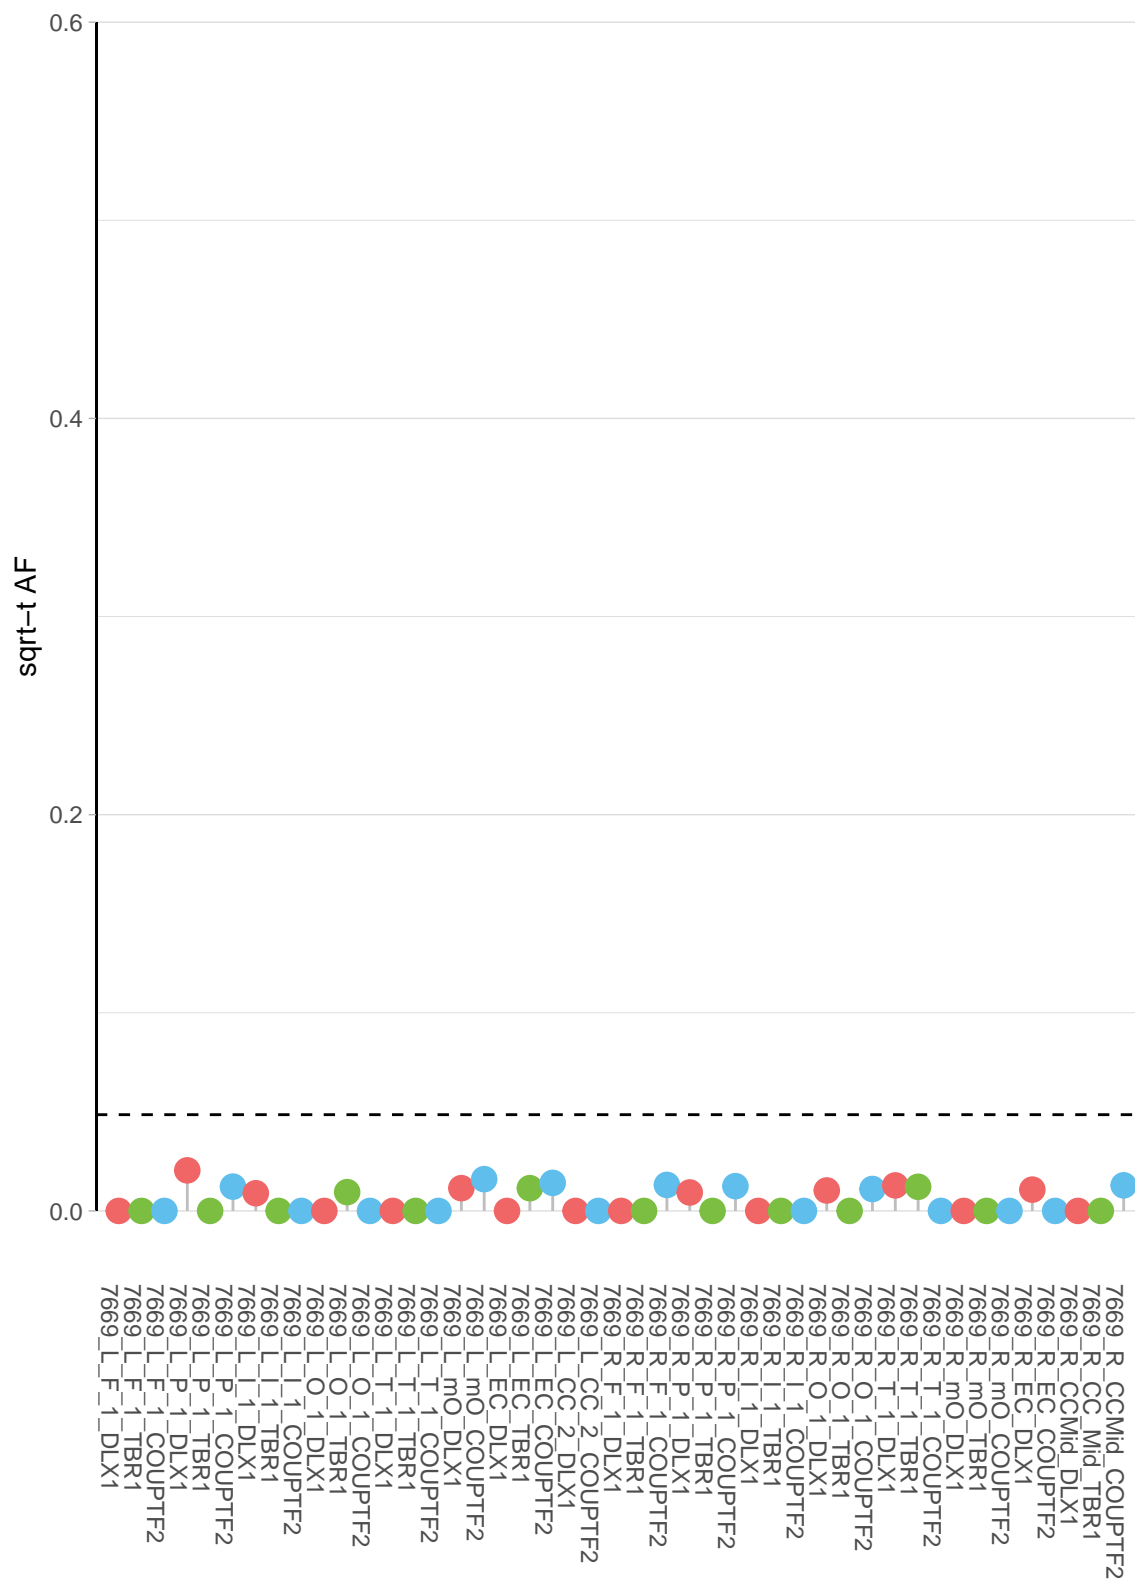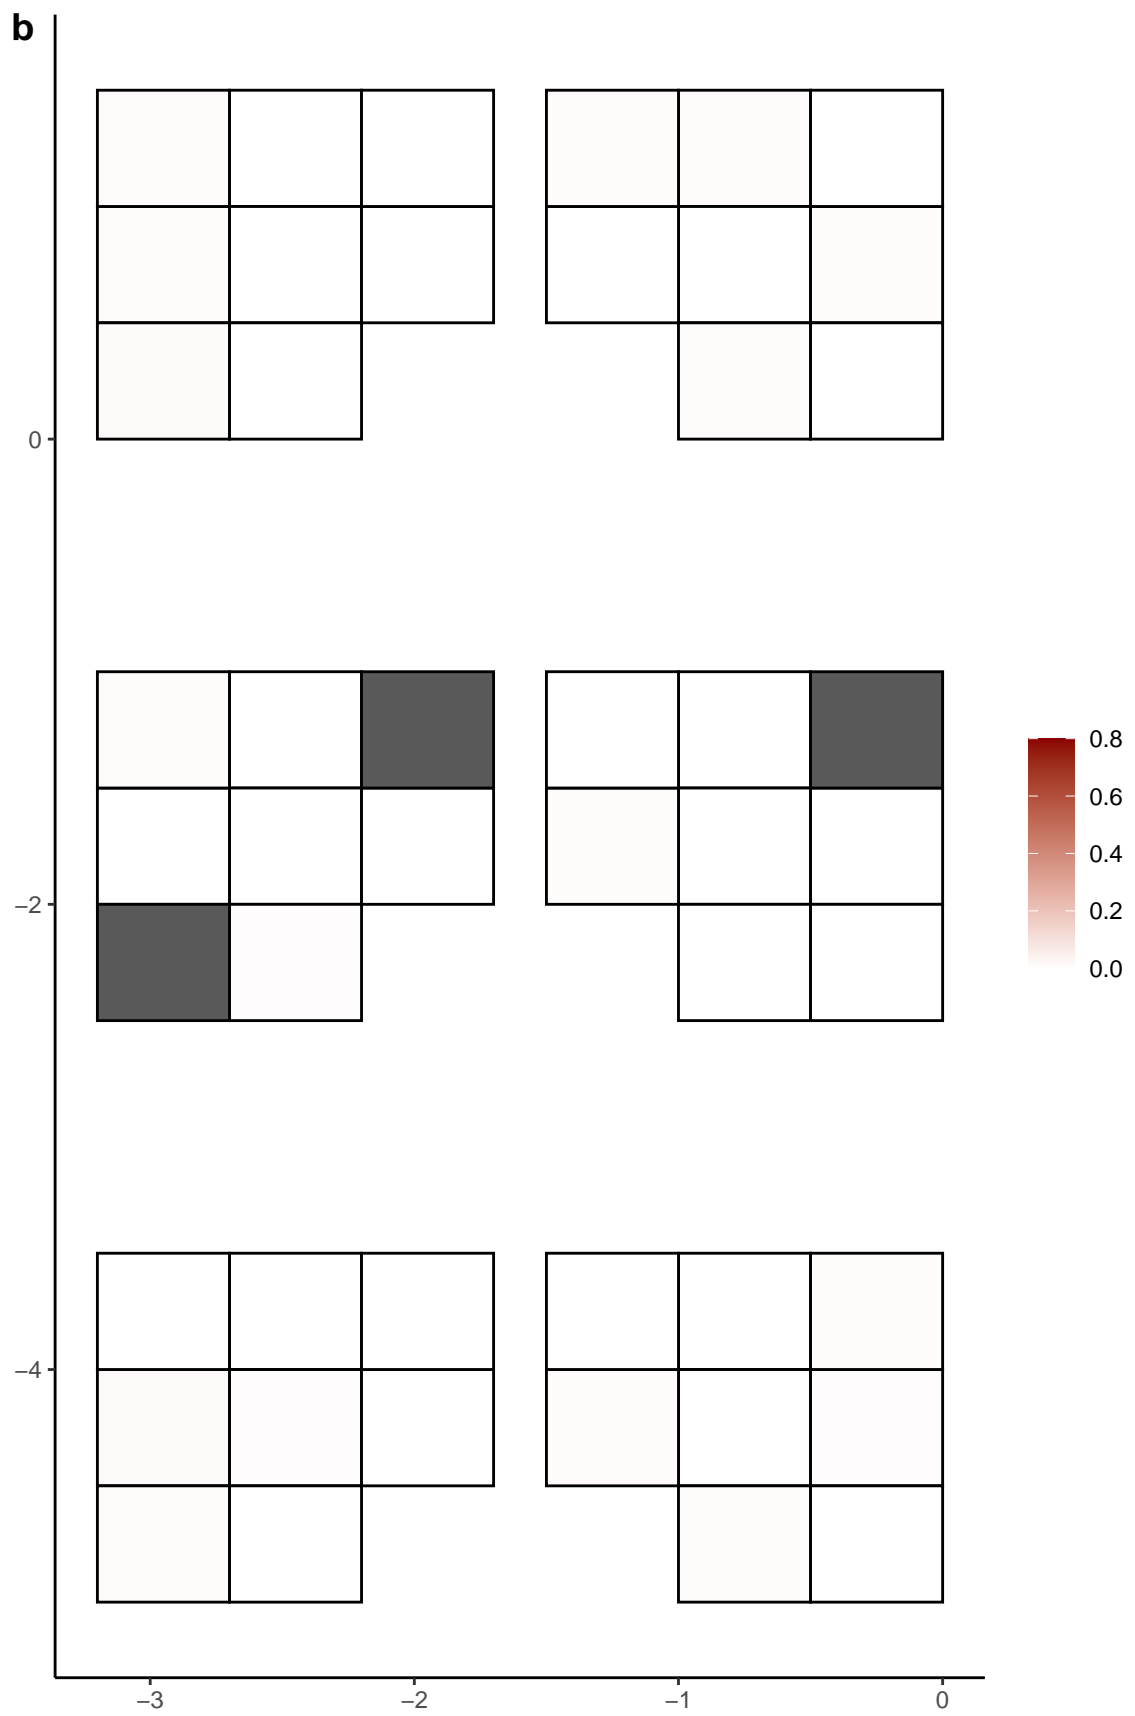



**a** ID05 10-2261700-AT-A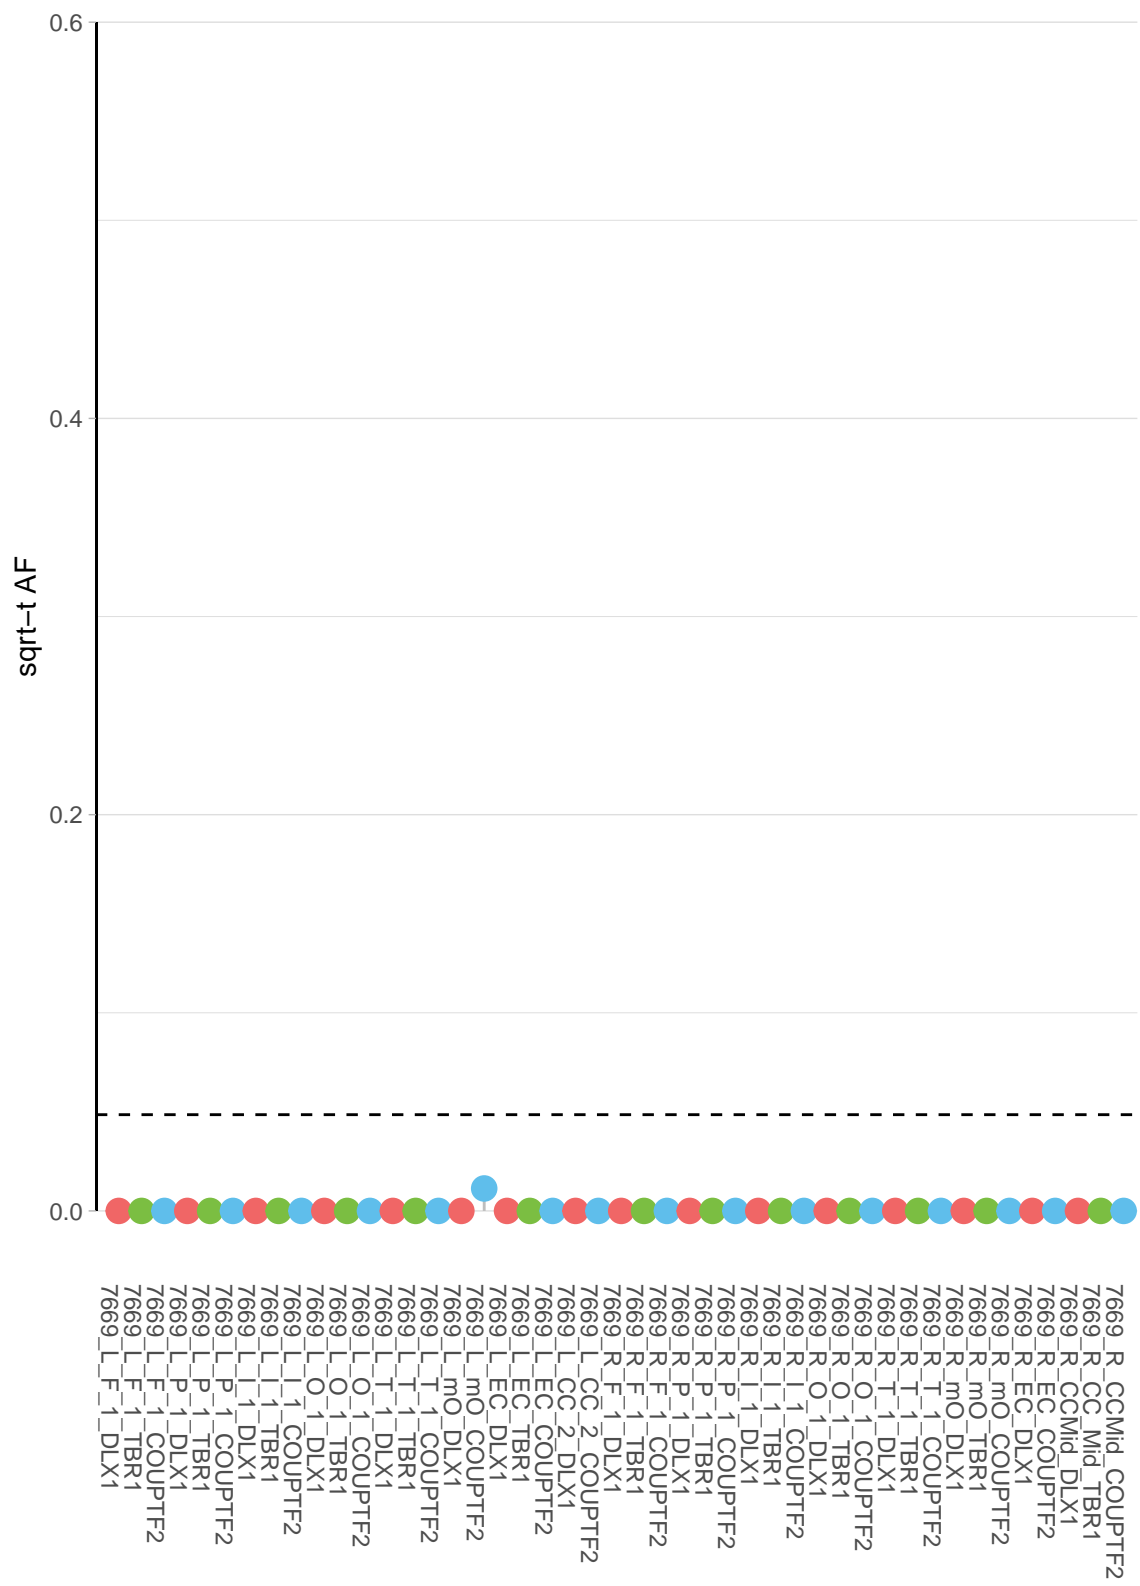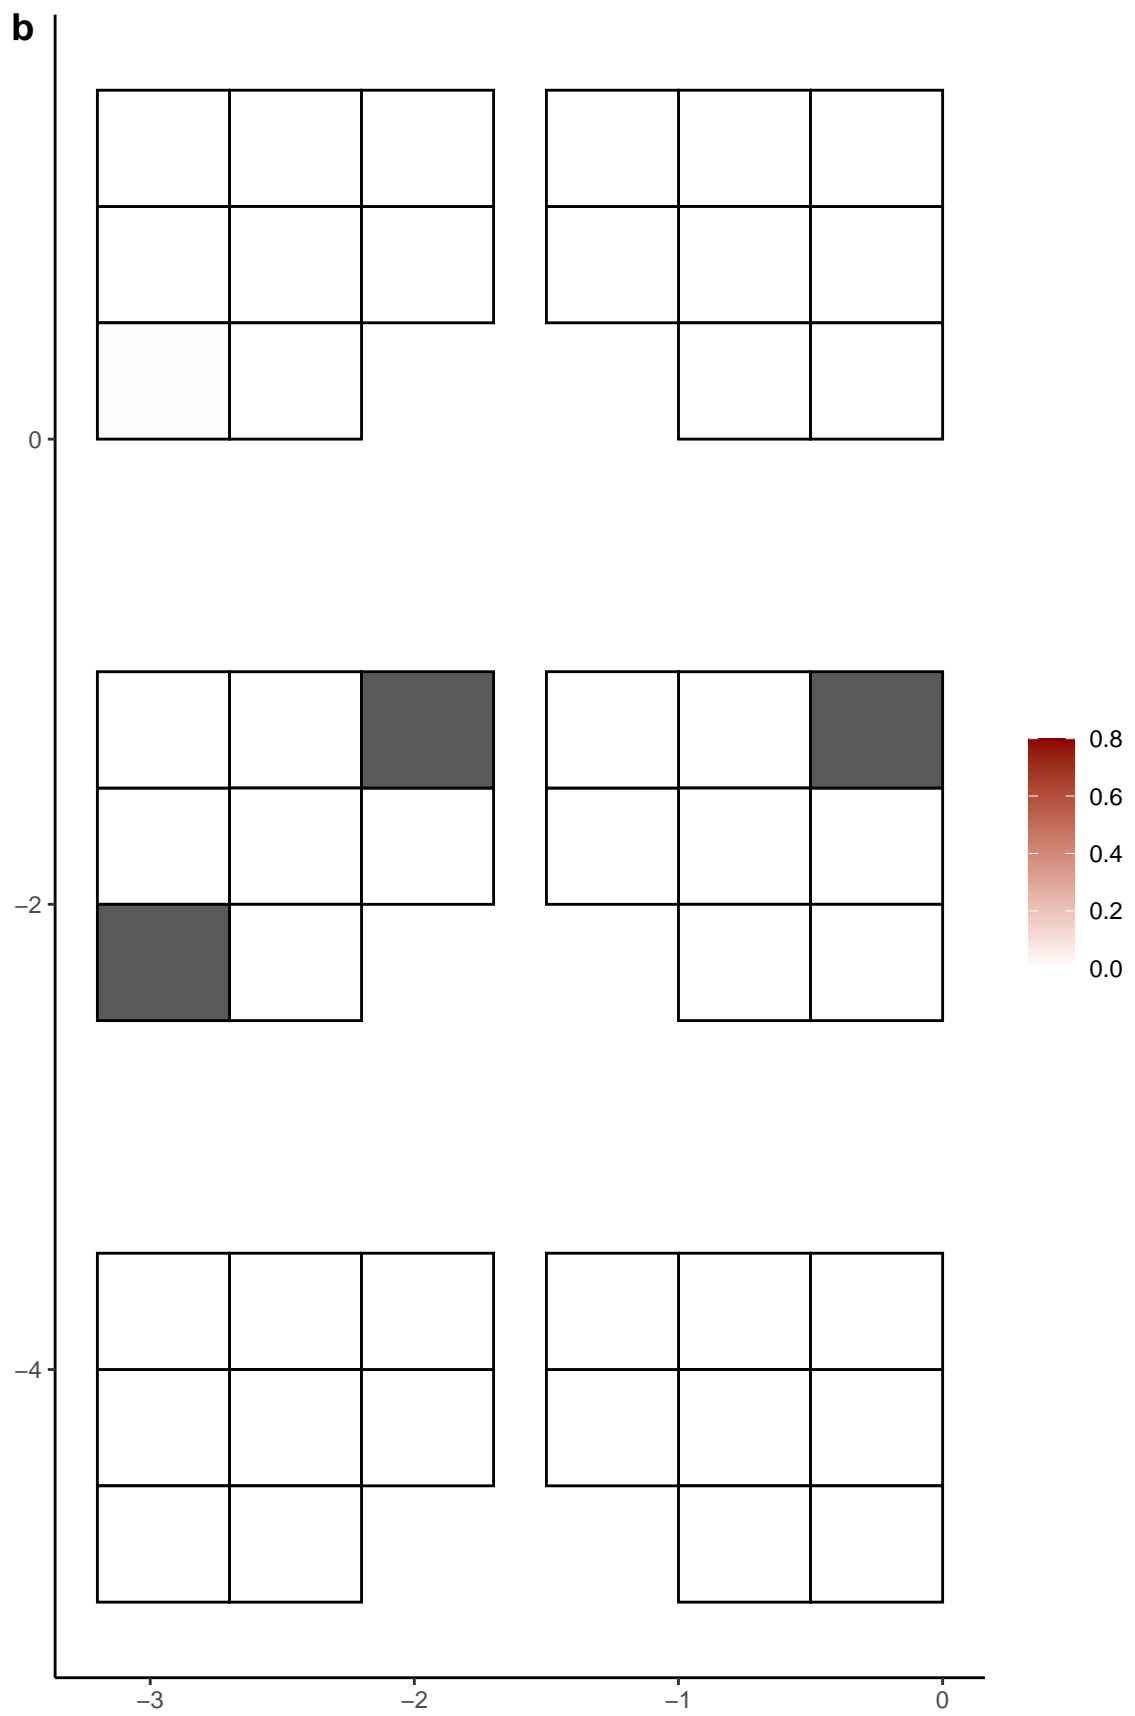

**a** ID05 10-22765172-A-T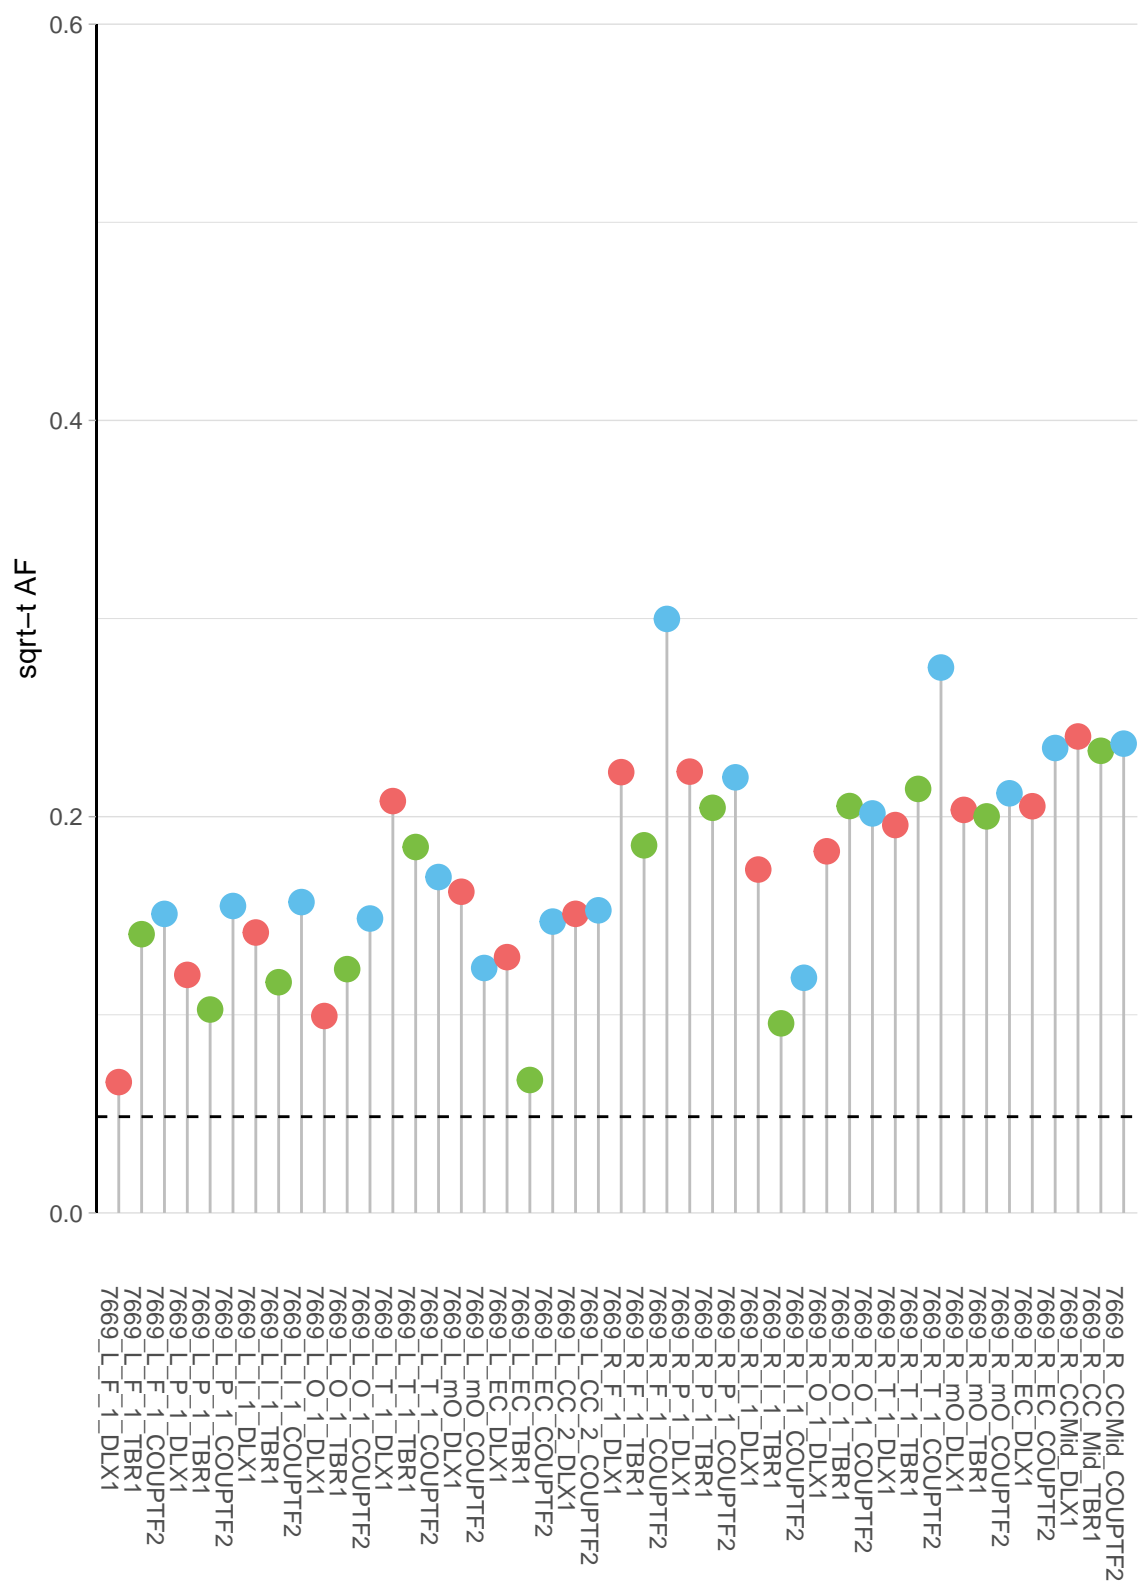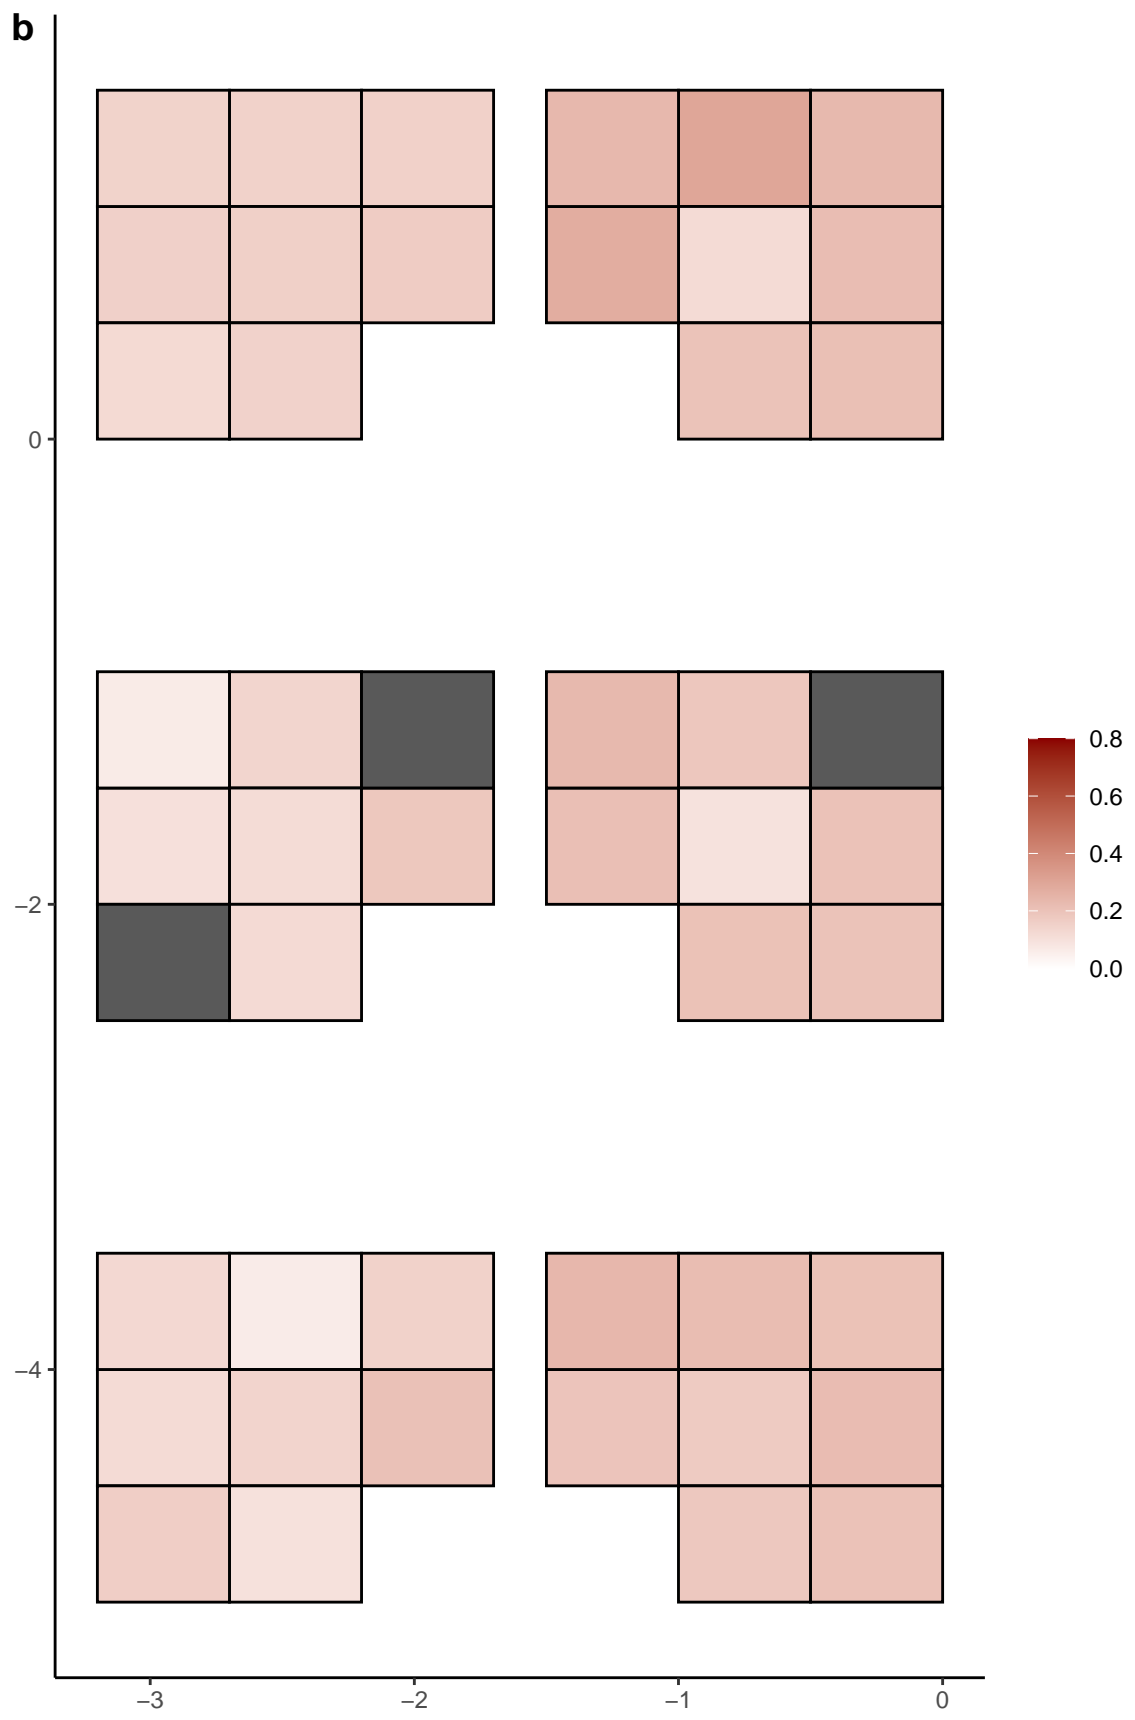

**a** ID05 10-23976083-C-A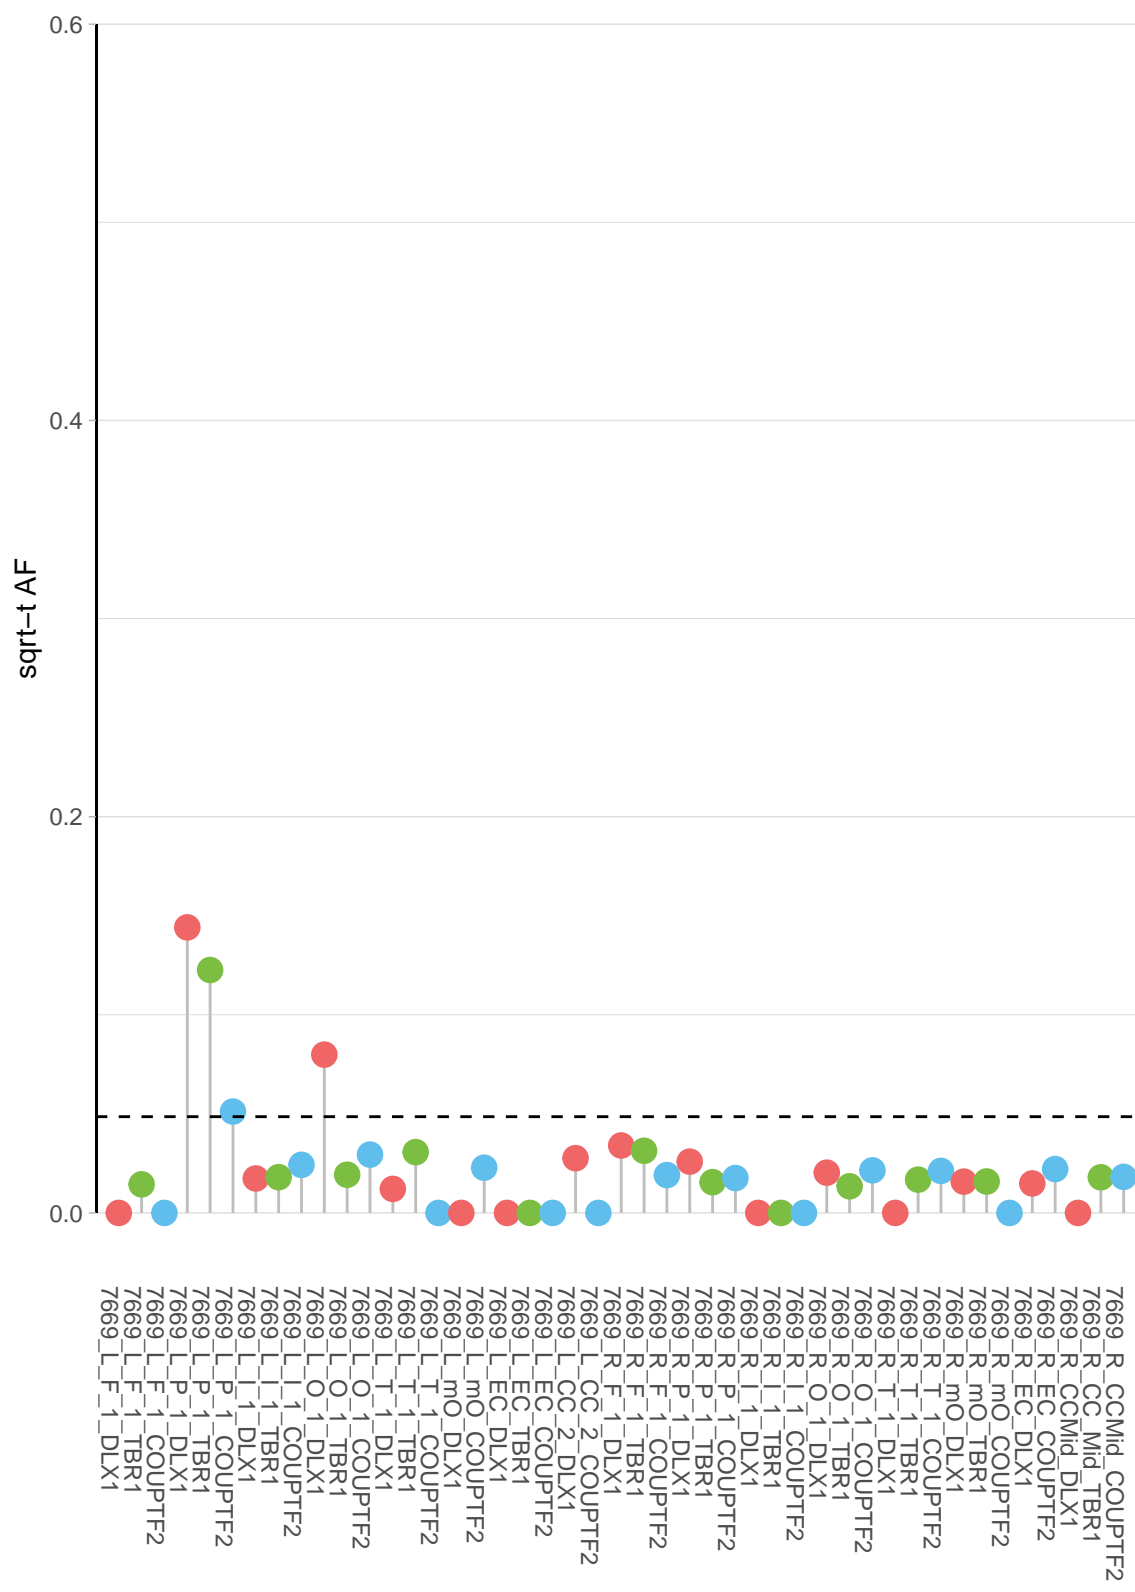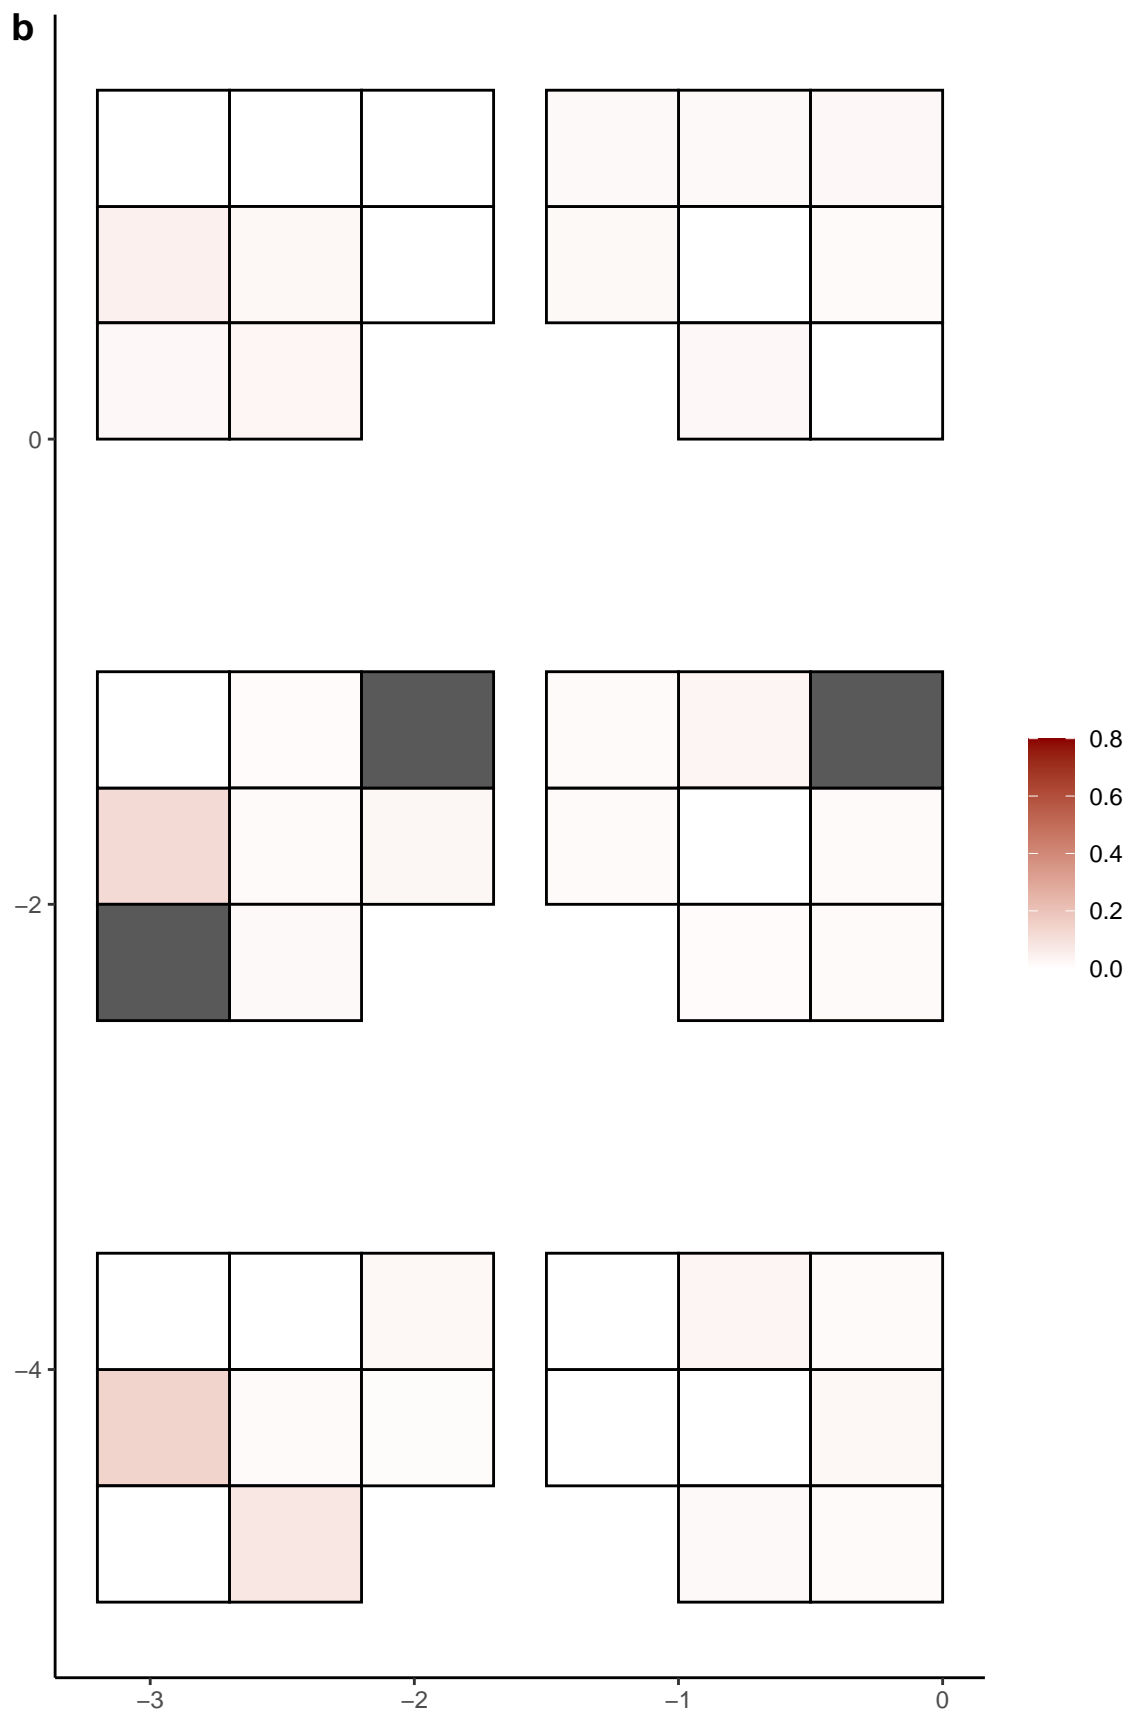

**a** ID05 10-25457893-C-T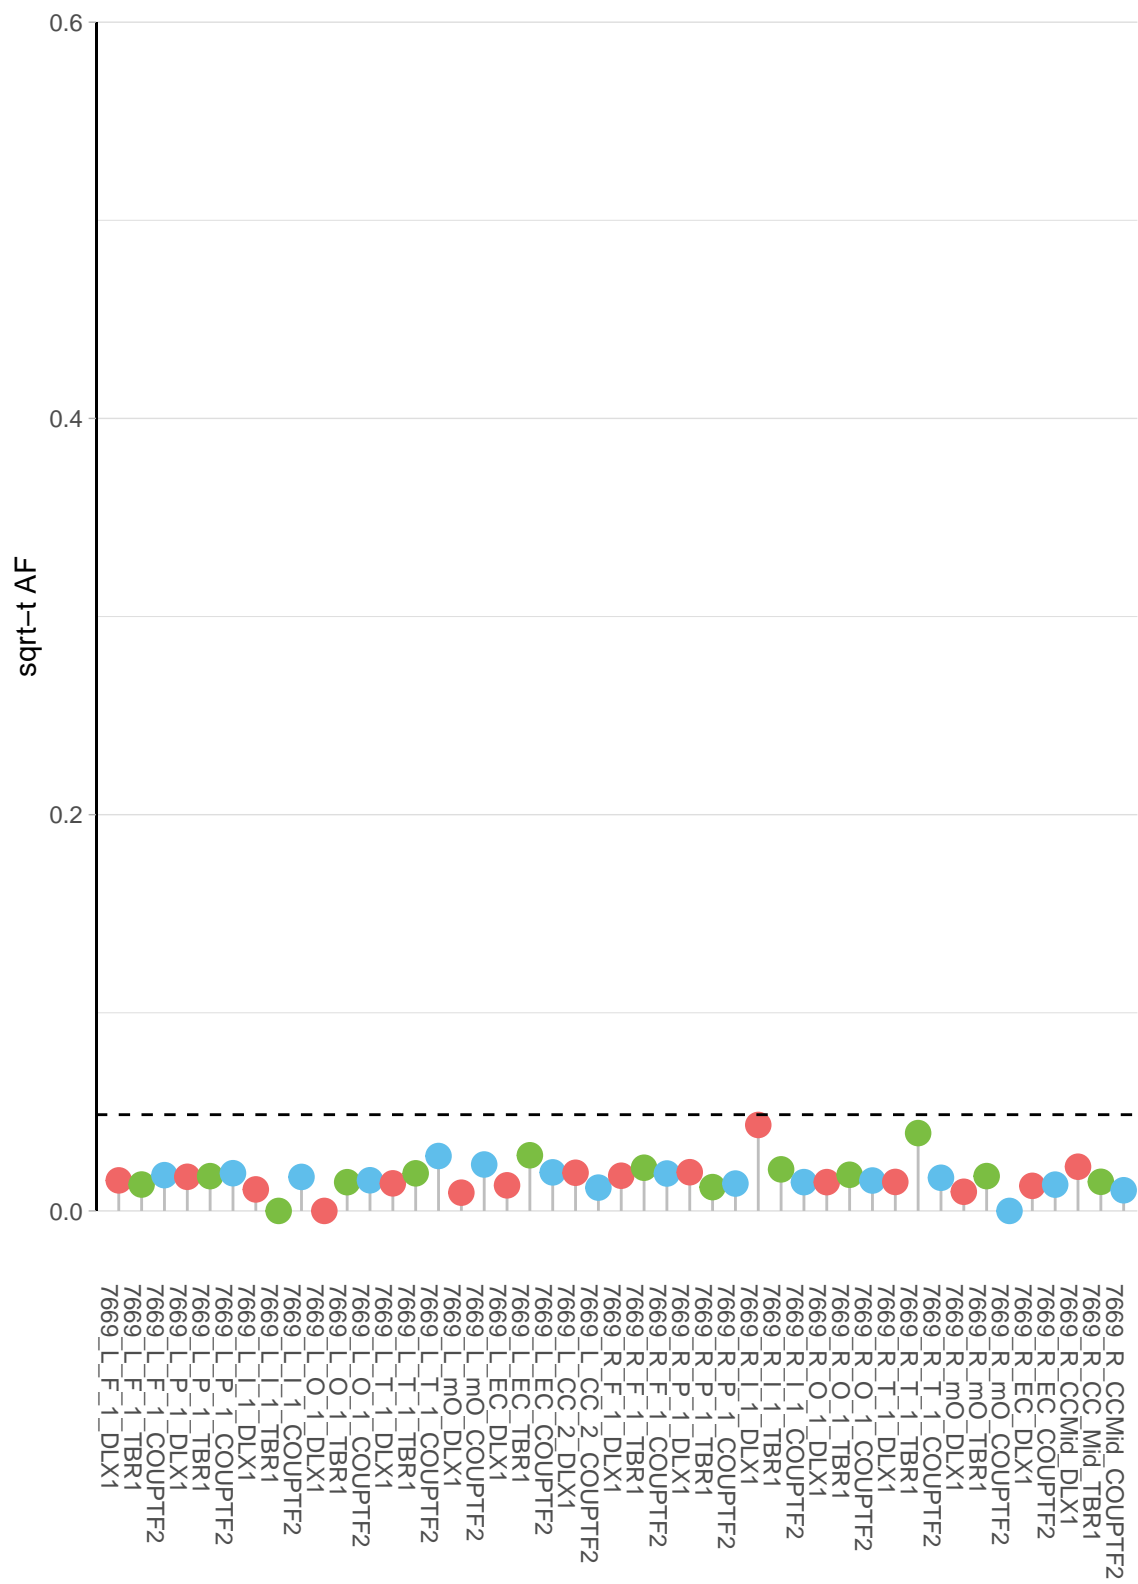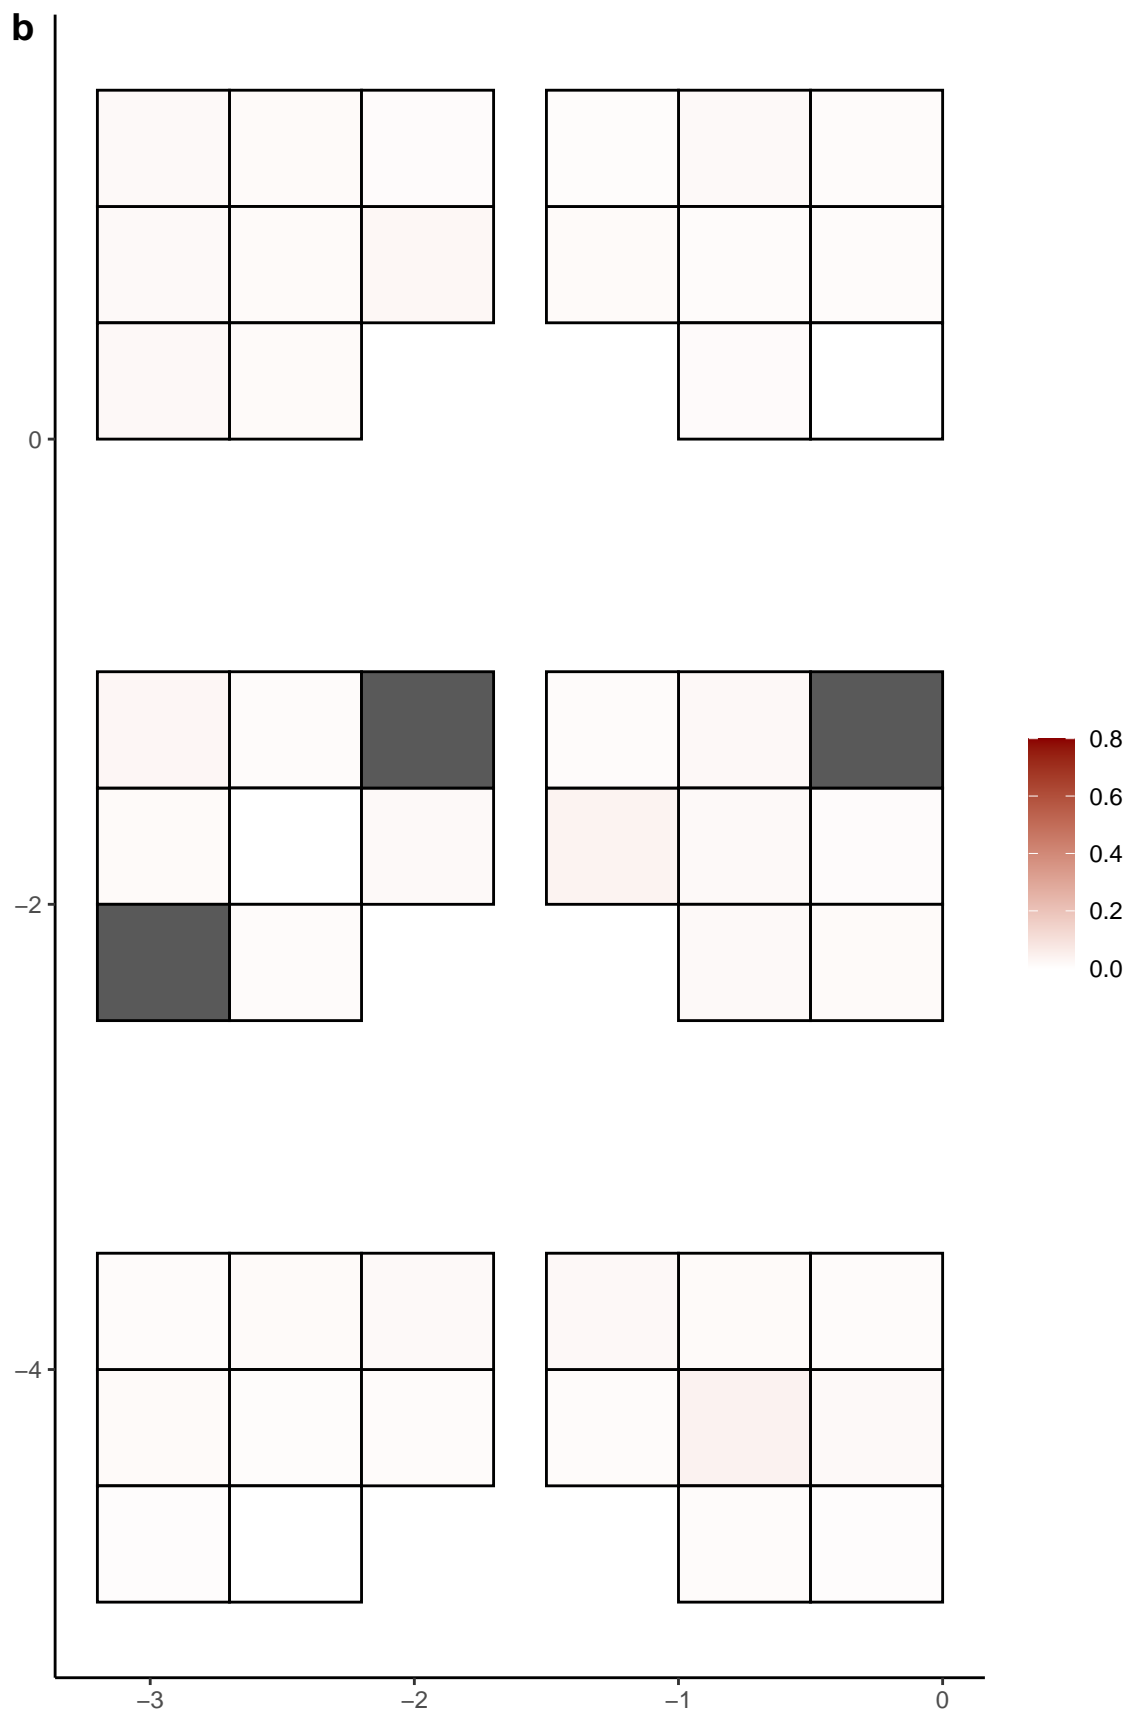



**a** ID05 10-34121088-A-G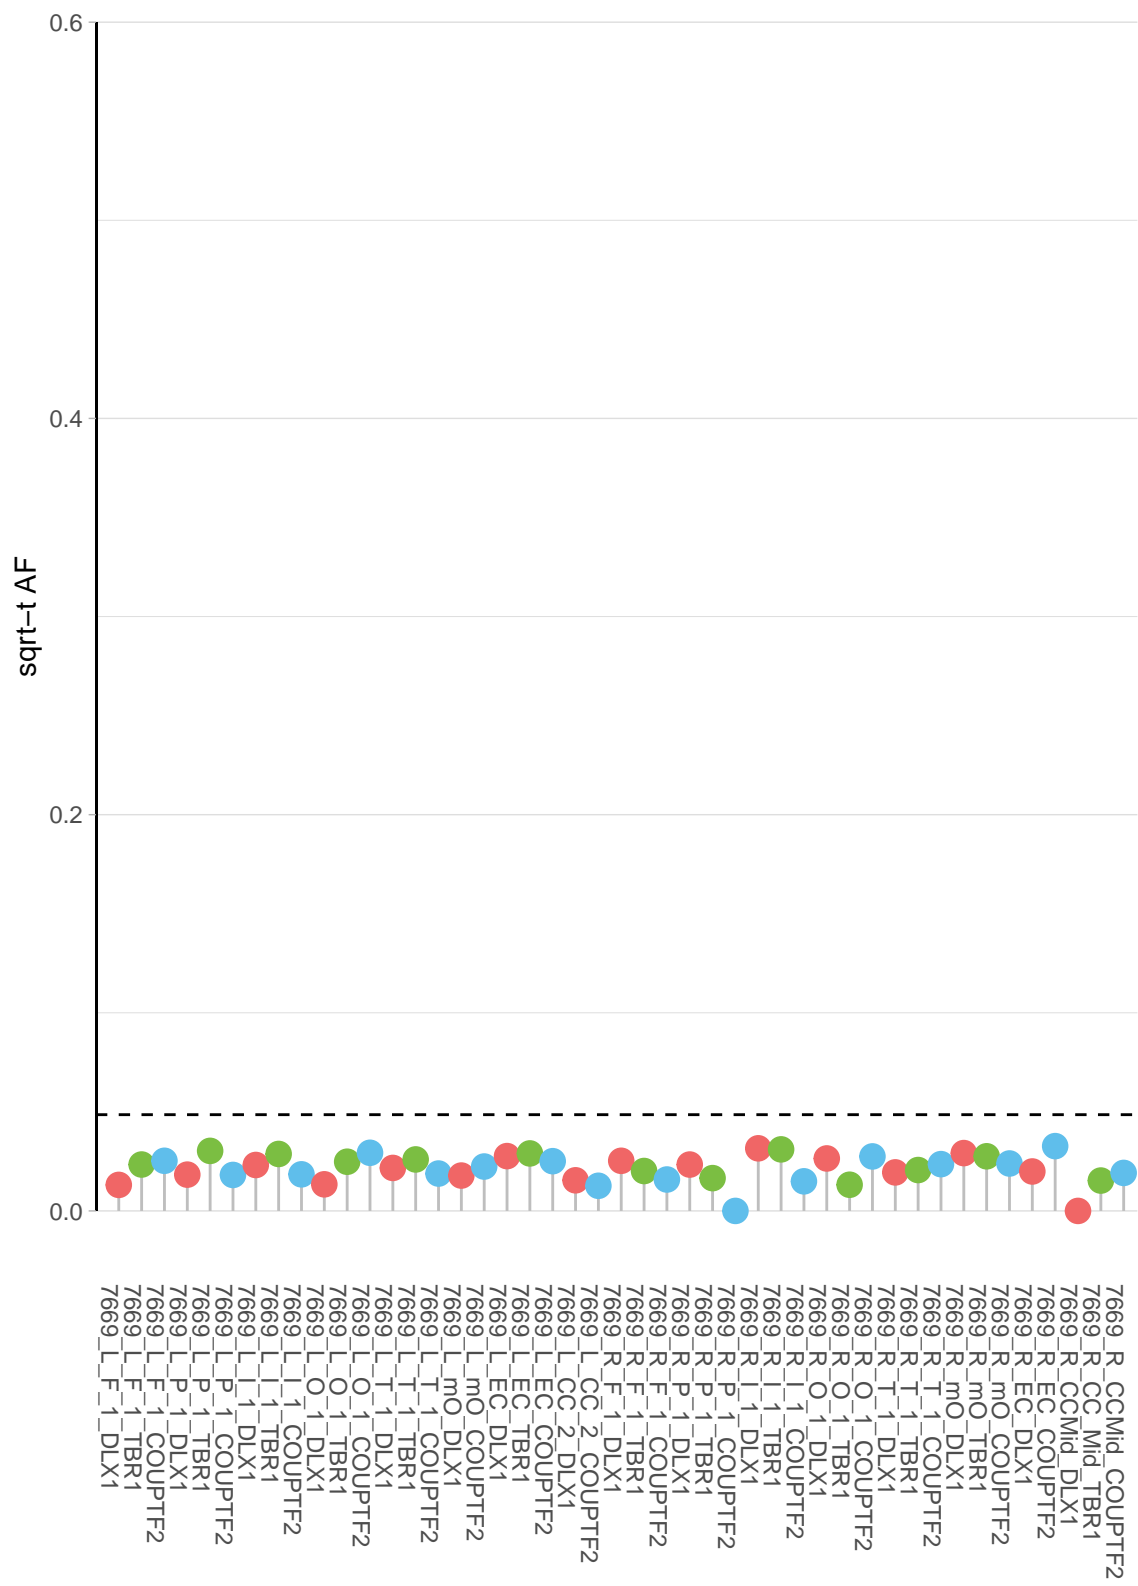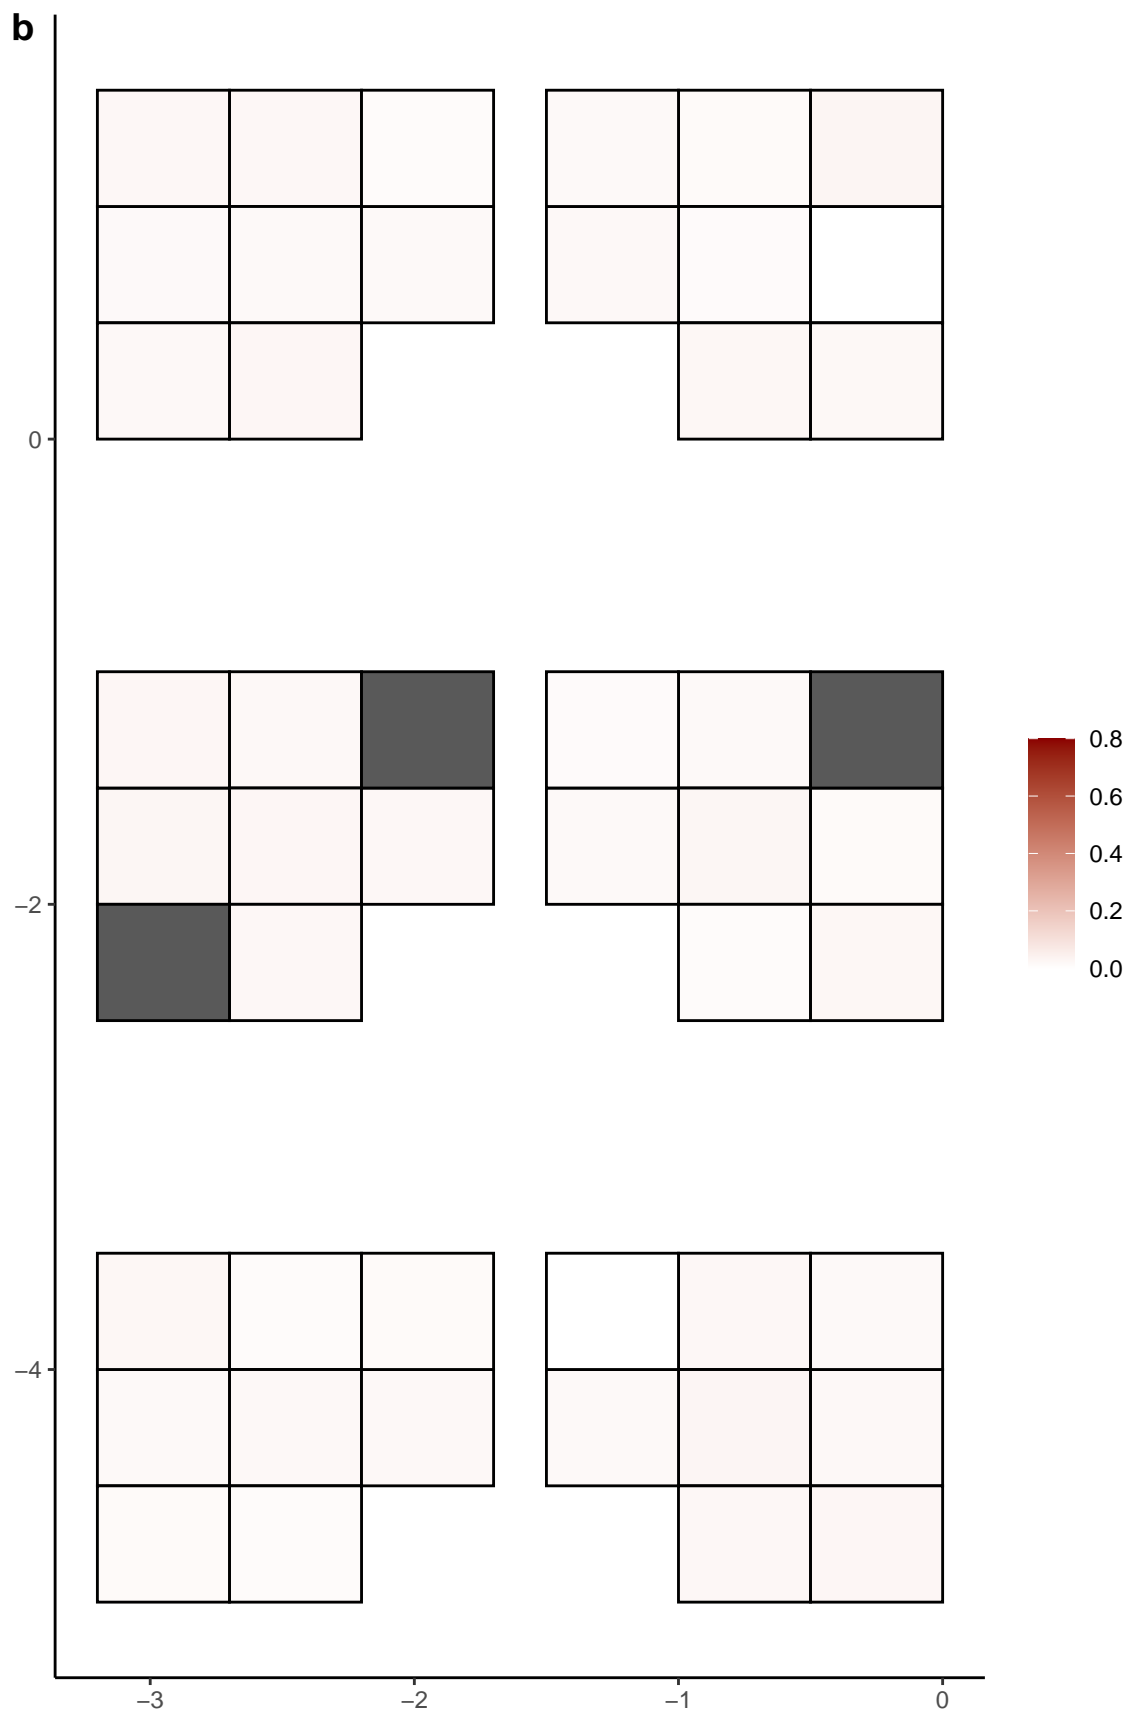

**a** ID05 10-36039114-G-A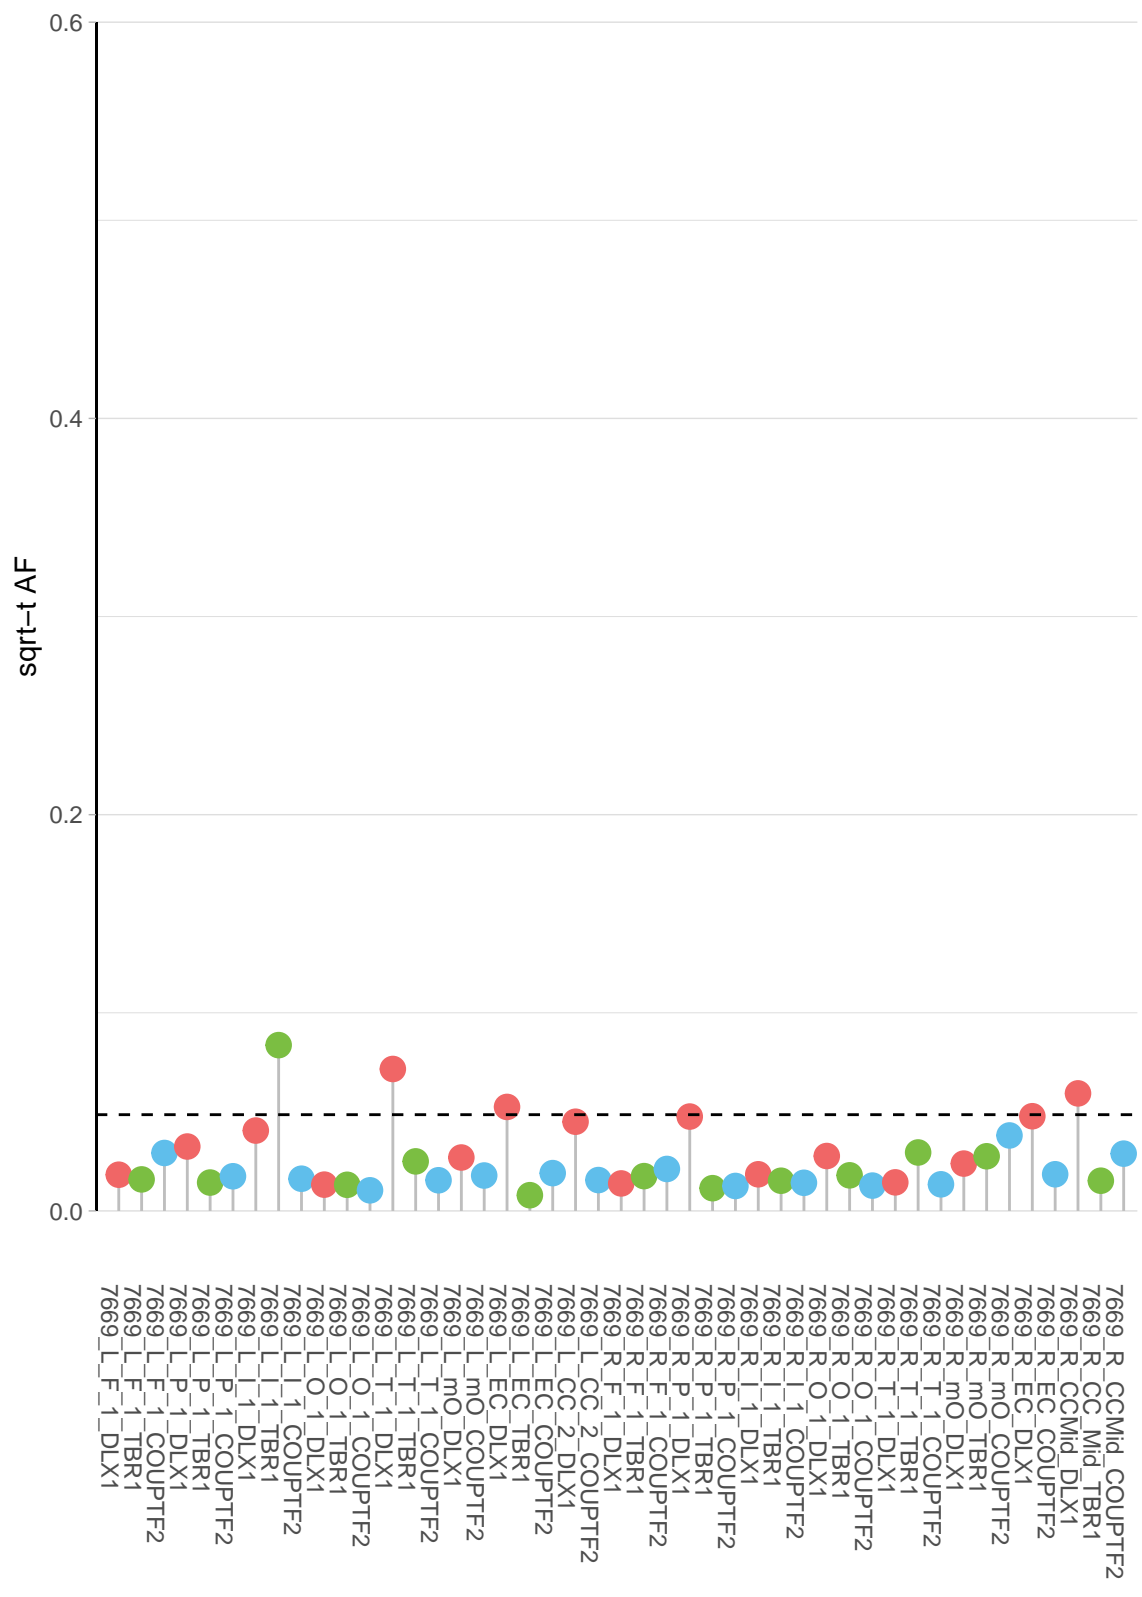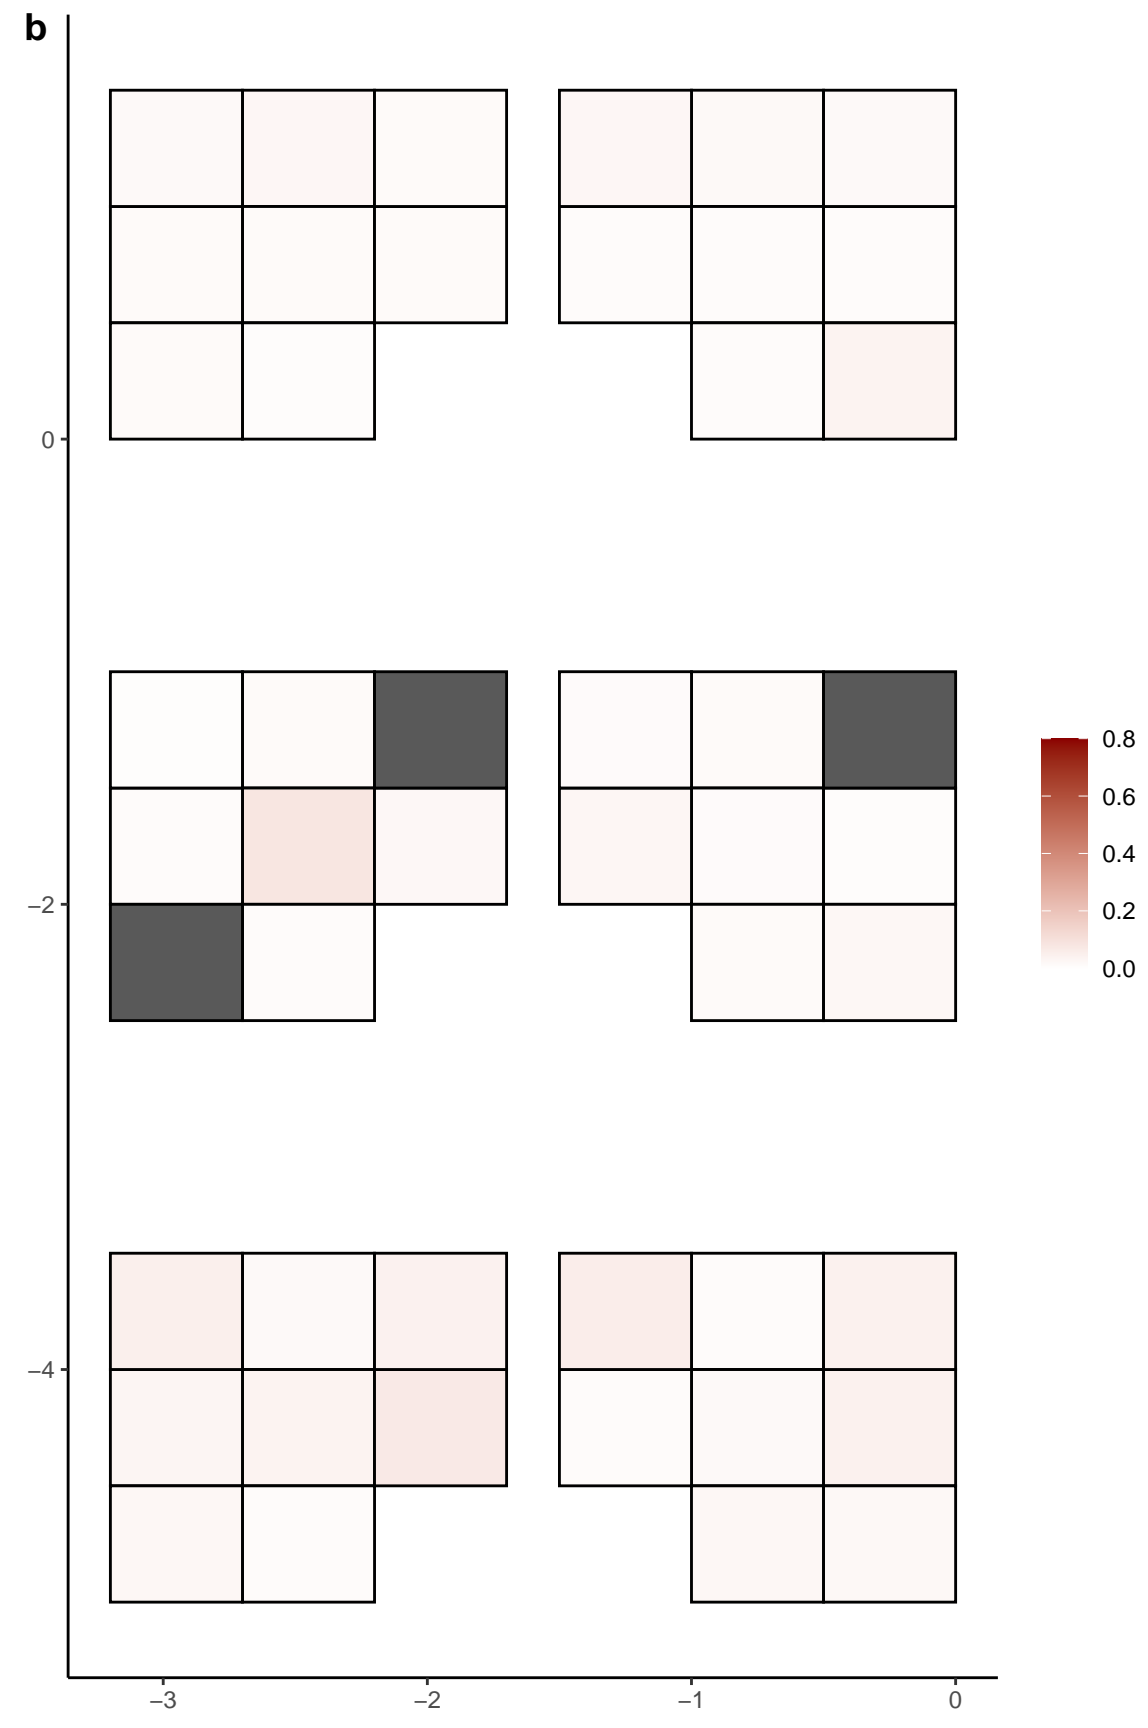

**a** ID05 10-58152659-C-T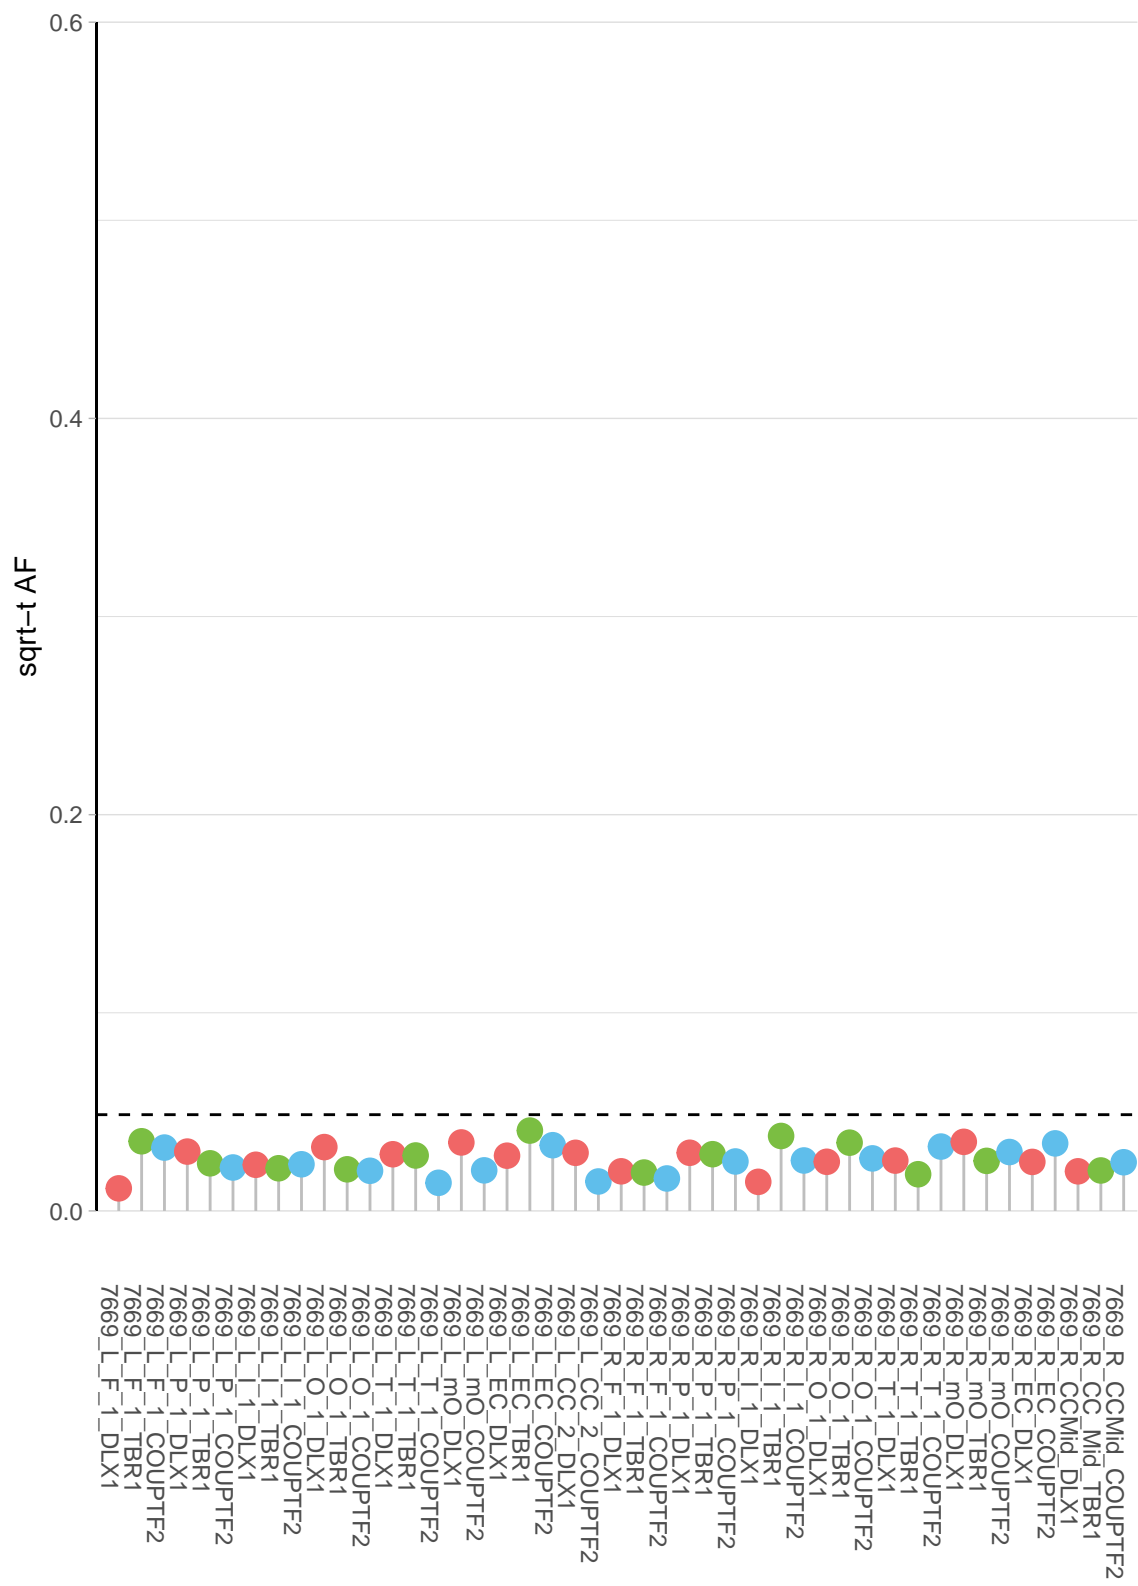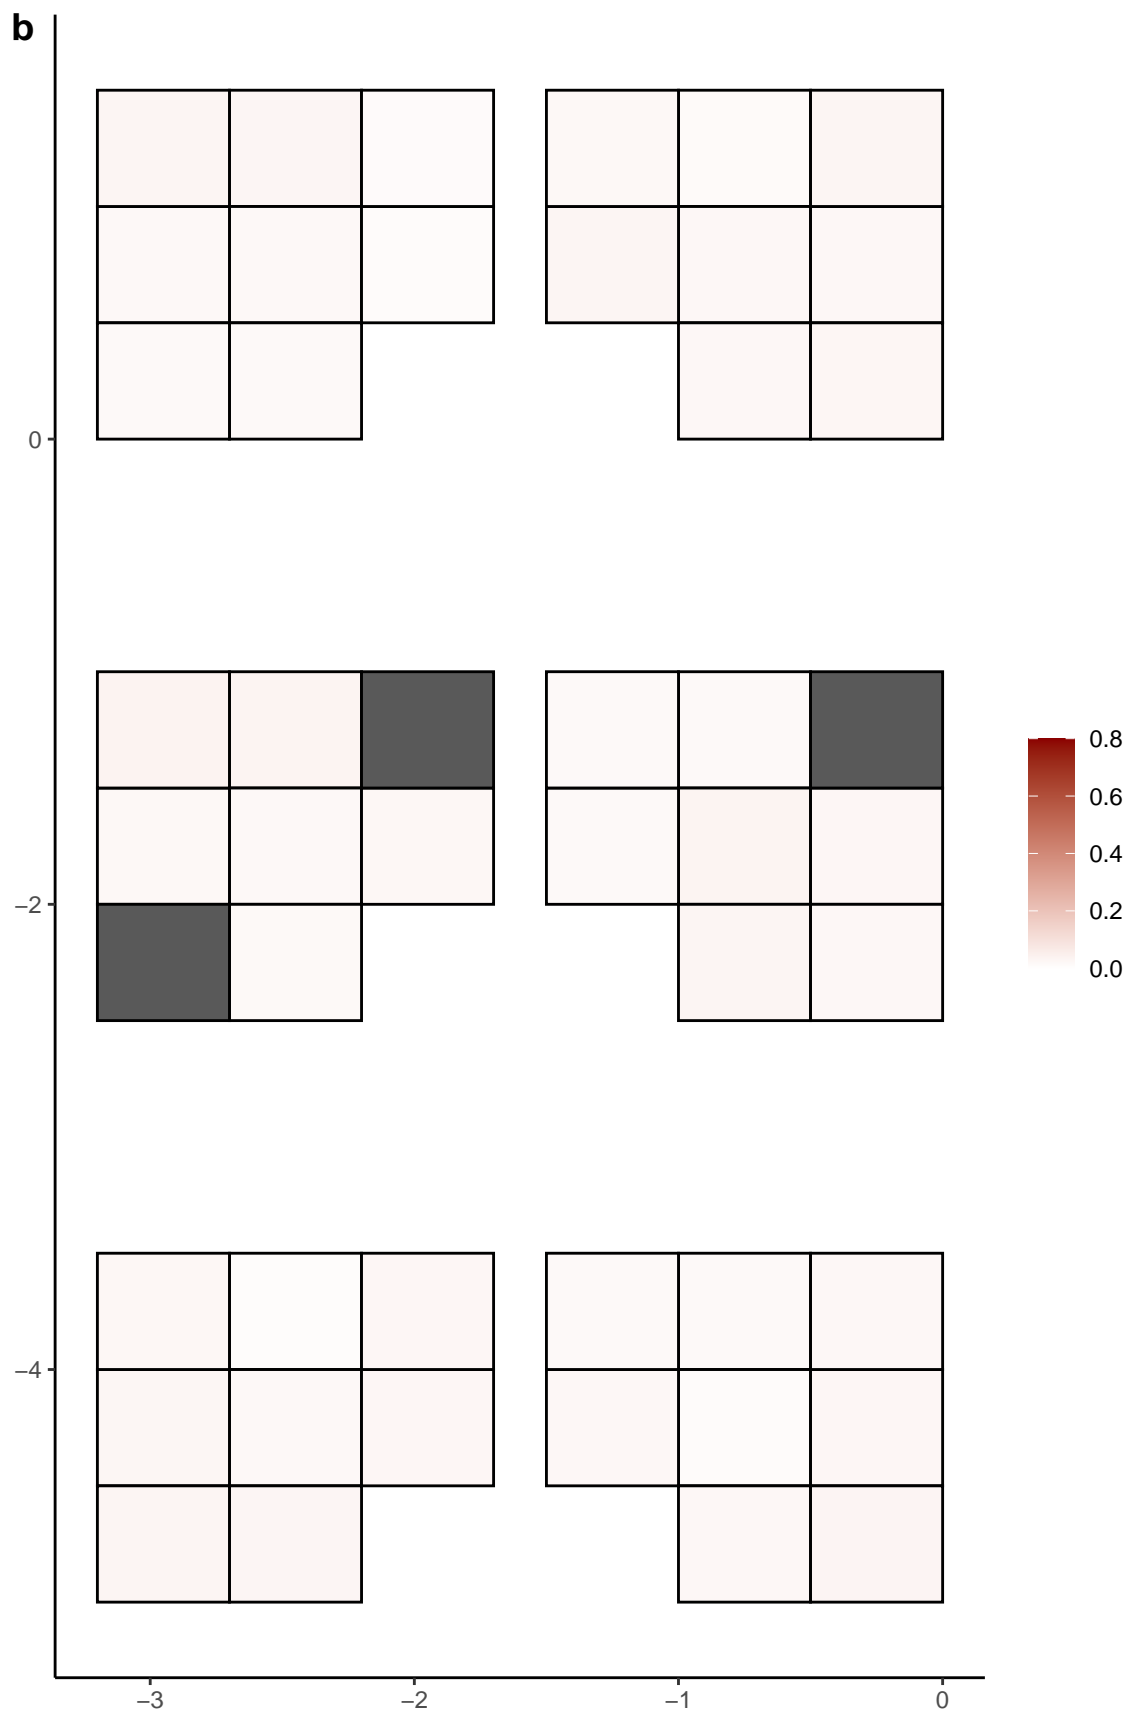



**a** ID05 10-58457040-T-G

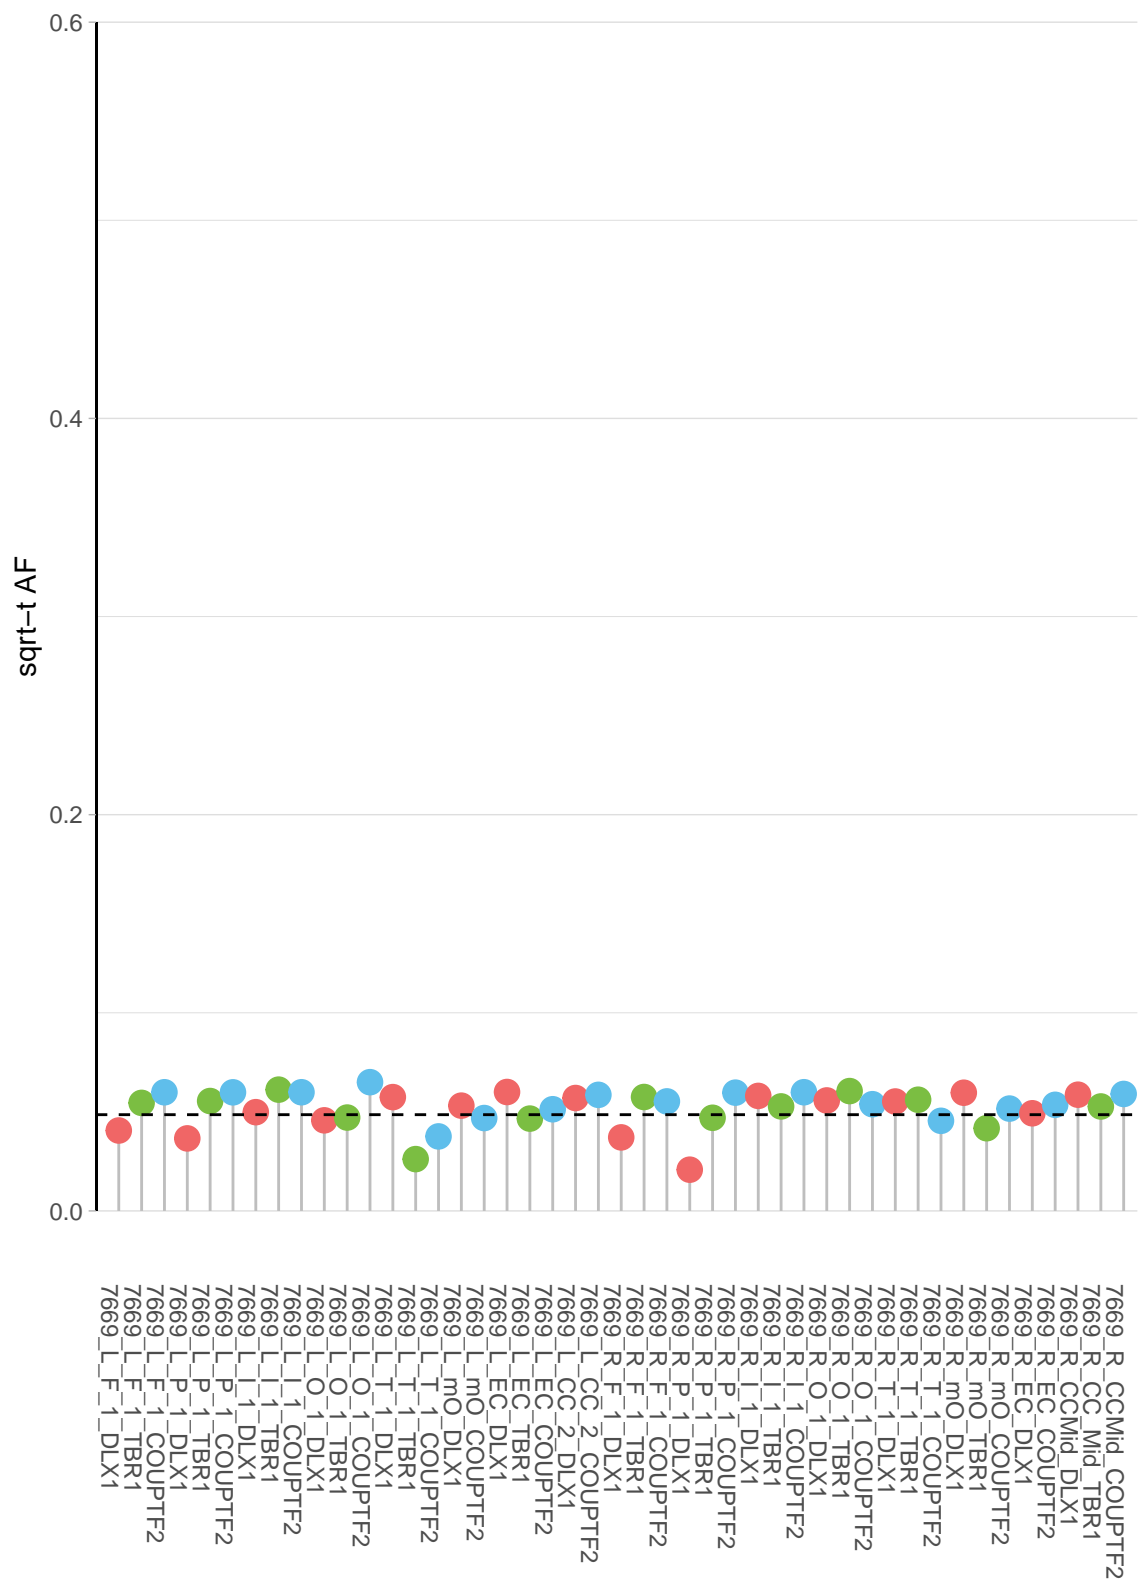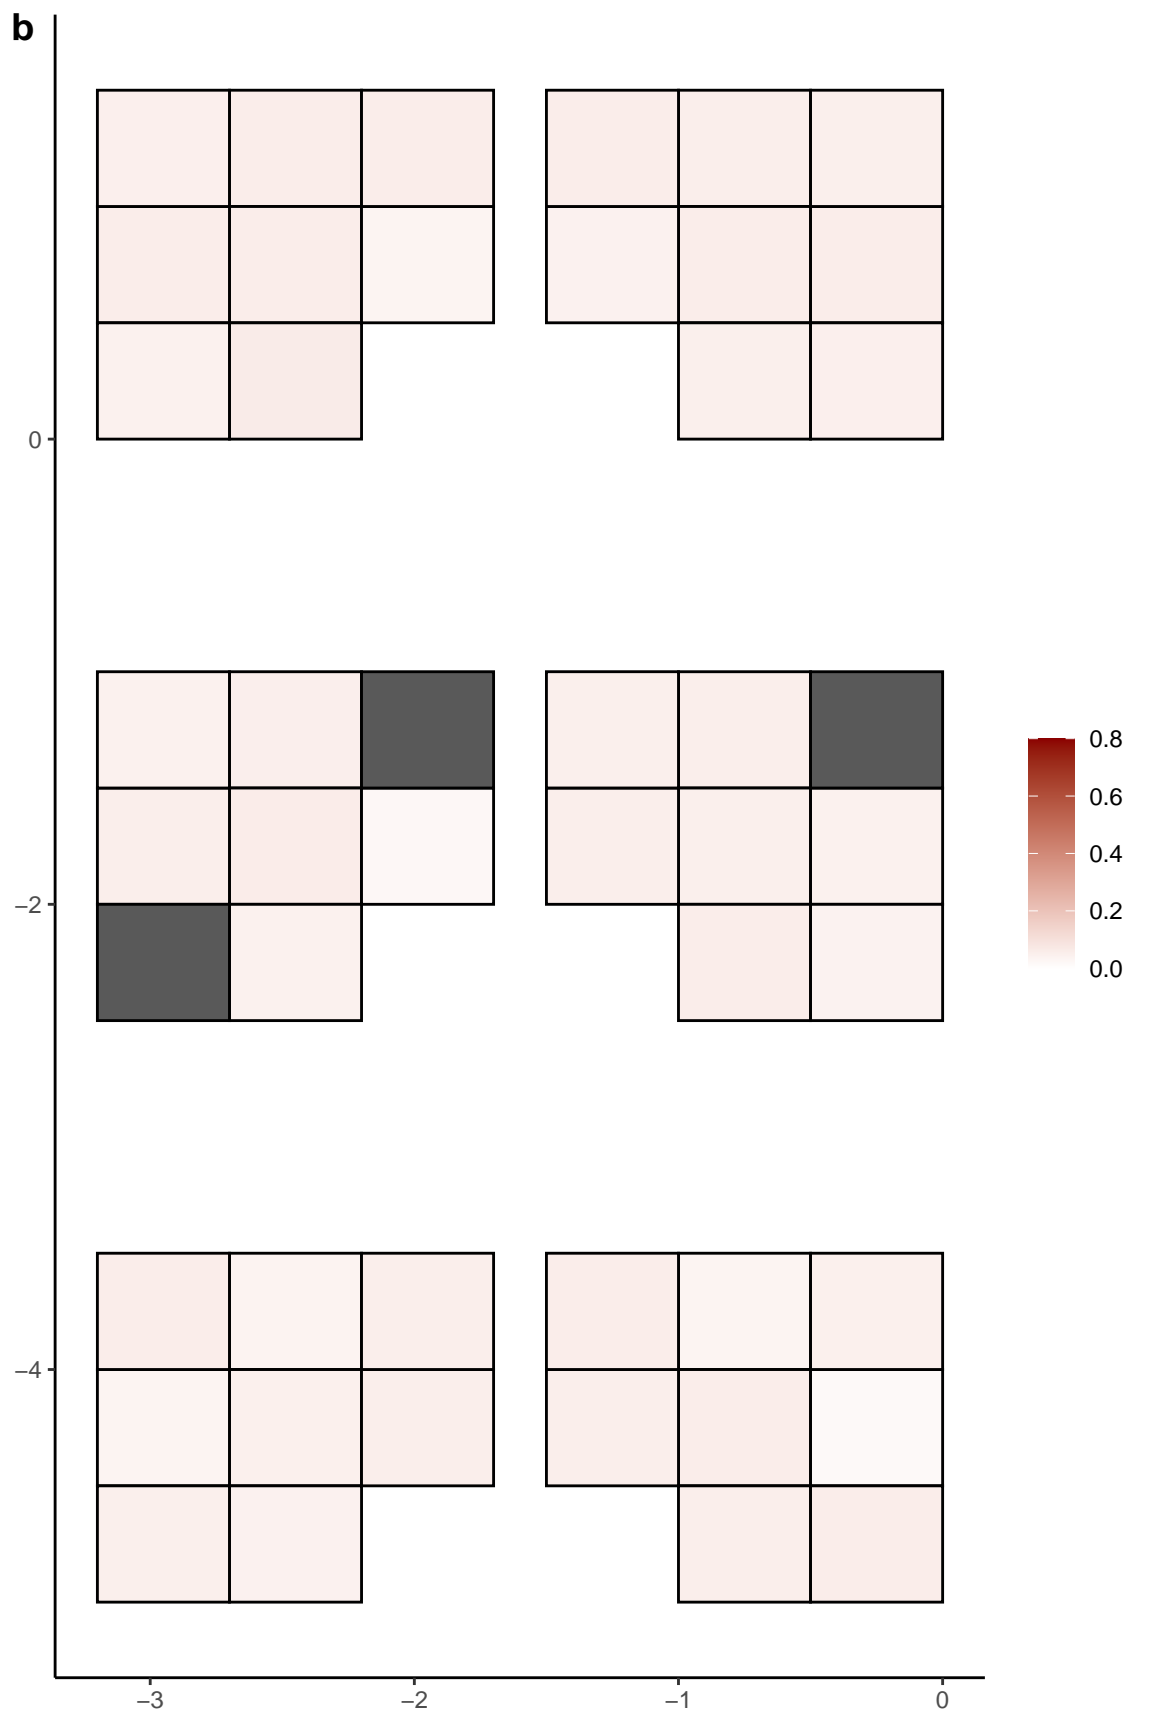

**a** ID05 10-60559957-C-T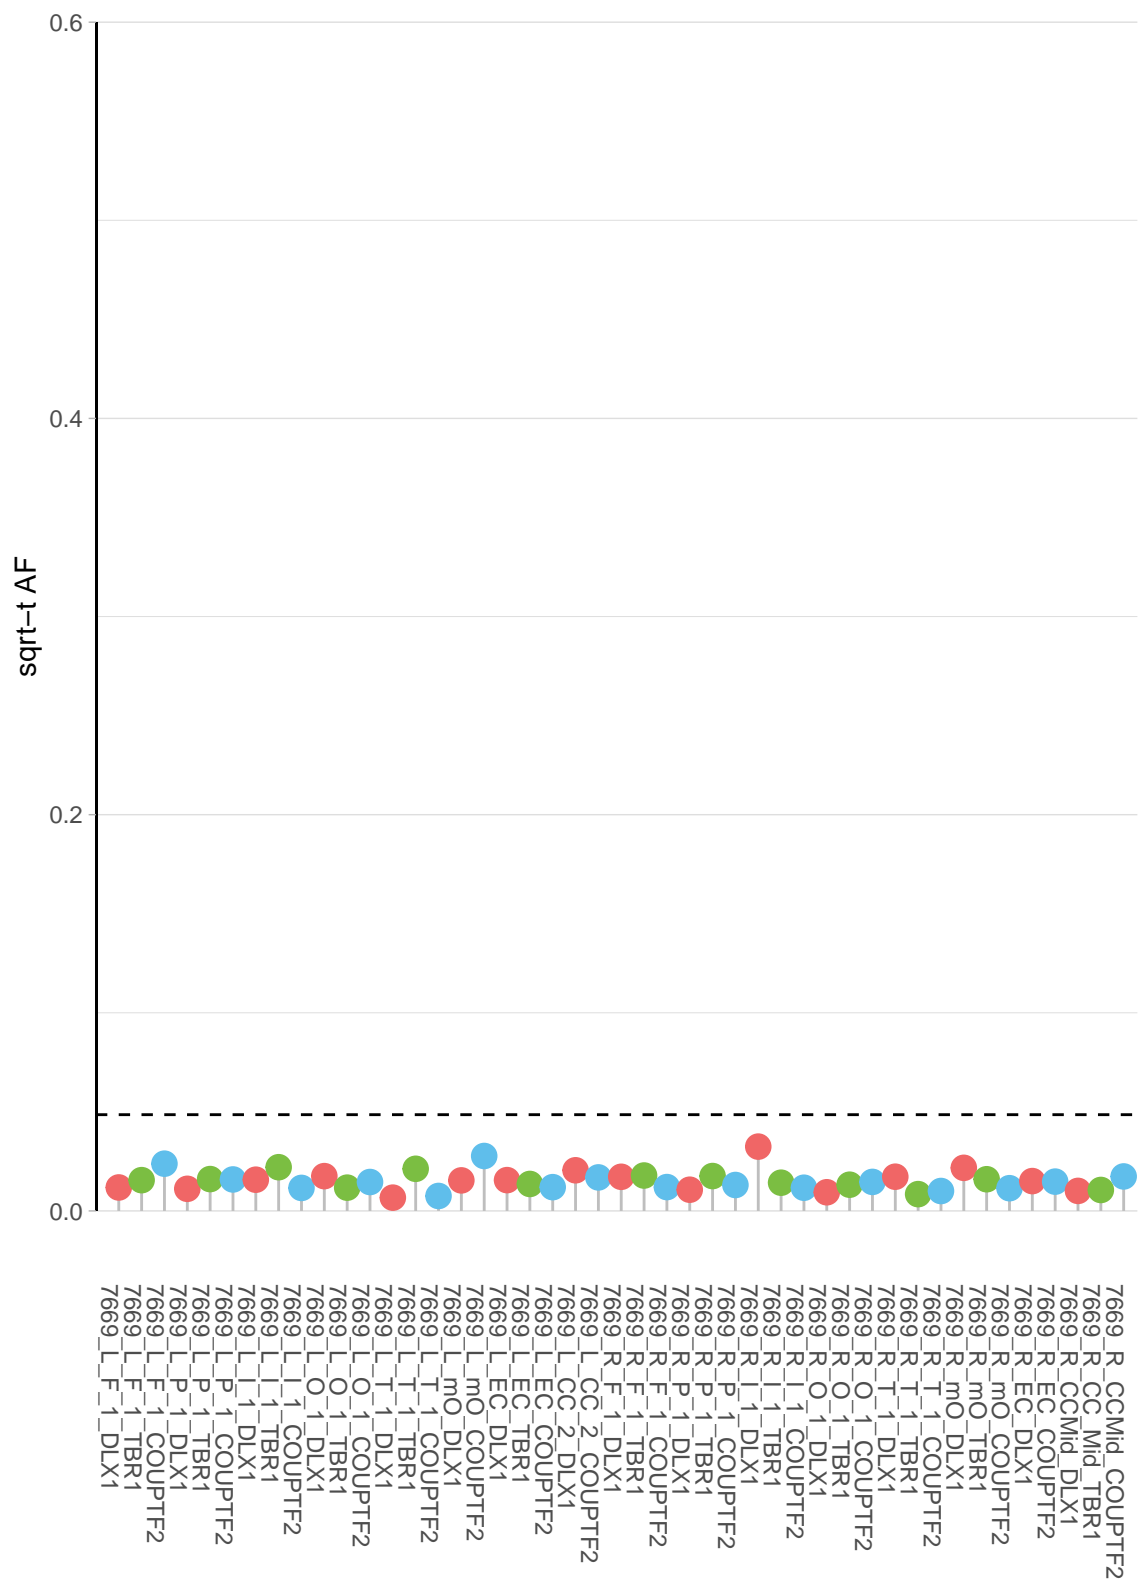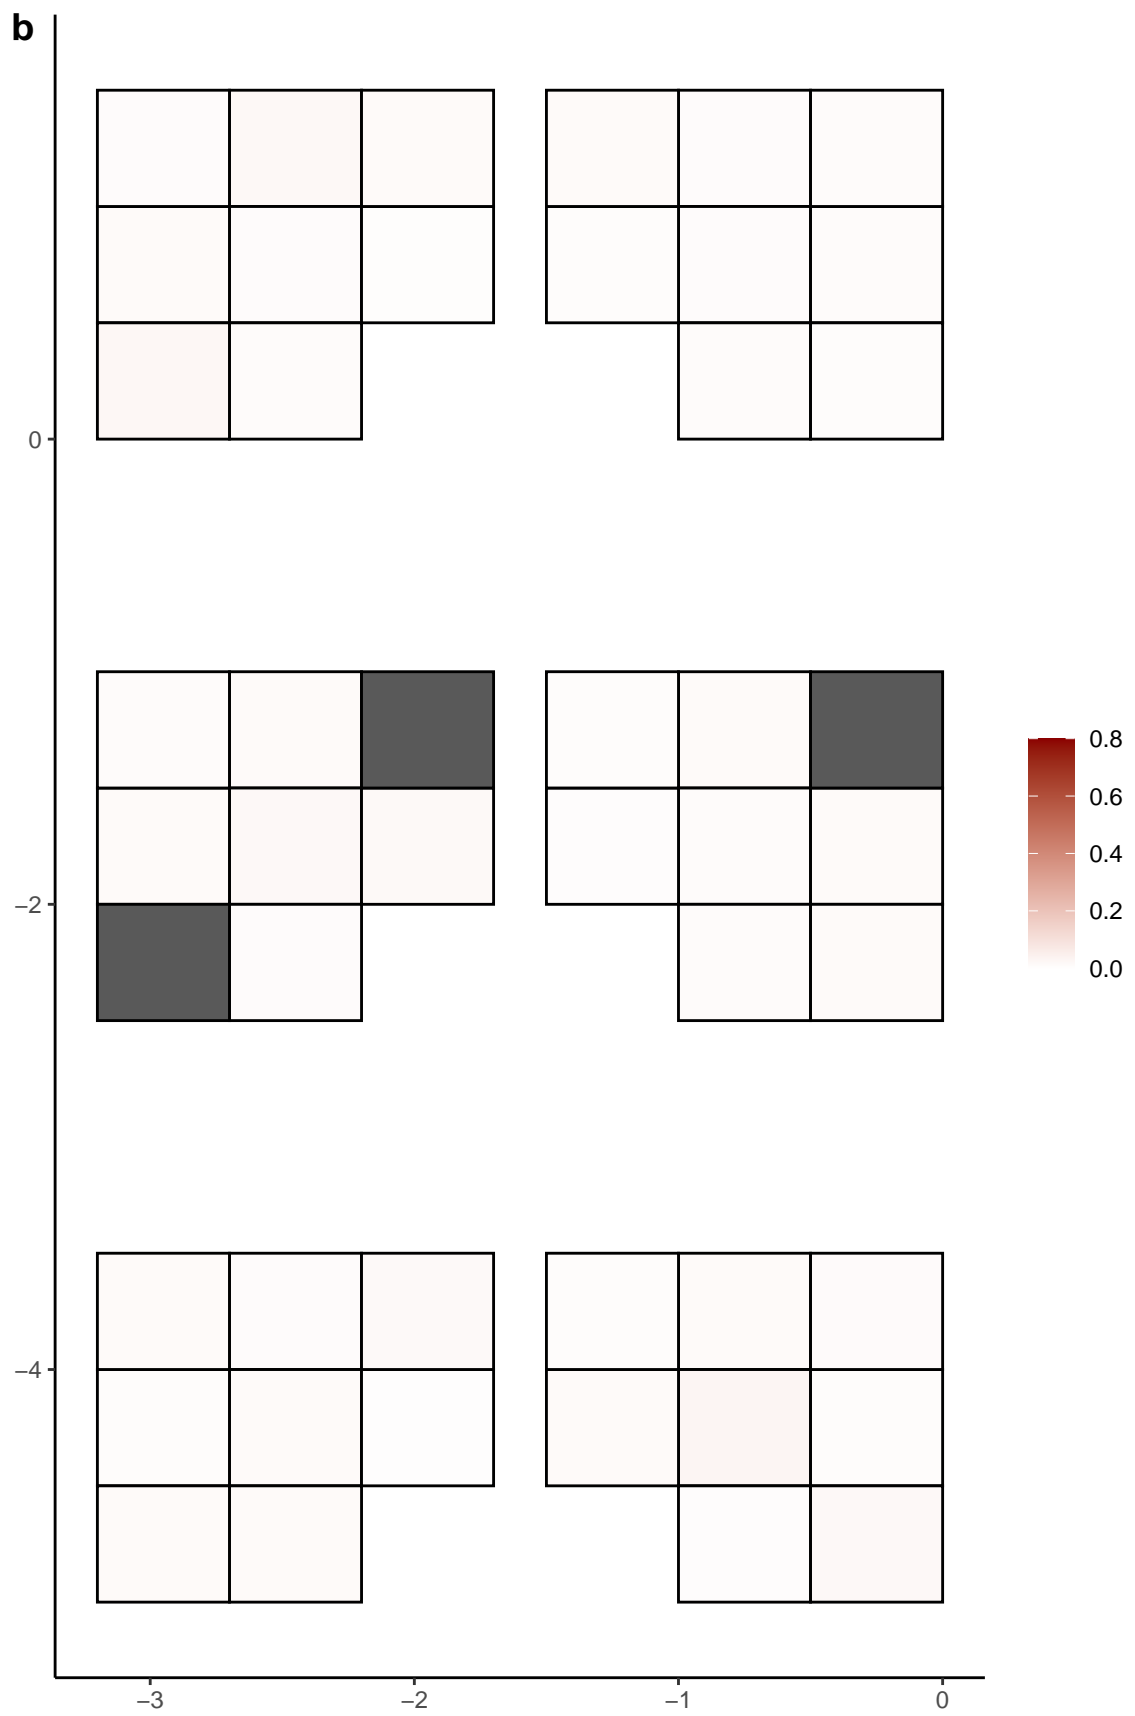

**a** ID05 10-7459695-G-A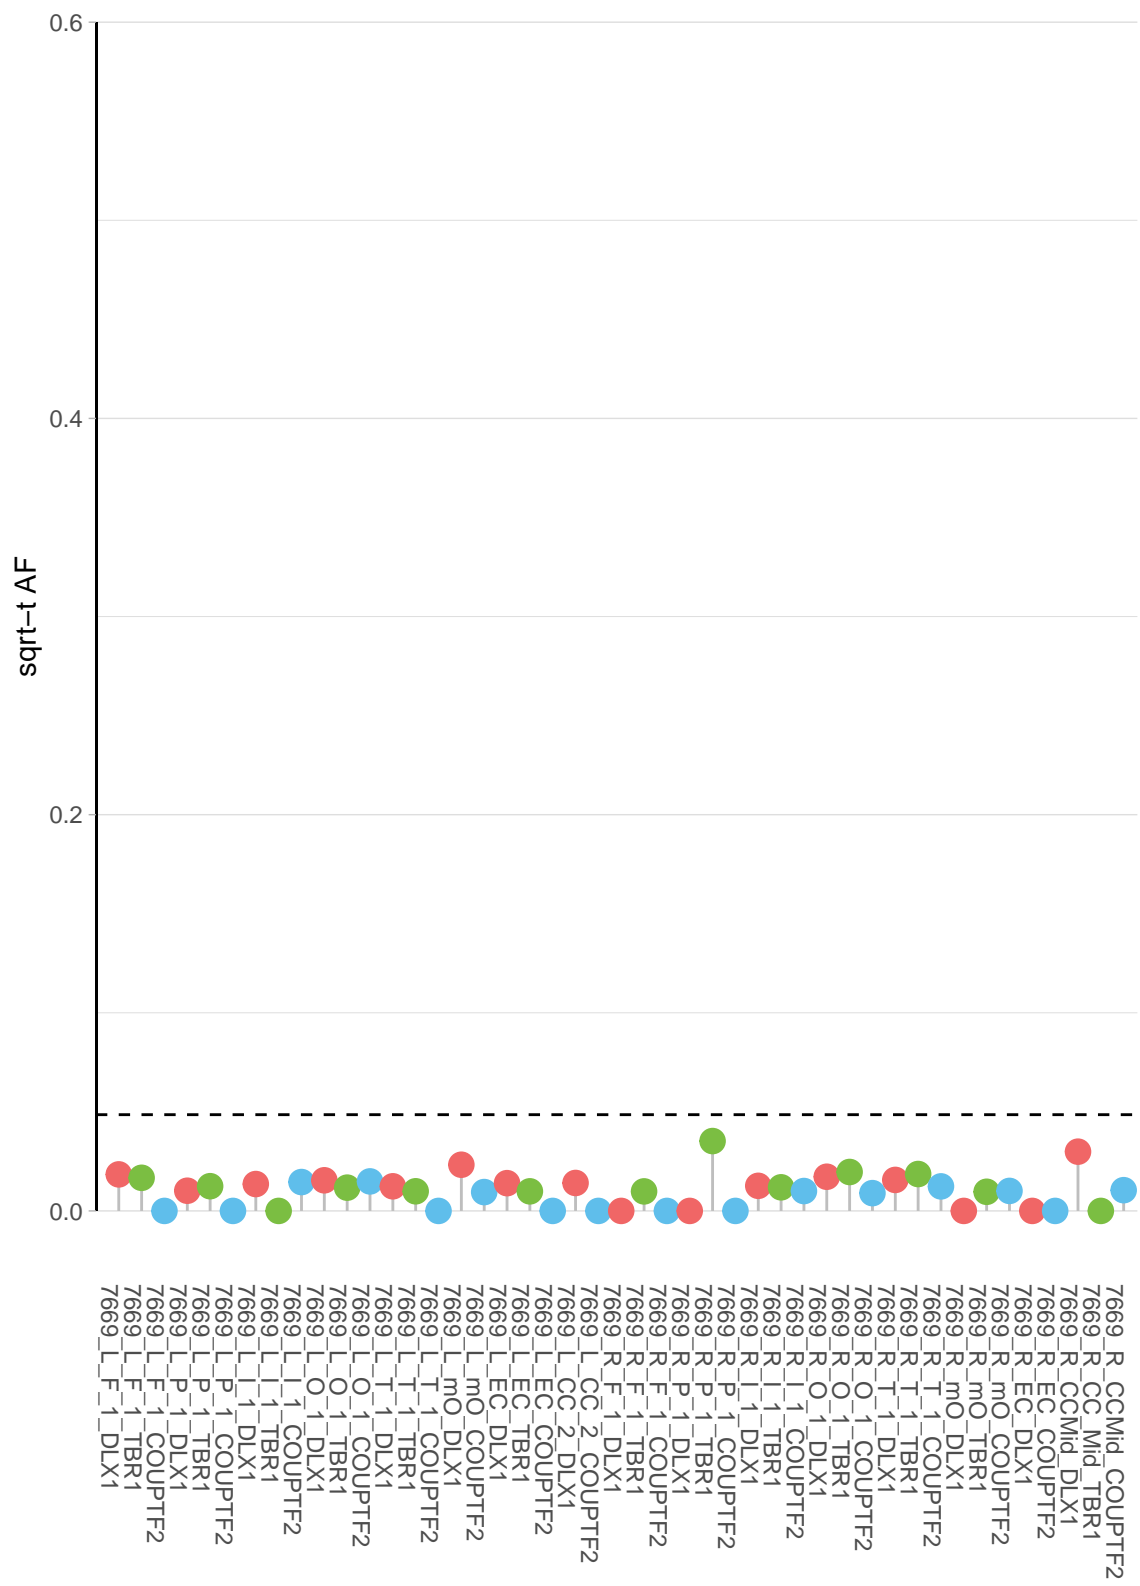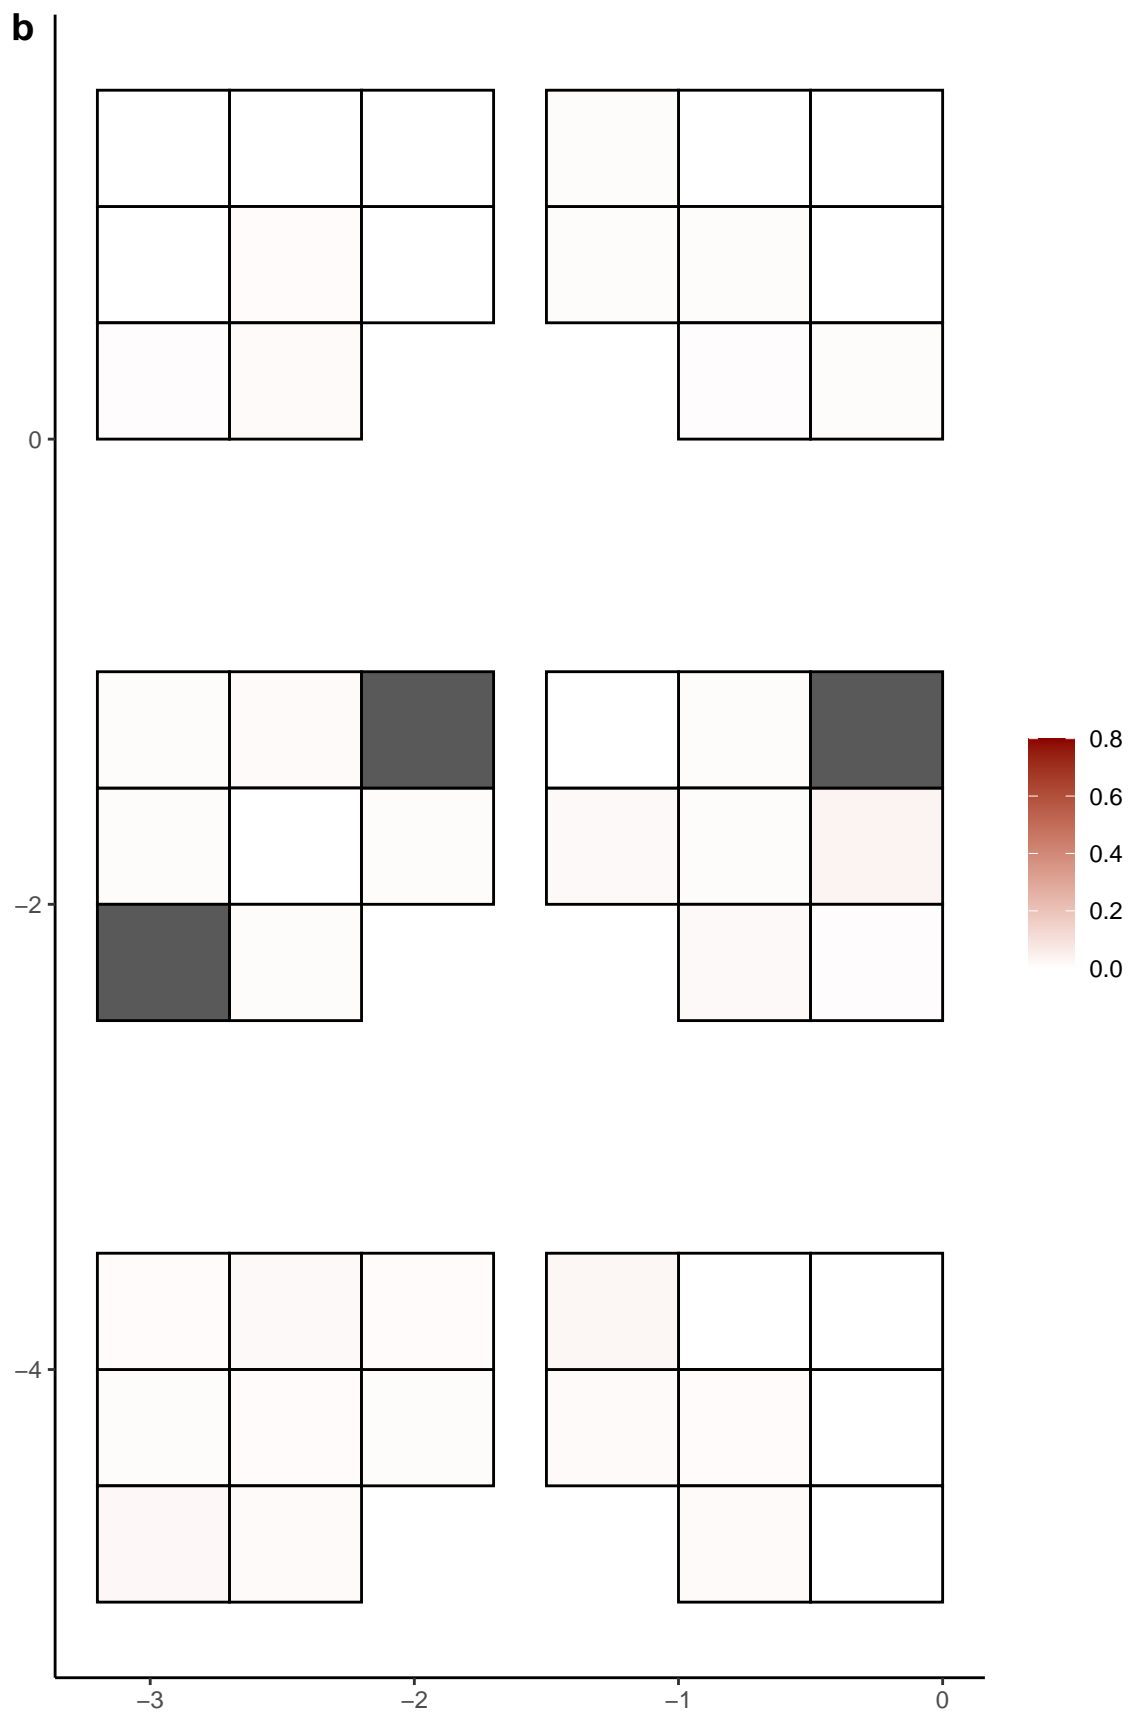

**a** ID05 10-79843135-G-A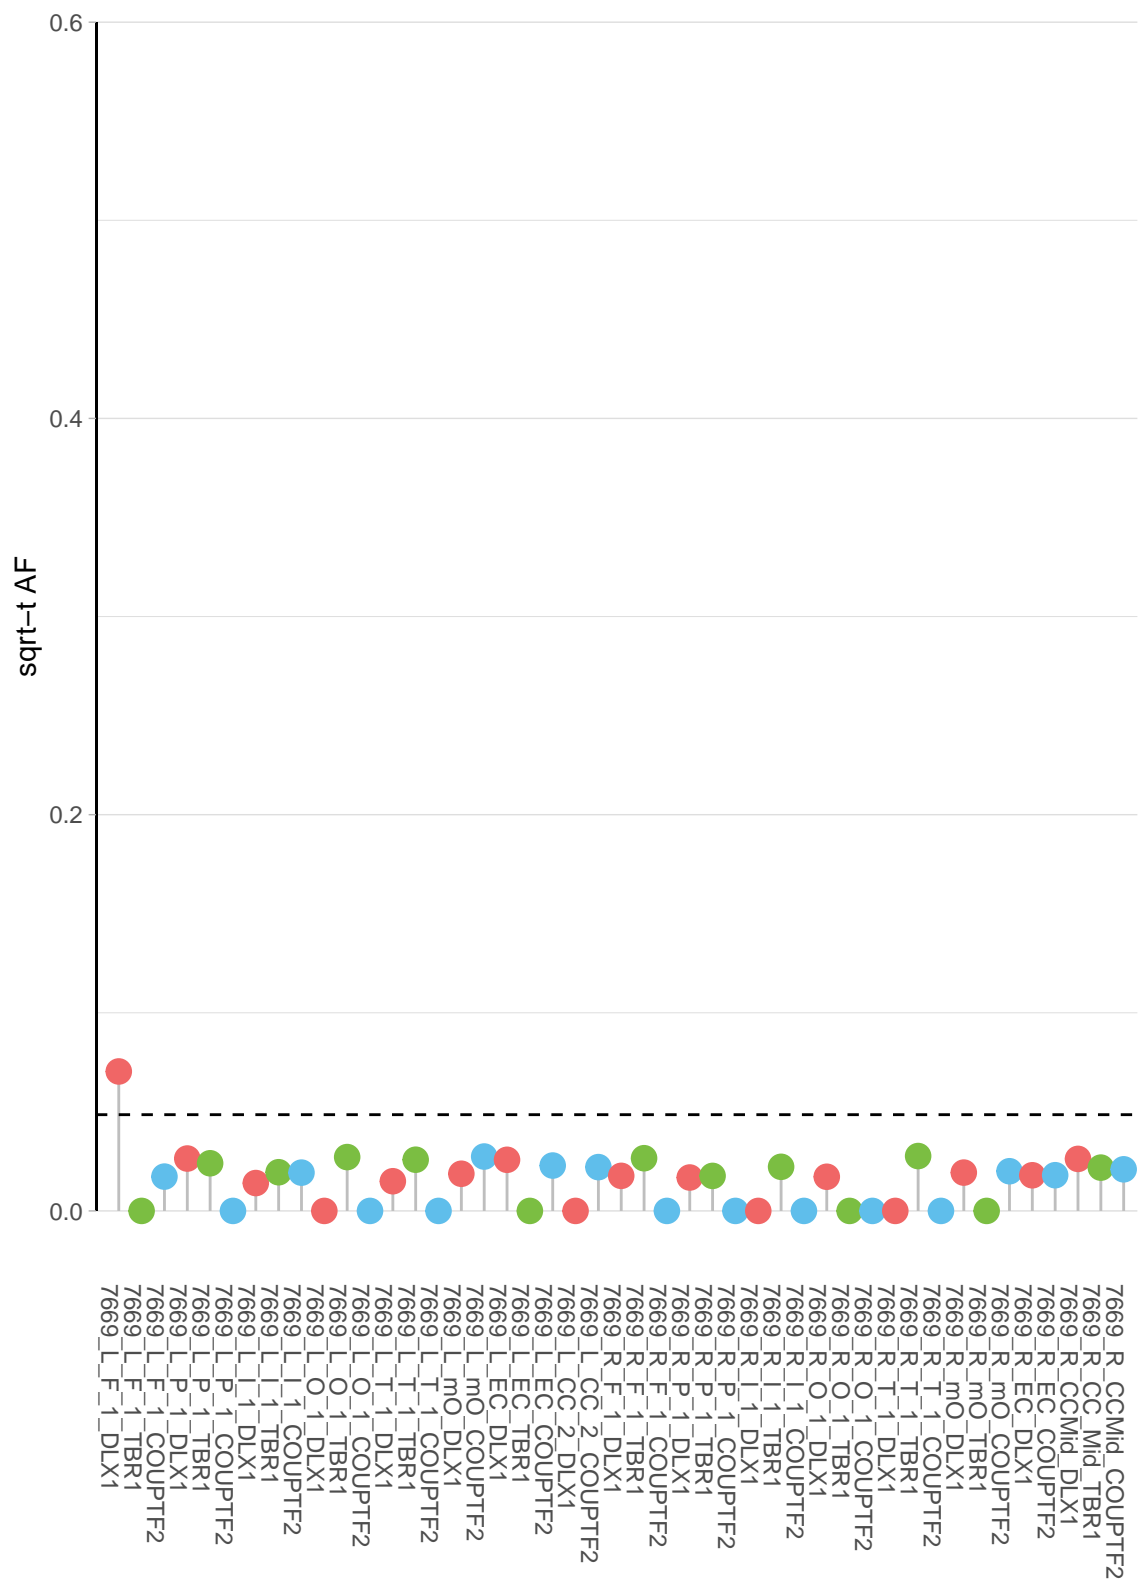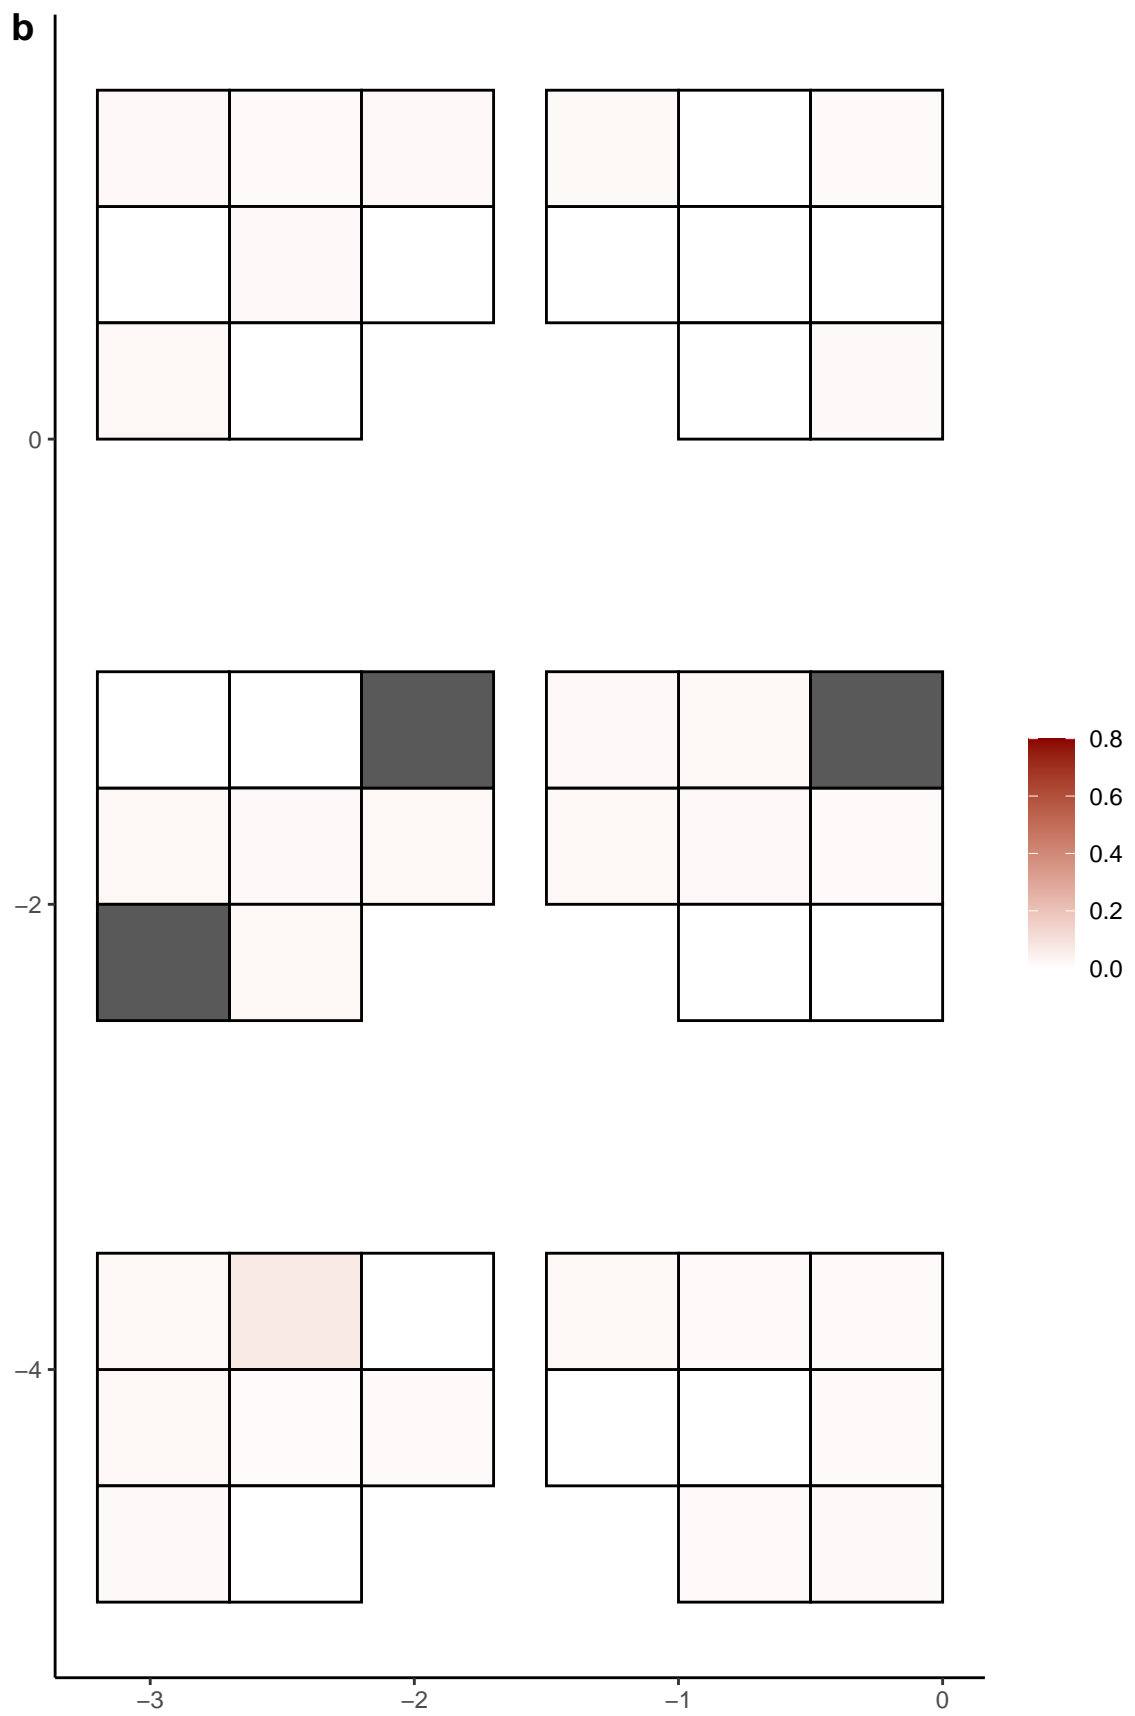

**a** ID05 10-86000116-G-A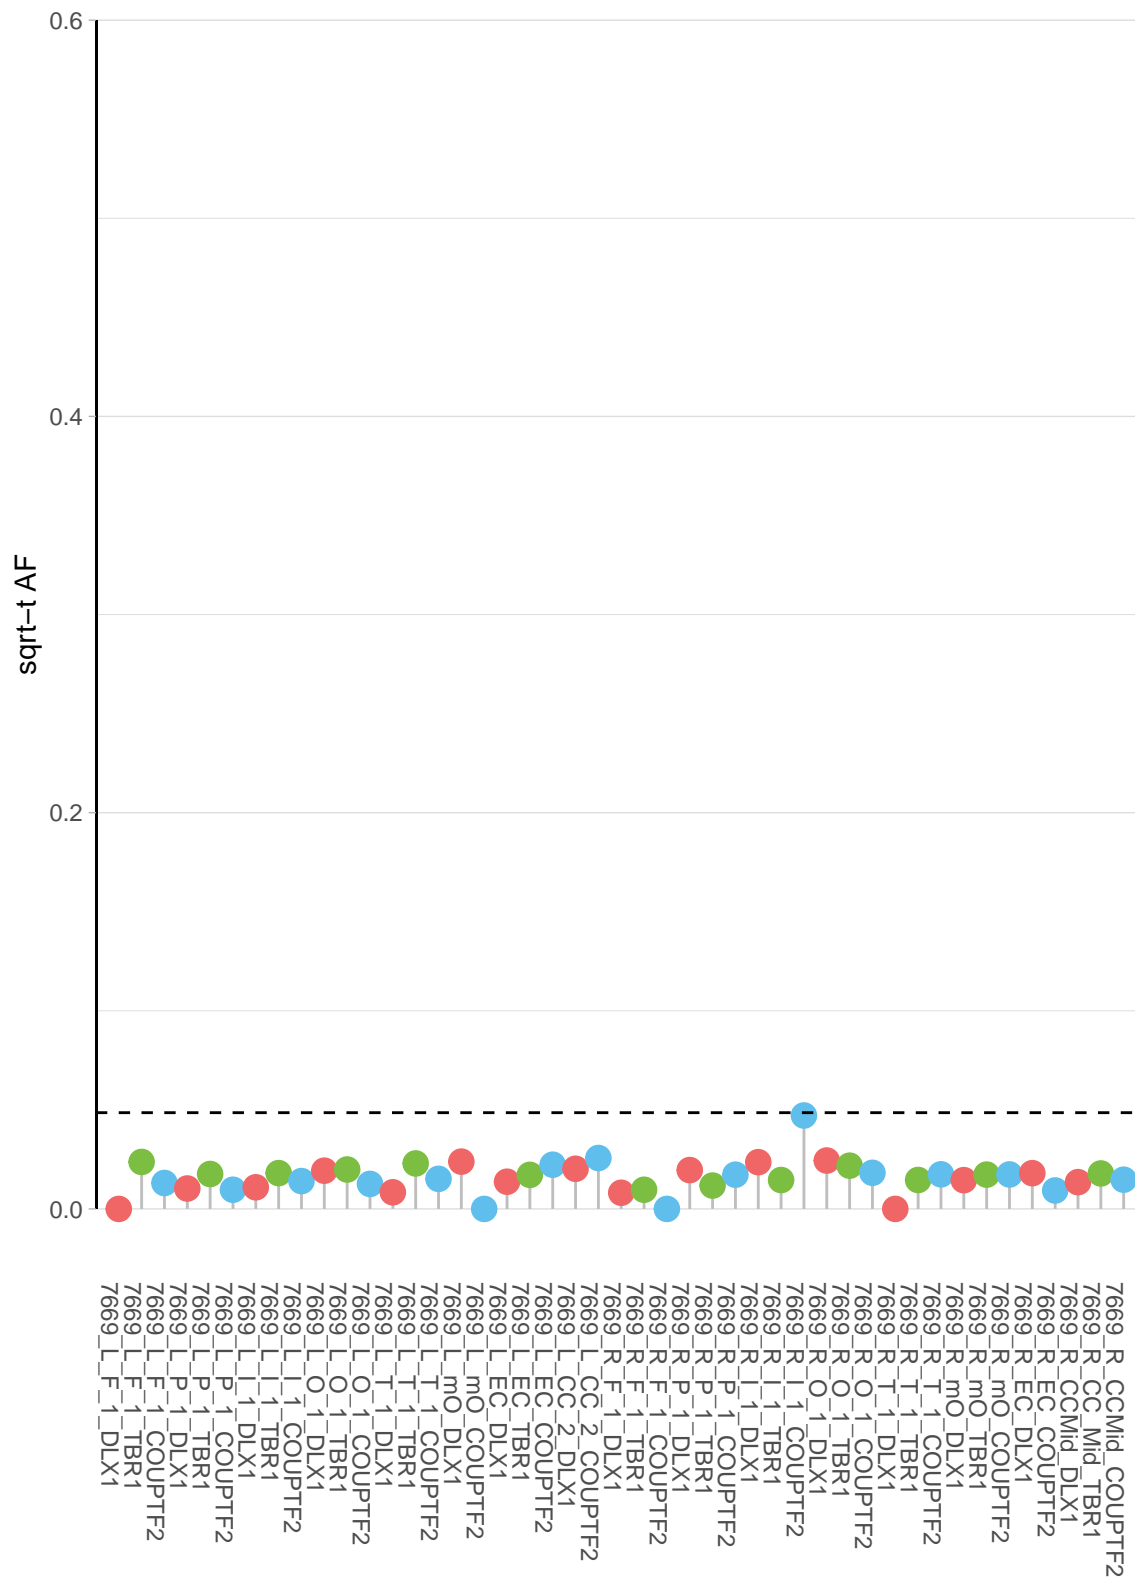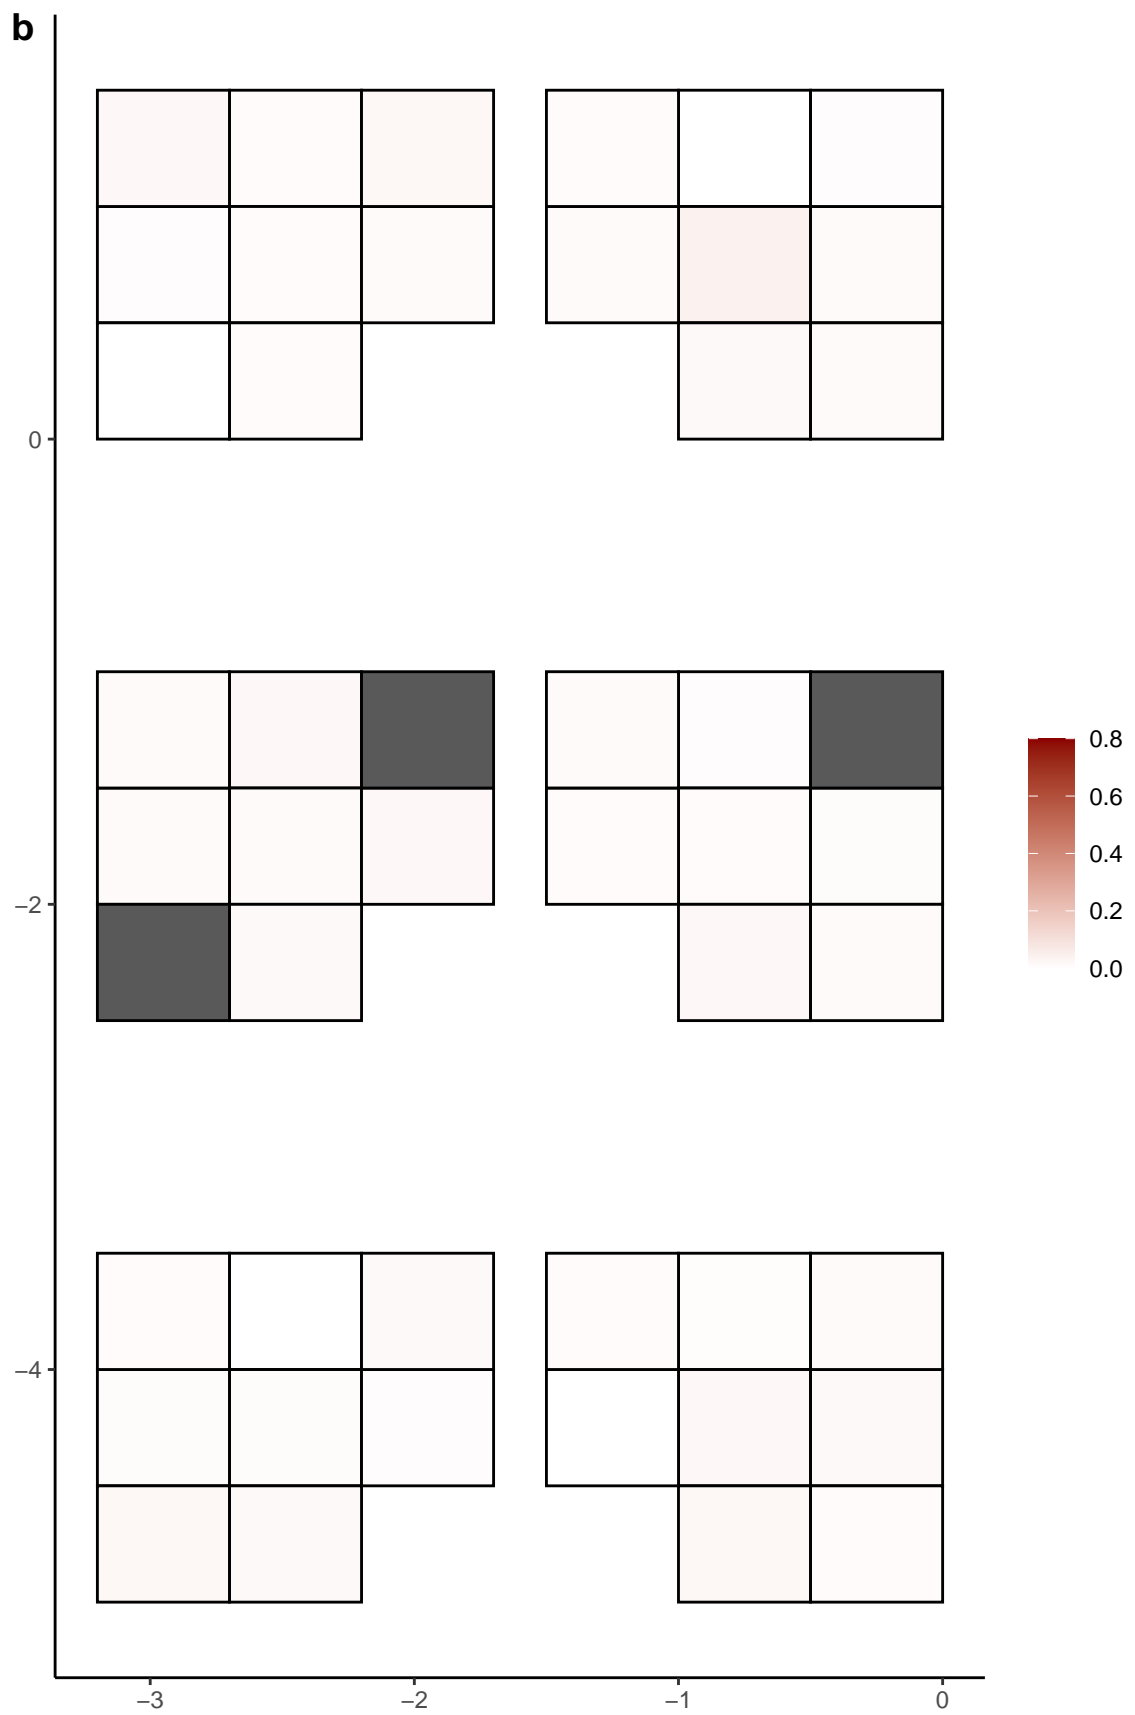

**a** ID05 10-90743647-G-T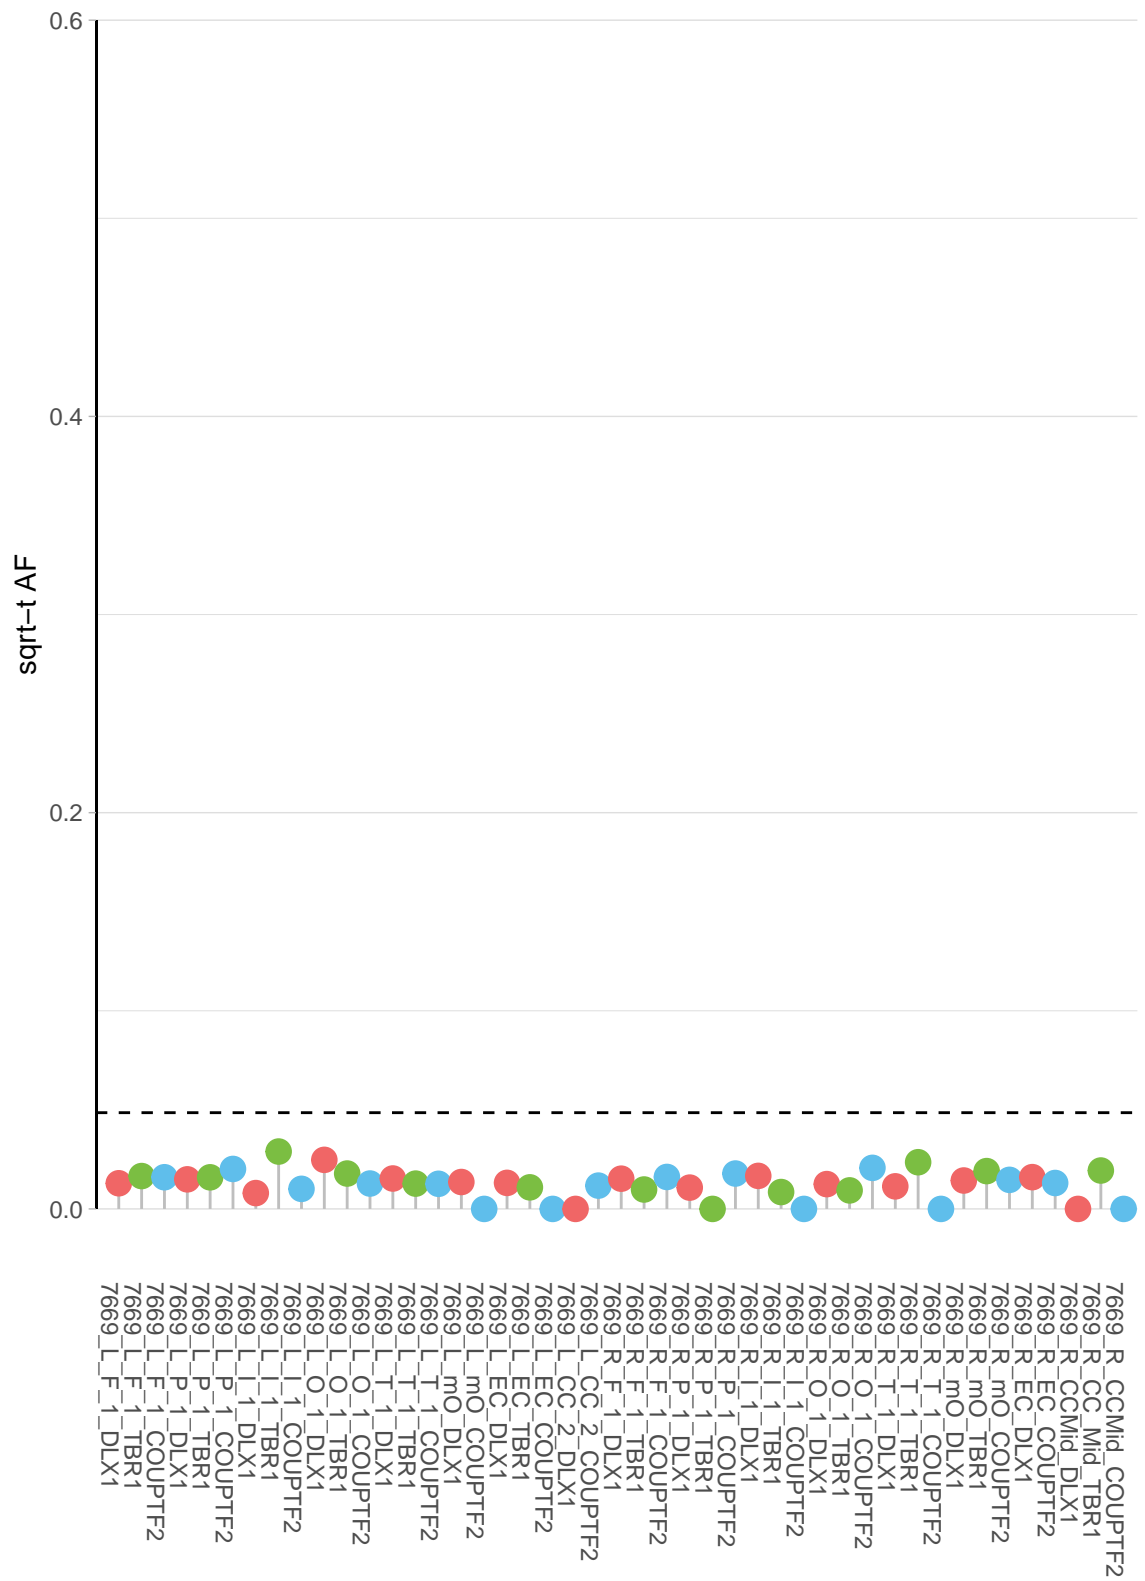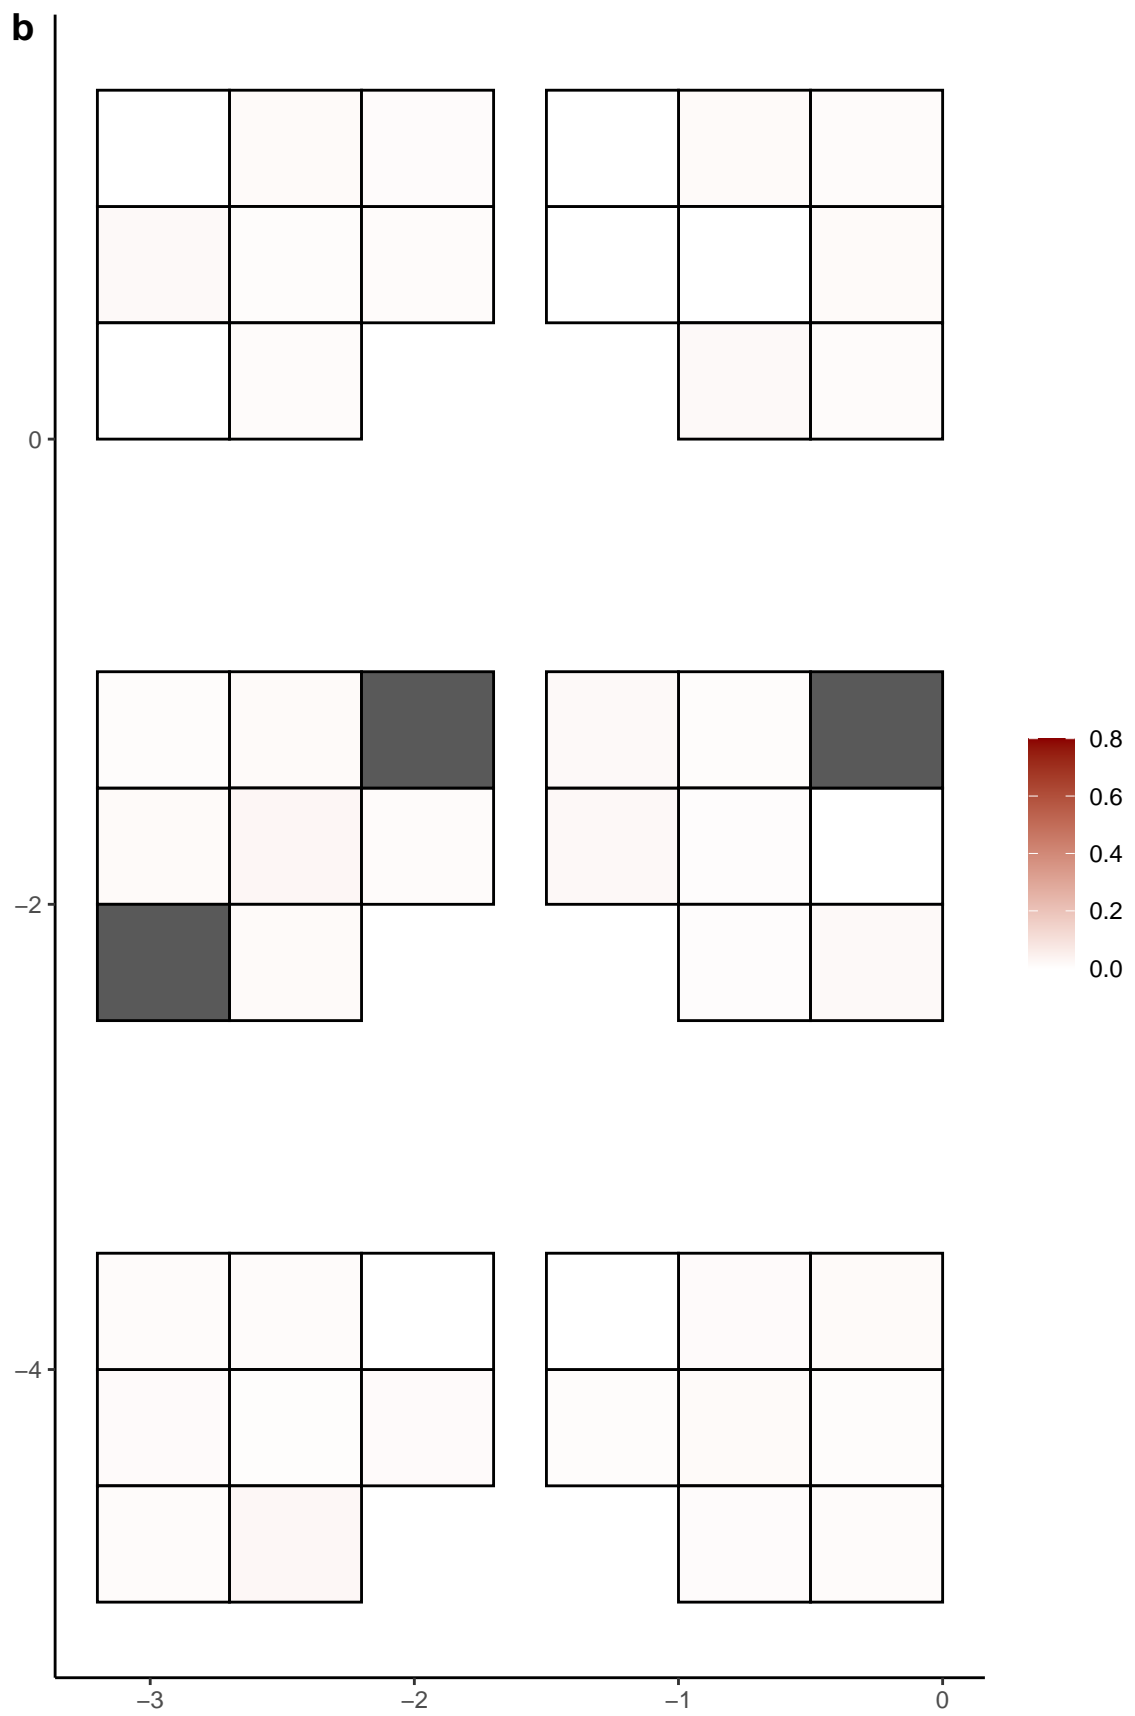

**a** ID05 10-92052309-G-A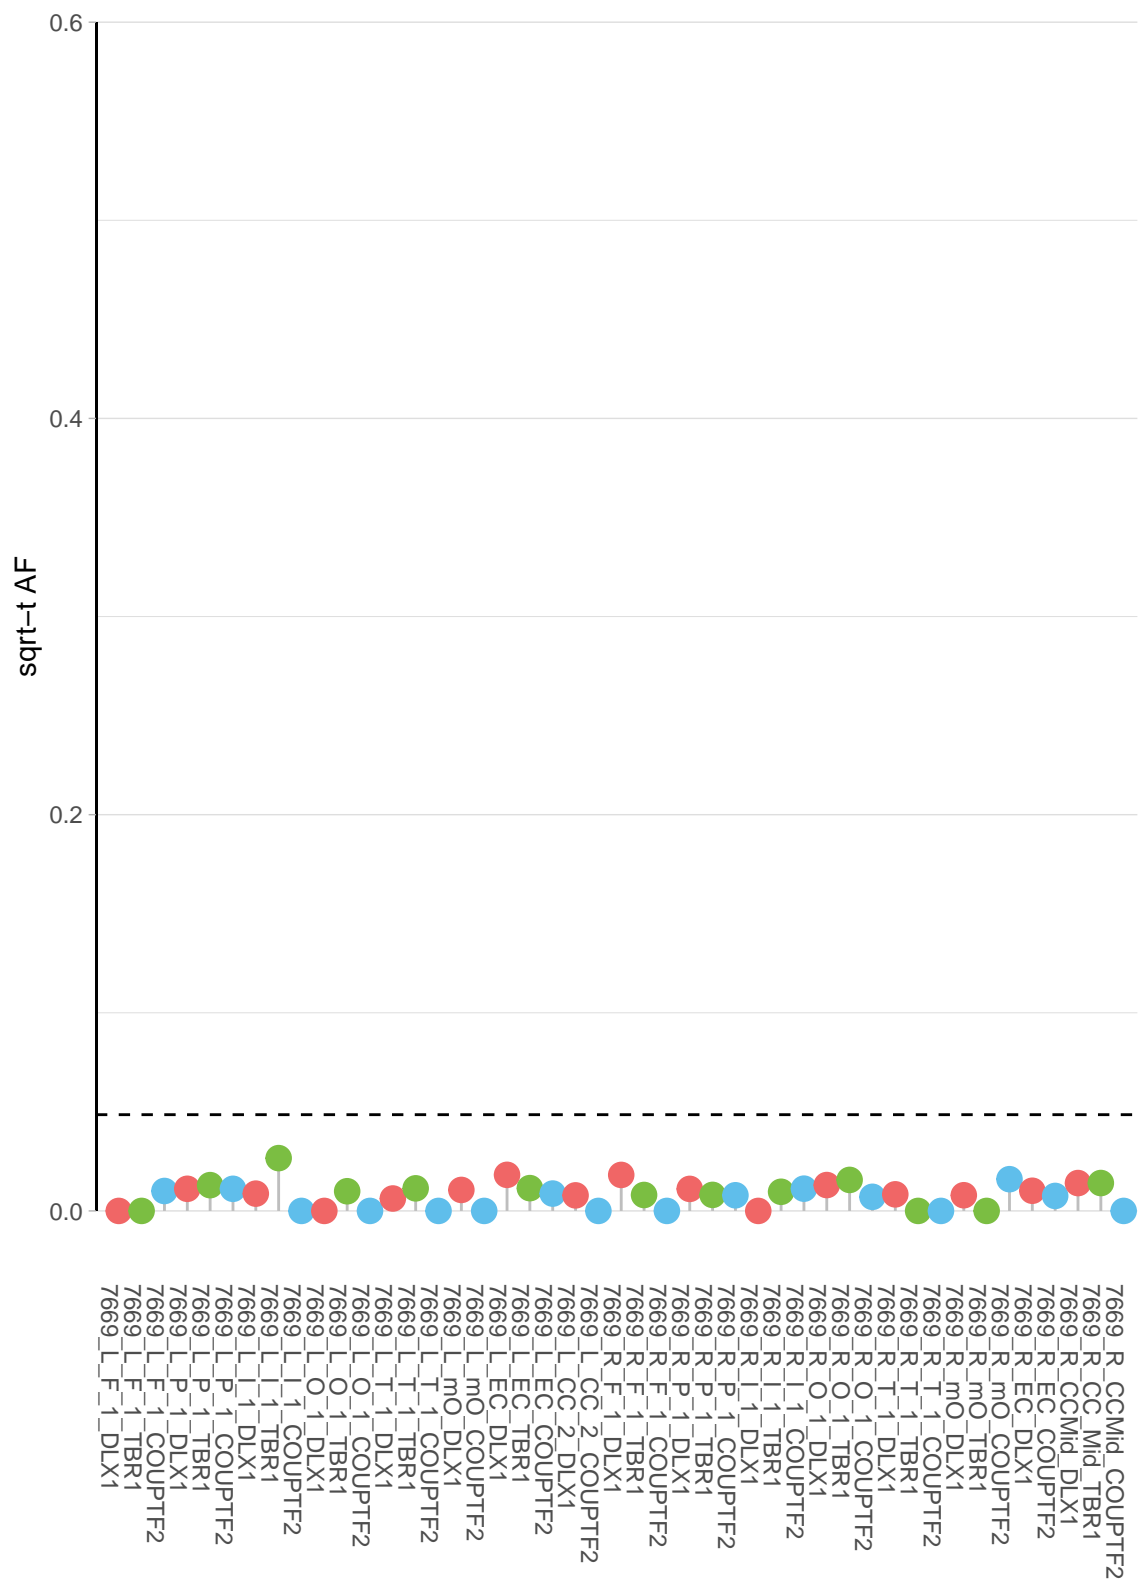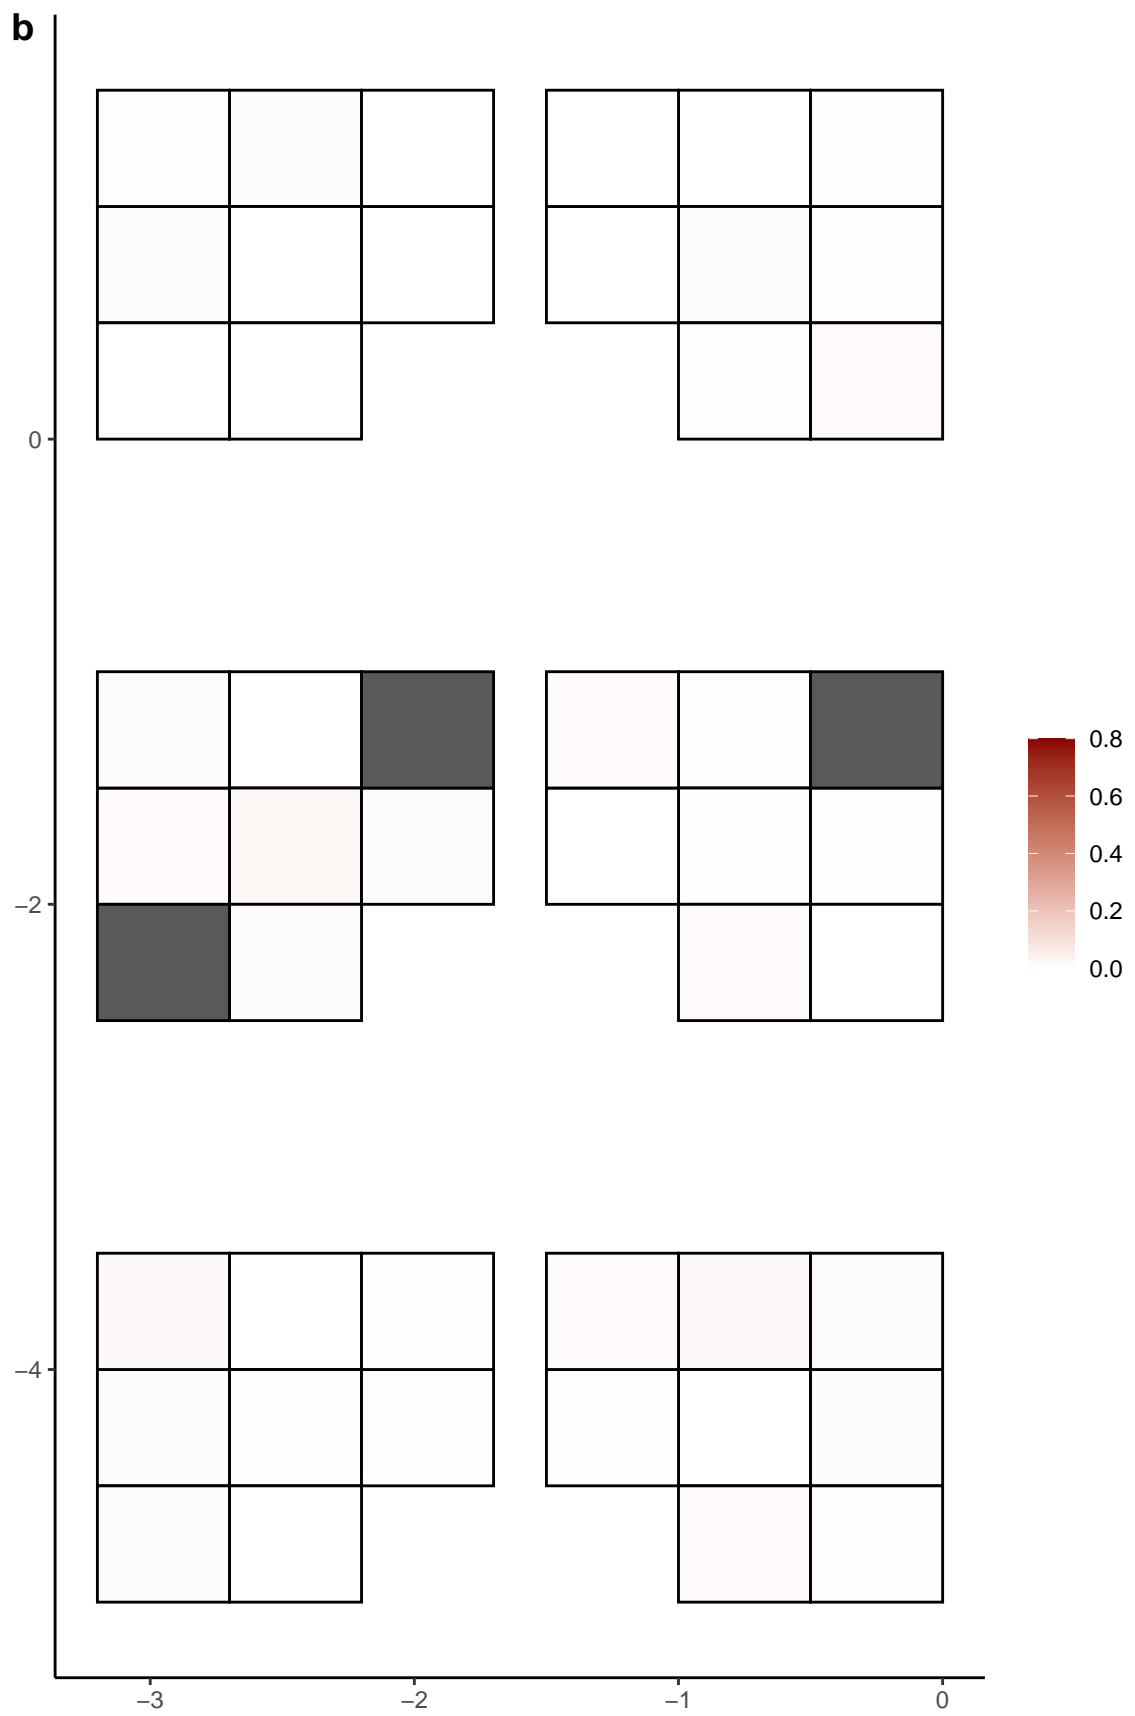

**a** ID05 10-98832334-C-T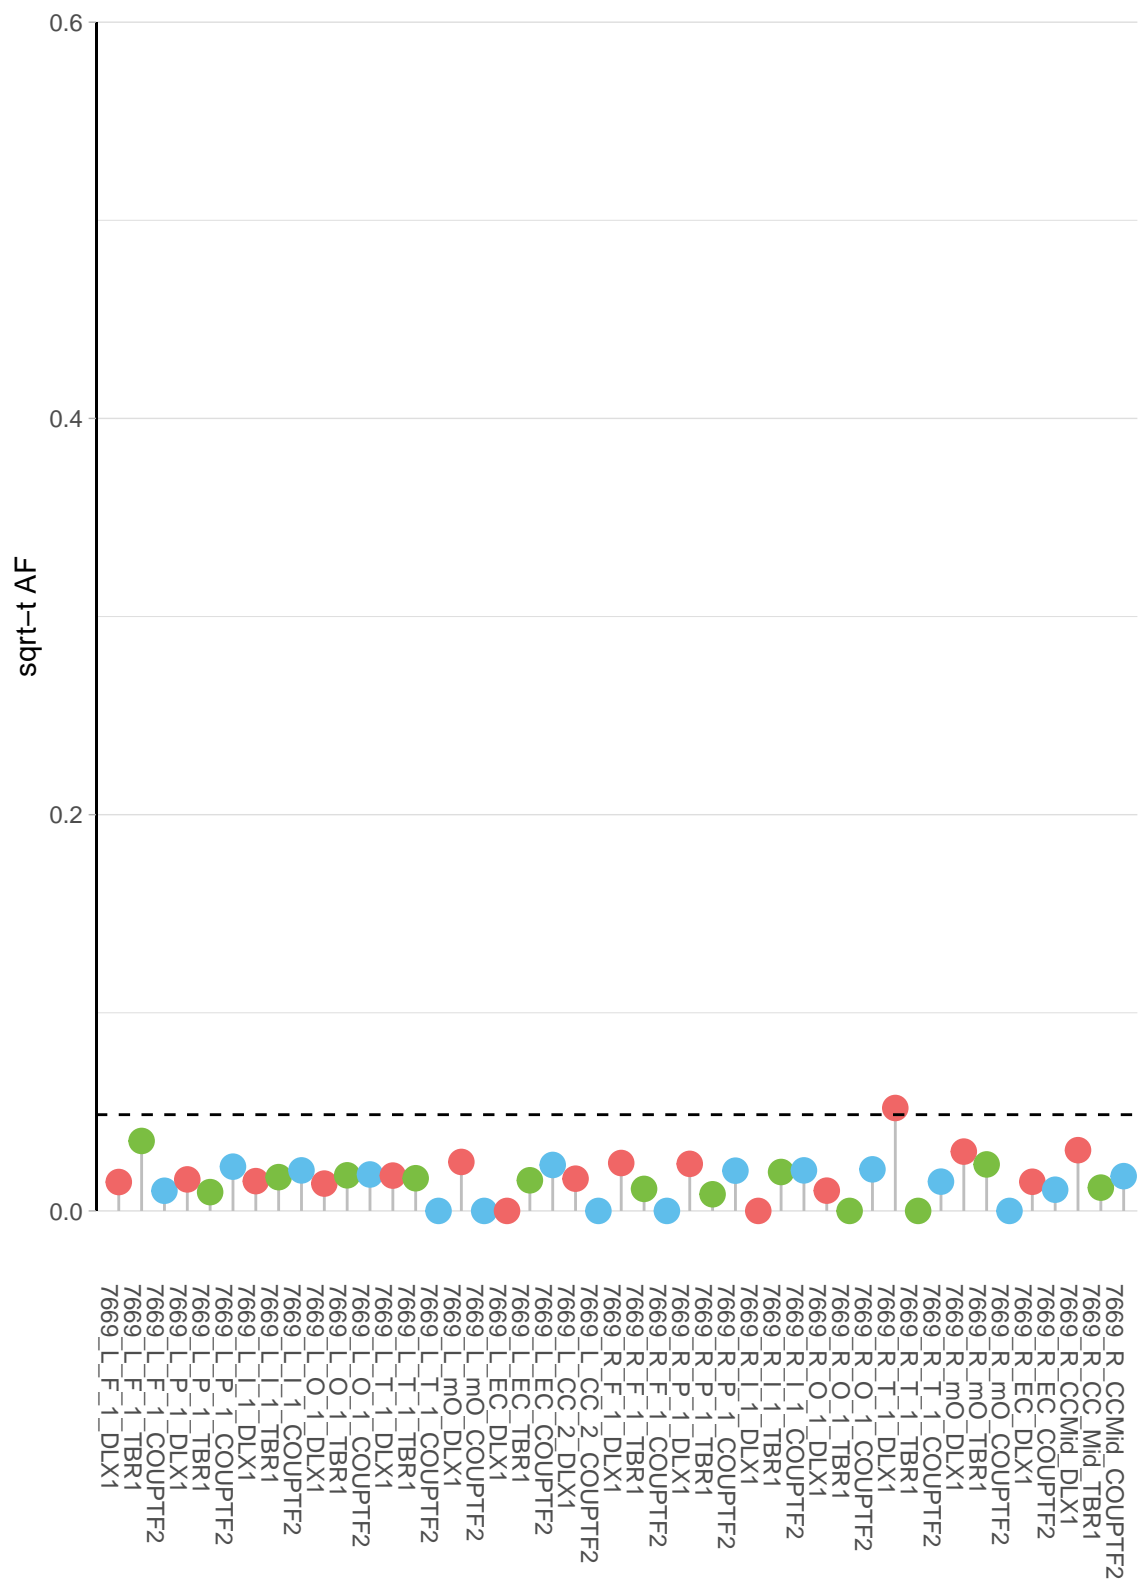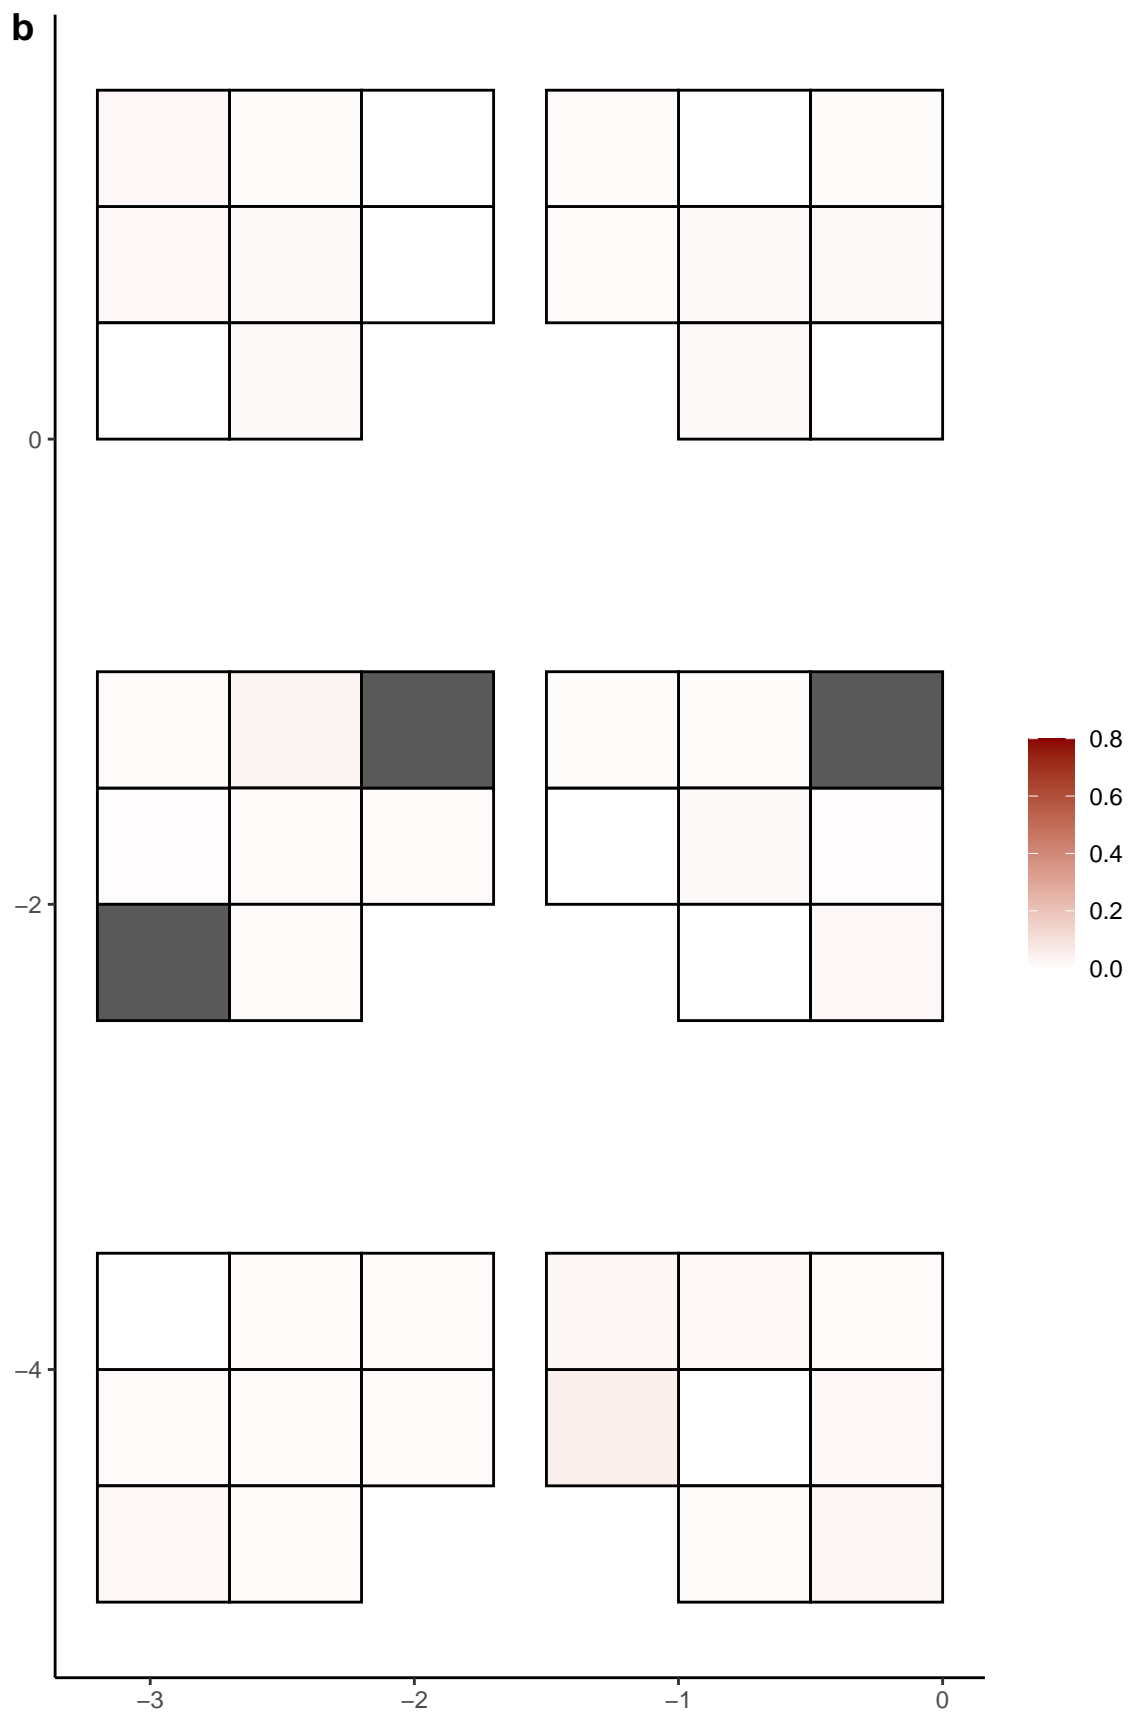



**a** ID05 10-98832335-C-A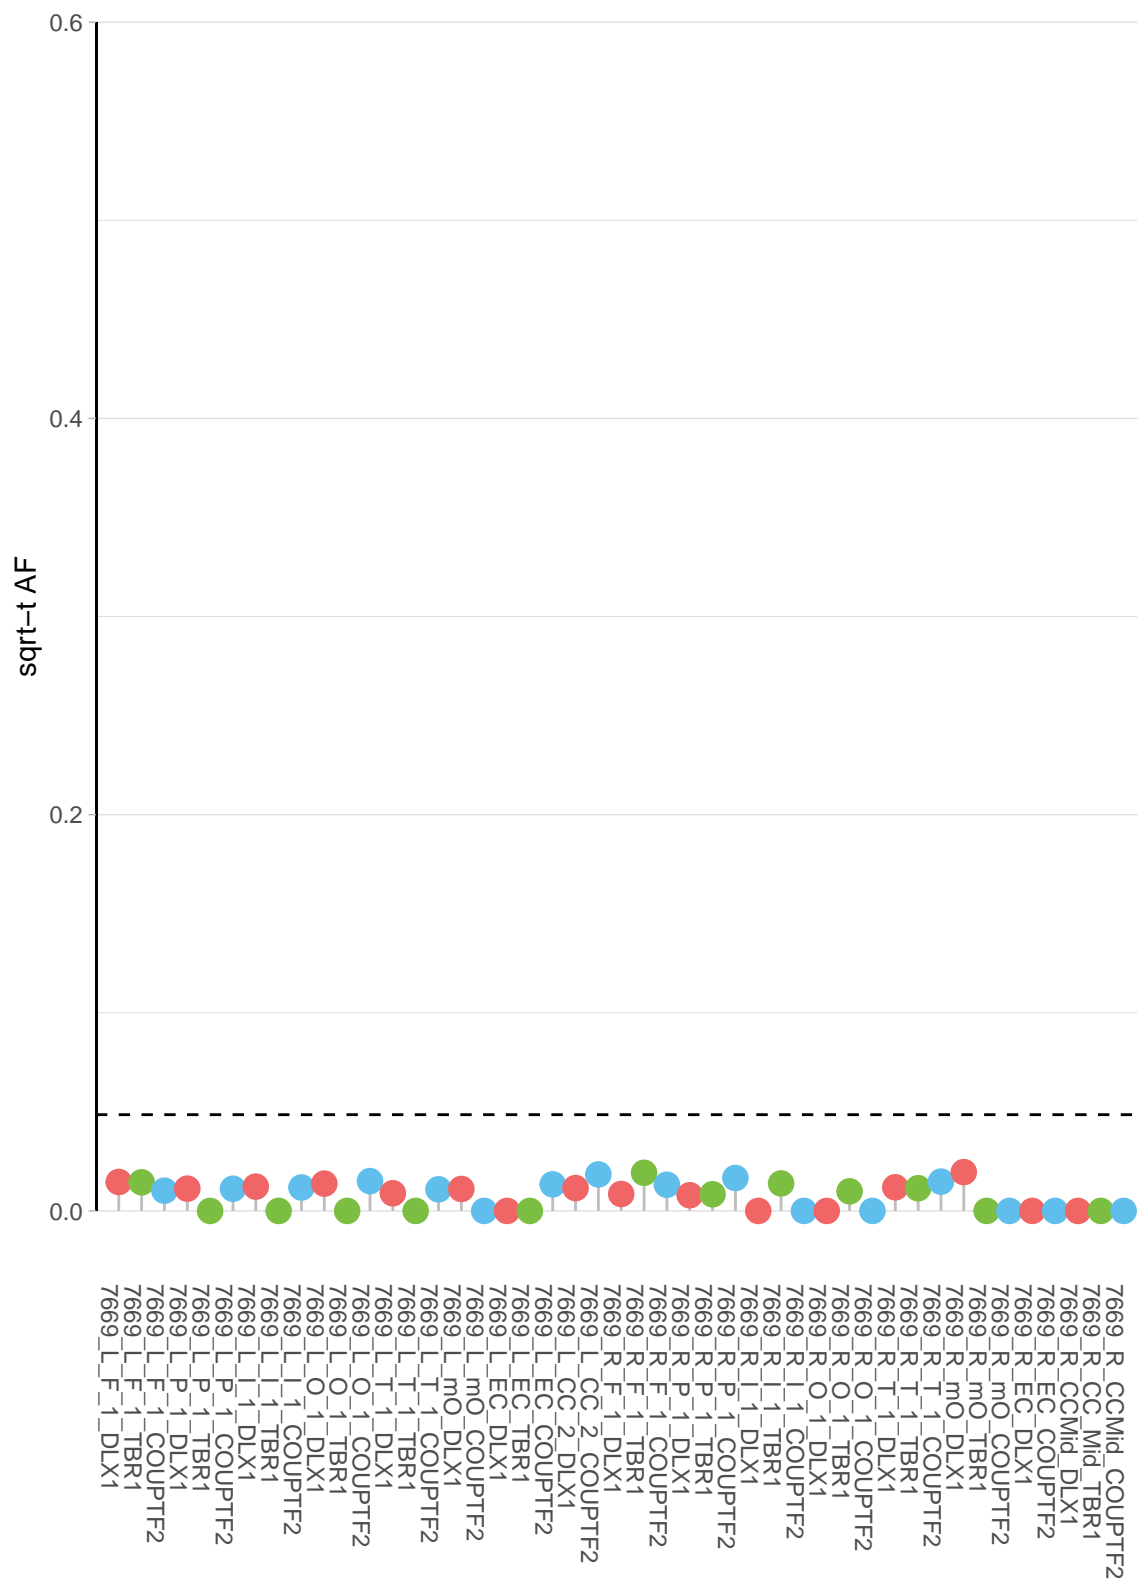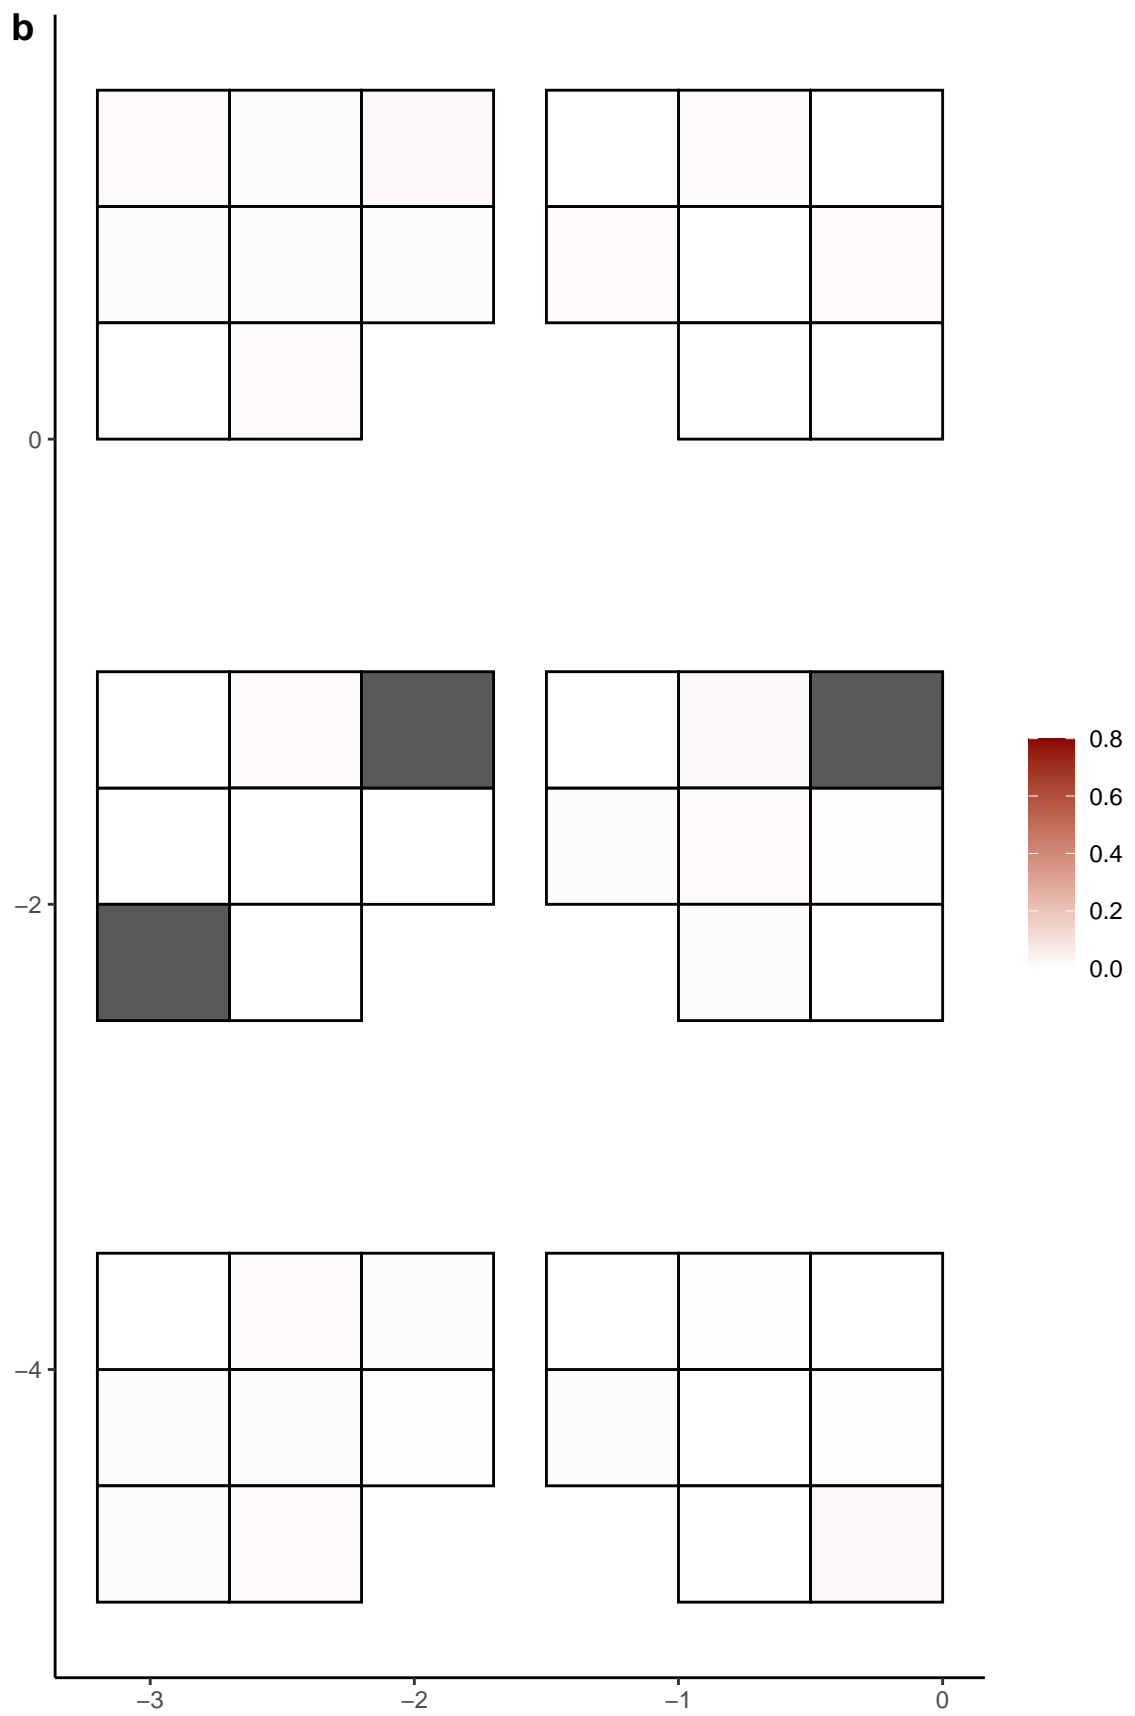

**a** ID05 11-105769654-T-C

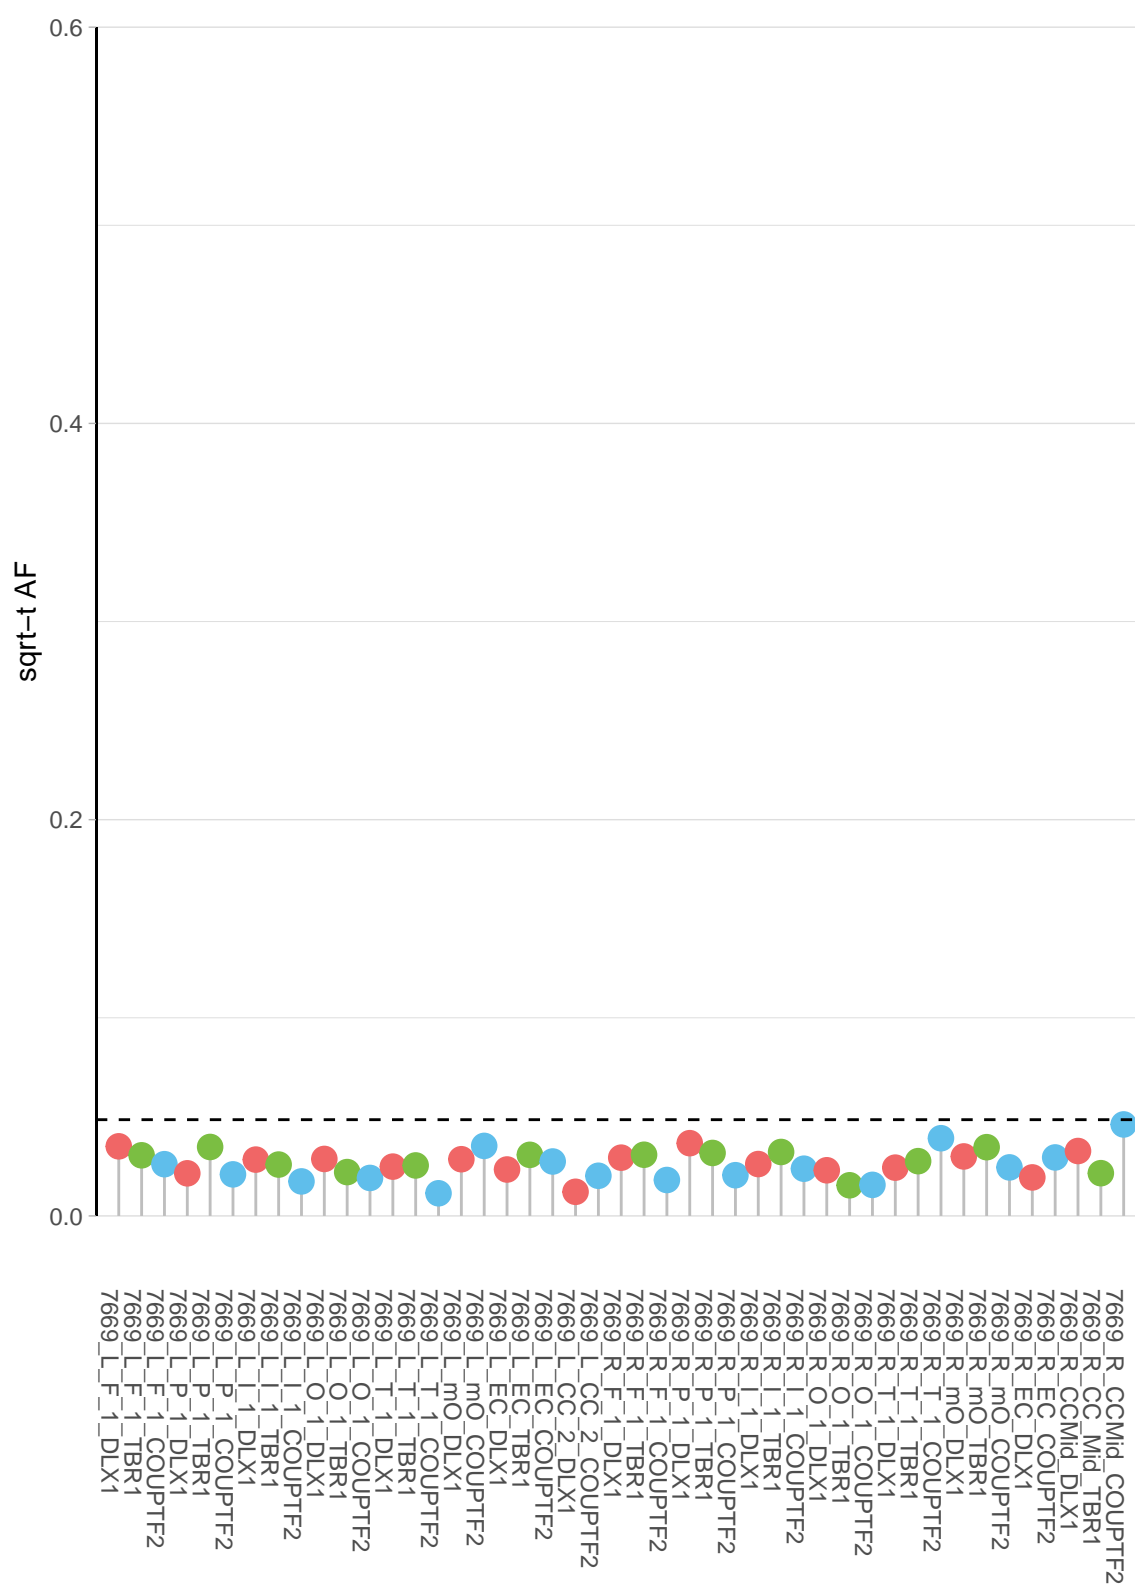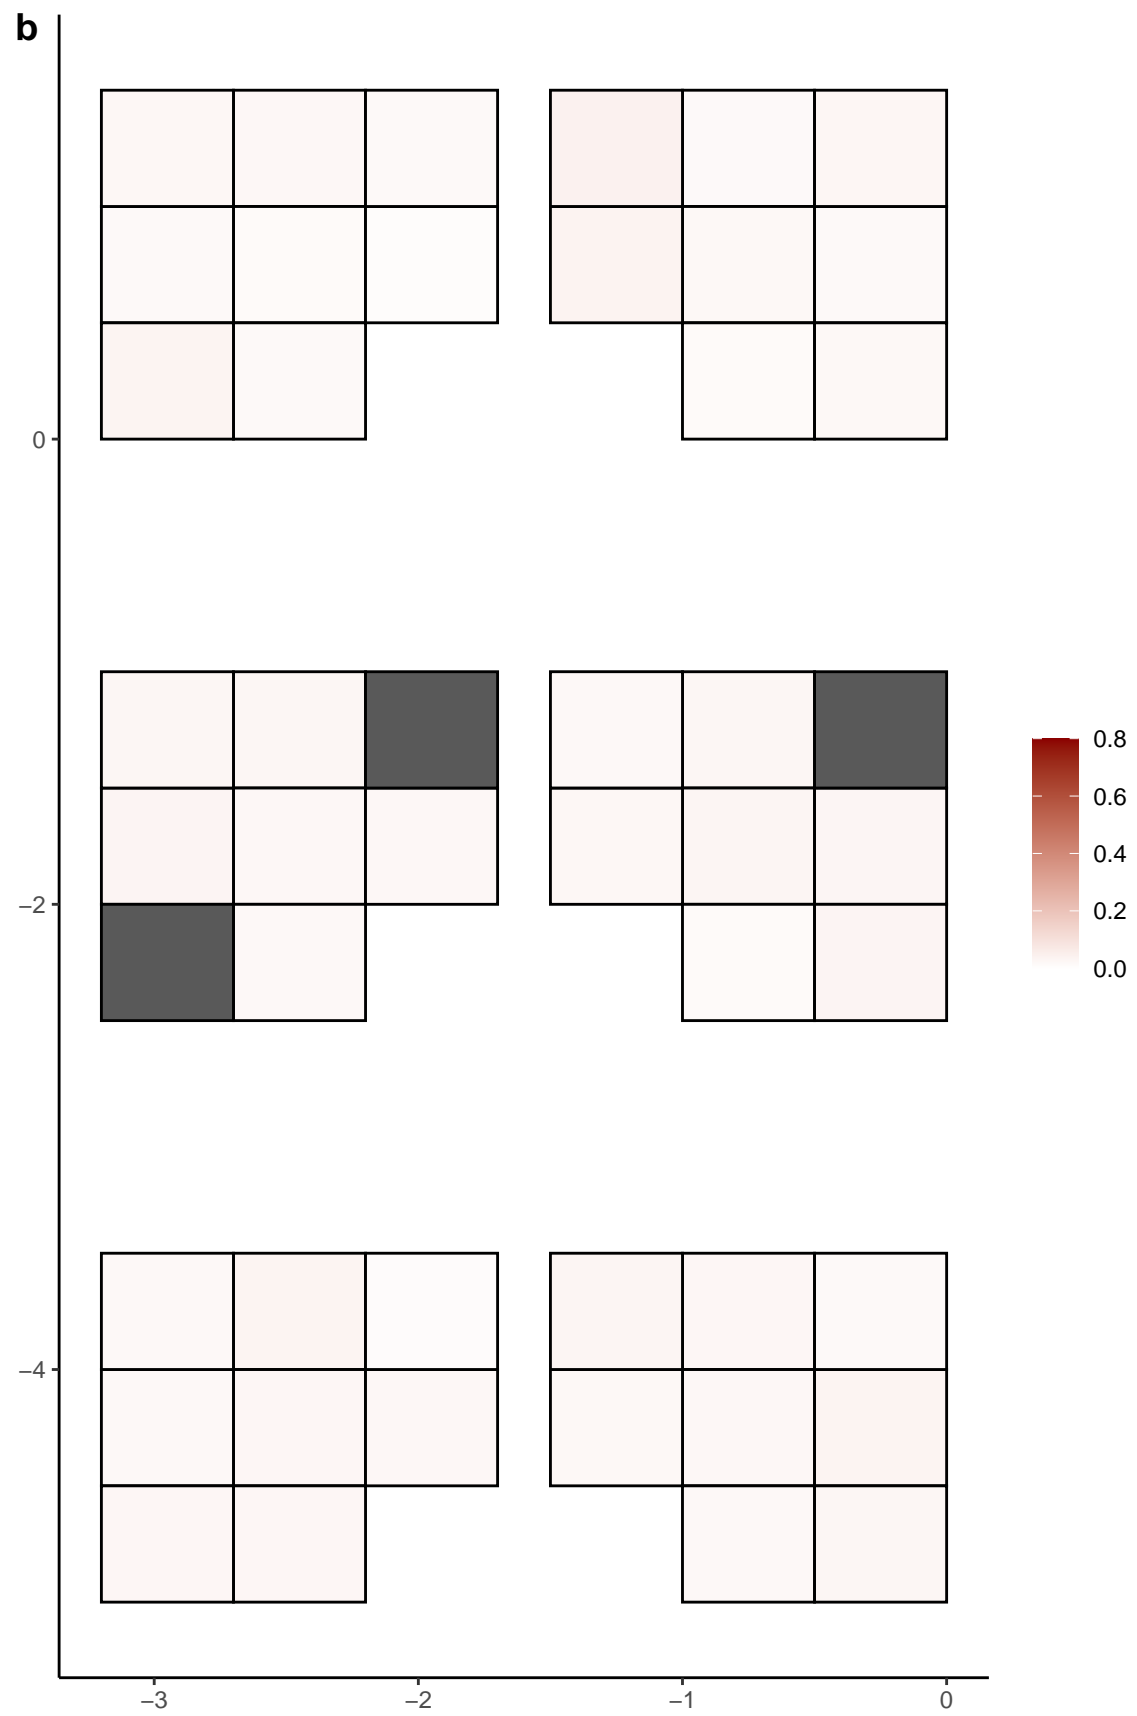

**a** ID05 11-109546001-G-C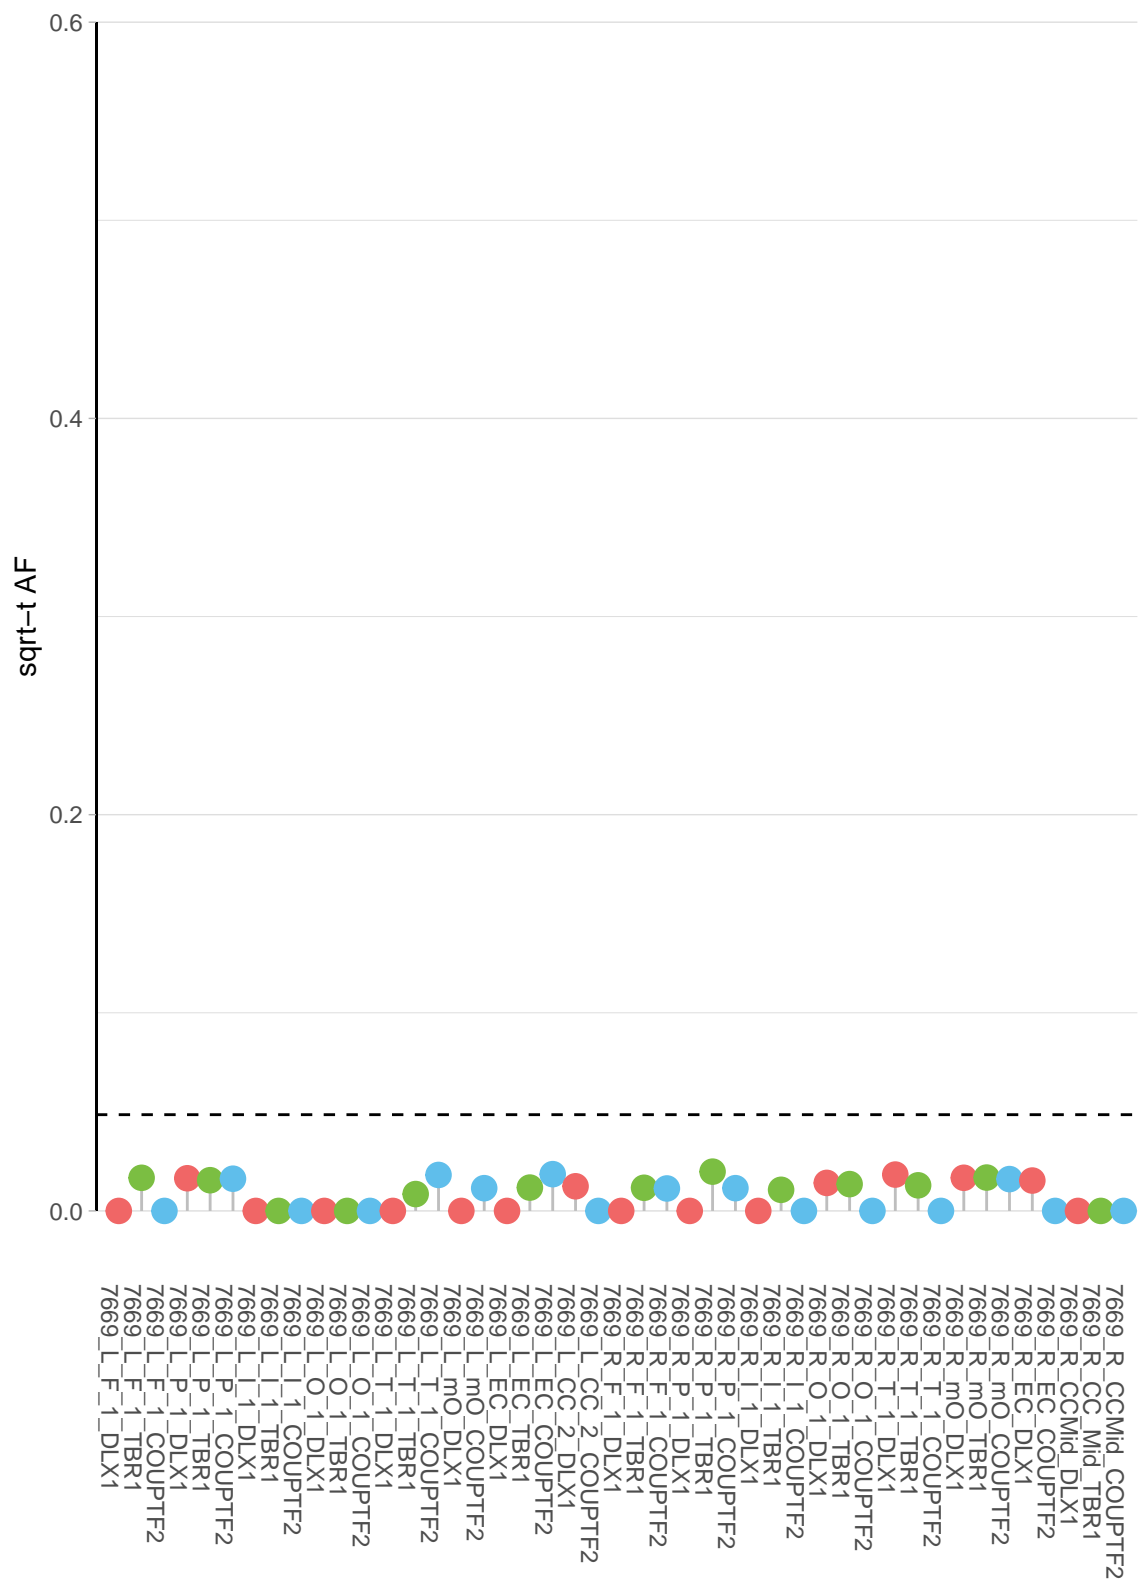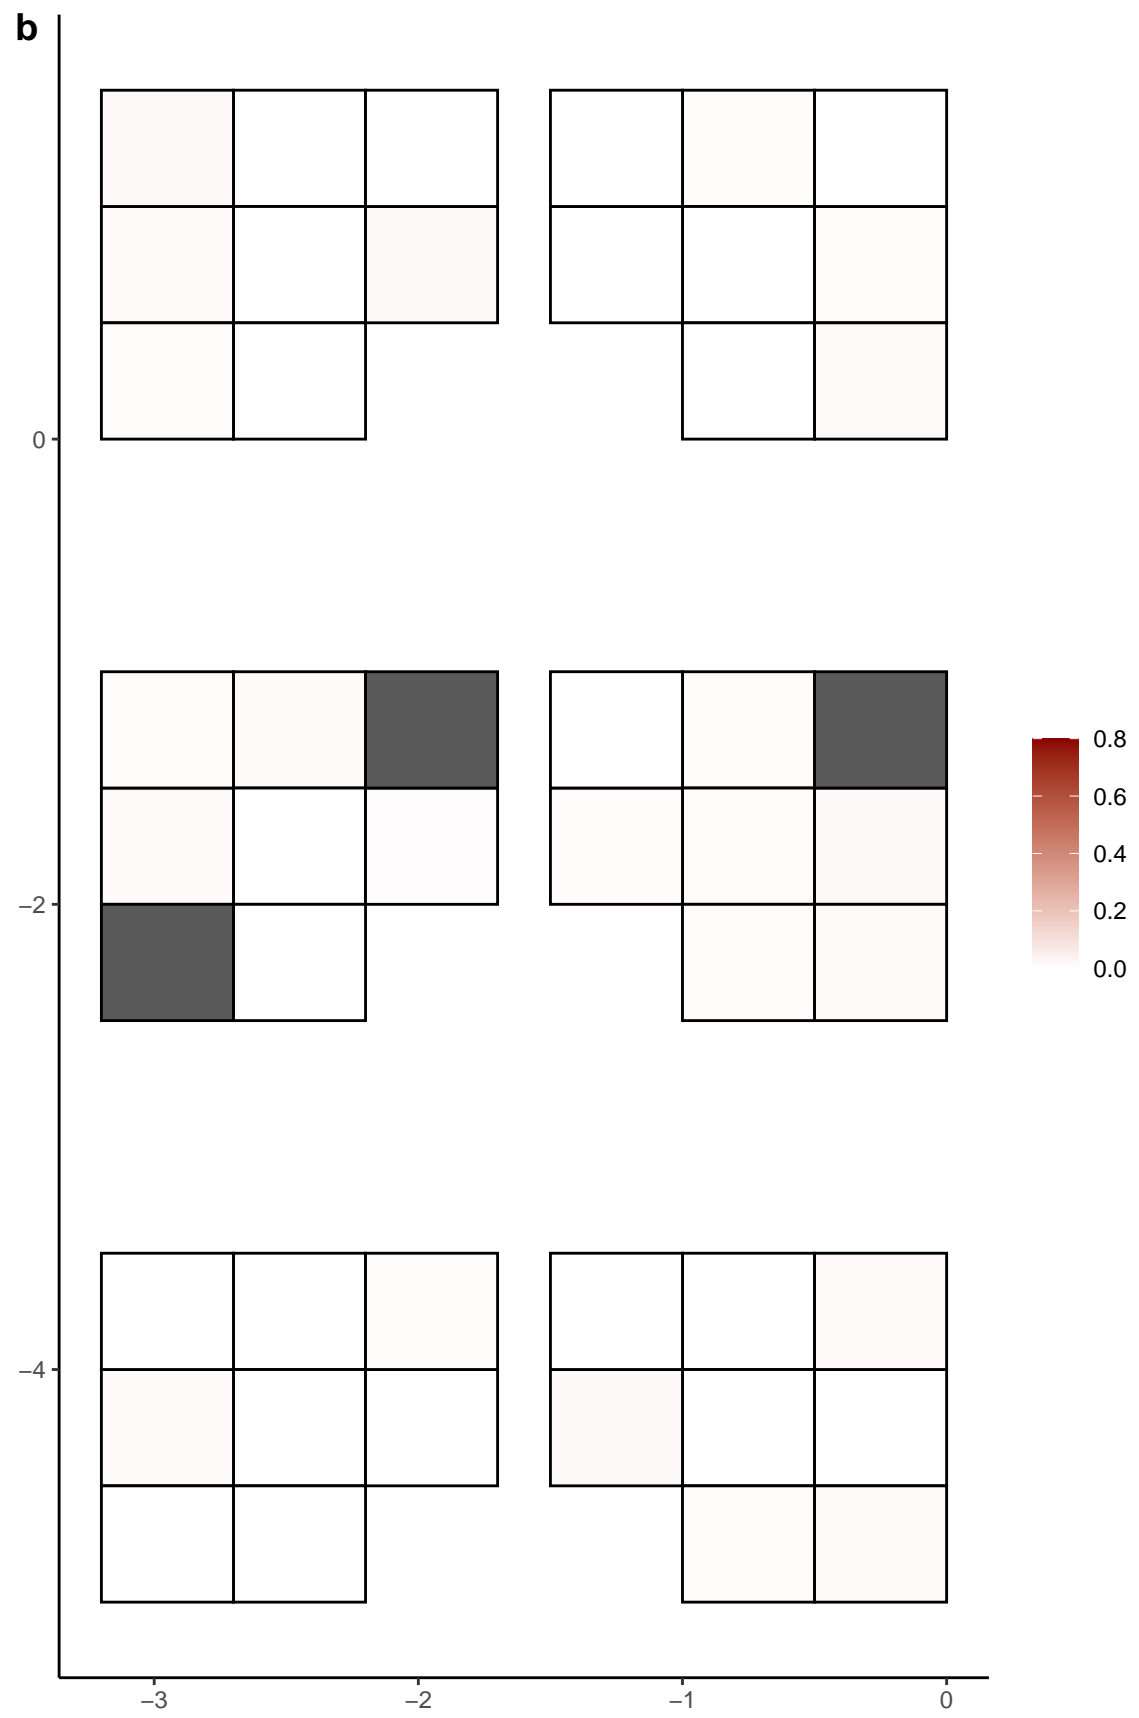

**a** ID05 11-111580997-G-A

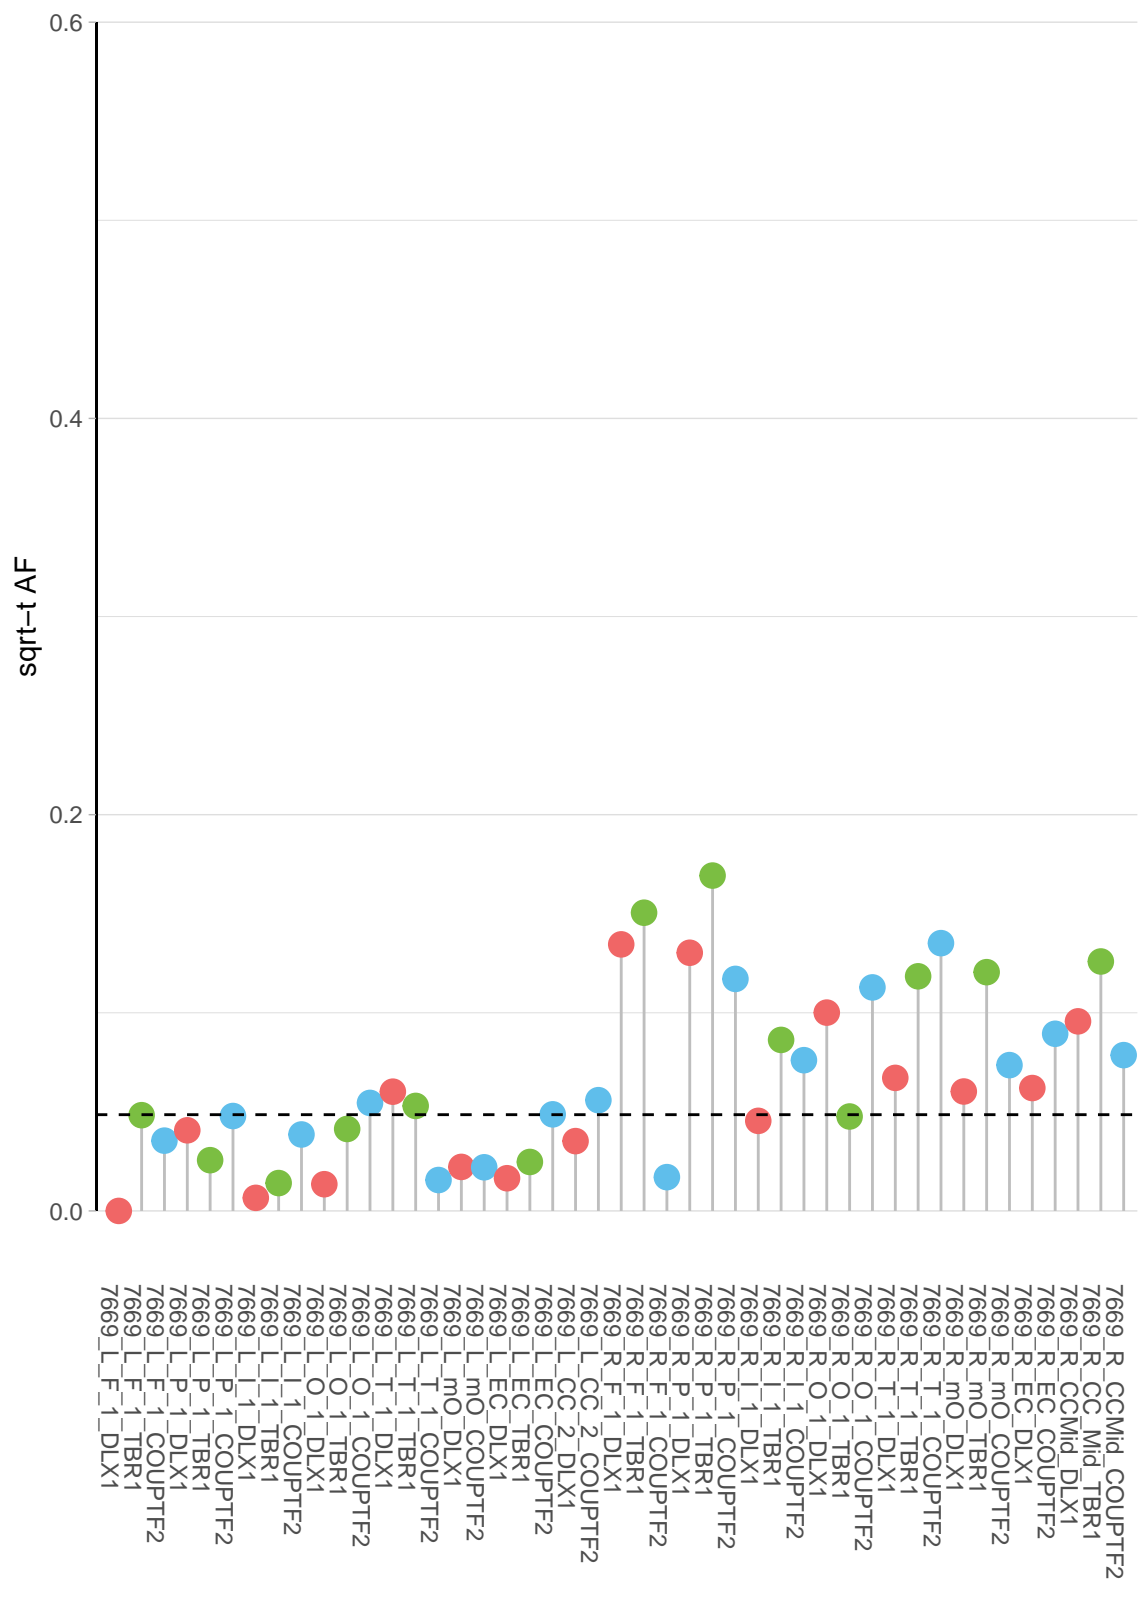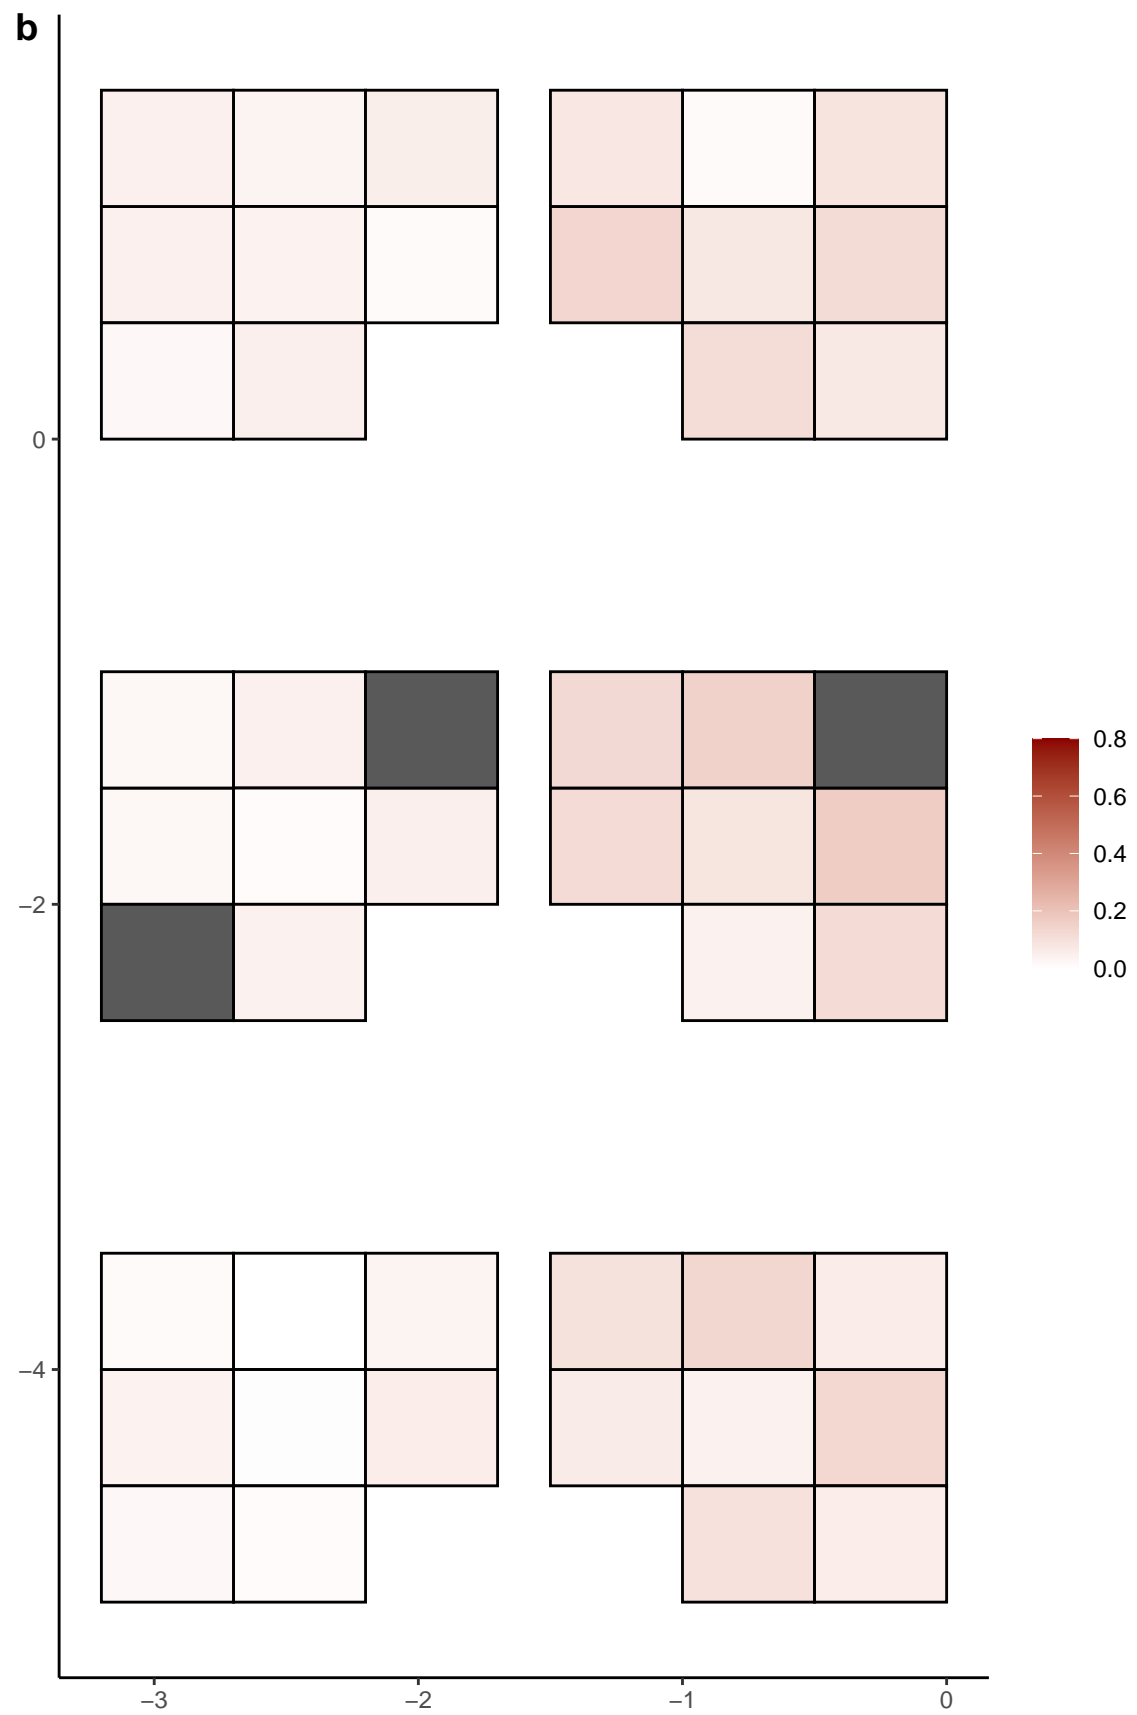

**a** ID05 11-112581116-G-A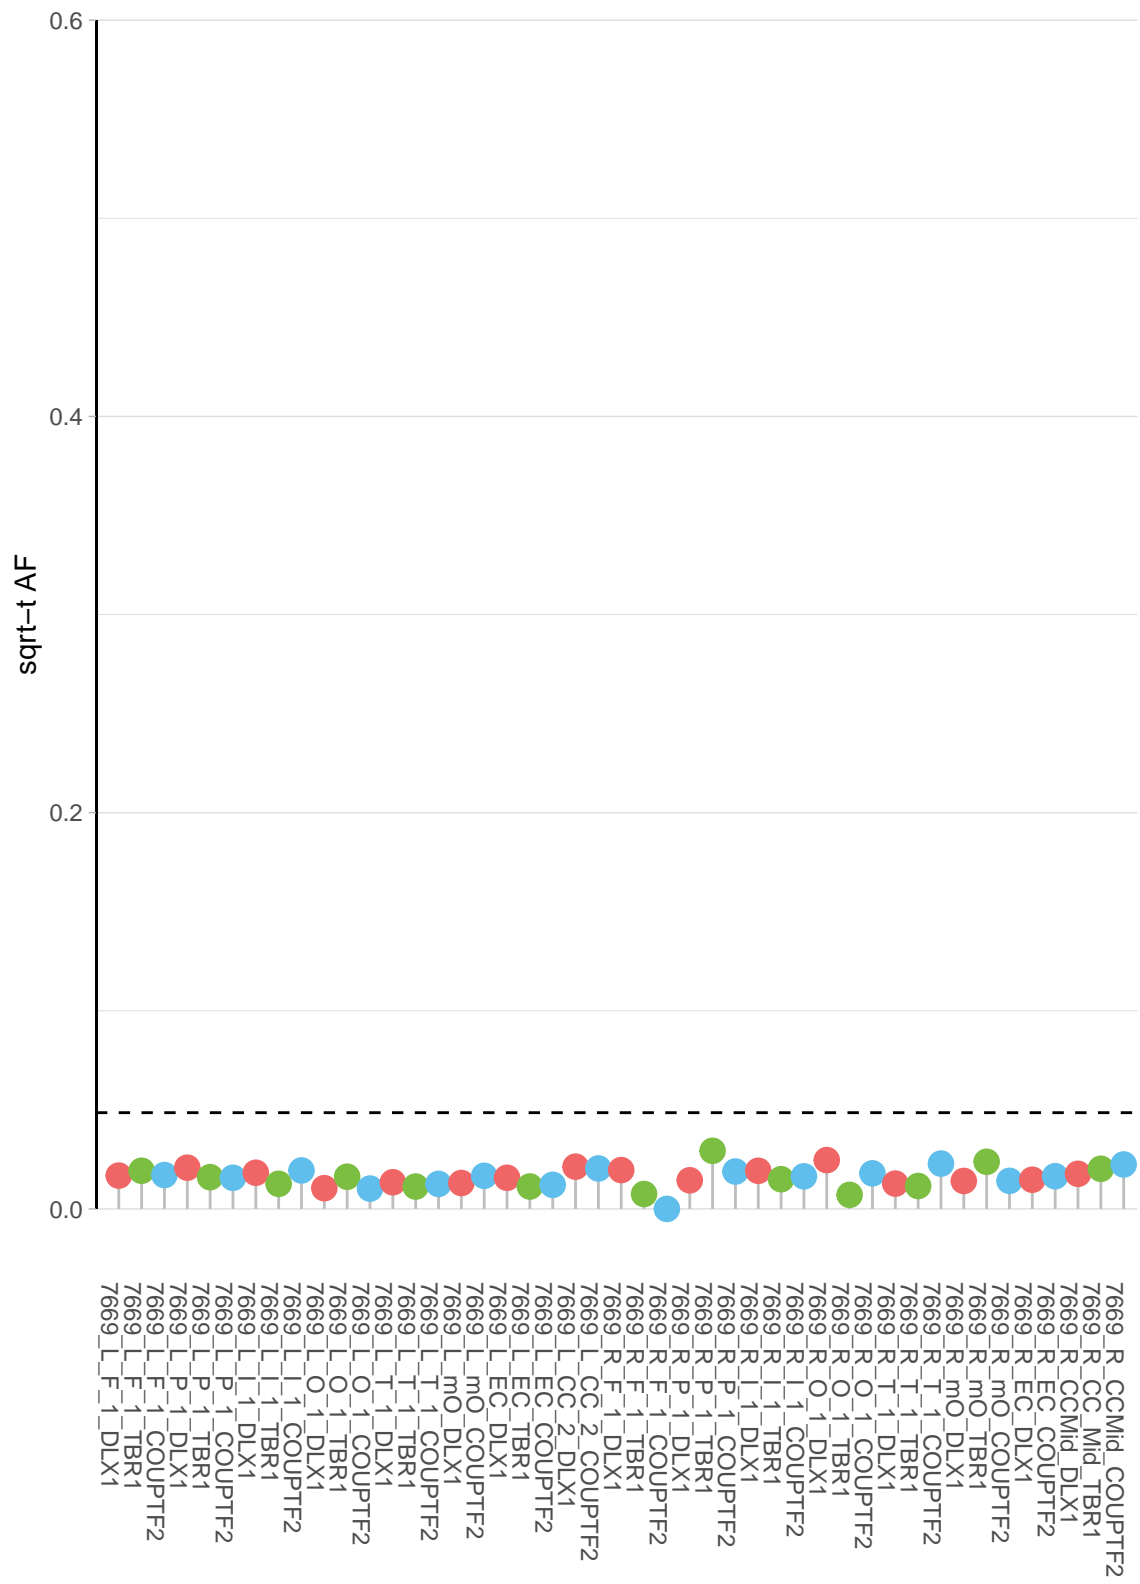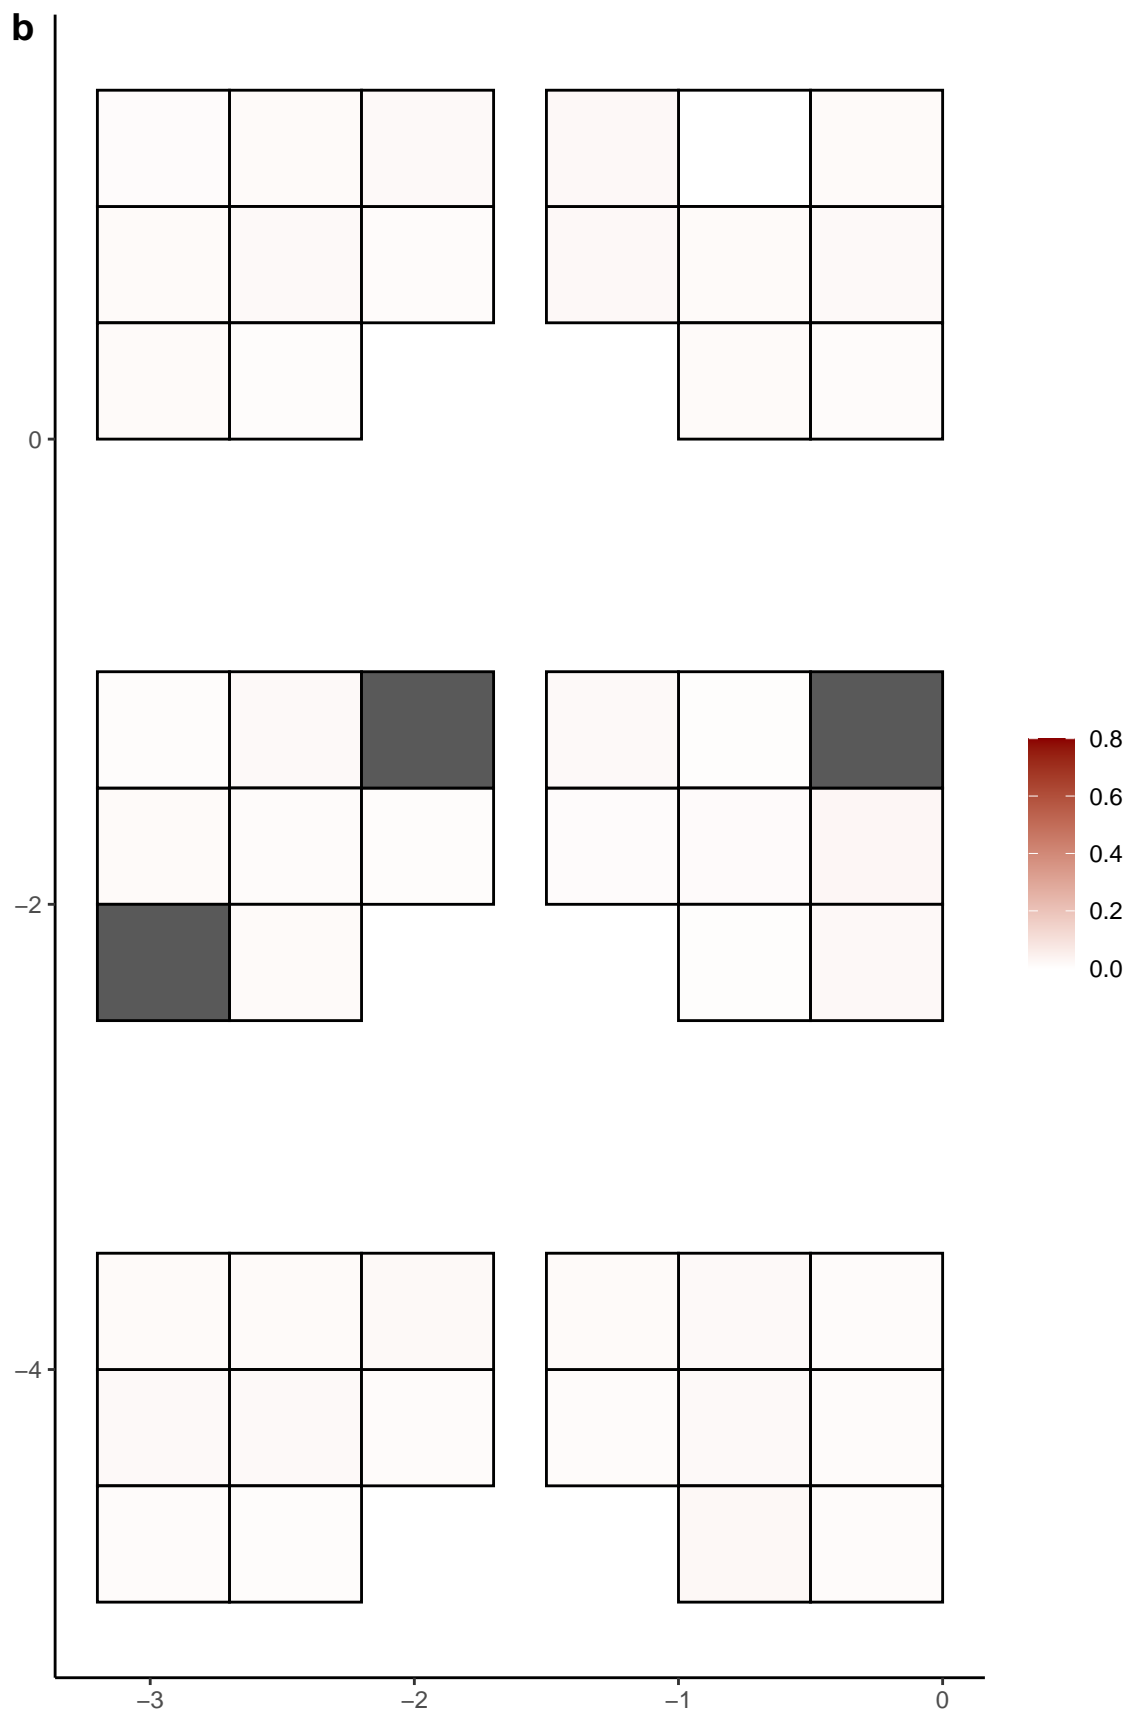









**a** ID05 11-125271170-G-C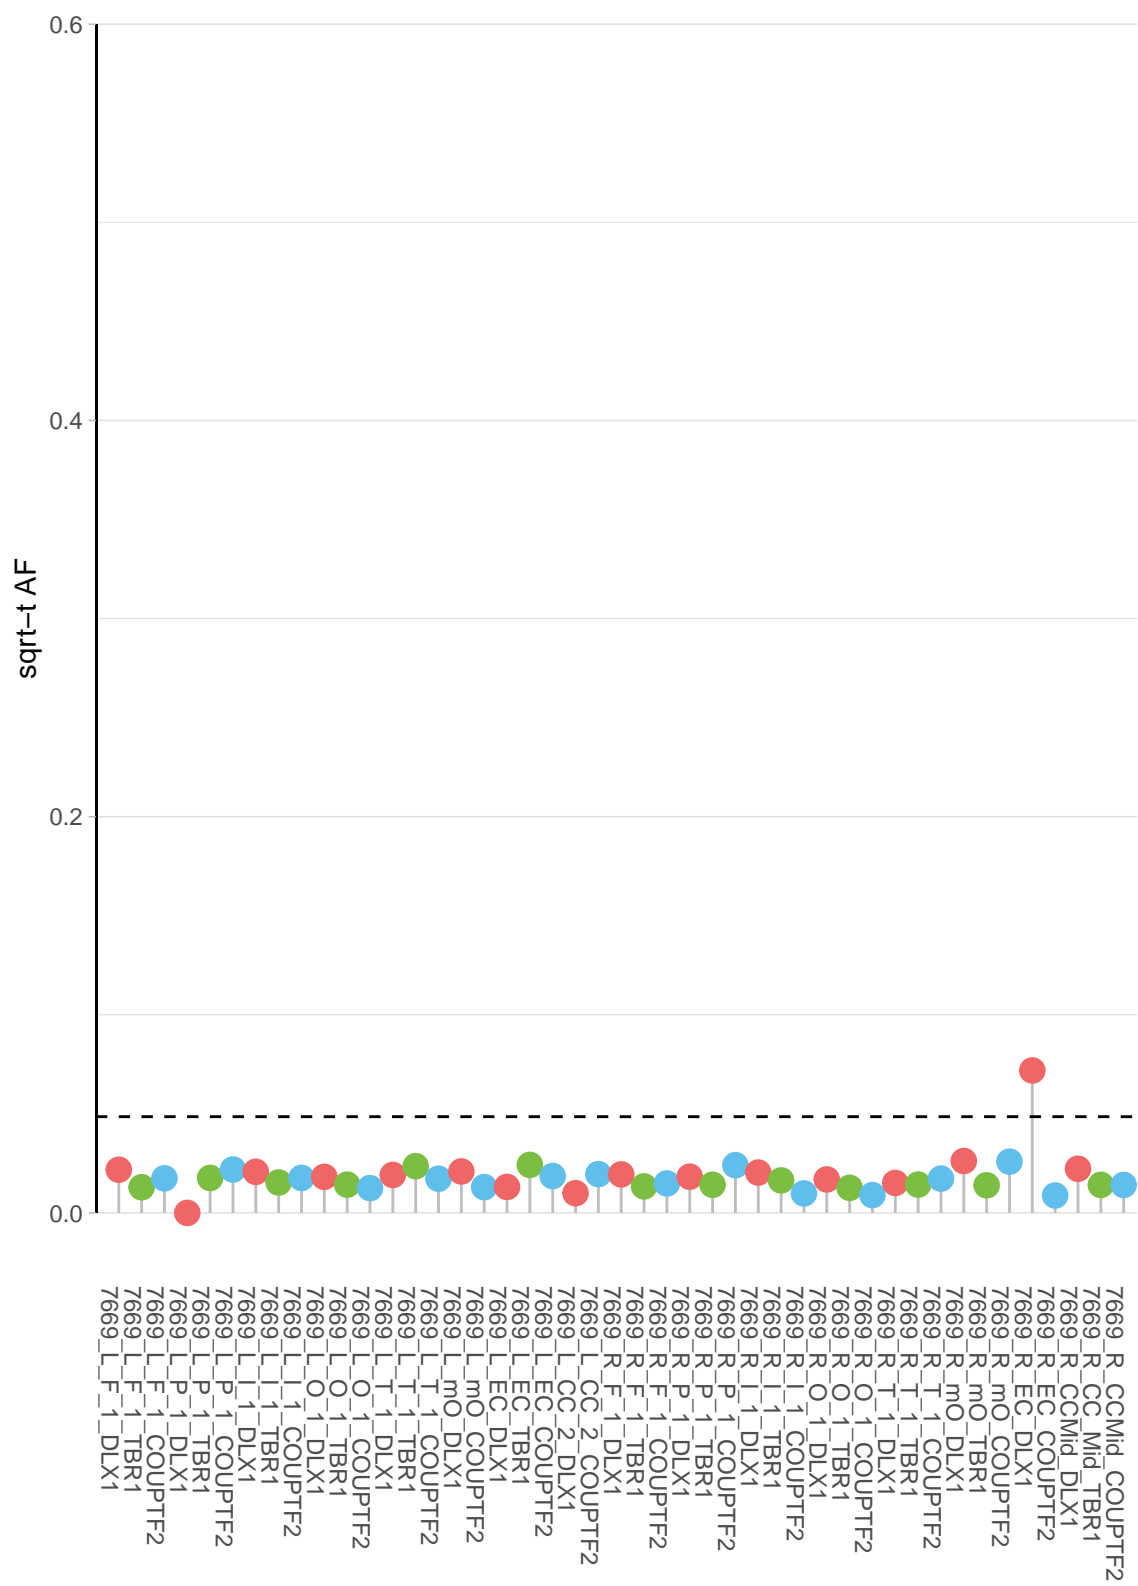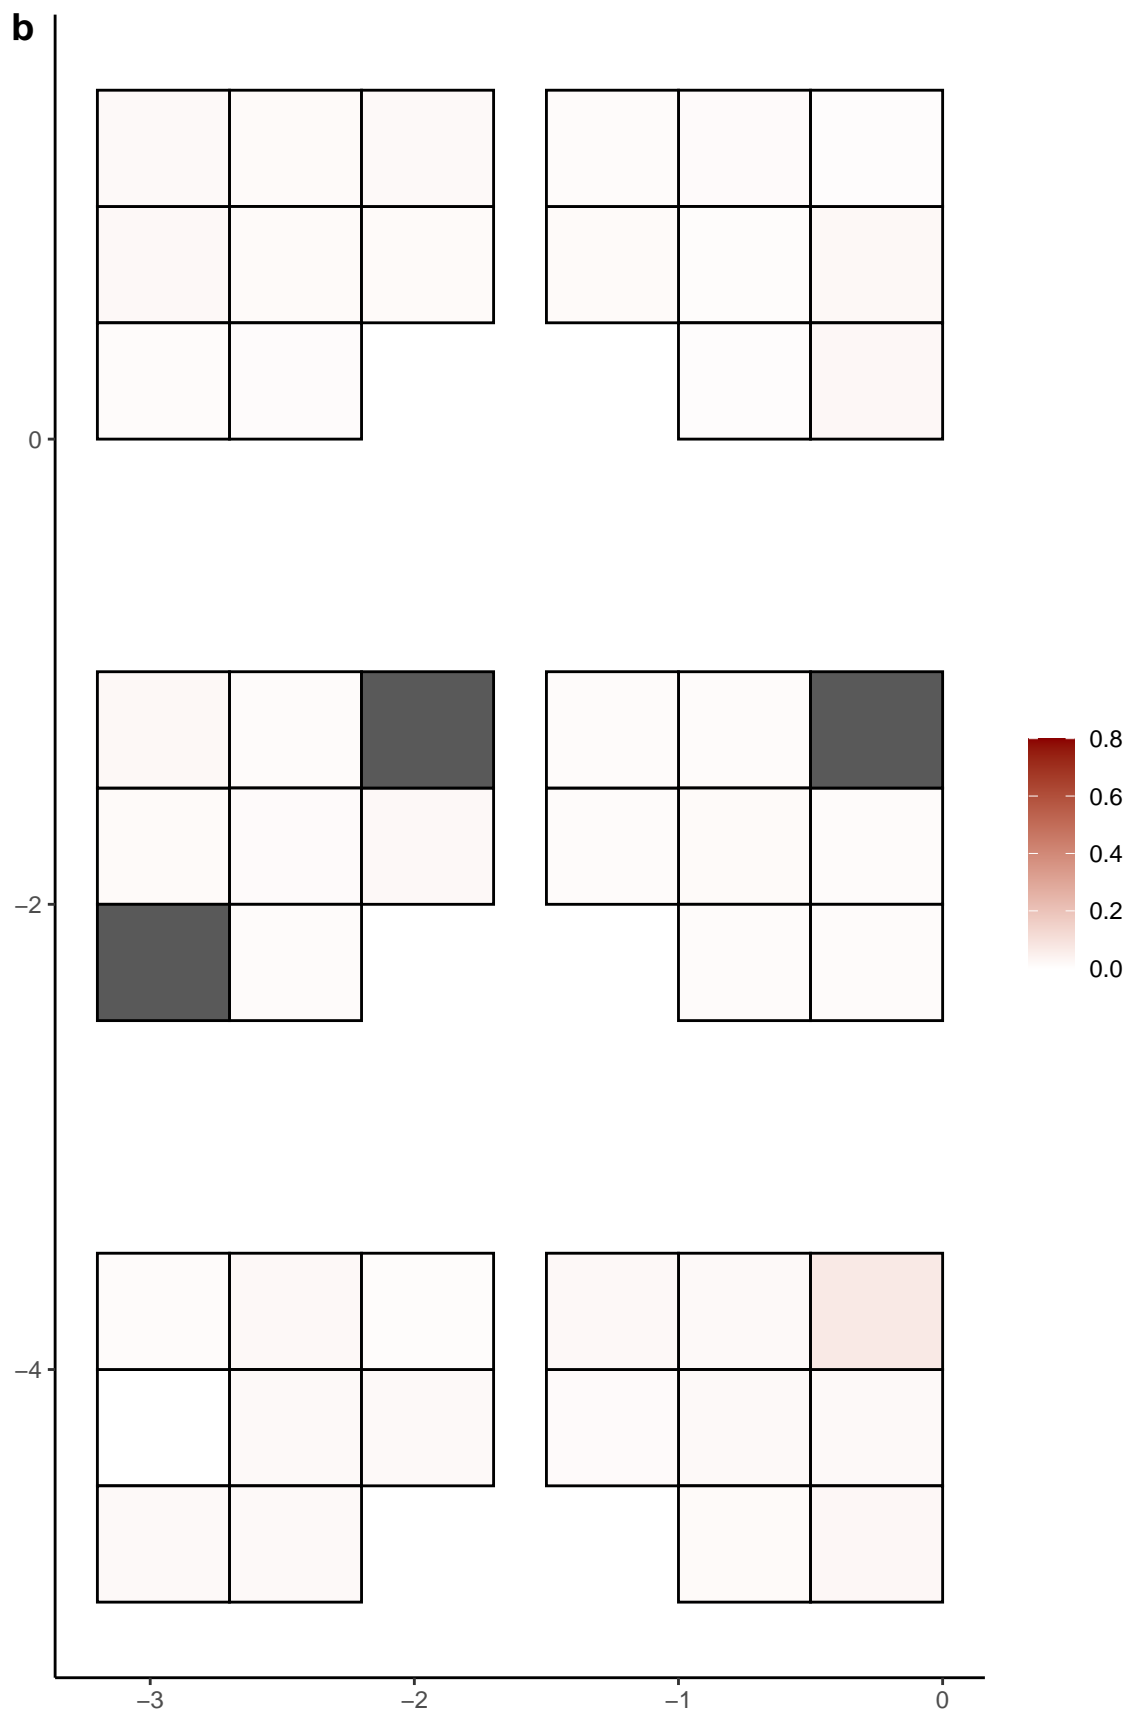

**a** ID05 11-127350815-C-T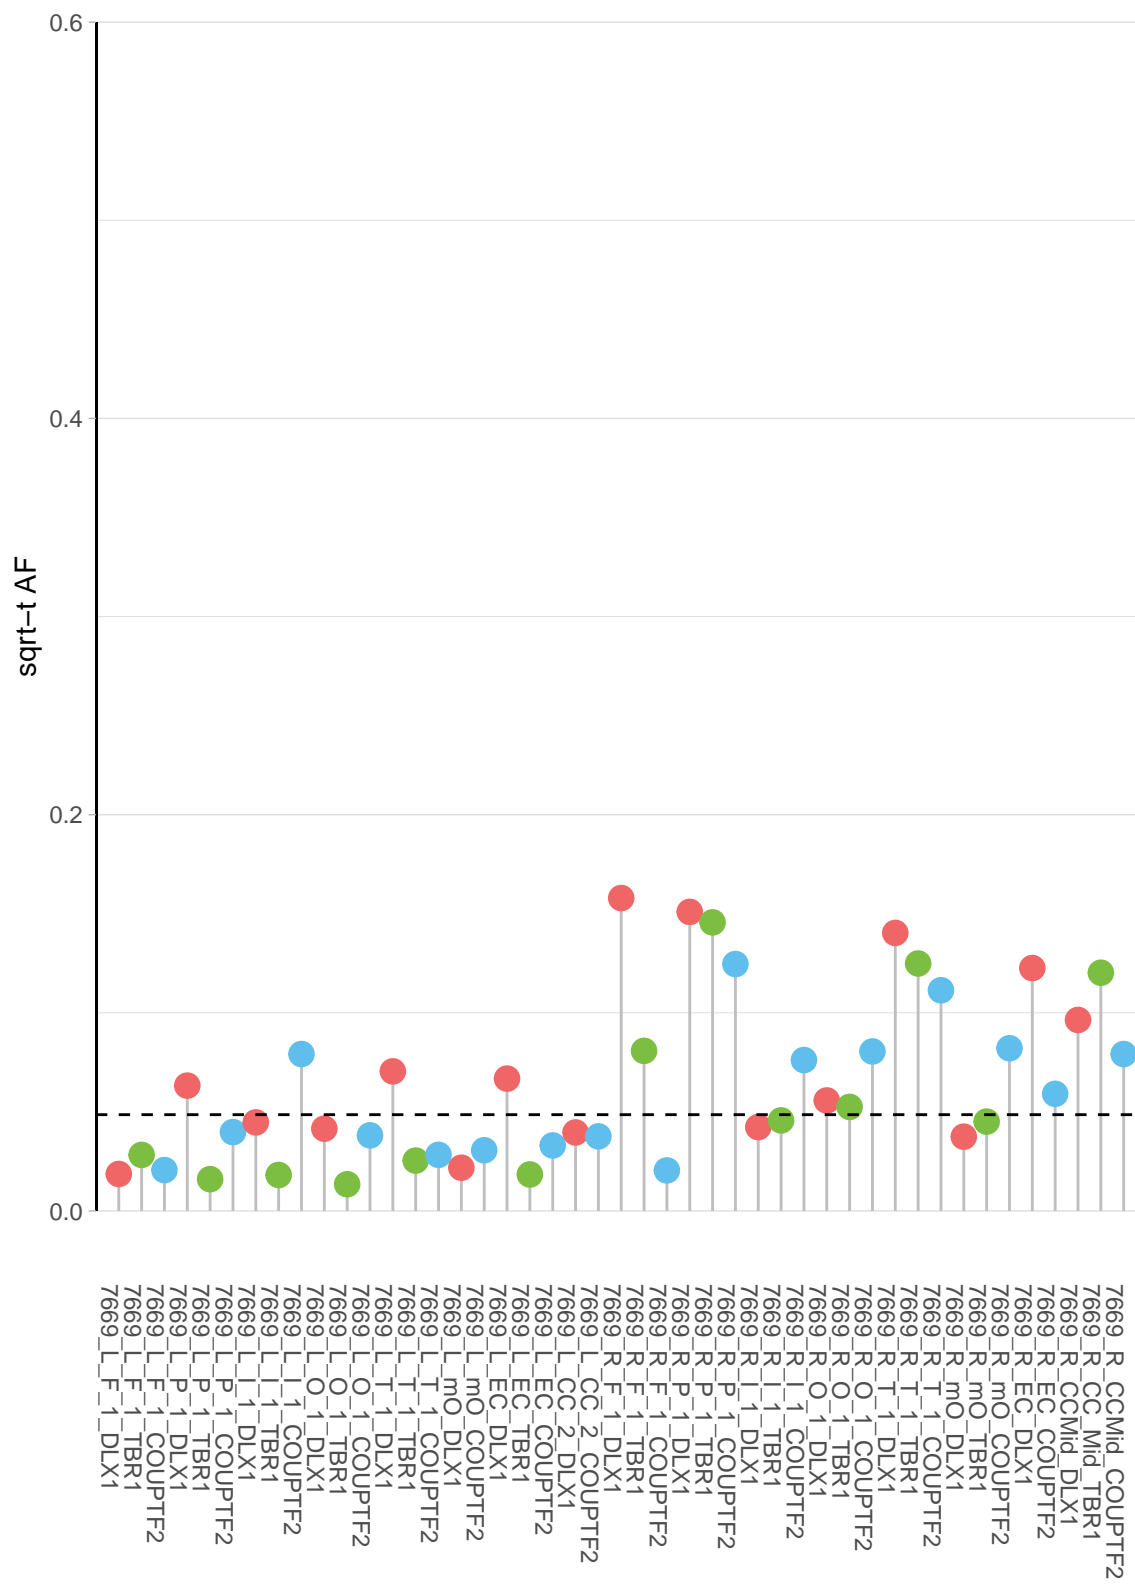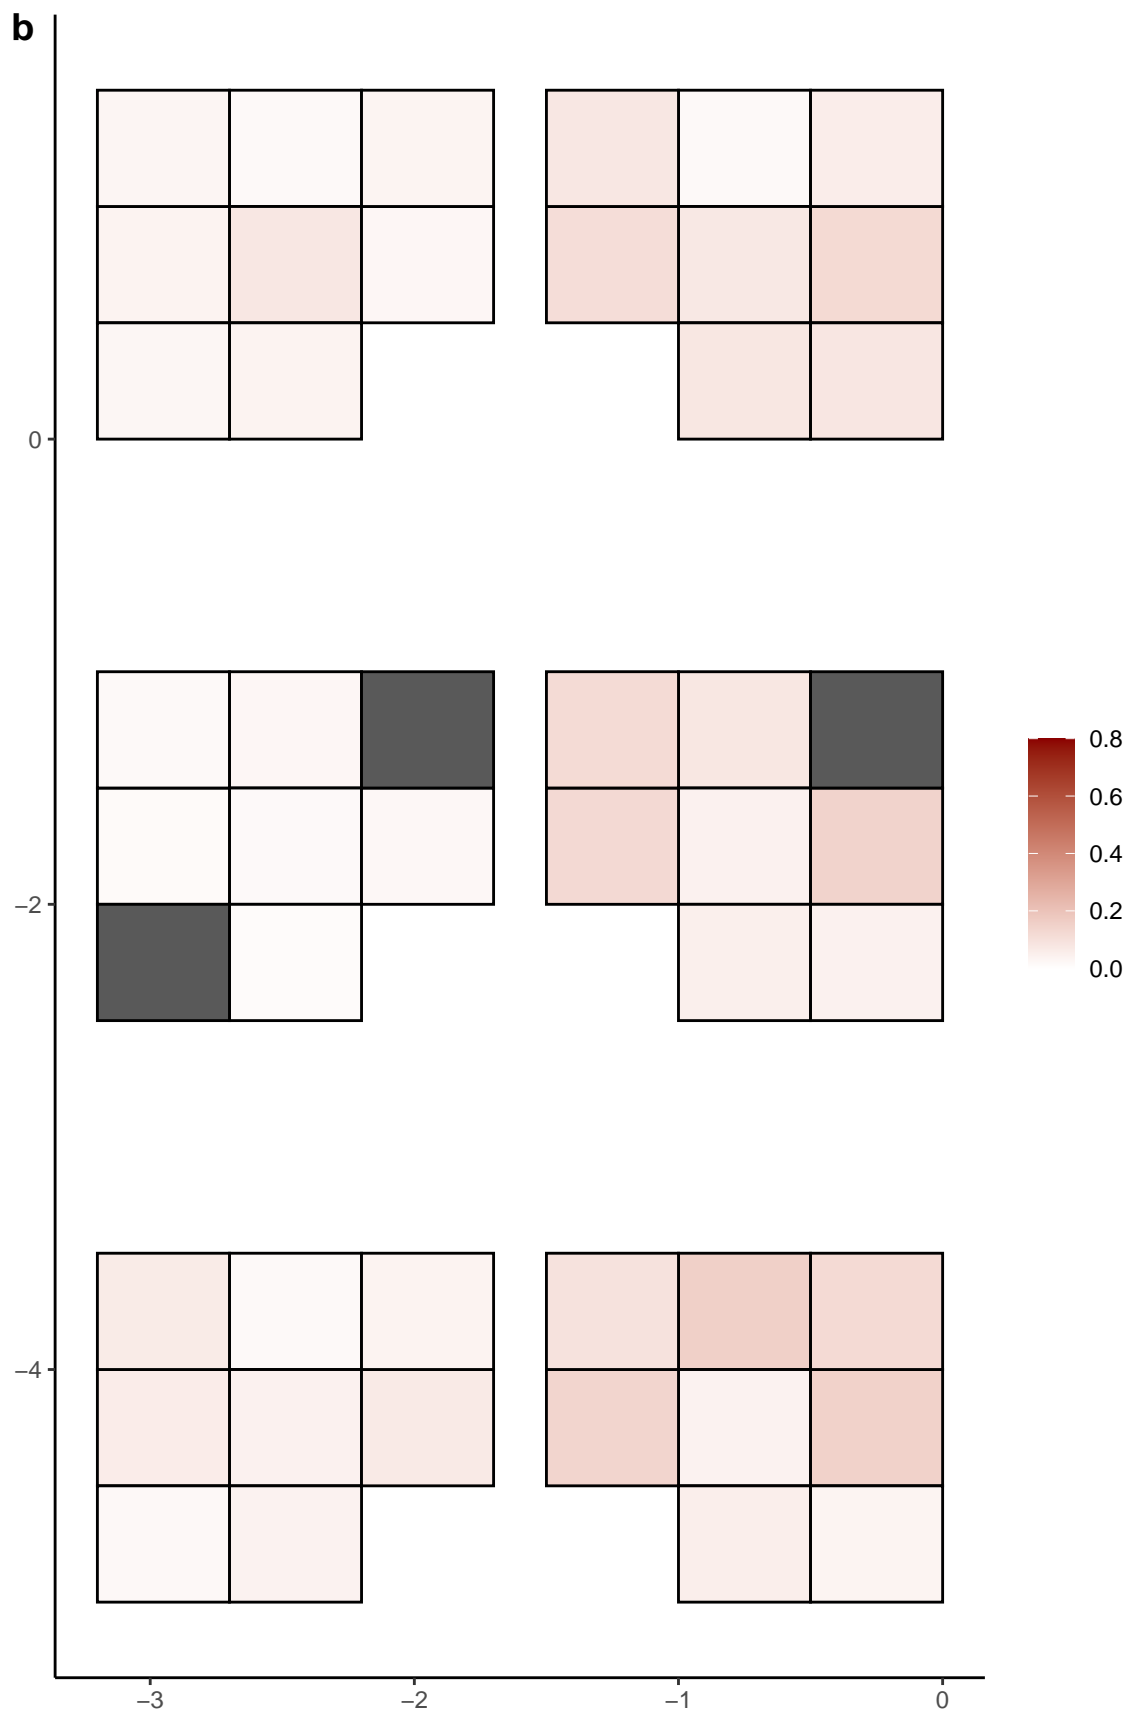



**a** ID05 11-21194438-G-A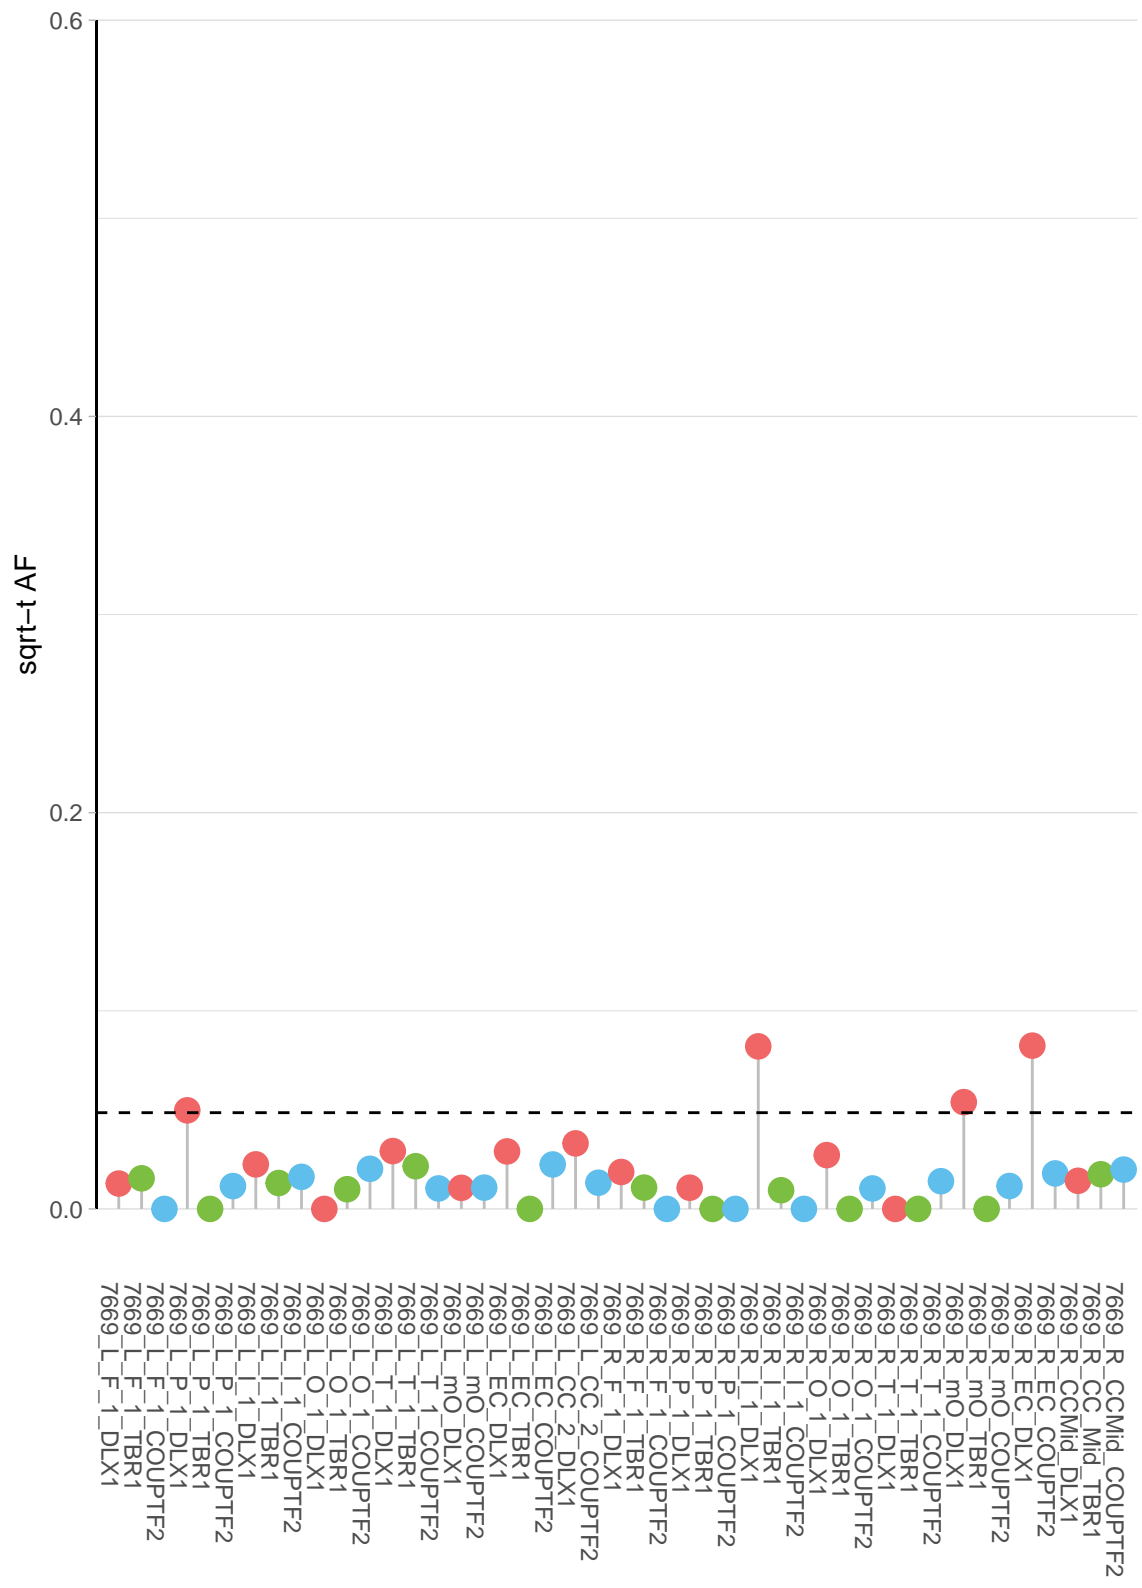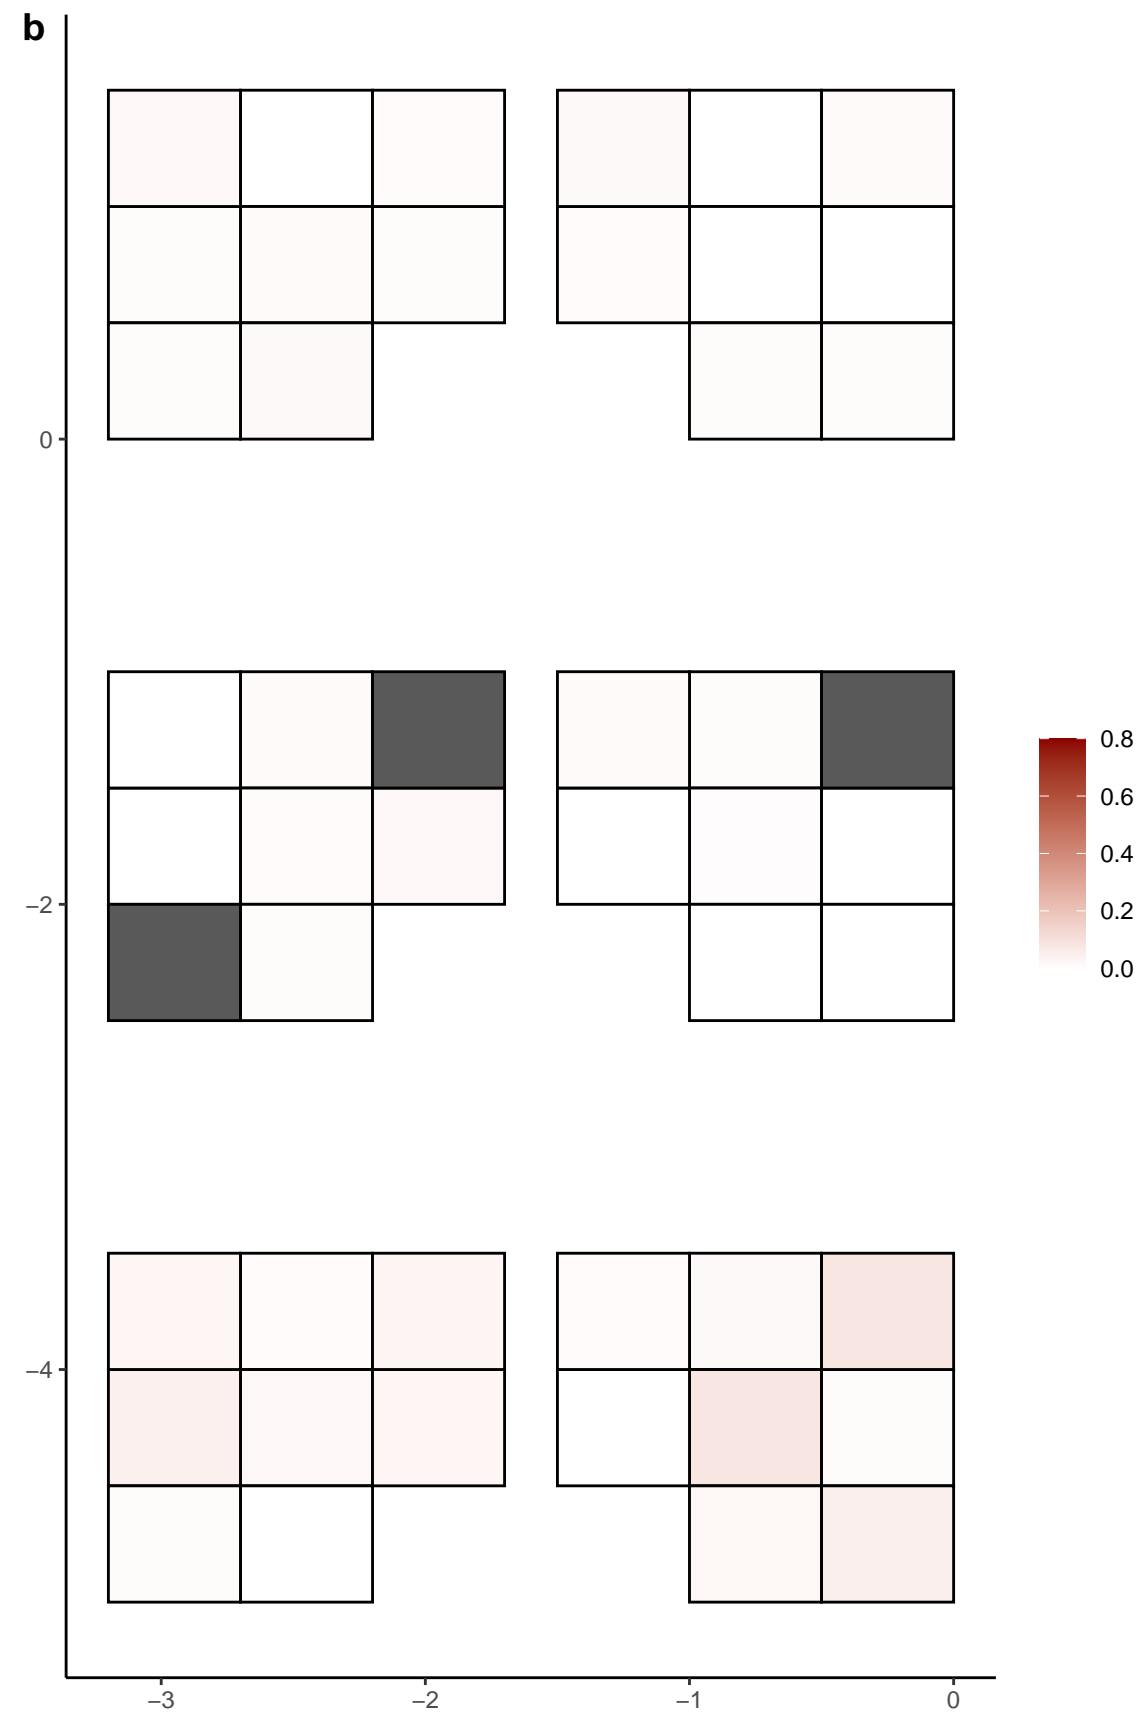

**a** ID05 11-22211258-C-T

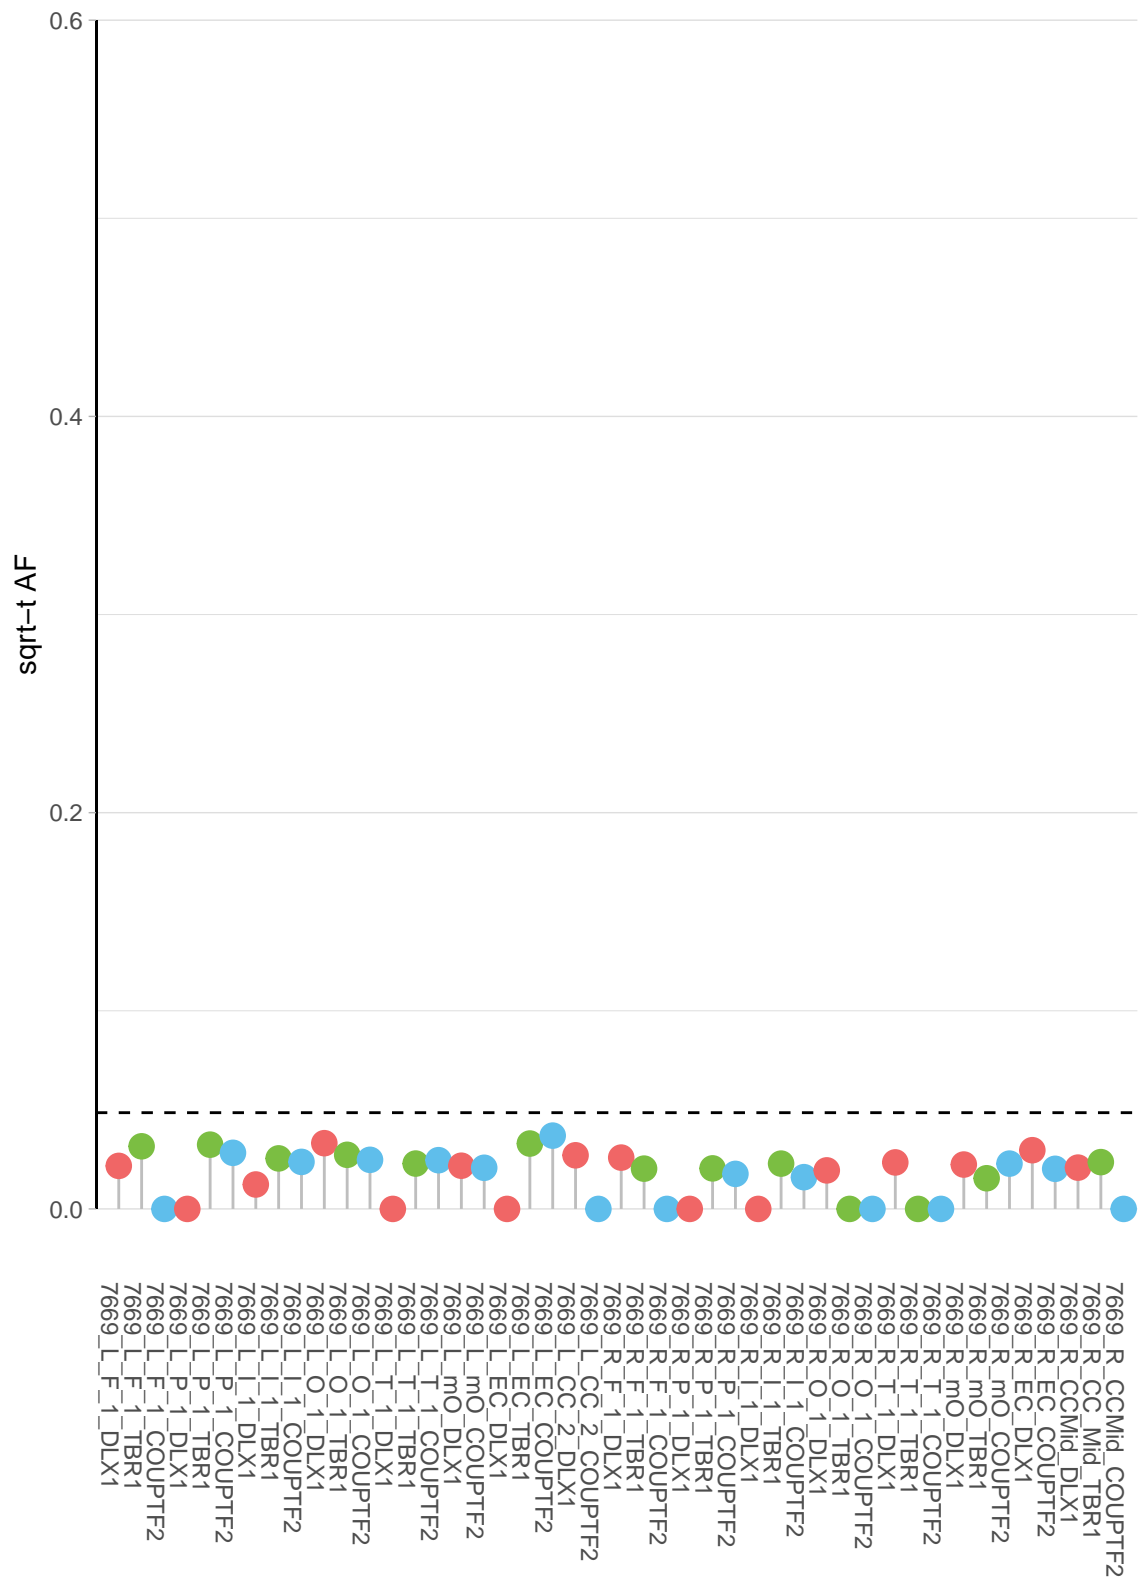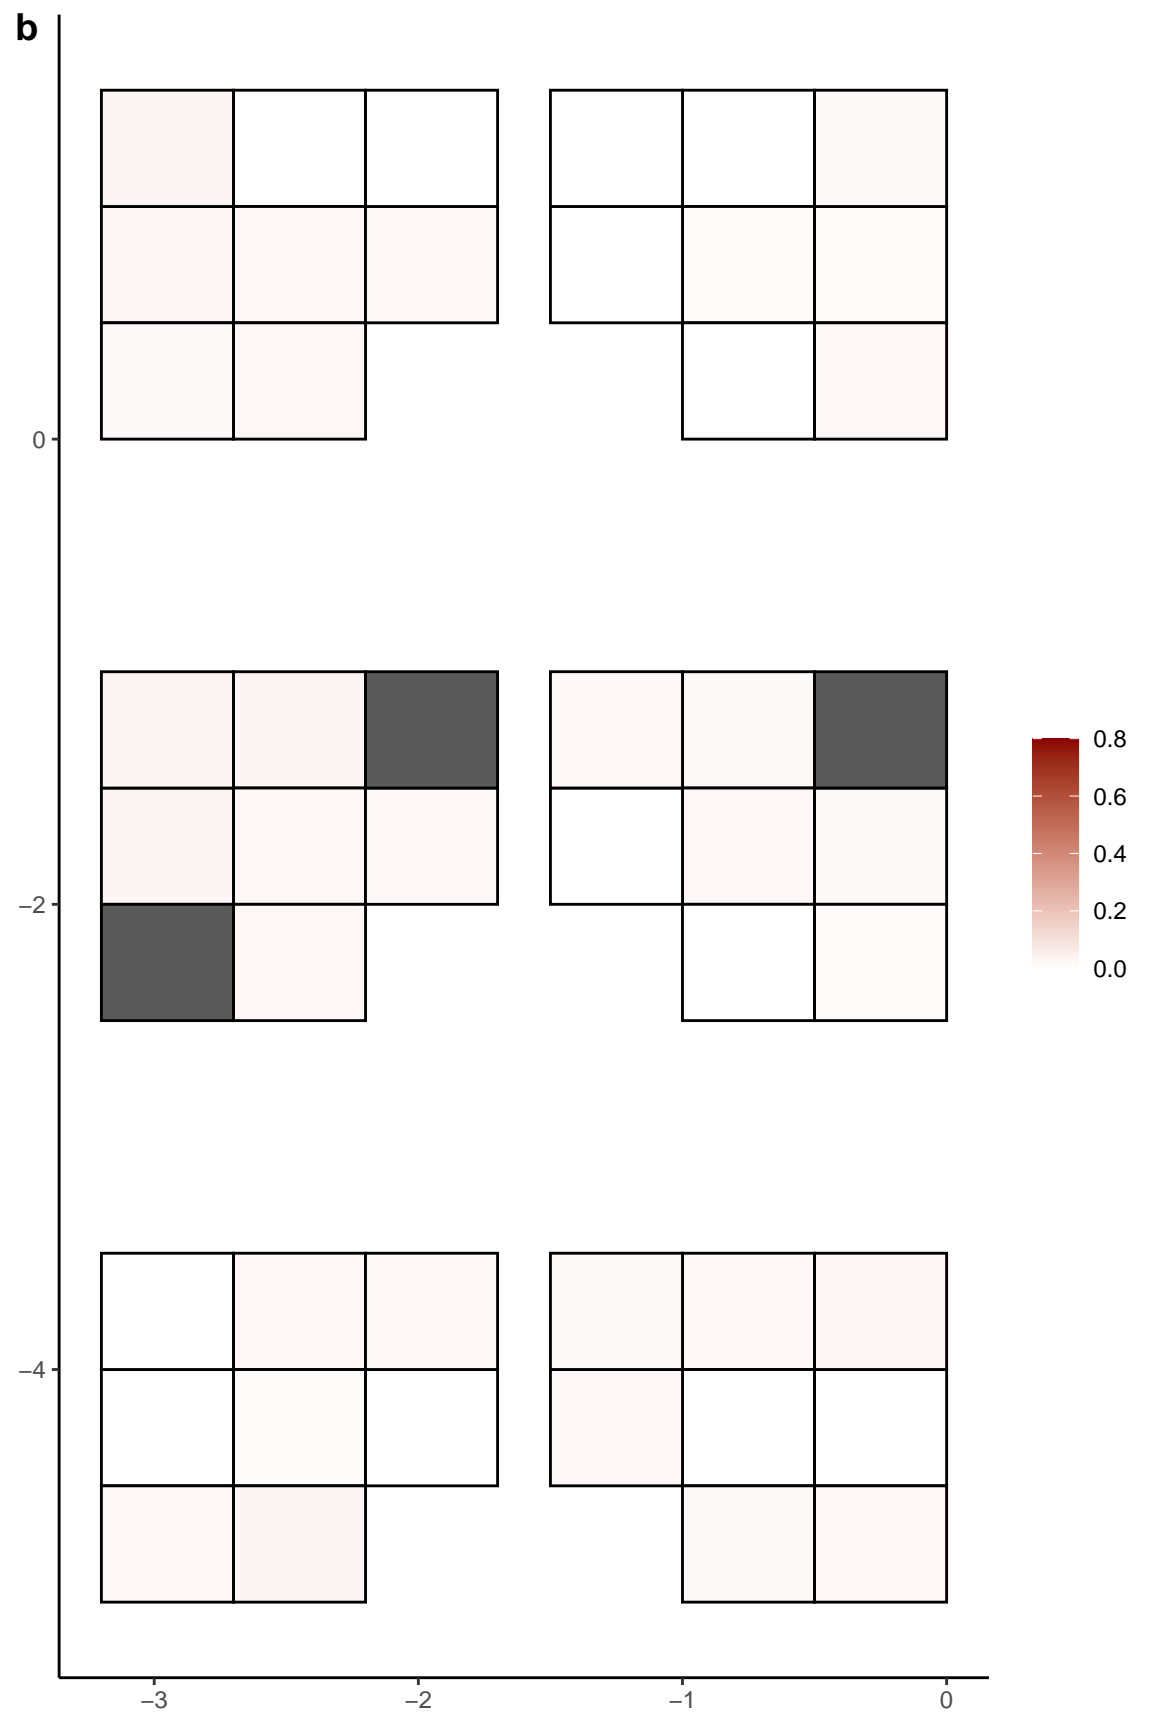

**a** ID05 11-25958939-C-T
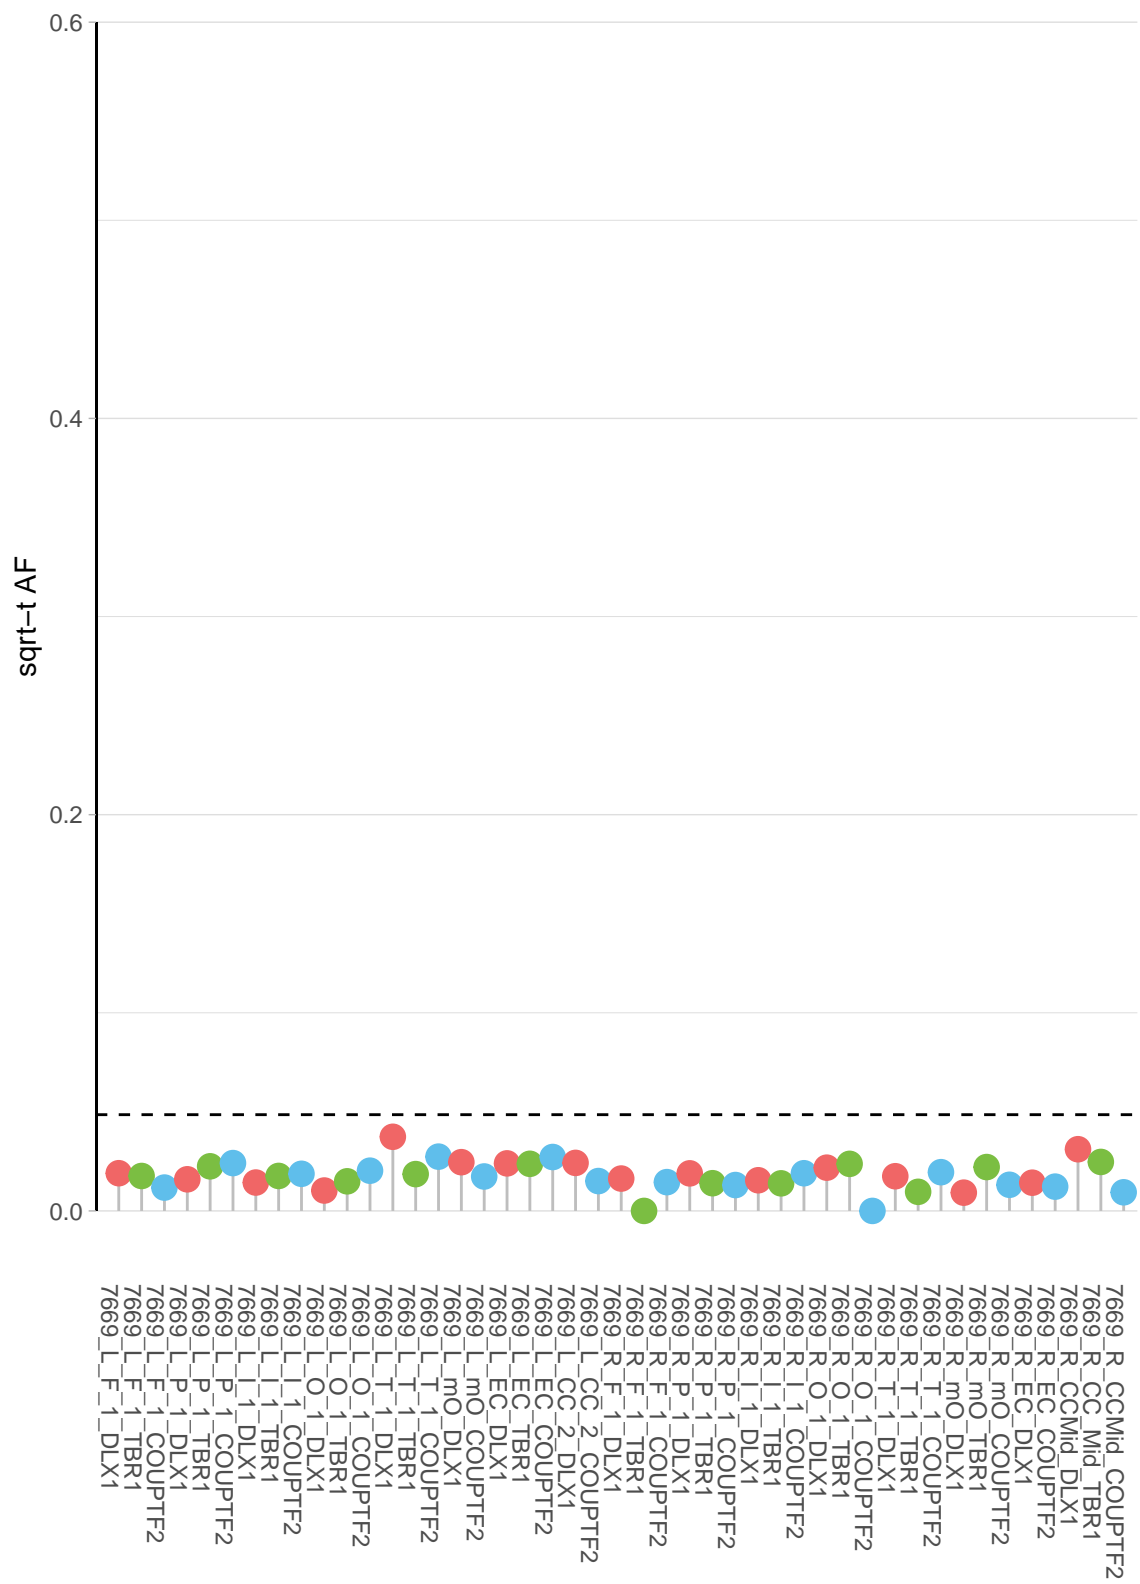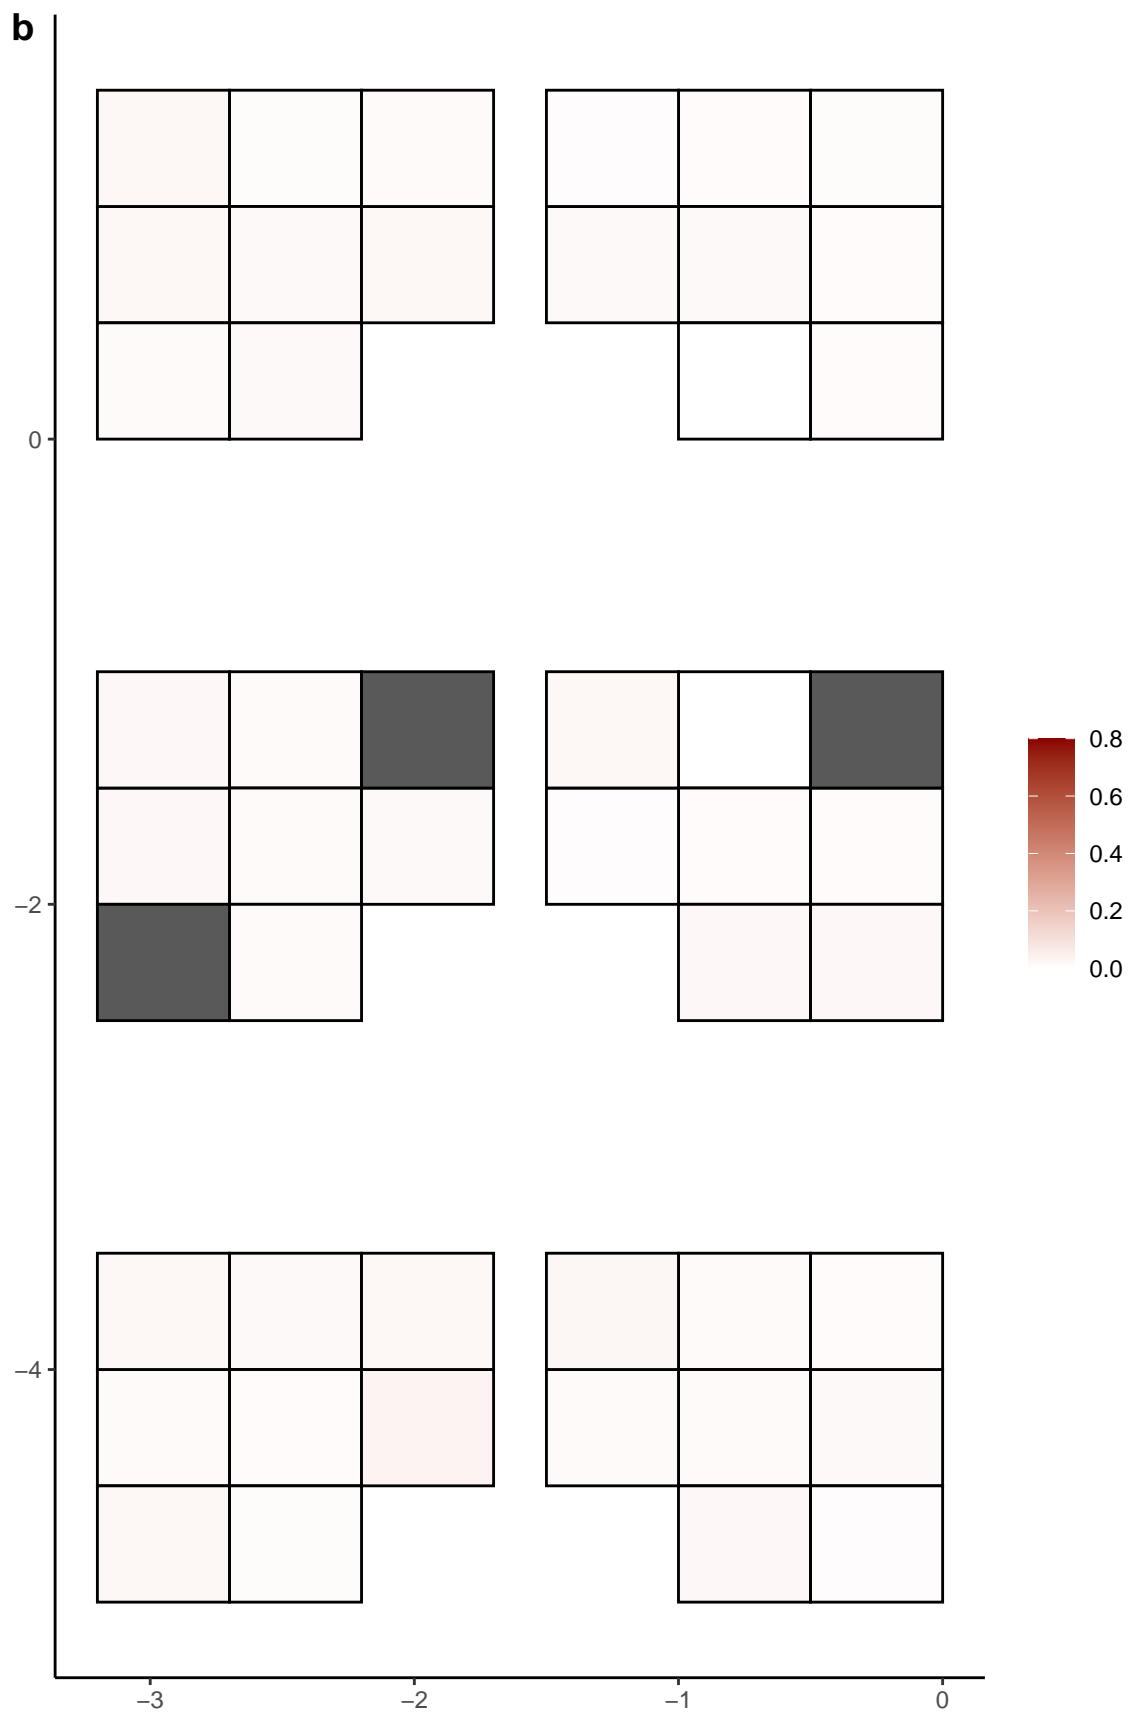

**a** ID05 11-31054132-T-C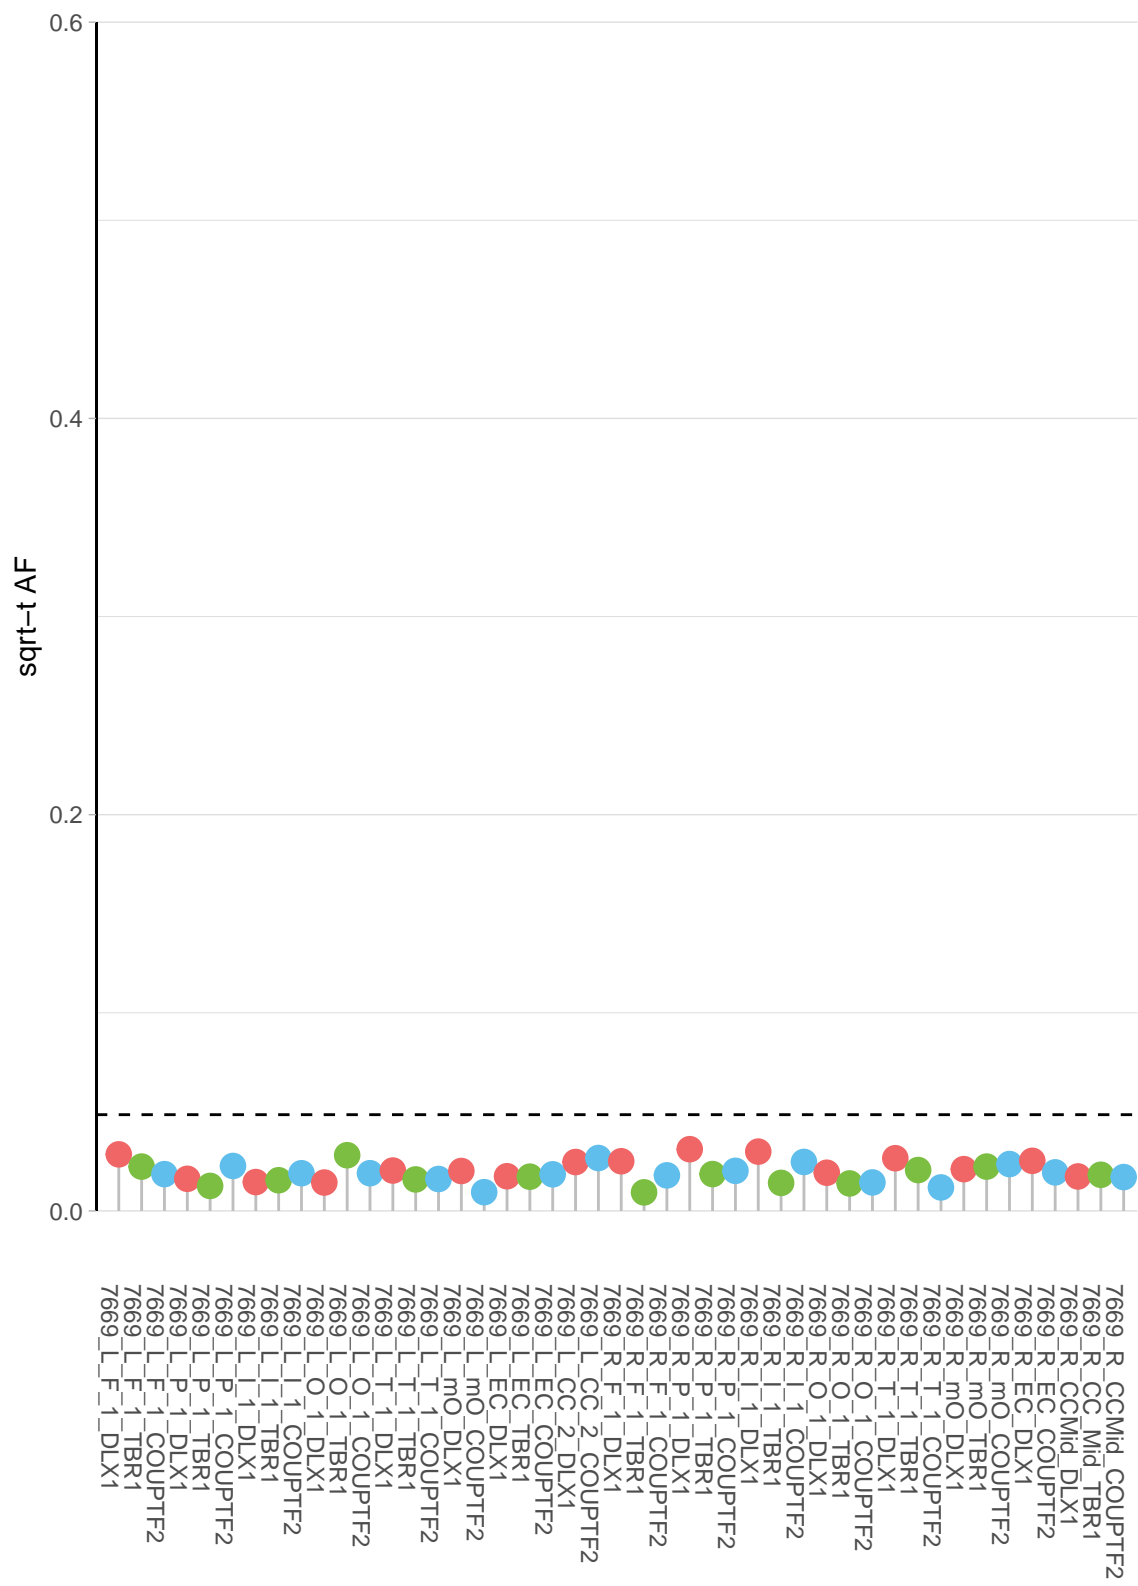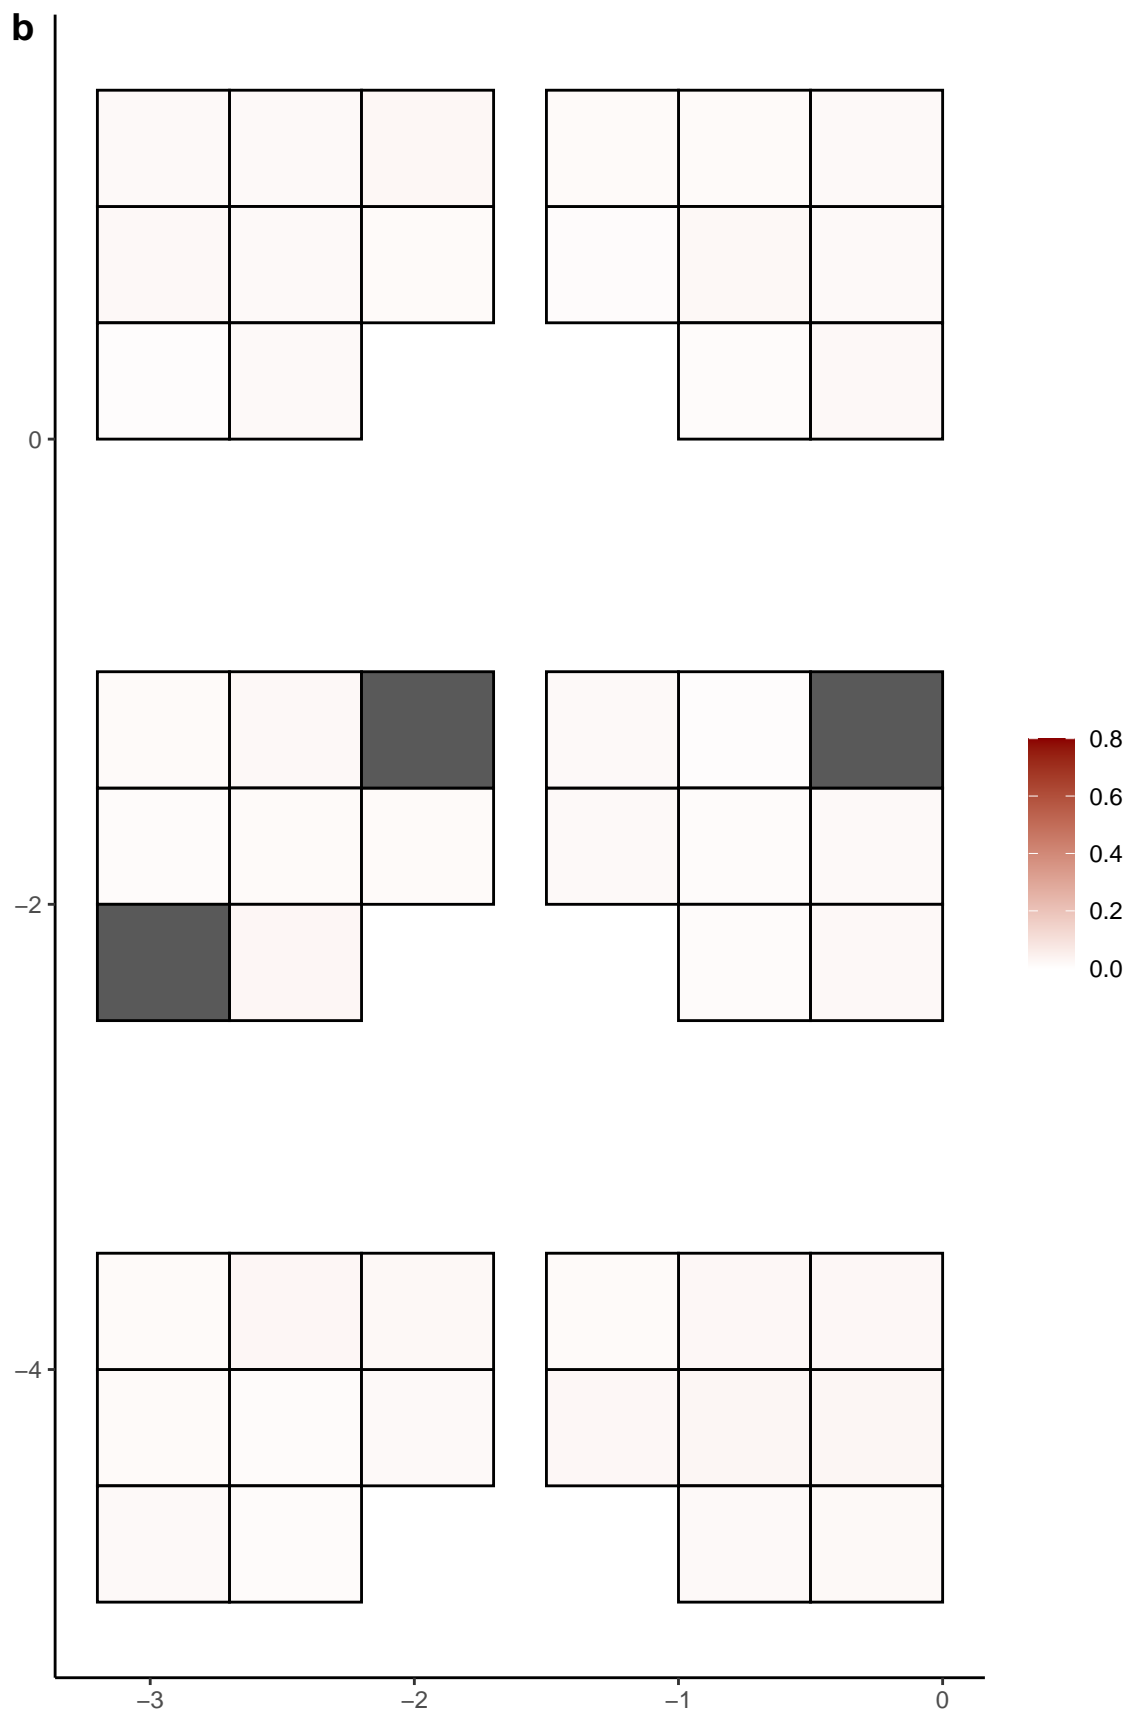

**a** ID05 11-32349753-T-A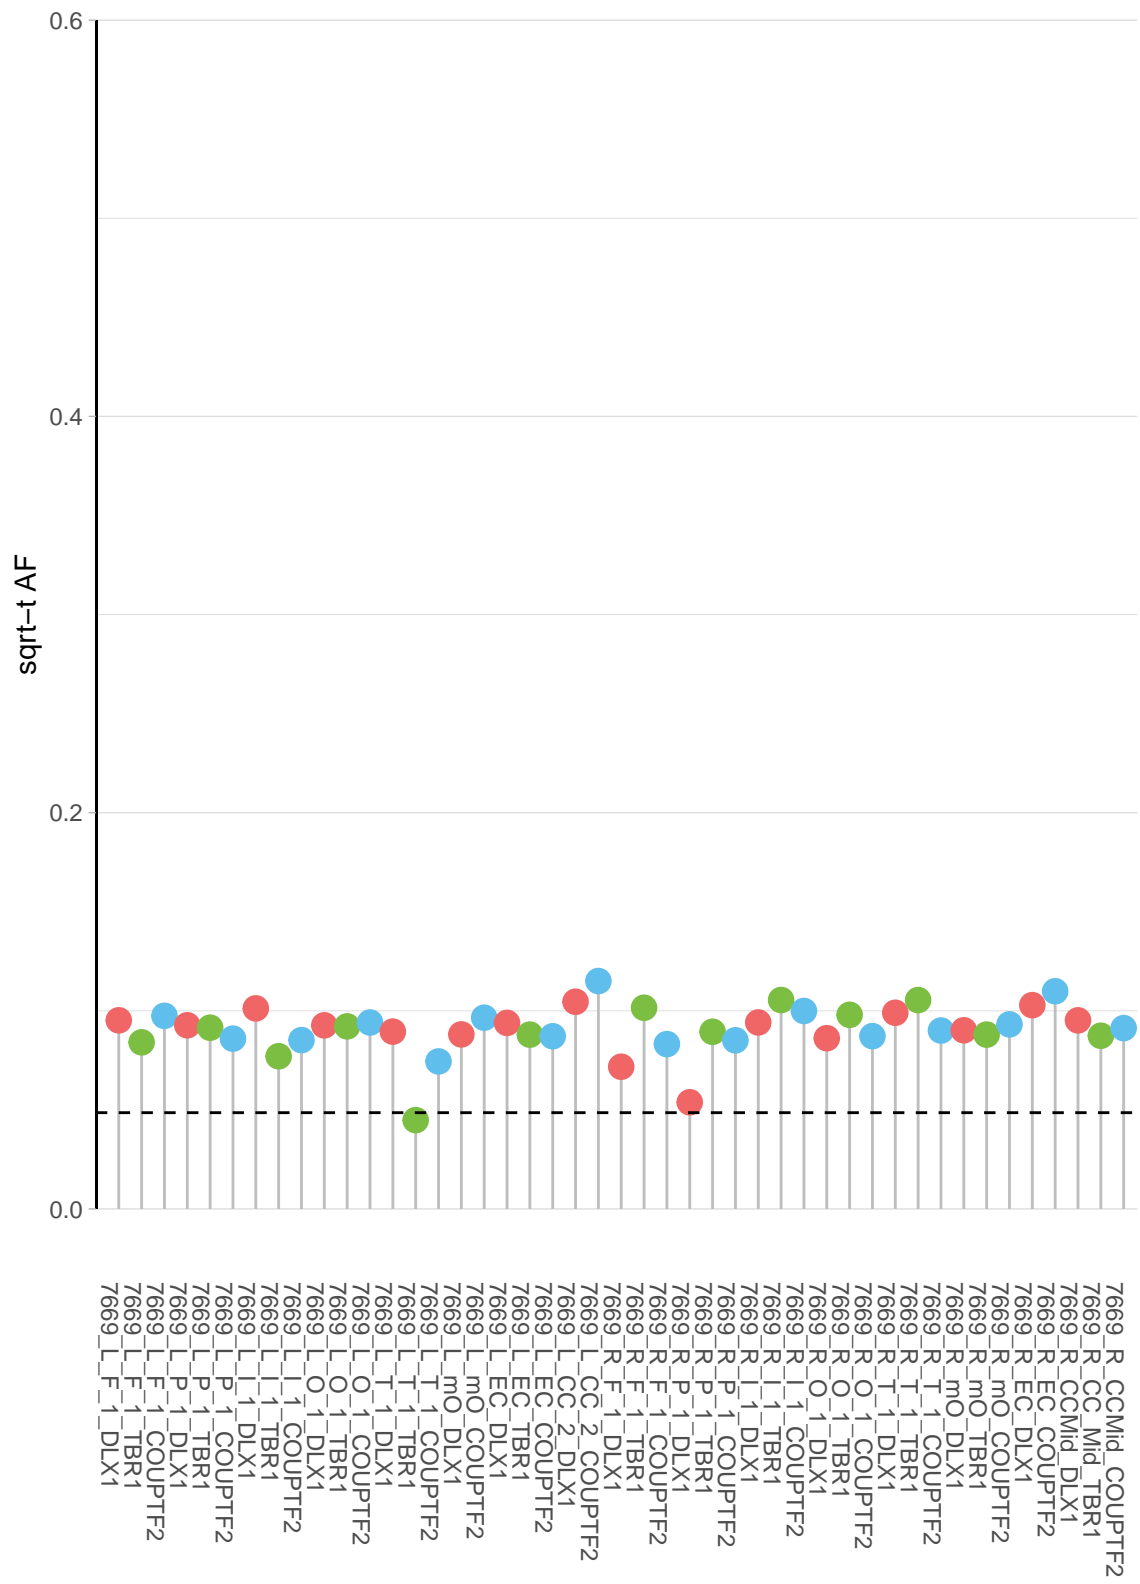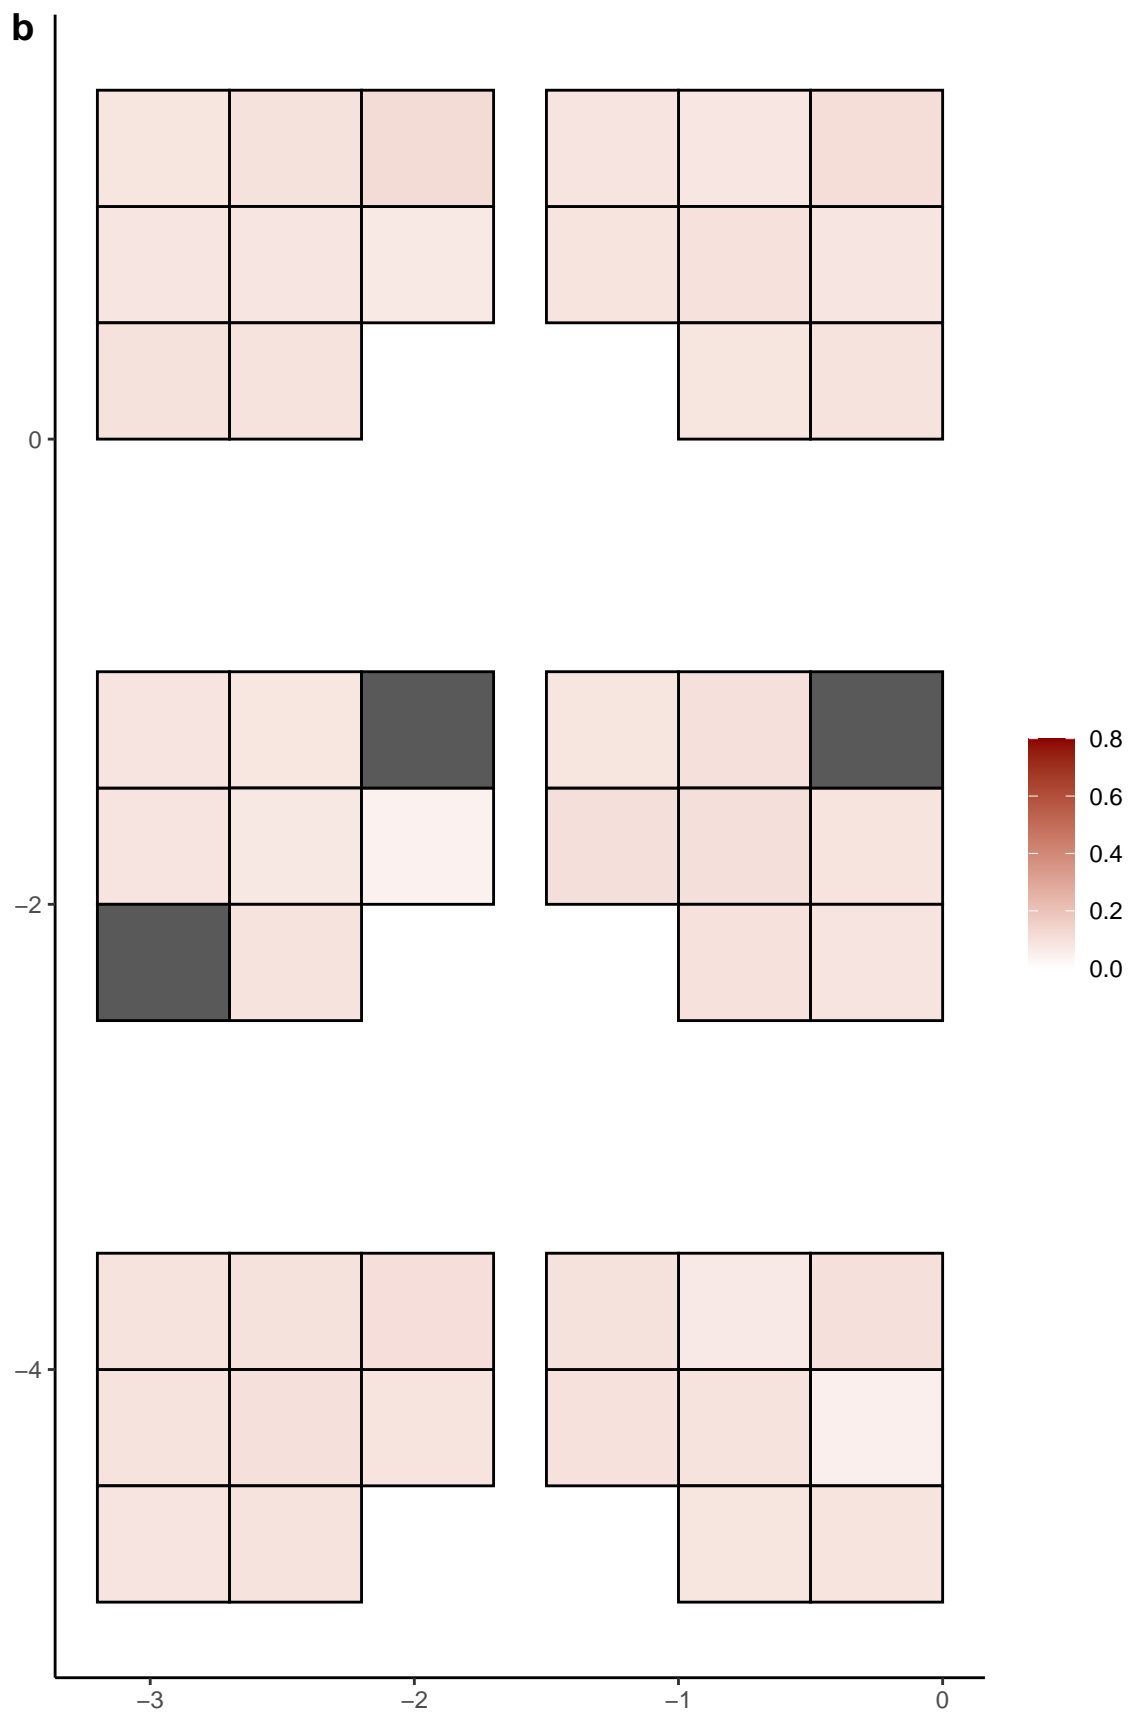



**a** ID05 11-32349754-T-A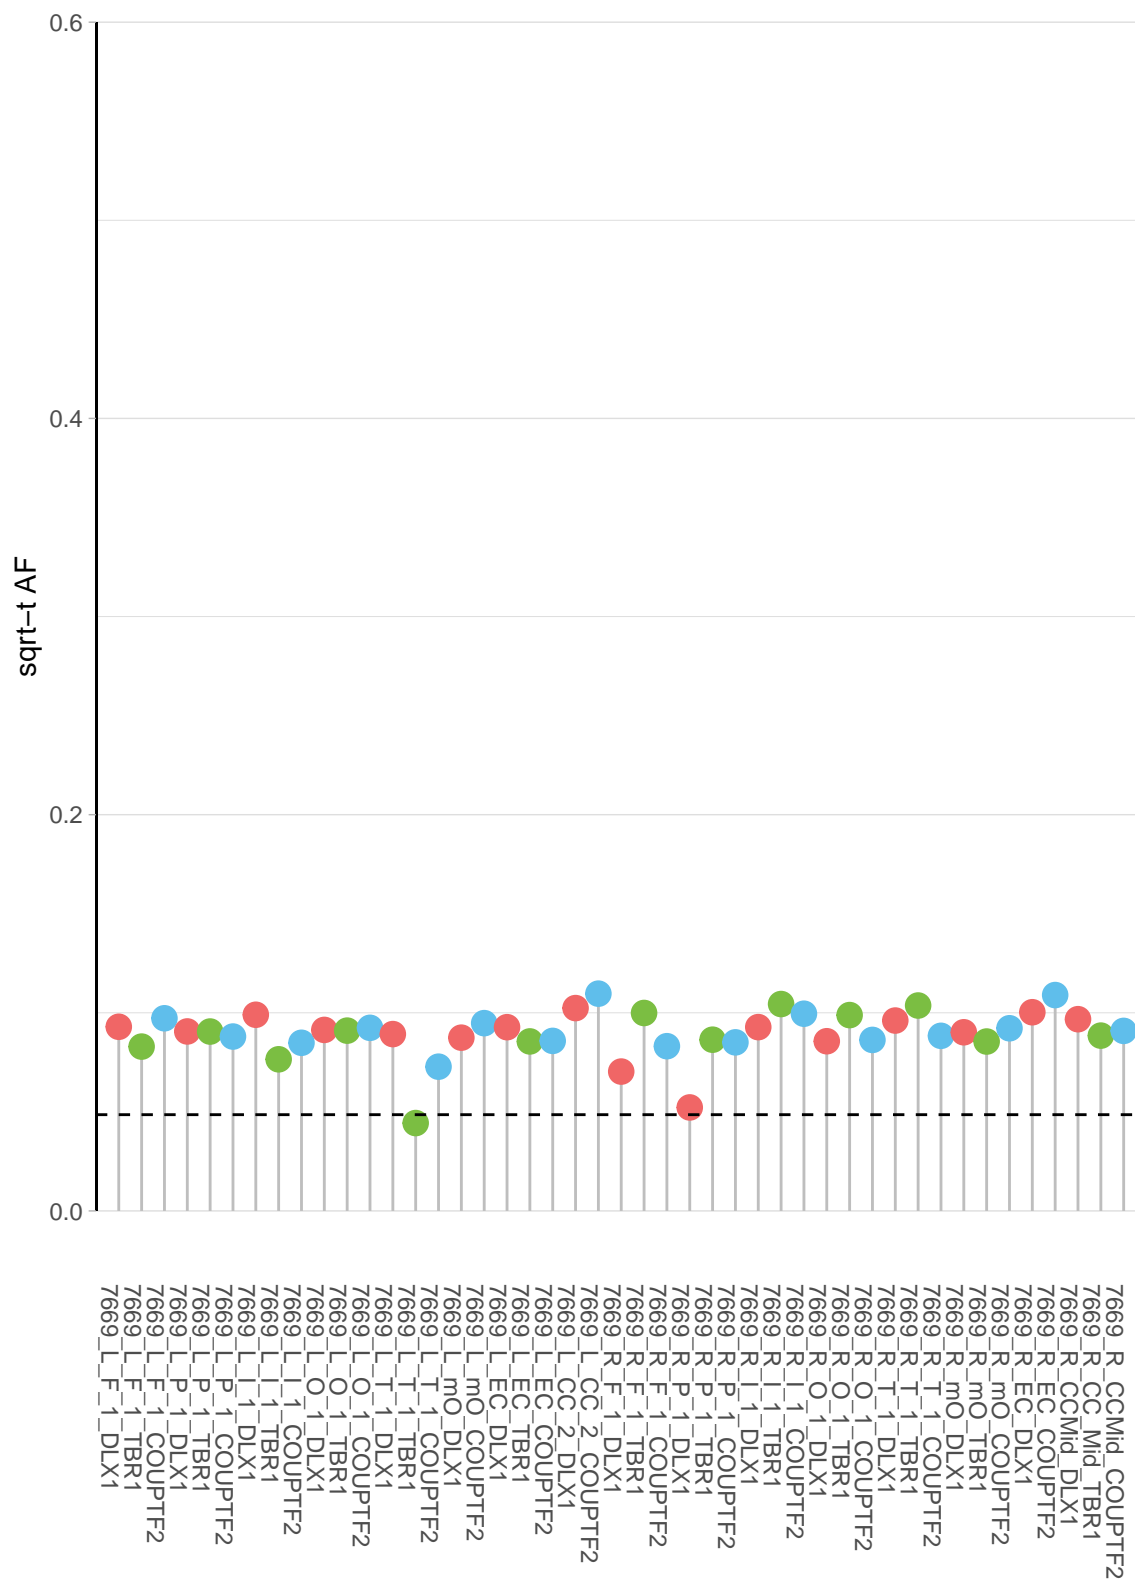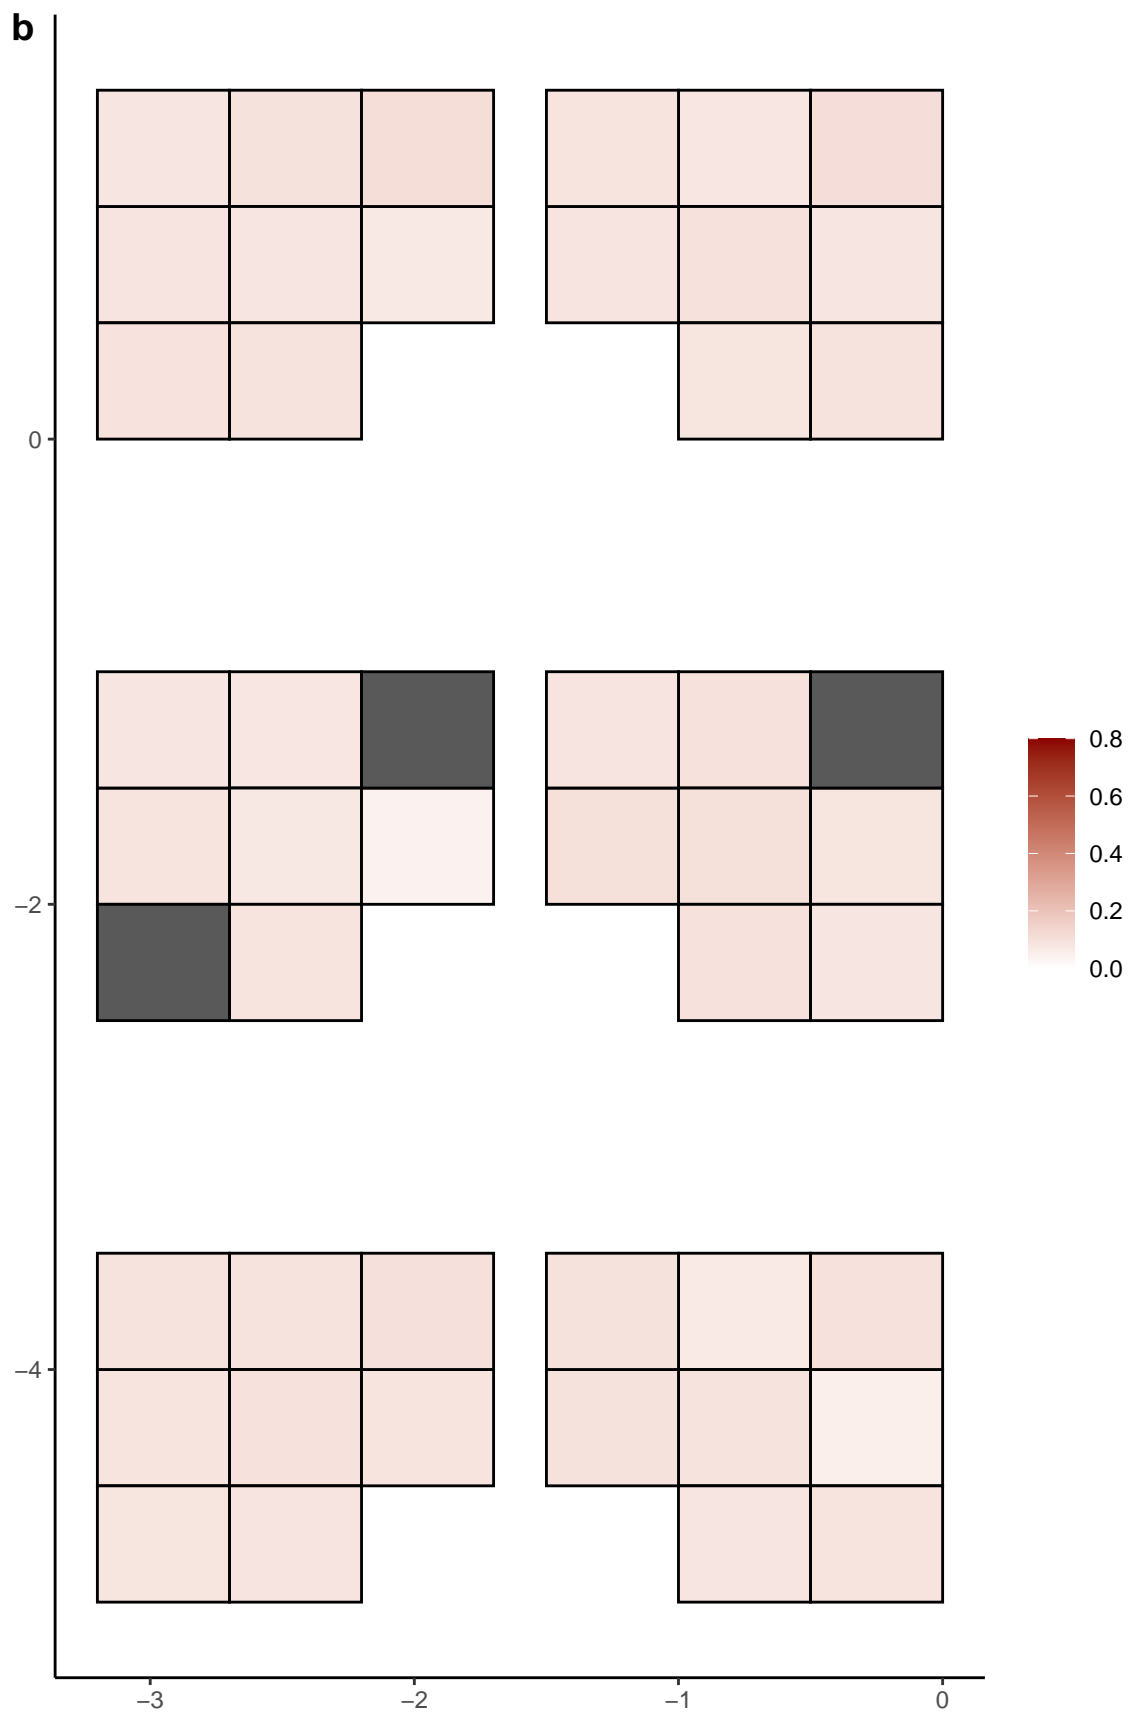

**a** ID05 11-35512752-C-T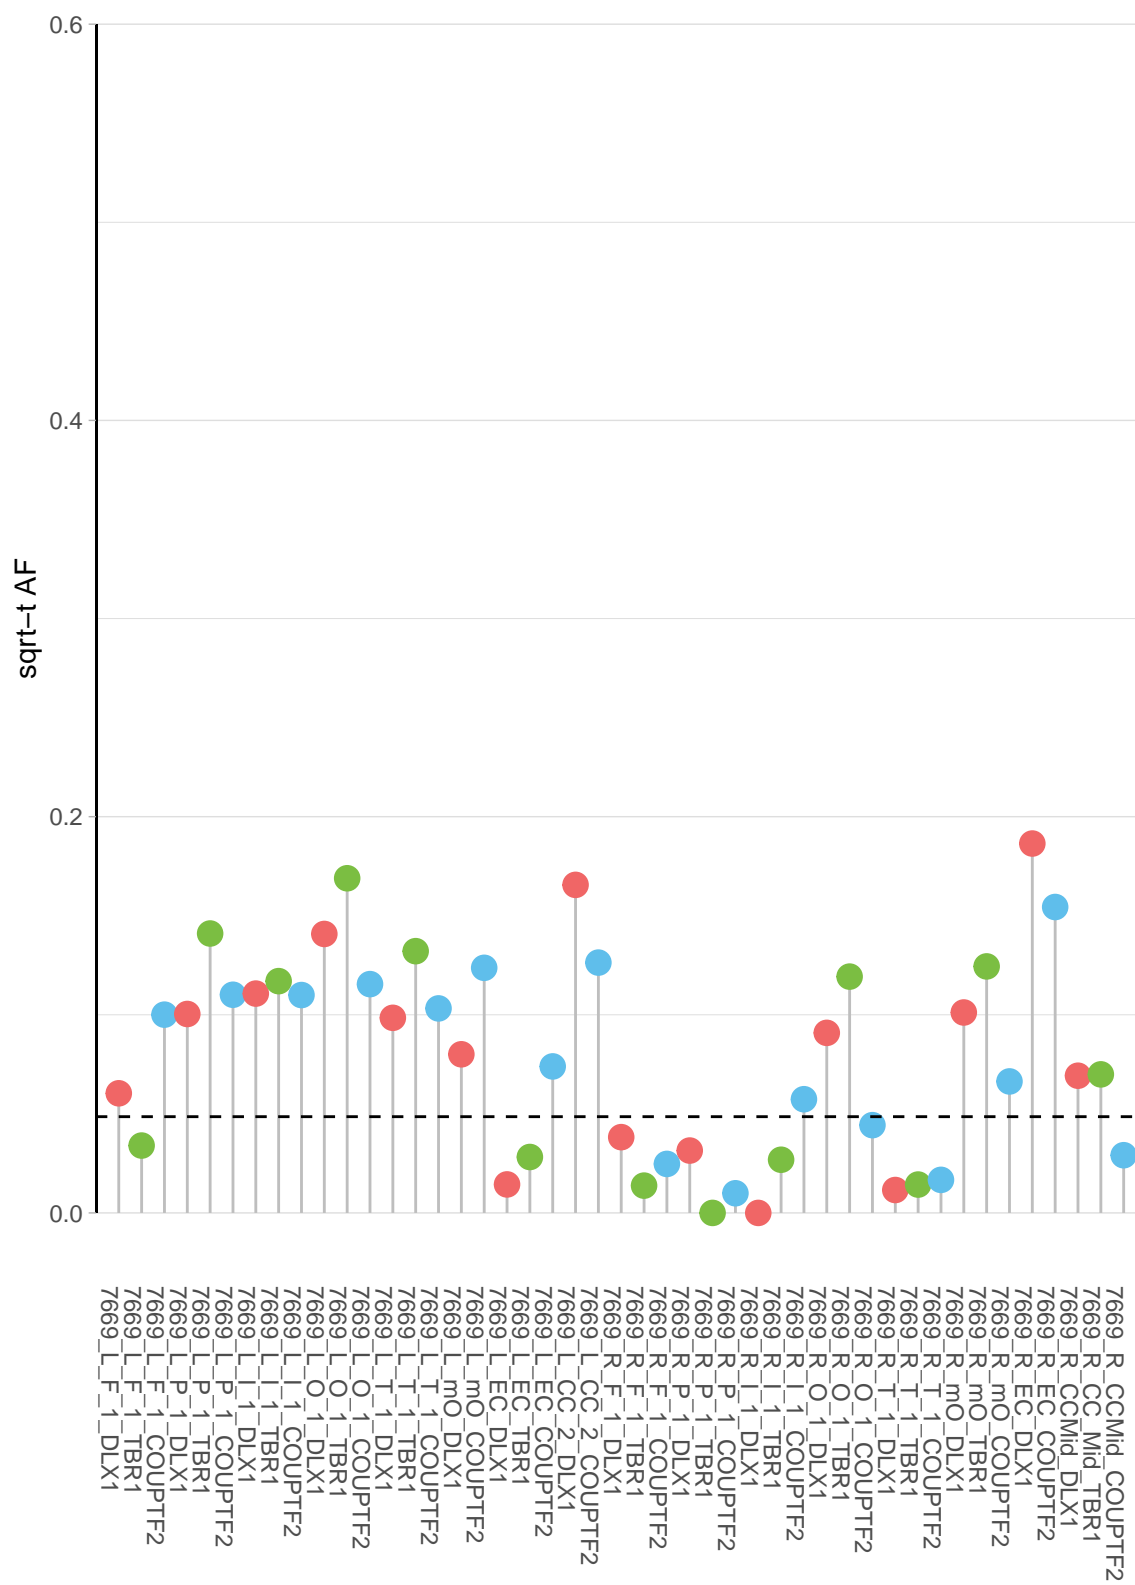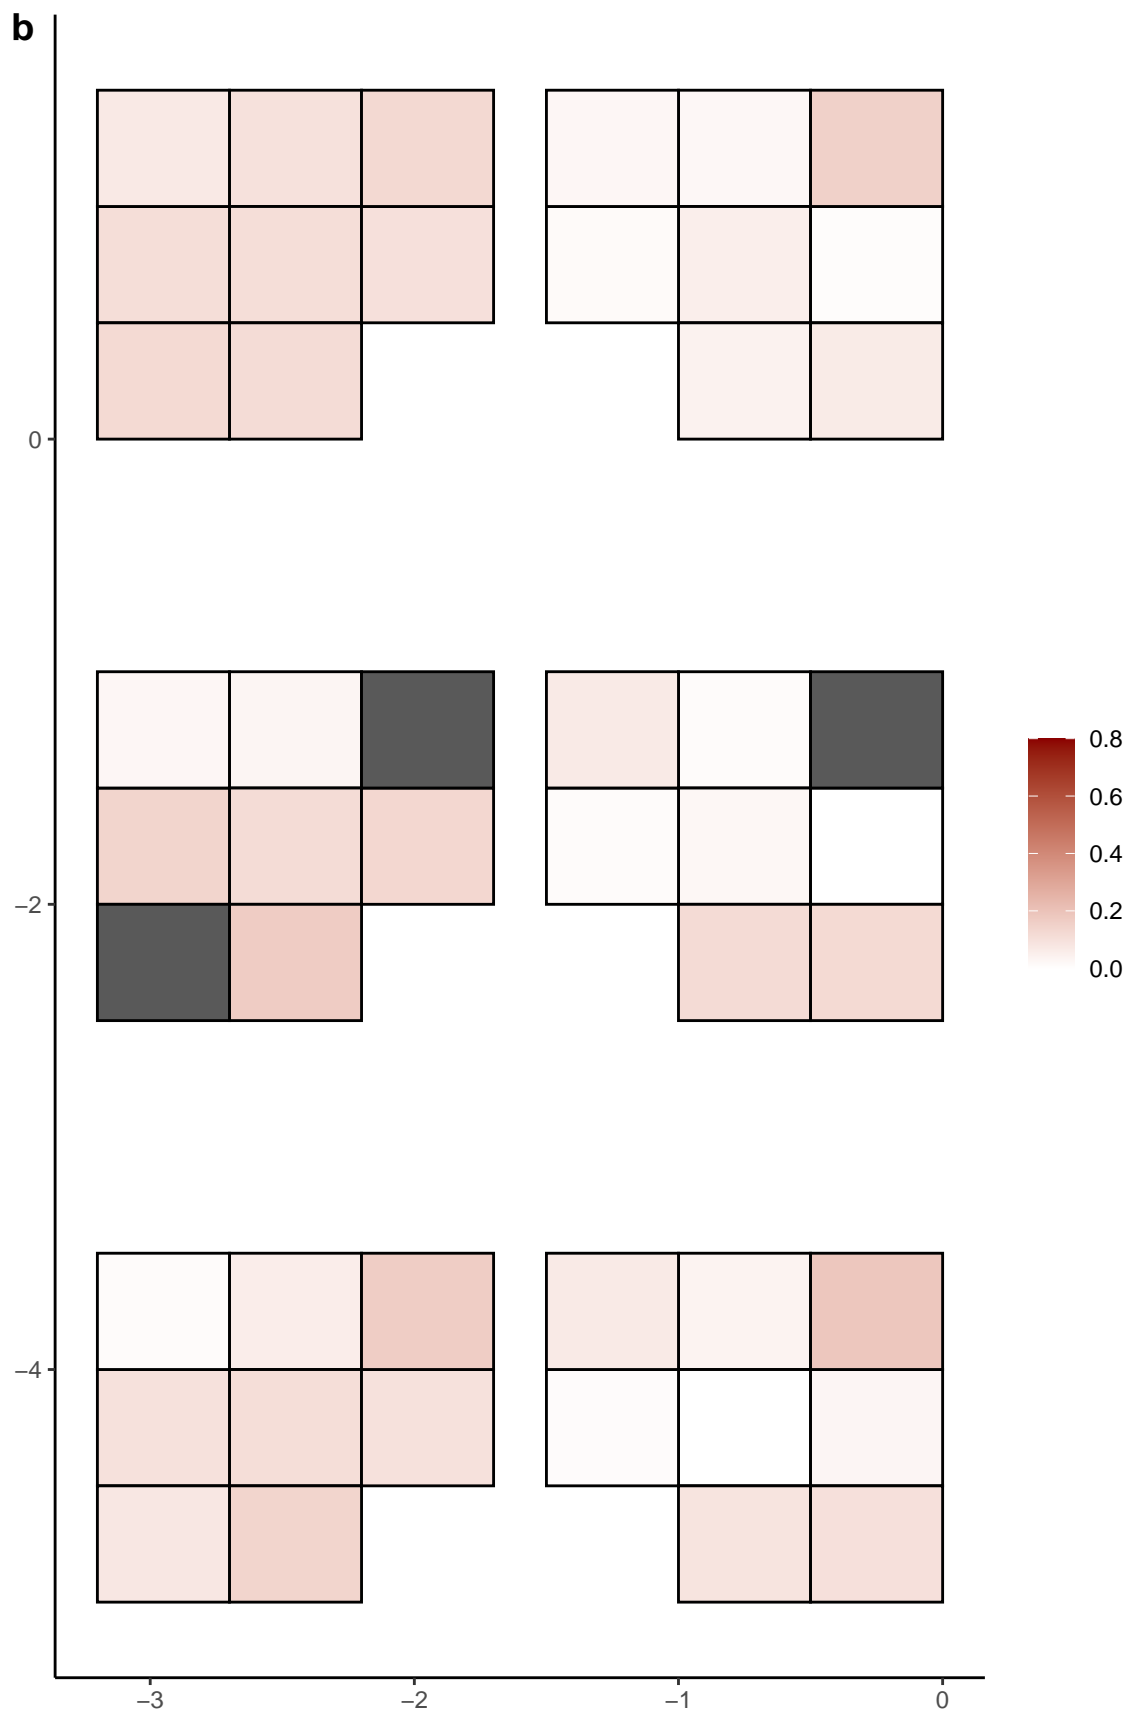

**a** ID05 11-44221191-C-G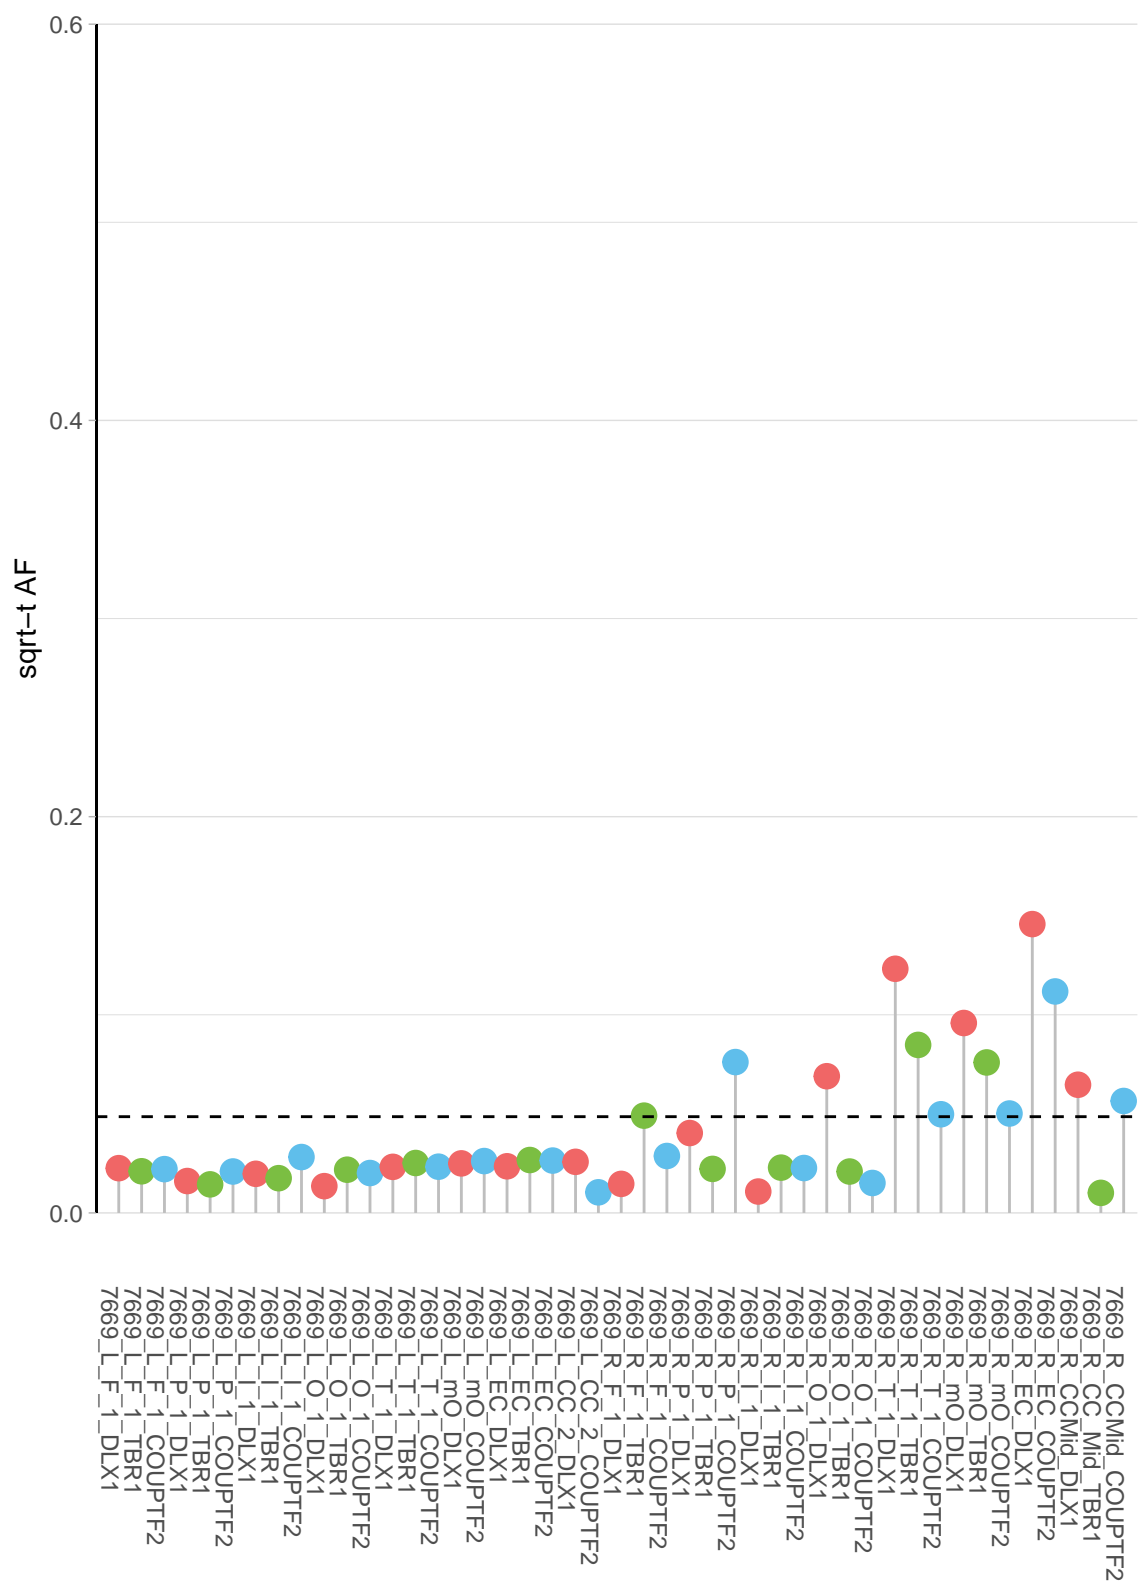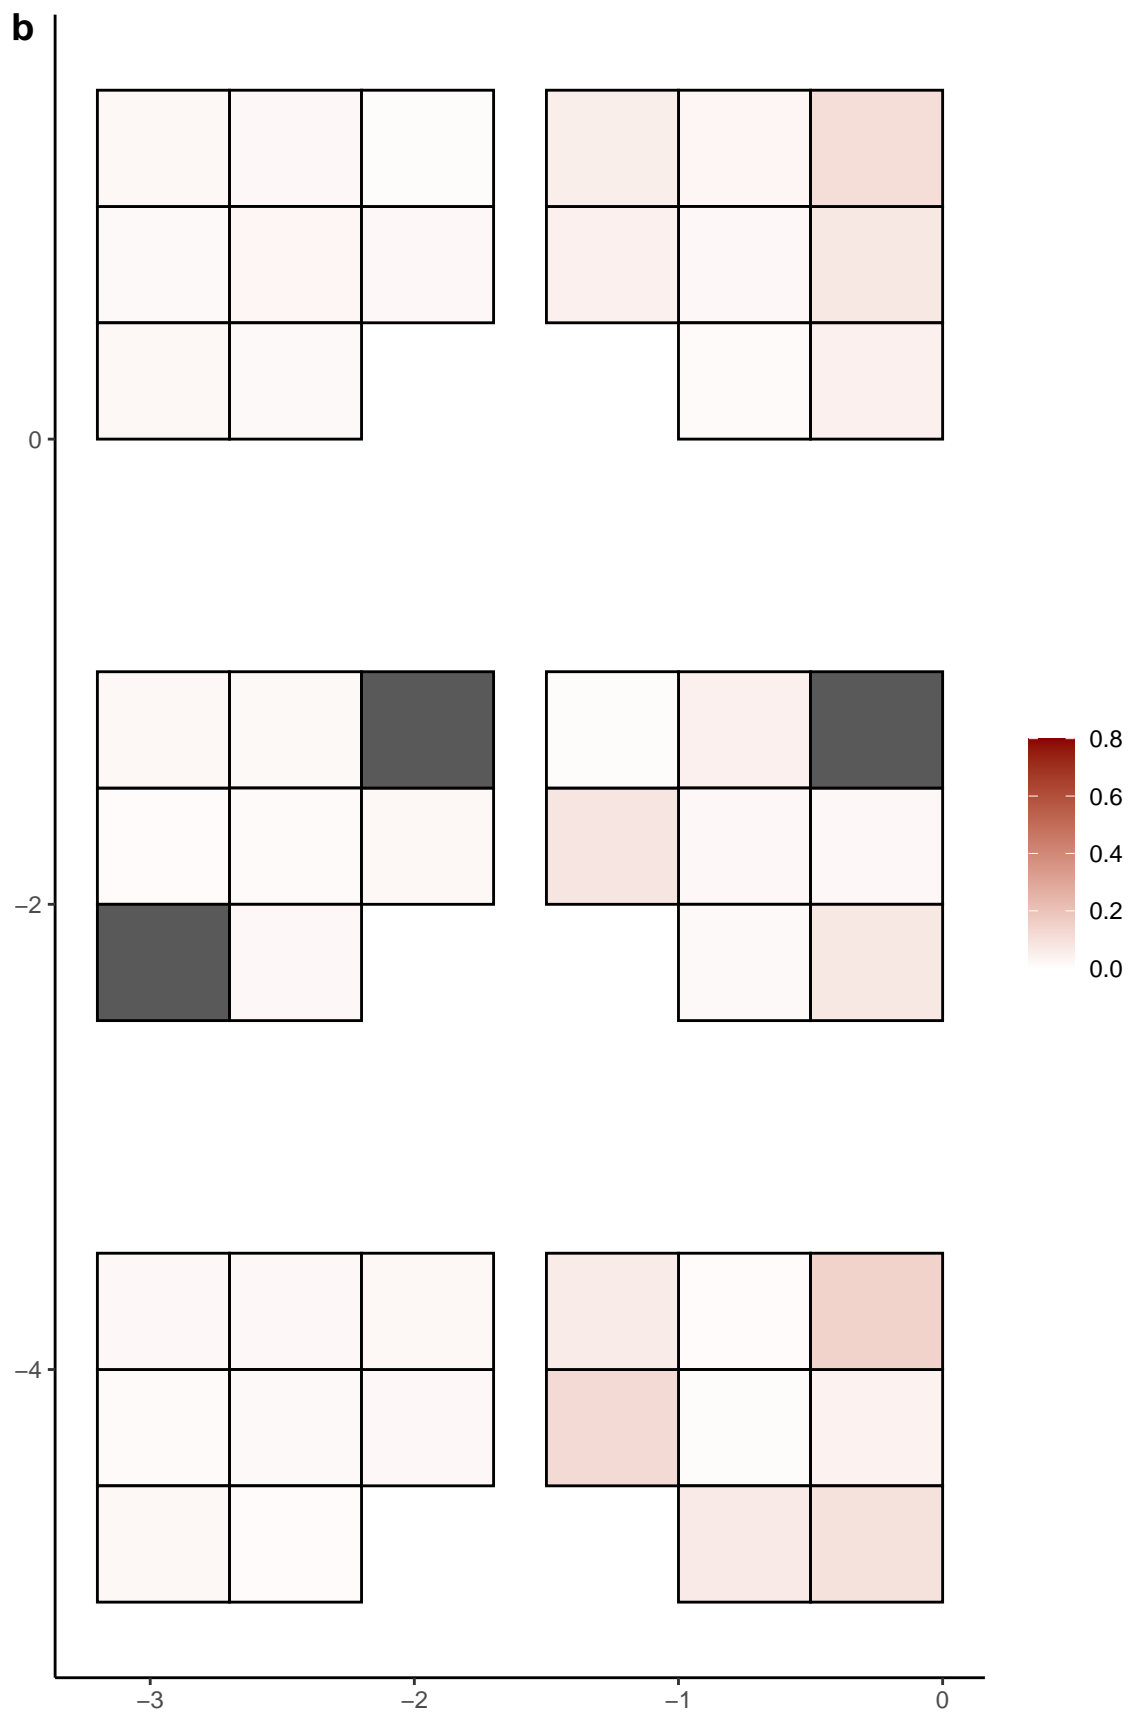

**a** ID05 11-45873419-G-A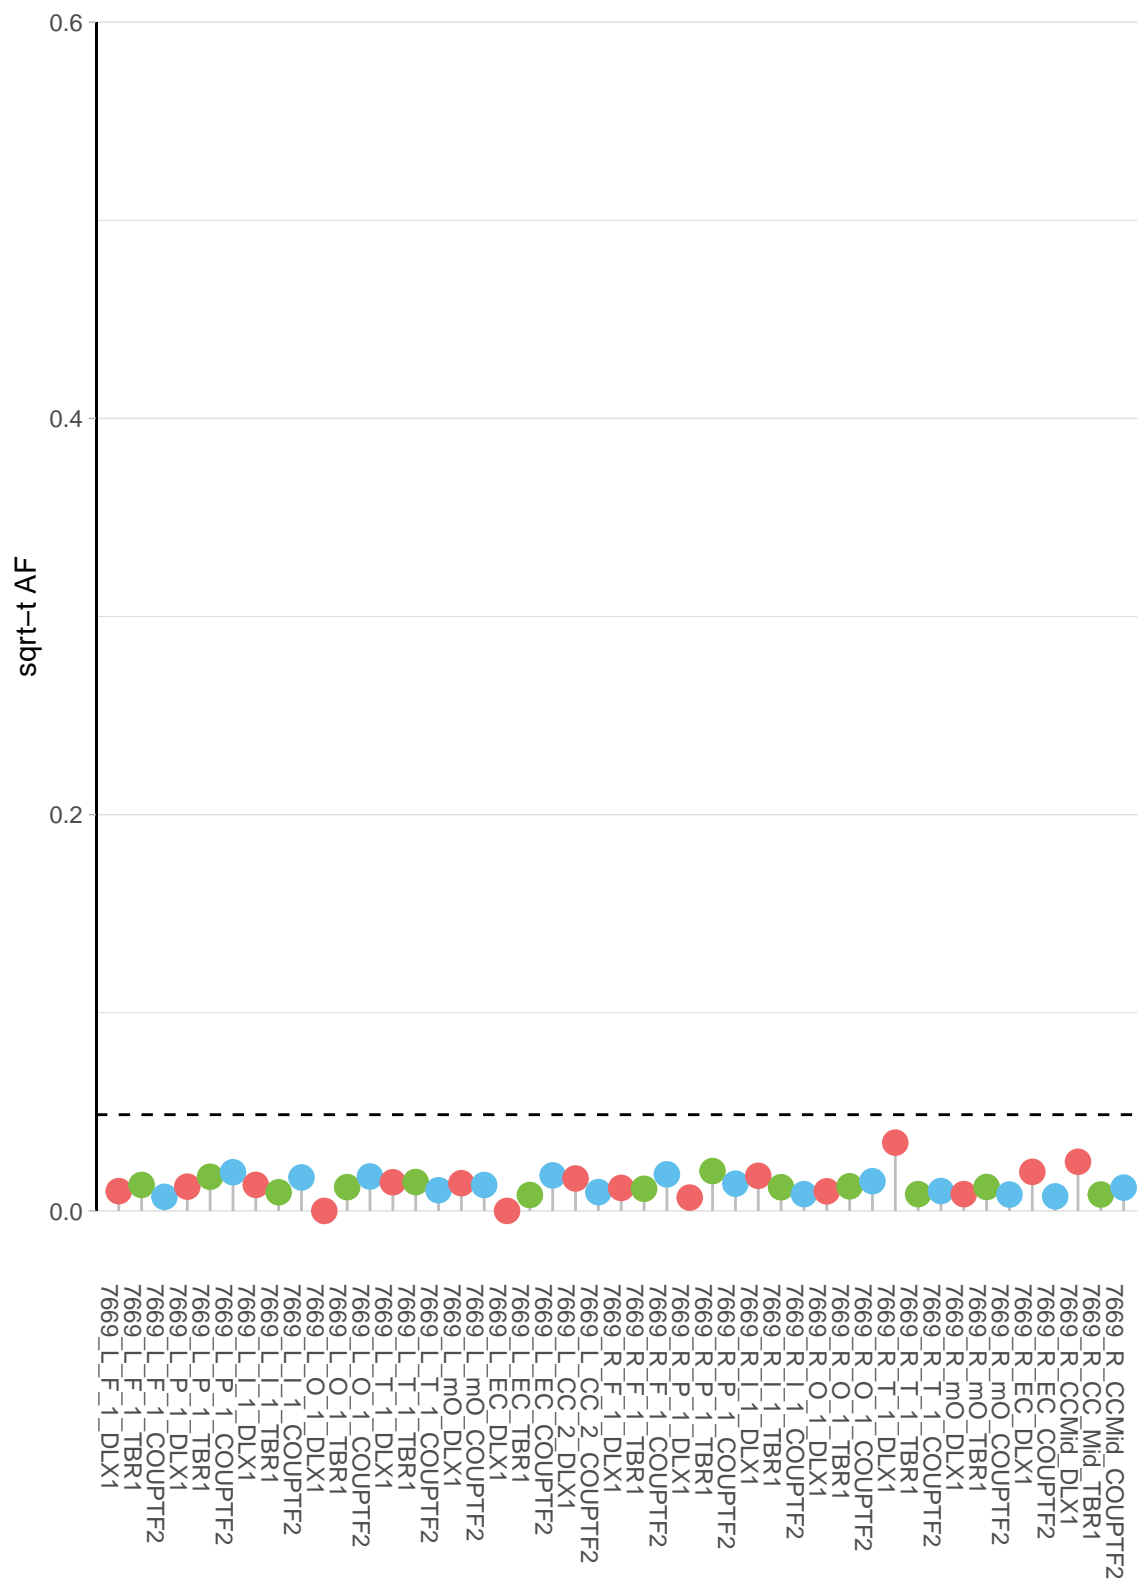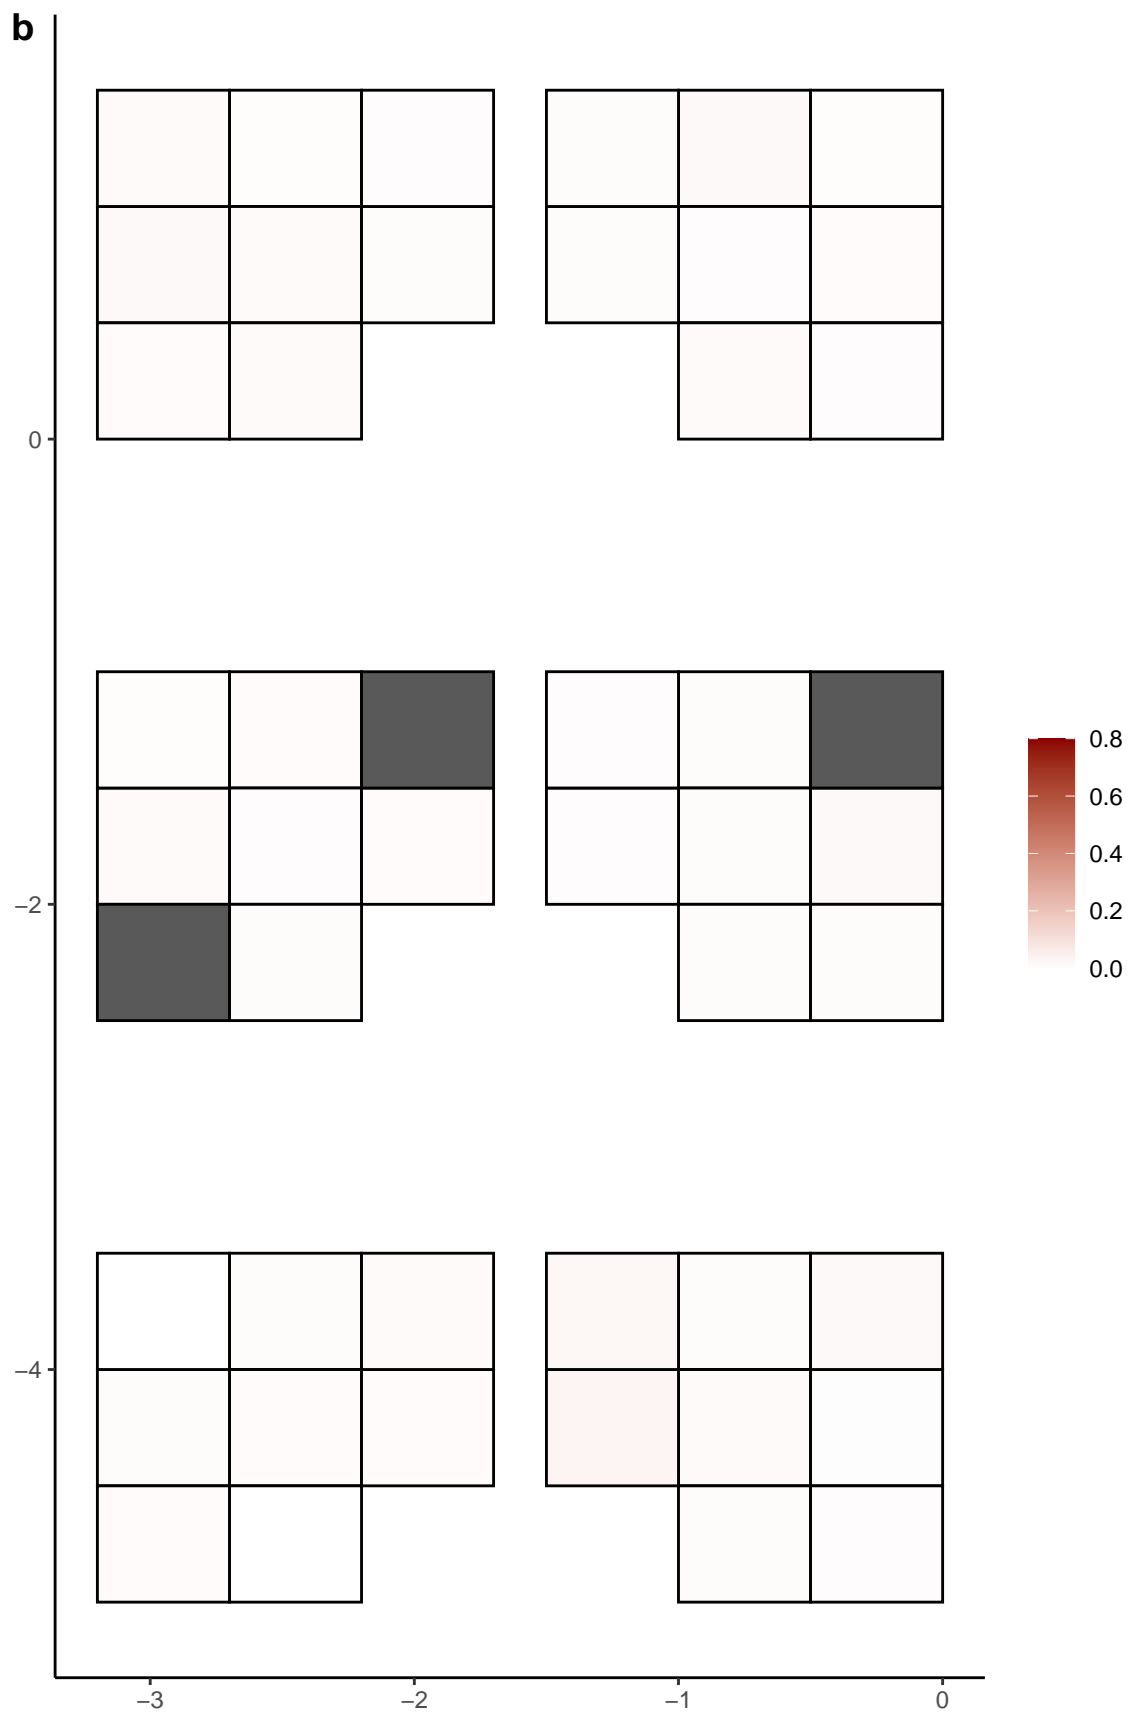

**a** ID05 11-55838876-G-T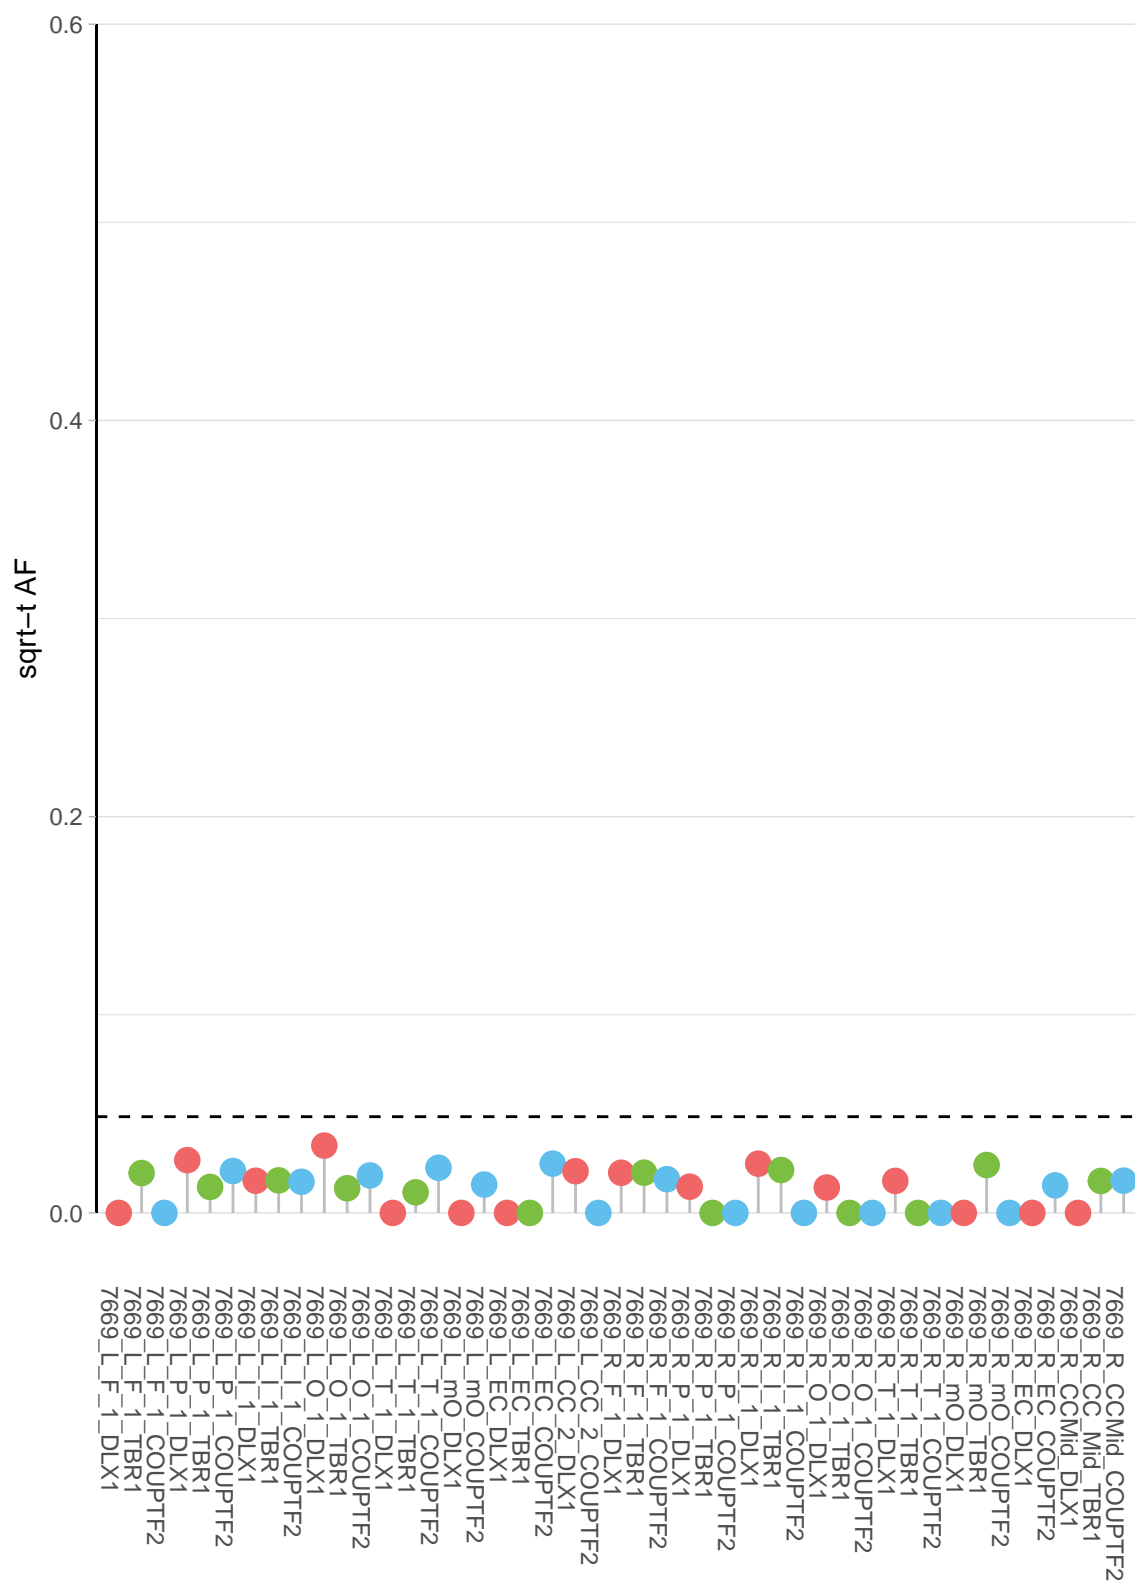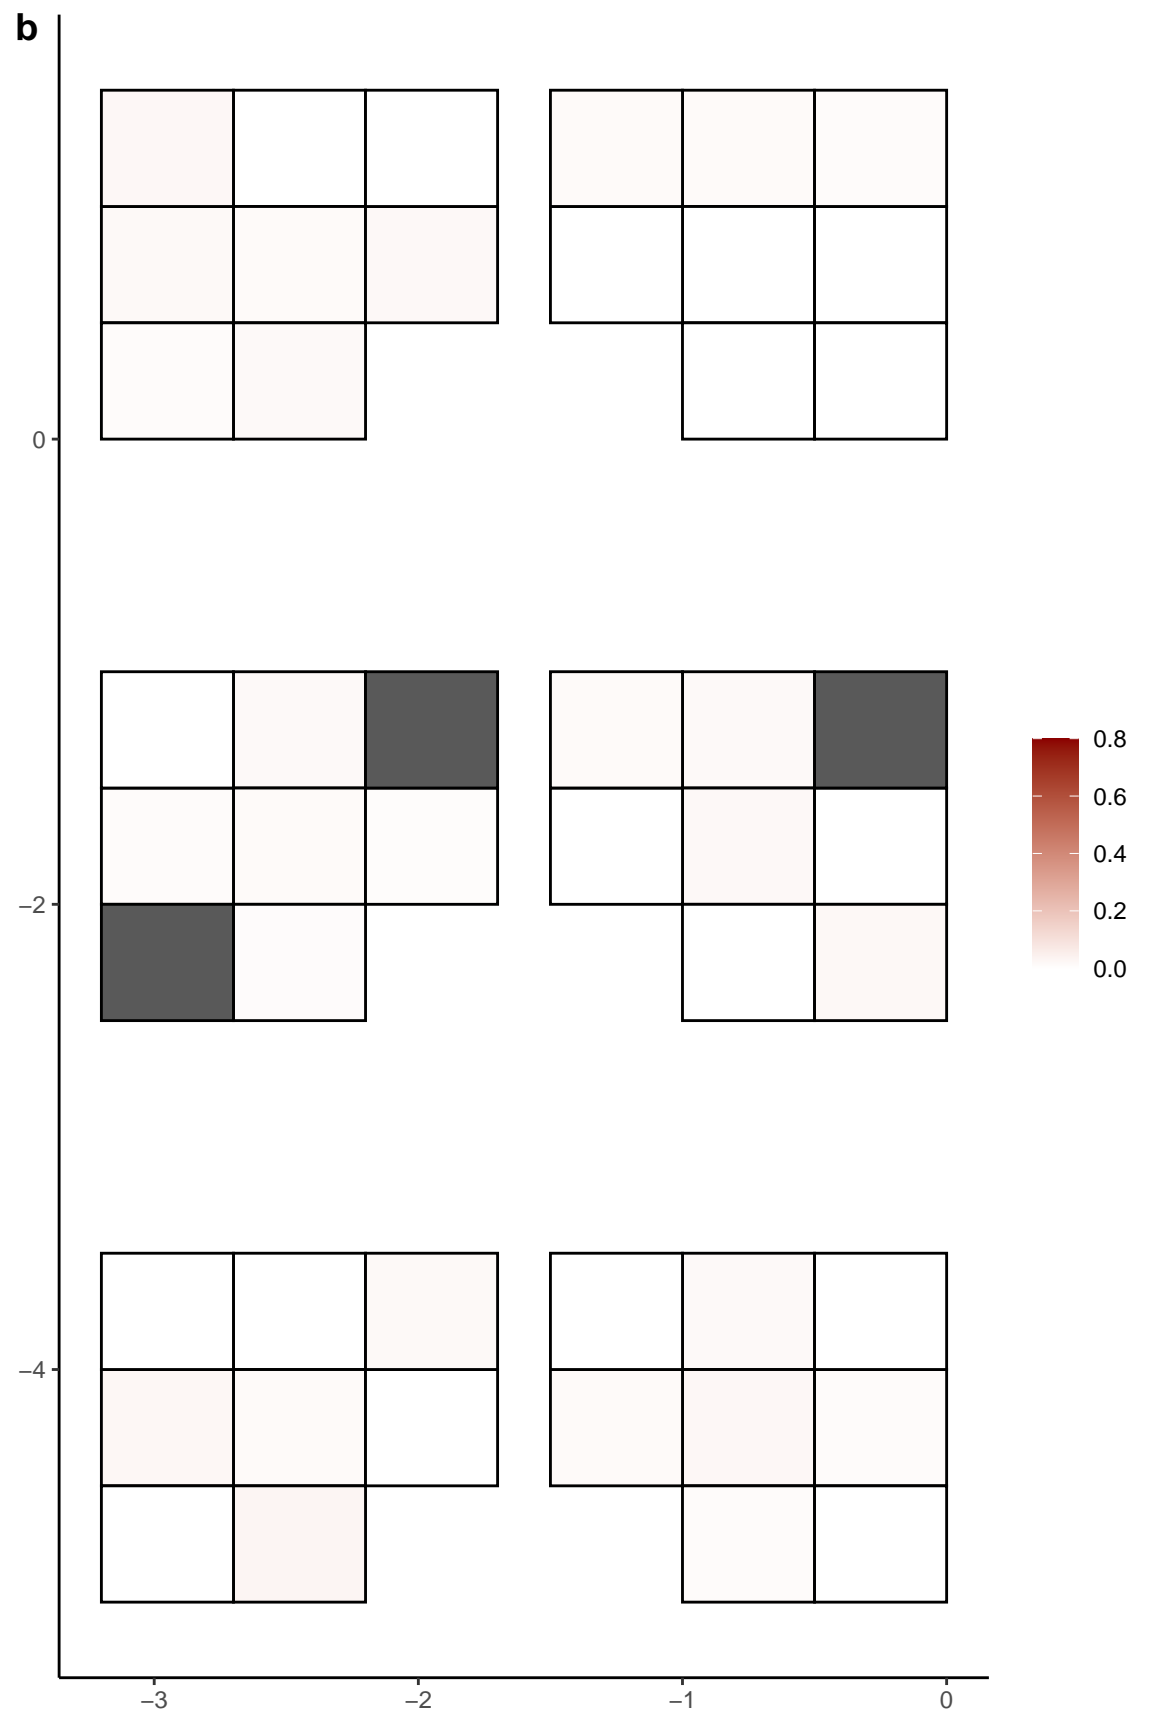

**a** ID05 11-55997990-C-T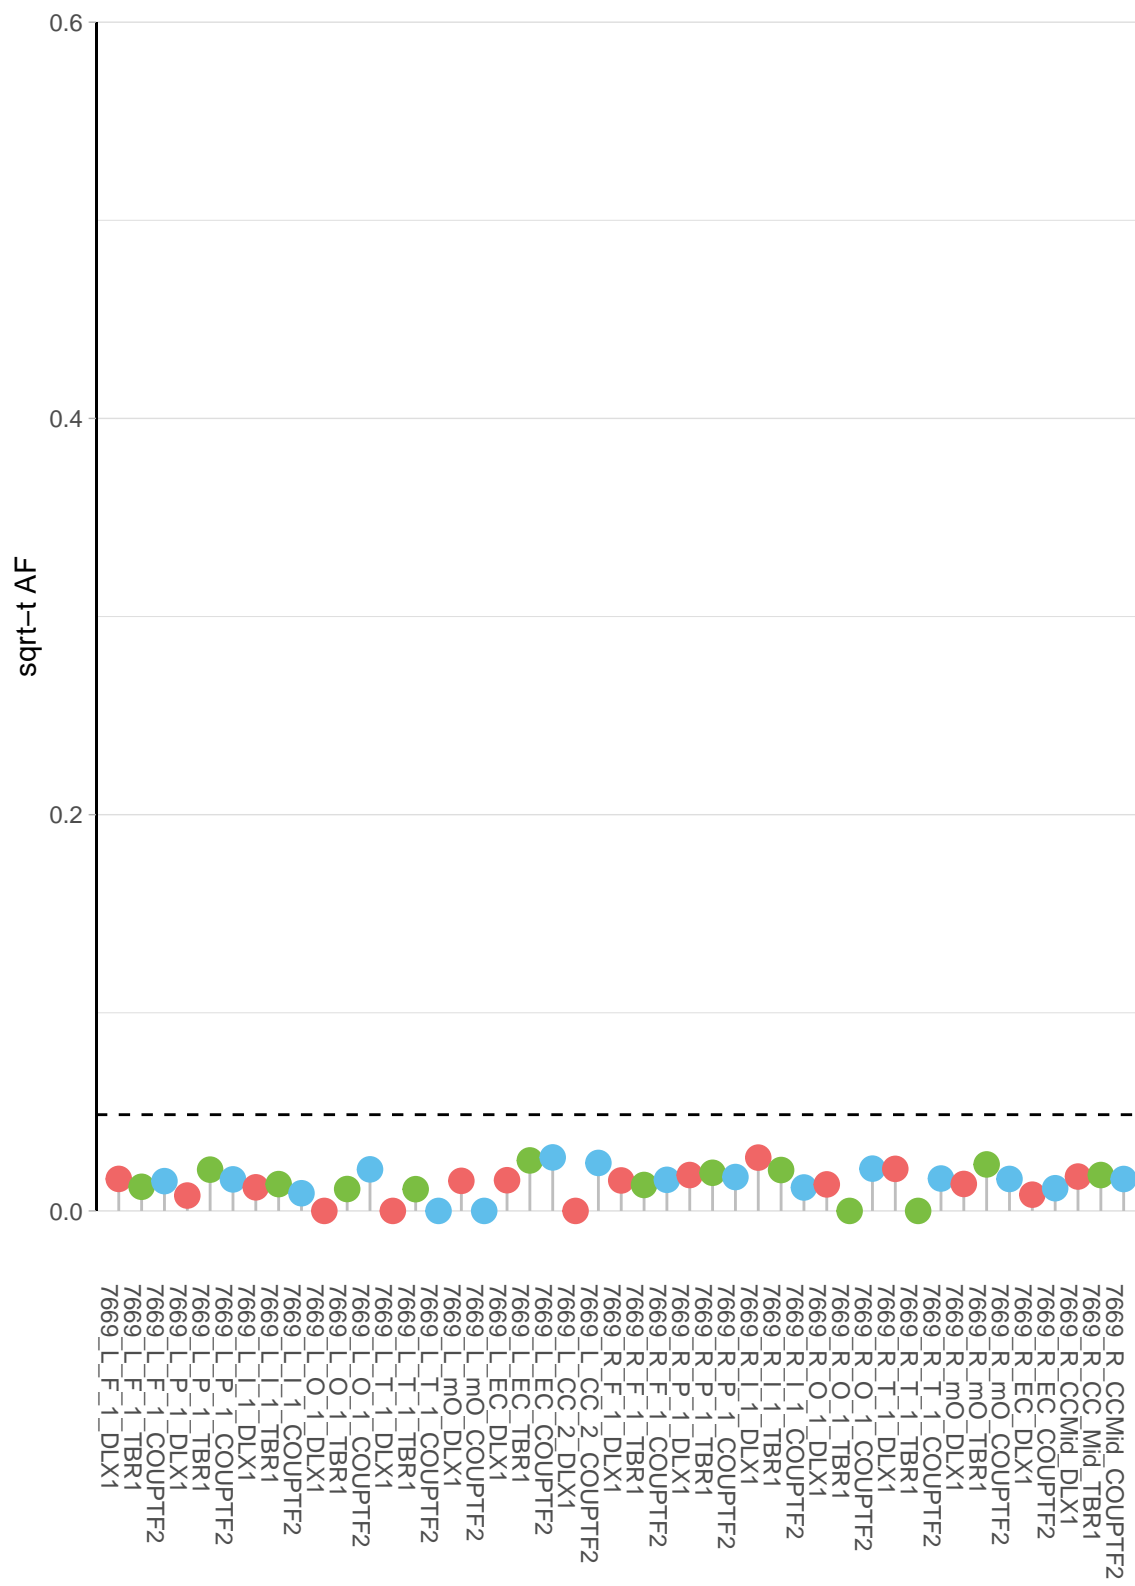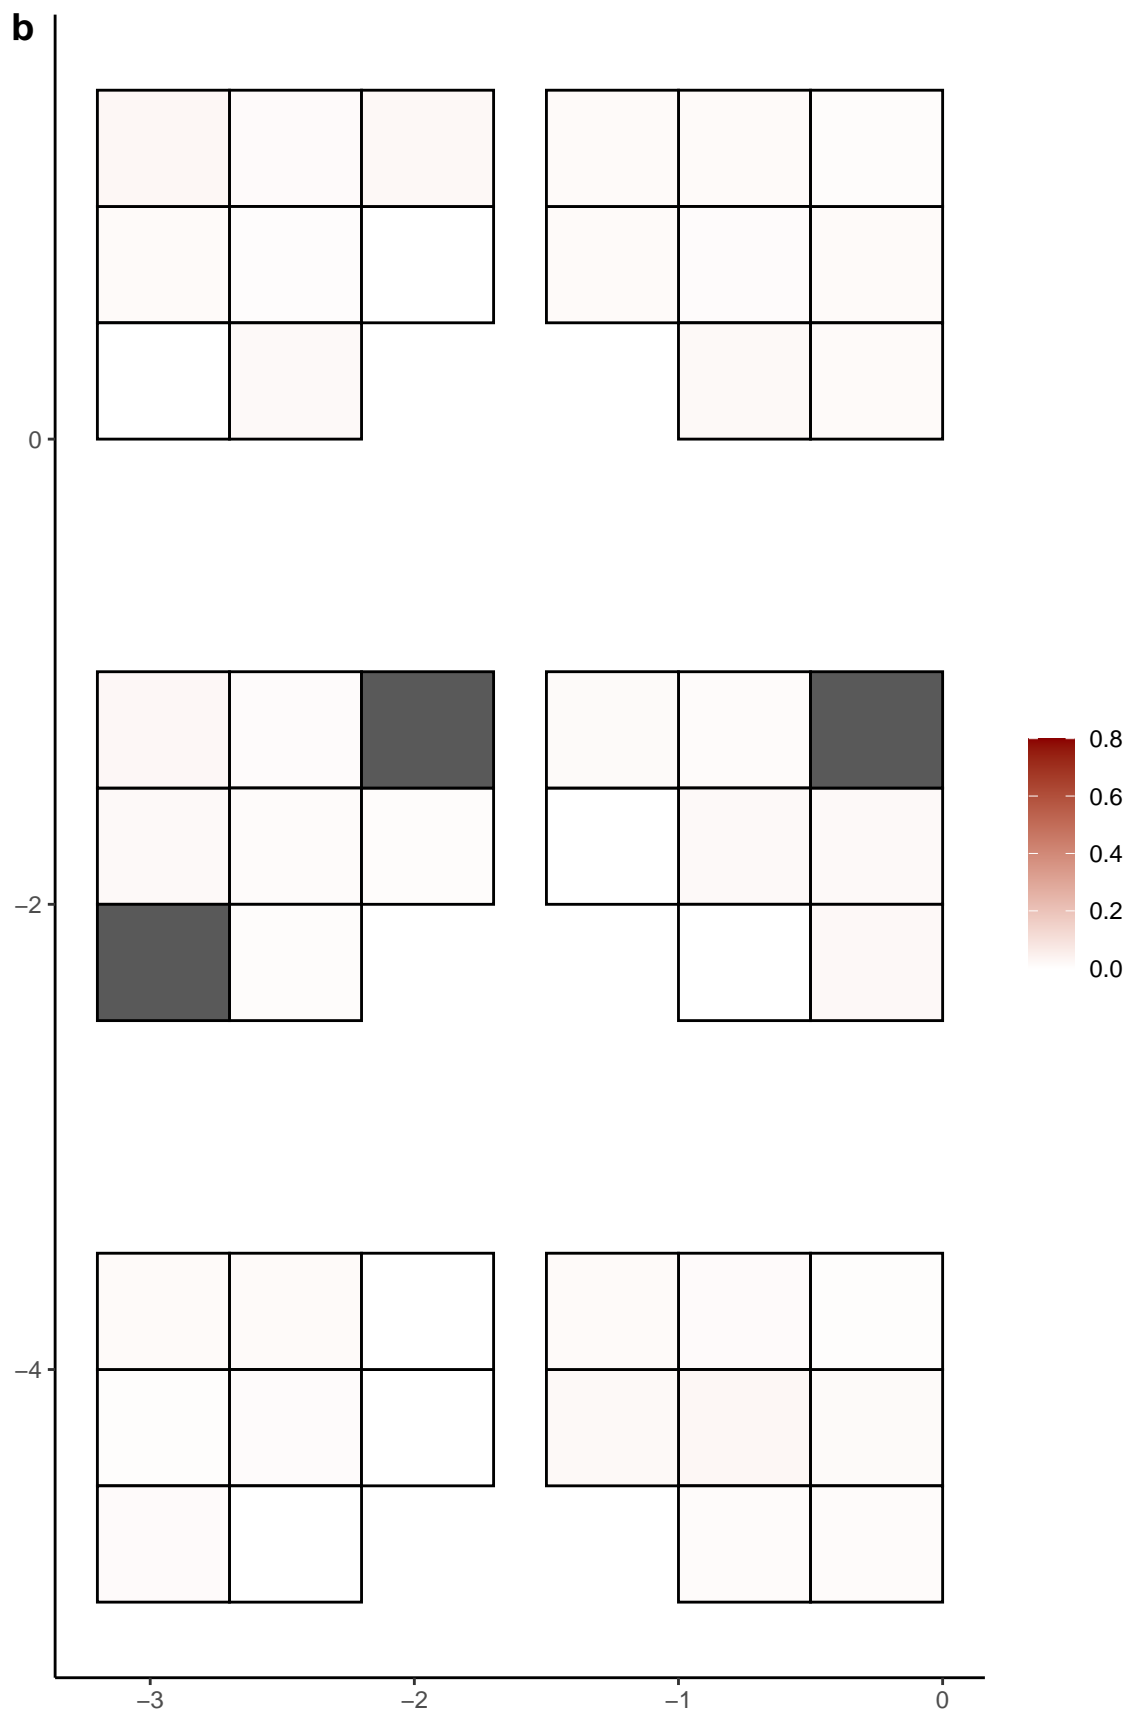

**a** ID05 11-56409116-C-T

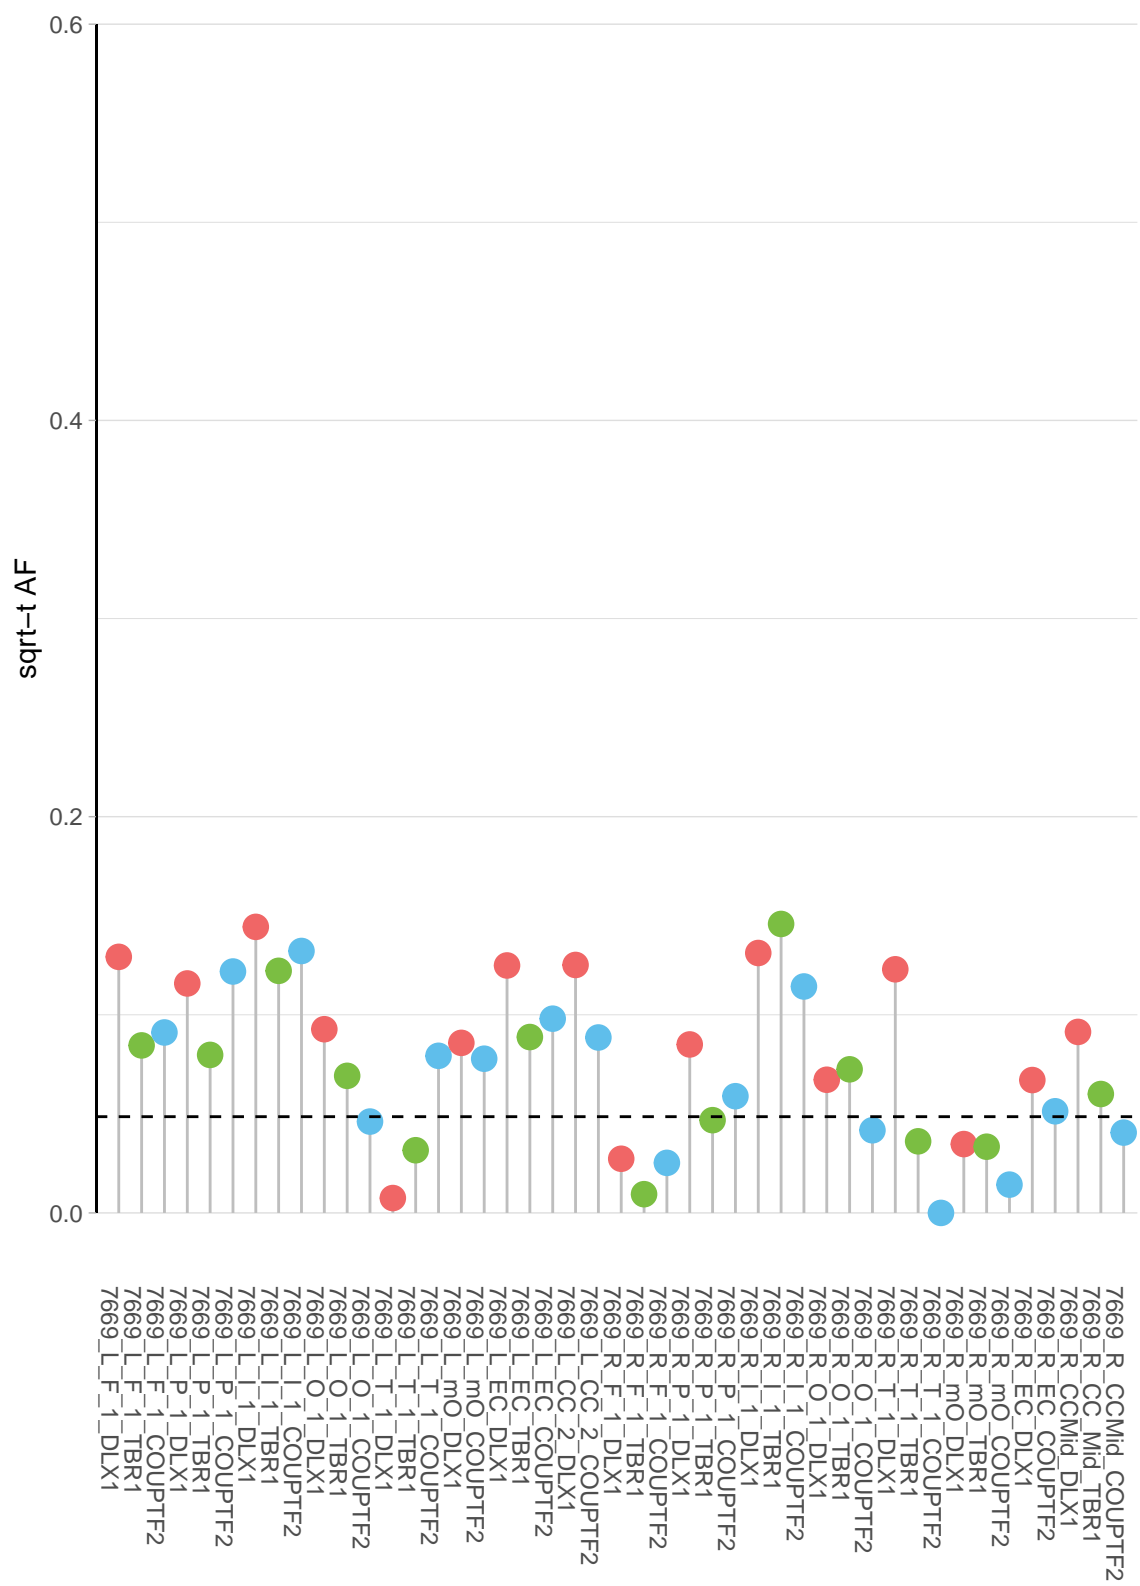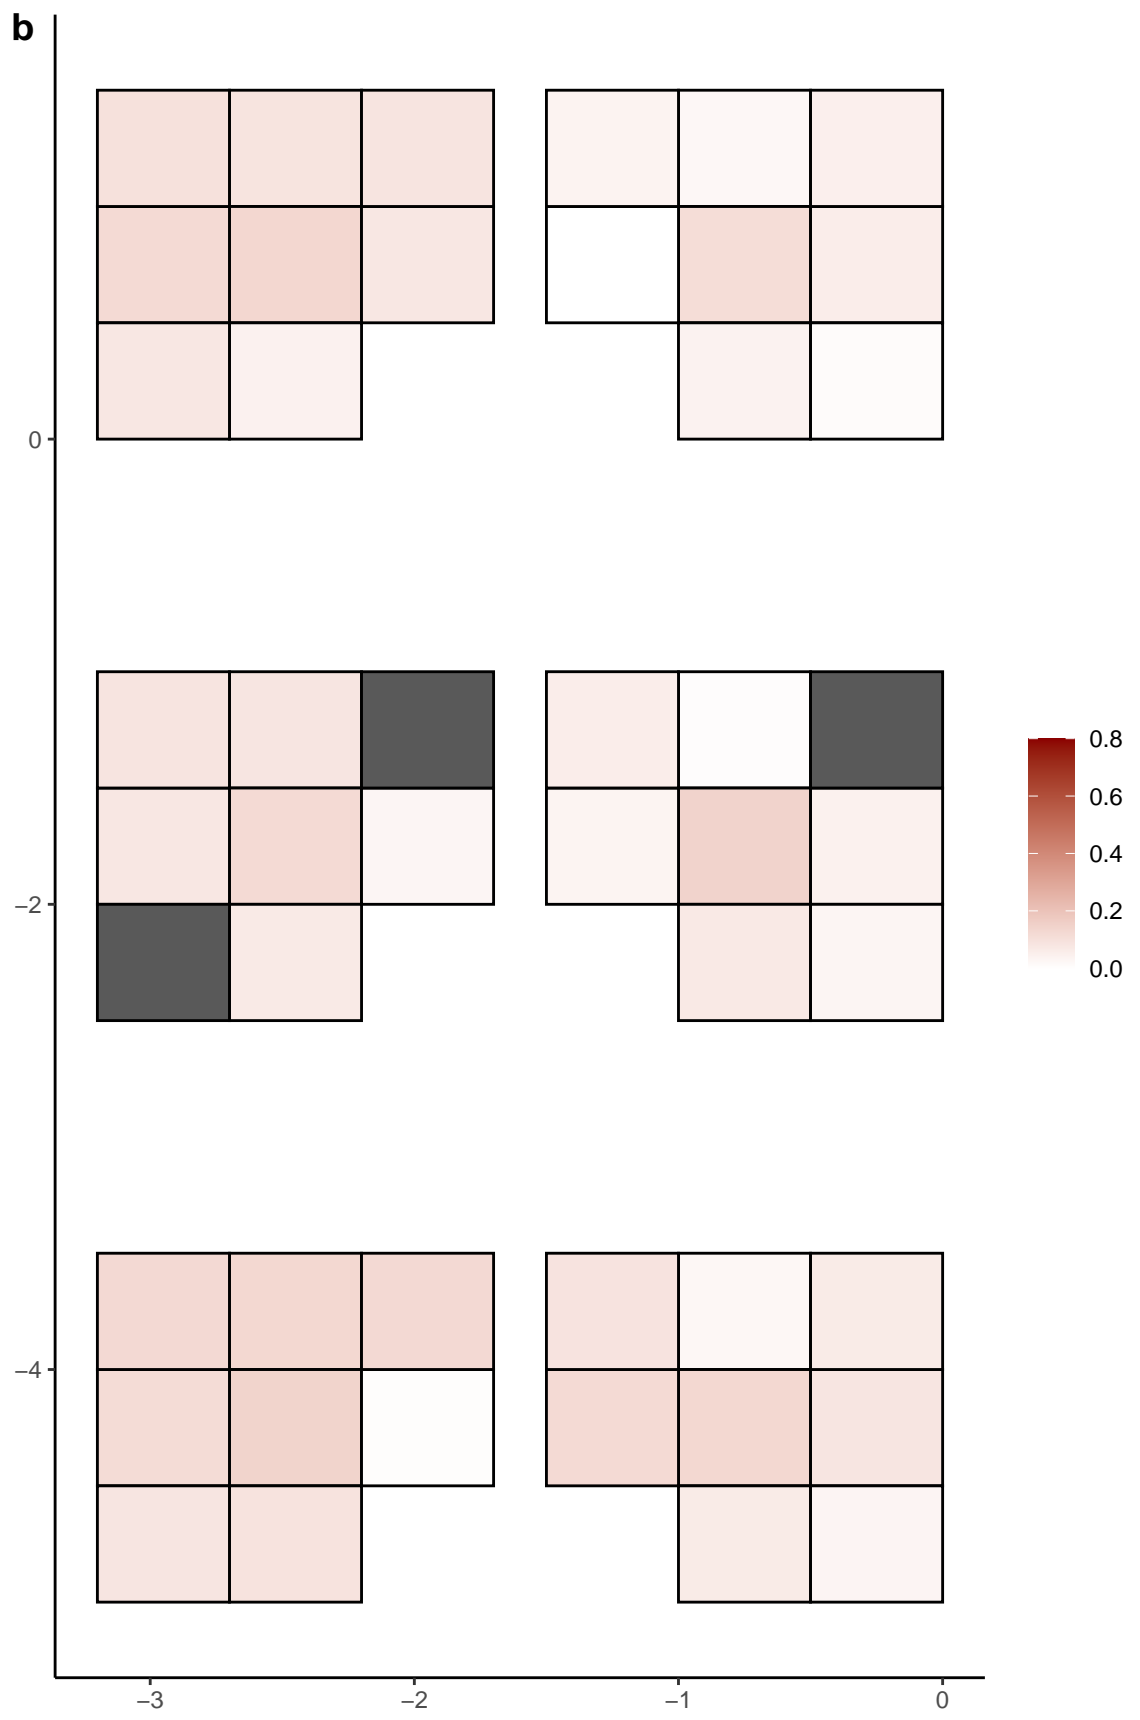

**a** ID05 11-57985375-T-C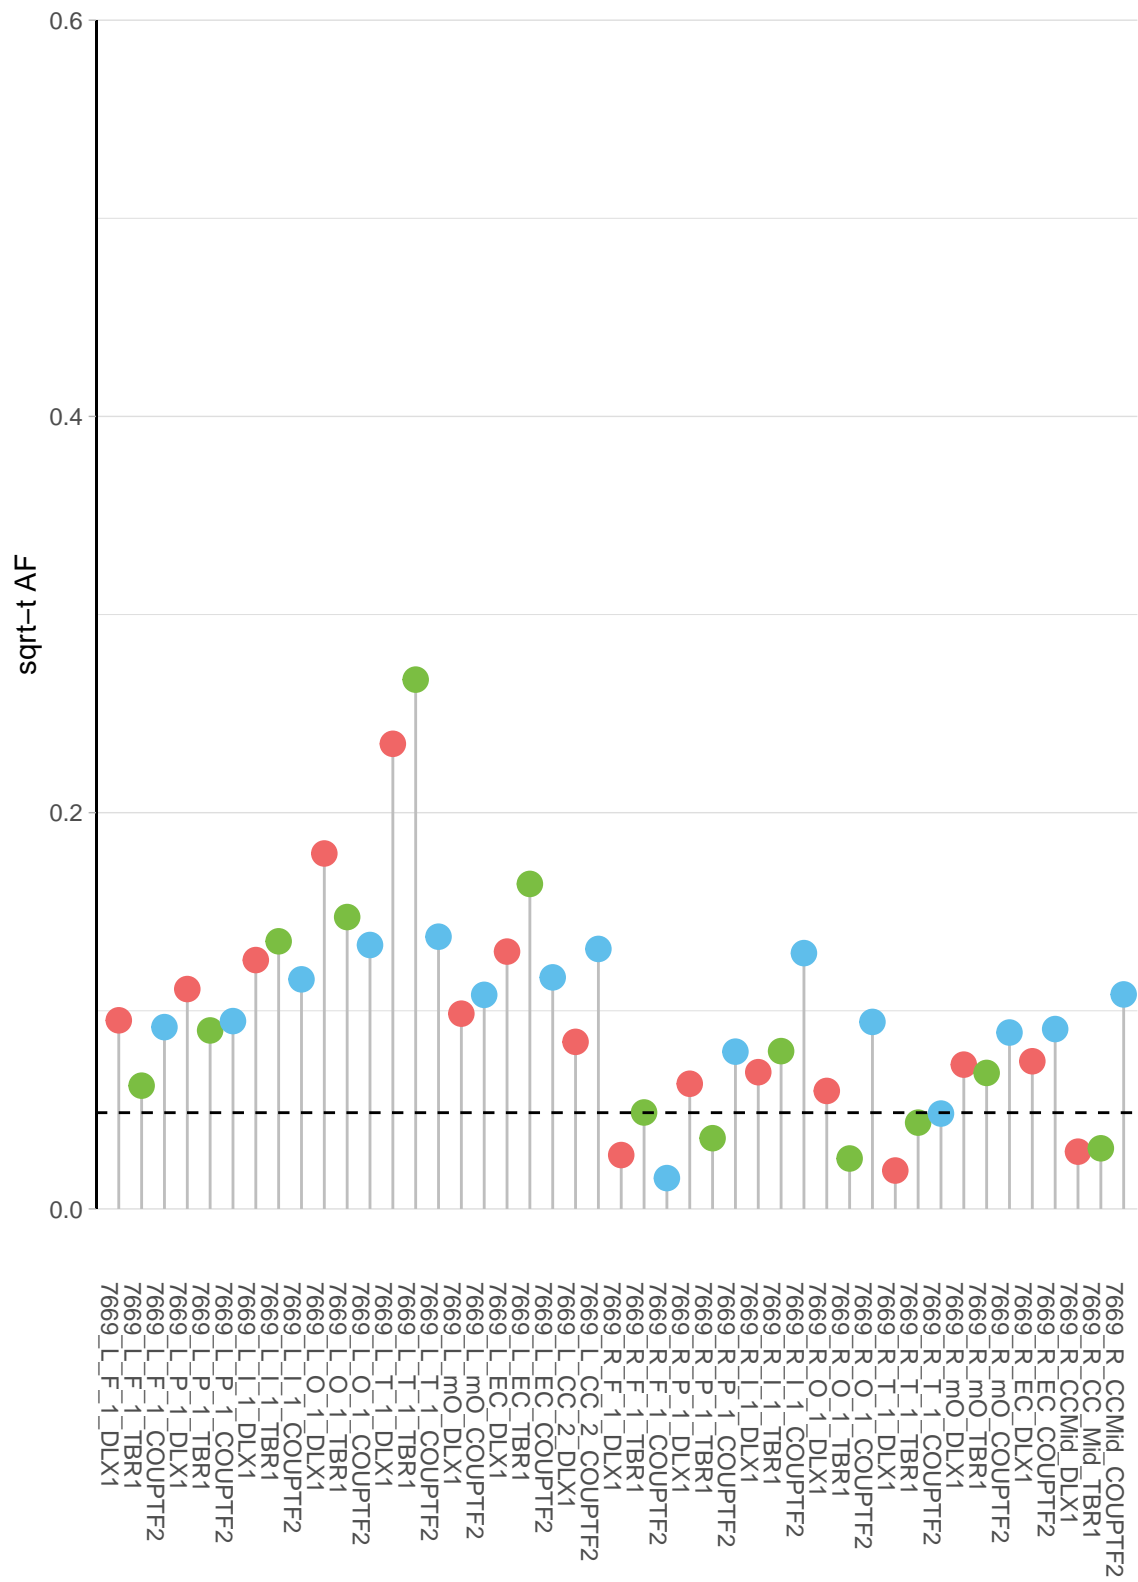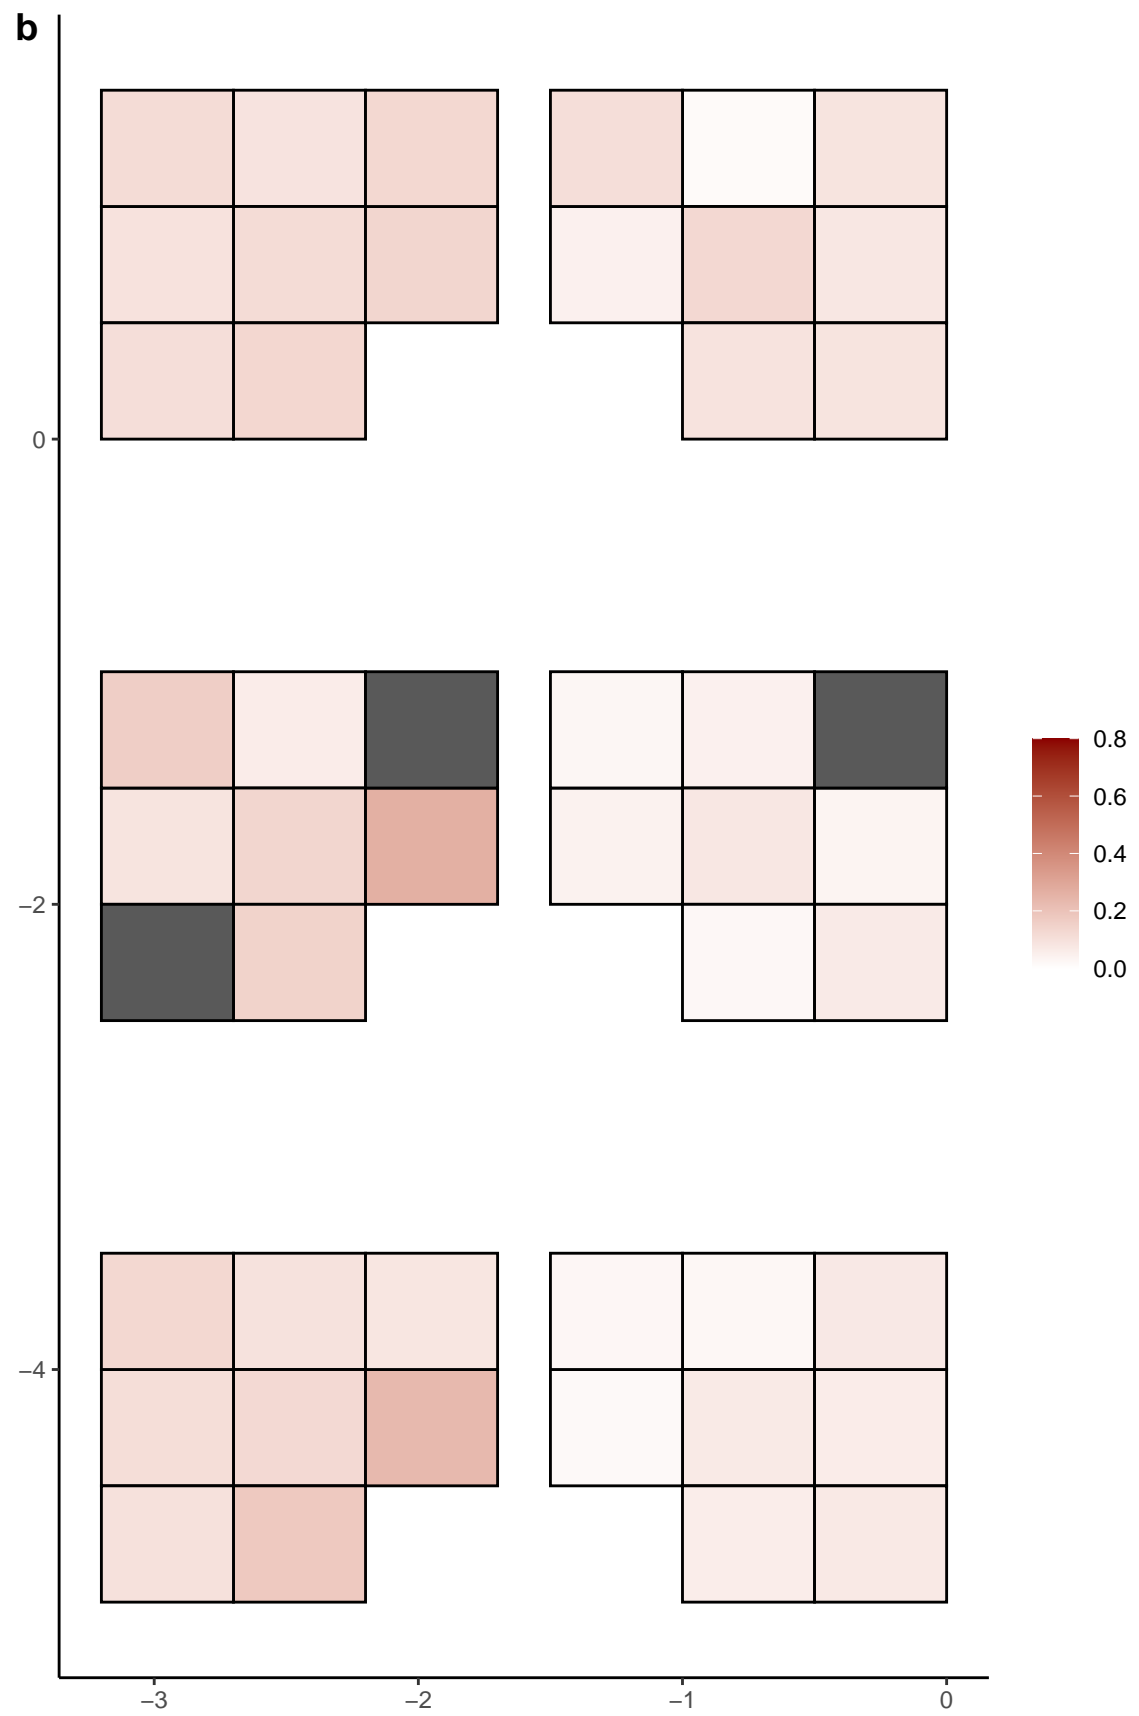



**a** ID05 11-79785519-G-T

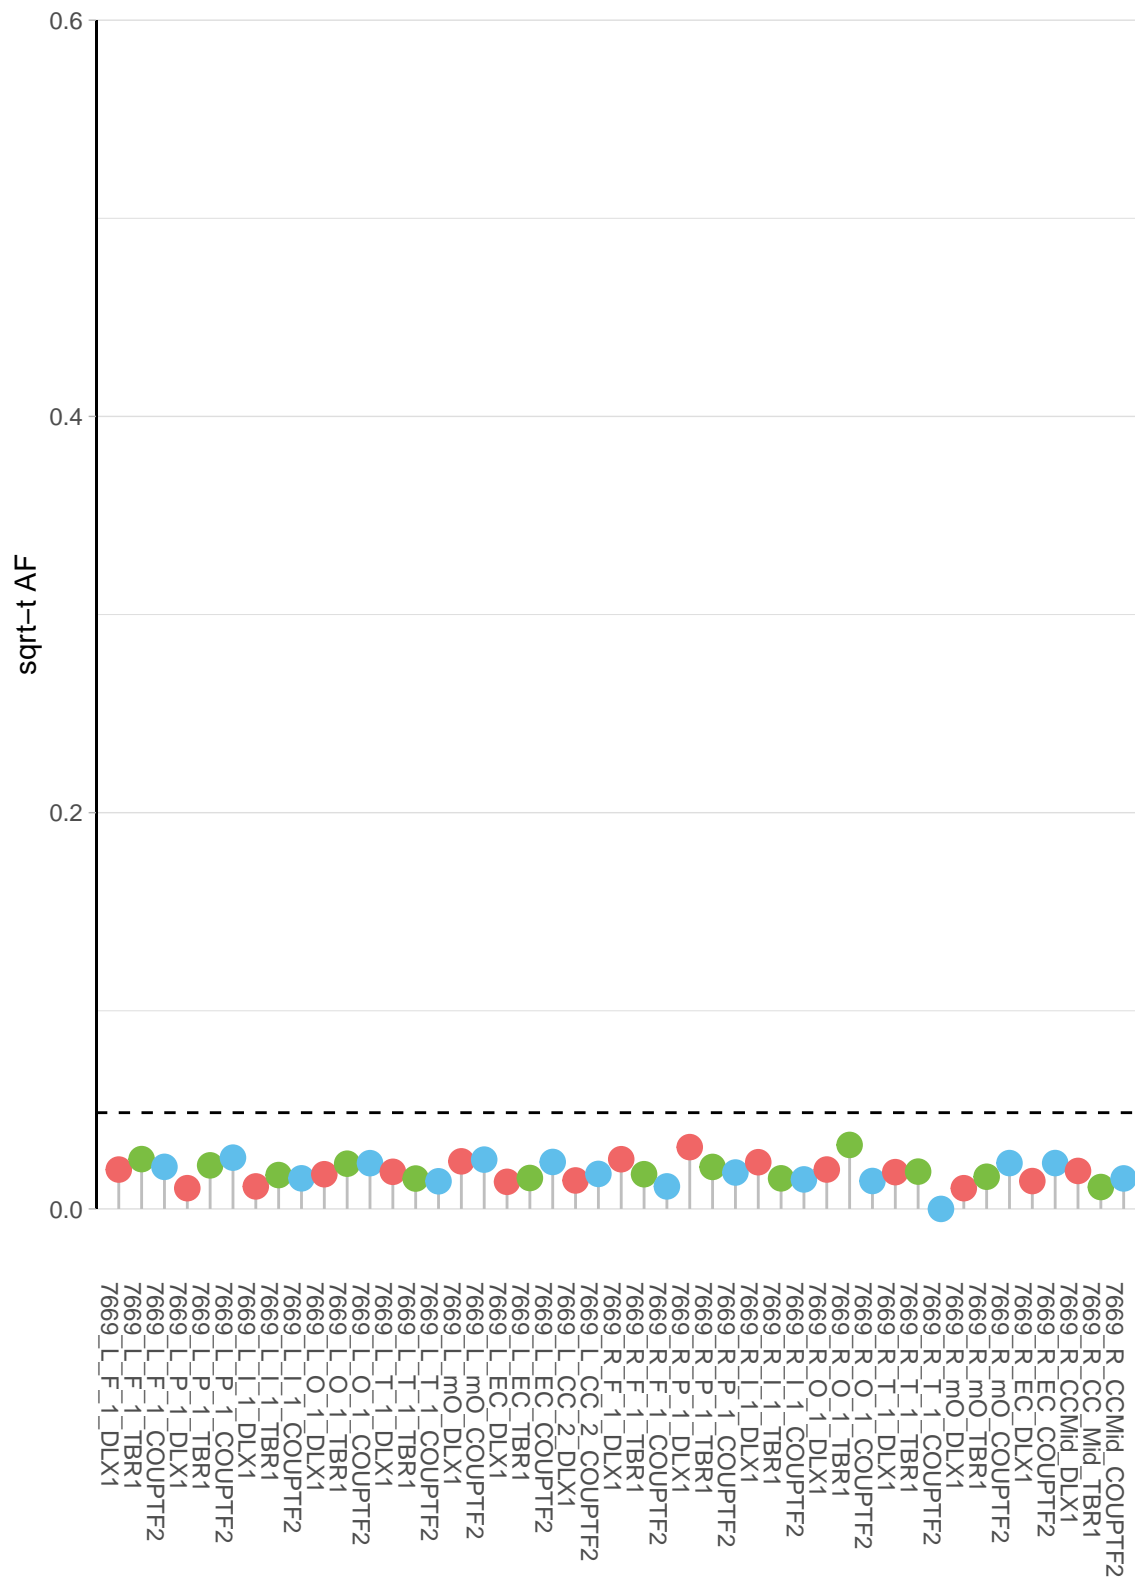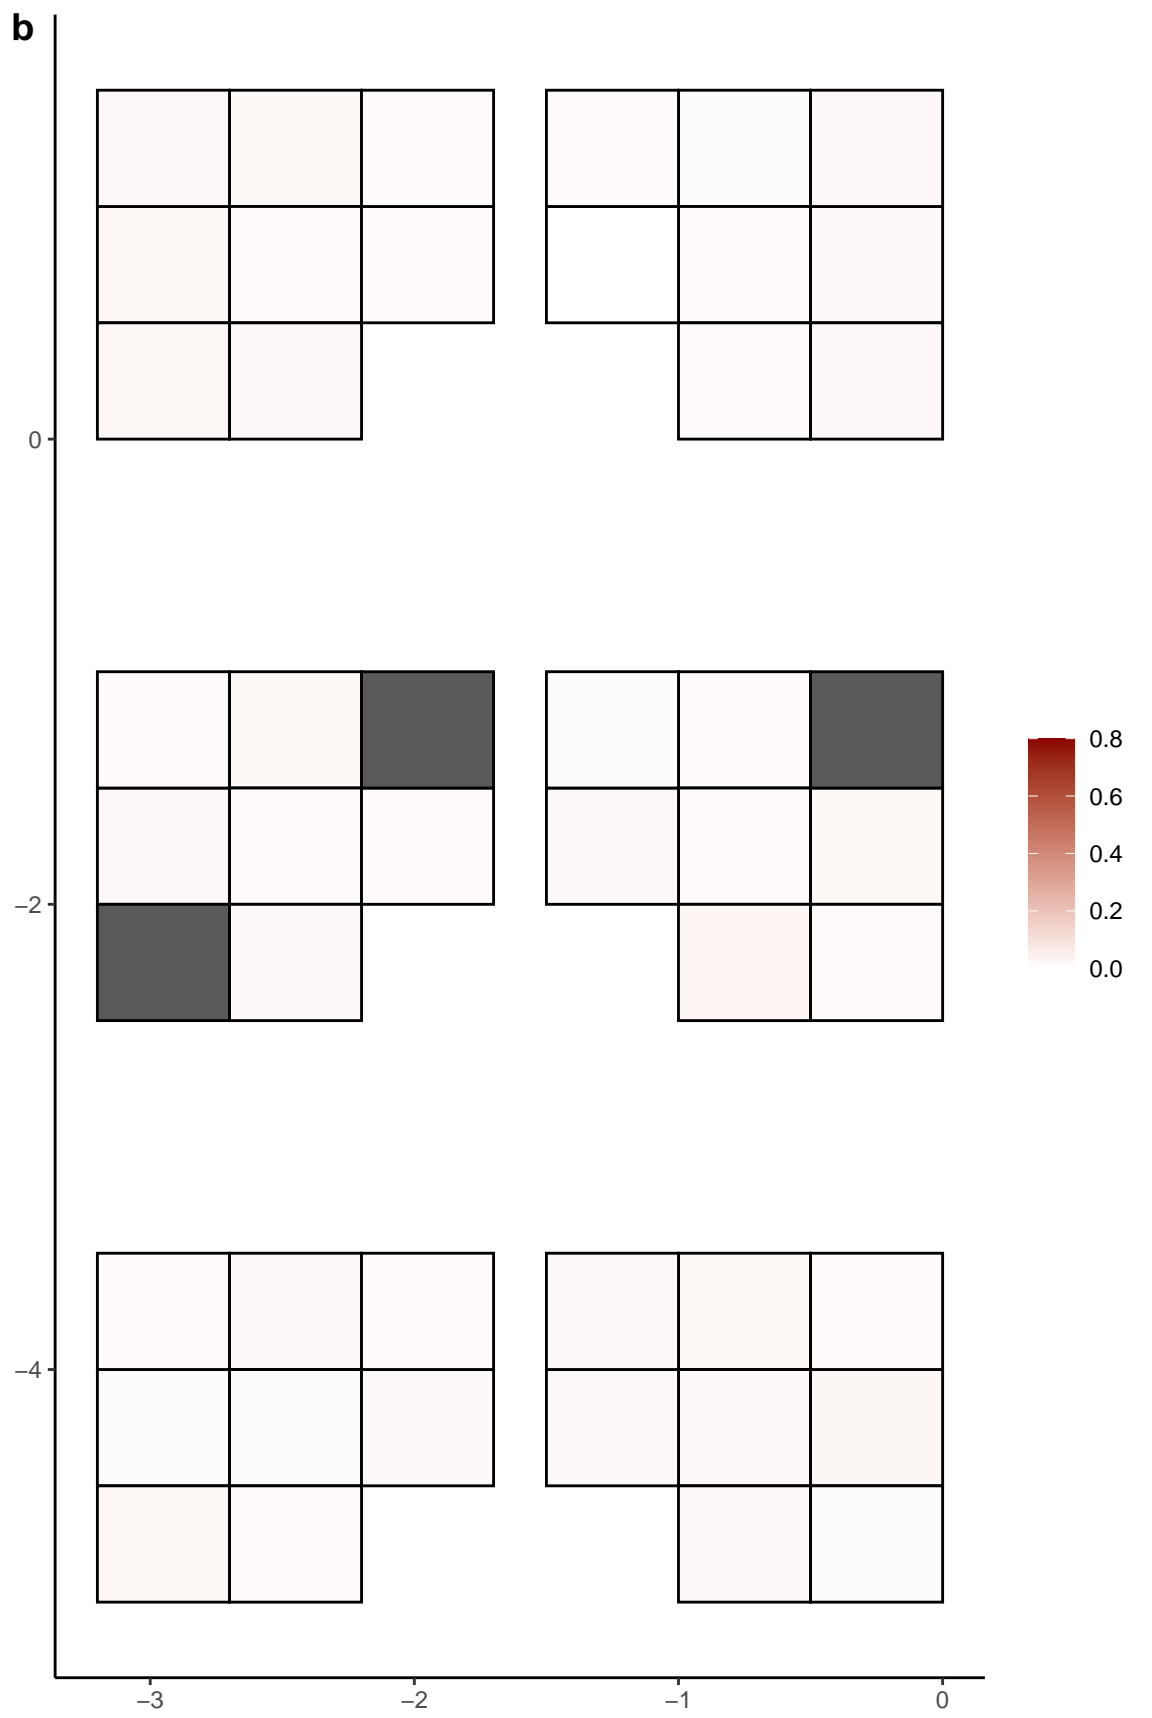



**a** ID05 11-91169265-C-T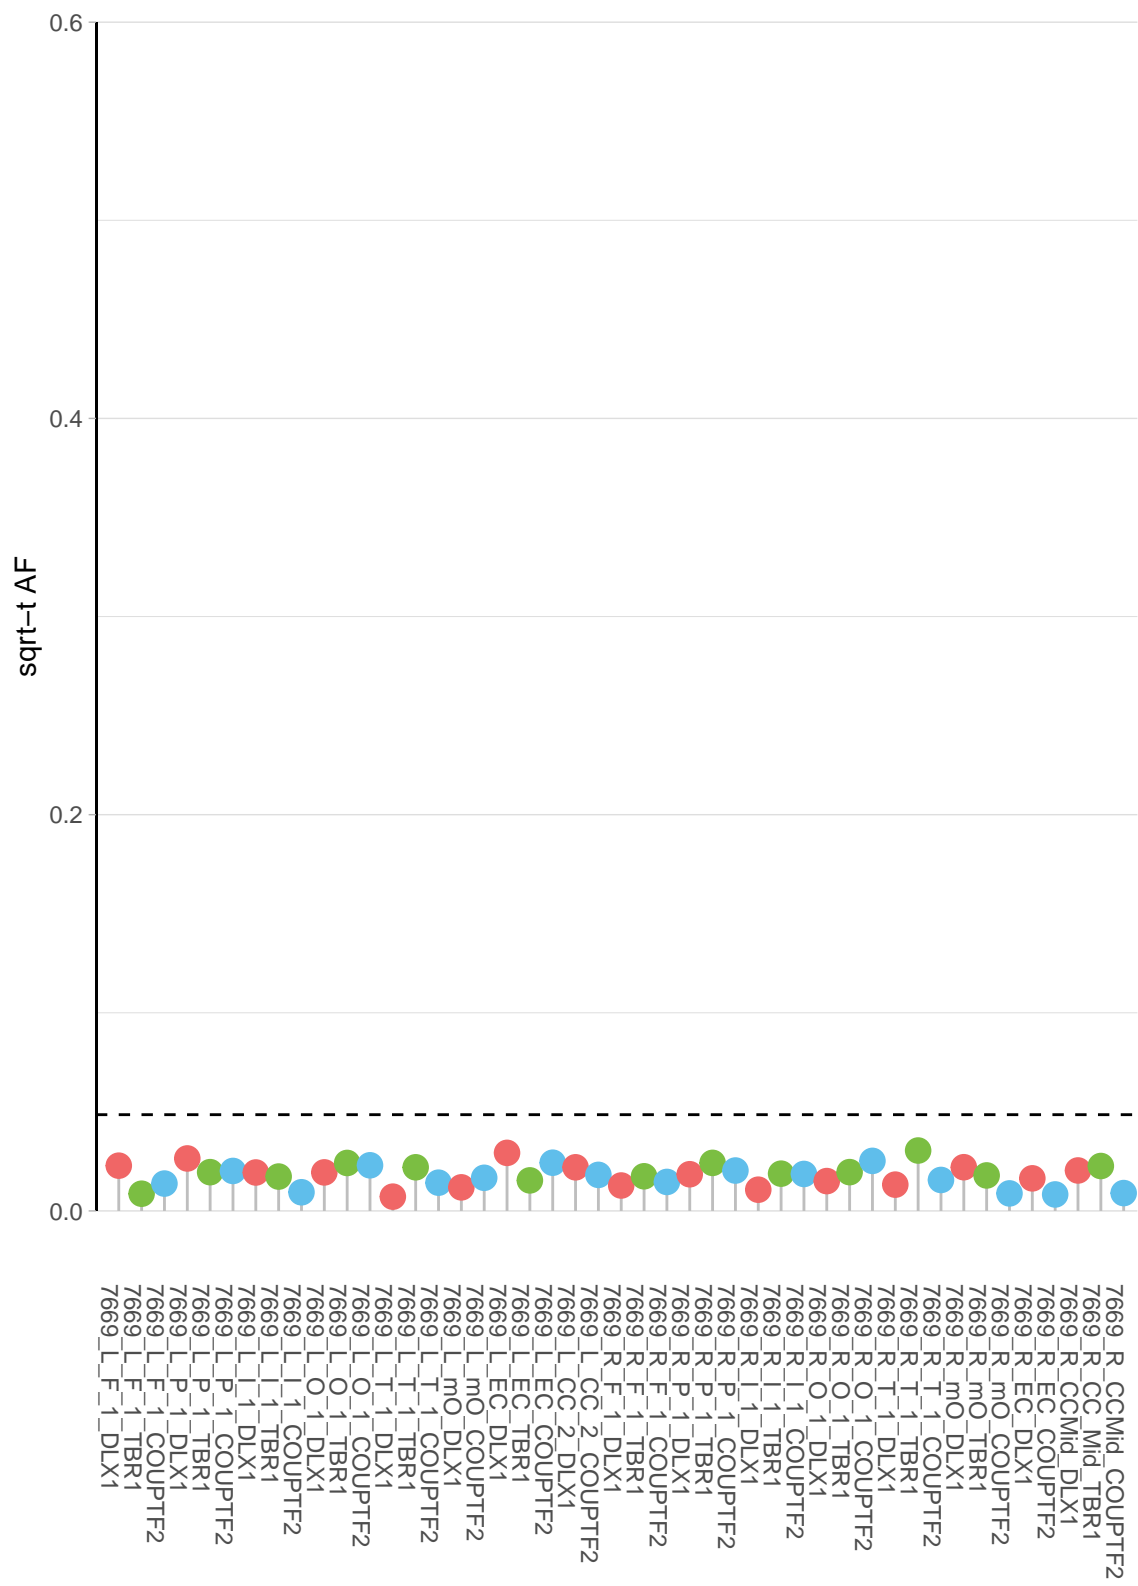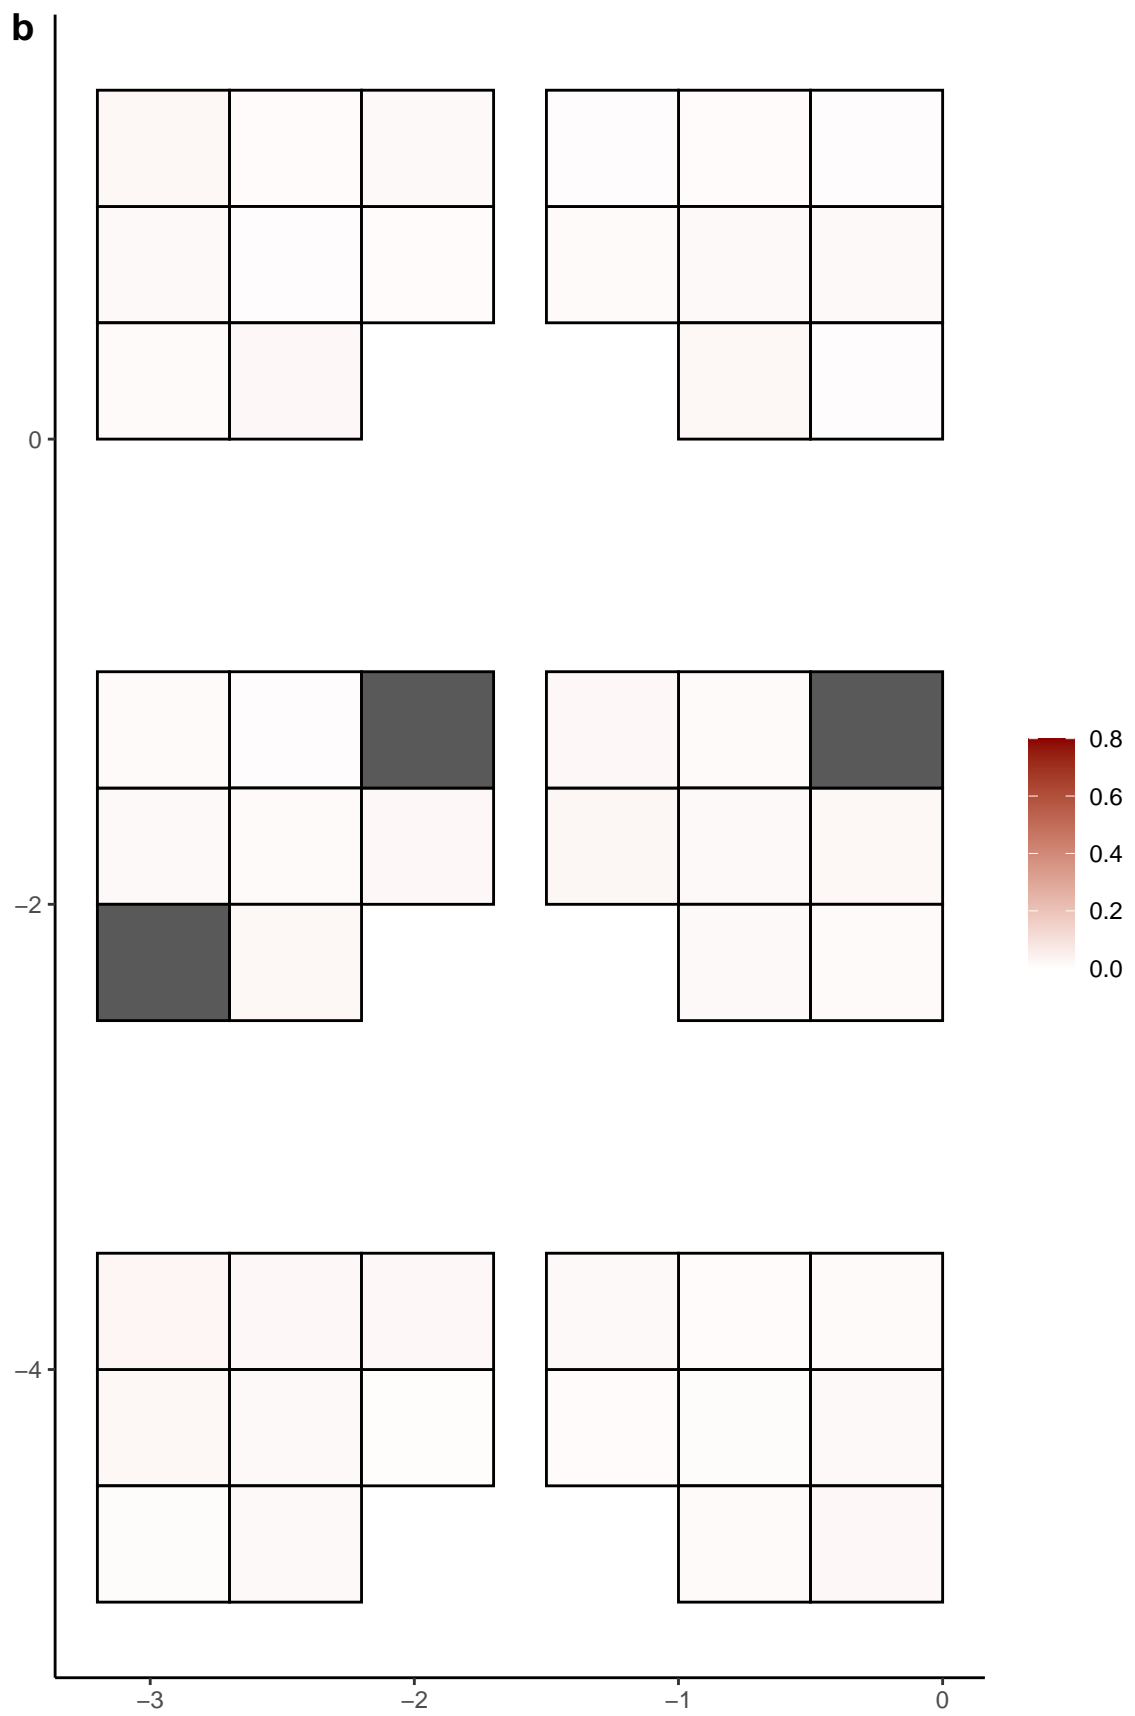

**a** ID05 11-93547360-G-A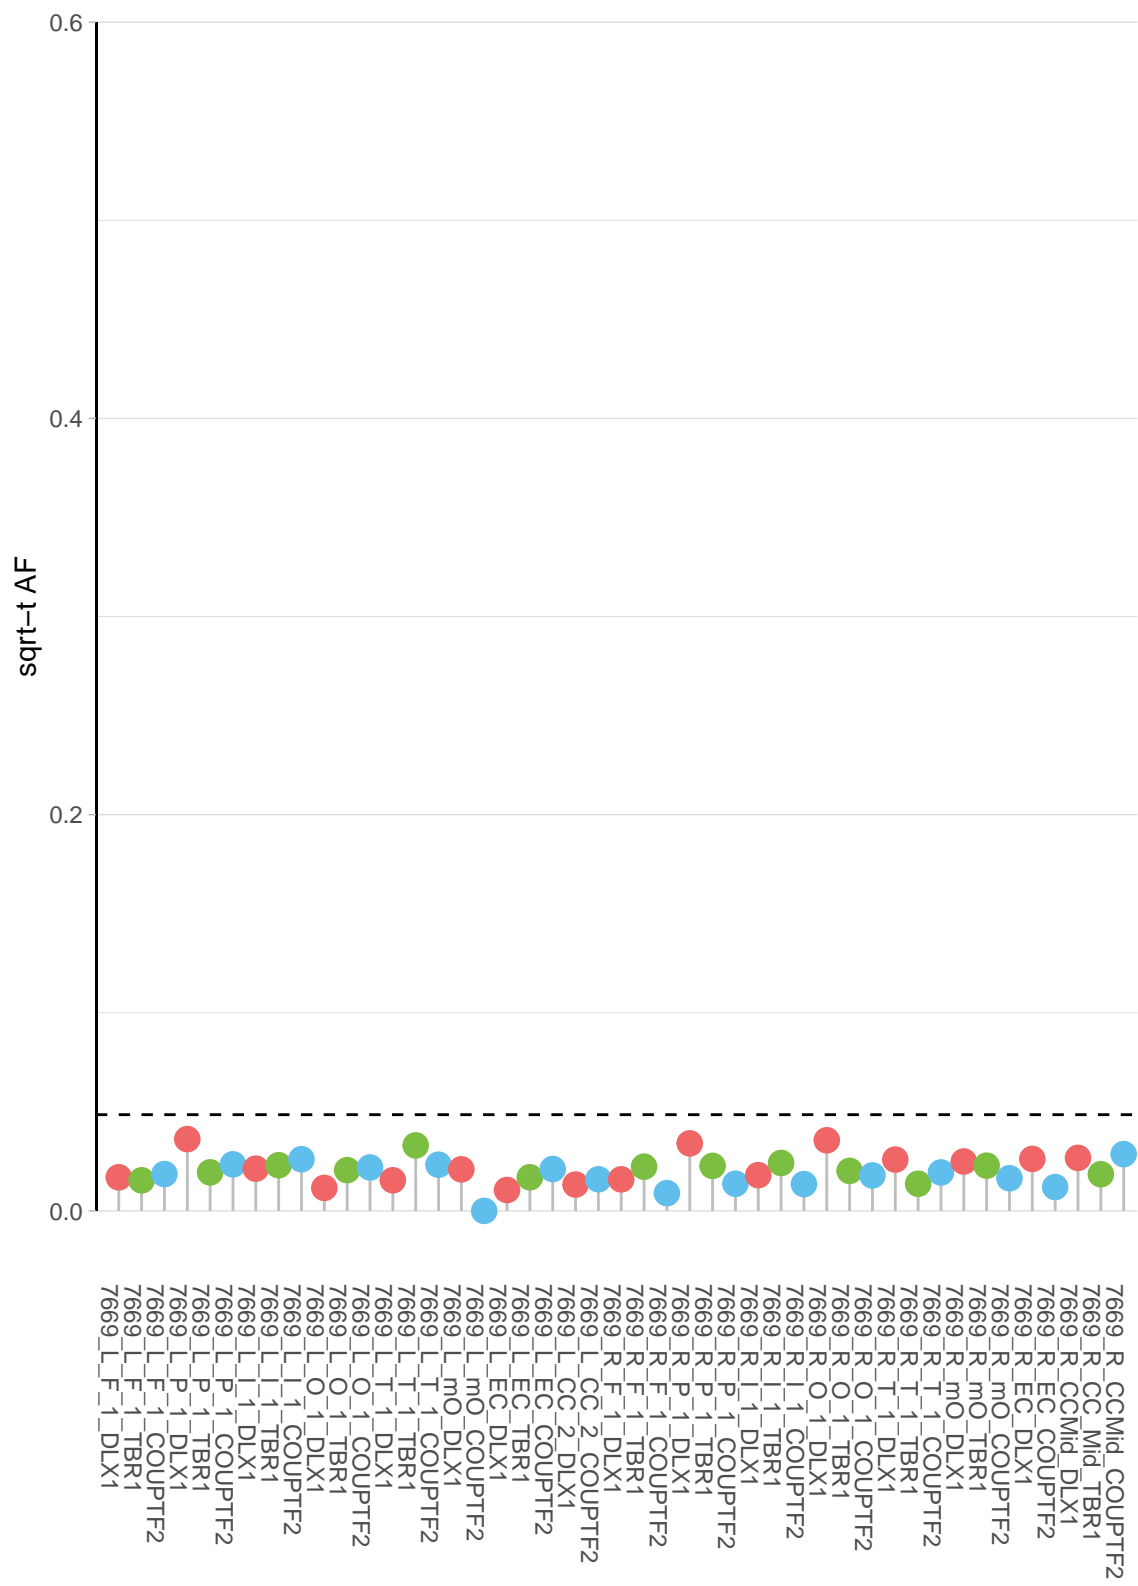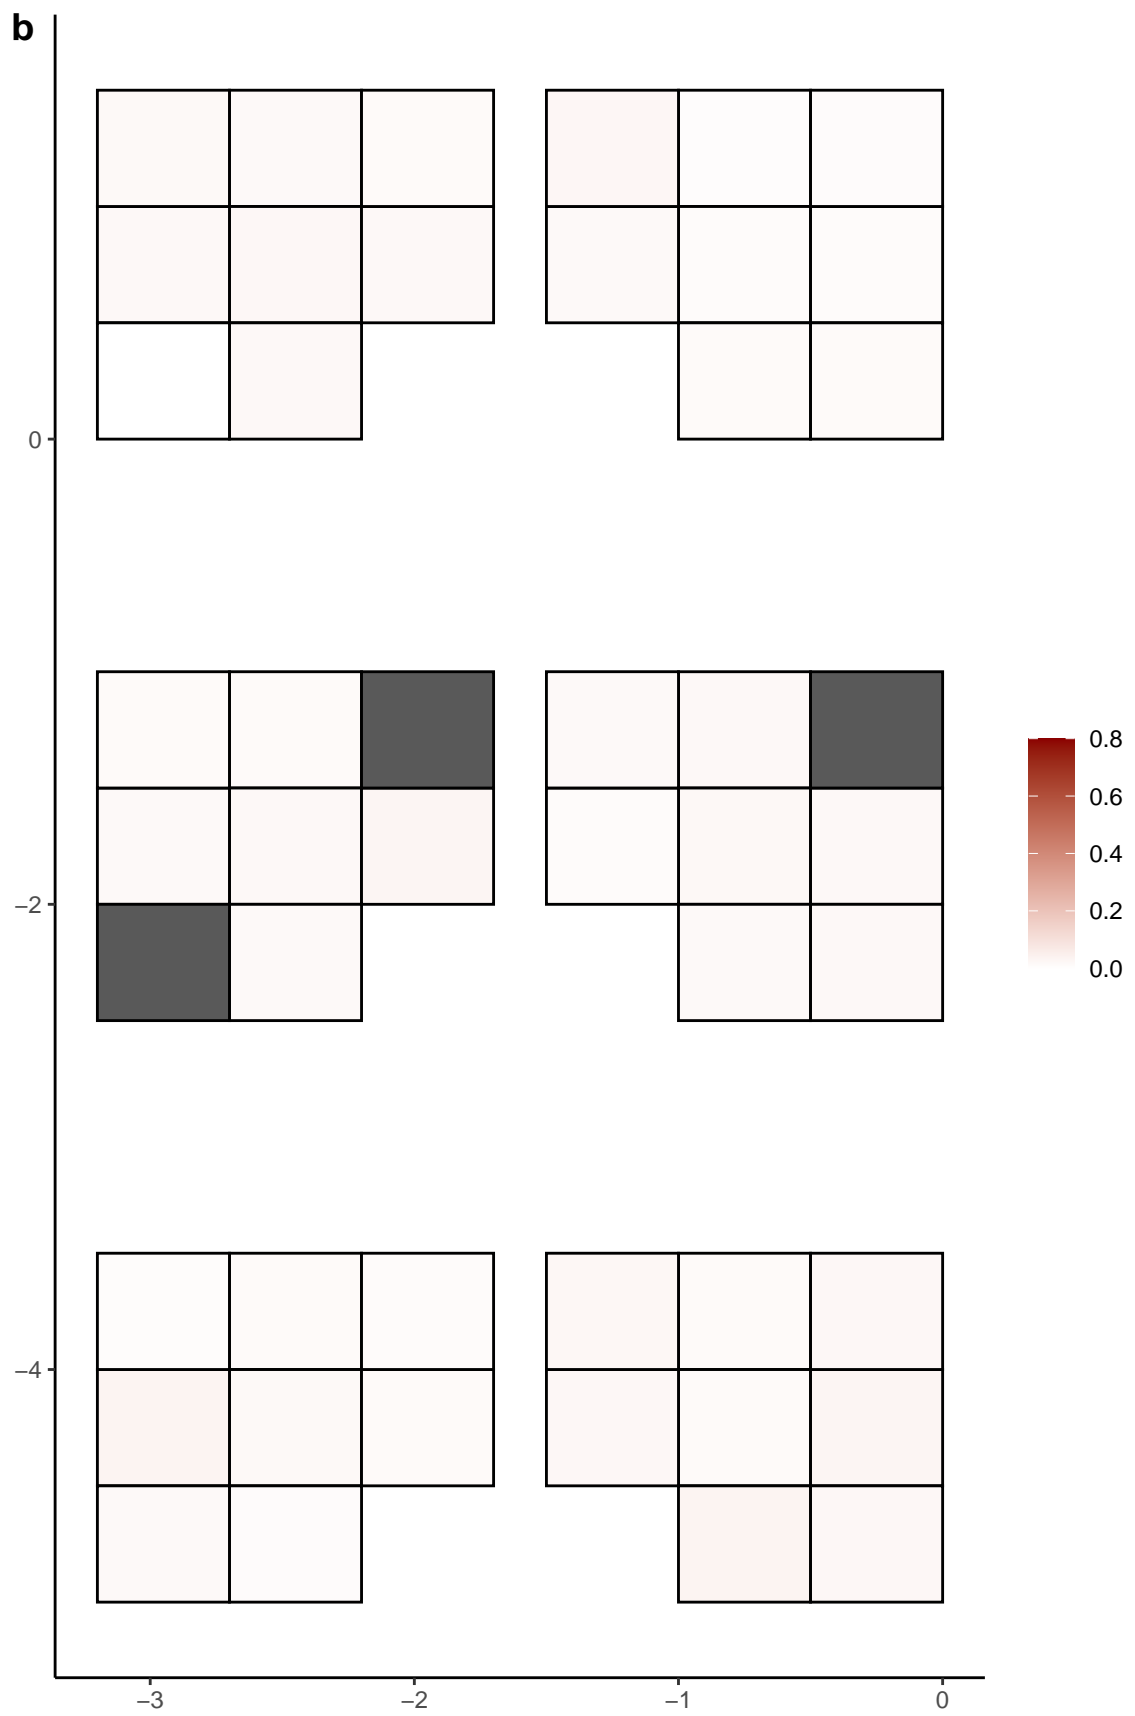

**a** ID05 11-98811391-C-T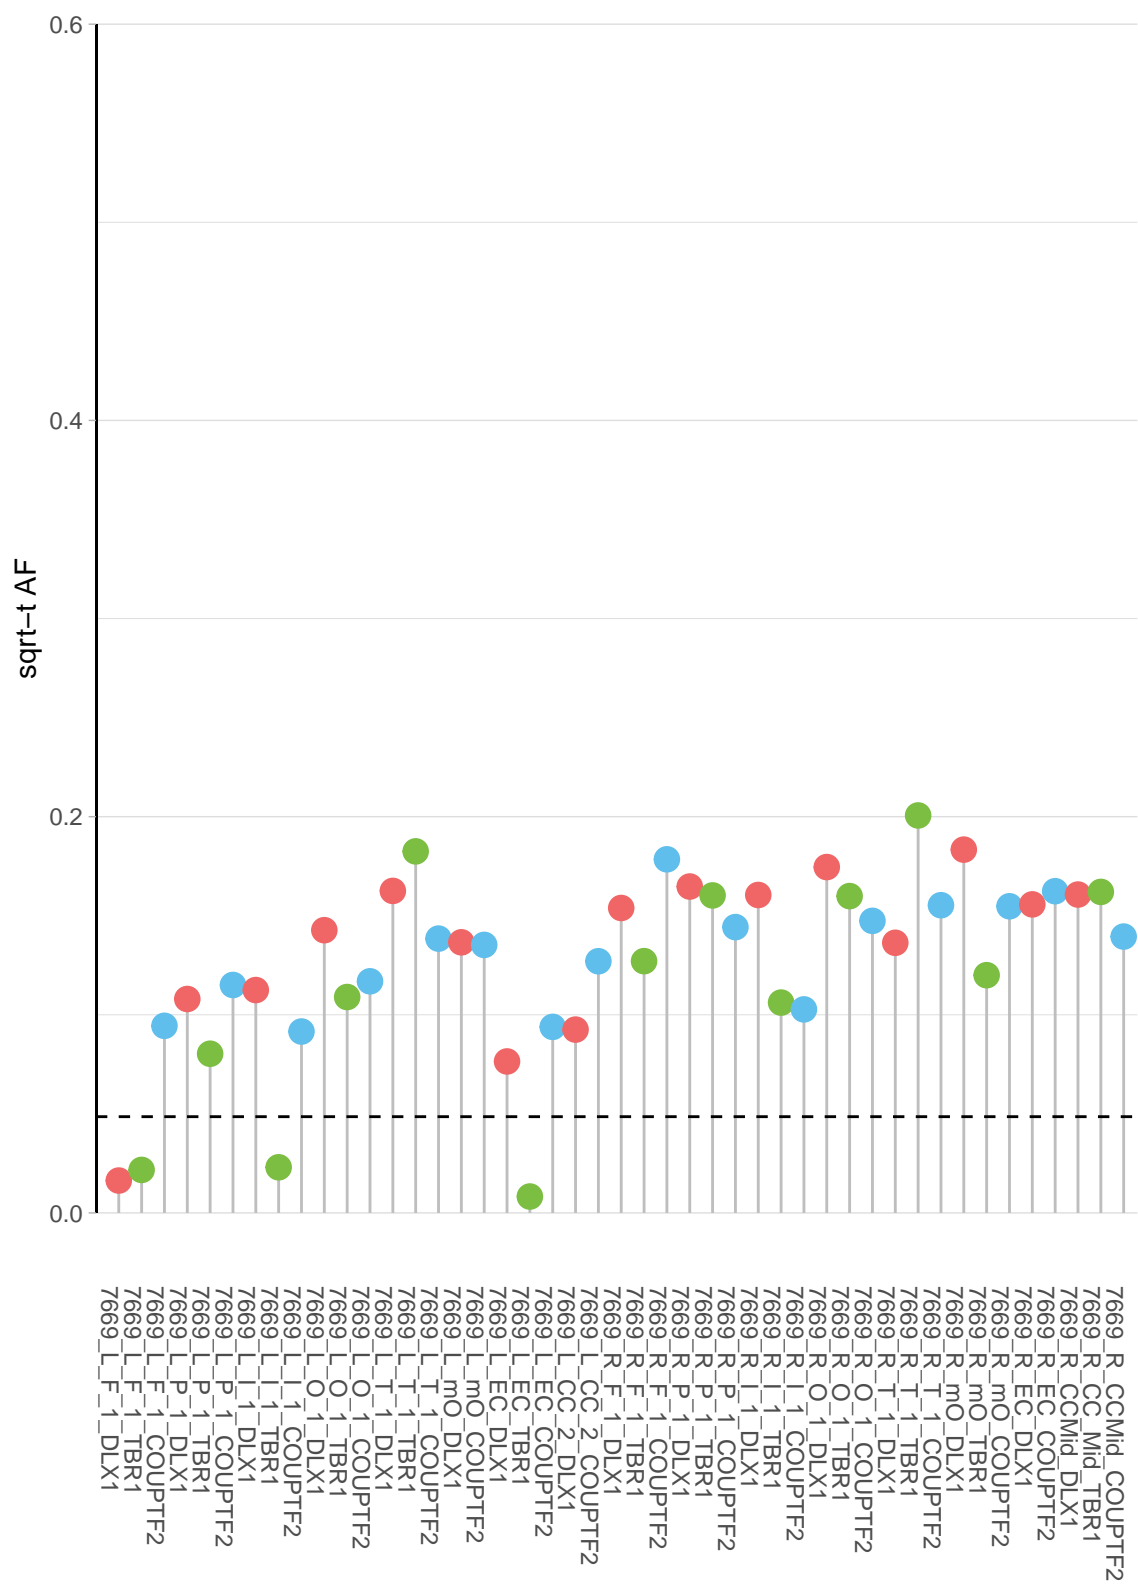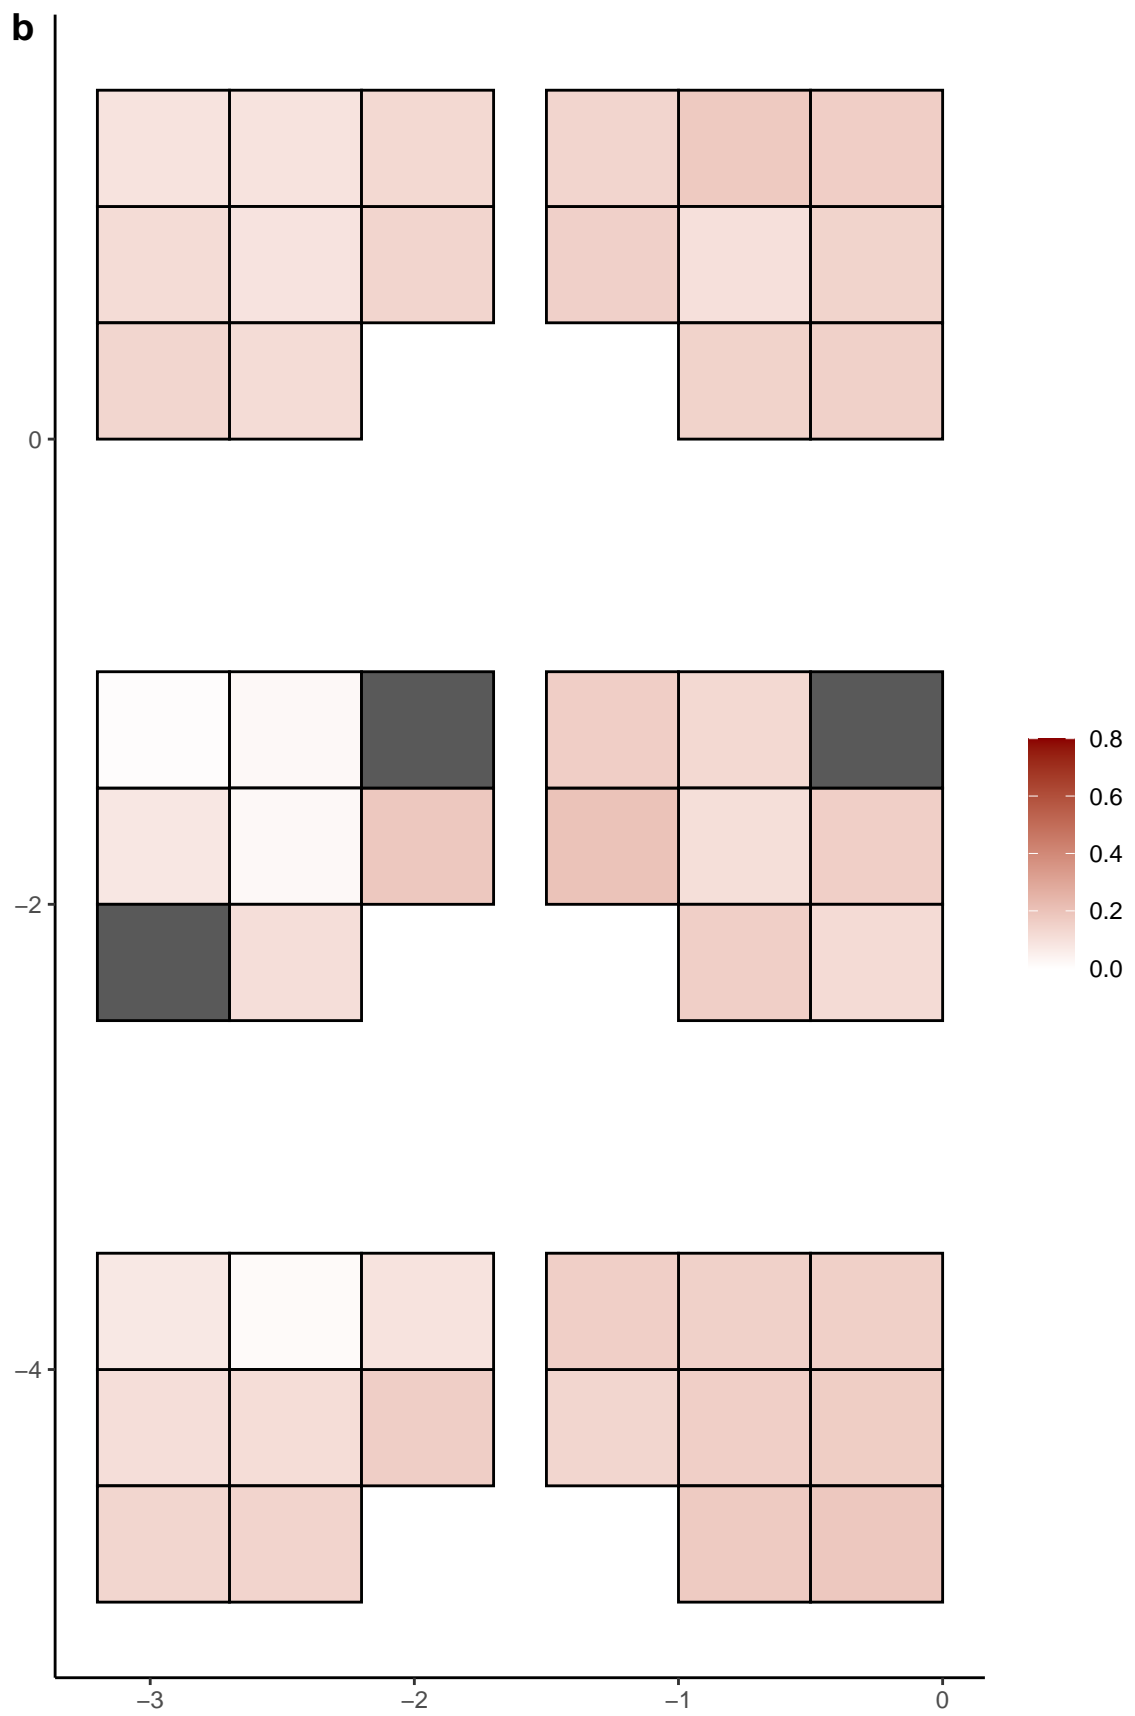









**a** ID05 12-112926872-C-T

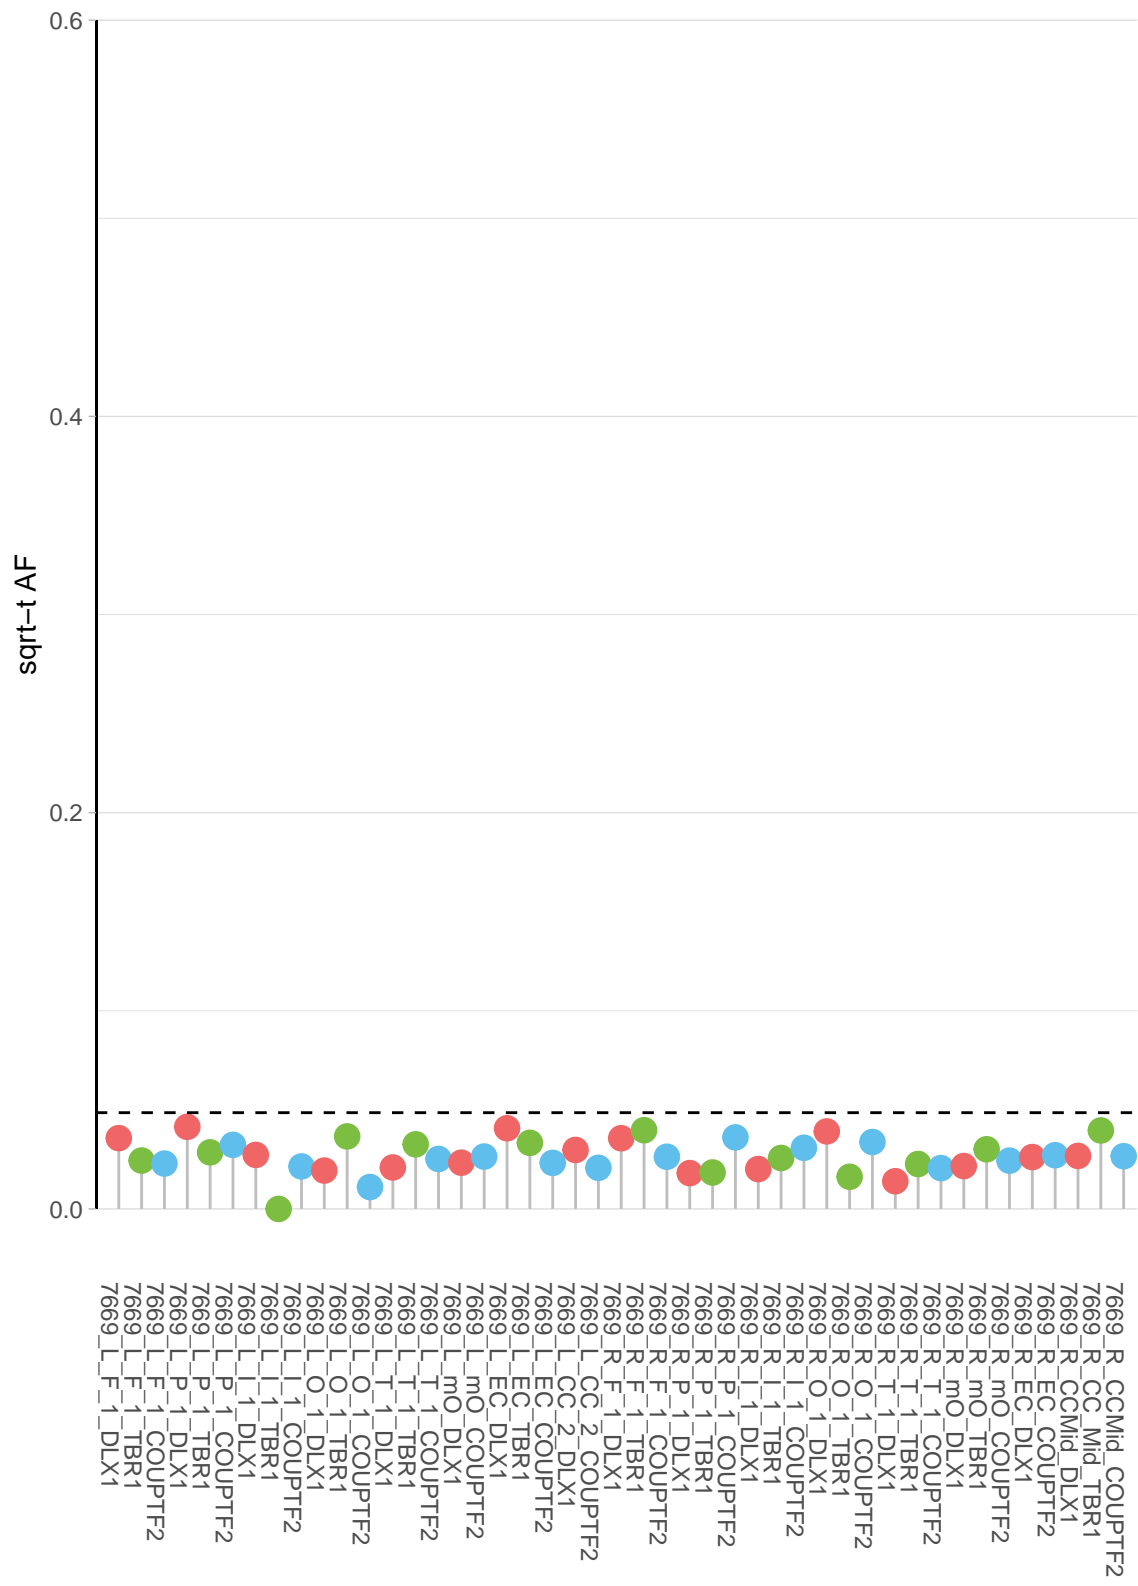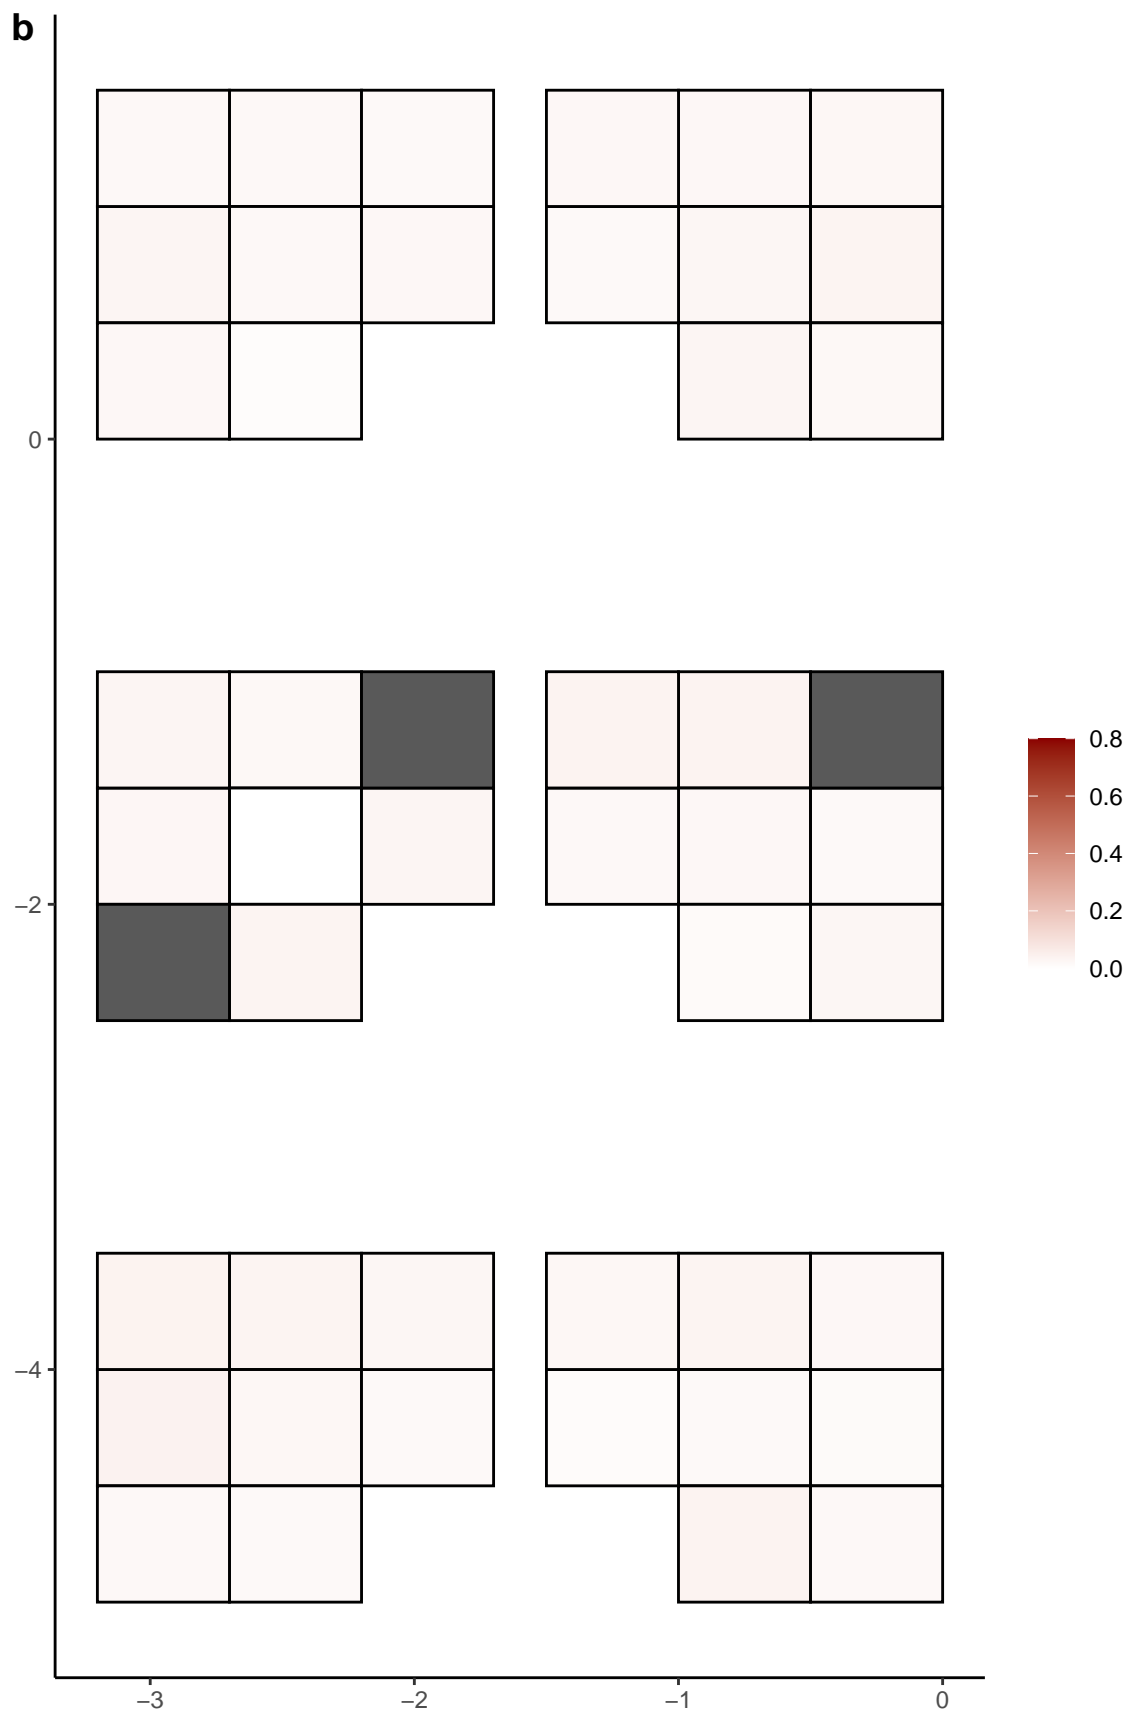

**a** ID05 12-121682145-G-A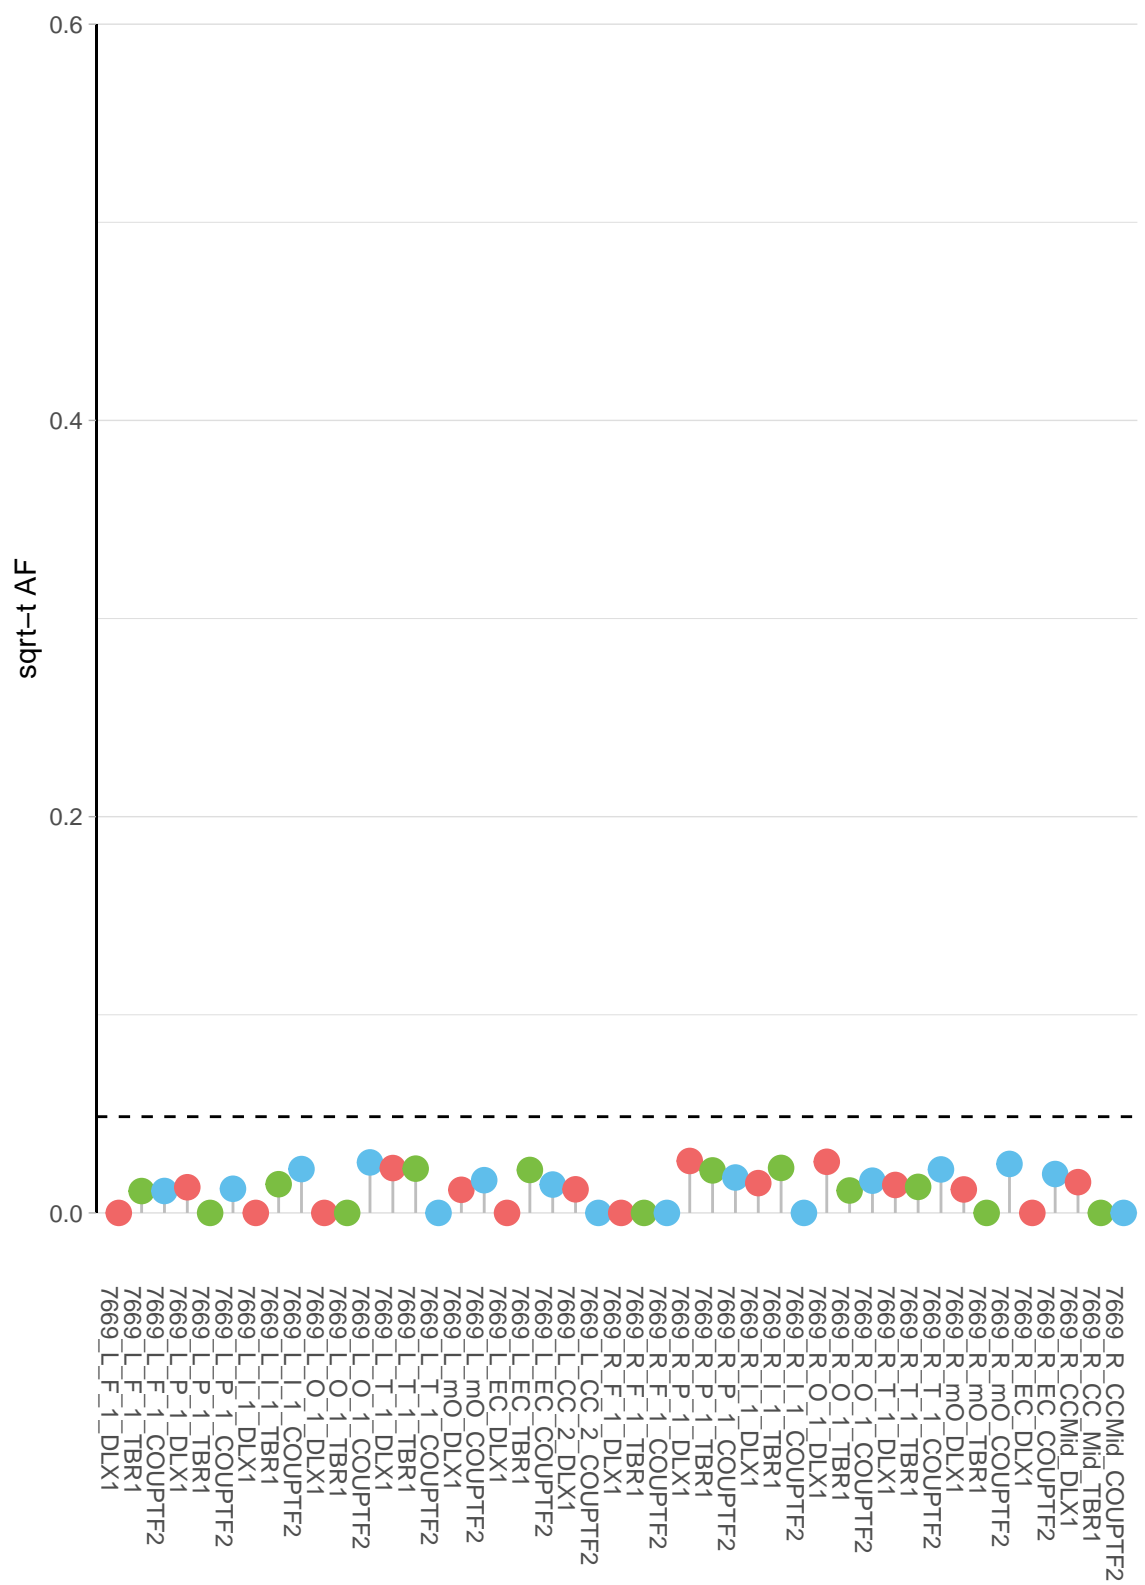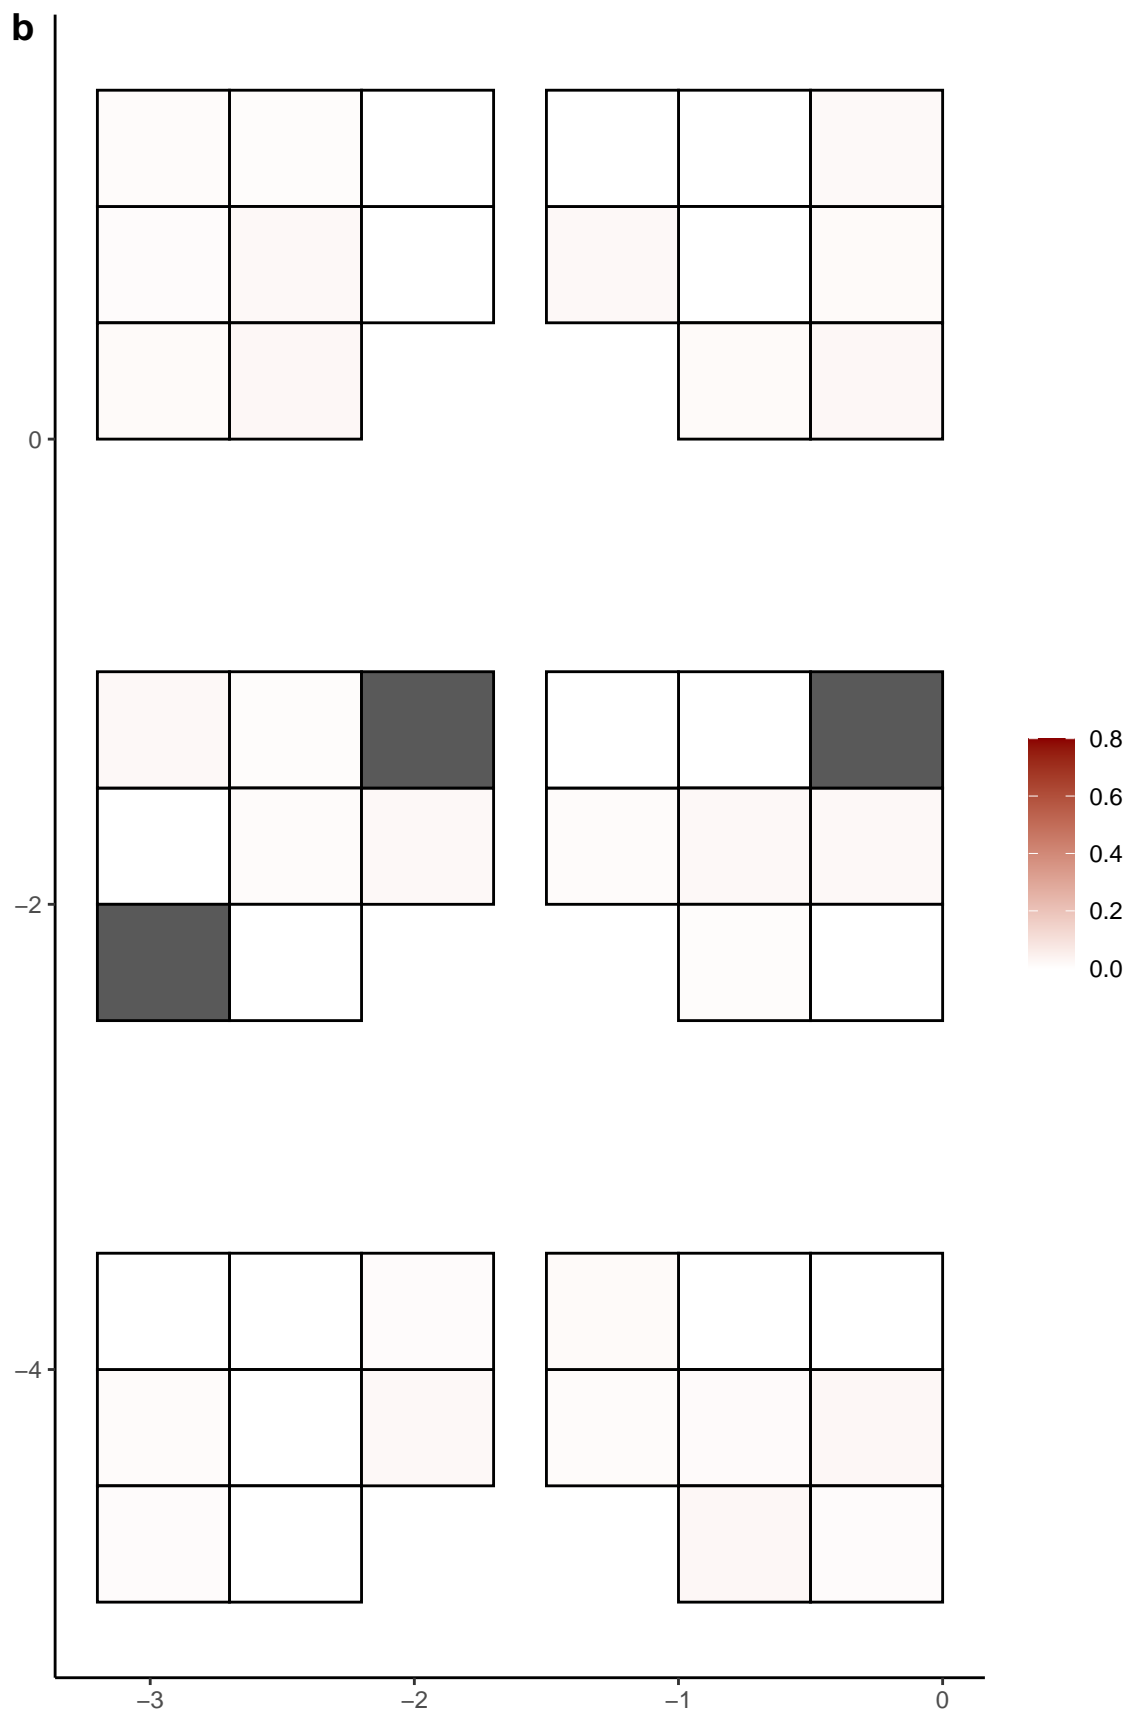

**a** ID05 12-121707377-T-C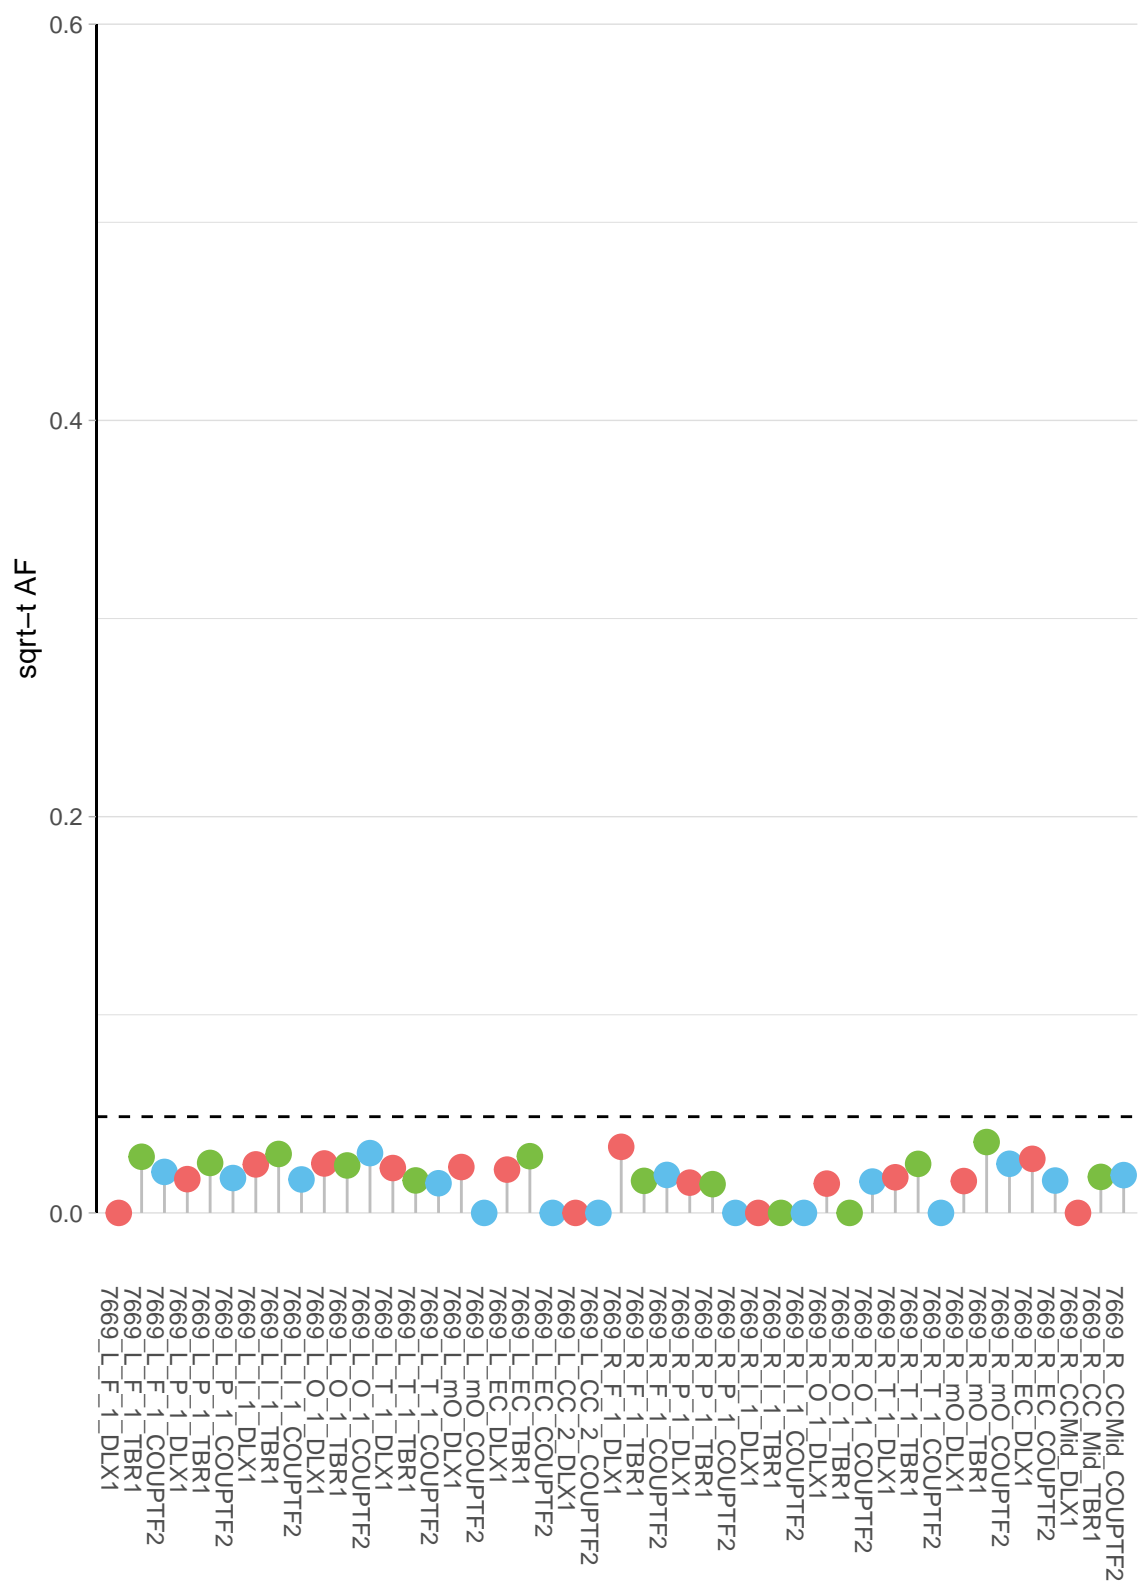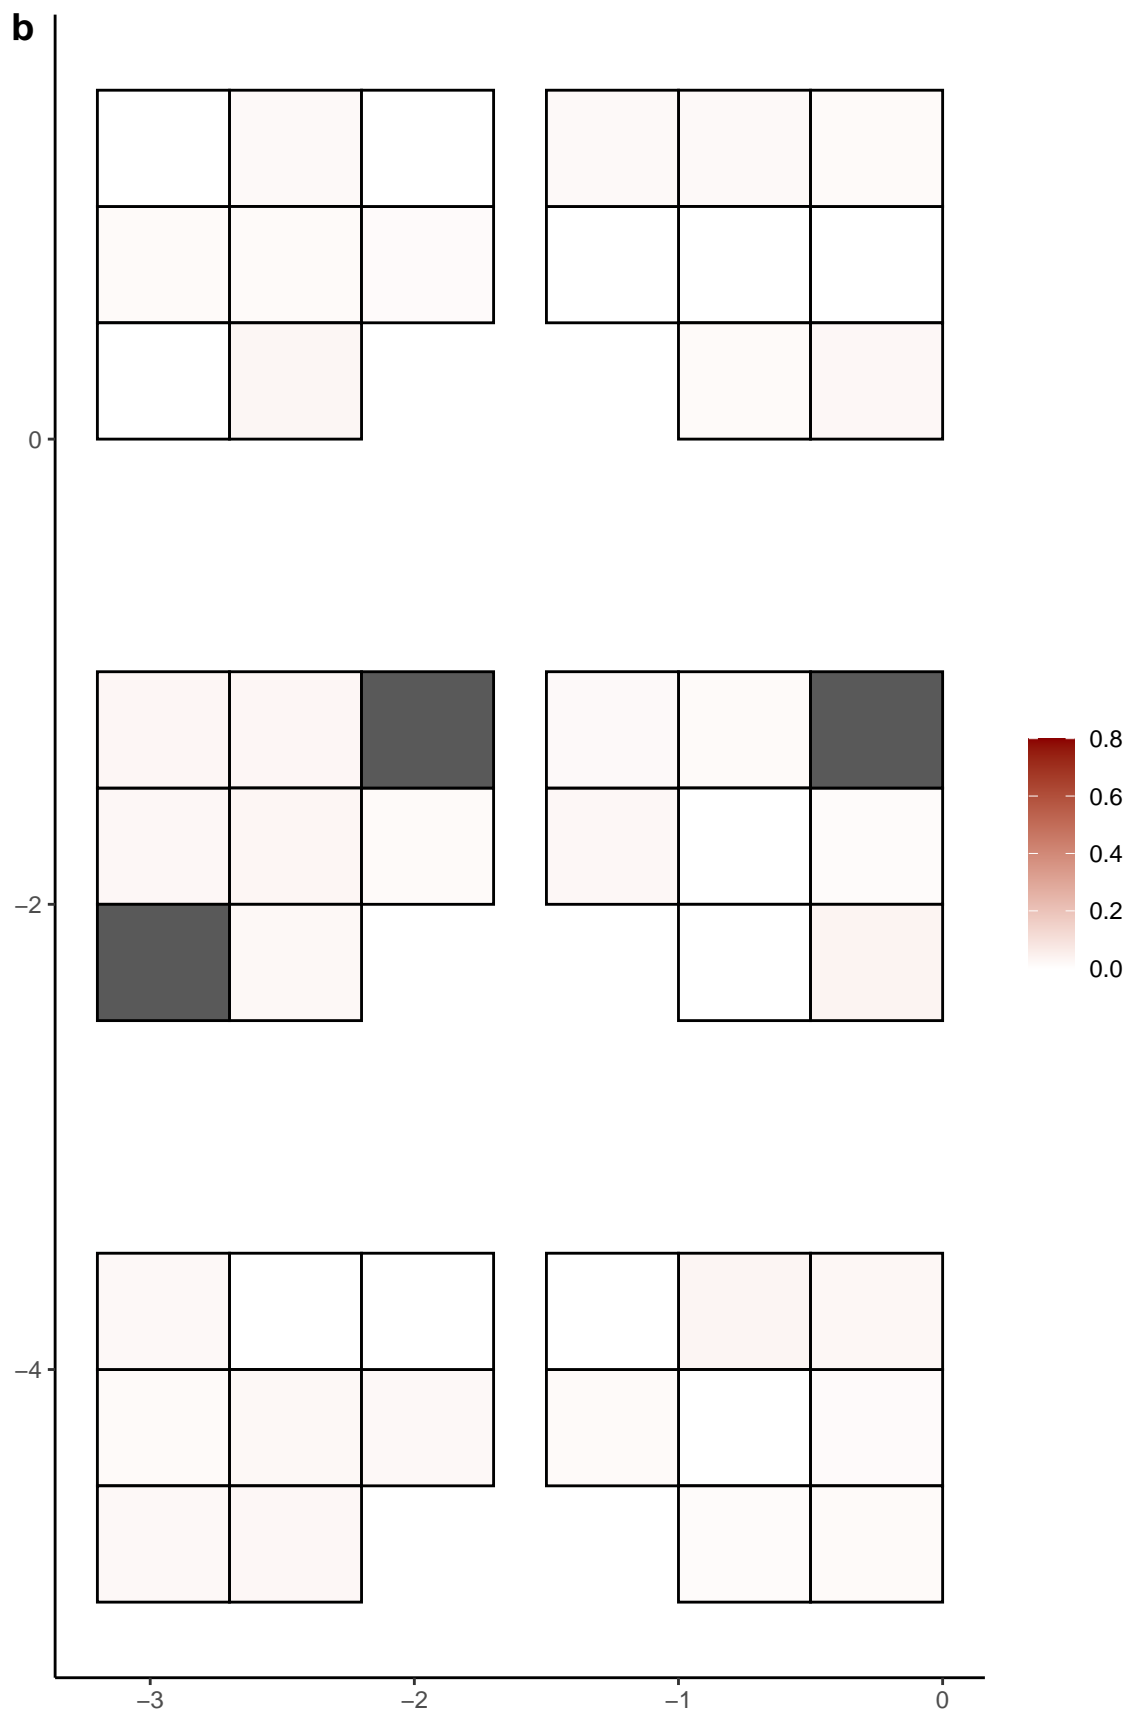



**a** ID05 12-128703875-C-T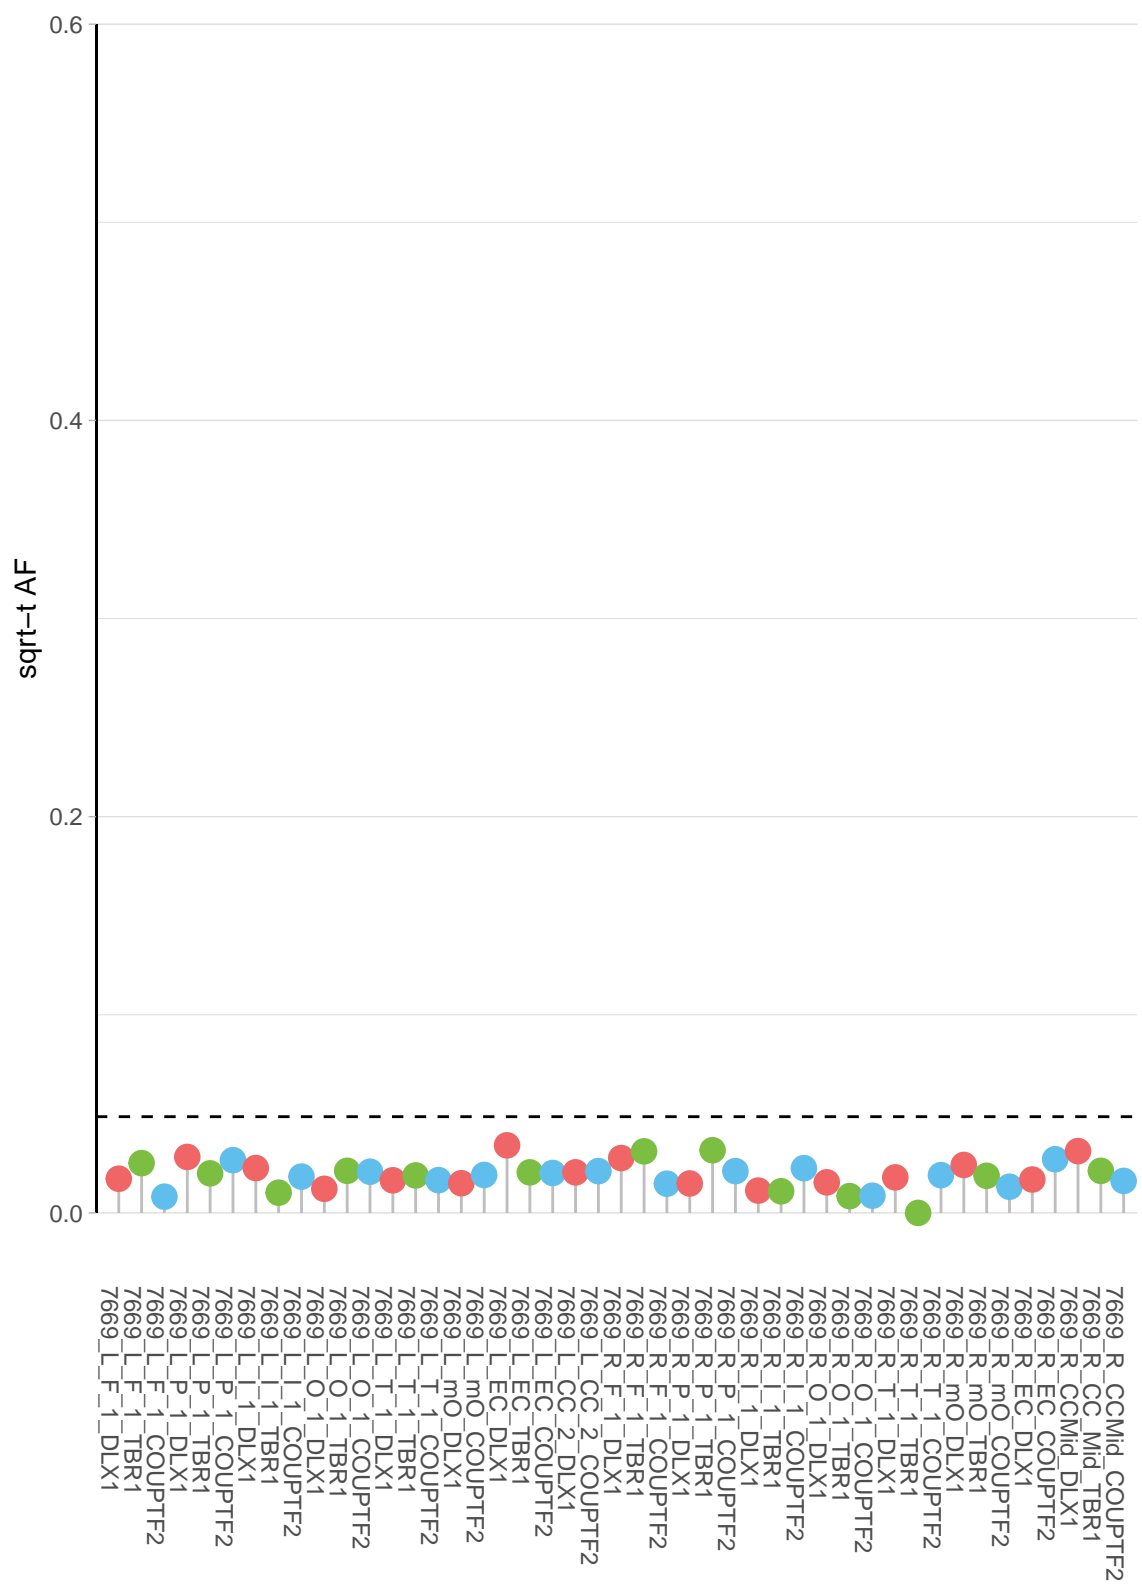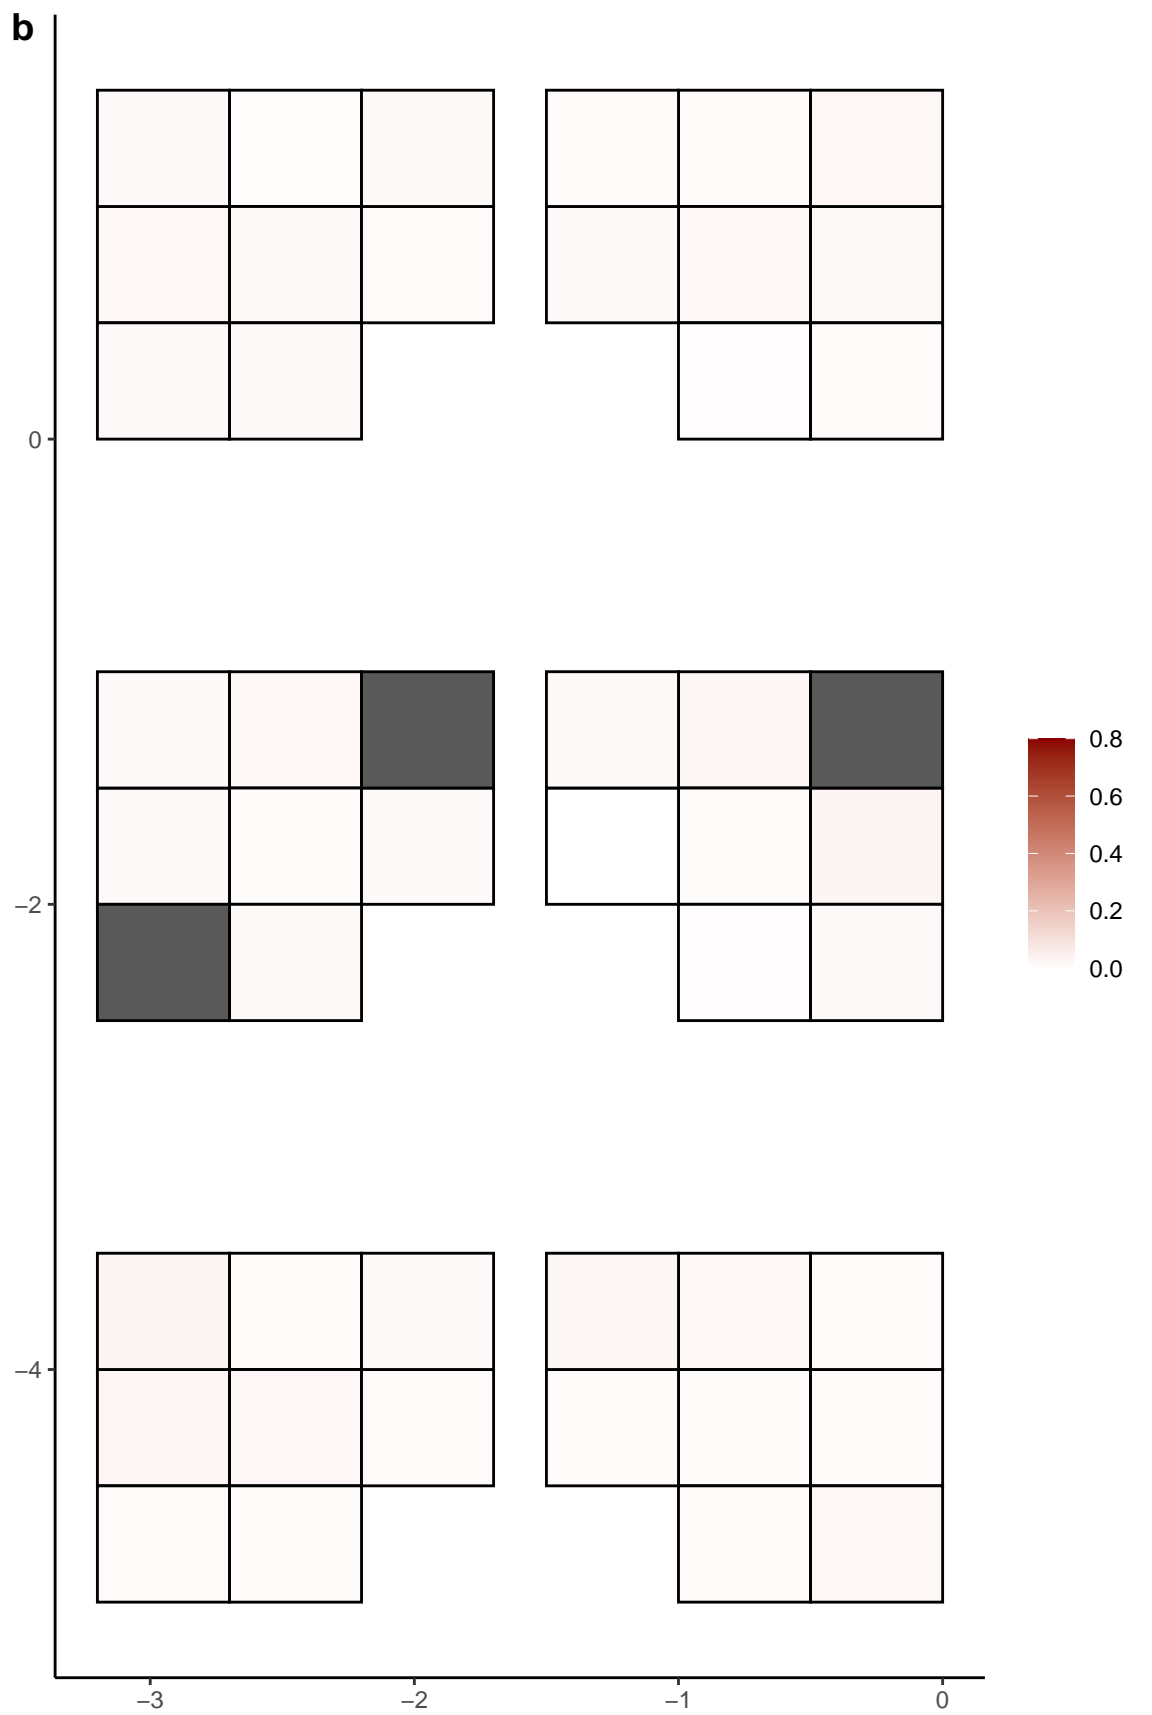

**a** ID05 12-130892713-C-T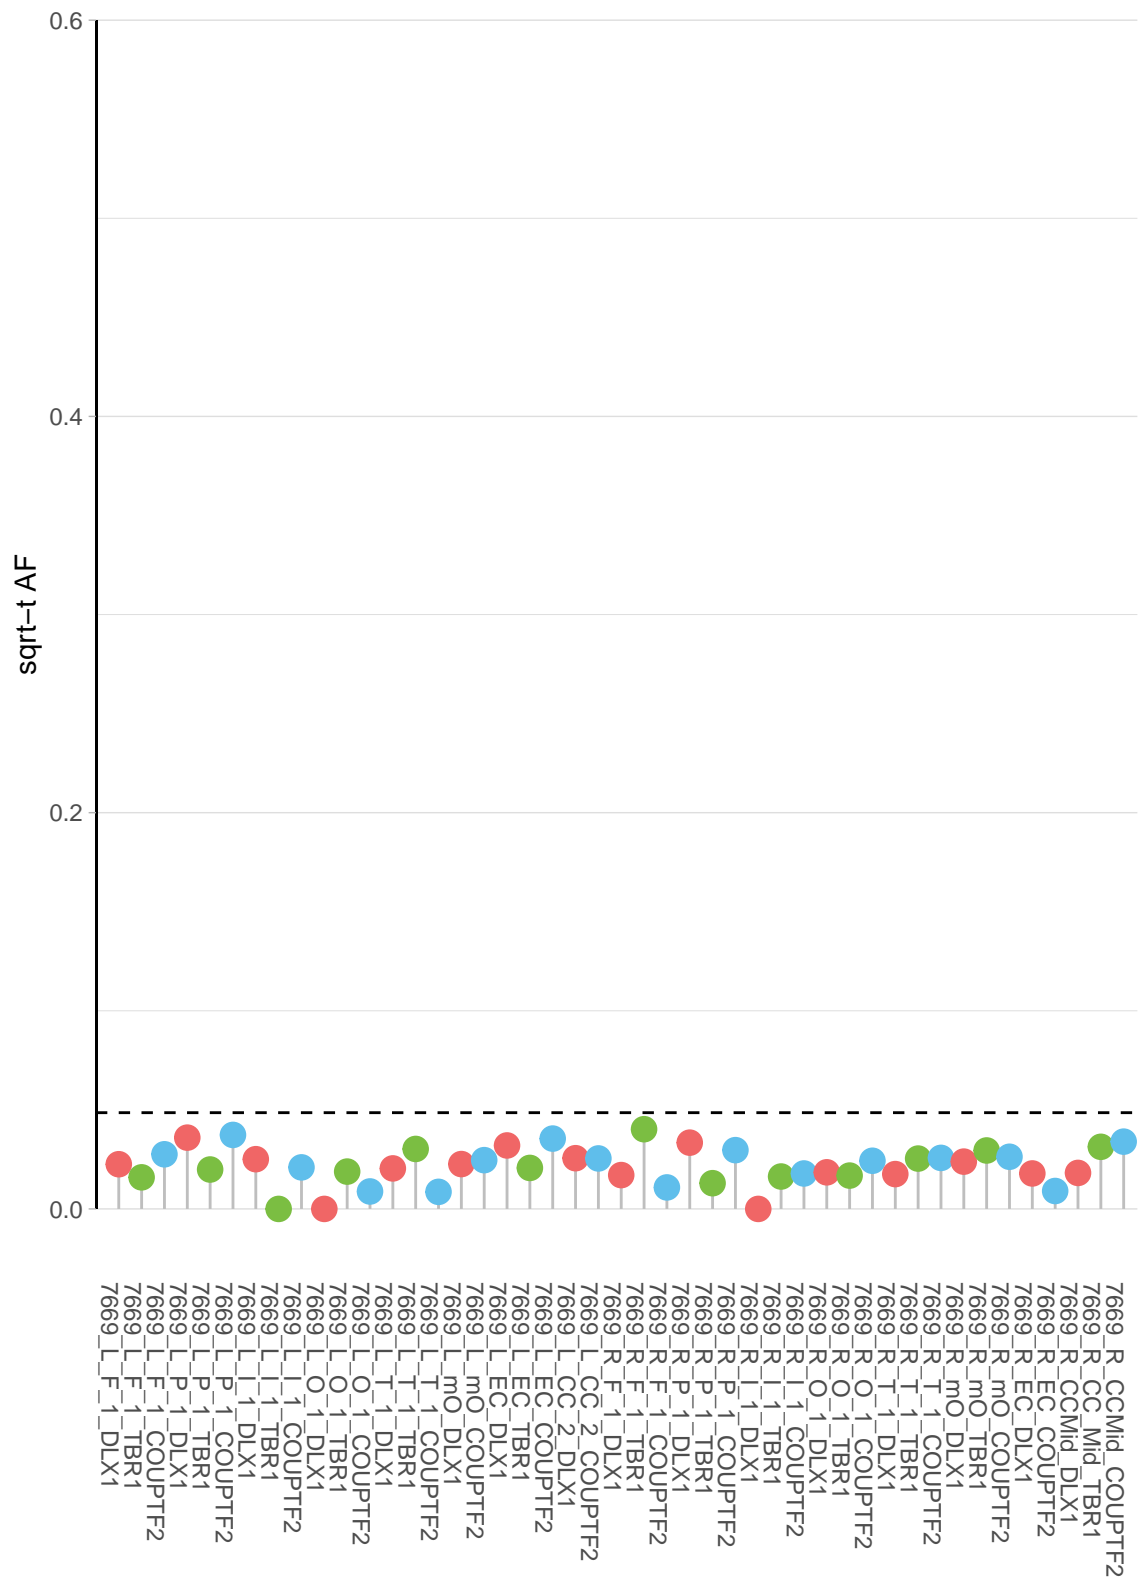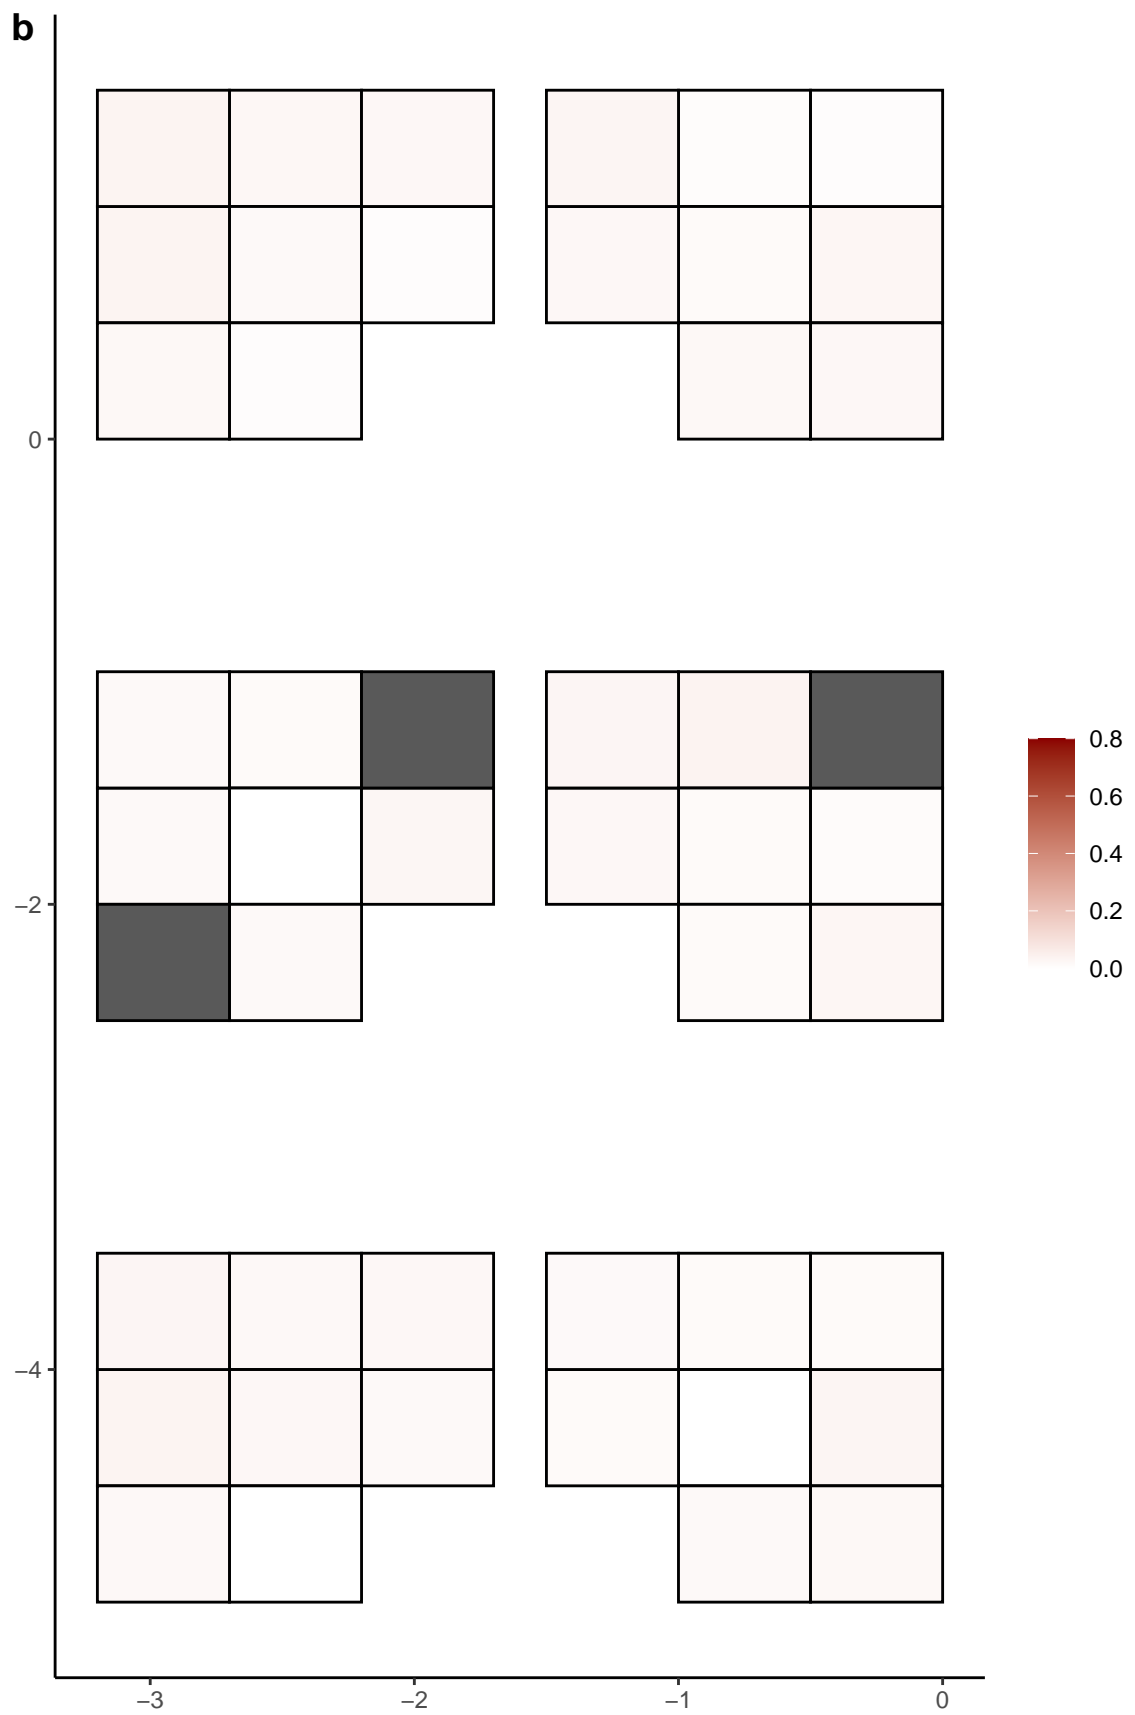



**a** ID05 12-16325538-C-T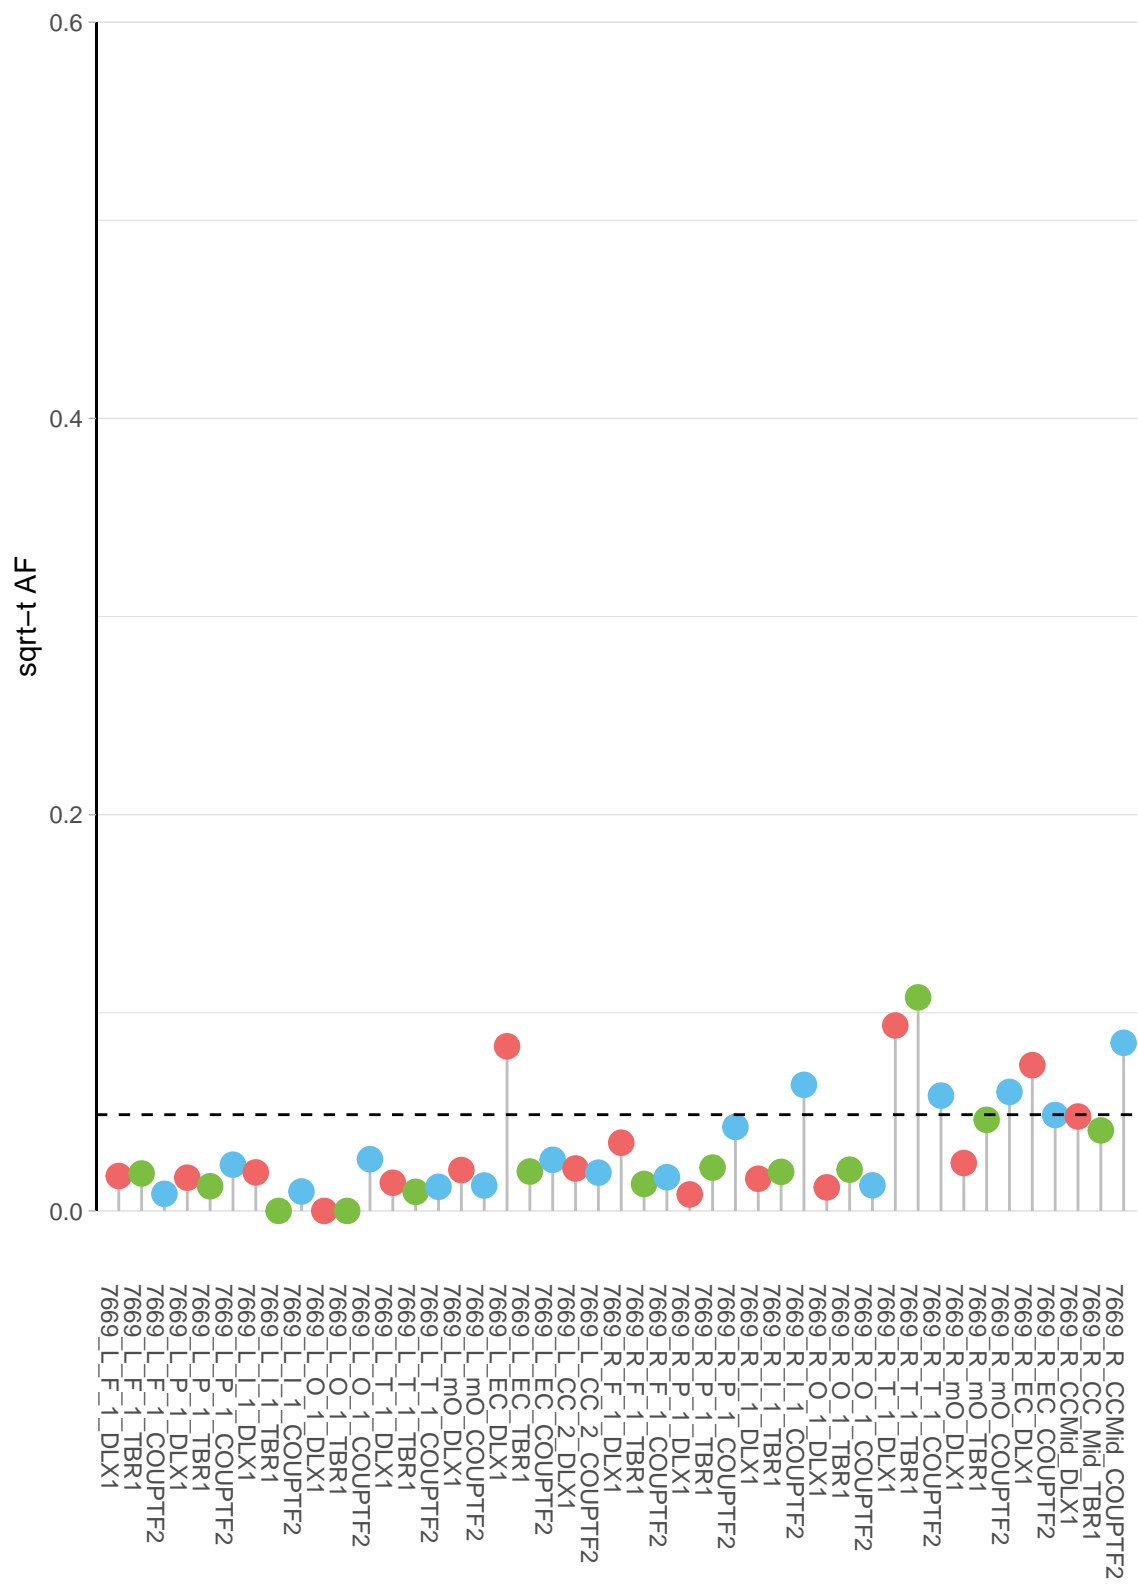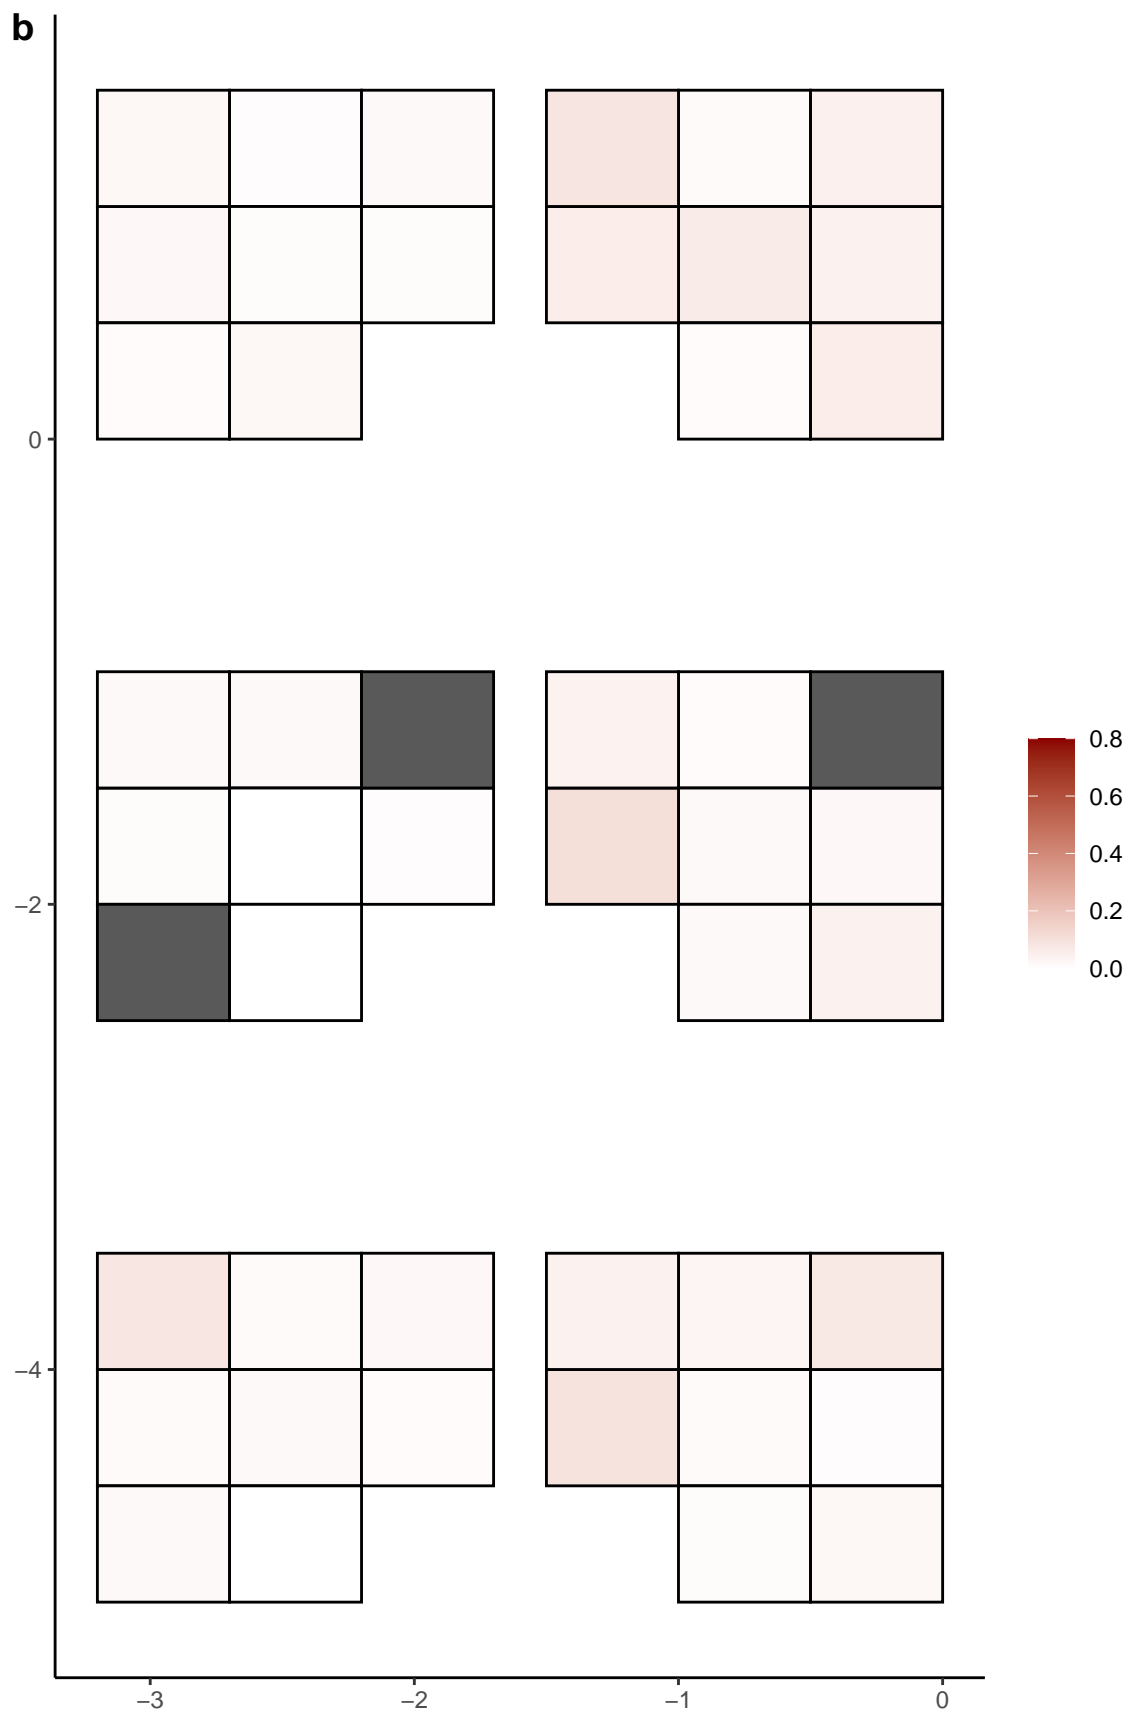



**a** ID05 12-17467014-G-T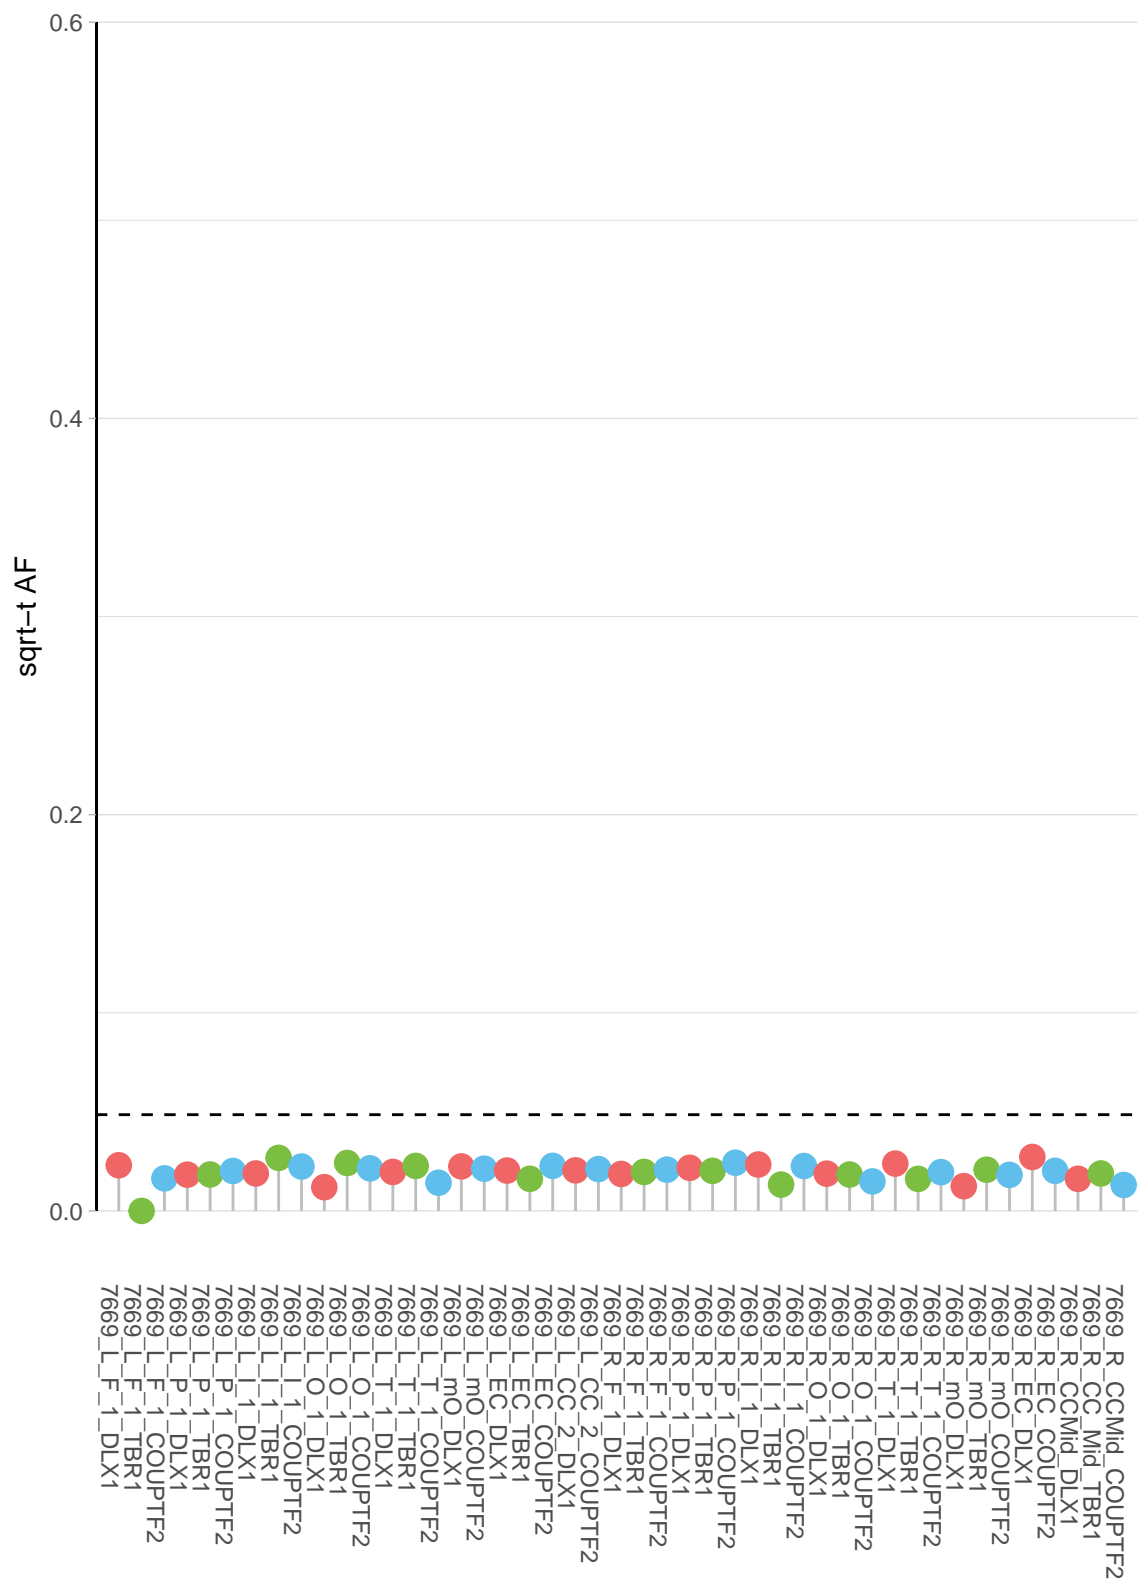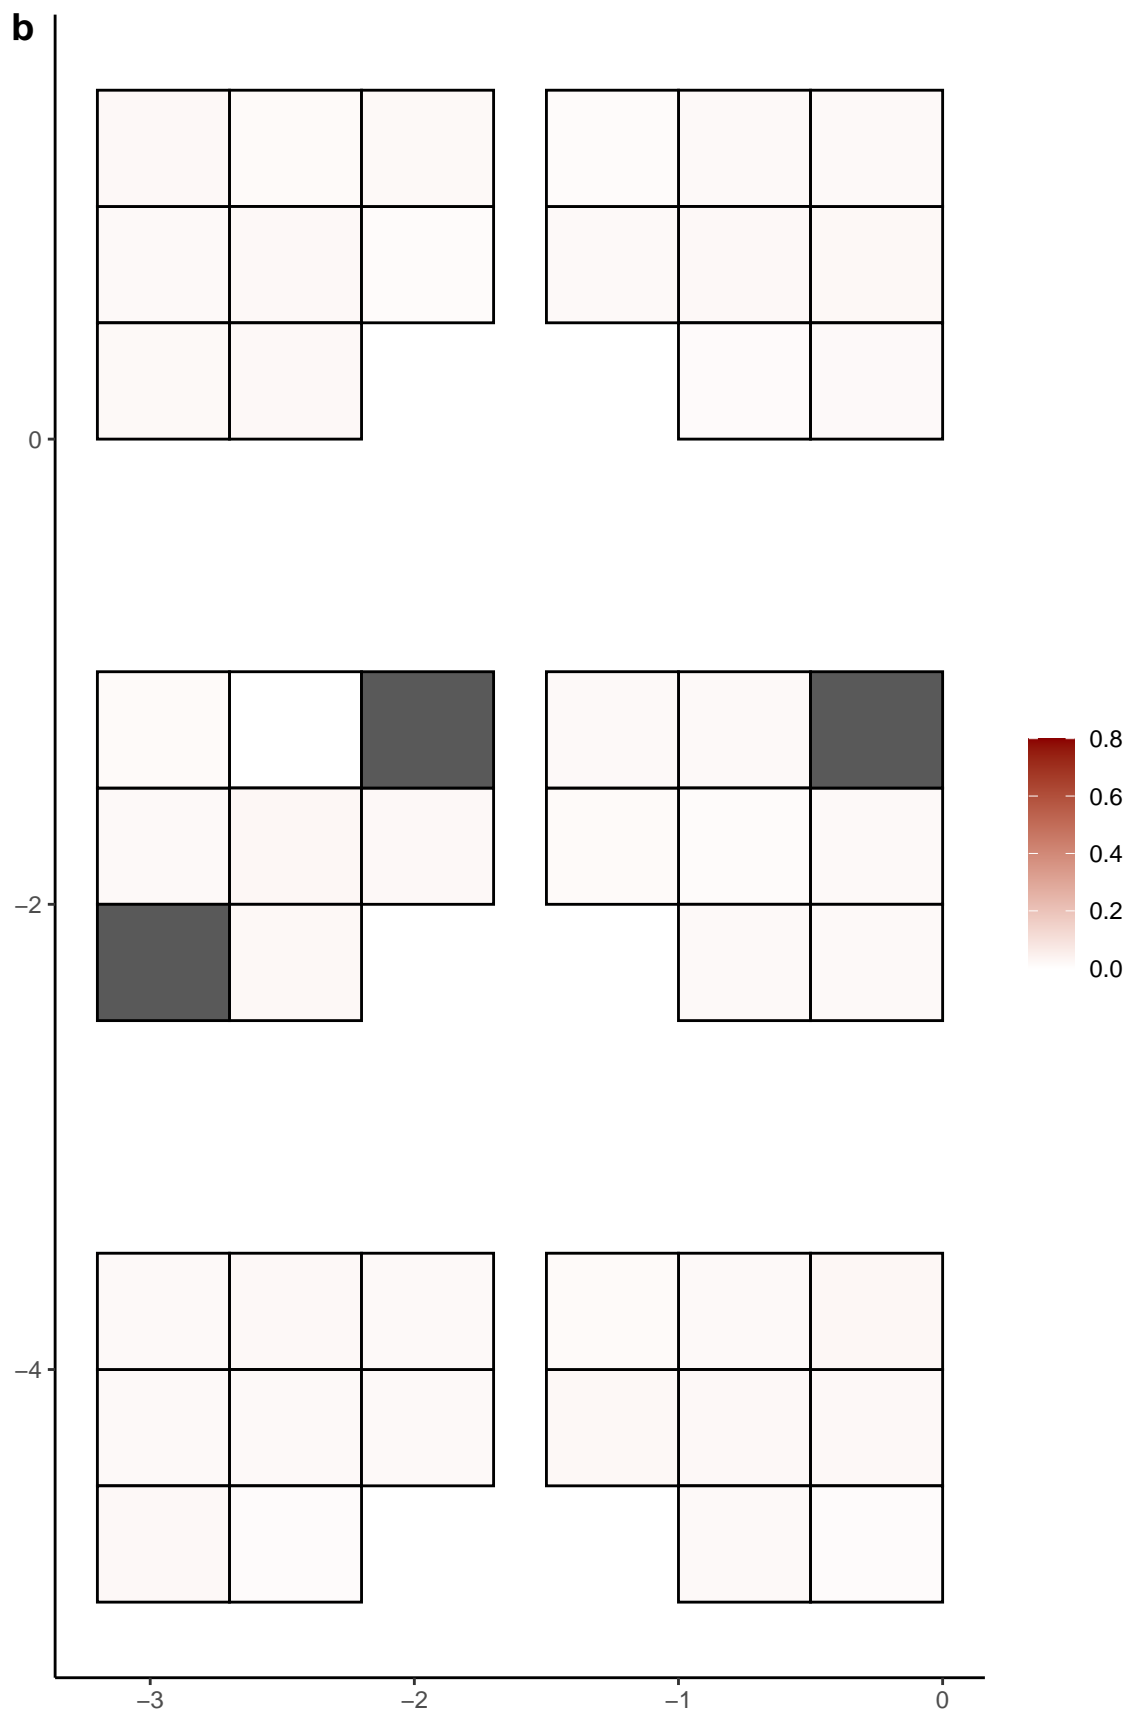

**a** ID05 12-19615034-G-T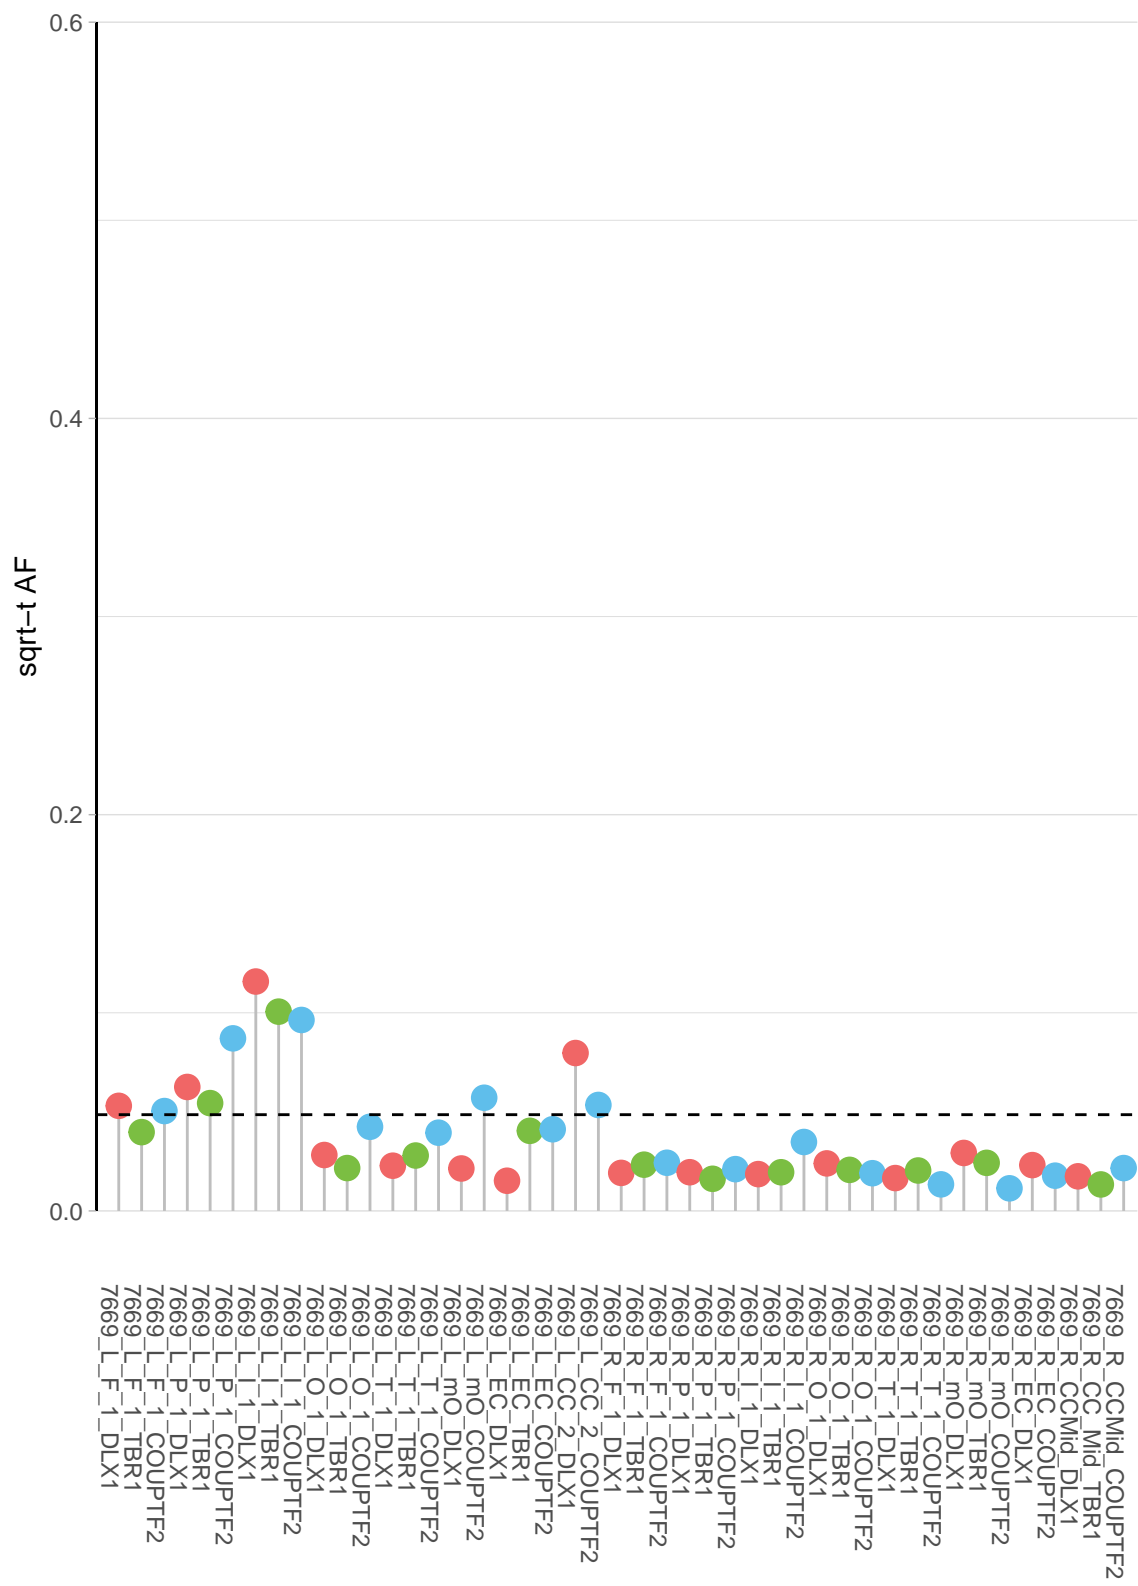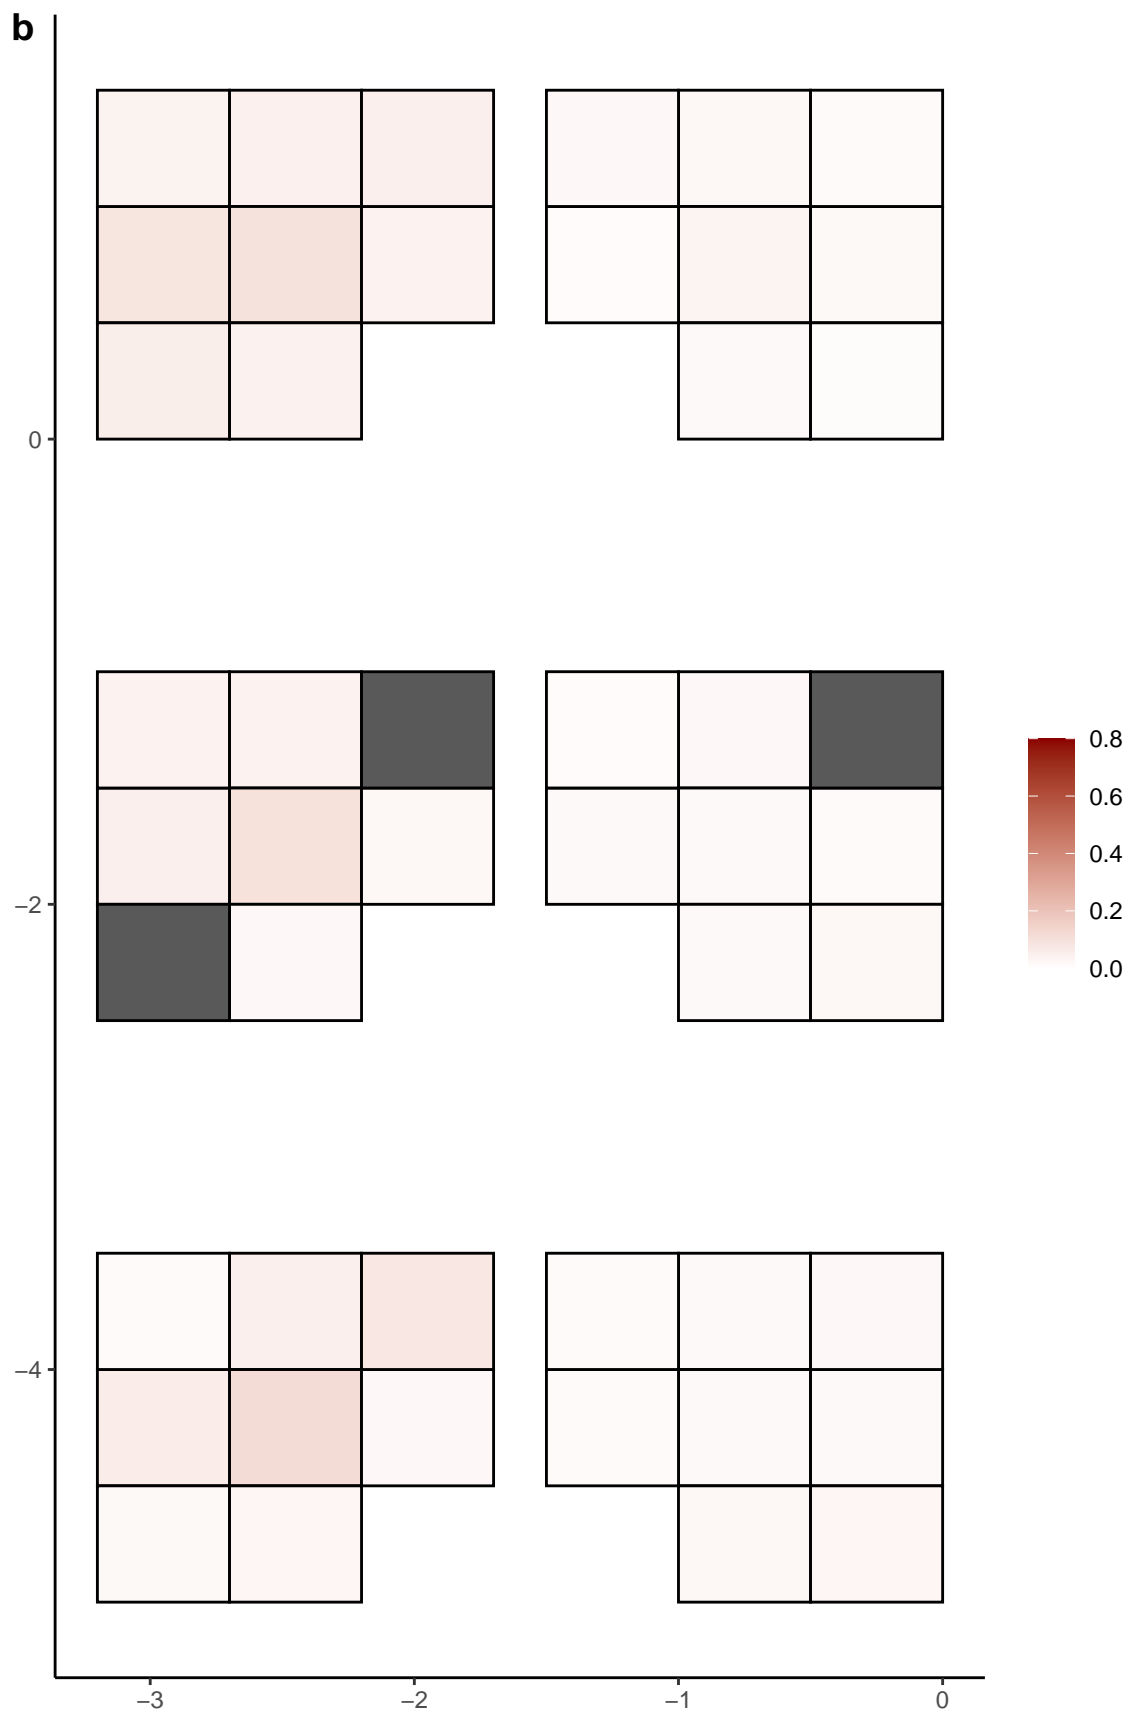



**a** ID05 12-2204021-A-G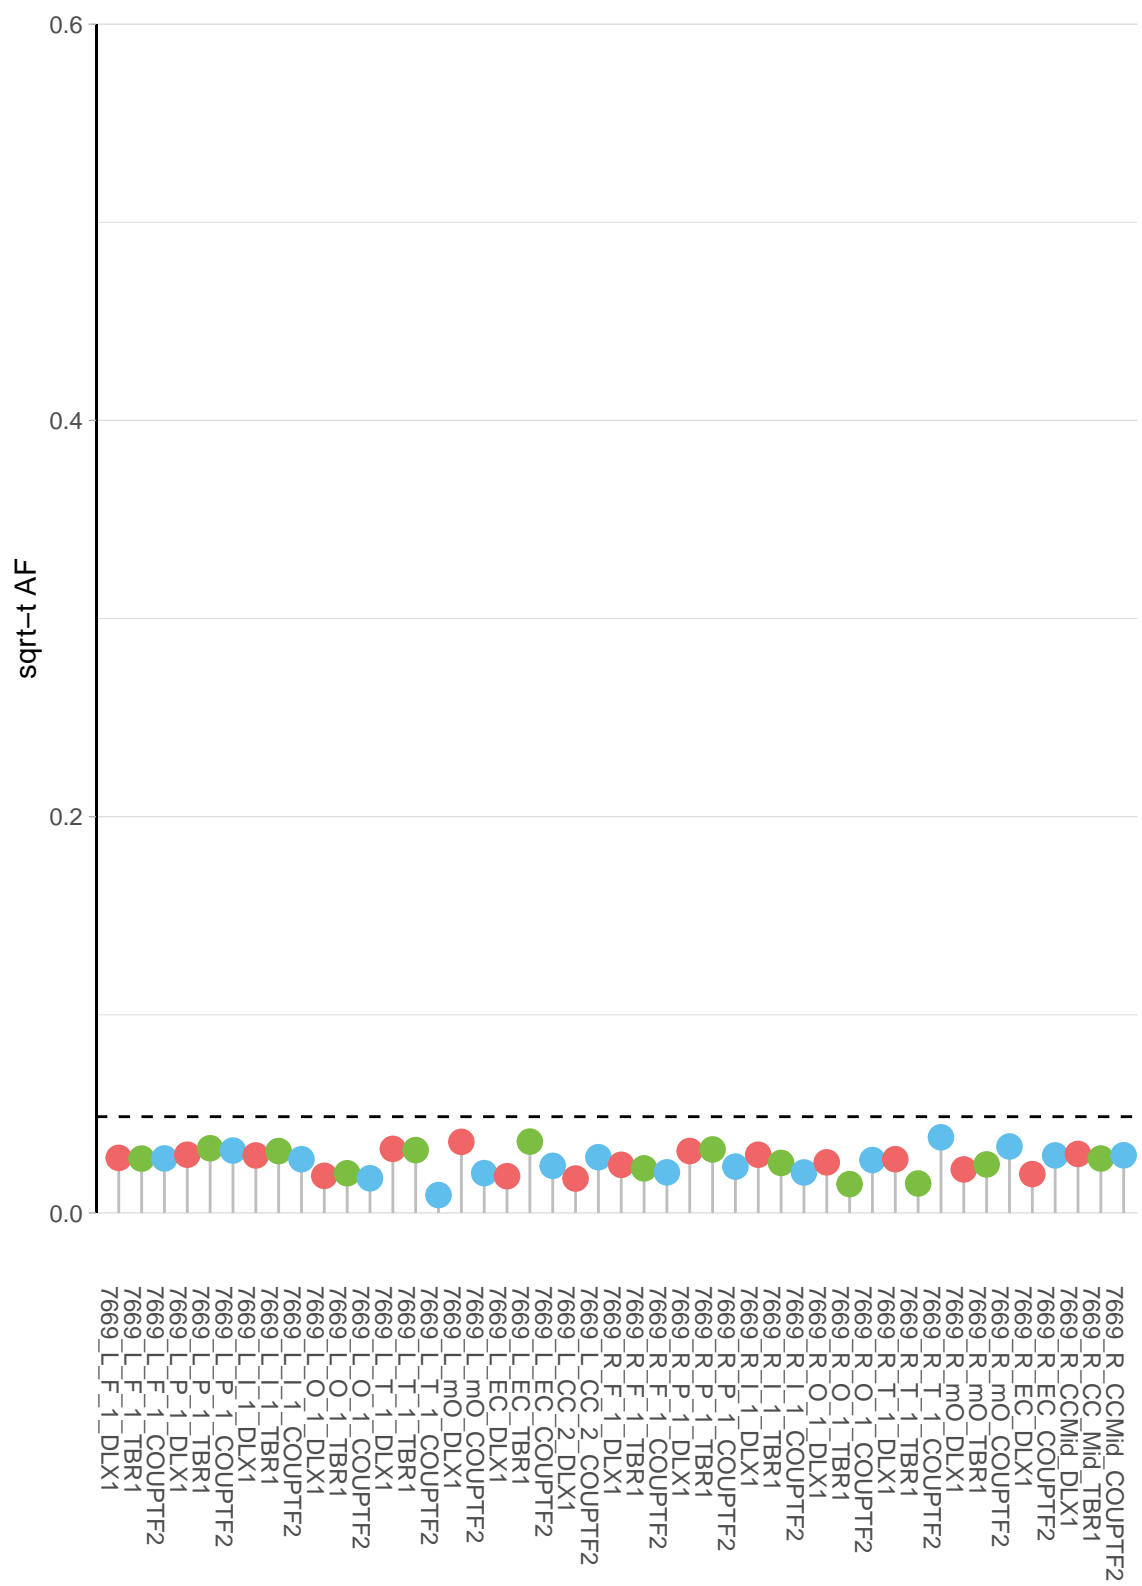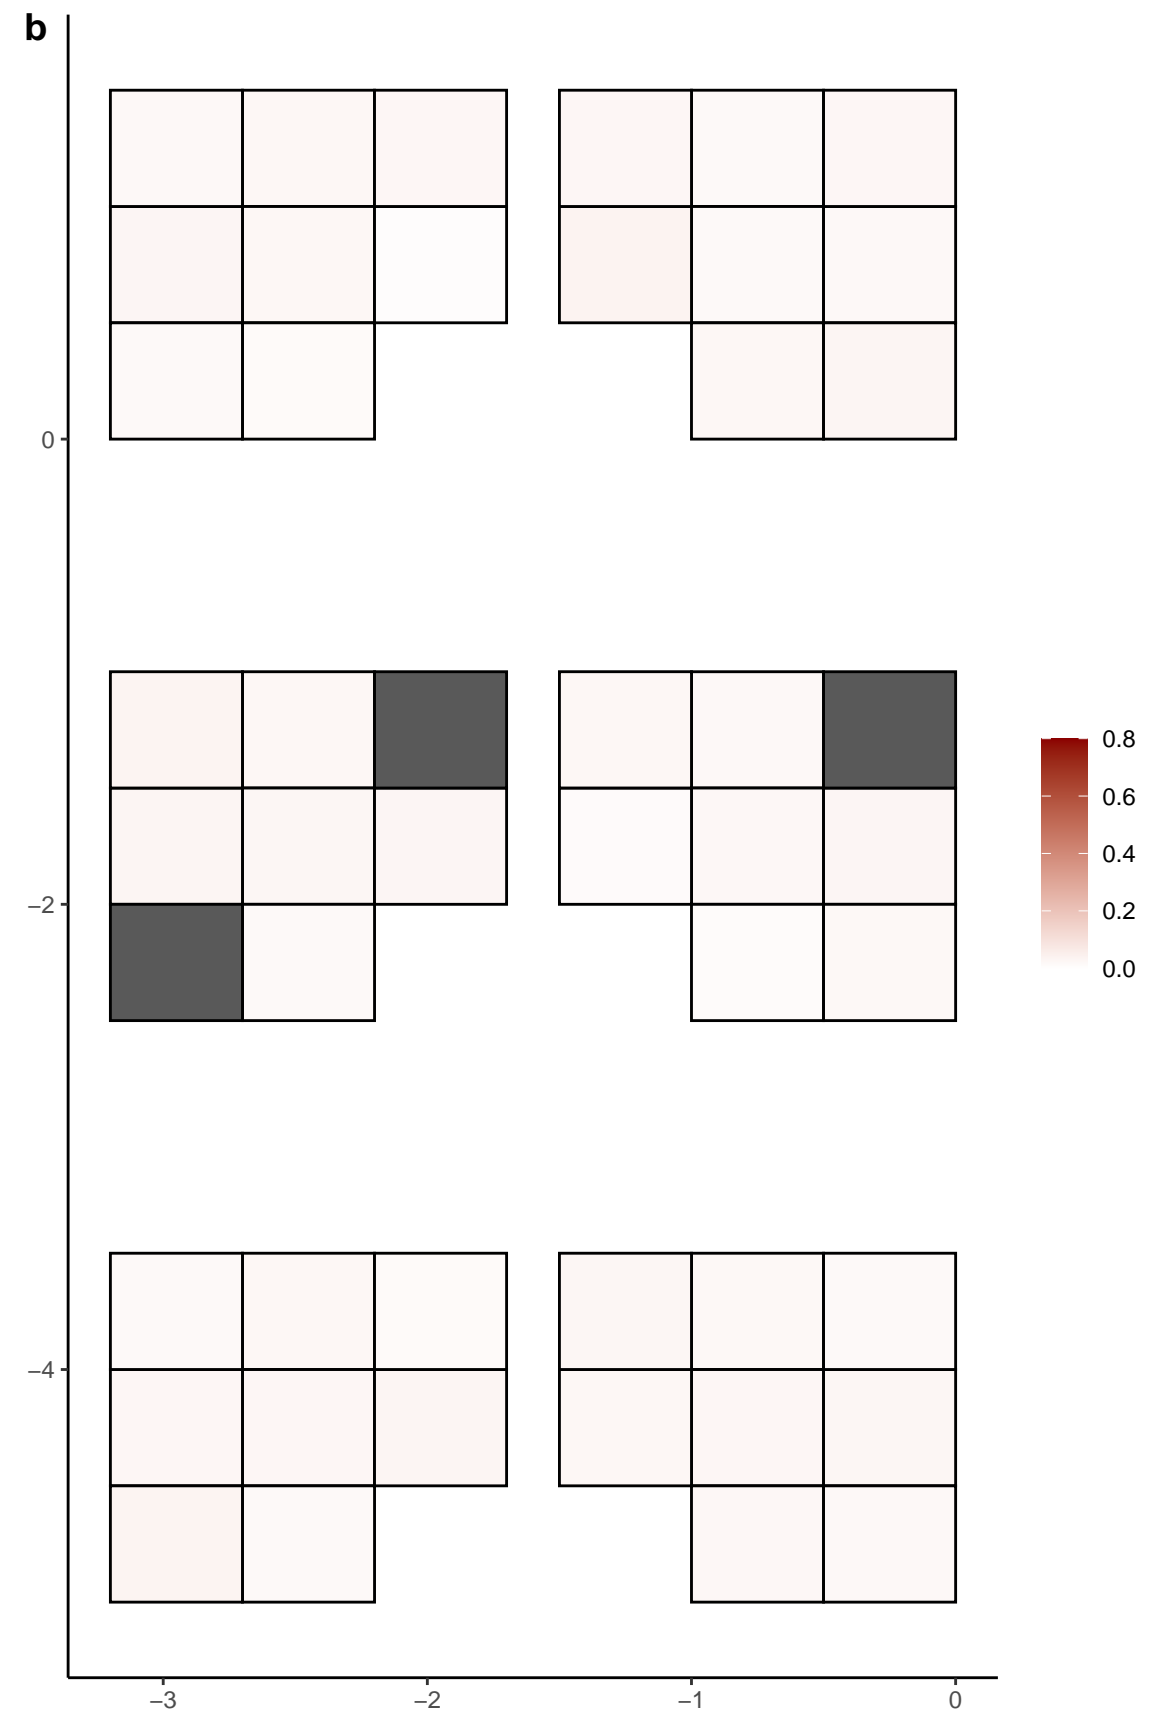

**a** ID05 12-24436884-C-T

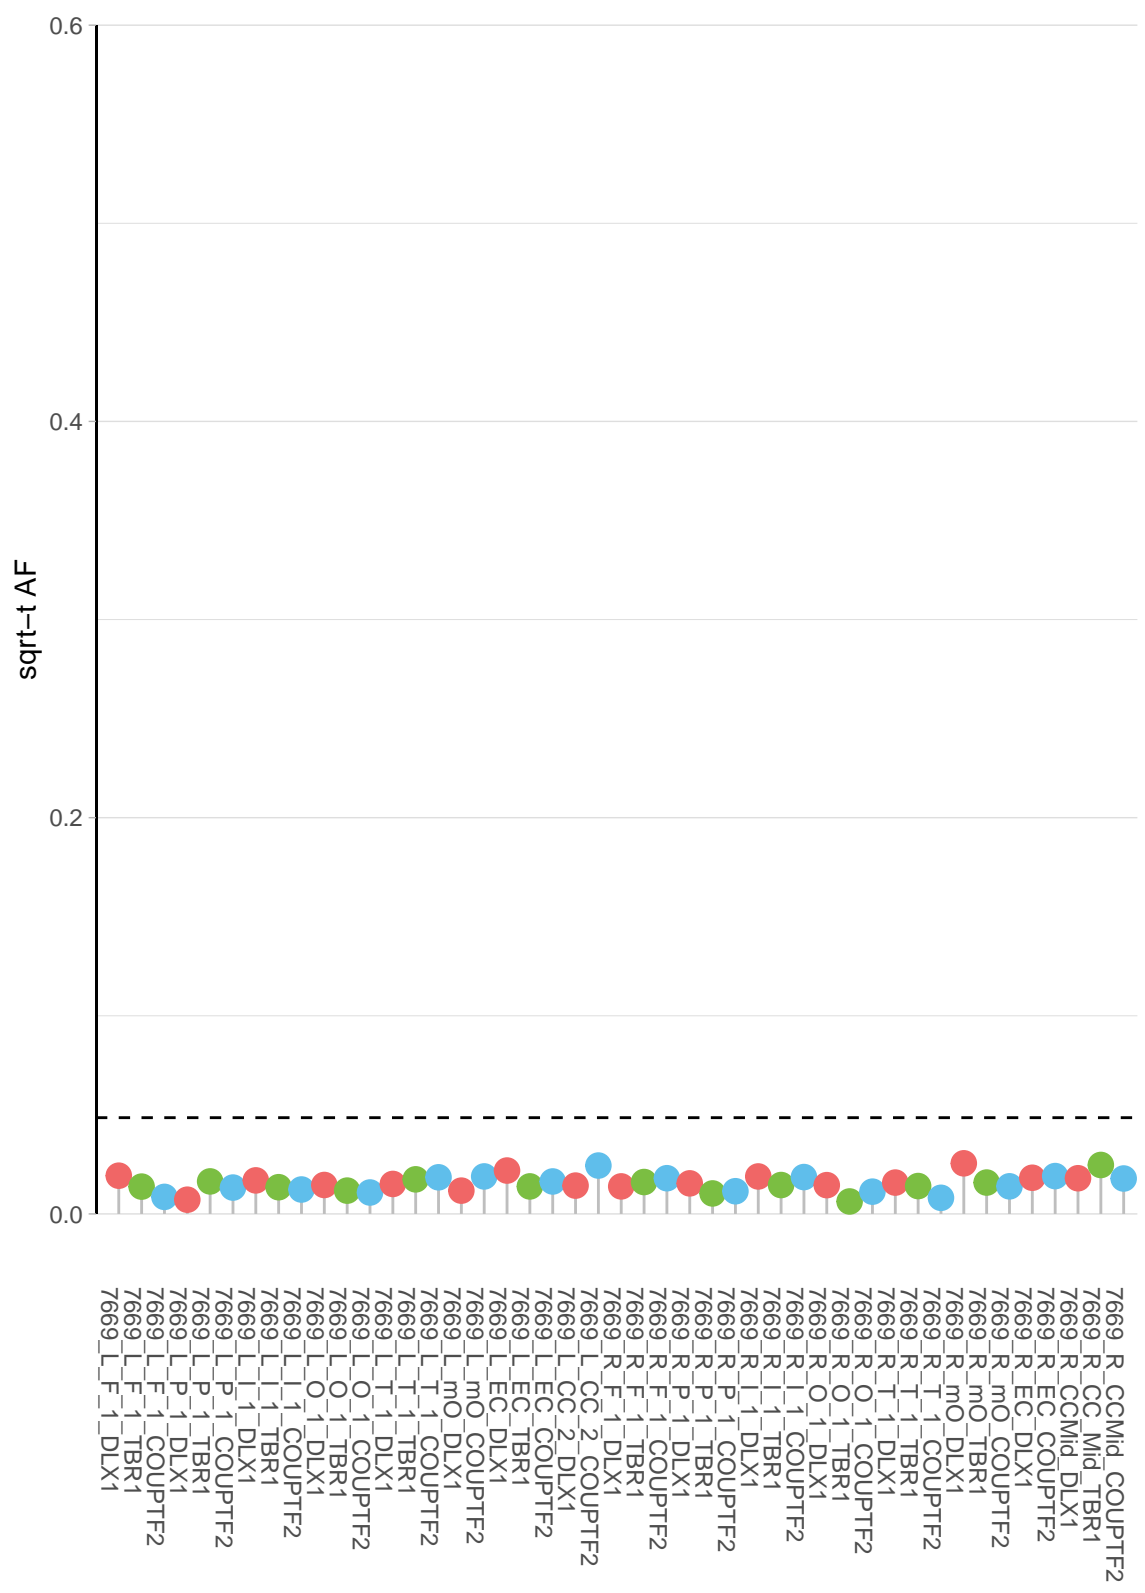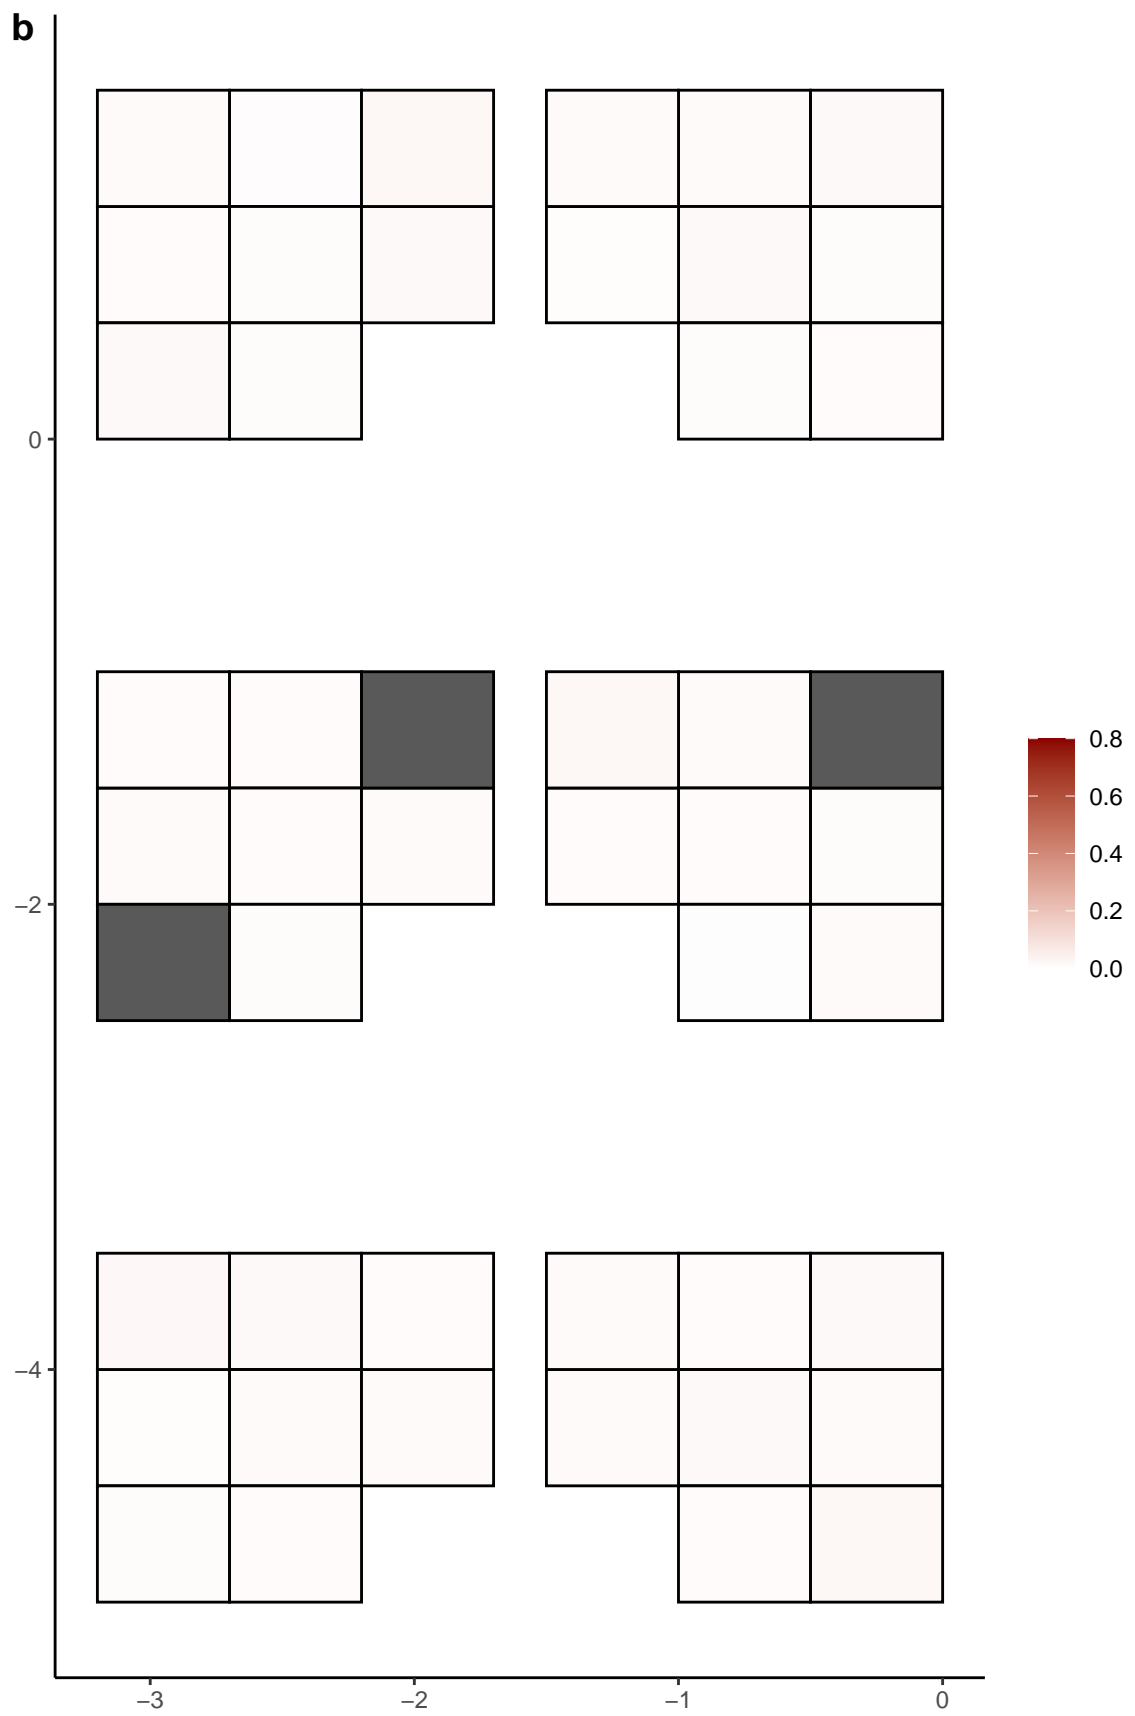

**a** ID05 12-55677268-C-A

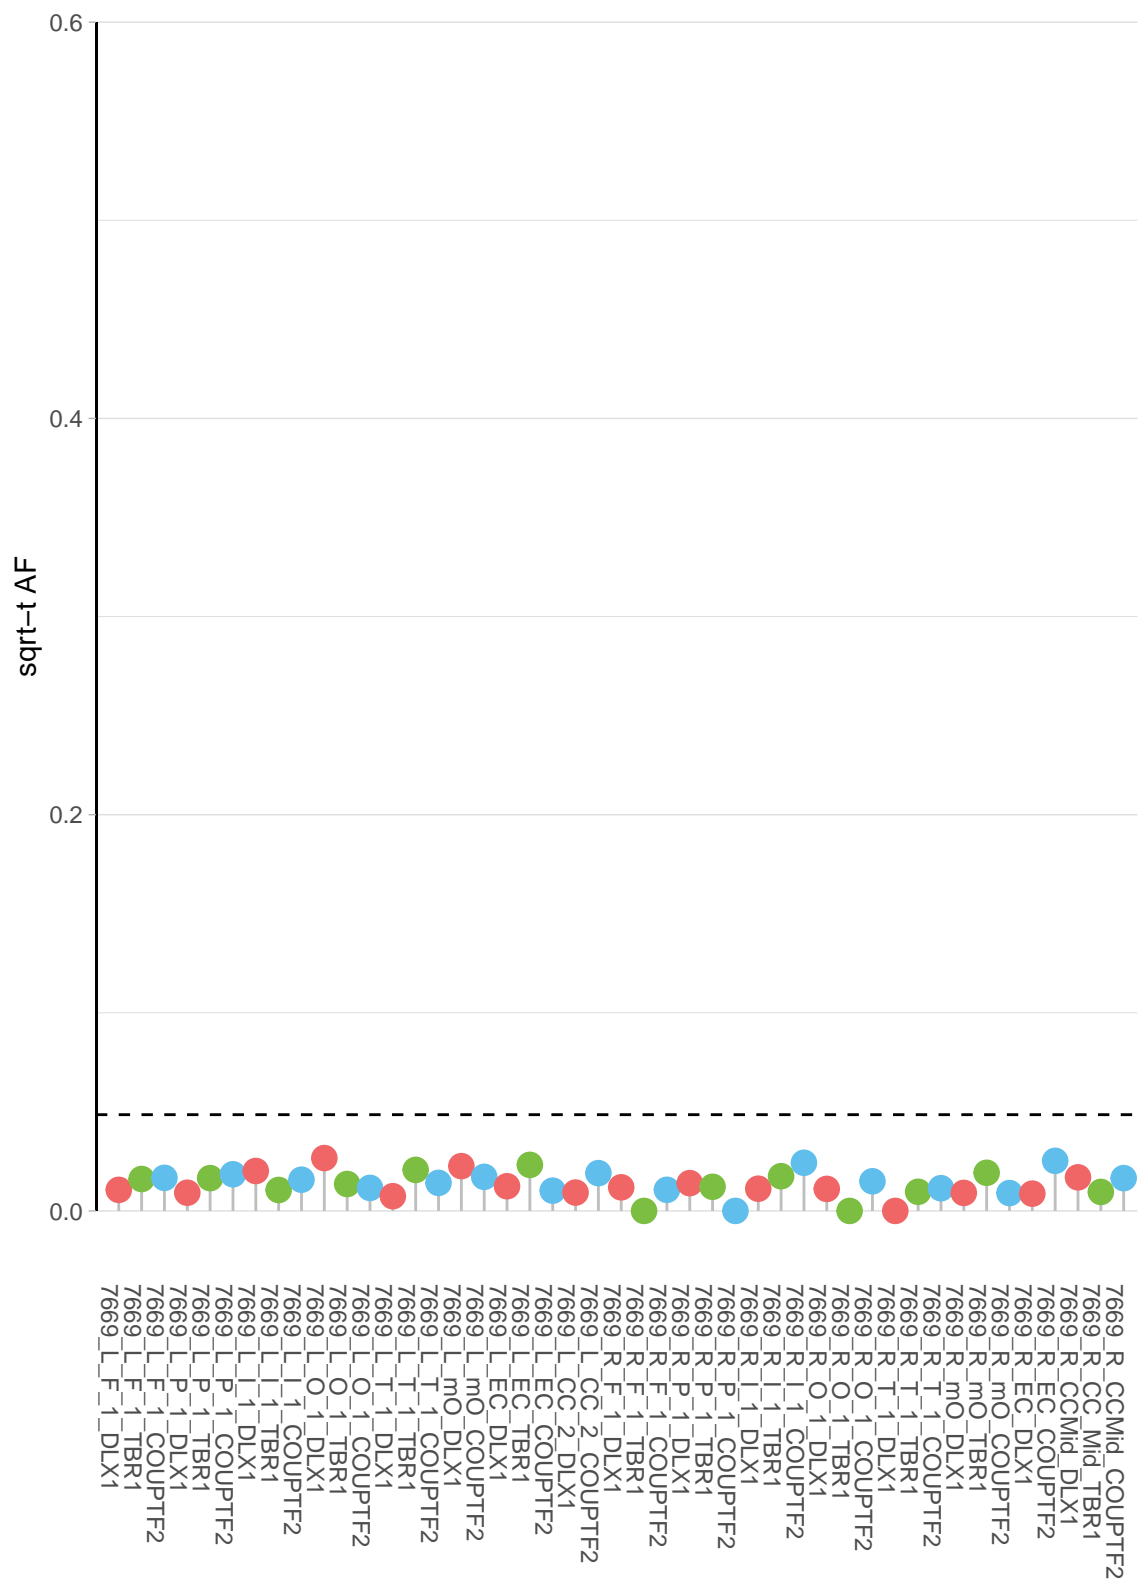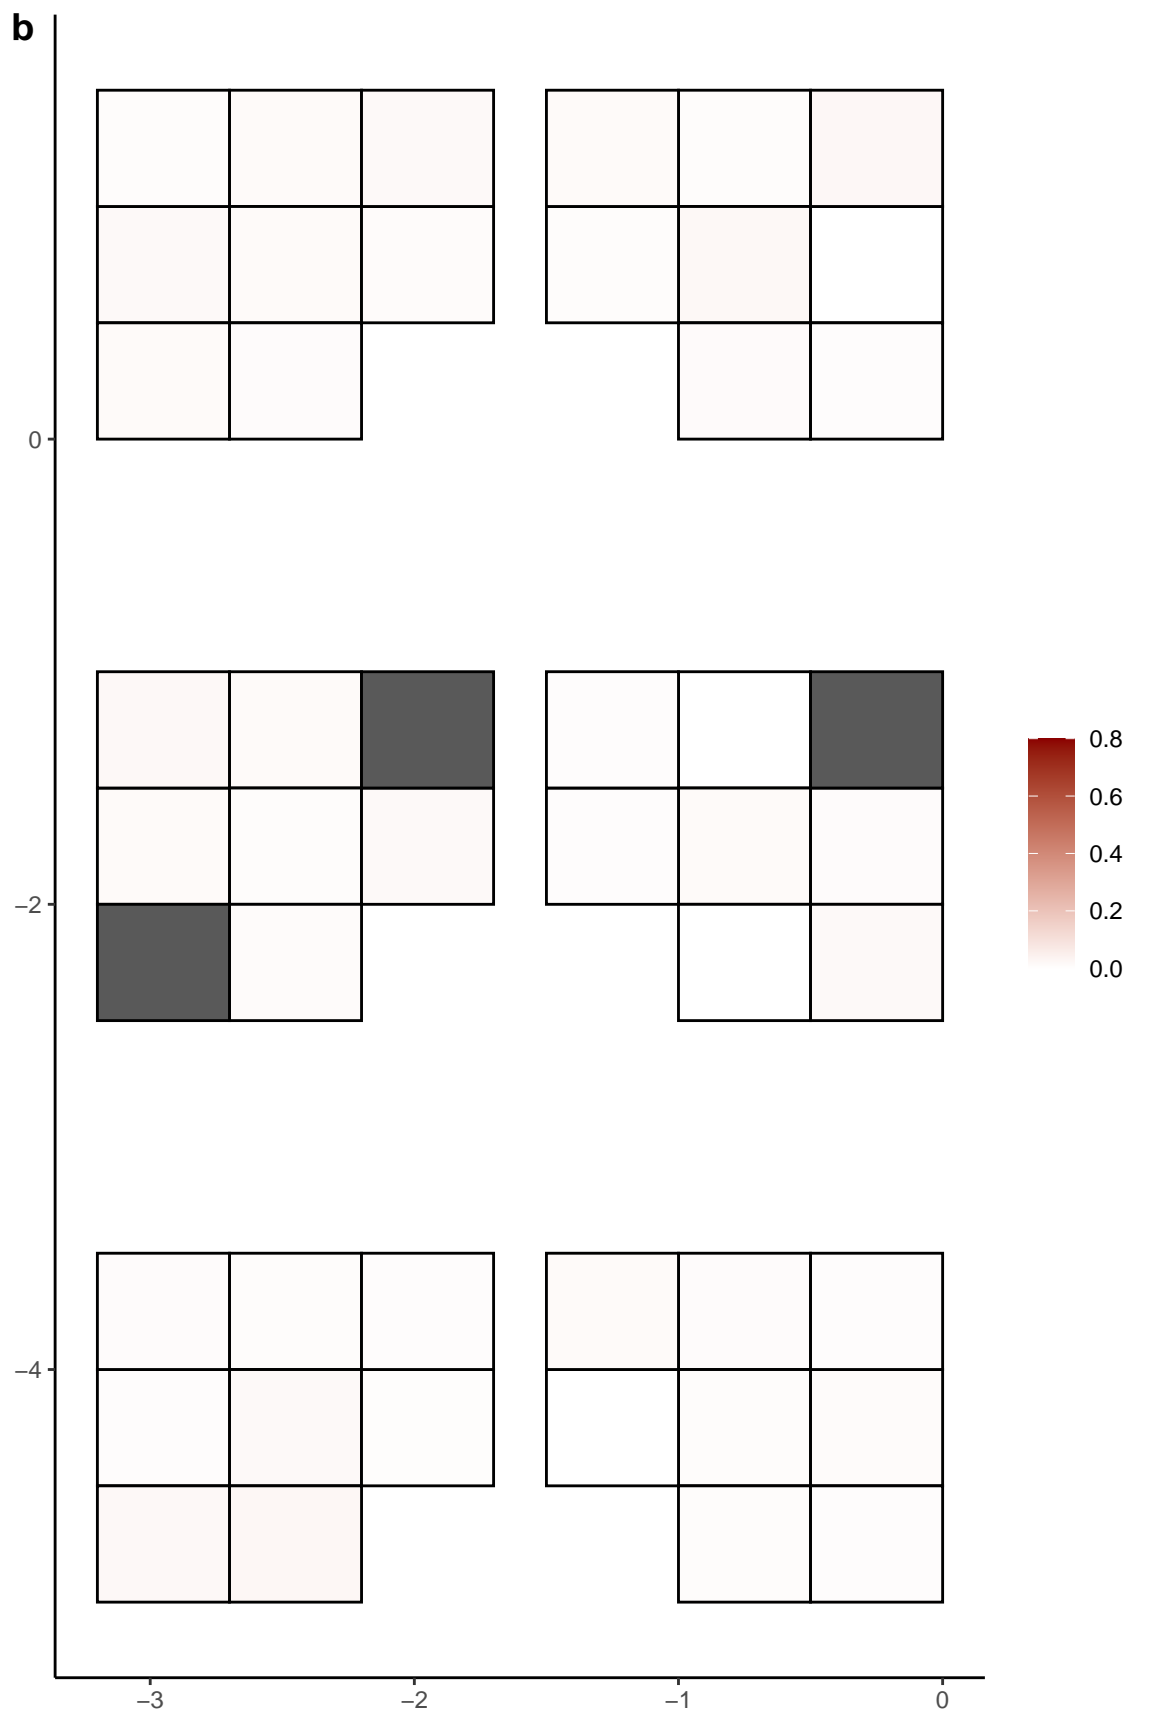

**a** ID05 12-62486556-G-A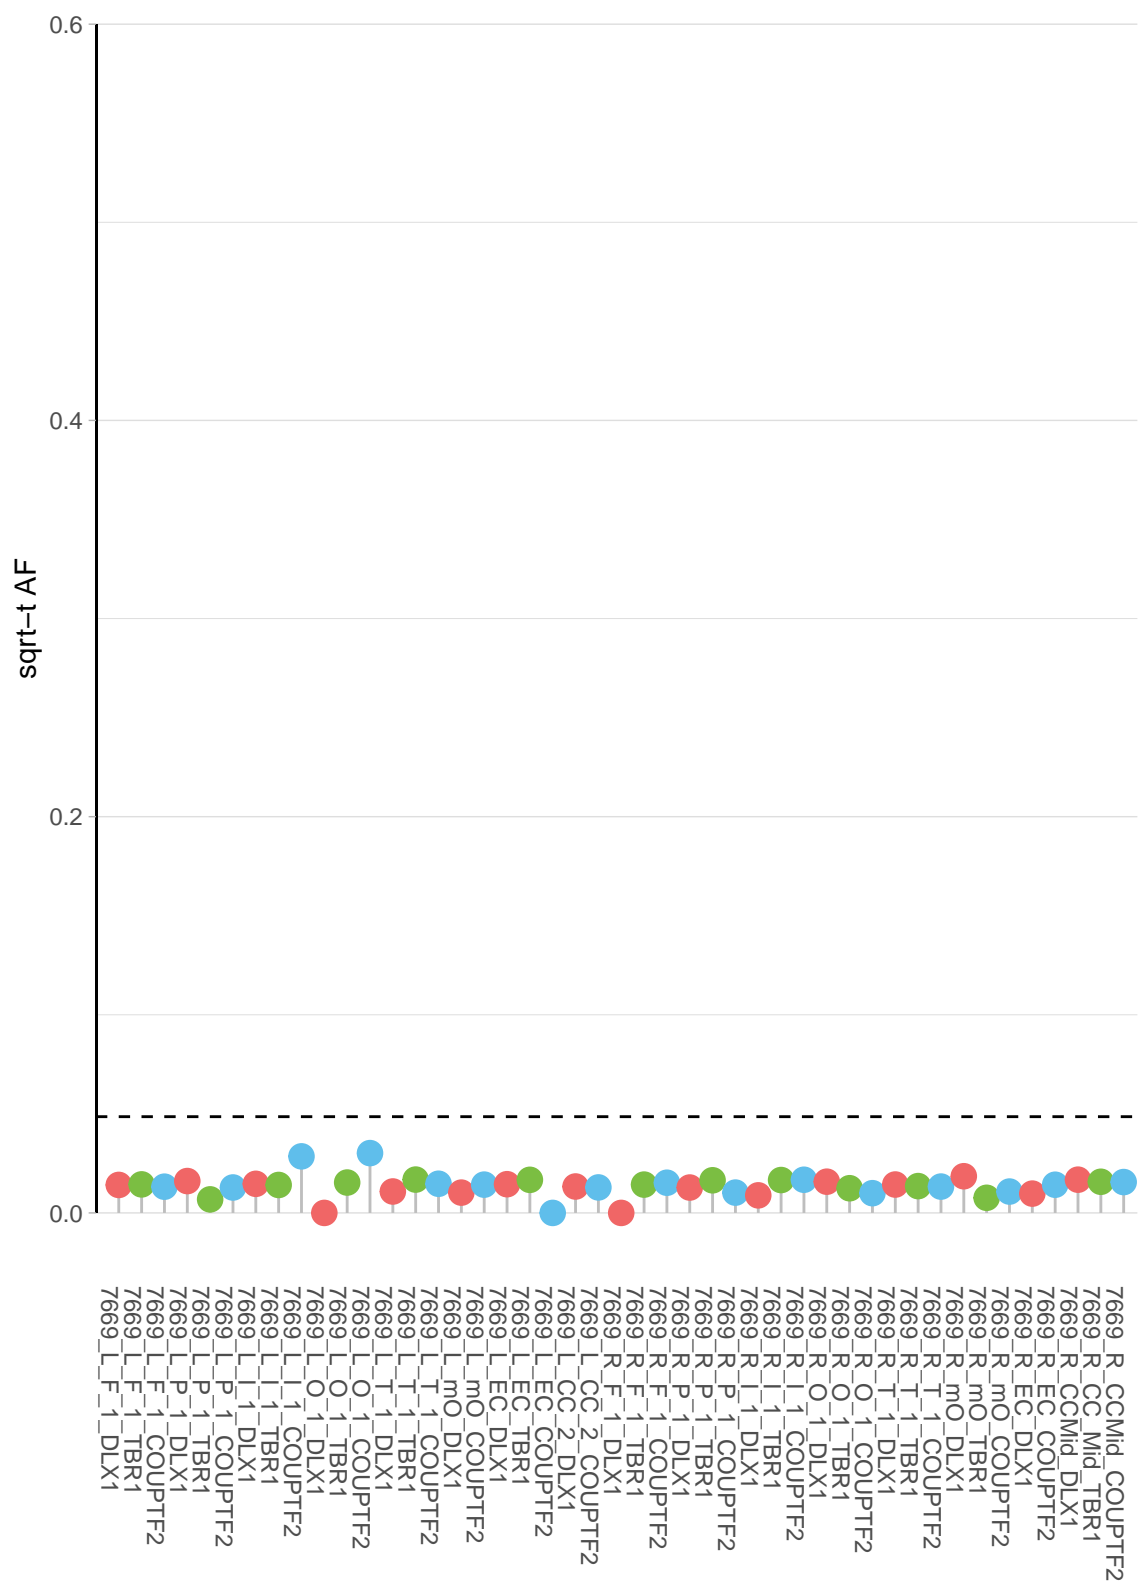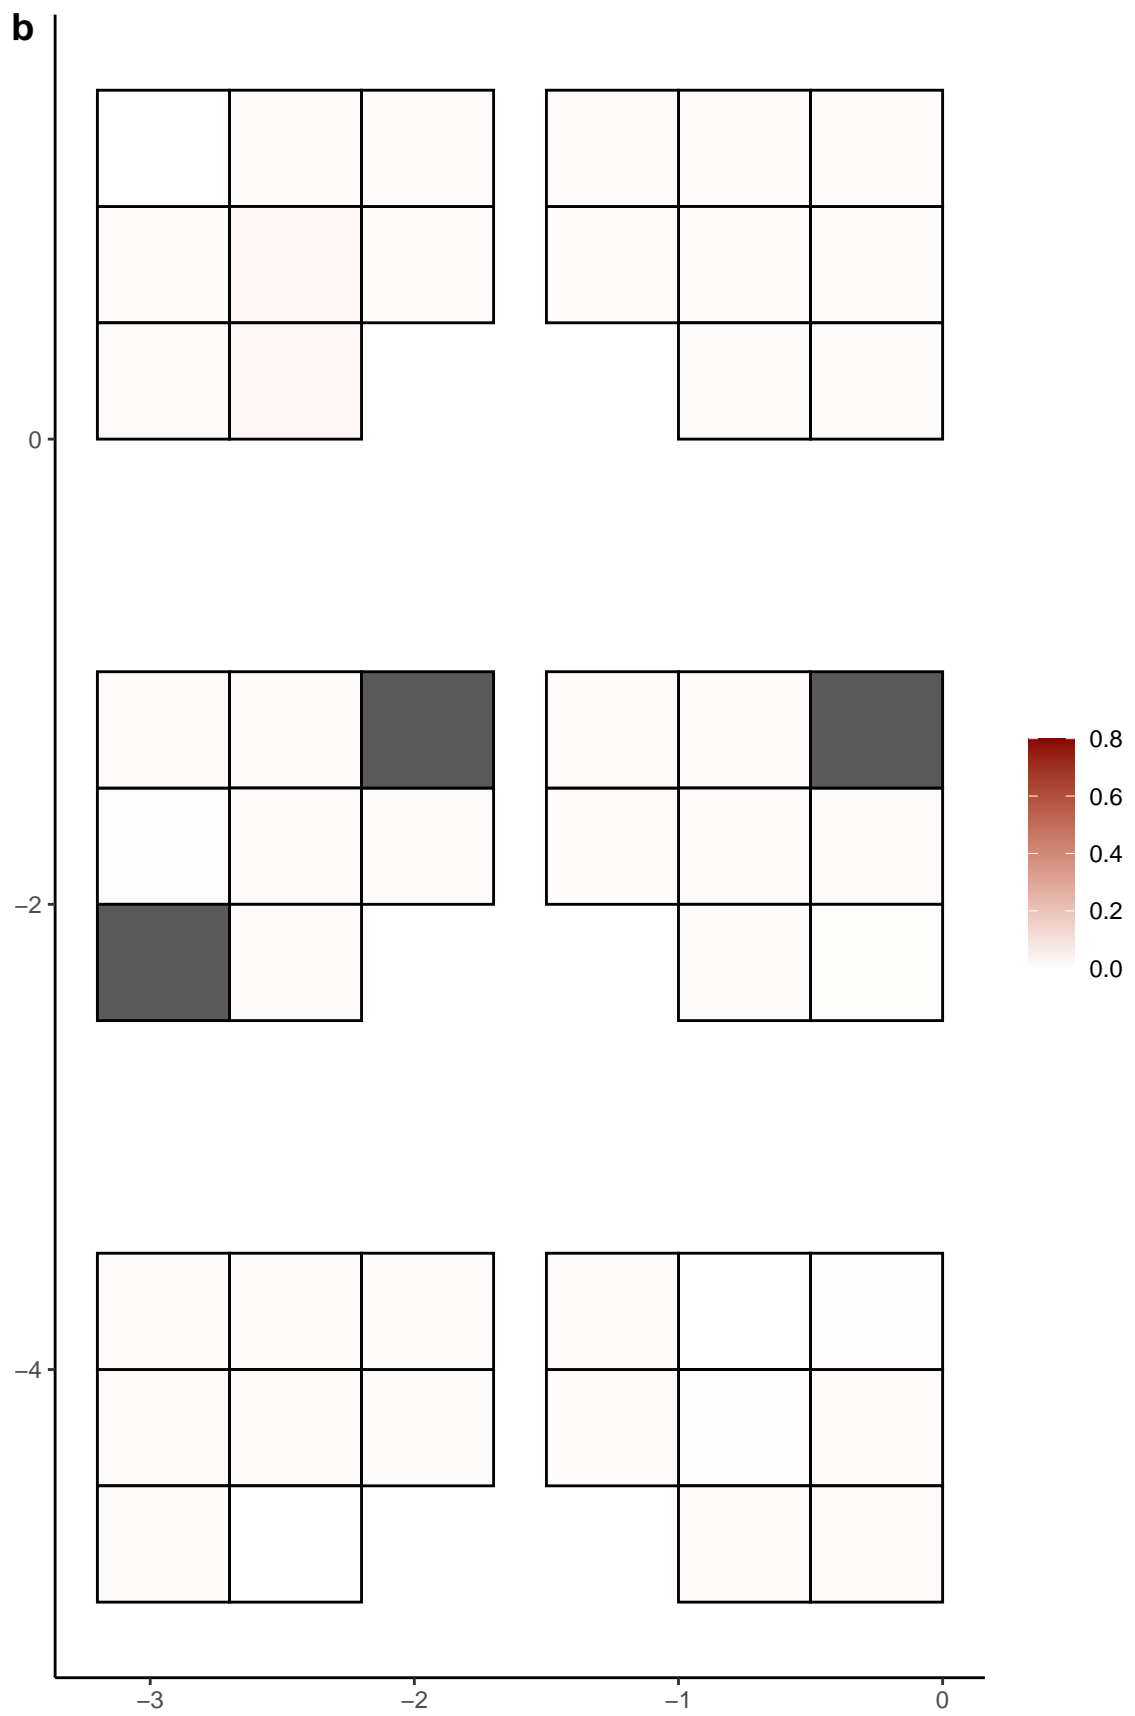

**a** ID05 12-73783719-C-T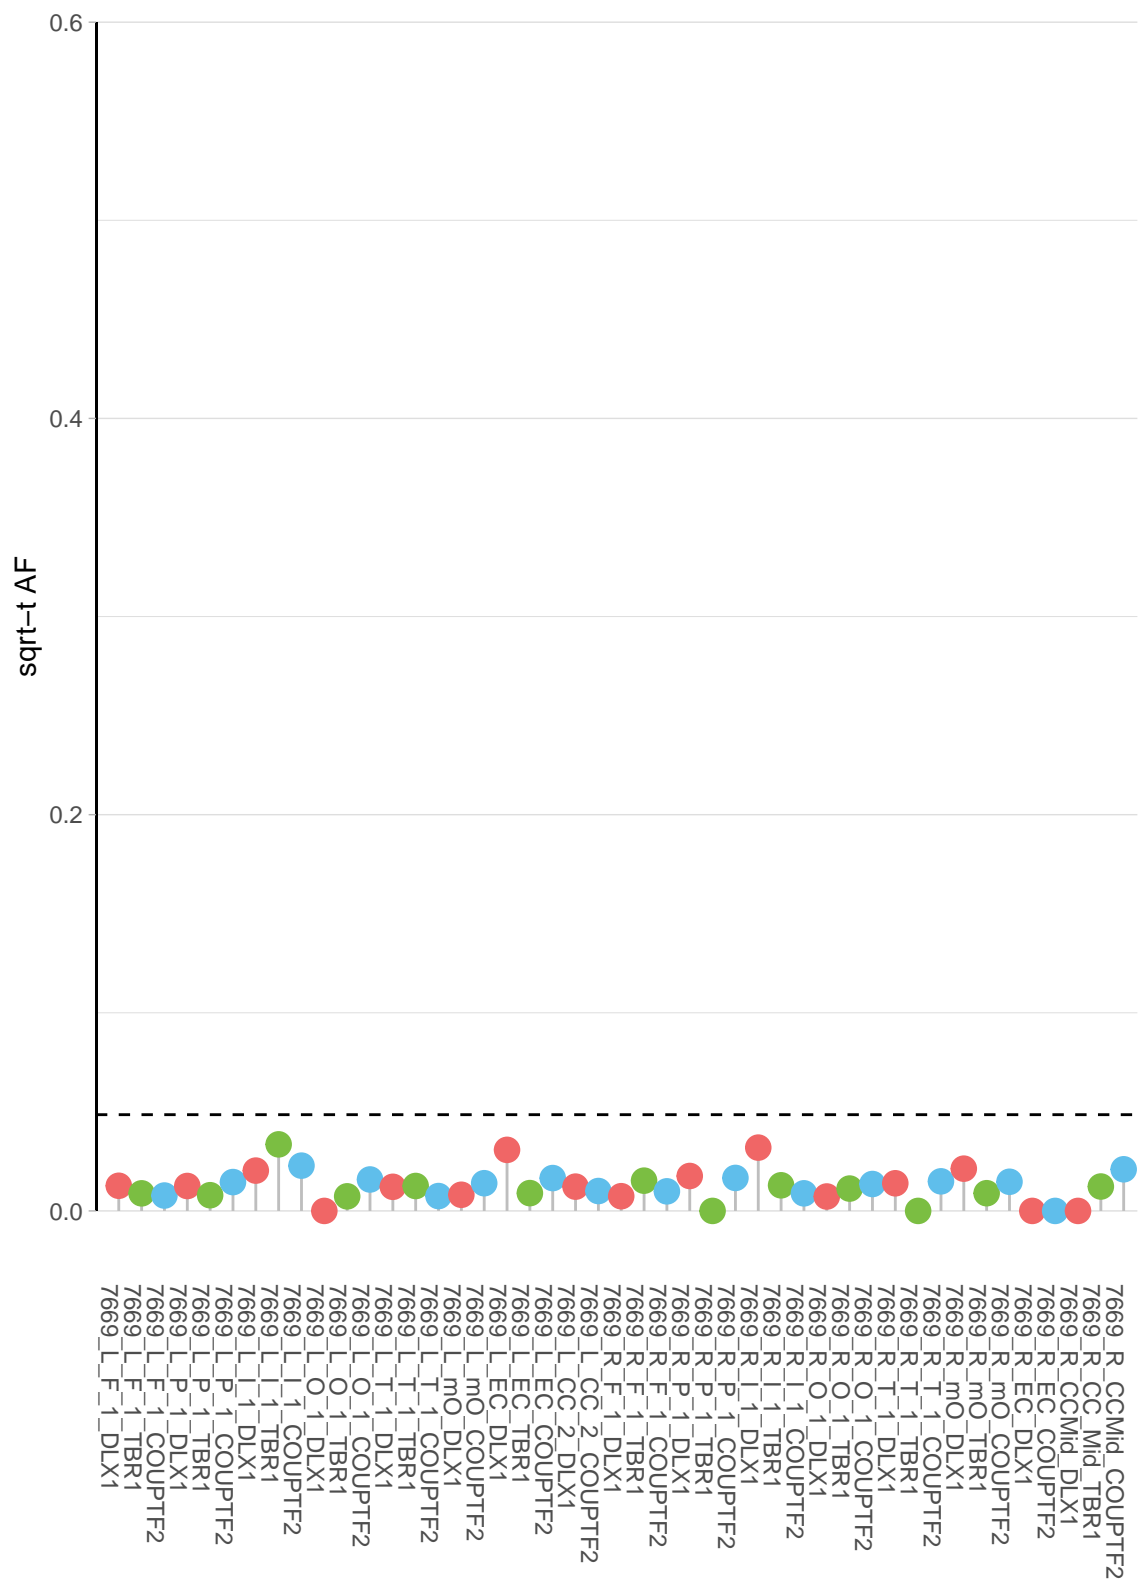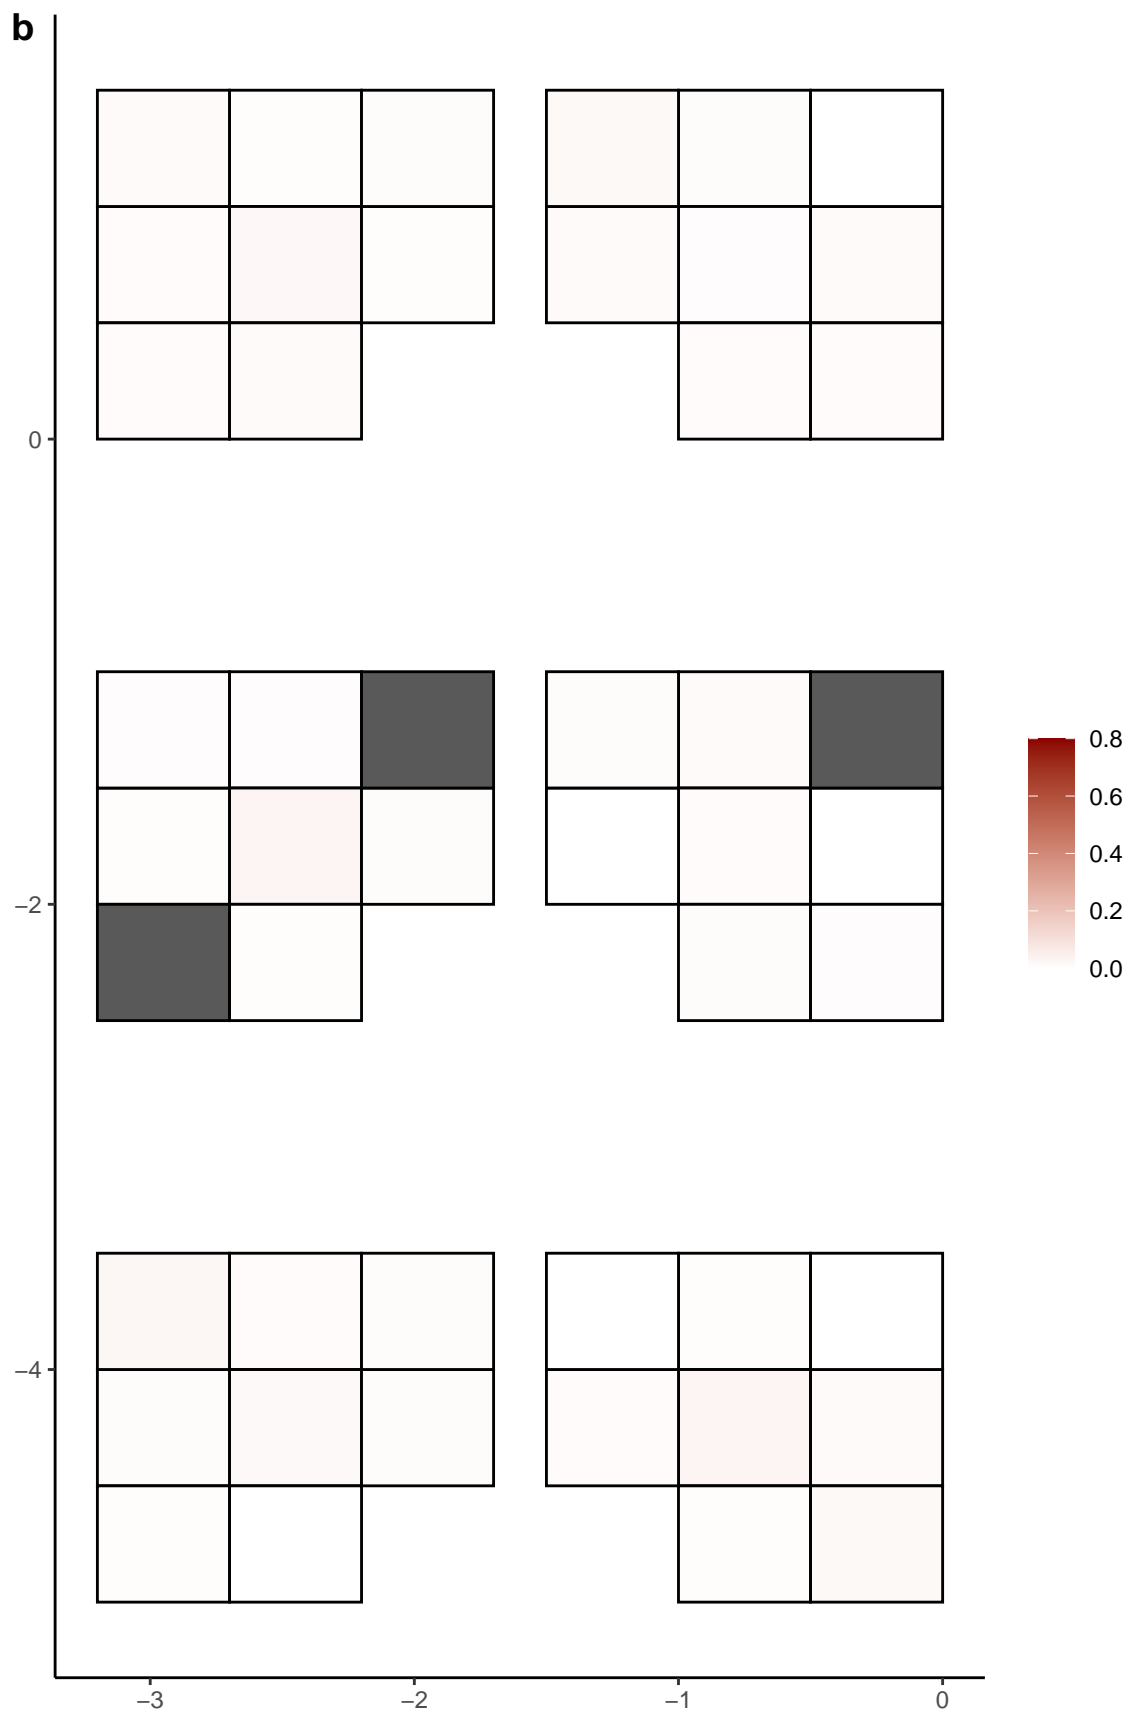





**a** ID05 12-79536312-C-T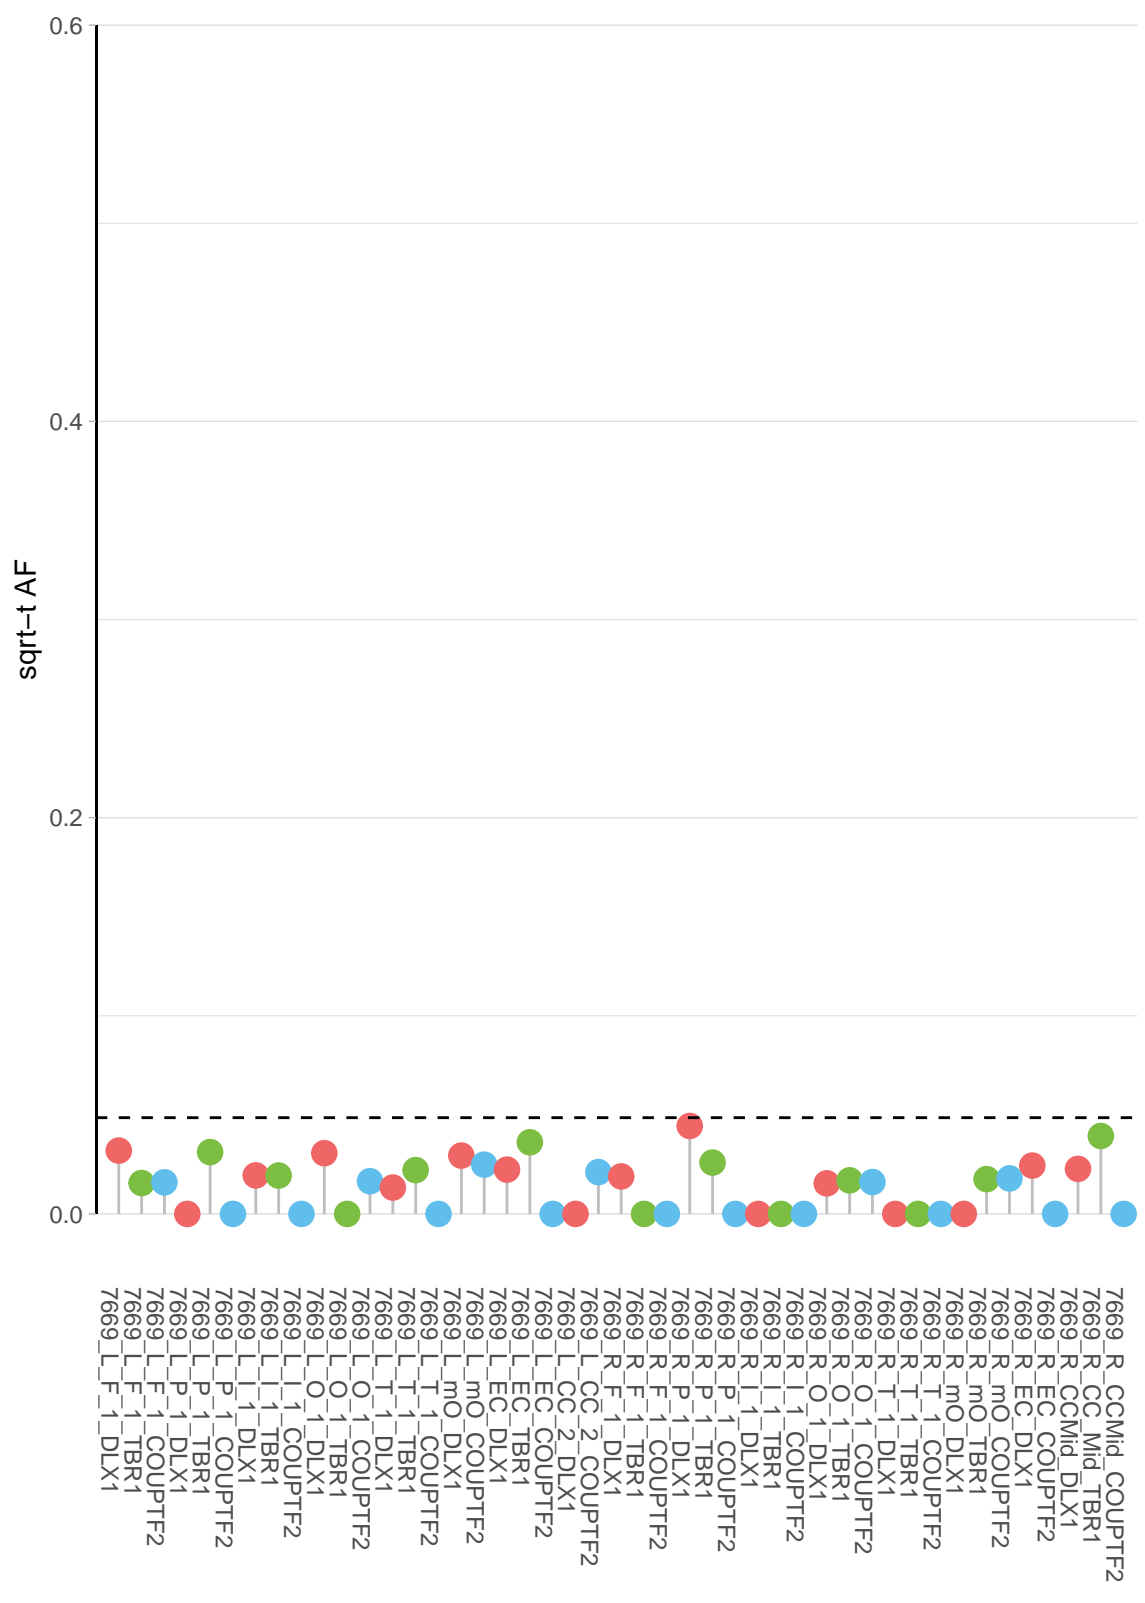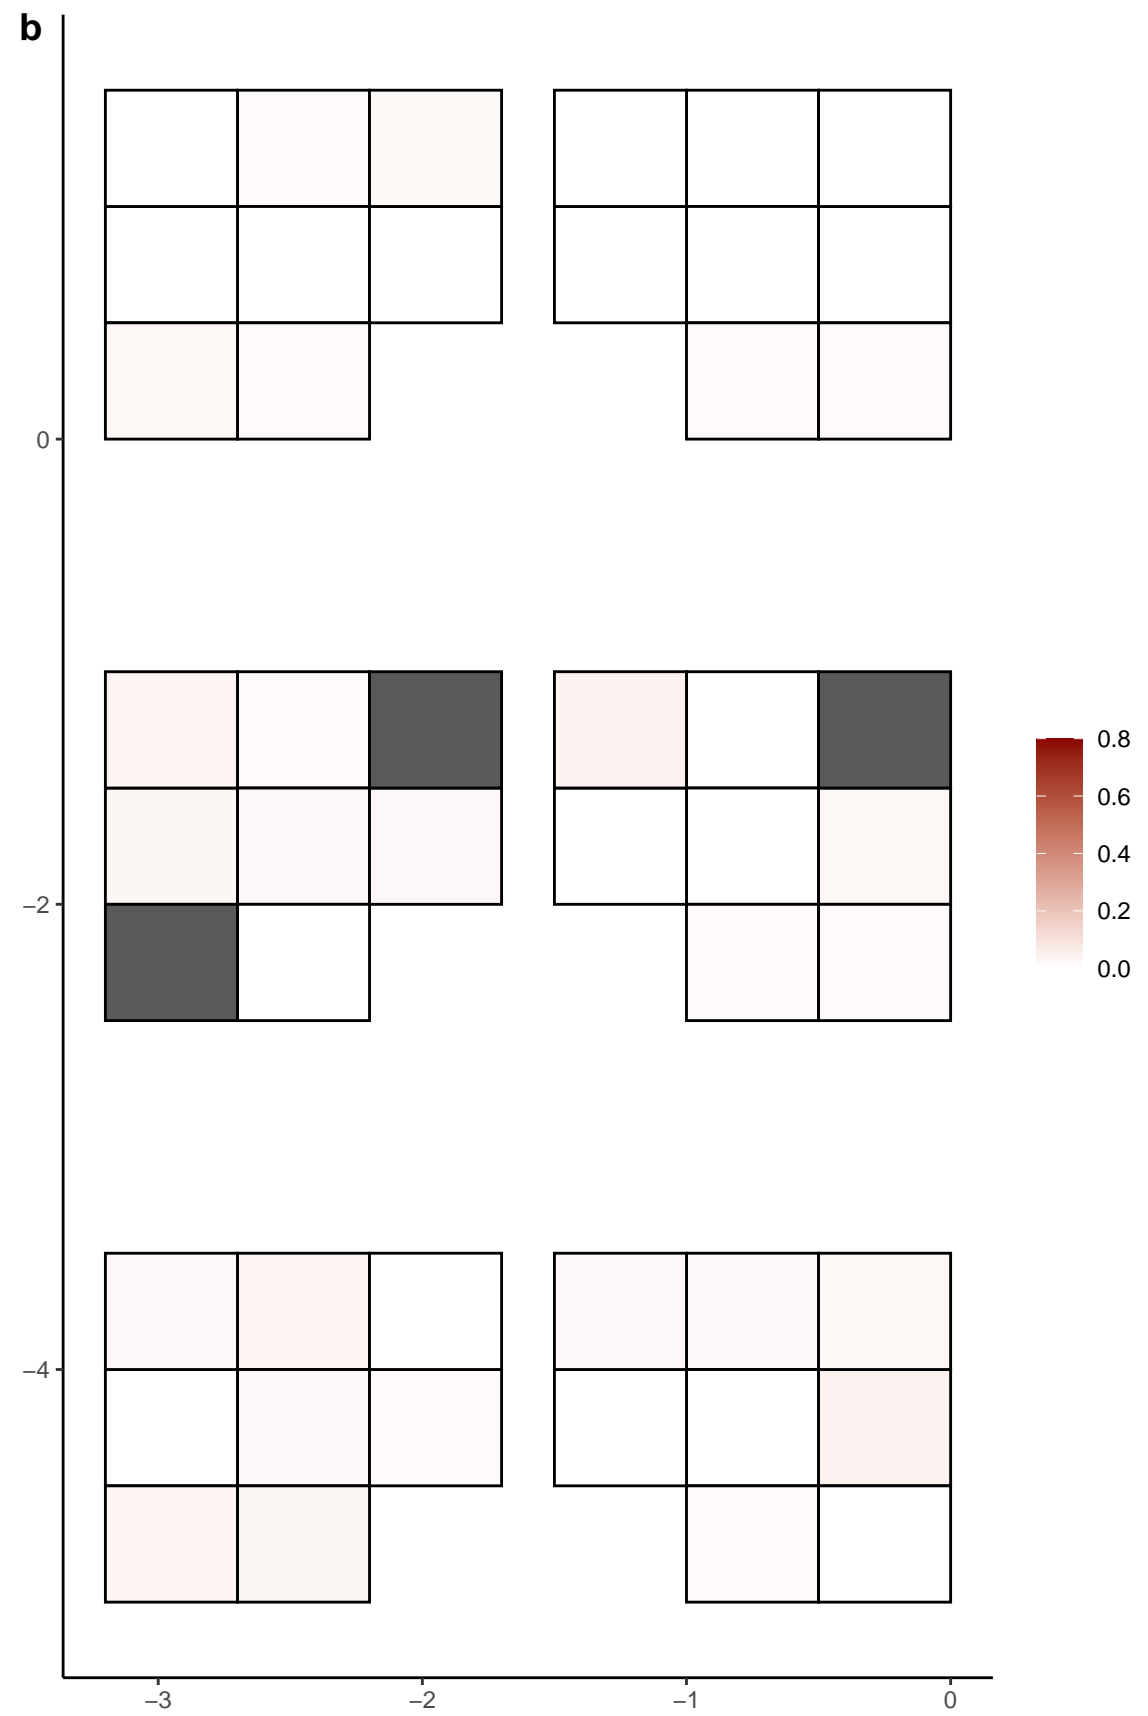

**a** ID05 12-85014452-T-A

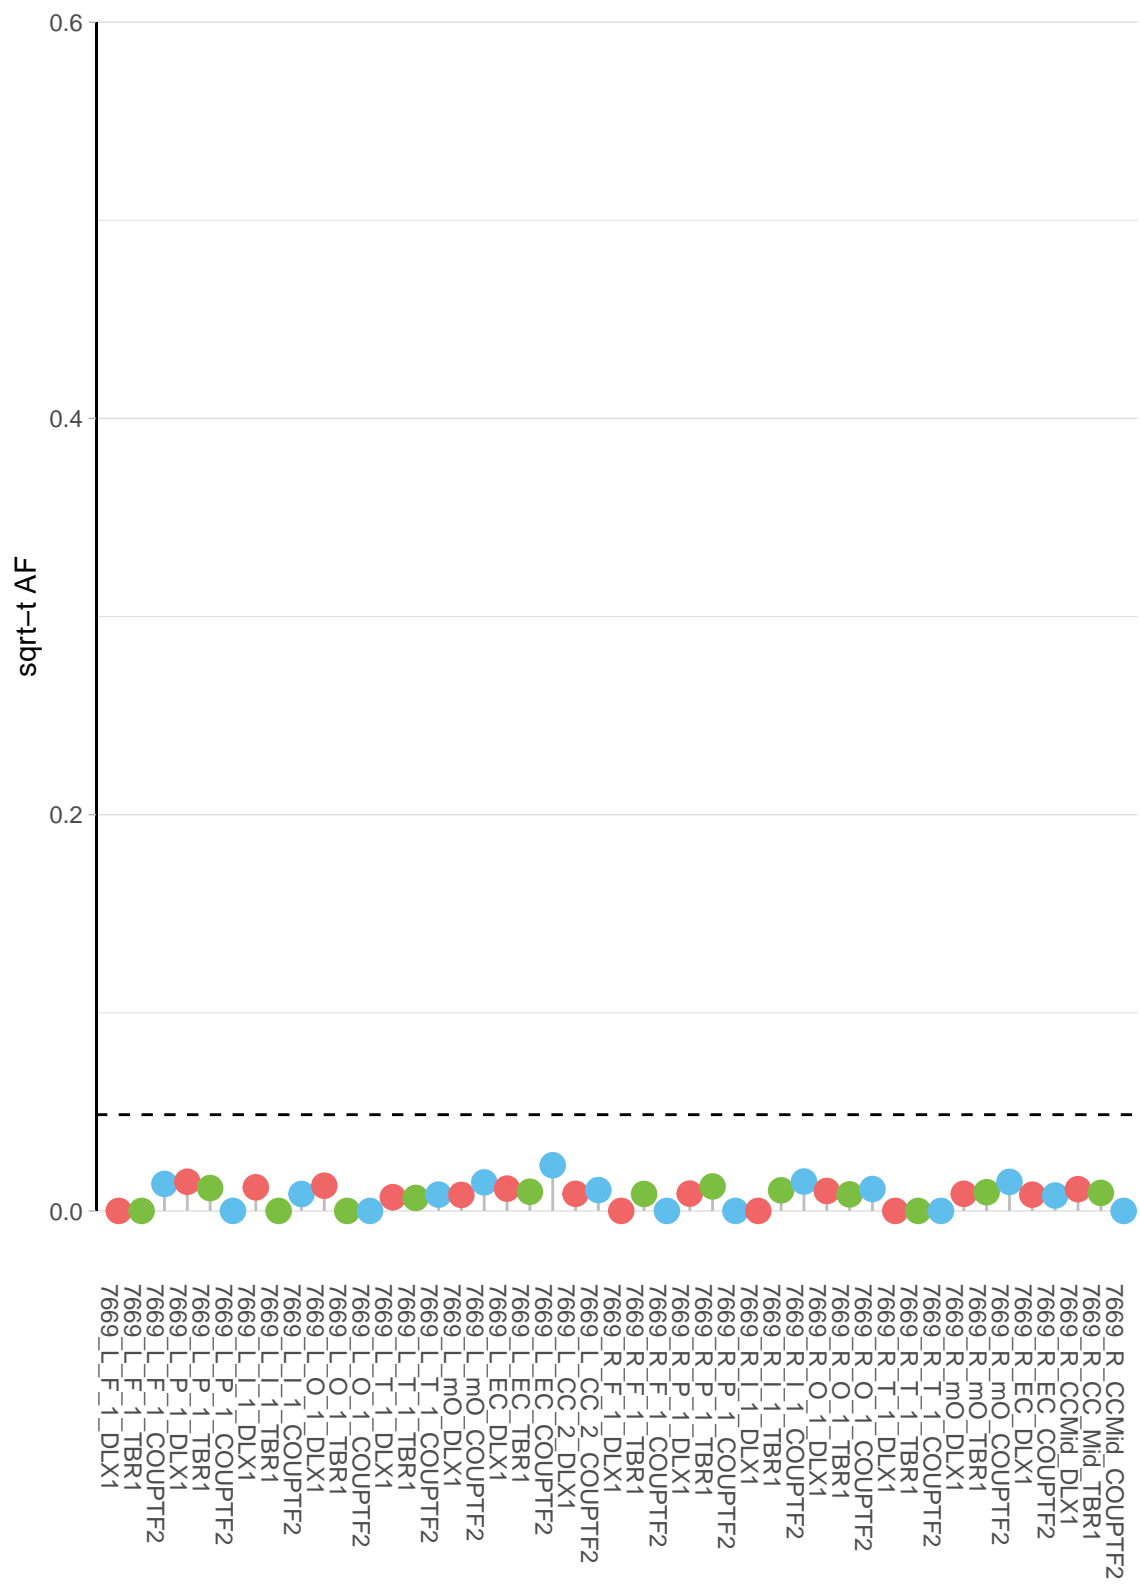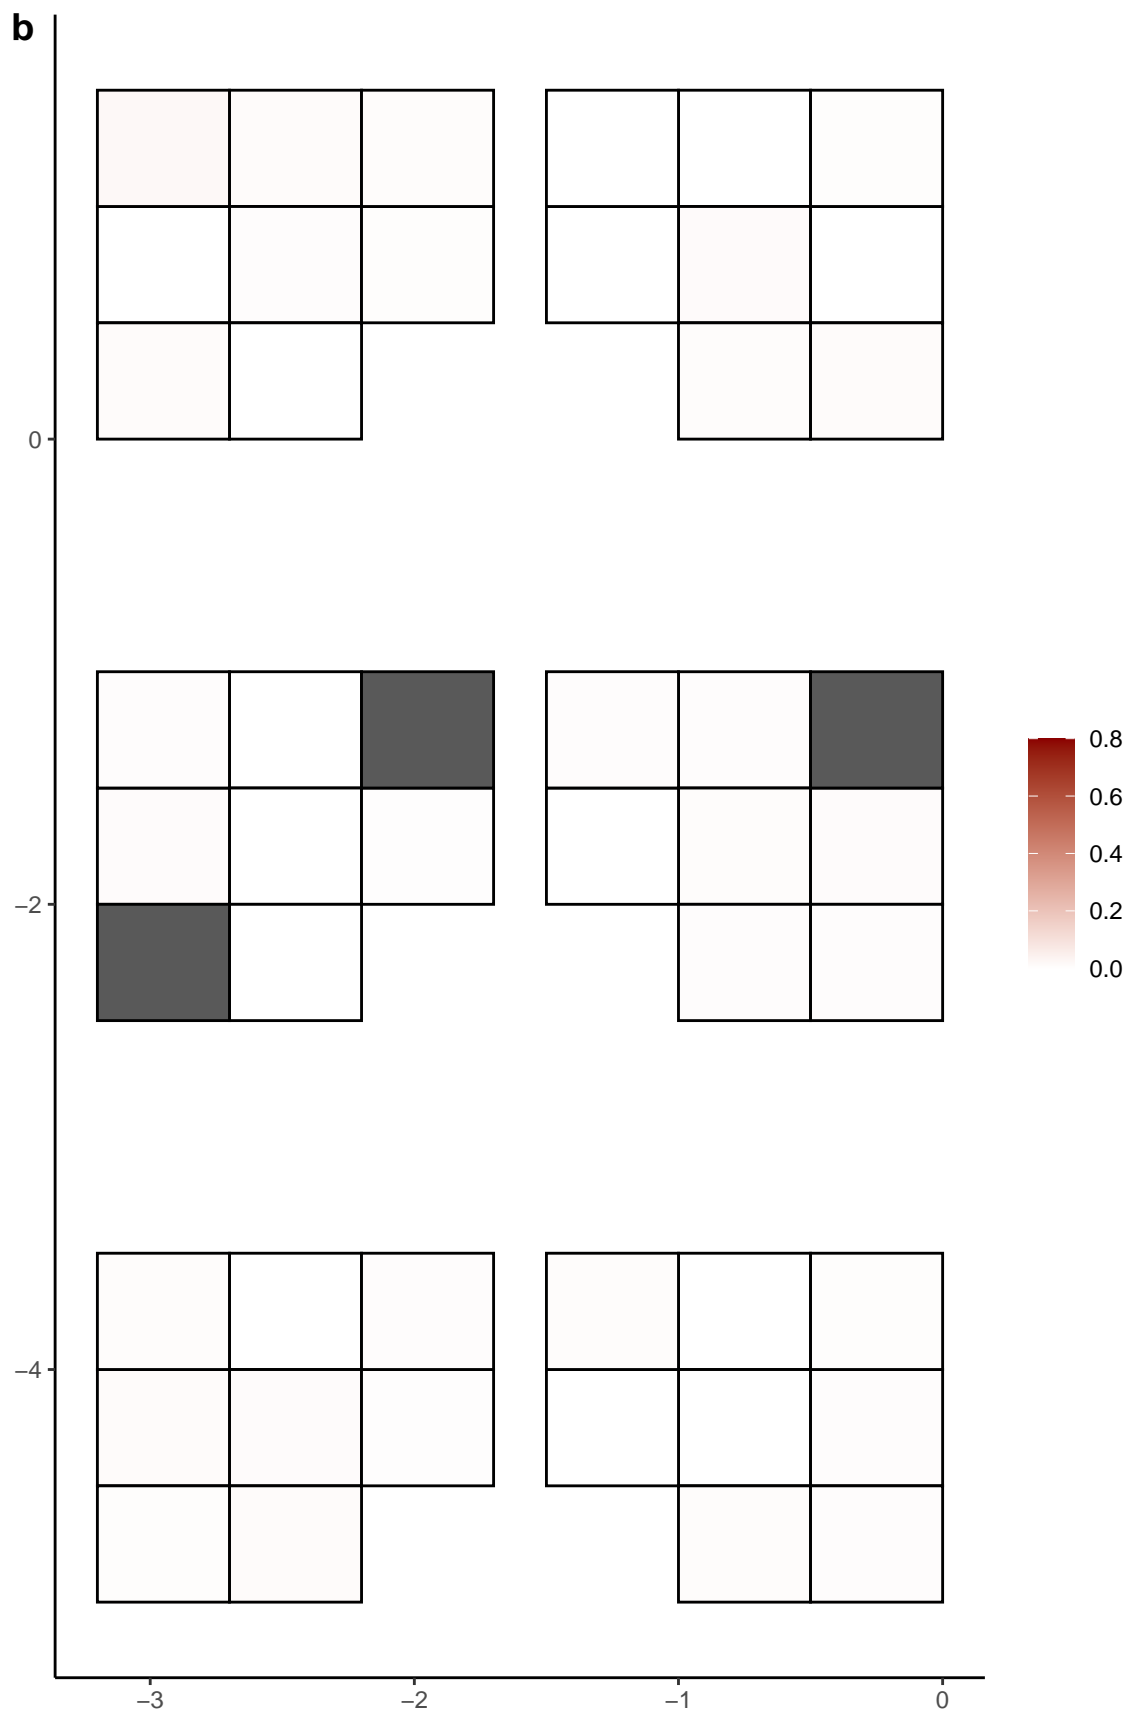

**a** ID05 12-85787527-A-T

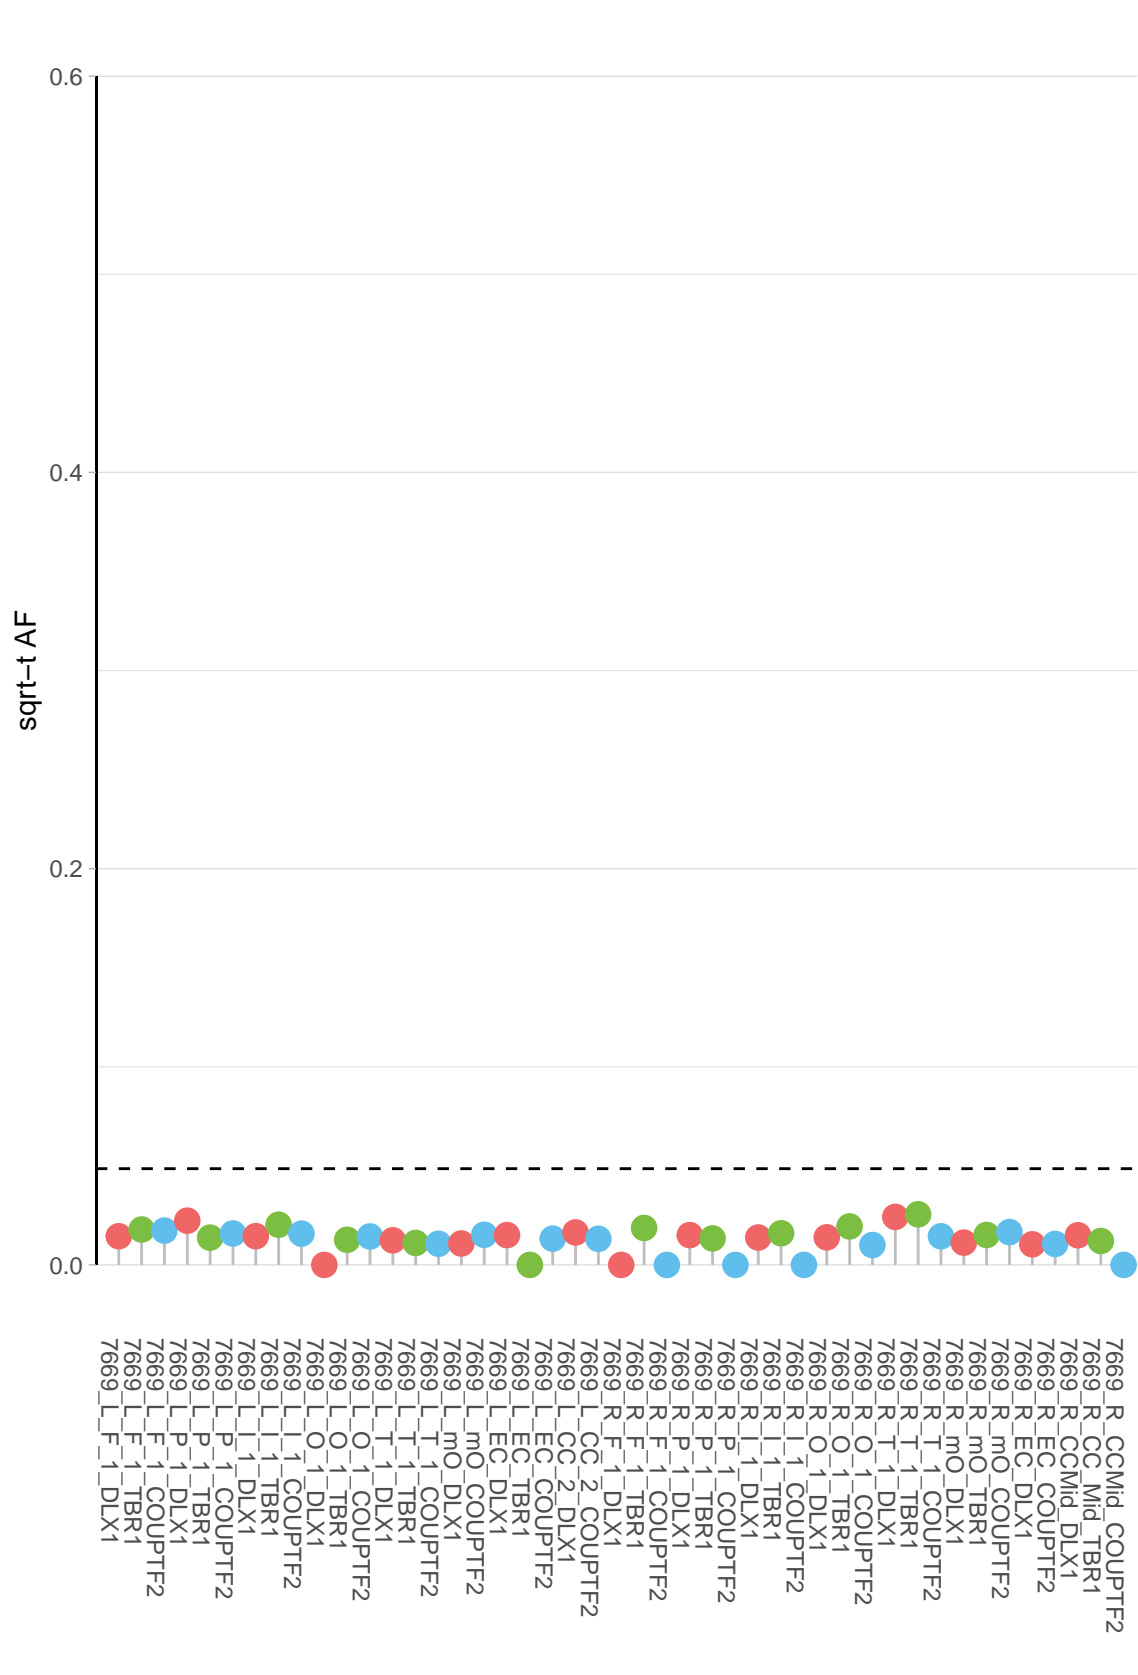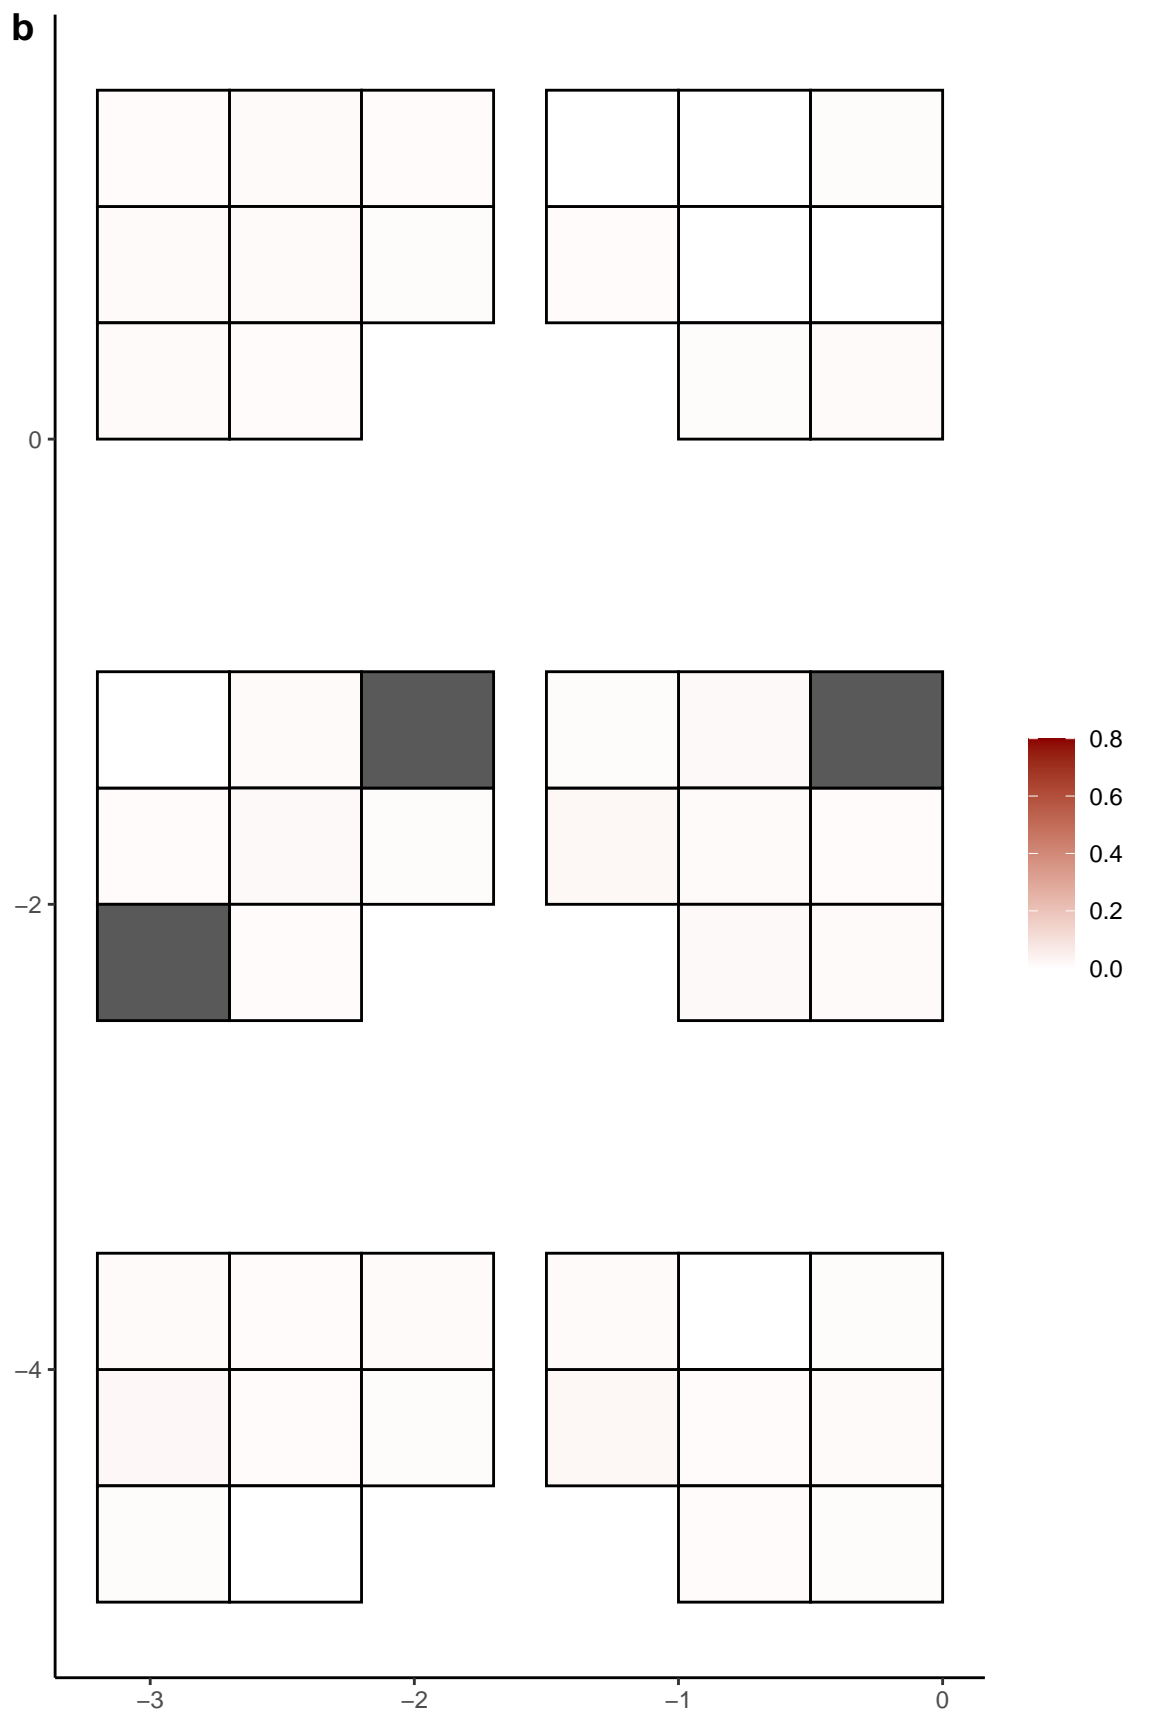

**a** ID05 12-90774790-C-T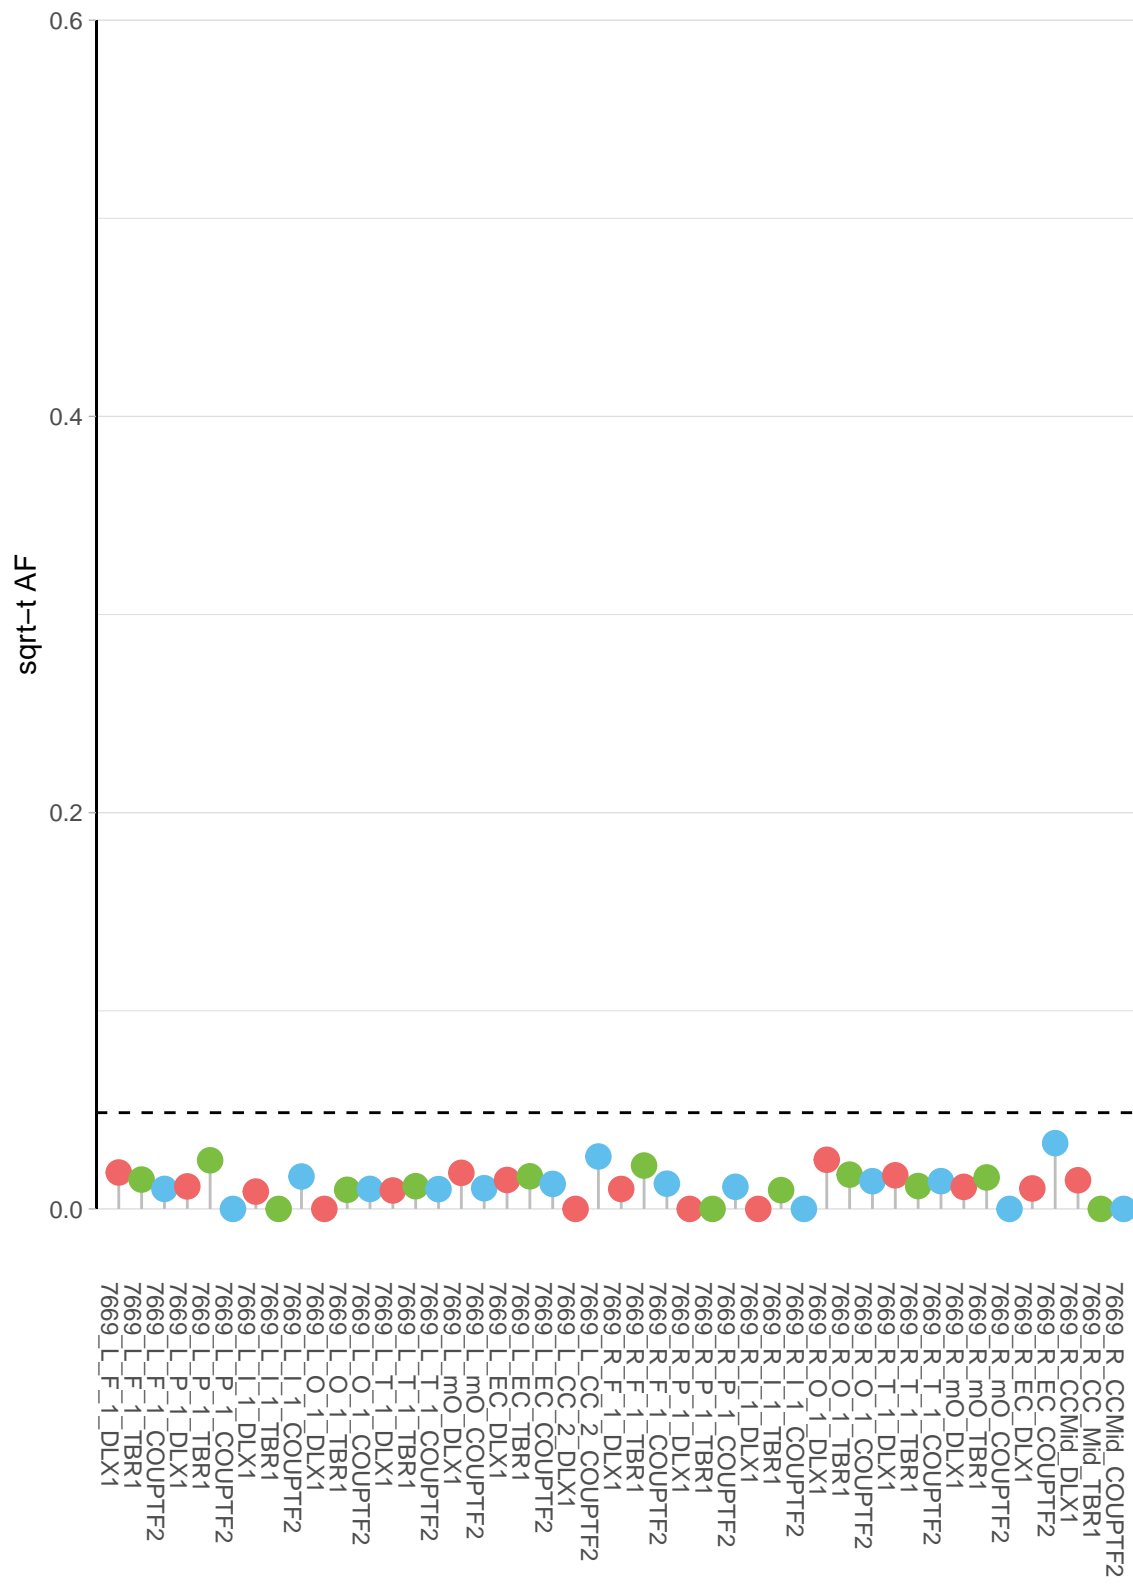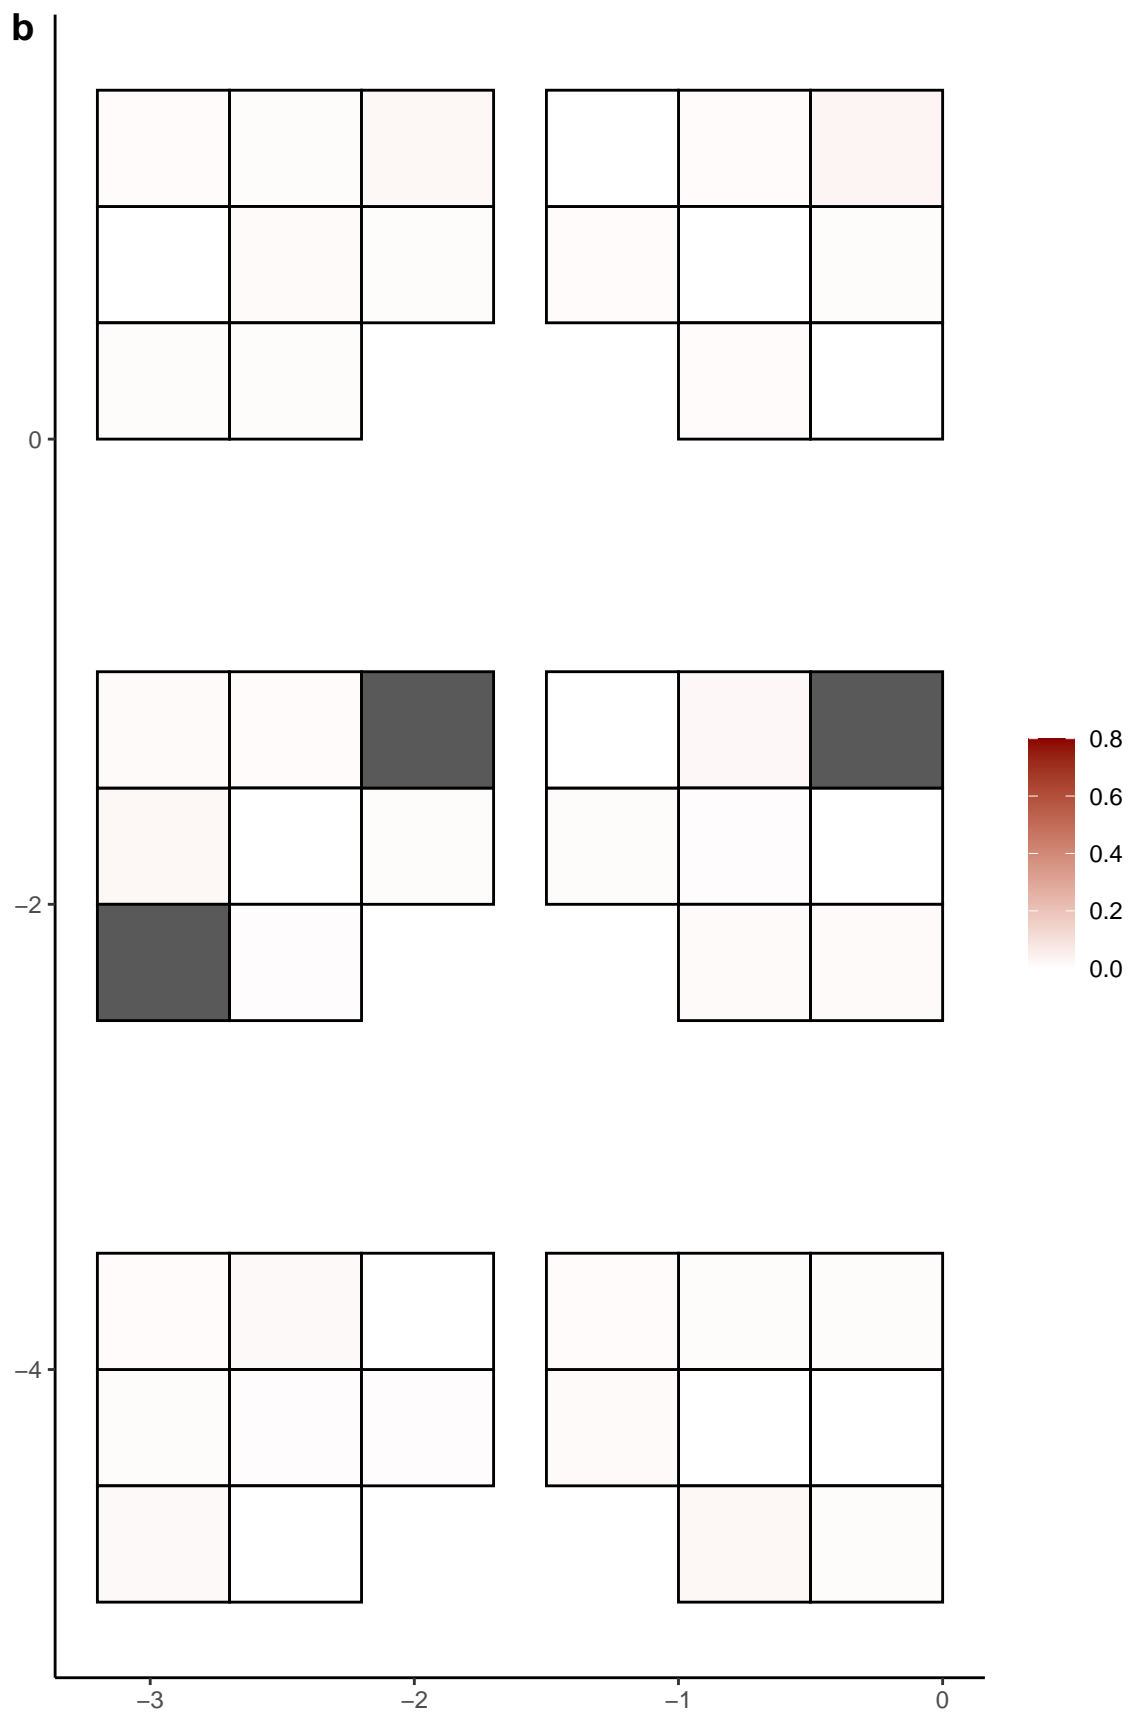

**a** ID05 12-98567754-C-T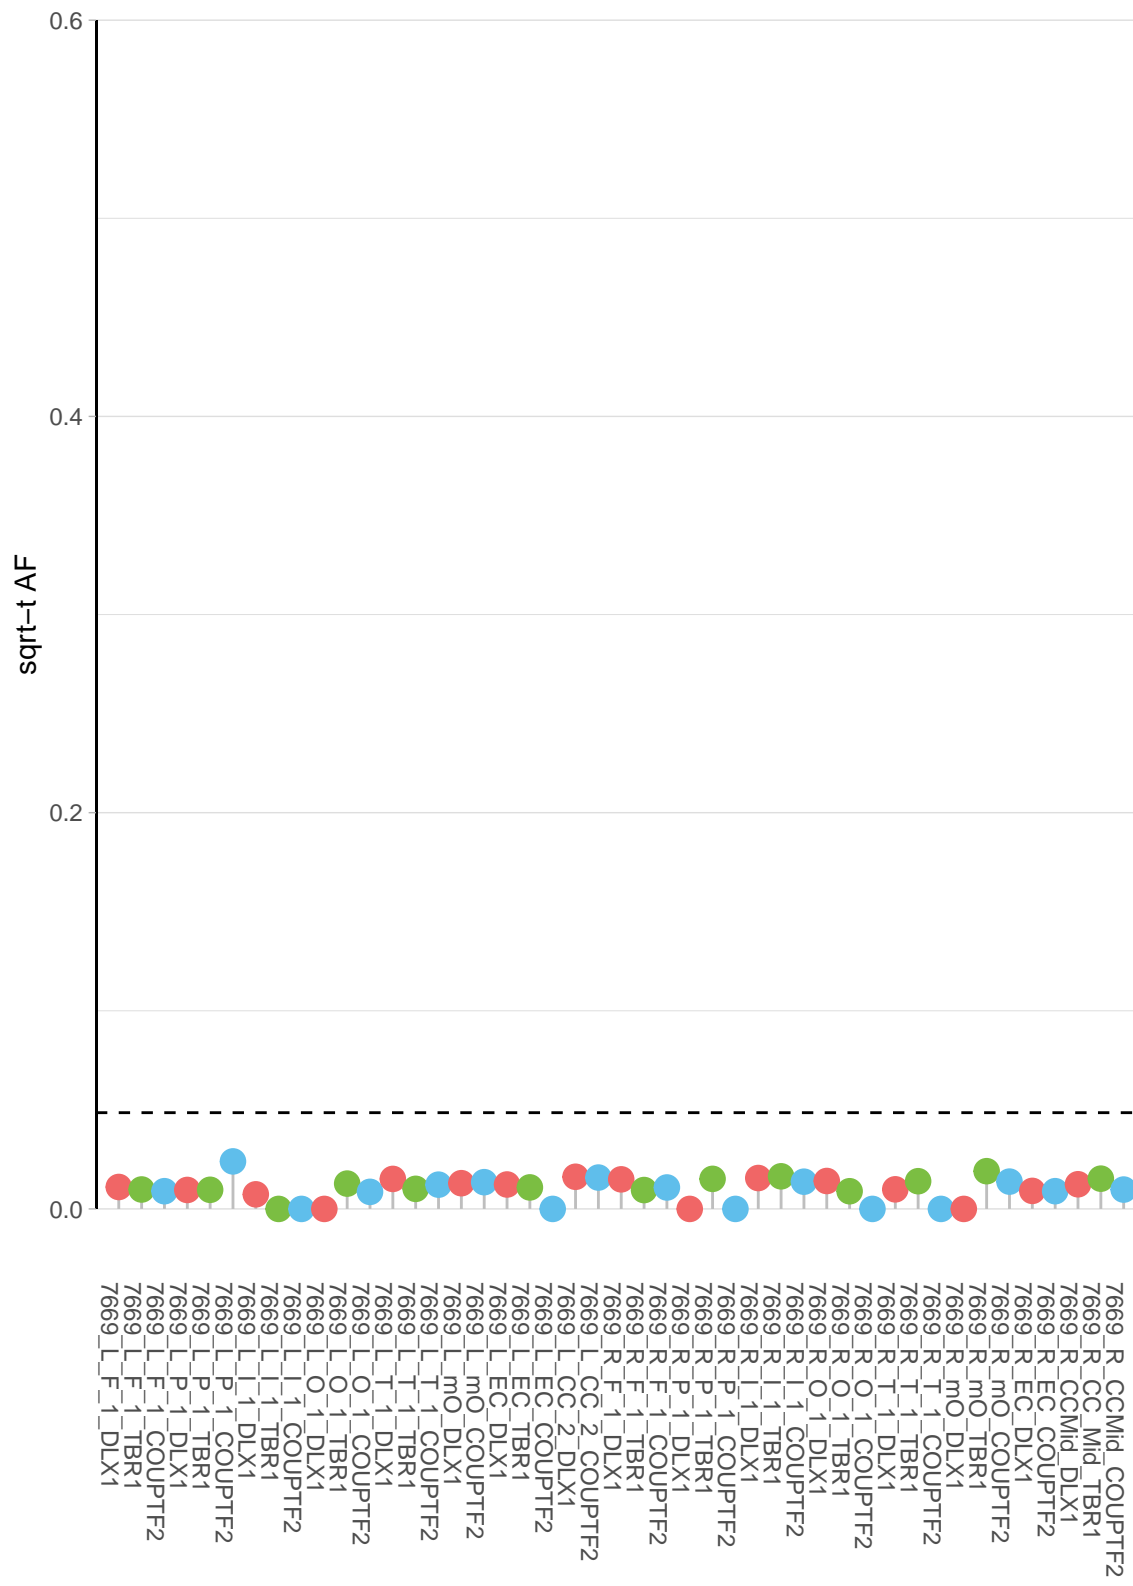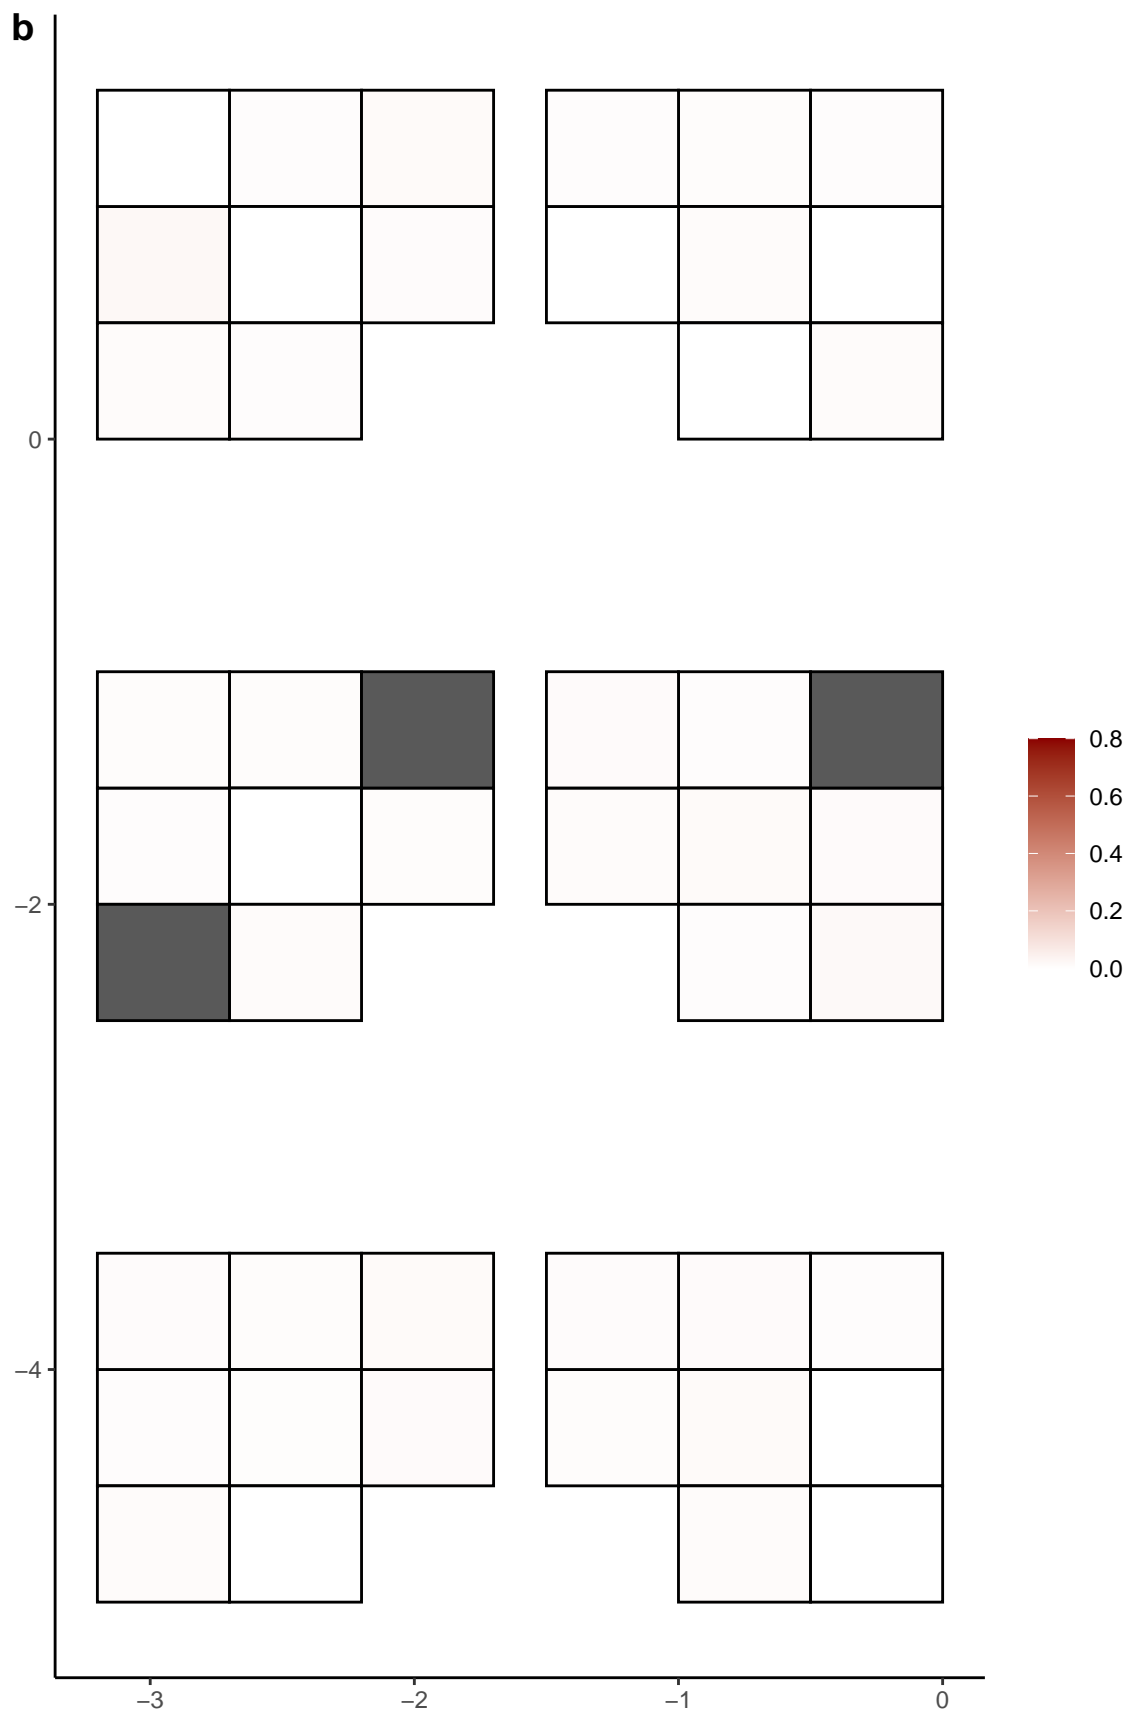

**a** ID05 12-98674630-C-T

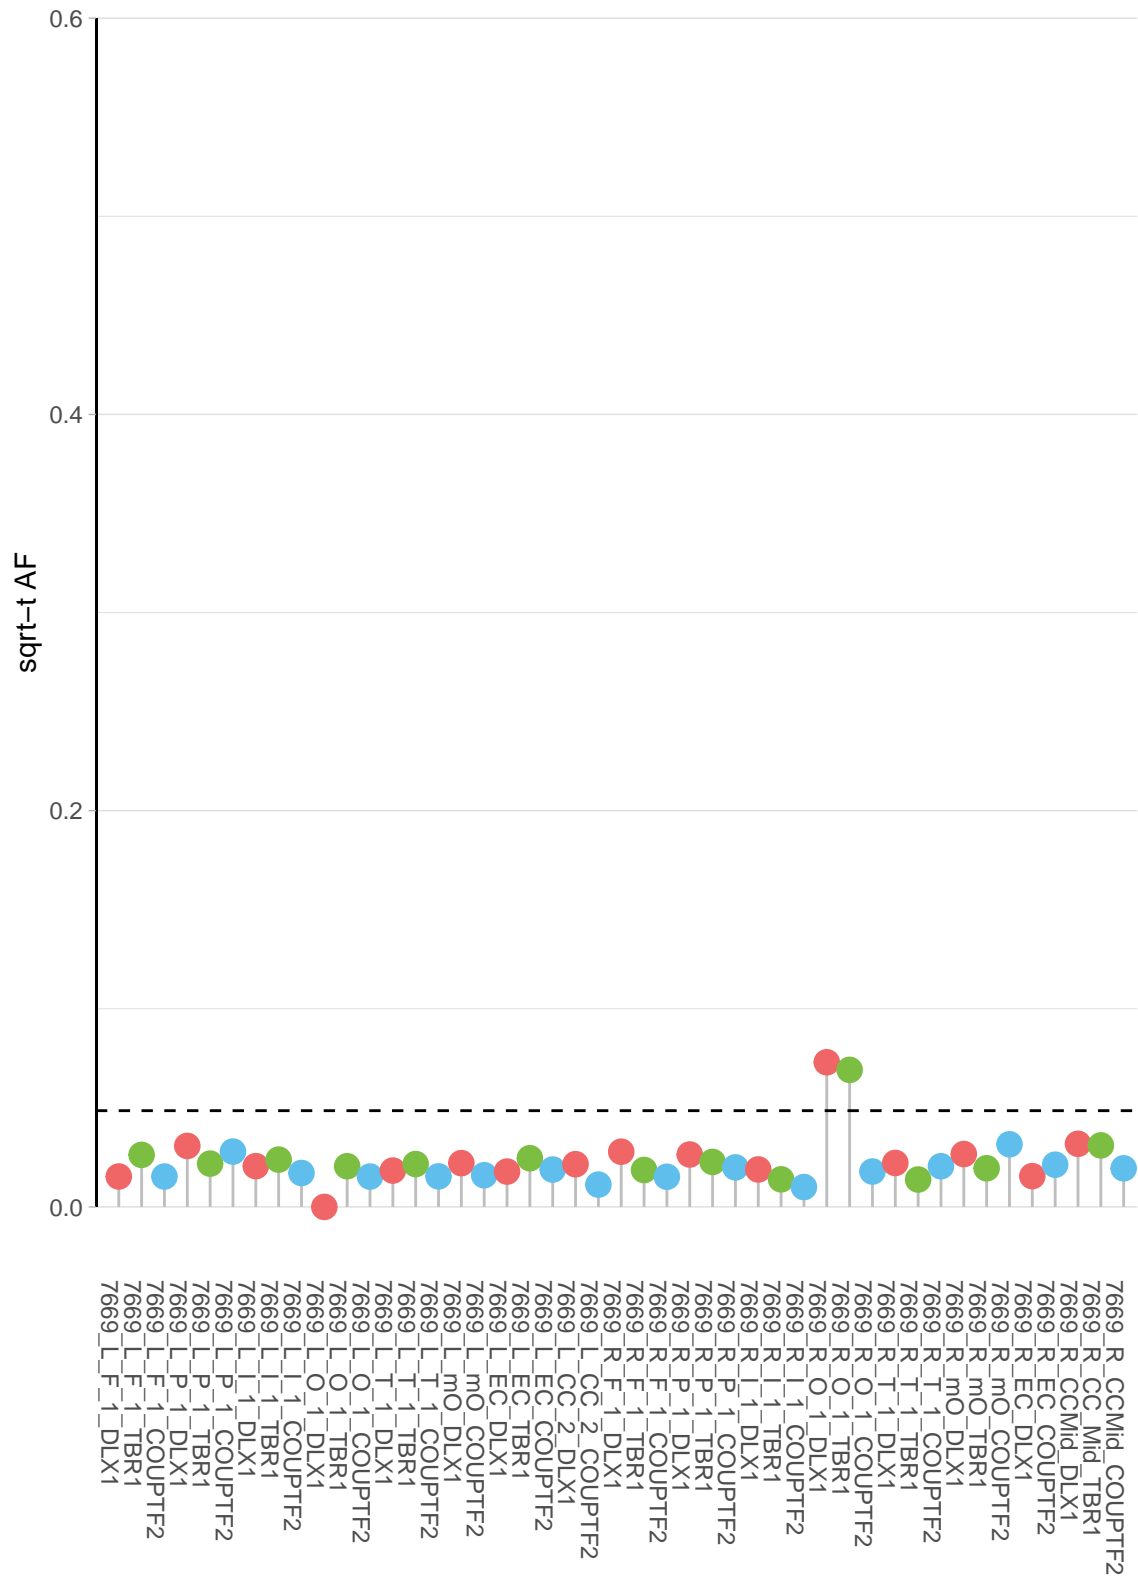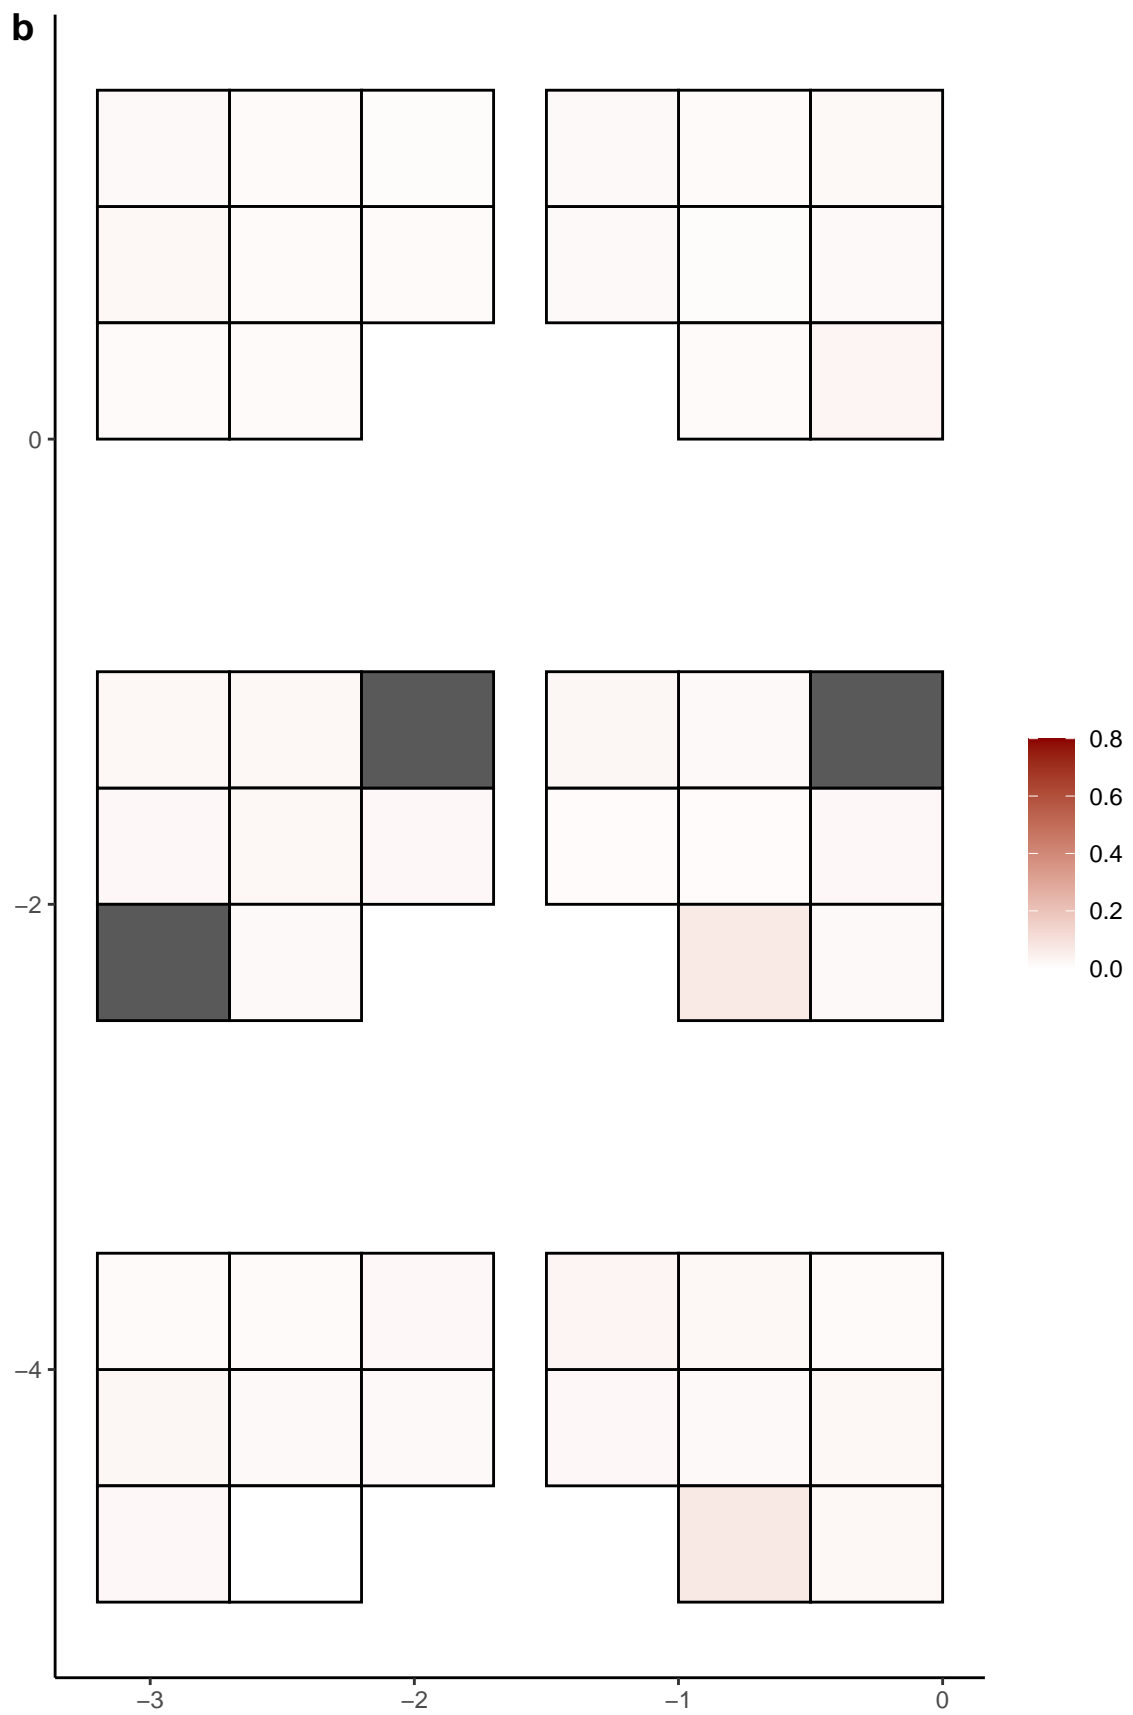

**a** ID05 13-102240084-A-T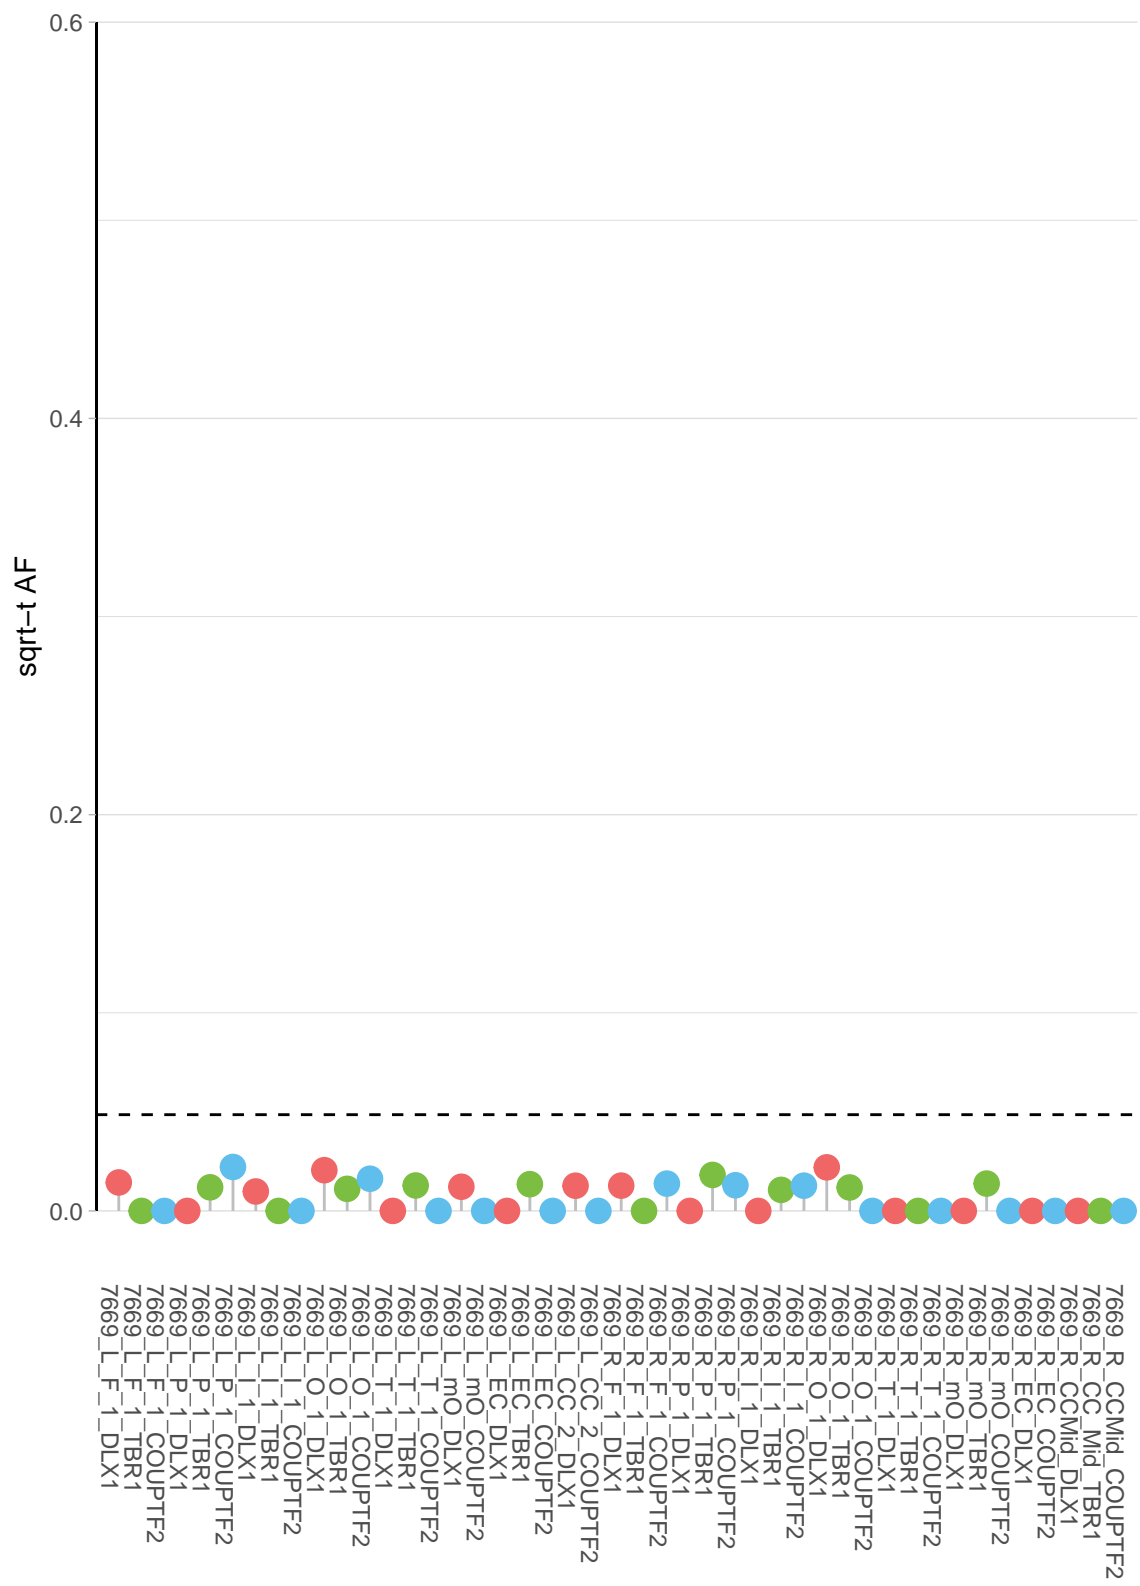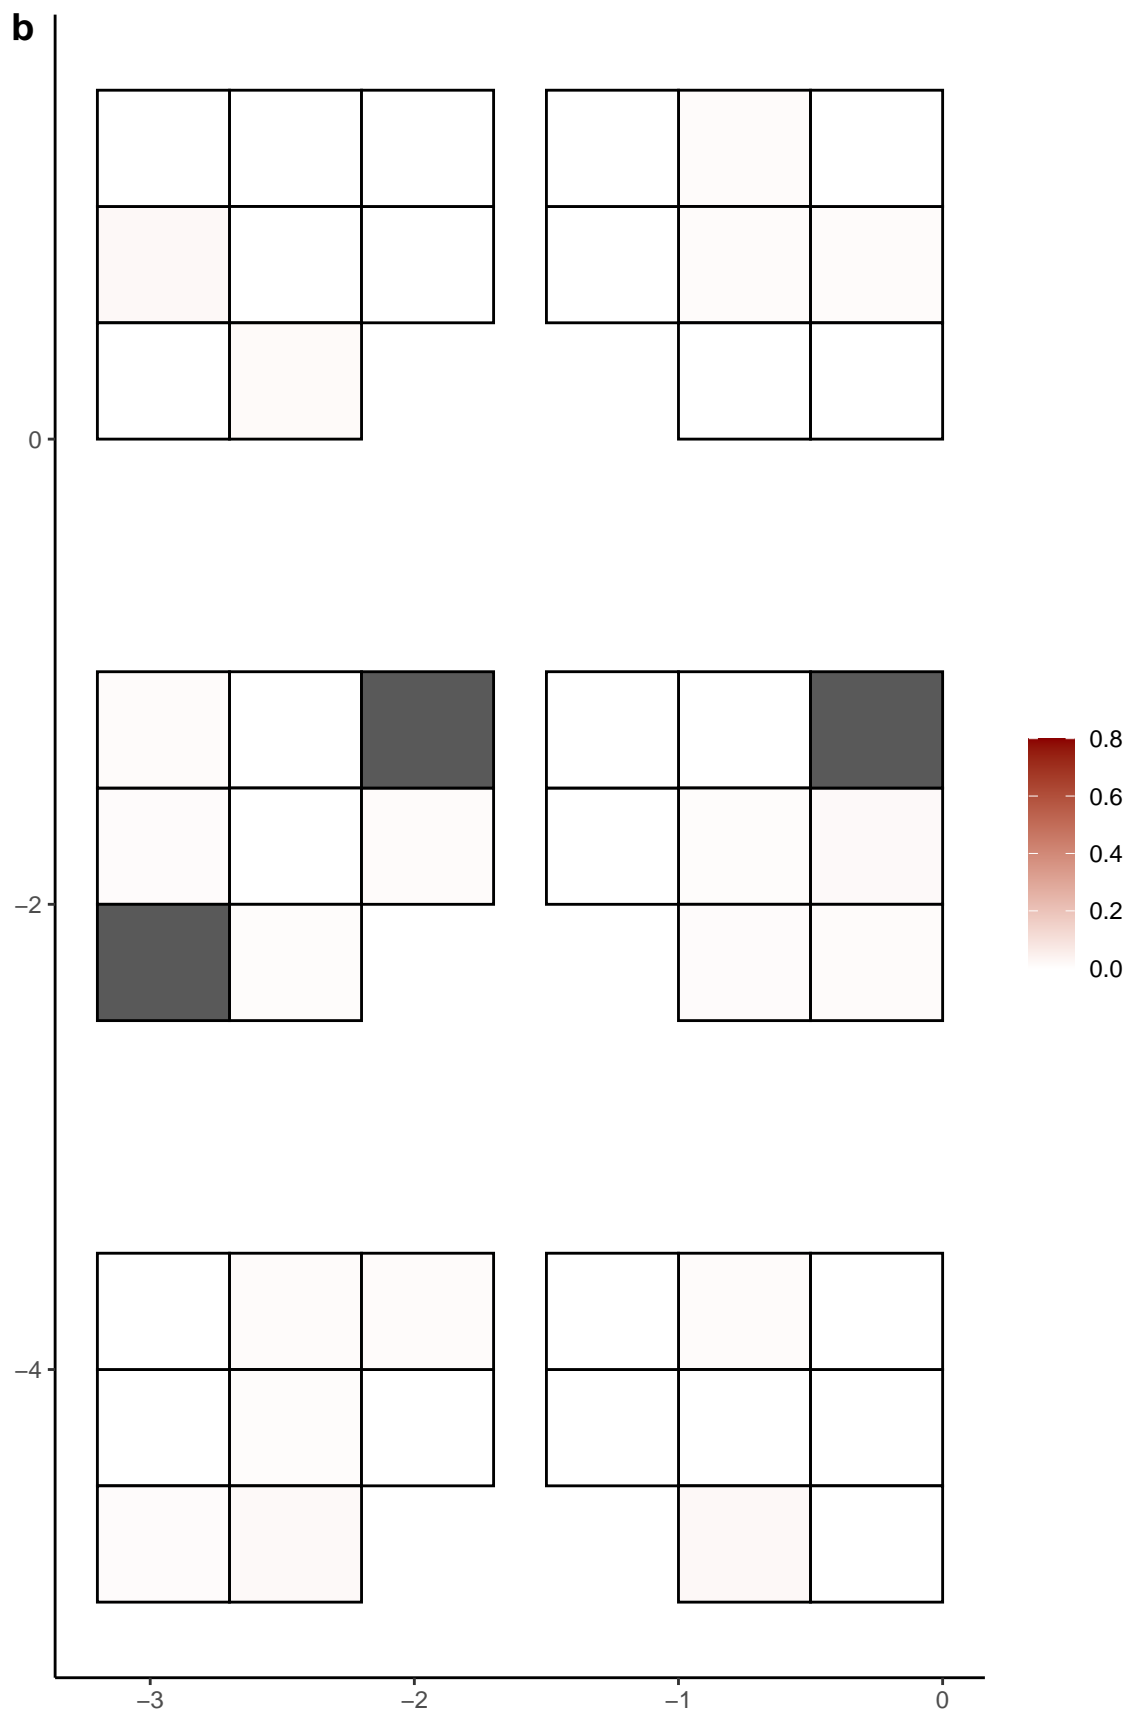



**a** ID05 13-106141548-C-T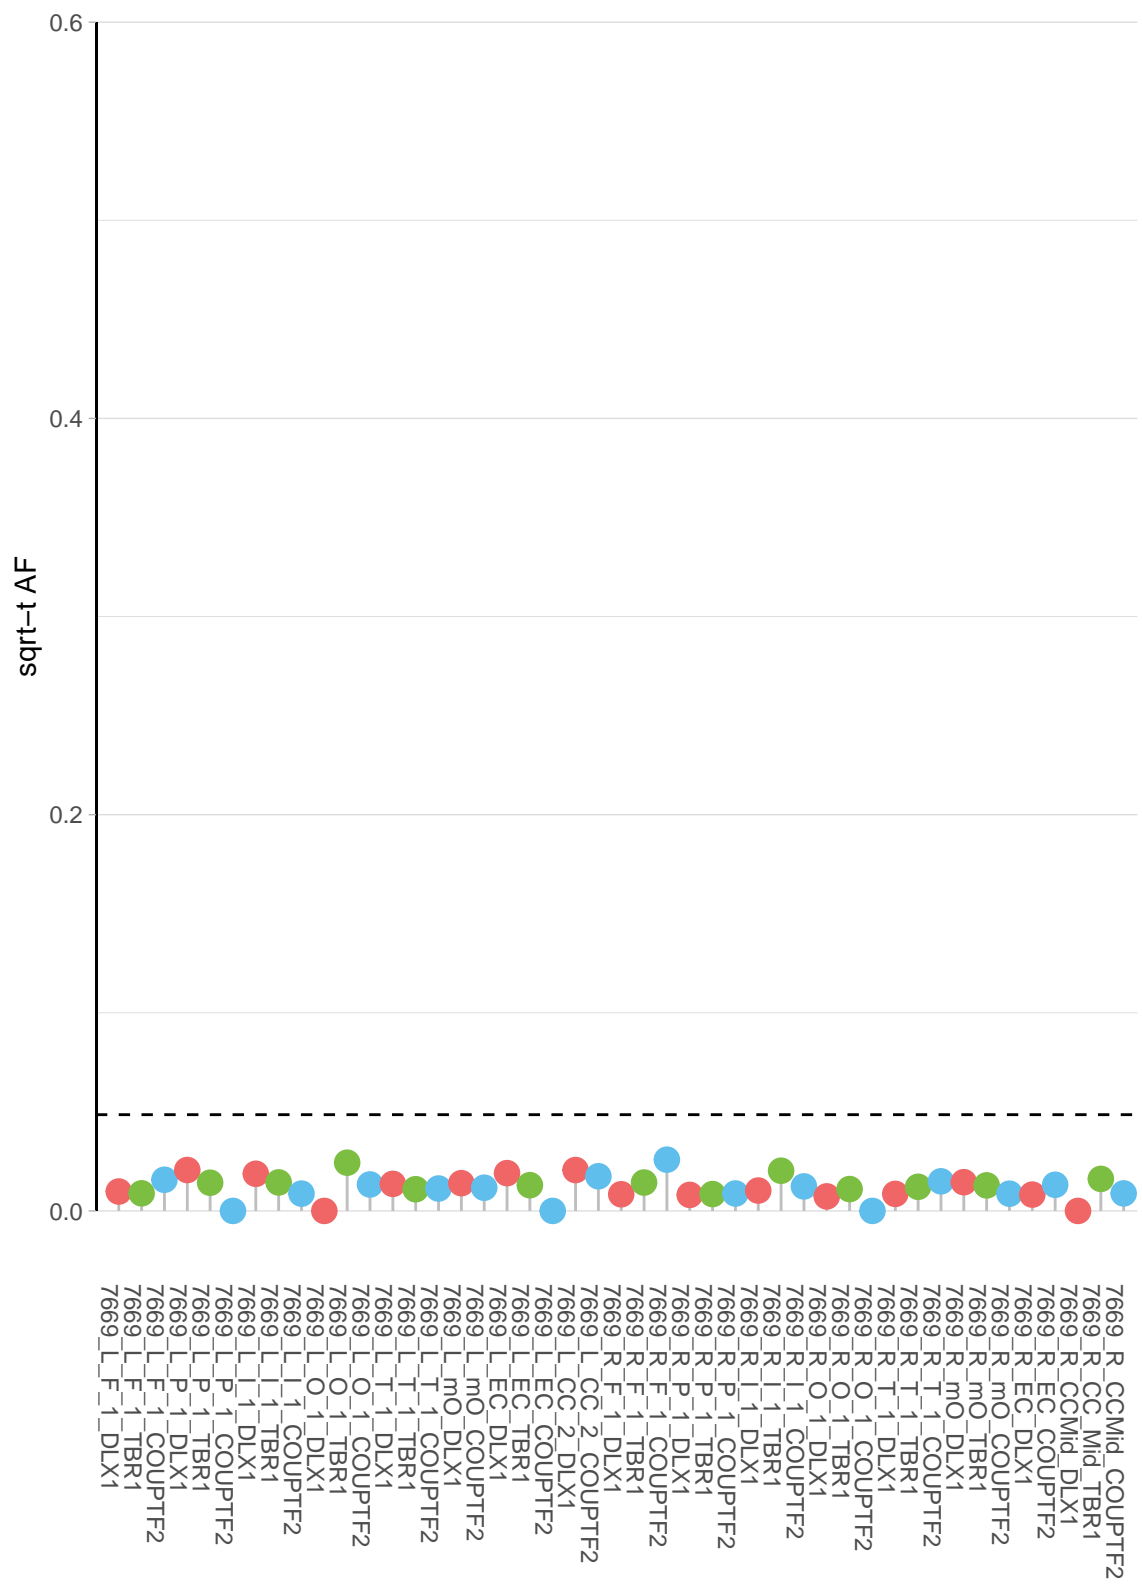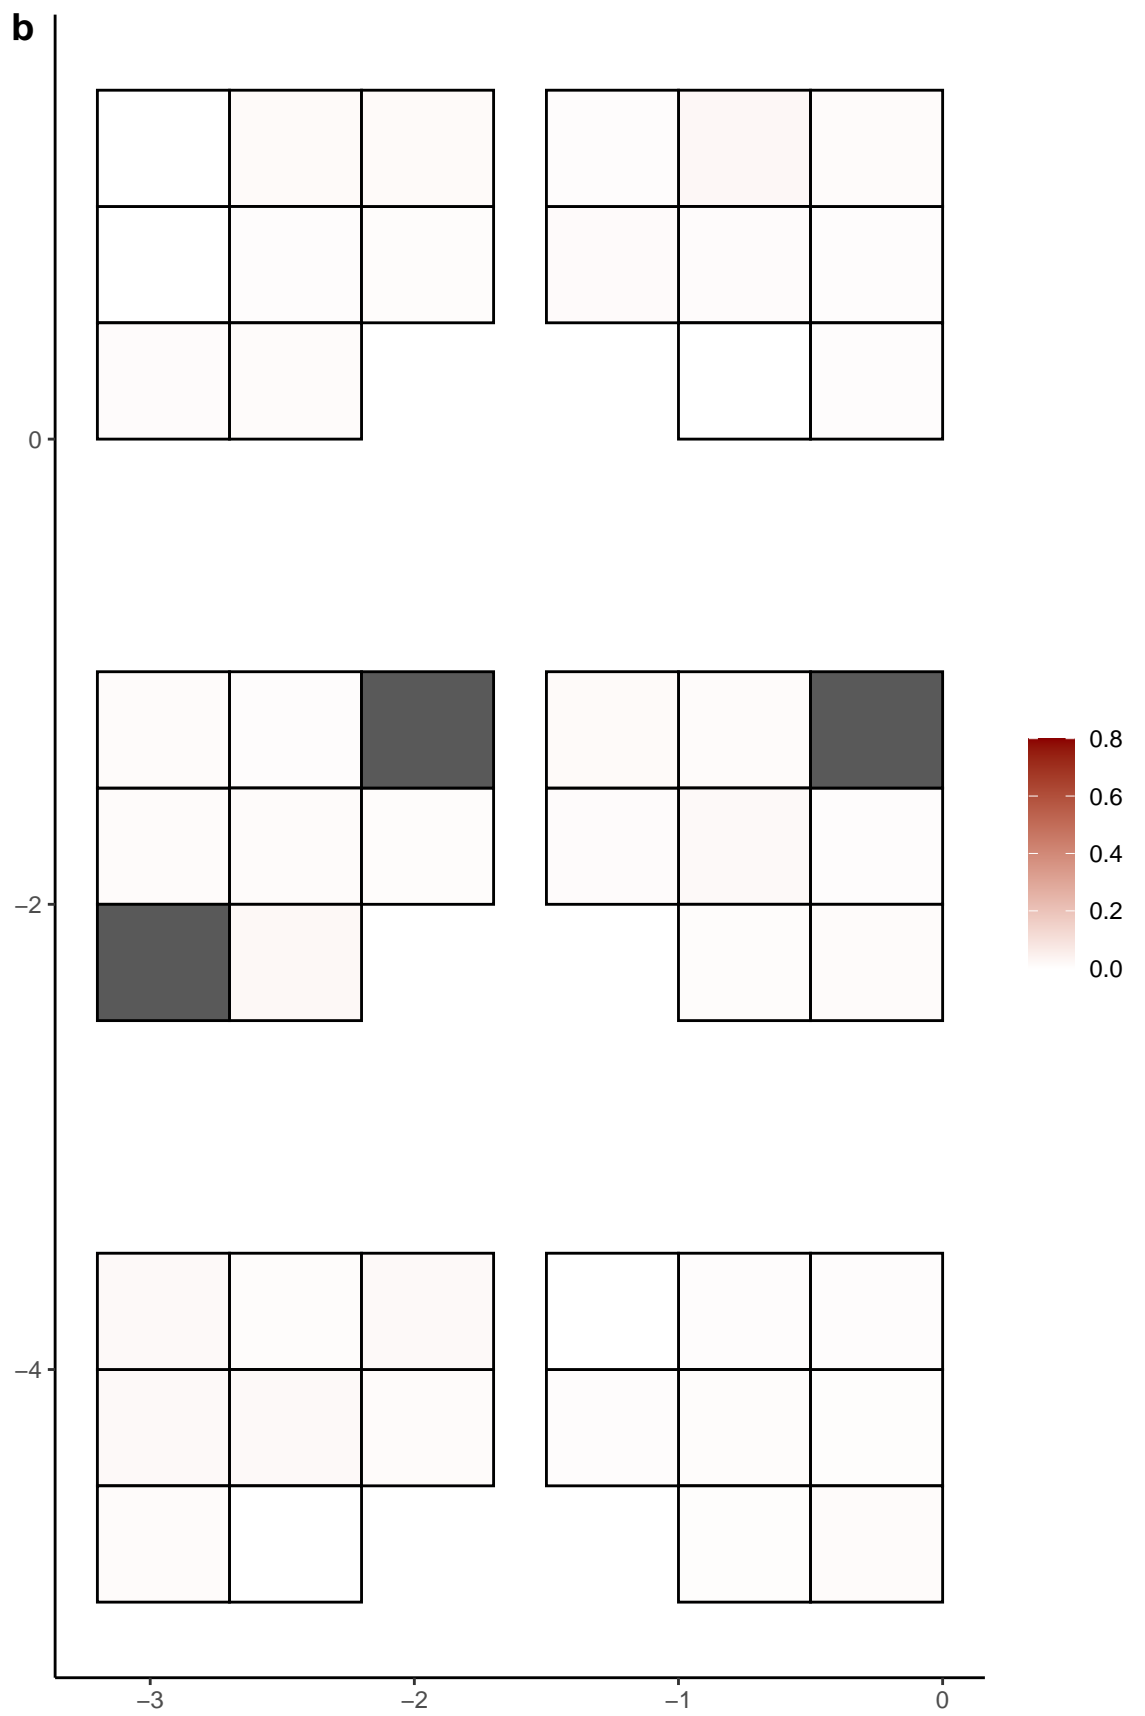

**a** ID05 13-109148397-G-A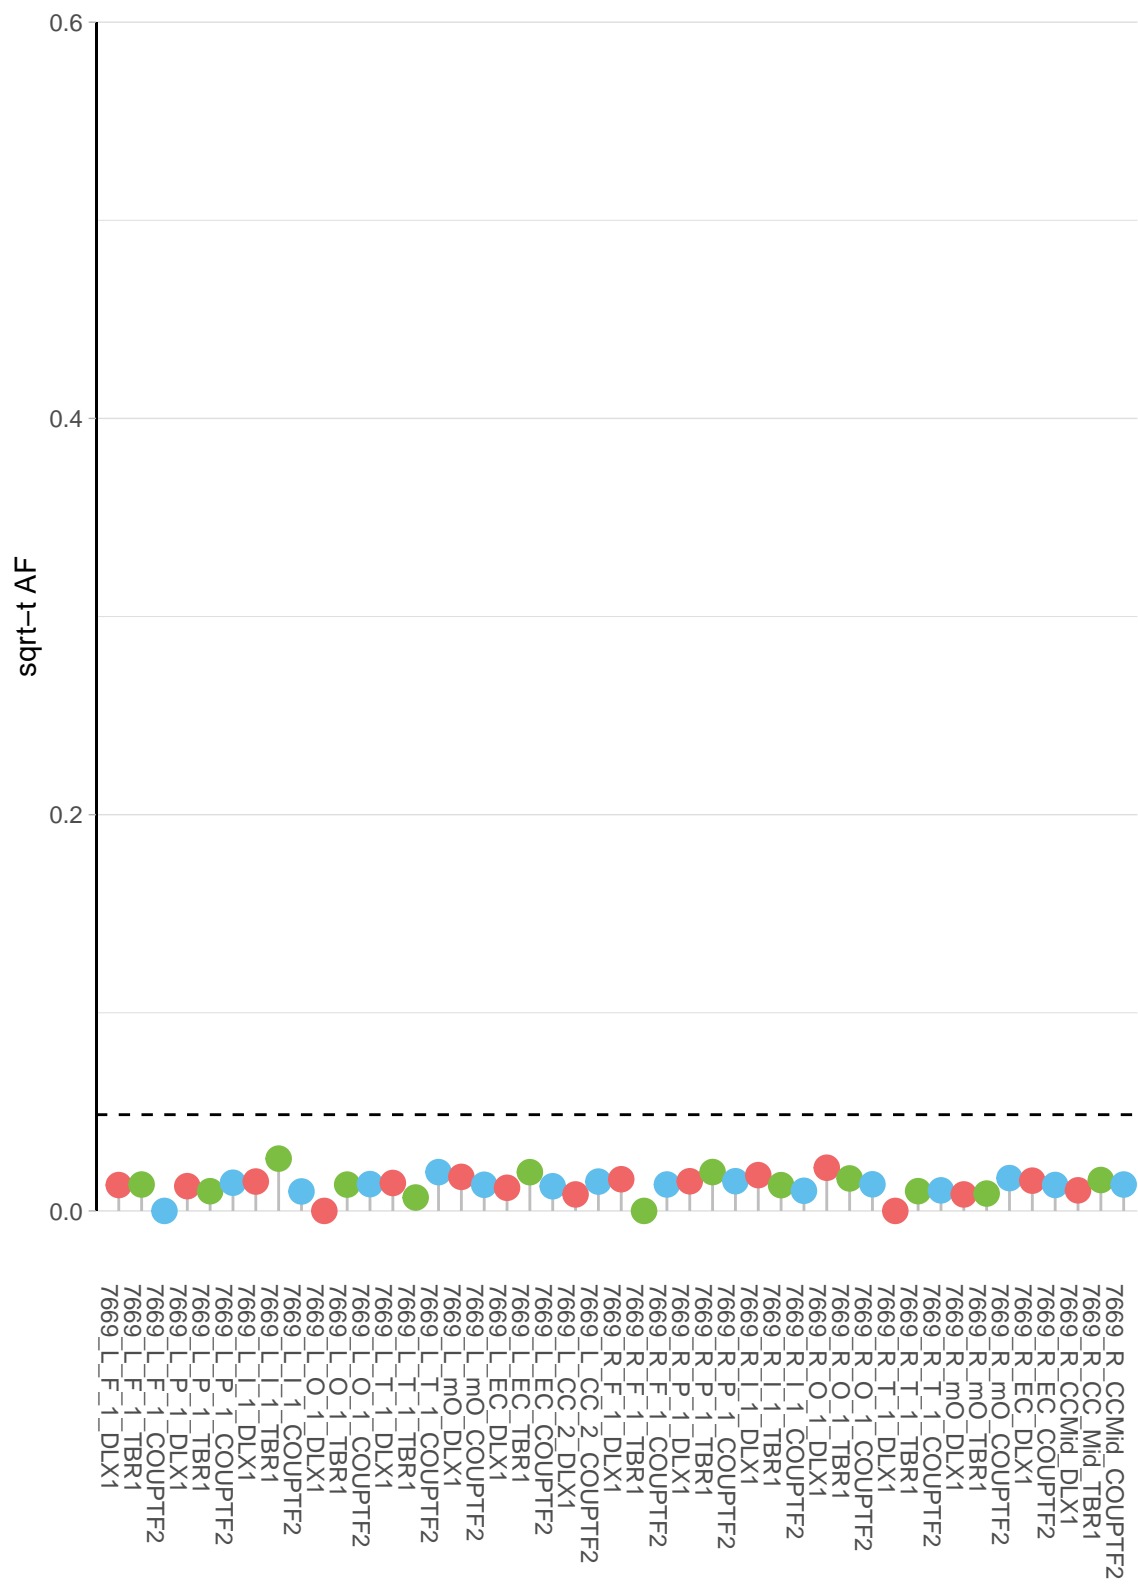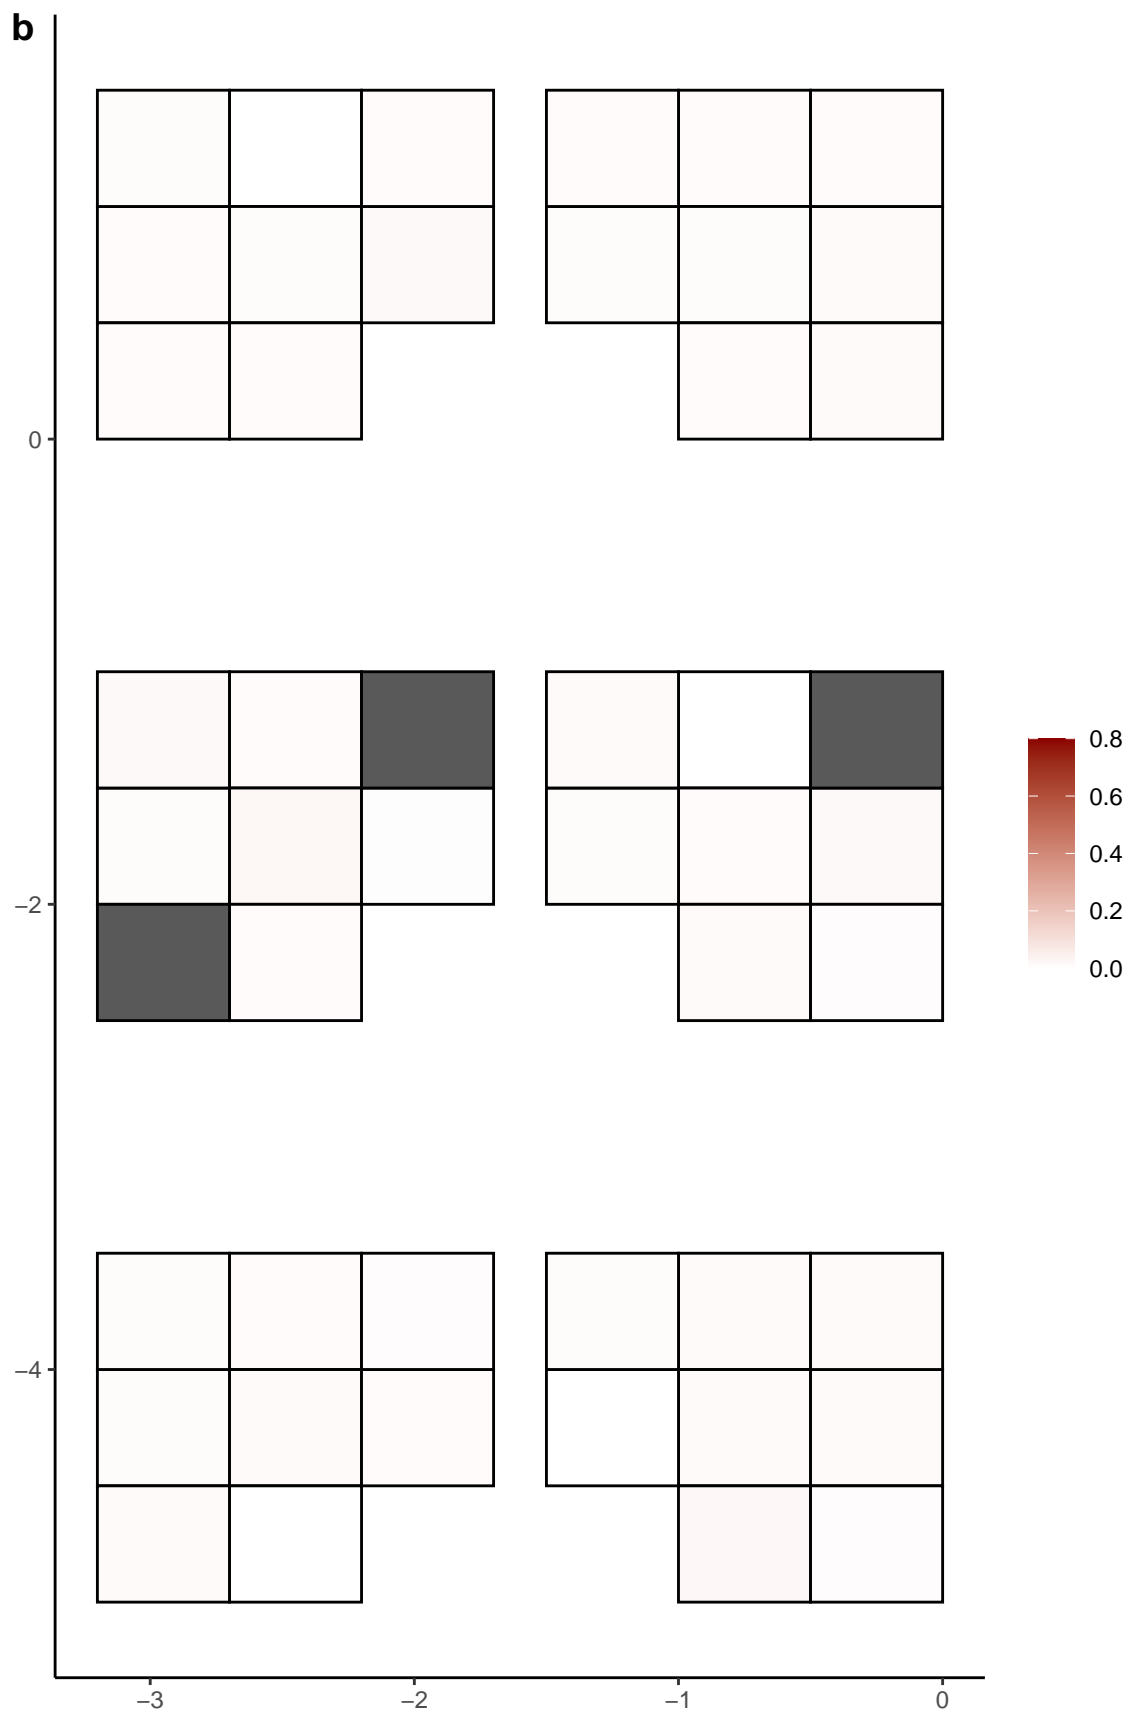

**a** ID05 13-109292761-G-A

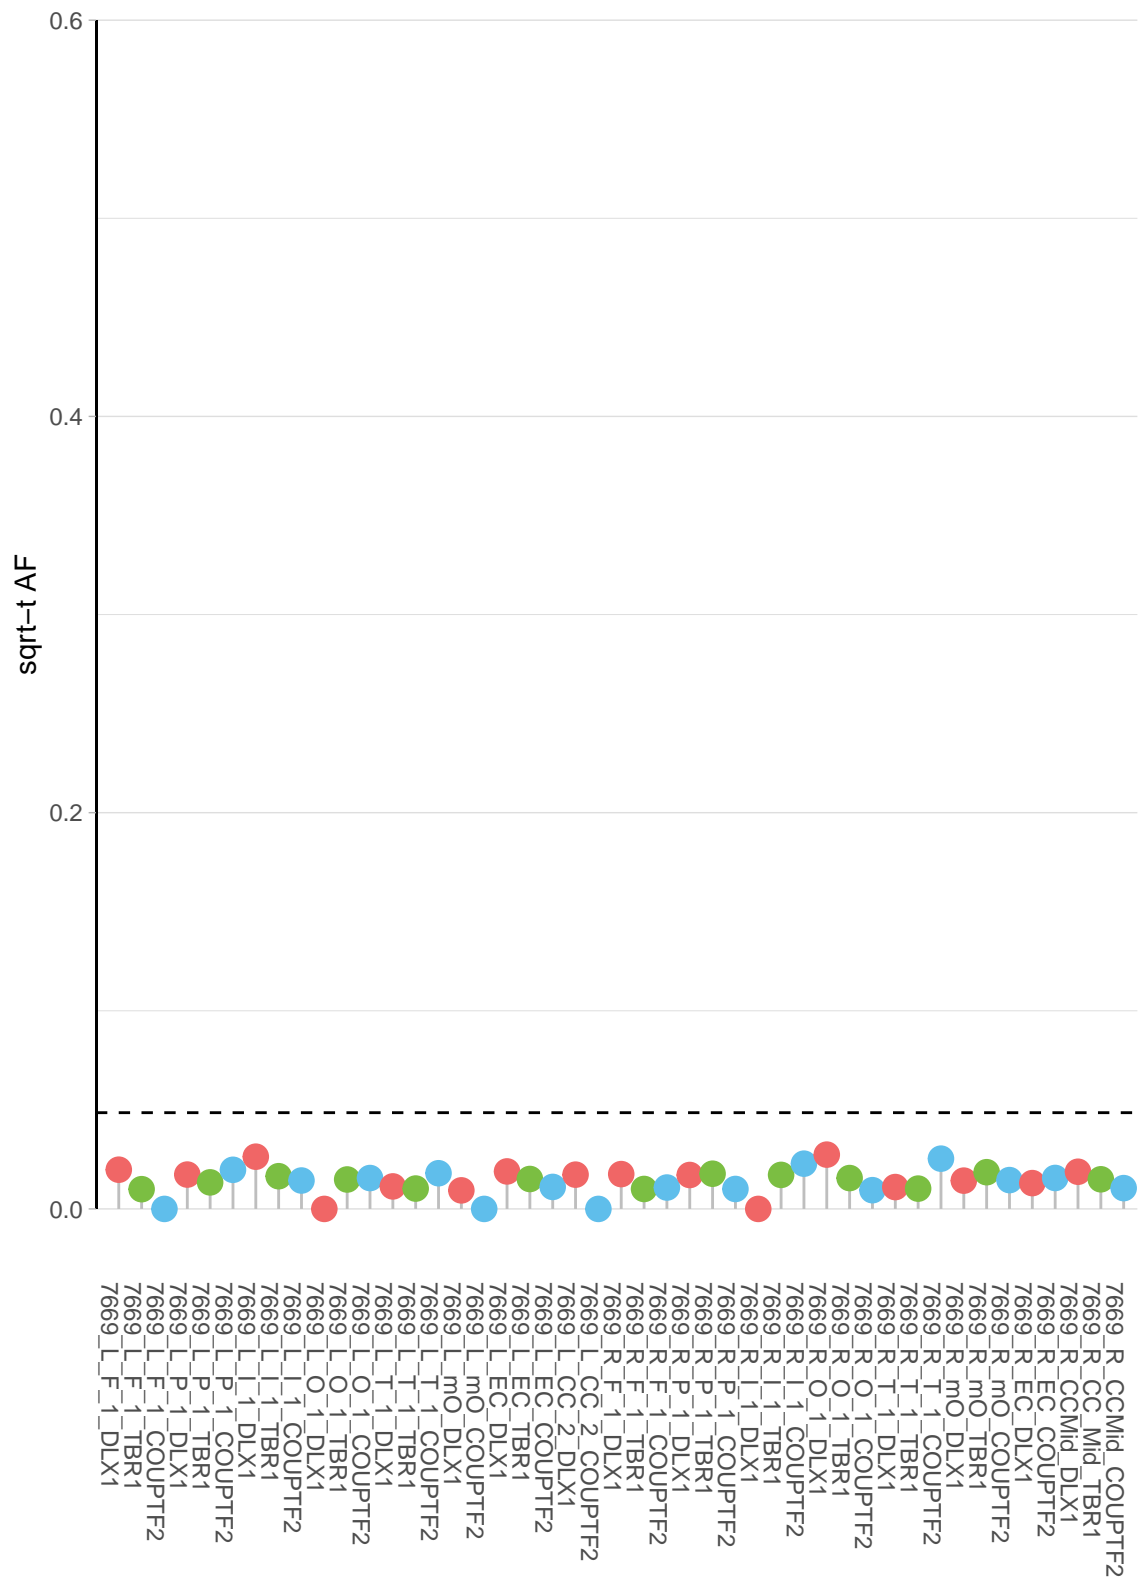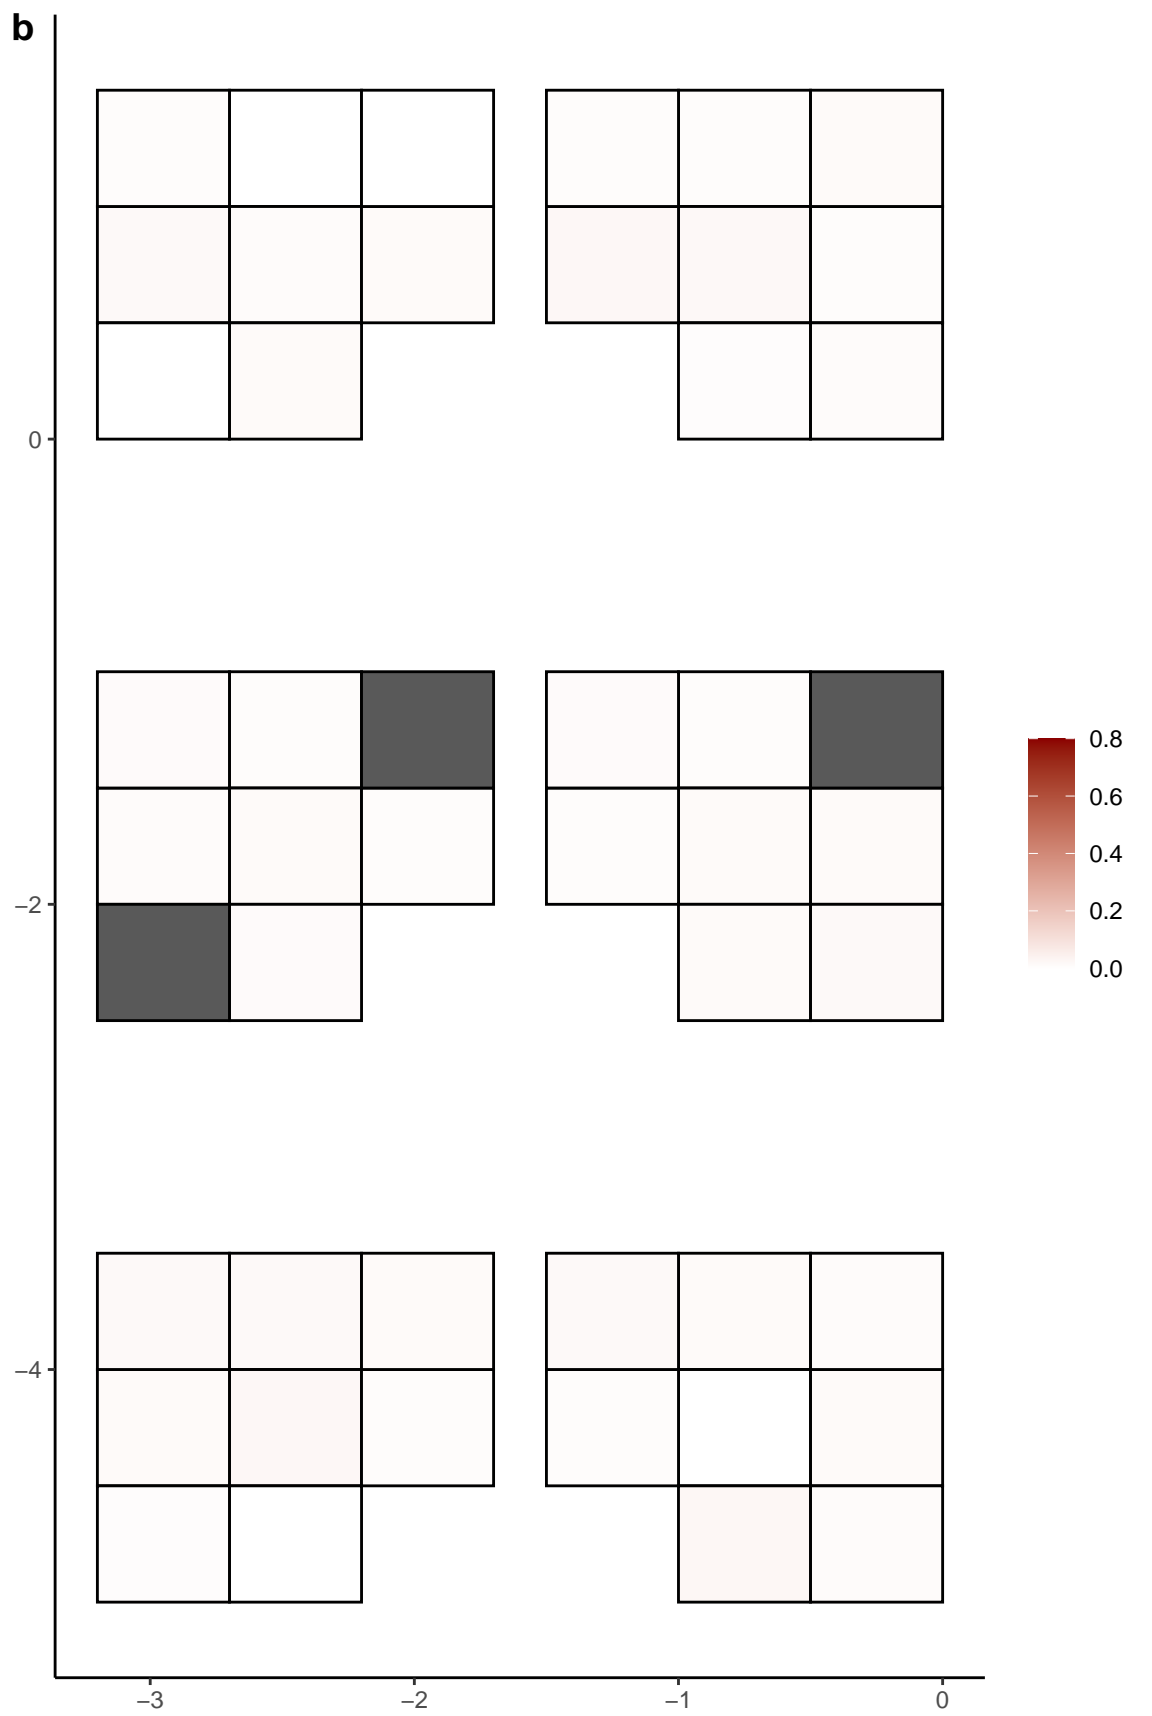

**a** ID05 13-111450669-C-T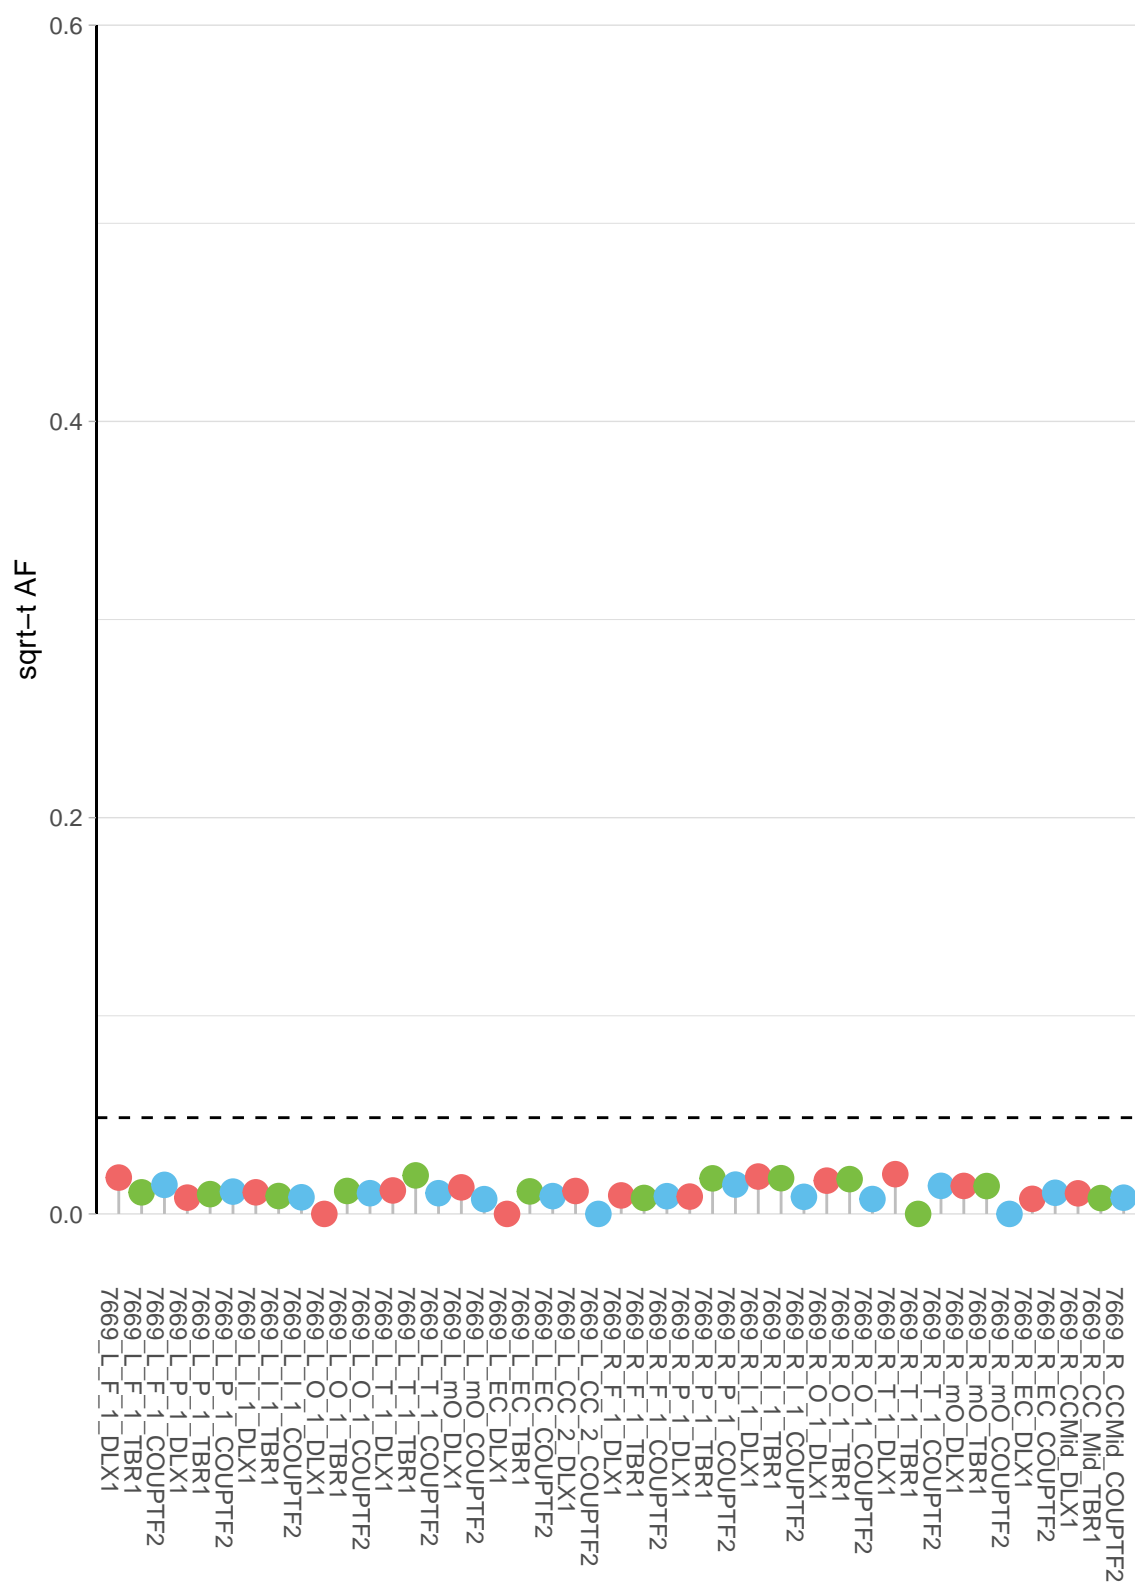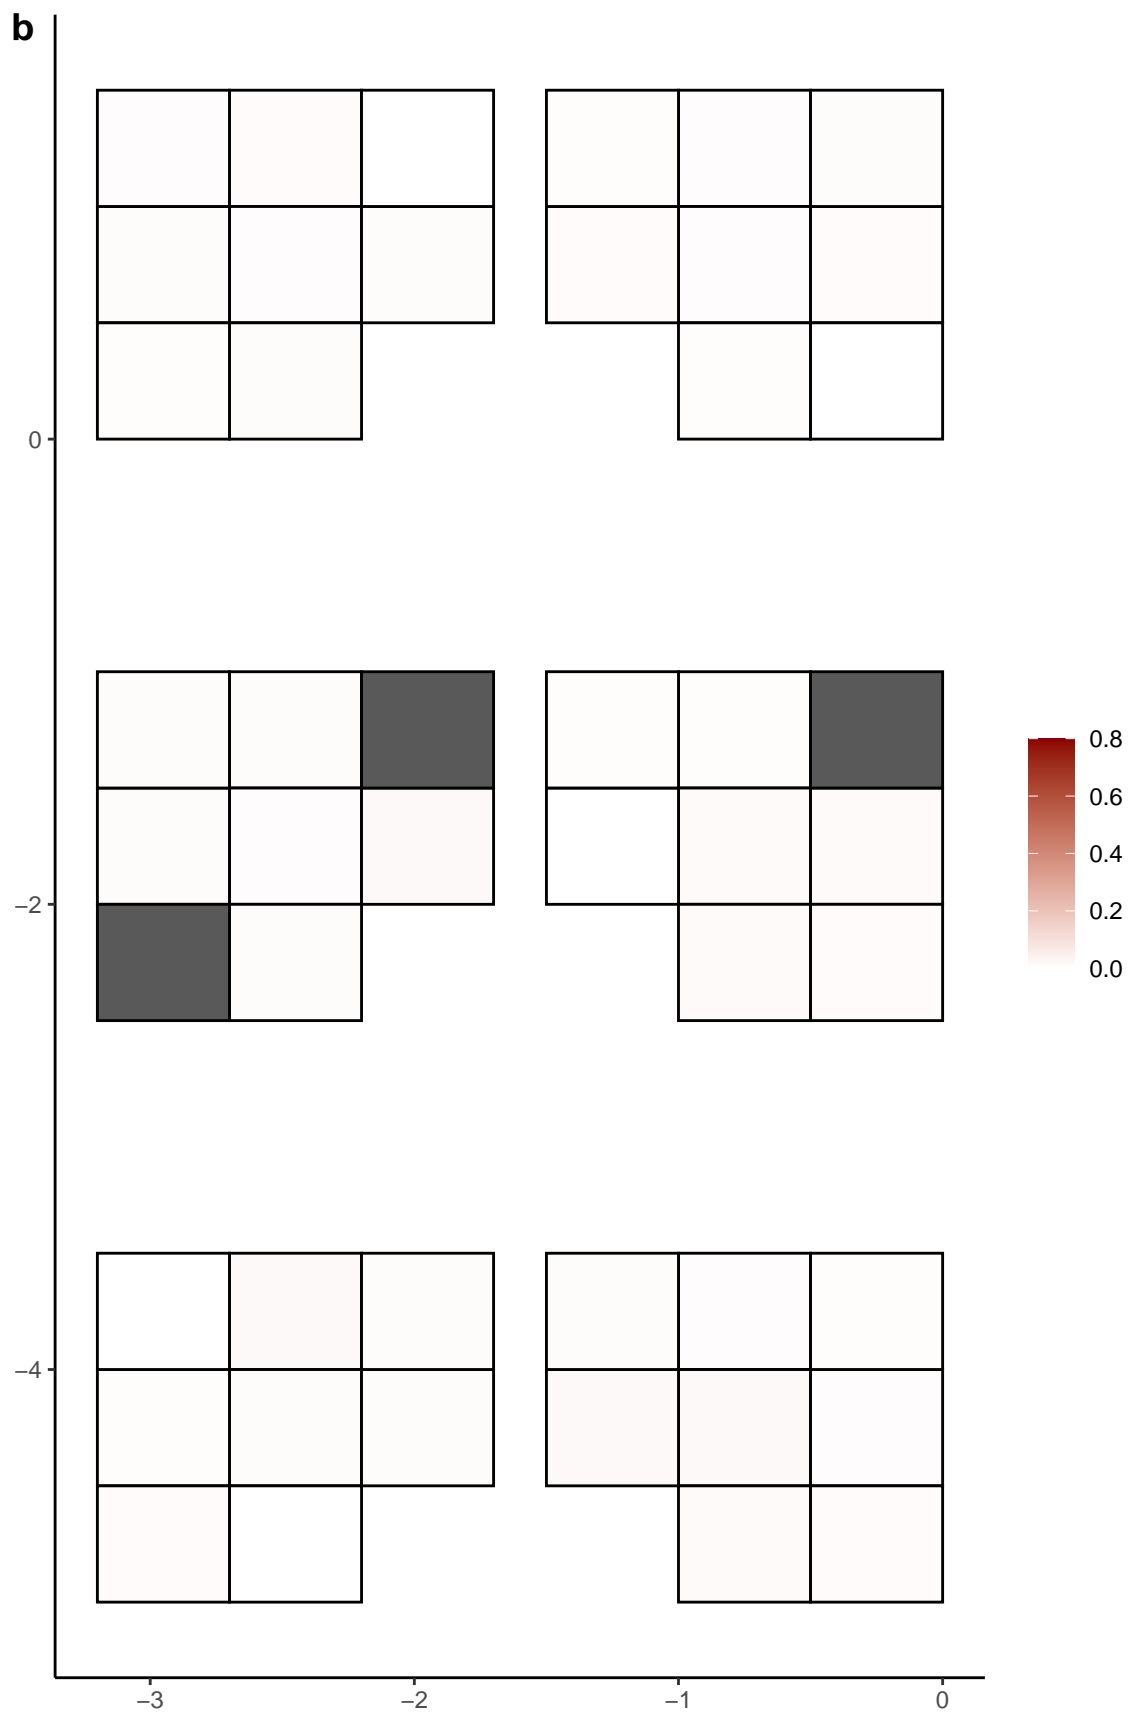

**a** ID05 13-113879720-G-A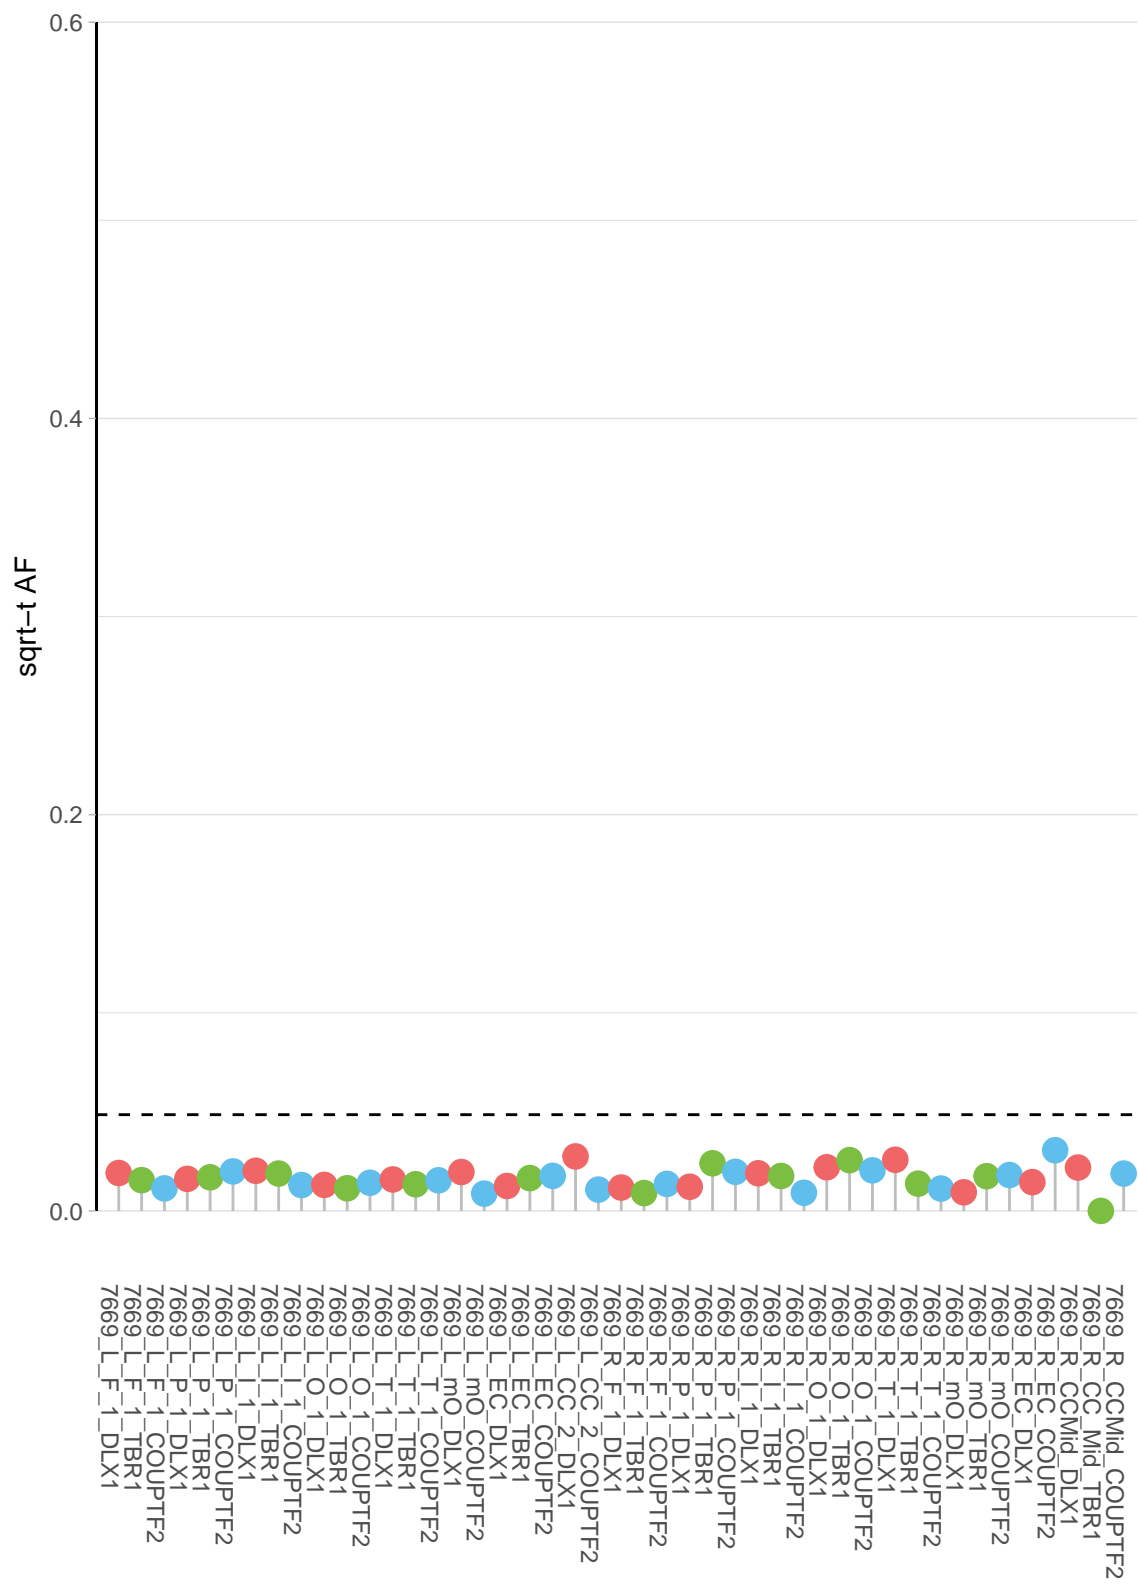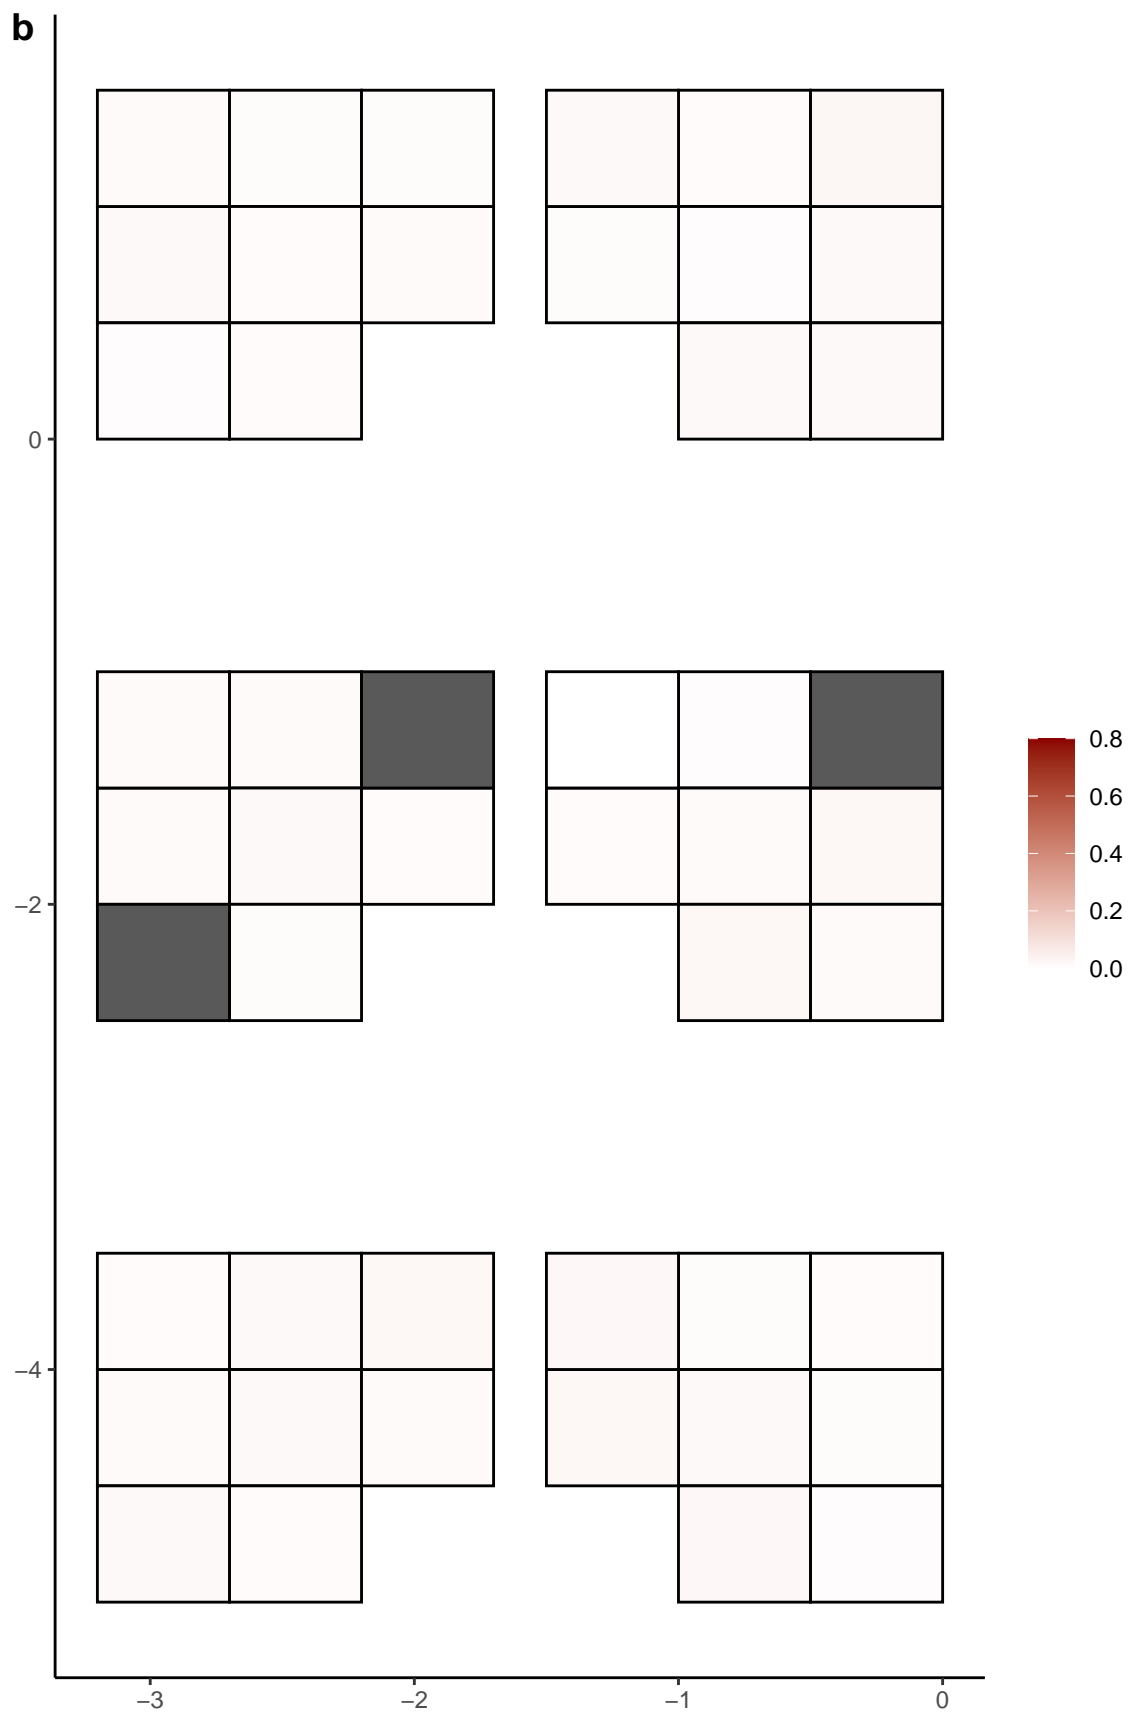

**a** ID05 13-26972654-G-A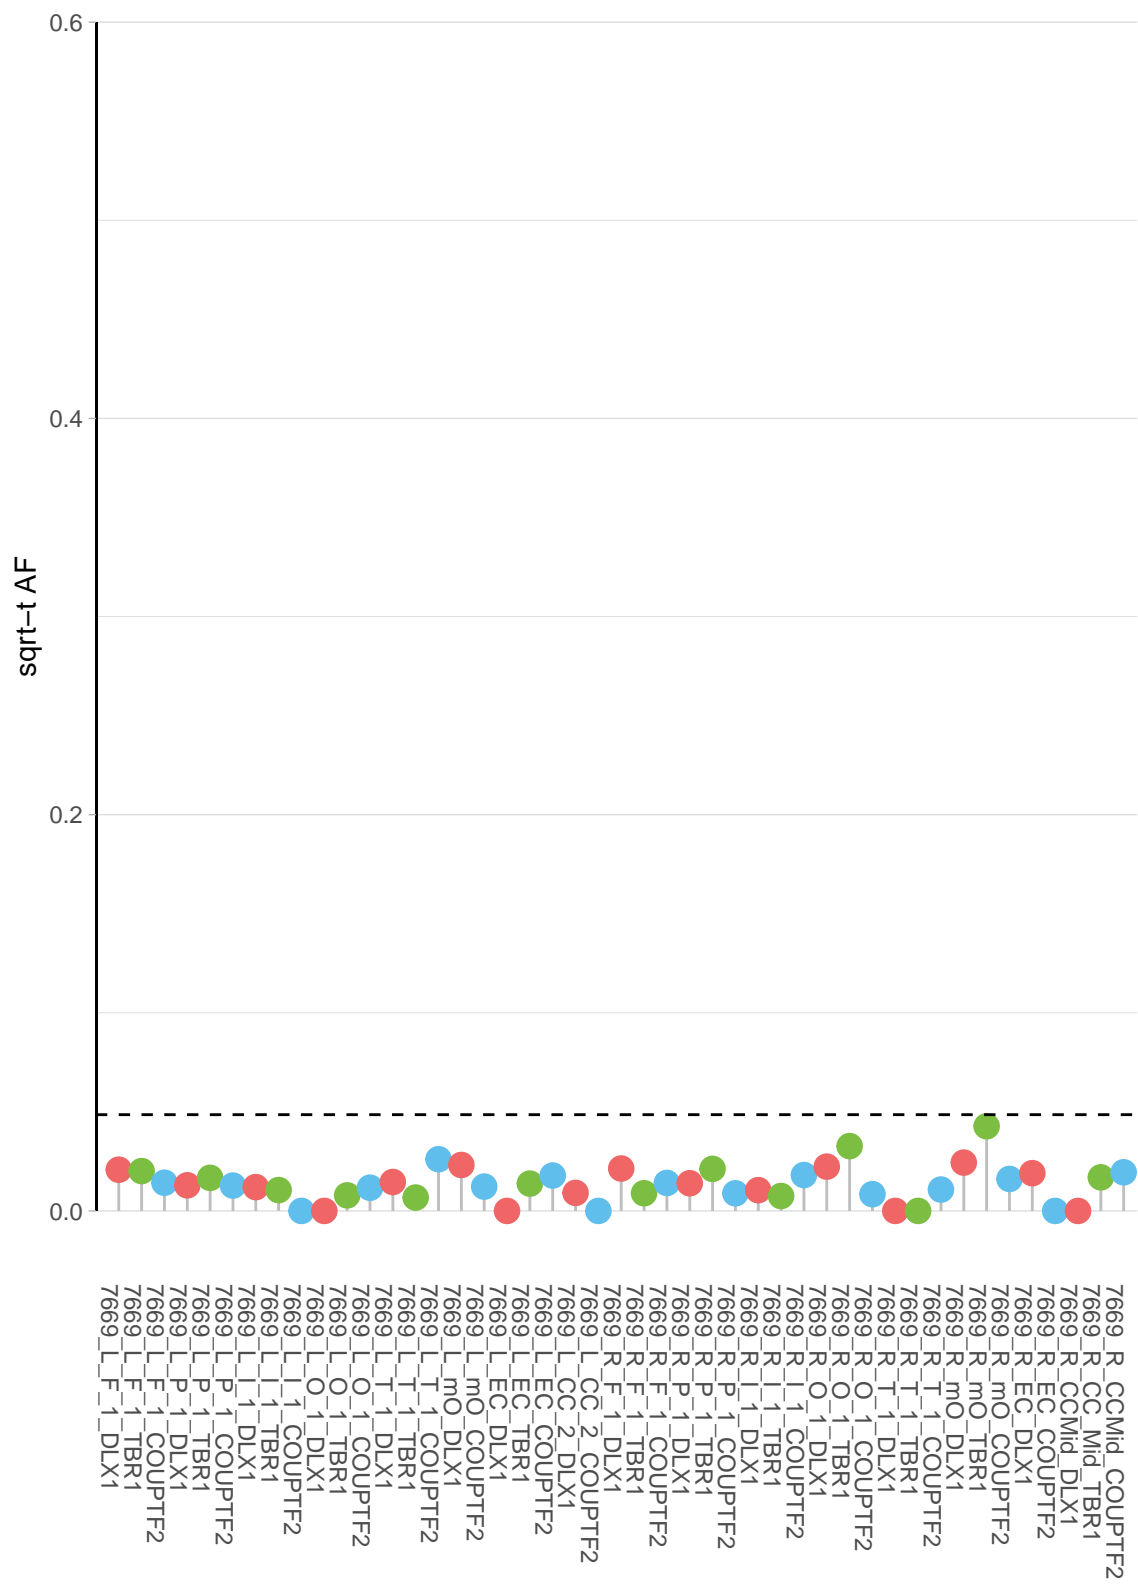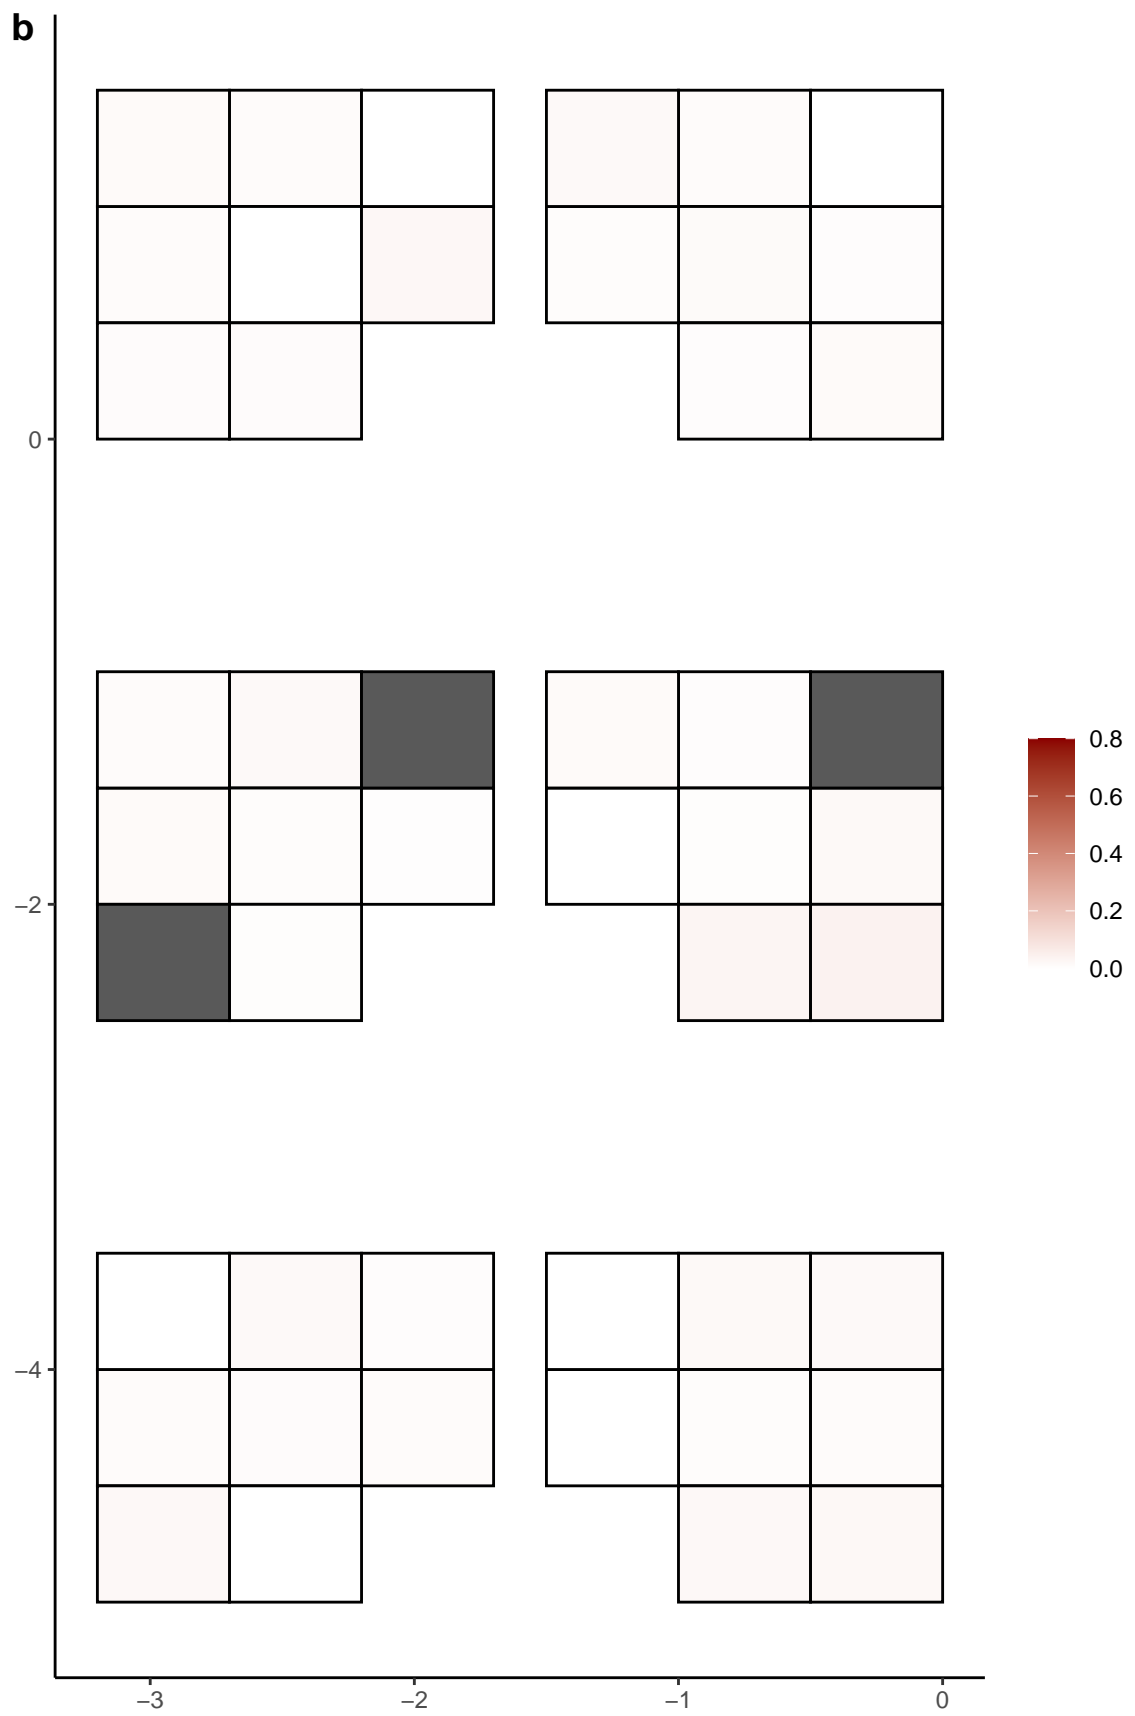

**a** ID05 13-26972655-G-A

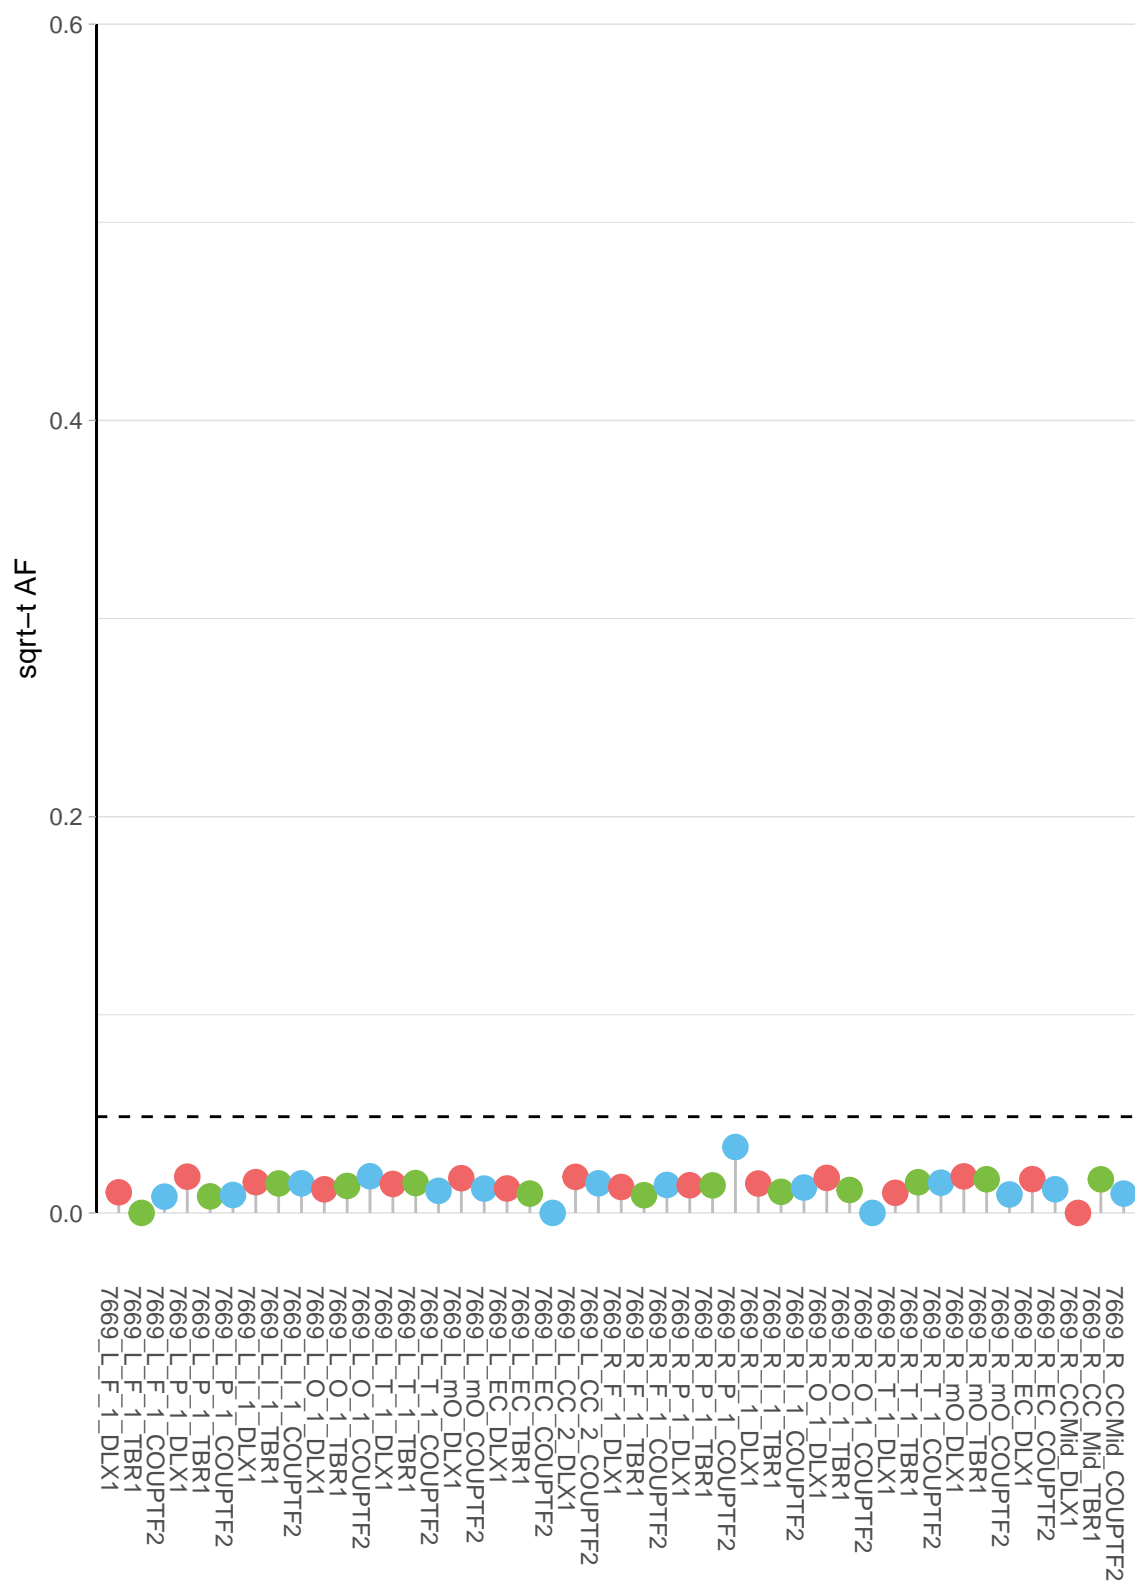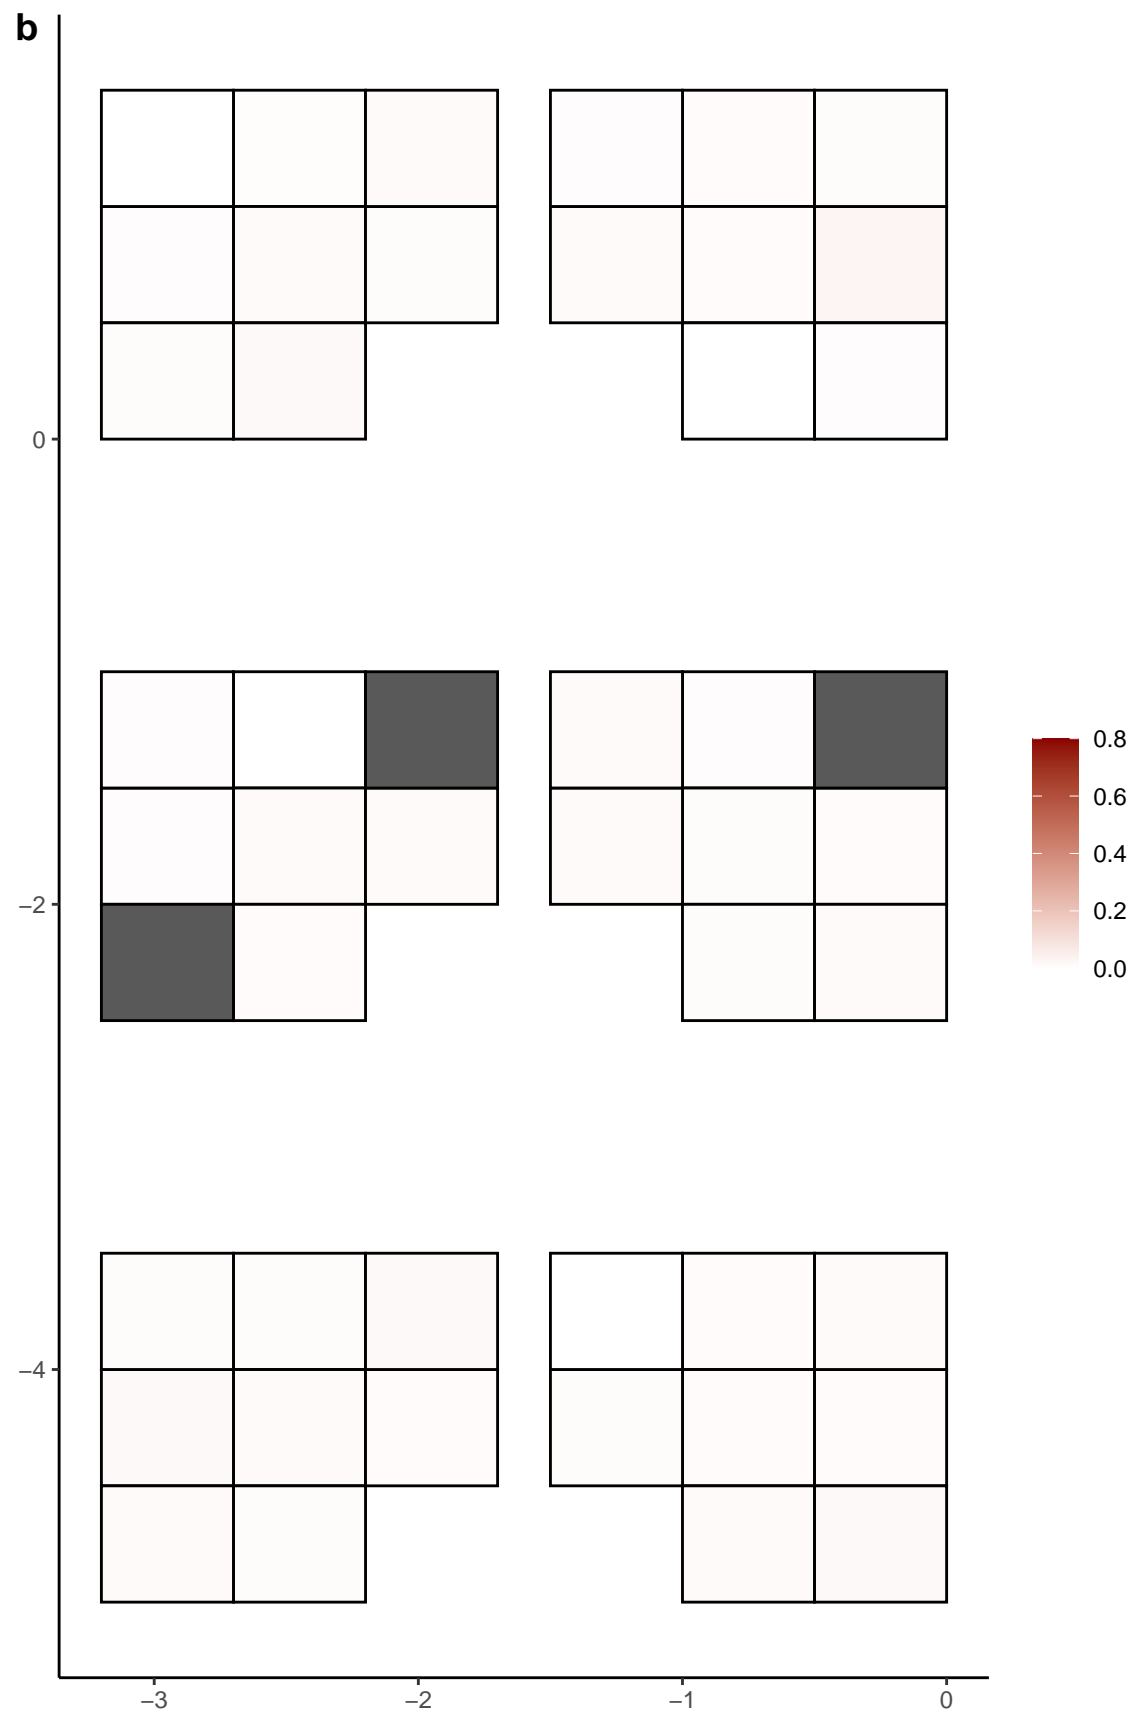

**a** ID05 13-29040893-G-A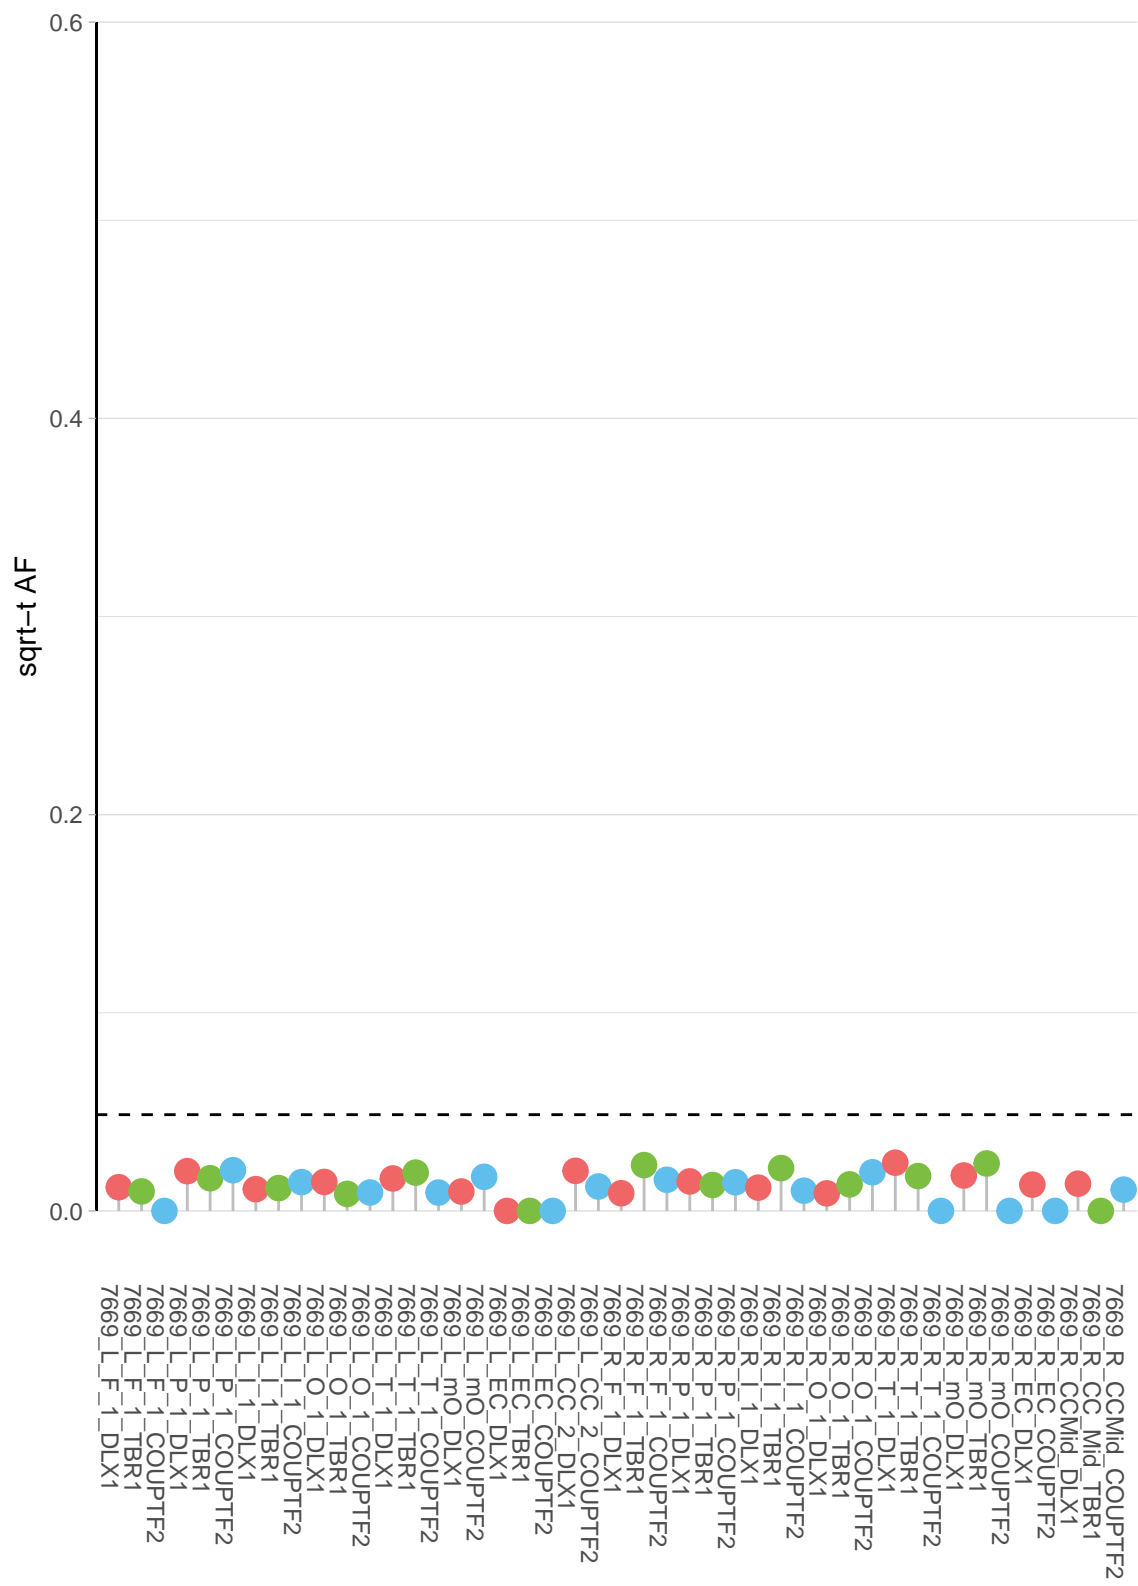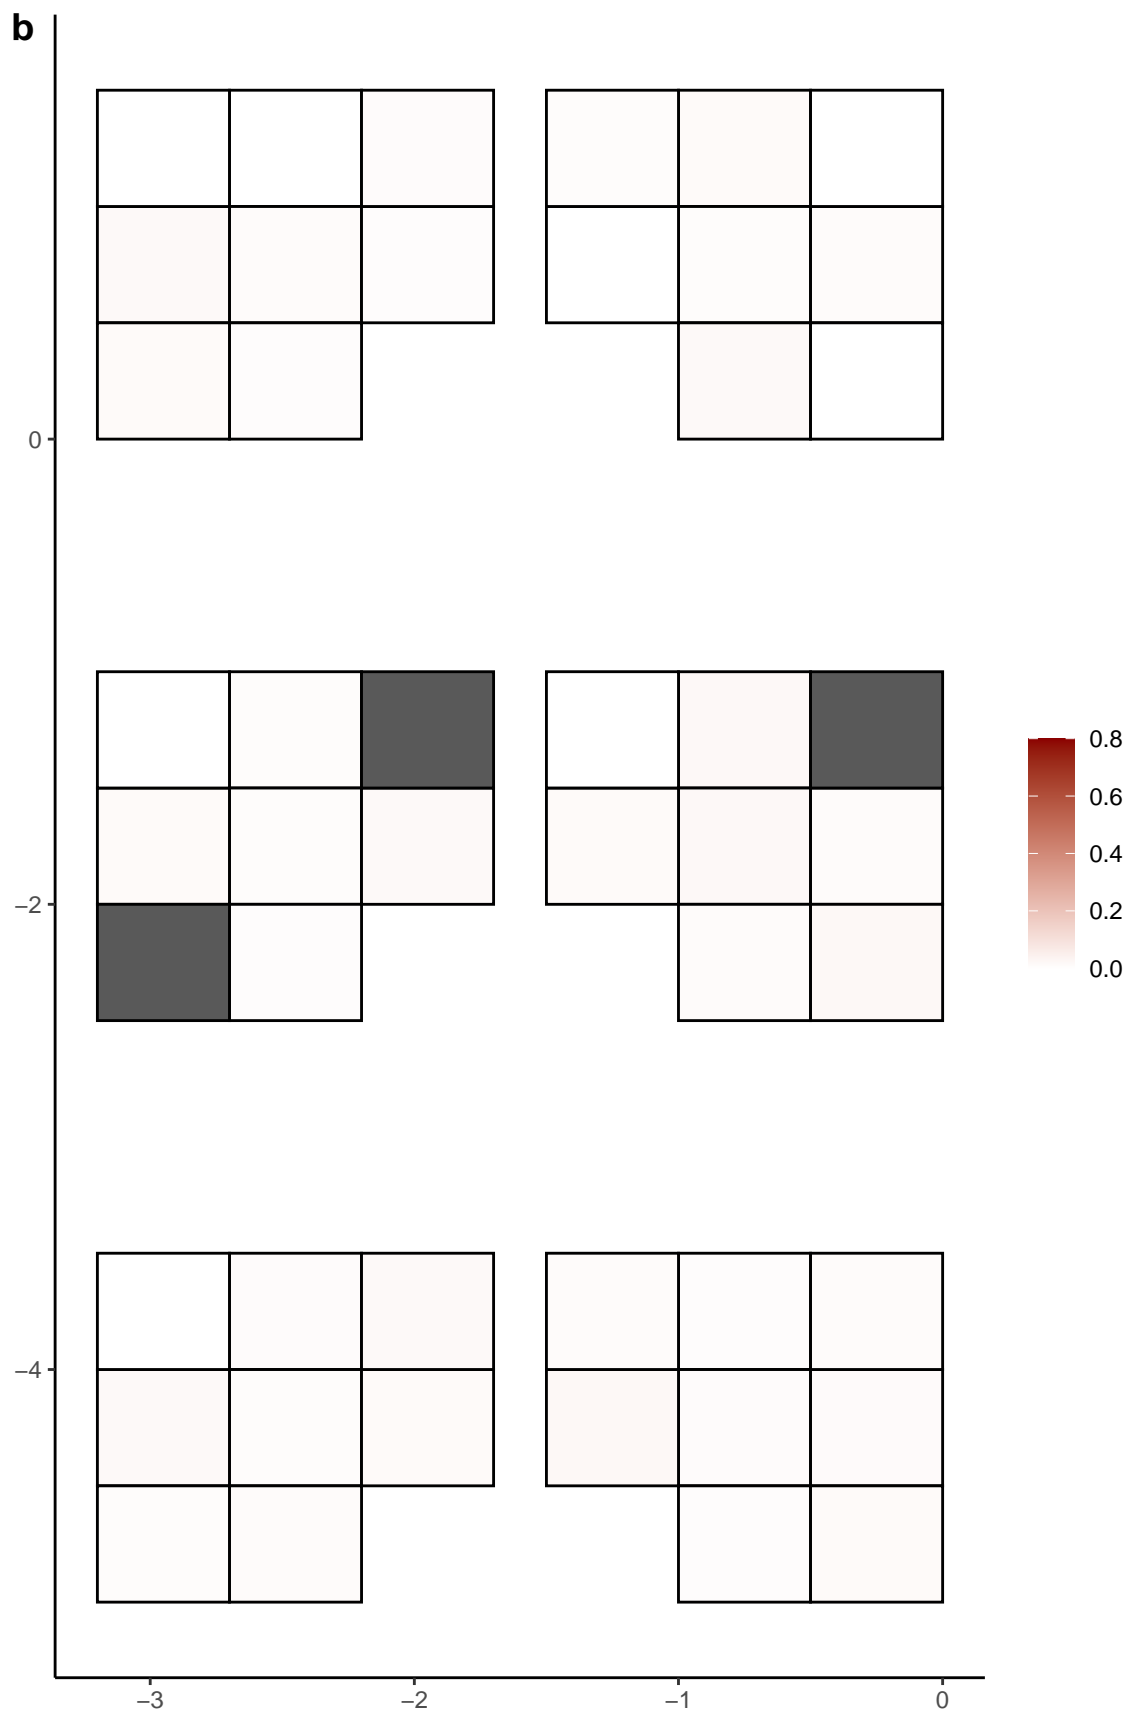



**a** ID05 13-29577886-G-A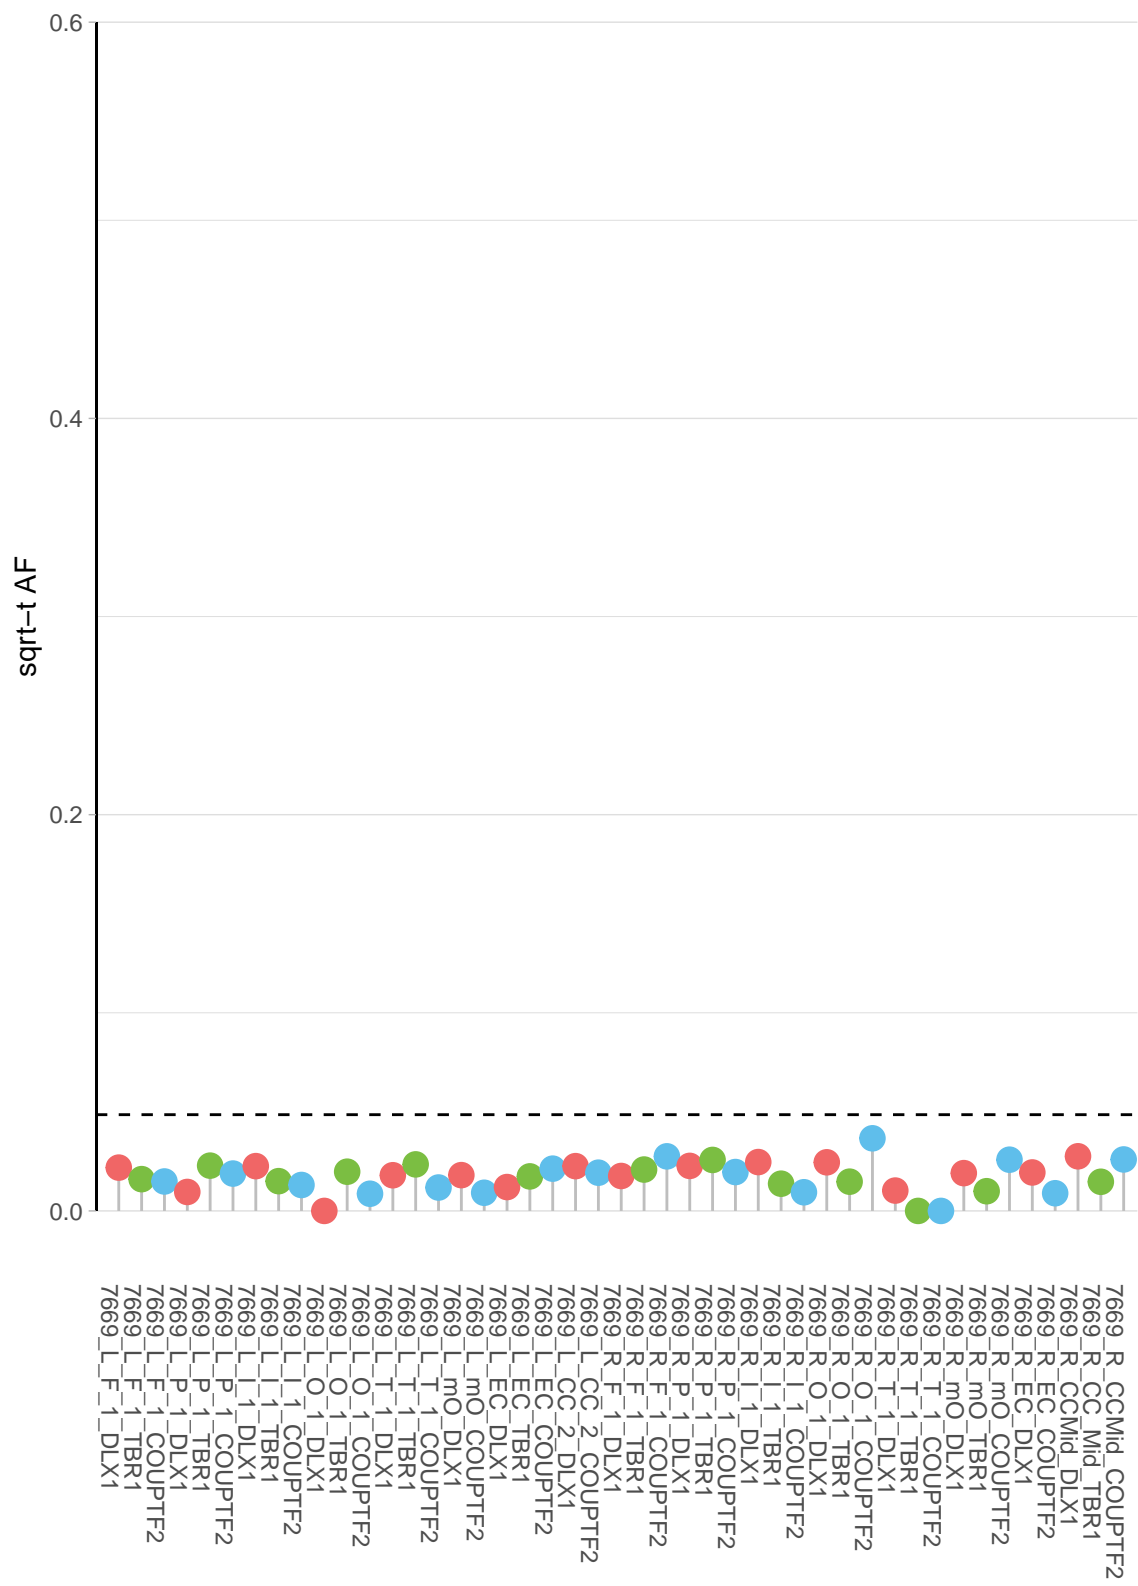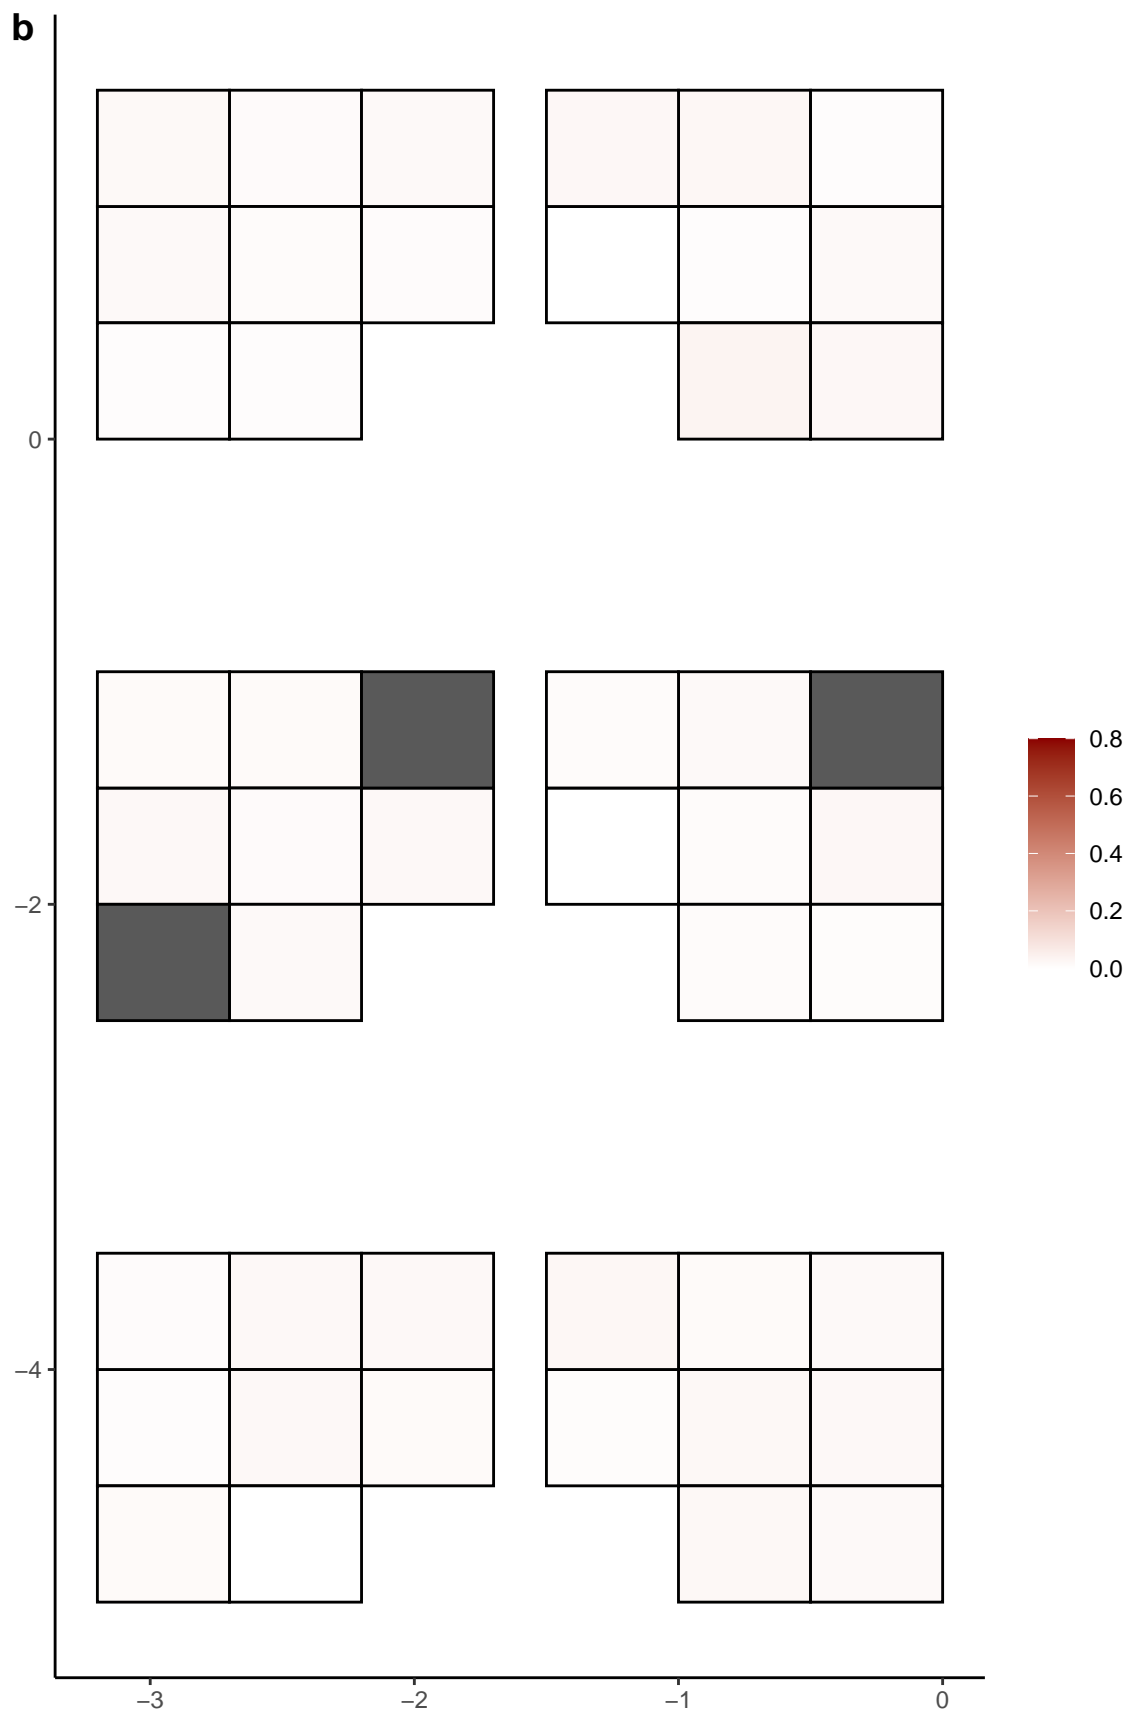

**a** ID05 13-33420156-G-A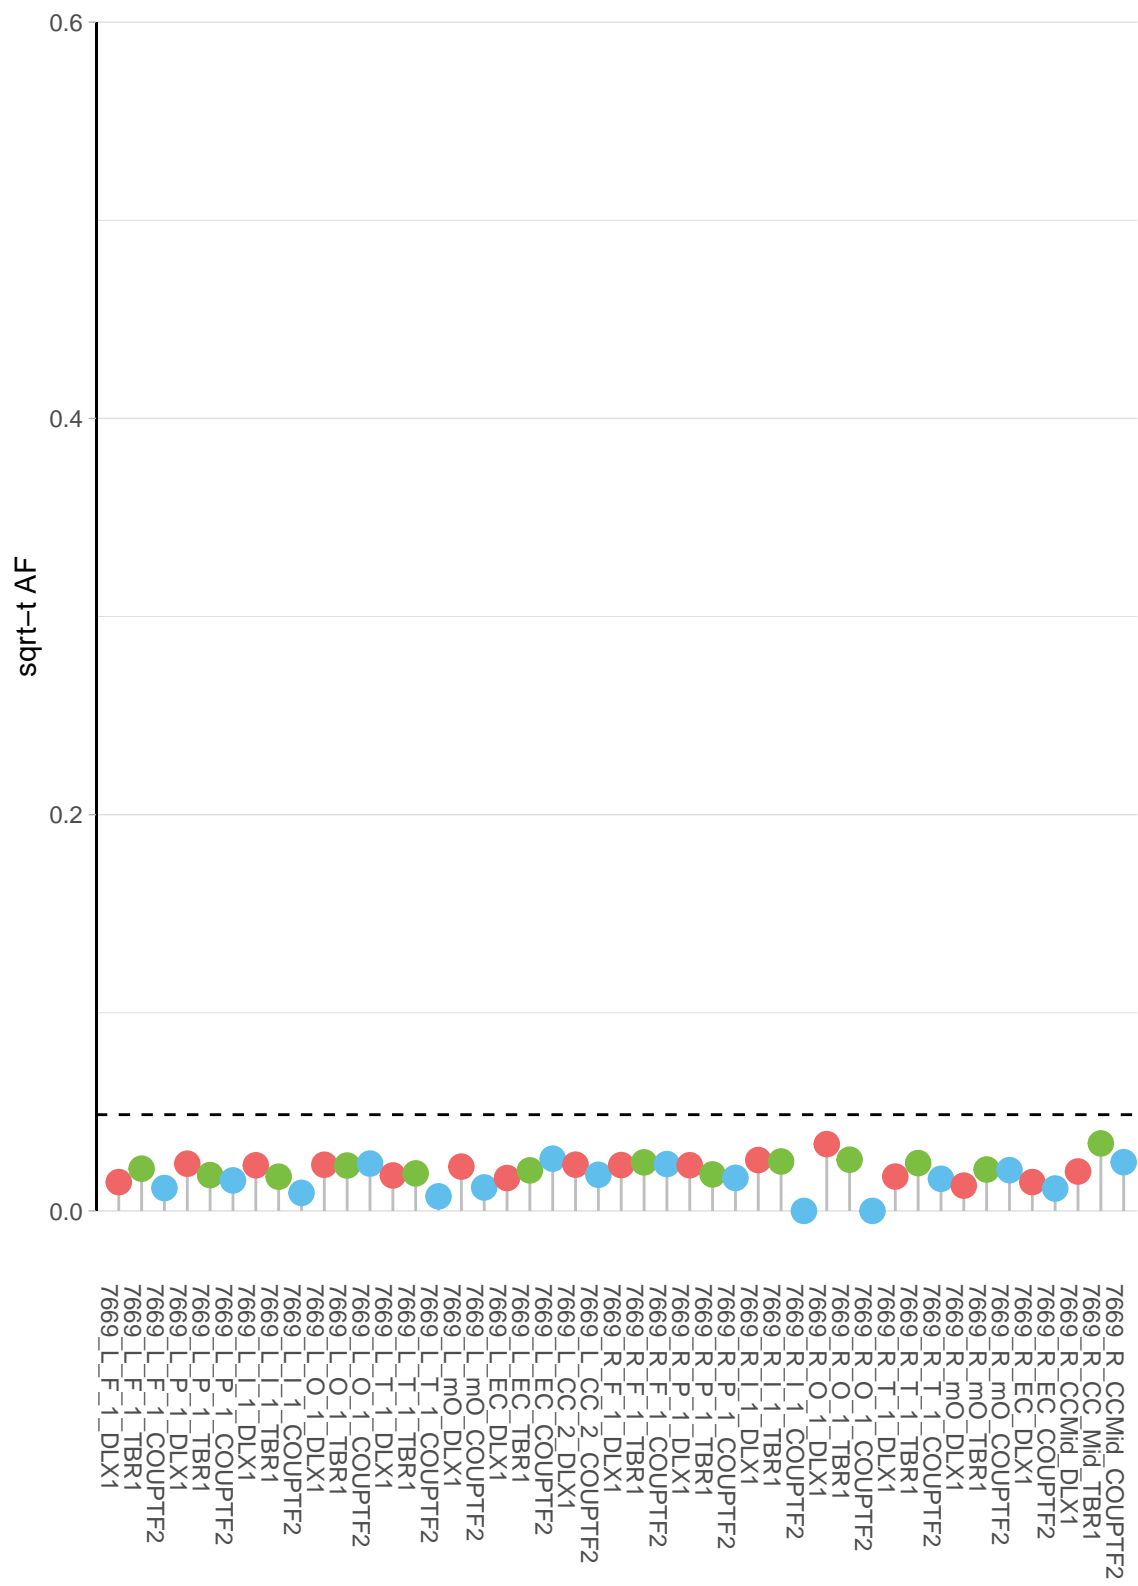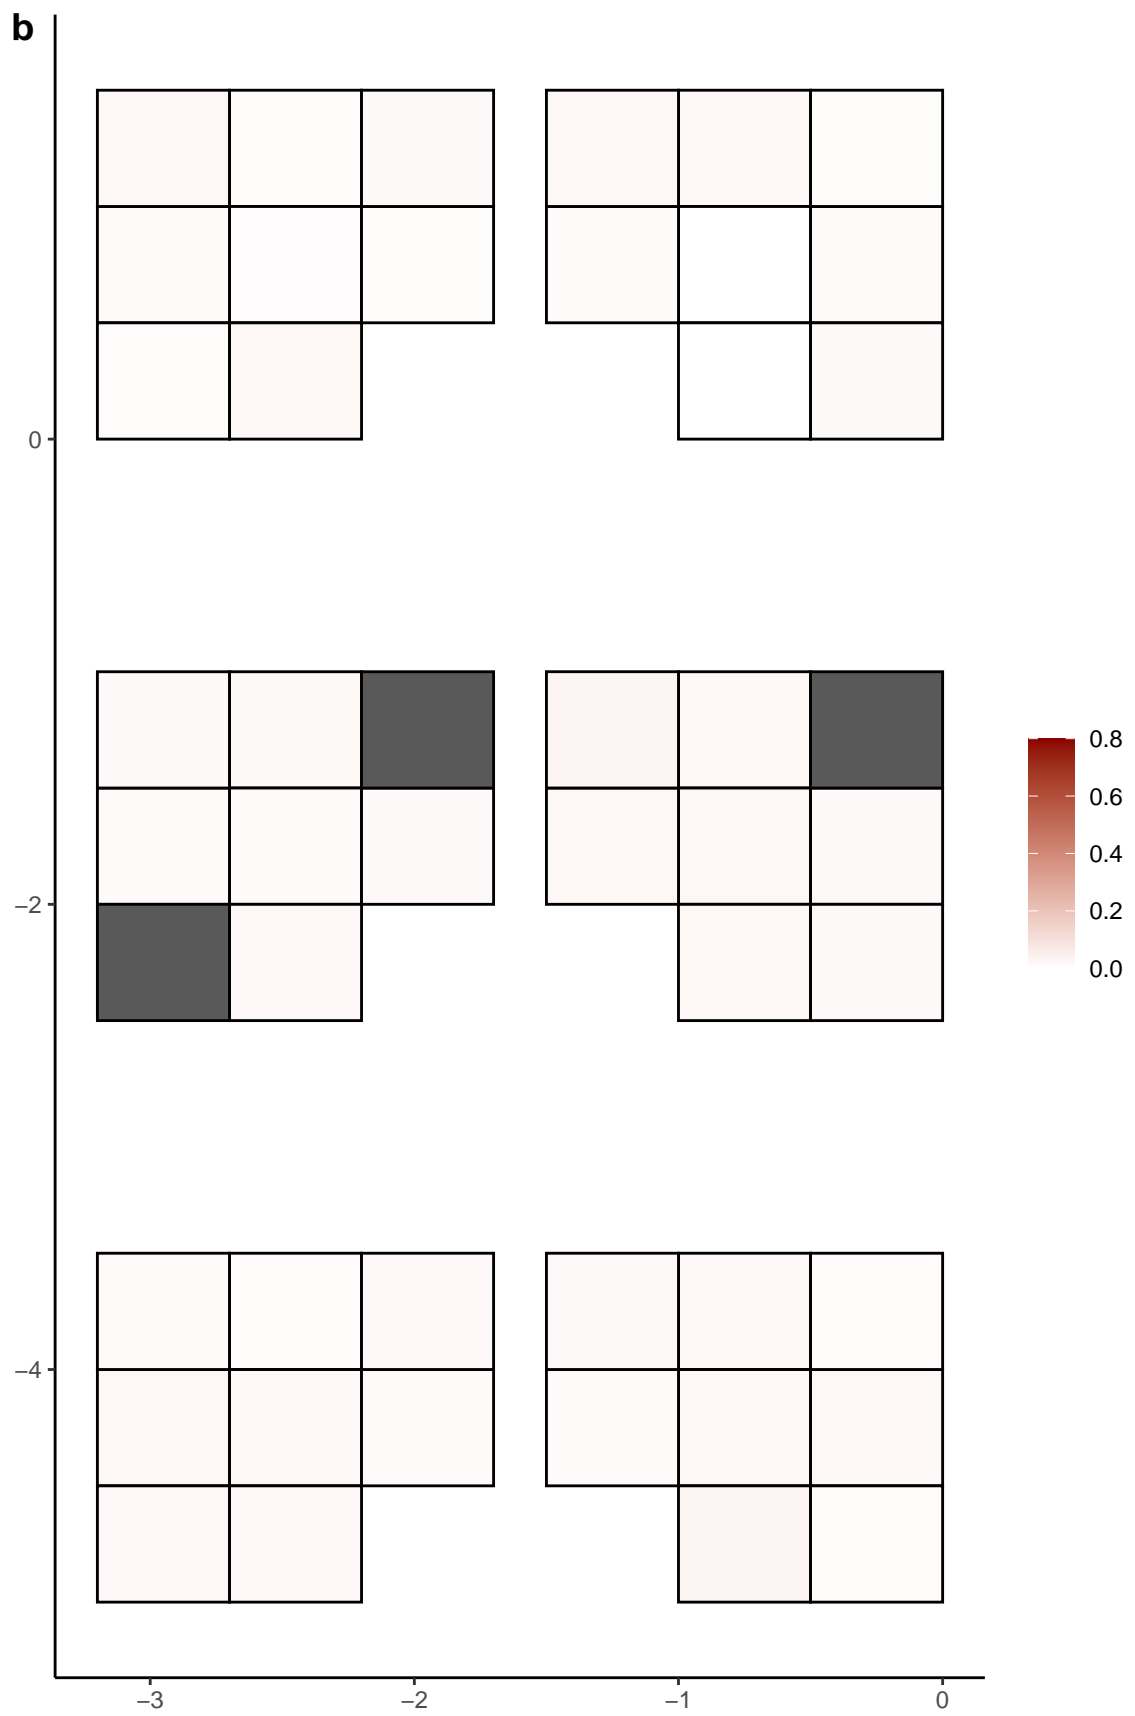

**a** ID05 13-41556737-G-C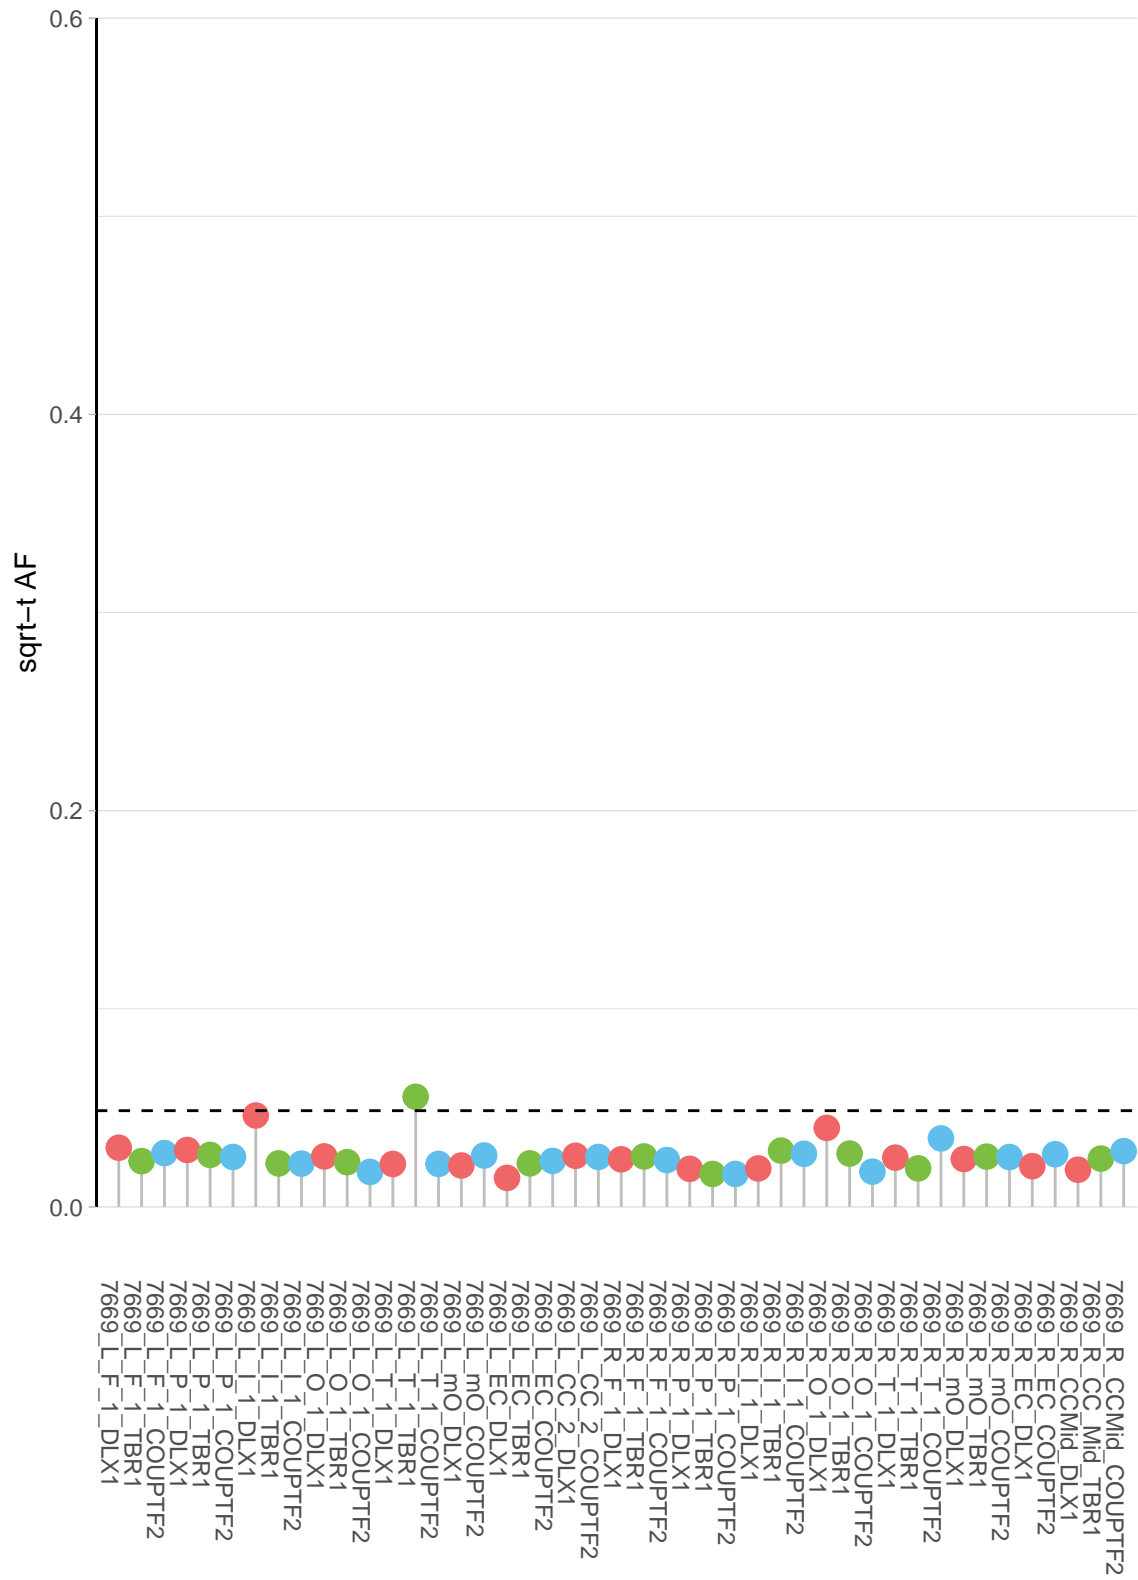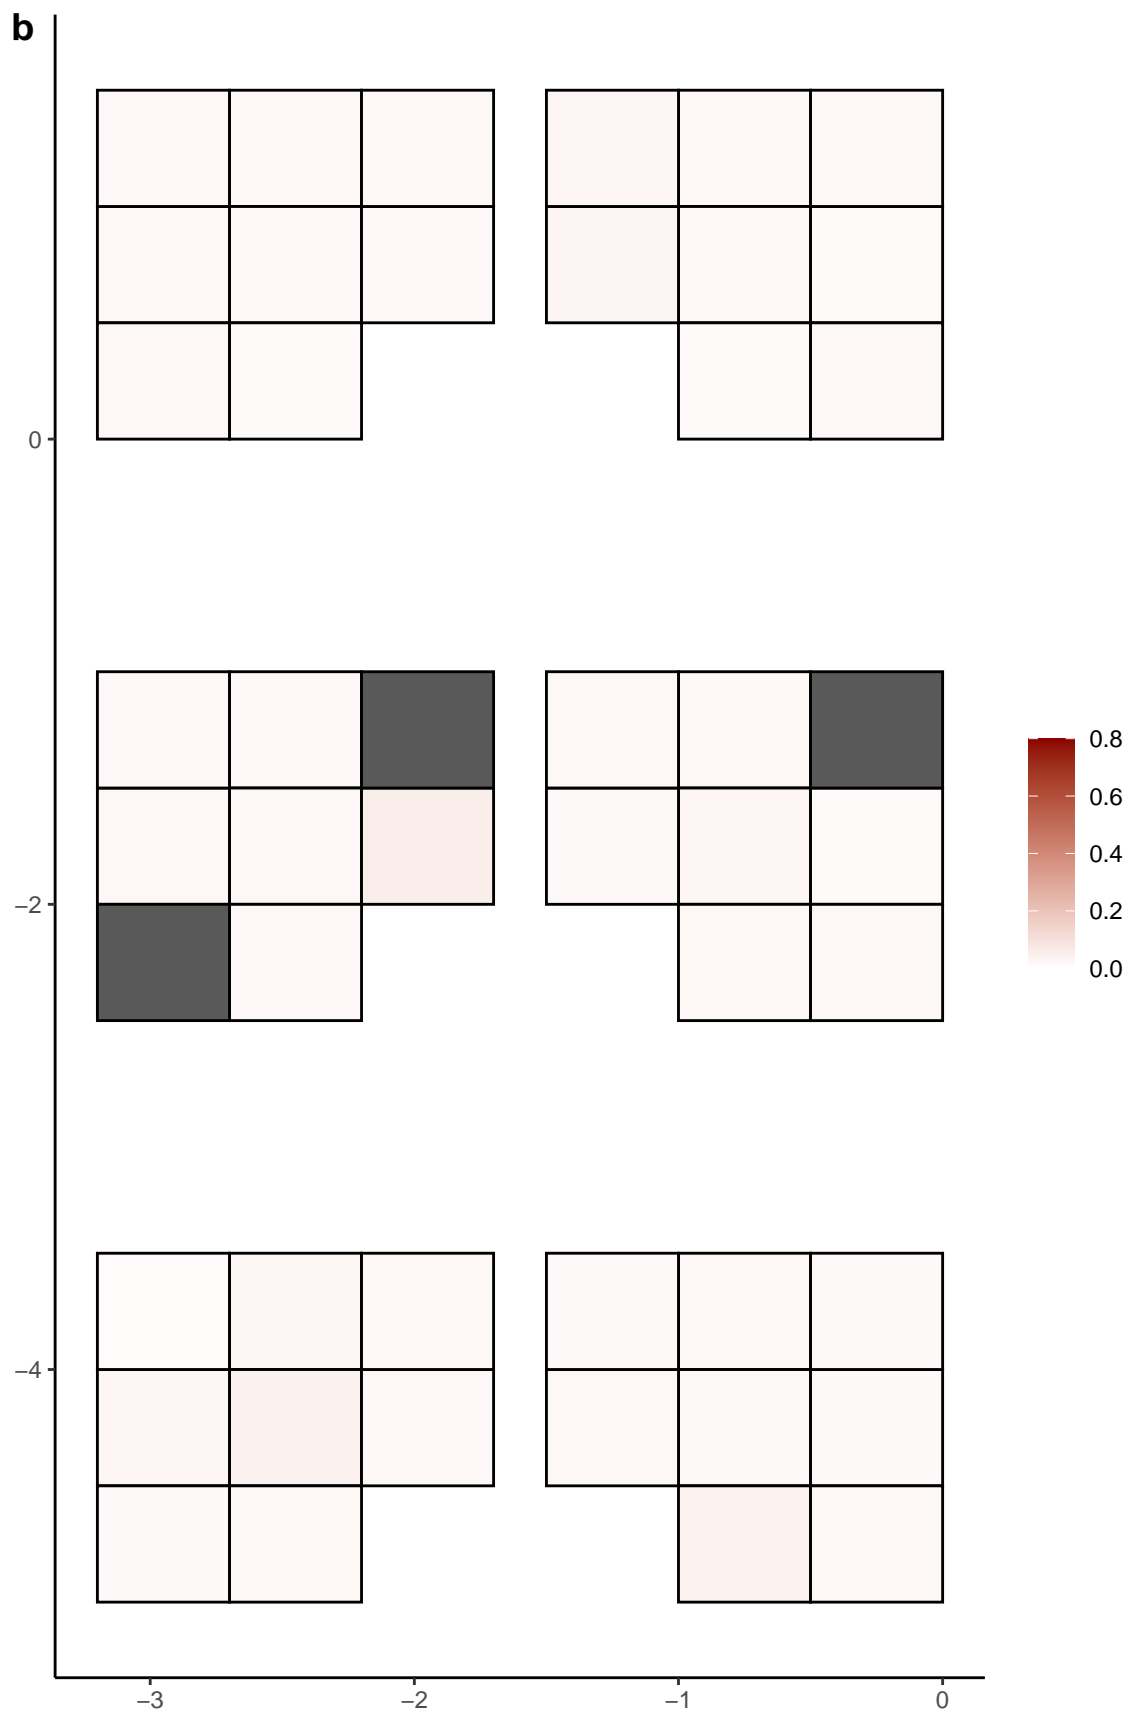

**a** ID05 13-46288201-G-A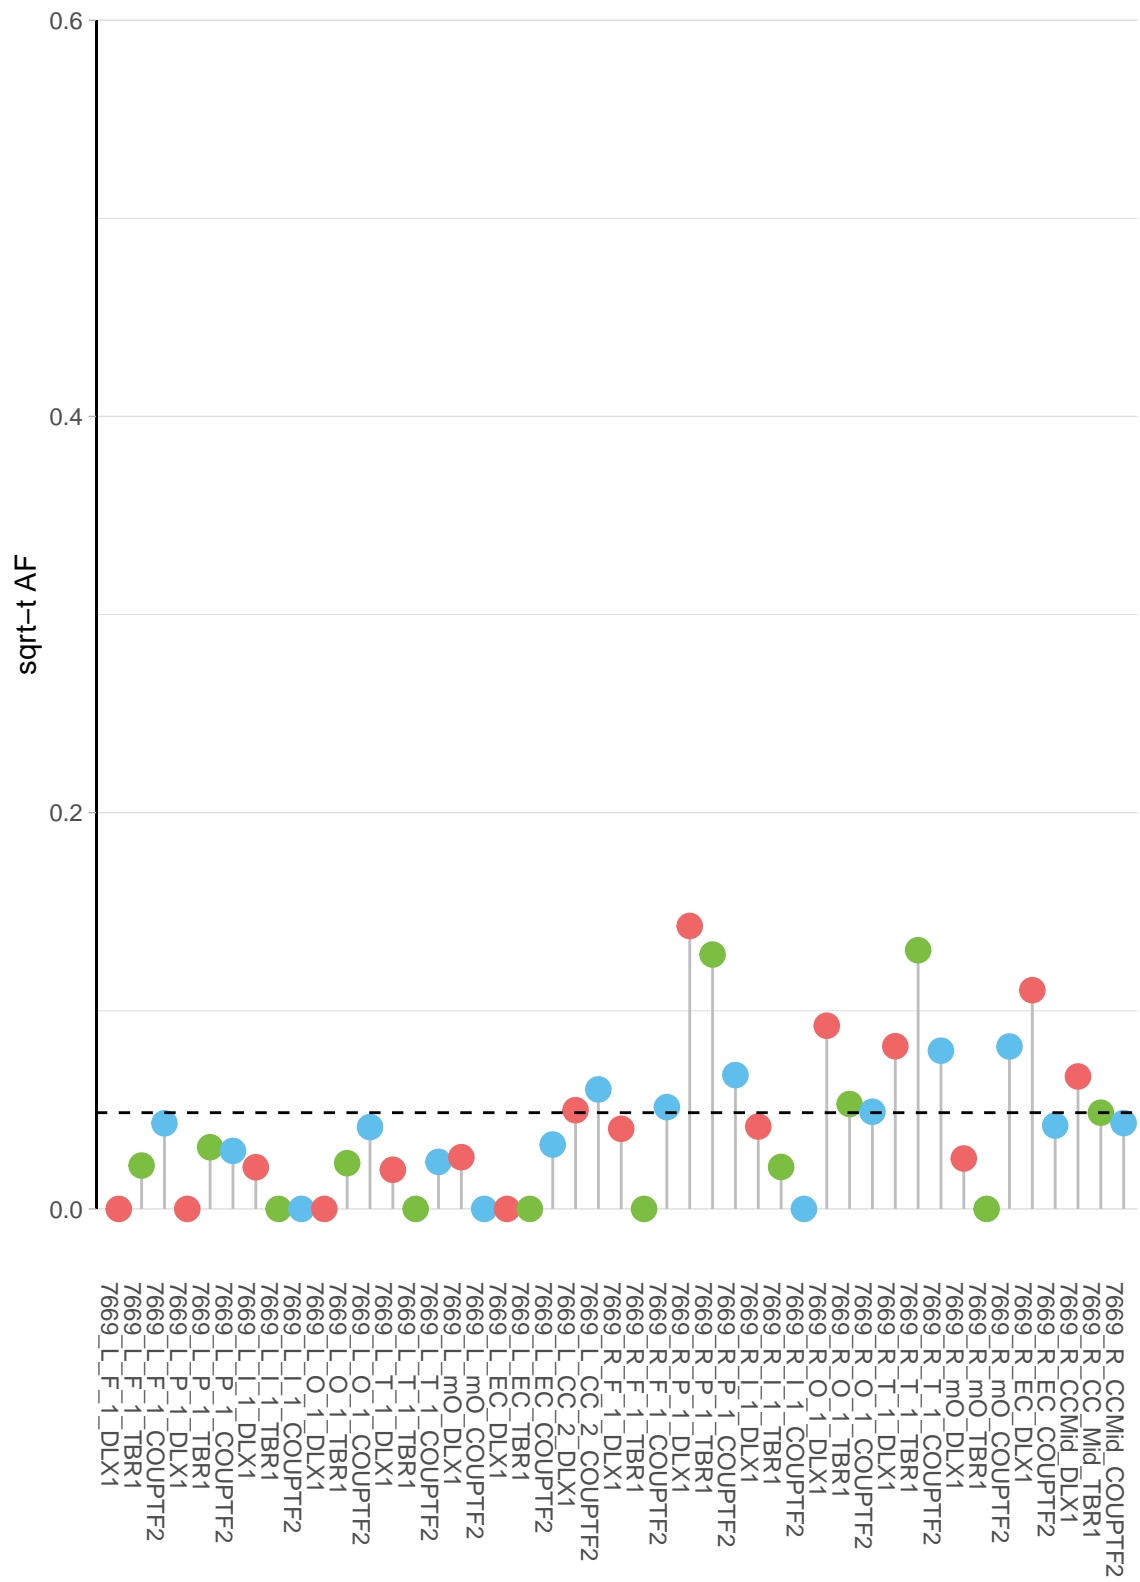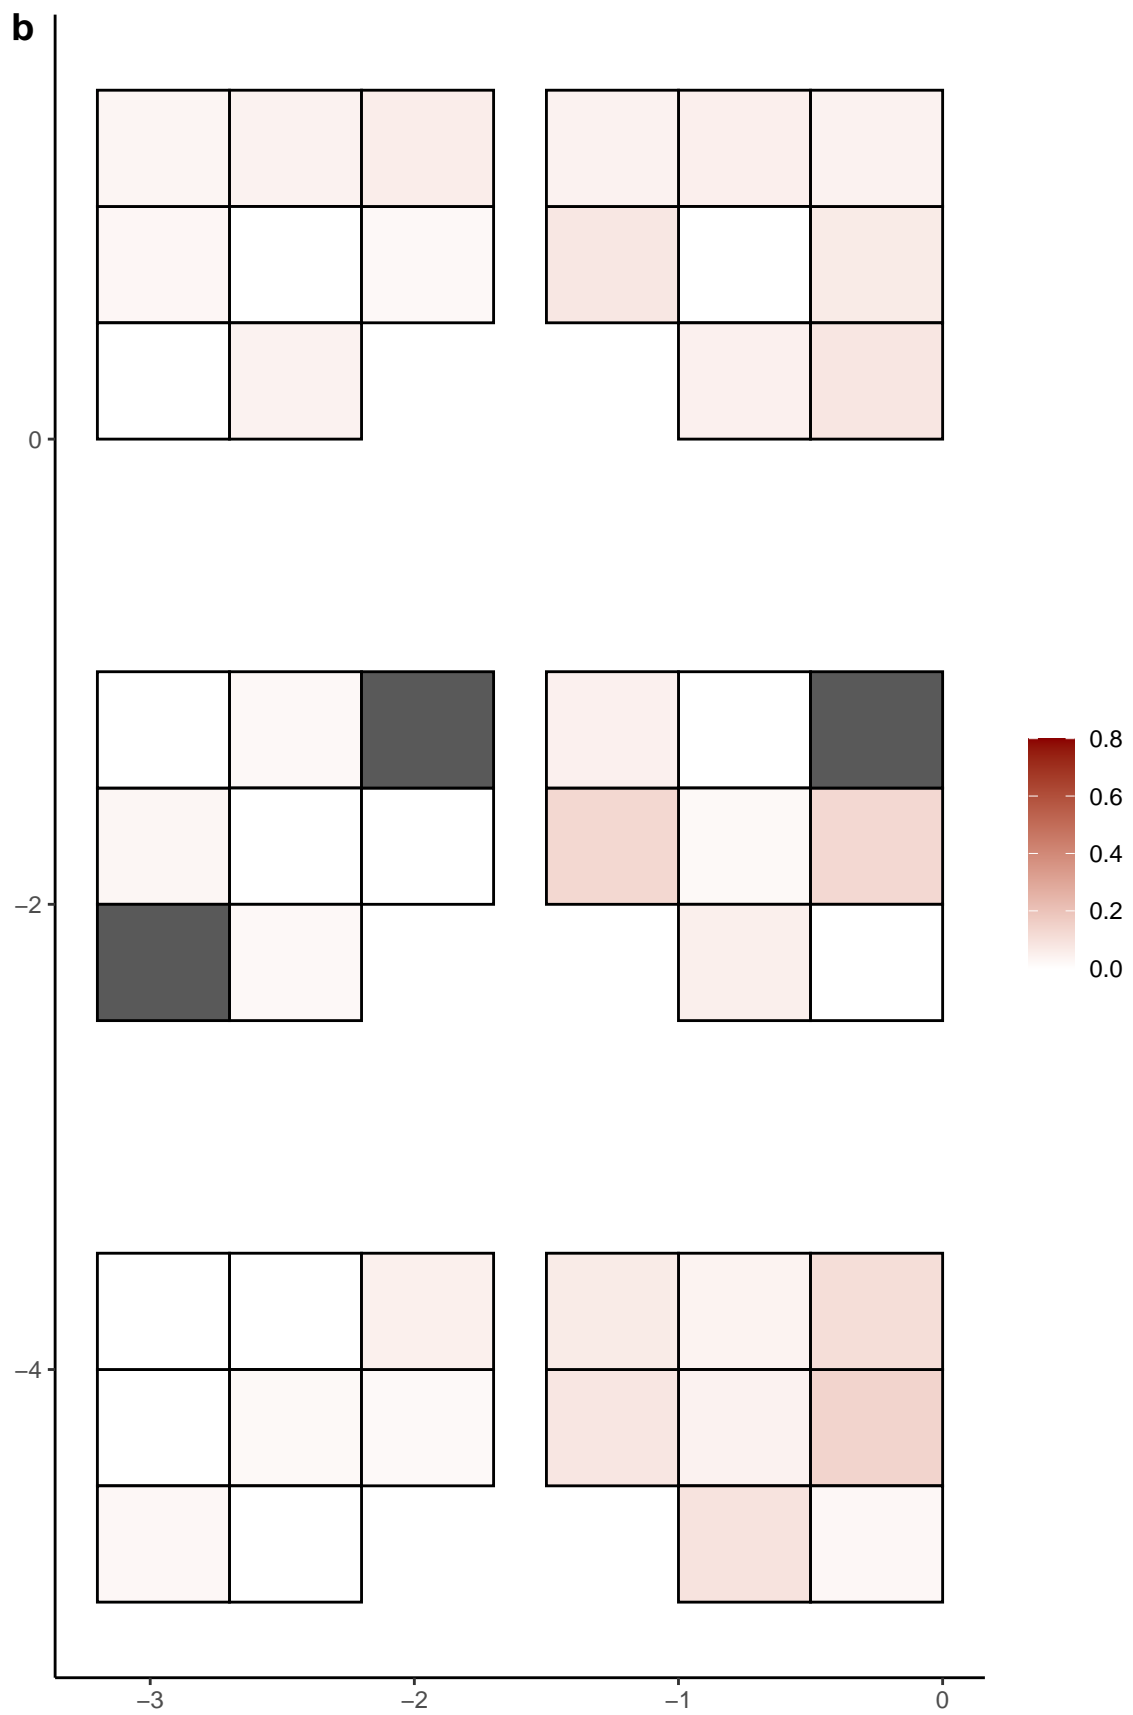

**a** ID05 13-55140512-C-T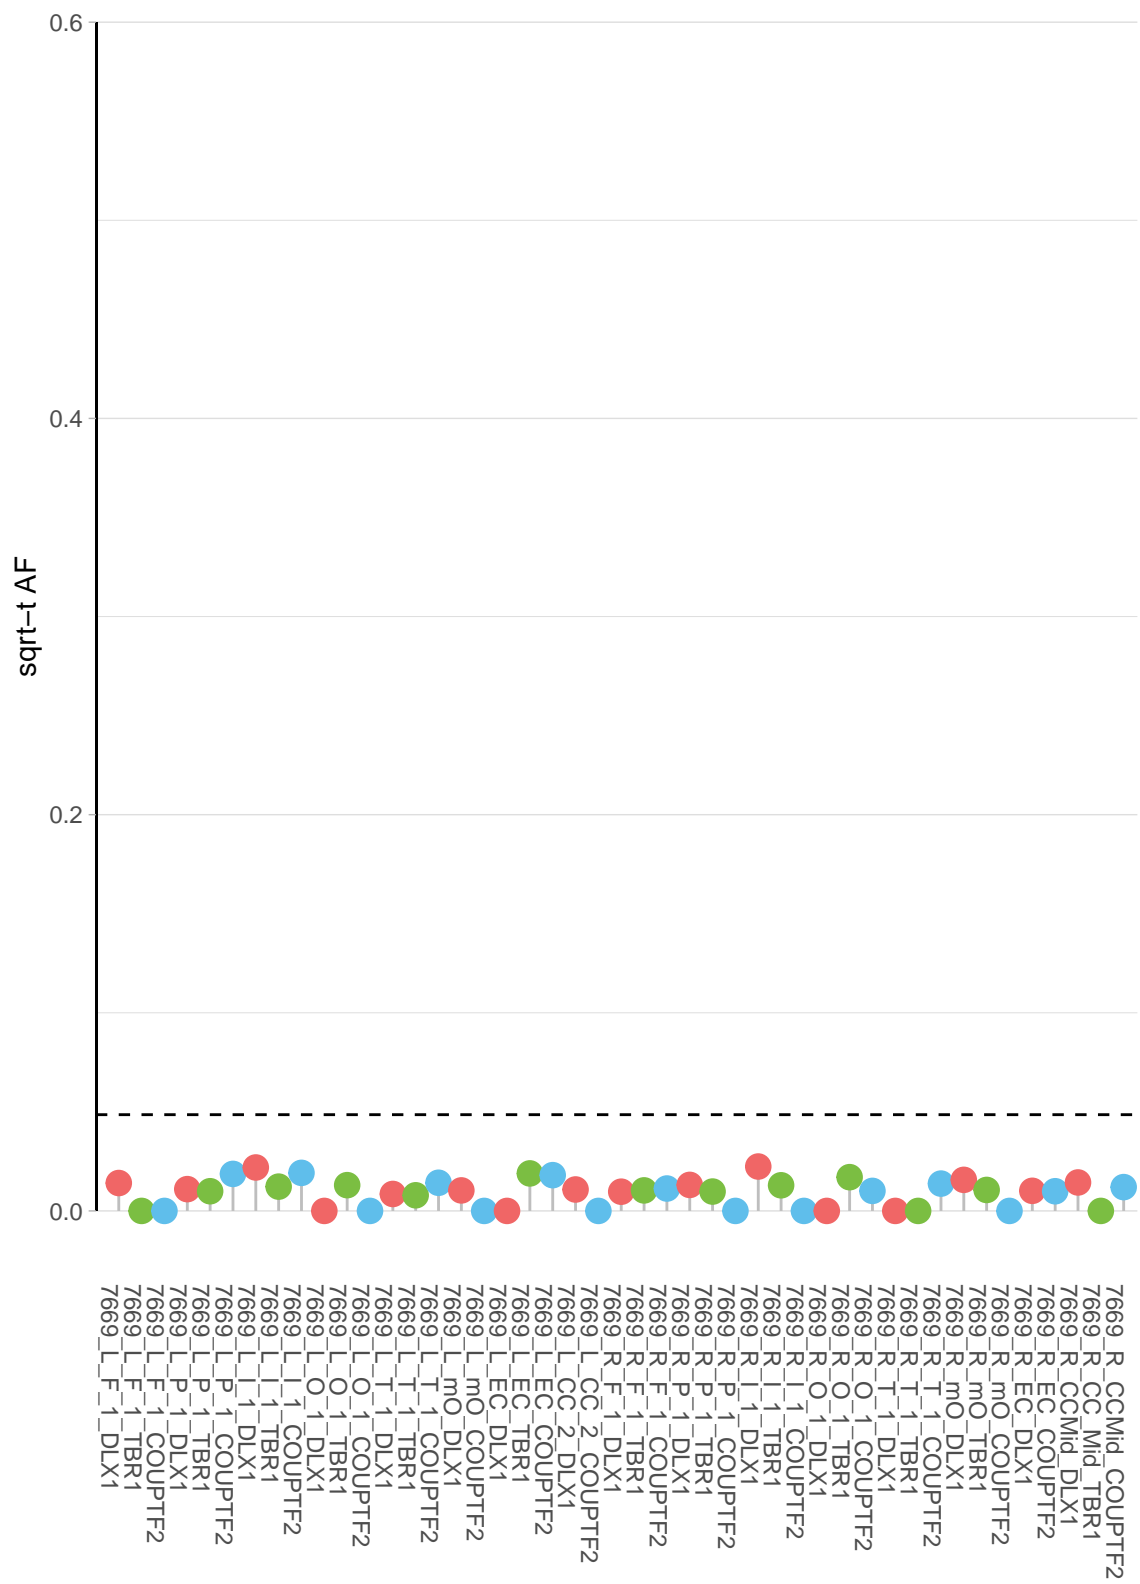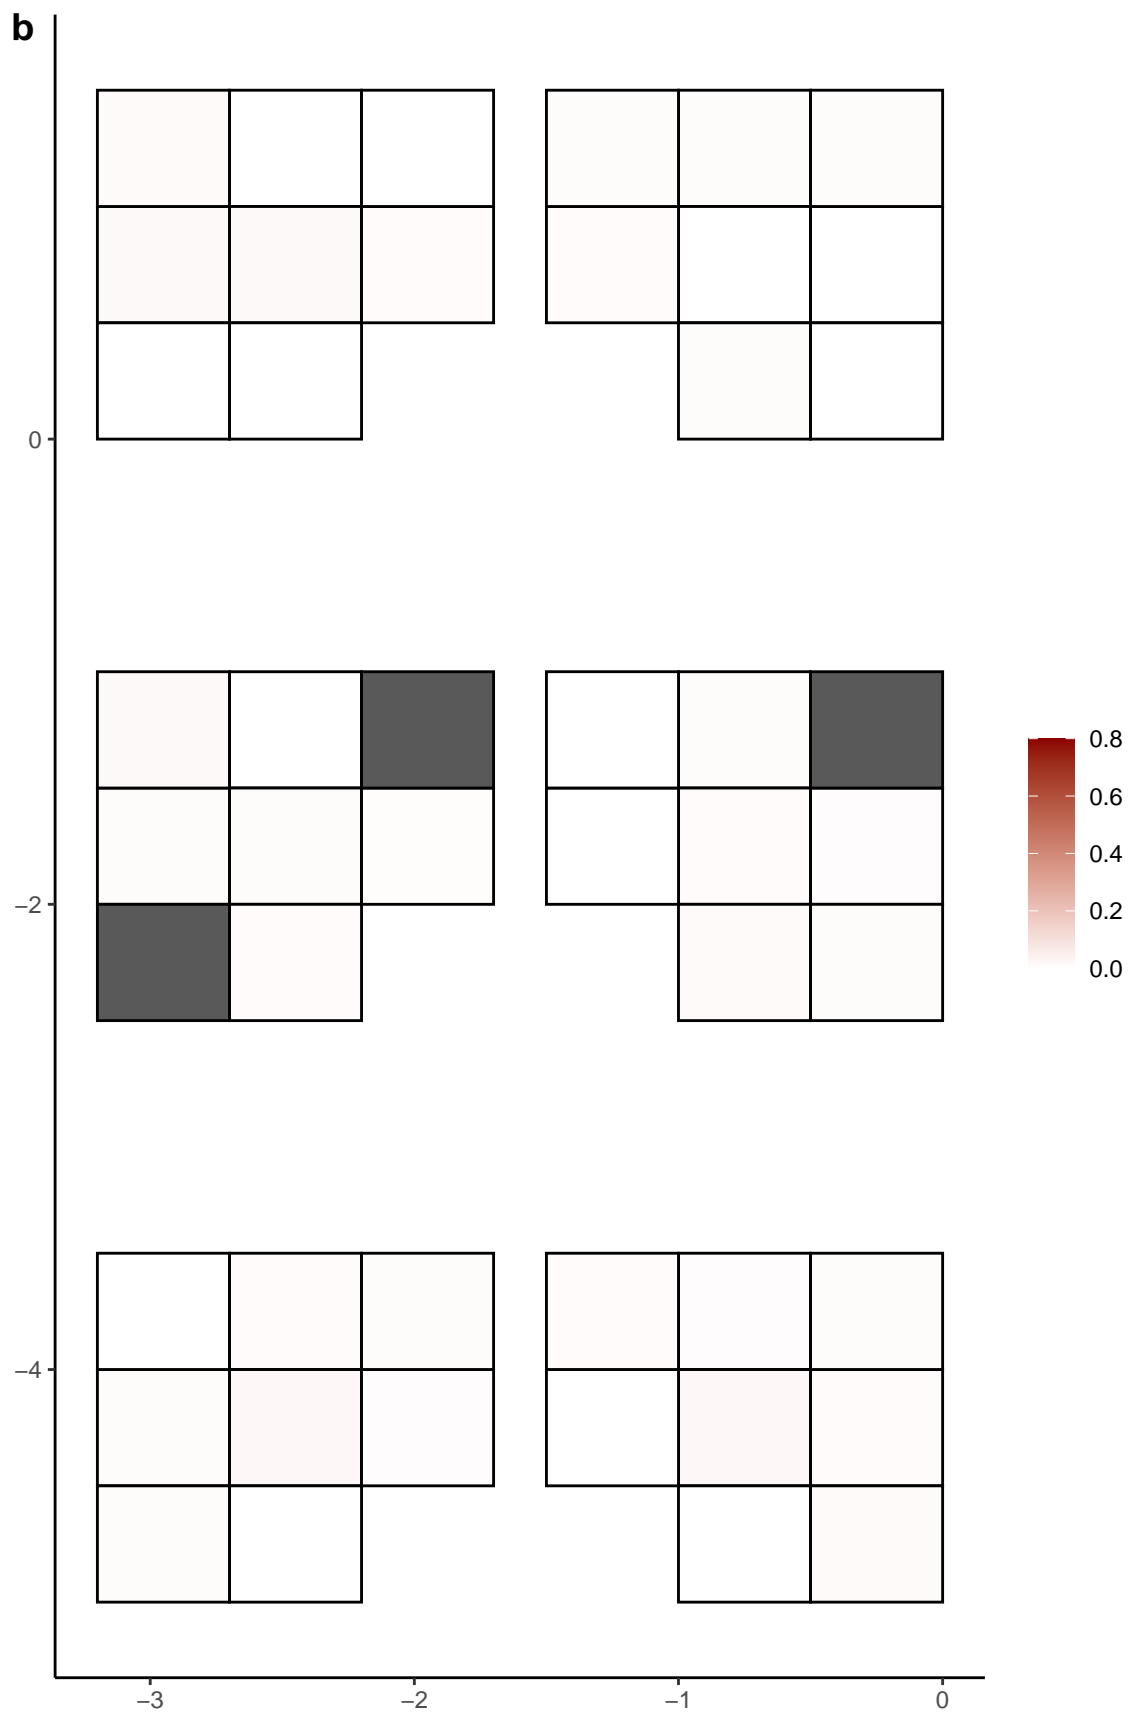



**a** ID05 13-59159499-G-A

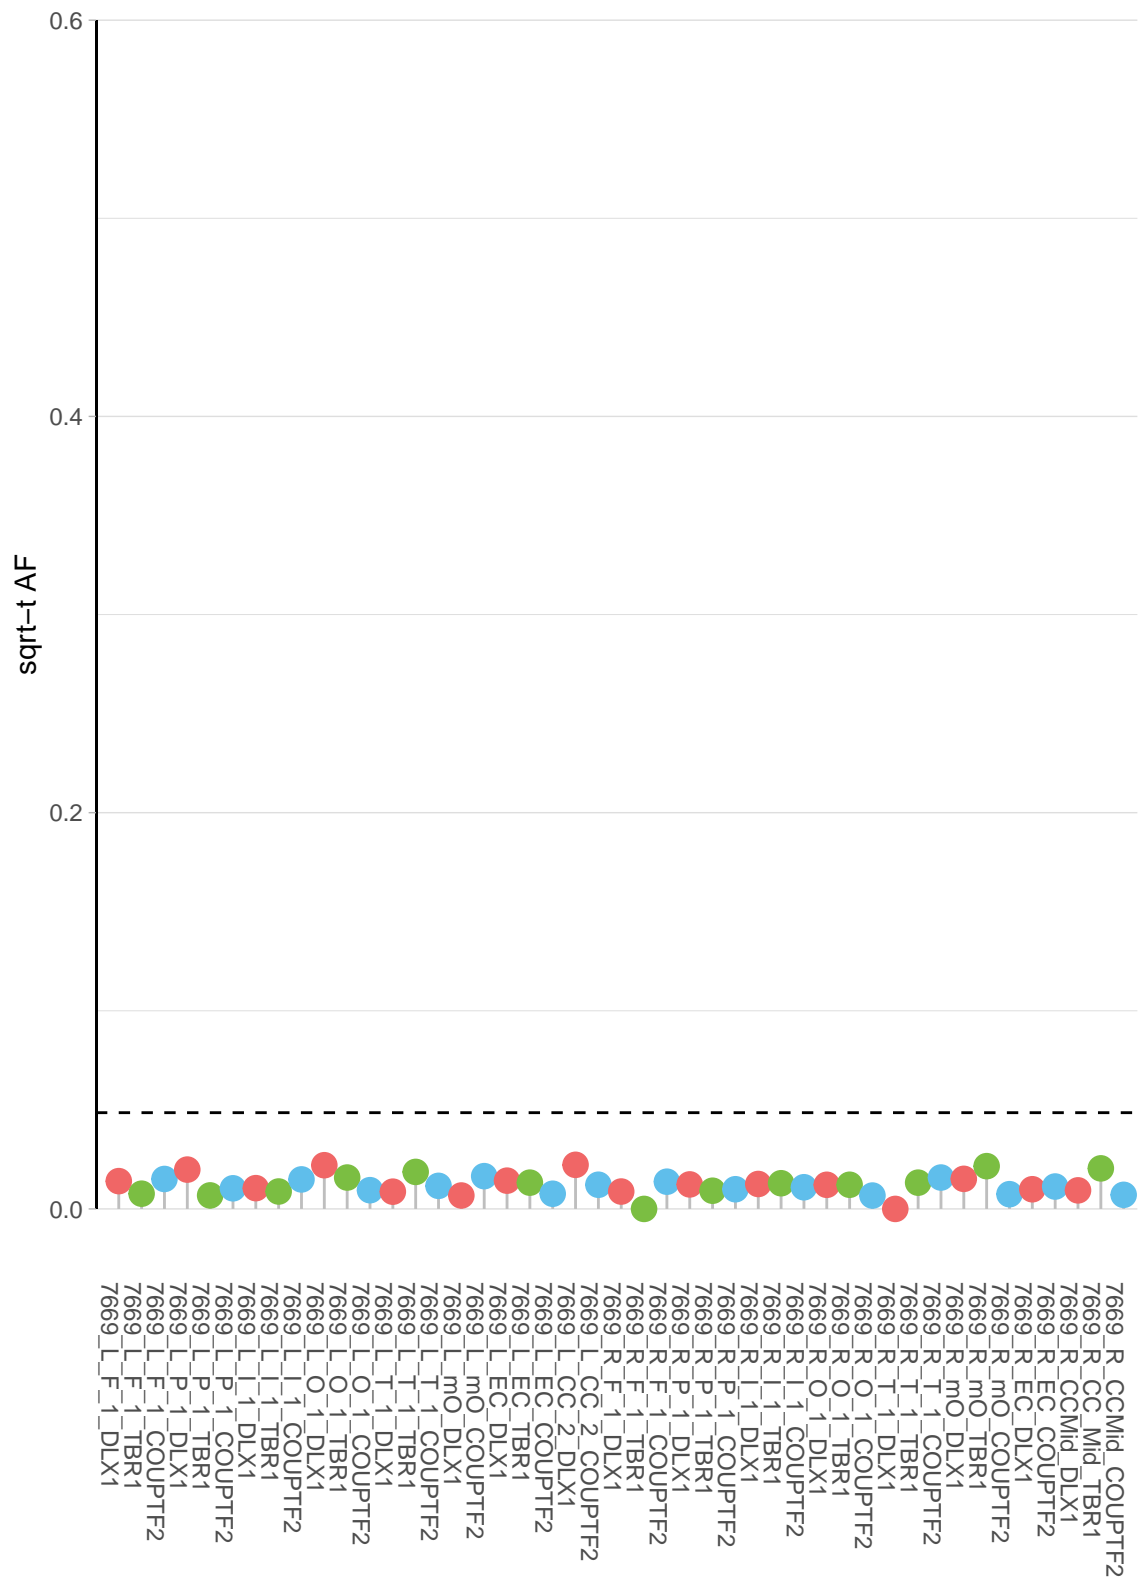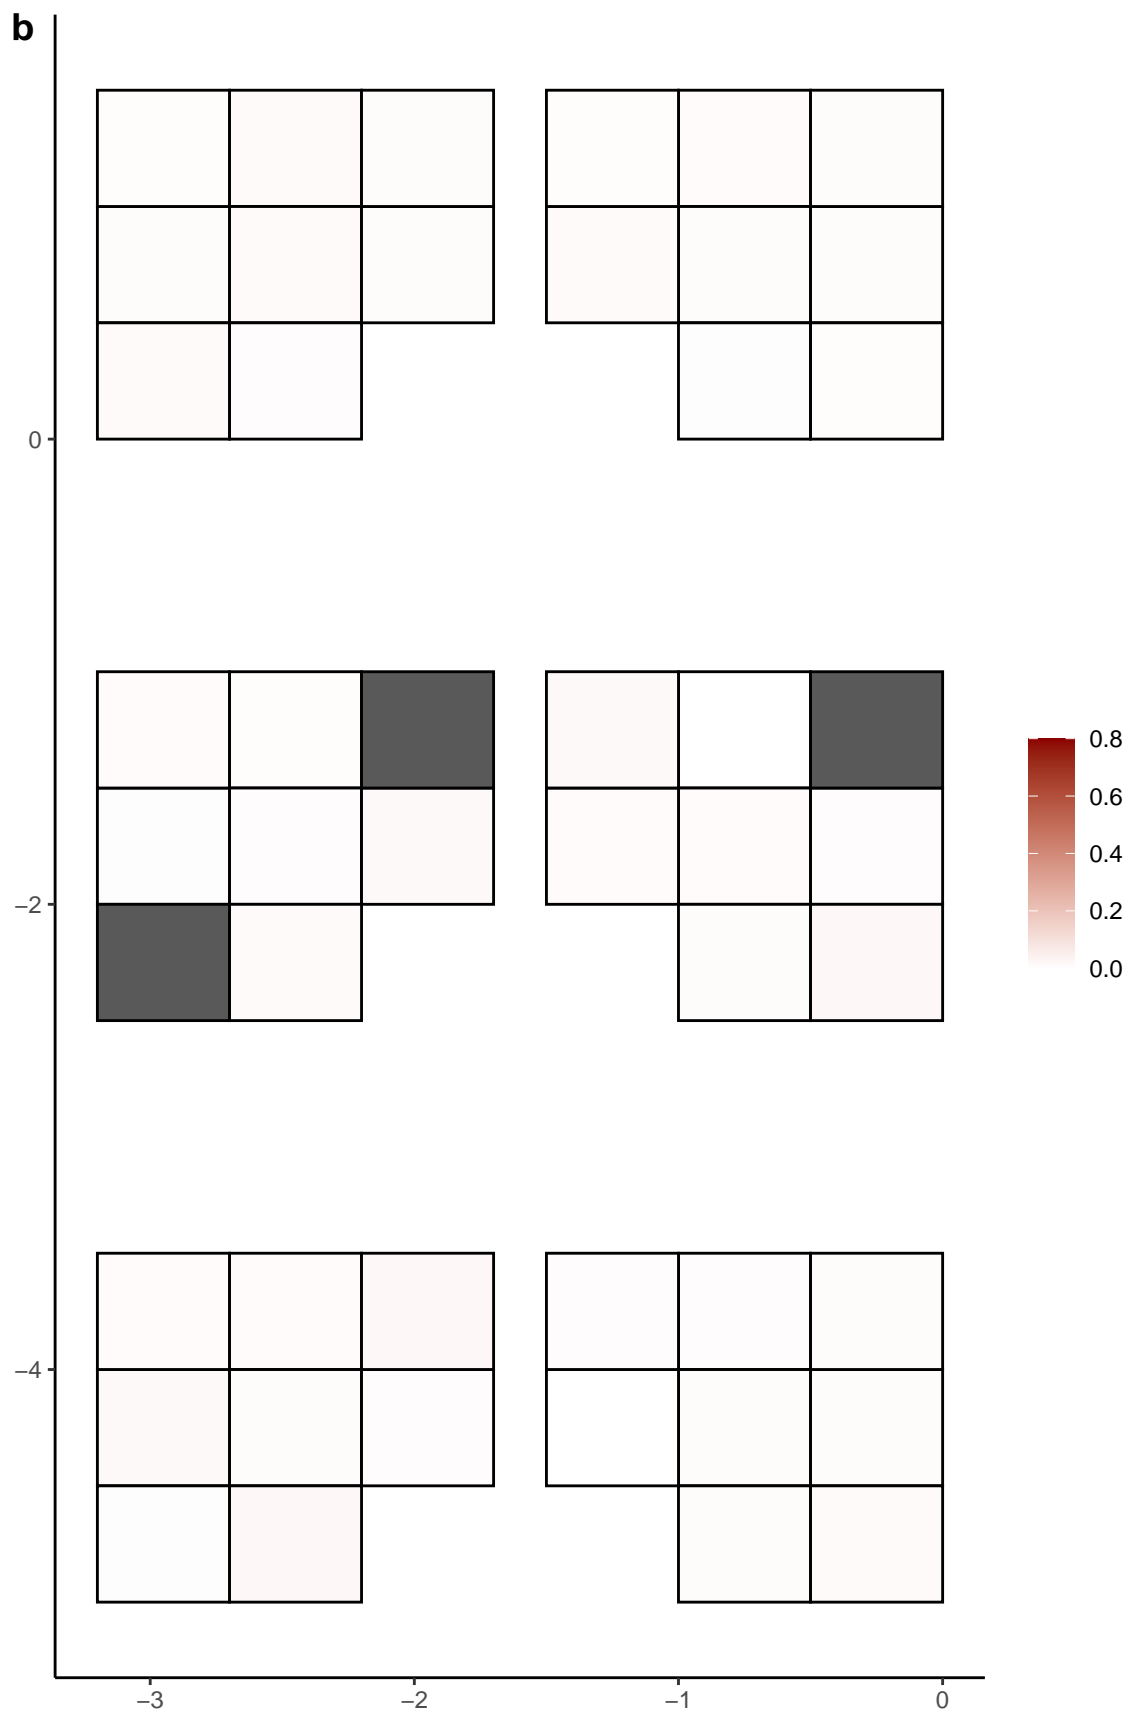









**a** ID05 13-67322807-C-A

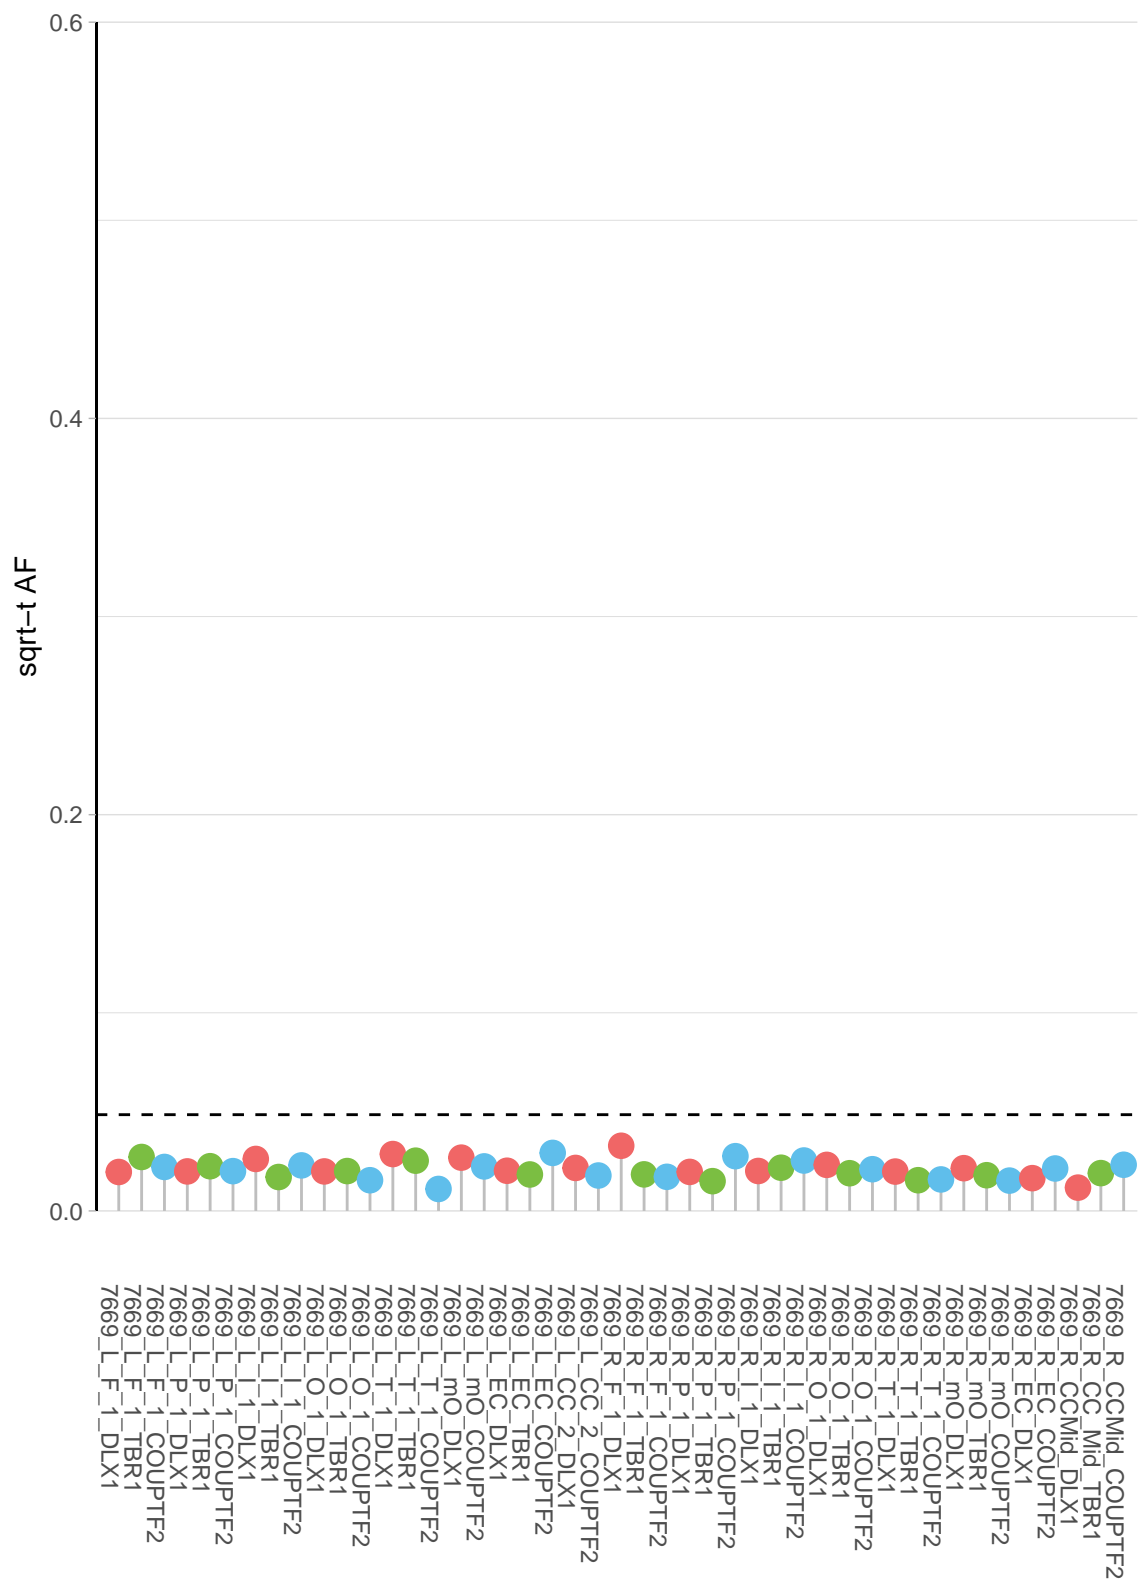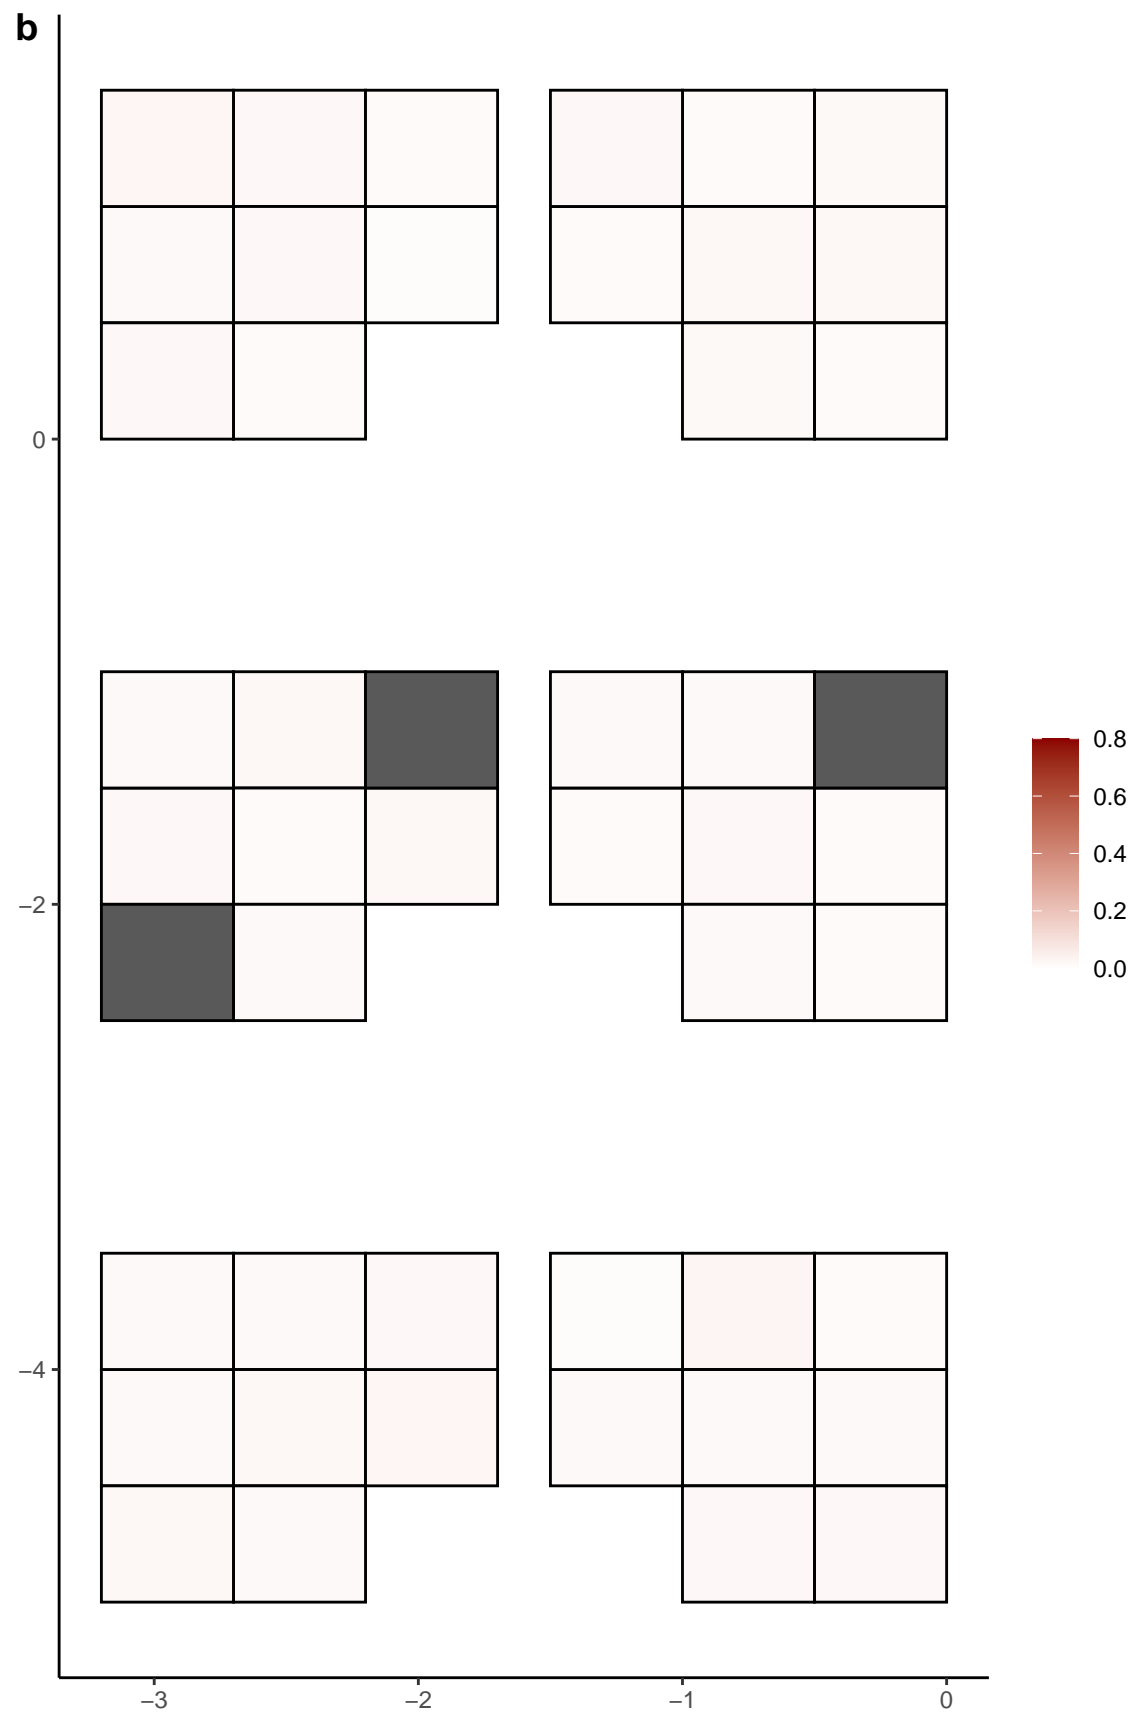

**a** ID05 13-67852564-G-A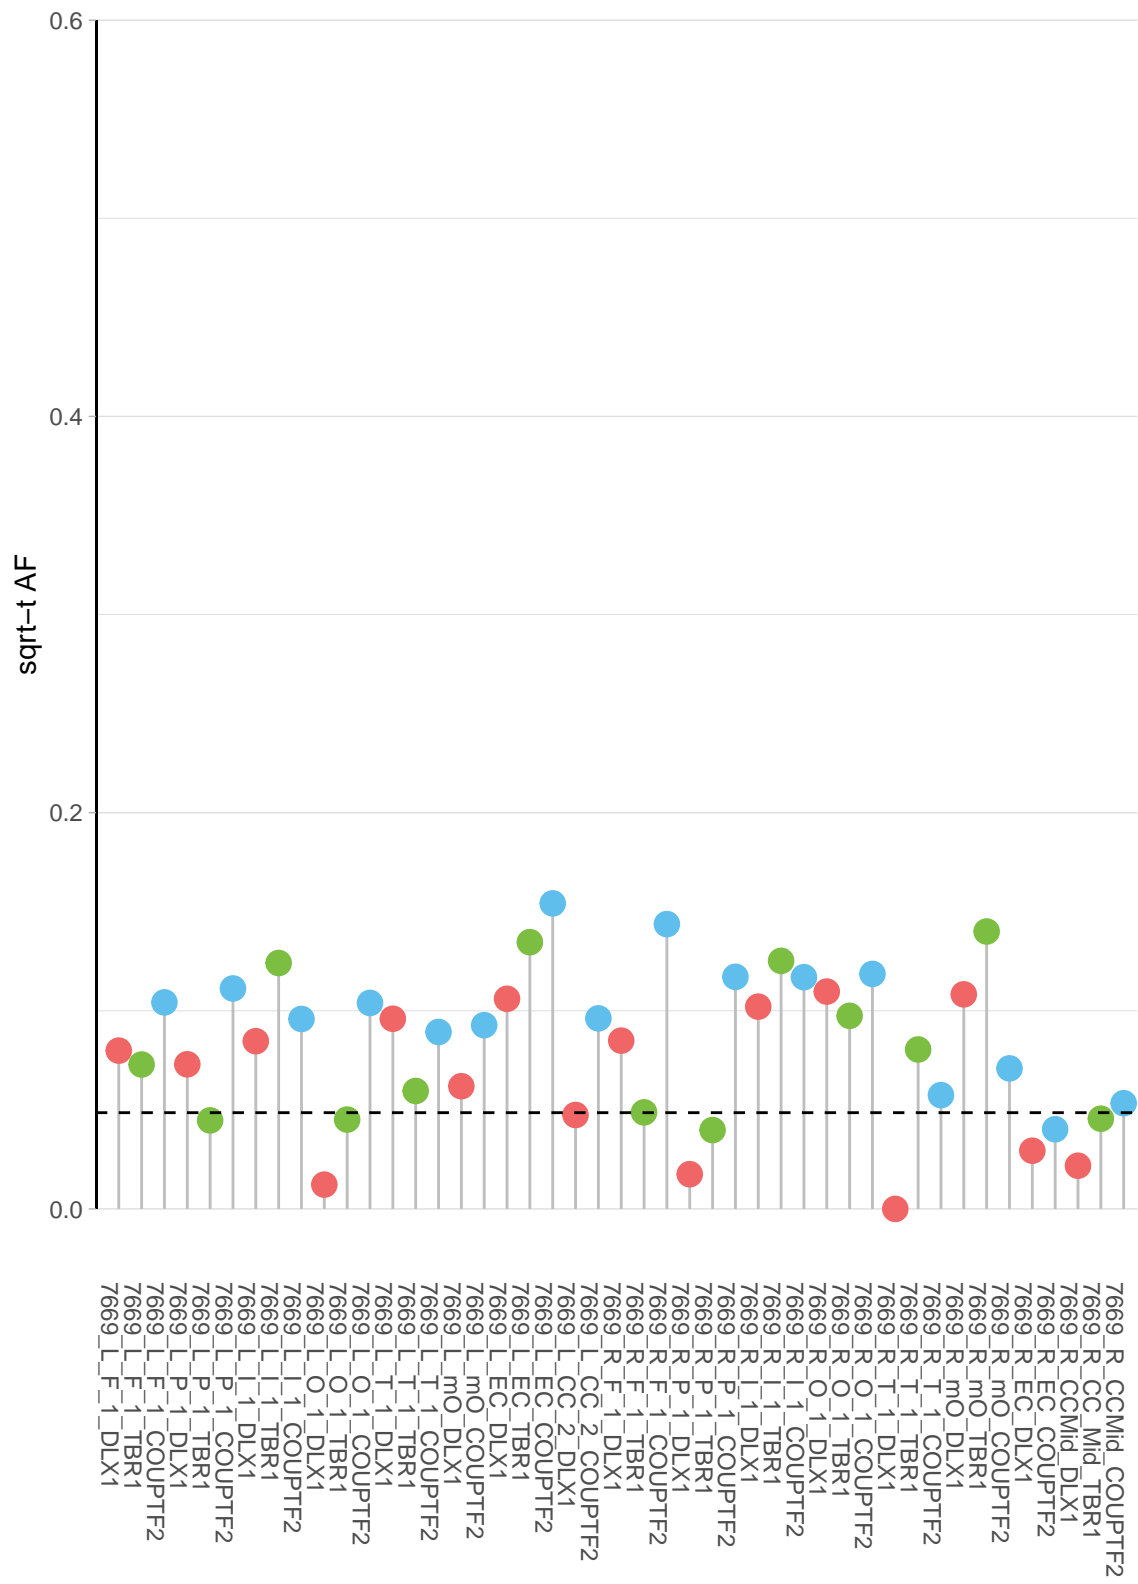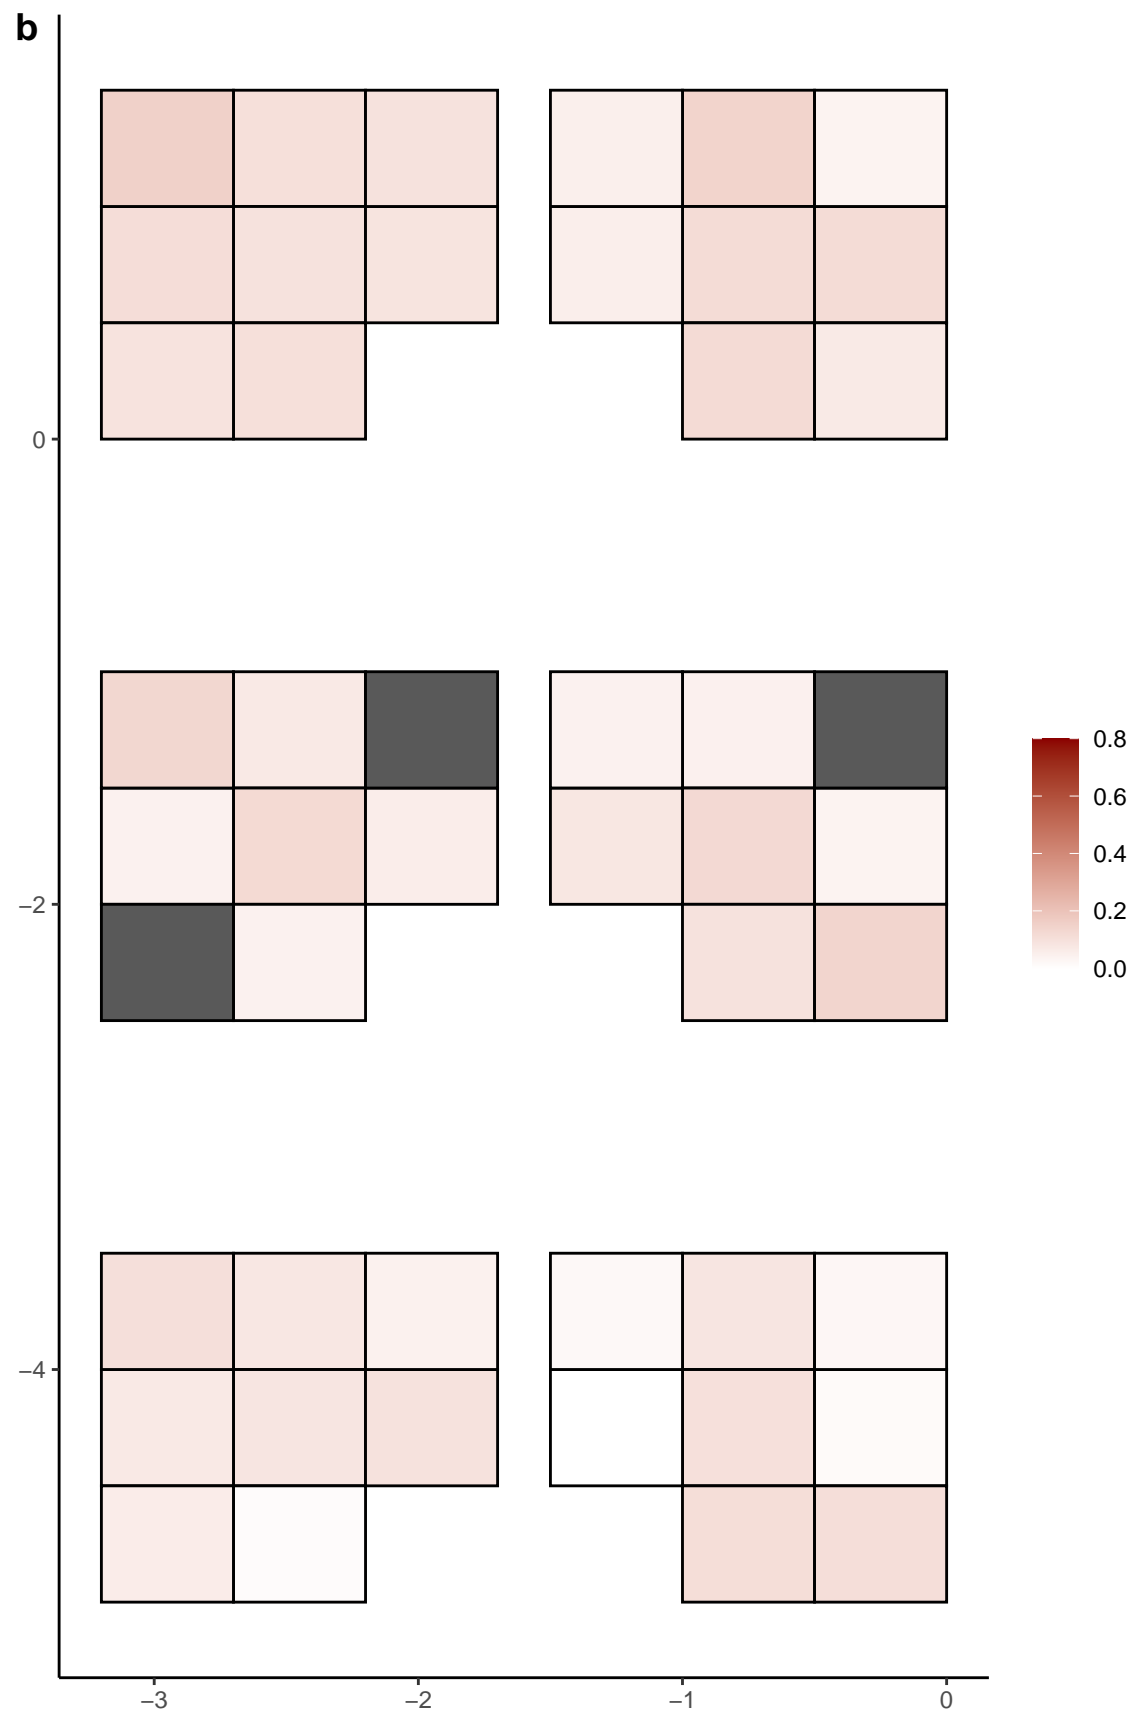

**a** ID05 13-69093869-G-A

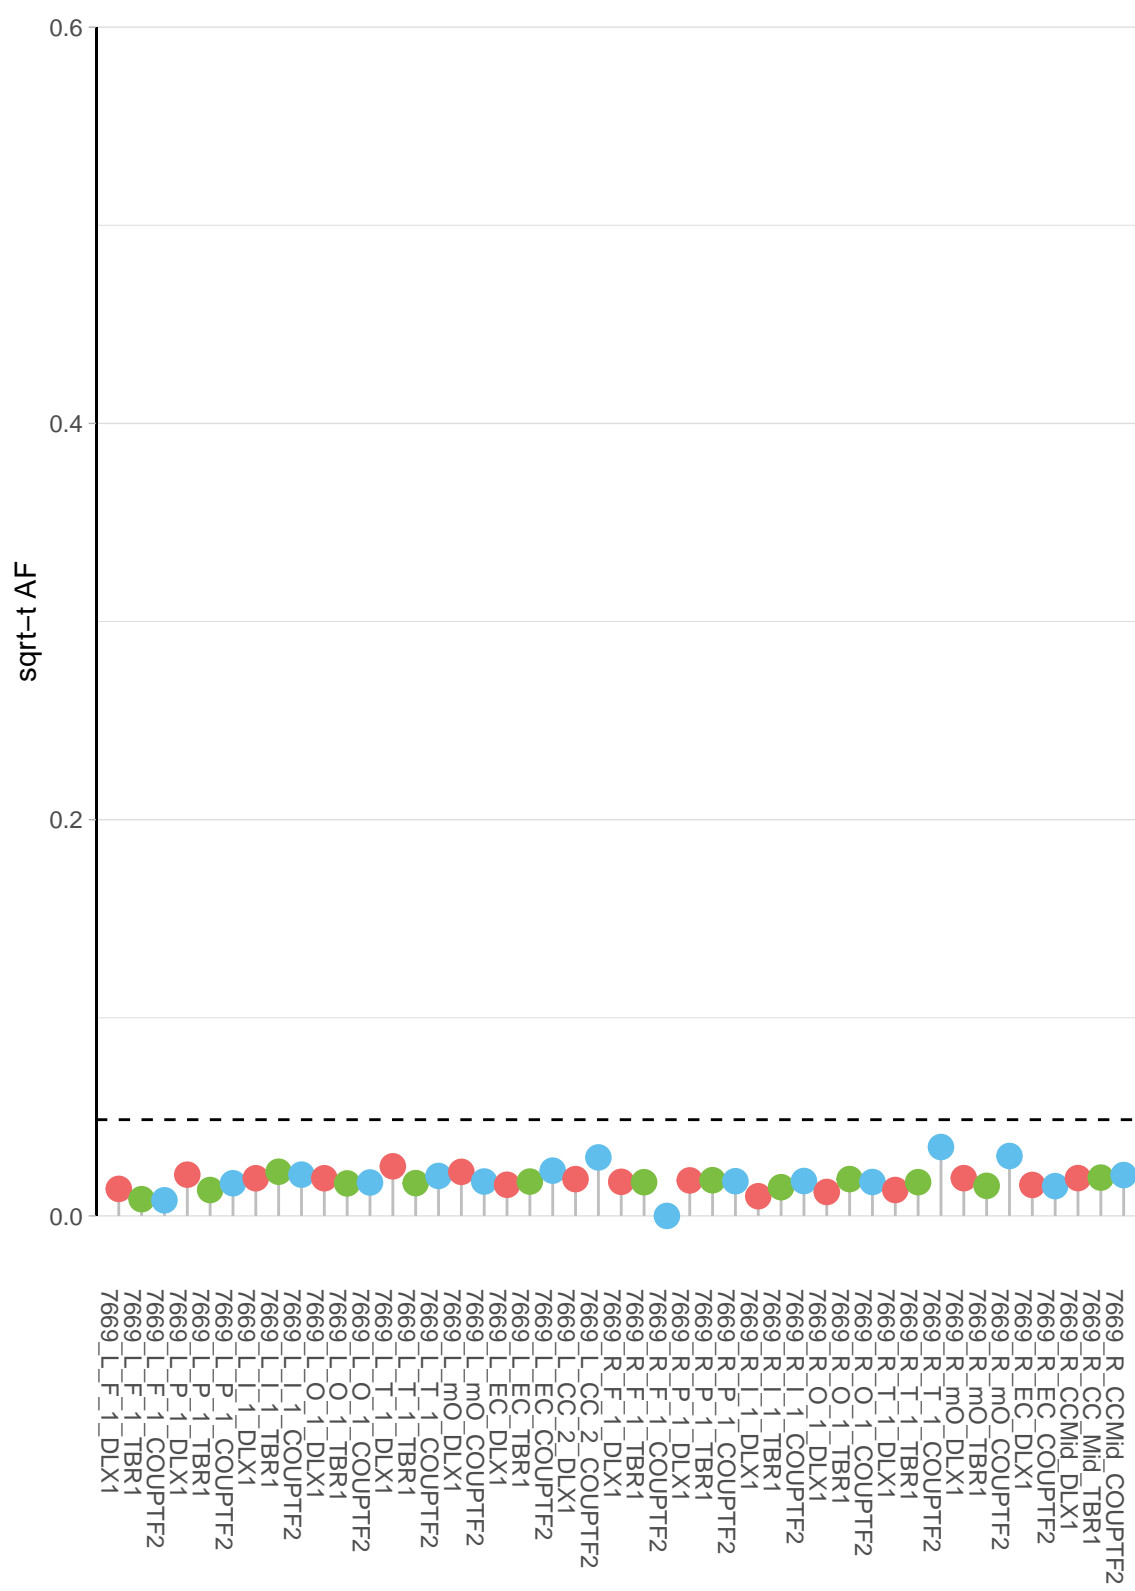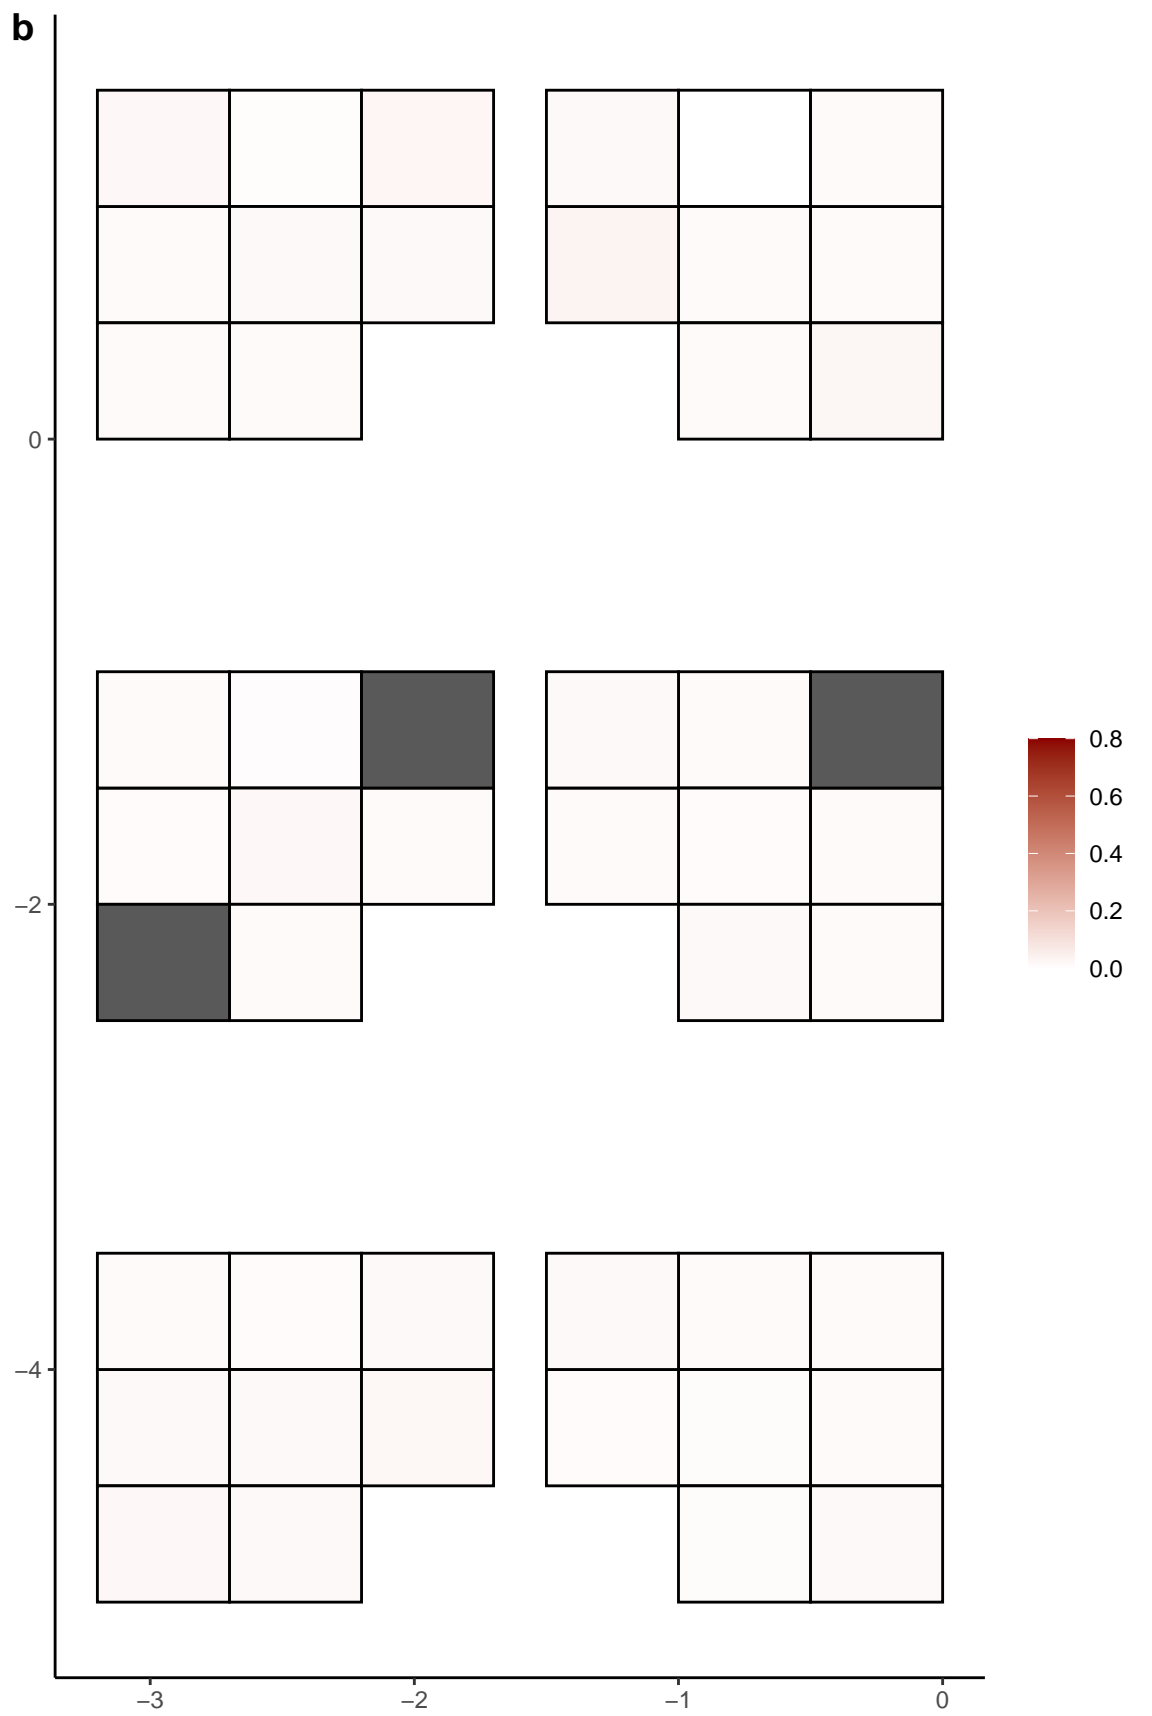

**a** ID05 13-69308268-A-G

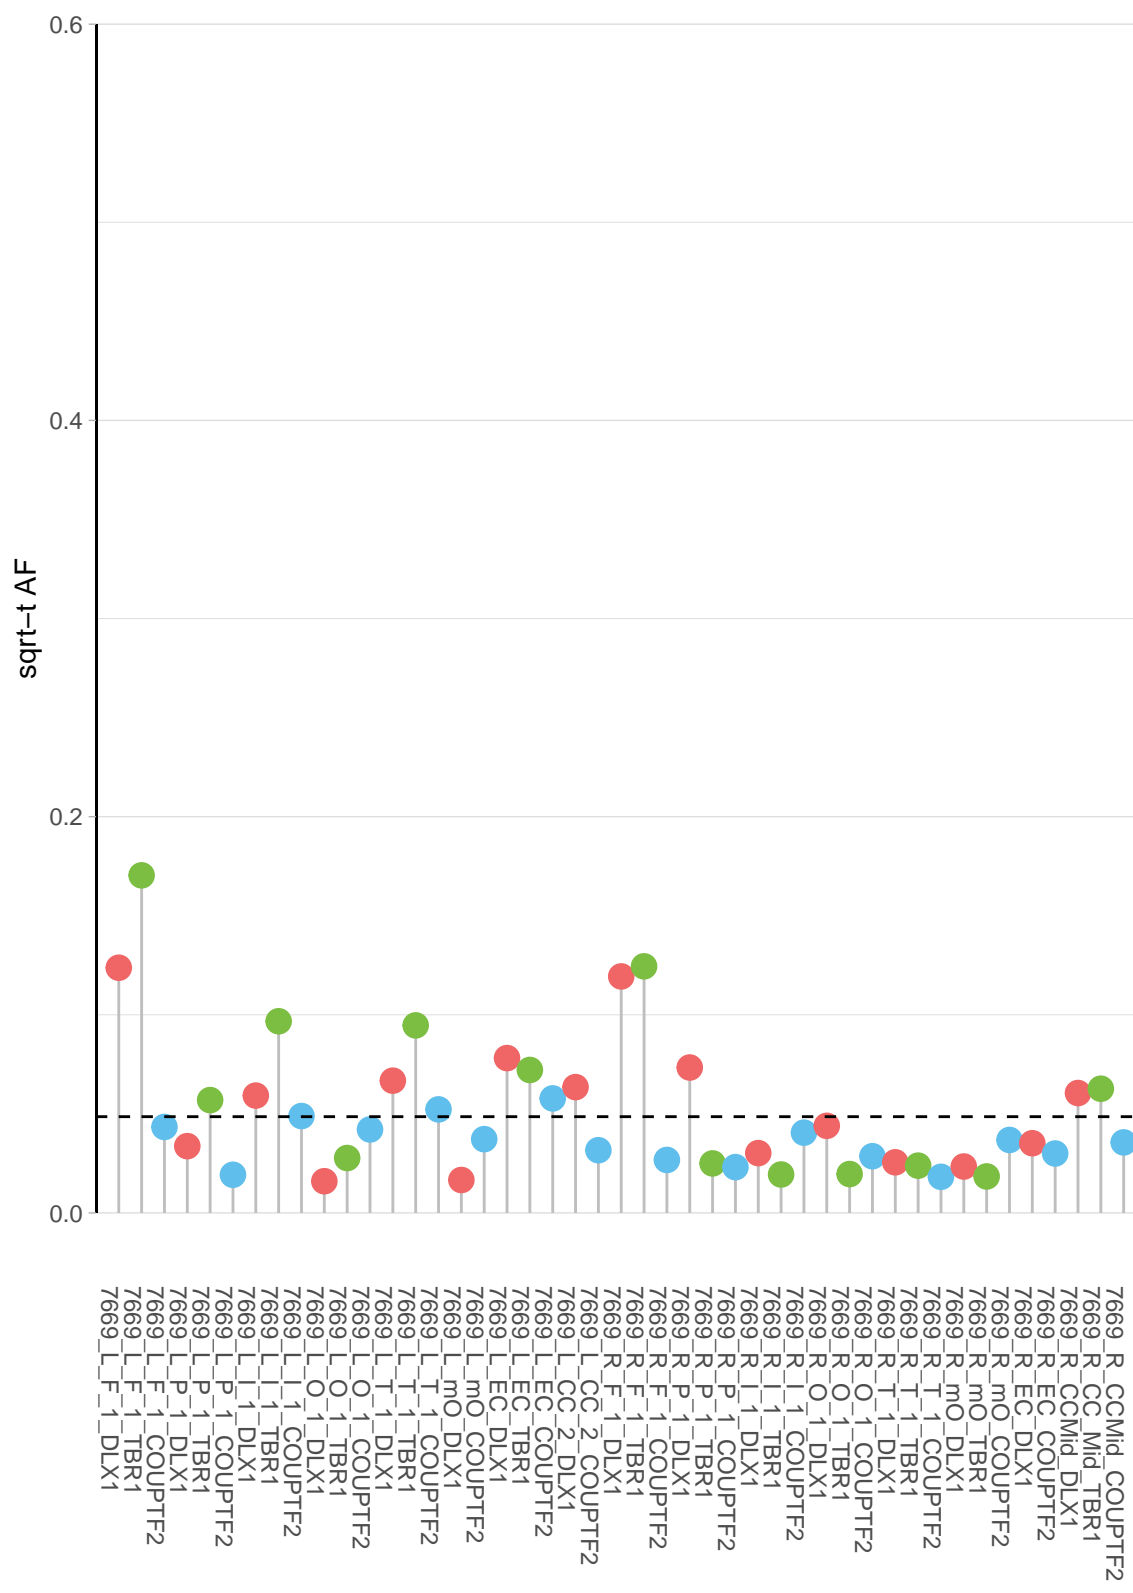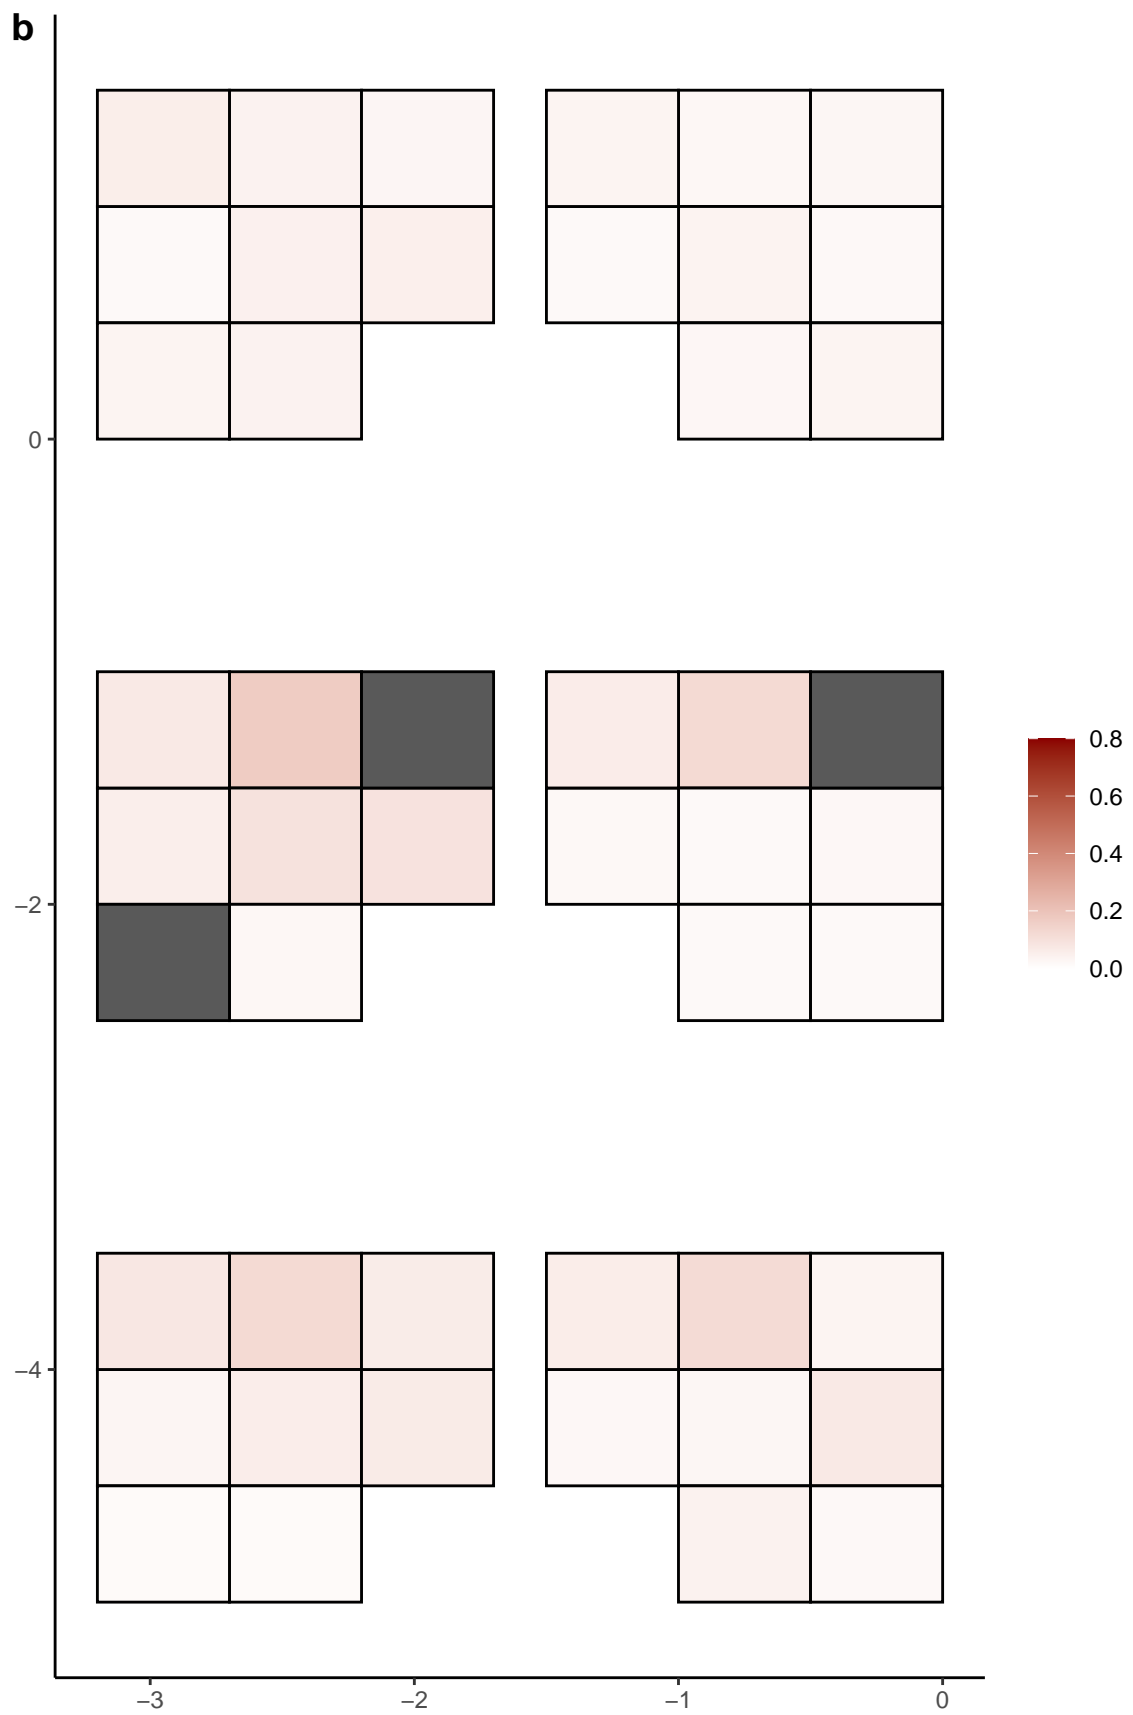

**a** ID05 13-70279433-G-A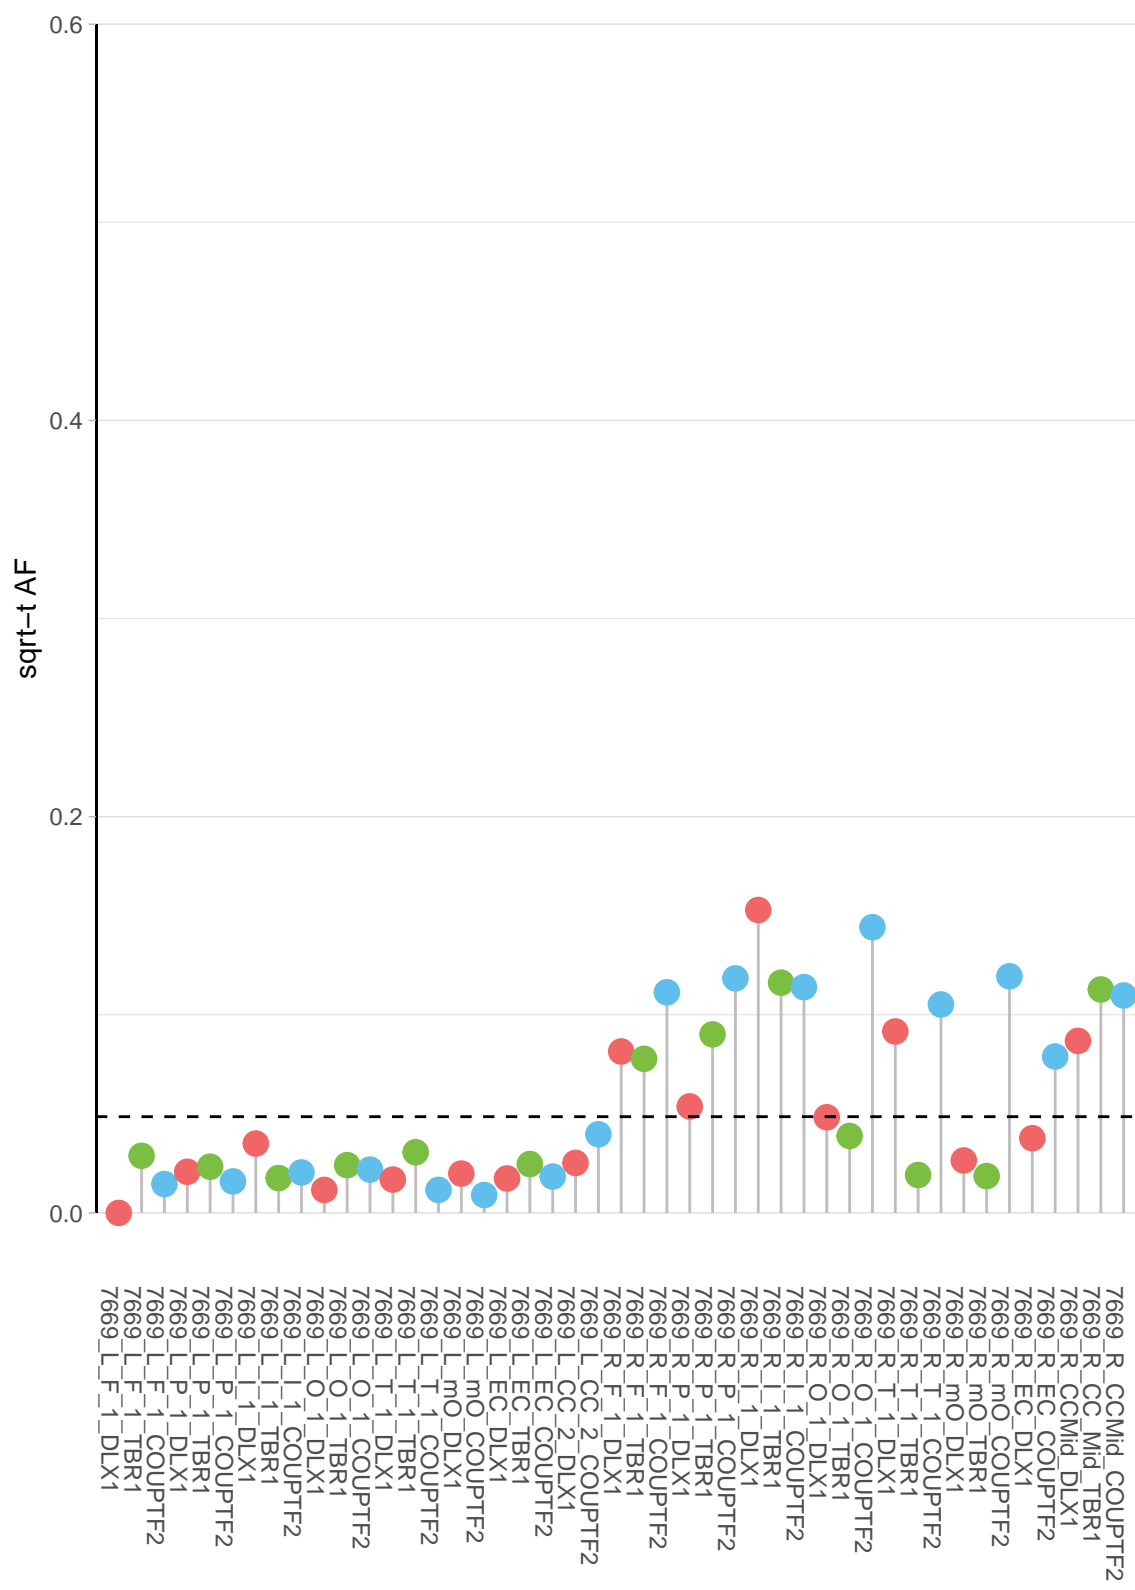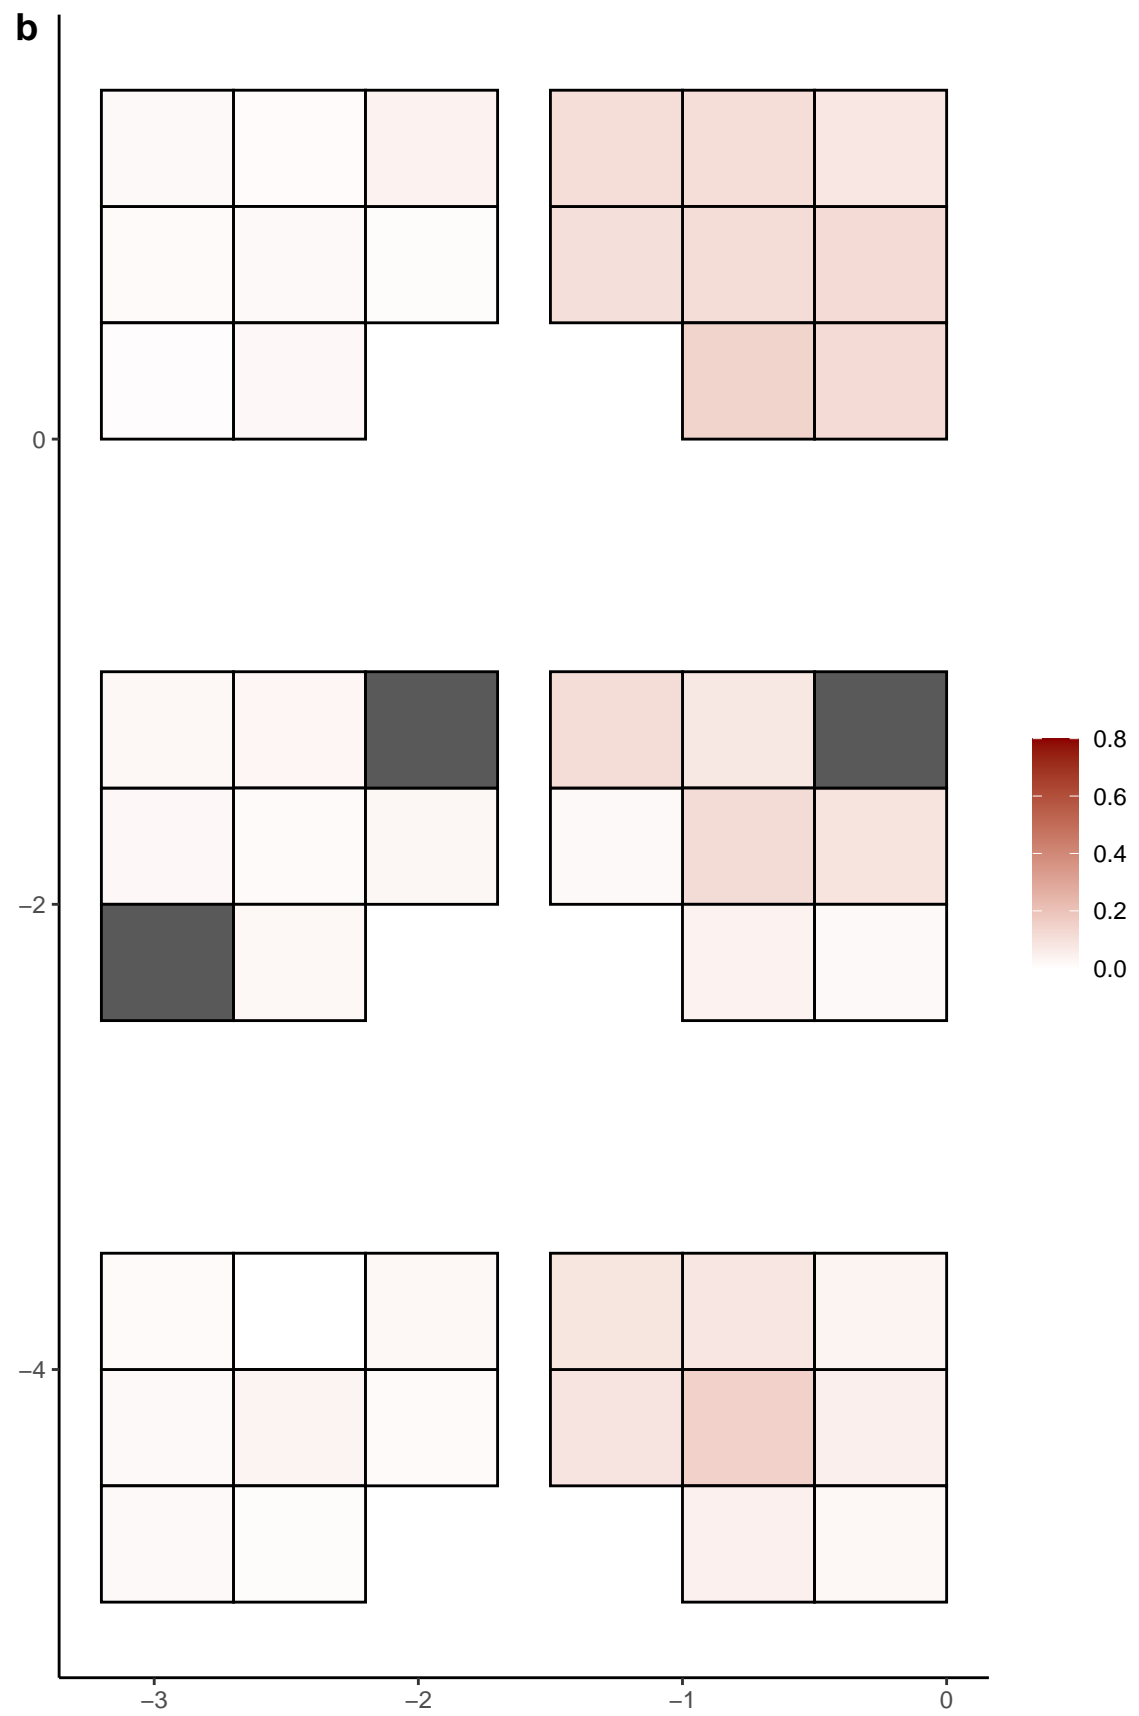

**a** ID05 13-72218943-C-A

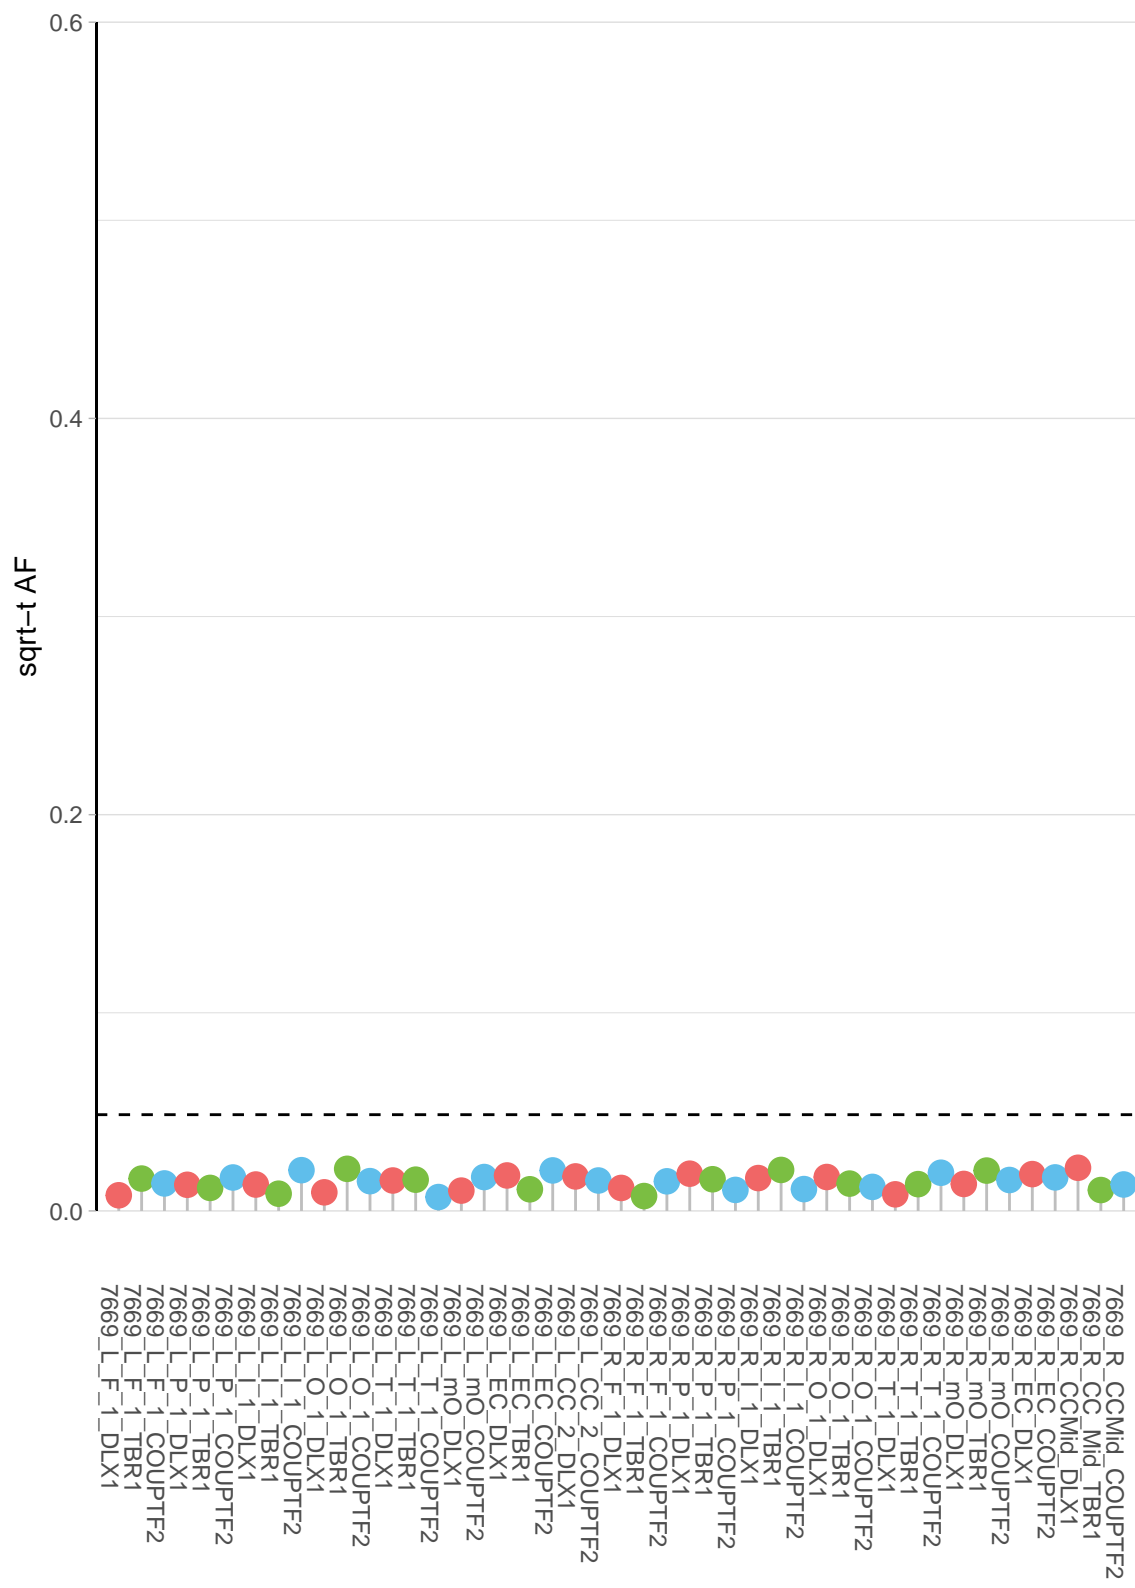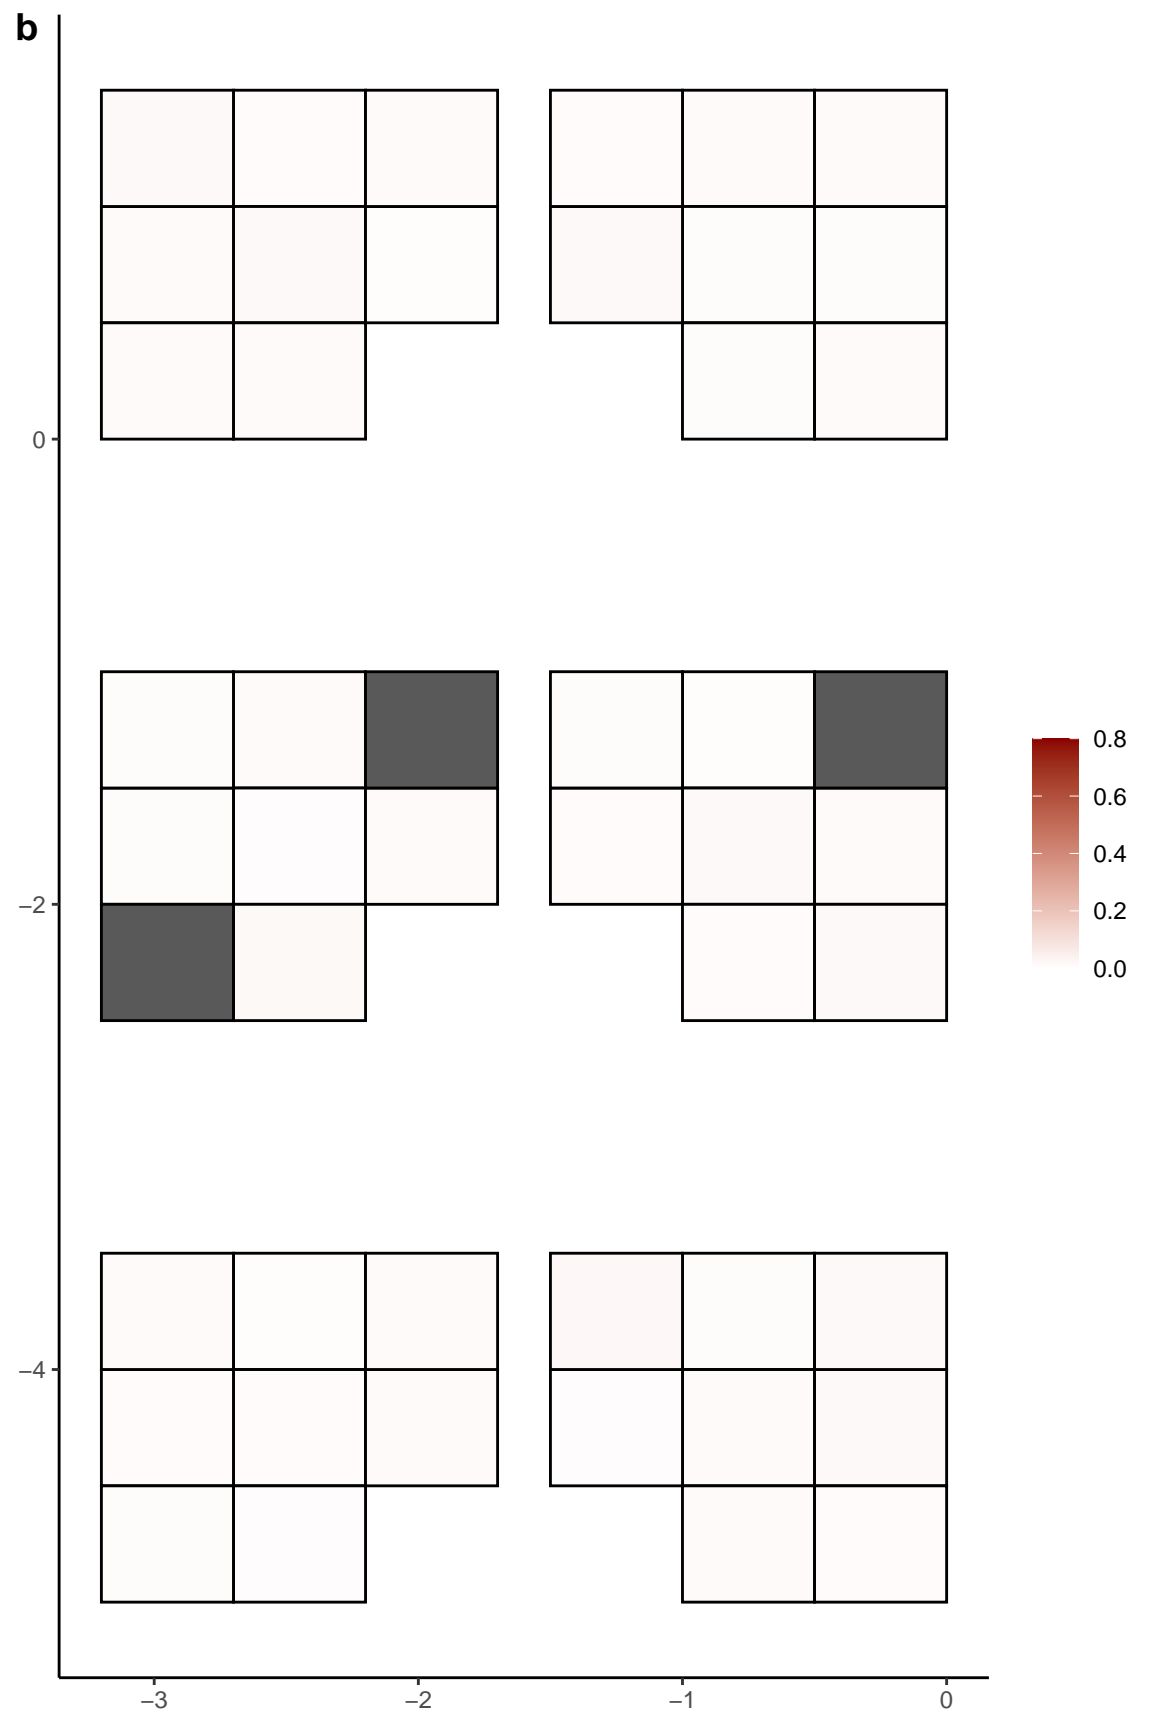



**a** ID05 13-76279674-G-A

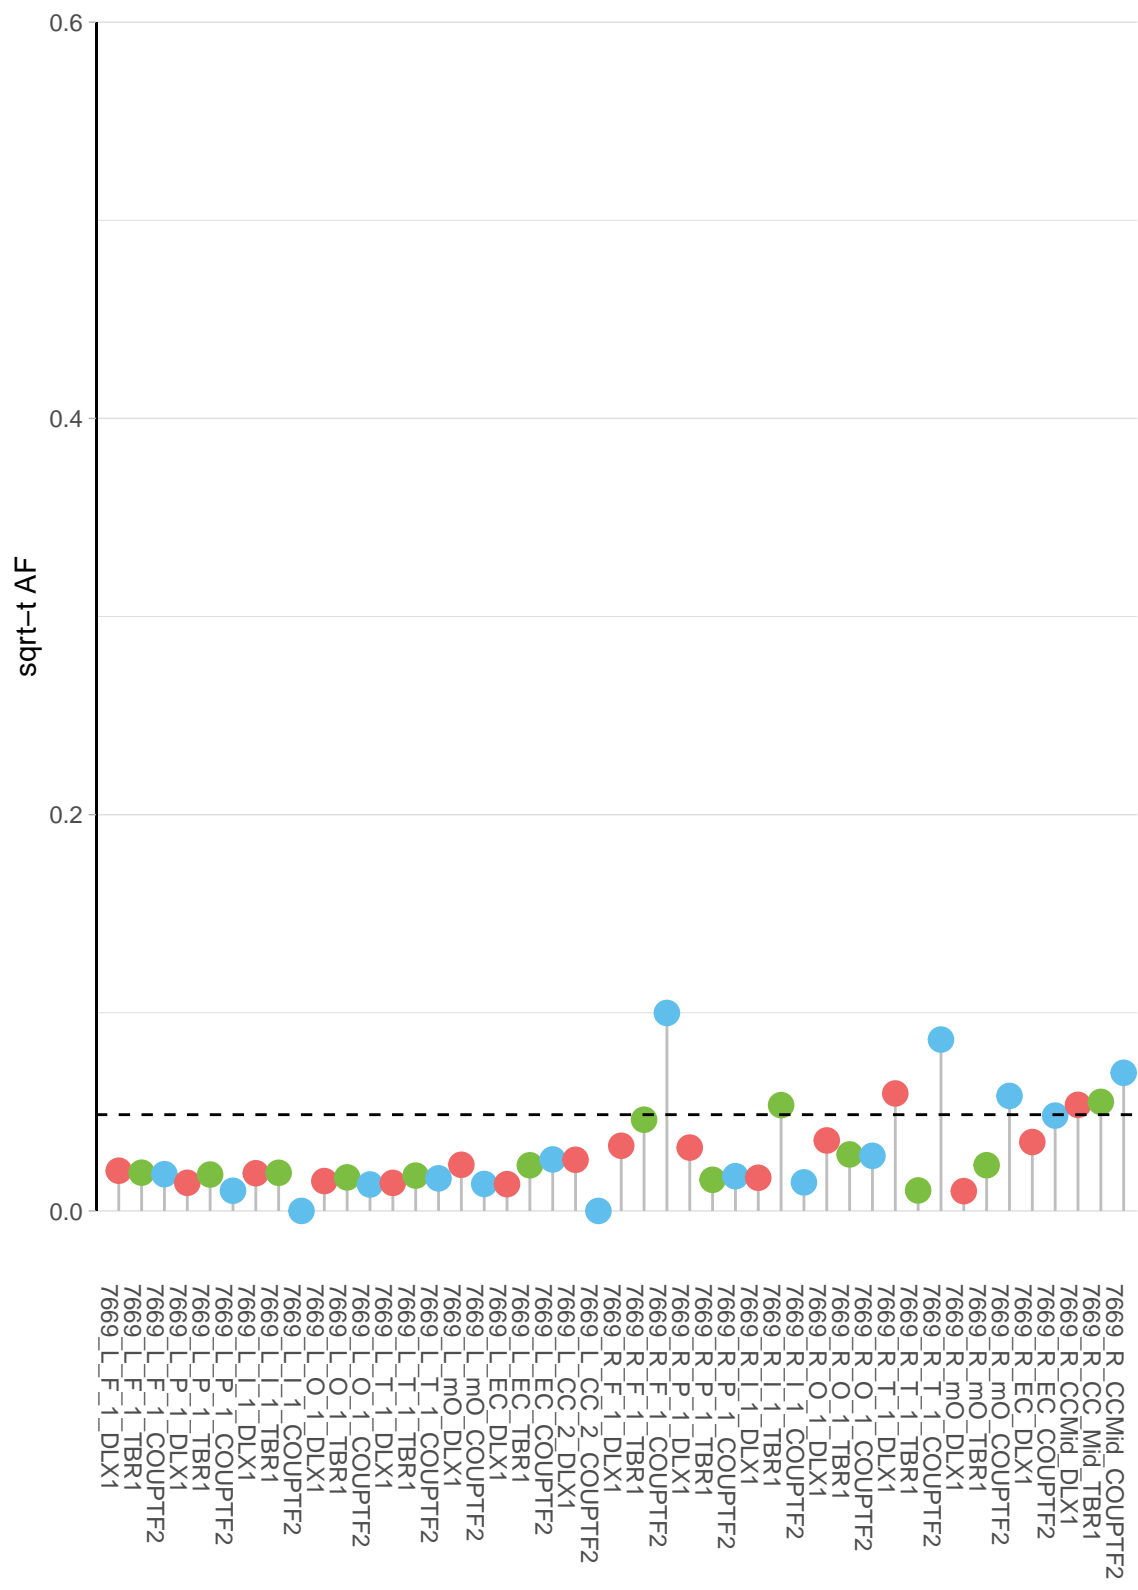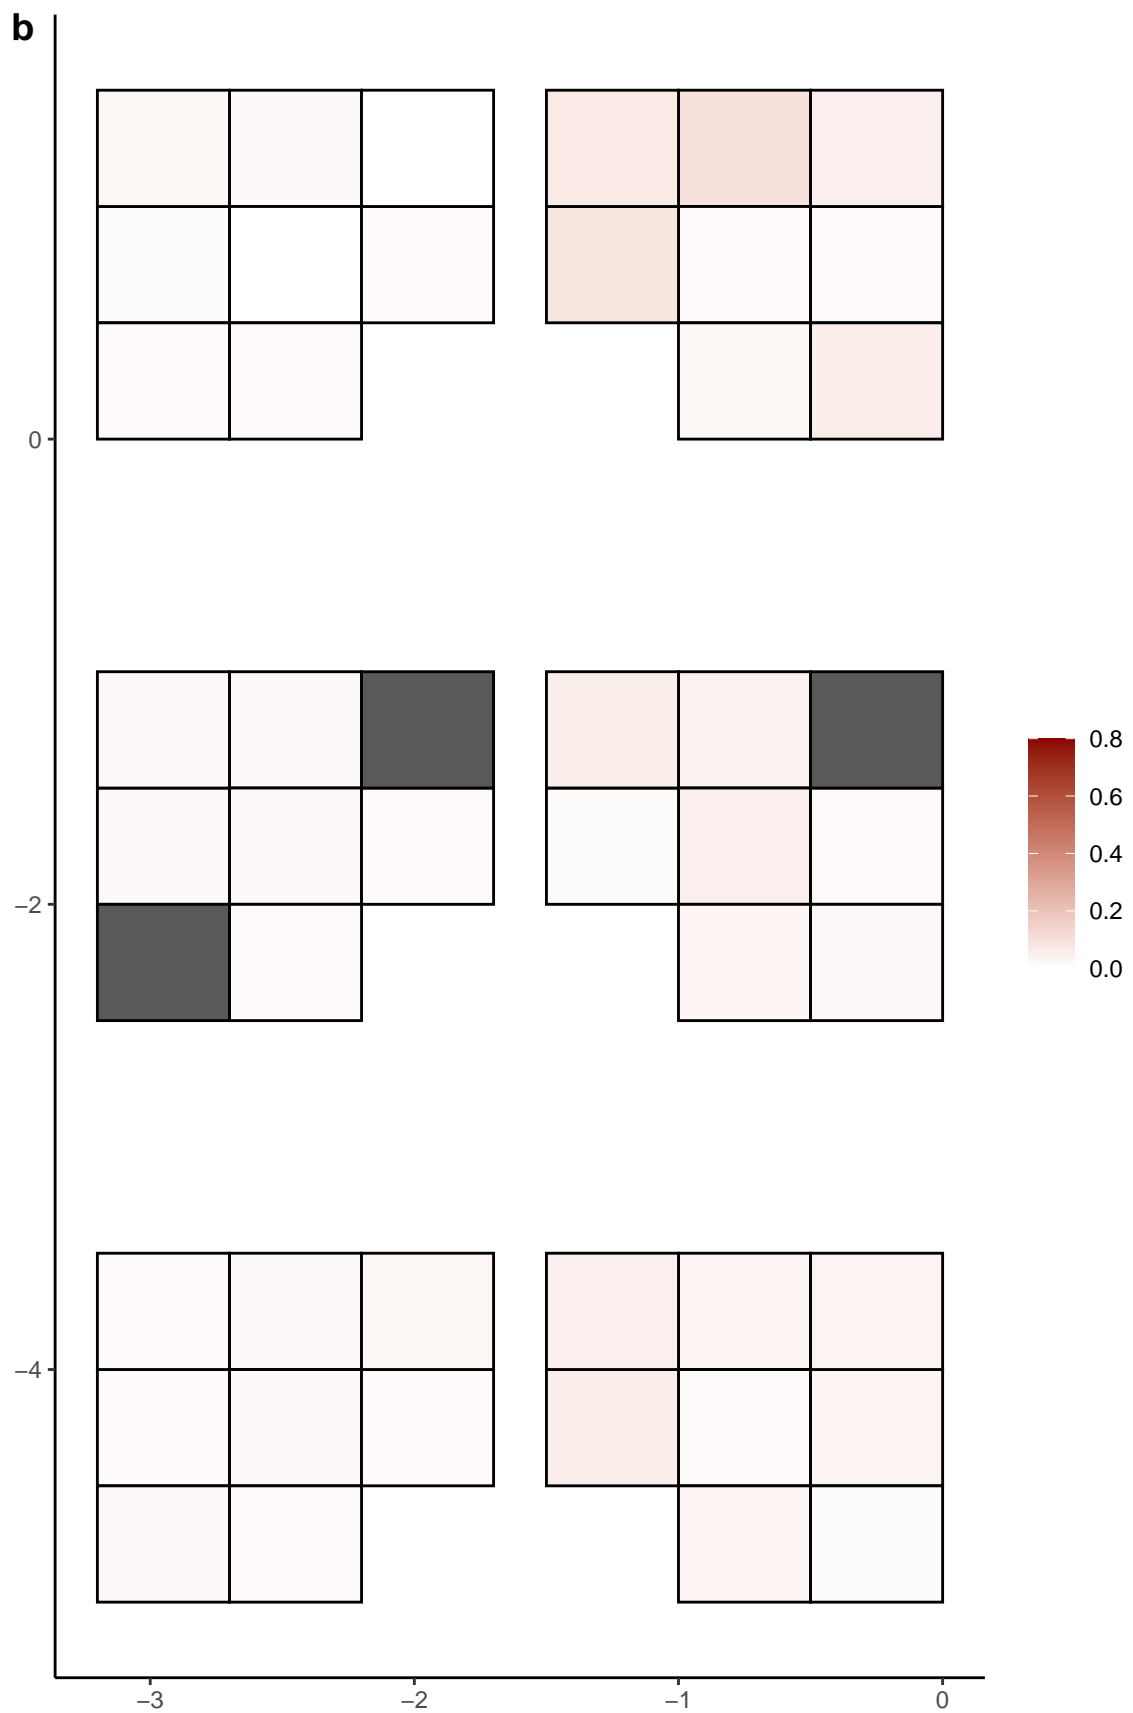

**a** ID05 13-76874198-C-T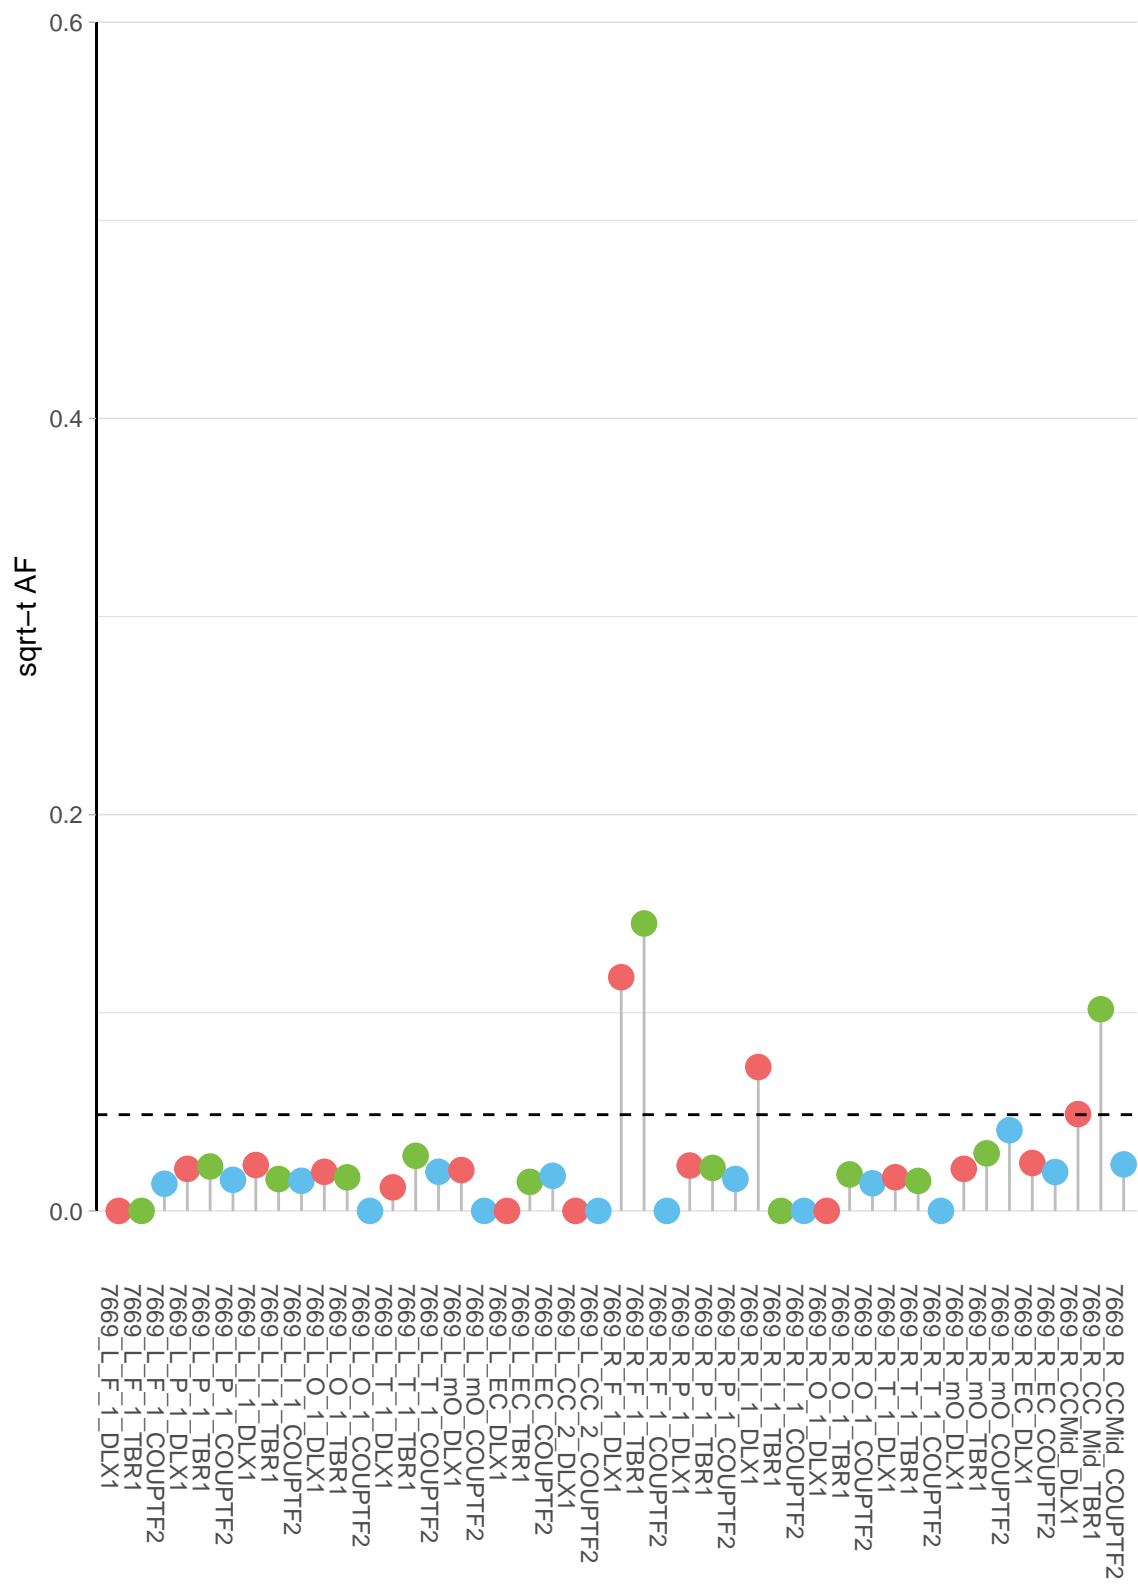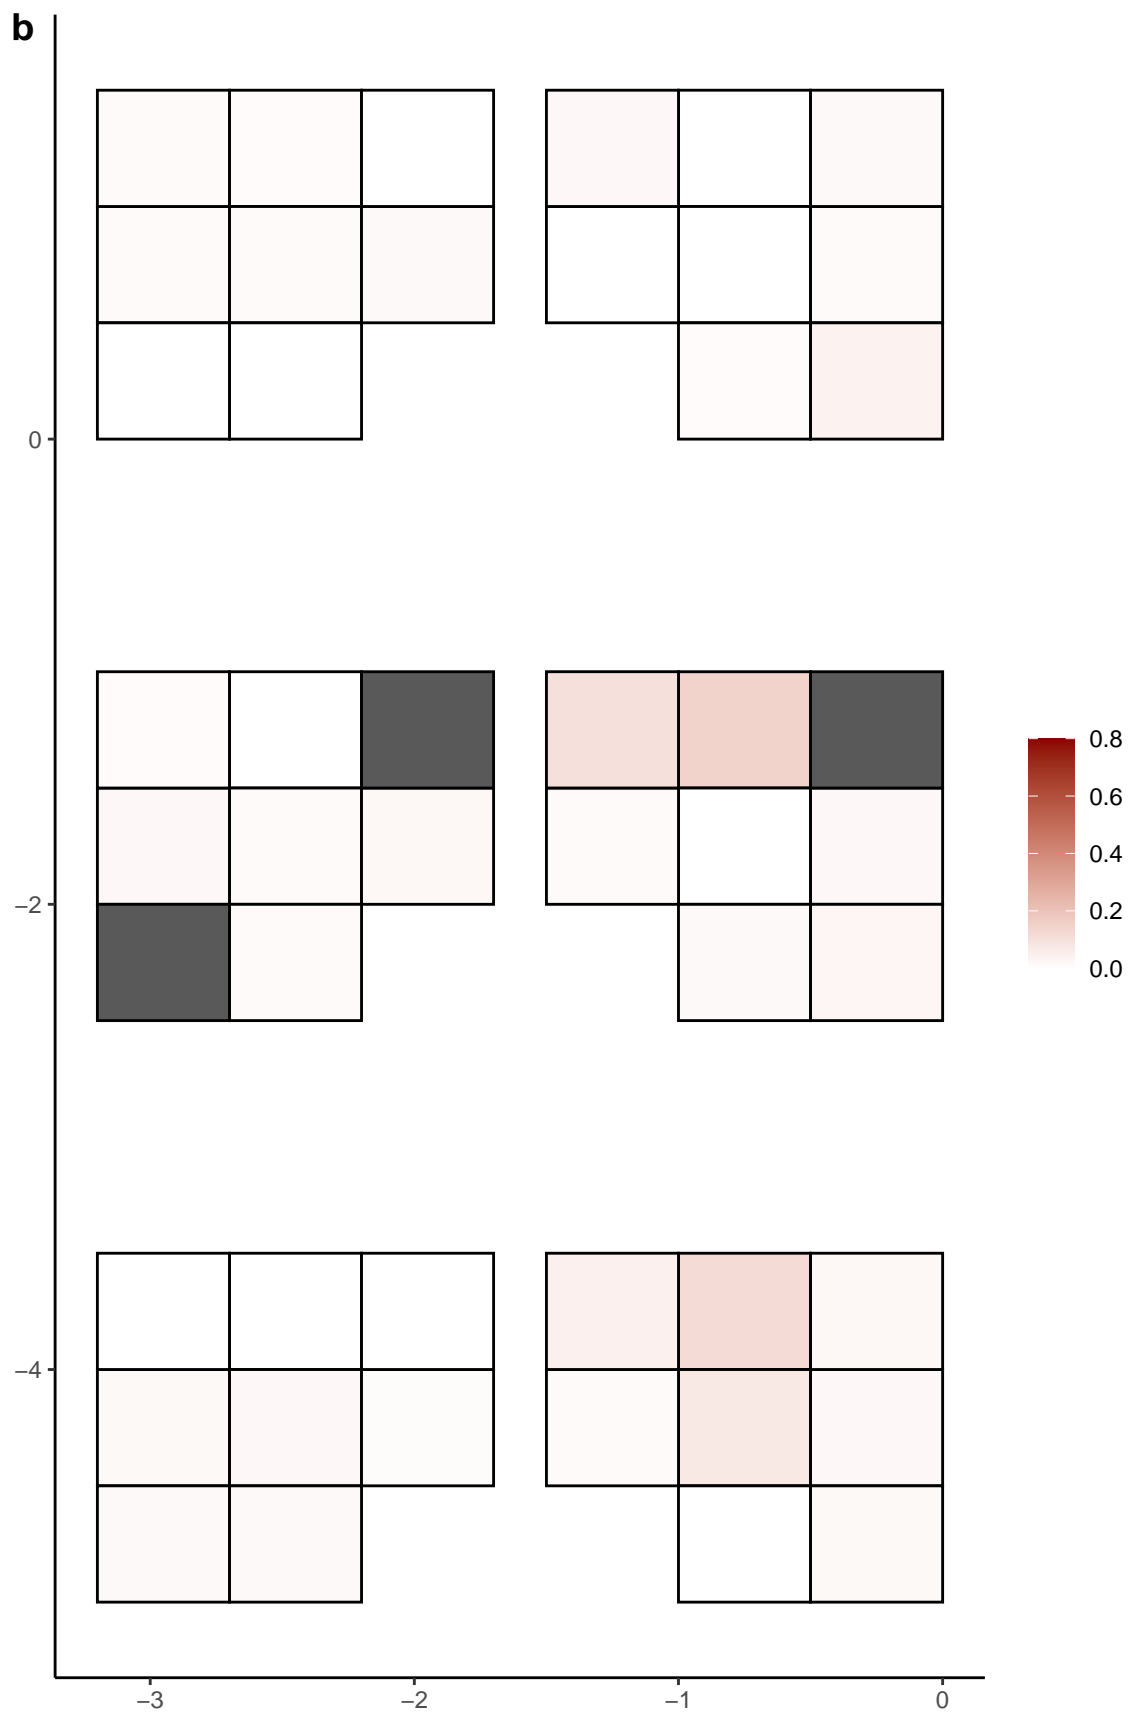

**a** ID05 13-77509041-G-T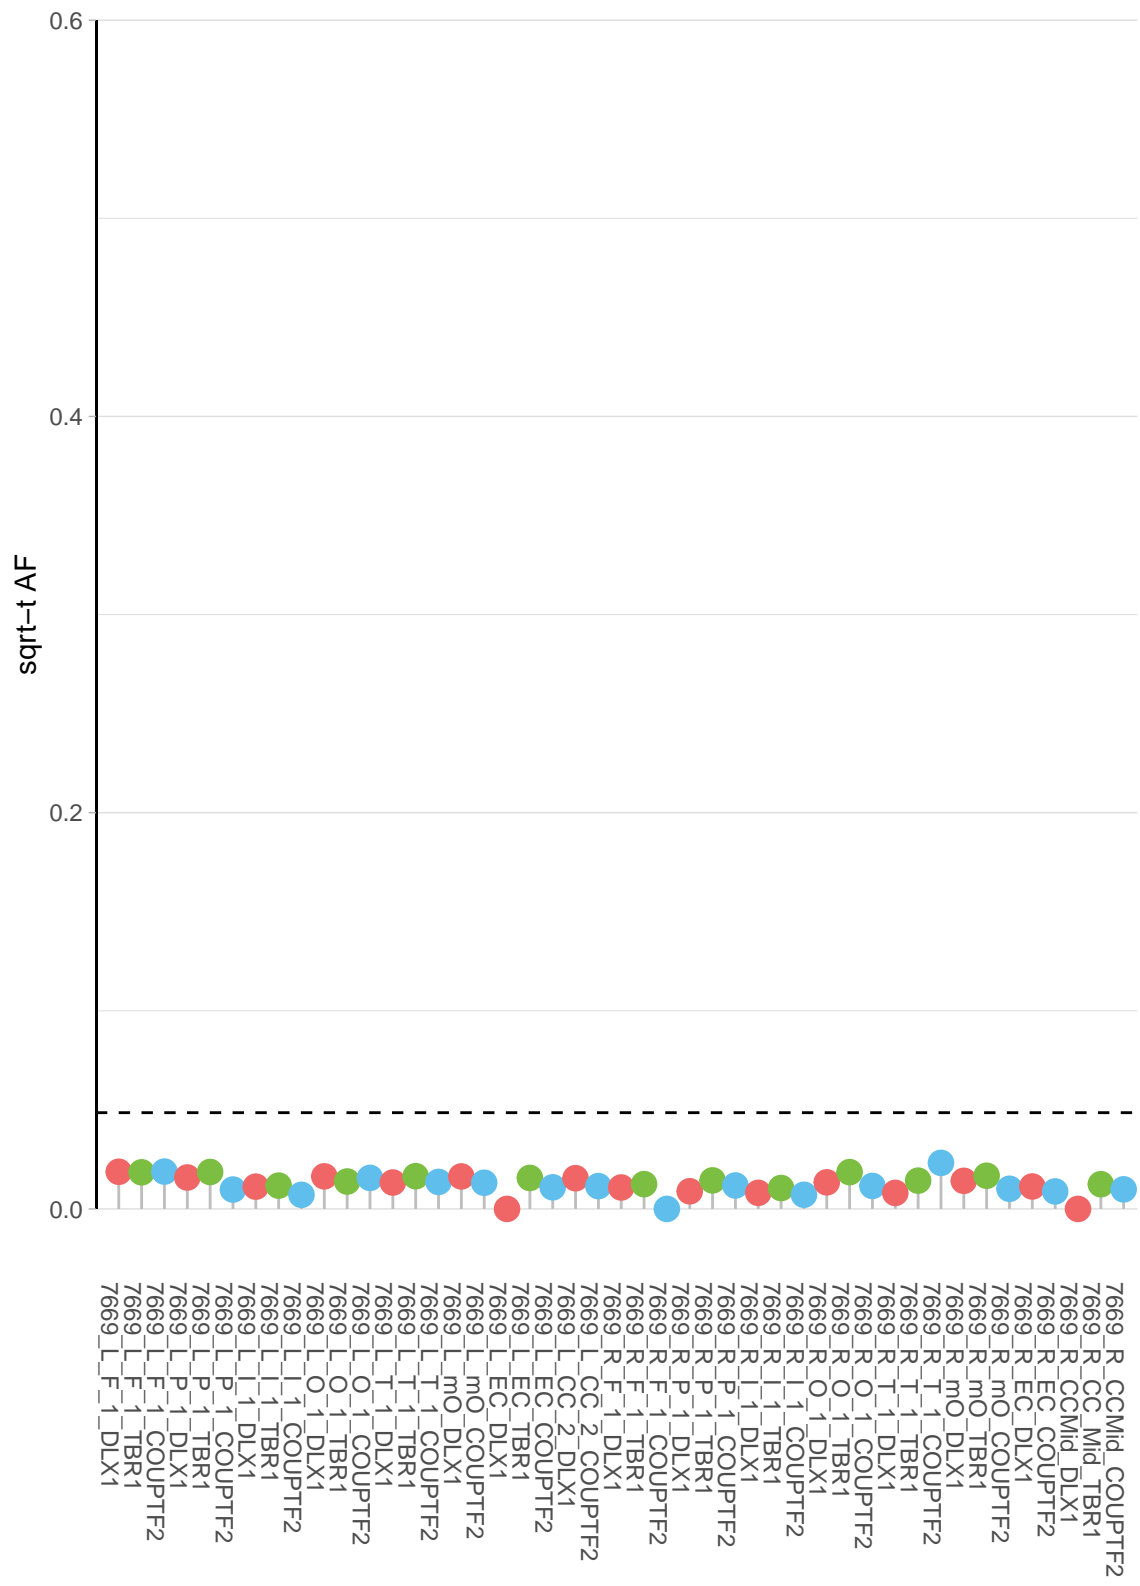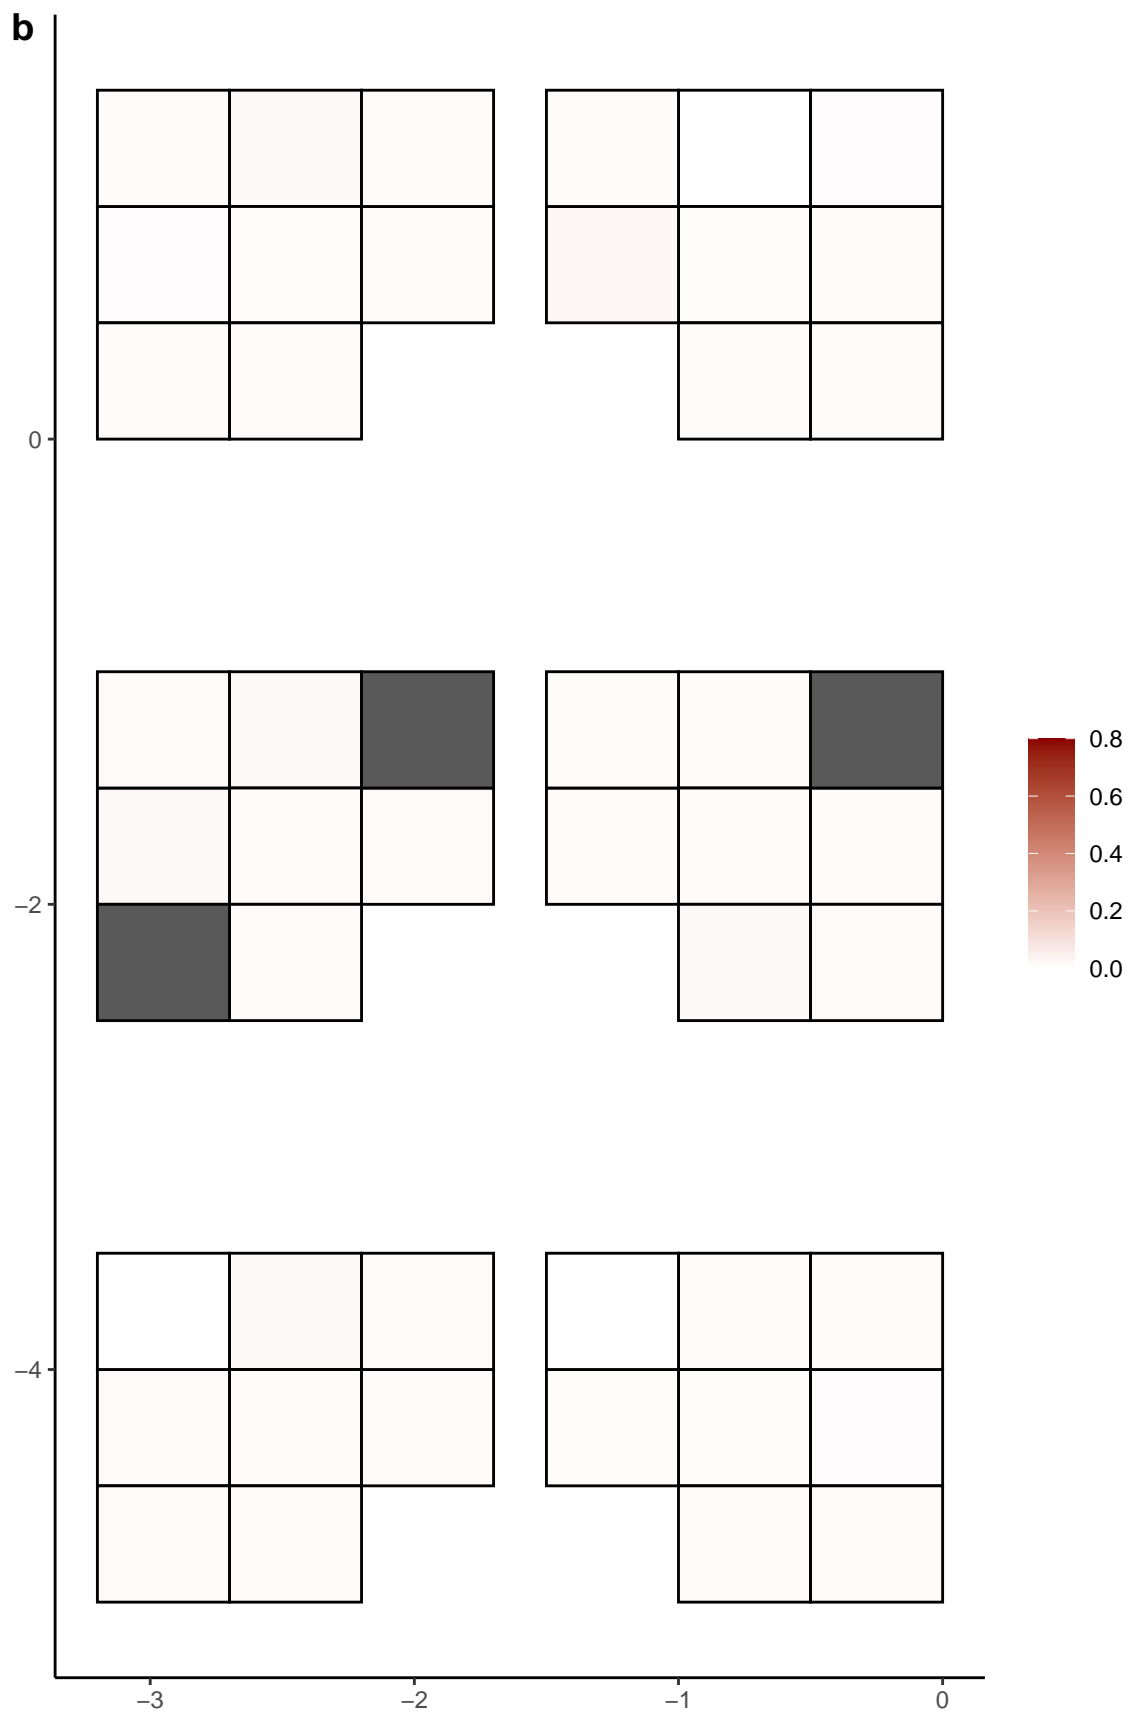



**a** ID05 13-87055884-G-A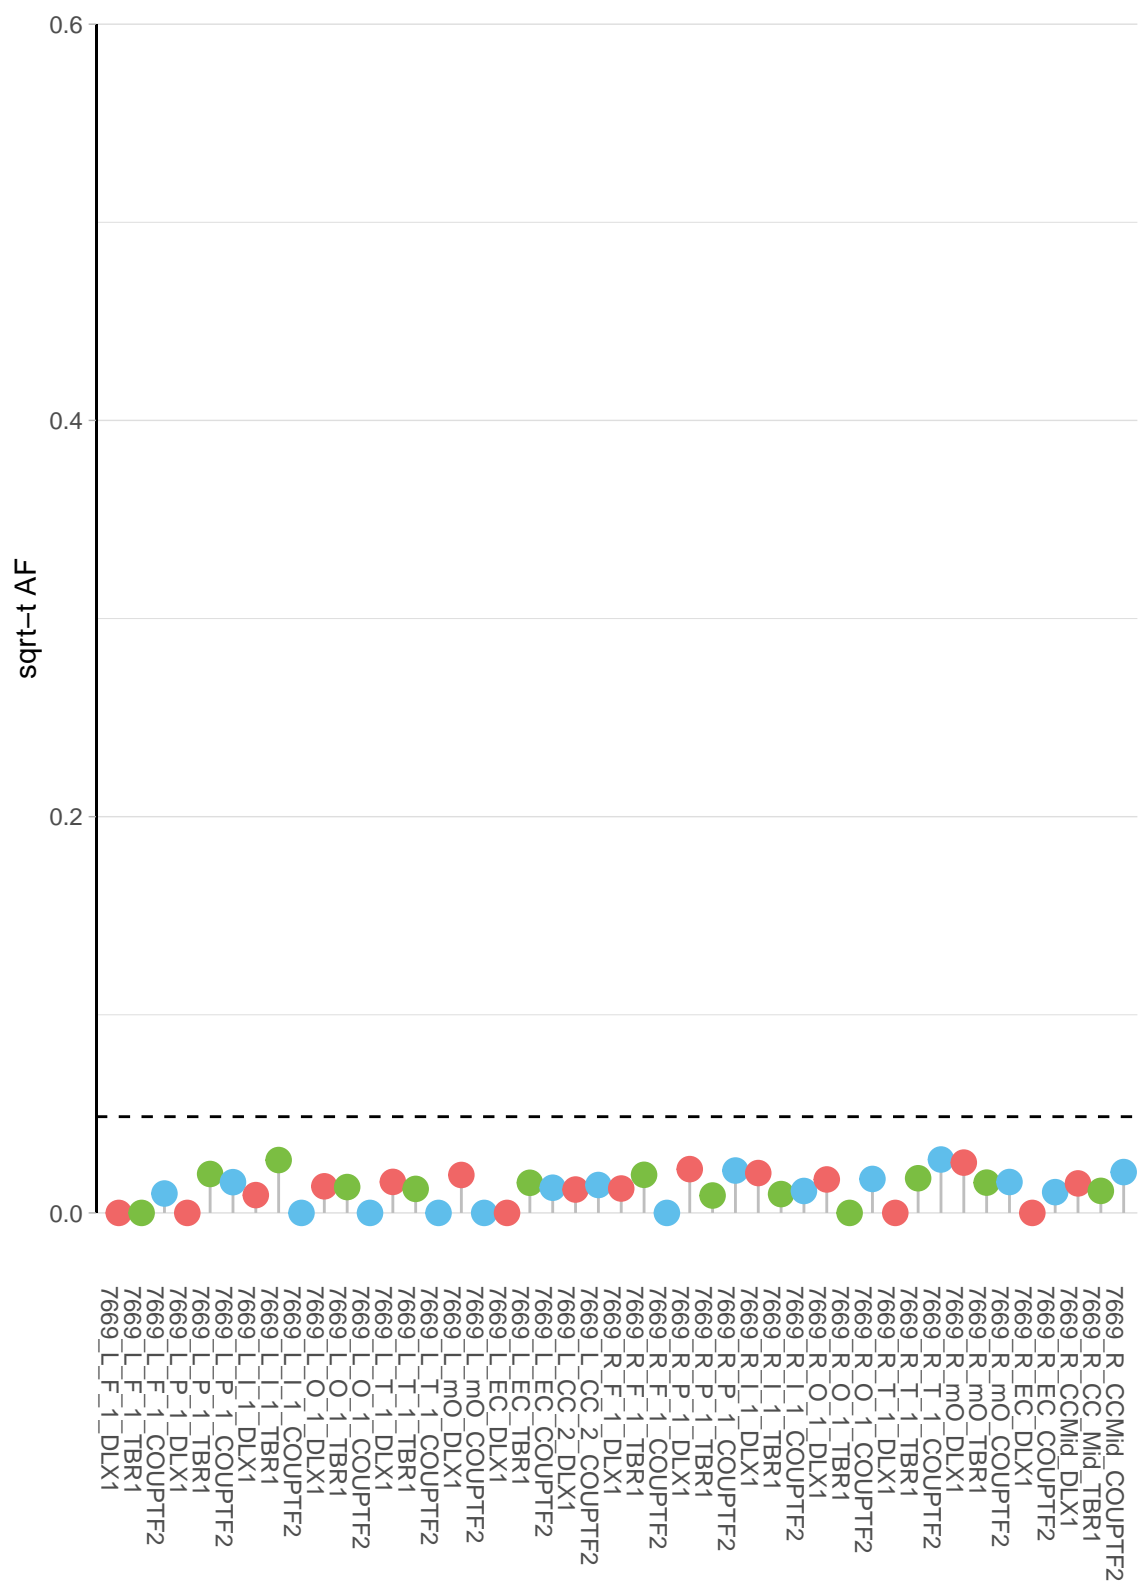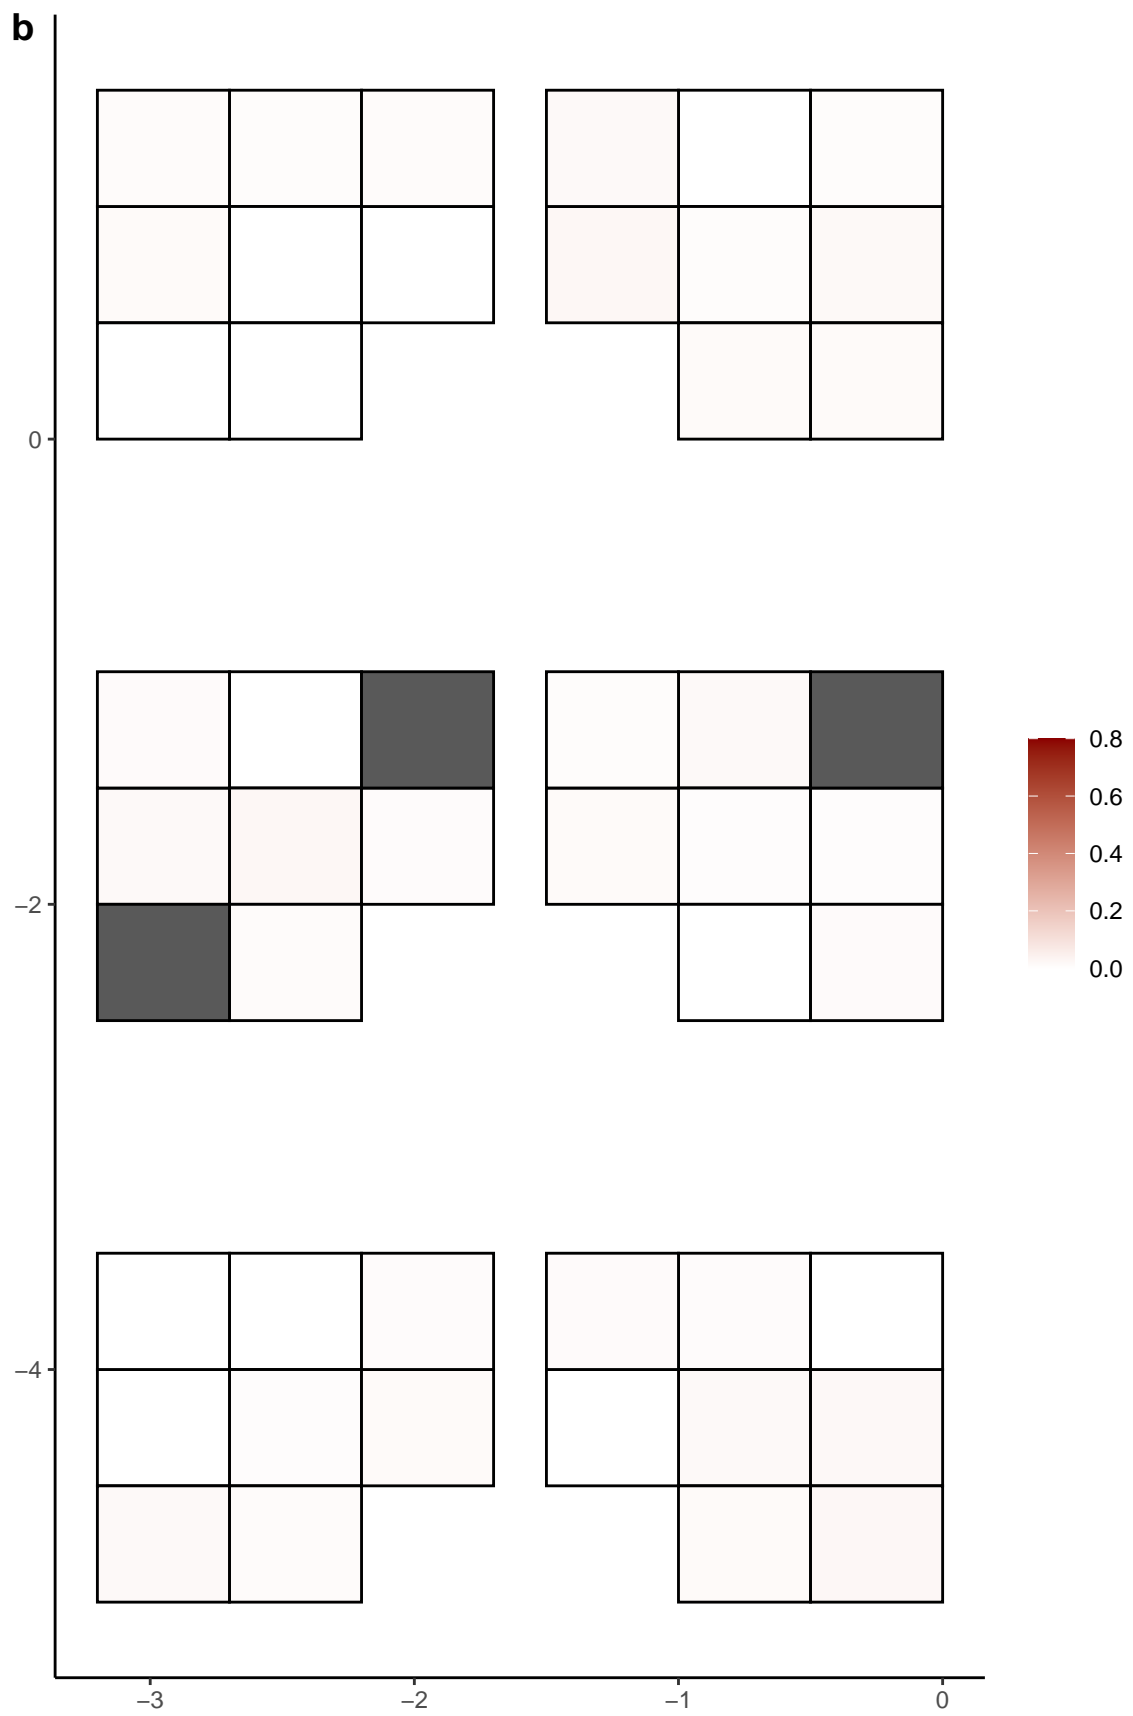

**a** ID05 13-92867989-T-C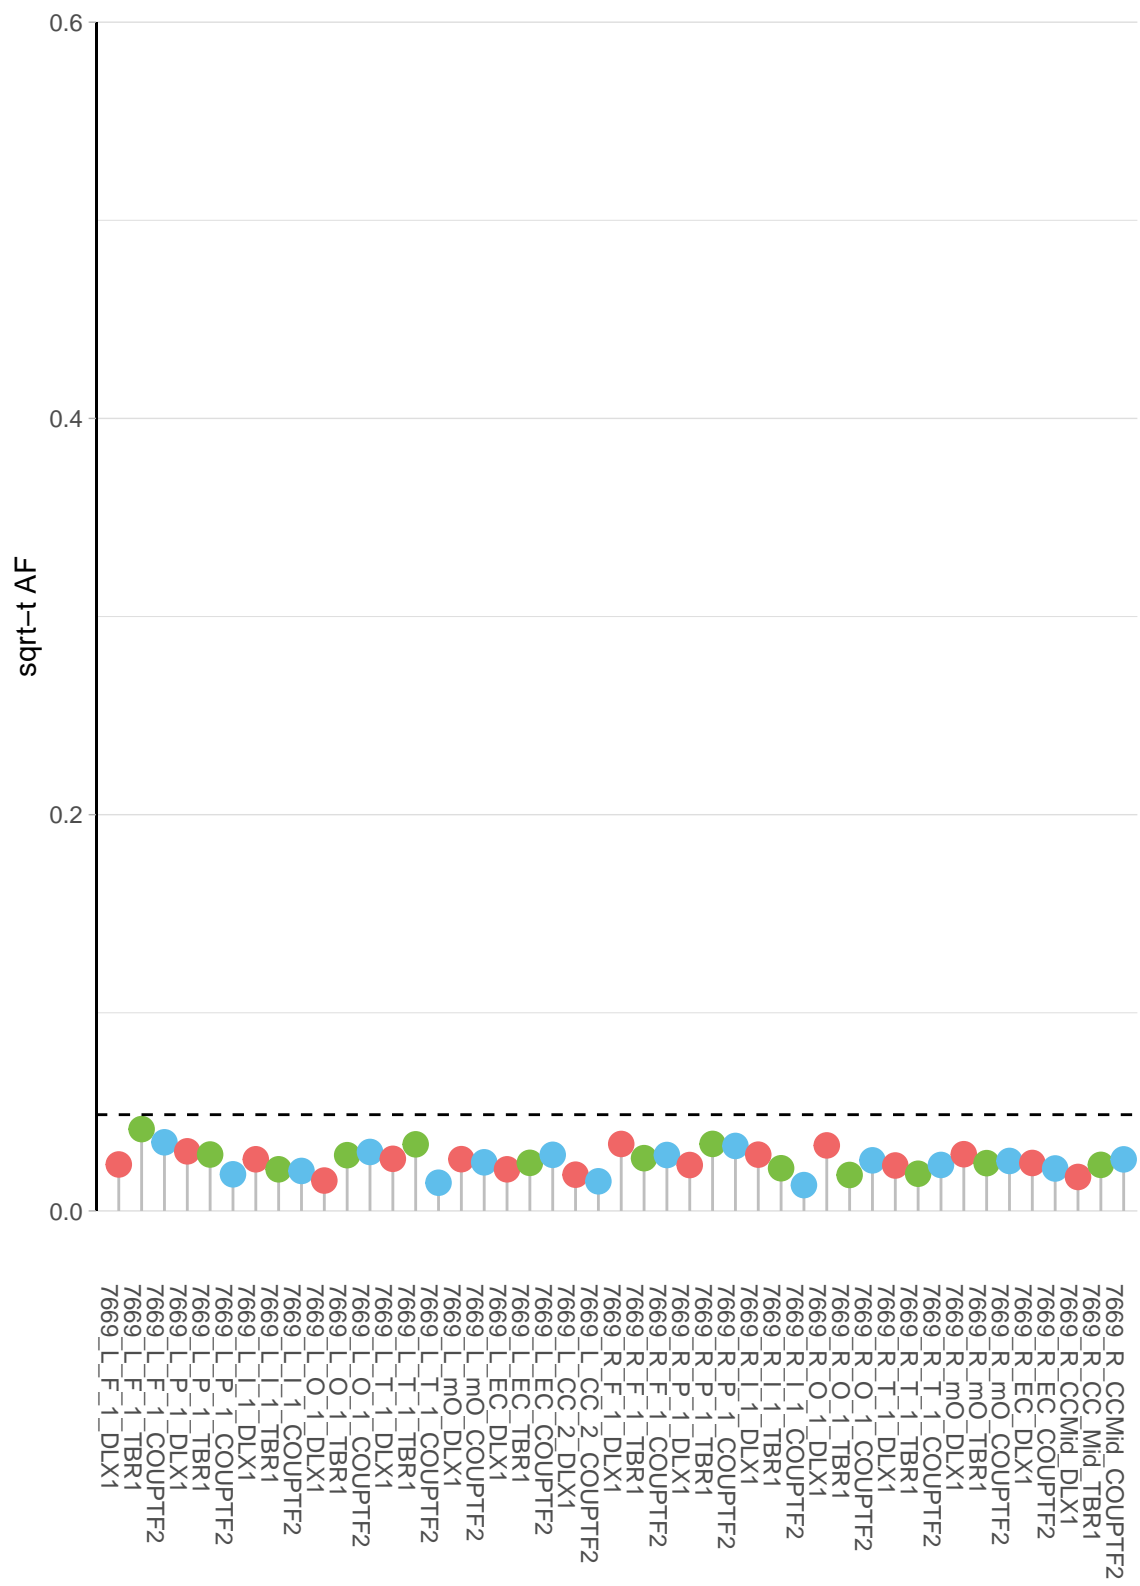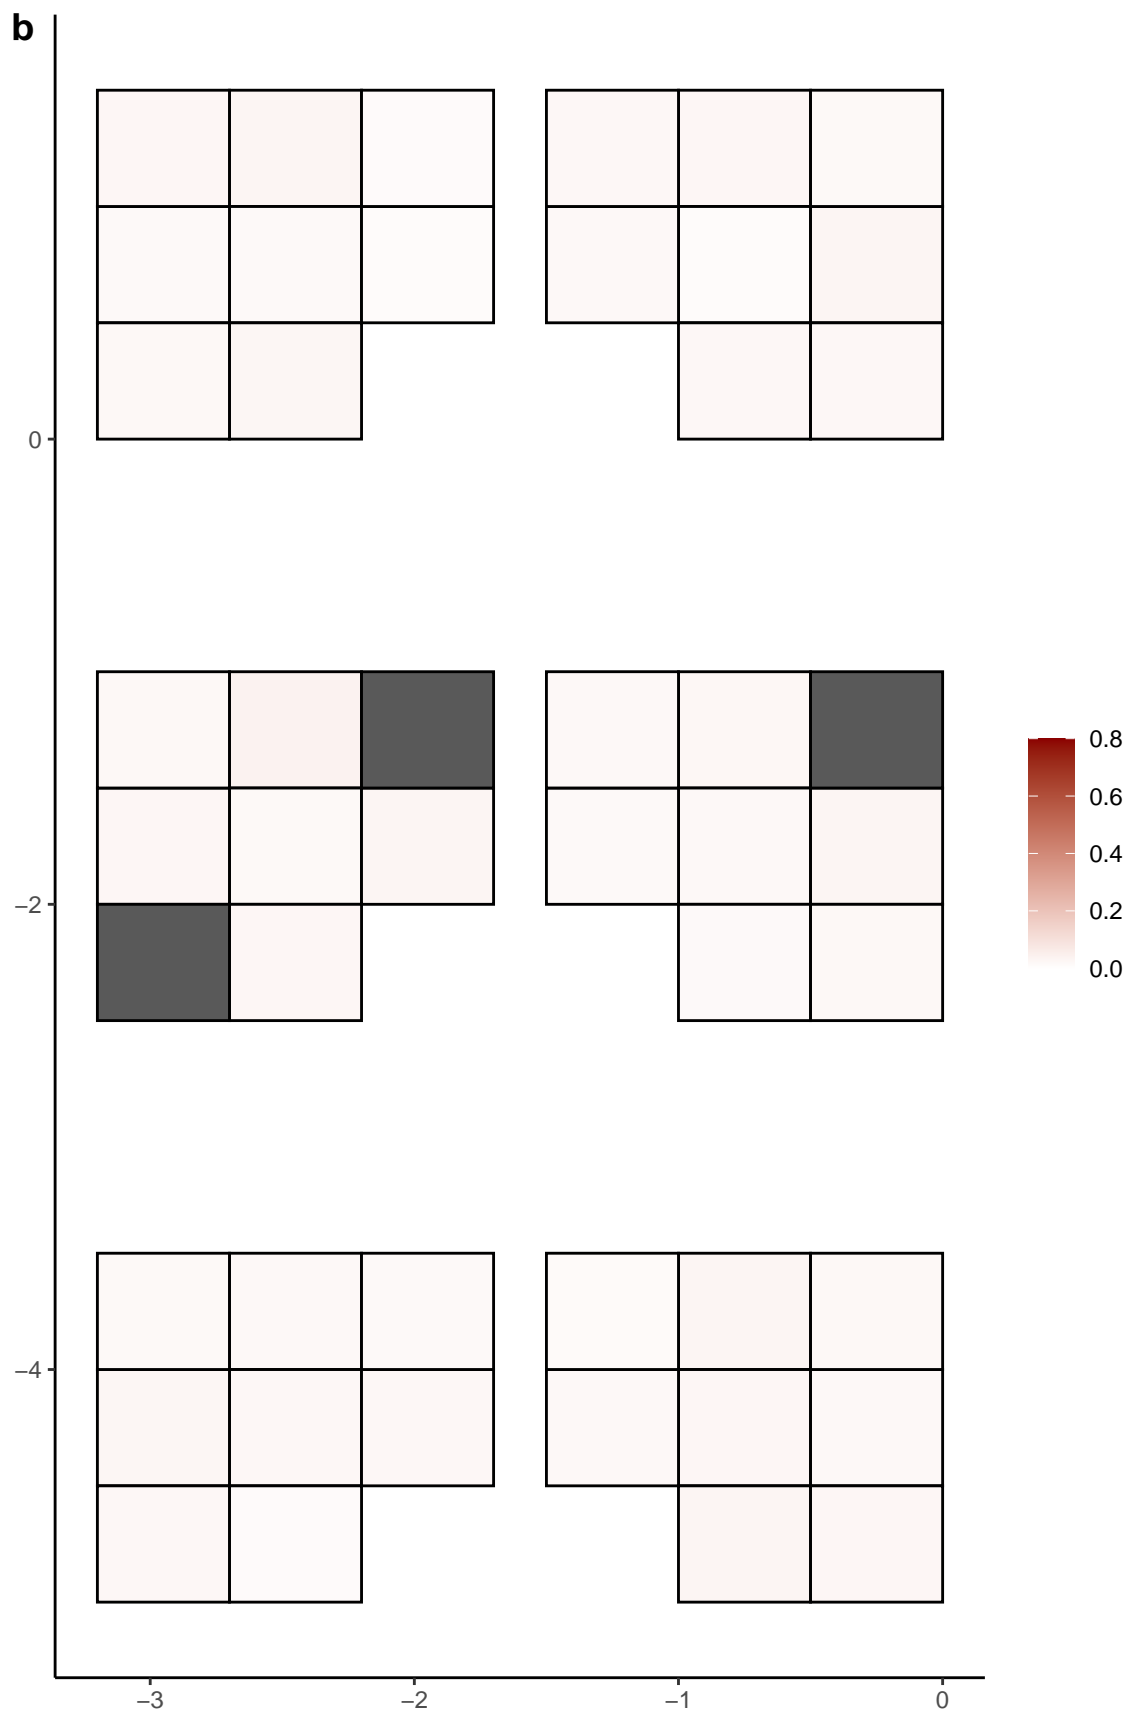

**a** ID05 13-96955504-C-T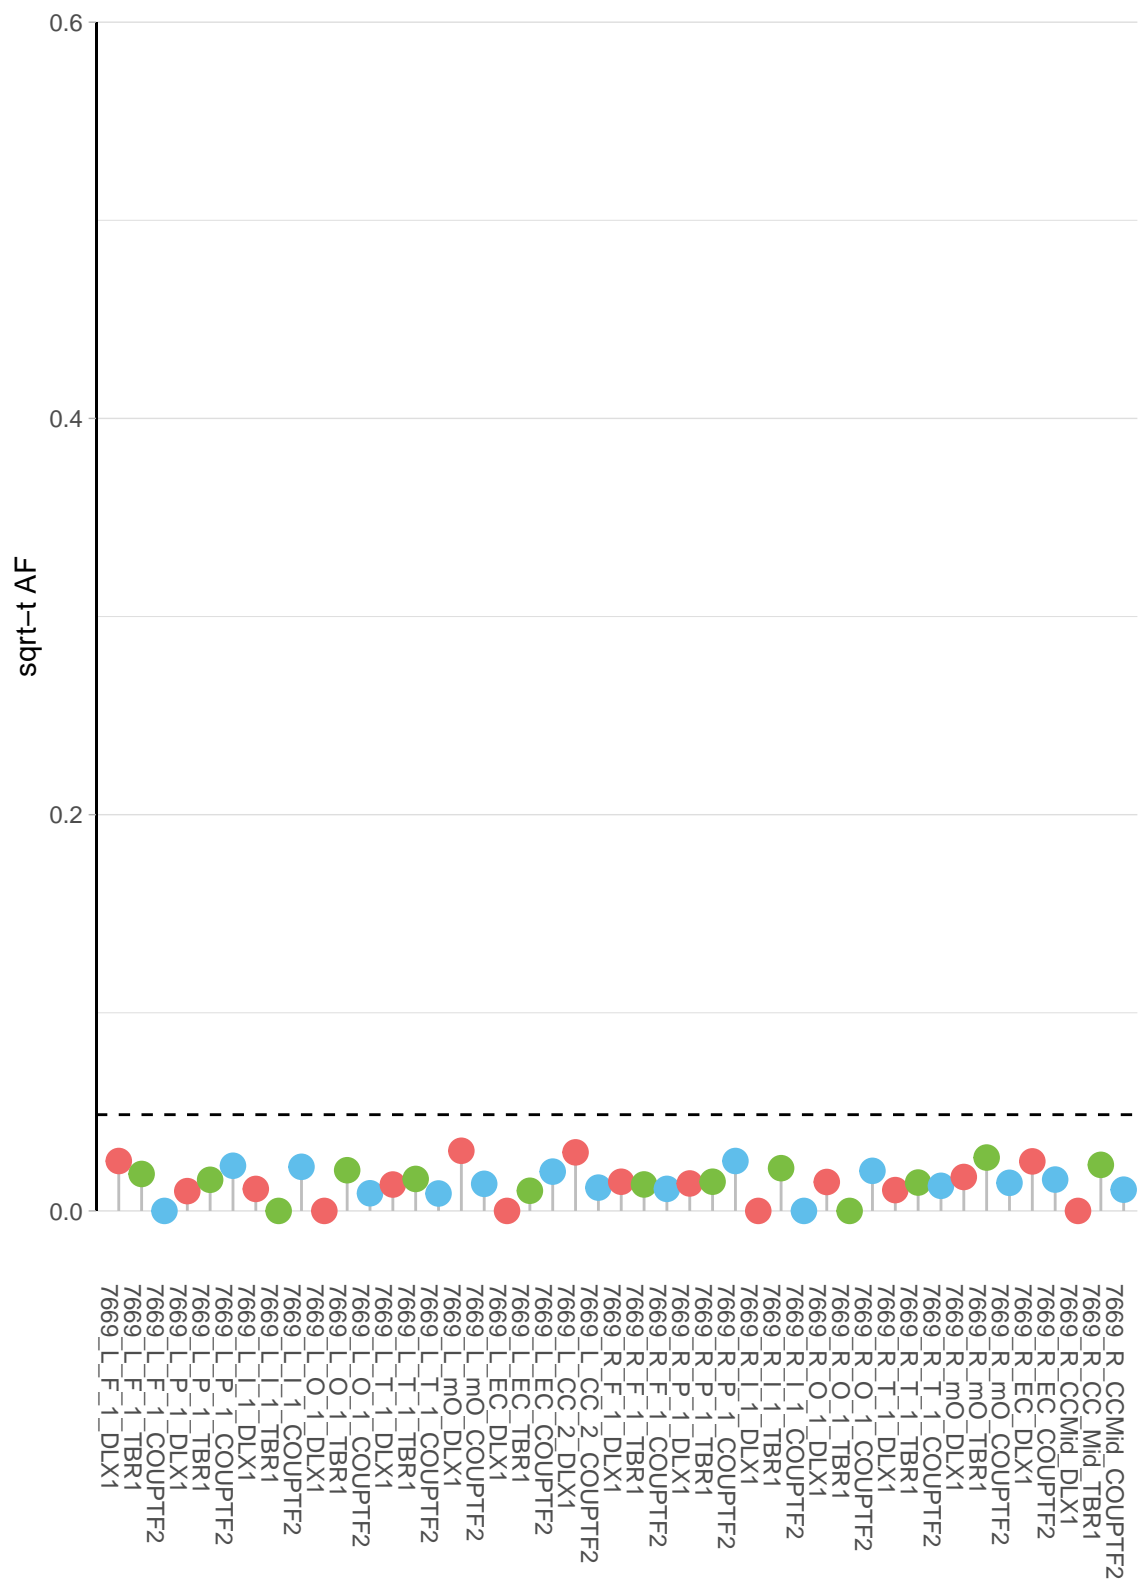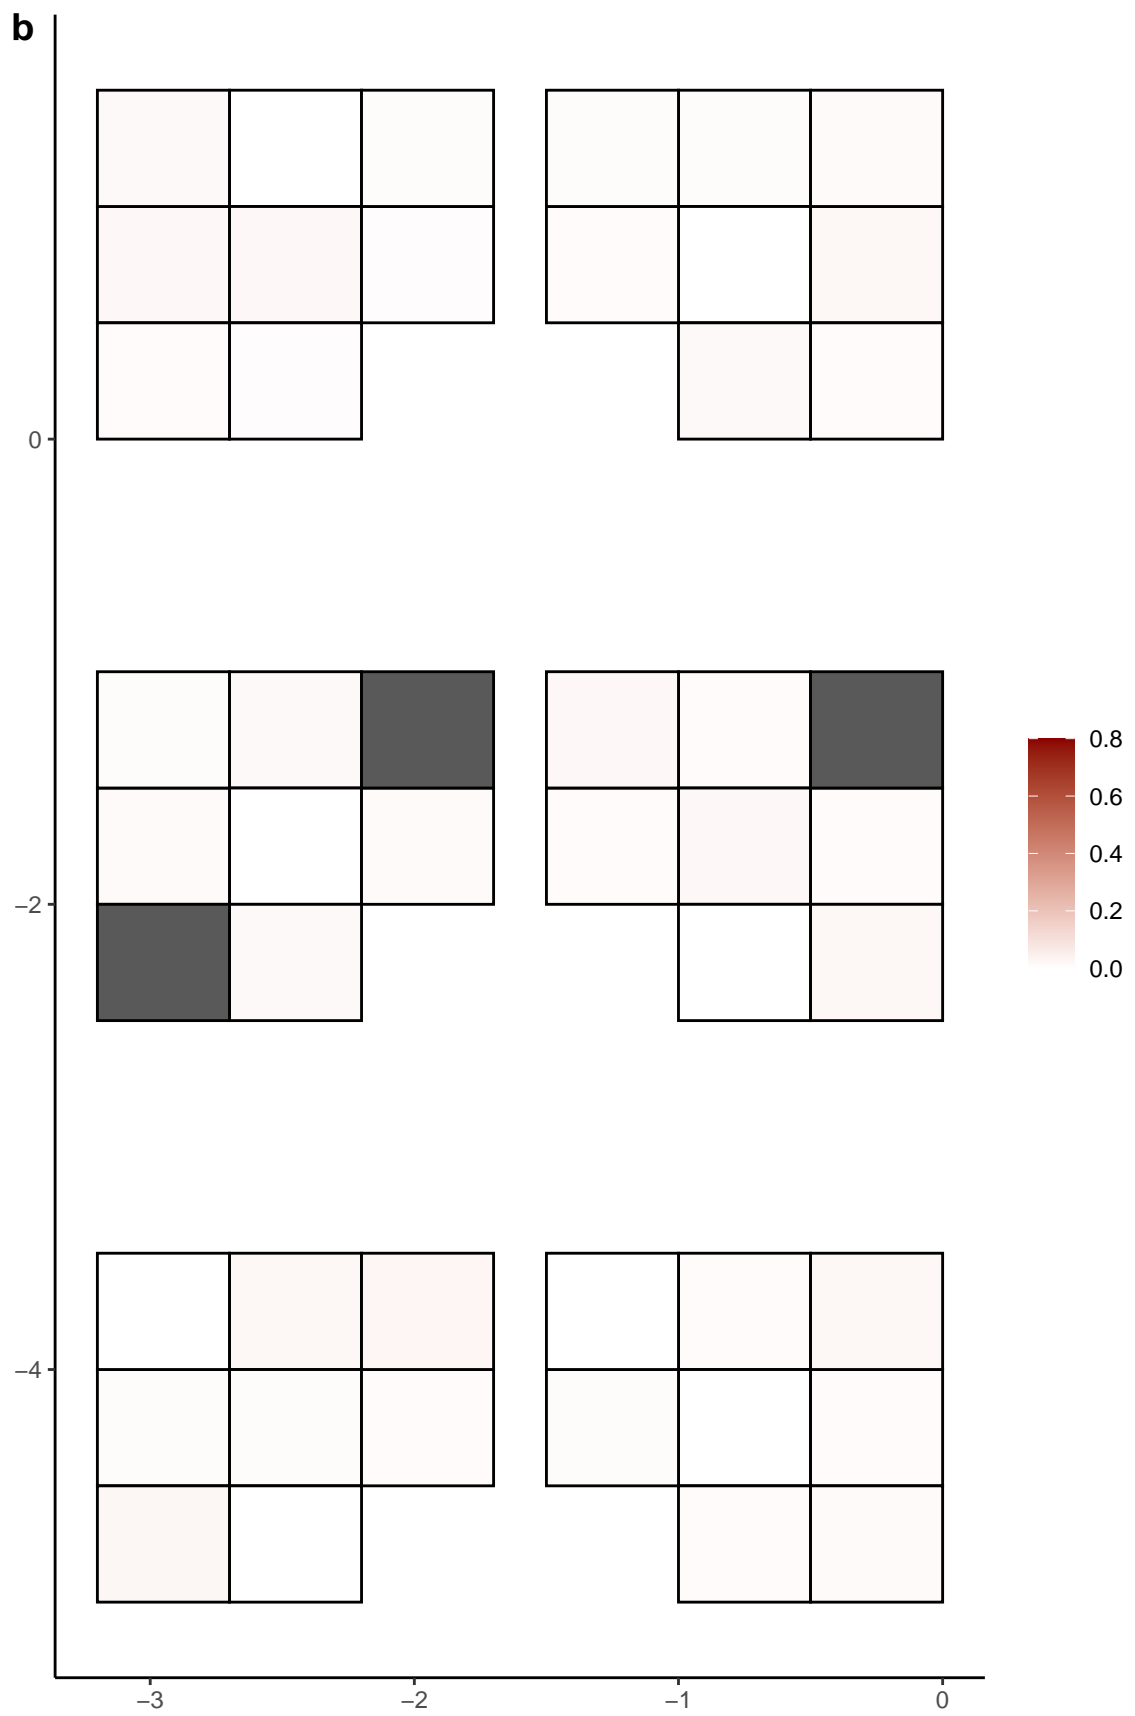

**a** ID05 13-97072497-C-T

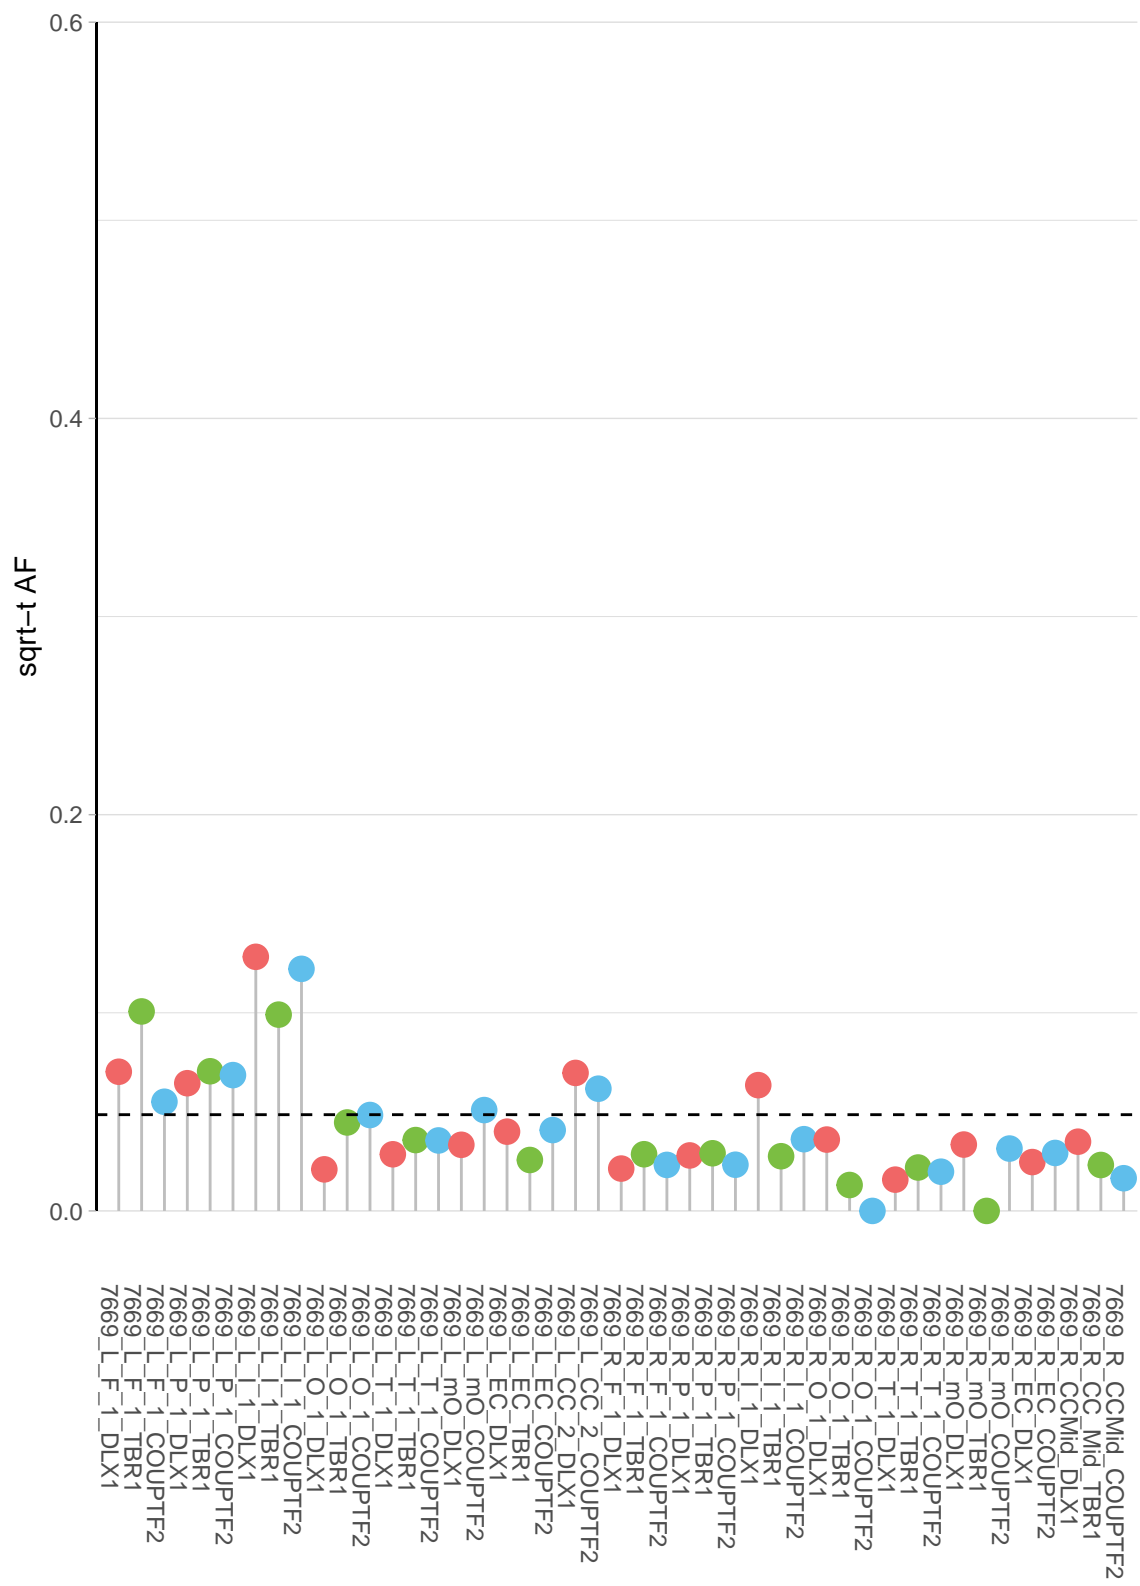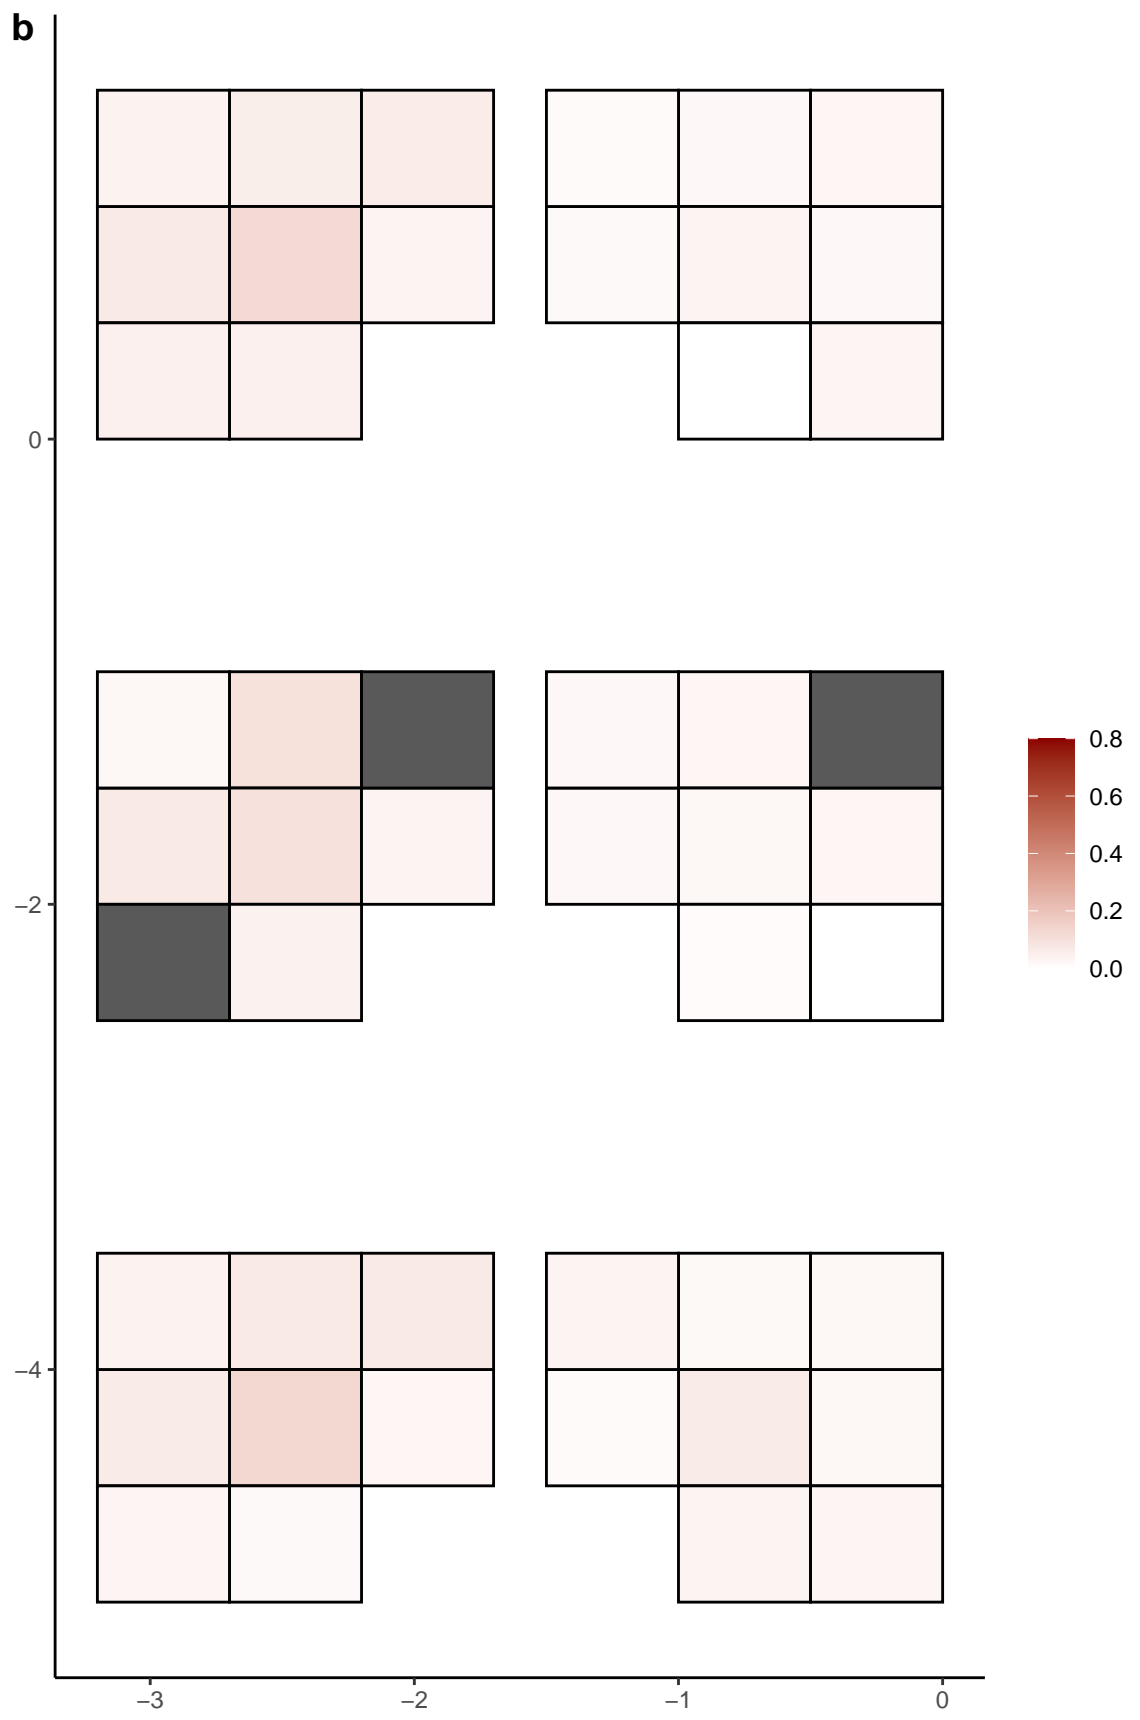



**a** ID05 14-100590107-C-T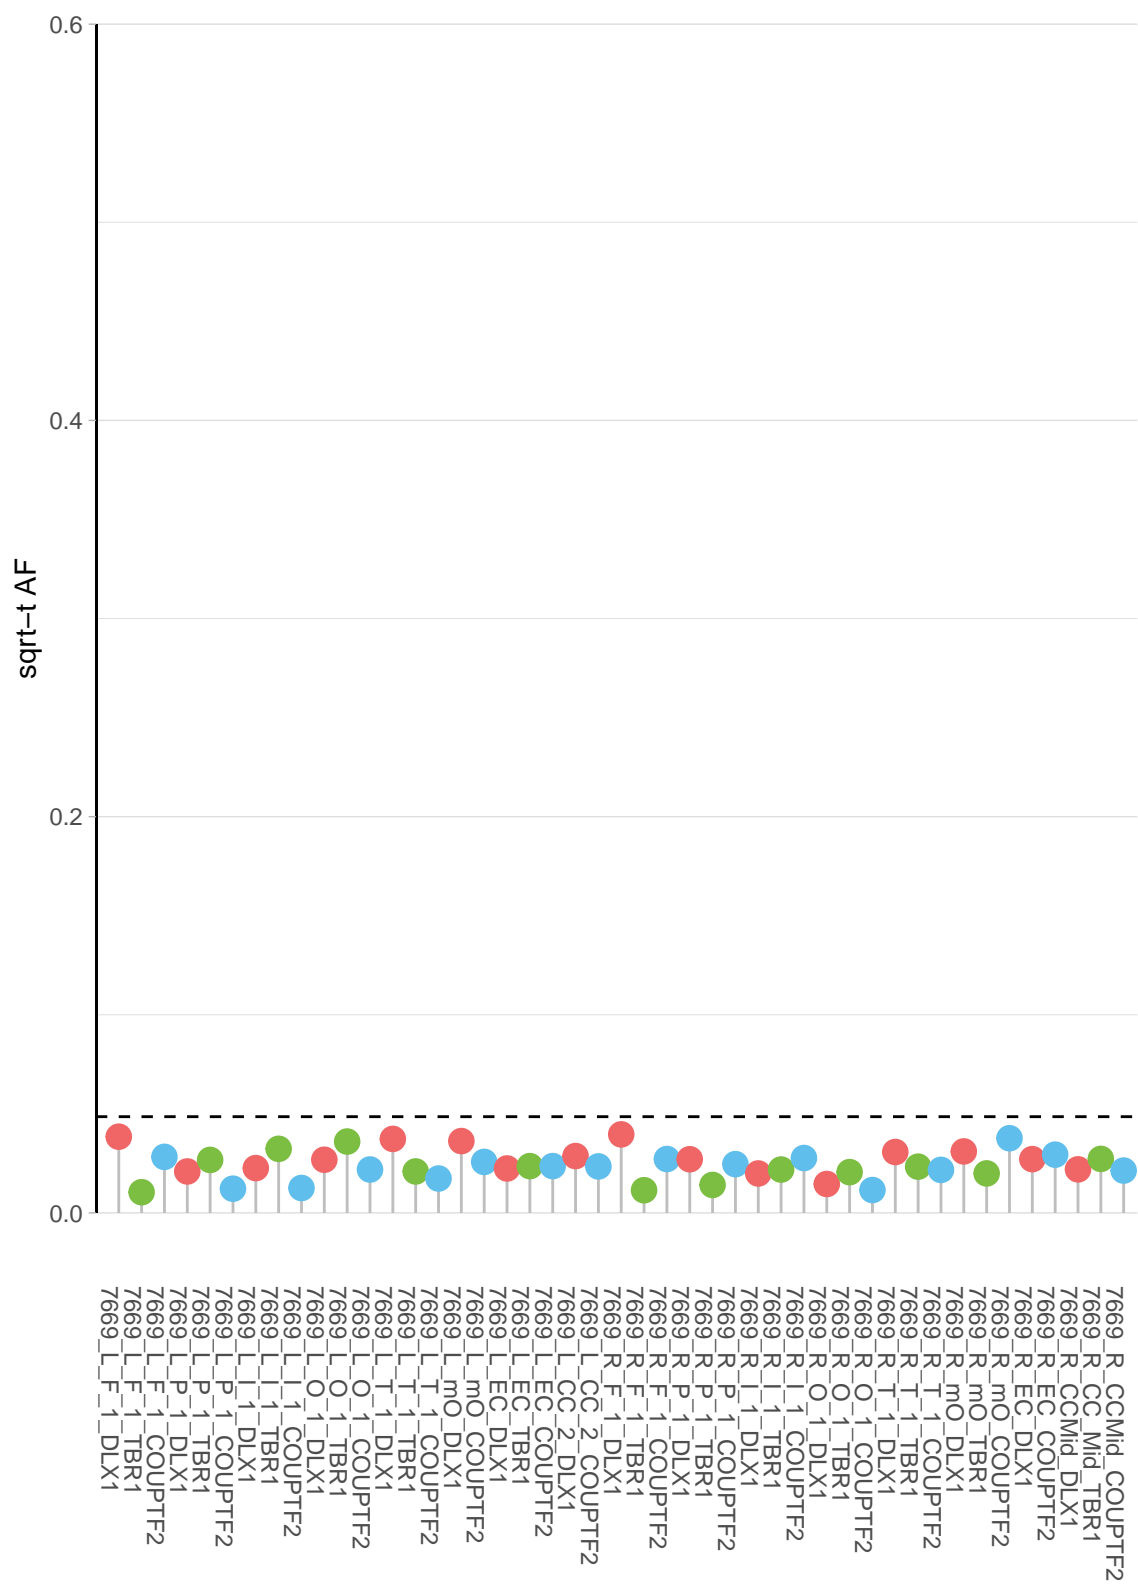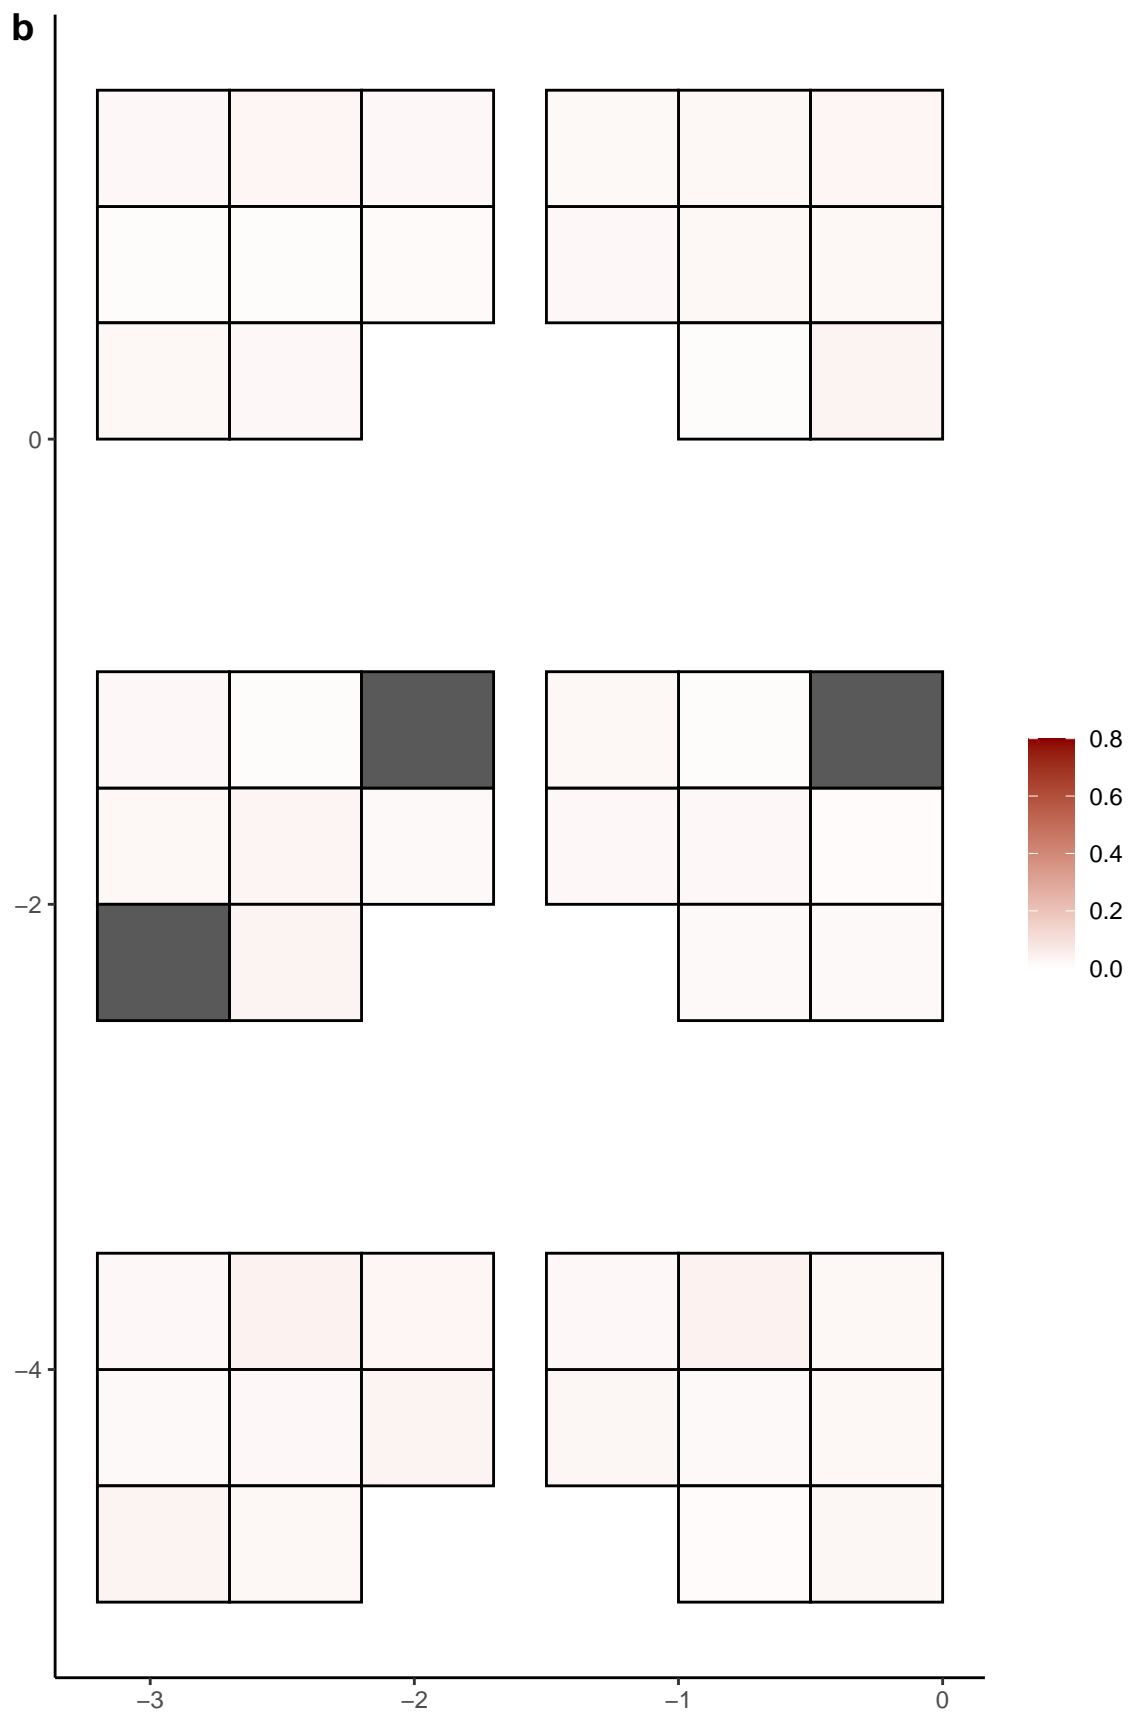



**a** ID05 14-27412390-G-A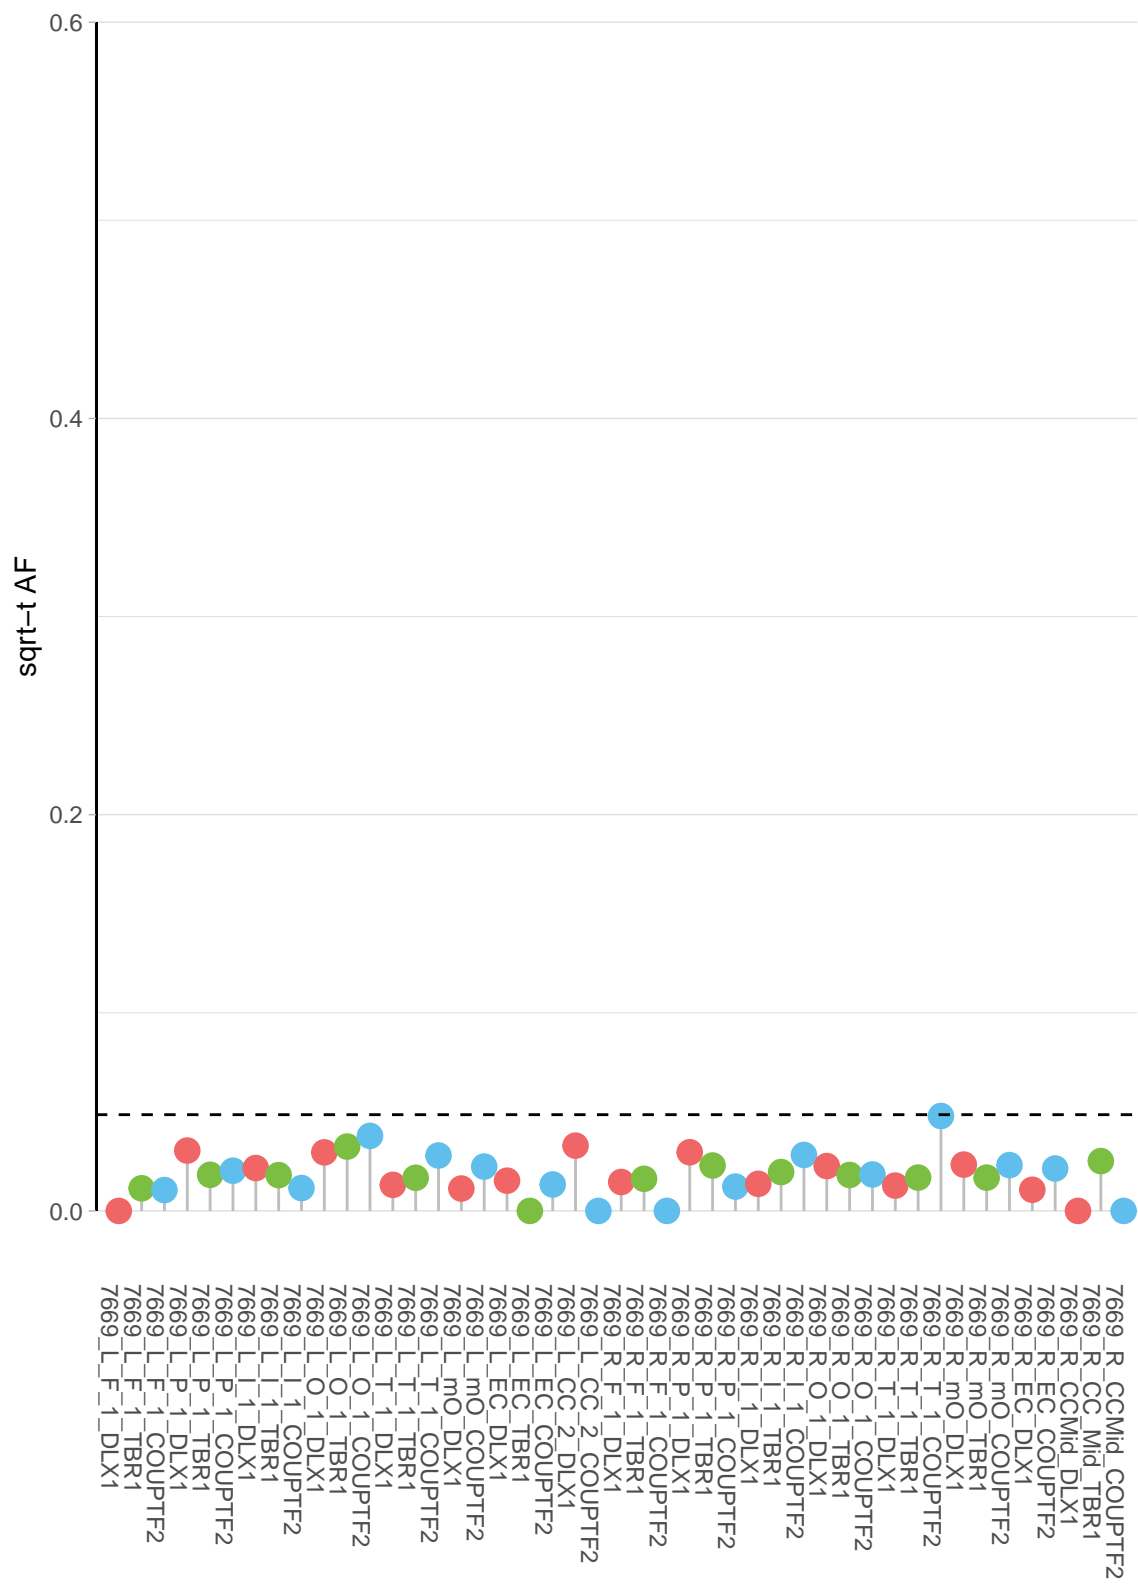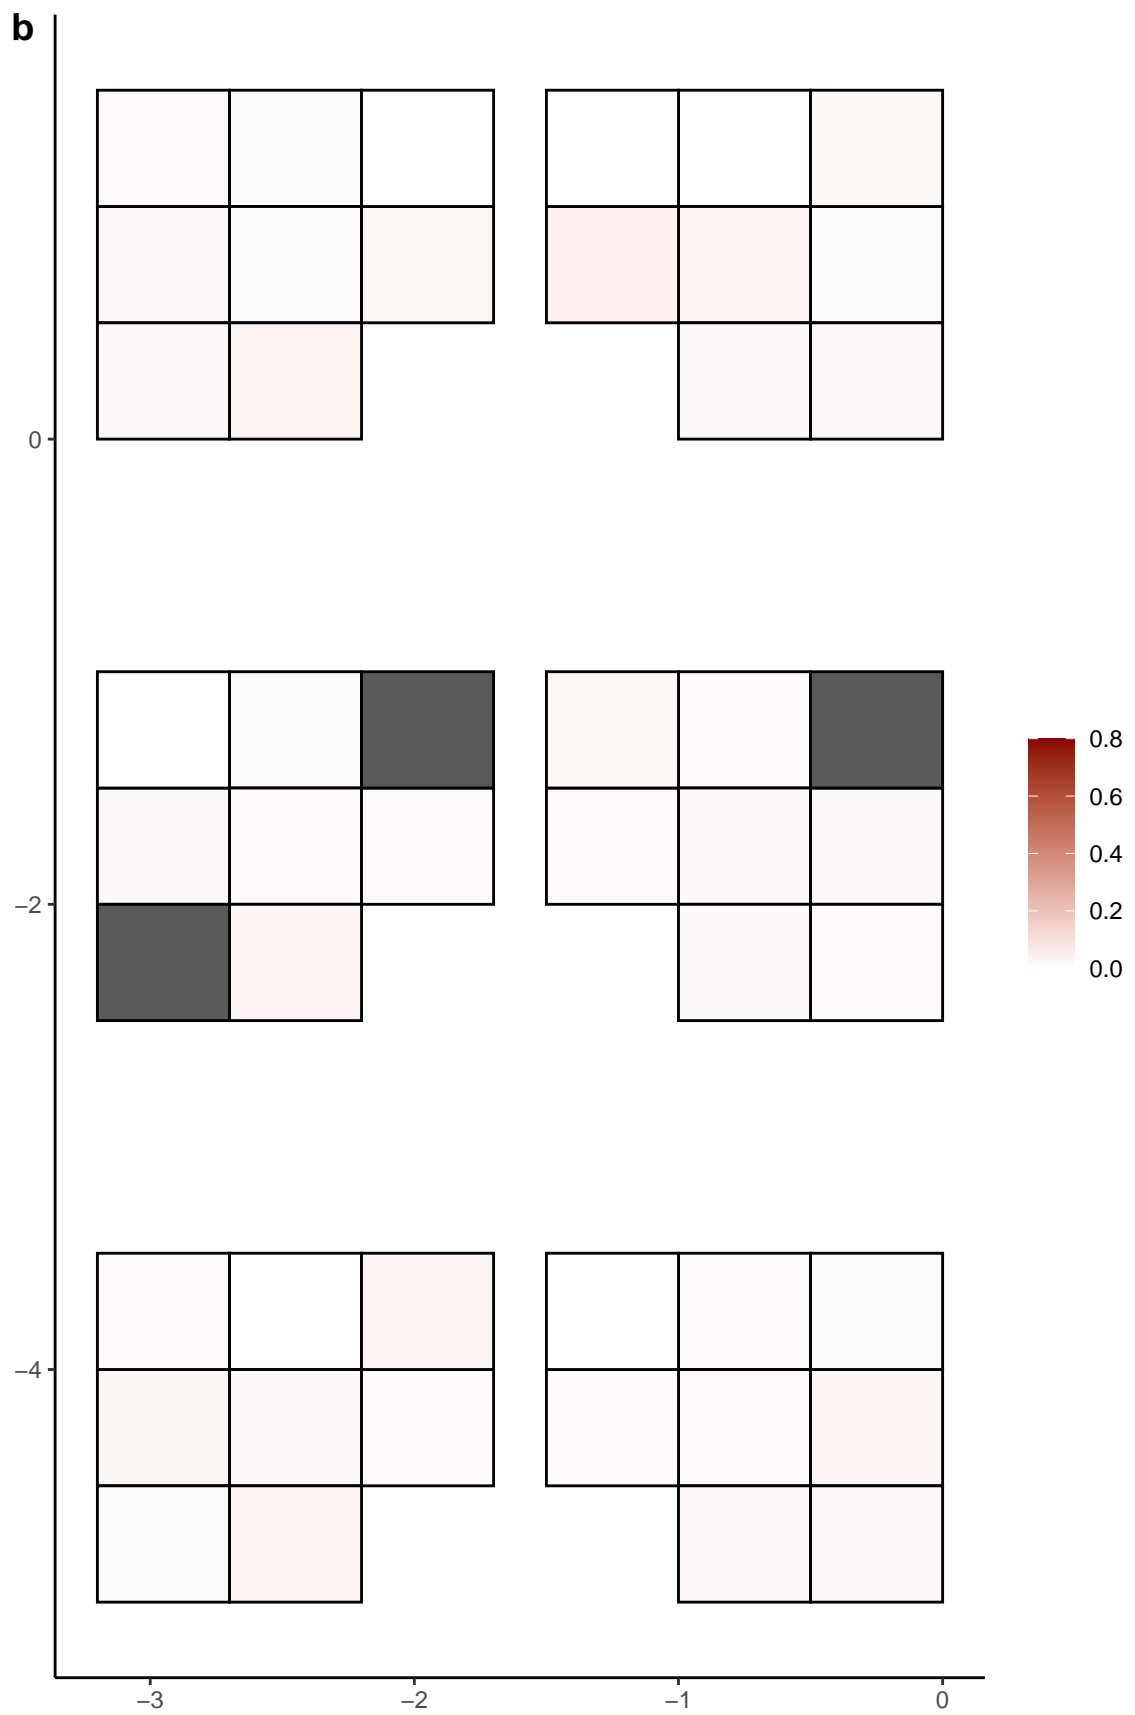

**a** ID05 14-27649824-C-T

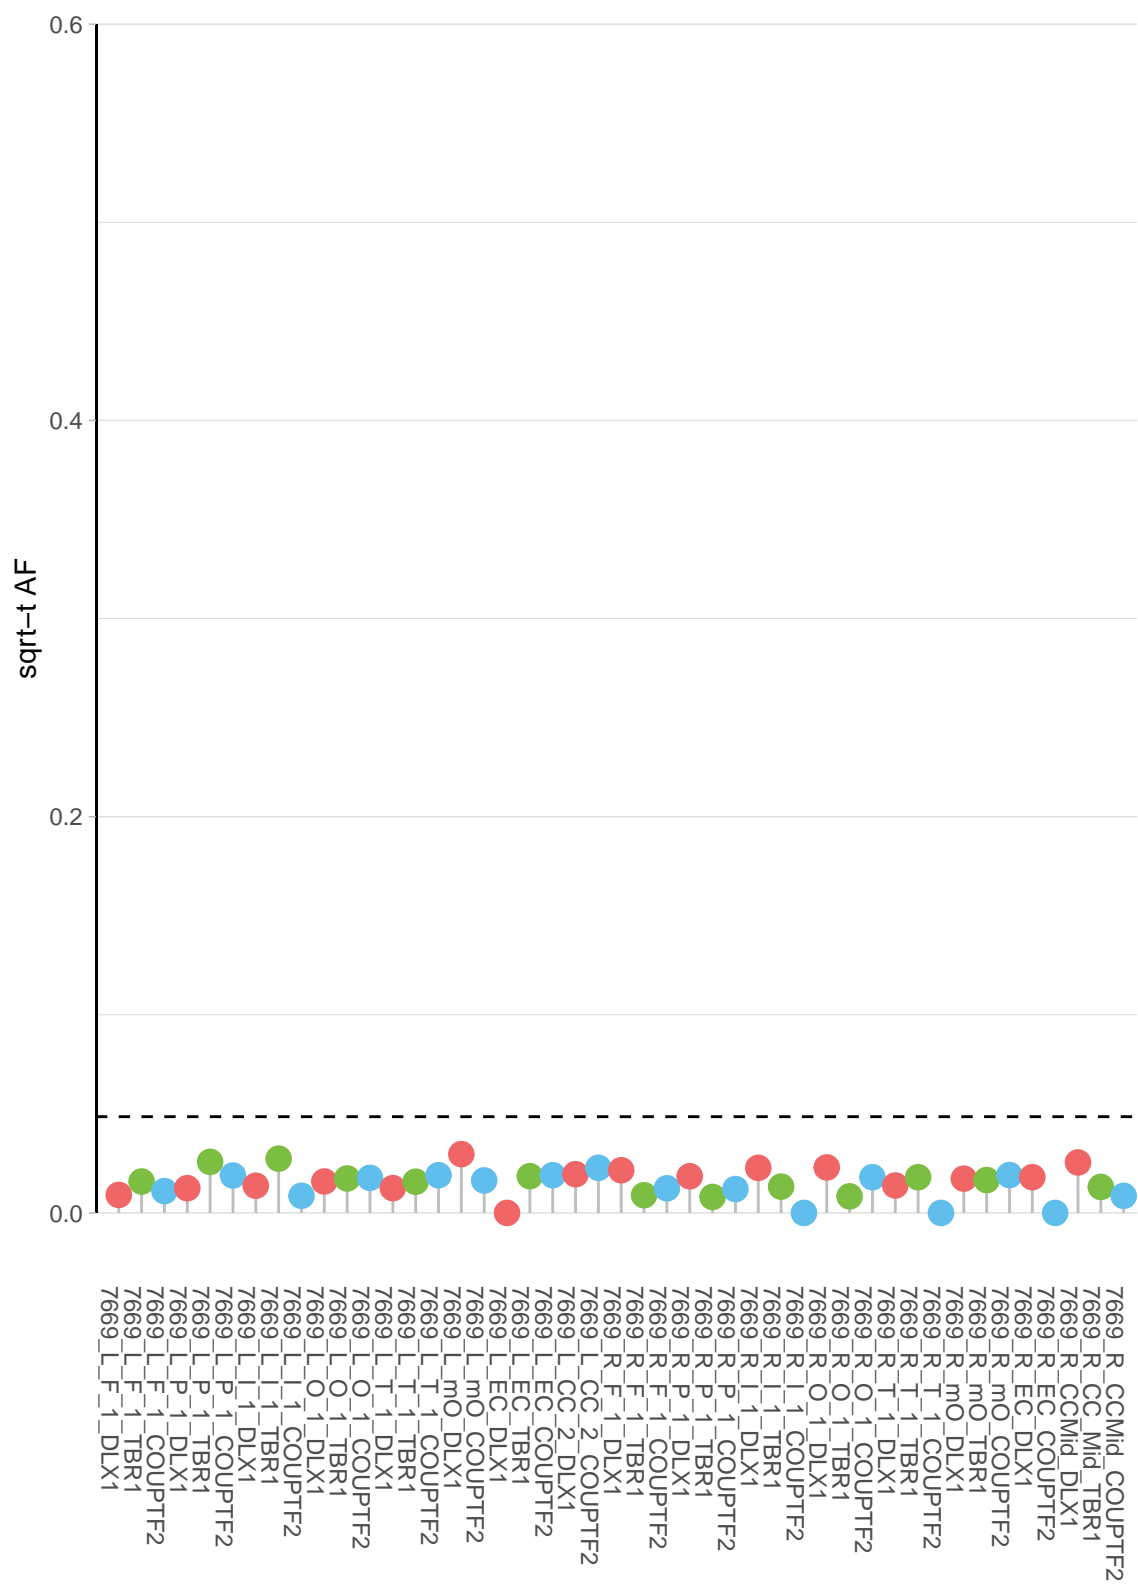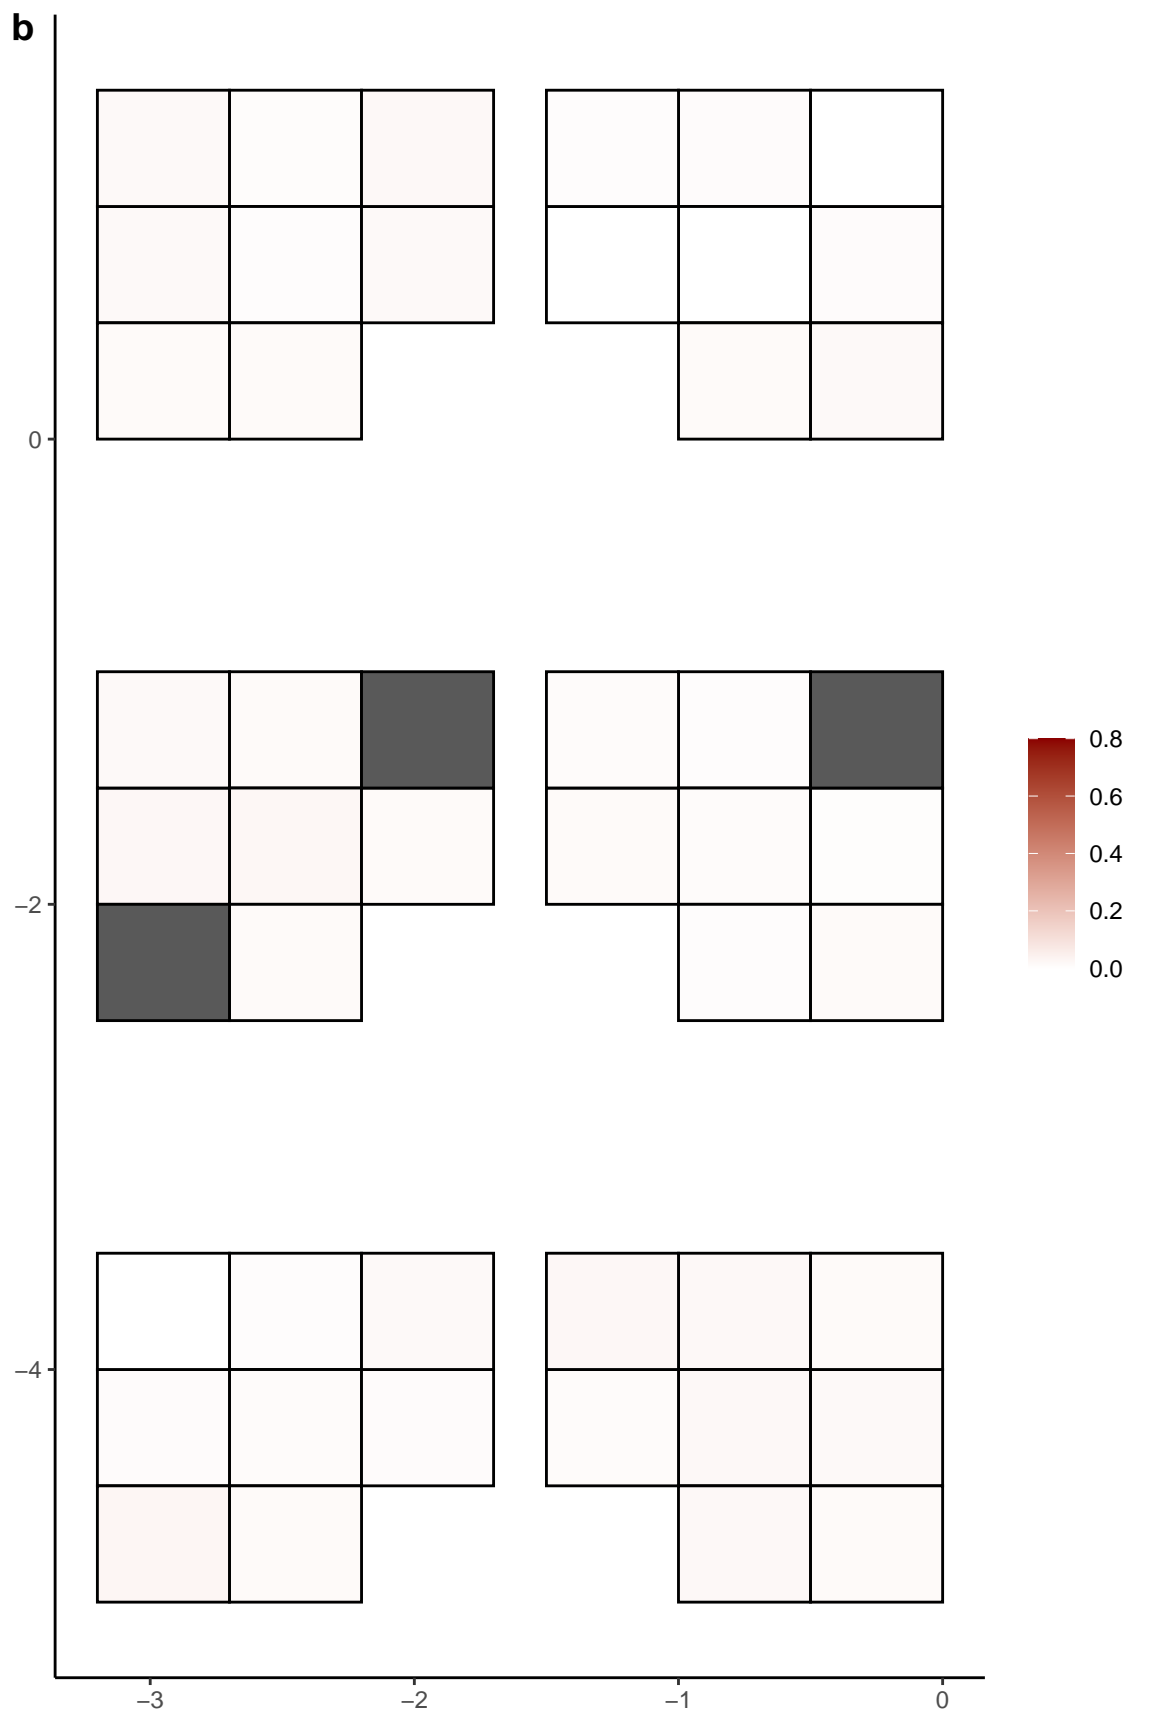

**a** ID05 14-36924791-G-C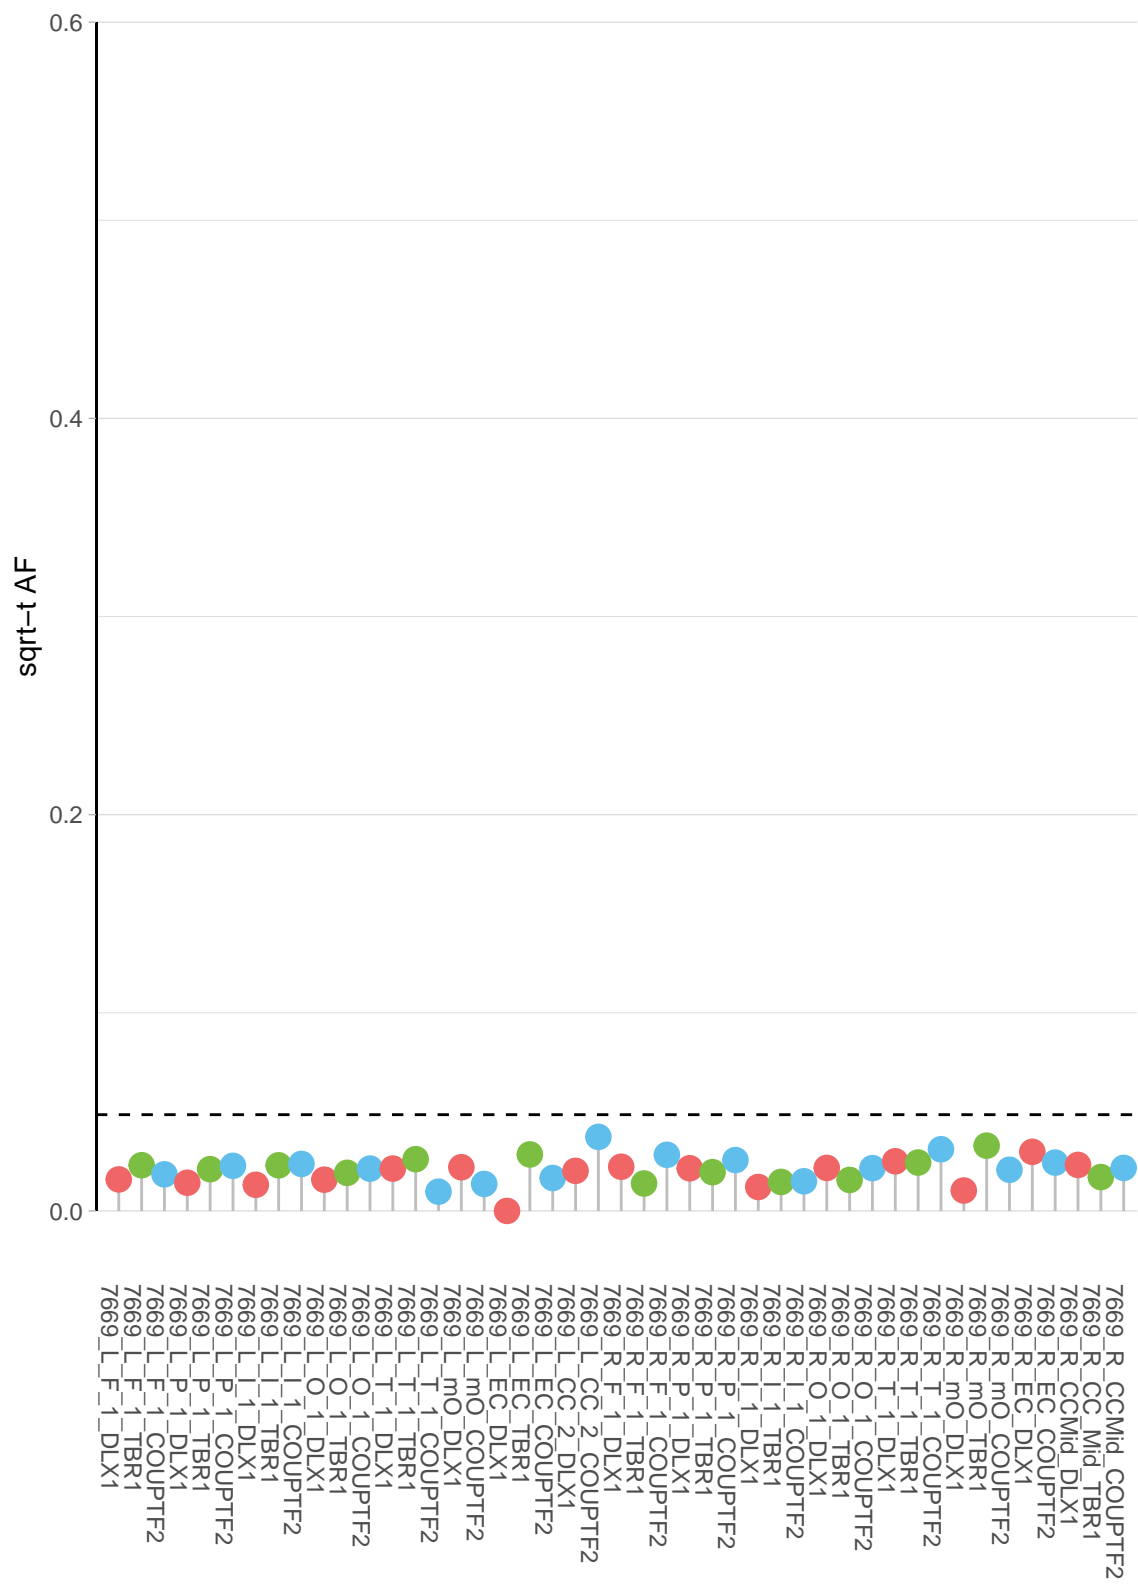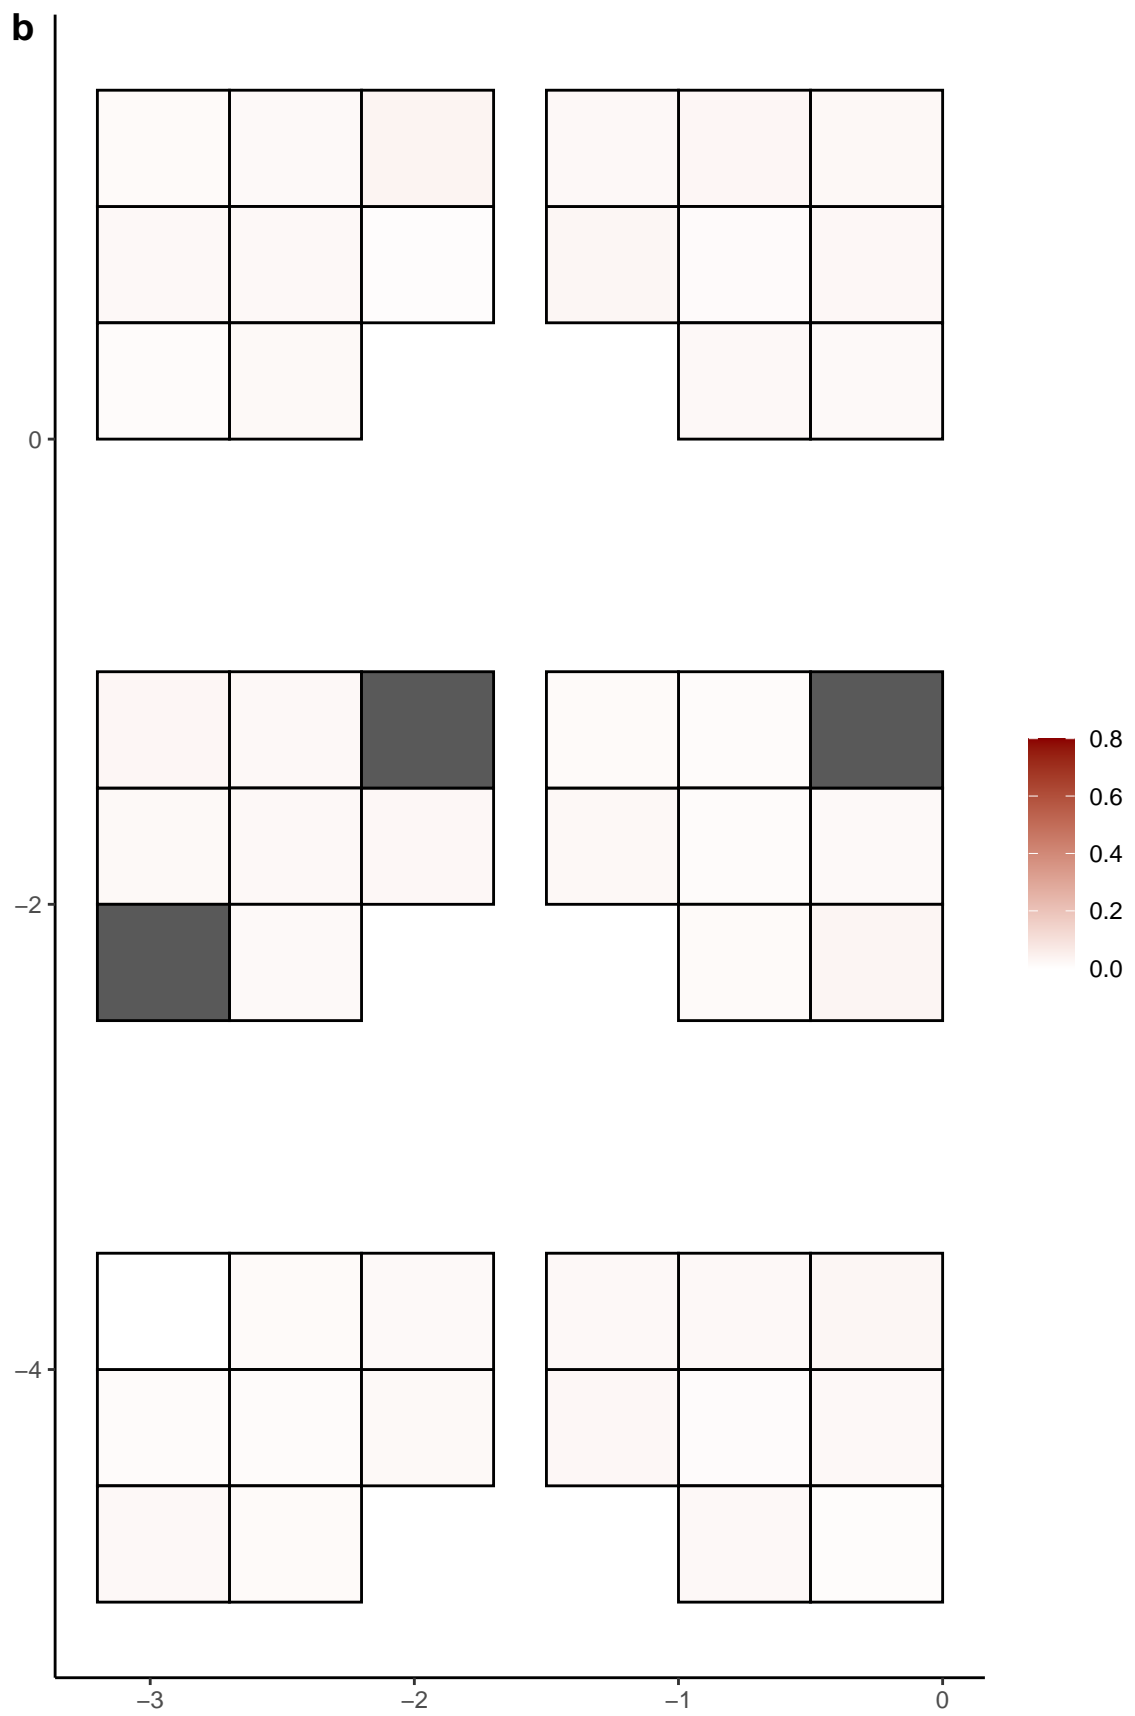

**a** ID05 14-41027959-C-T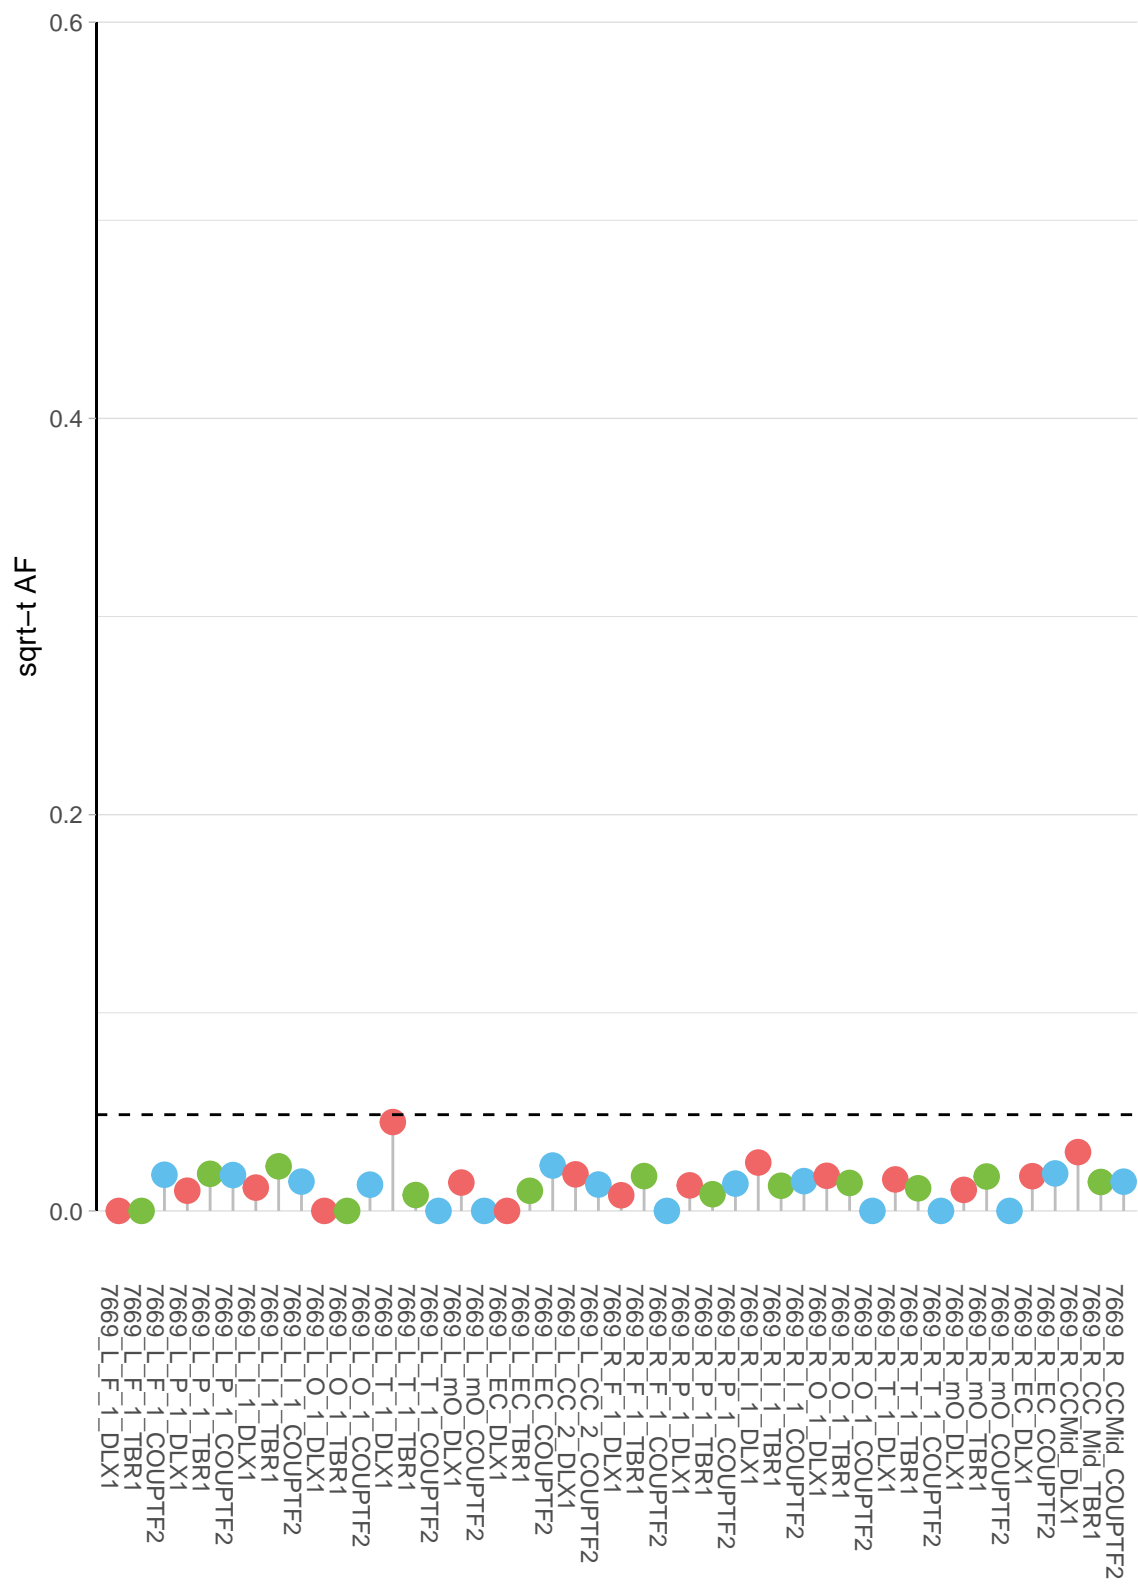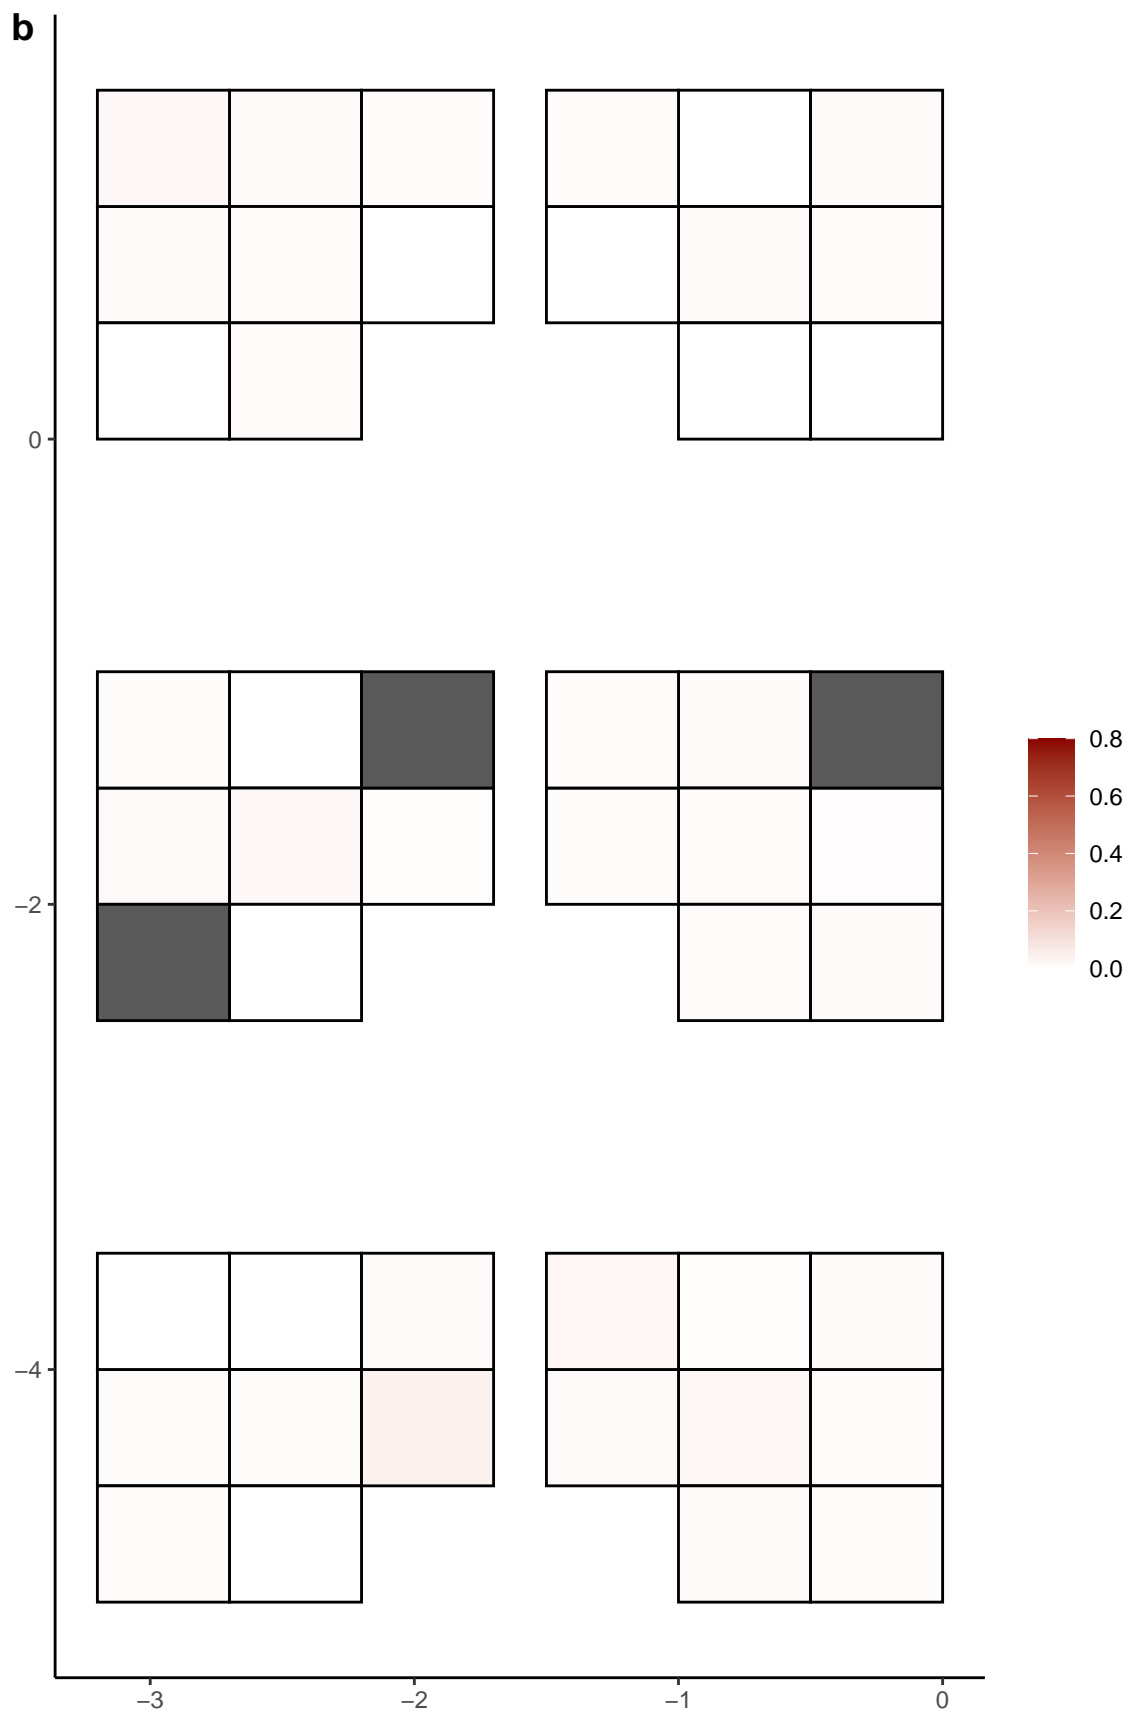

**a** ID05 14-48152228-A-G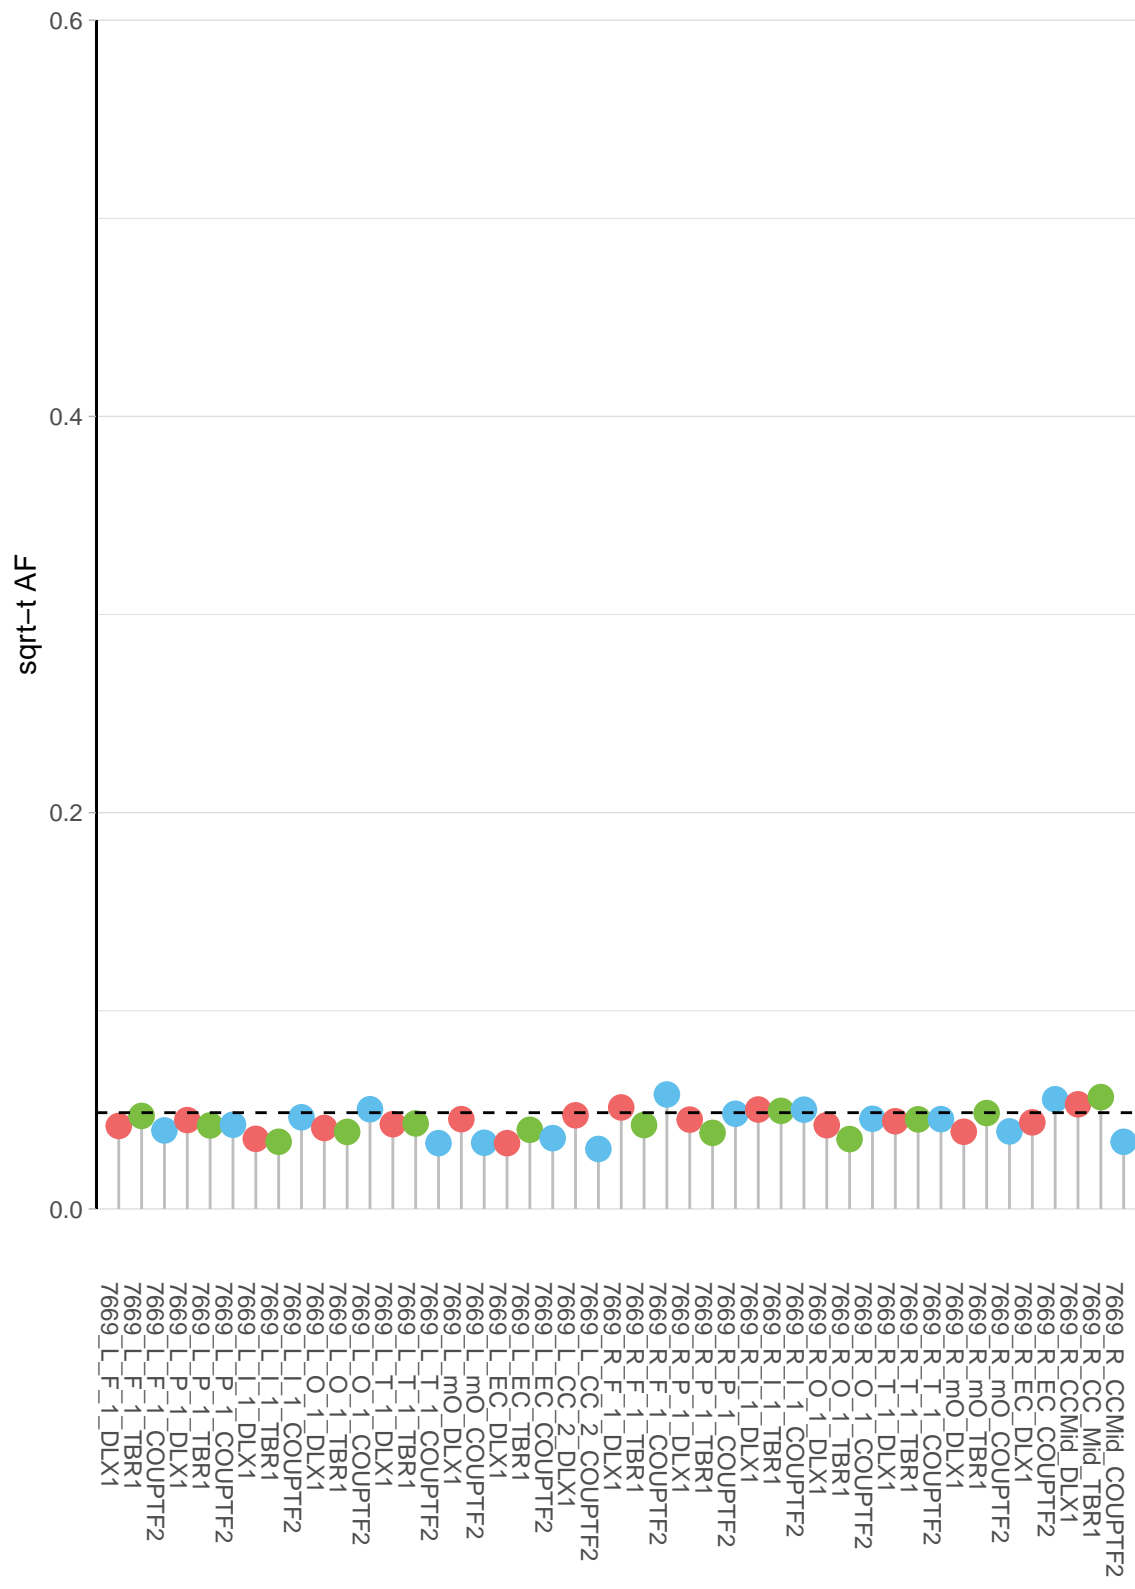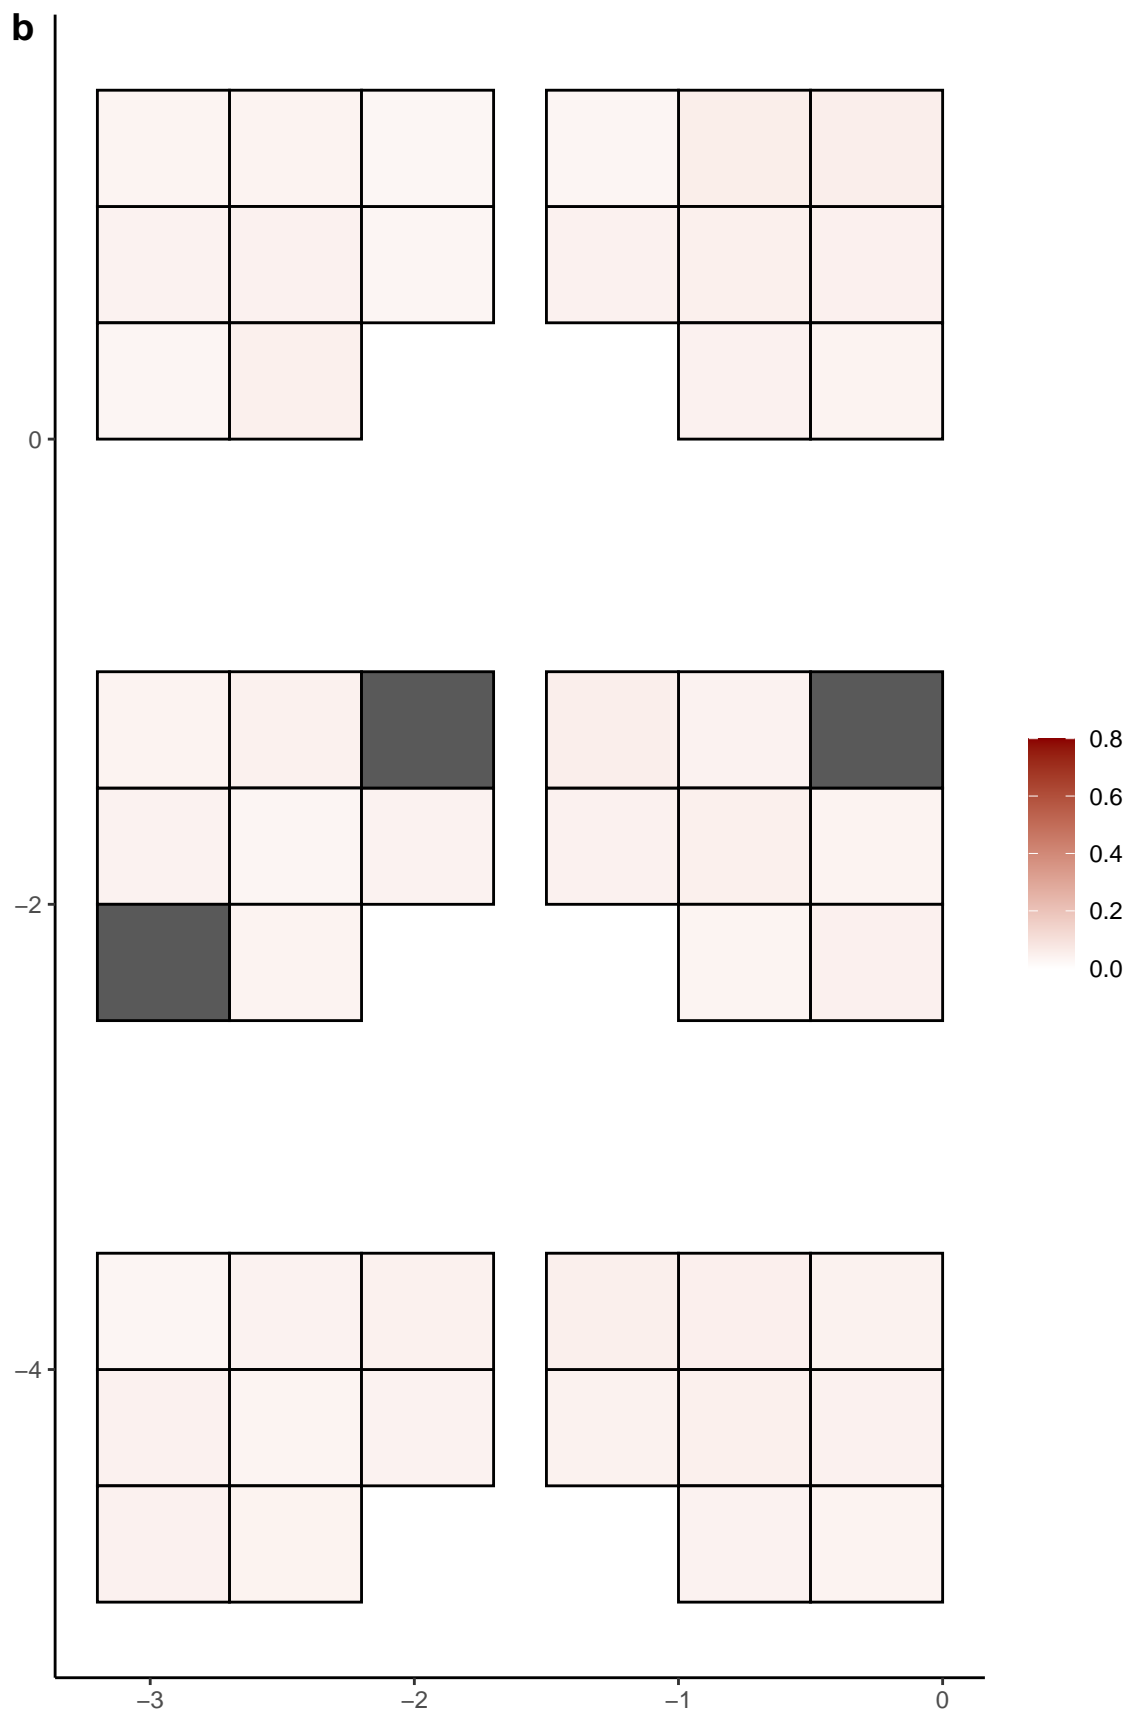





**a** ID05 14-55887203-A-G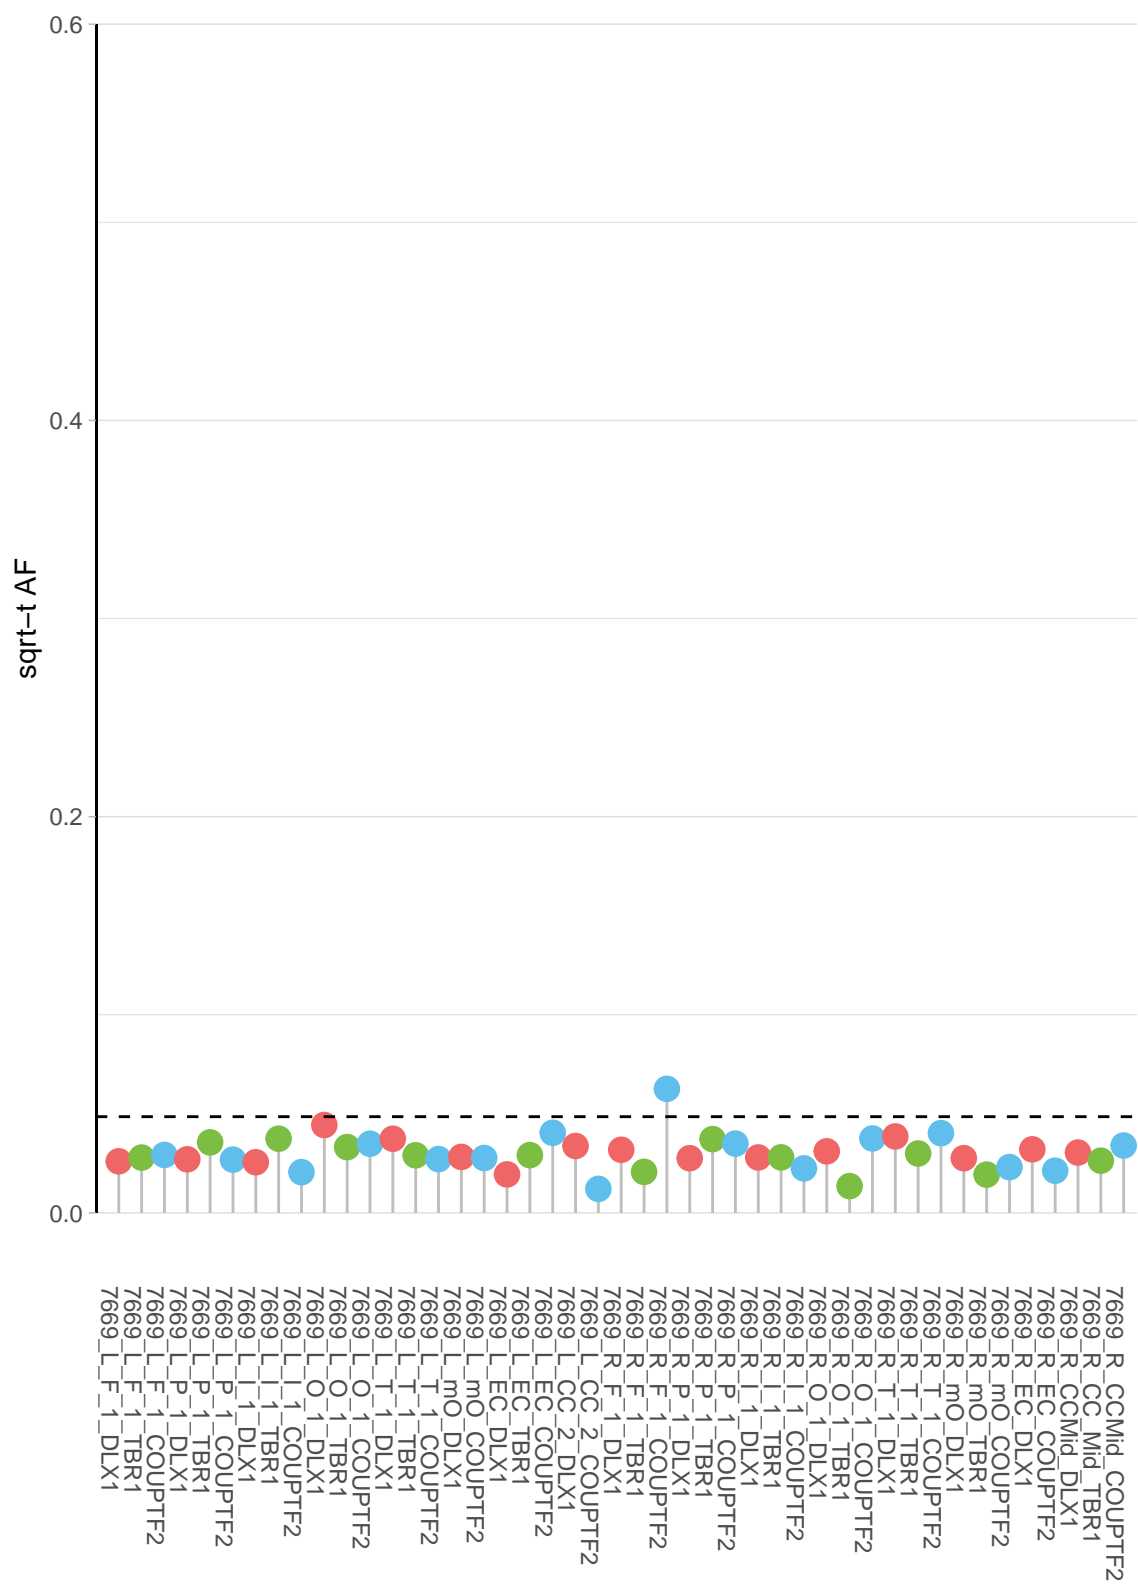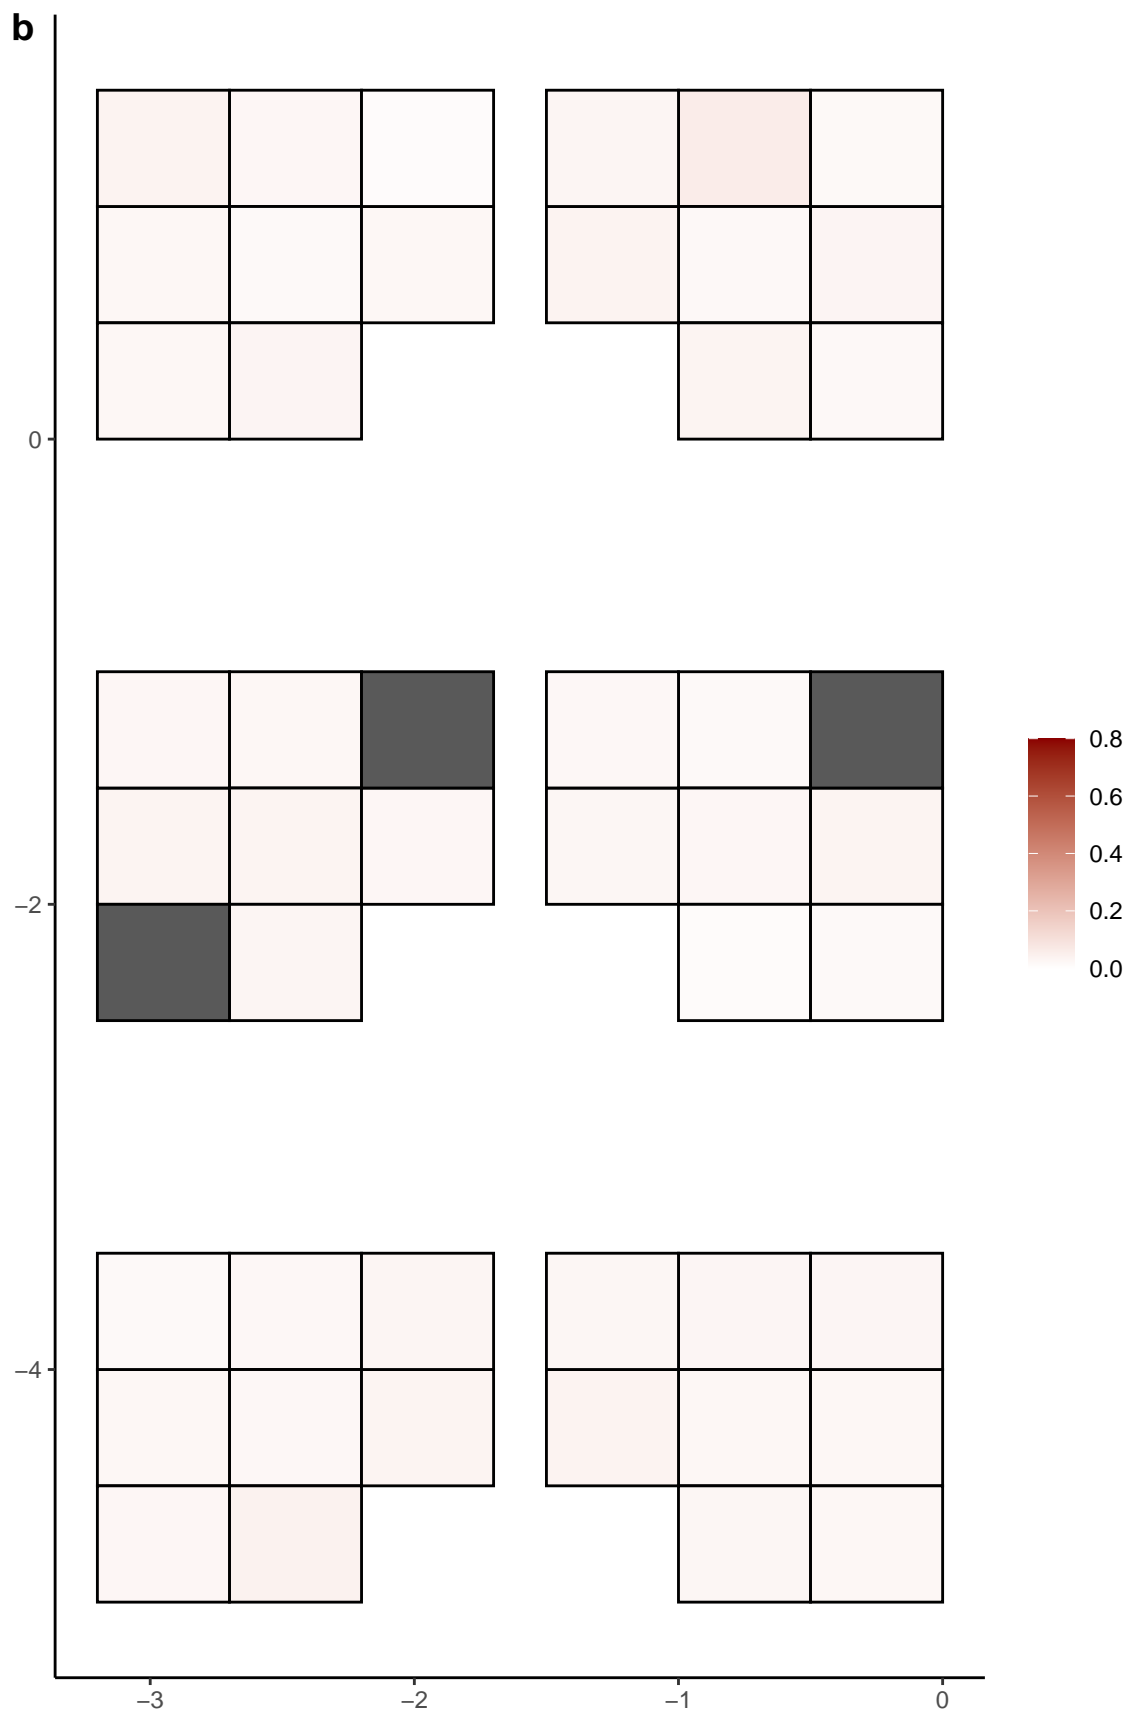

**a** ID05 14-59827441-C-T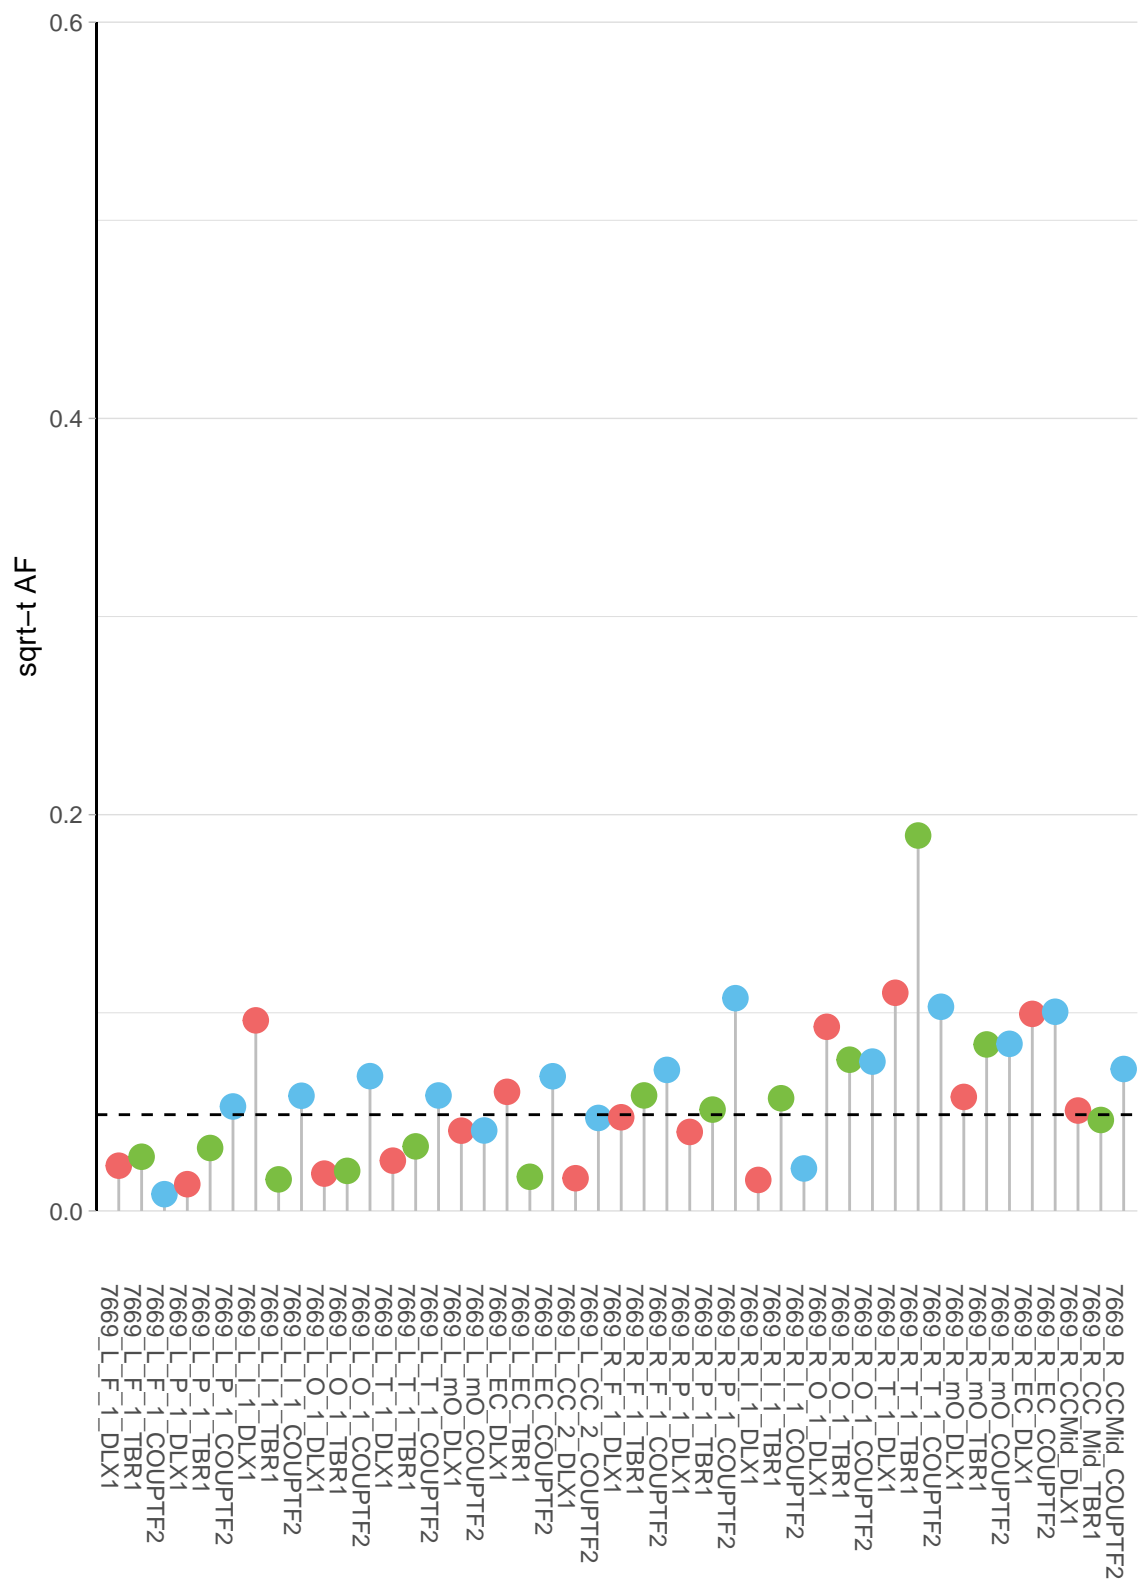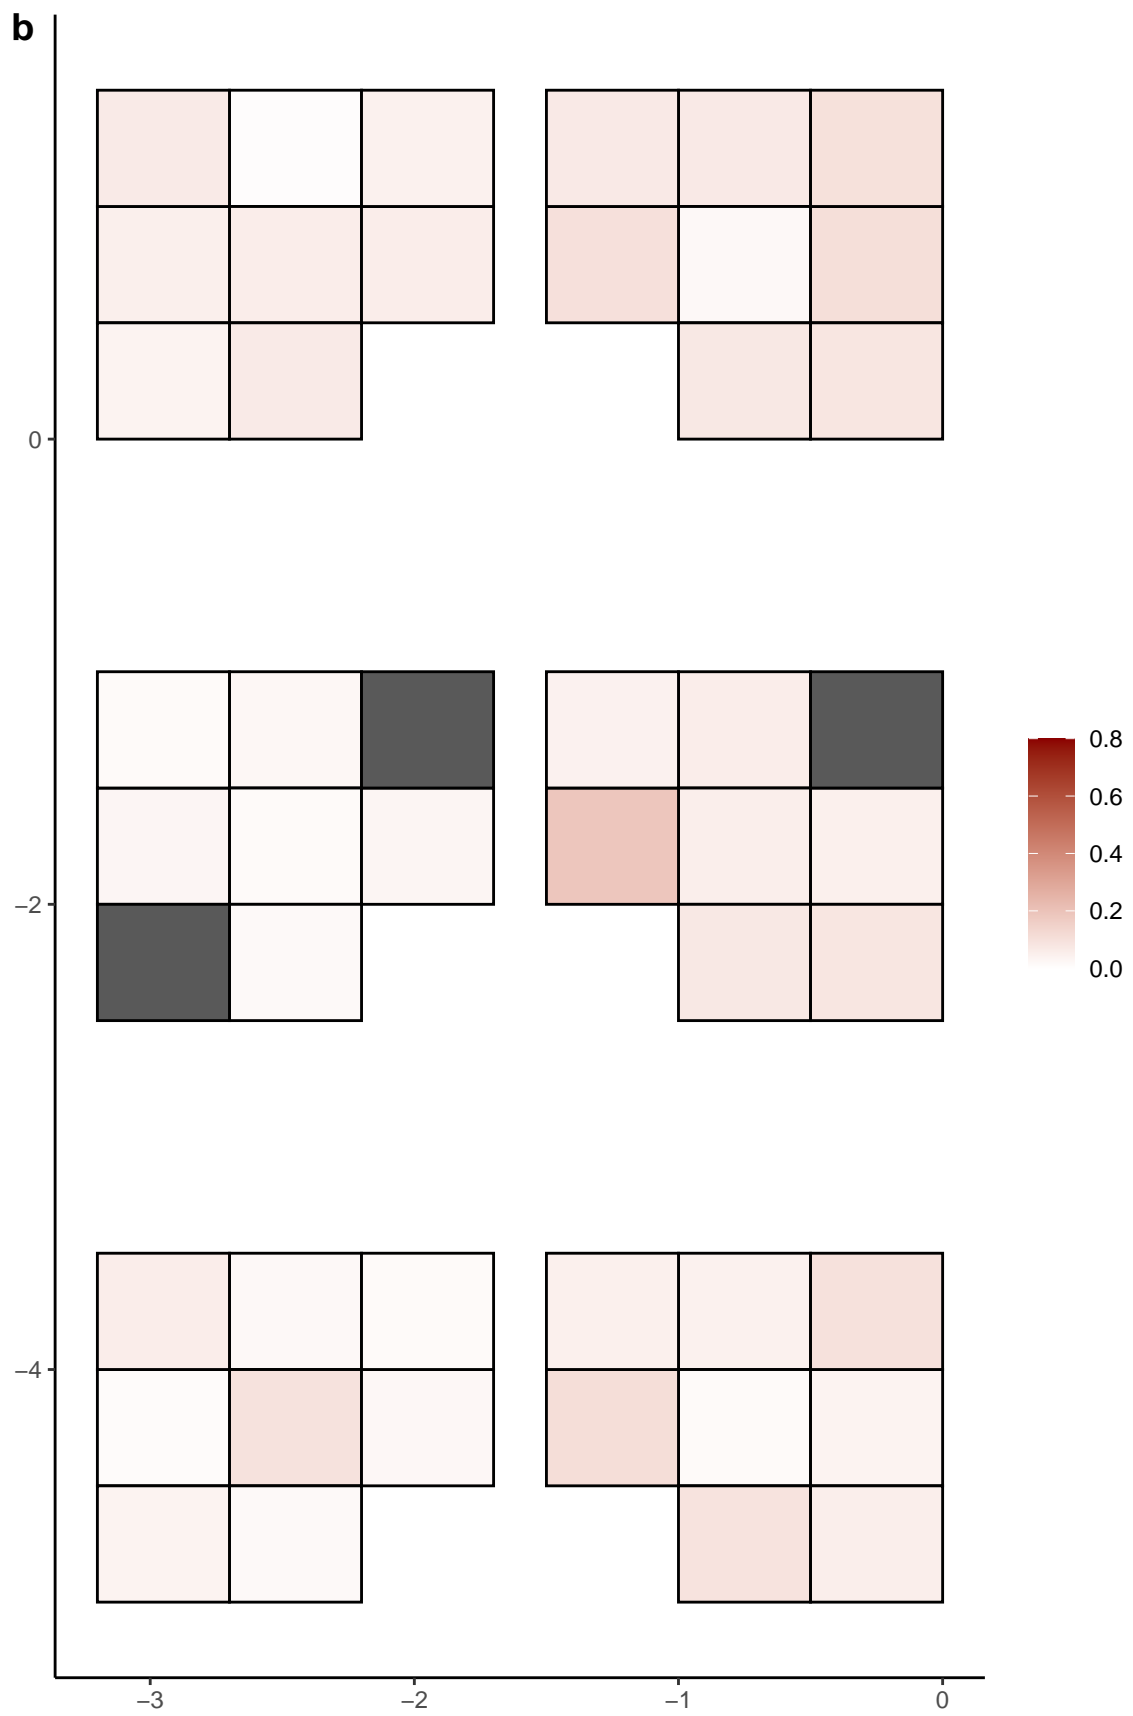

**a** ID05 14-65264866-C-T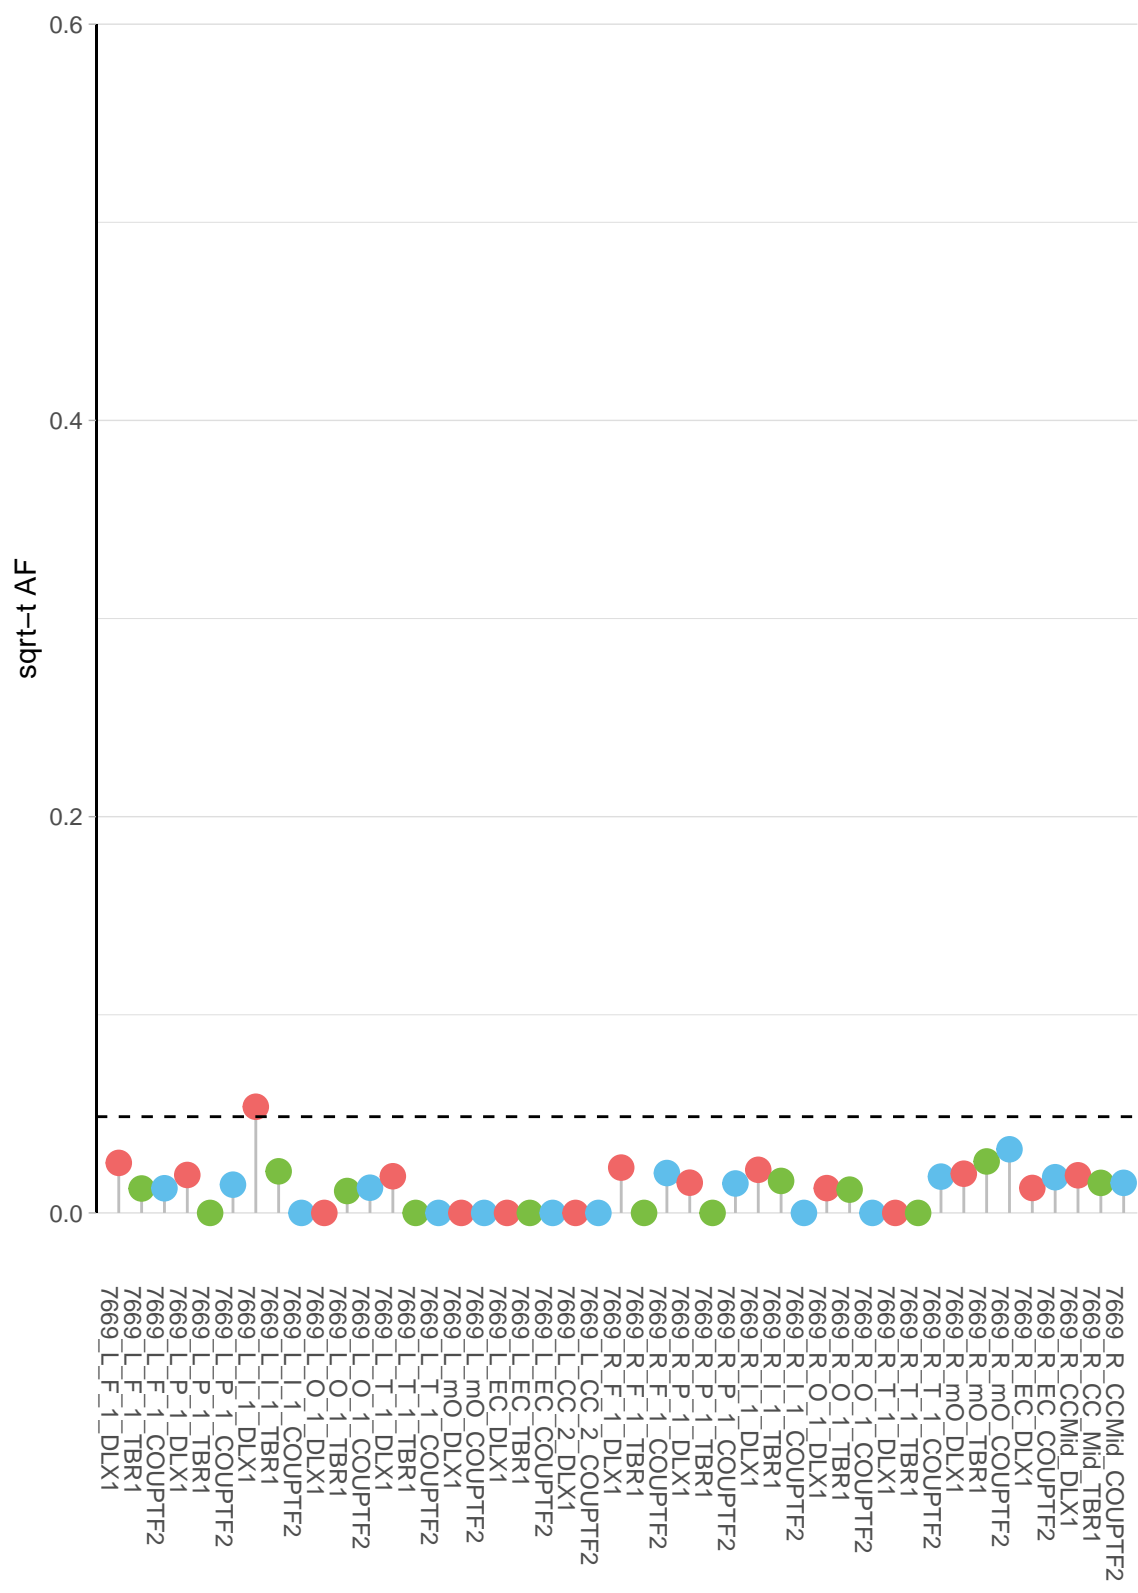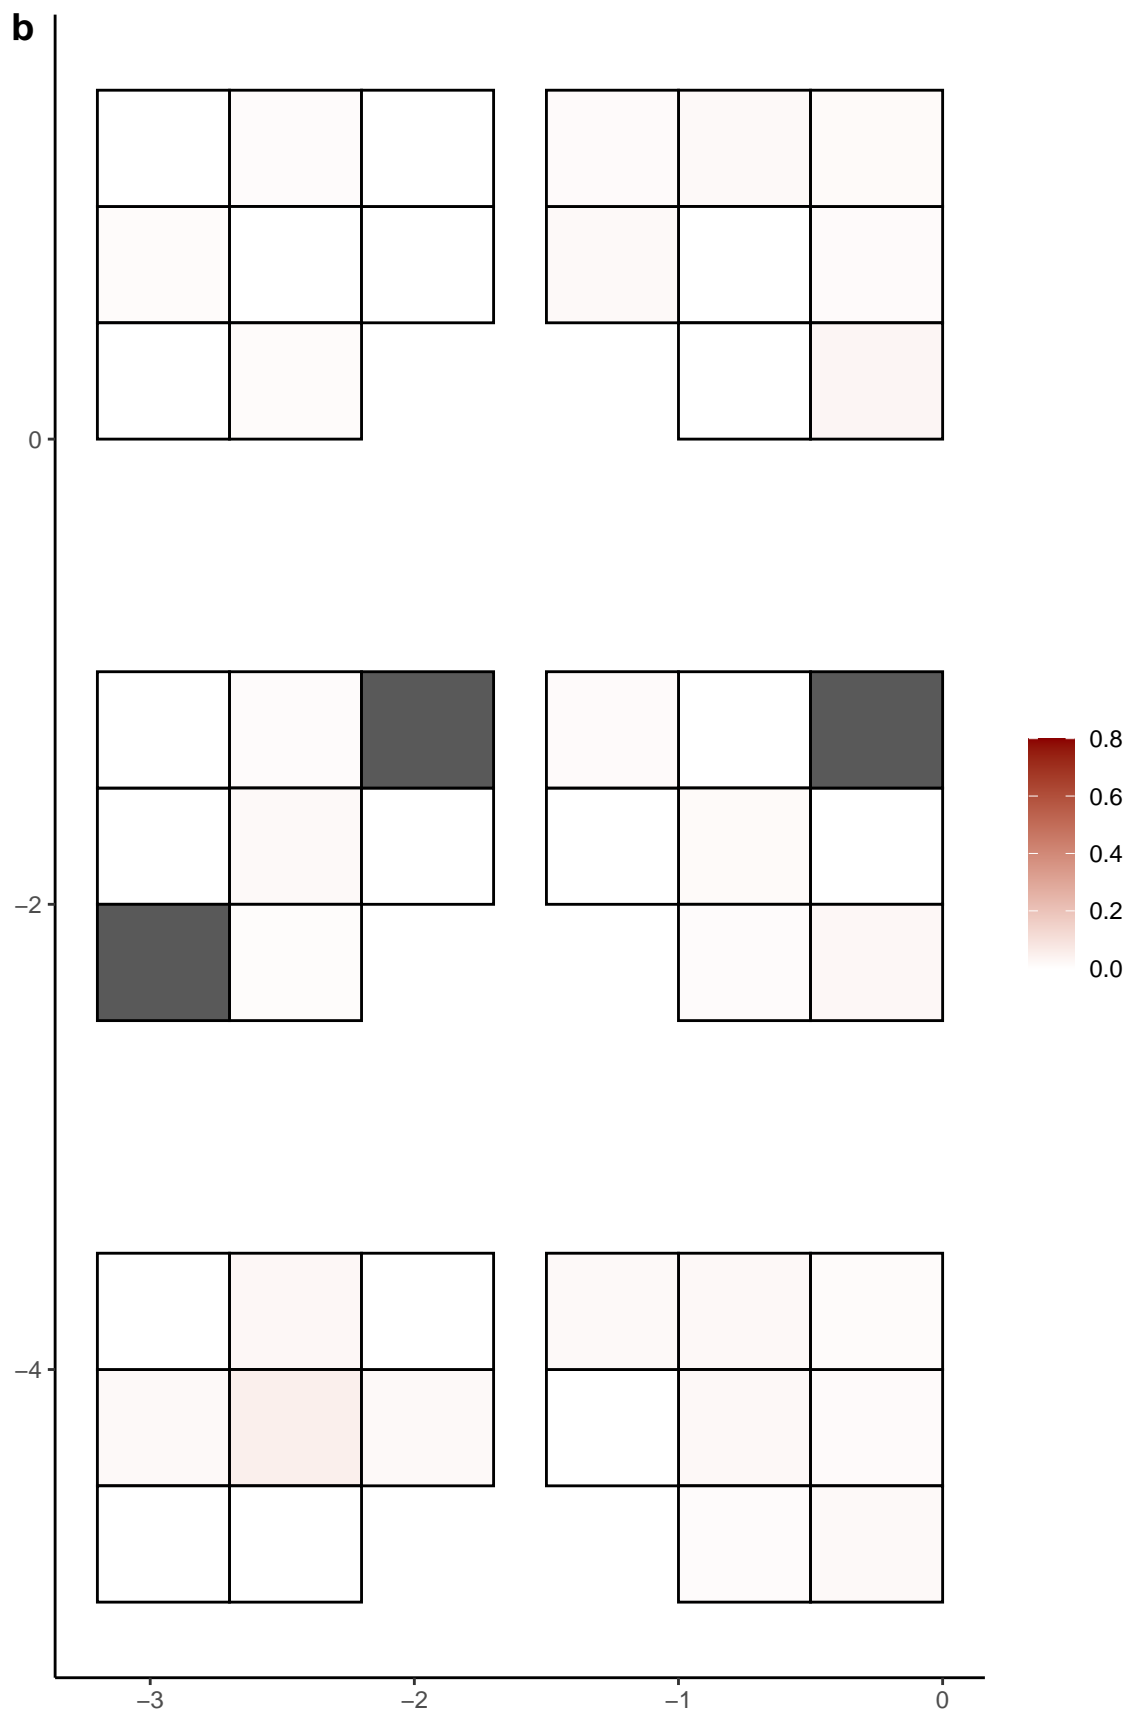



**a** ID05 14-77126705-G-A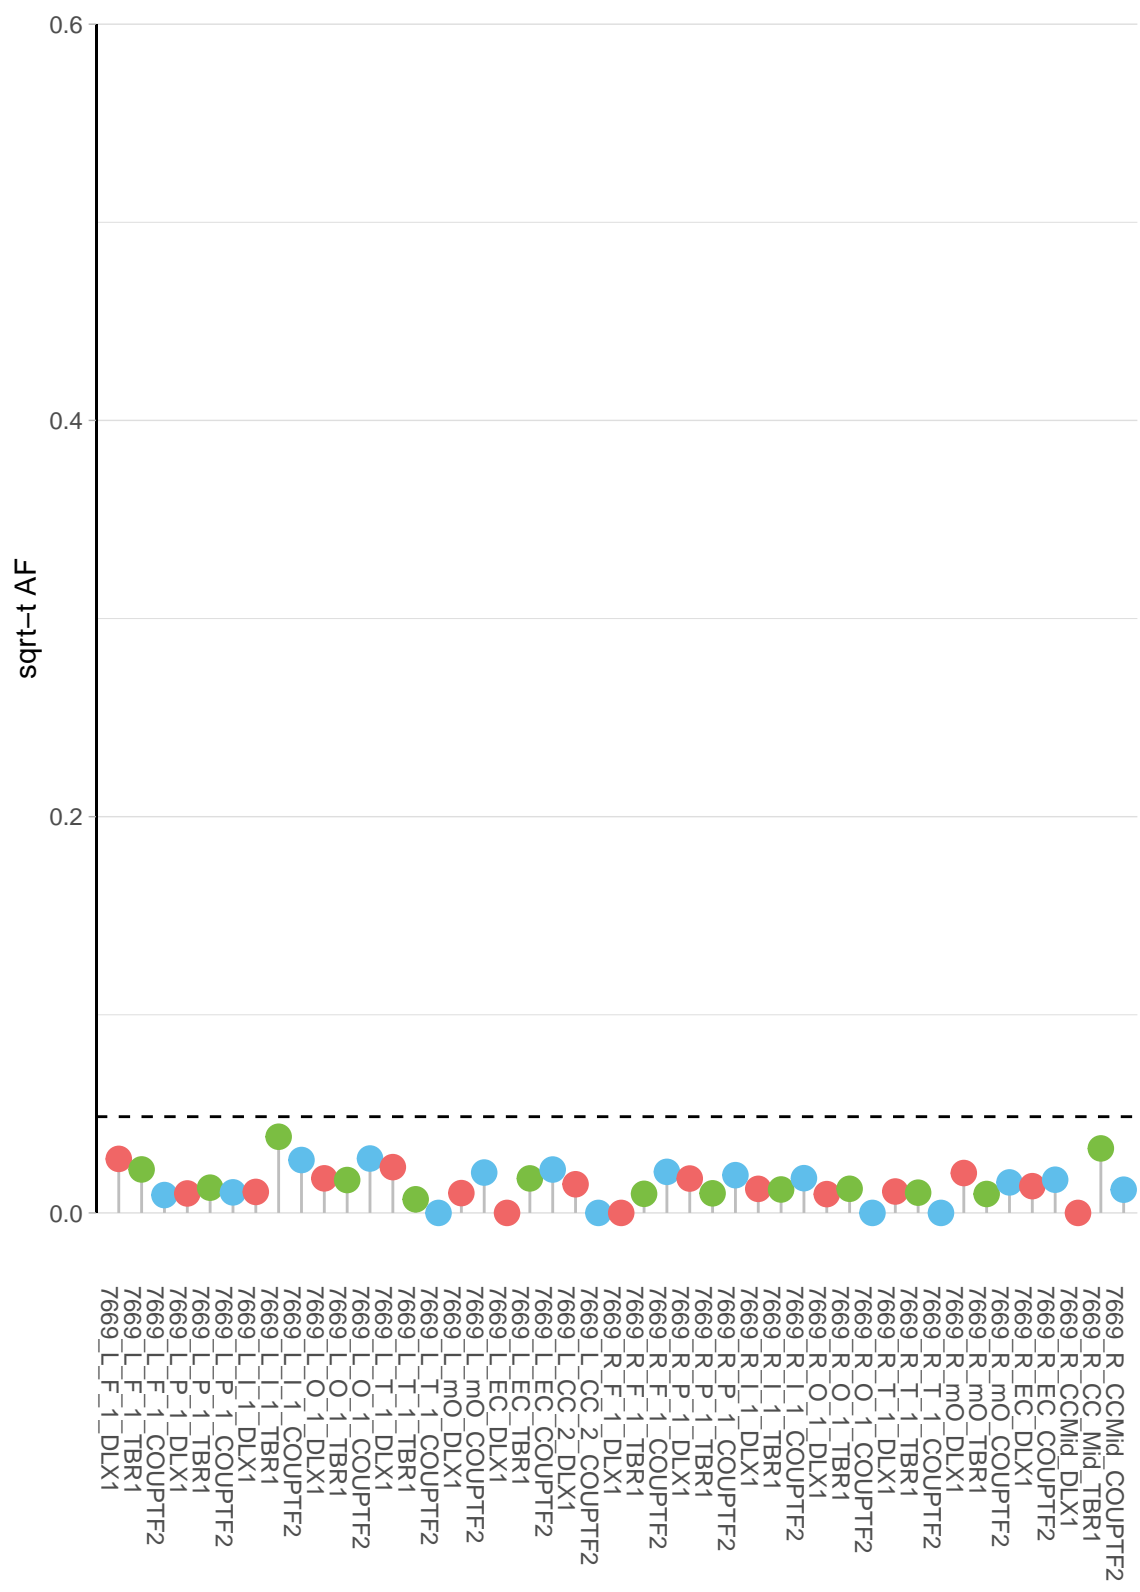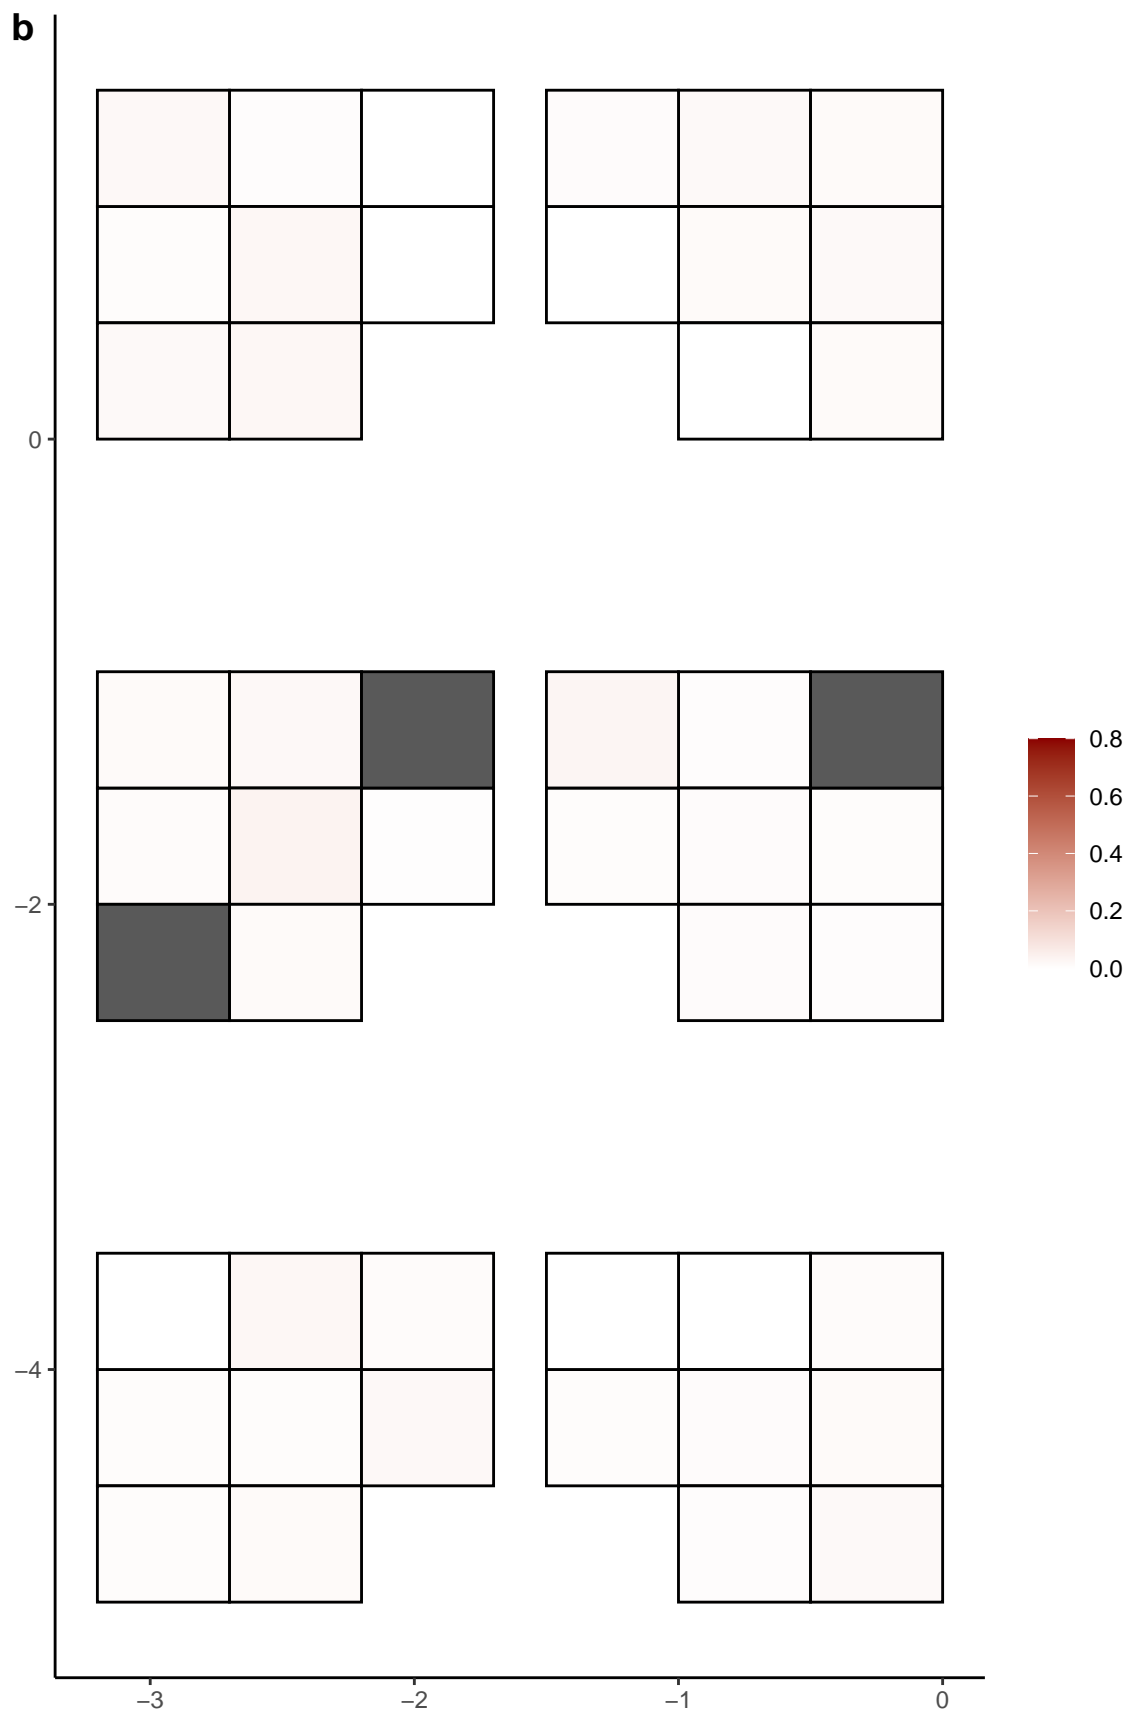

**a** ID05 14-88471461-G-A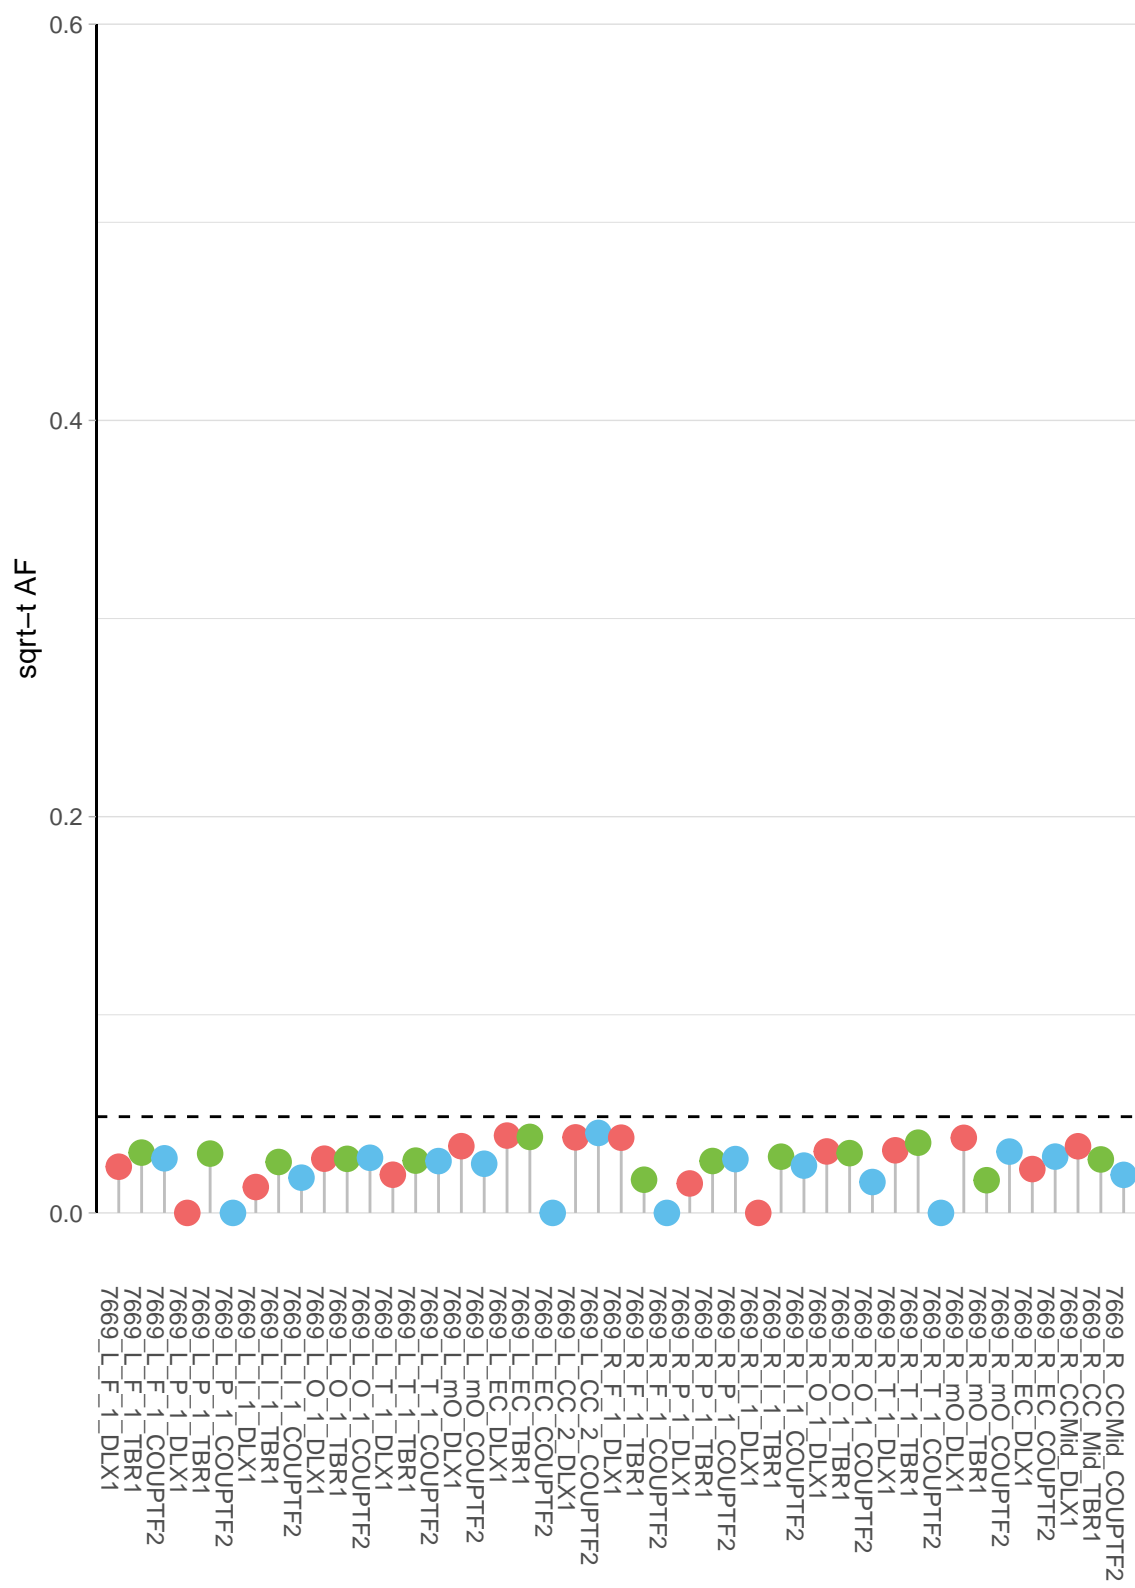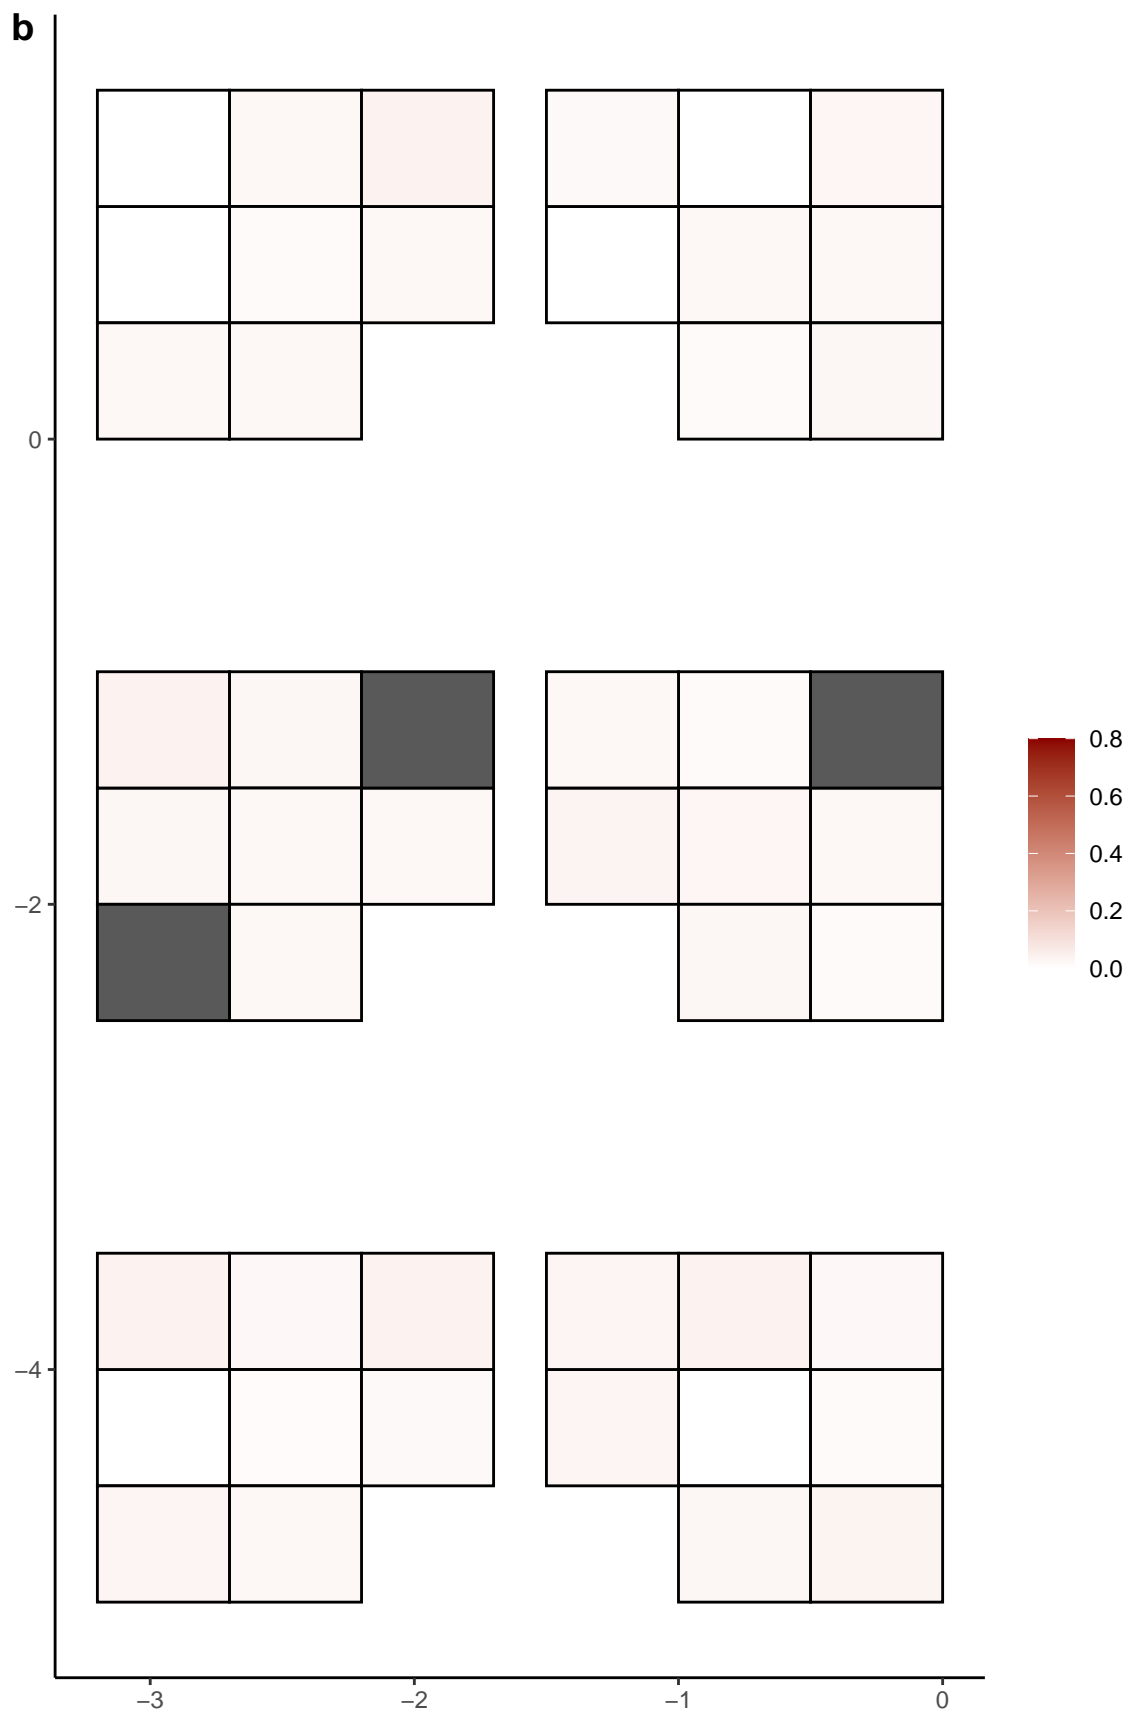

**a** ID05 14-89375012-G-T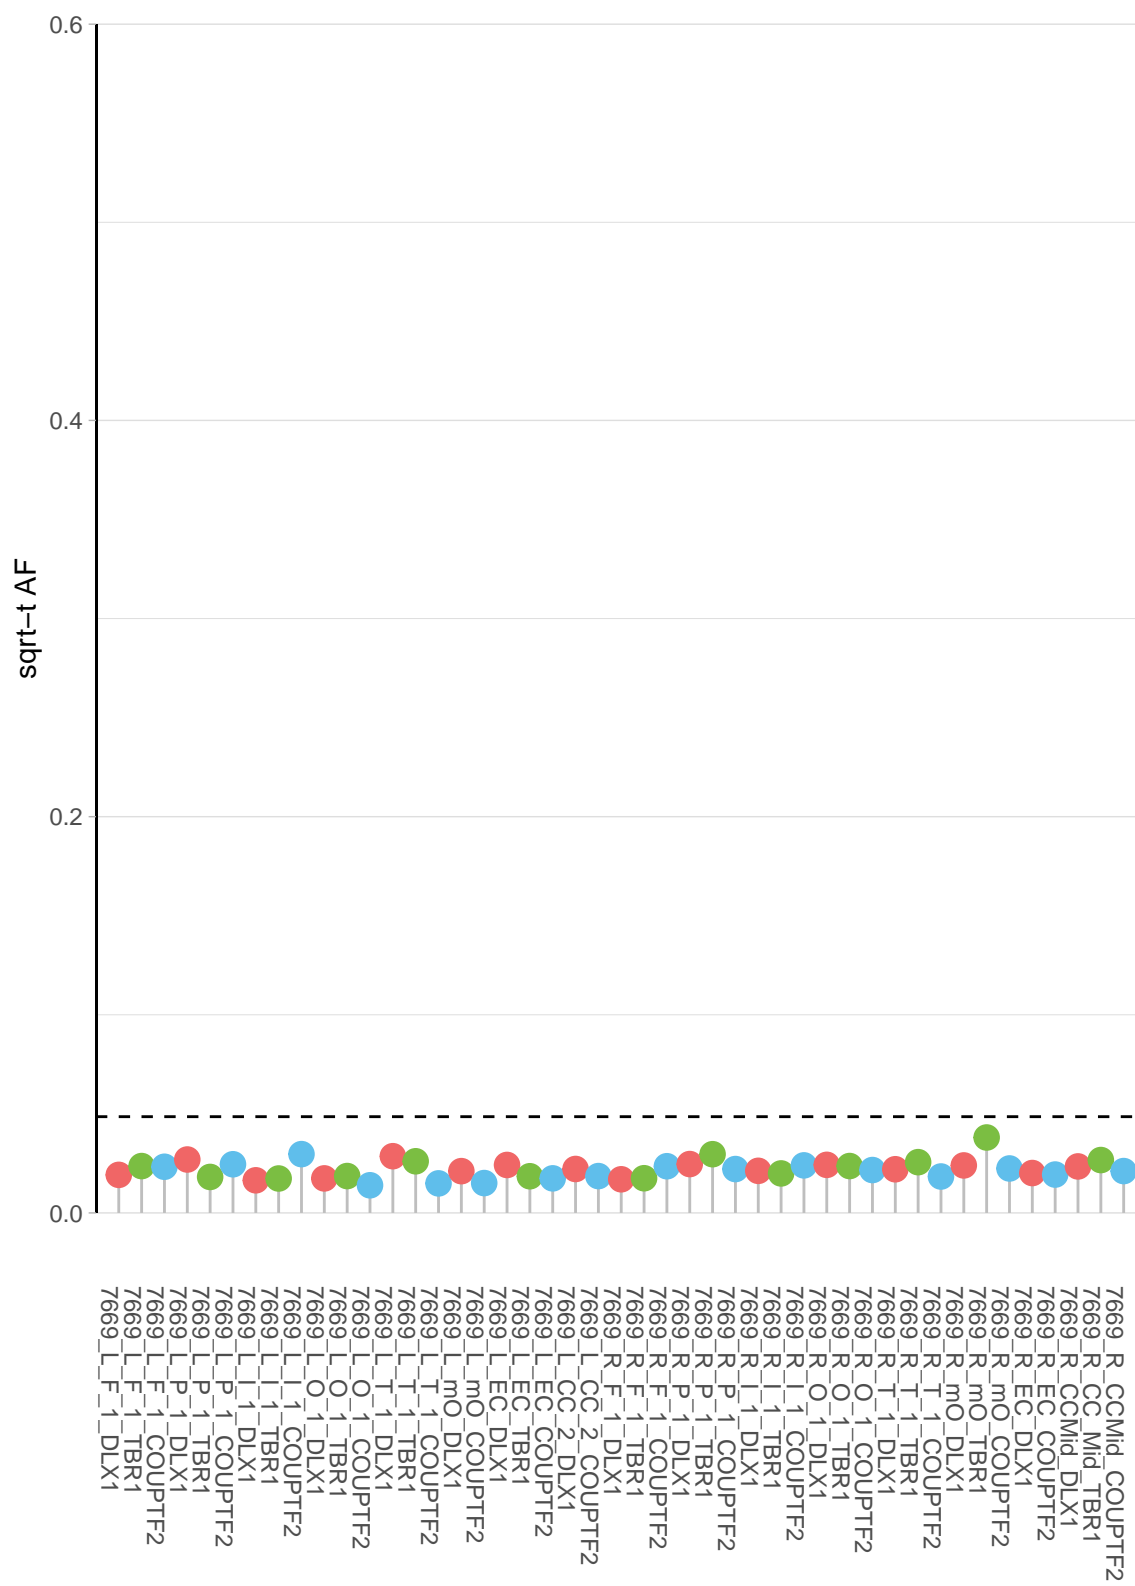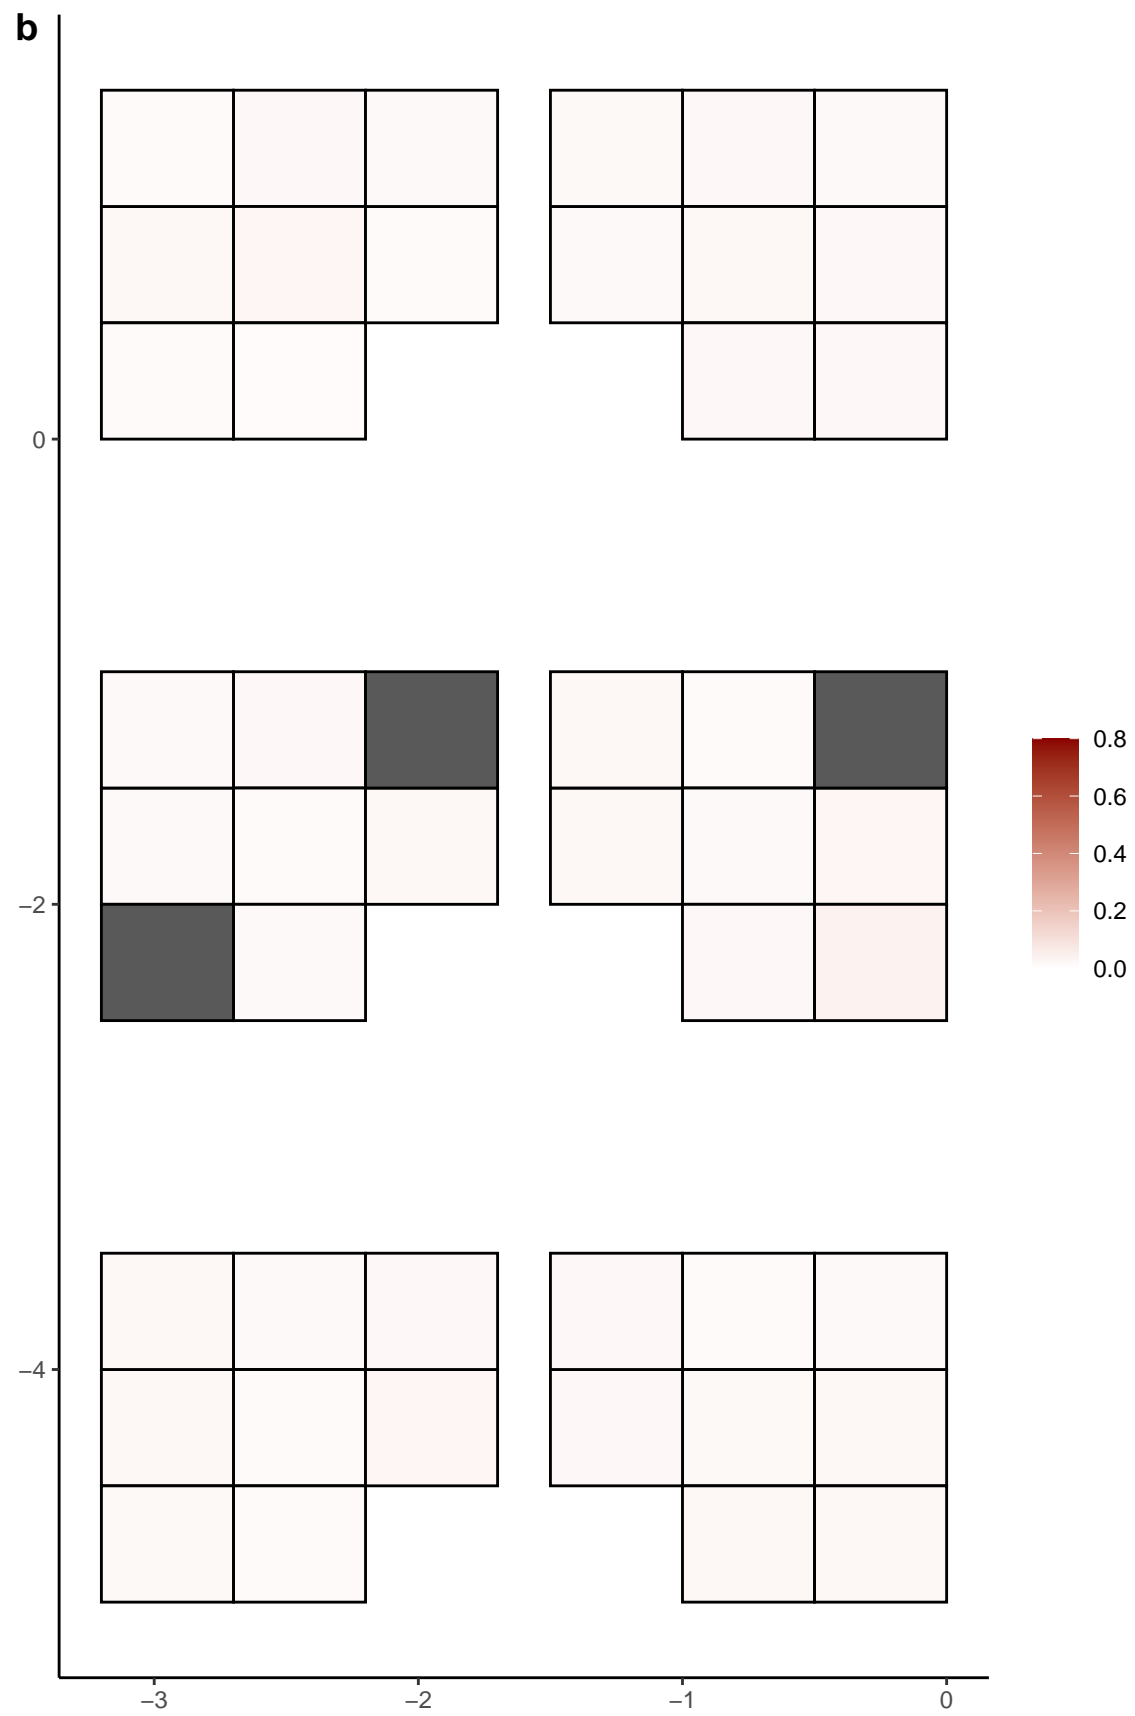

**a** ID05 14-93813737-C-T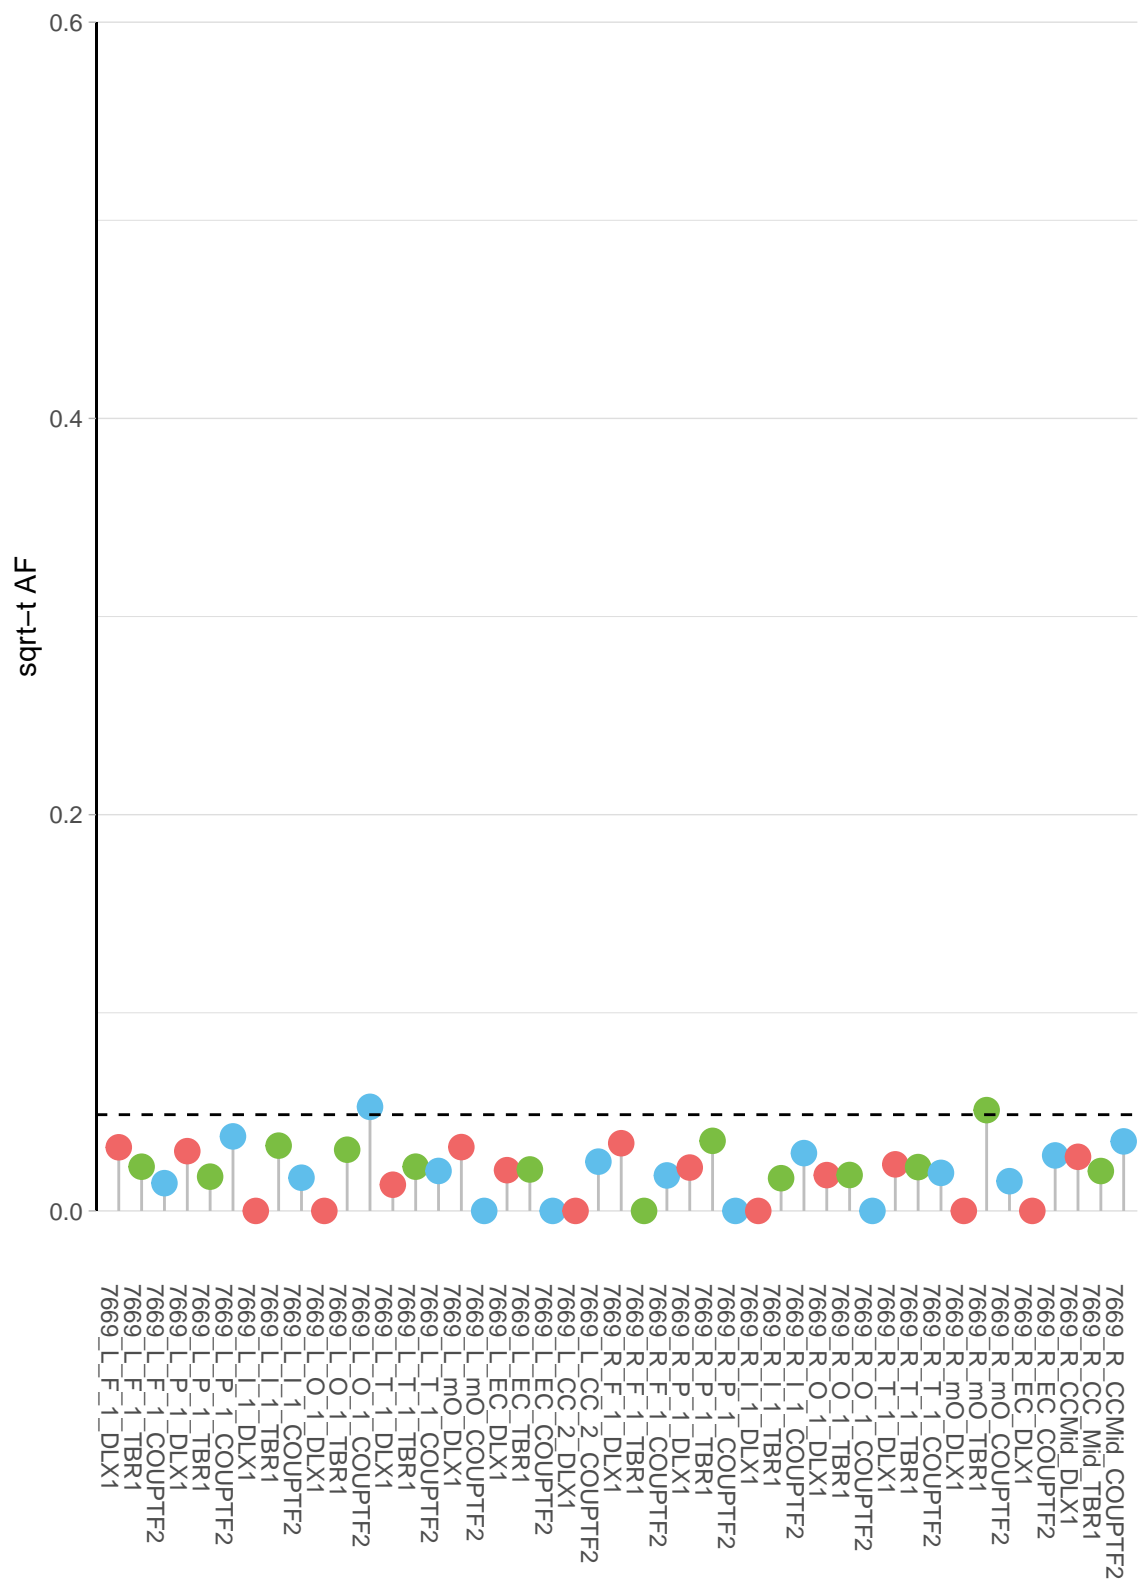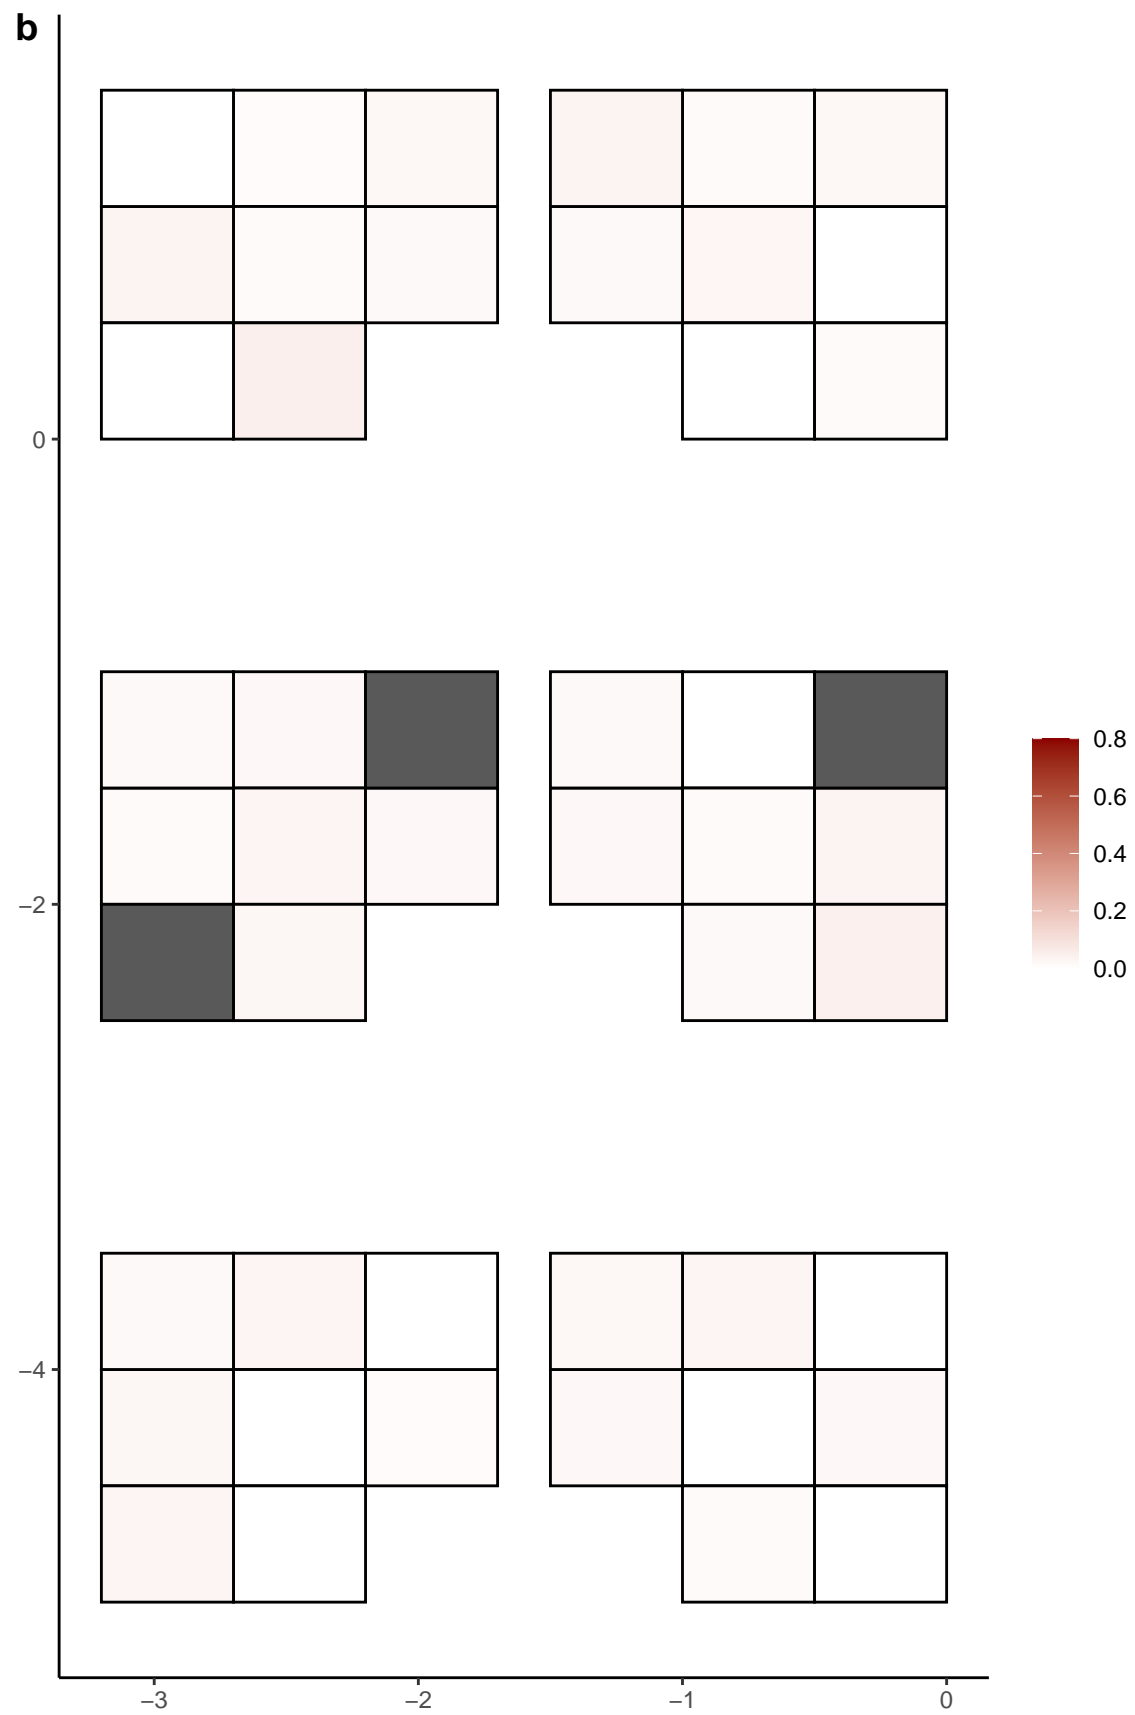







**a** ID05 15-27301889-G-A

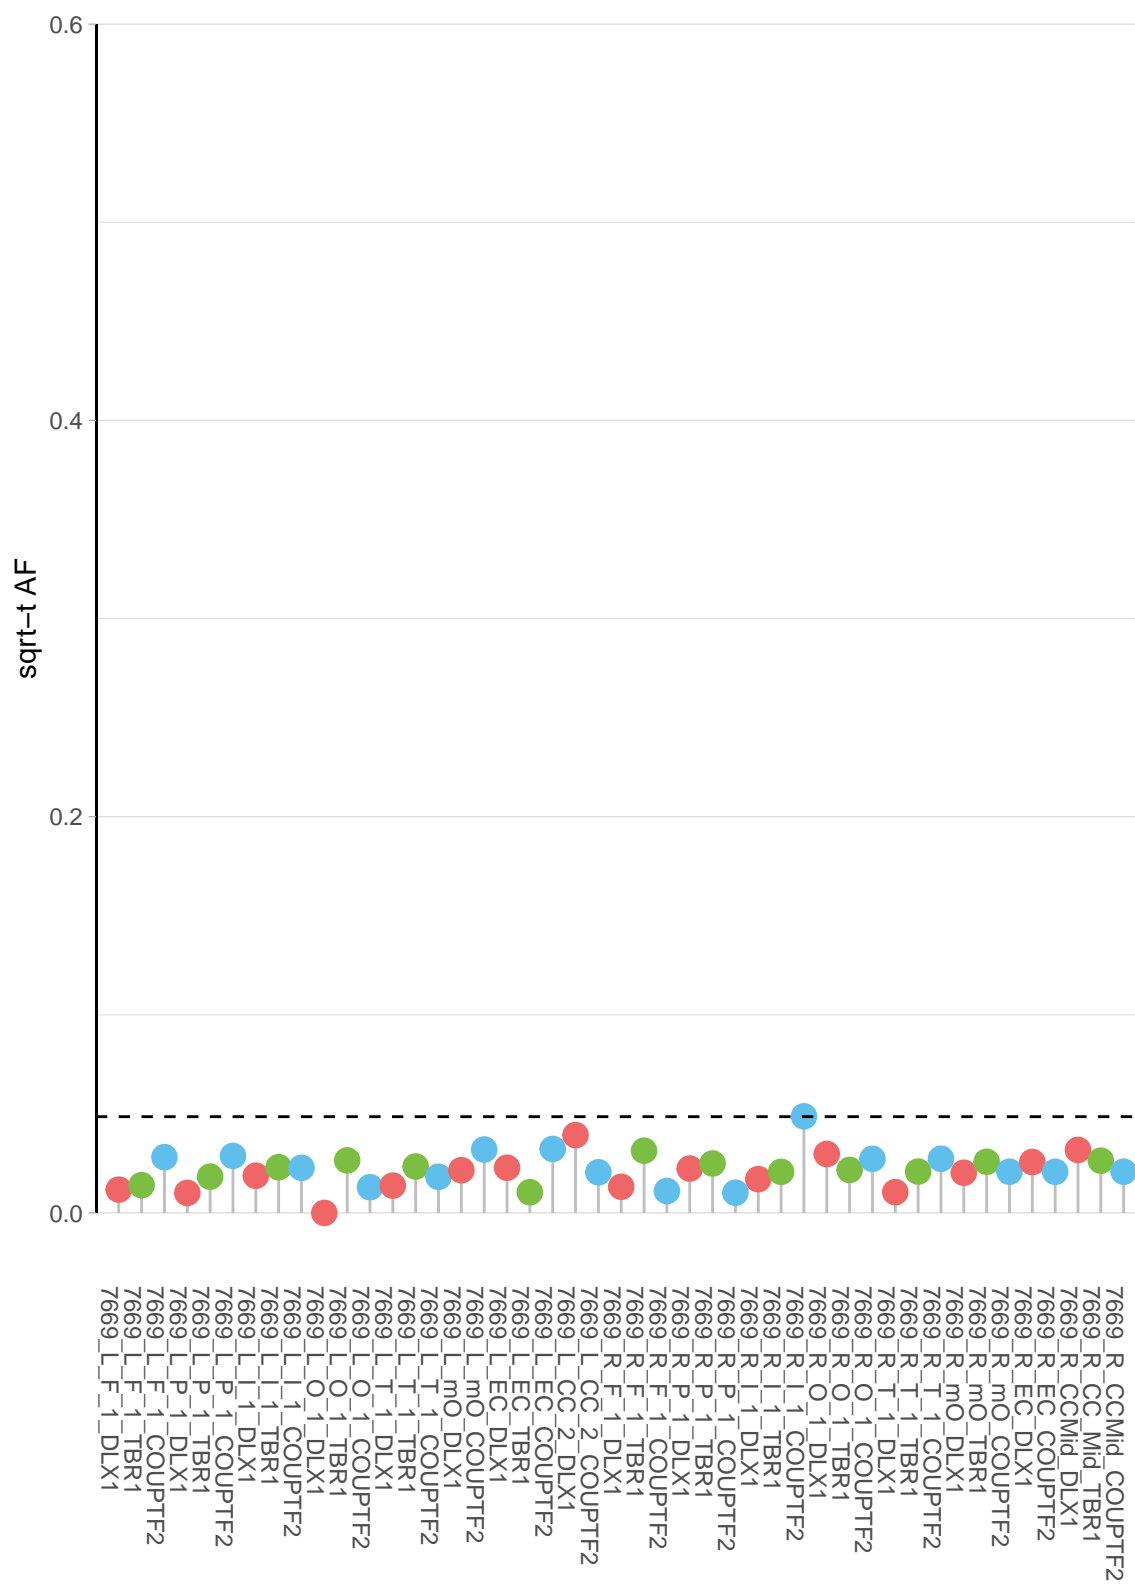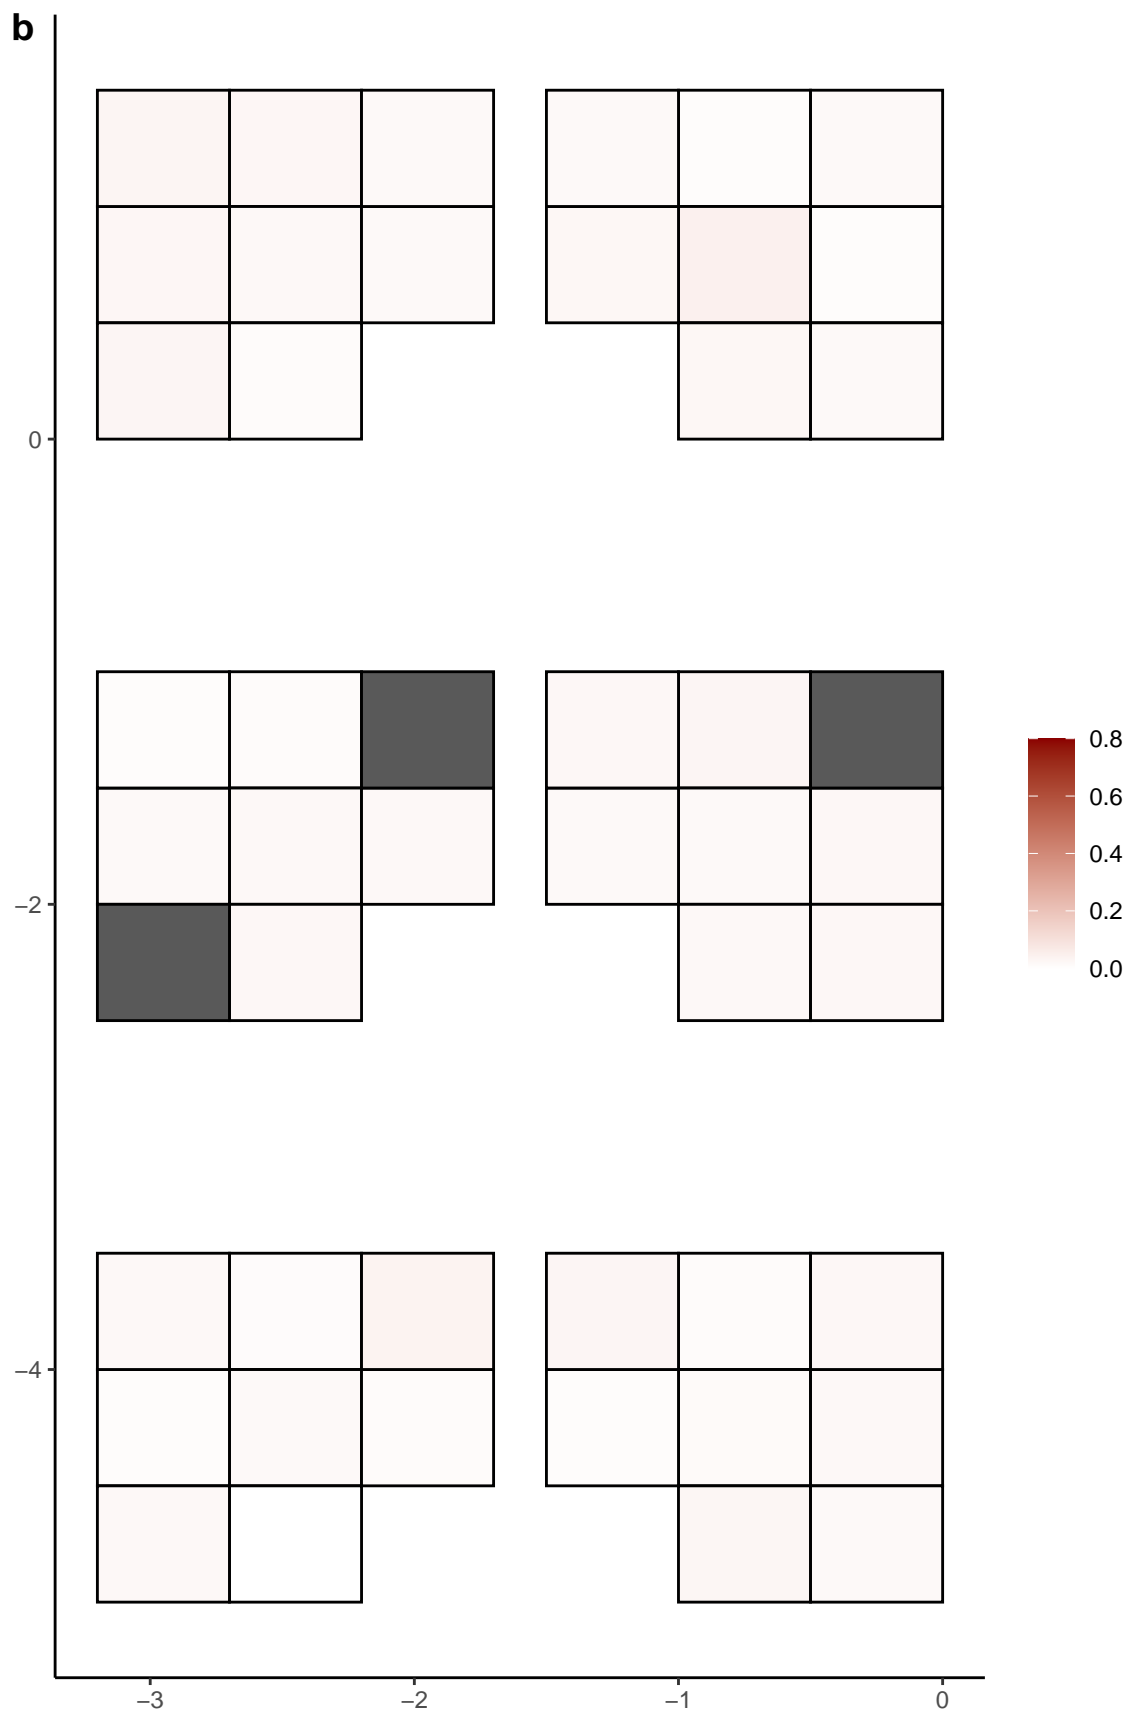

**a** ID05 15-40429032-G-A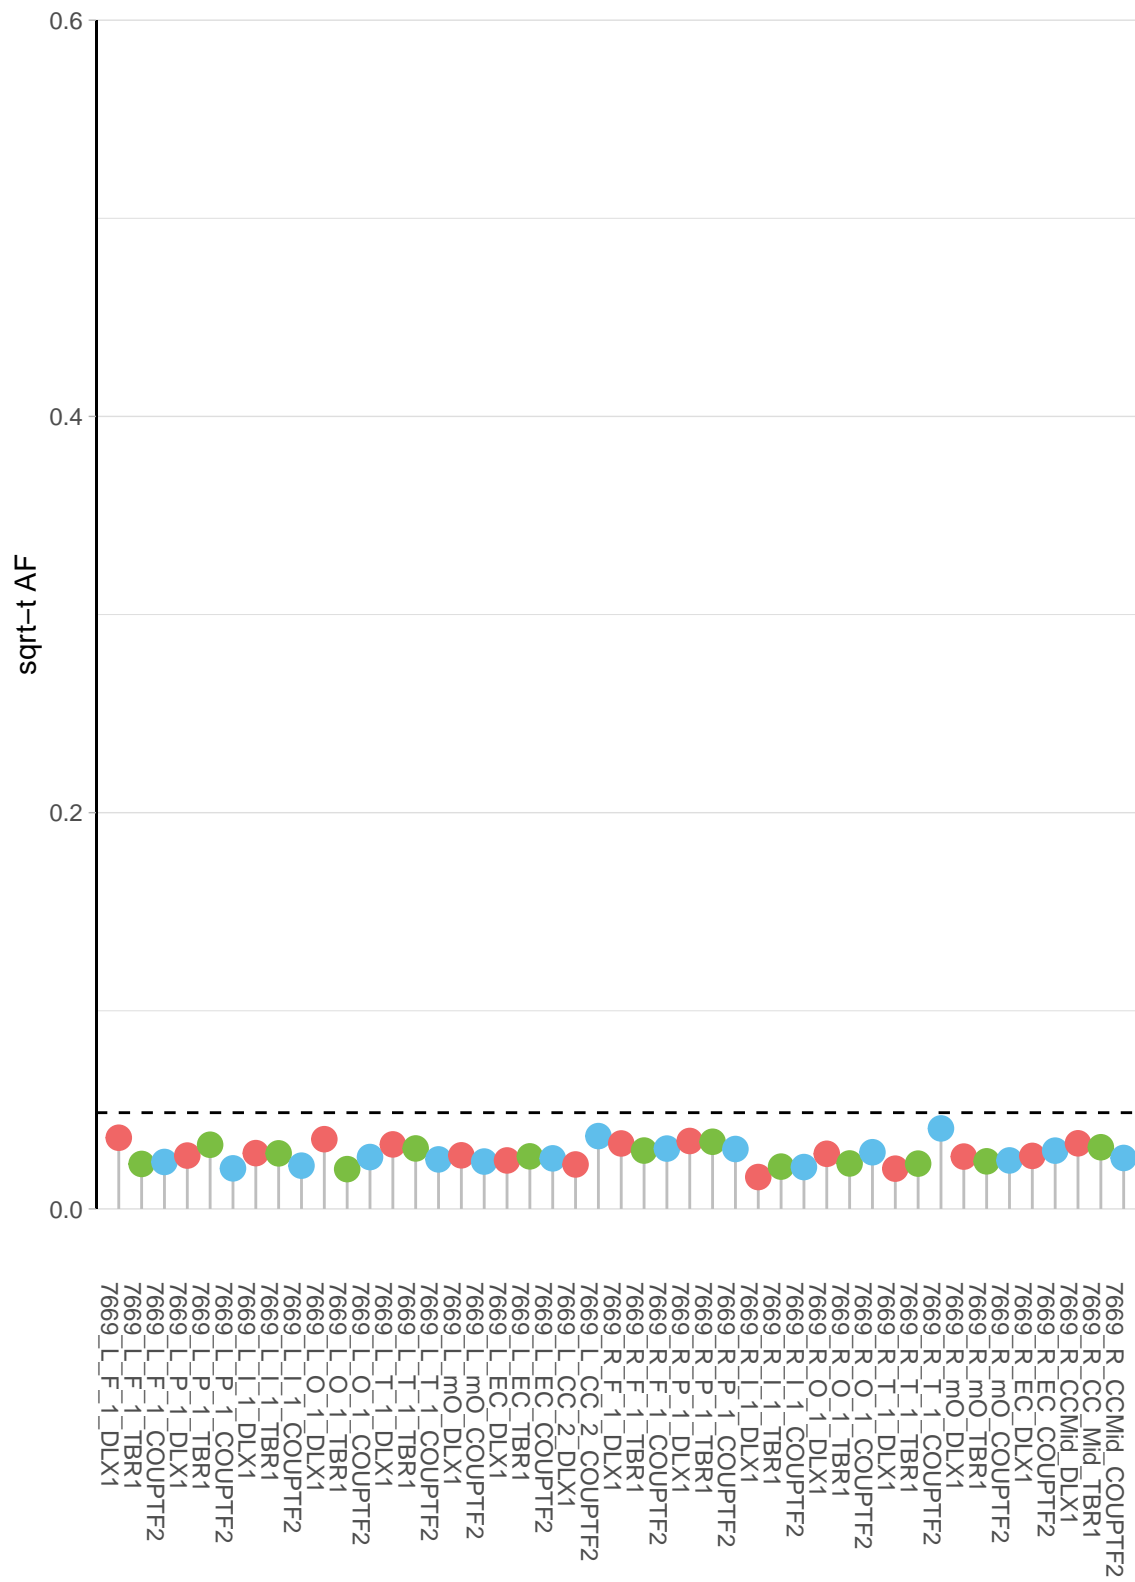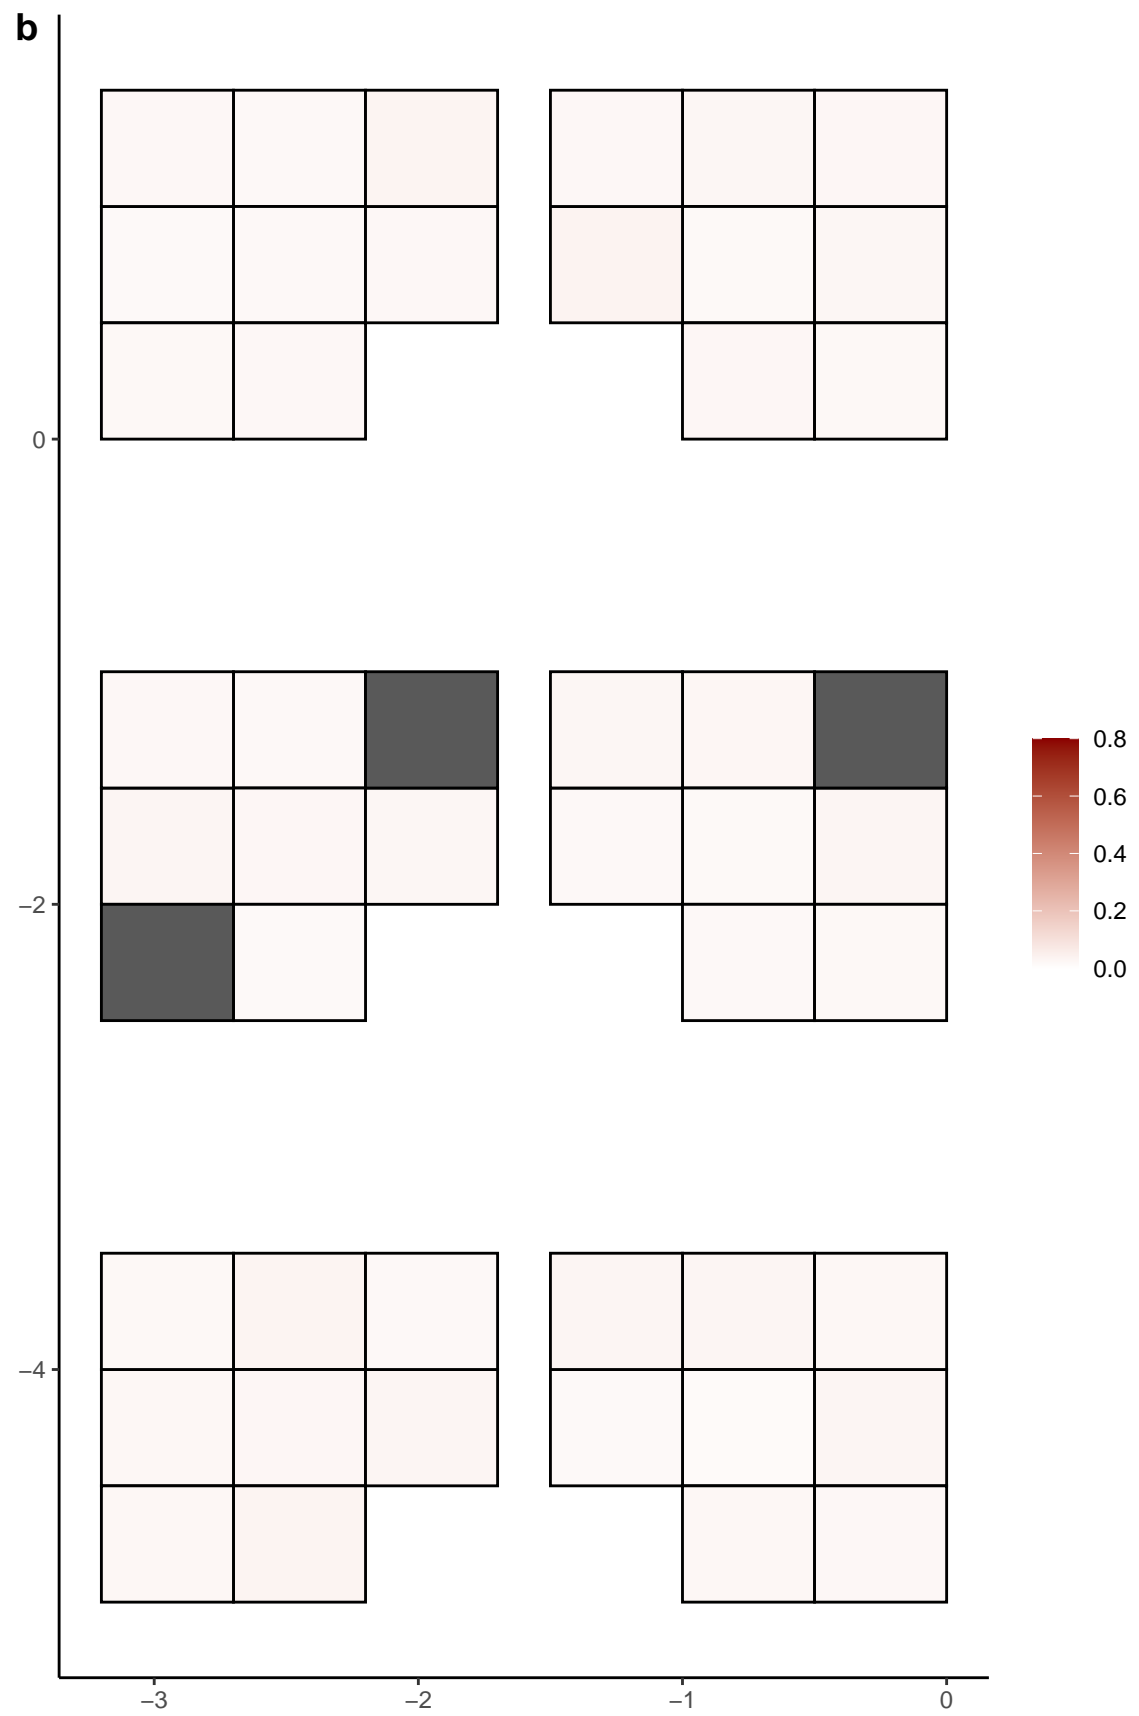



**a** ID05 15-46962188-T-A

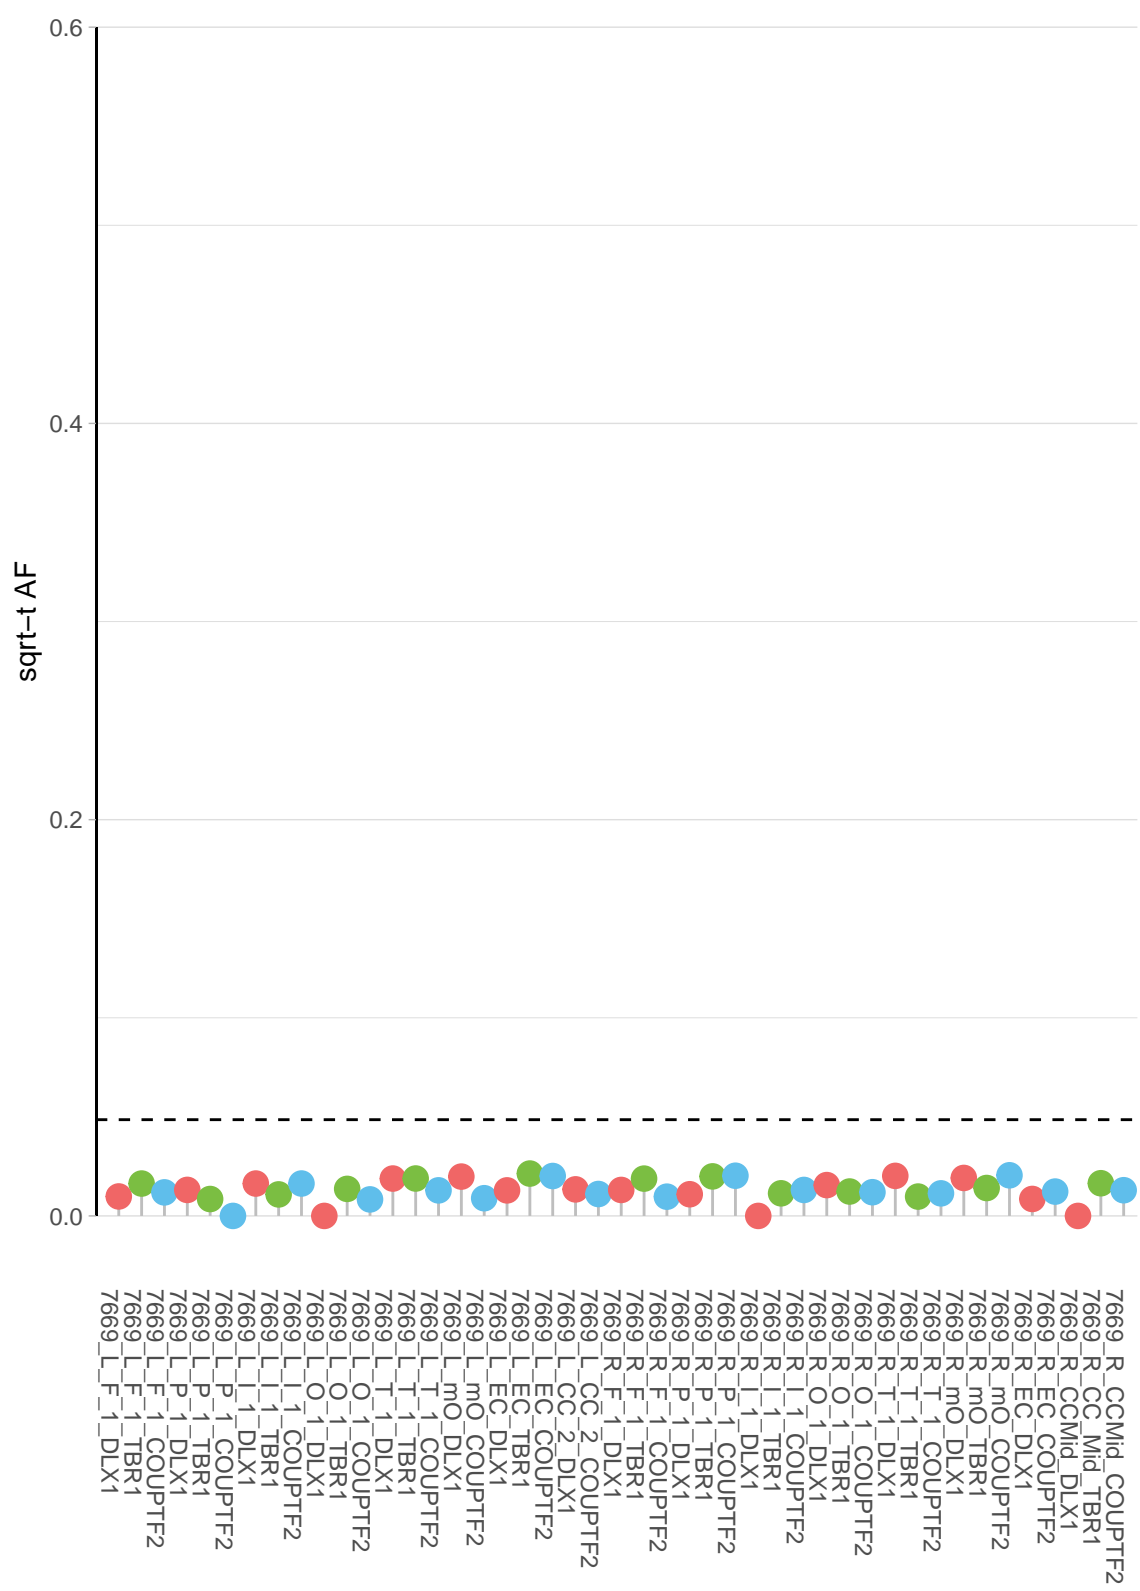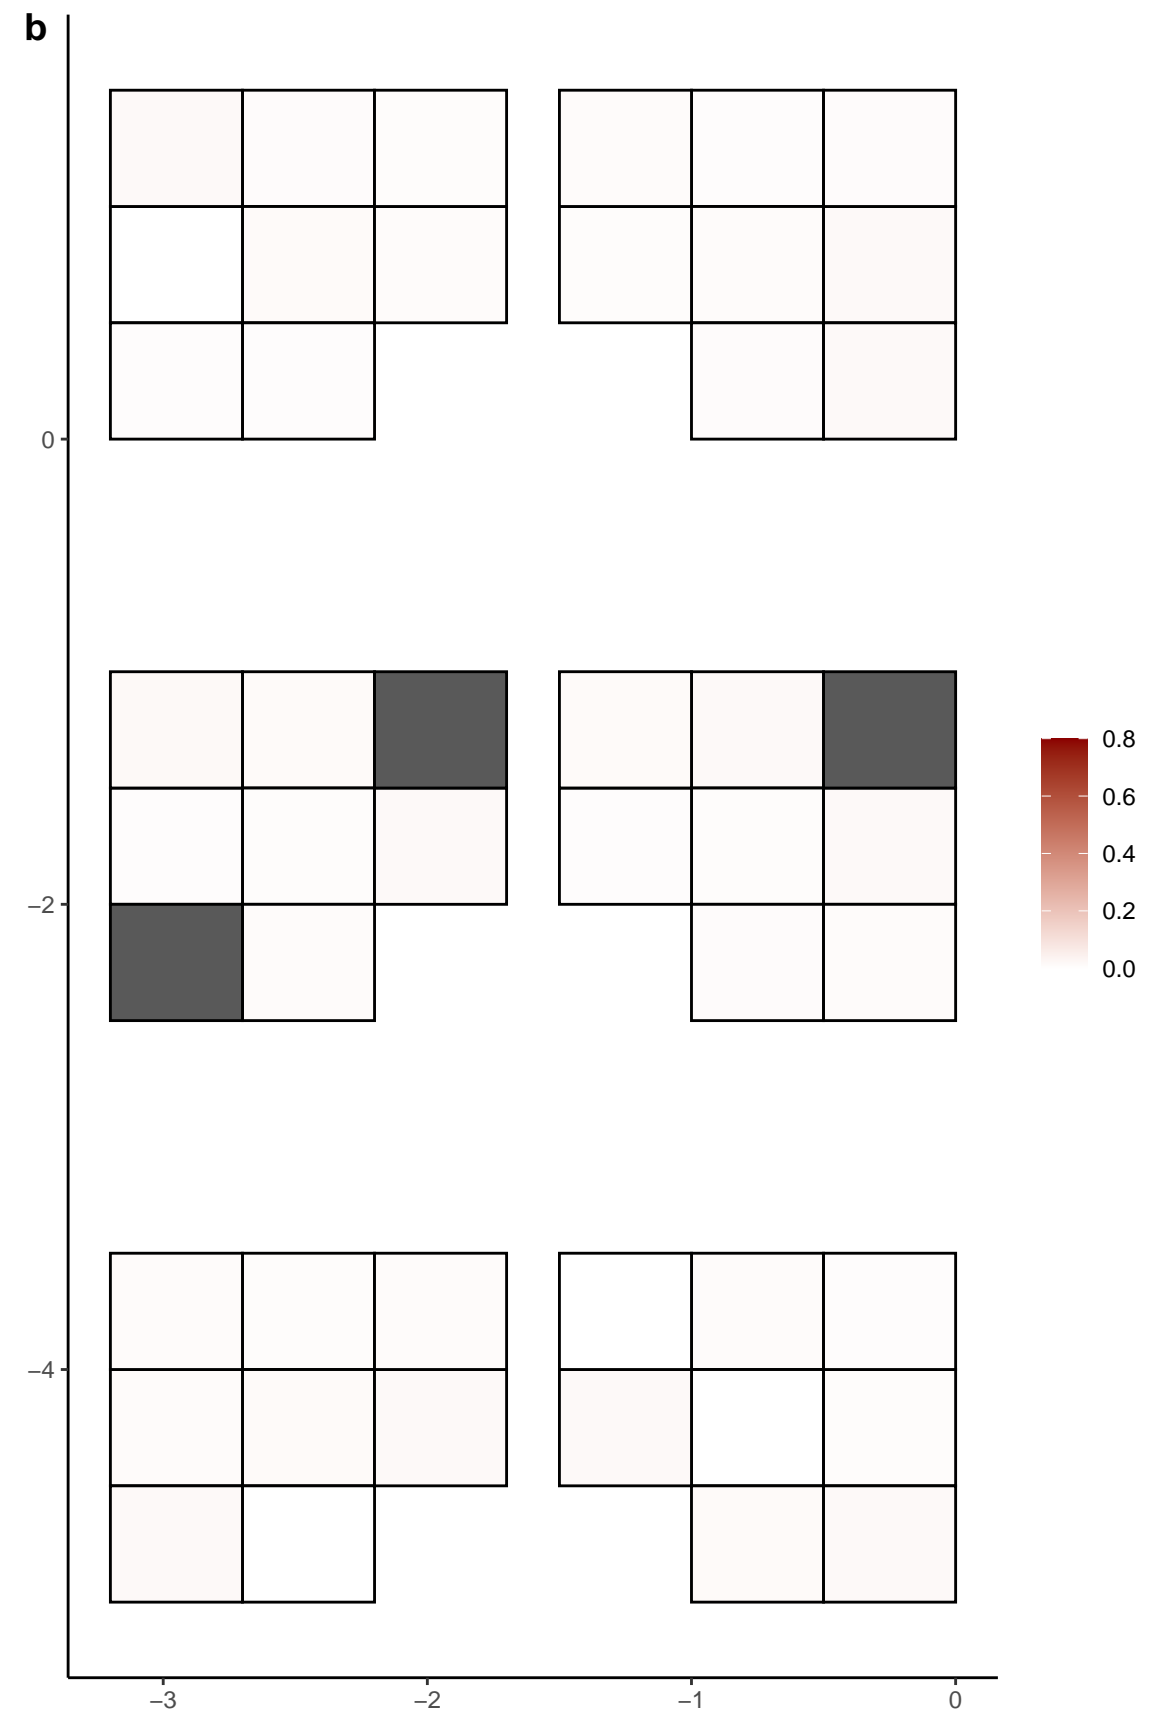

**a** ID05 15-51489592-C-T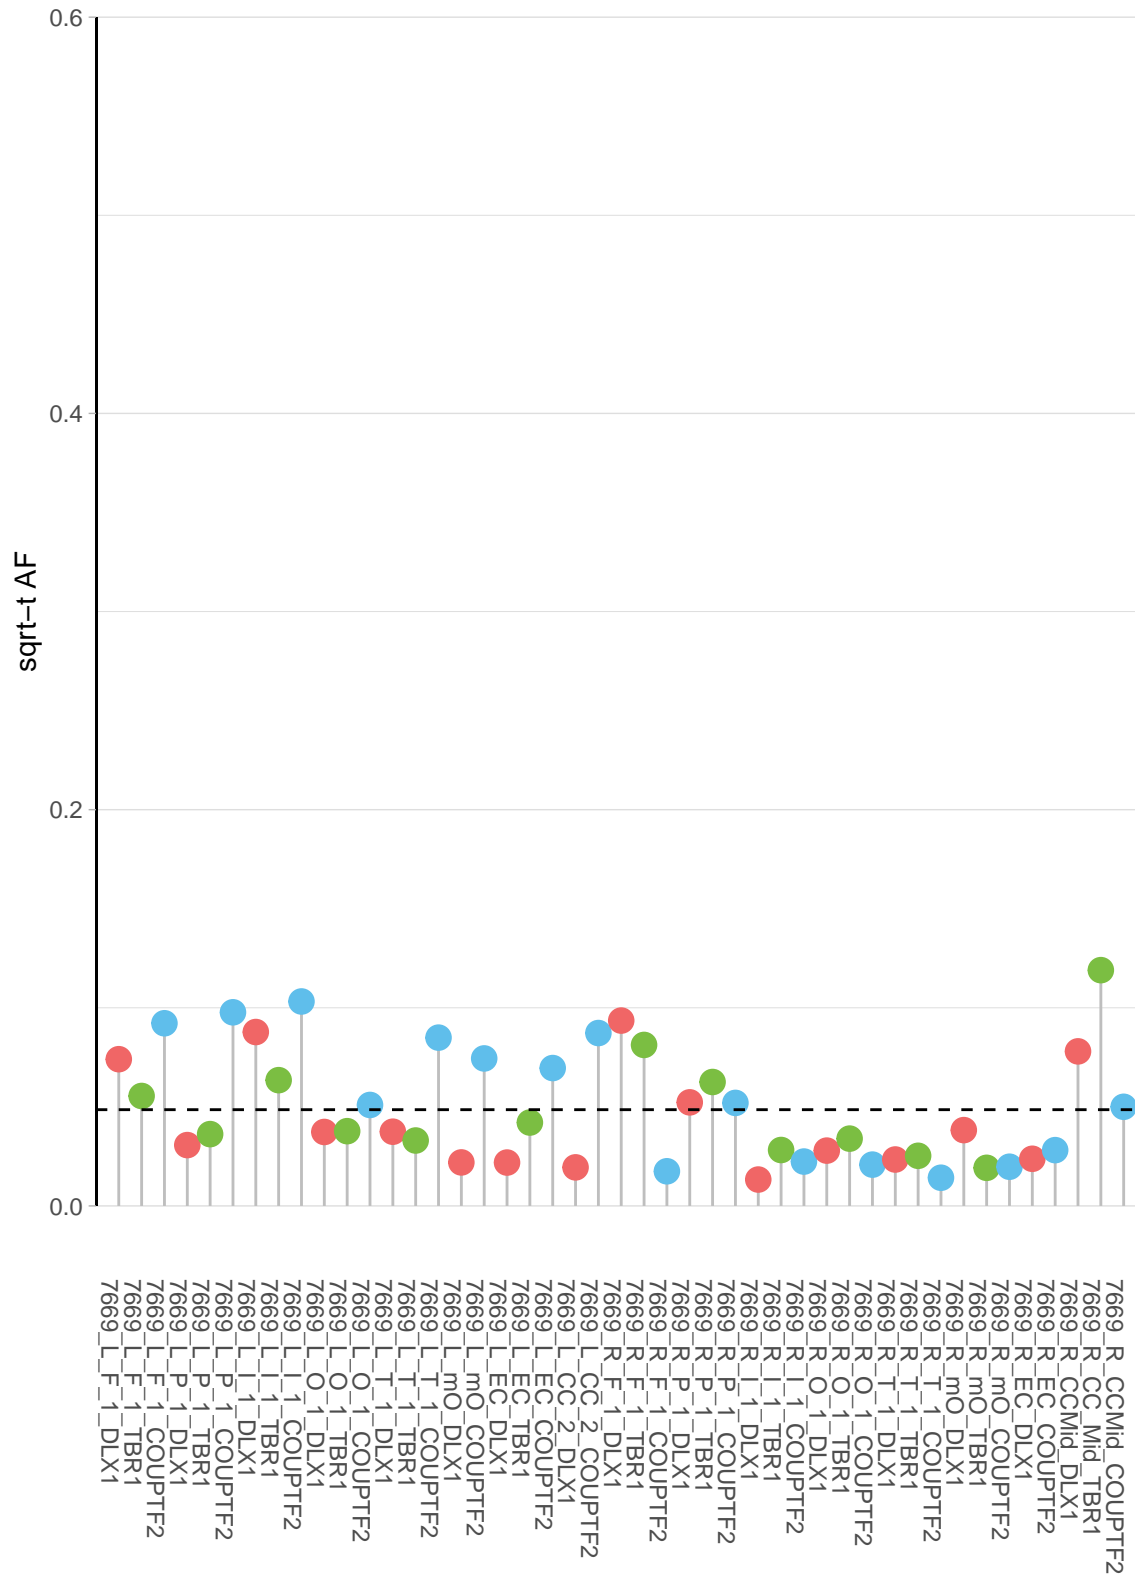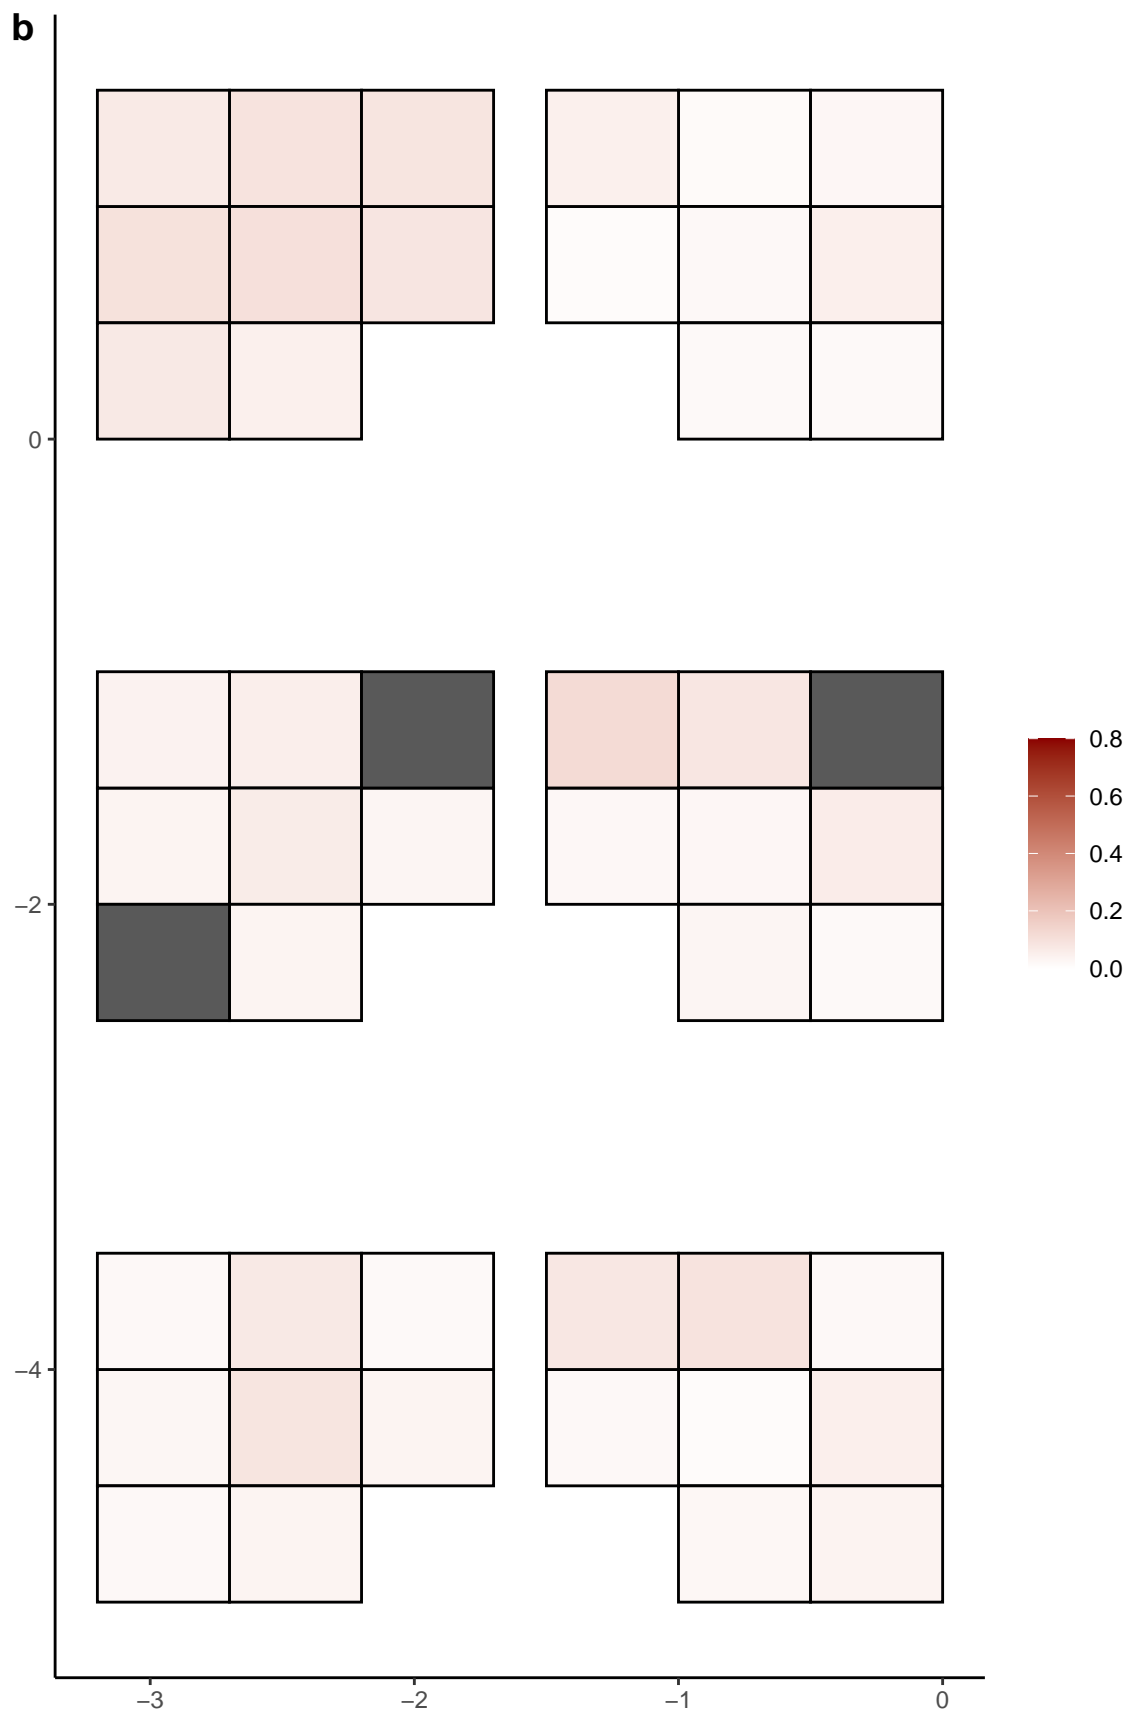

**a** ID05 15-53985651-C-T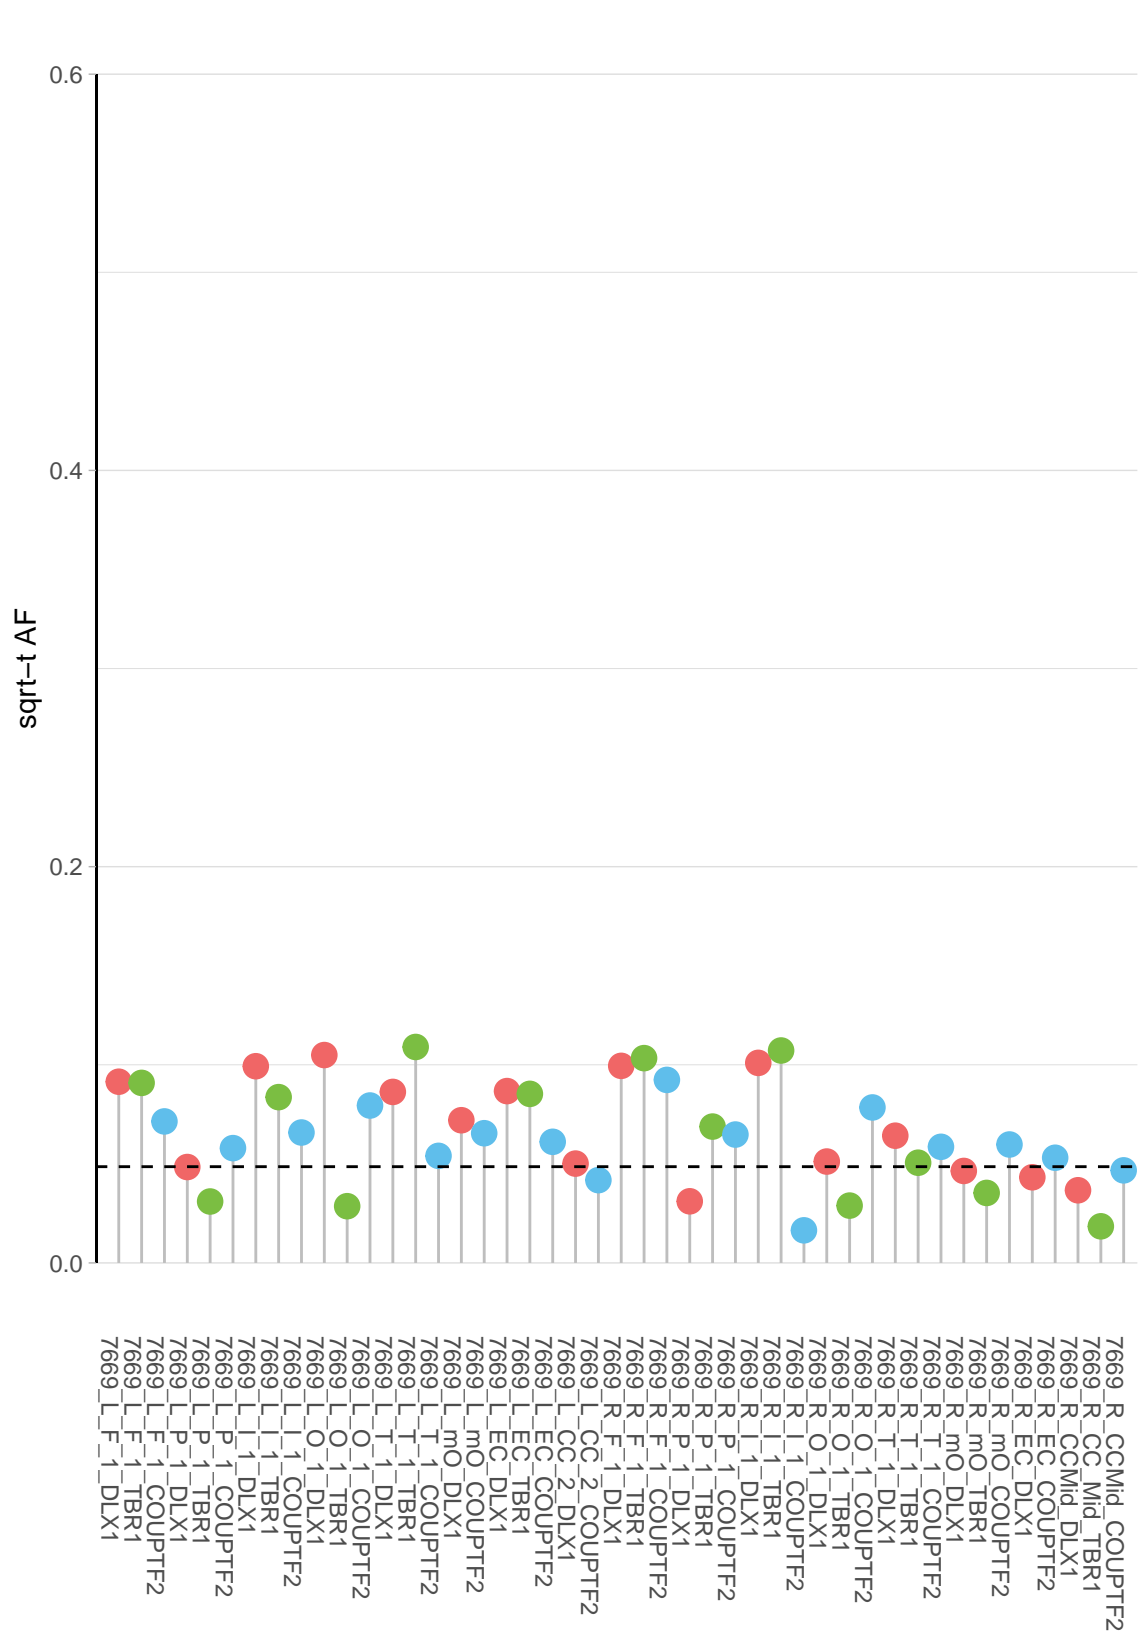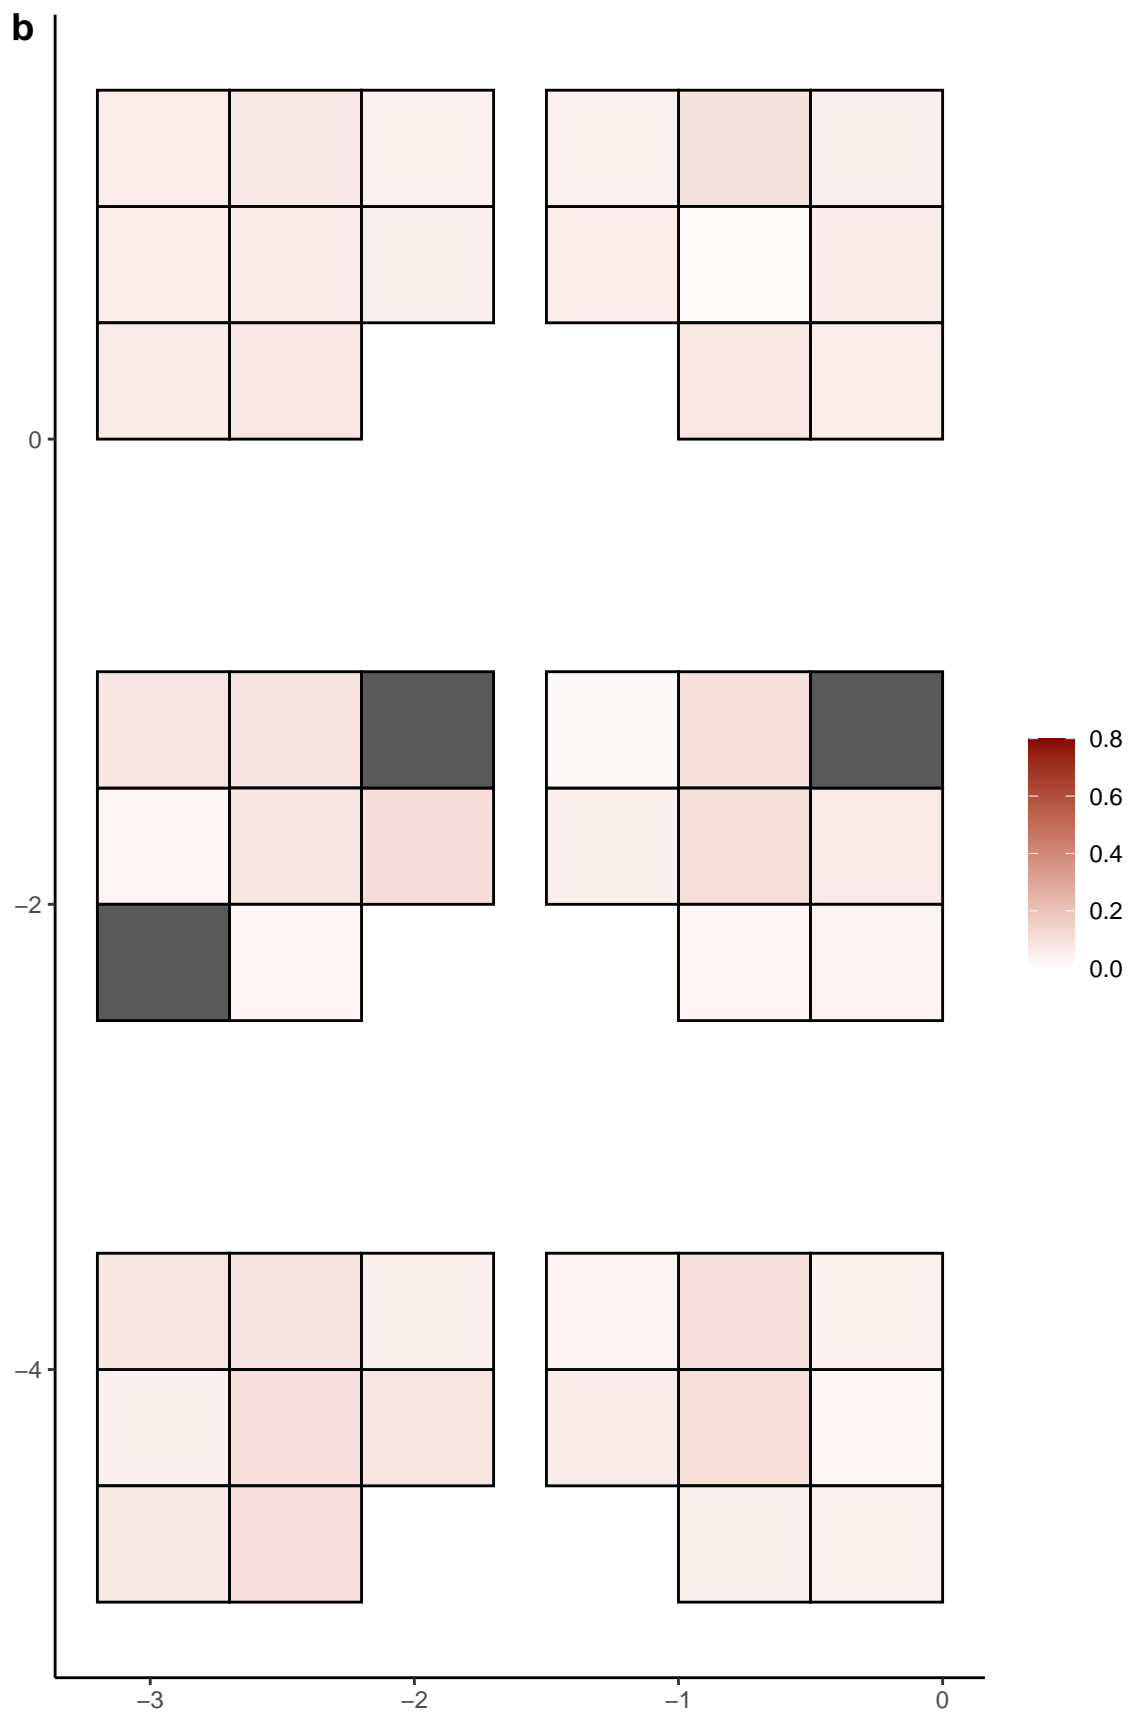



**a** ID05 15-60164292-C-T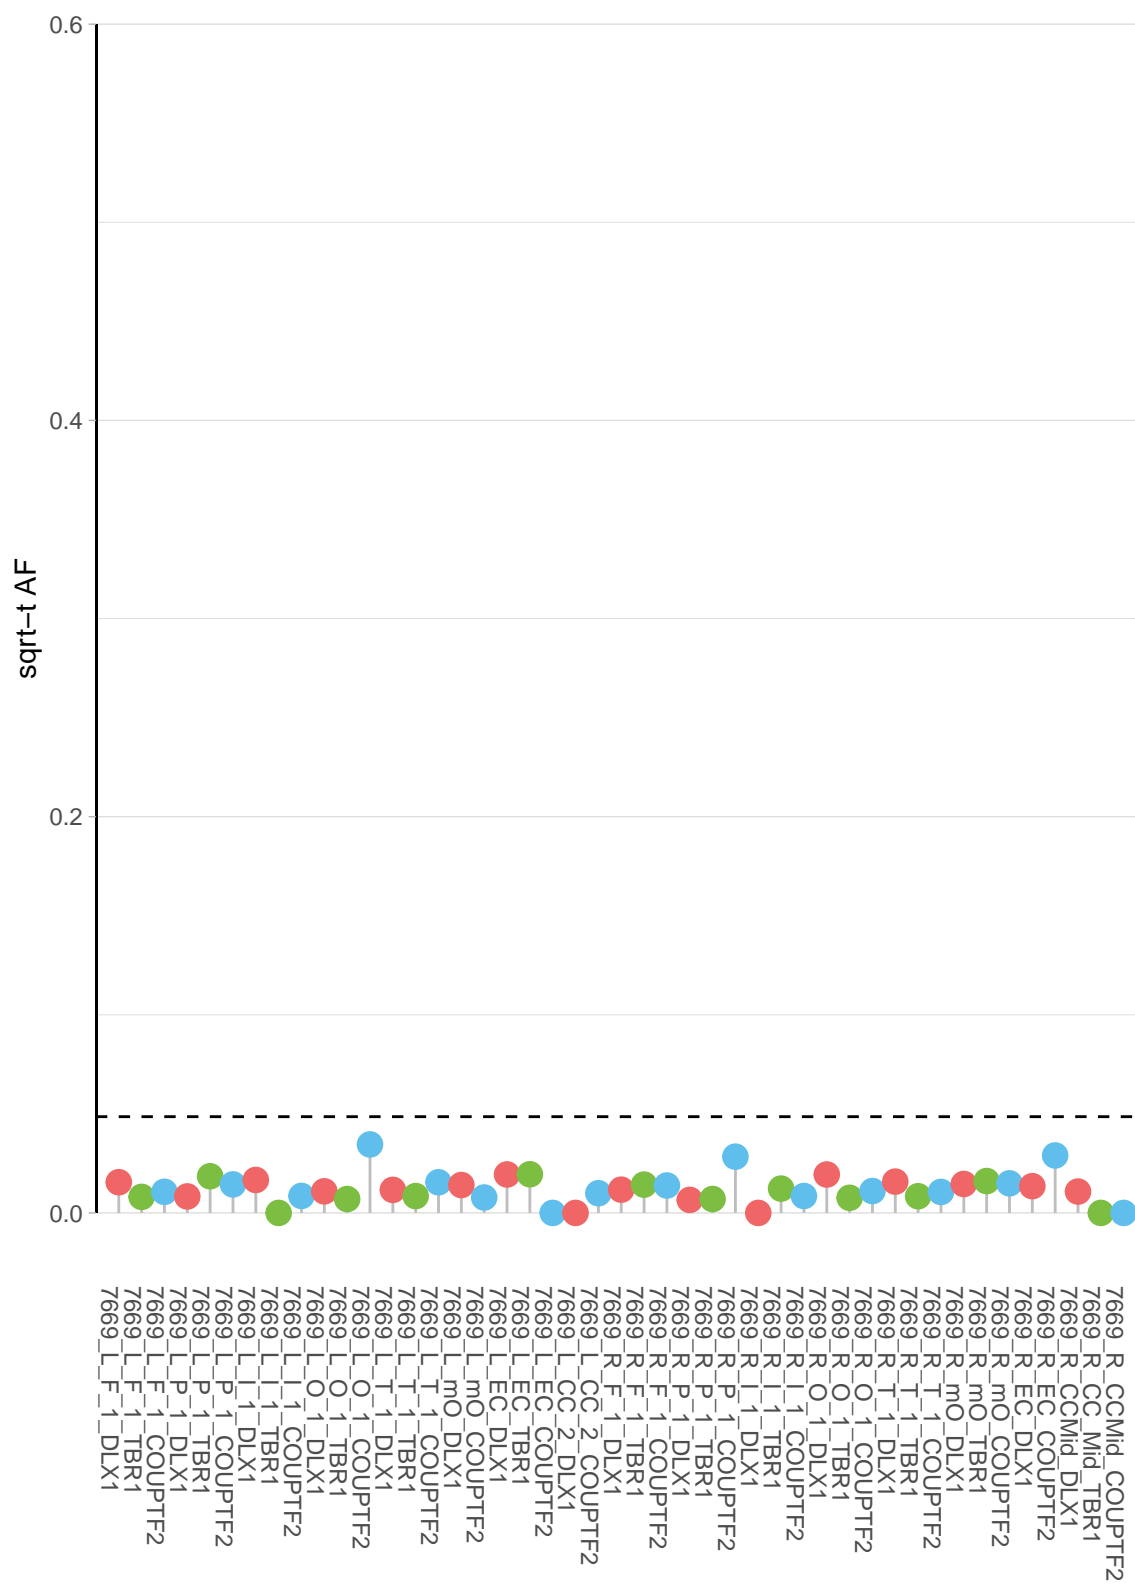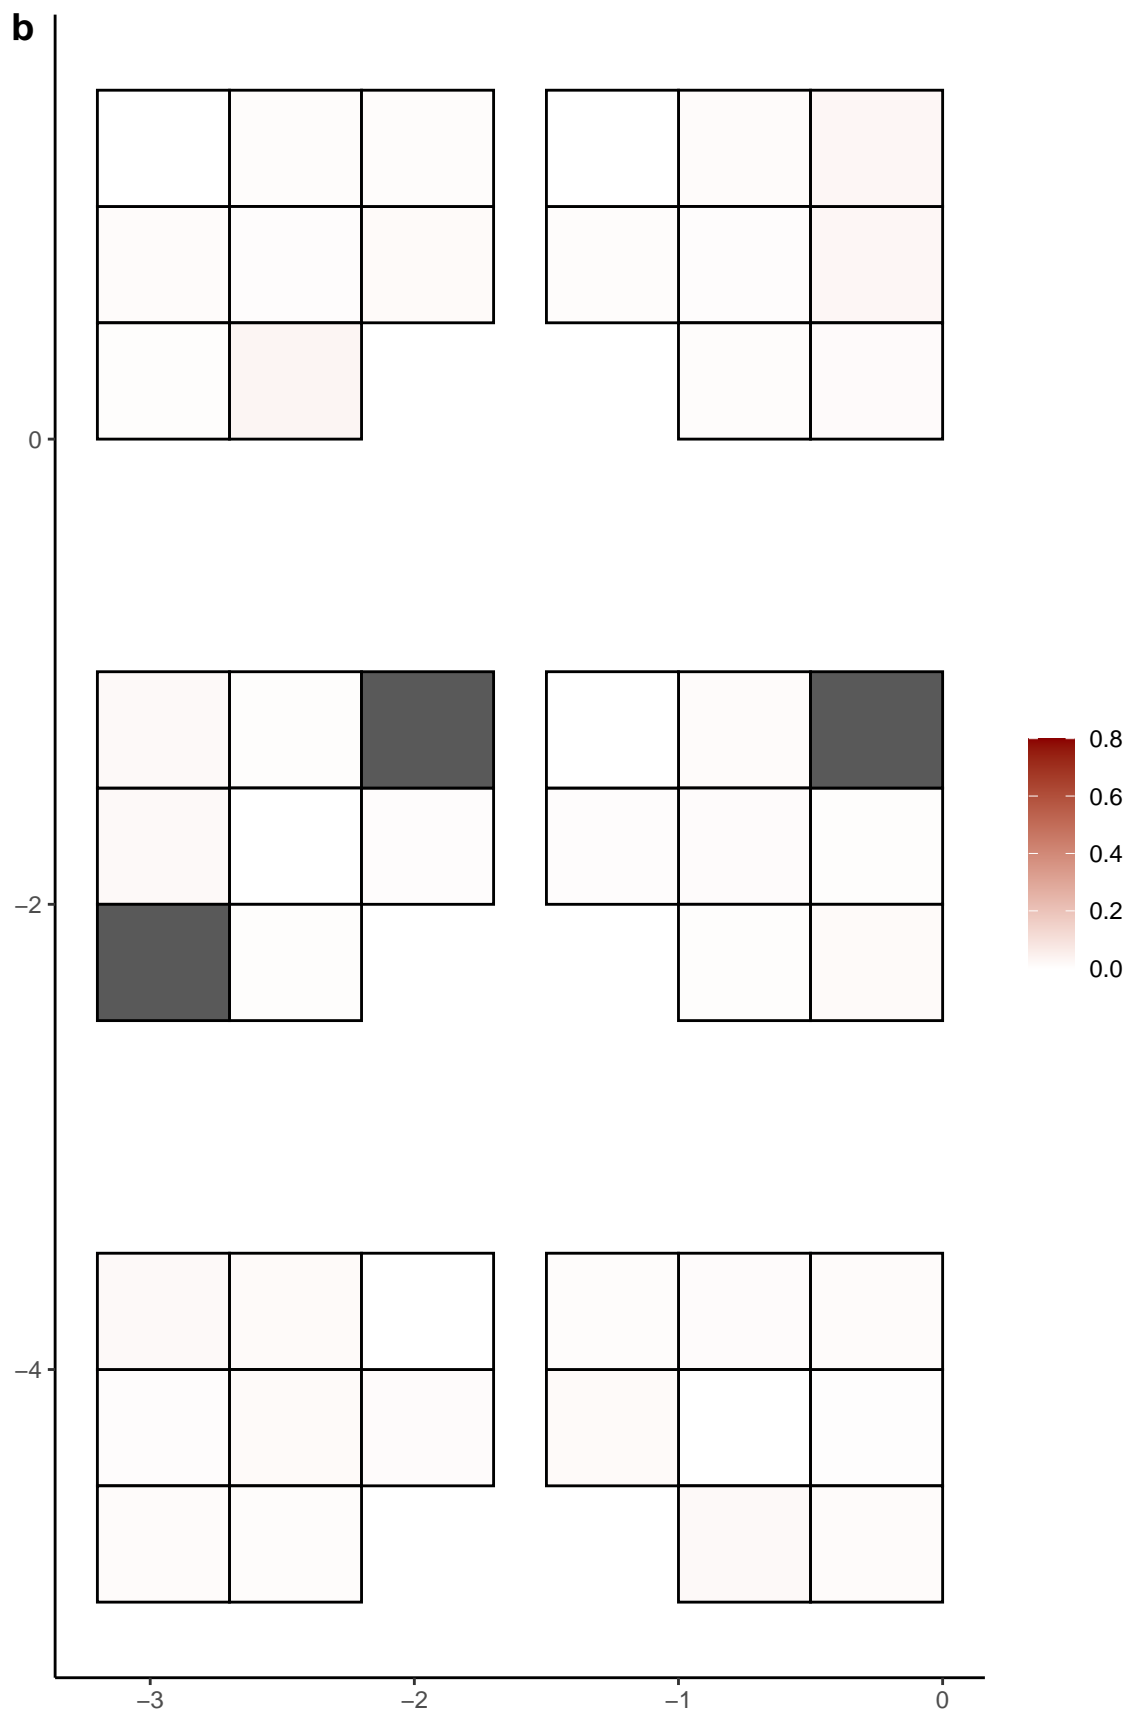

**a** ID05 15-68132566-T-C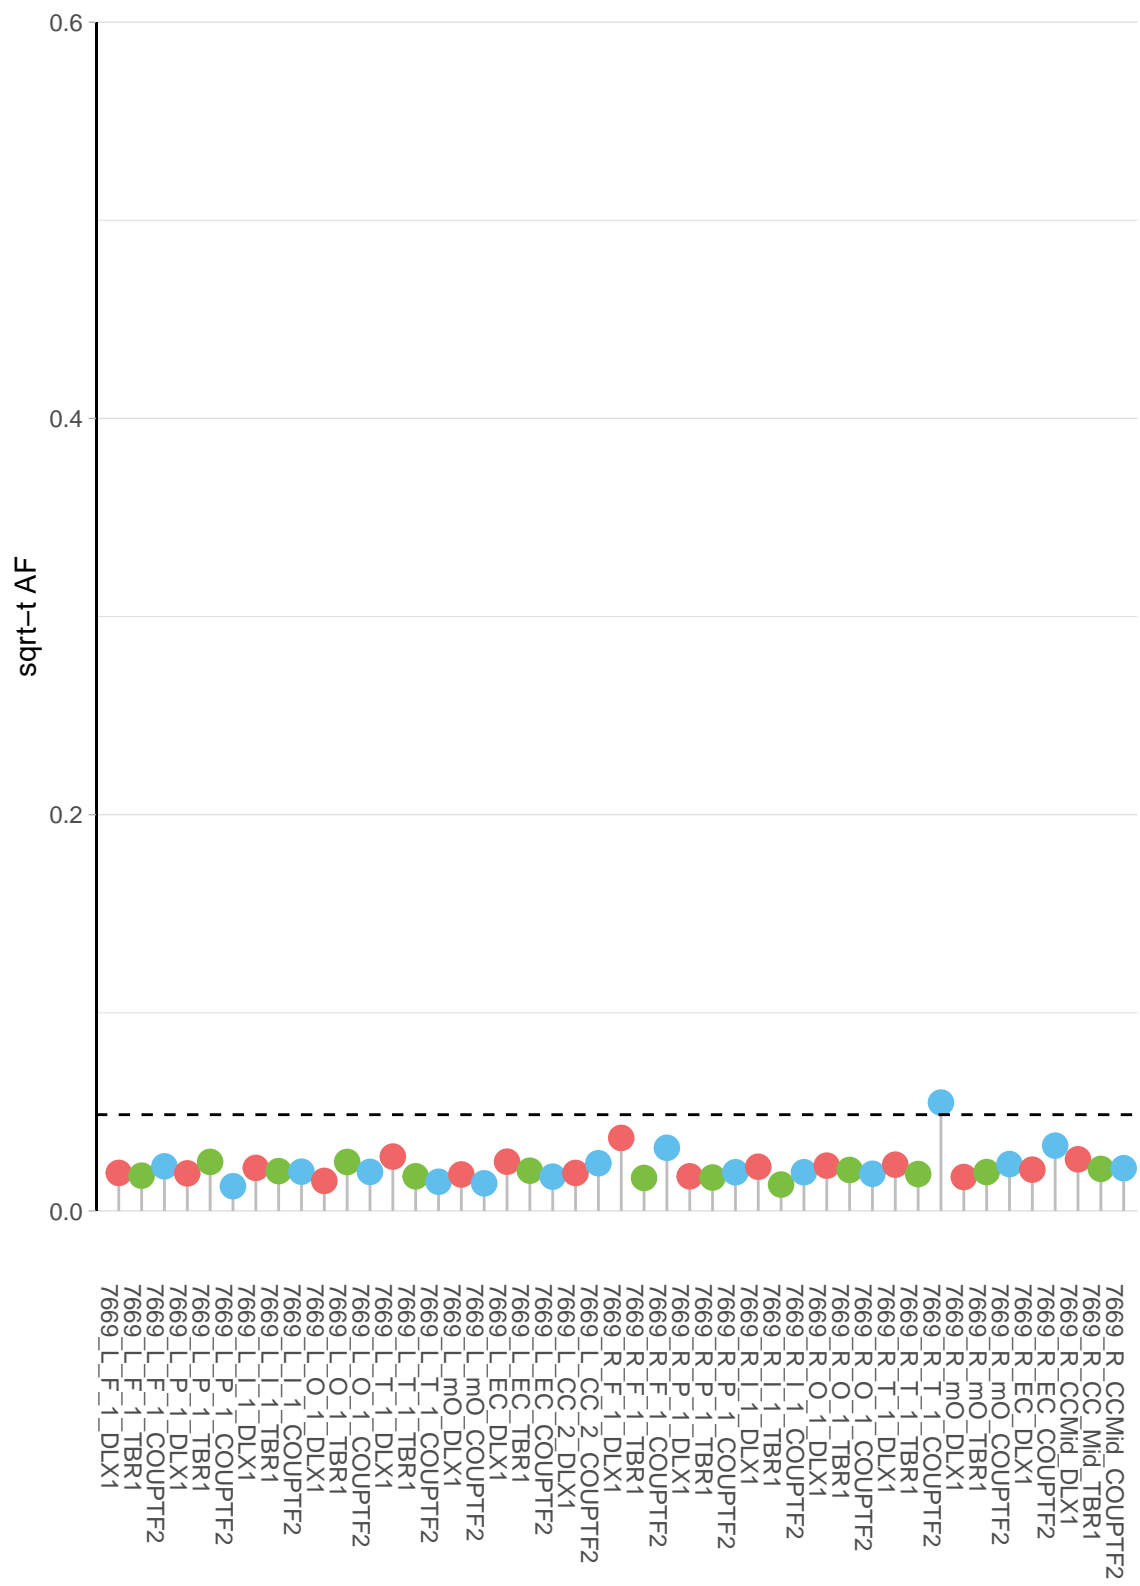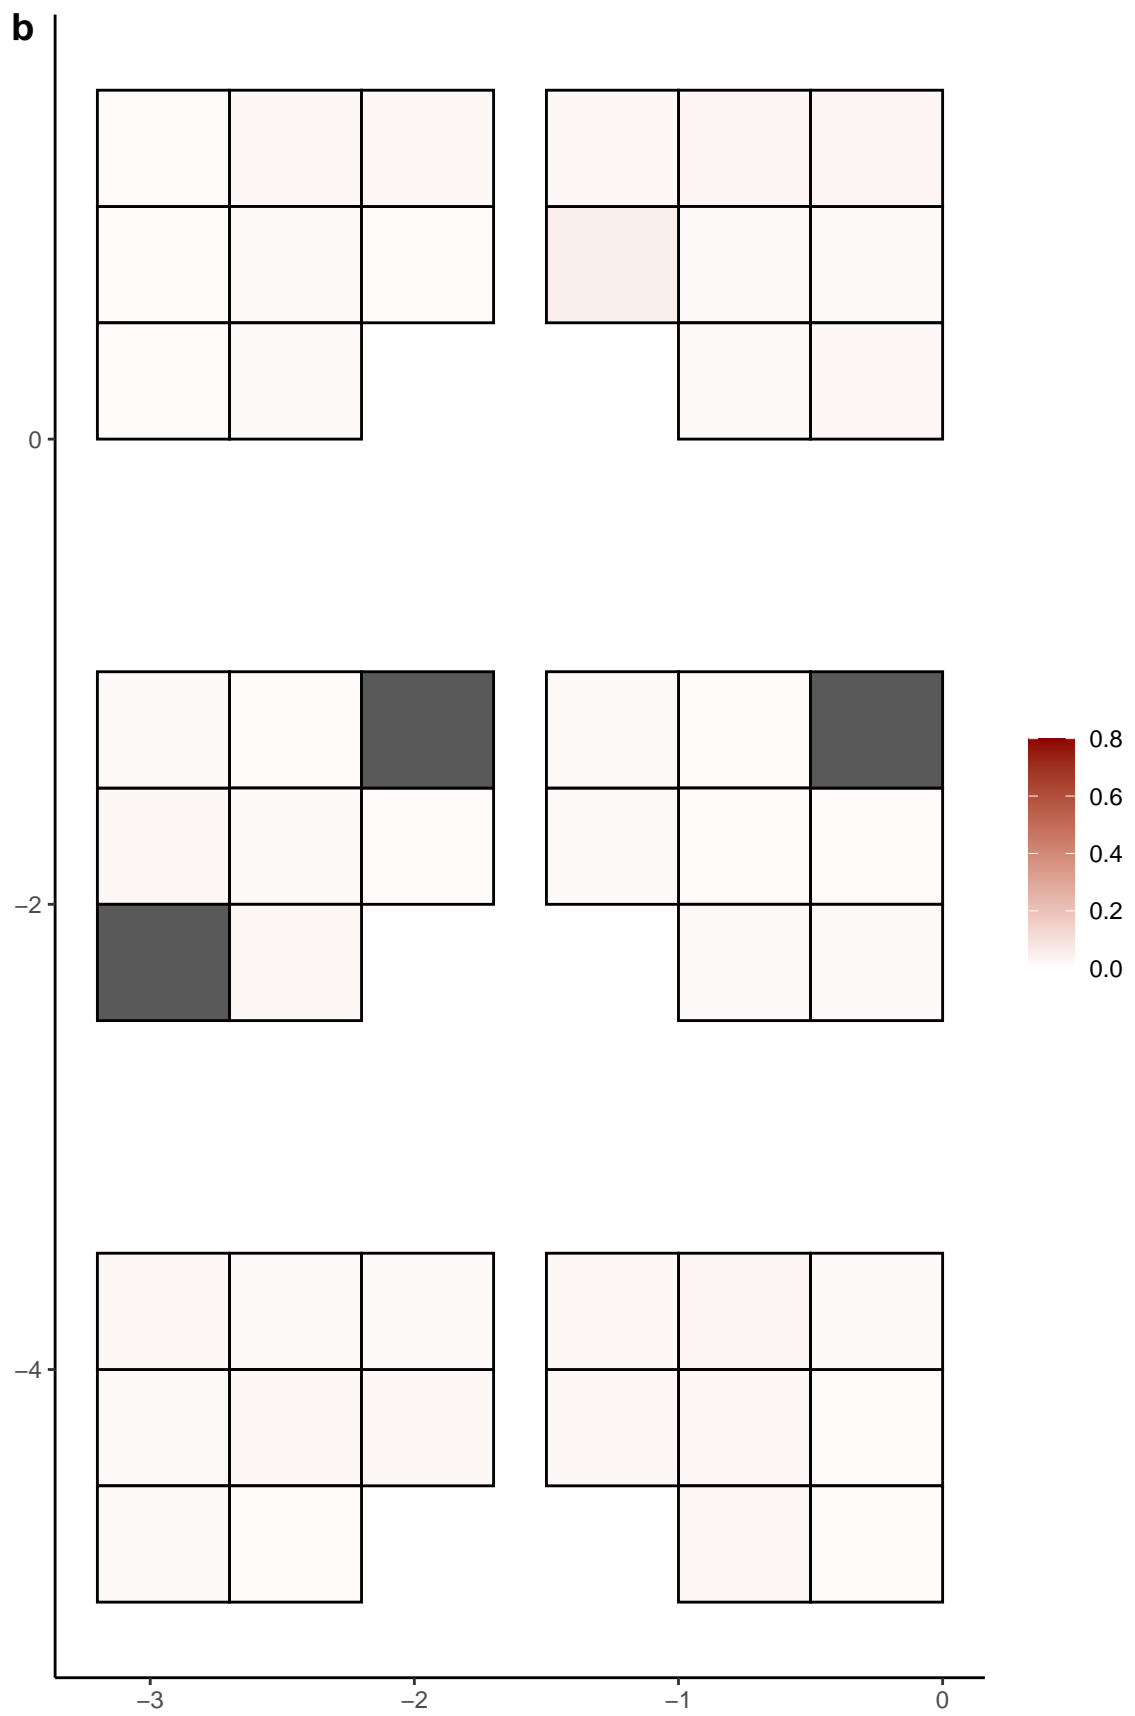

**a** ID05 15-81097594-T-A

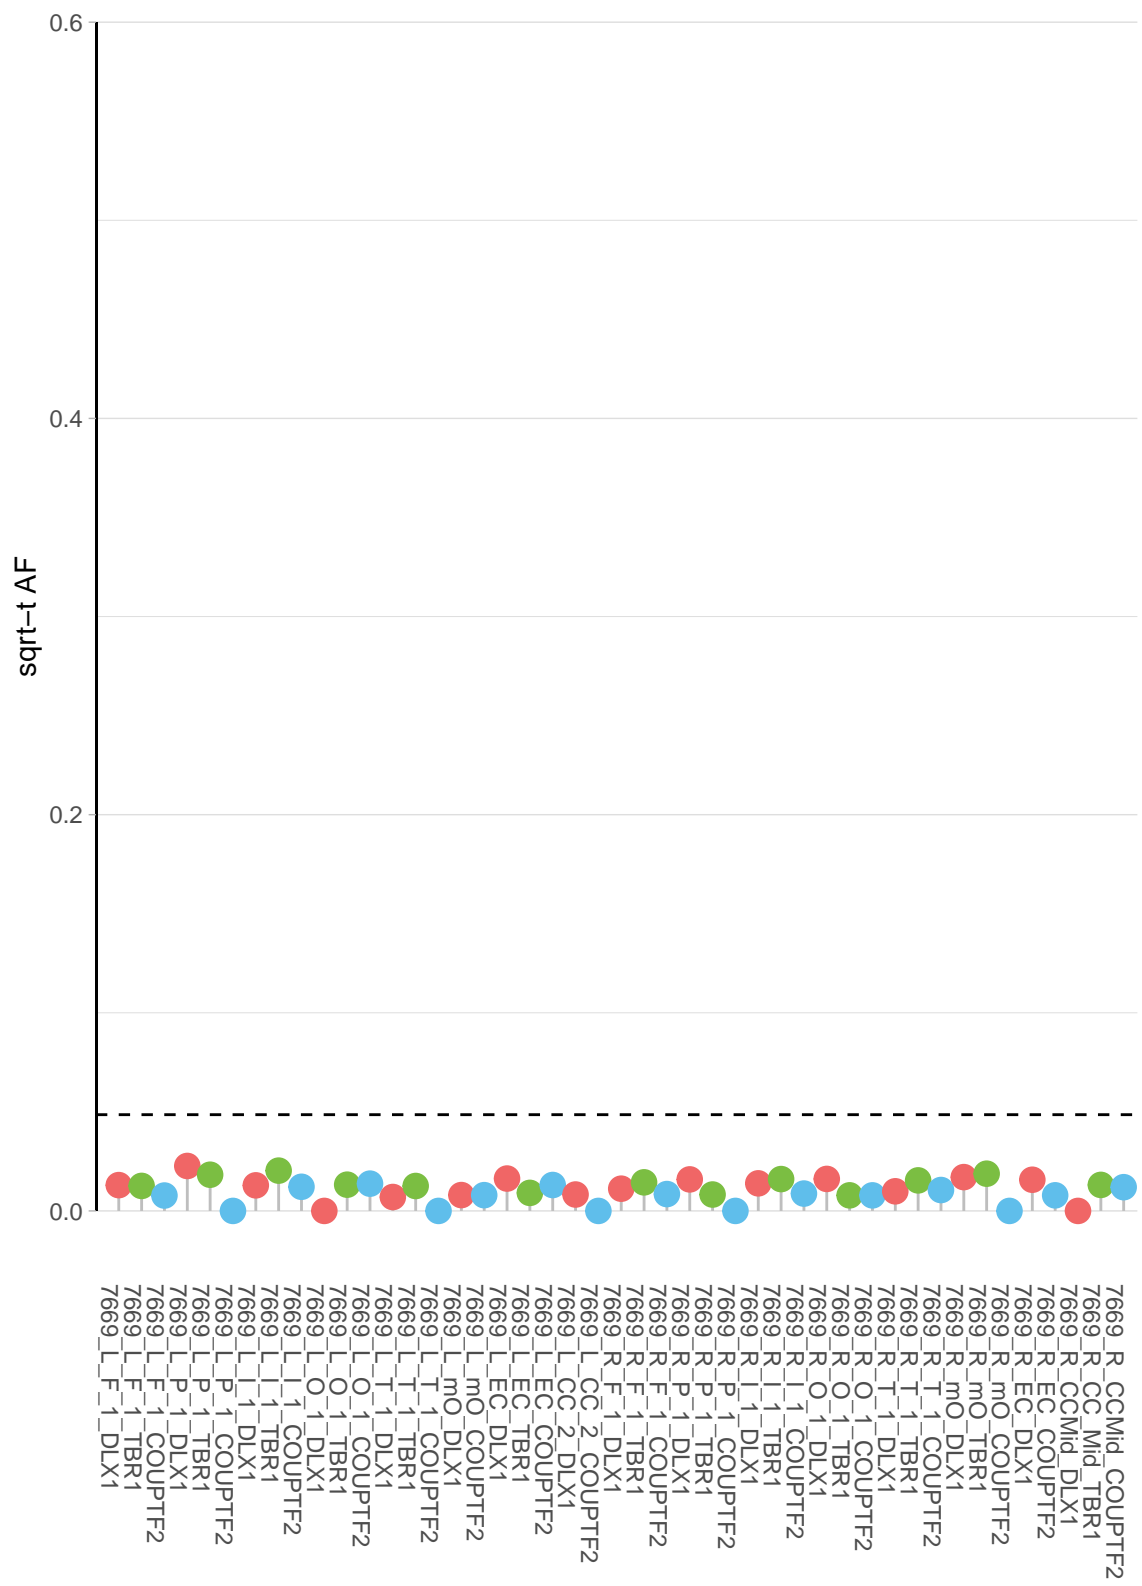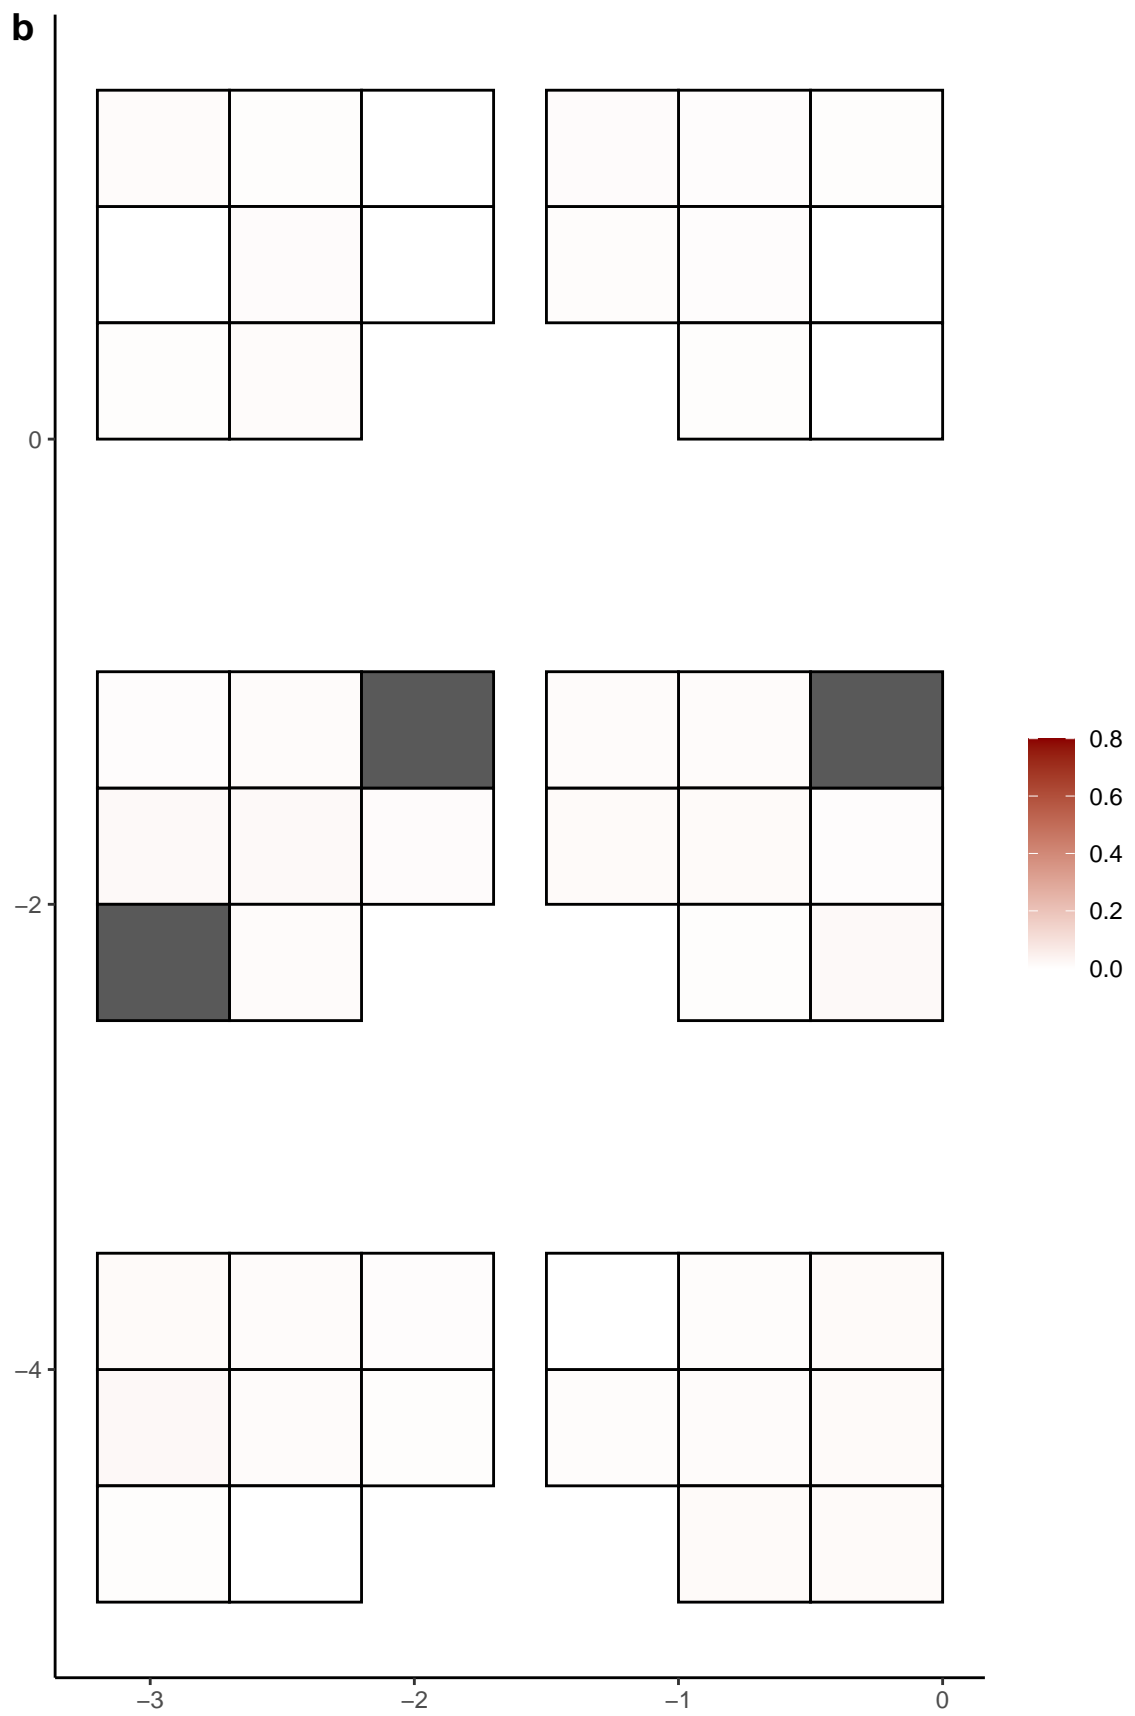

**a** ID05 15-82103153-G-A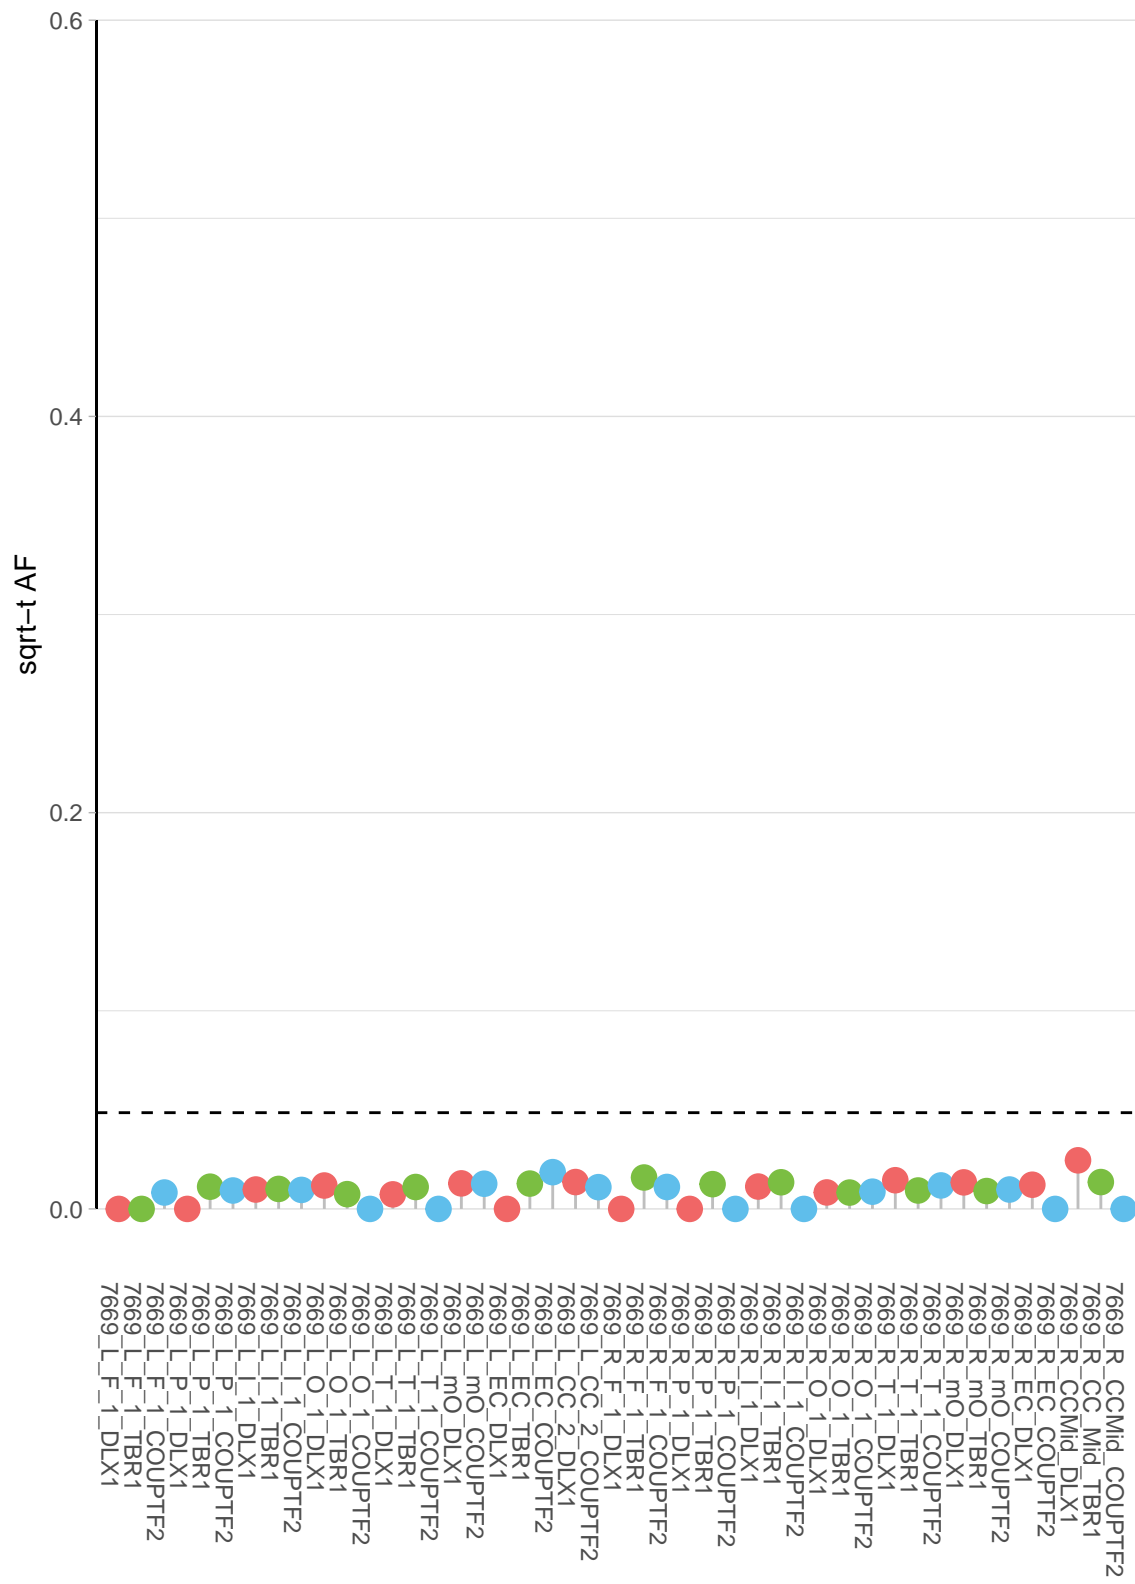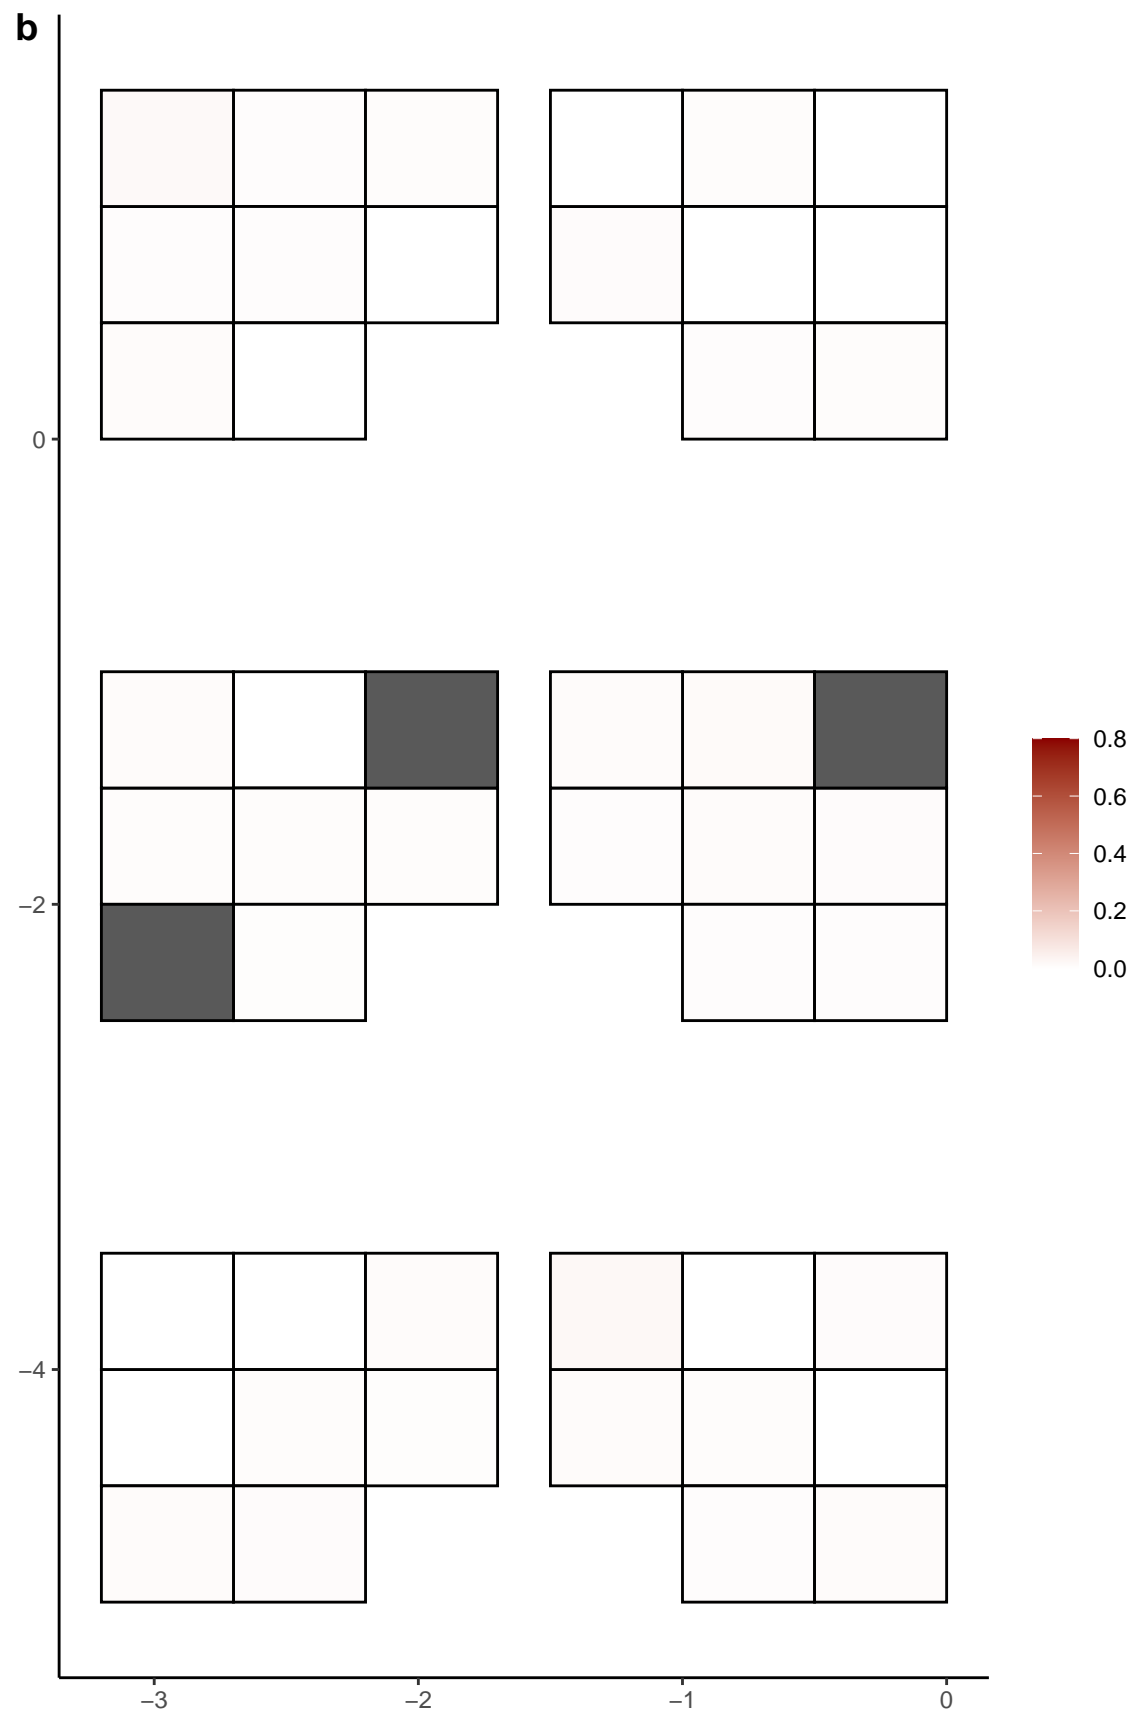

**a** ID05 15-89449716-CT-C

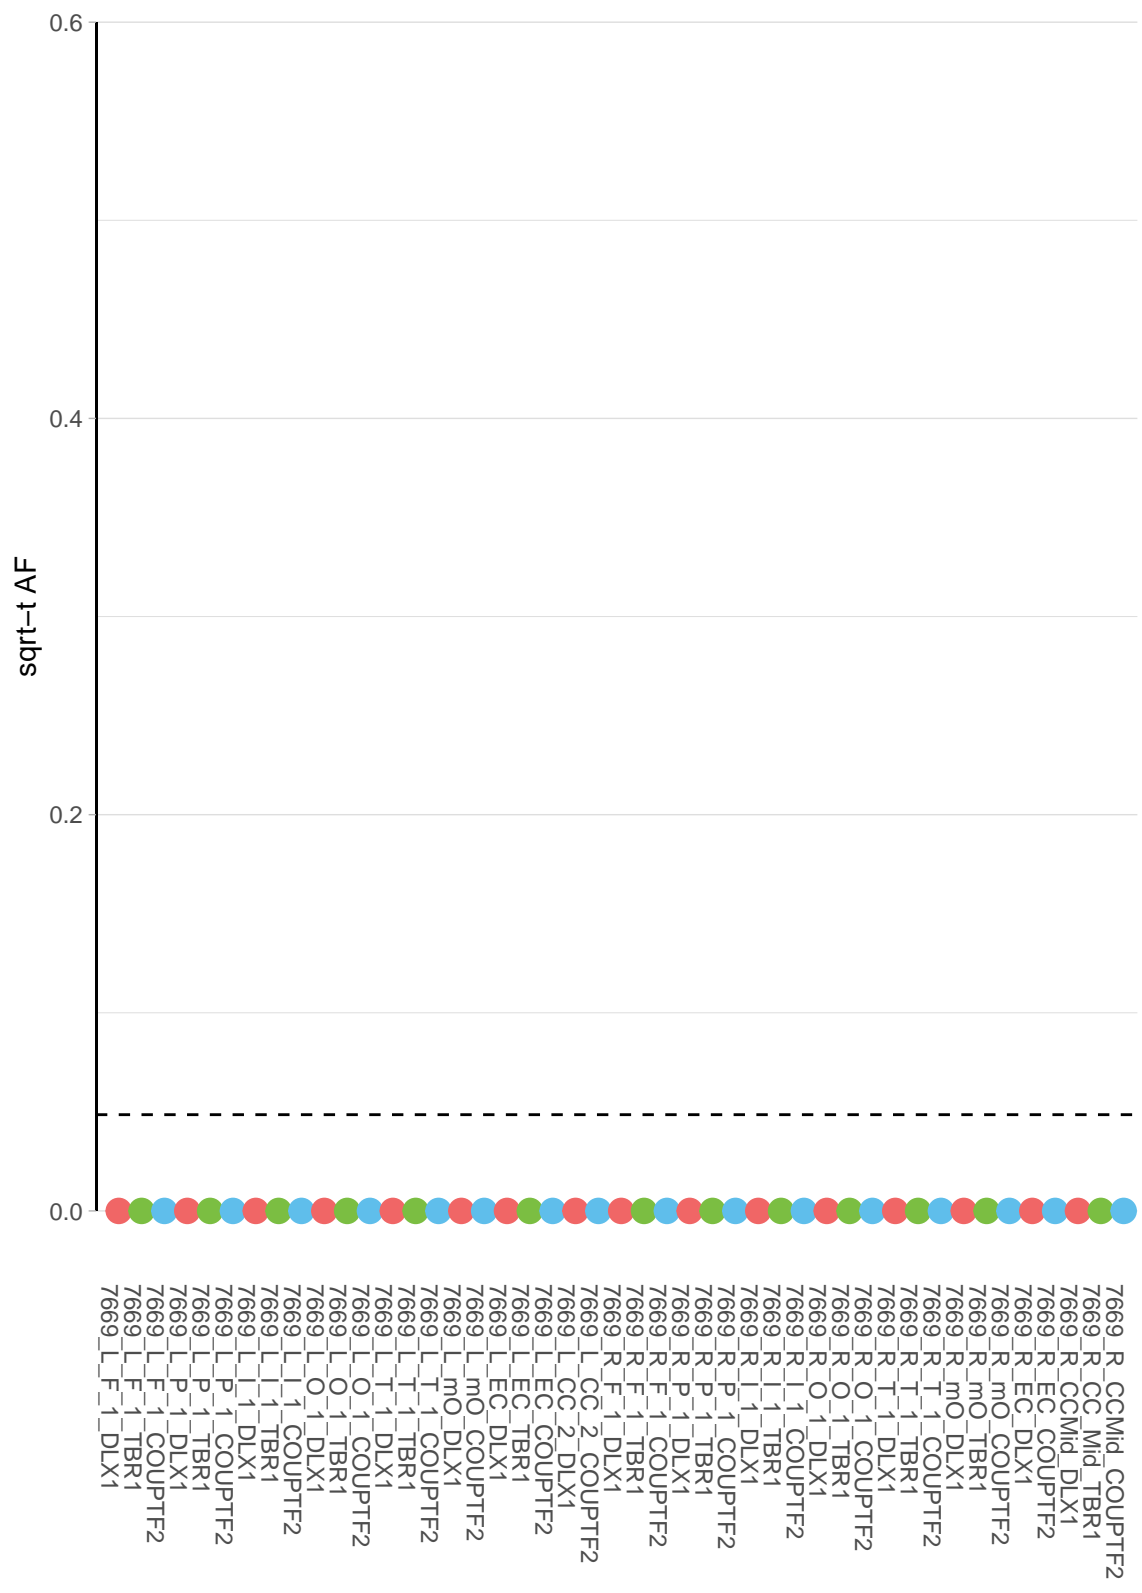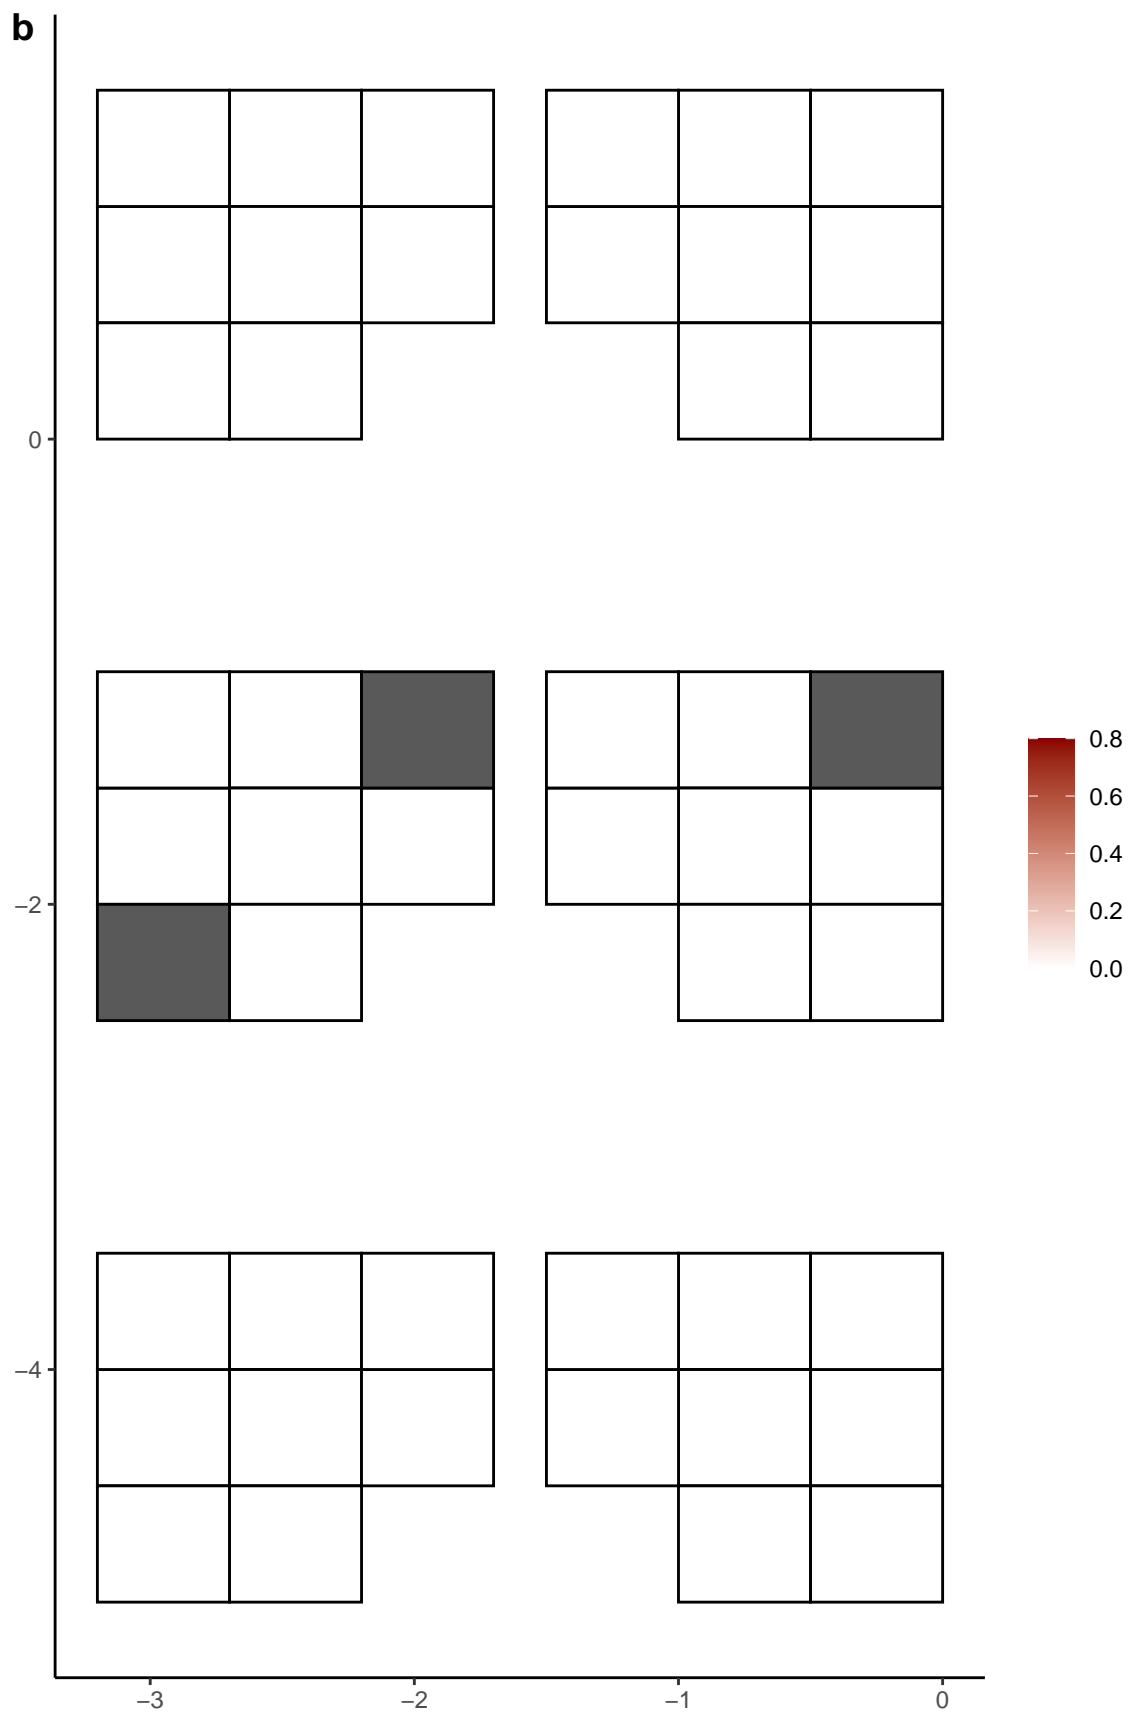



**a** ID05 15-94903736-C-T

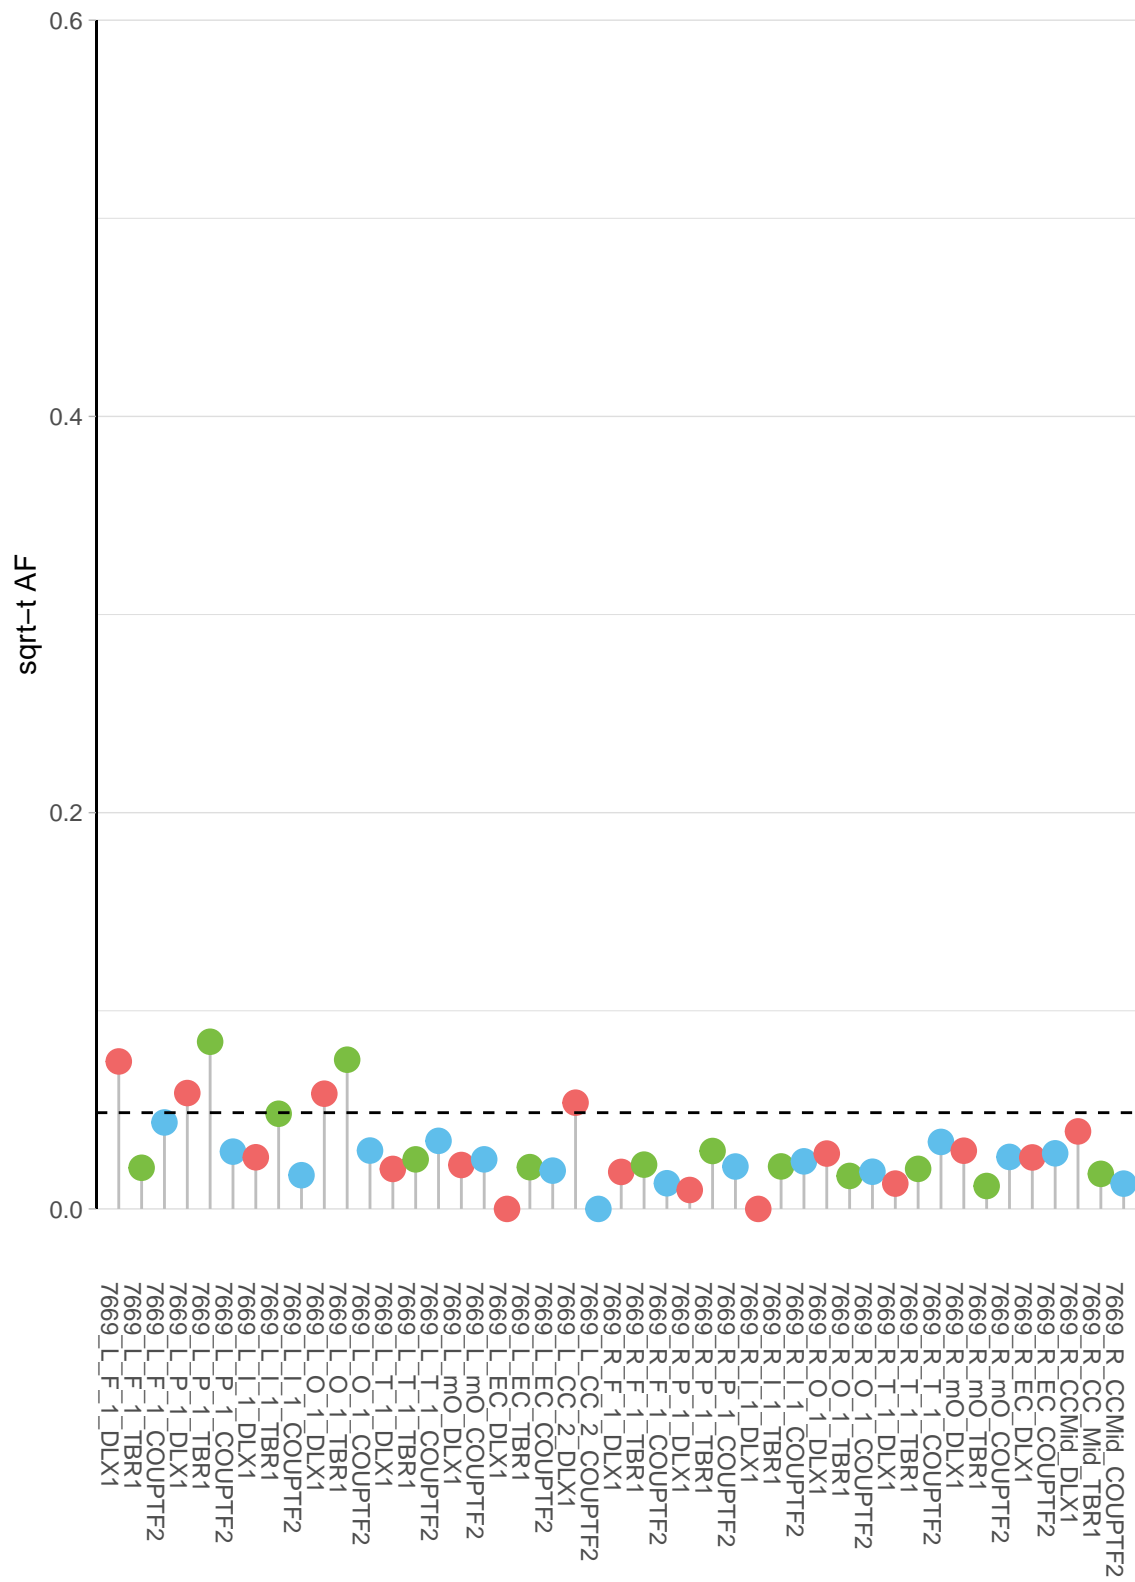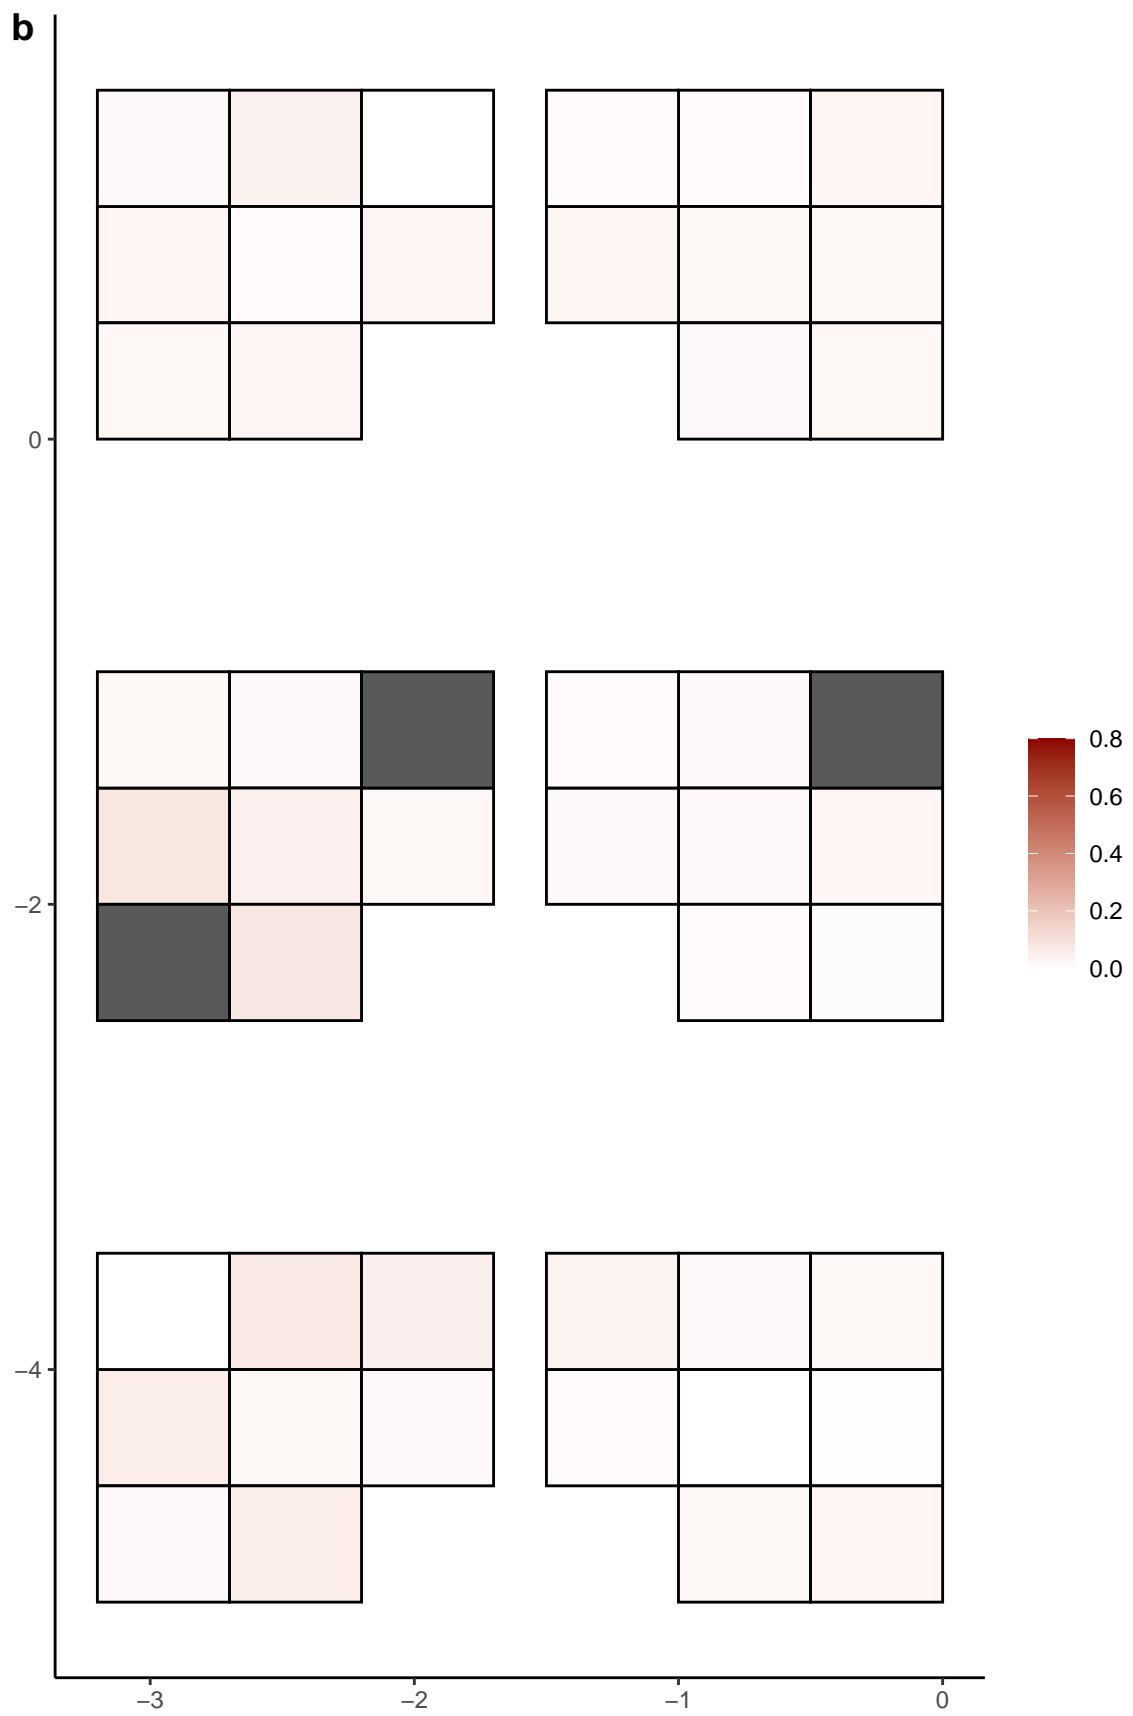

**a** ID05 15-95374715-A-T

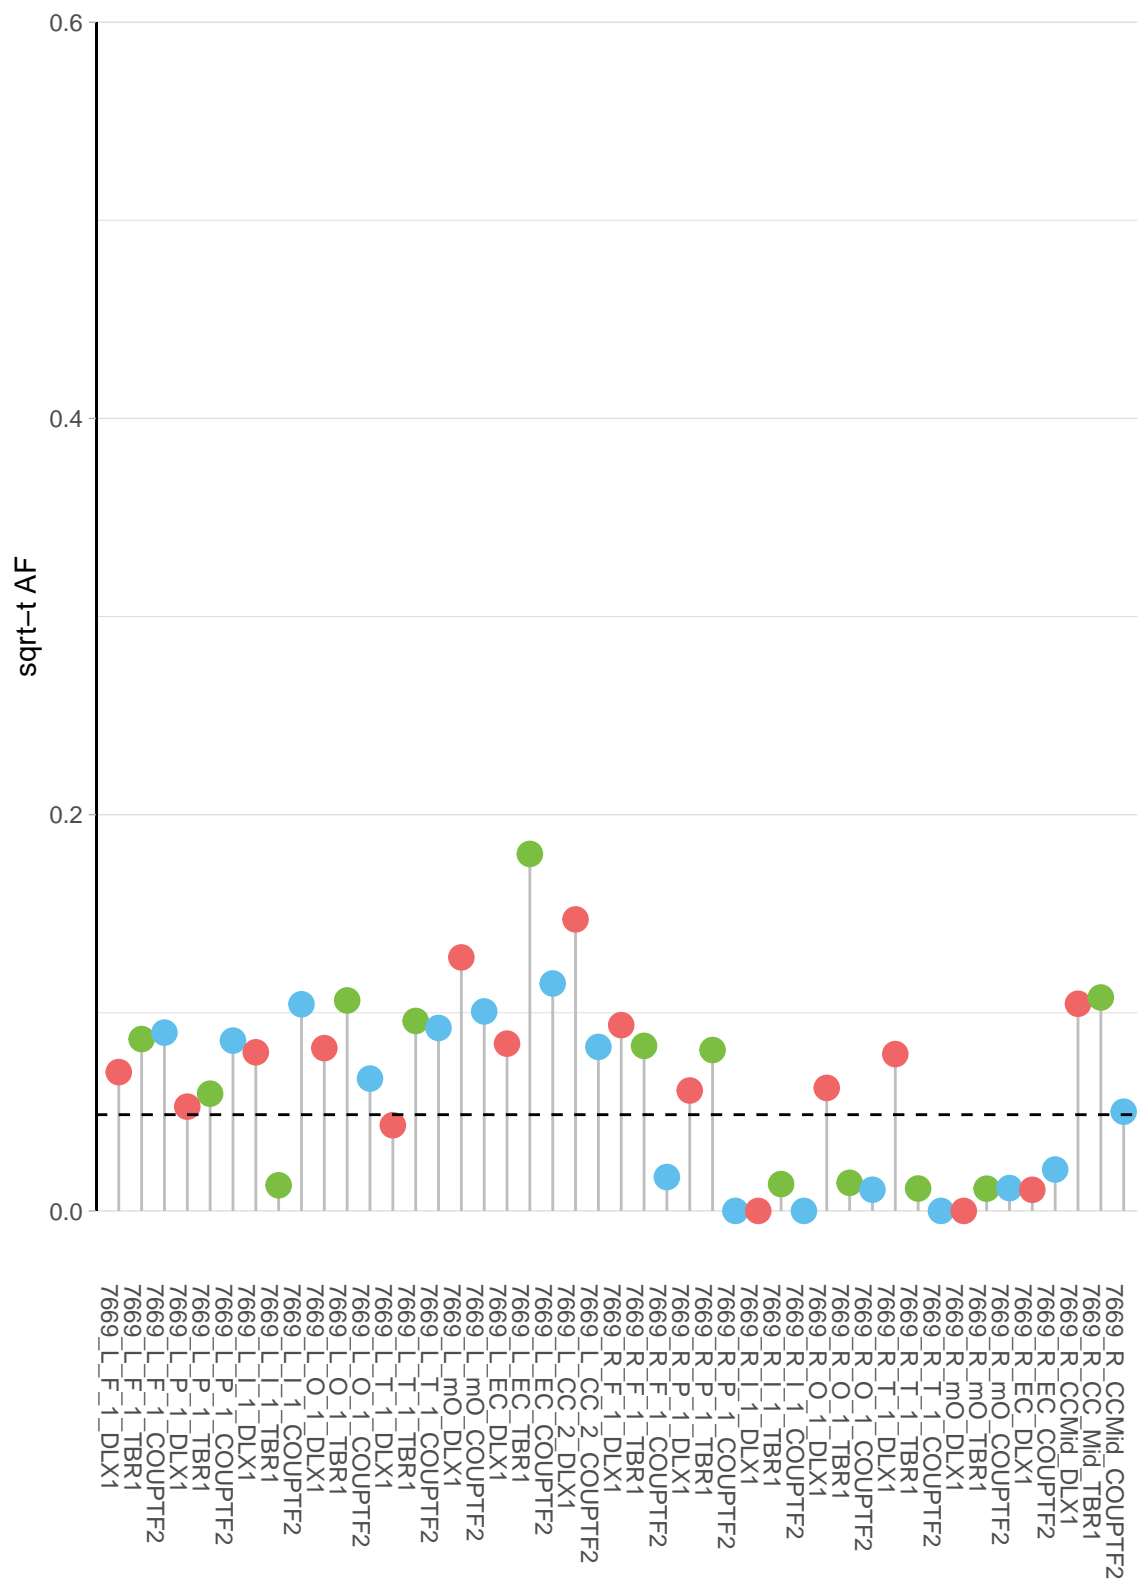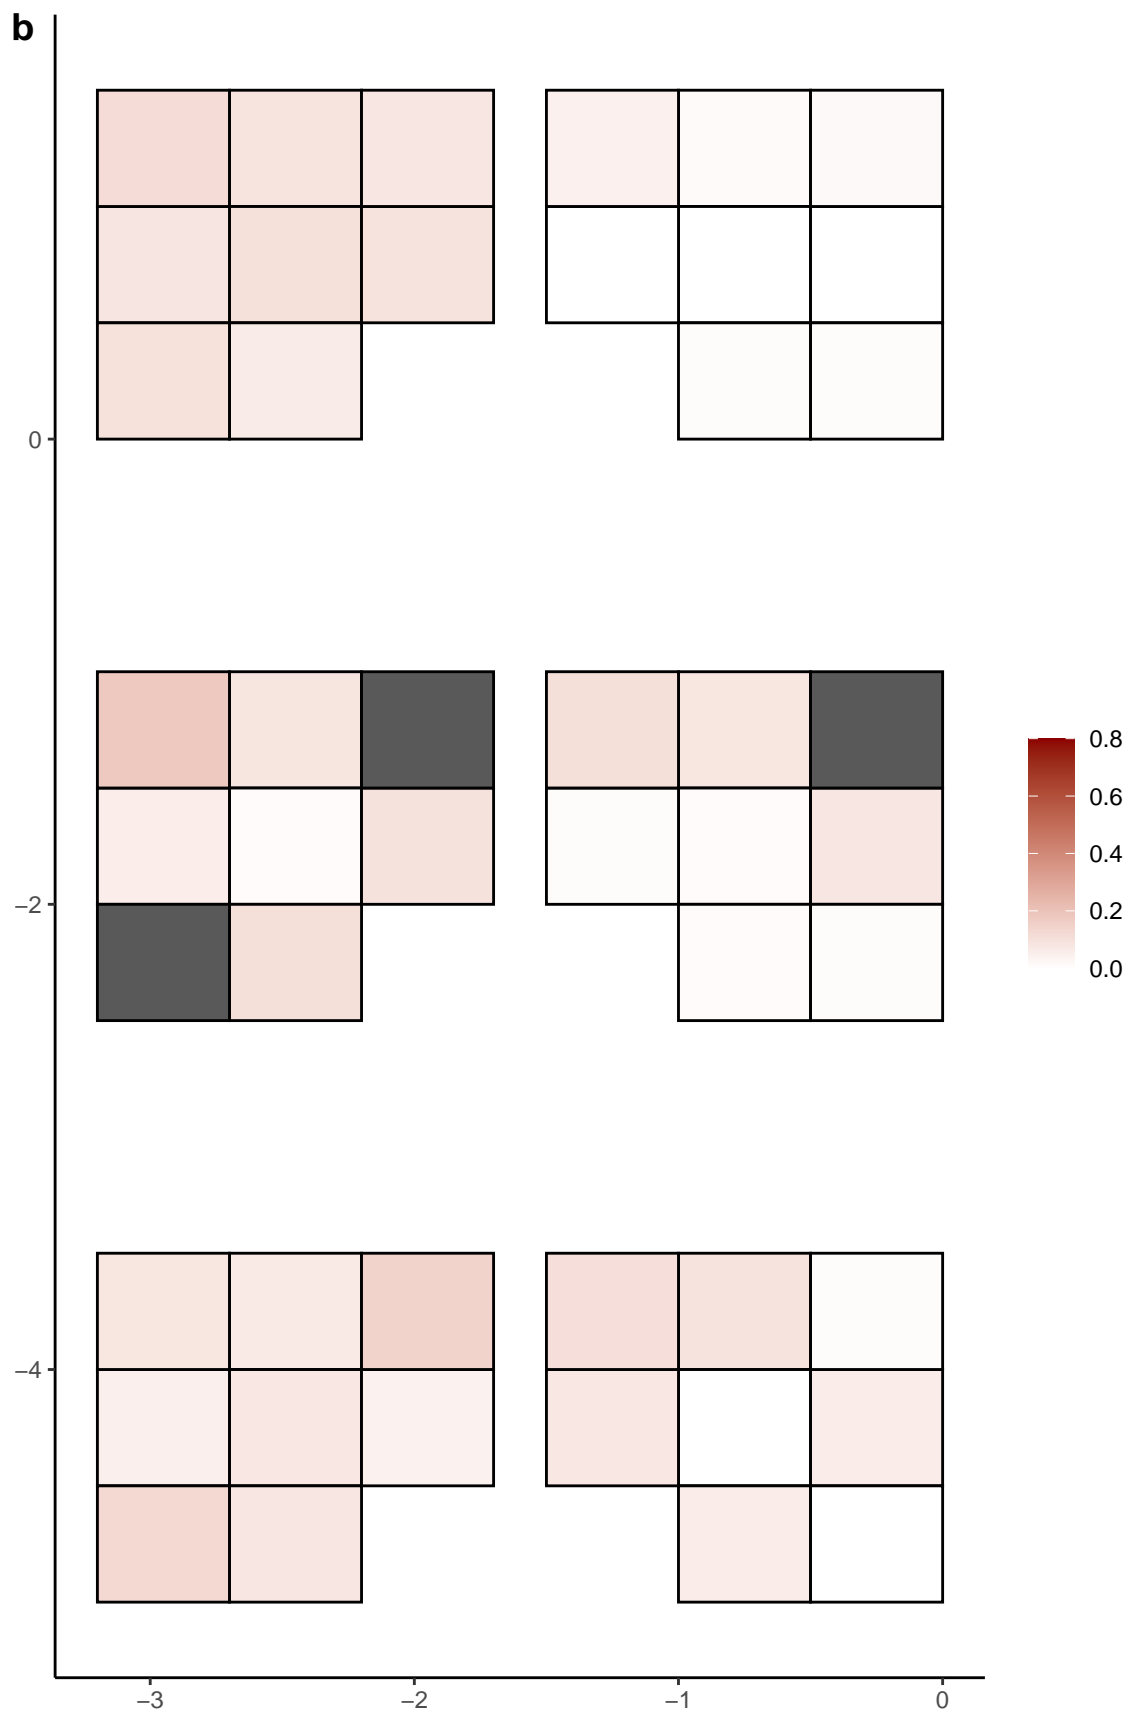



**a** ID05 15-95789506-C-T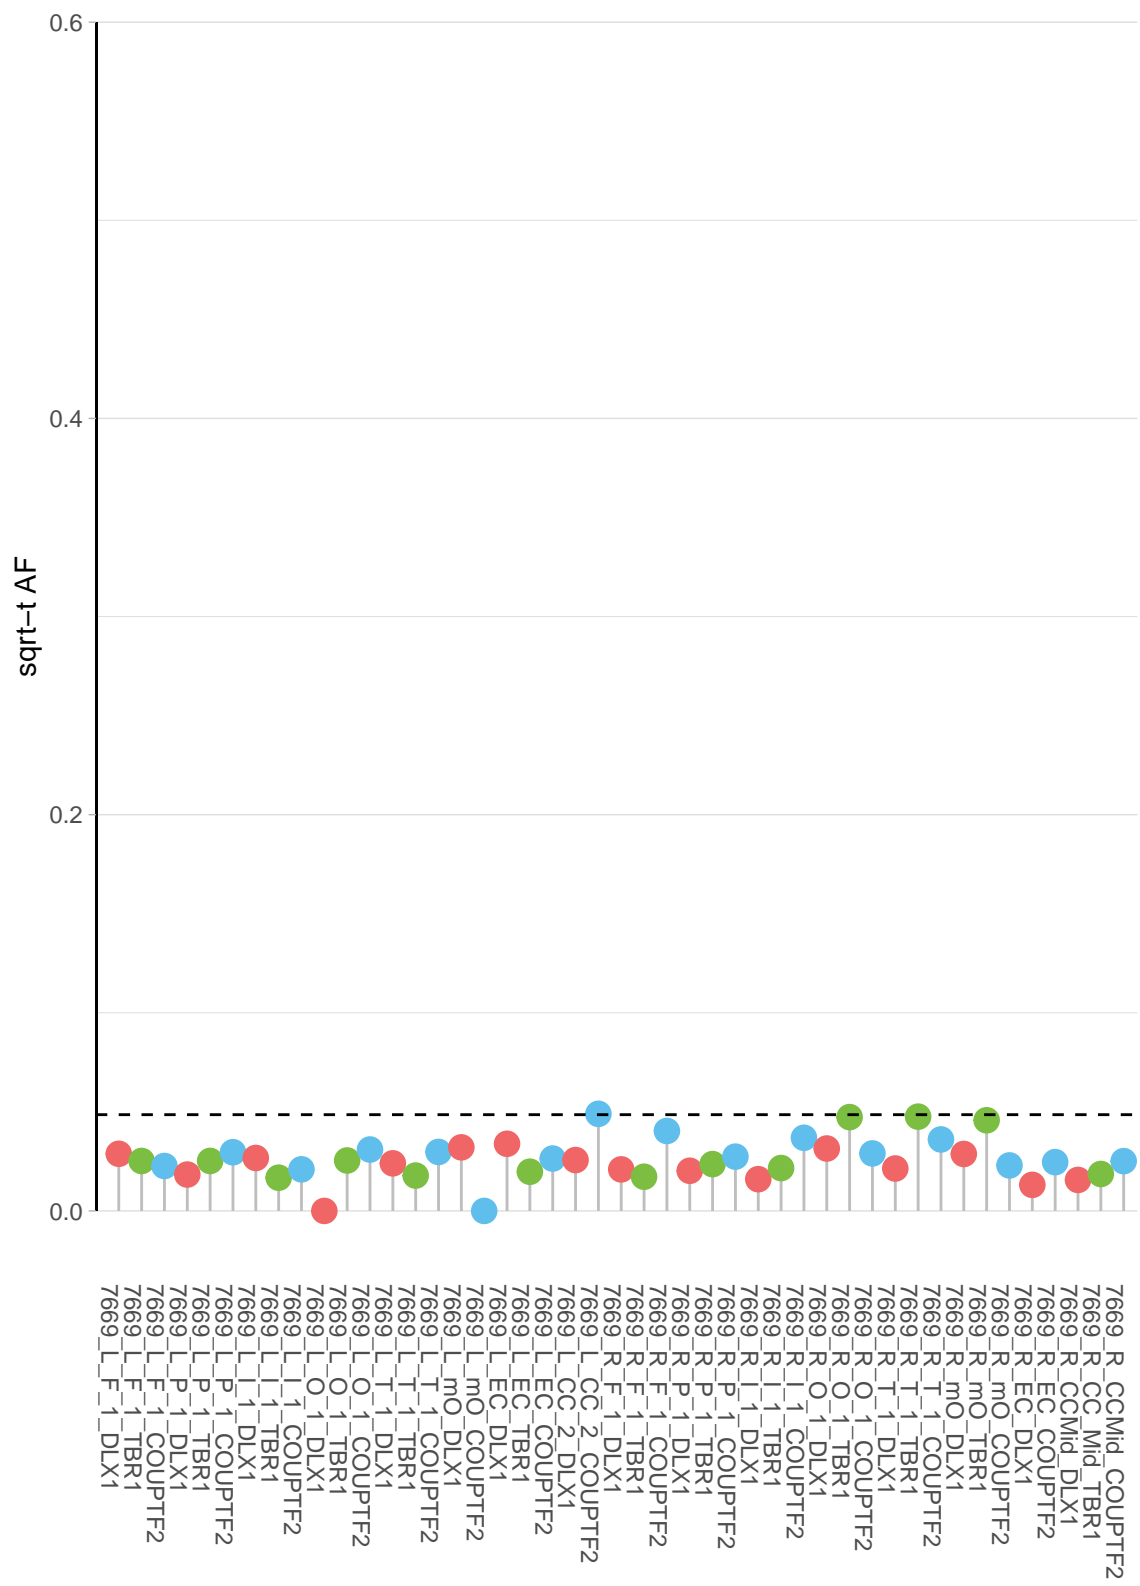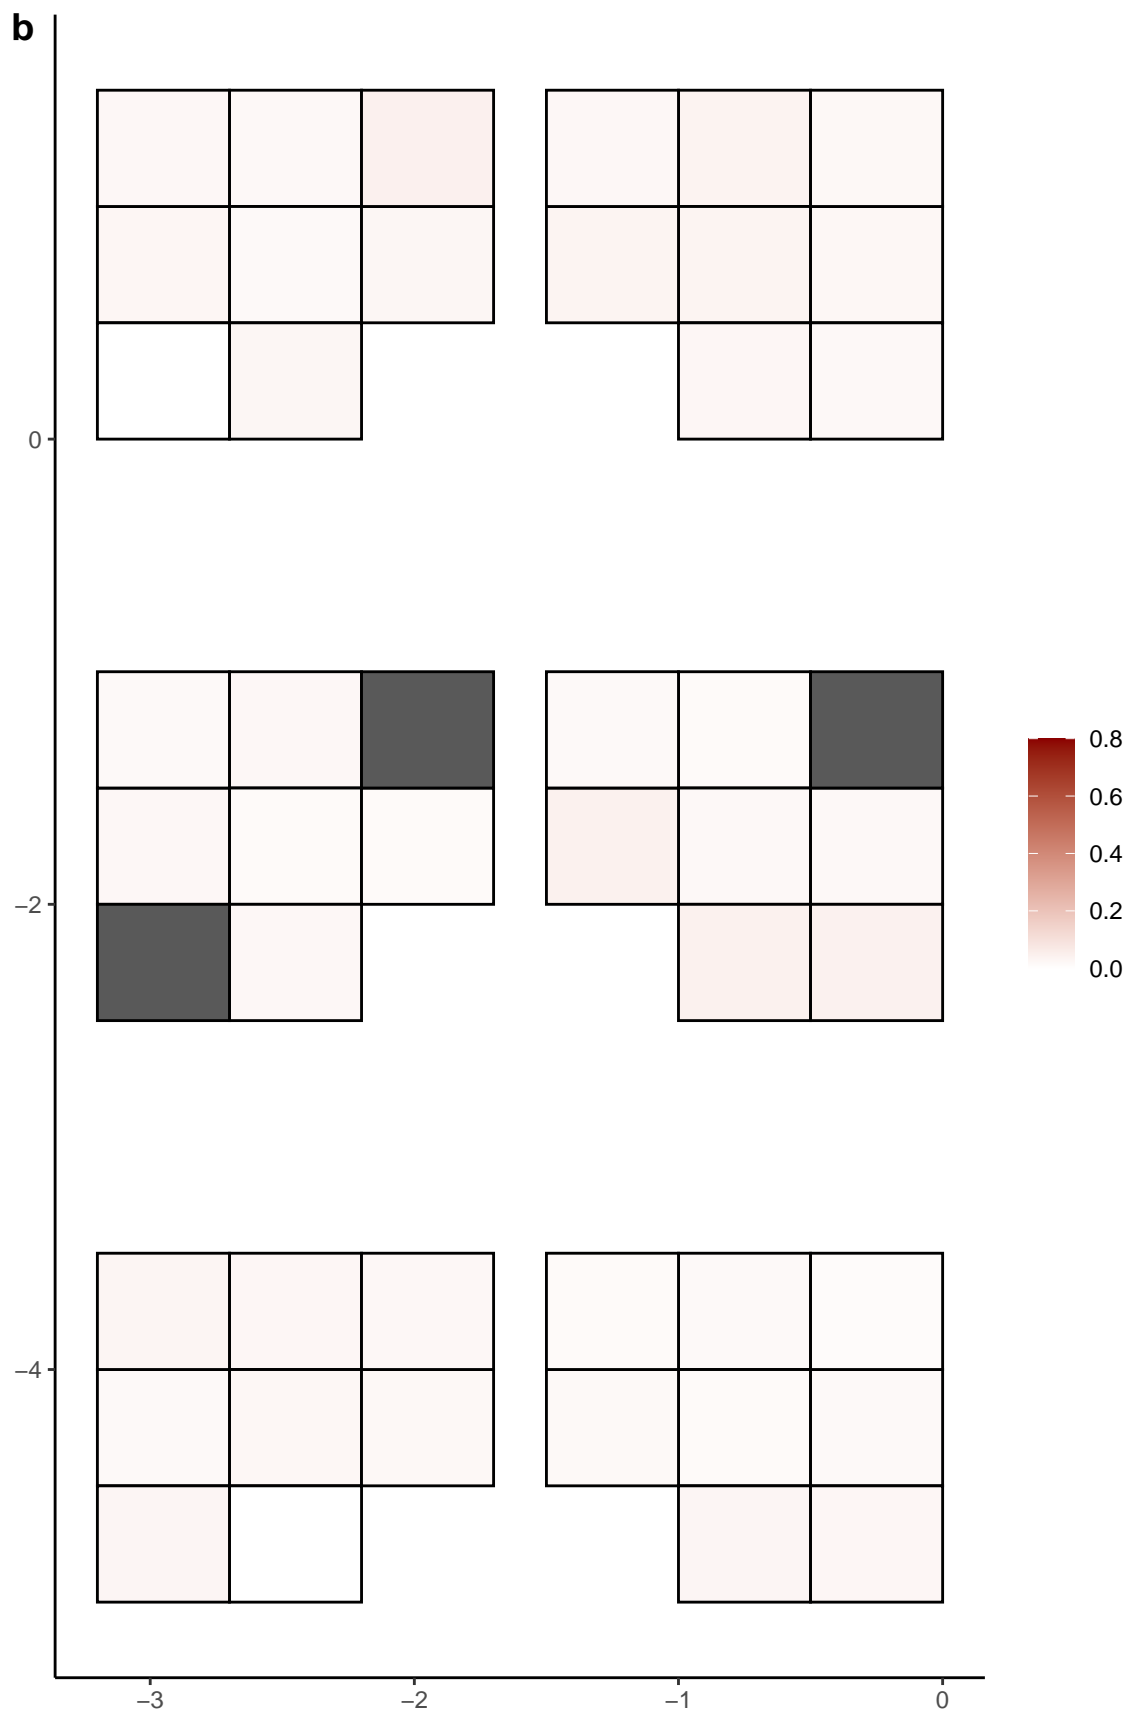

**a** ID05 15-95947987-C-G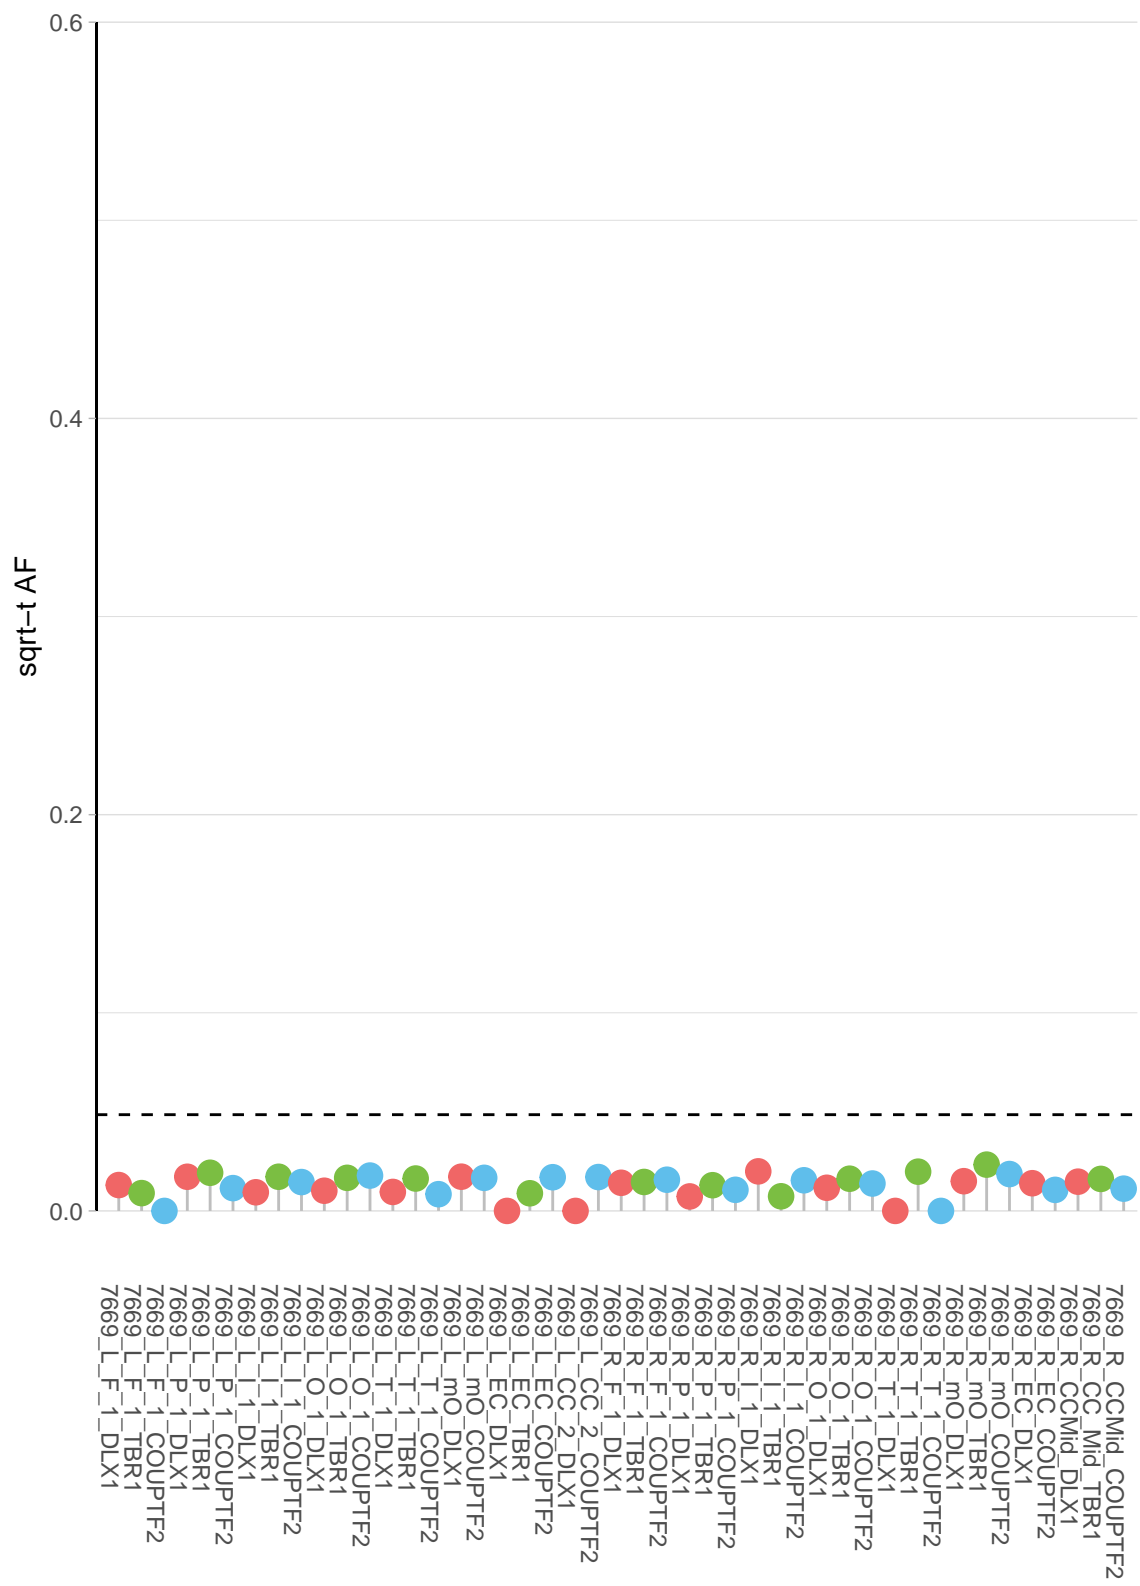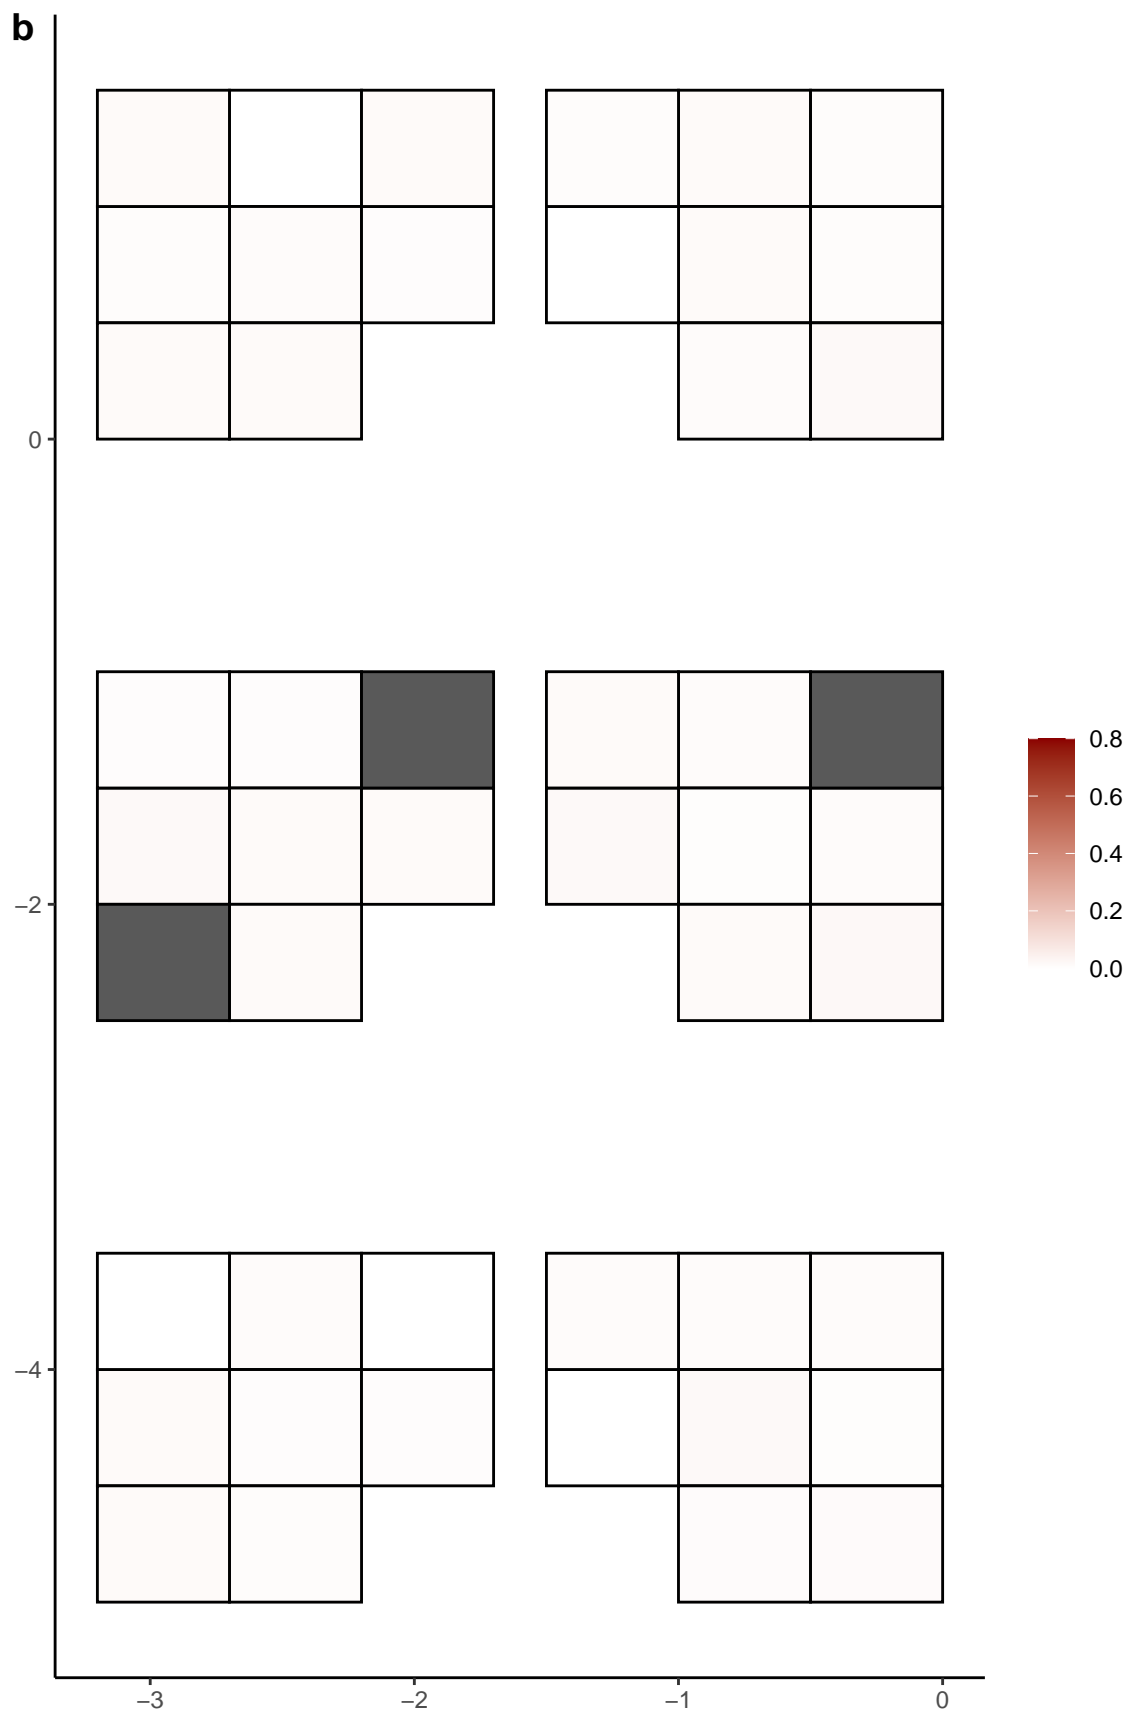

**a** ID05 16-22921756-C-A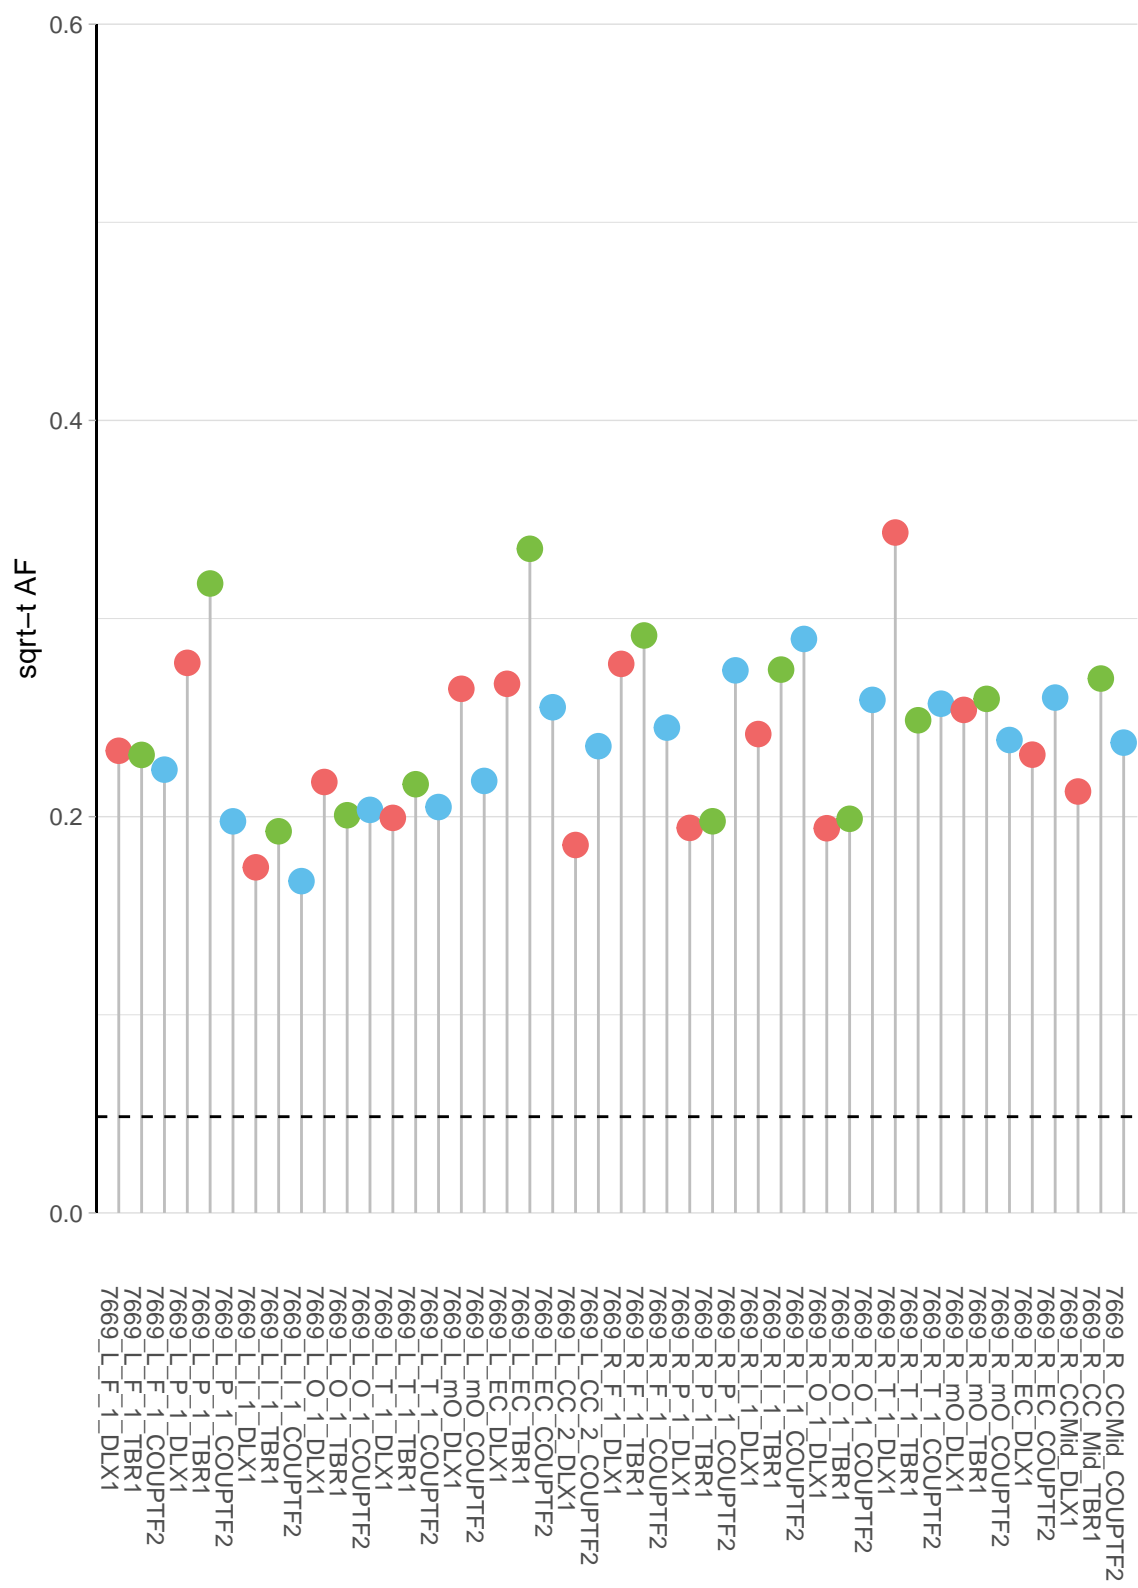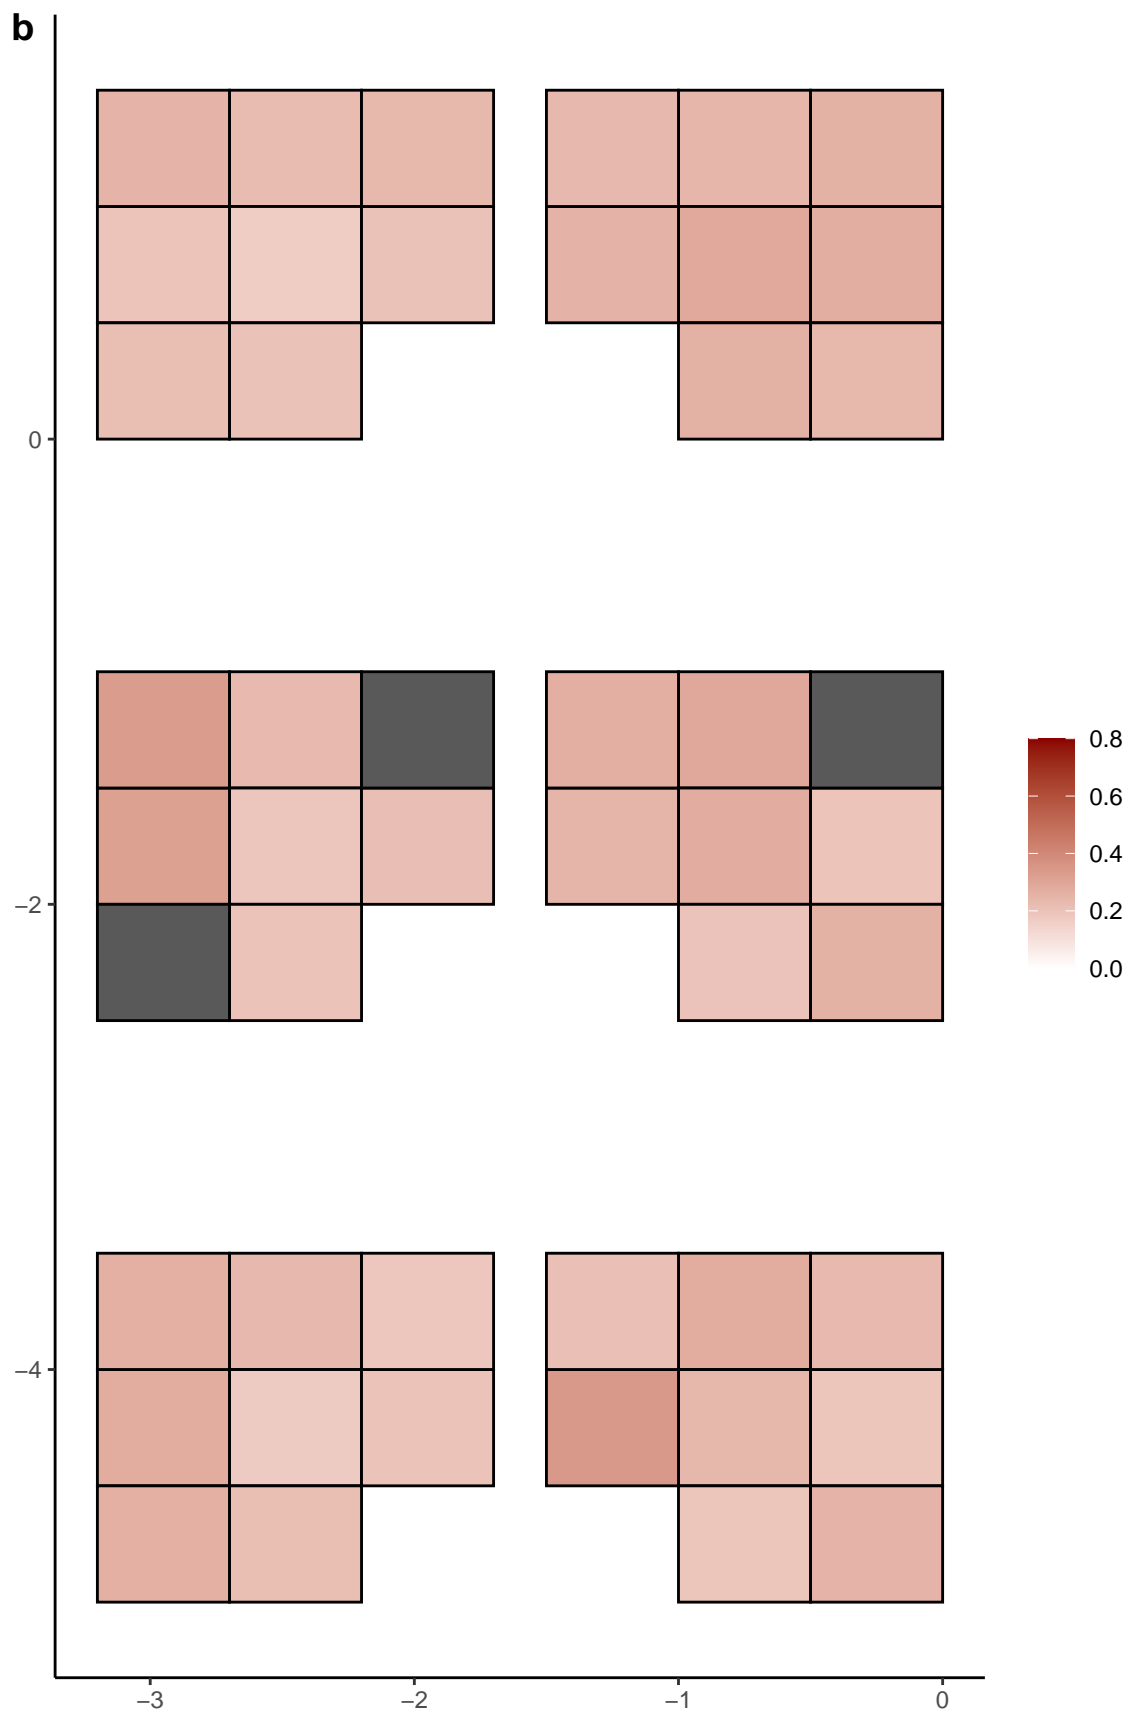

**a** ID05 16-24164513-T-C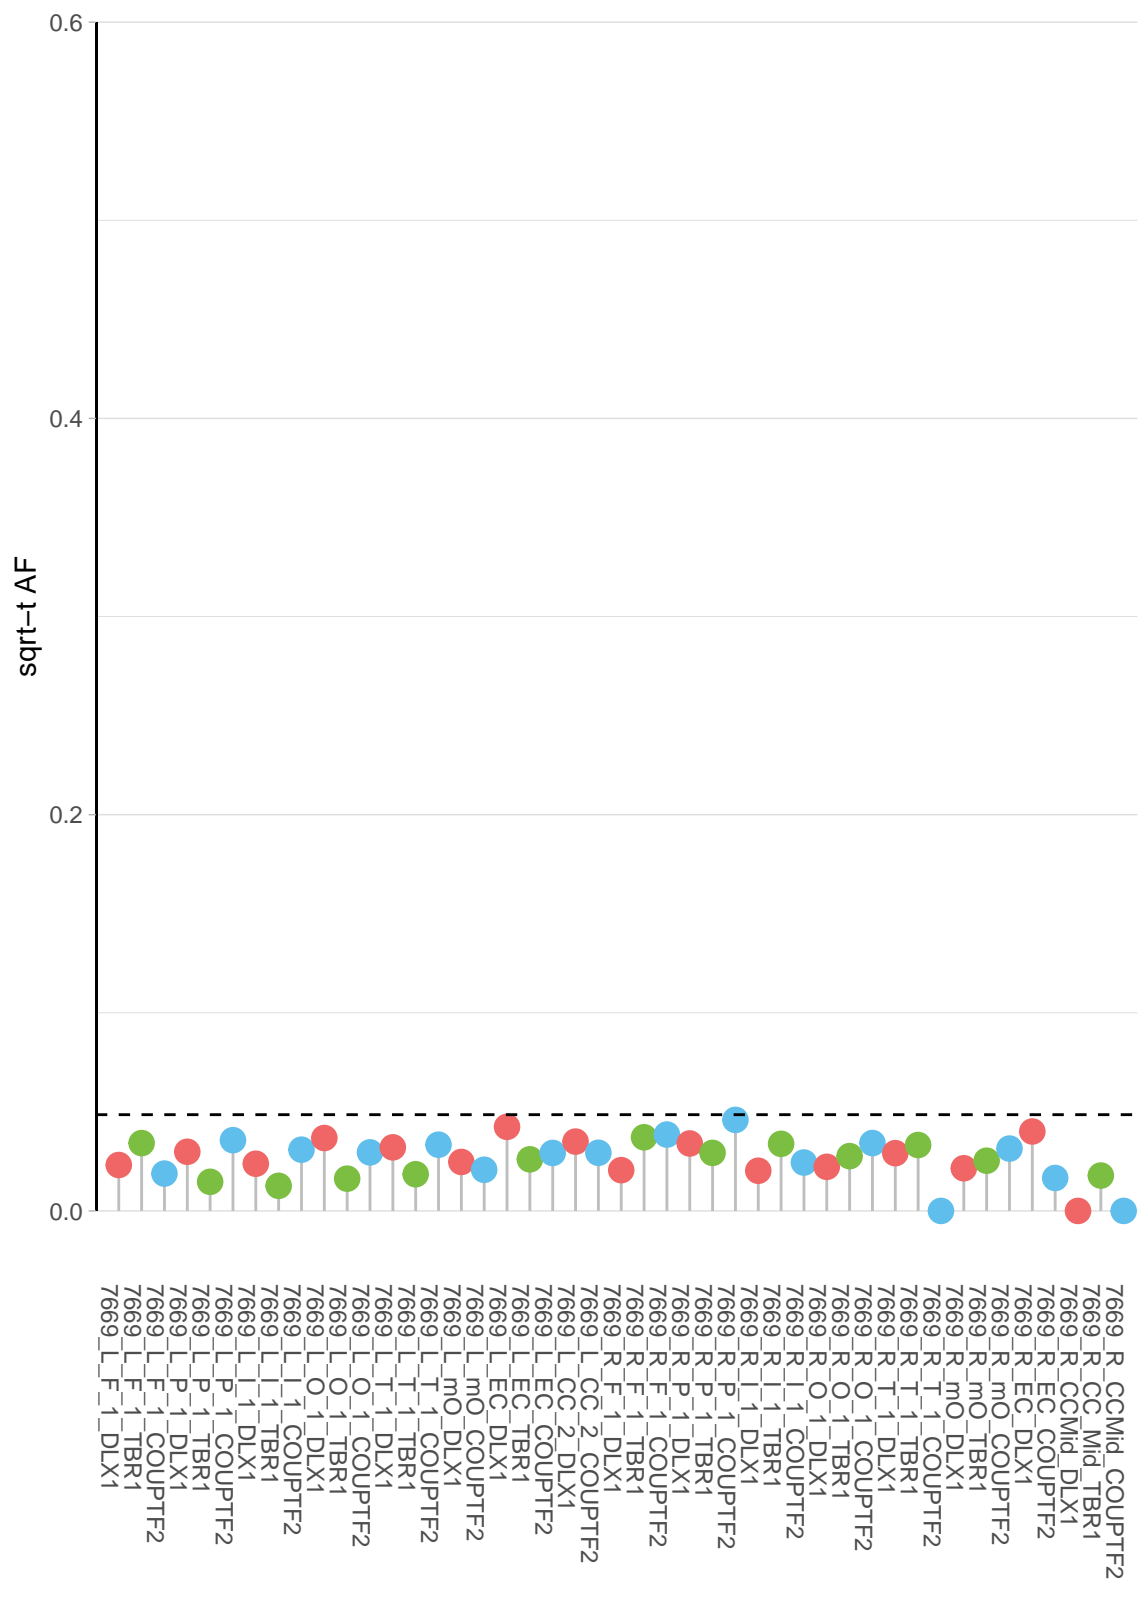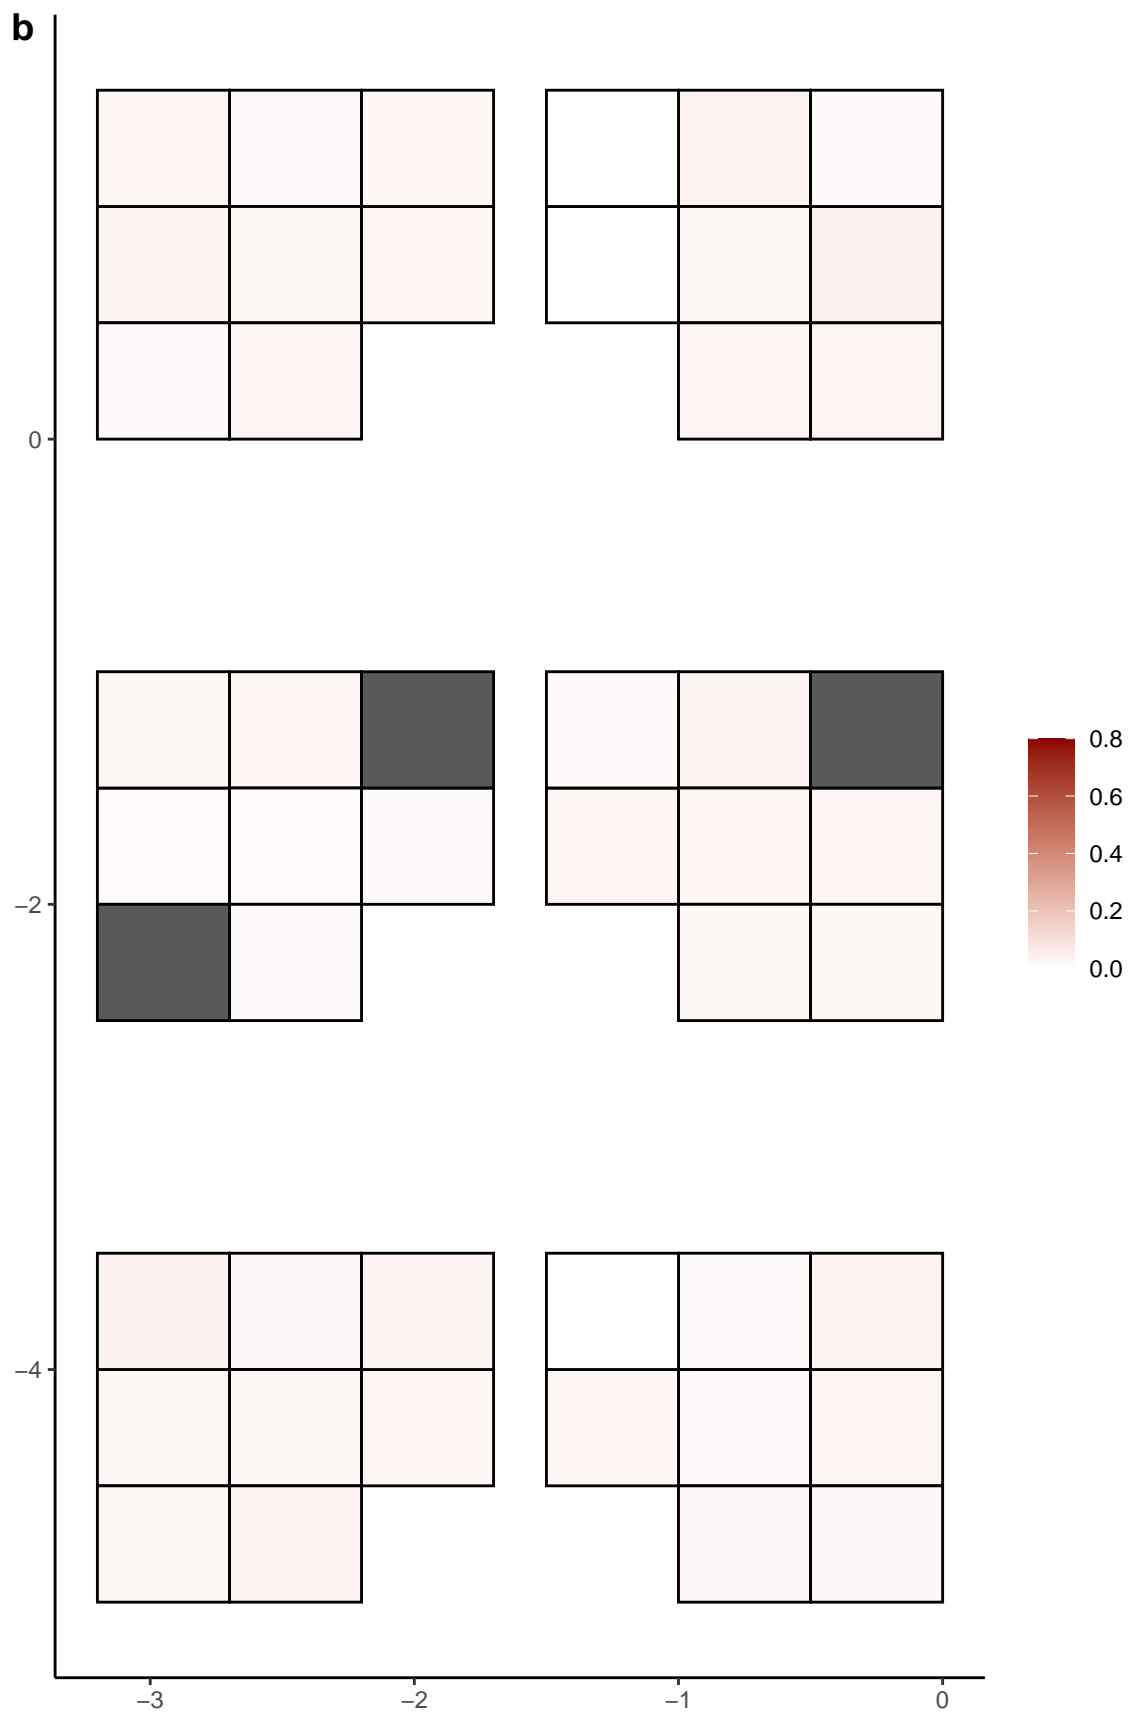

**a** ID05 16-4649206-C-T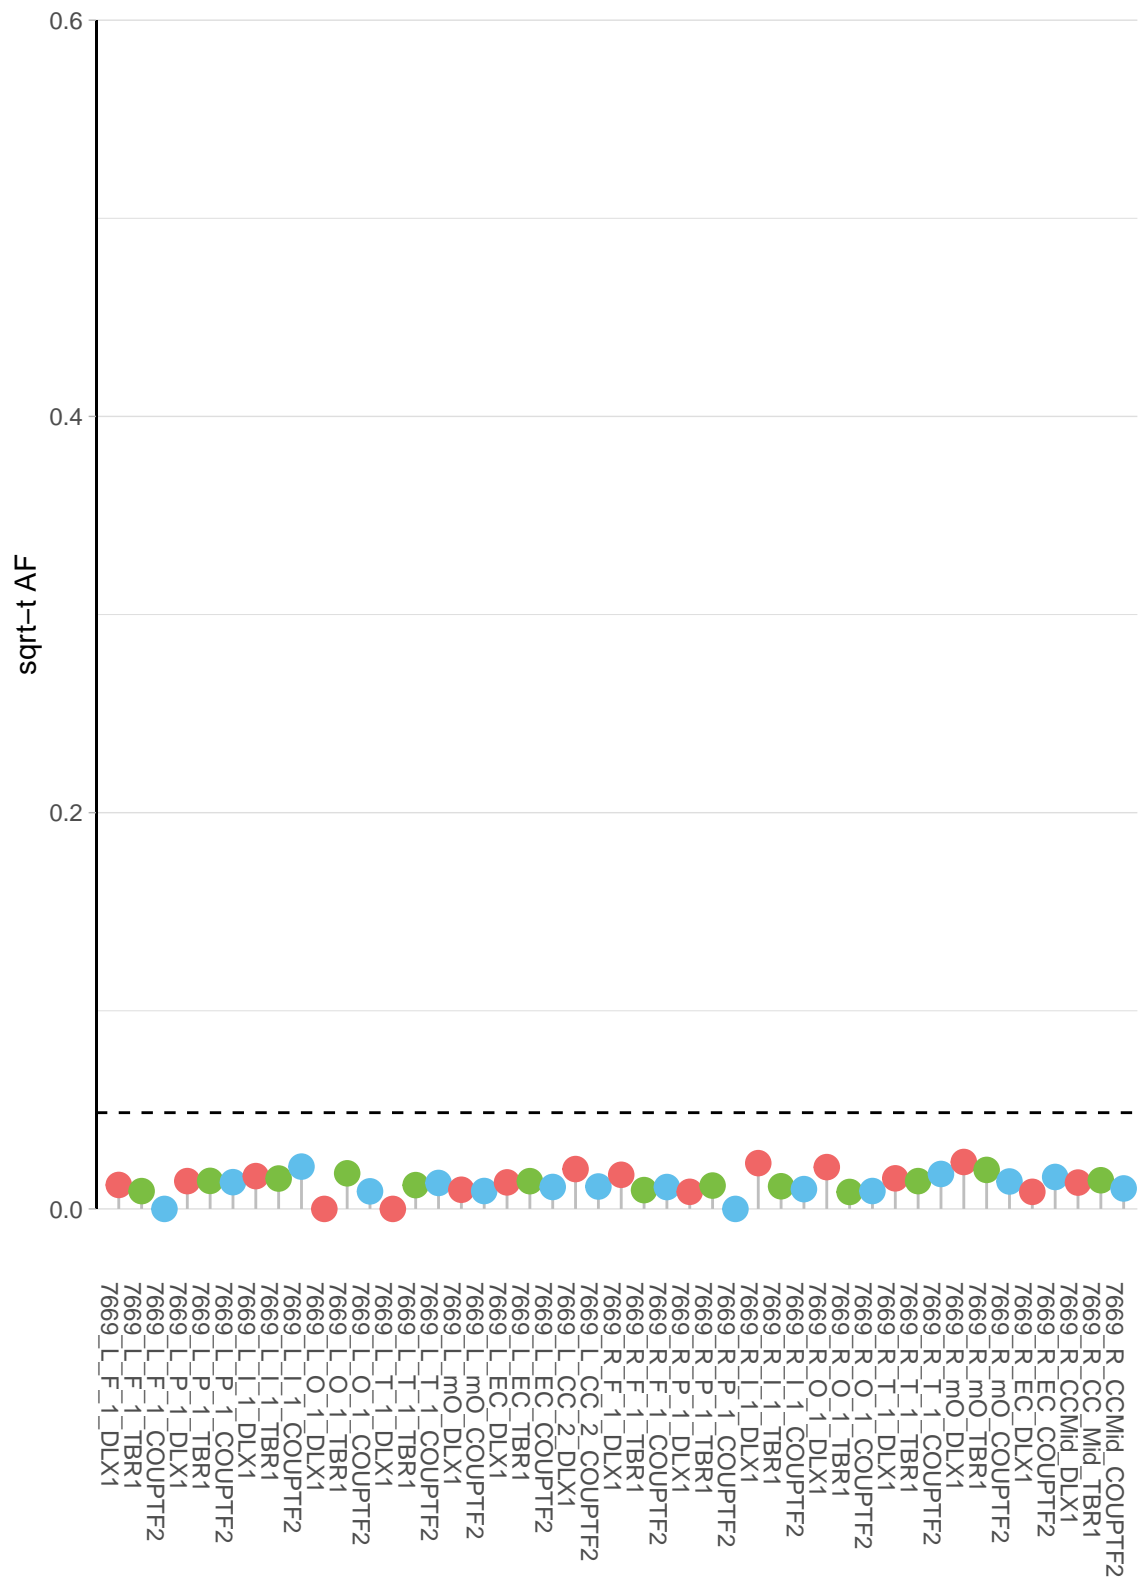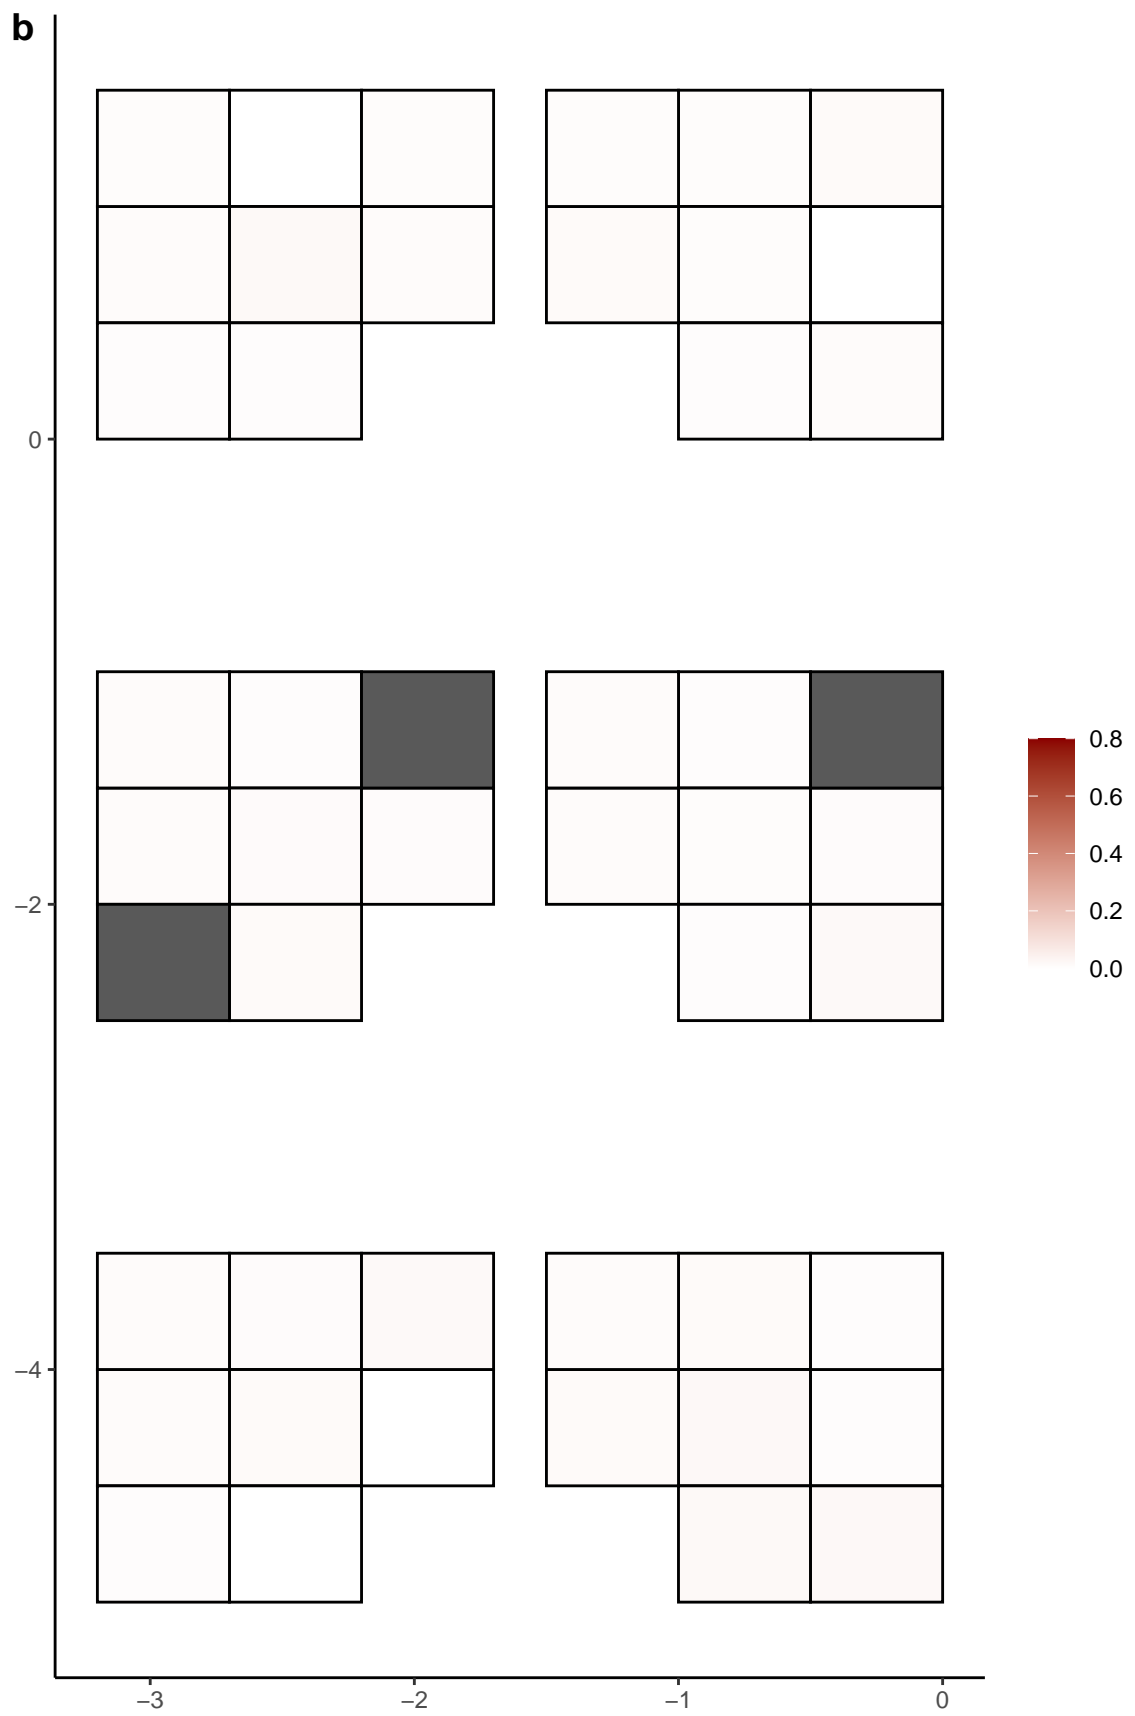

**a** ID05 16-47975657-G-A

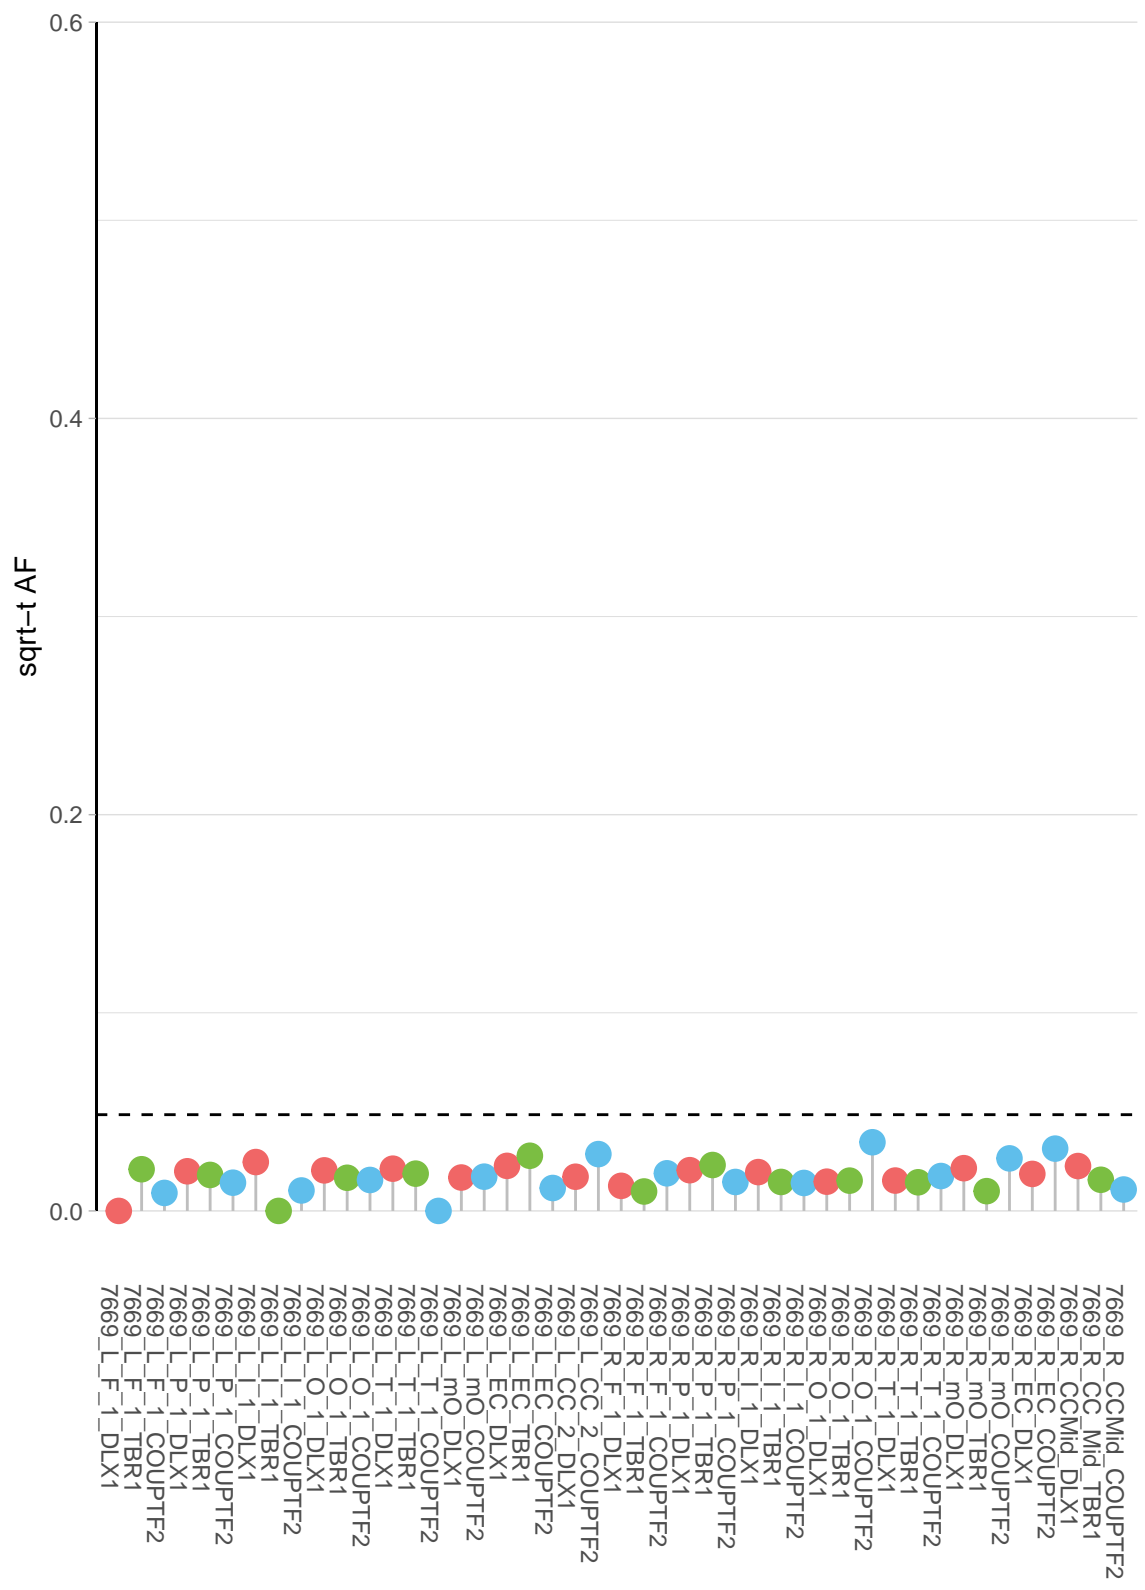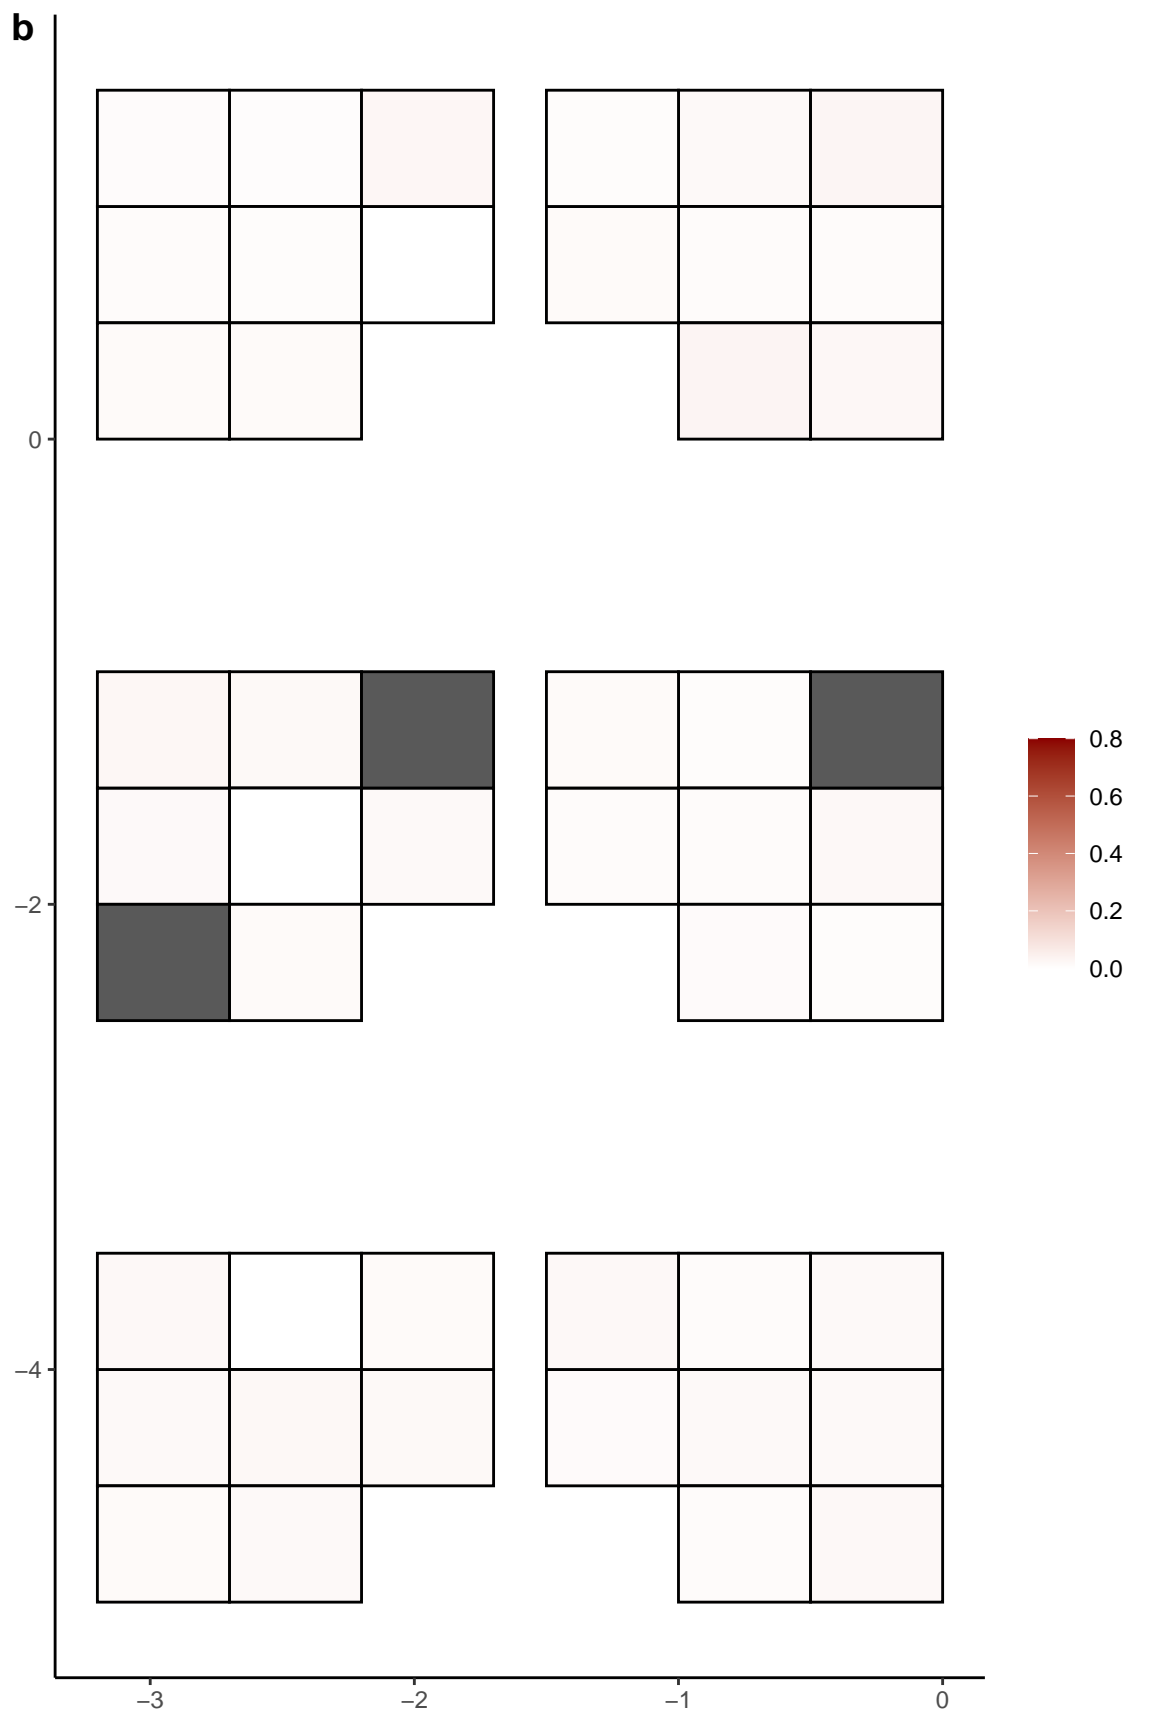

**a** ID05 16-53451083-T-A

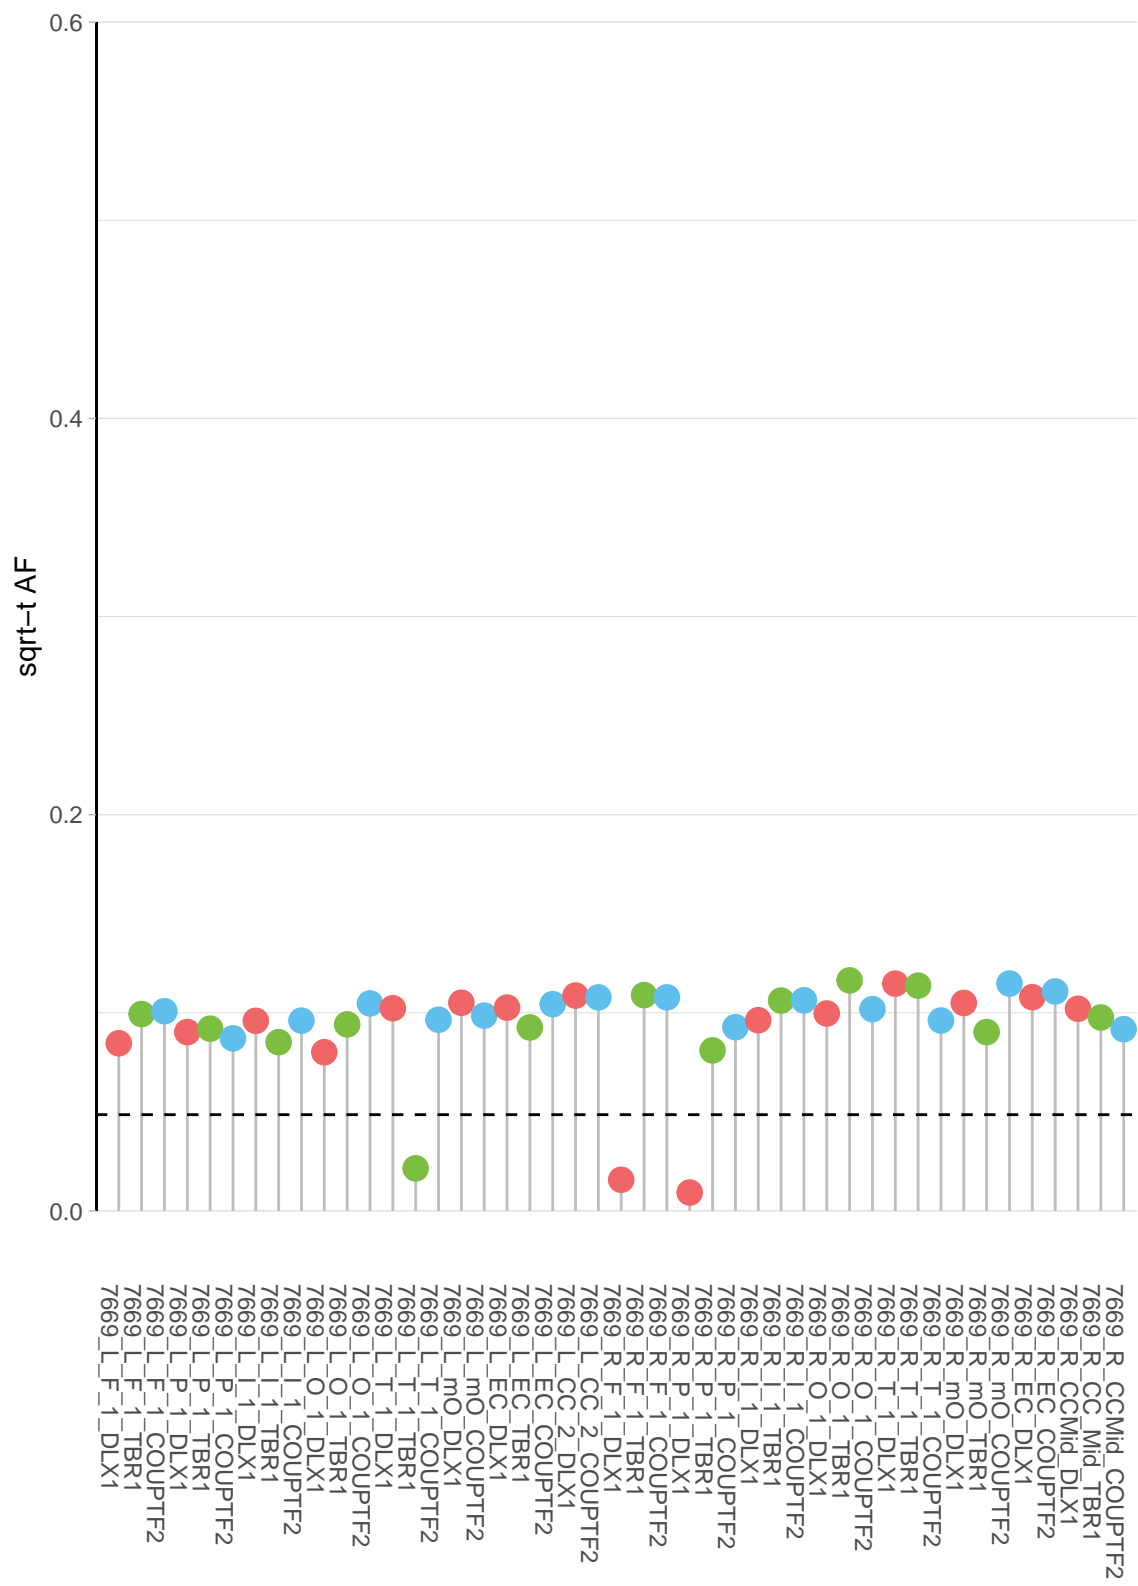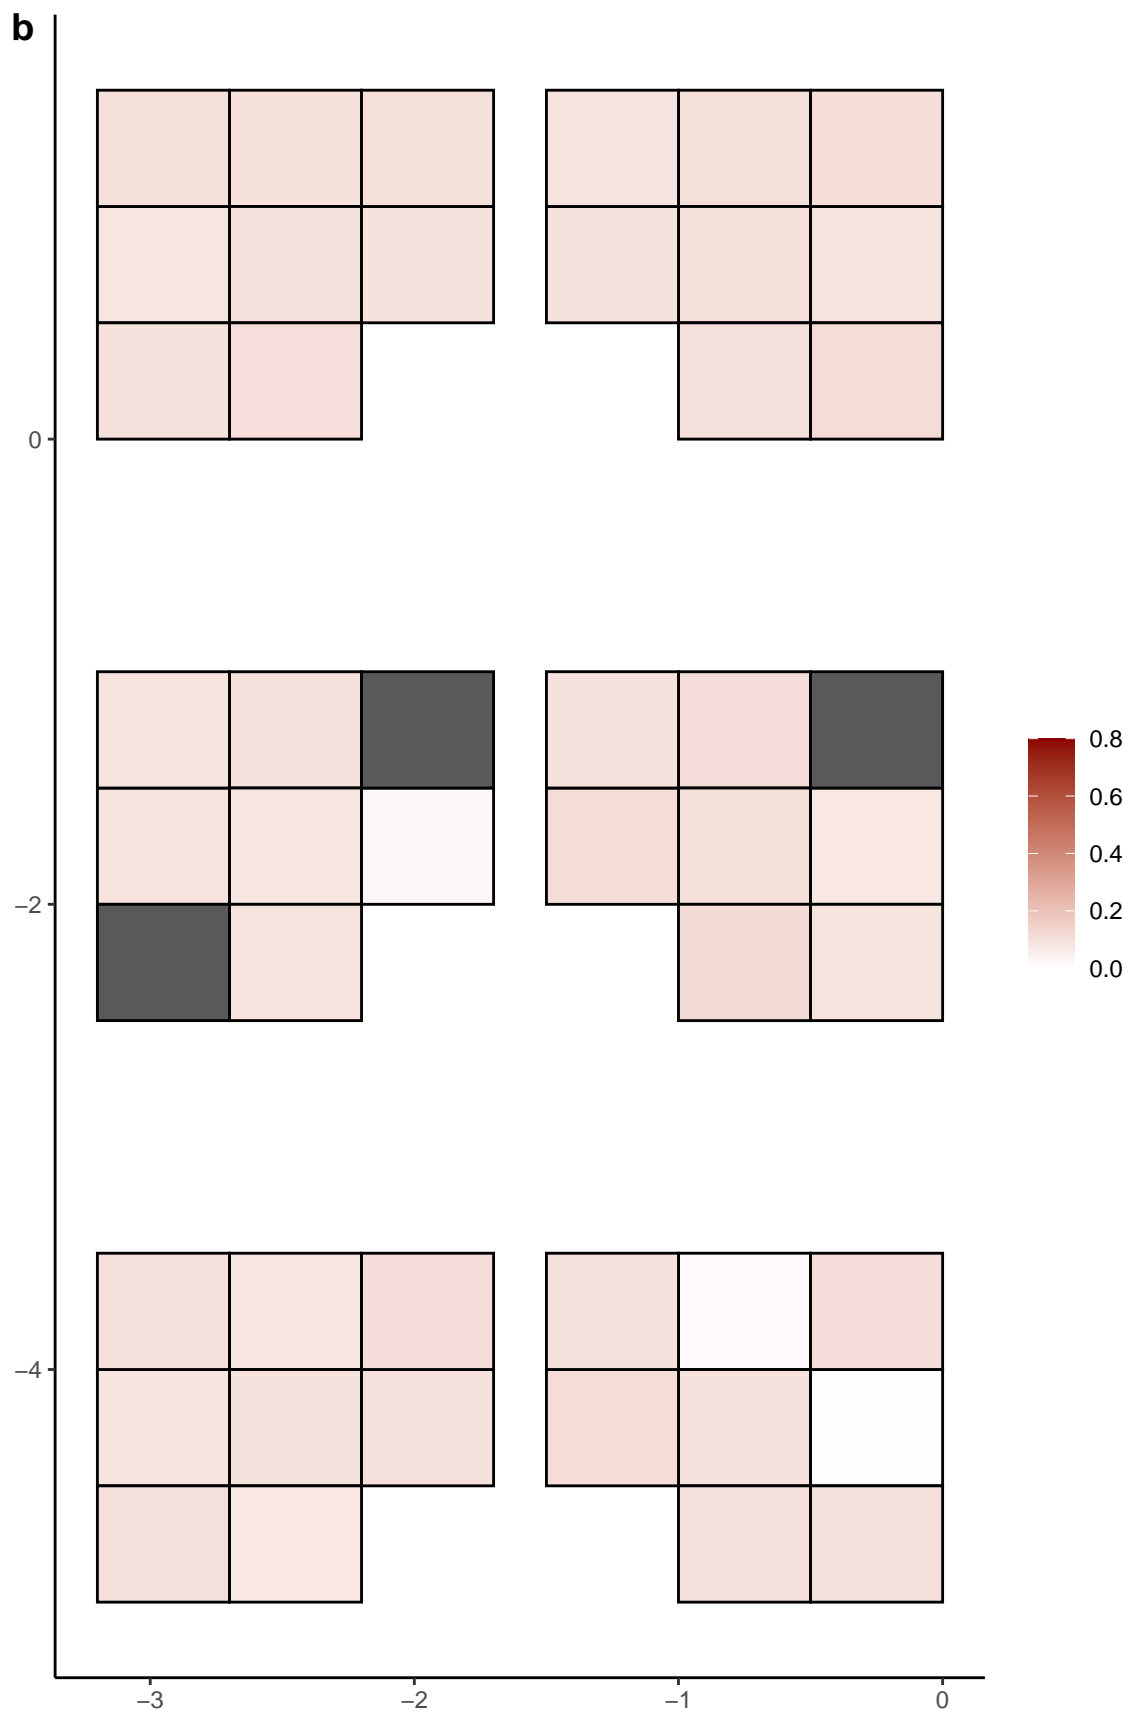

**a** ID05 16-53451084-T-A

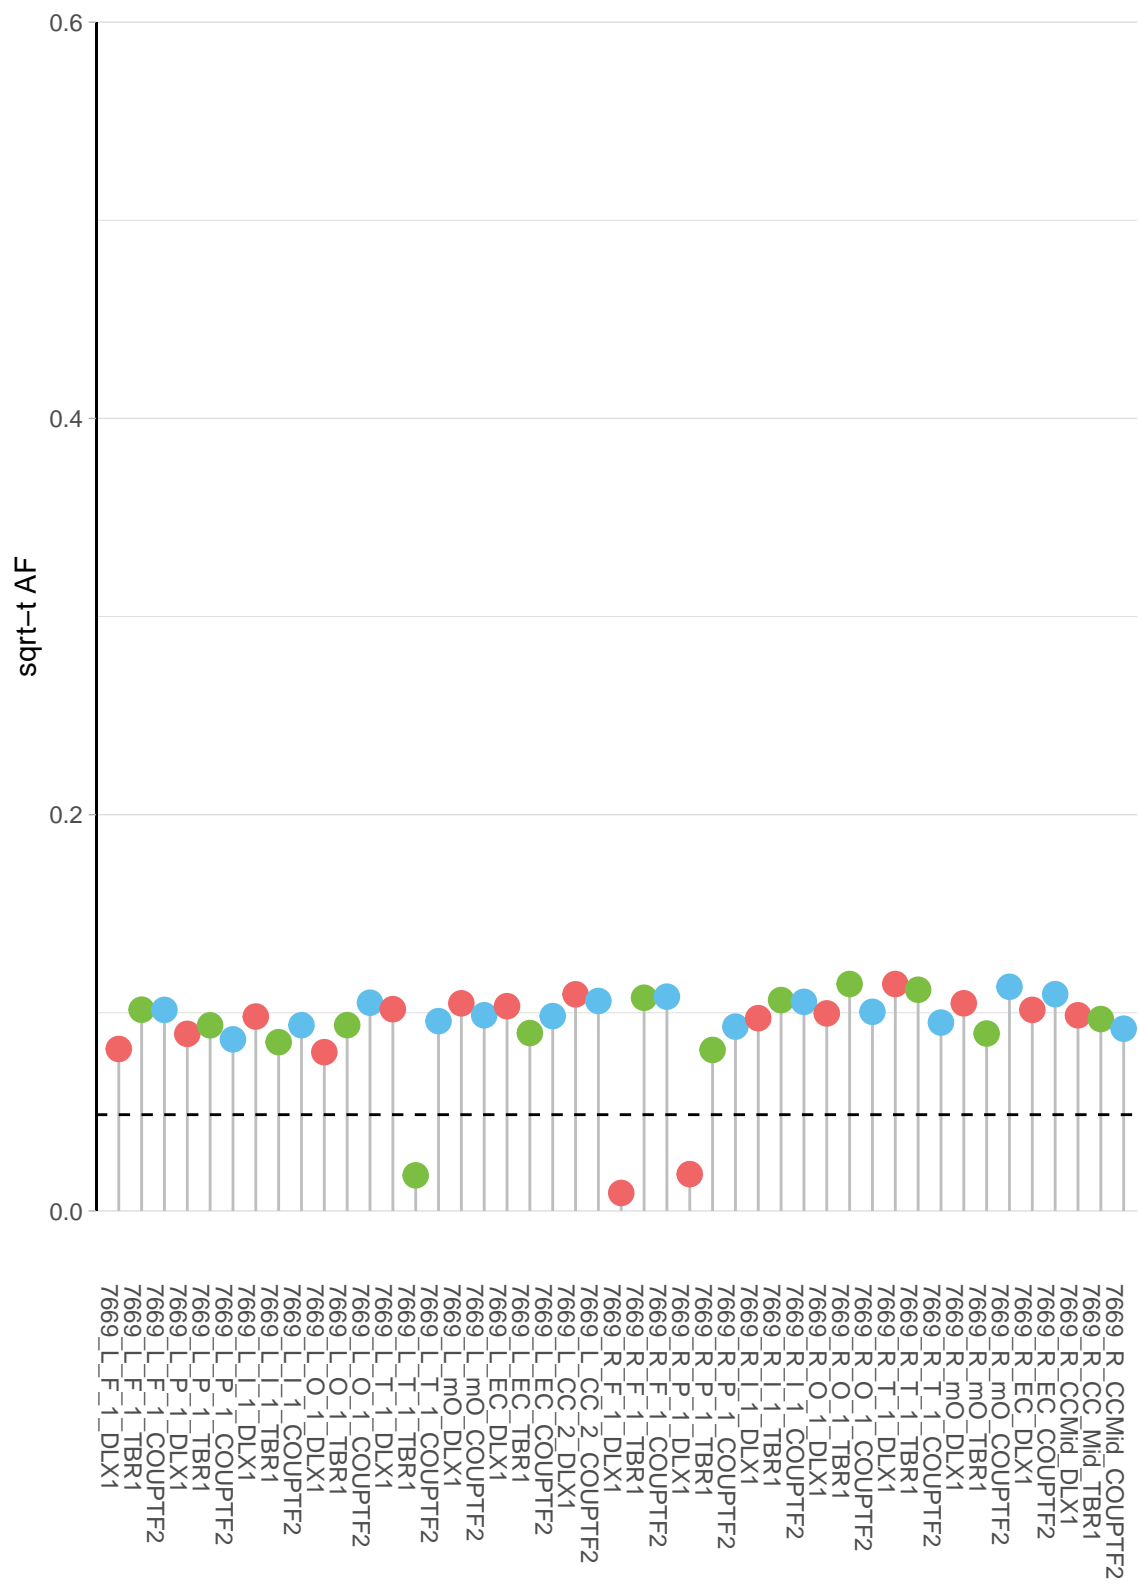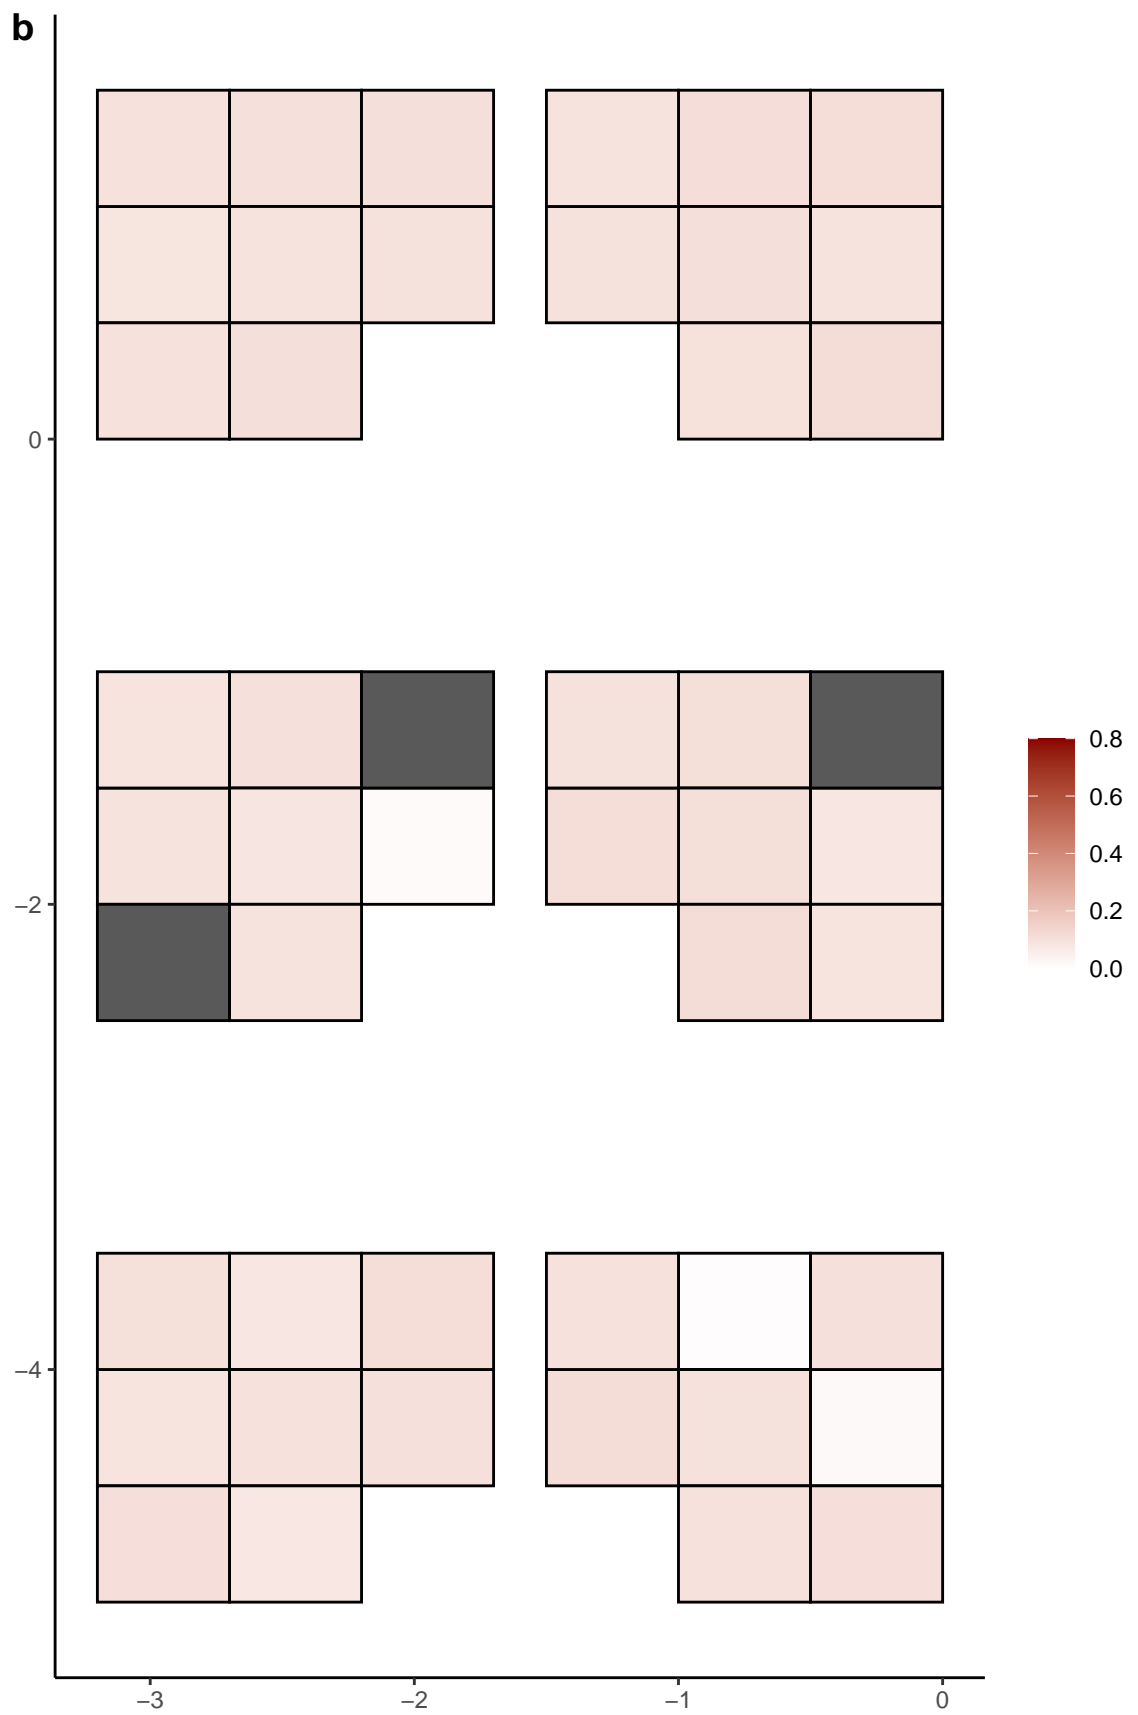



**a** ID05 16-5864193-G-T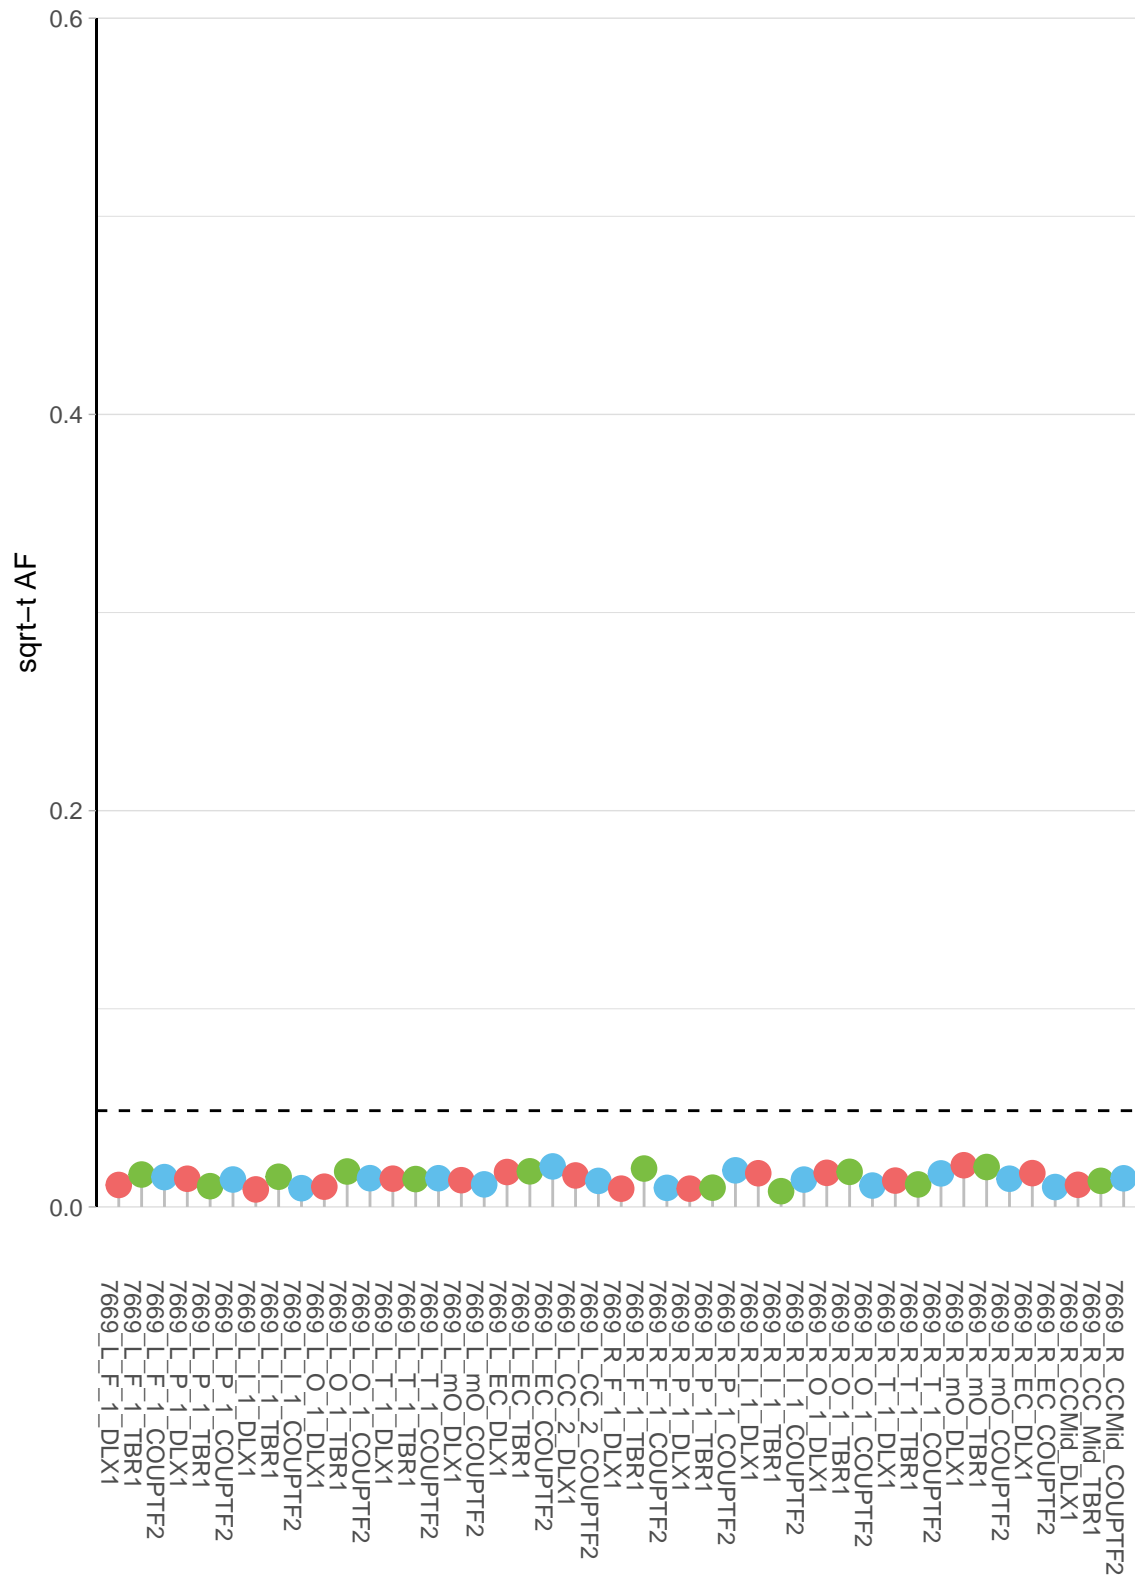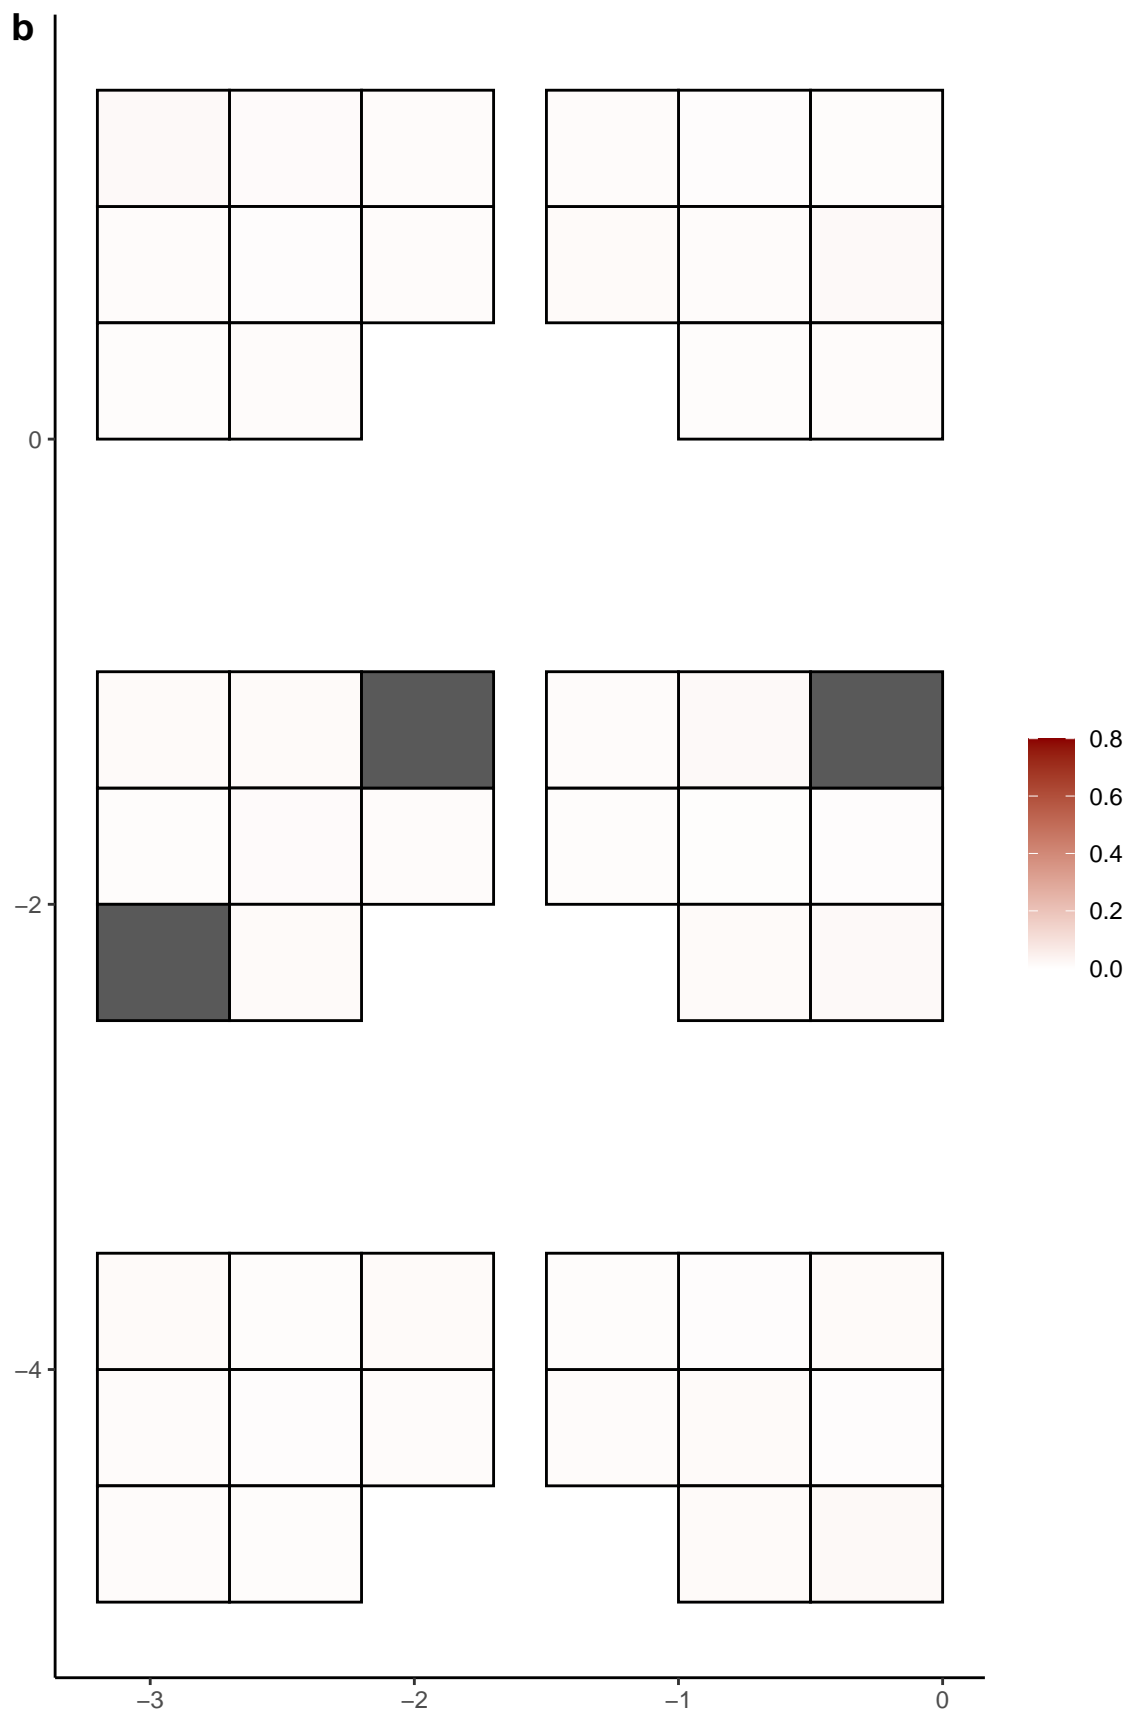

**a** ID05 16-59987114-A-G

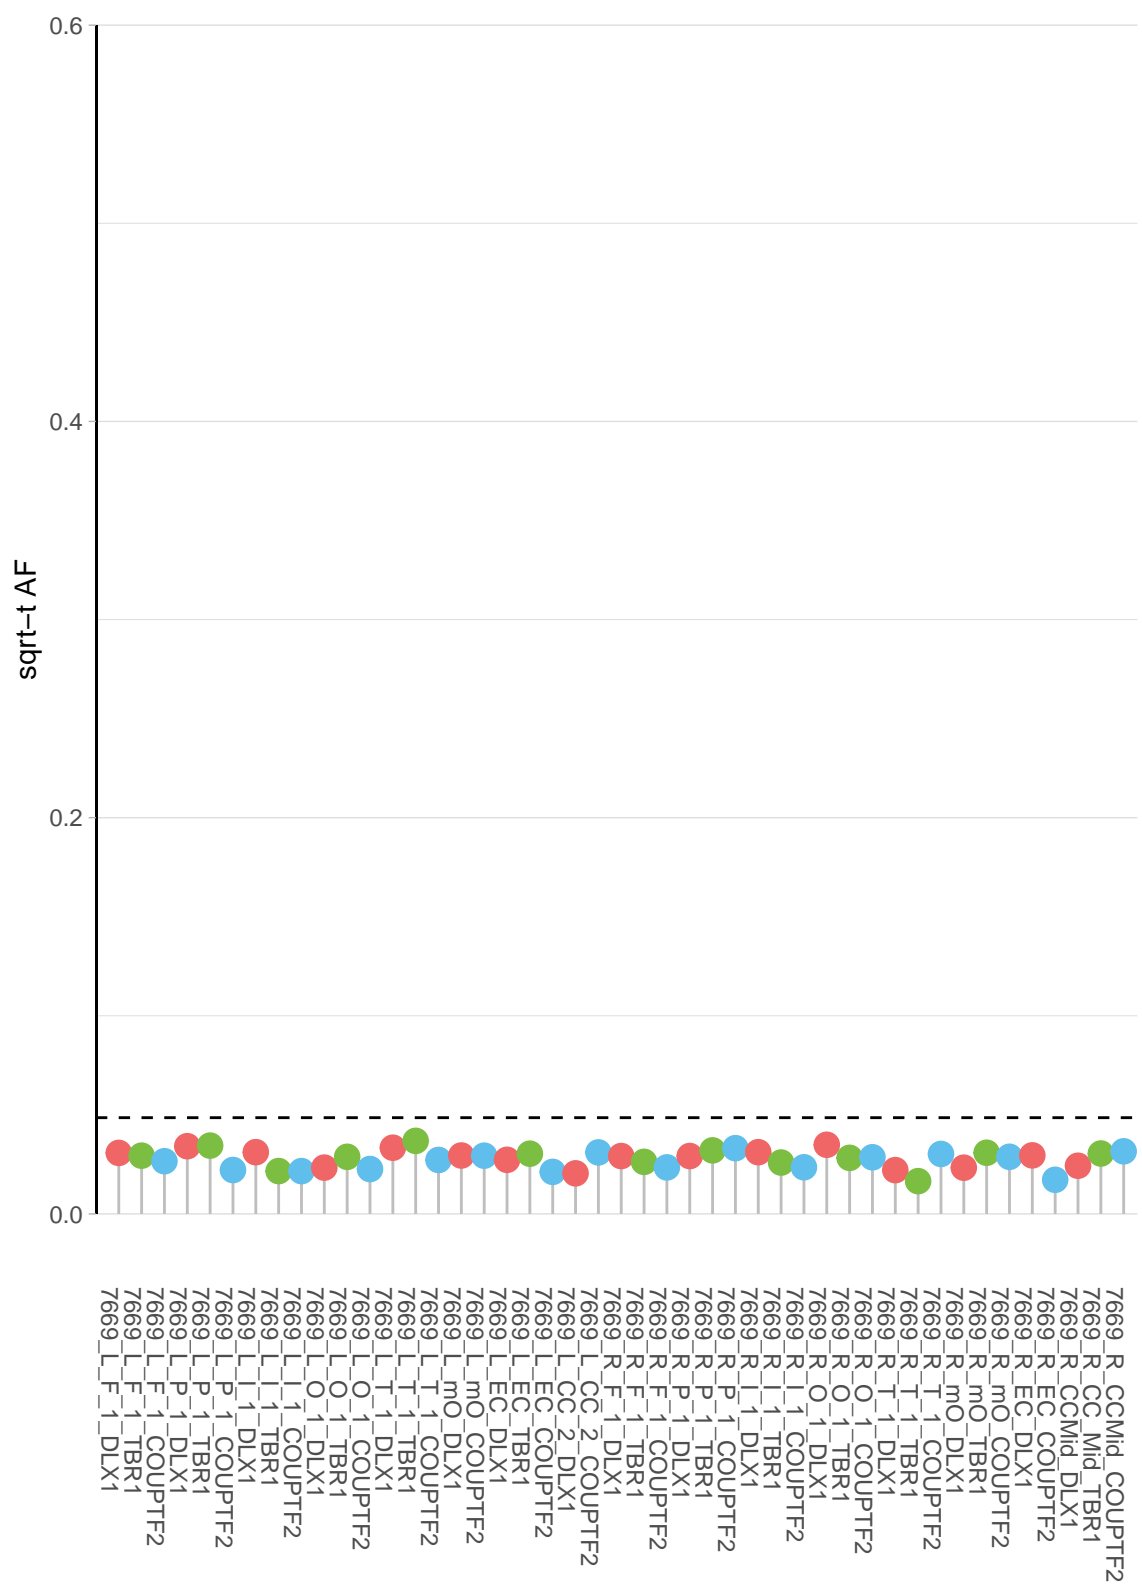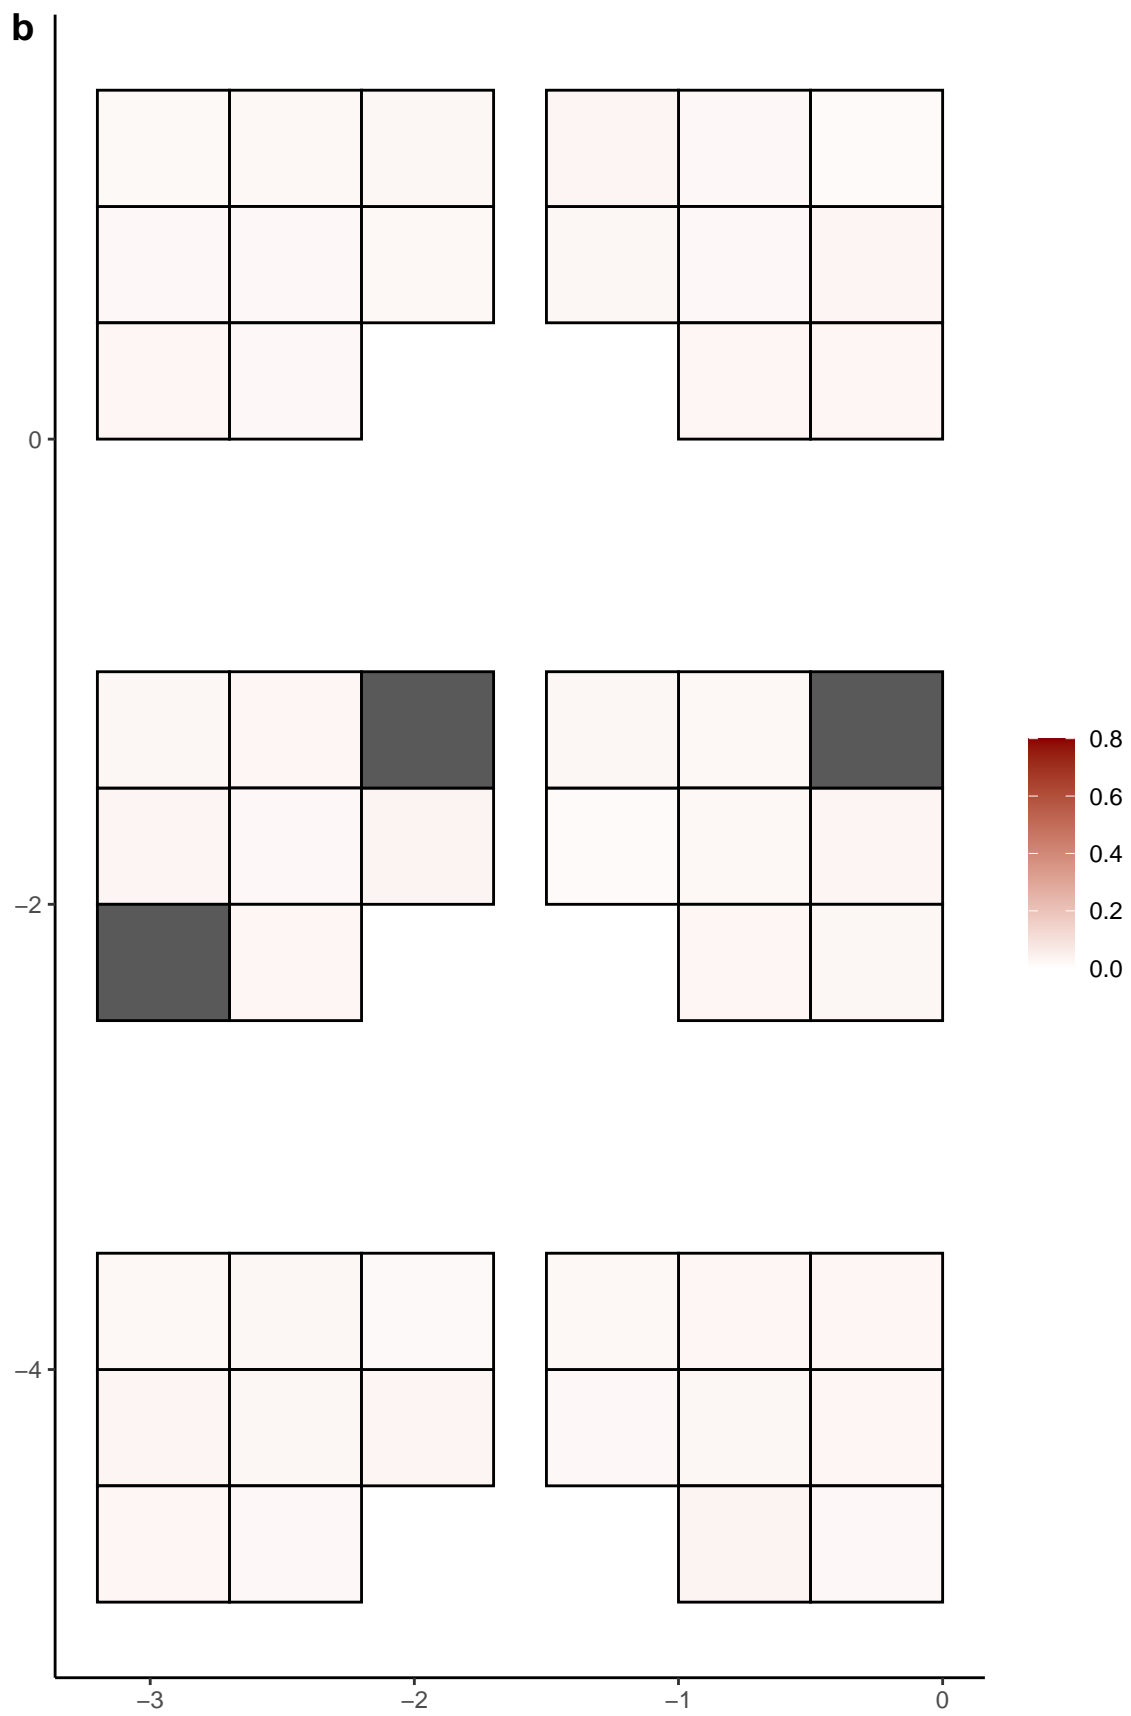

**a** ID05 16-60721807-G-T

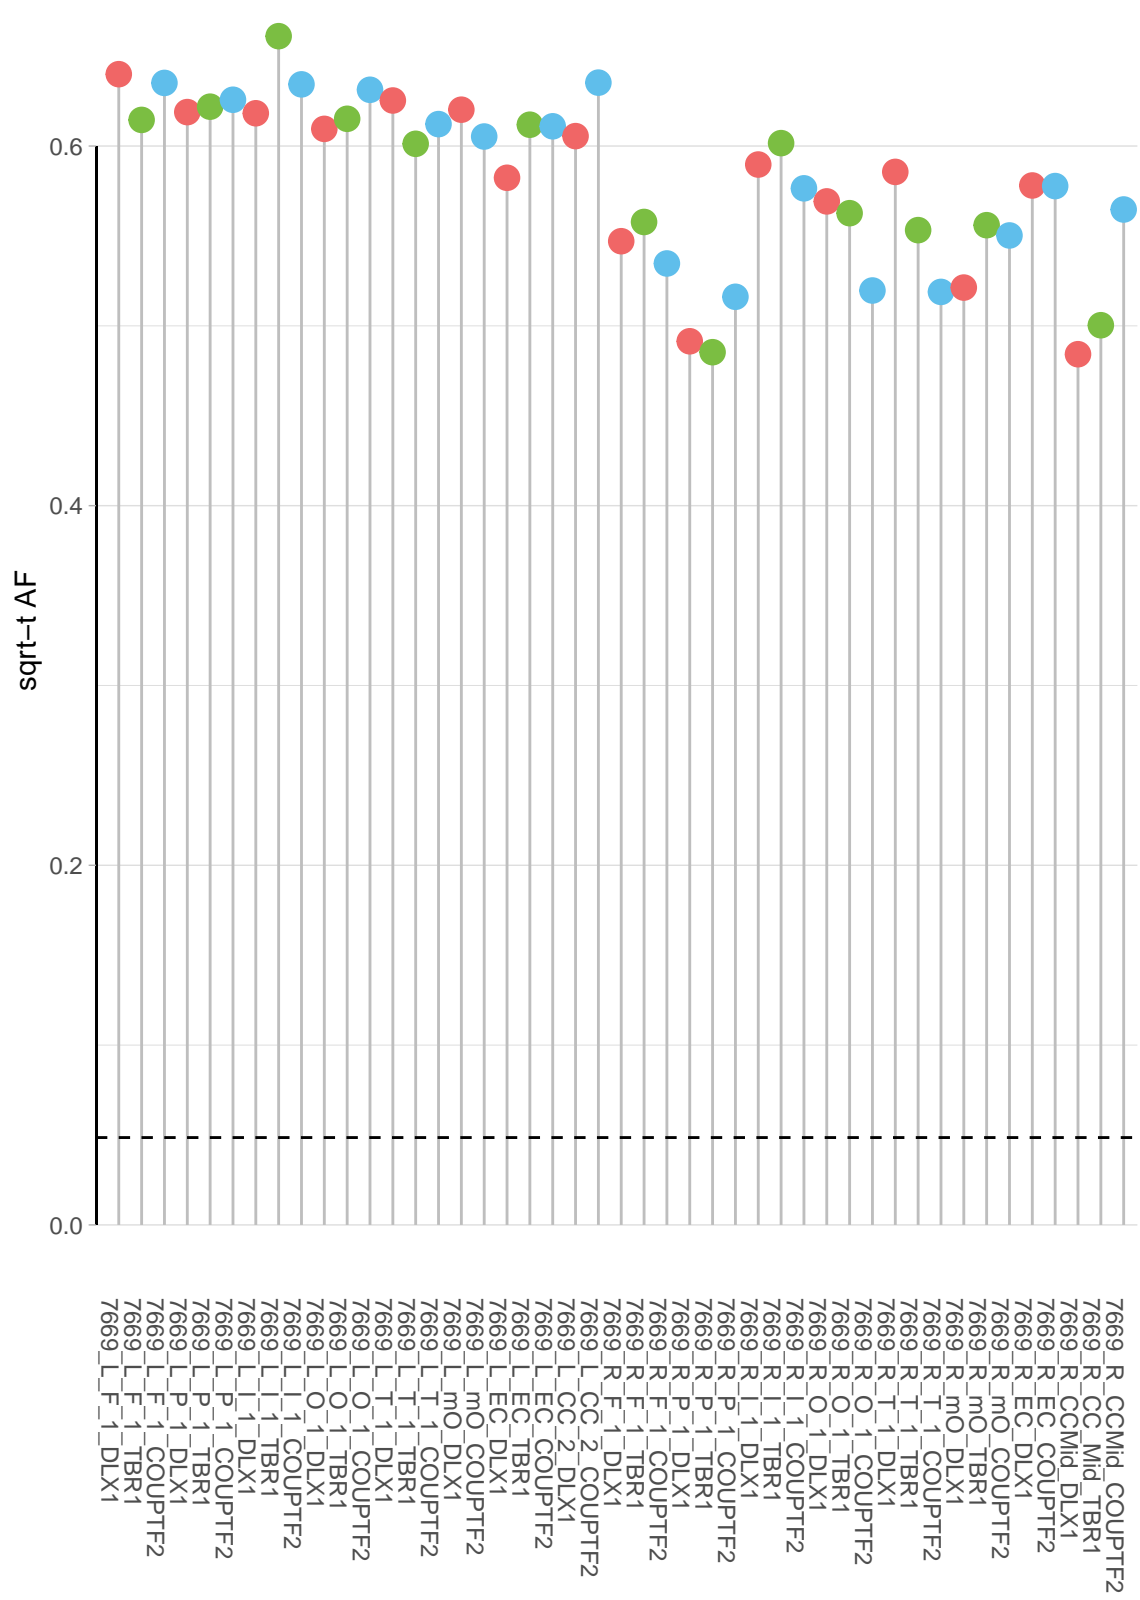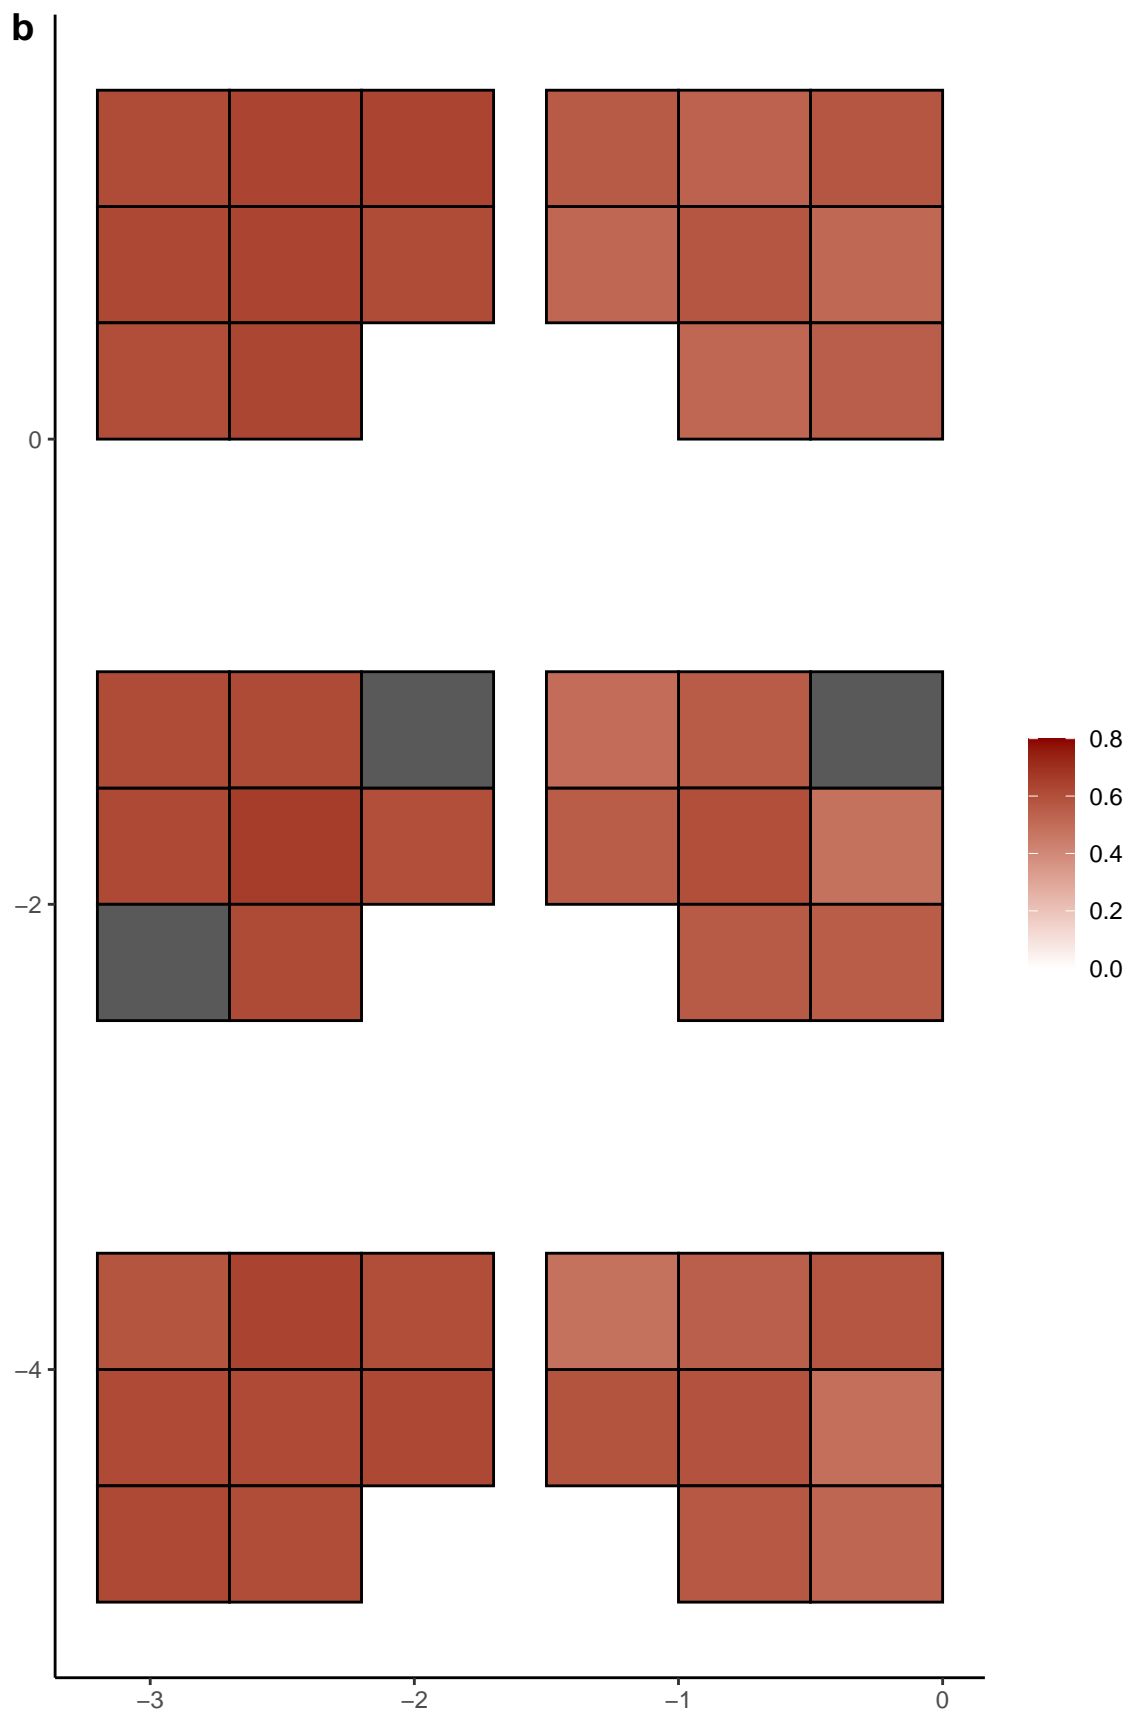

**a** ID05 16-60833275-C-G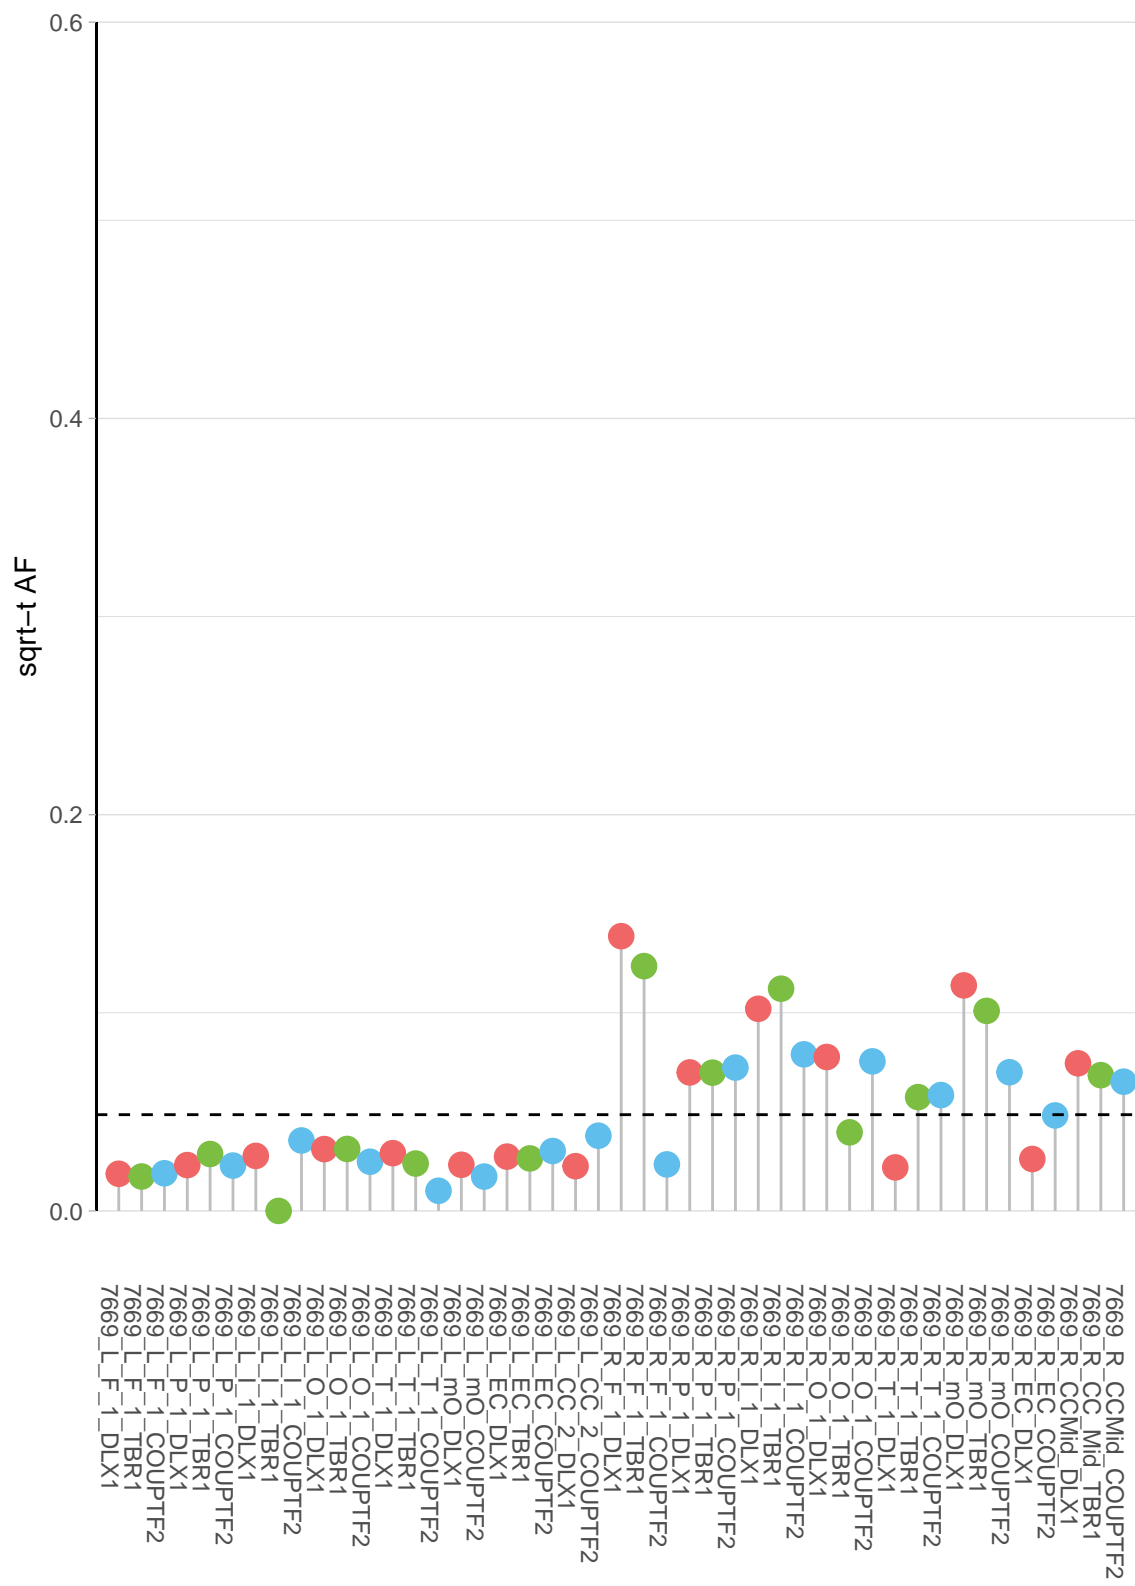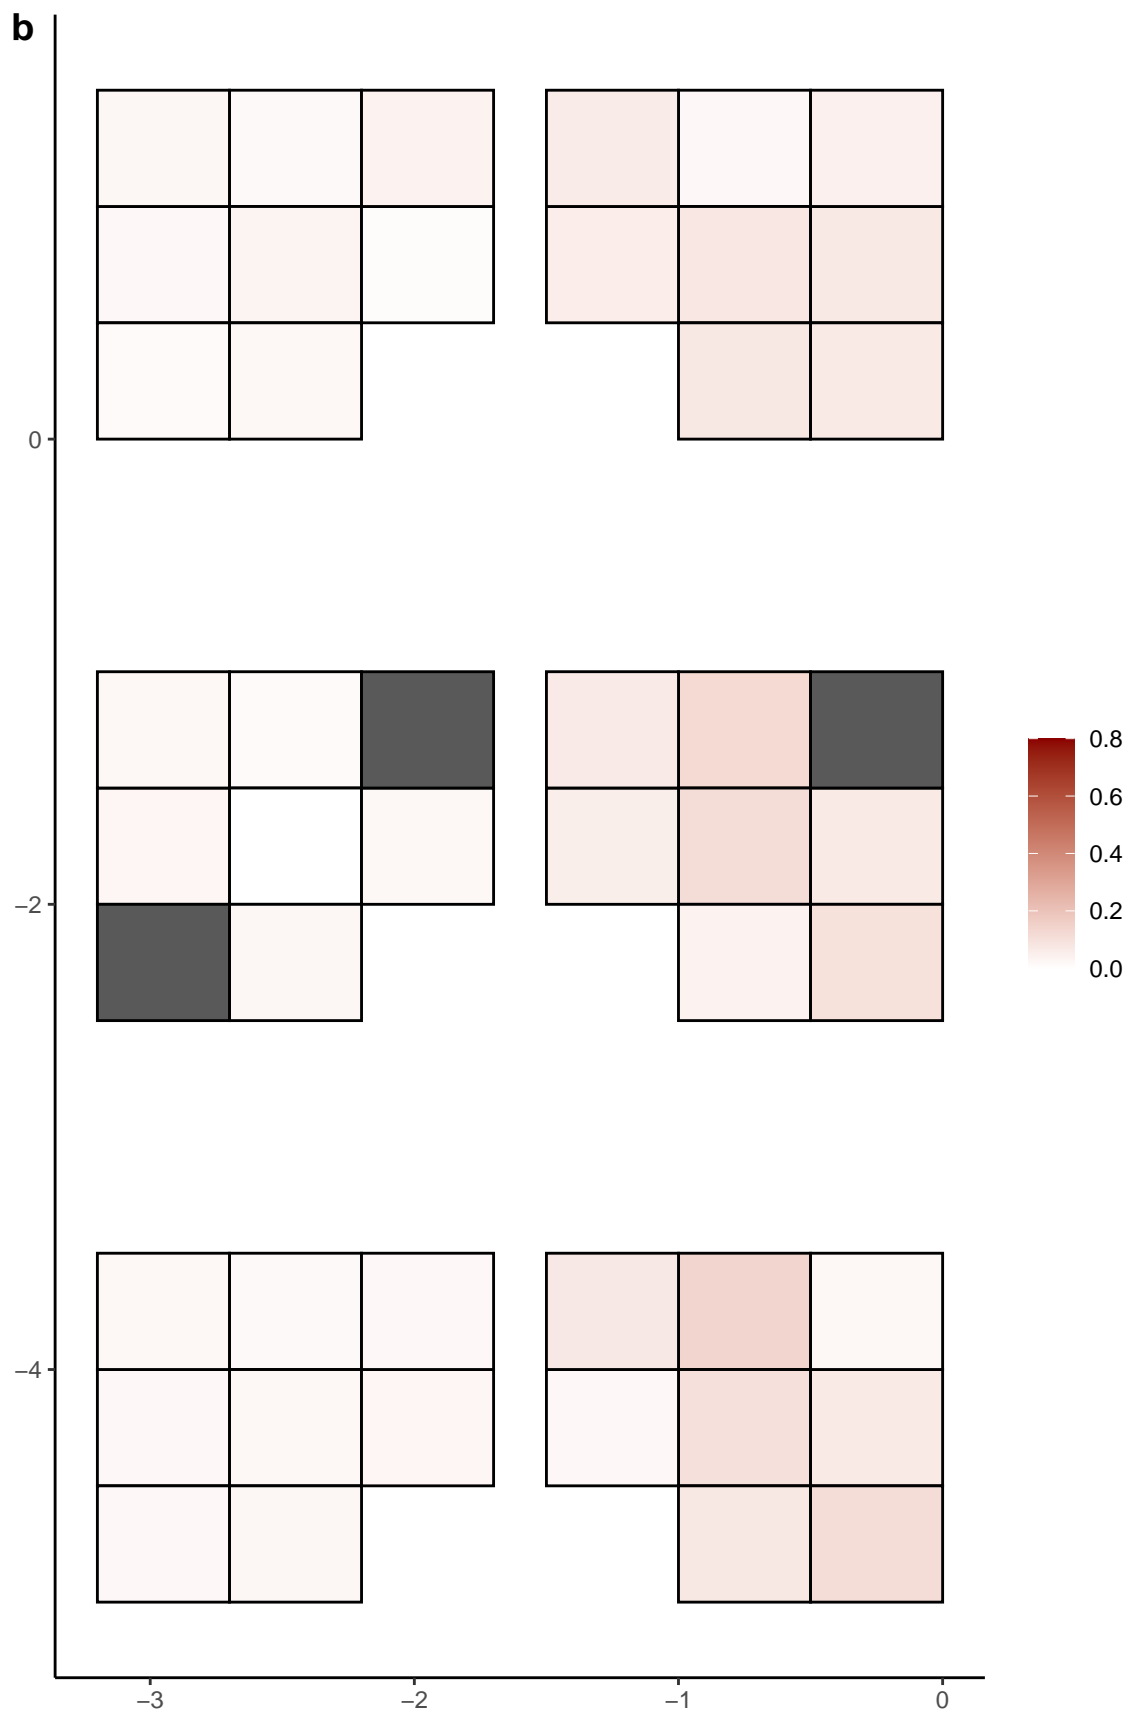

**a** ID05 16-63481903-A-T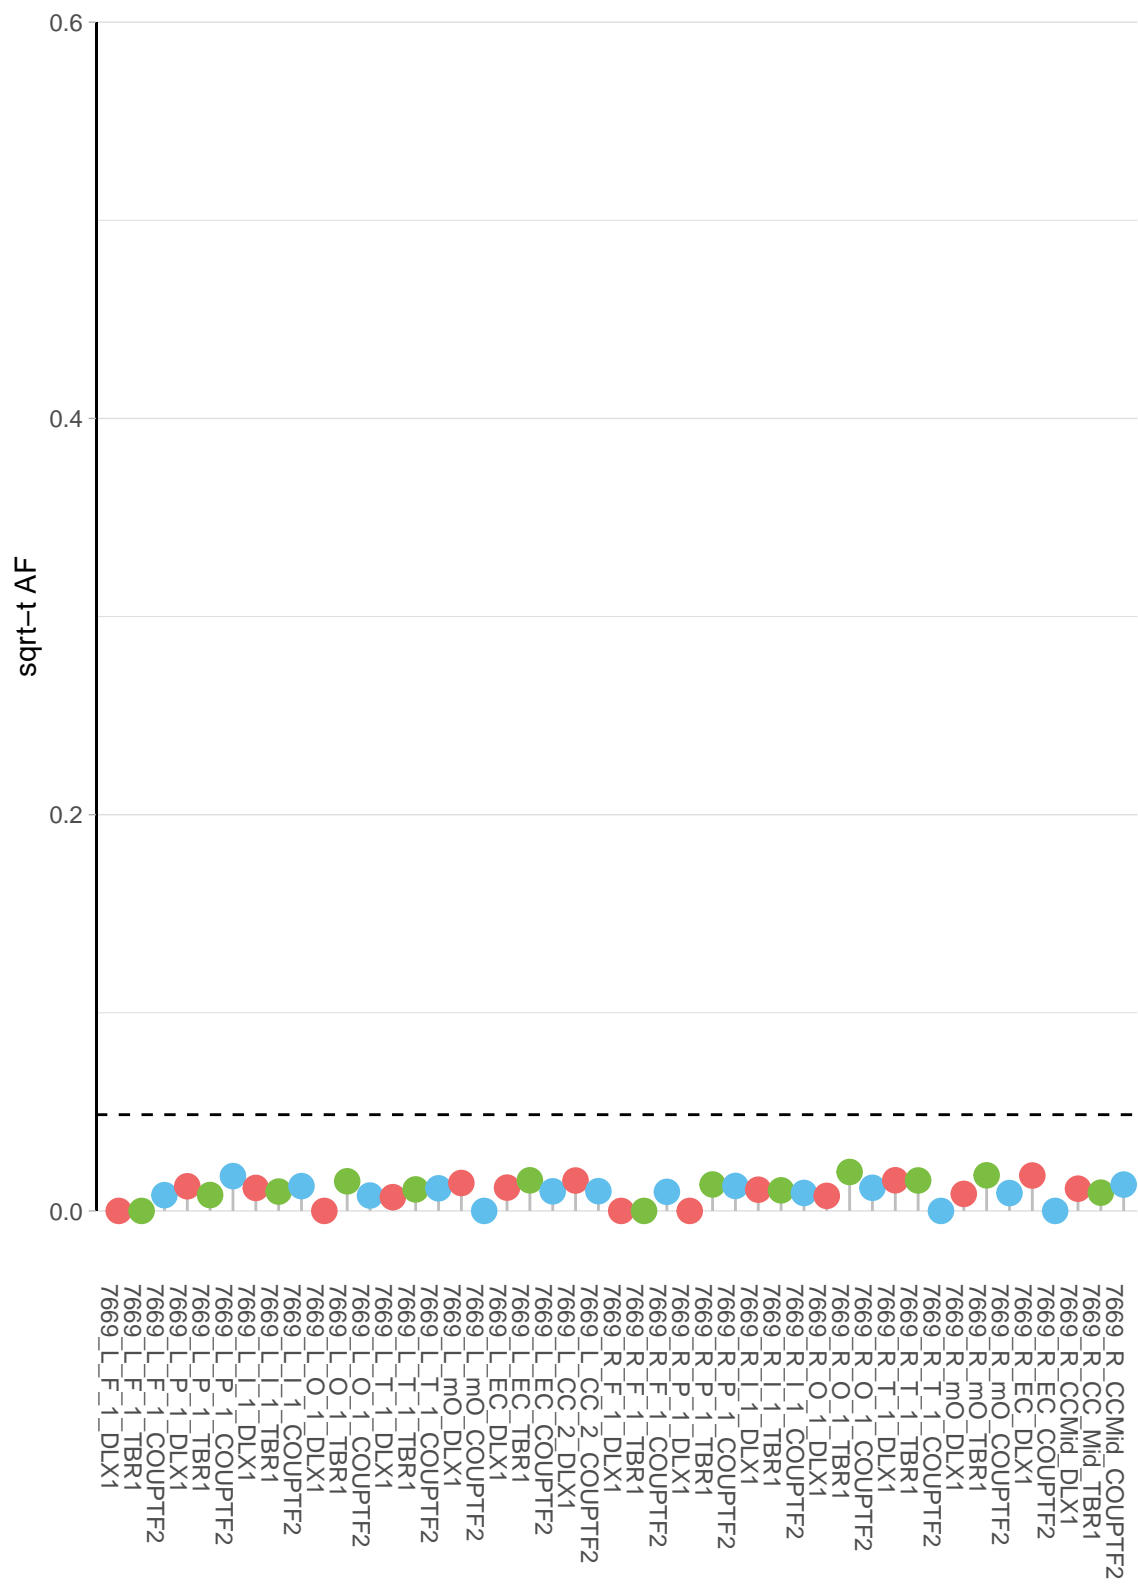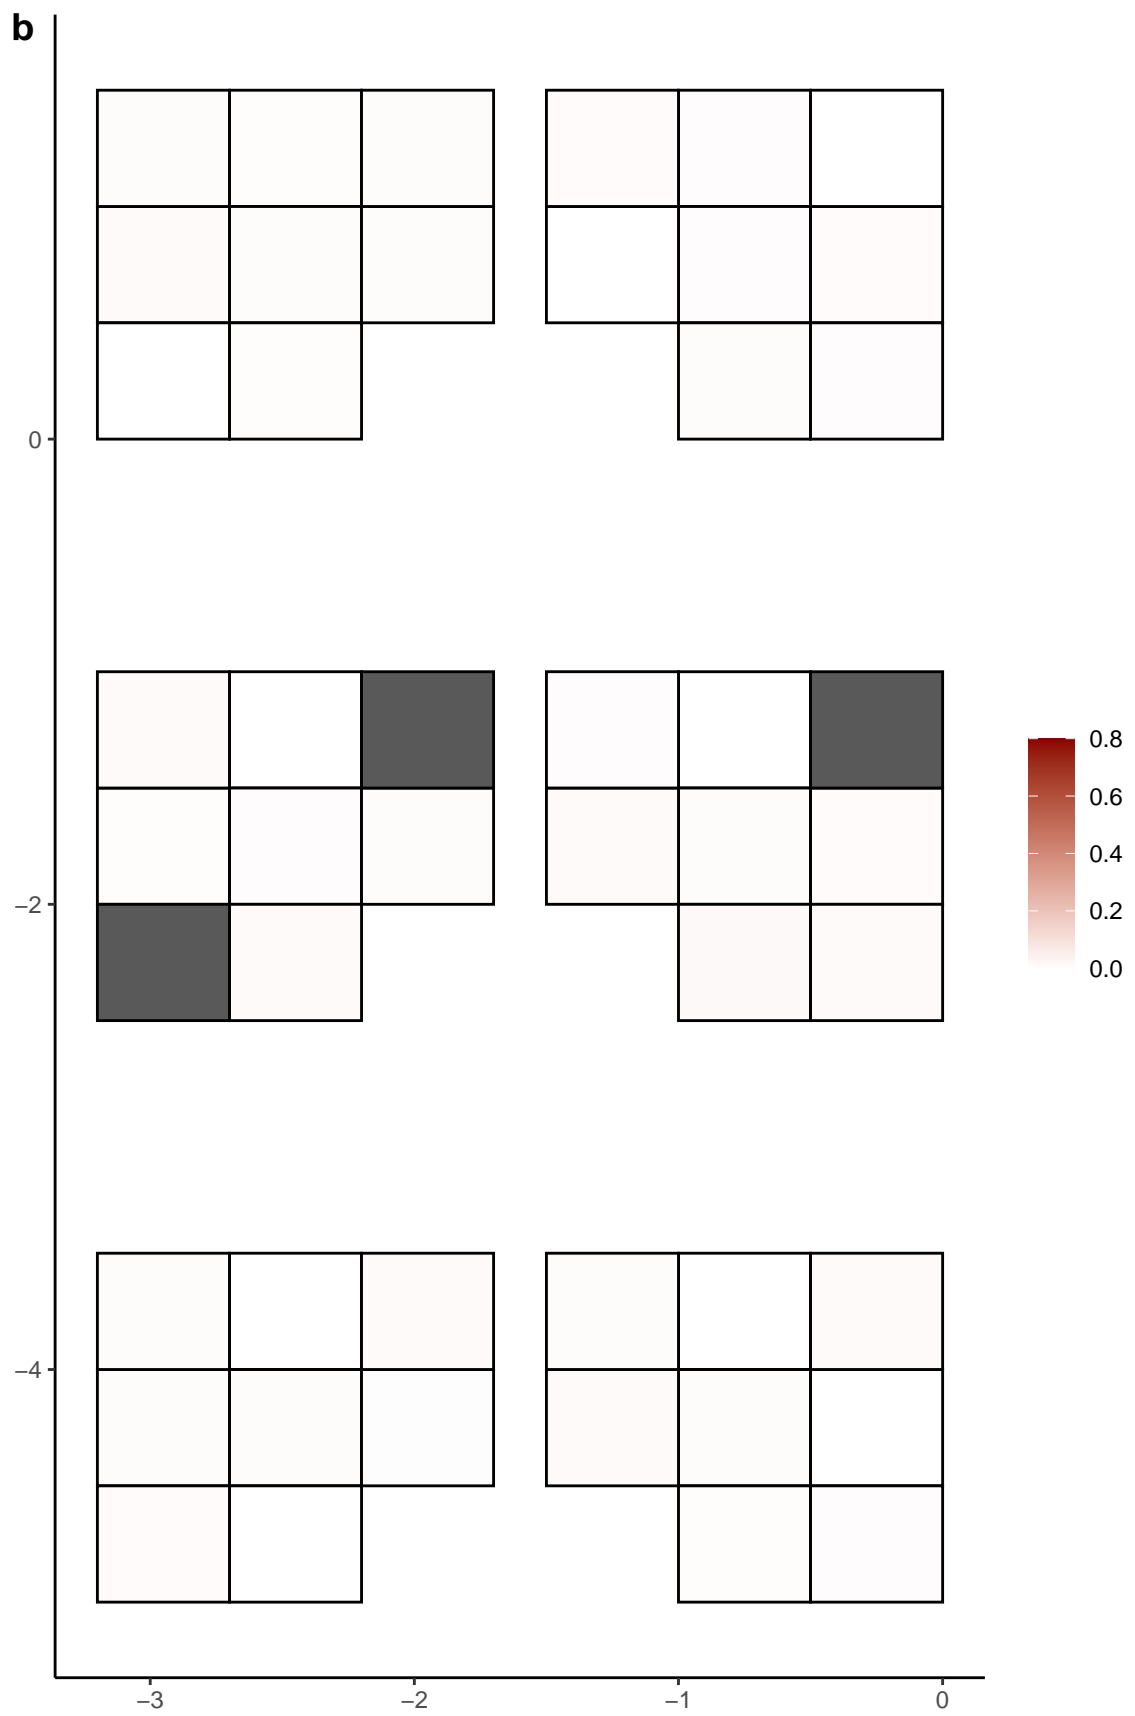

**a** ID05 16-64667272-C-T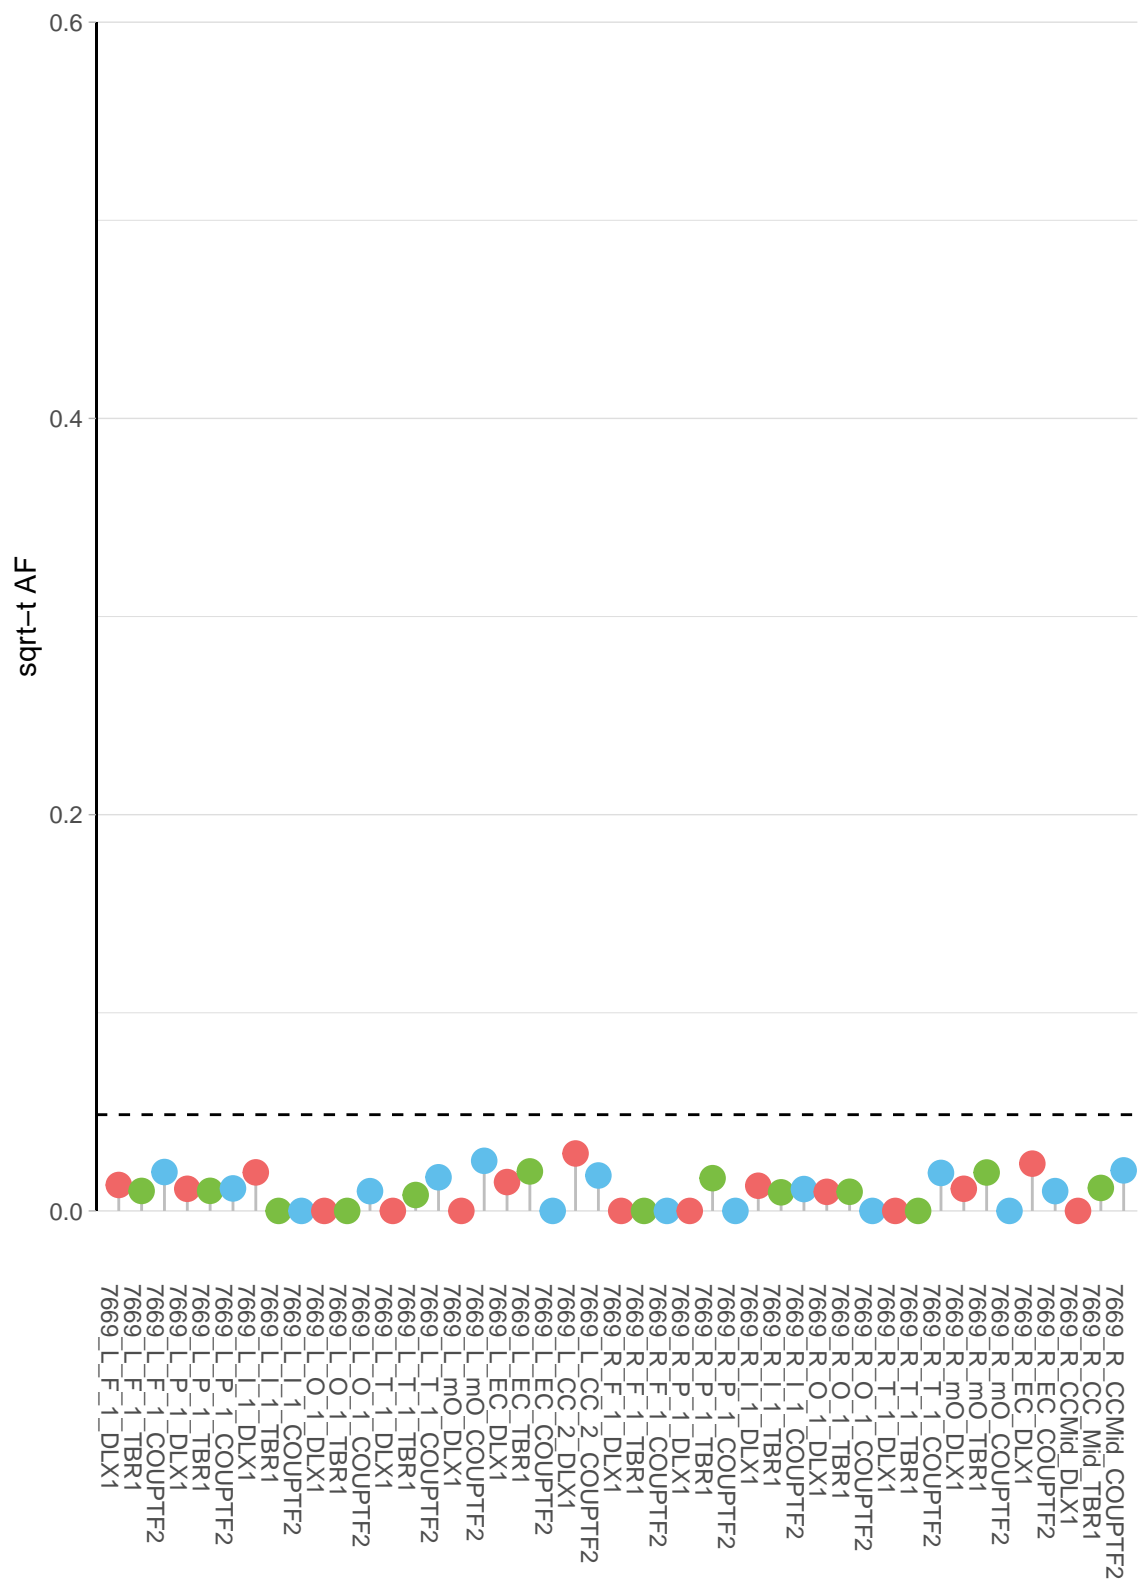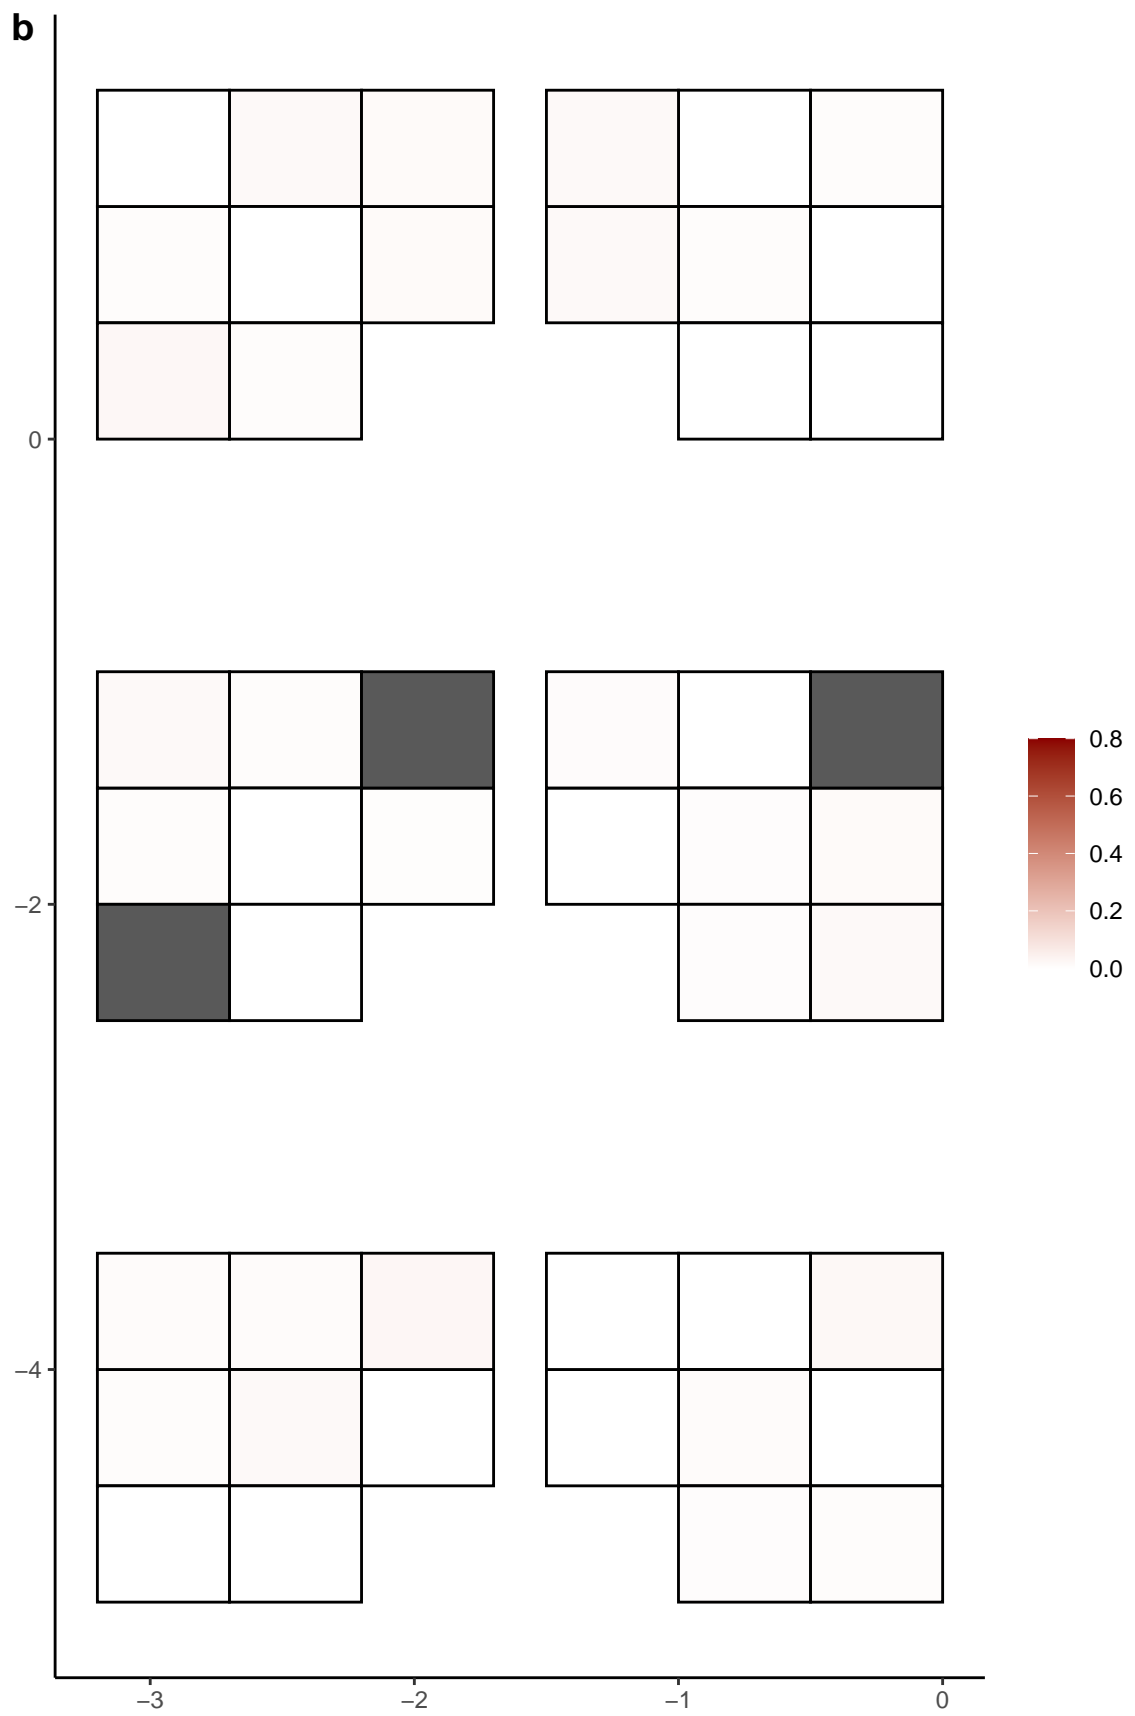

**a** ID05 16-64780863-G-A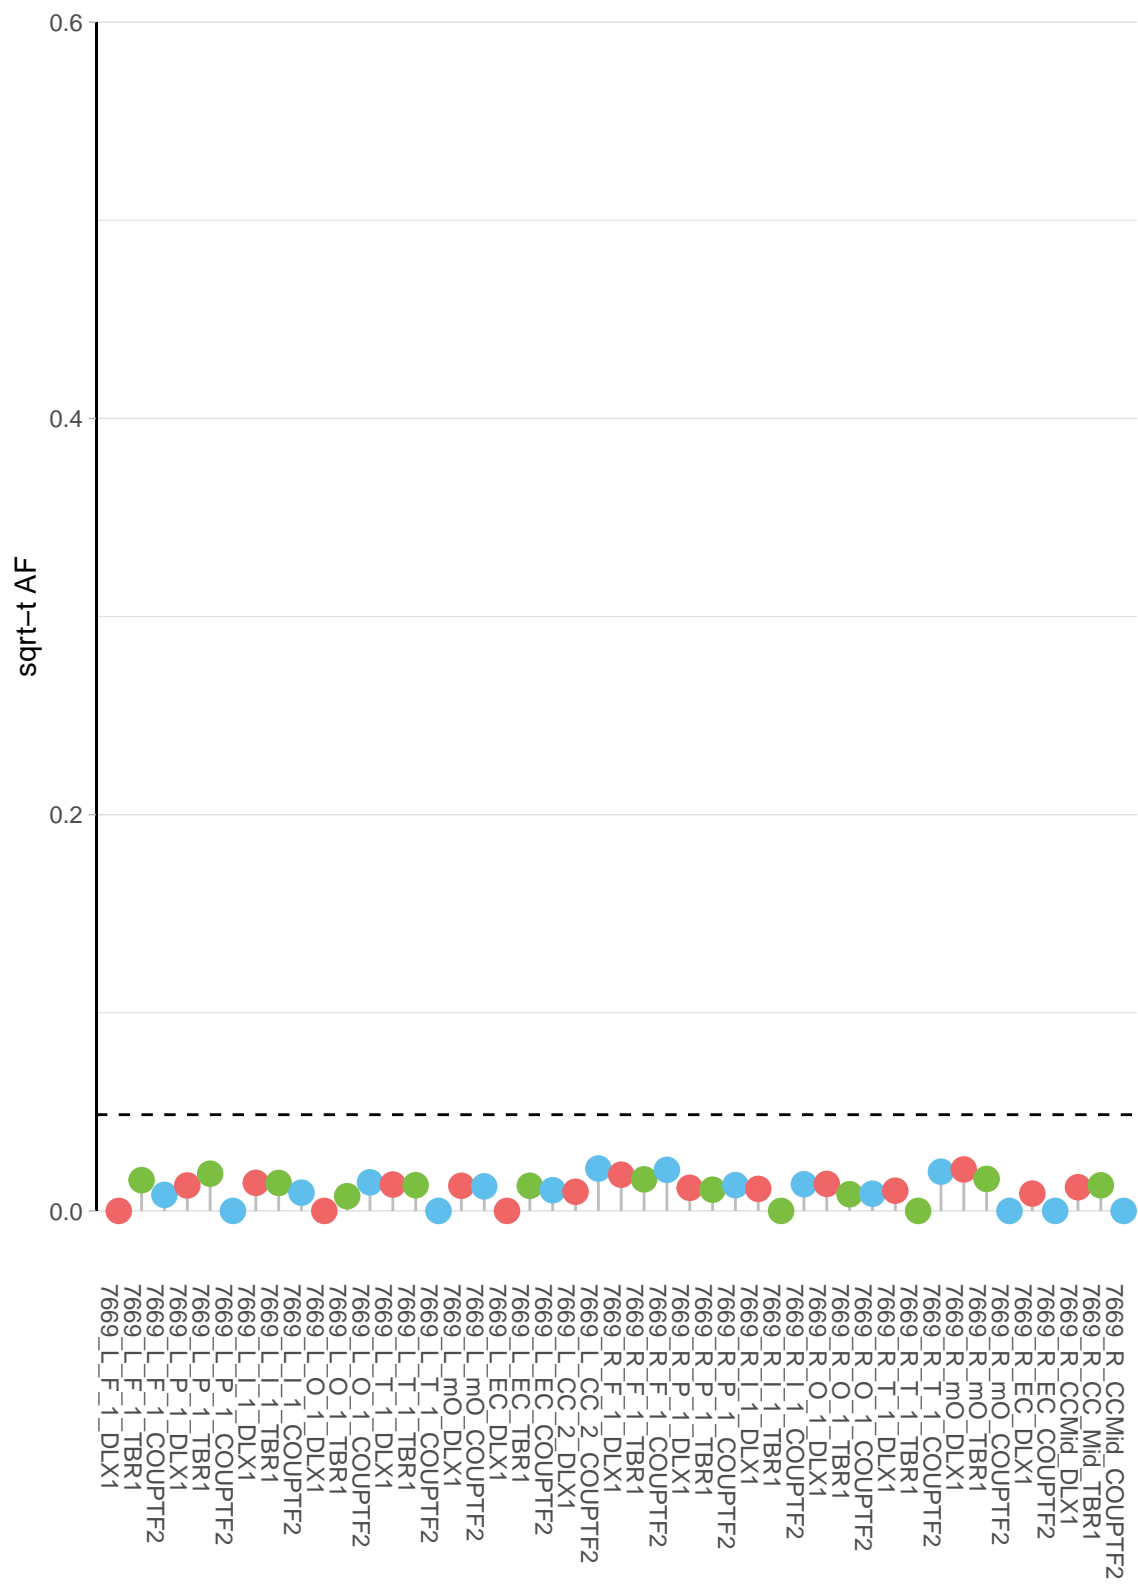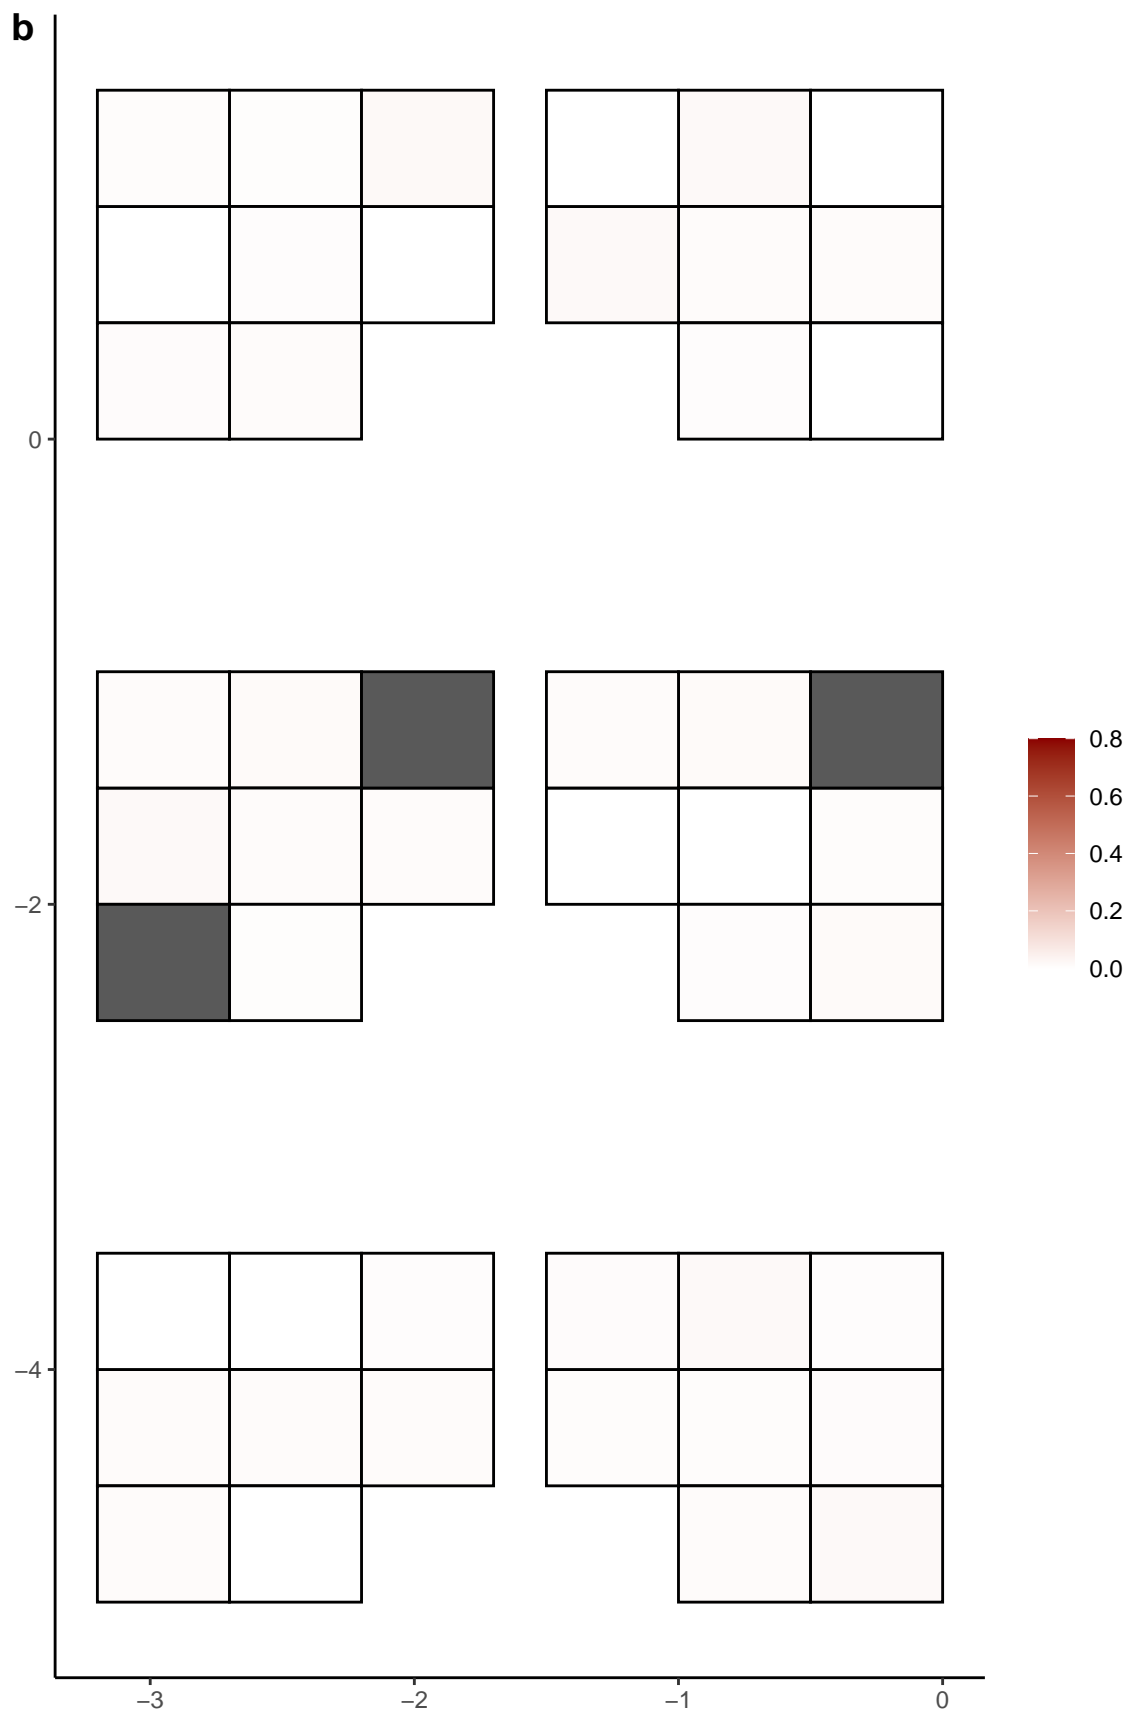

**a** ID05 16-71798192-C-A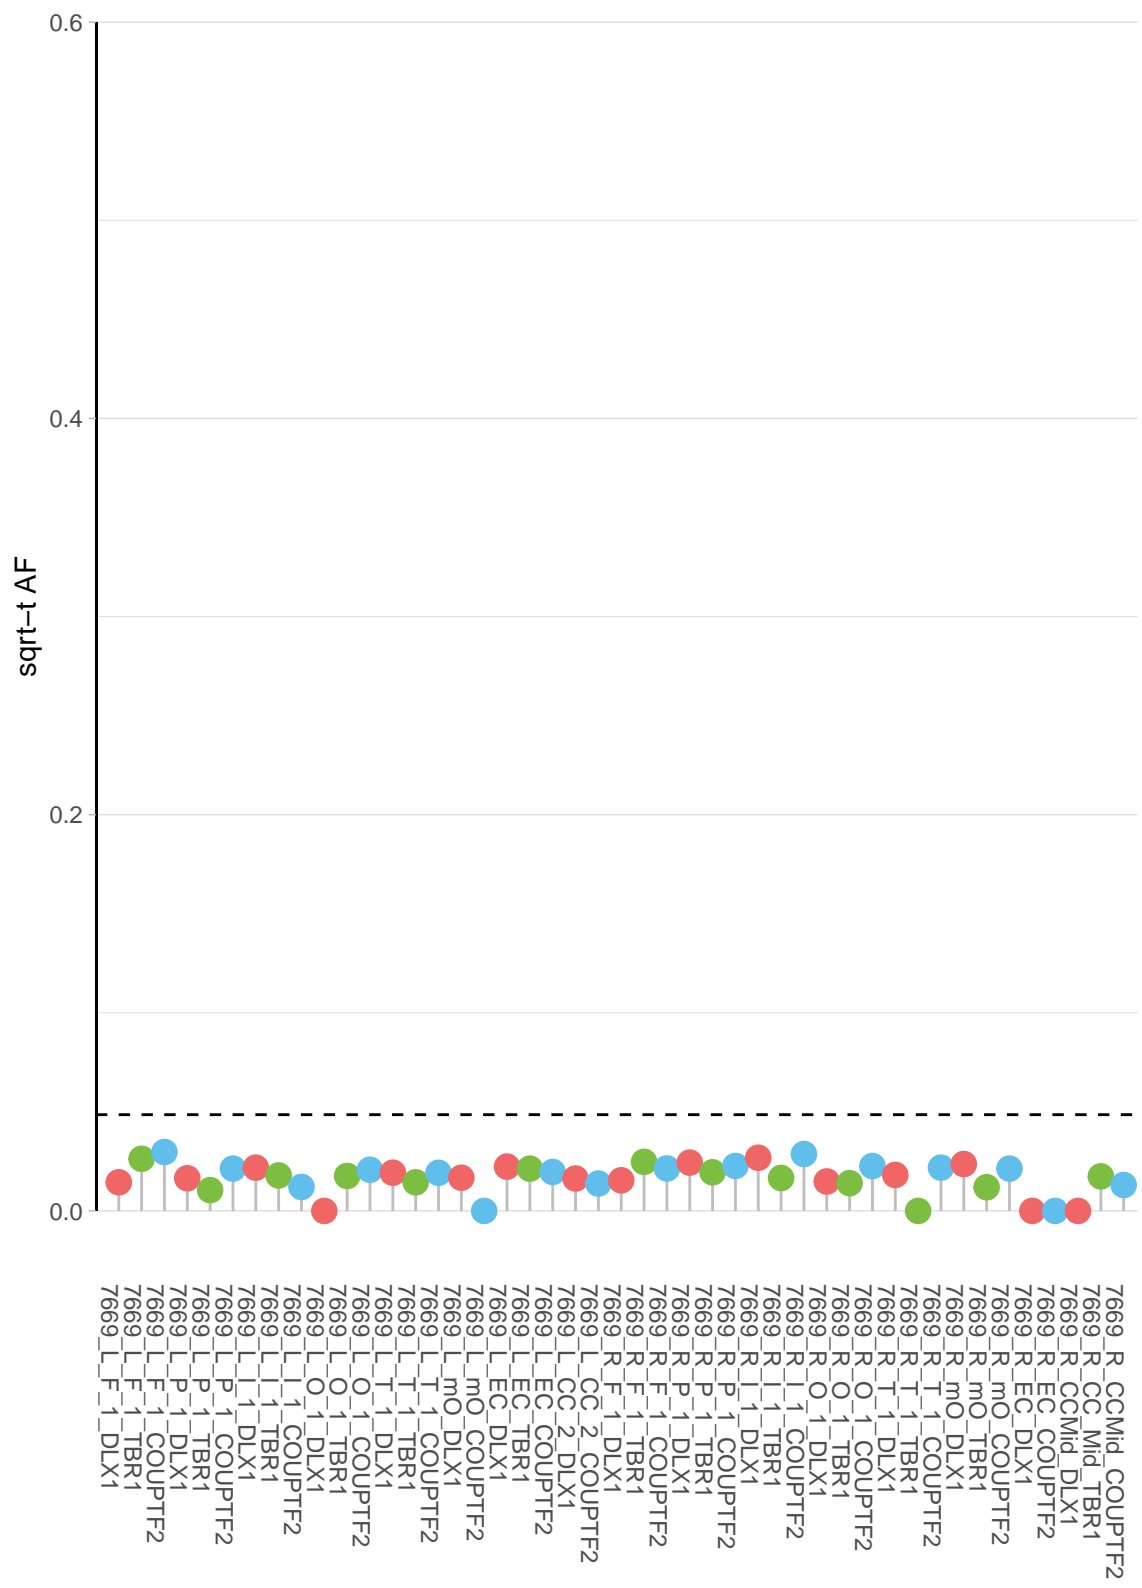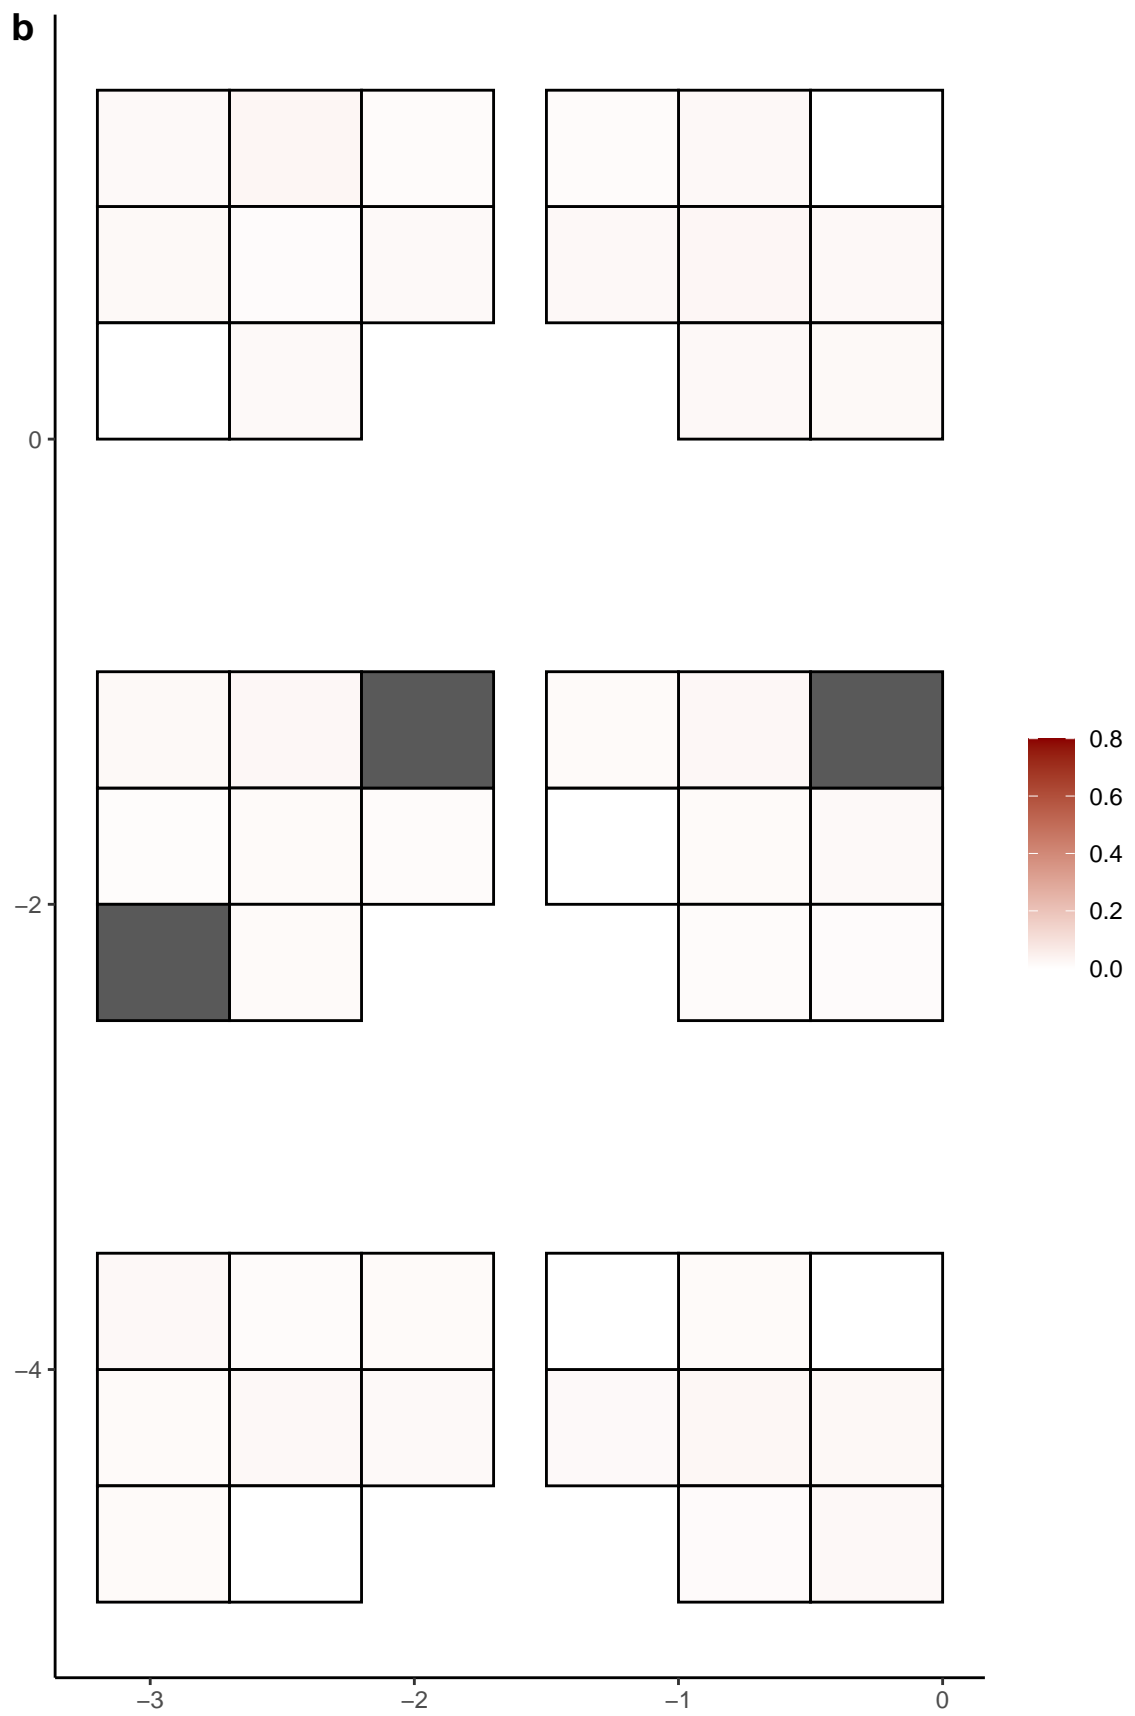



**a** ID05 16-73492923-G-T

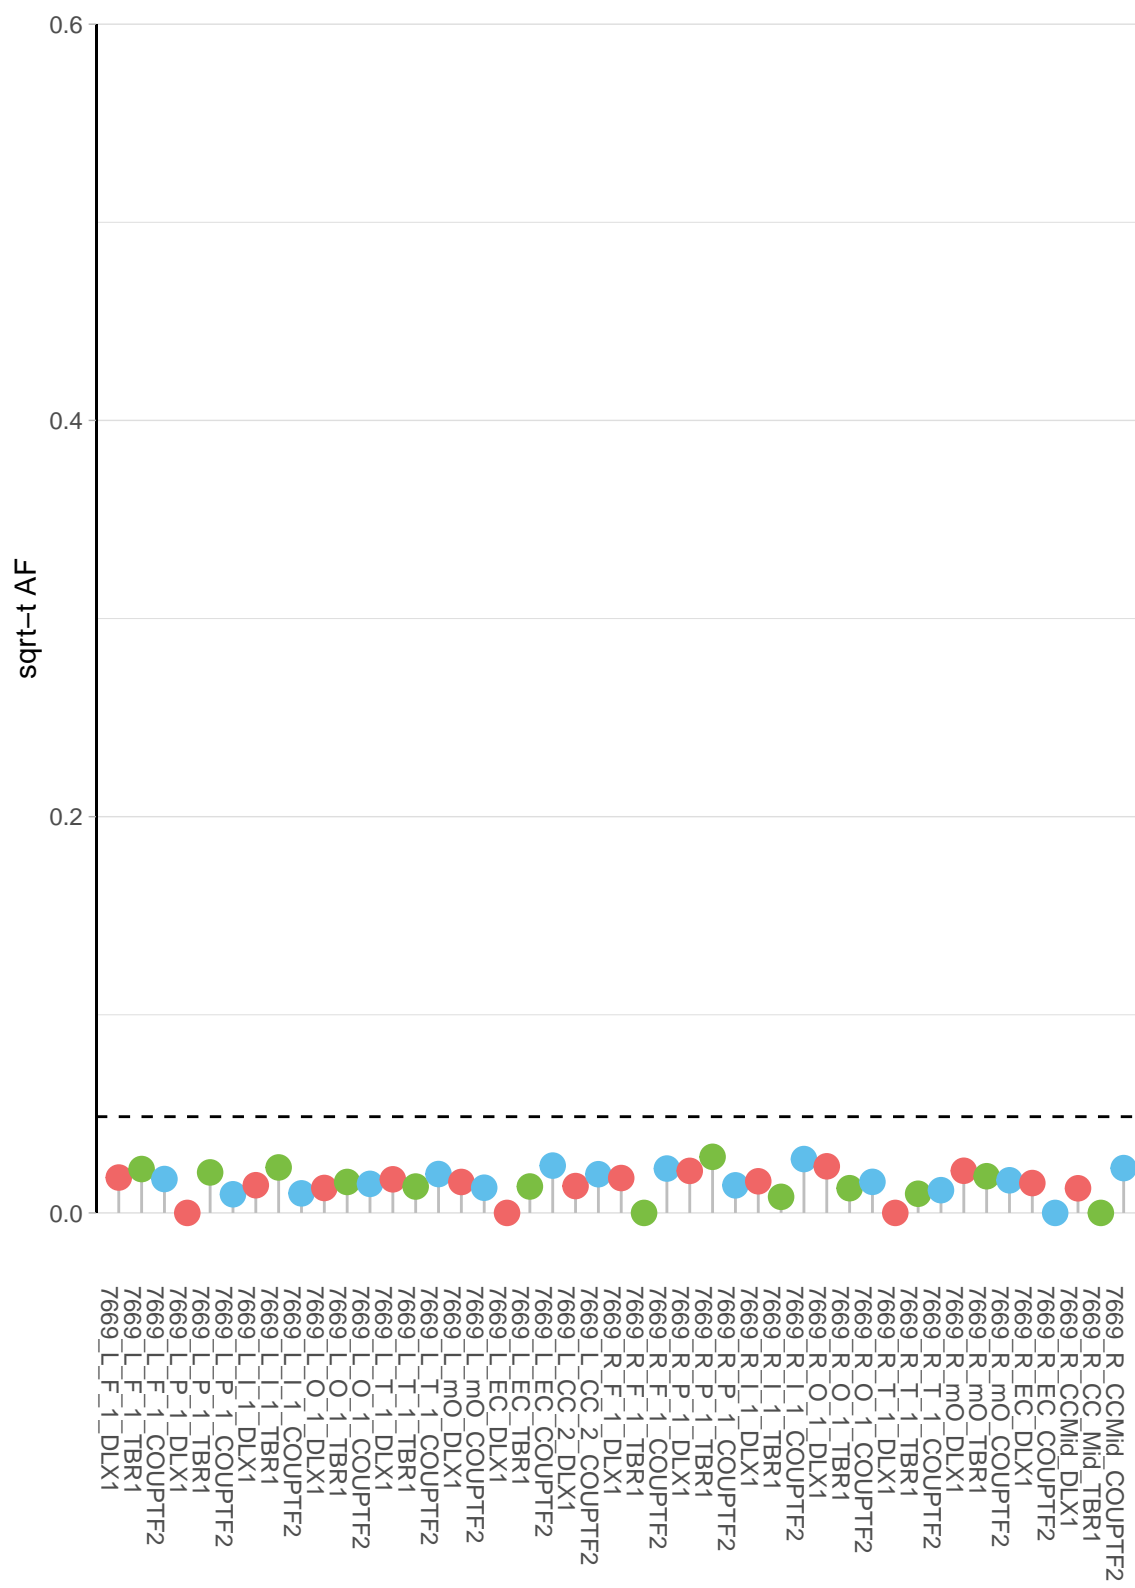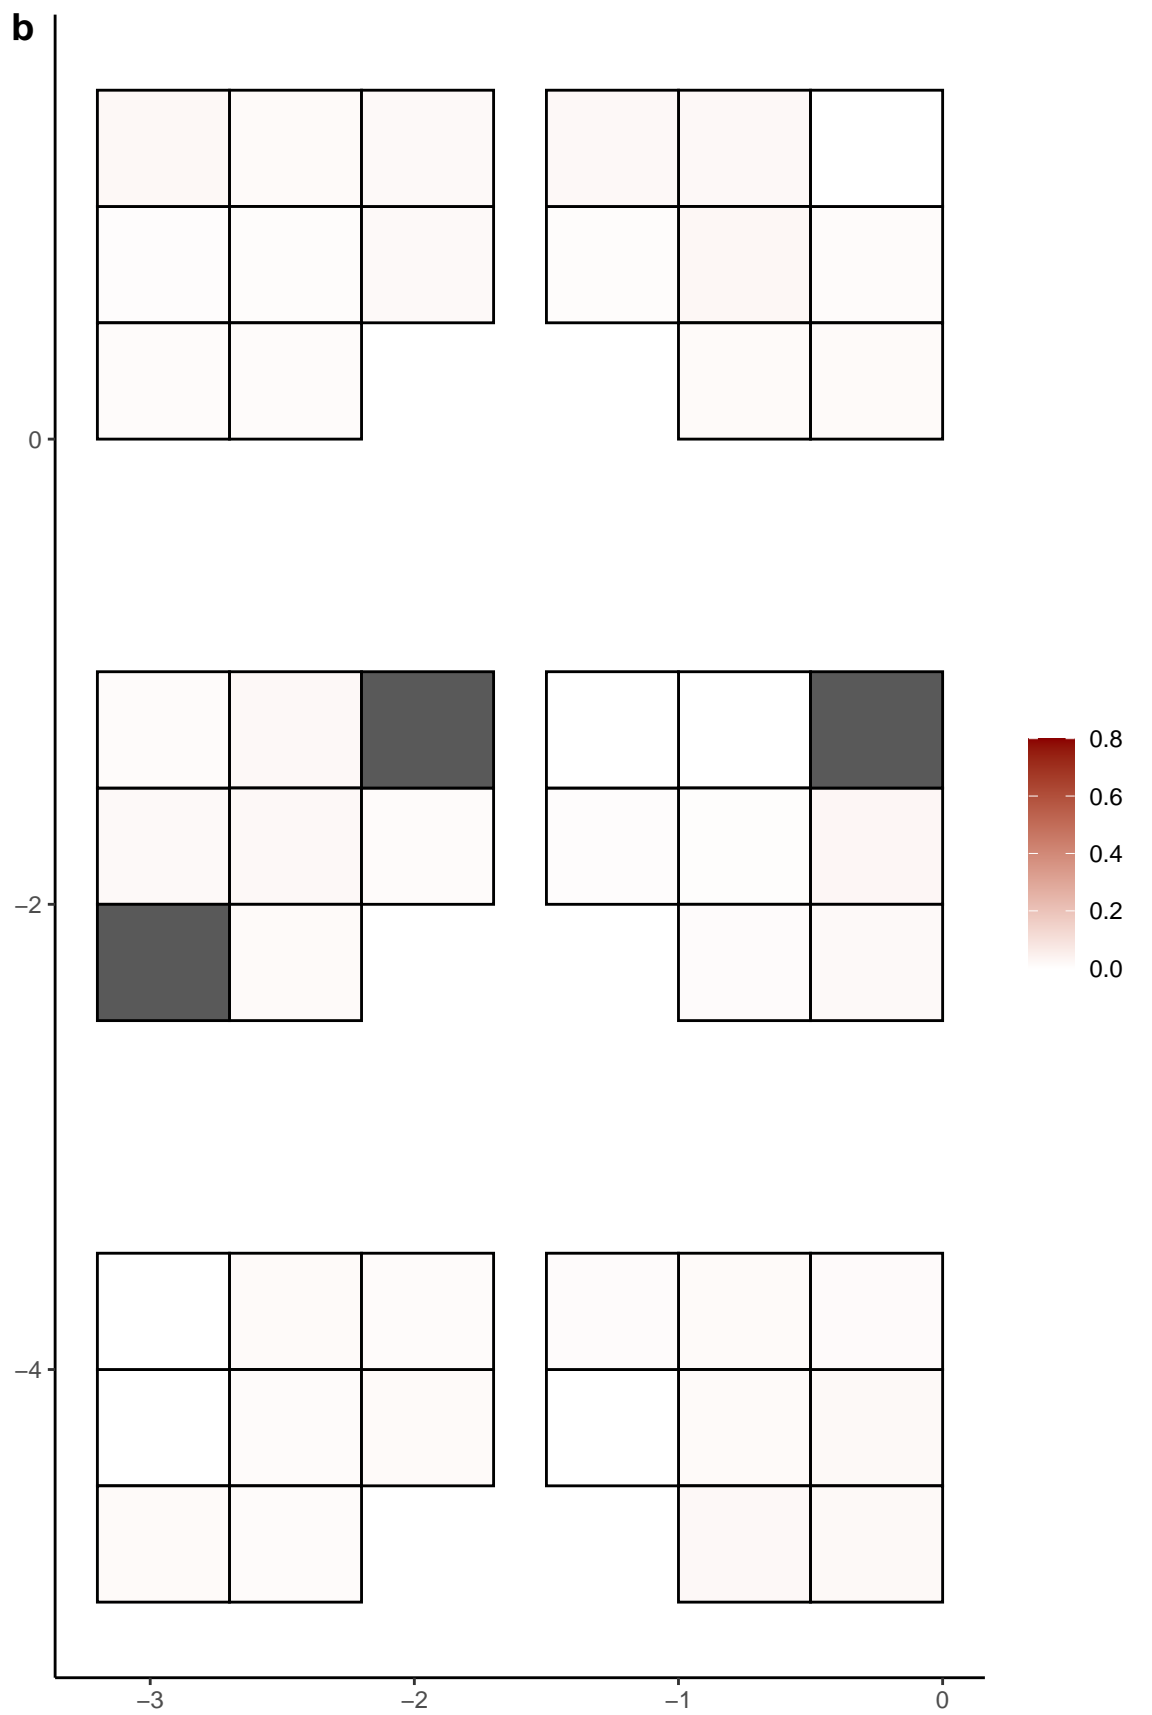

**a** ID05 16-77437520-G-T

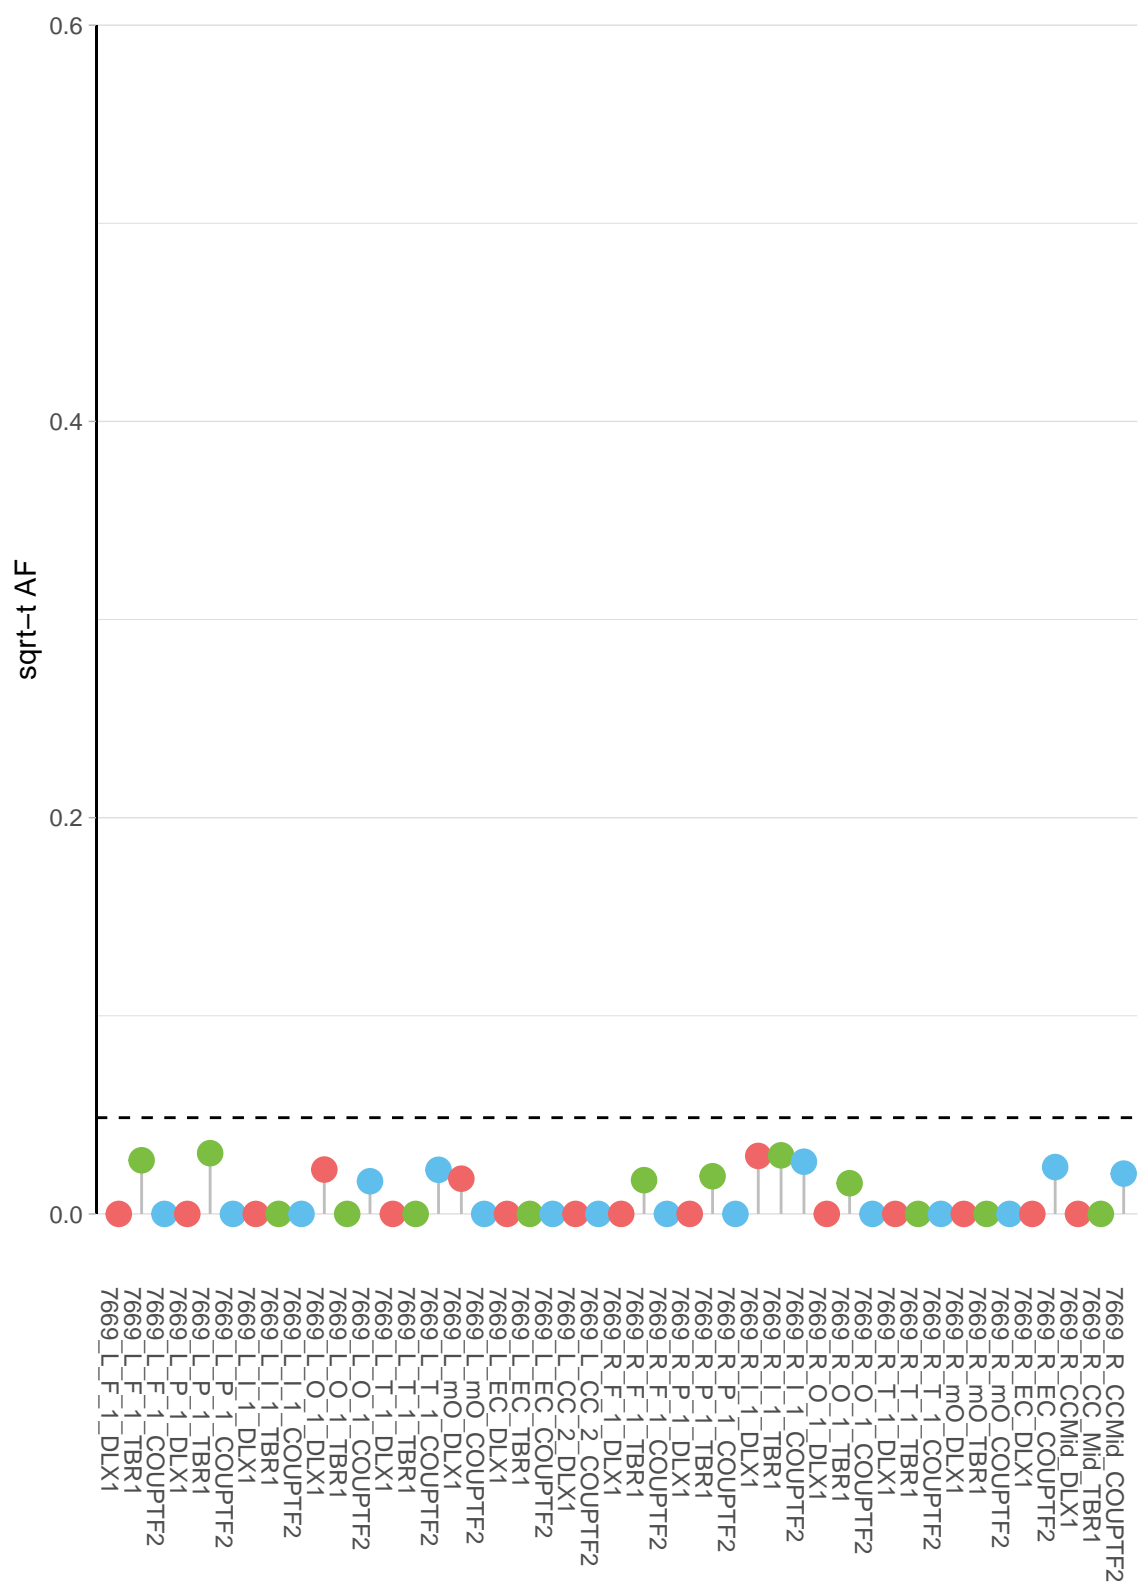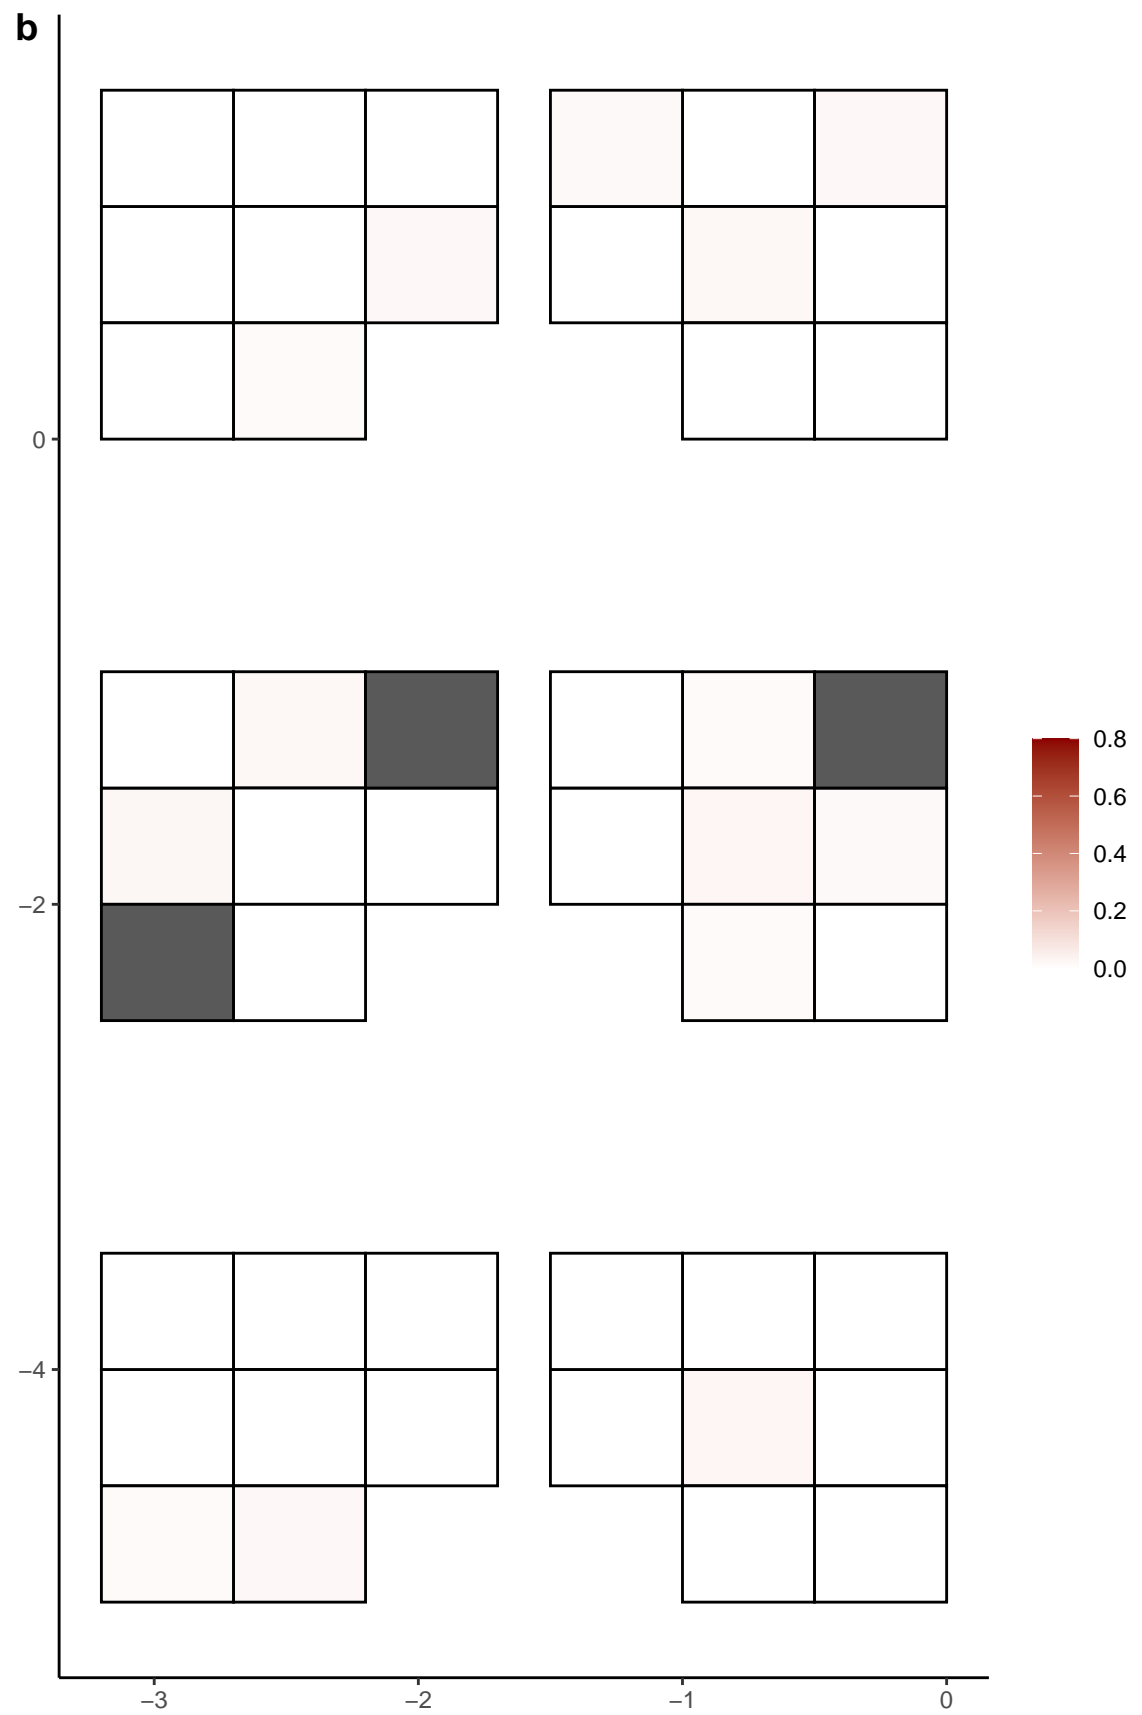



**a** ID05 16-86500807-C-T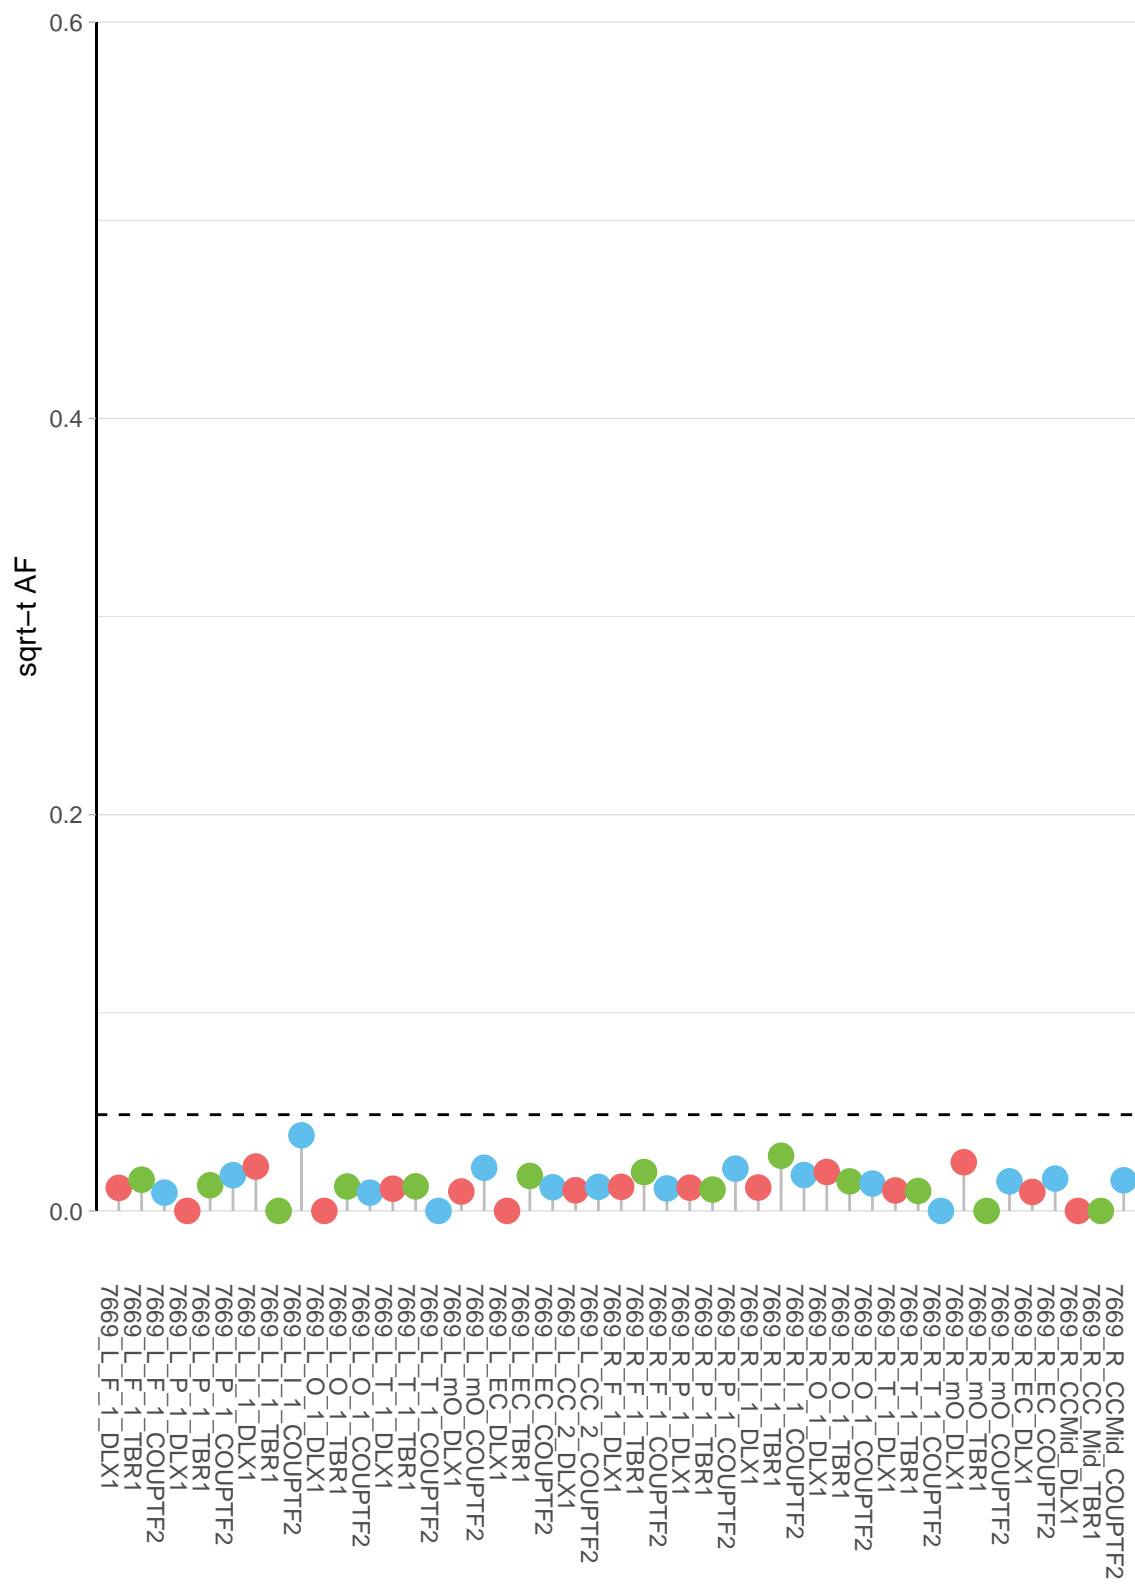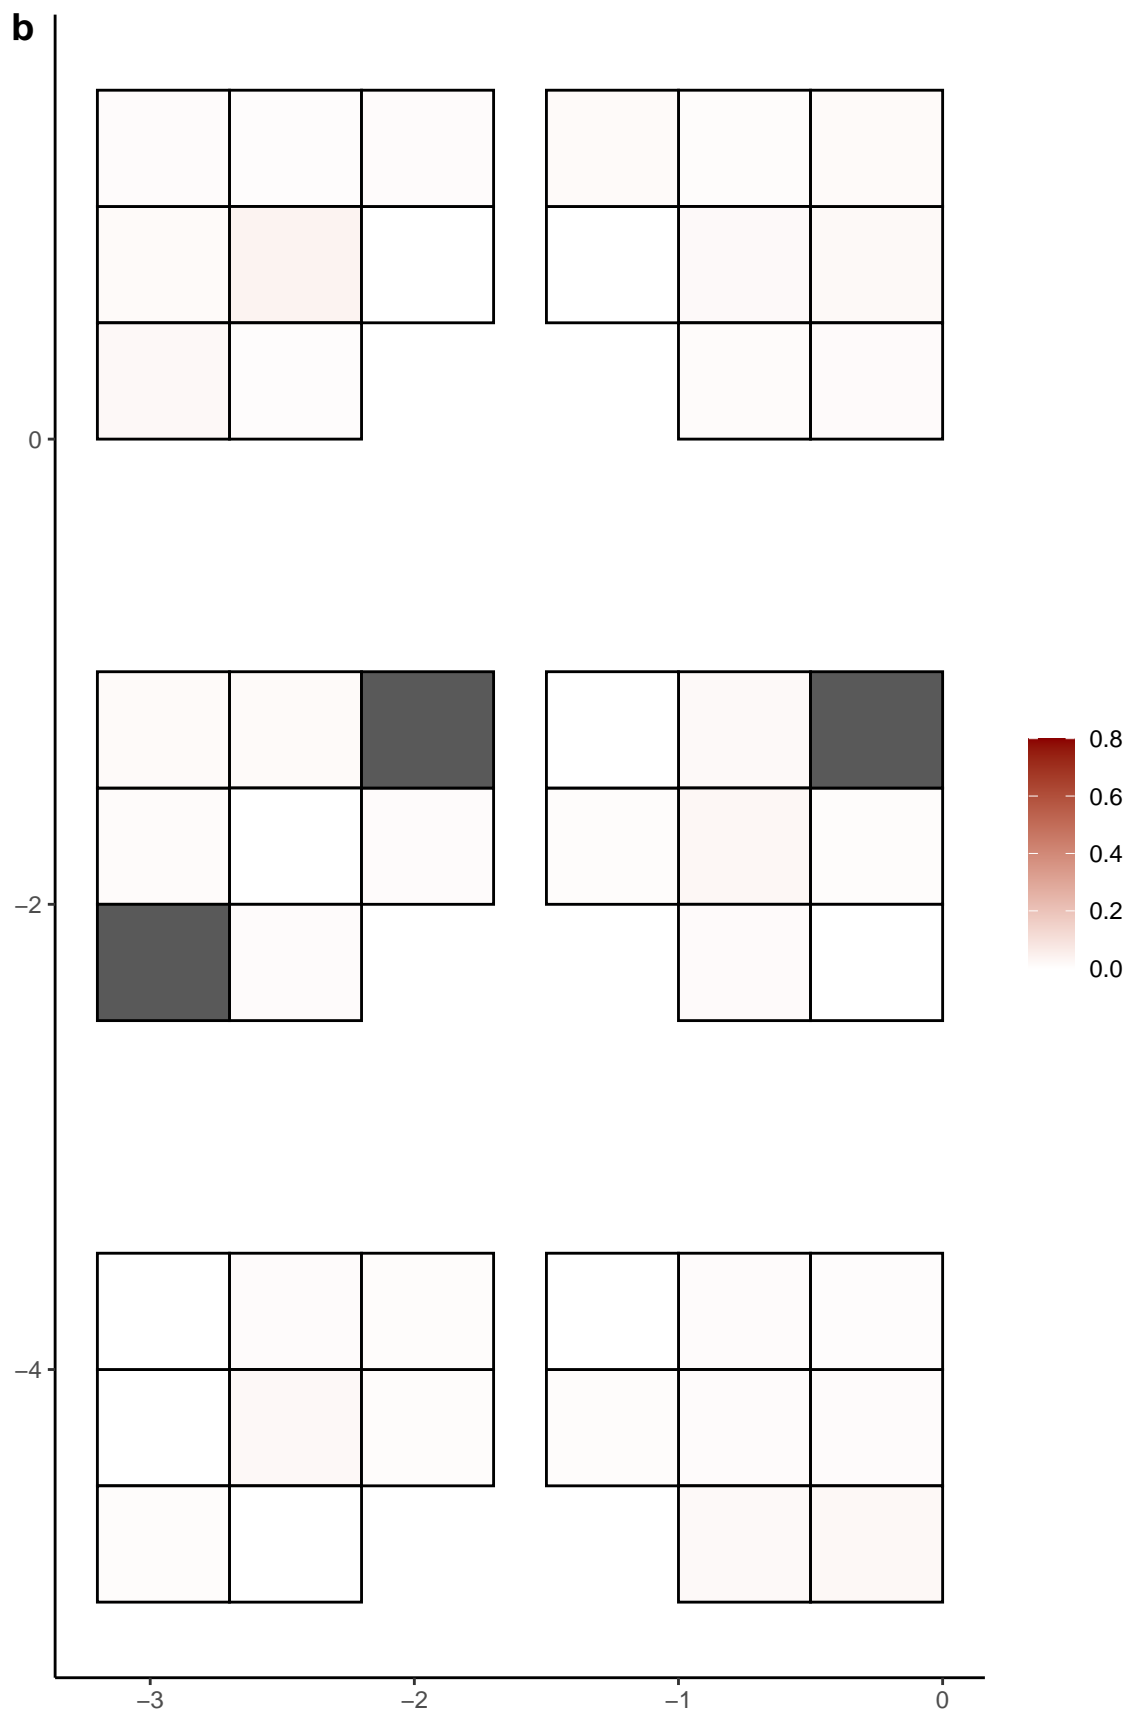

**a** ID05 16-8802550-C-T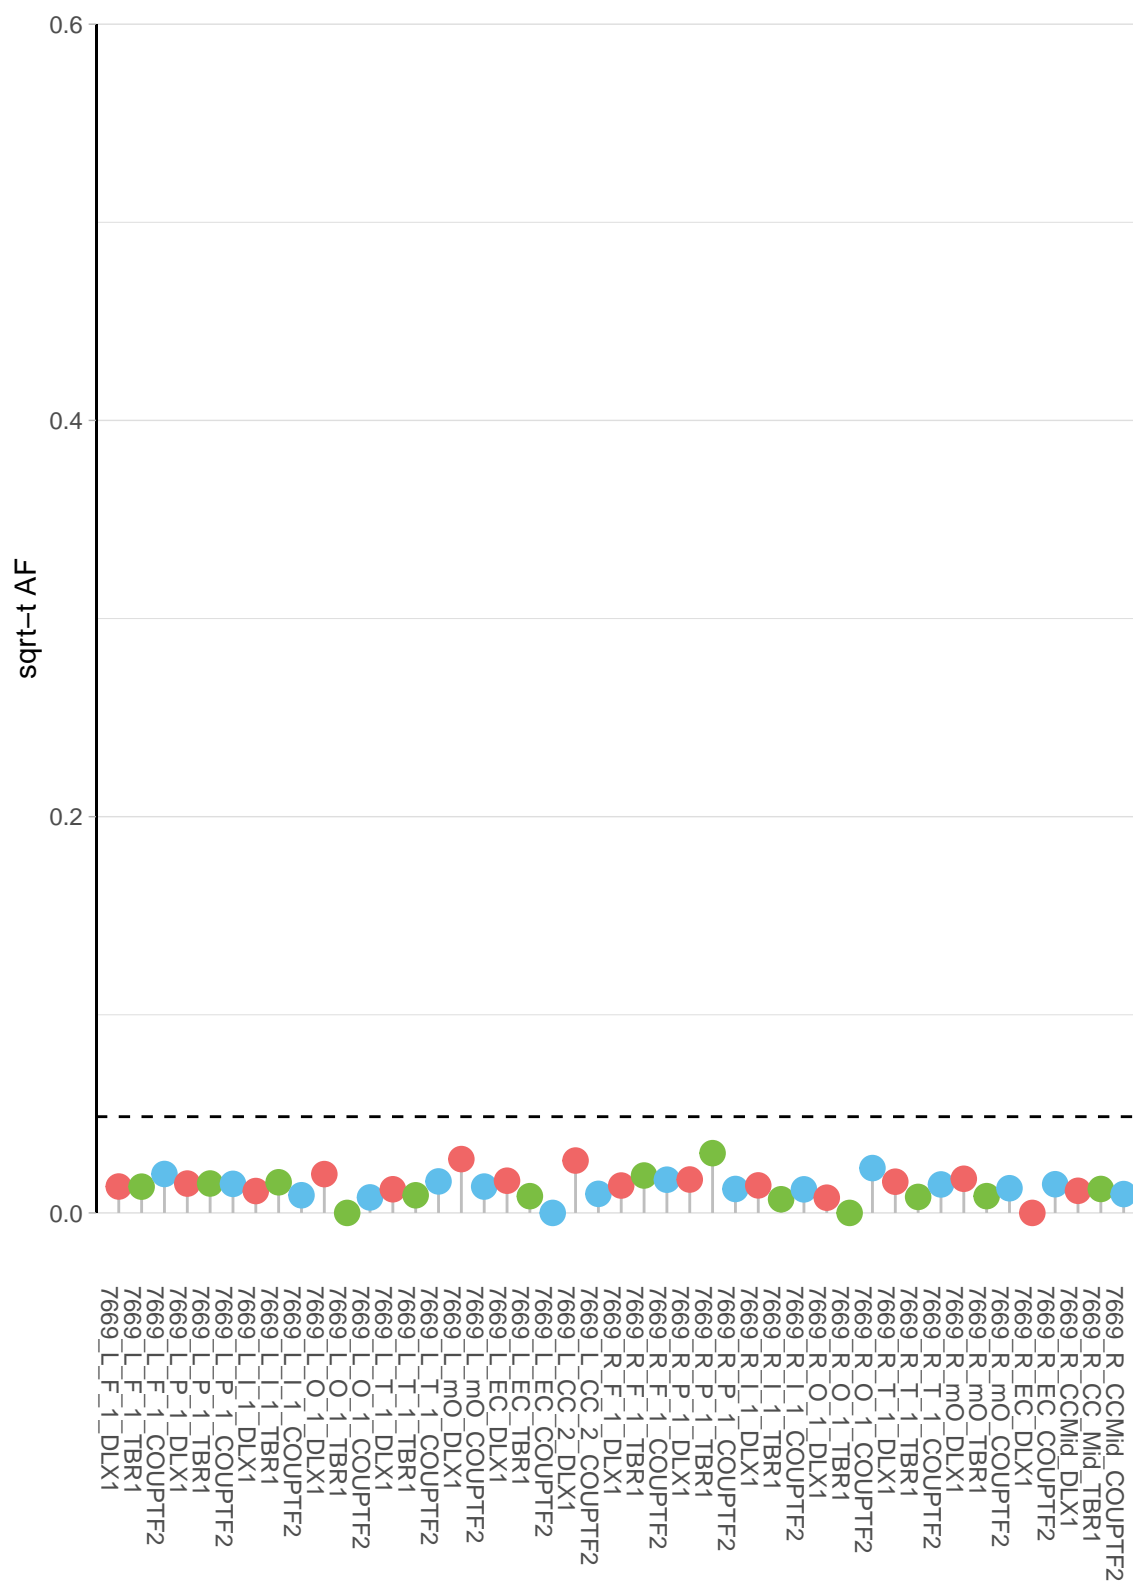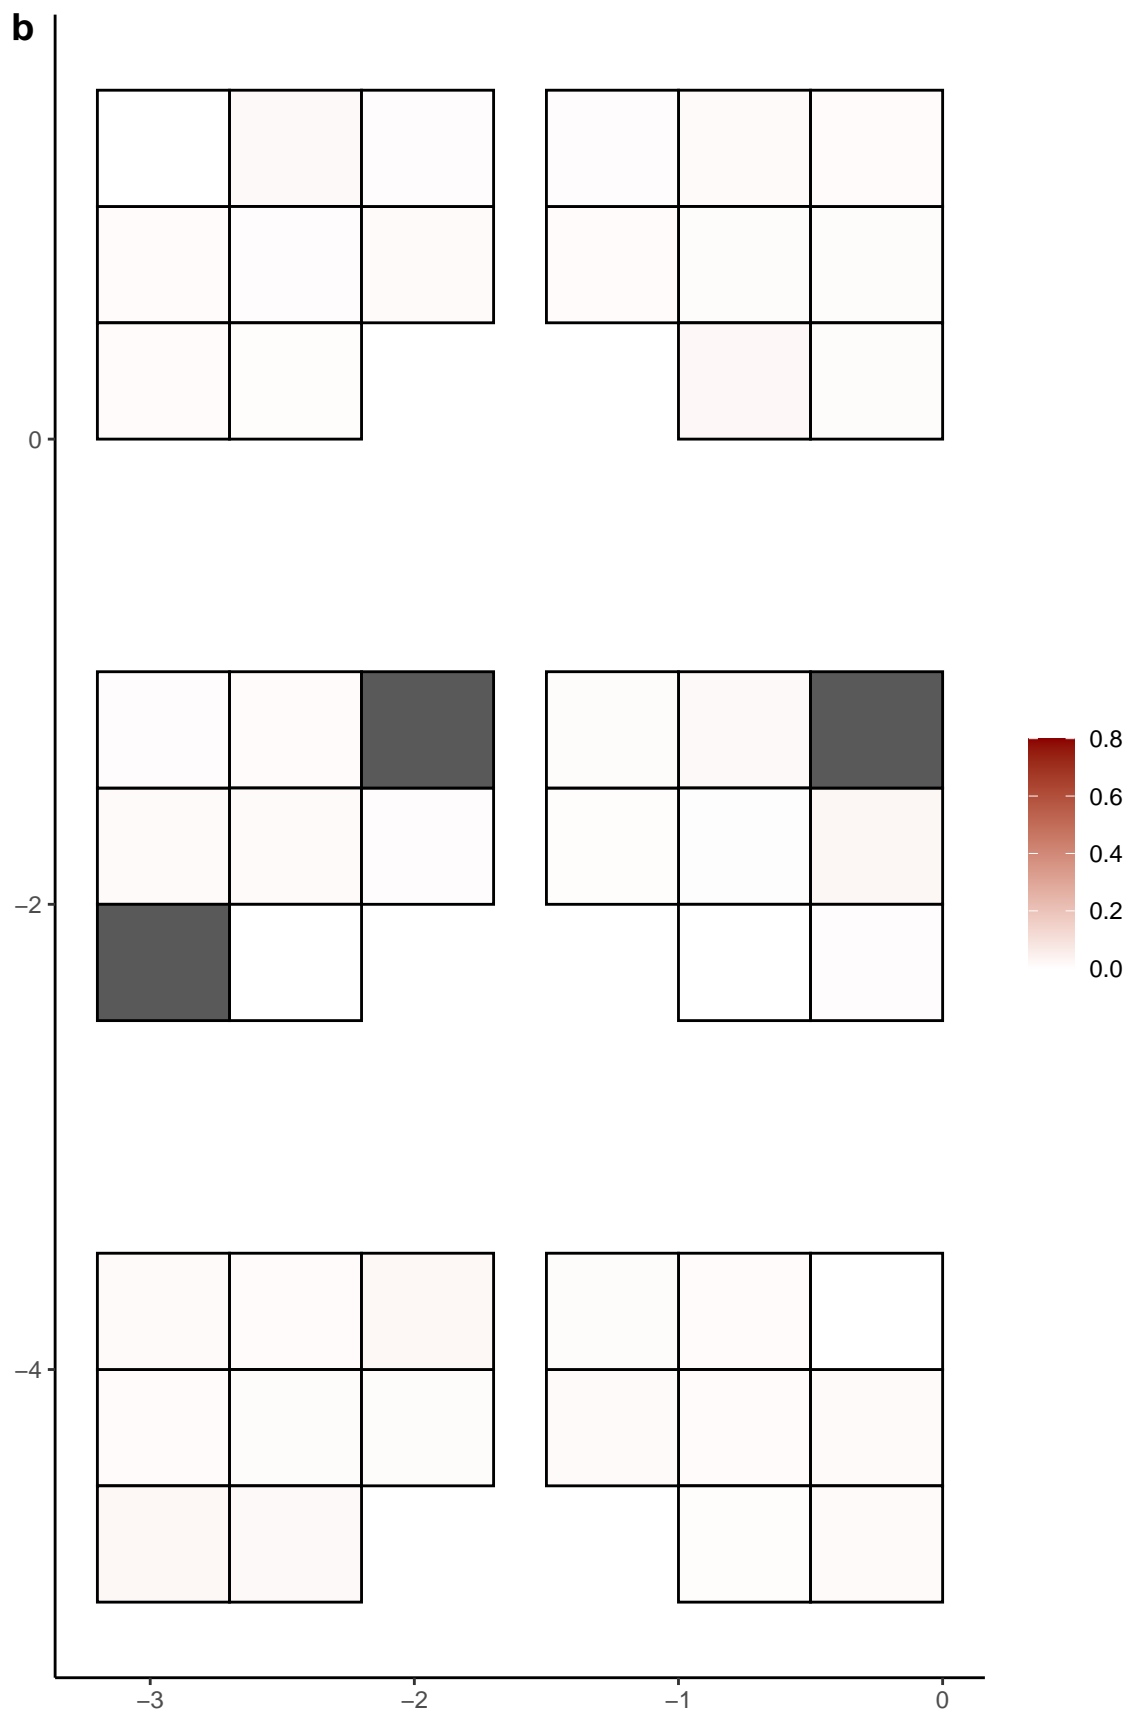

**a** ID05 16-925921-C-T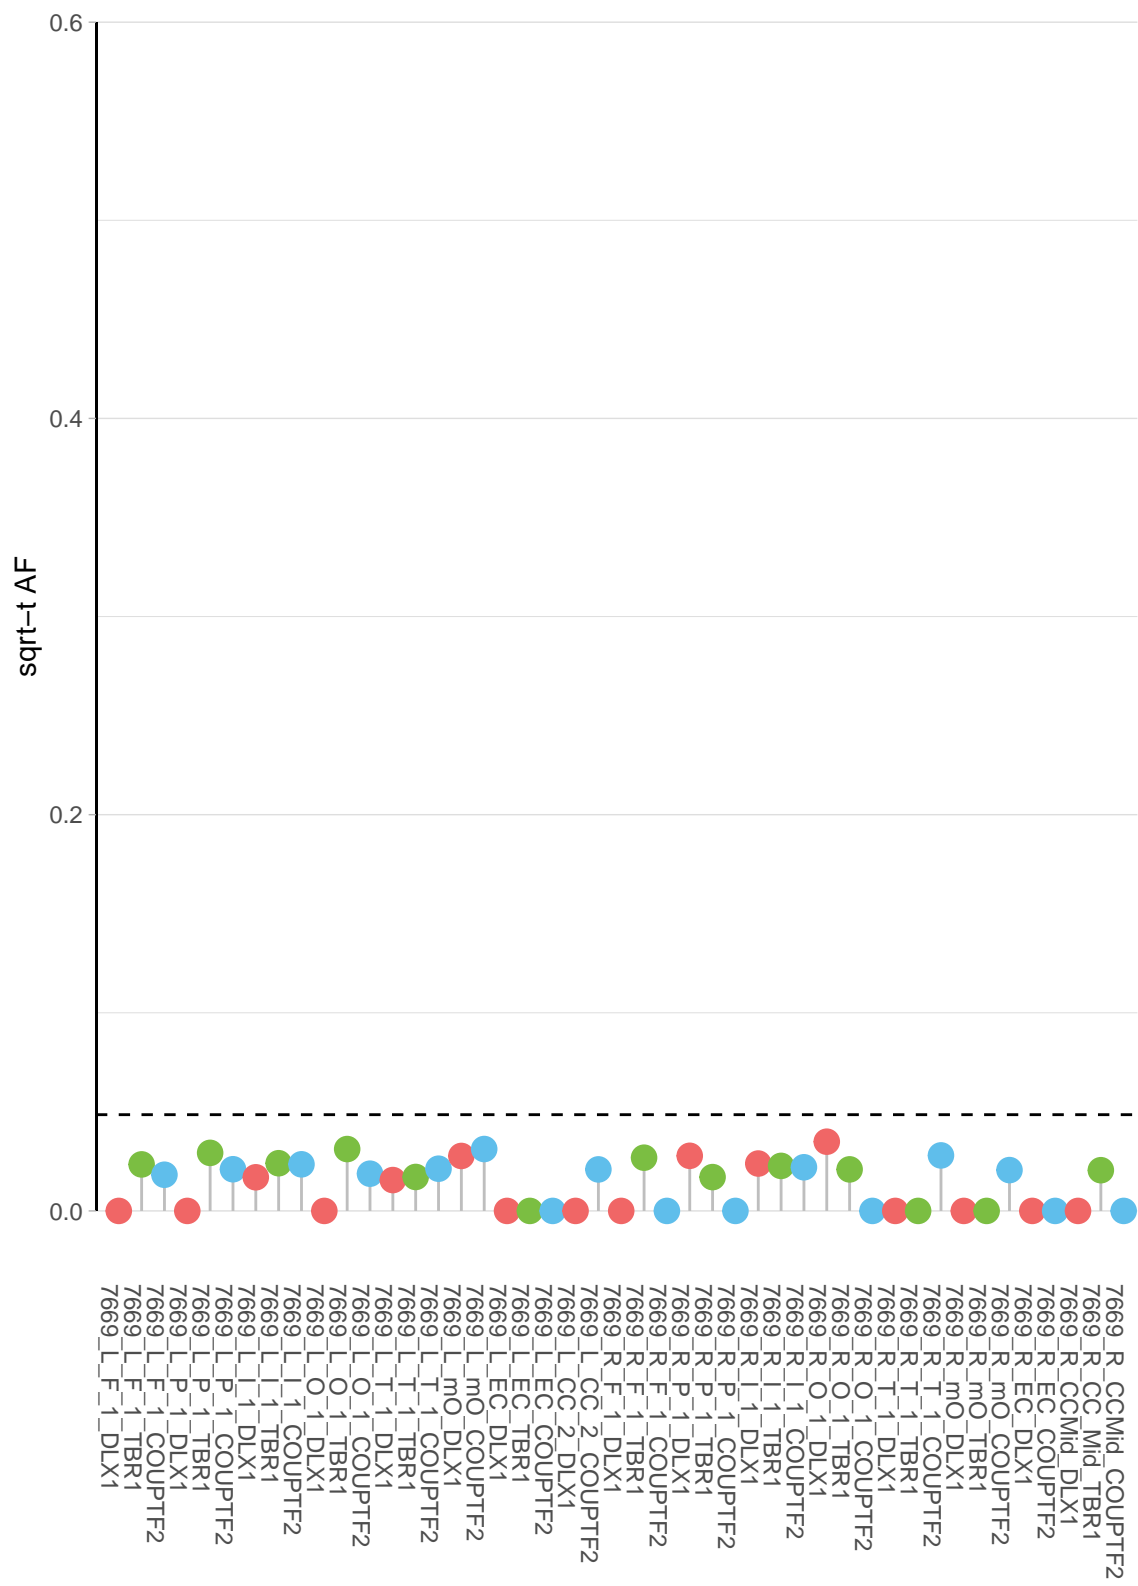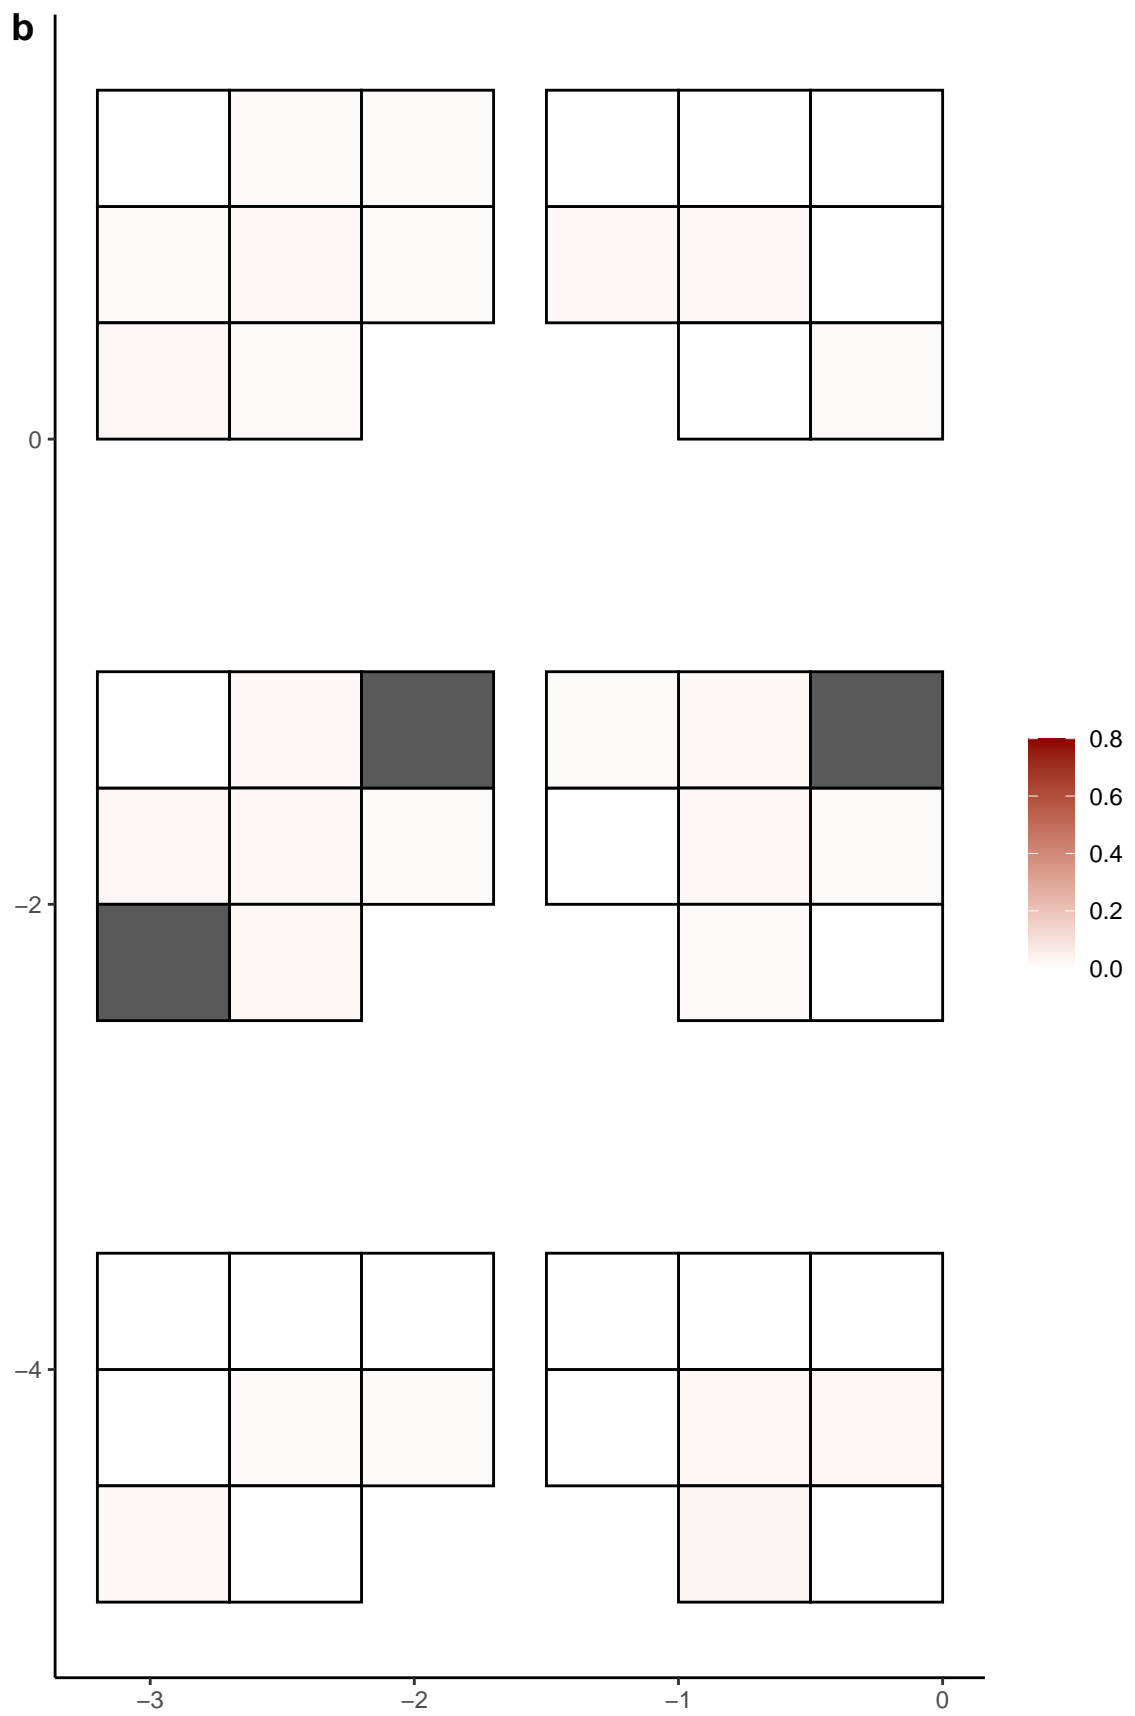

**a** ID05 16-9382504-C-T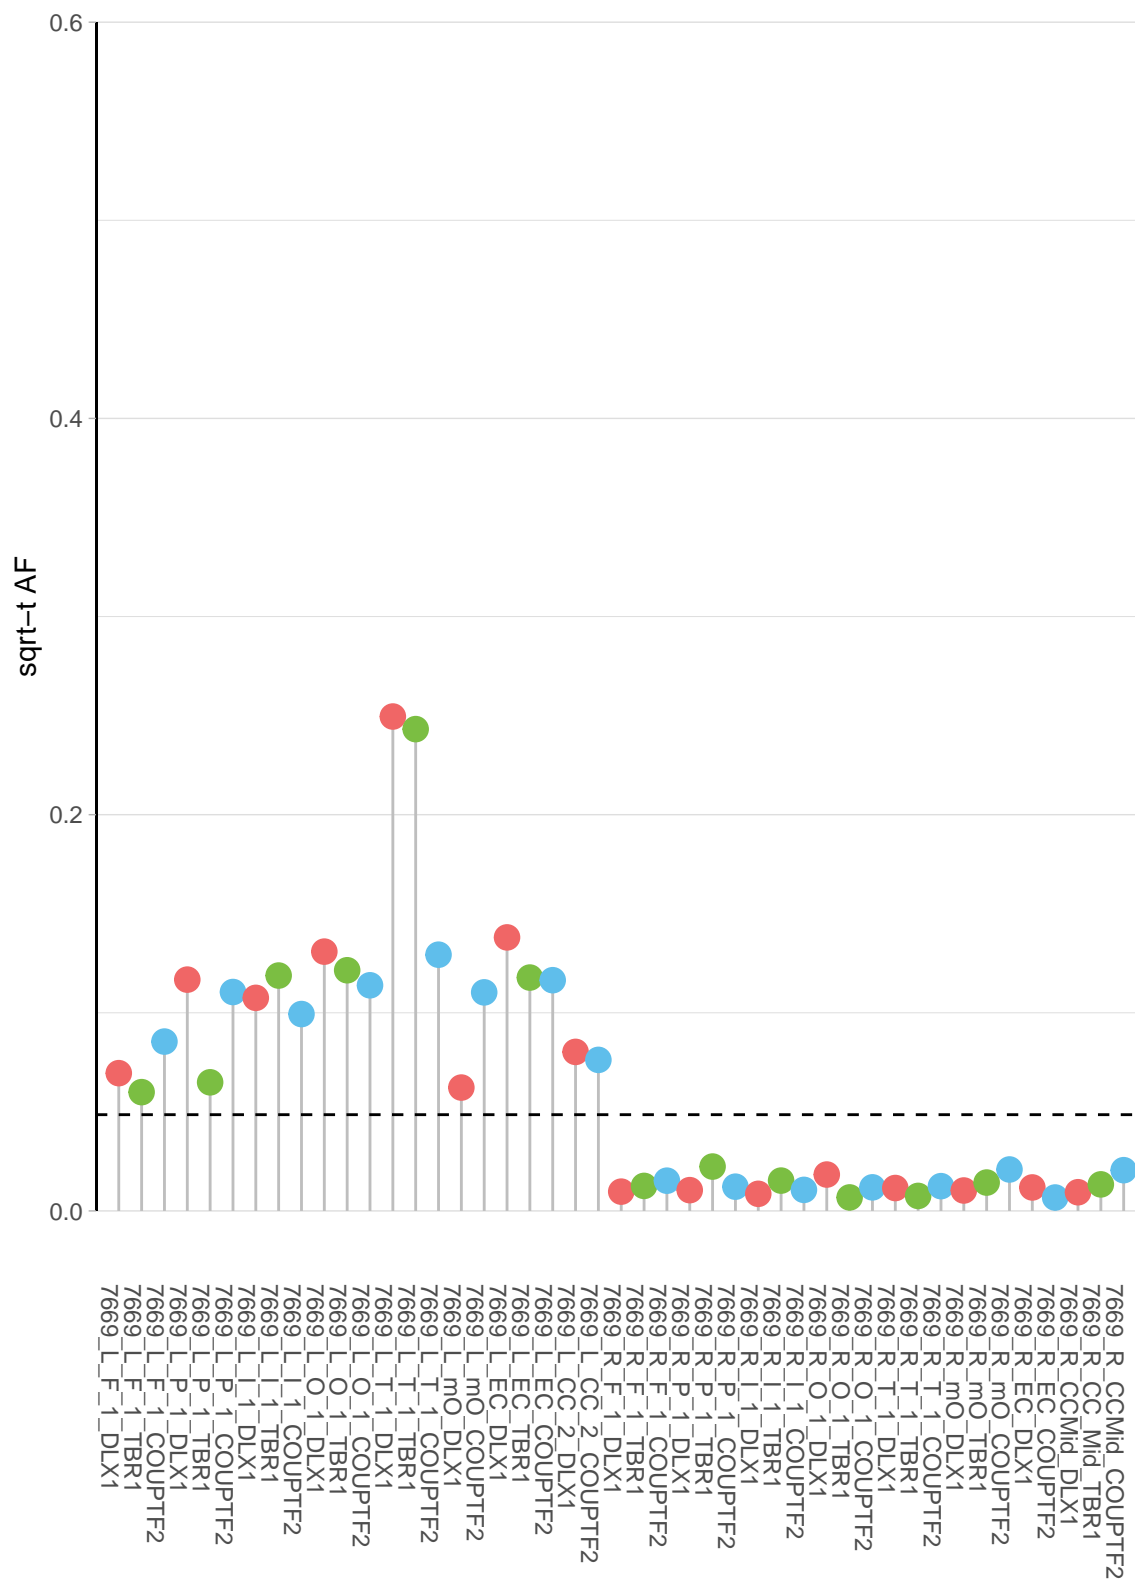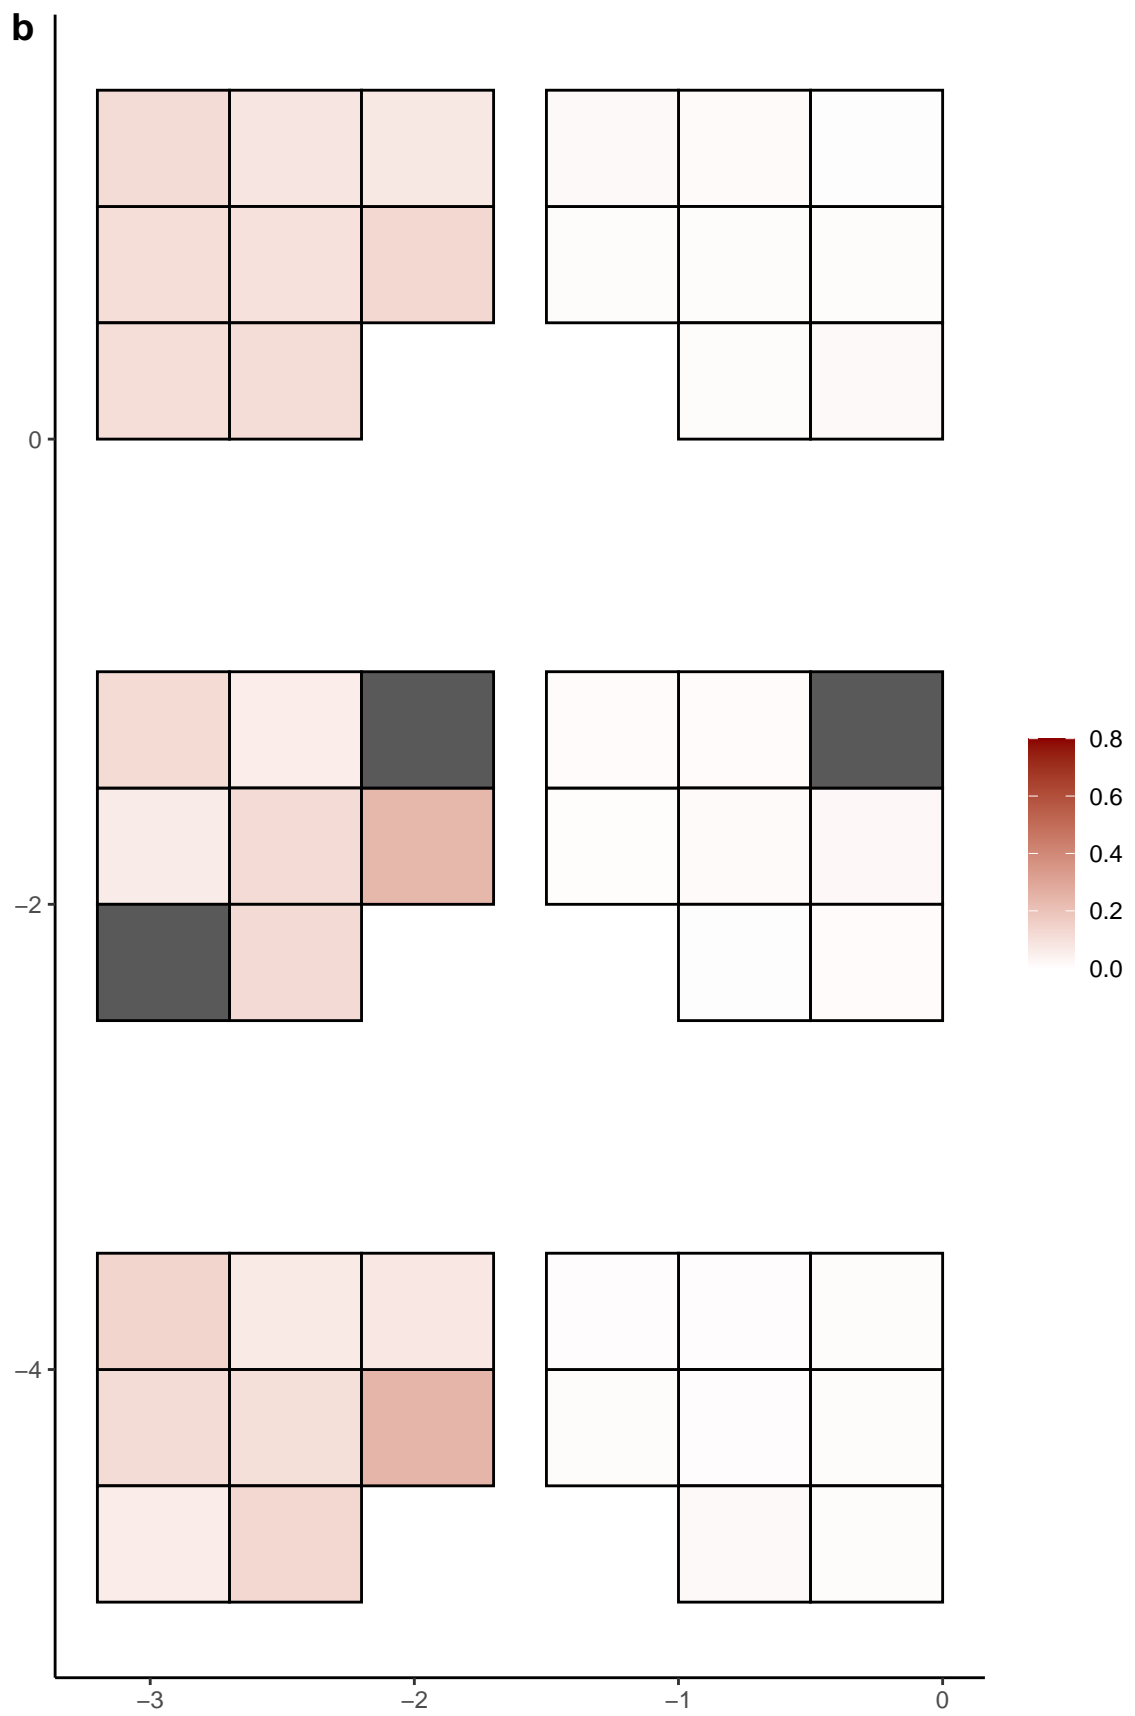

**a** ID05 17-10283611-C-T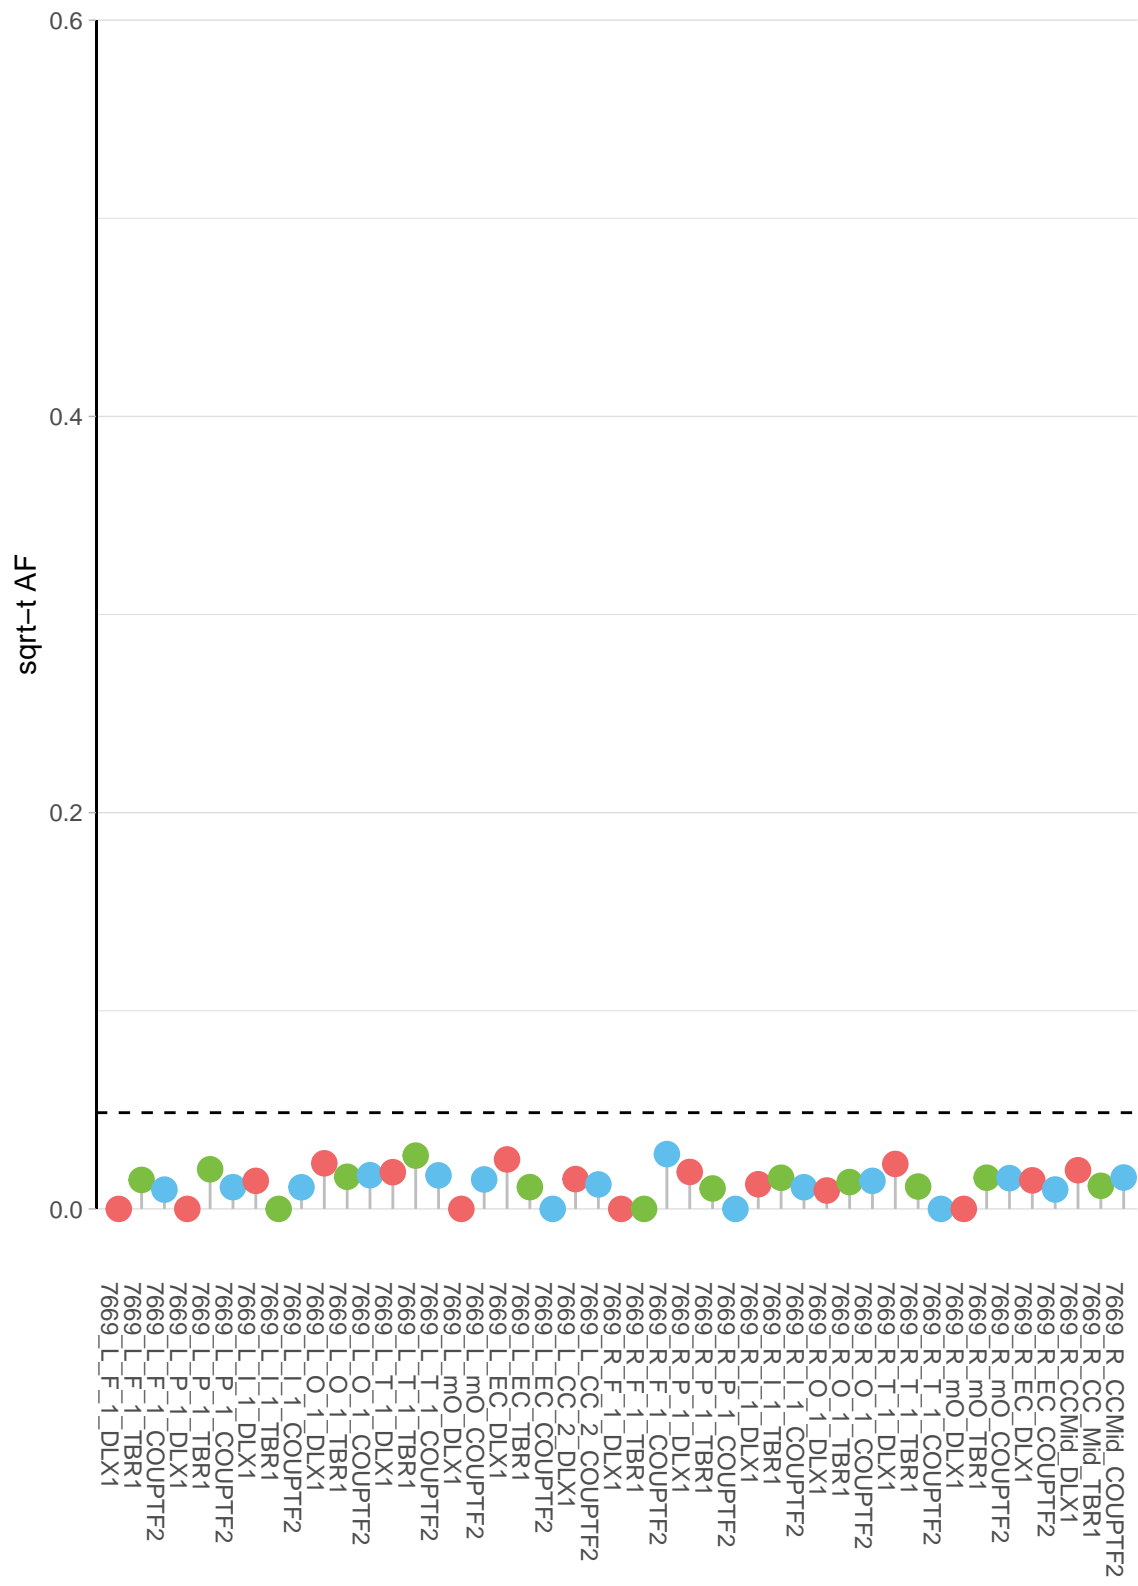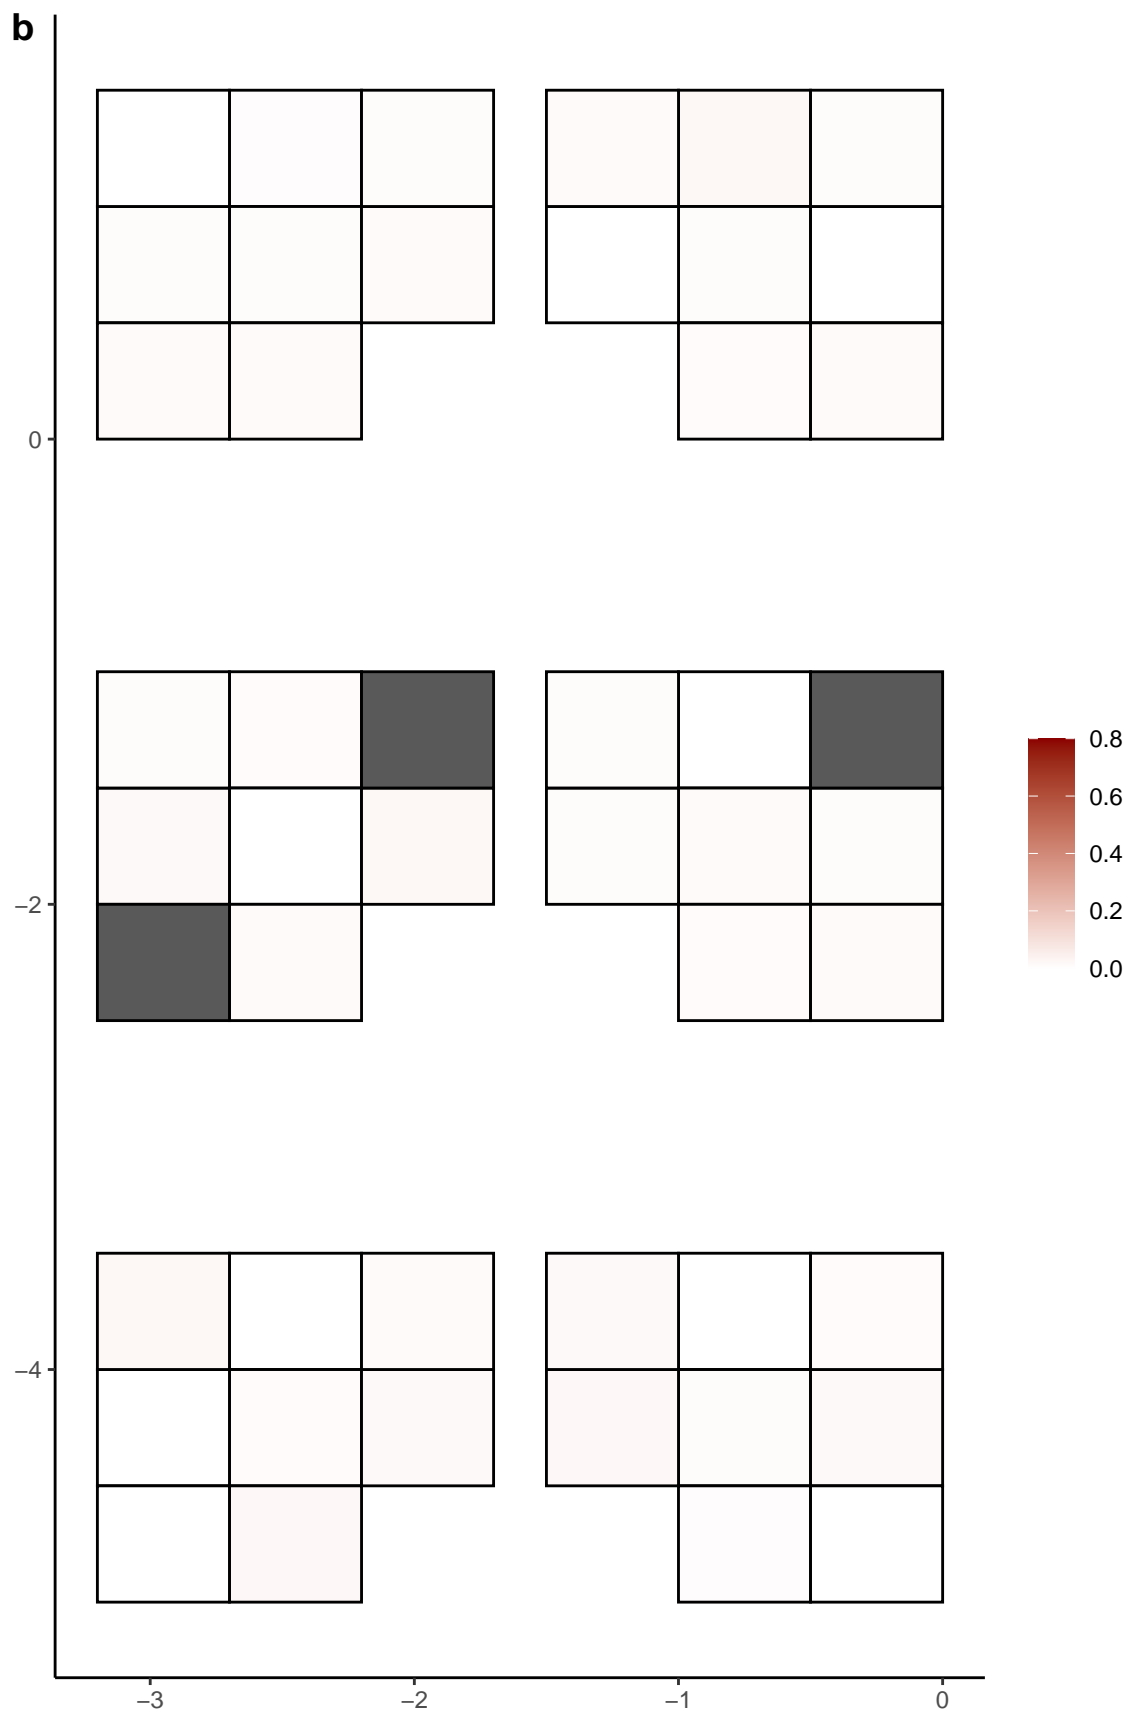



**a** ID05 17-12534415-G-T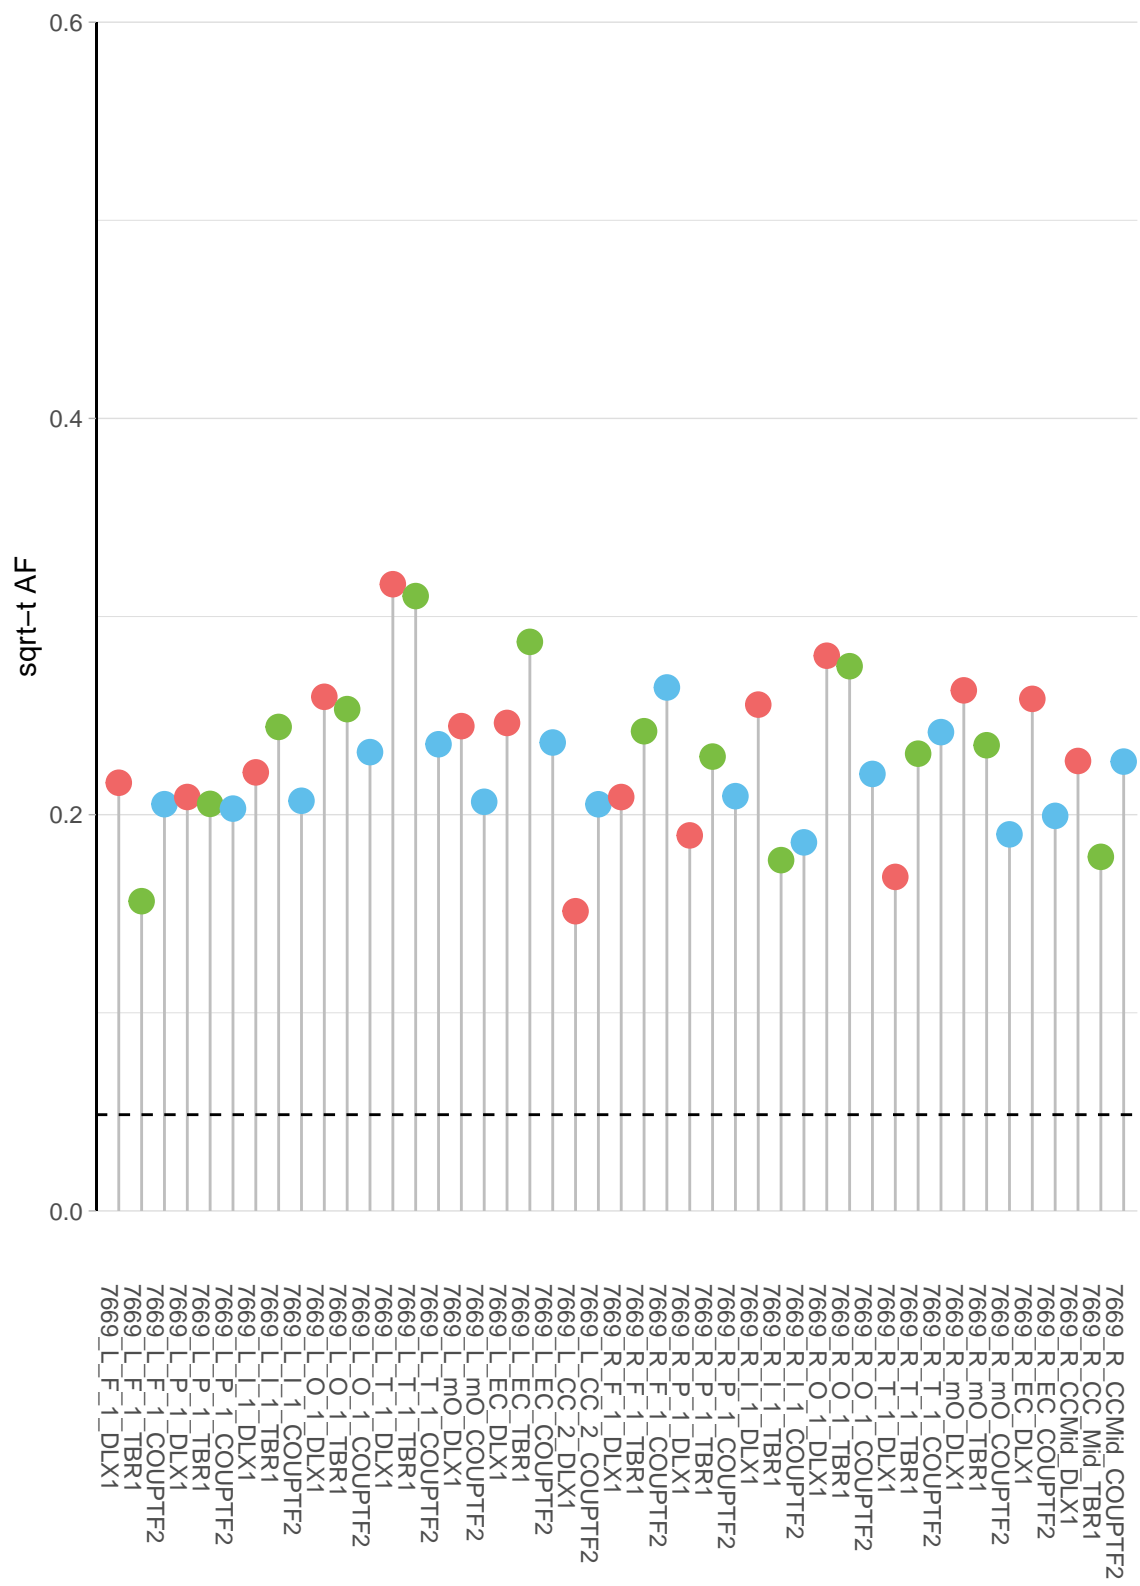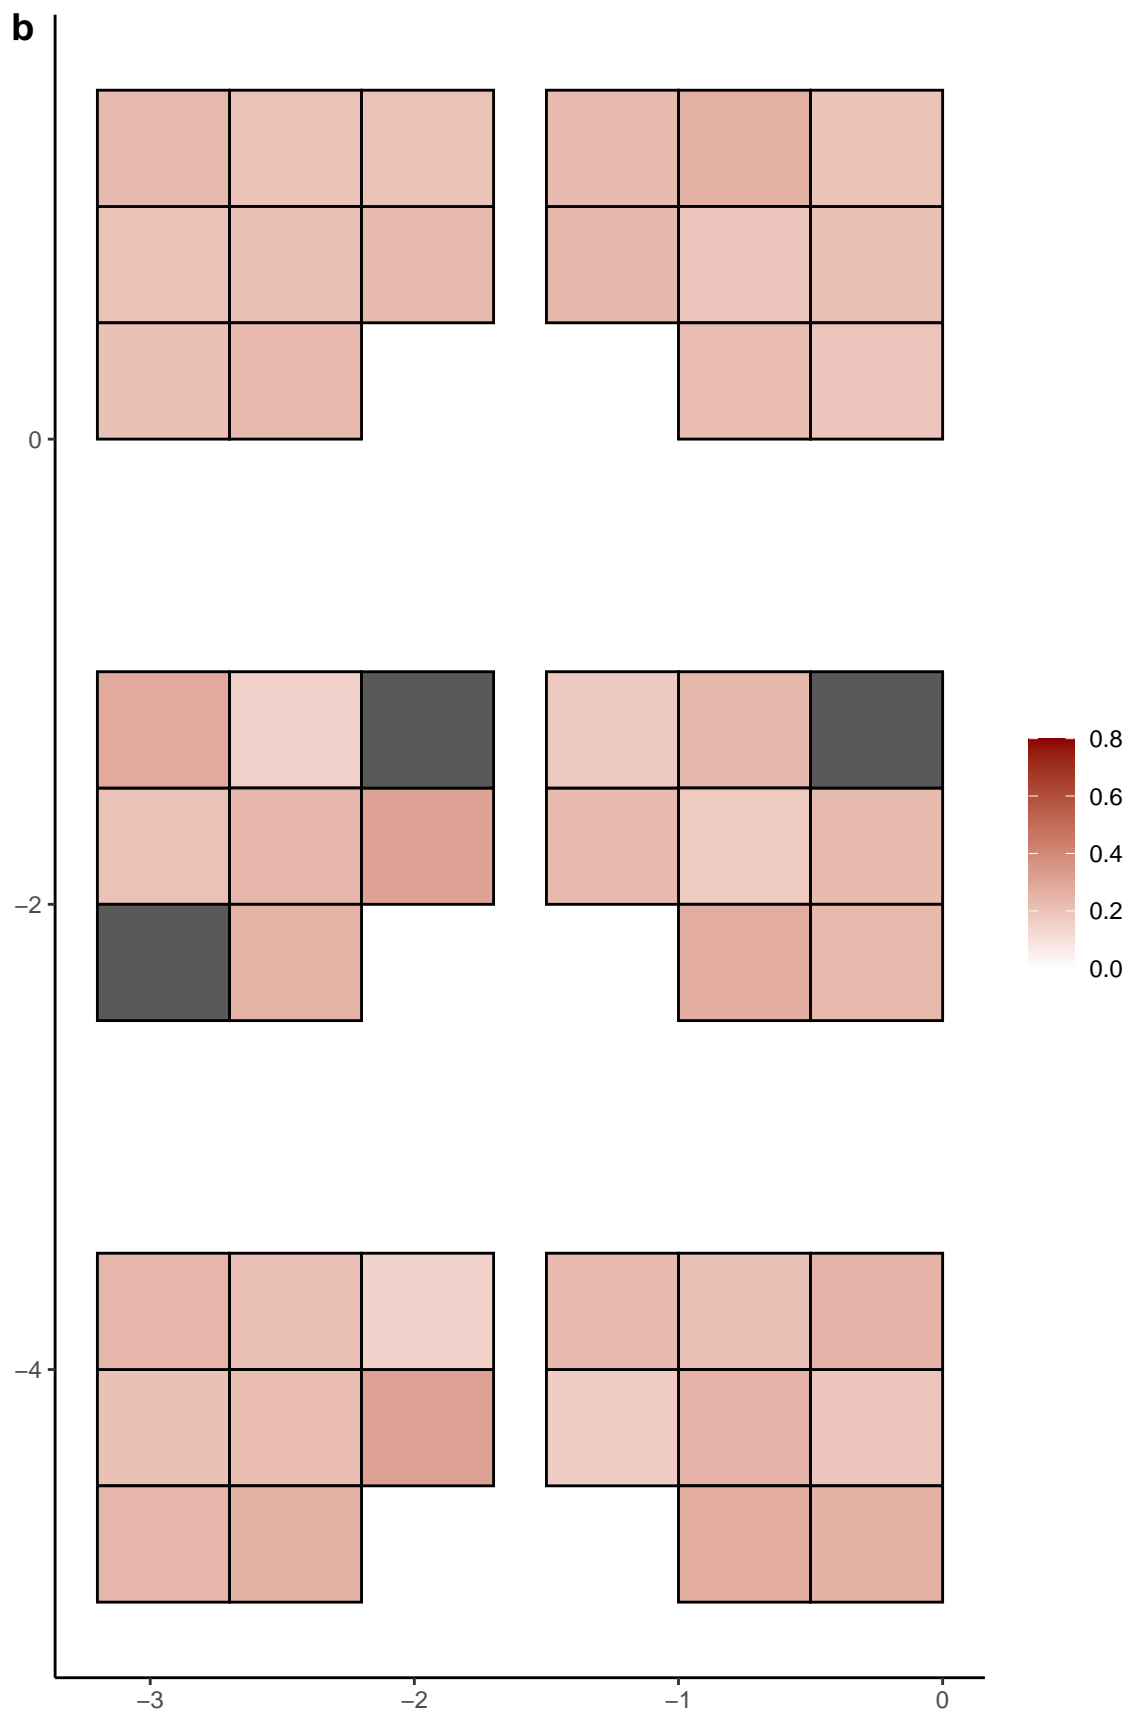

**a** ID05 17-1478793-G-A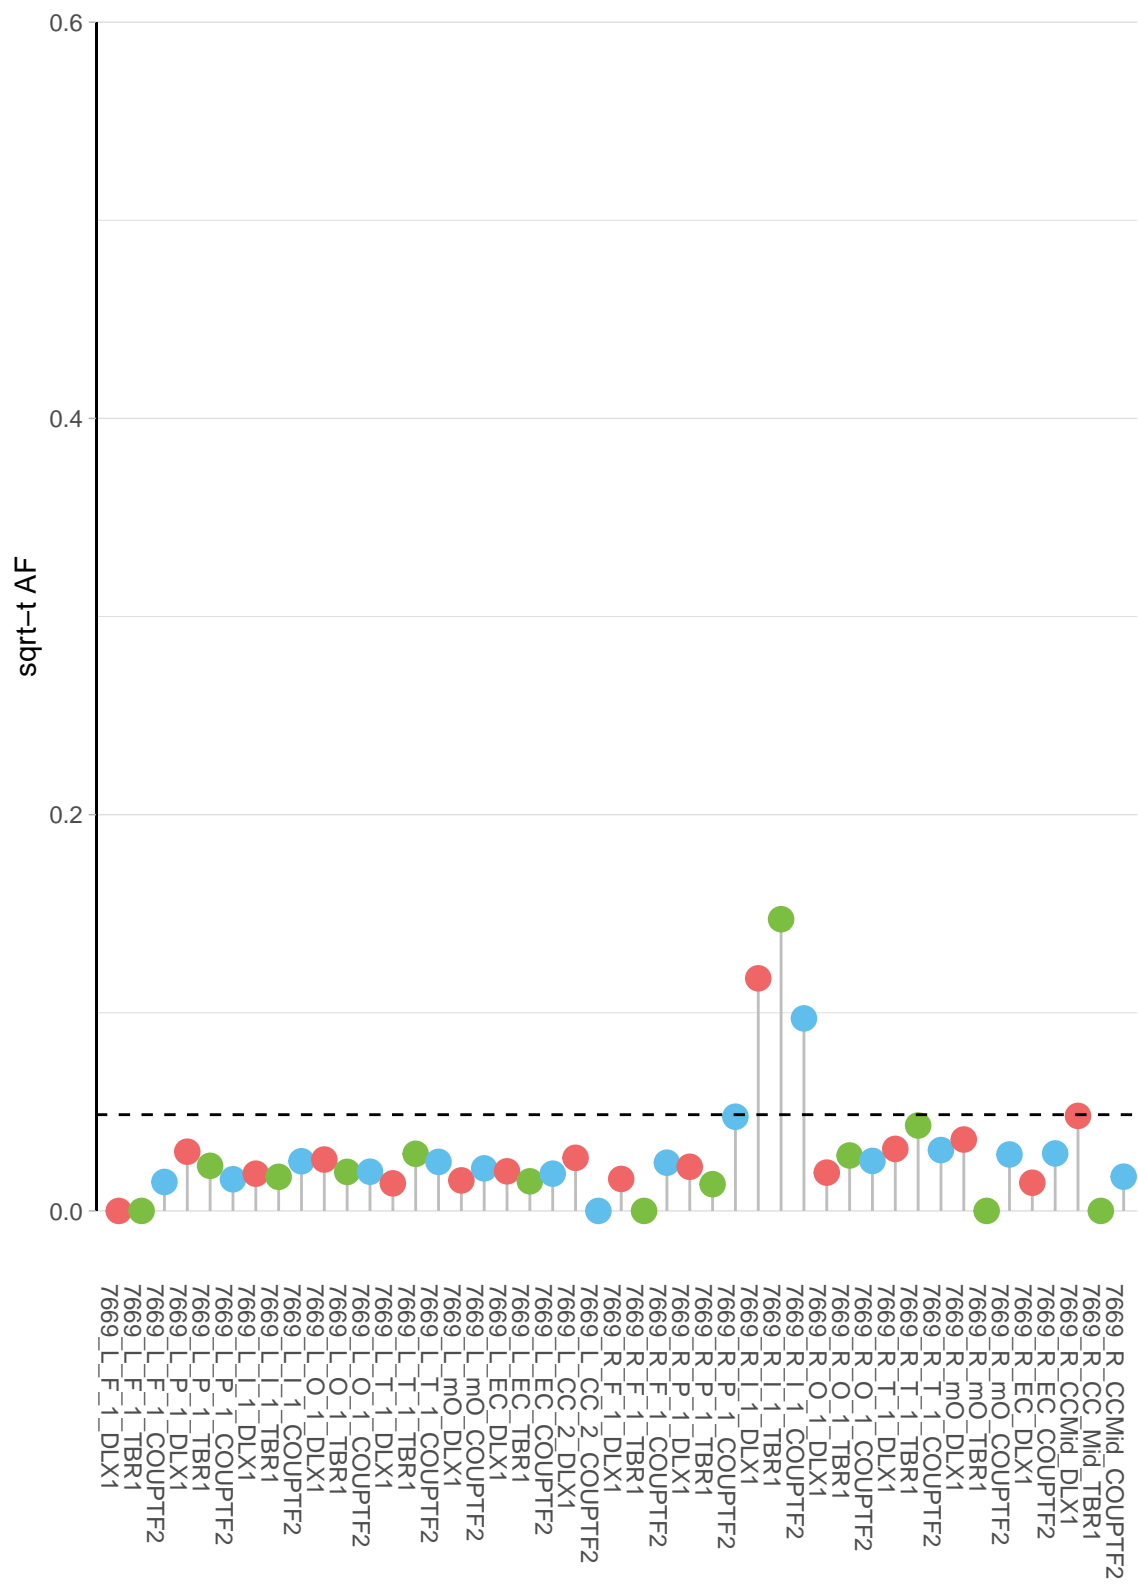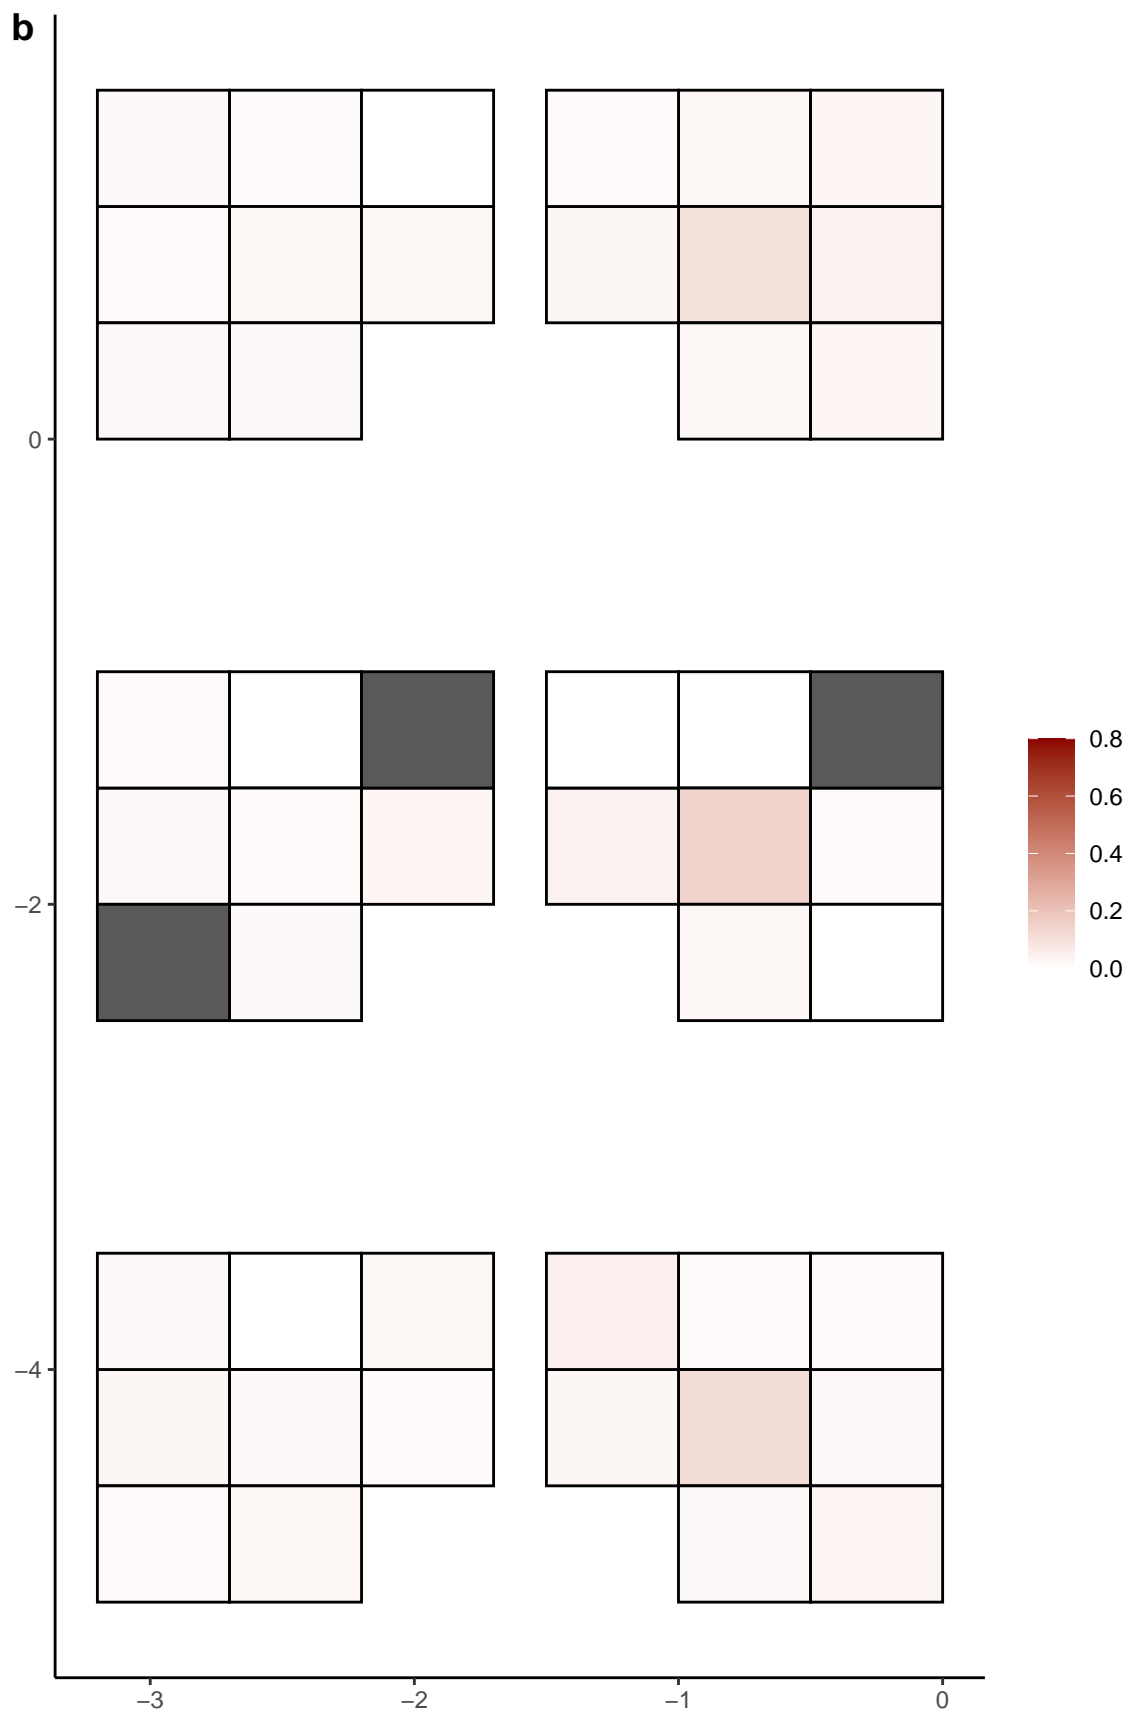

**a** ID05 17-1620800-G-T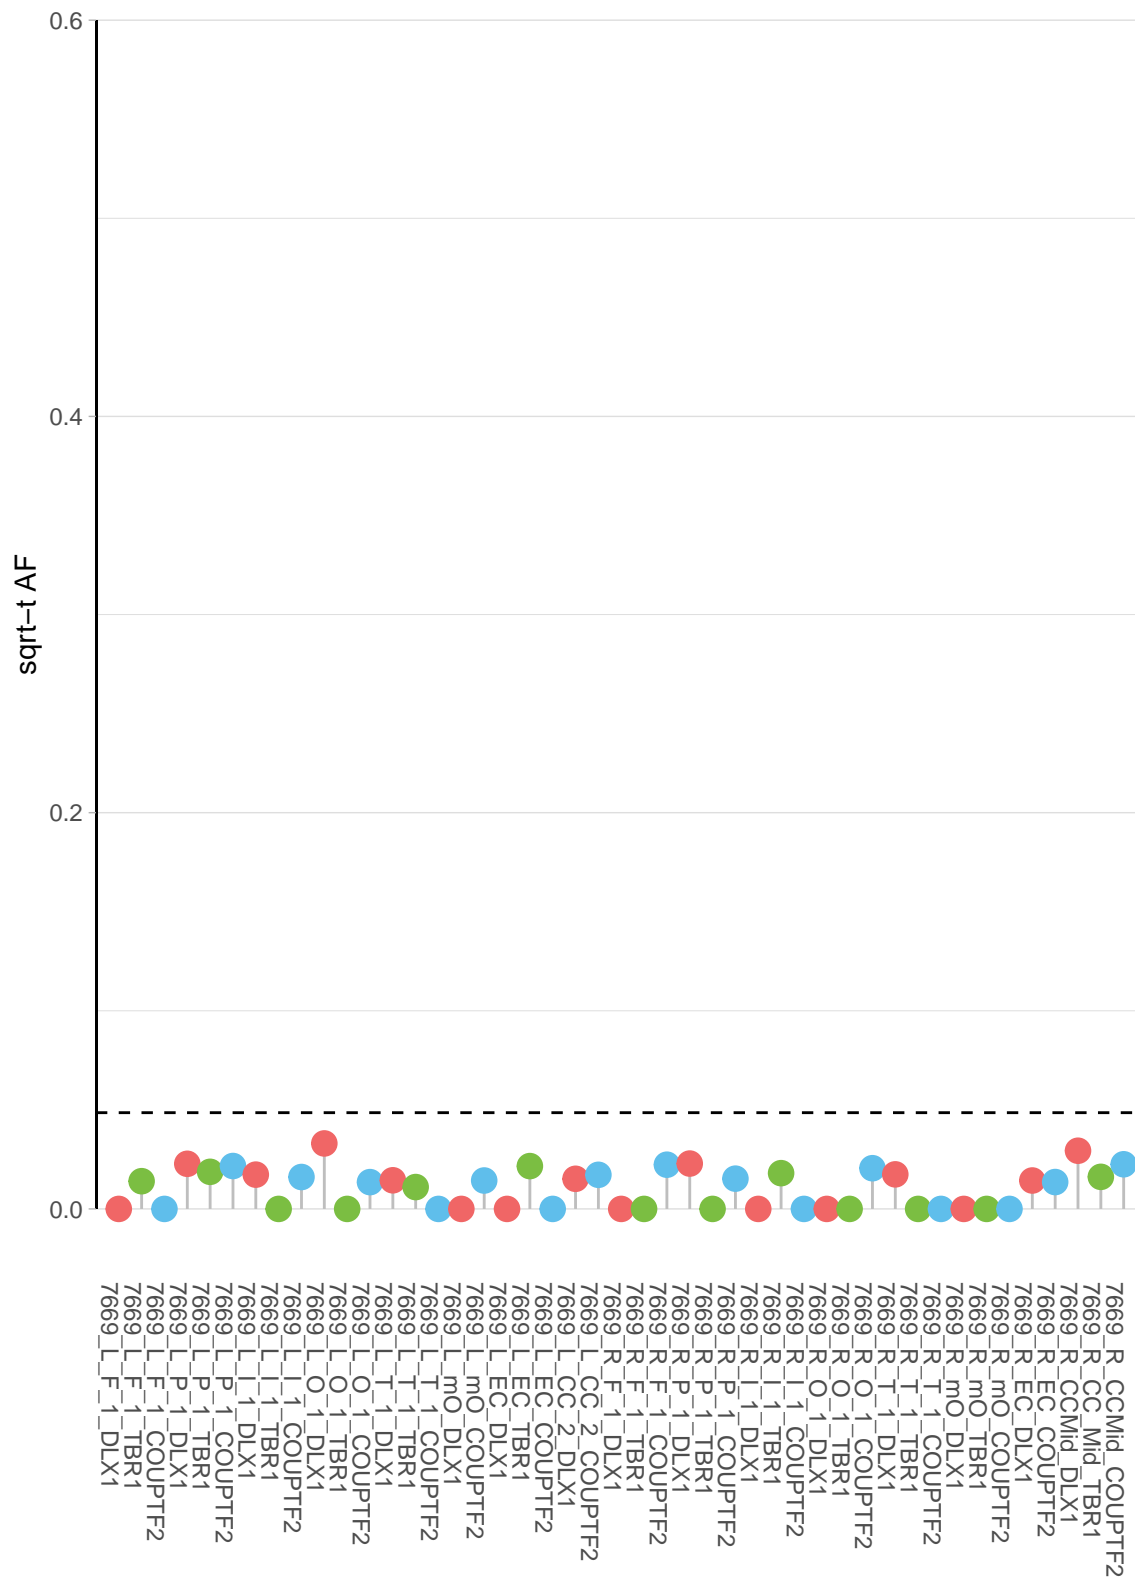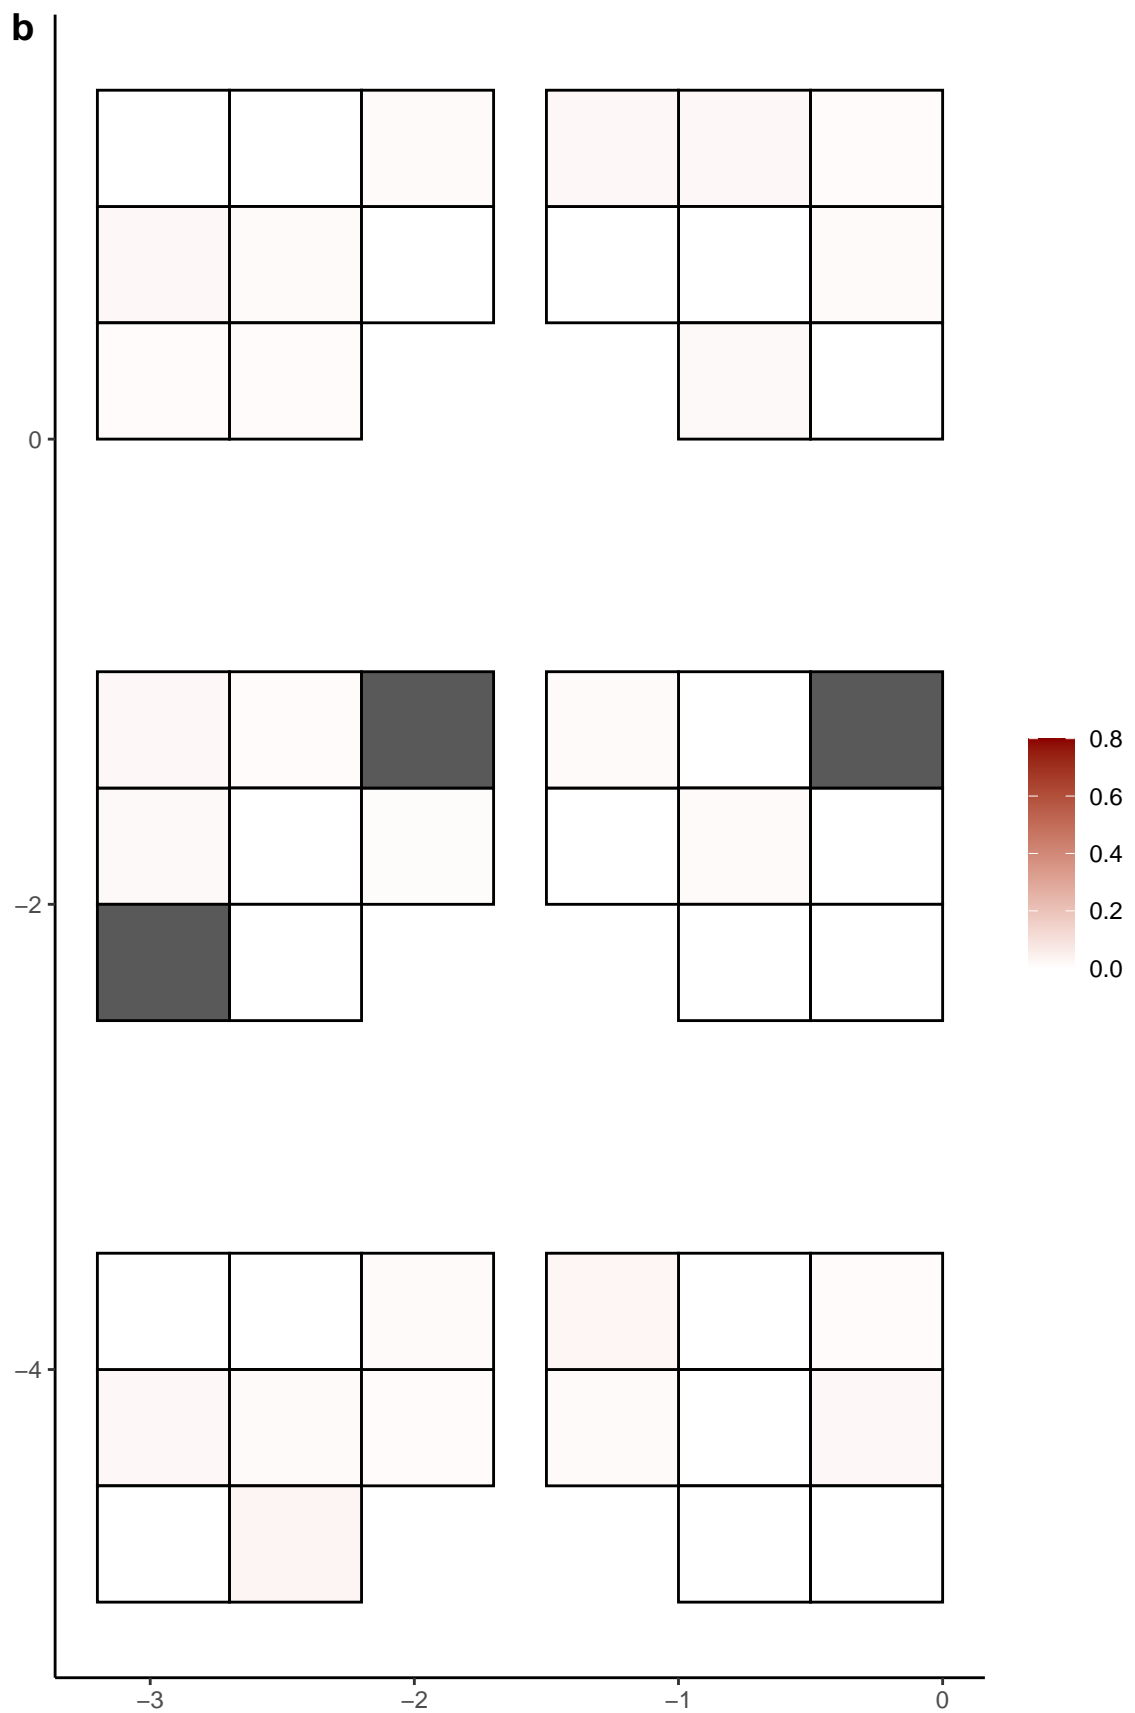

**a** ID05 17-17411221-G-A

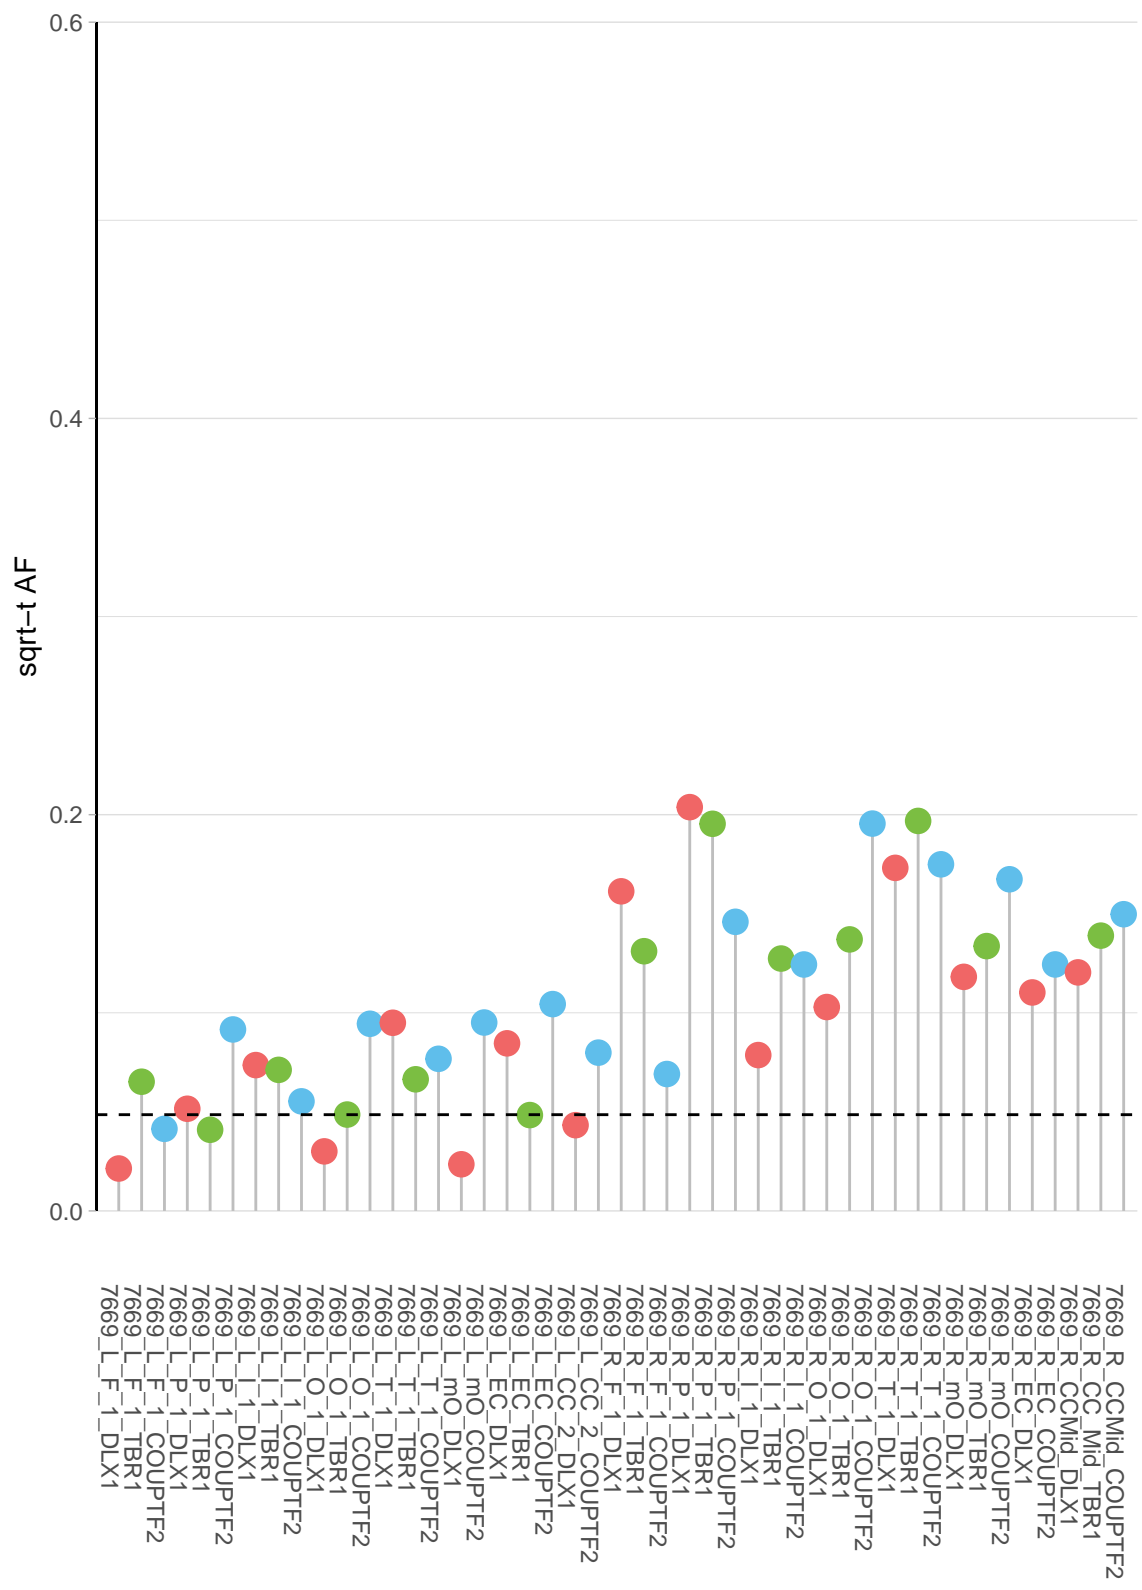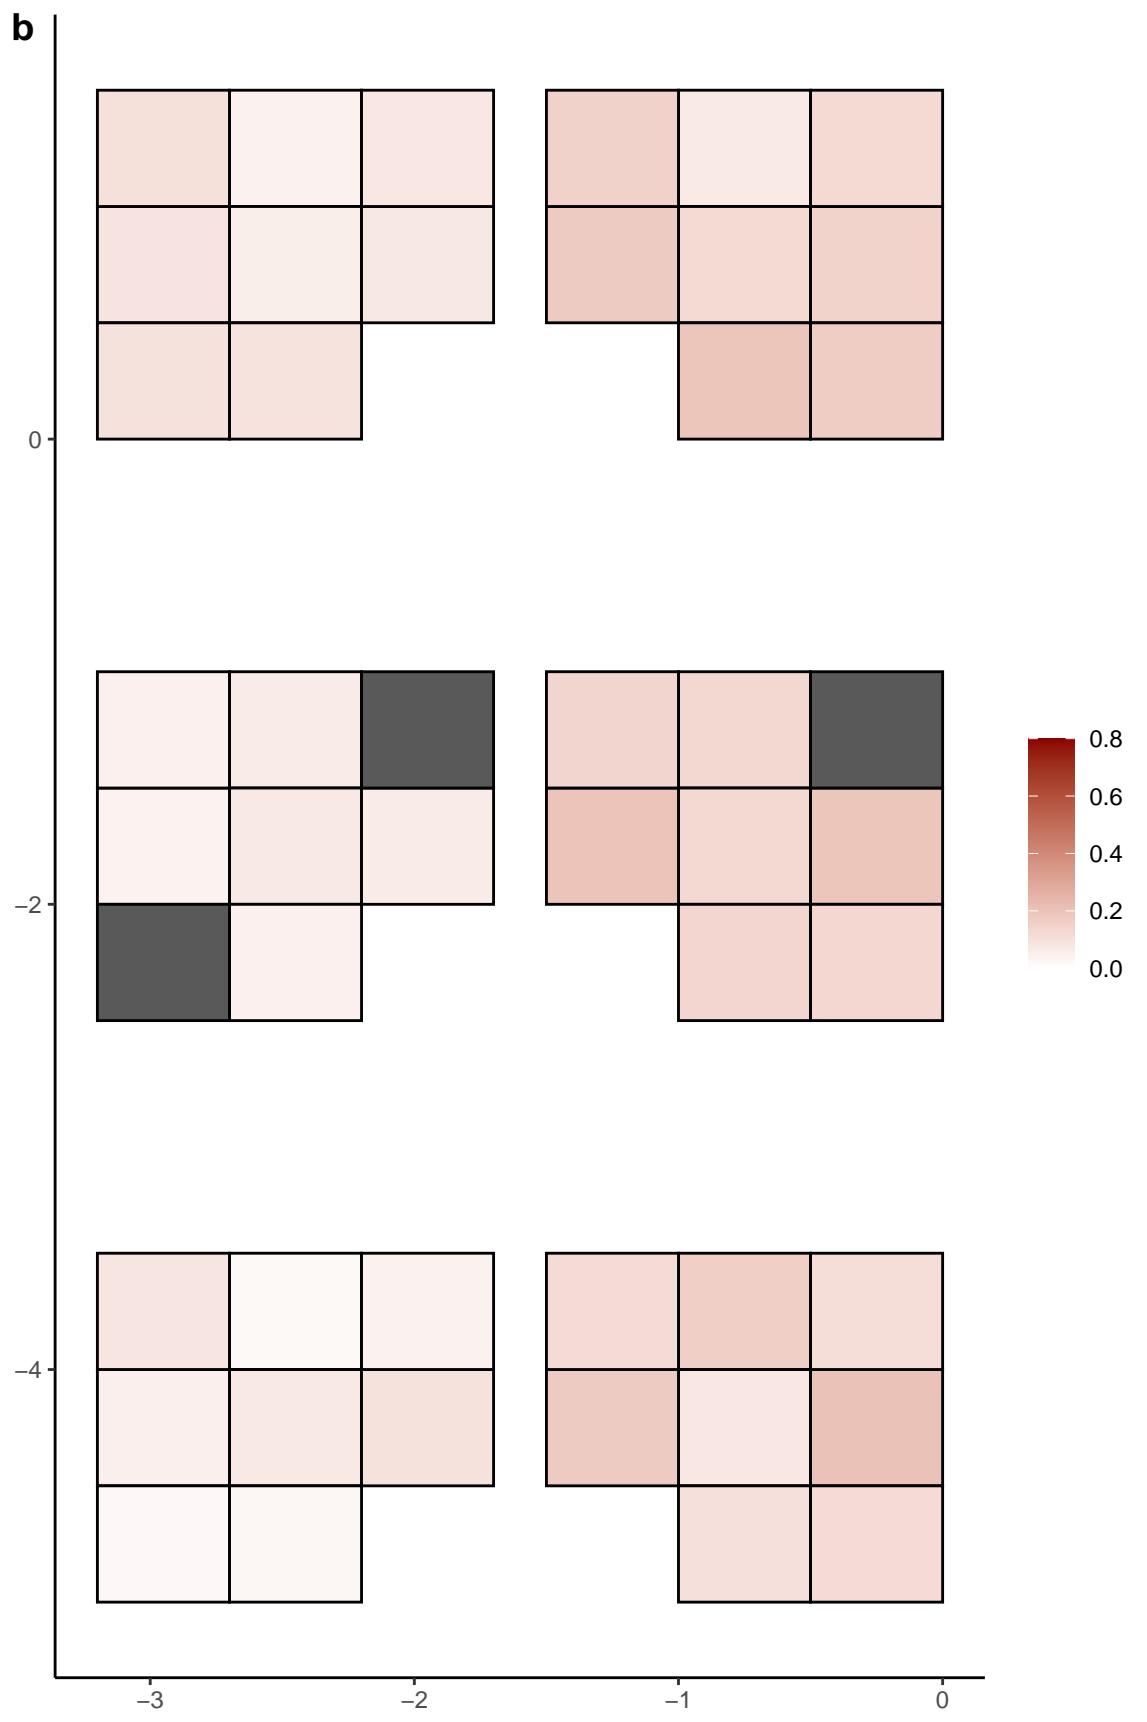



**a** ID05 17-20005504-G-A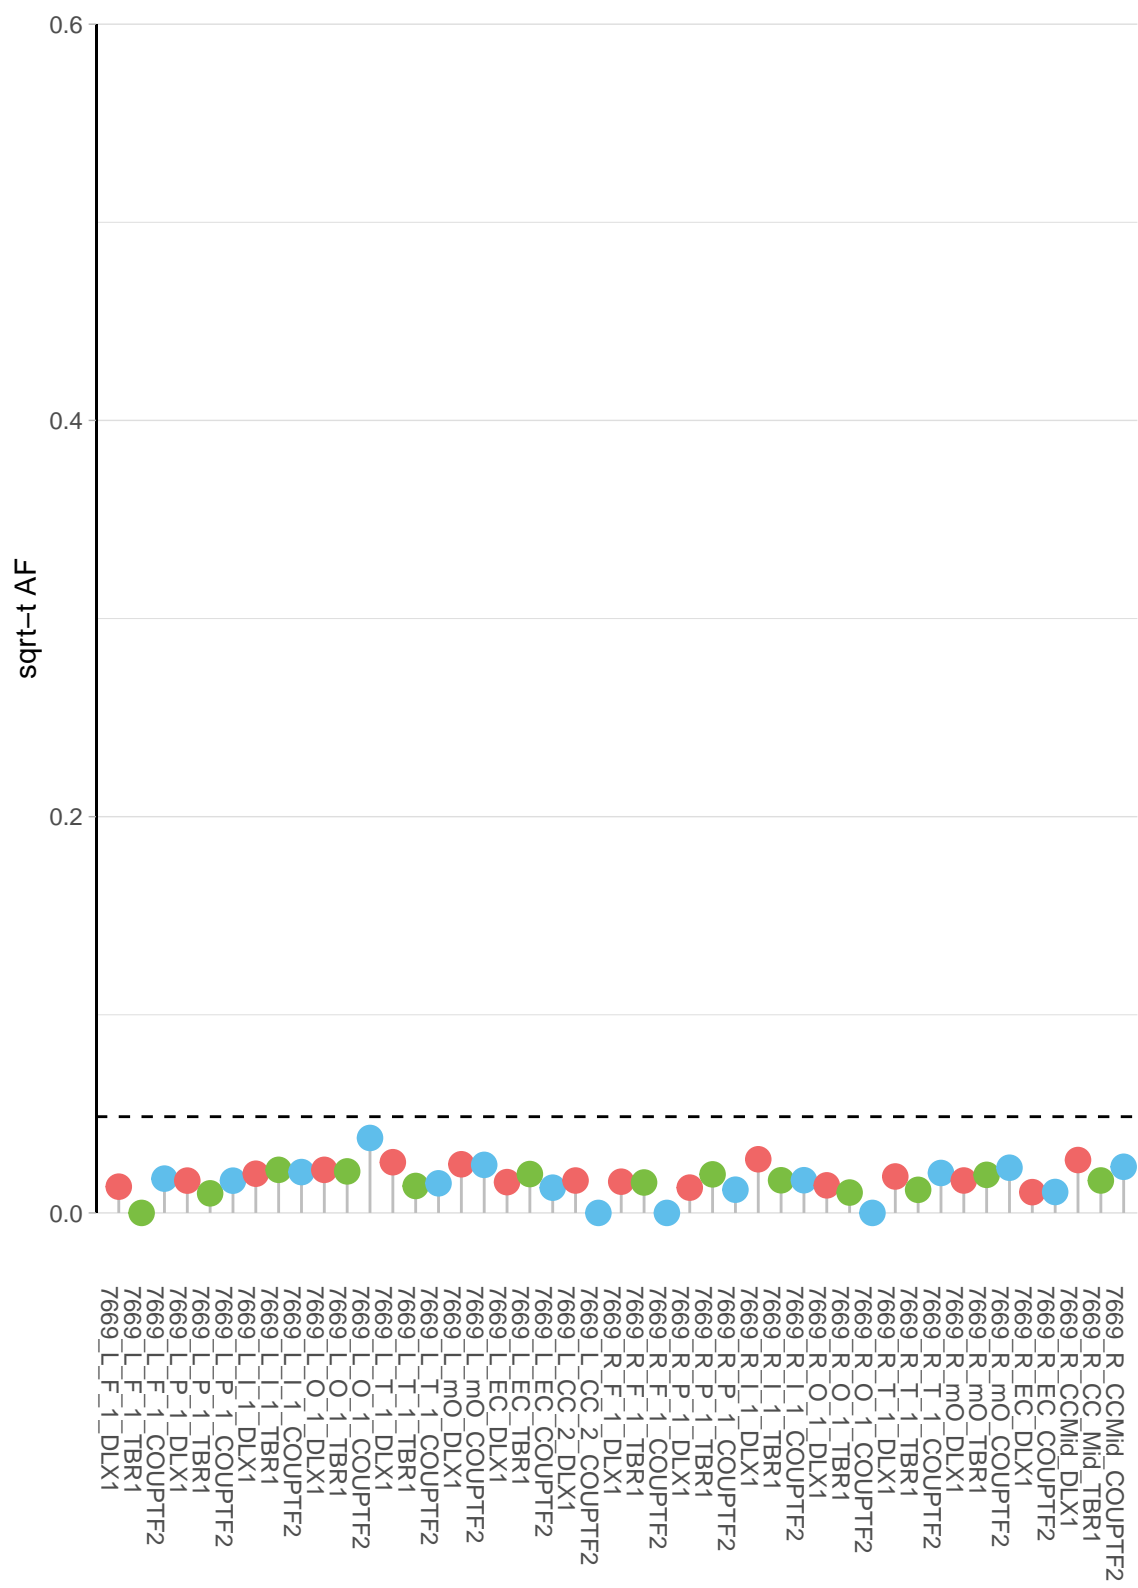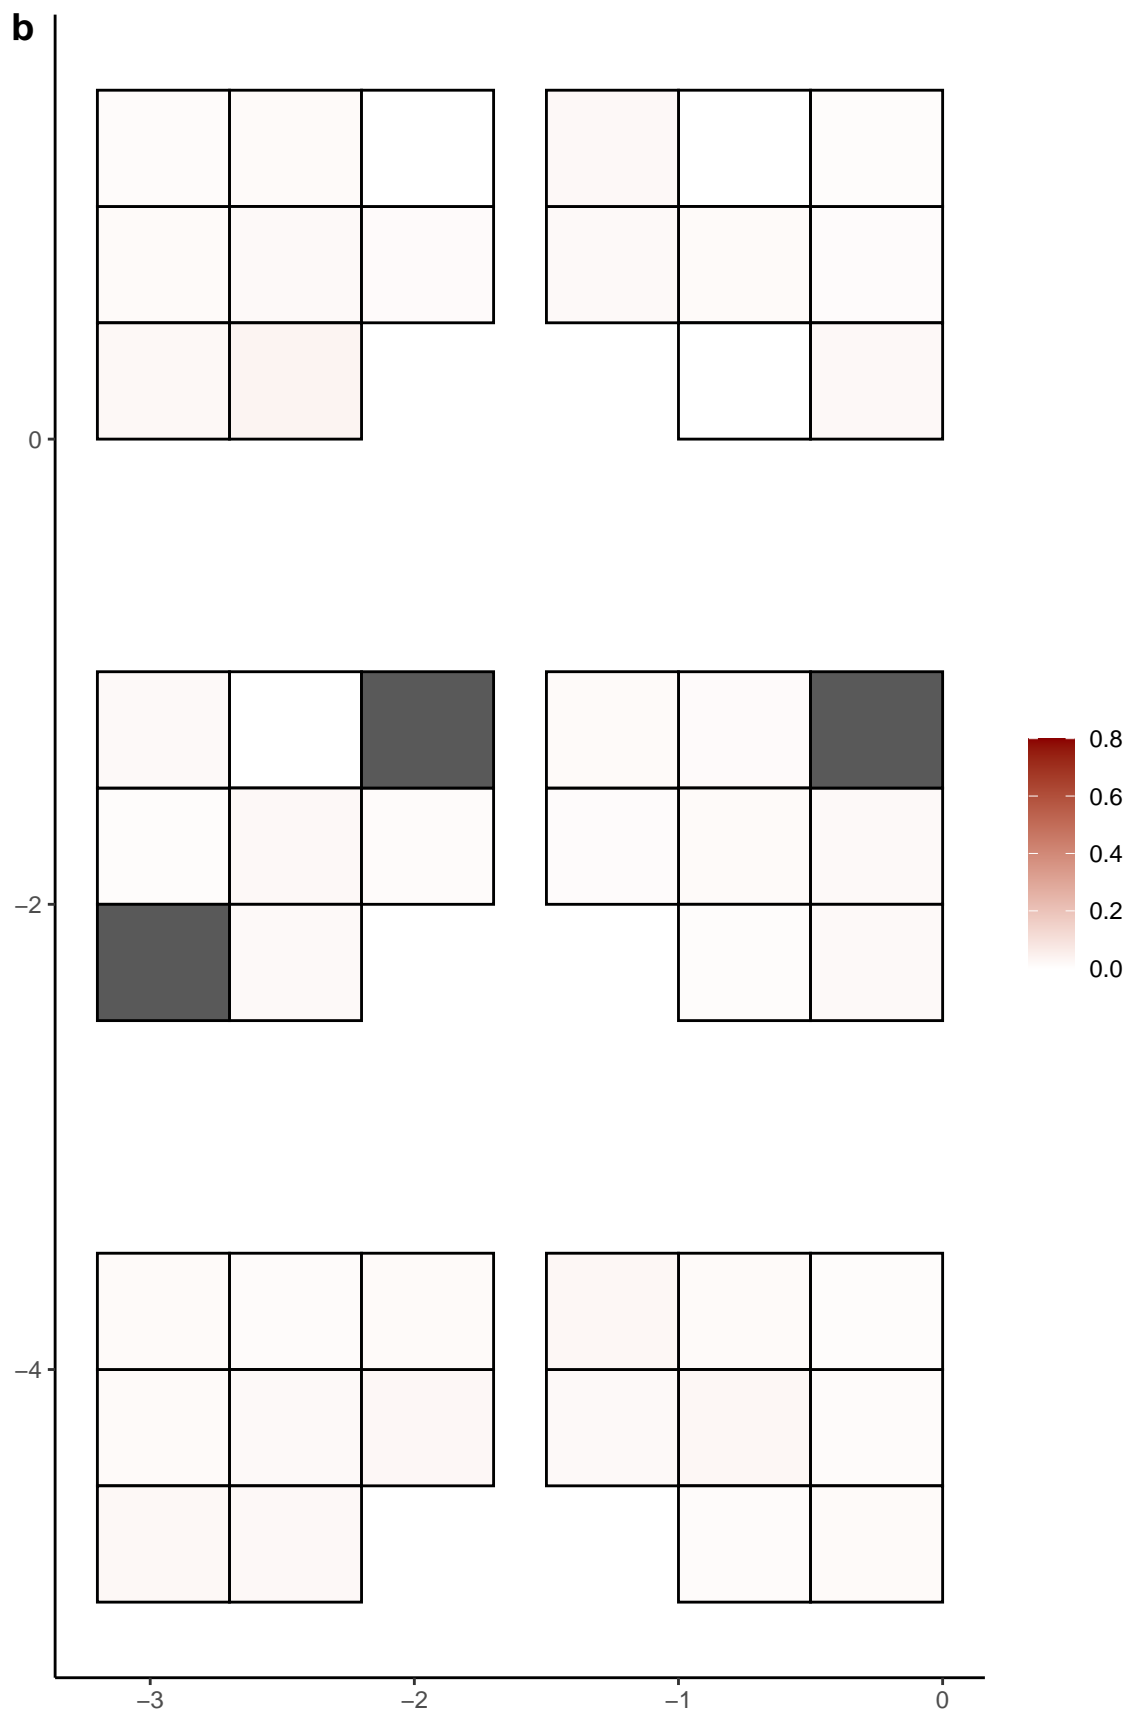







**a** ID05 17-40192535-C-G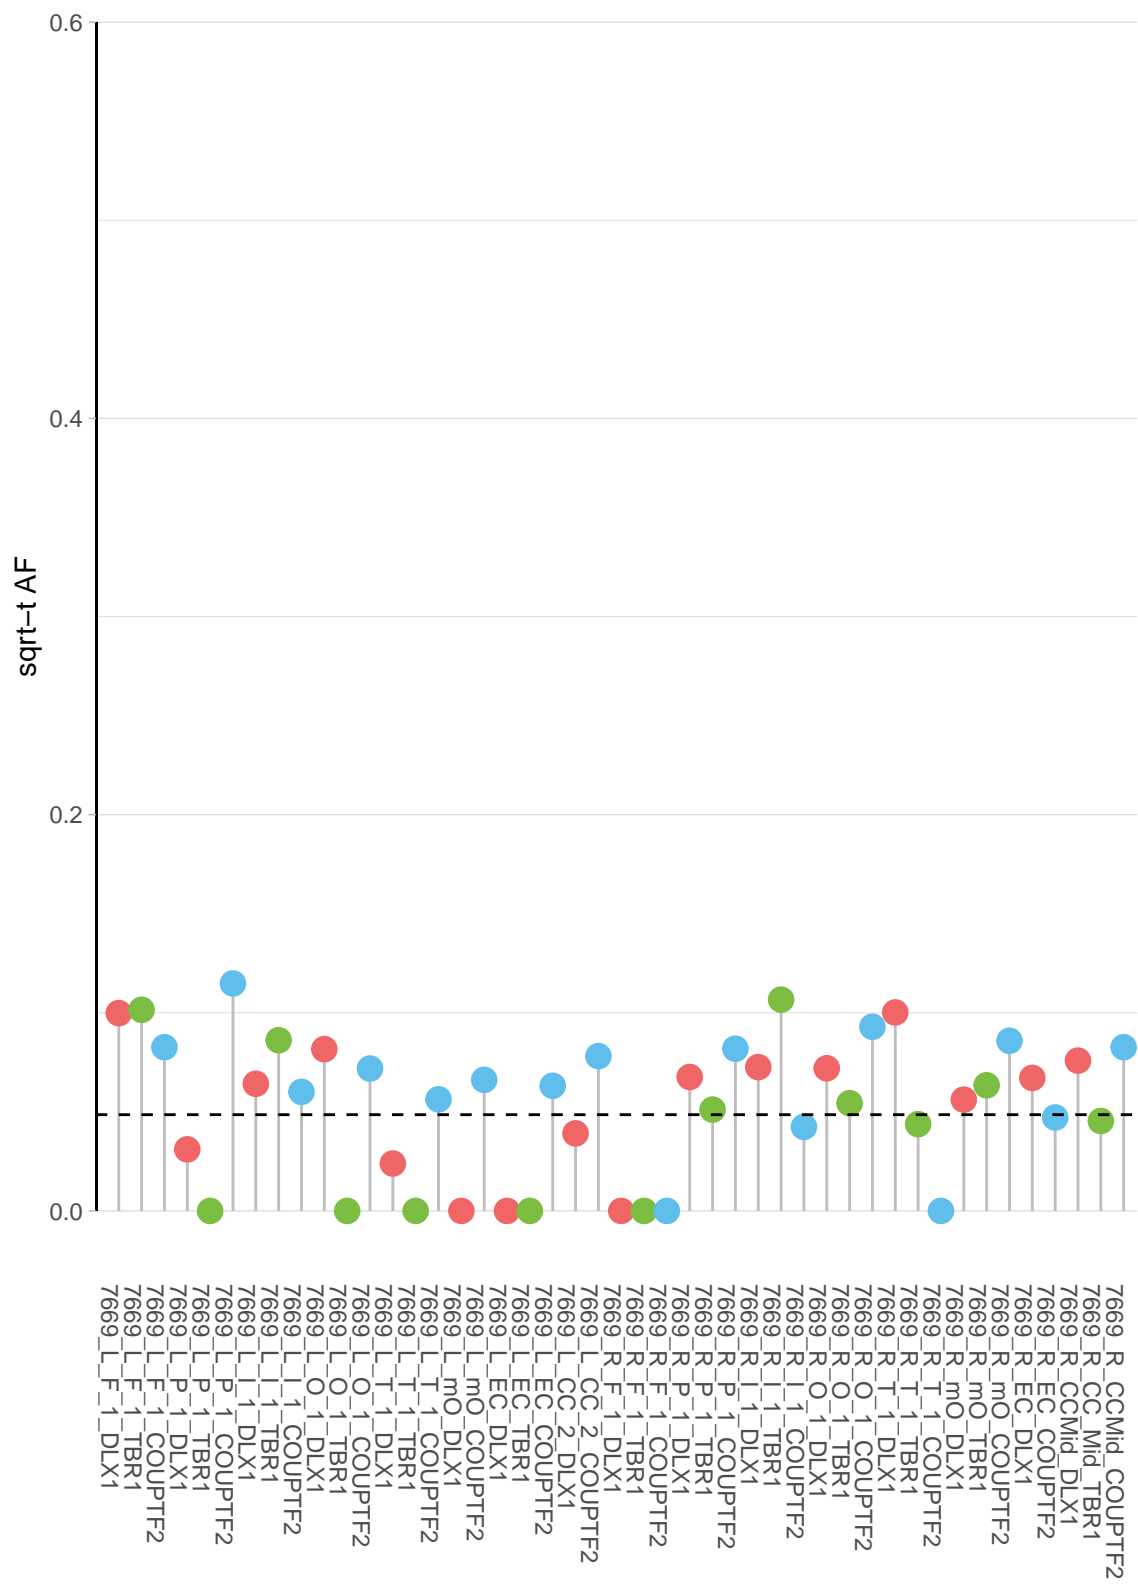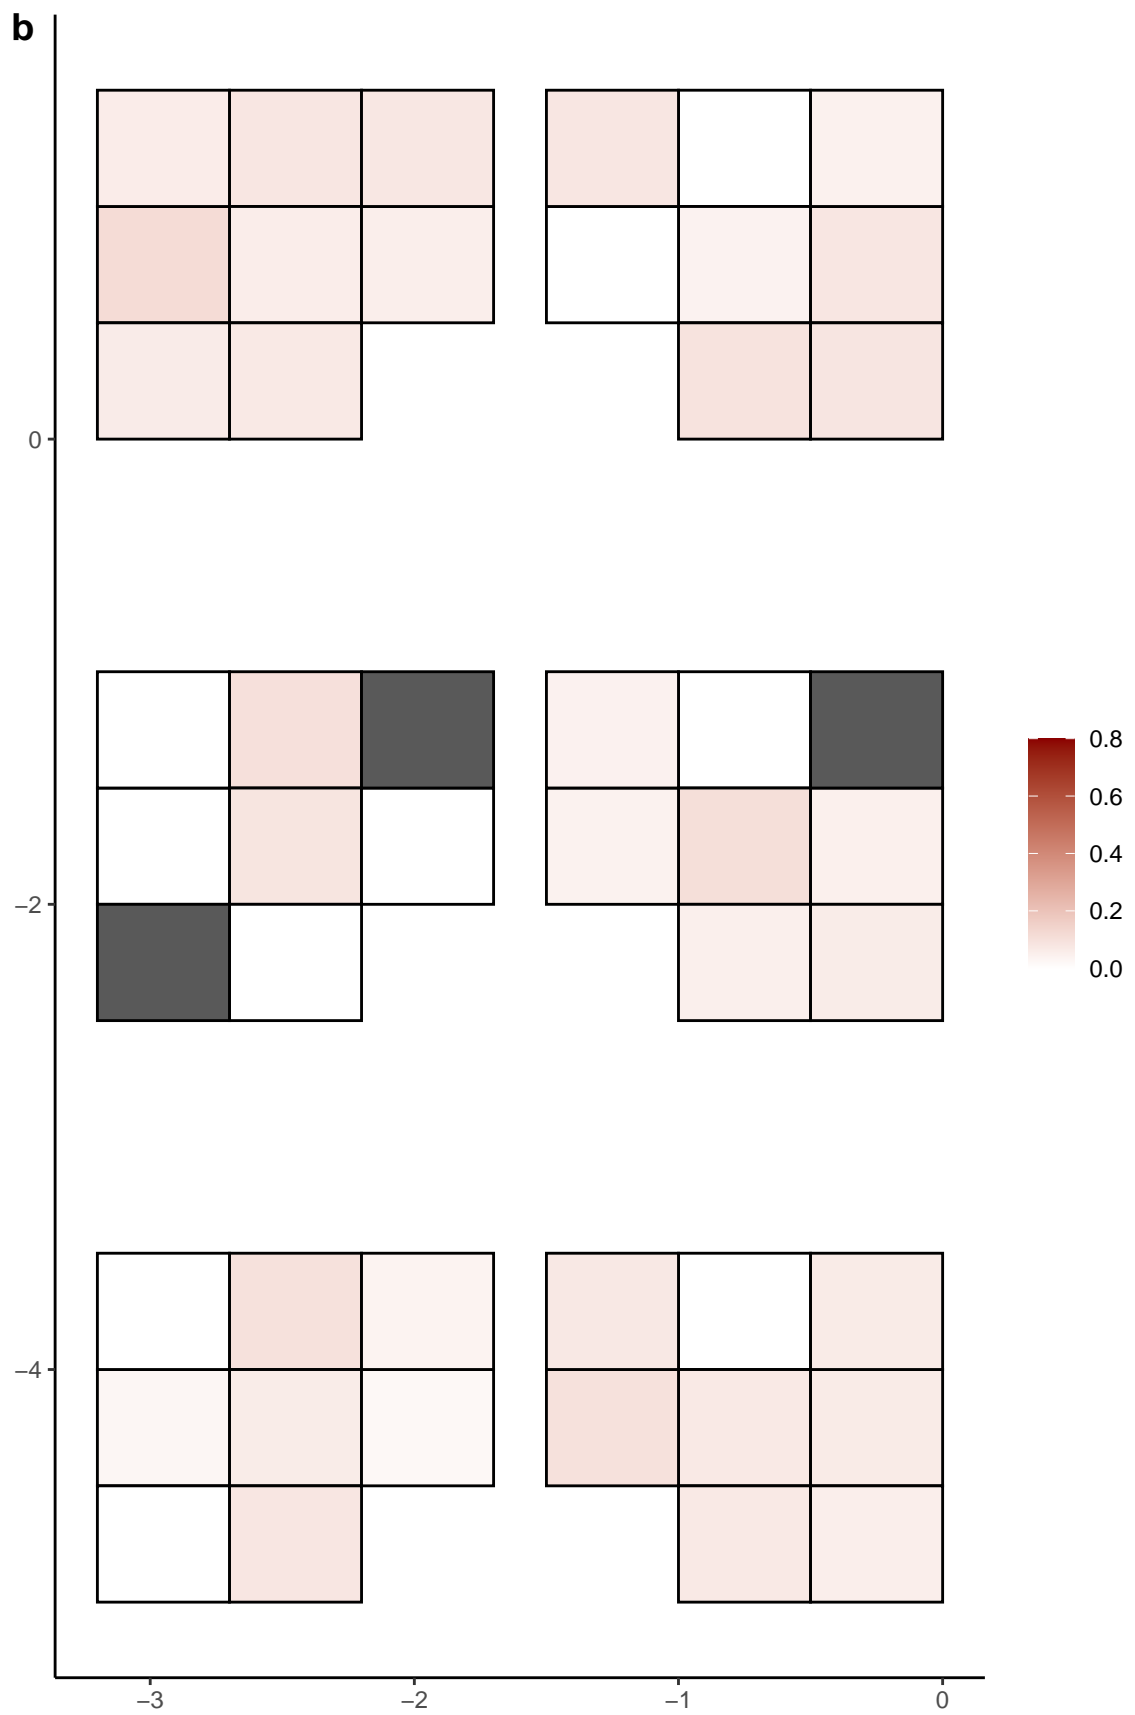



**a** ID05 17-45401979-G-A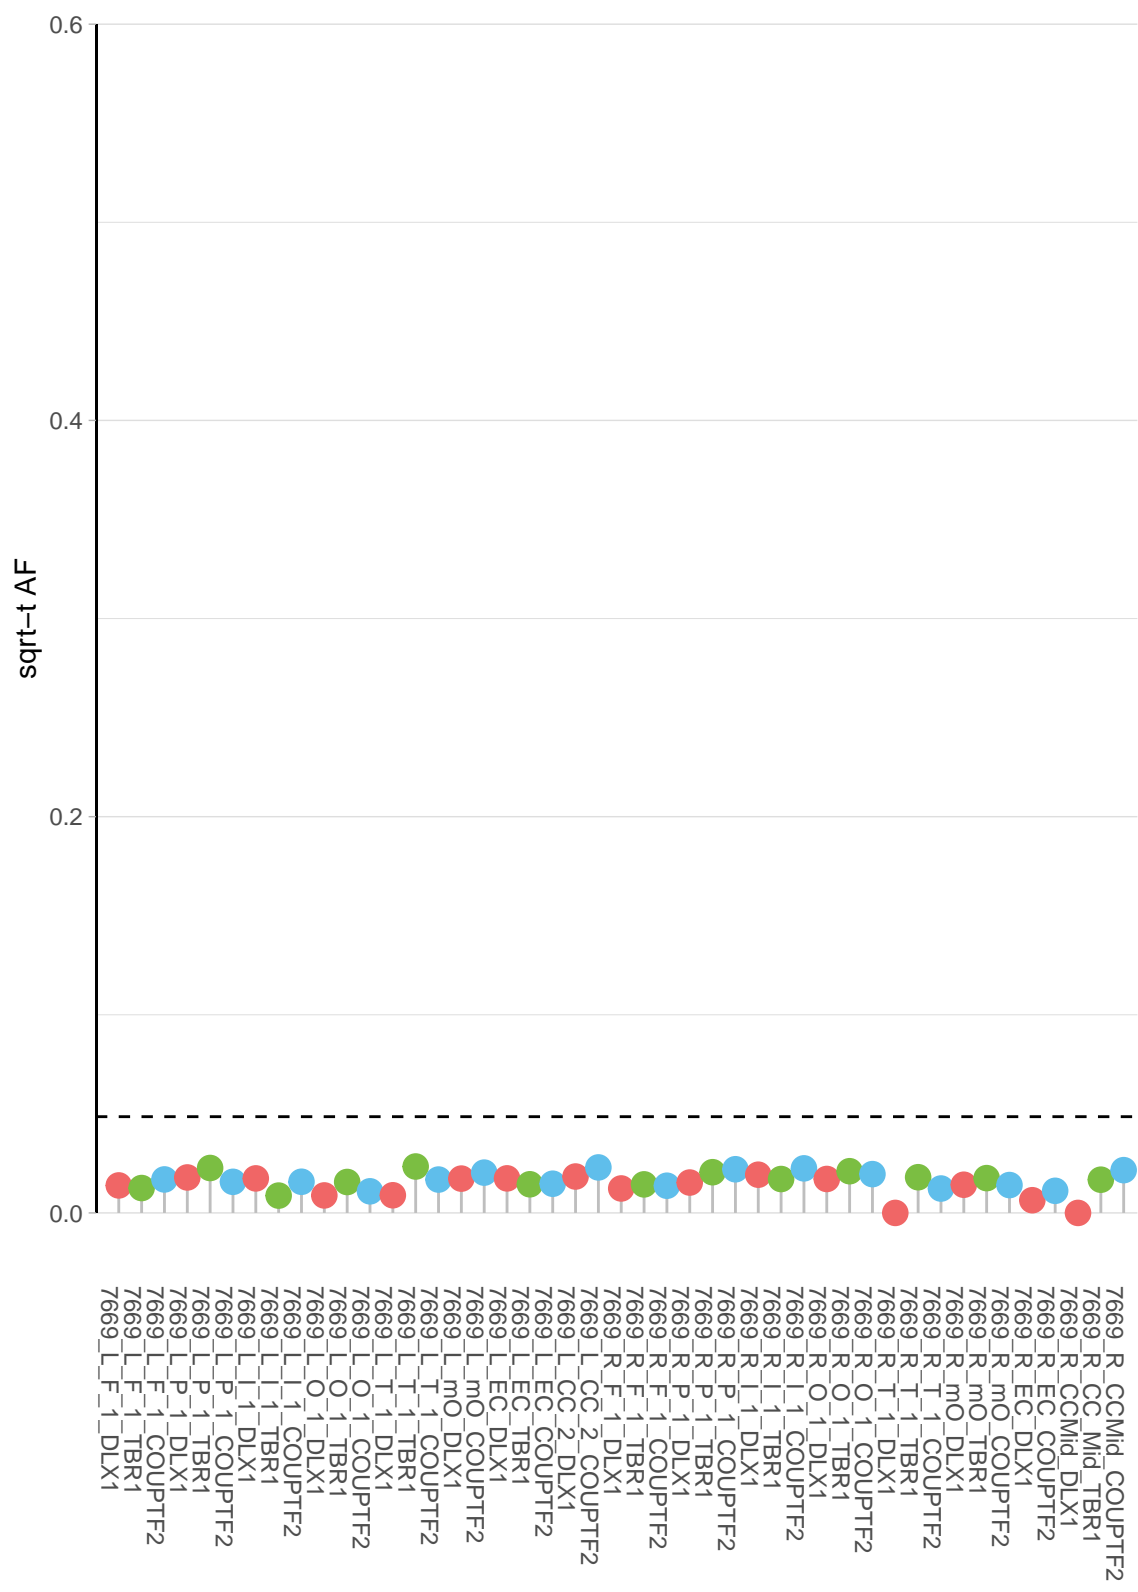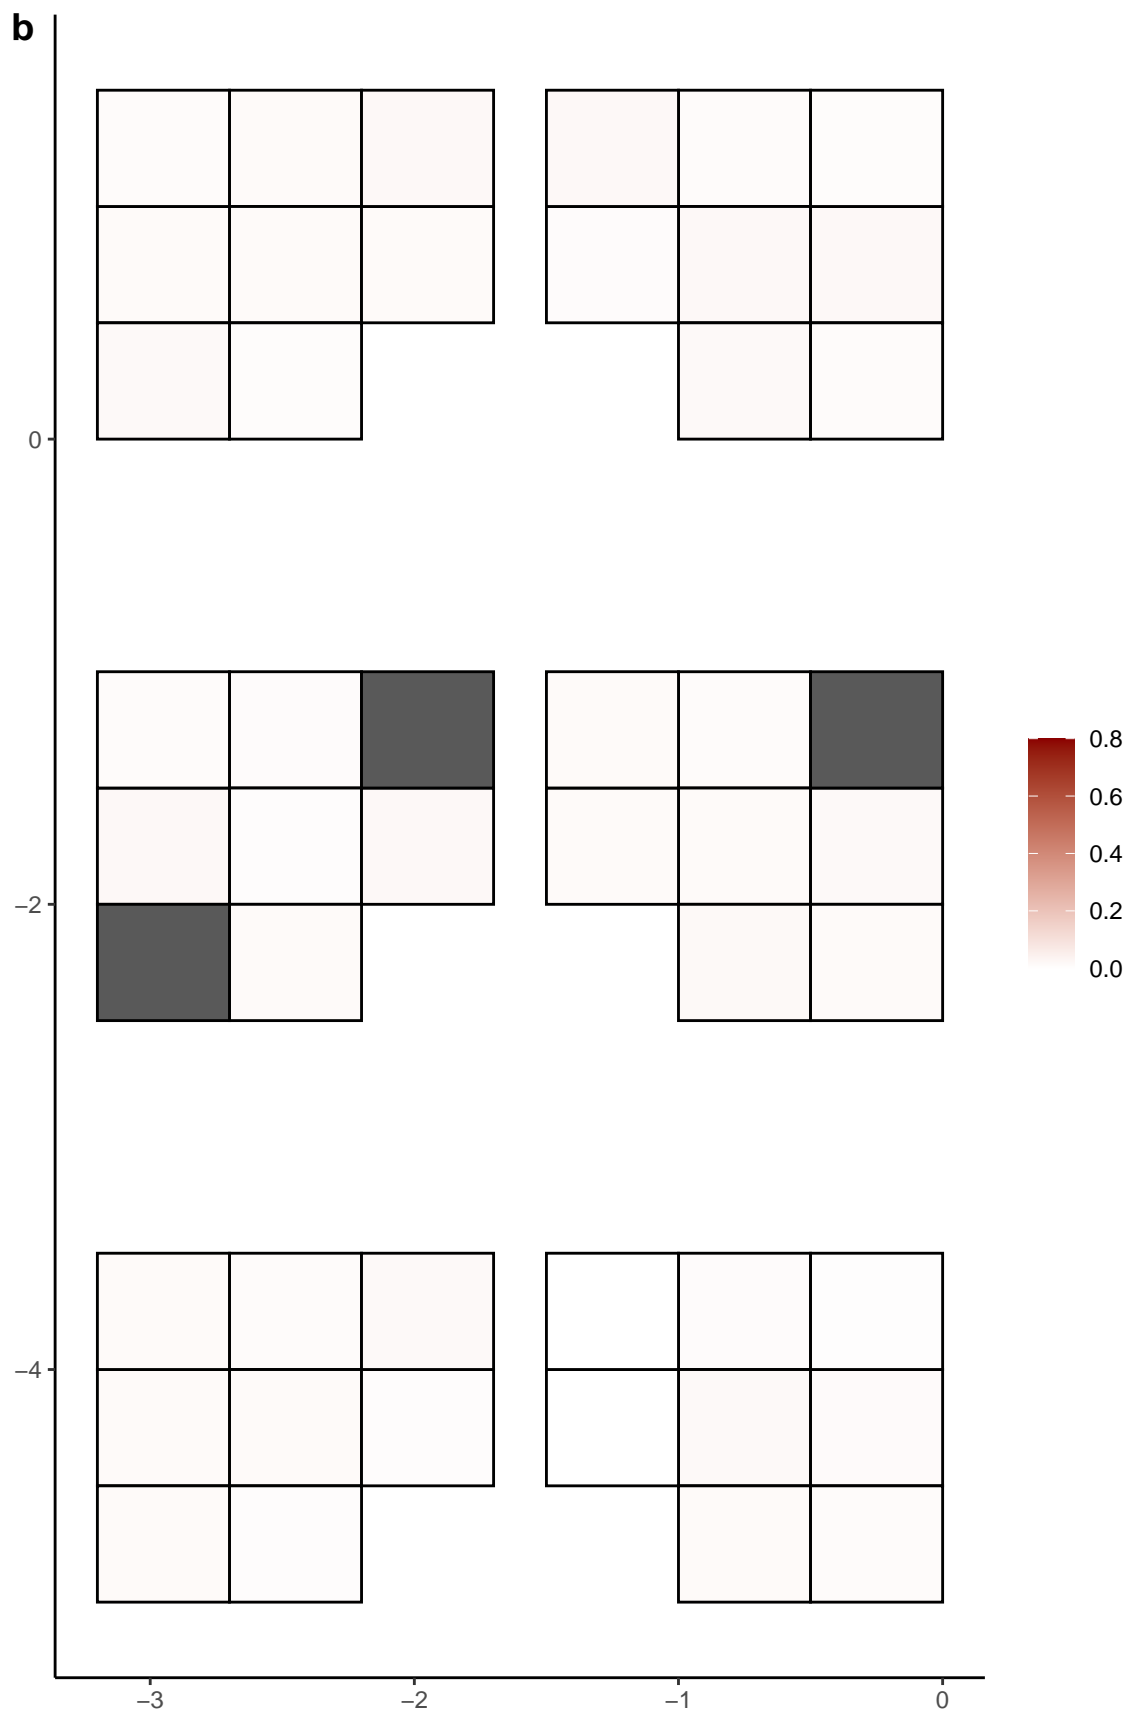

**a** ID05 17-50011156-A-T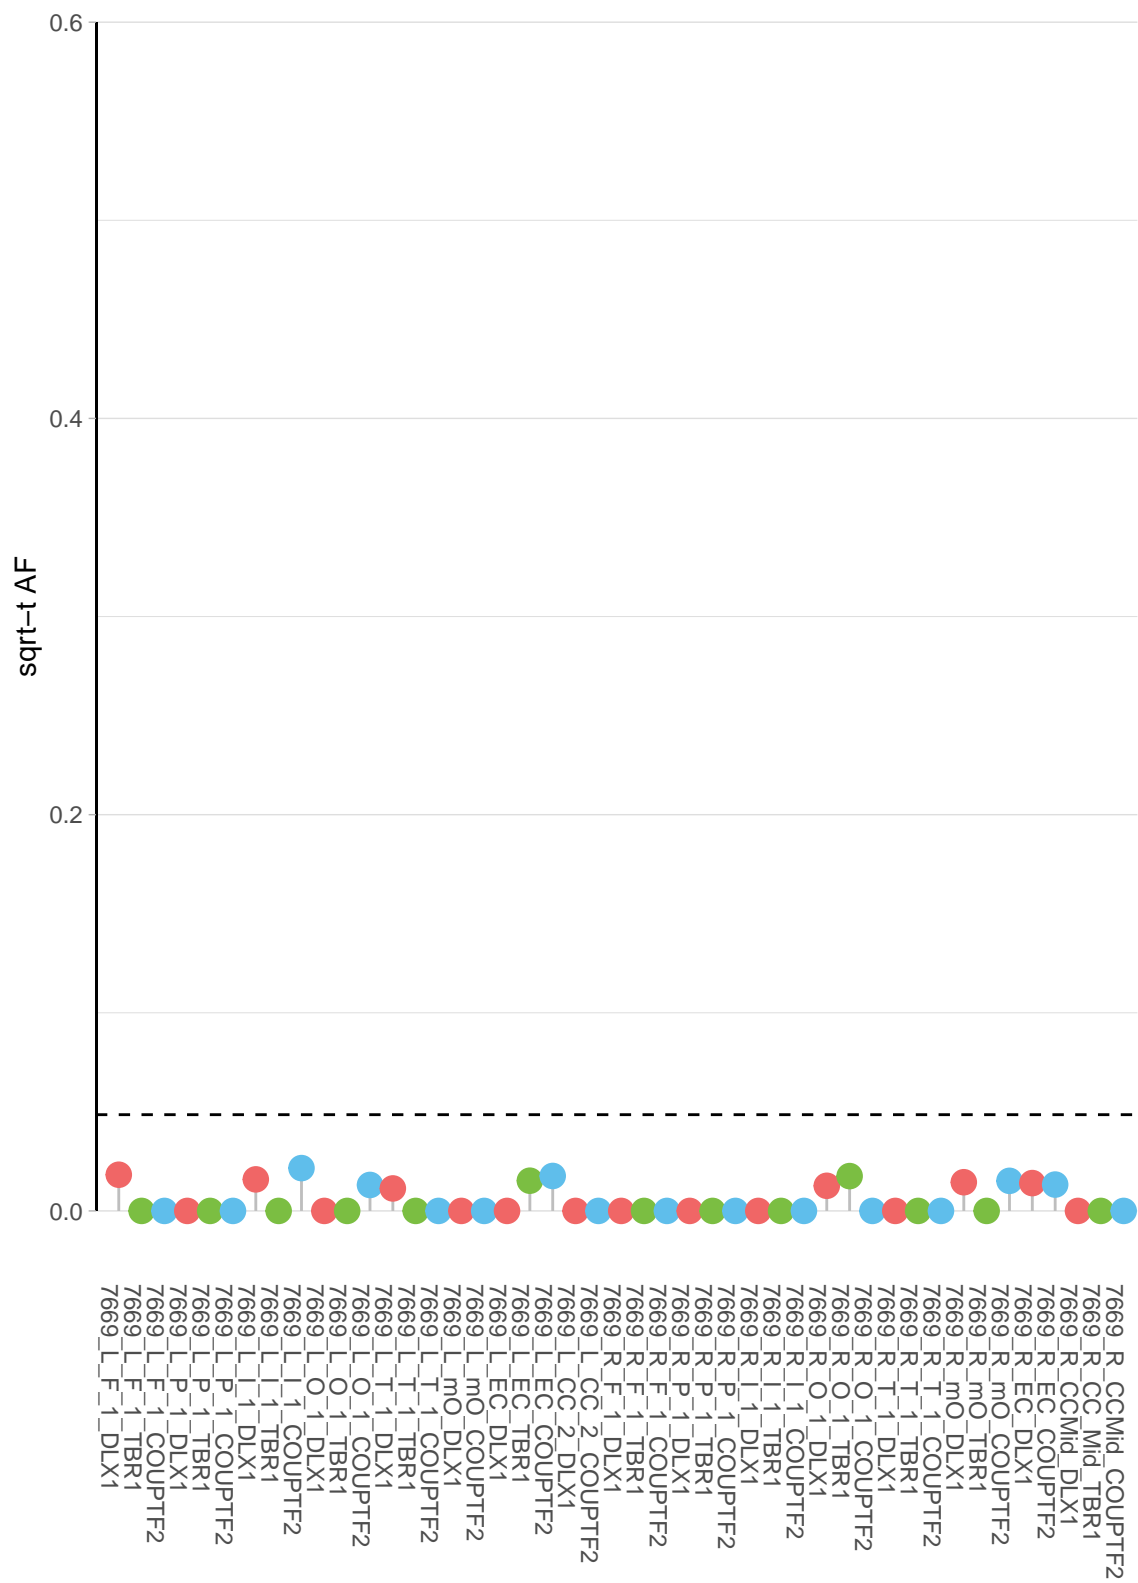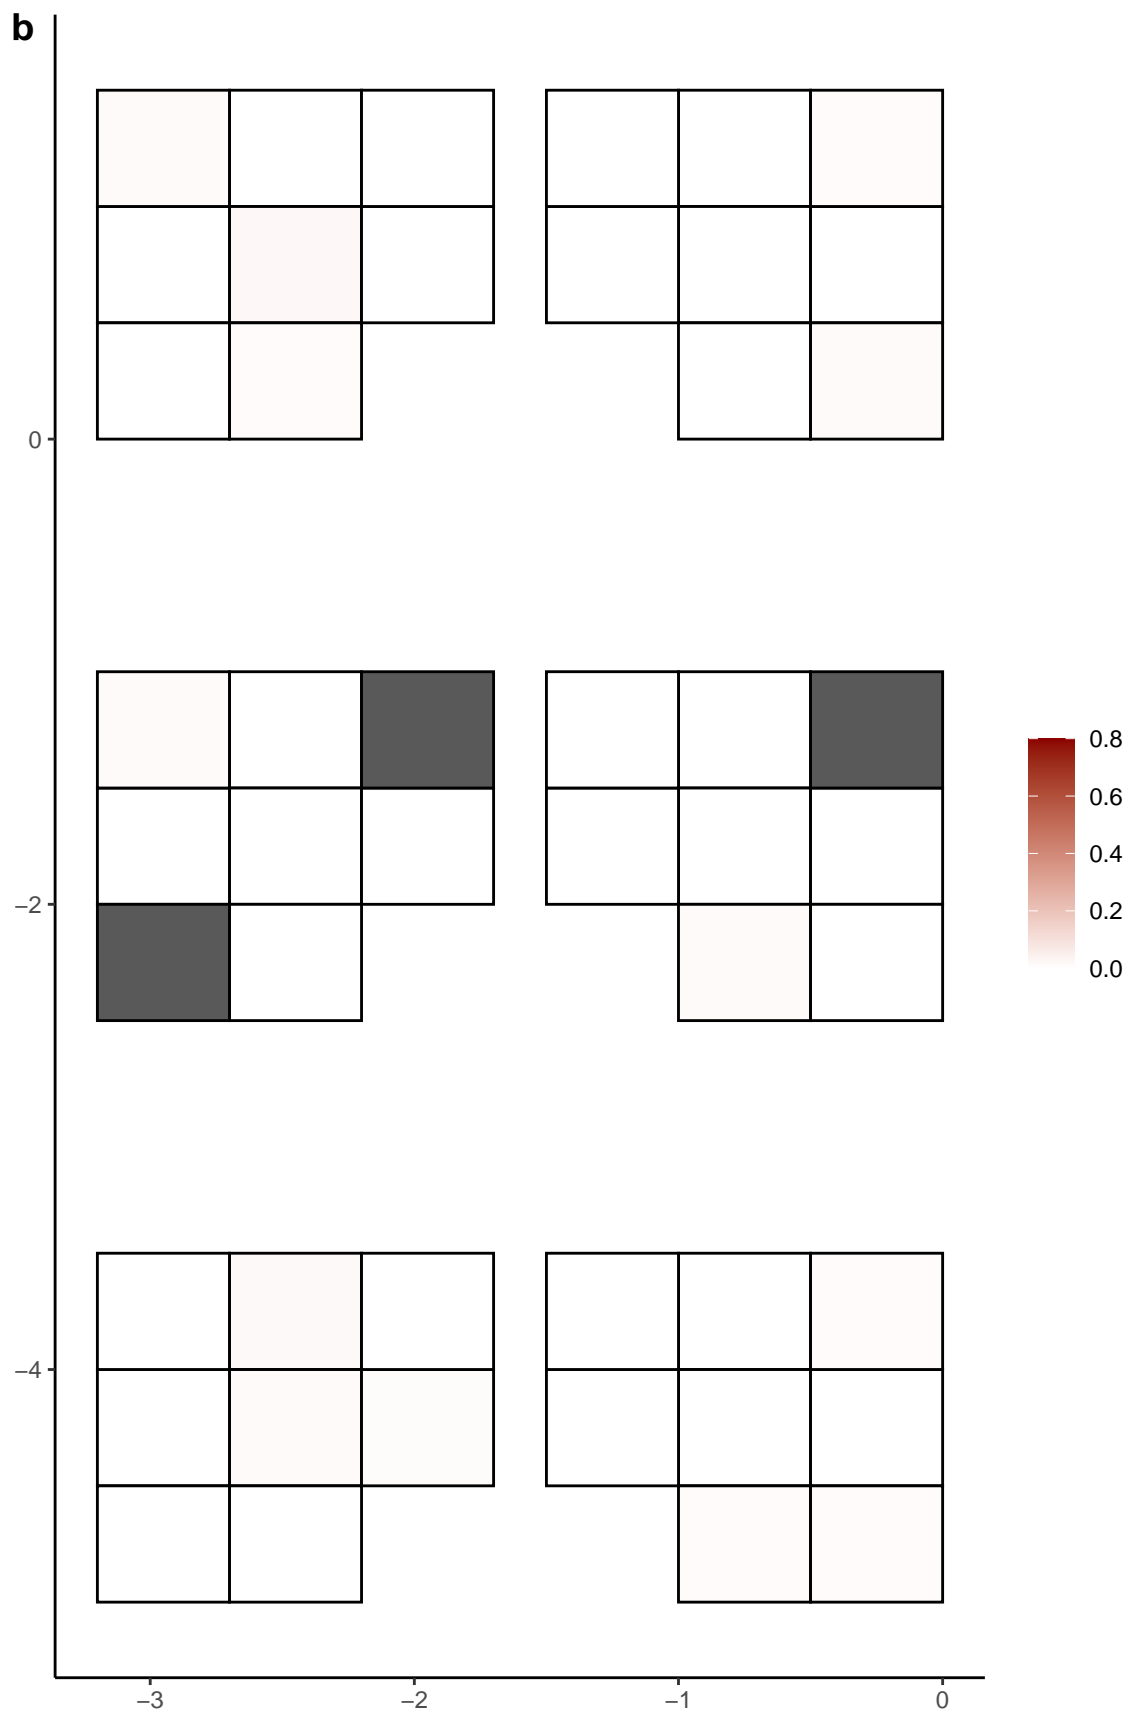

**a** ID05 17-59031927-C-T

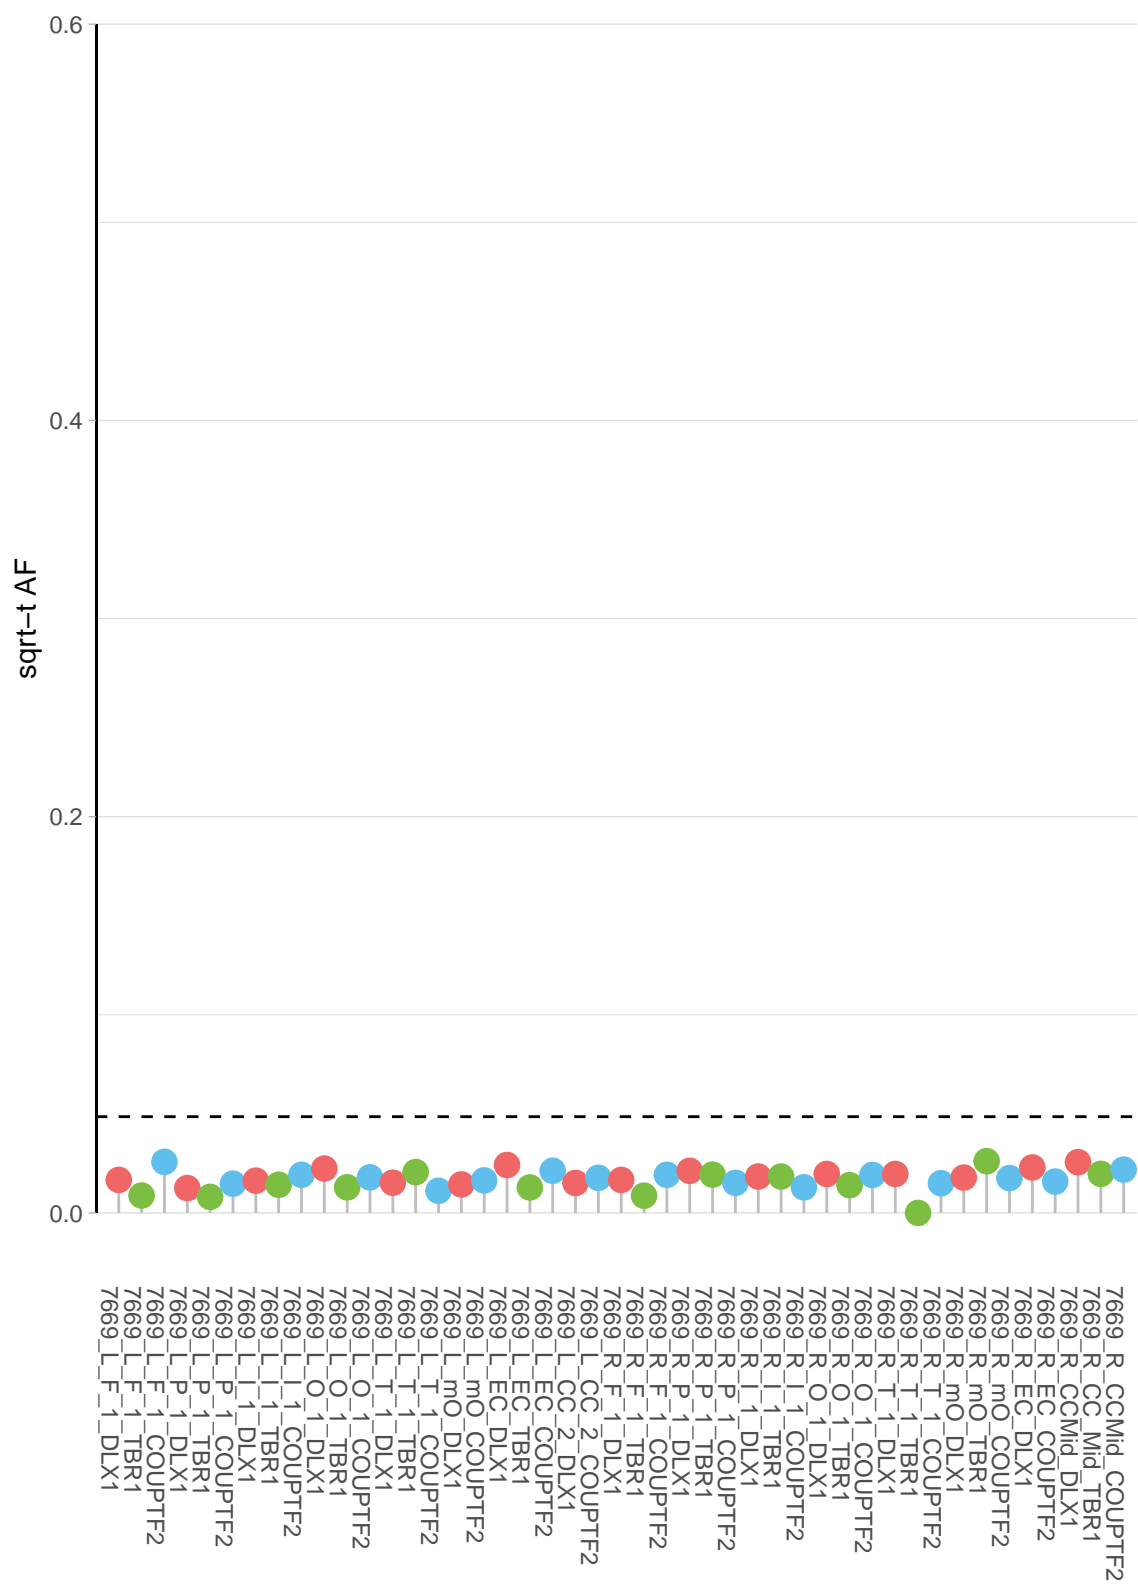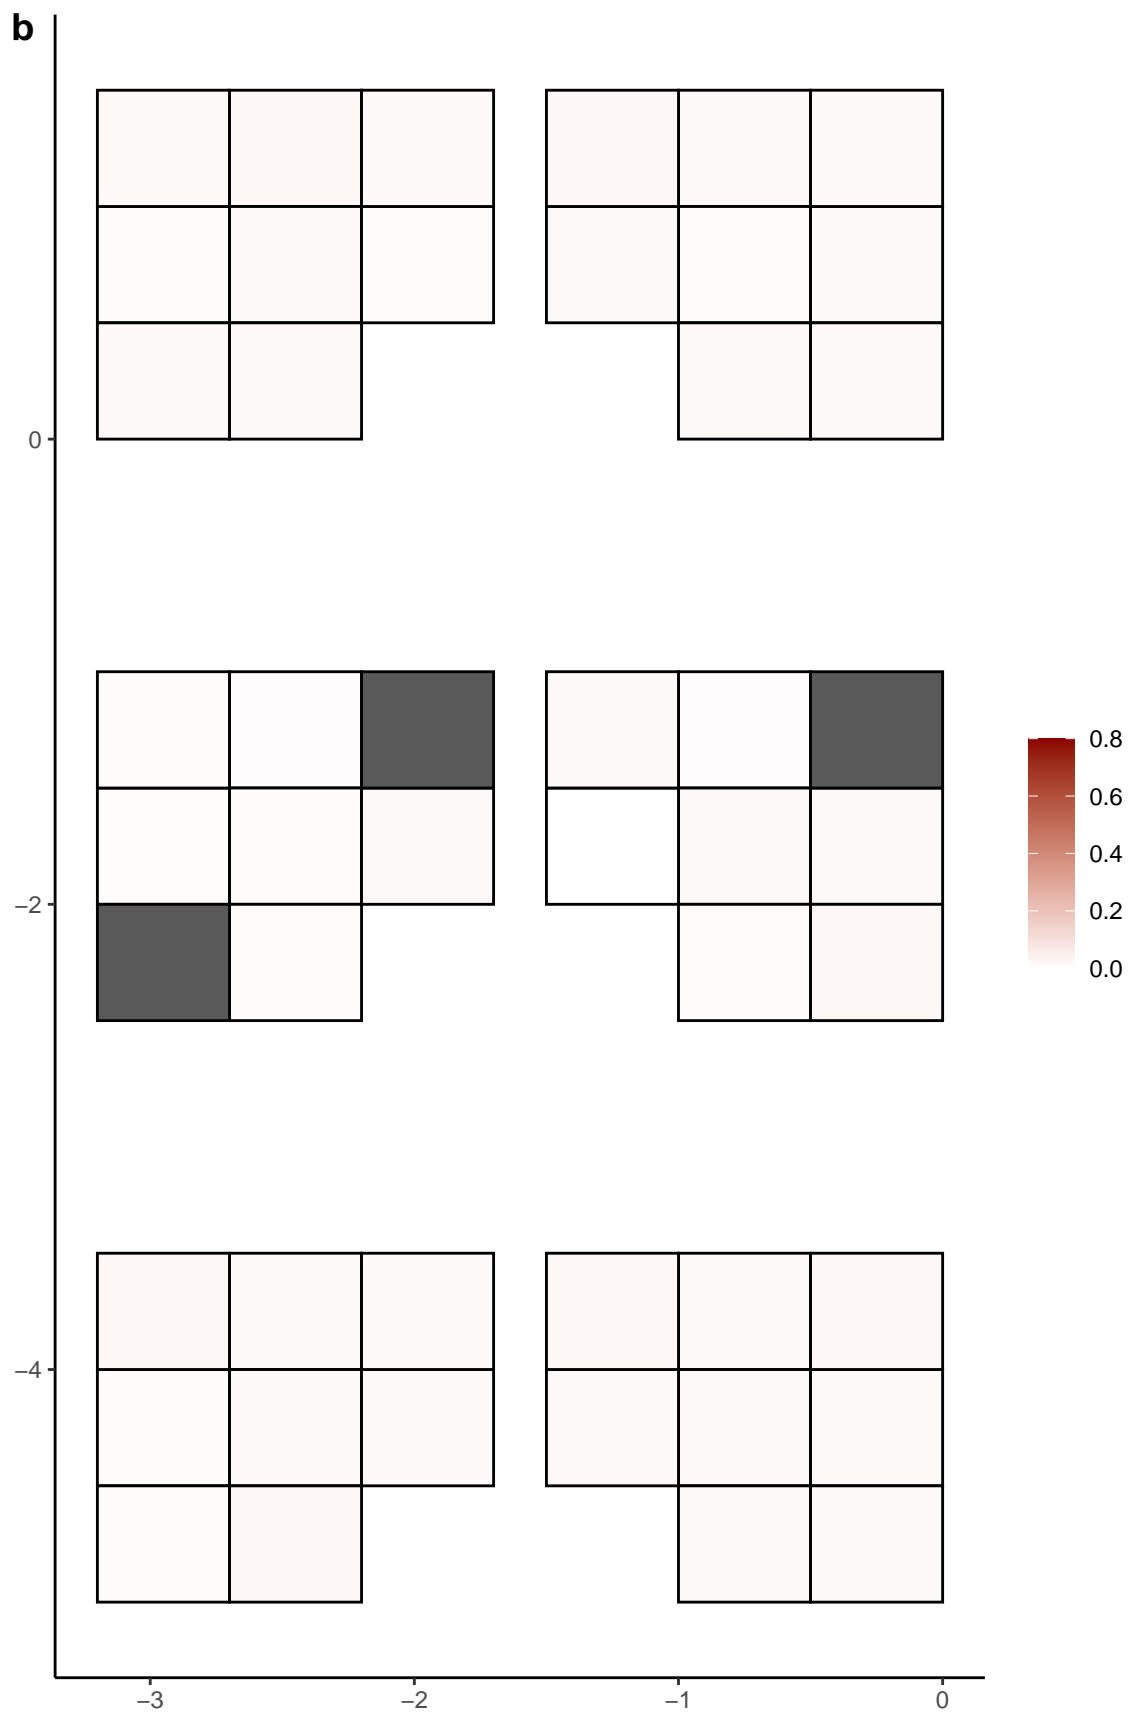



**a** ID05 17-66742030-T-G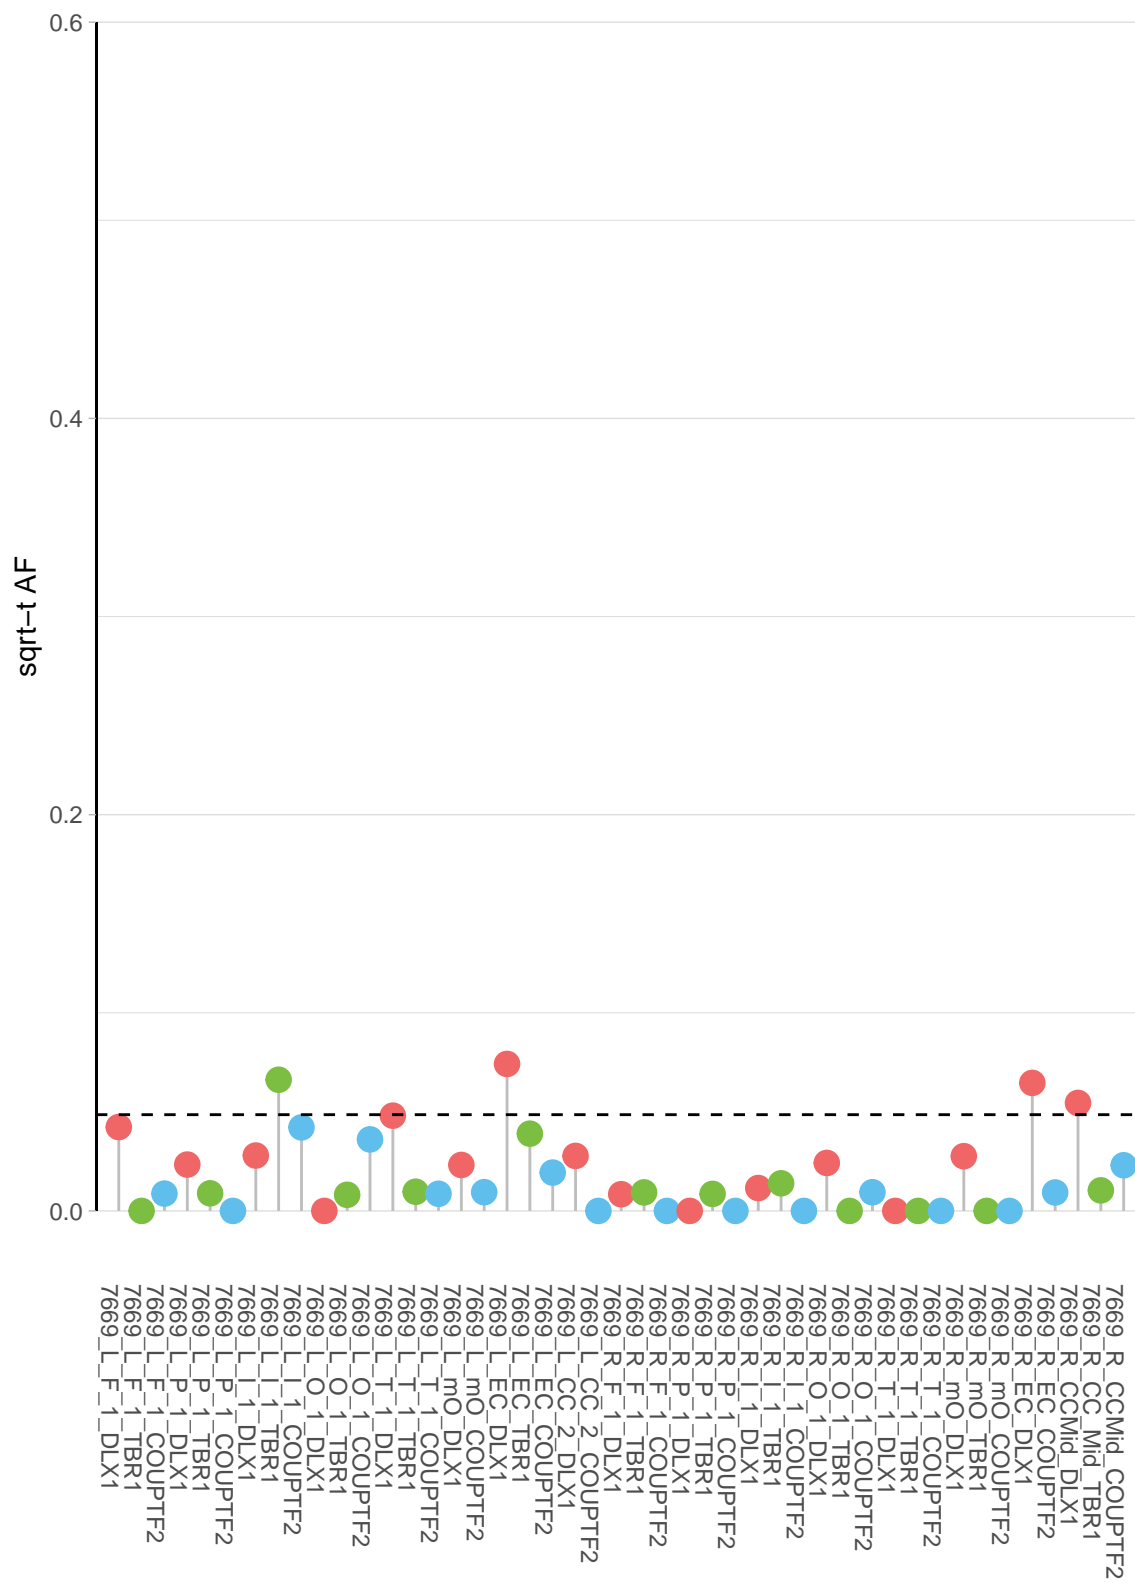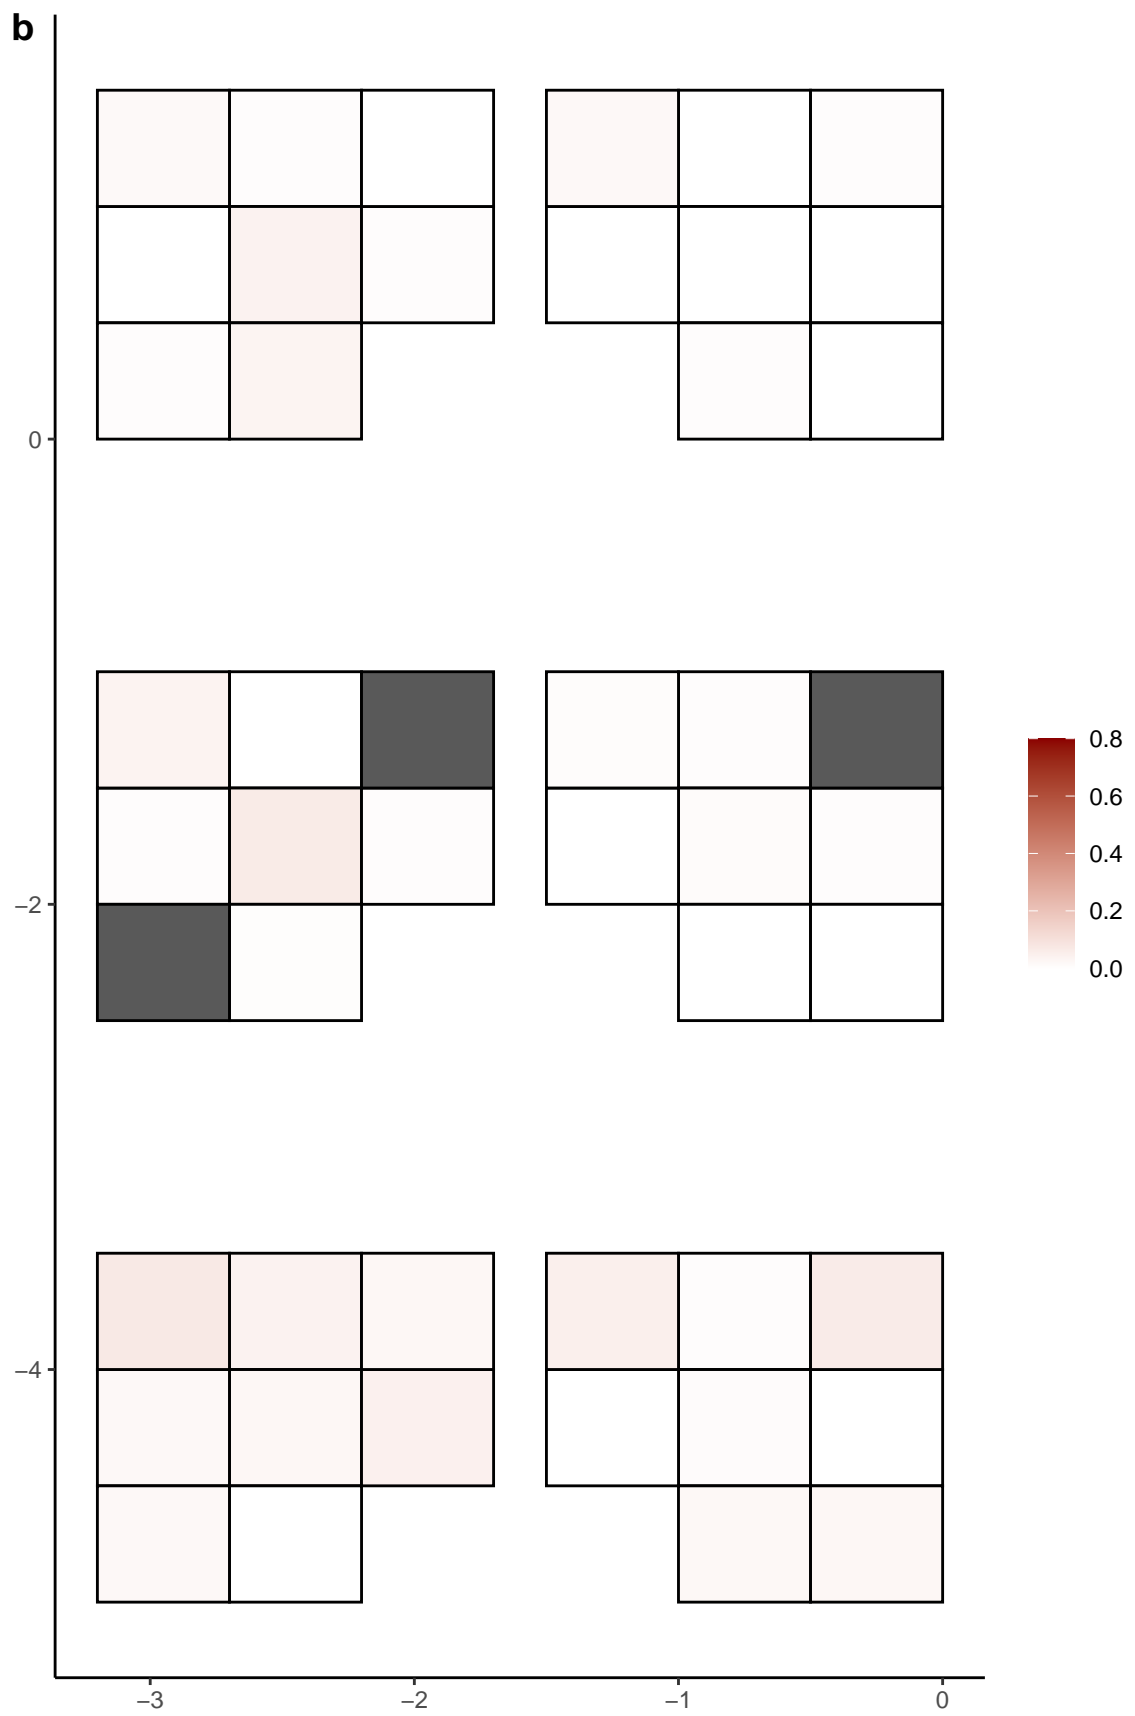





**a** ID05 17-77323400-C-T

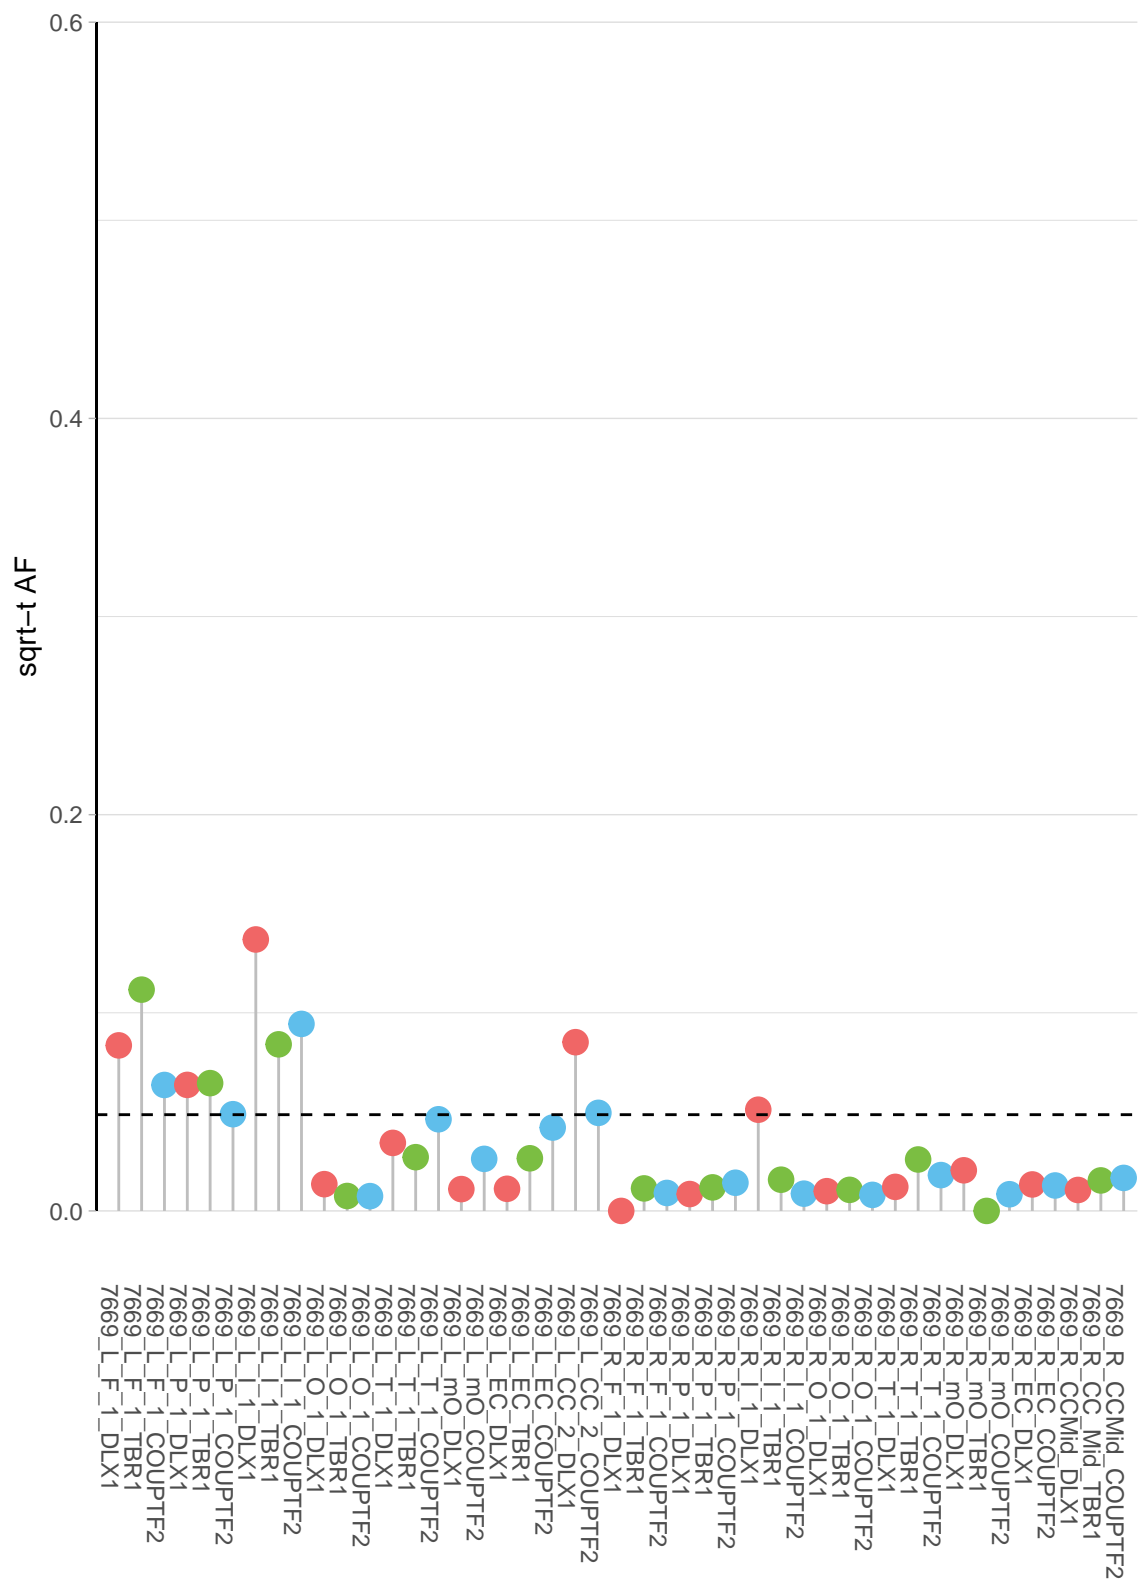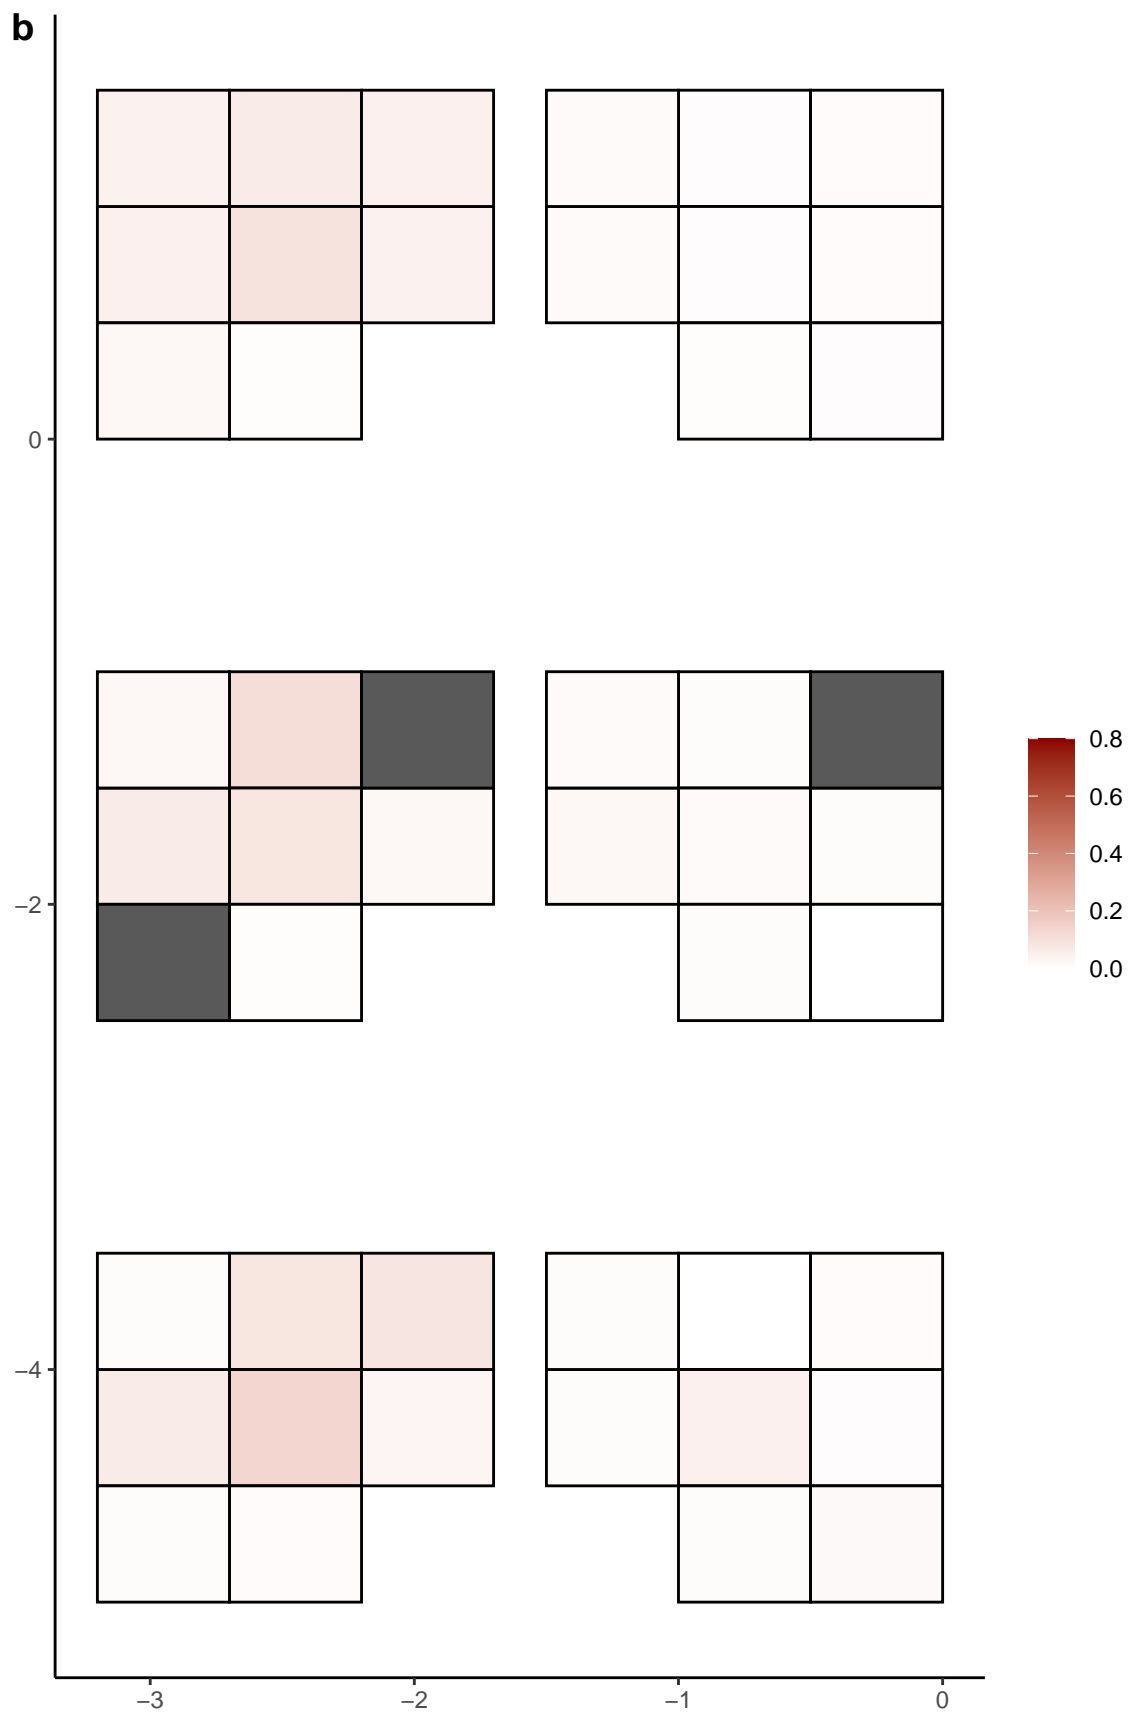

**a** ID05 17-79305344-G-A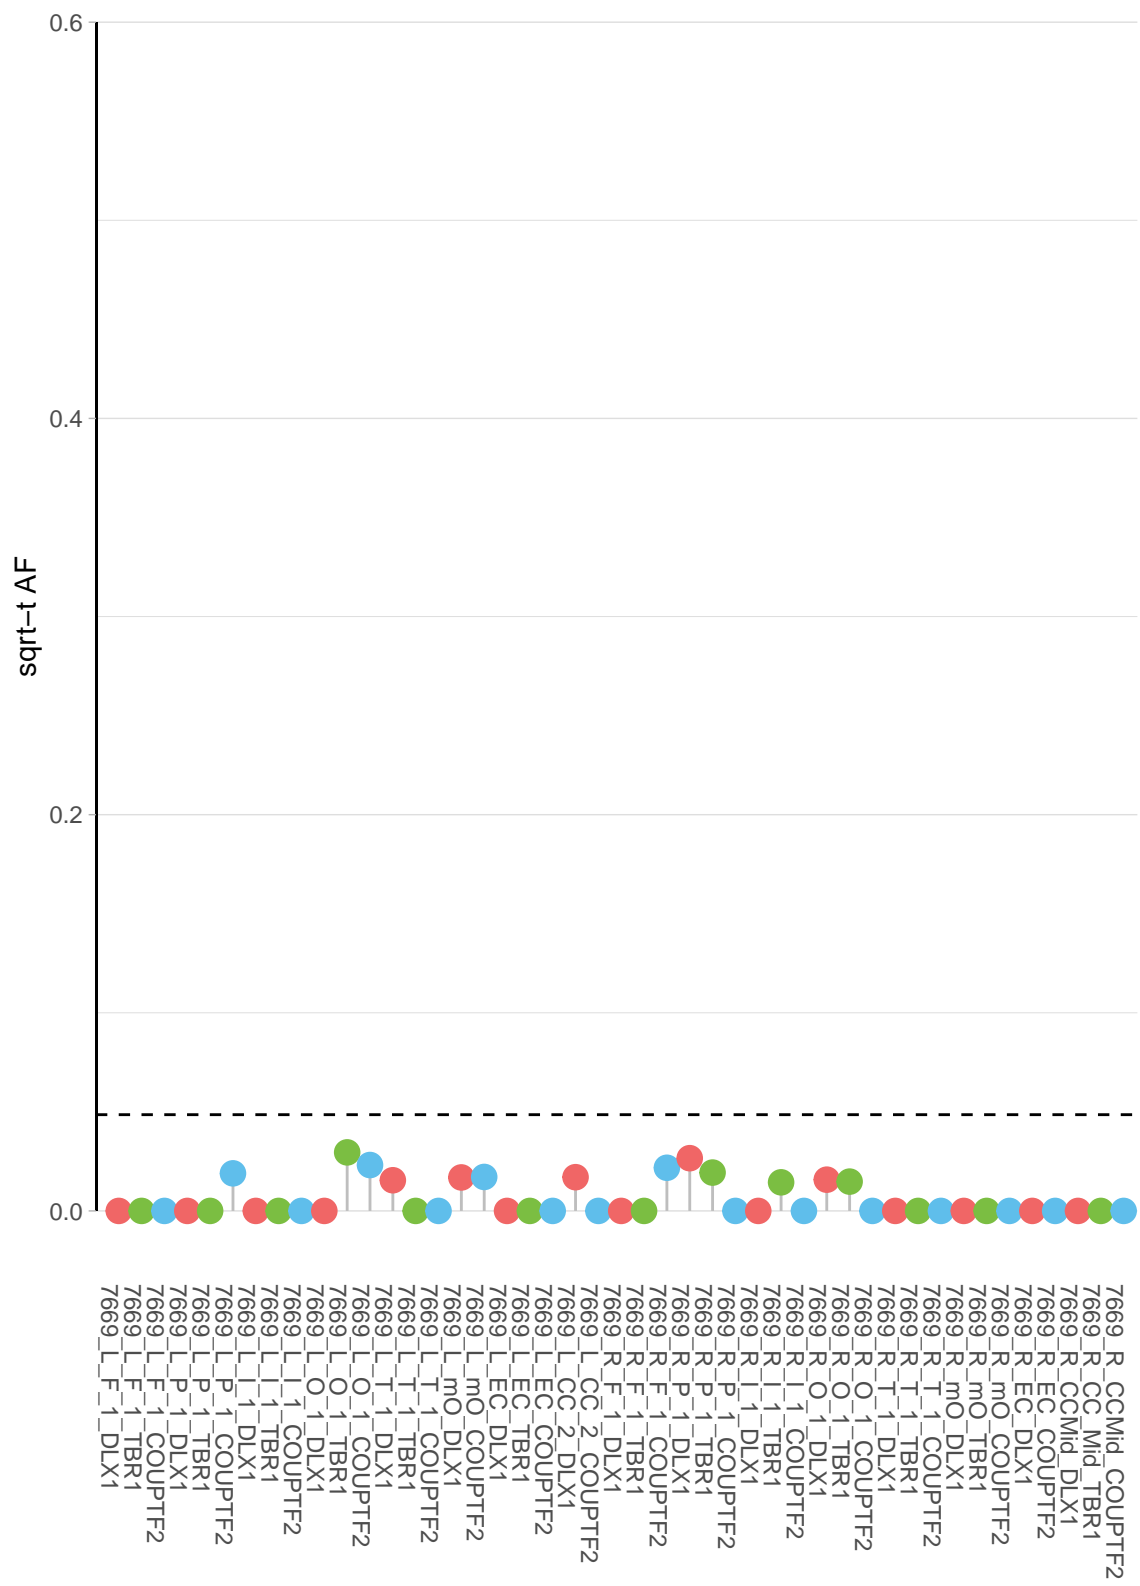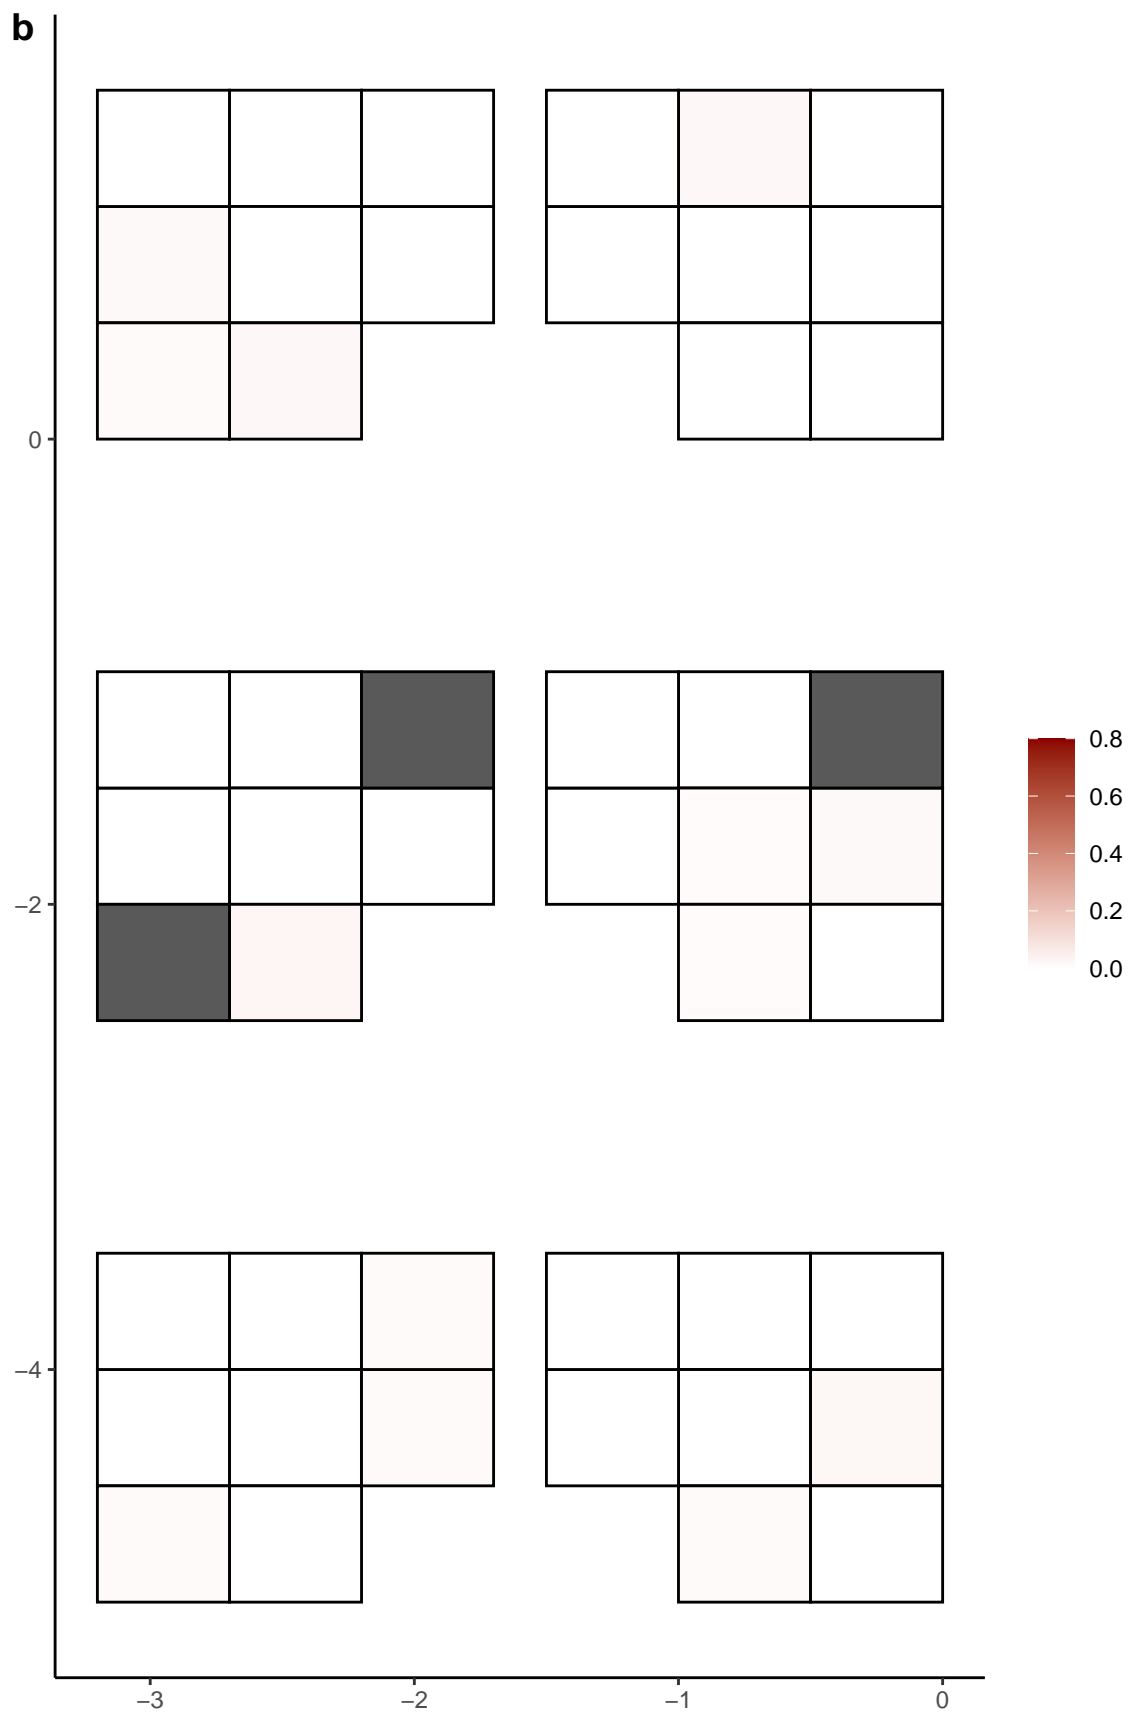

**a** ID05 17-80207448-G-A
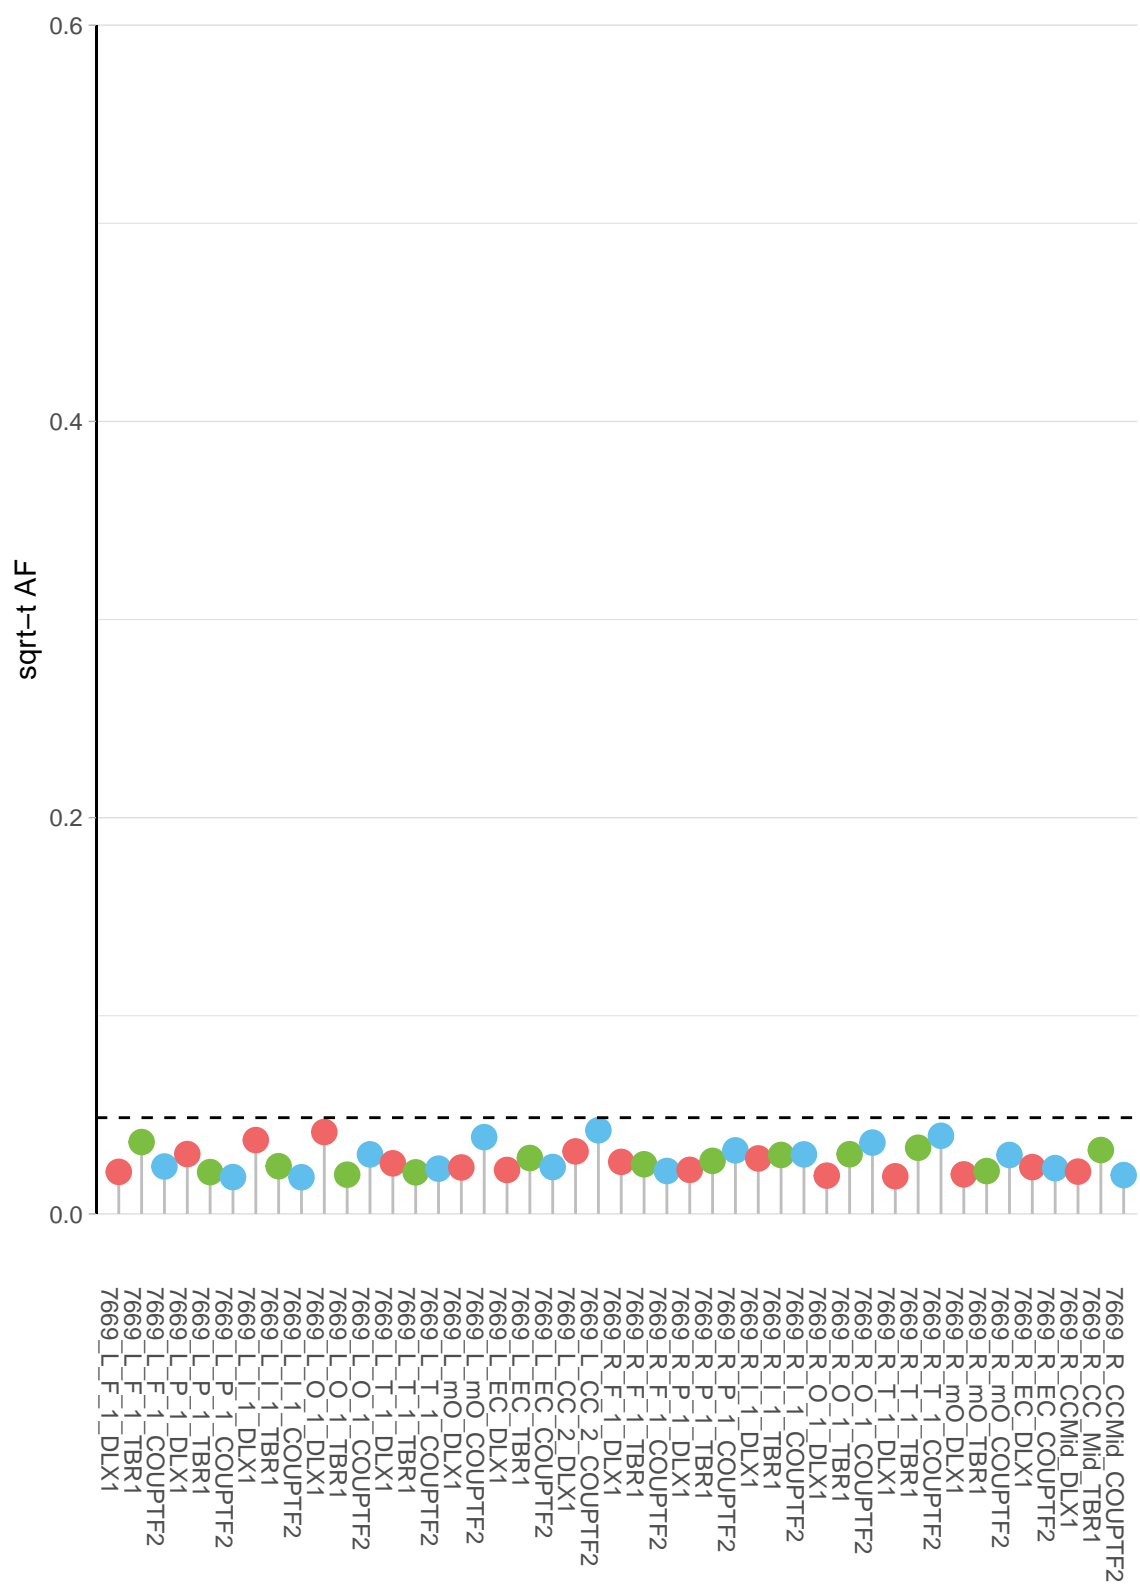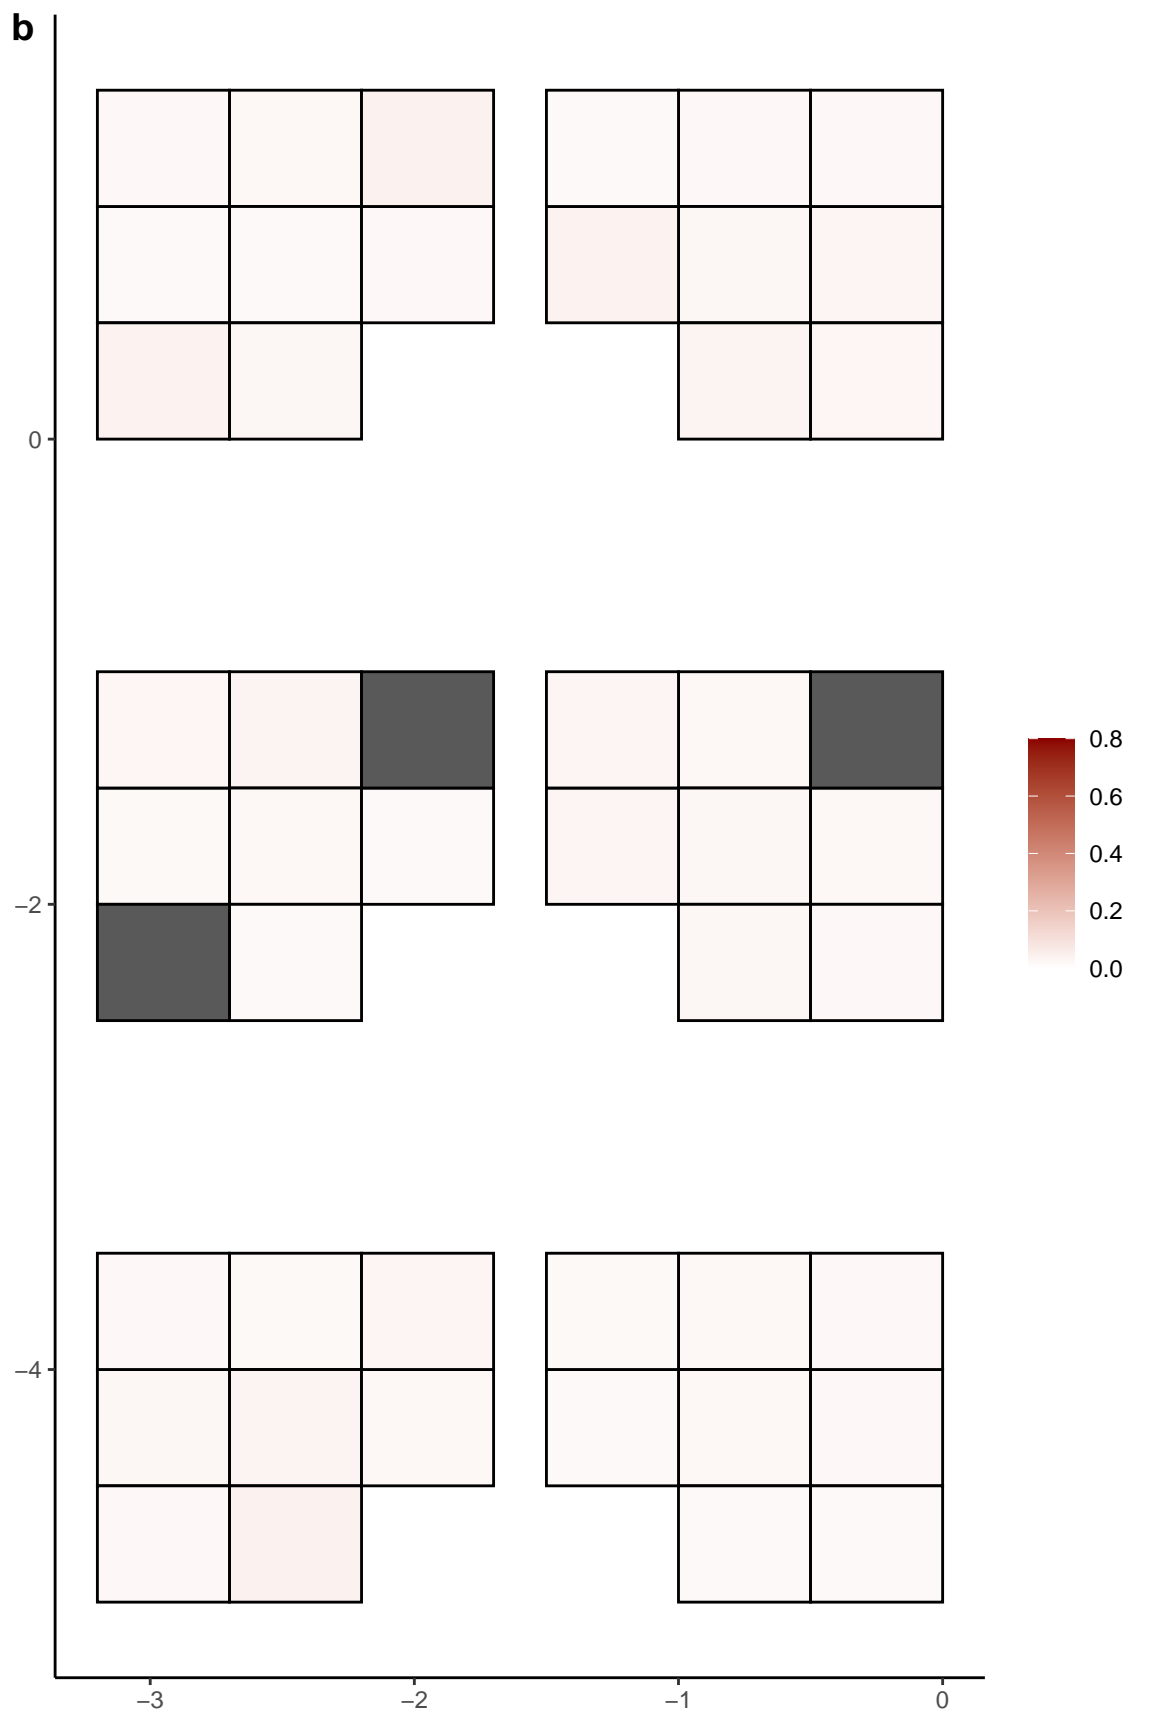

**a** ID05 17-80643417-G-A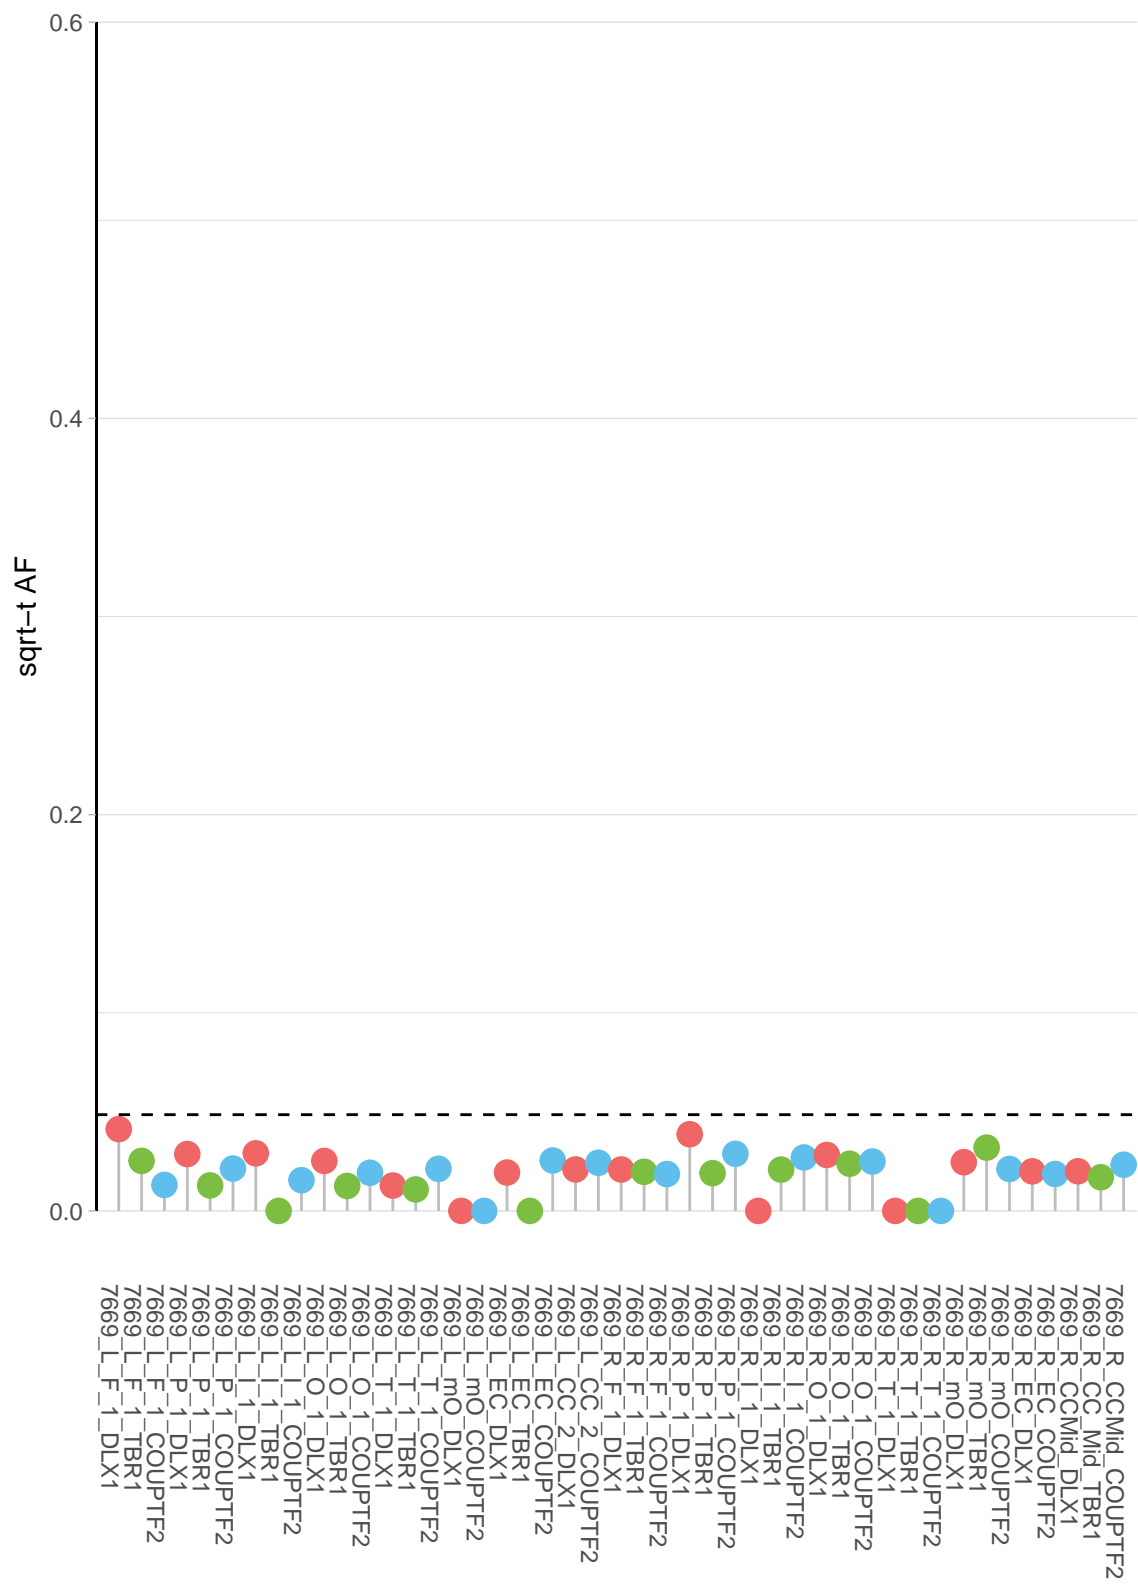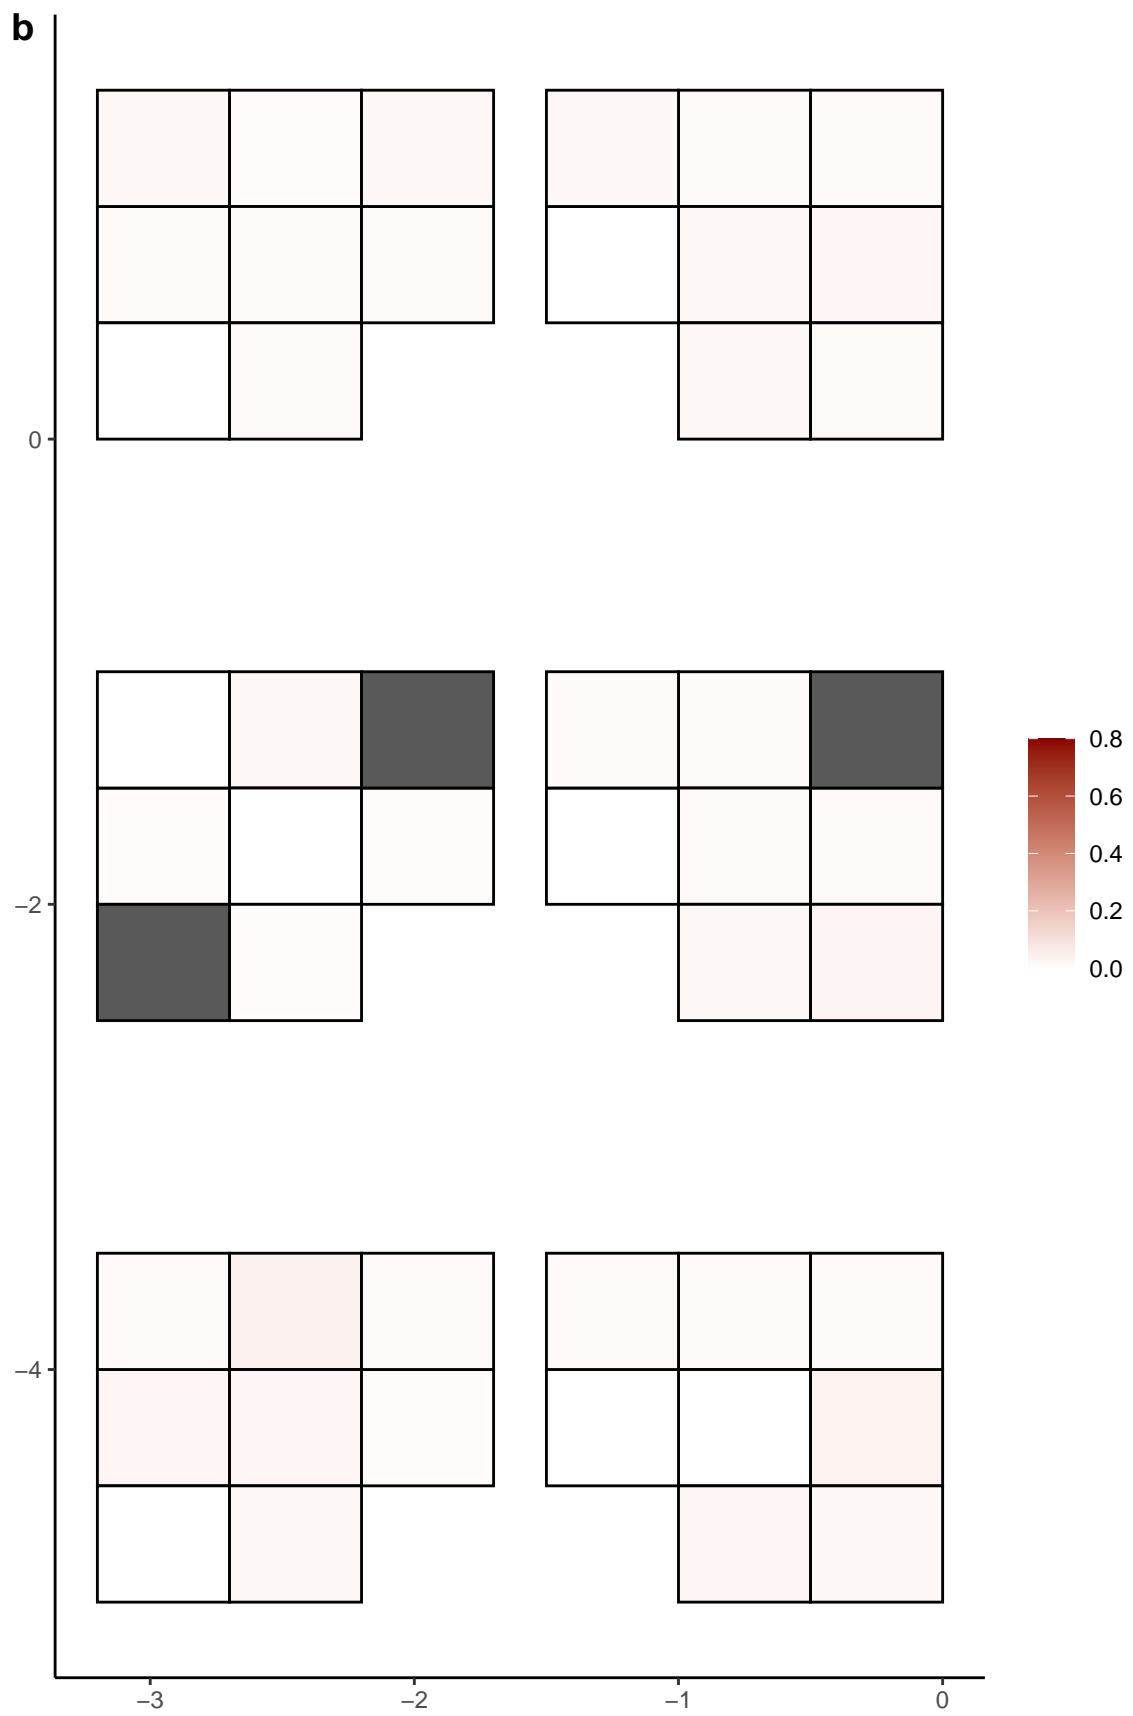

**a** ID05 17-8815877-G-A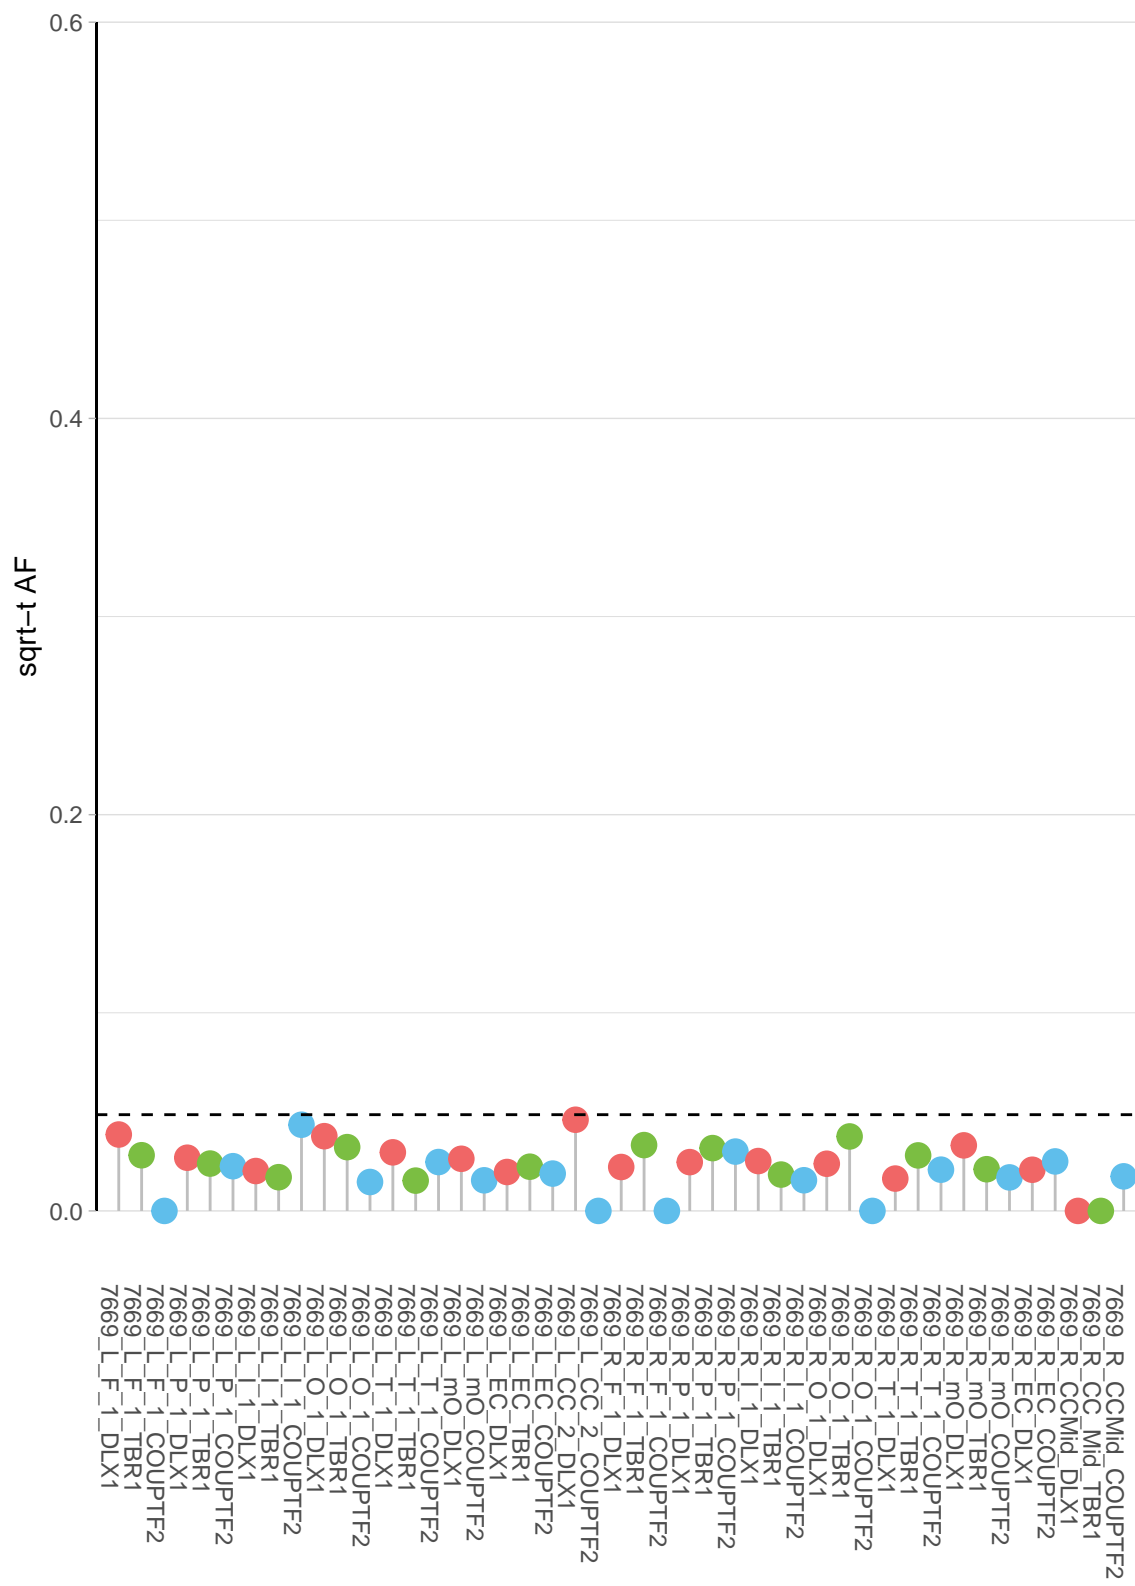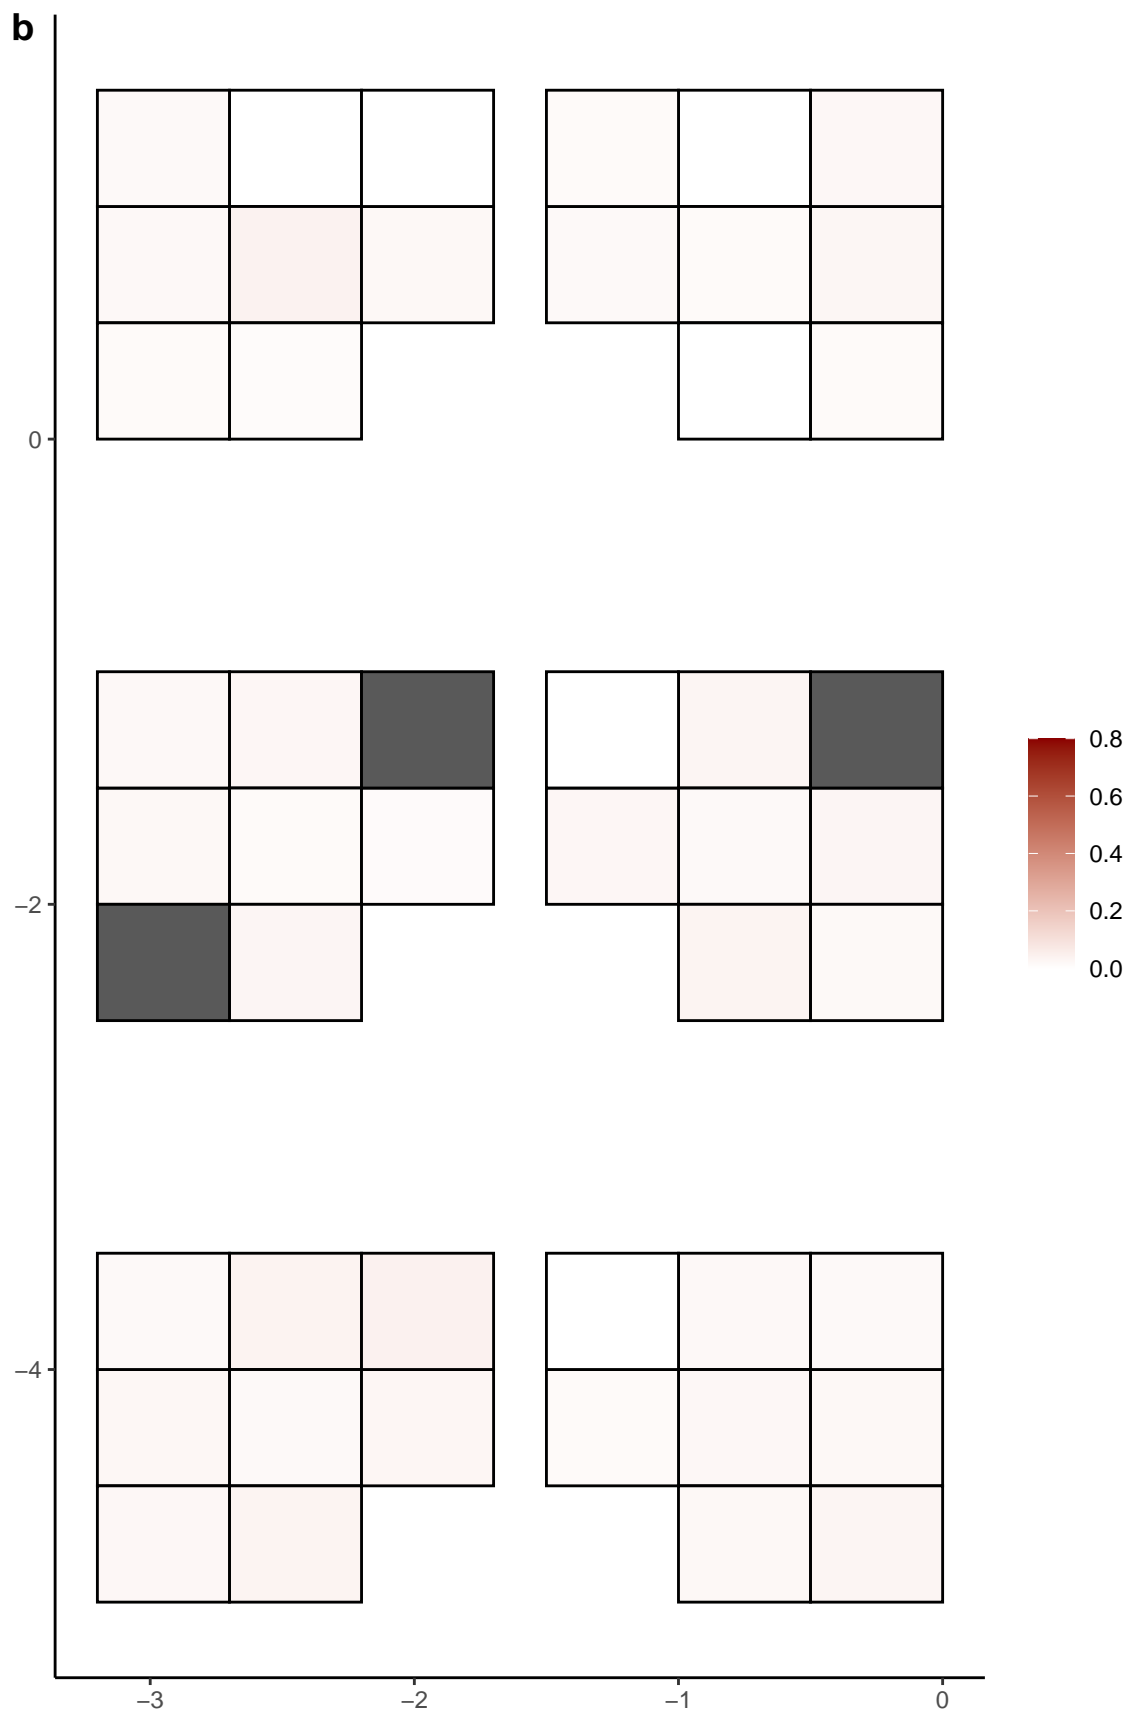

**a** ID05 17-9084127-C-T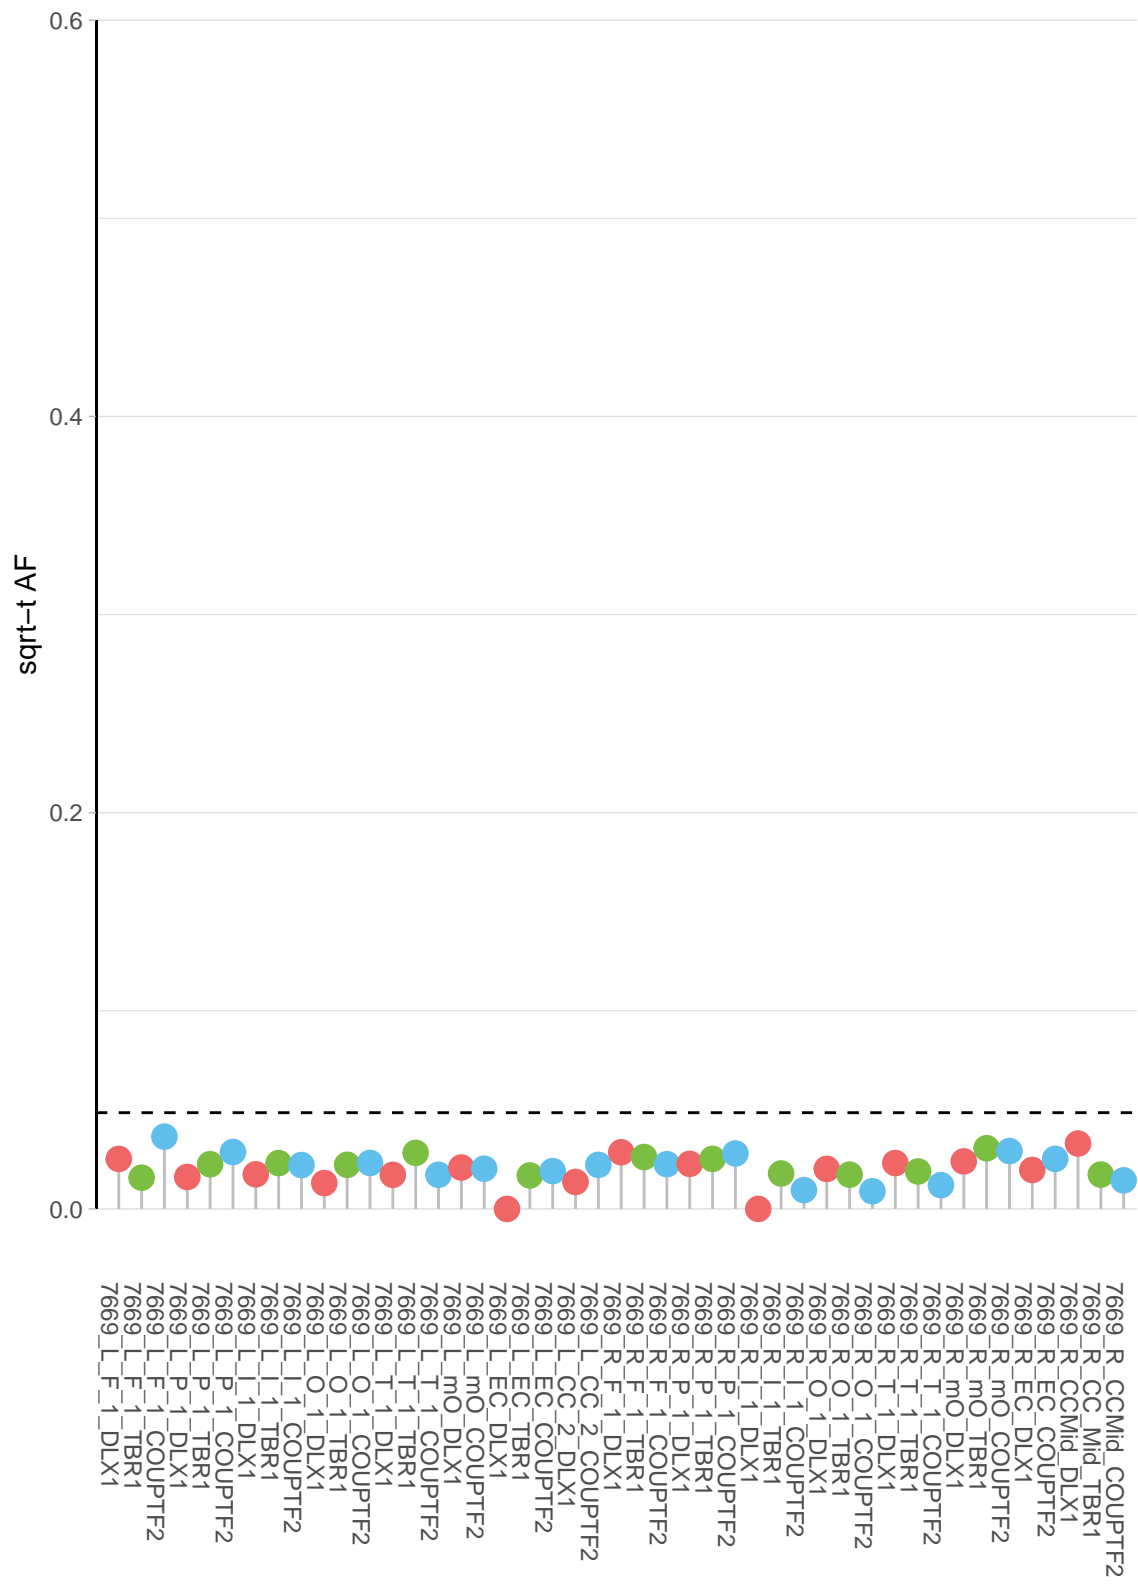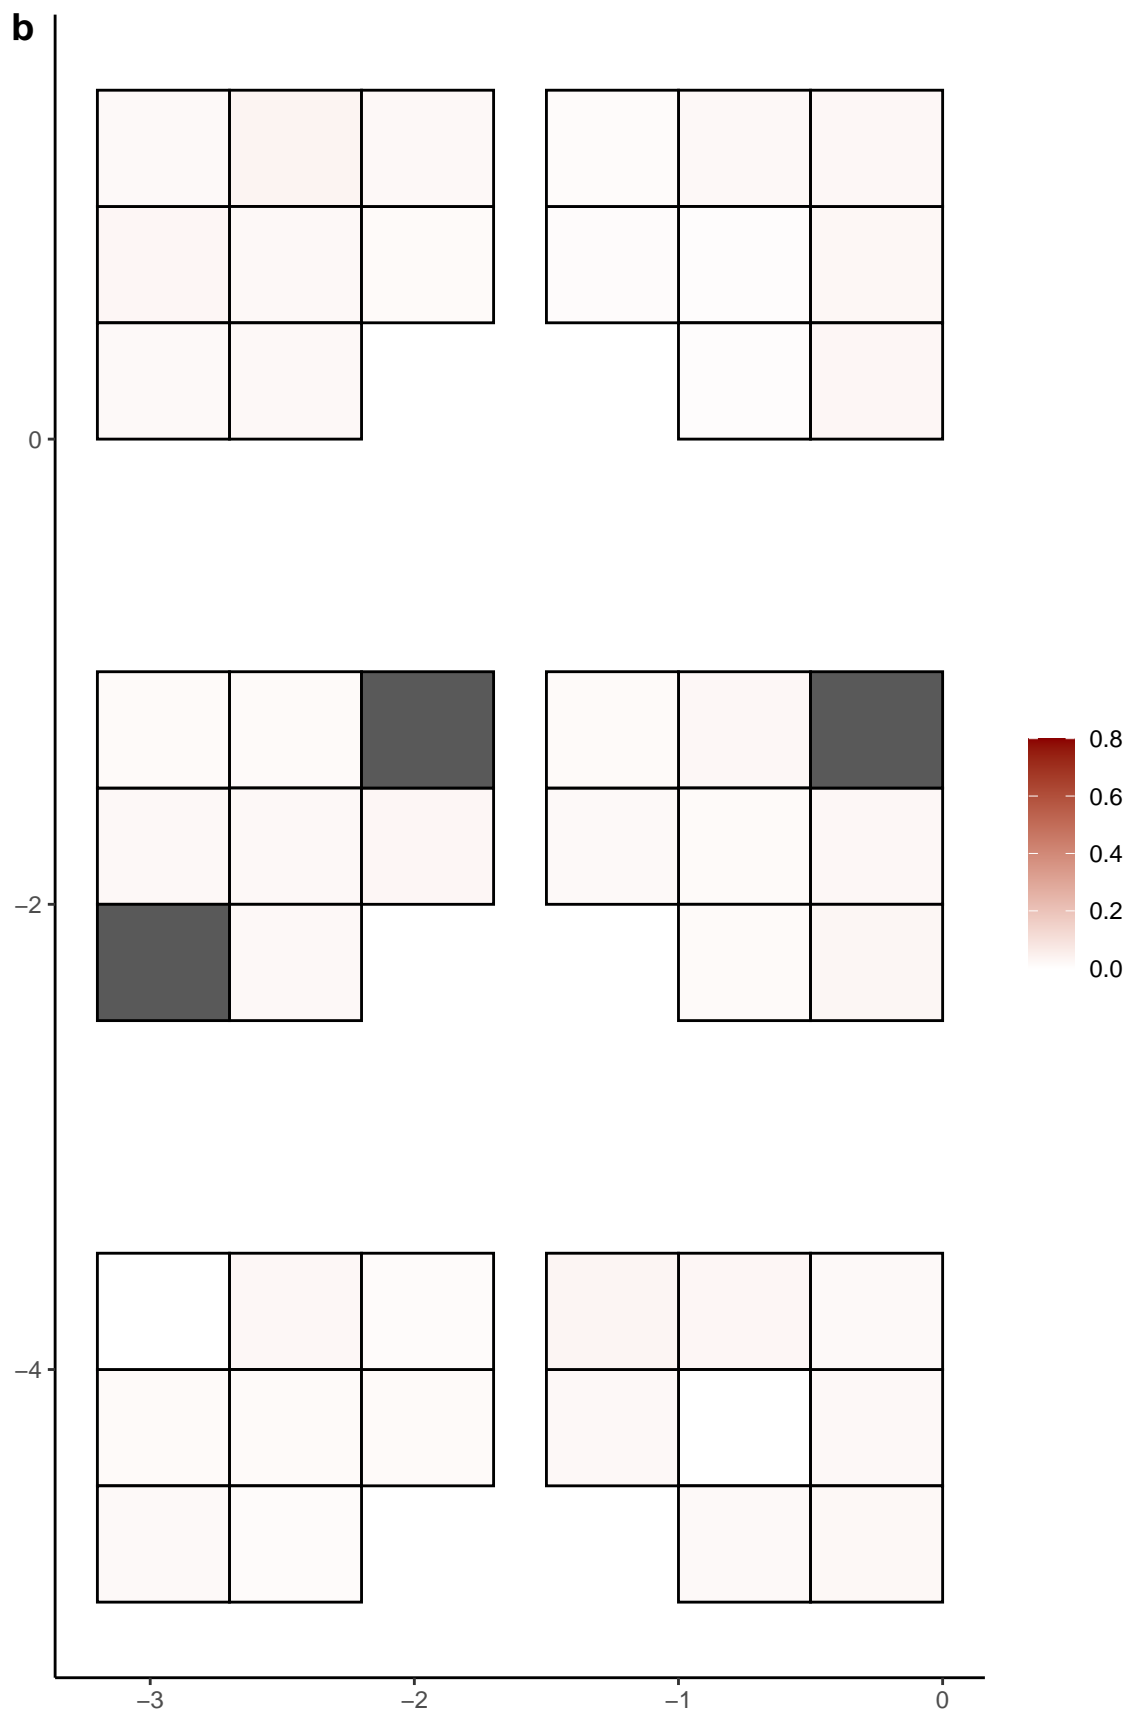

**a** ID05 18-1735890-A-C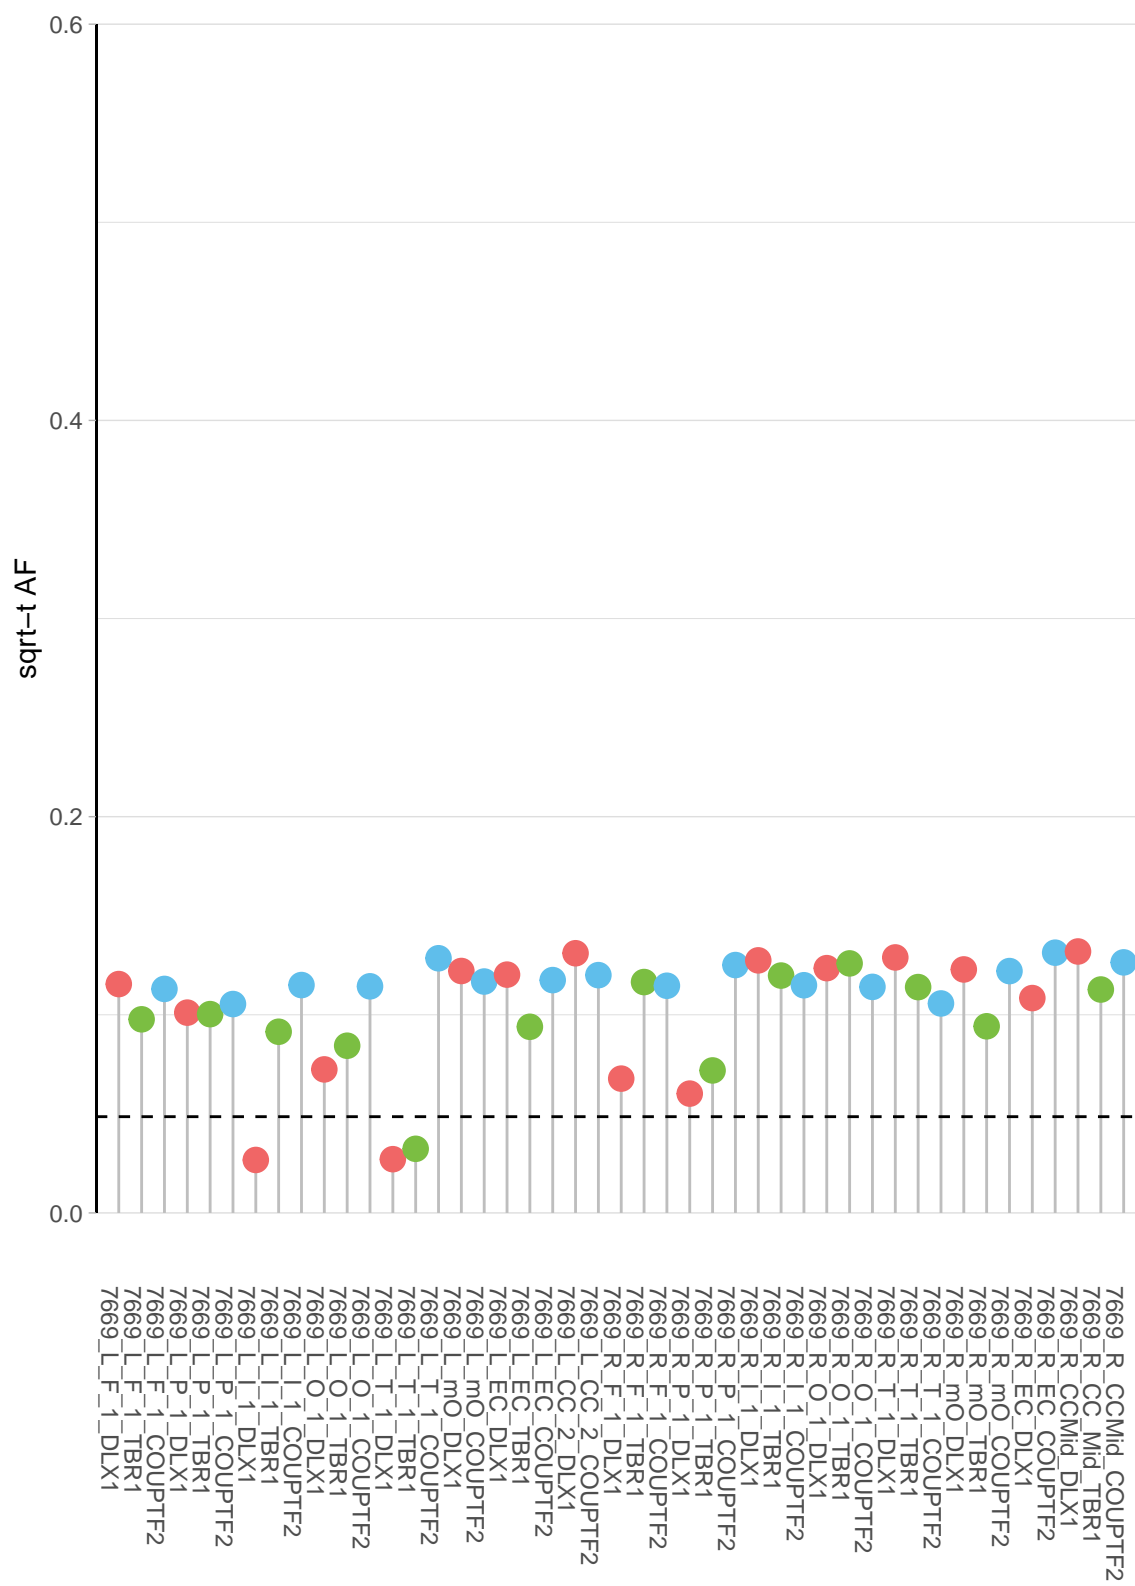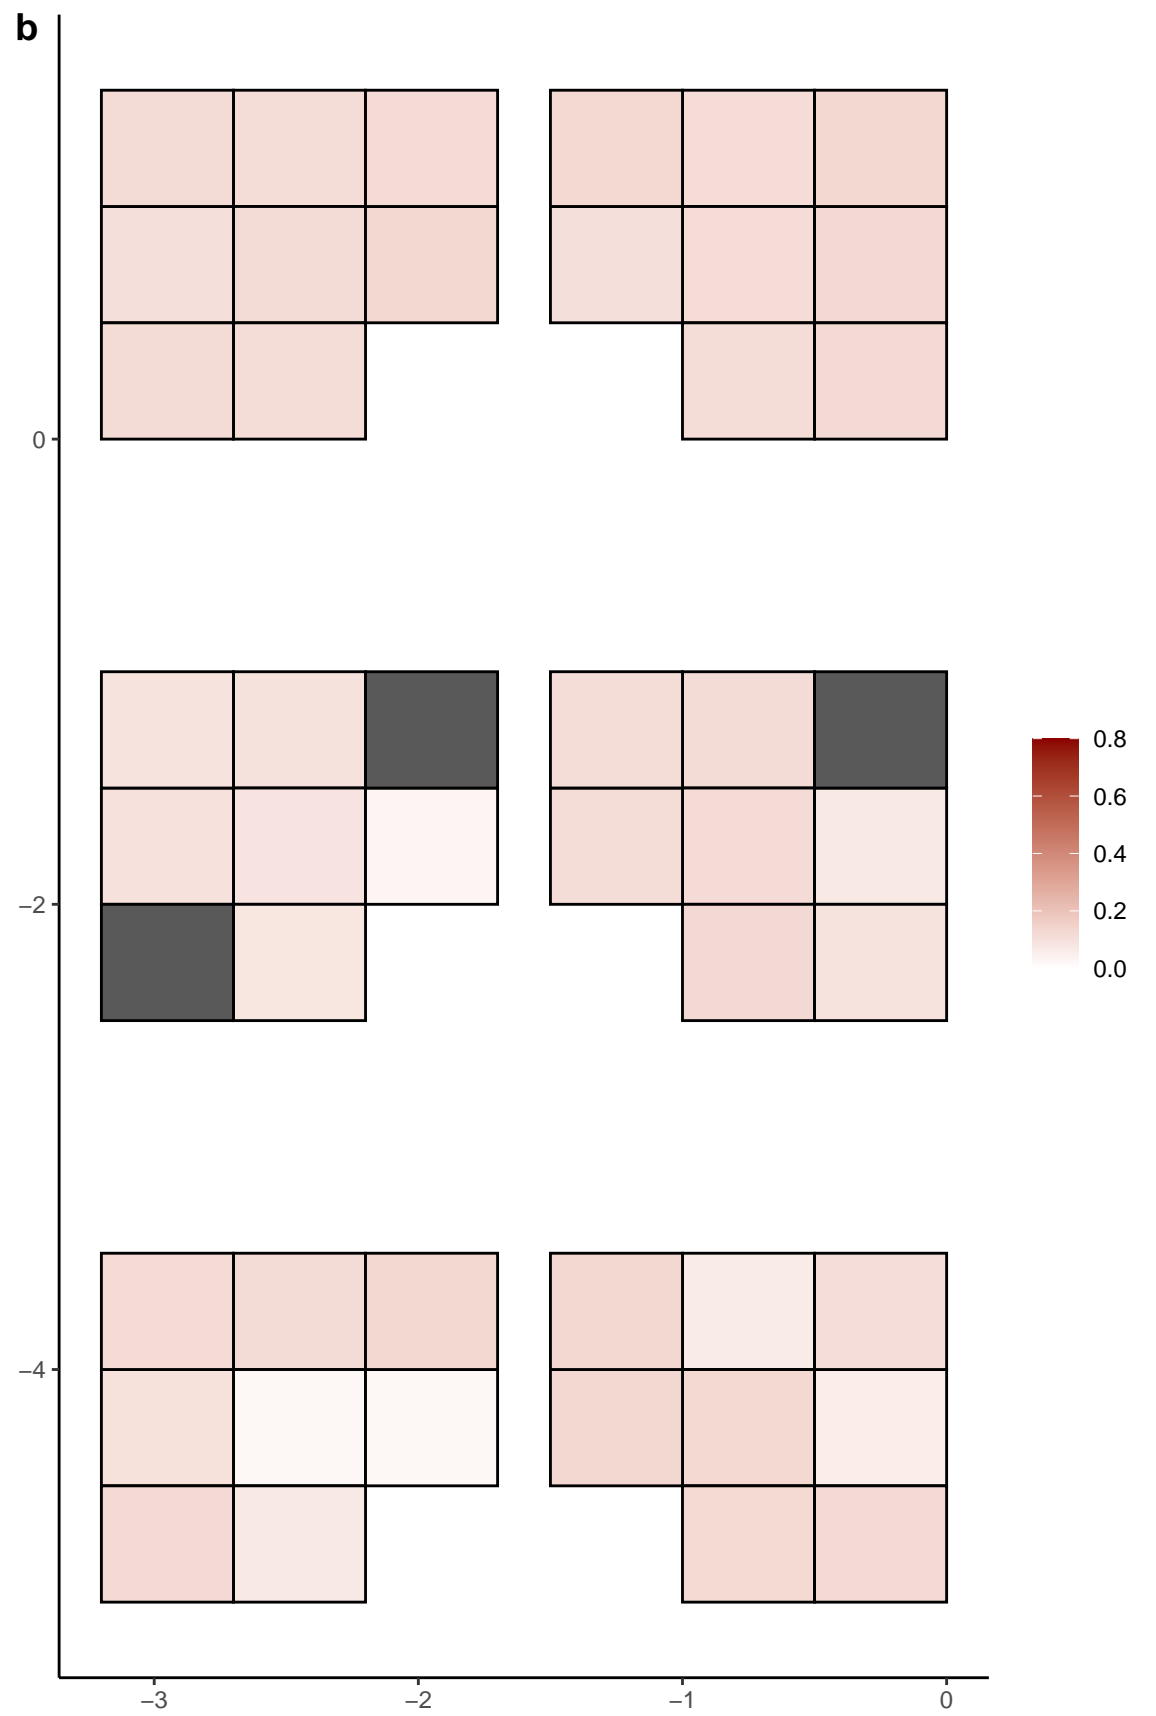

**a** ID05 18-1735891-G-T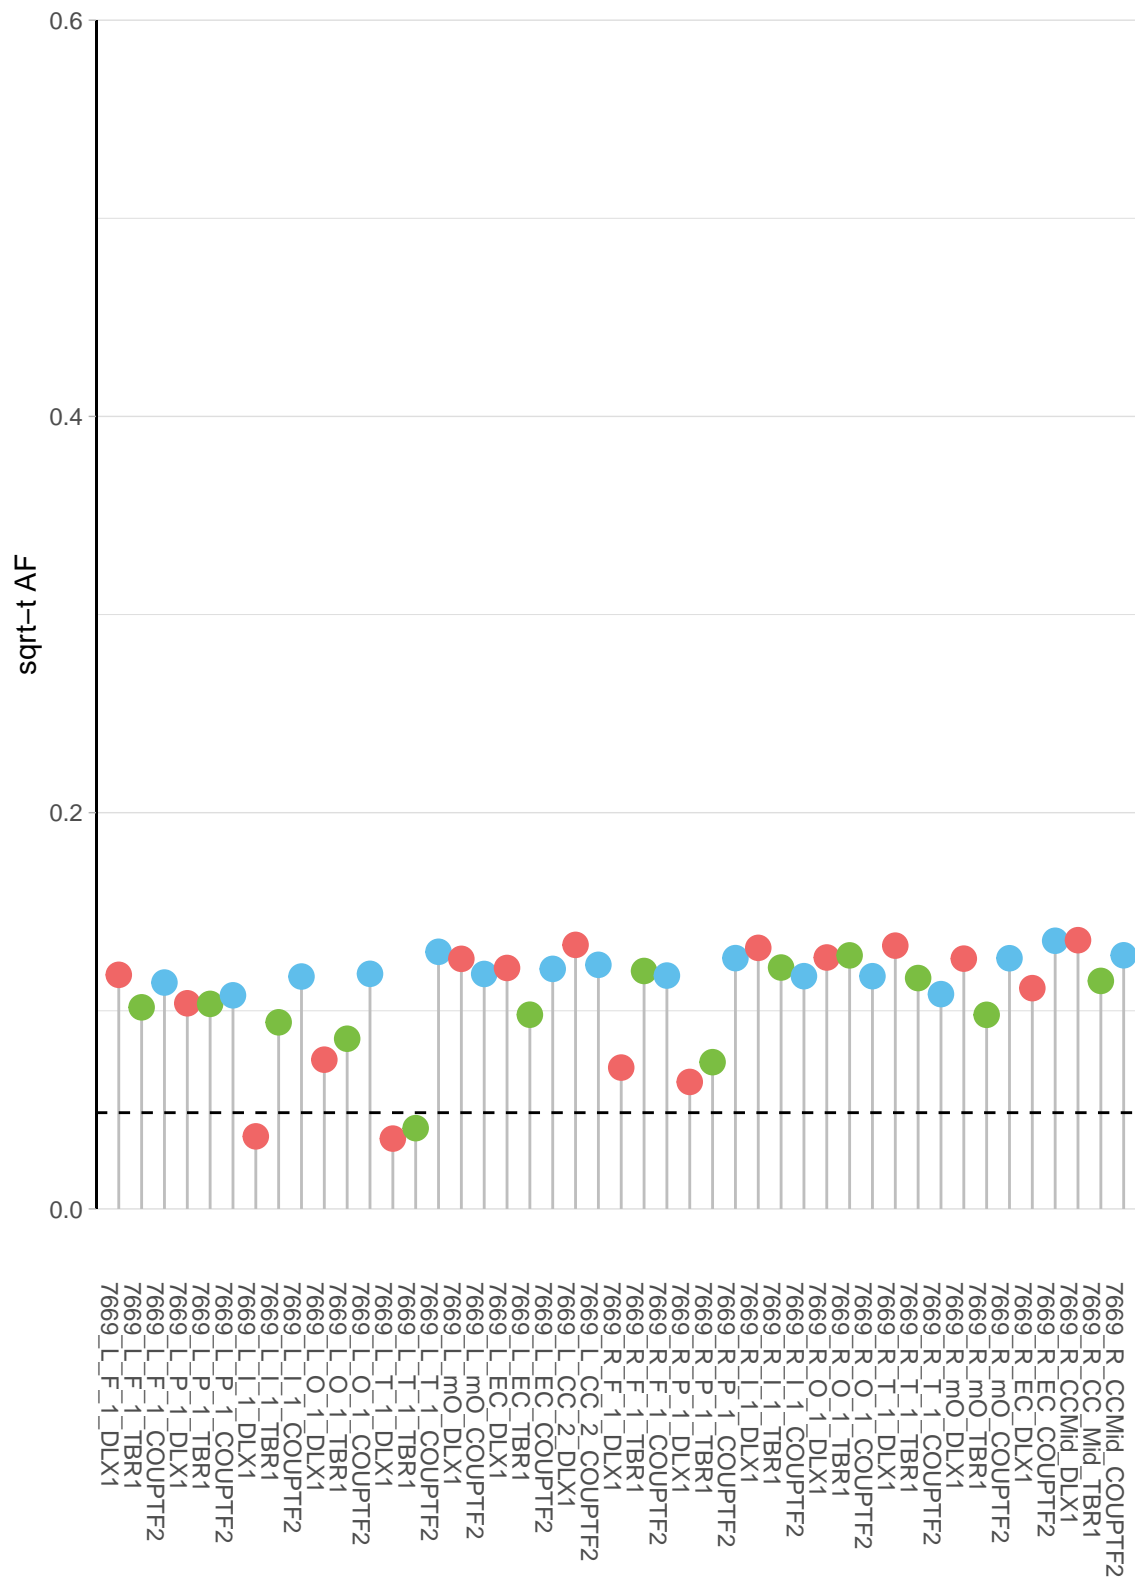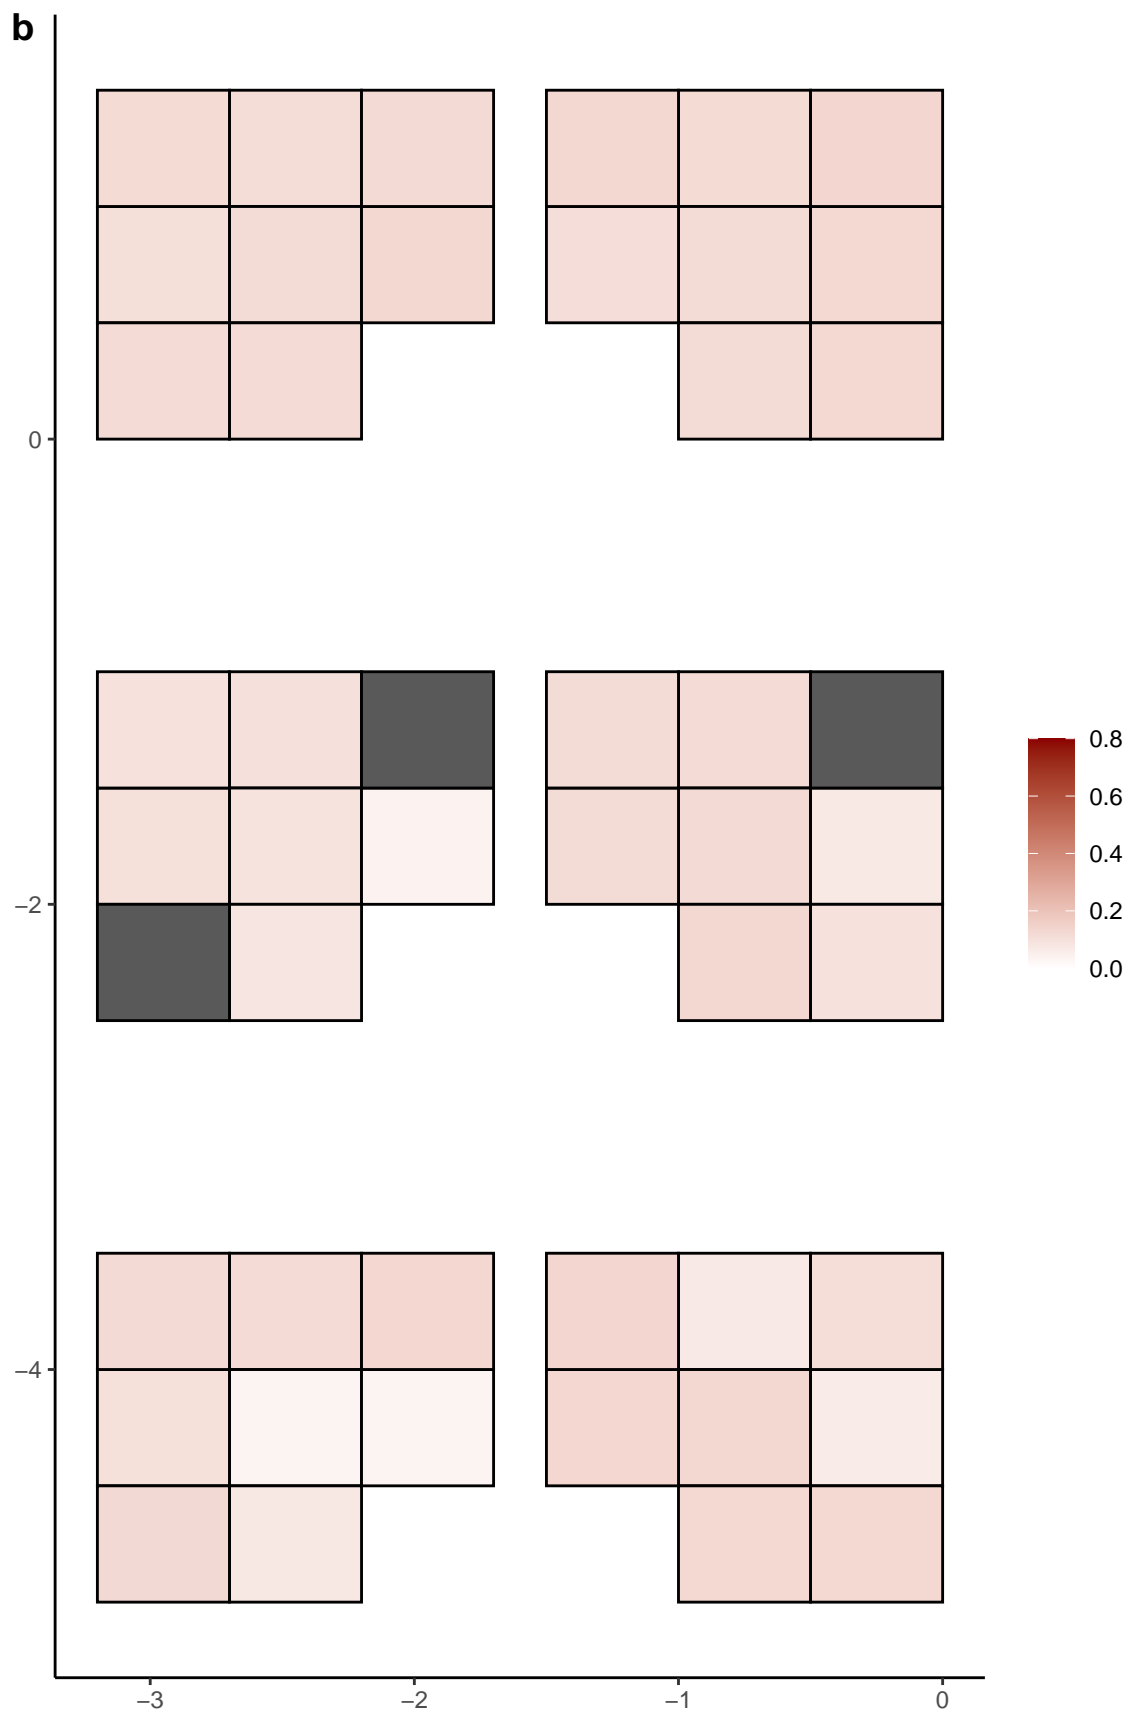



**a** ID05 18-24782762-T-A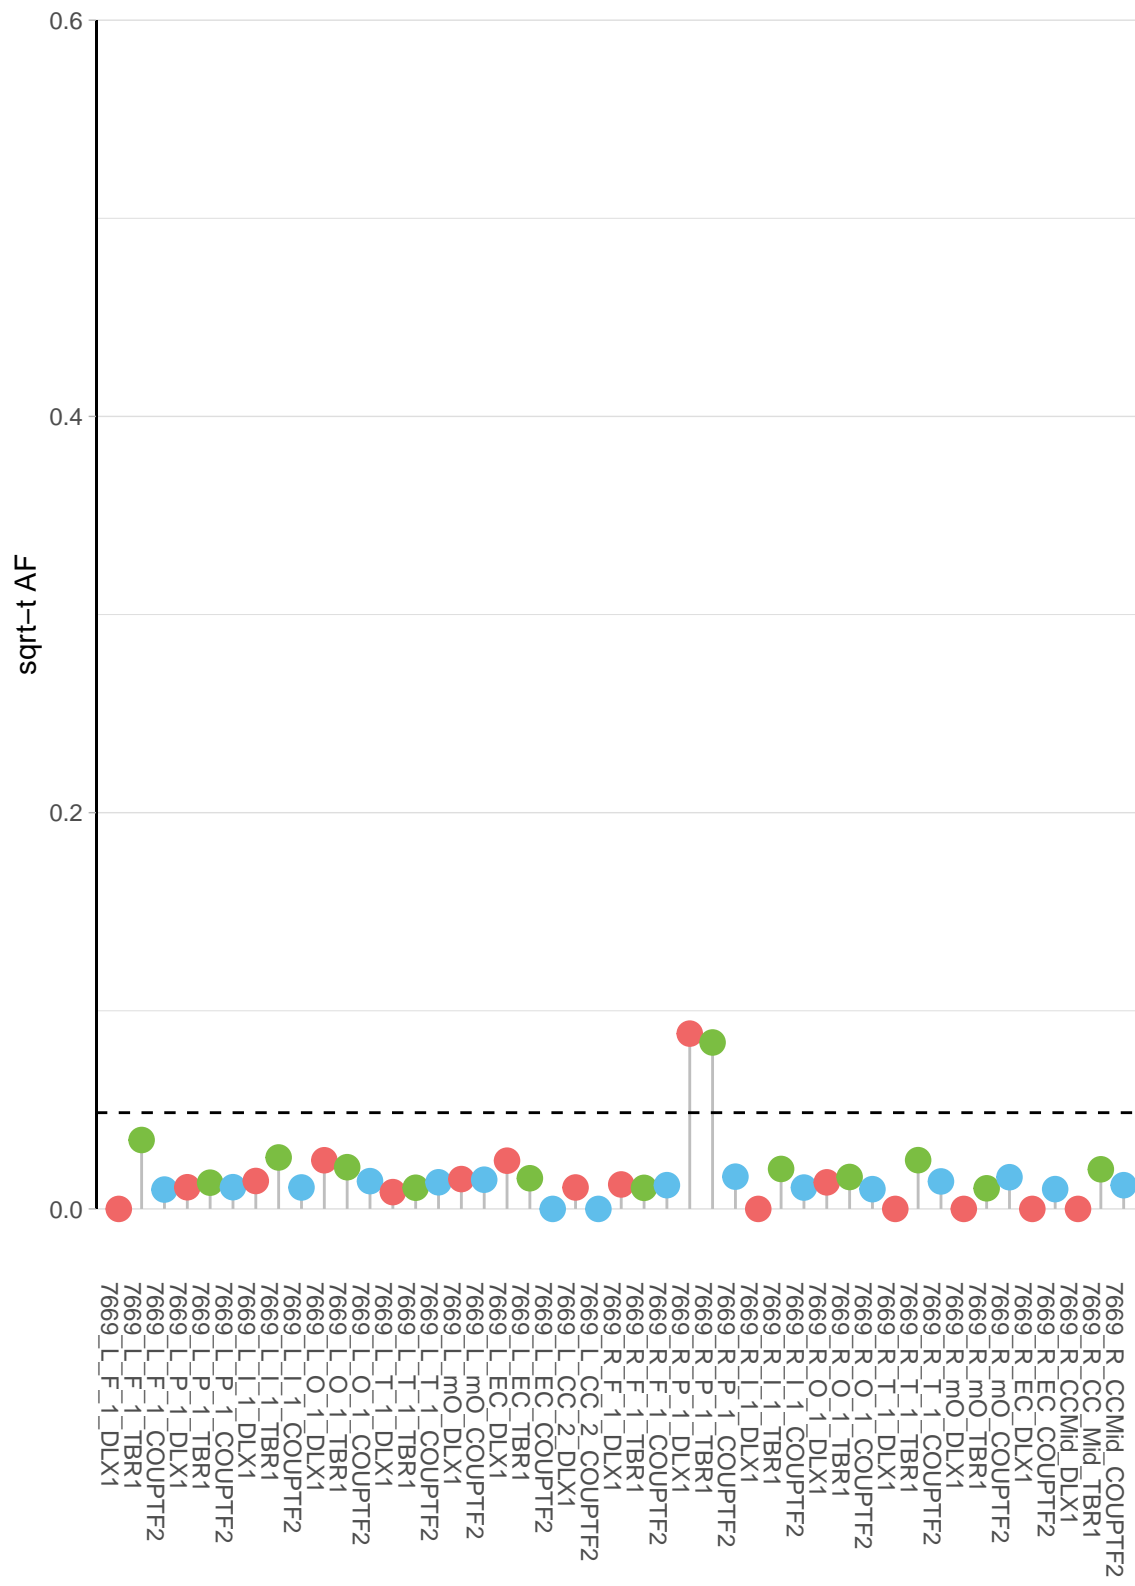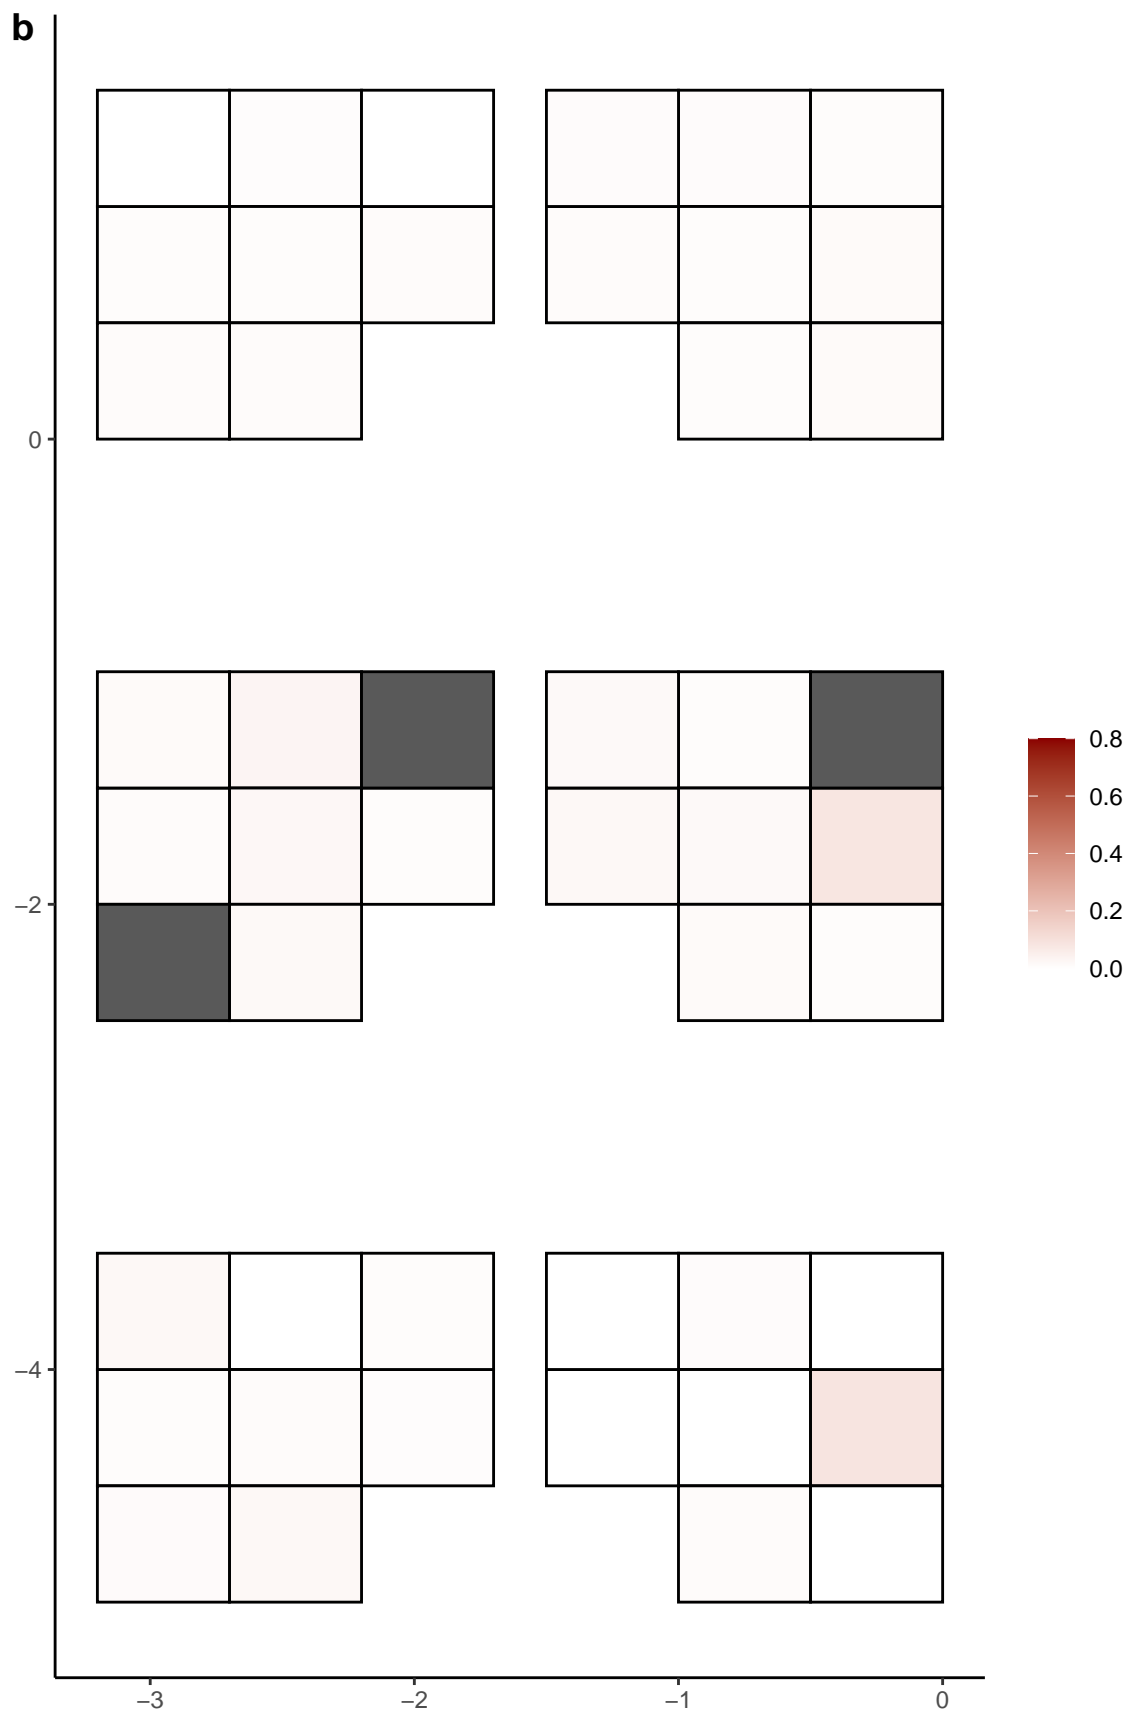

**a** ID05 18-25171573-C-T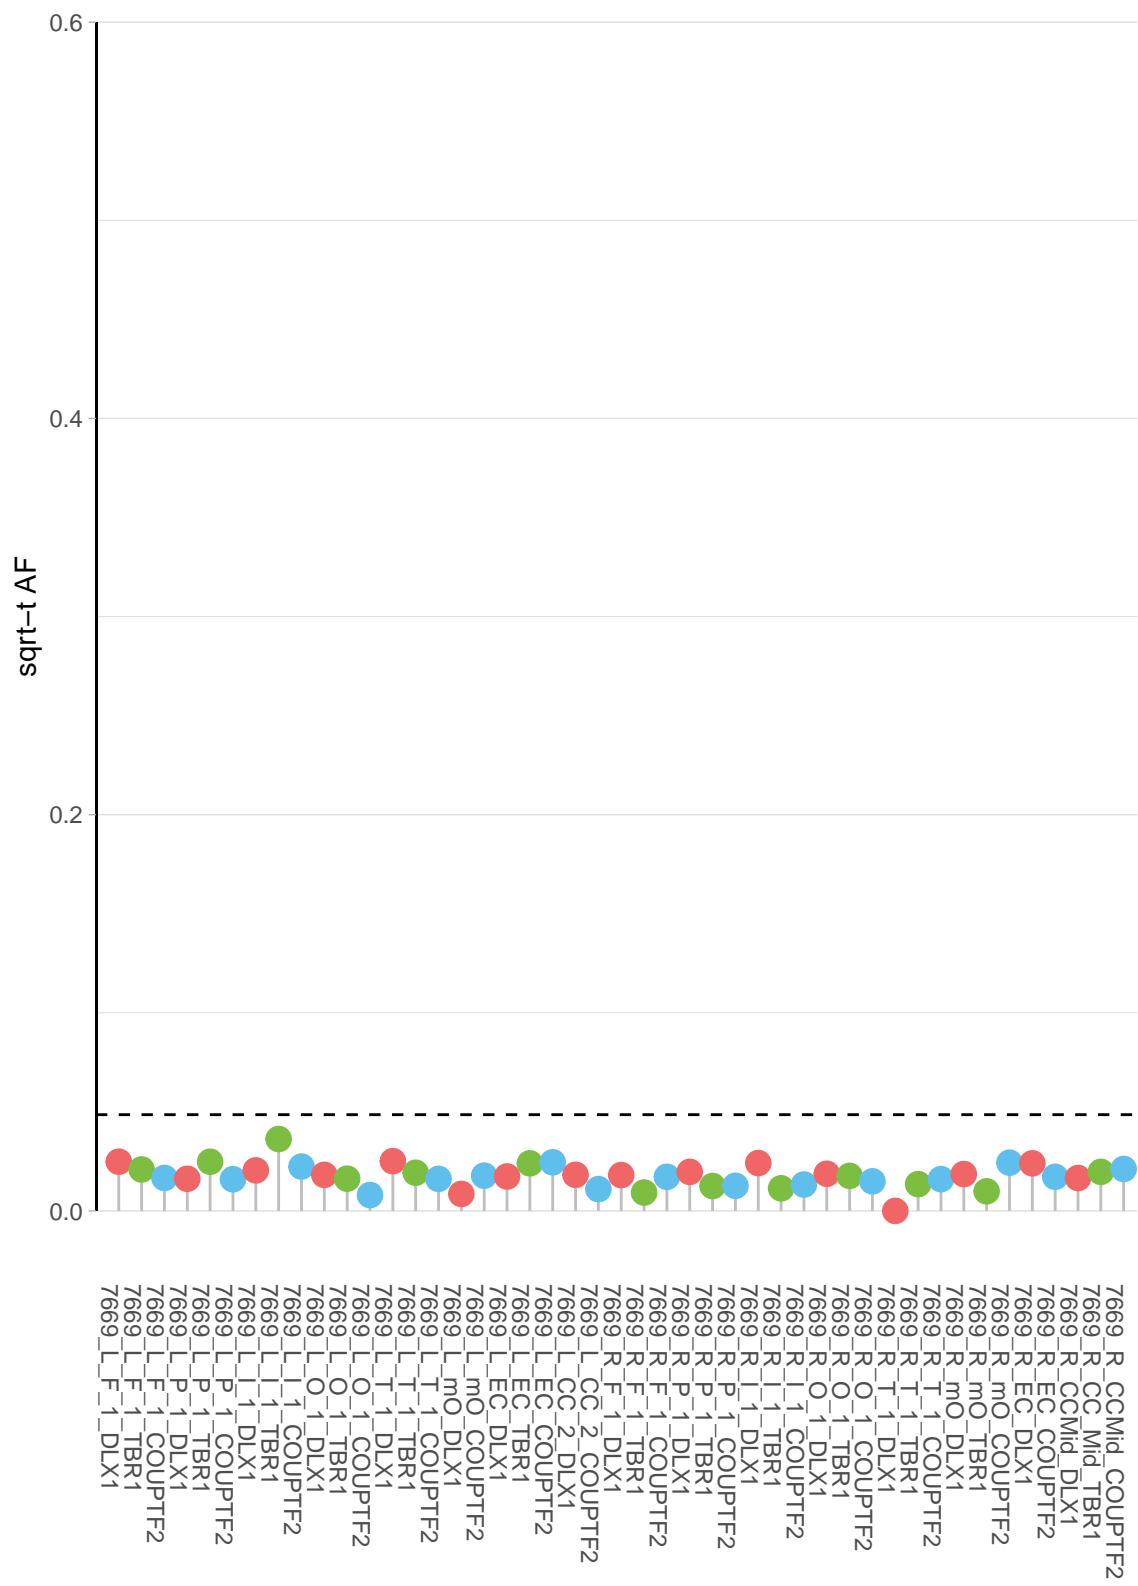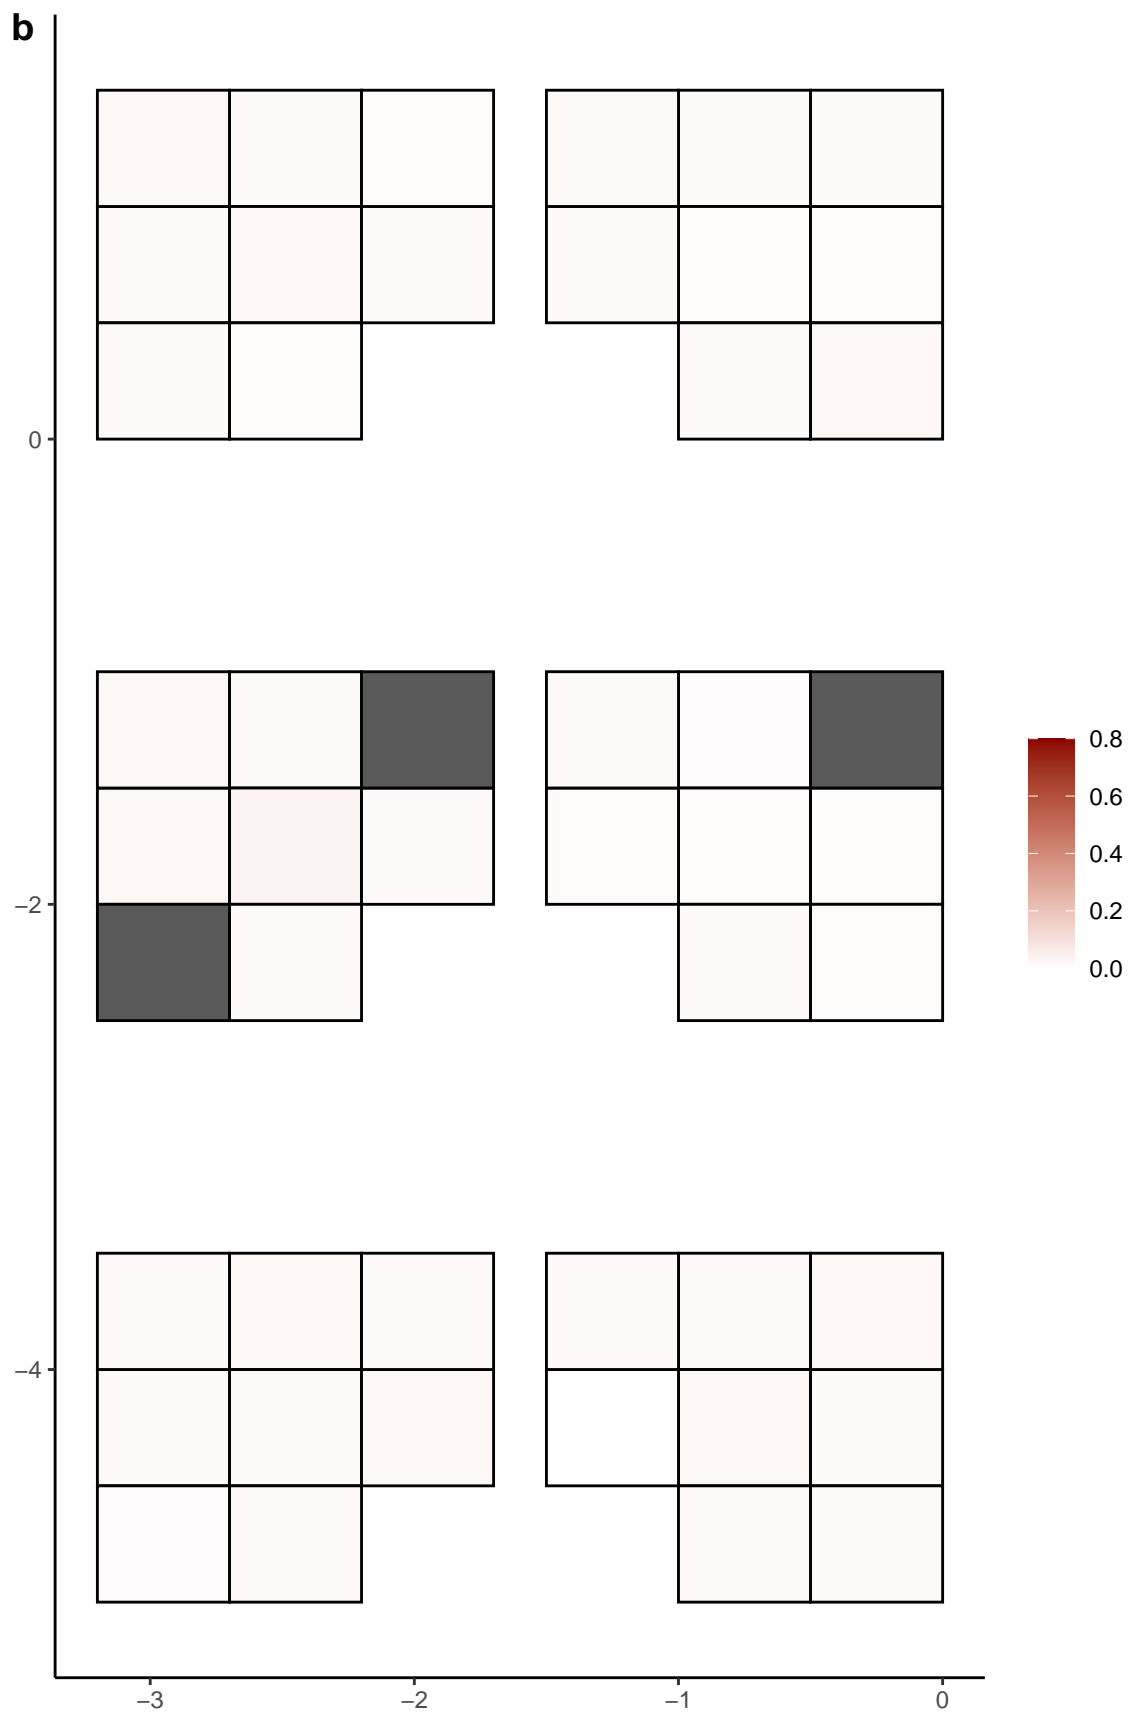

**a** ID05 18-33999883-C-T

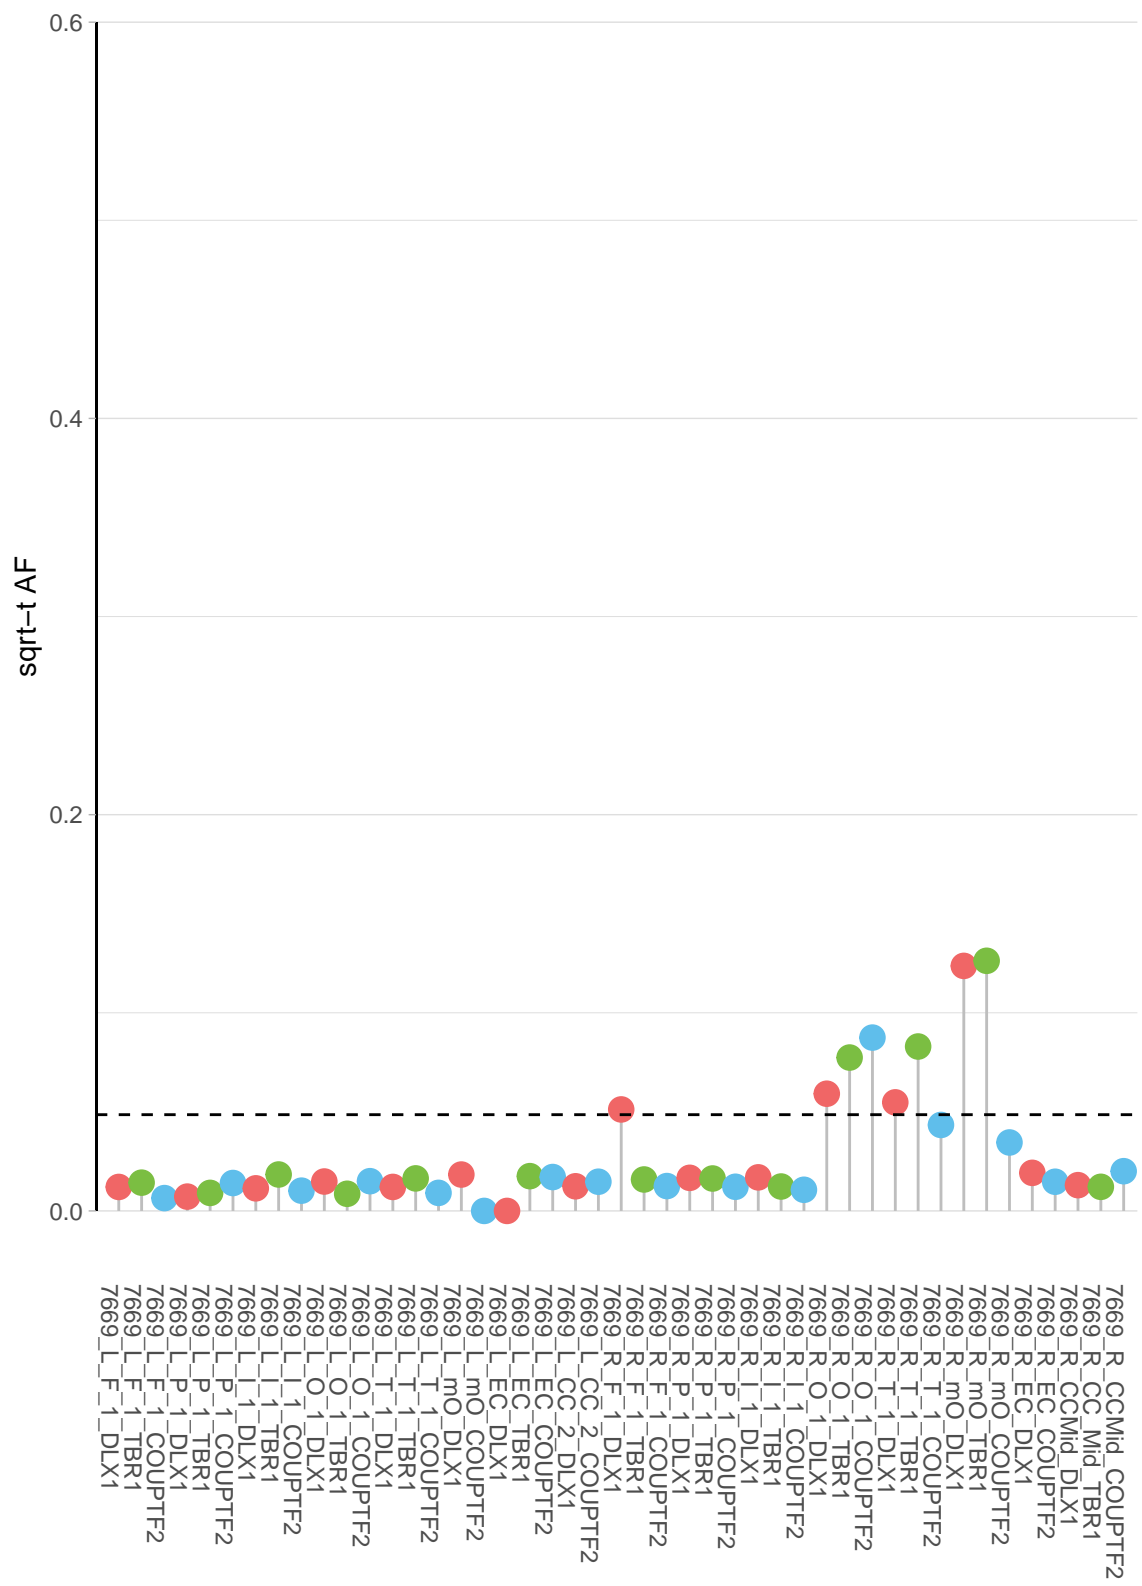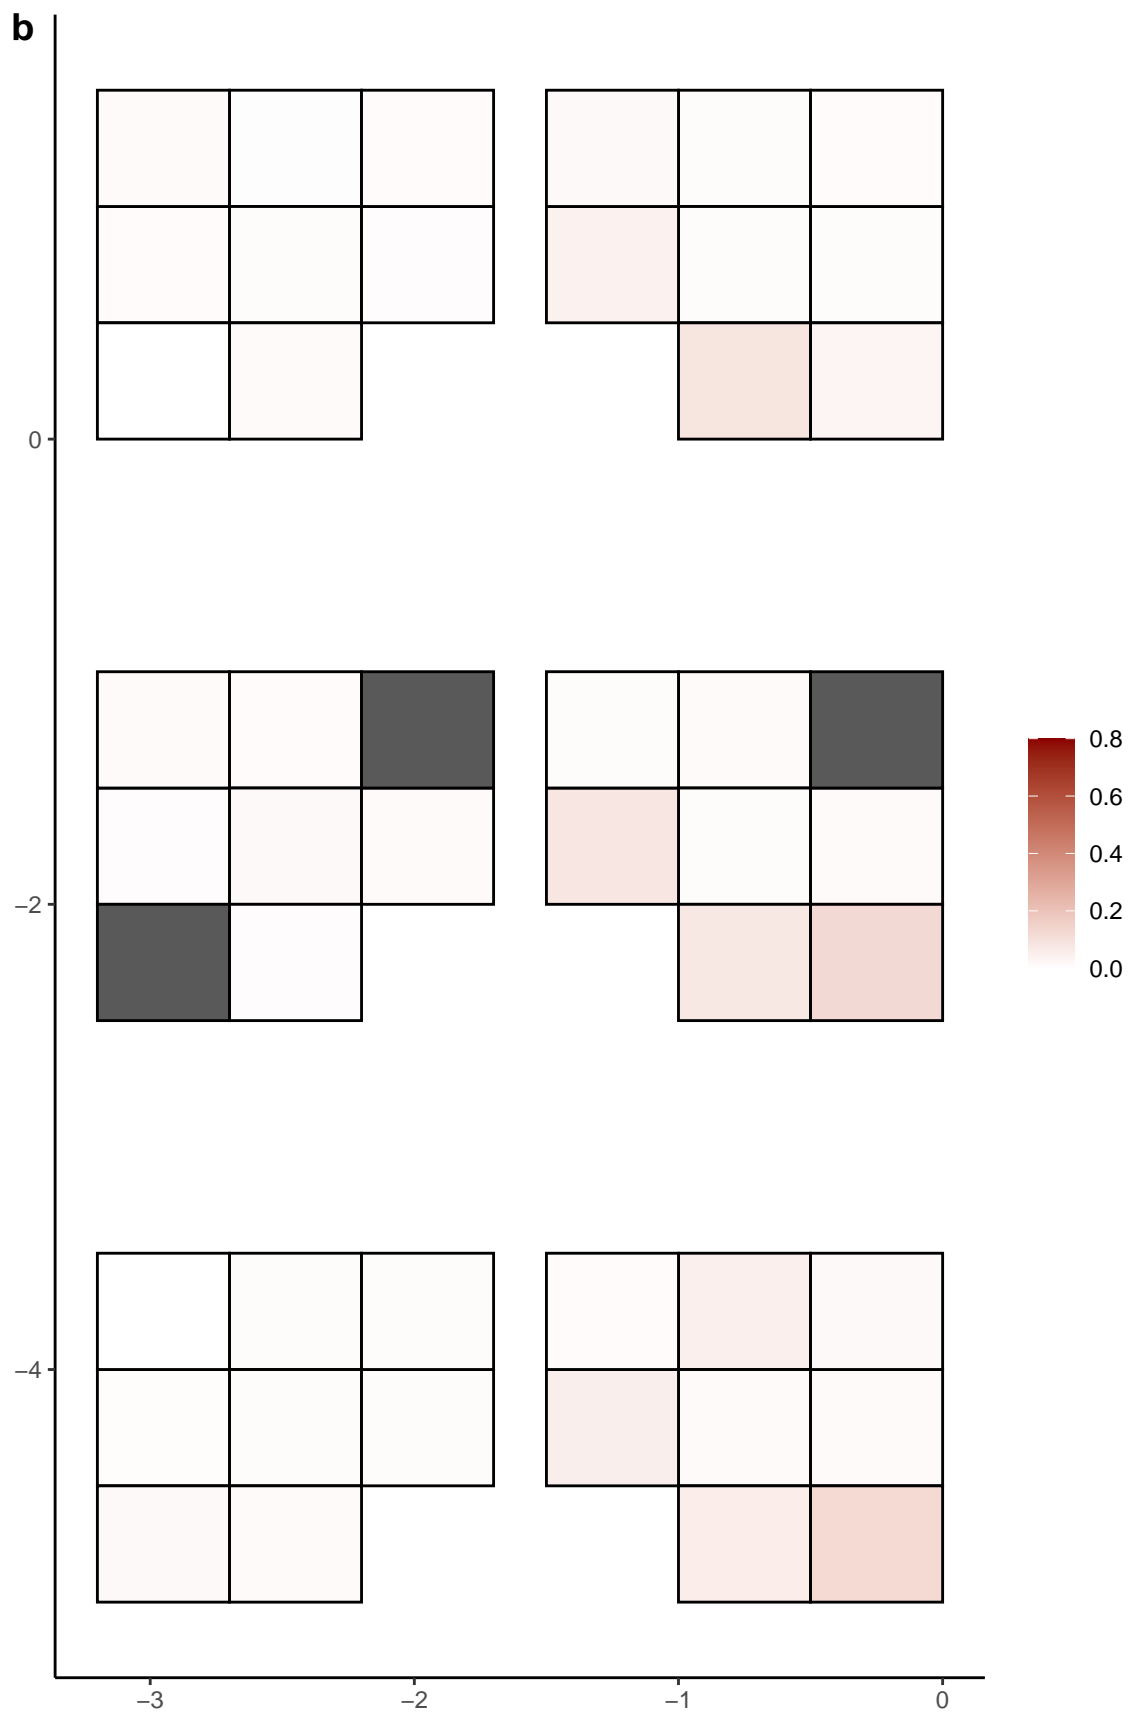

**a** ID05 18-36090085-A-C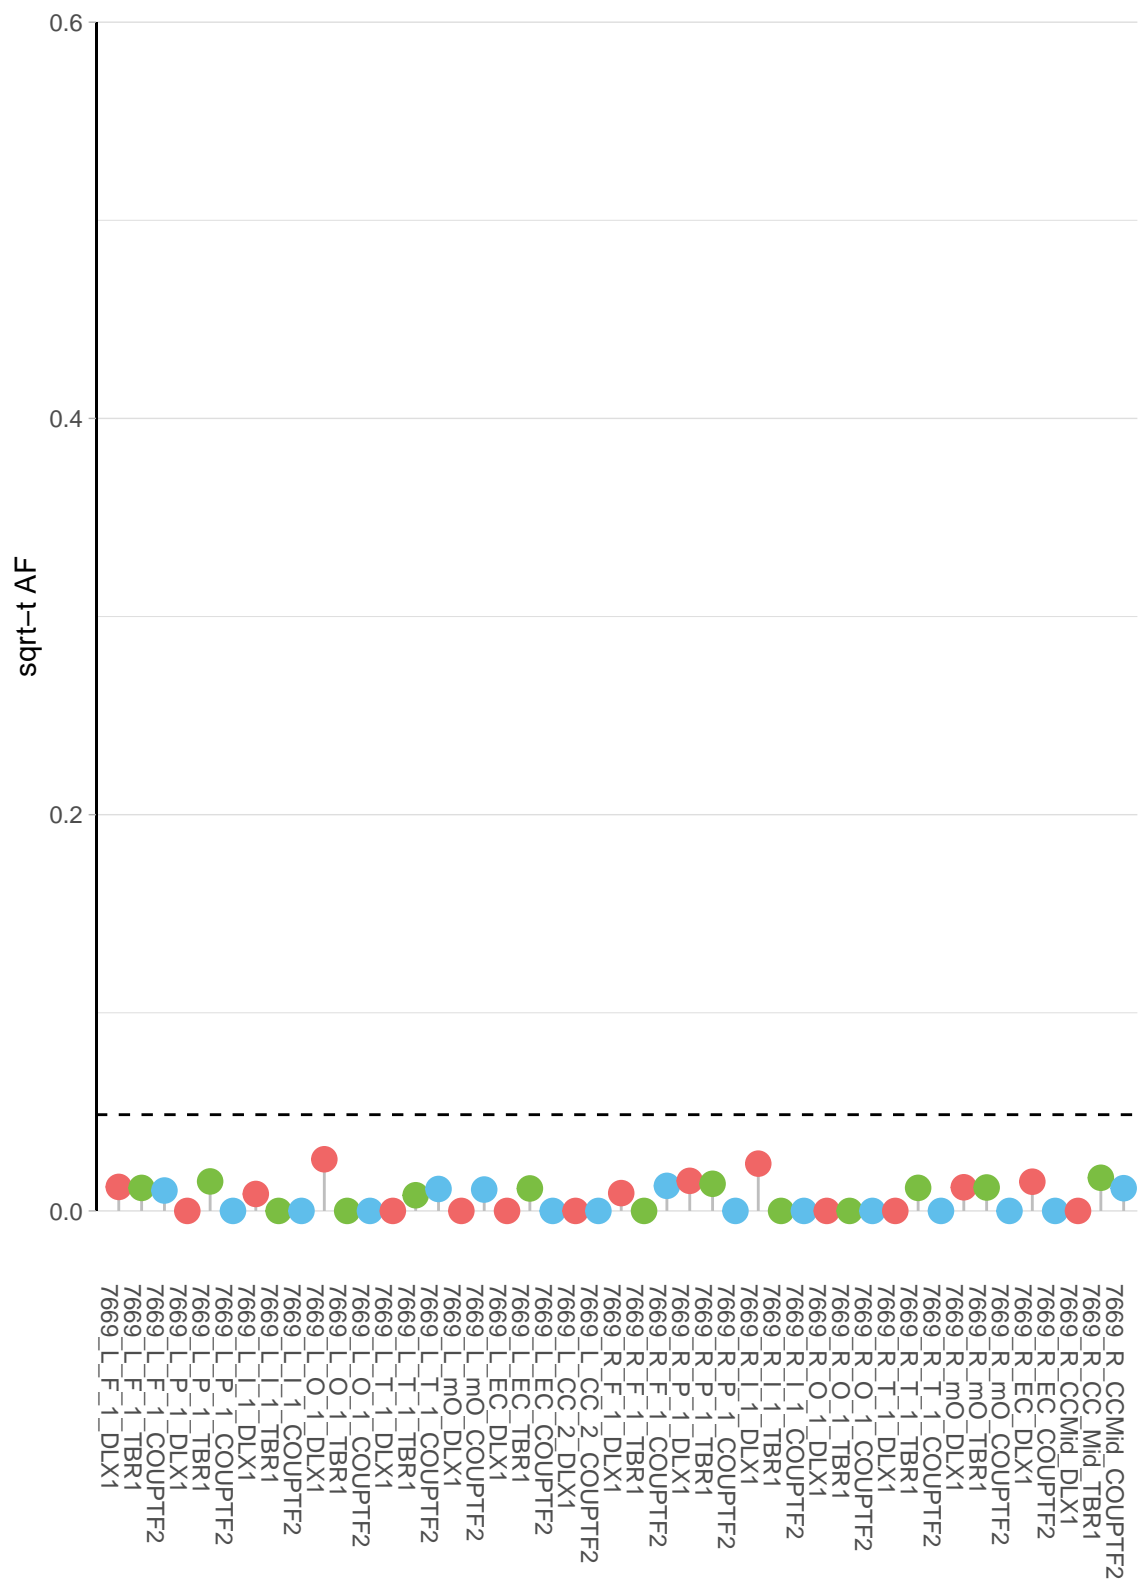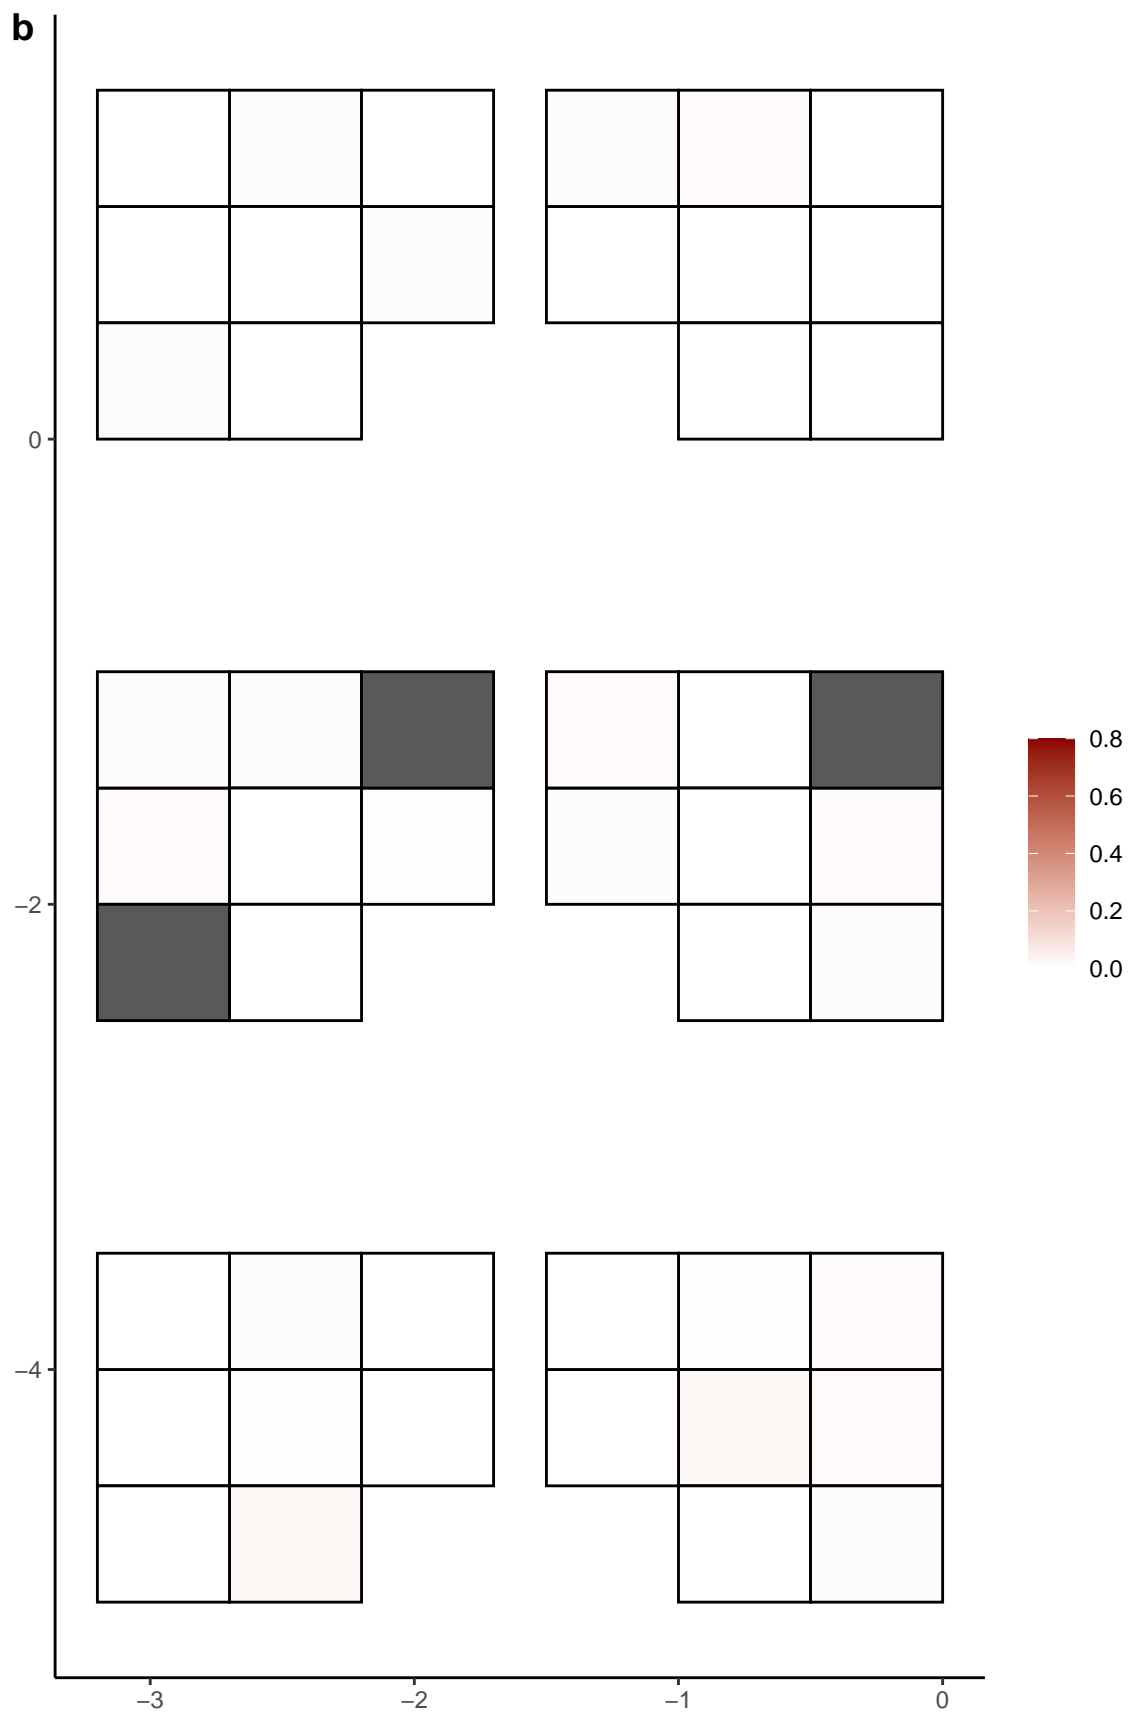

**a** ID05 18-36334609-T-C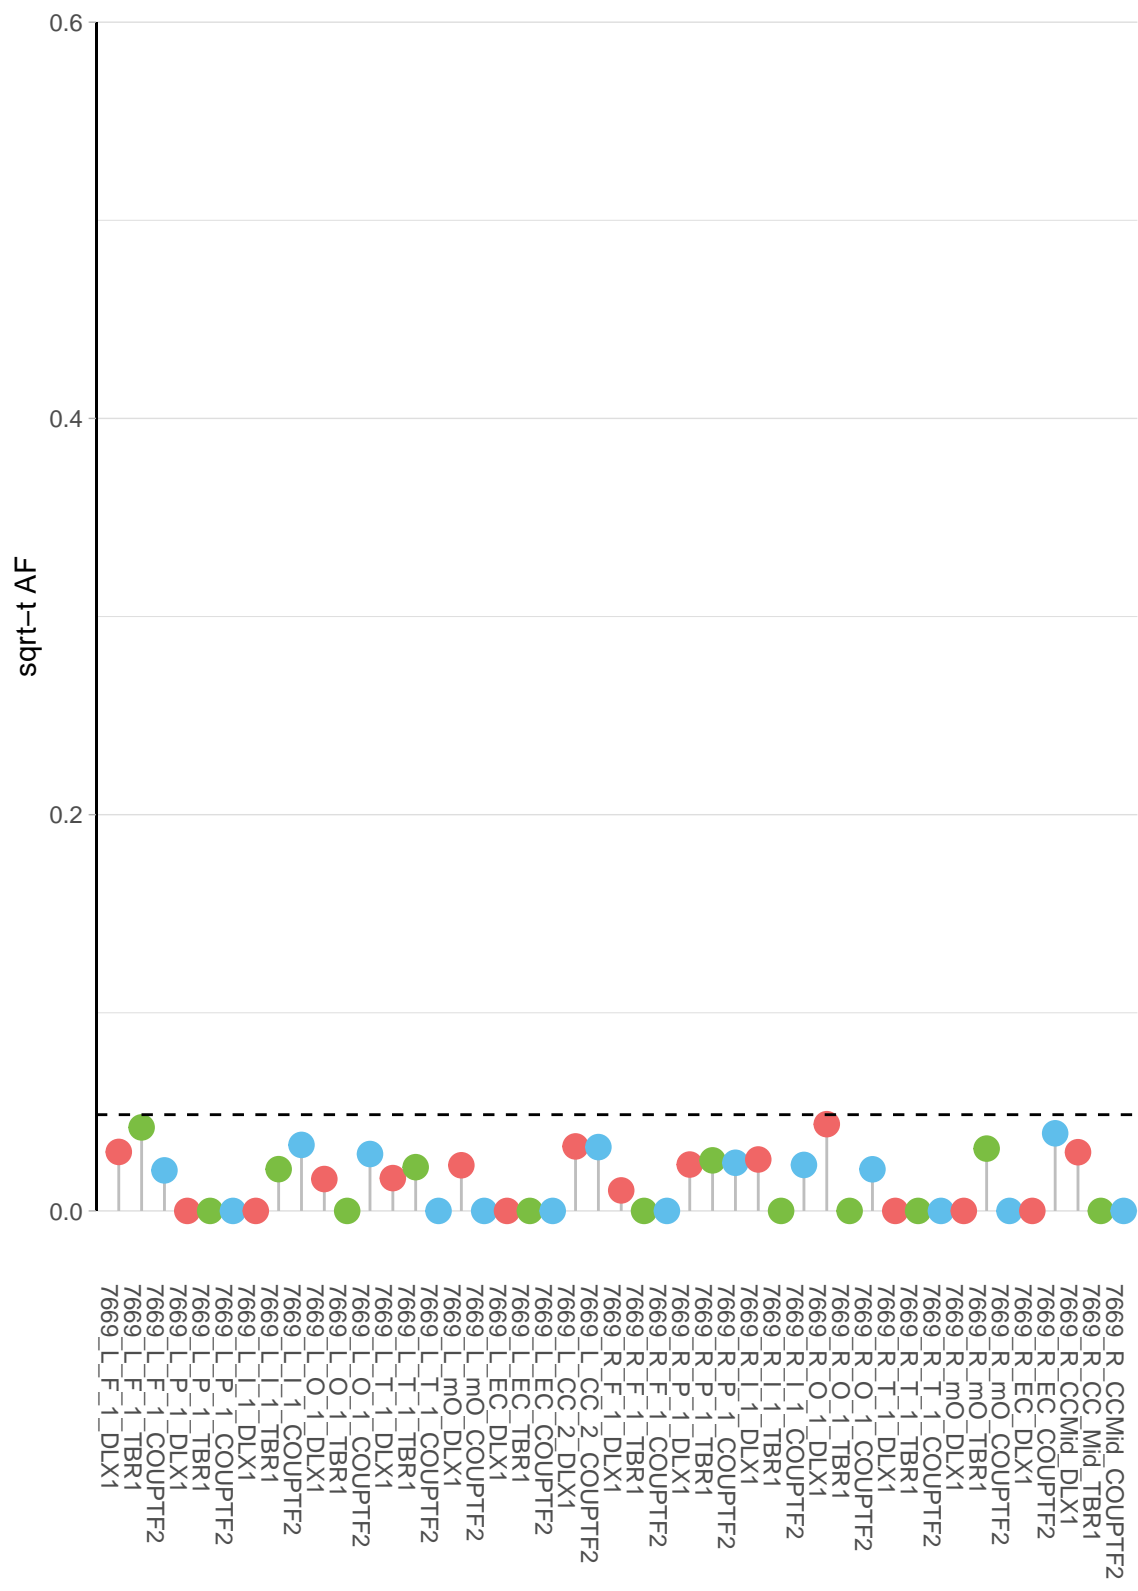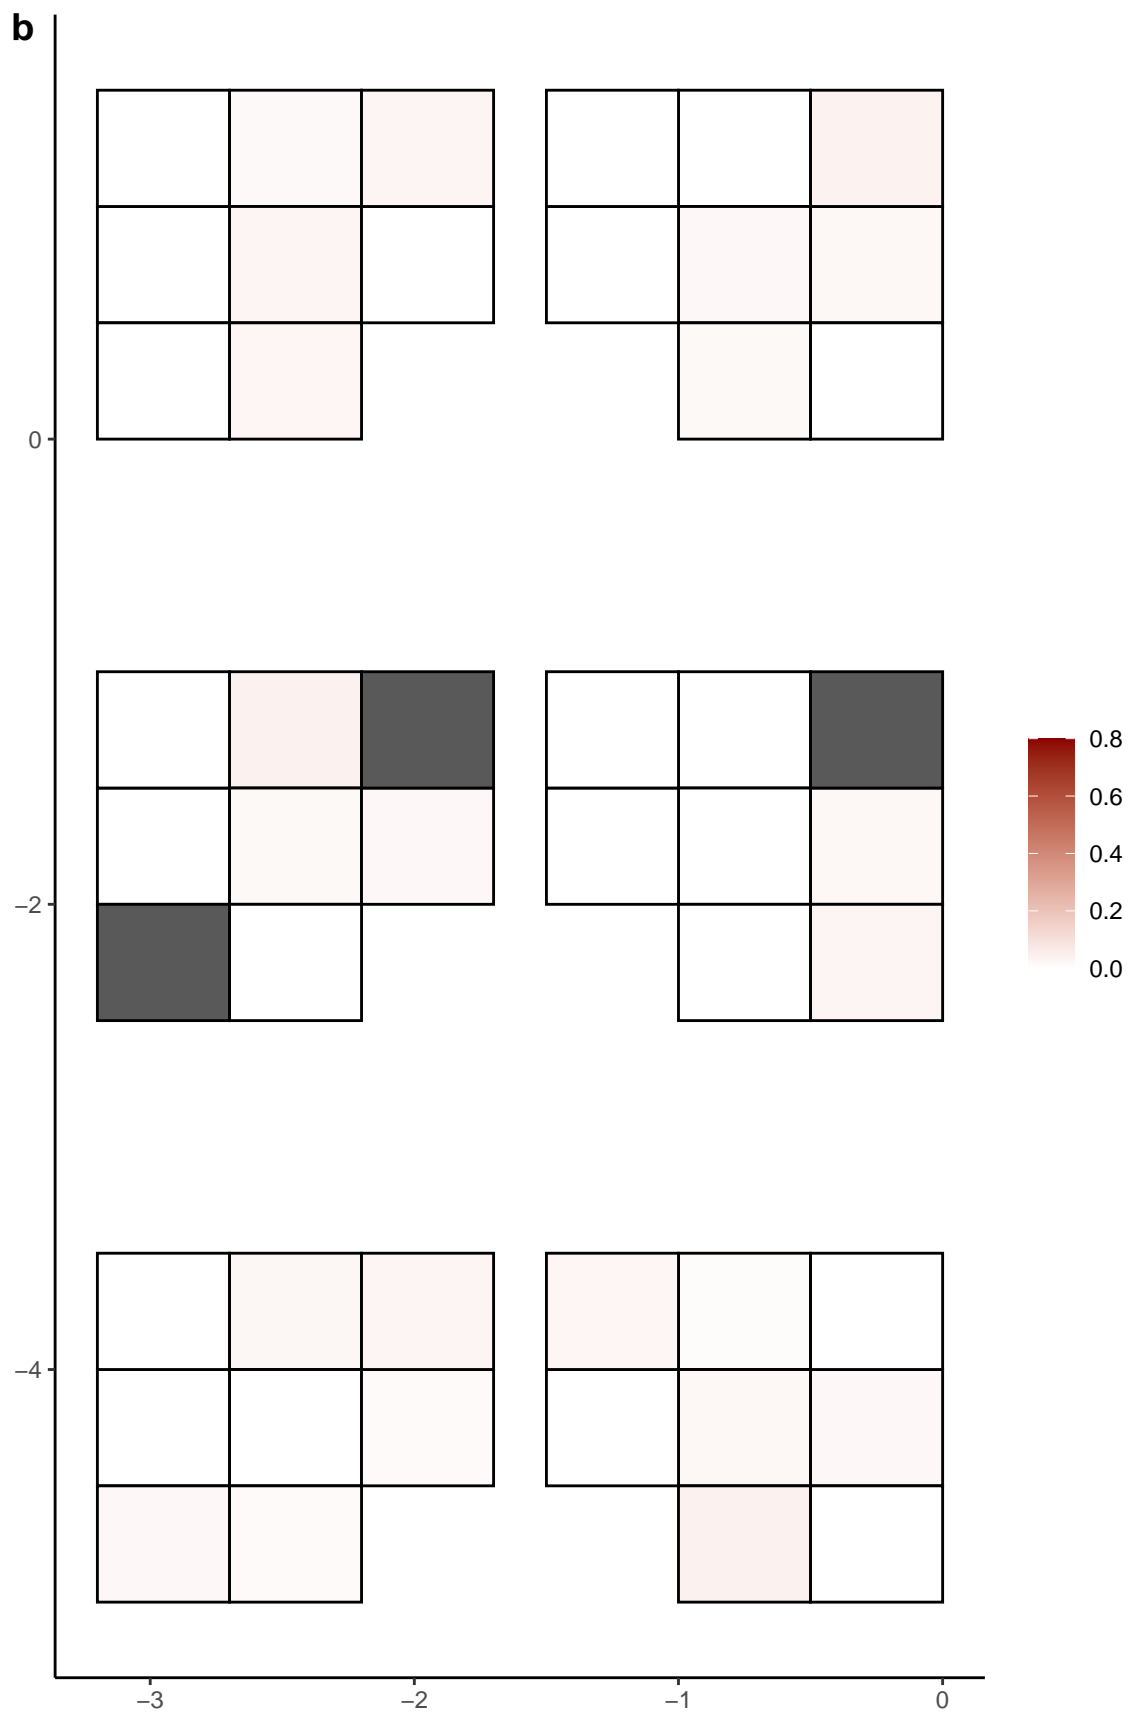

**a** ID05 18-37021461-T-C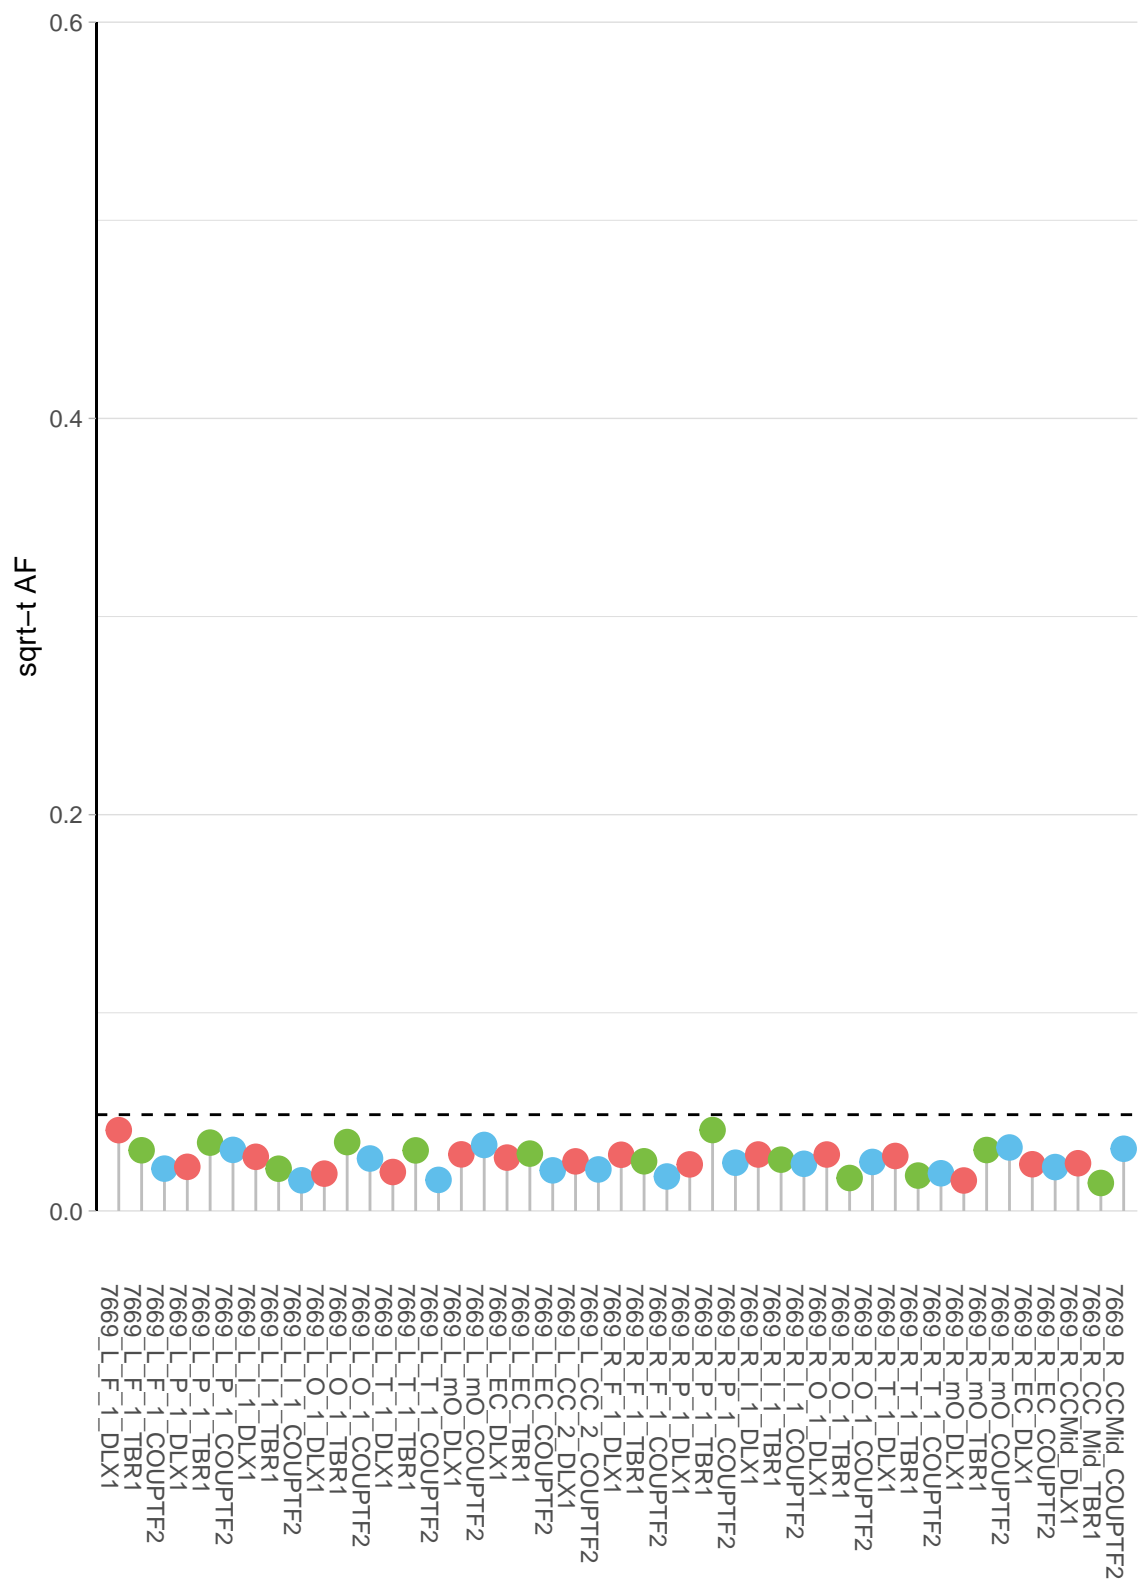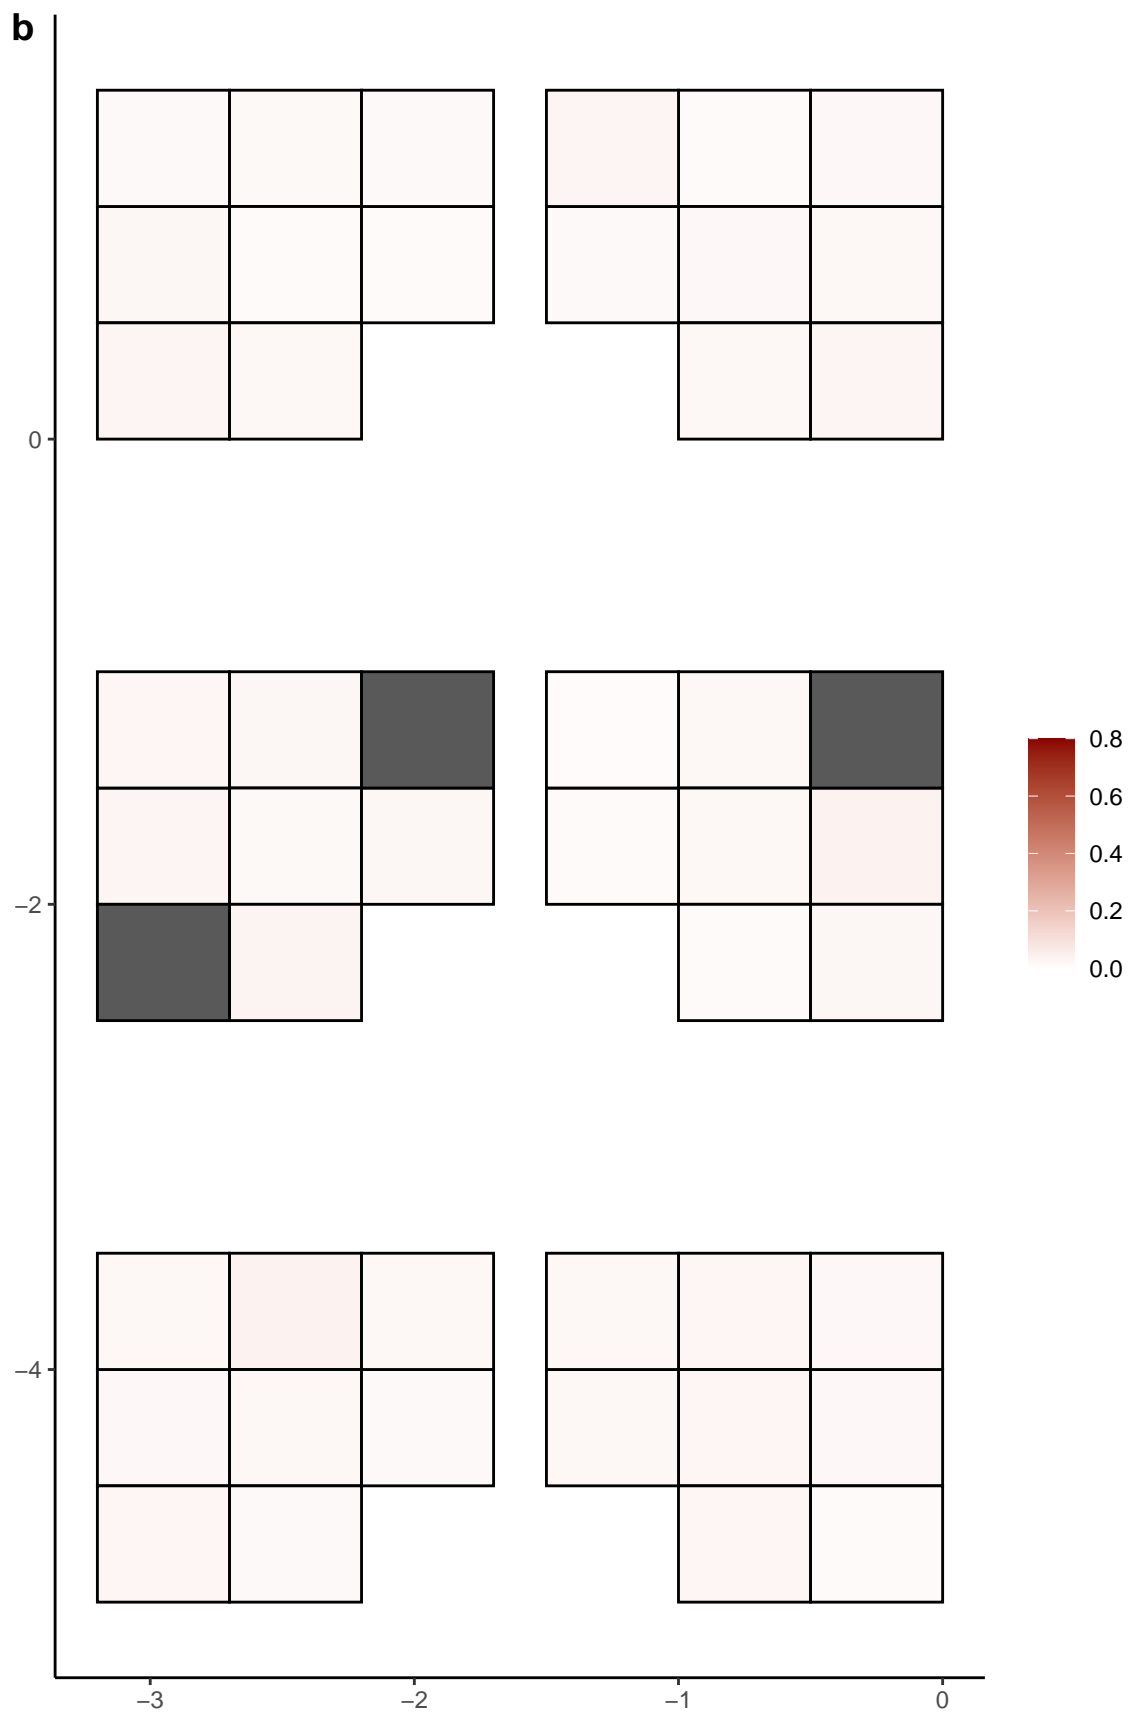



**a** ID05 18-49194474-G-A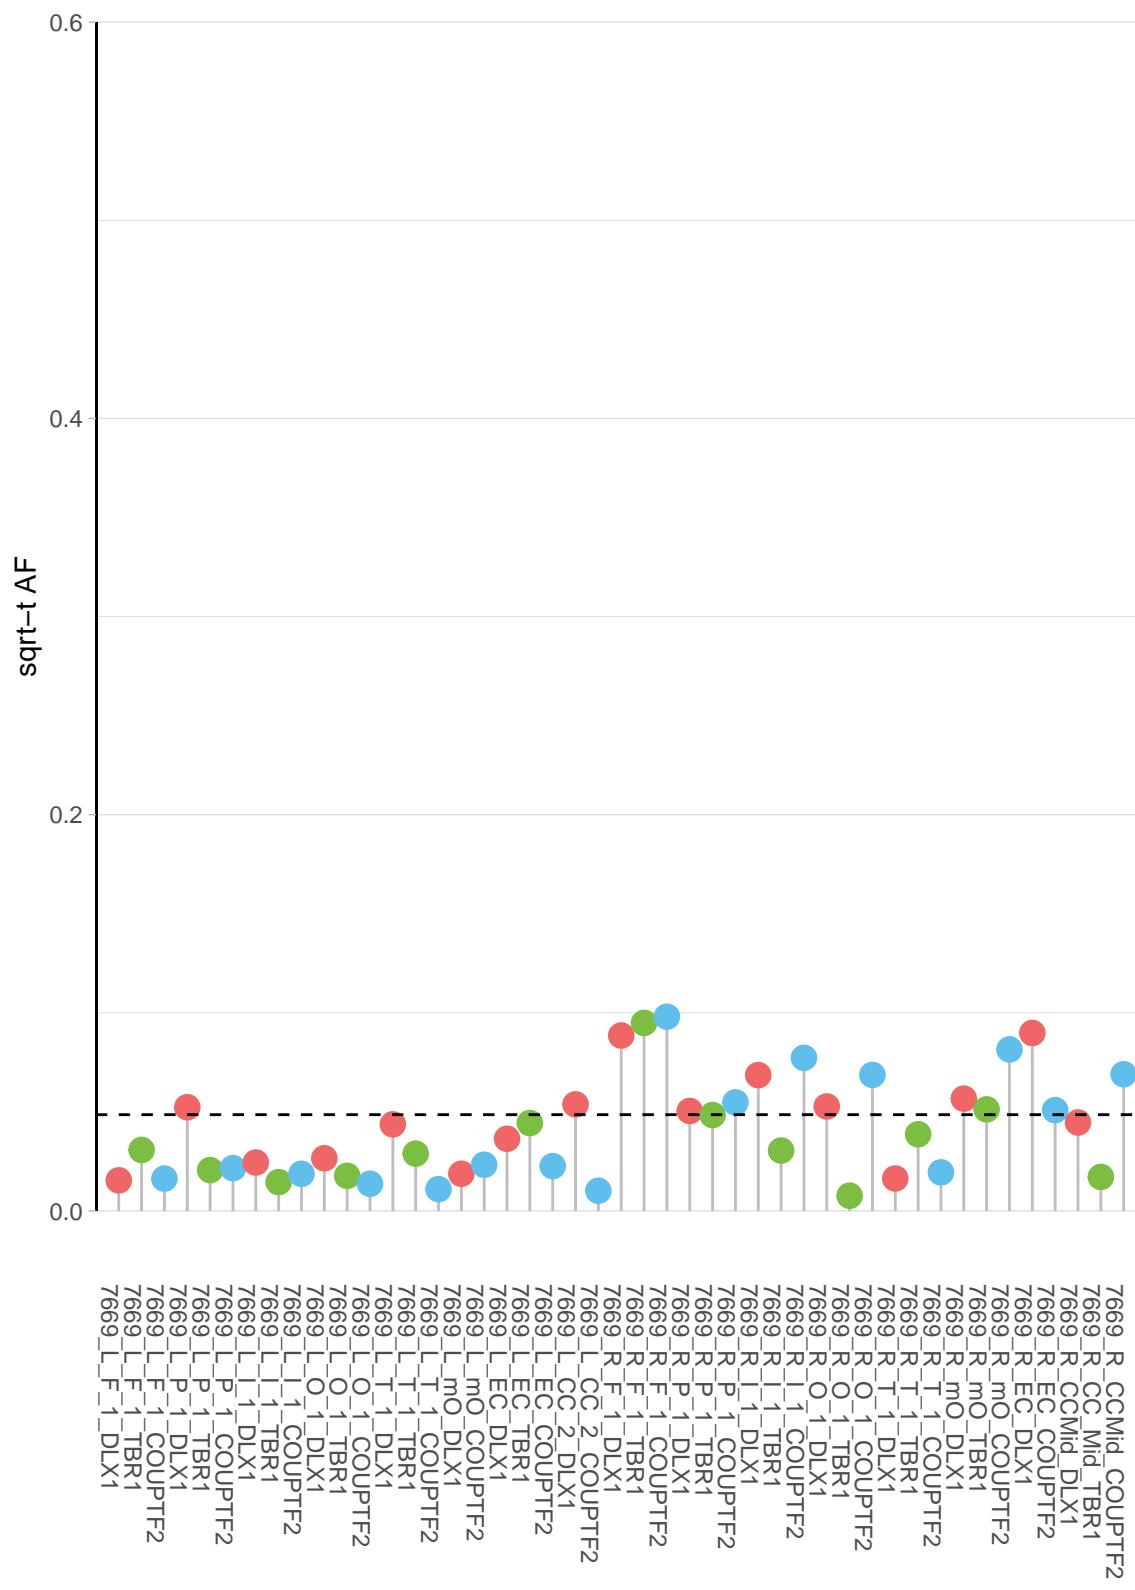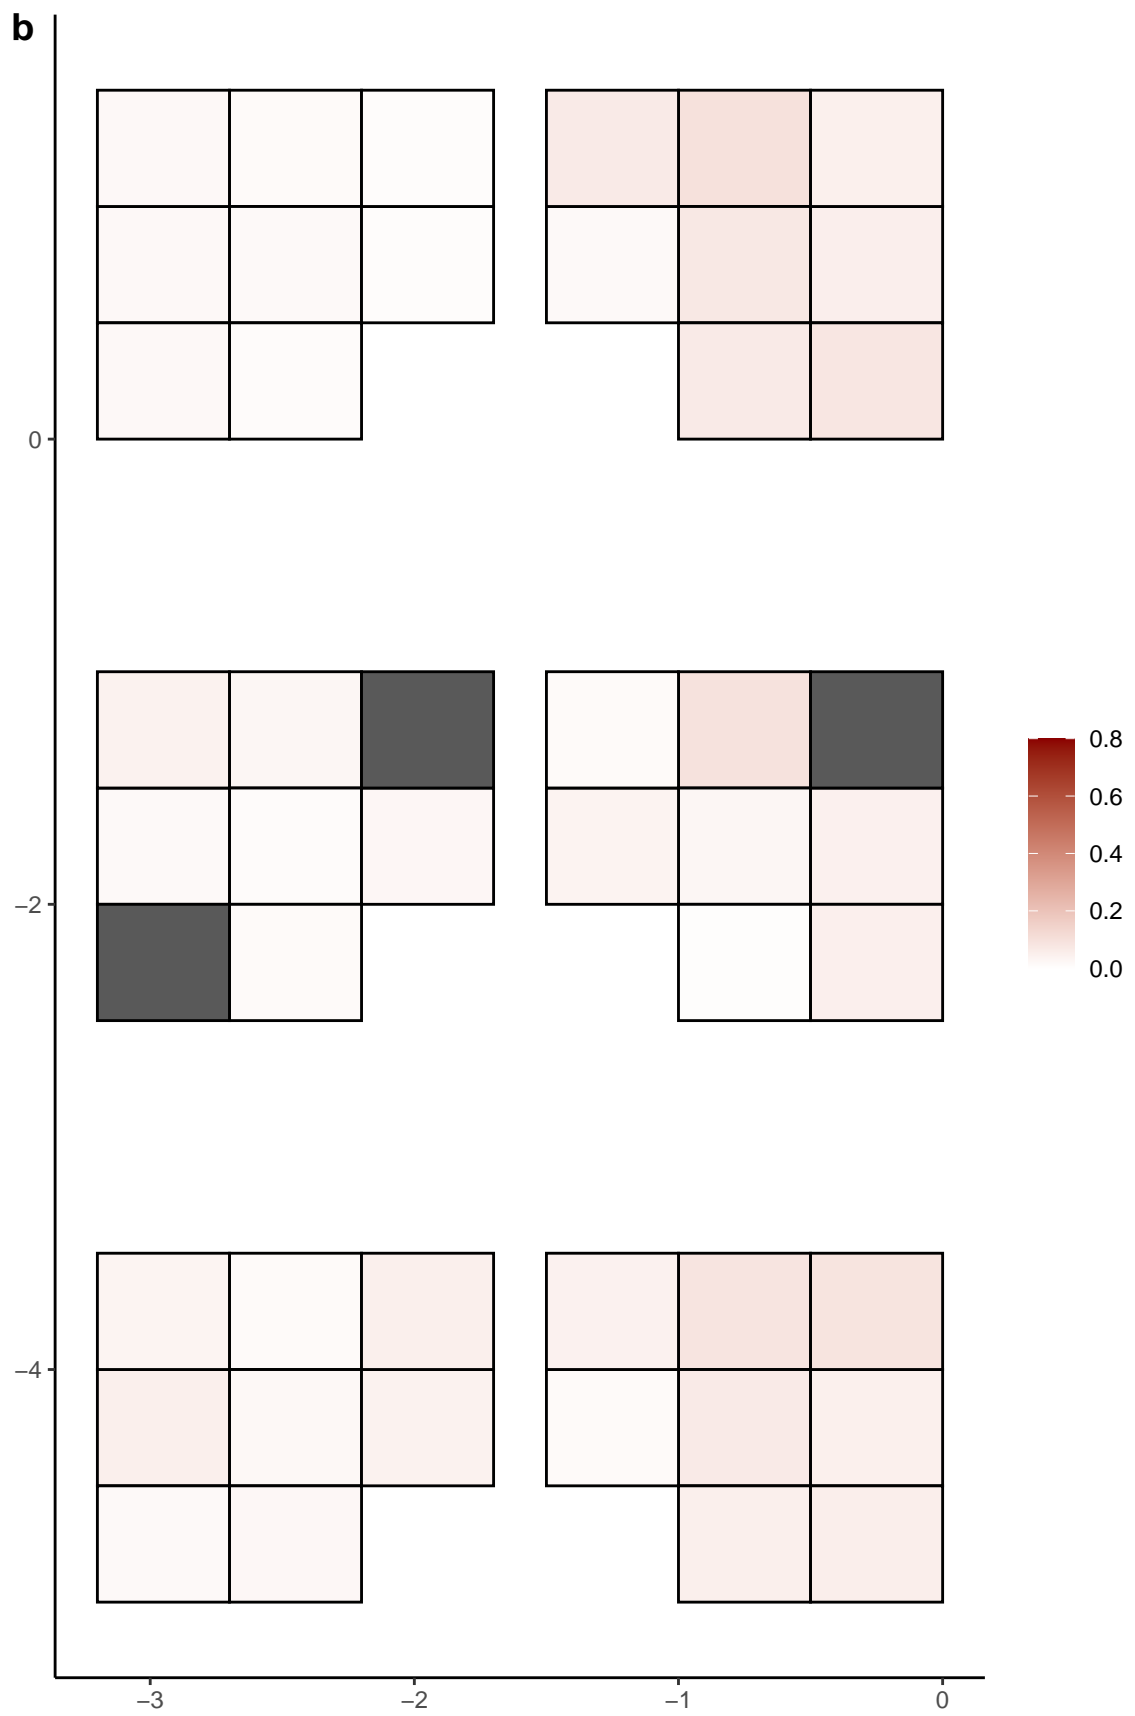



**a** ID05 18-49557610-G-T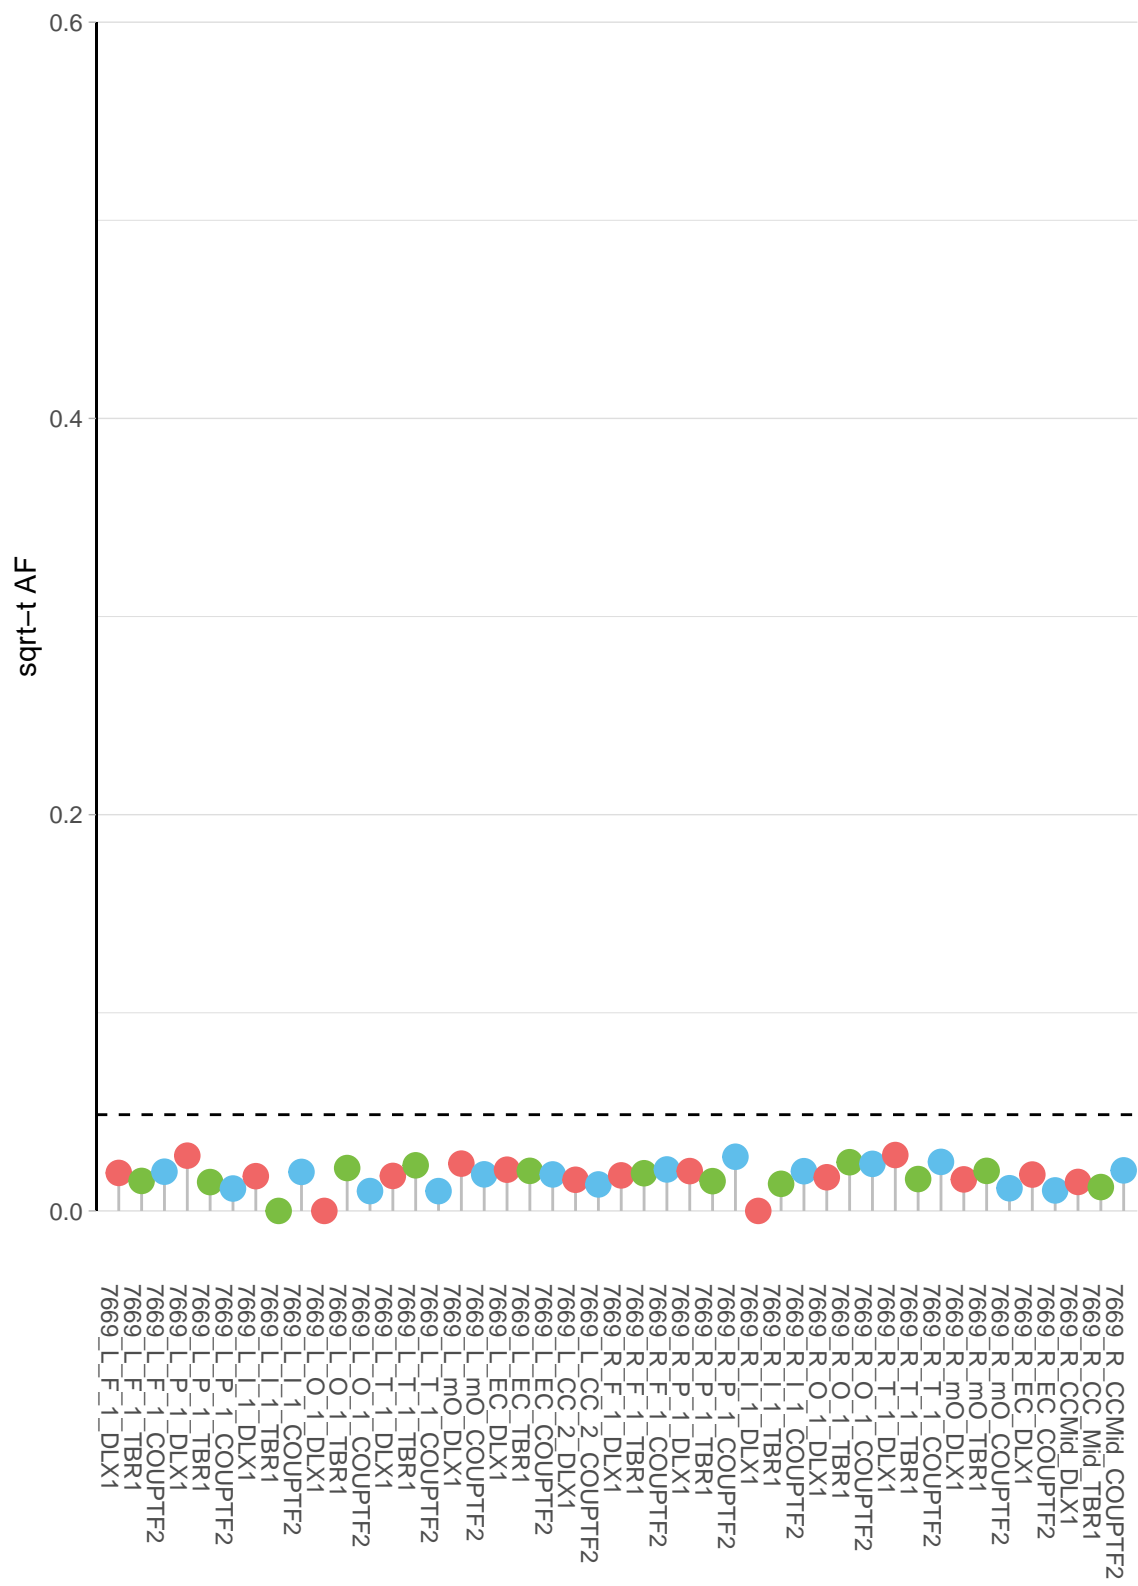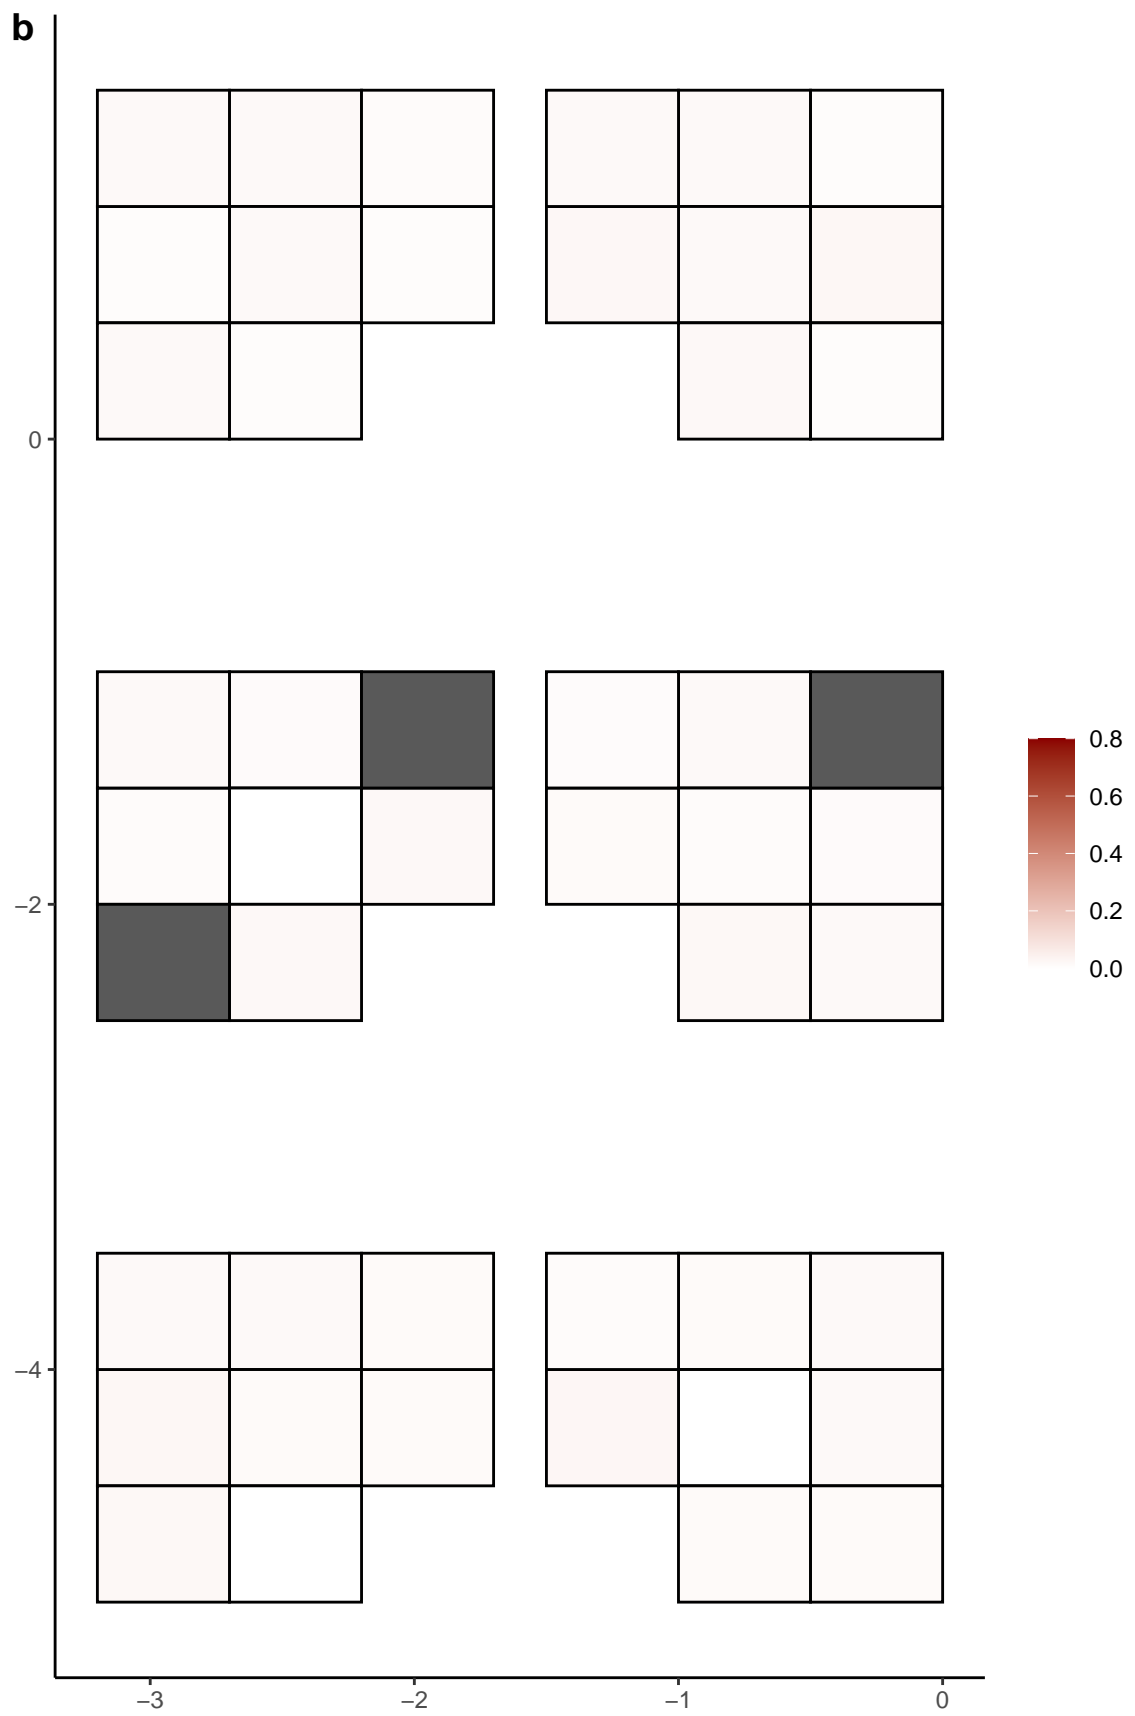

**a** ID05 18-60849046-C-T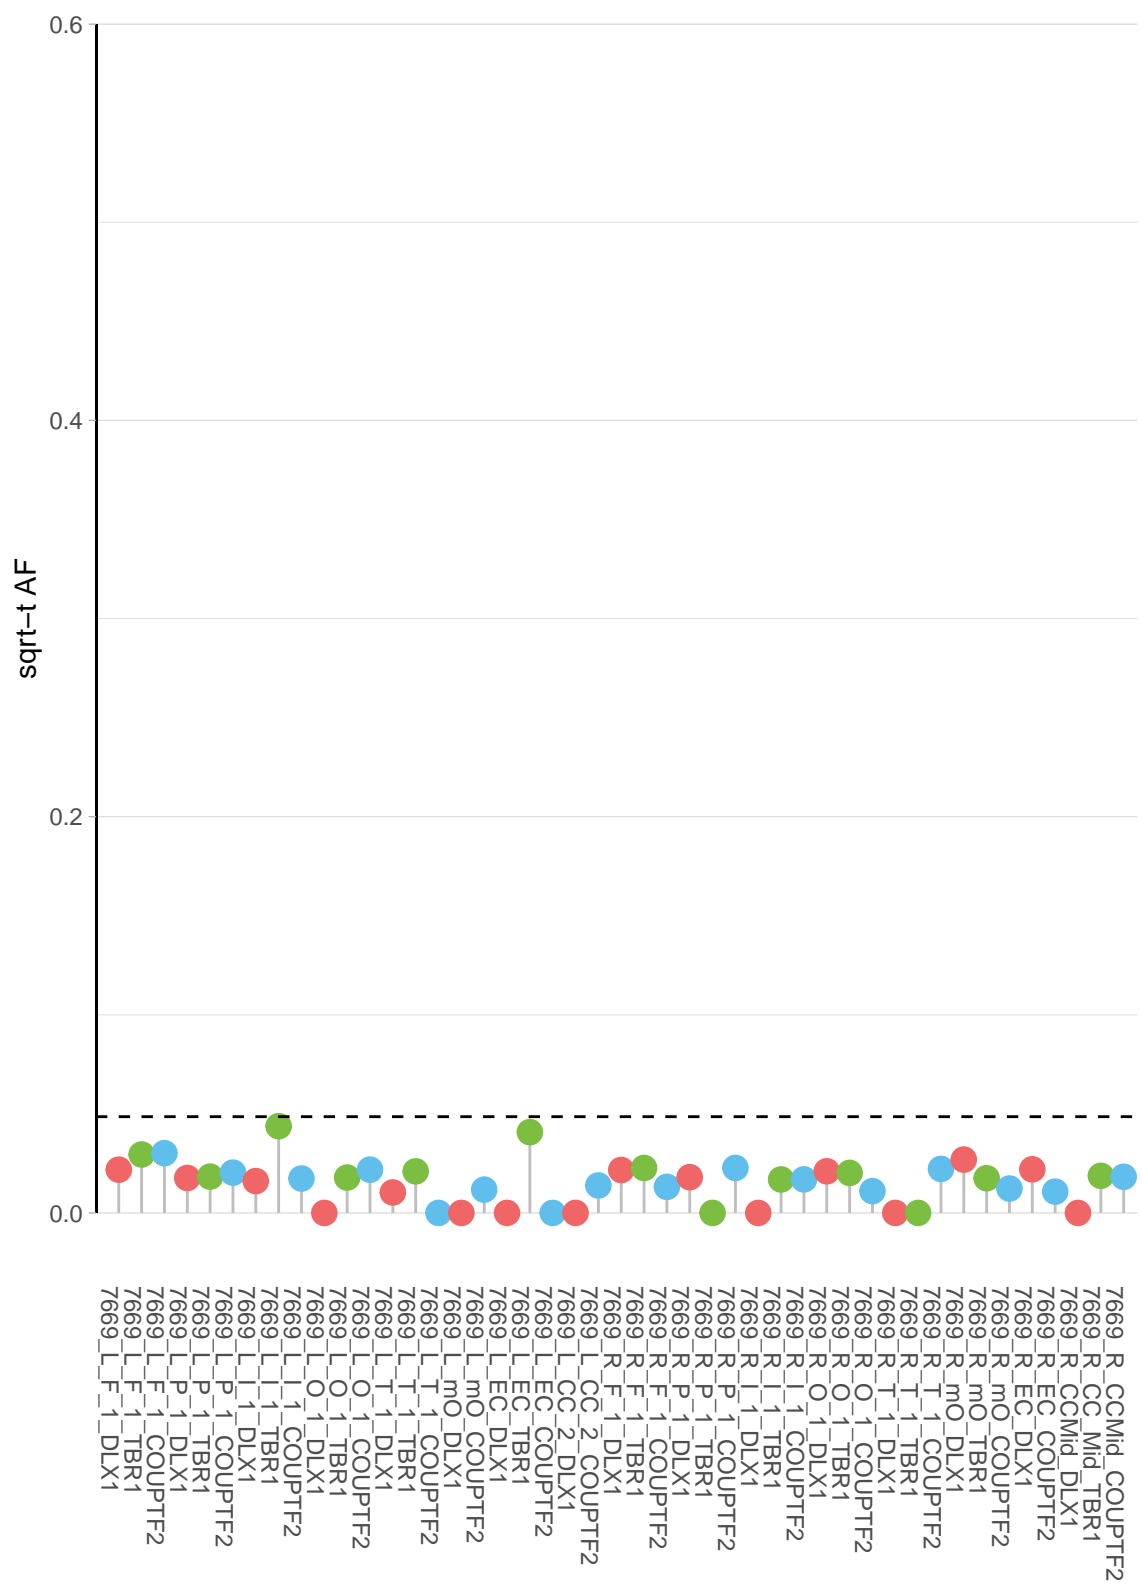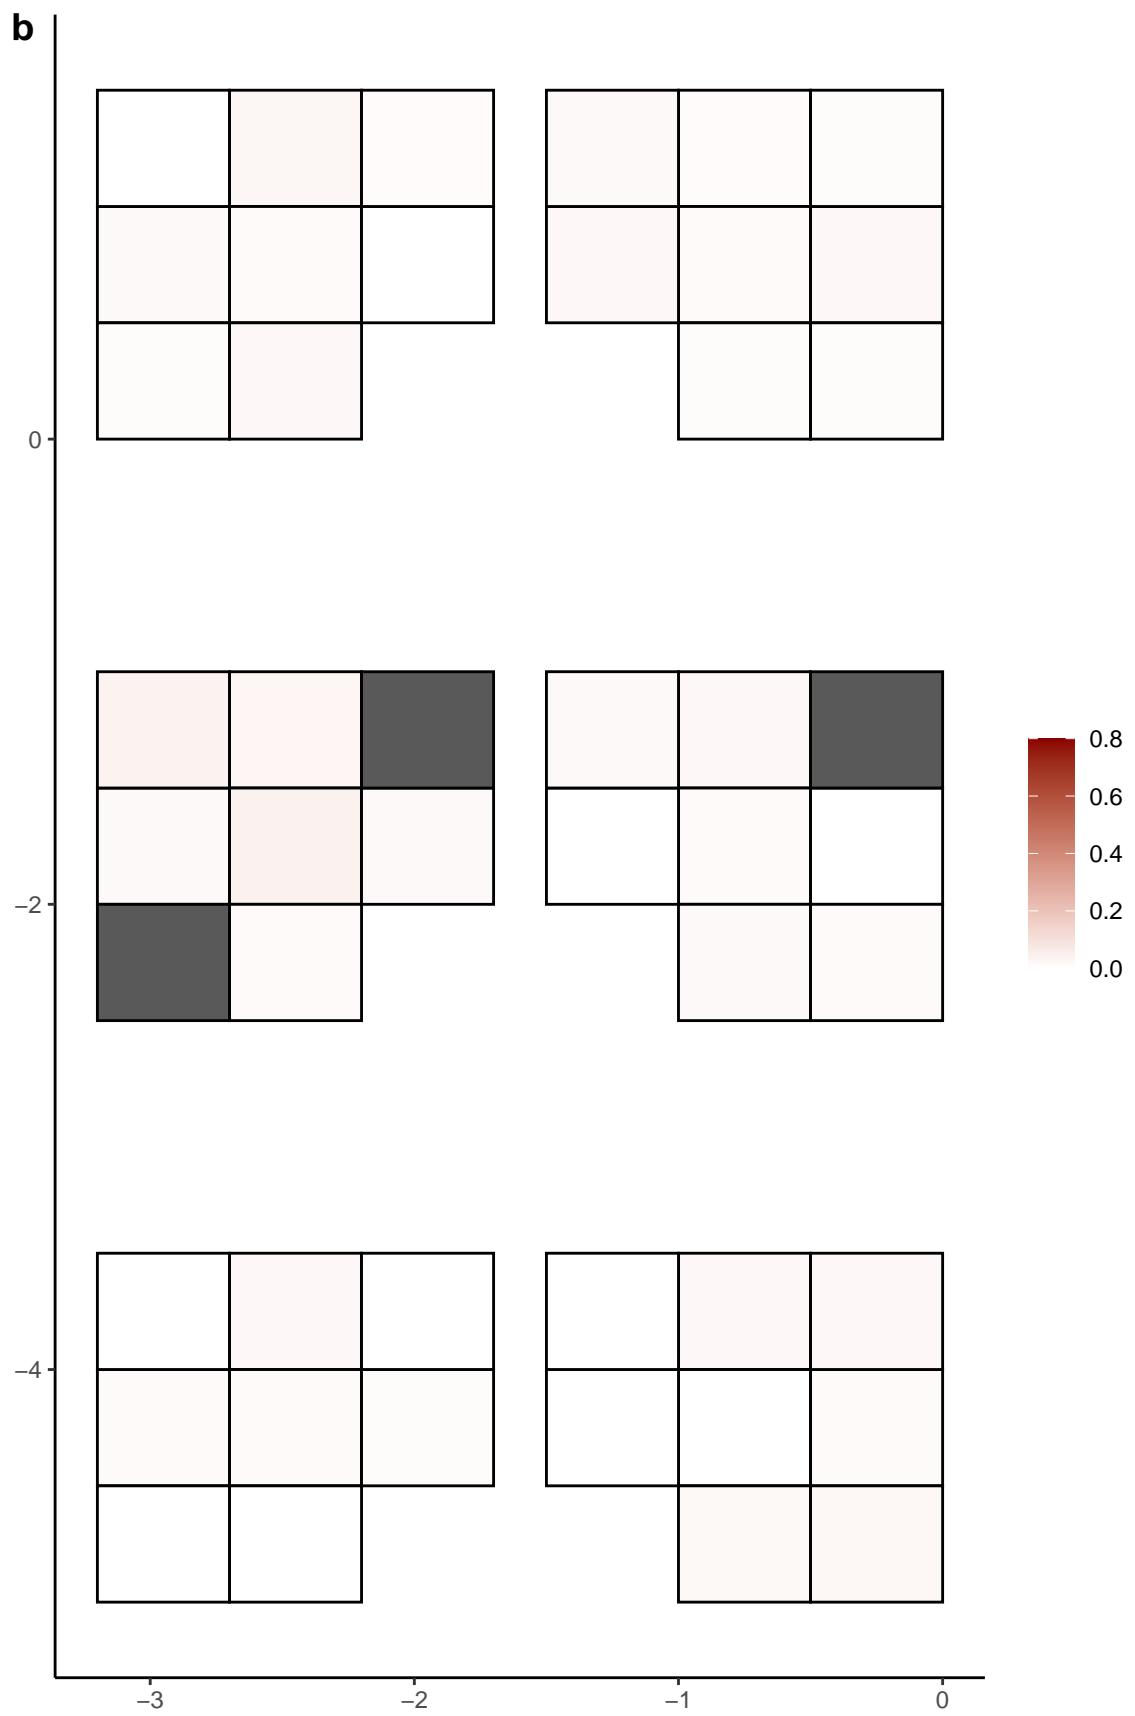

**a** ID05 18-64016149-C-A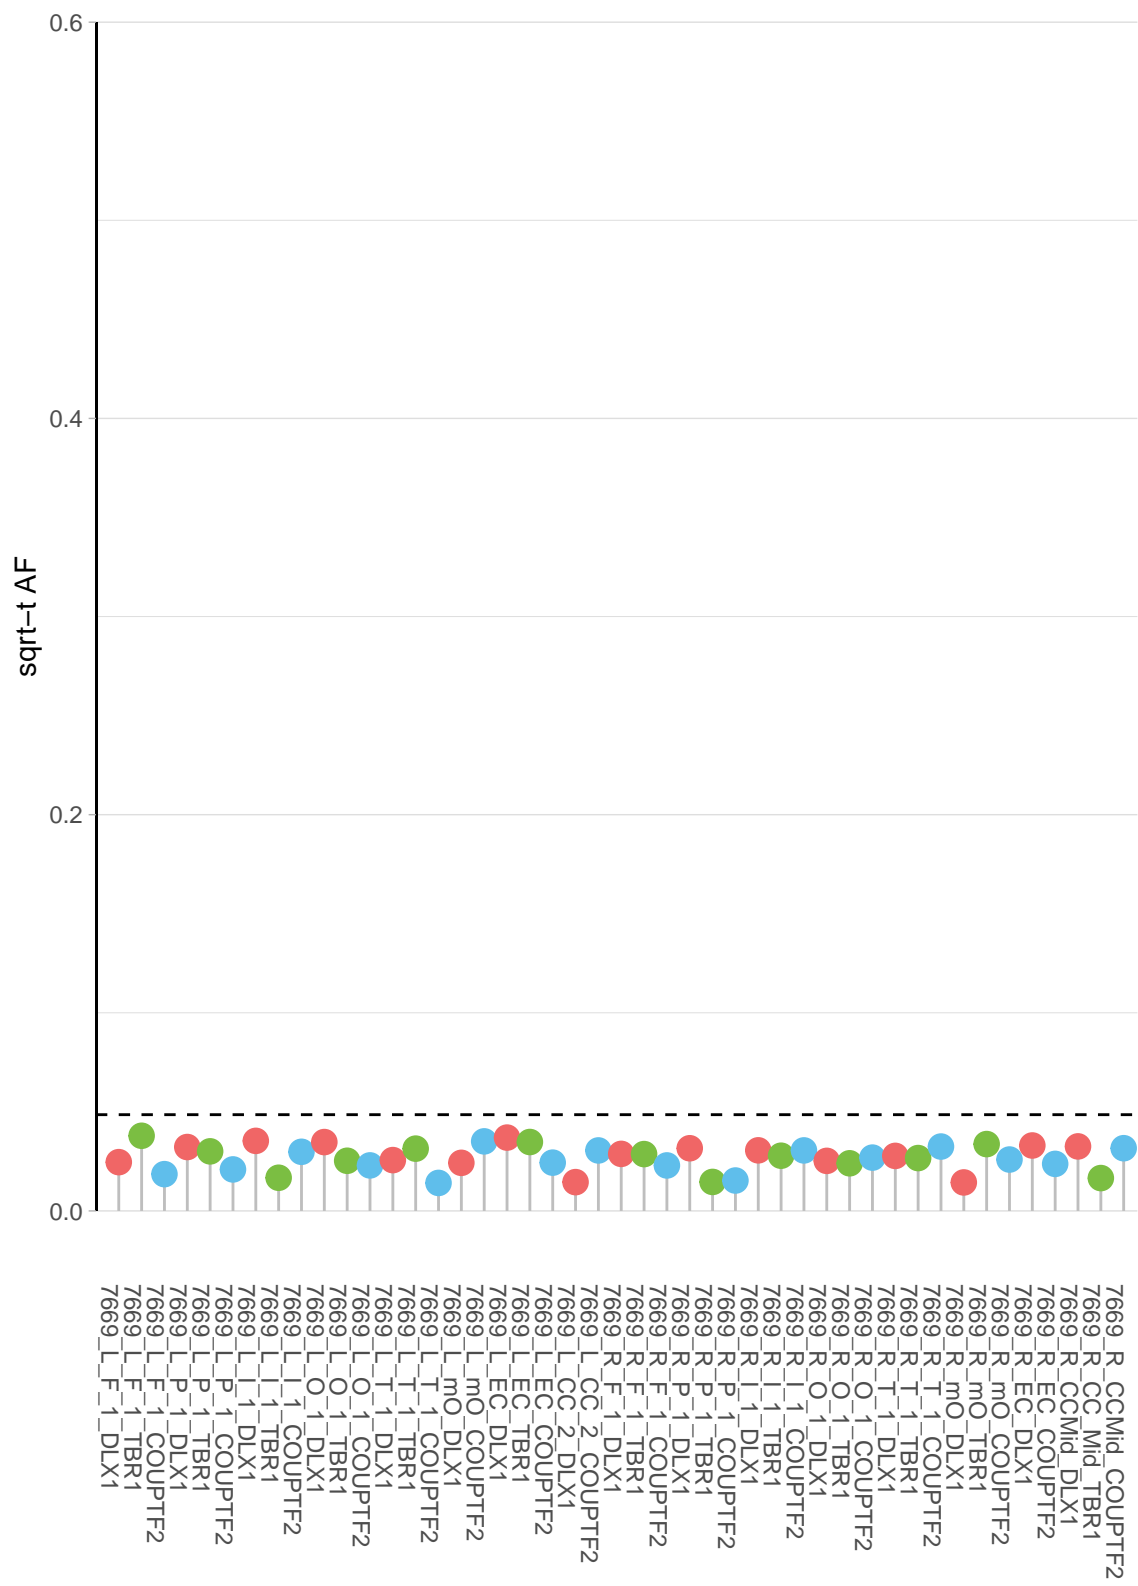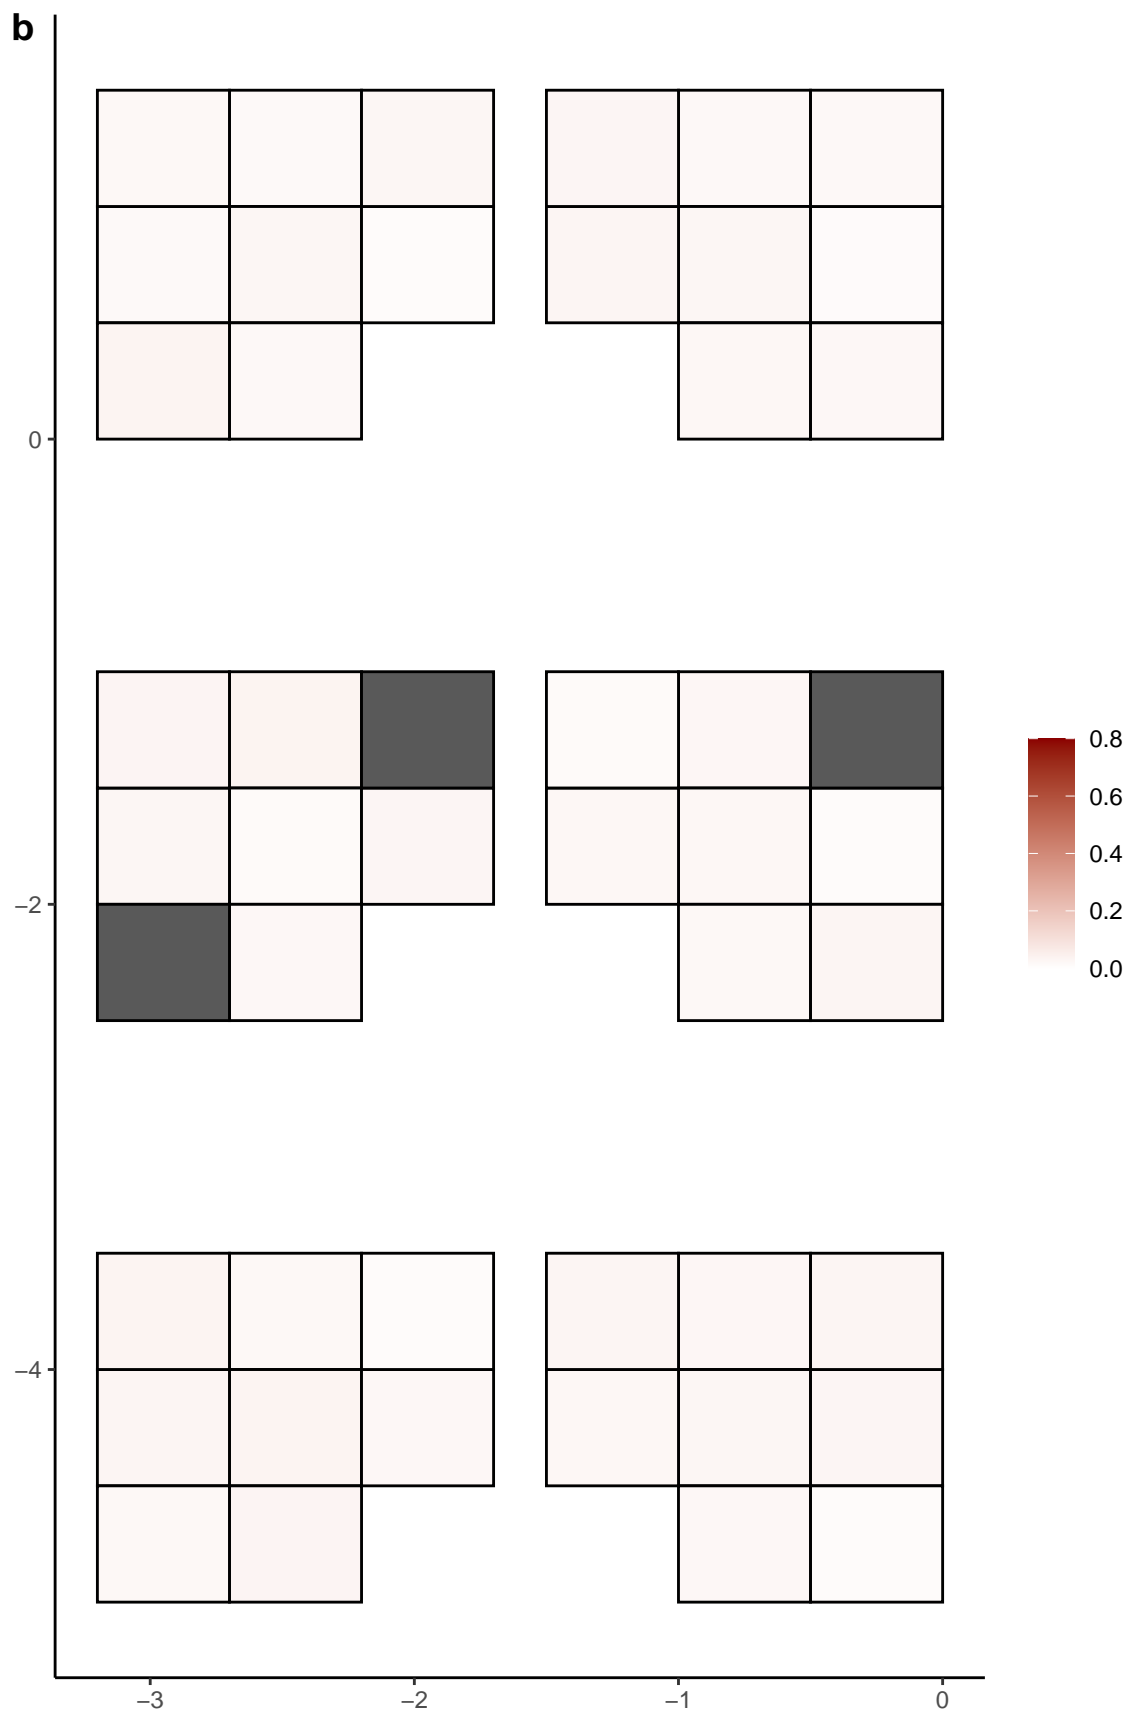

a ID05 18-64125536-C-G

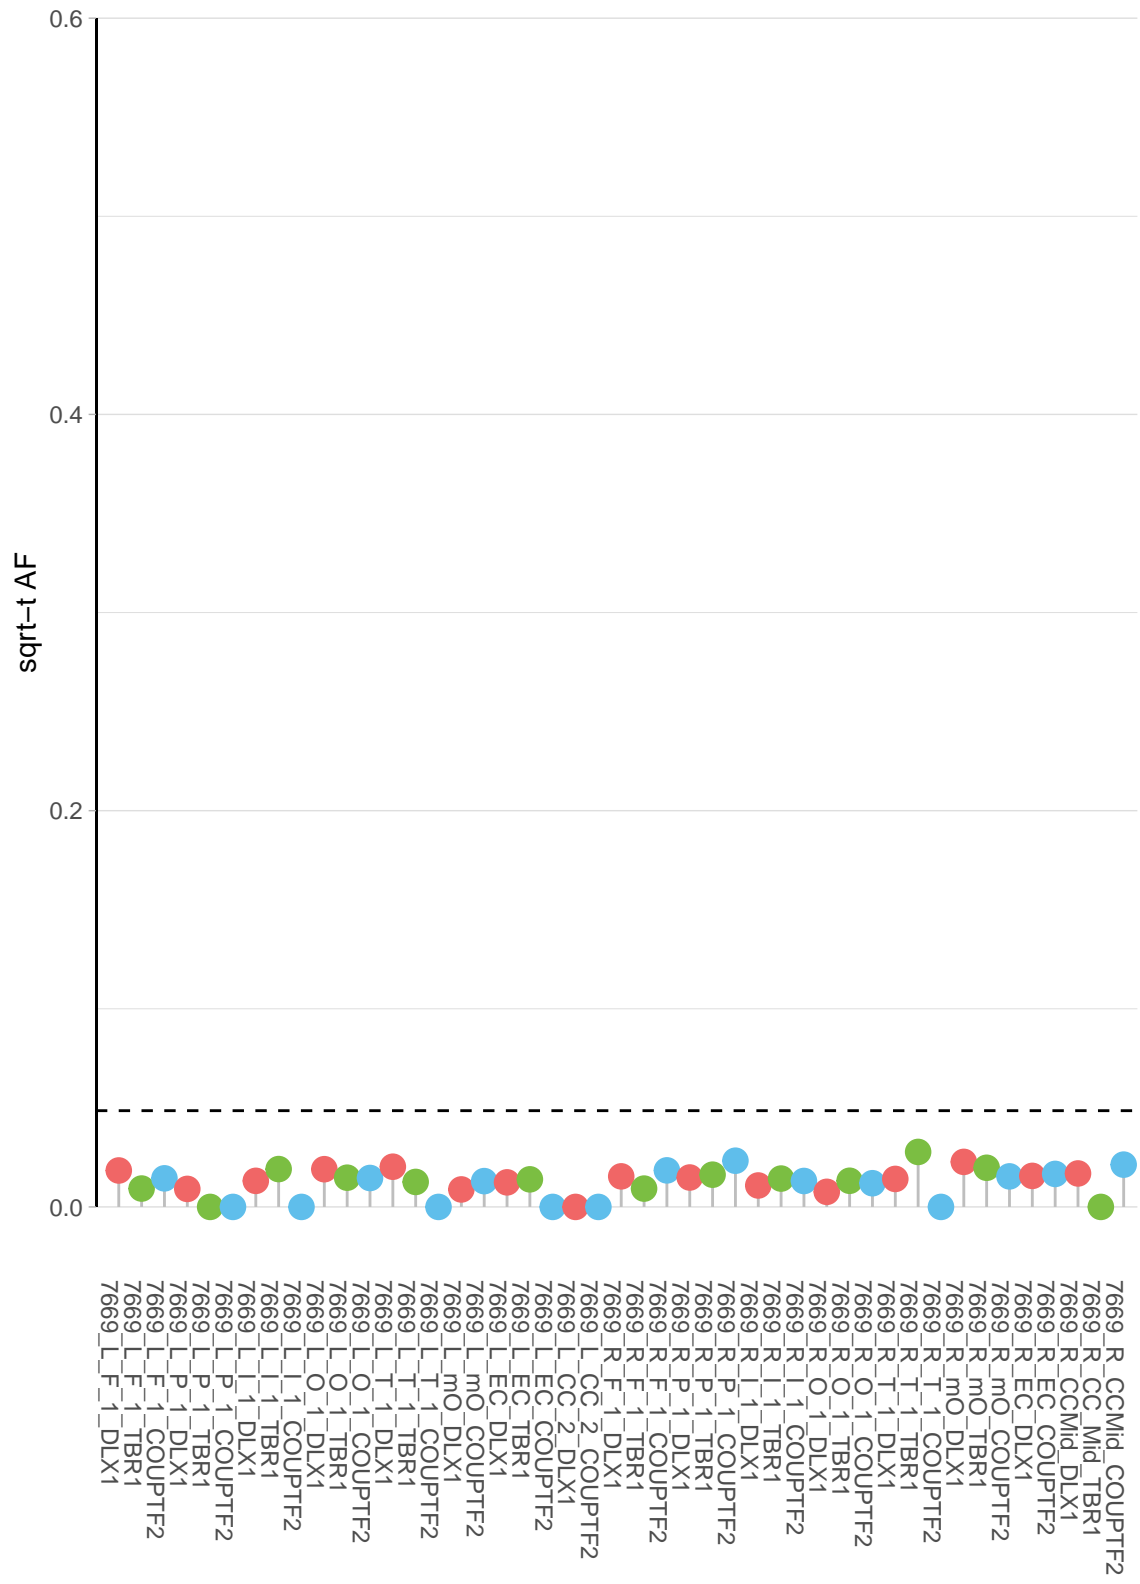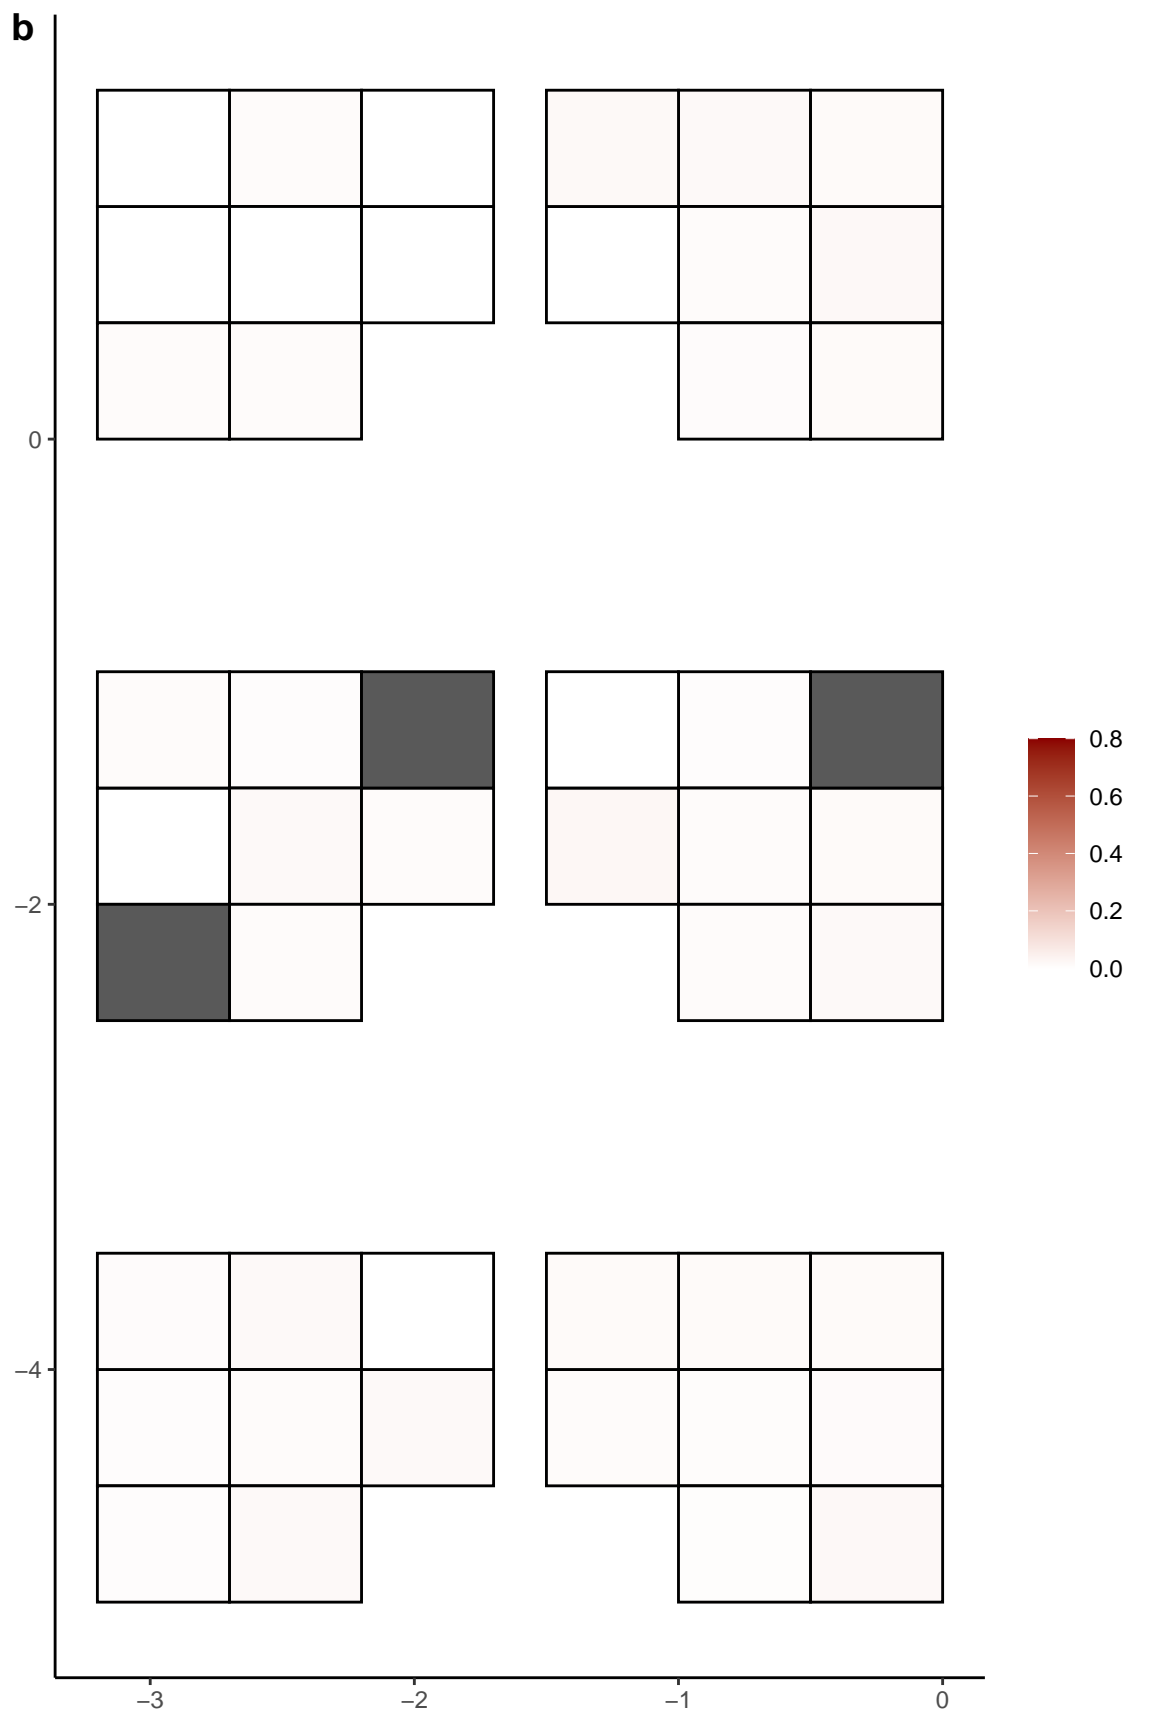

**a** ID05 18-66103772-A-T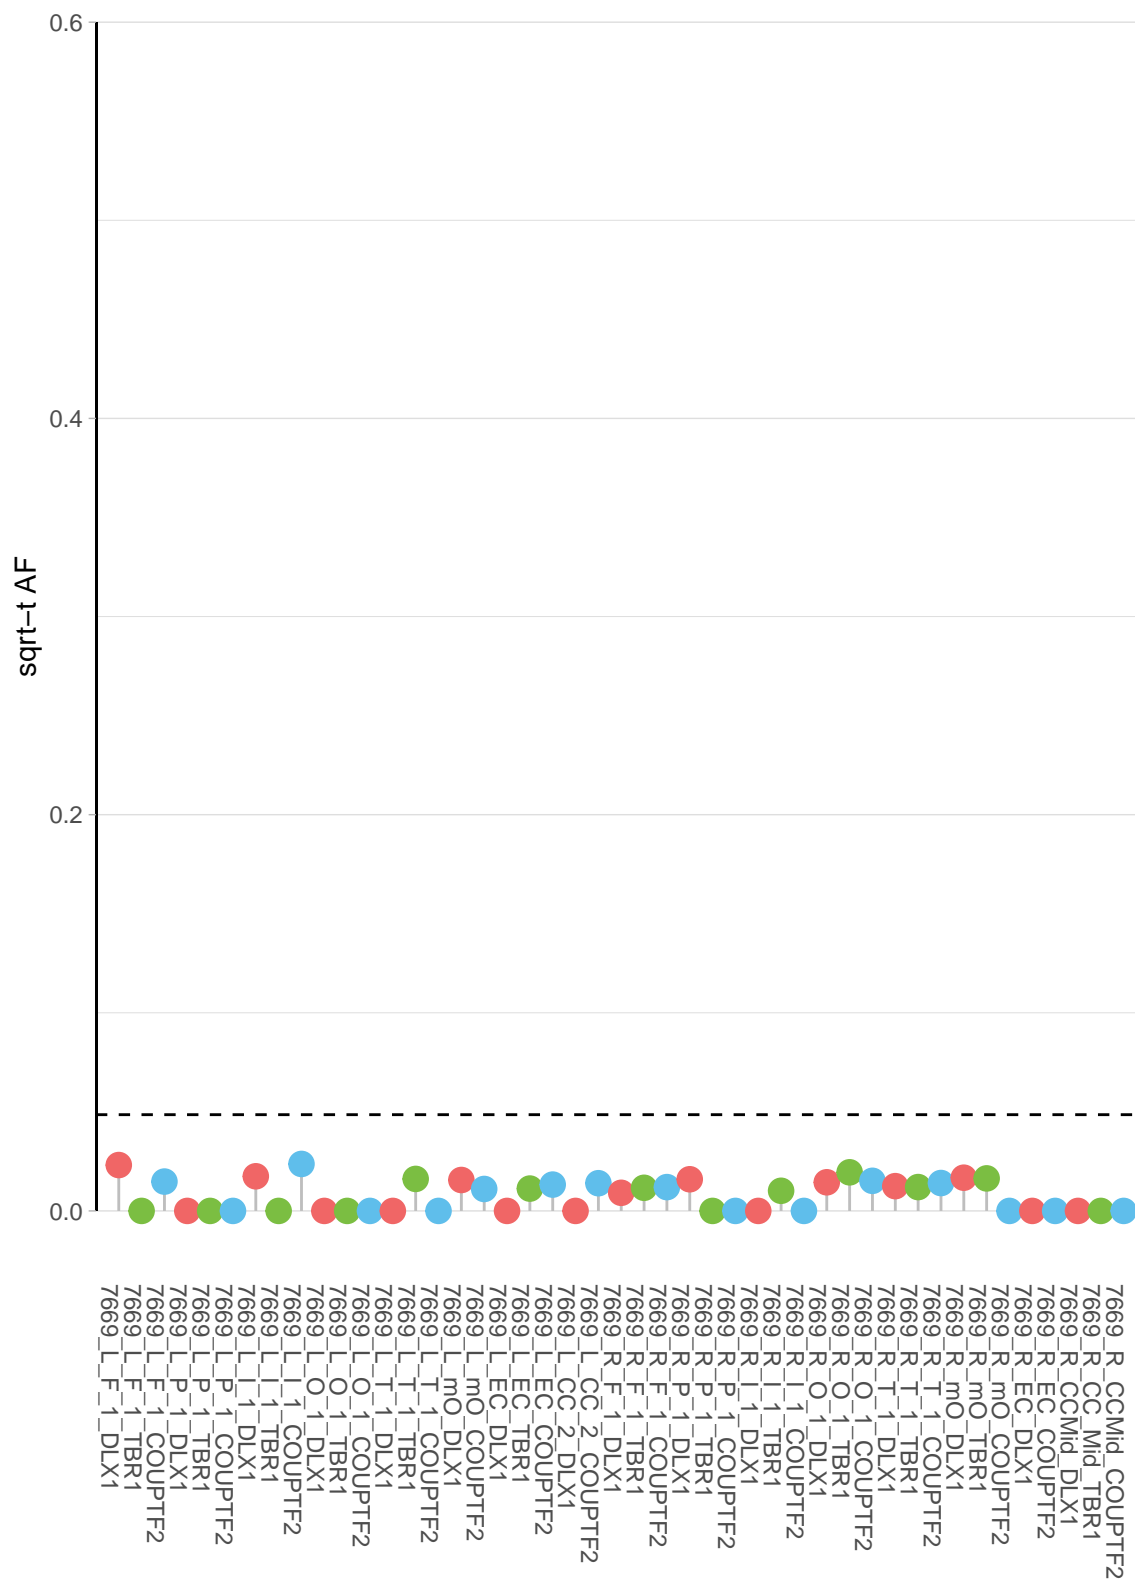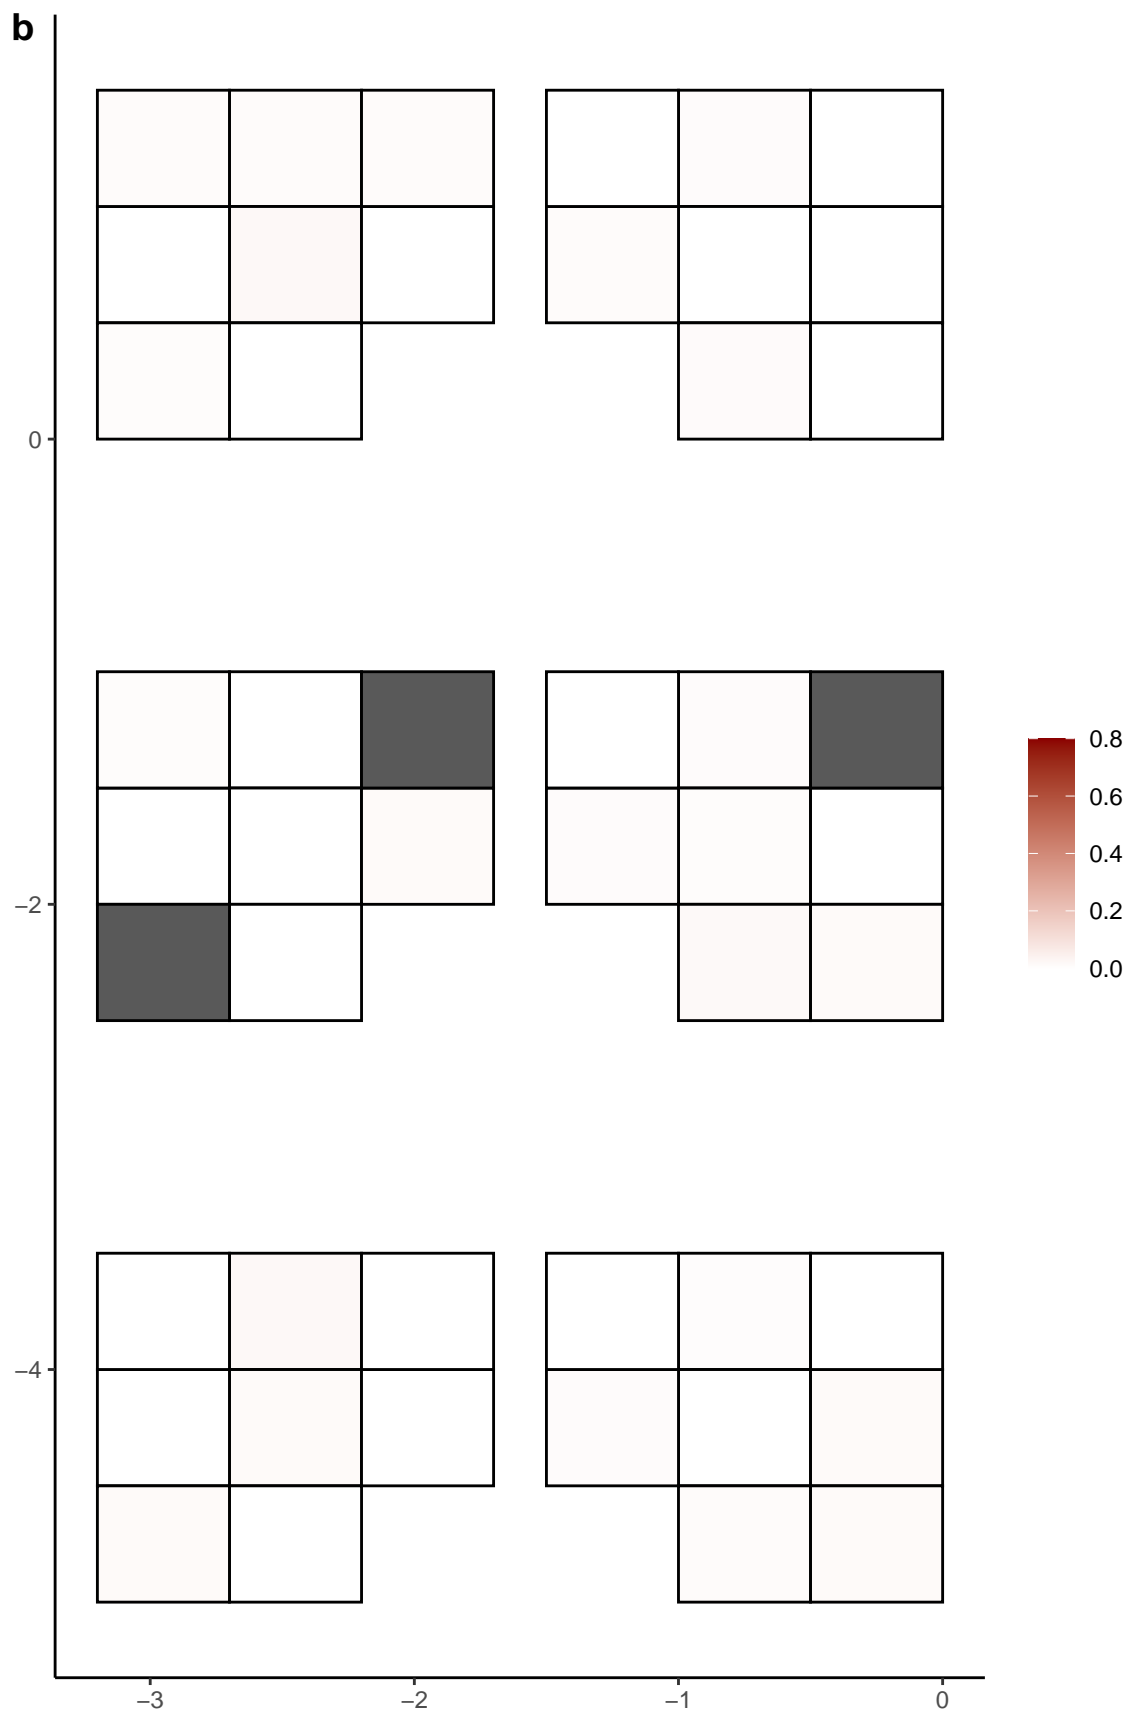

**a** ID05 18-68768921-C-T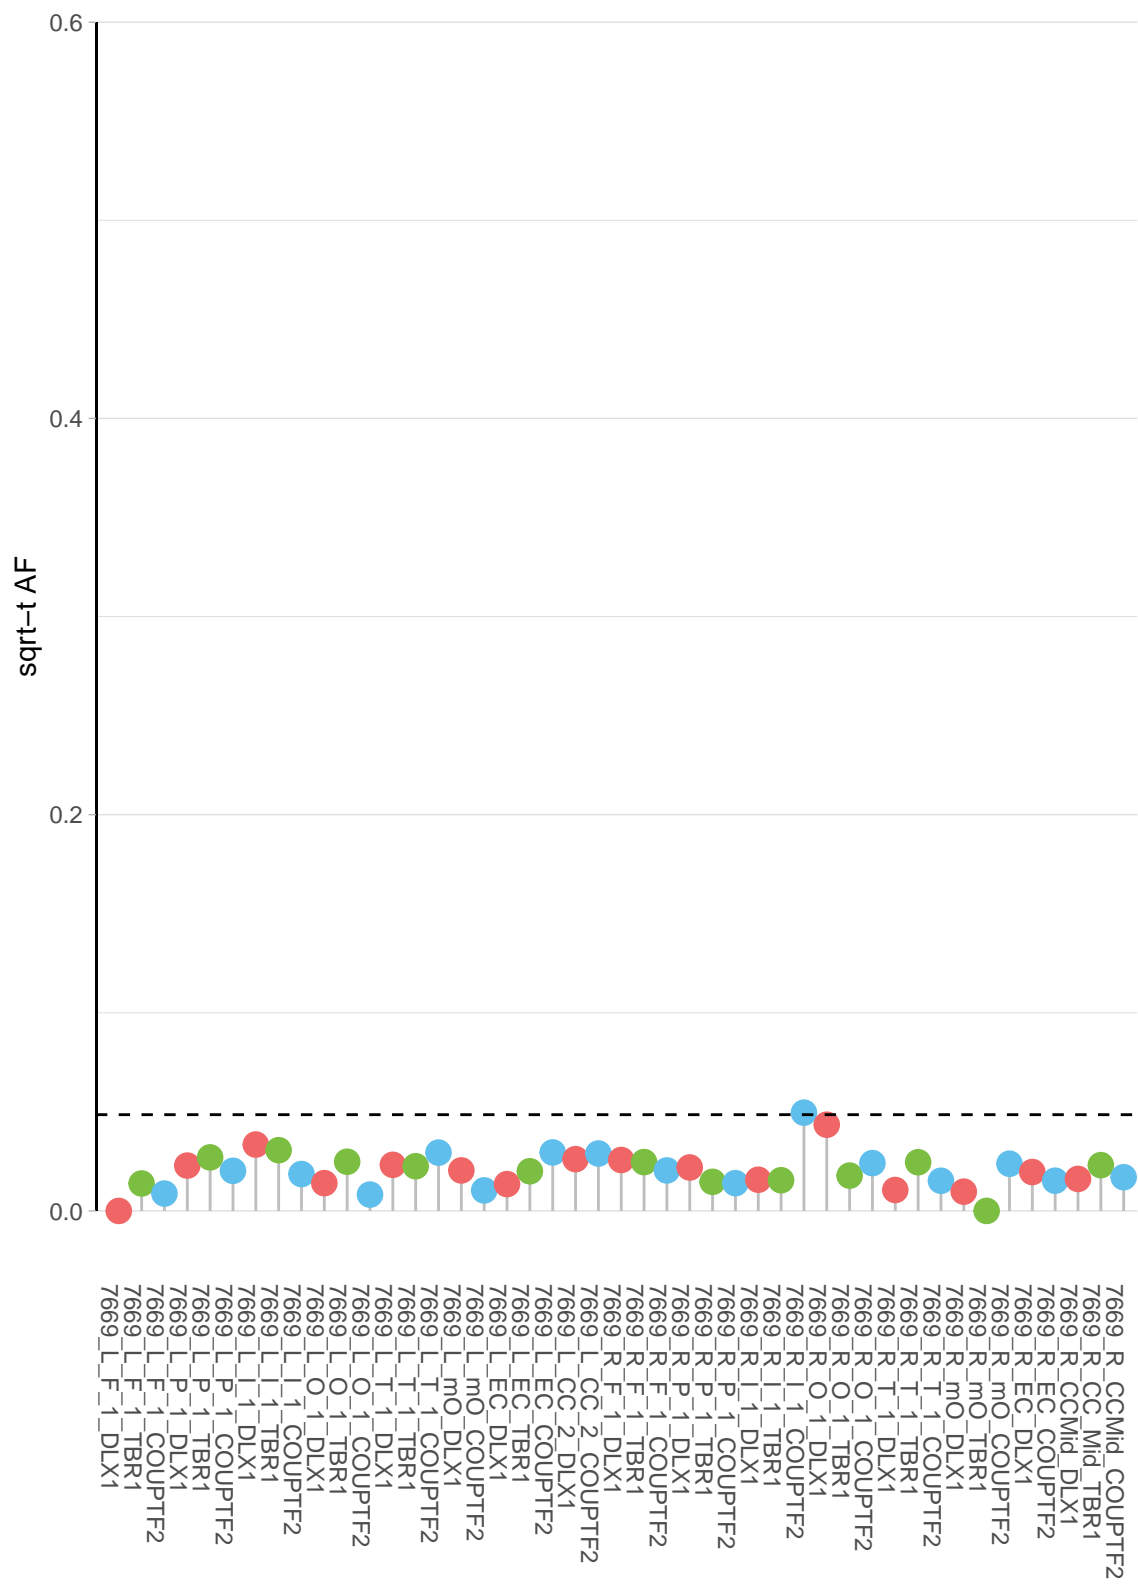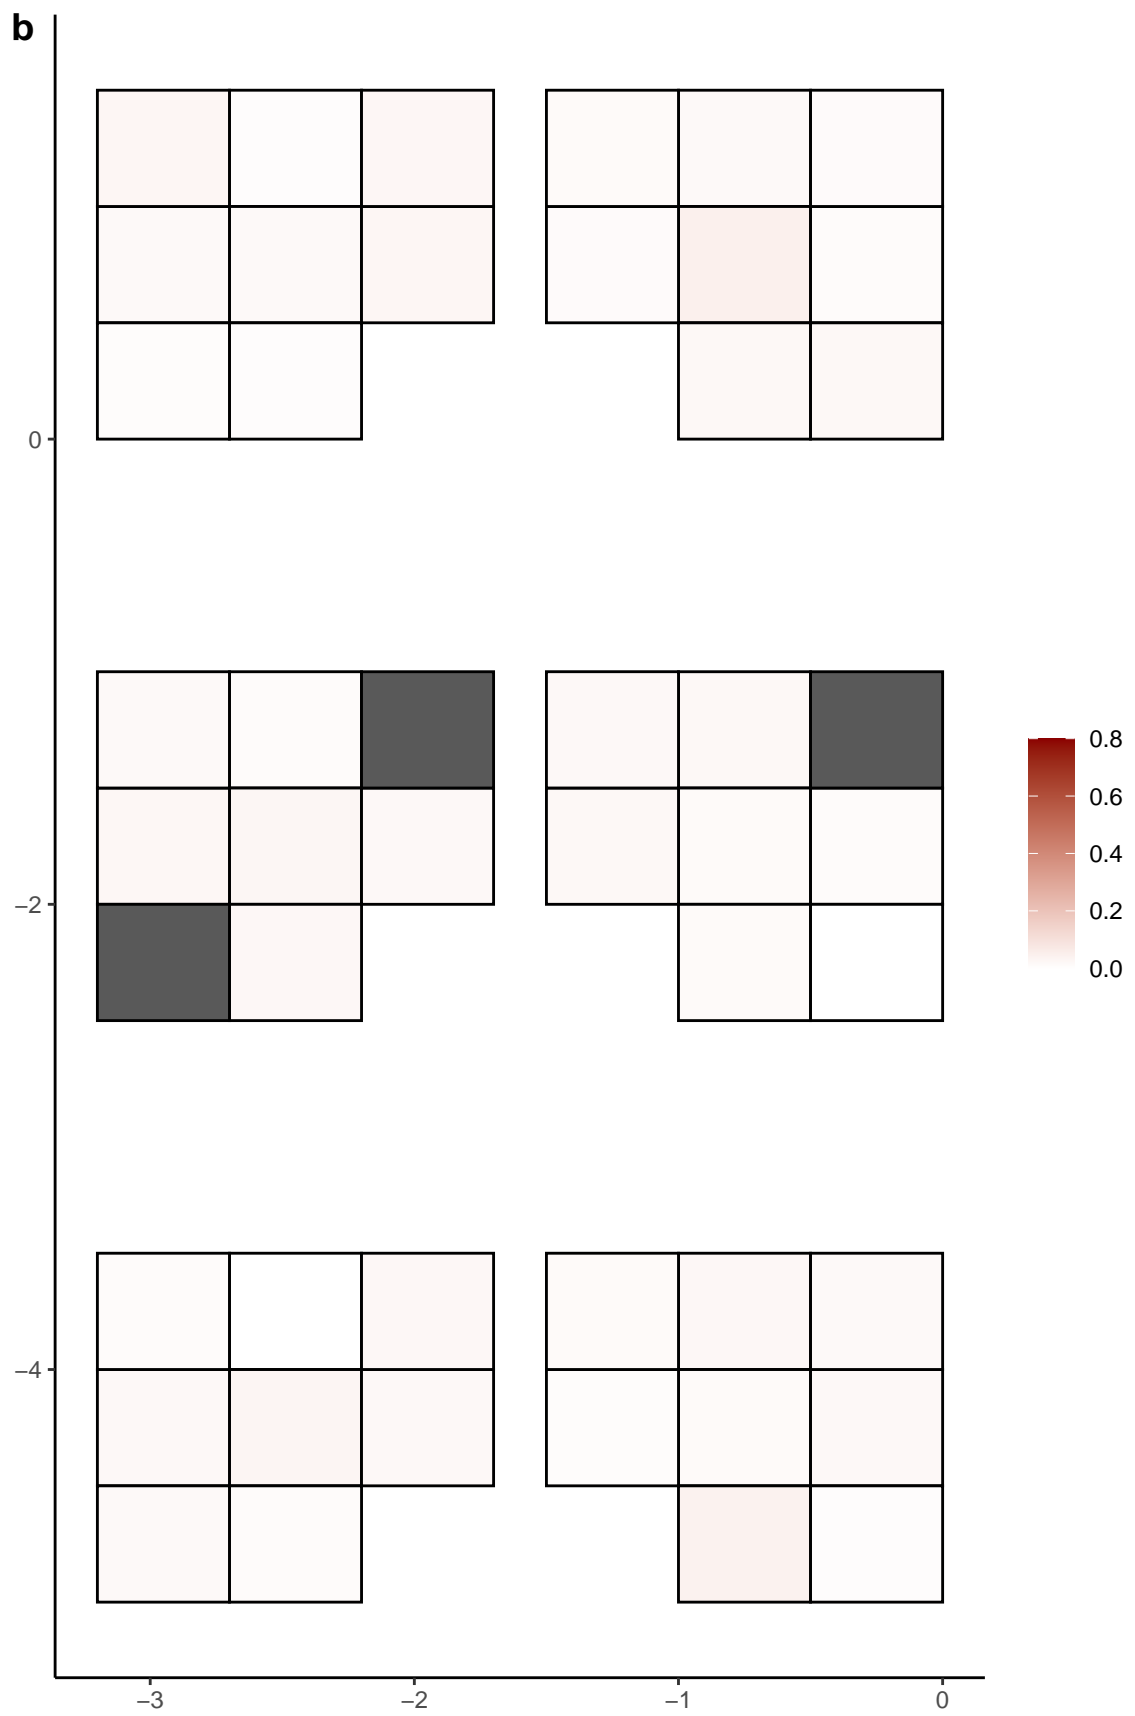



**a** ID05 19-13941229-G-A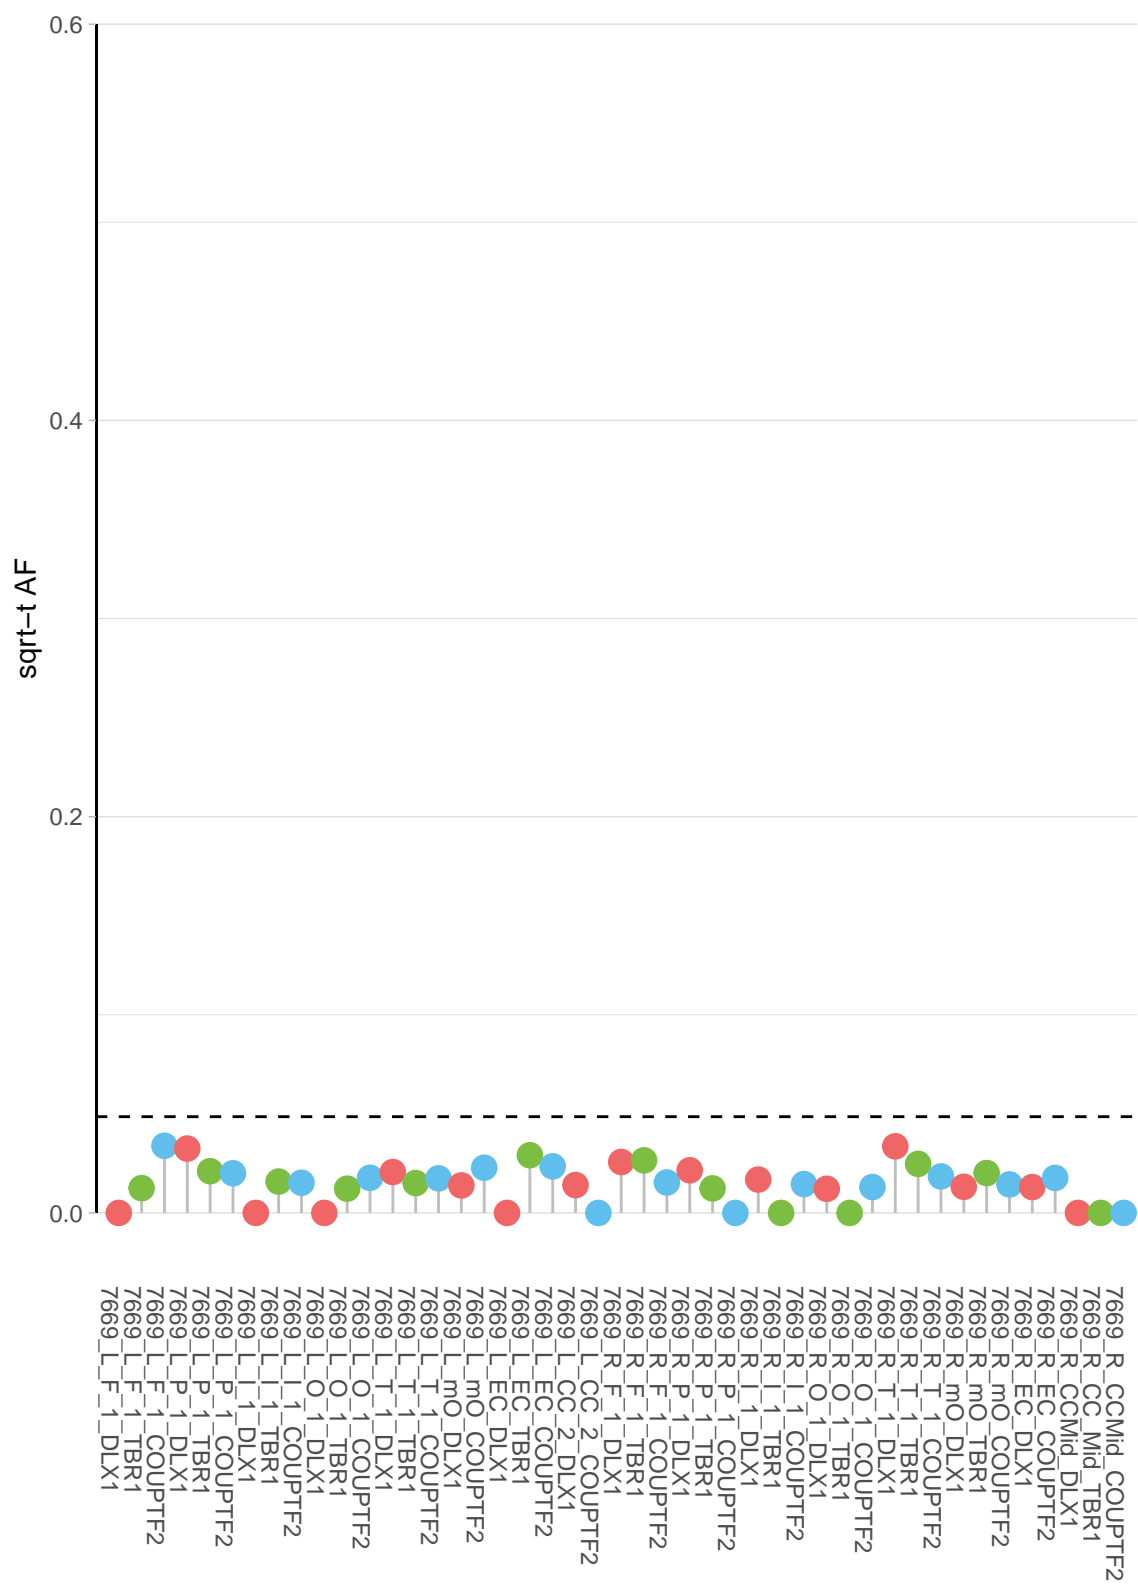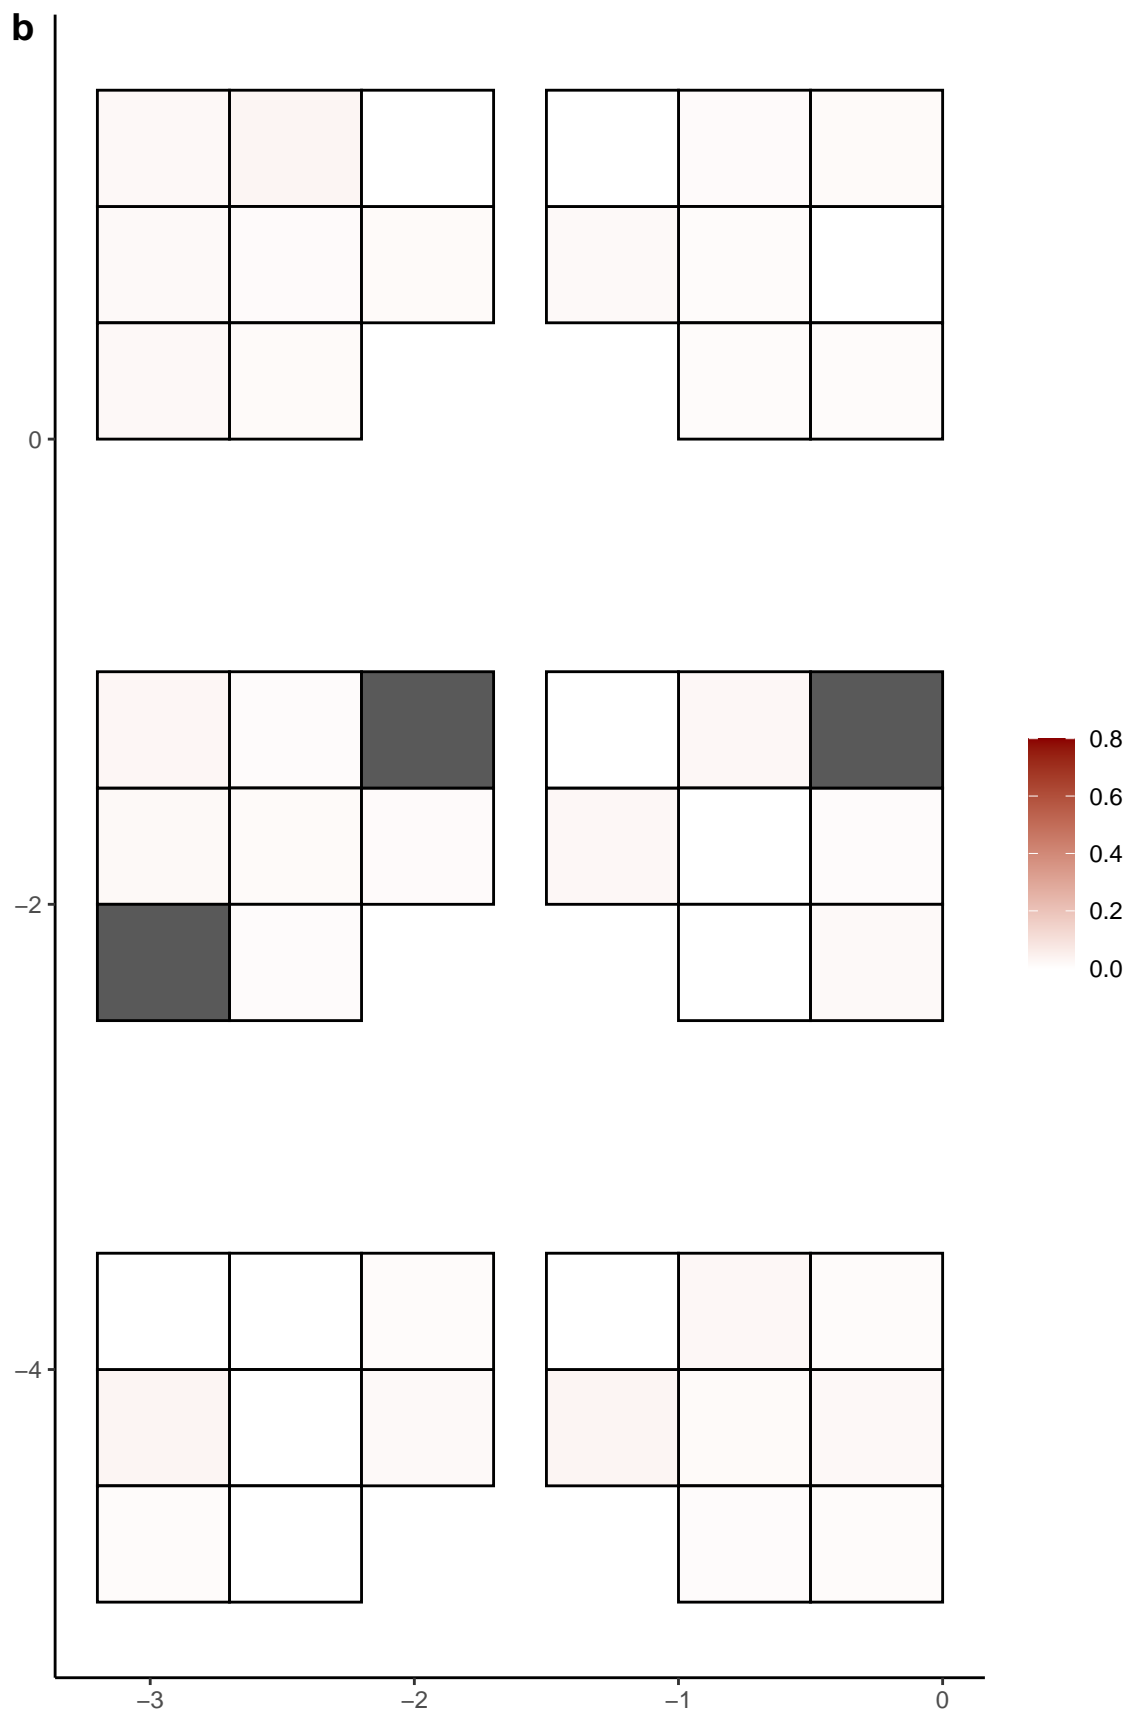



**a** ID05 19-15010579-G-A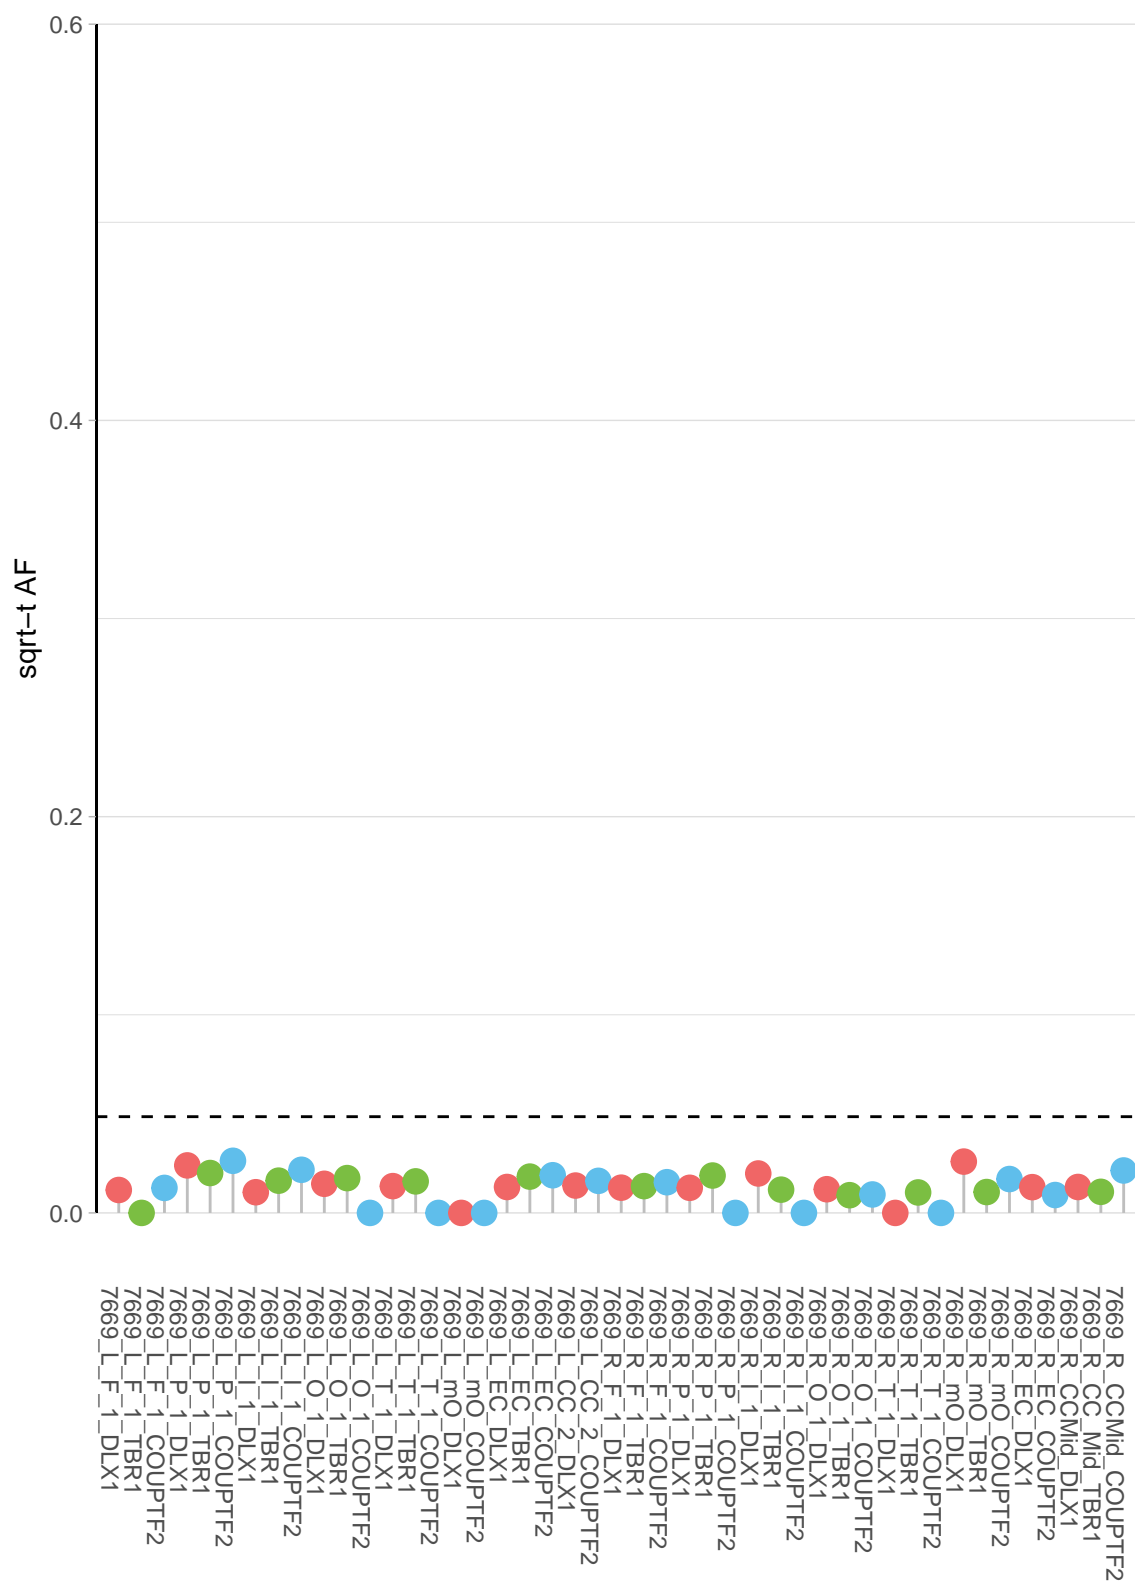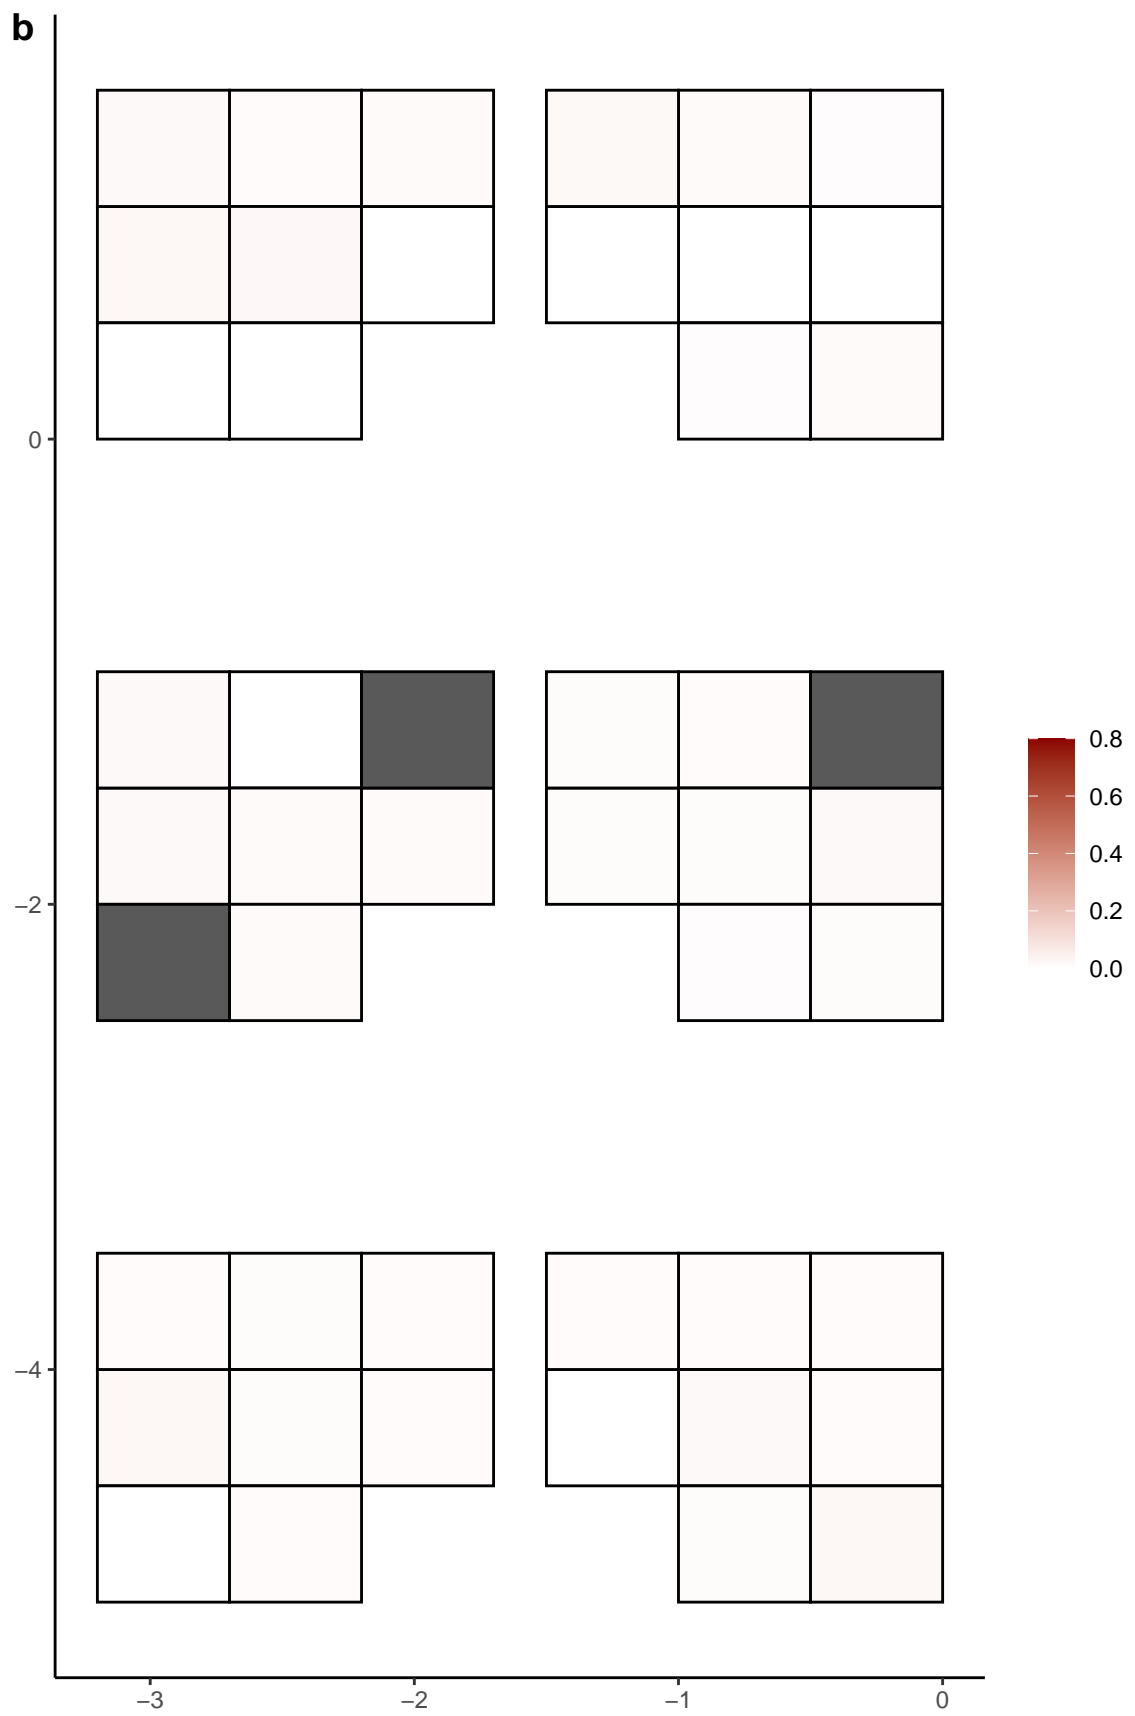

**a** ID05 19-1621289-C-T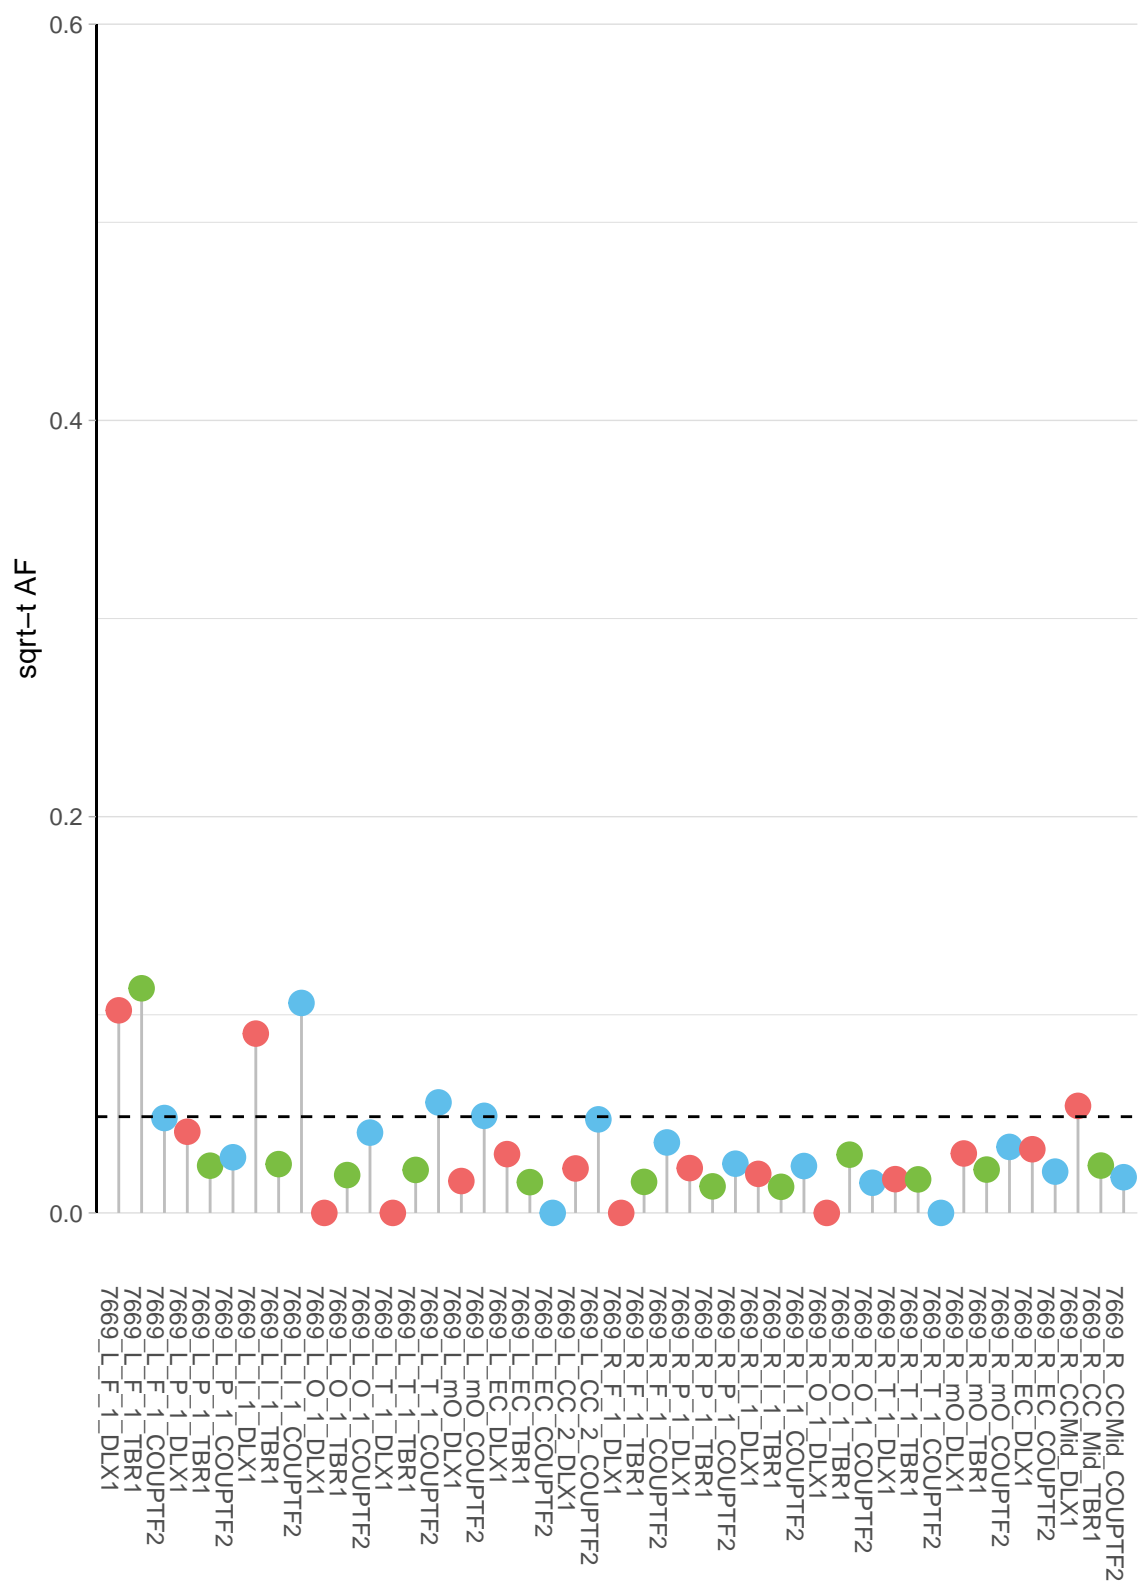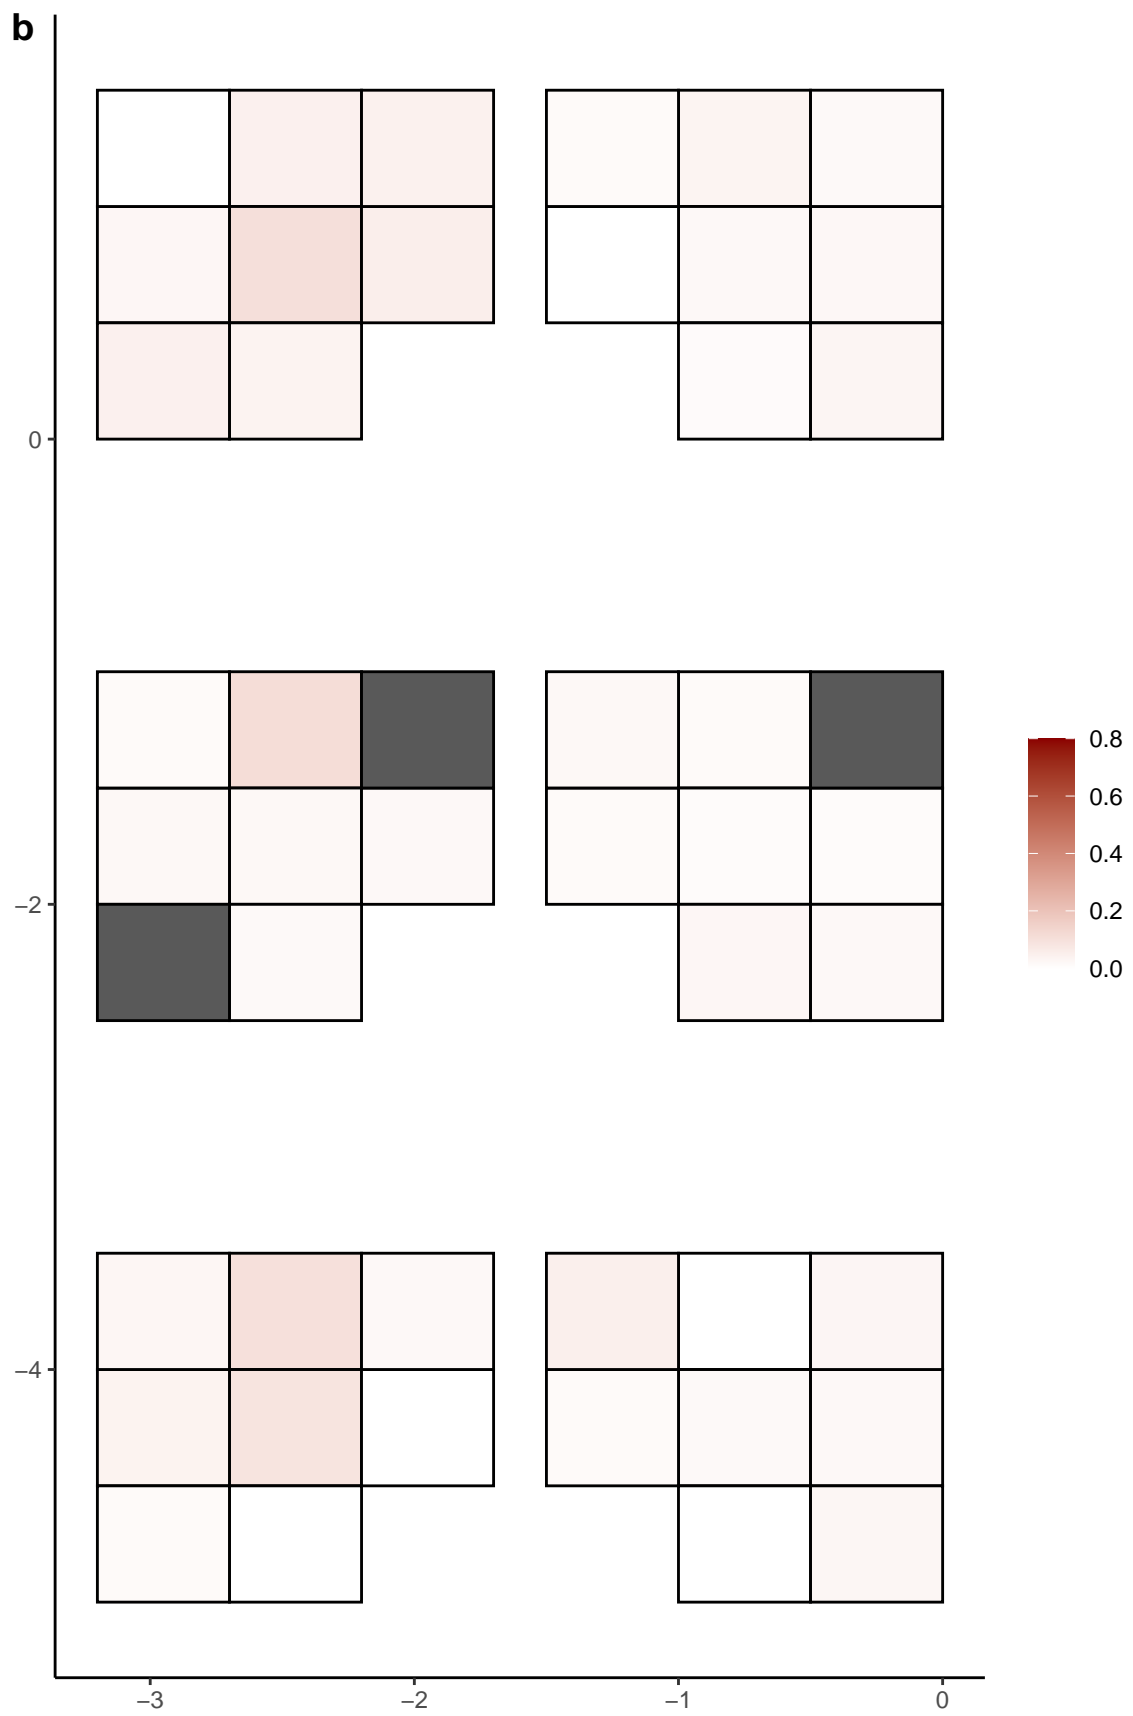

**a** ID05 19-30808081-C-T

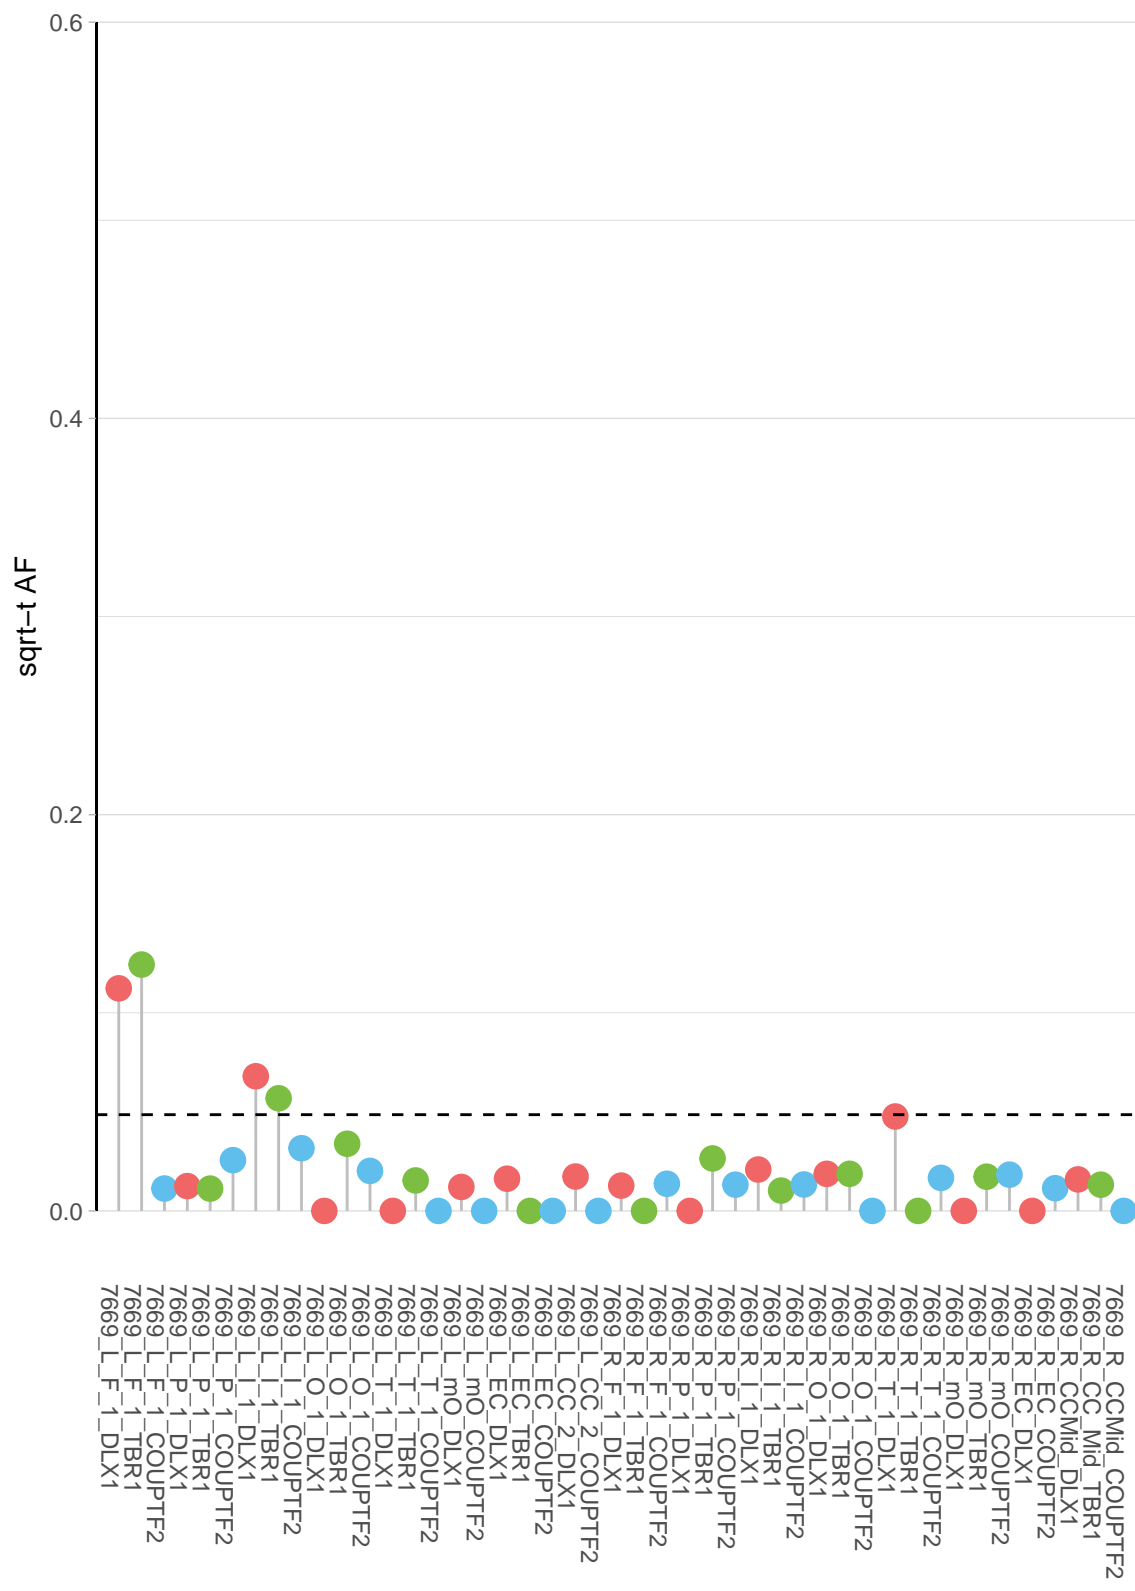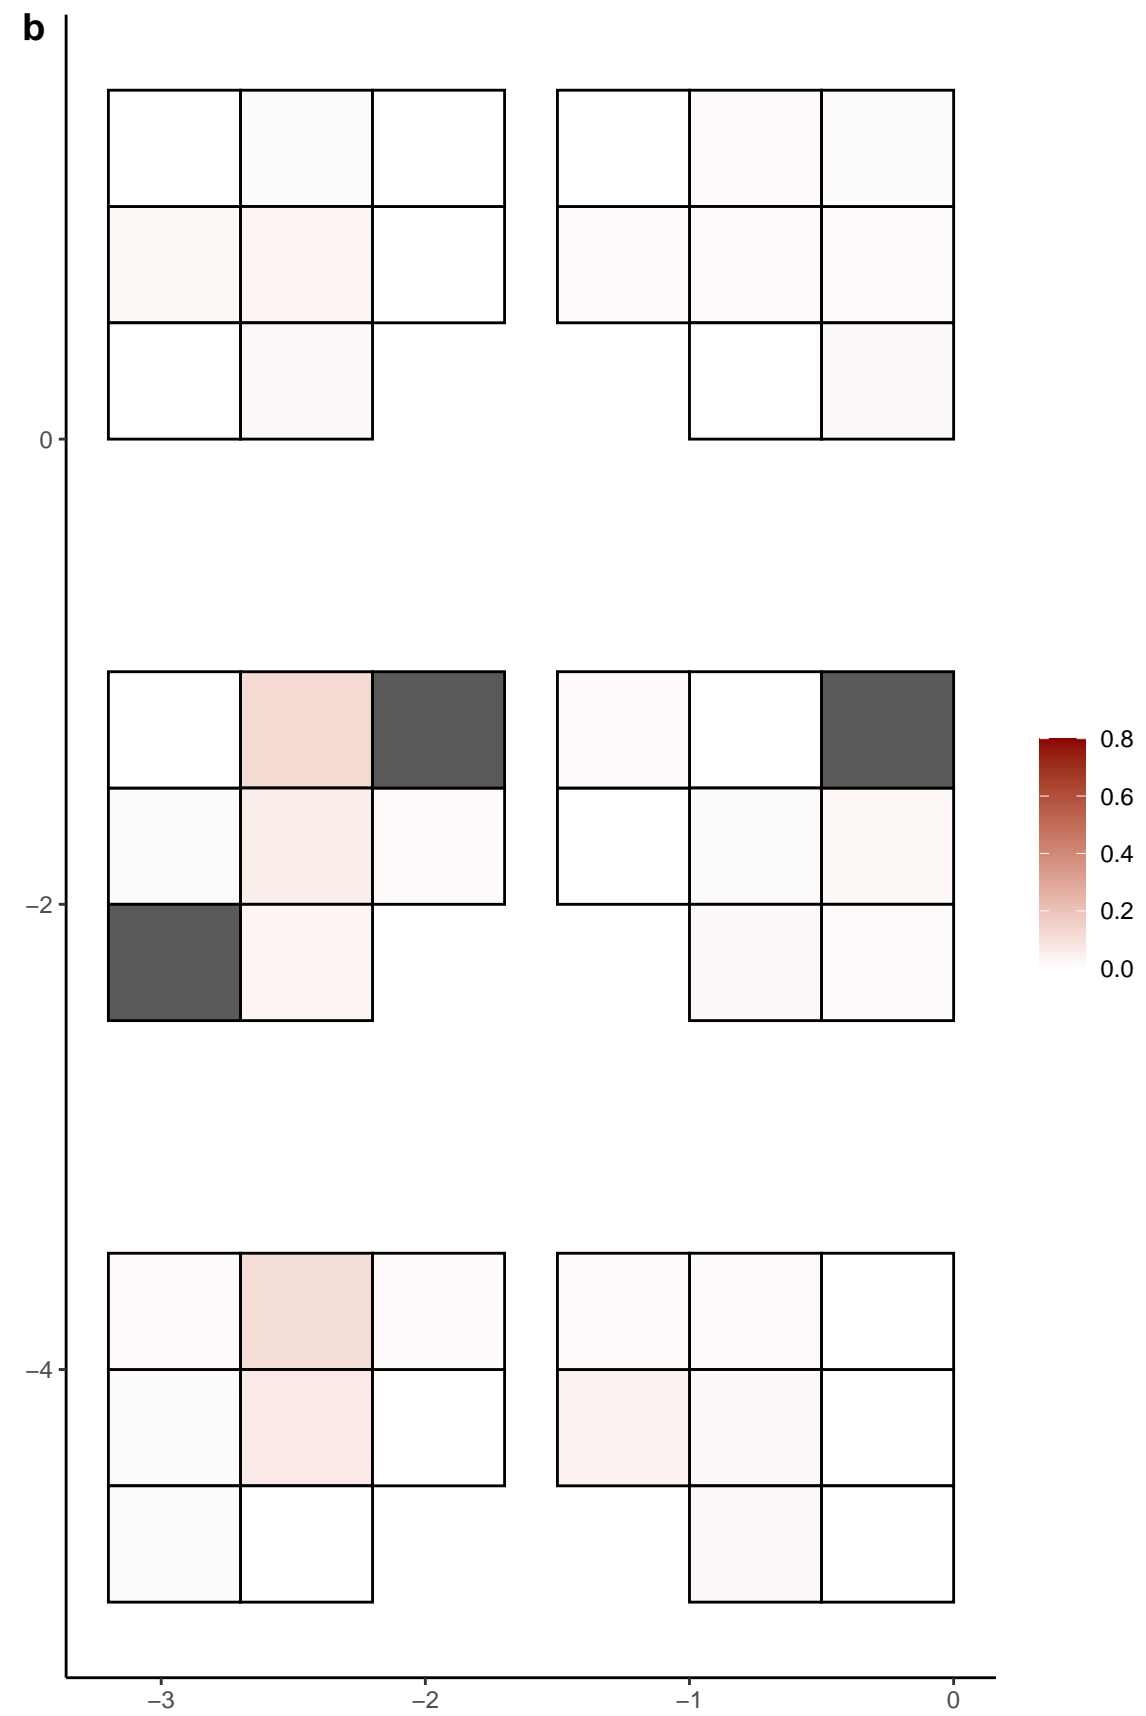



**a** ID05 19-36516973-C-T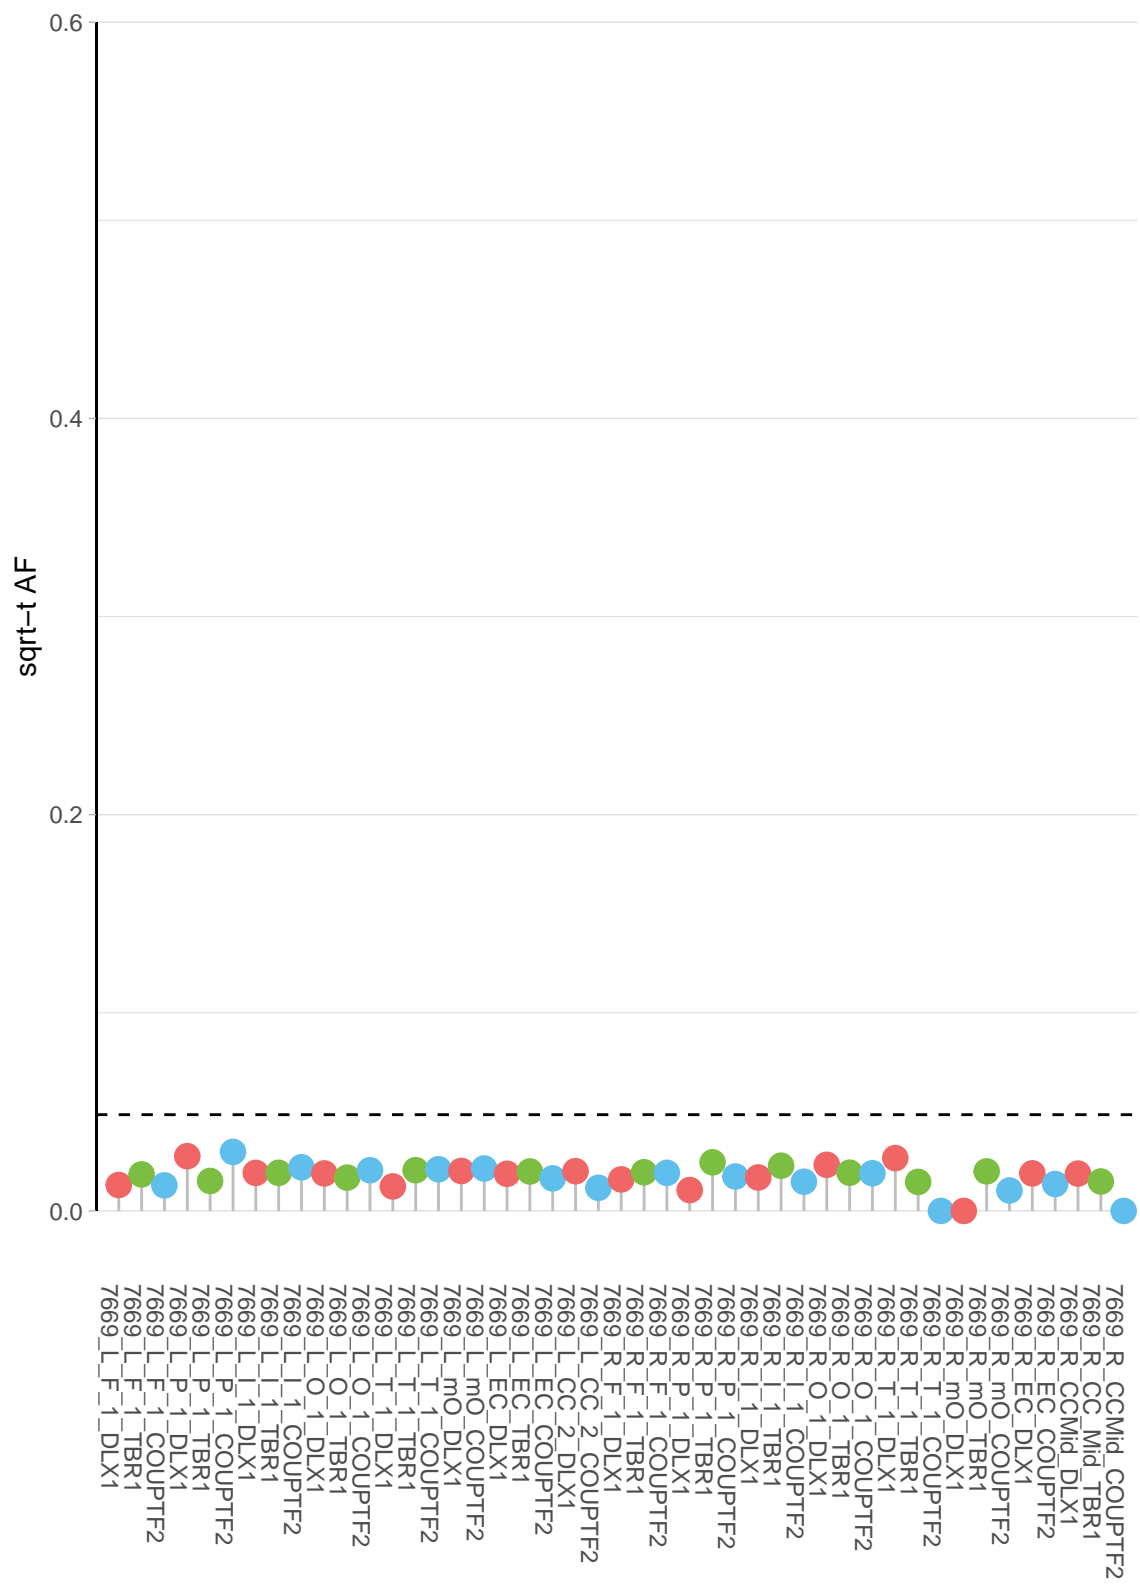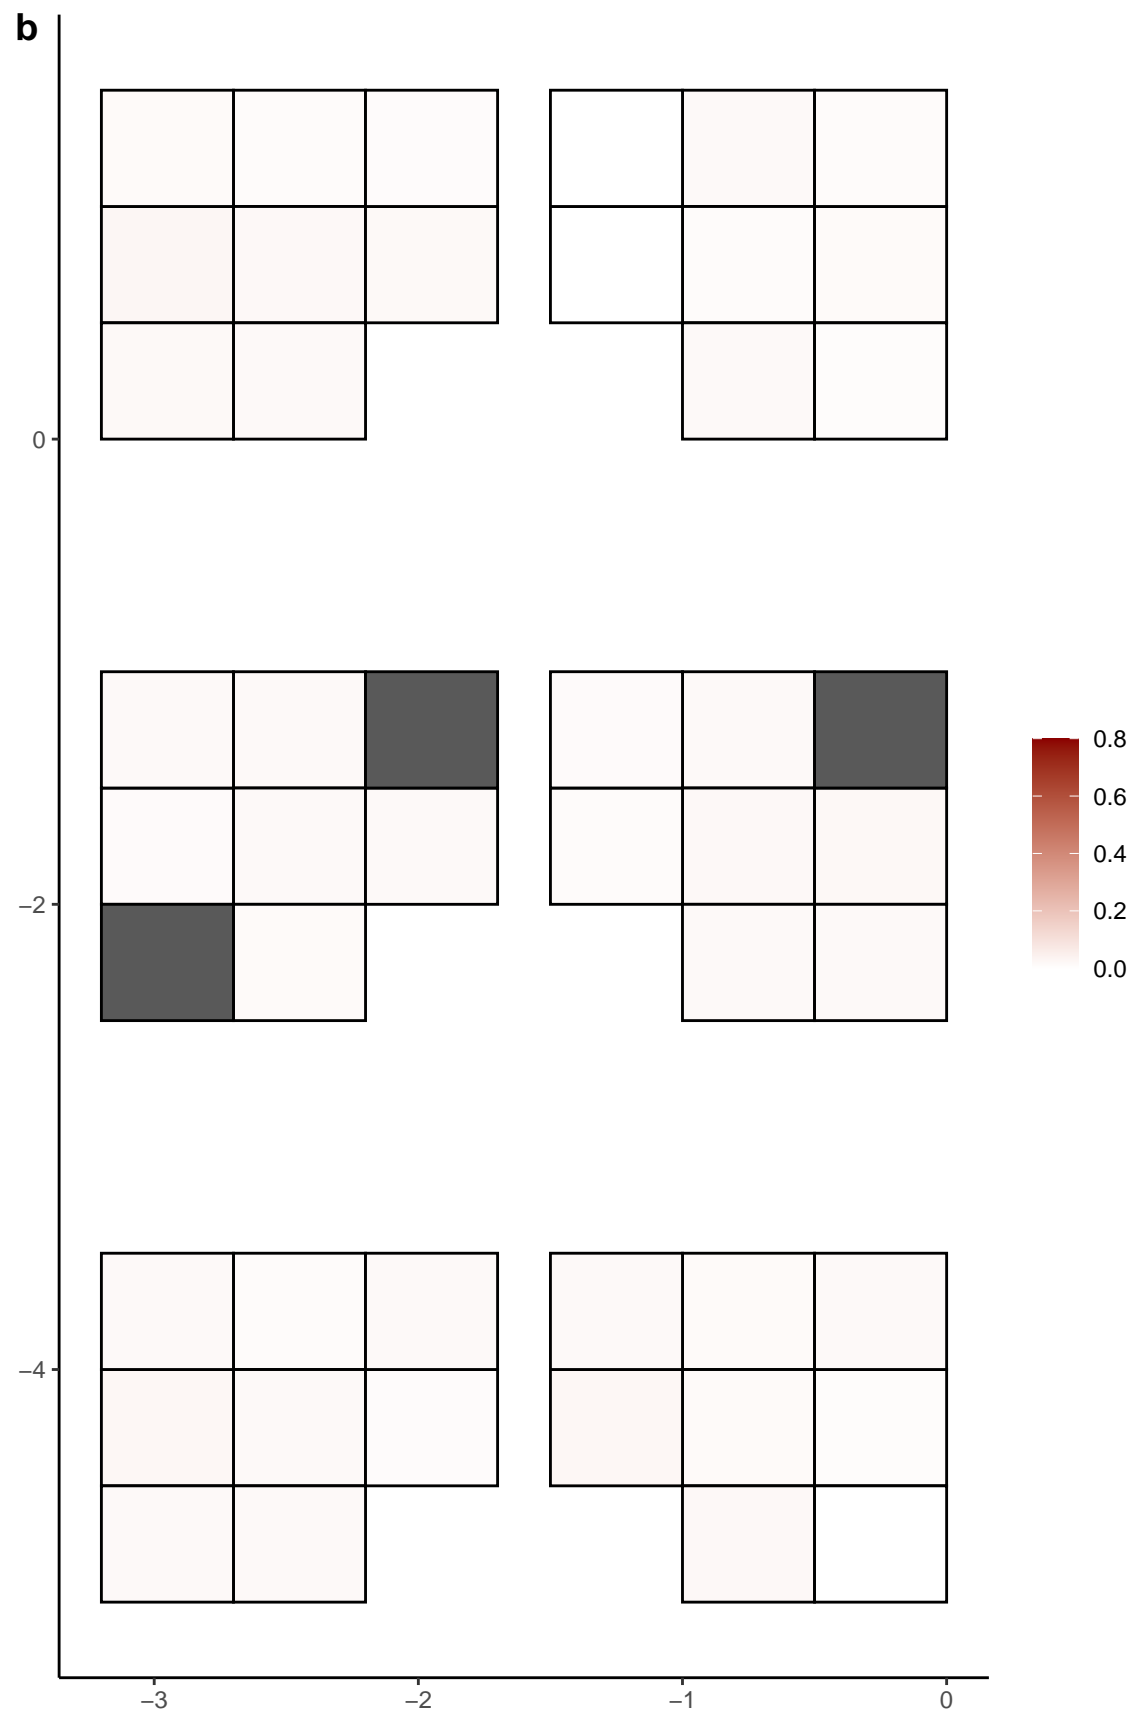



**a** ID05 19-53880285-C-T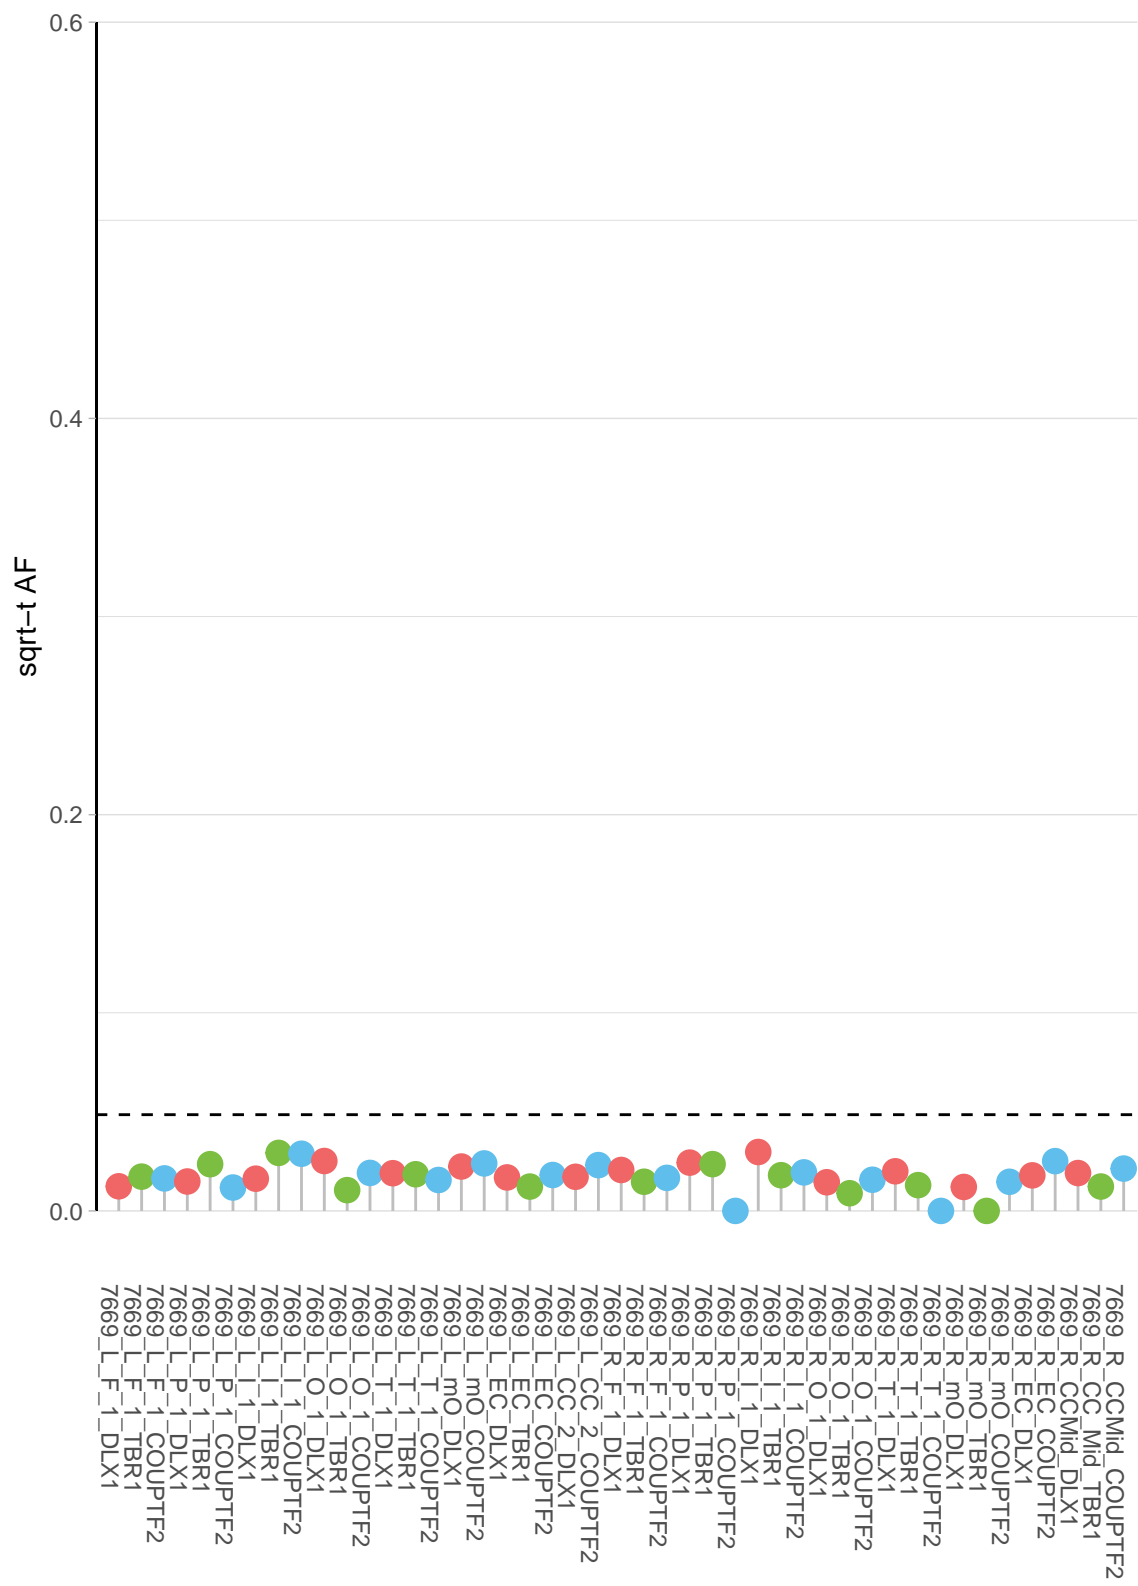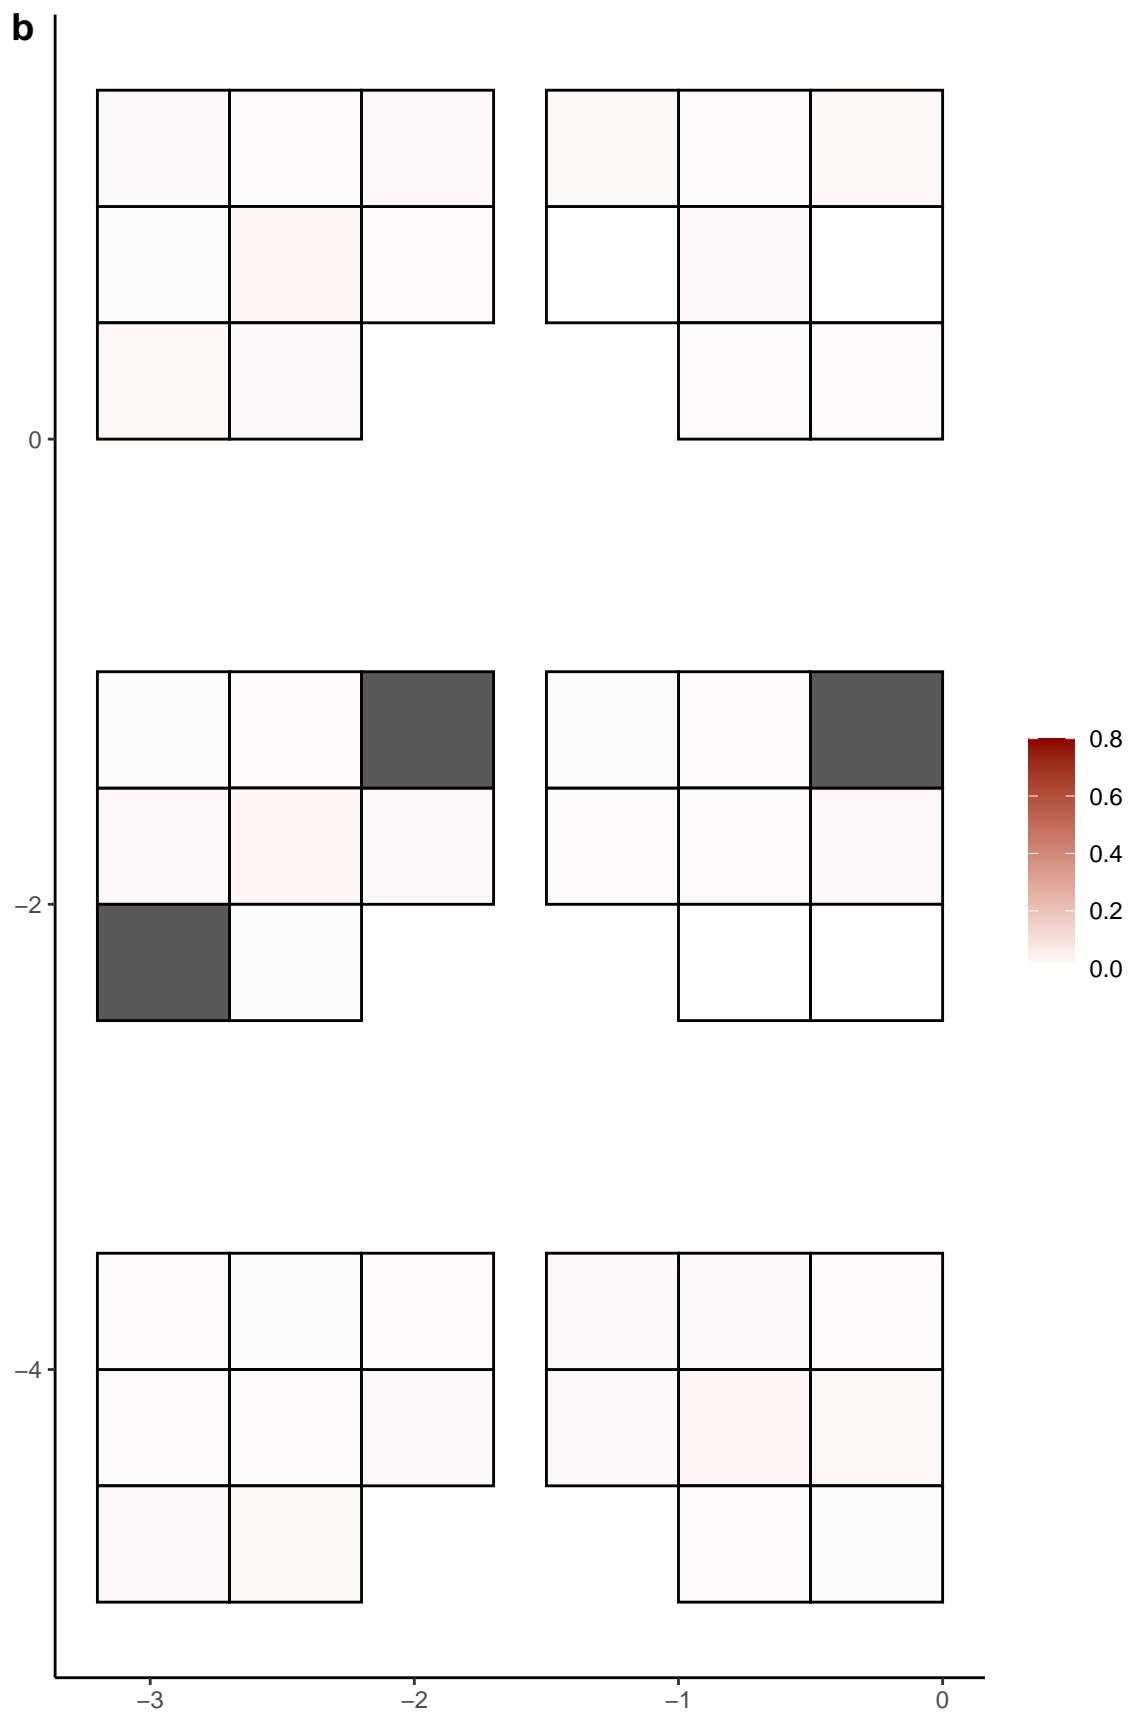





**a** ID05 19-55665618-G-A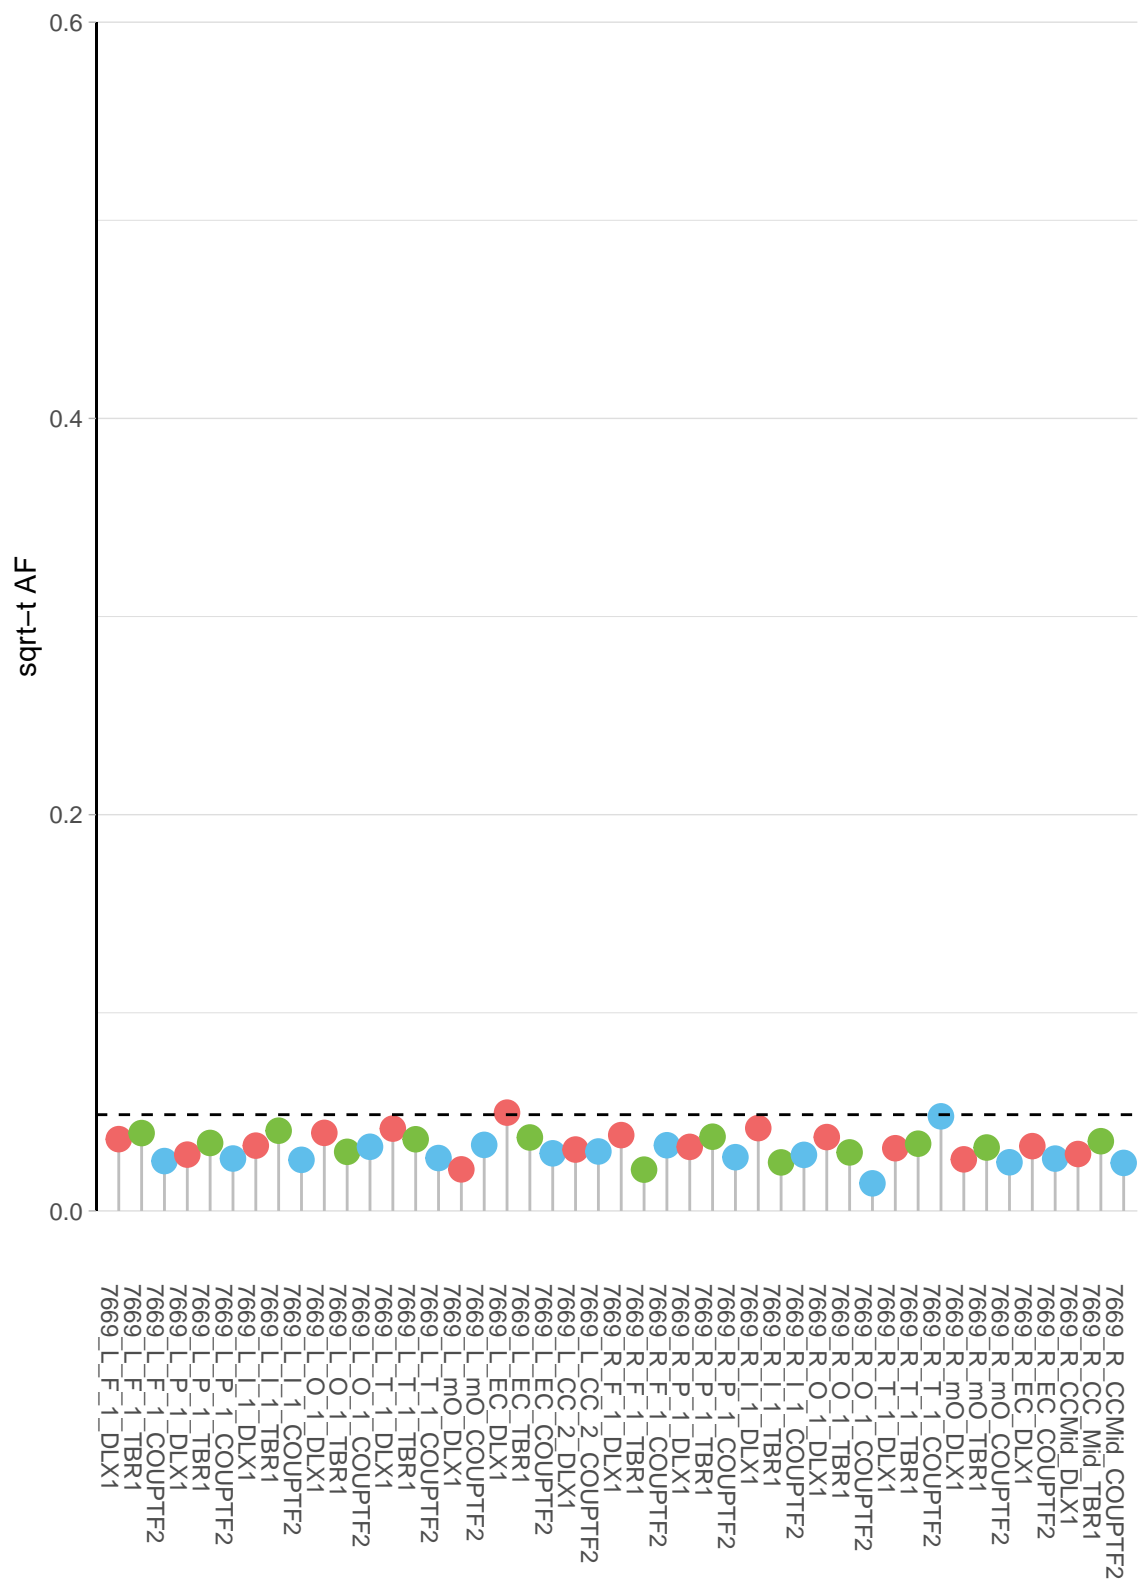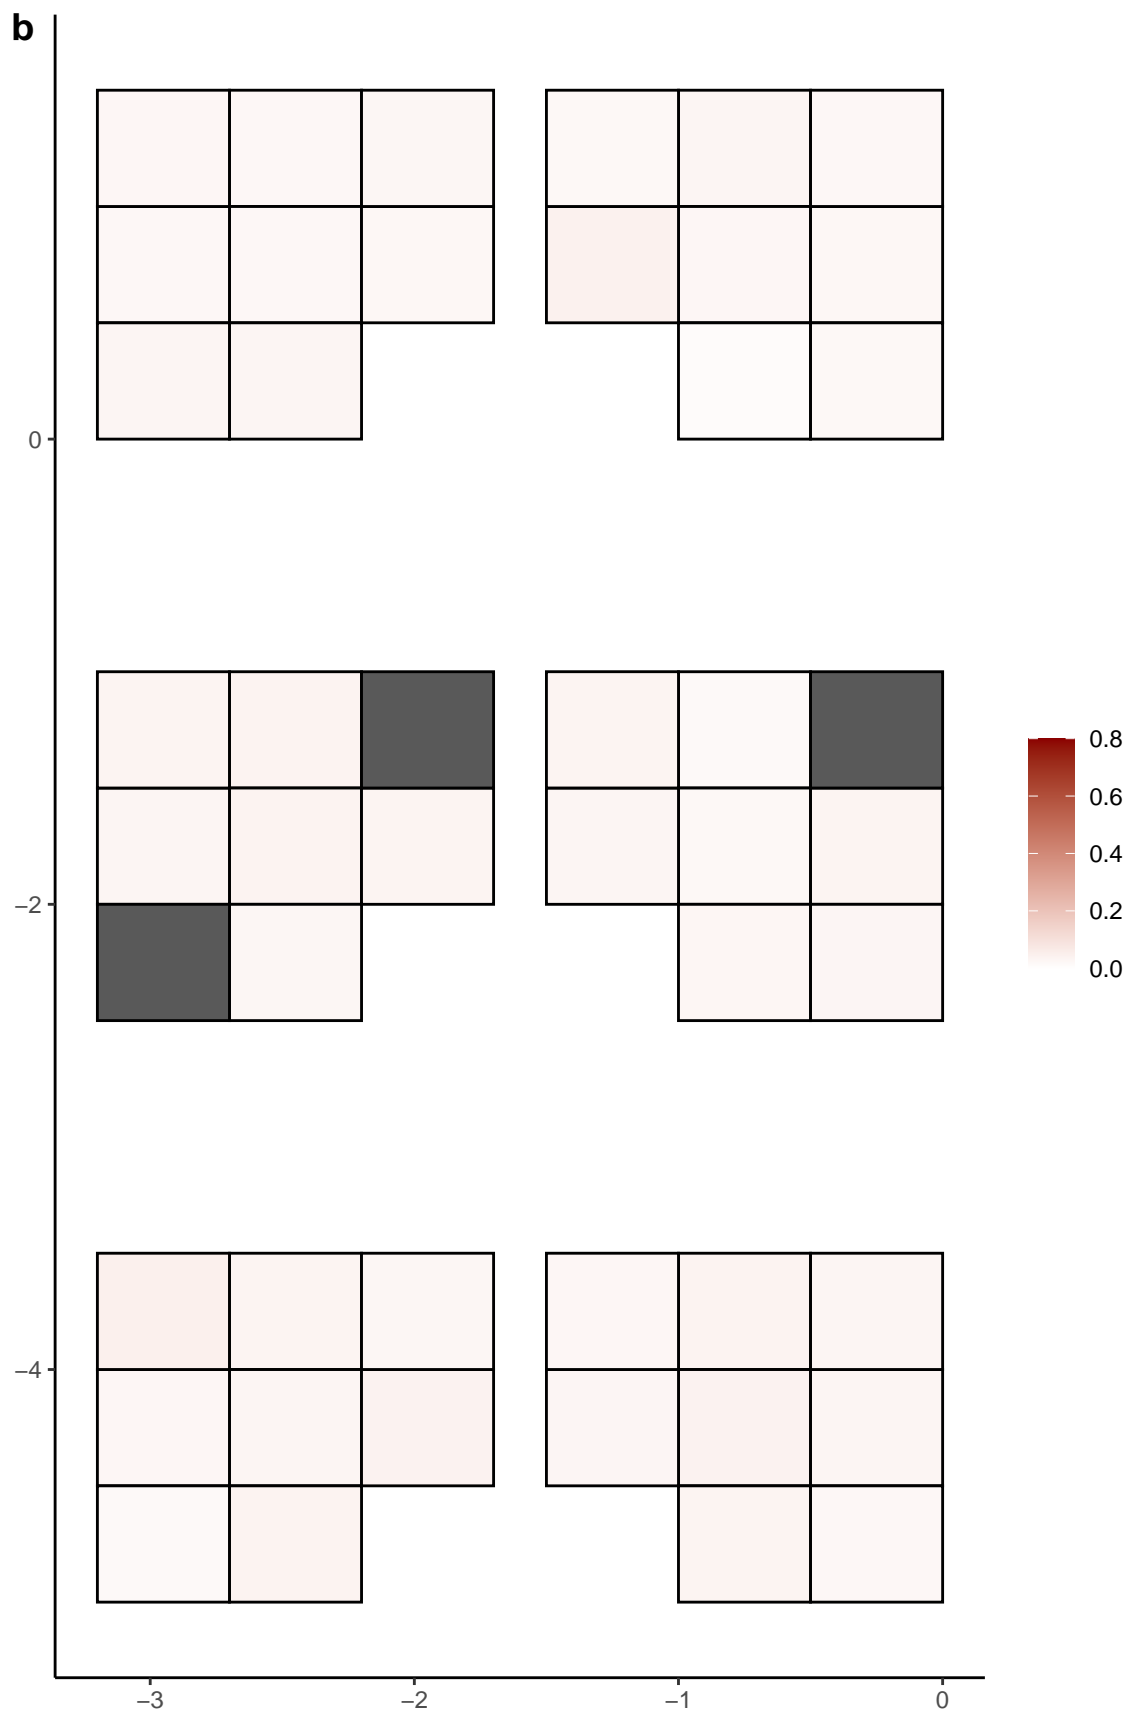

**a** ID05 19-57342142-G-A

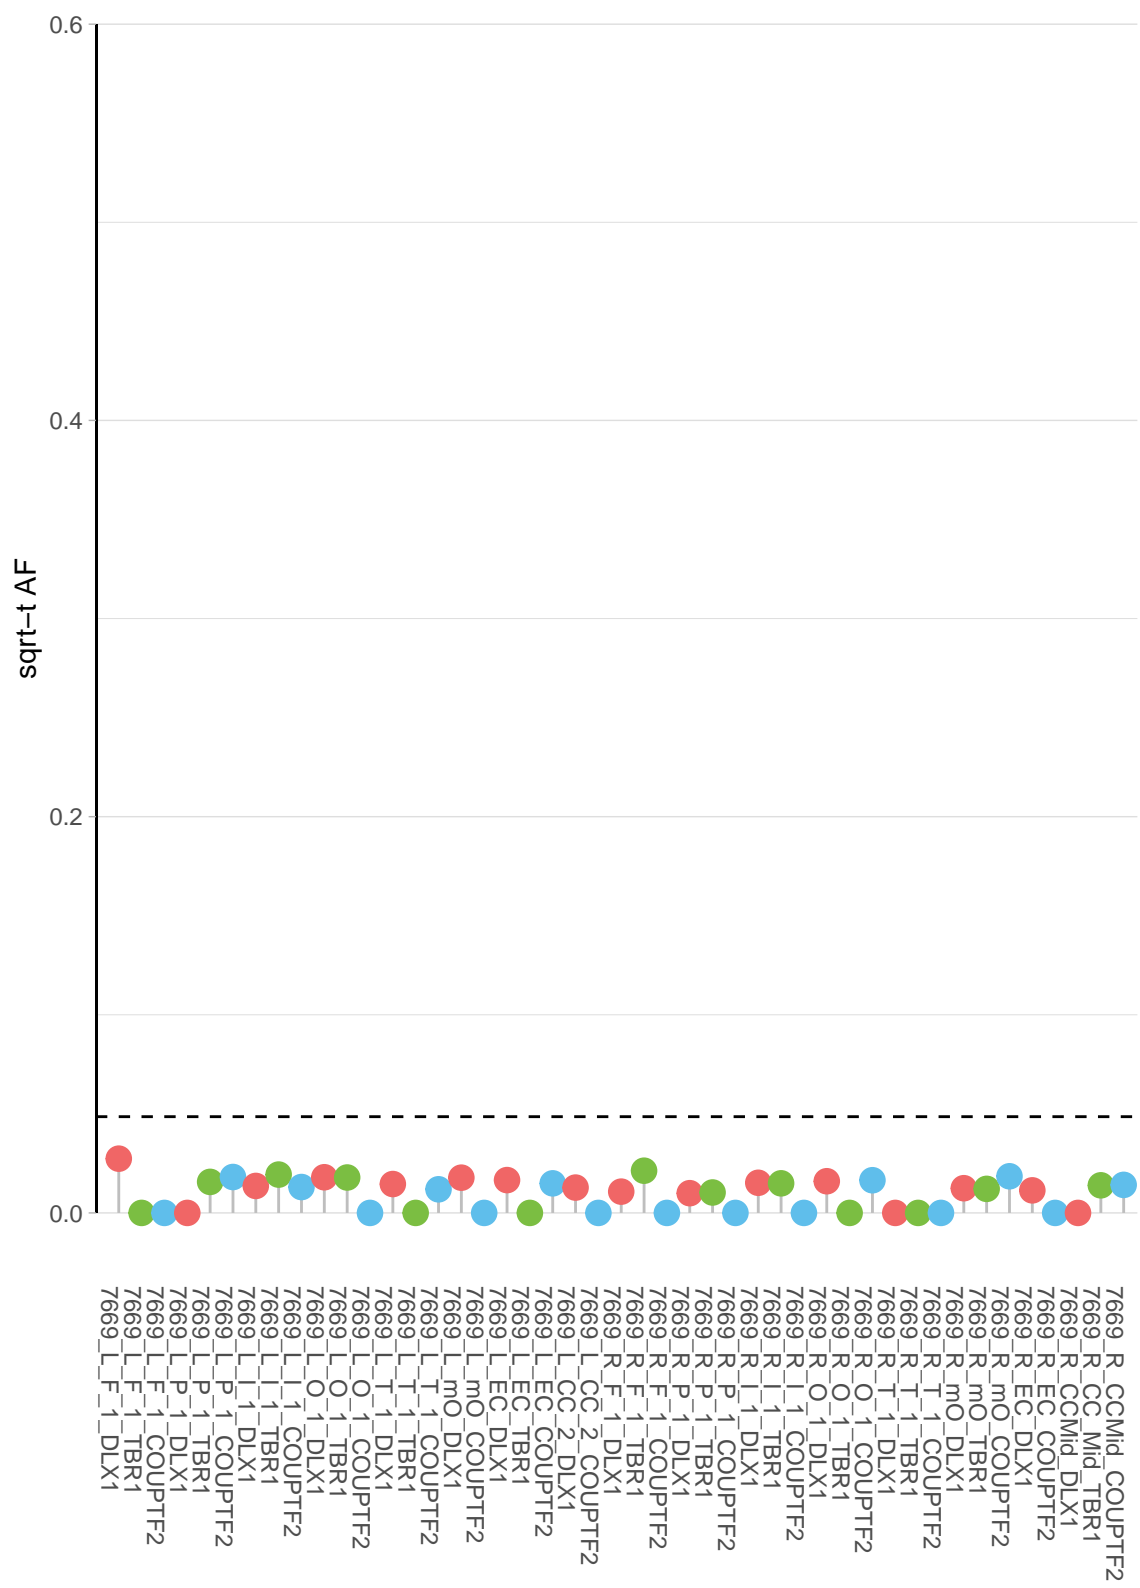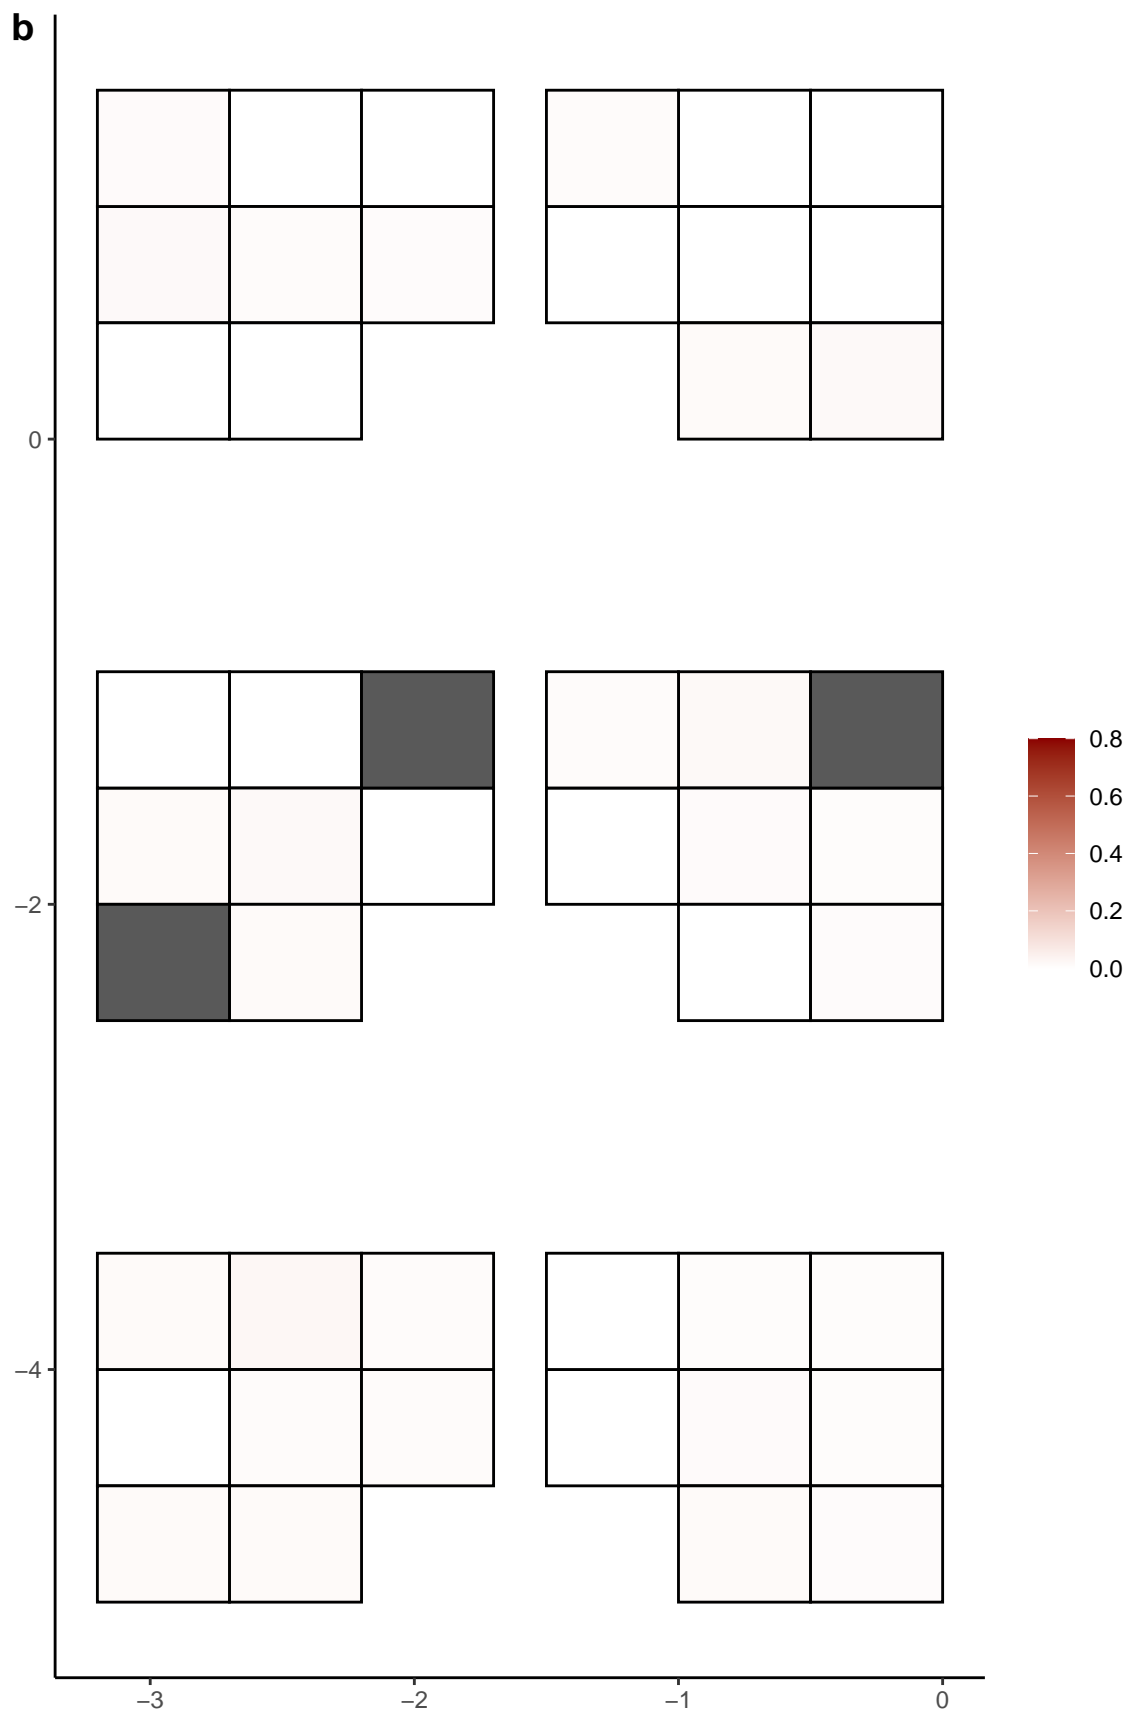

**a** ID05 19-58610340-T-G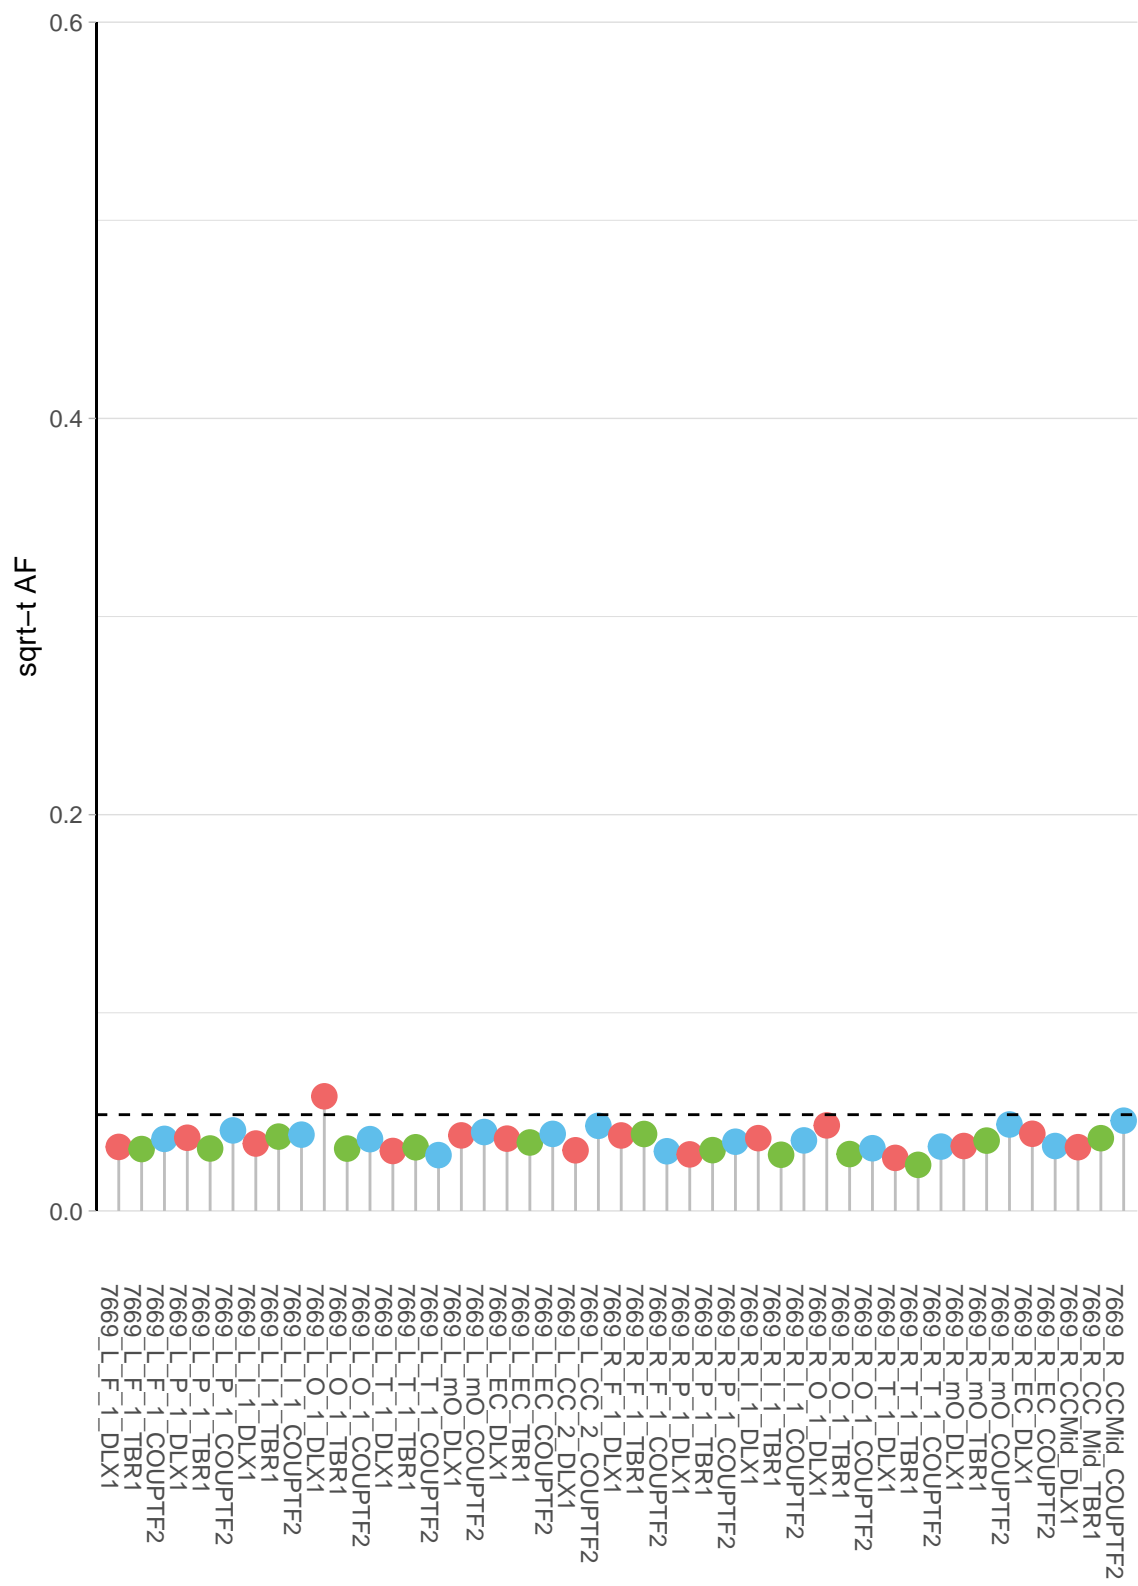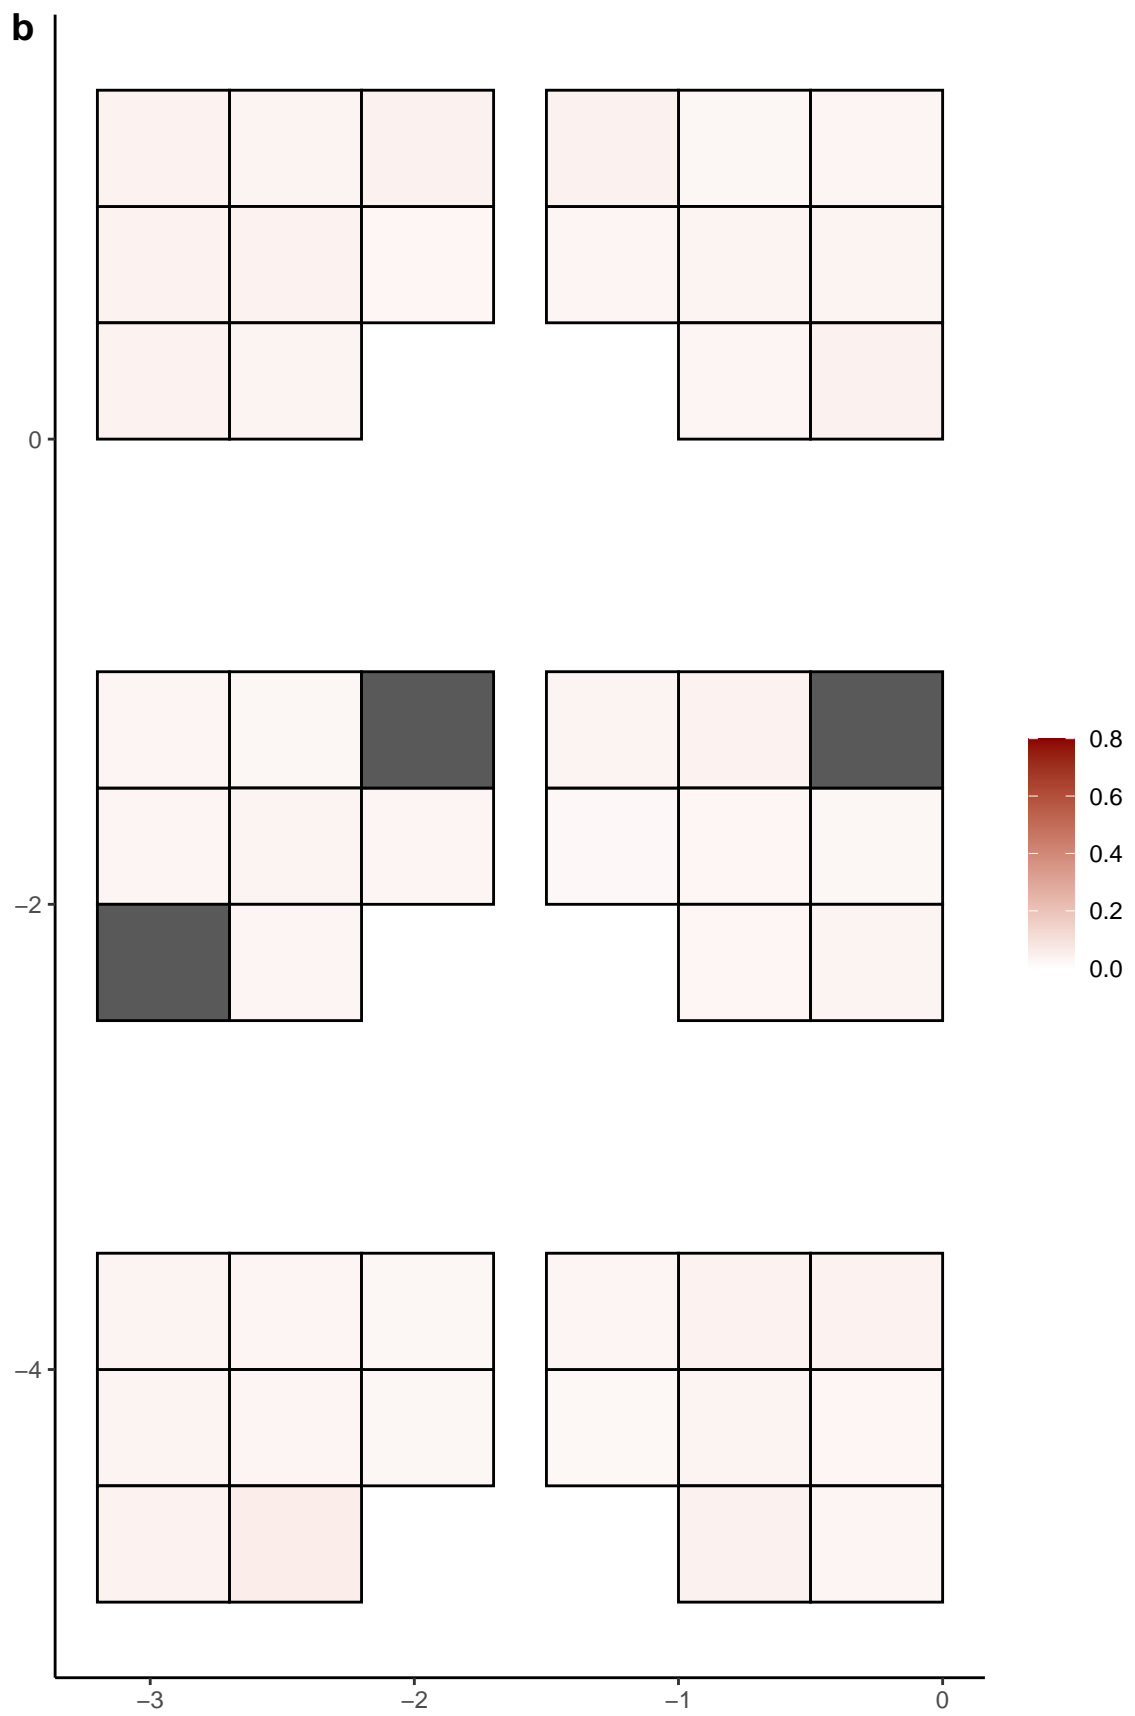

**a** ID05 19-5879037-C-T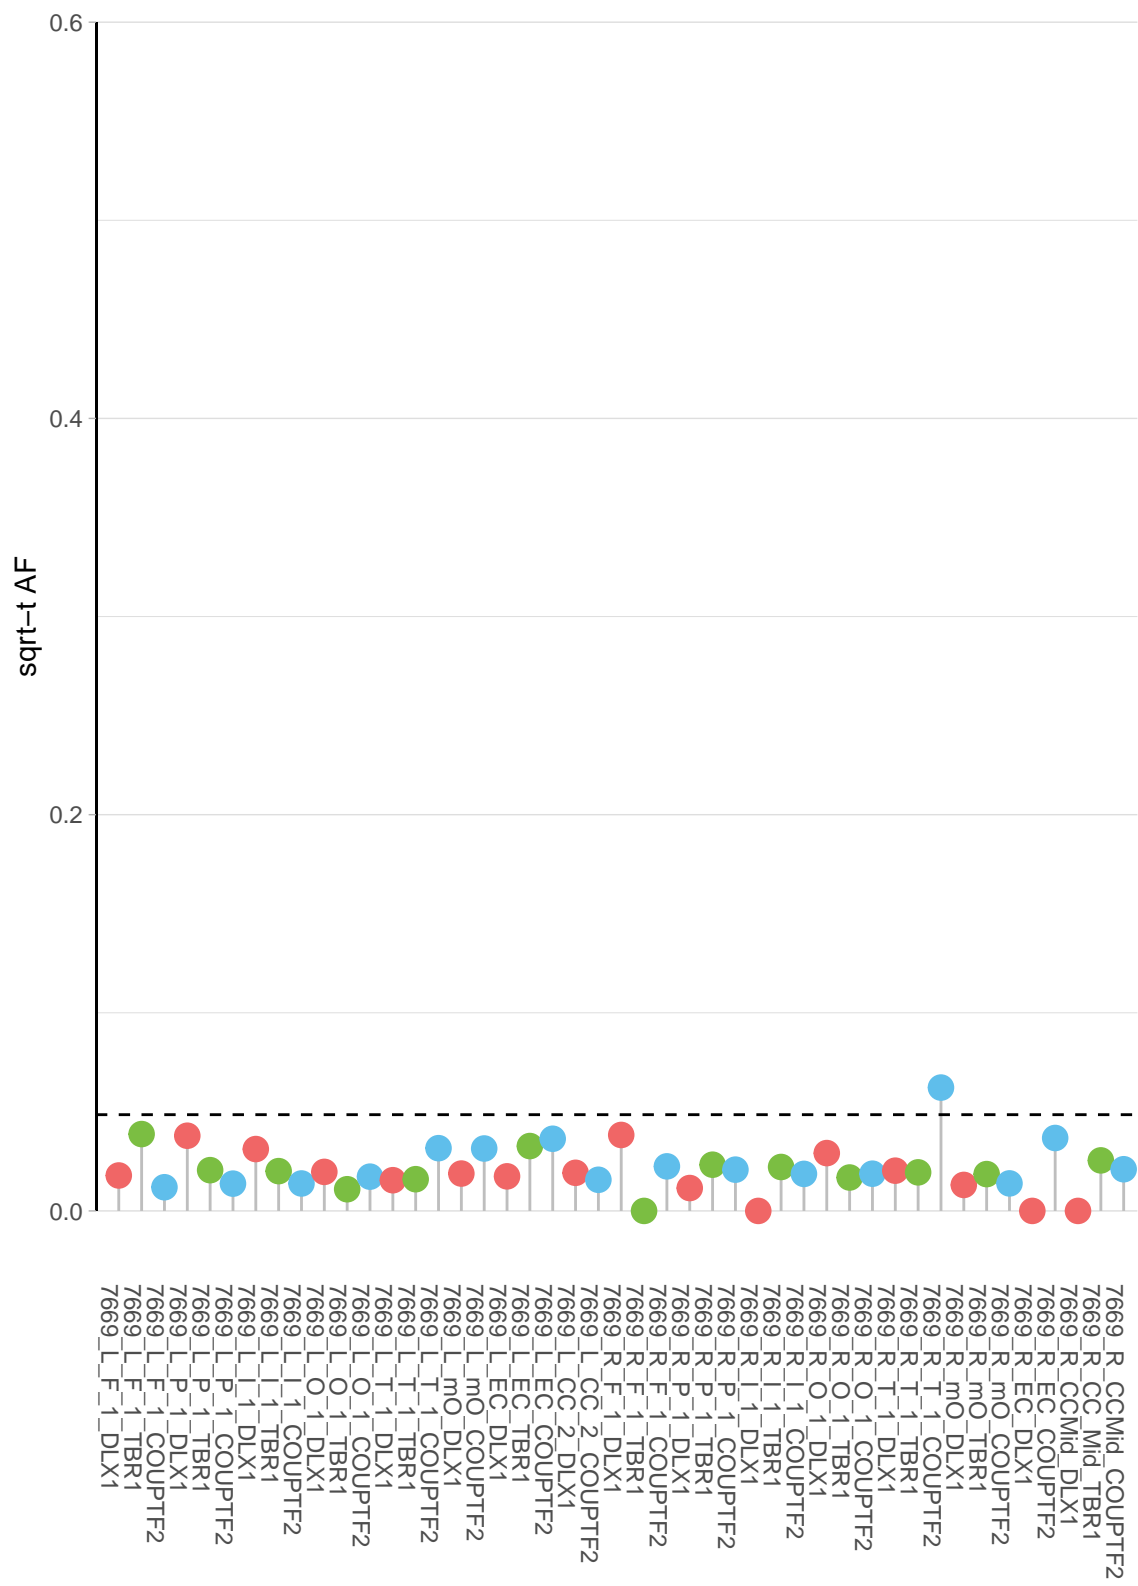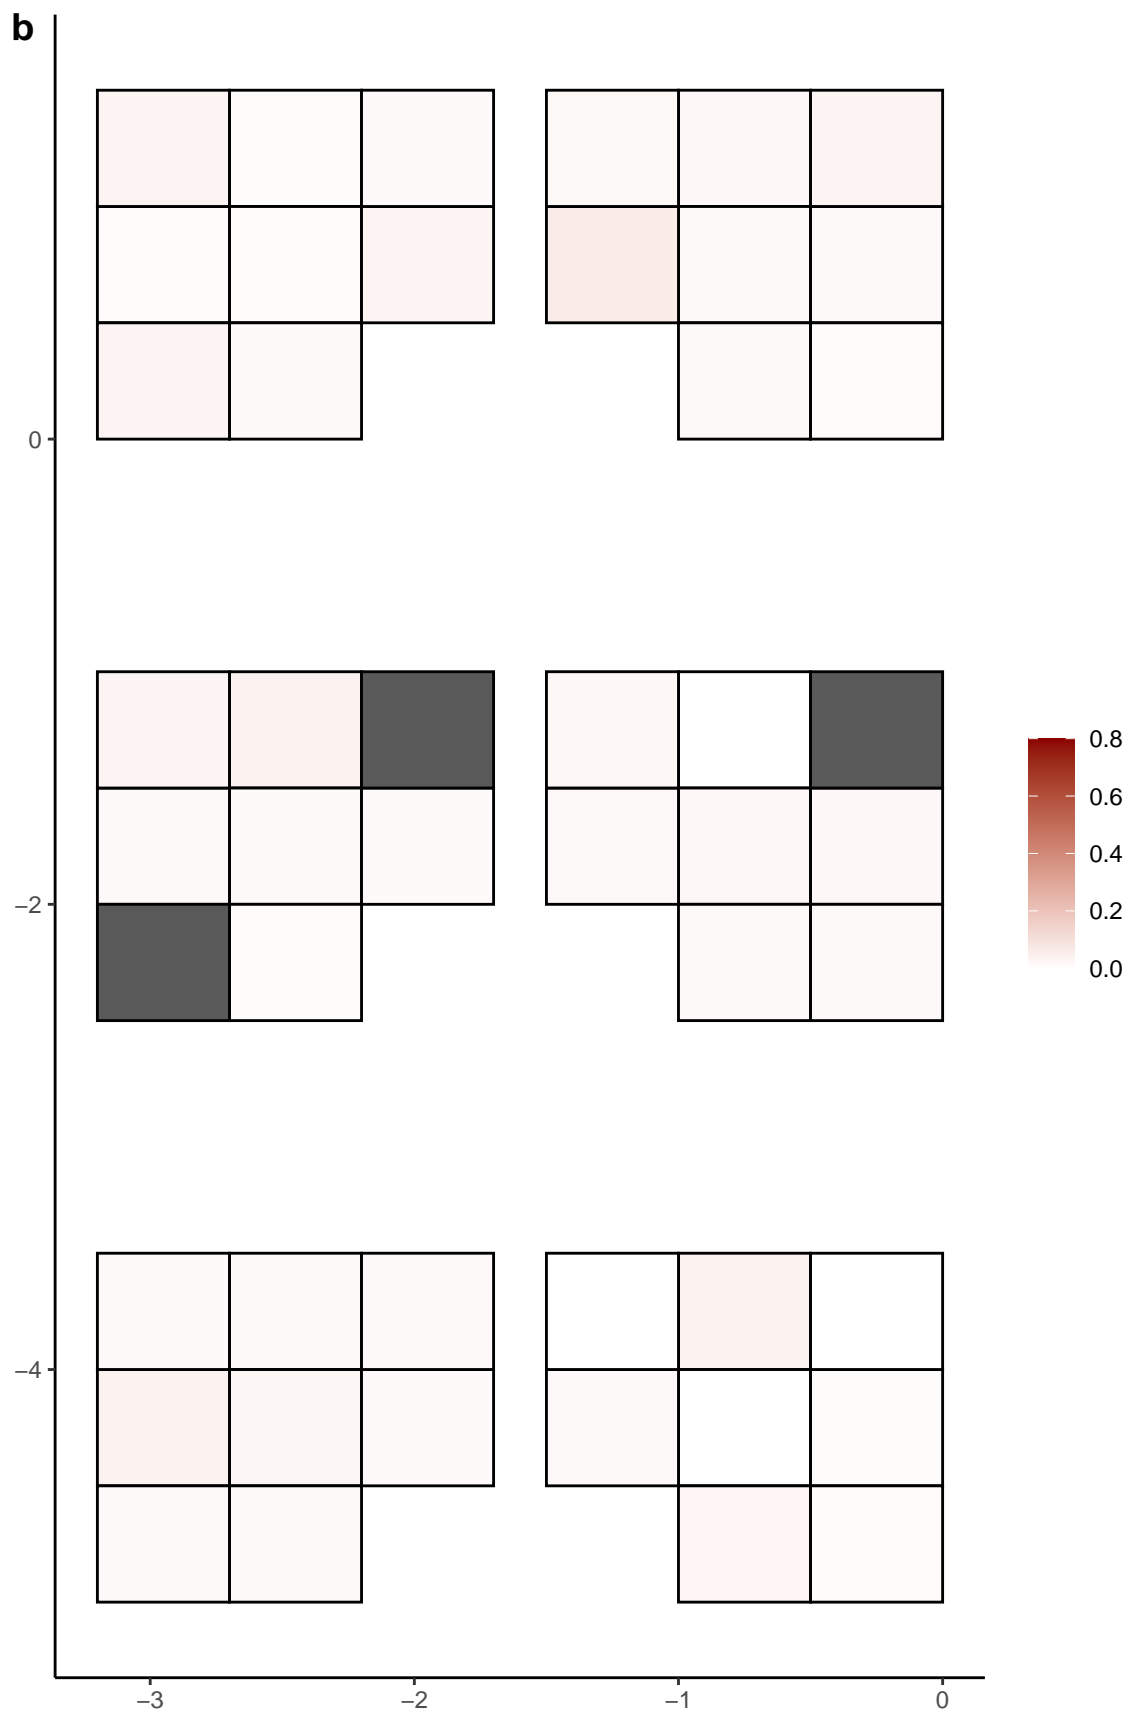

**a** ID05 2-104851040-C-T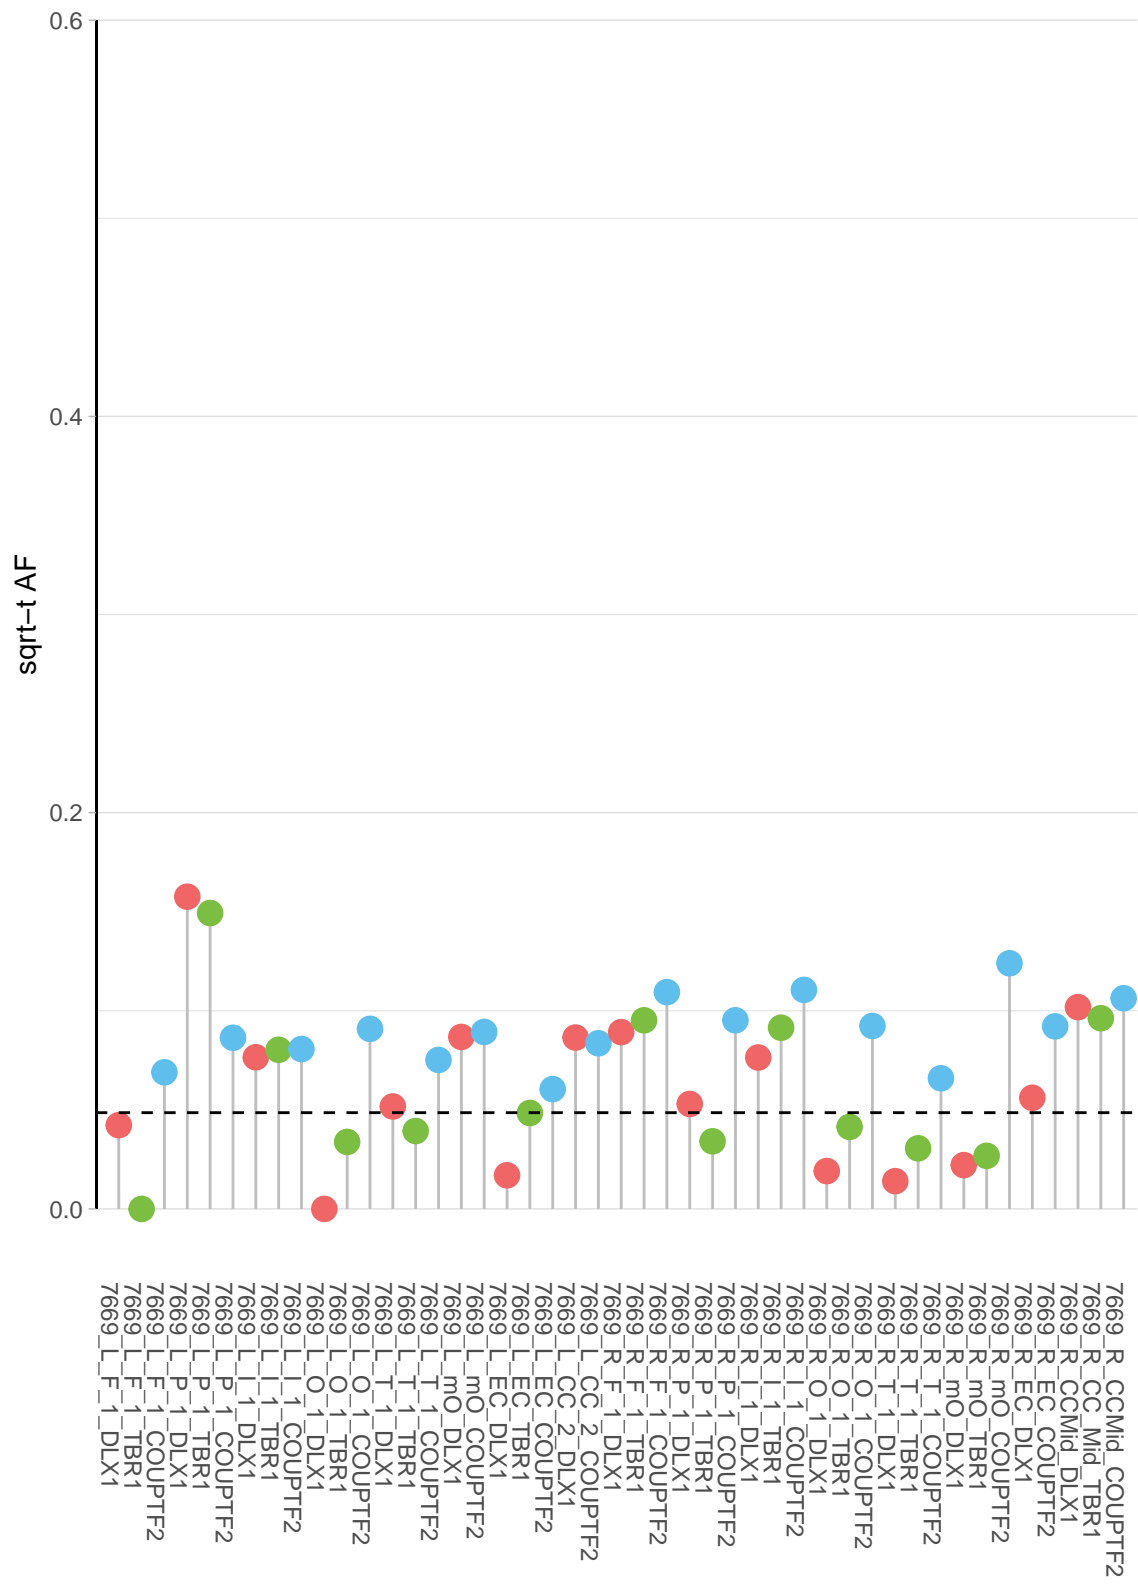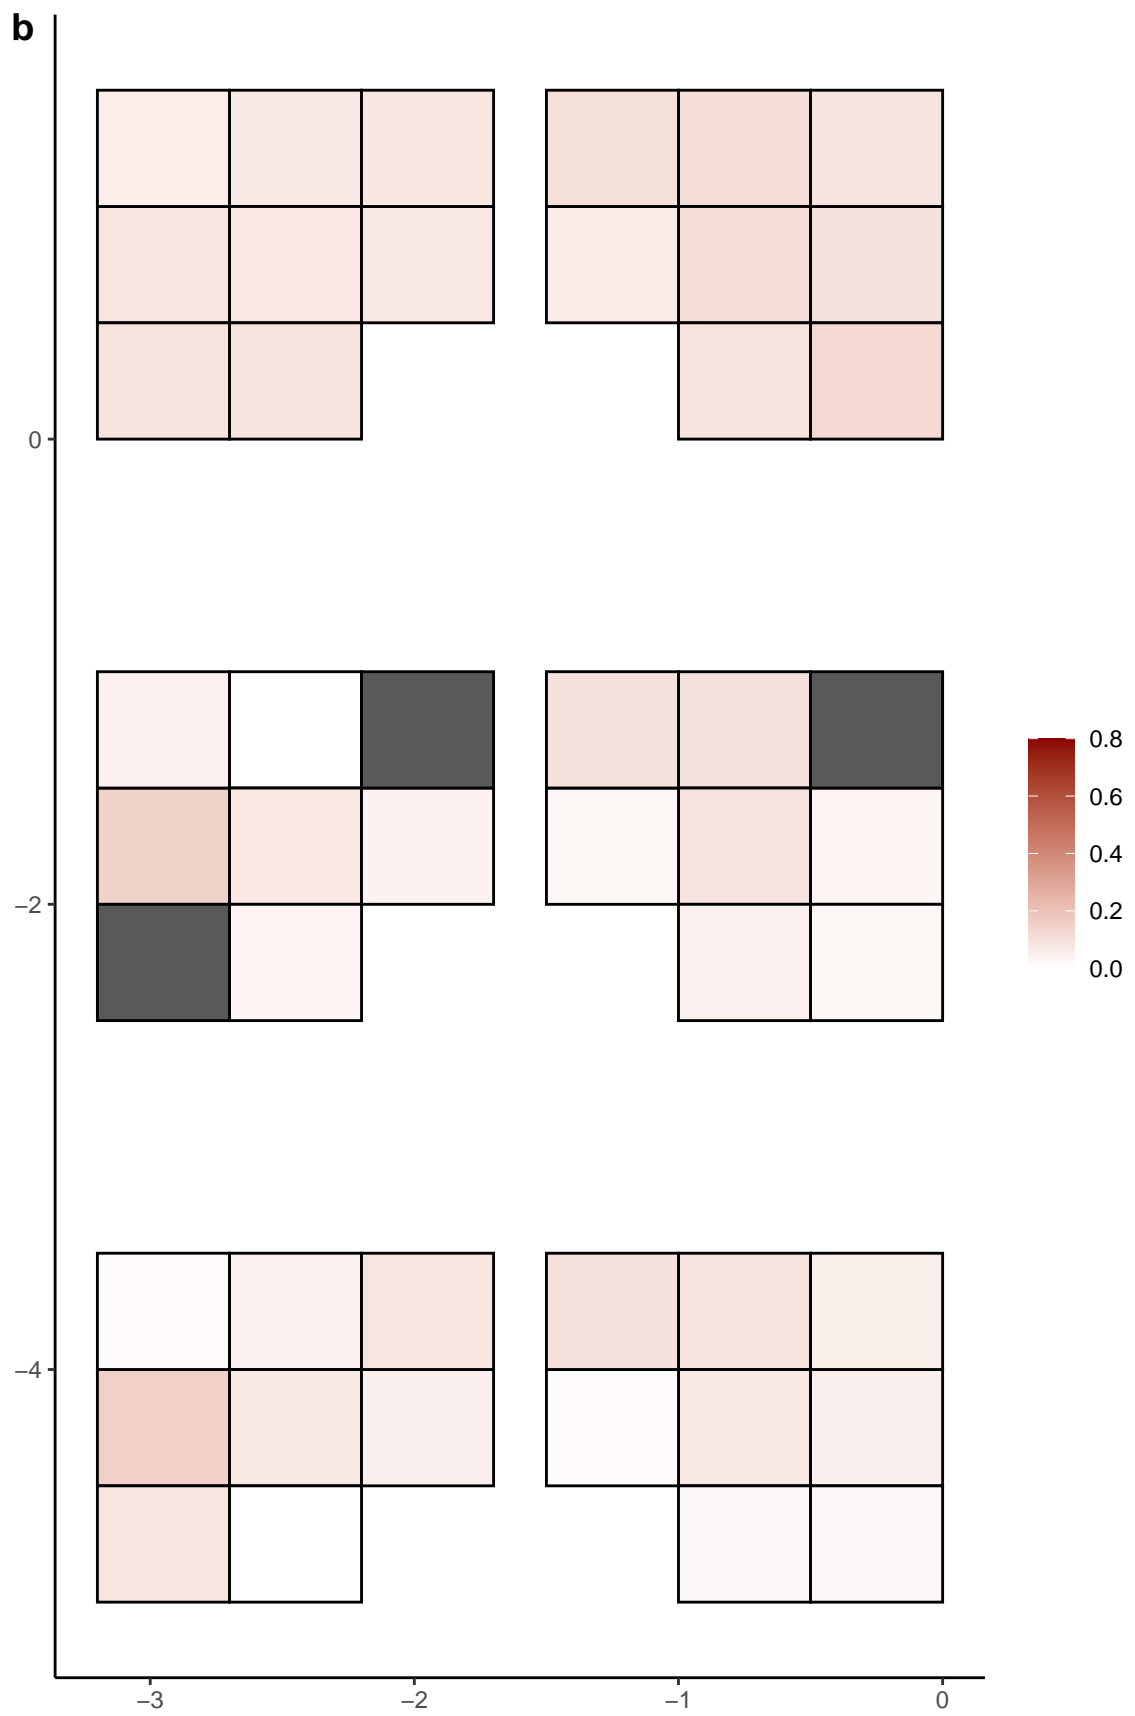

**a** ID05 2-104885895-T-C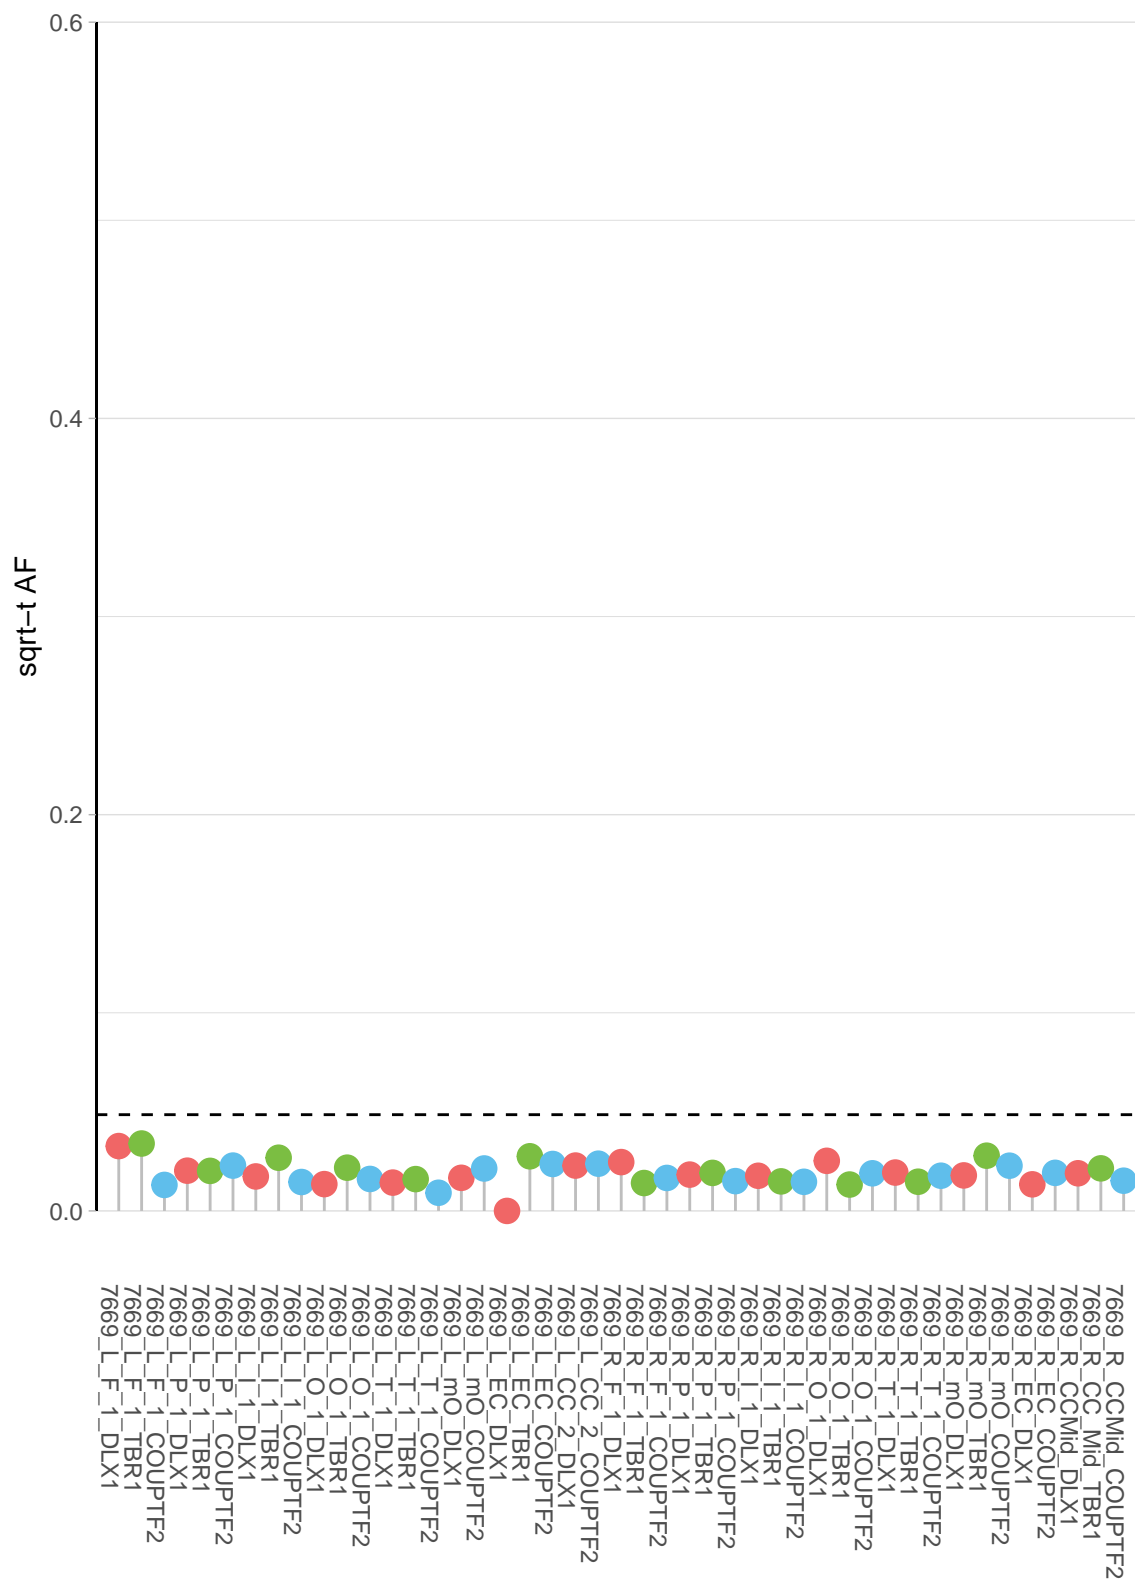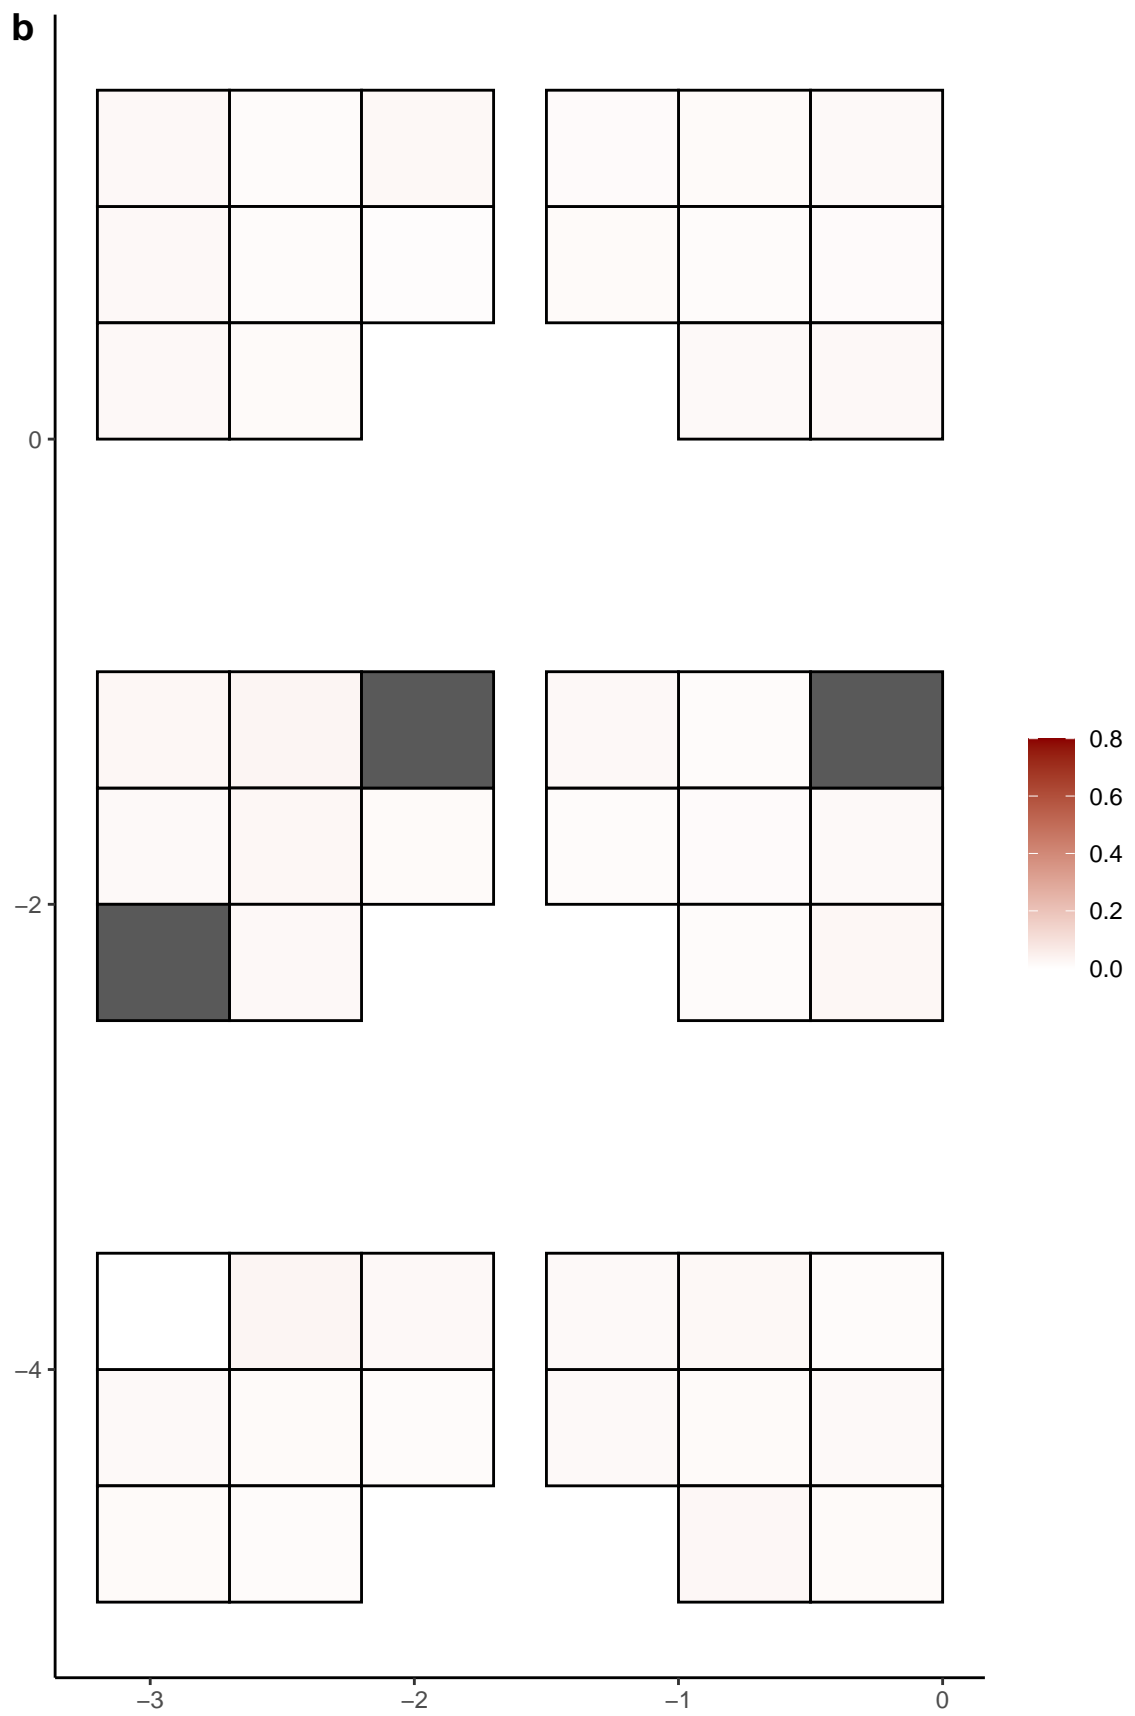

**a** ID05 2-105083647-G-A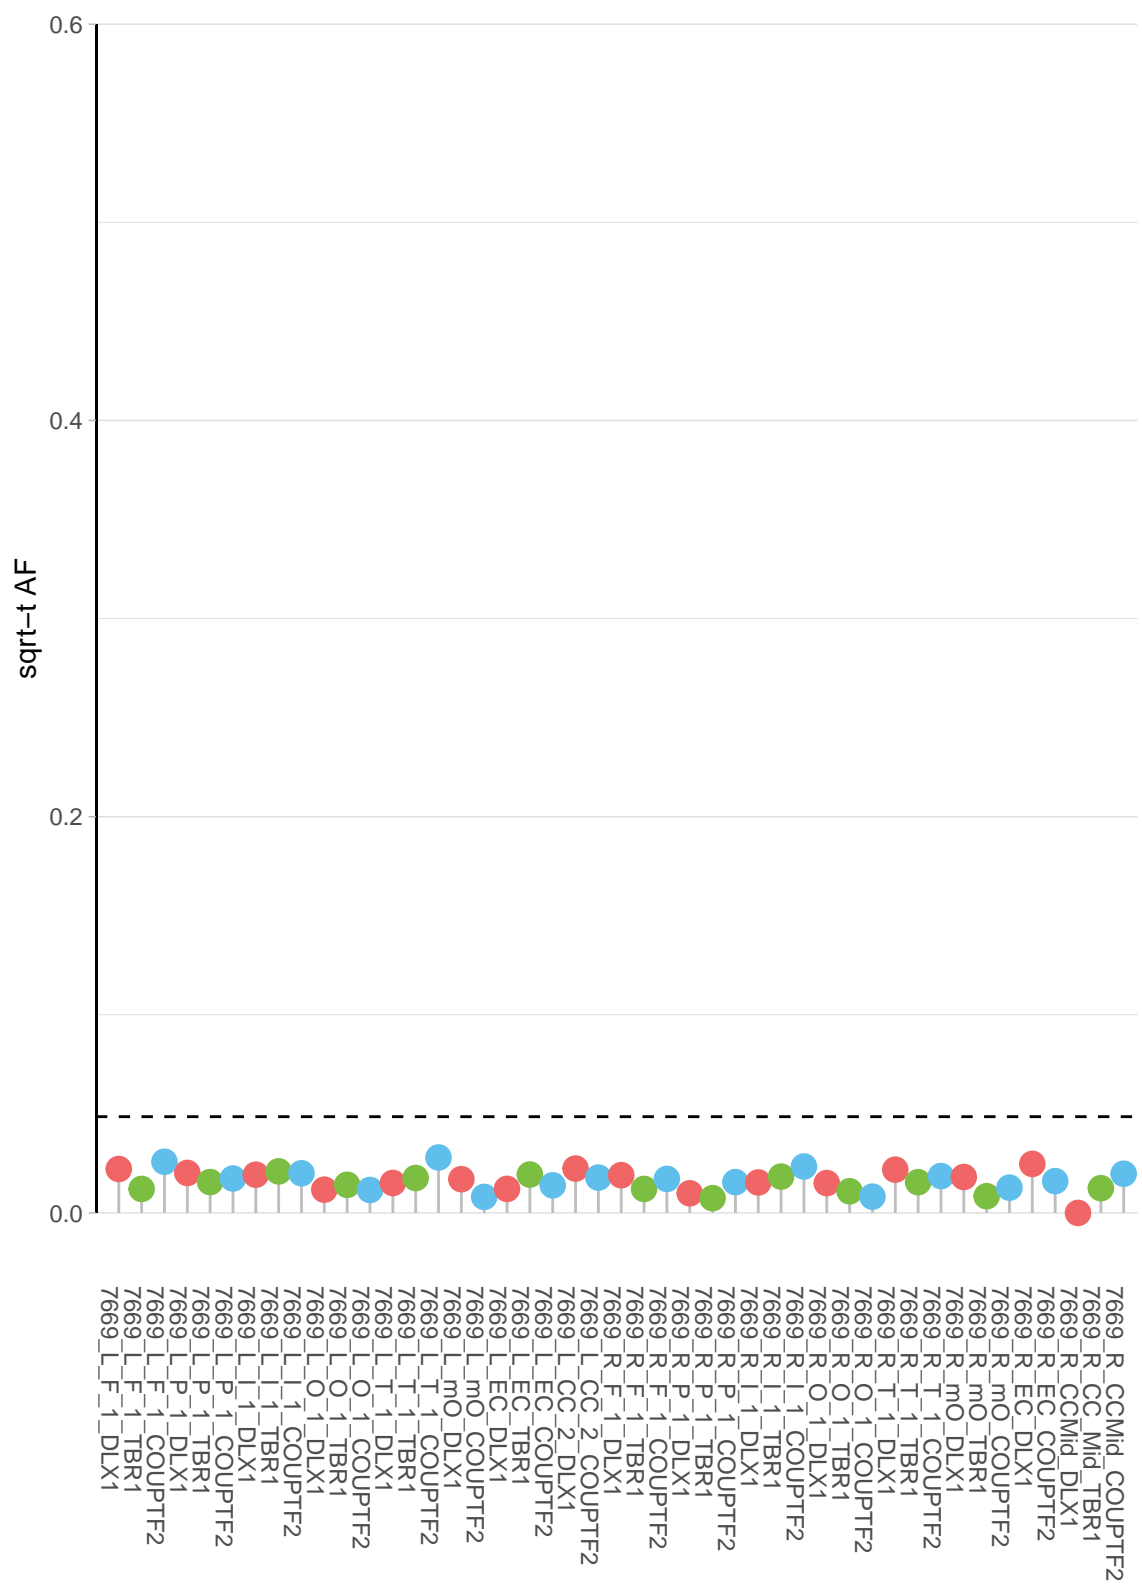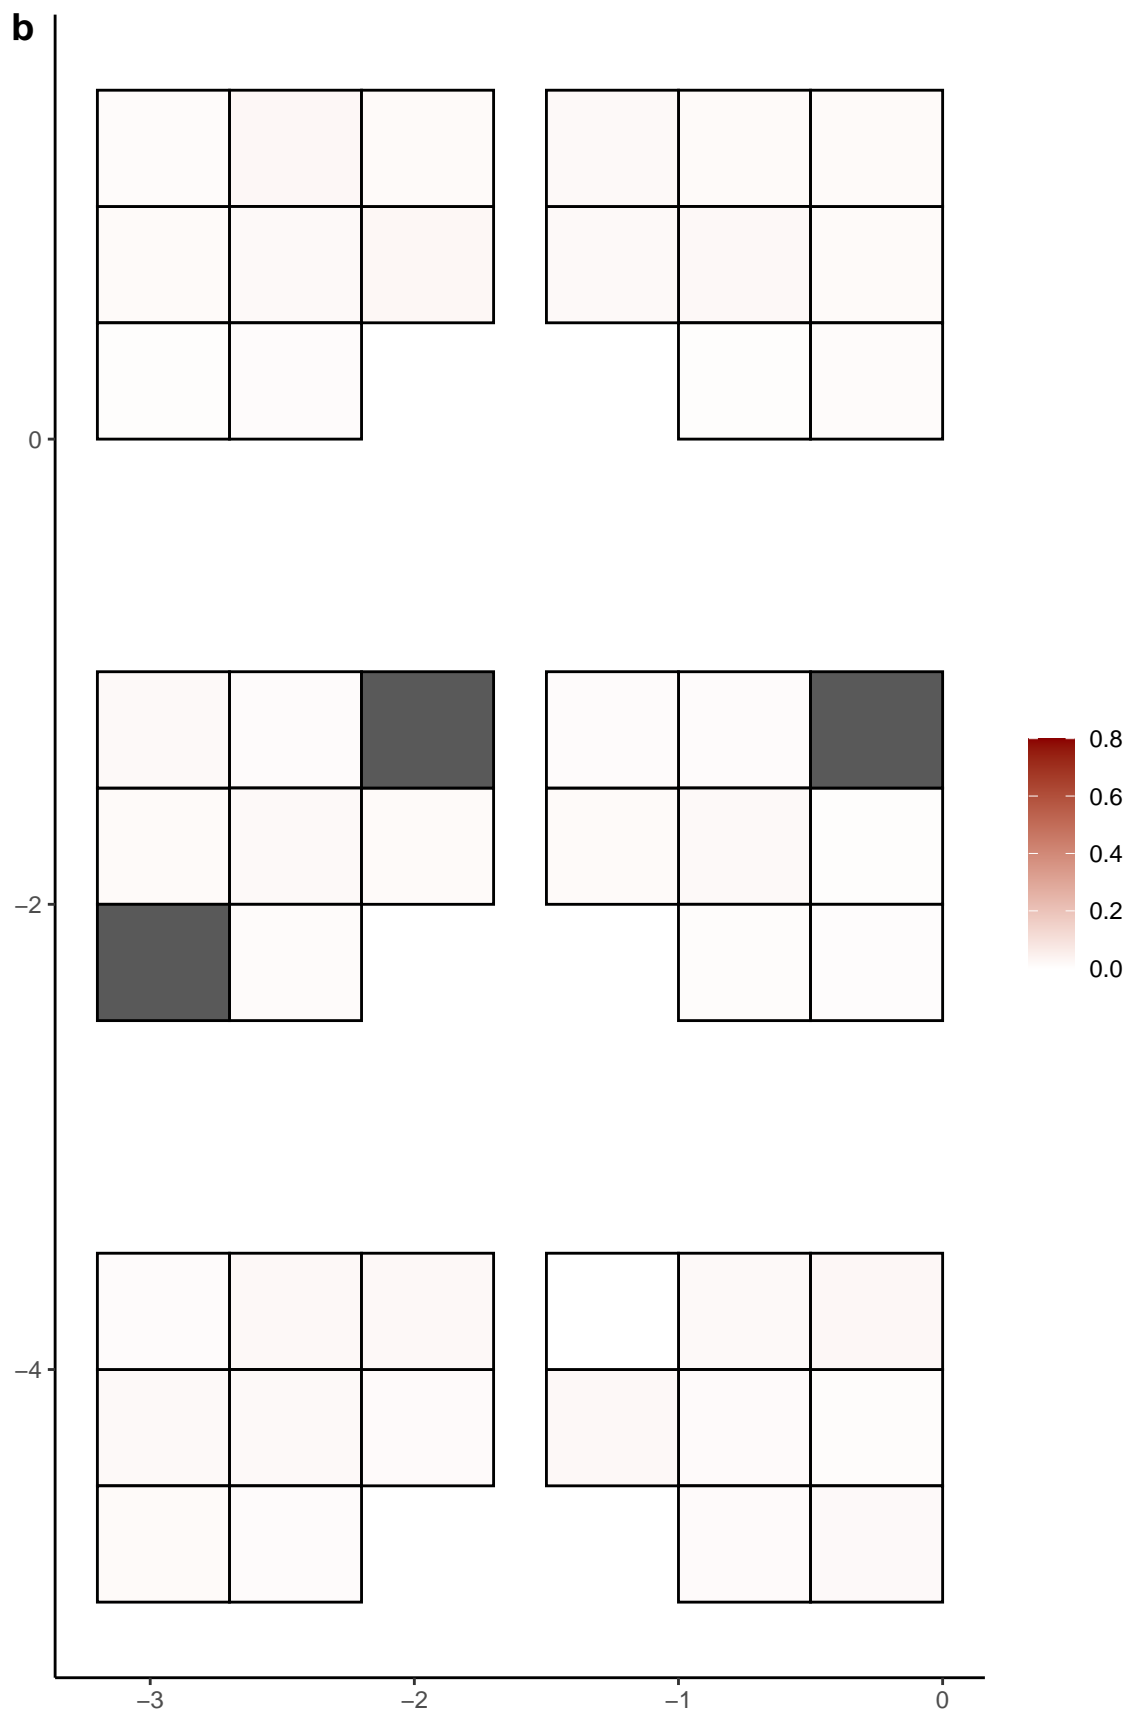

**a** ID05 2-110272685-G-A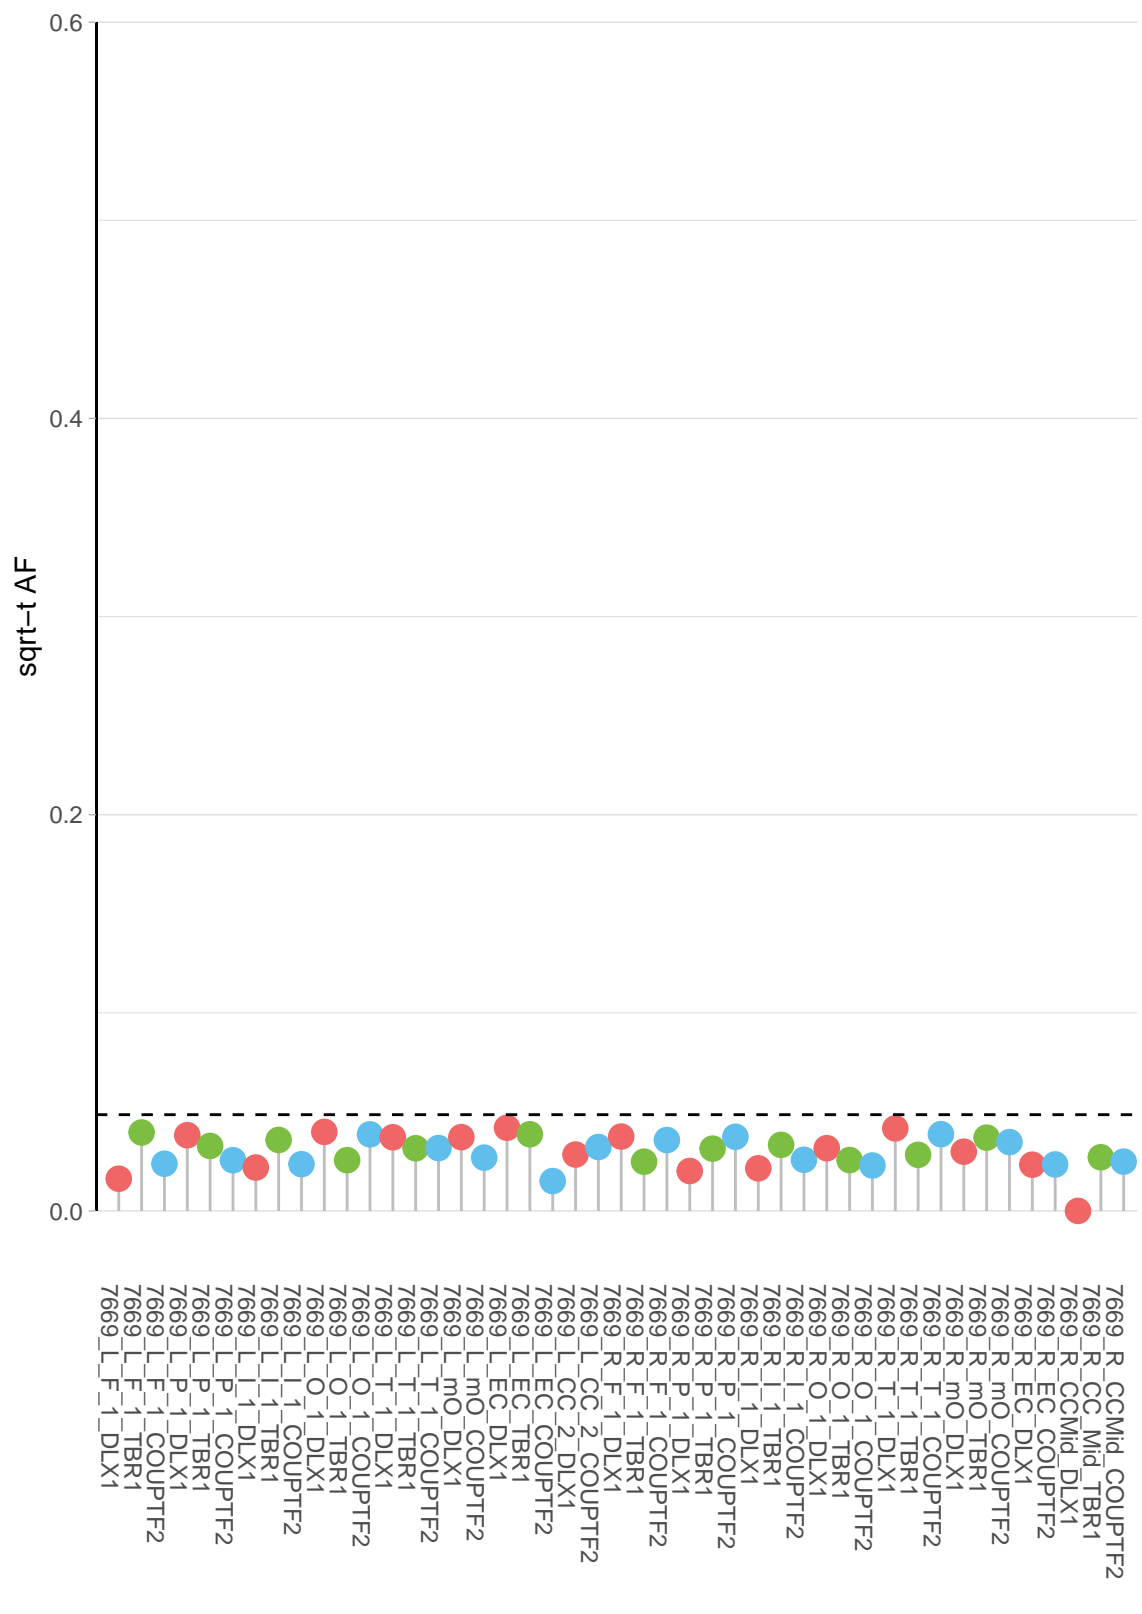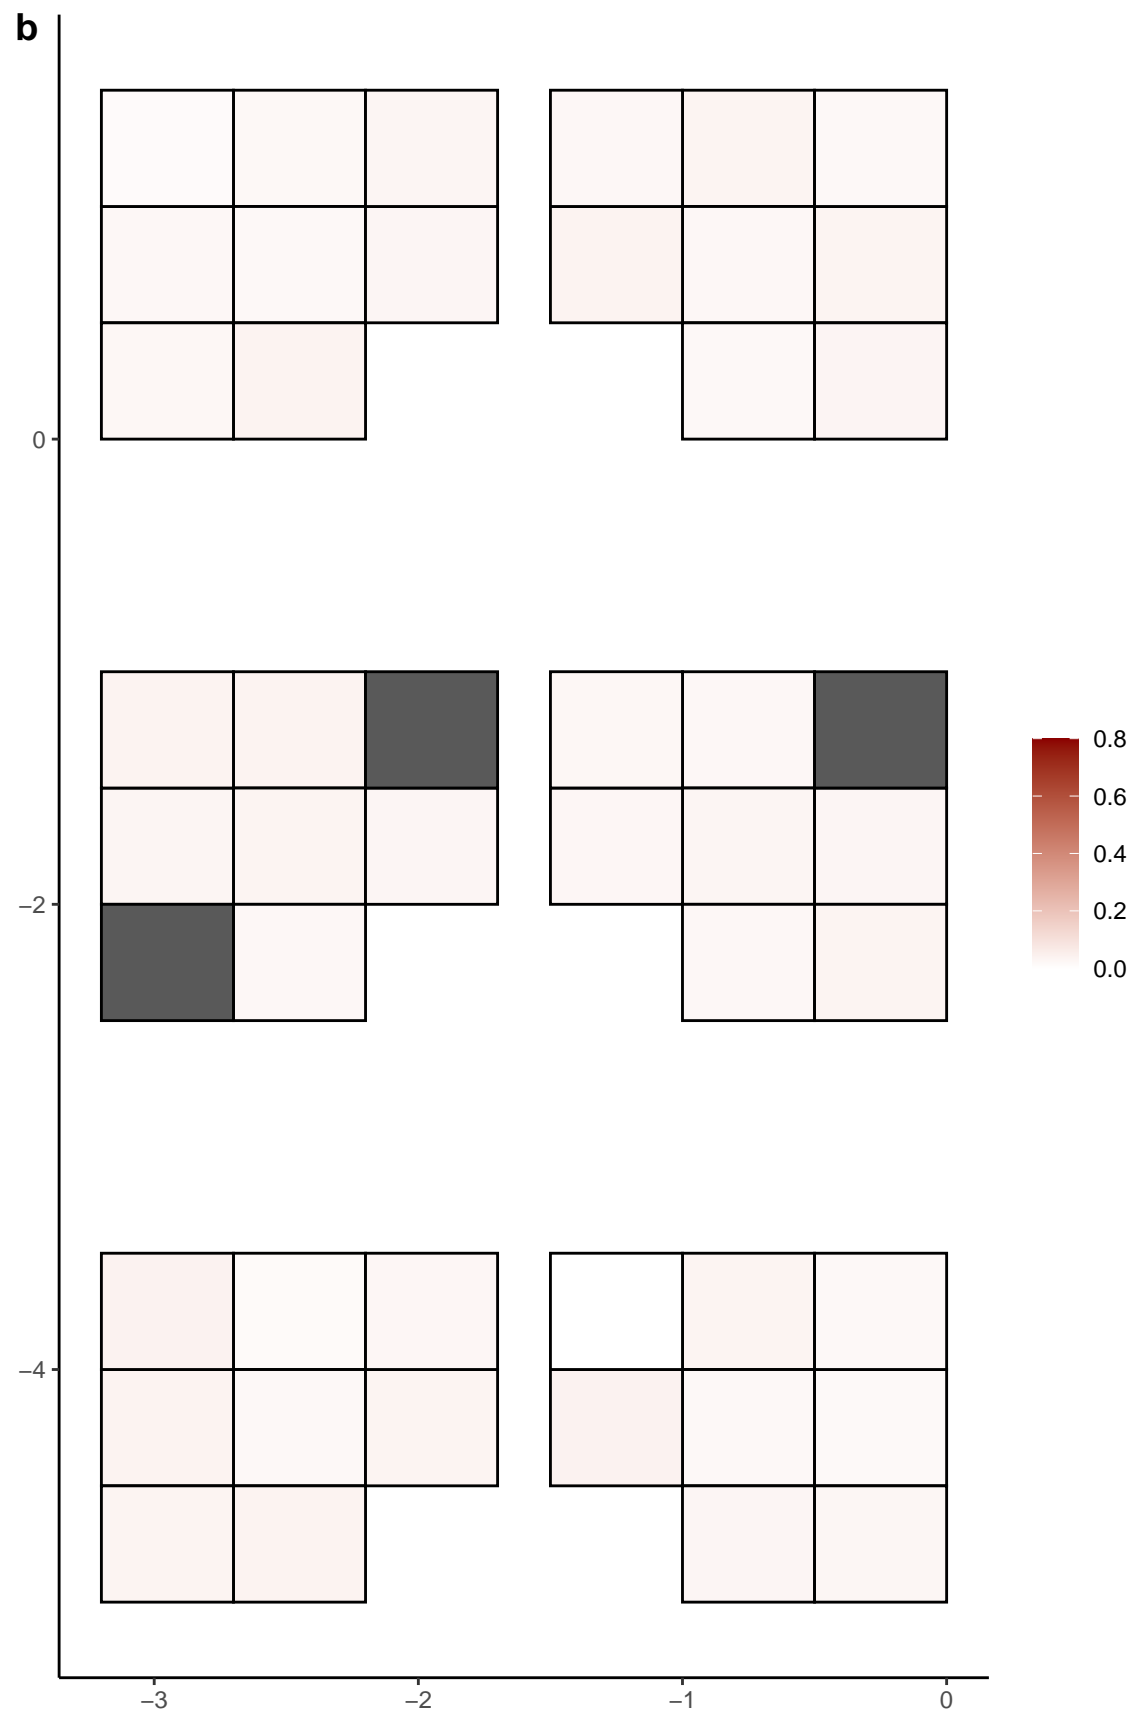



**a** ID05 2-115000633-A-G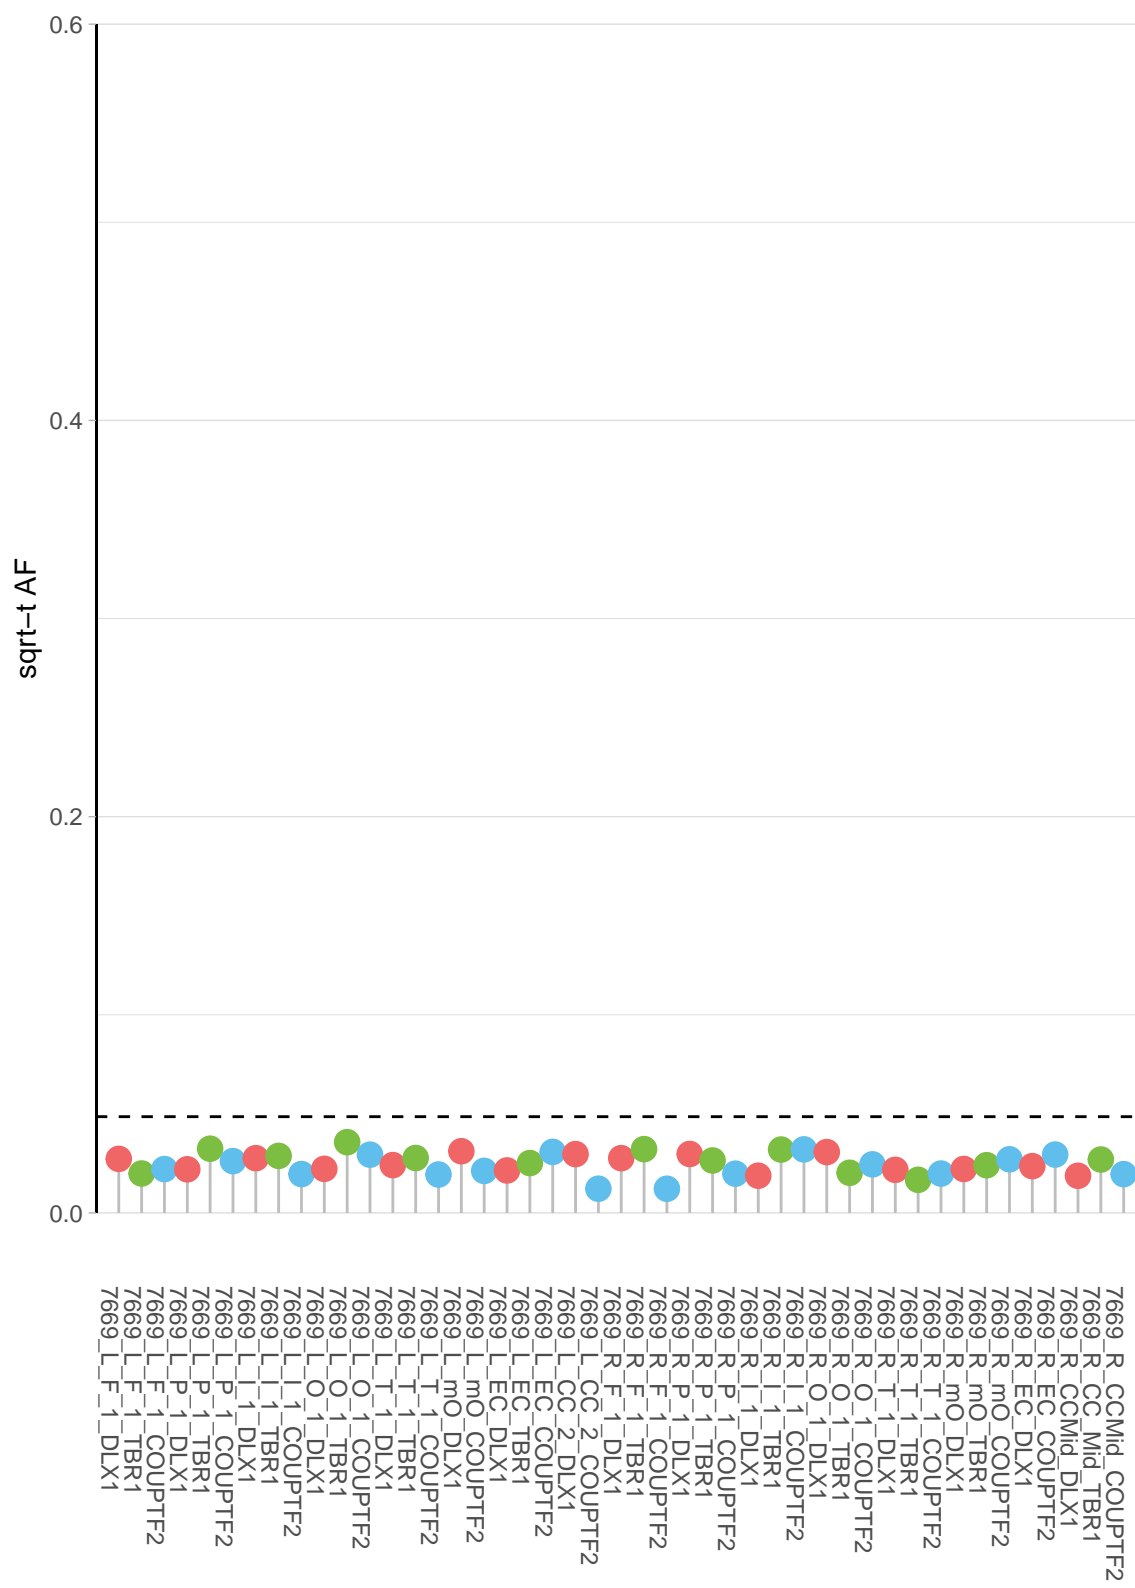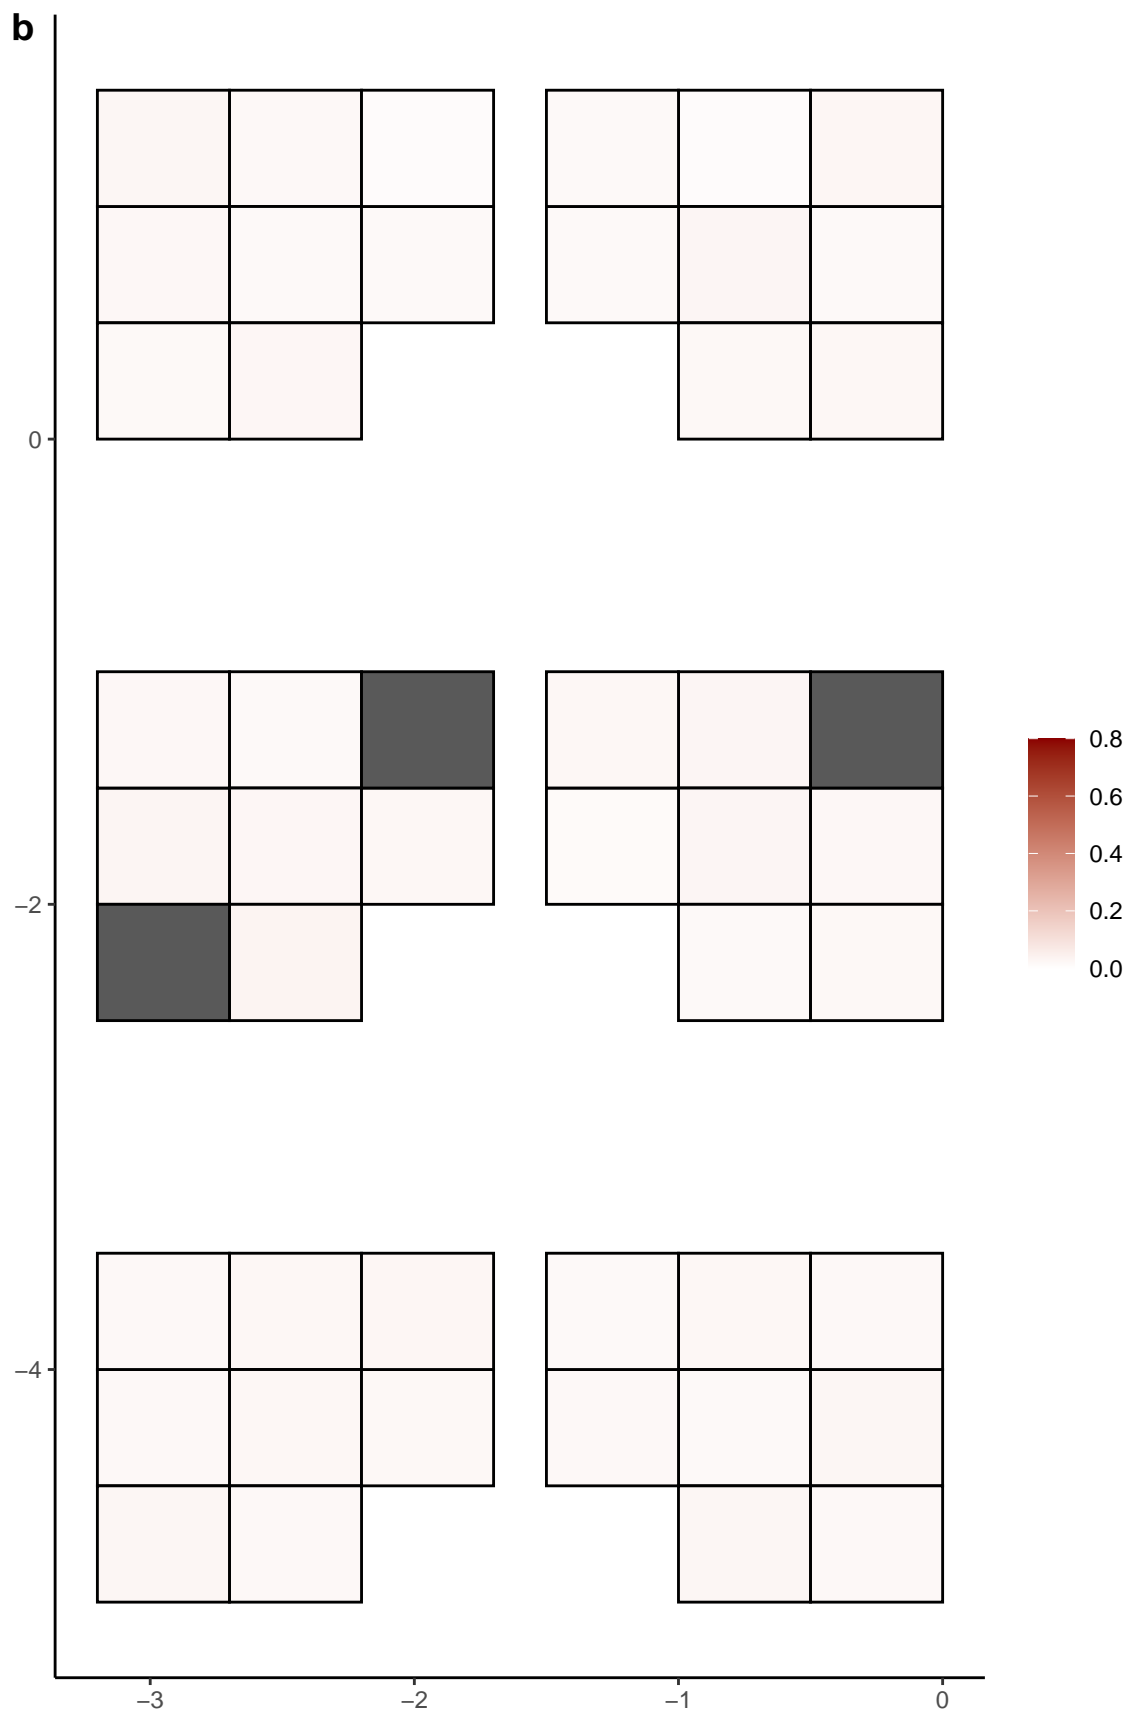



**a** ID05 2-115601554-G-A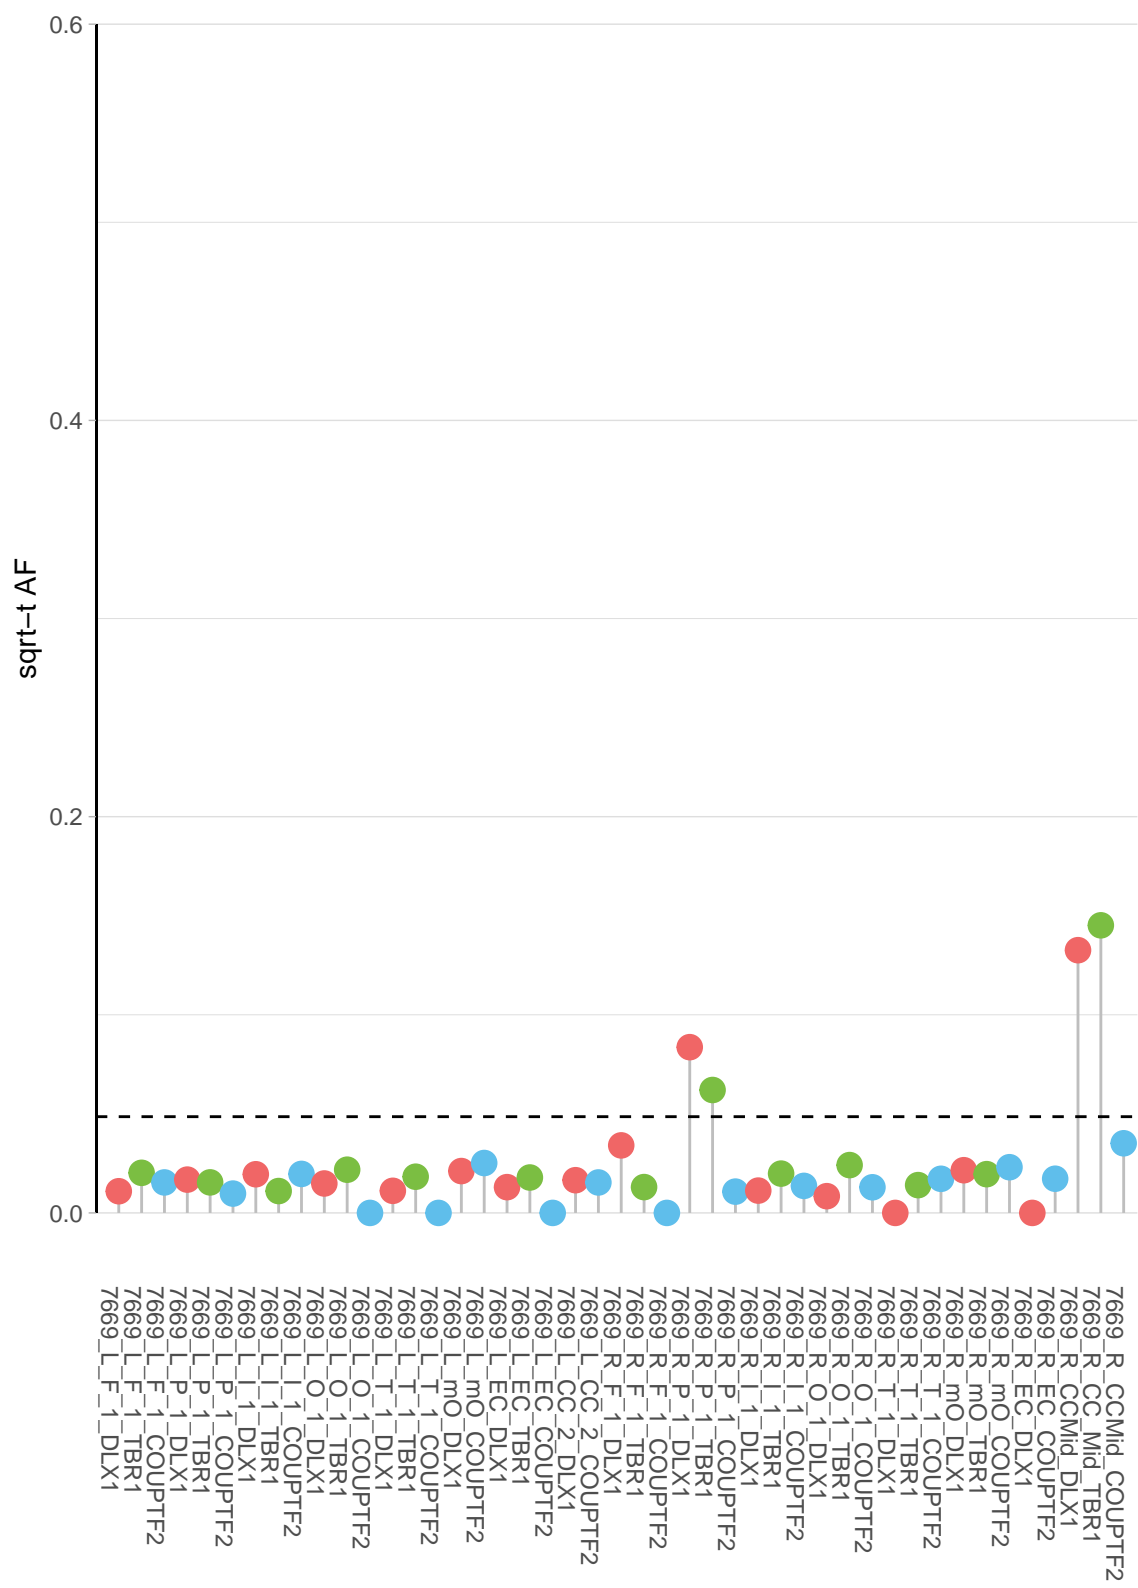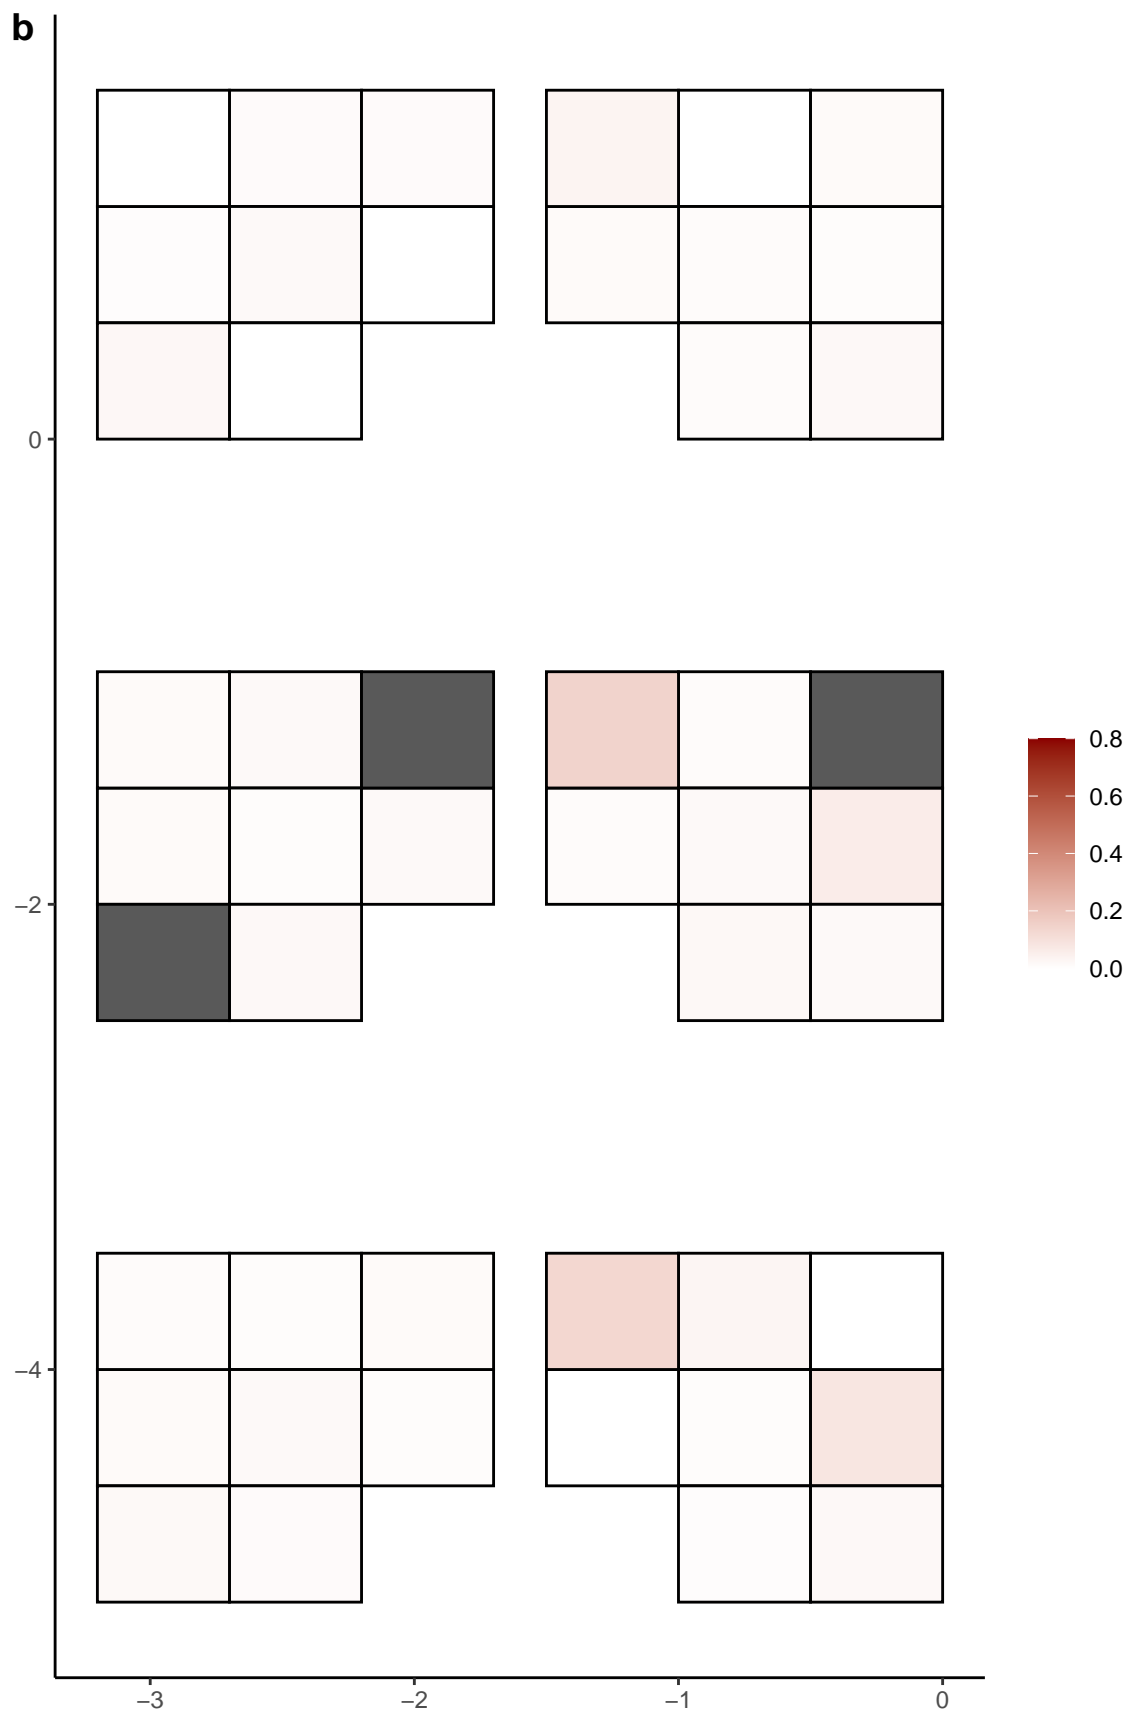

**a** ID05 2-115708162-C-T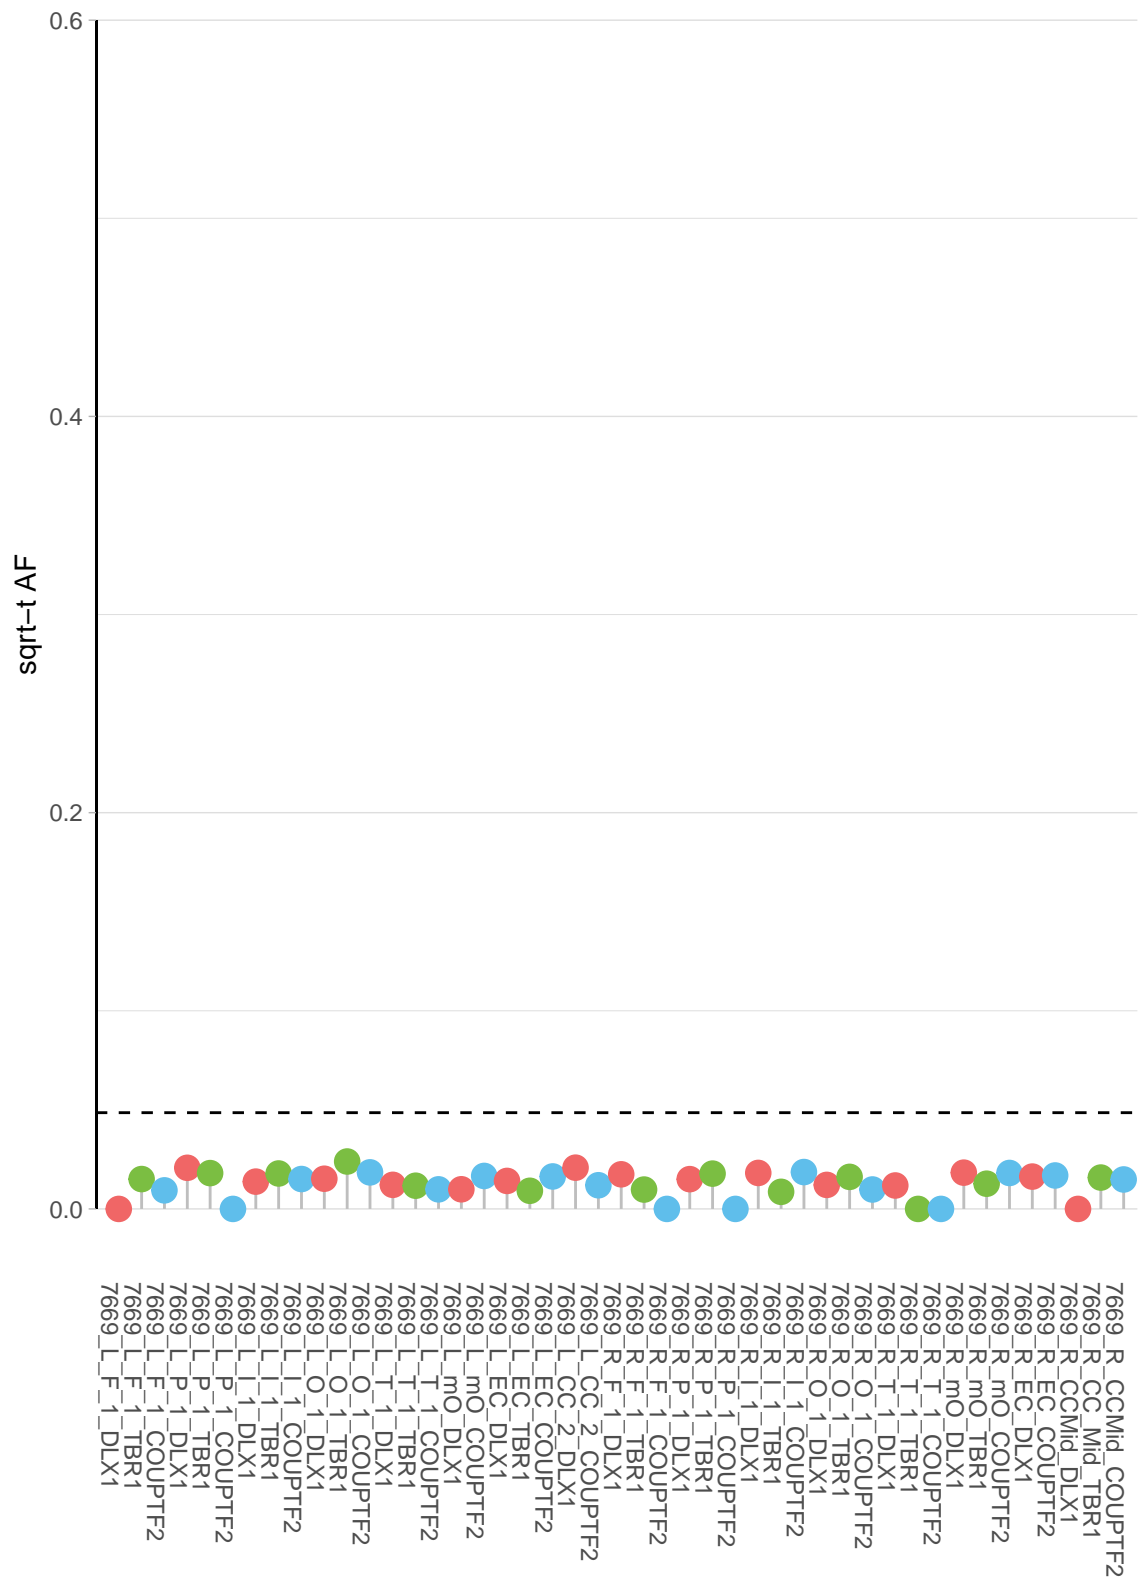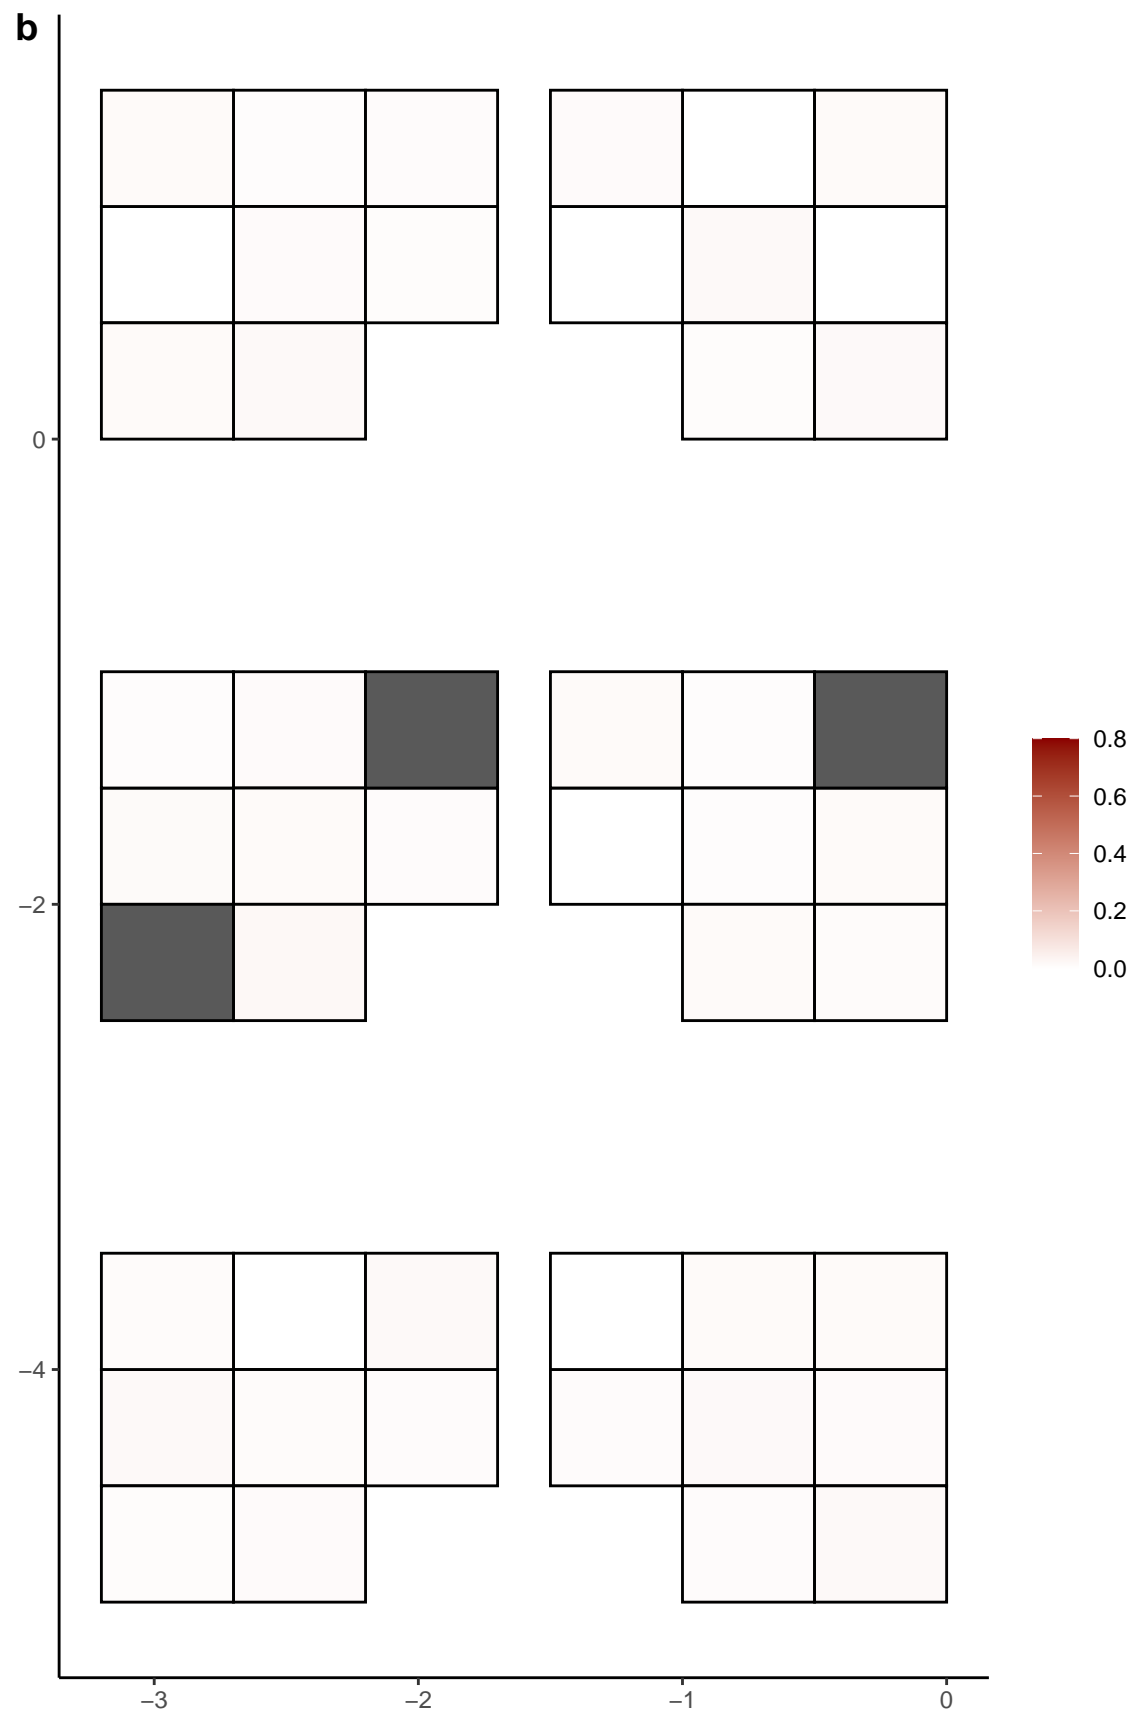

**a** ID05 2-116395374-G-T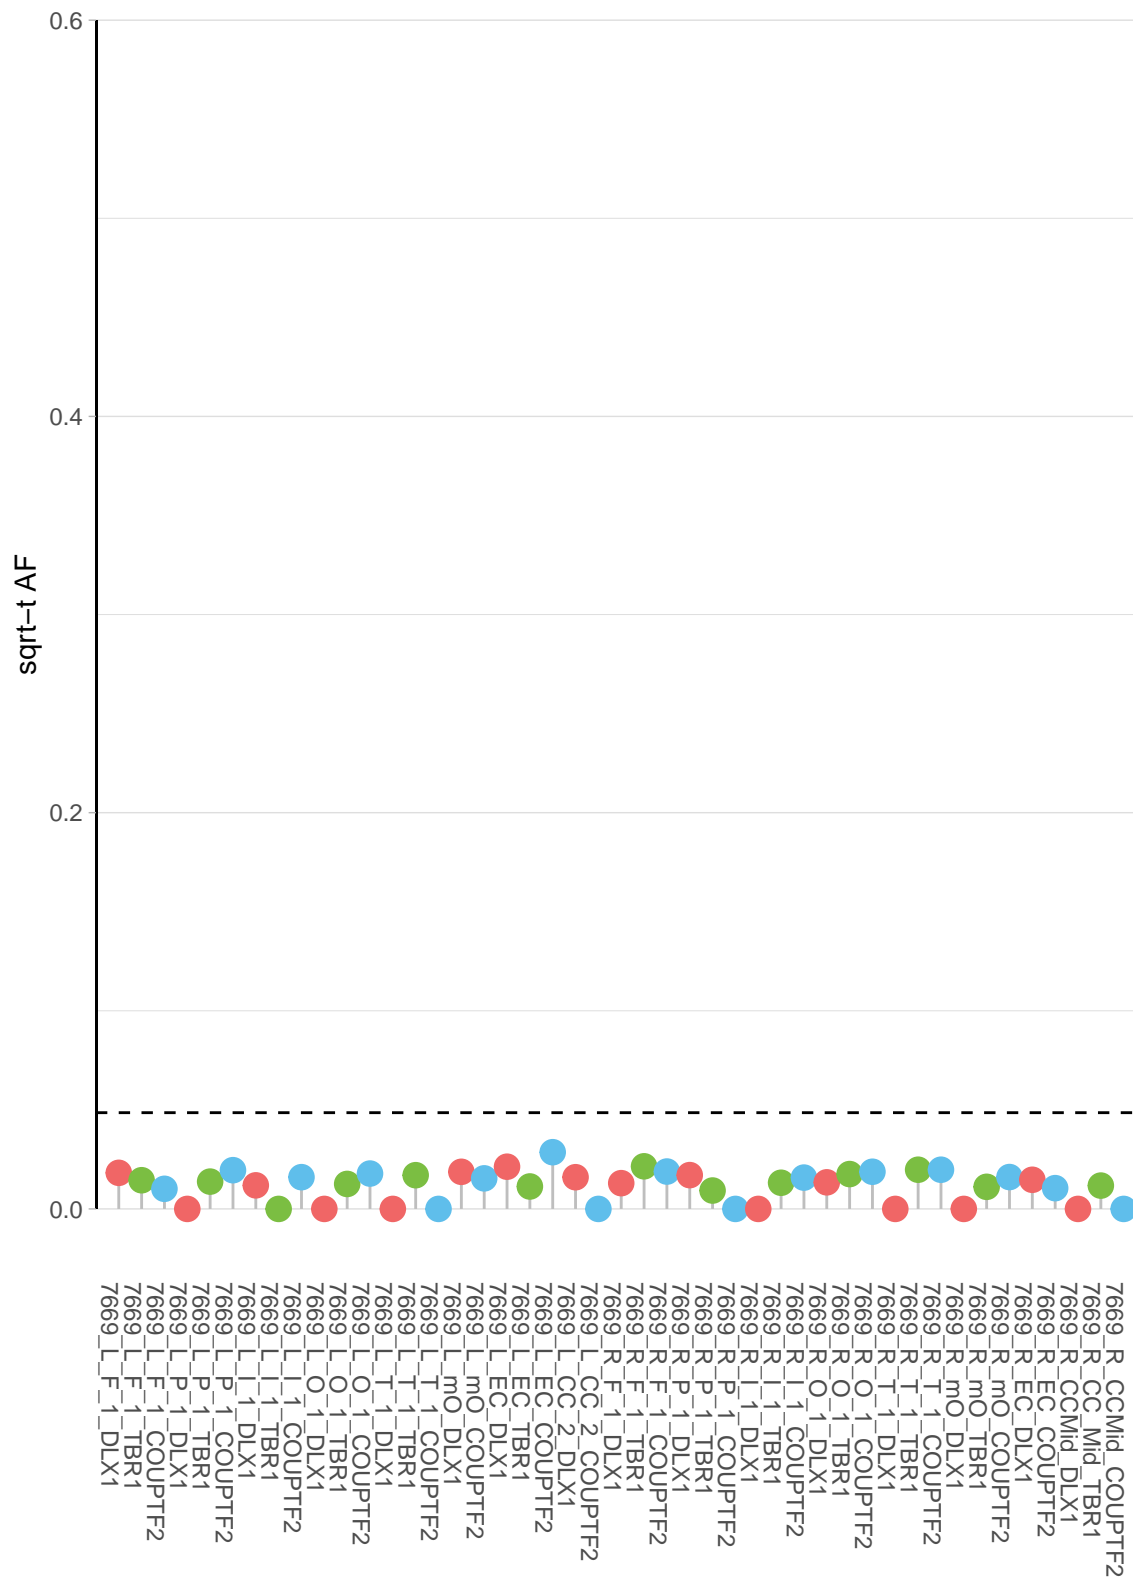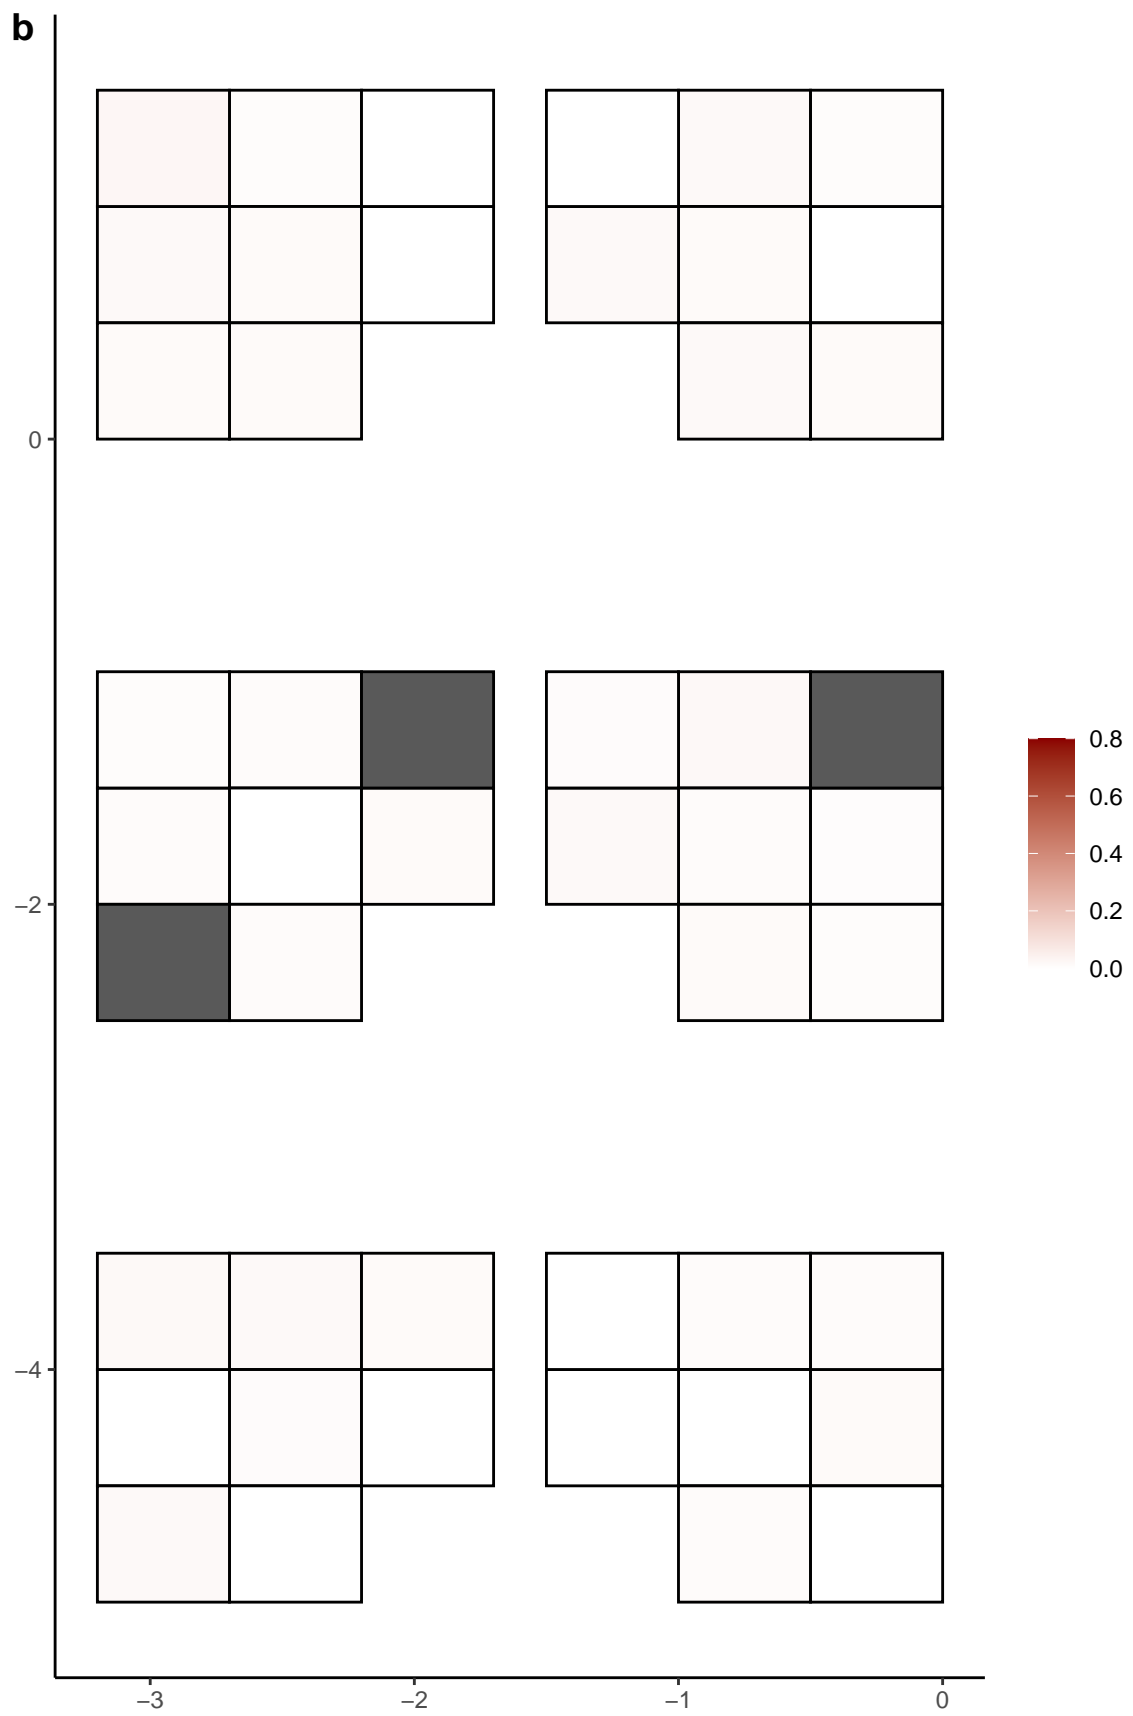

**a** ID05 2-118425584-C-T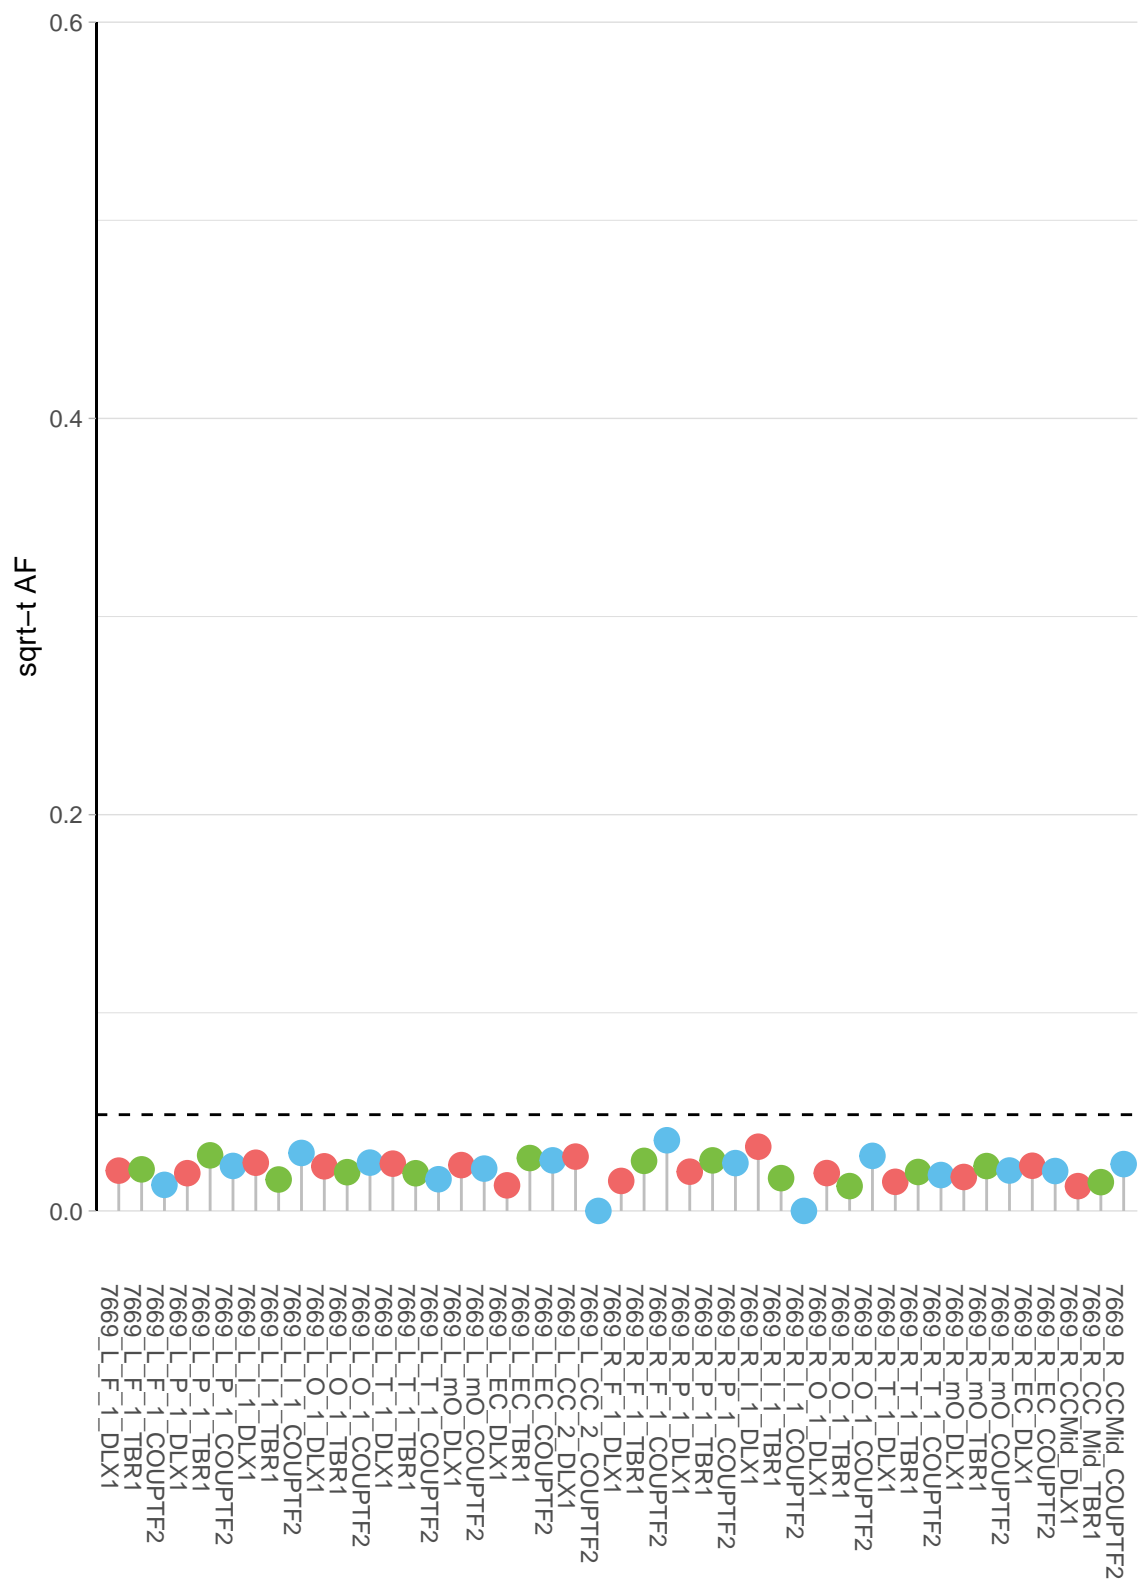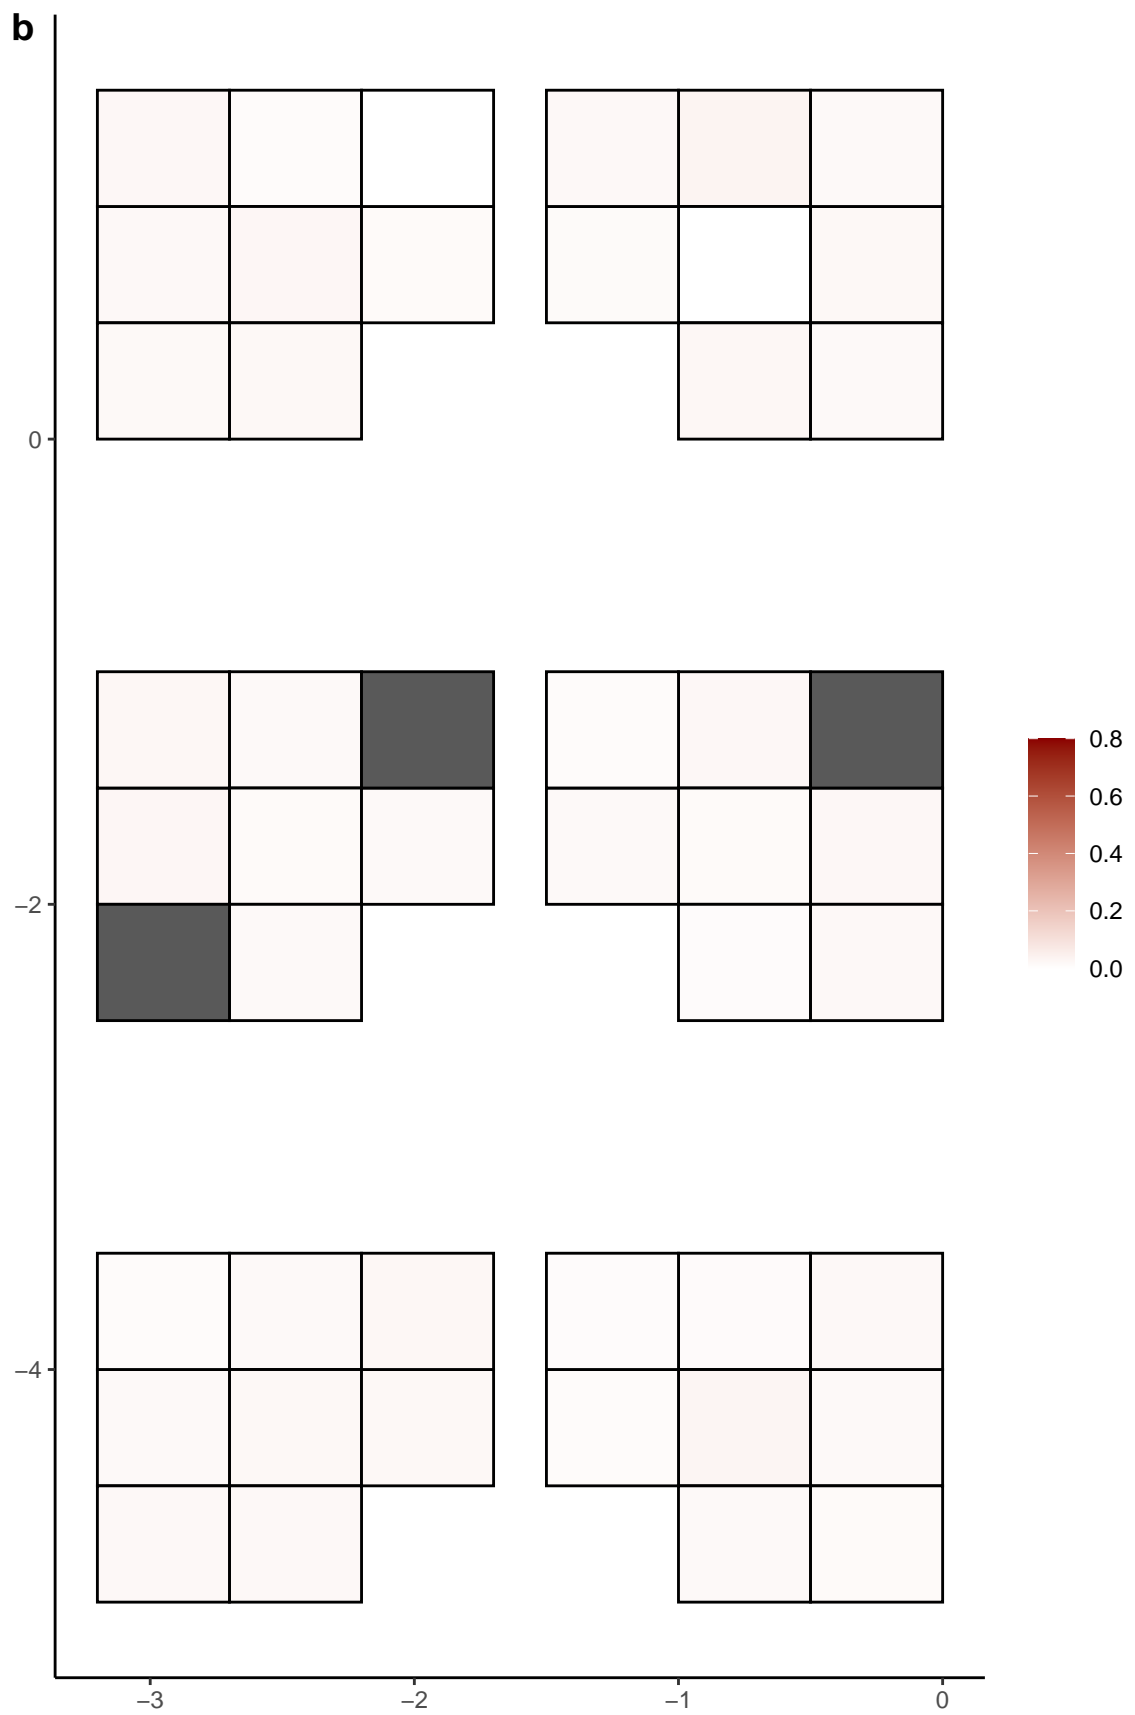

**a** ID05 2-129713862-G-A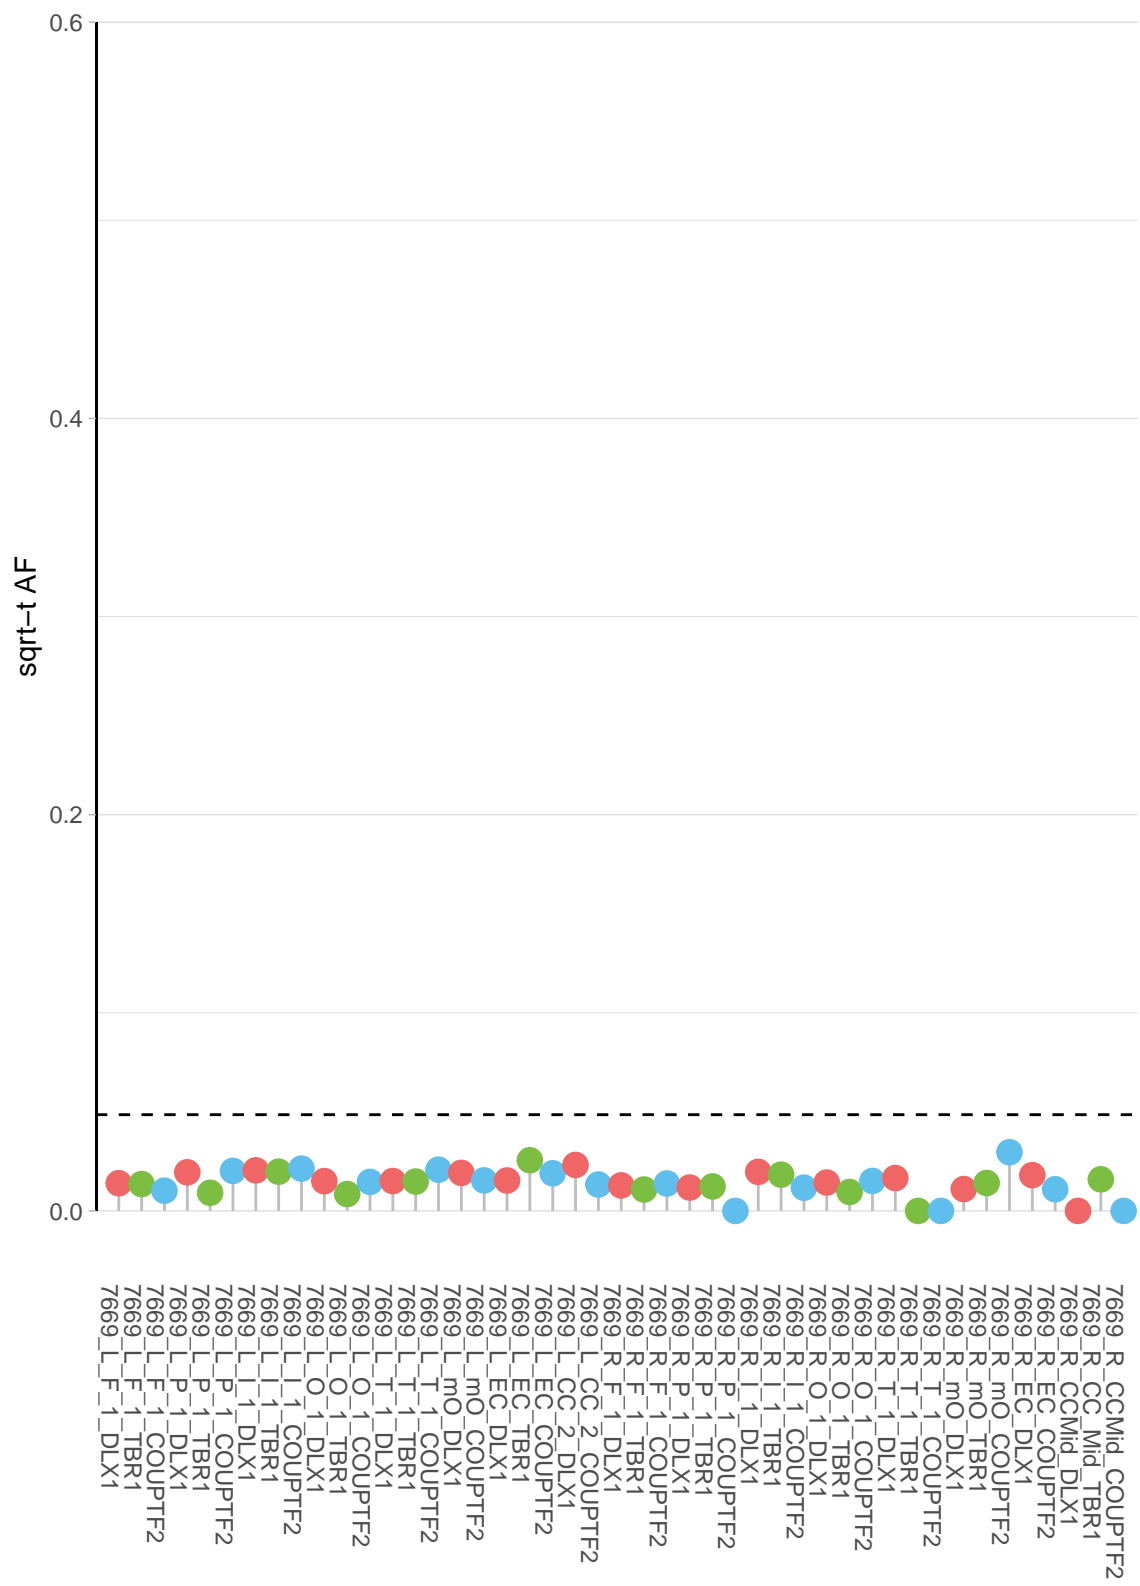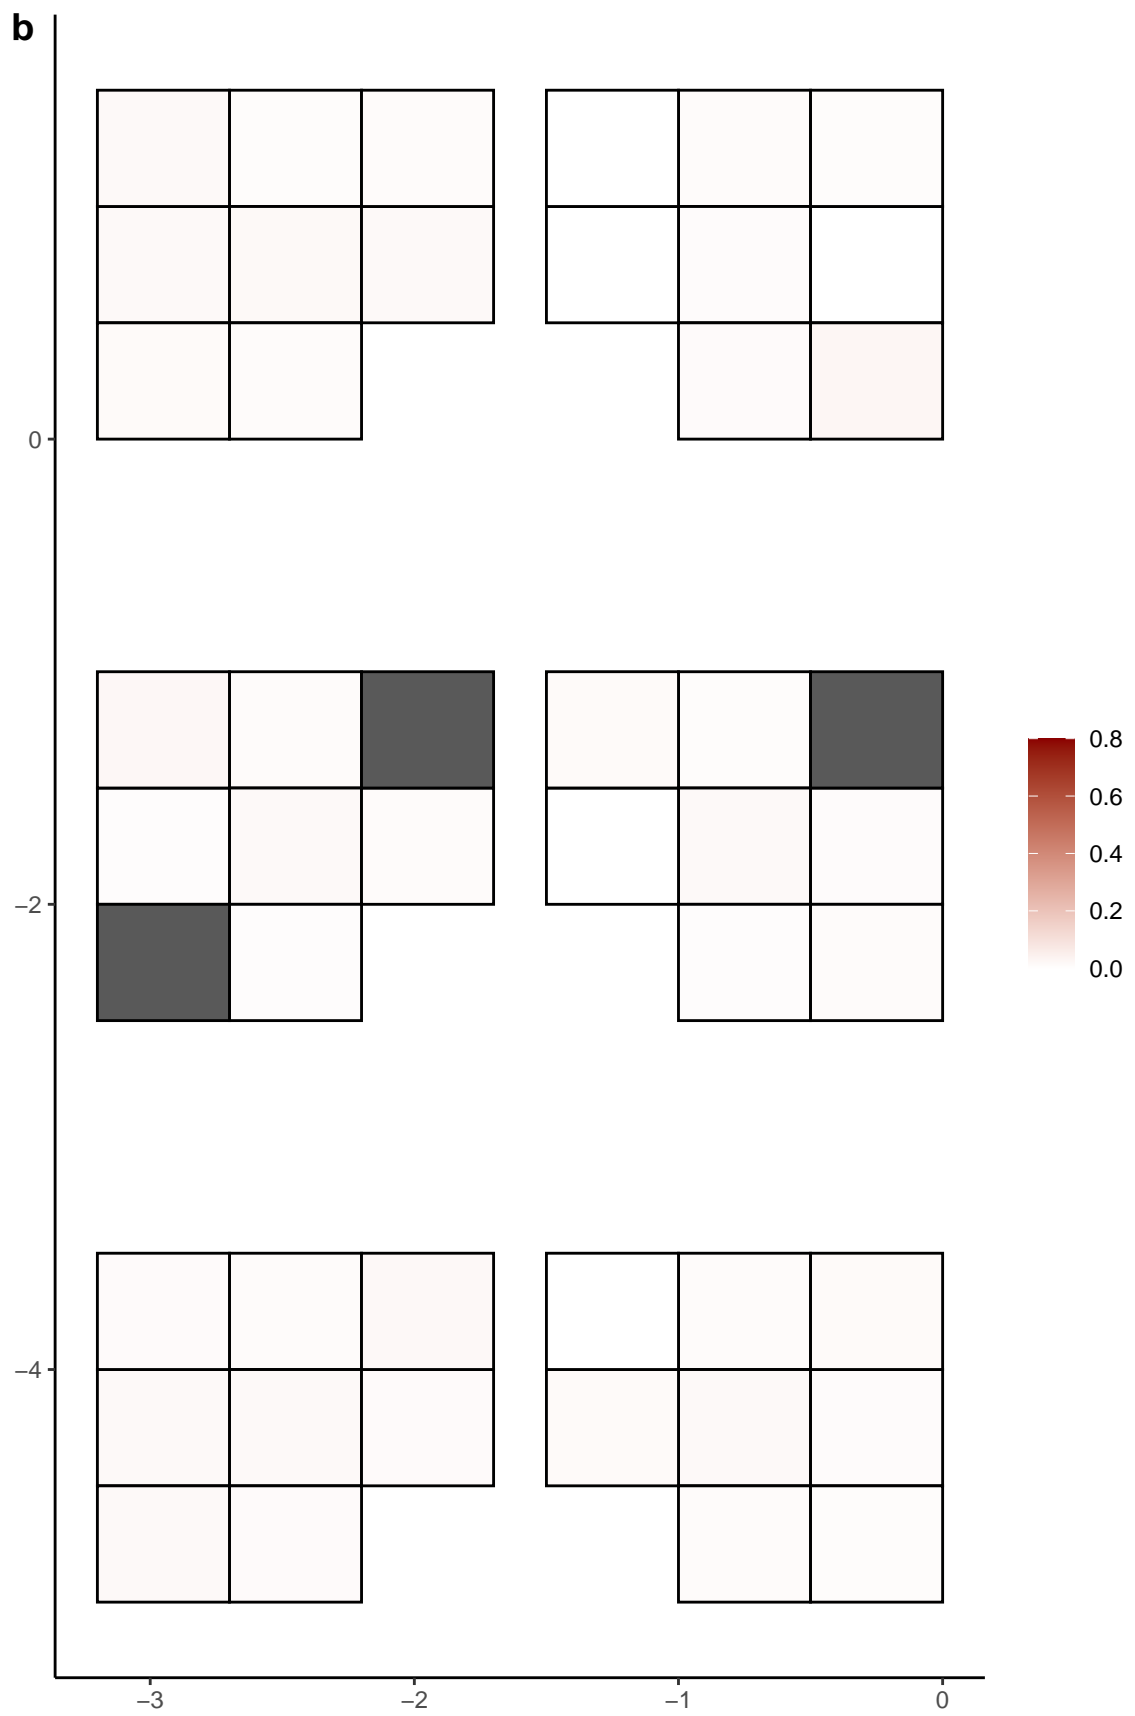

**a** ID05 2-130483876-C-T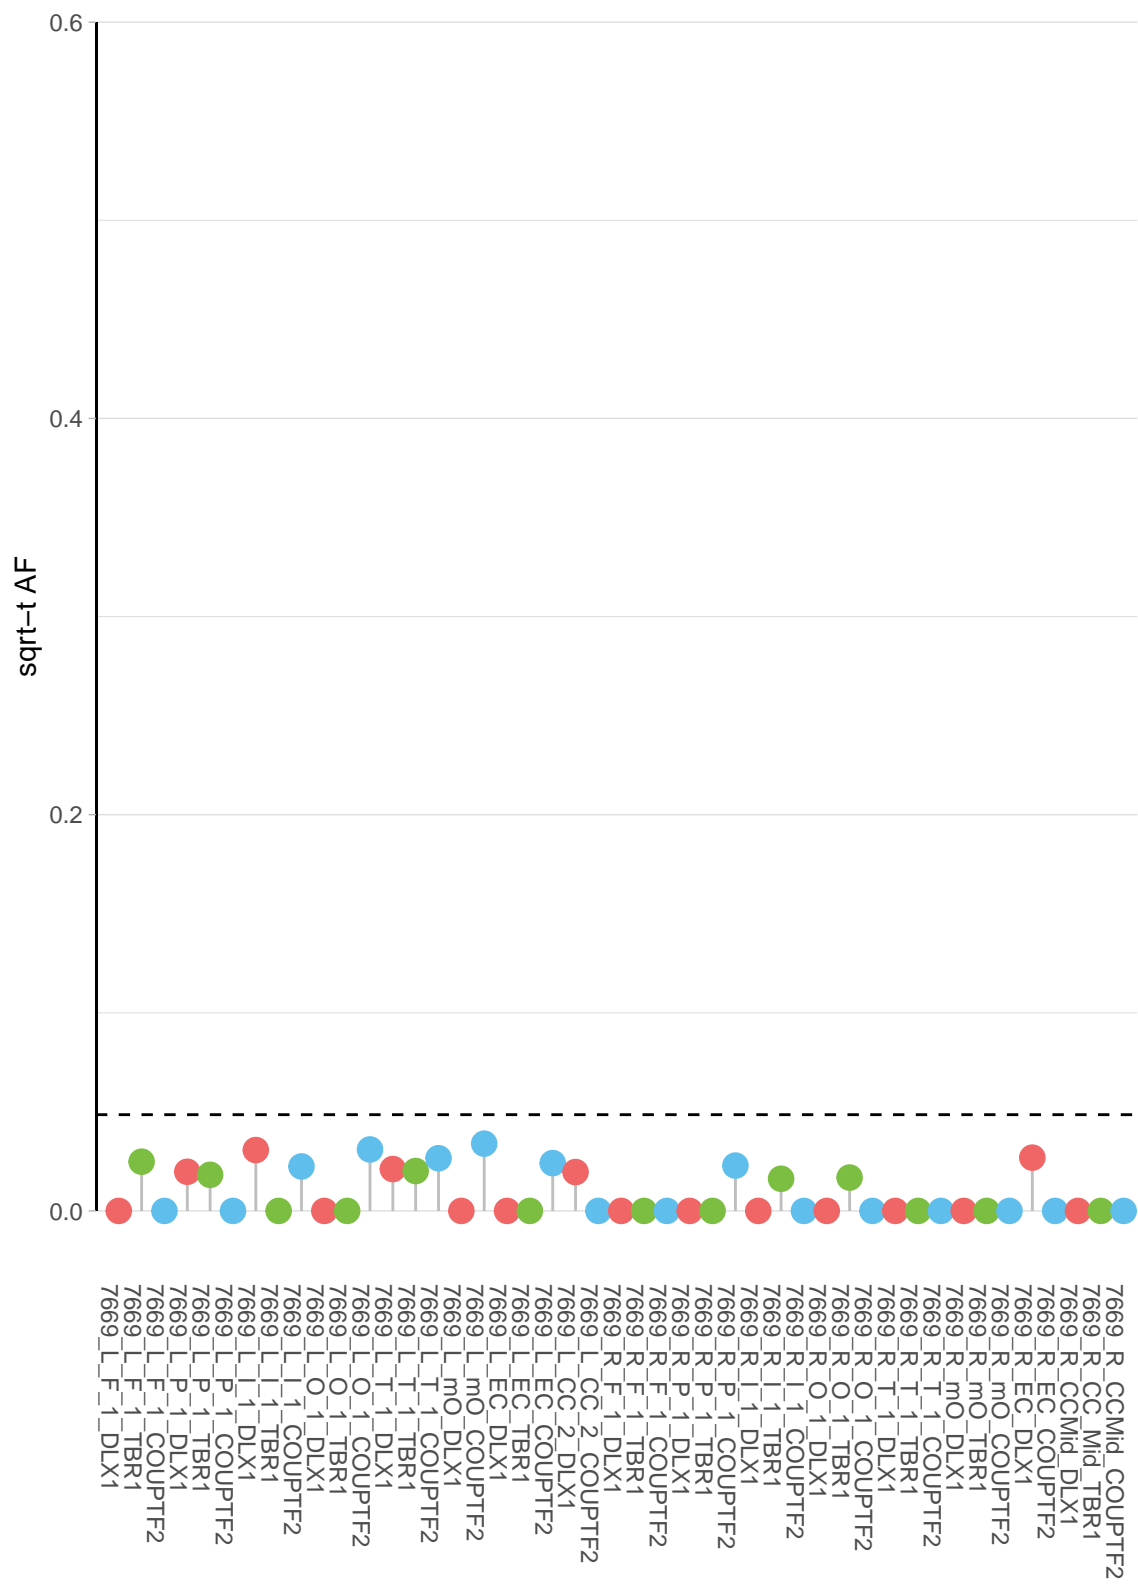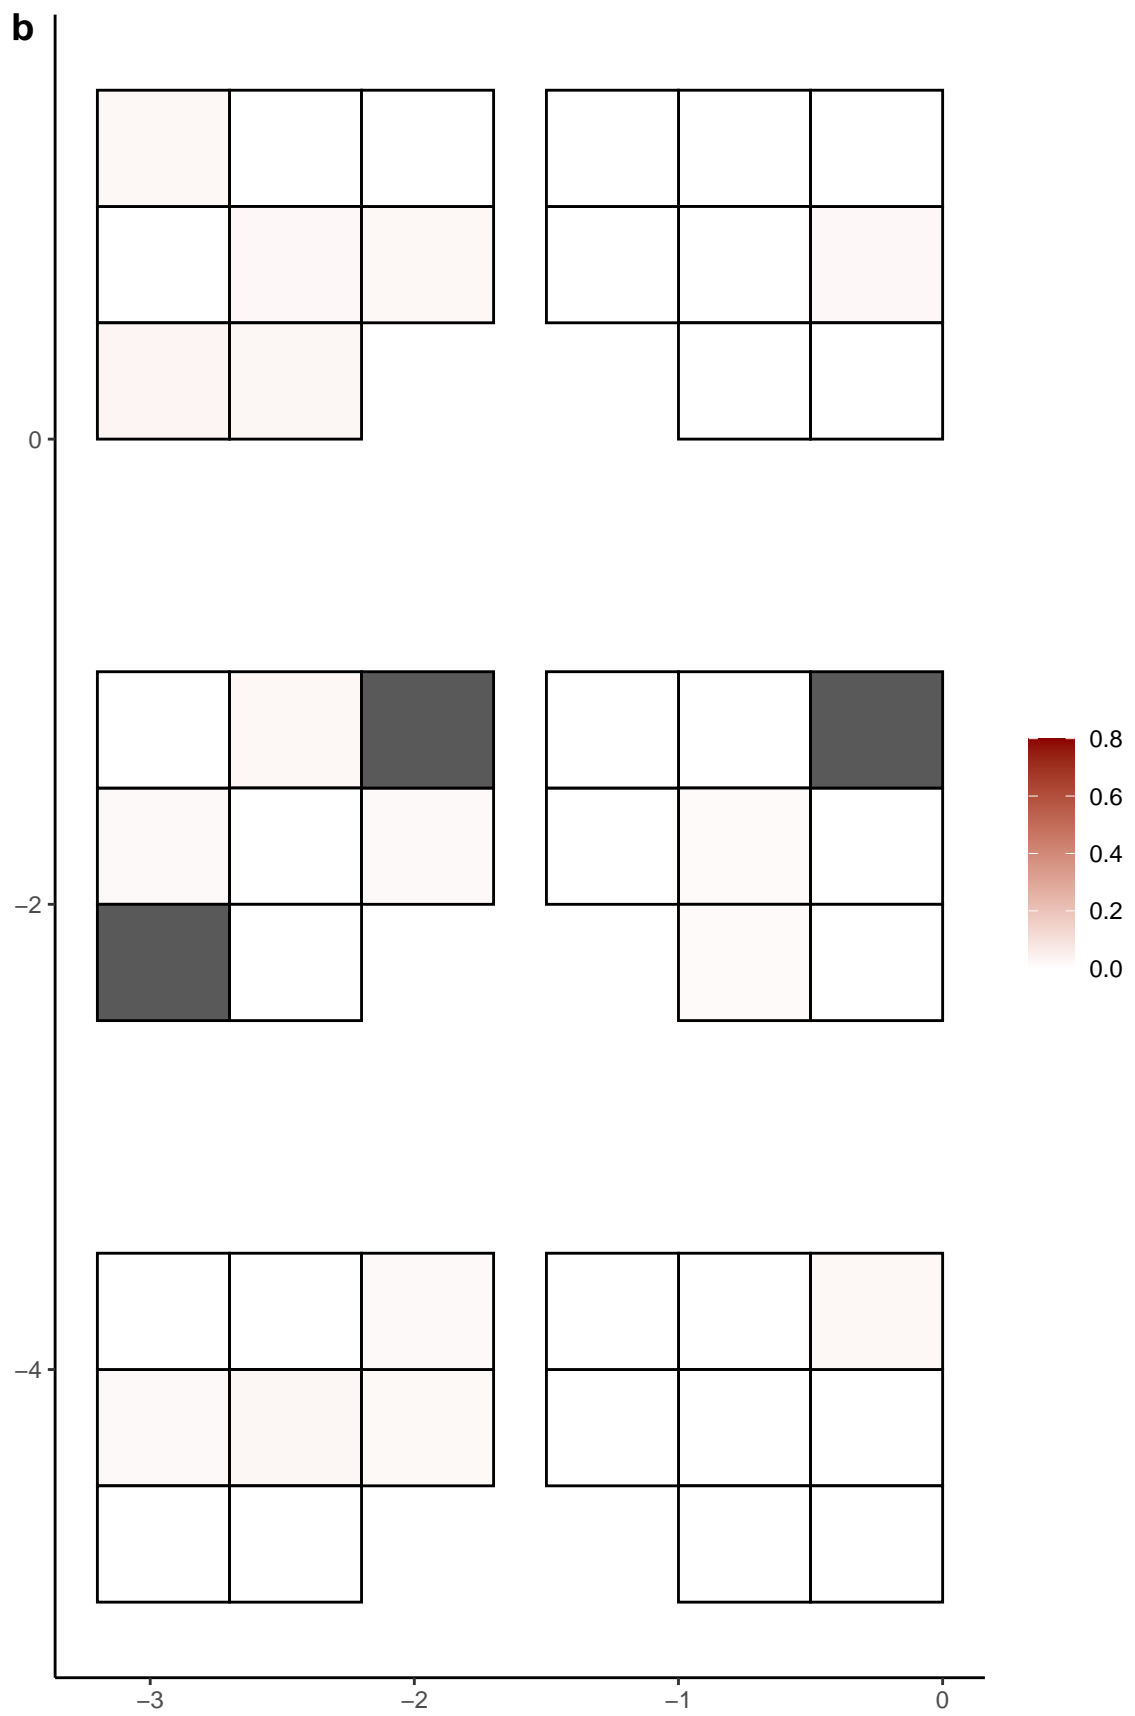



**a** ID05 2-137813385-AT-A

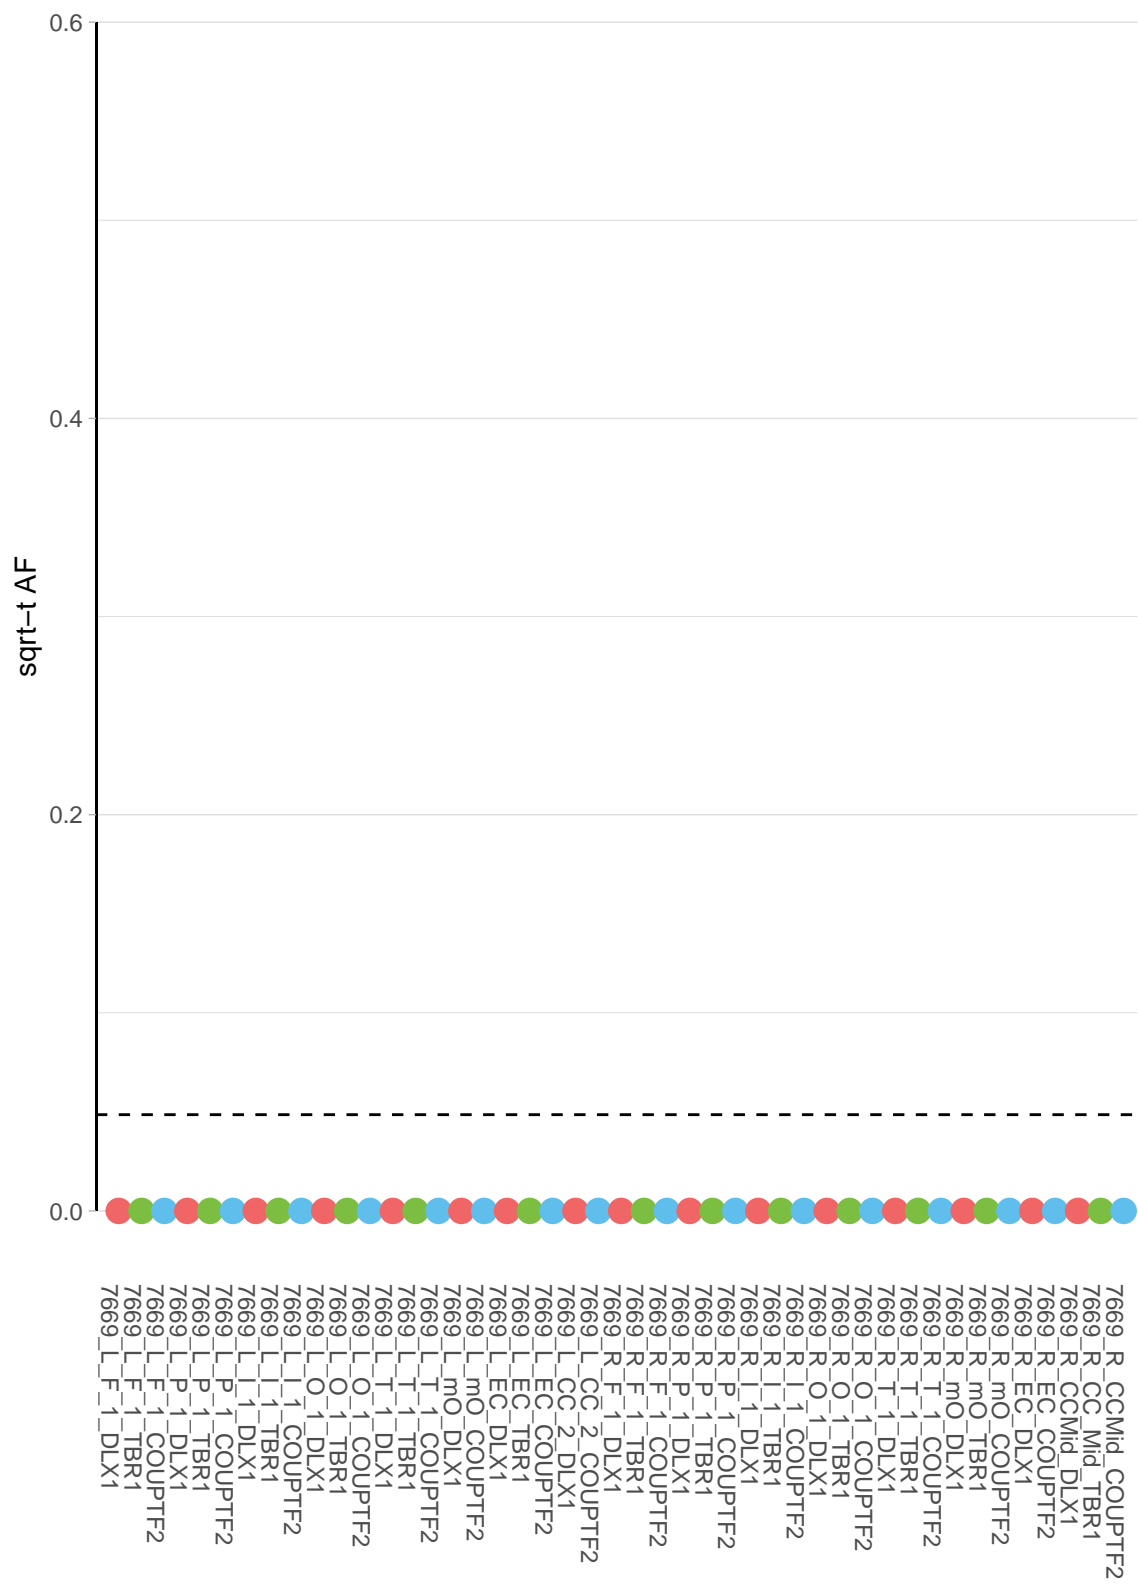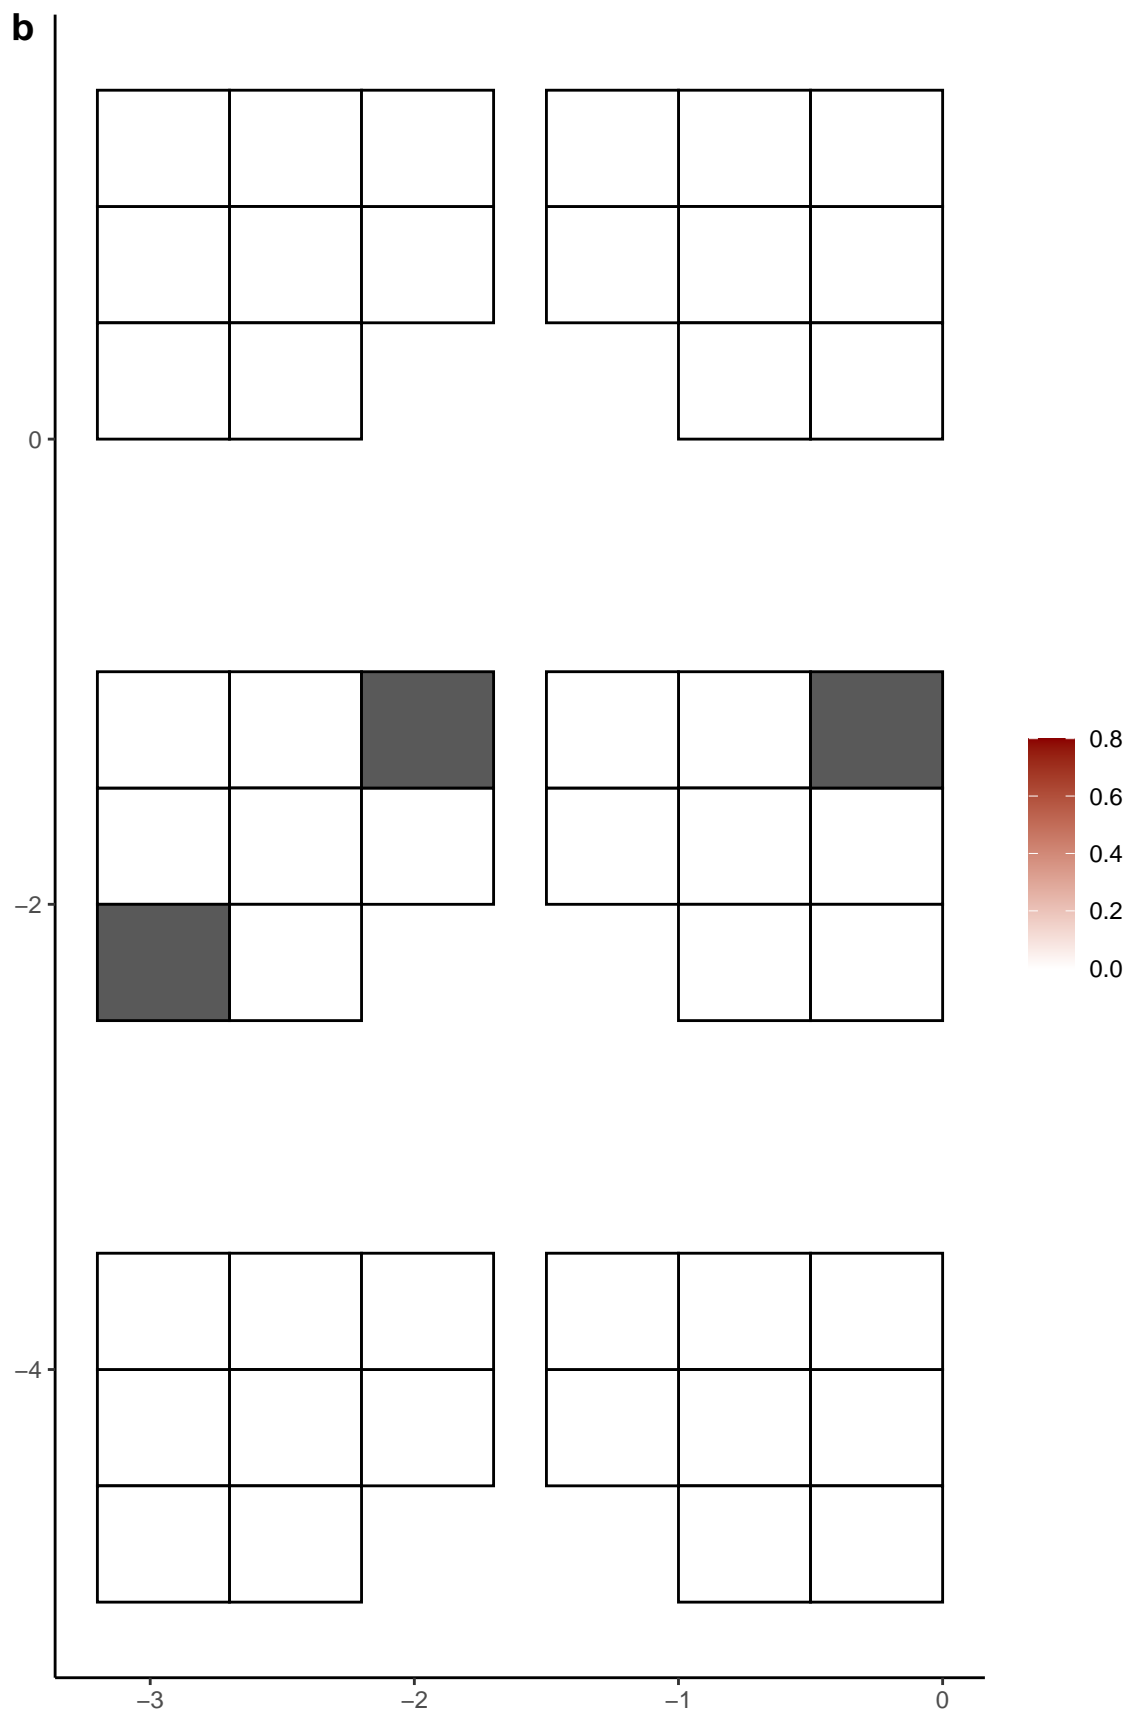

**a** ID05 2-139934078-G-A

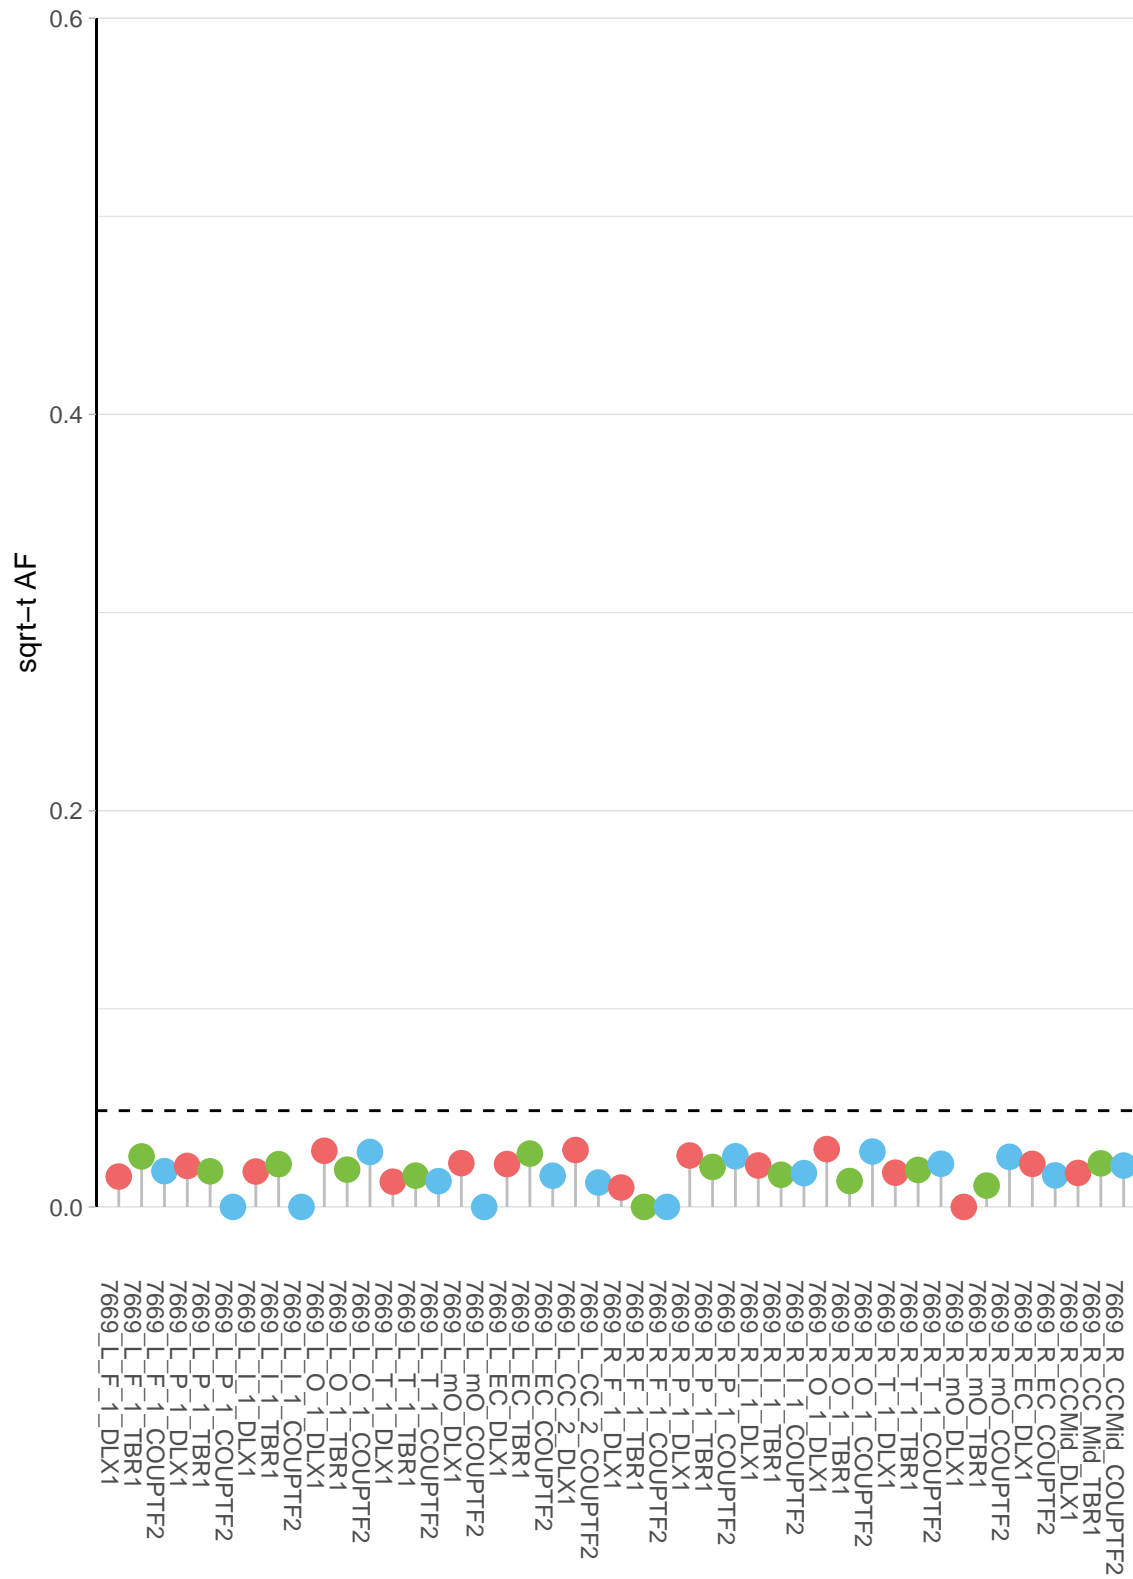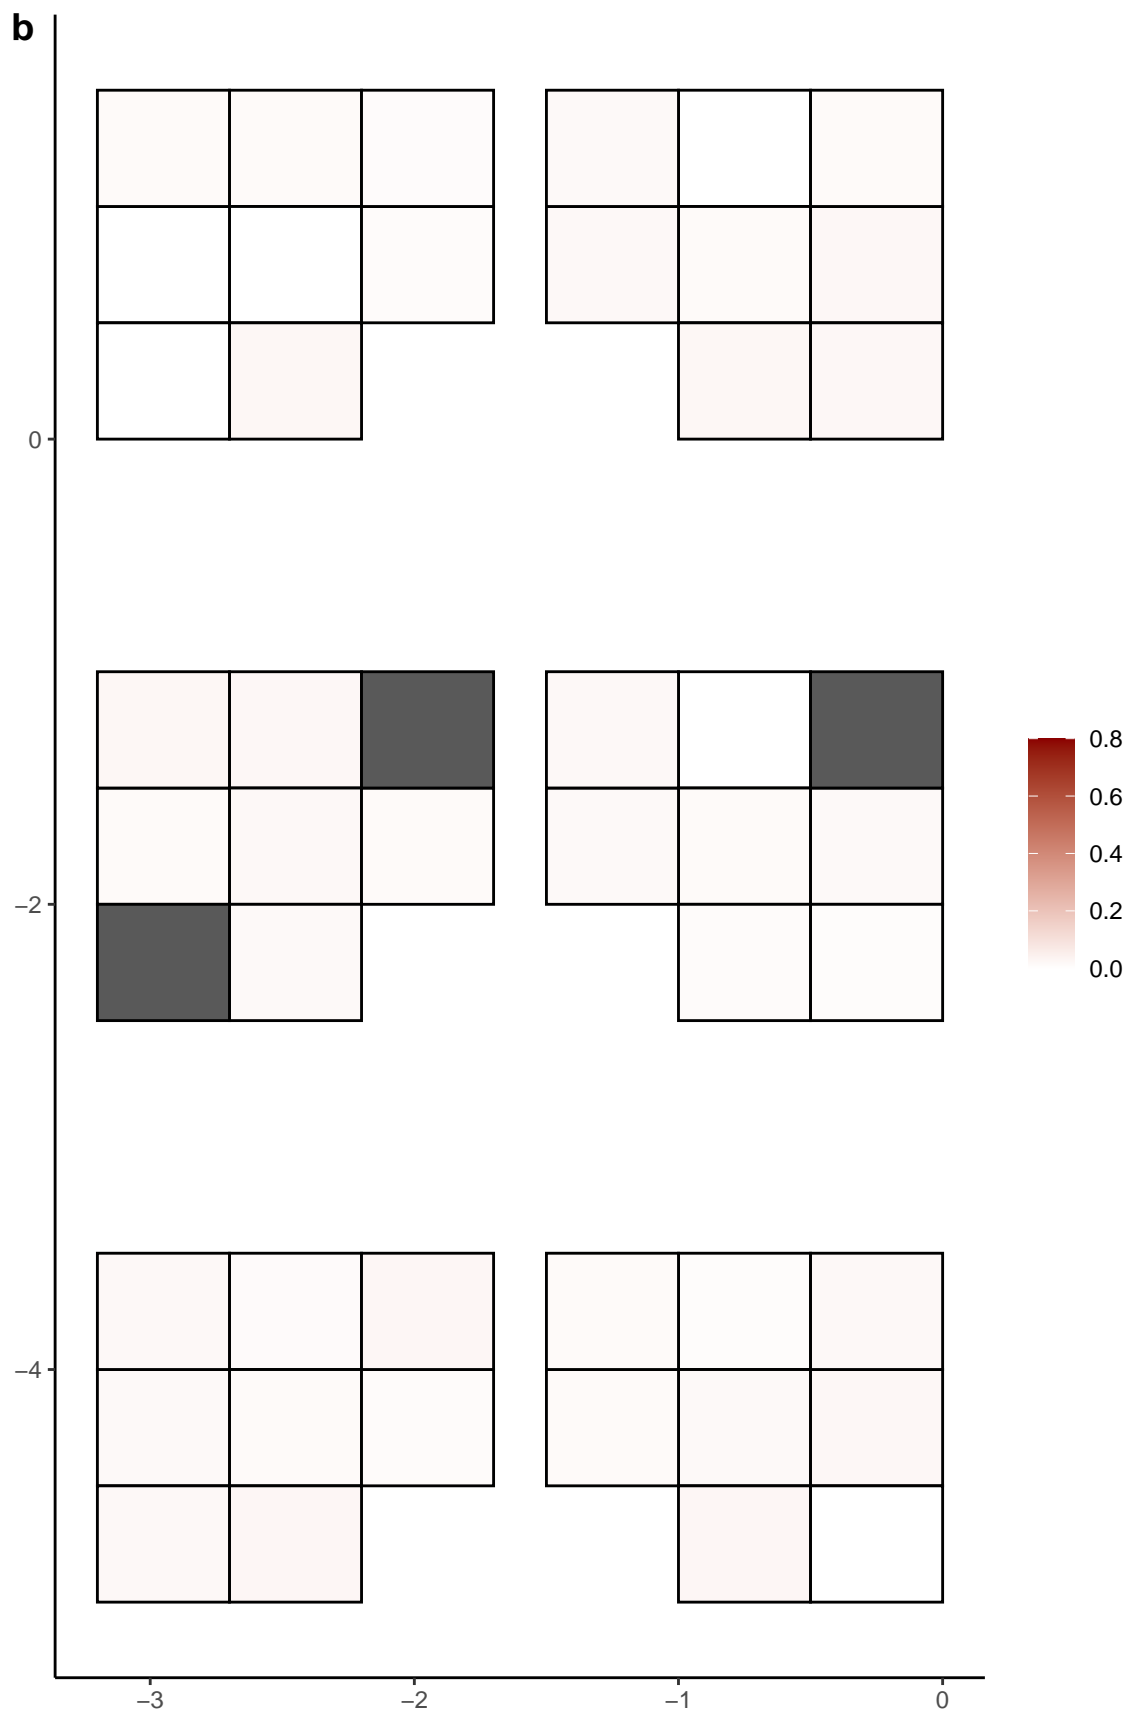

**a** ID05 2-141914766-A-T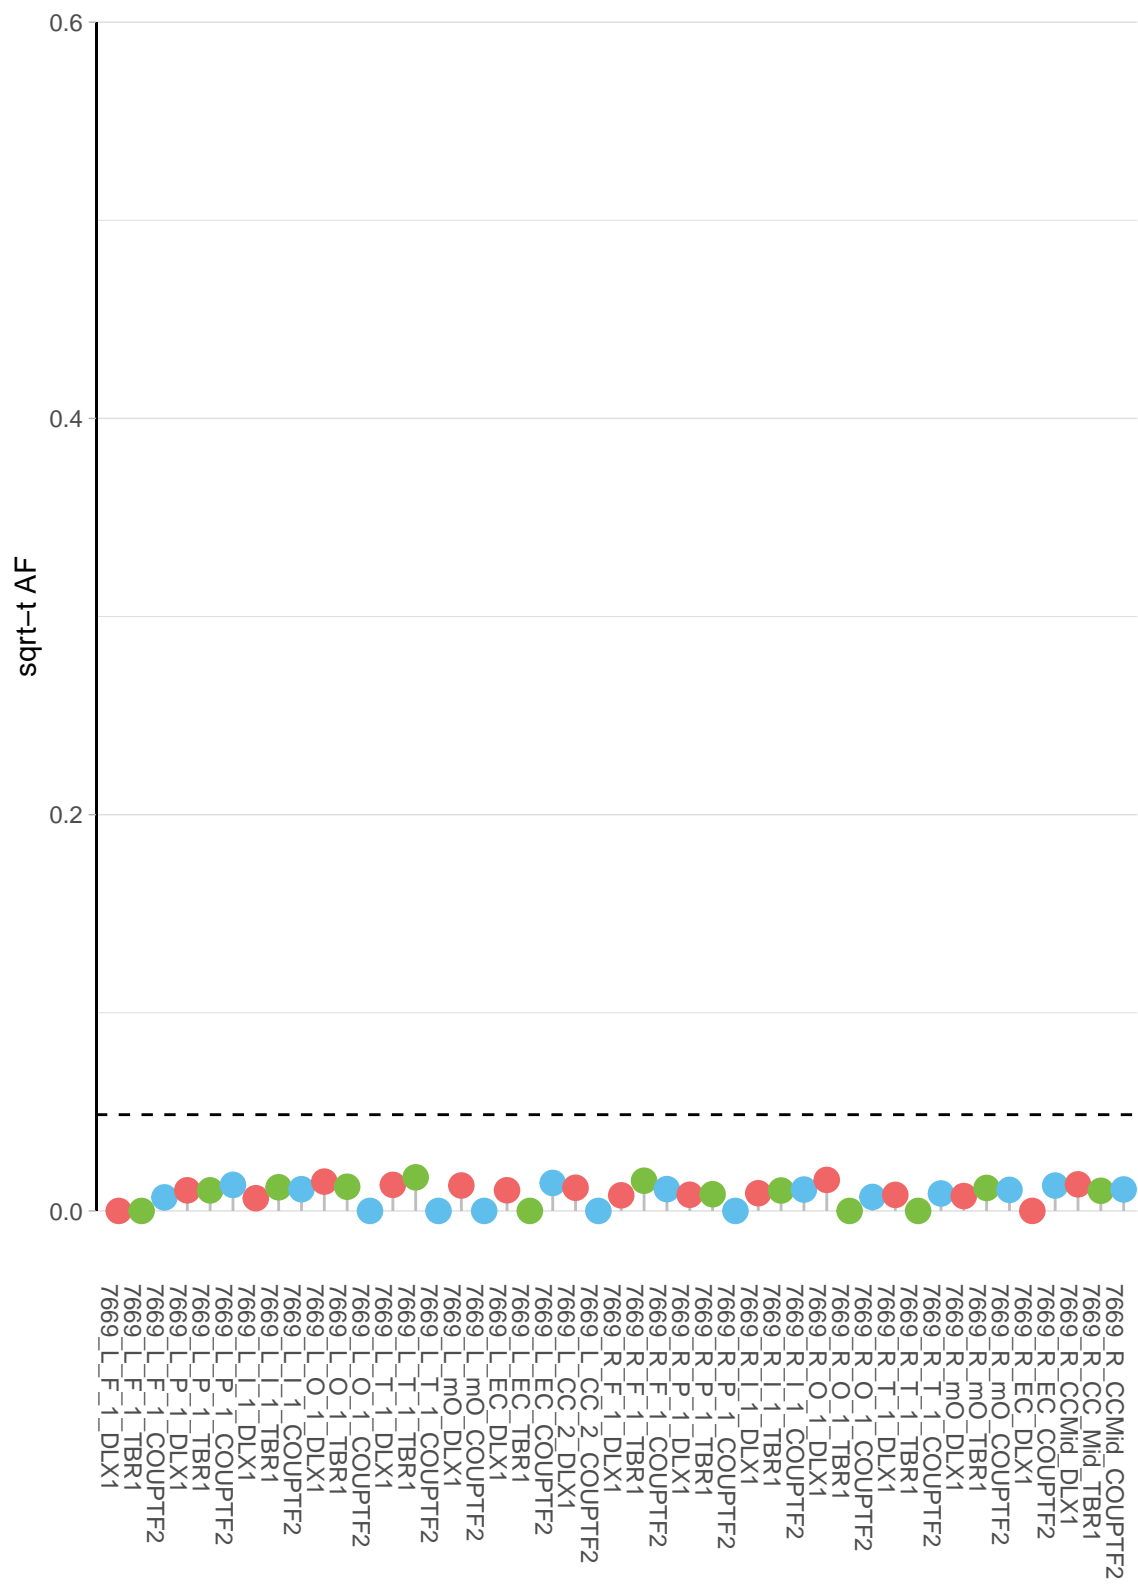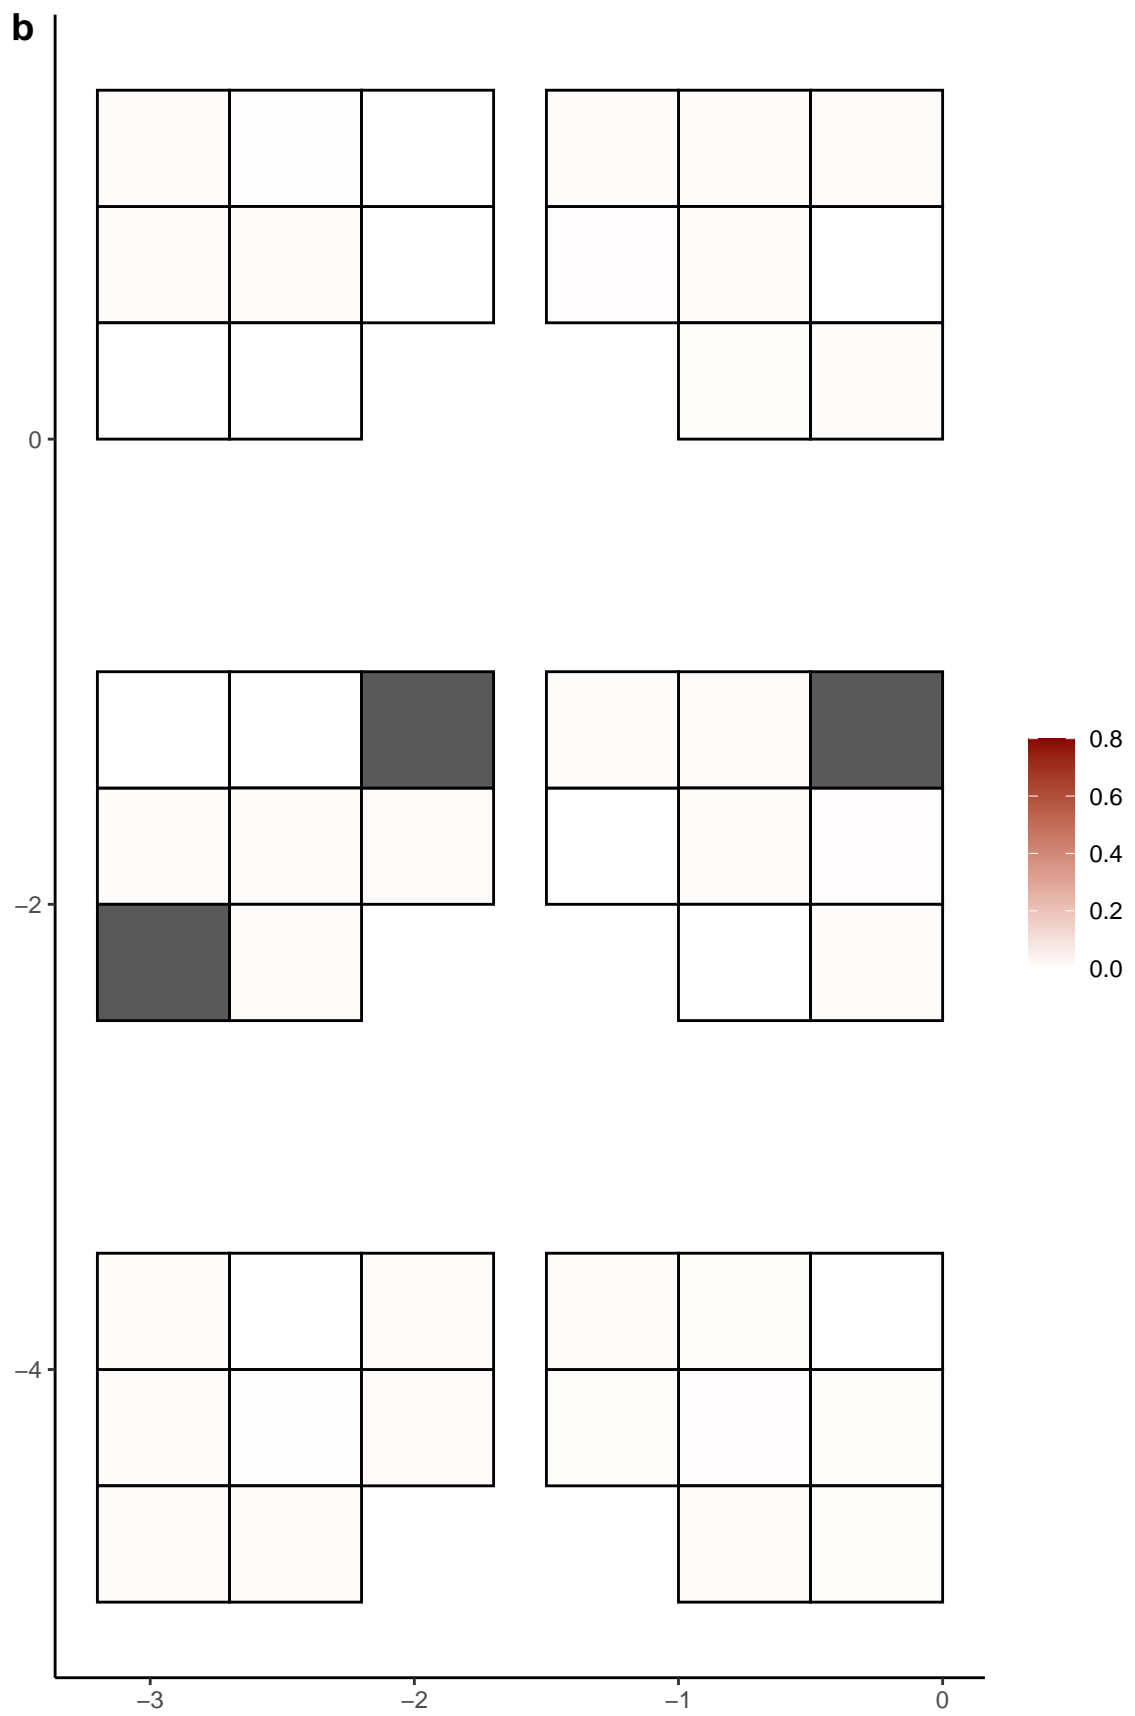

**a** ID05 2-143167083-A-G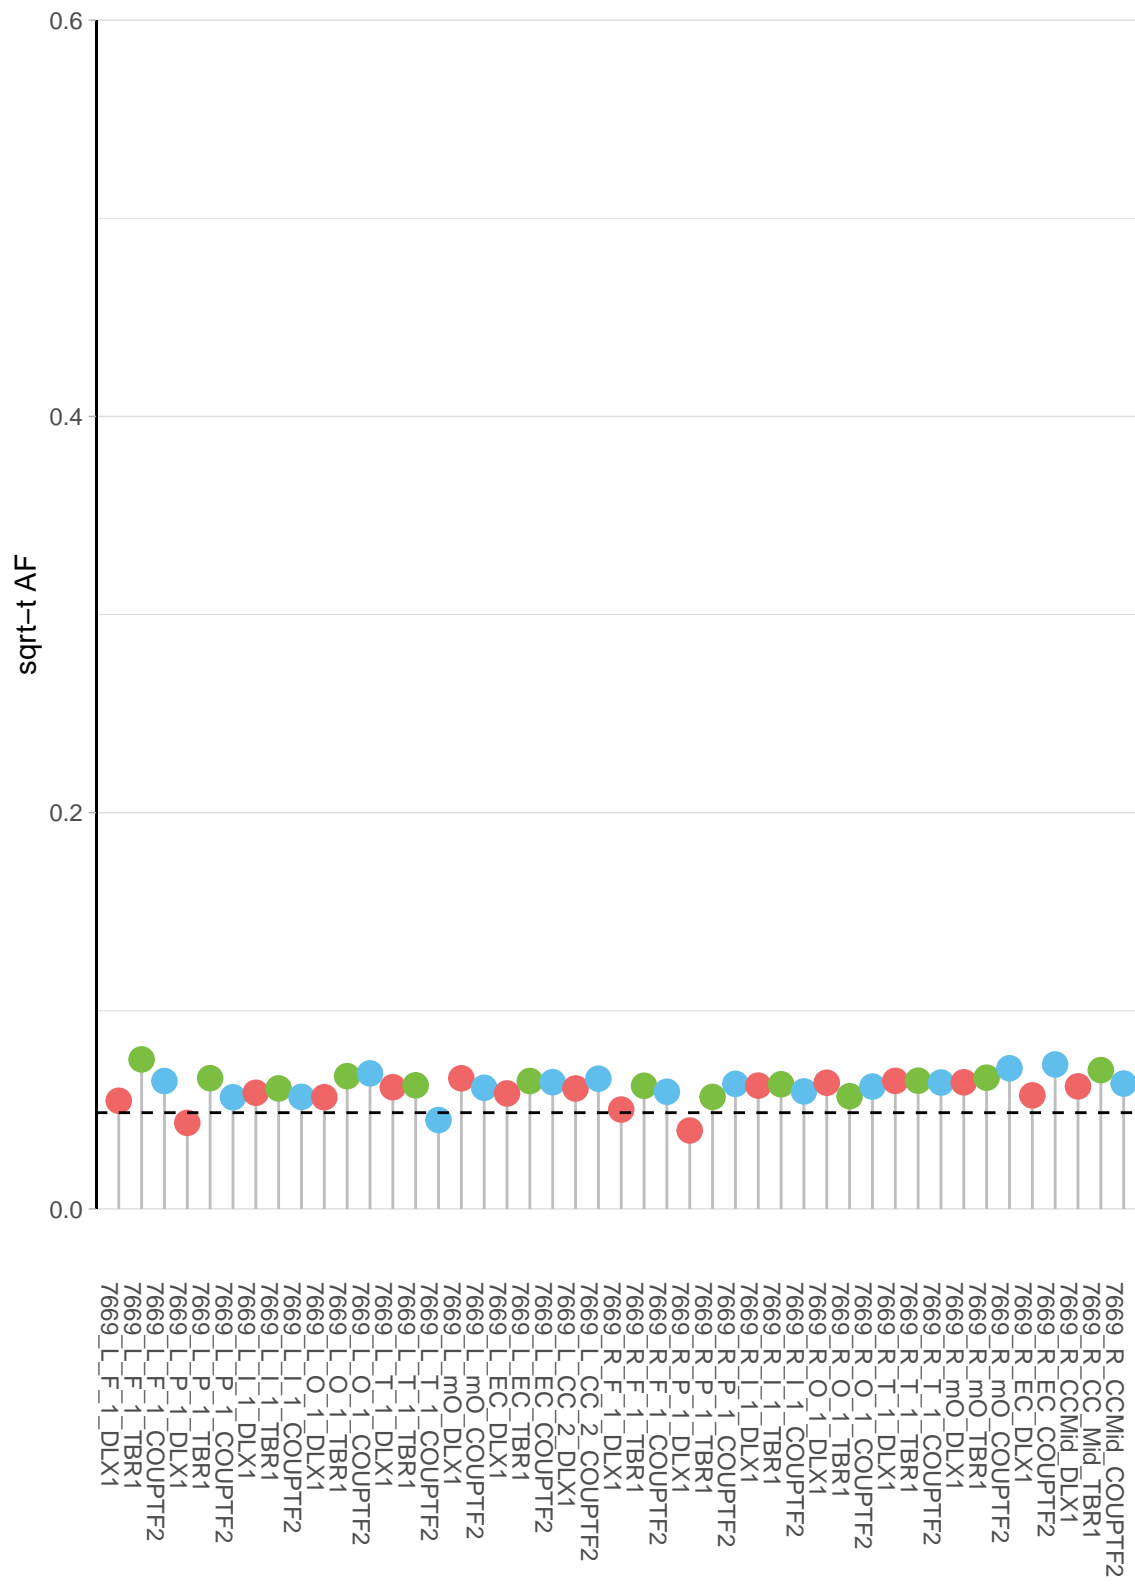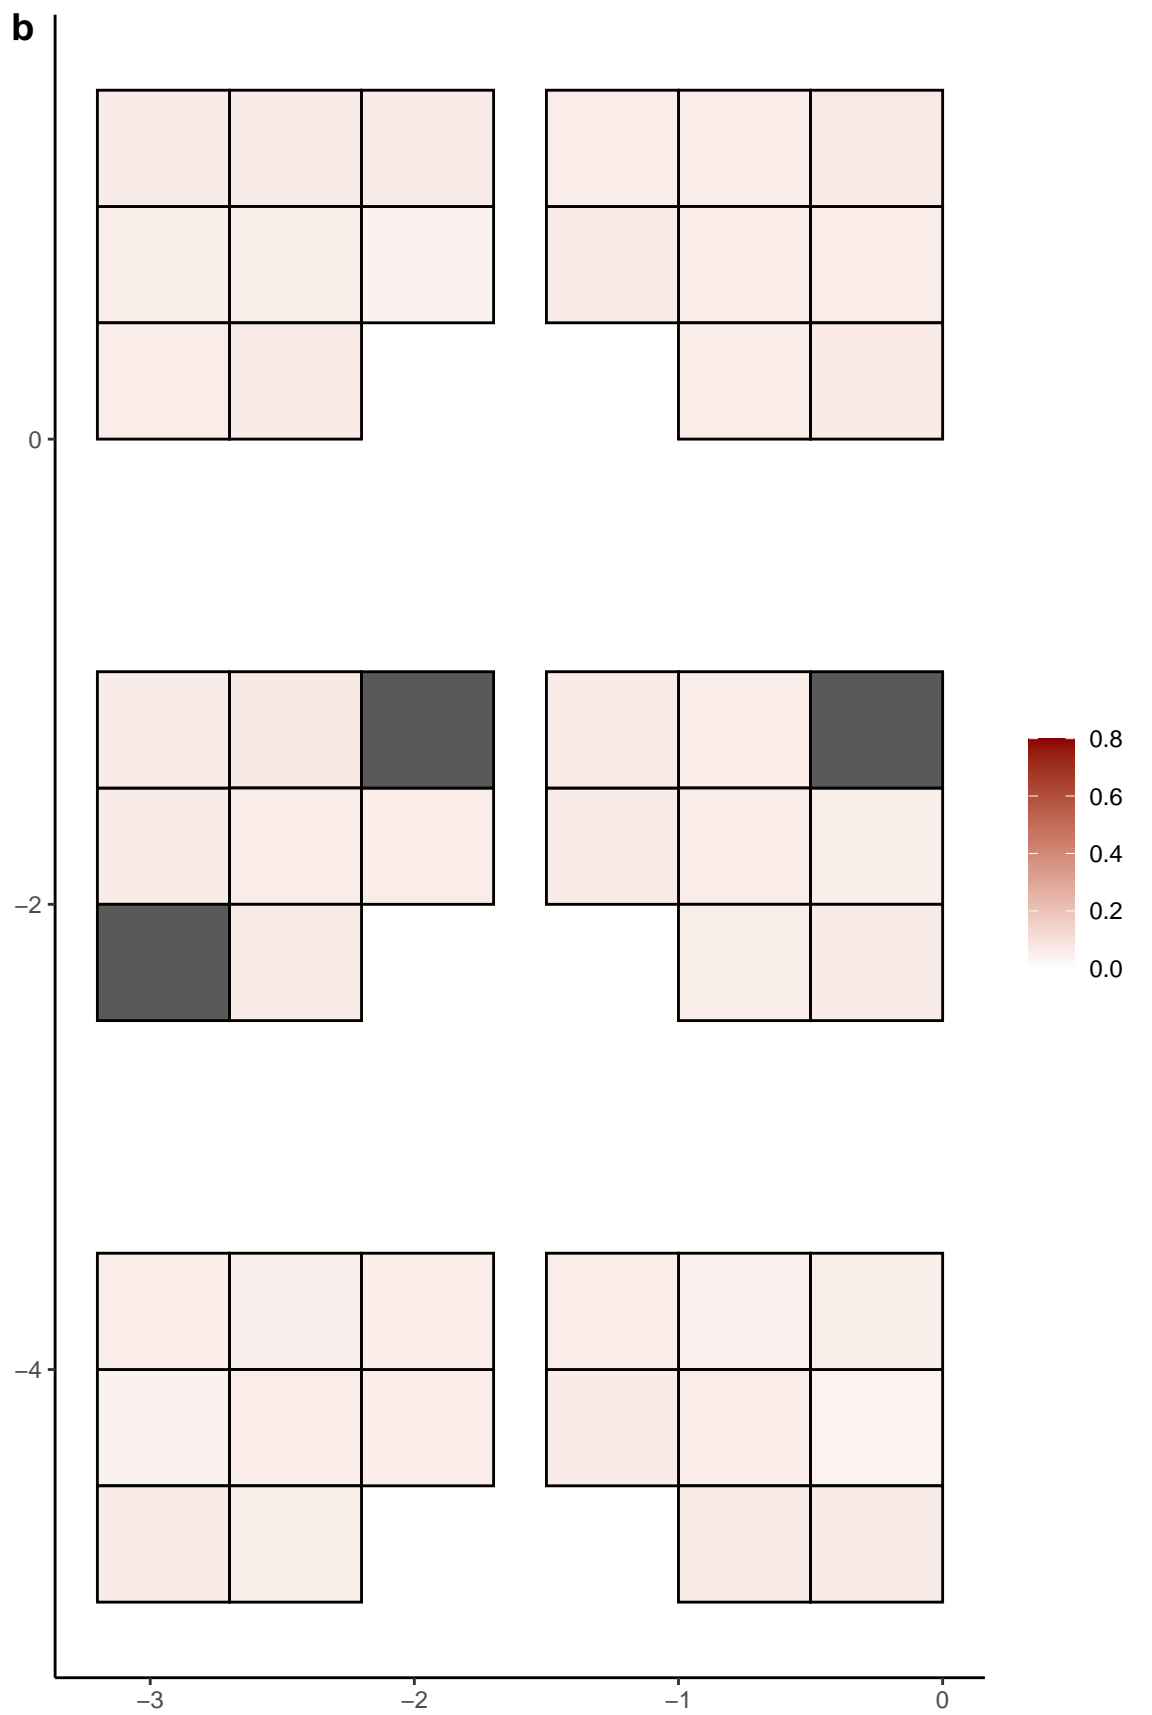

**a** ID05 2-14466159-G-A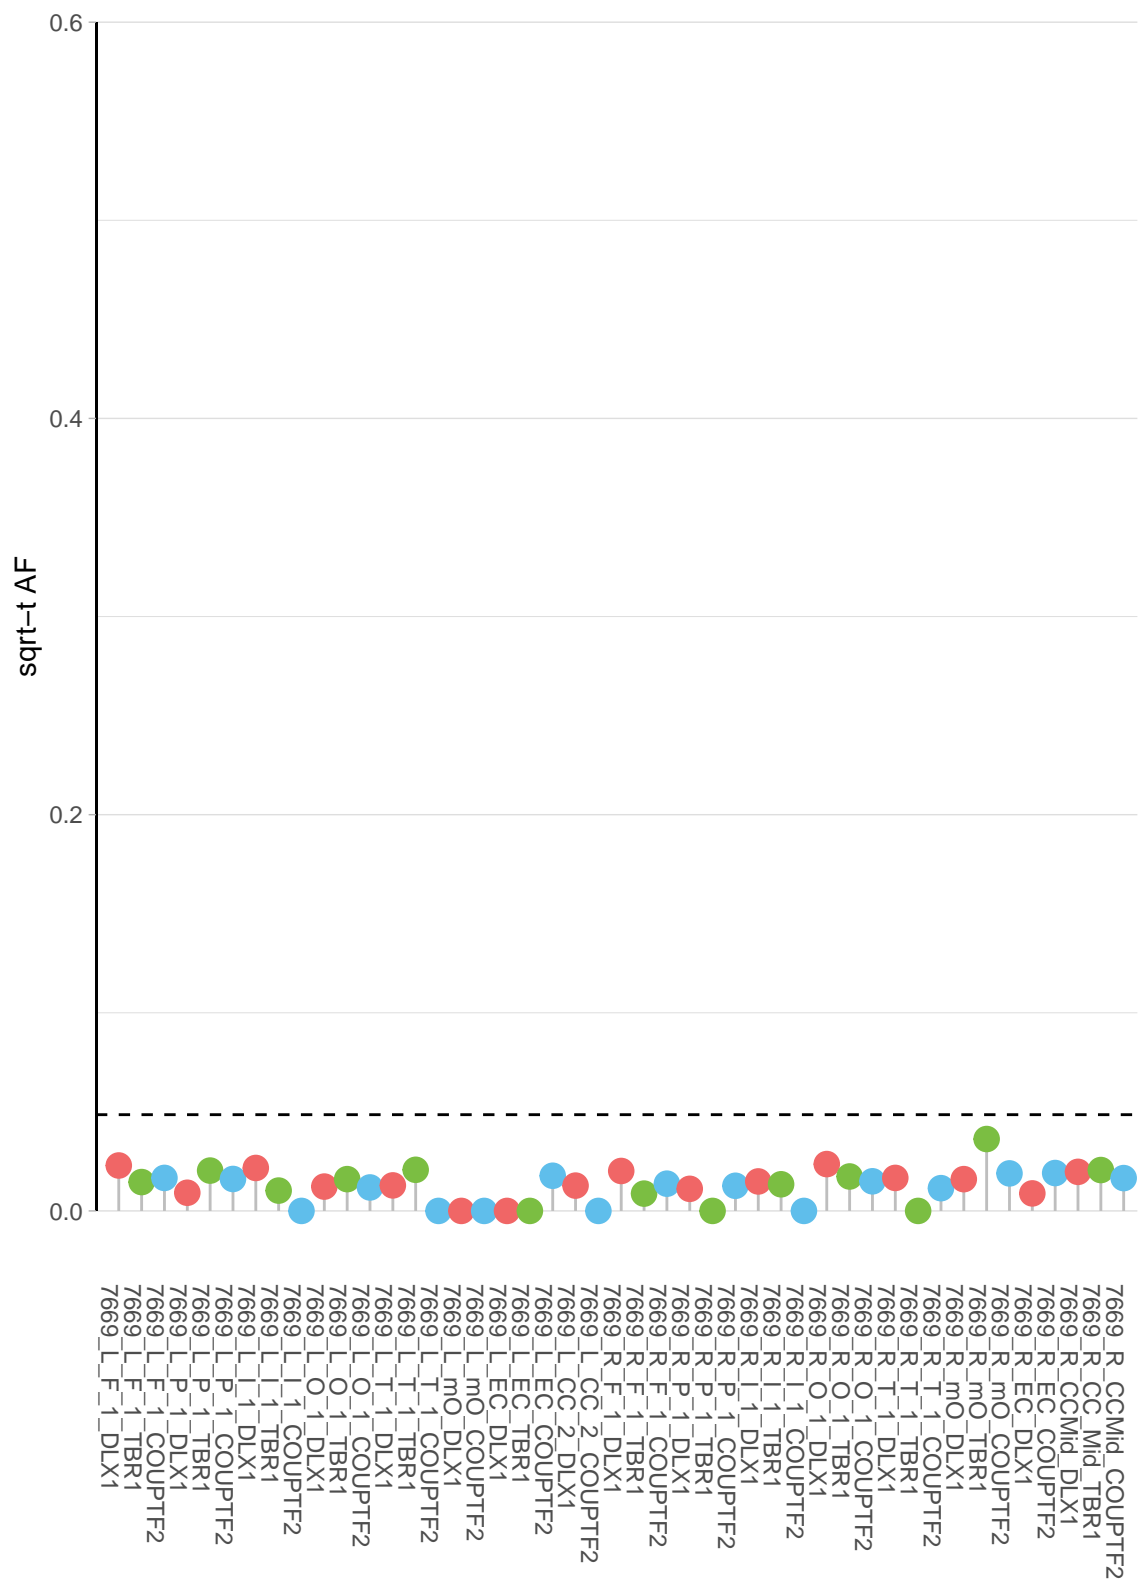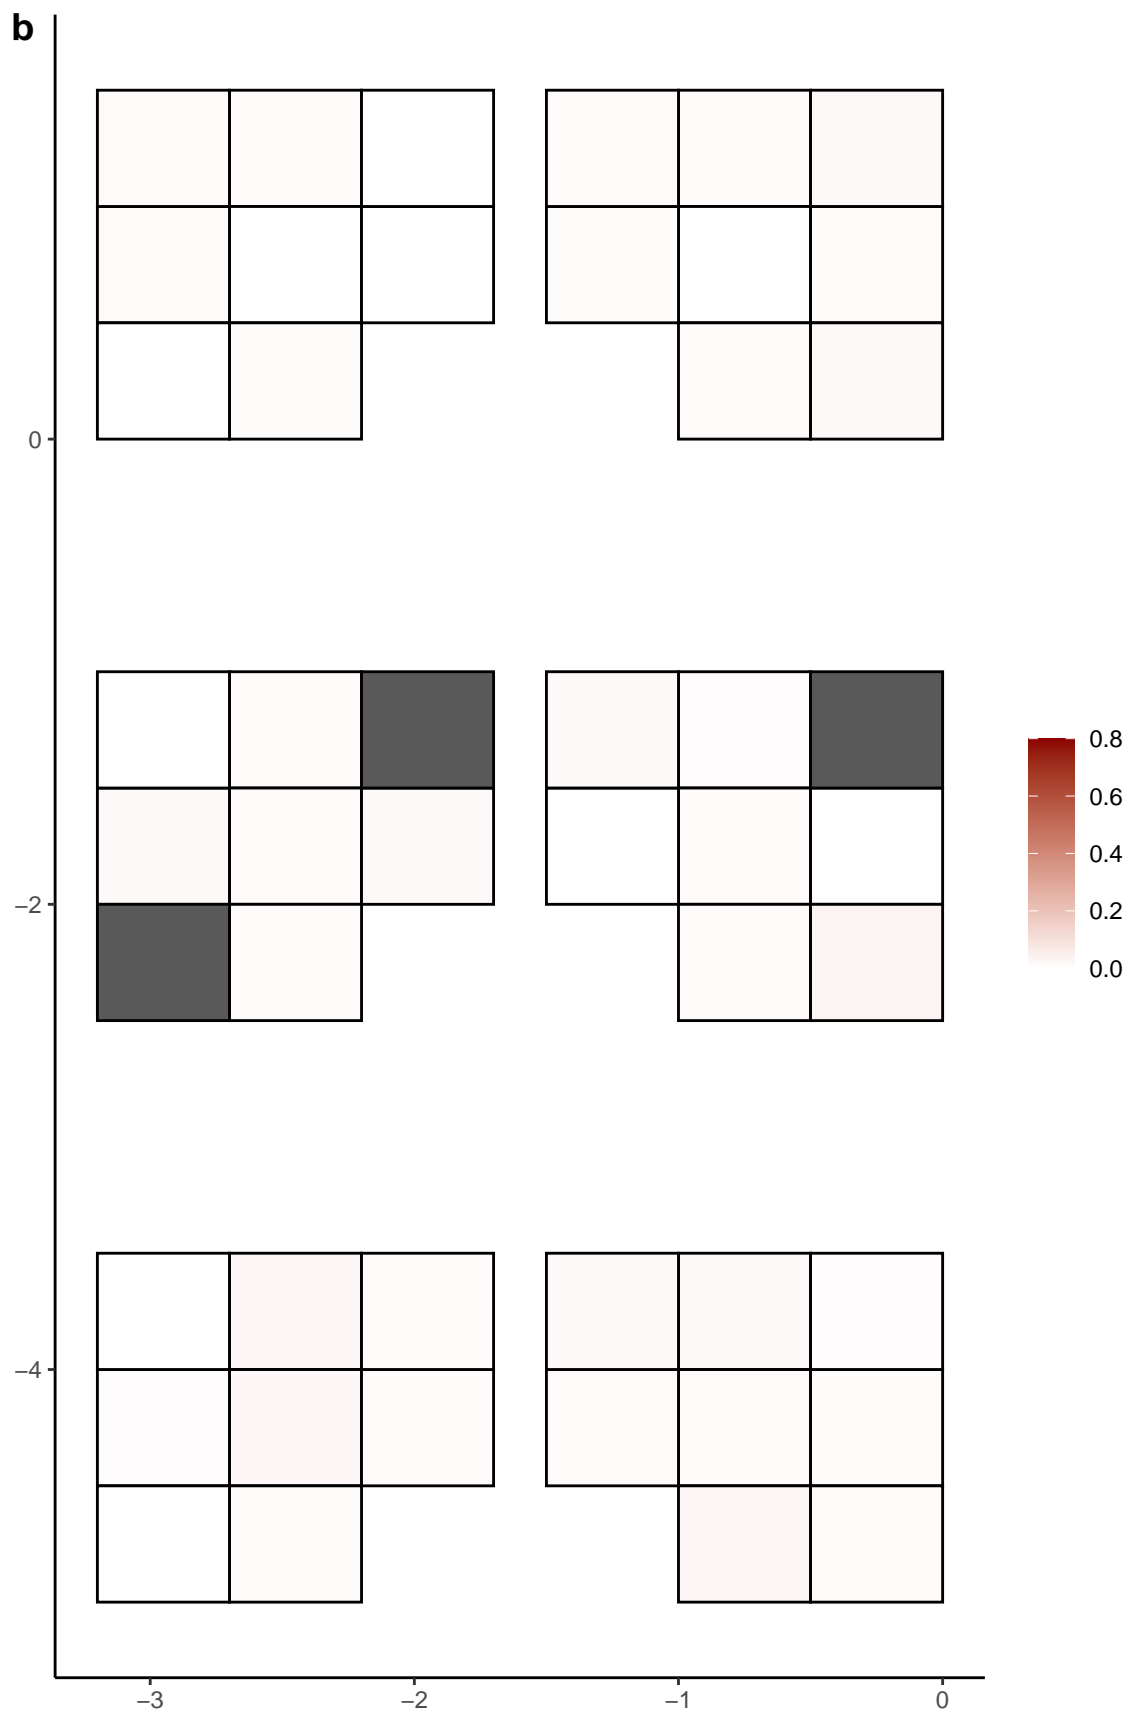

**a** ID05 2-159760148-C-T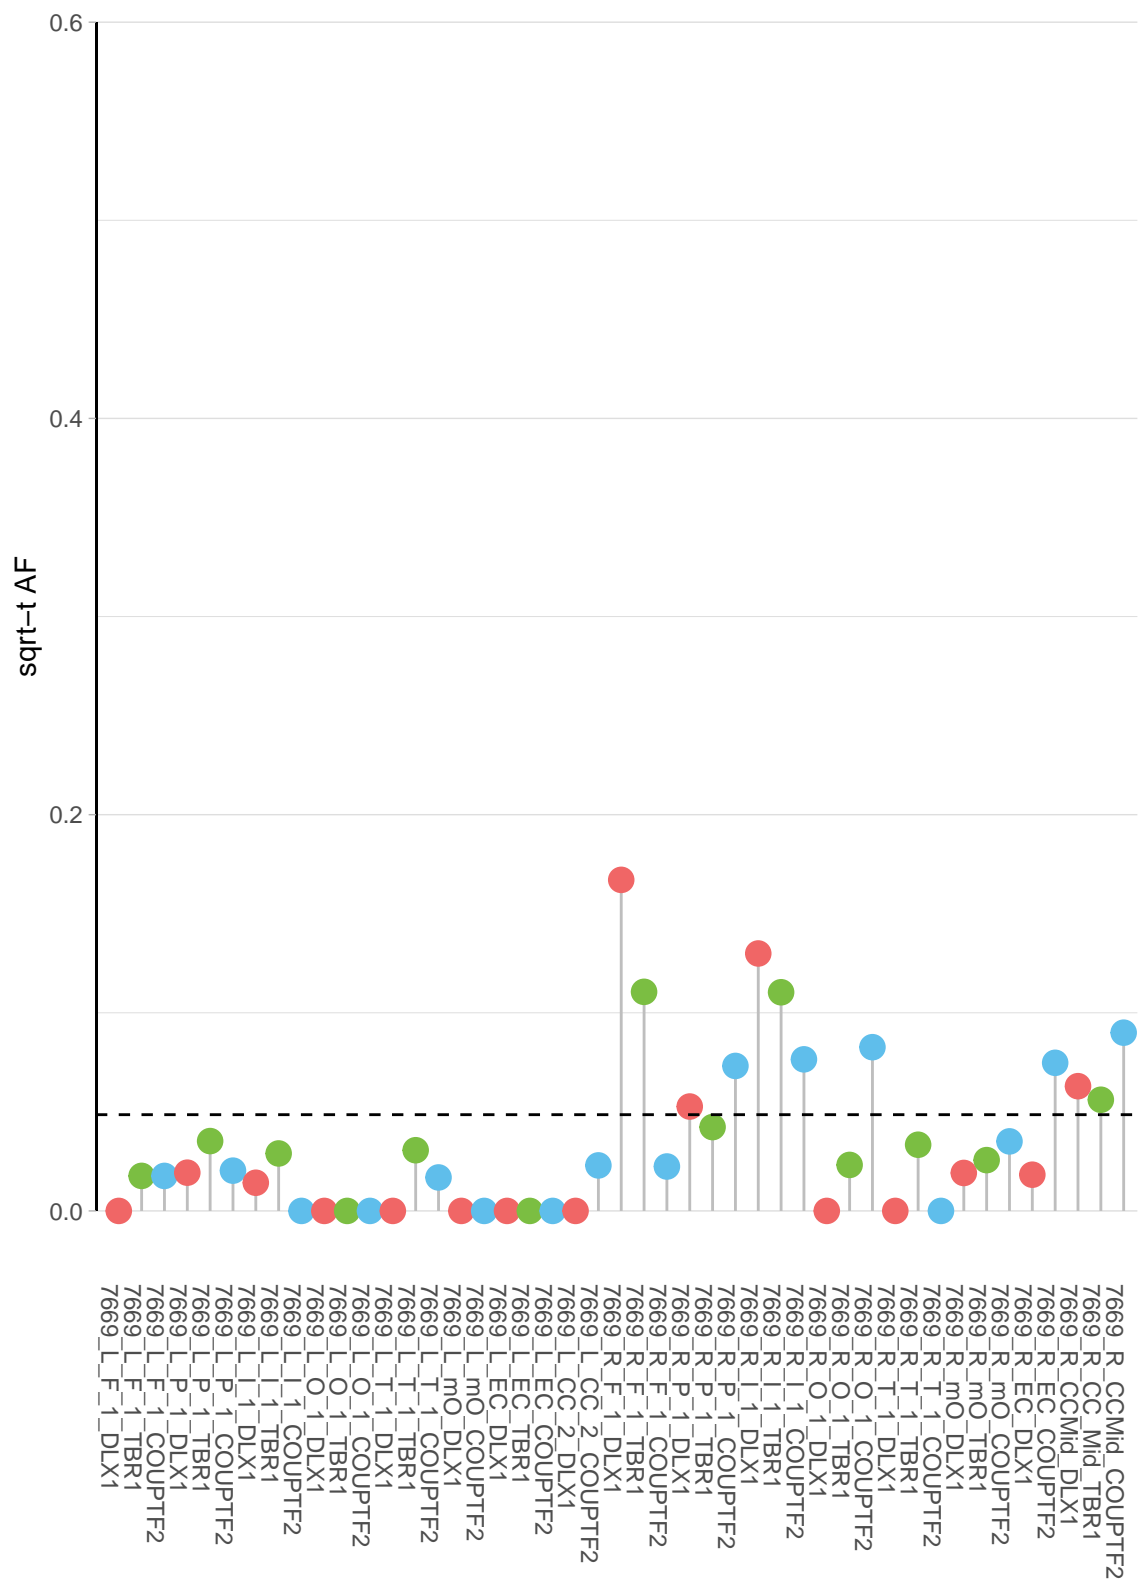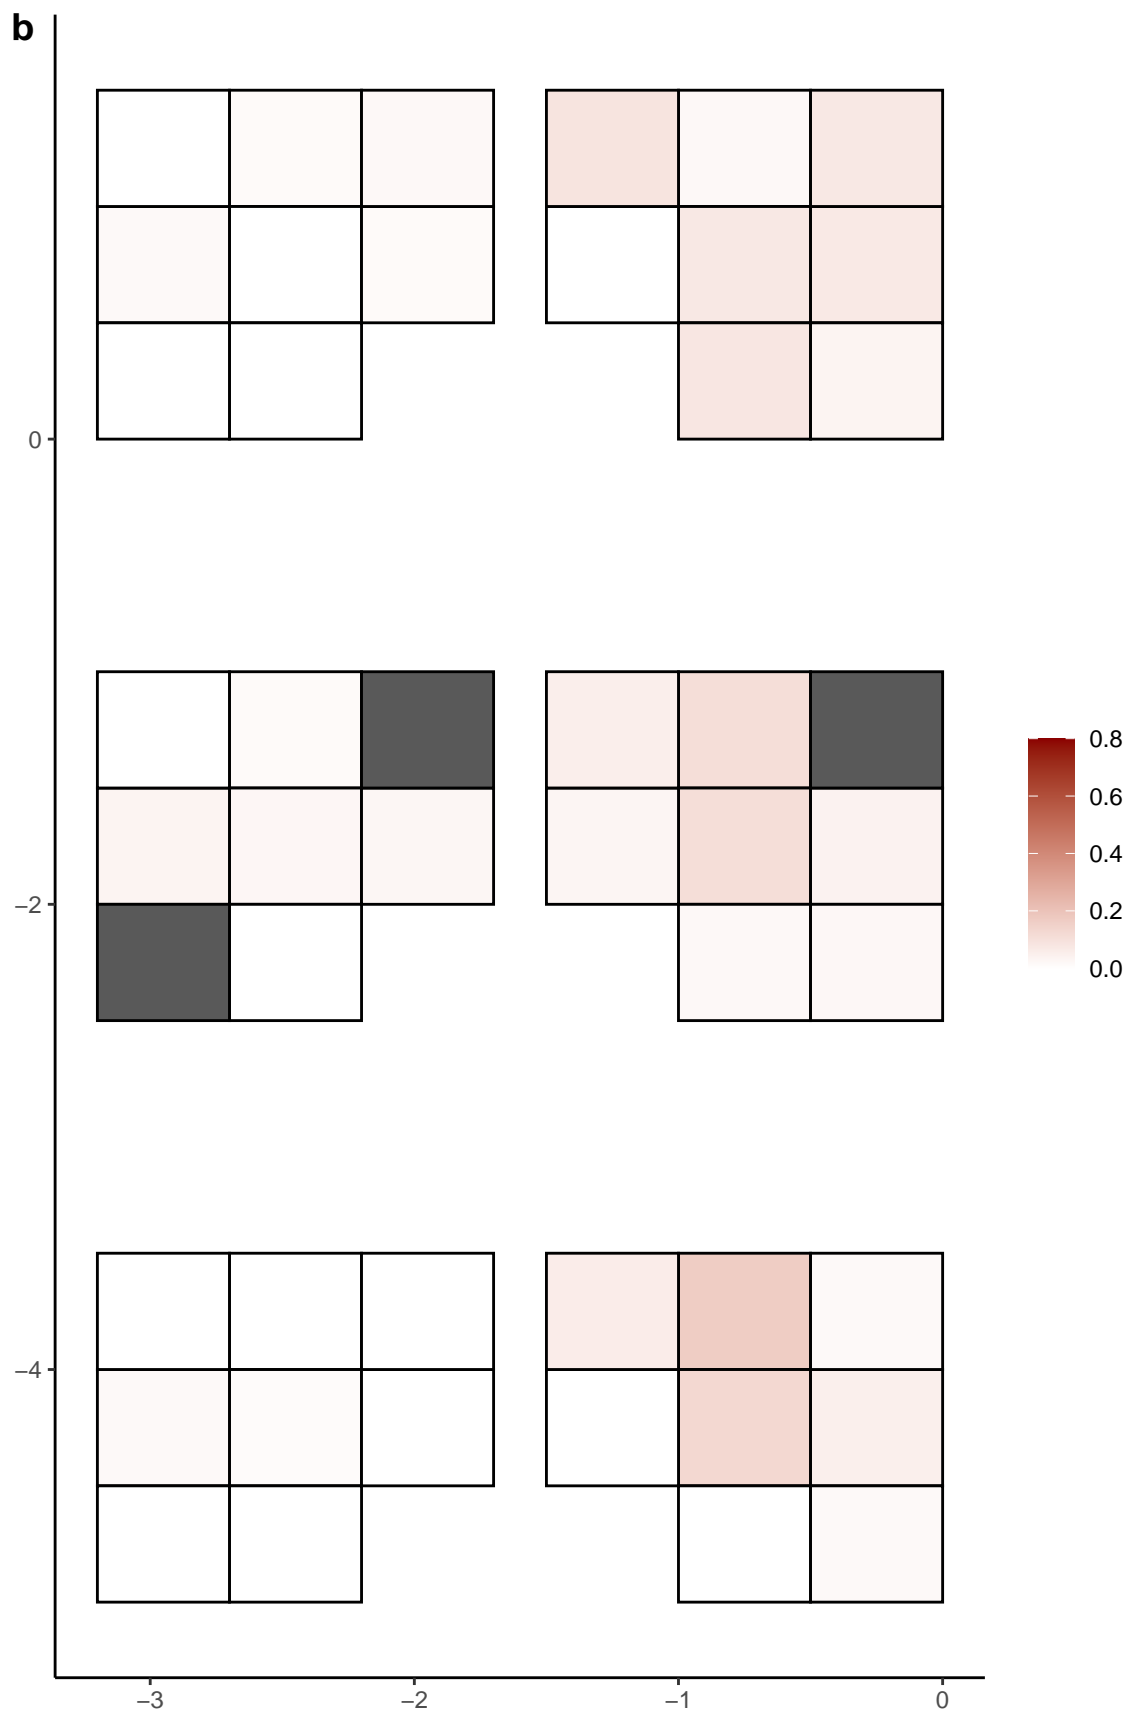

**a** ID05 2-163073318-G-A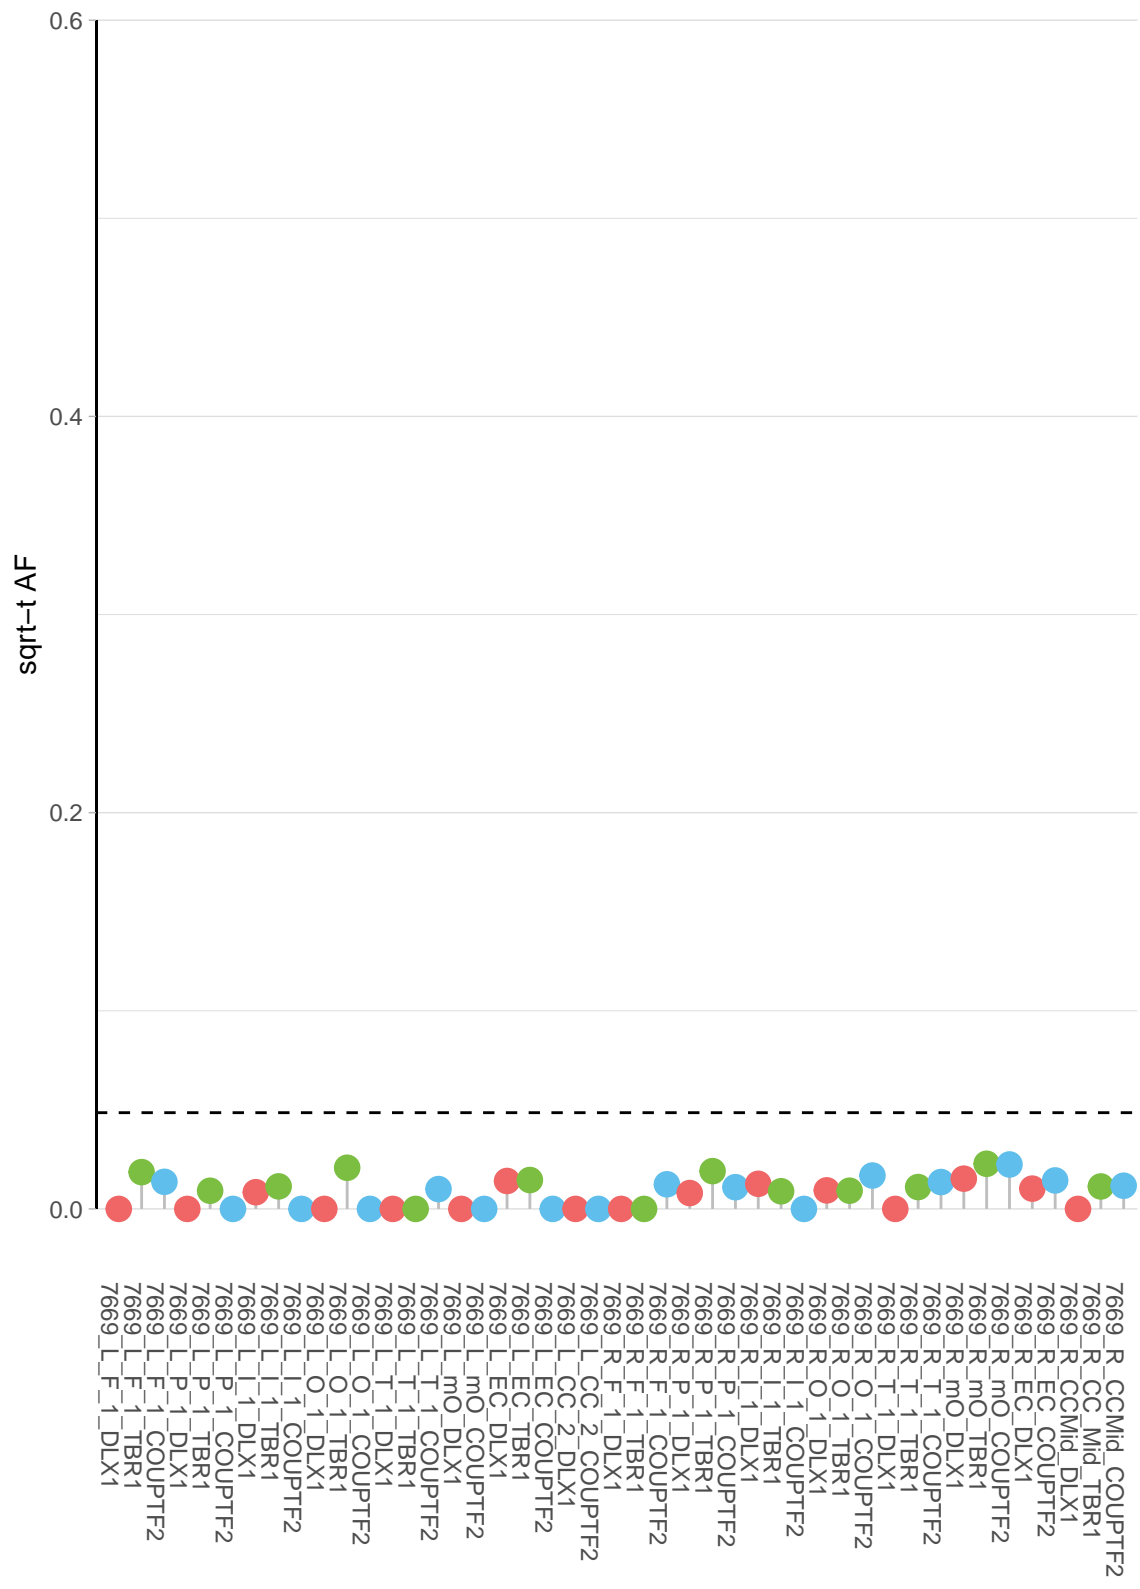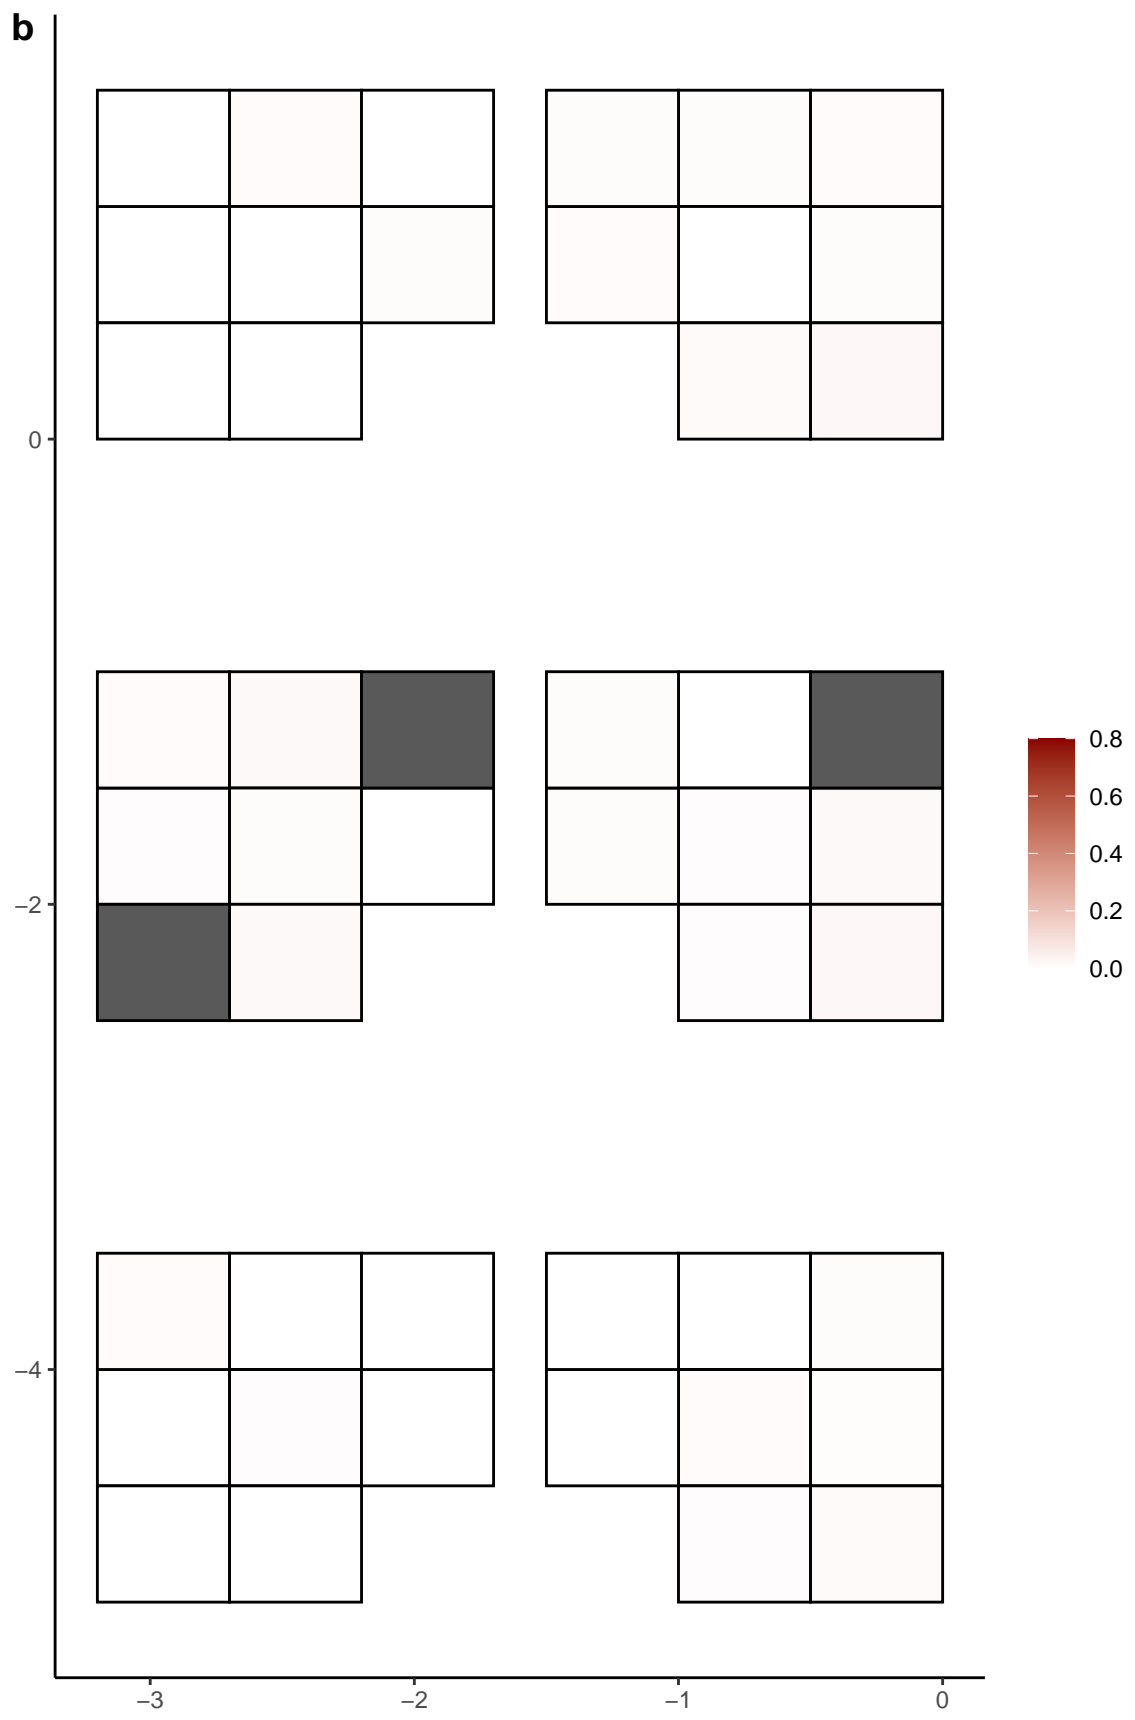

**a** ID05 2-164210723-G-A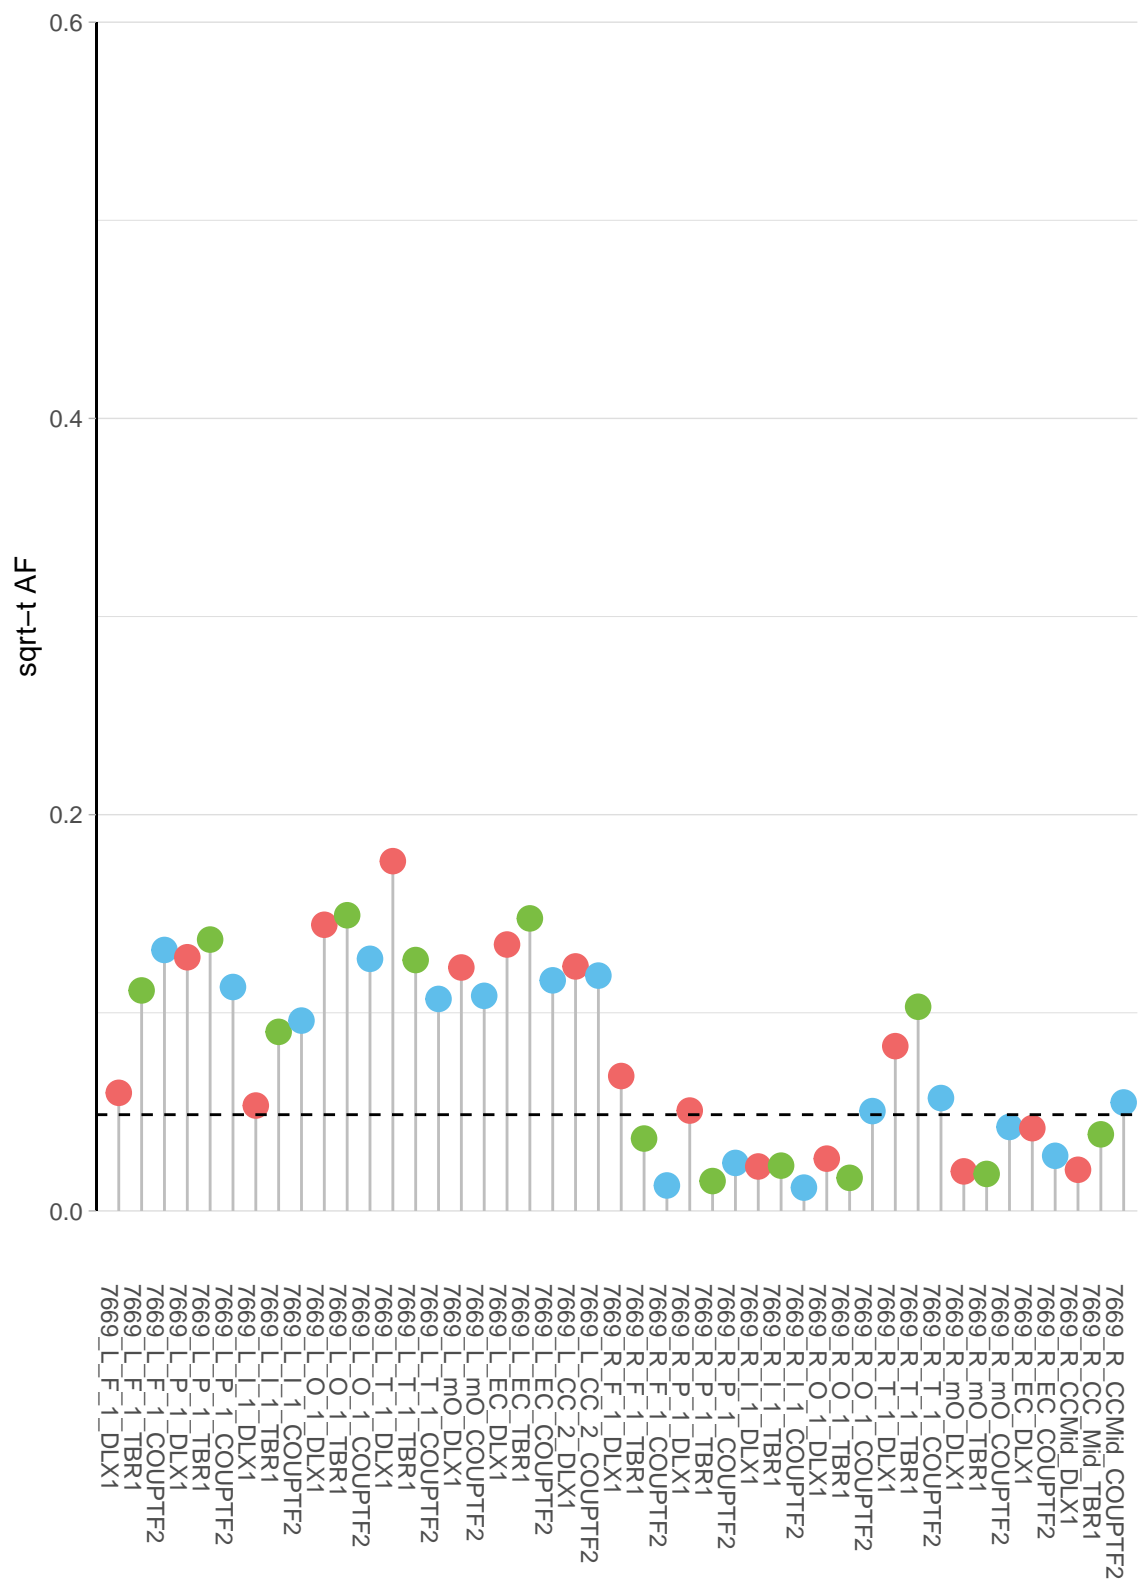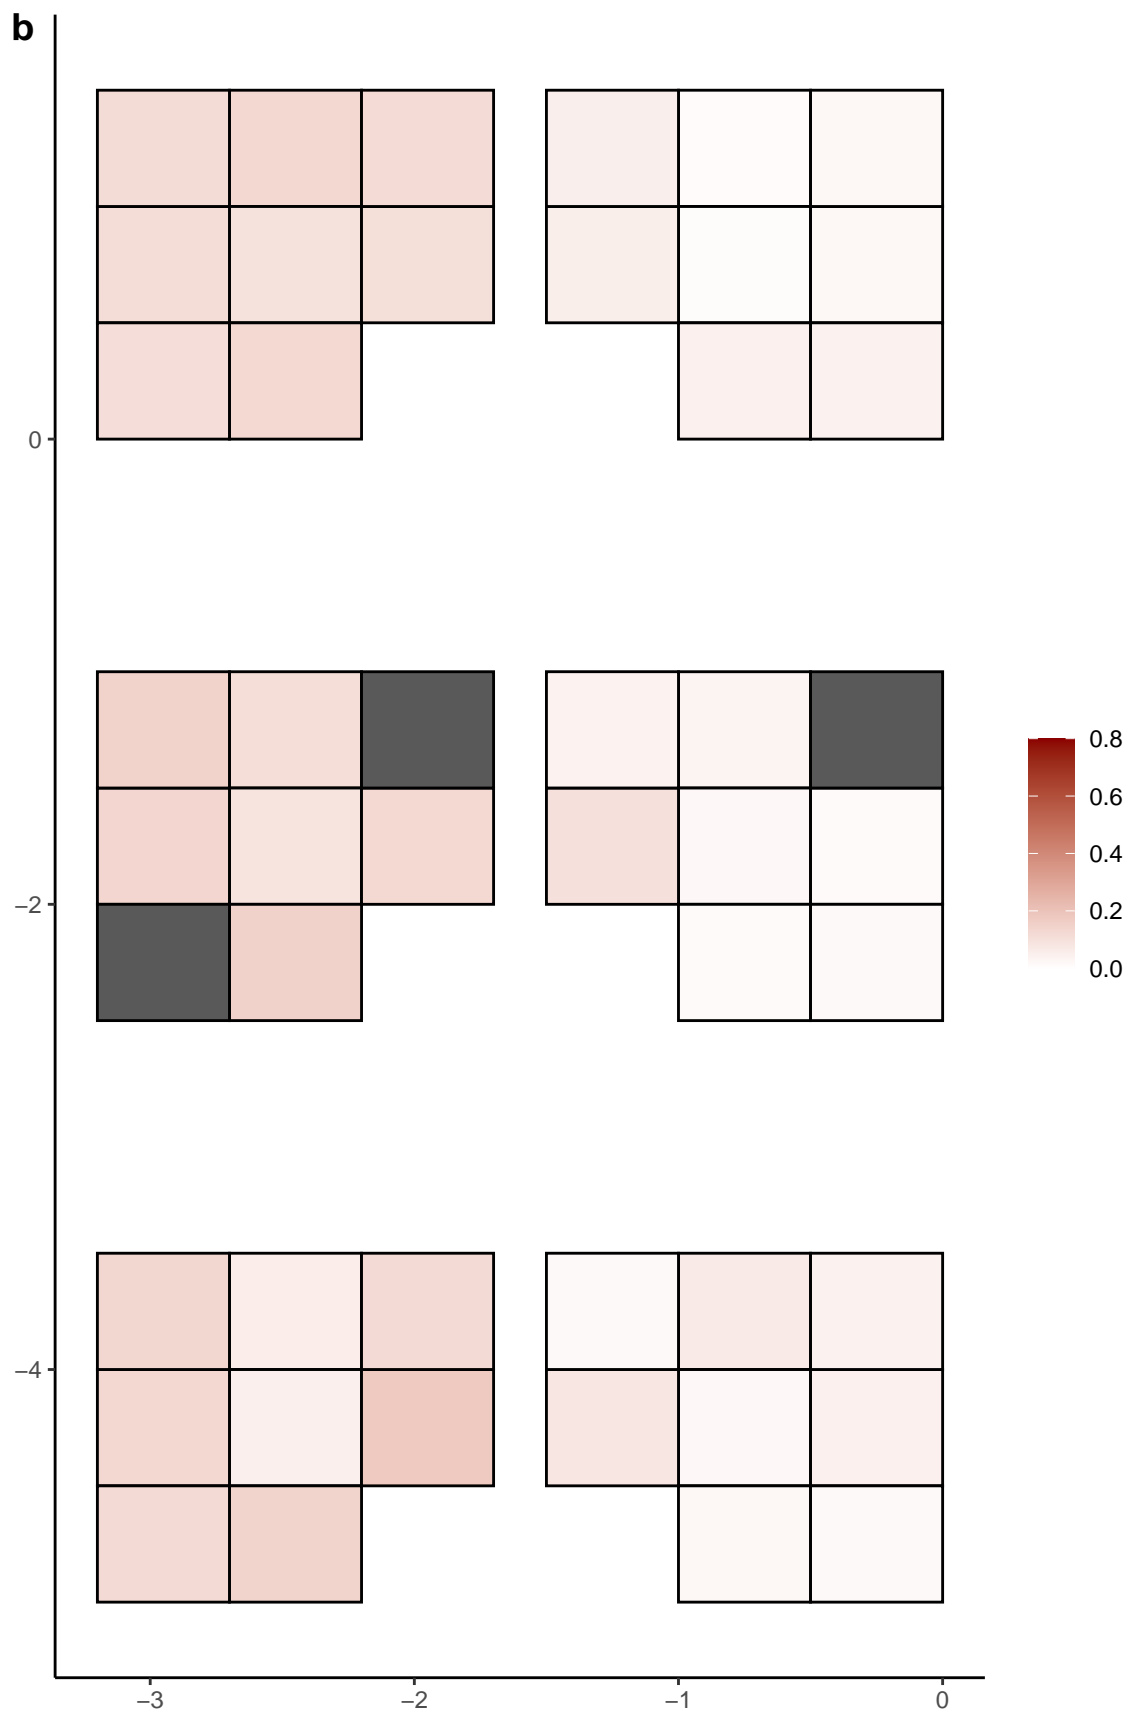





**a** ID05 2-167342653-C-T

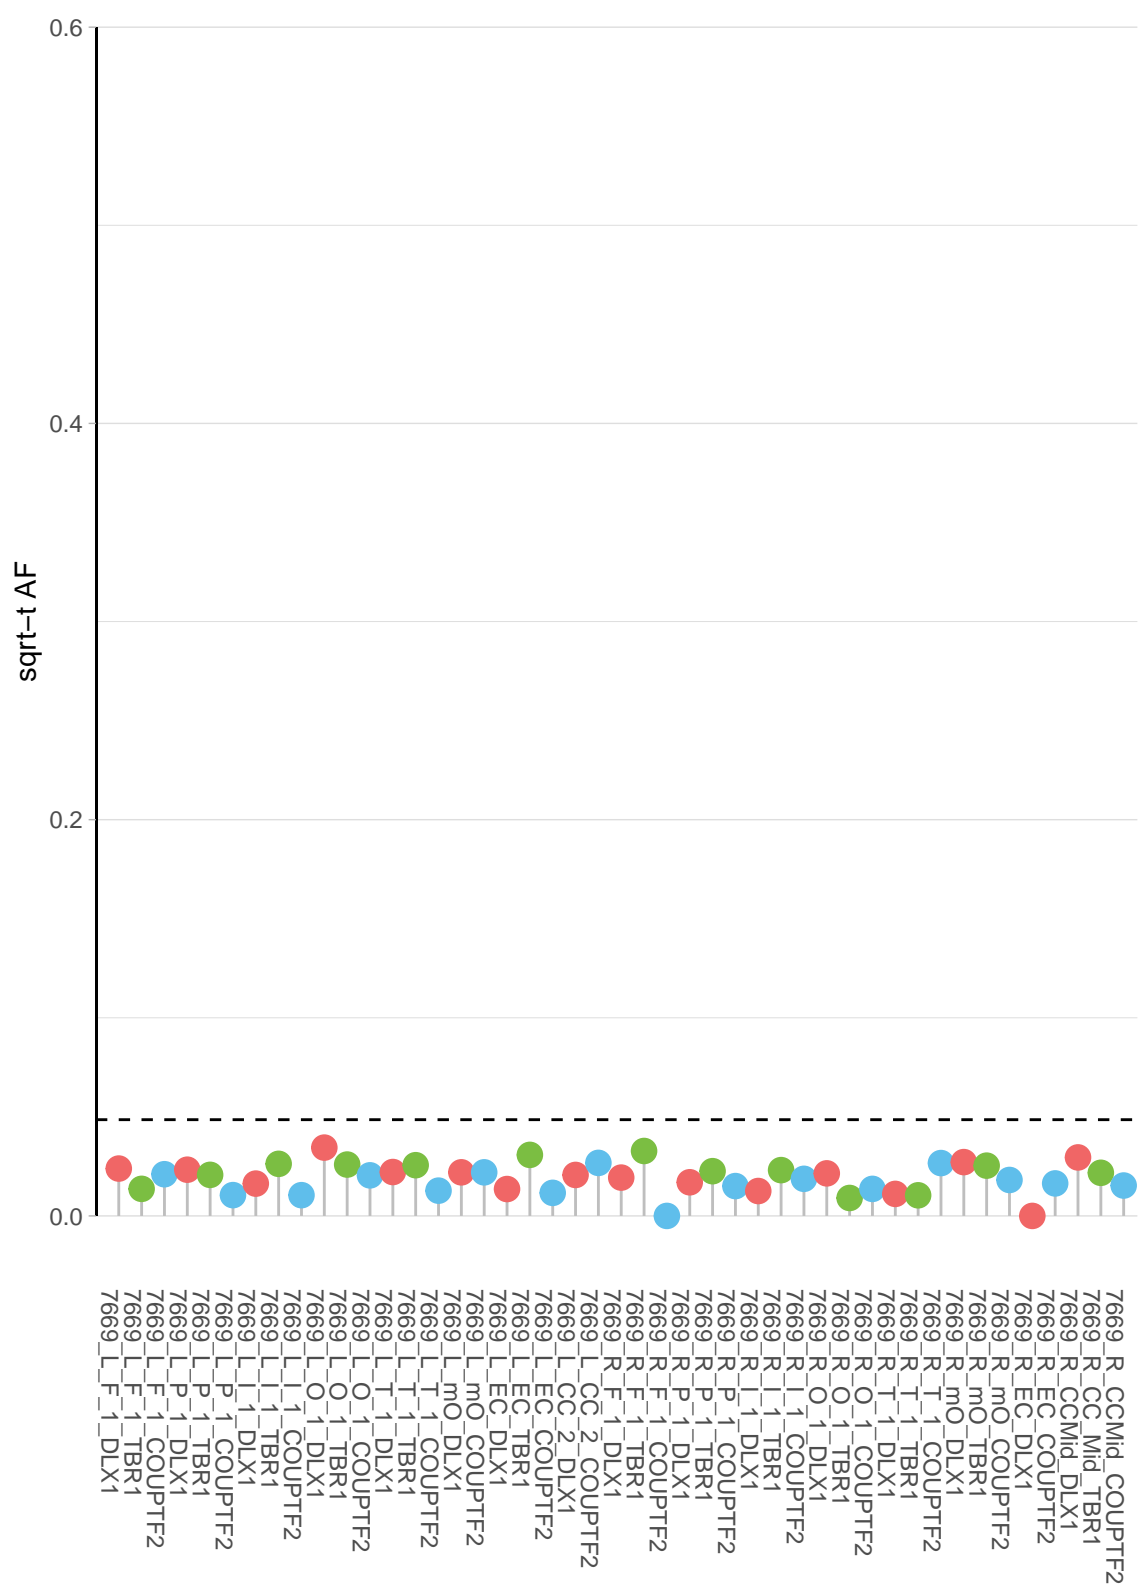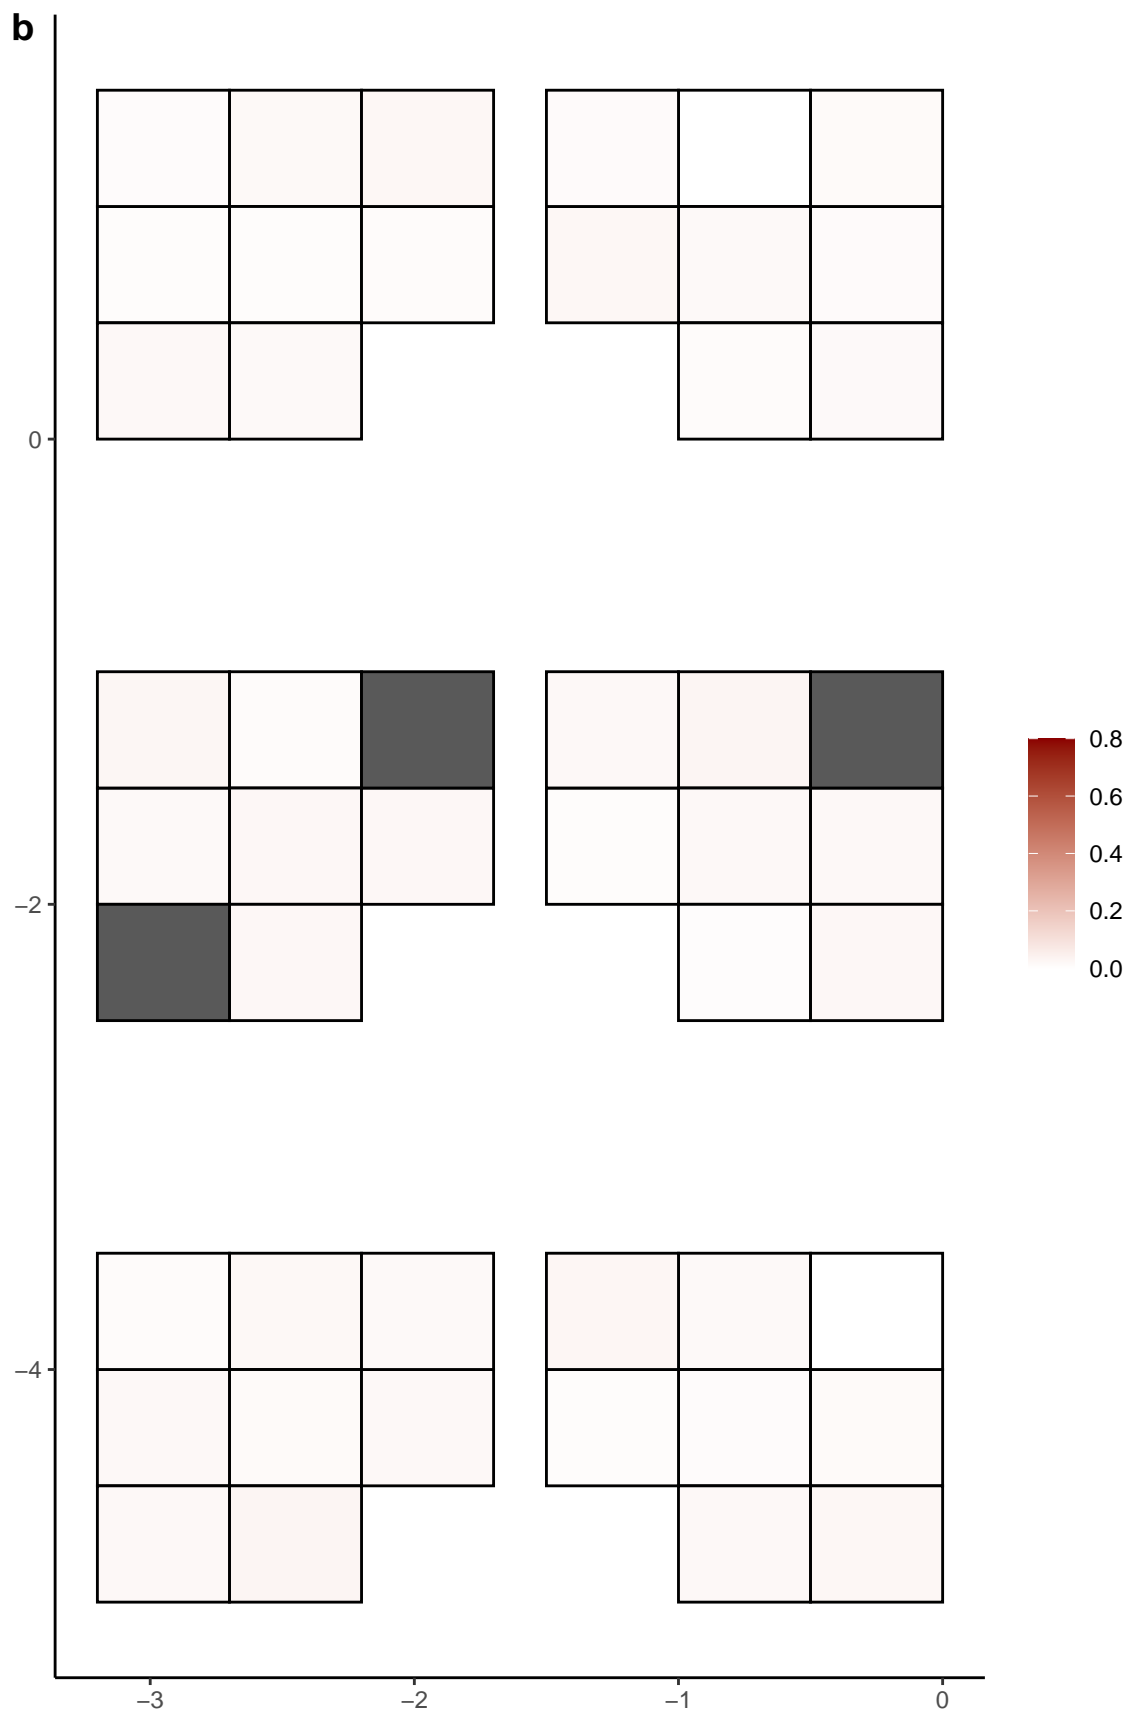



**a** ID05 2-172334983-T-G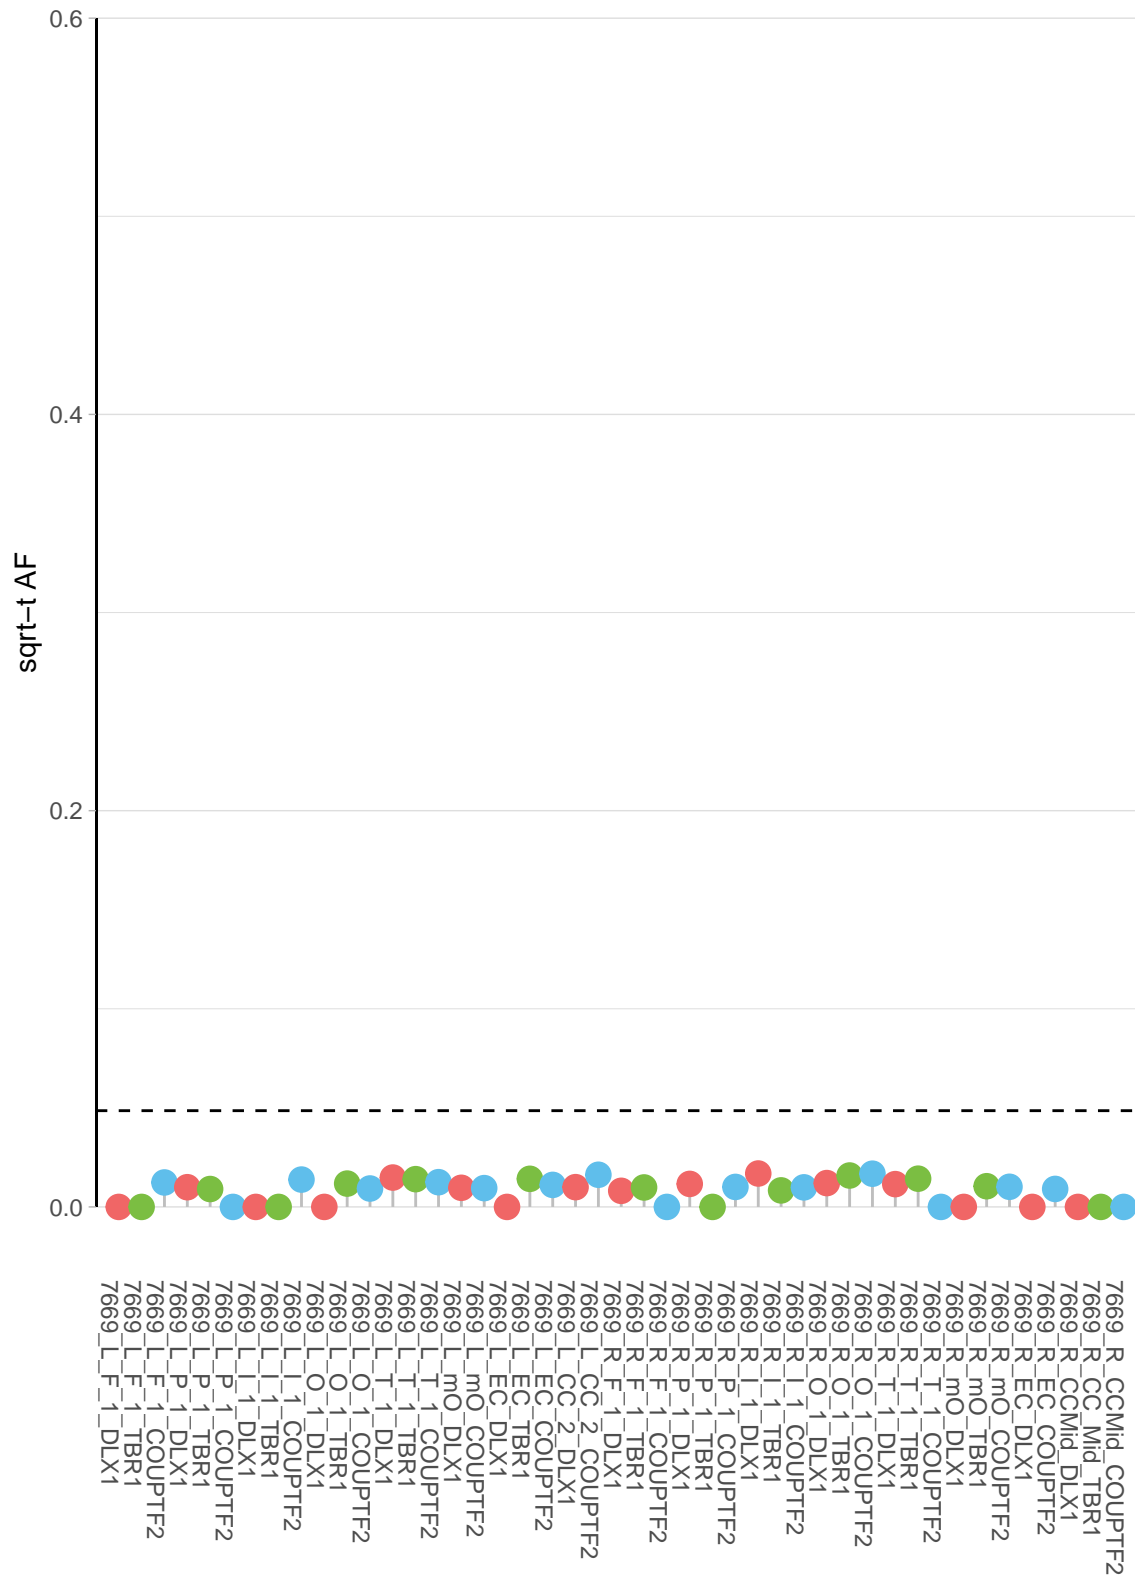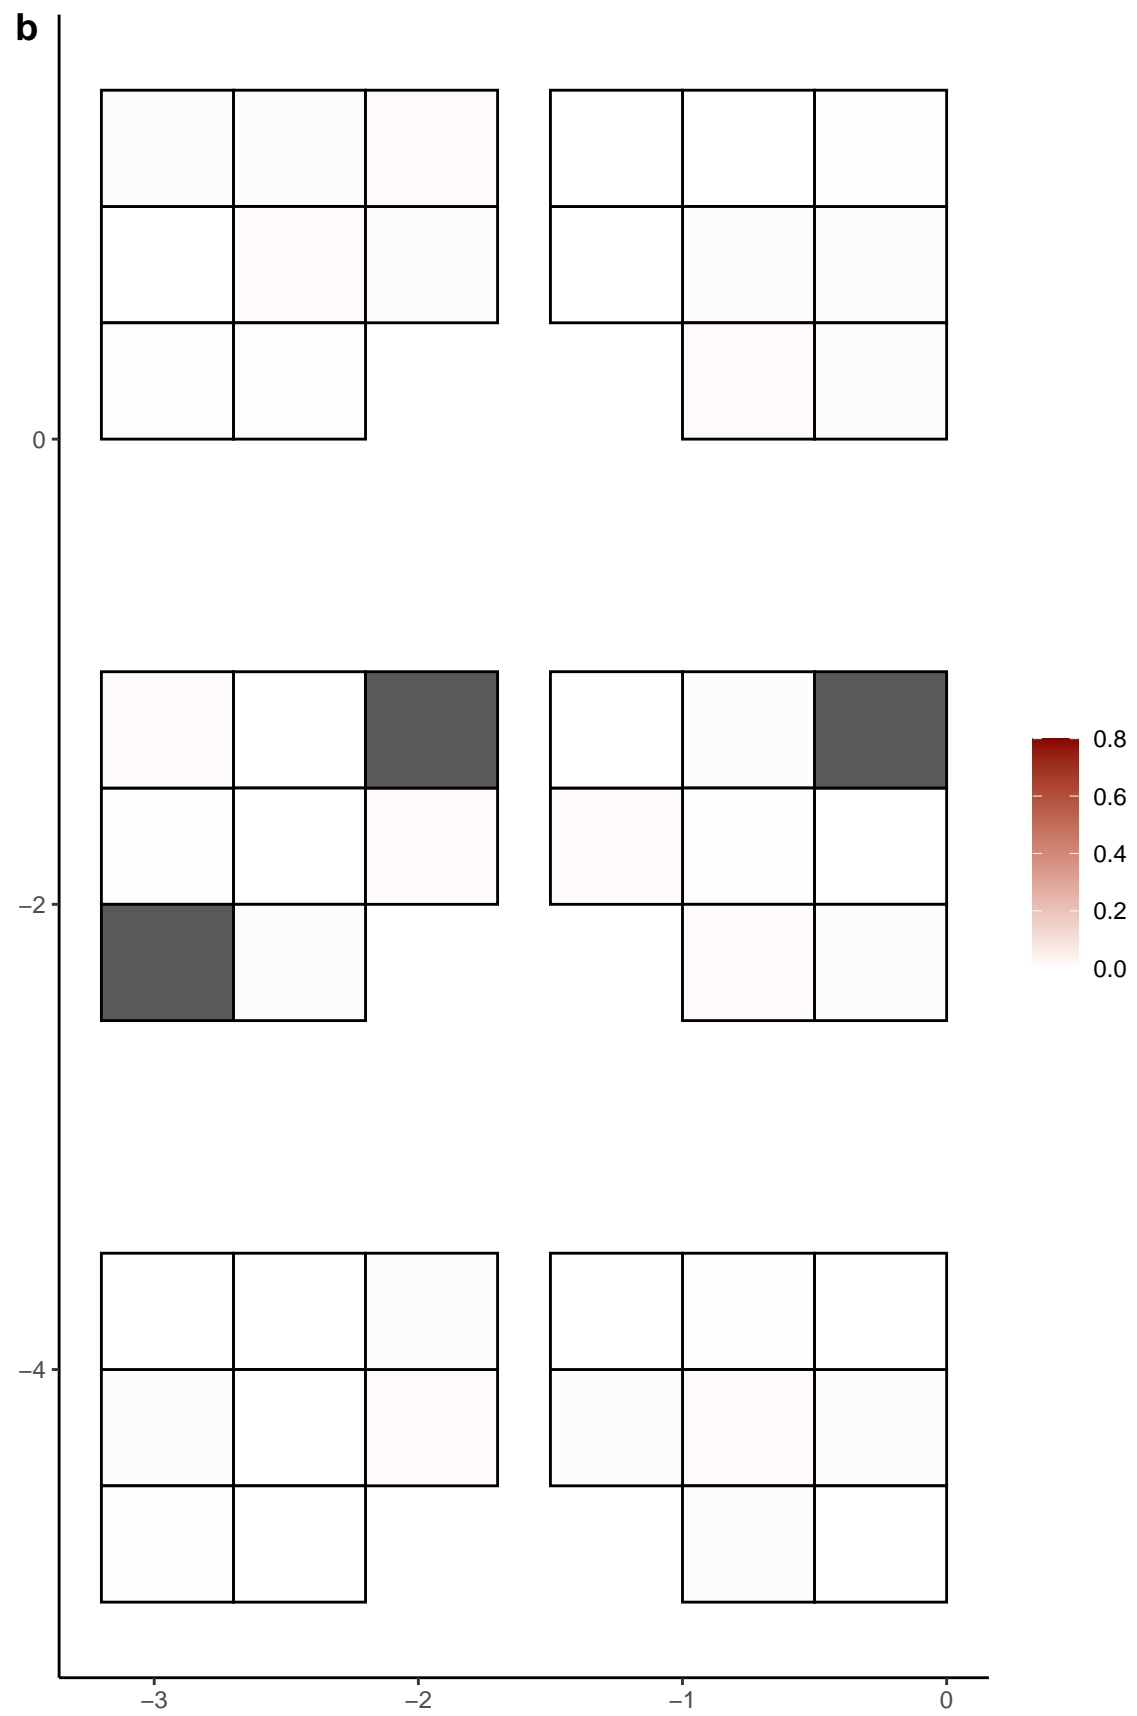

**a** ID05 2-177408568-G-A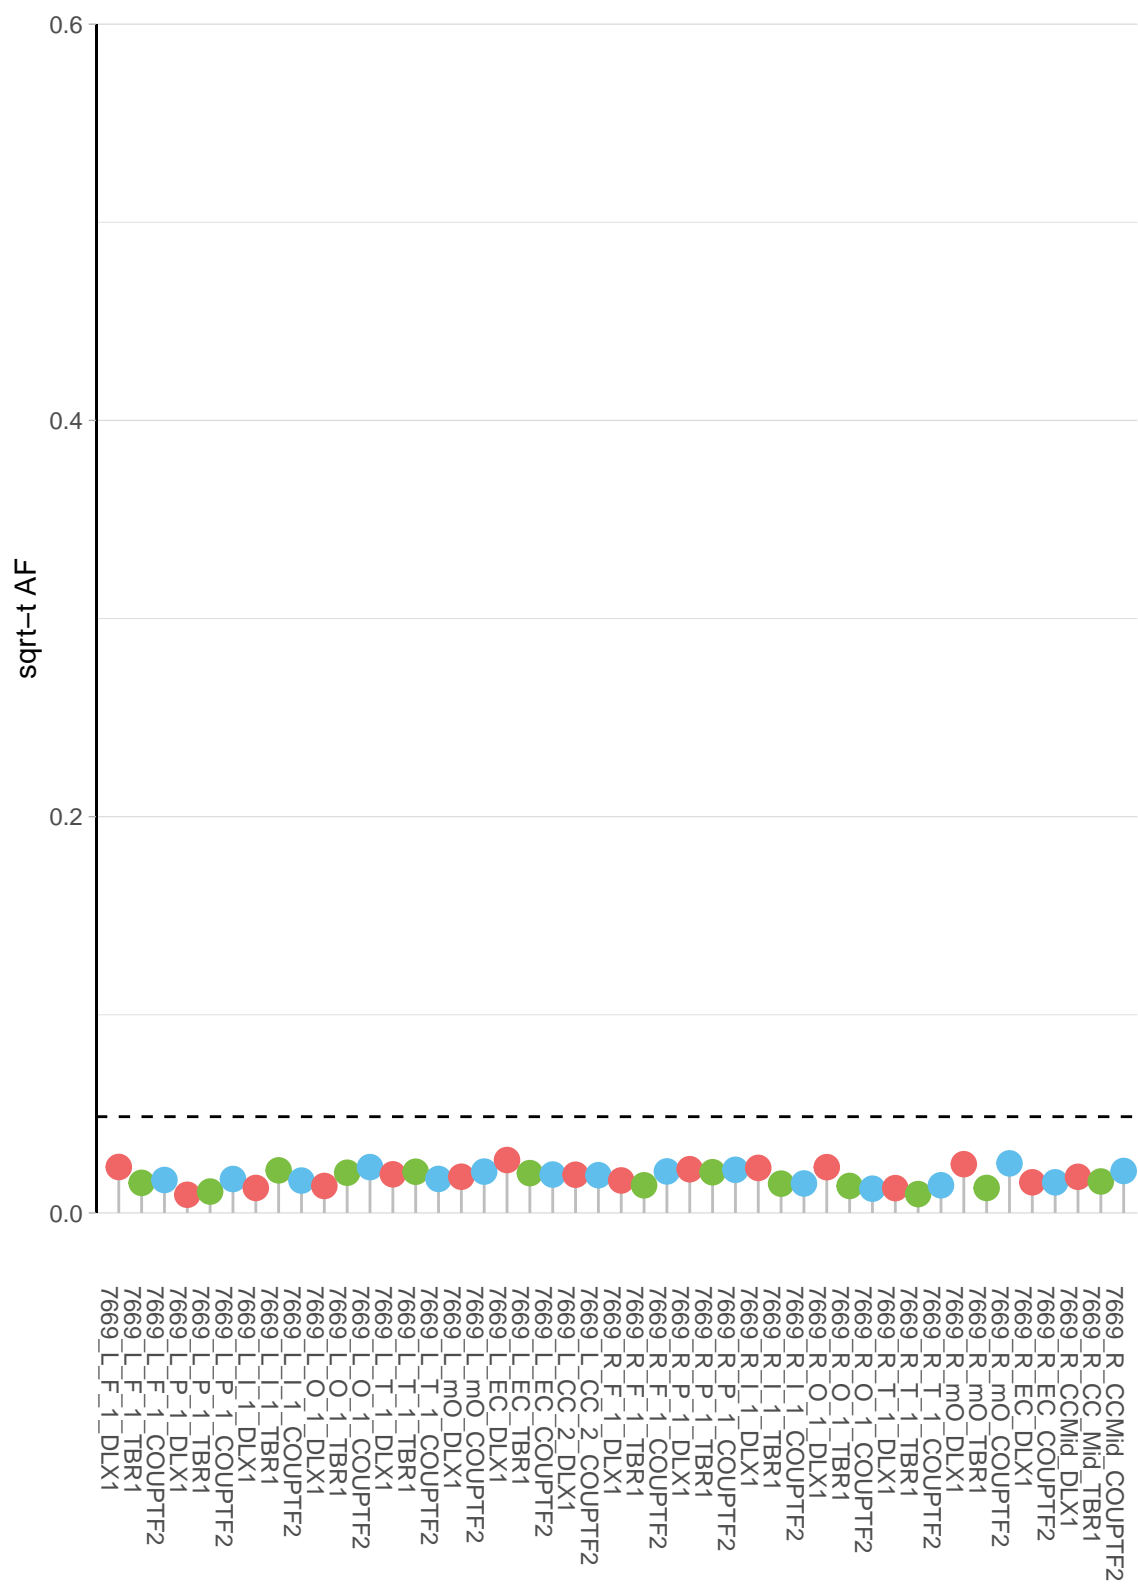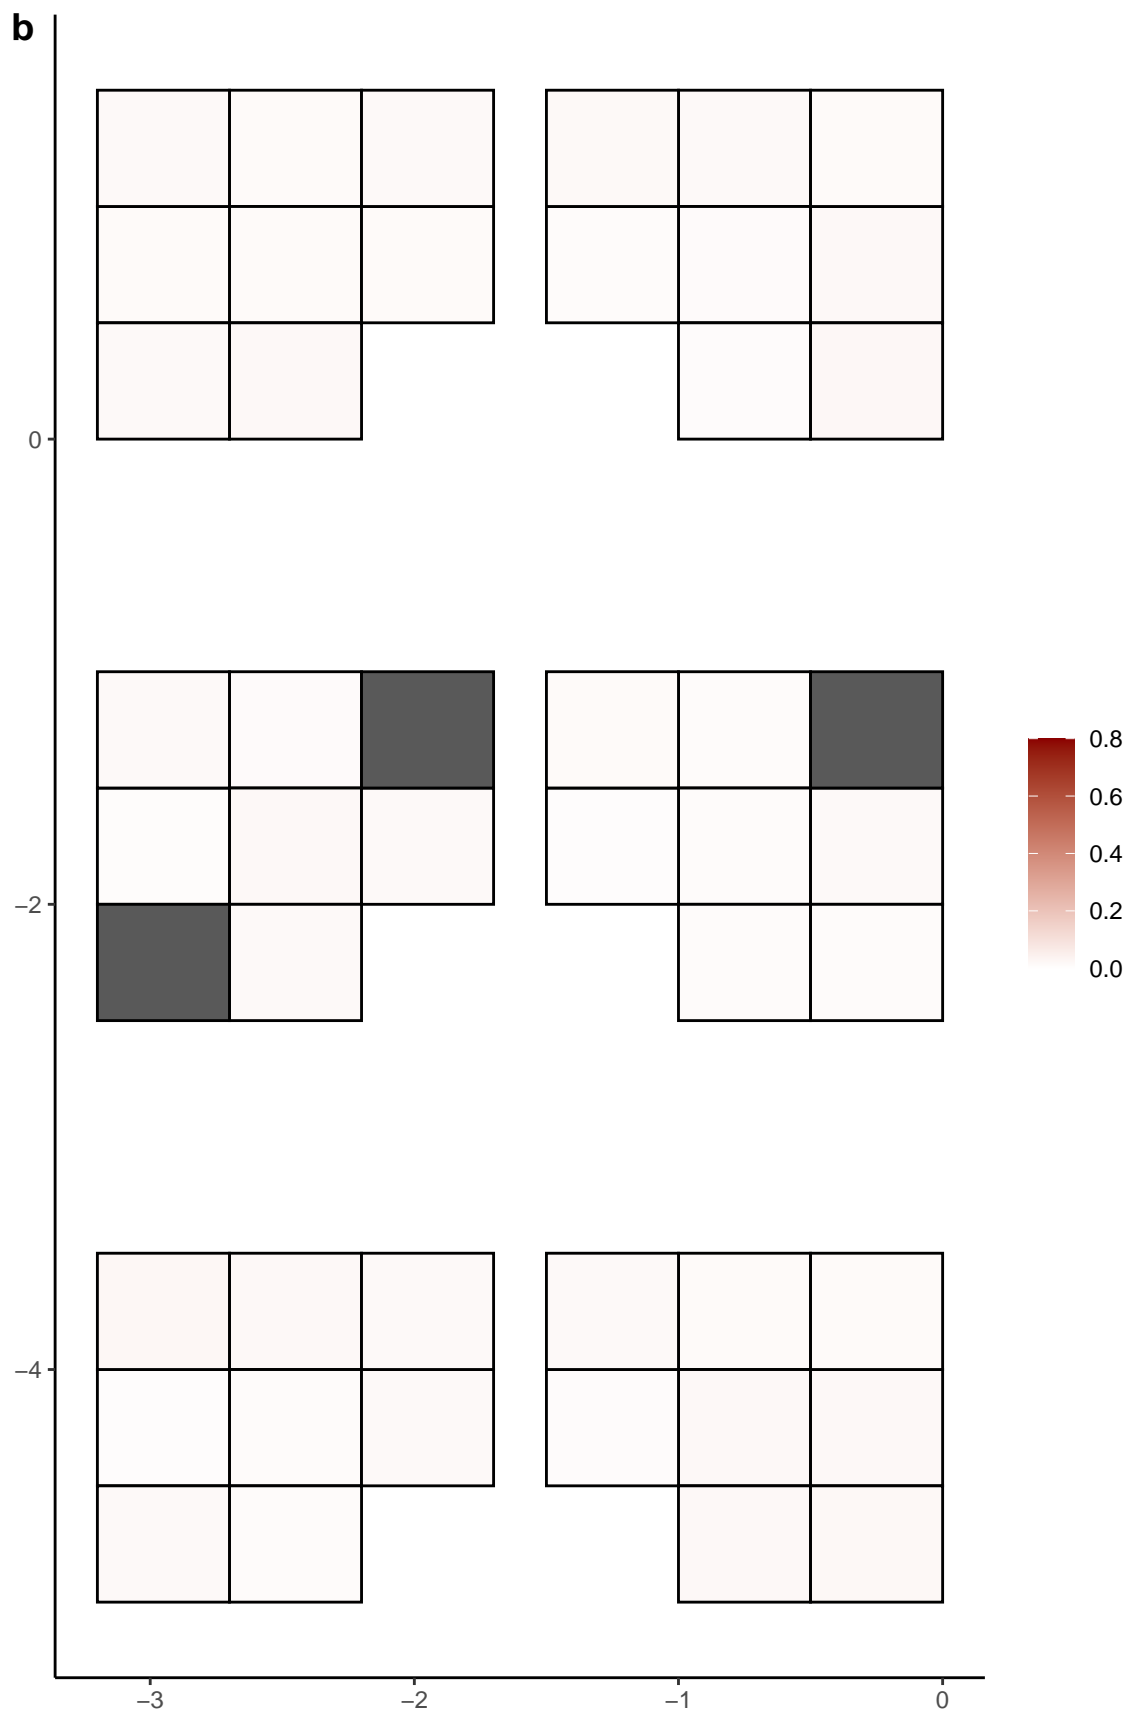

**a** ID05 2-178026730-A-T

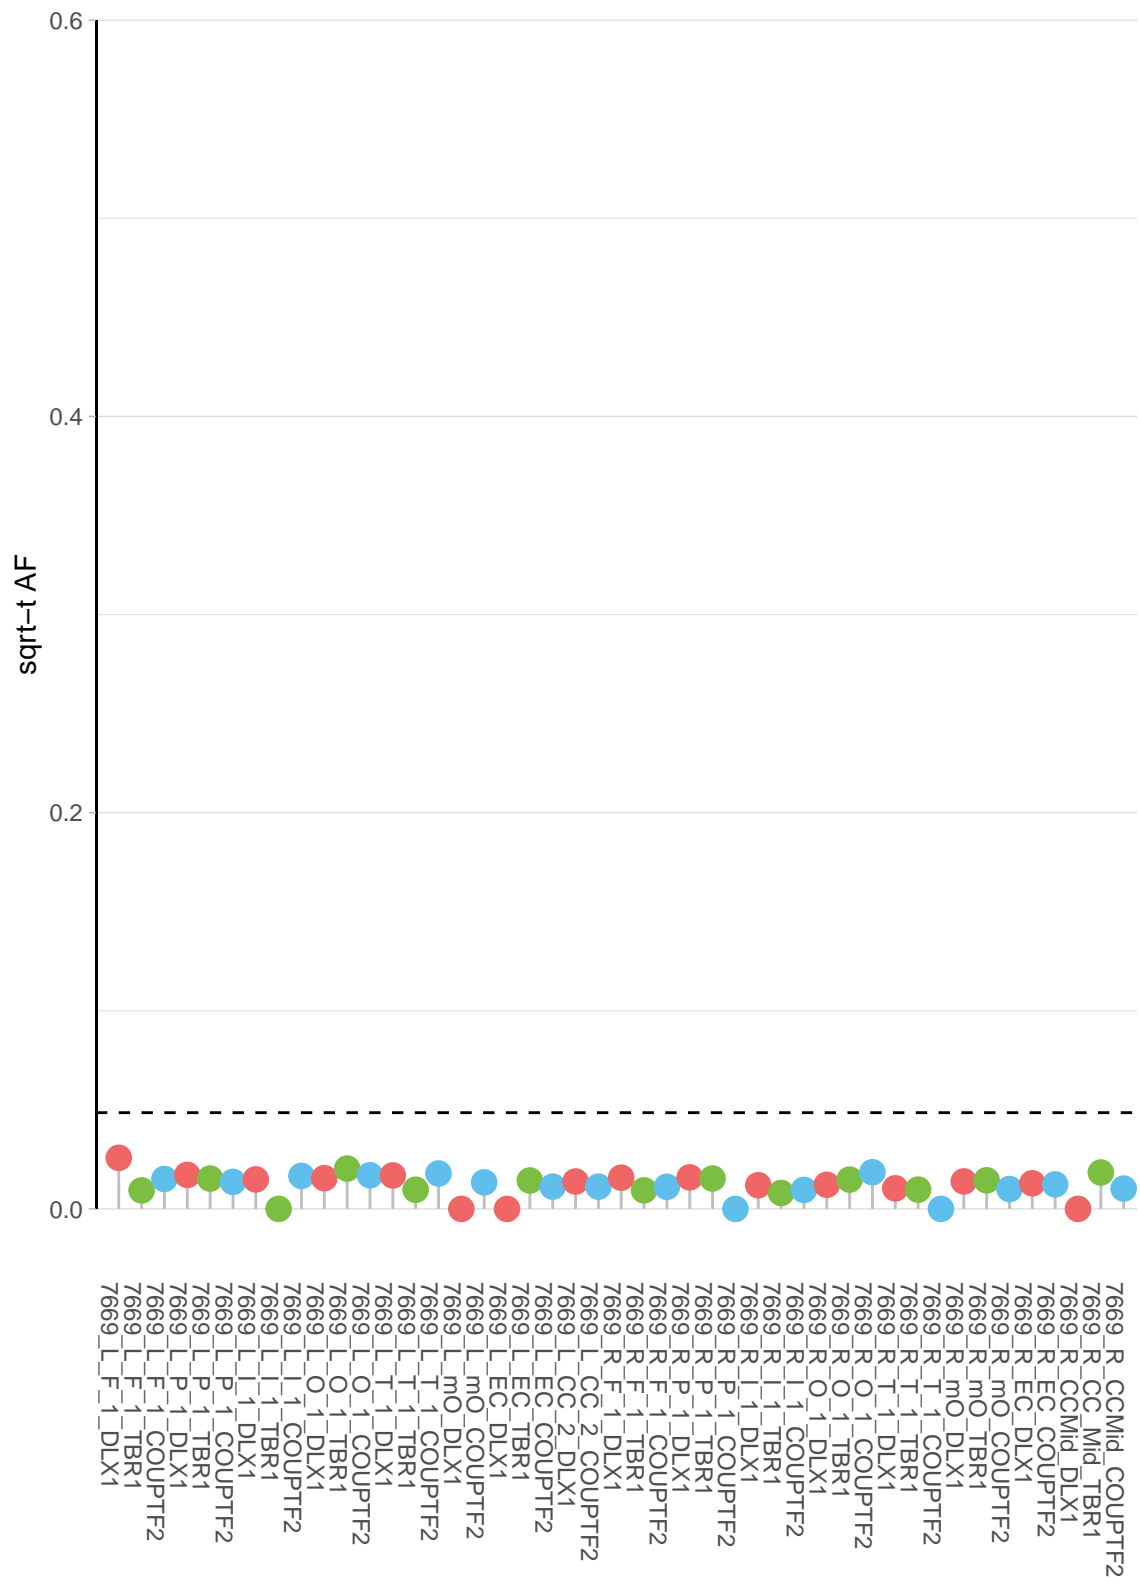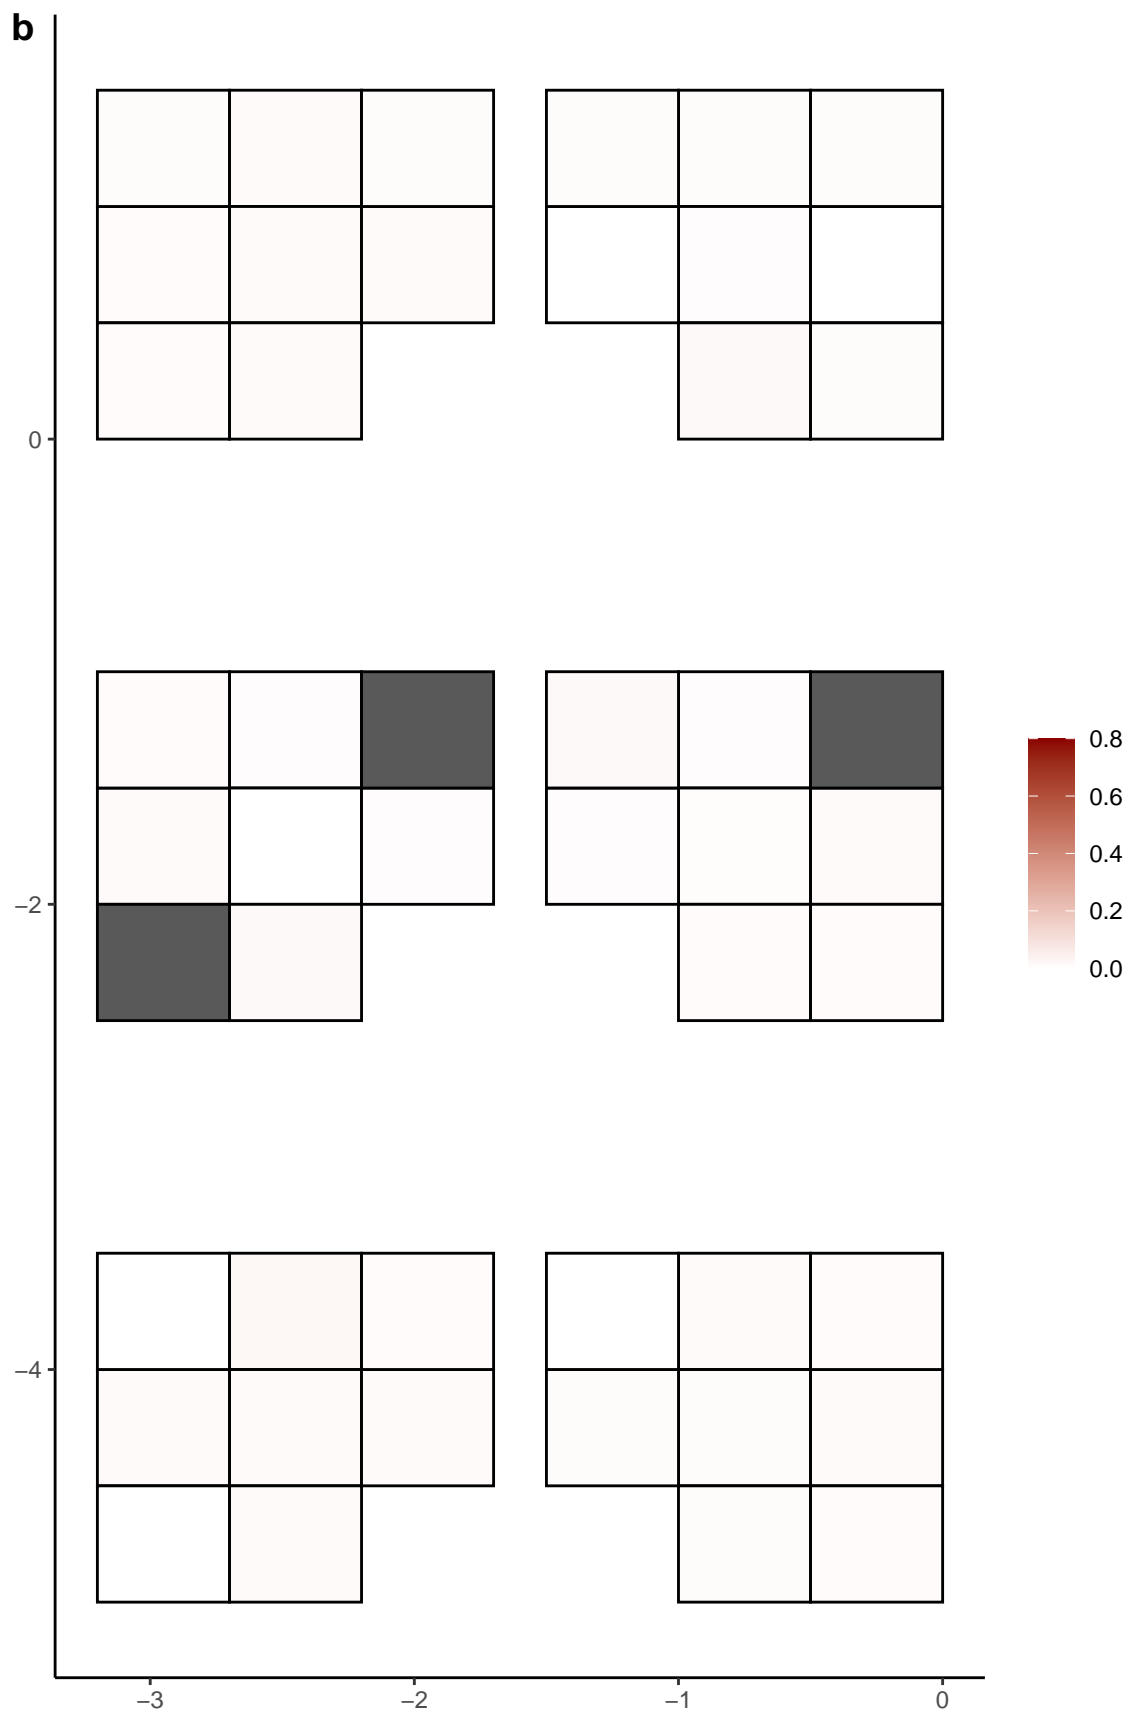

**a** ID05 2-187776755-G-A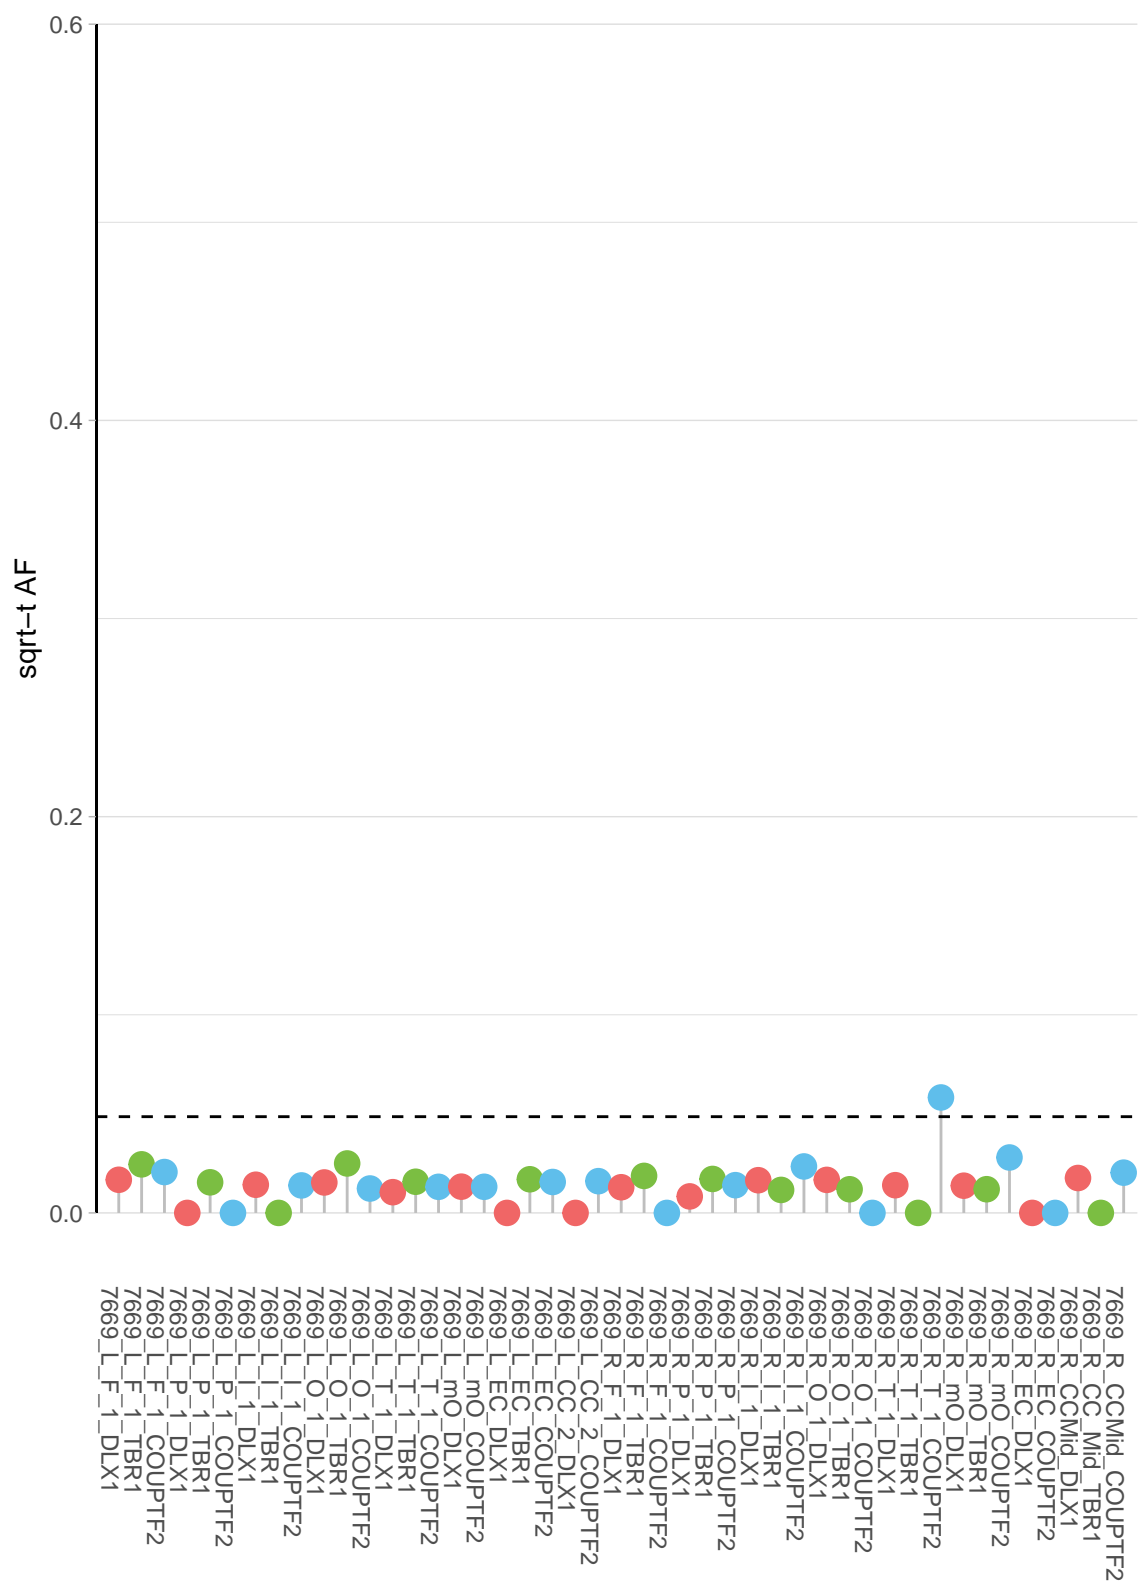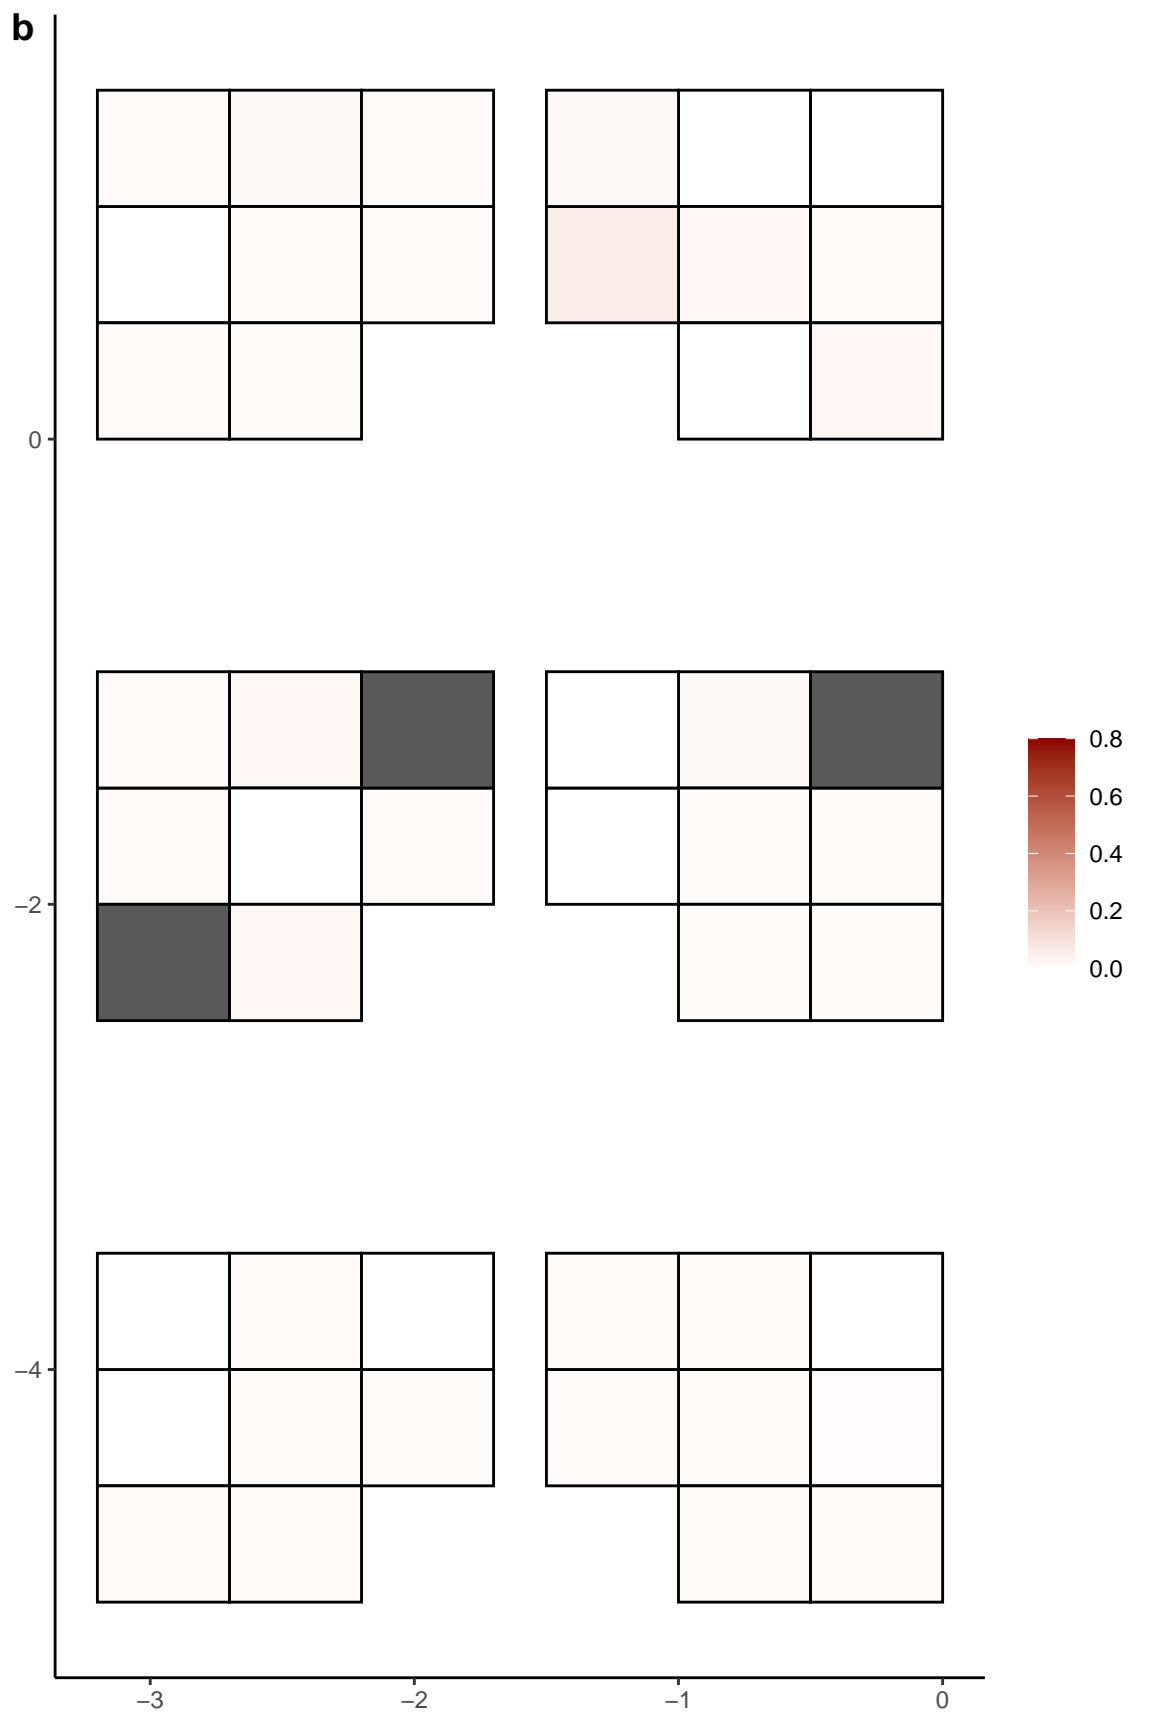







**a** ID05 2-193831190-T-A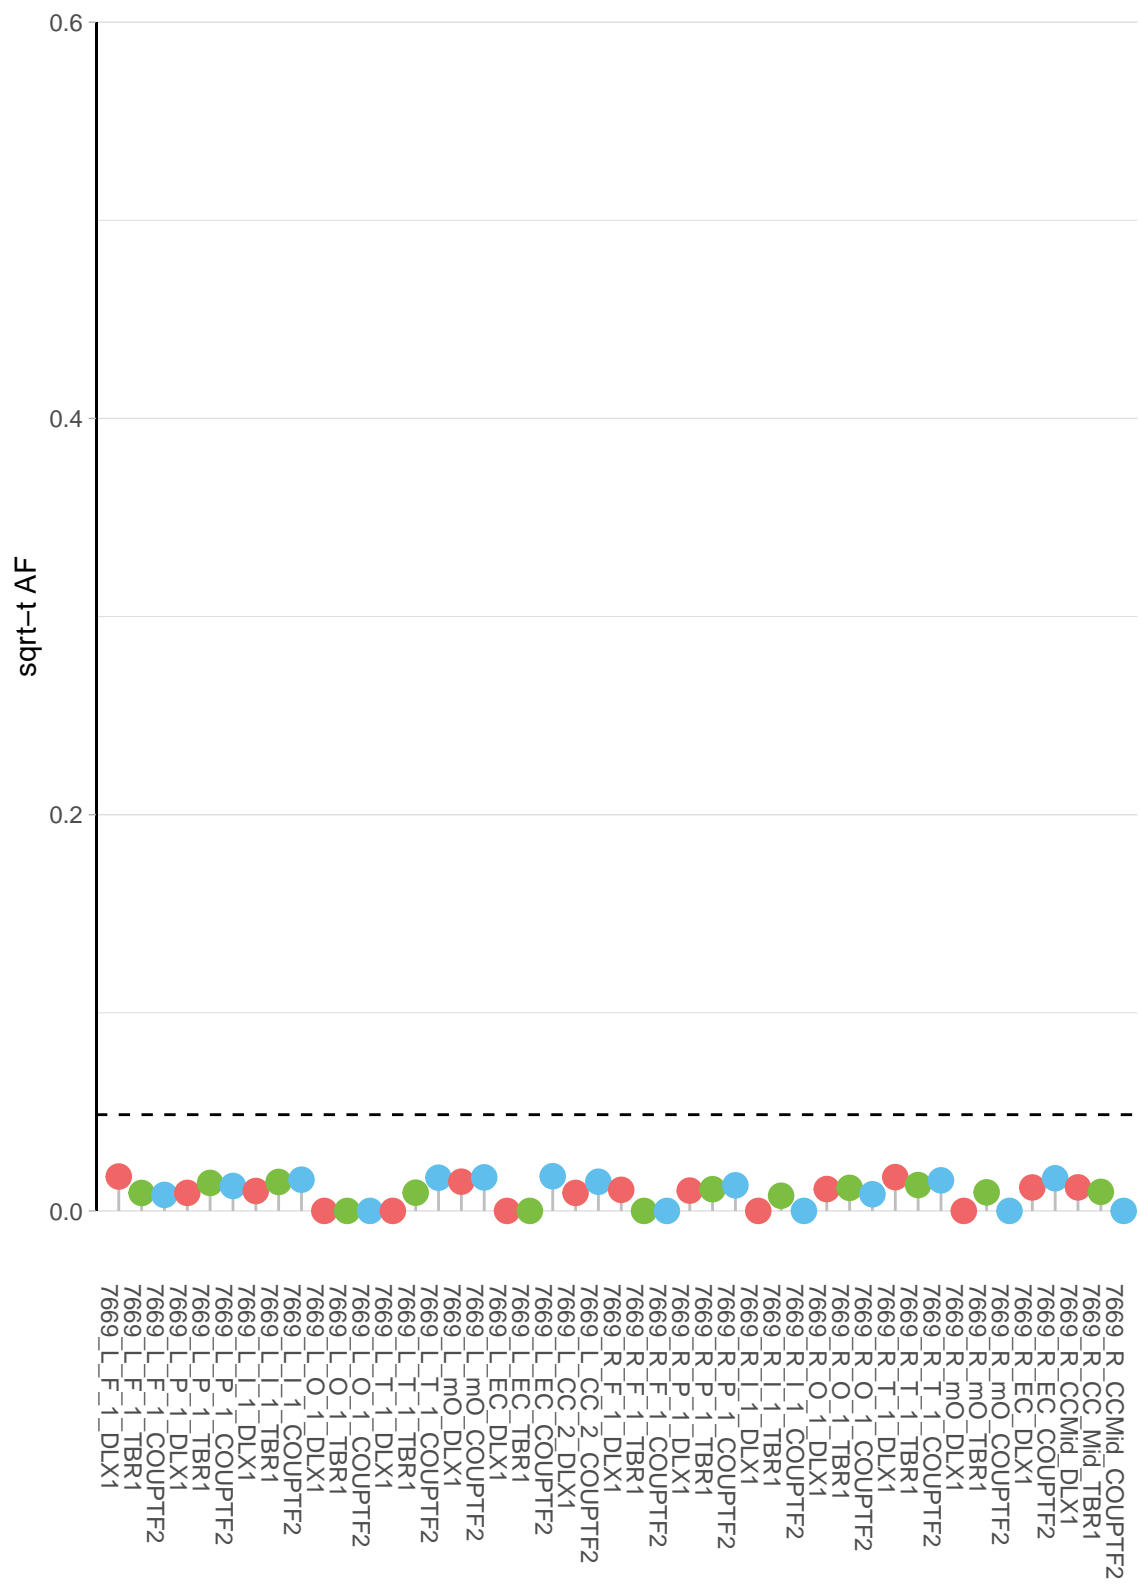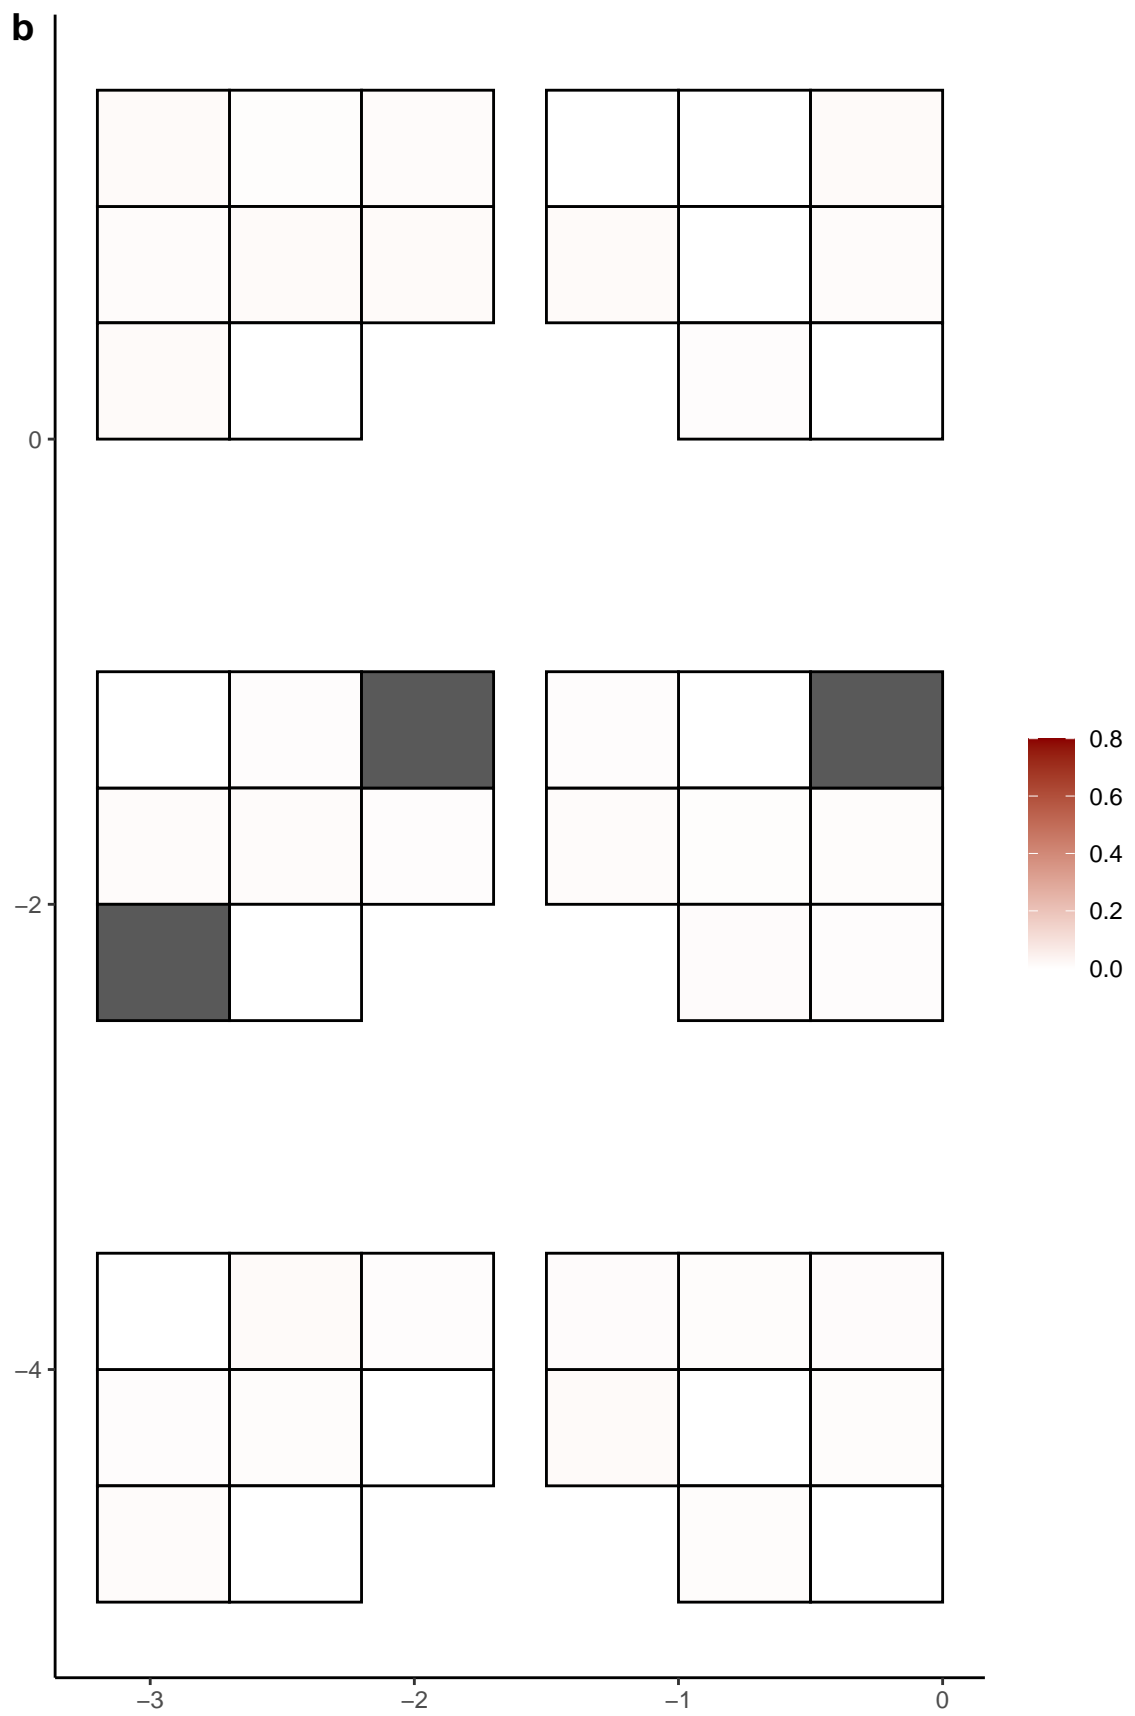

**a** ID05 2-198773820-A-G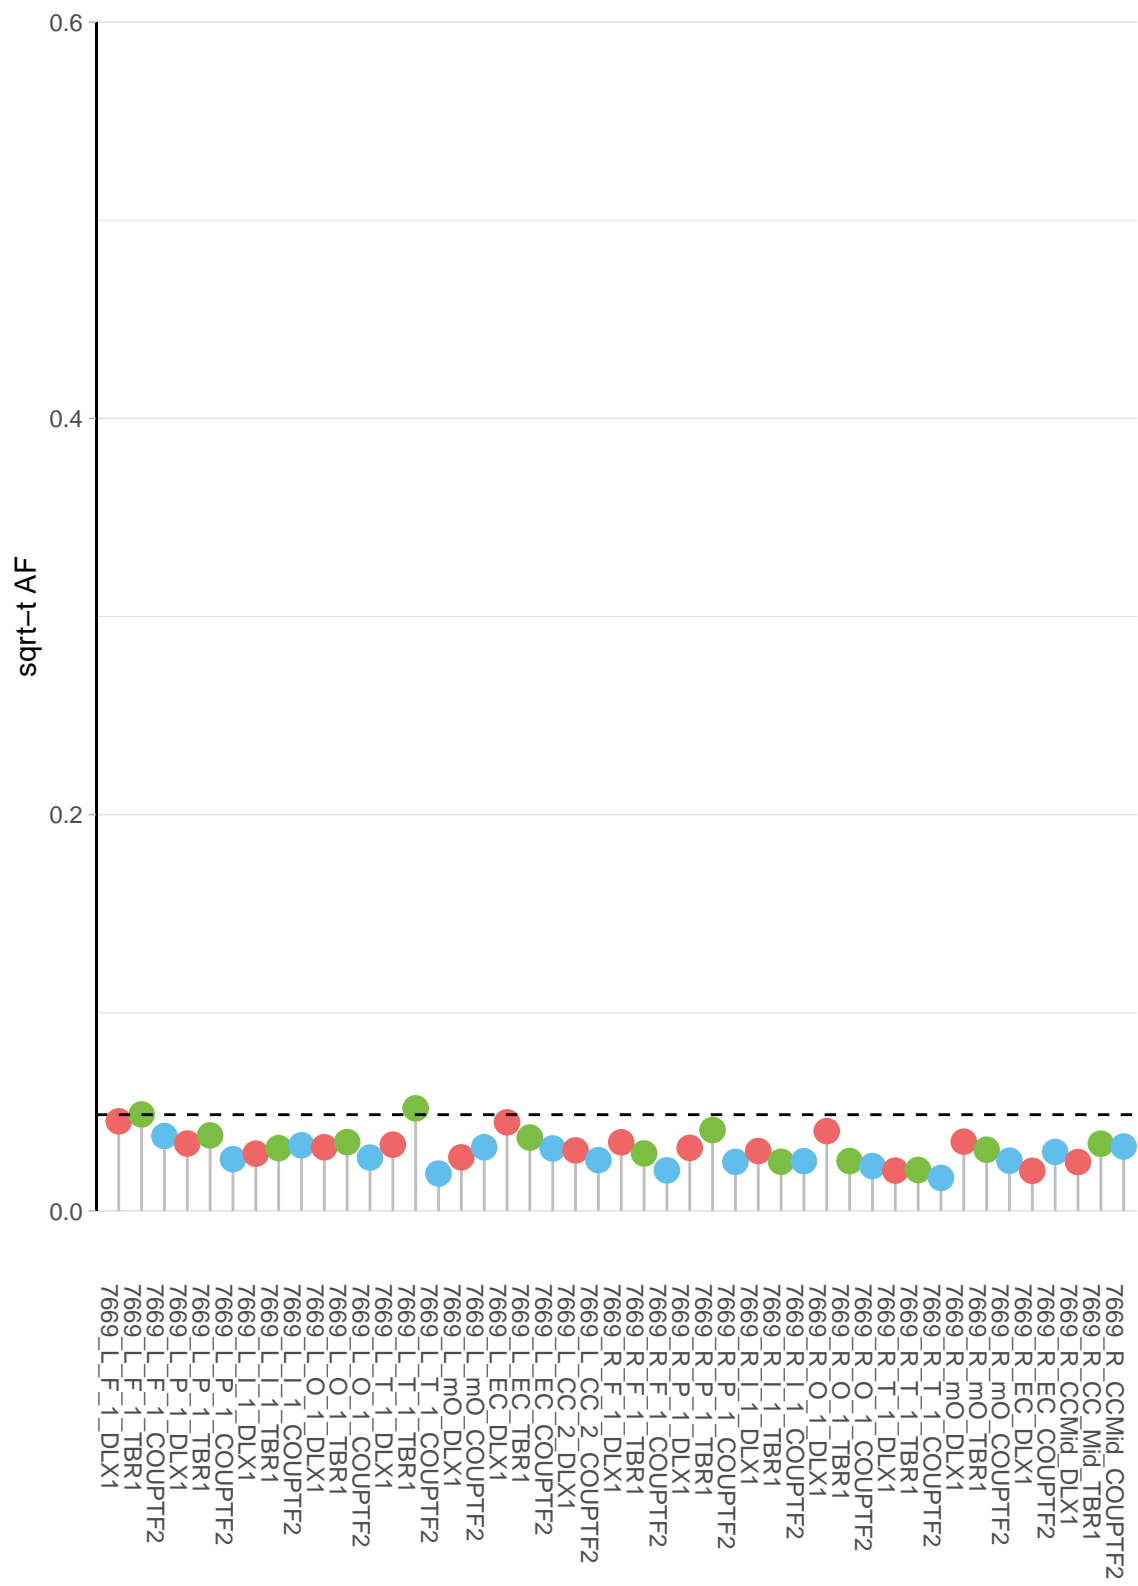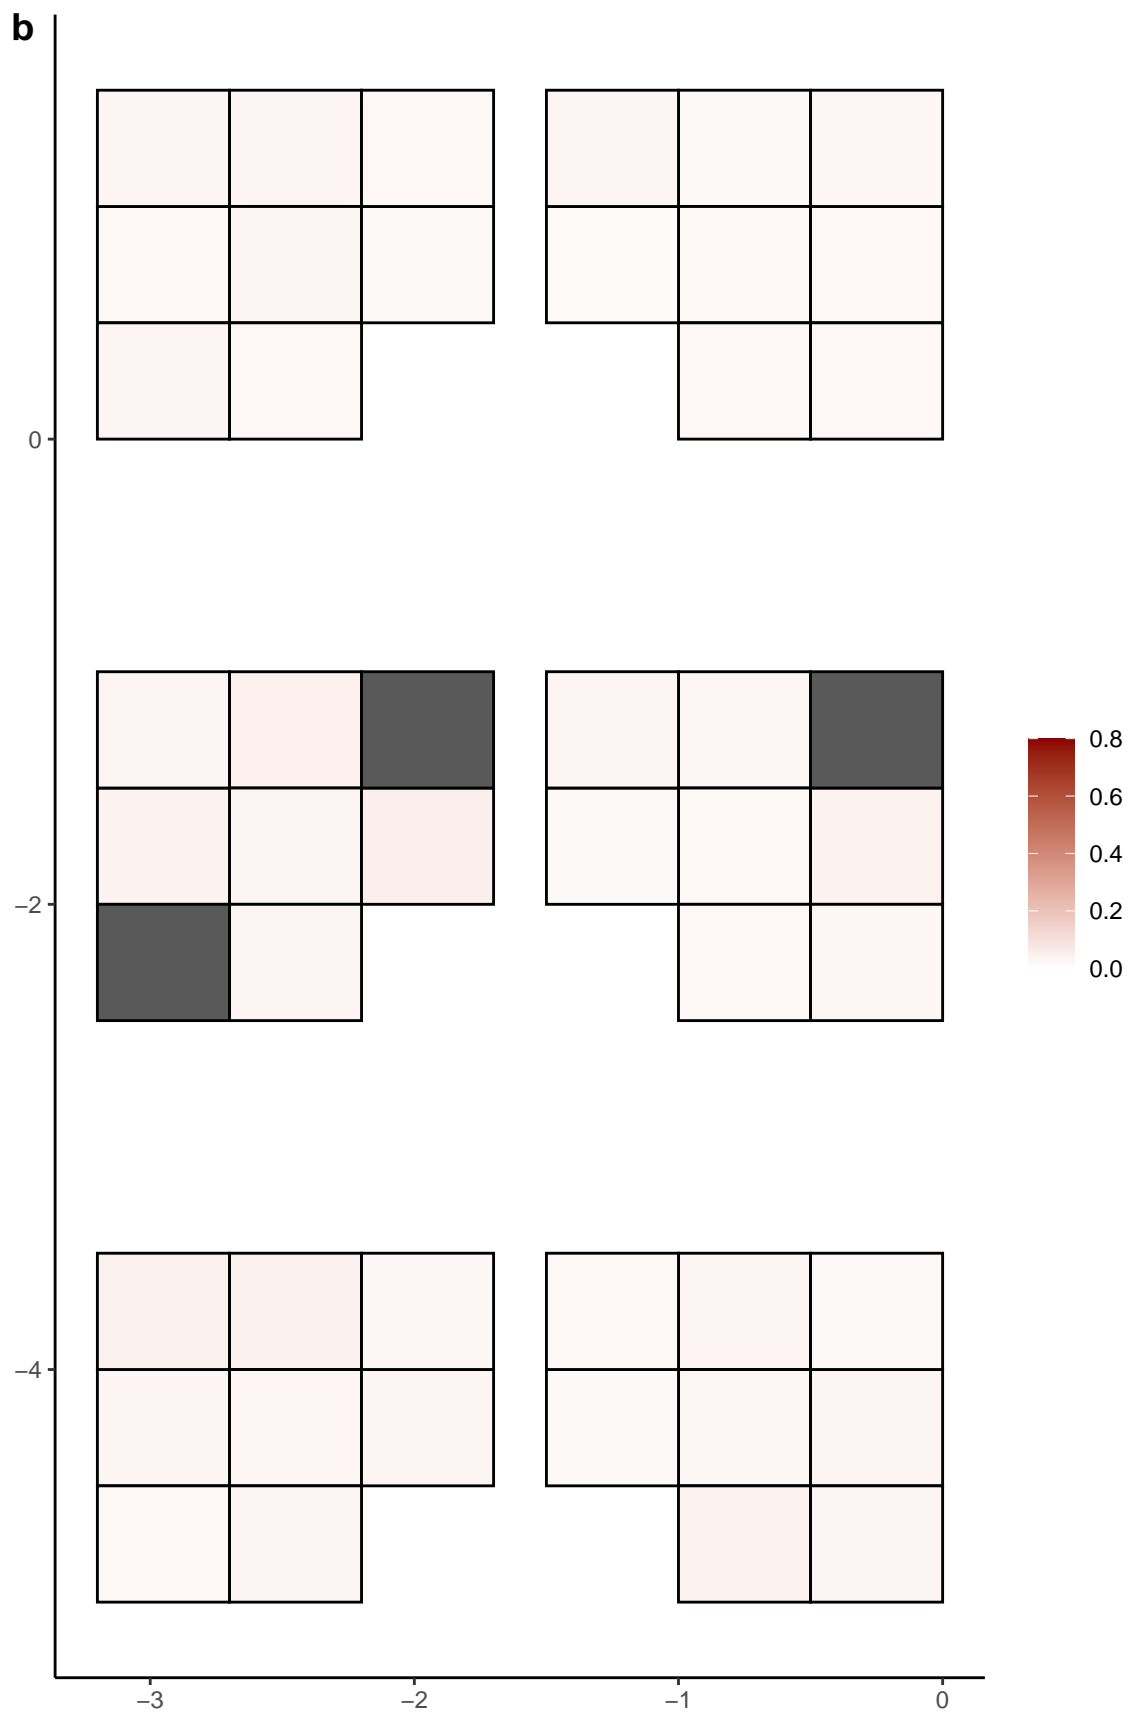

**a** ID05 2-203467456-T-C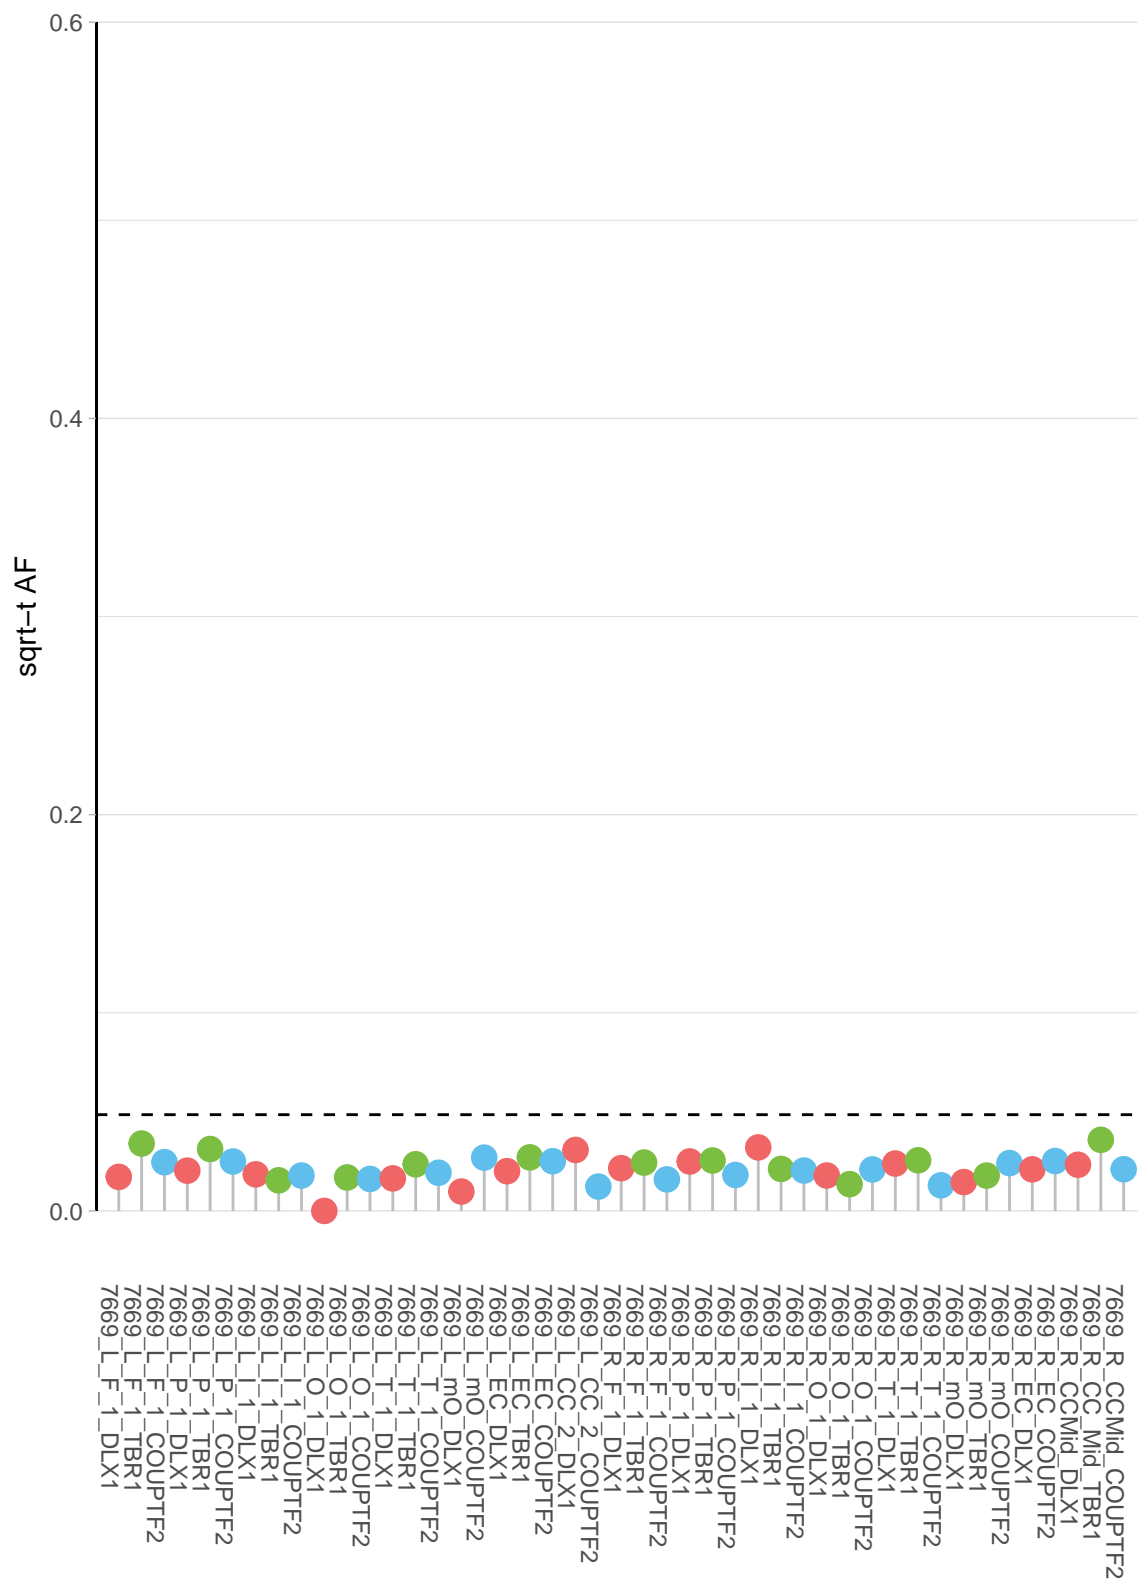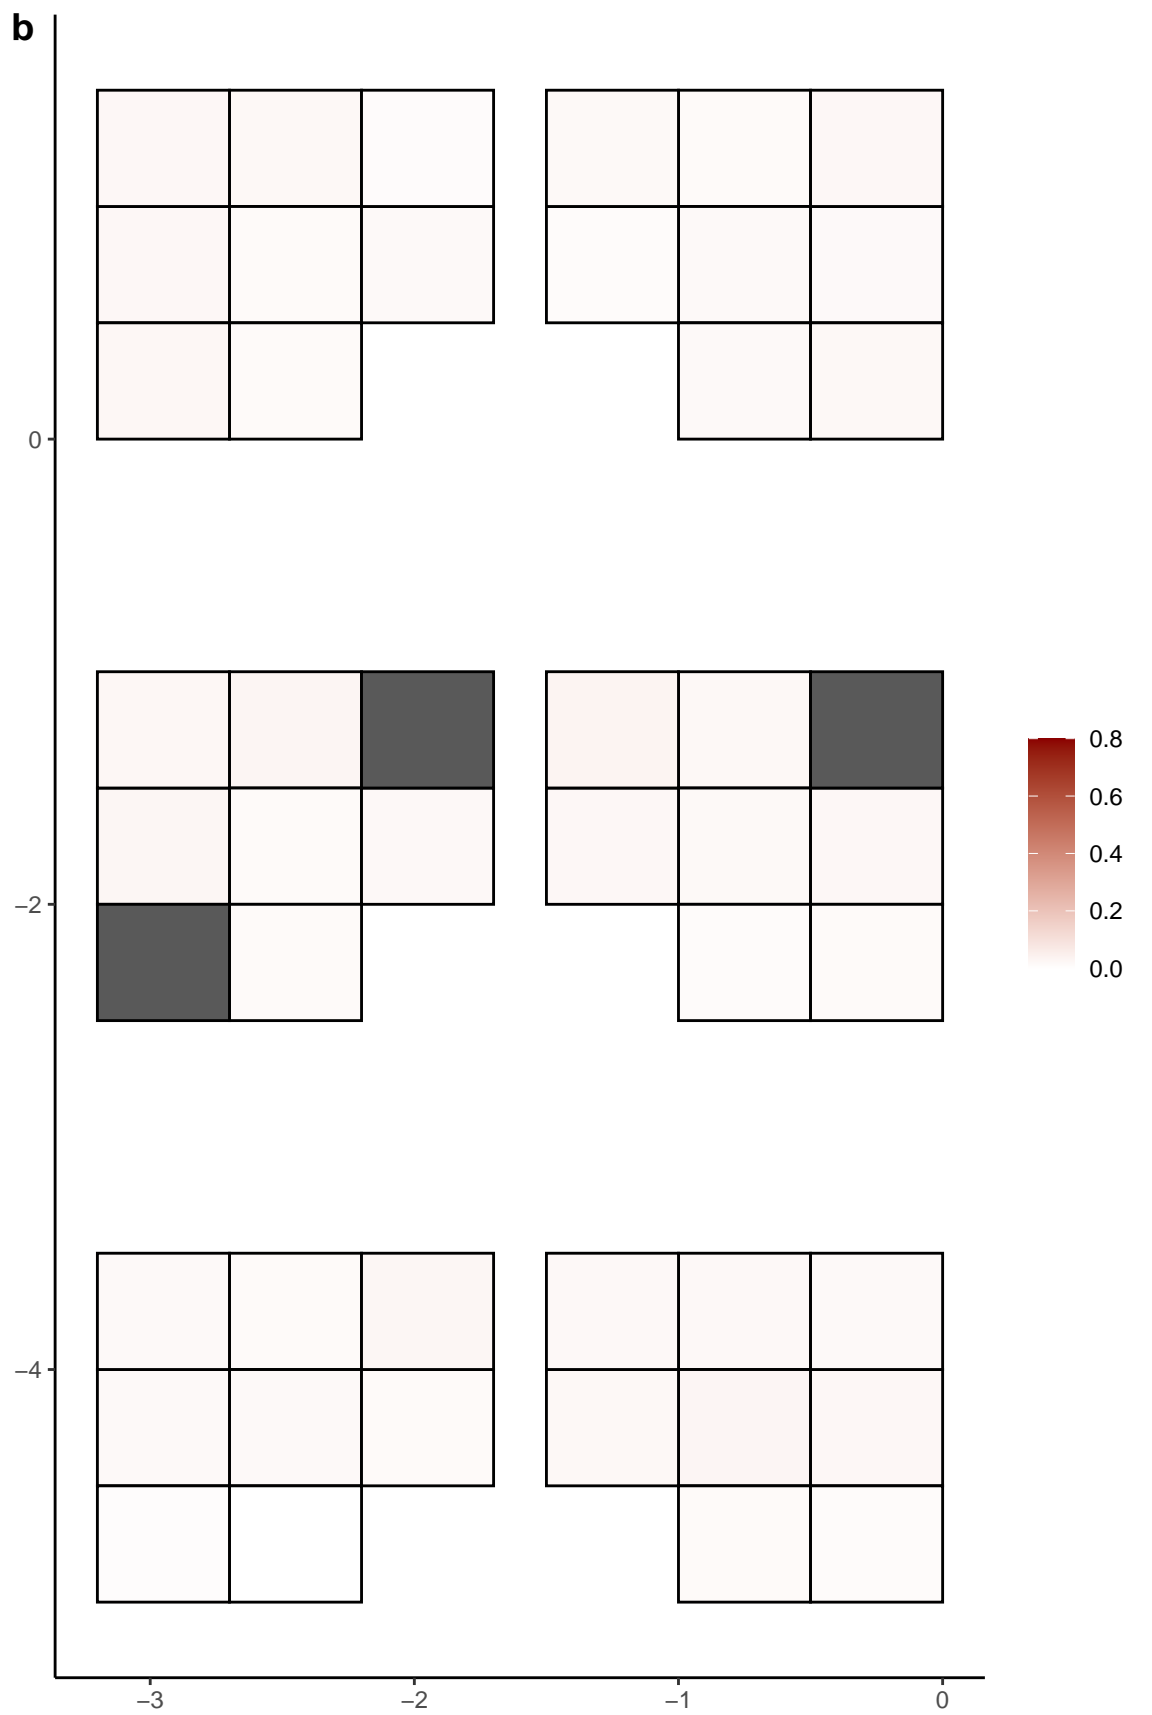

**a** ID05 2-204722237-C-T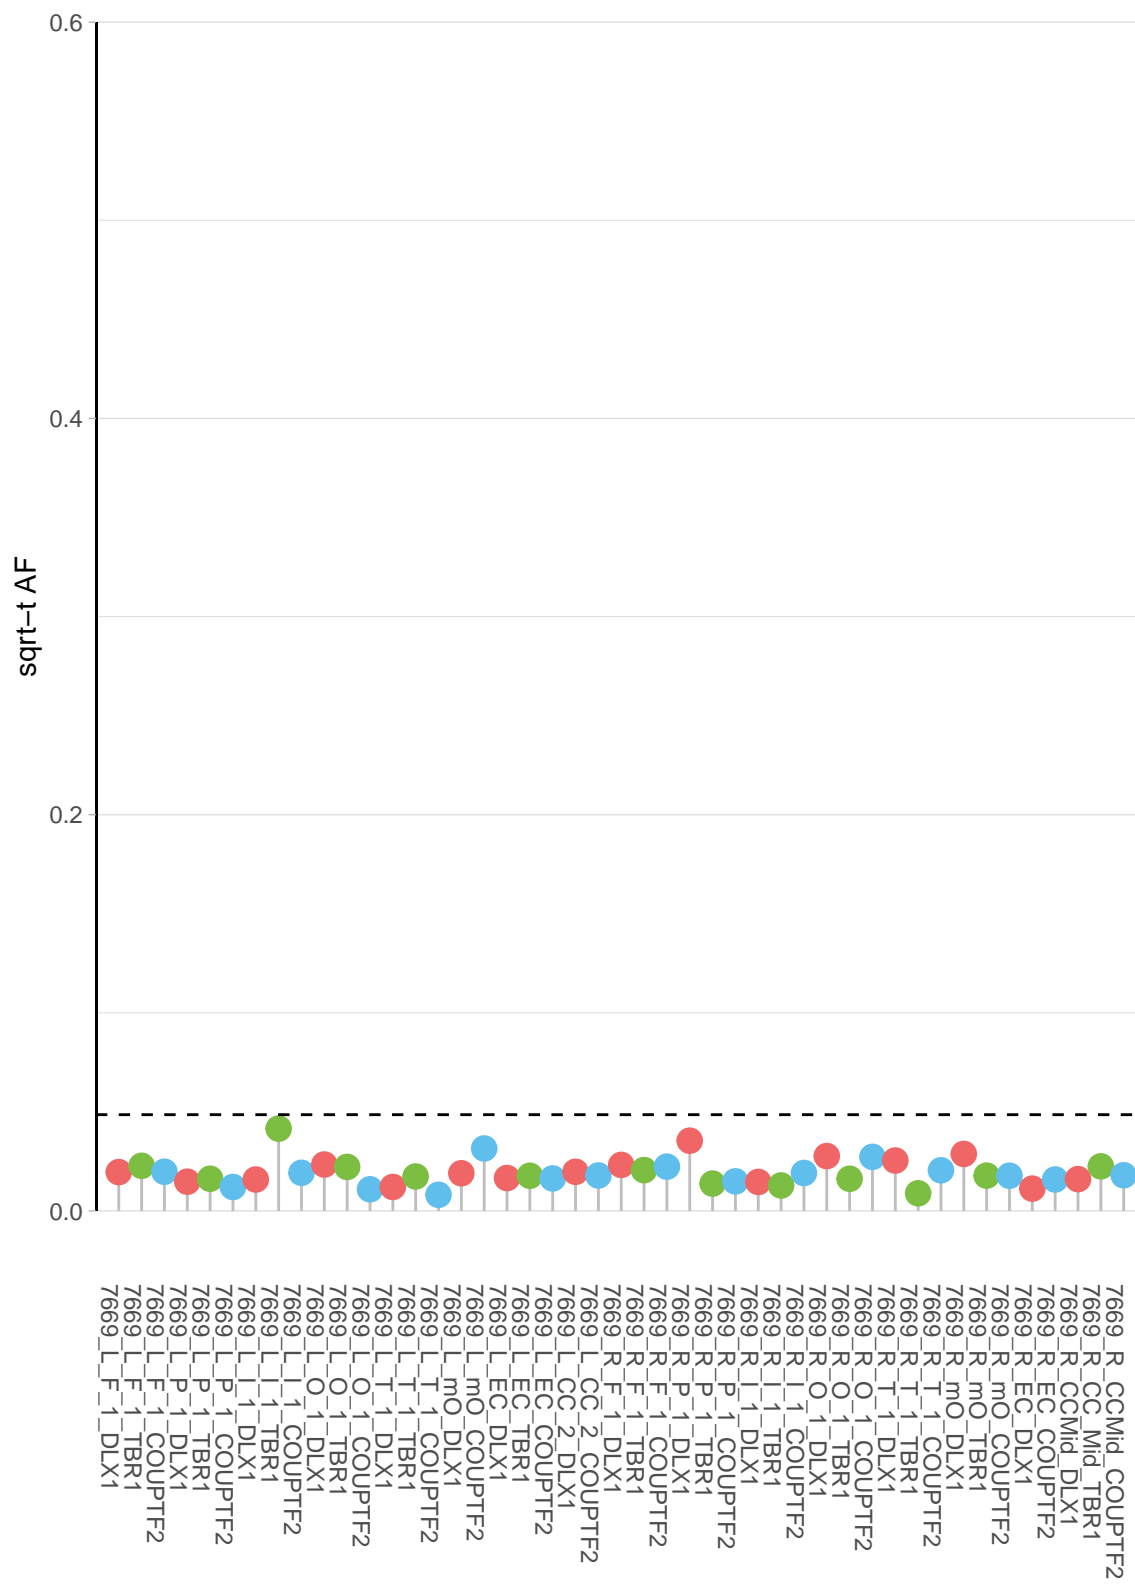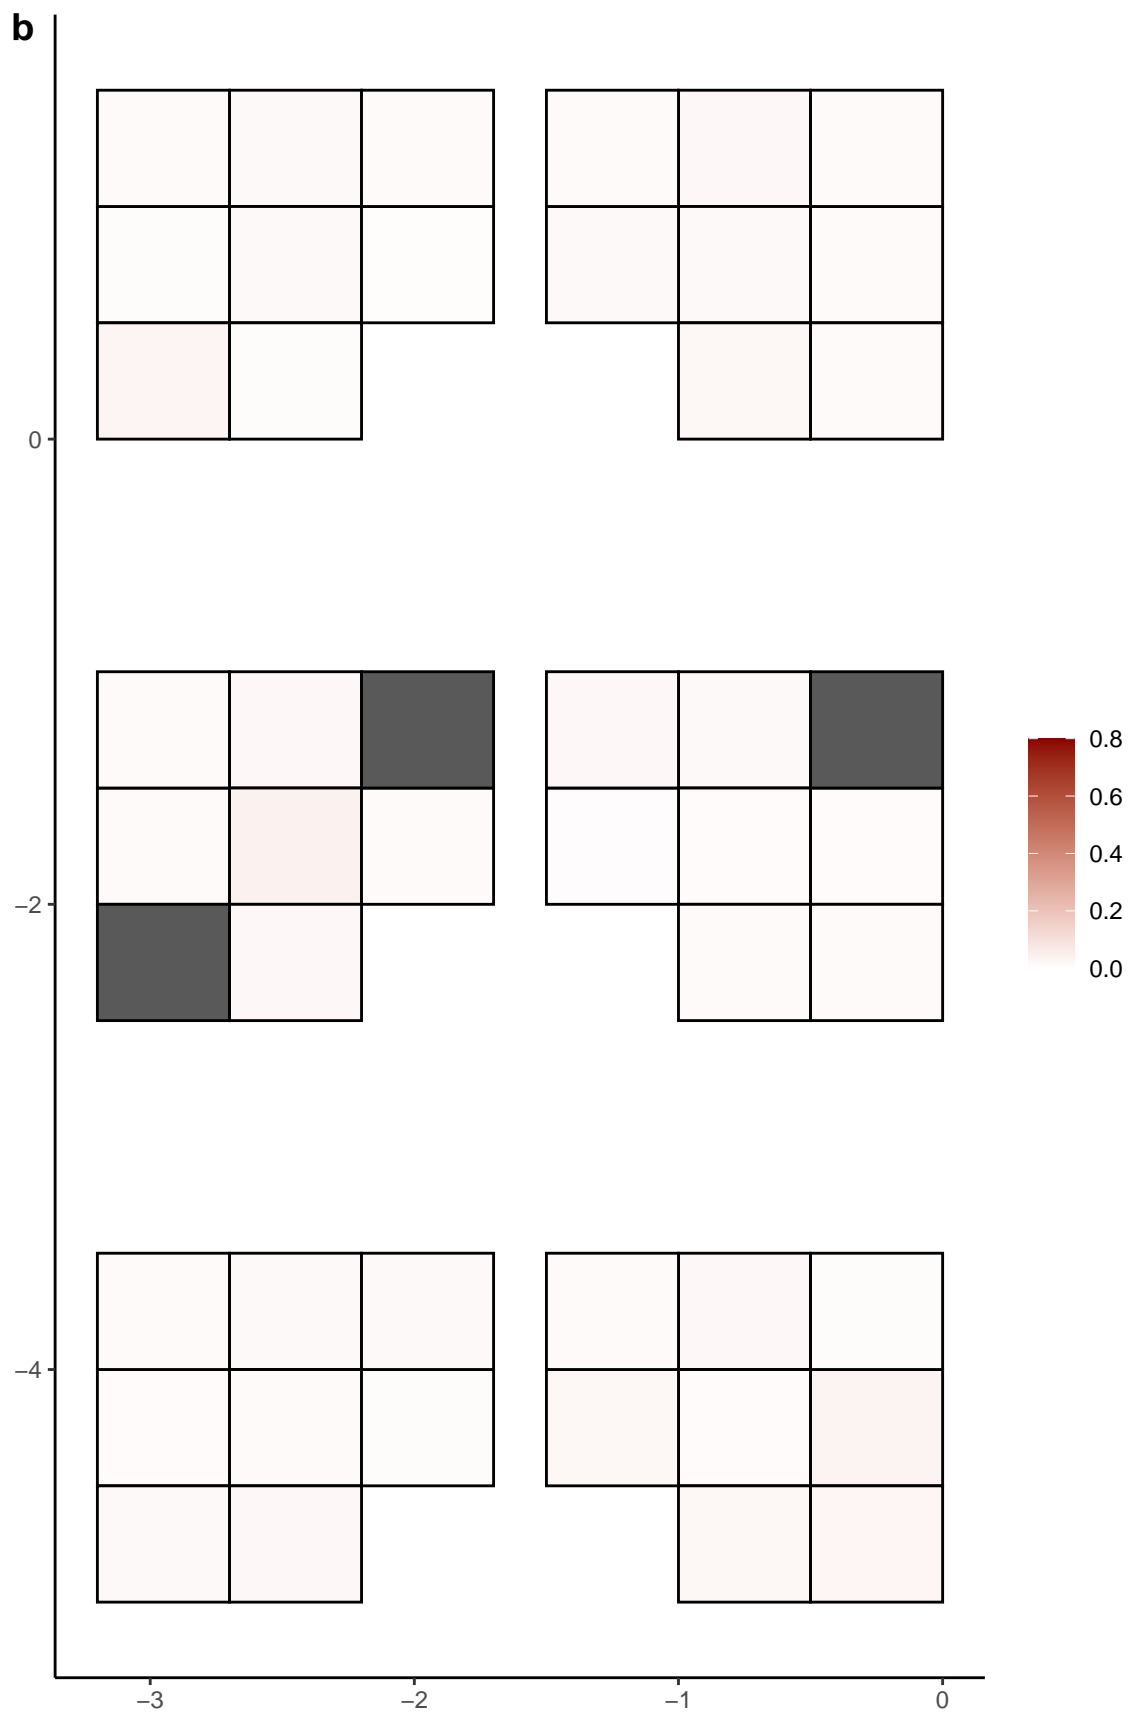

**a** ID05 2-209569113-C-T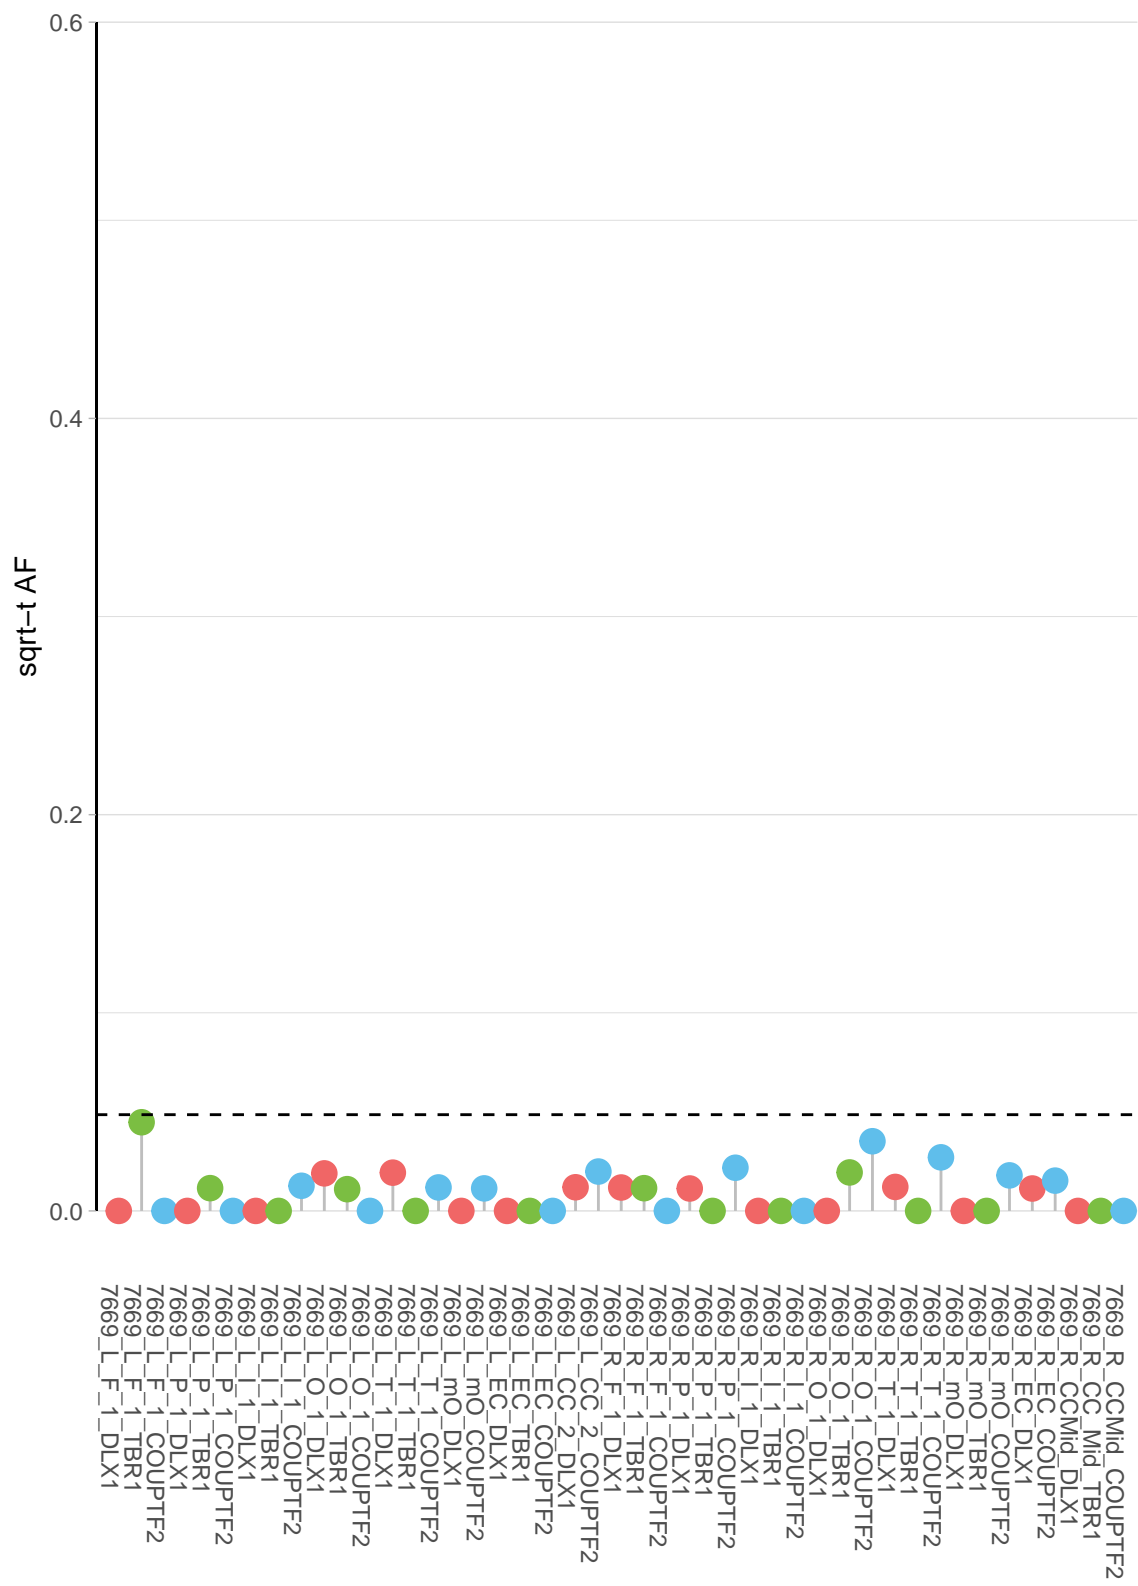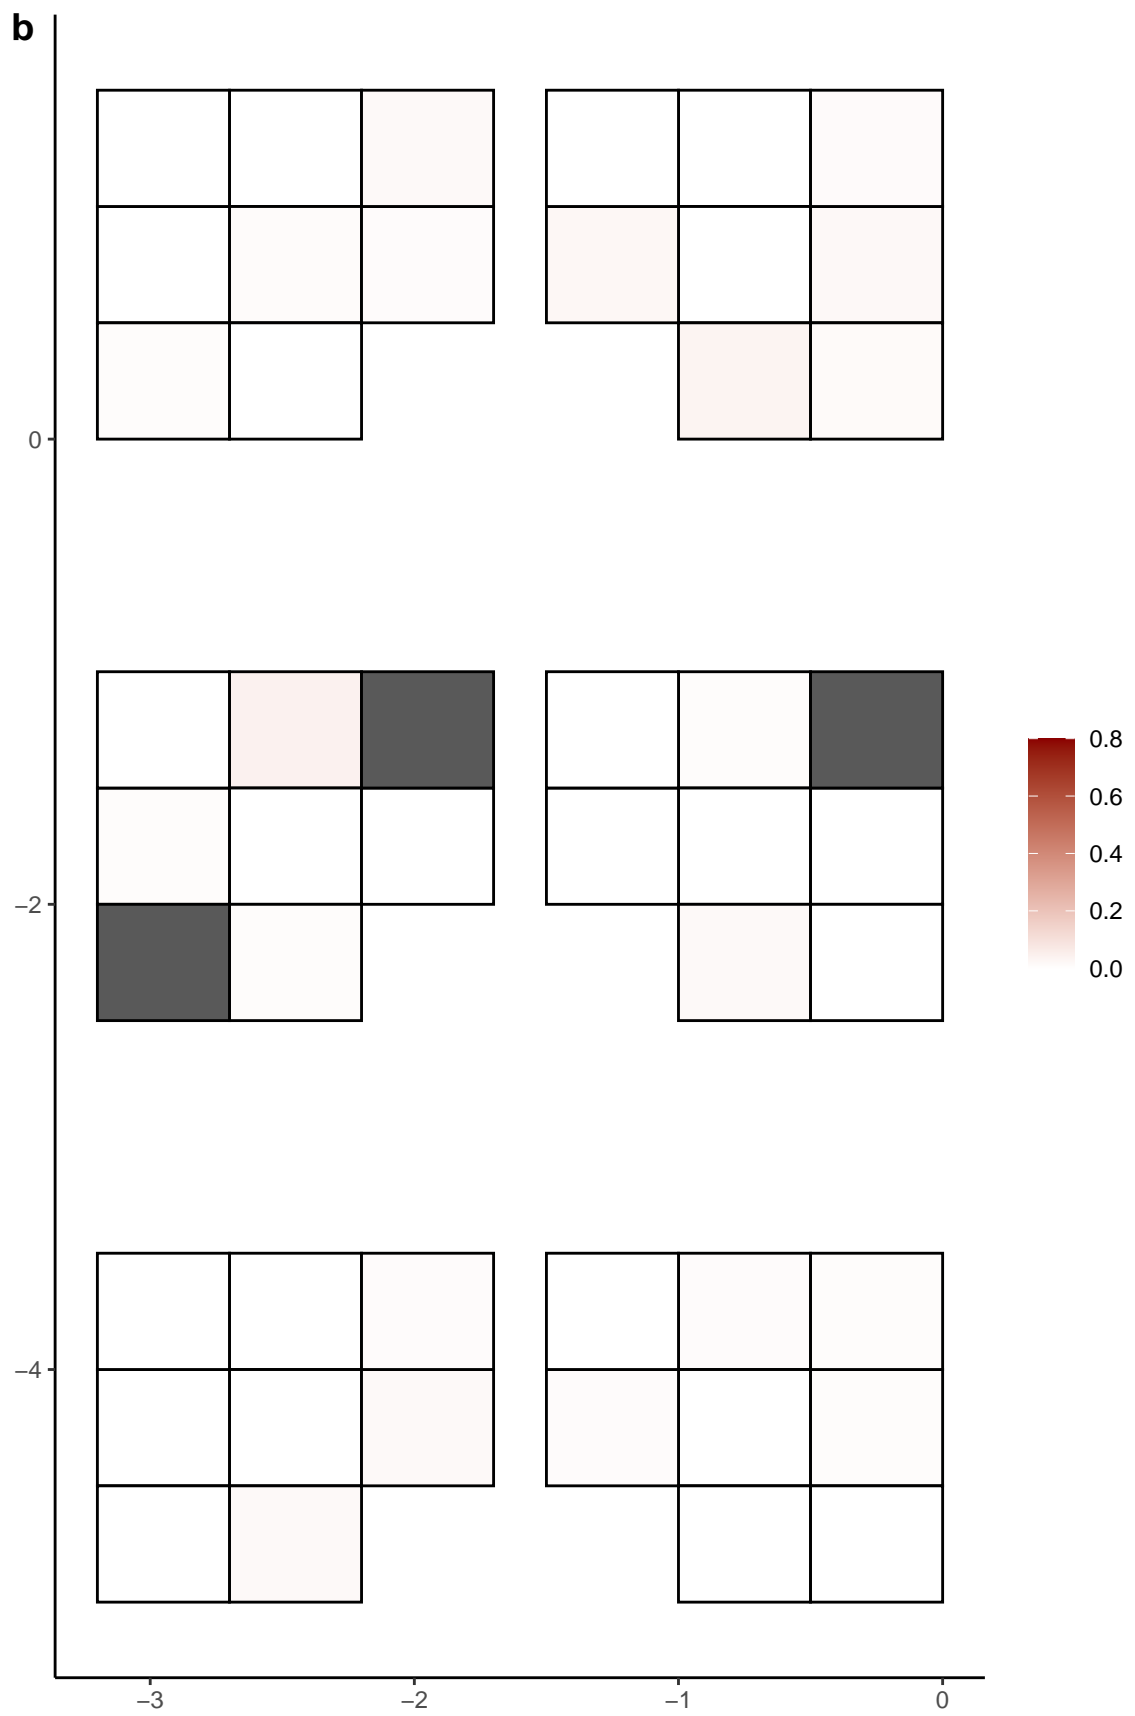

**a** ID05 2-213063972-C-T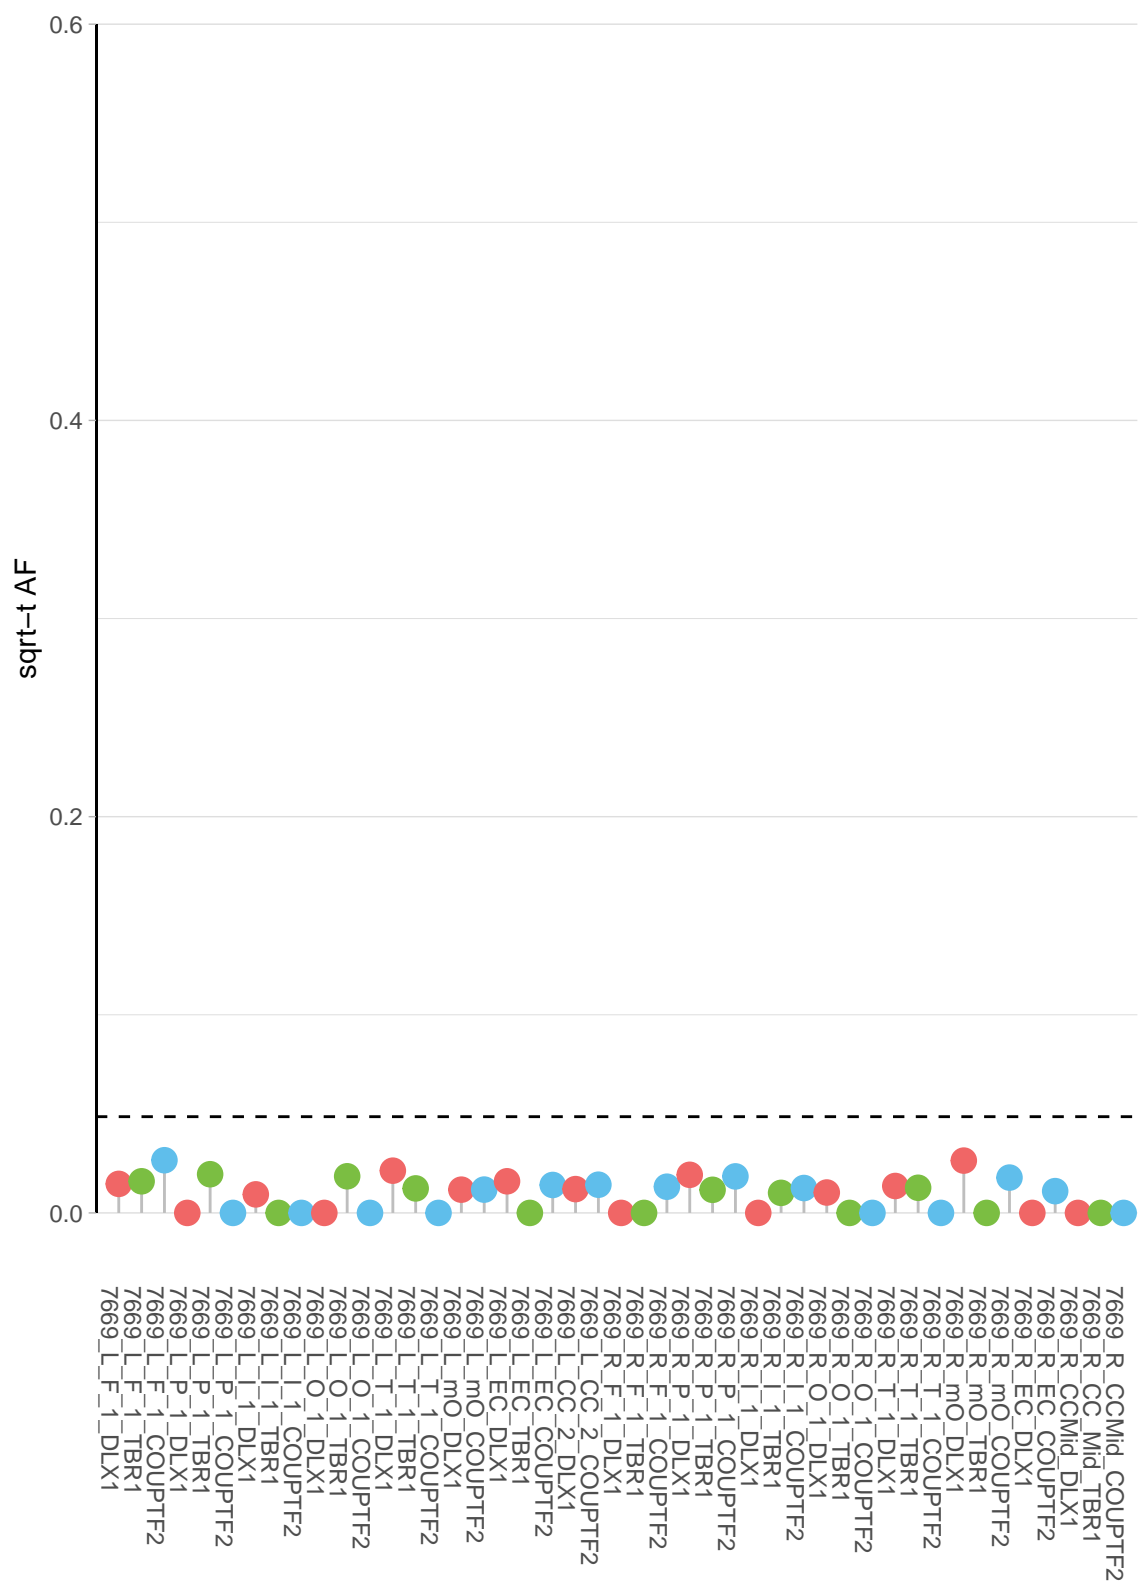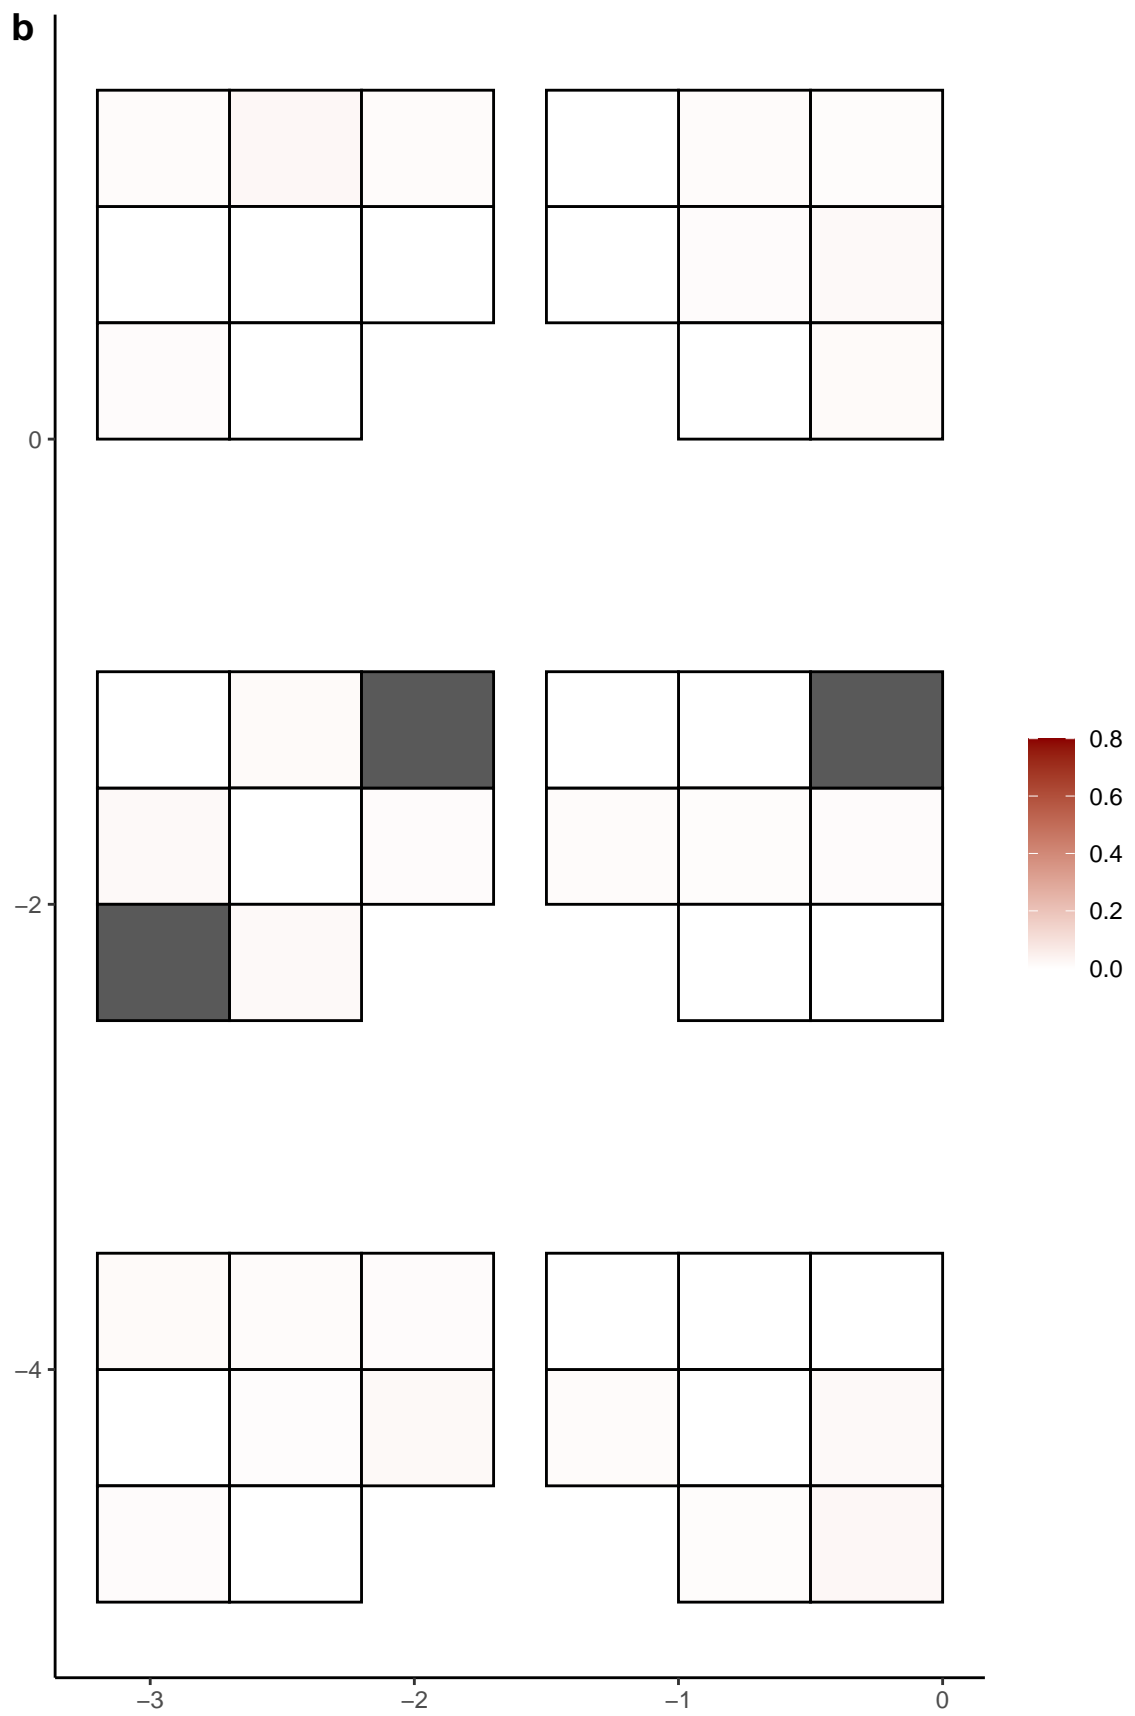

**a** ID05 2-22209916-G-A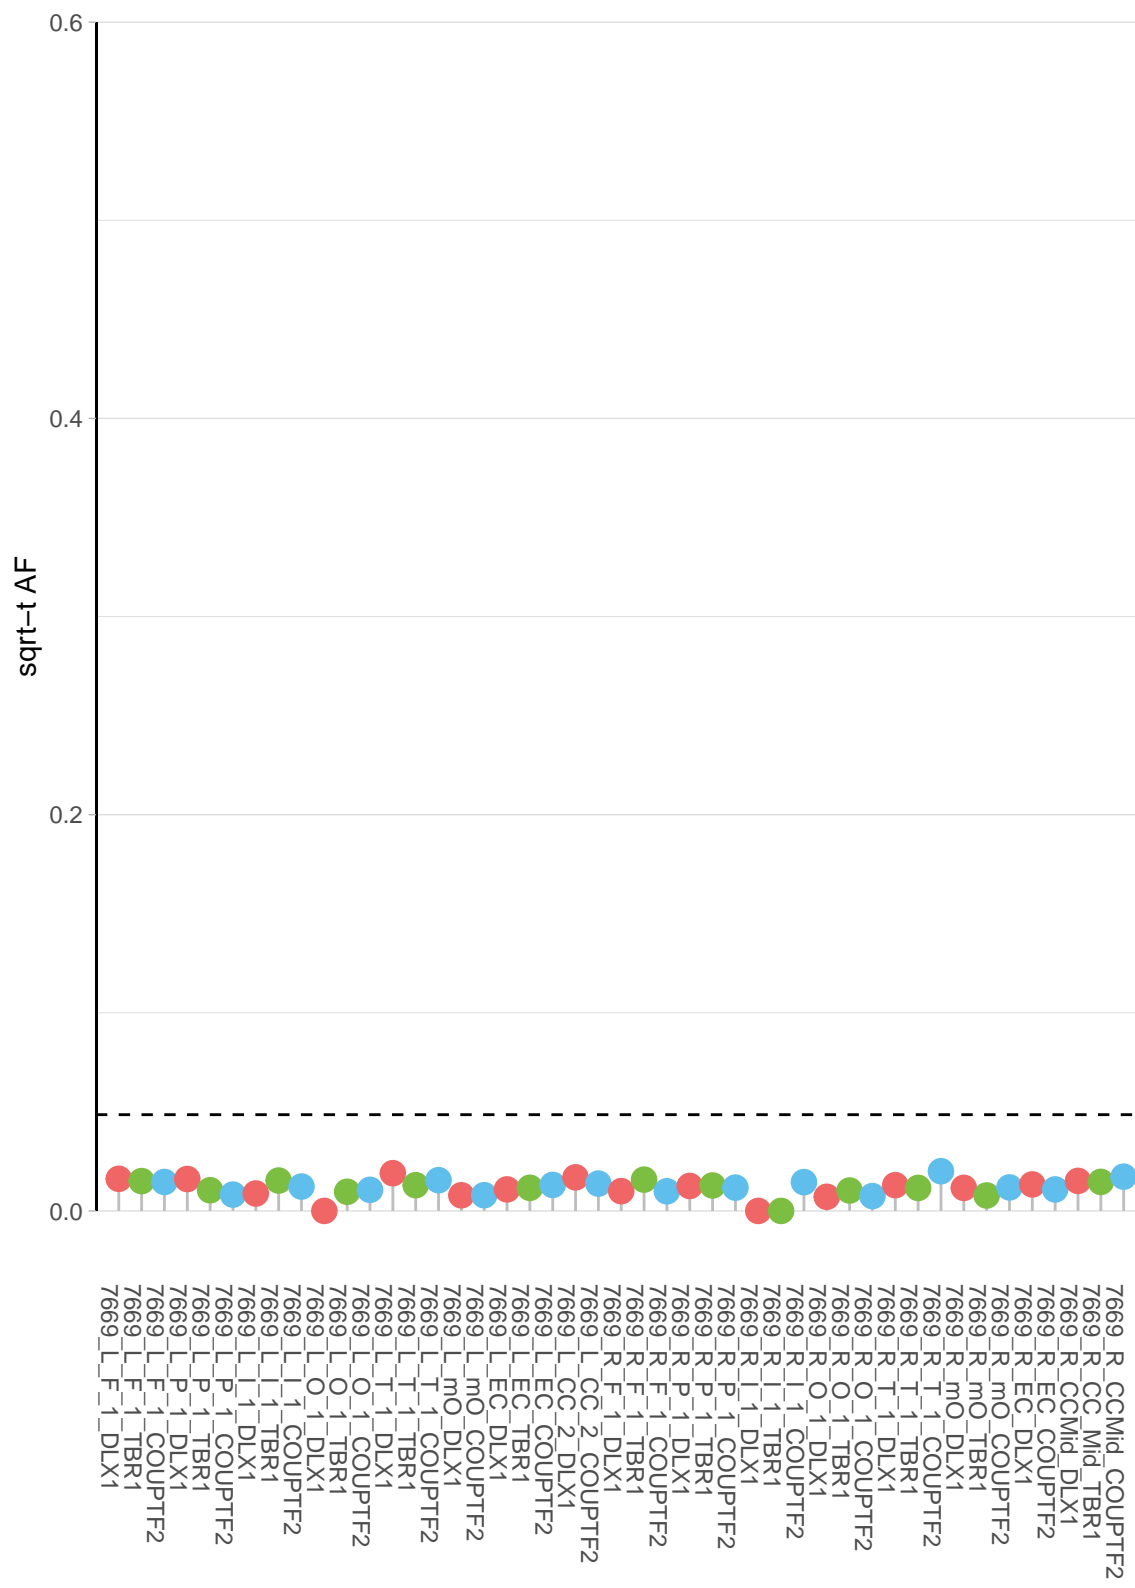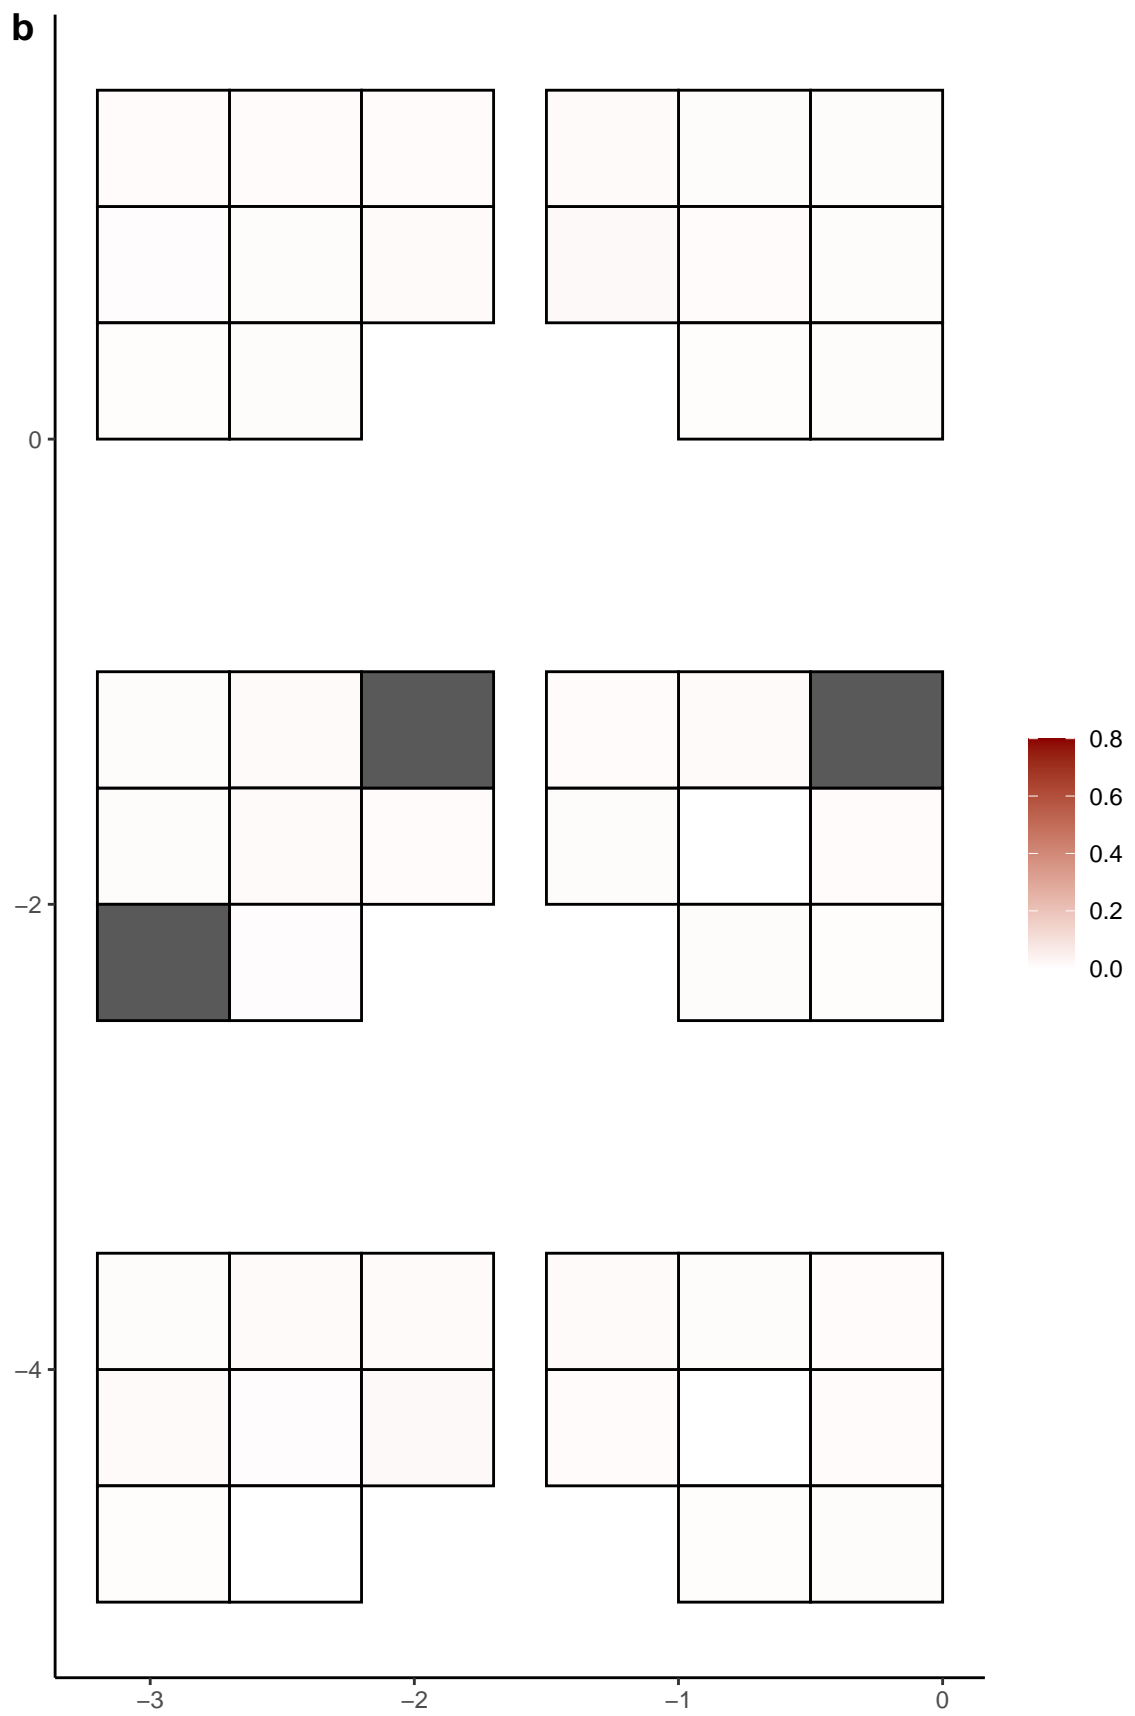



**a** ID05 2-222480660-G-A

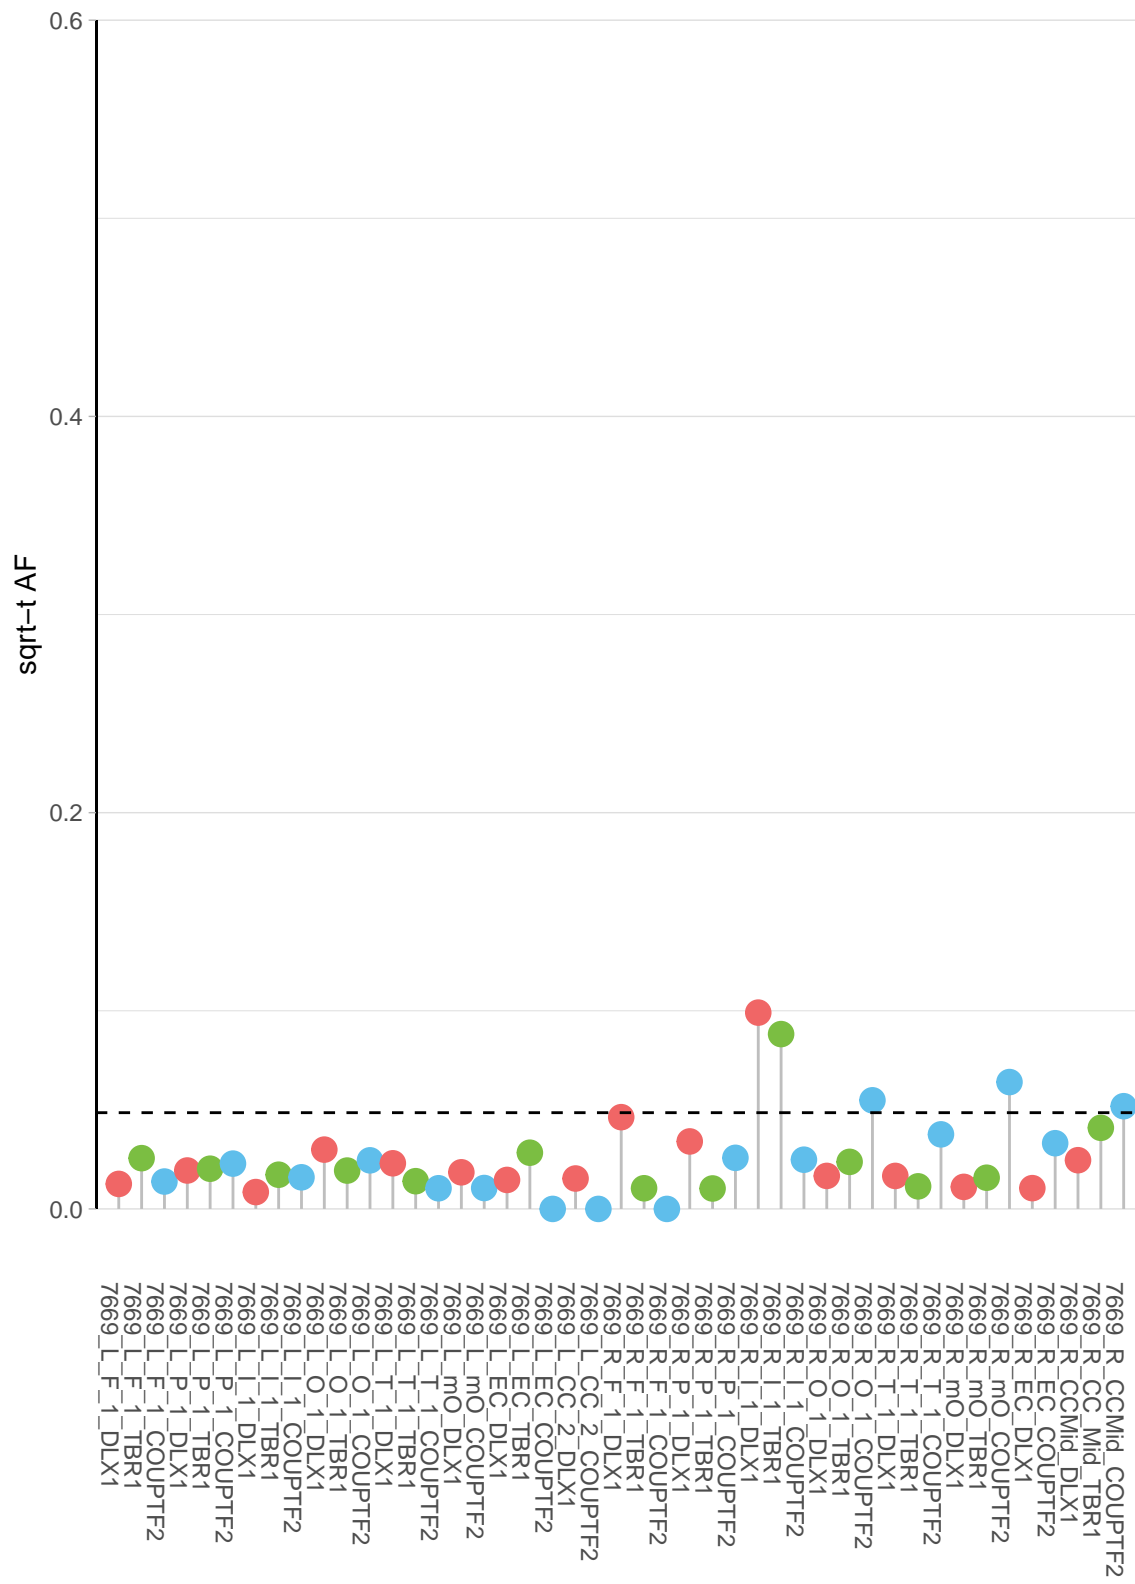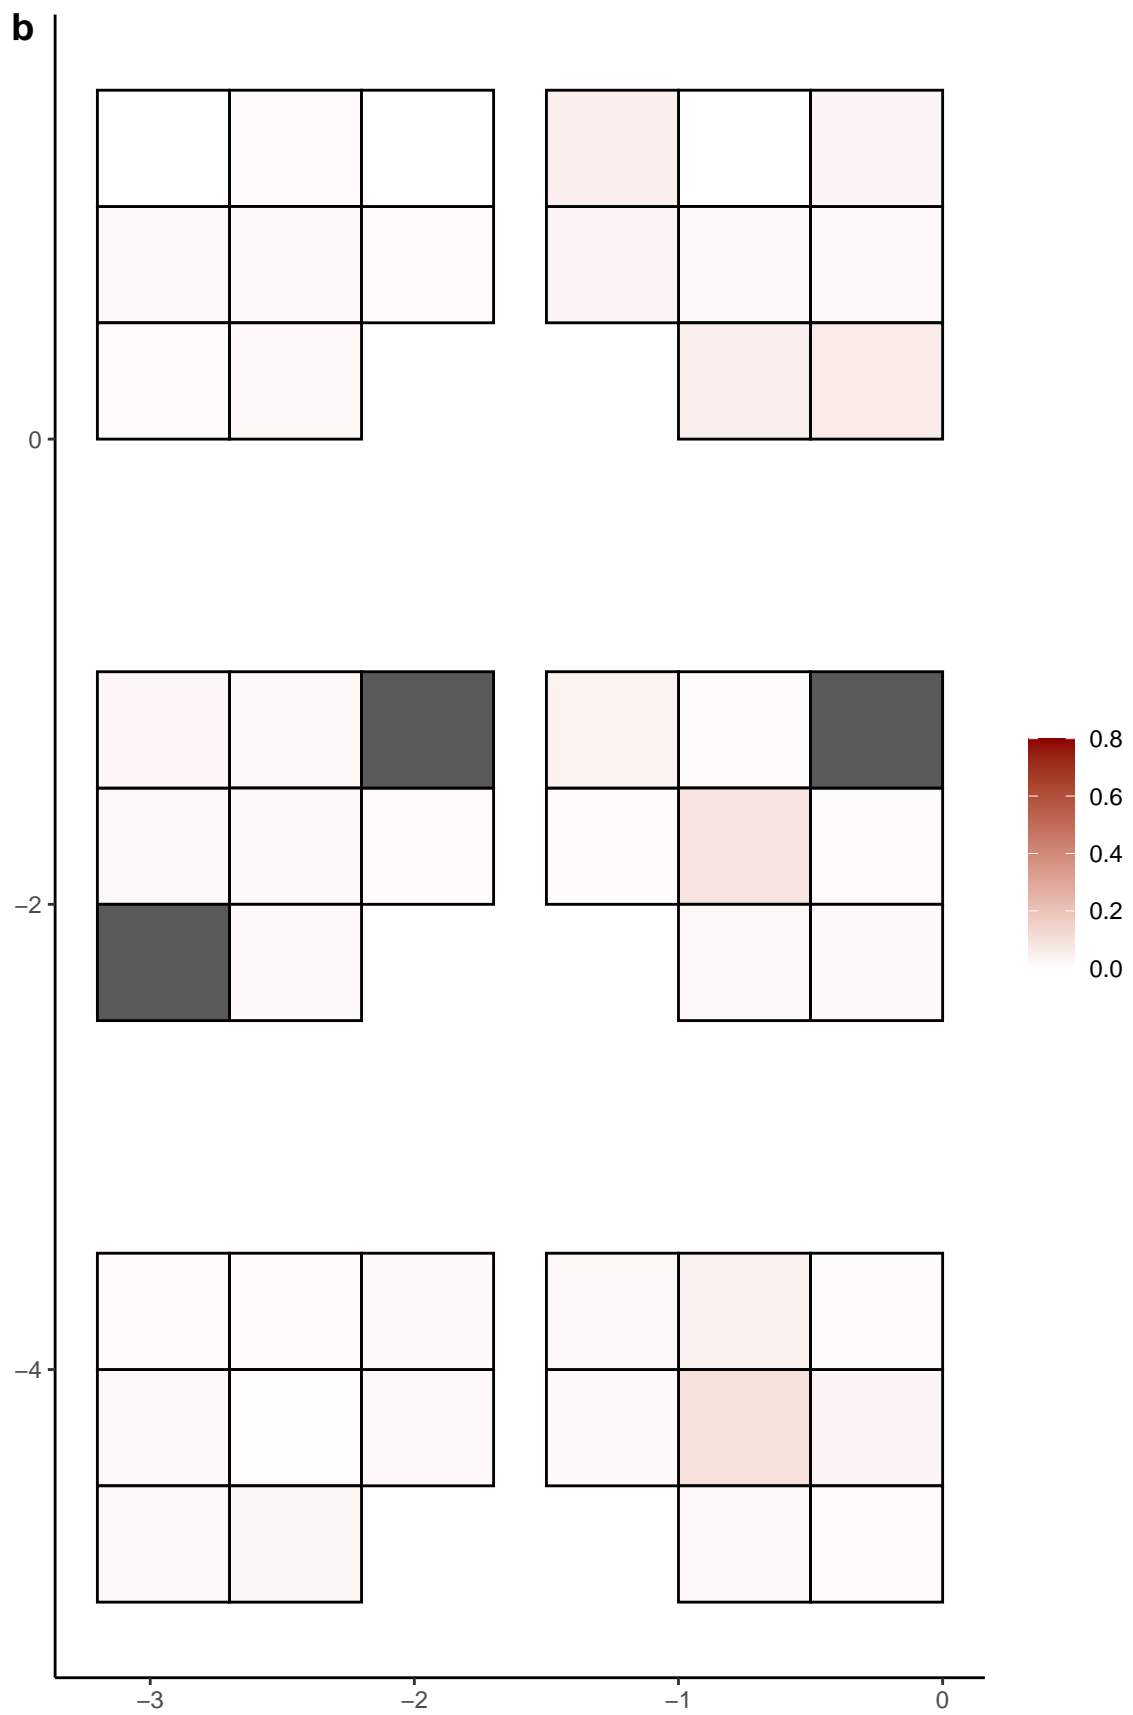

**a** ID05 2-225875953-A-G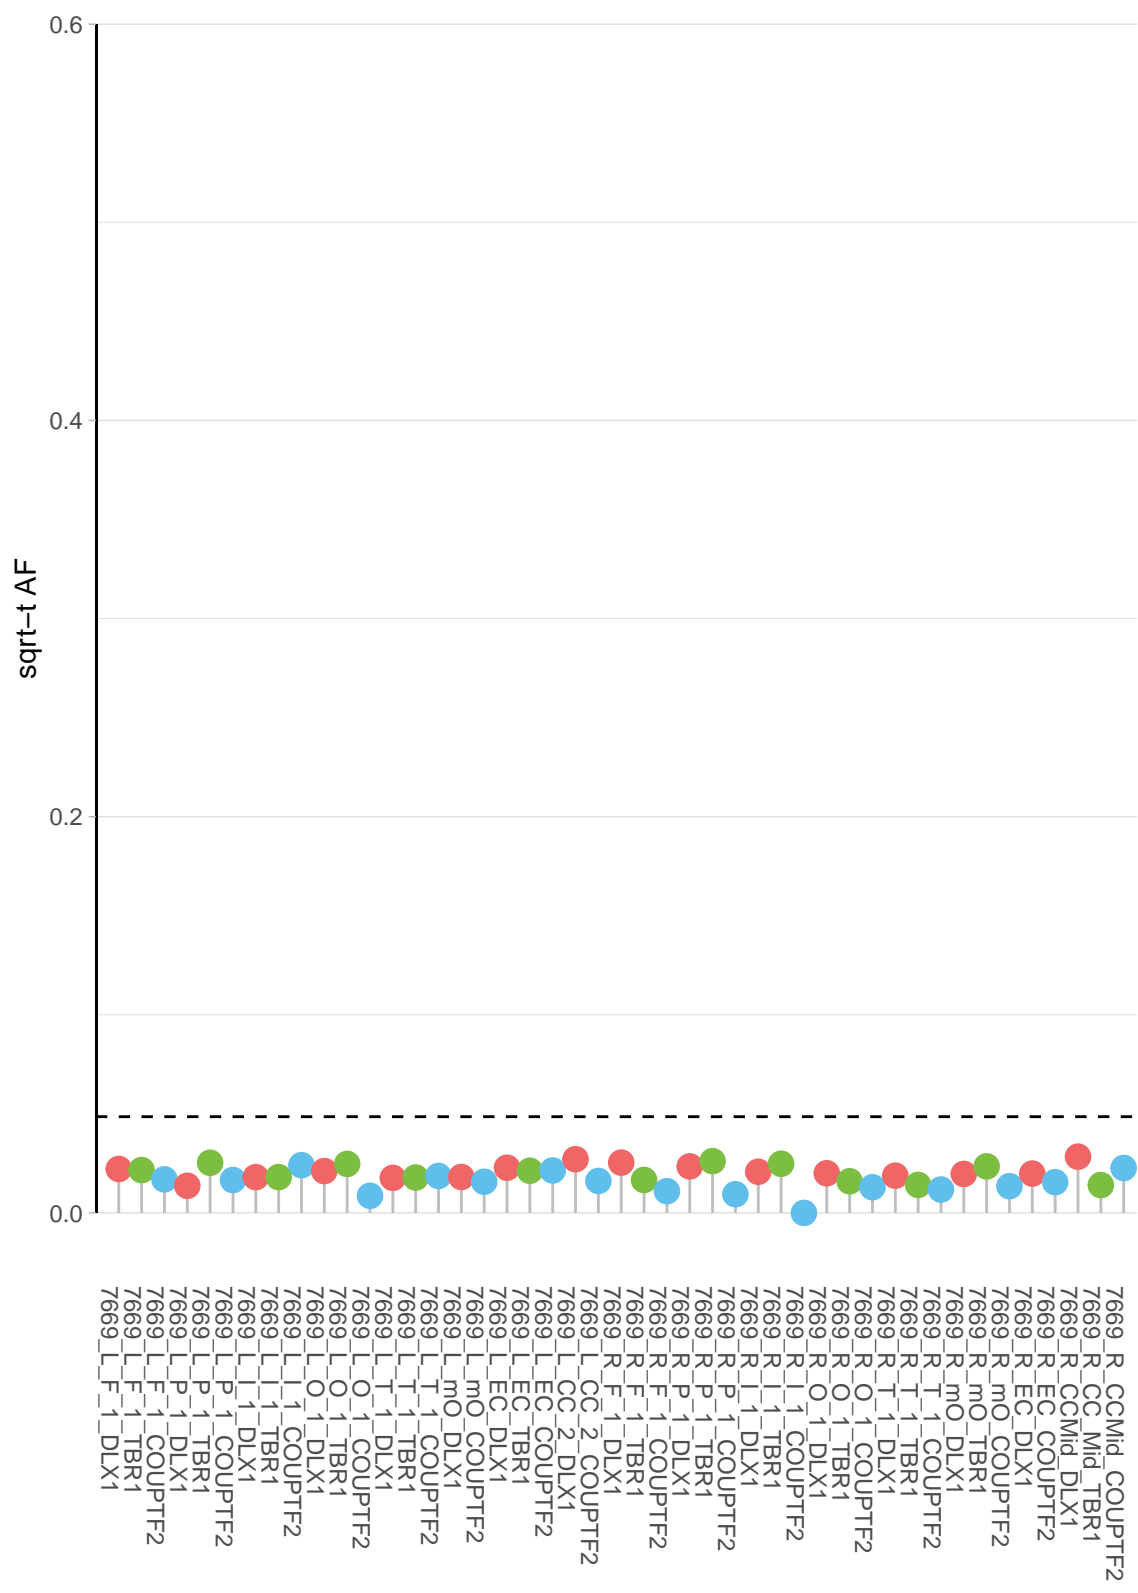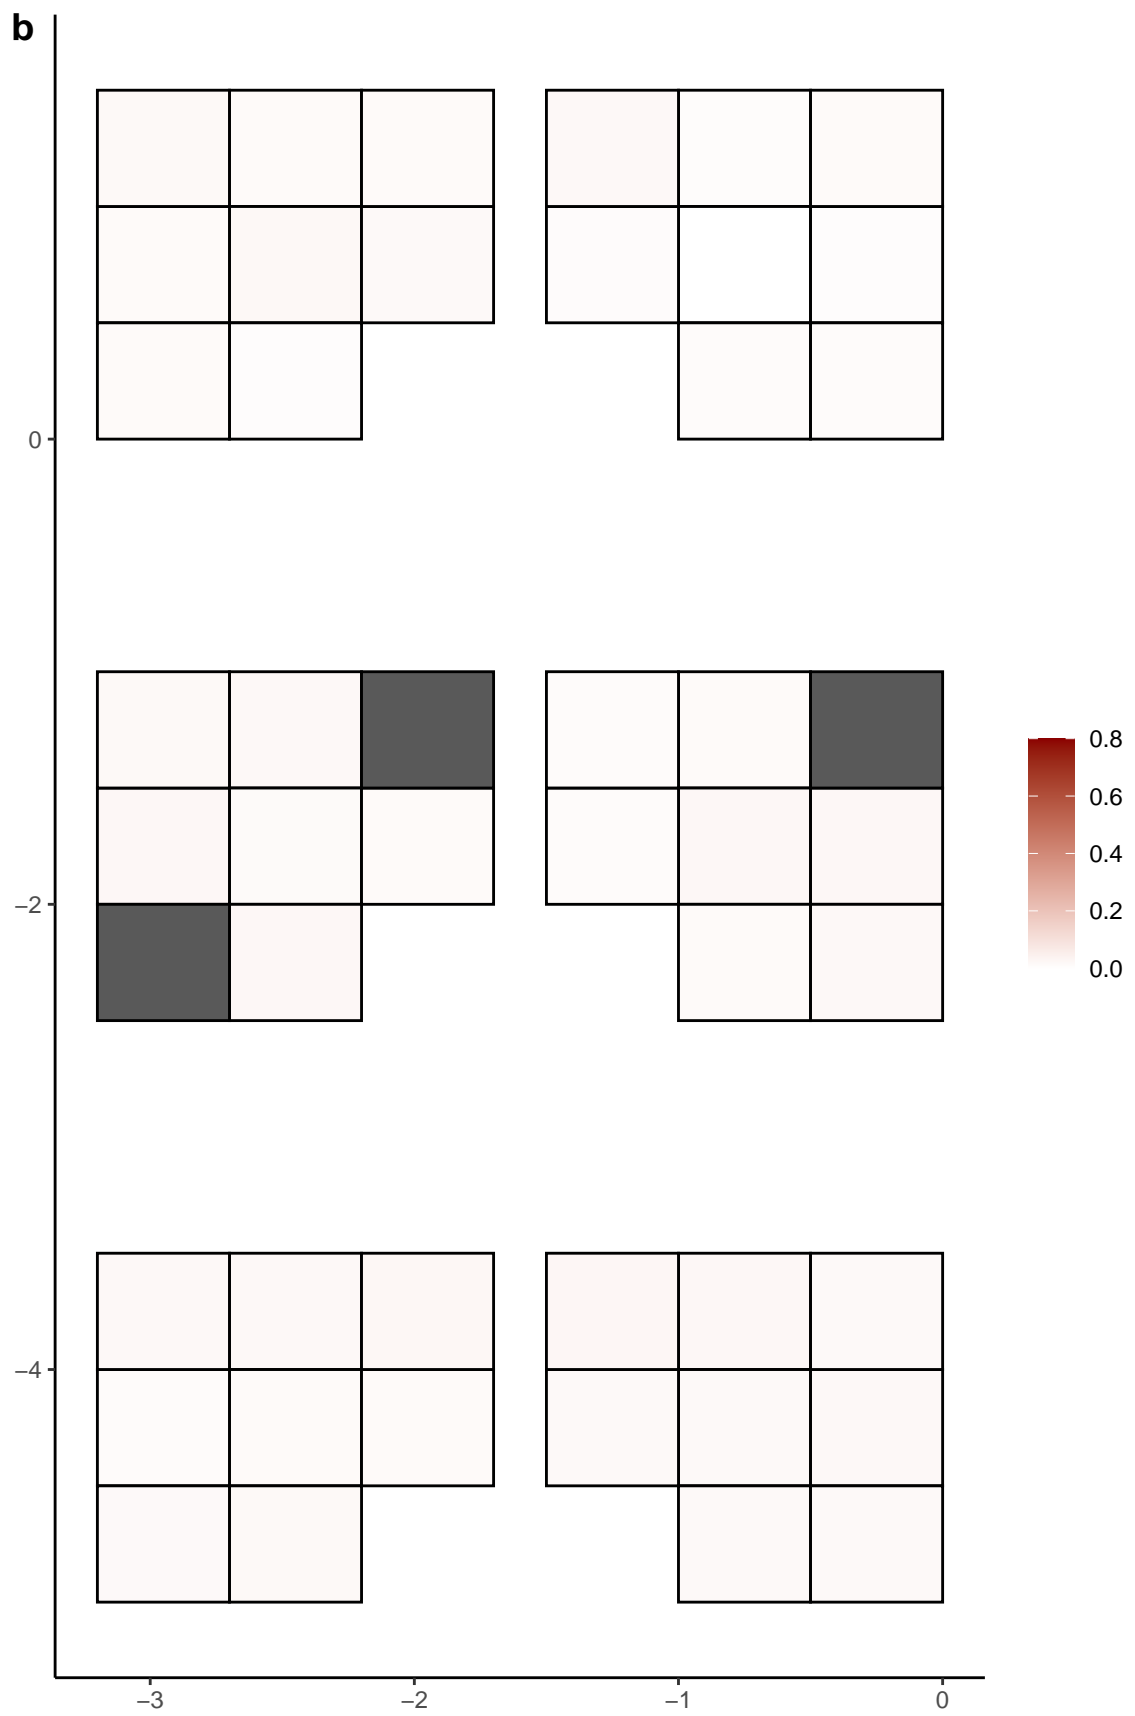

**a** ID05 2-226074050-C-A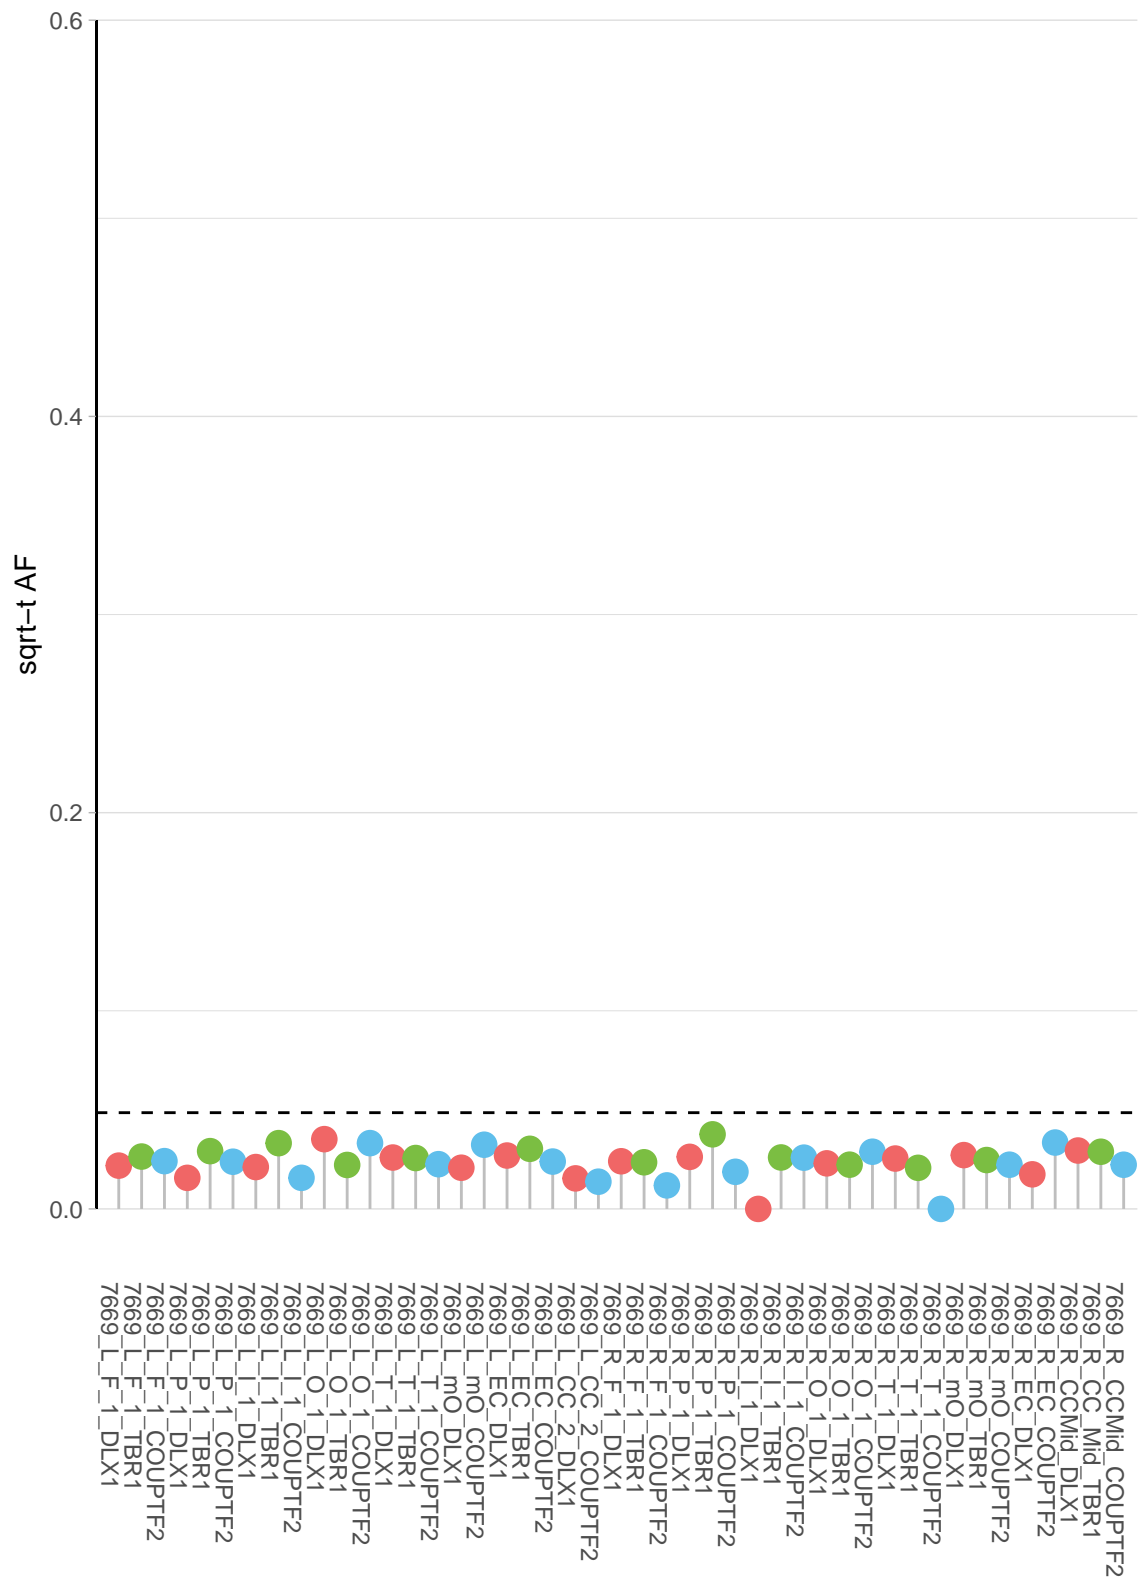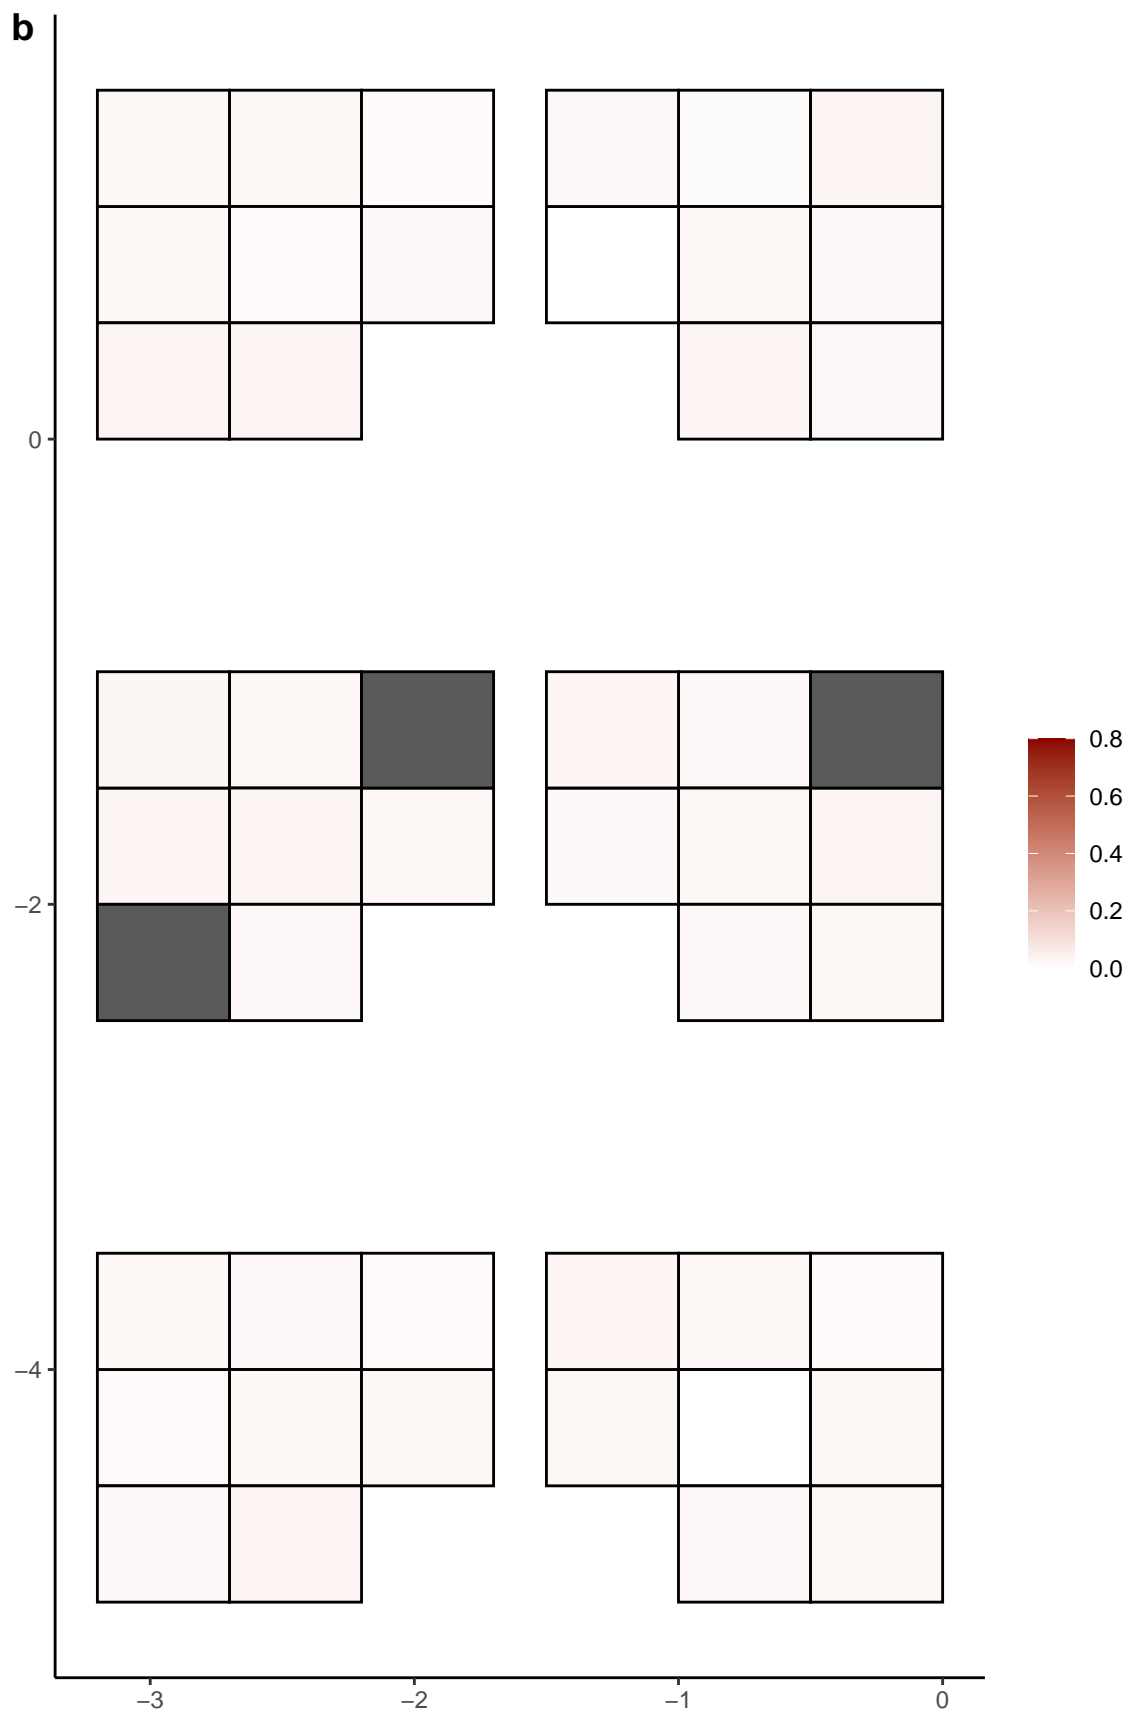

**a** ID05 2-226299479-C-T

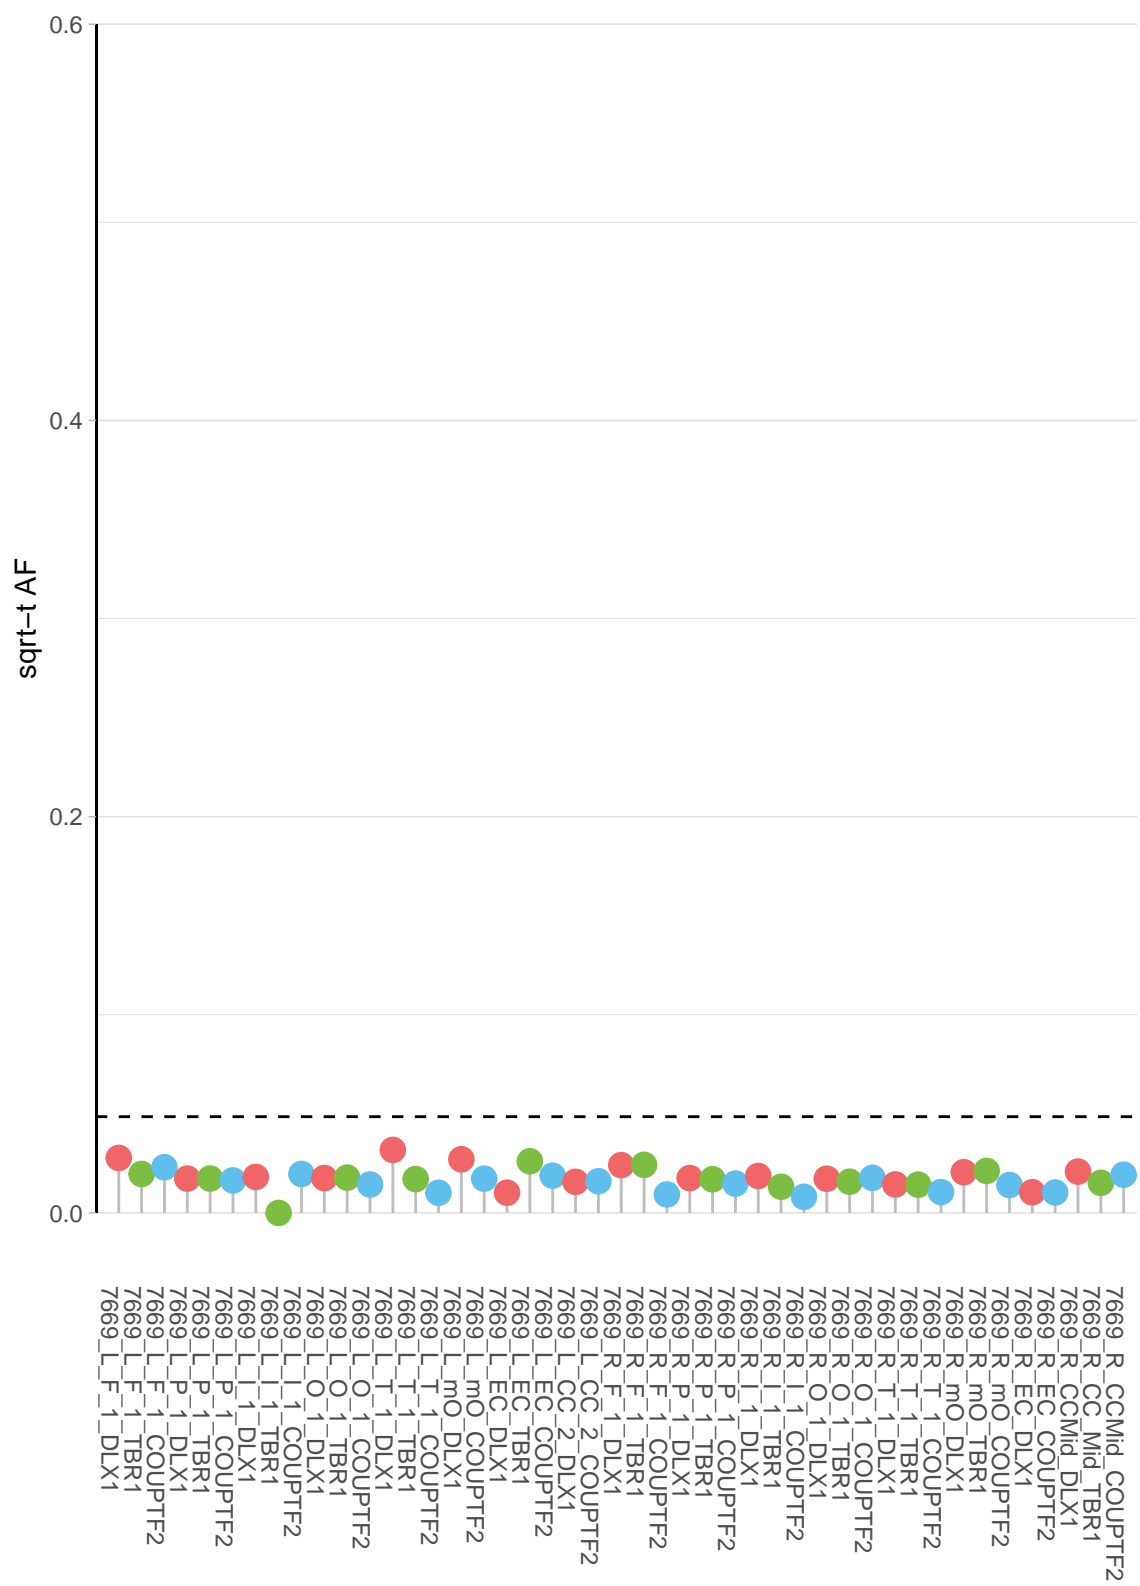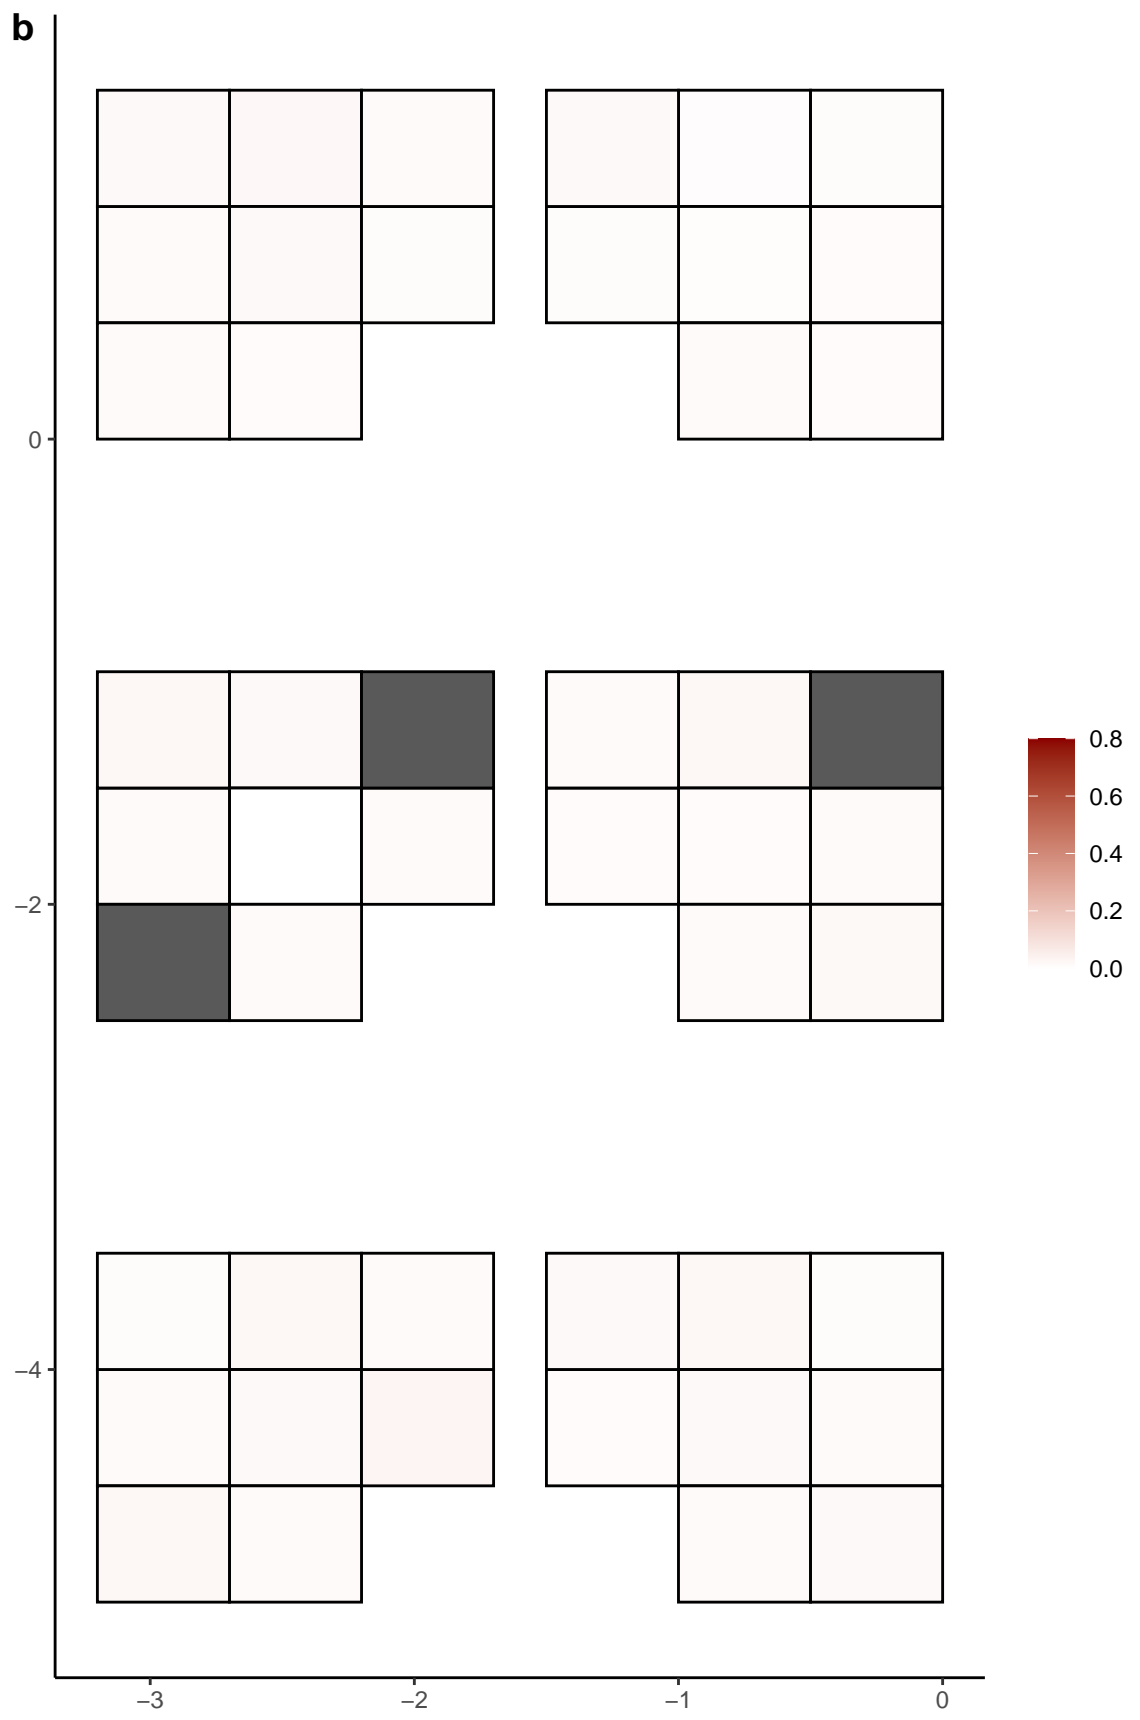

**a** ID05 2-229992854-G-A

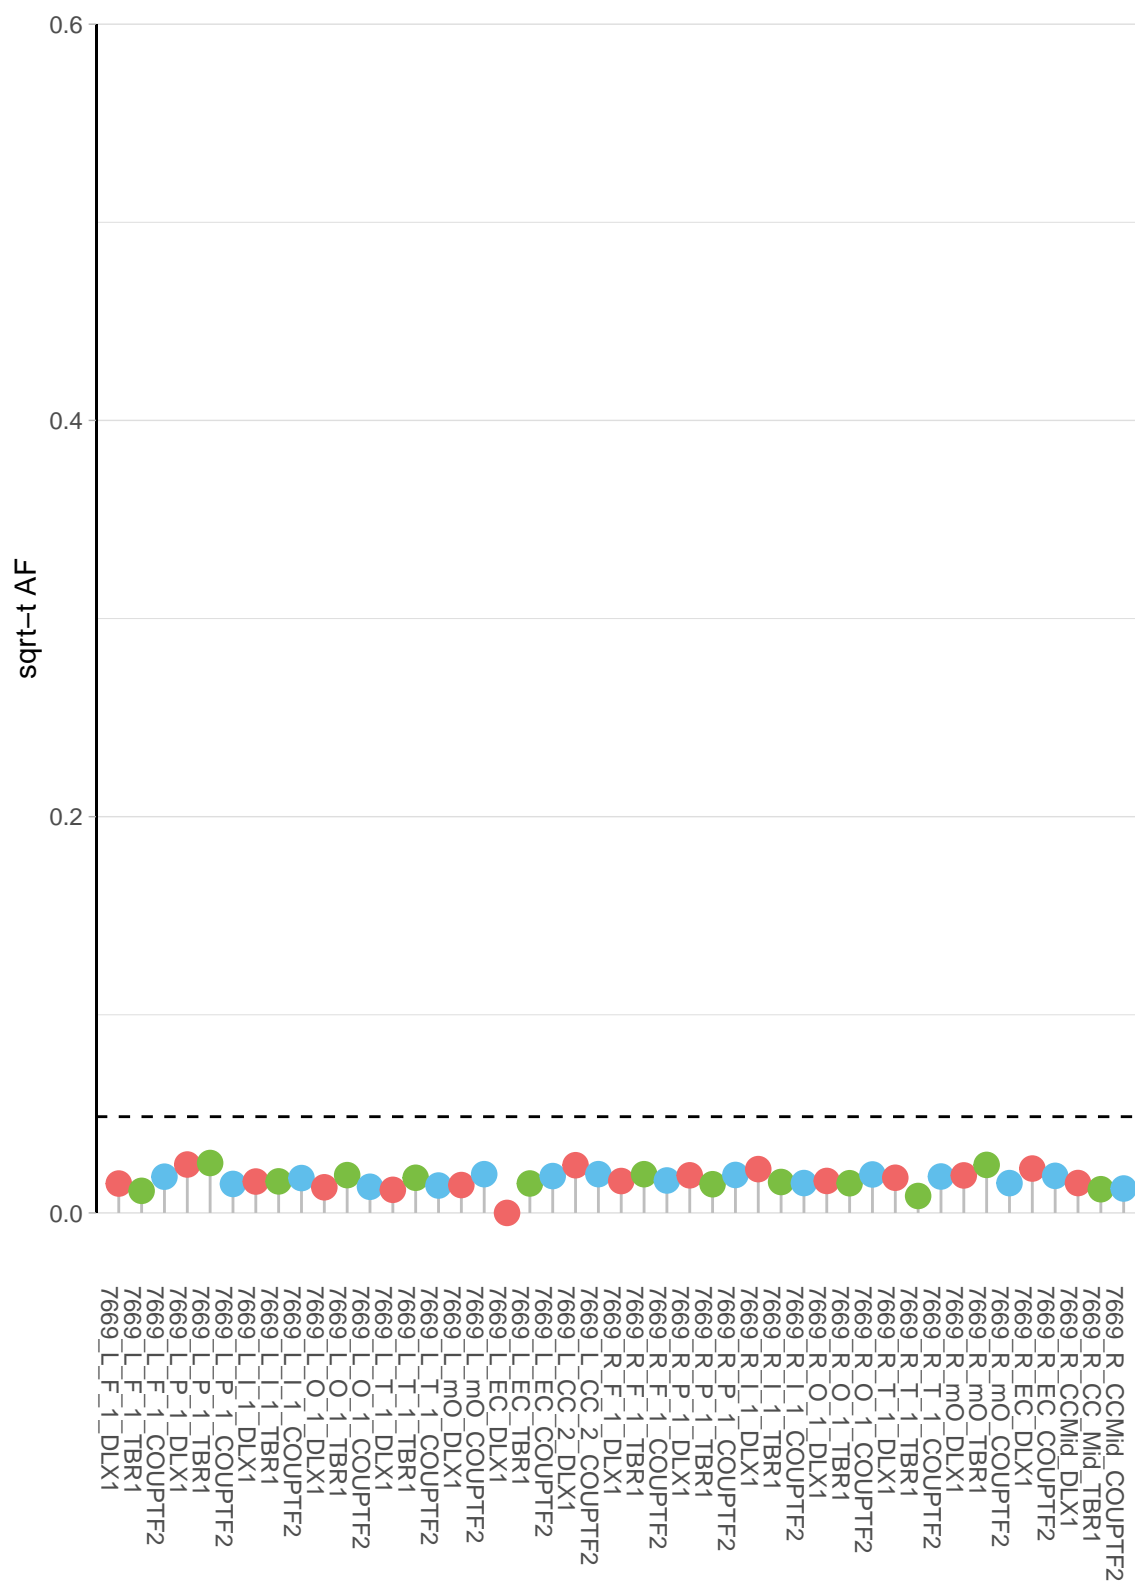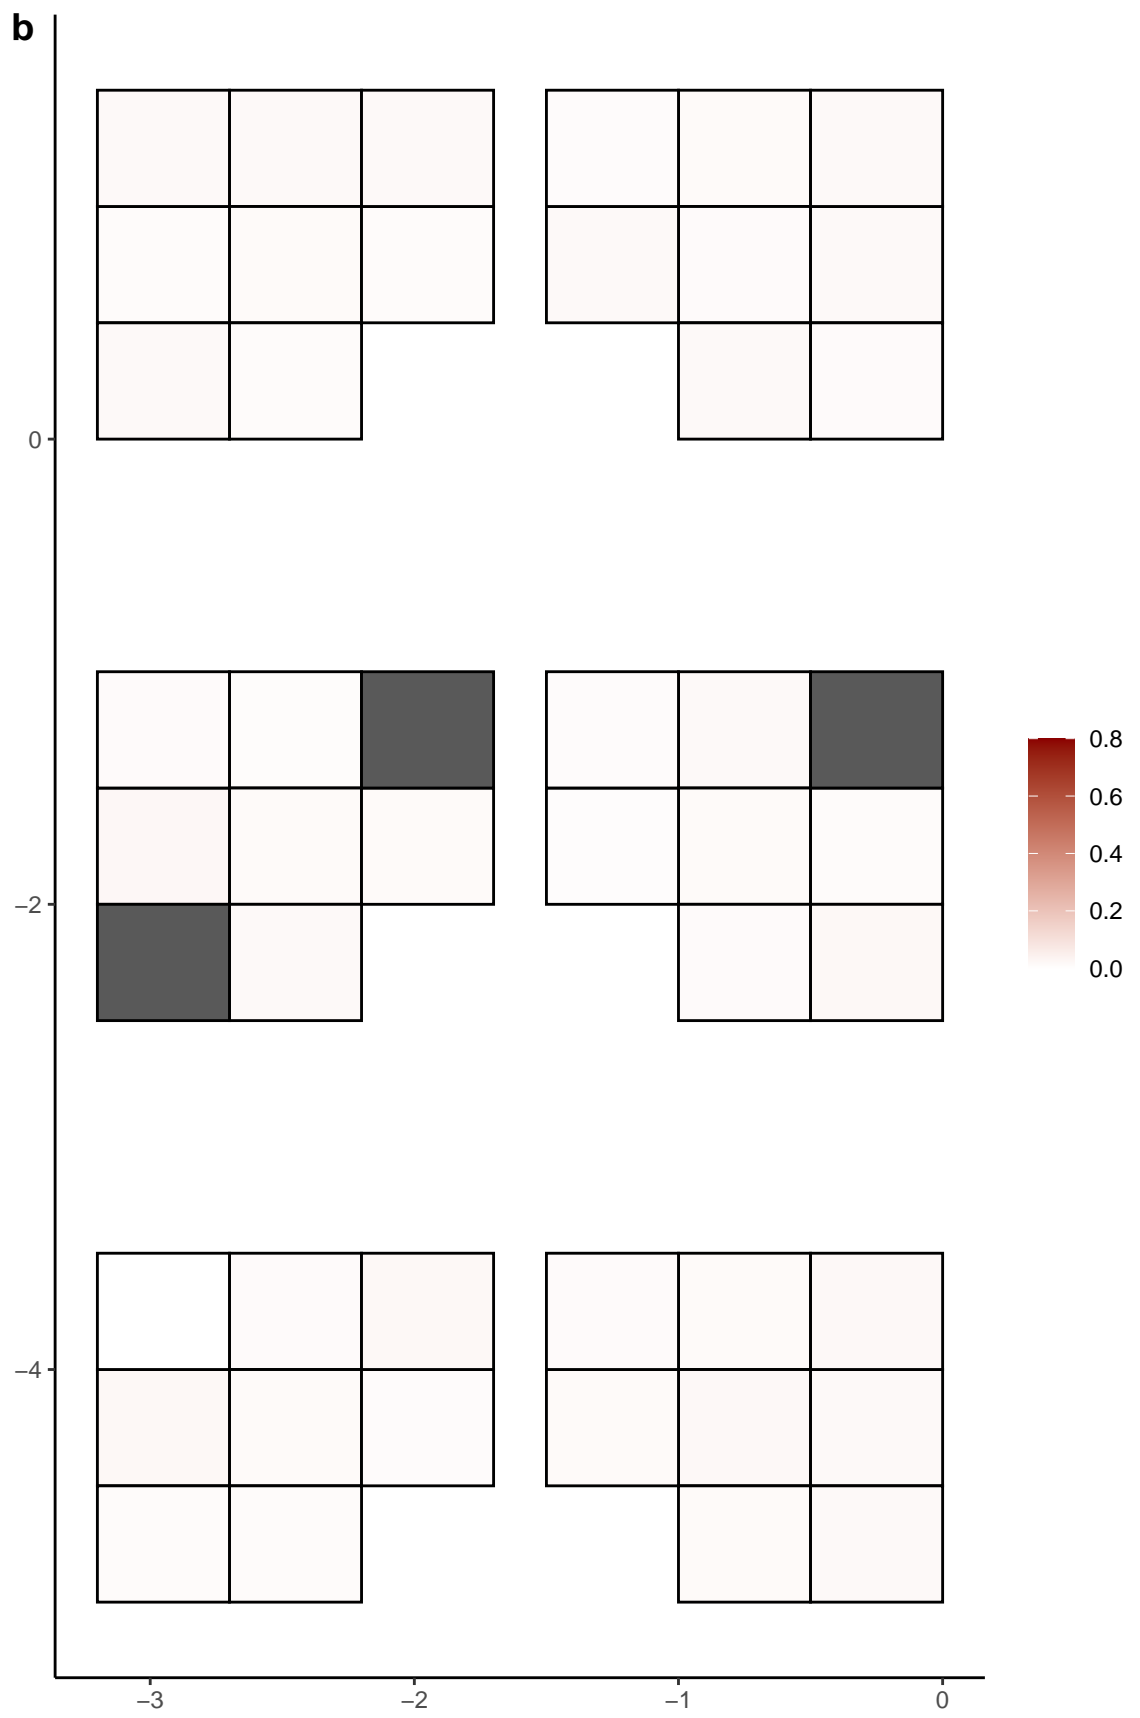

**a** ID05 2-234349292-A-G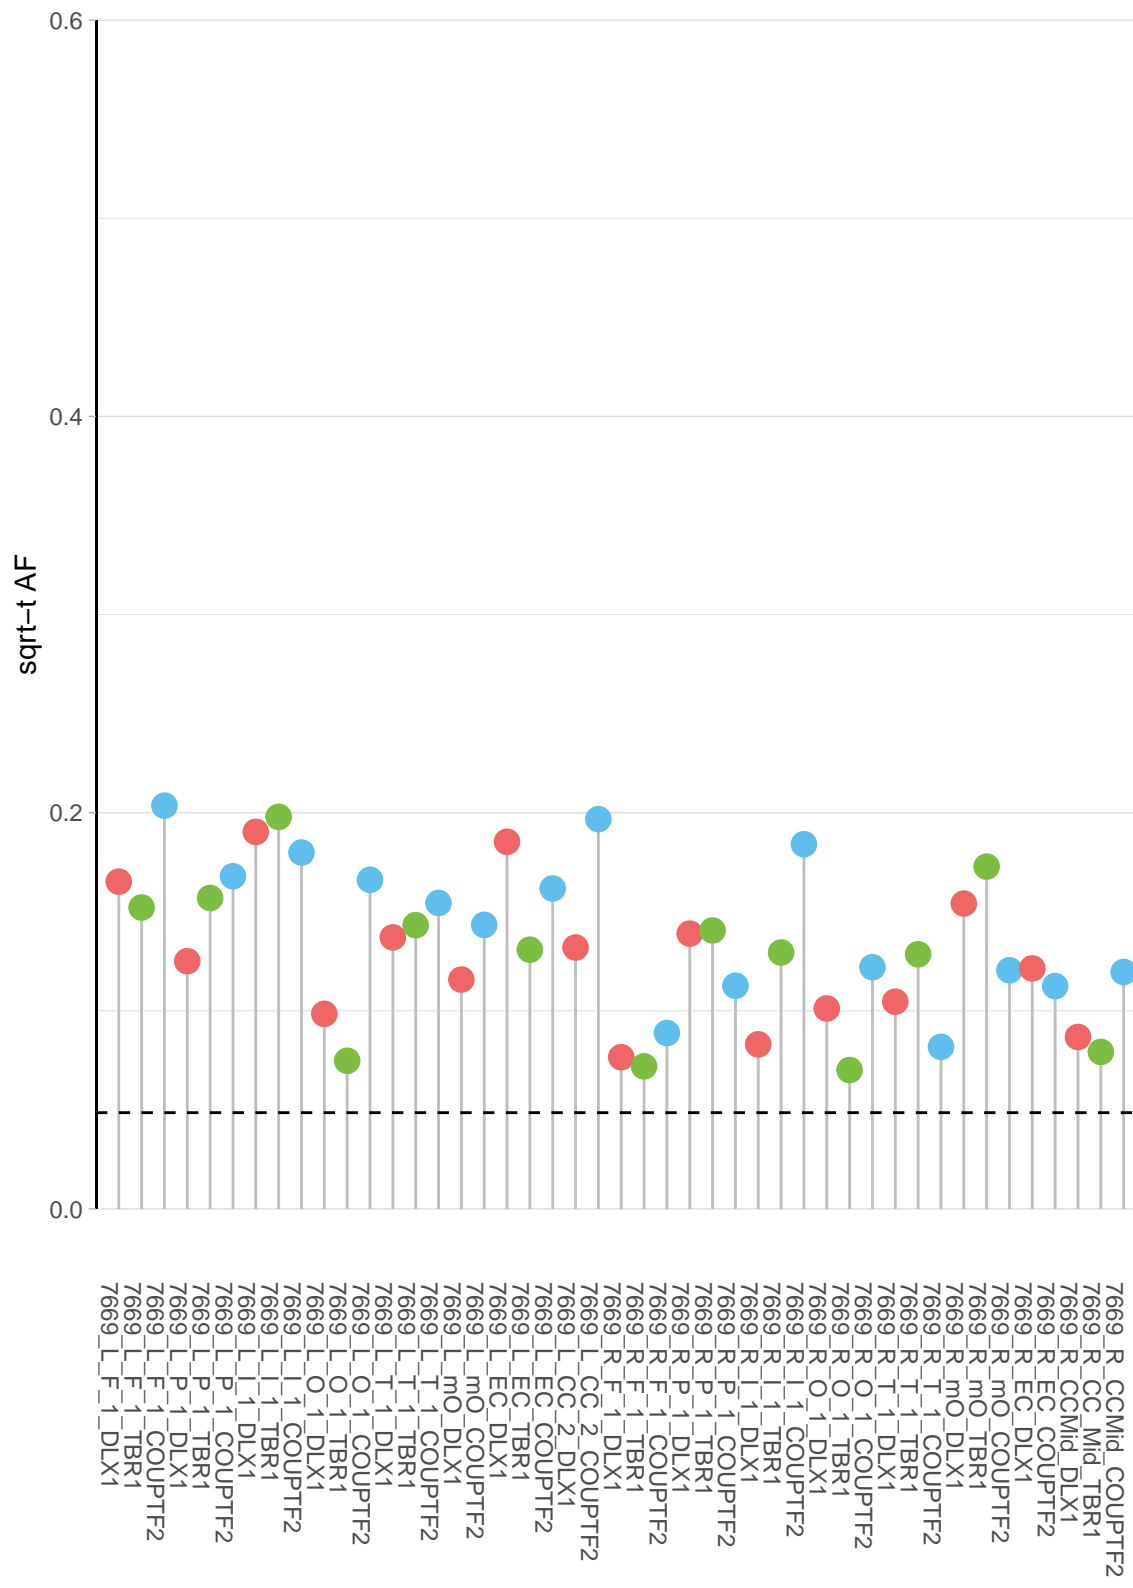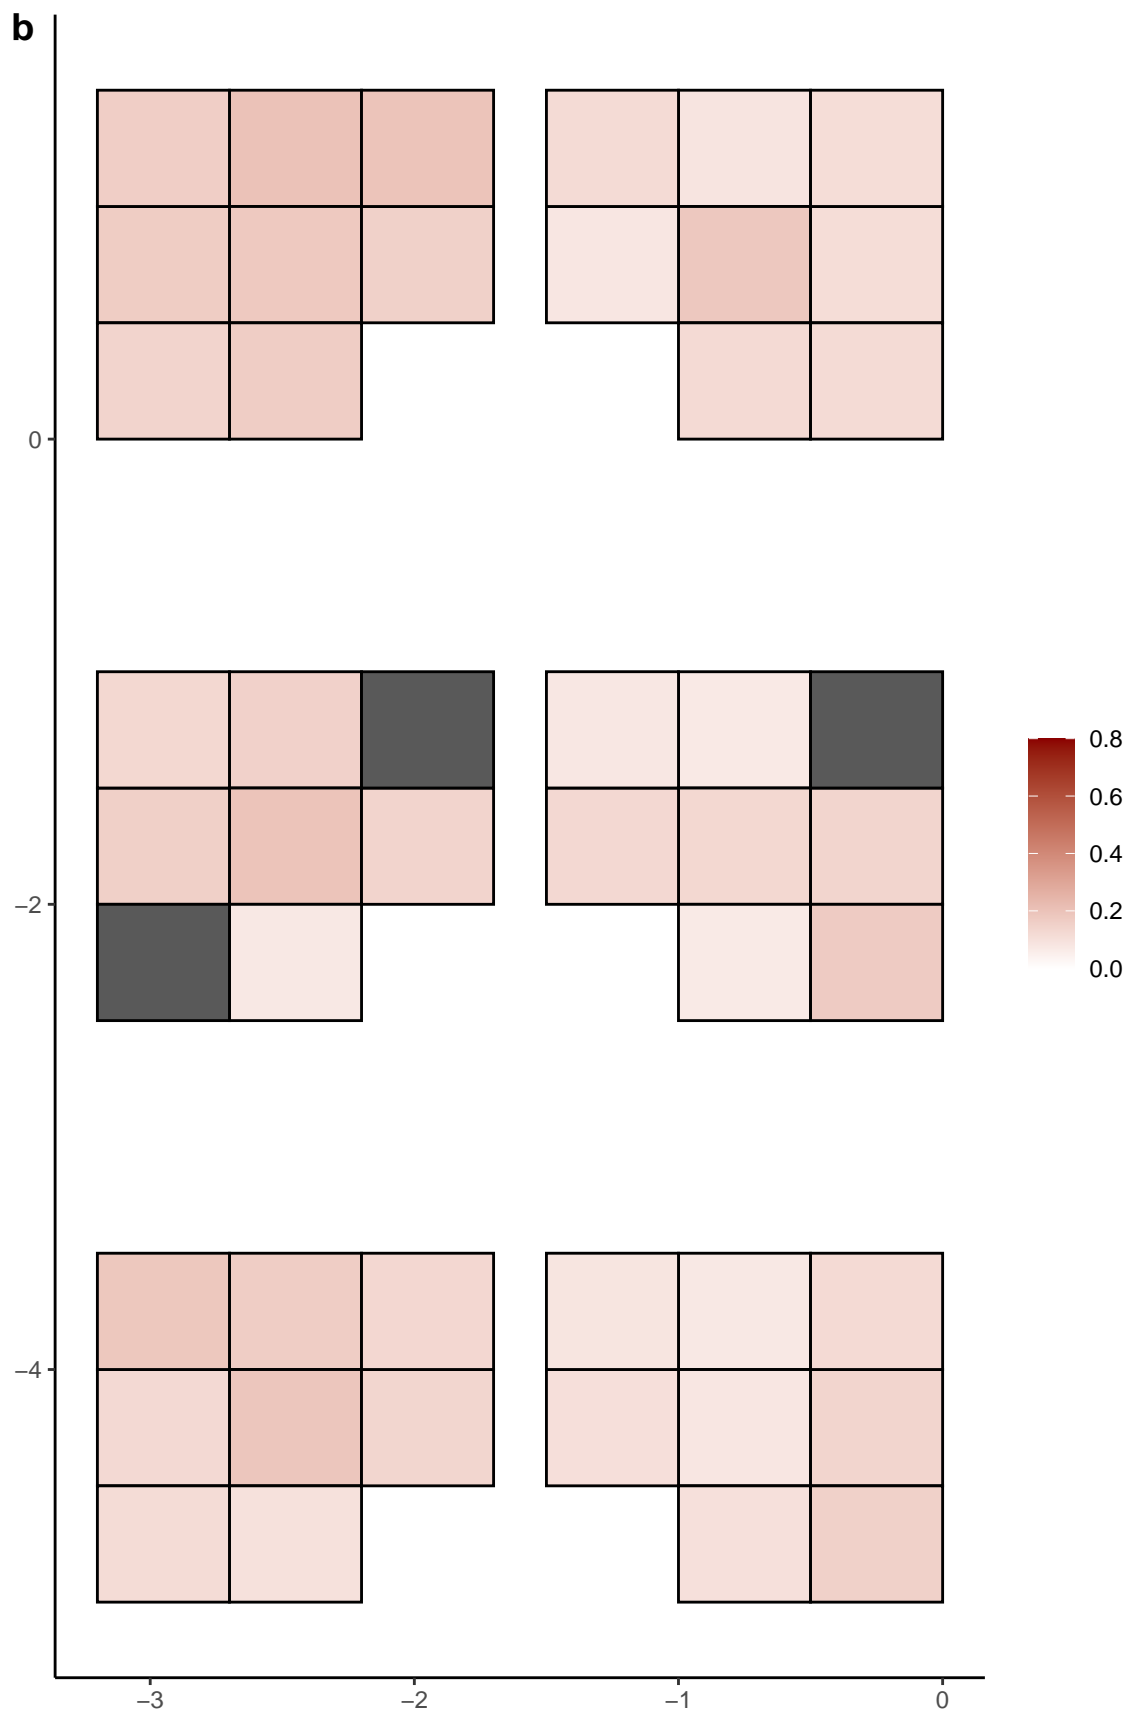

**a** ID05 2-240582791-G-A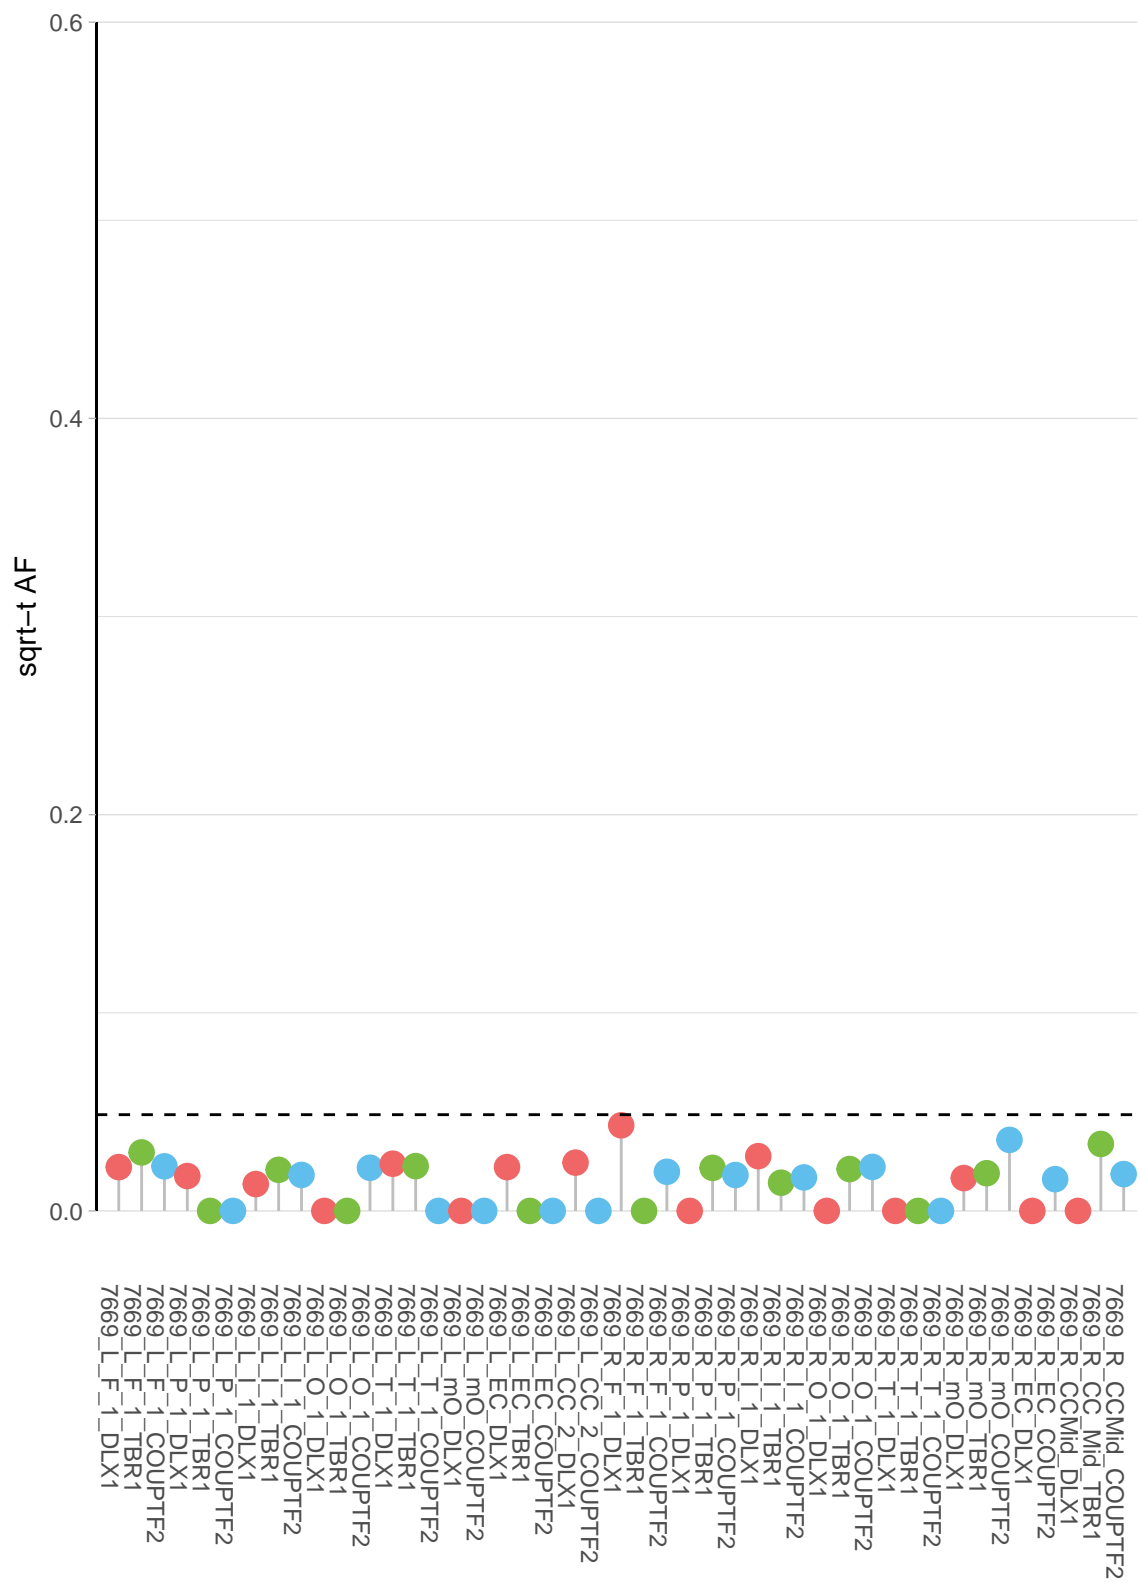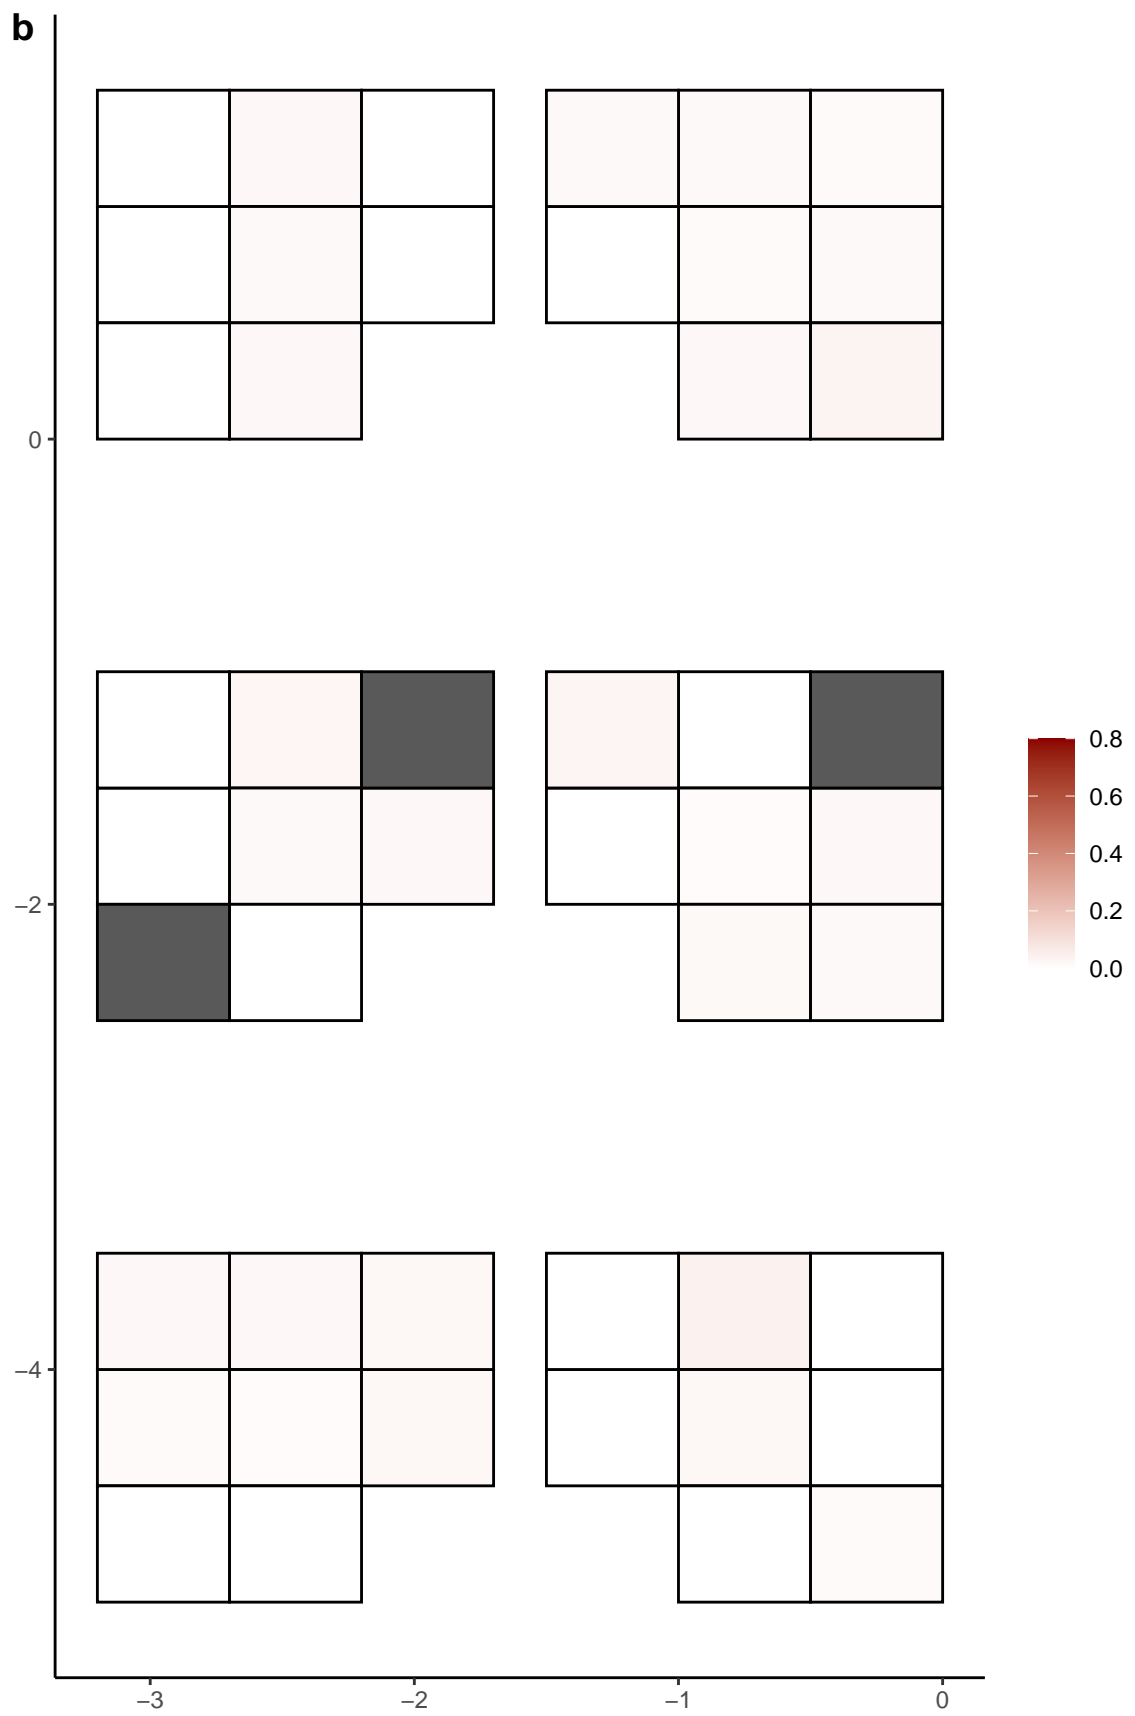

**a** ID05 2-241015446-G-A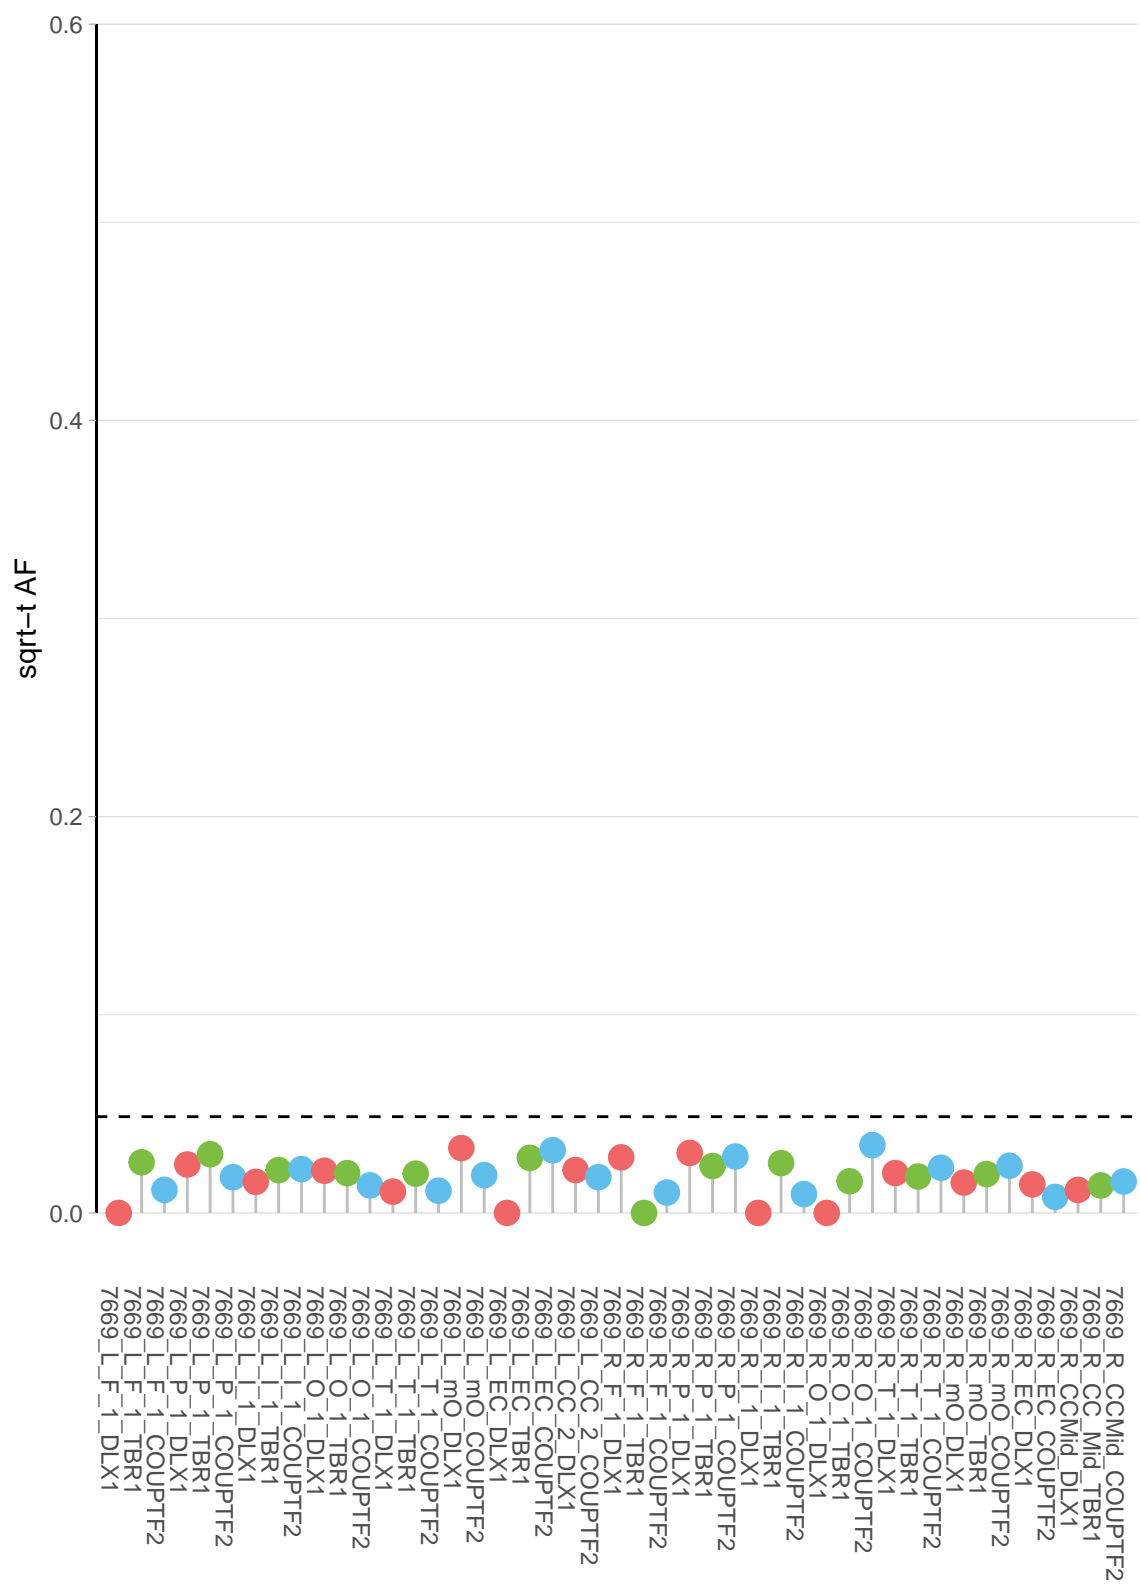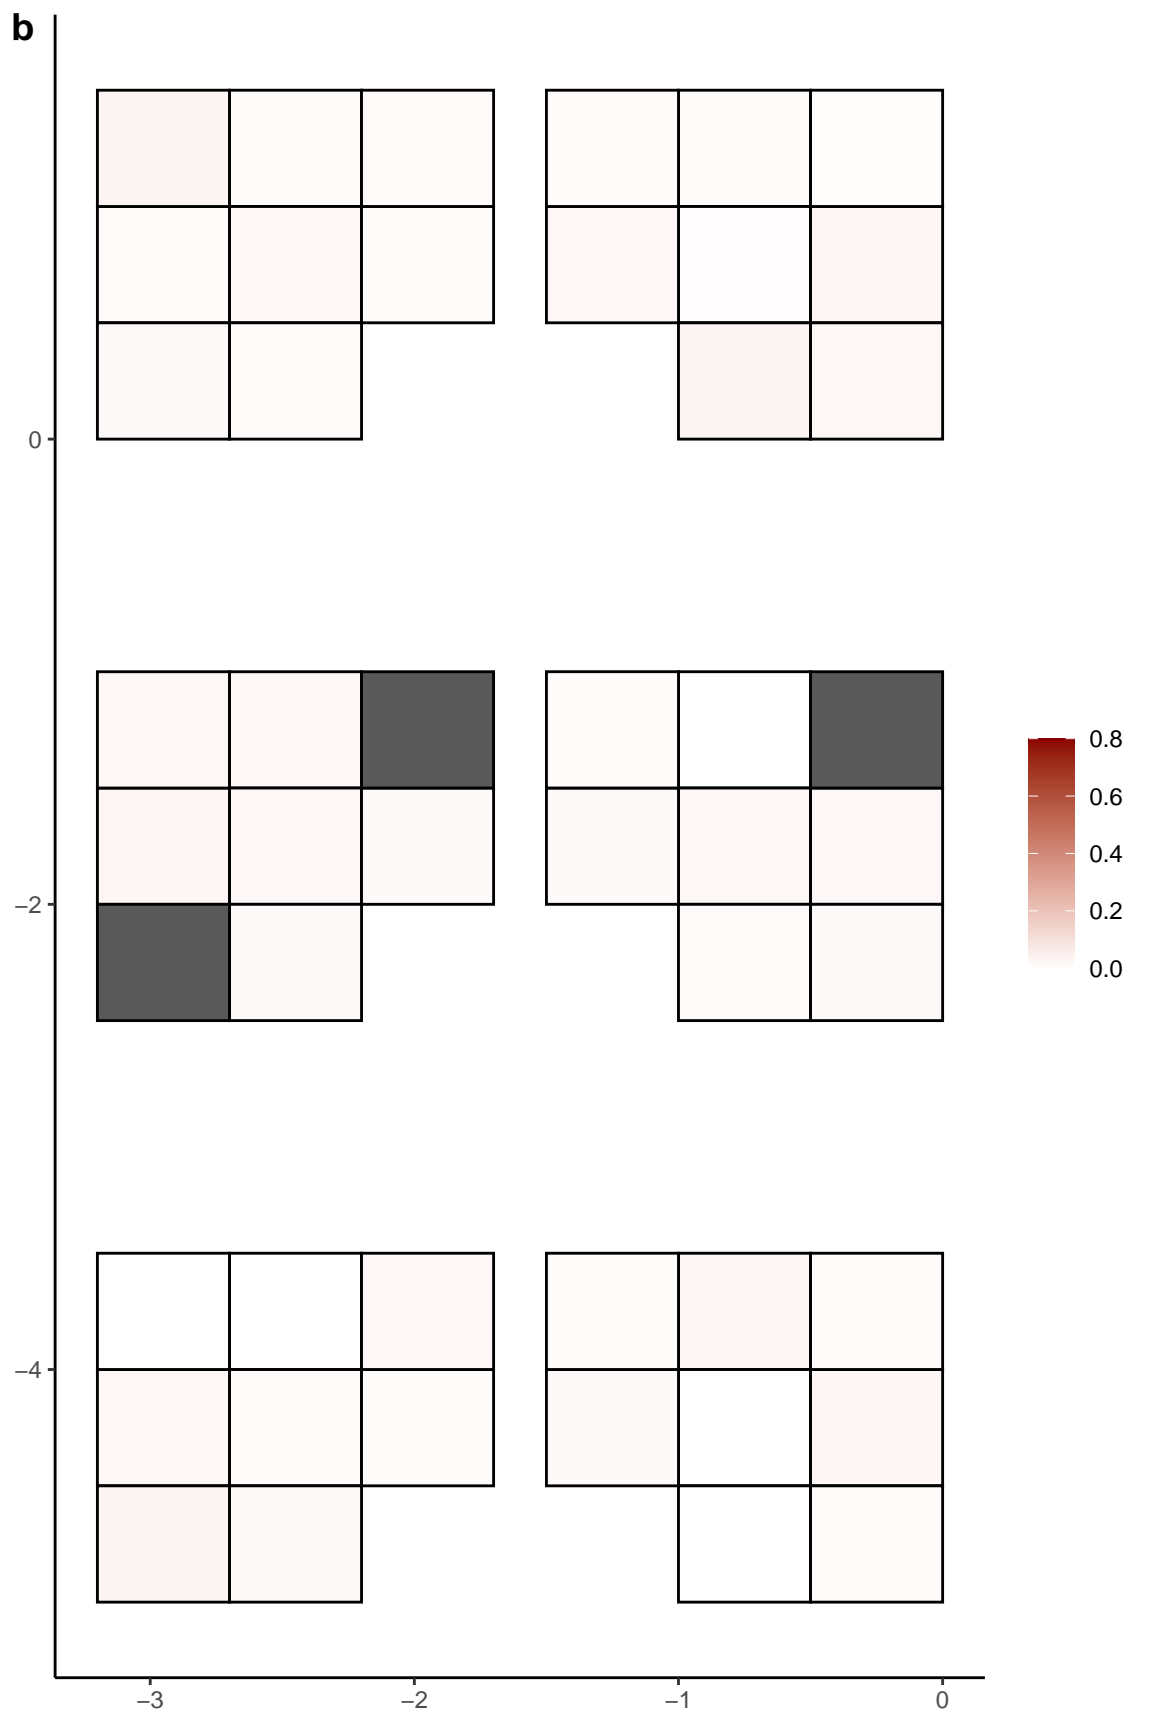



**a** ID05 2-241258643-G-A

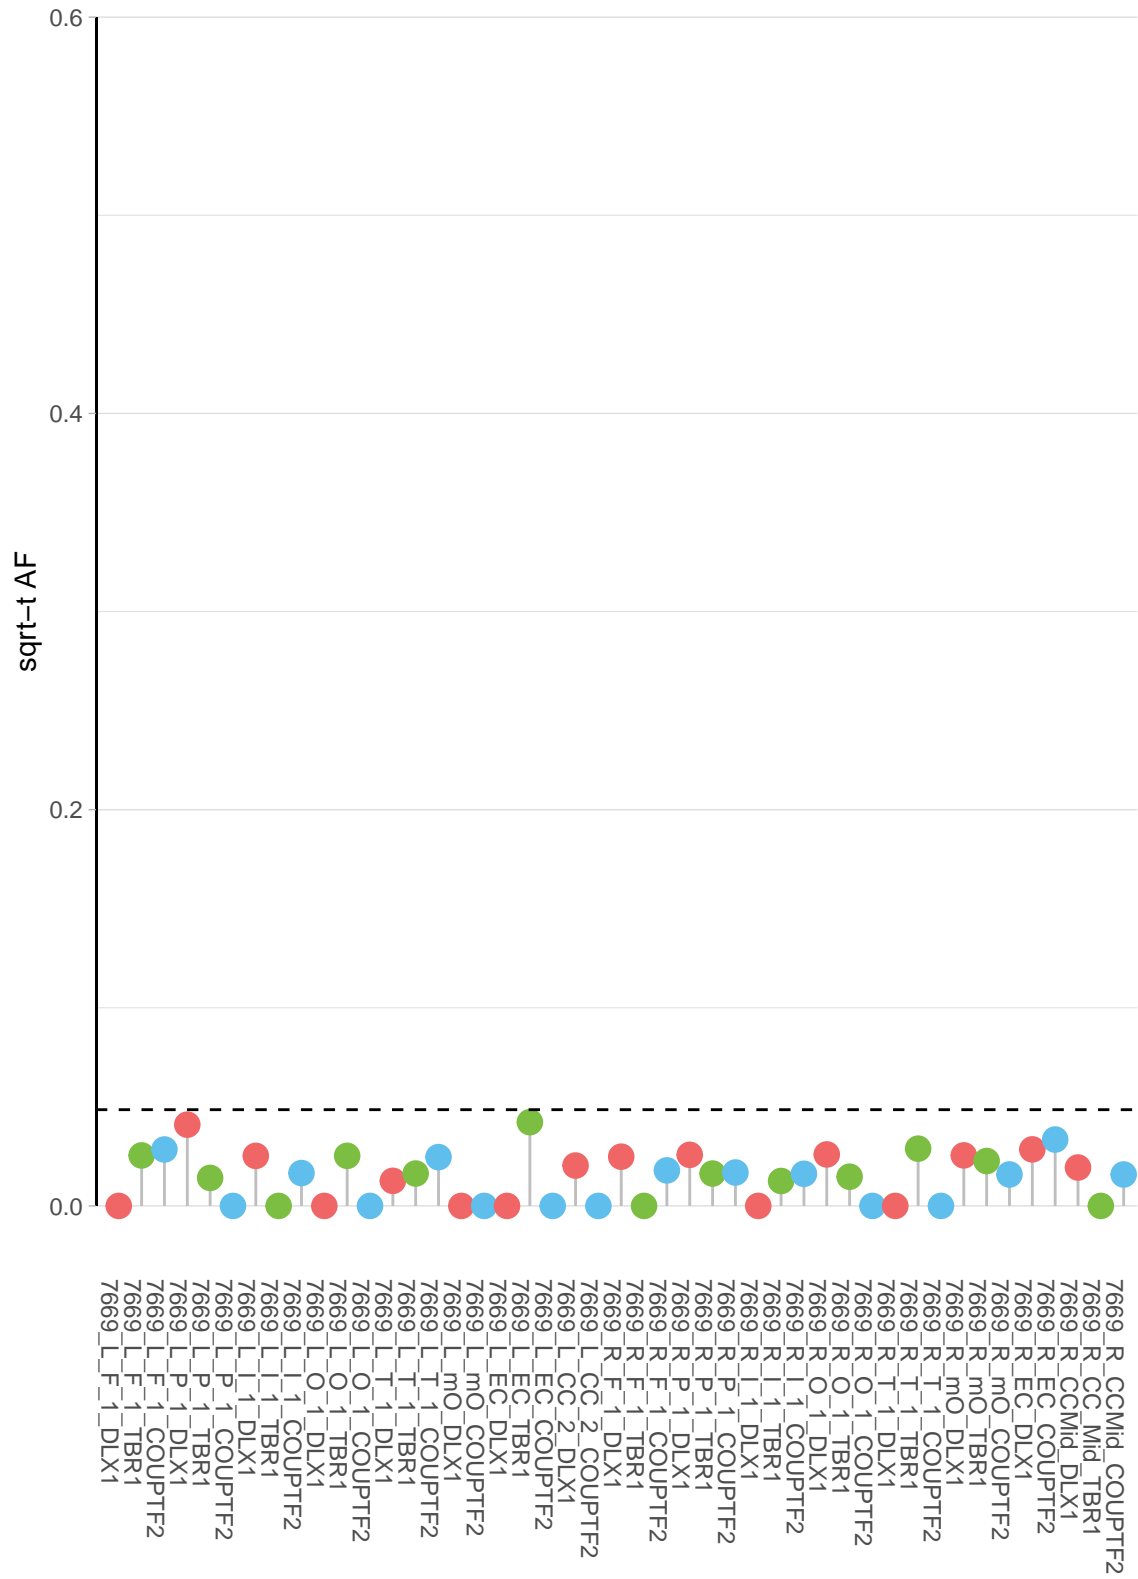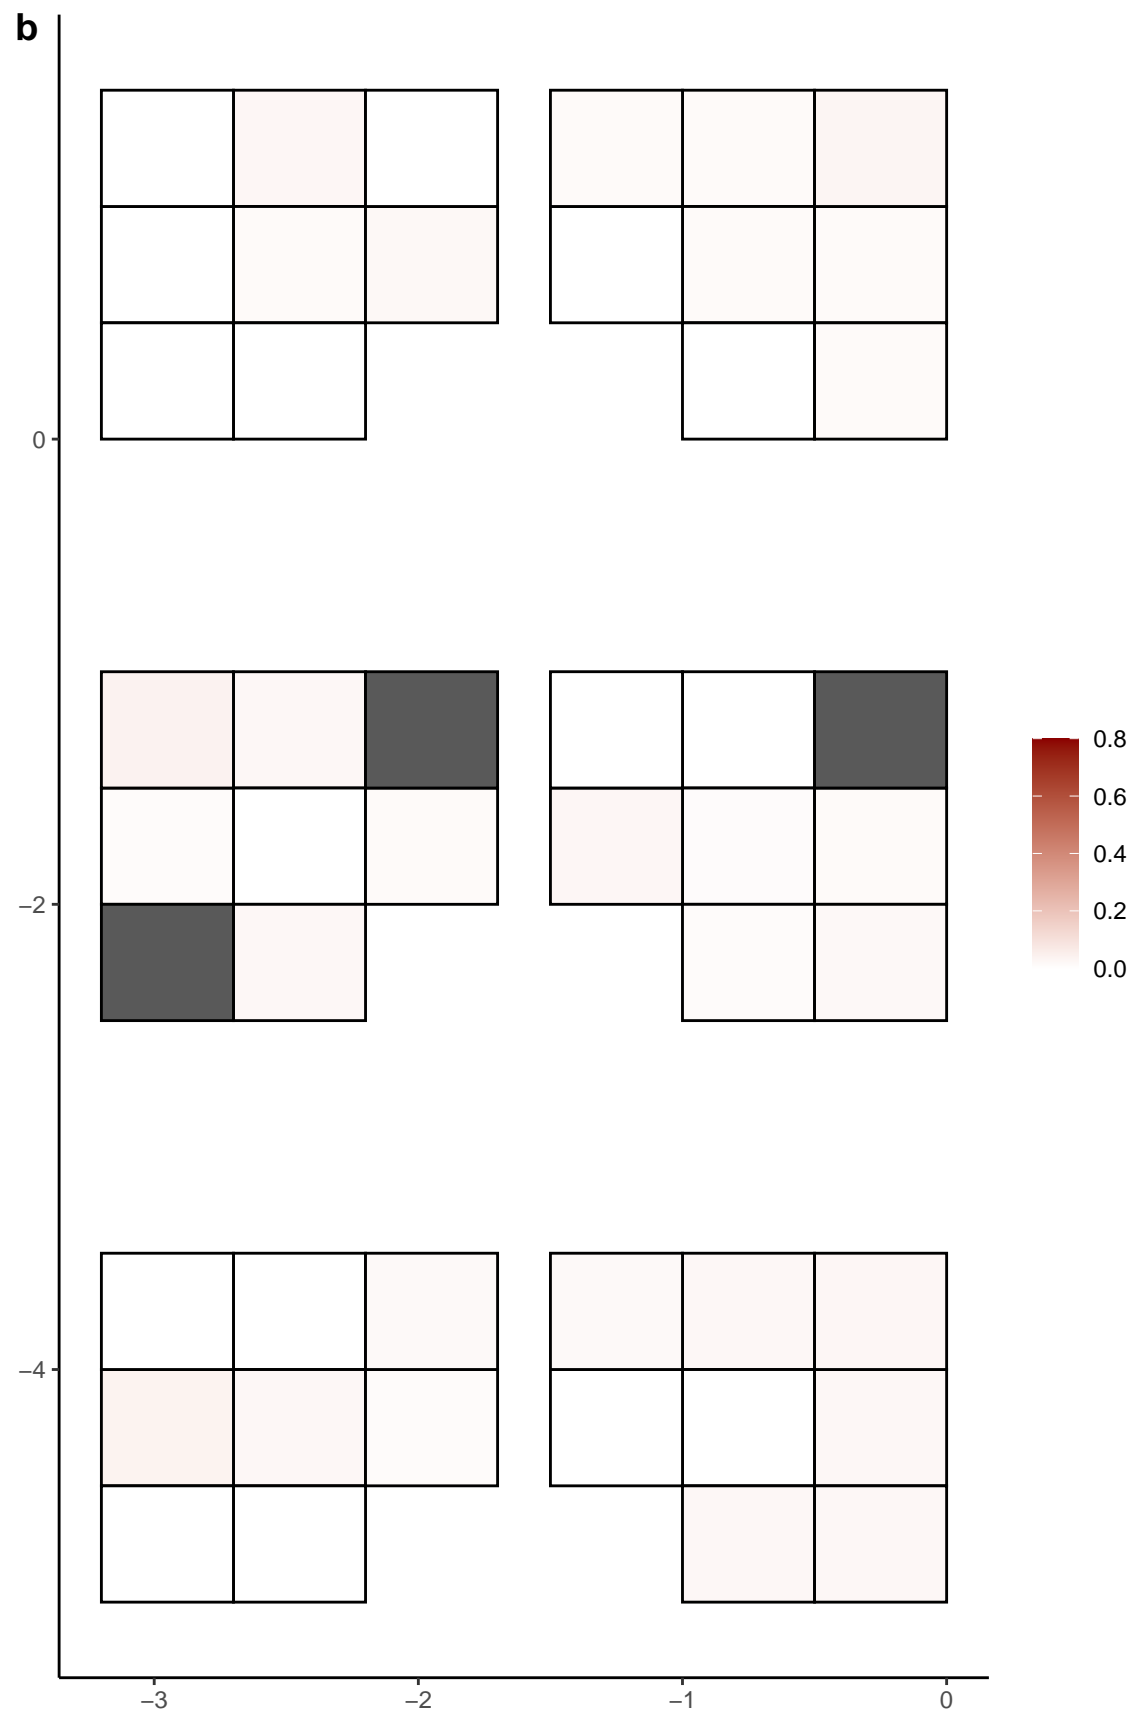

**a** ID05 2-27102490-G-A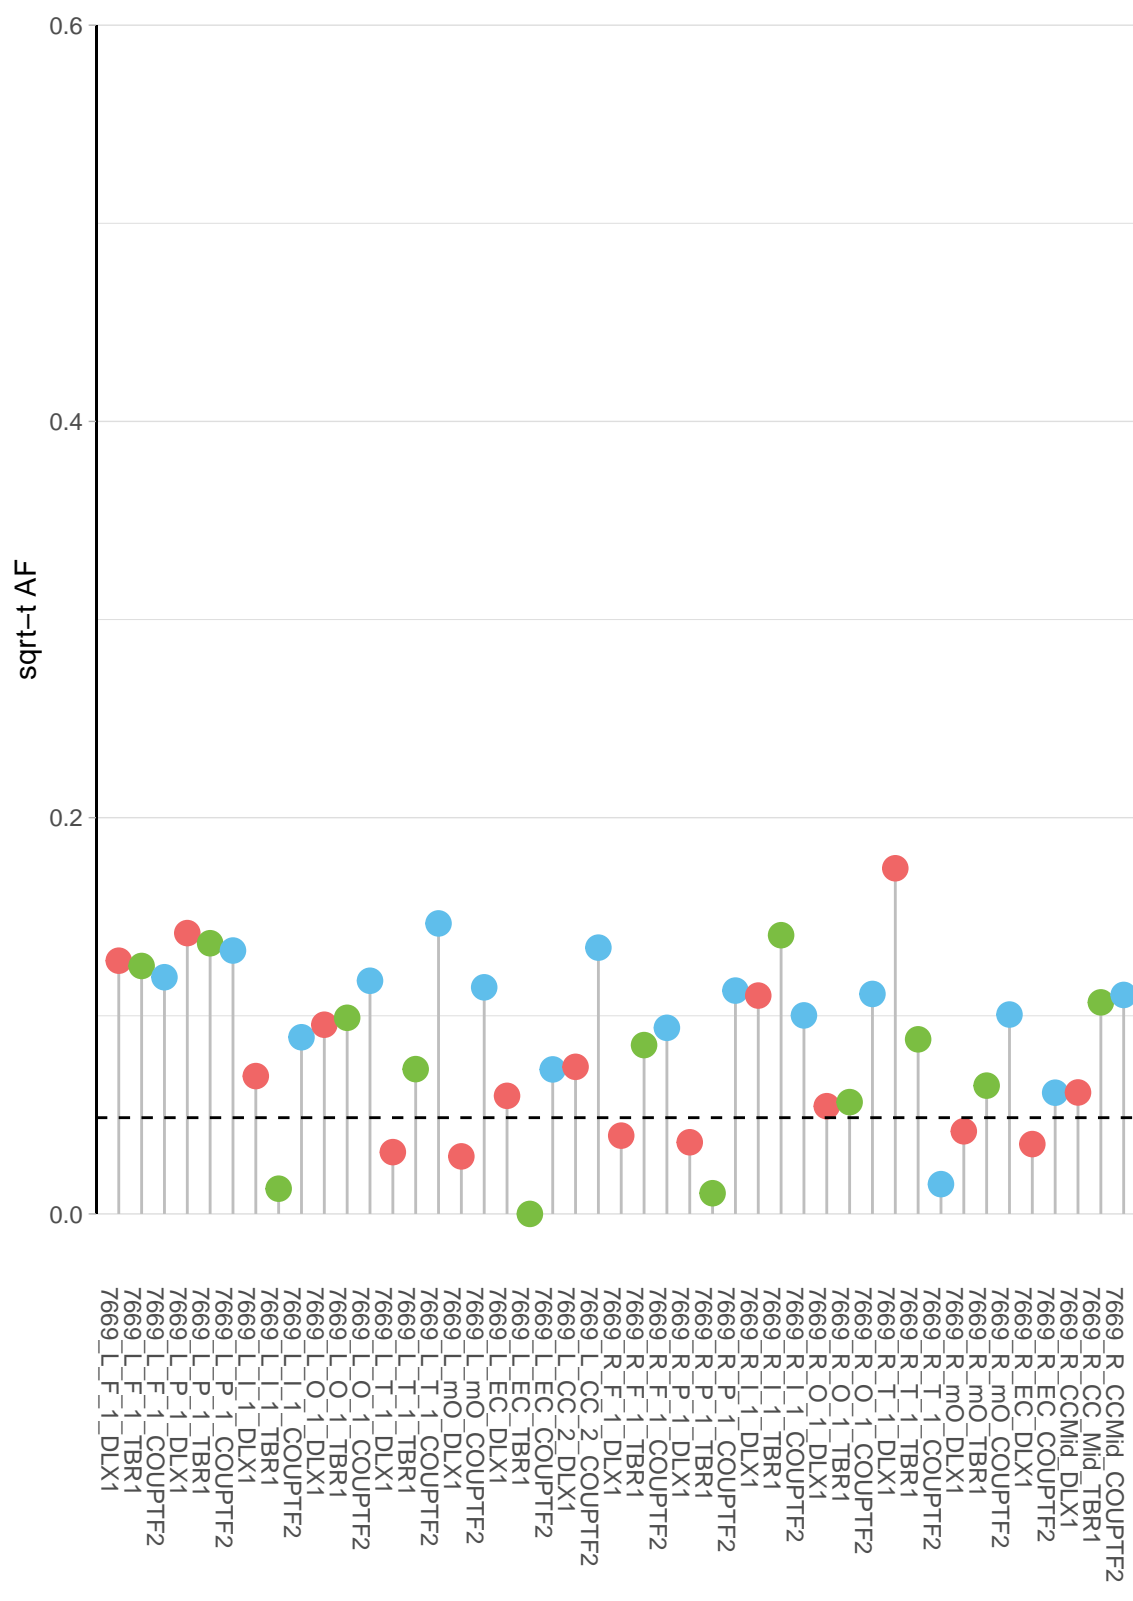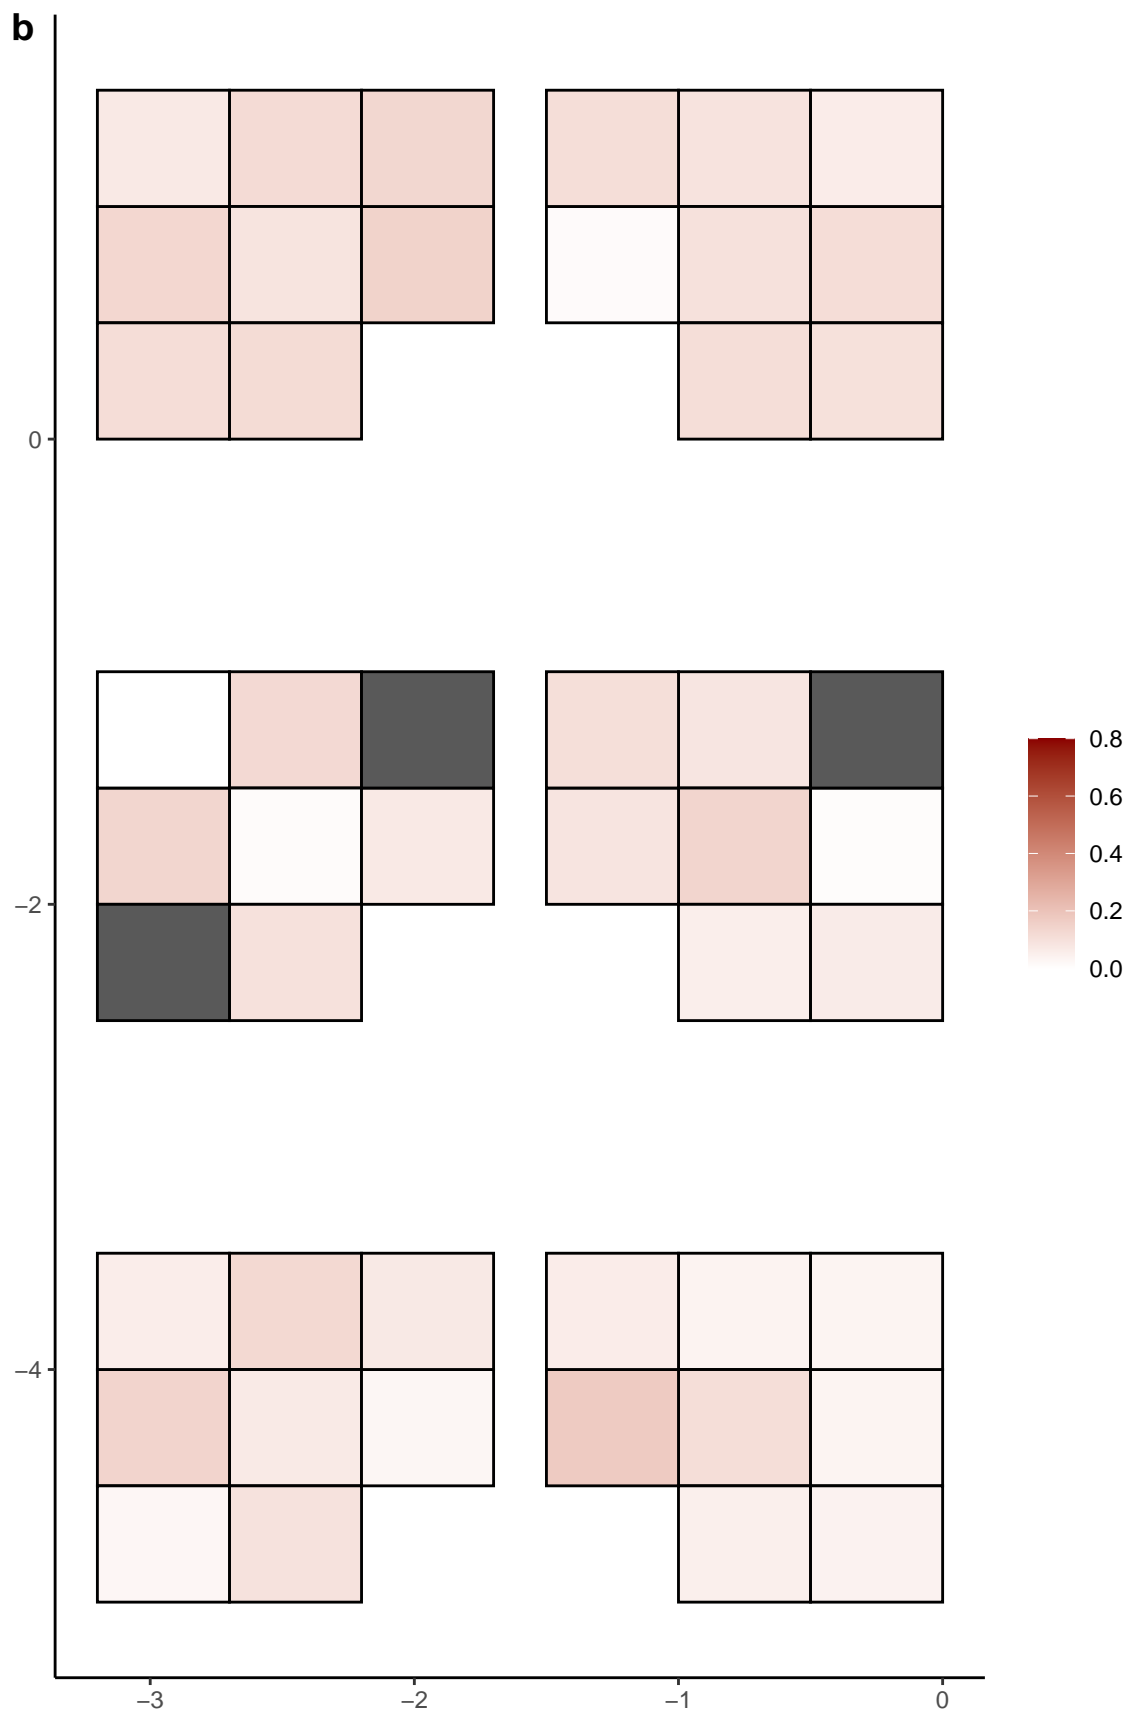

**a** ID05 2-3282940-C-T

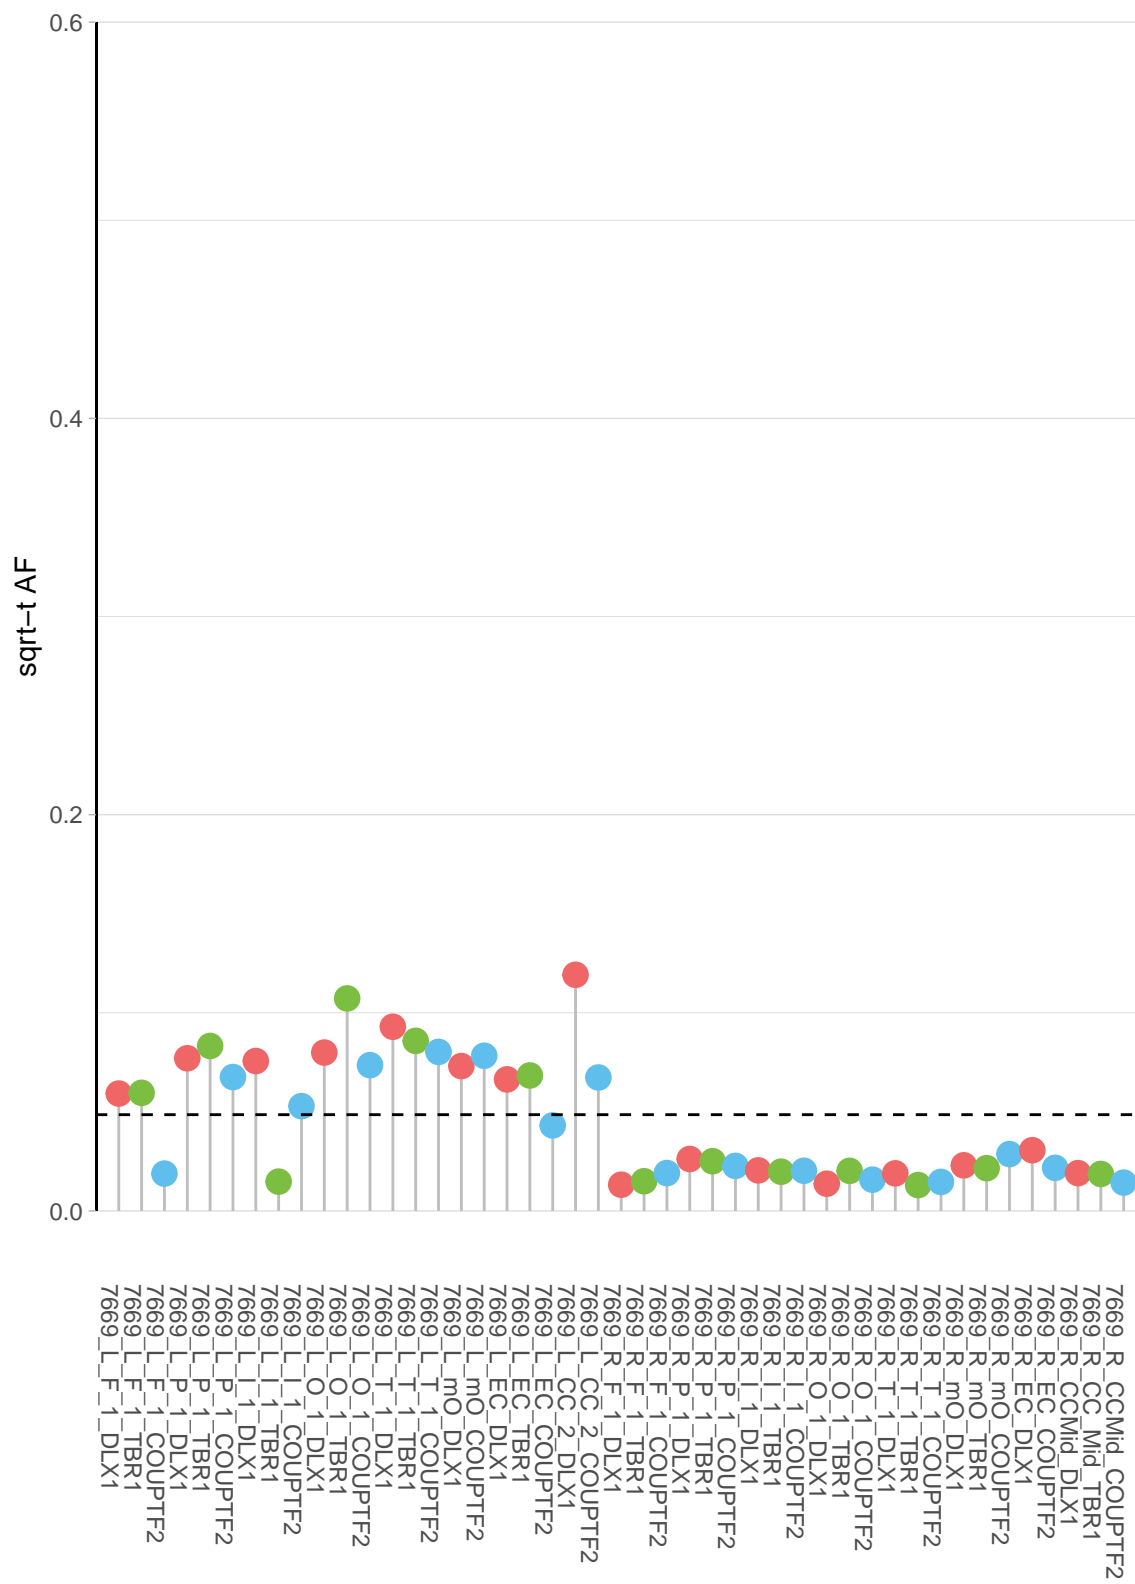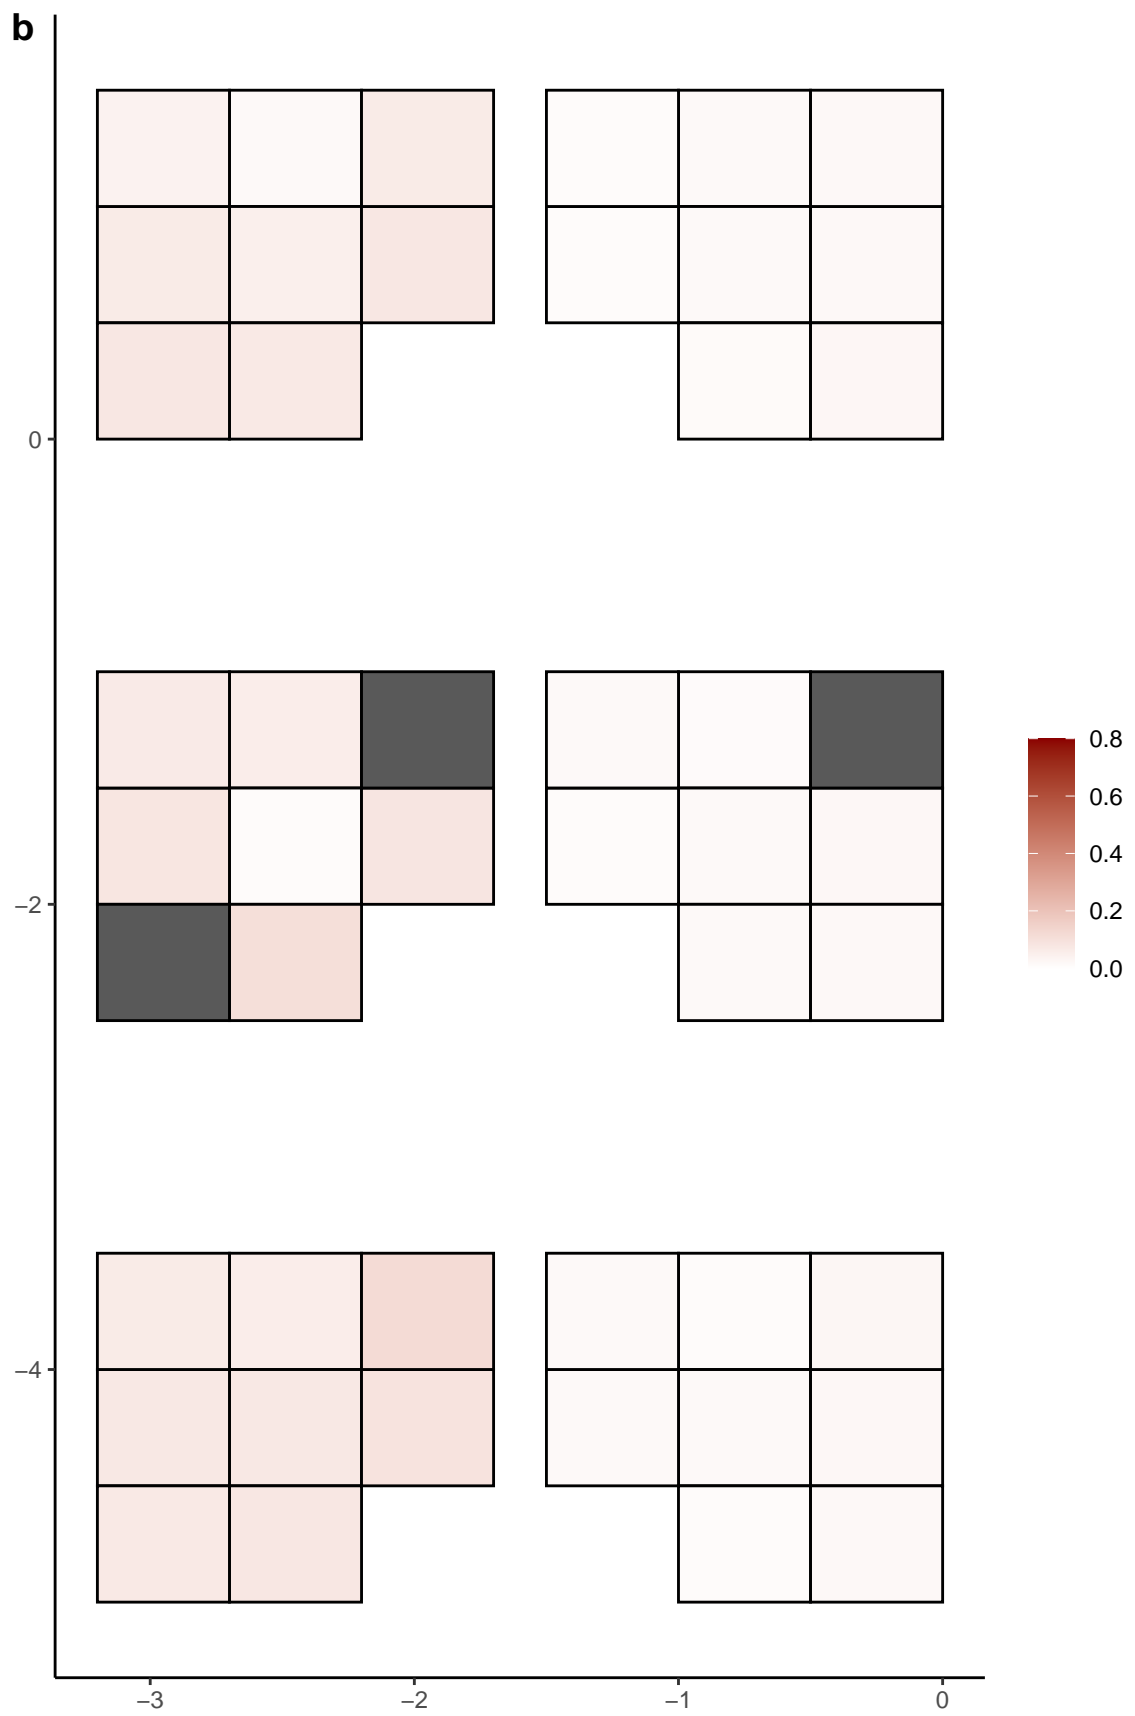

**a** ID05 2-34945794-T-C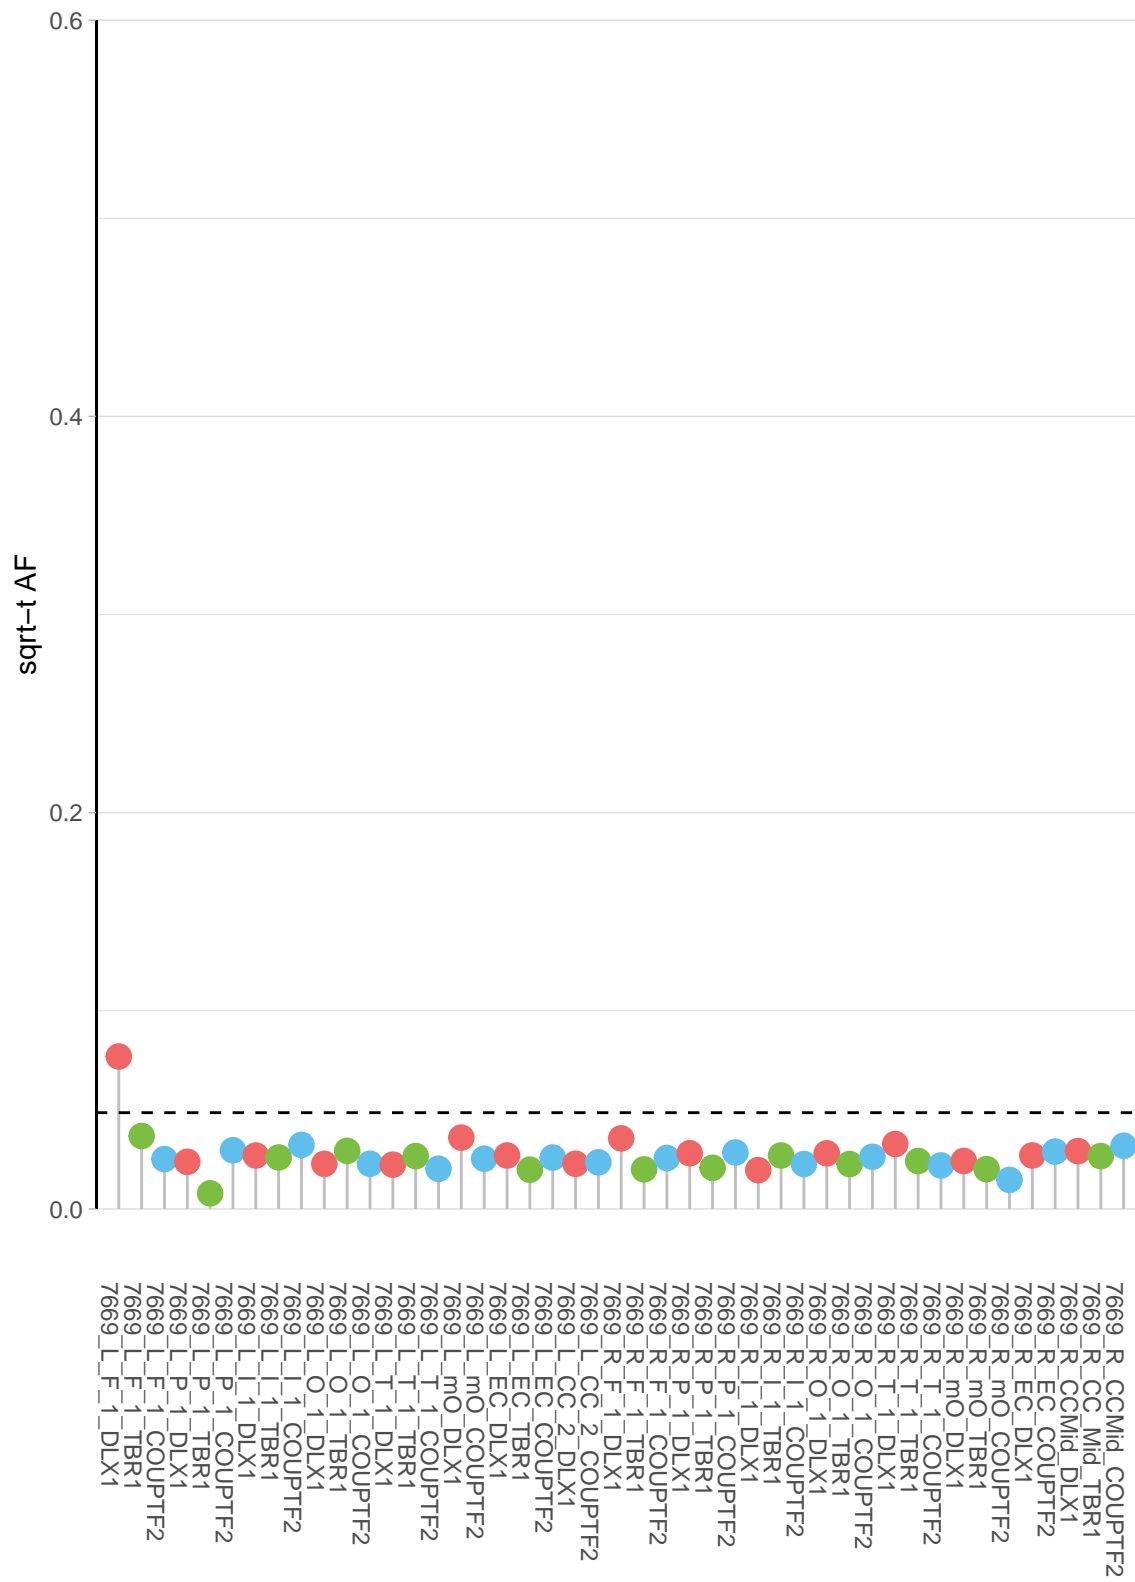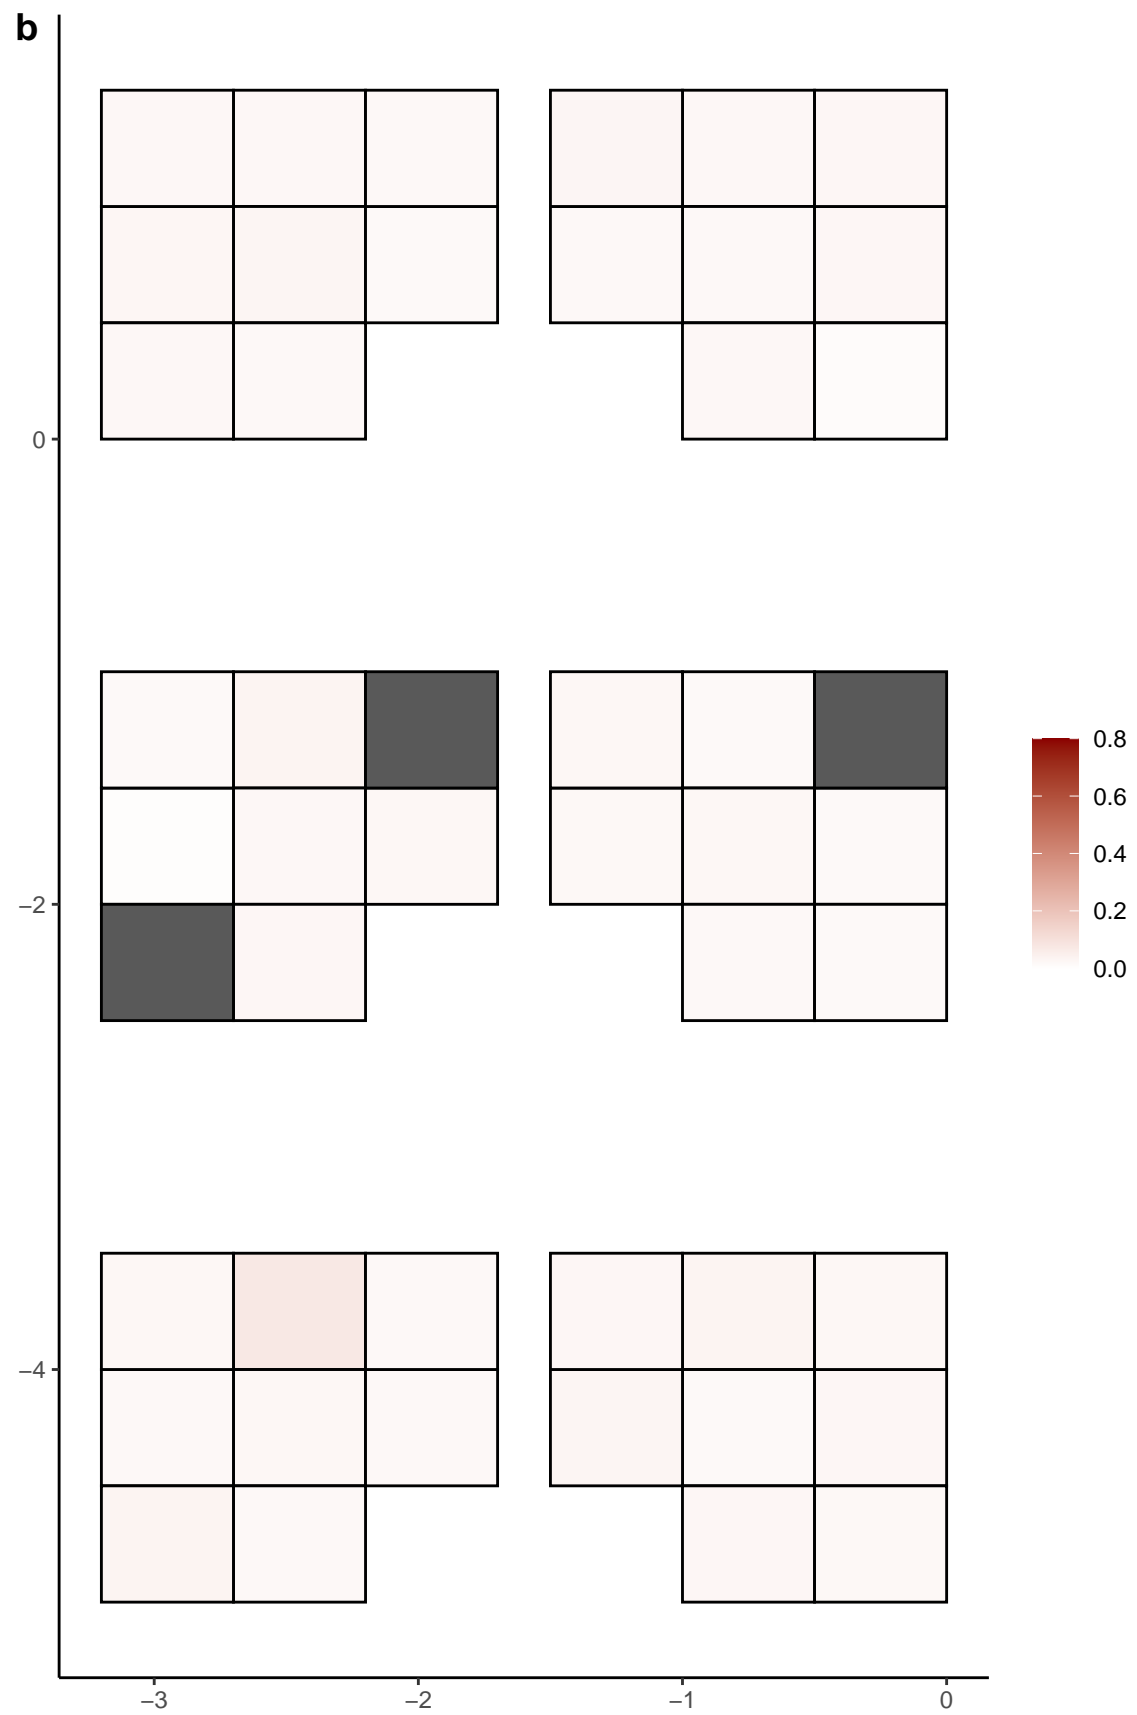

**a** ID05 2-35655269-C-T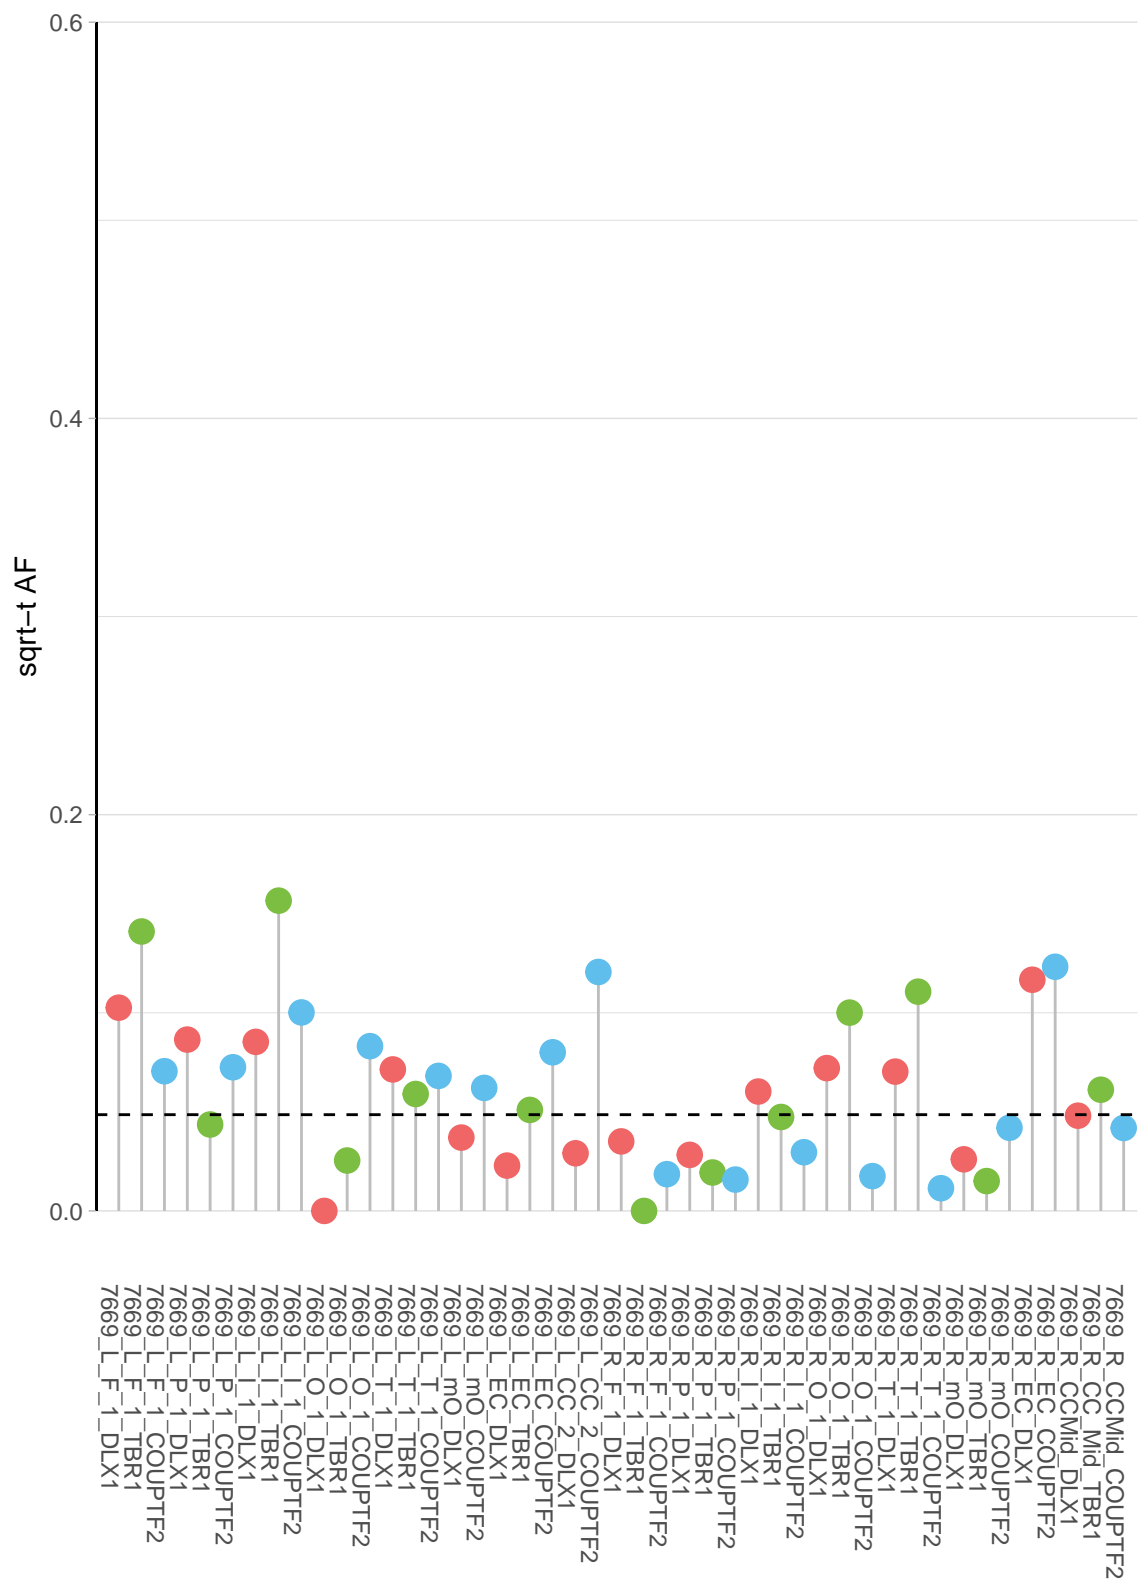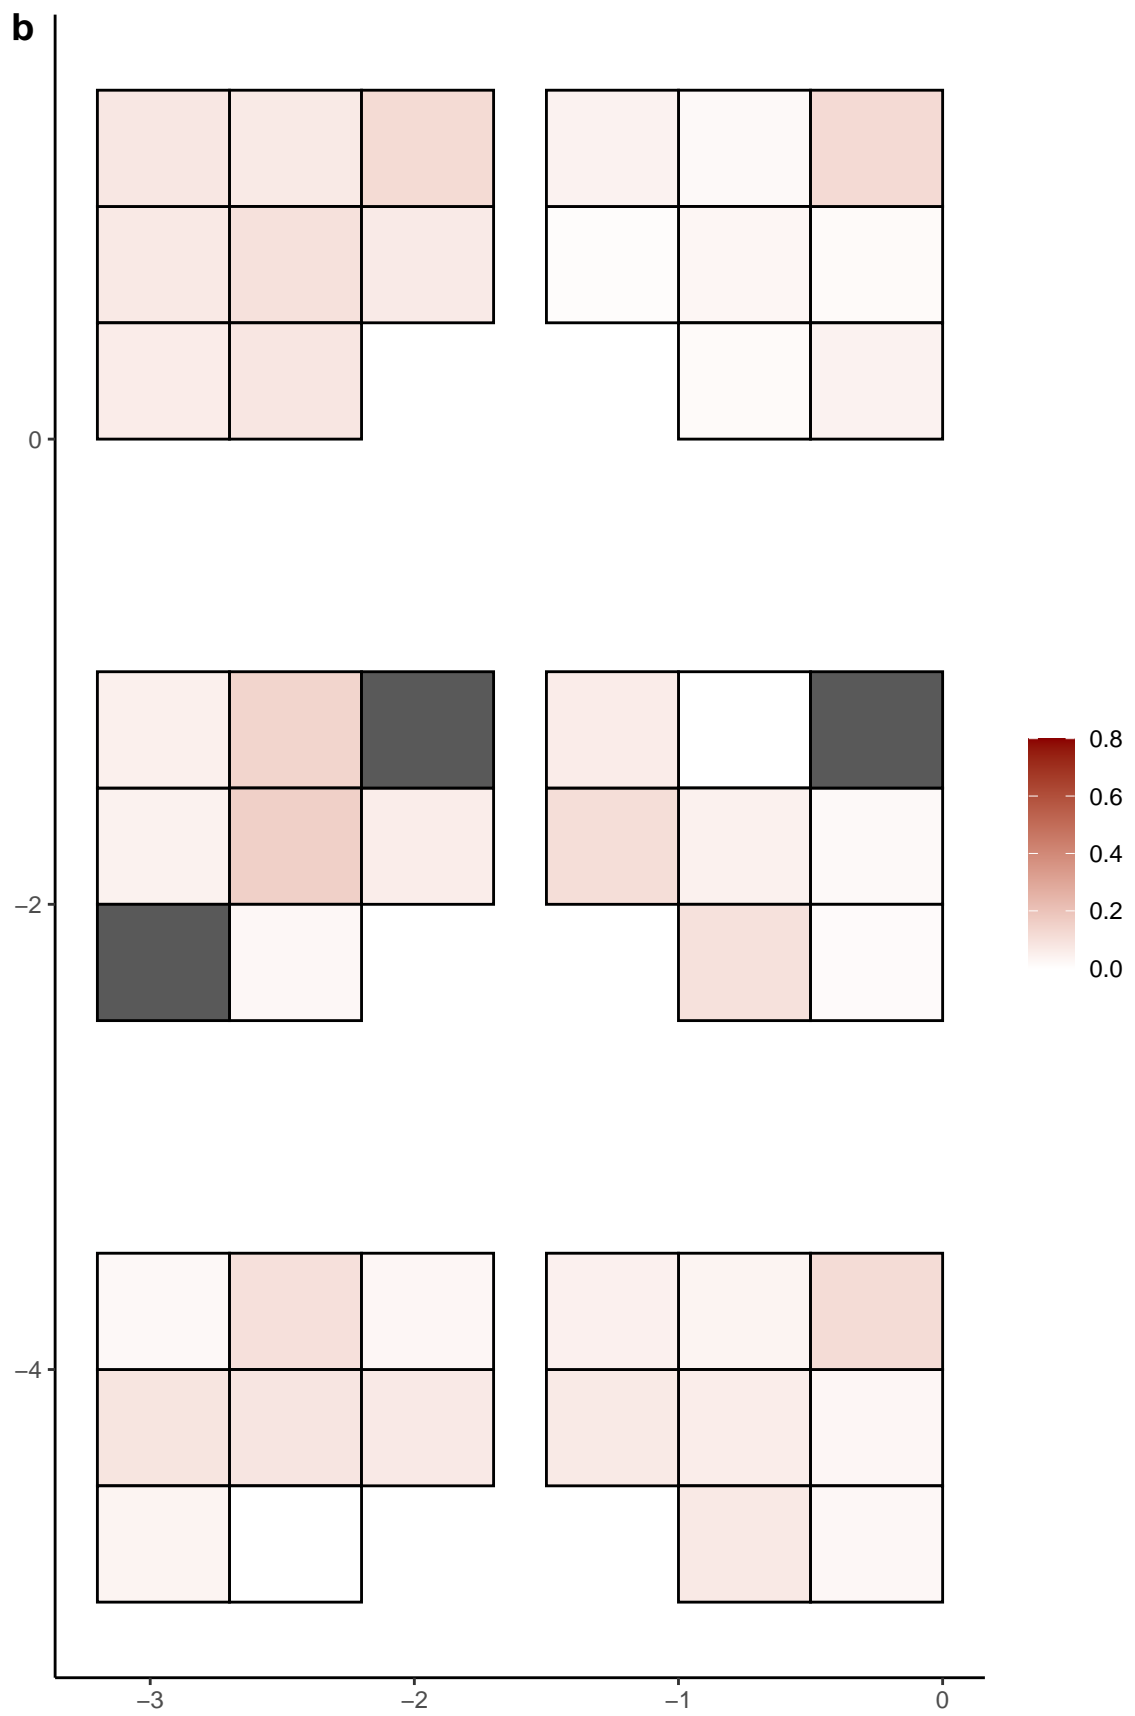

**a** ID05 2-41714937-C-A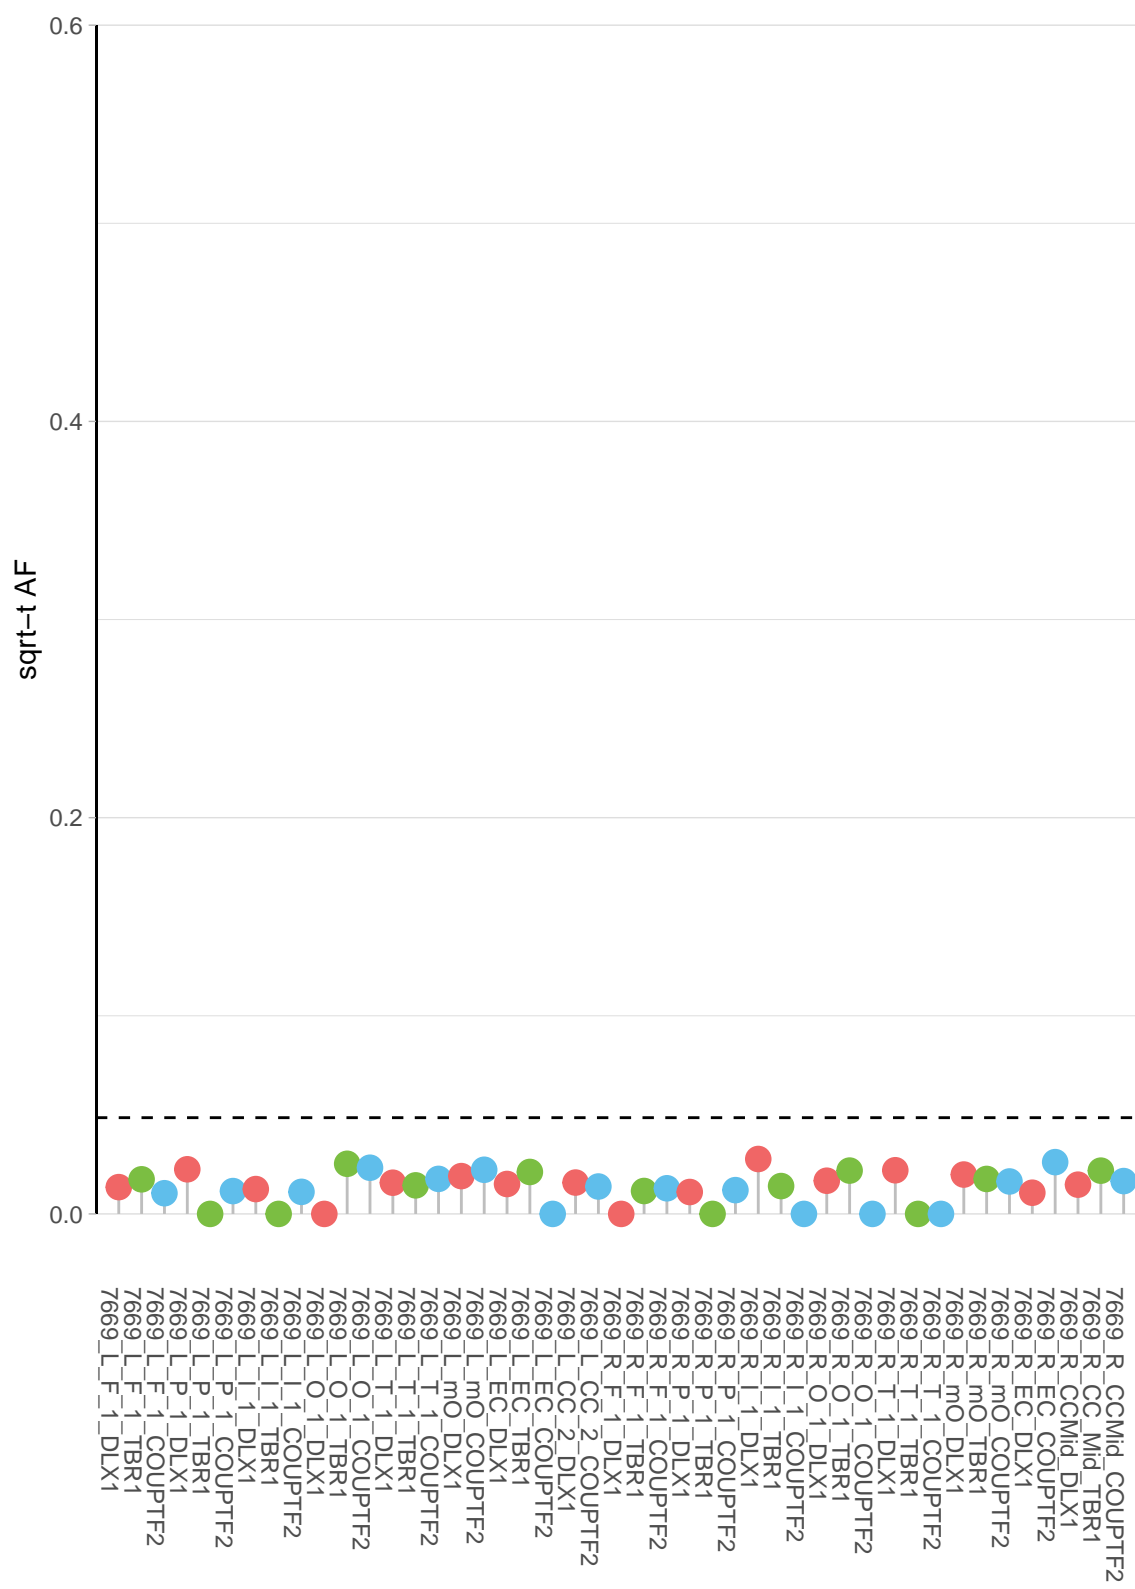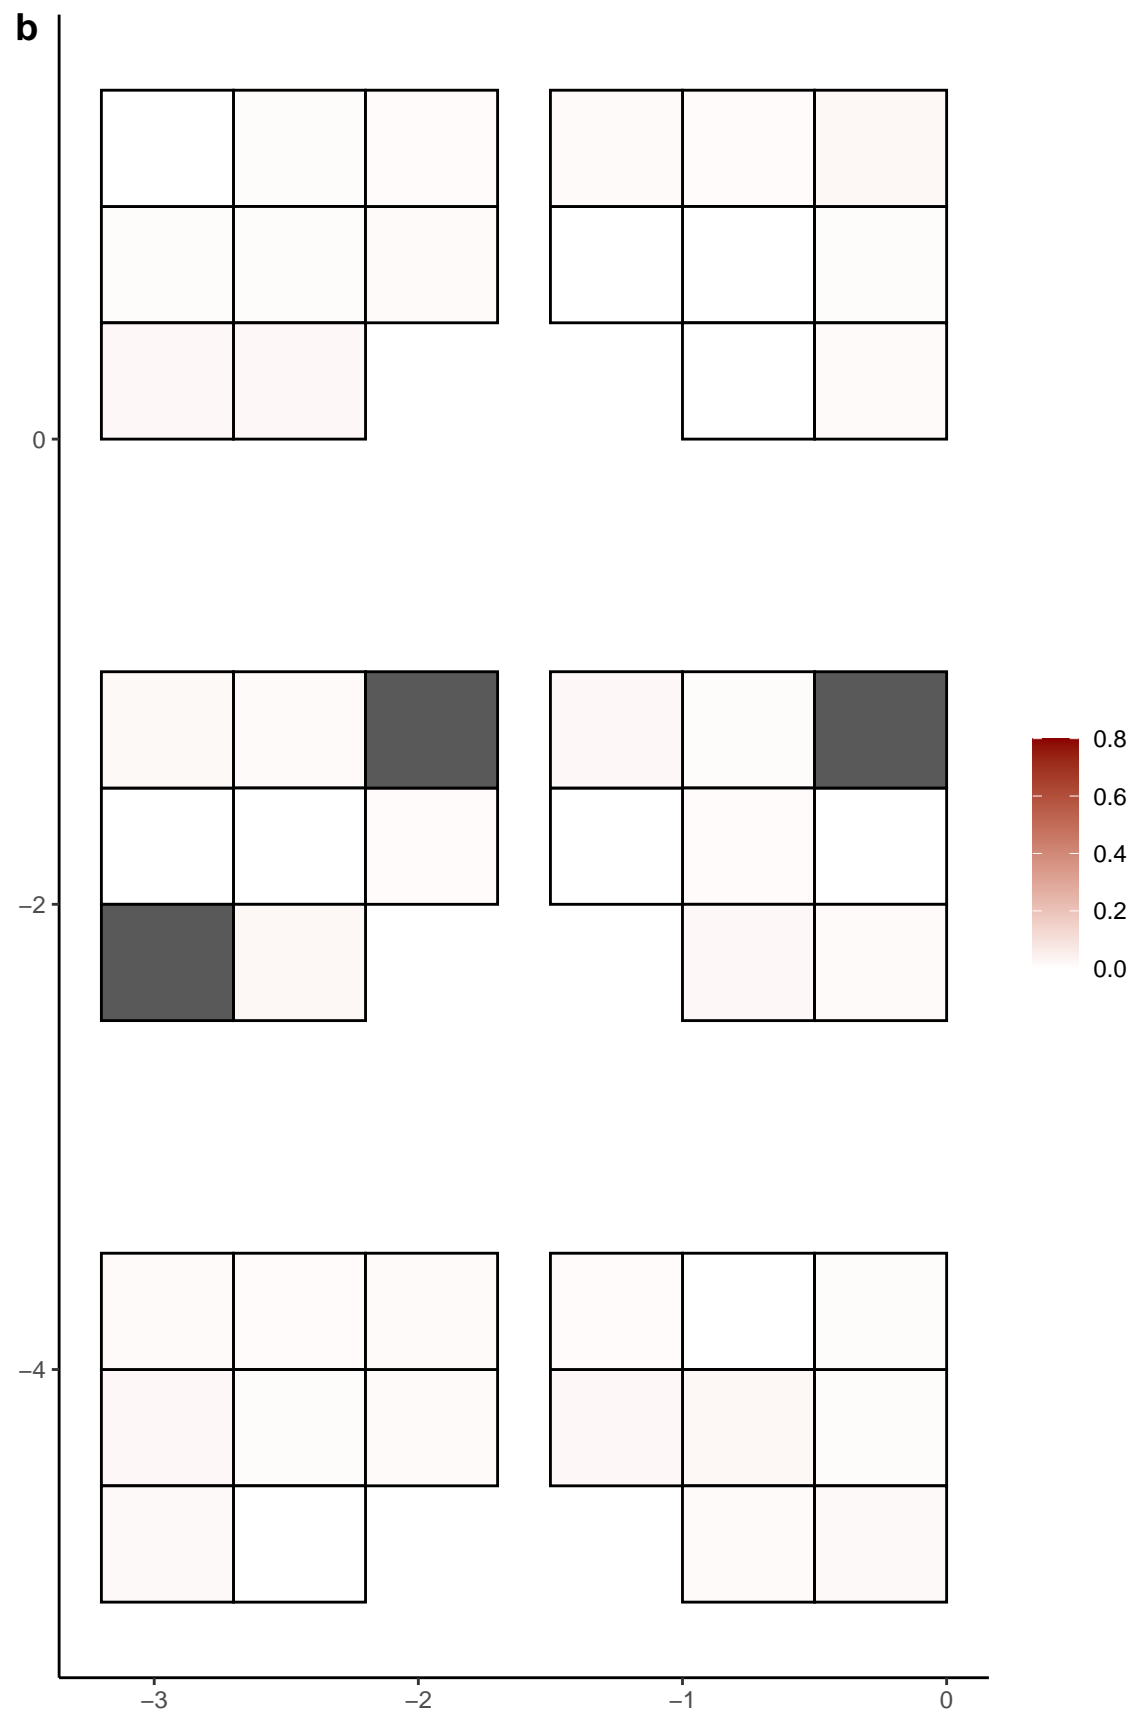



**a** ID05 2-45142013-G-A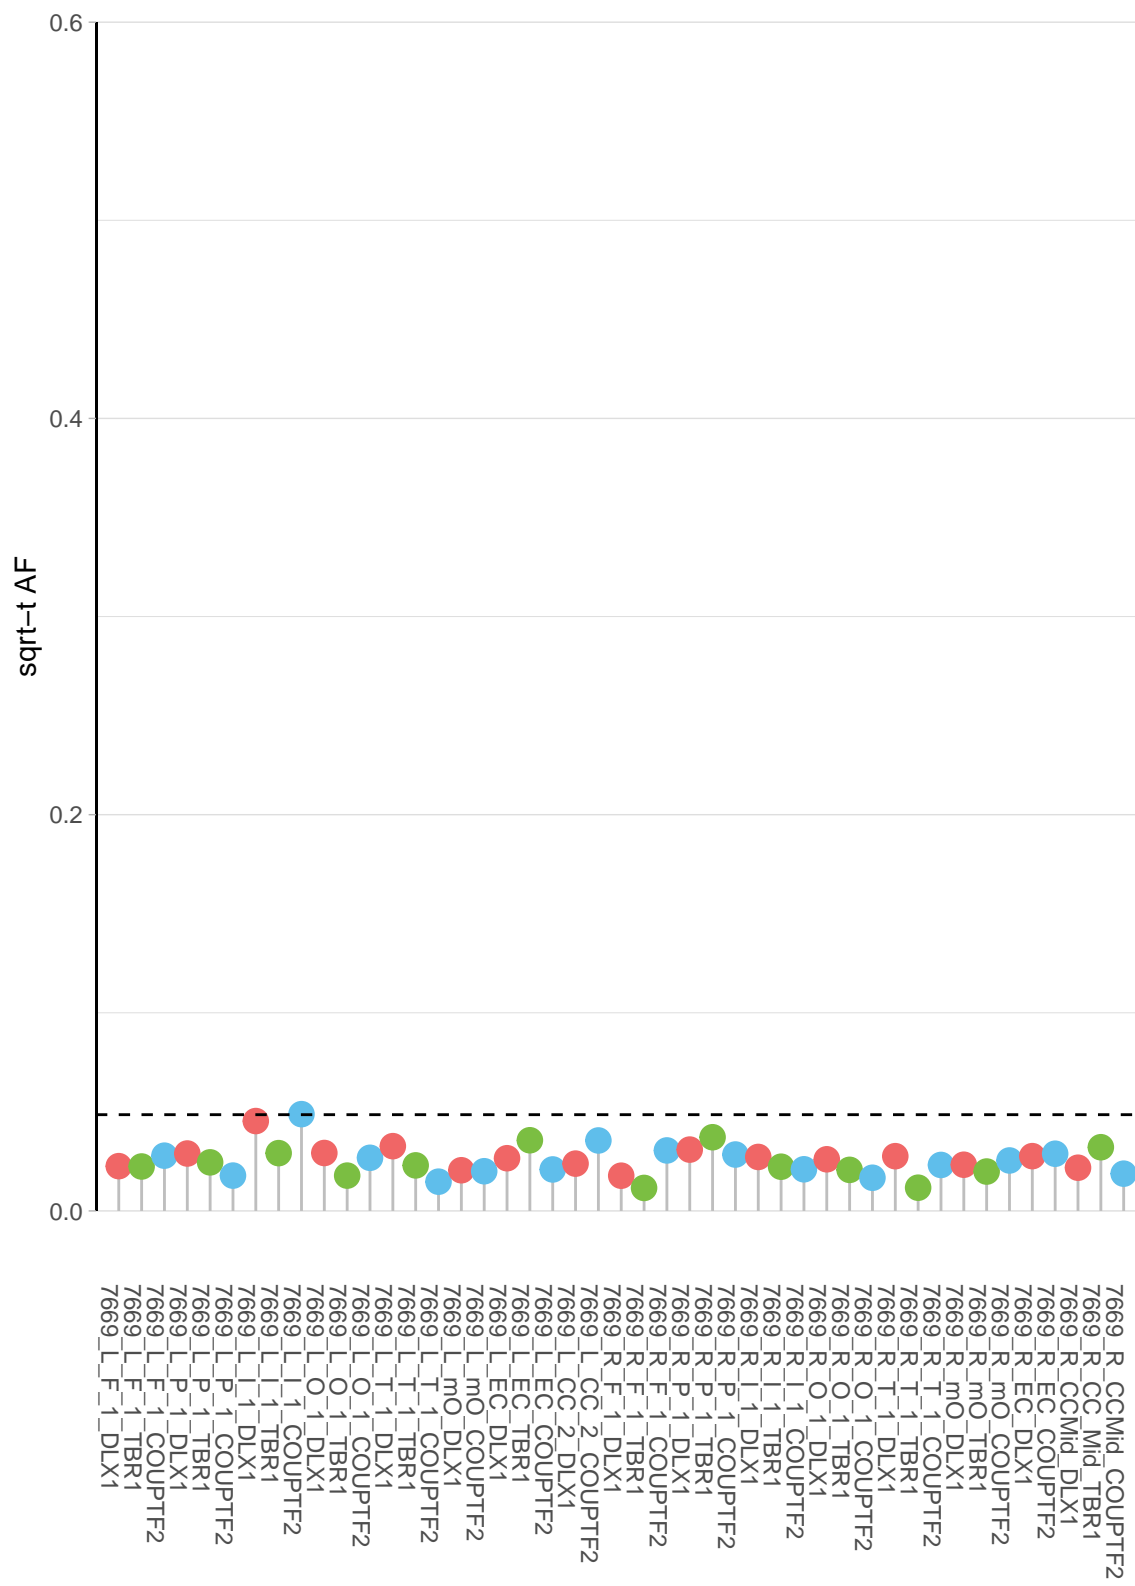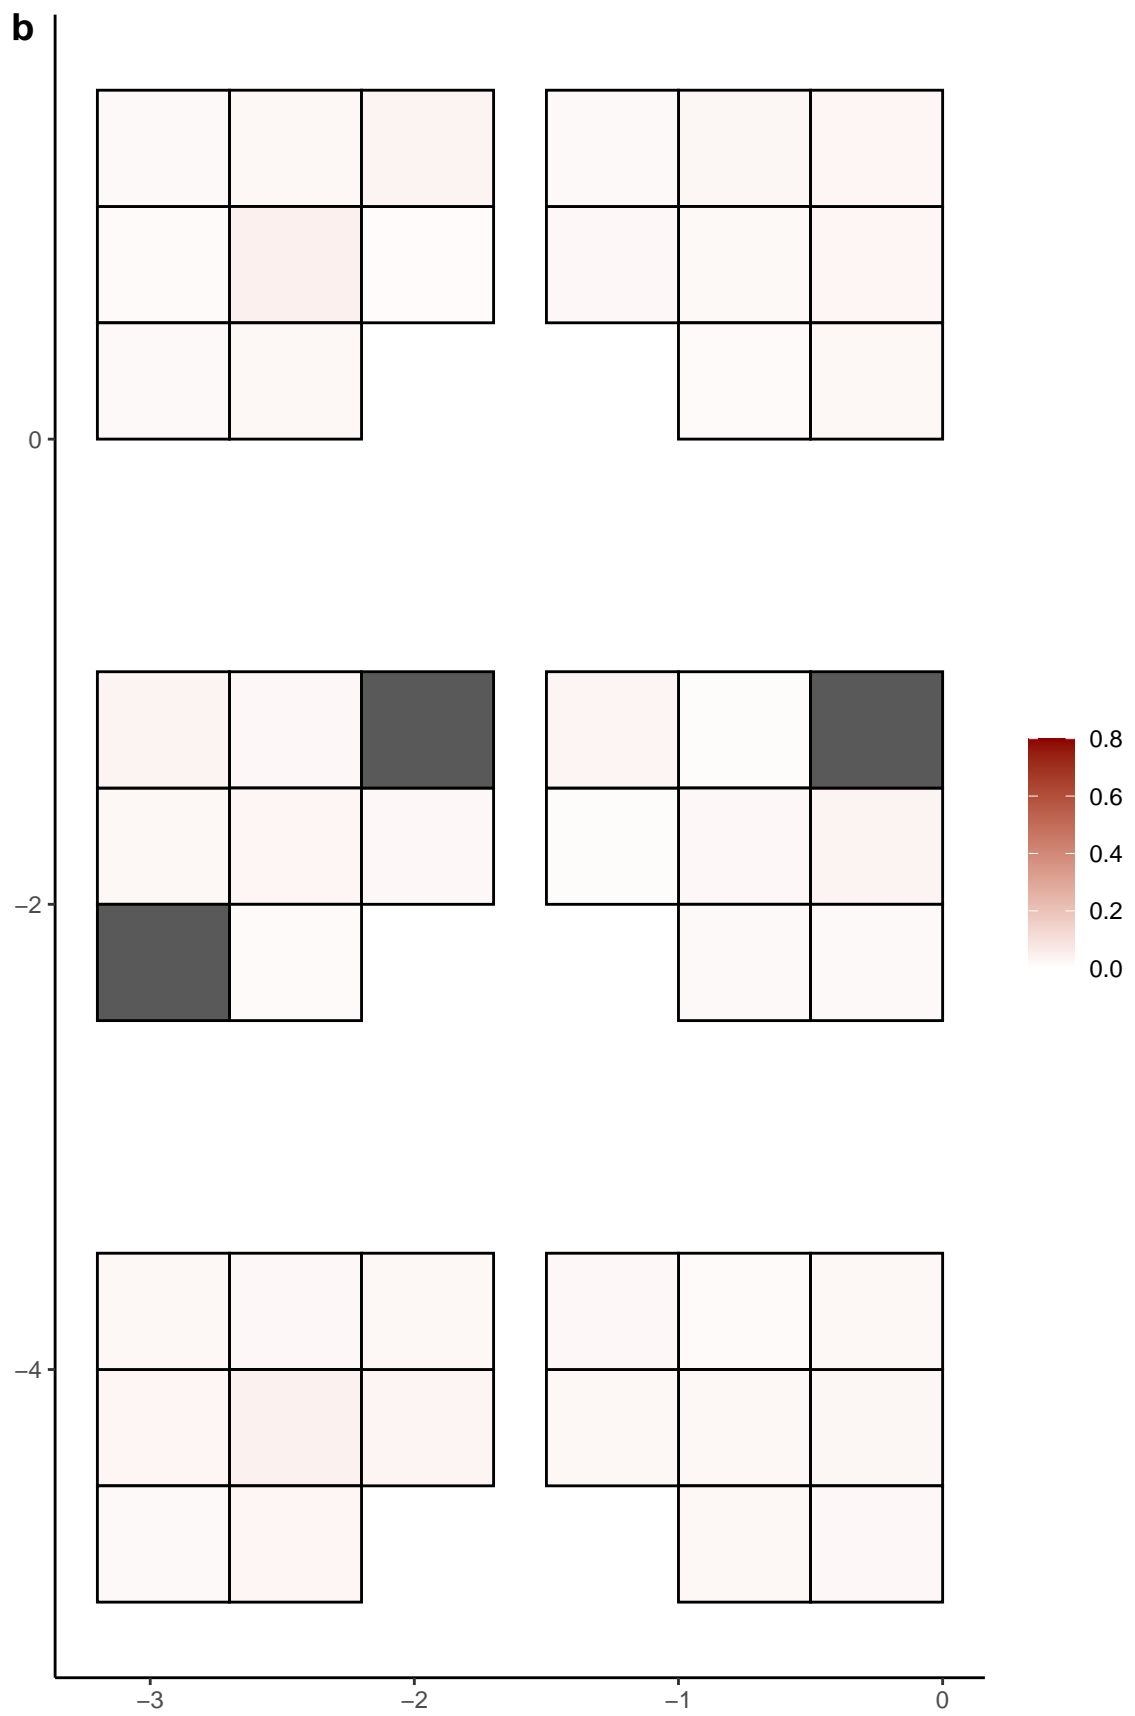



**a** ID05 2-48643619-C-T

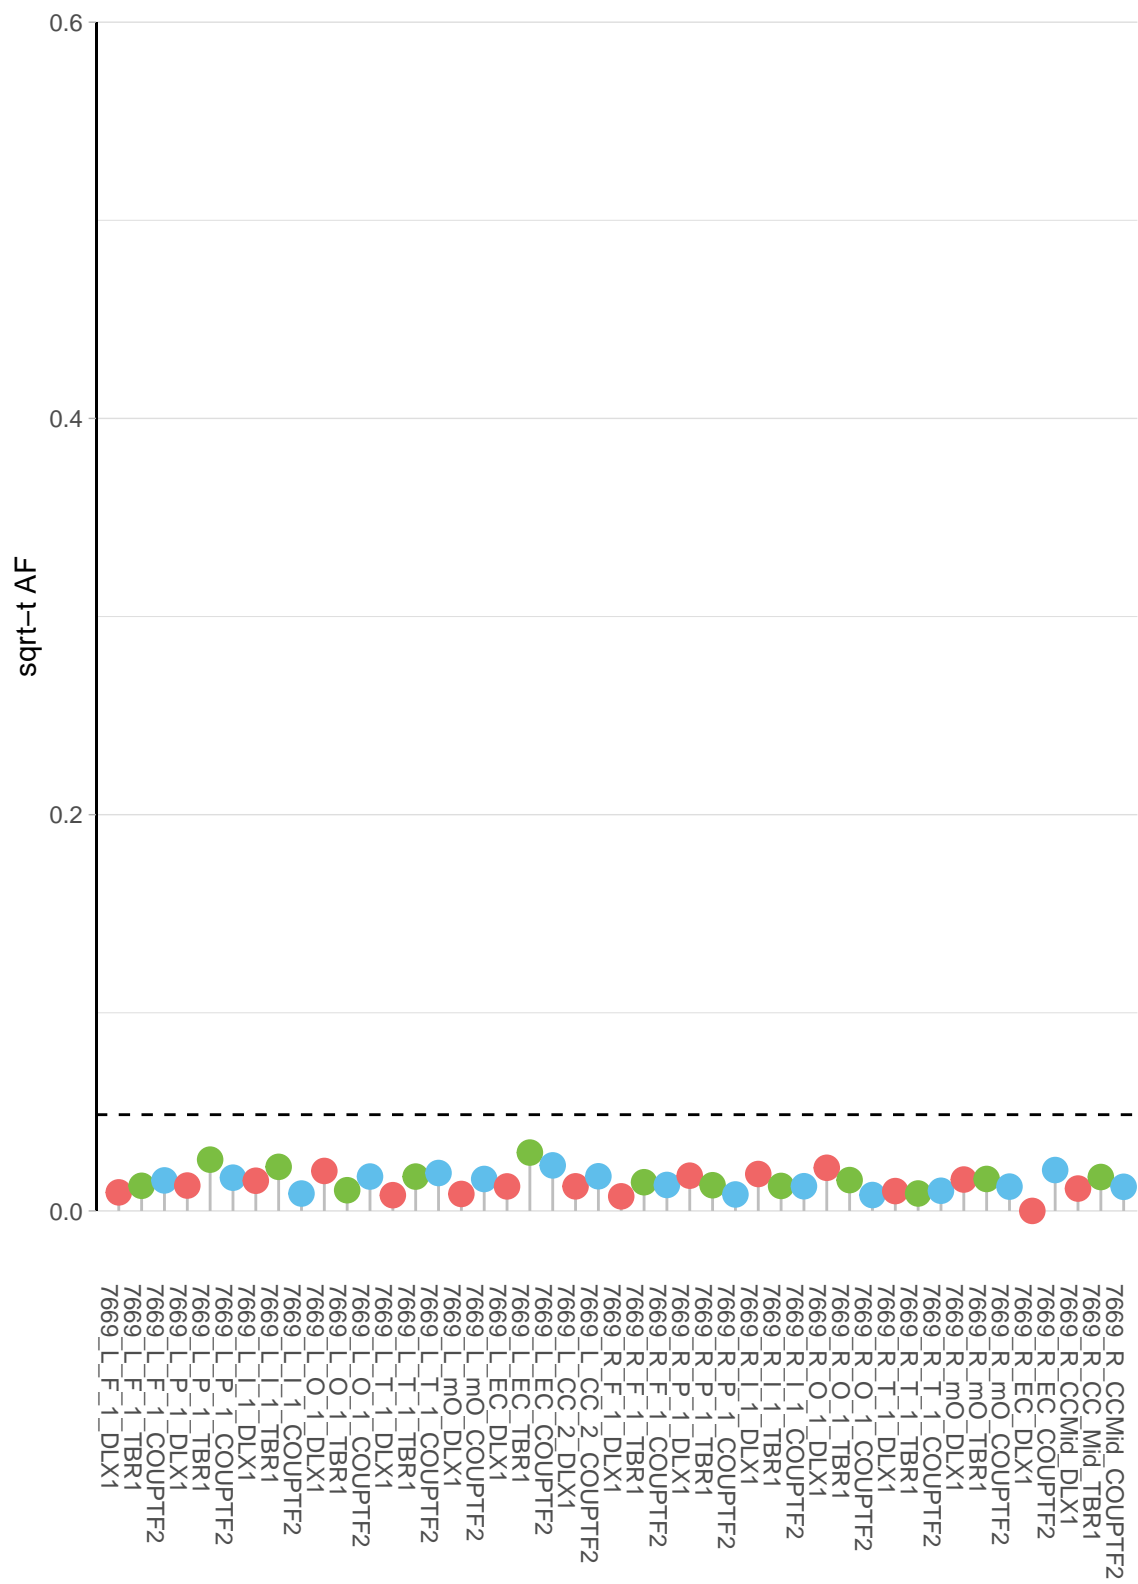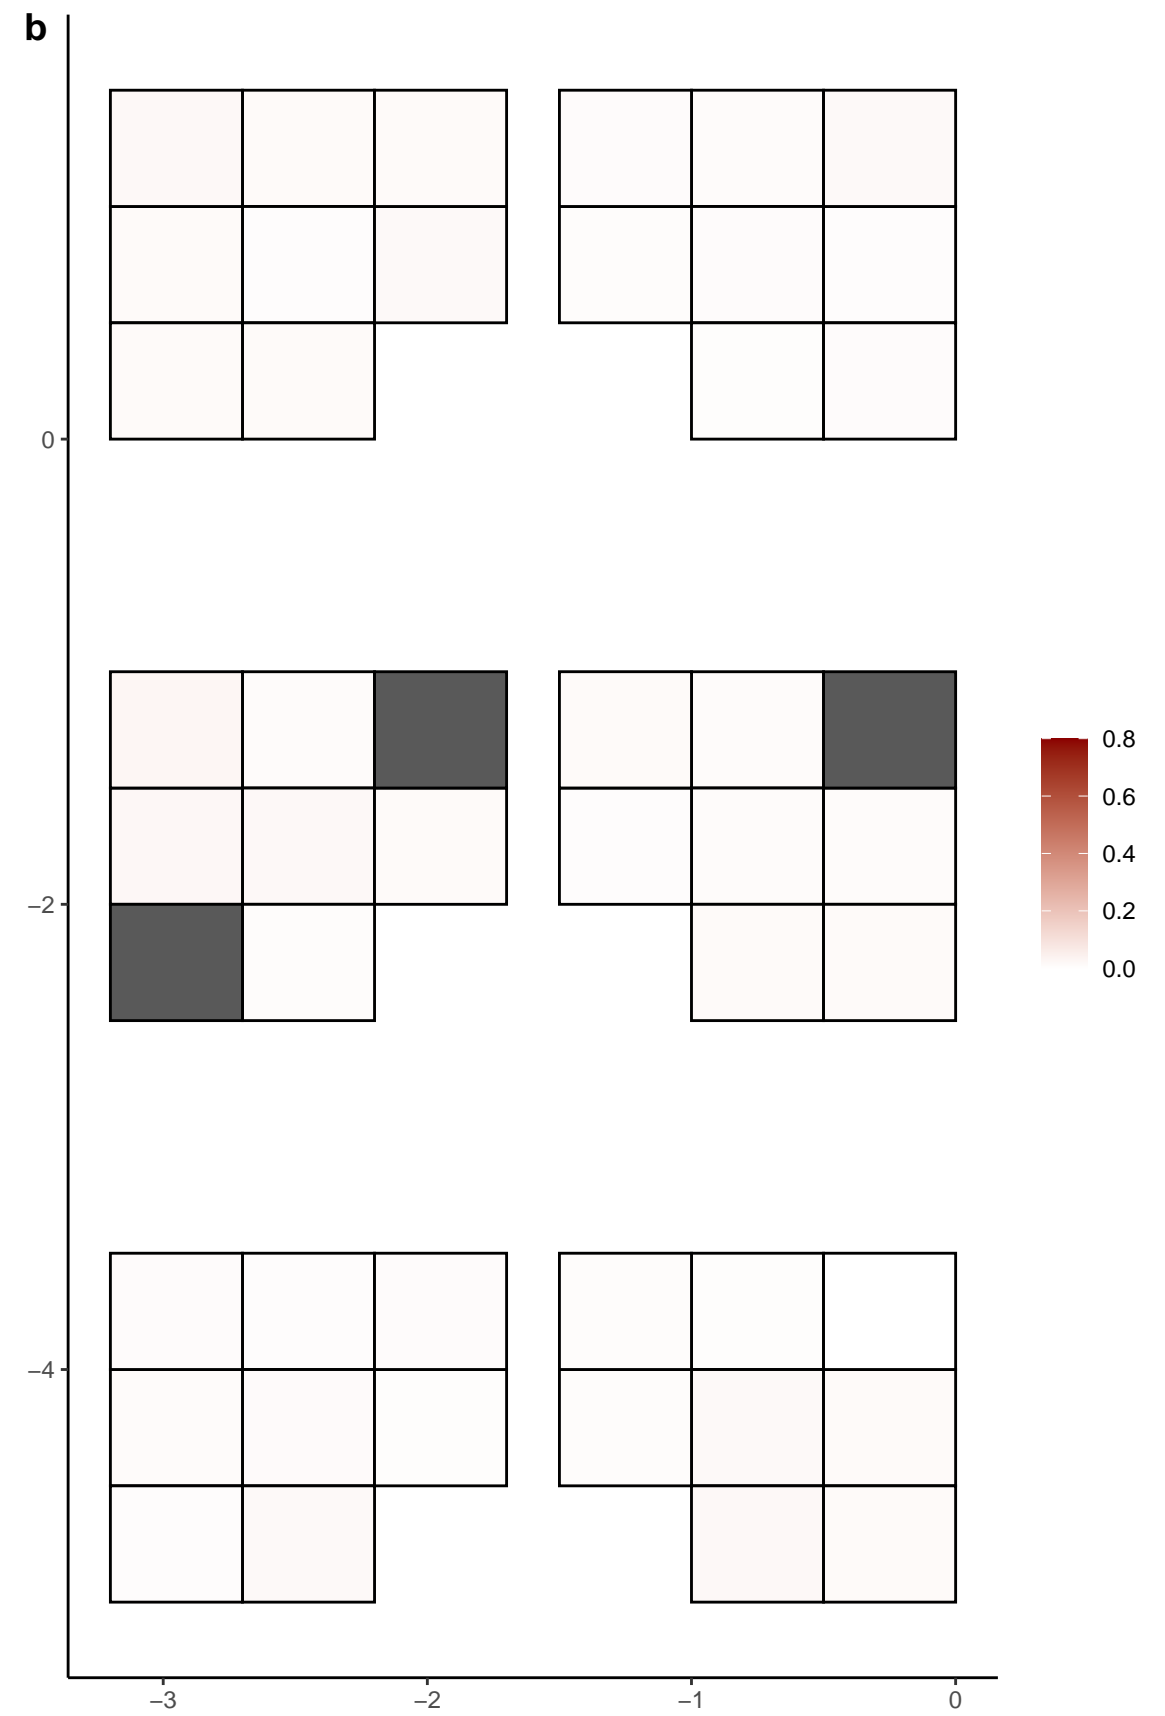

**a** ID05 2-52452769-G-A

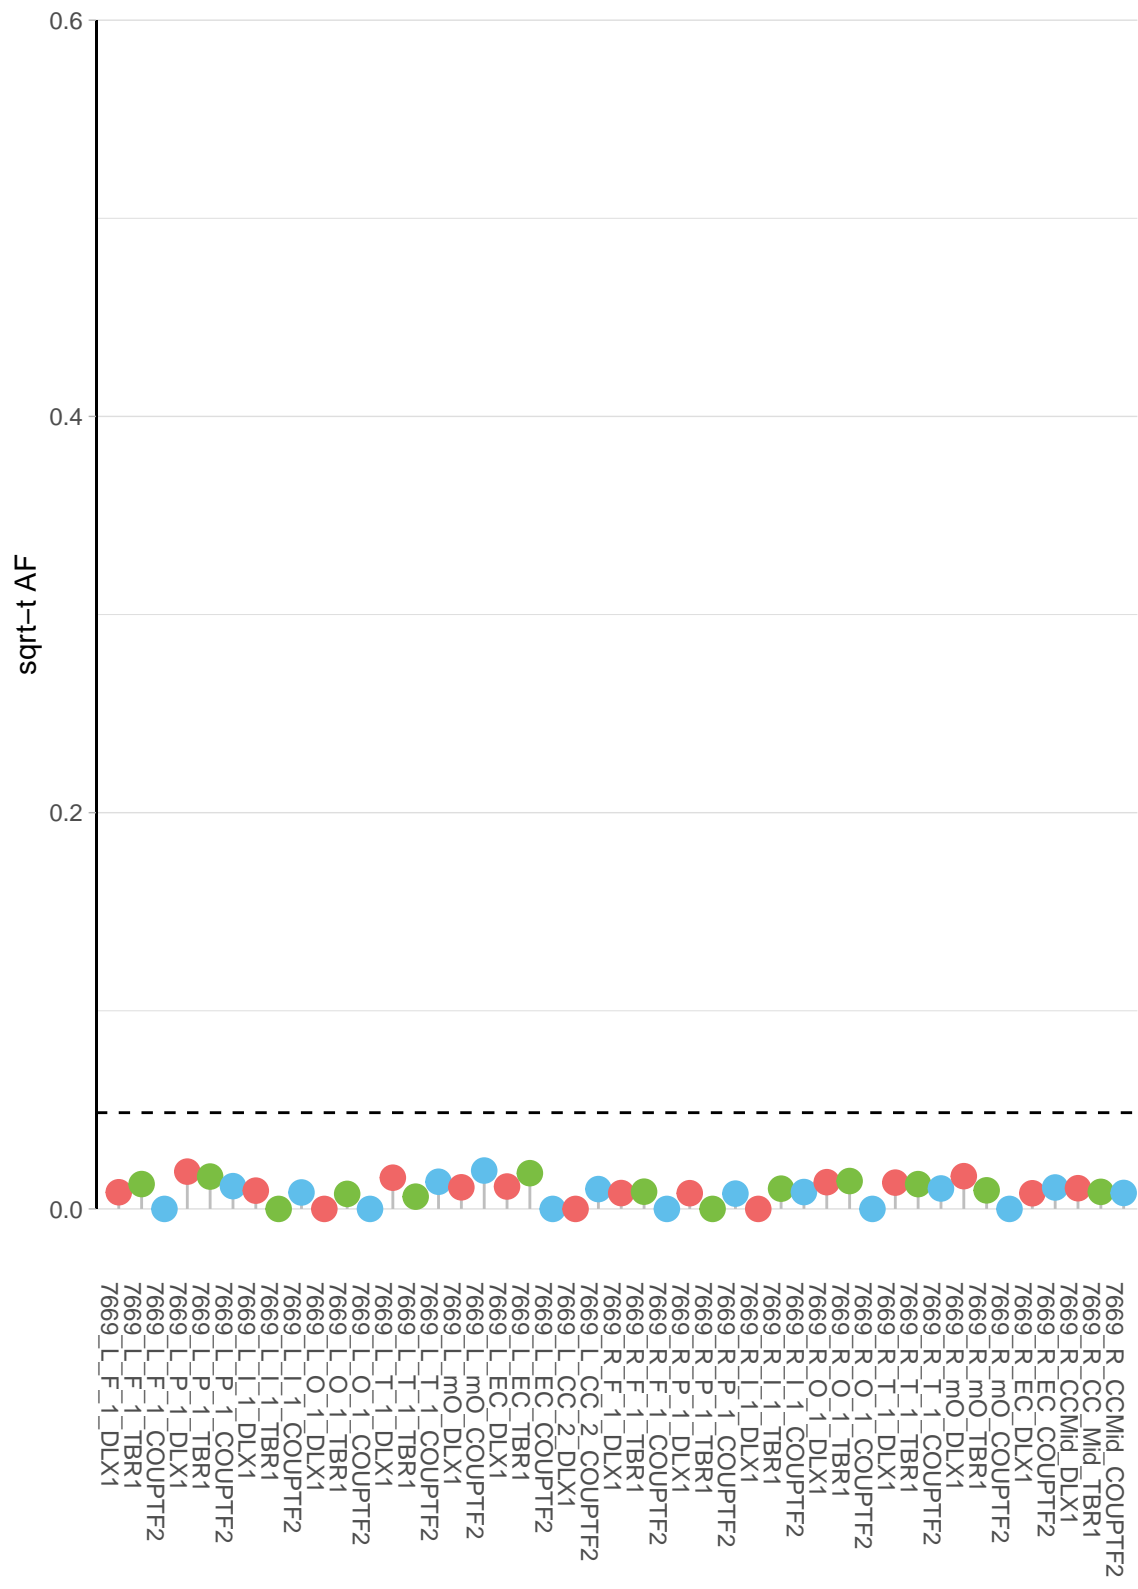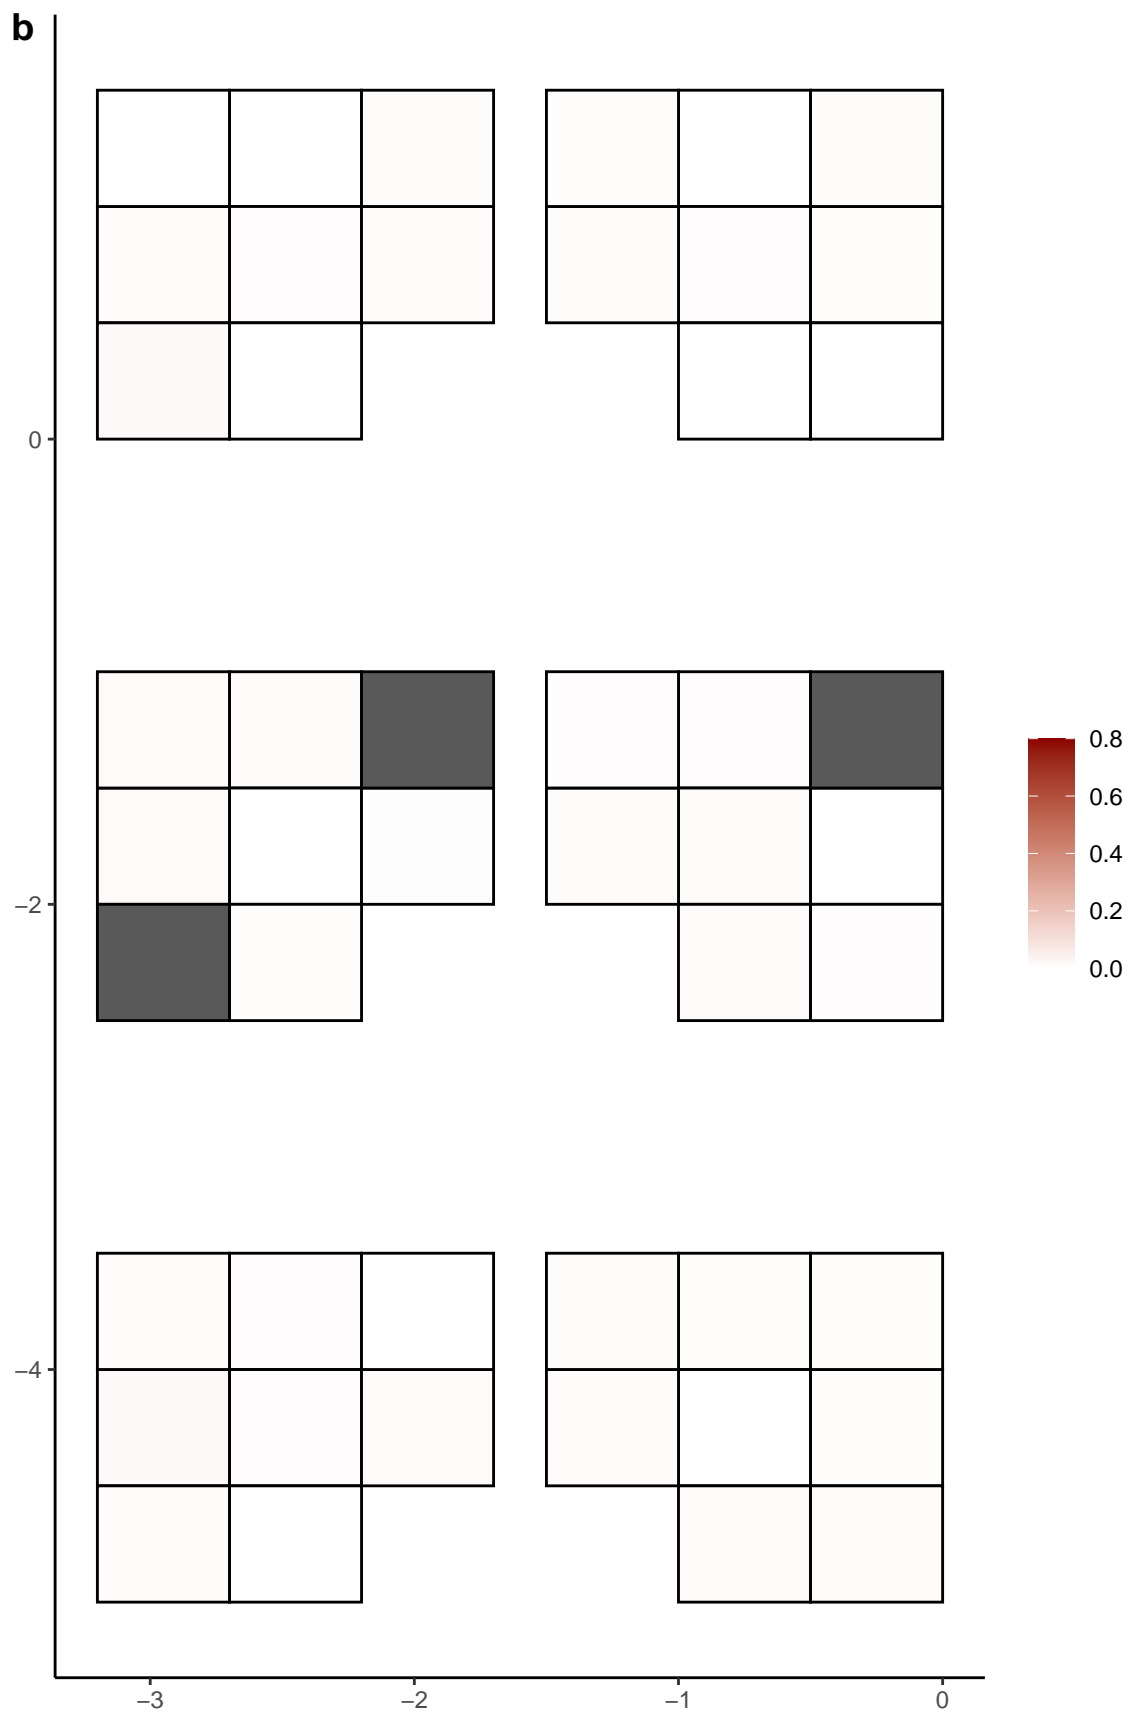

**a** ID05 2-53839419-G-A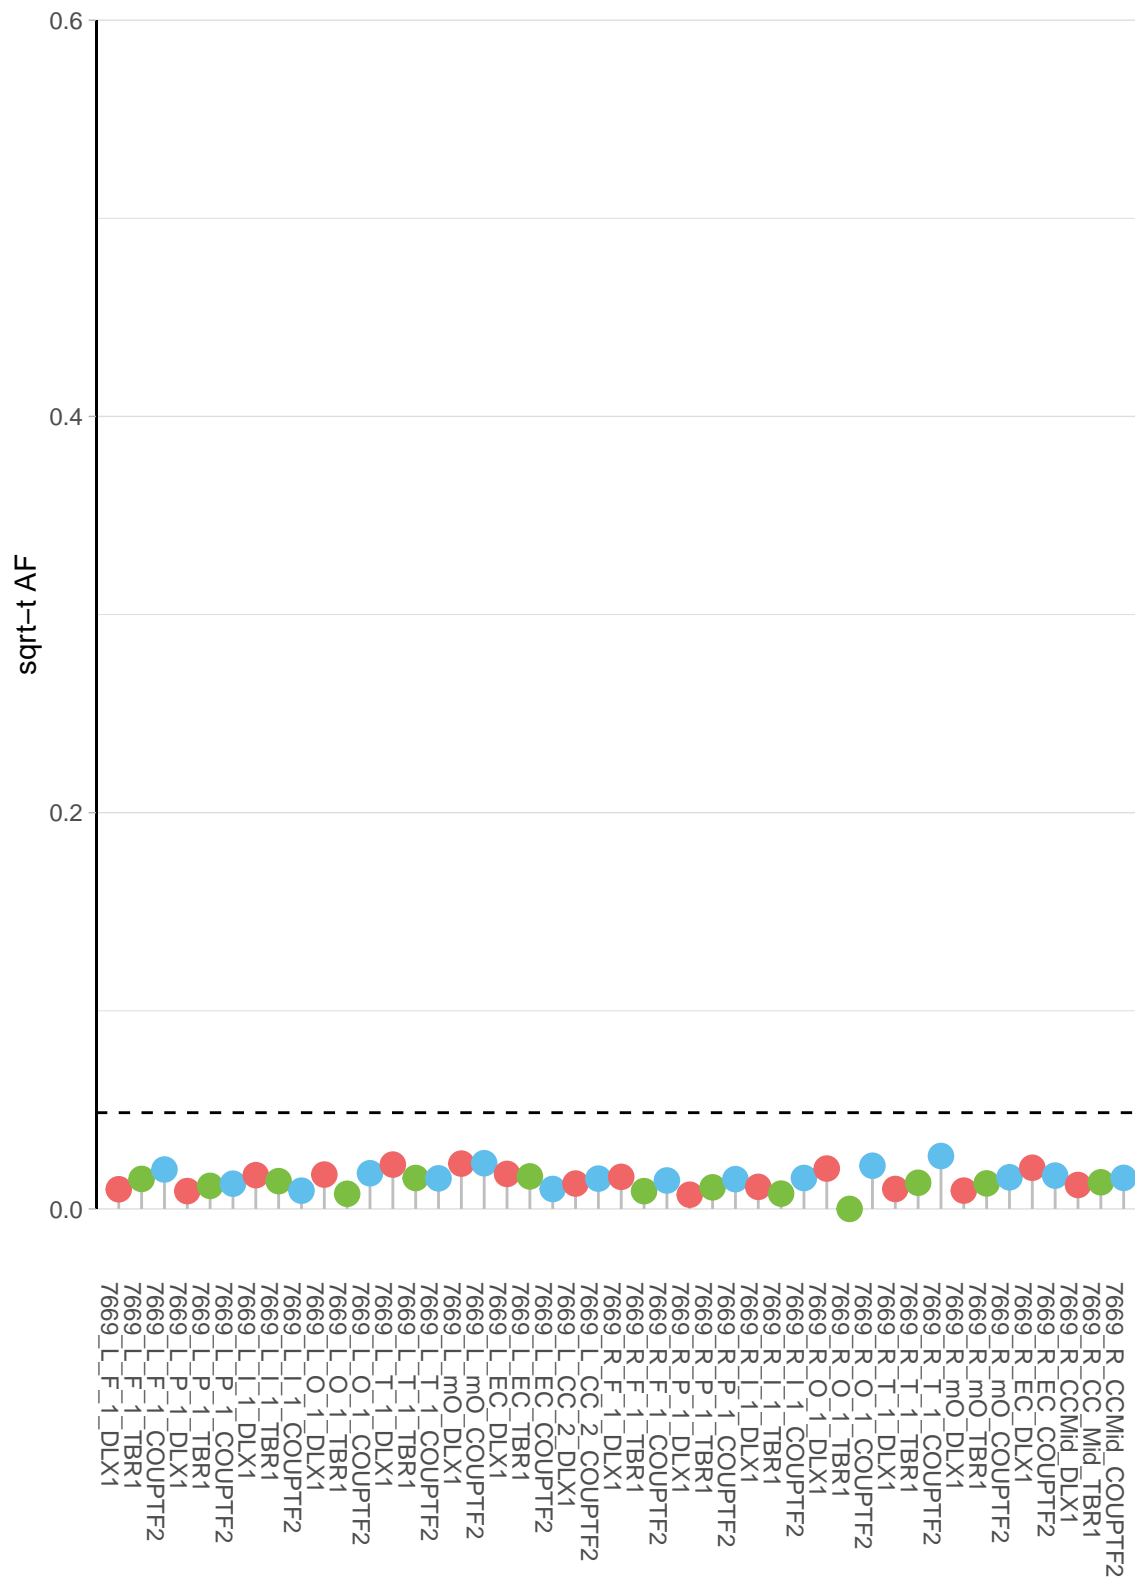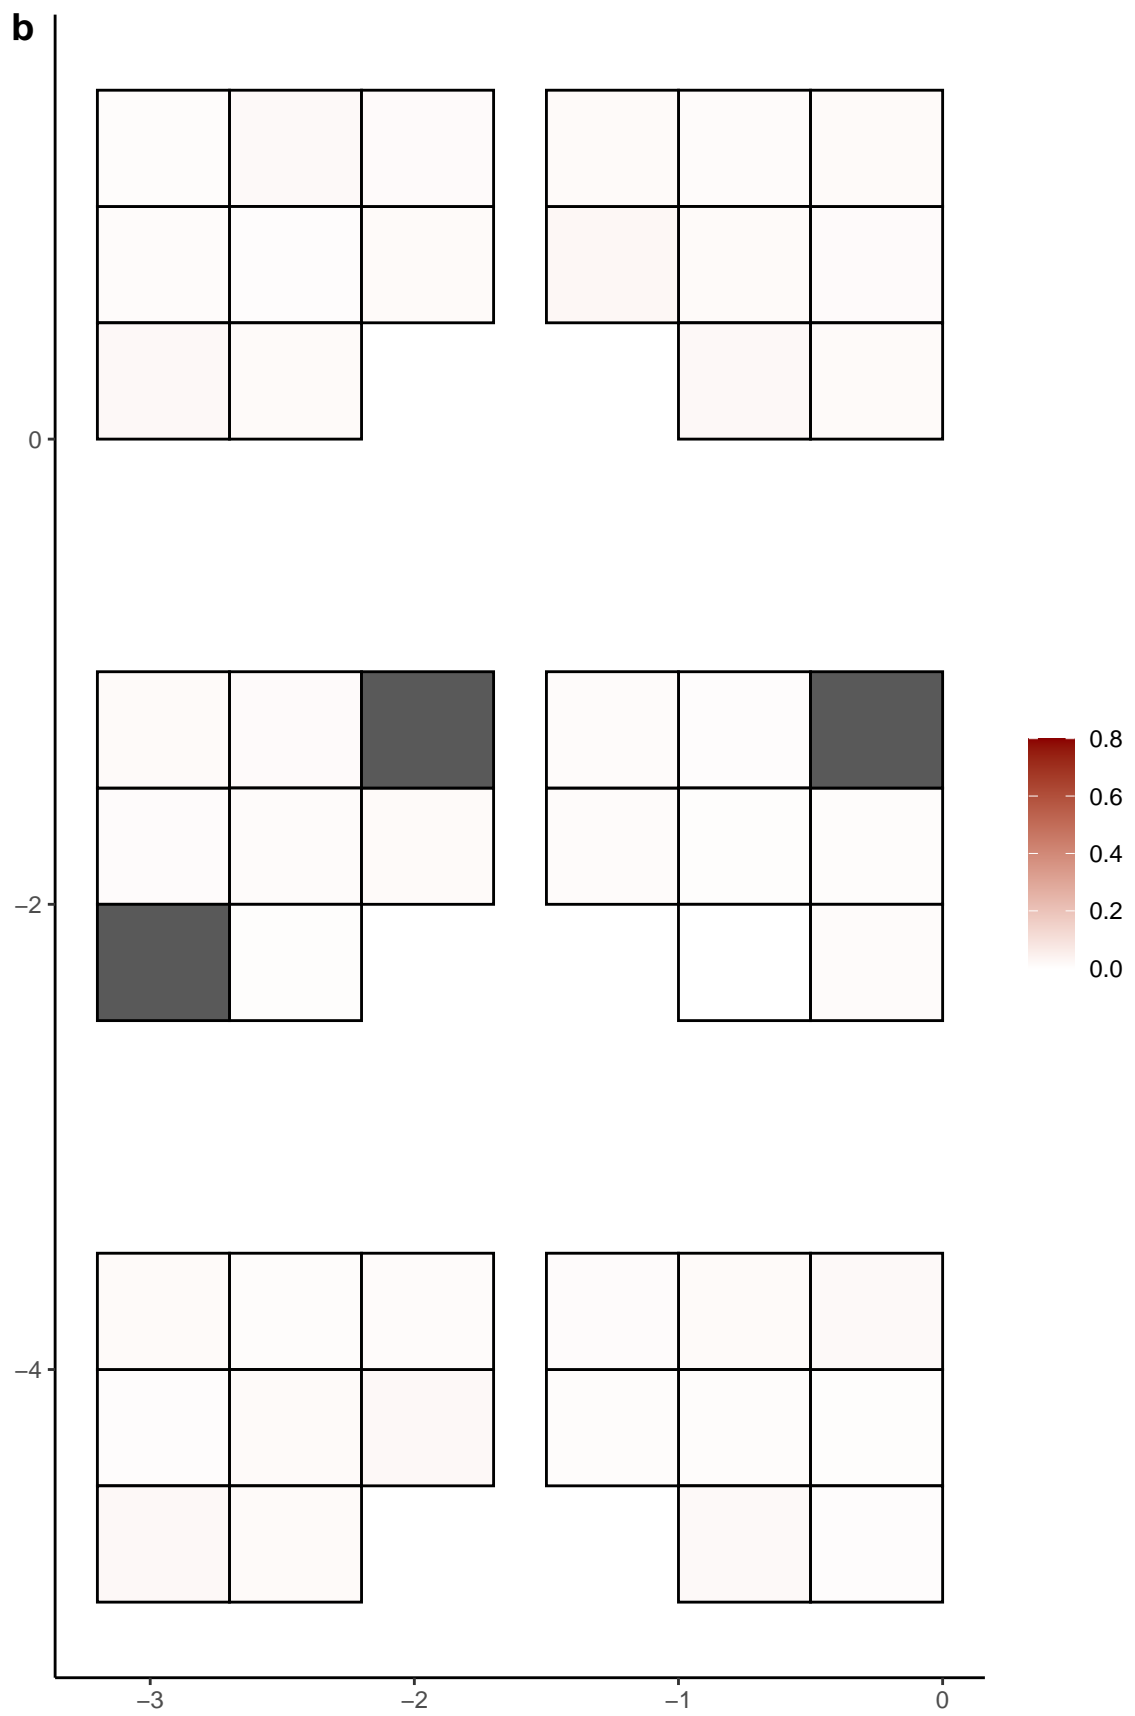

**a** ID05 2-57021433-T-C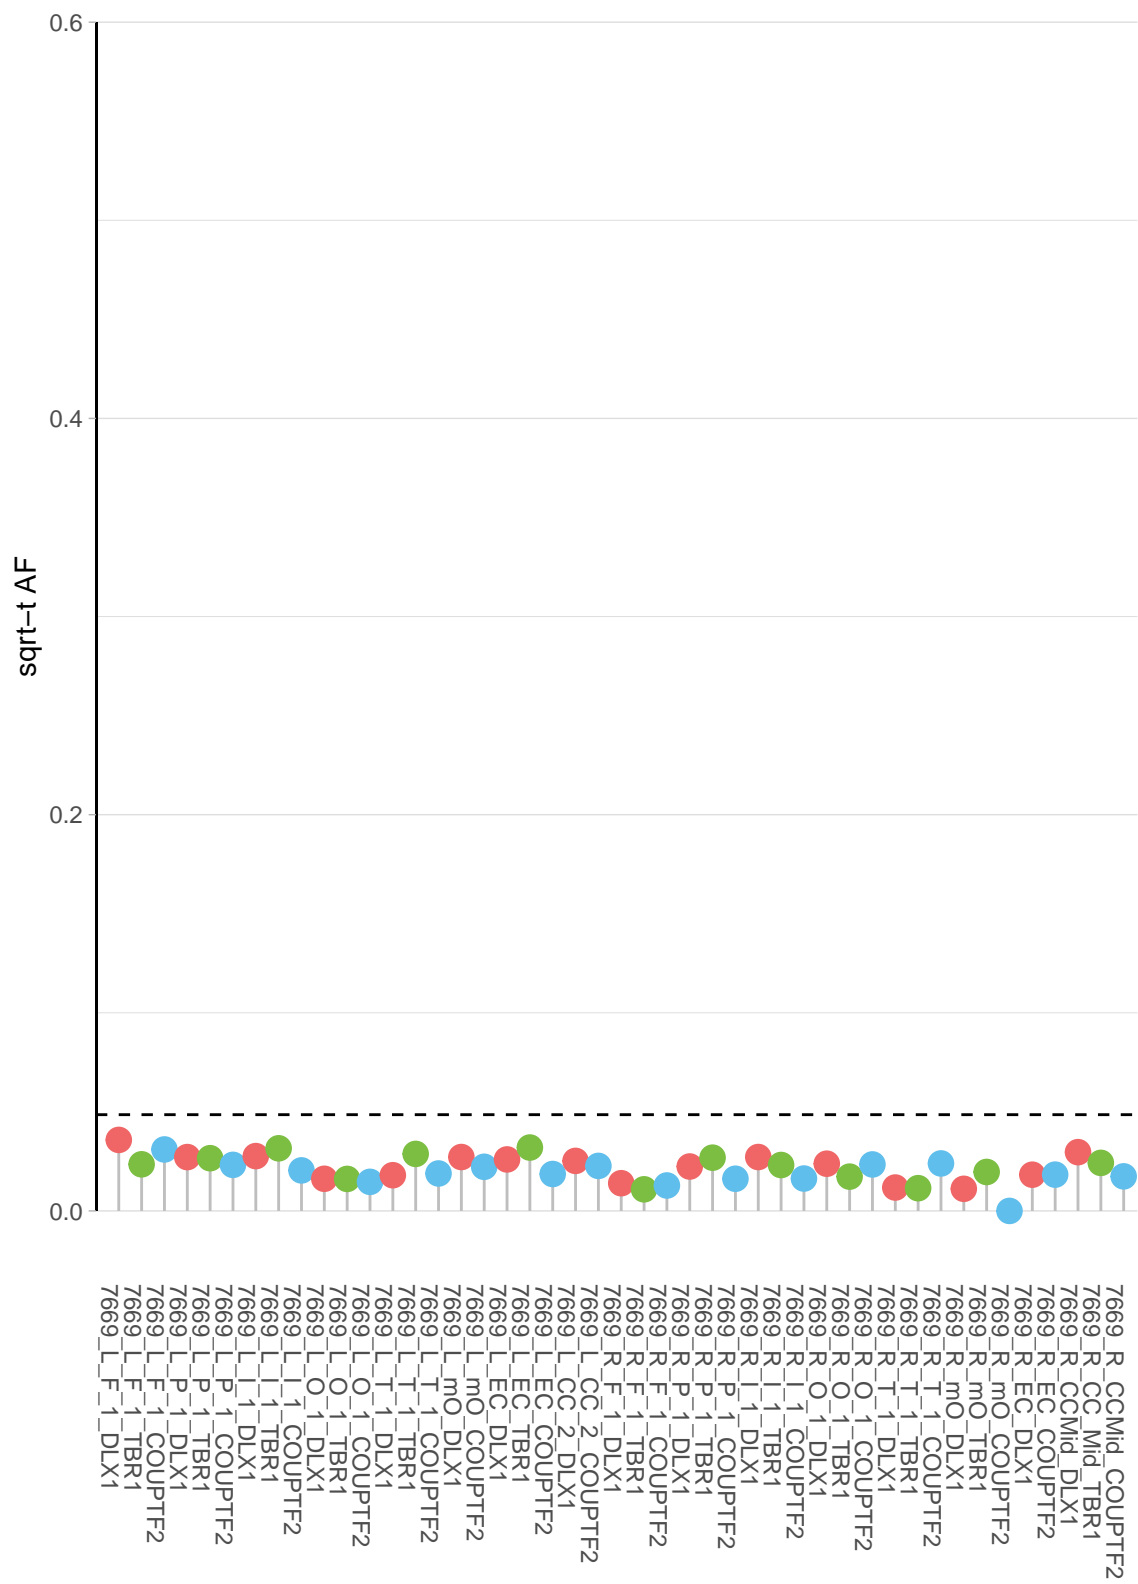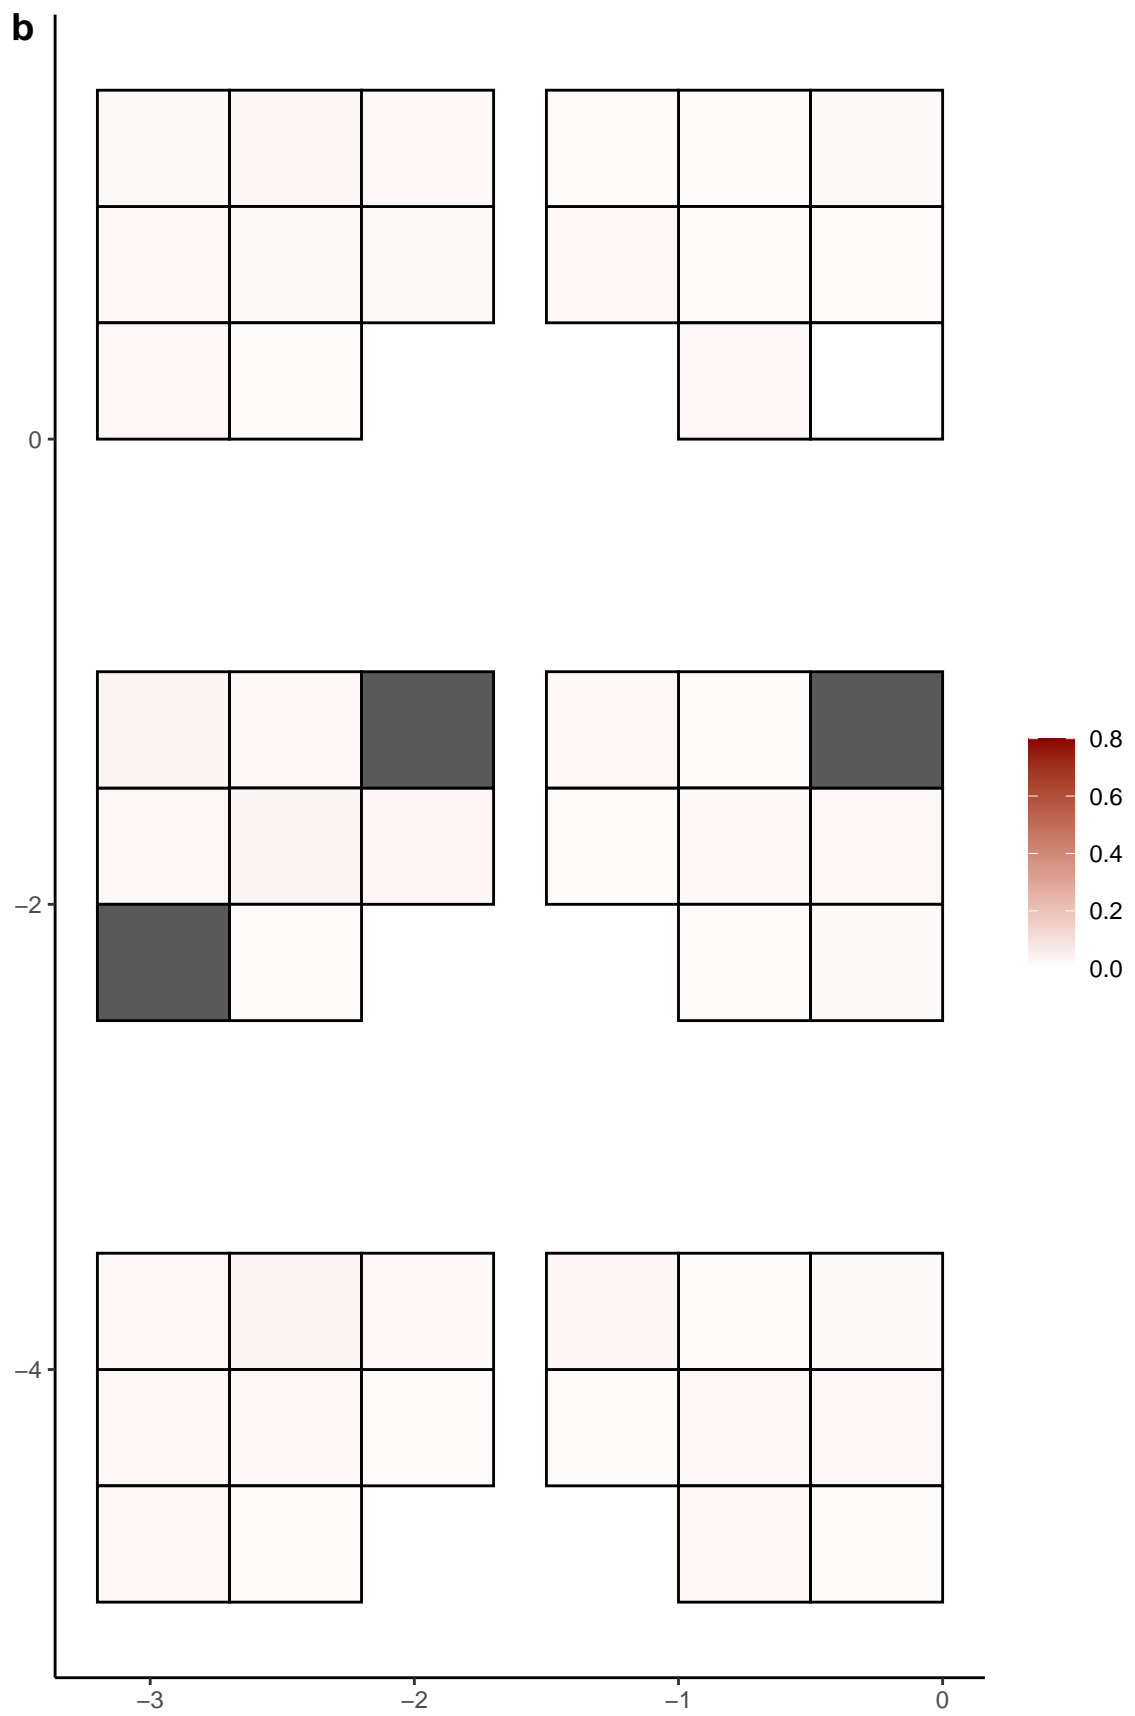





**a** ID05 2-78747329-C-A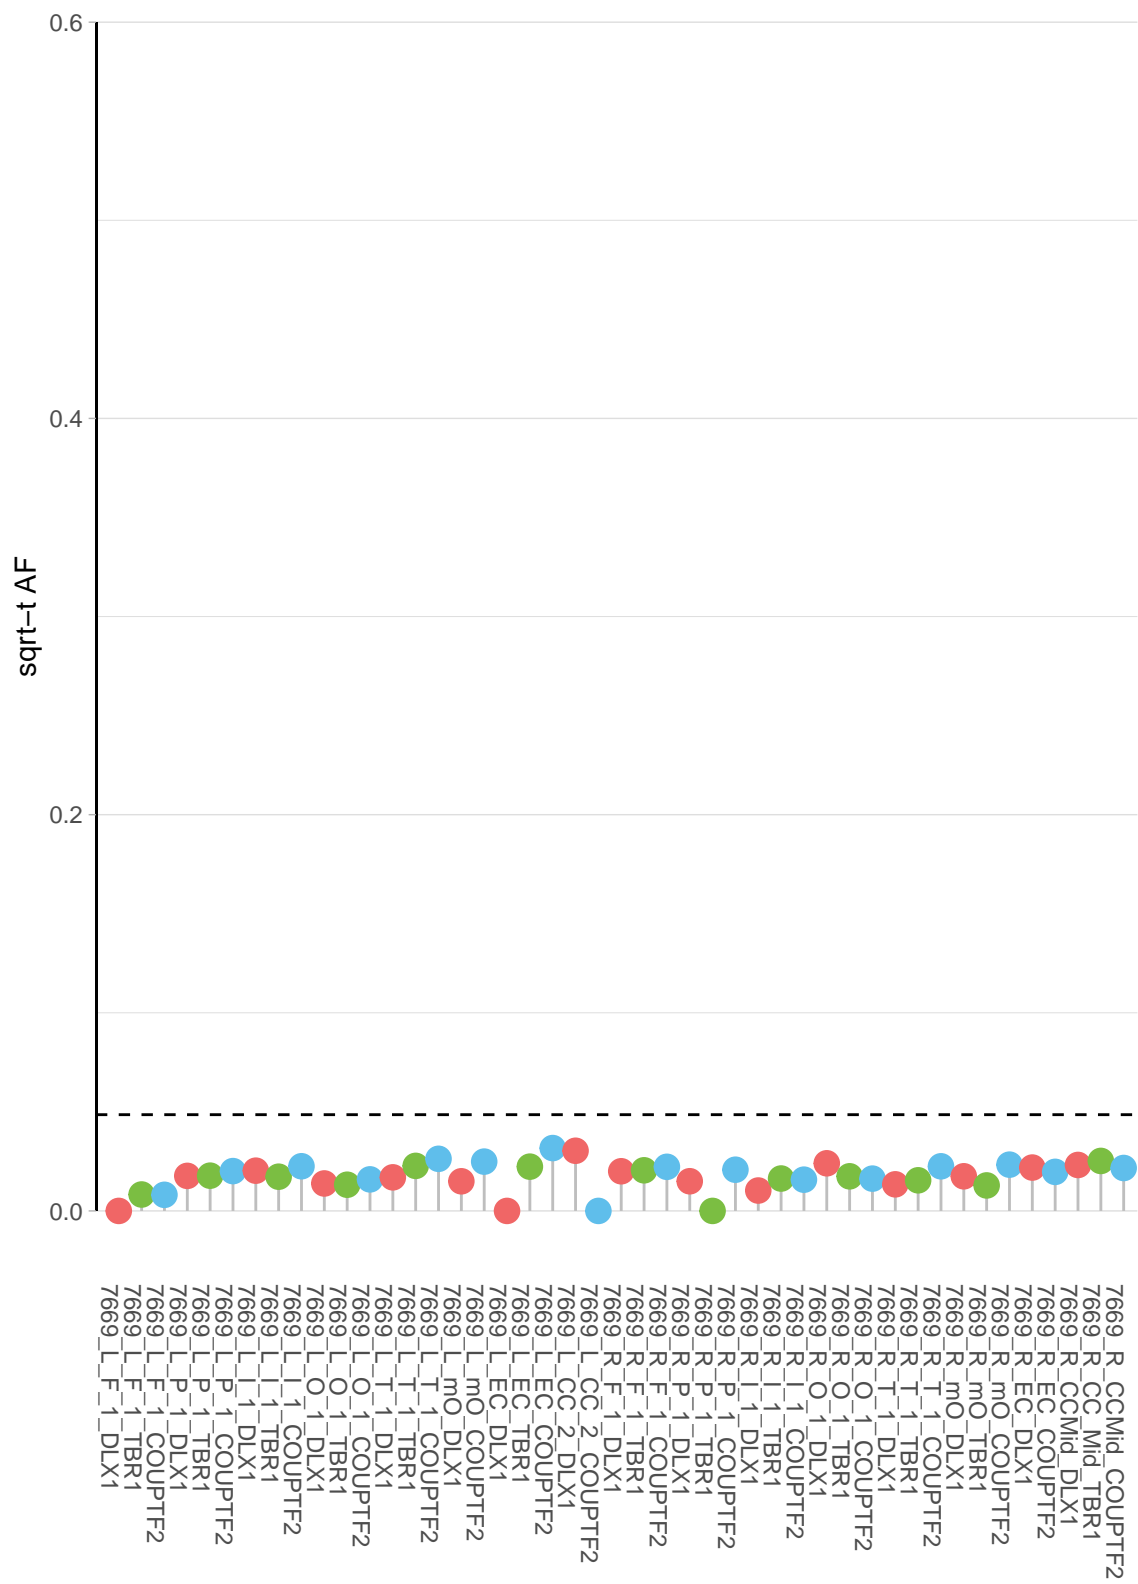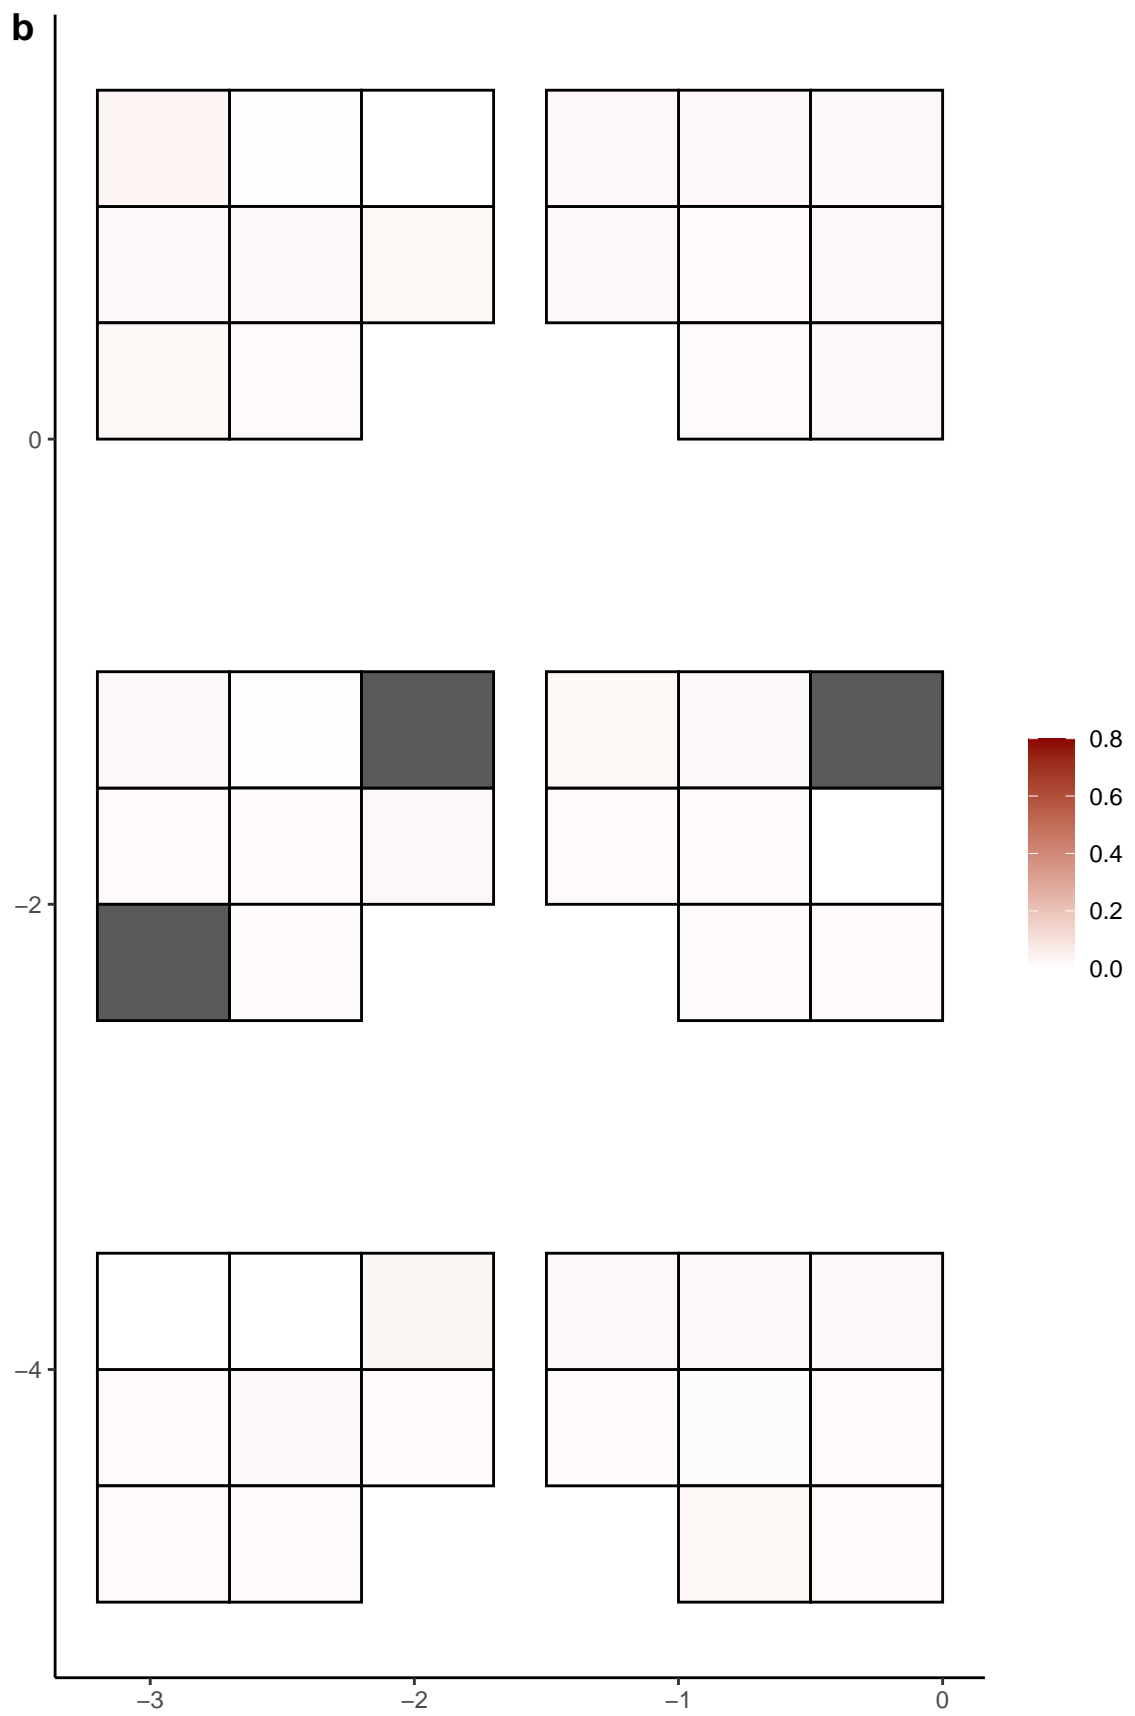

**a** ID05 2-82189643-C-A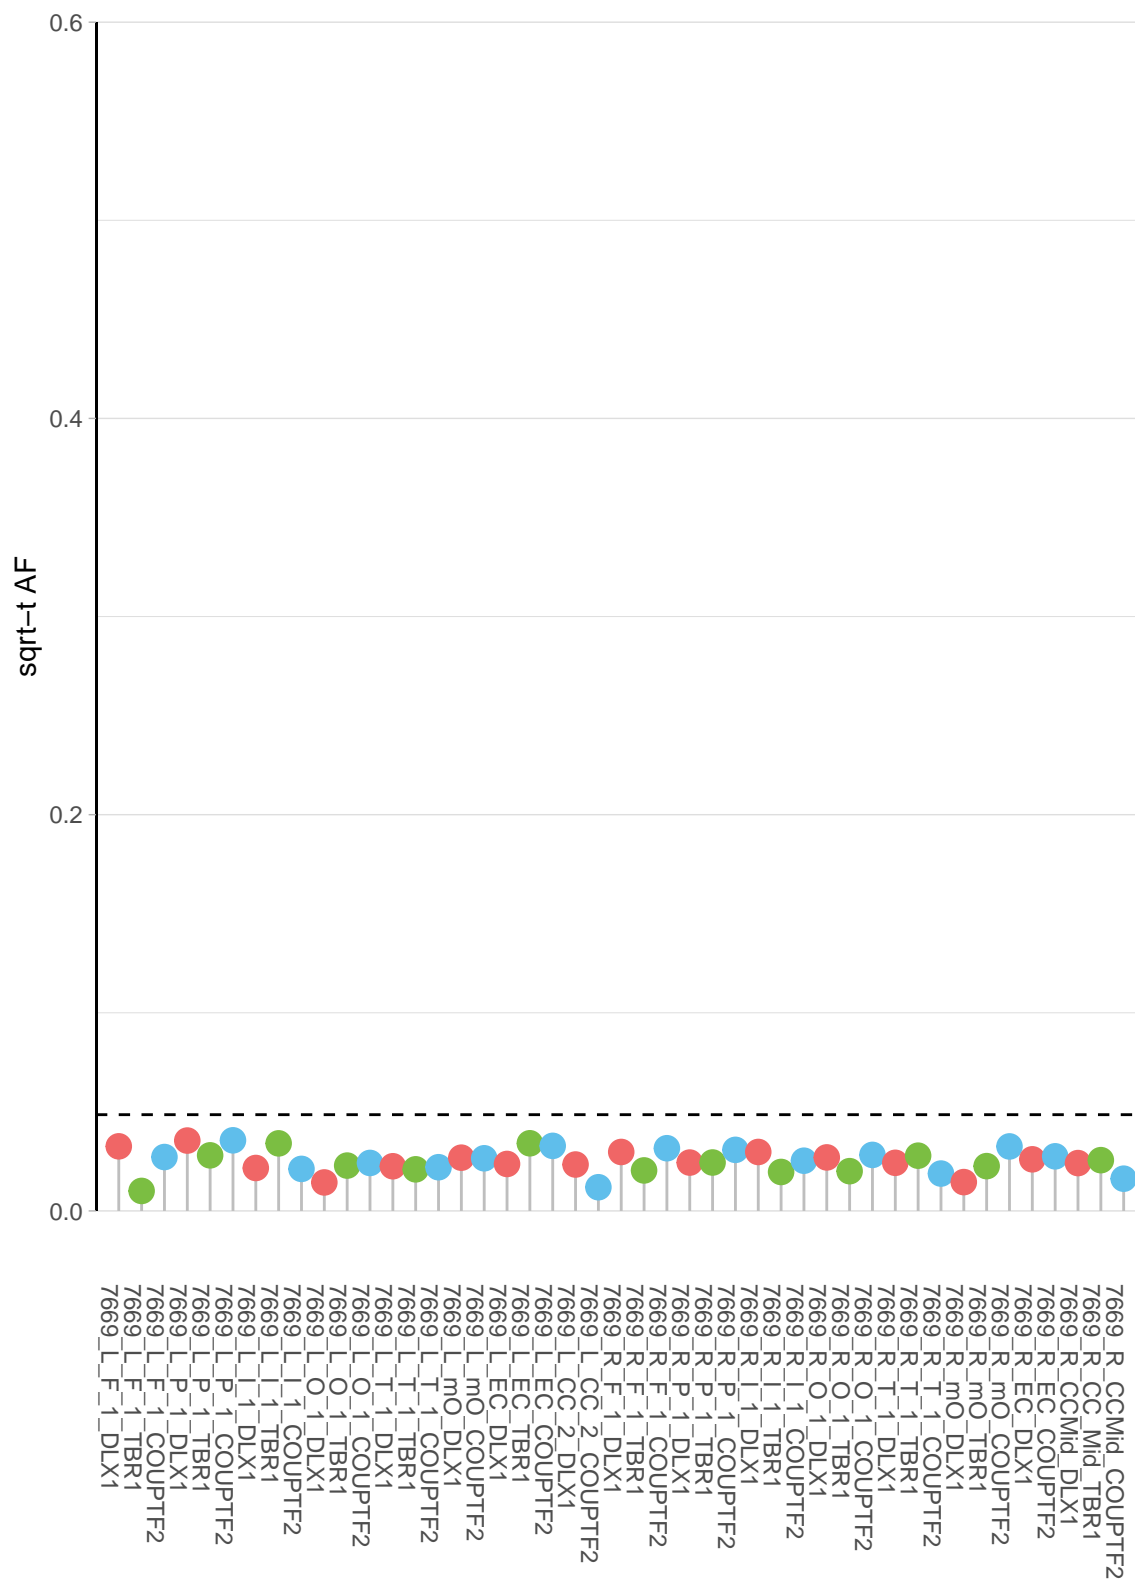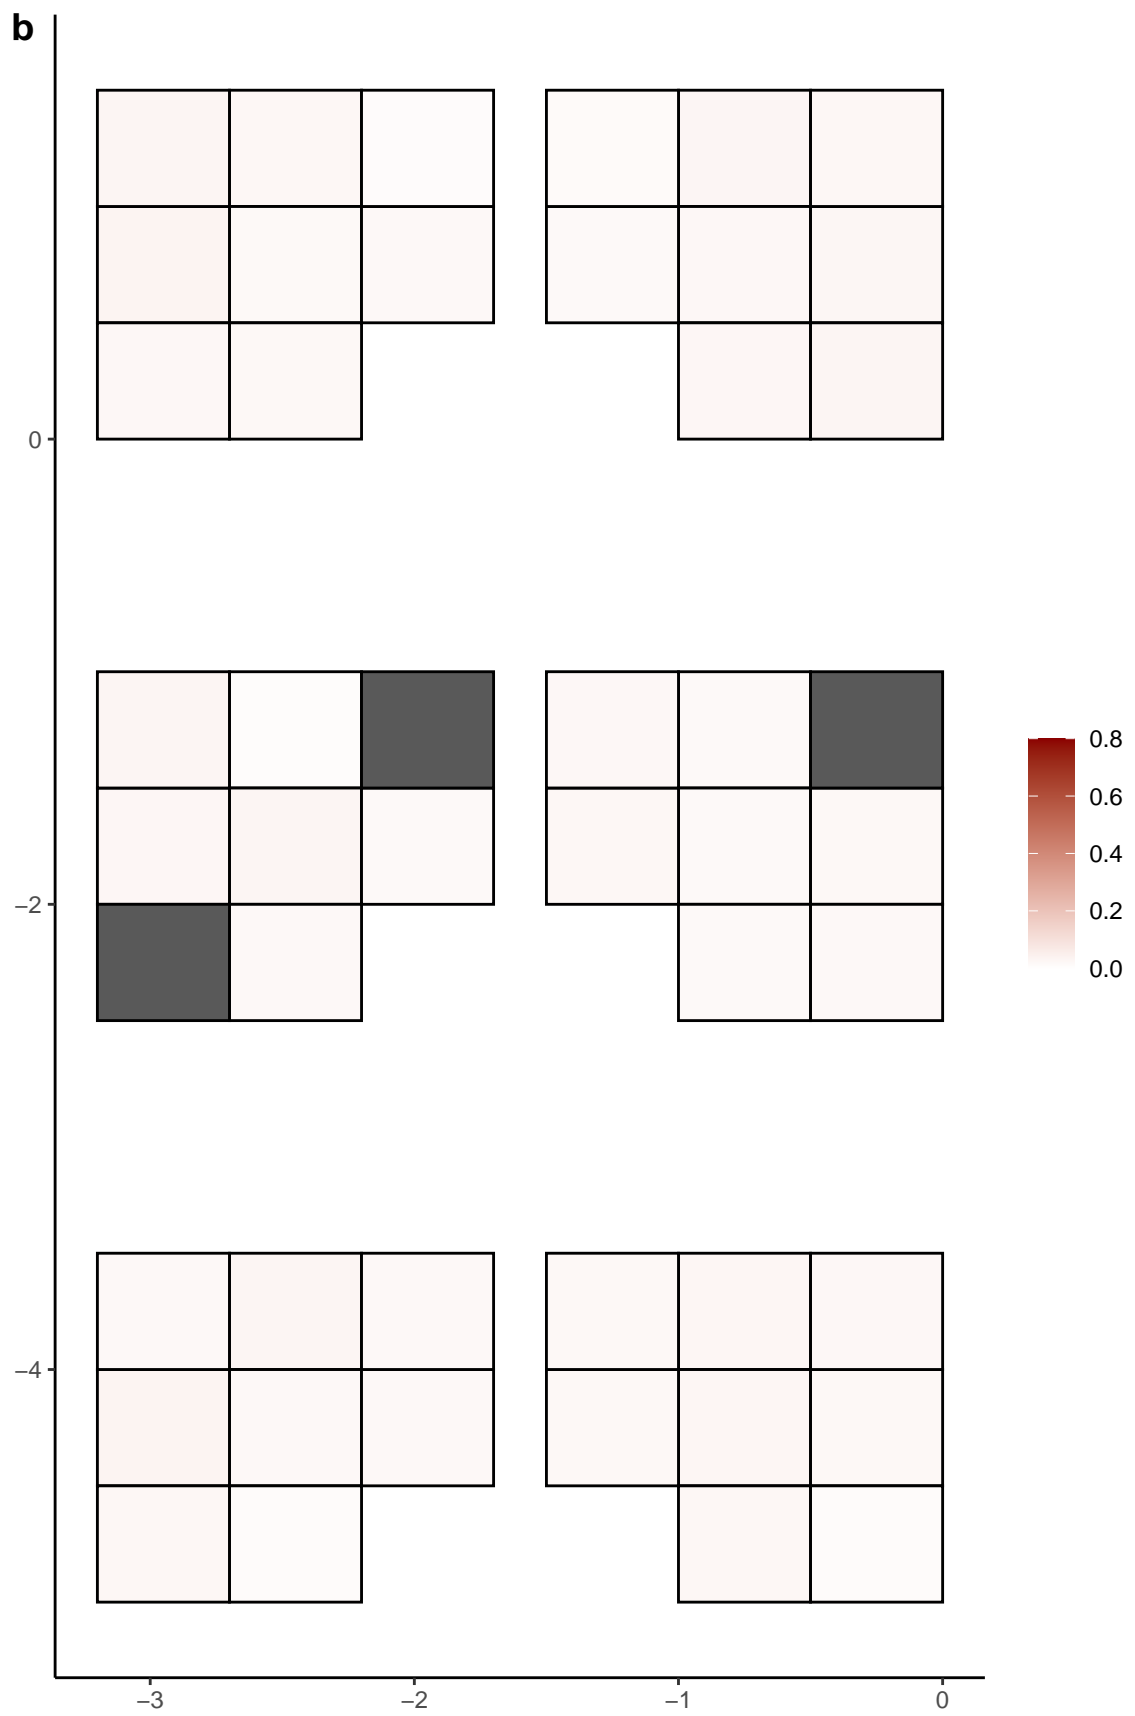



**a** ID05 2-86260205-G-A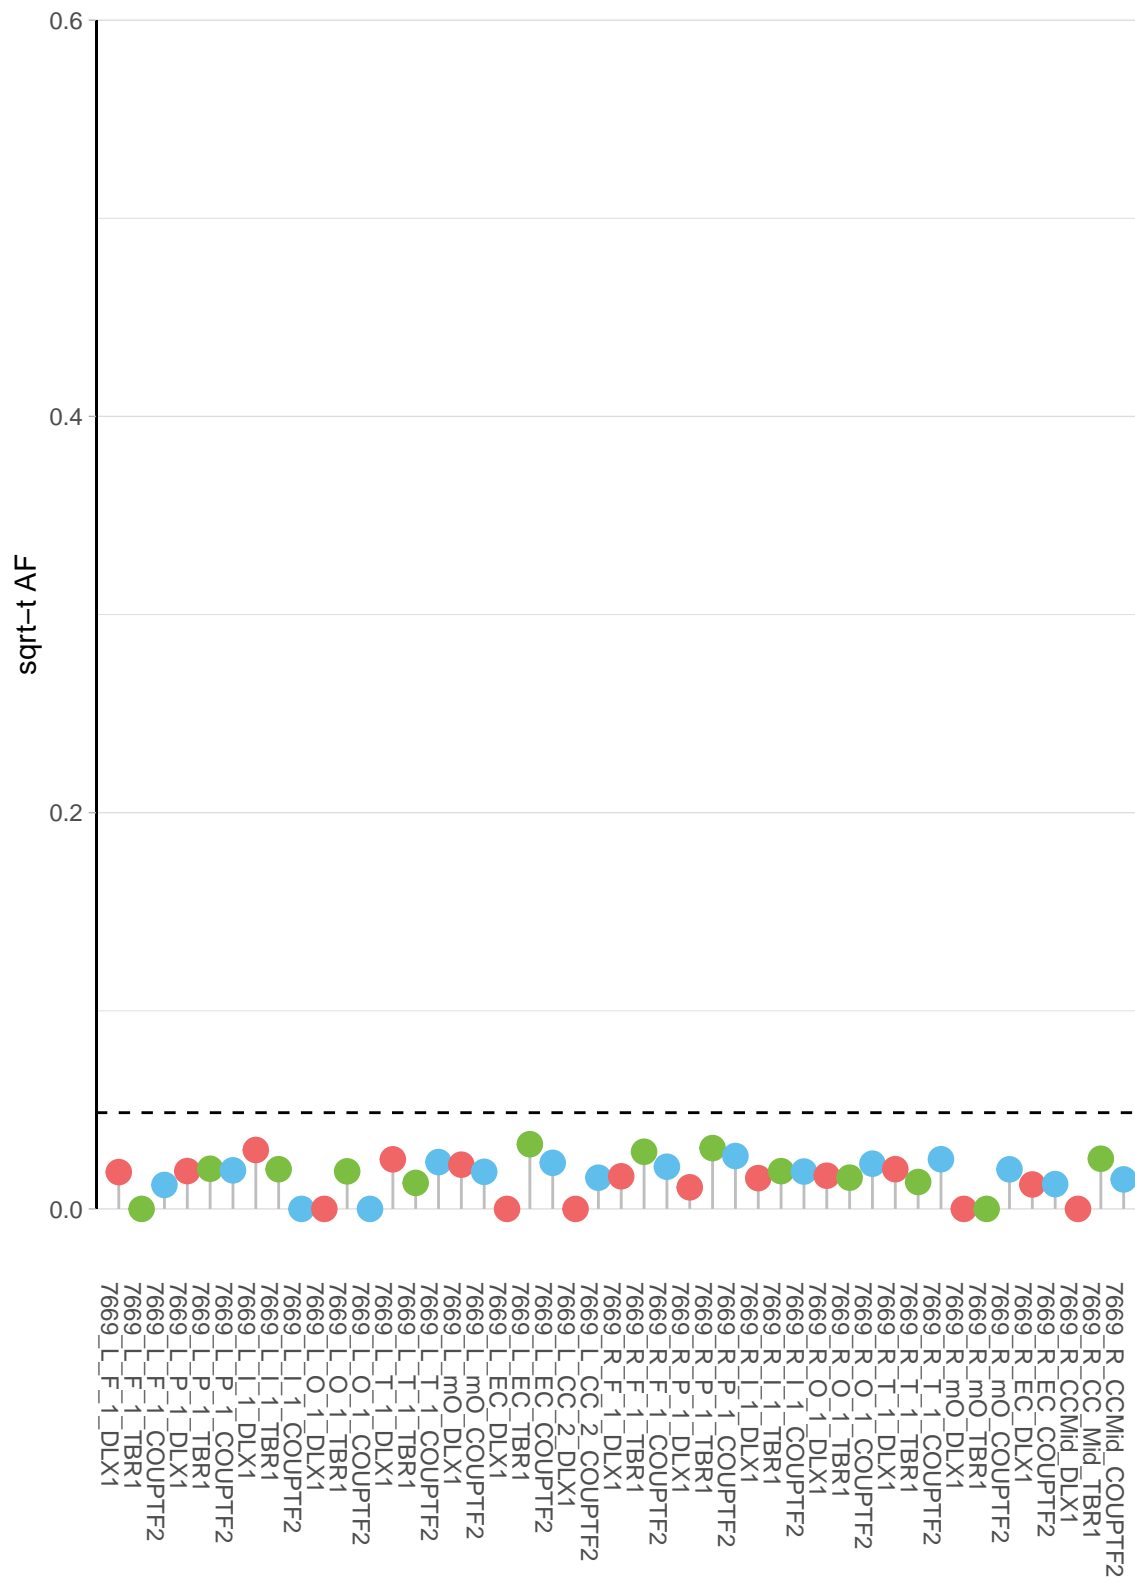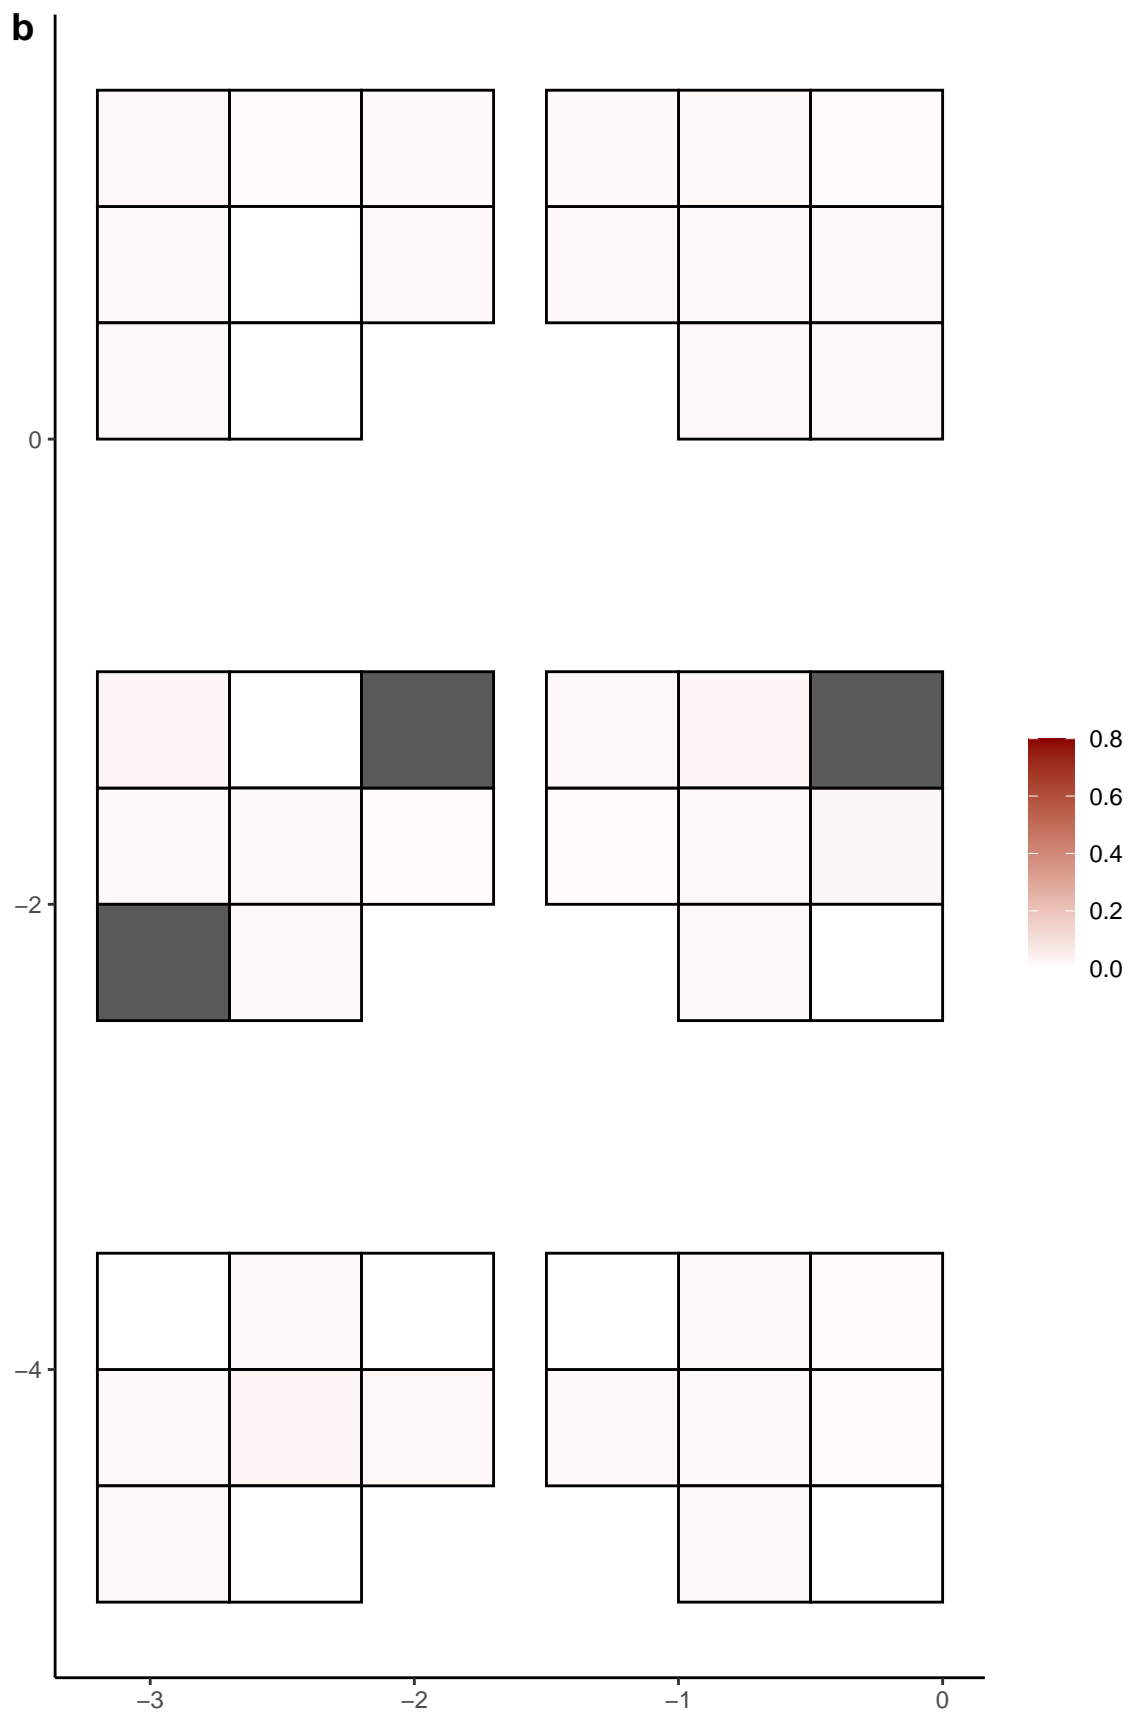

**a** ID05 2-88993566-C-T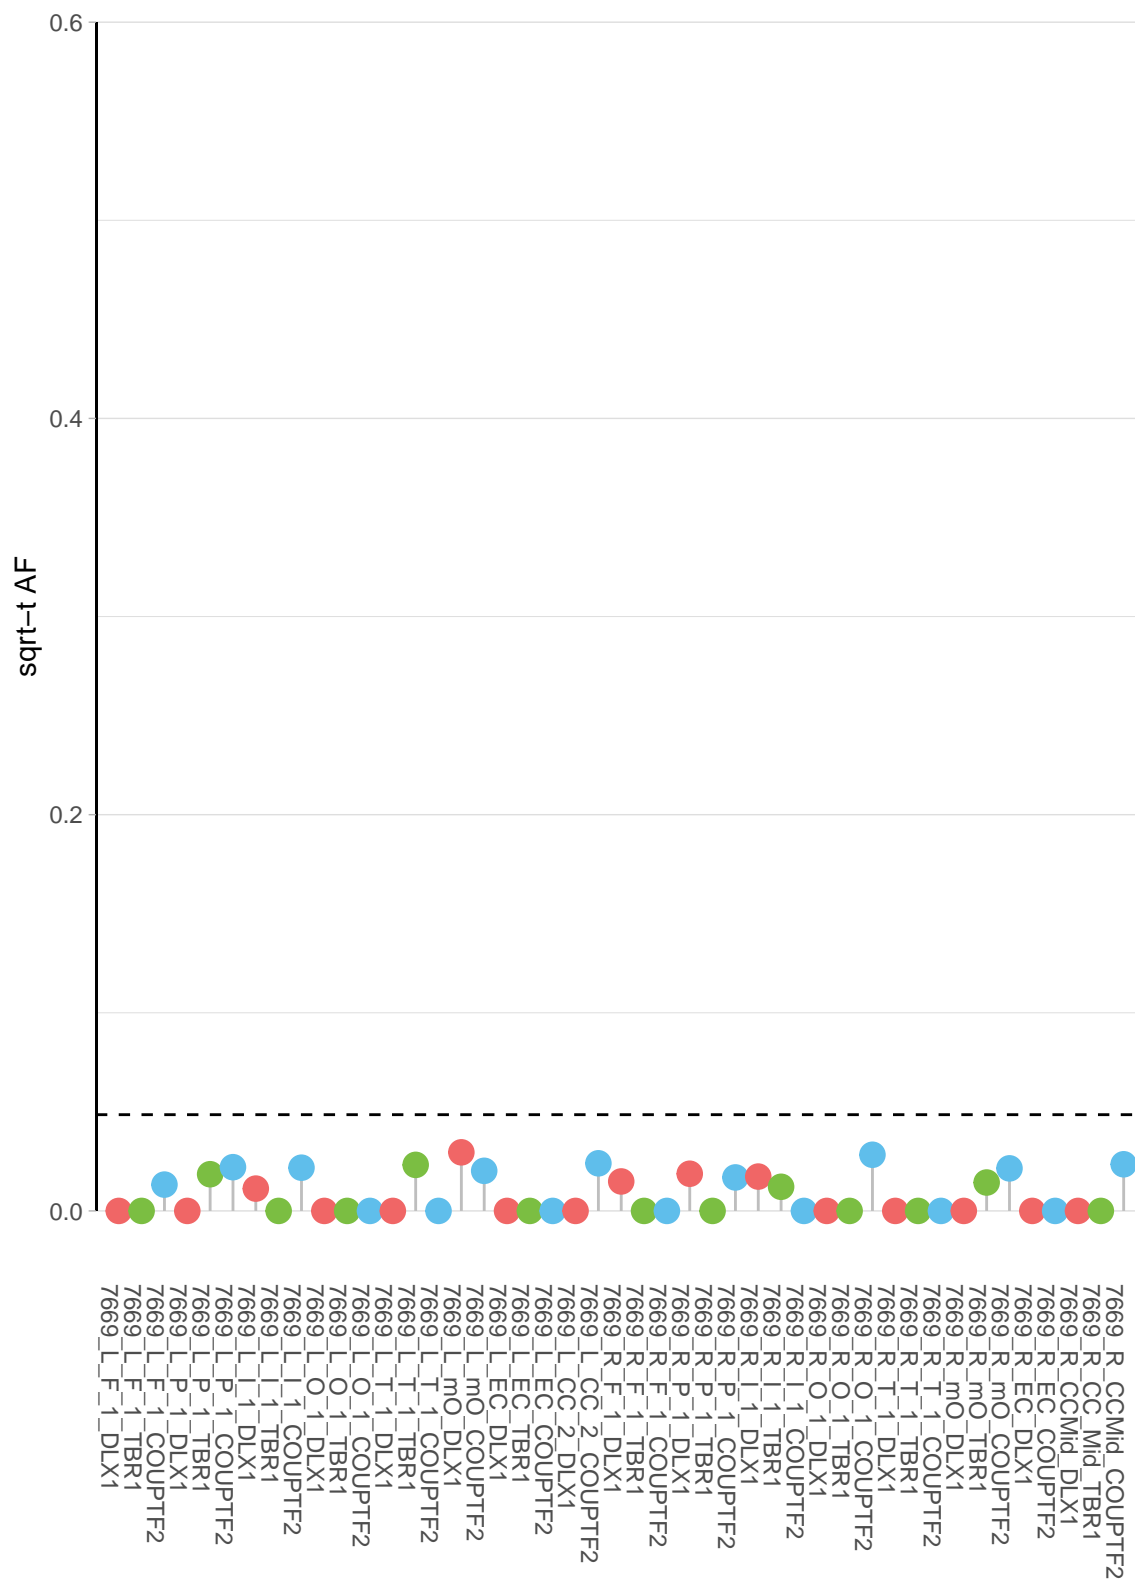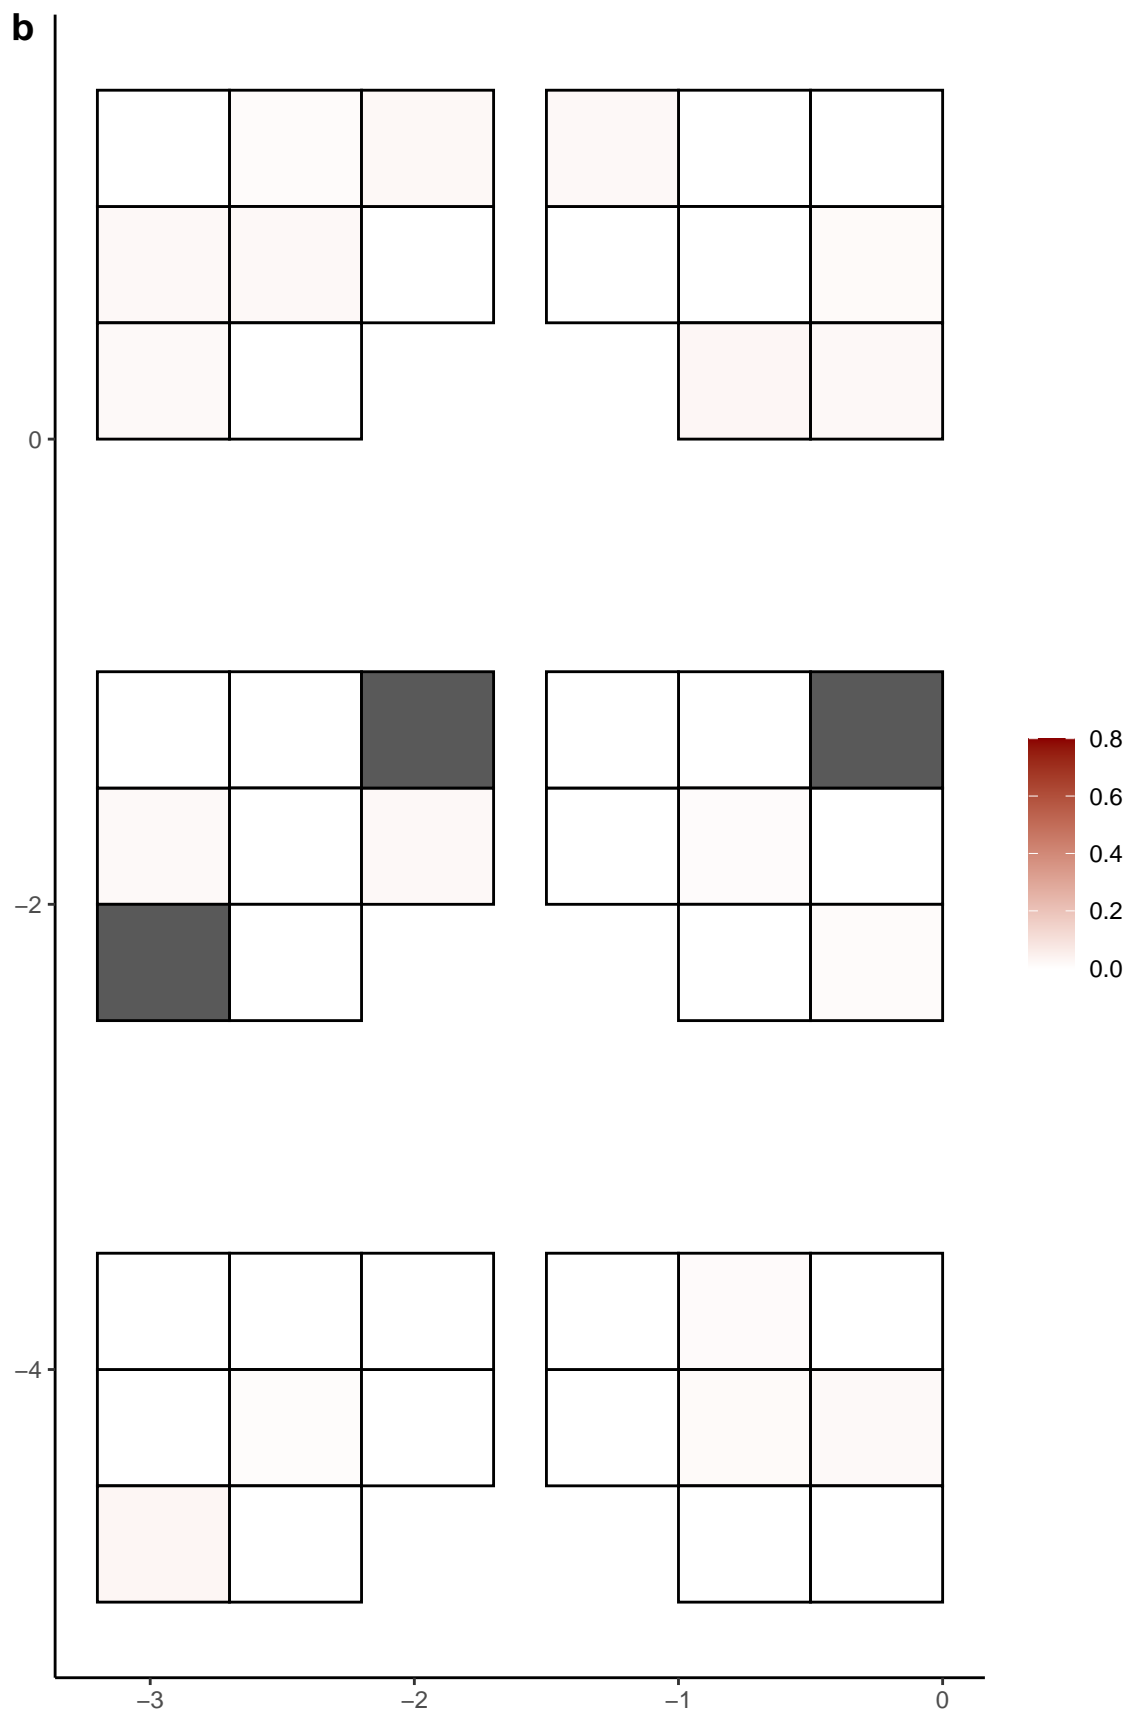

**a** ID05 2-97528065-C-T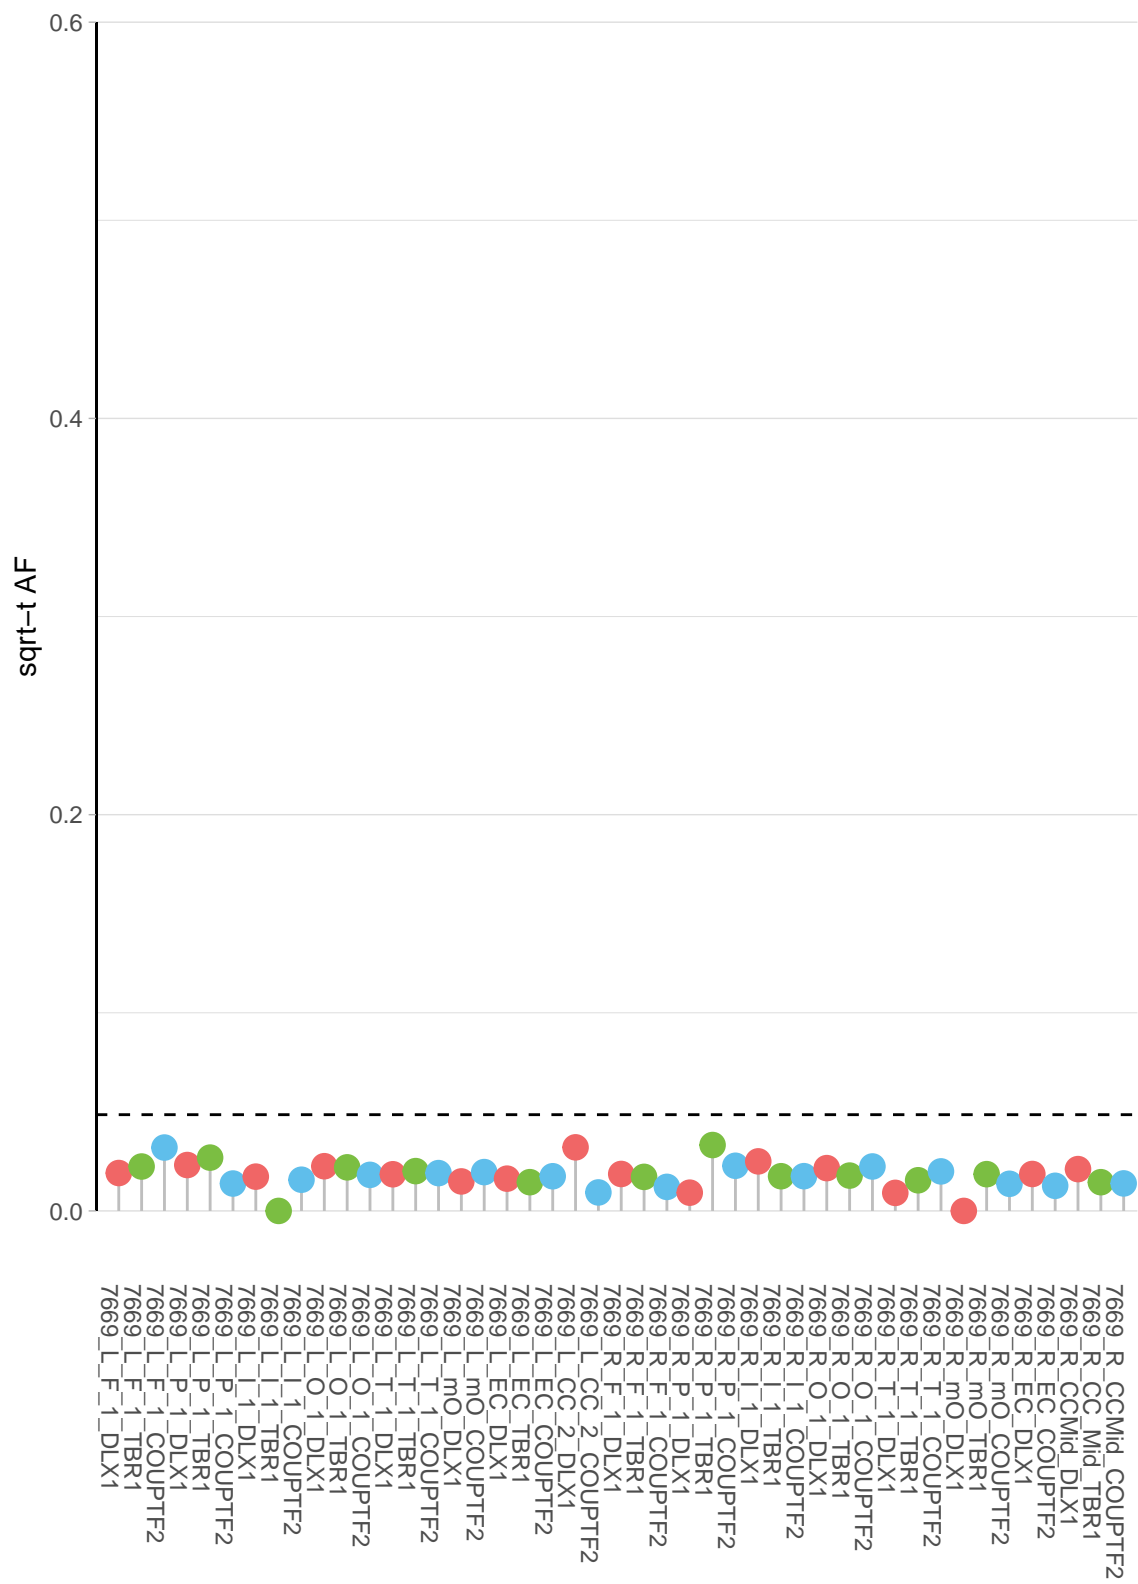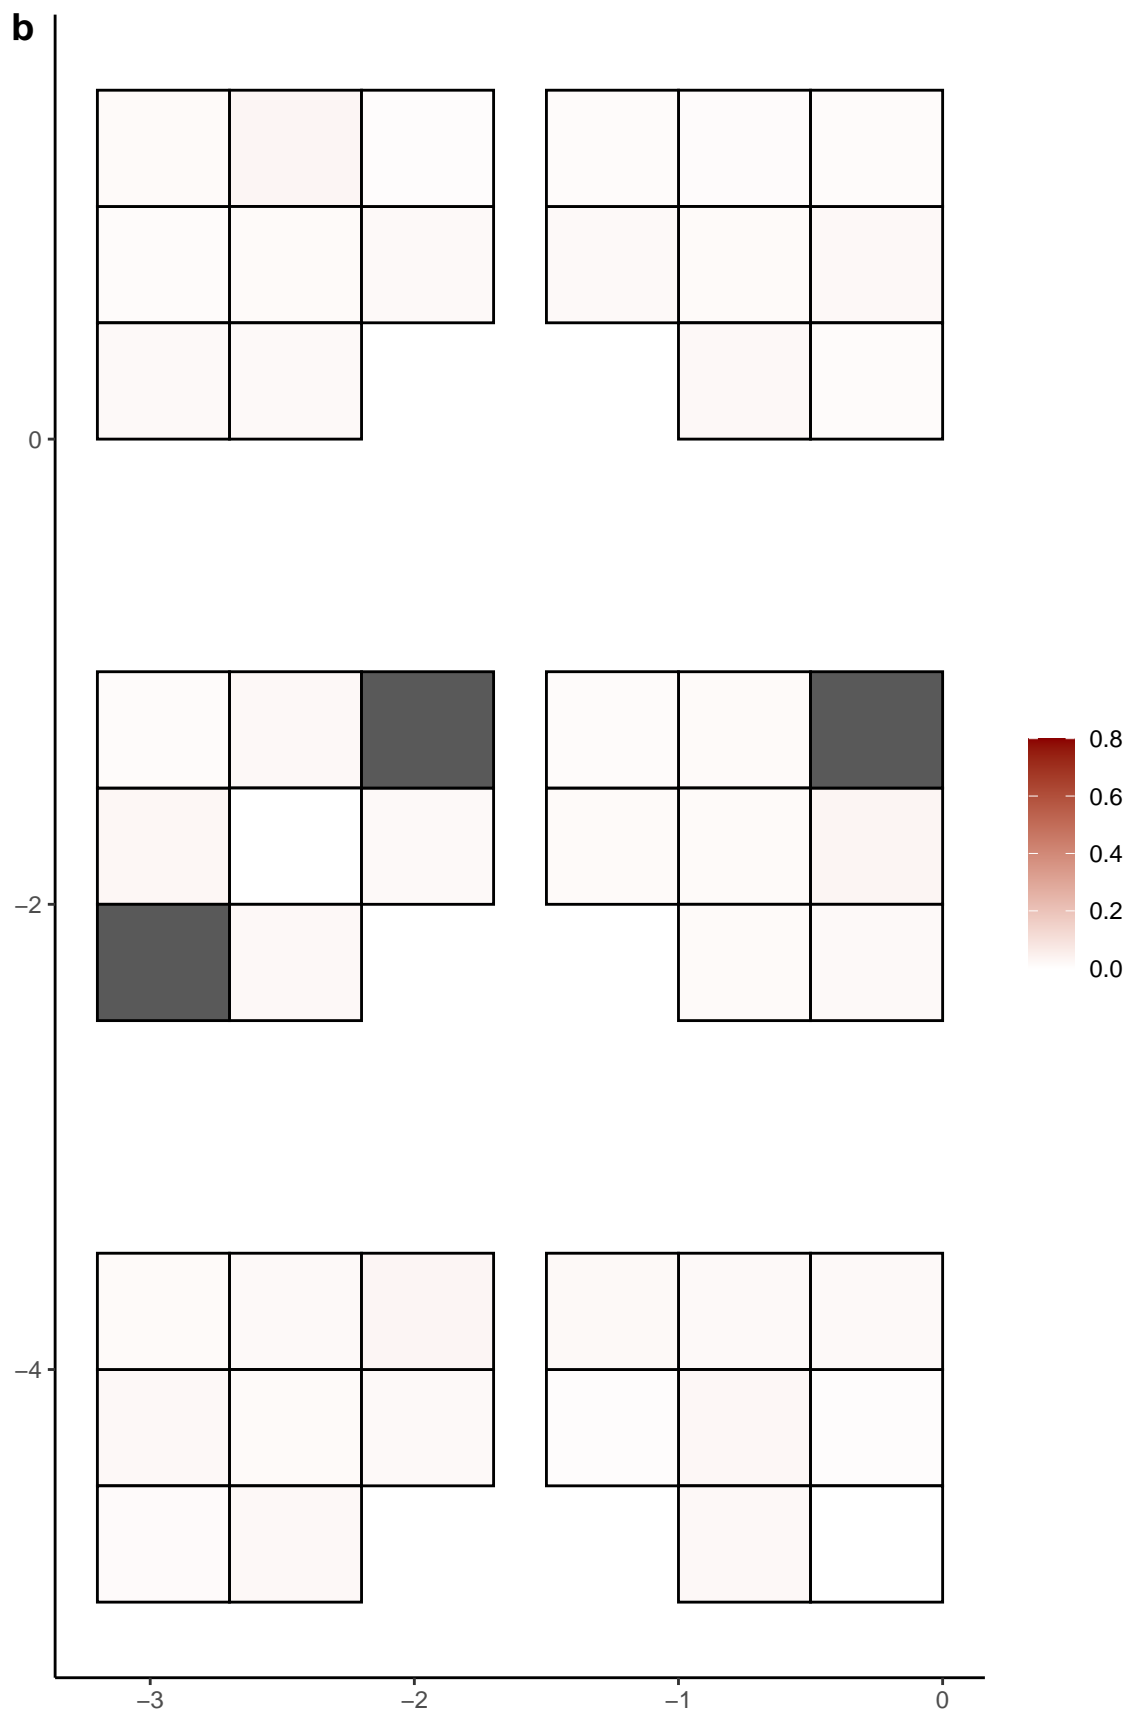

**a** ID05 20-10701398-A-G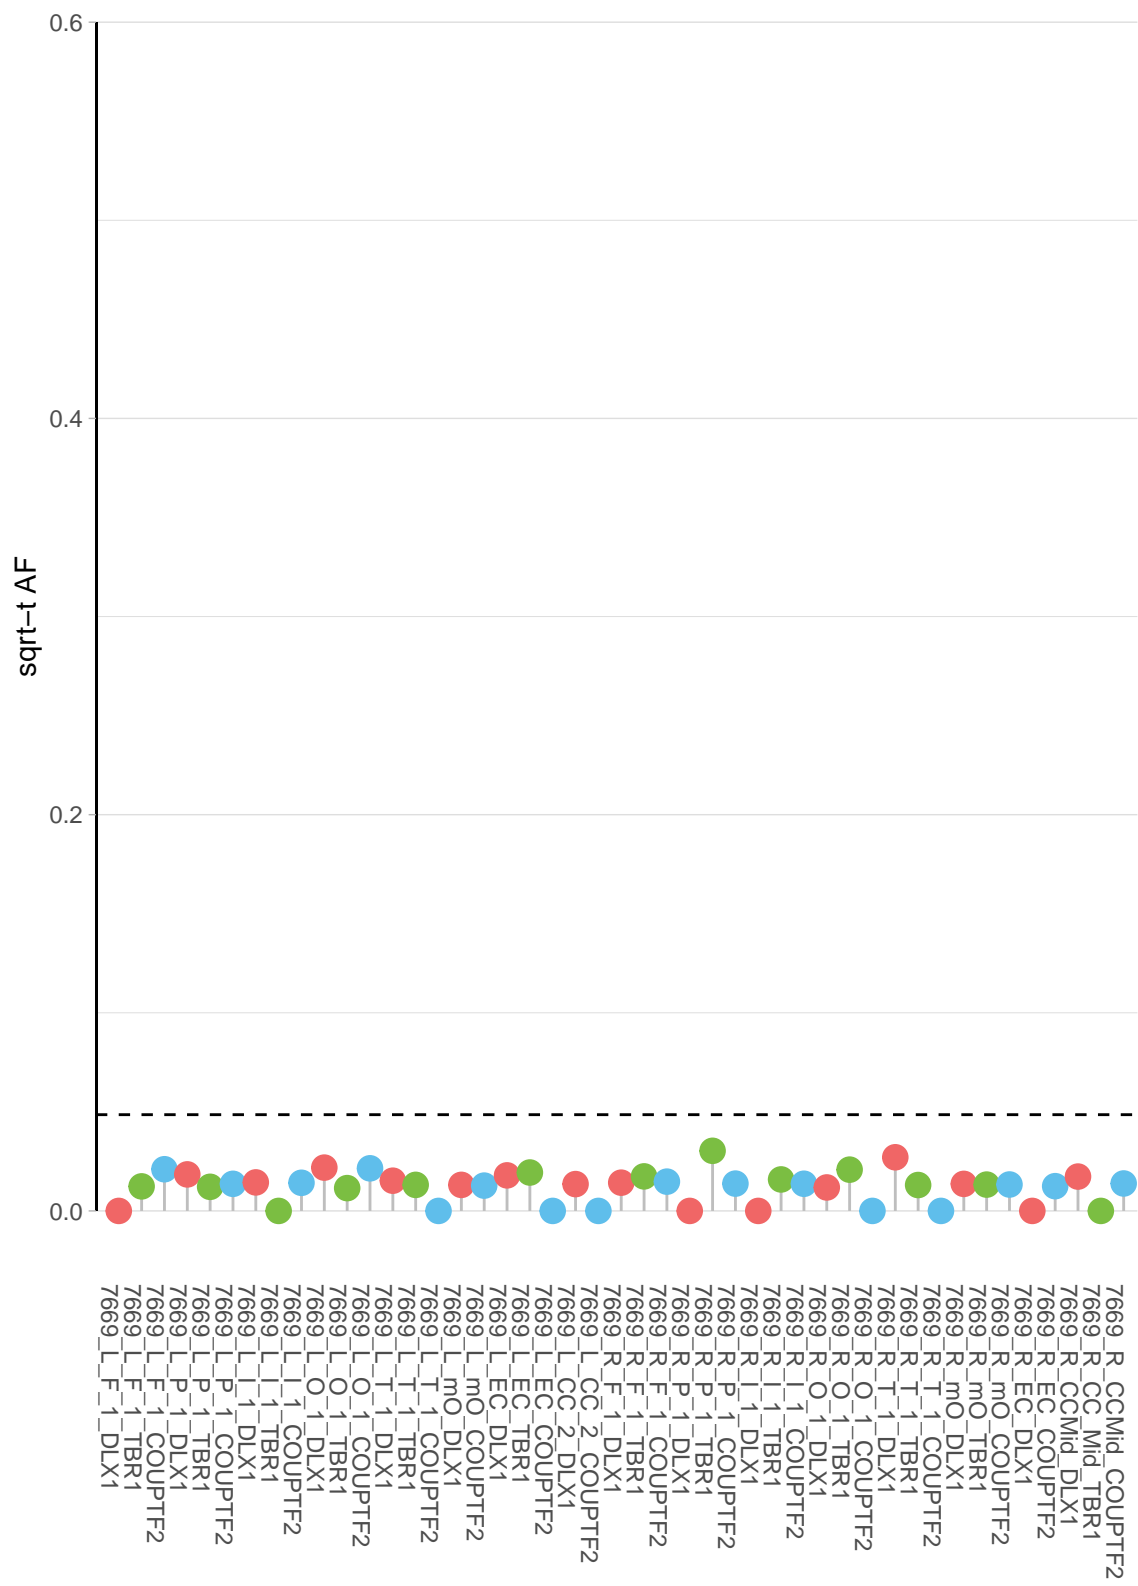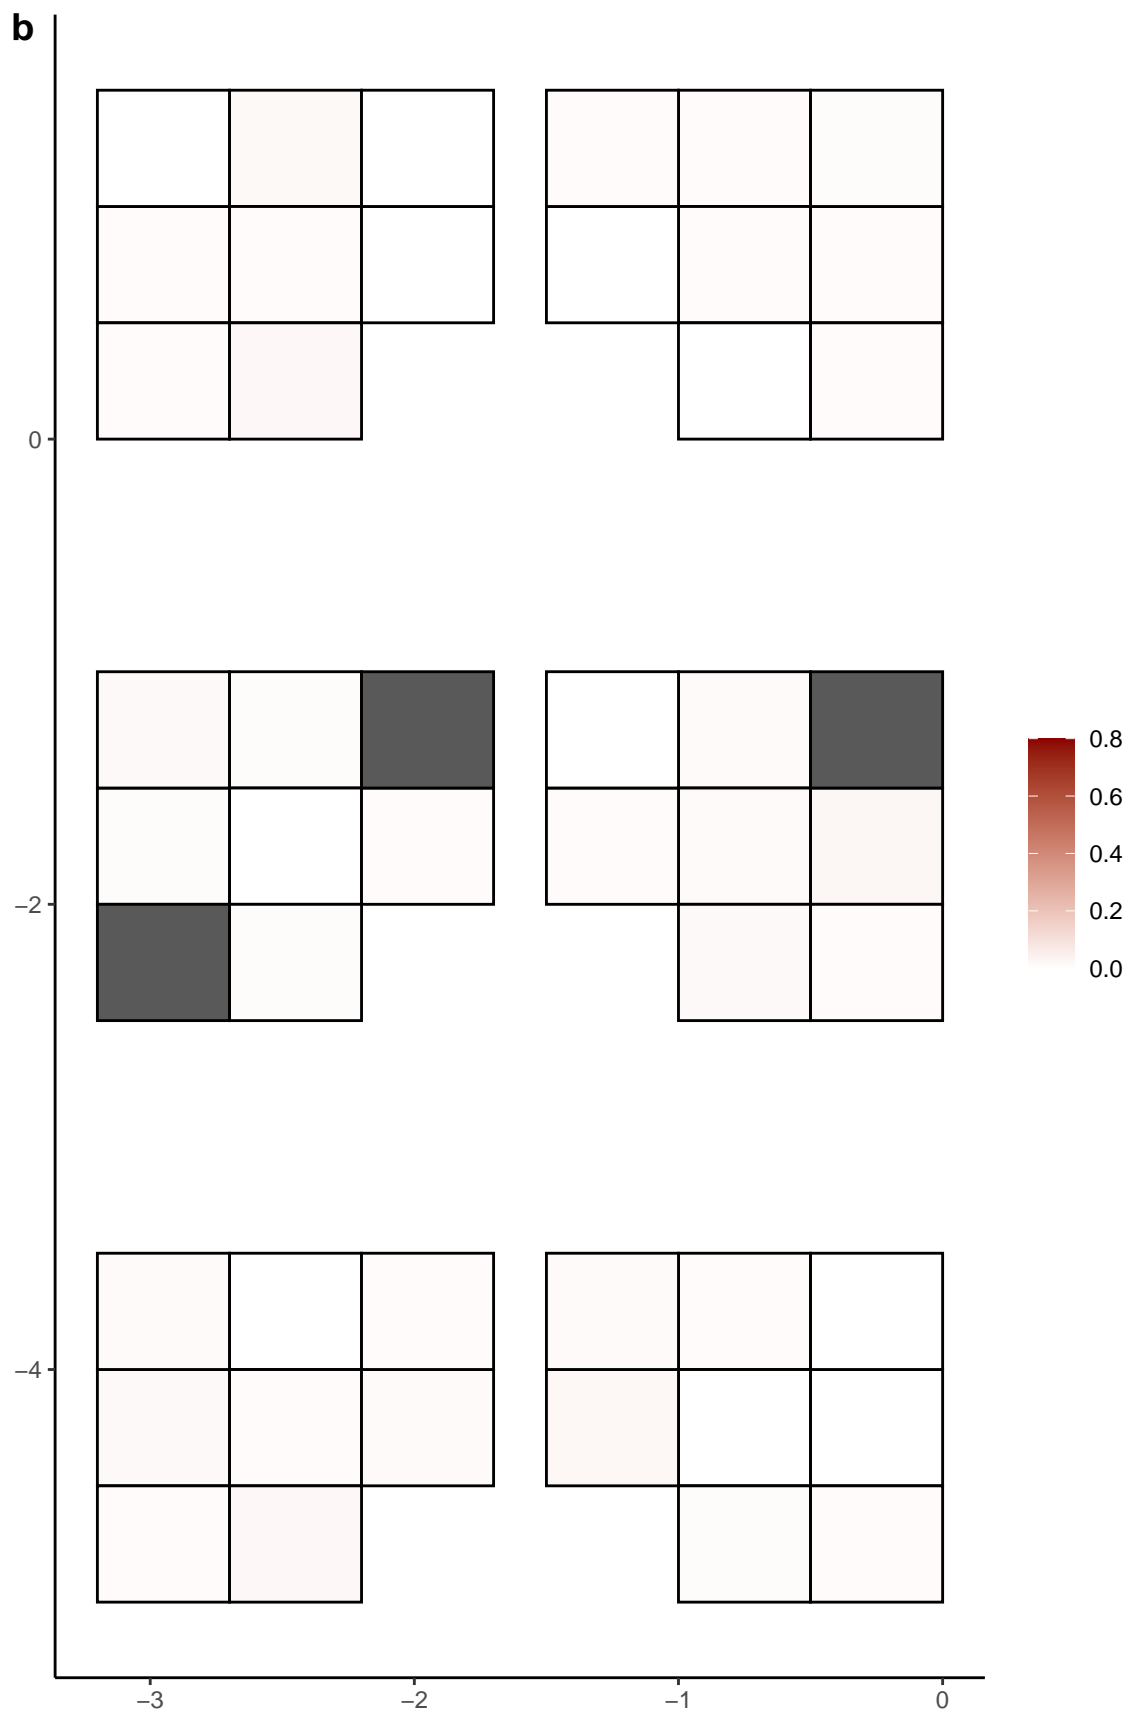







**a** ID05 20-15344074-C-T

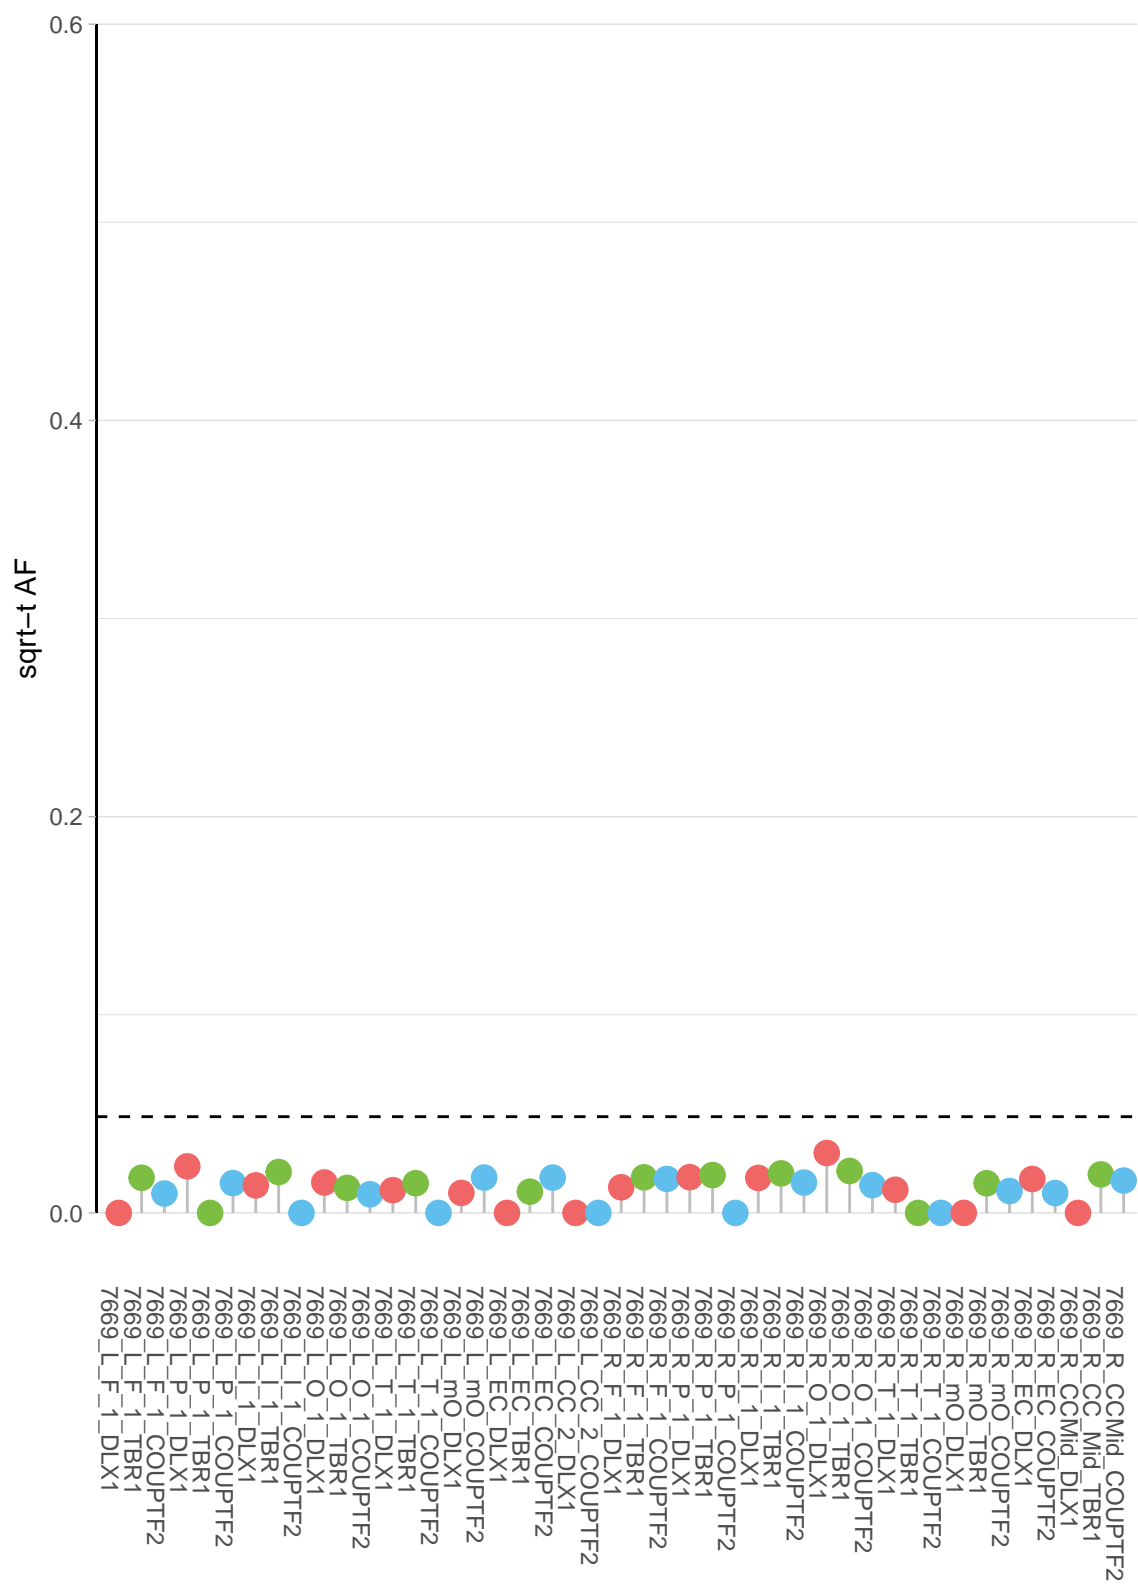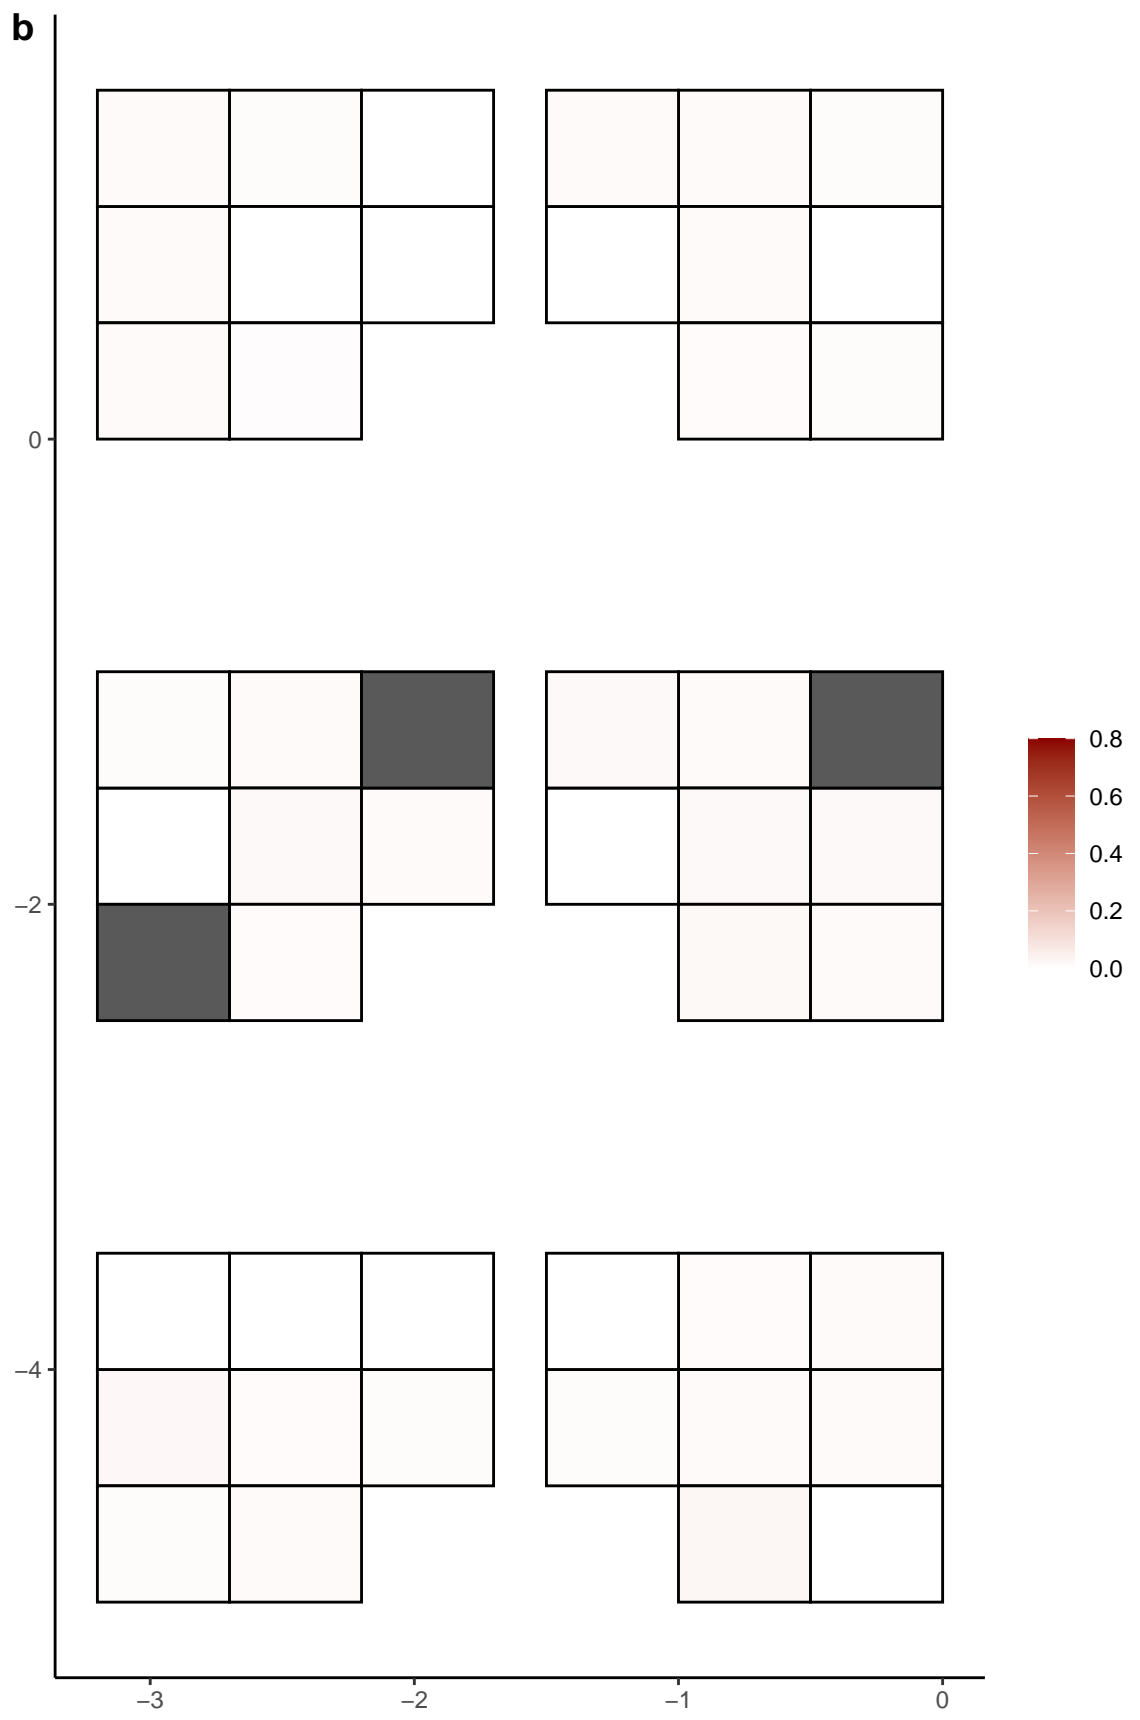



**a** ID05 20-16783172-C-T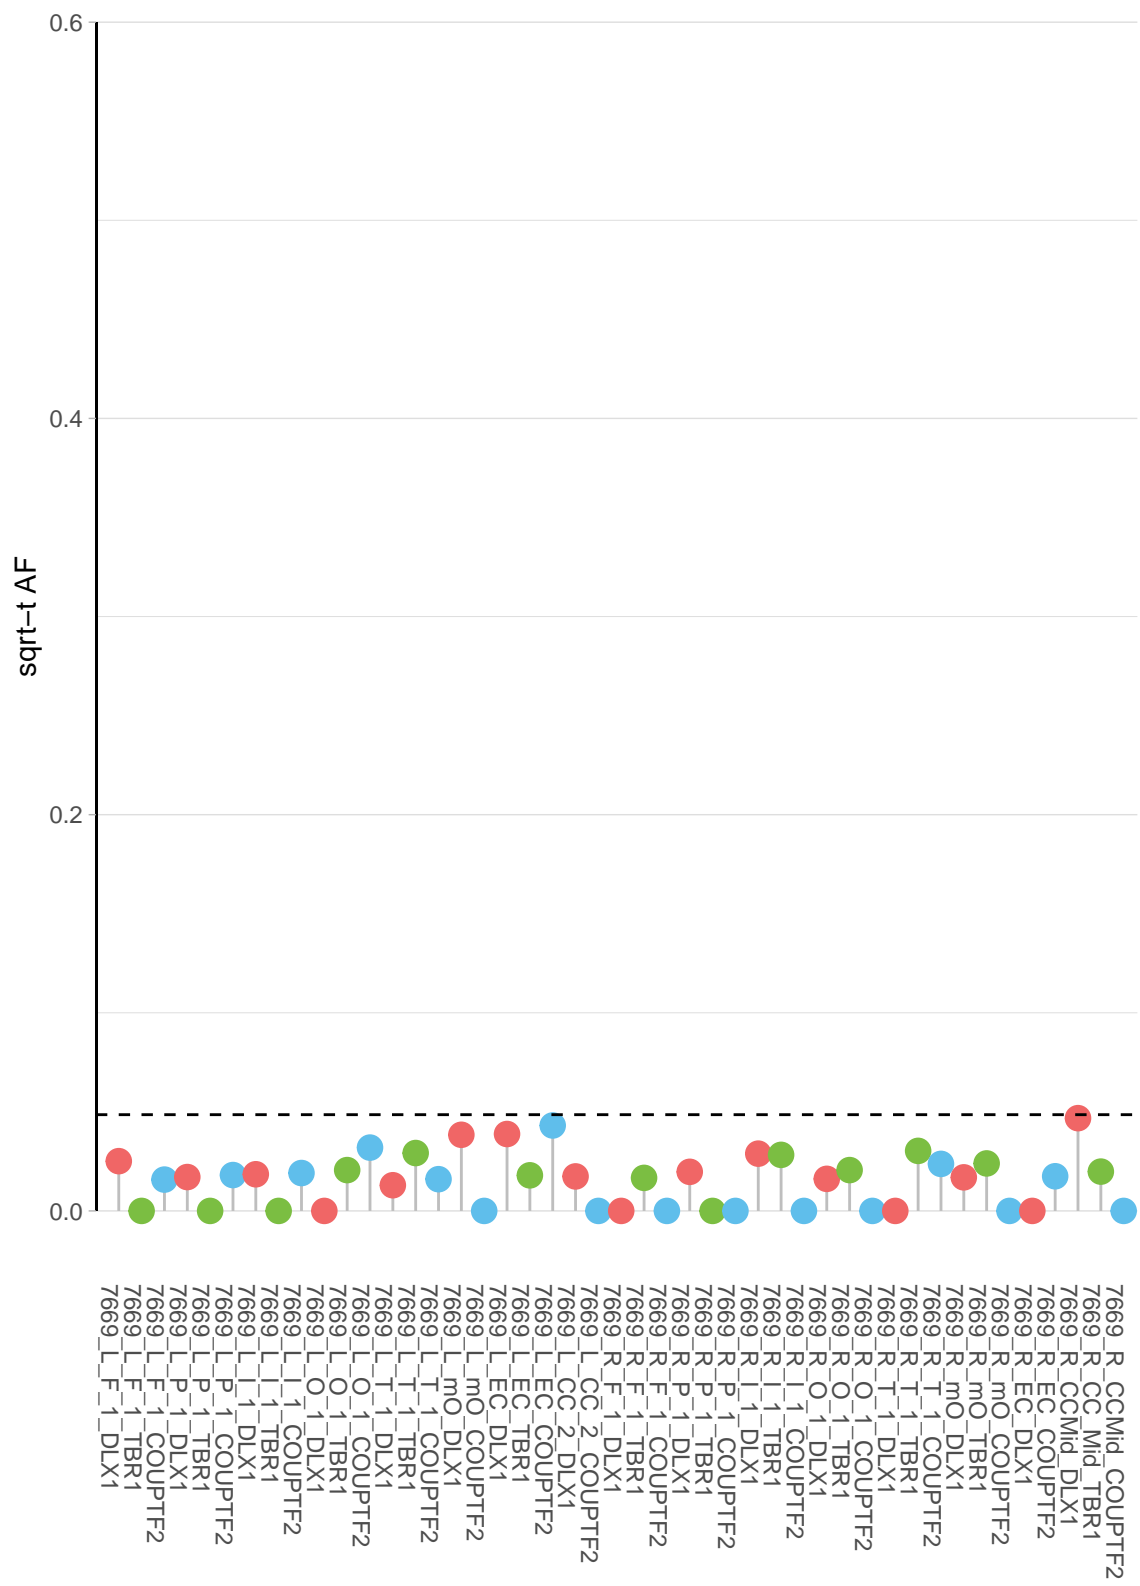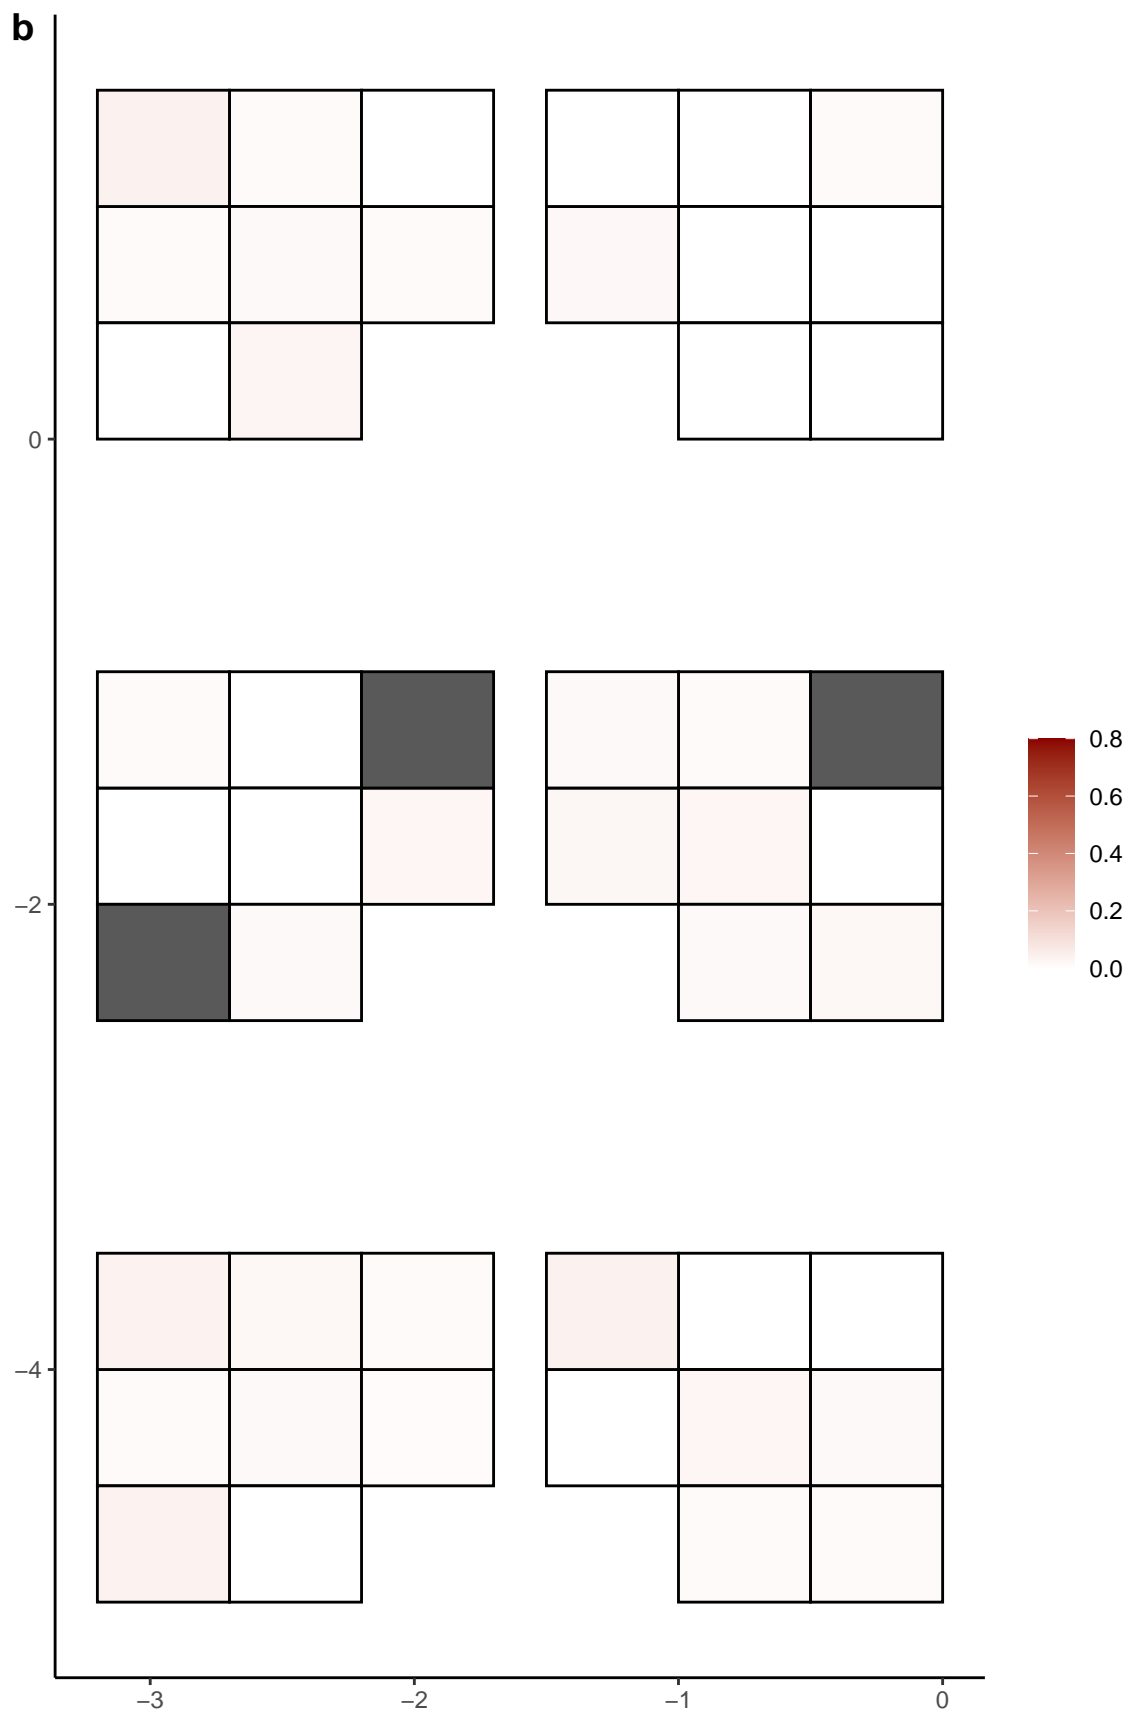

**a** ID05 20-18482771-G-T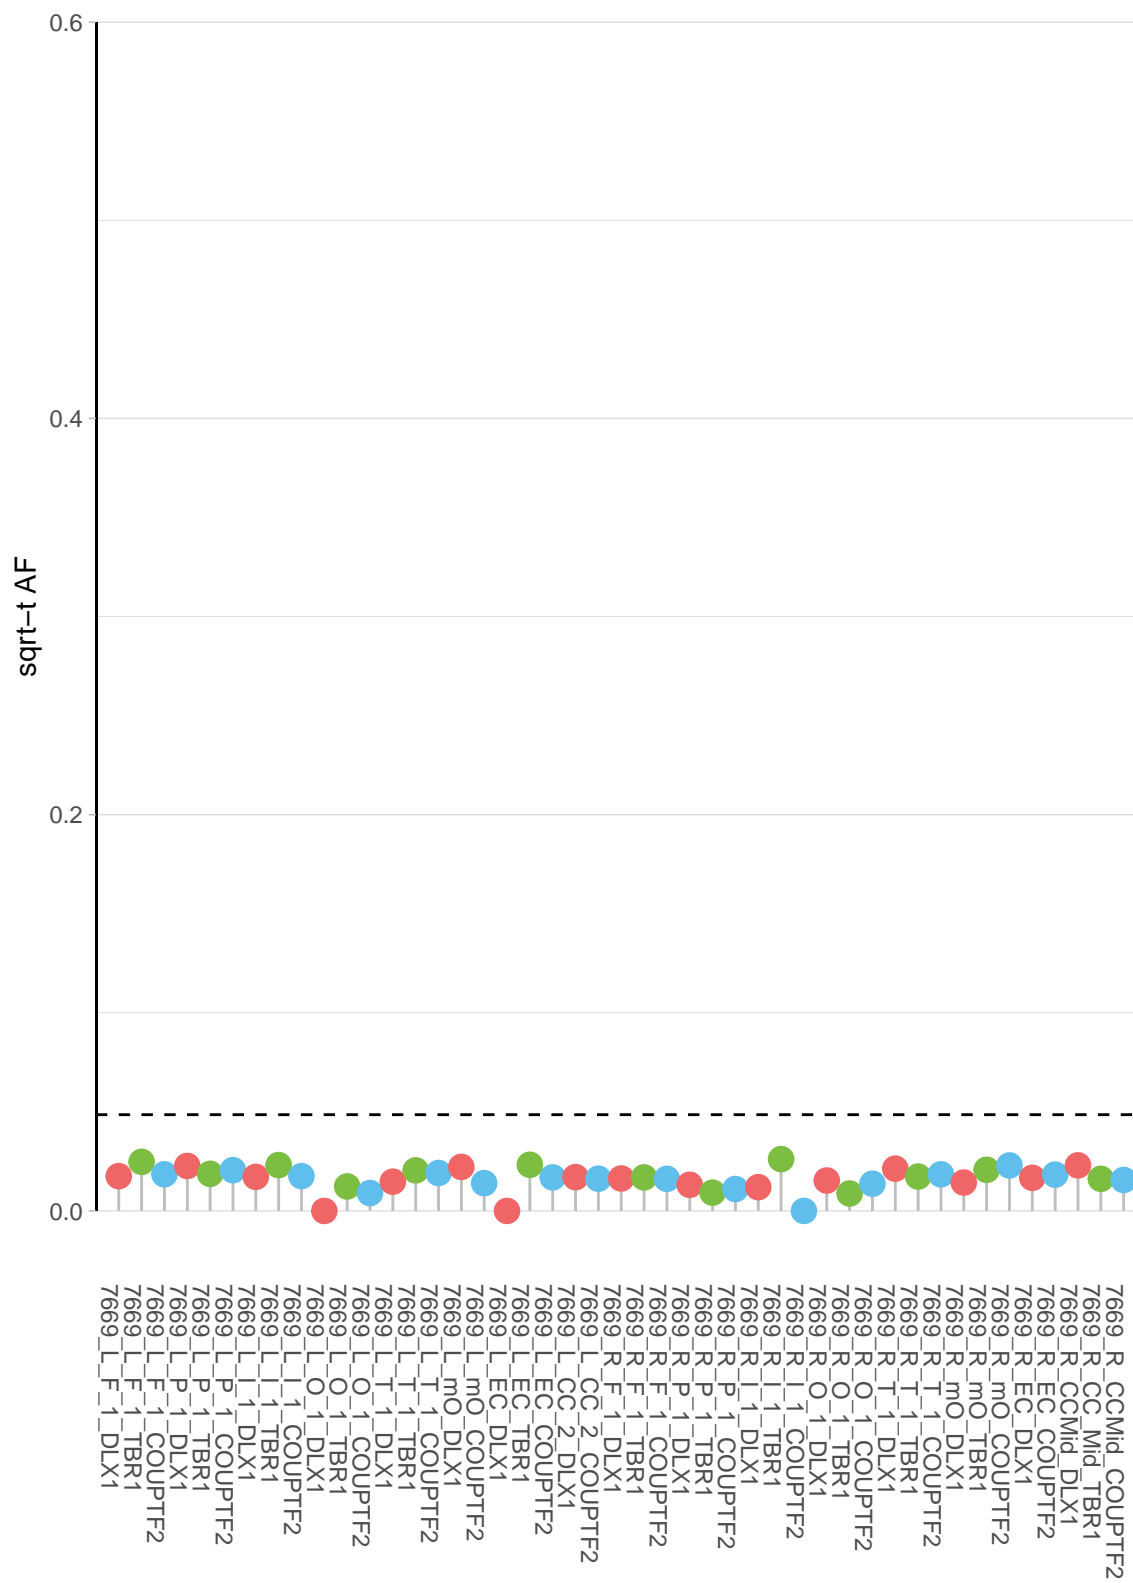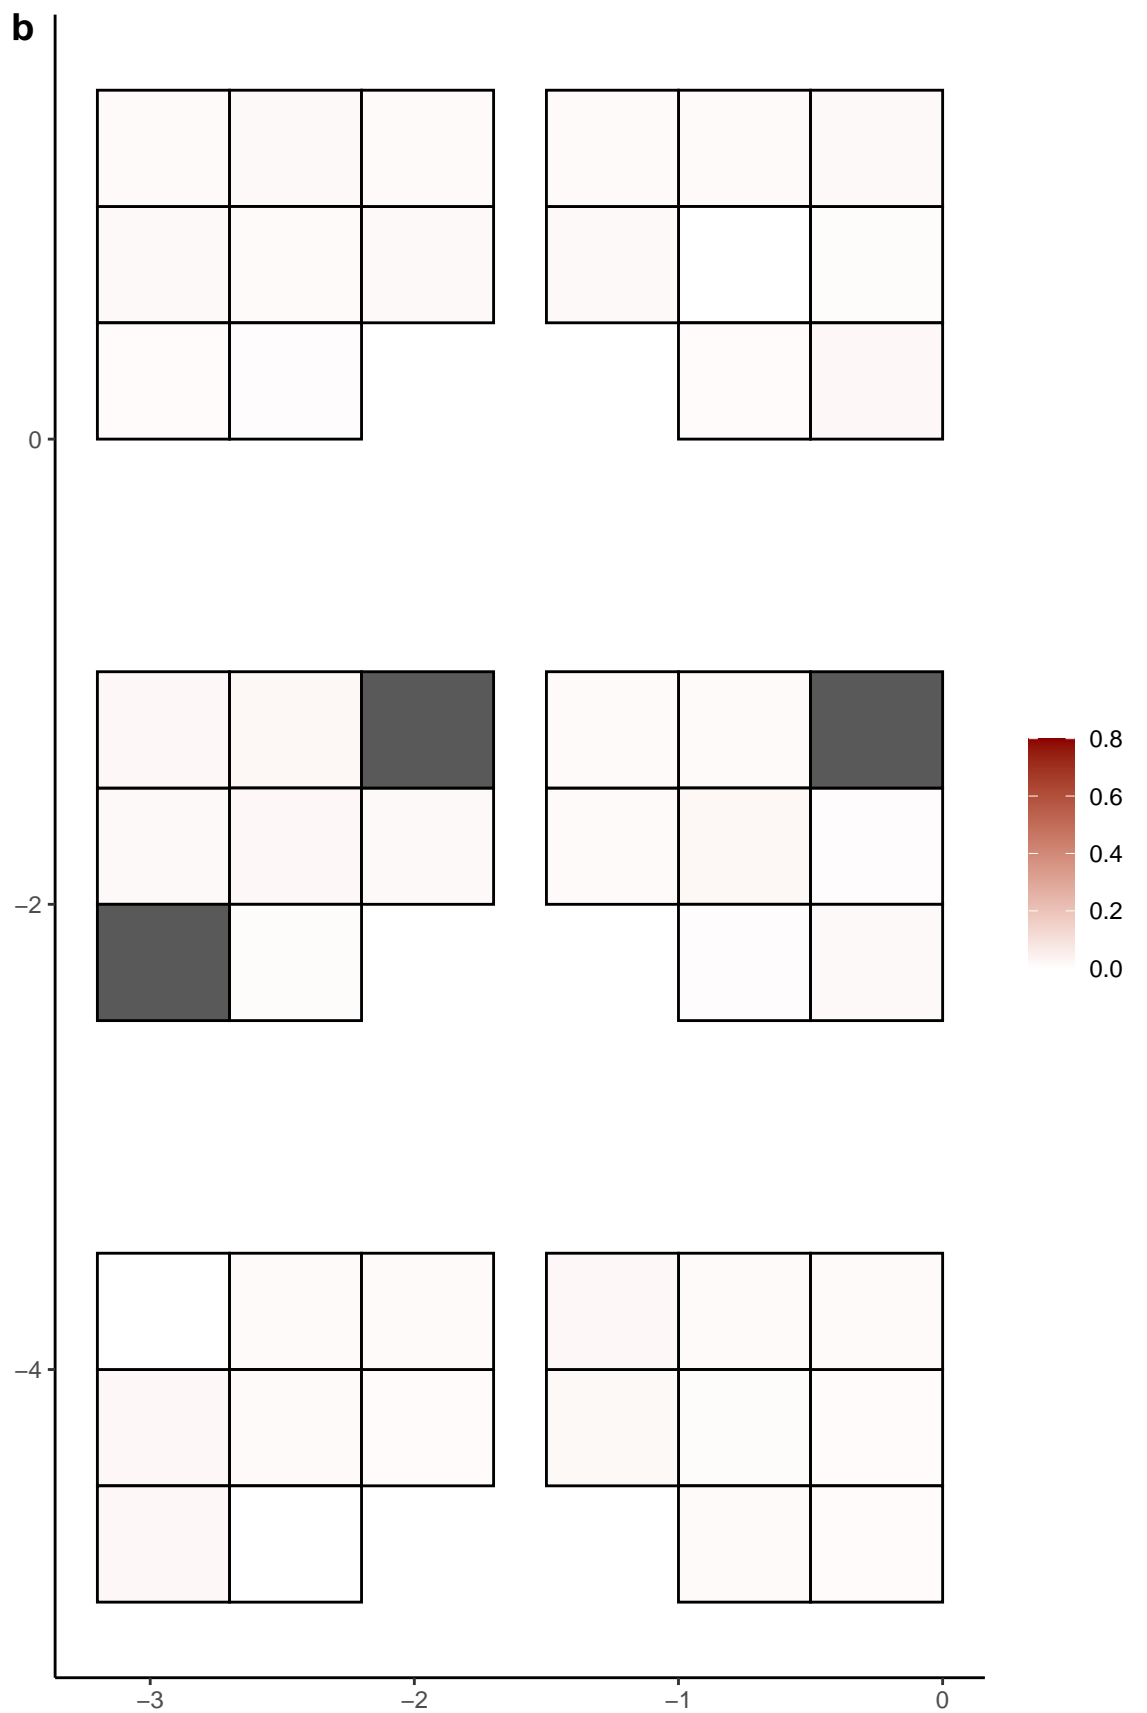

**a** ID05 20-21698027-C-T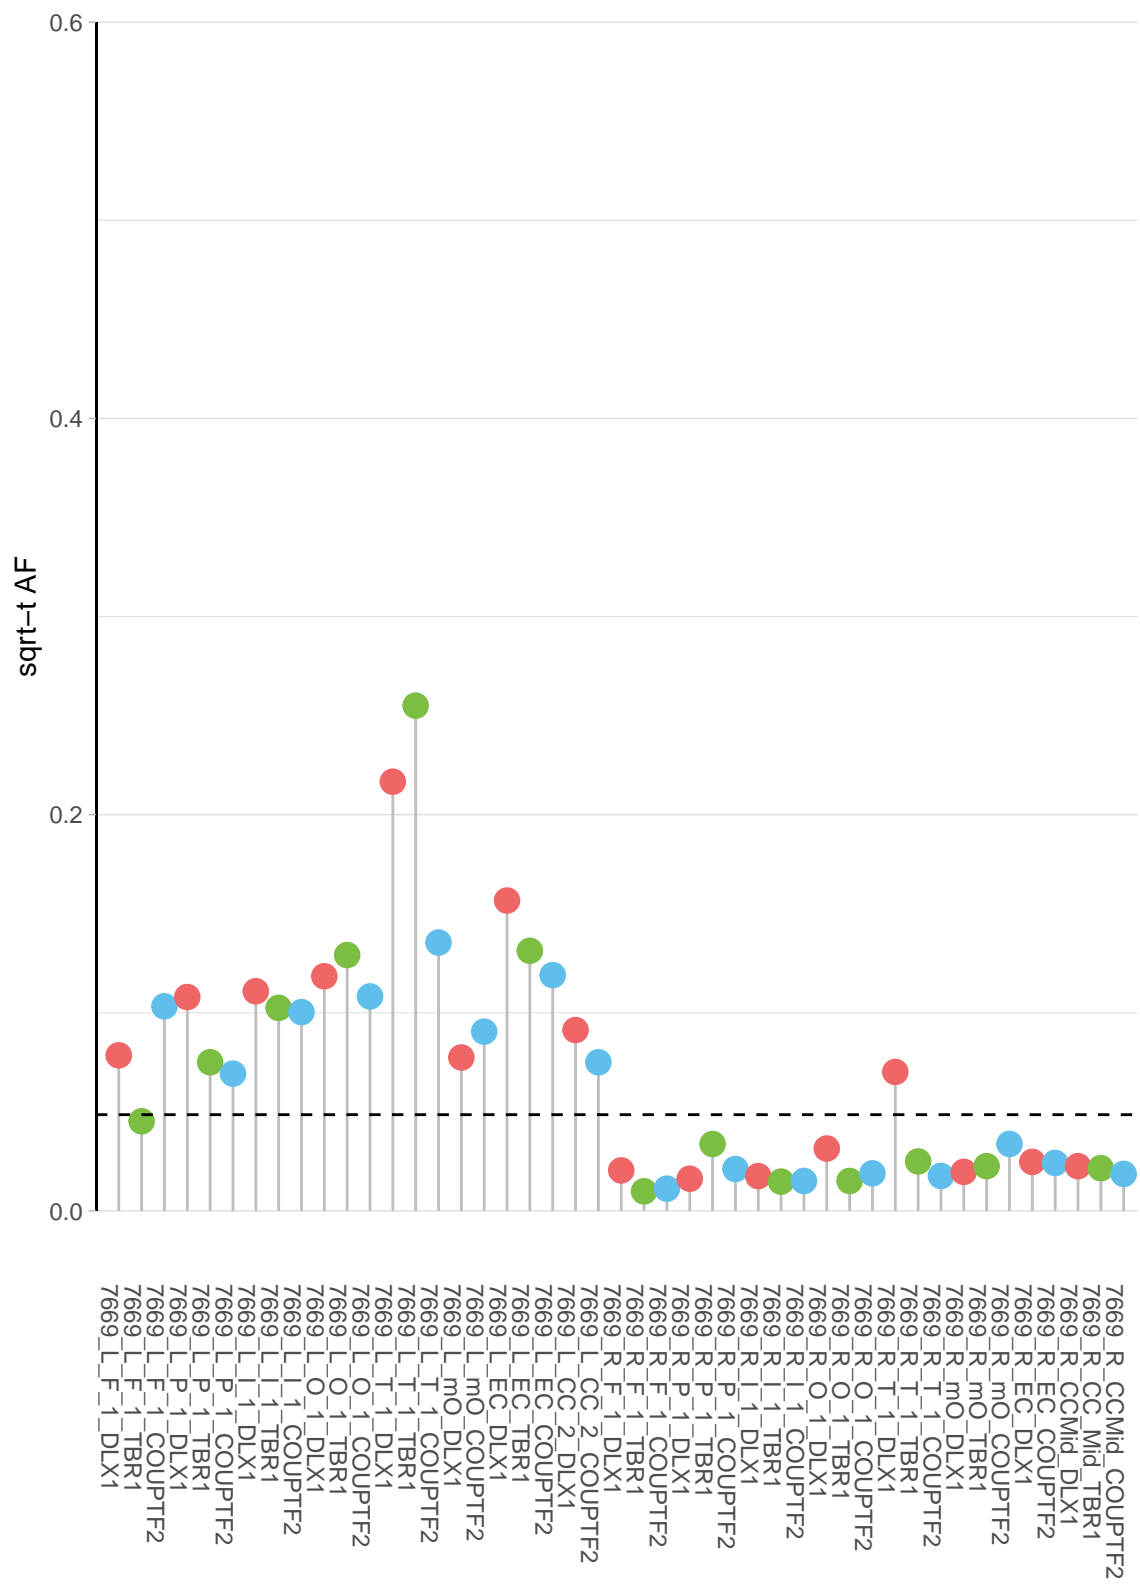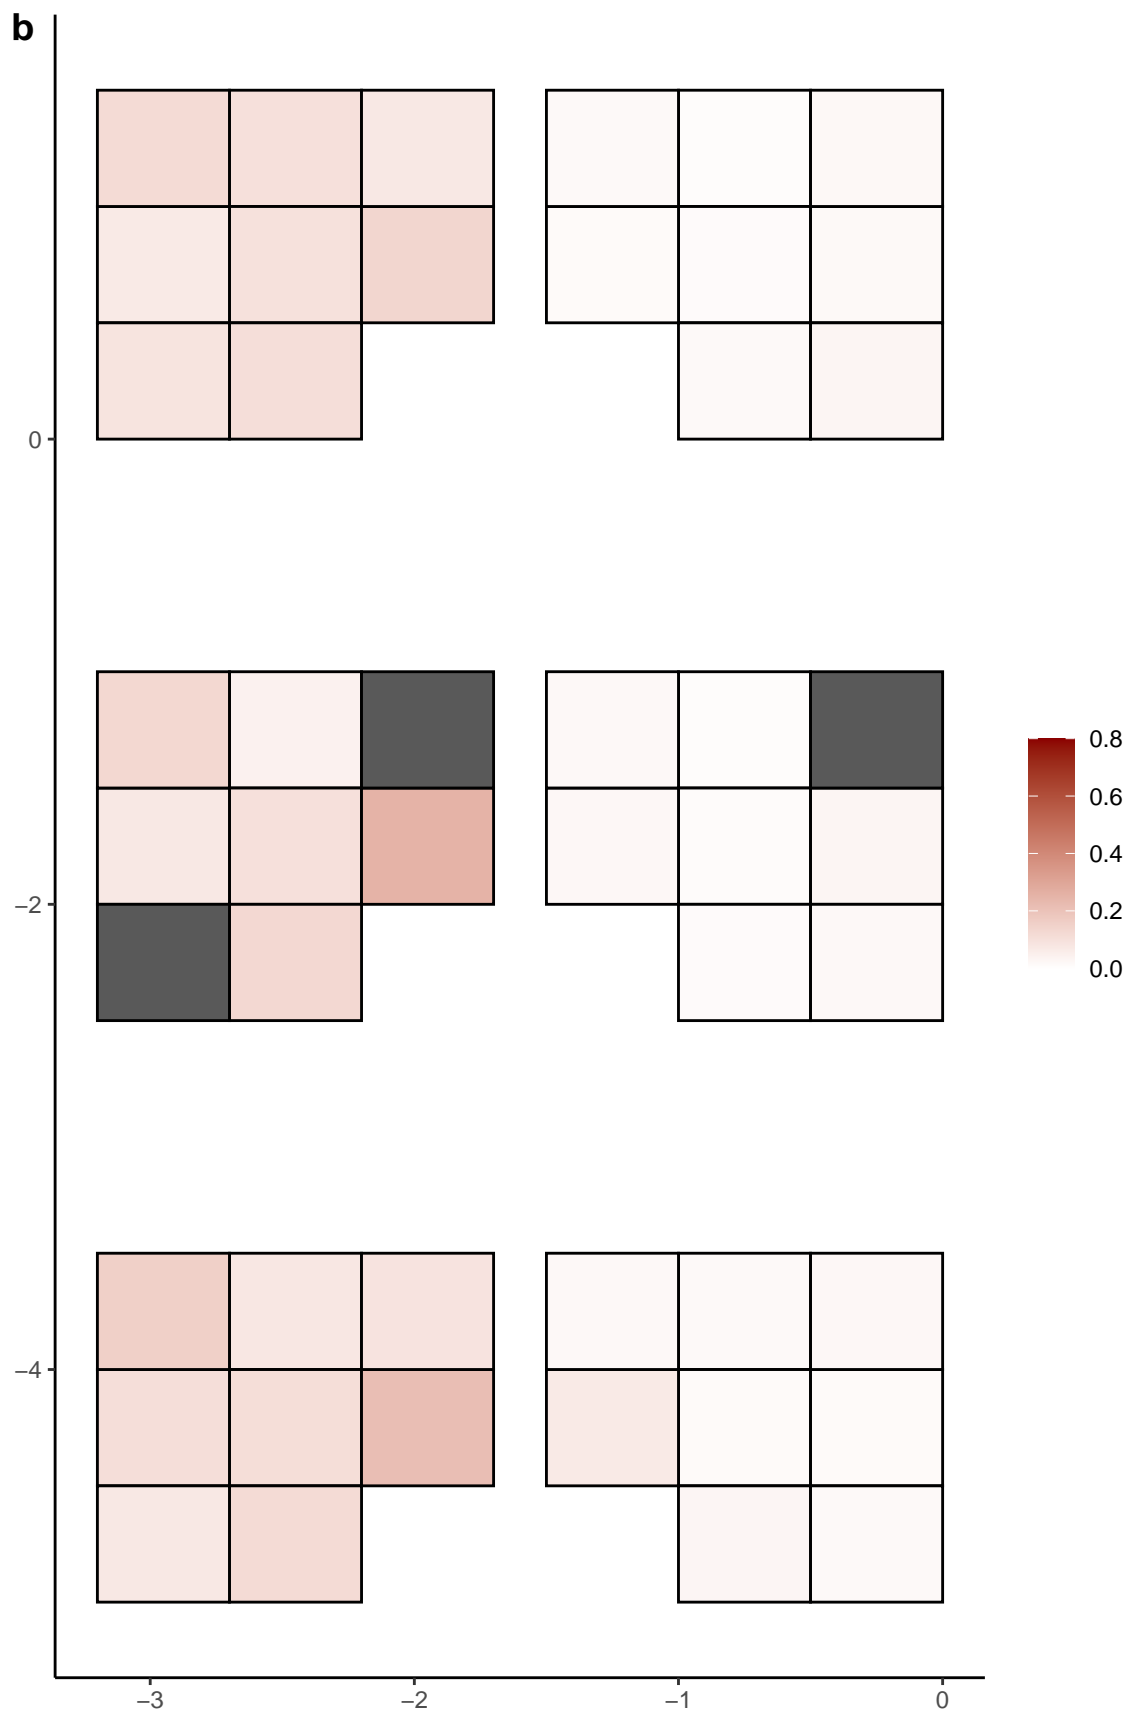



**a** ID05 20-22280961-C-T

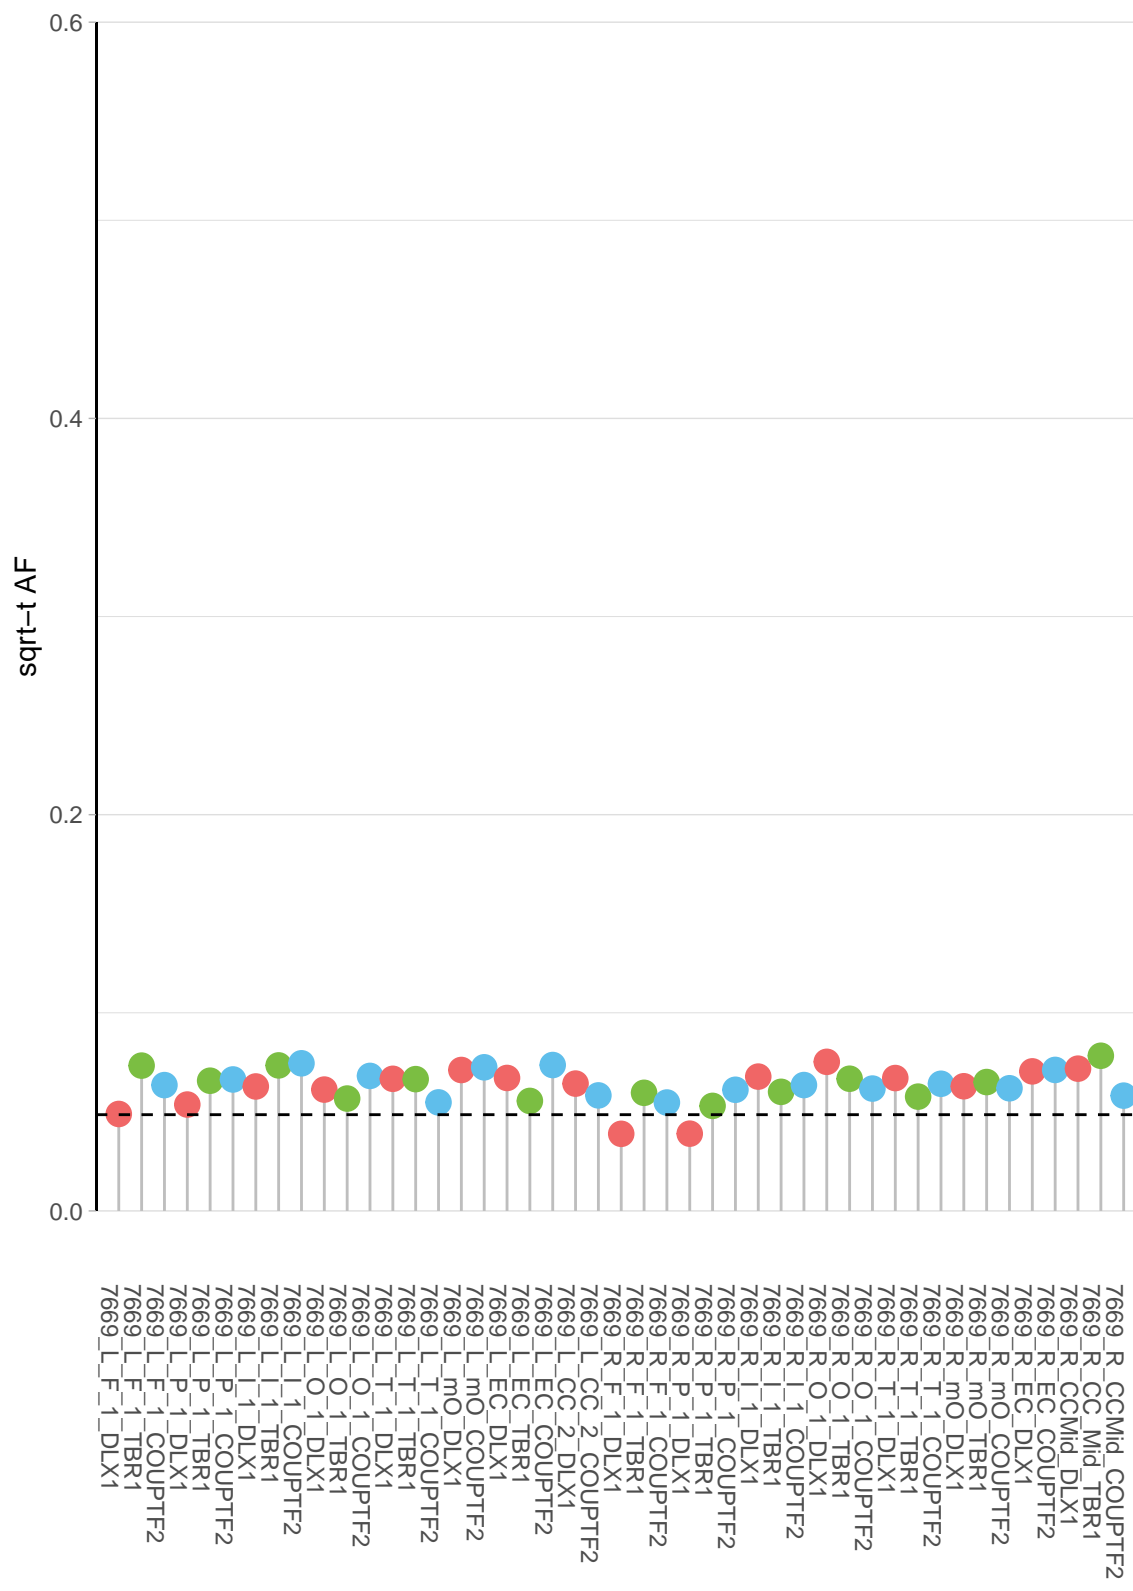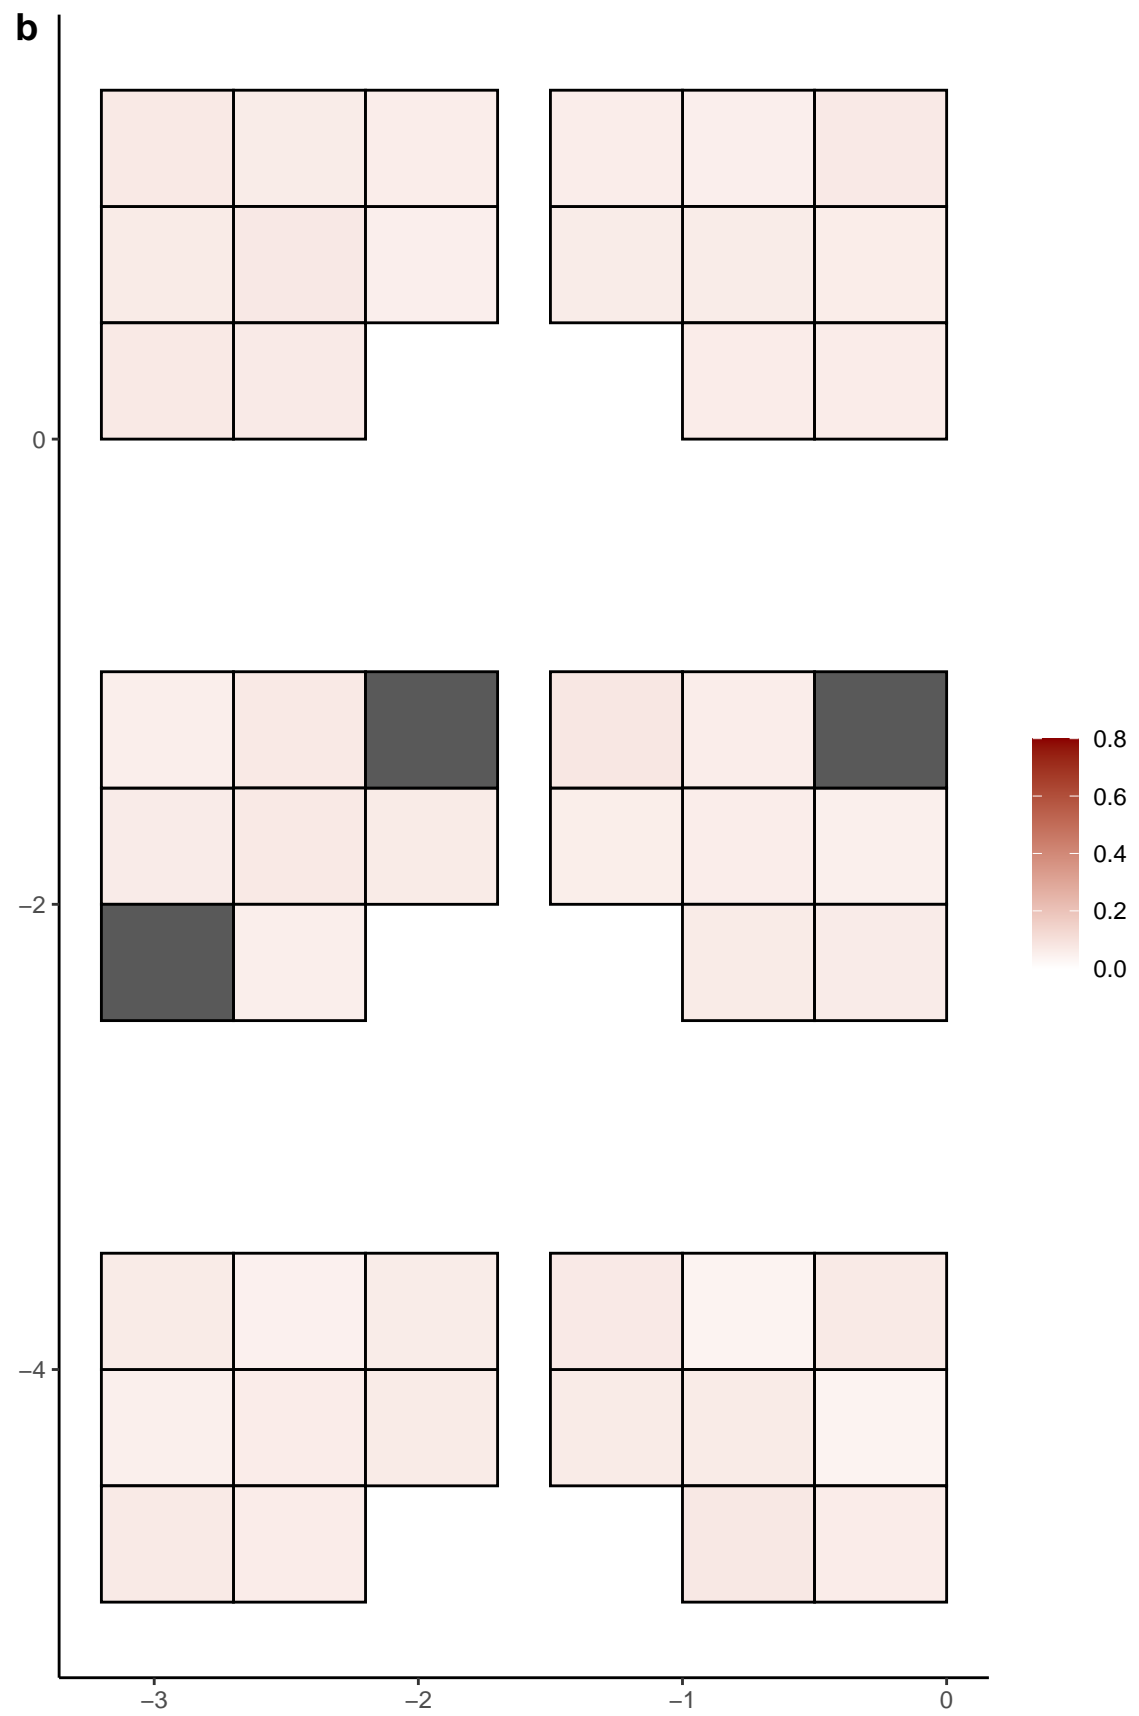

**a** ID05 20-22383923-C-A

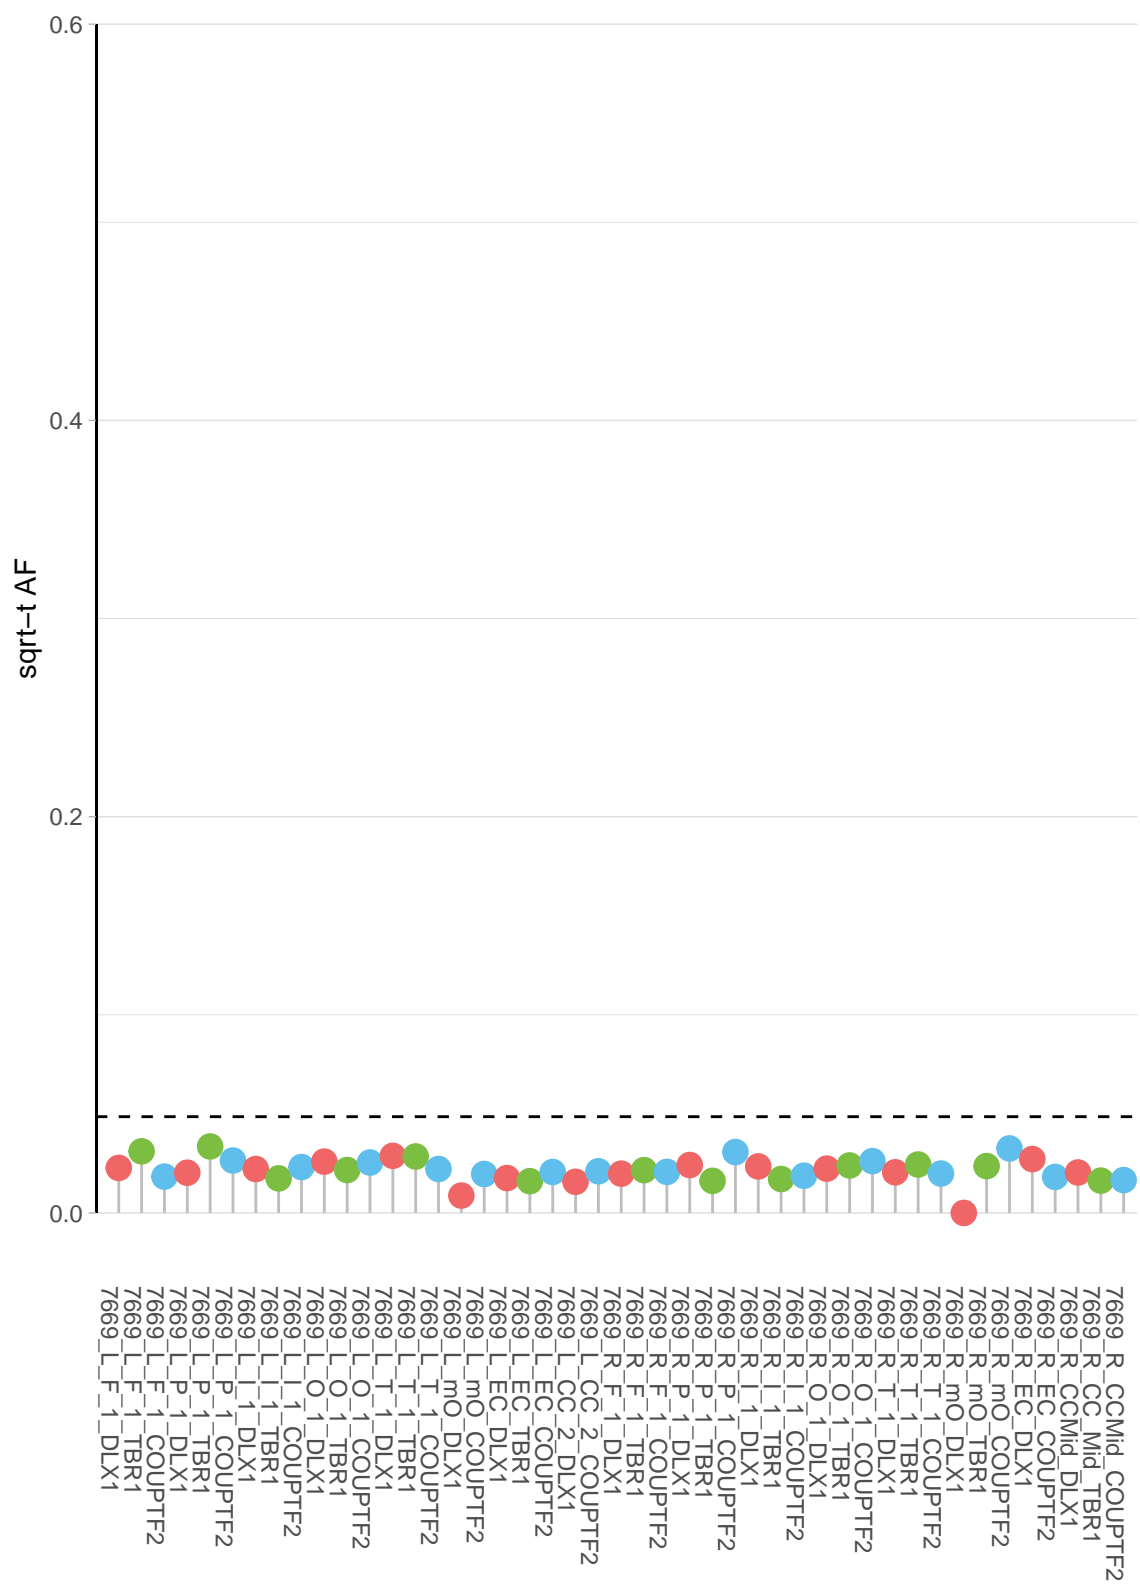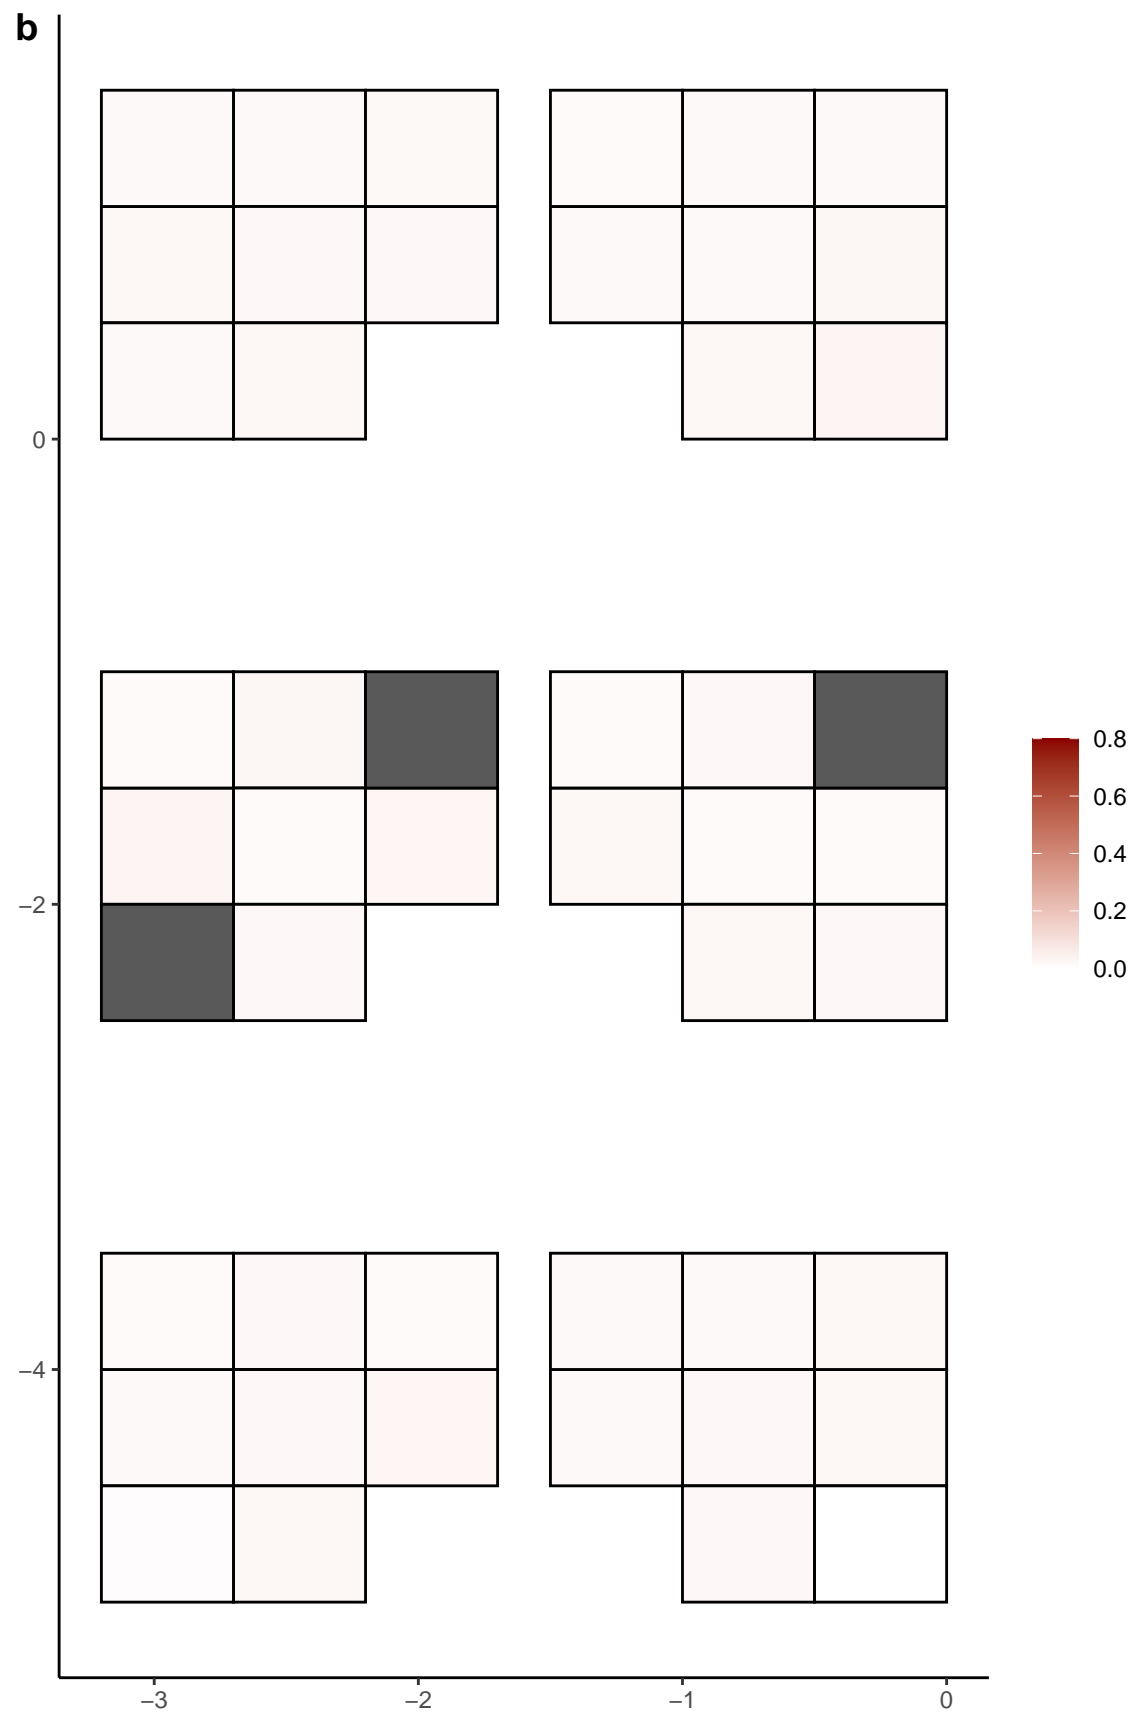

a ID05 20-24978911-G-A

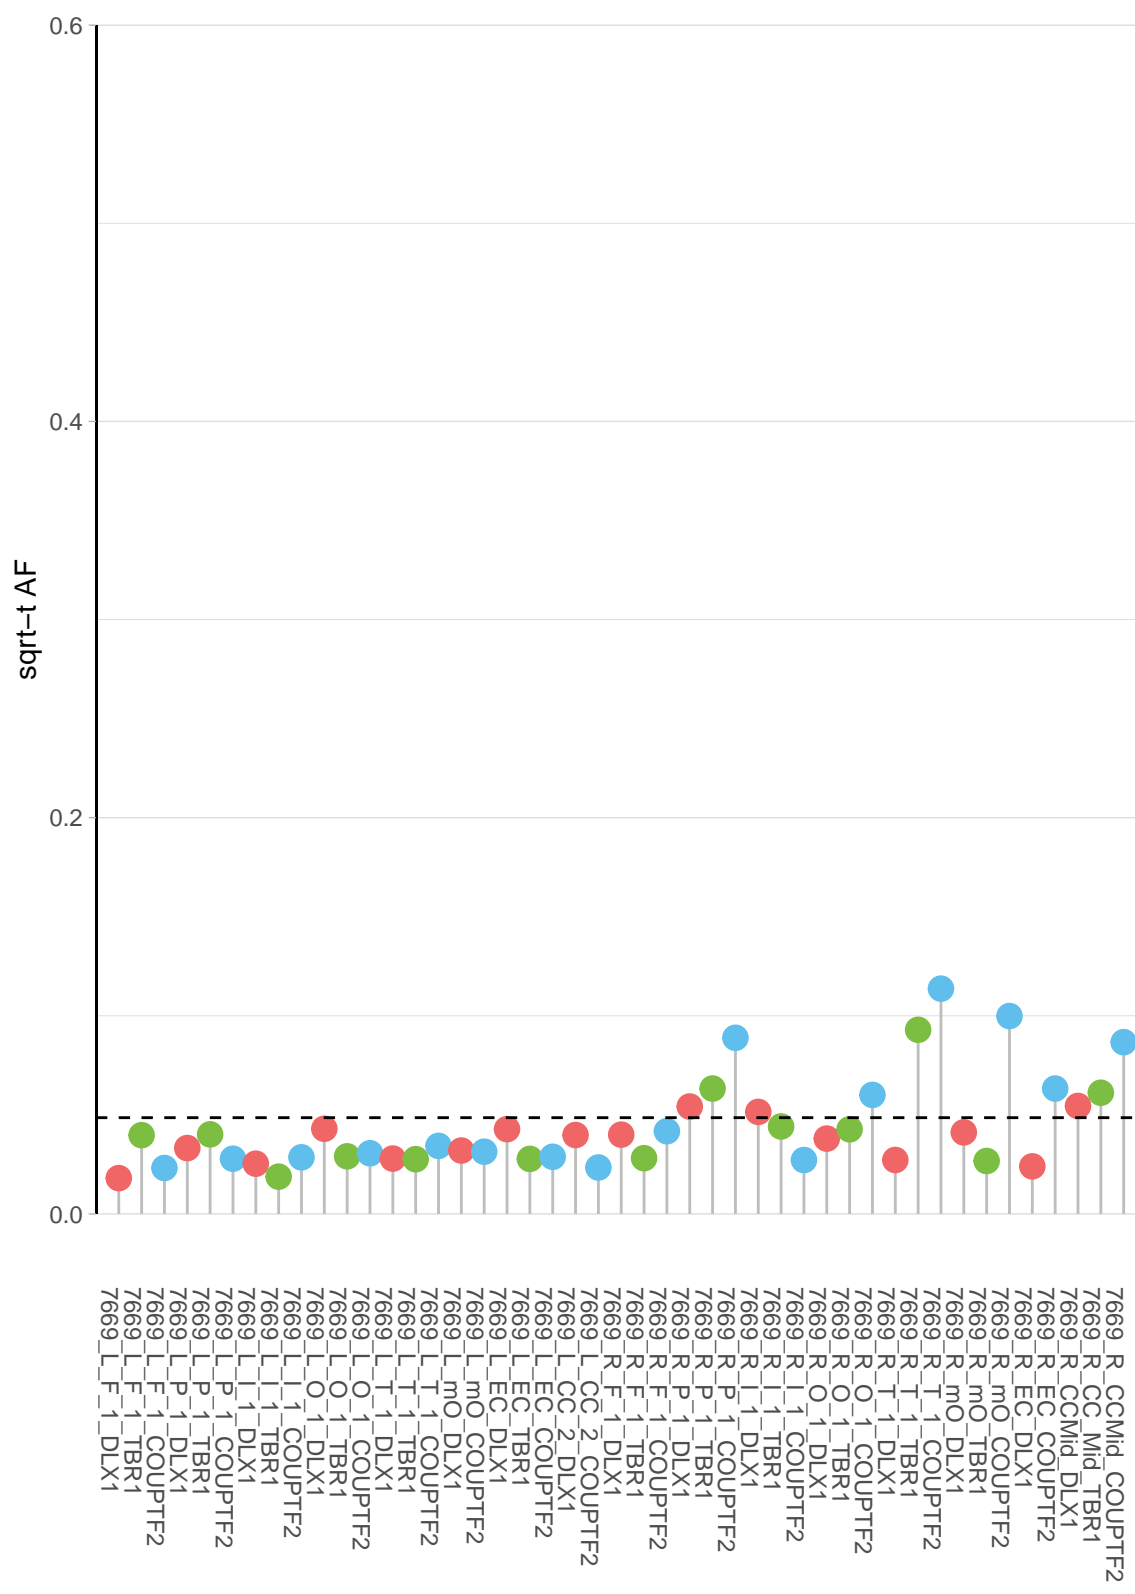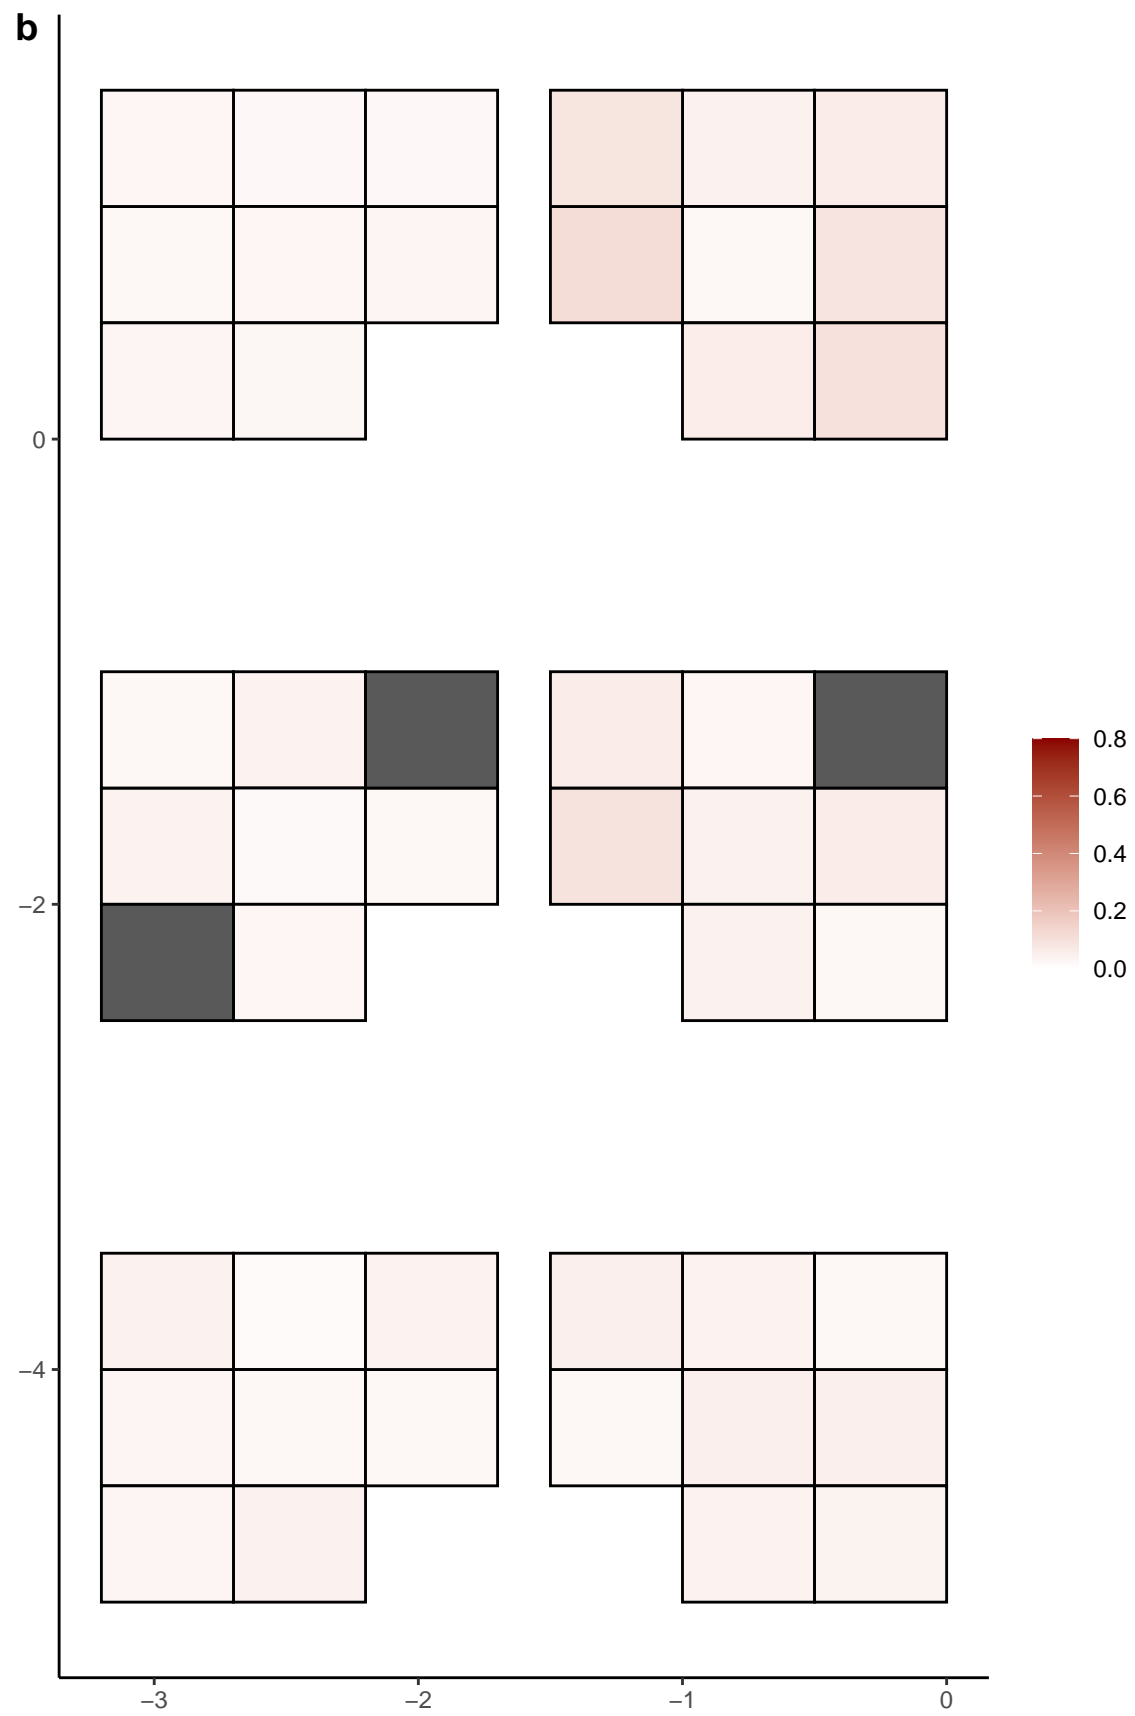

**a** ID05 20-32022224-A-G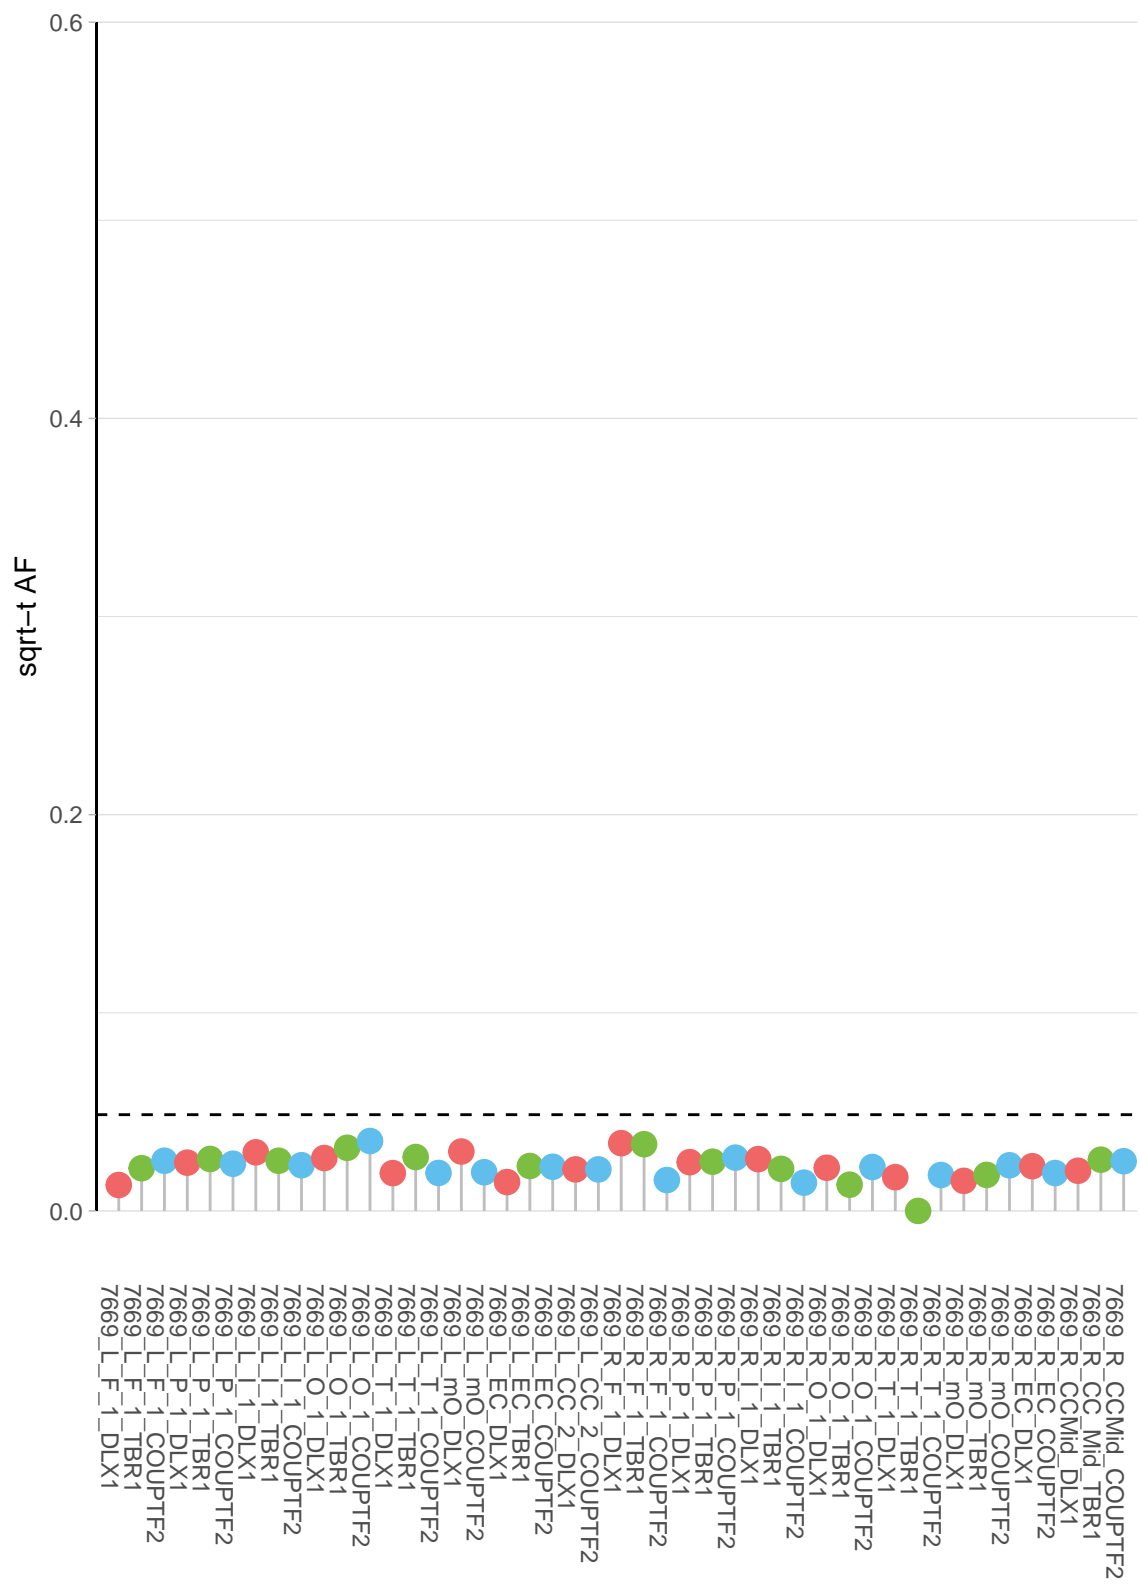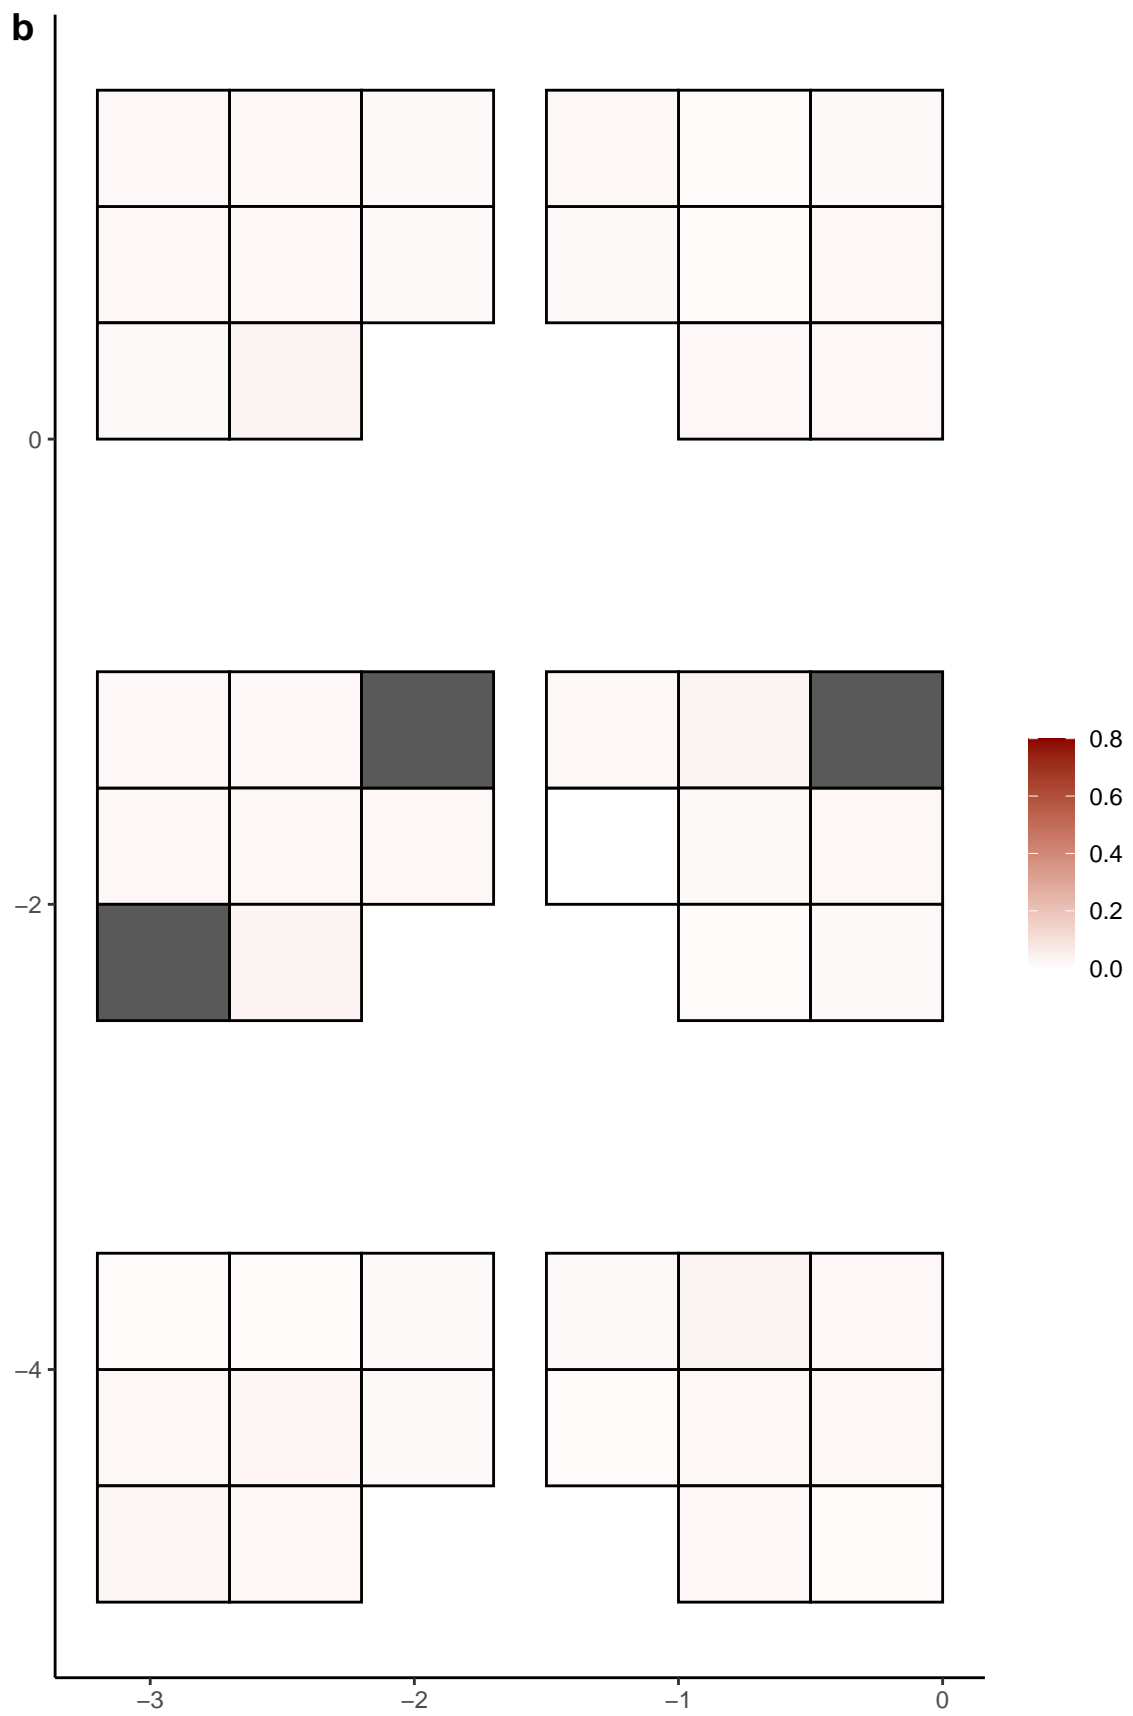



**a** ID05 20–34064358–C–T

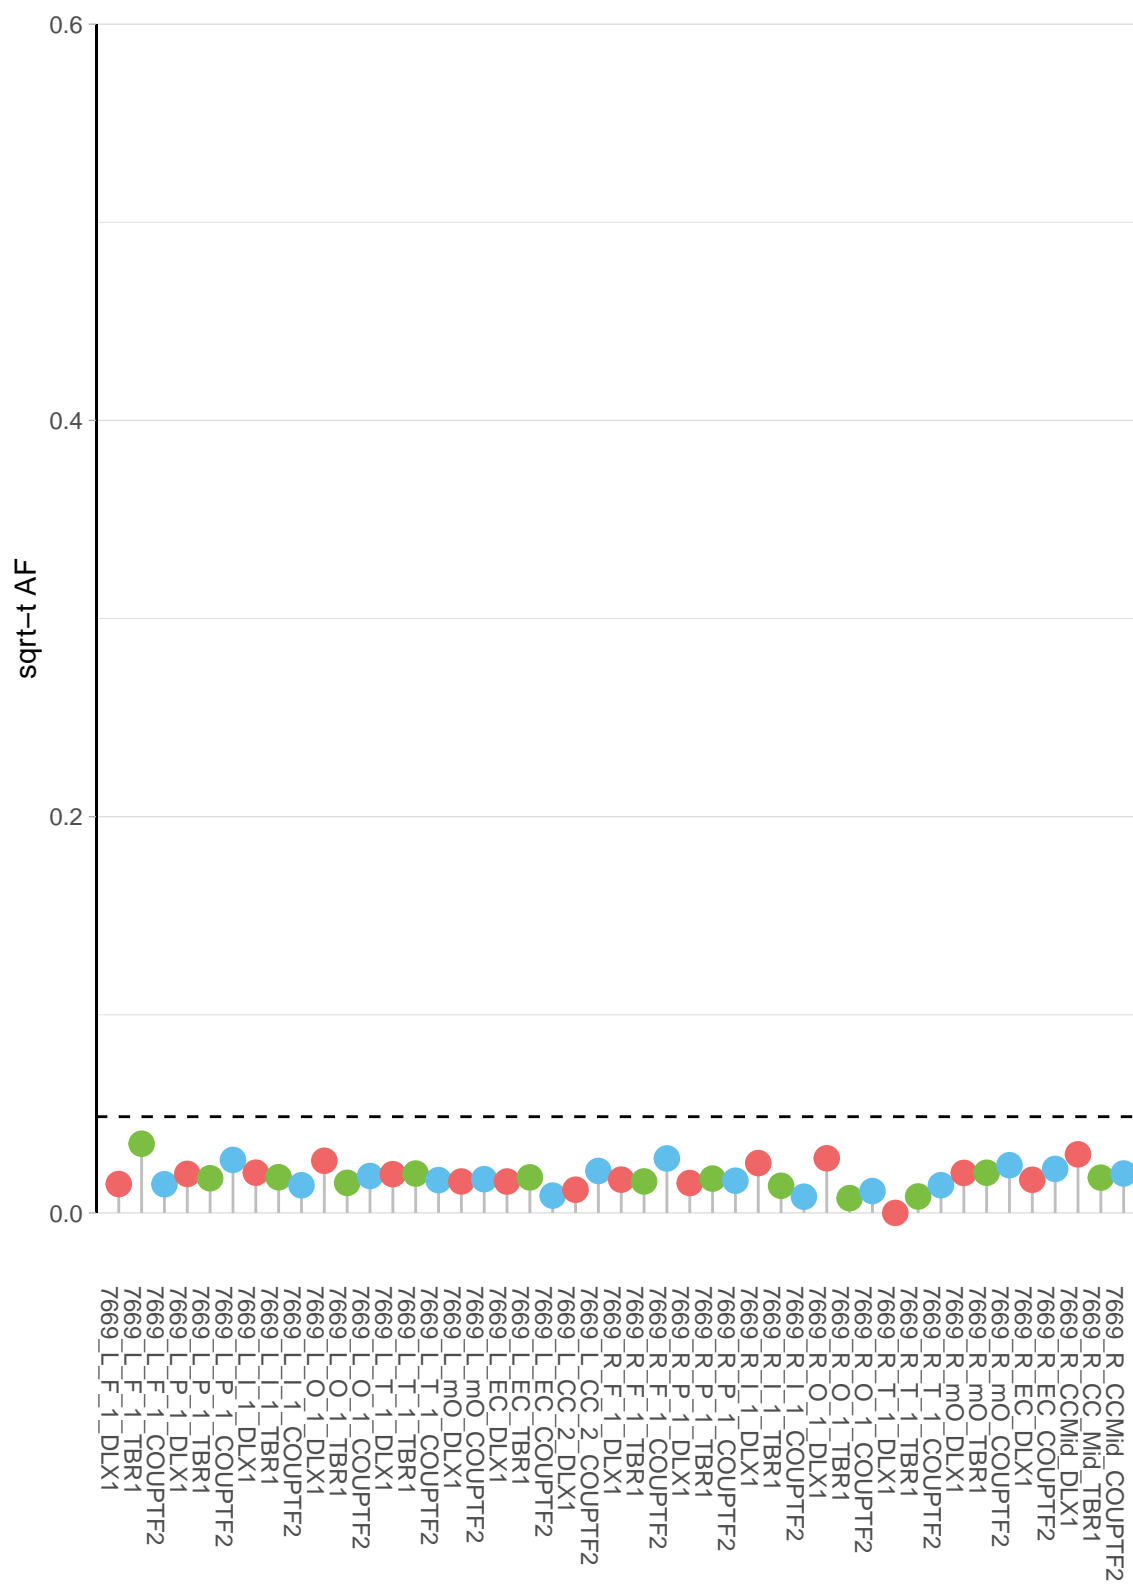

**b**

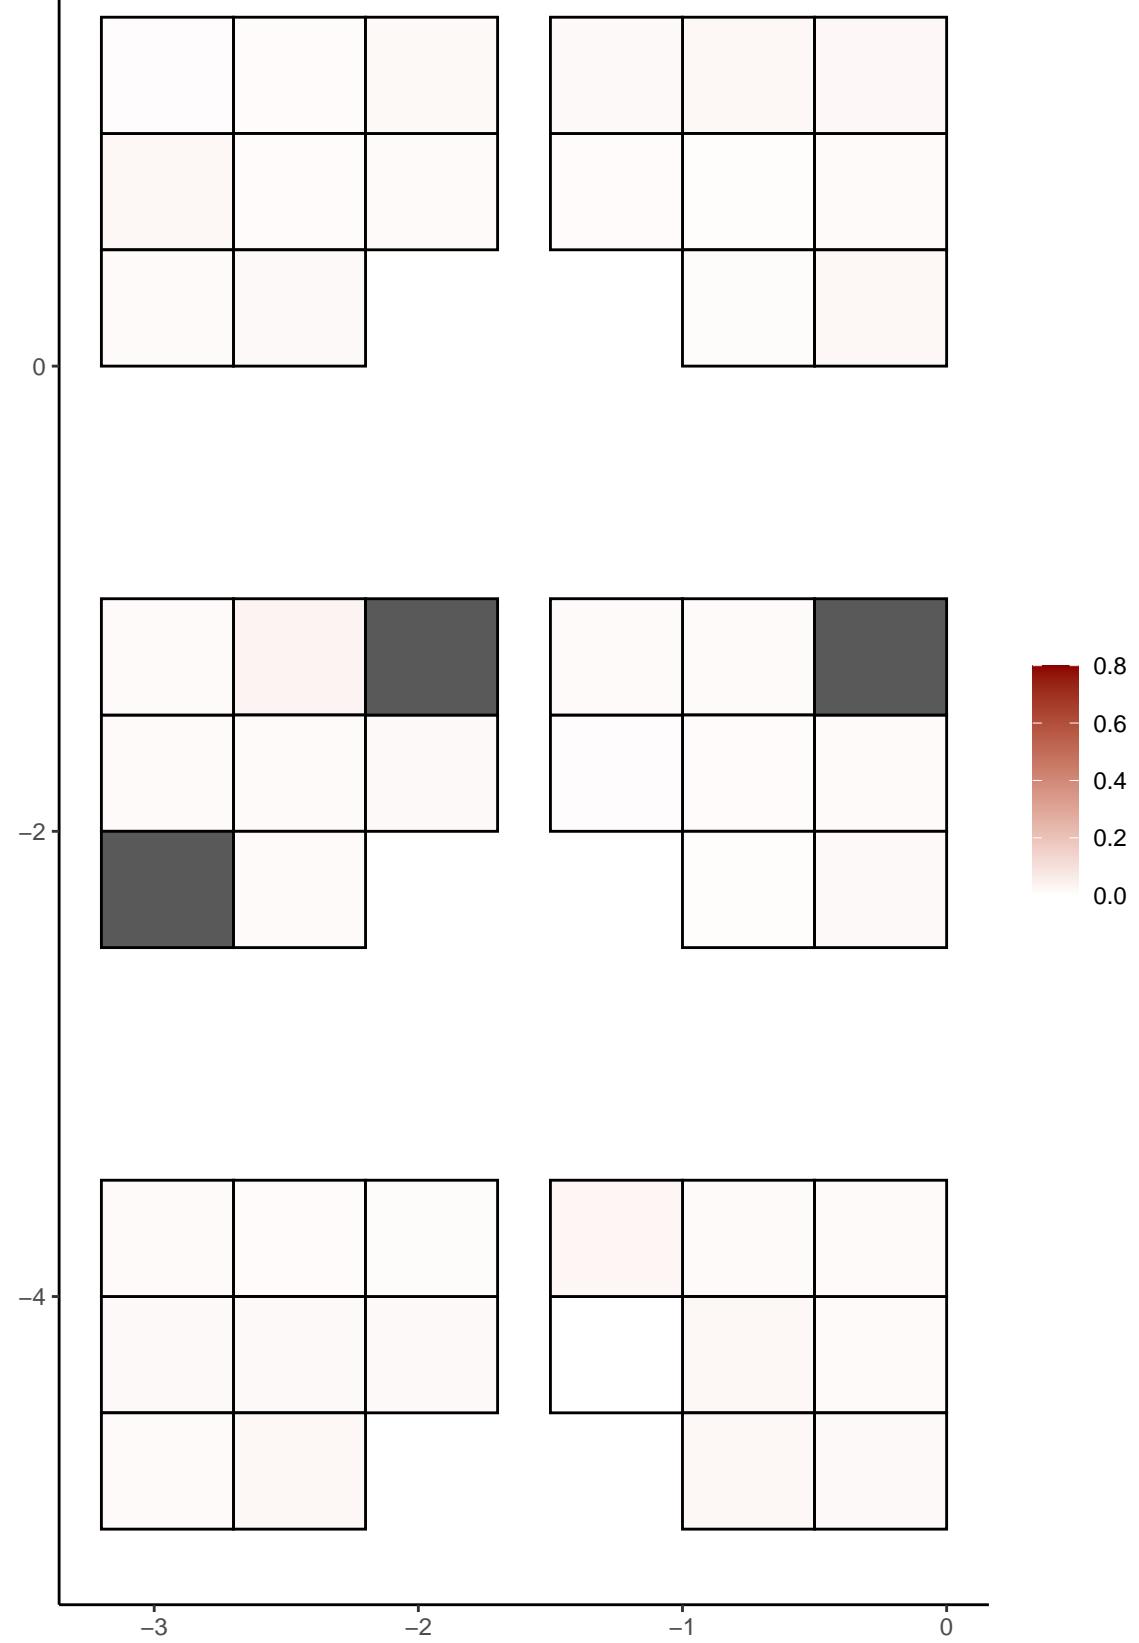

**a** ID05 20-38271172-C-T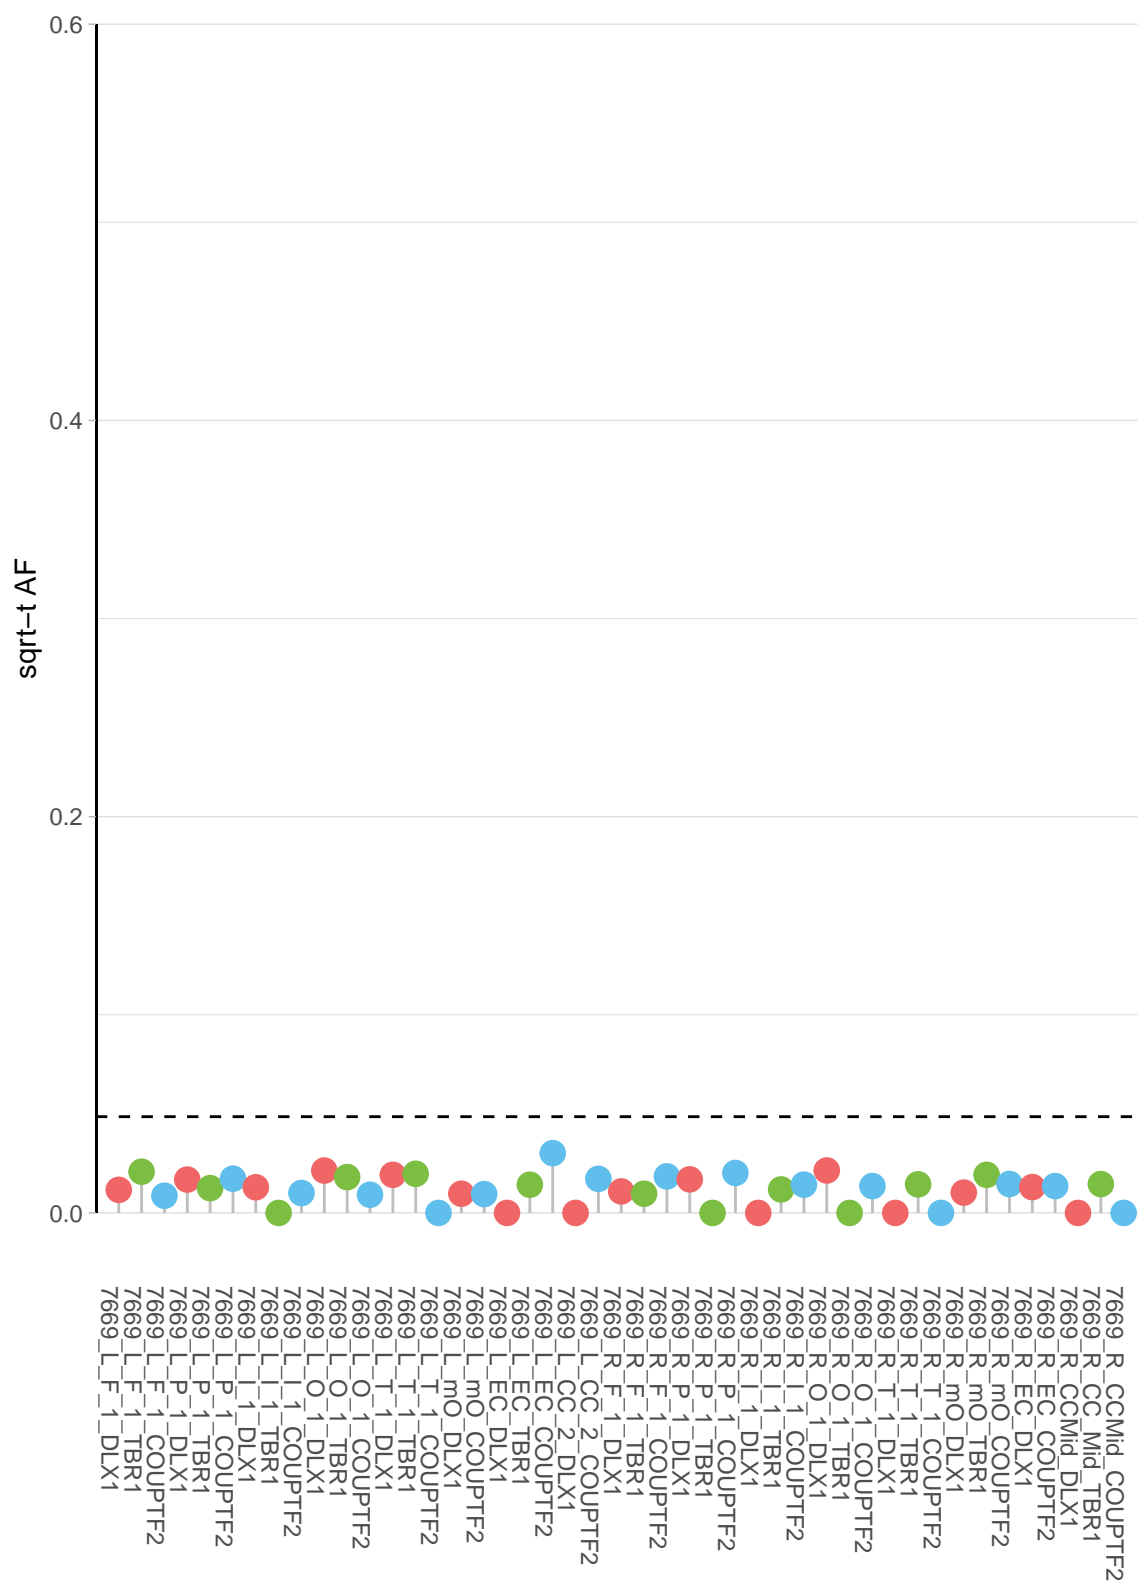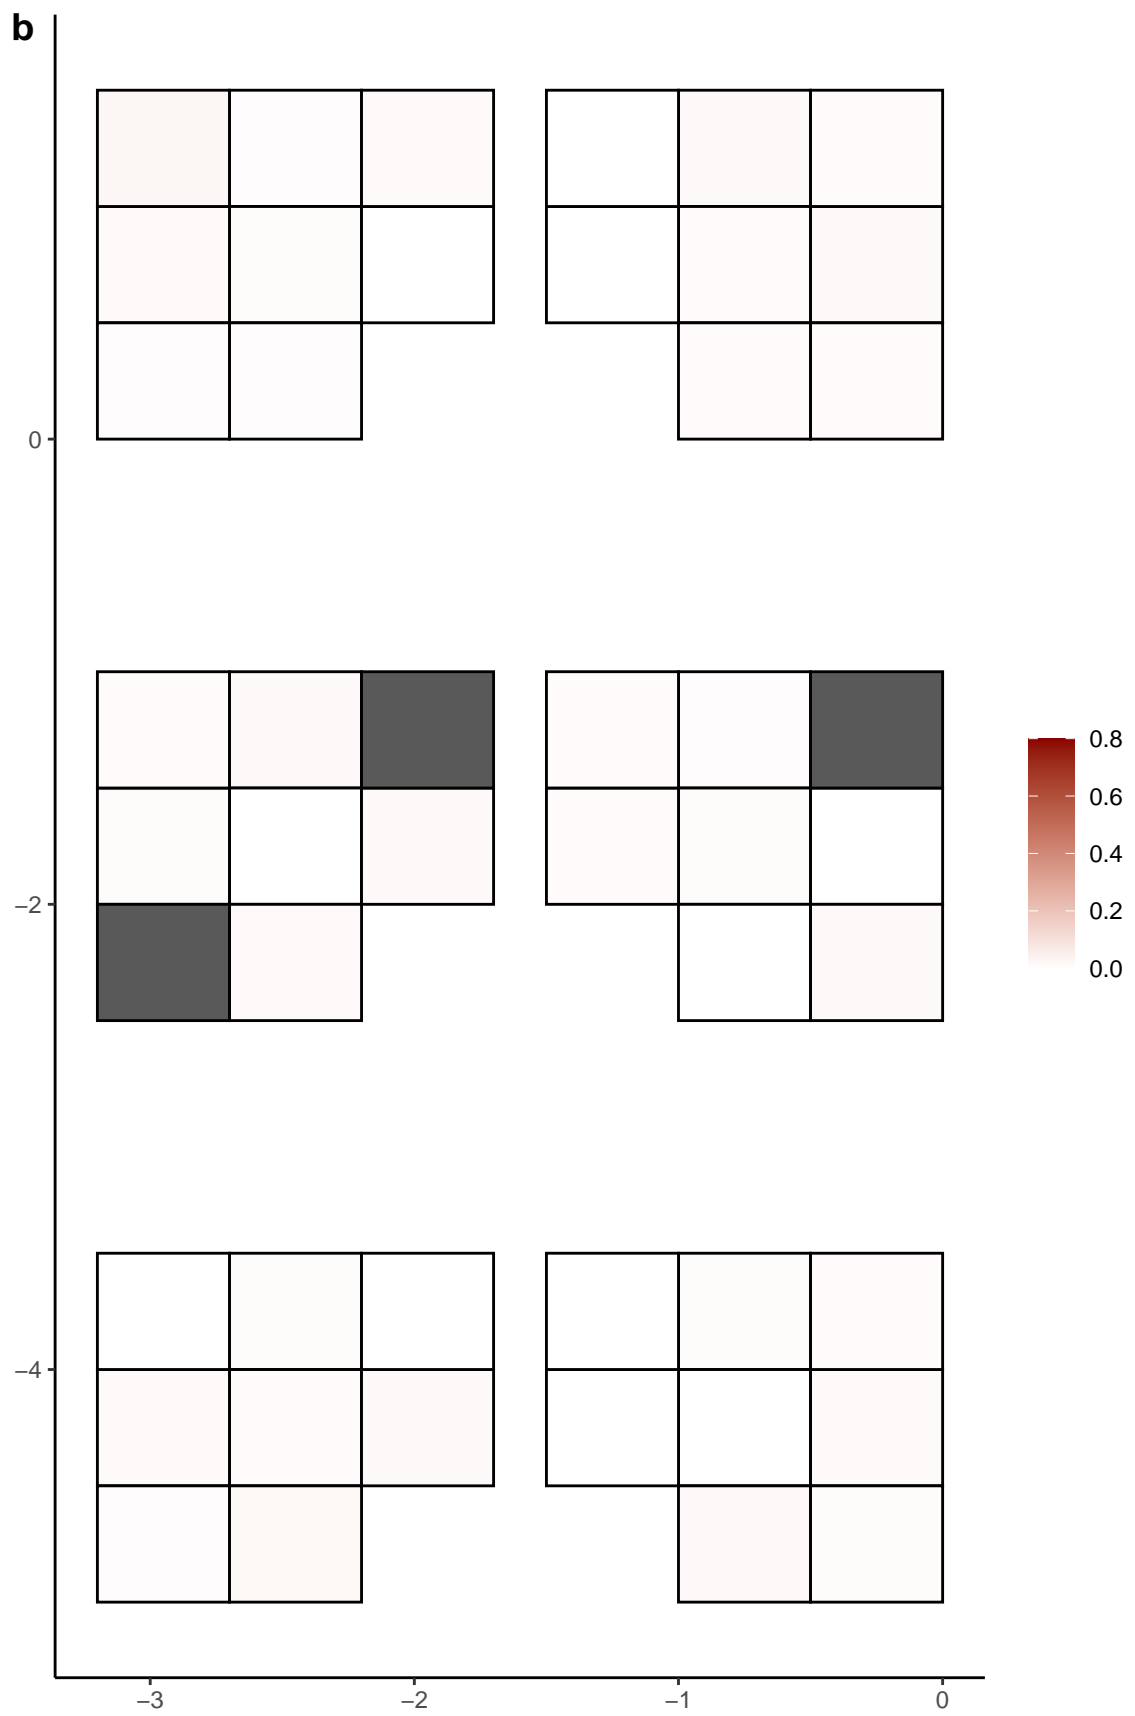

**a** ID05 20-39222576-G-T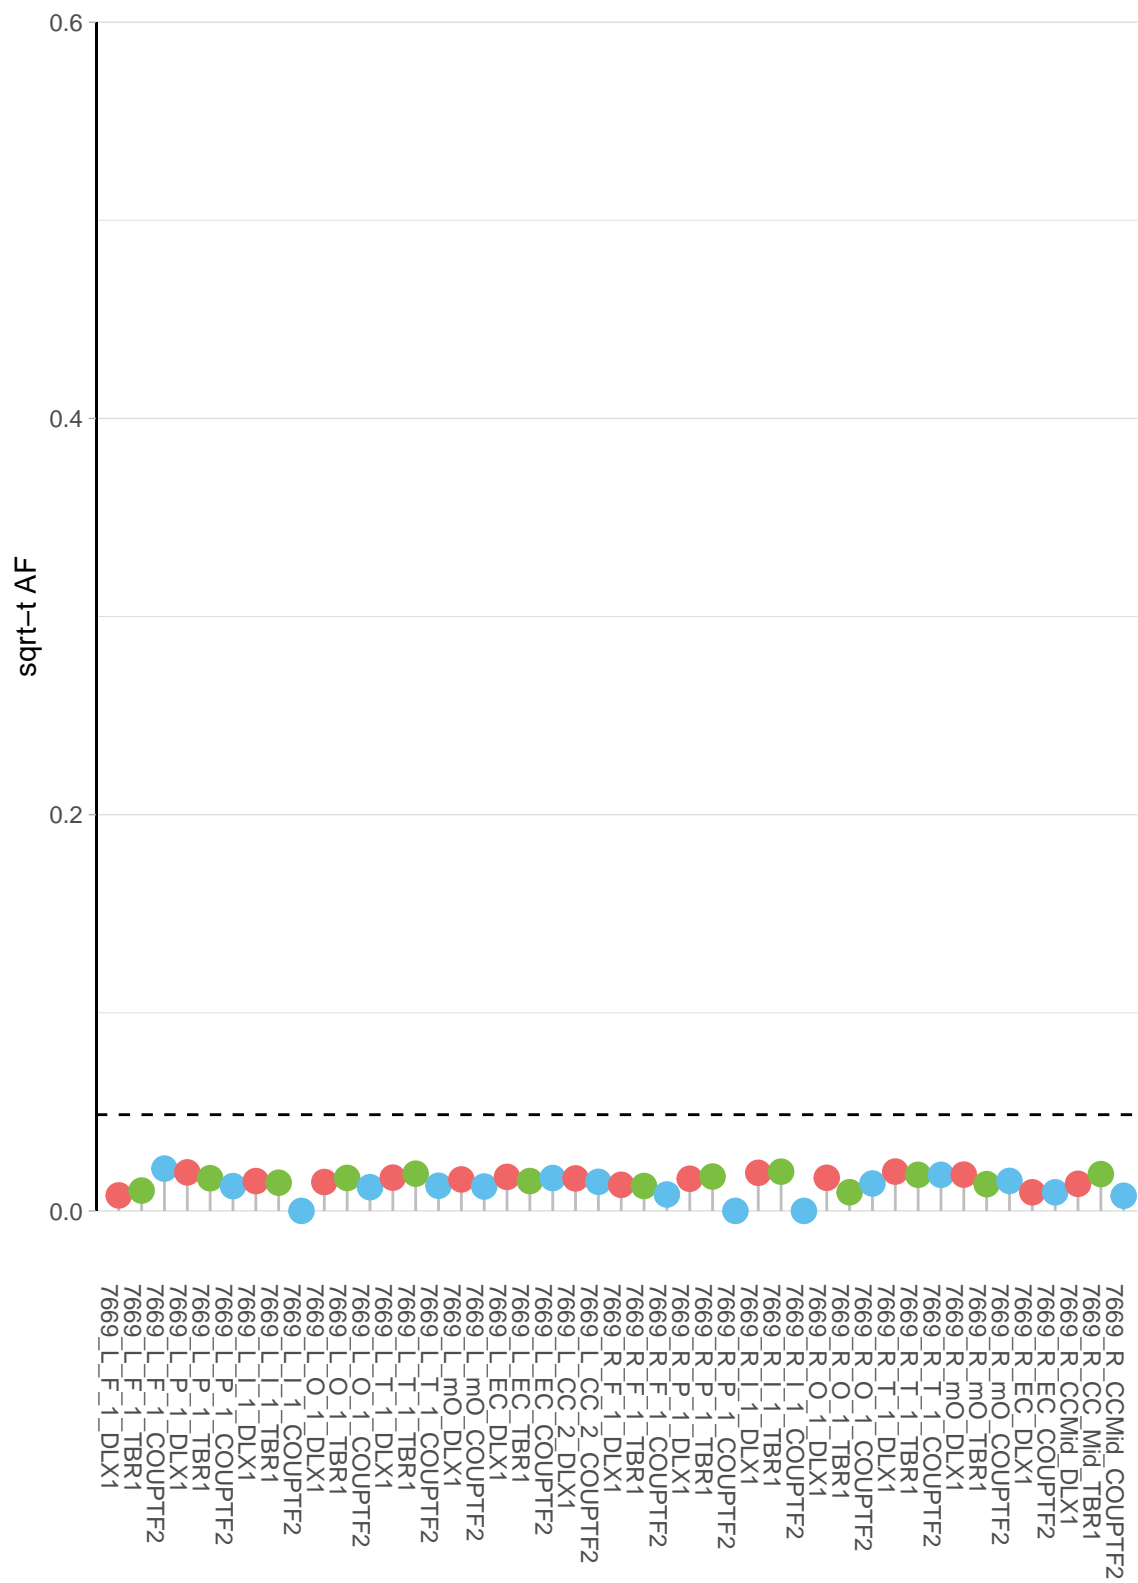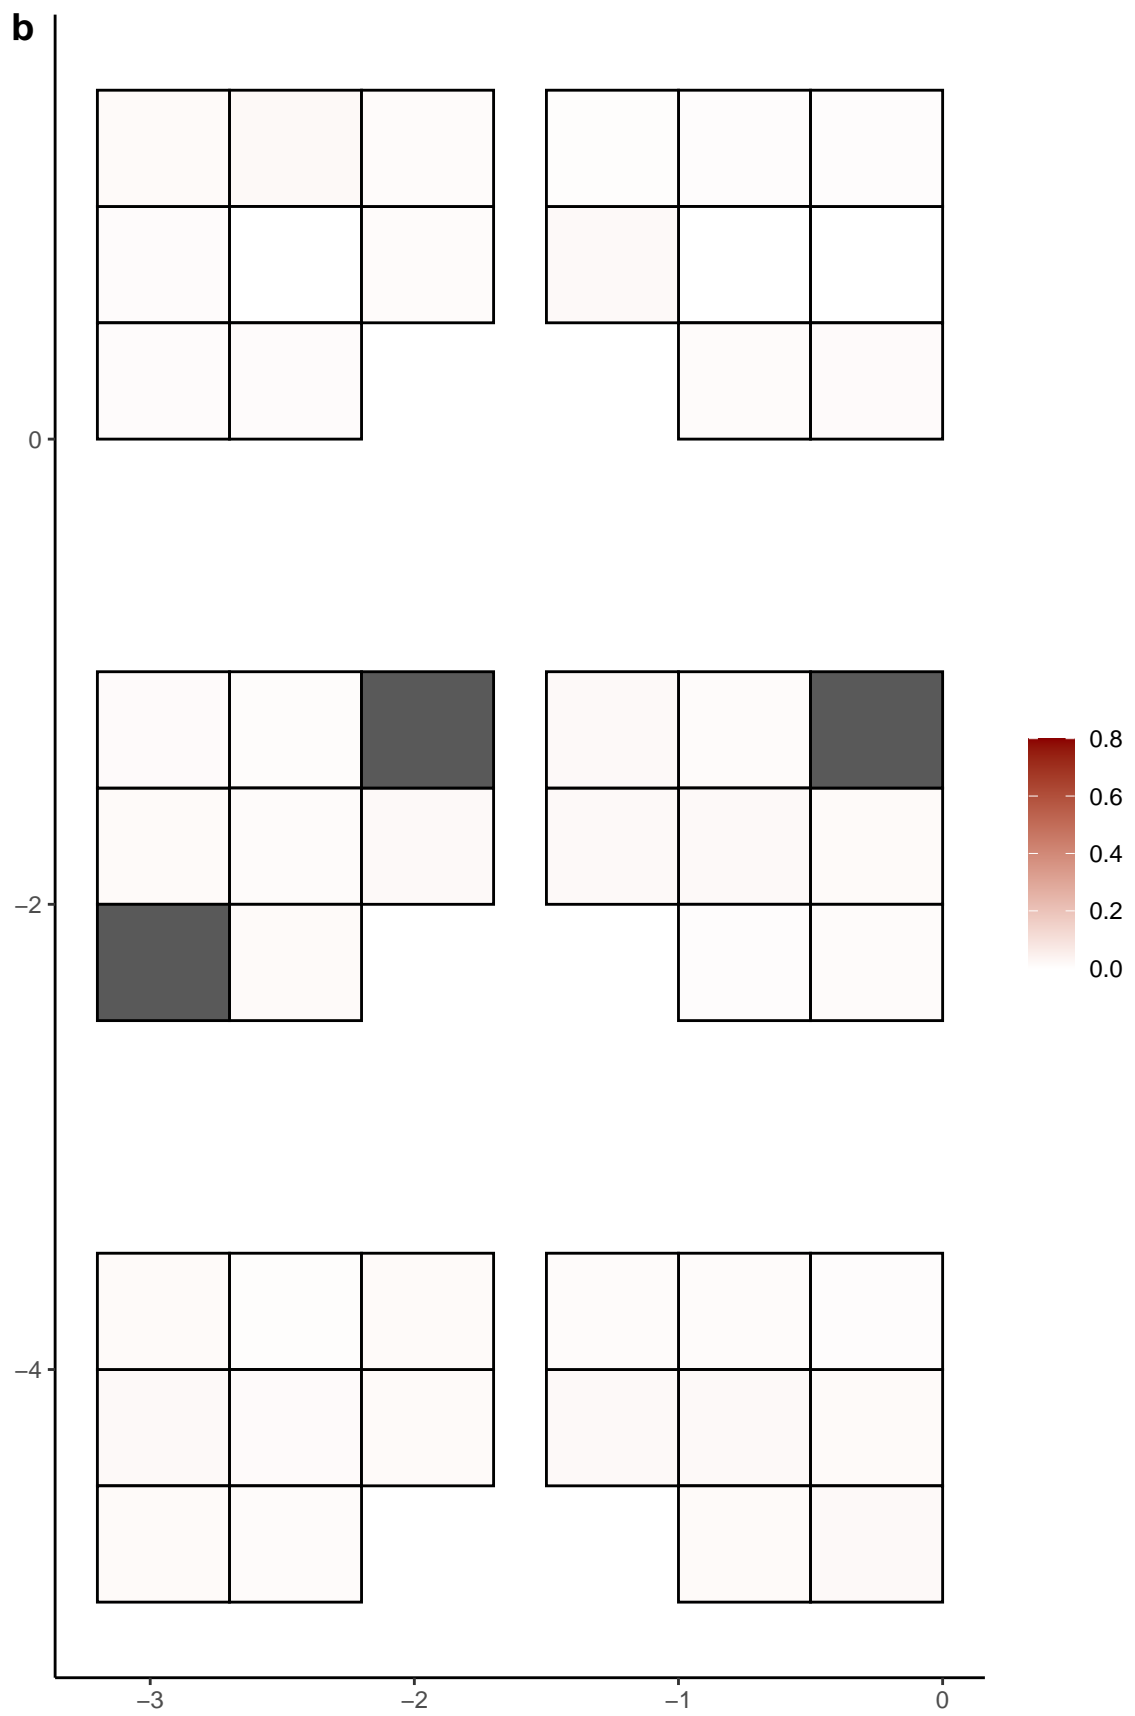



**a** ID05 20-41427297-T-C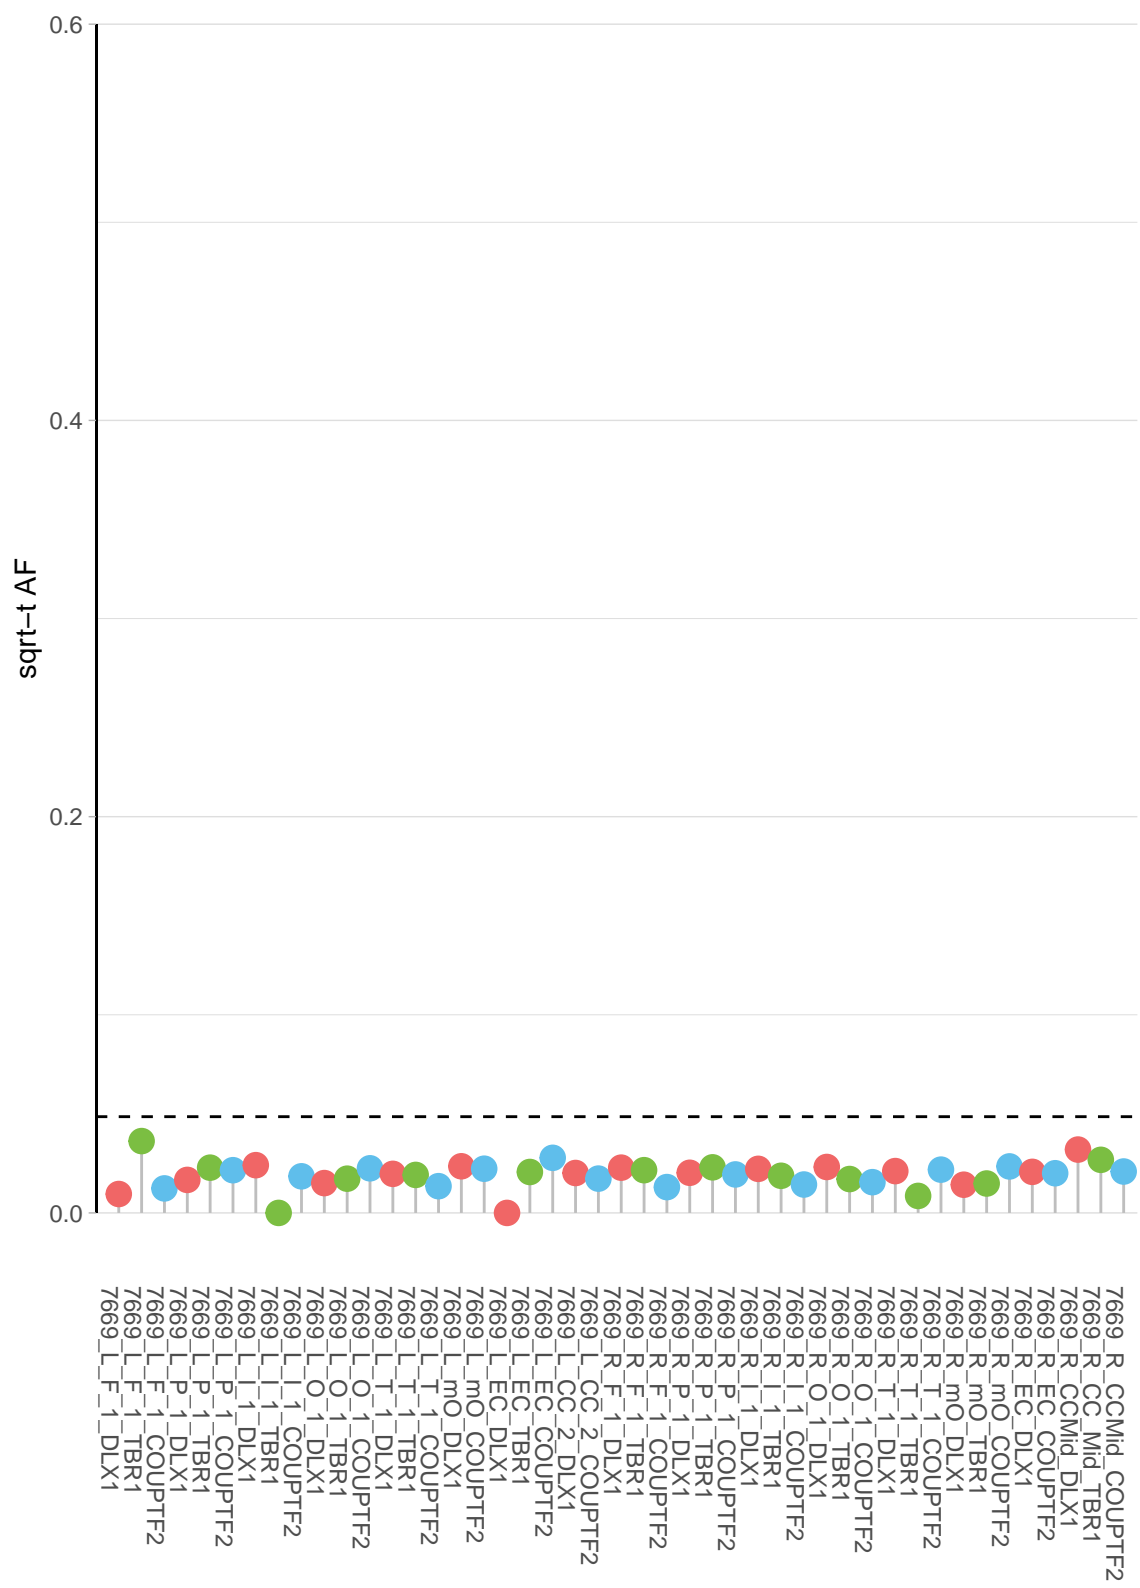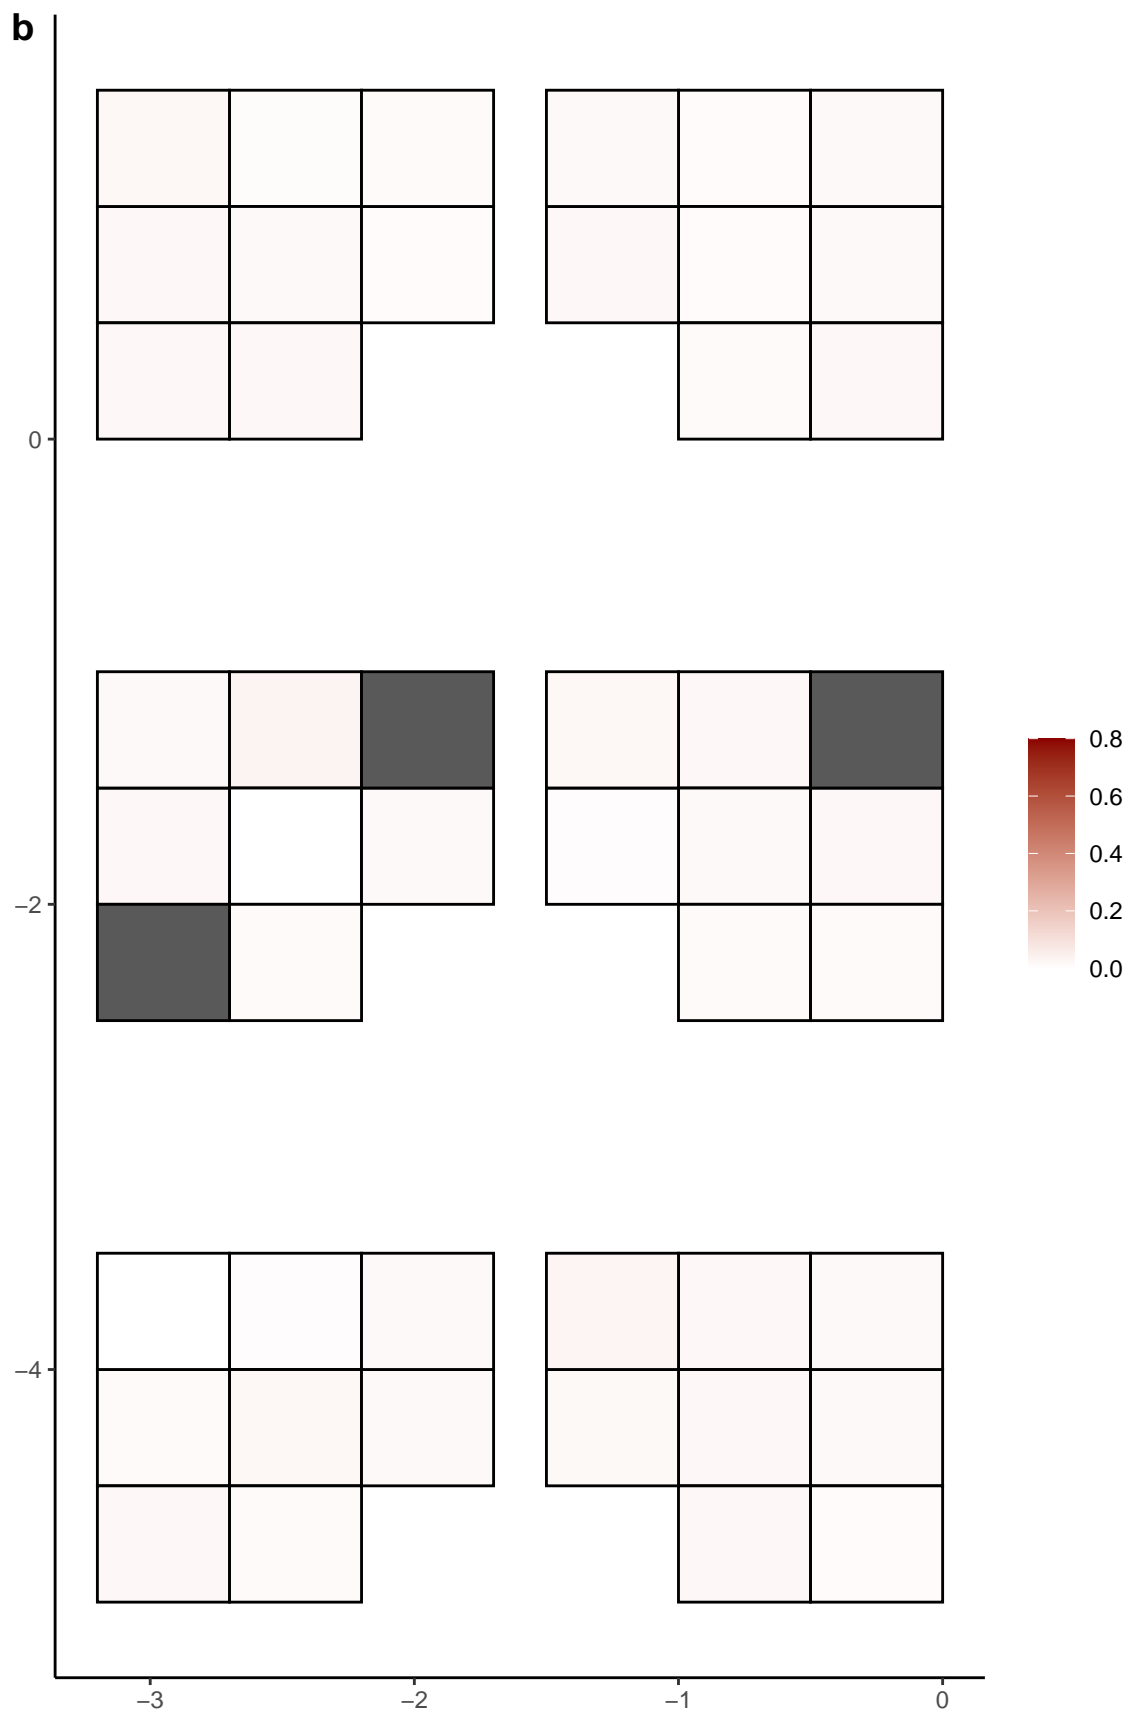

**a** ID05 20-52196787-G-A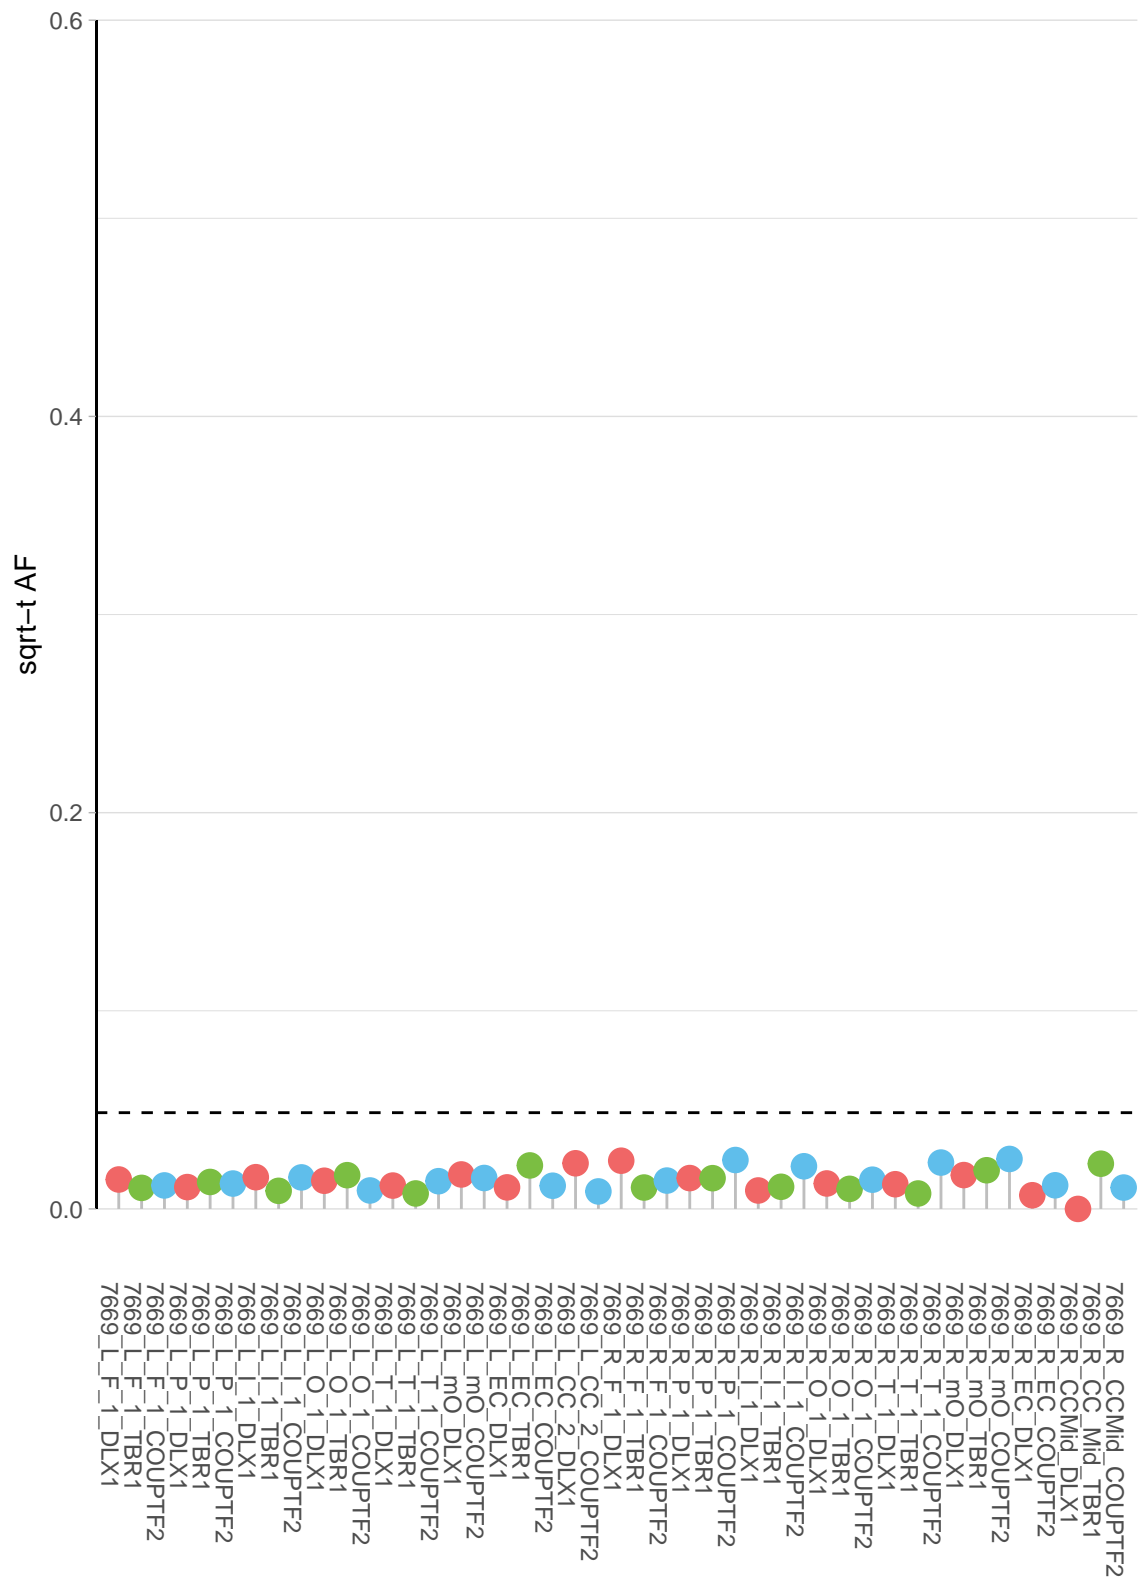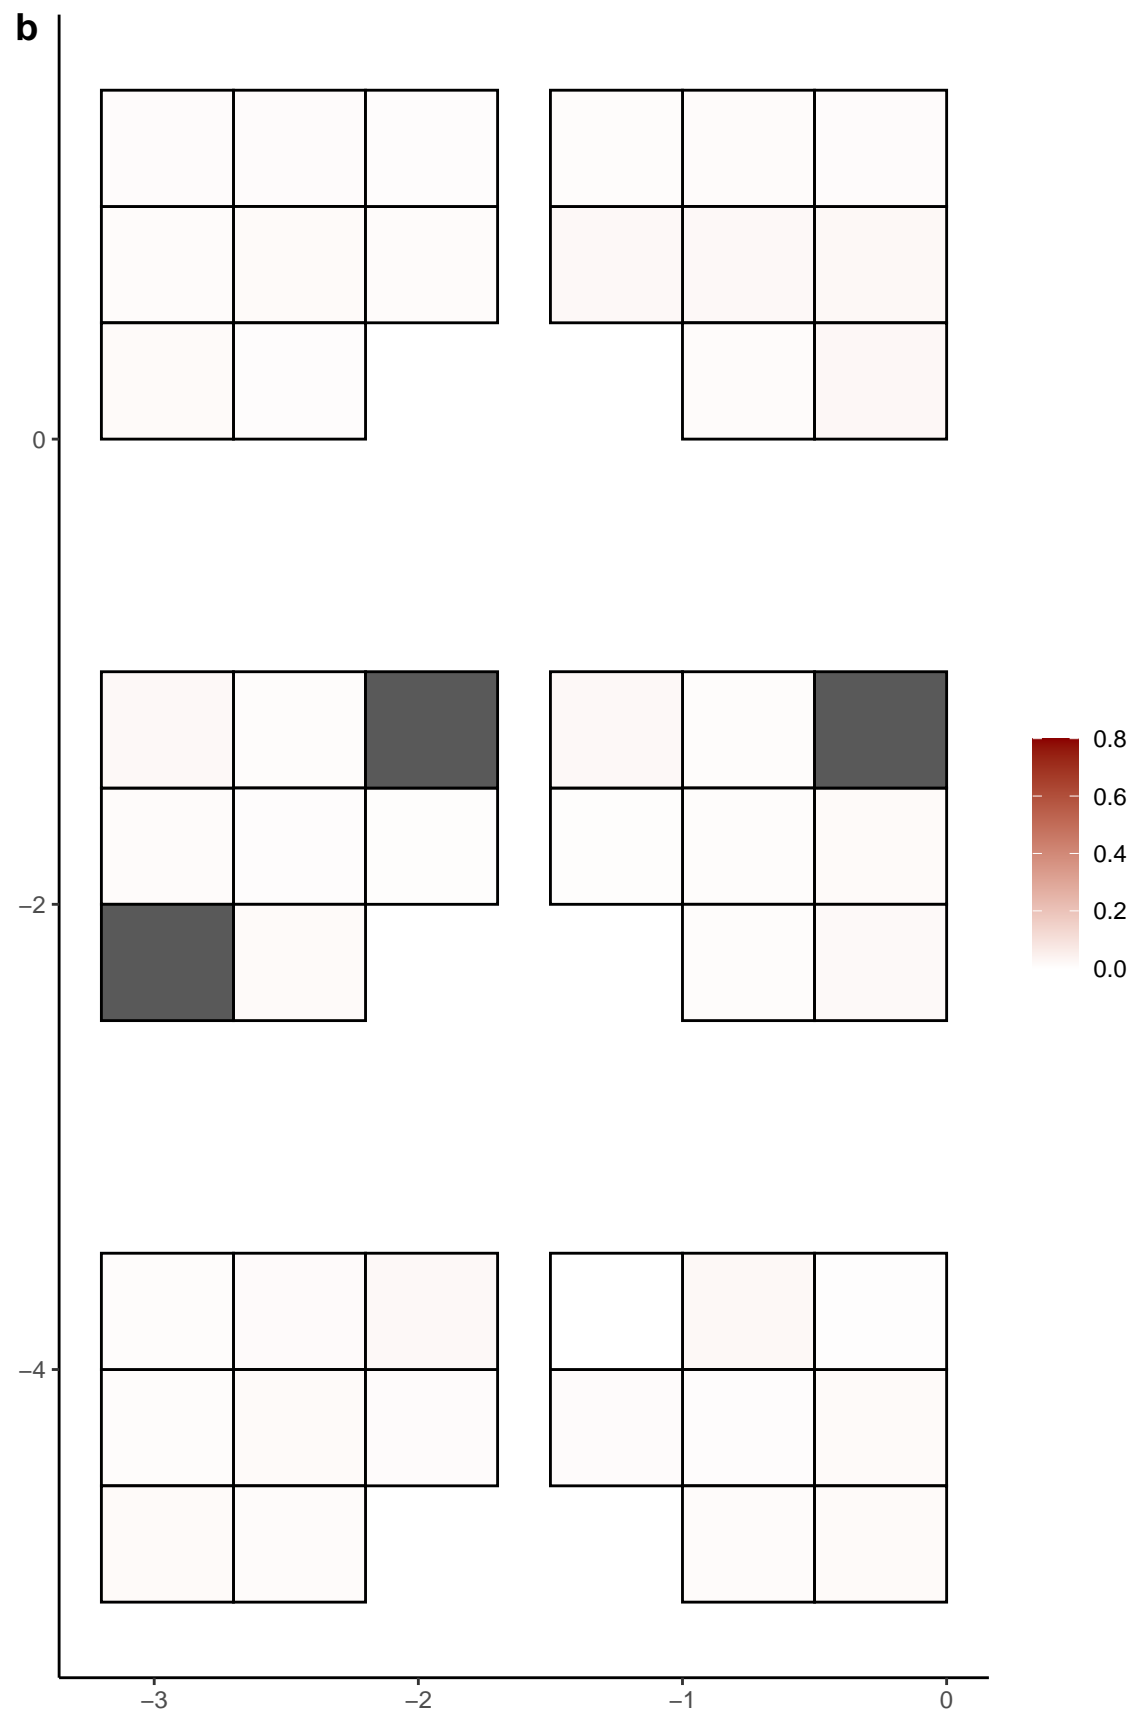

**a** ID05 20-5456475-C-T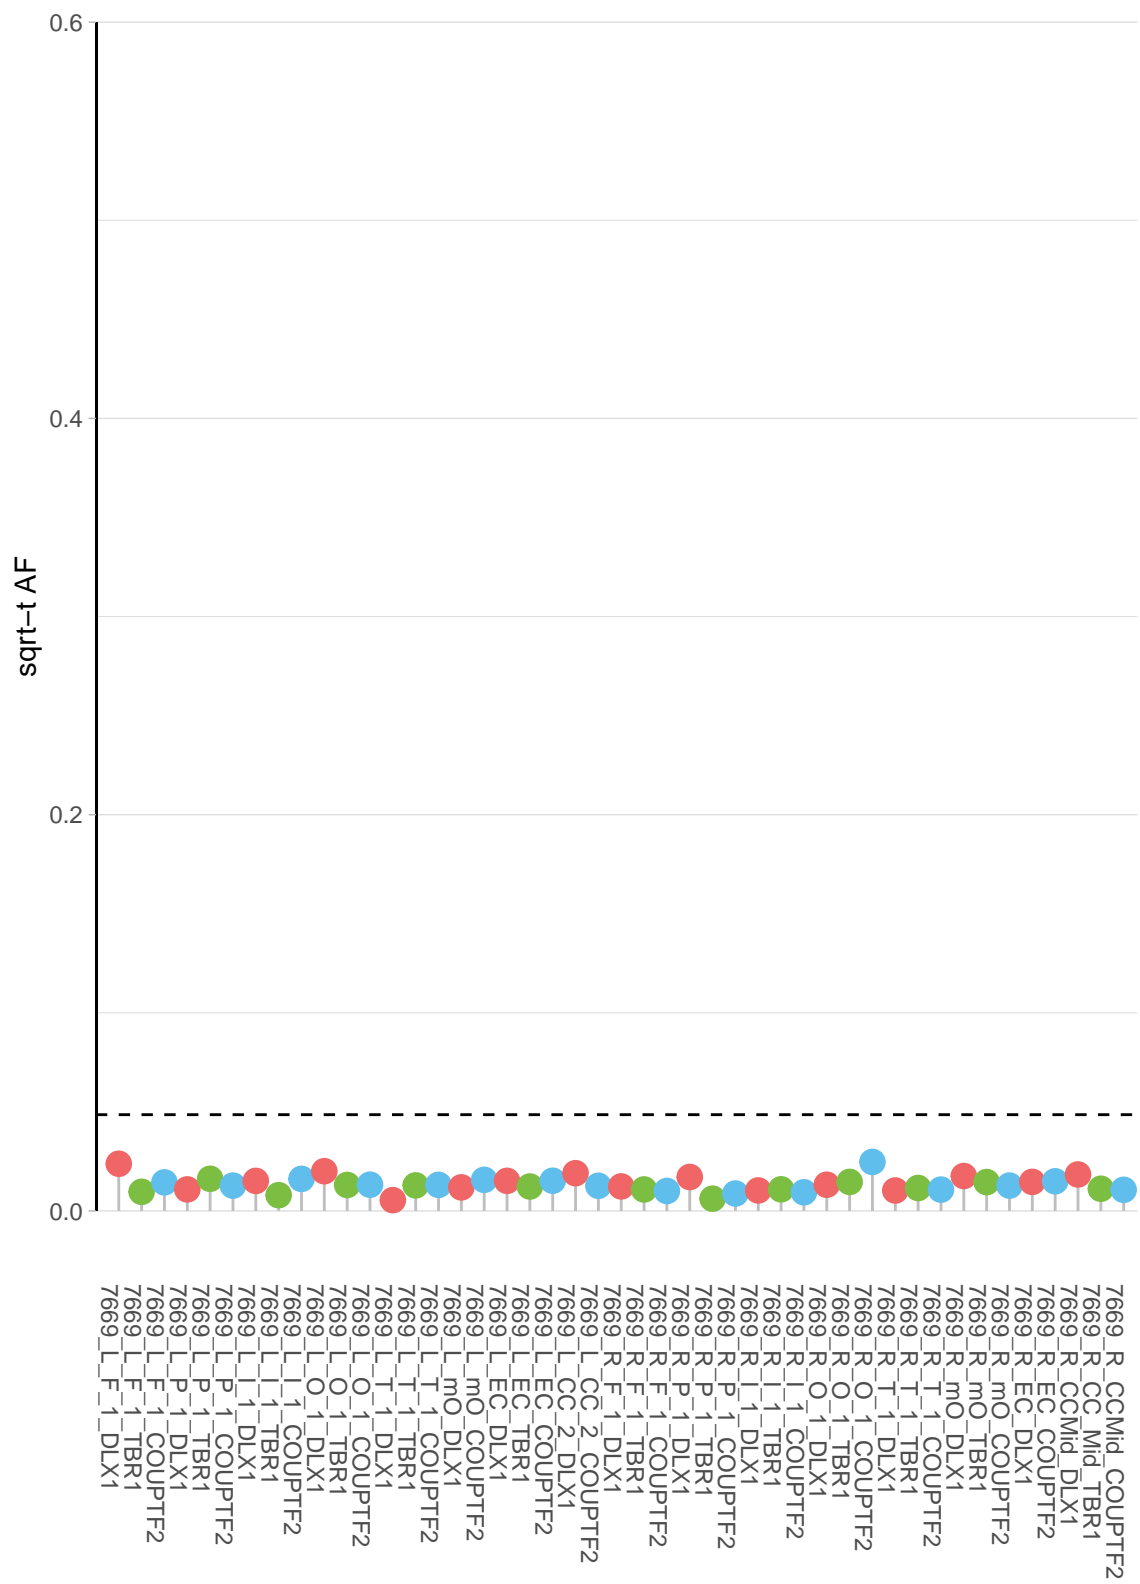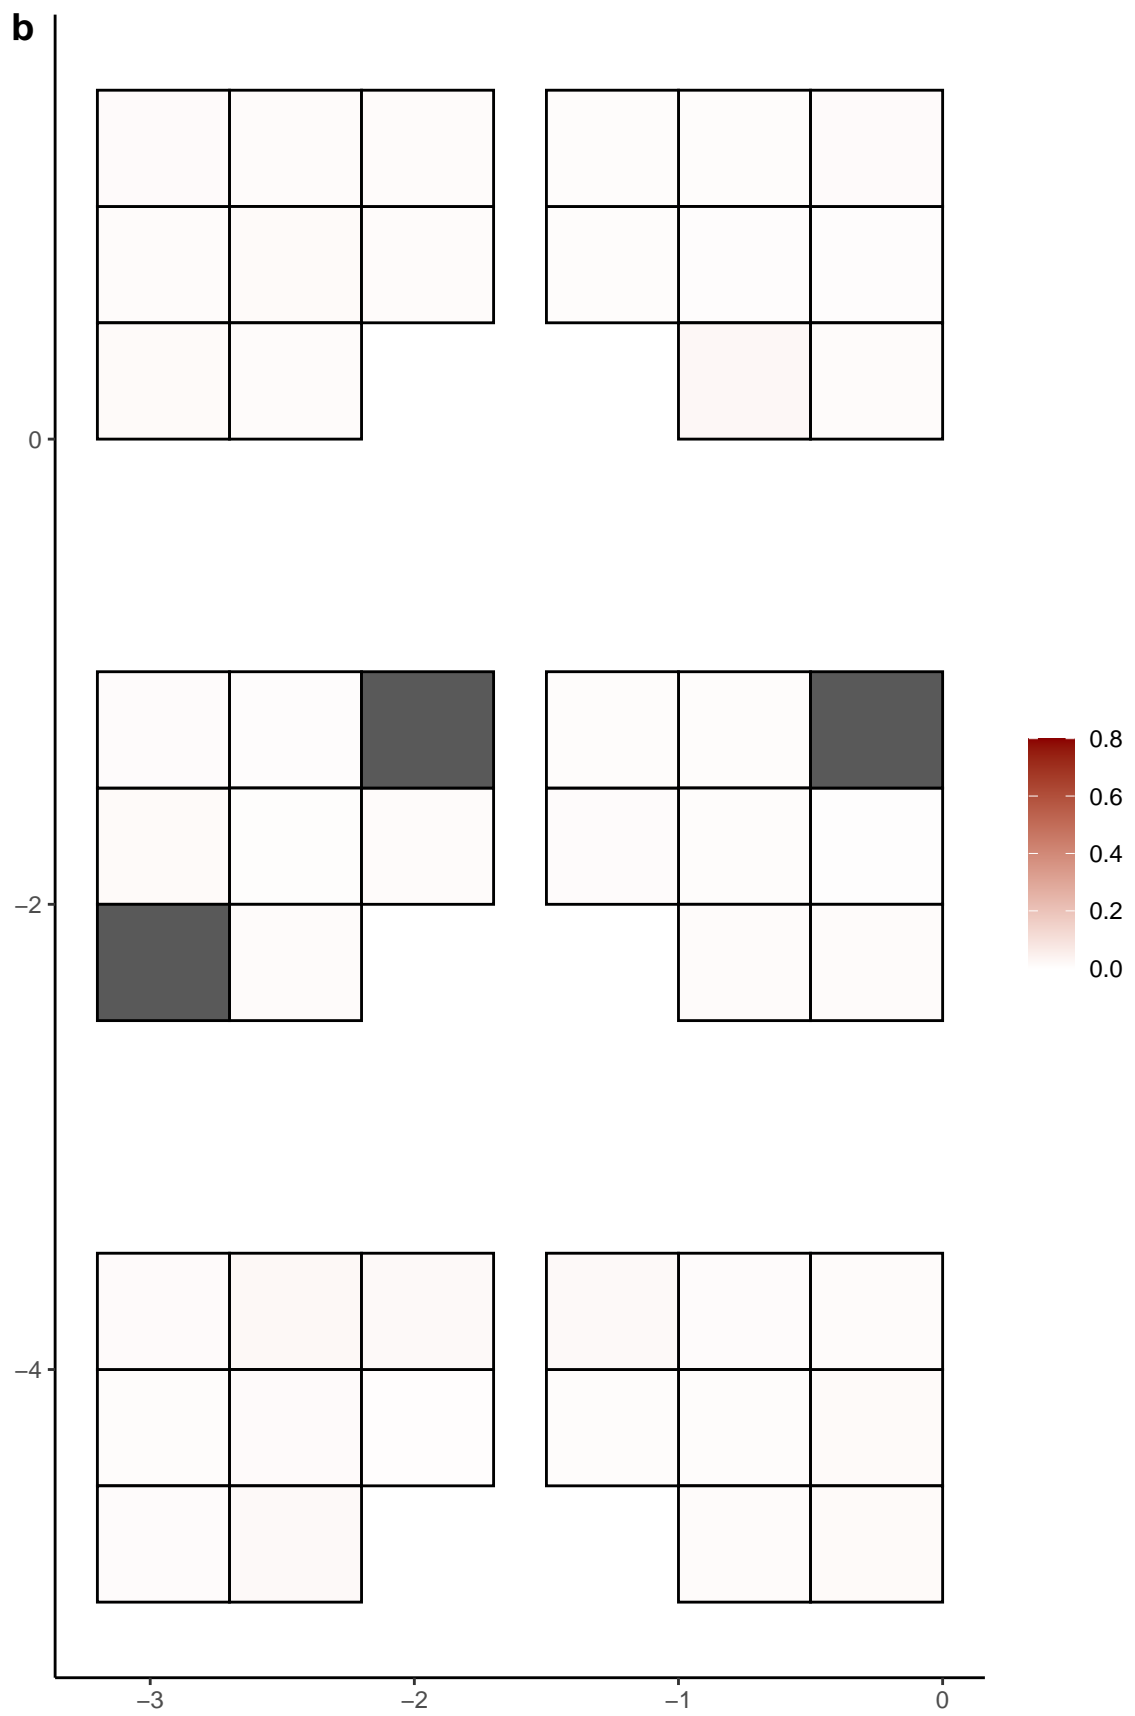





**a** ID05 20-61014143-G-A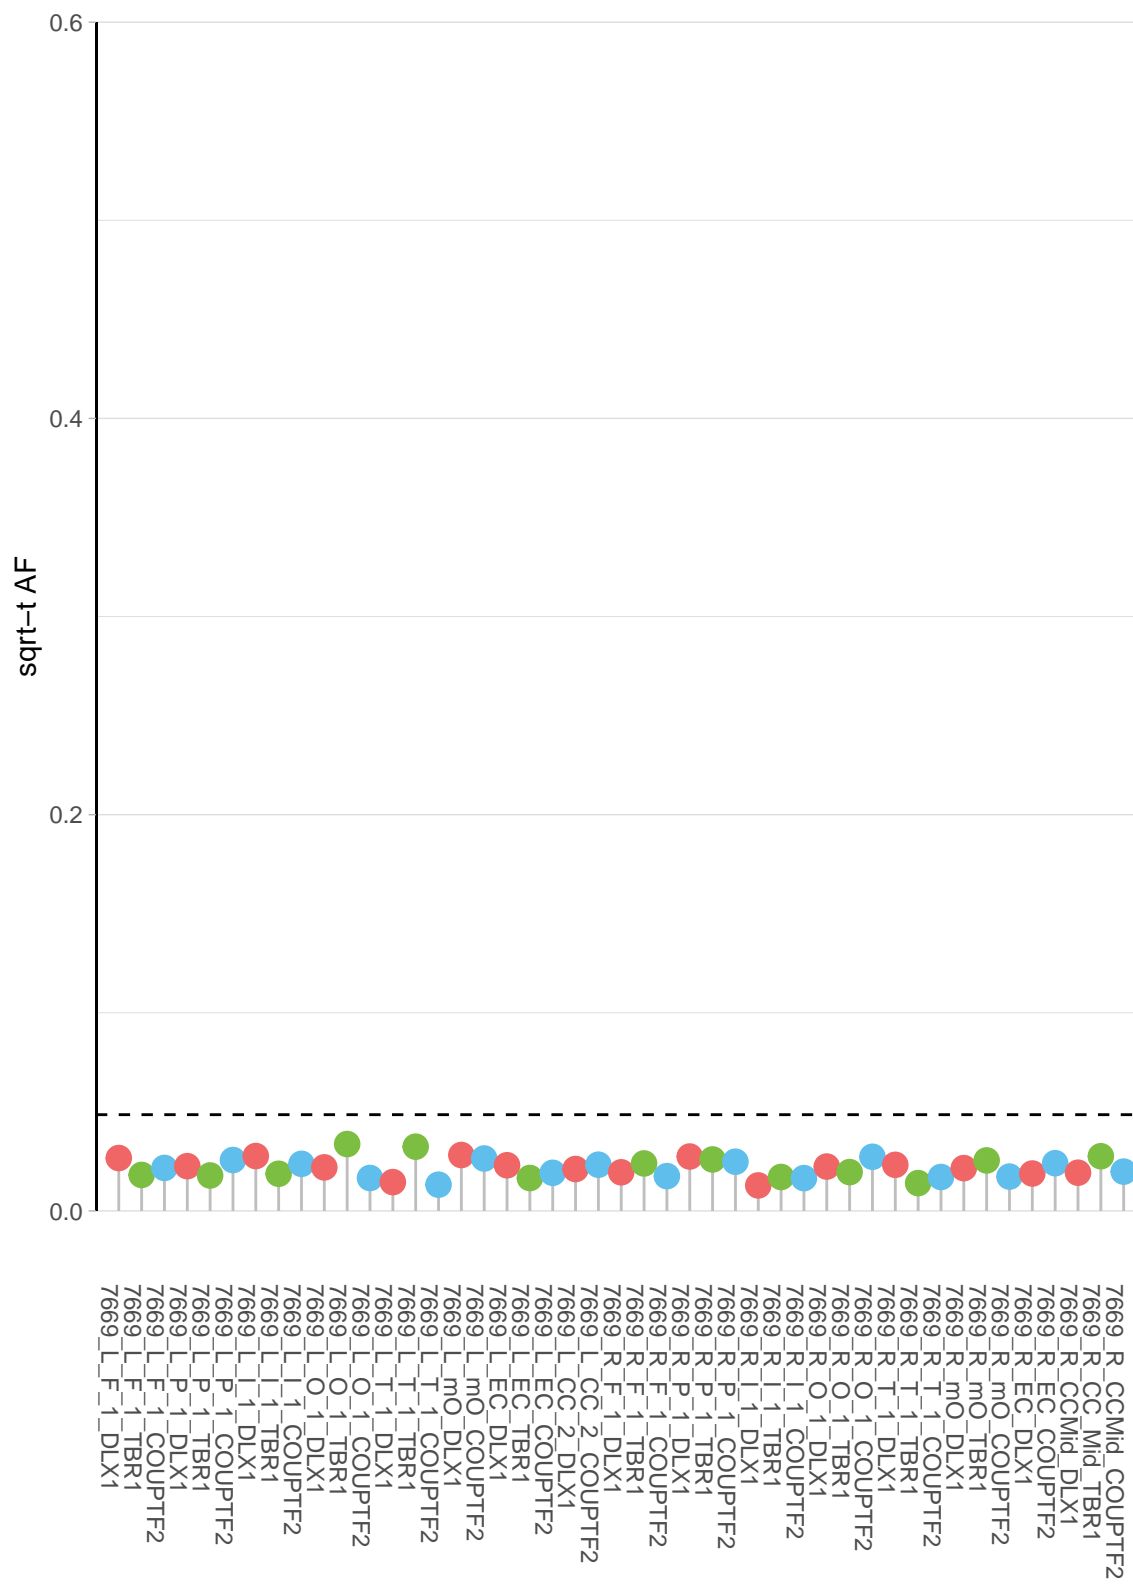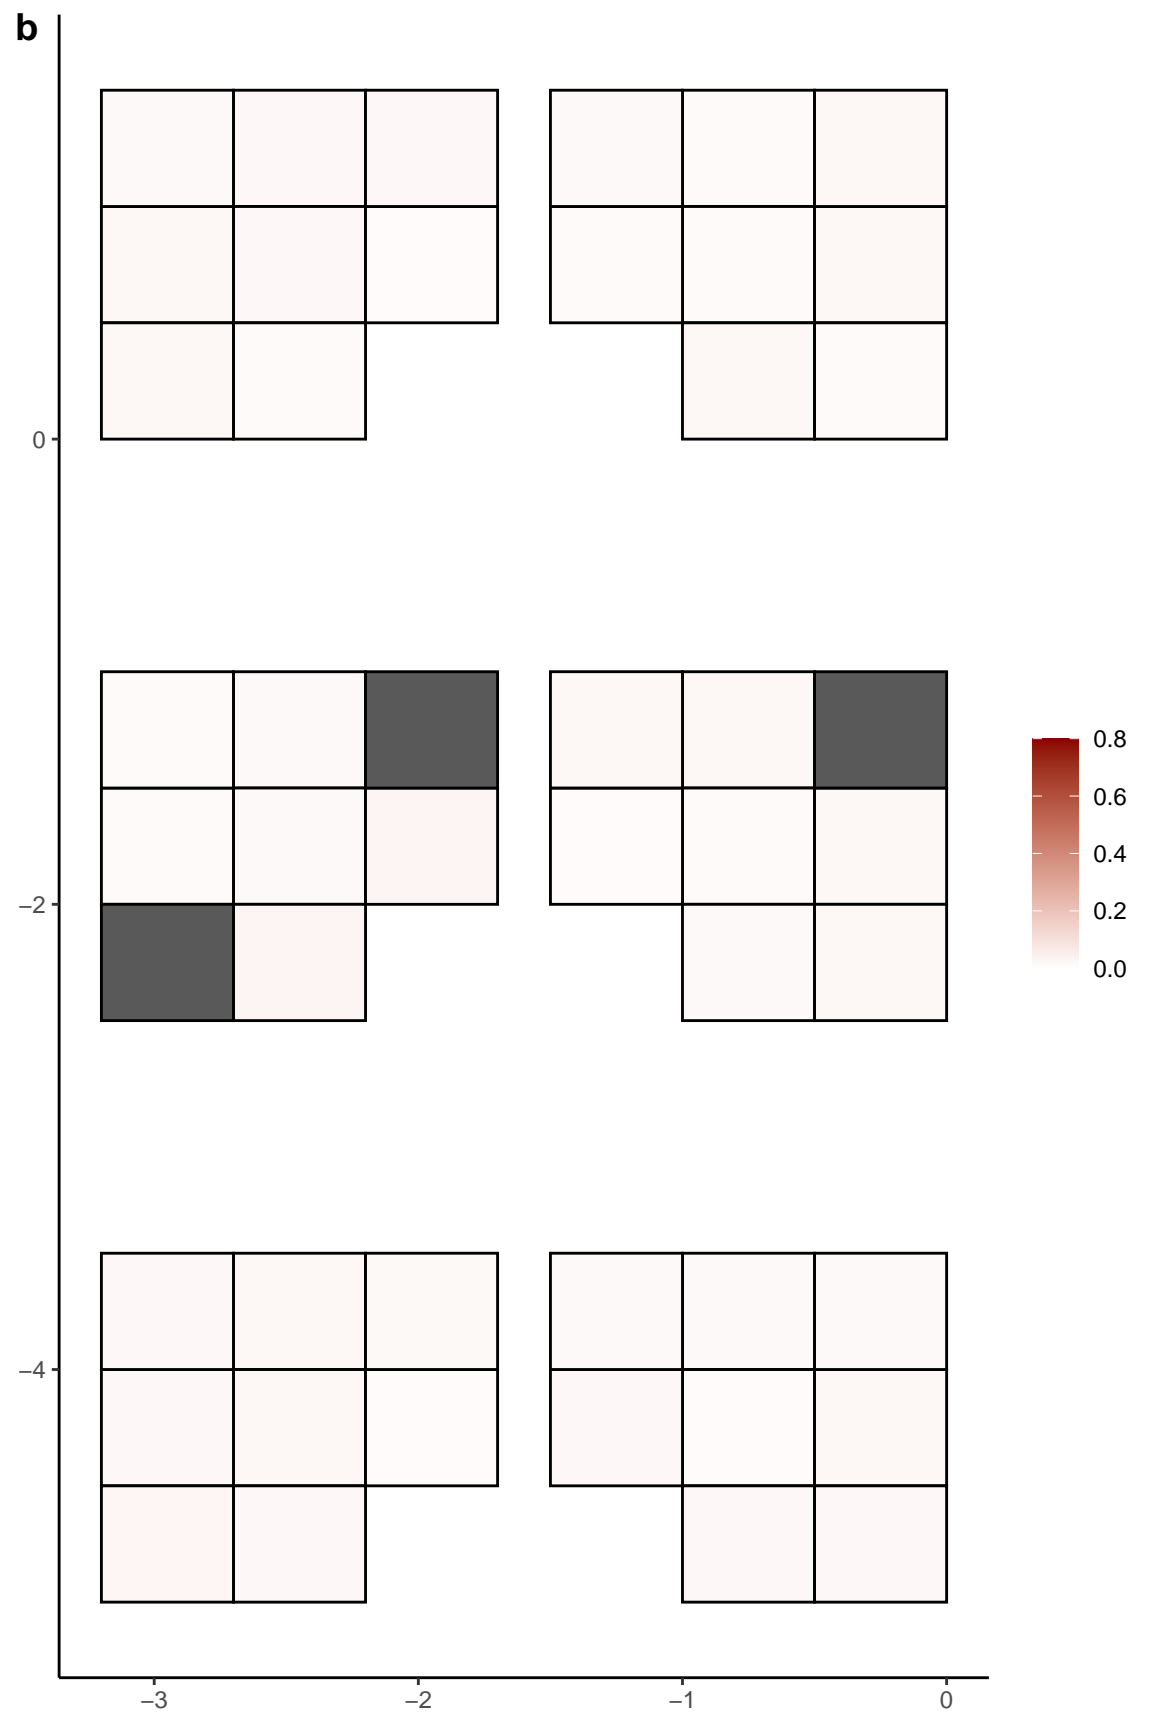





**a** ID05 21-21779235-G-T

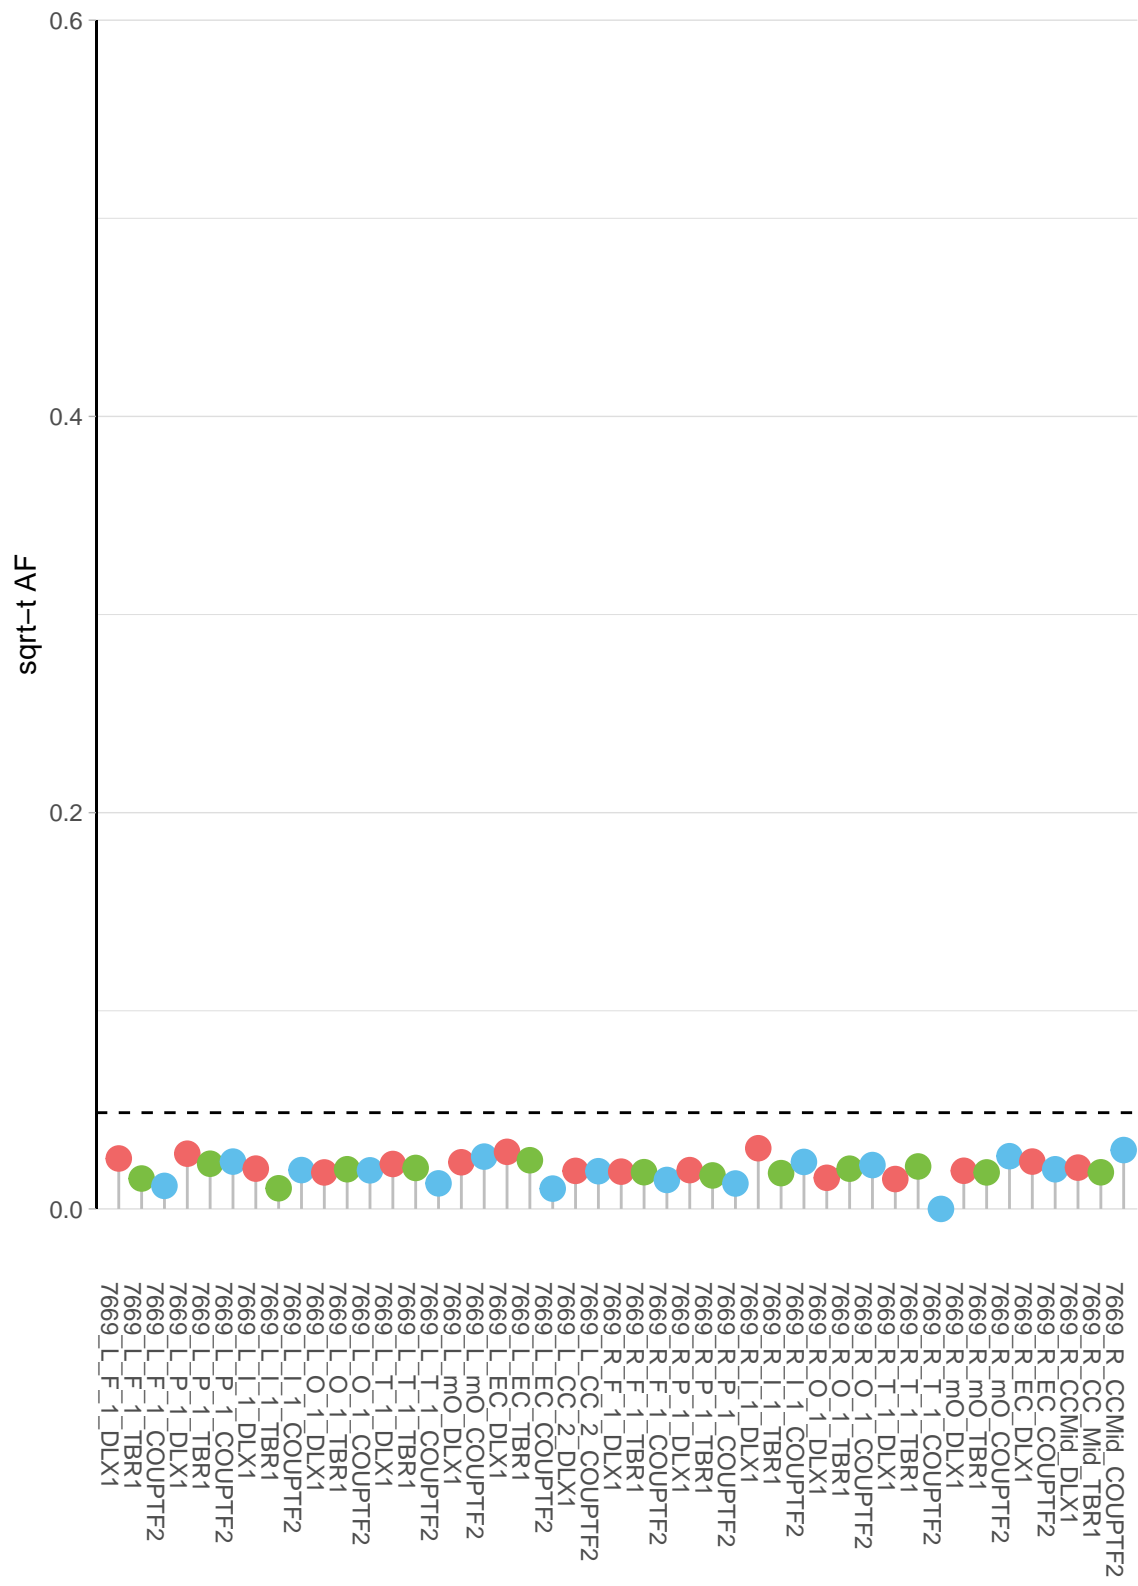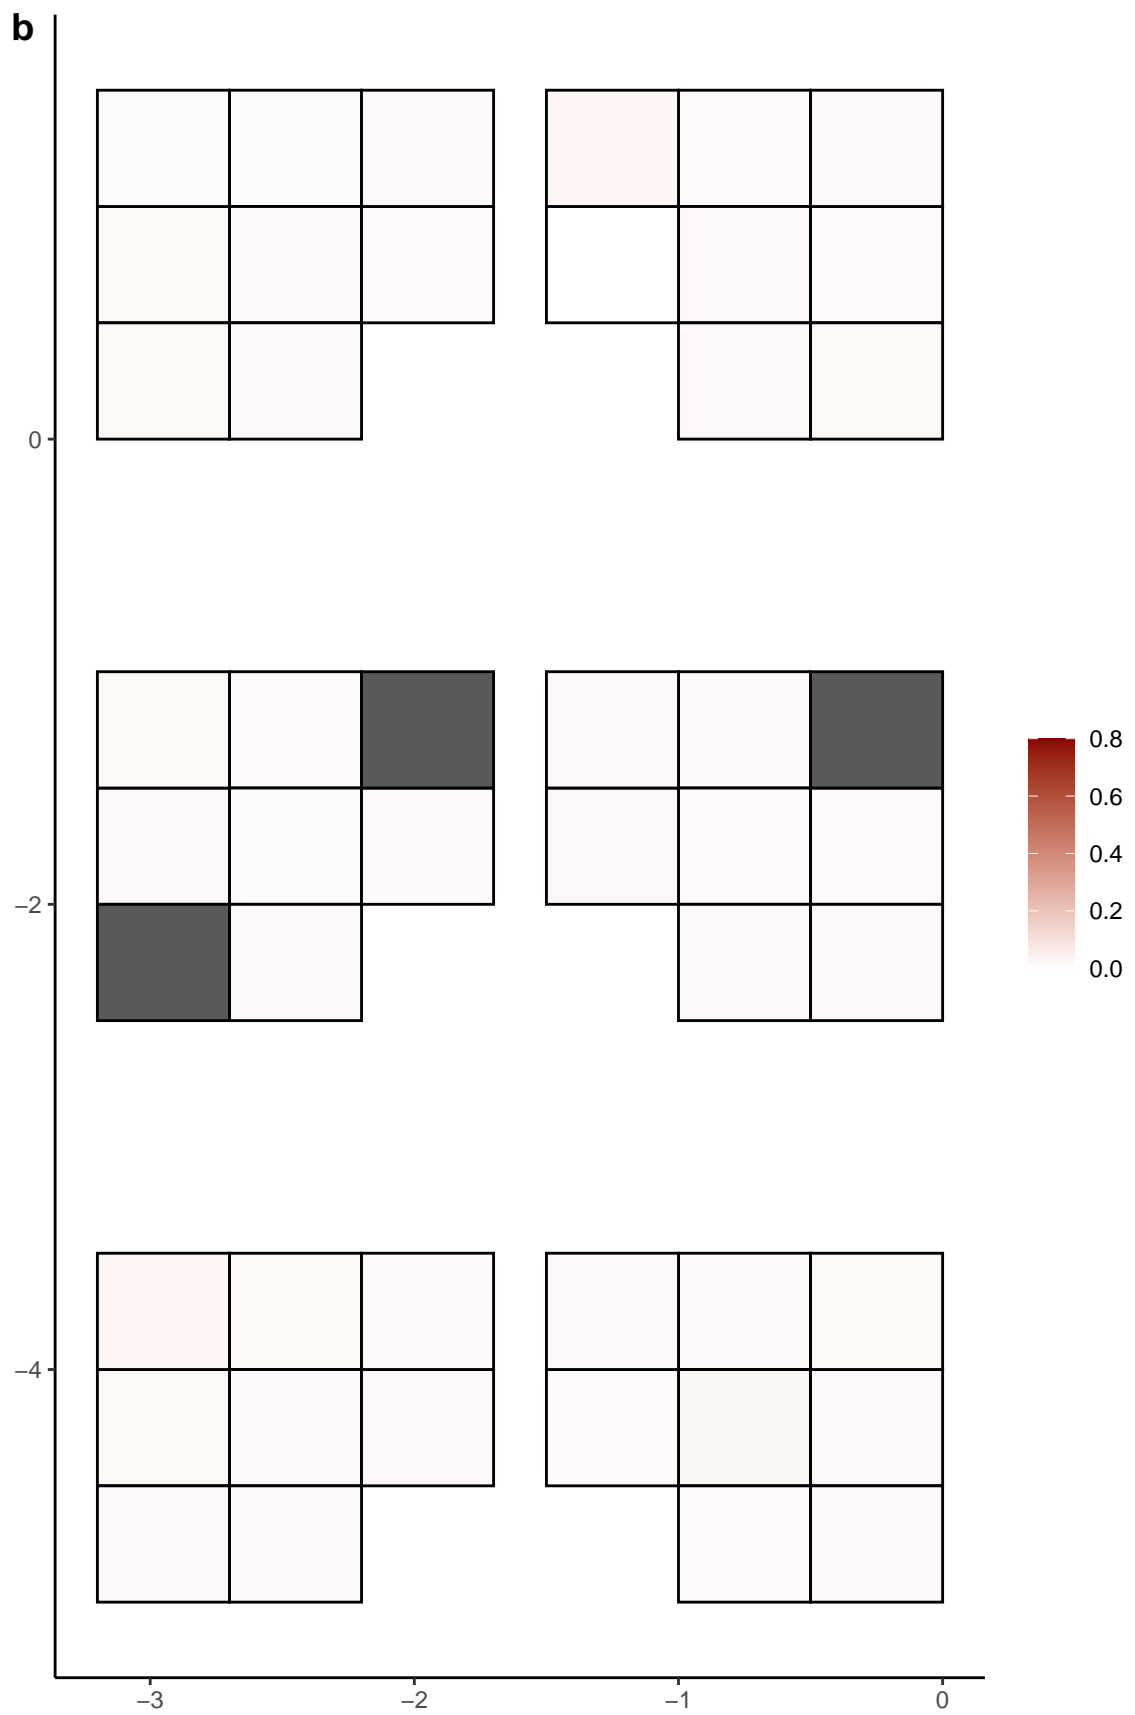



**a** ID05 21-28769343-G-A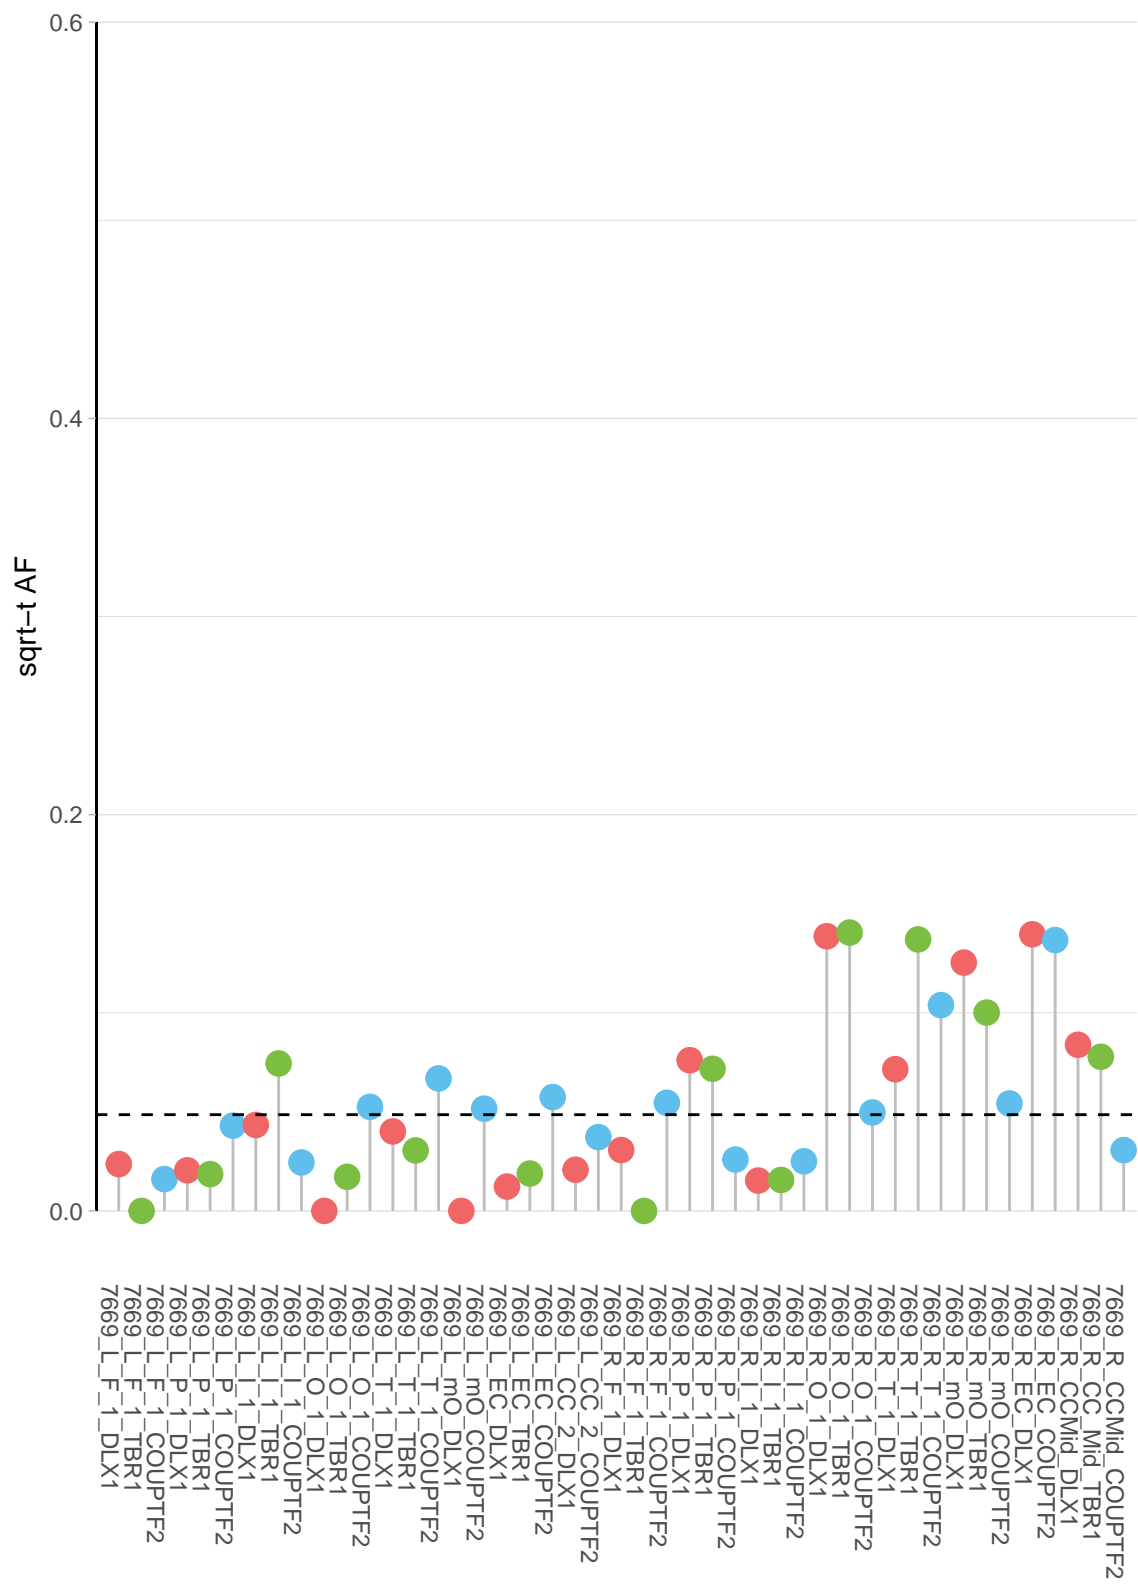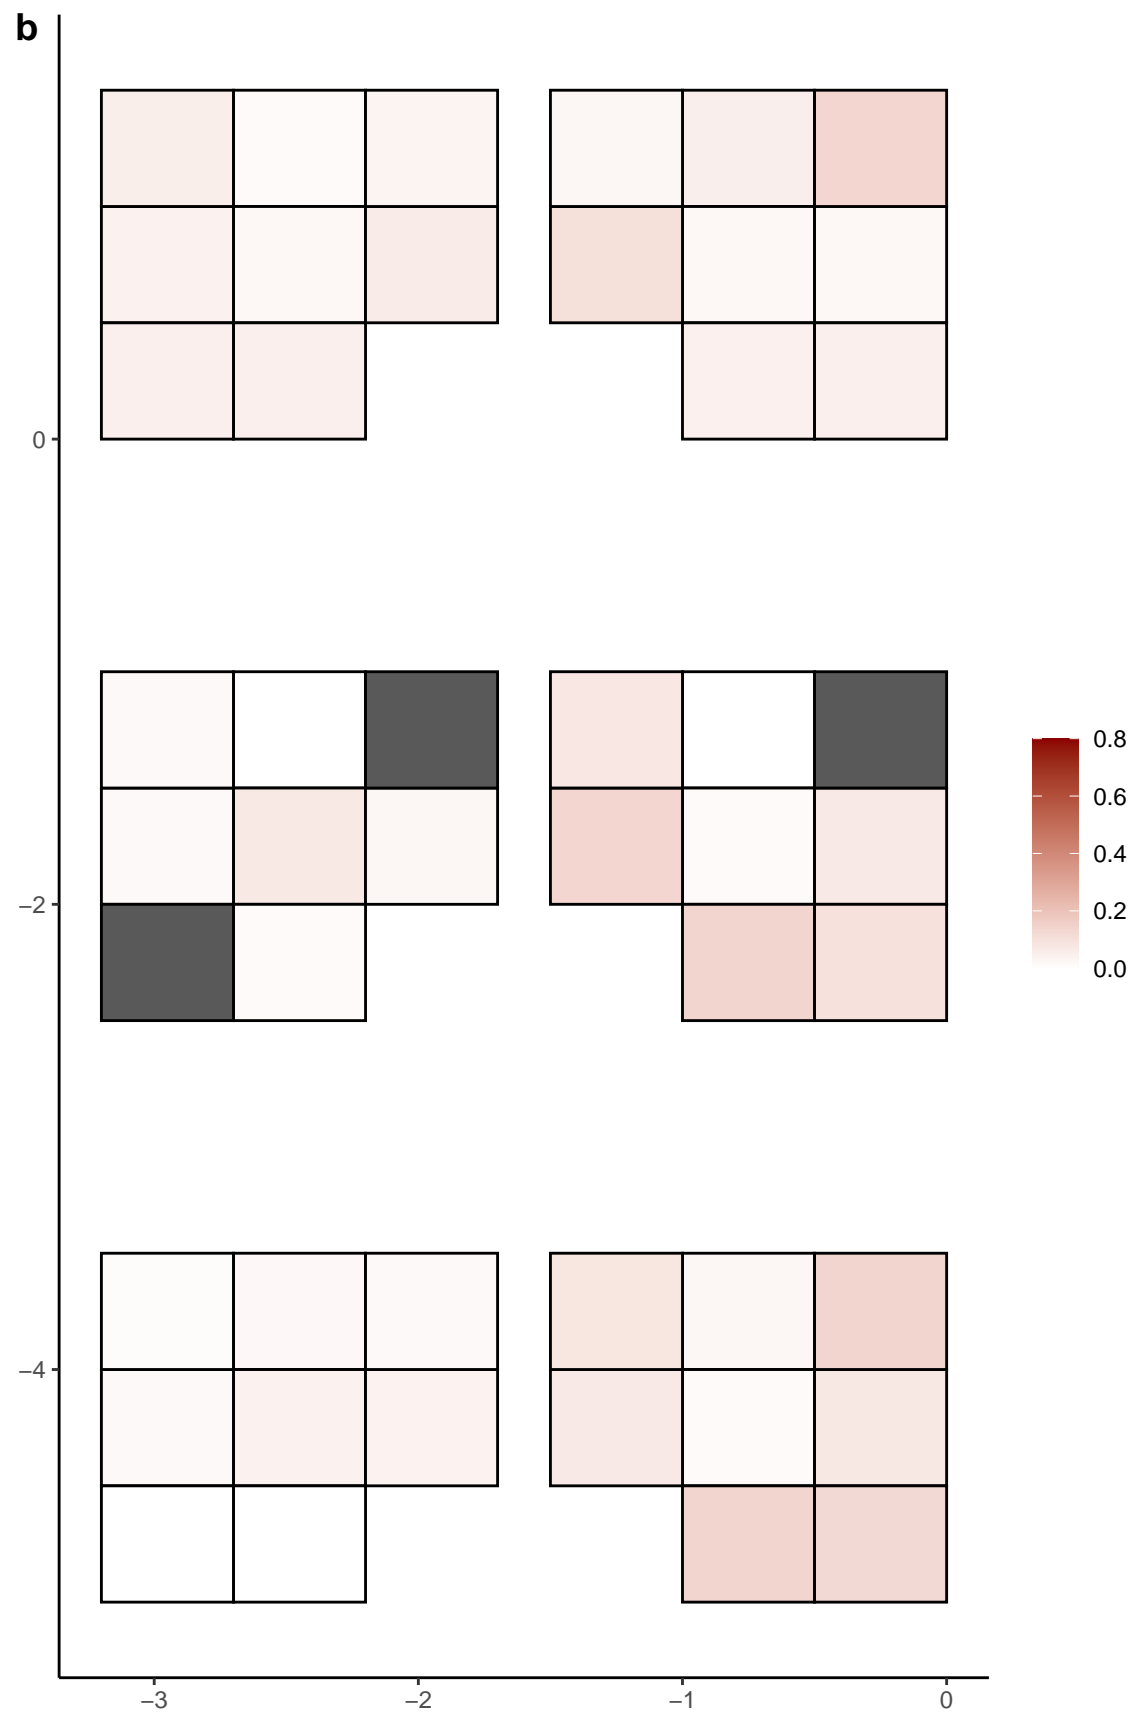

**a** ID05 21-32316236-C-T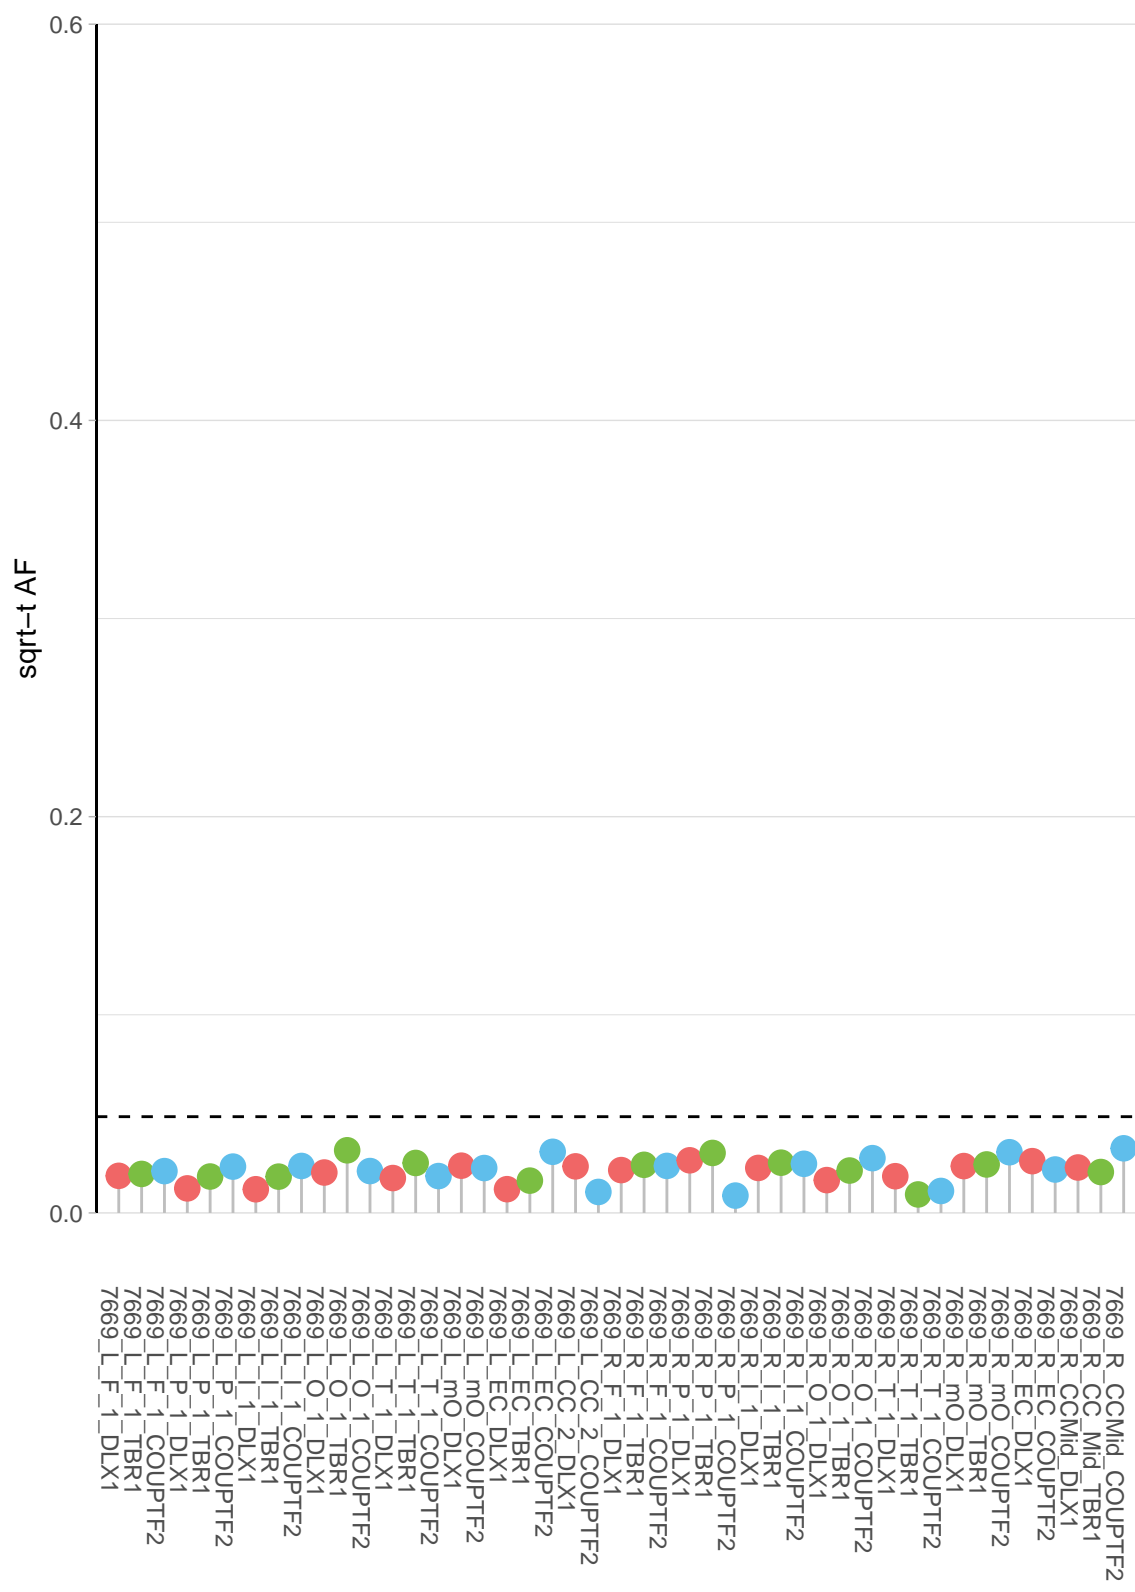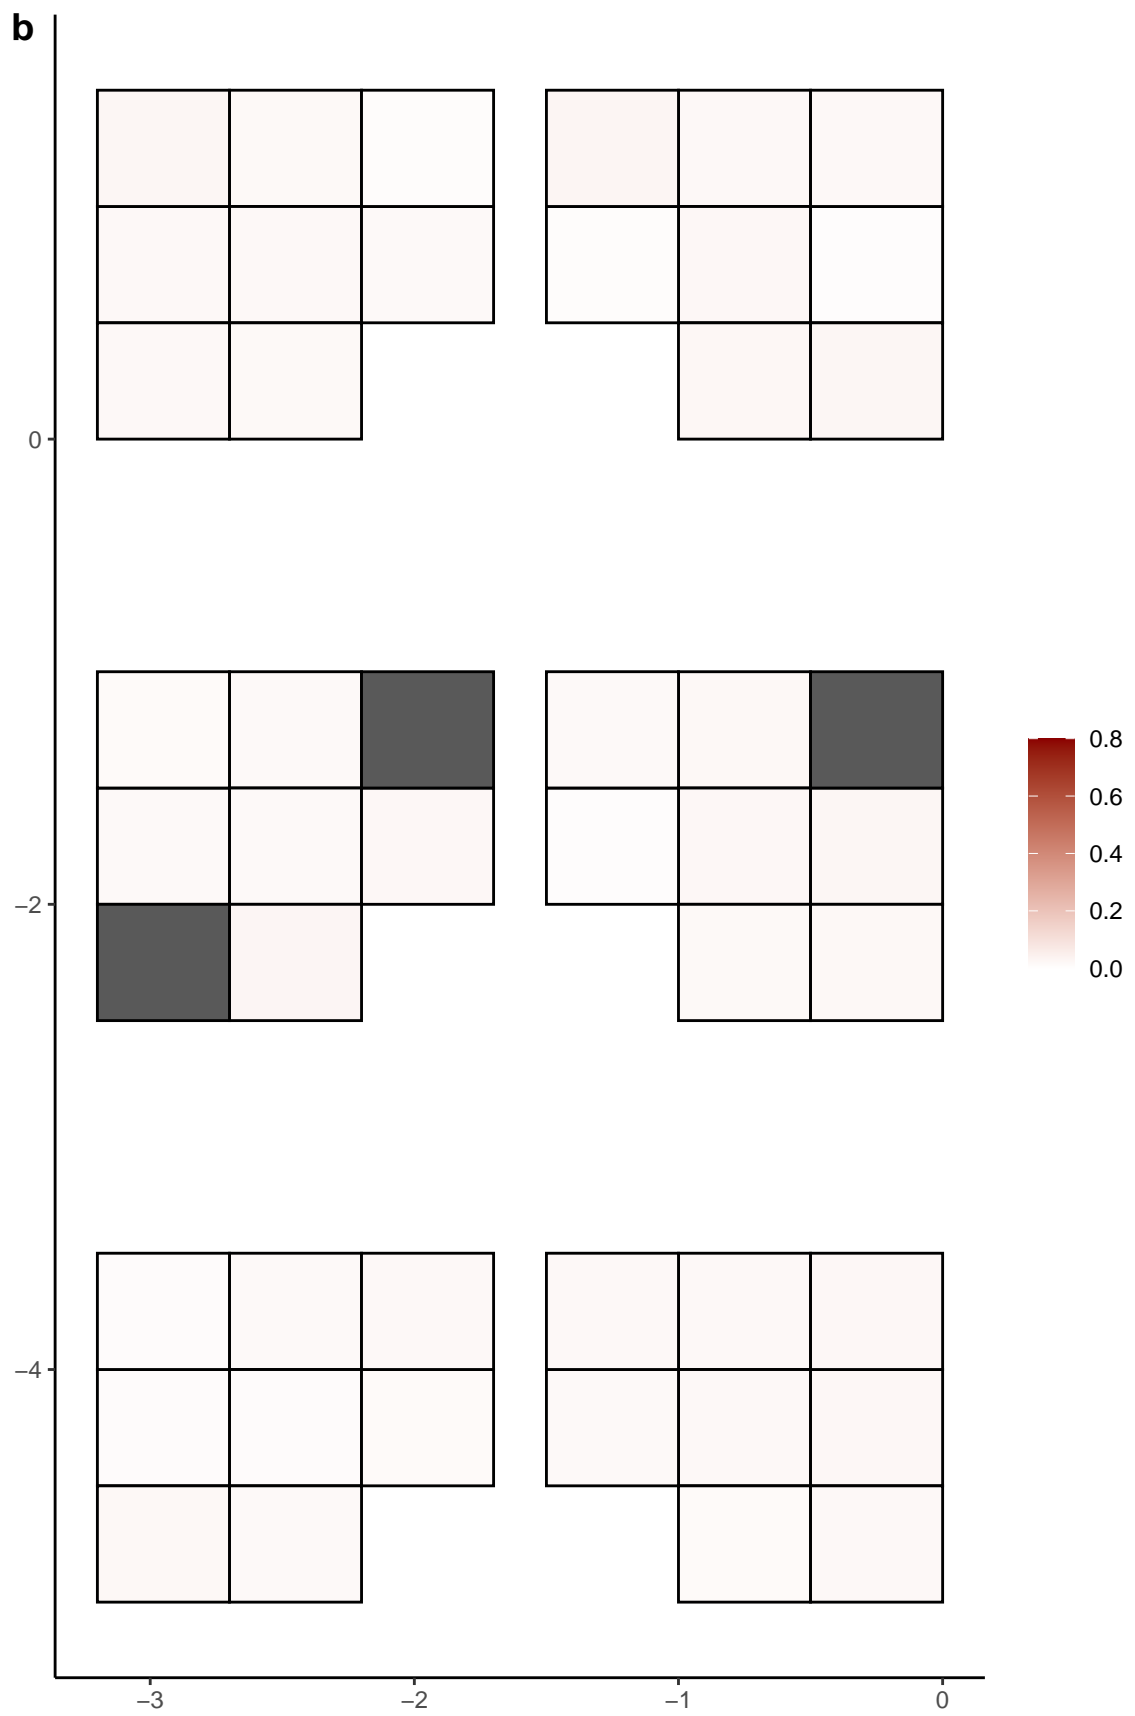

a ID05 21-32682912-C-T

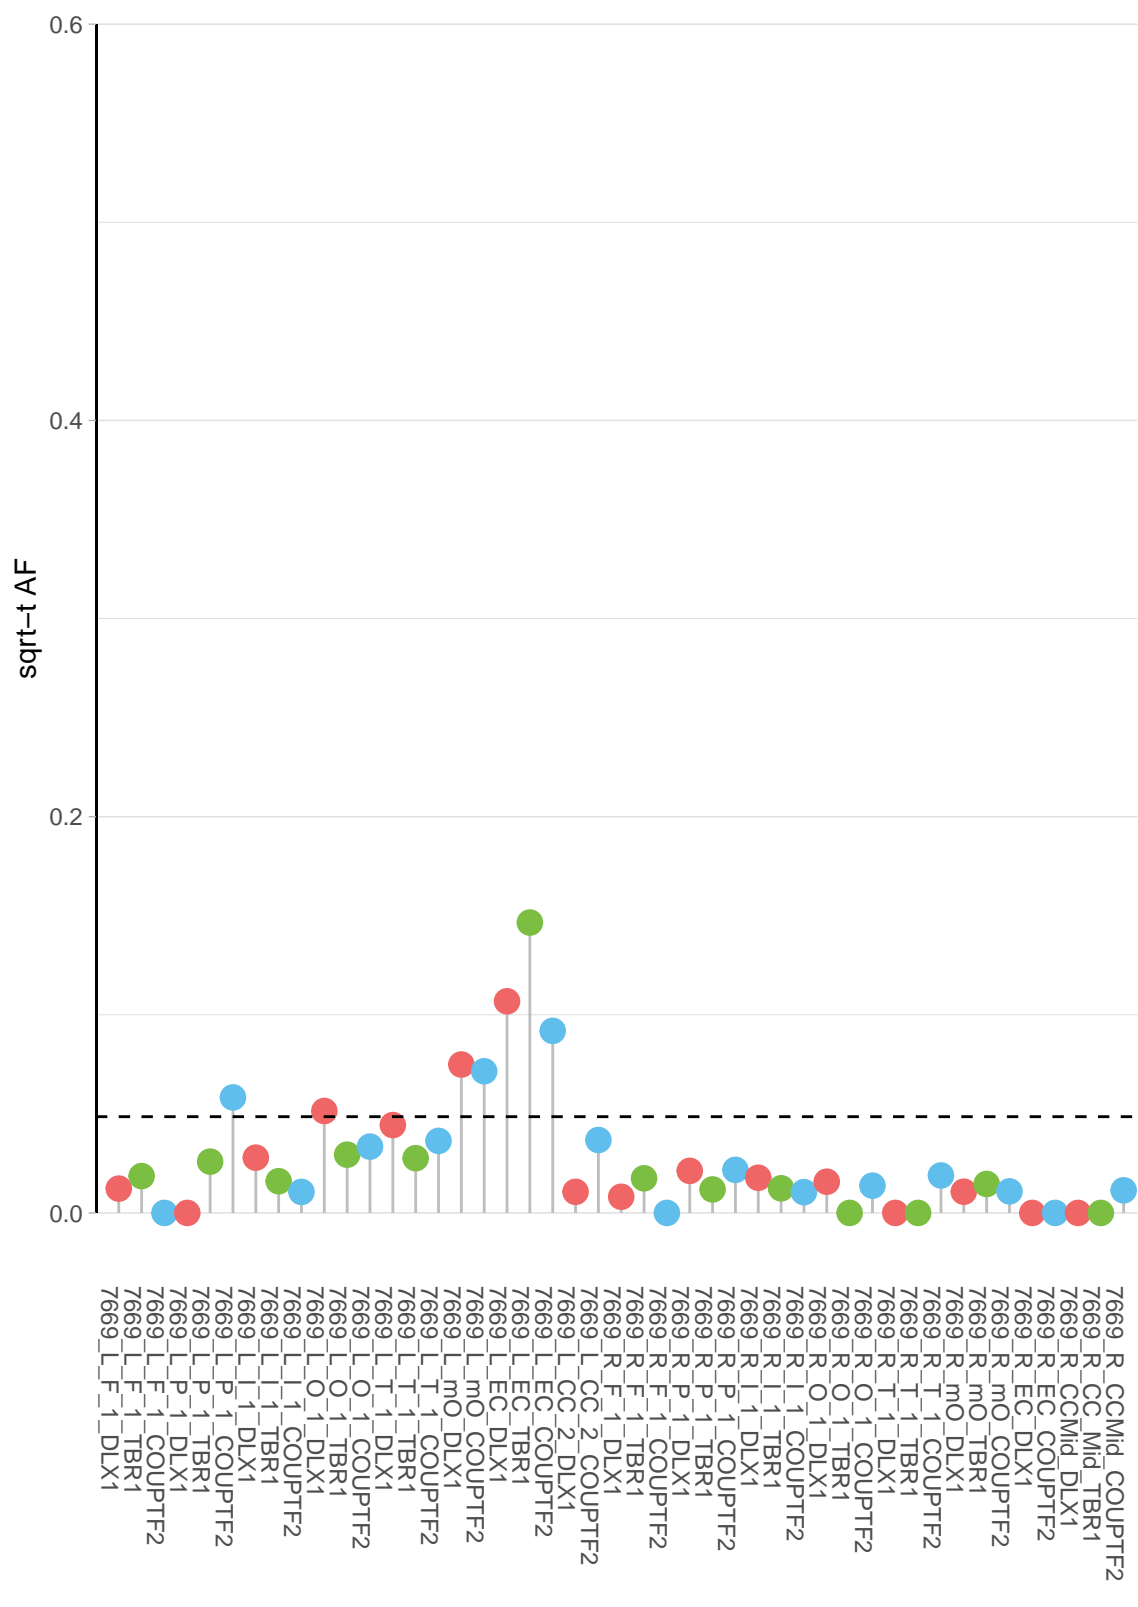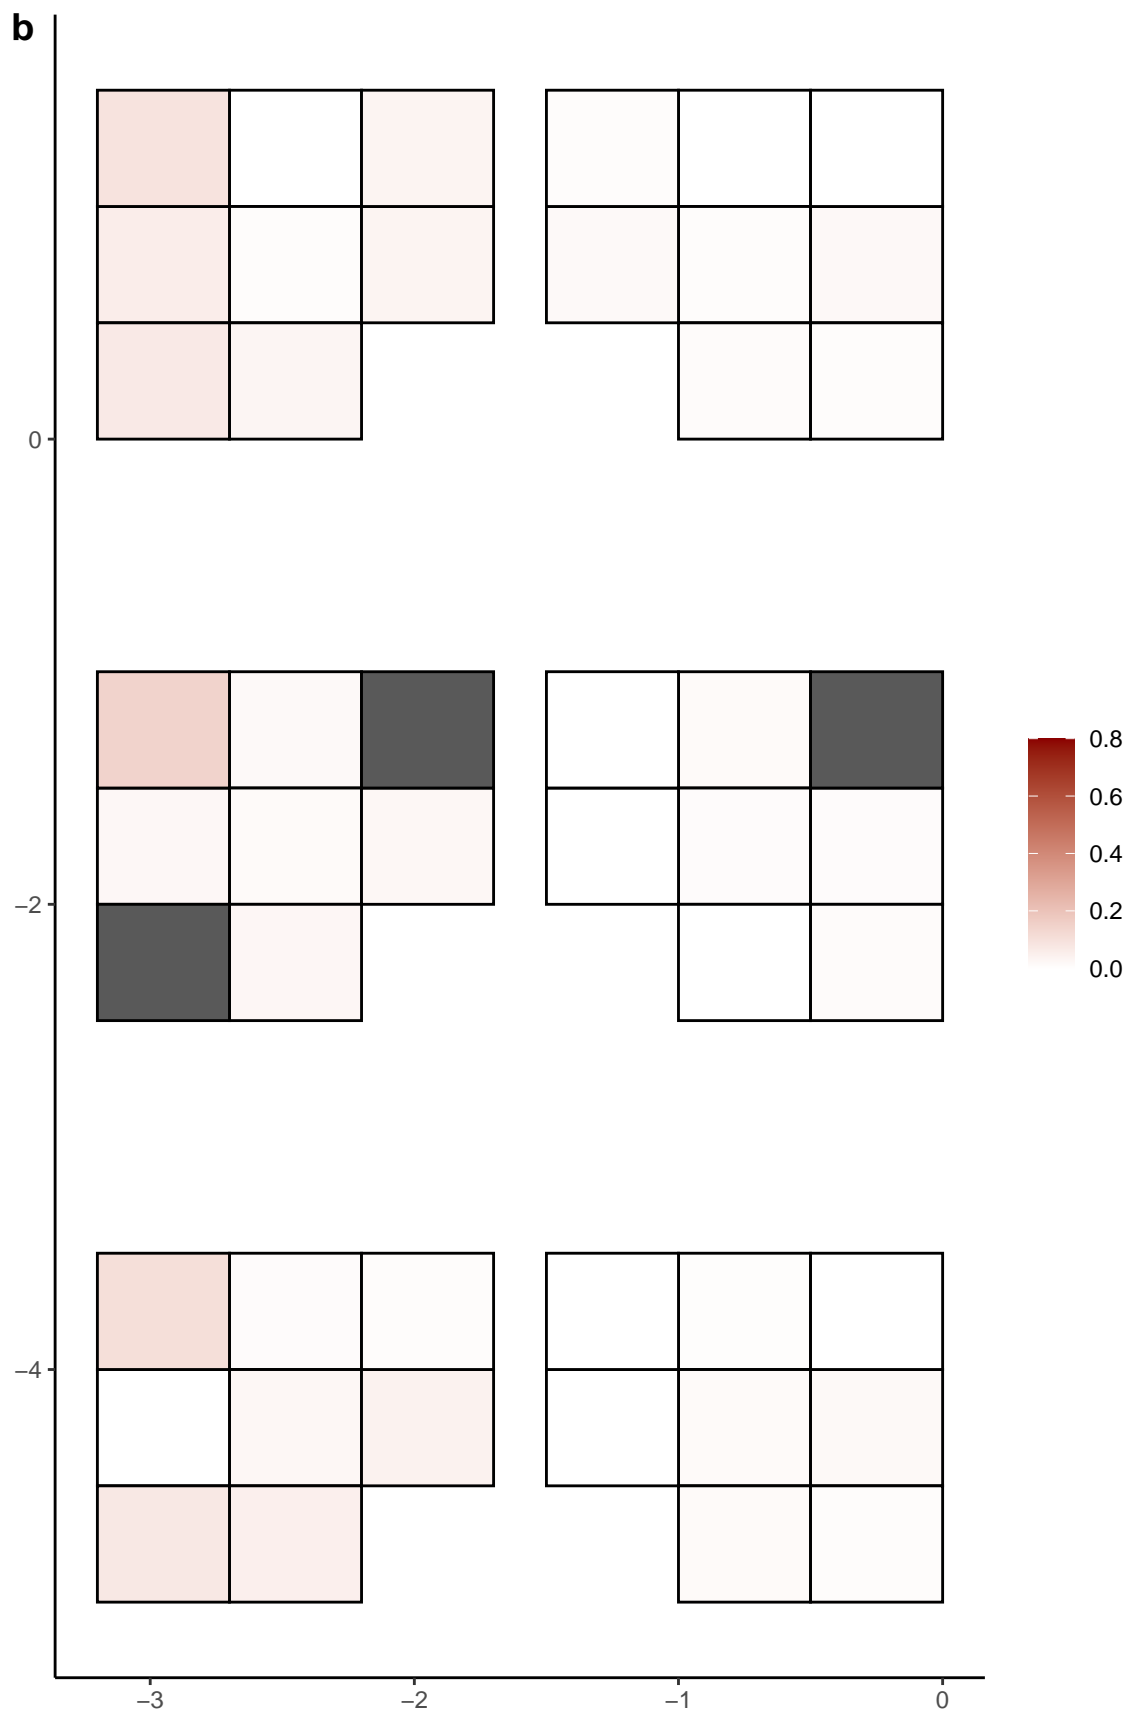



**a** ID05 21-35772900-A-G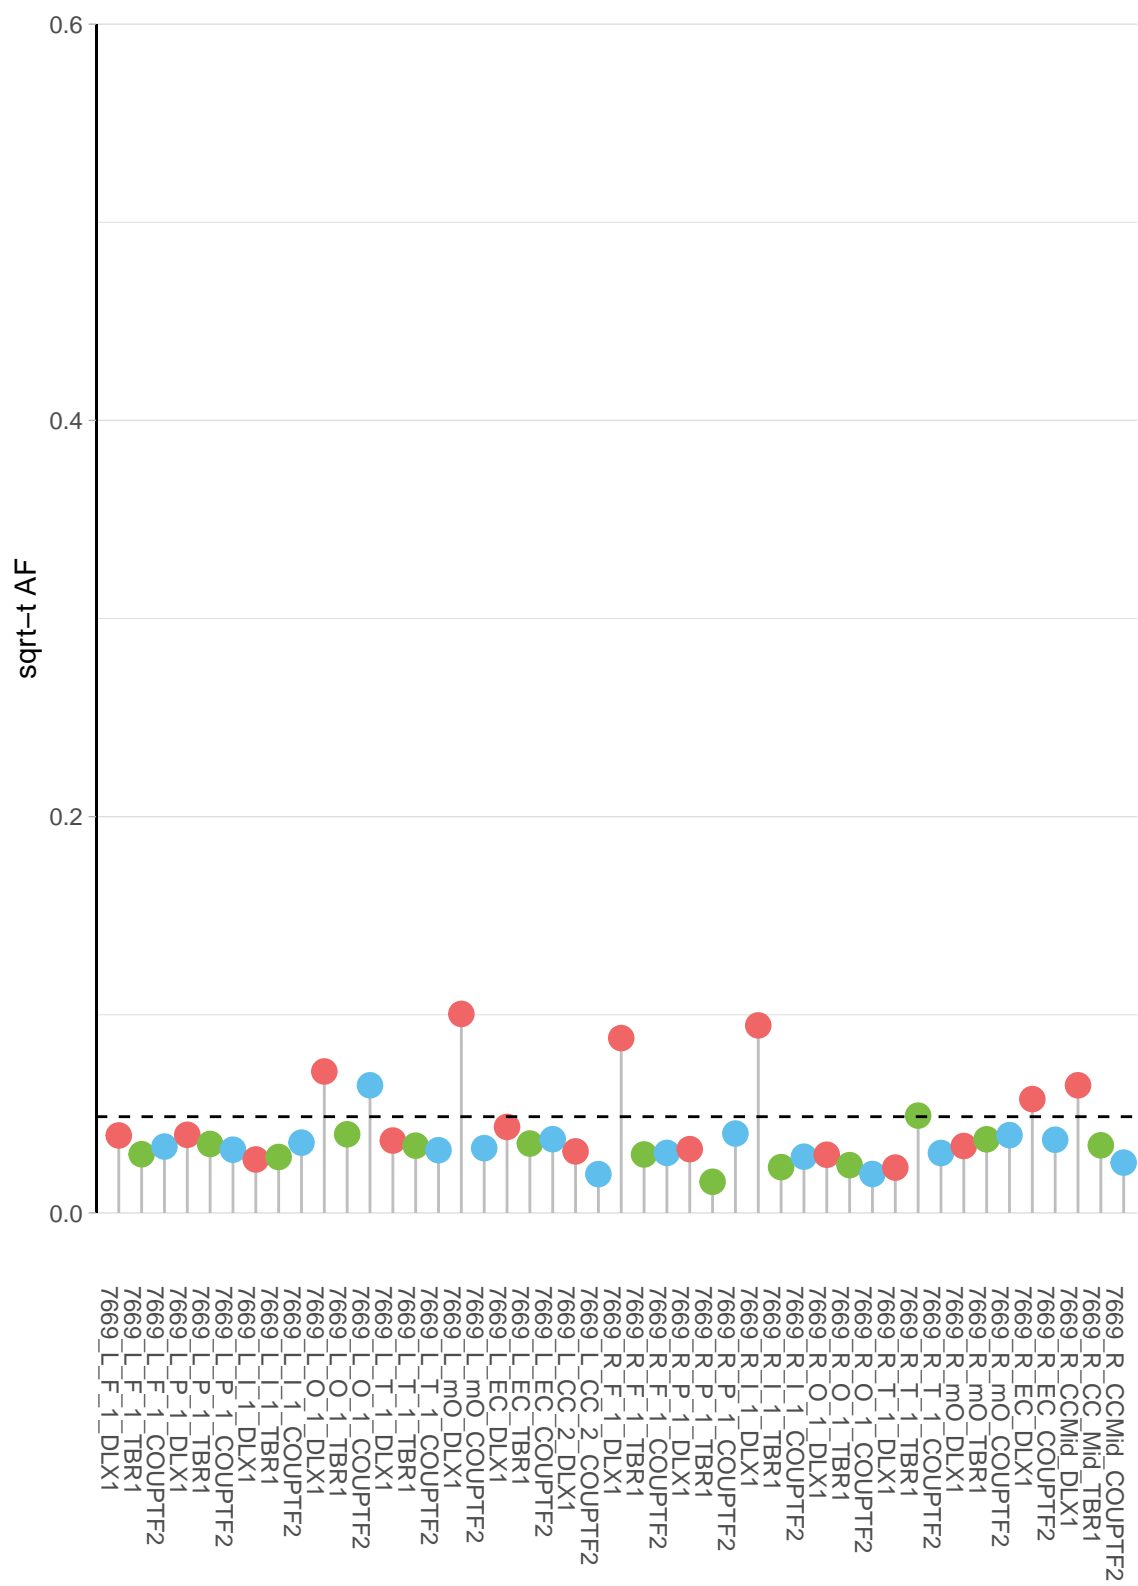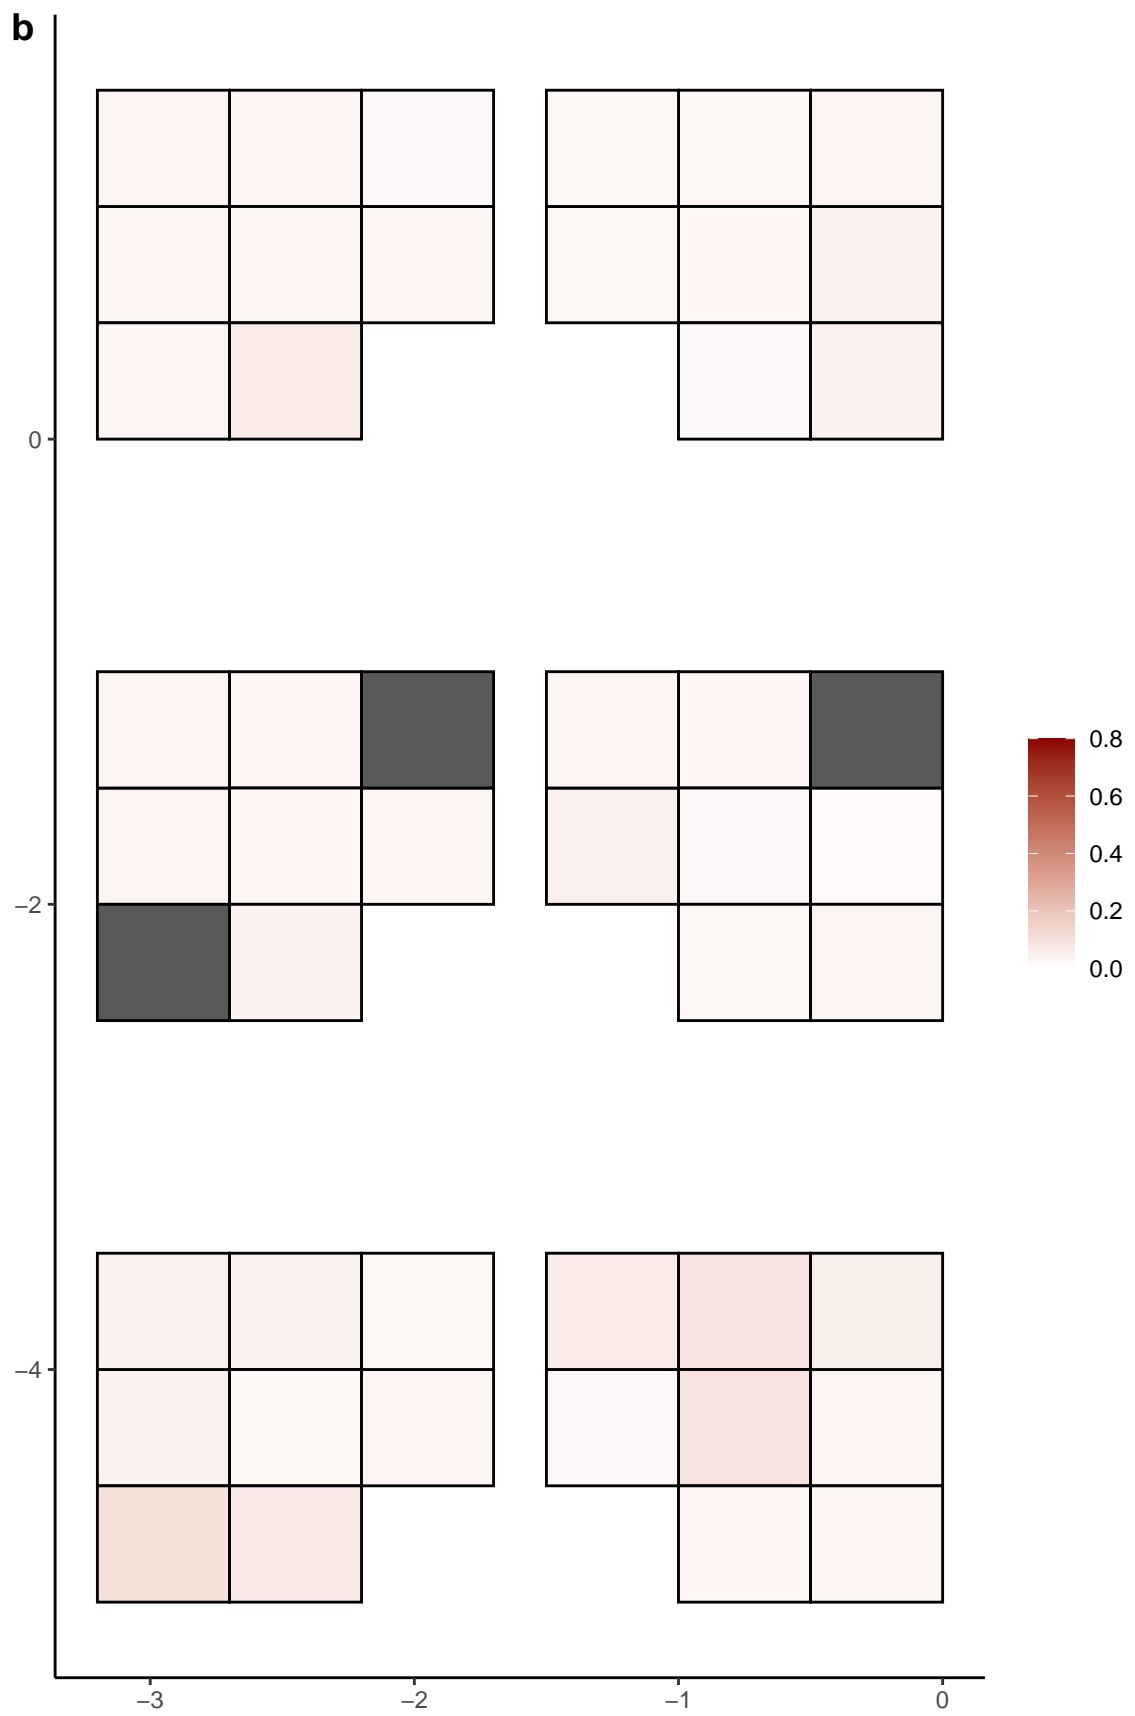

**a** ID05 21-41023573-C-T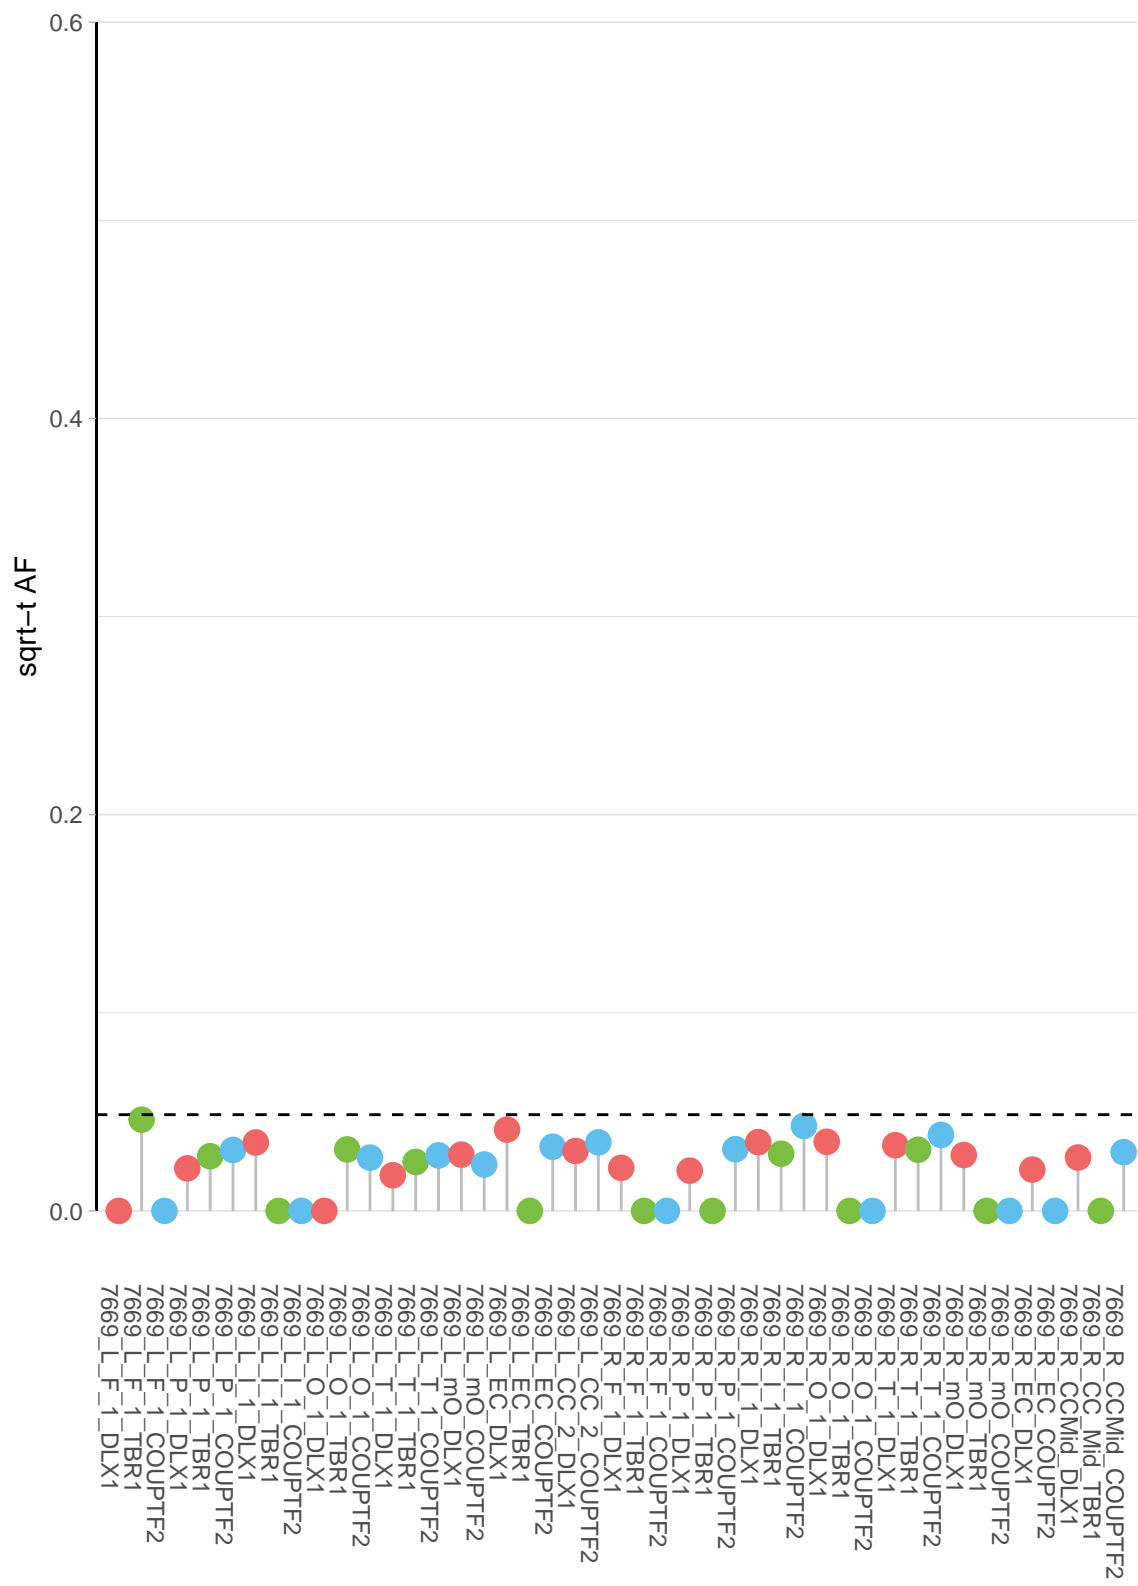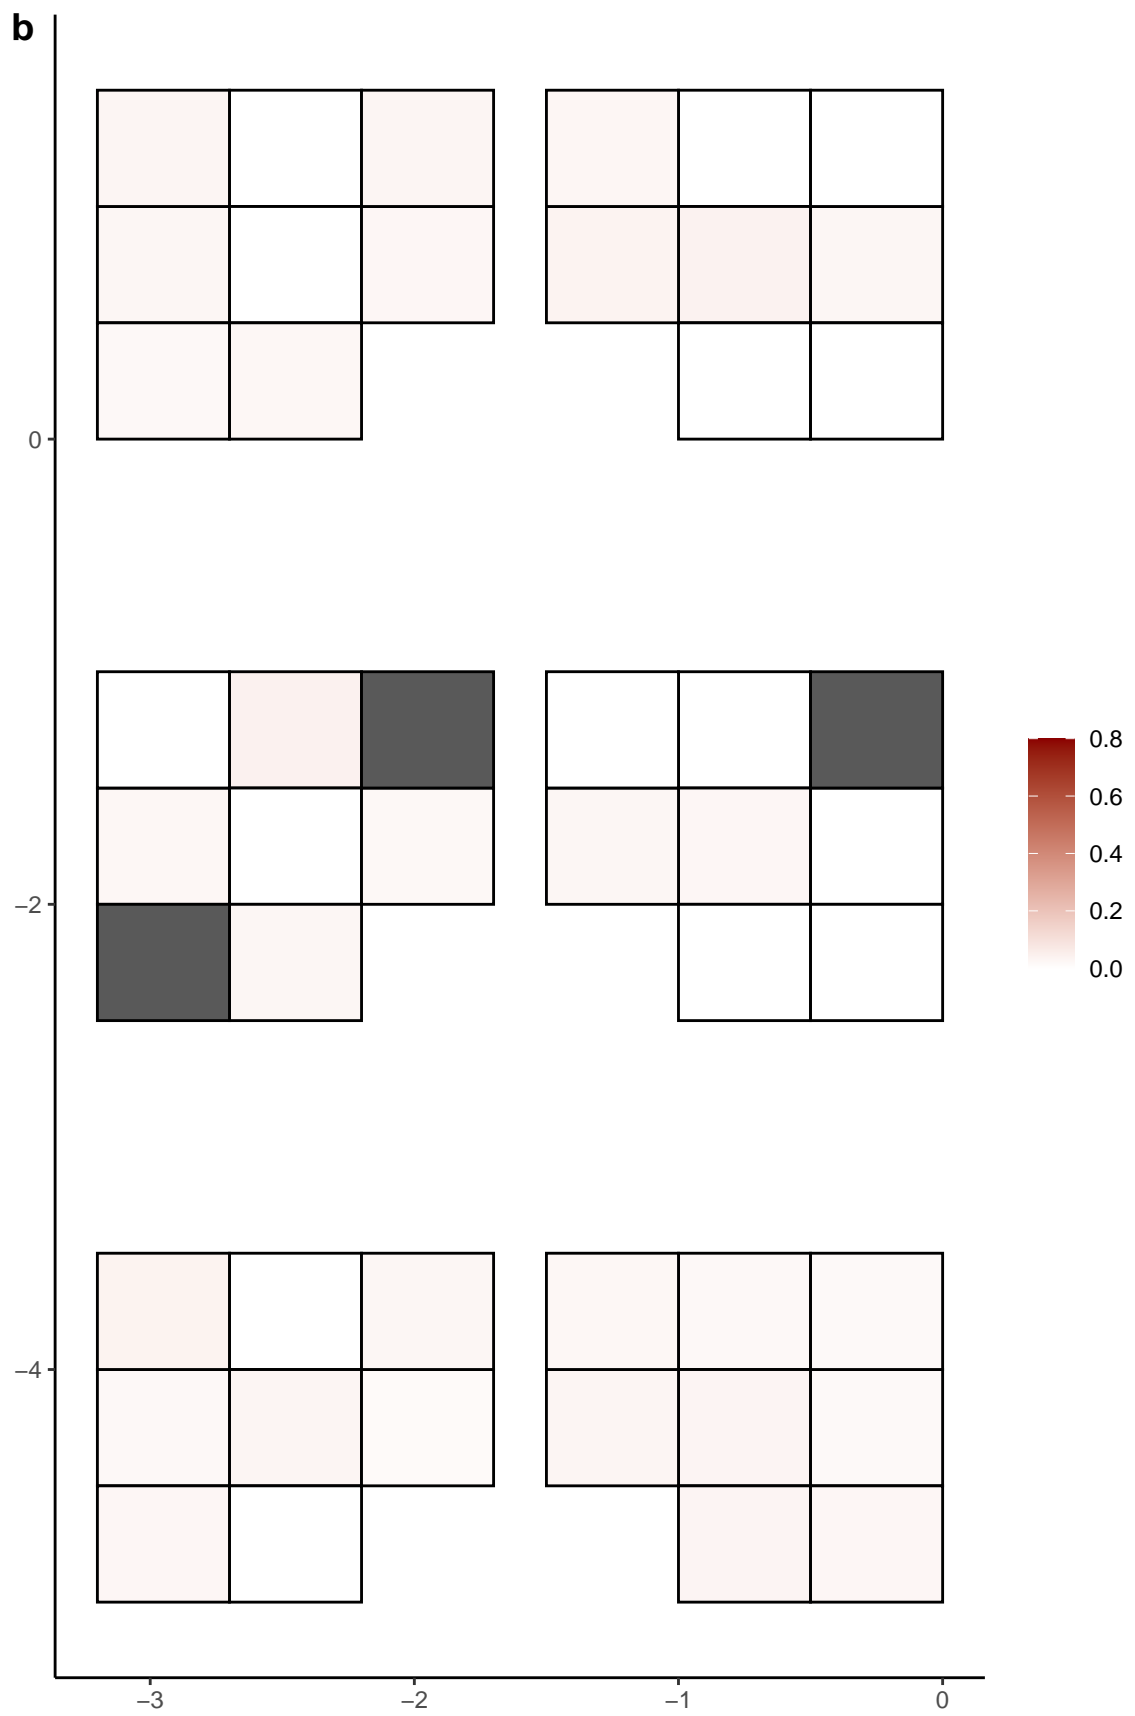

**a** ID05 21-41236582-C-T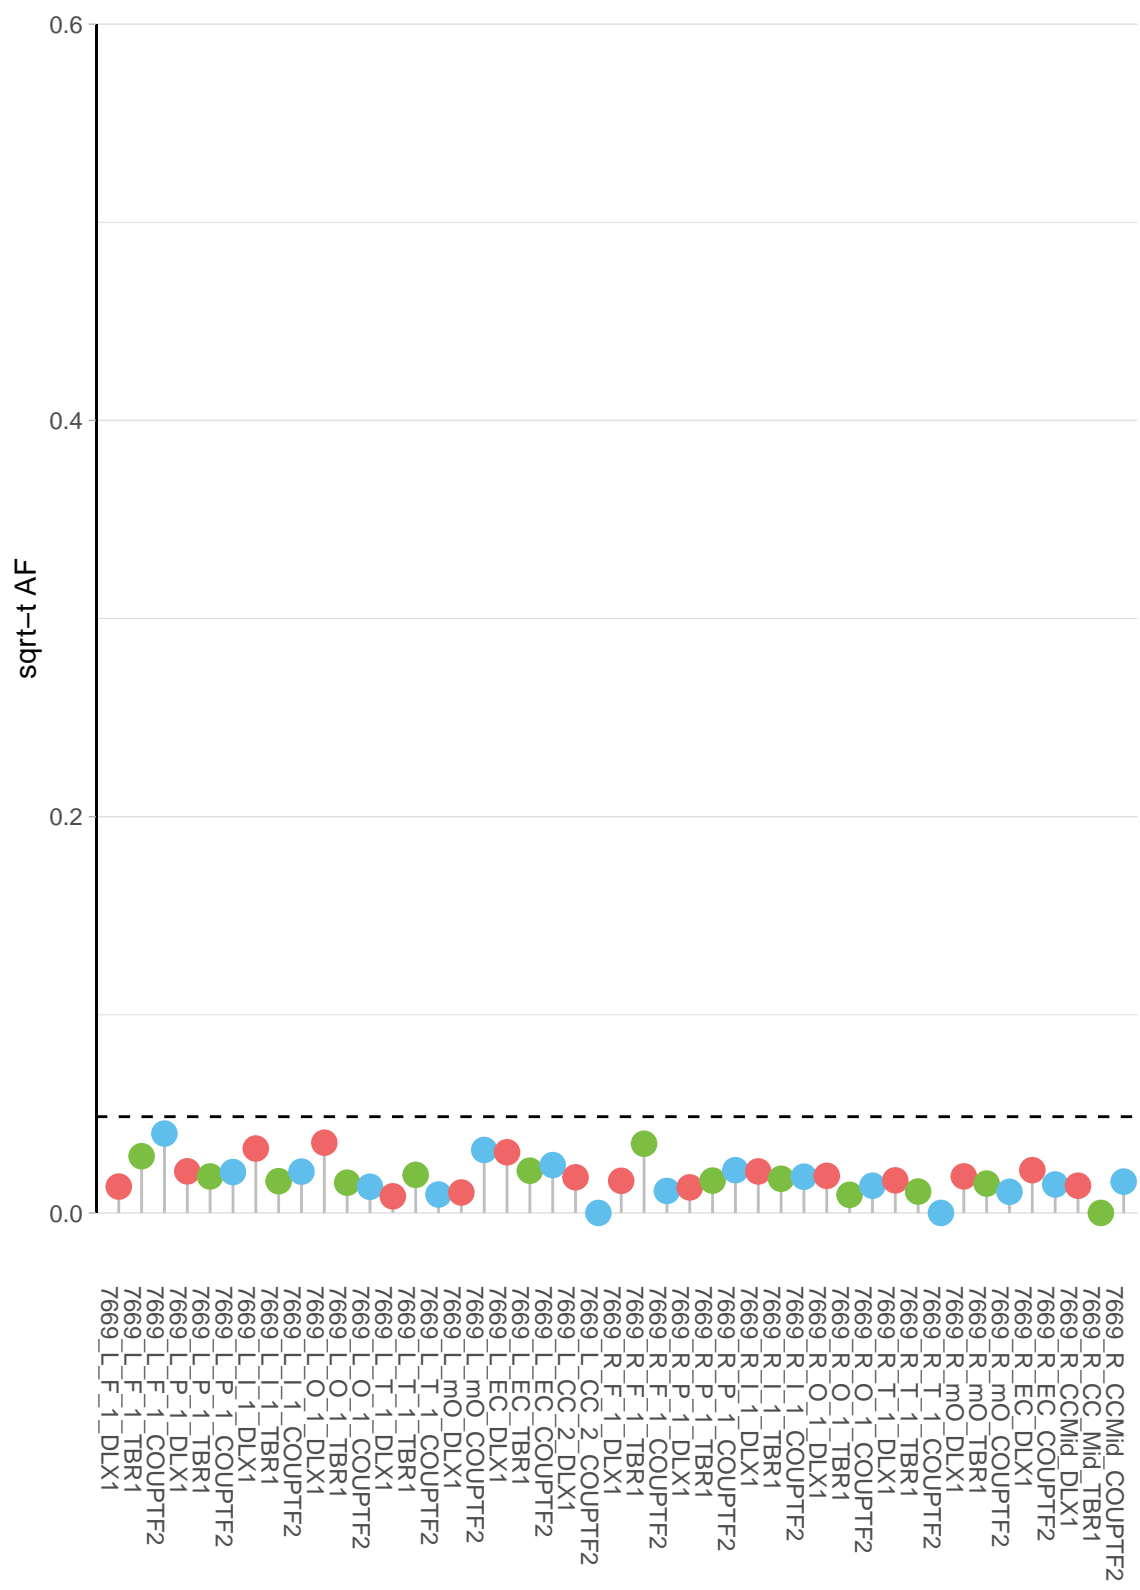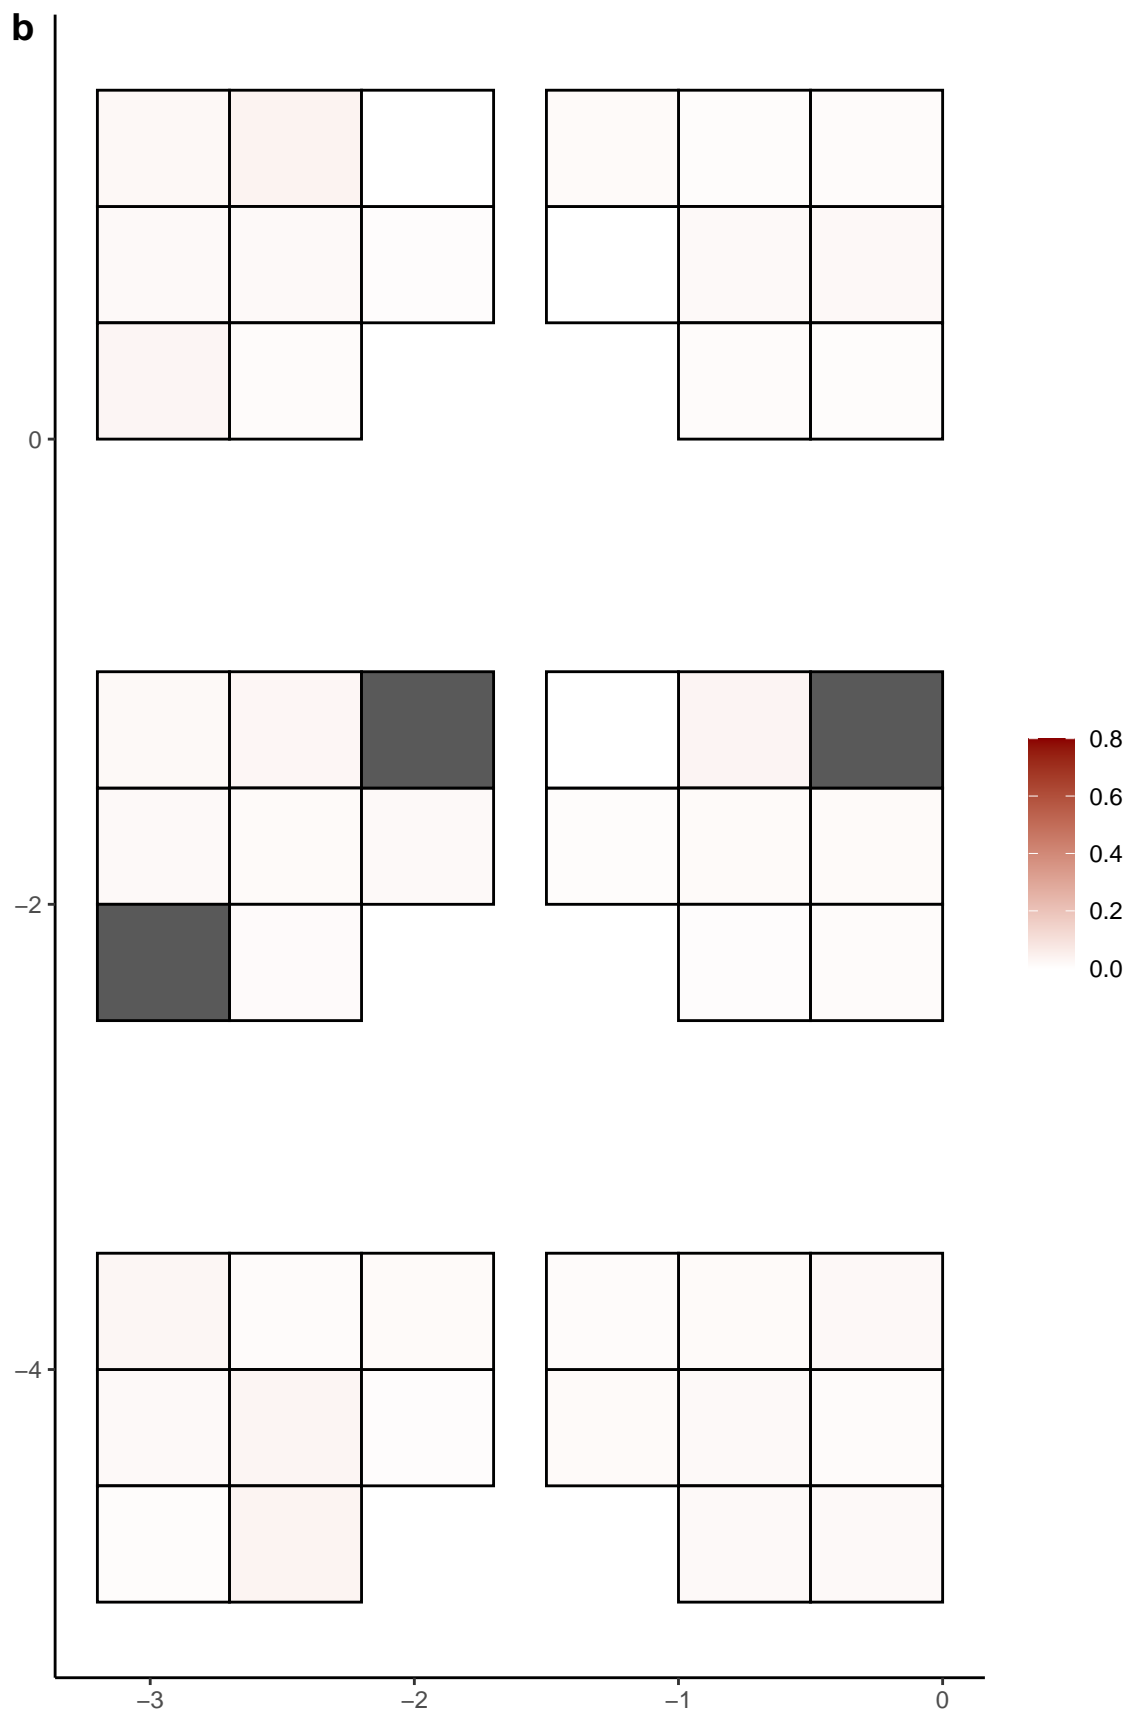

**a** ID05 21-41370607-T-C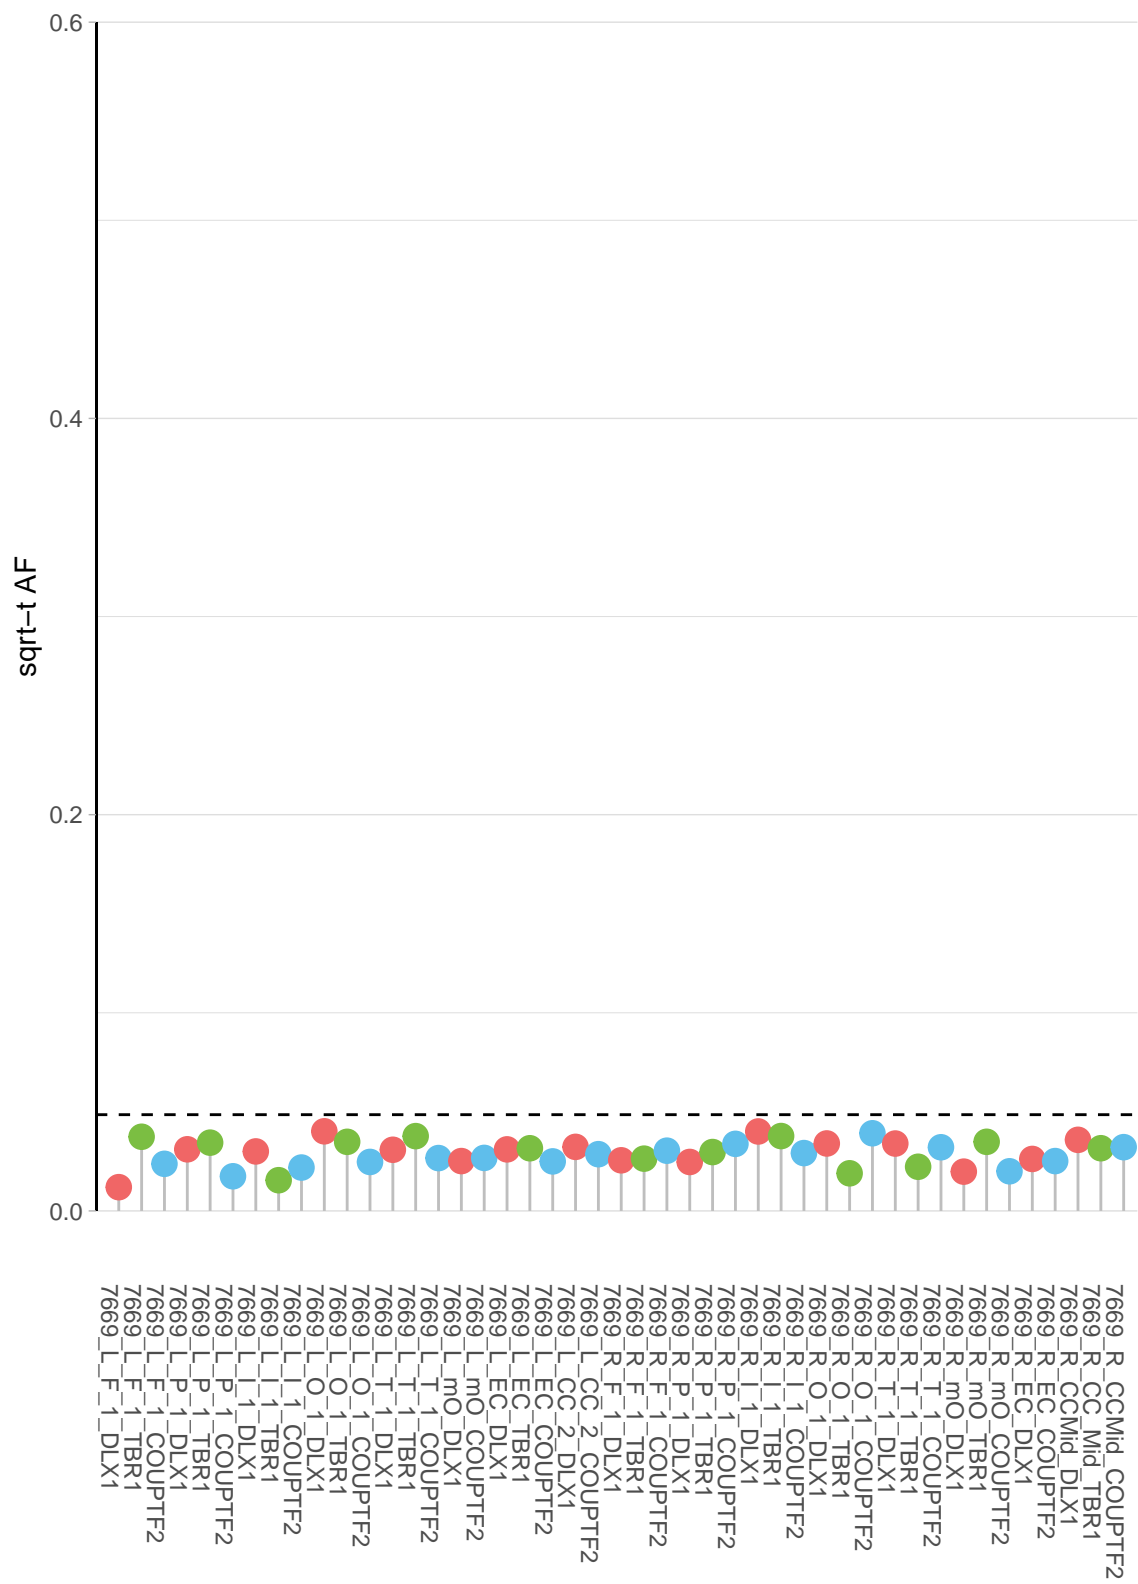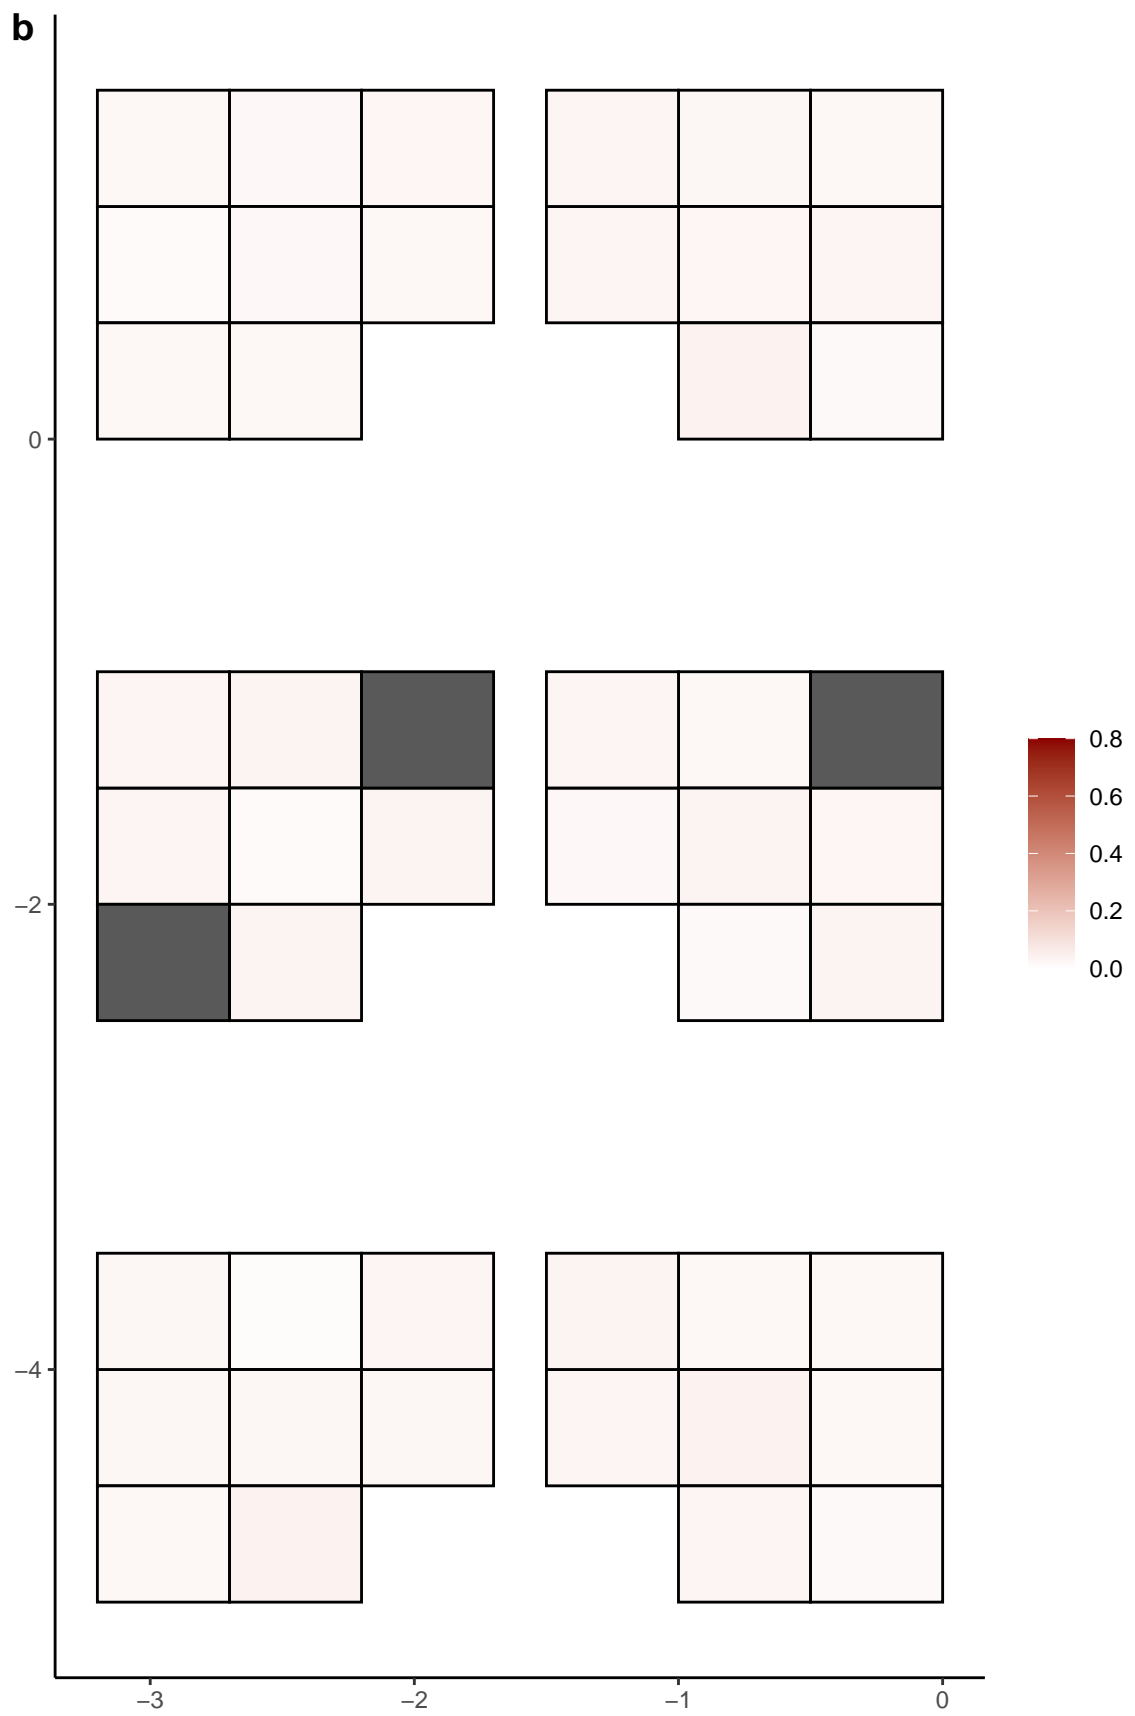

**a** ID05 21-42343147-G-A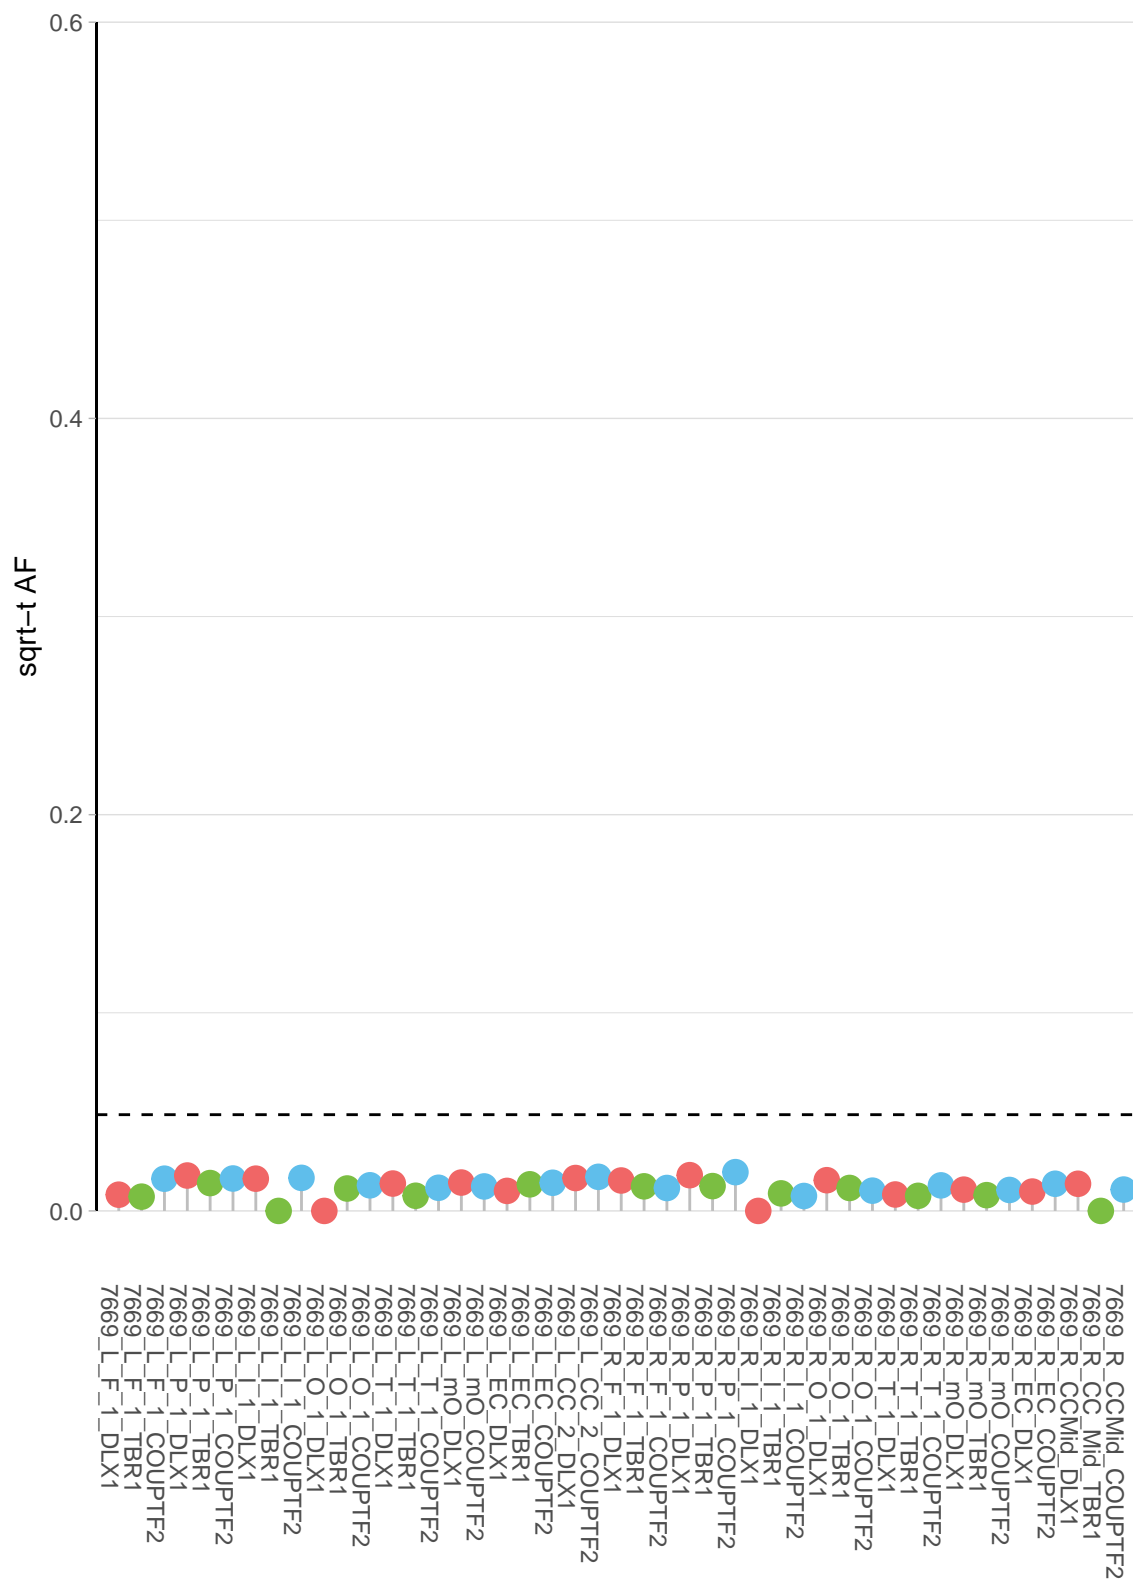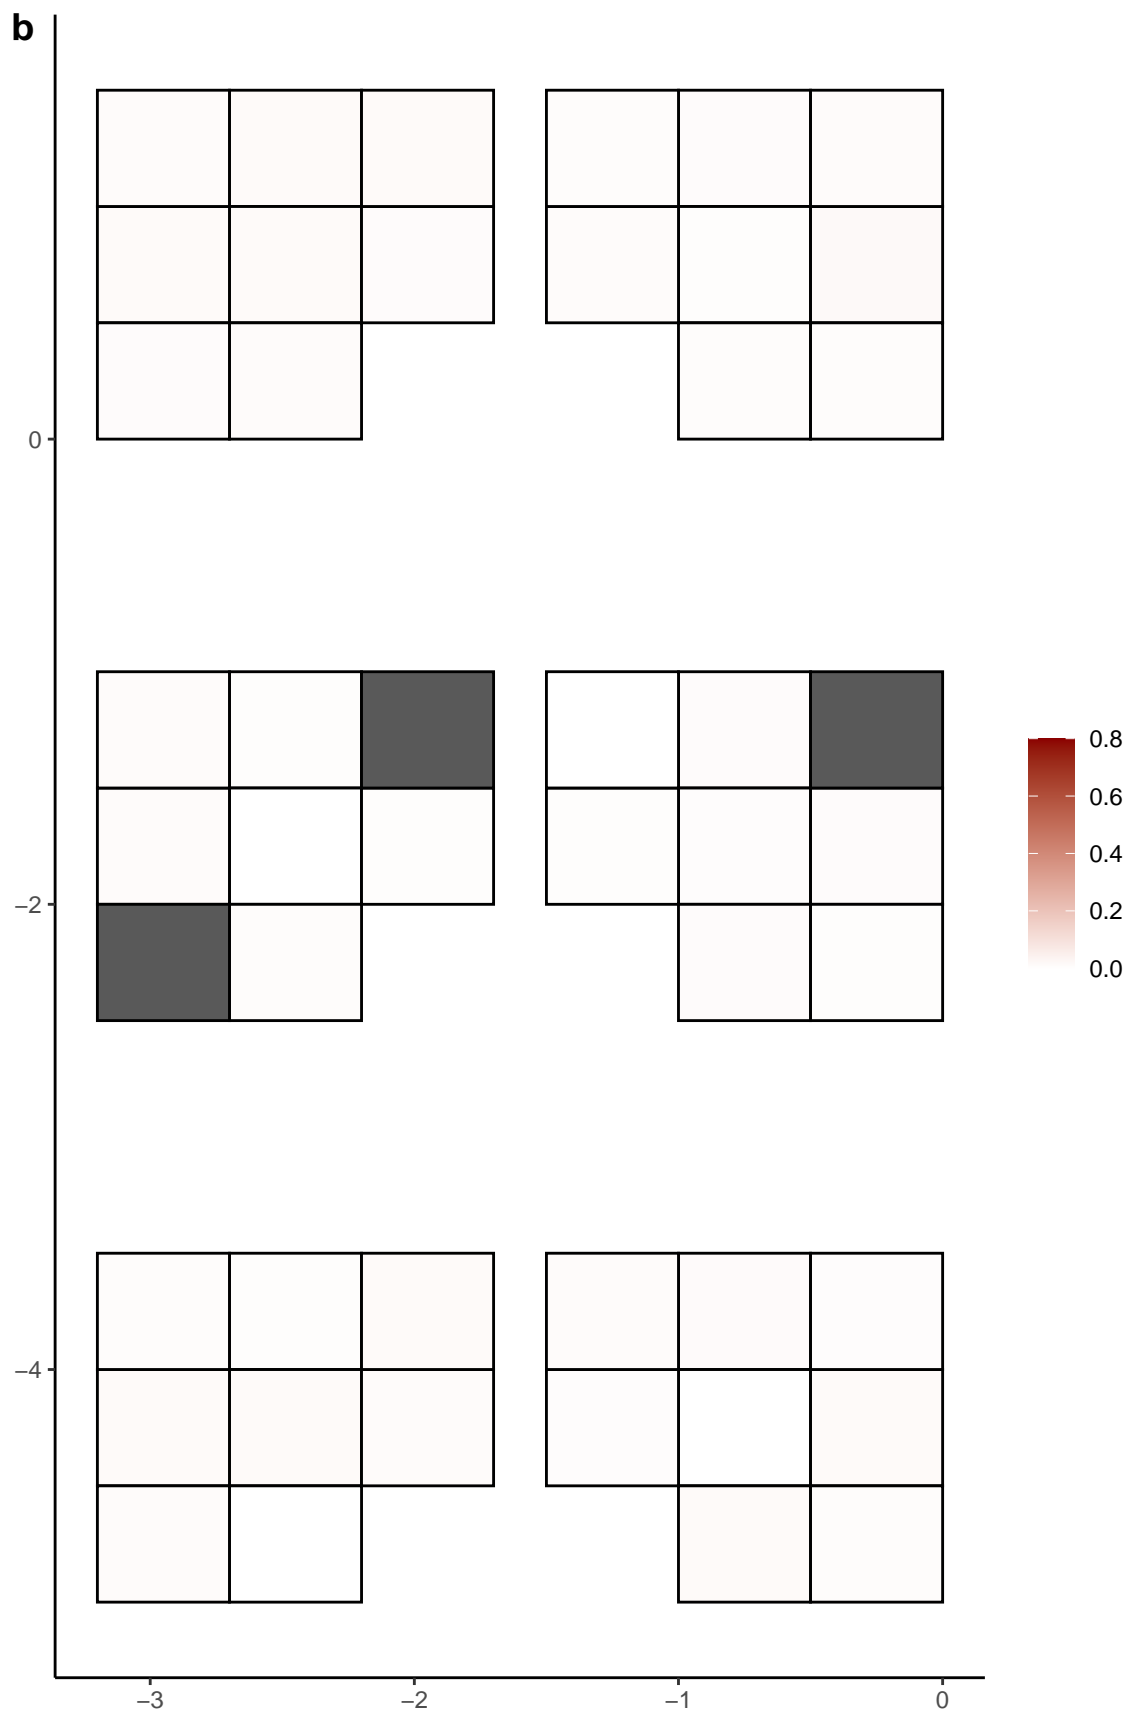

**a** ID05 21-42676569-G-A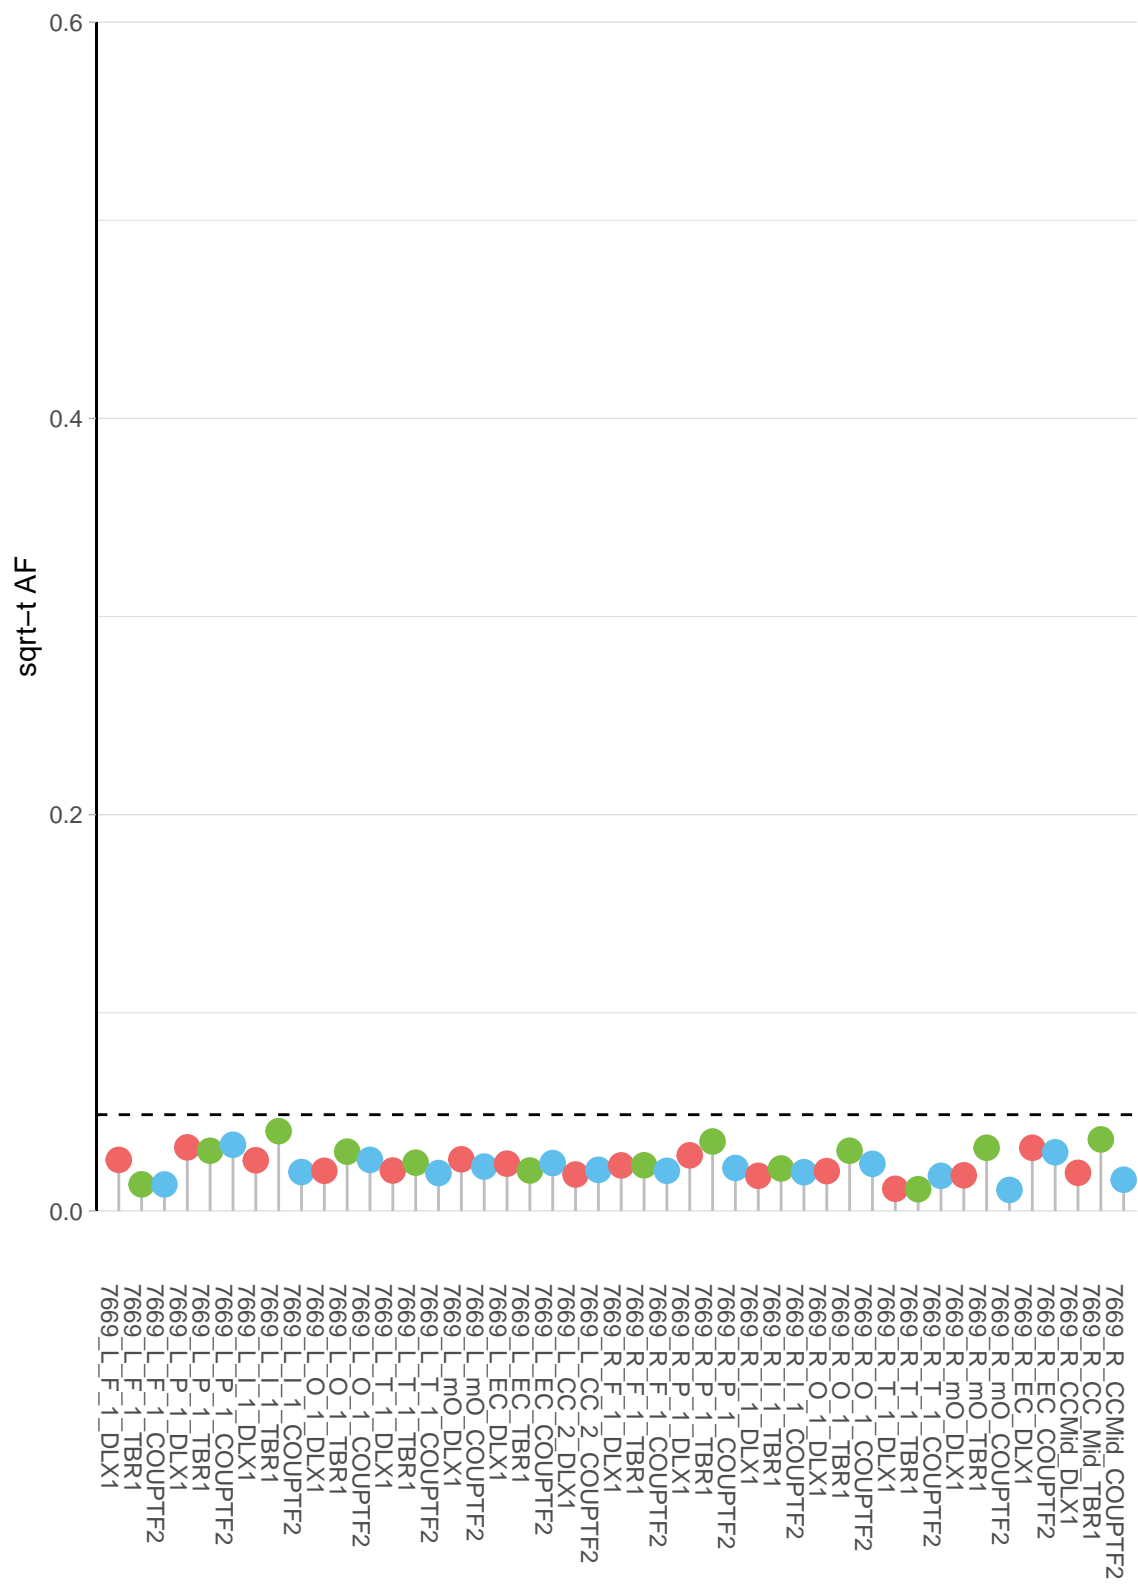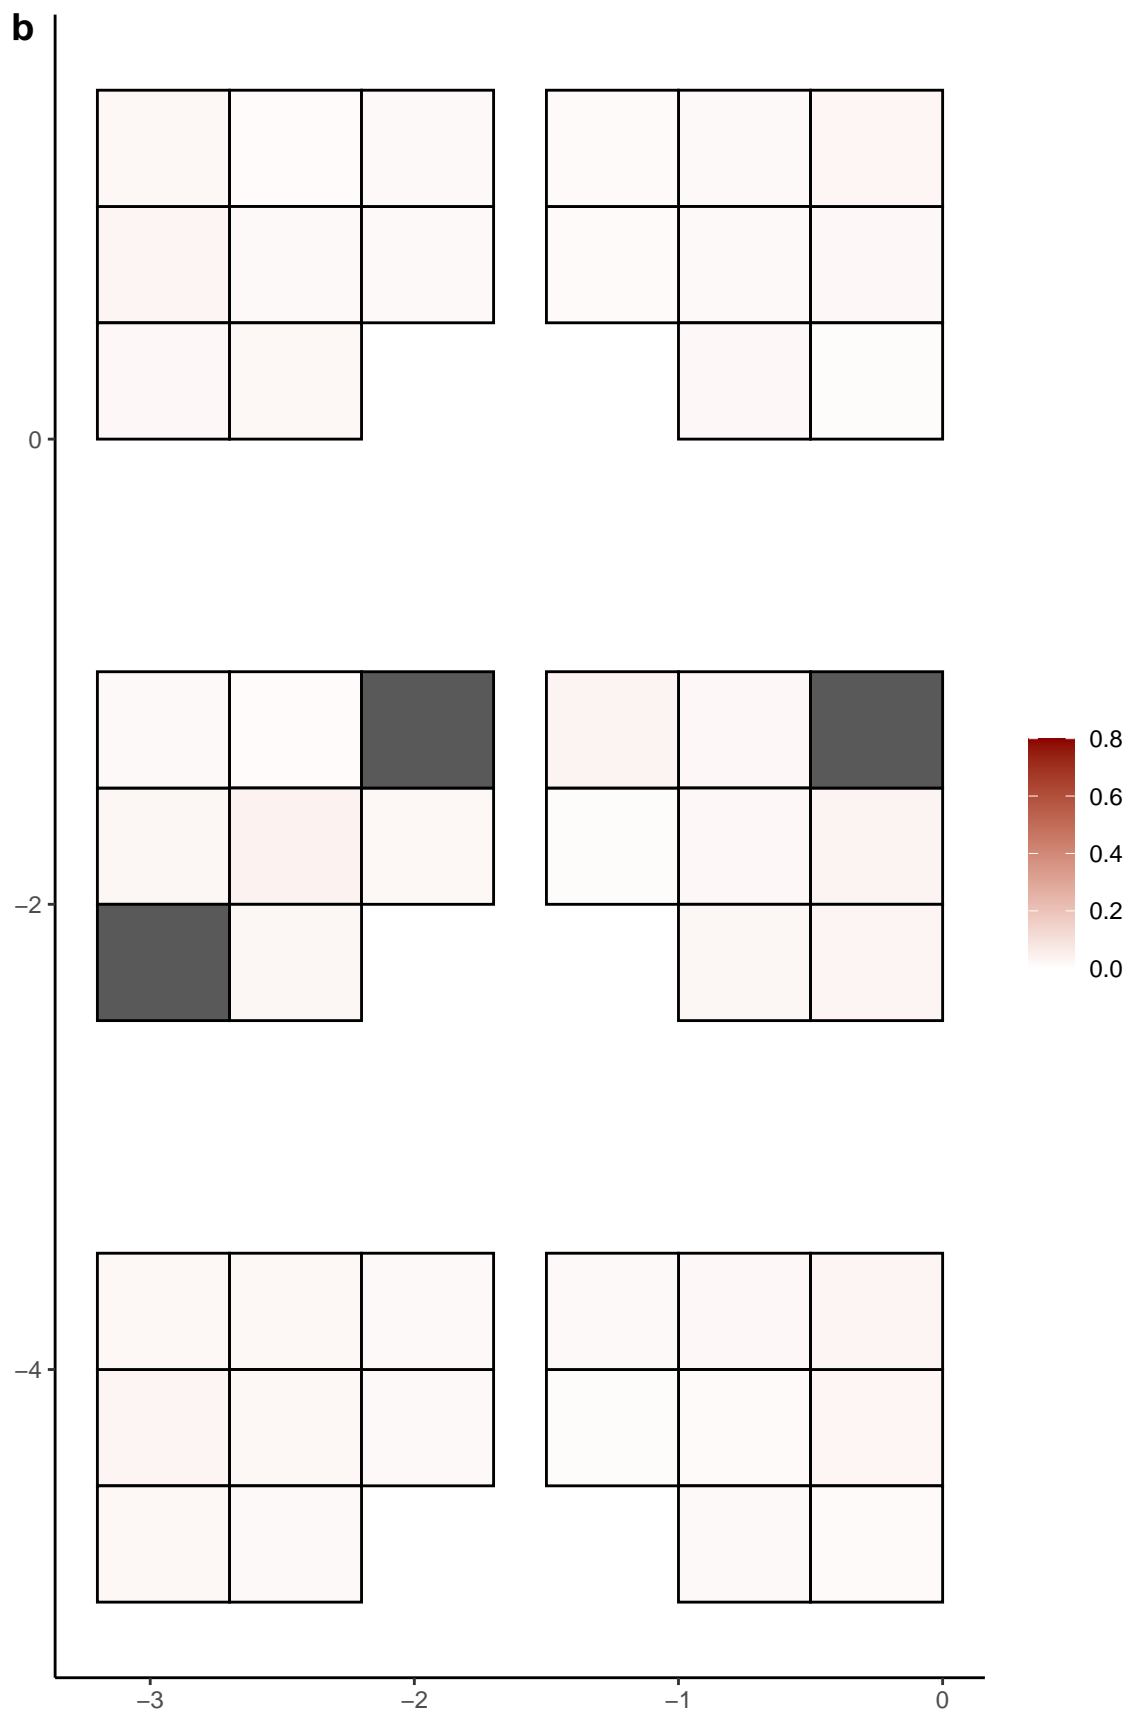

**a** ID05 21-43768376-C-T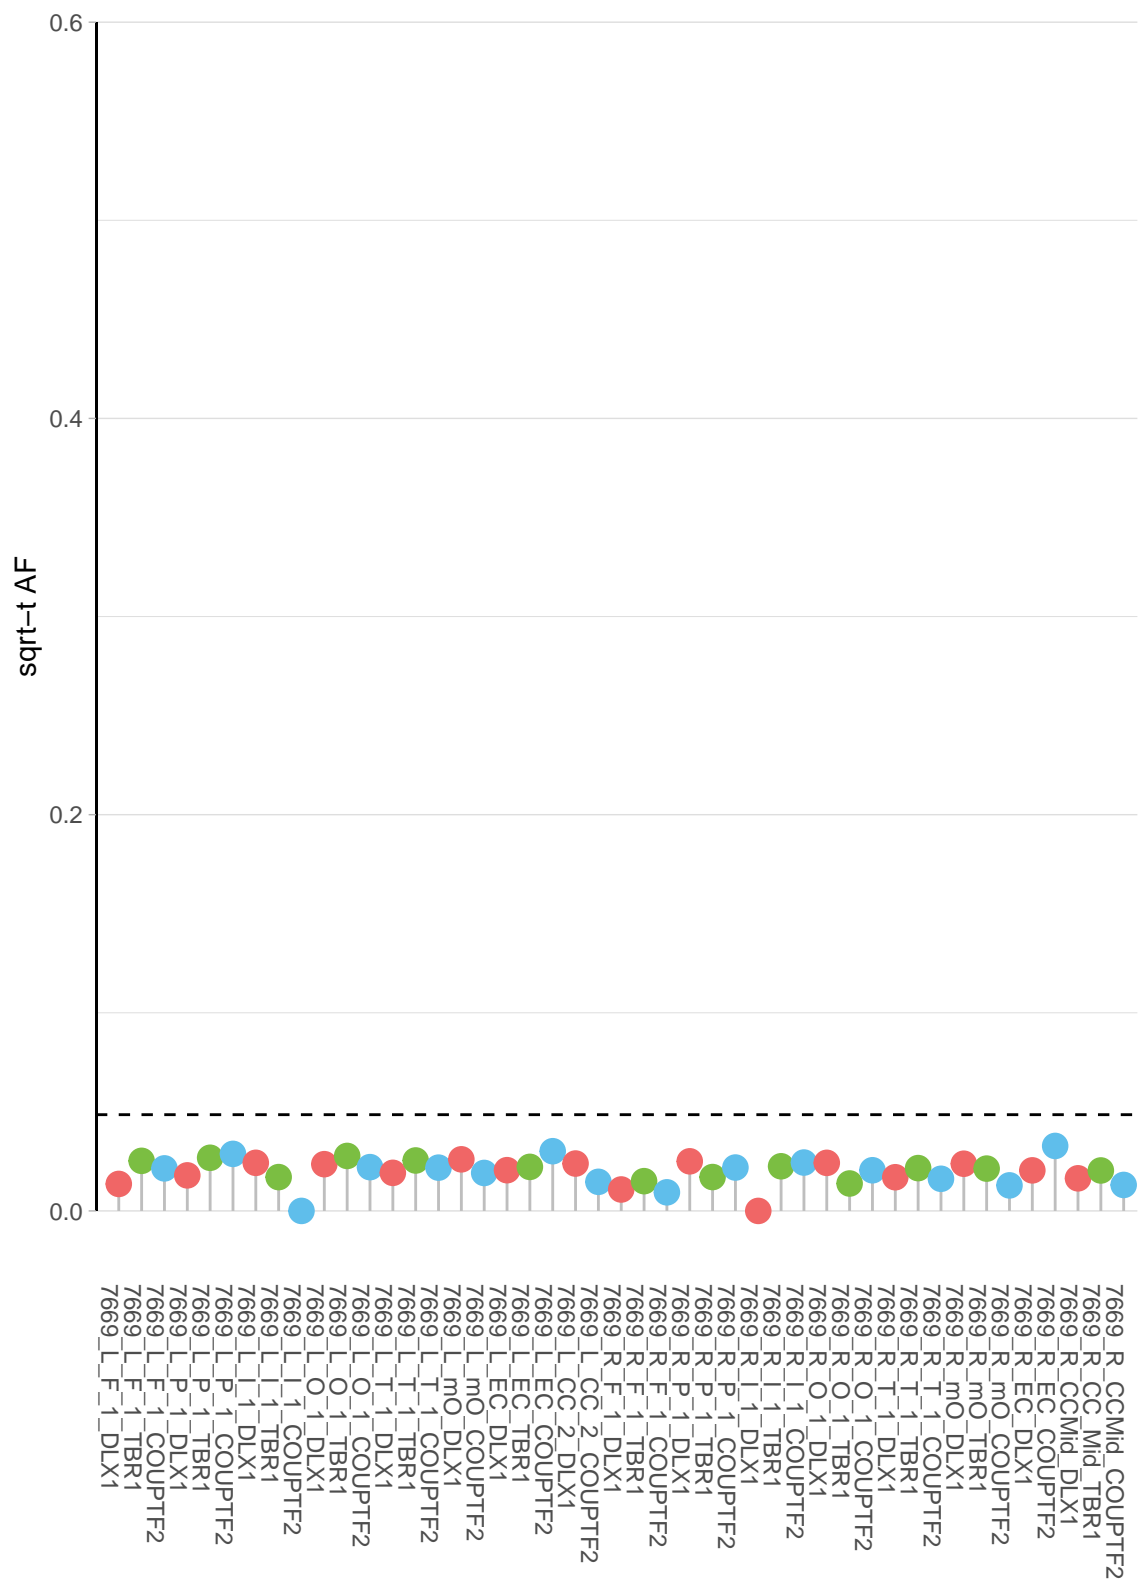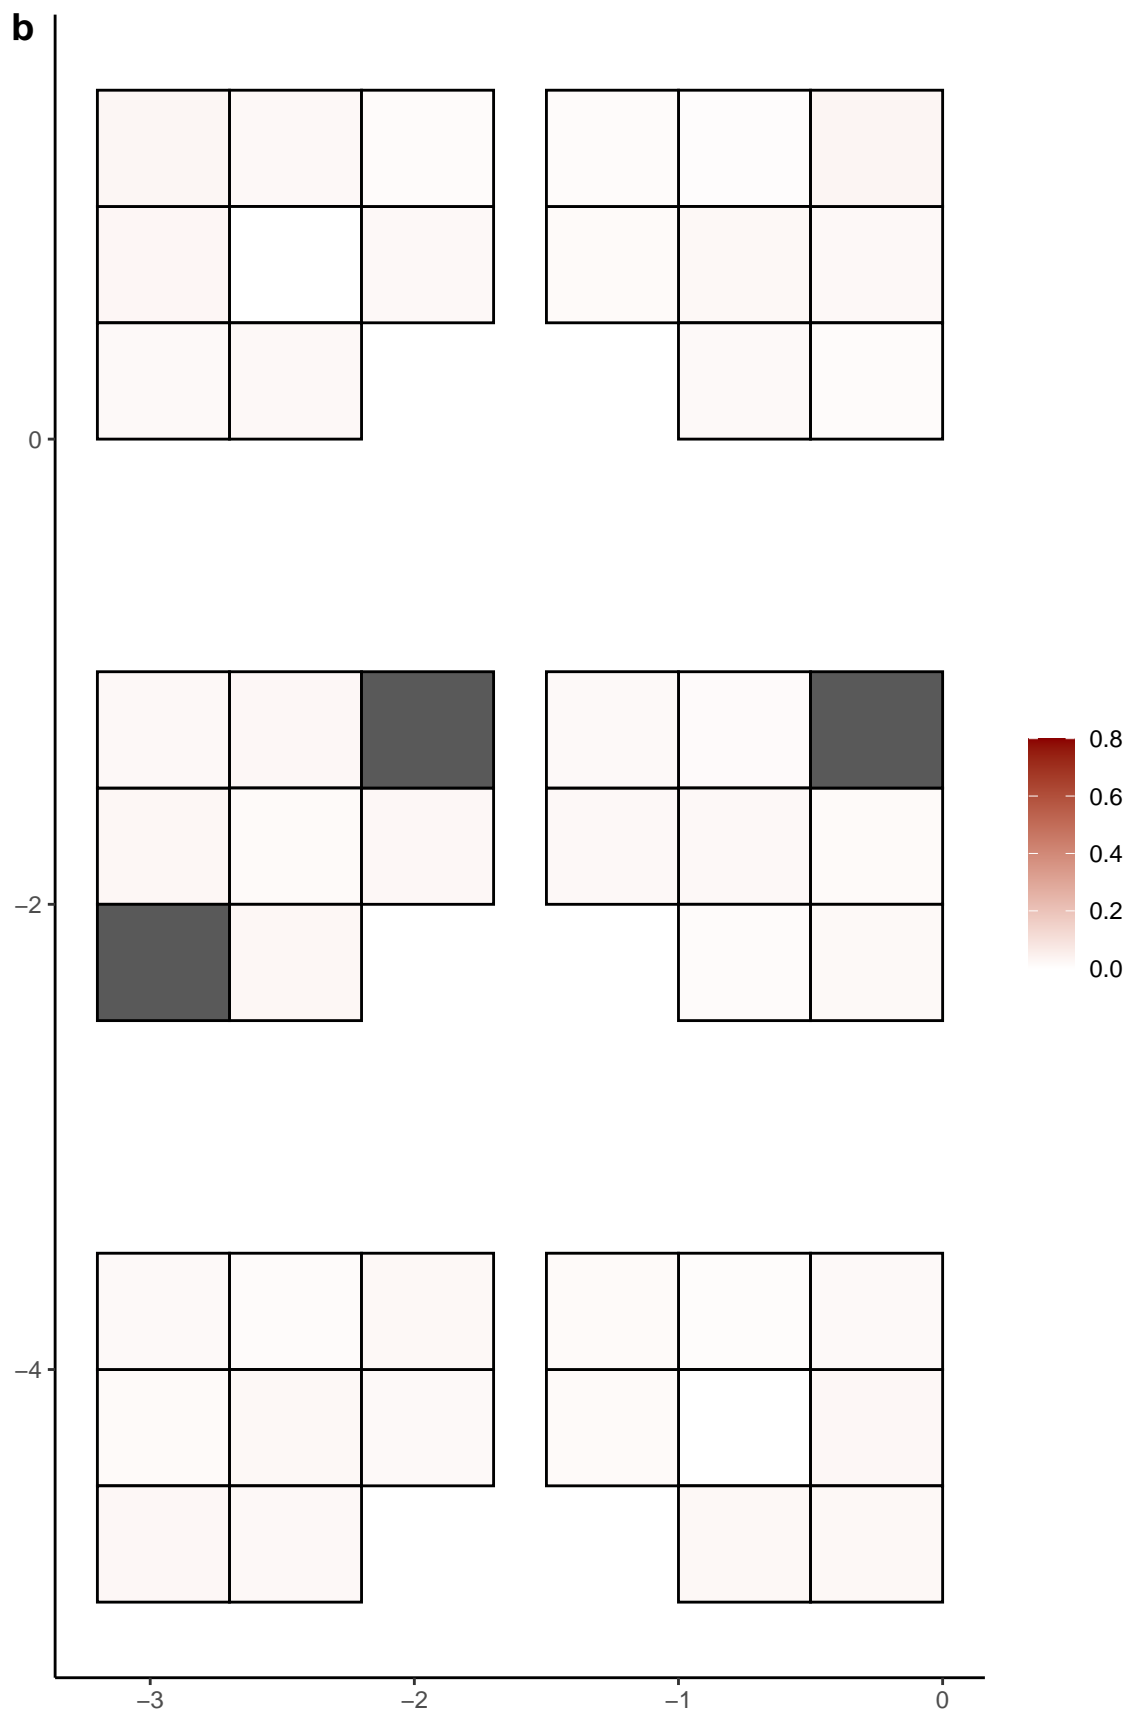

**a** ID05 21-47553269-G-A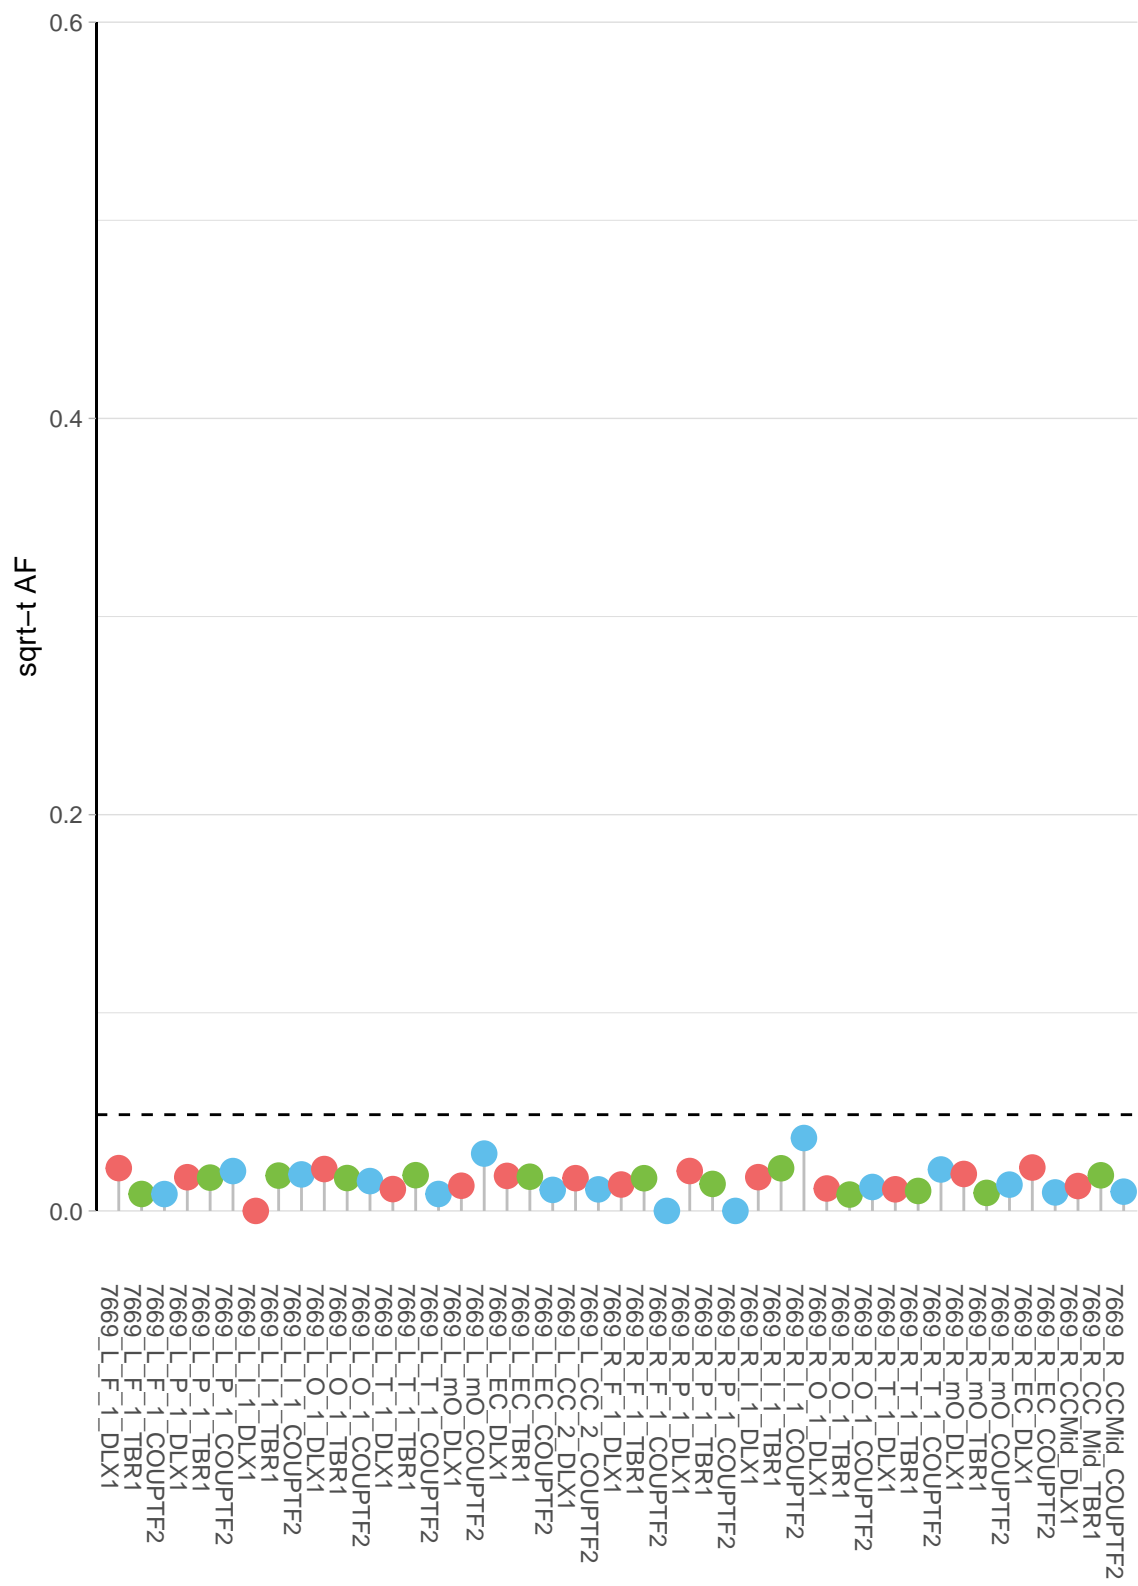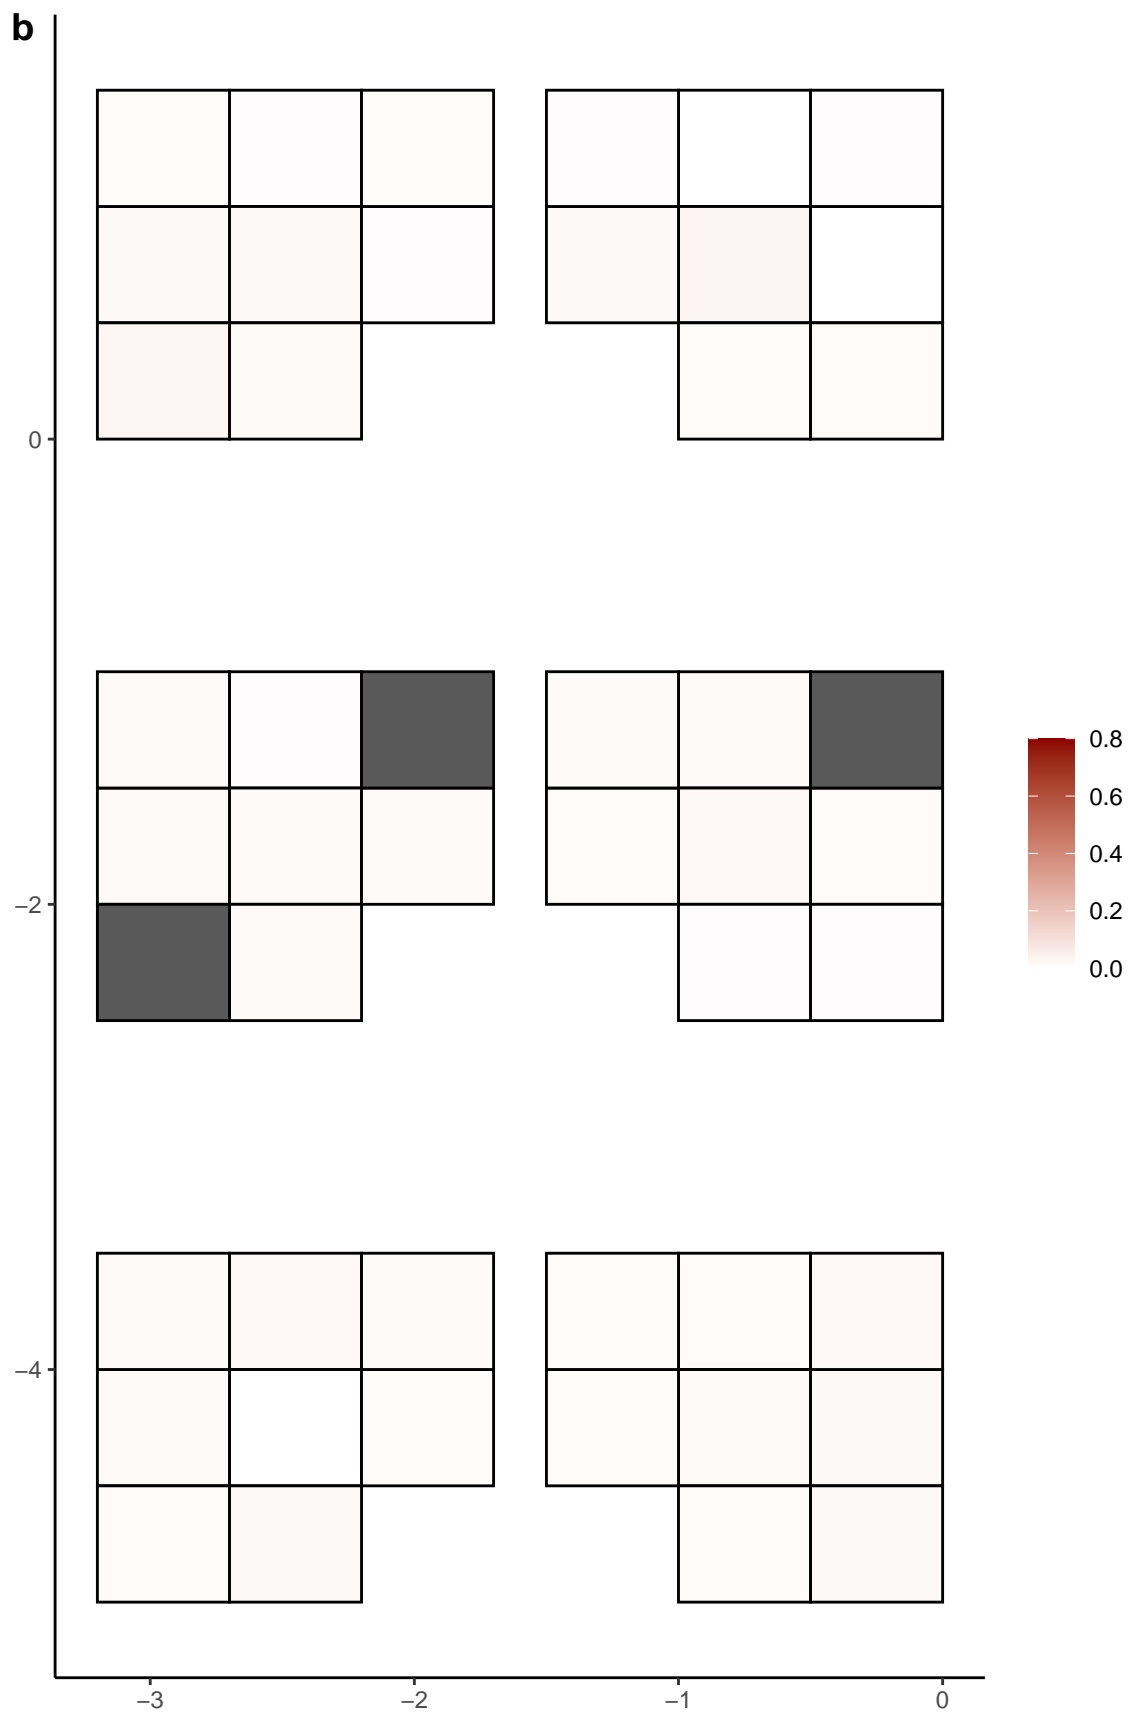



**a** ID05 22-23315541-G-A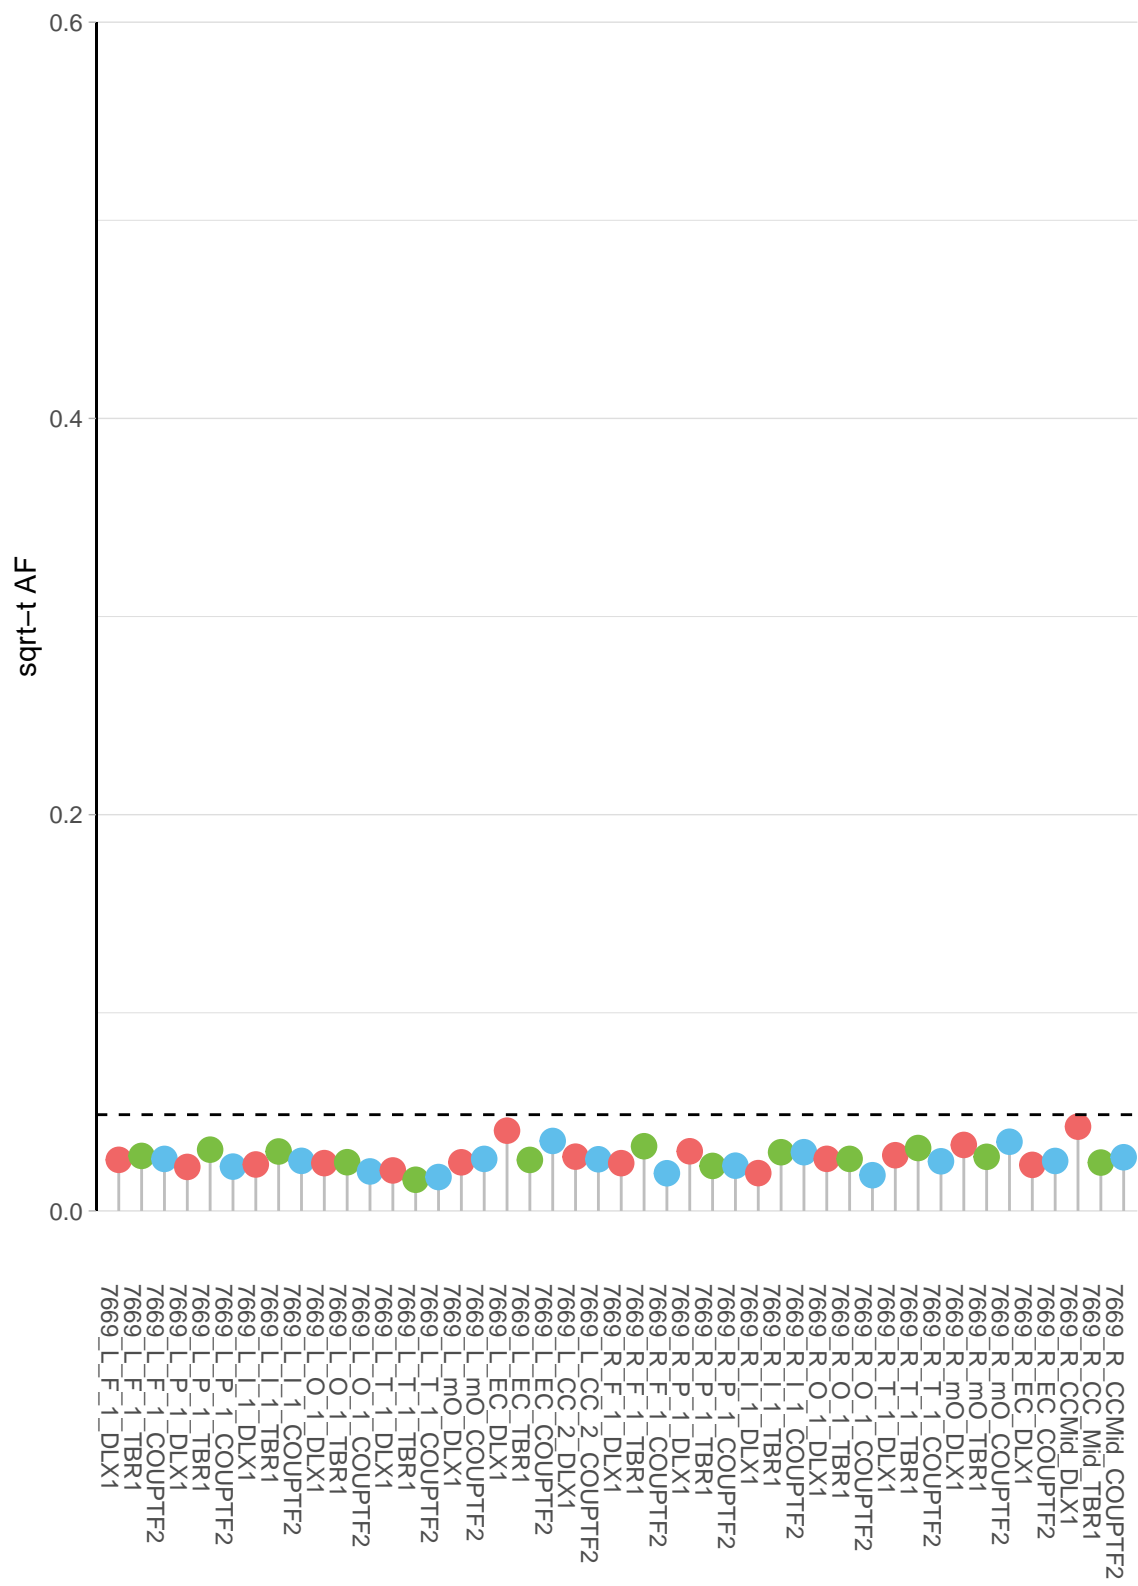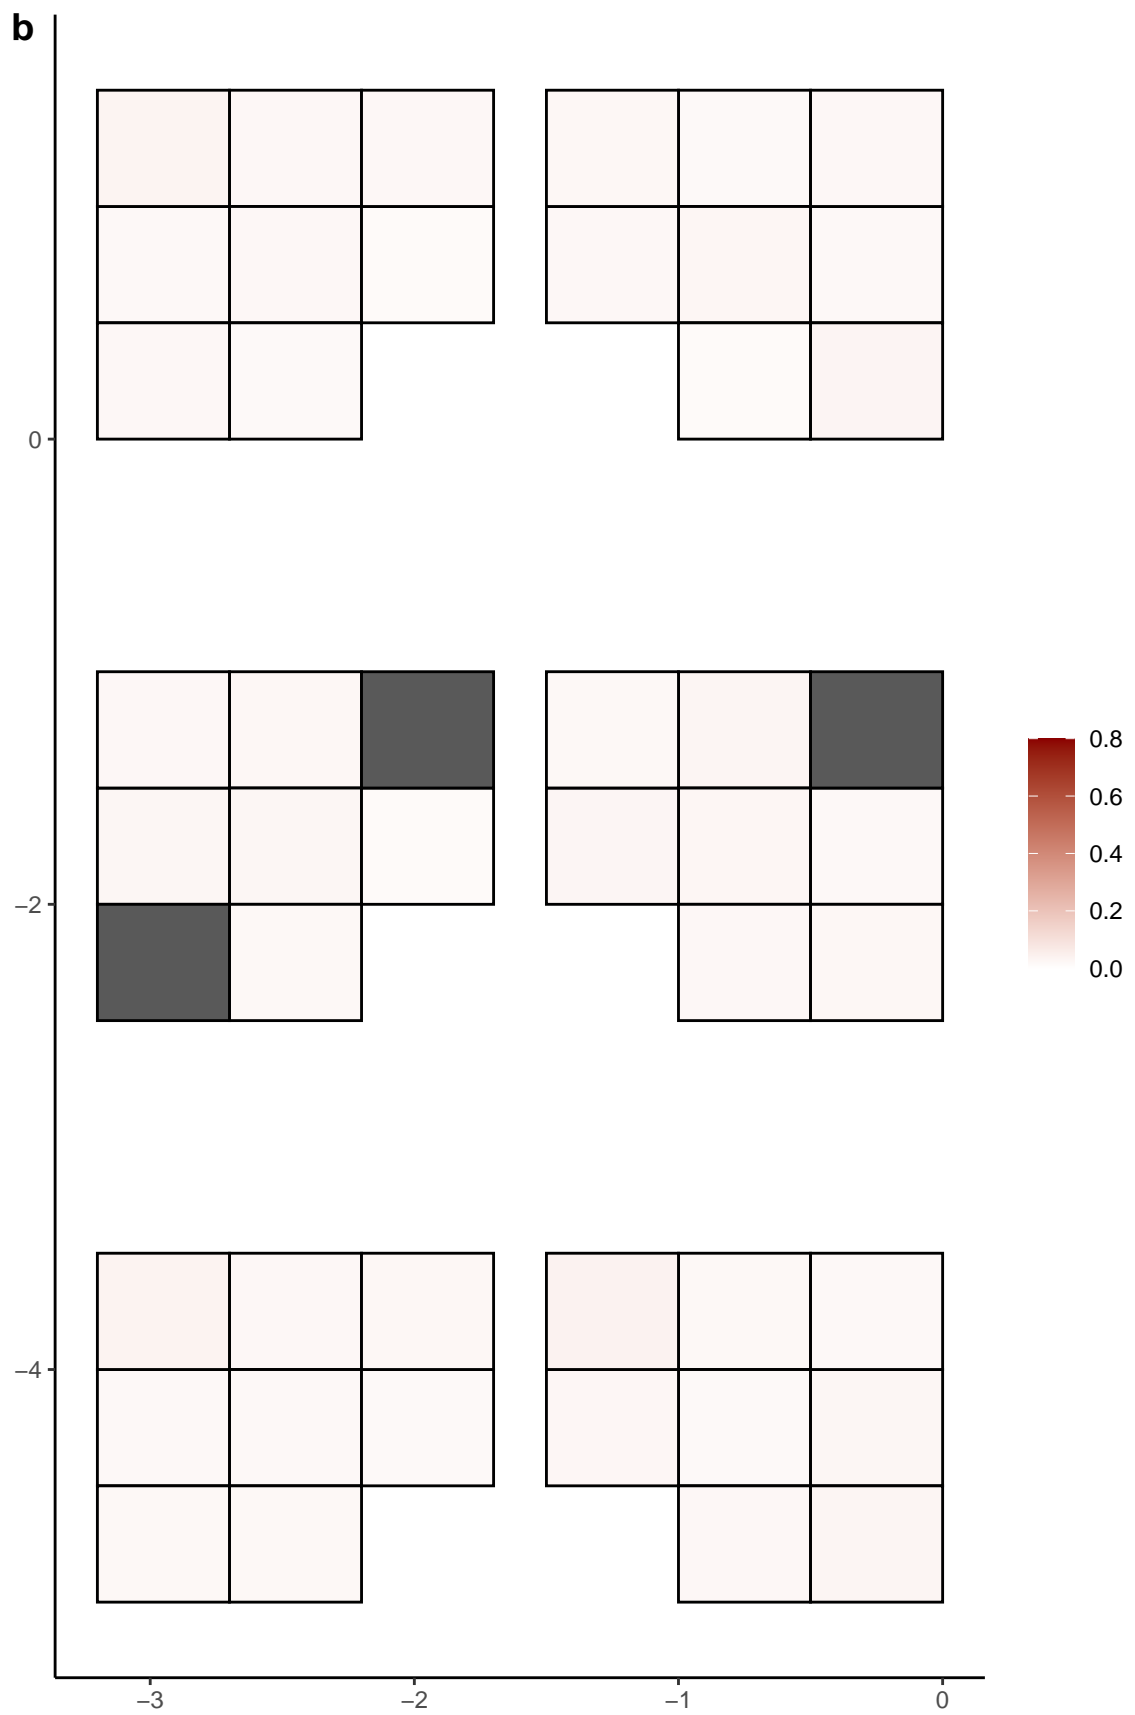



**a** ID05 22-47149979-G-A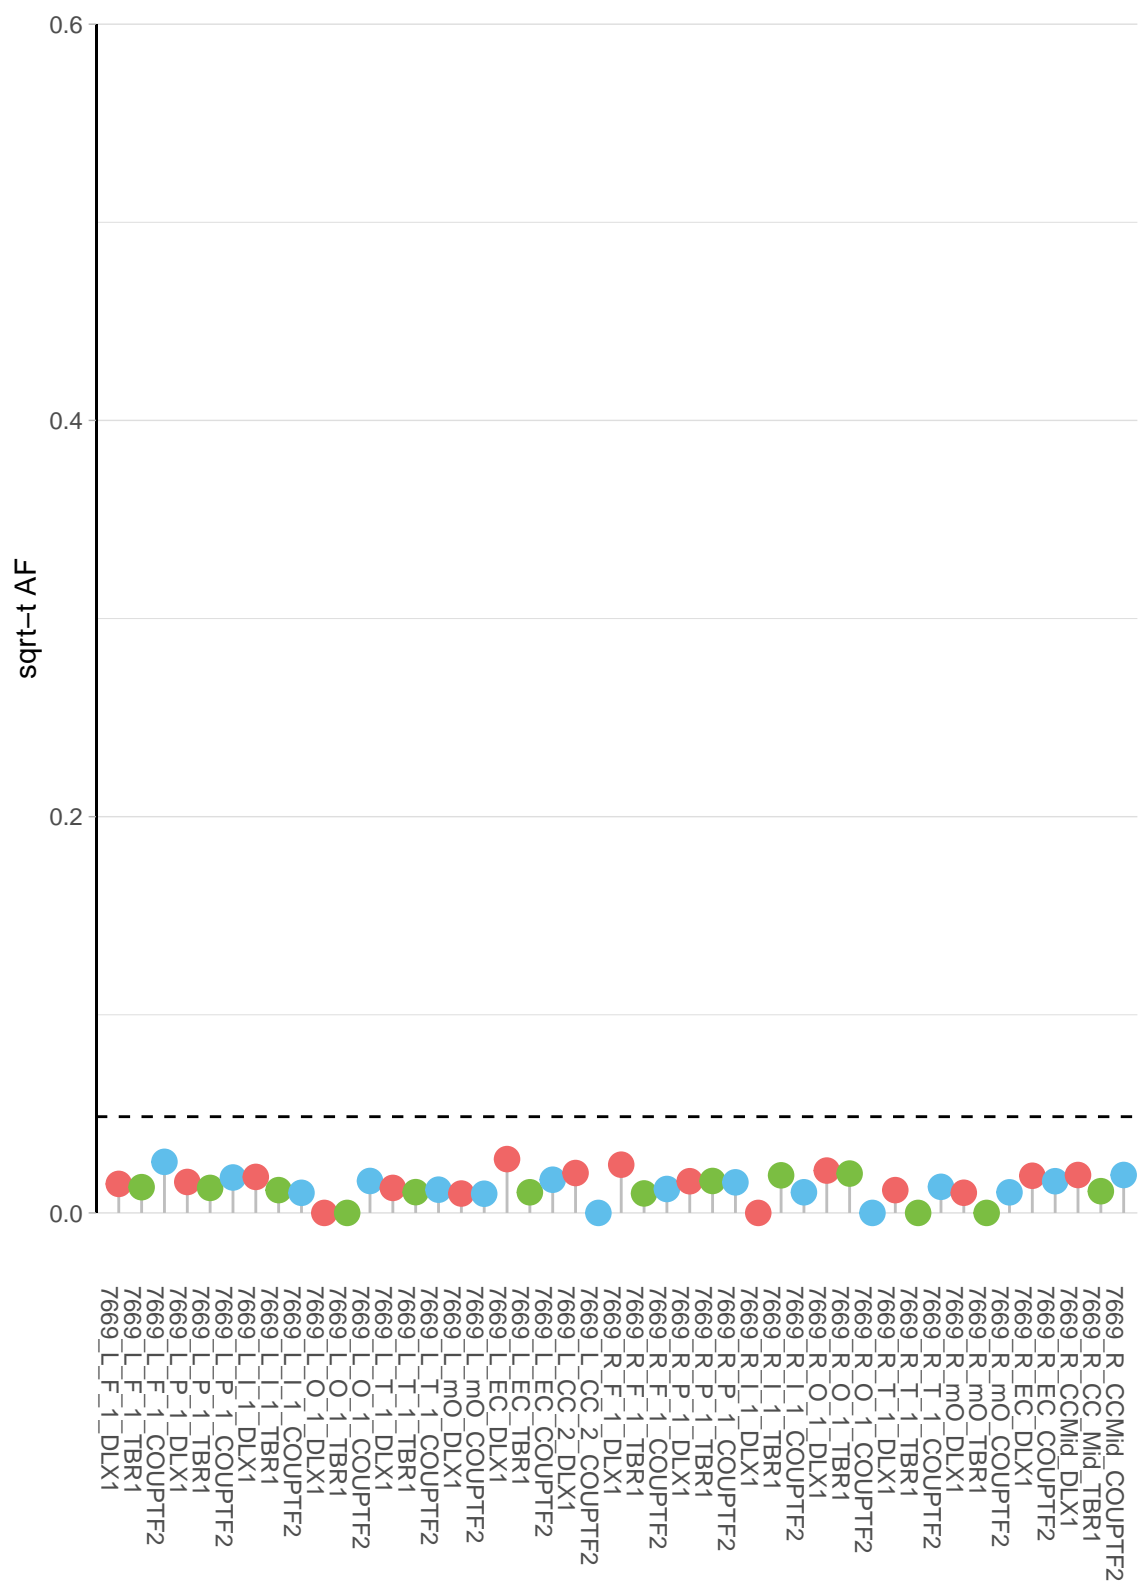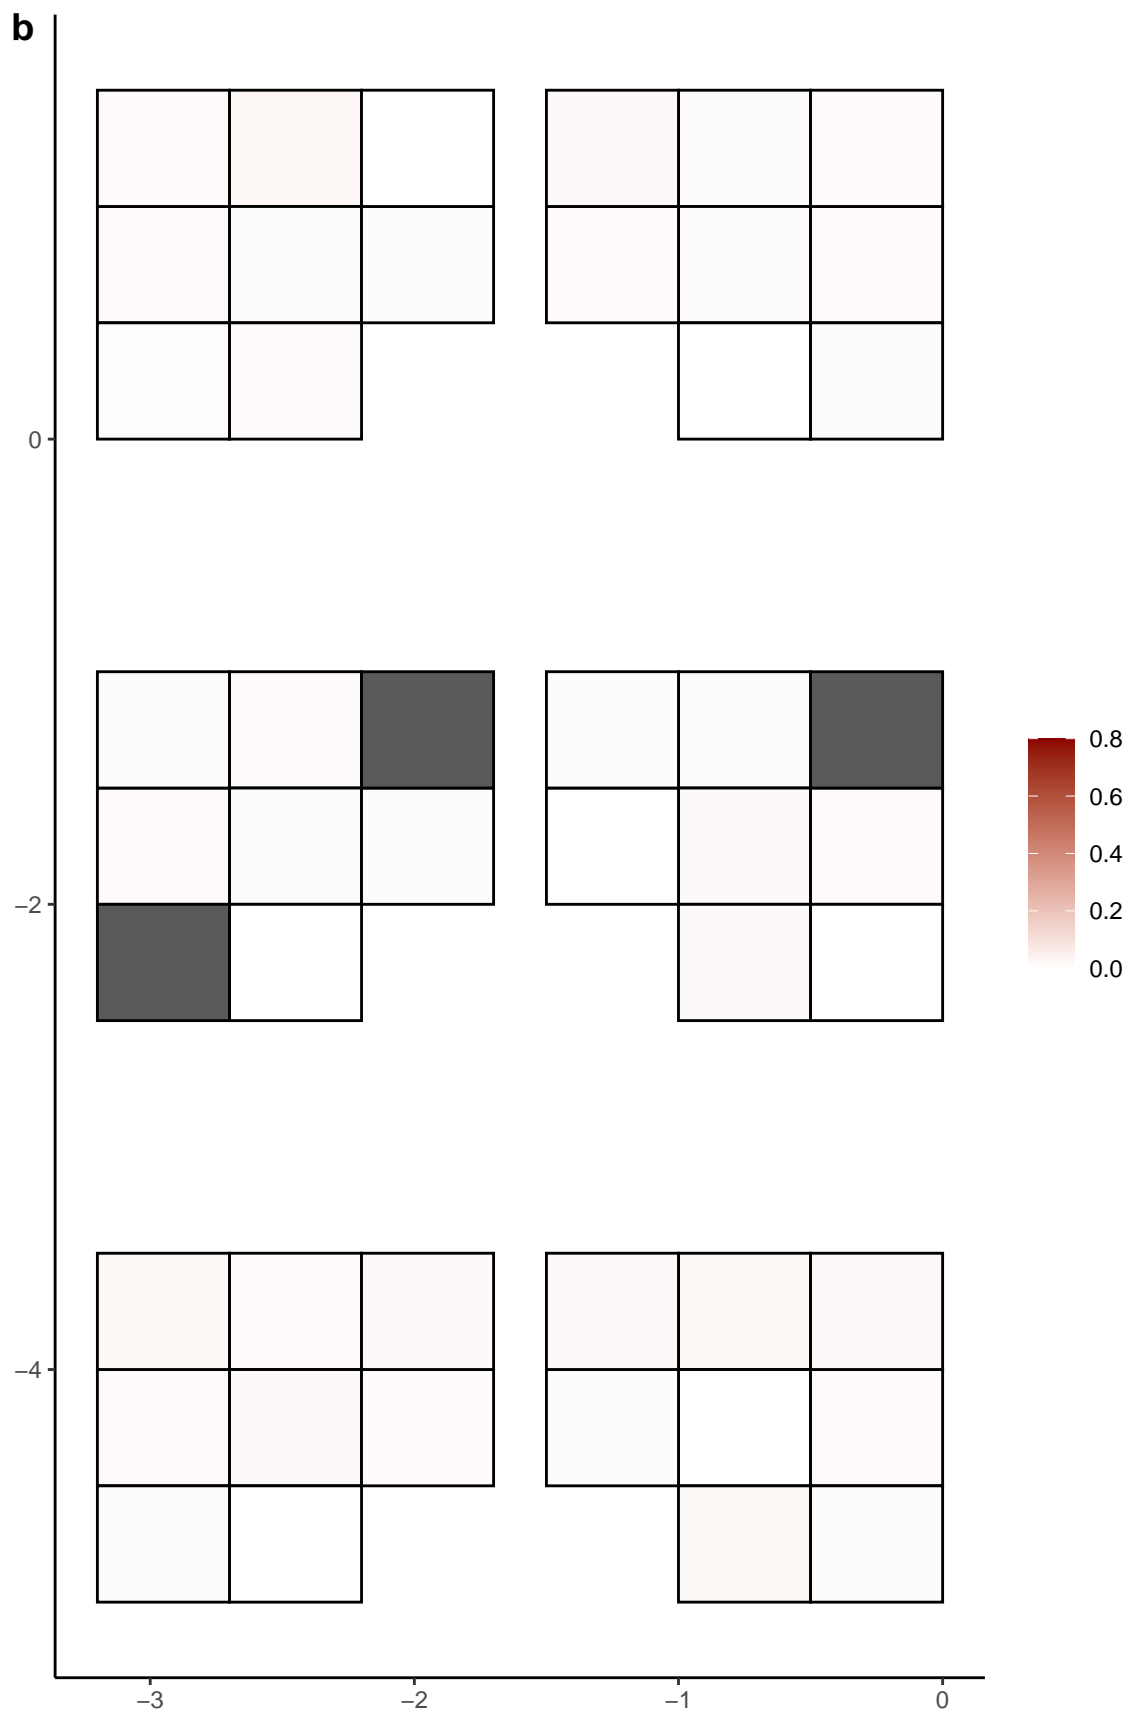

**a** ID05 22-49202968-G-A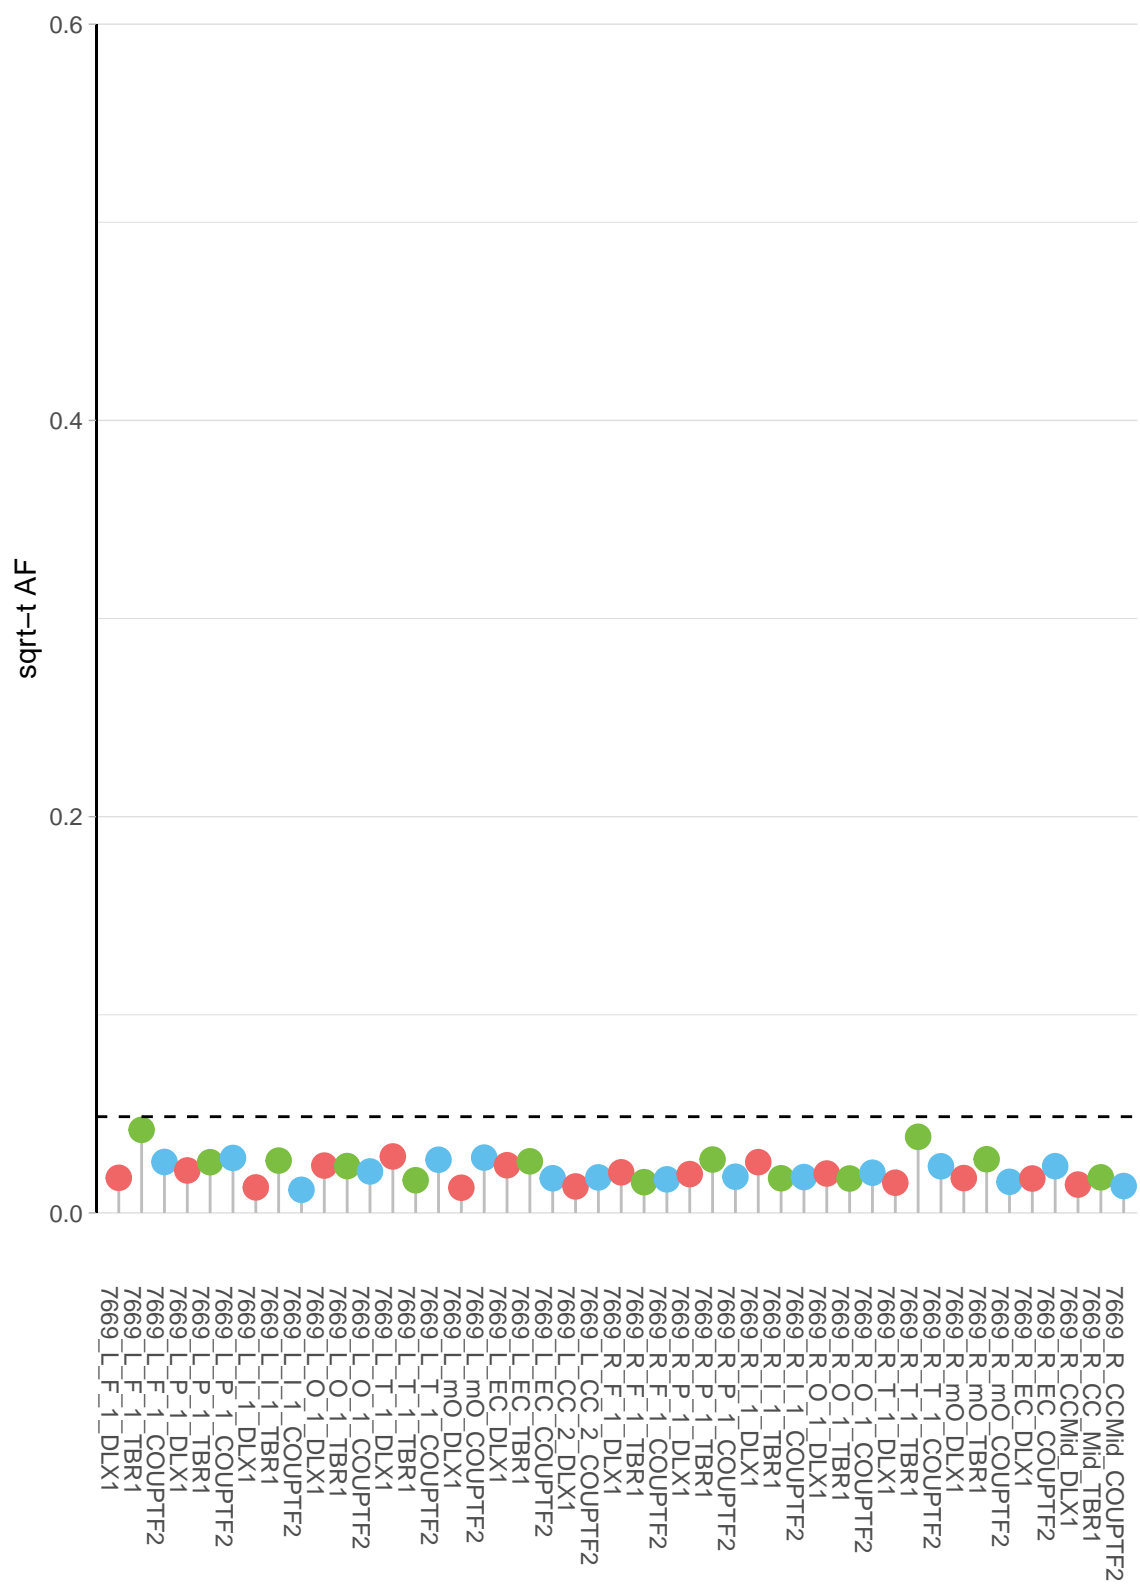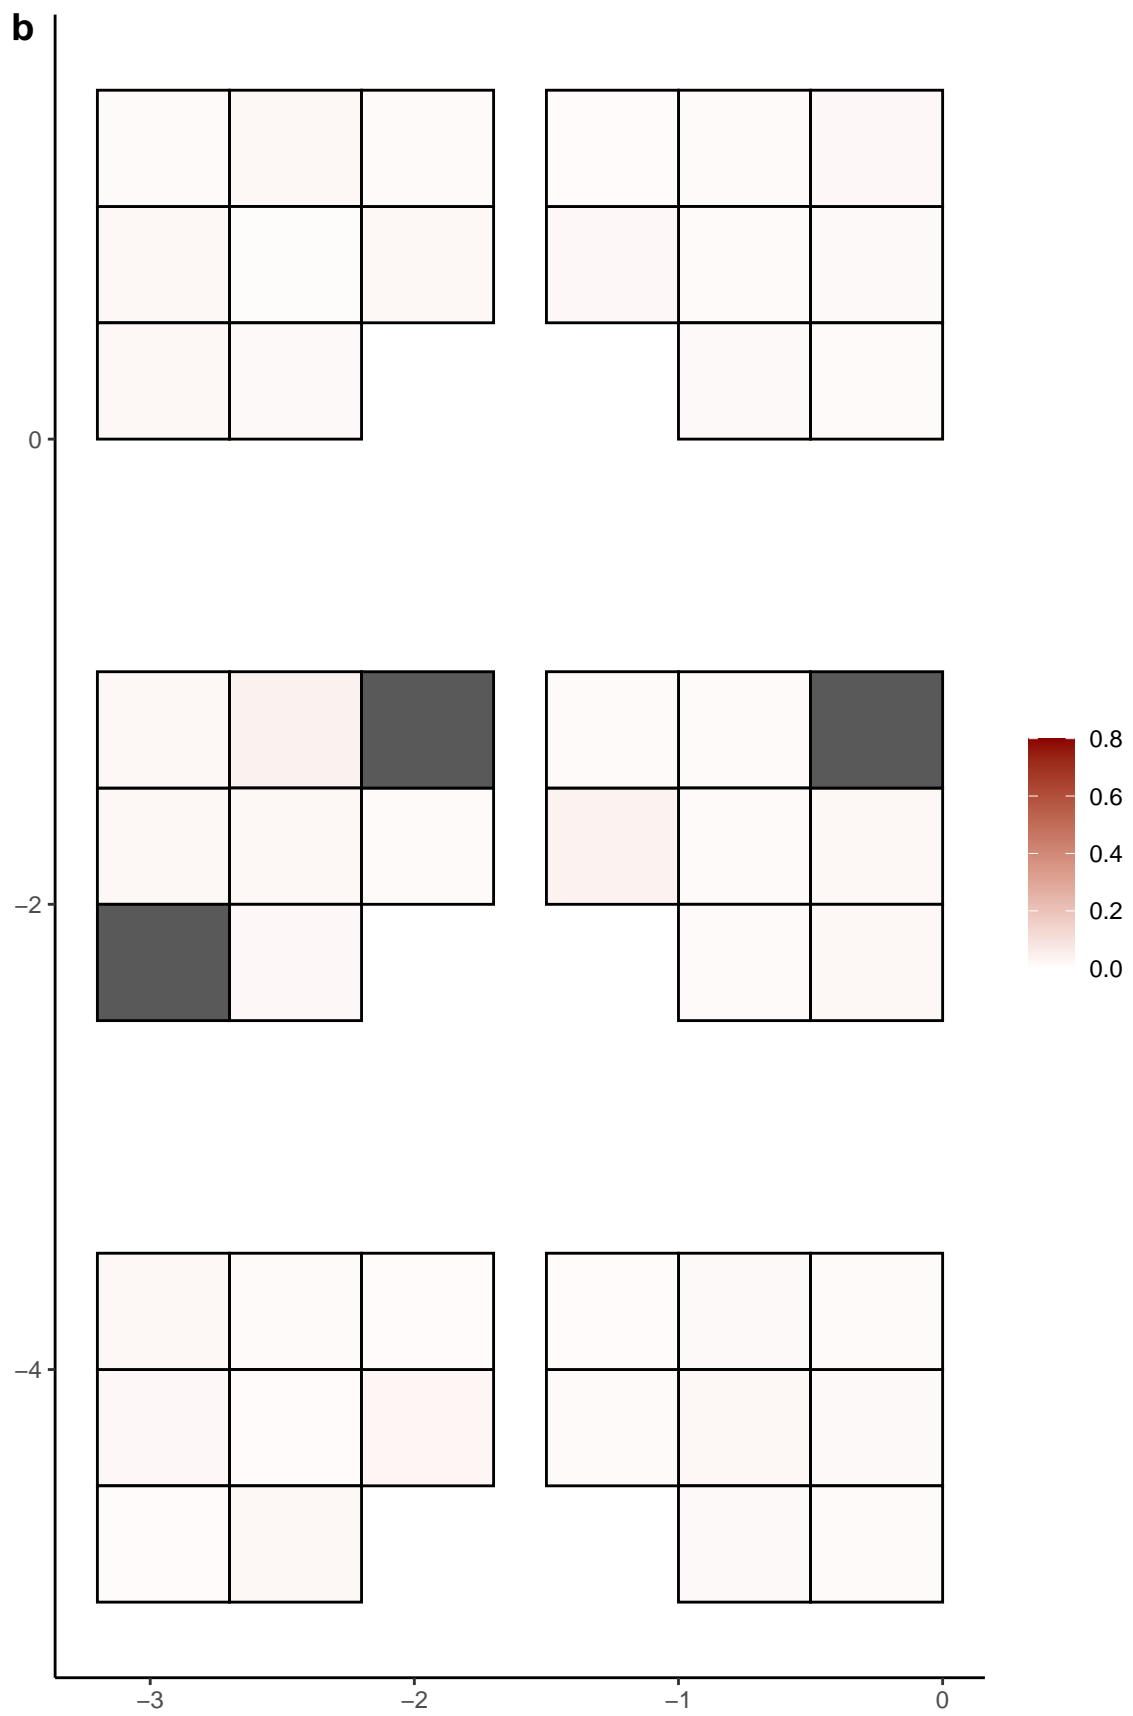

**a** ID05 22-49376519-G-A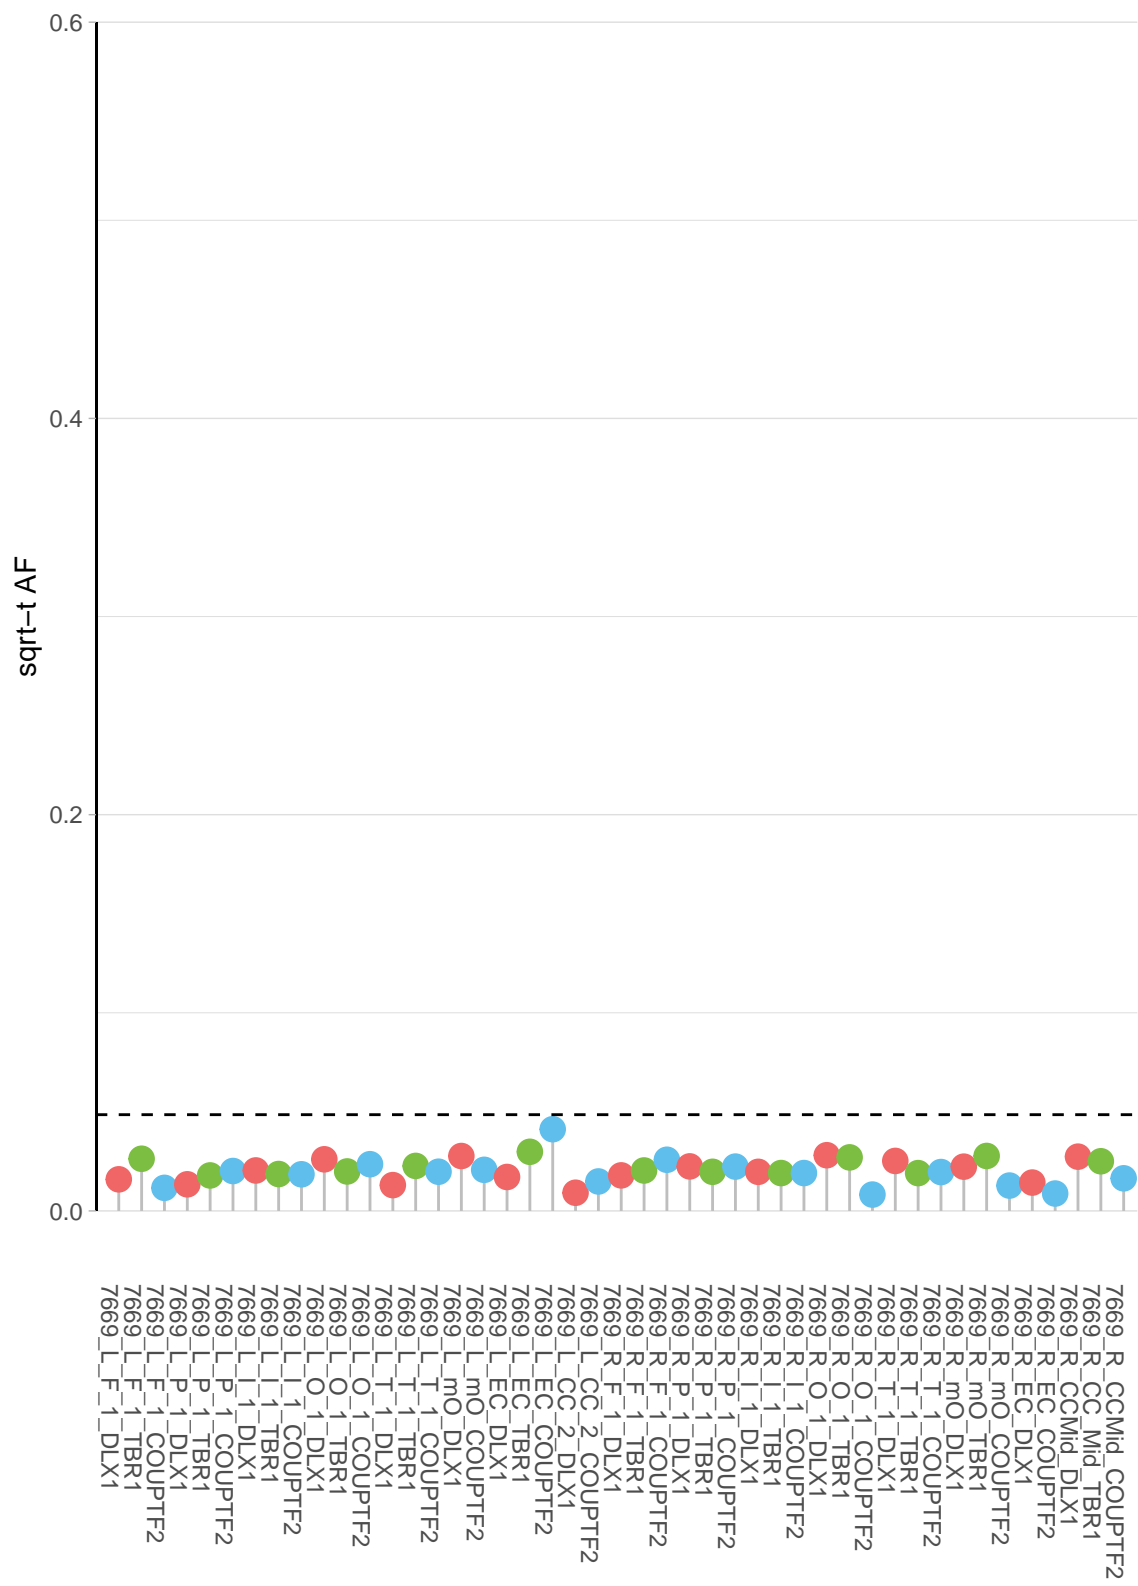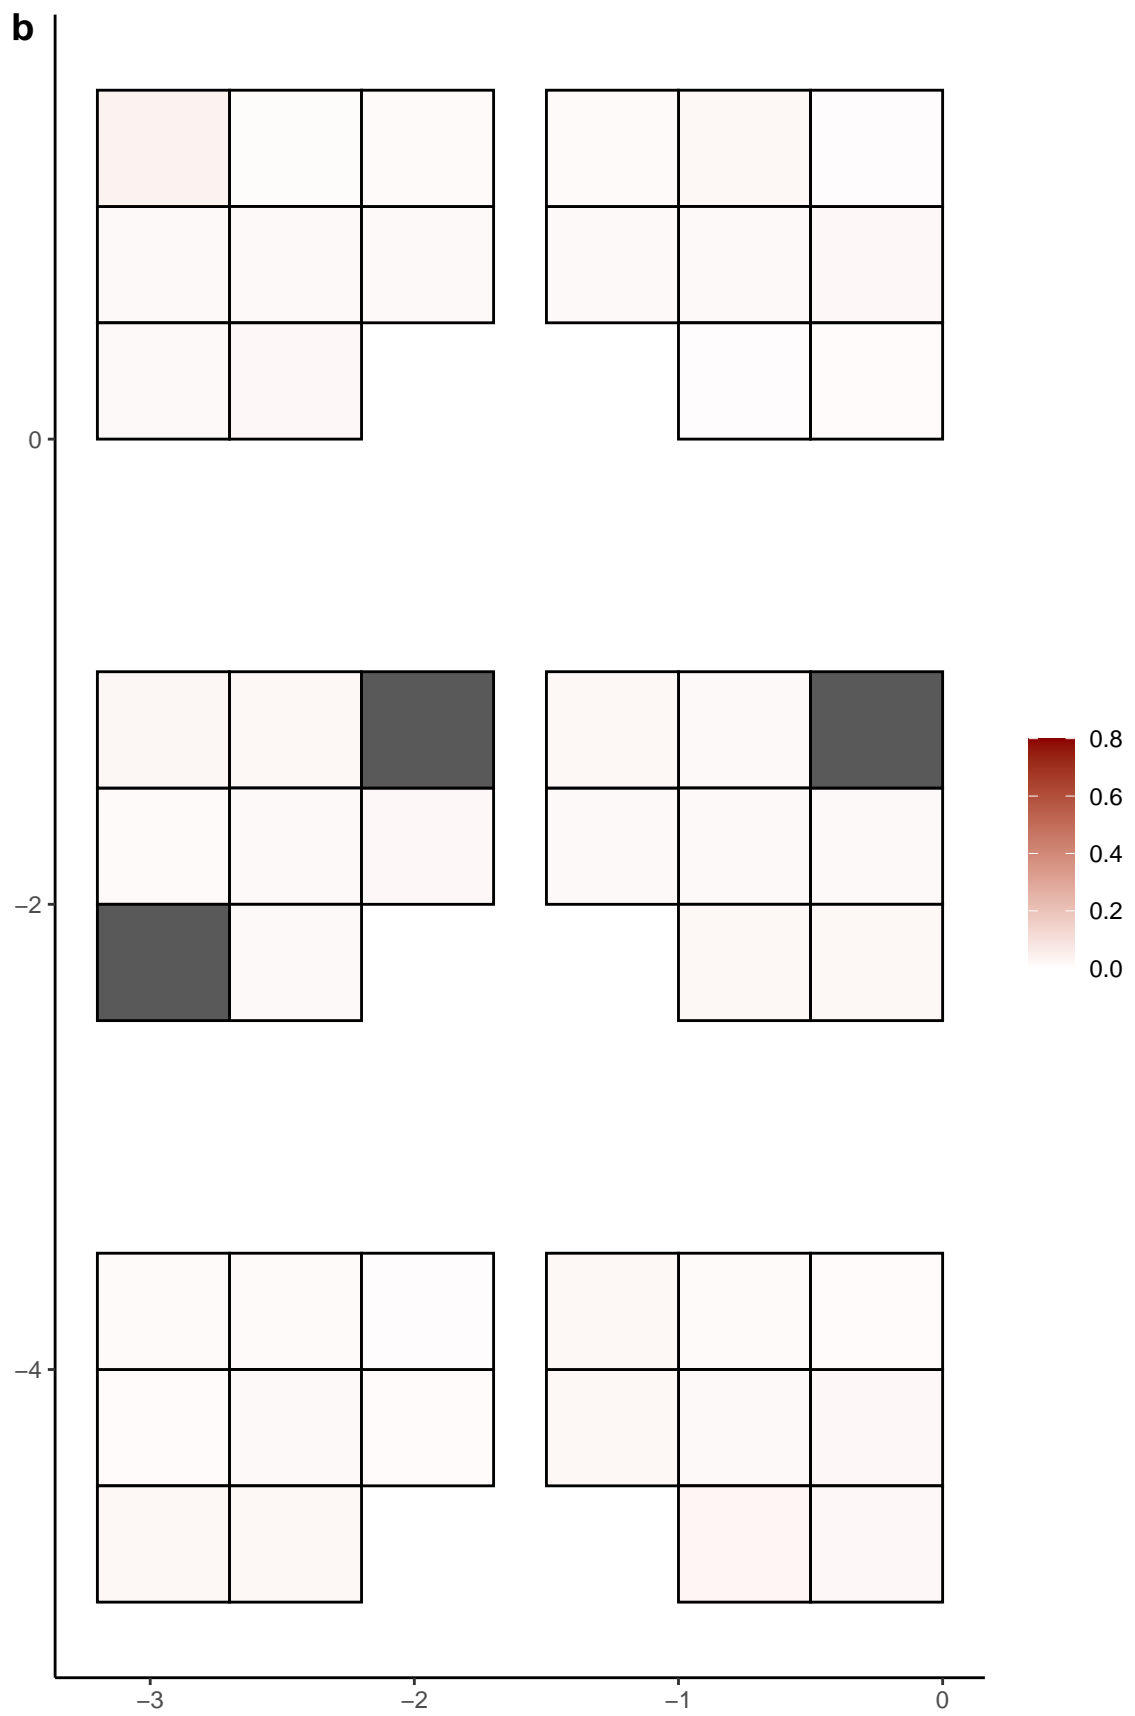

**a** ID05 22-49717540-G-A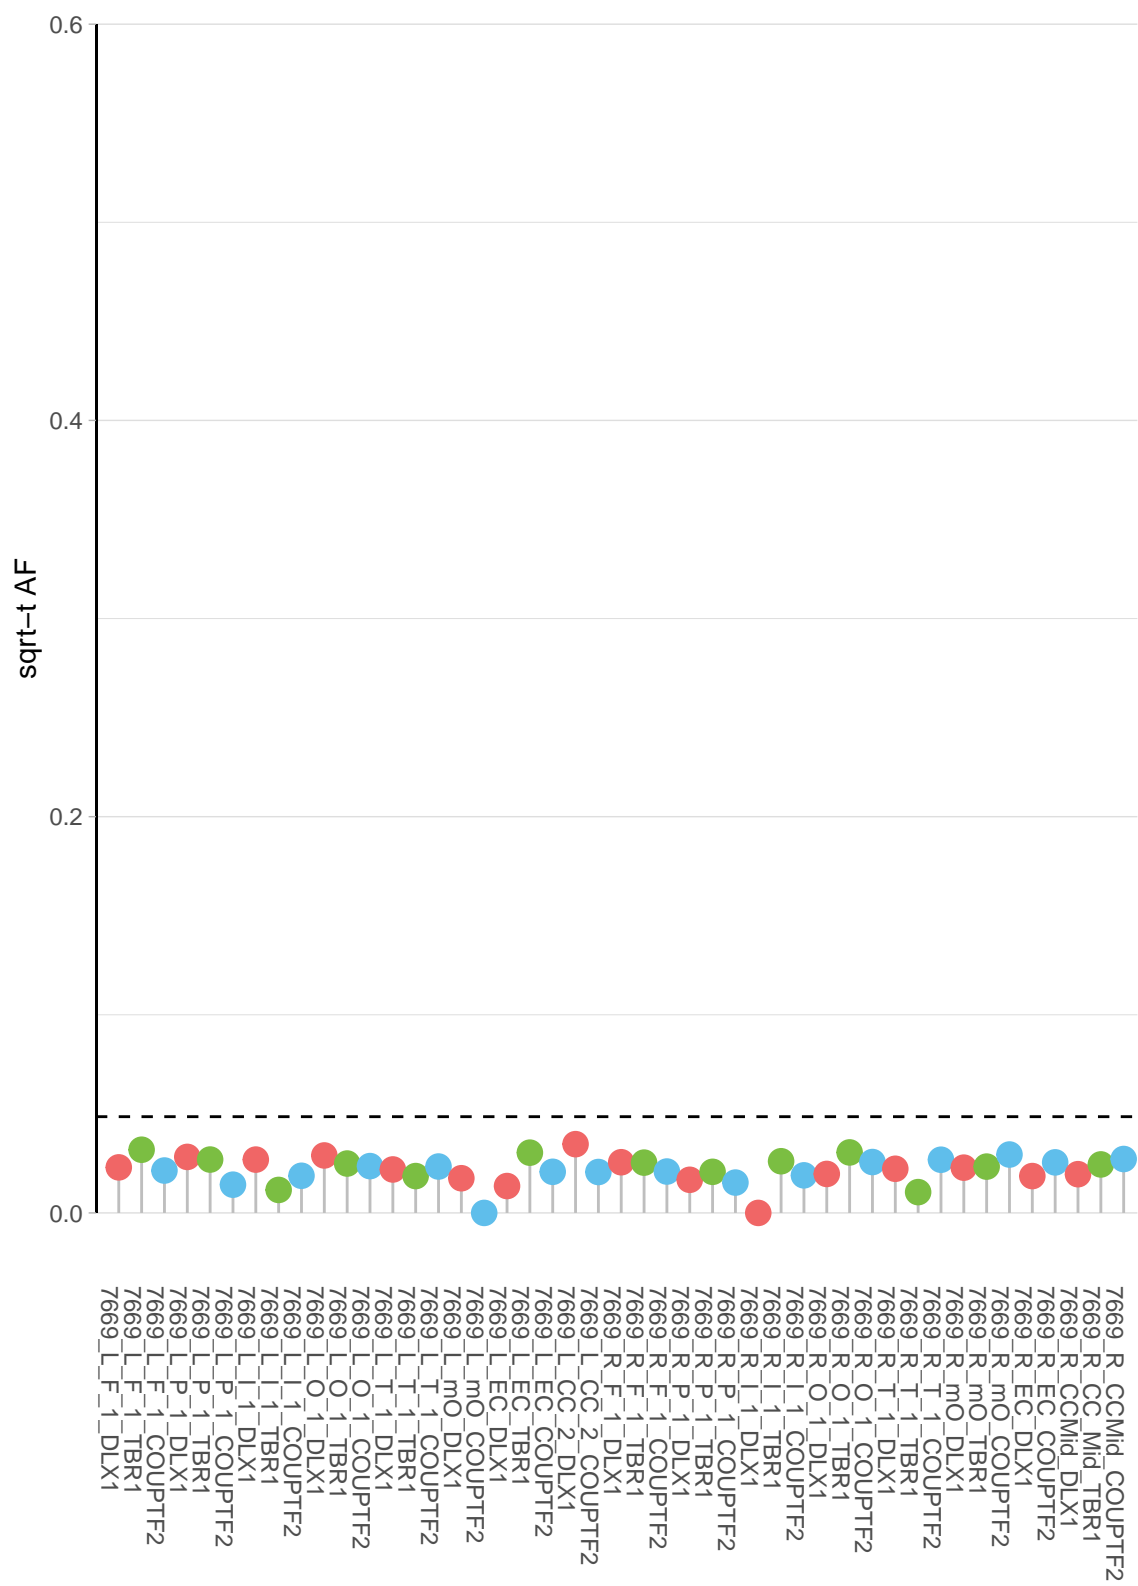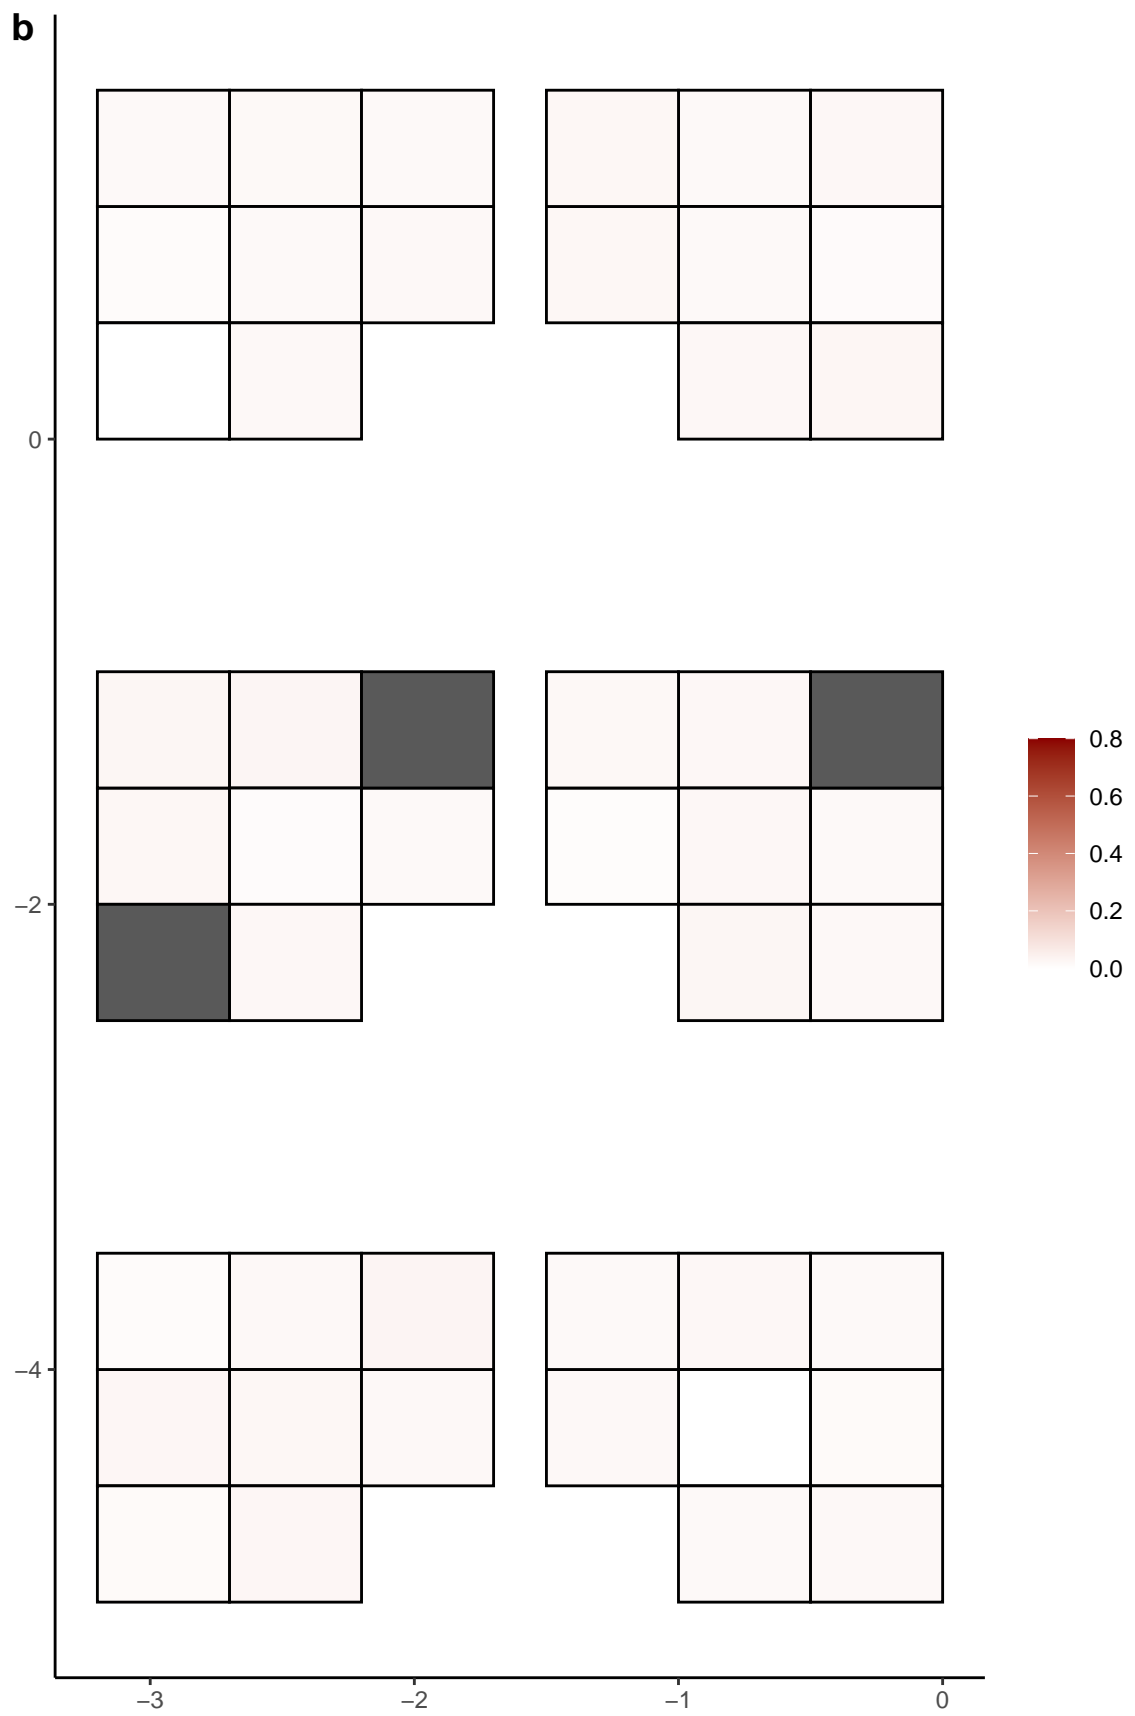

**a** ID05 22-49847904-G-A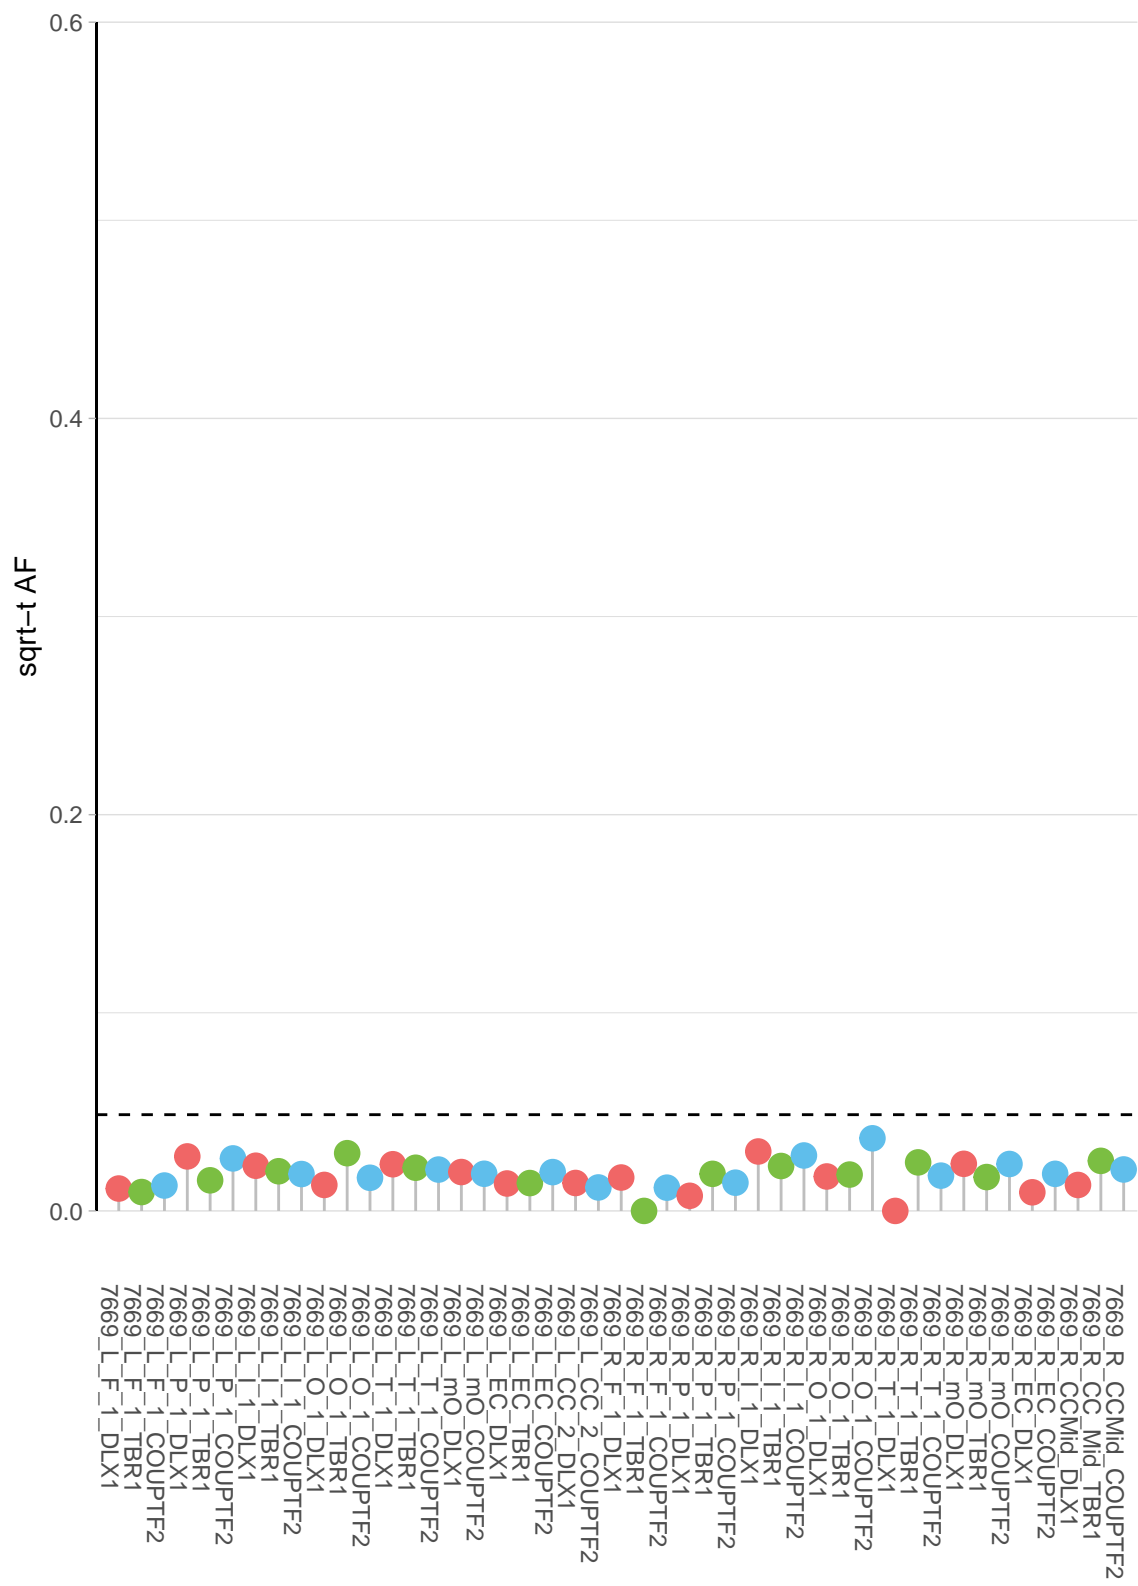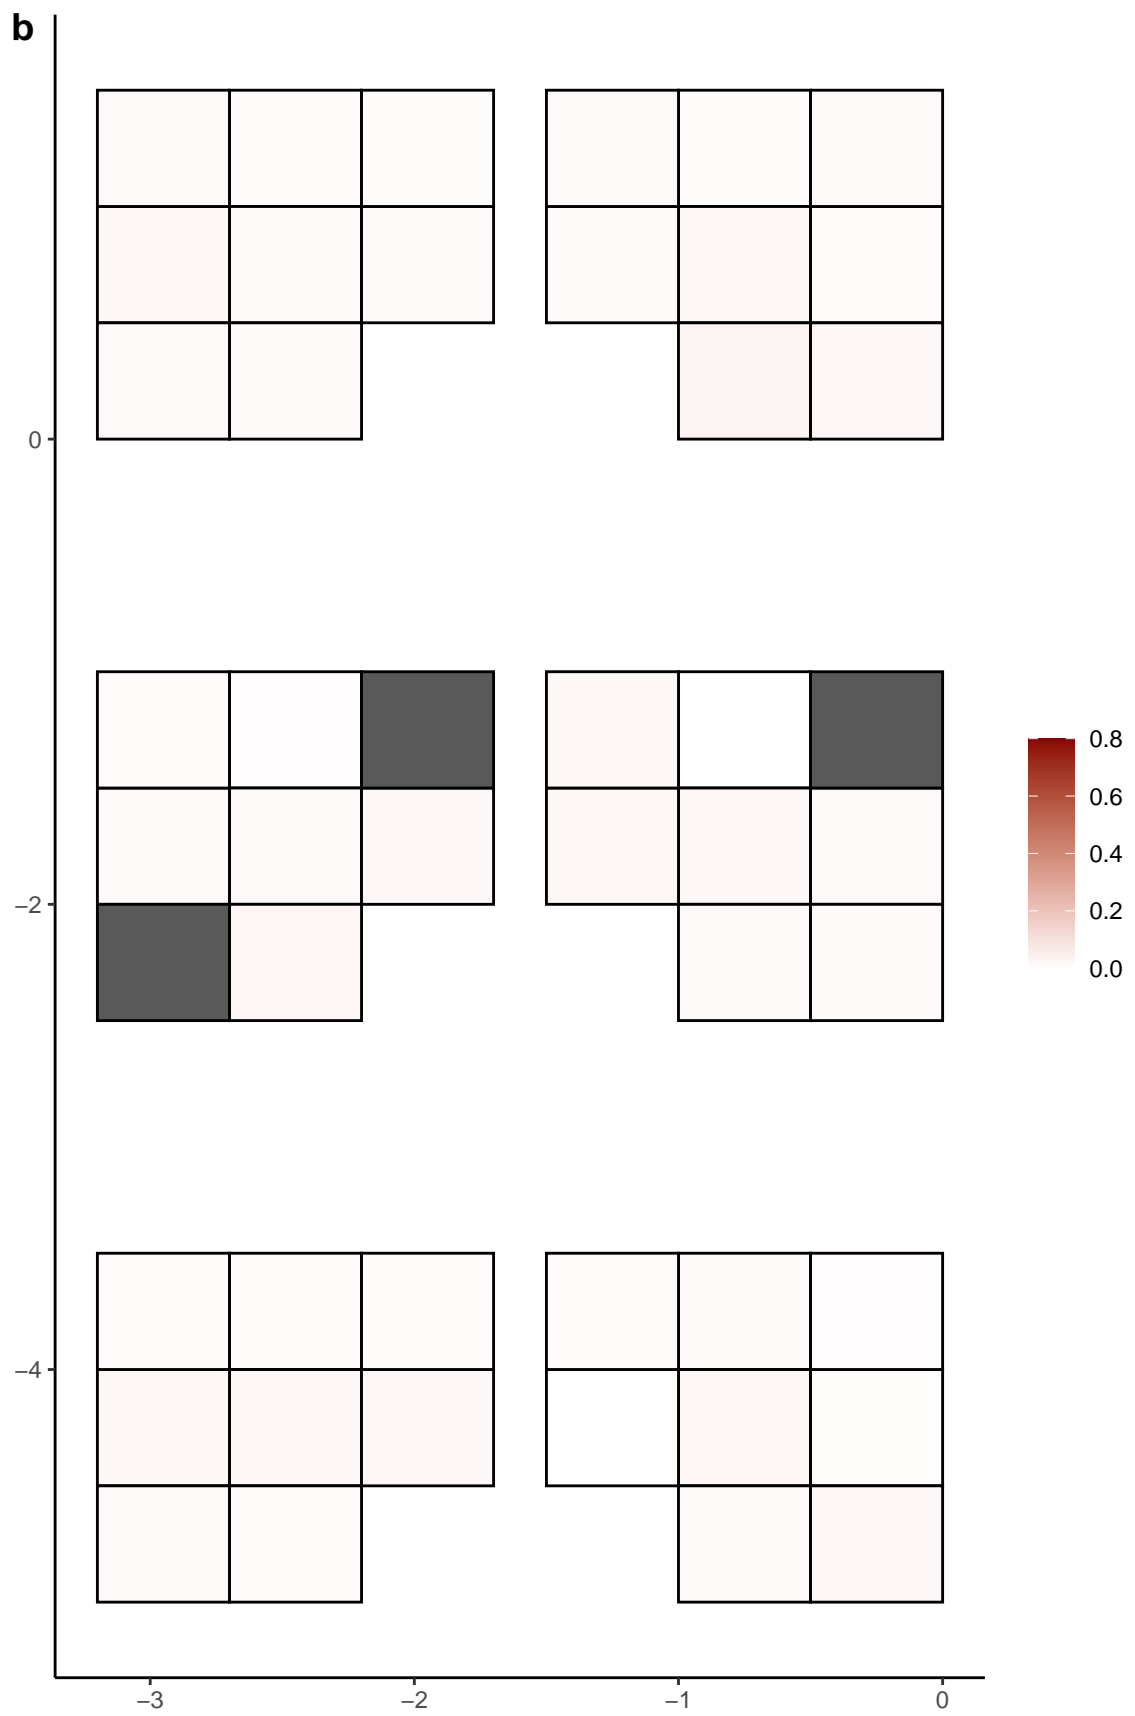

**a** ID05 22-51170068-G-A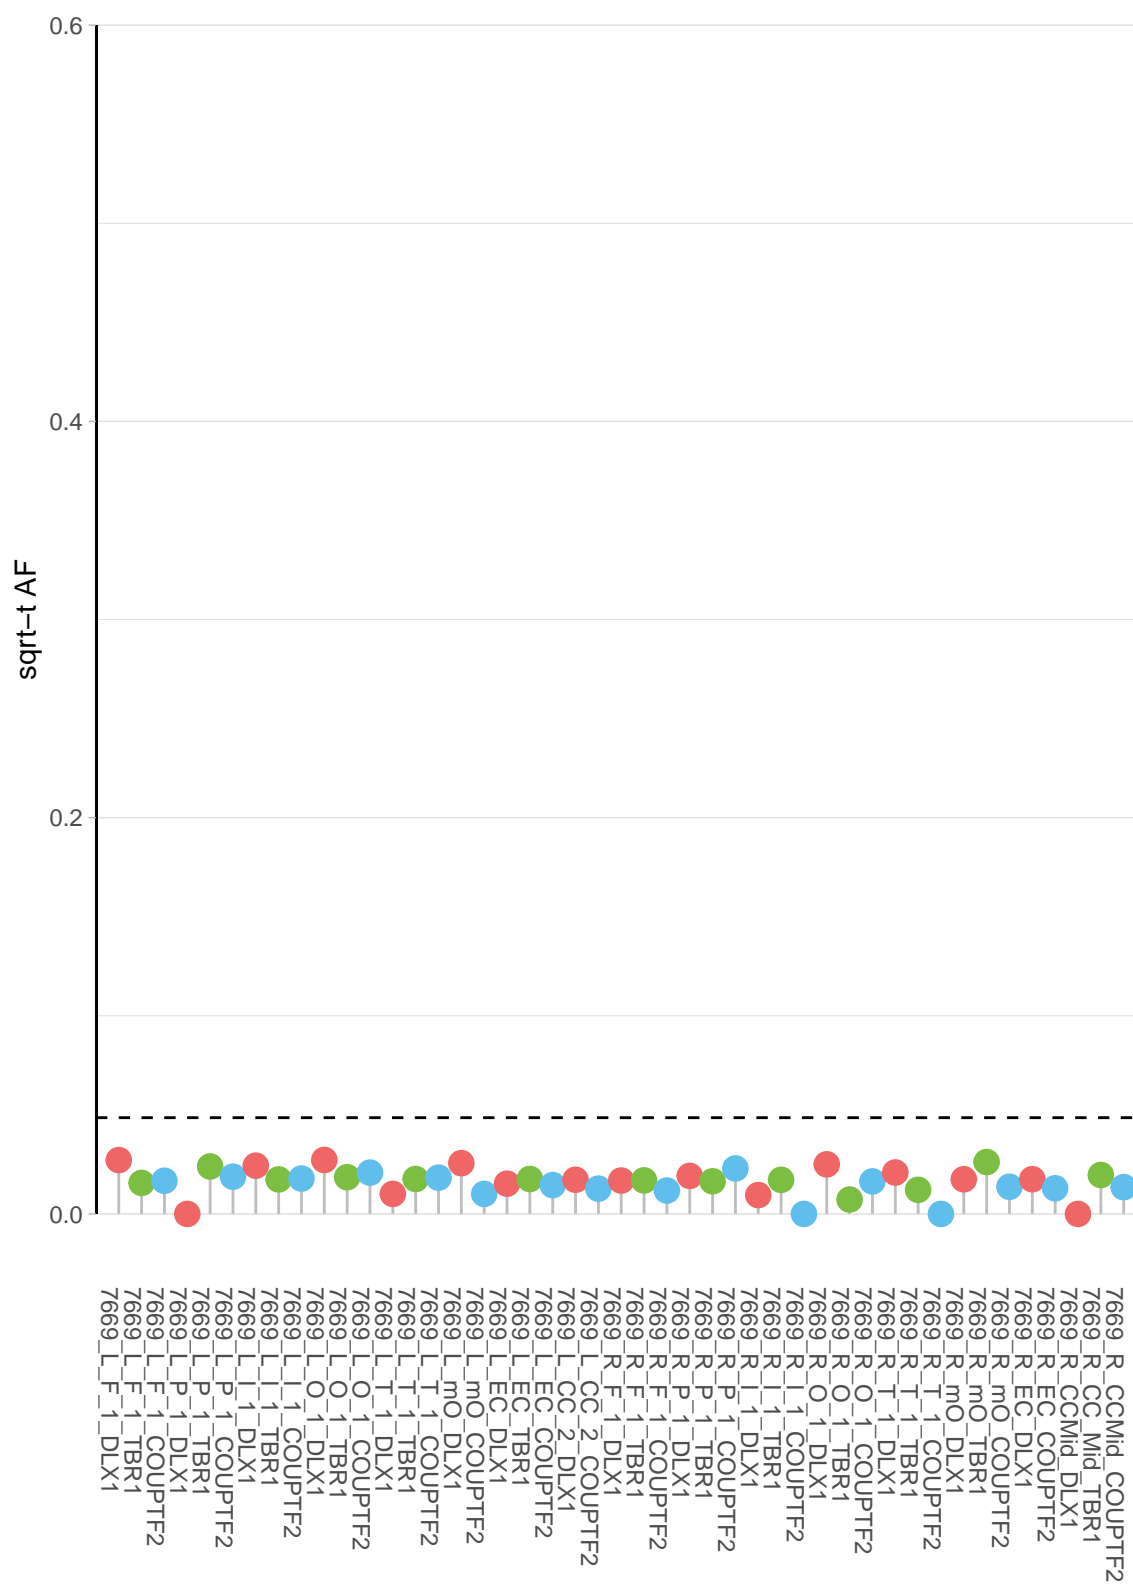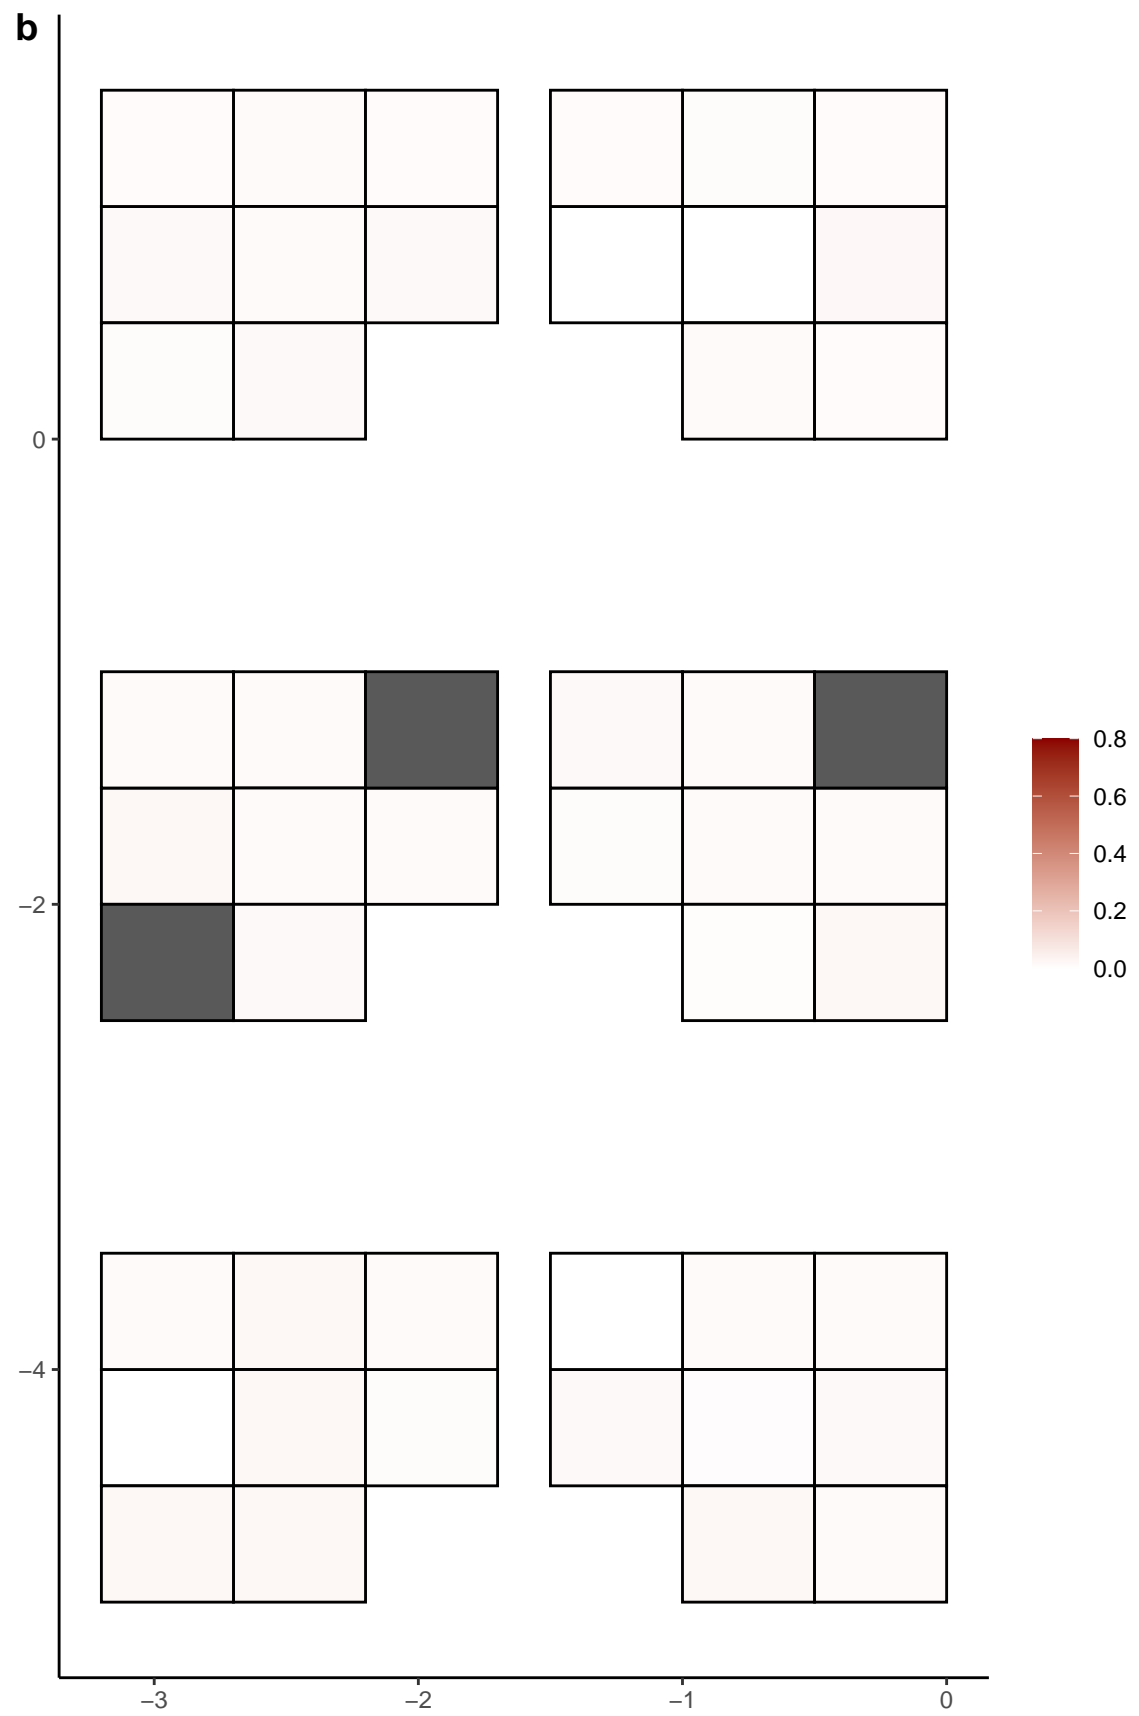



**a** ID05 3-101156372-T-C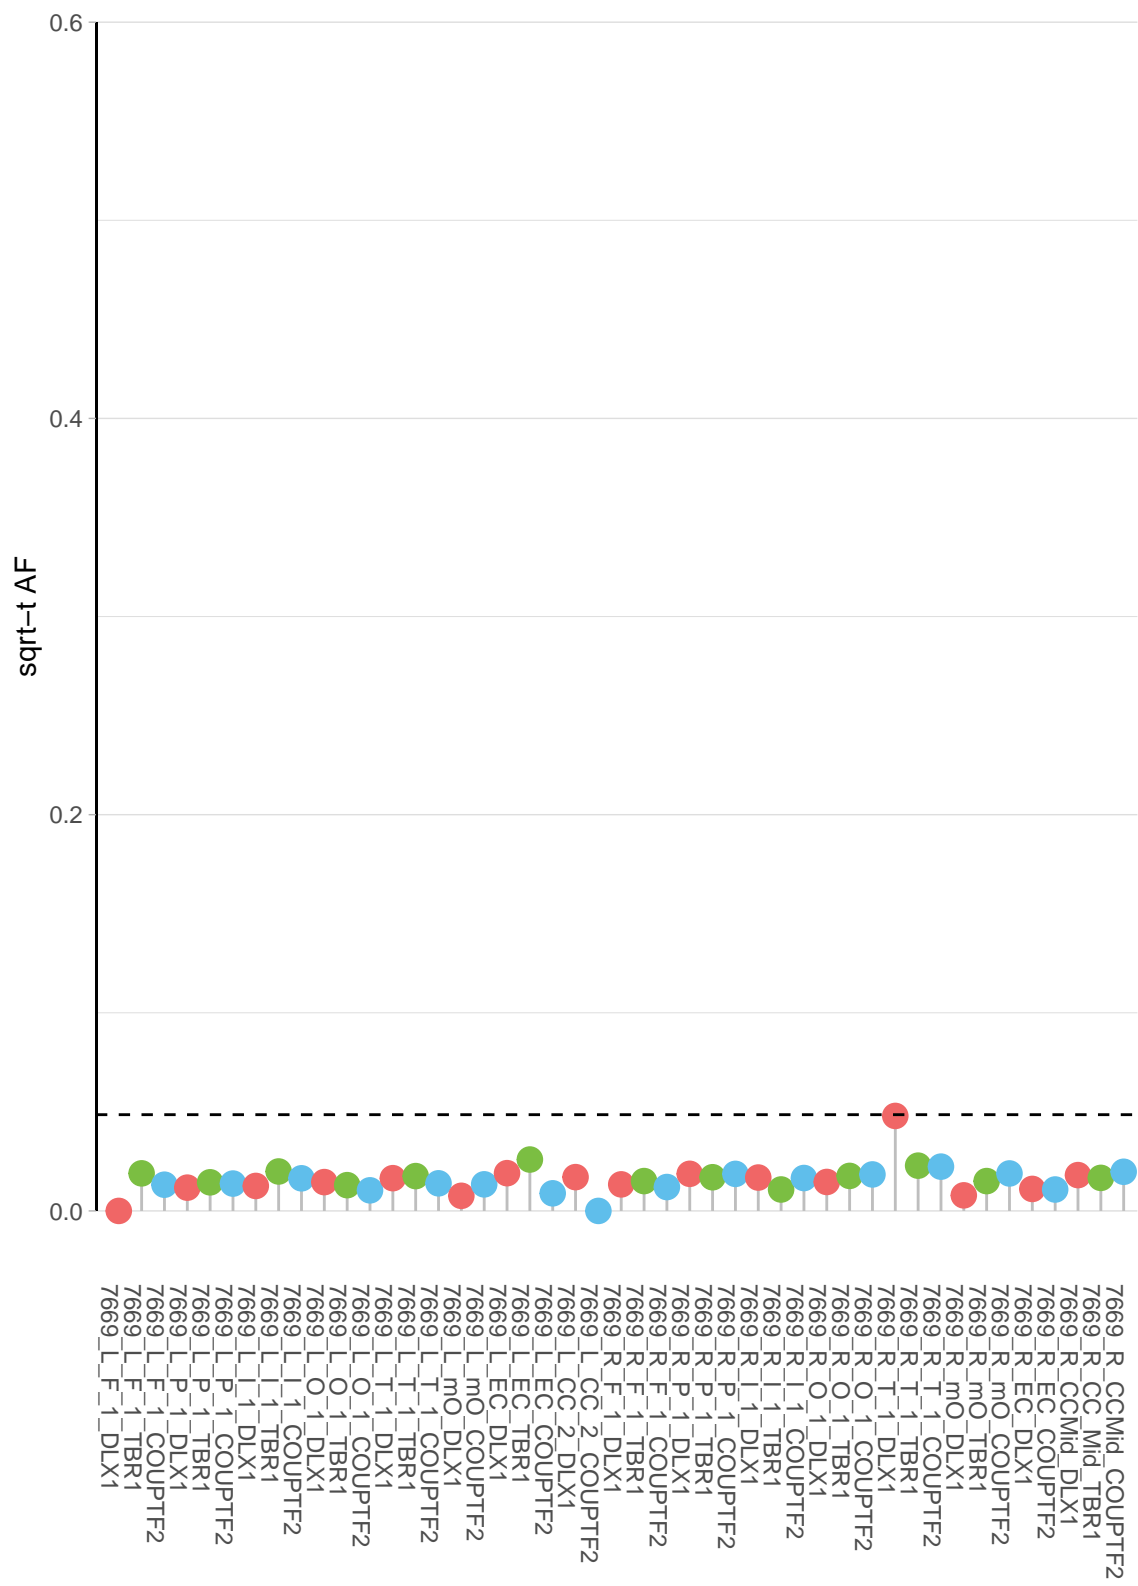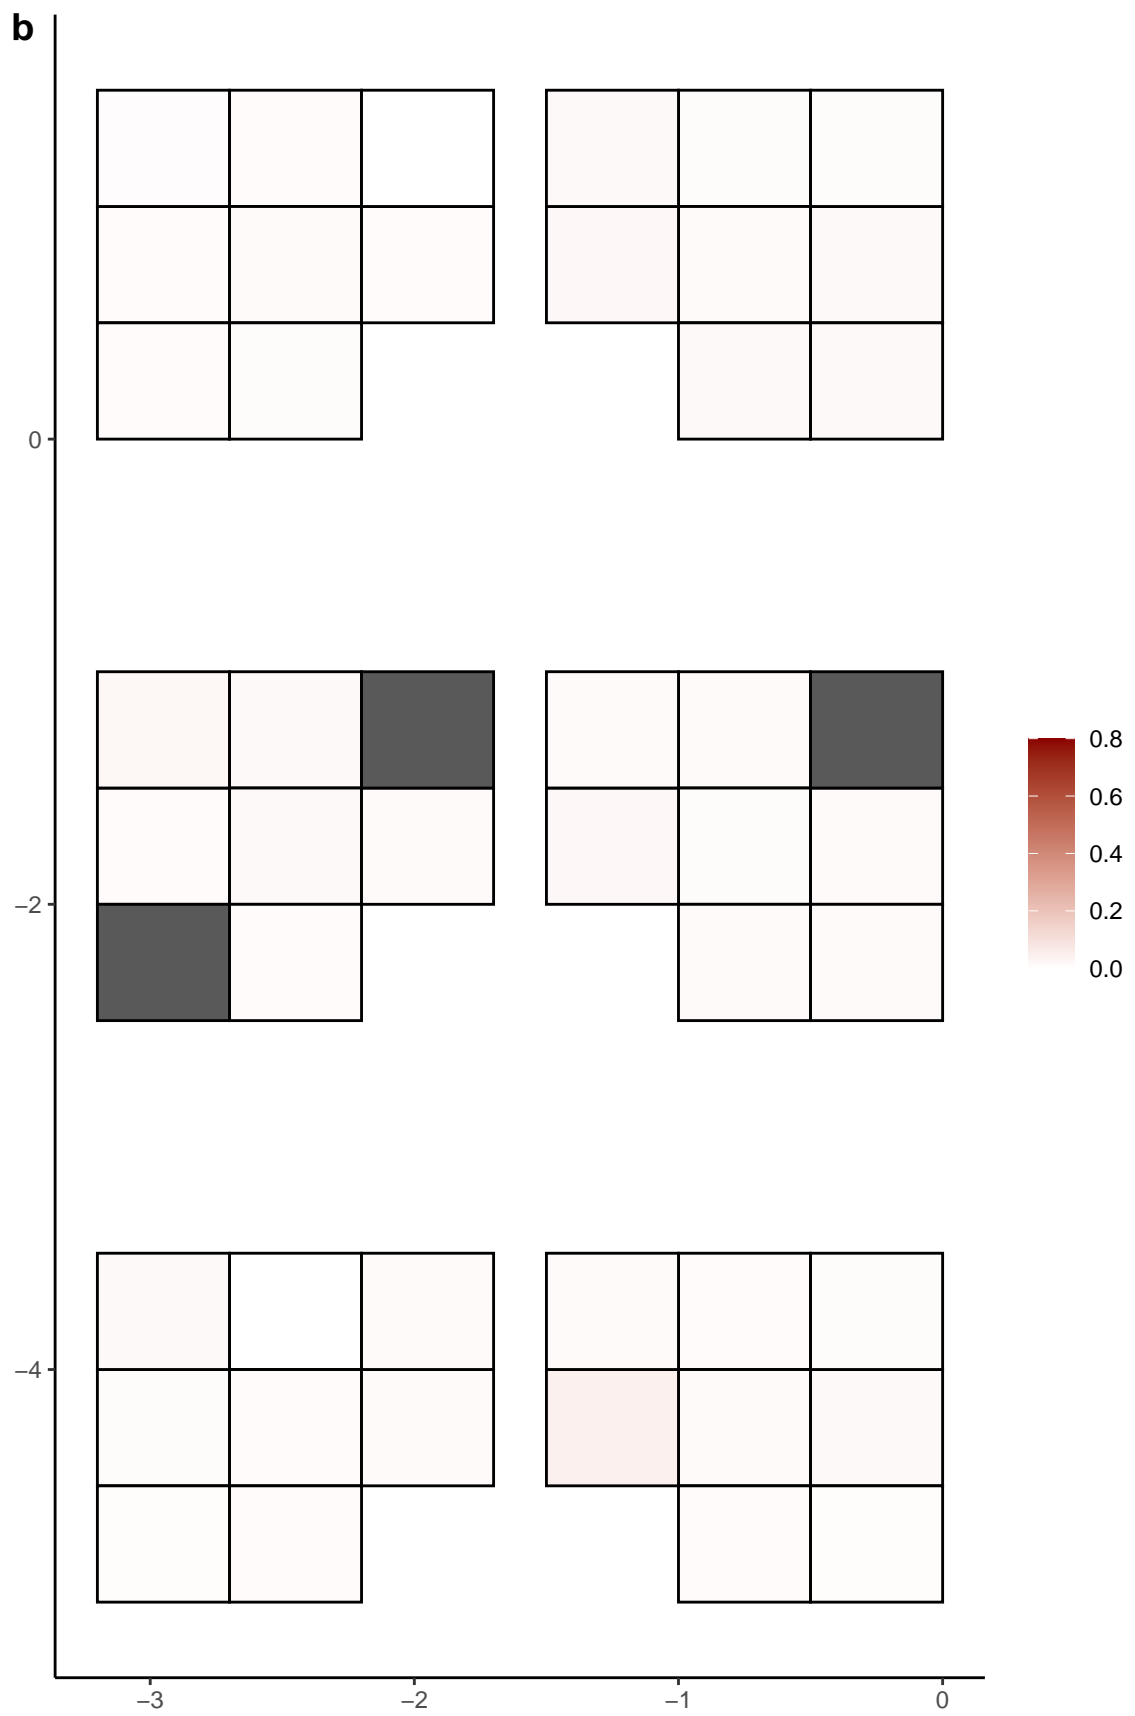

**a** ID05 3-103294509-T-G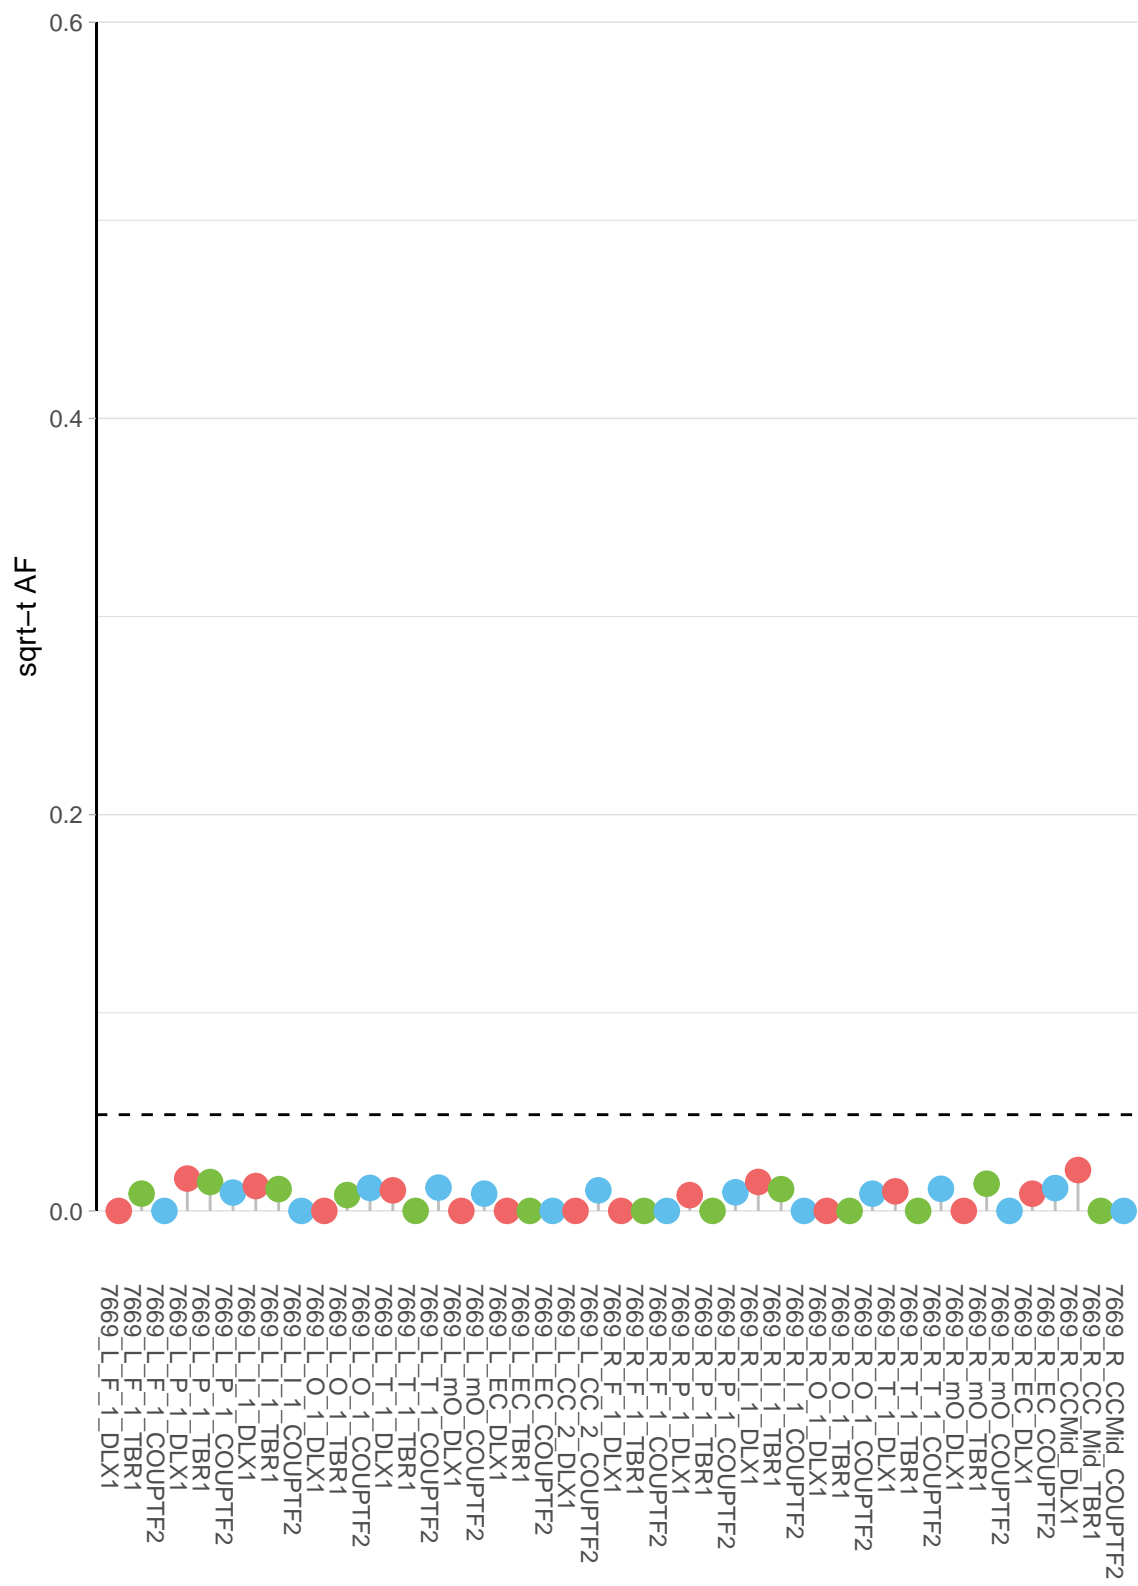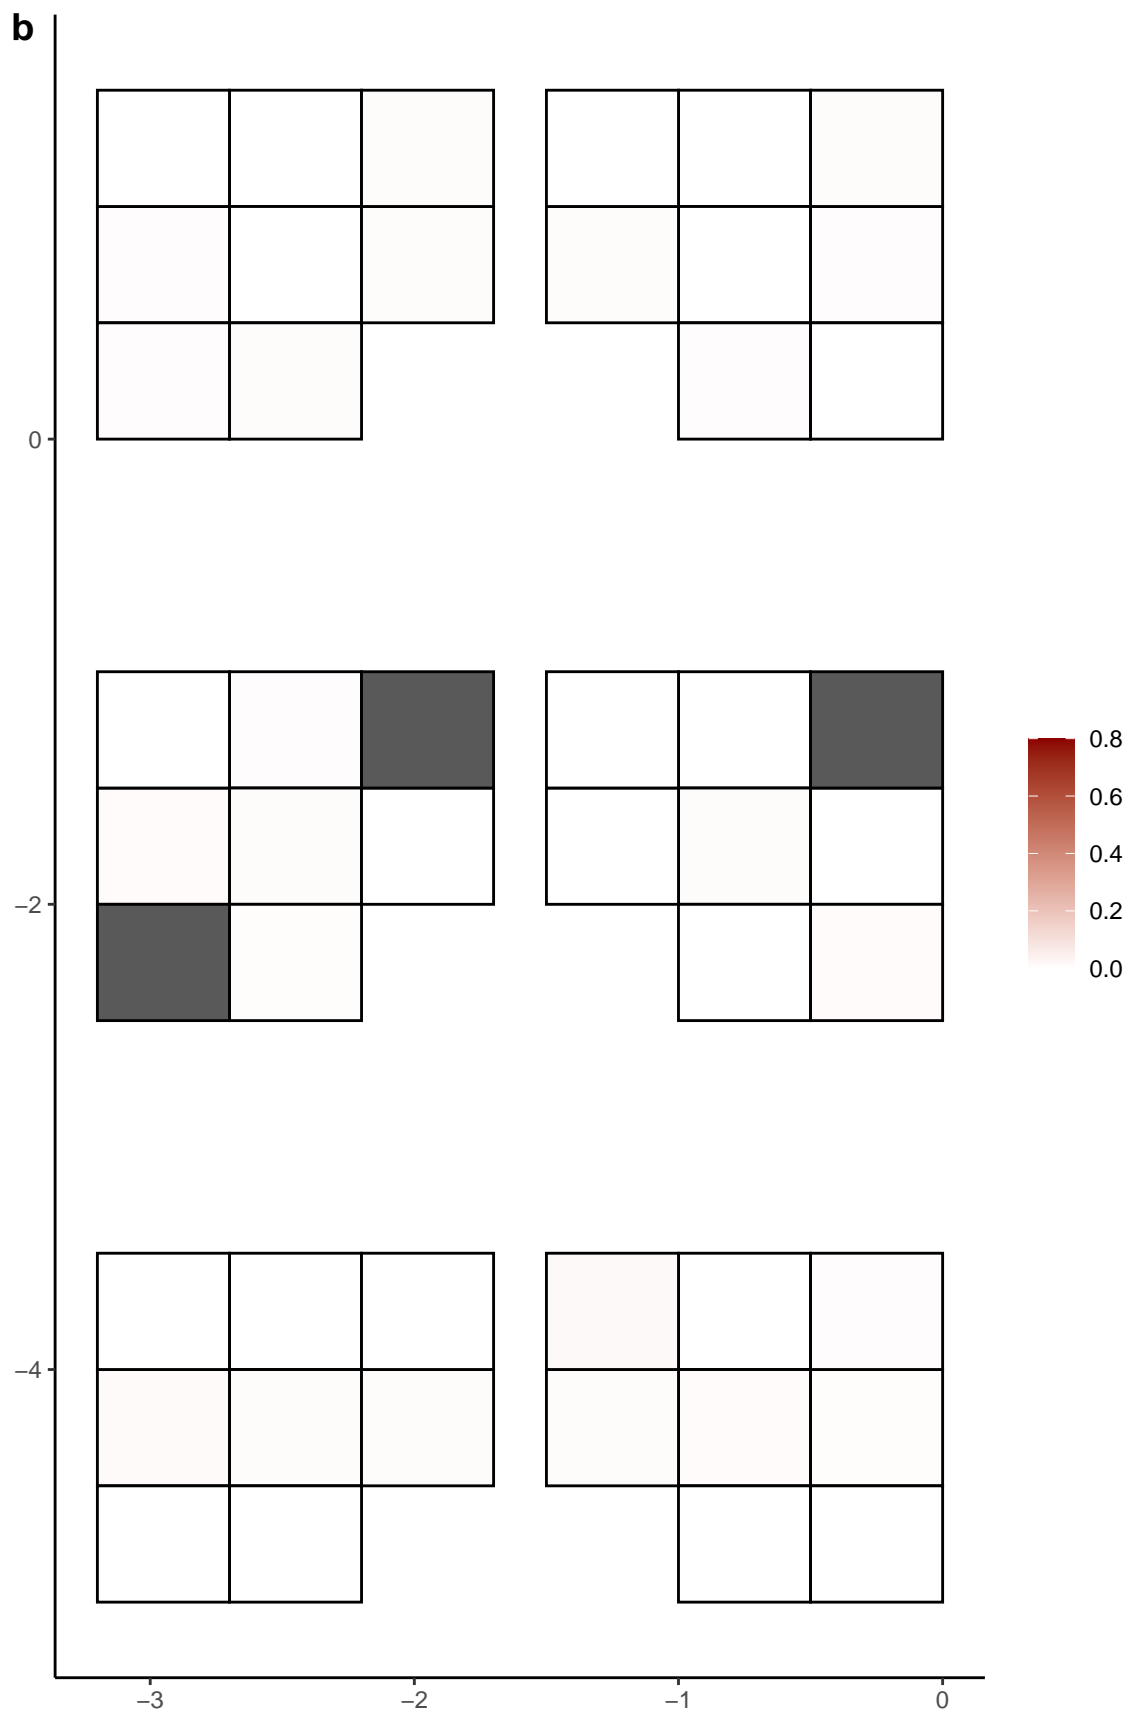



**a** ID05 3-107821326-C-T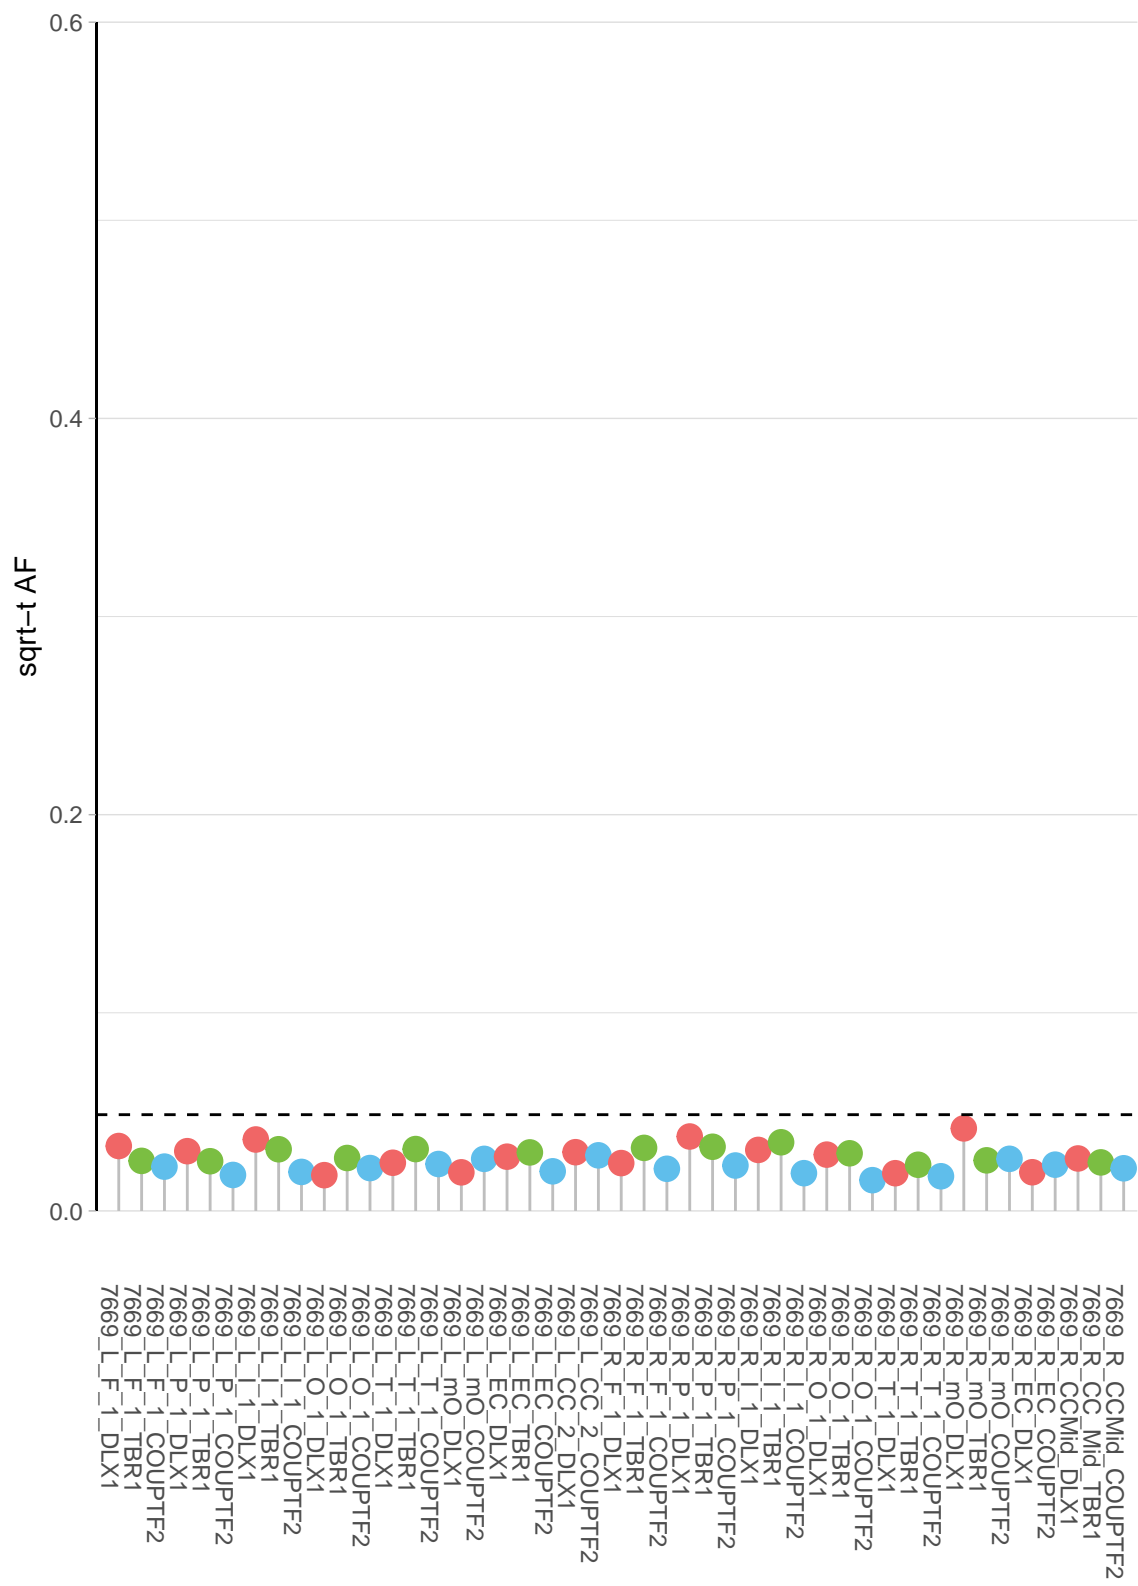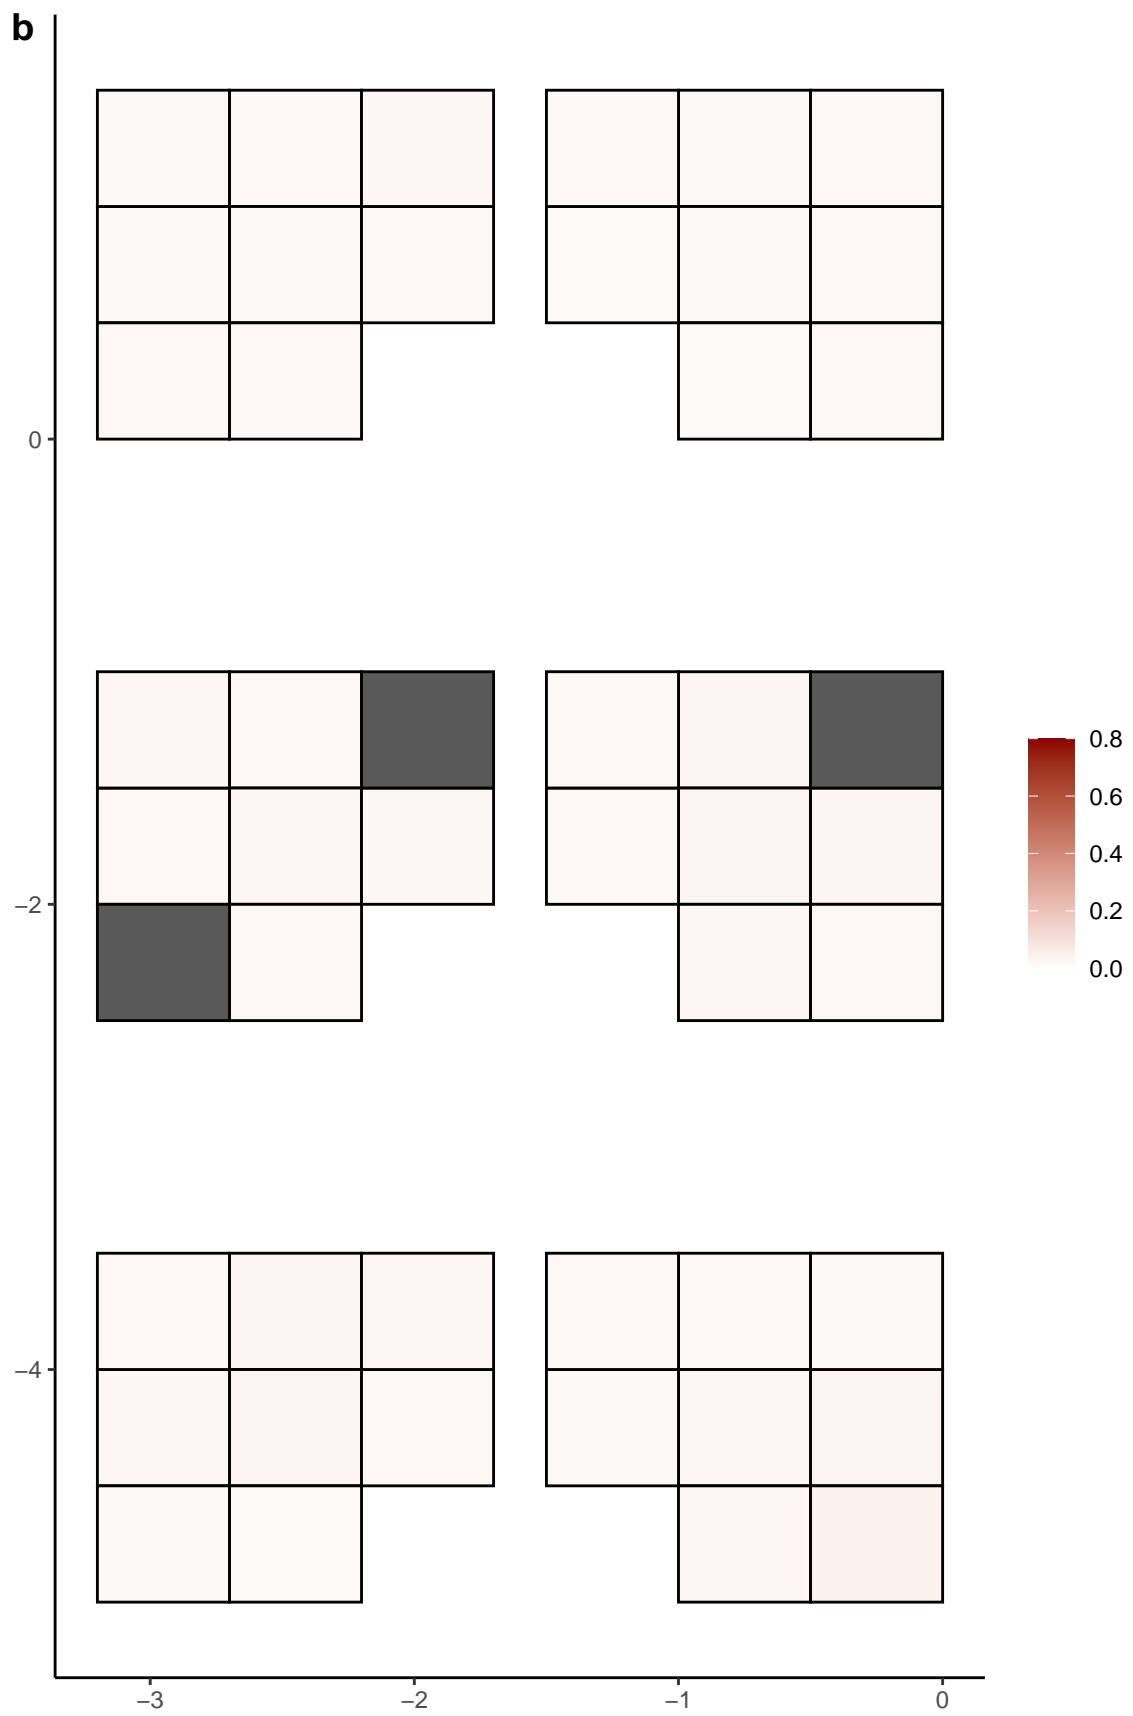

**a** ID05 3-108008662-A-T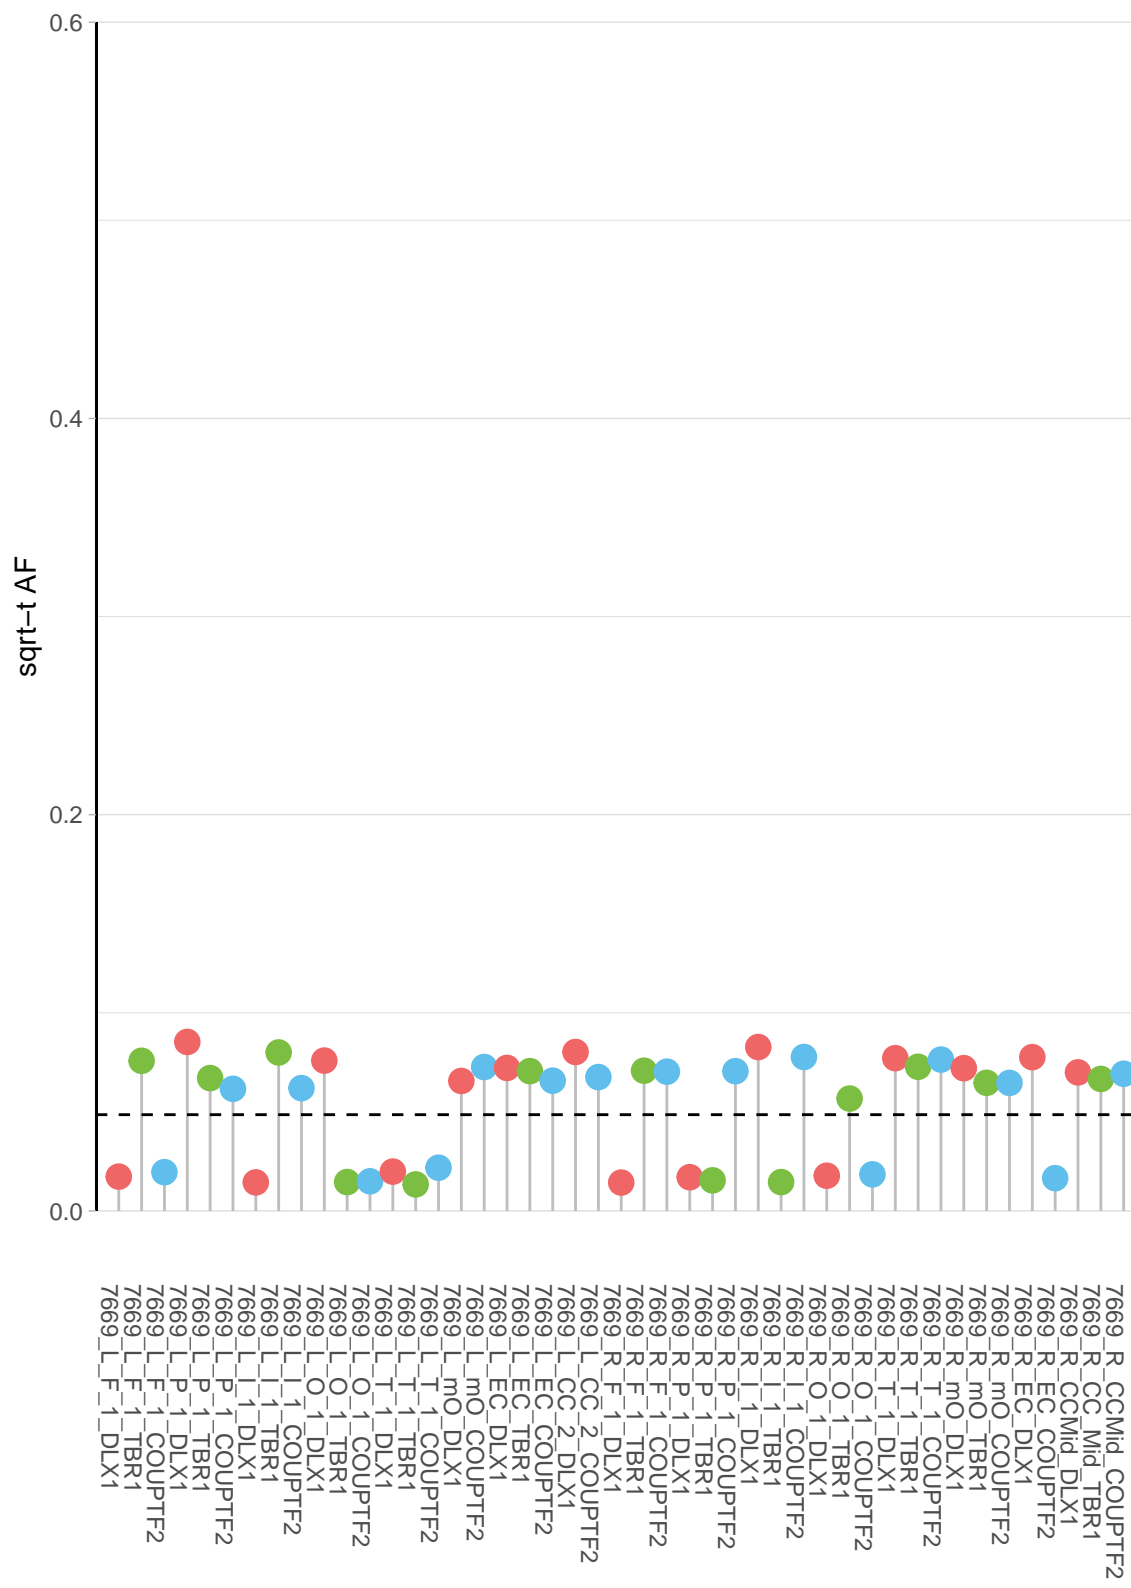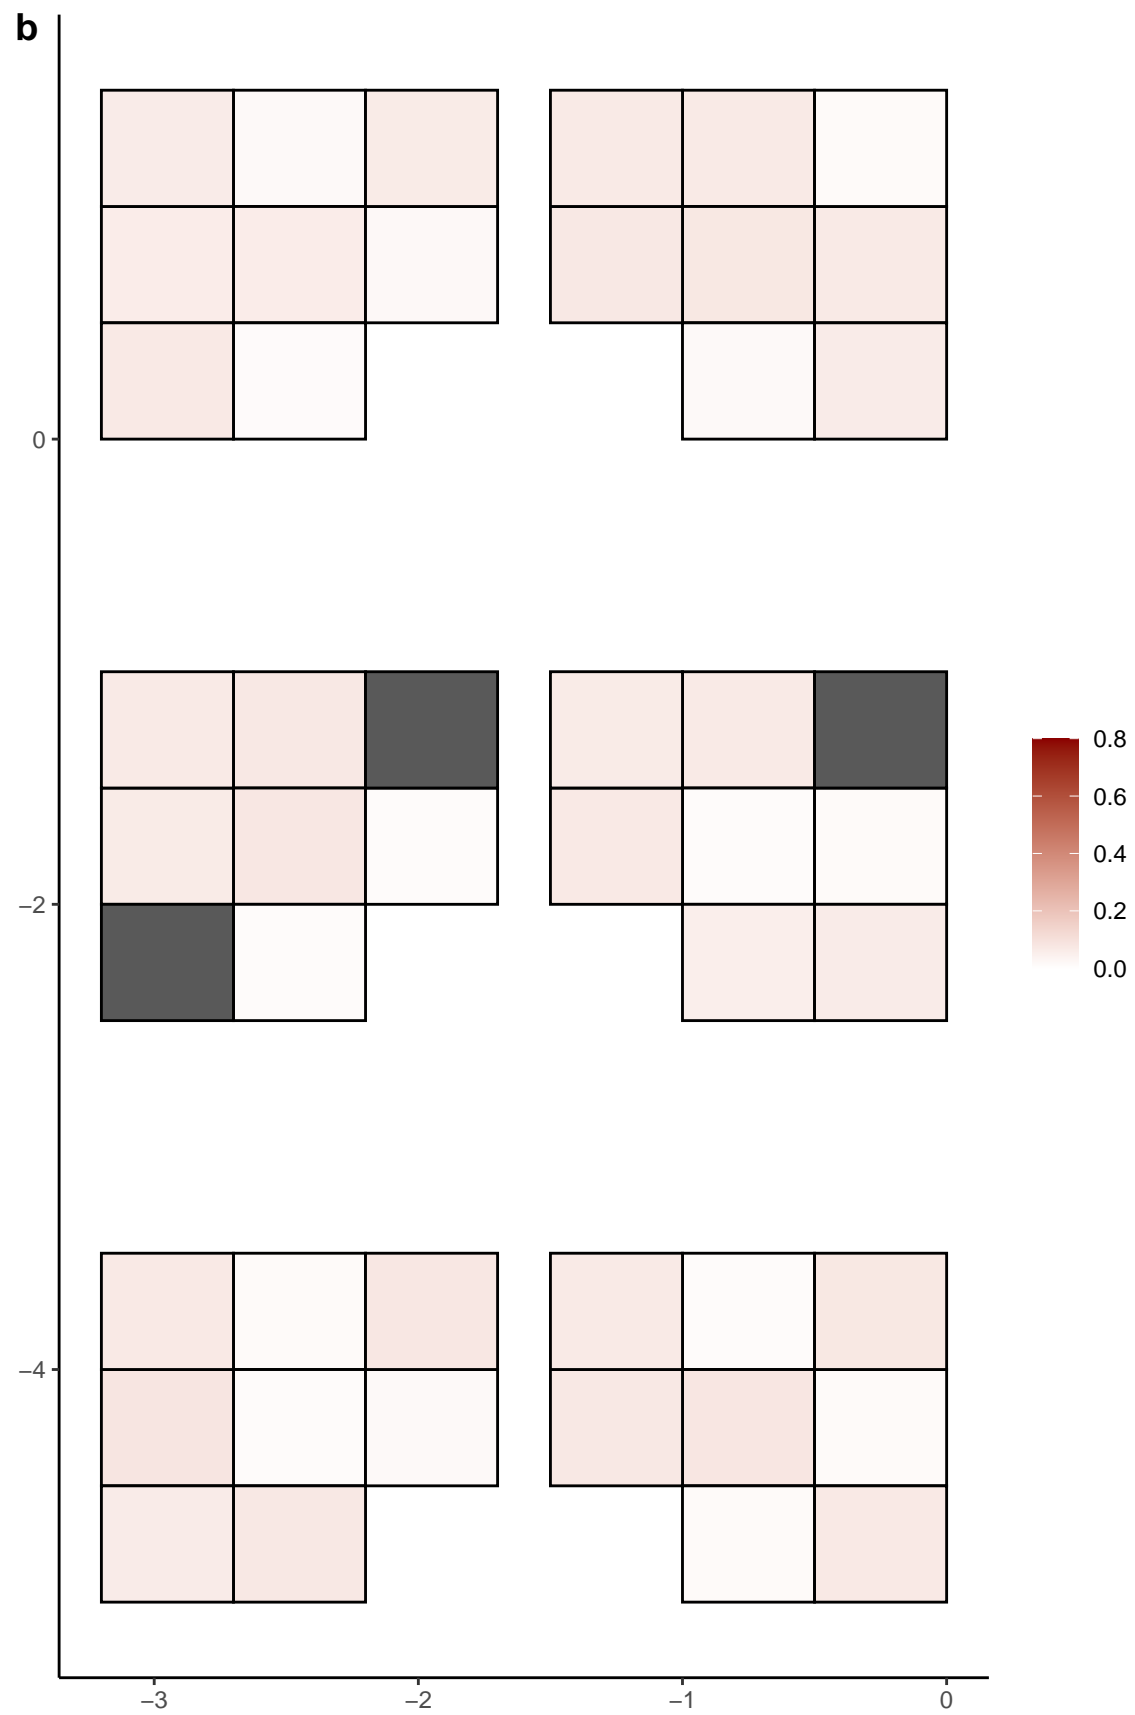



**a** ID05 3-116101704-C-G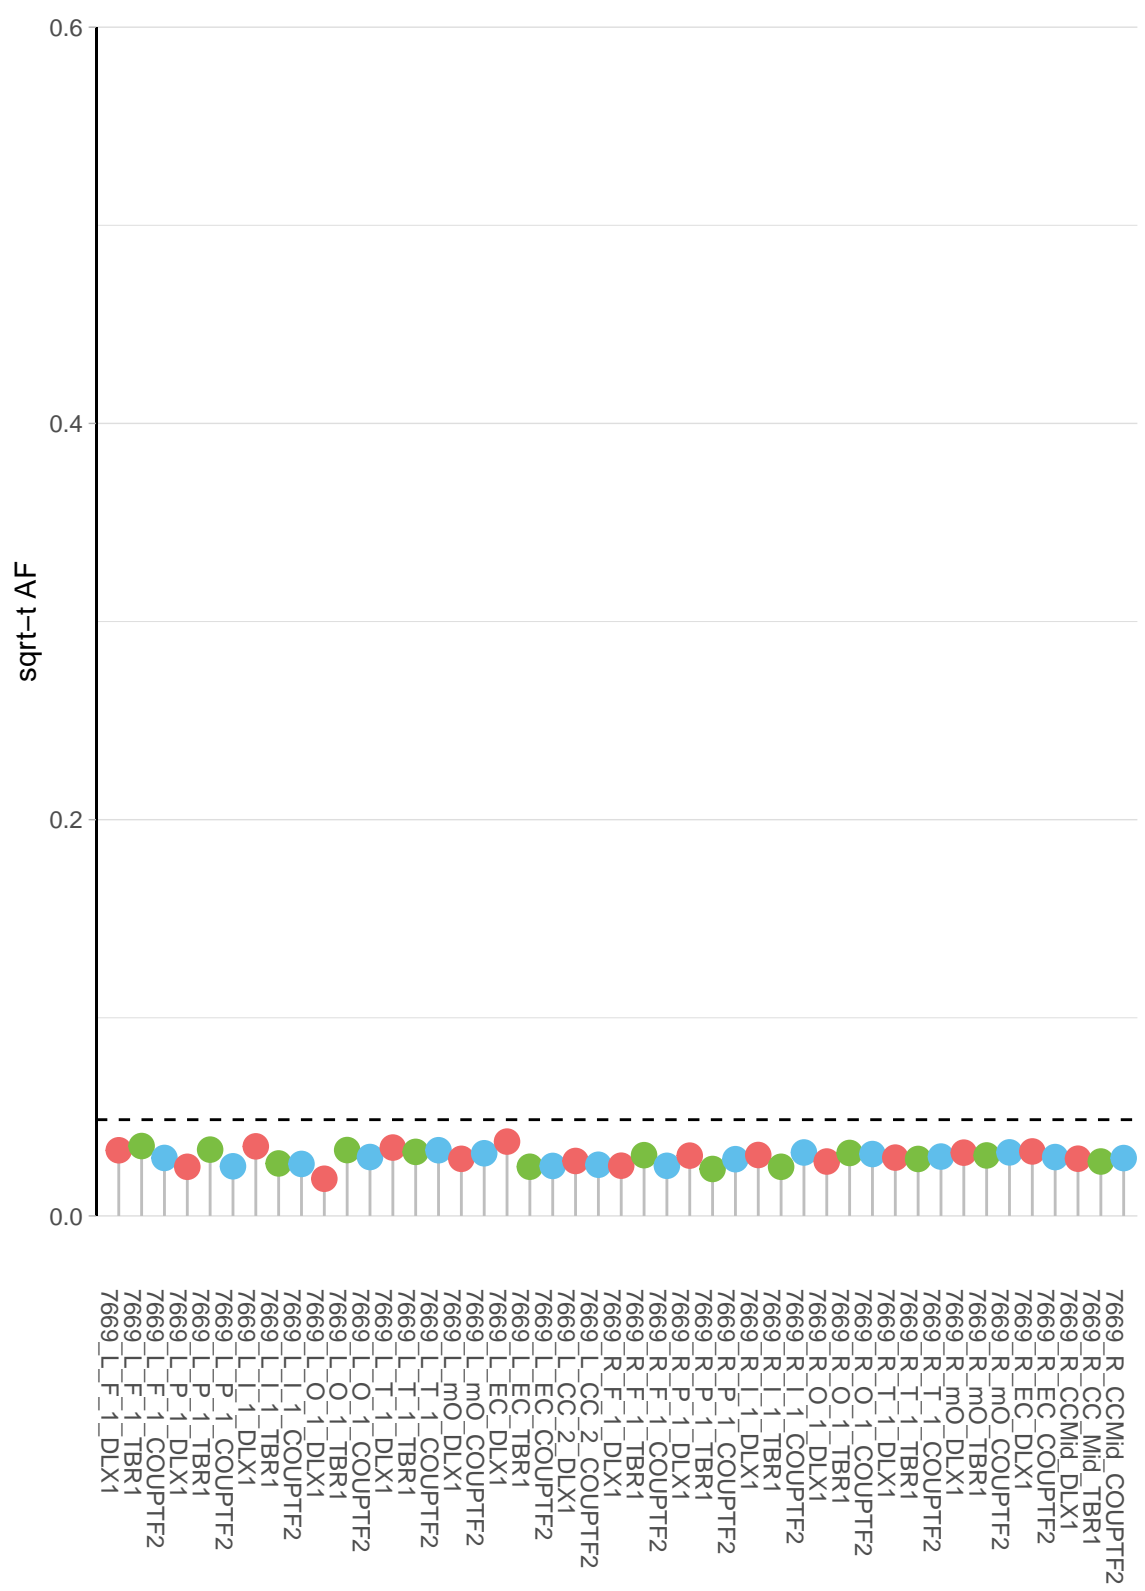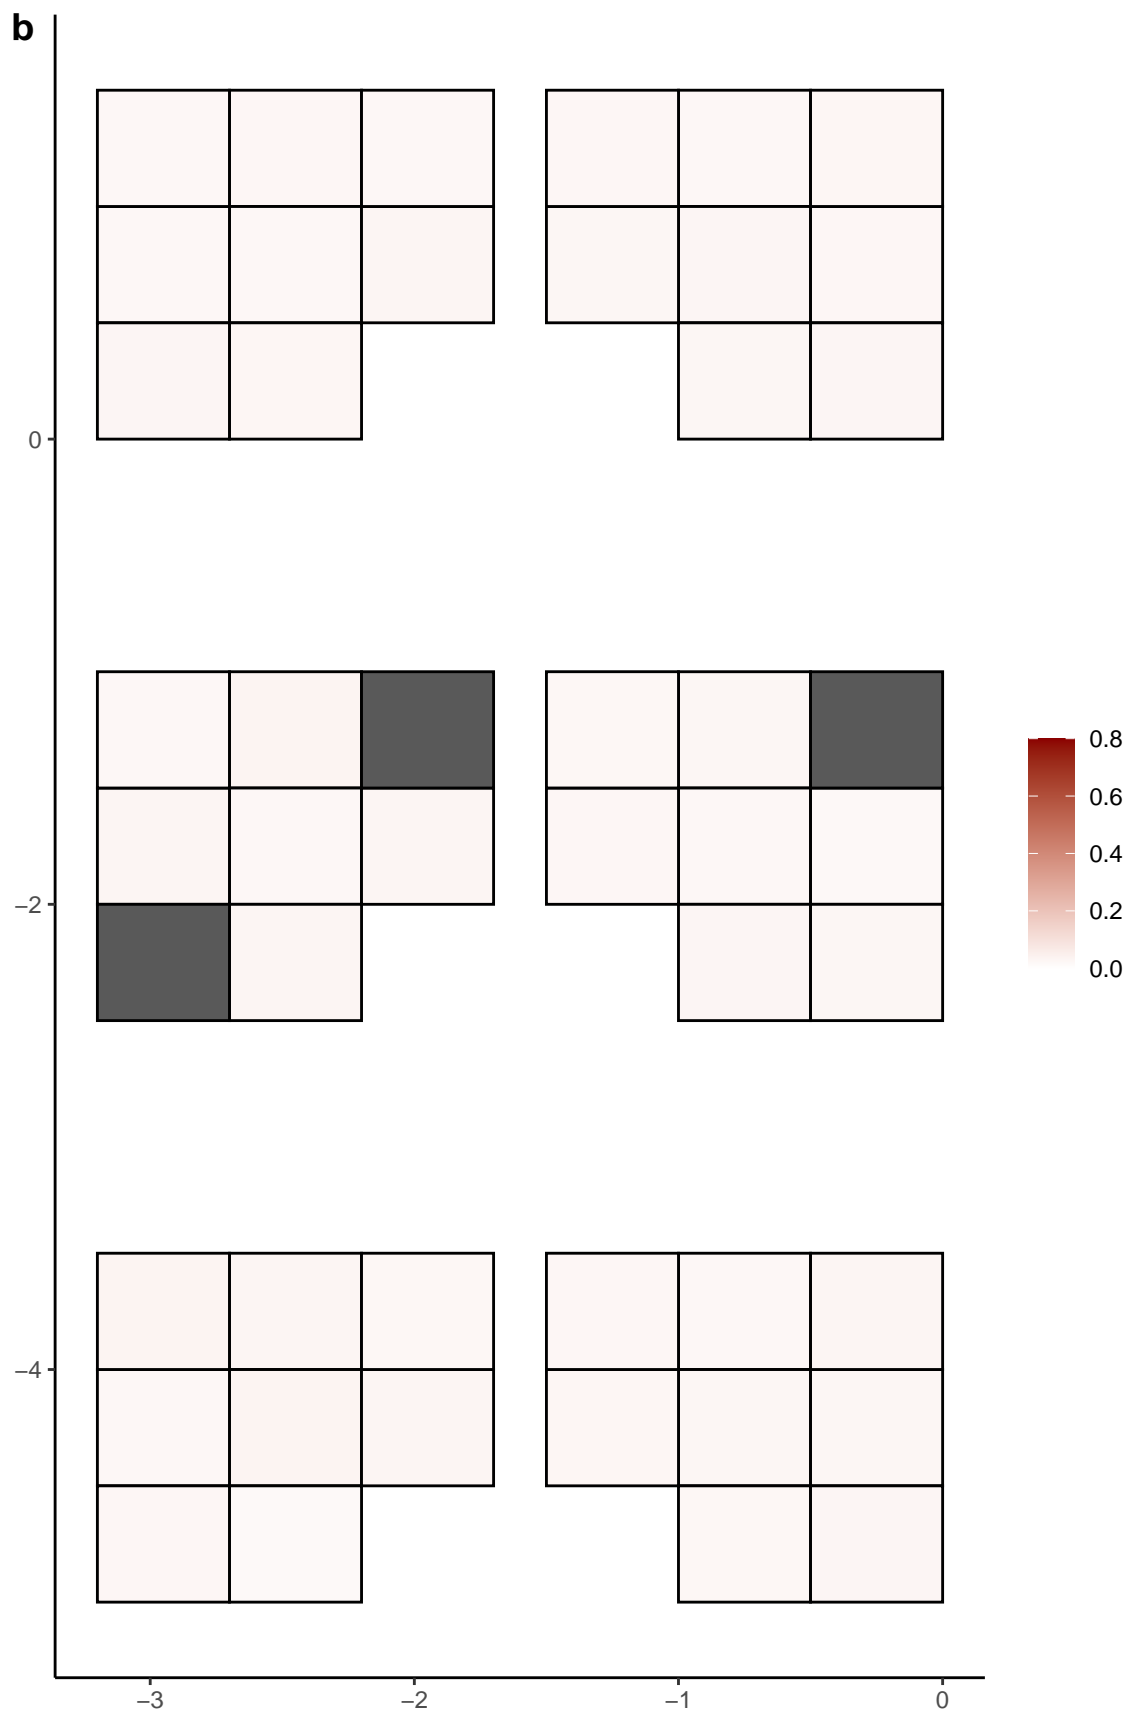





**a** ID05 3-119866148-A-C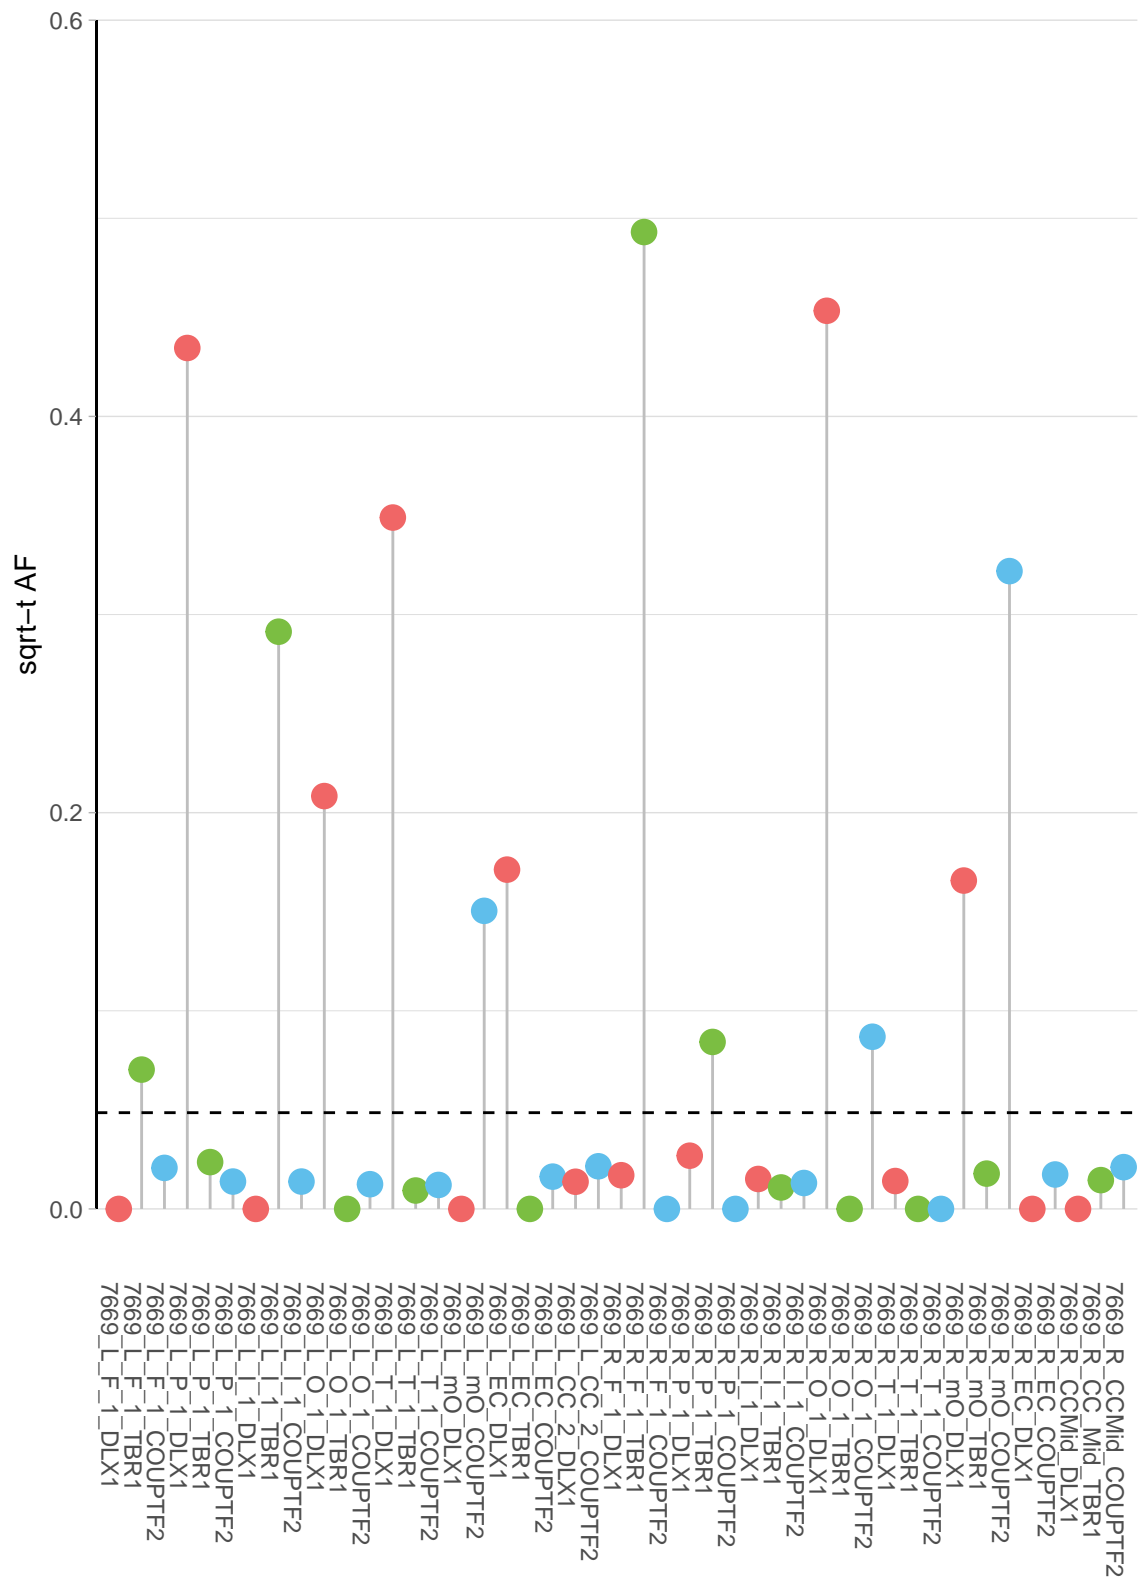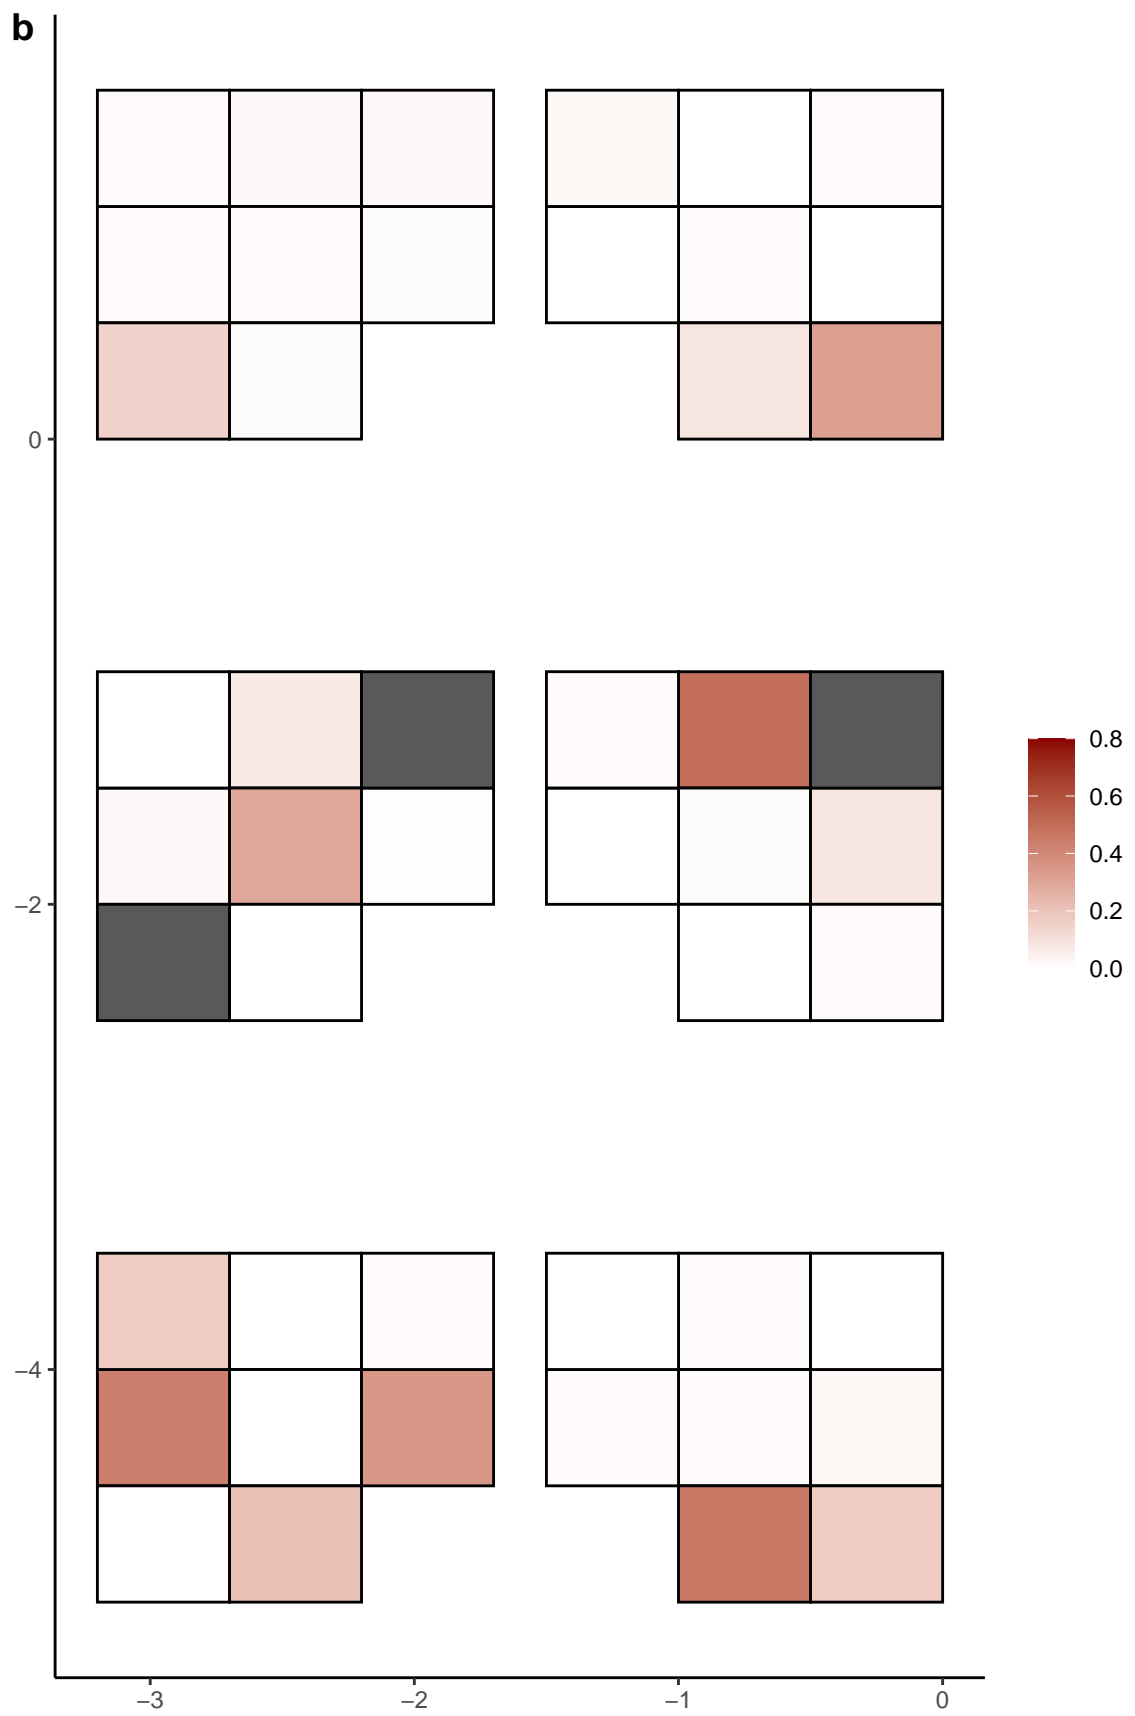

**a** ID05 3-124402098-G-A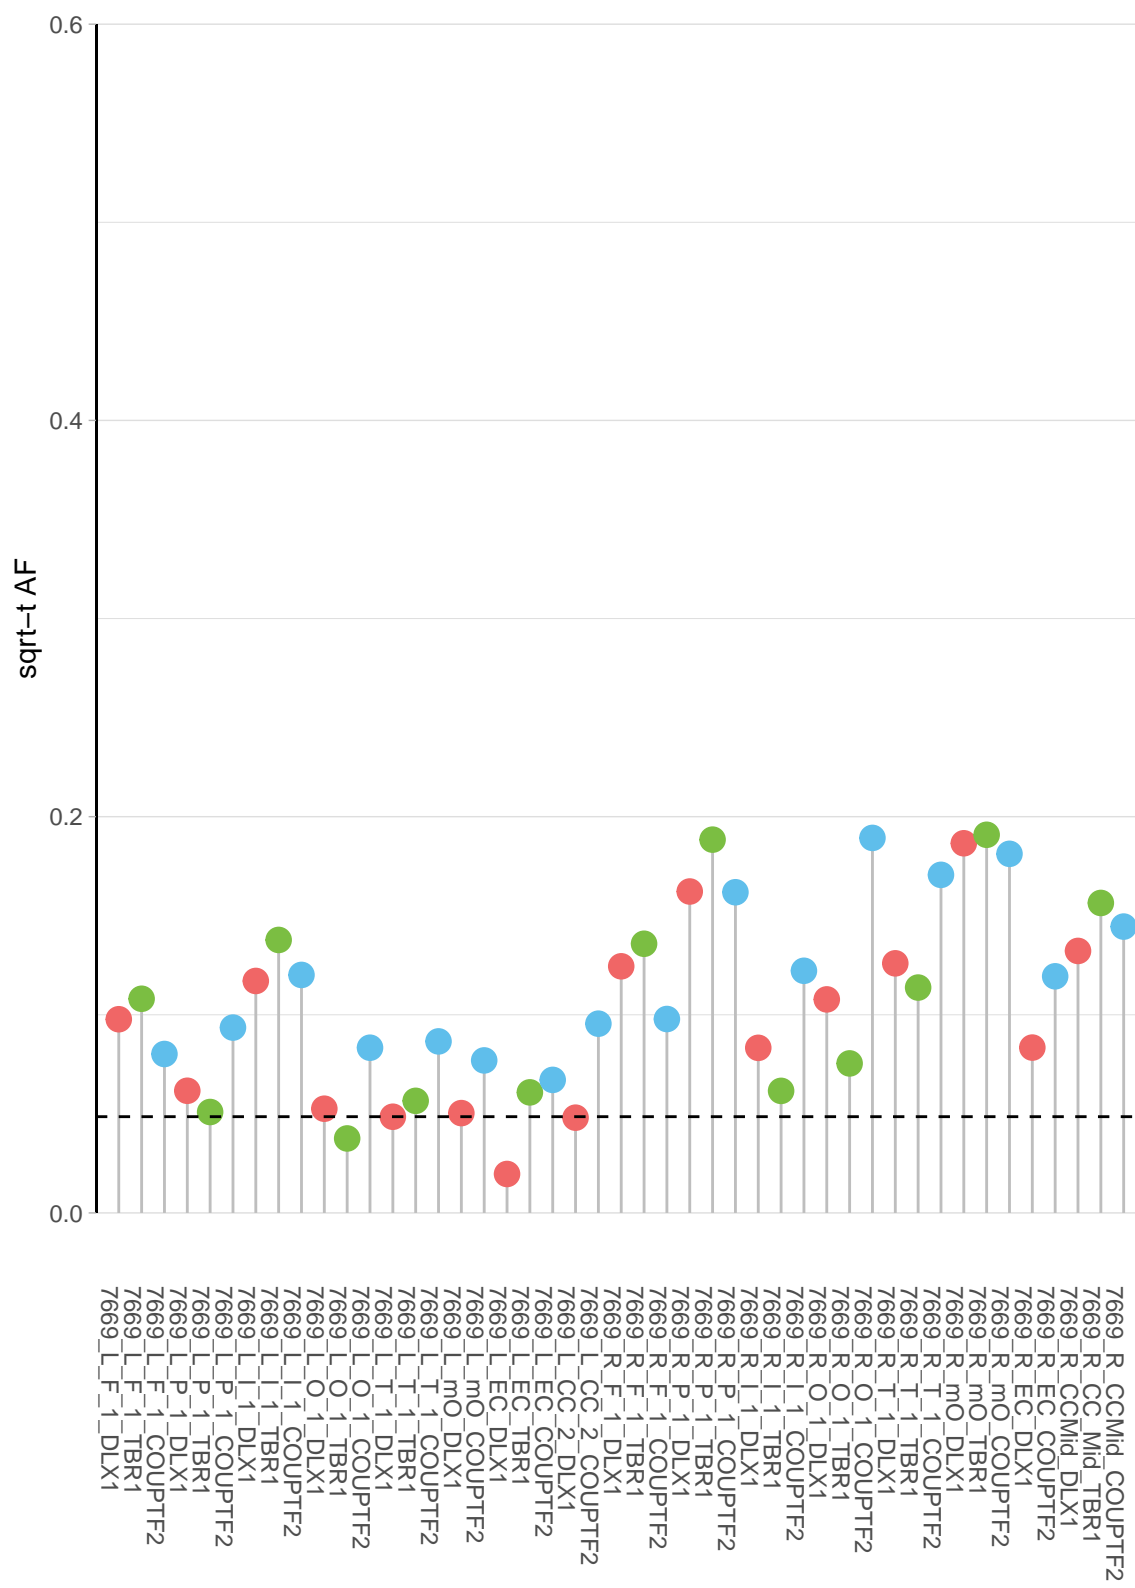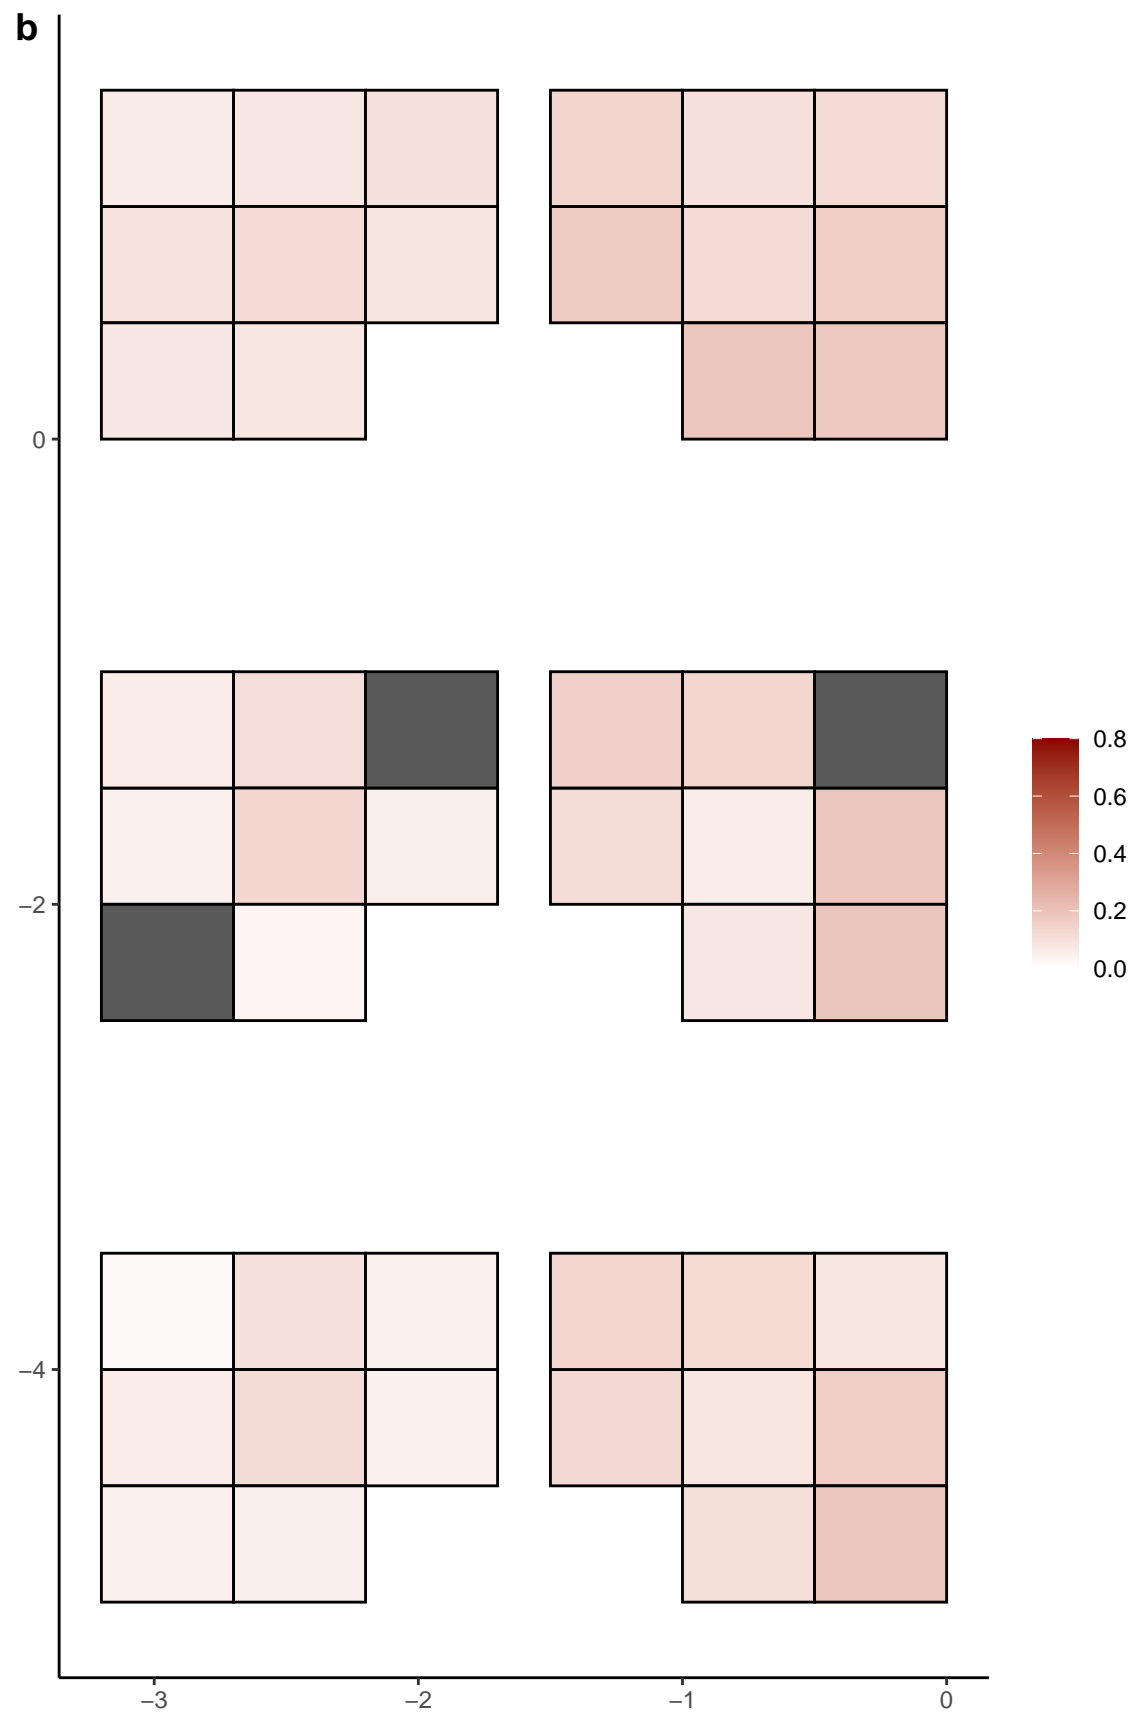

**a** ID05 3-130175696-A-G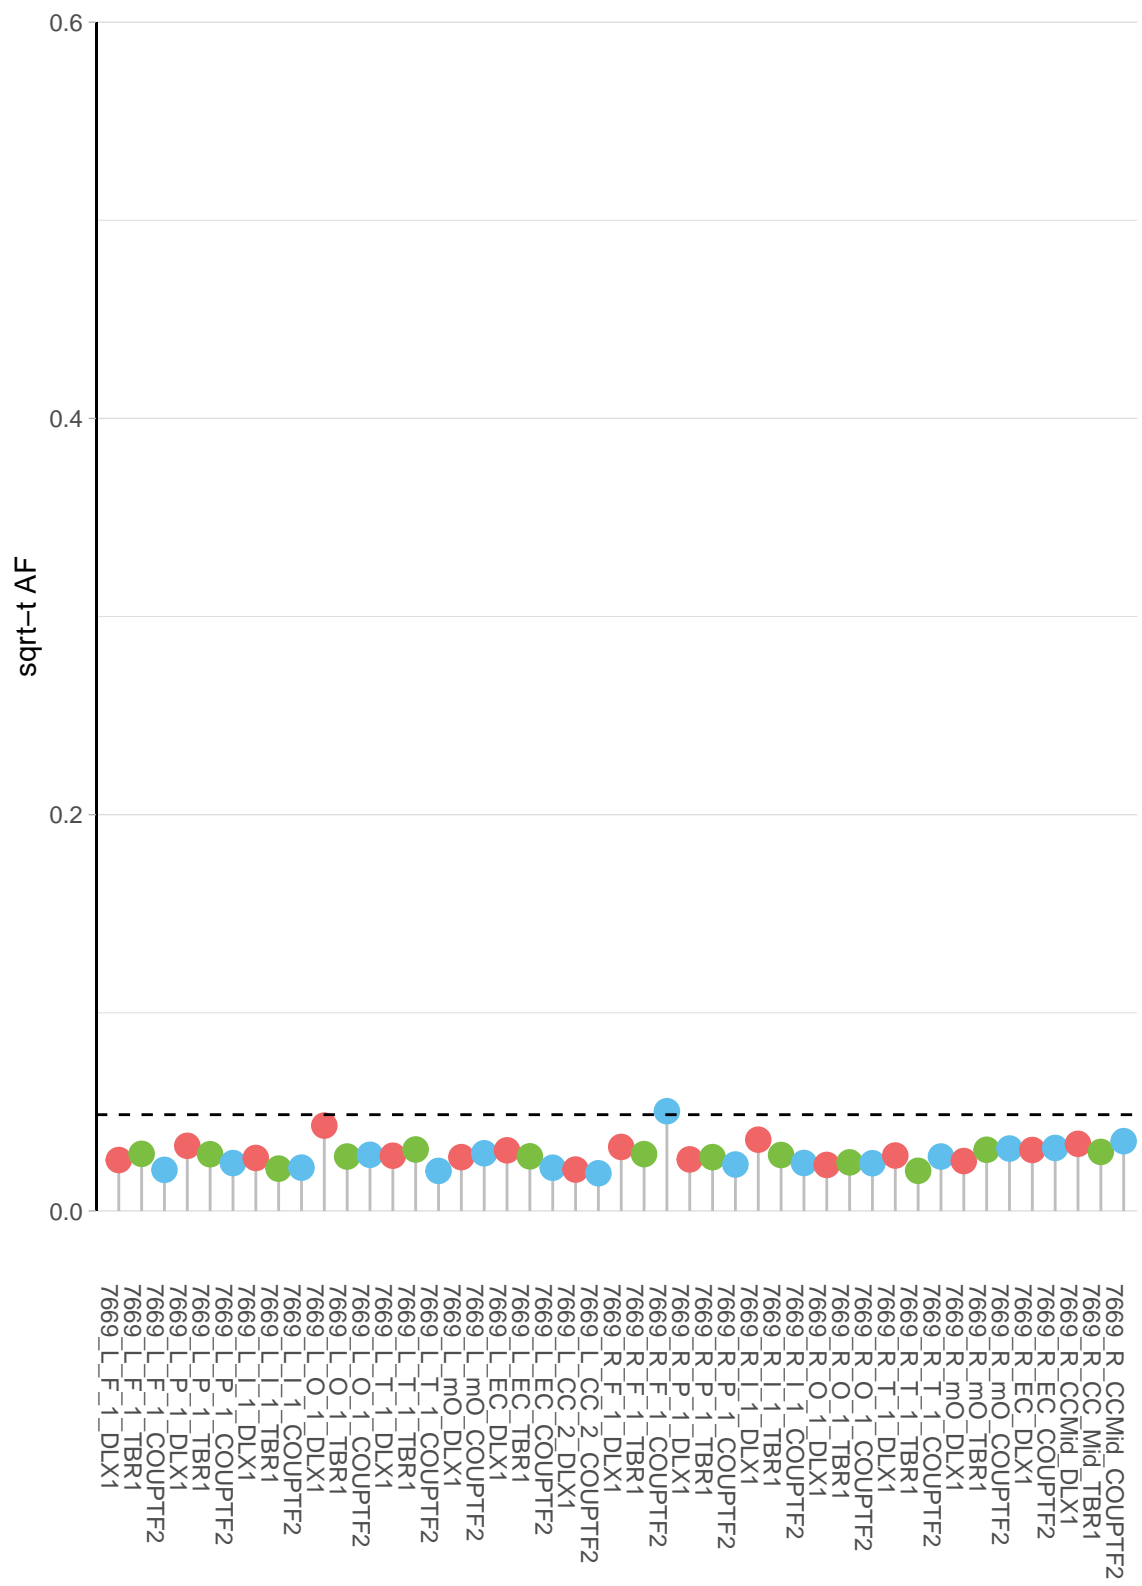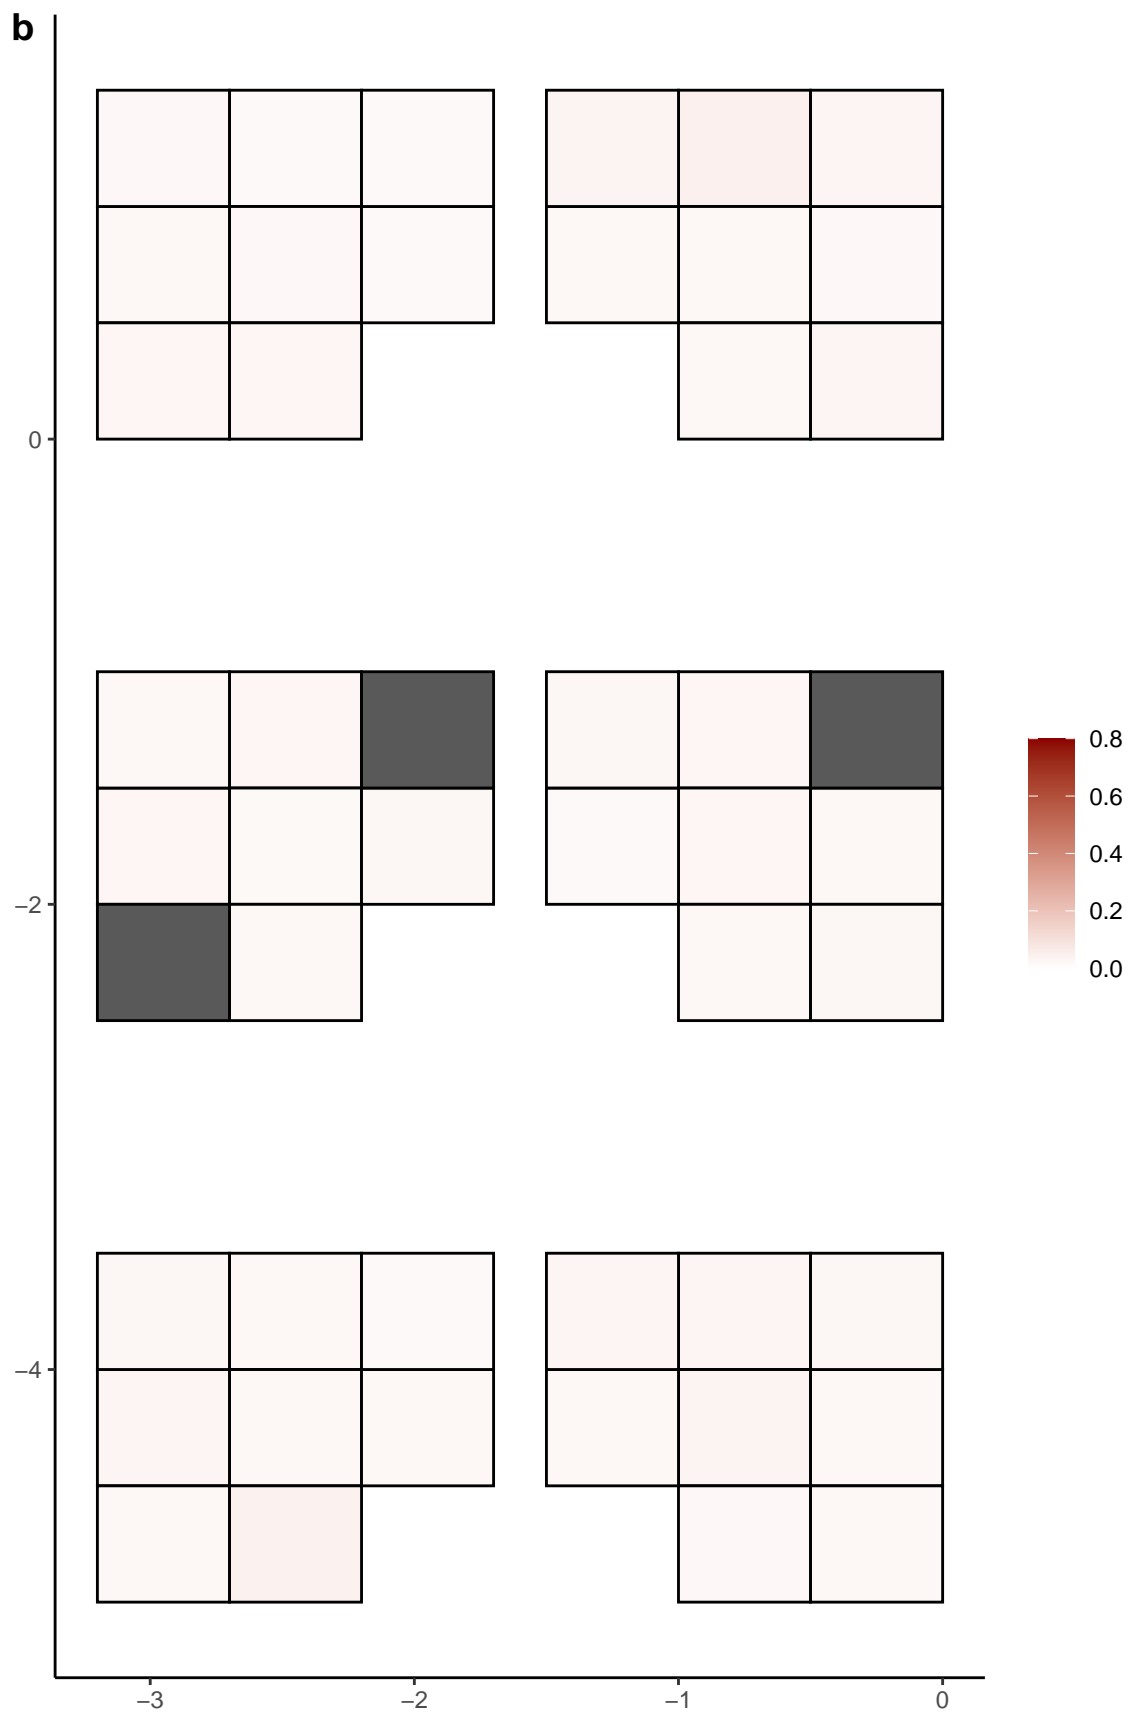

**a** ID05 3-137569791-G-A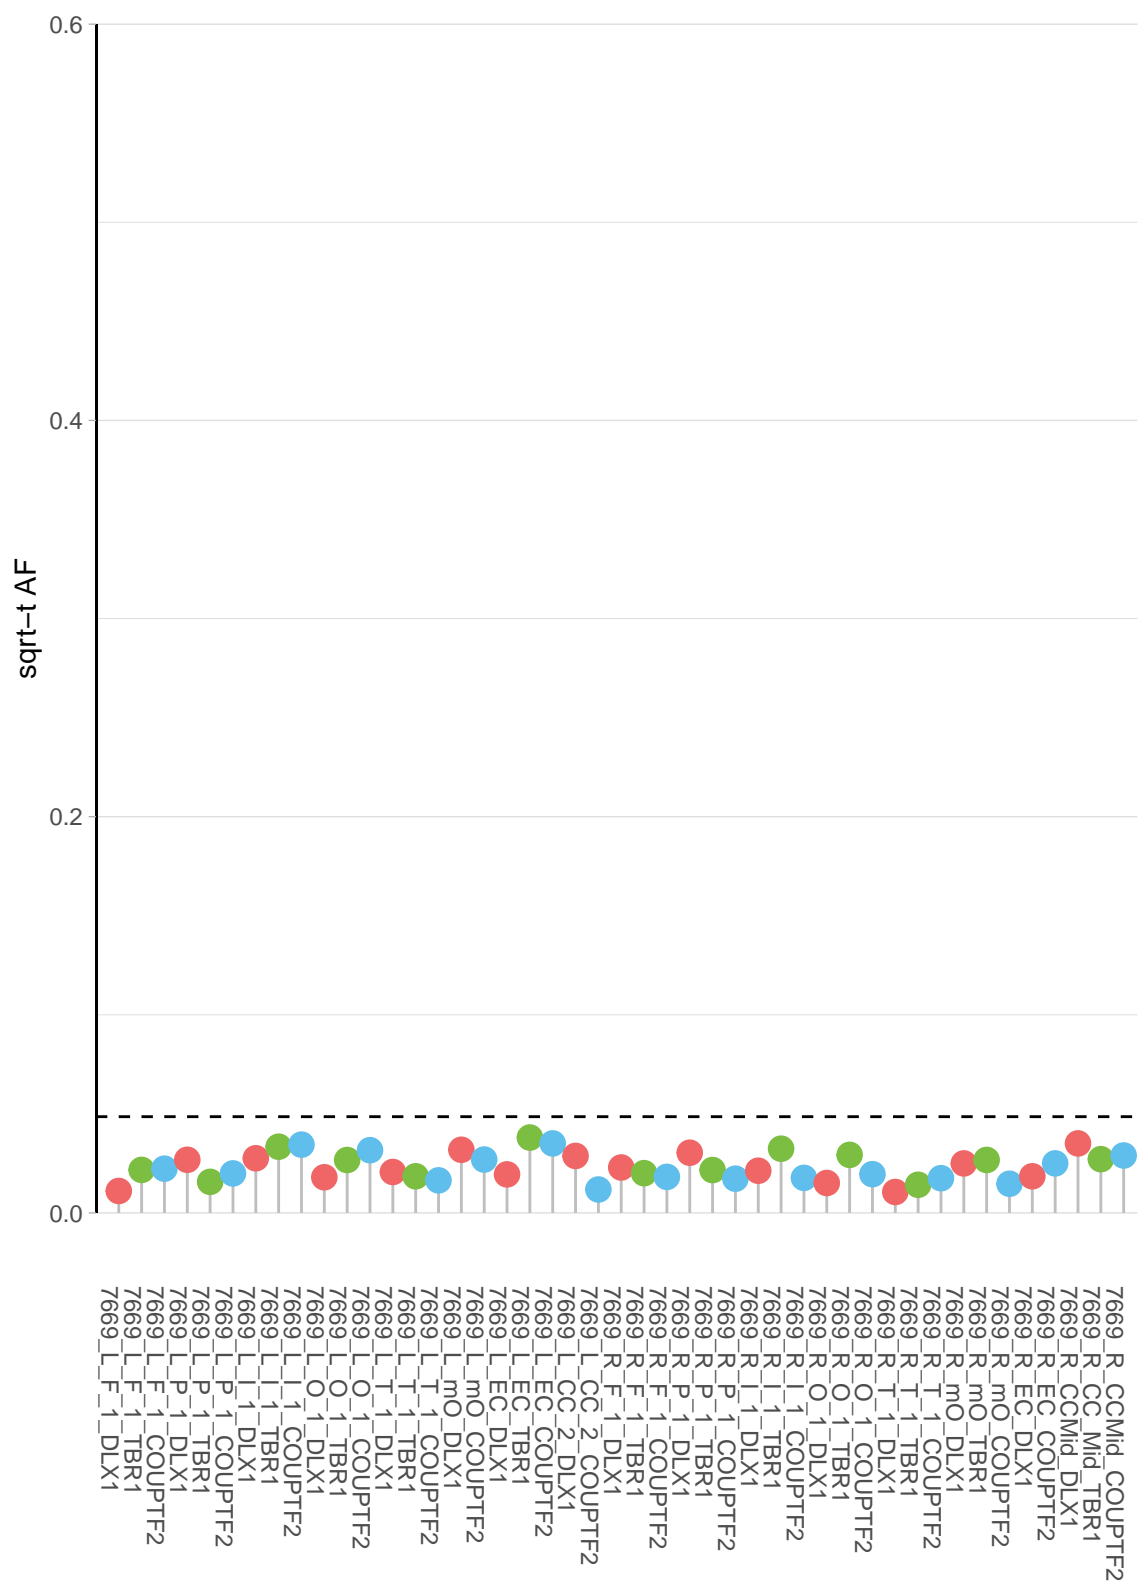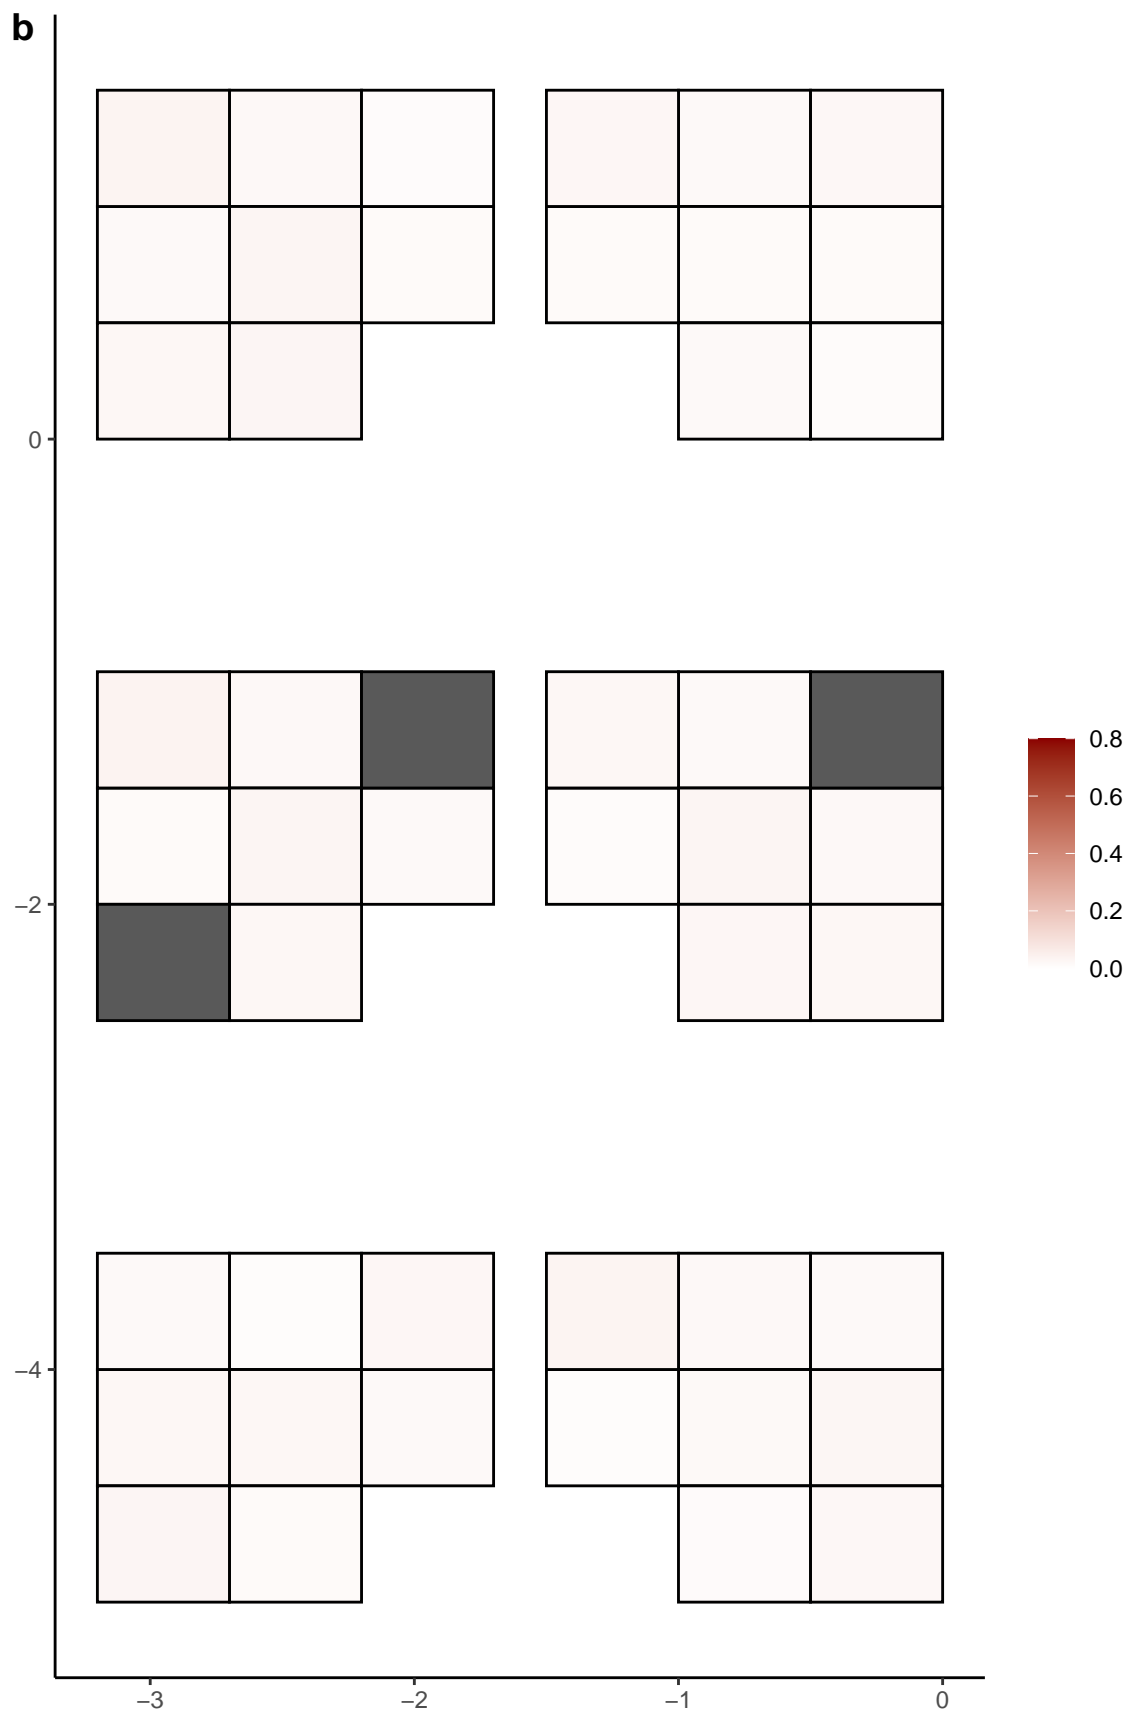

**a** ID05 3-145391171-A-G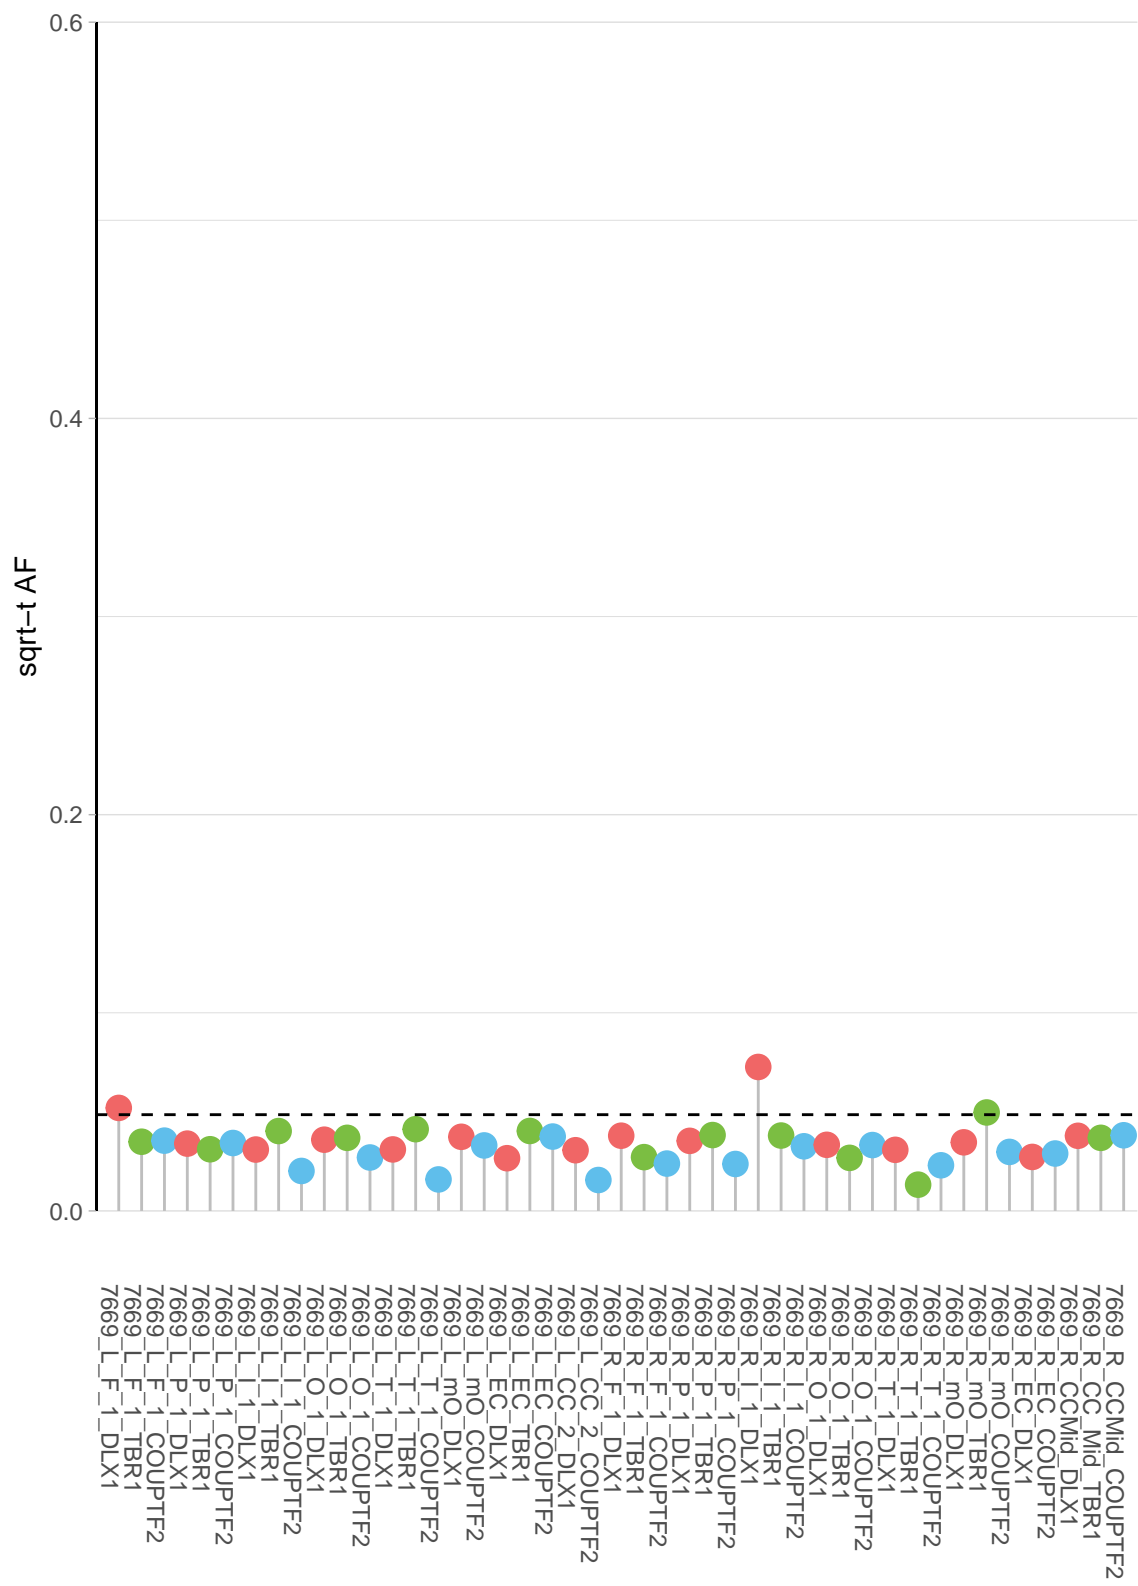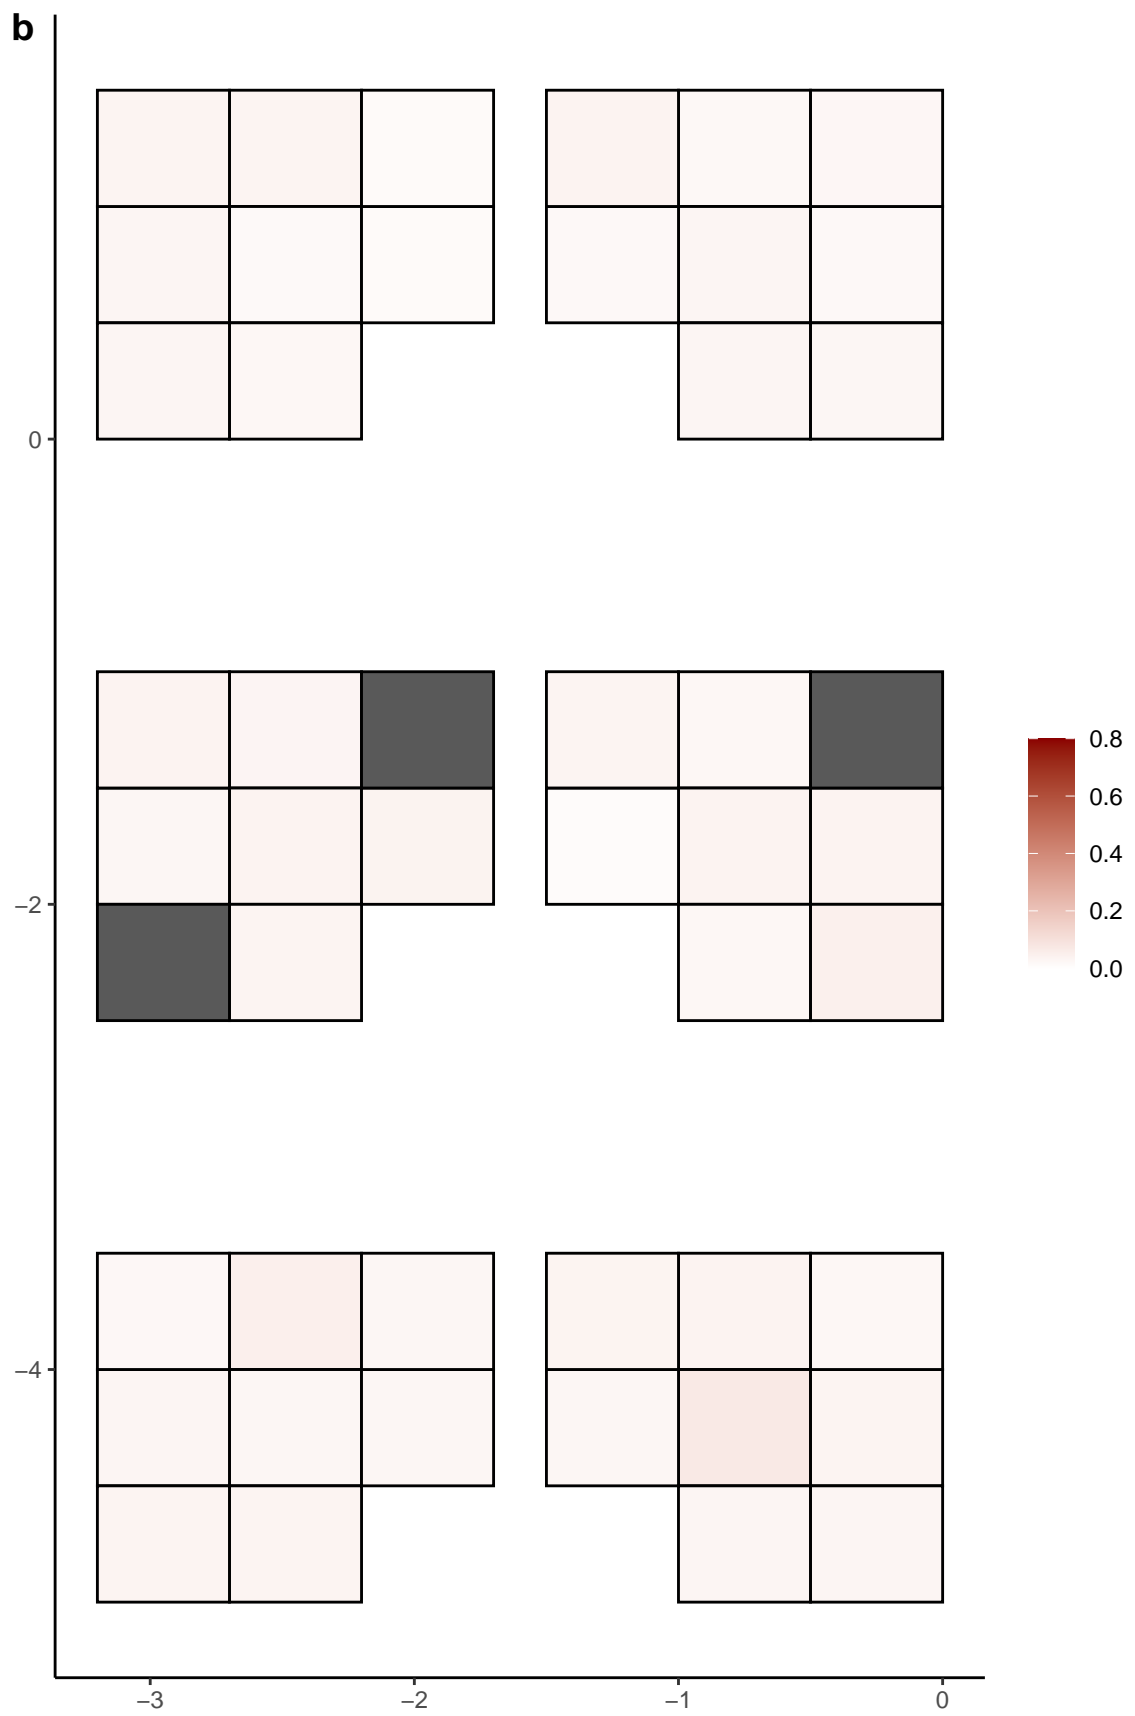

**a** ID05 3-147144597-G-A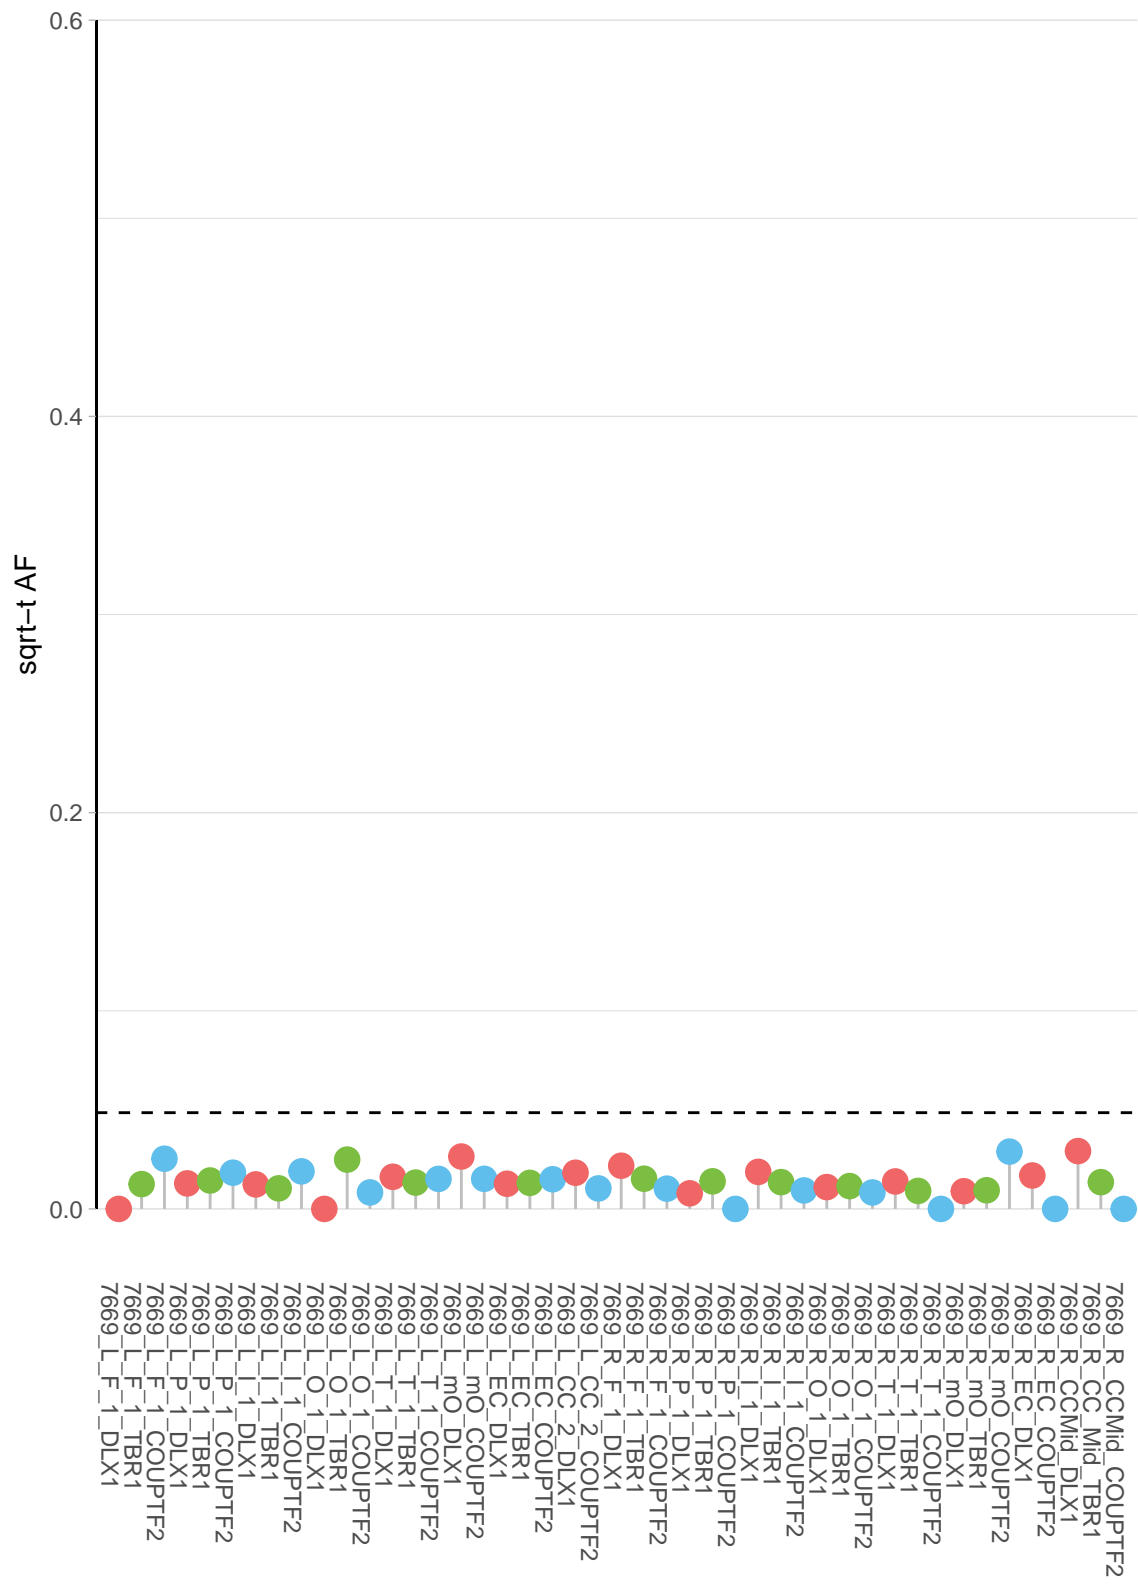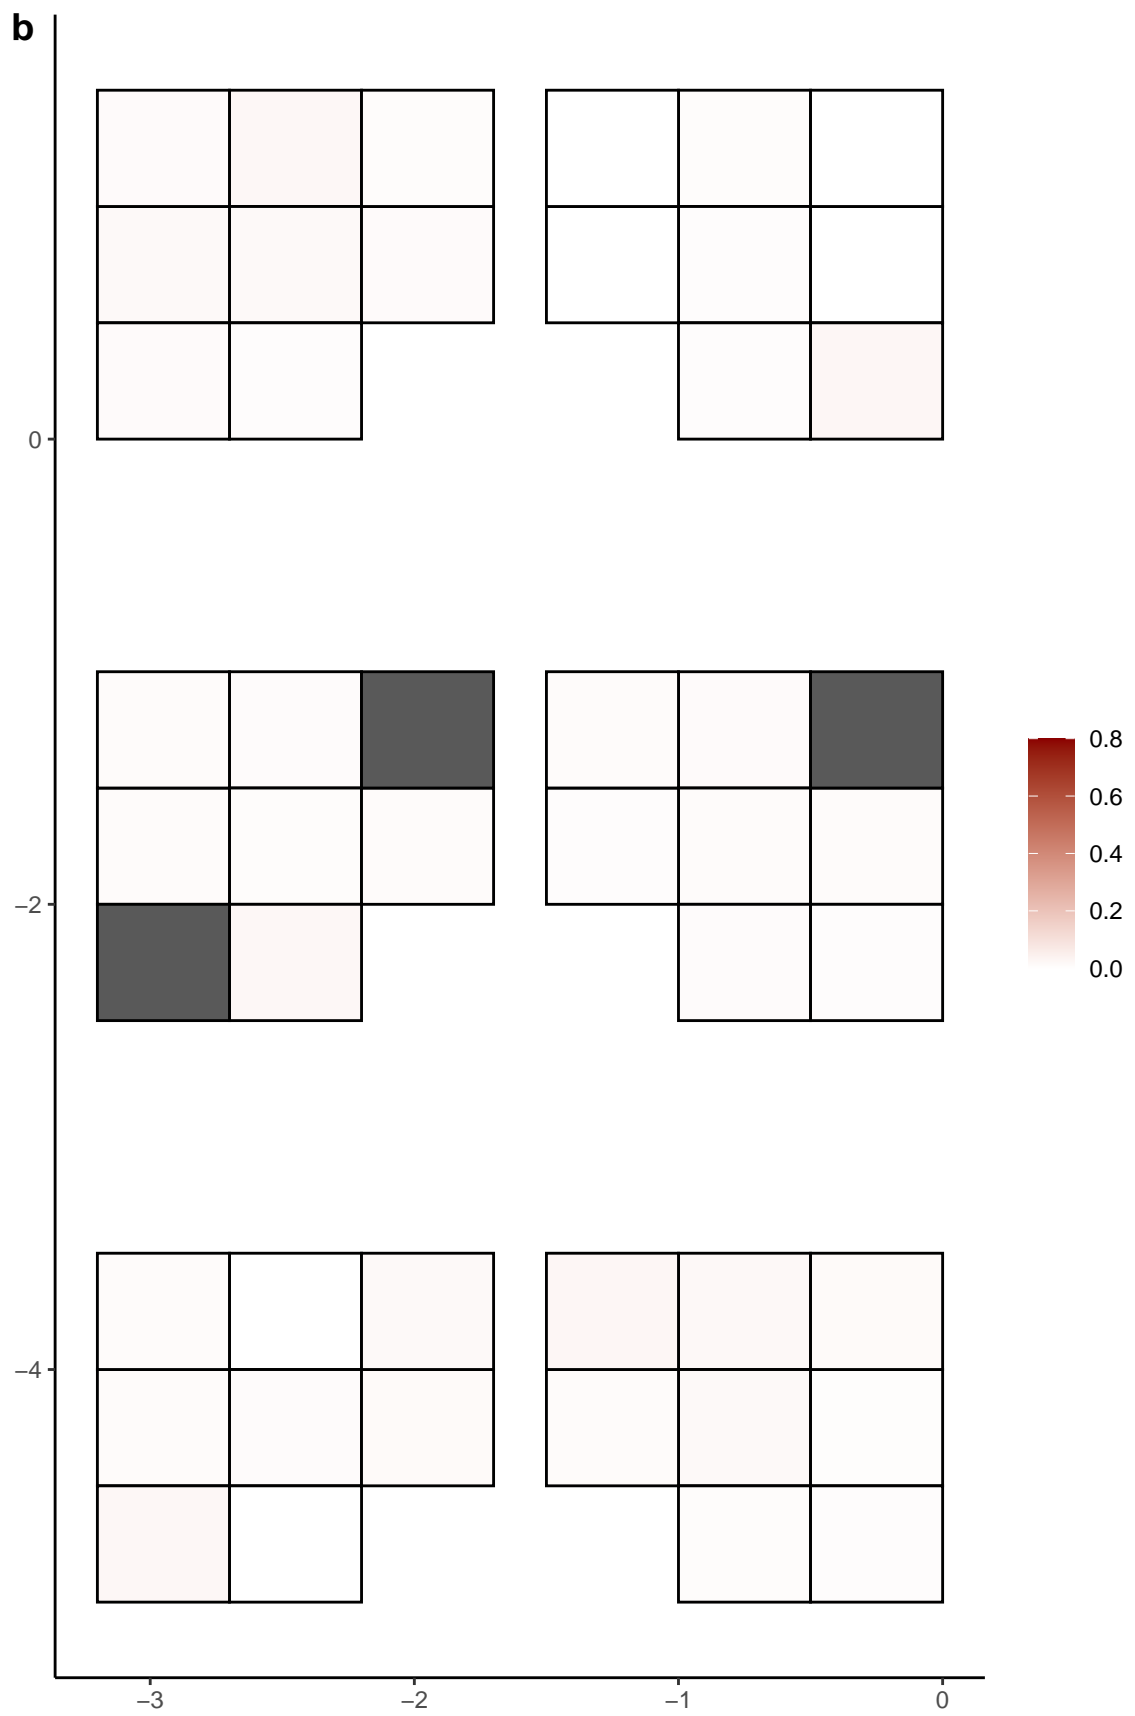

**a** ID05 3-154786585-A-G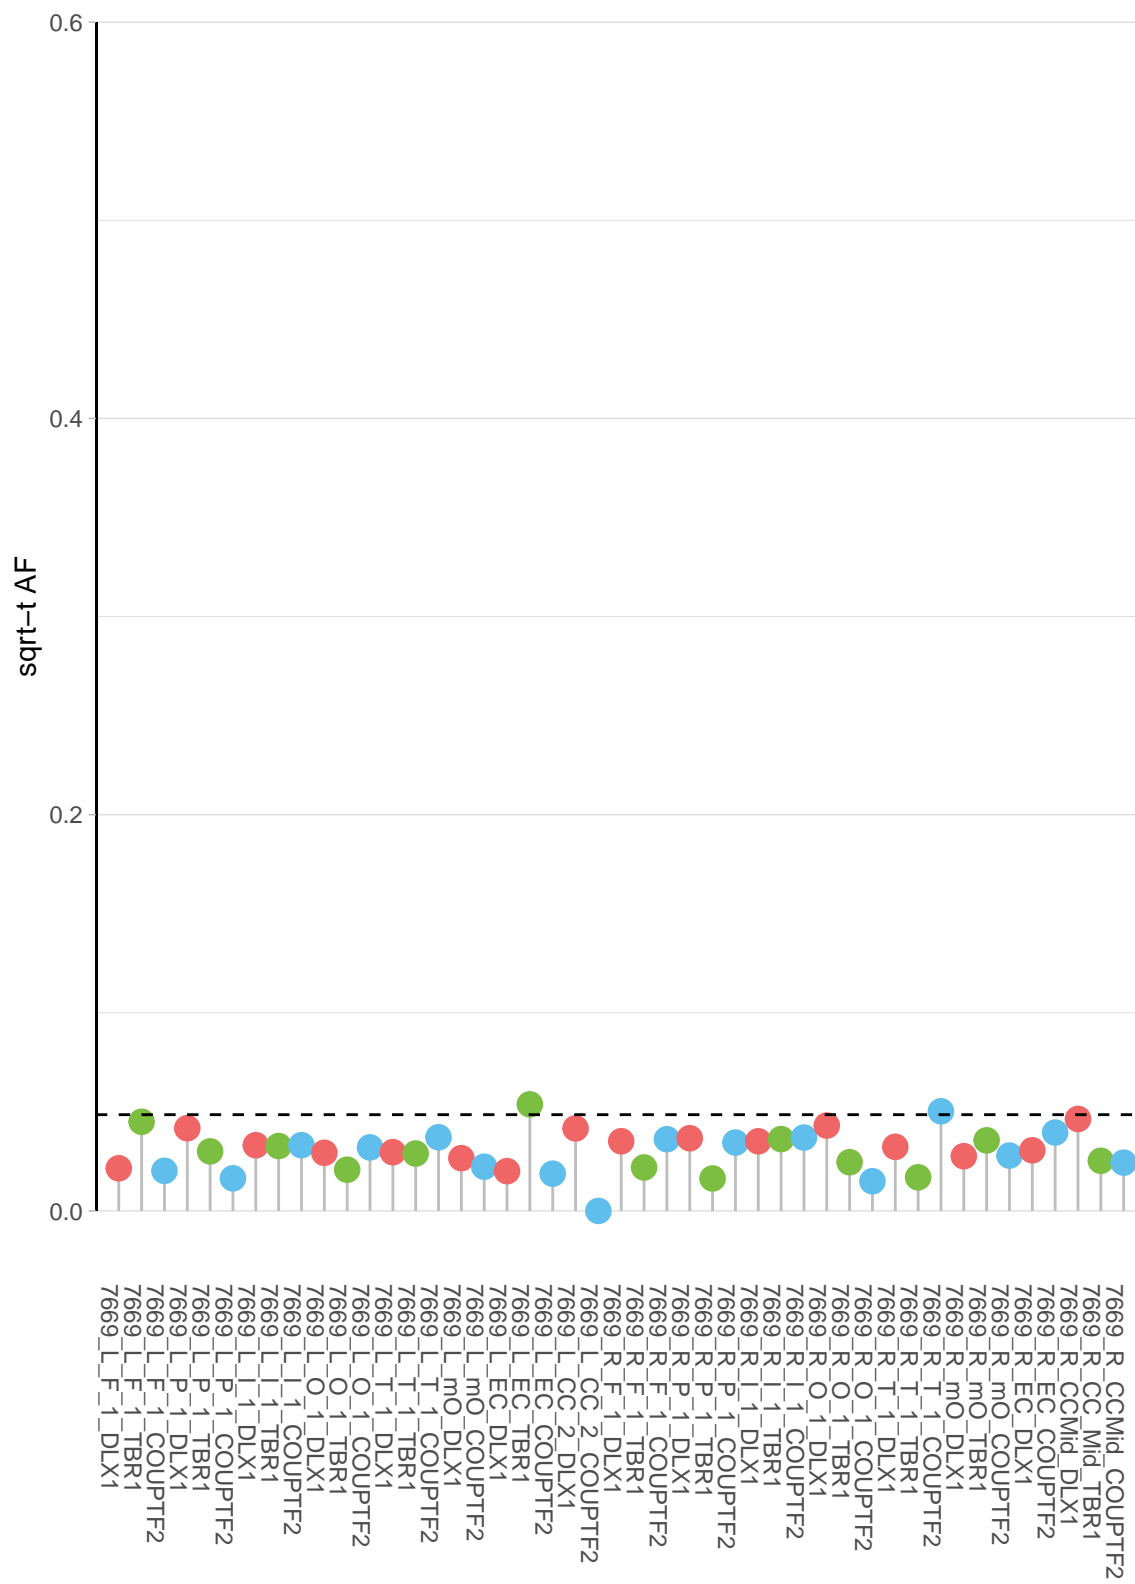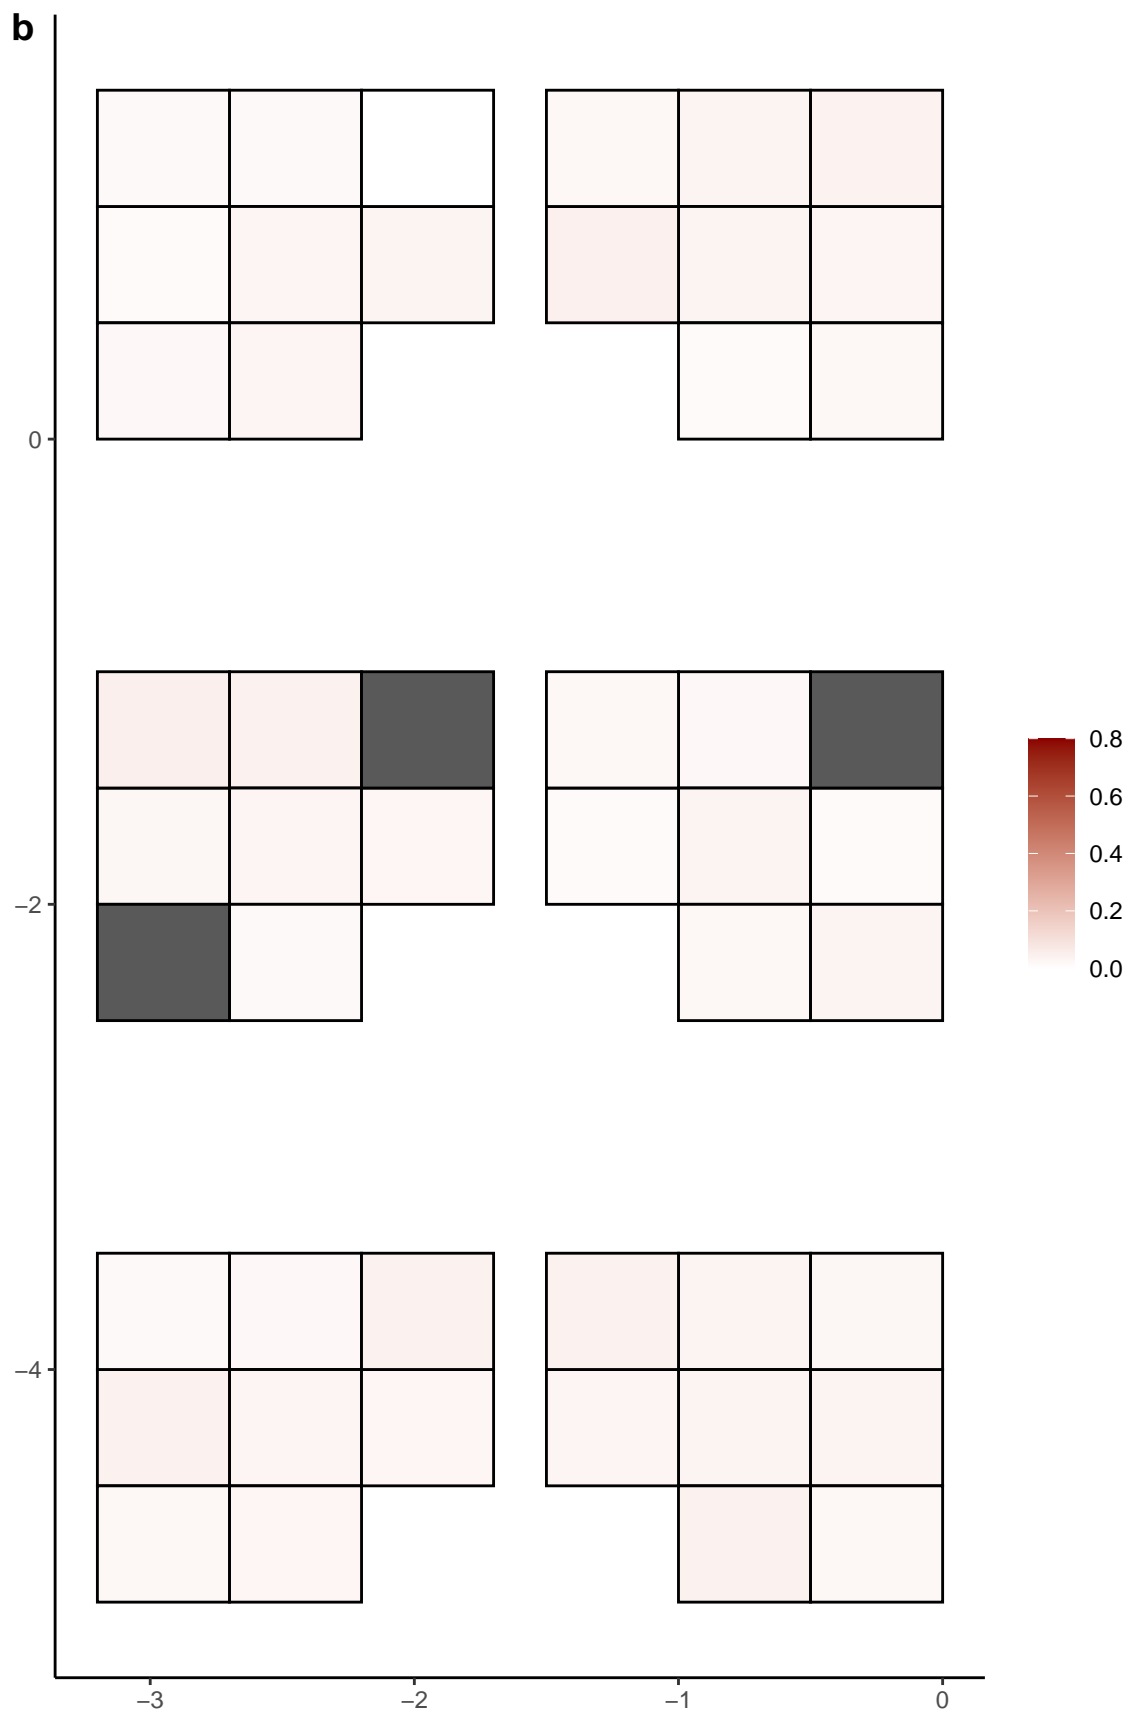

**a** ID05 3-155866578-C-T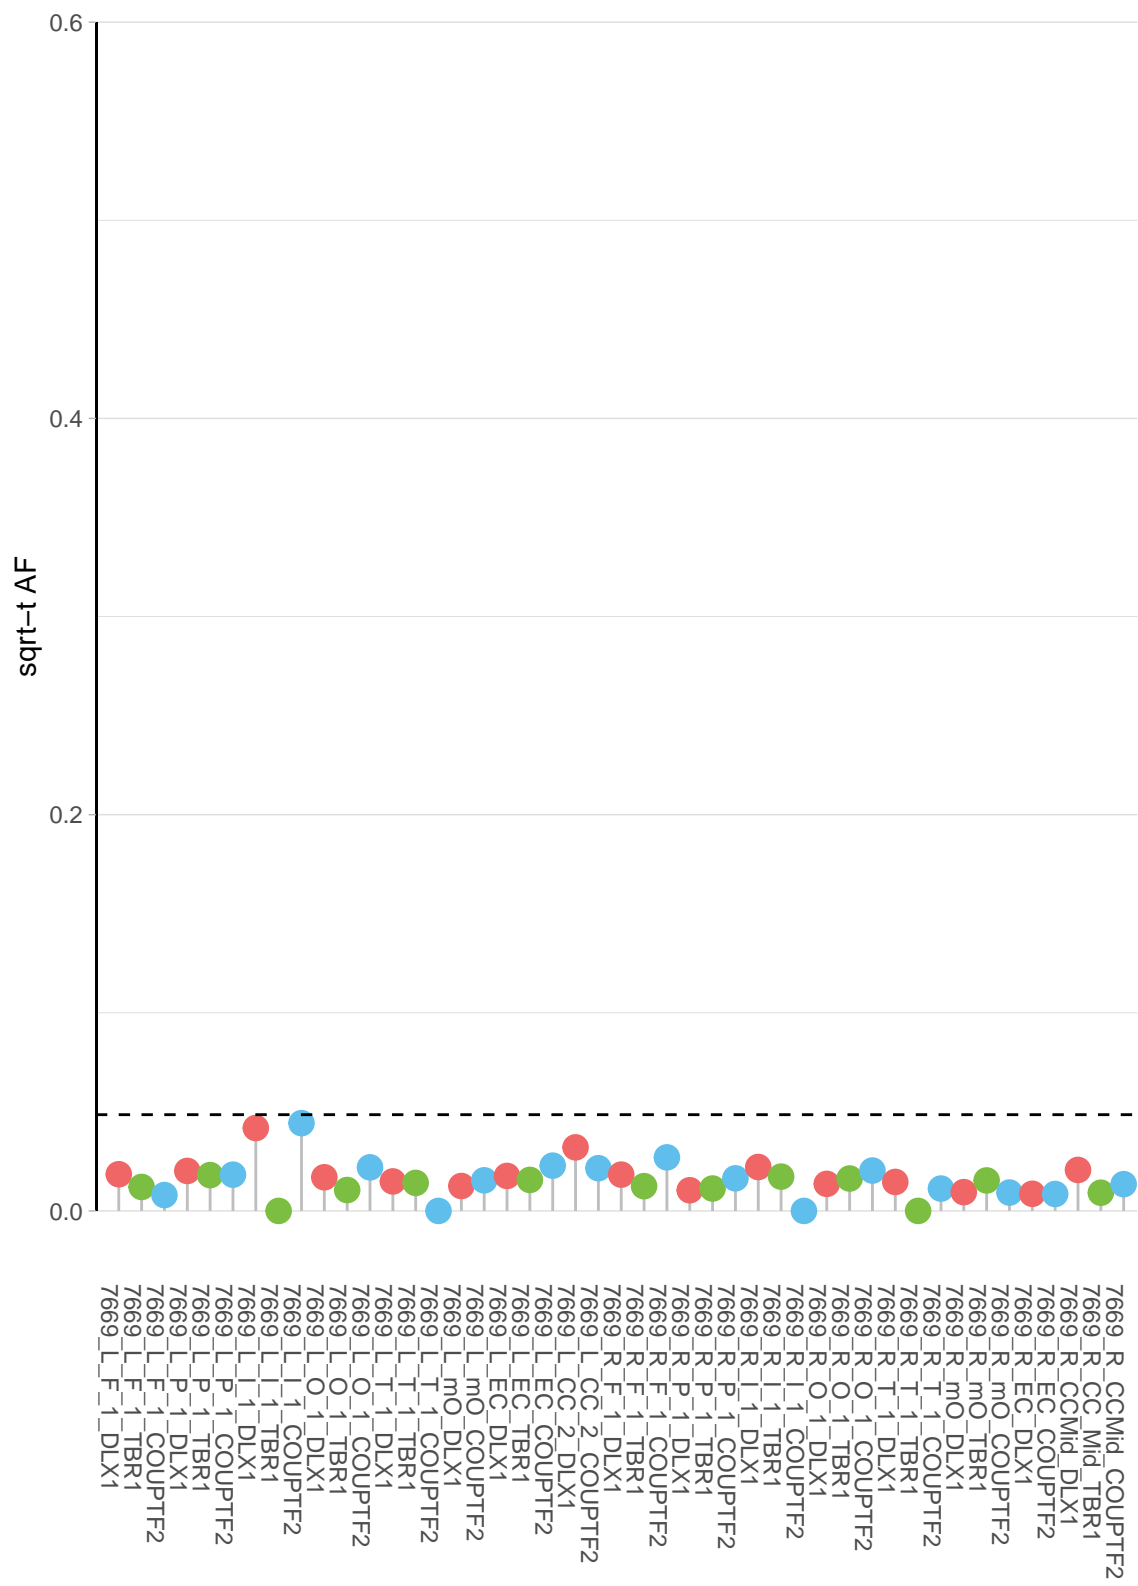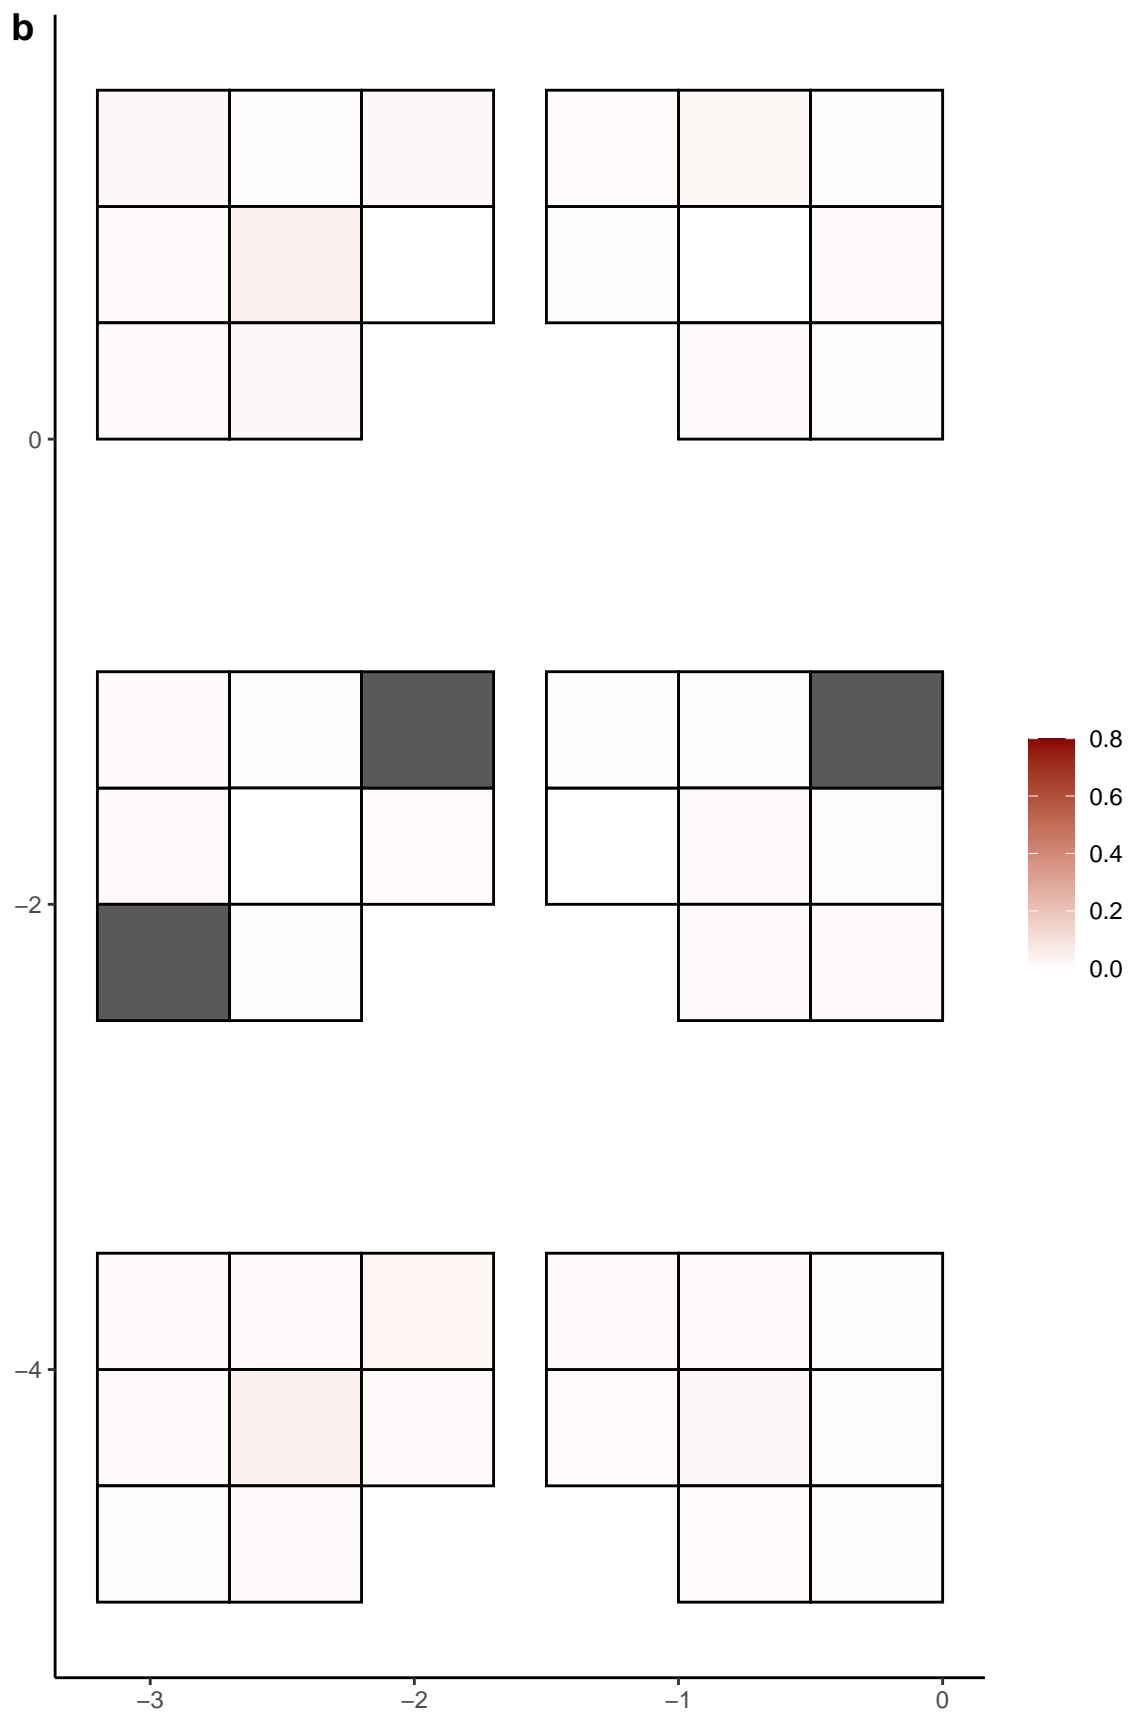



**a** ID05 3-156768561-C-T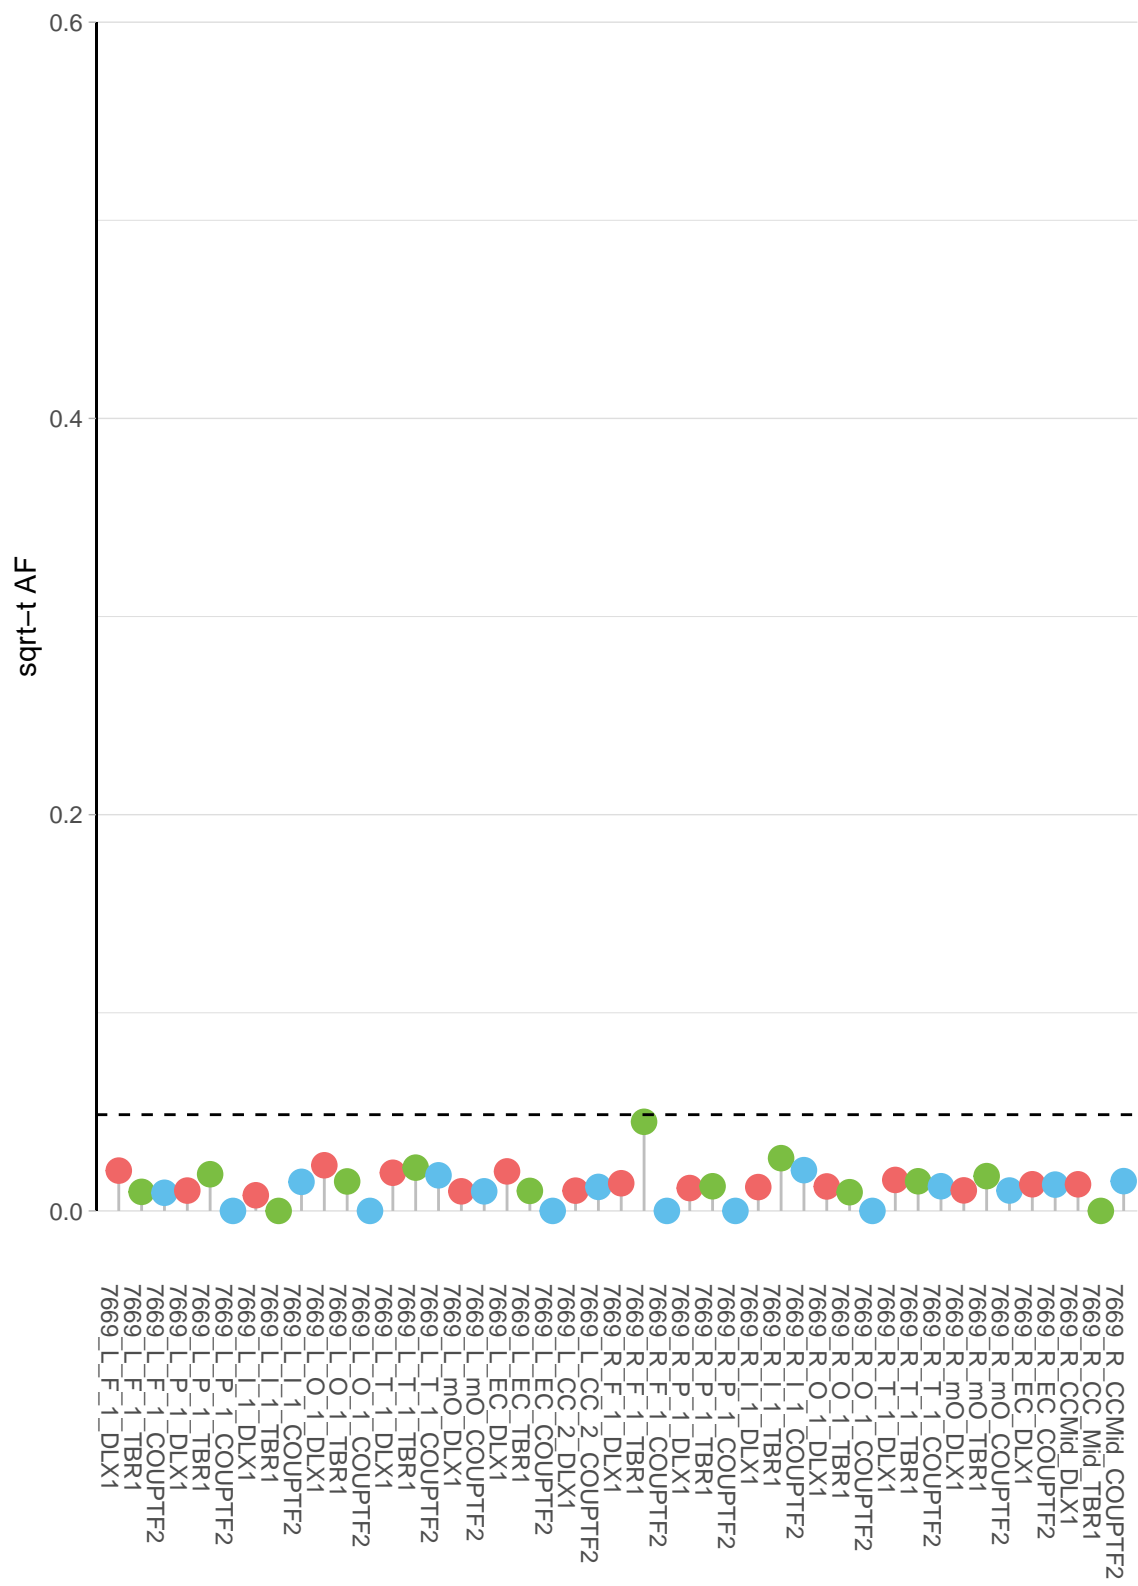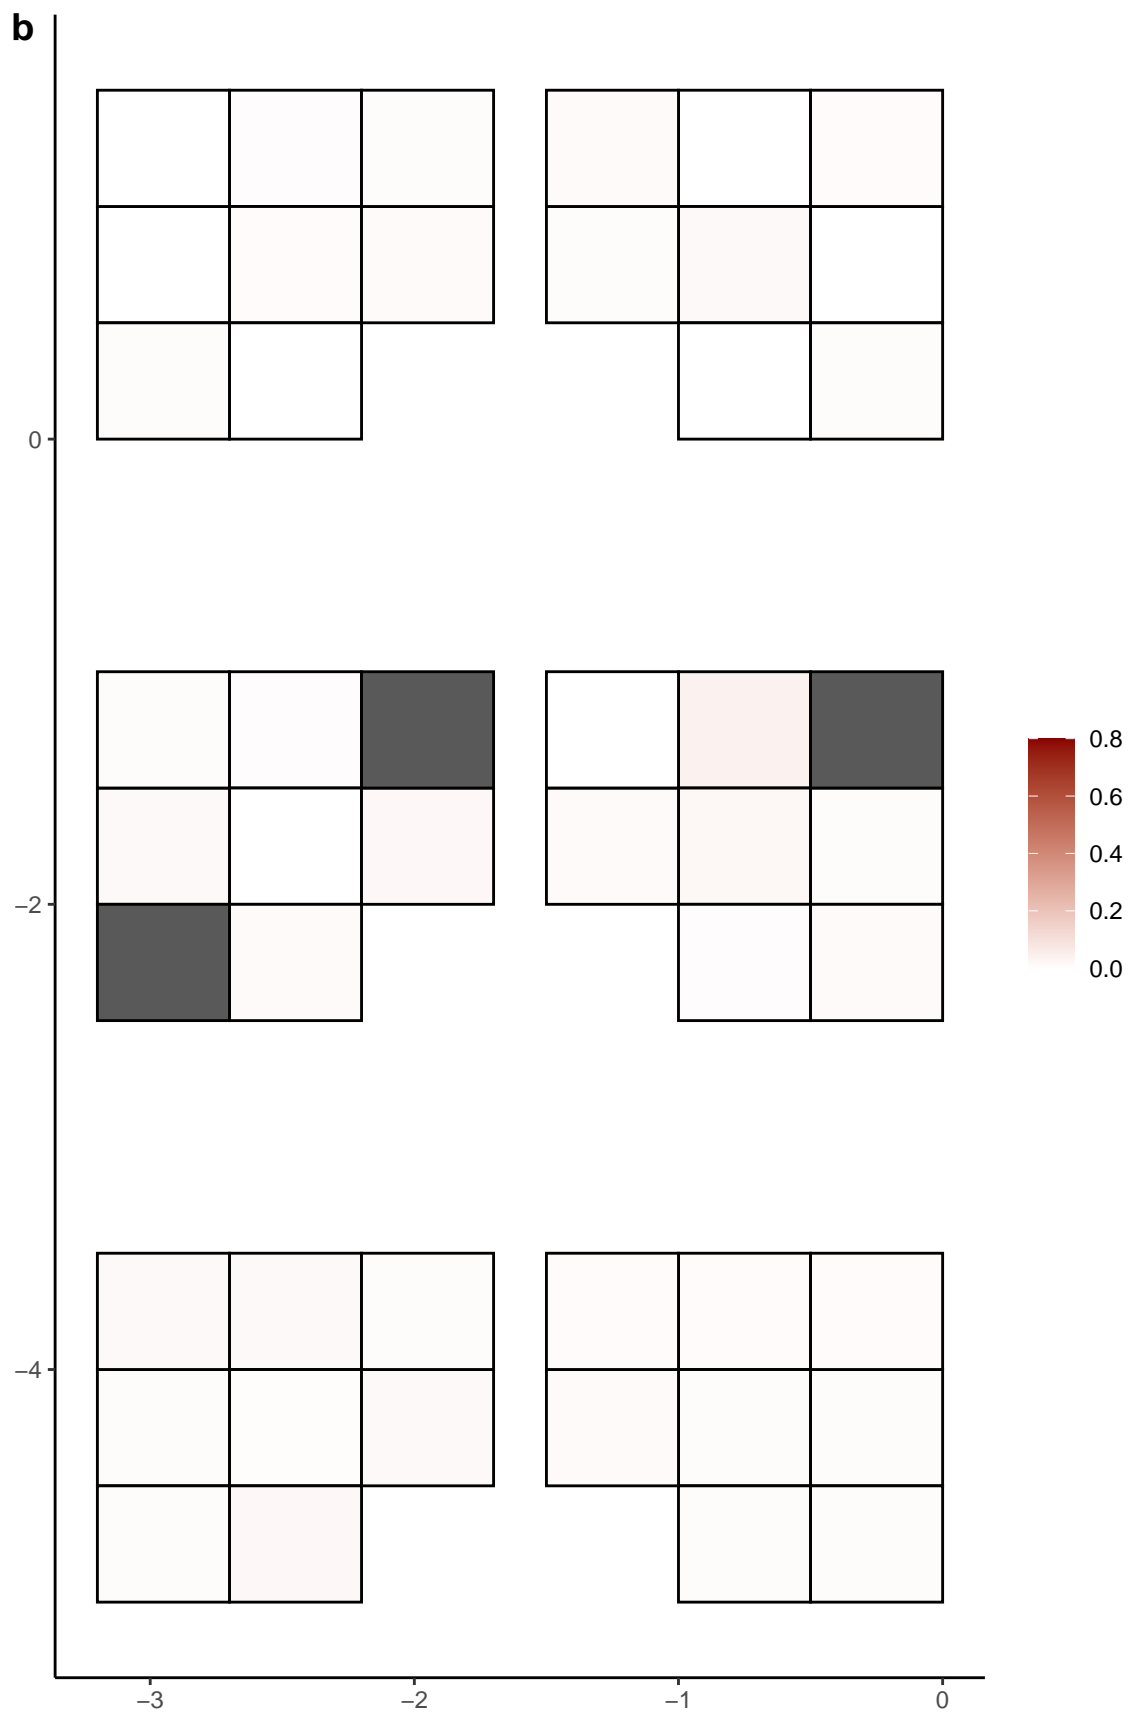

**a** ID05 3-158256477-C-T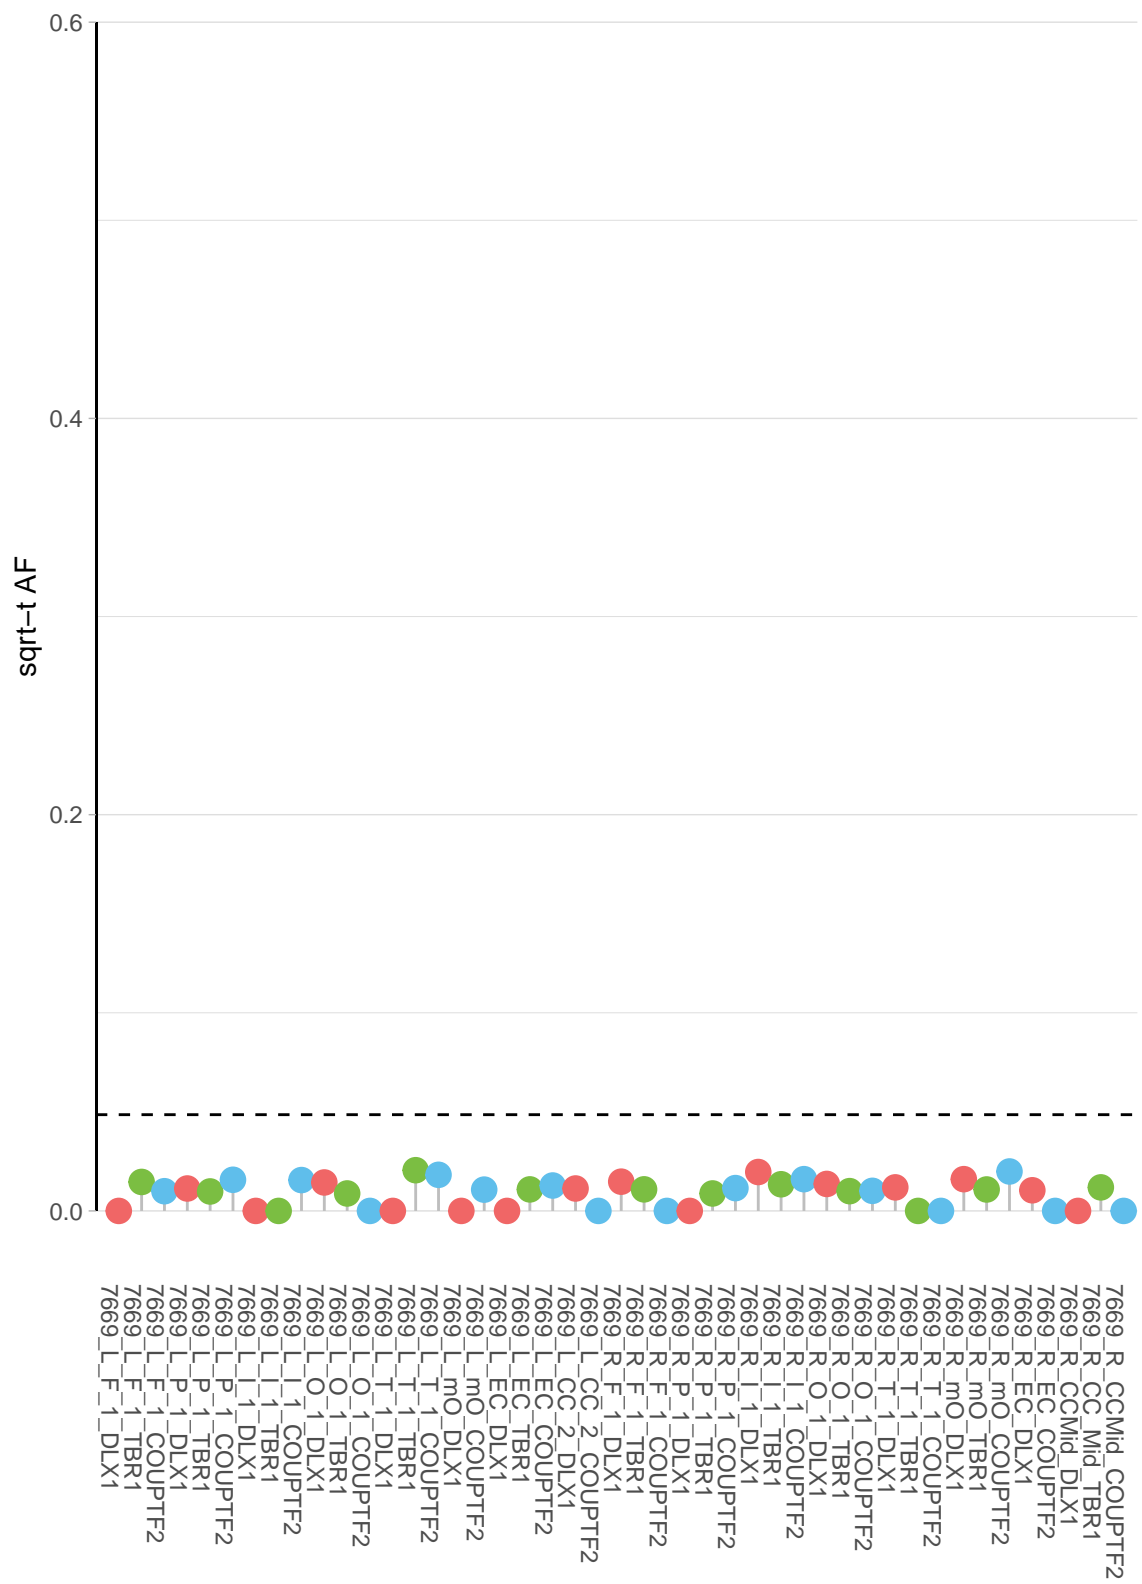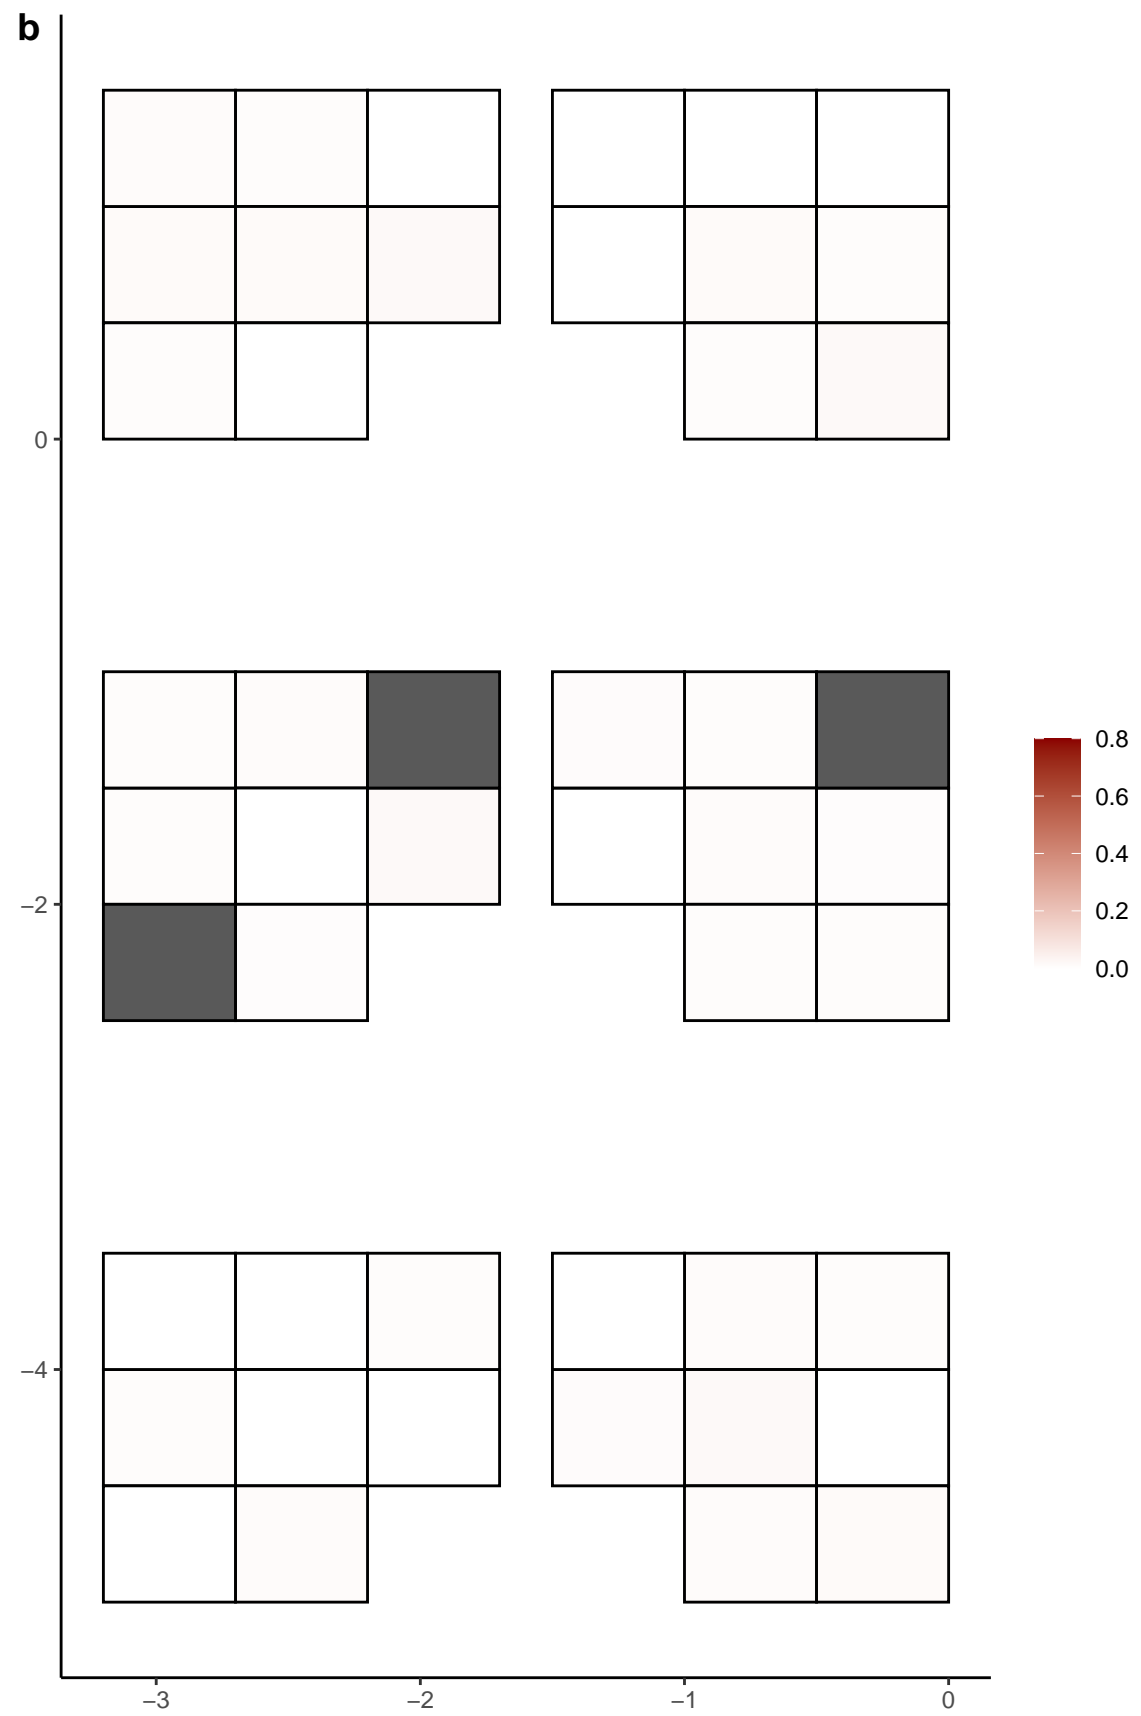

**a** ID05 3-159483100-C-T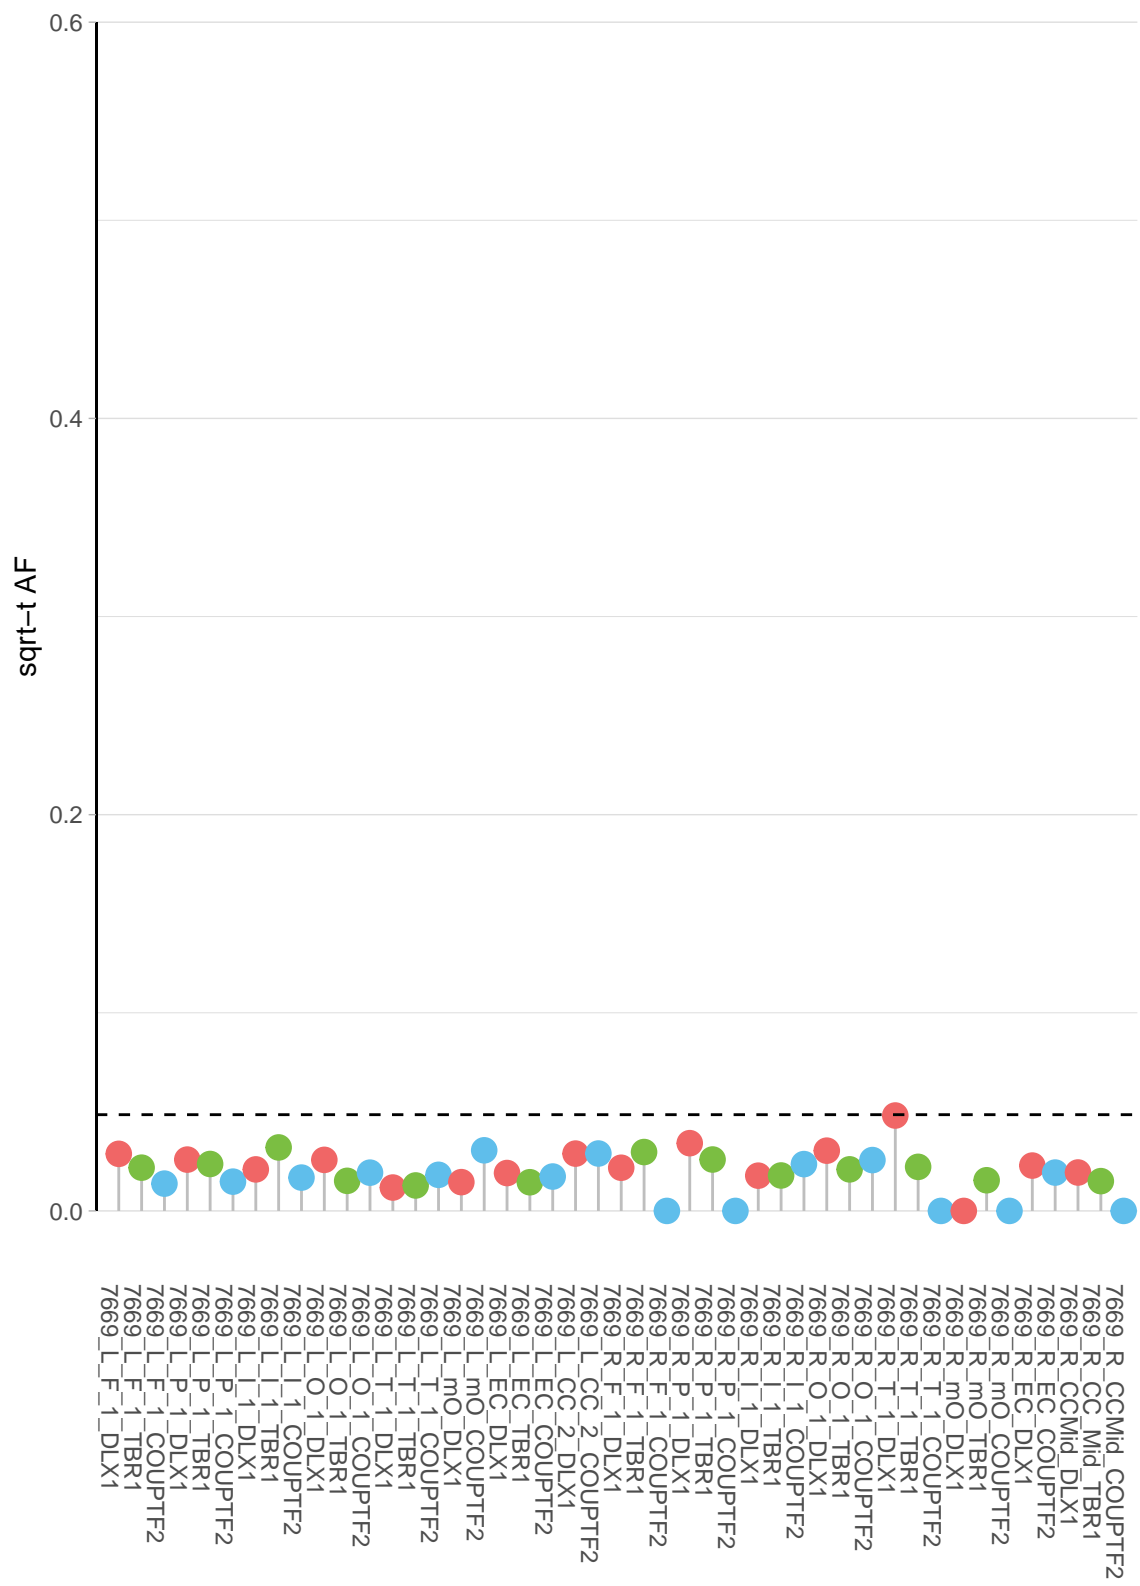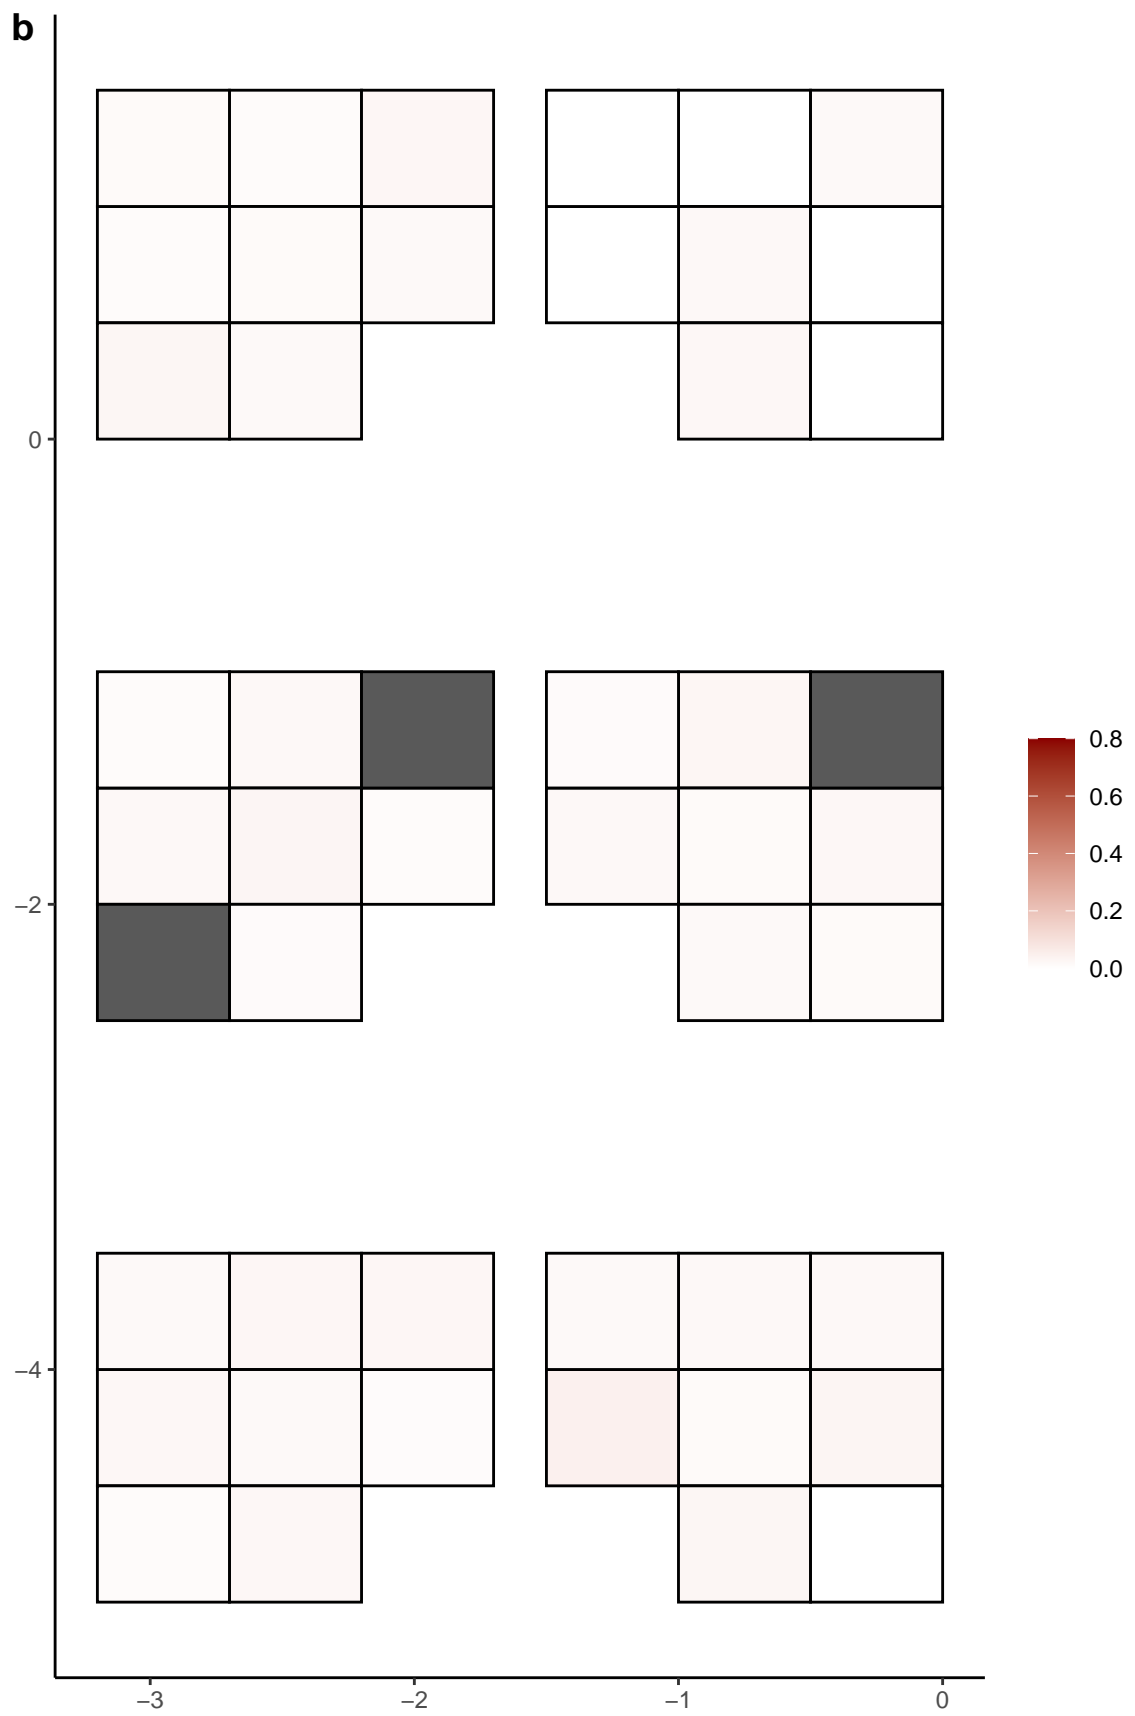

**a** ID05 3-159569557-A-C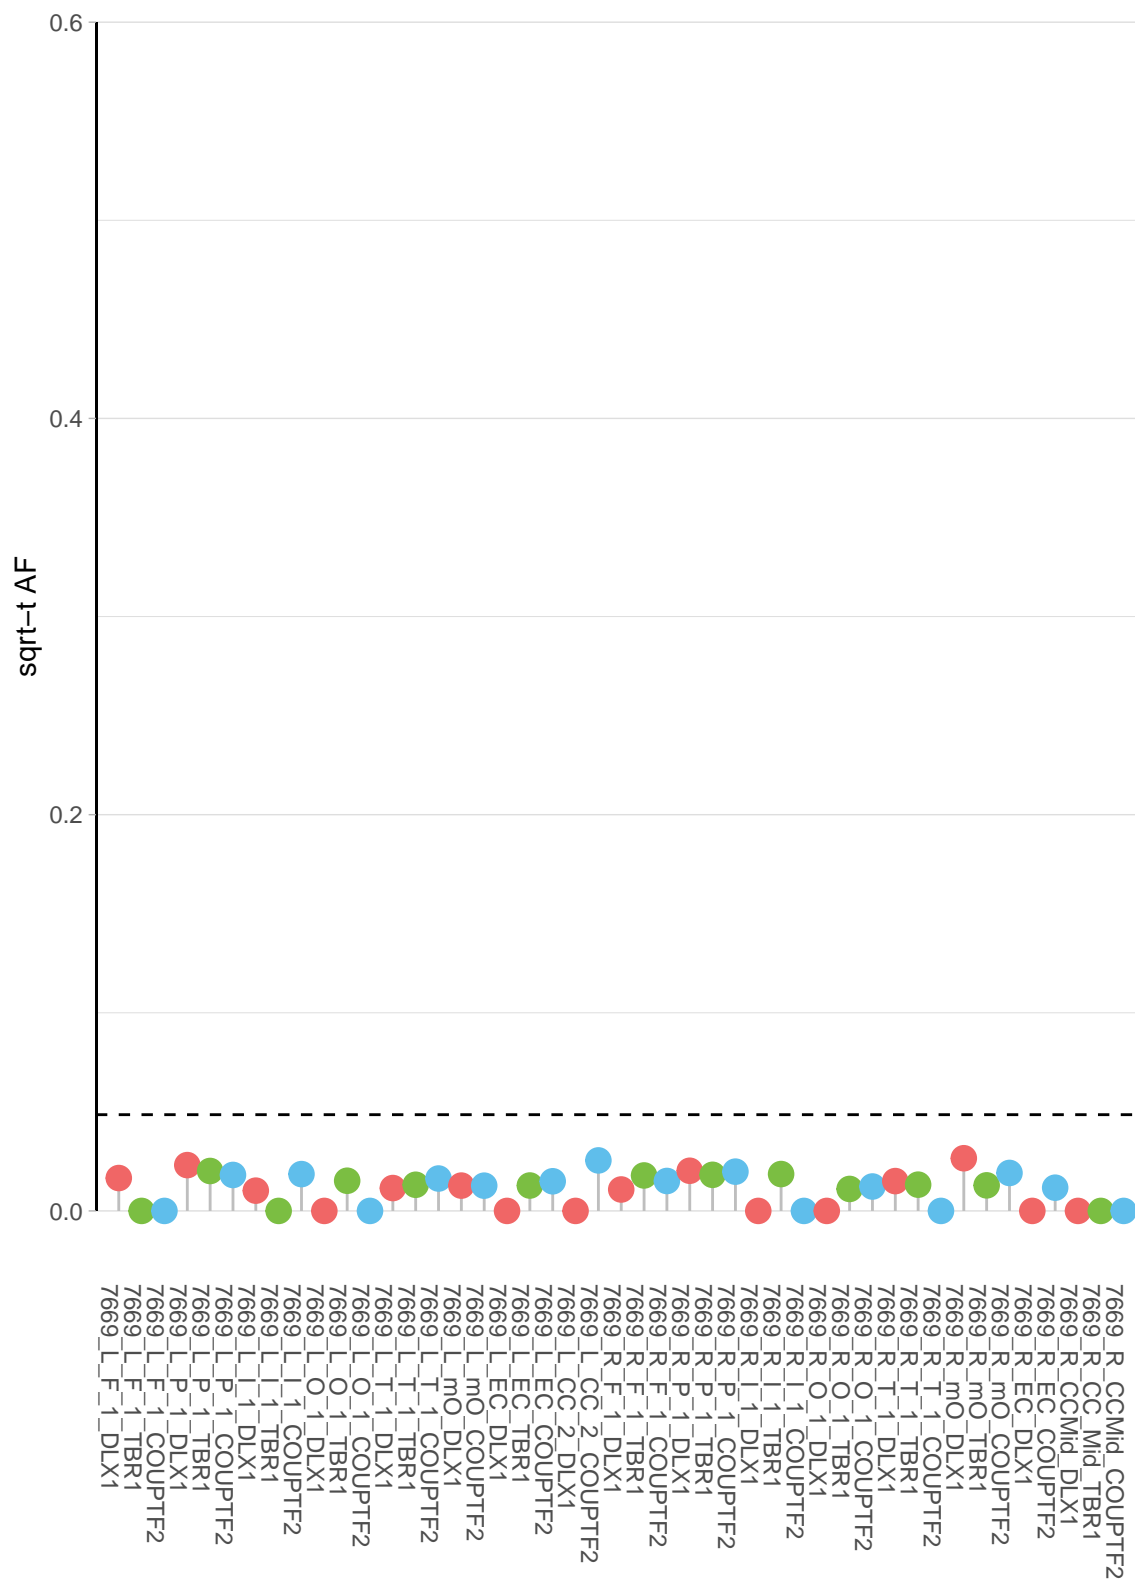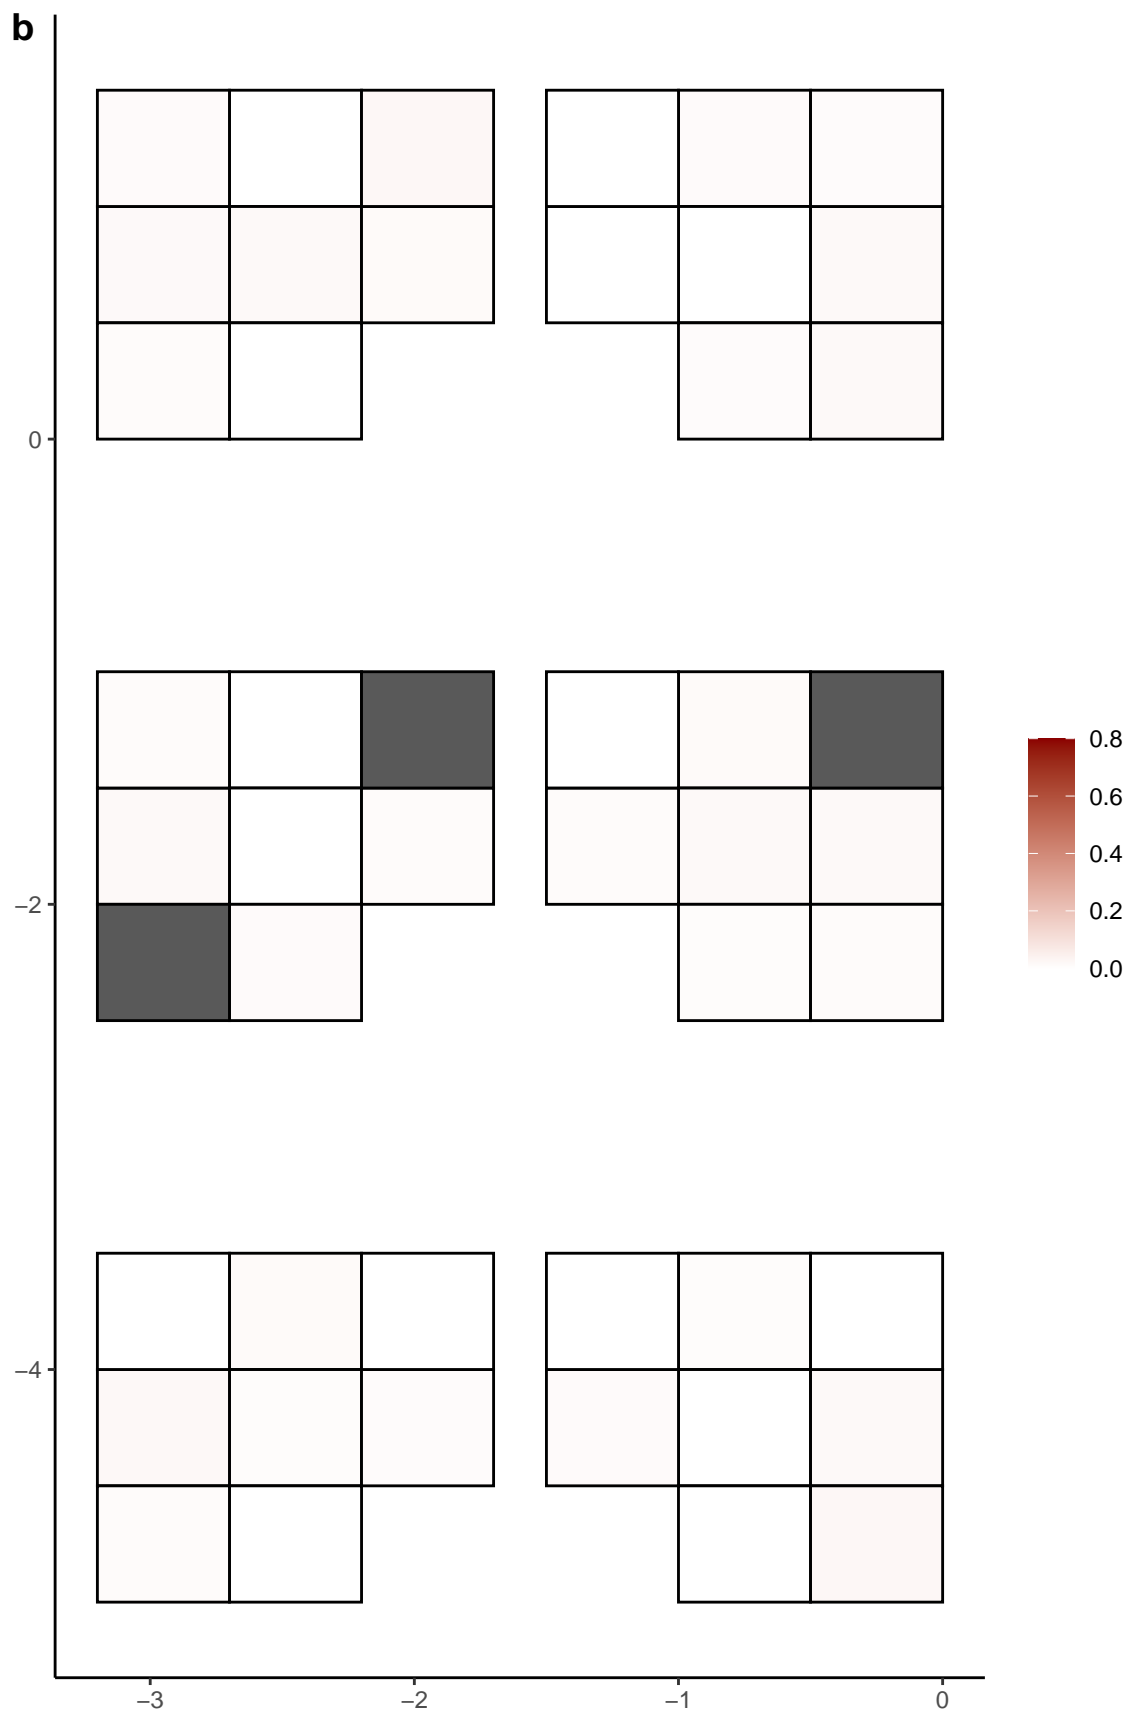

**a** ID05 3-164879470-C-T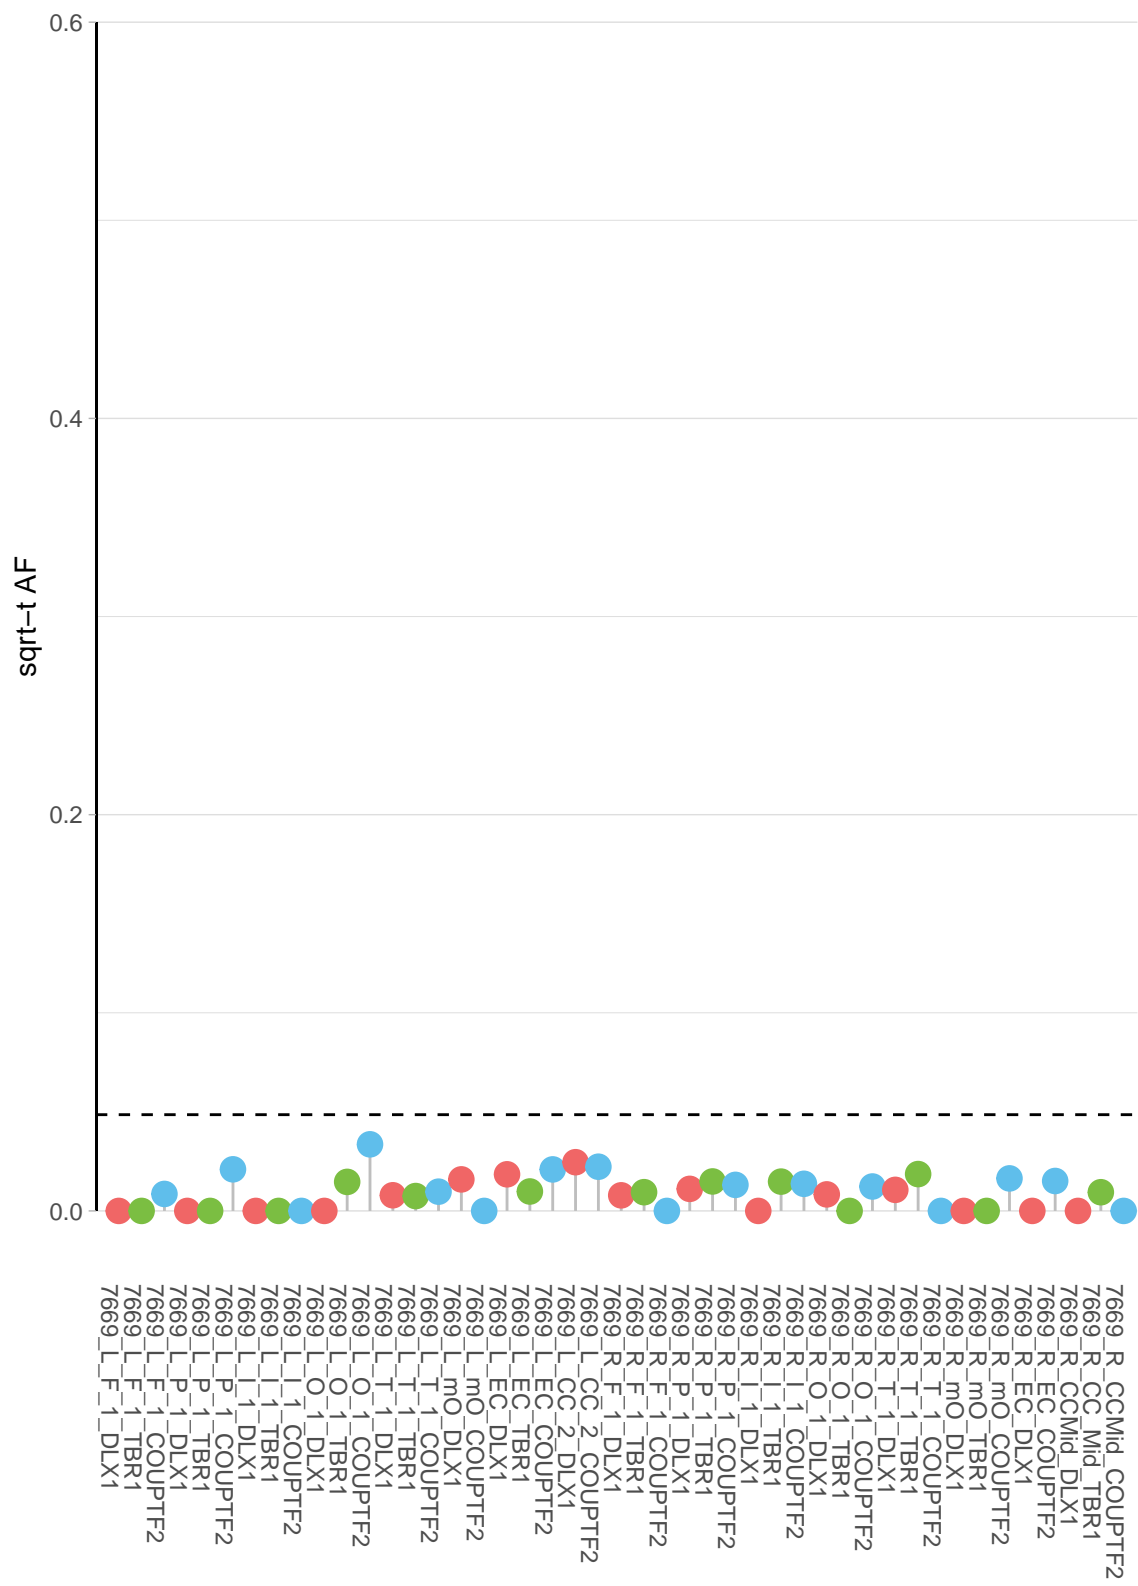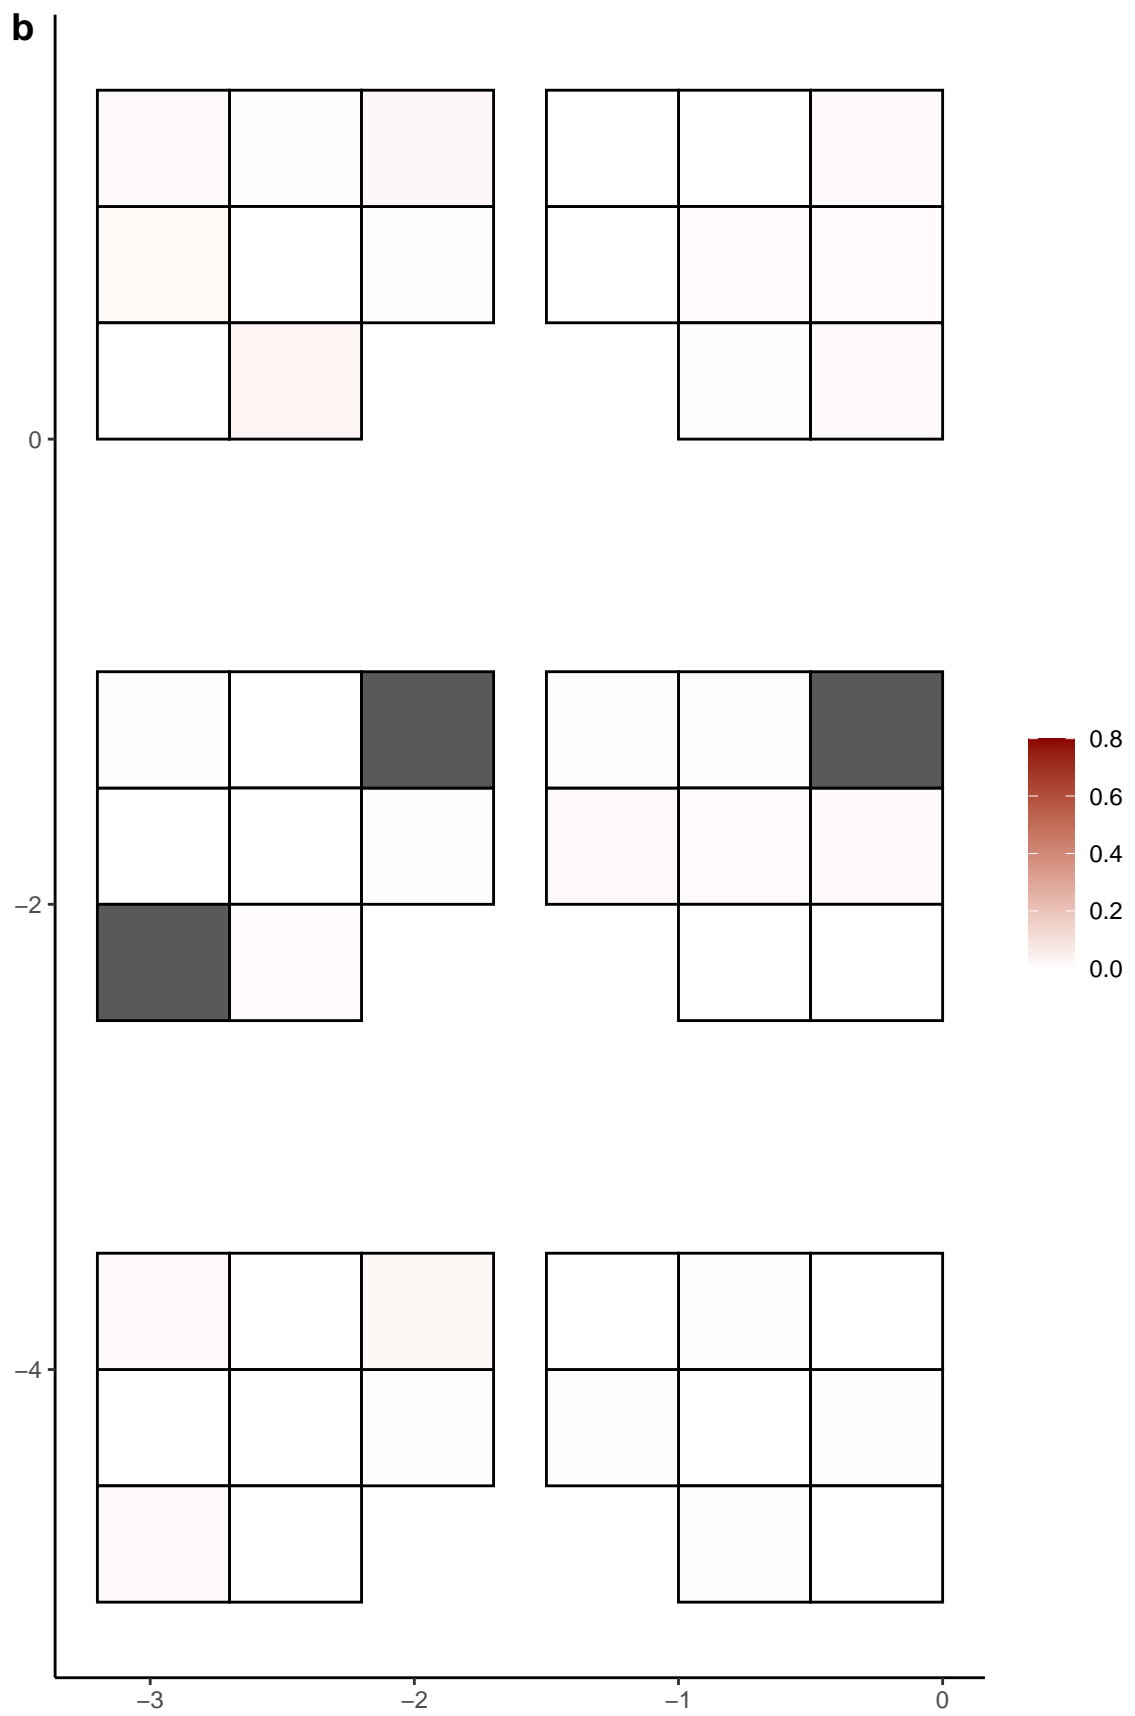

**a** ID05 3-16511350-A-C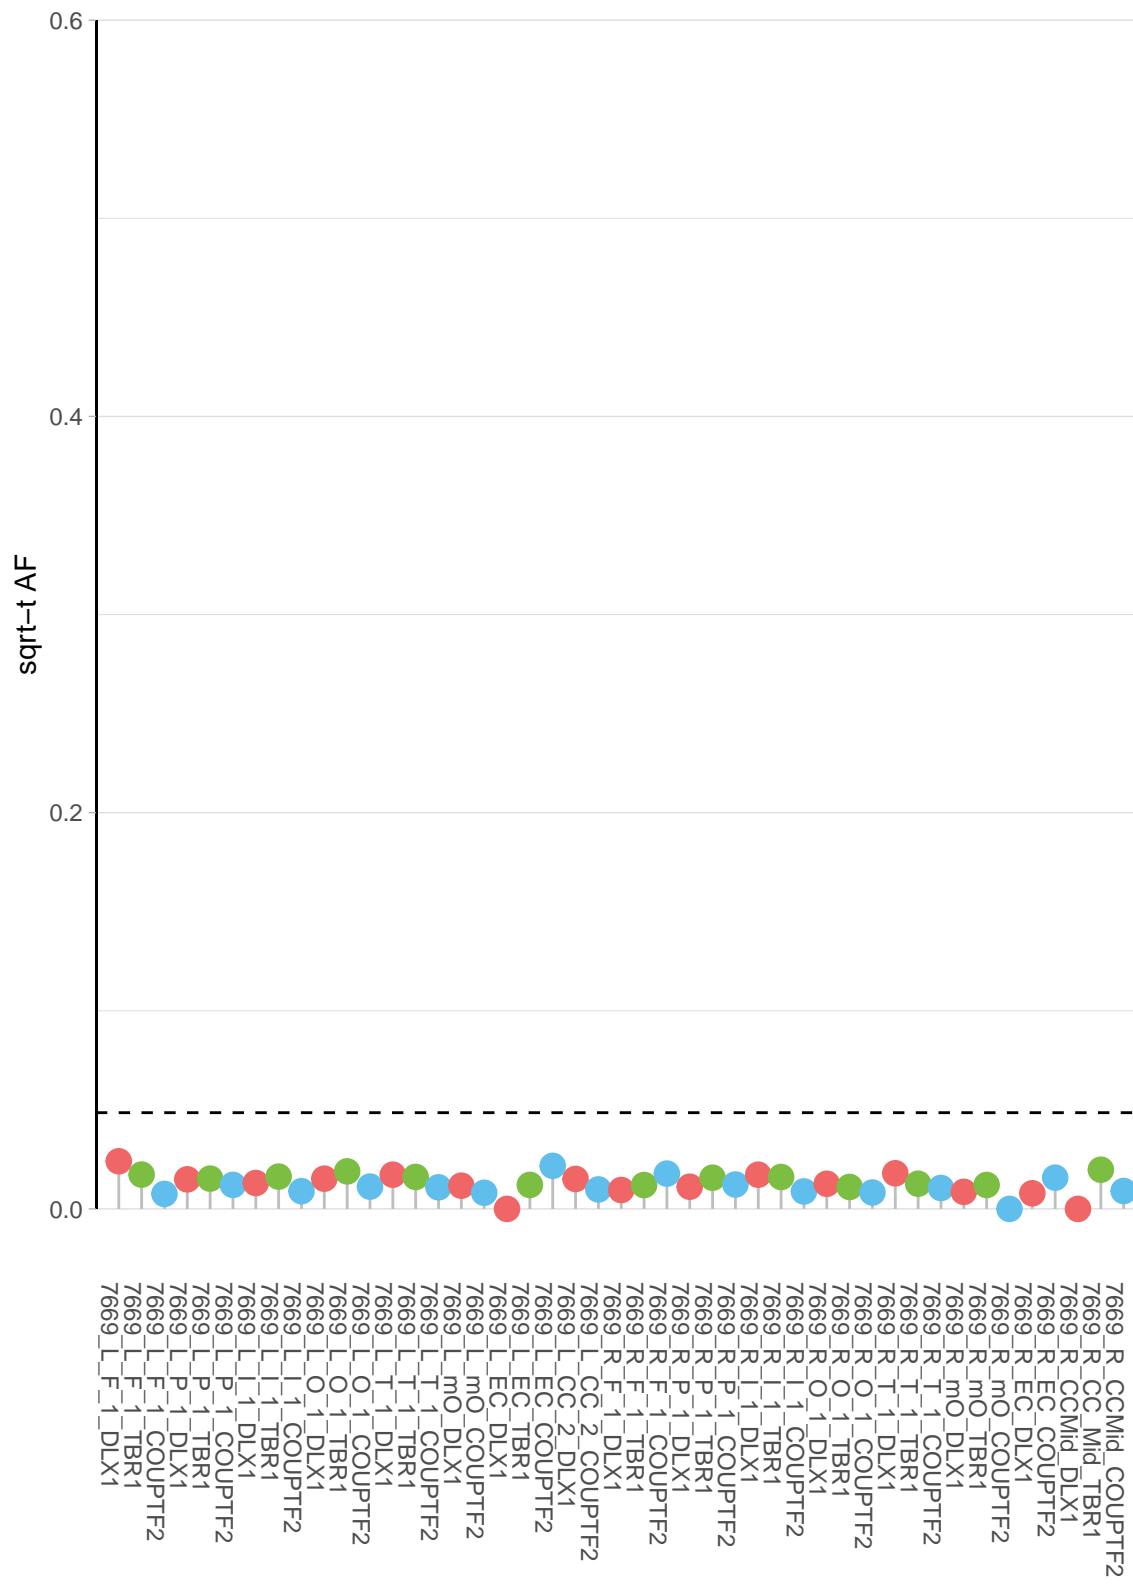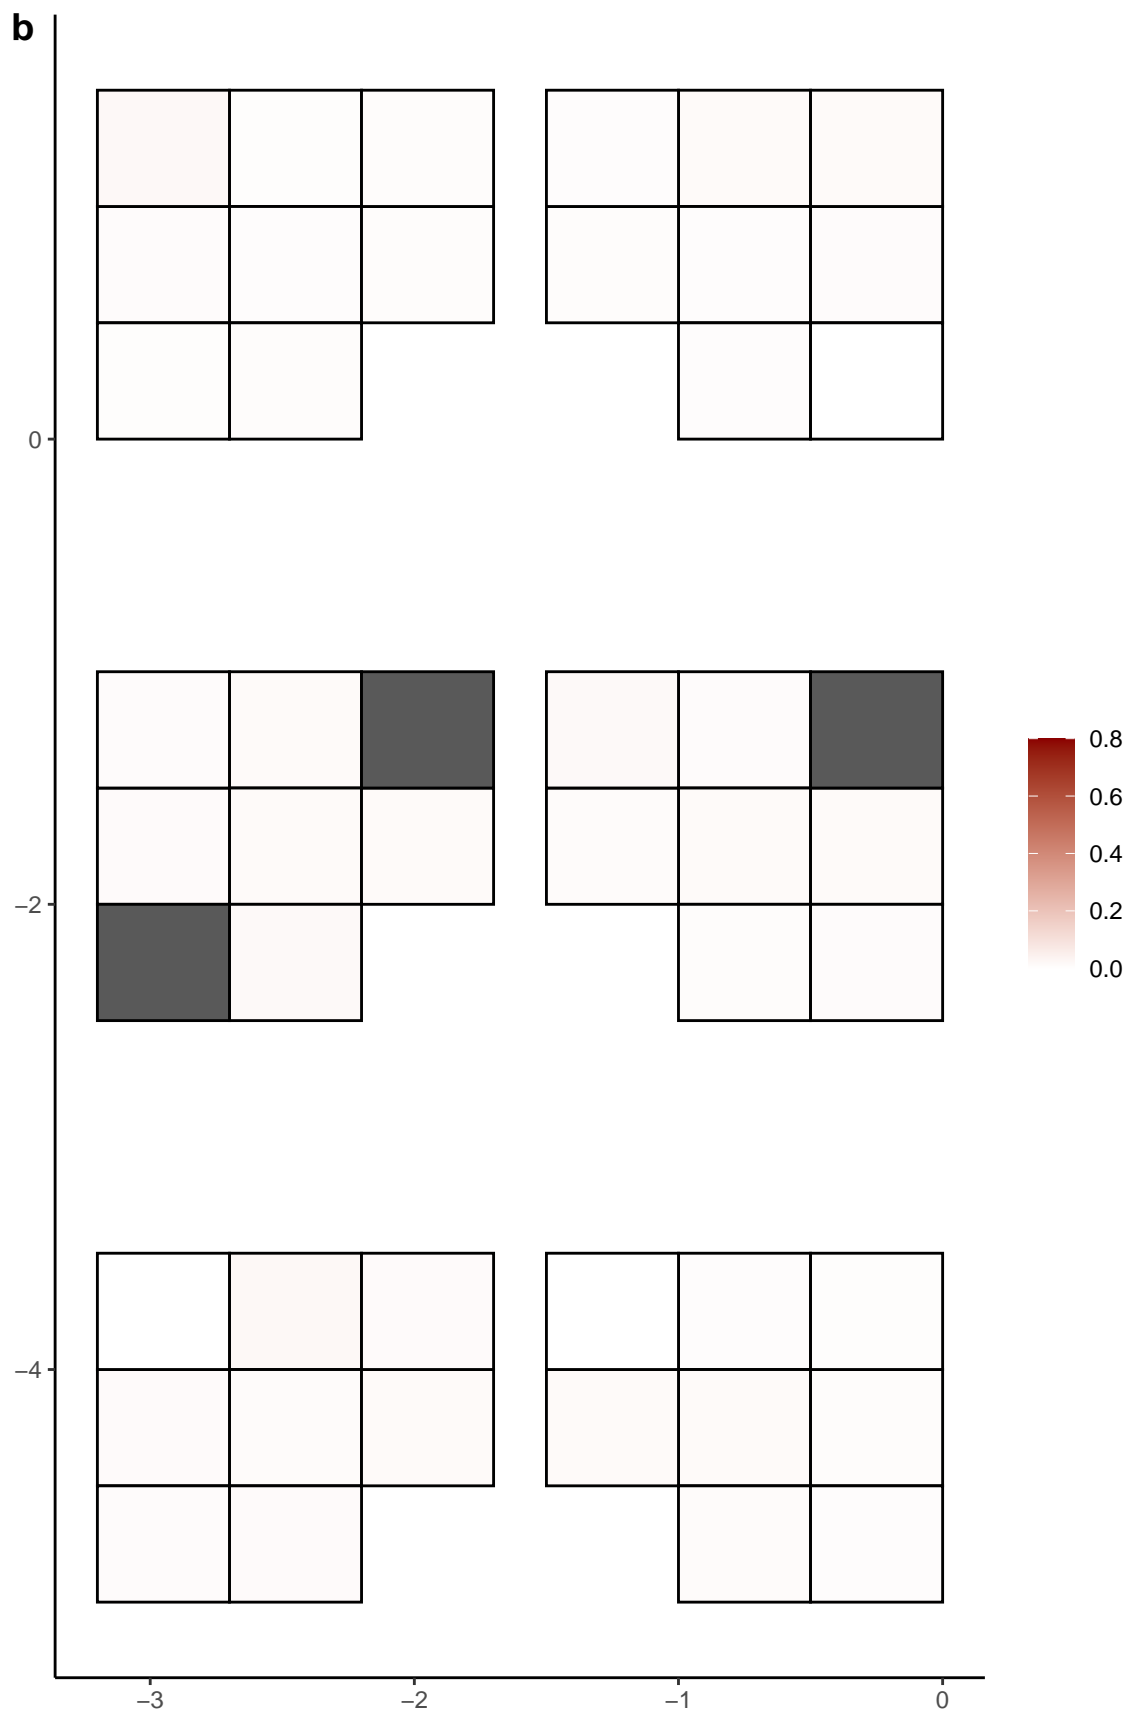

**a** ID05 3-16568702-C-T

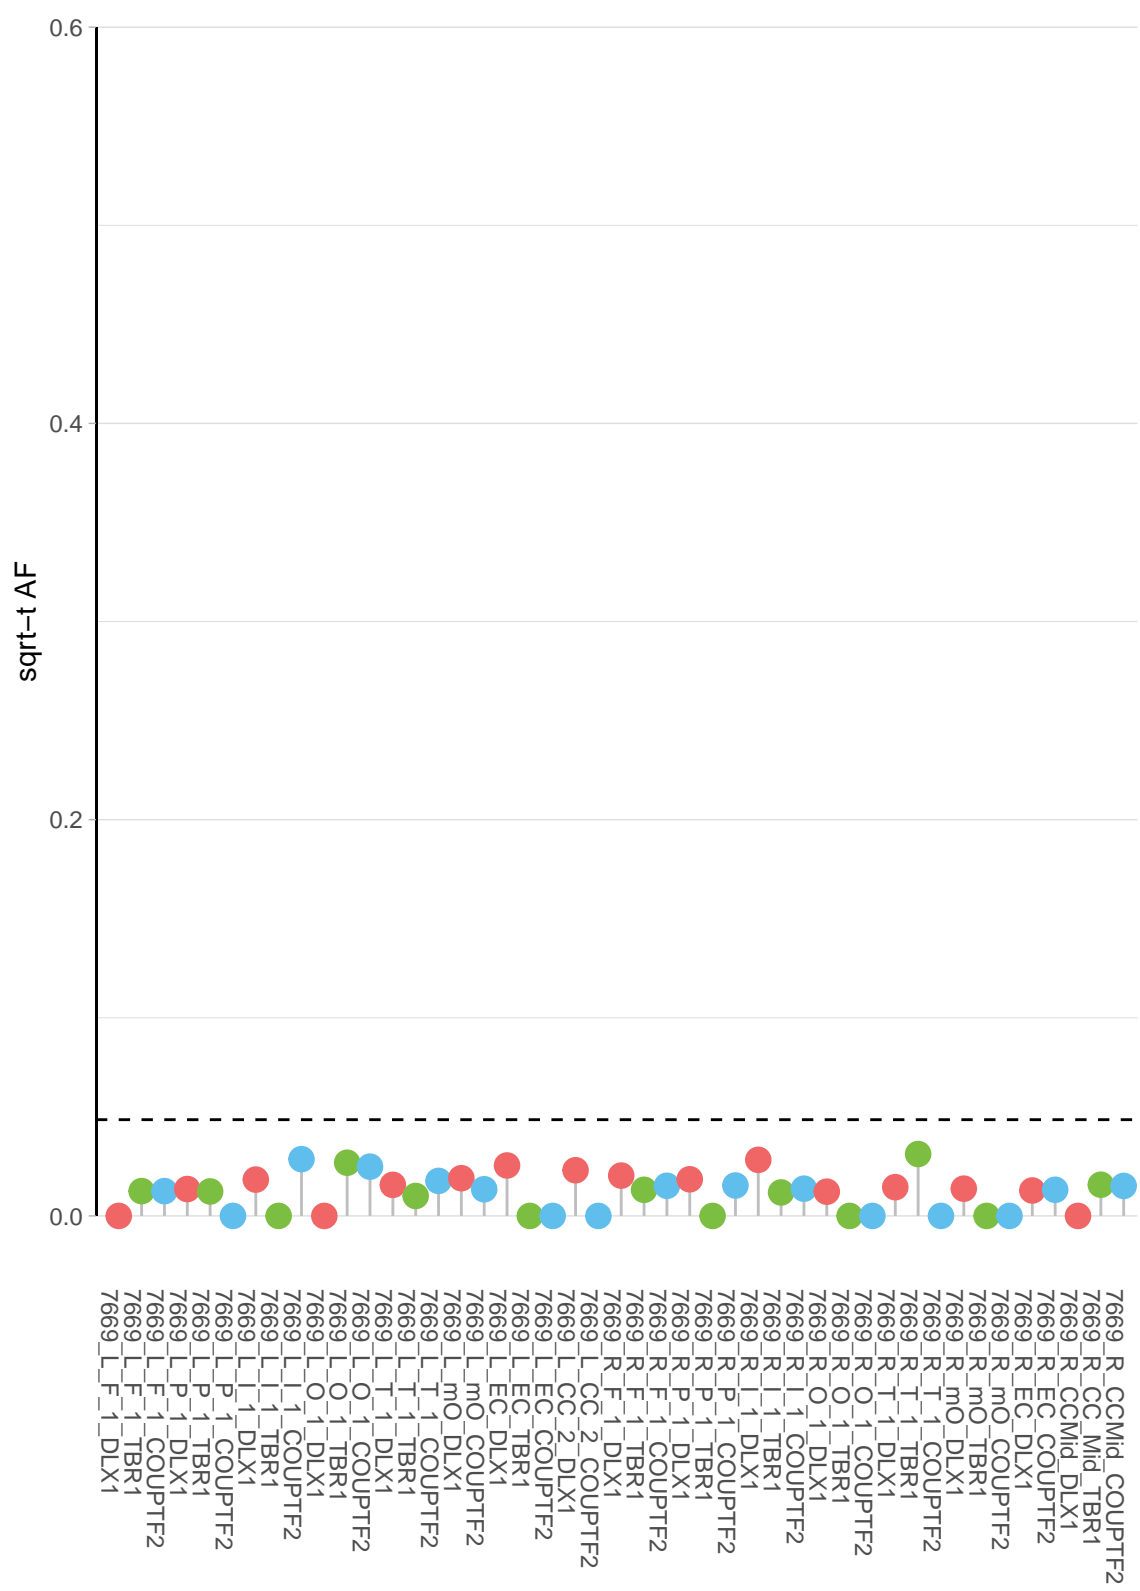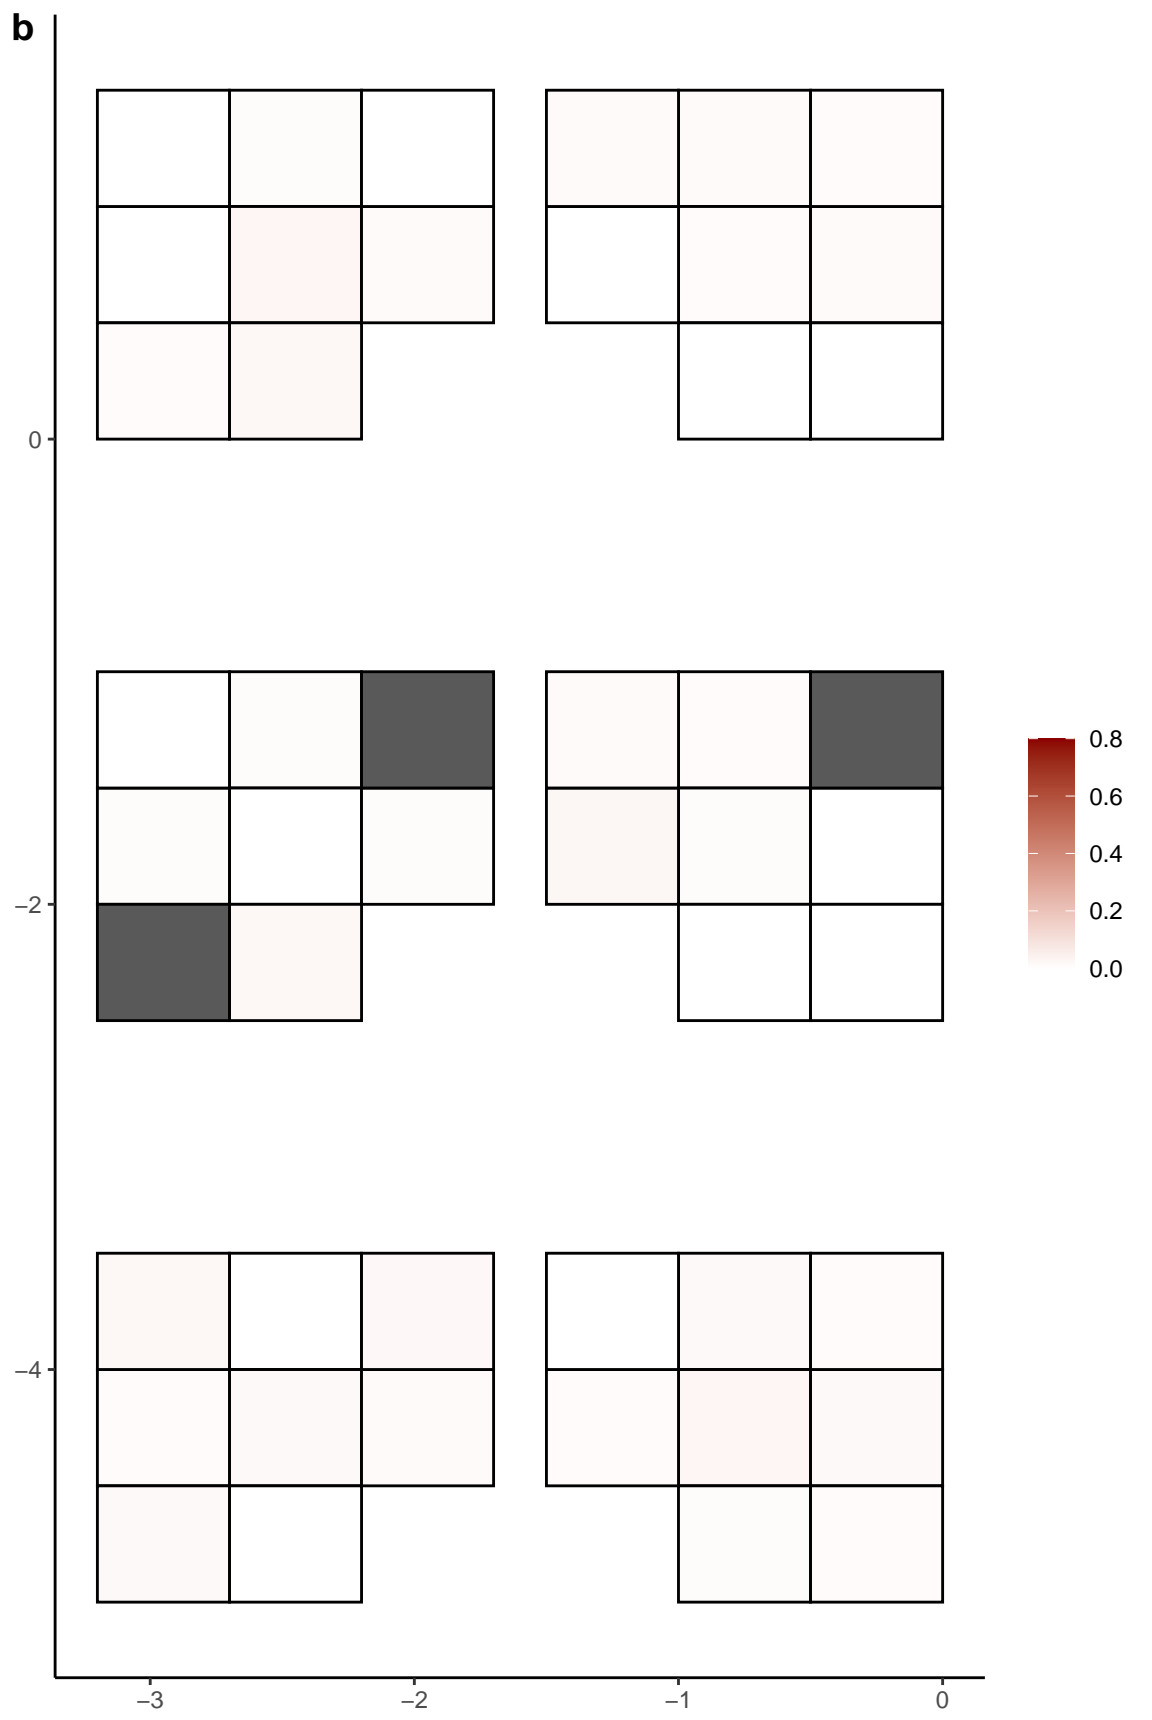

**a** ID05 3-169833345-G-A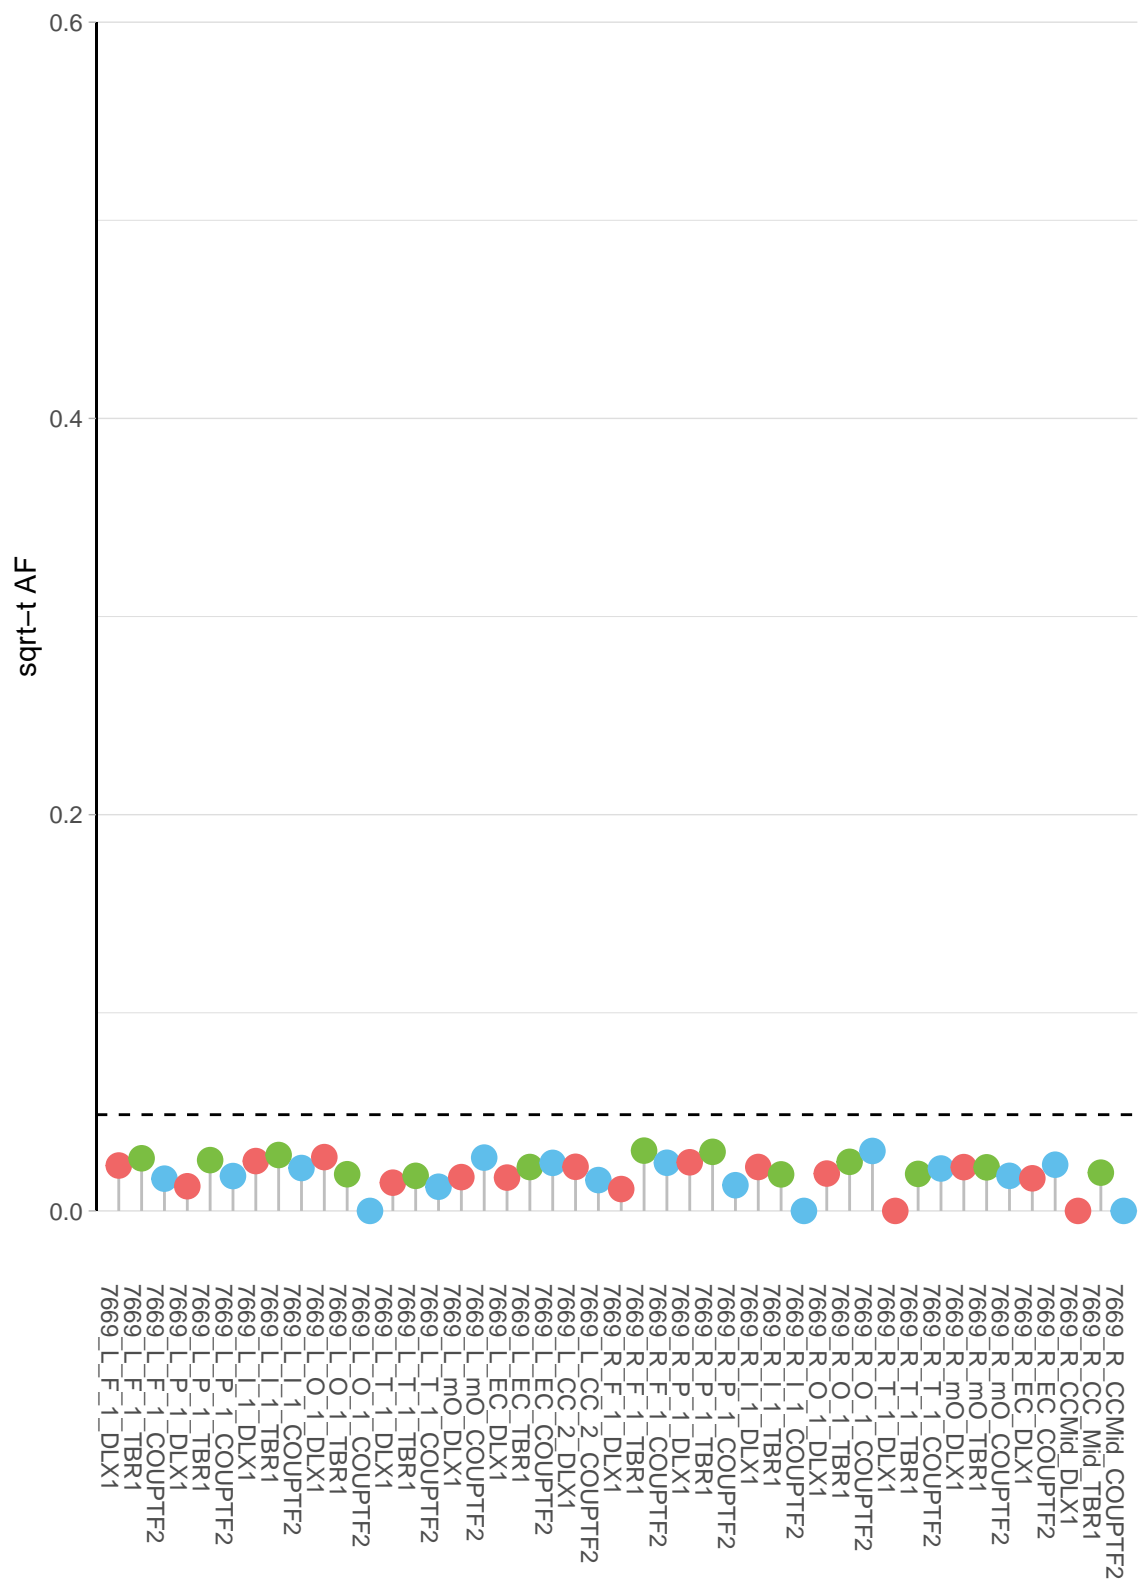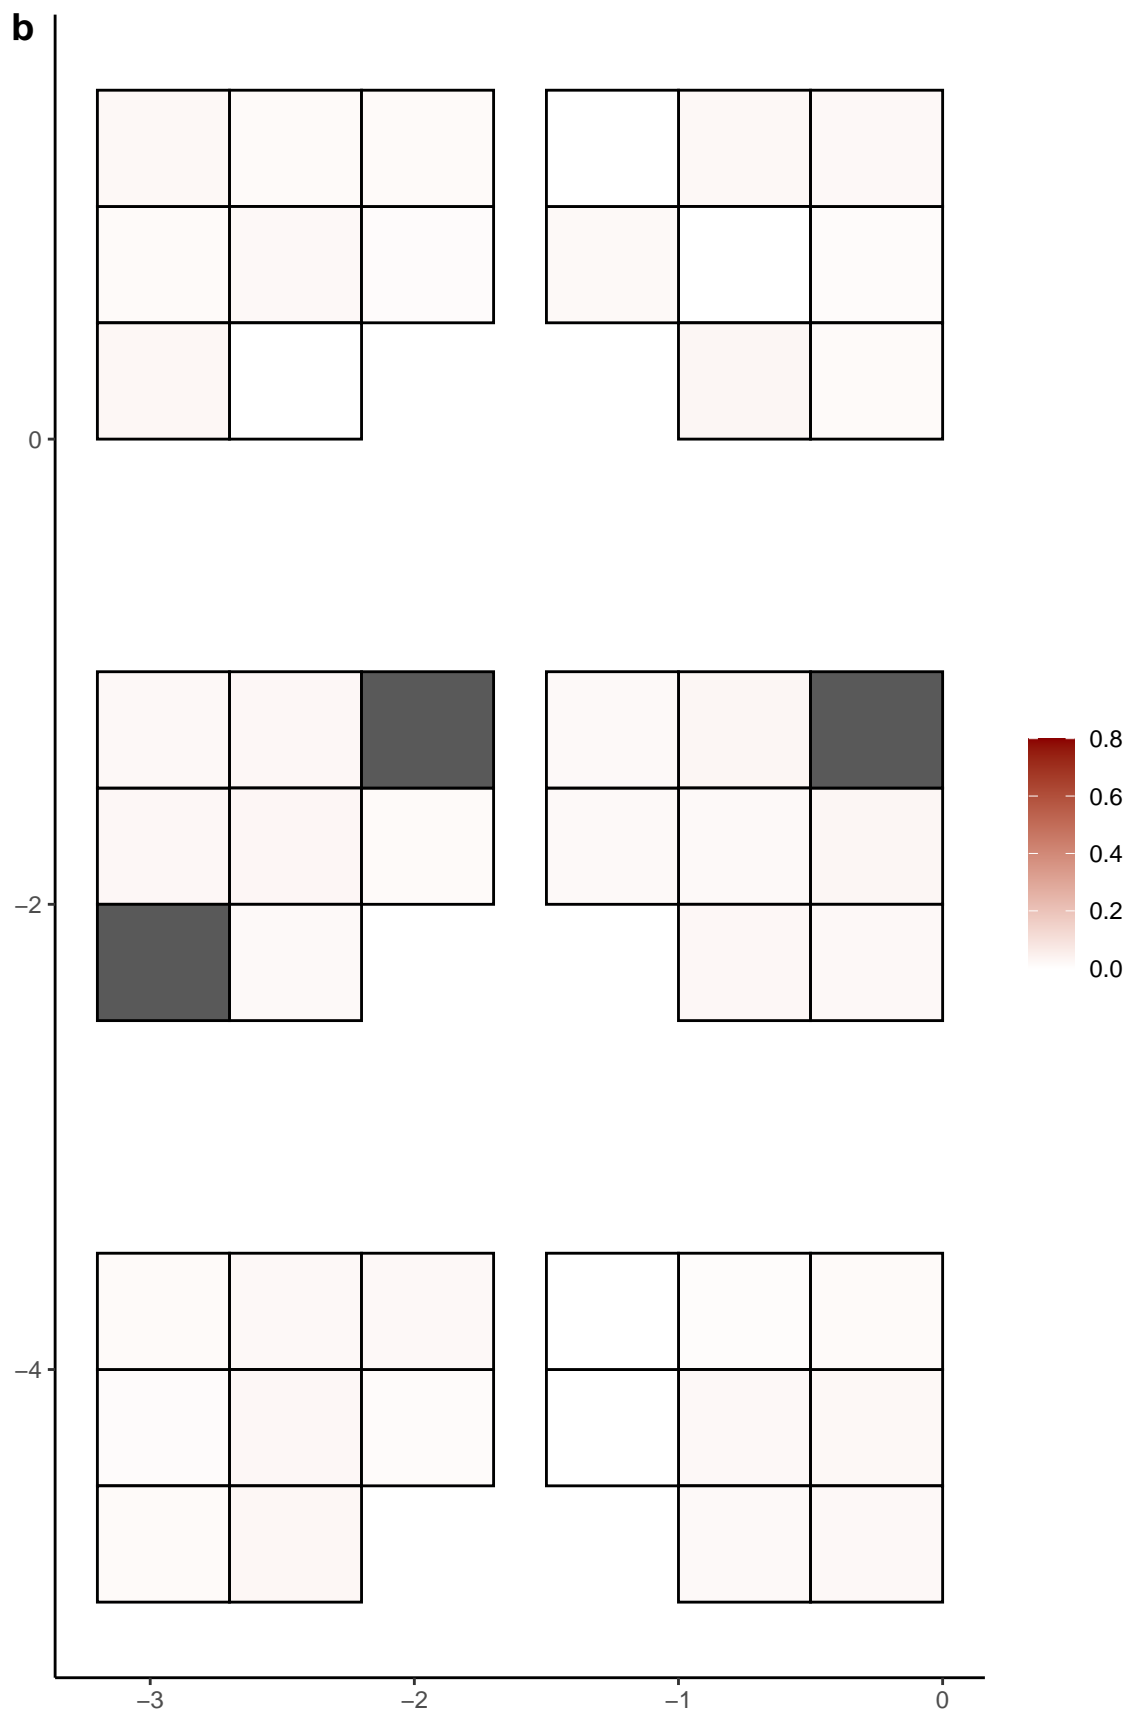



**a** ID05 3-172635725-G-A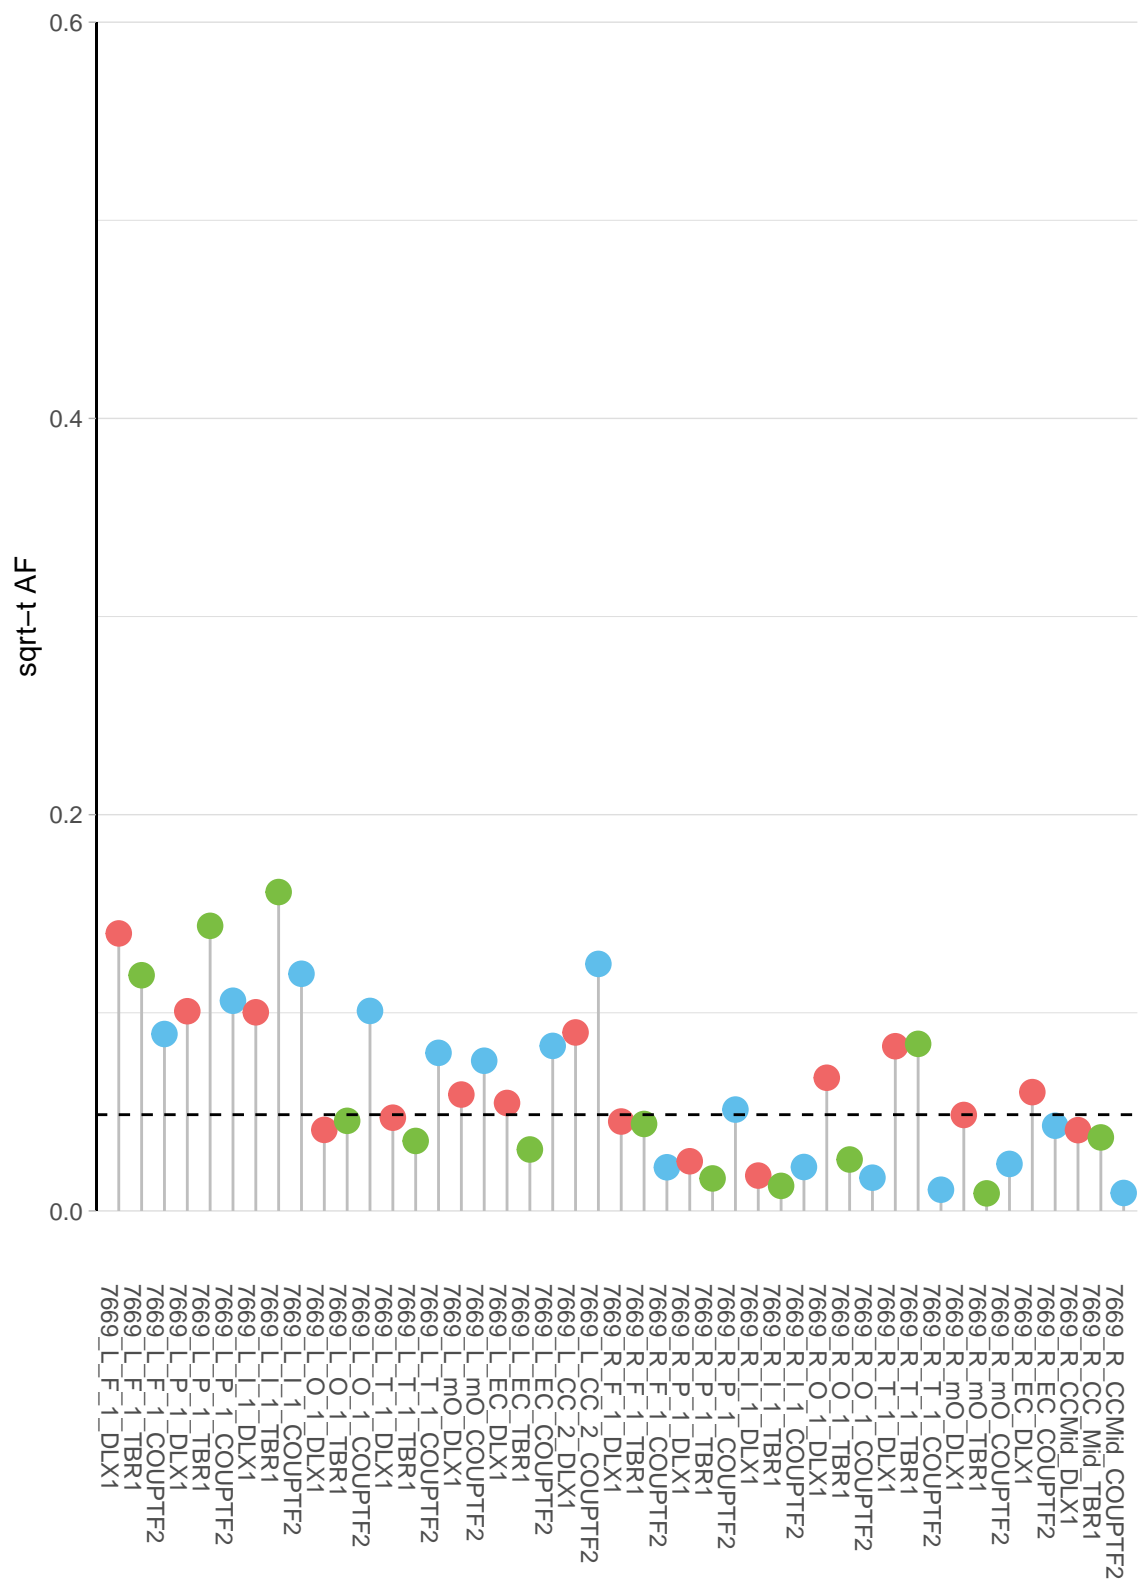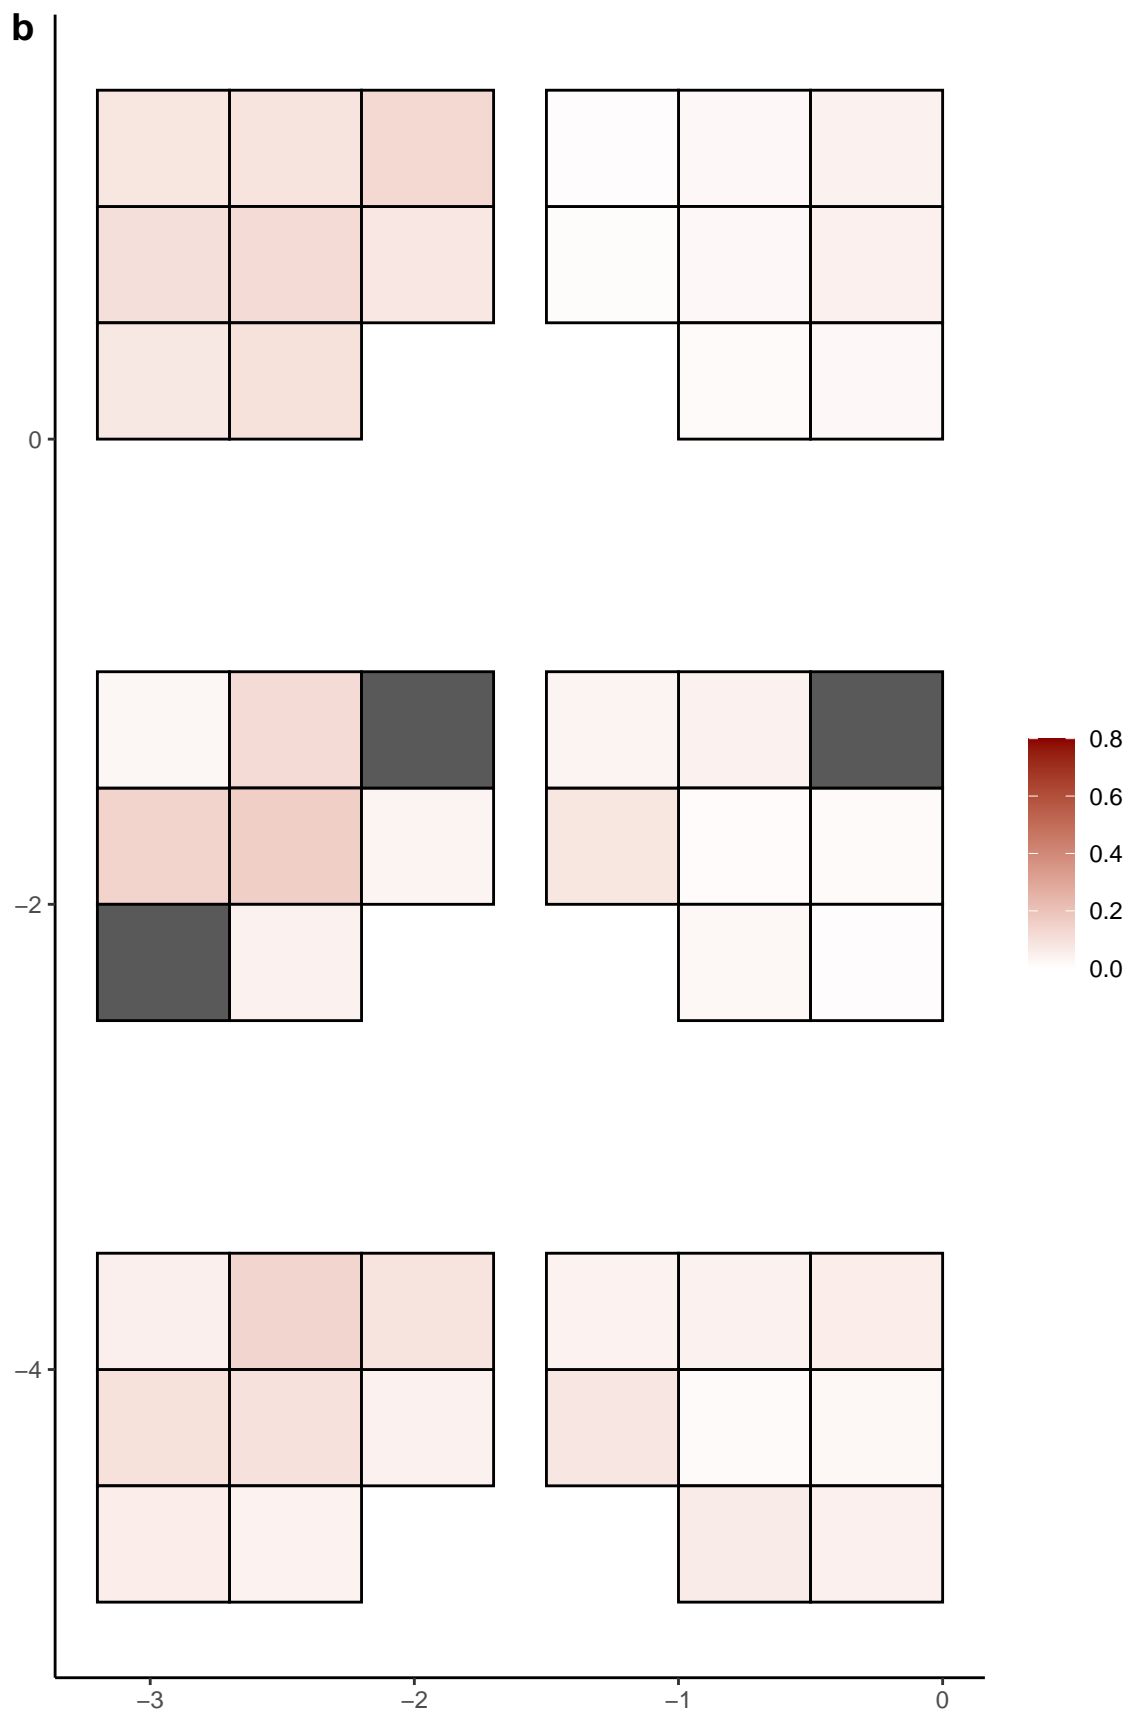

**a** ID05 3-173423567-C-A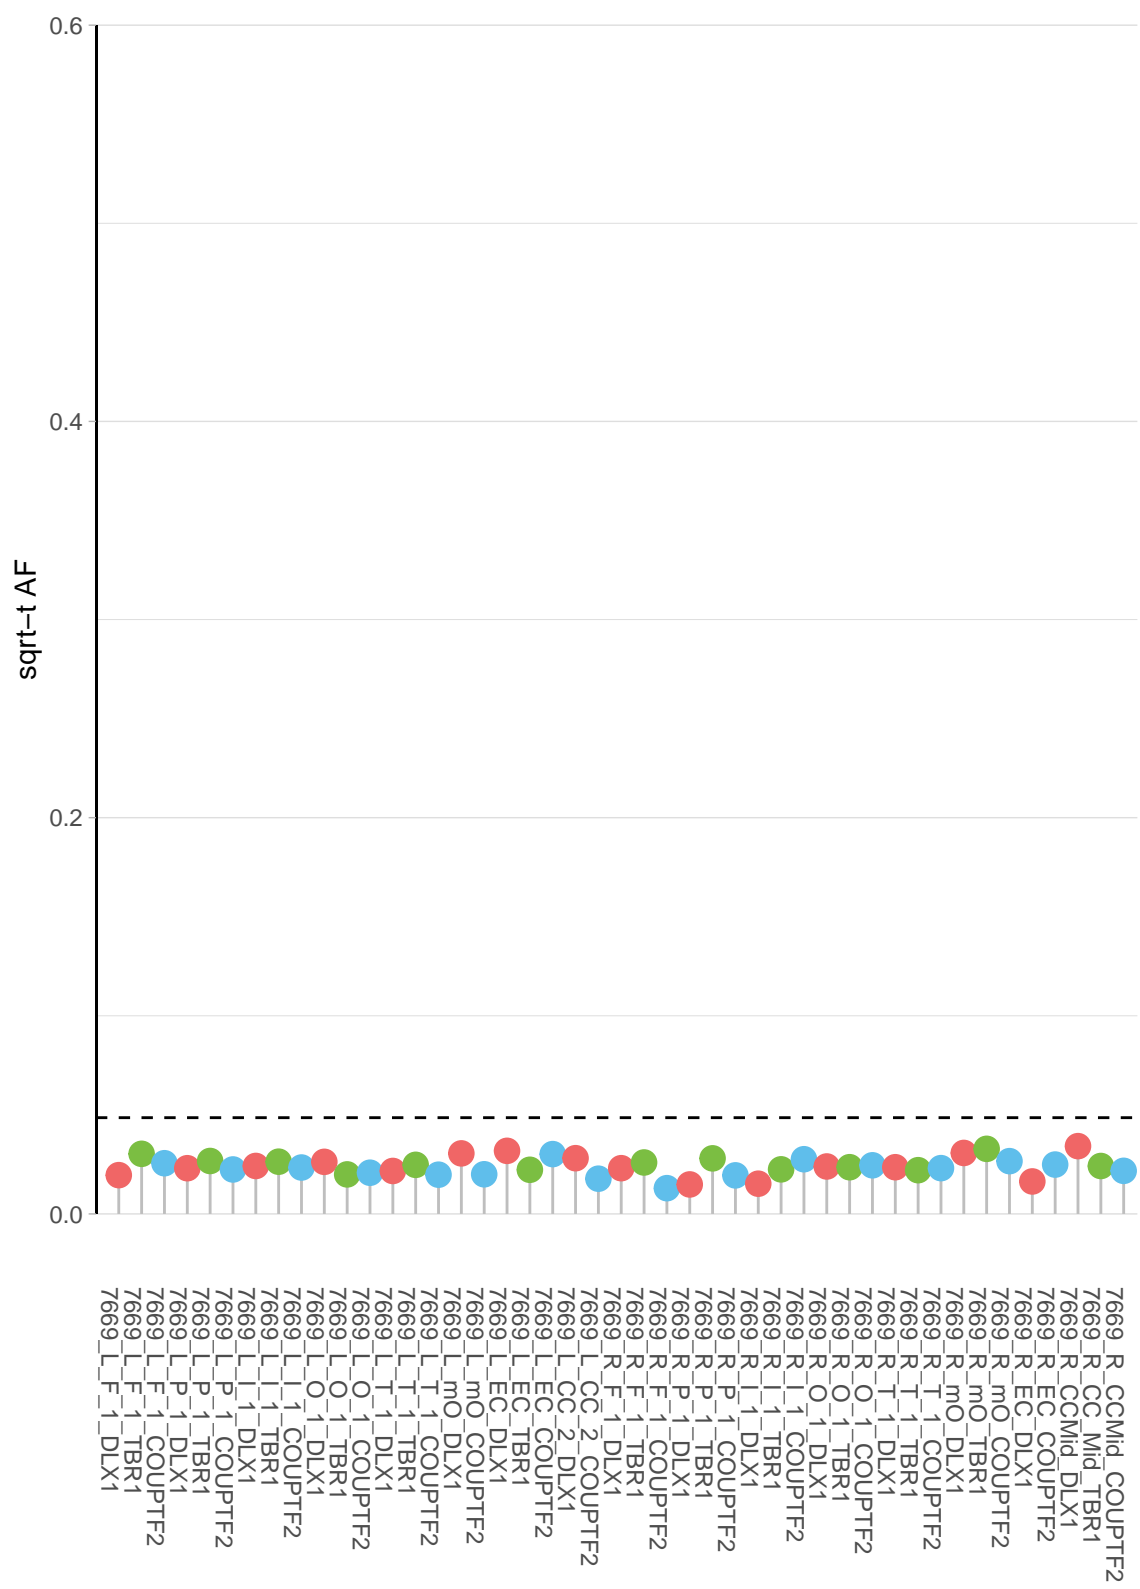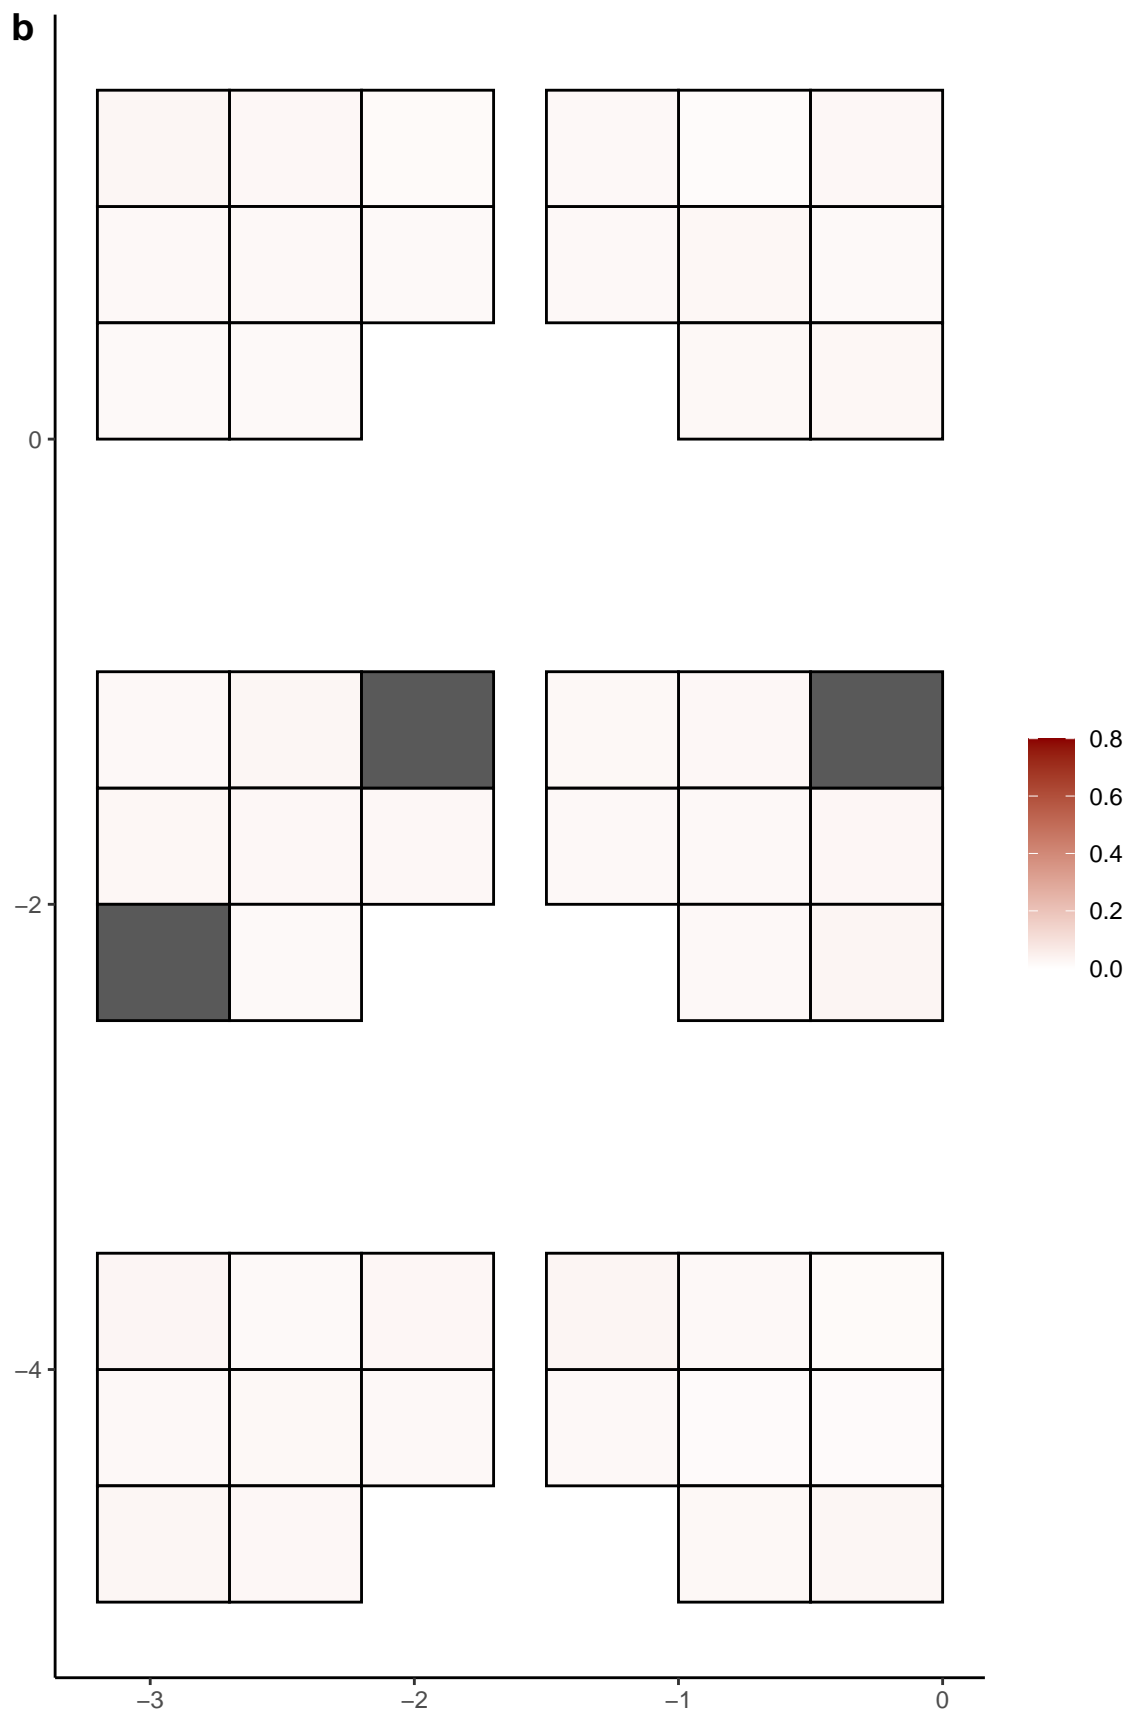

**a** ID05 3-181259475-C-T

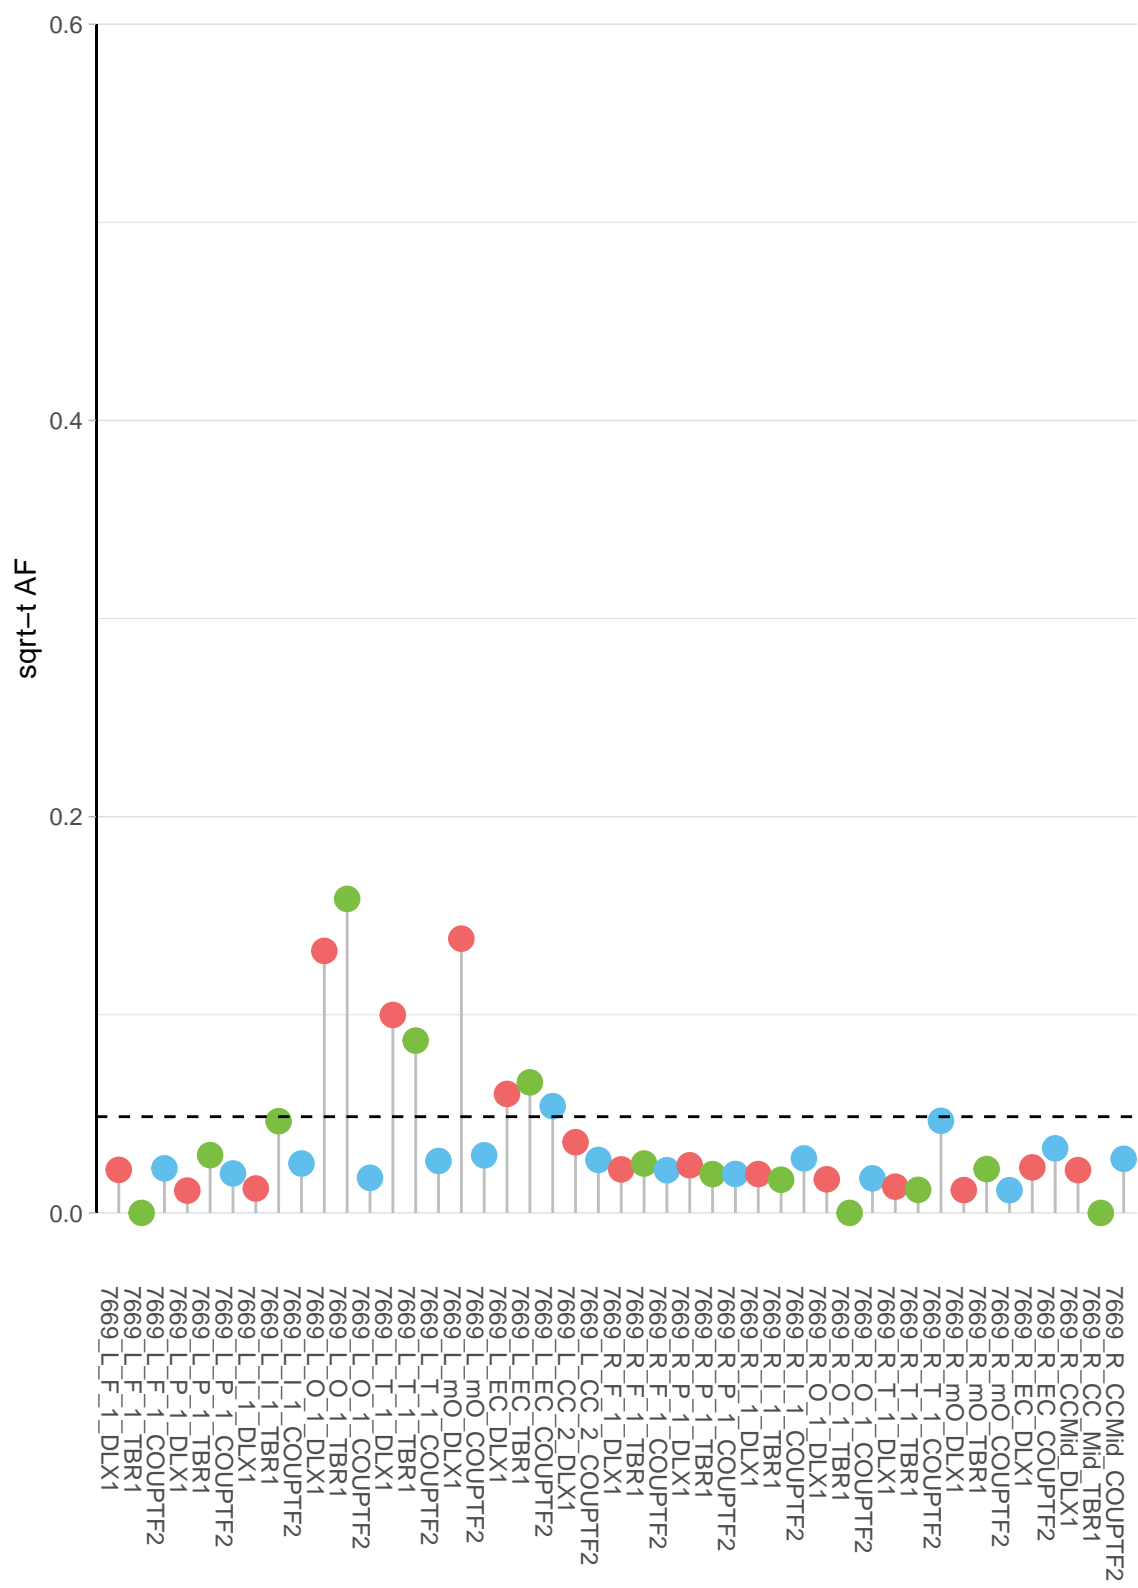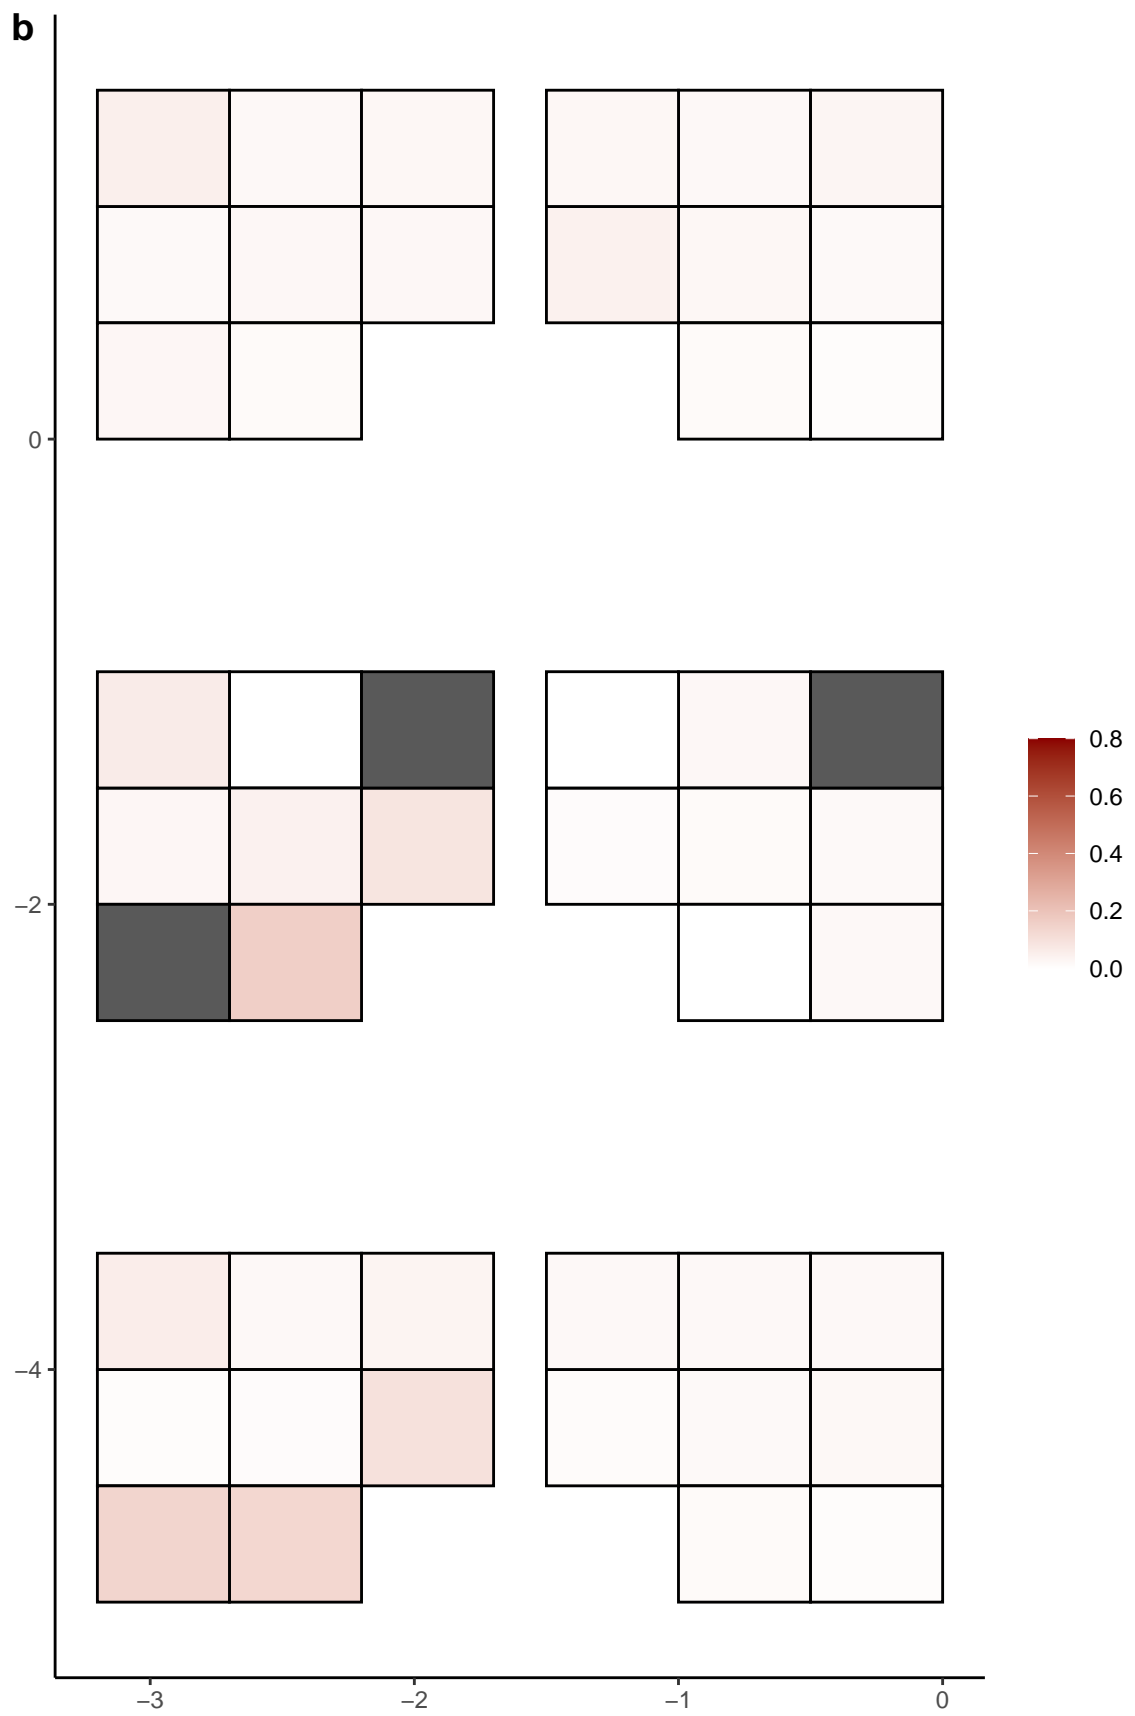

**a** ID05 3-185077743-C-T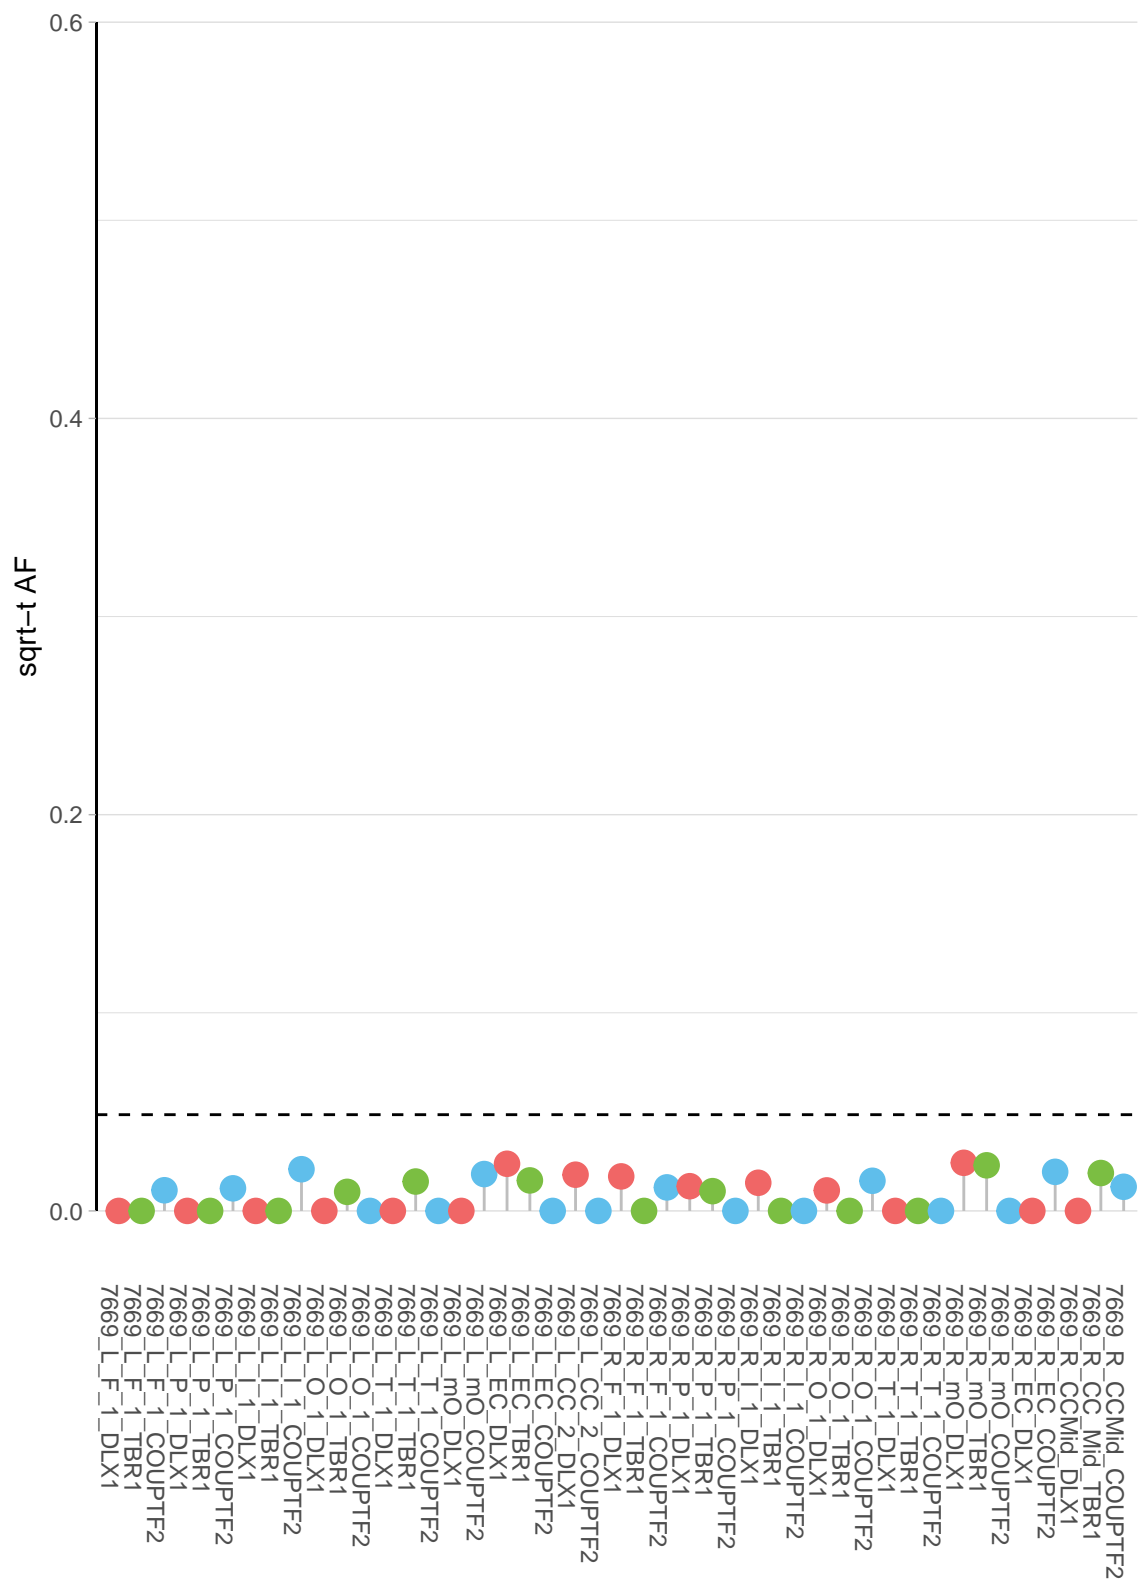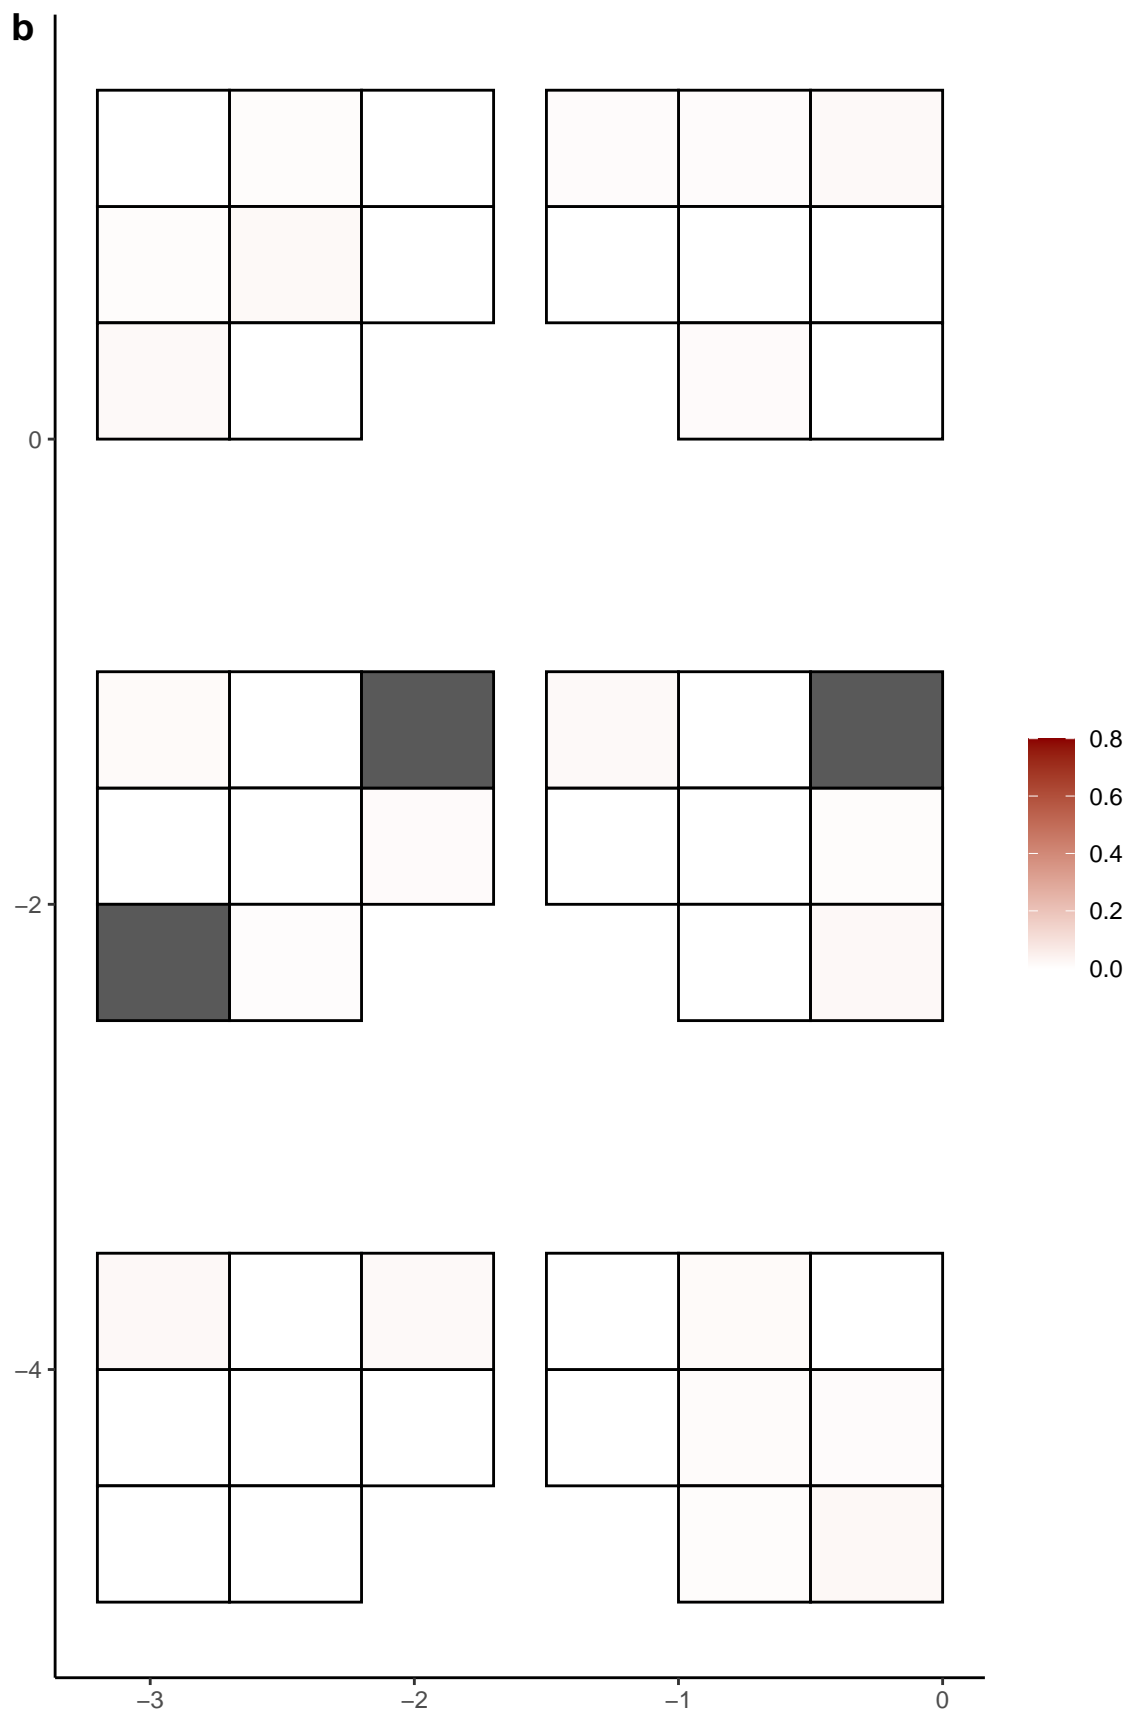

**a** ID05 3-189834708-G-T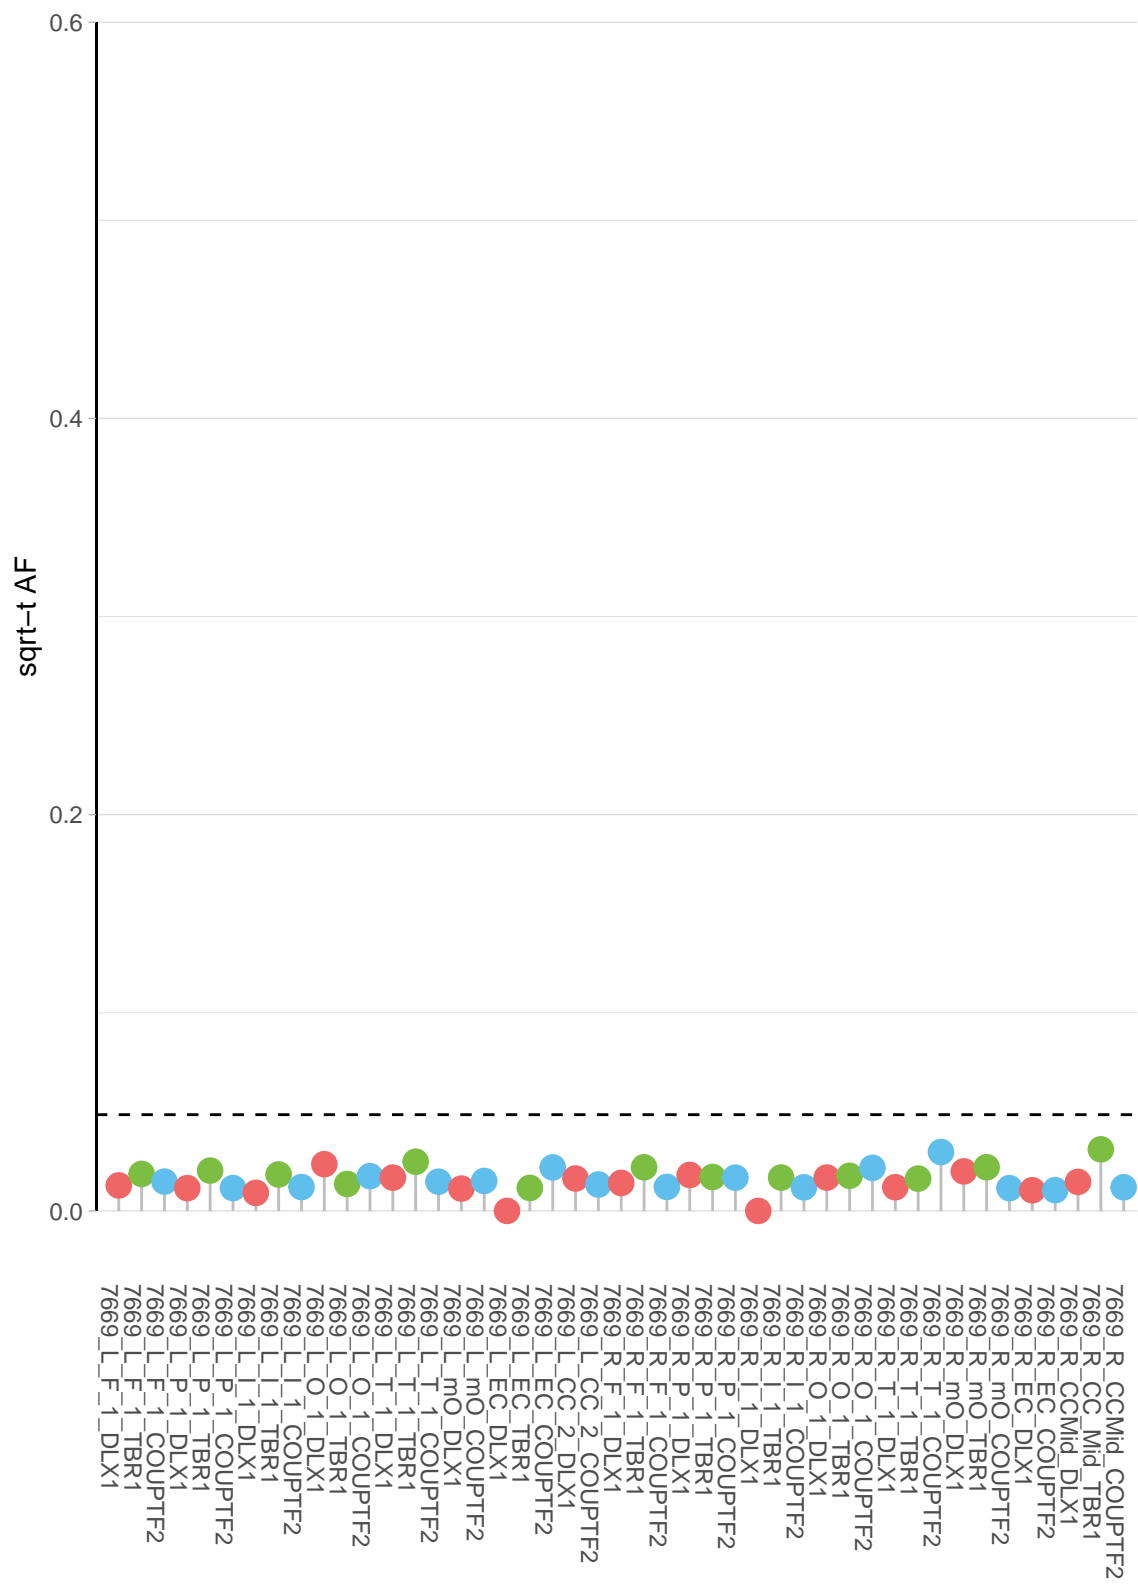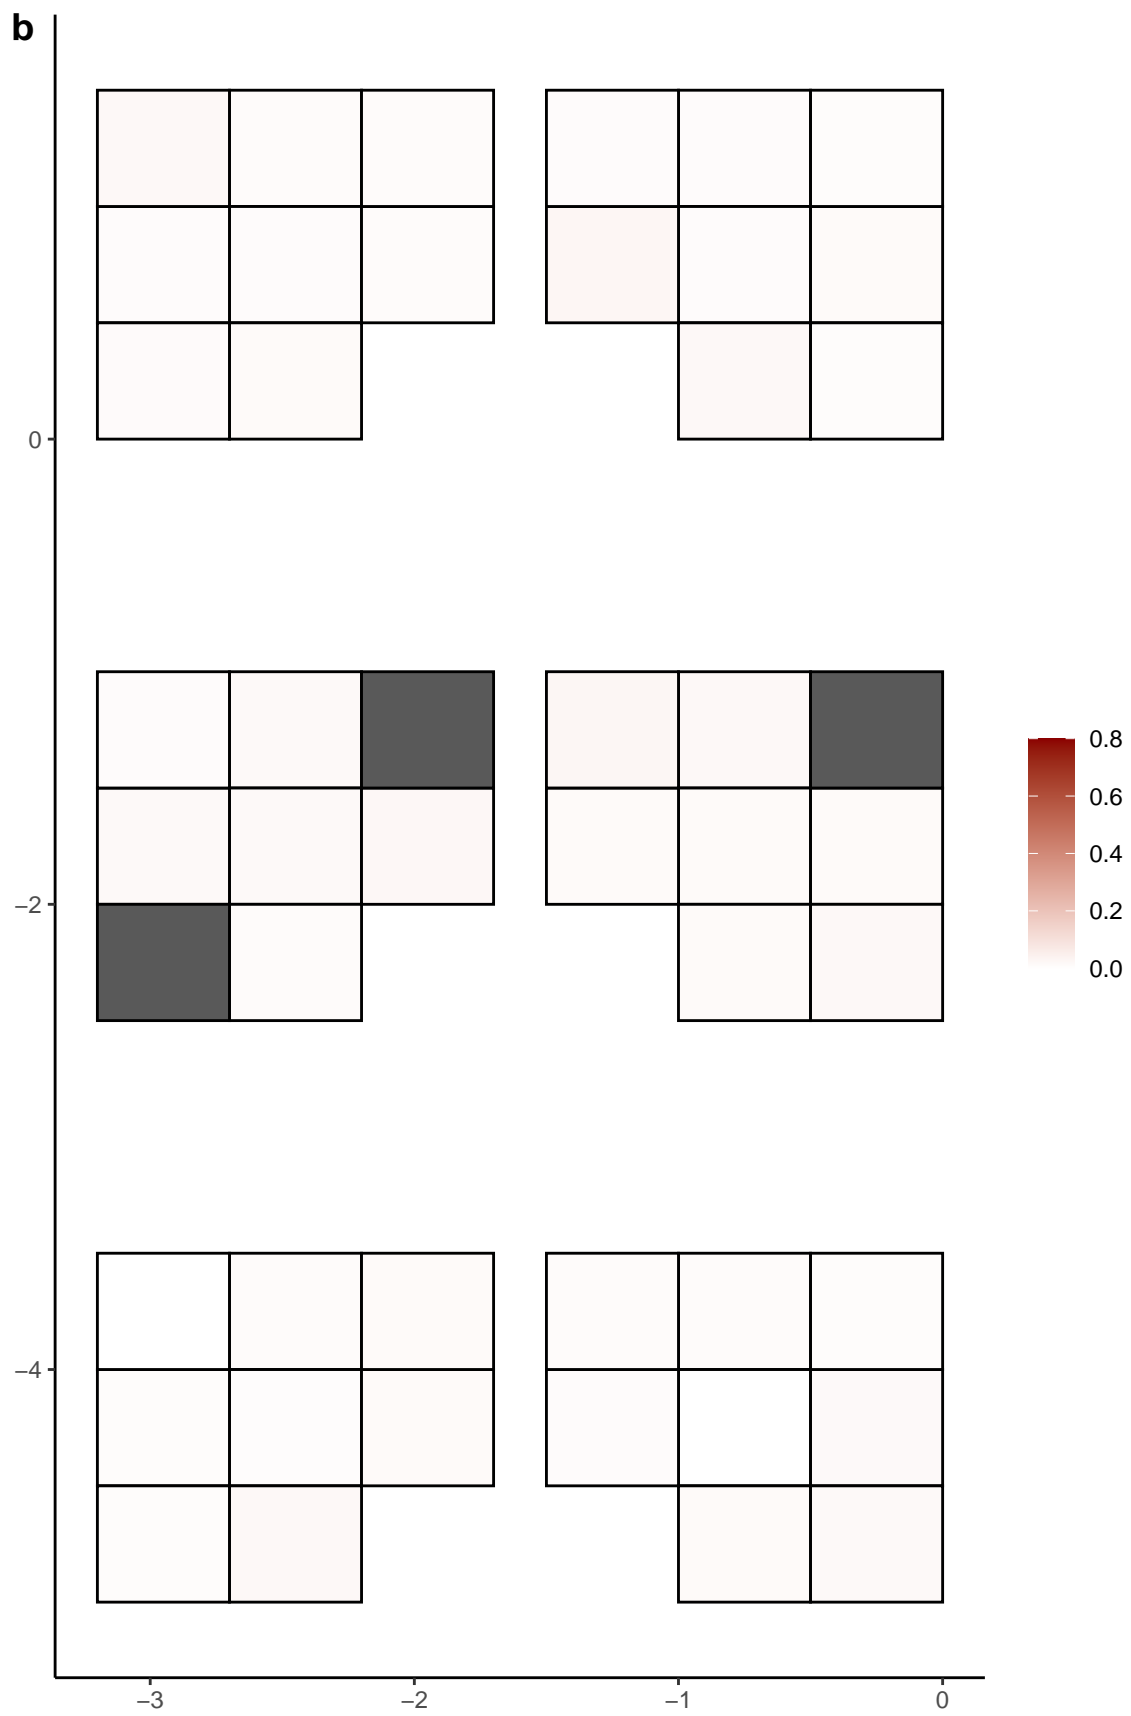



**a** ID05 3-193720234-C-T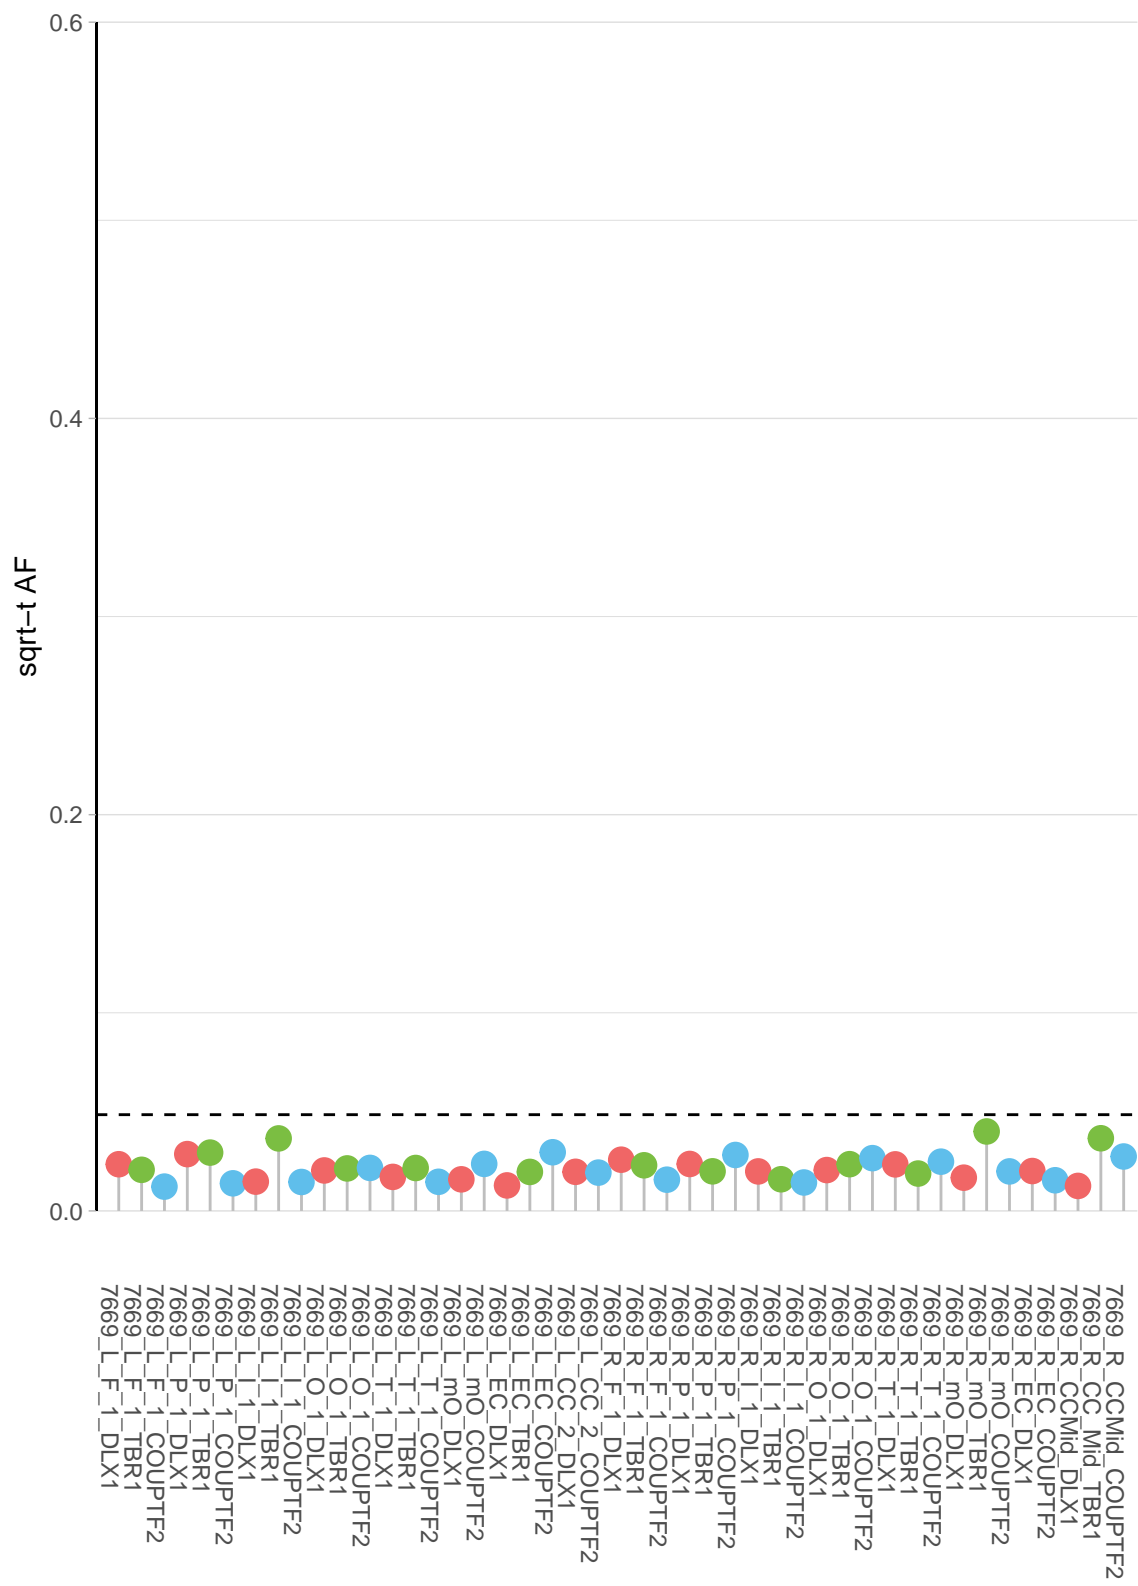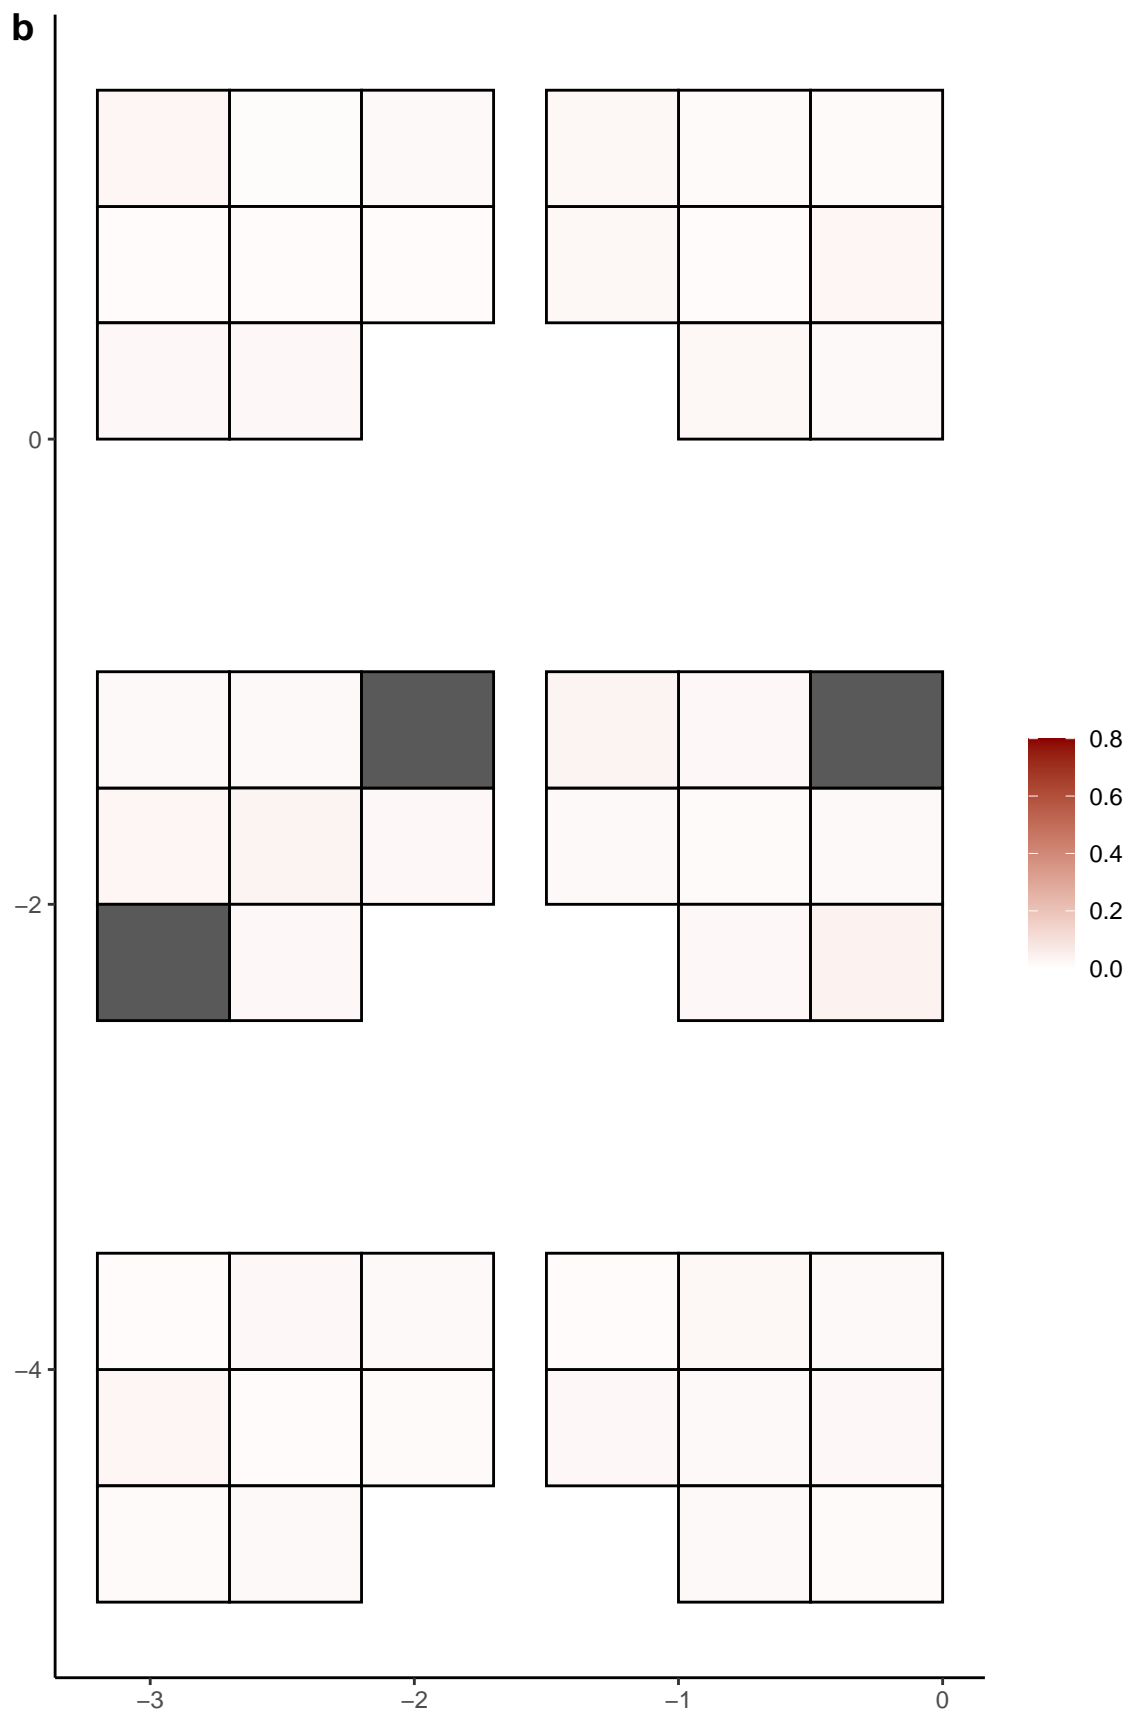

**a** ID05 3-195270223-T-G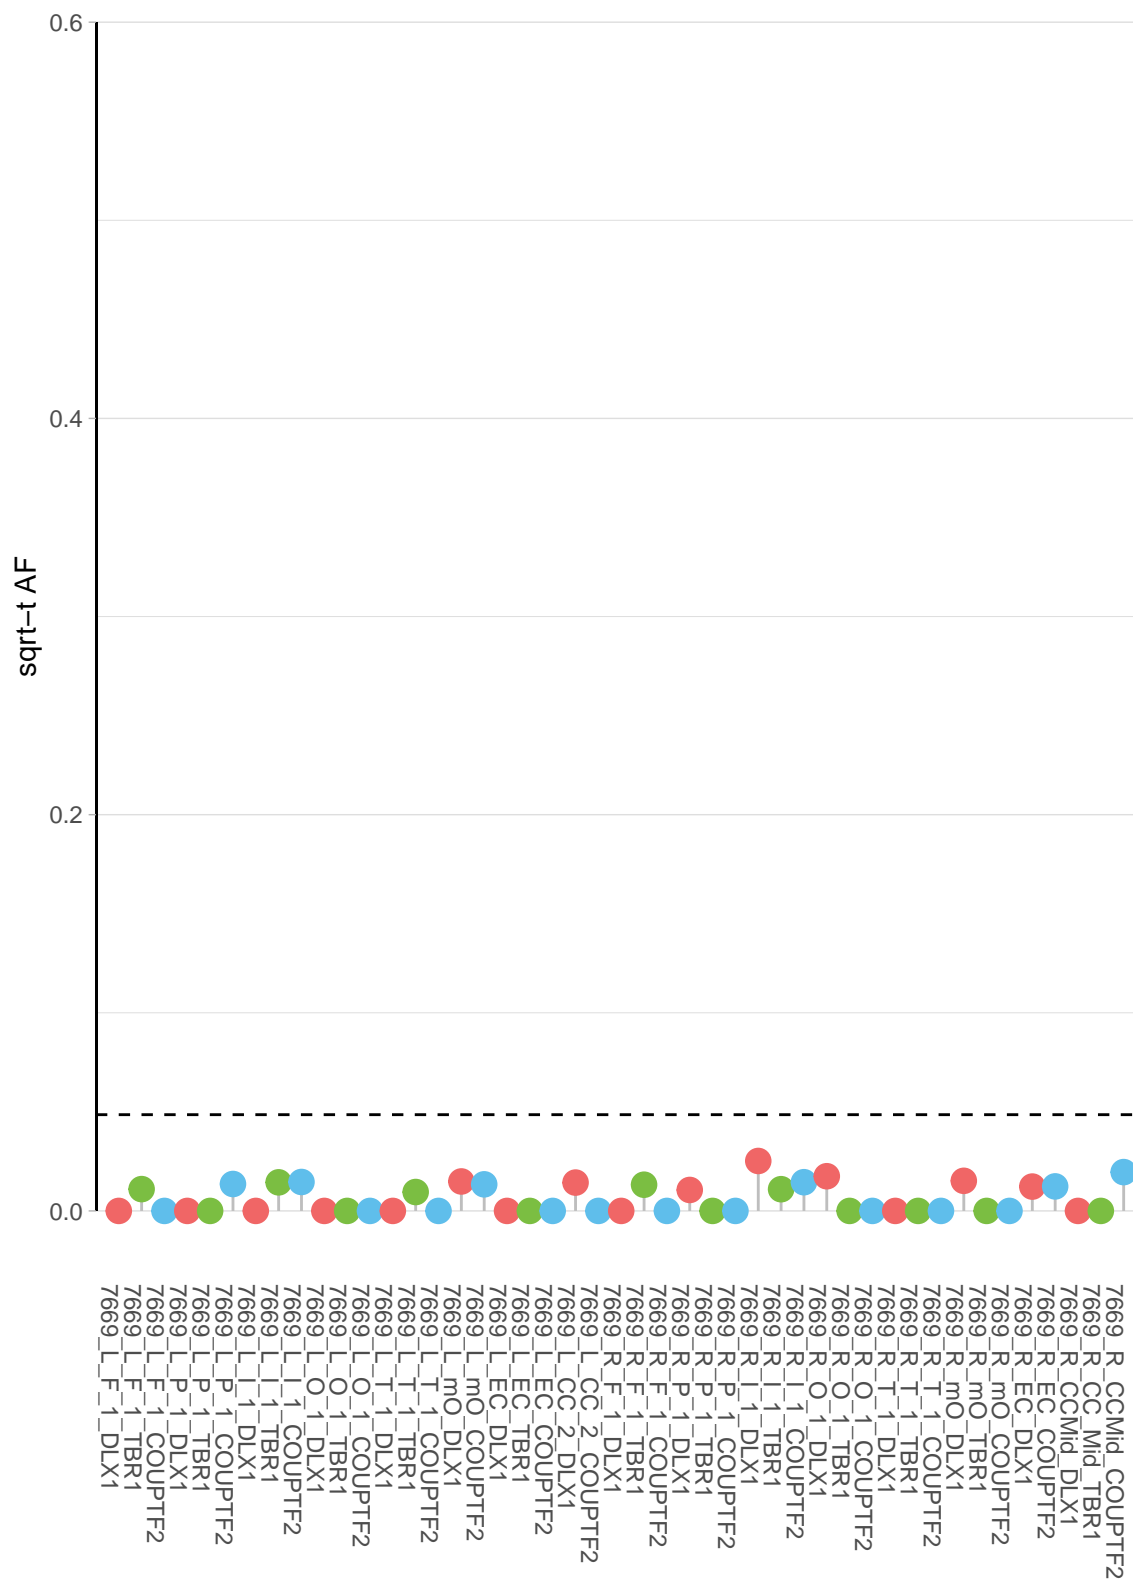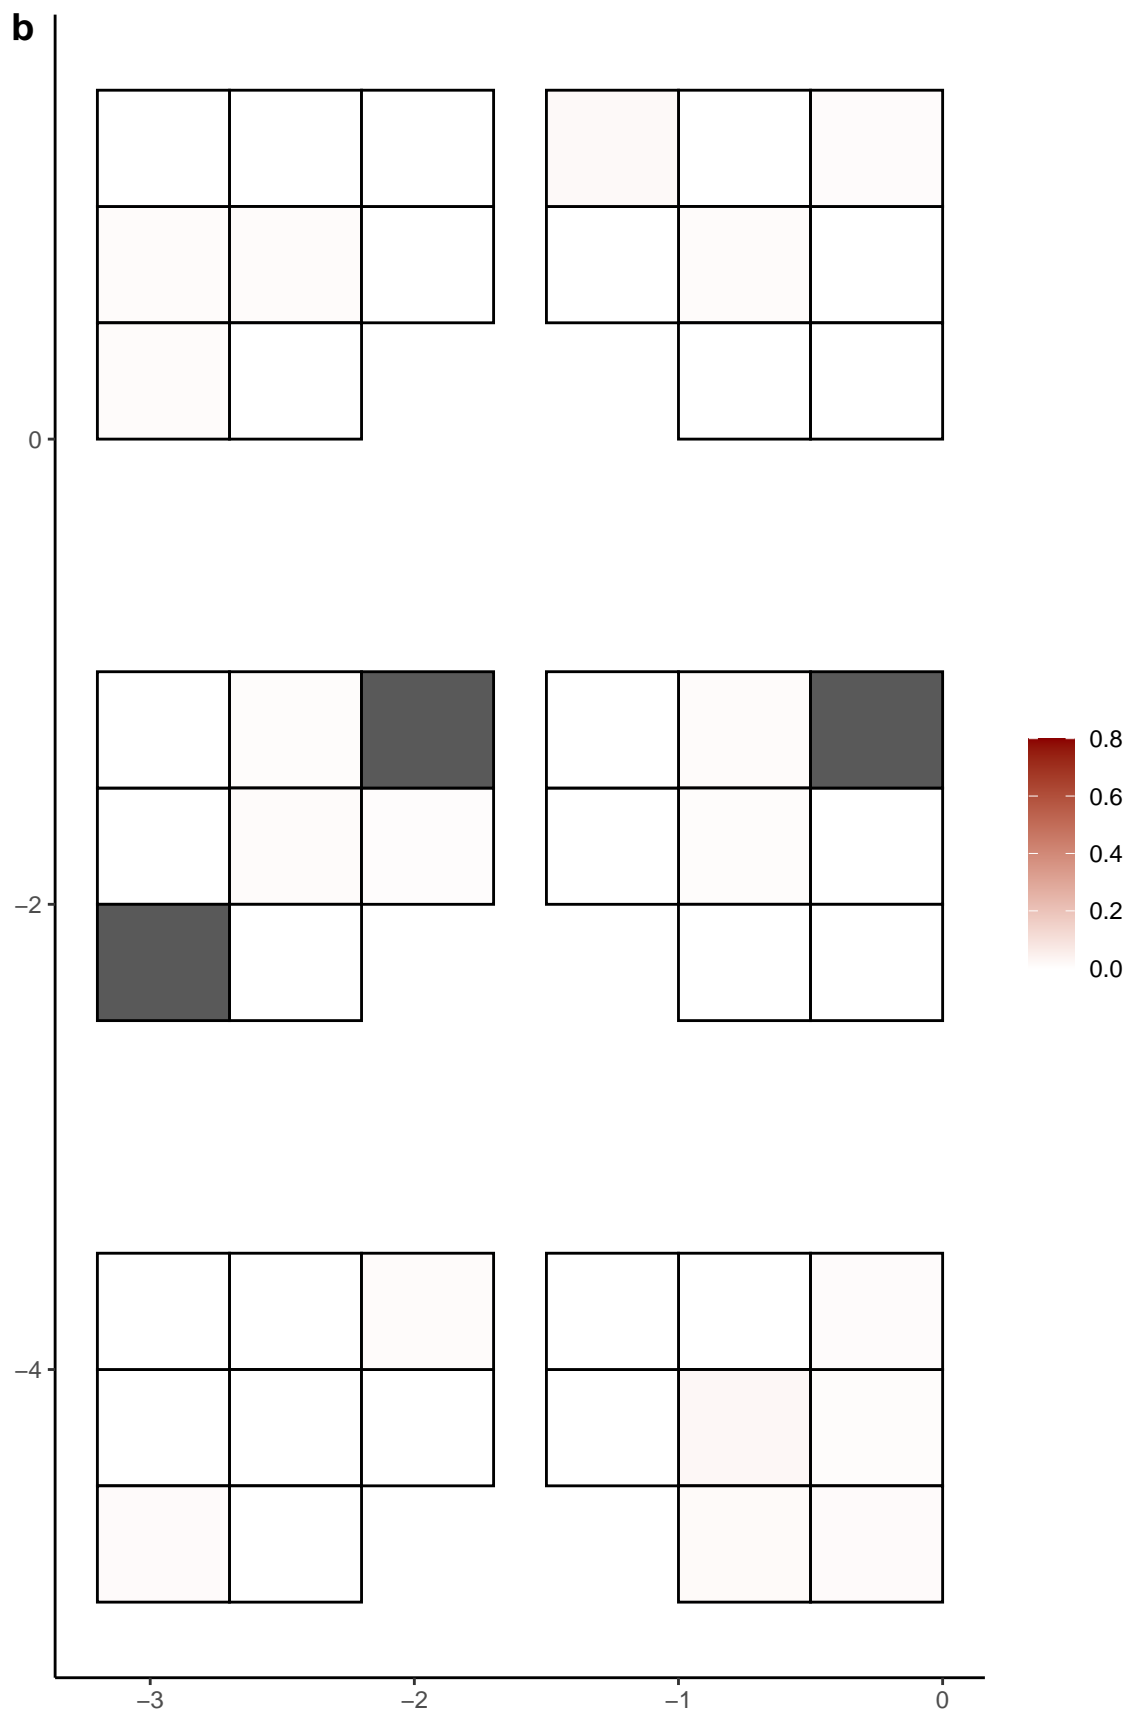



**a** ID05 3-20053569-C-T

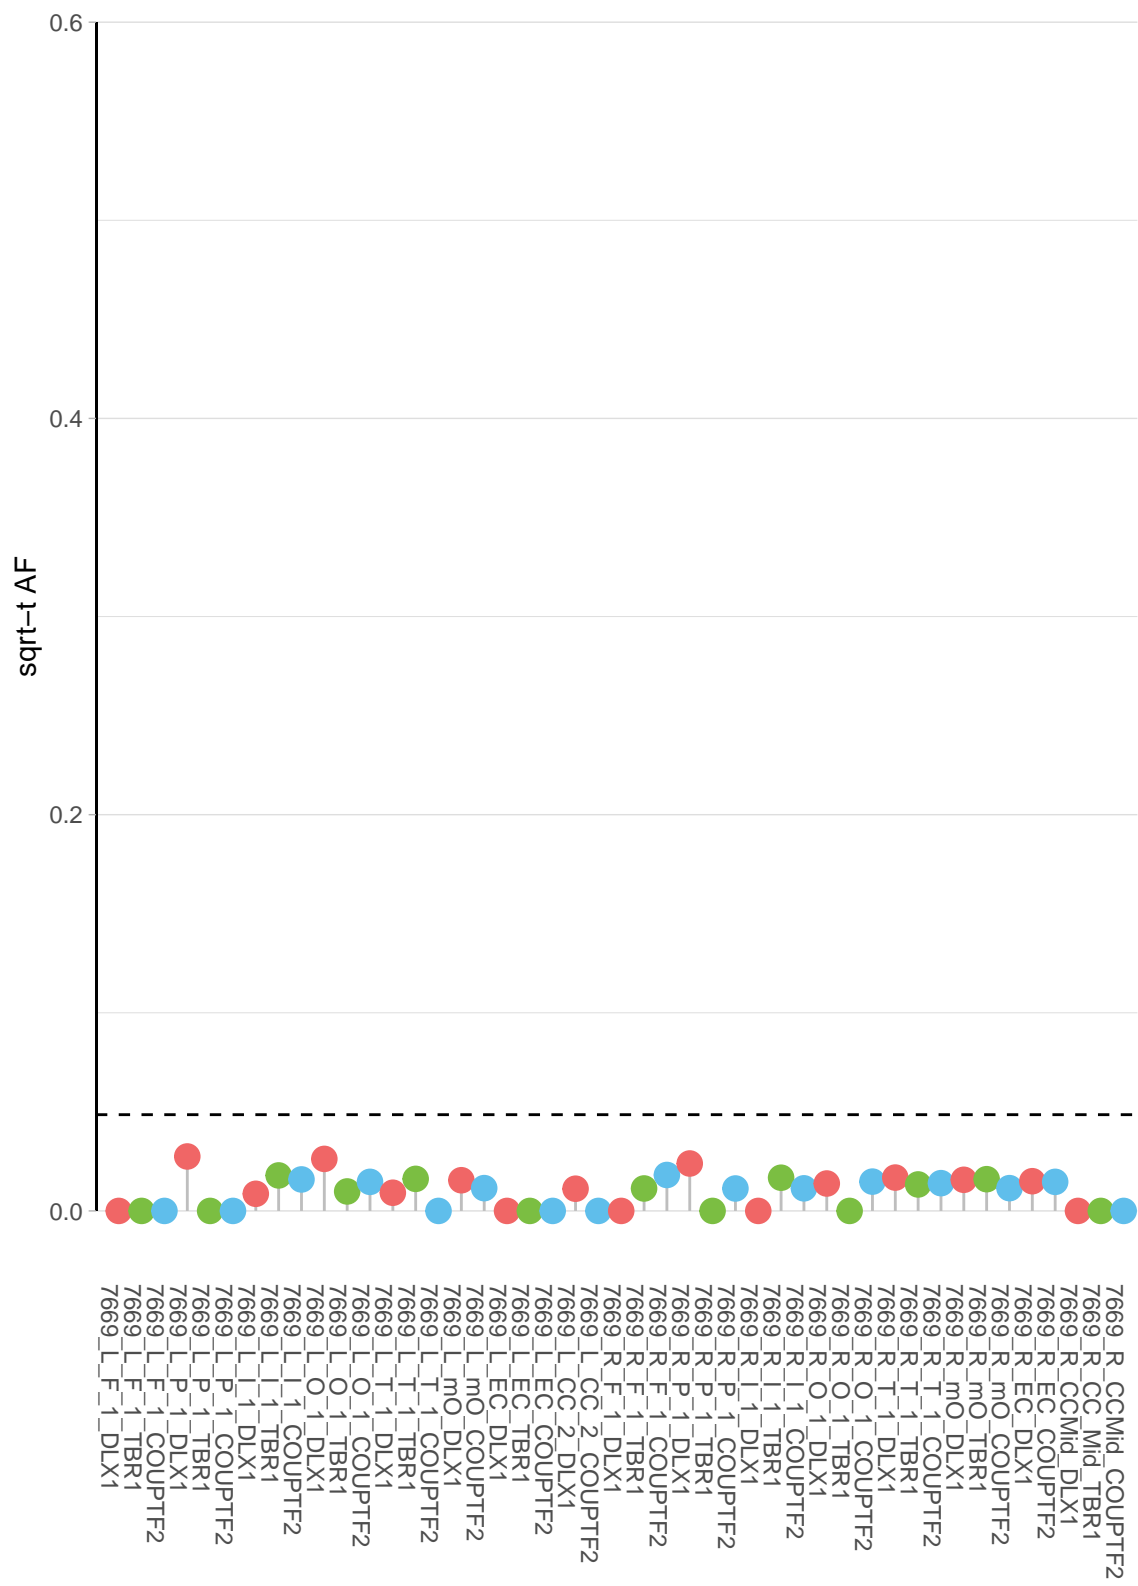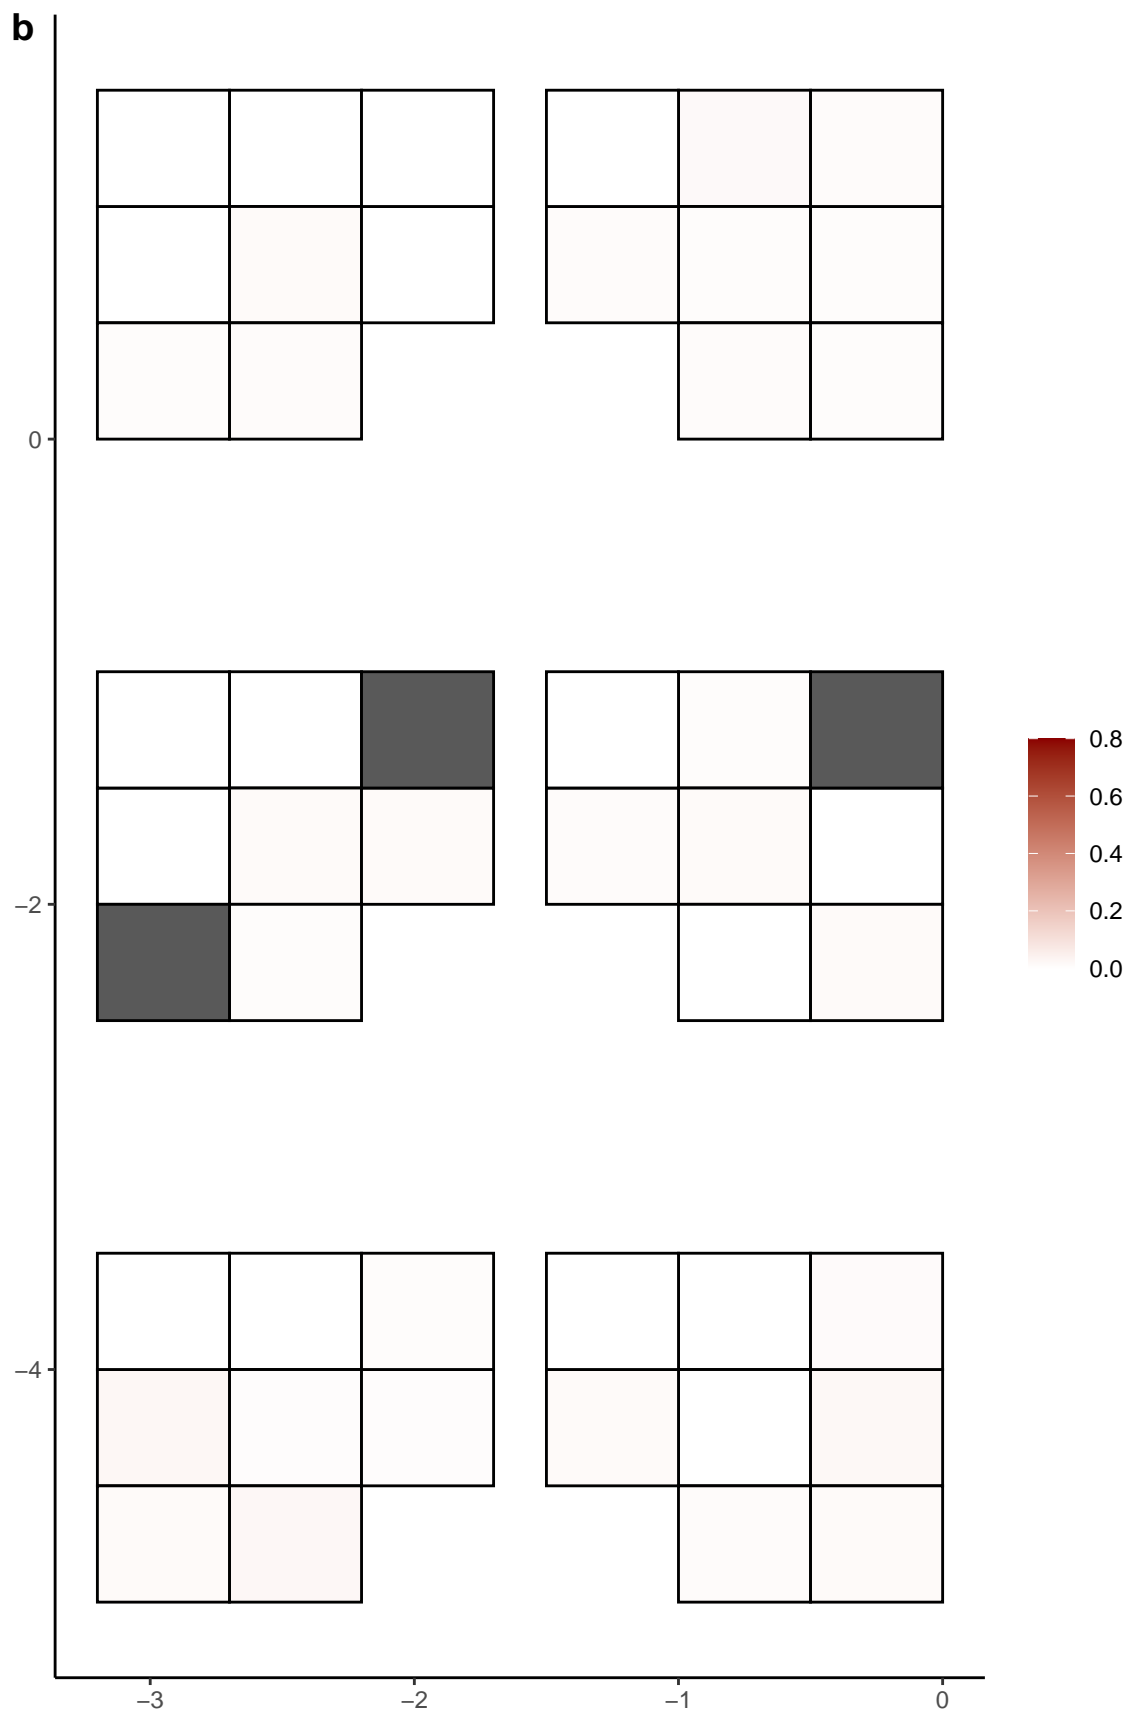

**a** ID05 3-20145262-G-C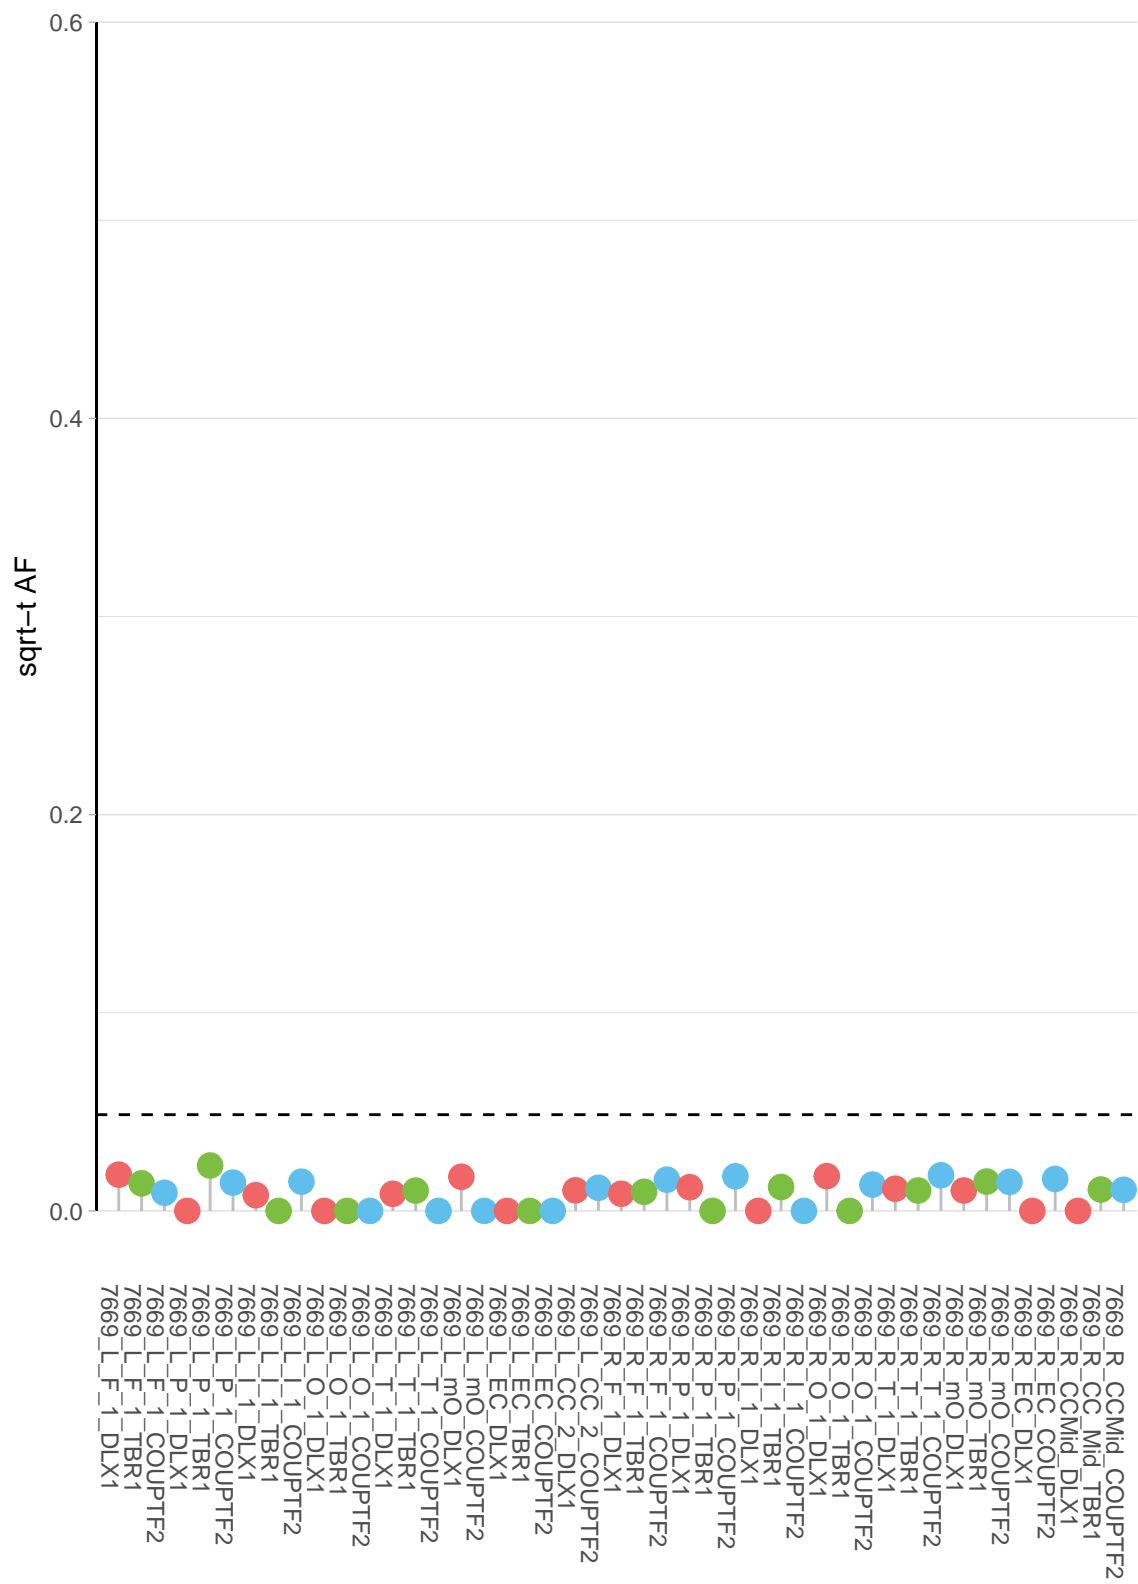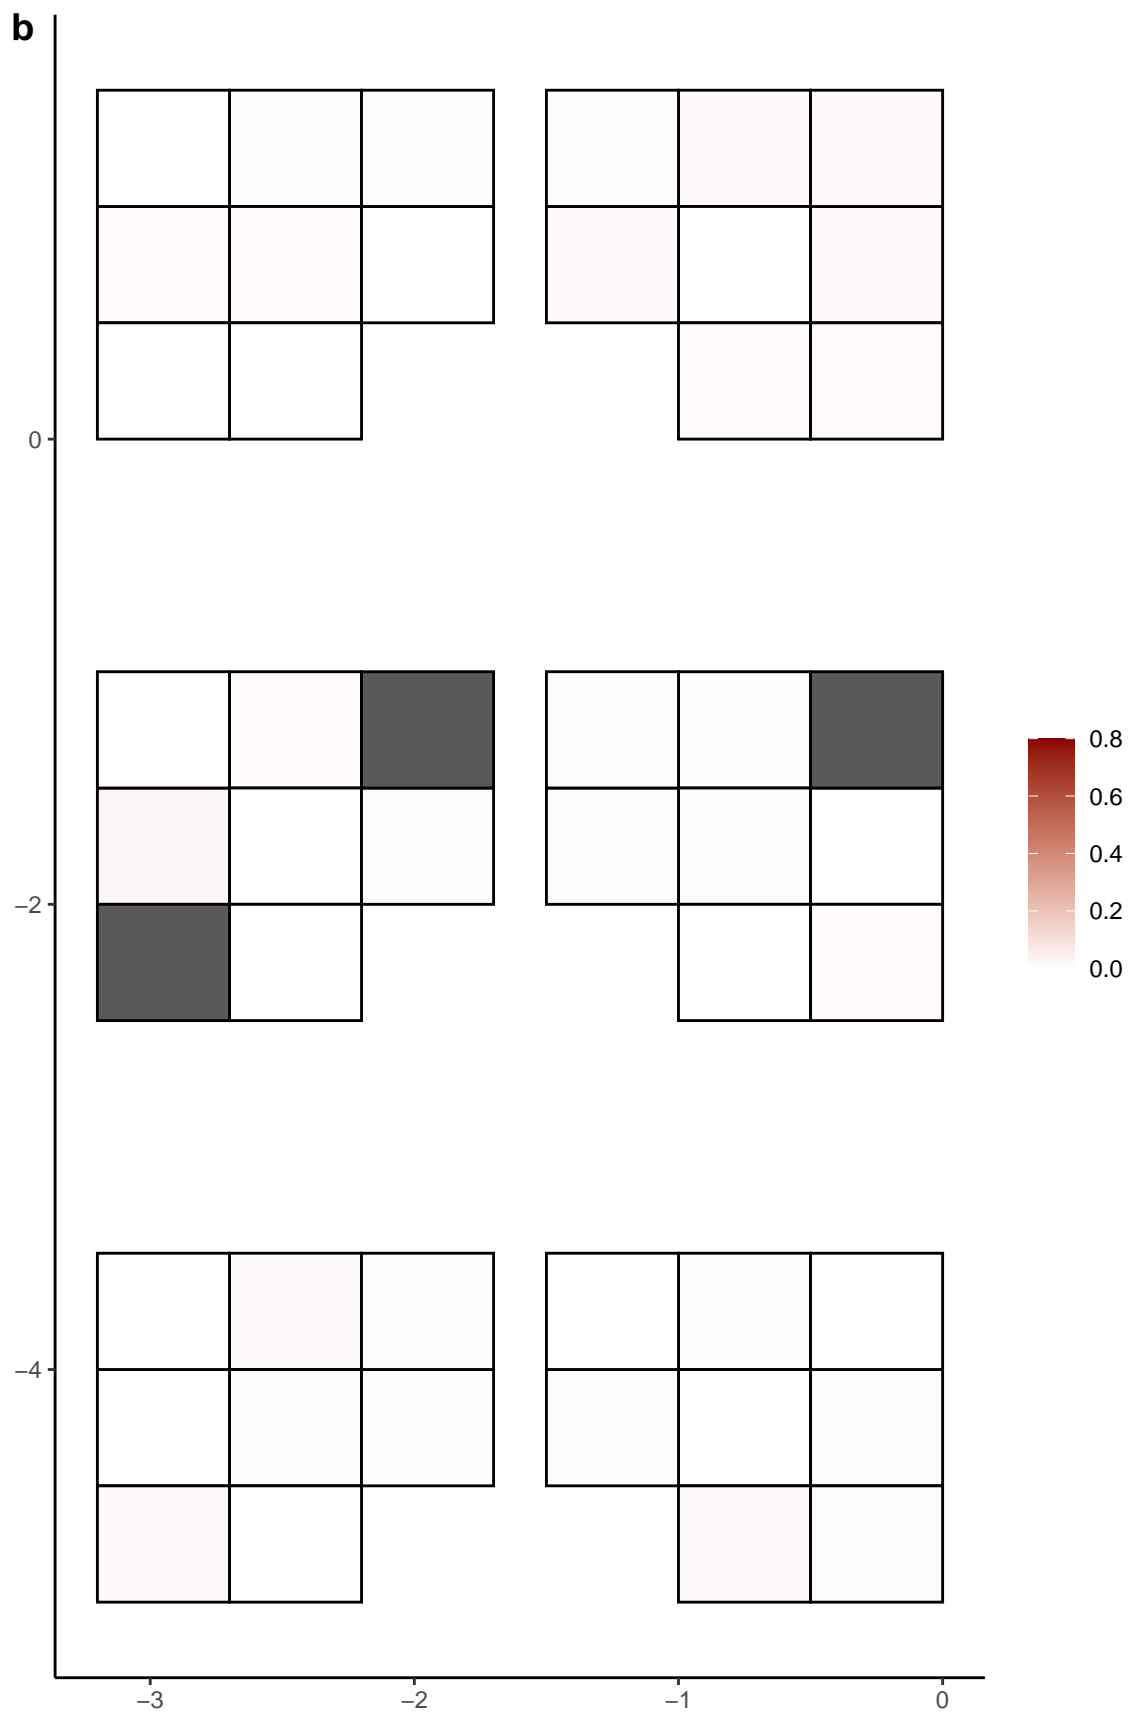

**a** ID05 3-20222654-C-T

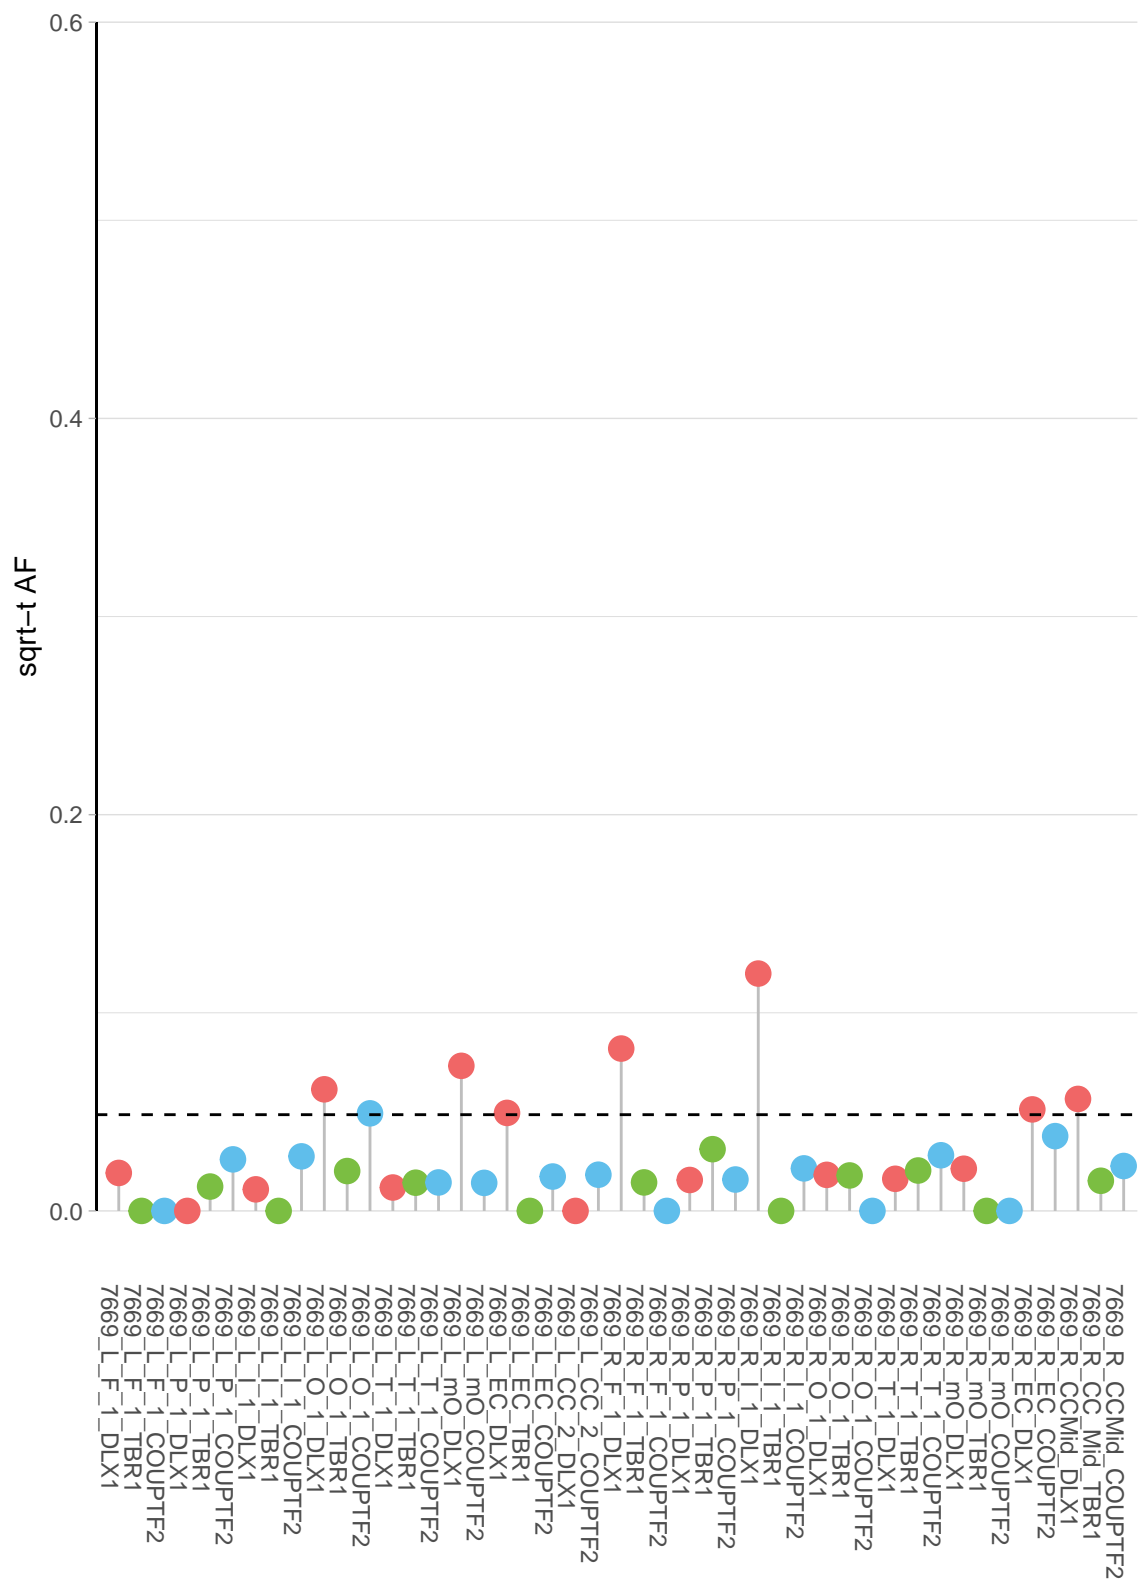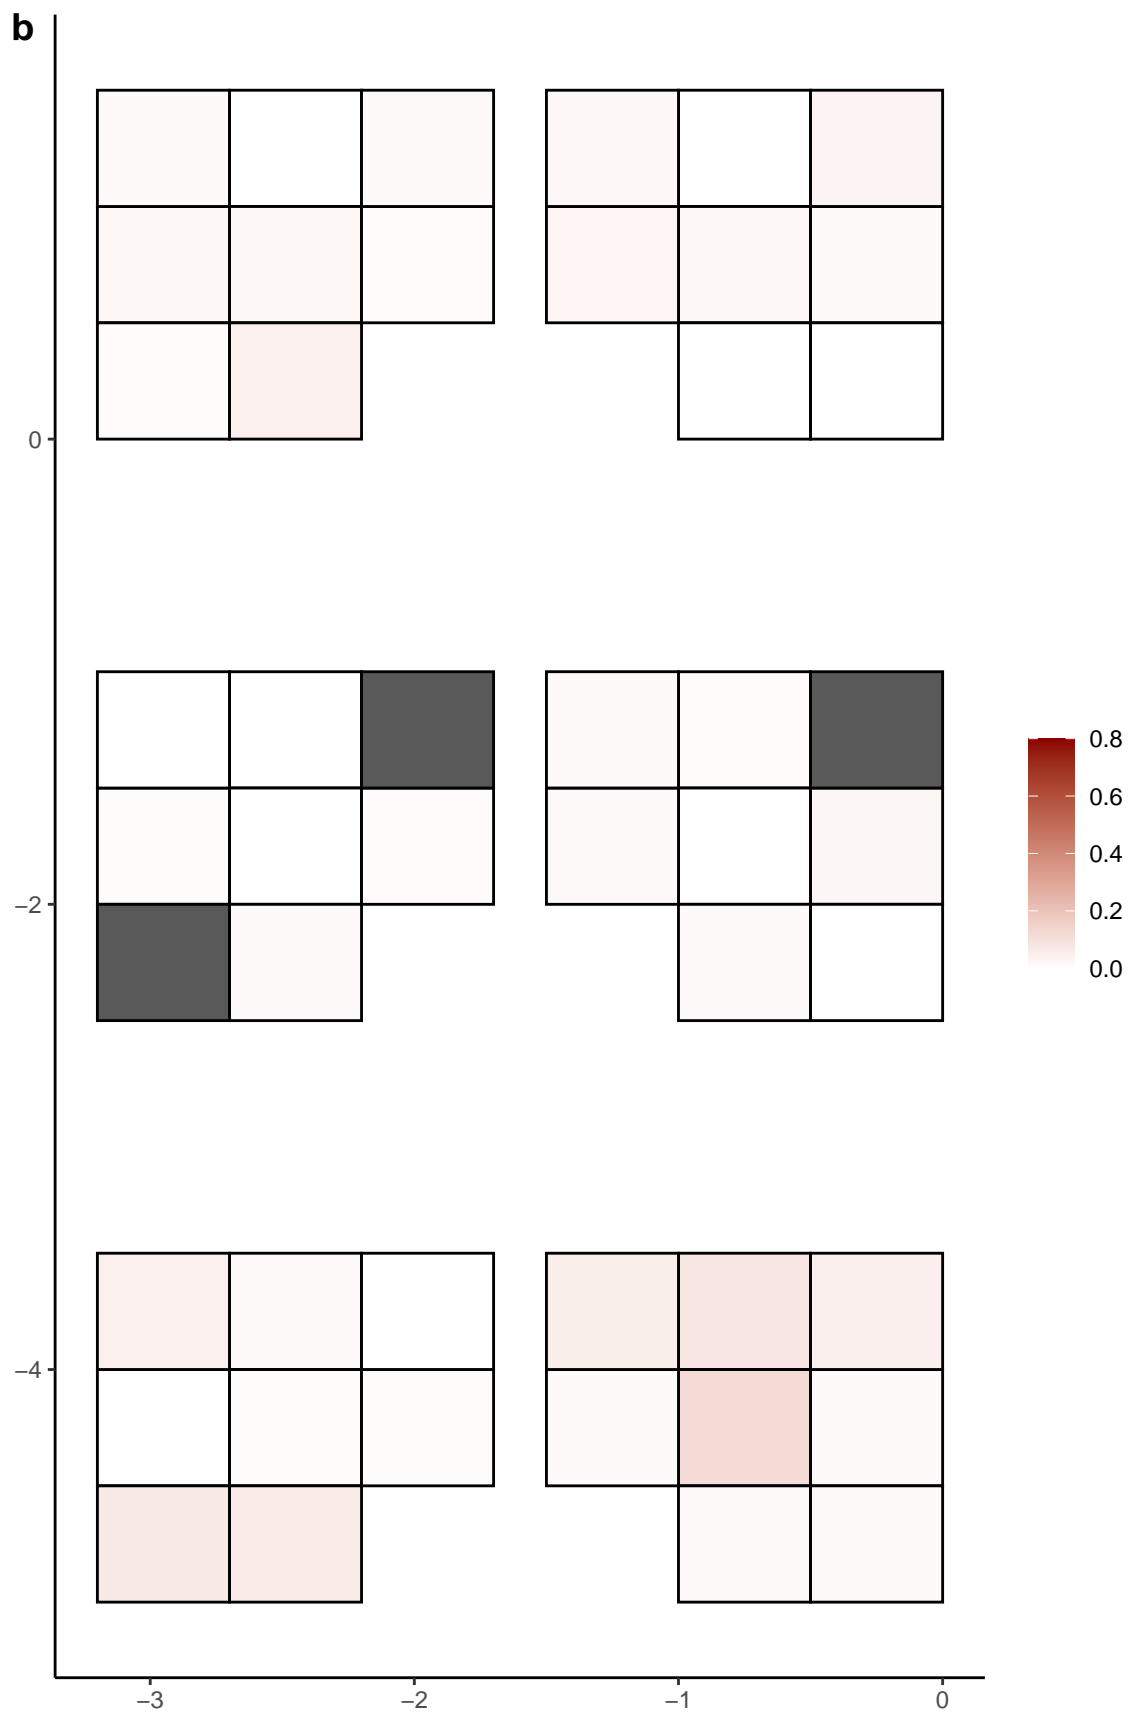

**a** ID05 3-2448814-G-A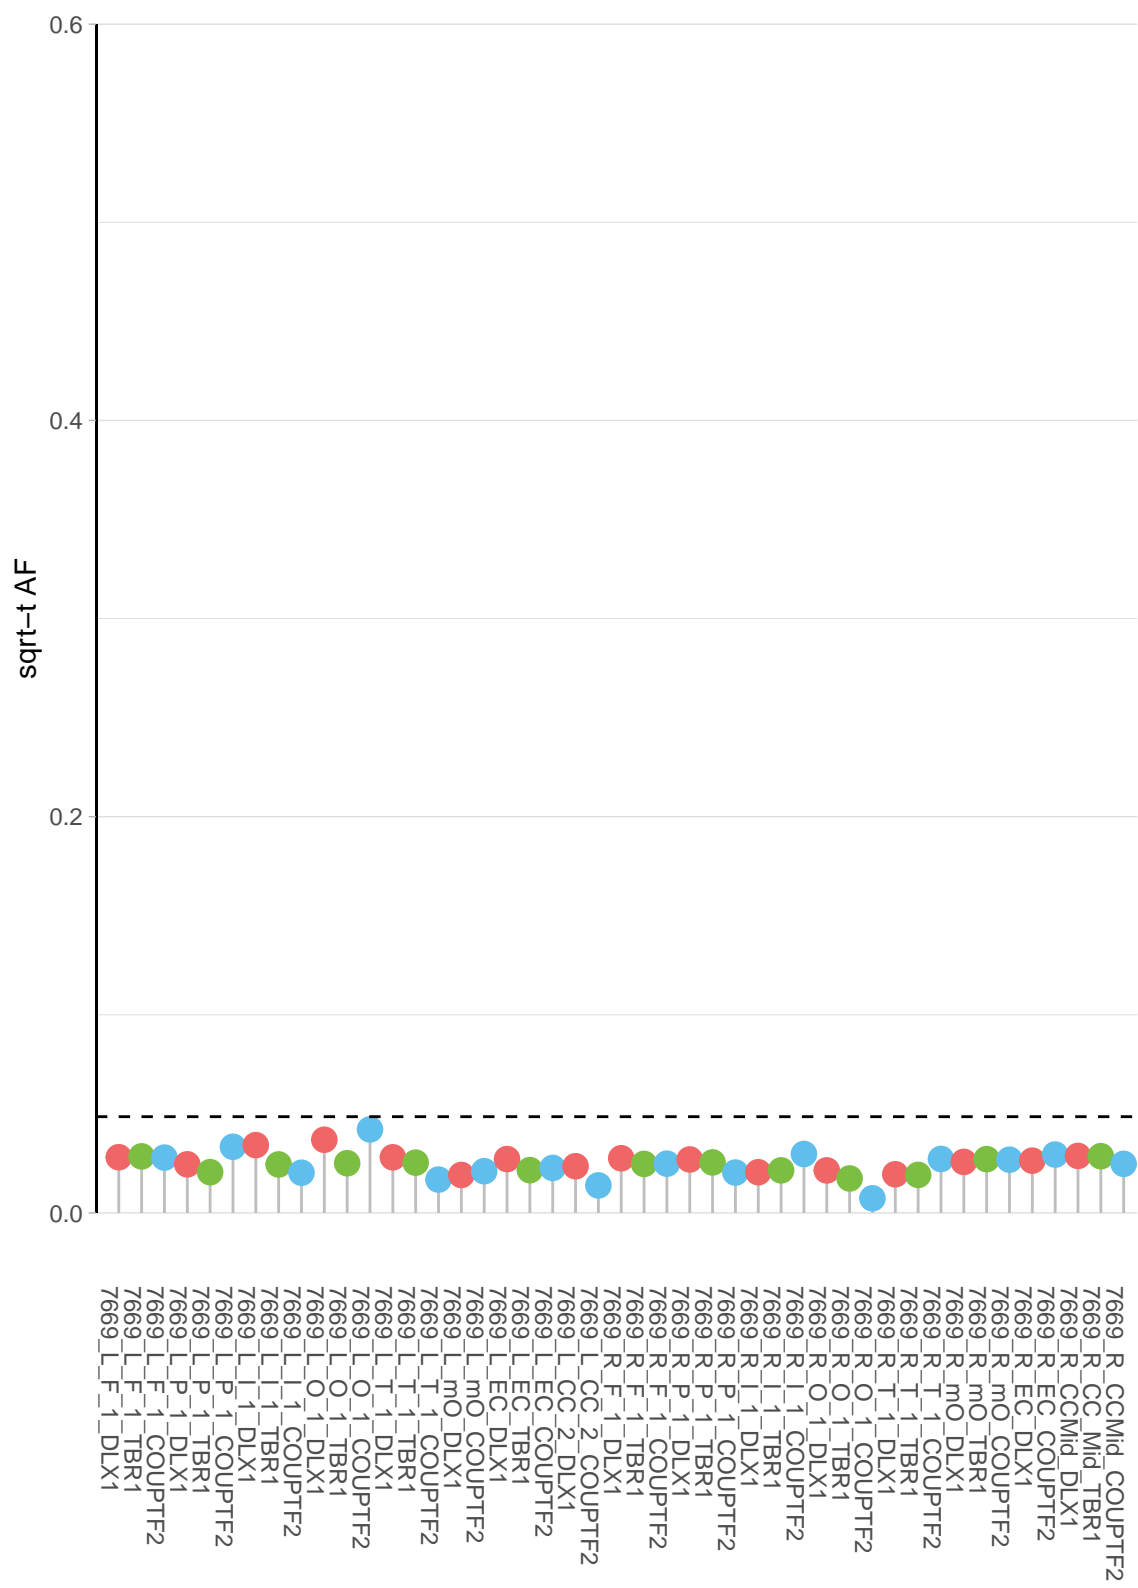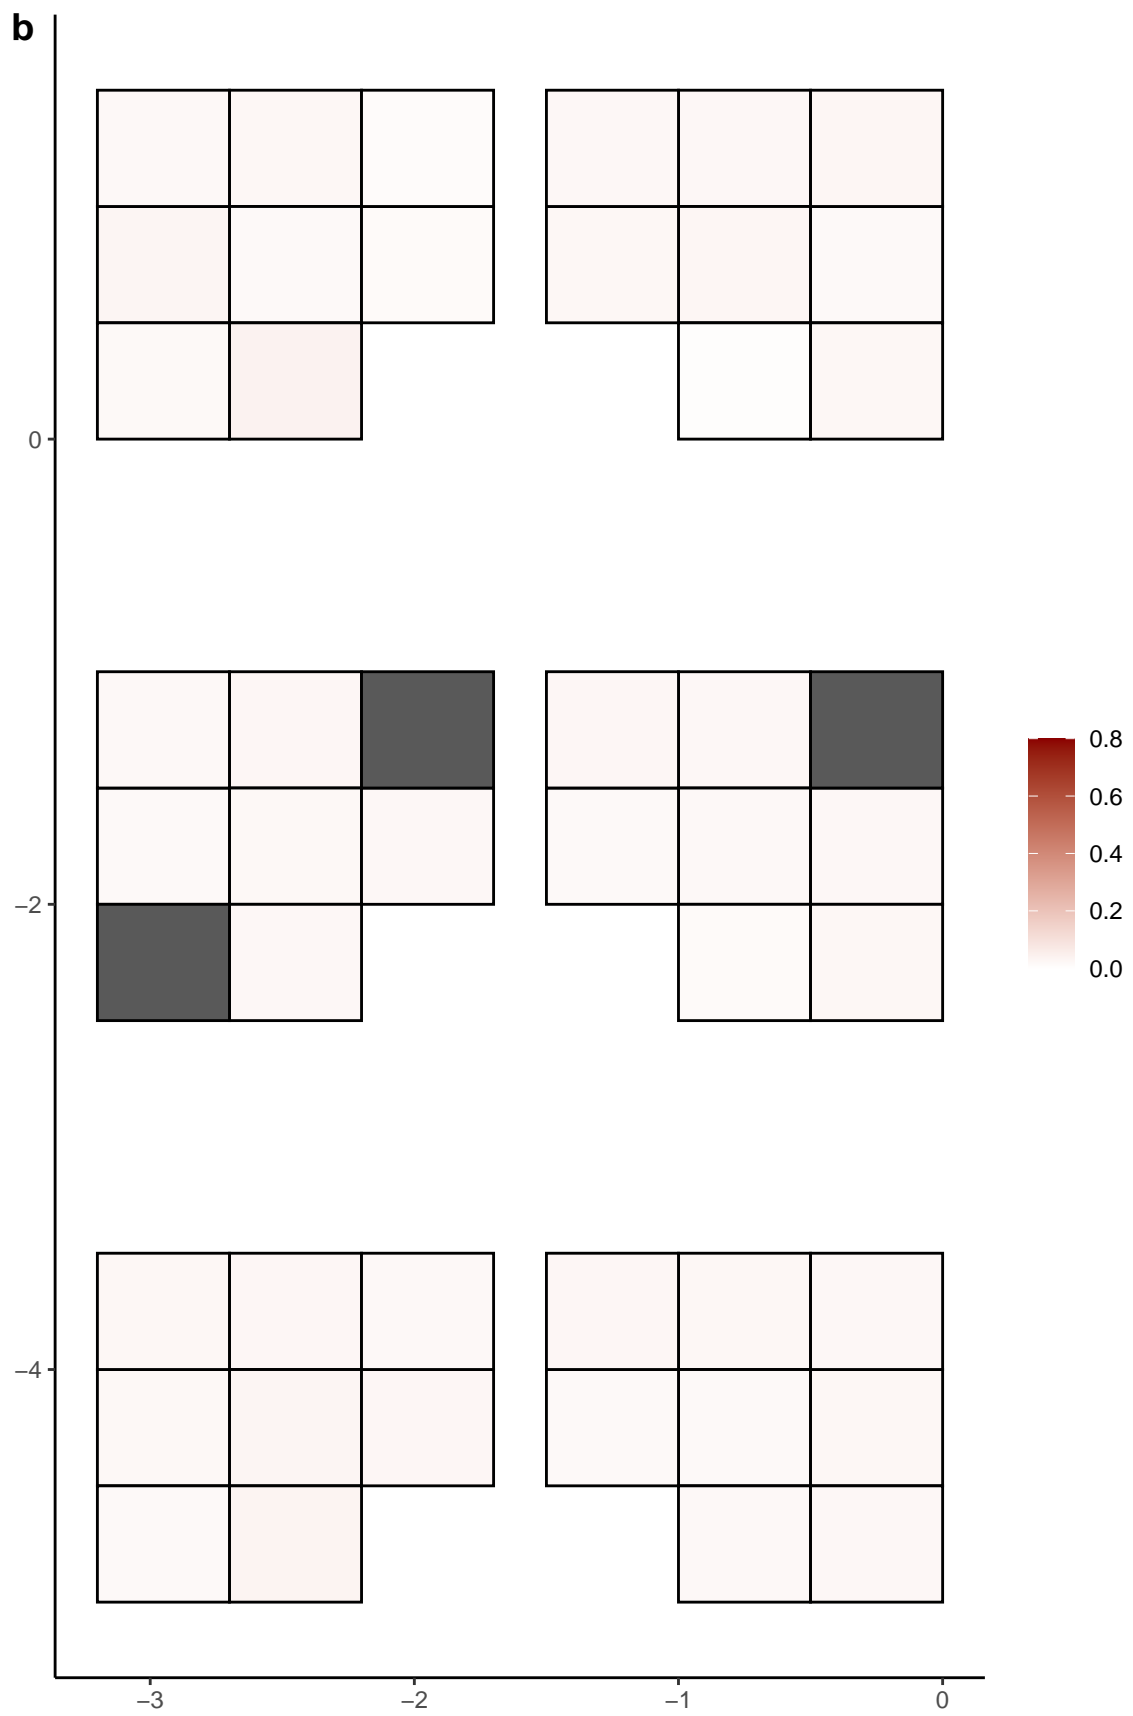

**a** ID05 3-29362488-G-A

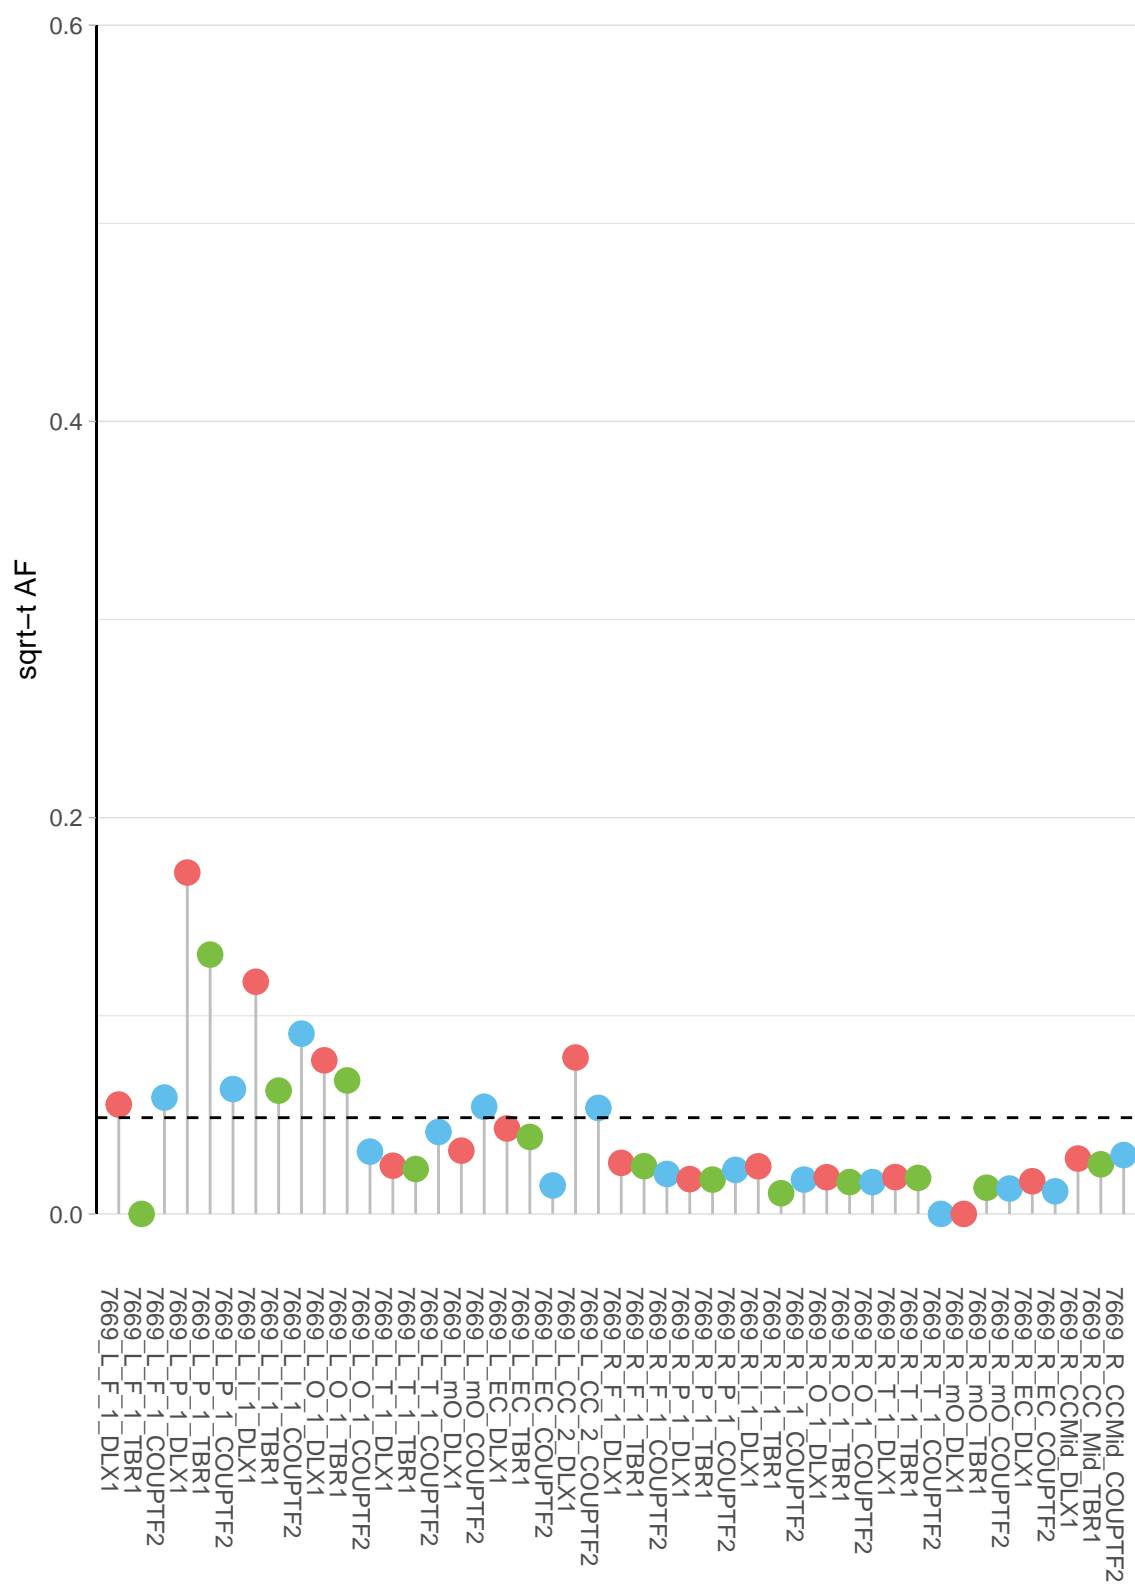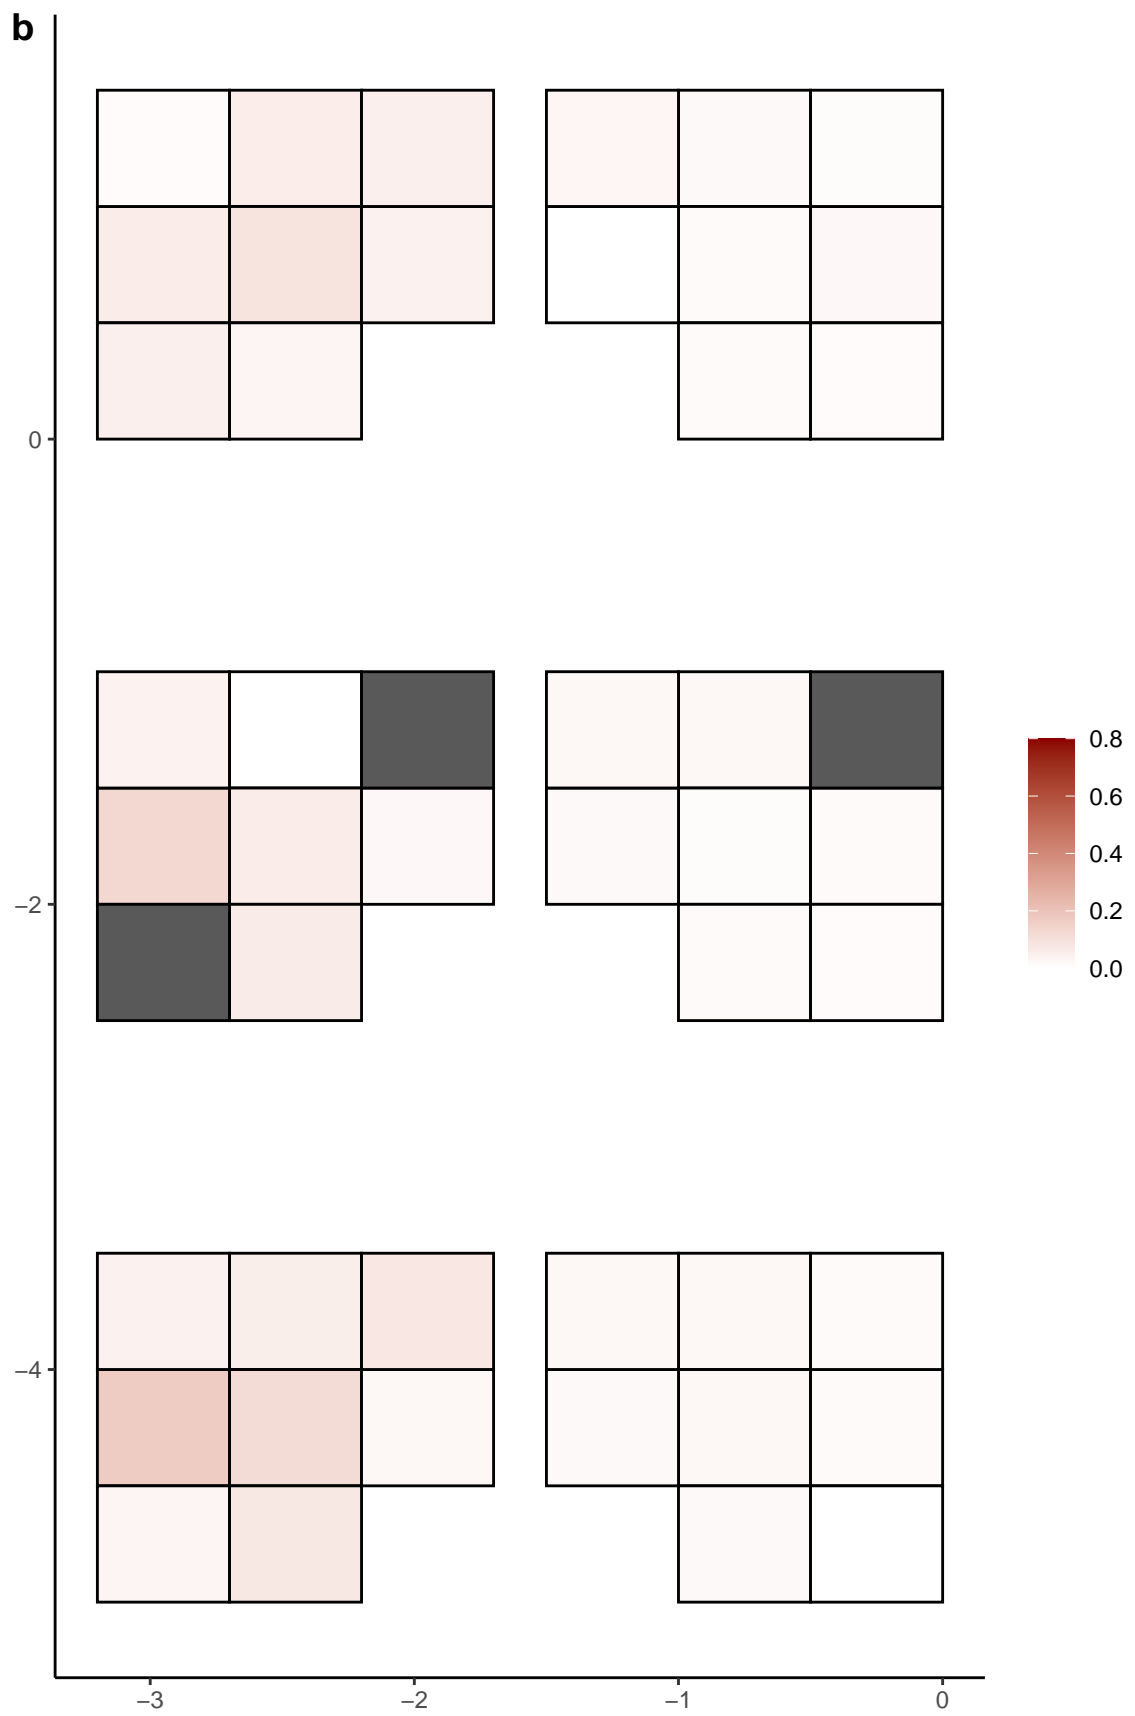

**a** ID05 3-29763350-T-C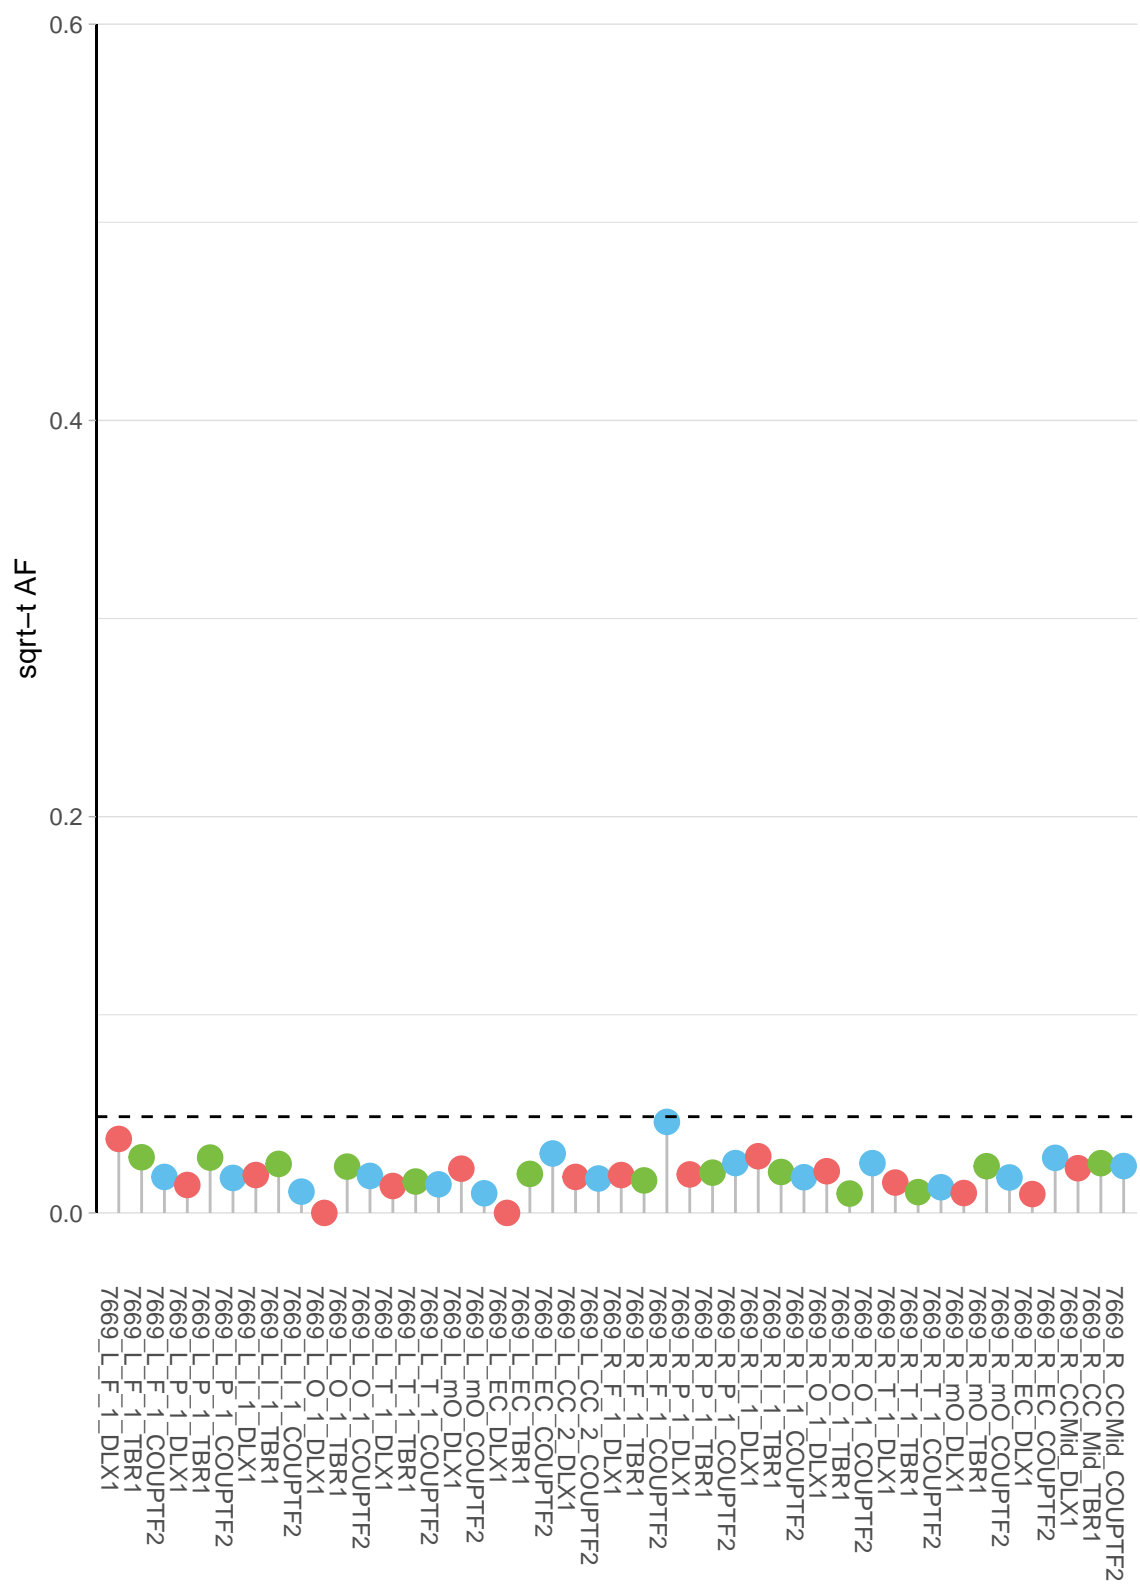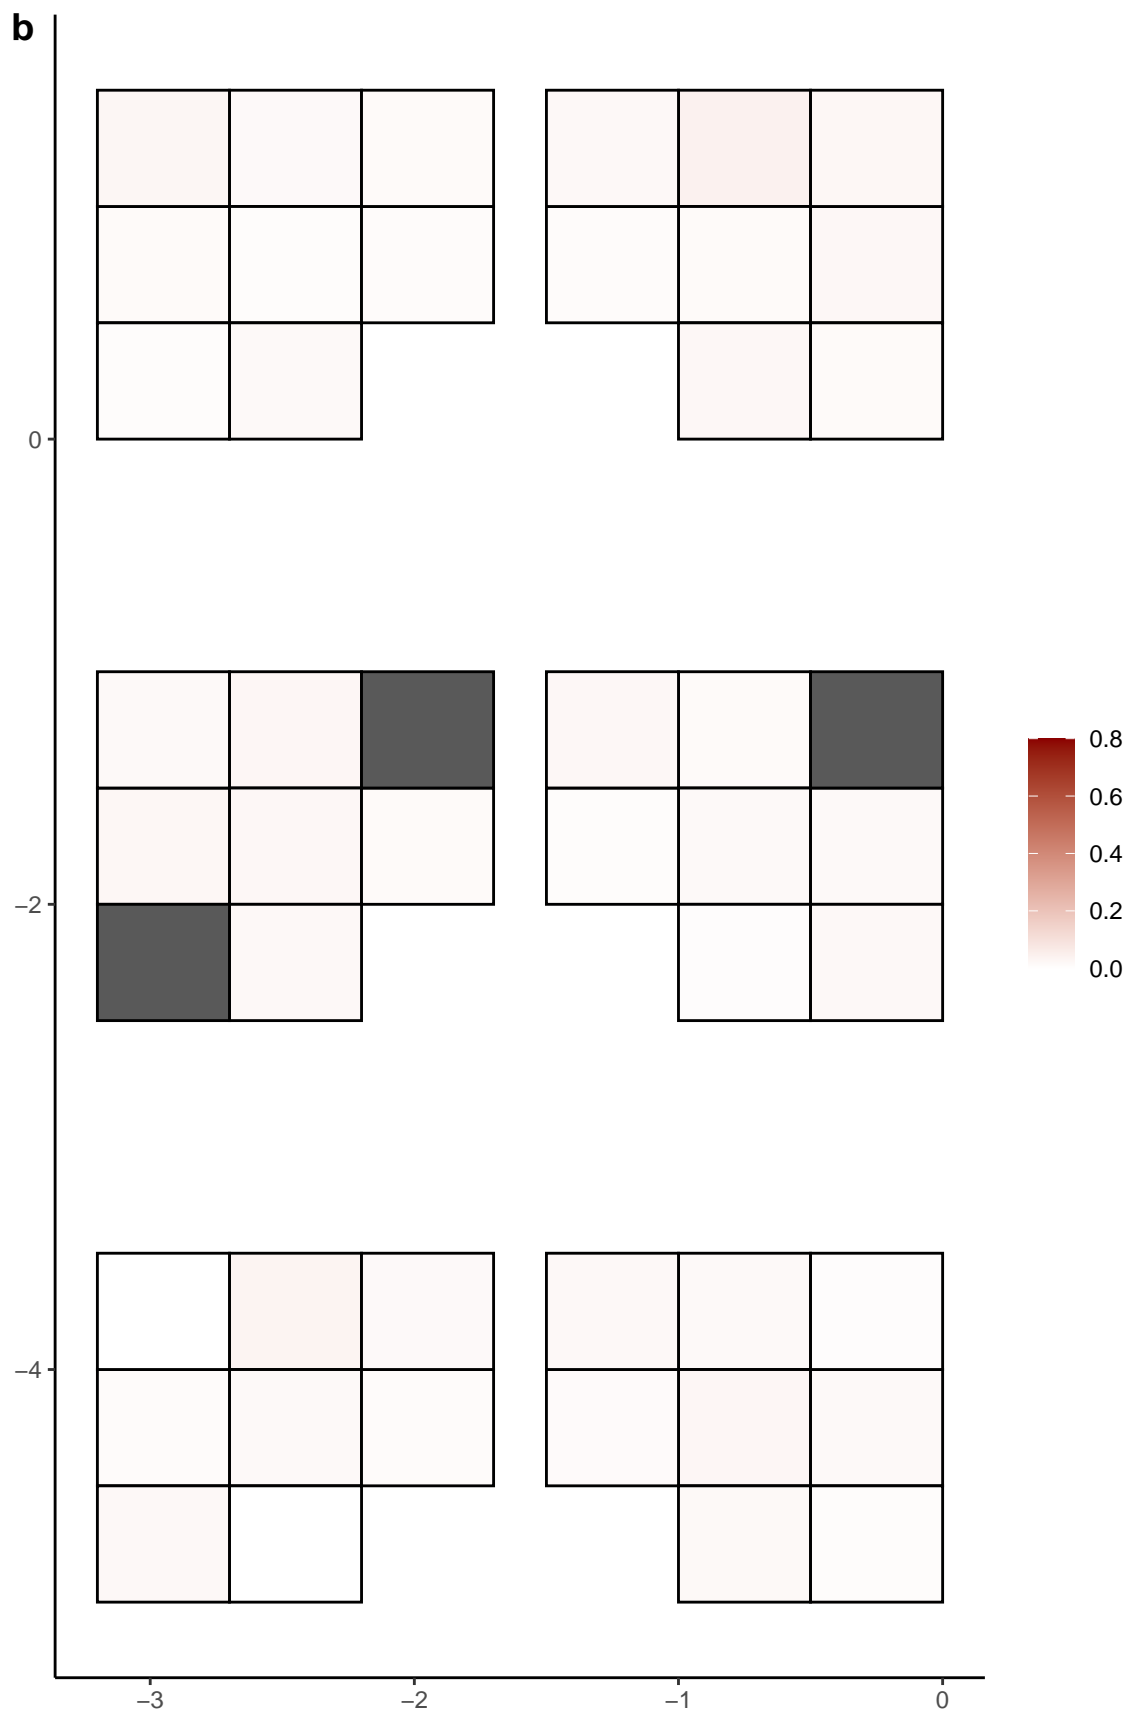



**a** ID05 3-3458468-TG-T

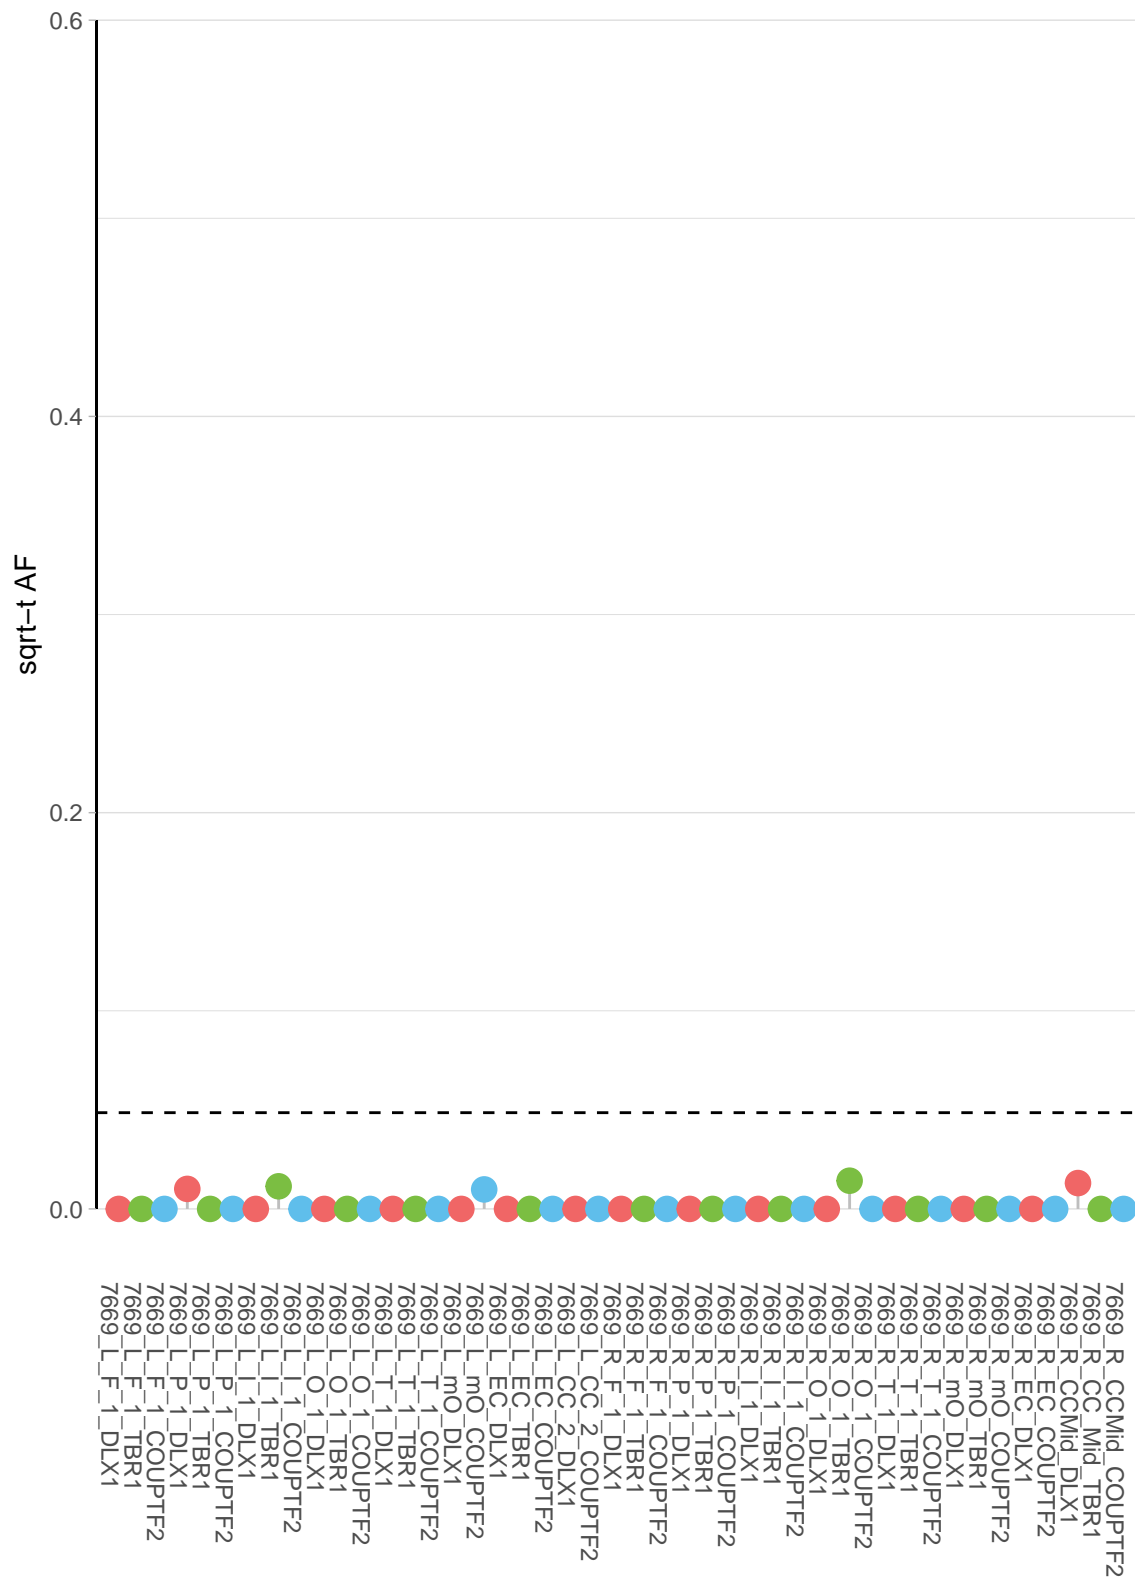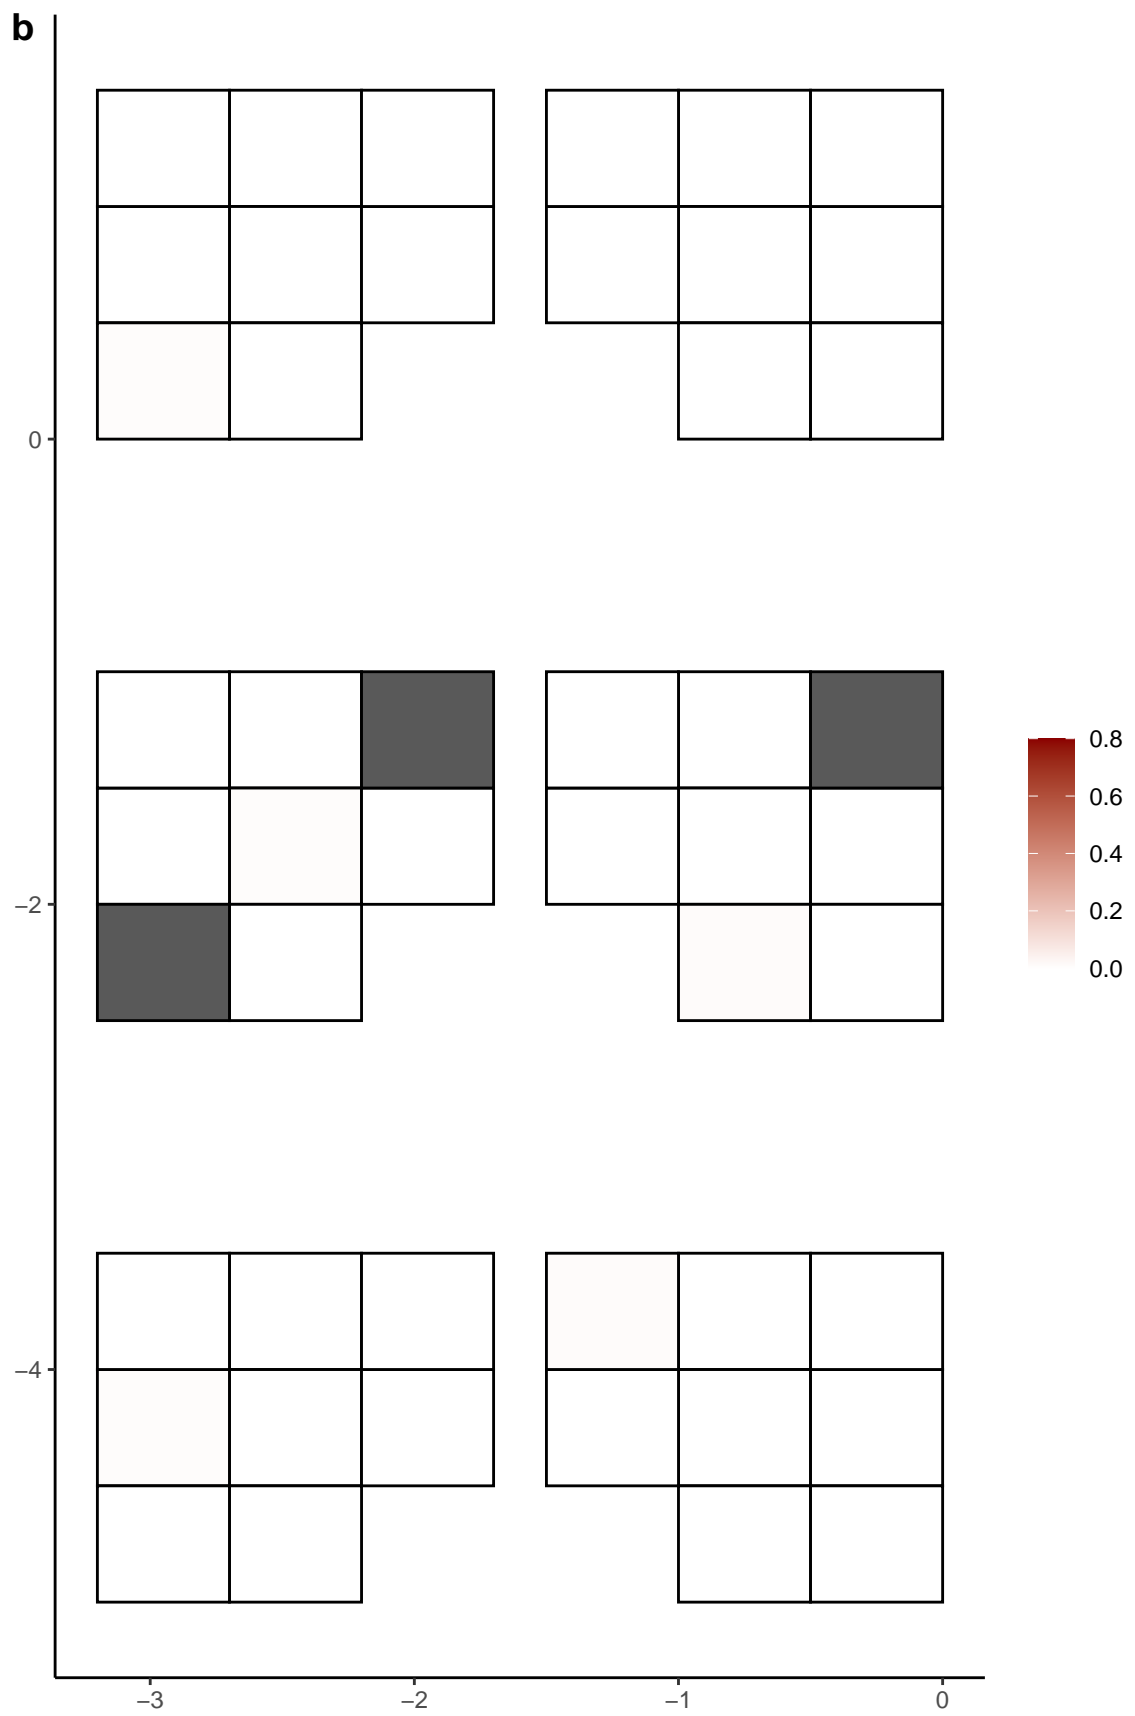





**a** ID05 3-36414768-C-G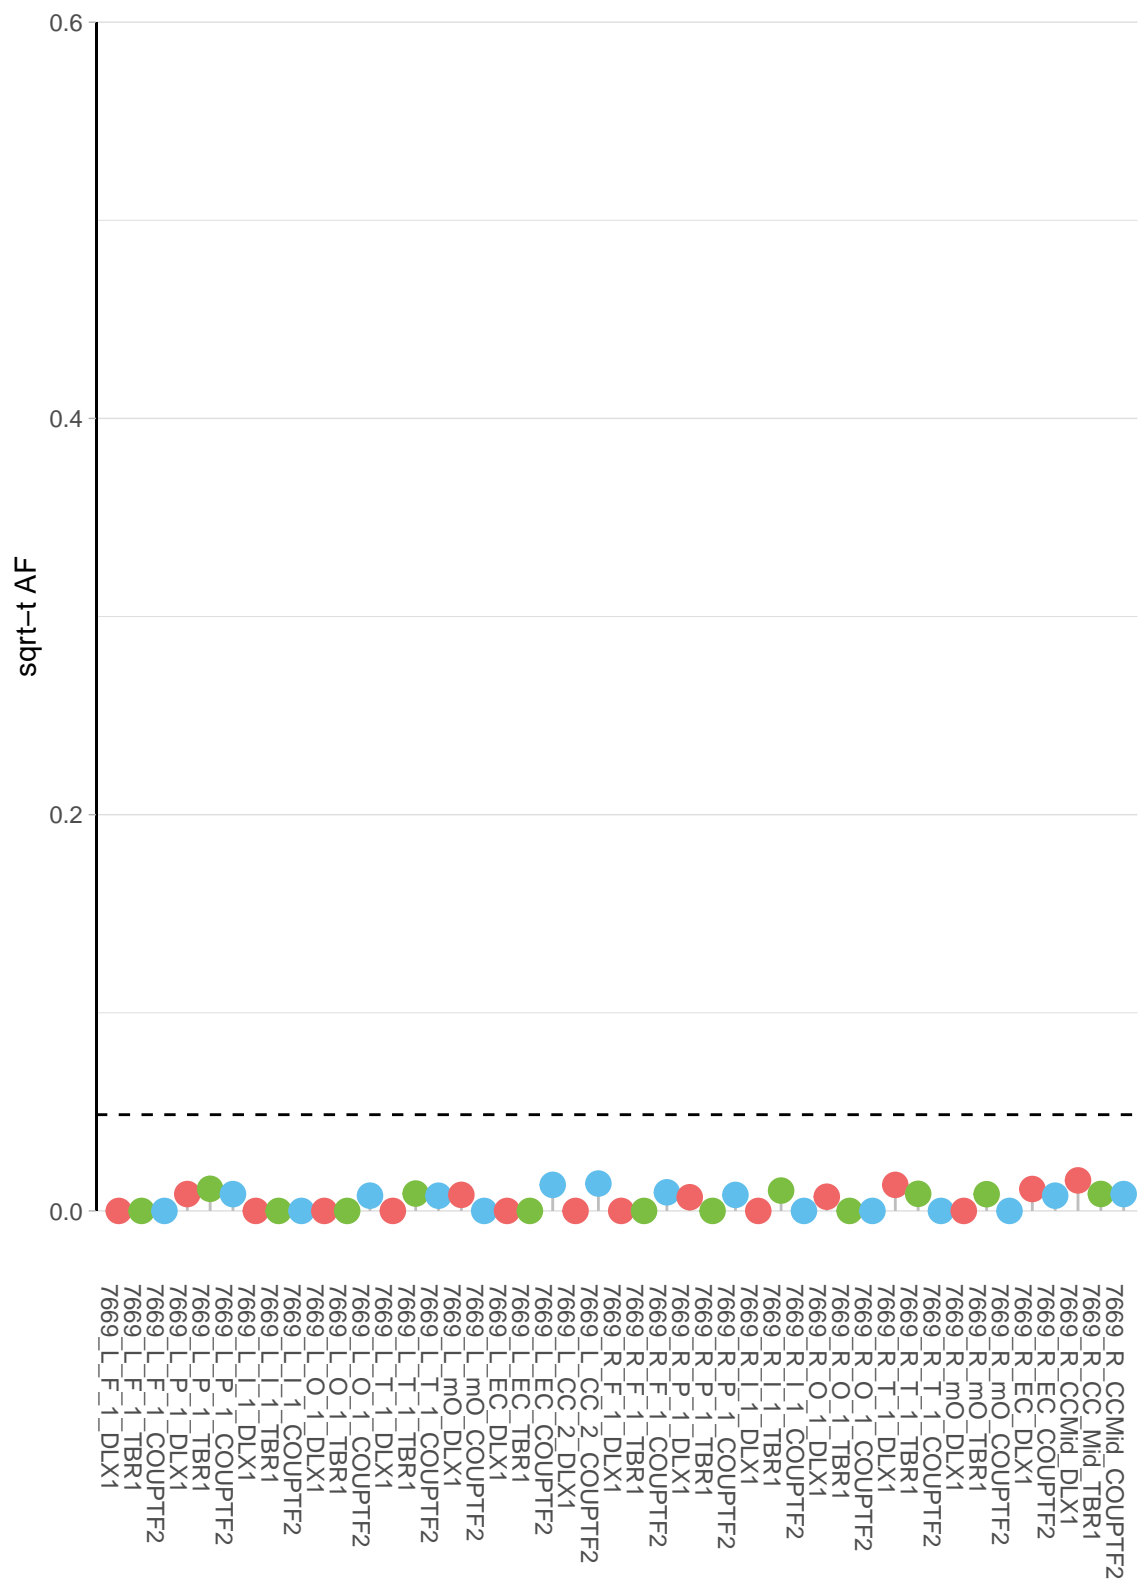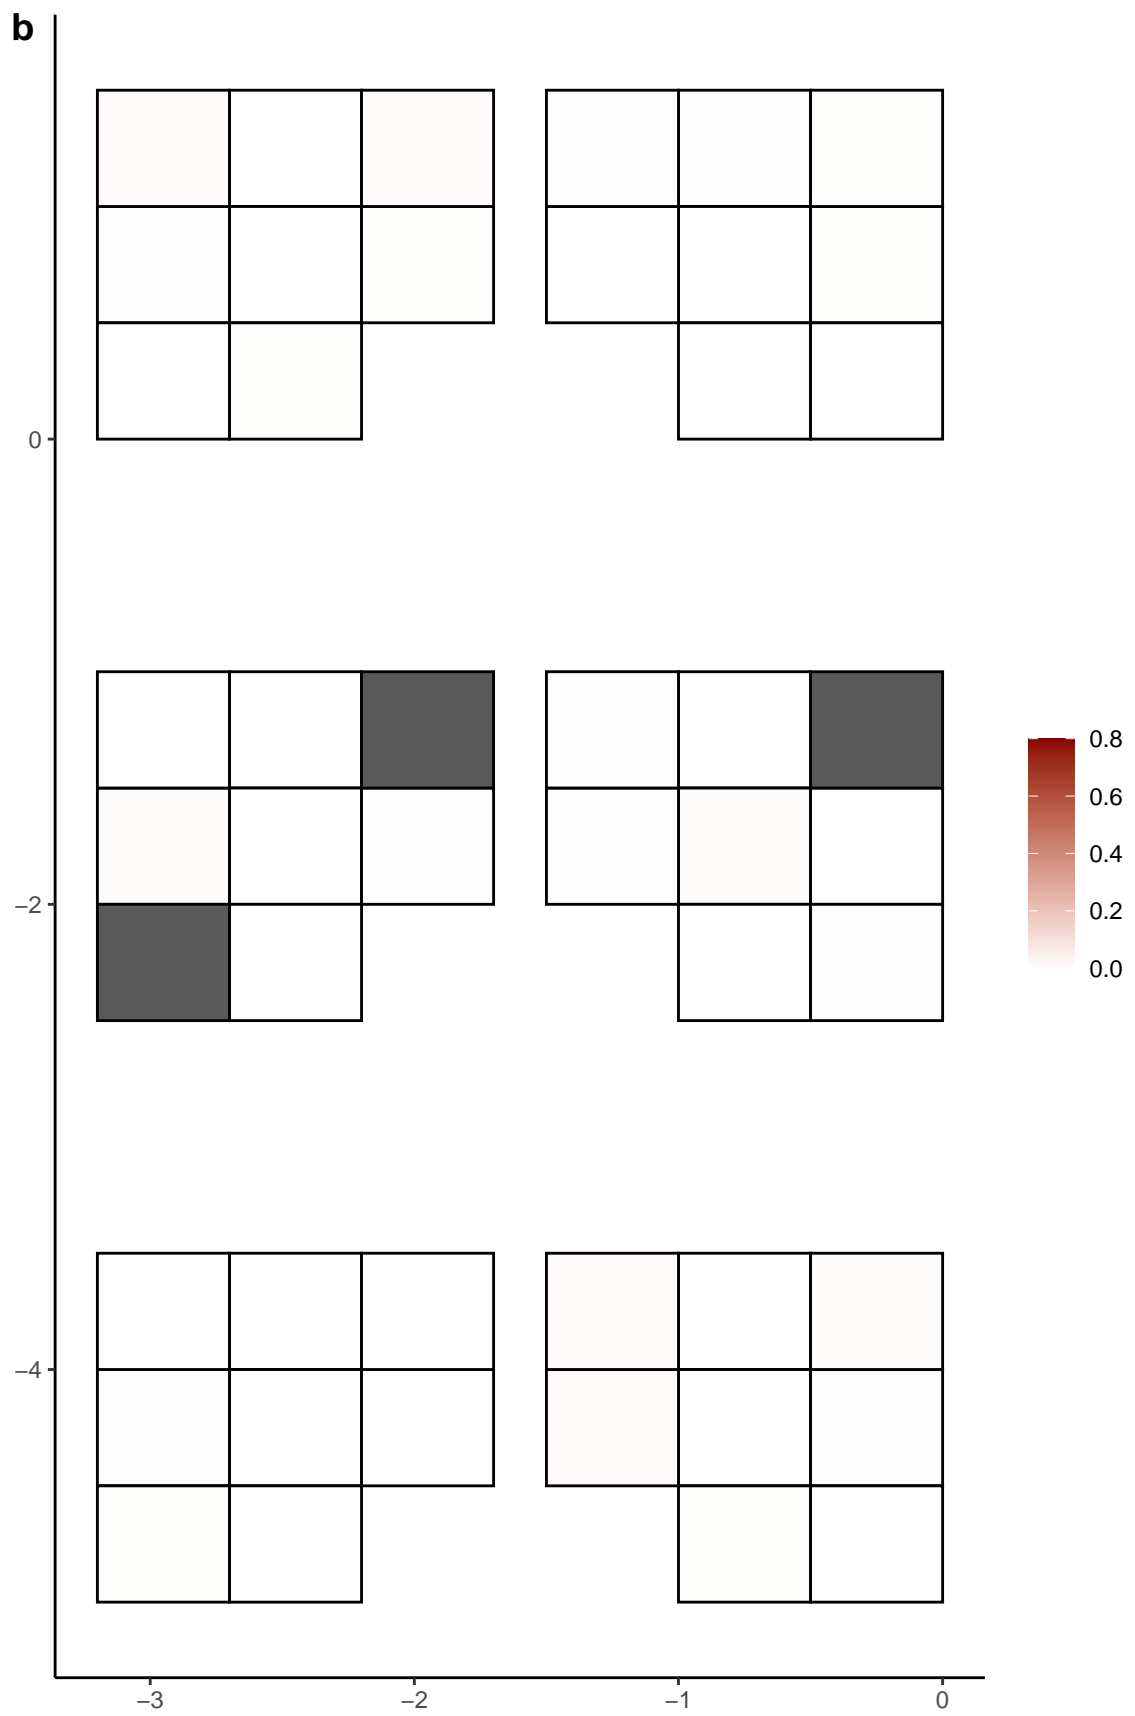

**a** ID05 3-40086182-G-T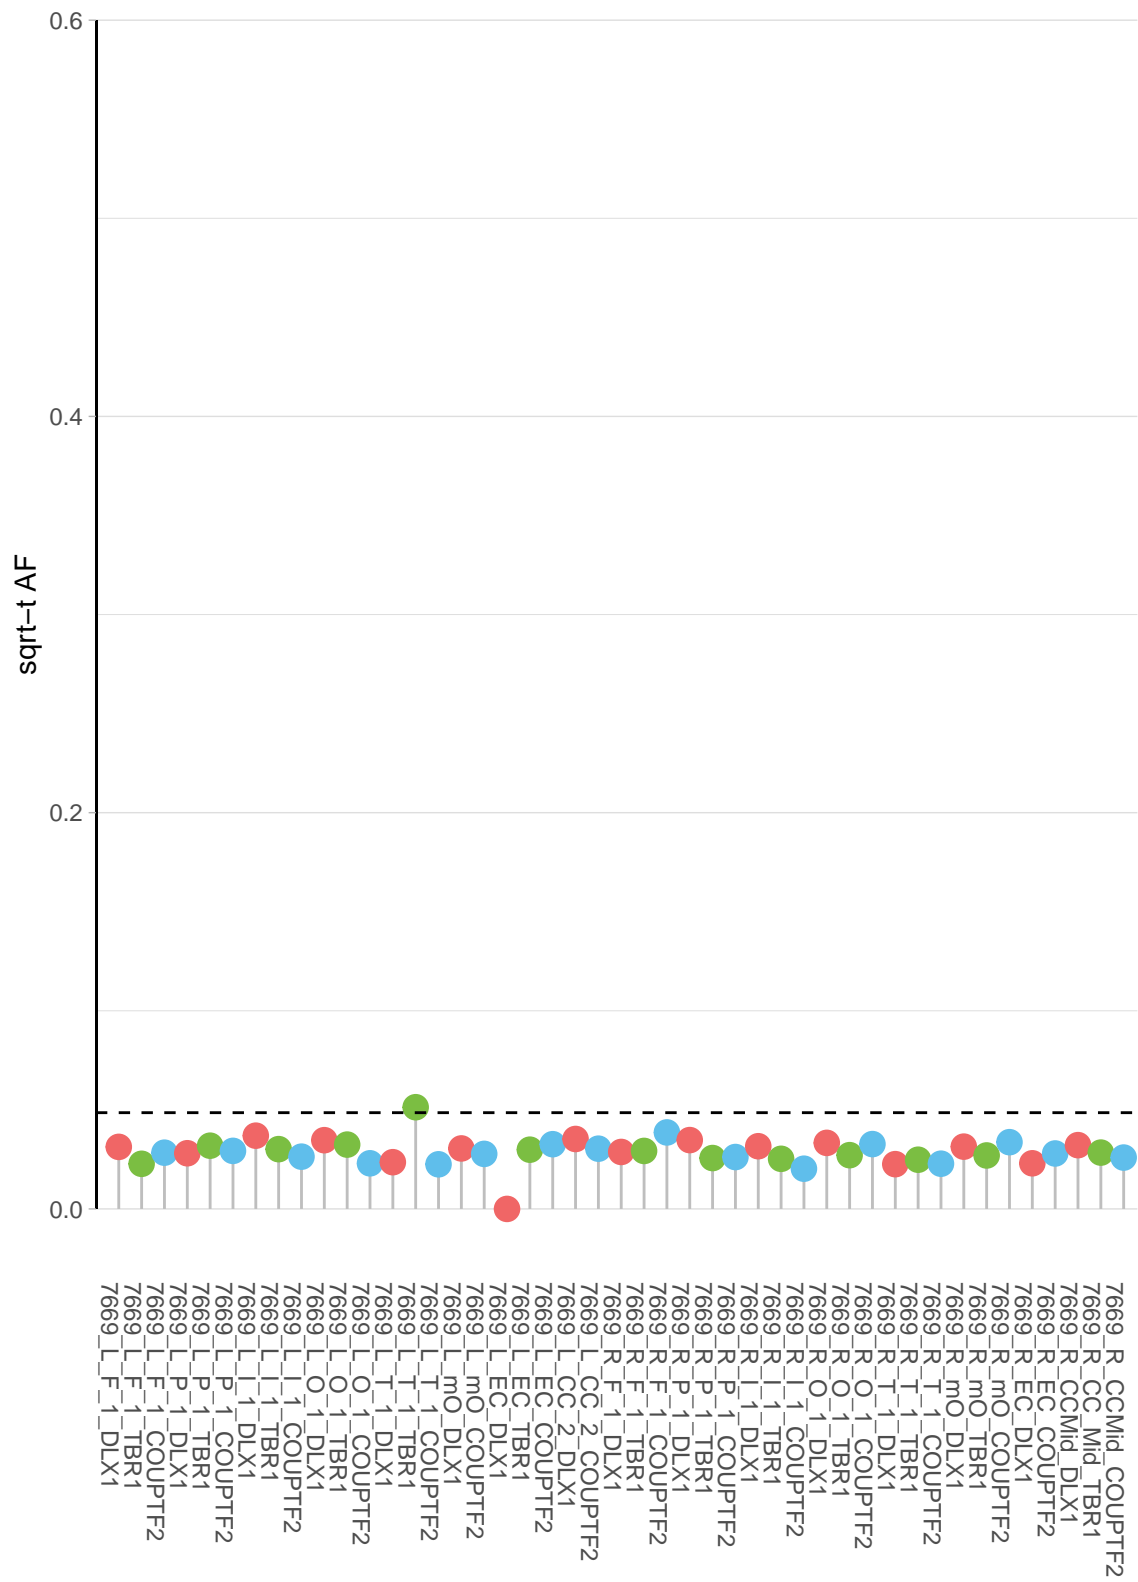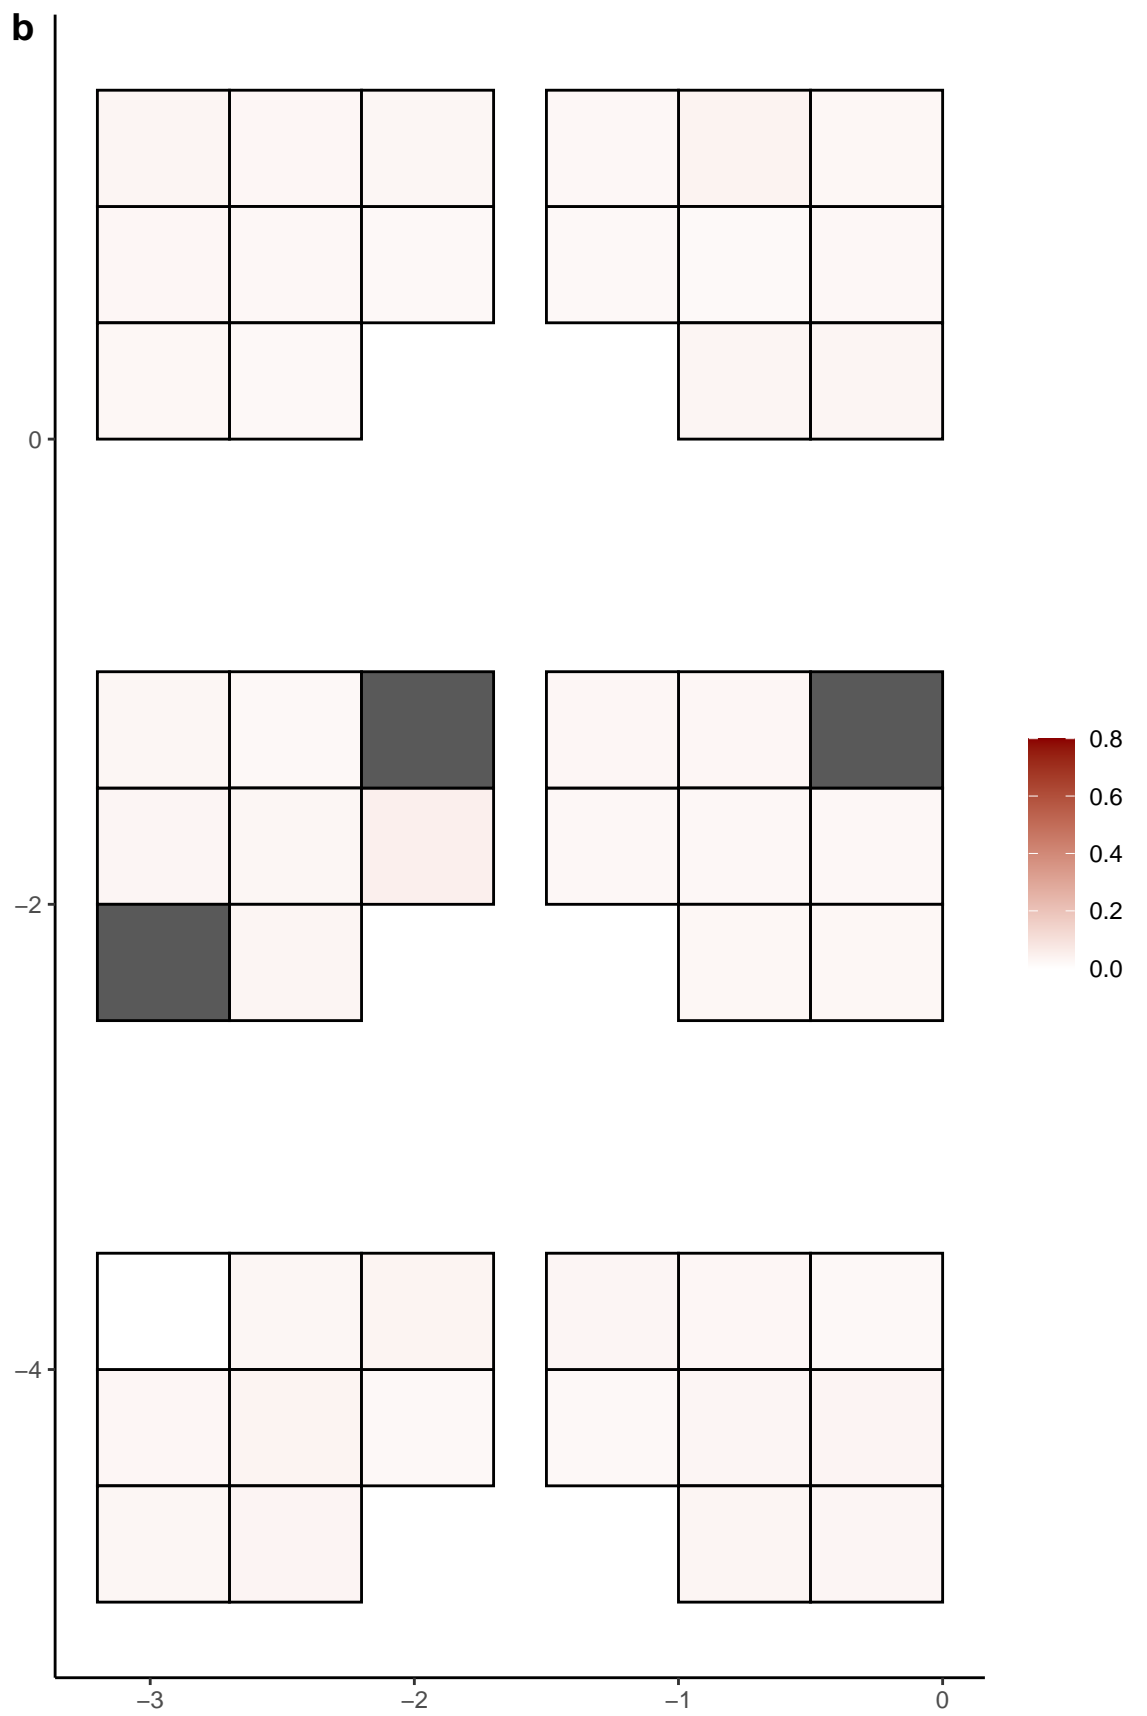

**a** ID05 3-44078495-G-A

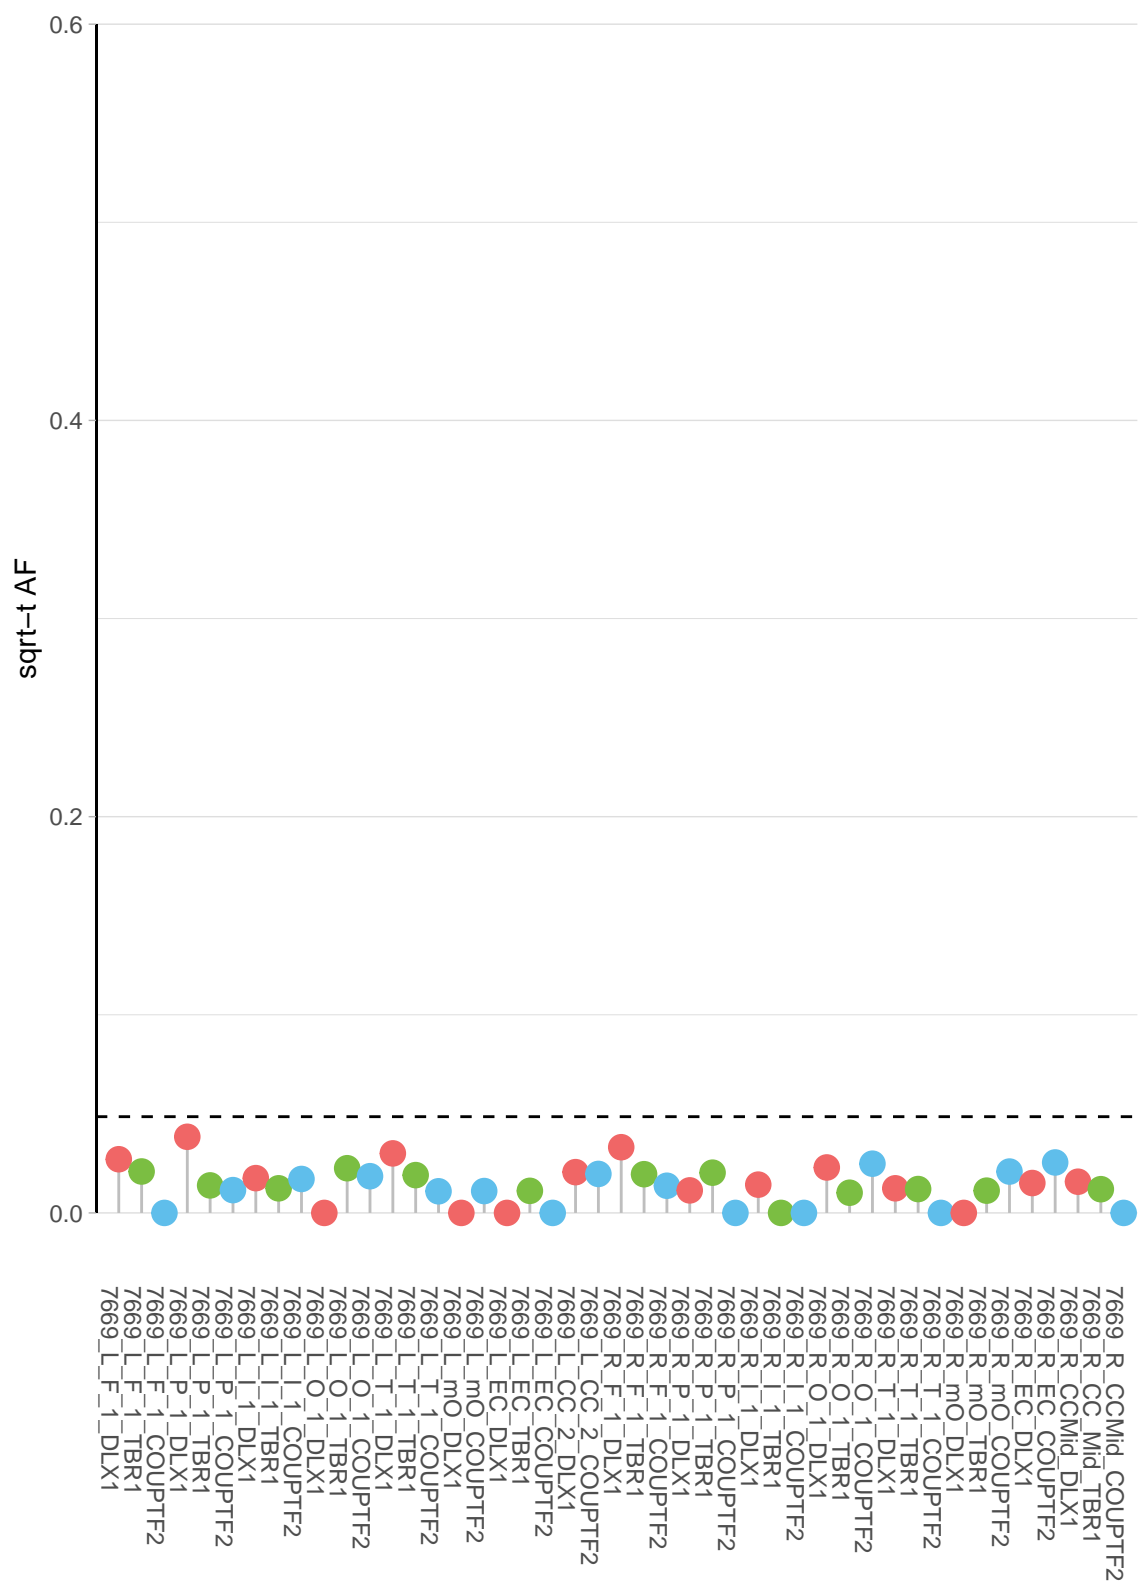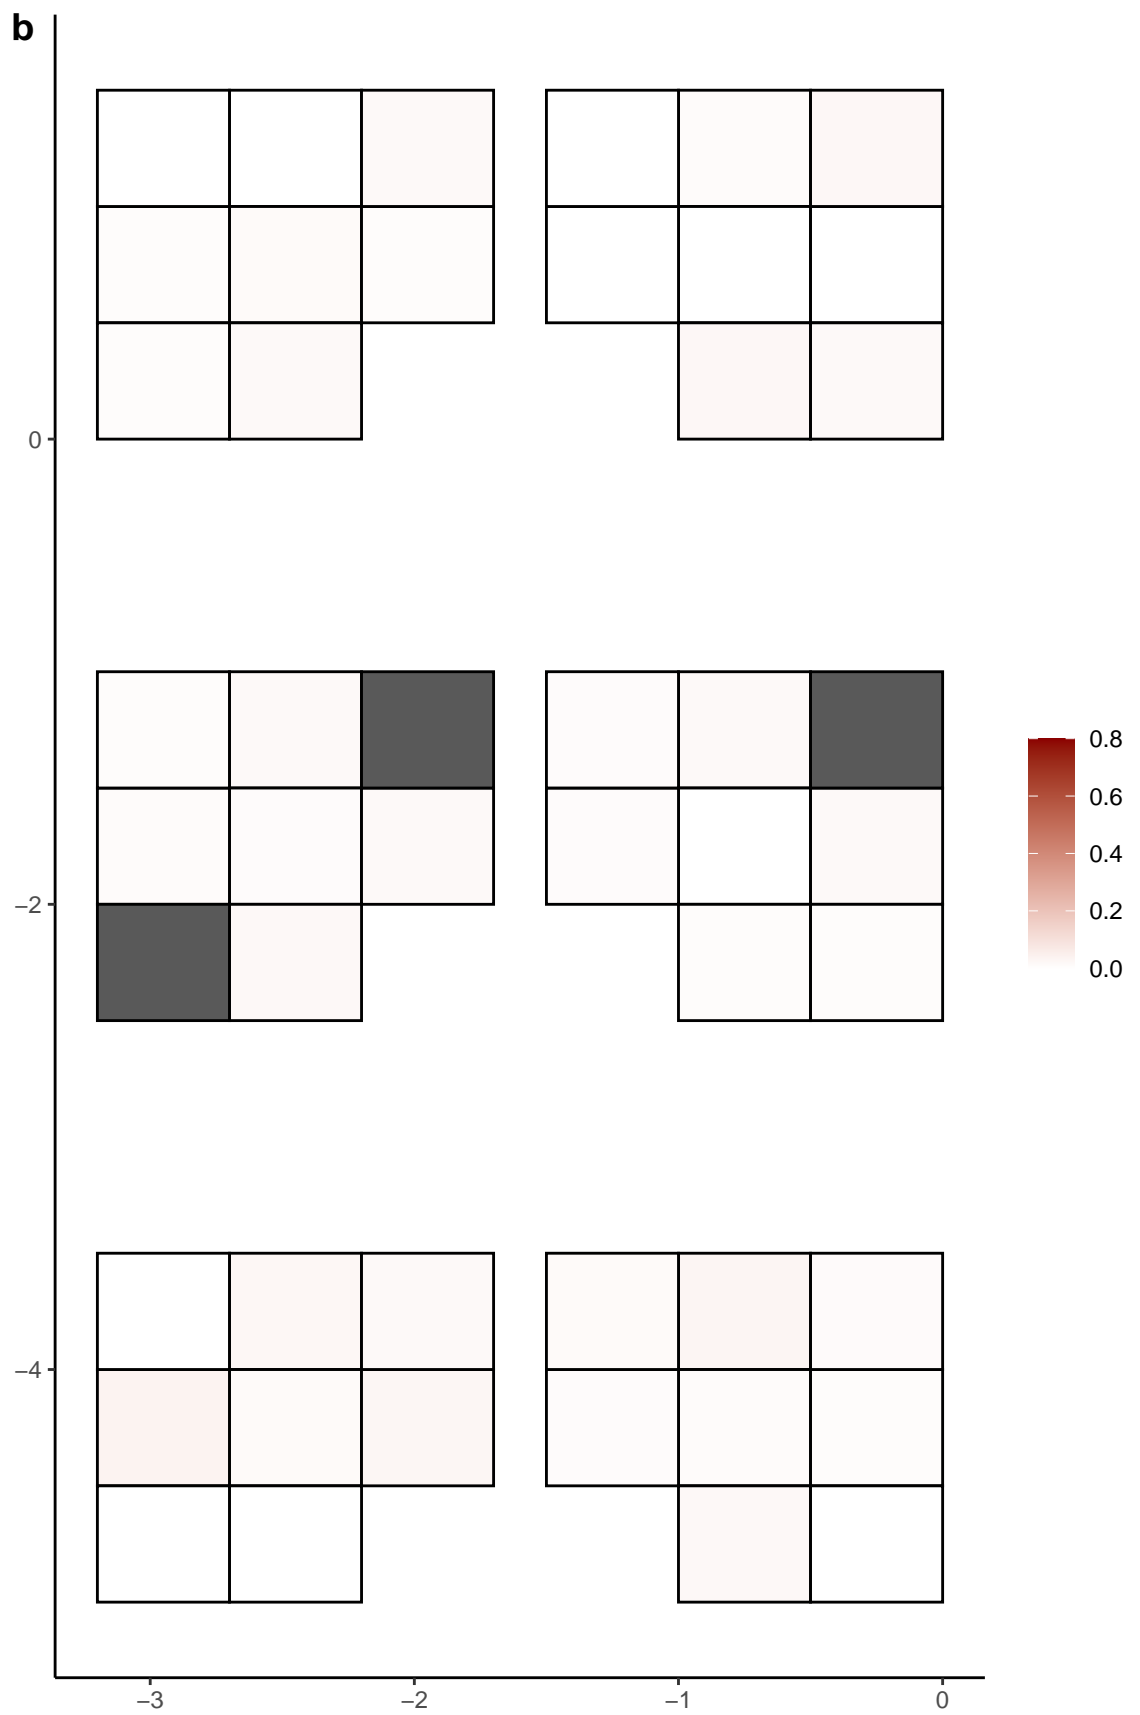

**a** ID05 3-492626-A-T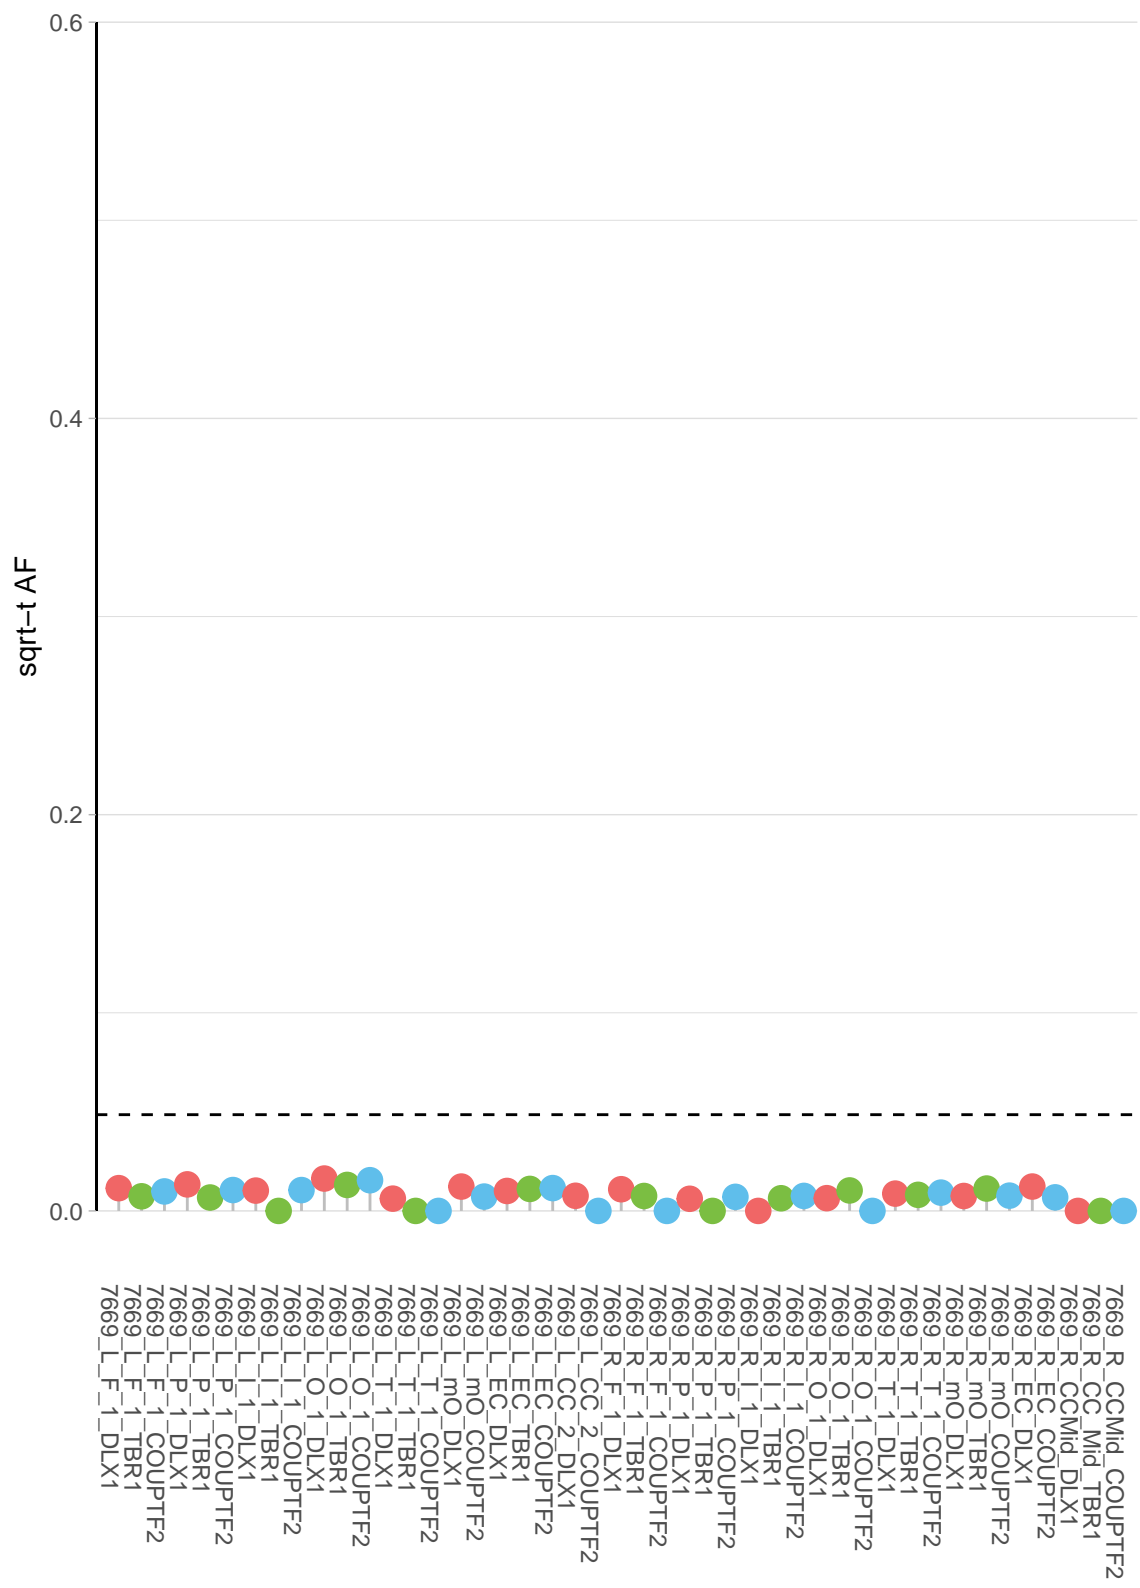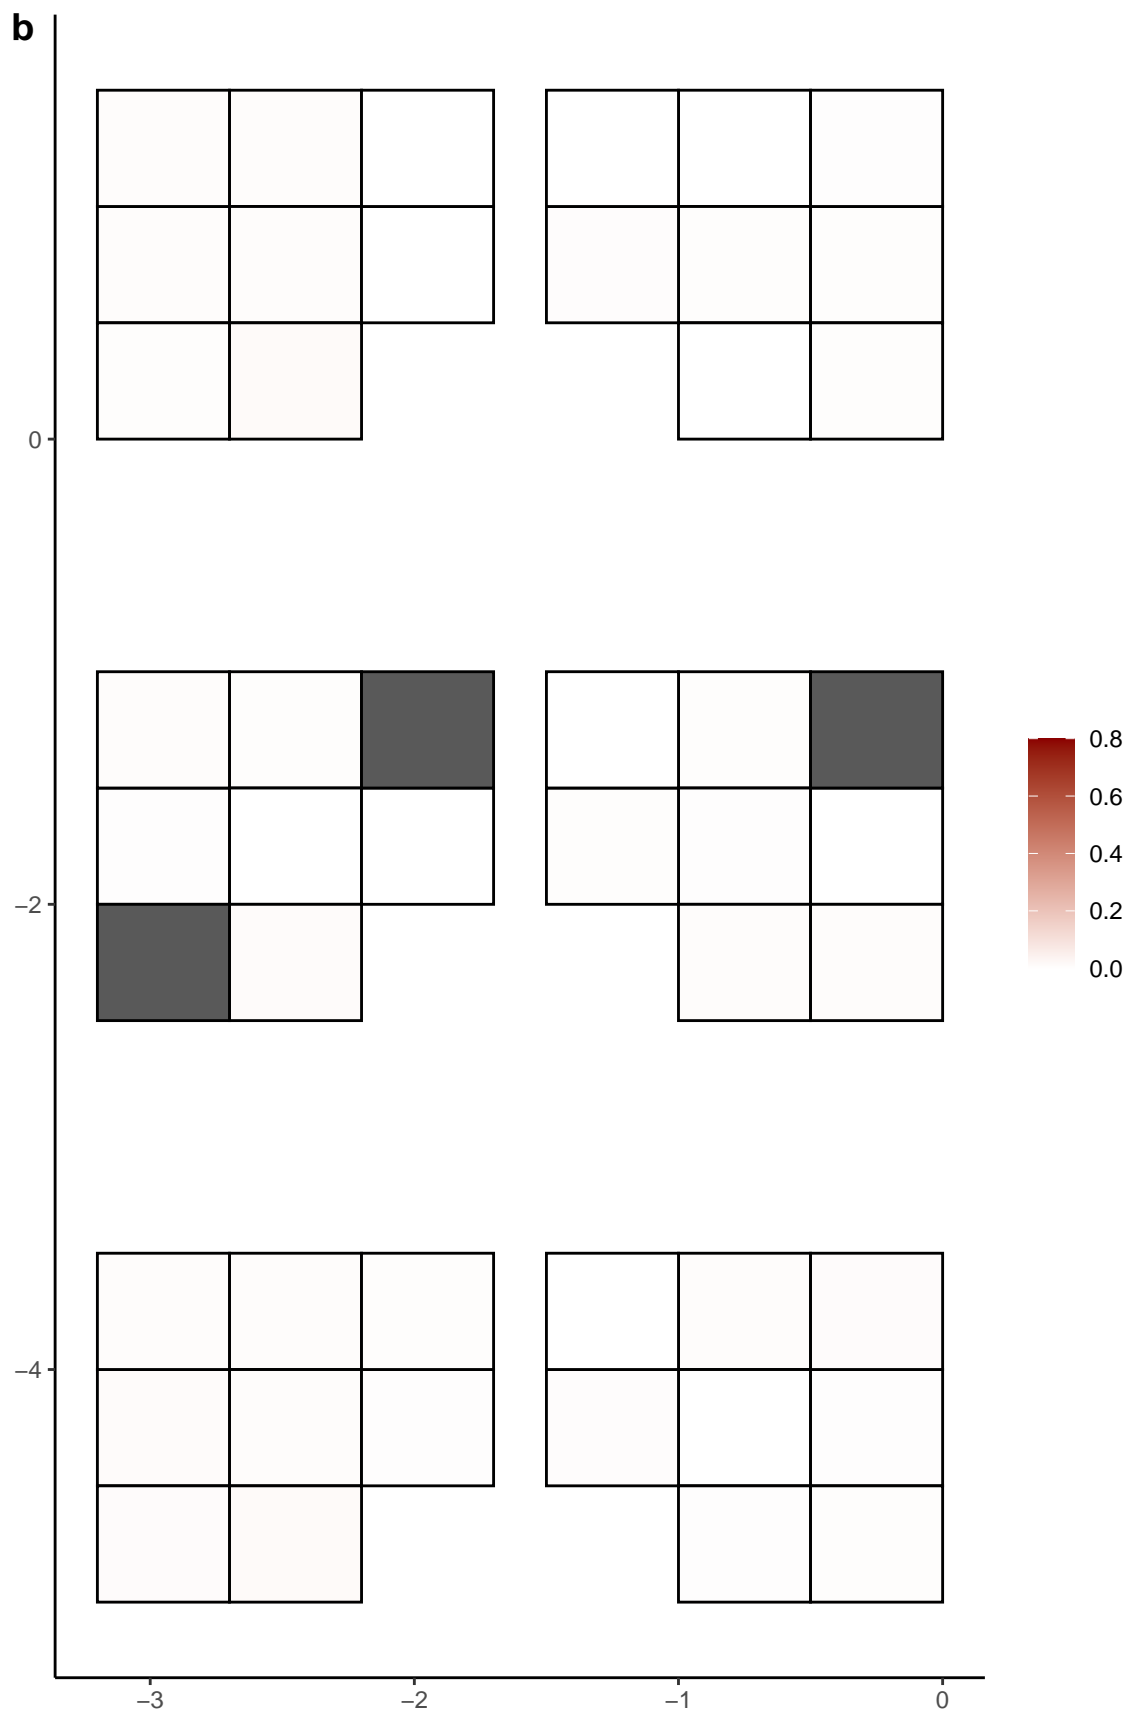

**a** ID05 3-52544490-C-T

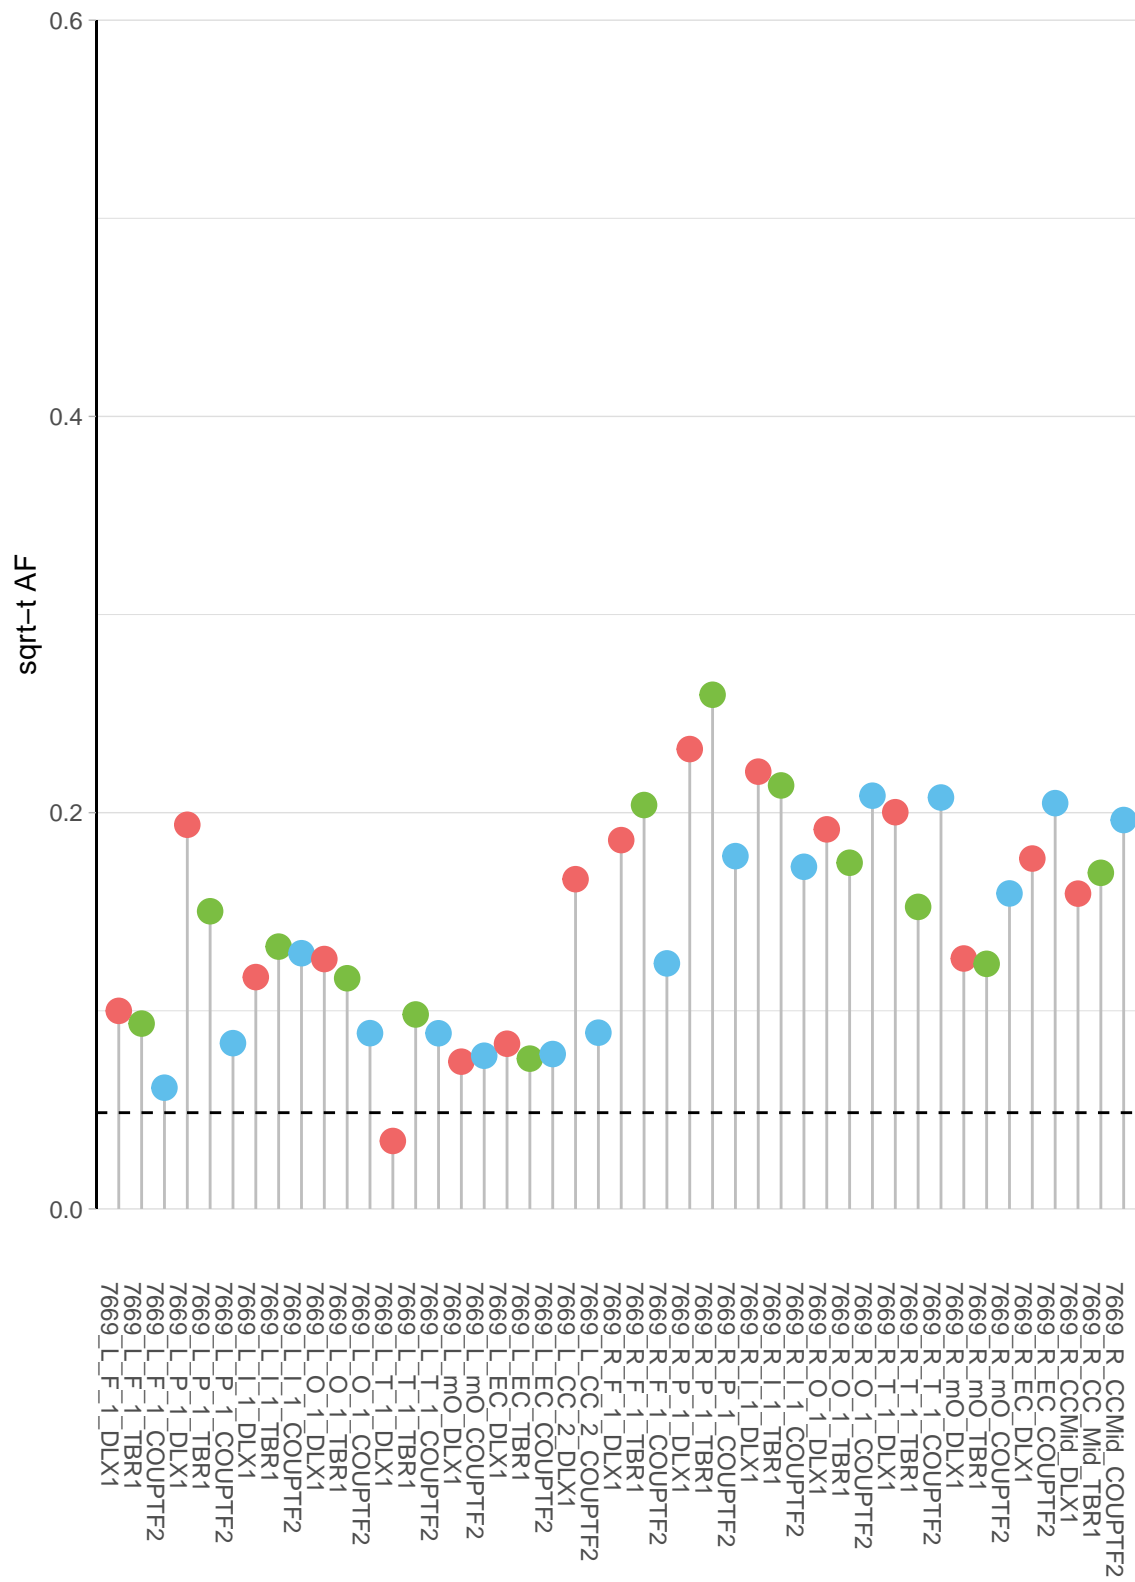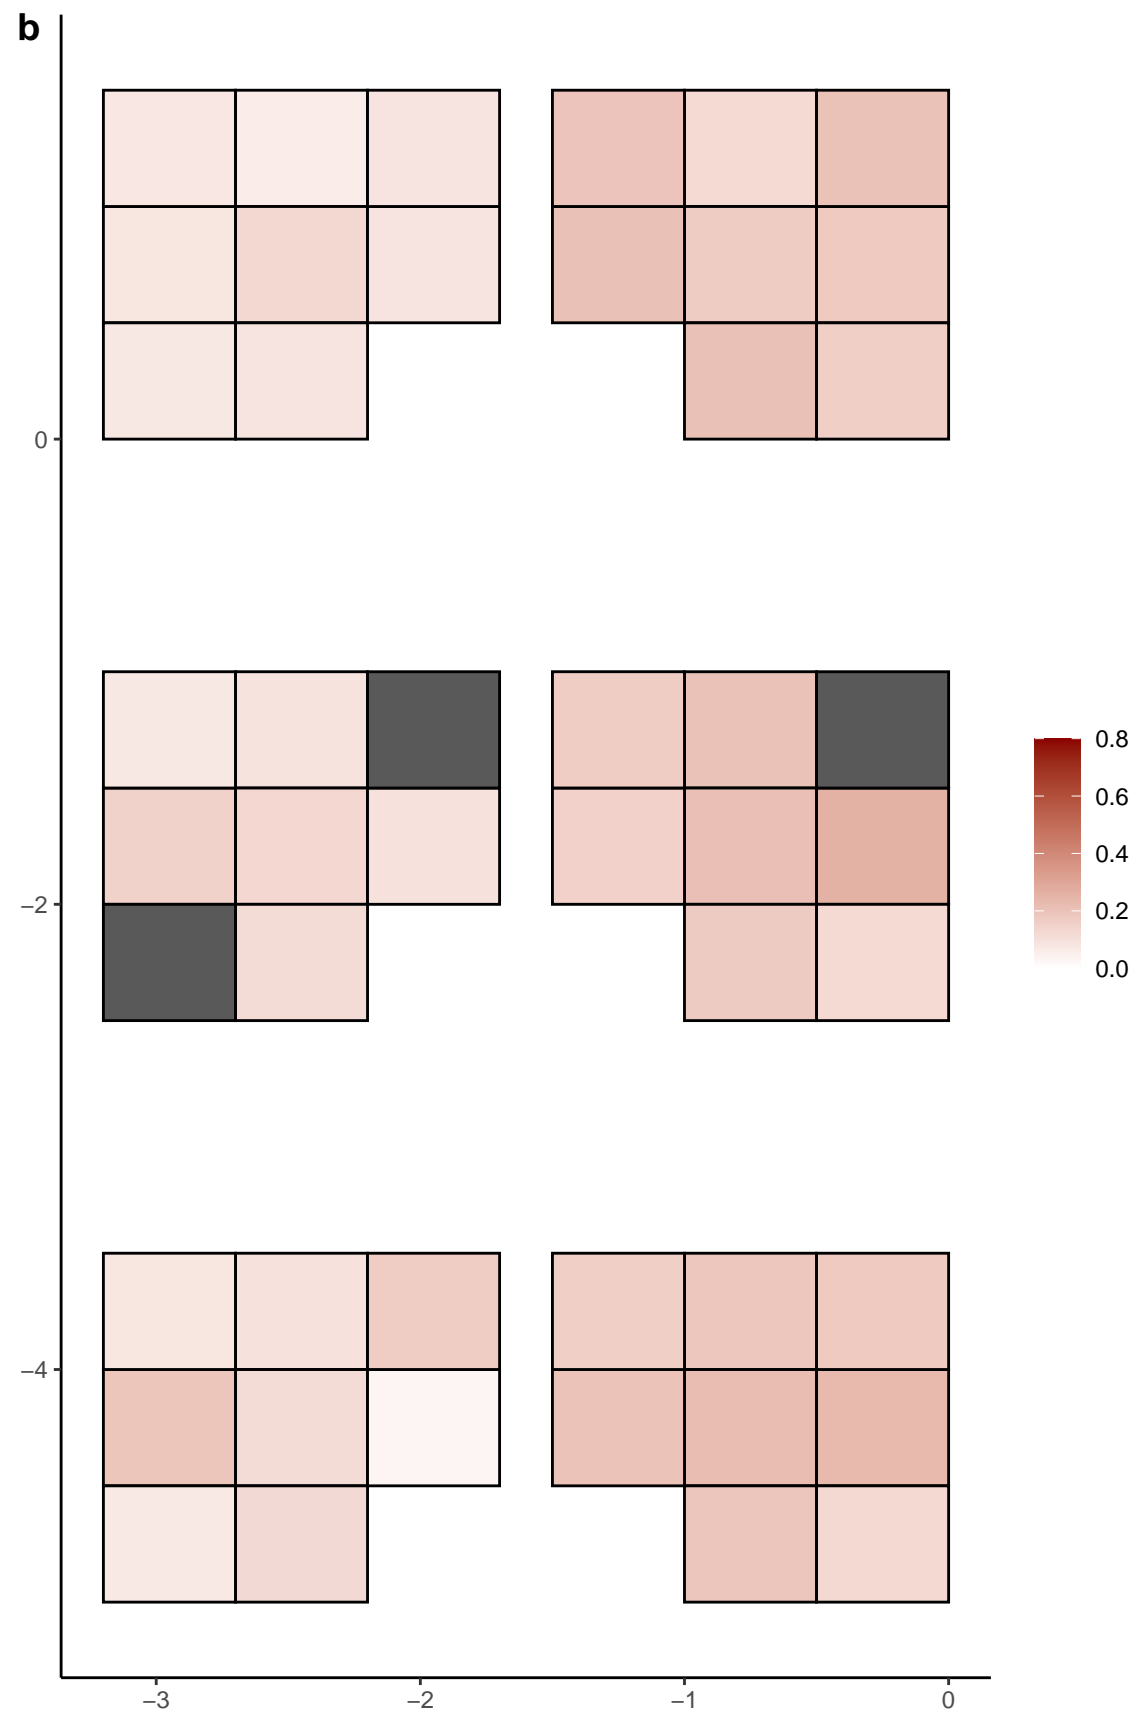

**a** ID05 3-5352719-C-T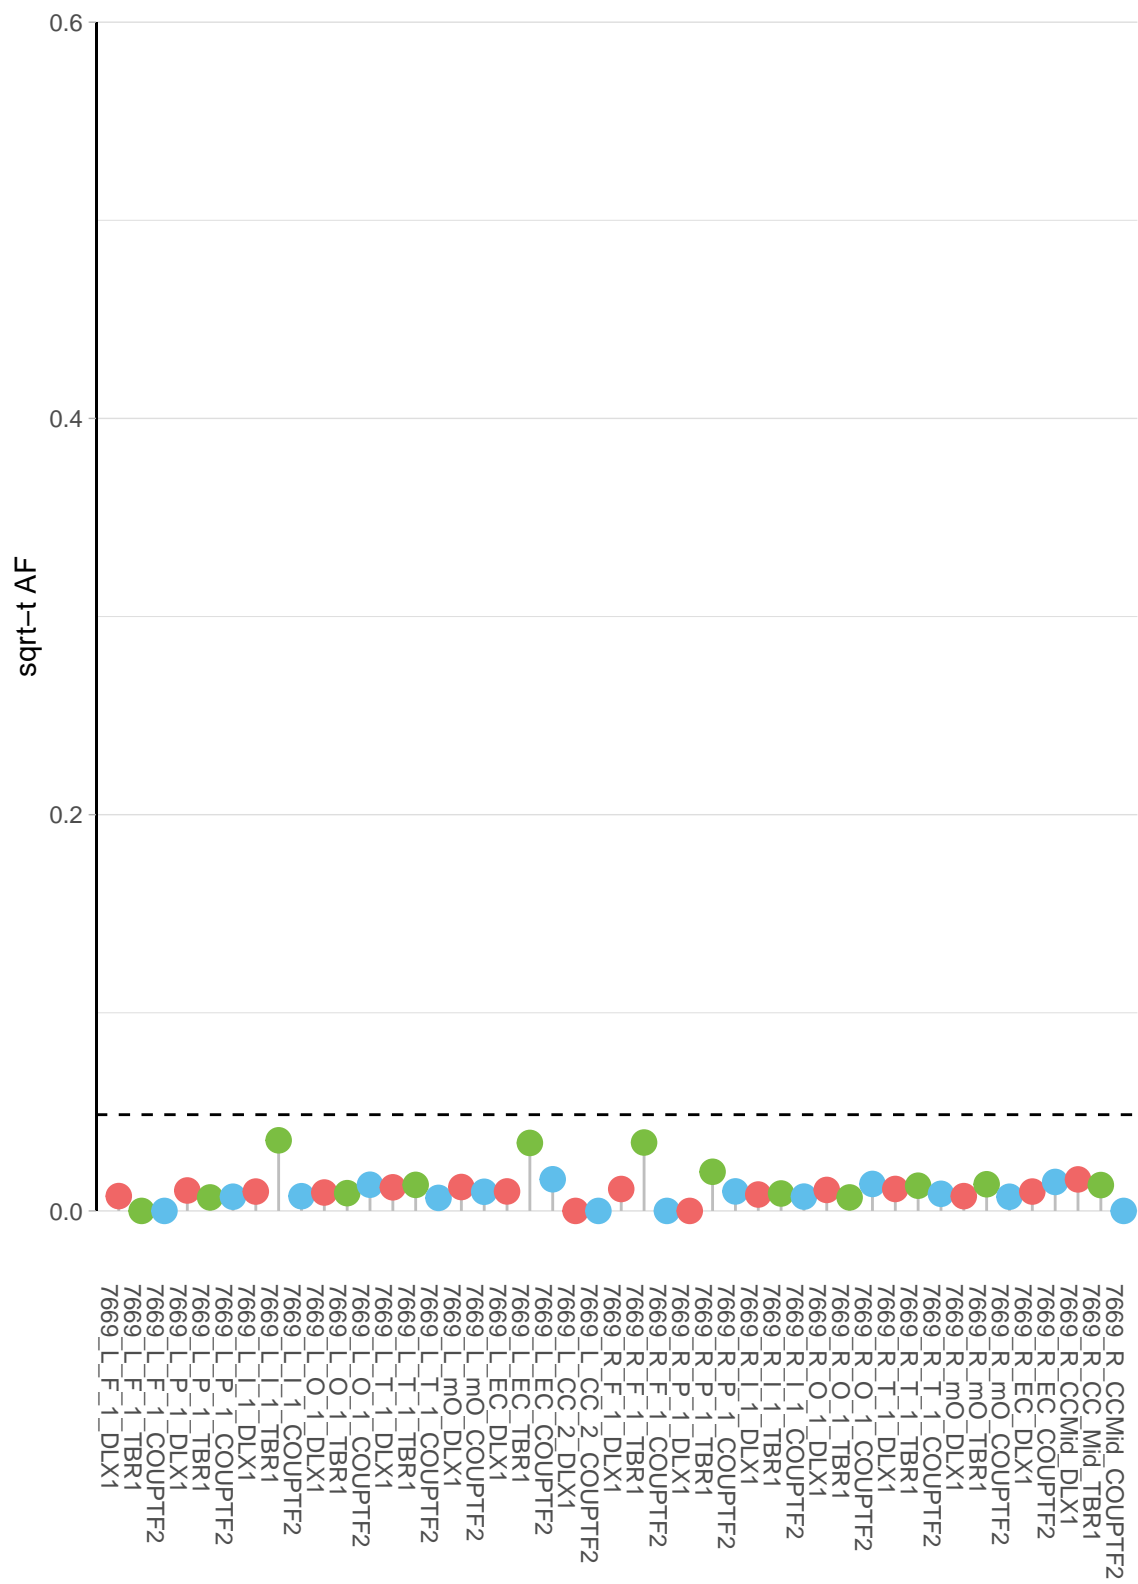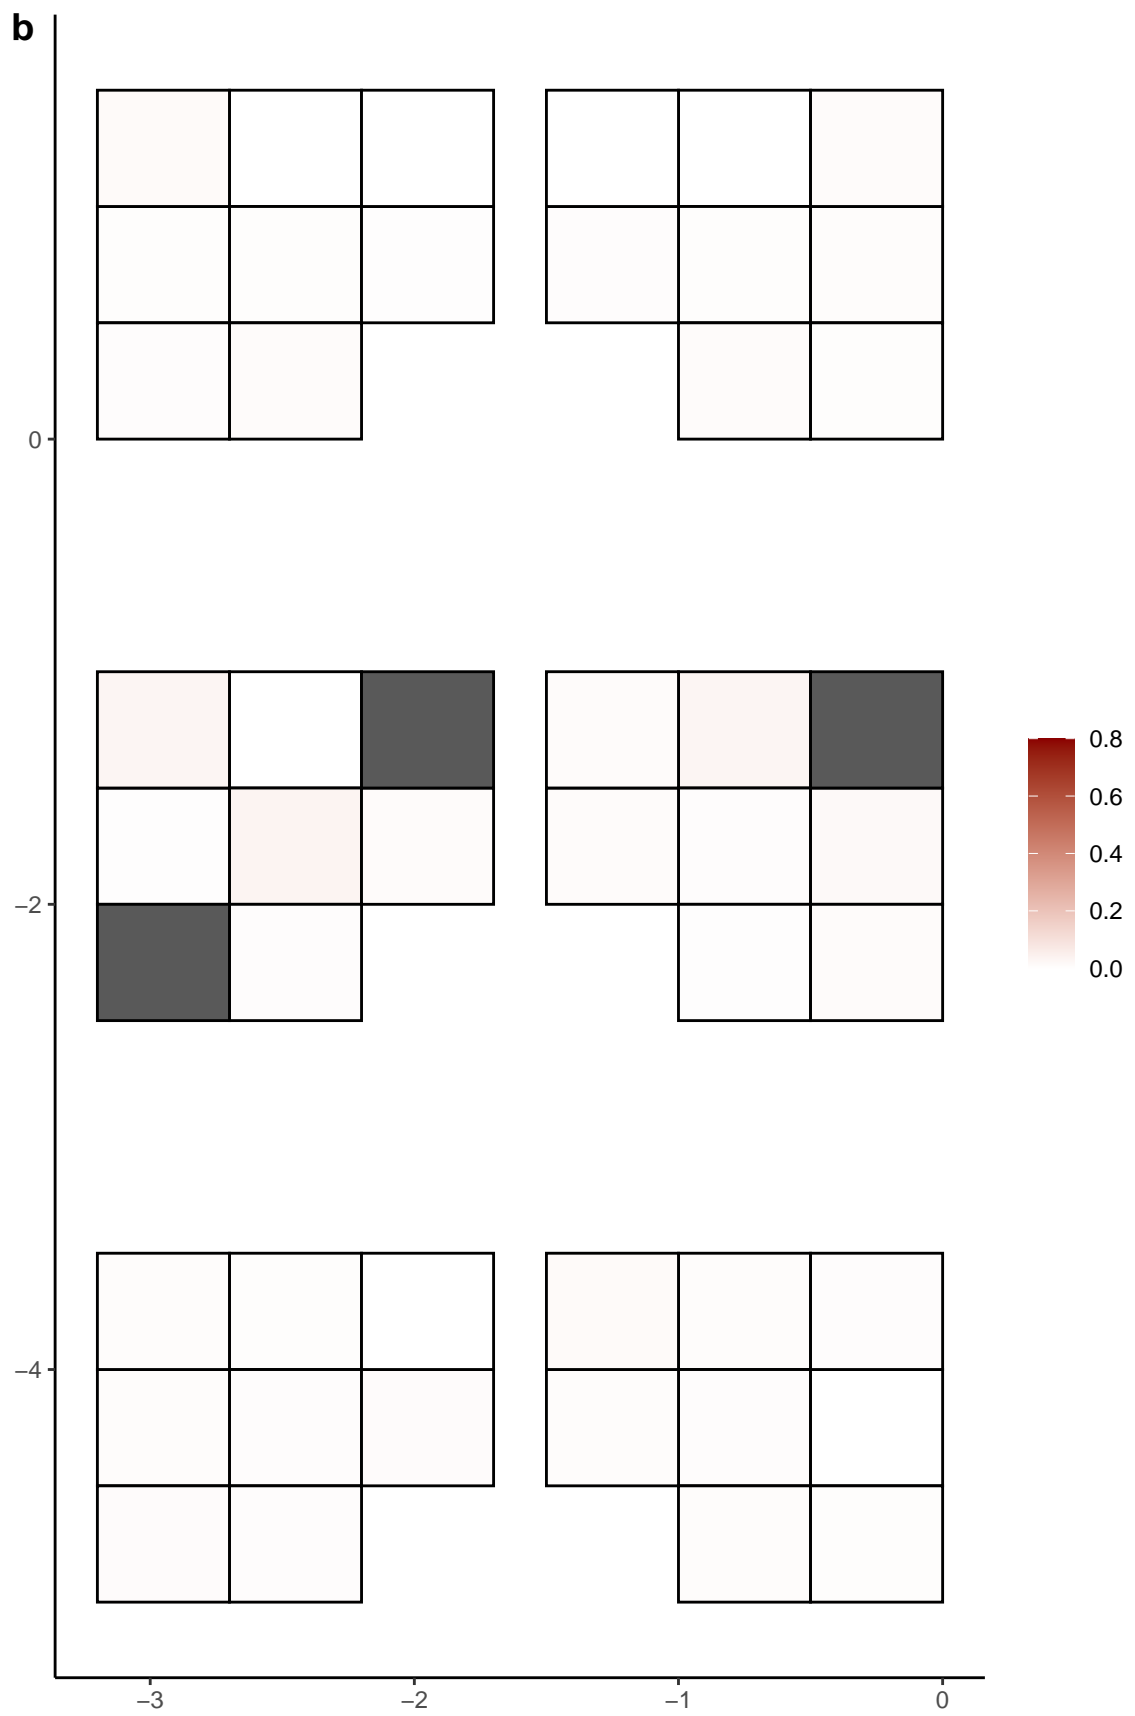

**a** ID05 3-54233044-C-T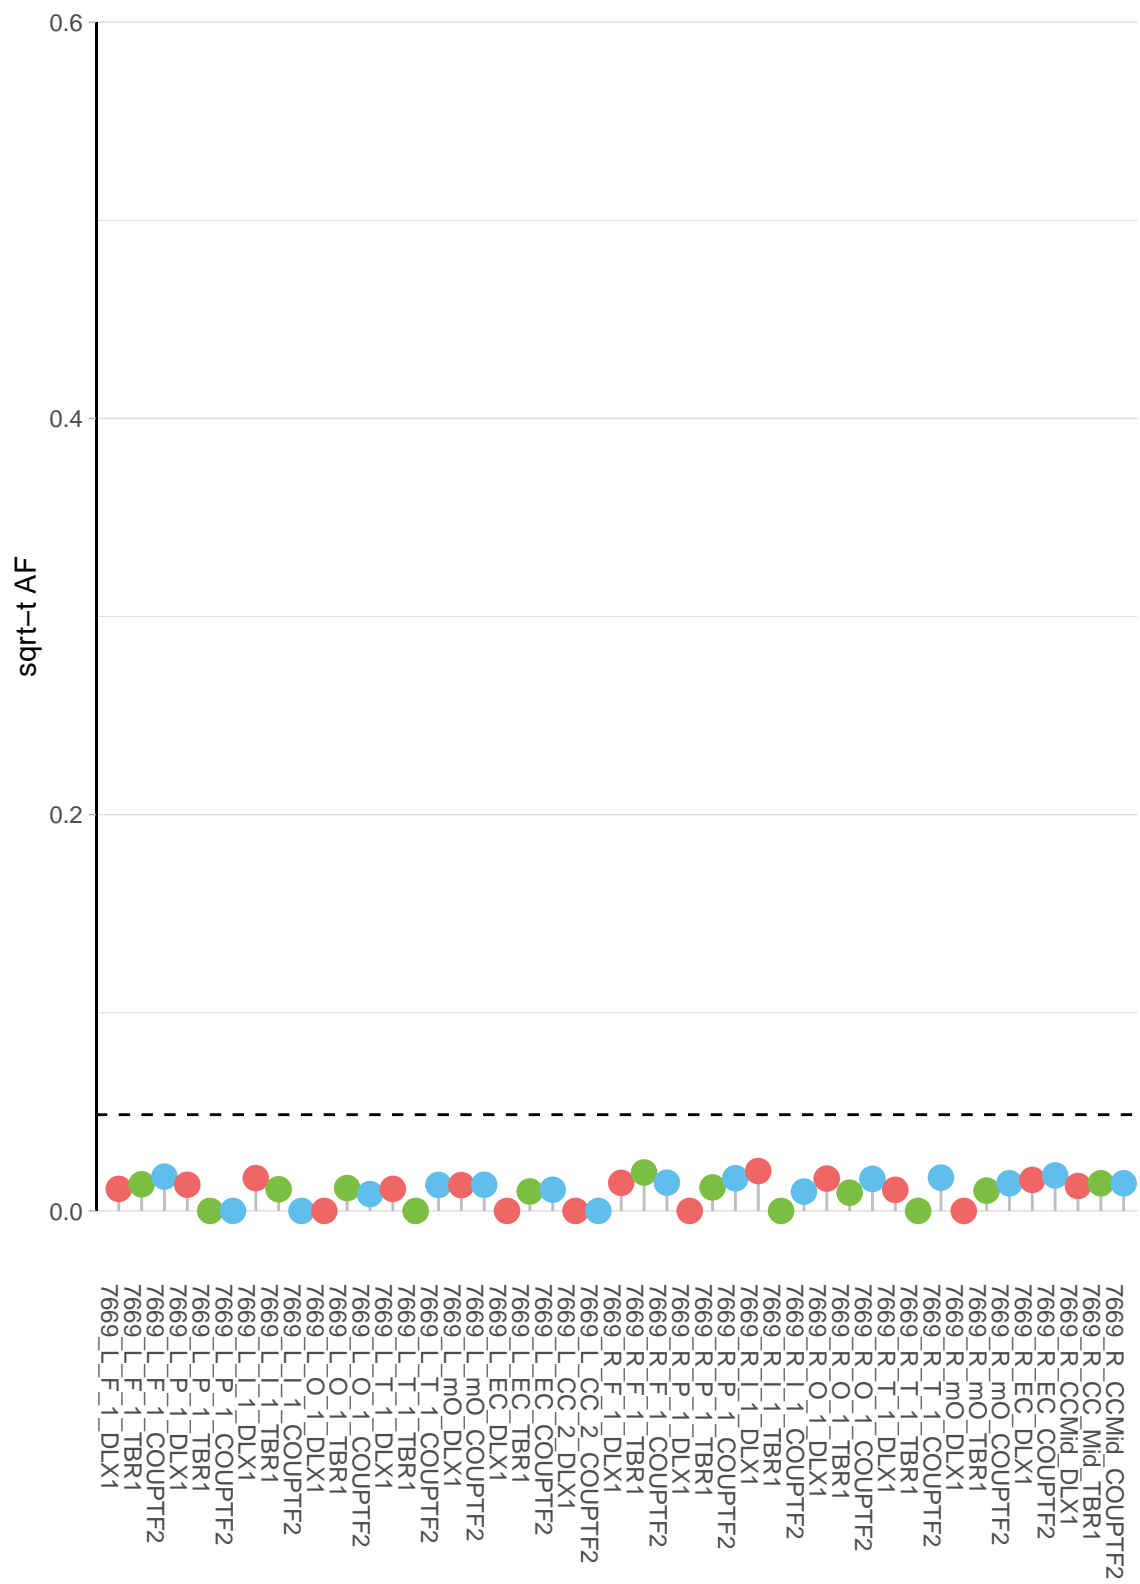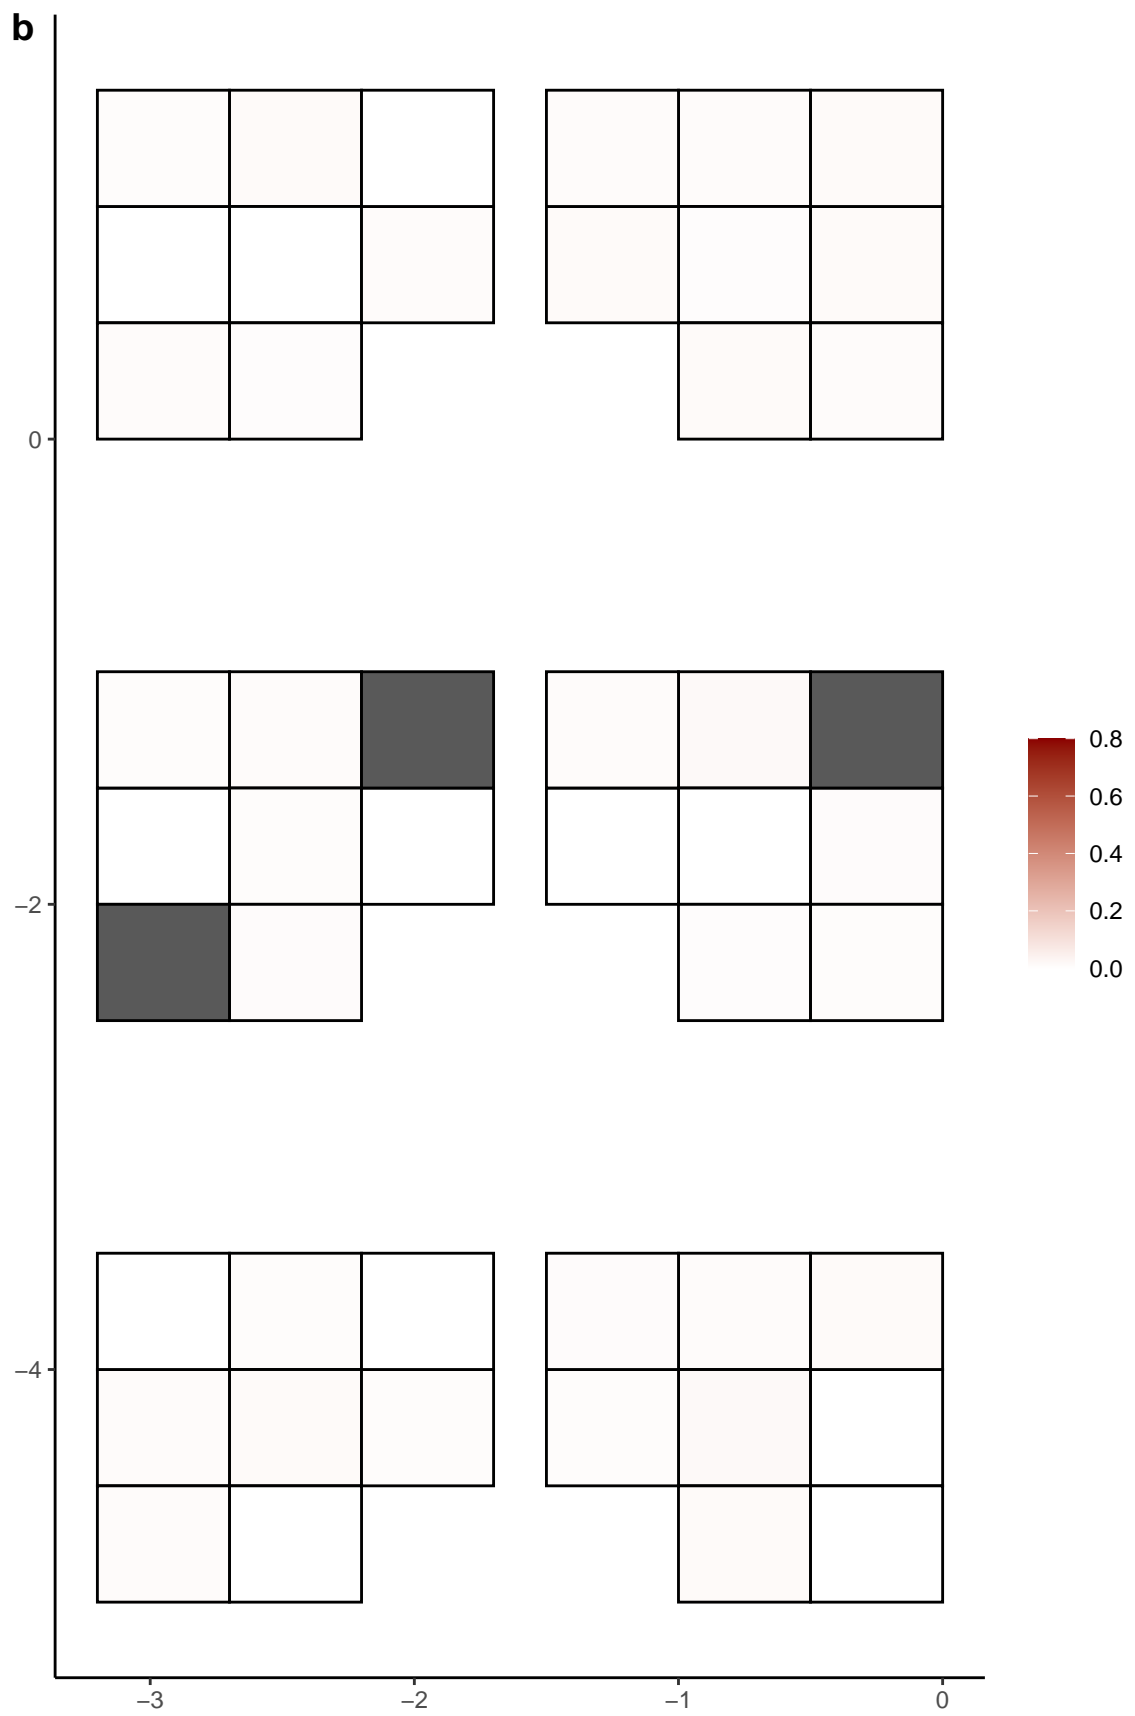



**a** ID05 3-57851309-G-A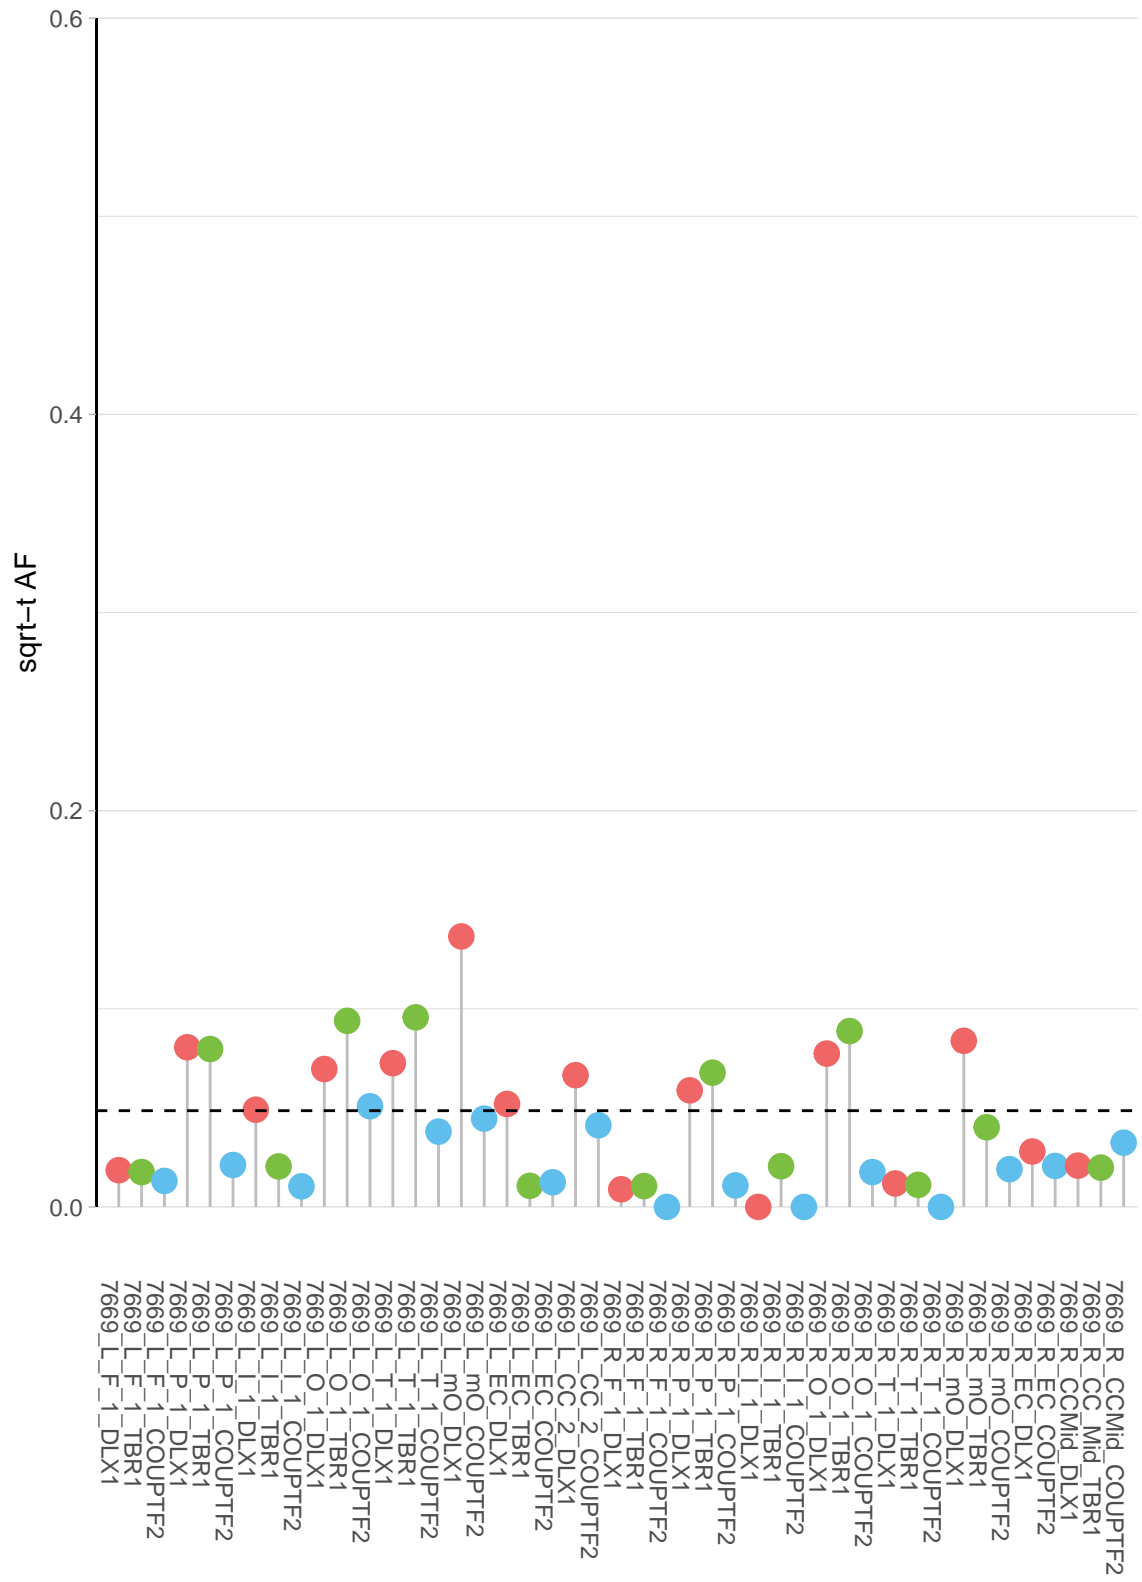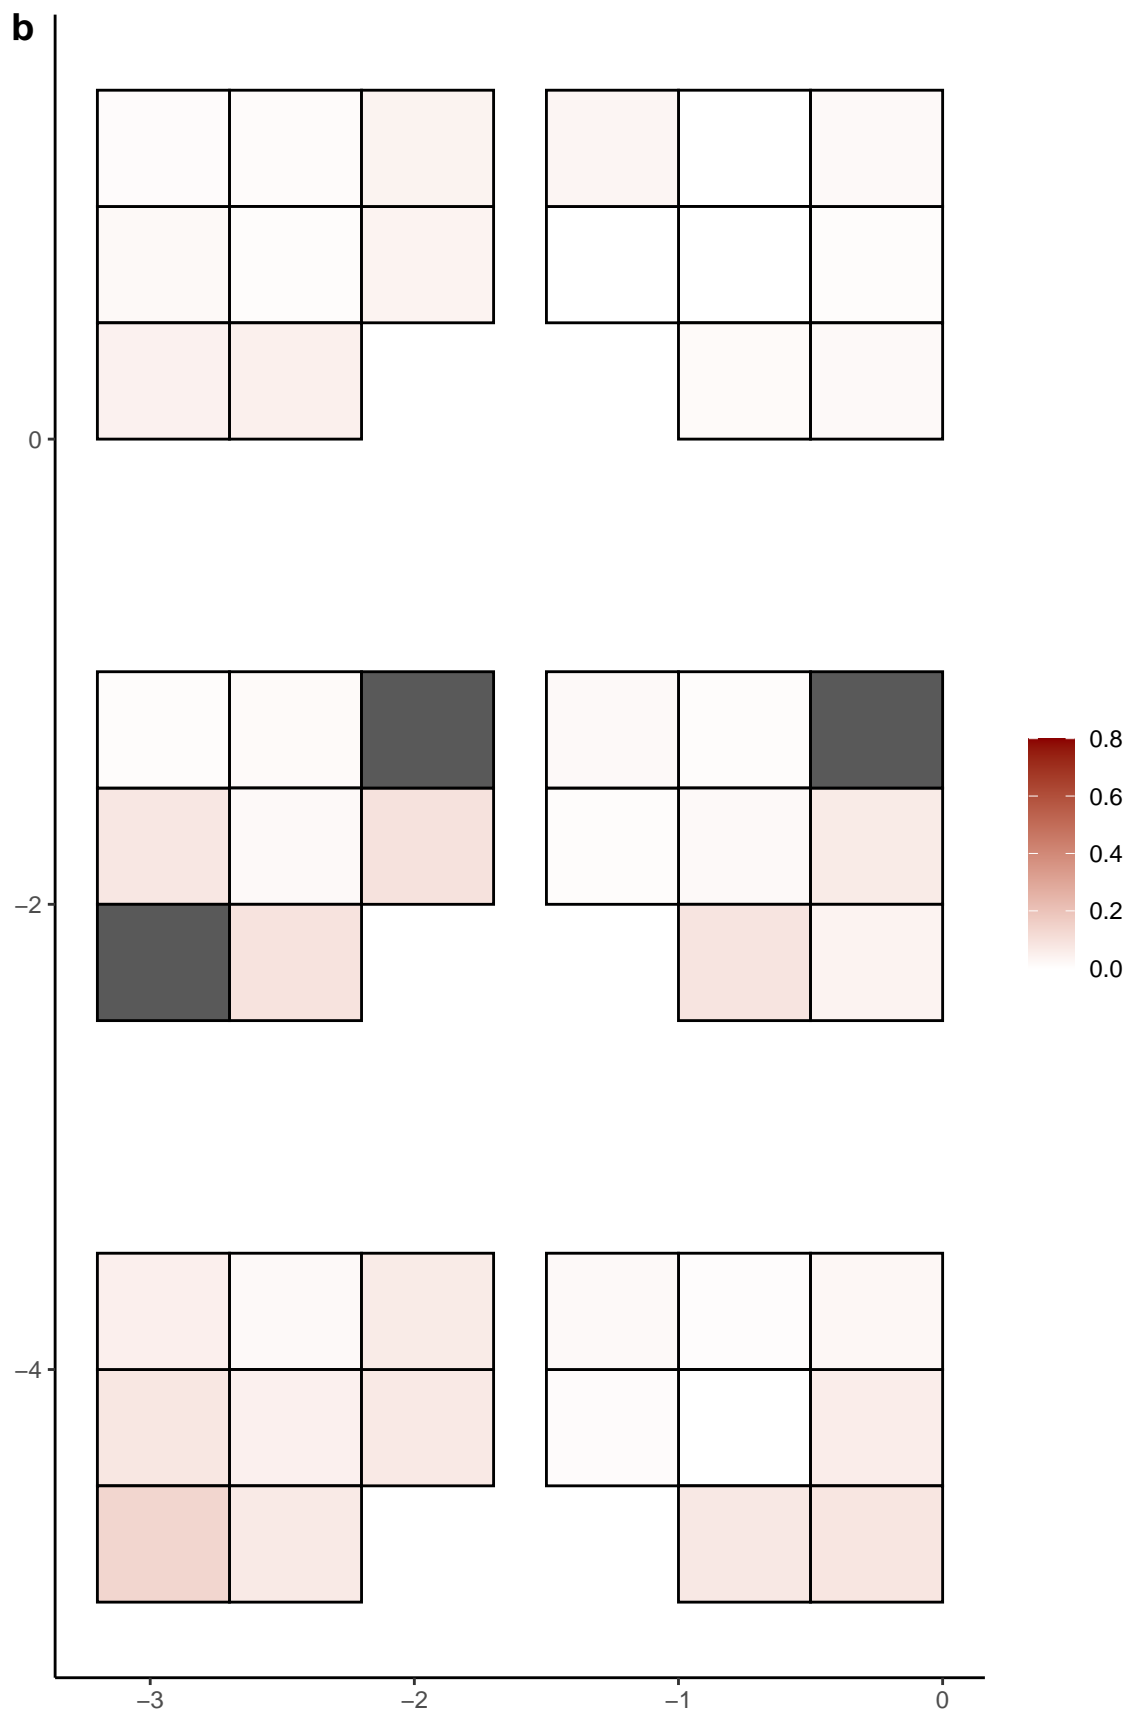

**a** ID05 3-58915984-C-A

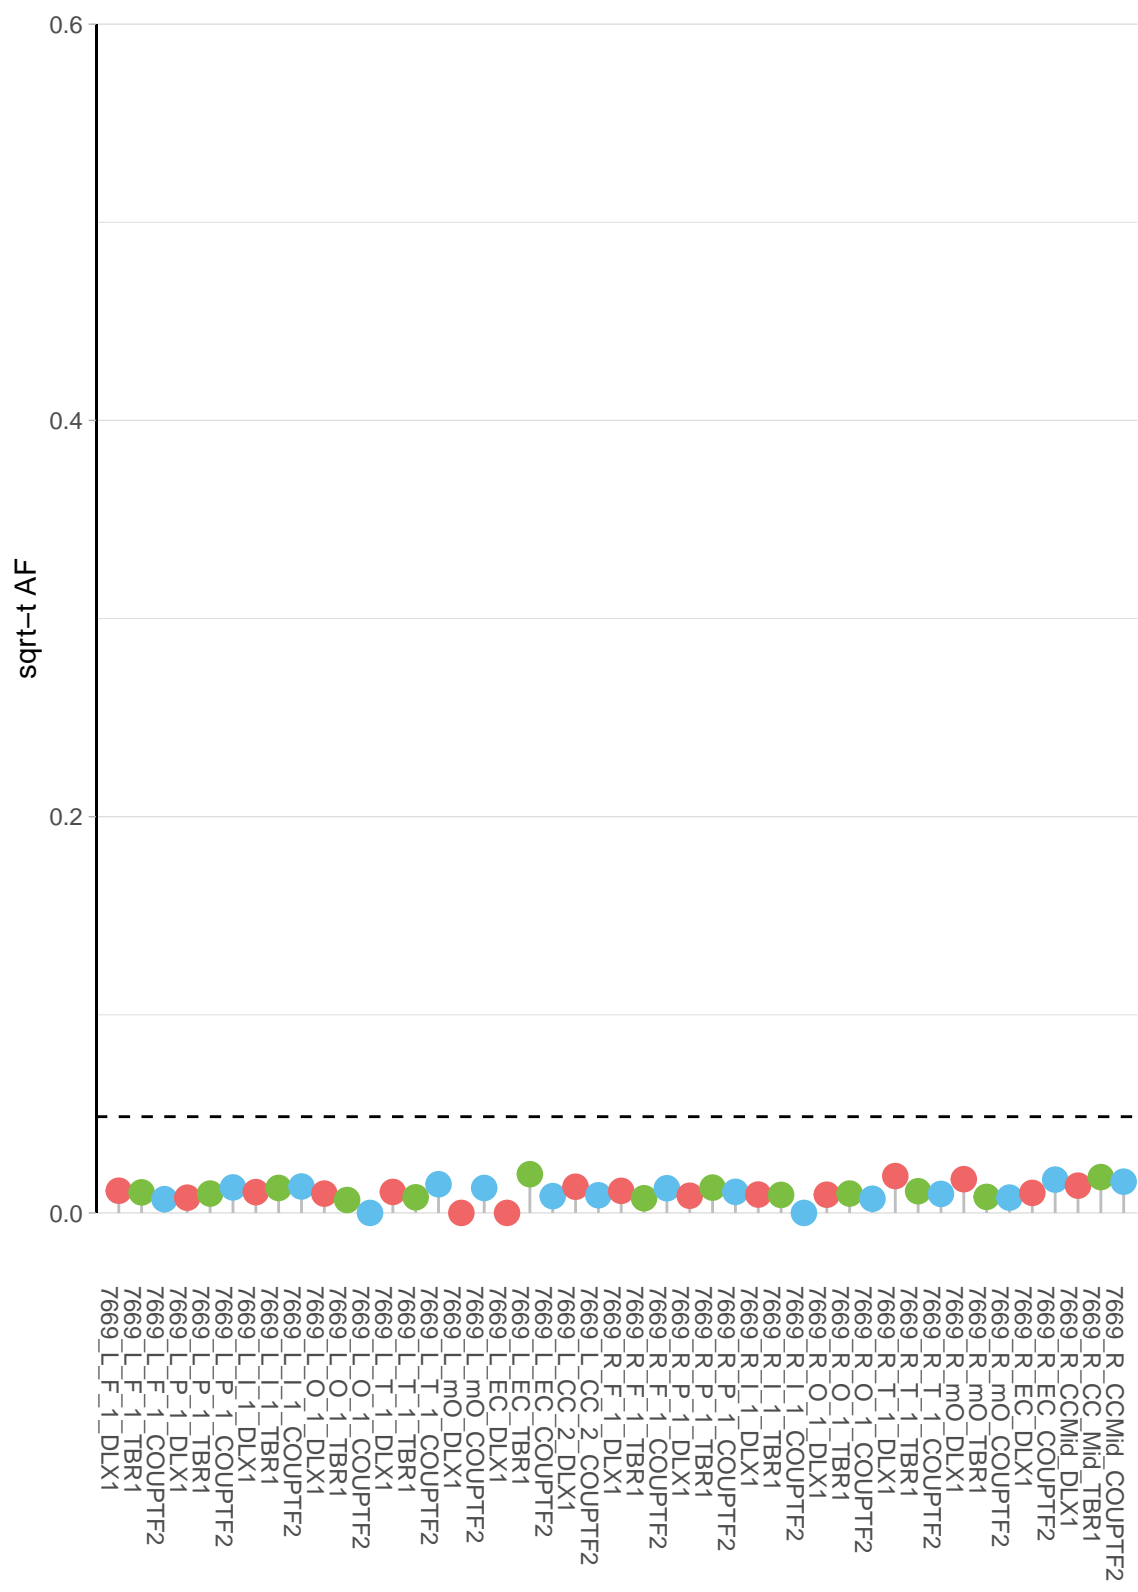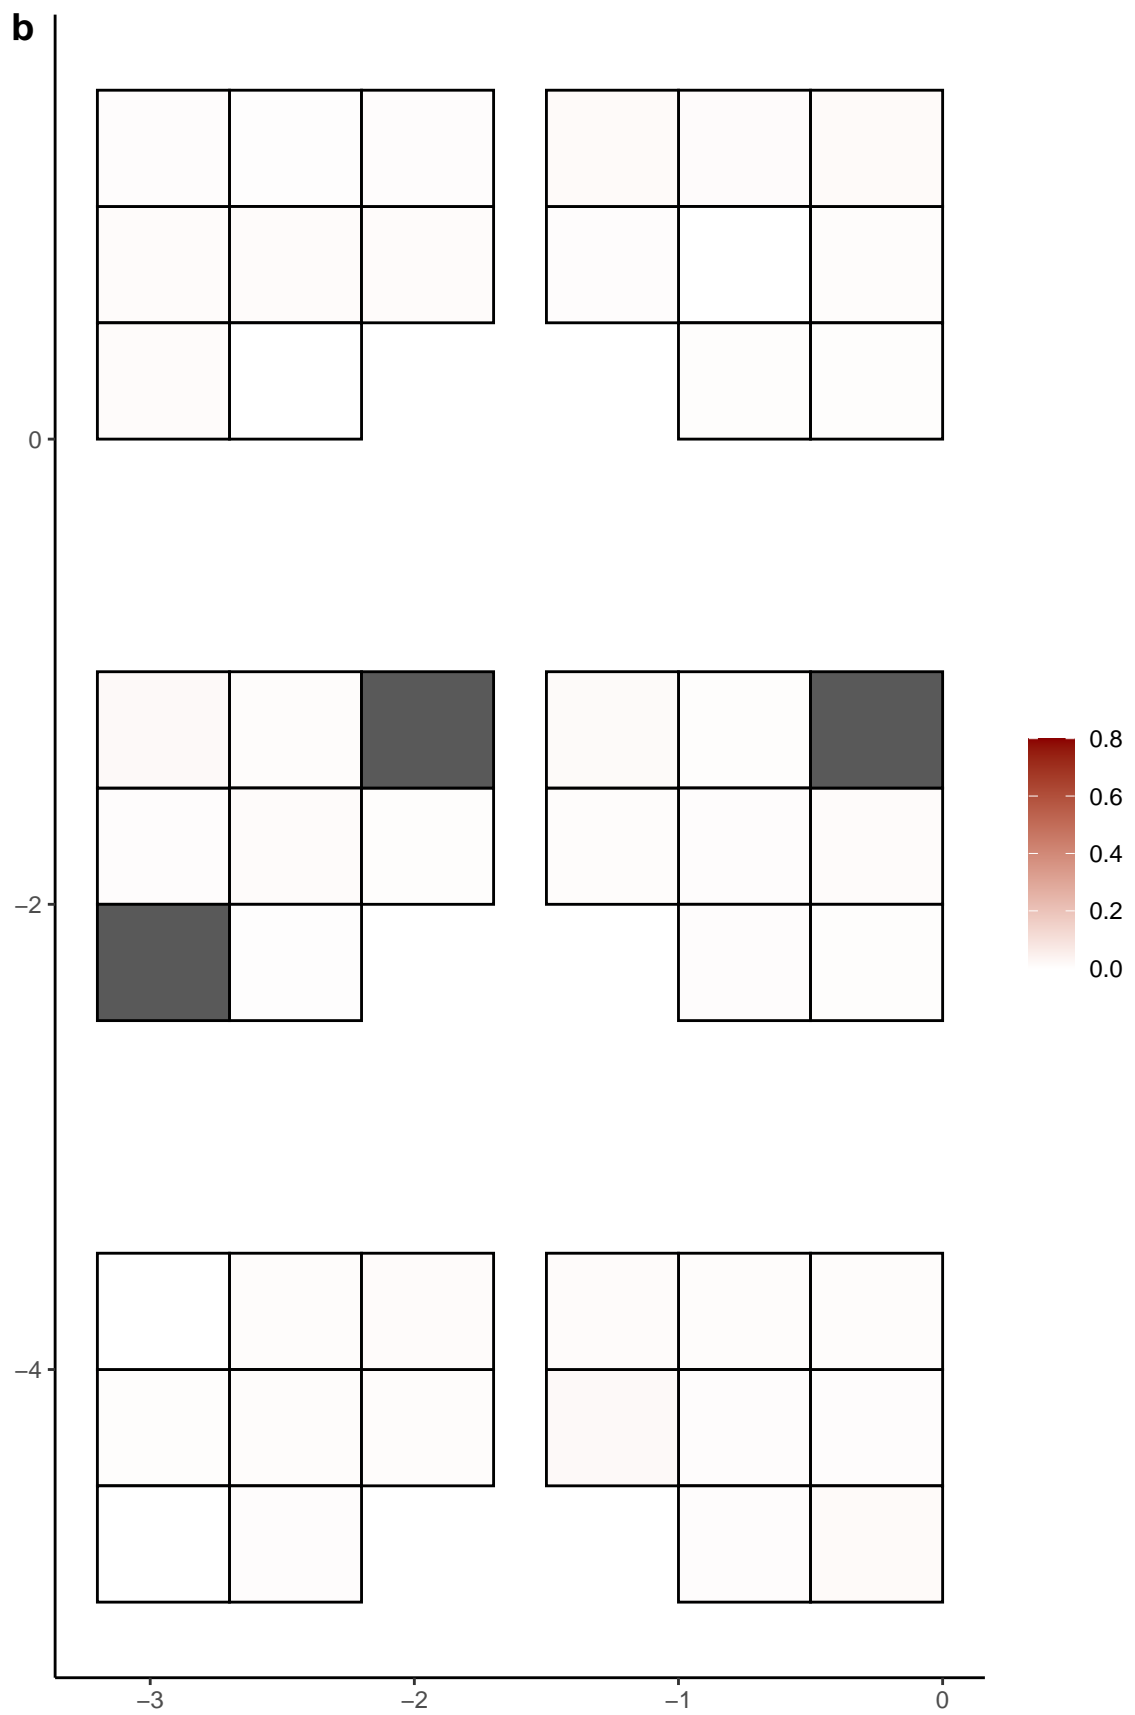

**a** ID05 3-61853127-C-T

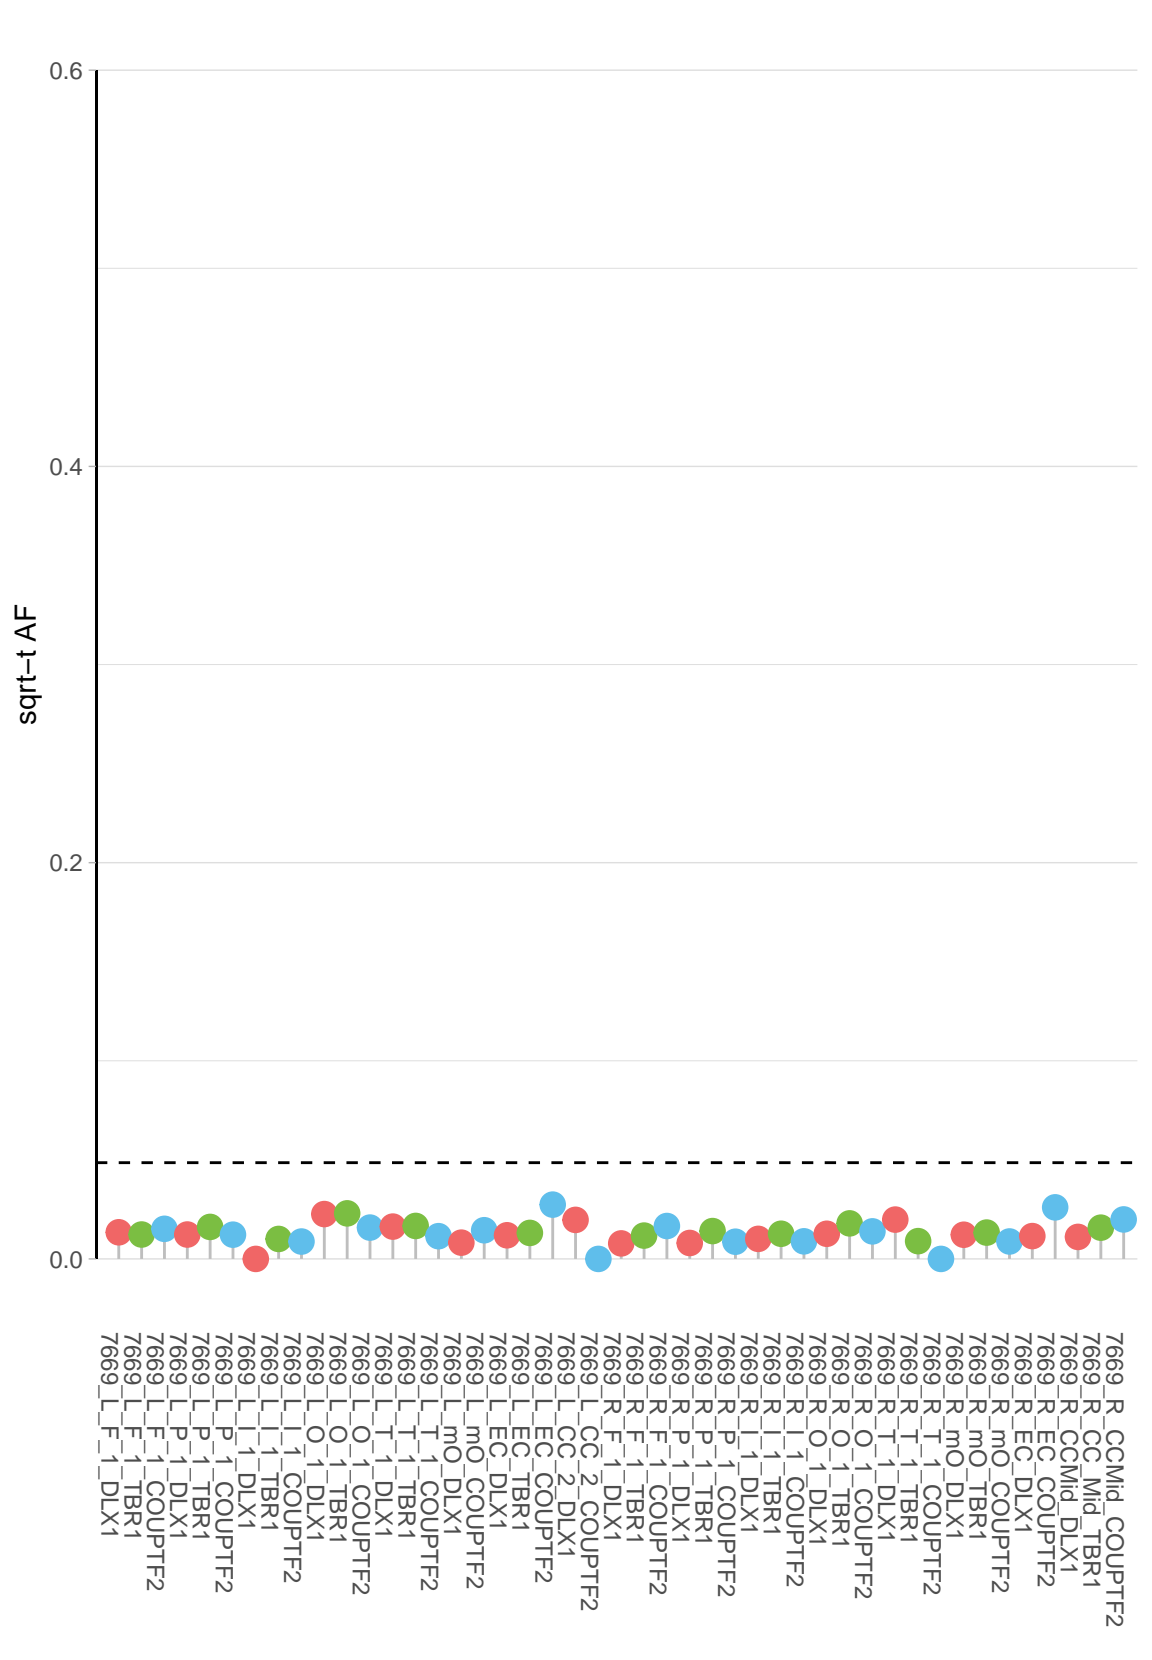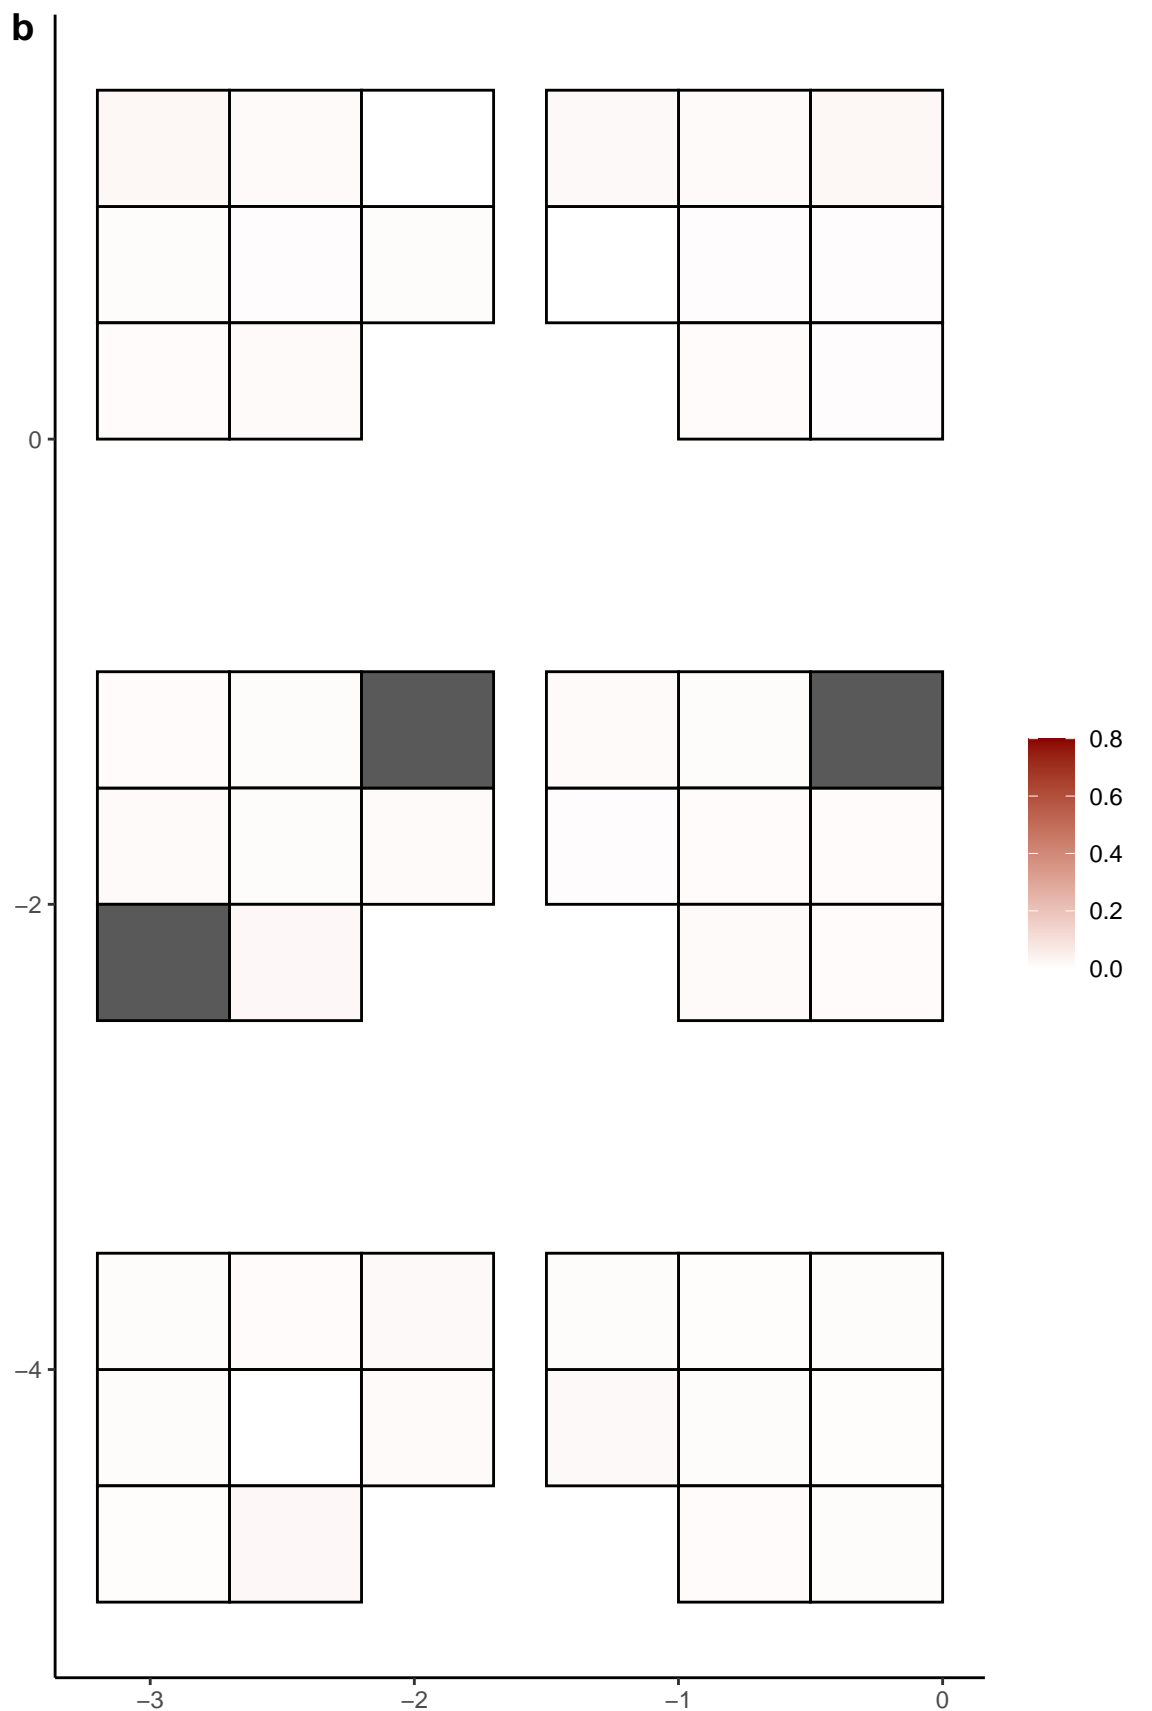

**a** ID05 3-69001163-C-T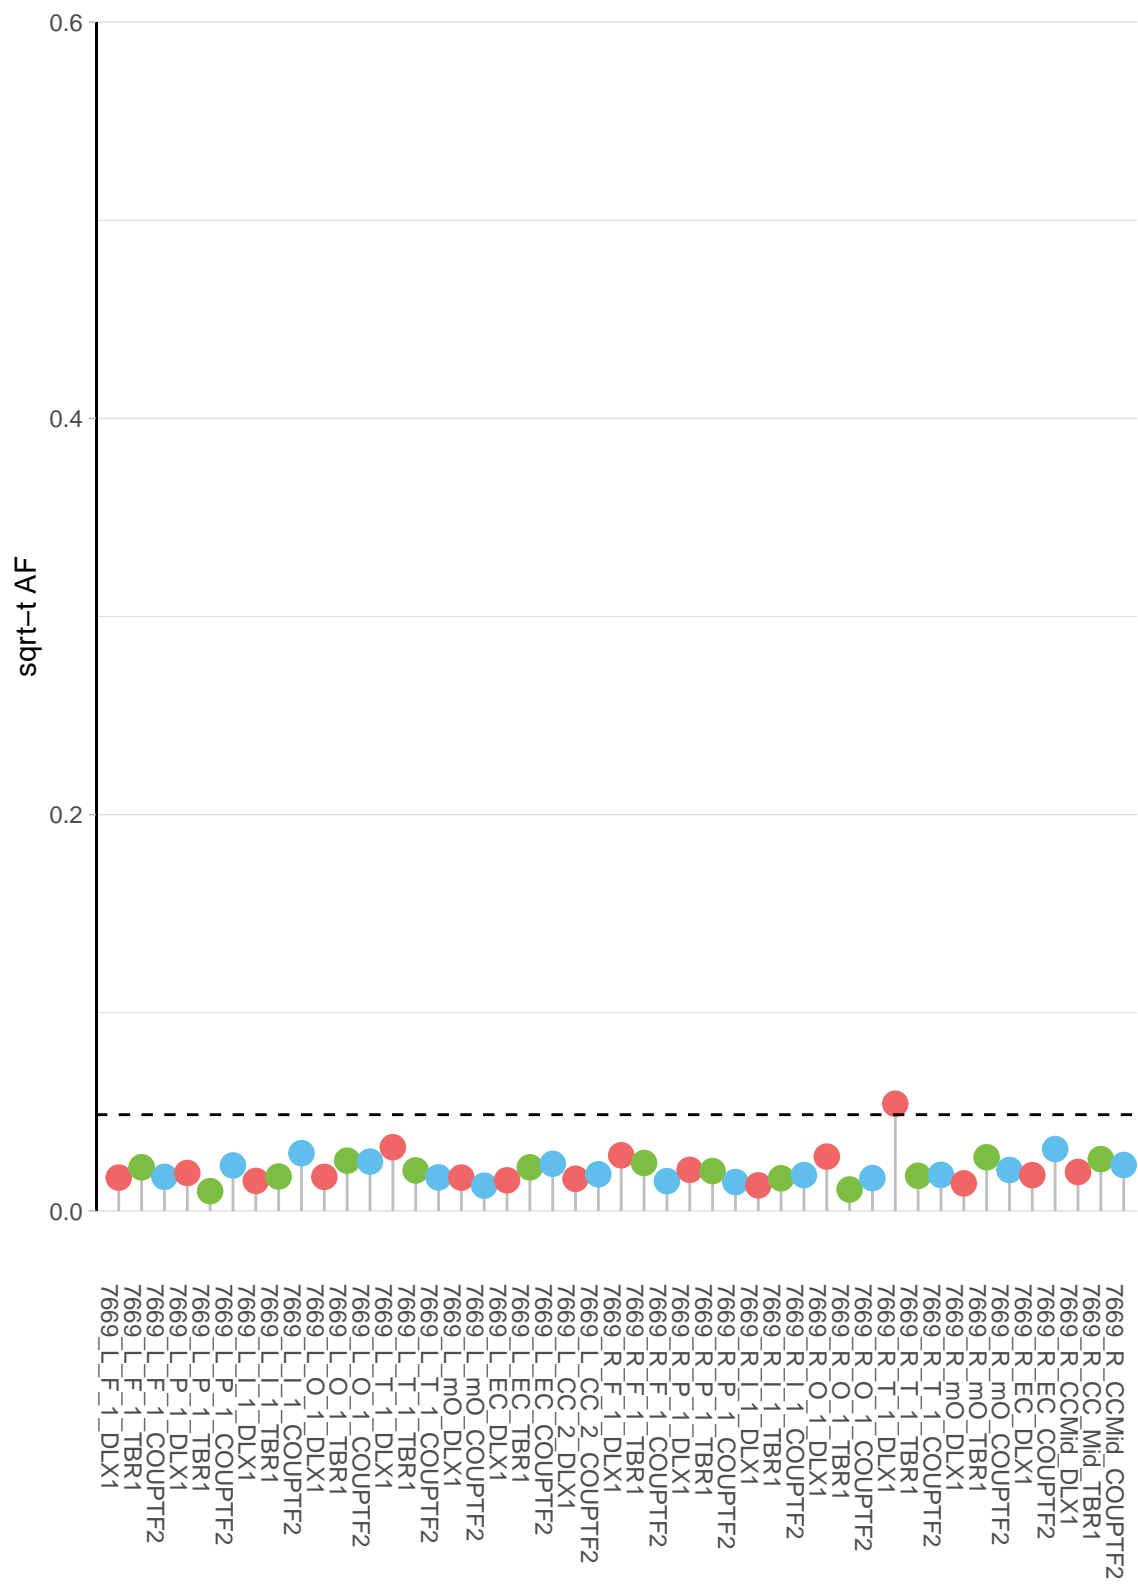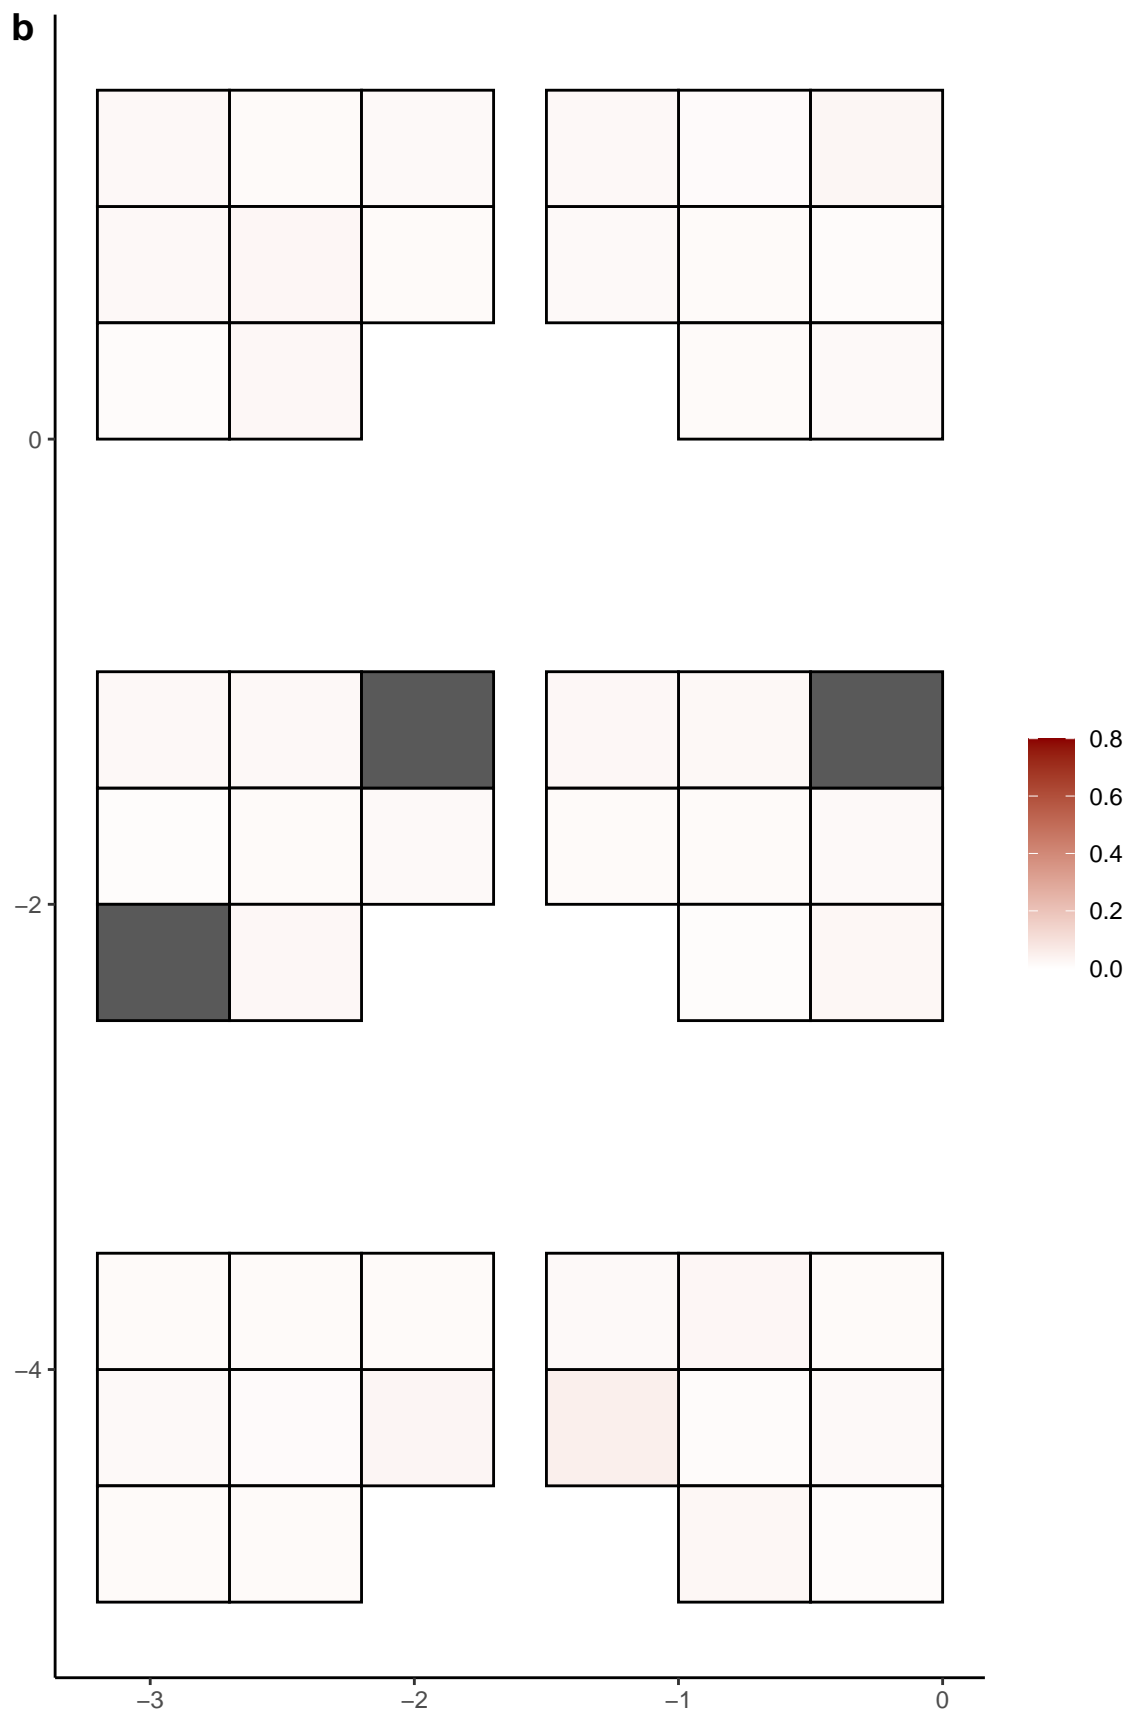

**a** ID05 3-69456970-G-A

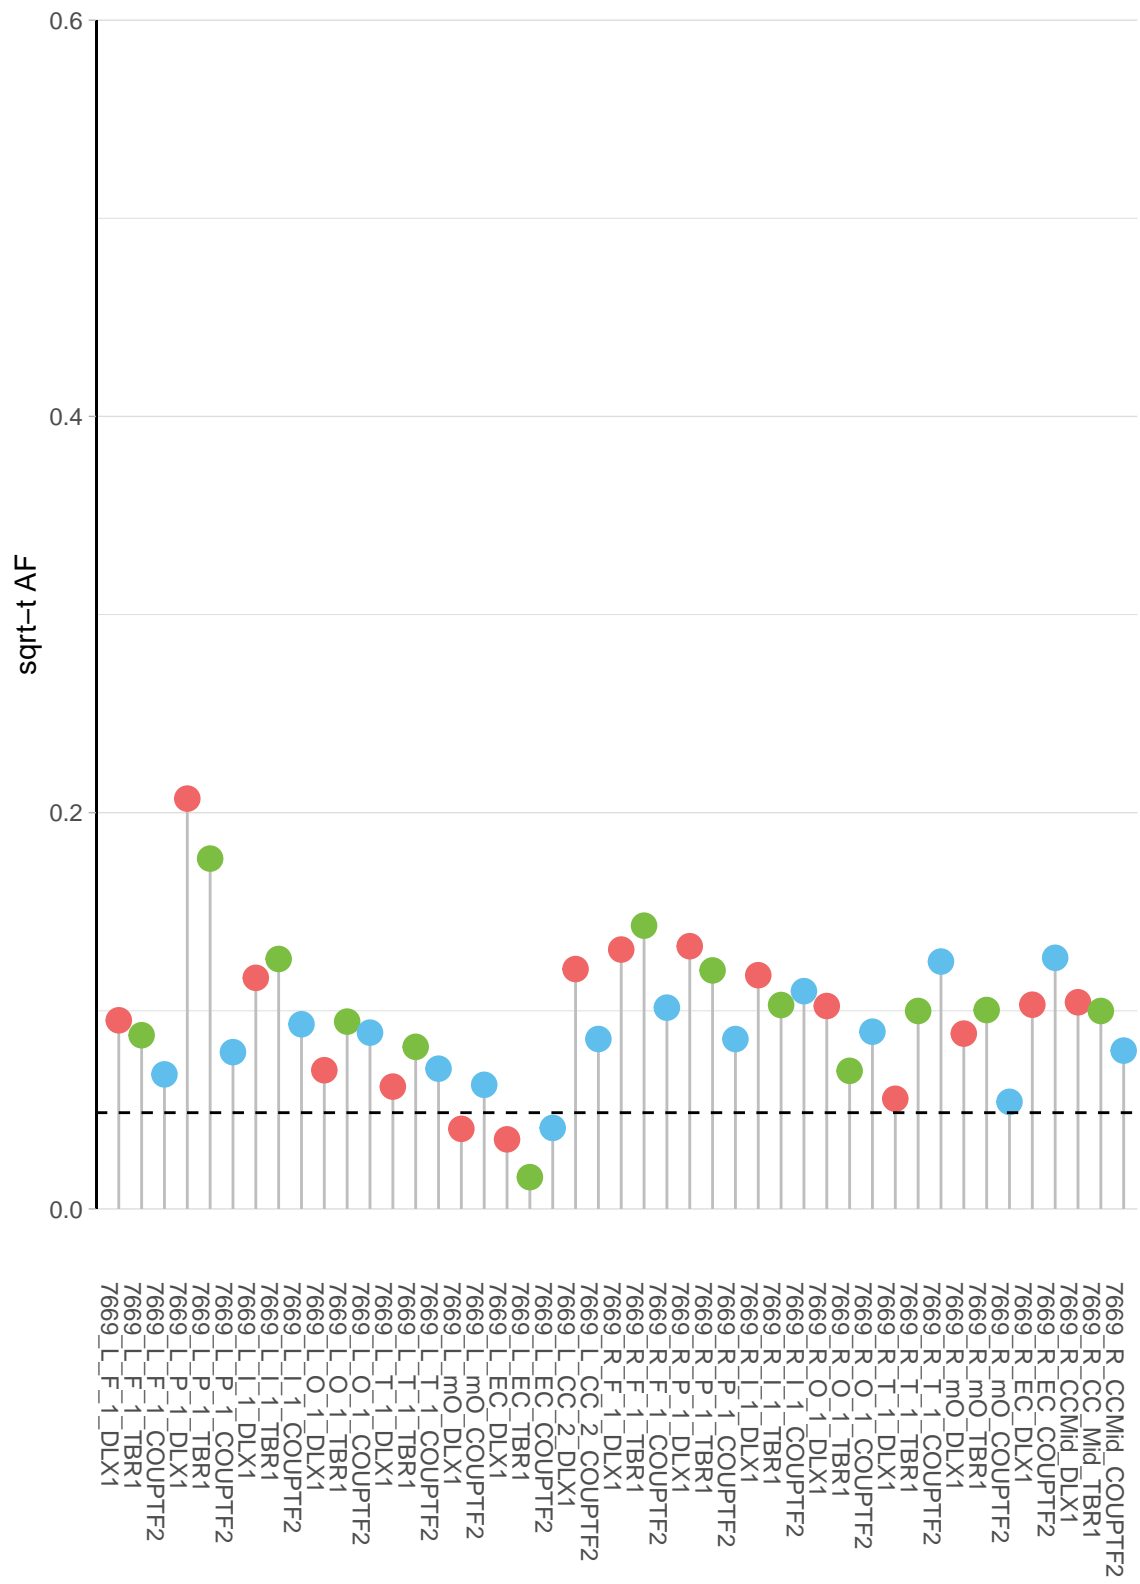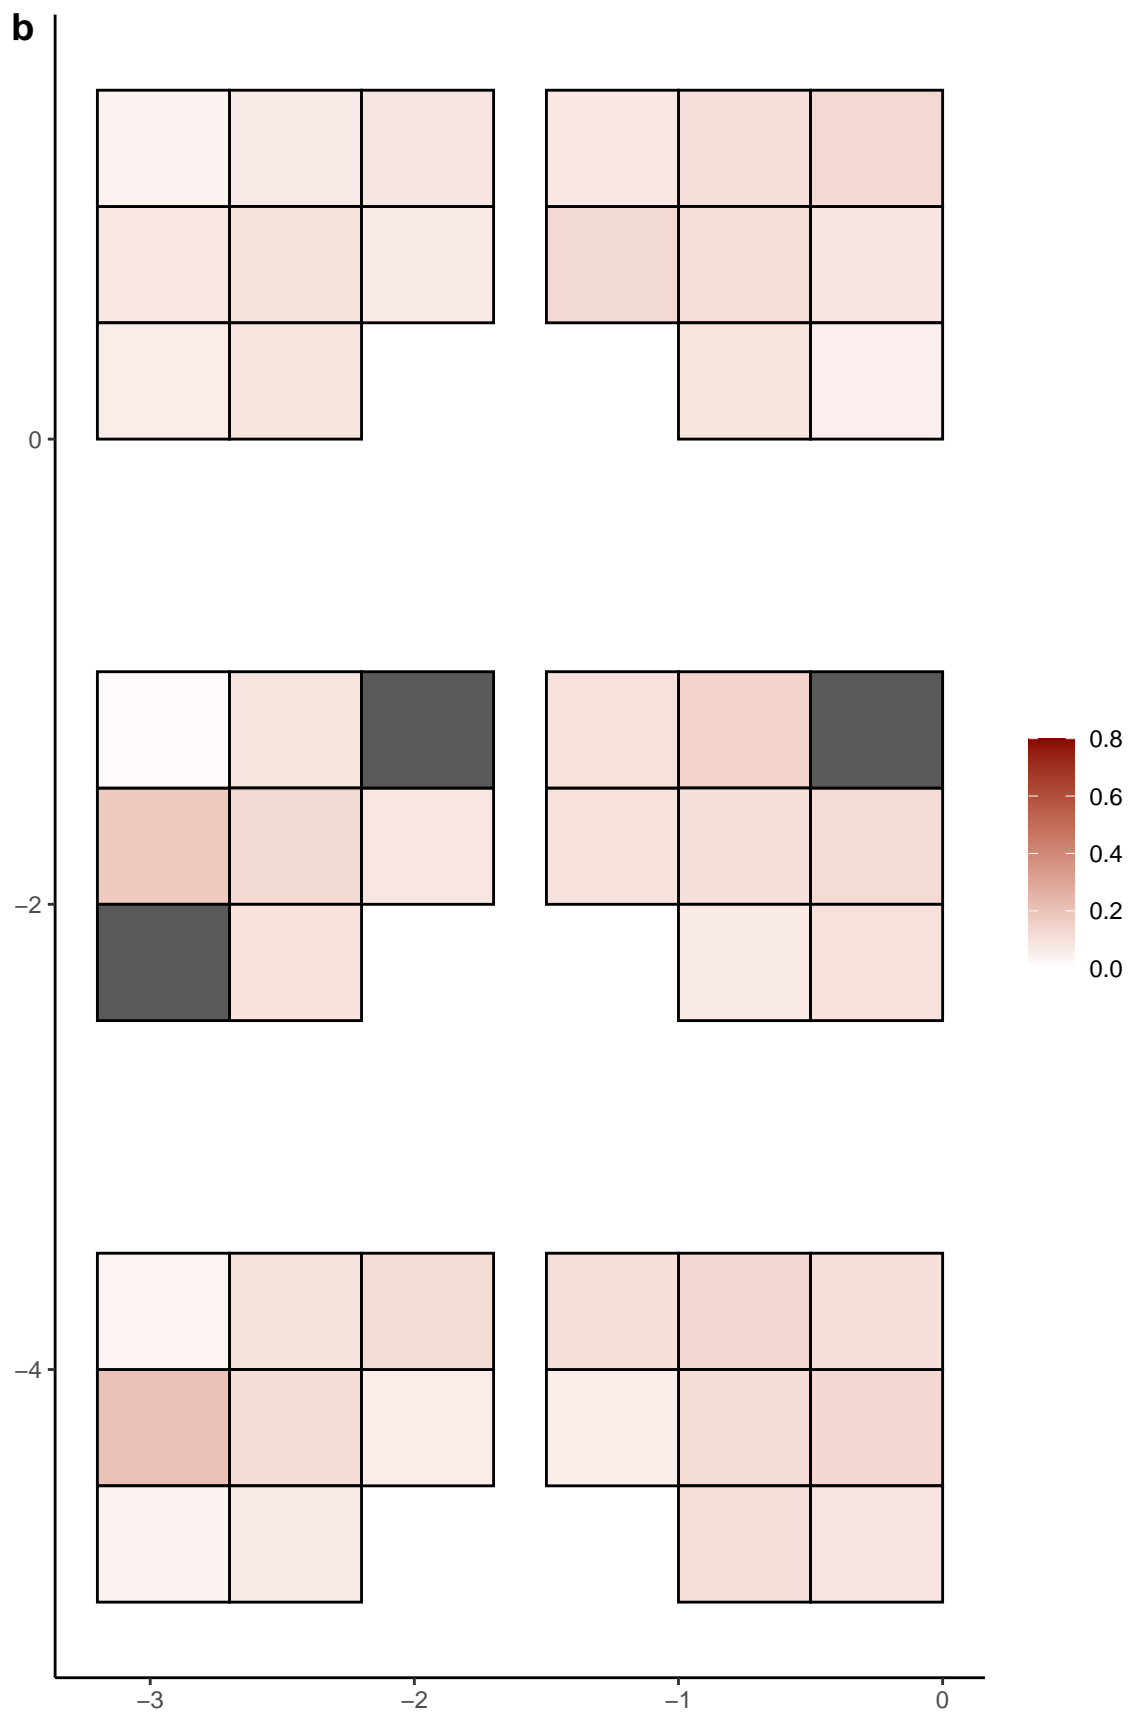

**a** ID05 3-78738978-T-C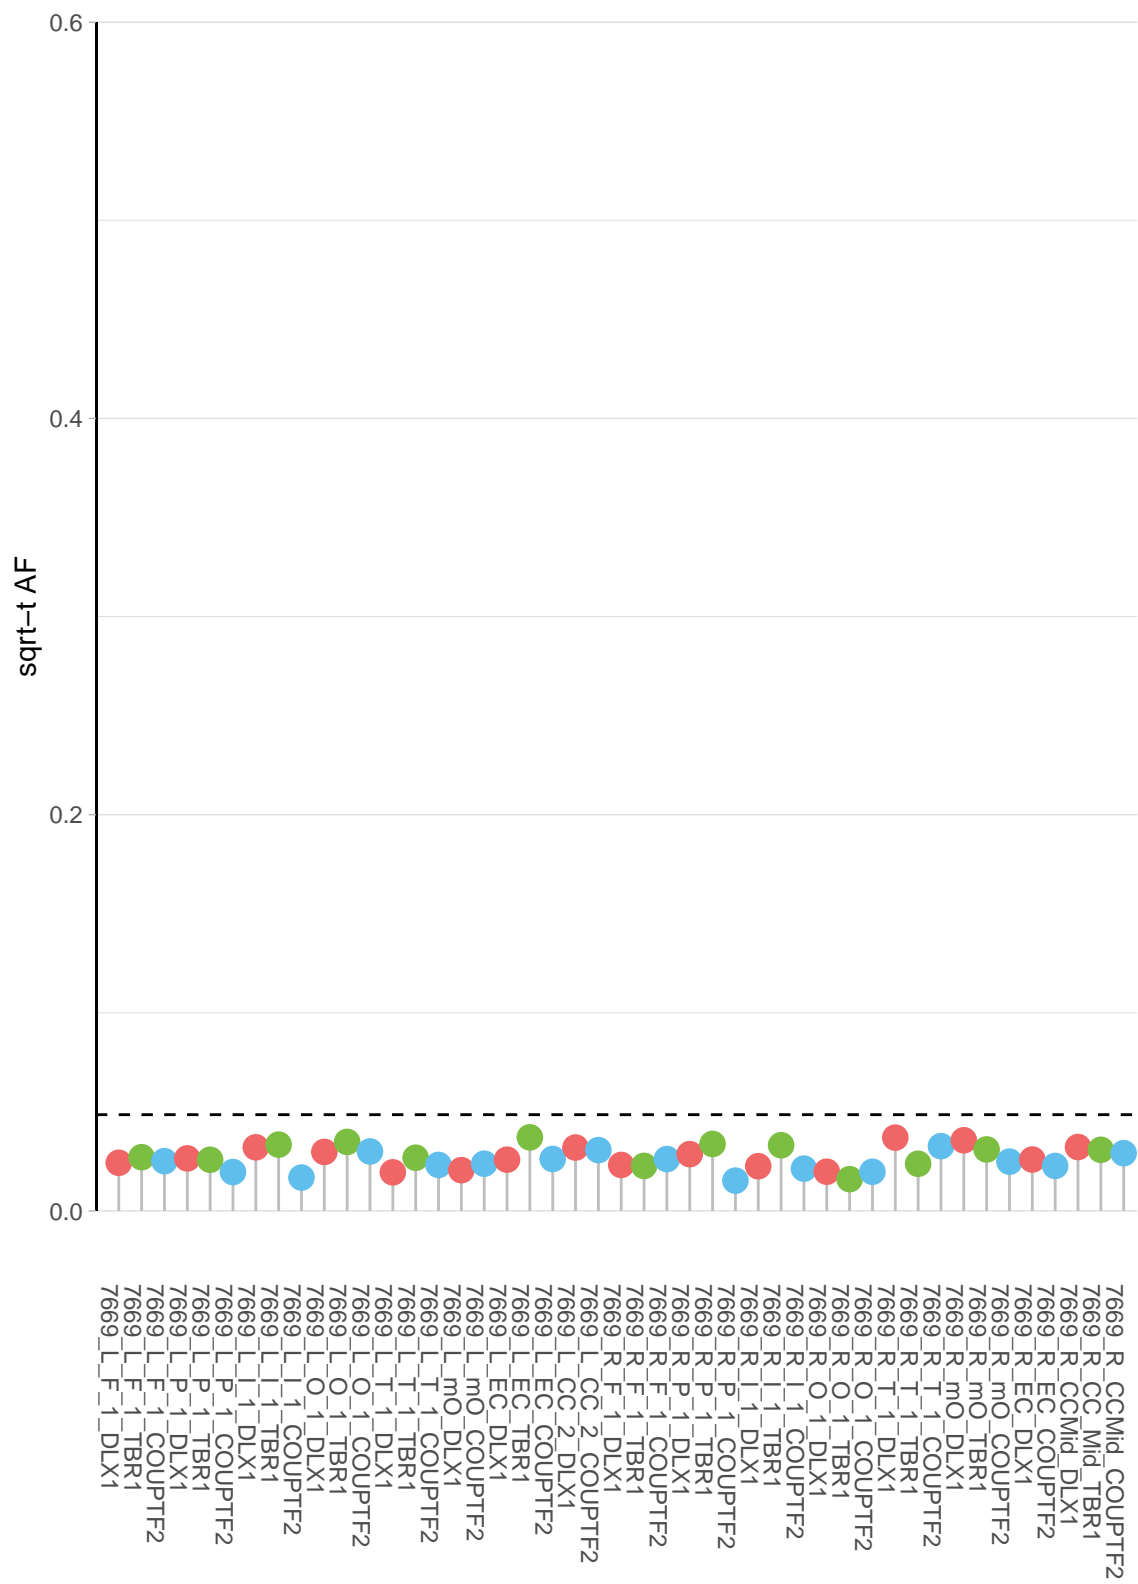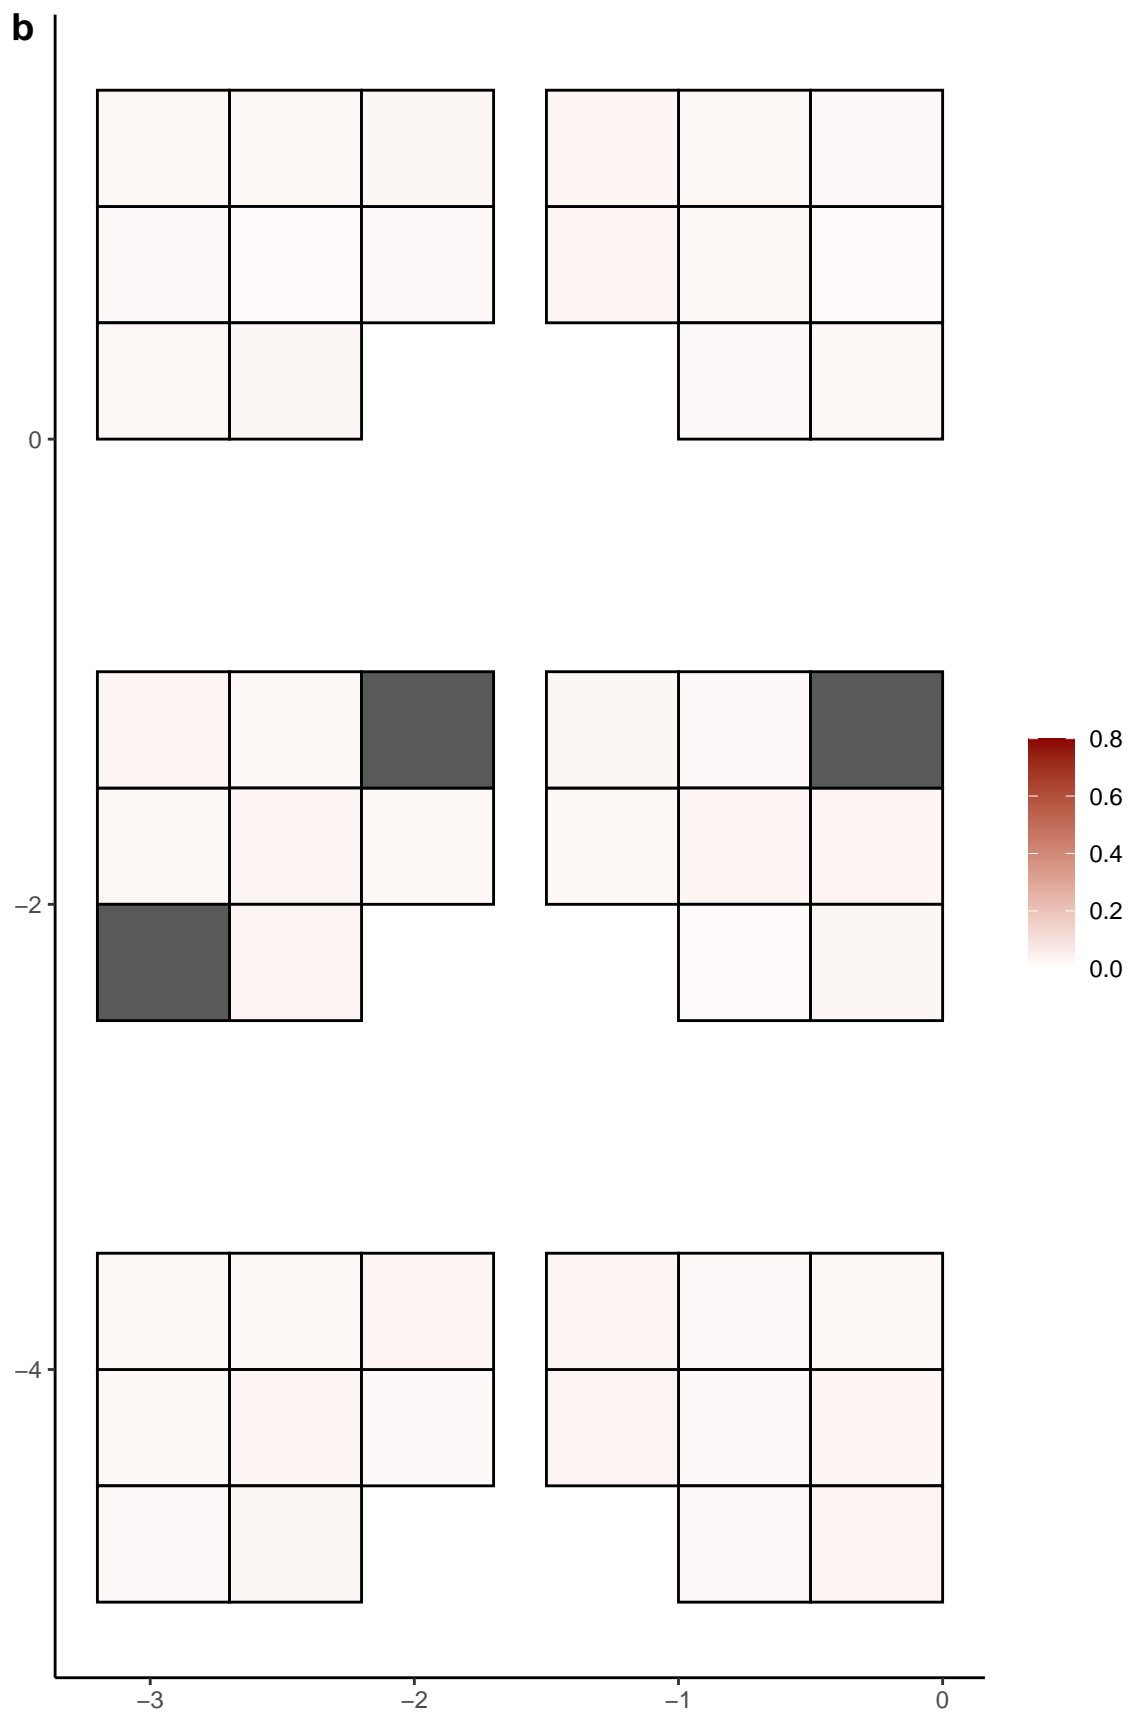

**a** ID05 3-79357944-G-C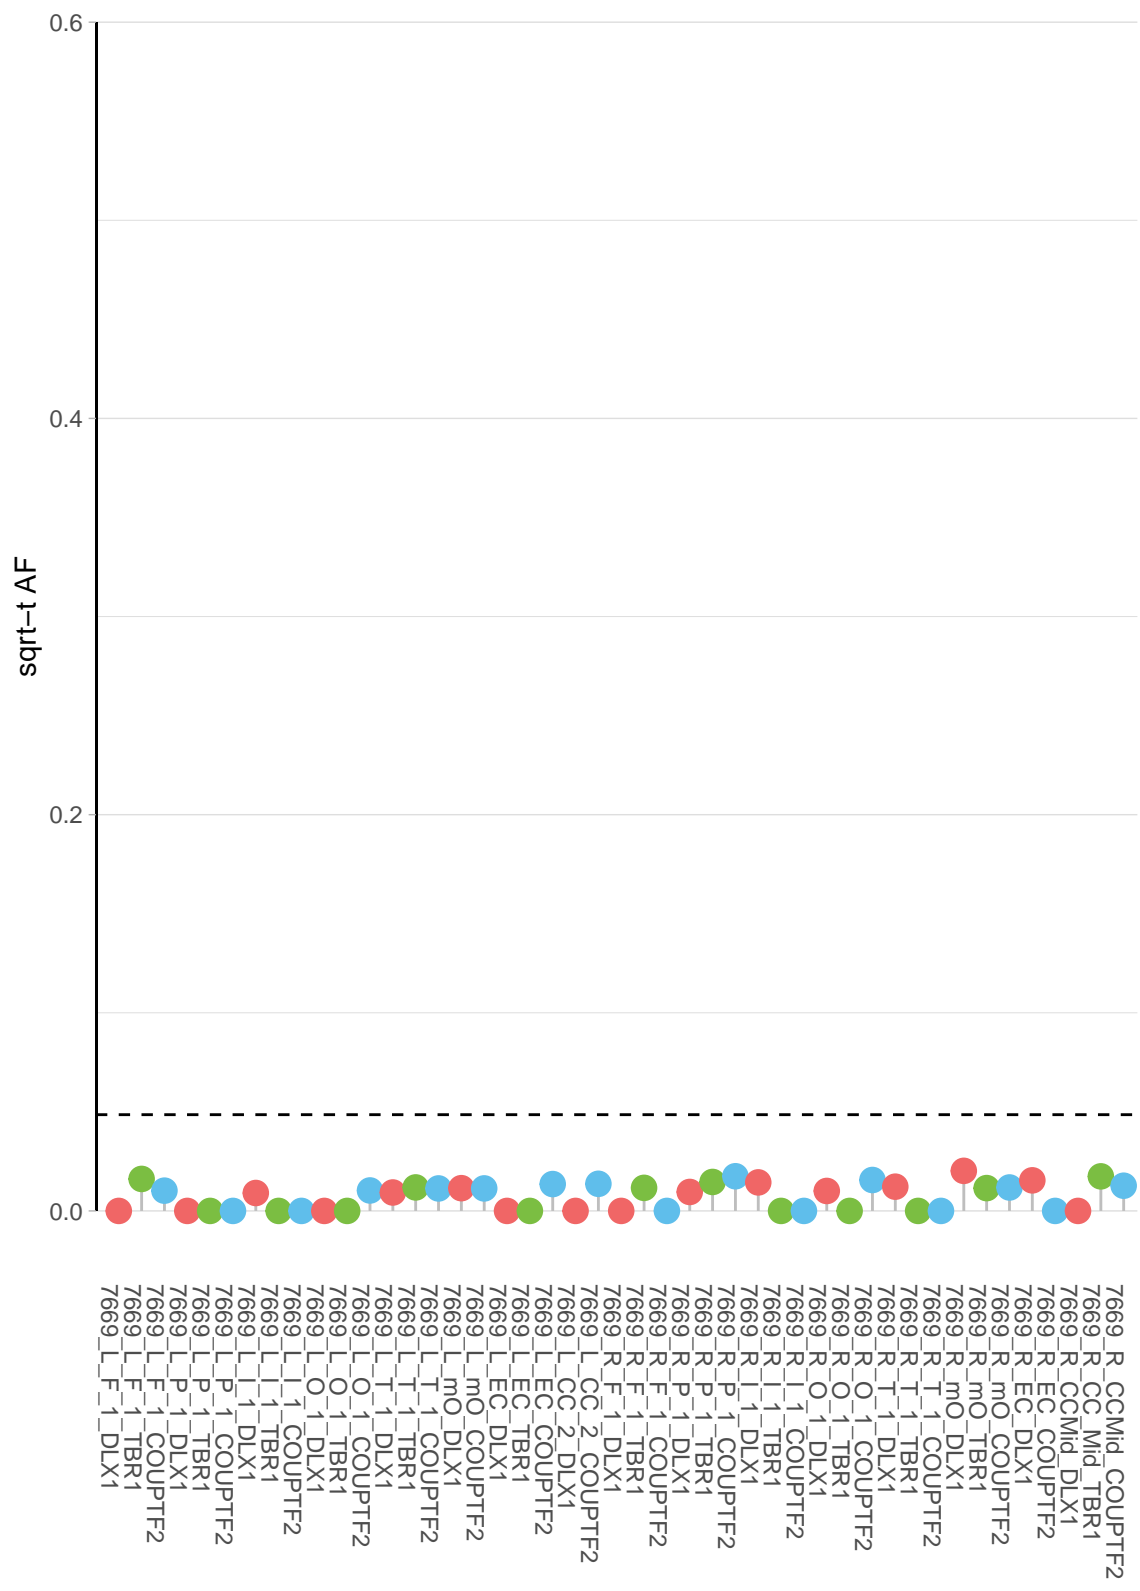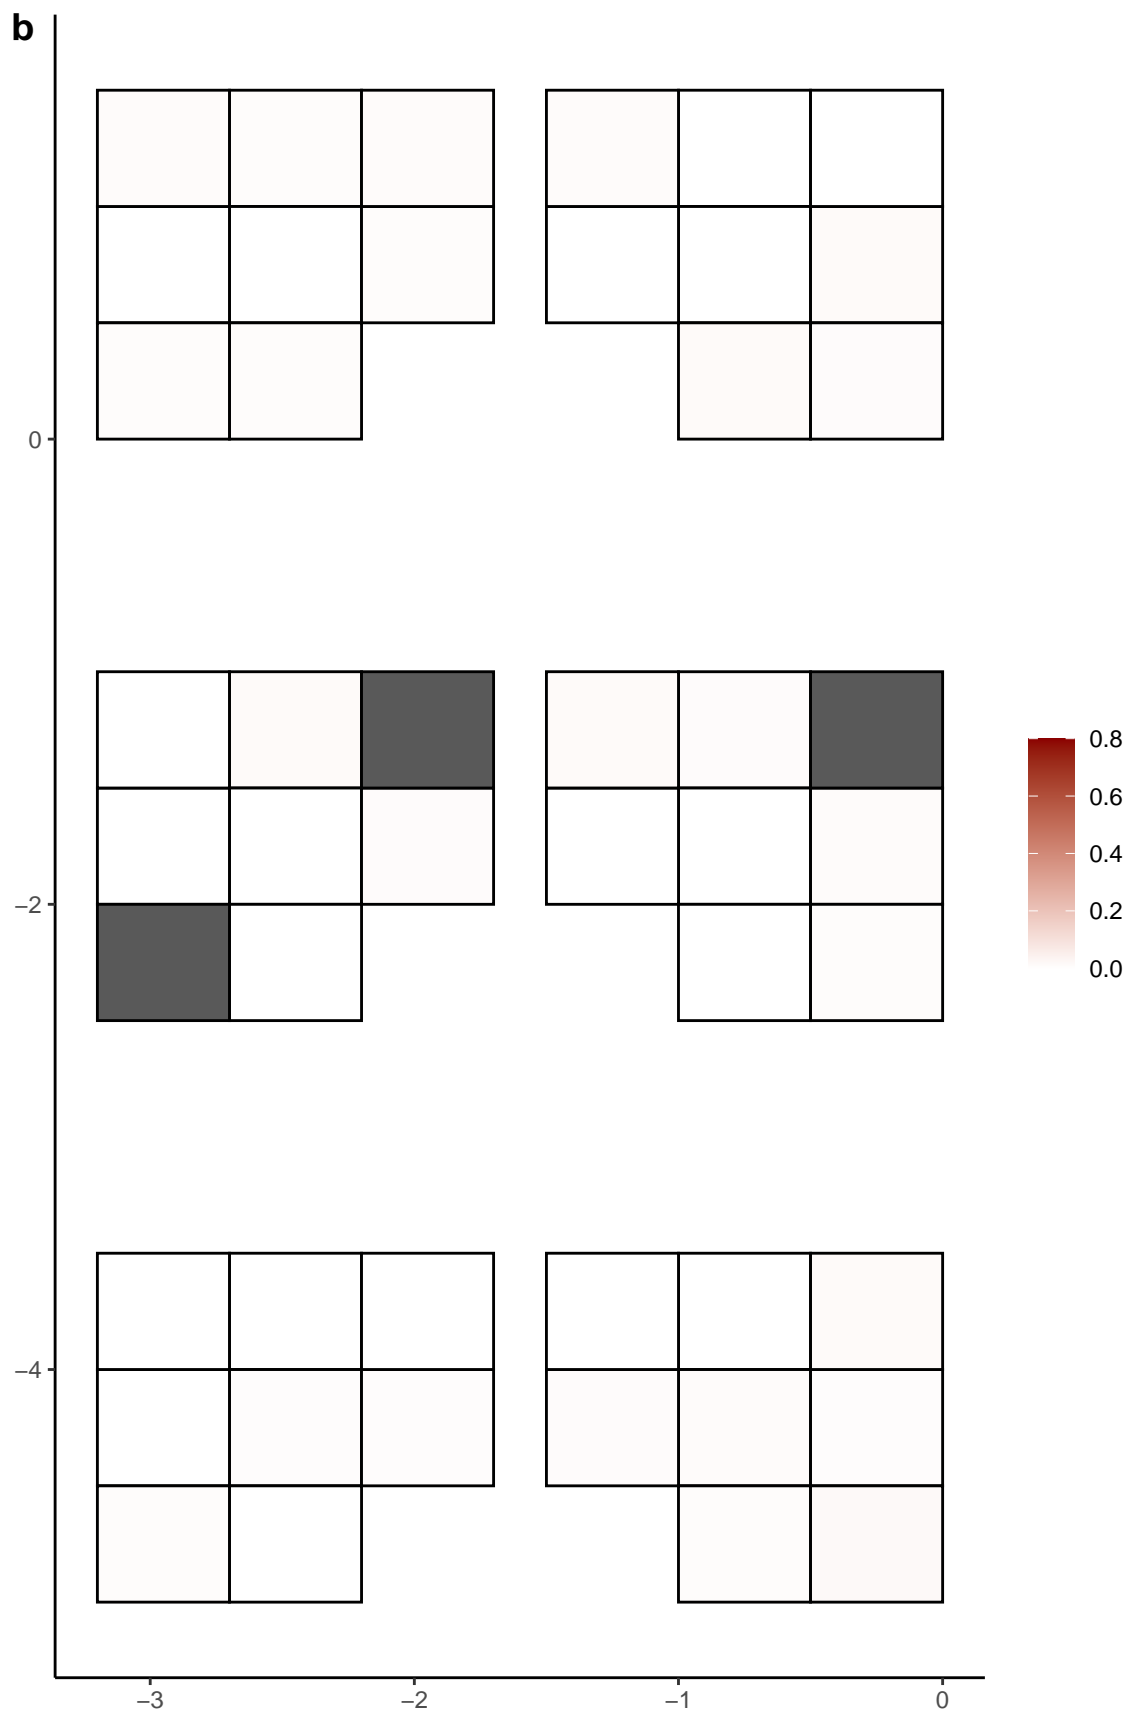

**a** ID05 3-79921898-G-T

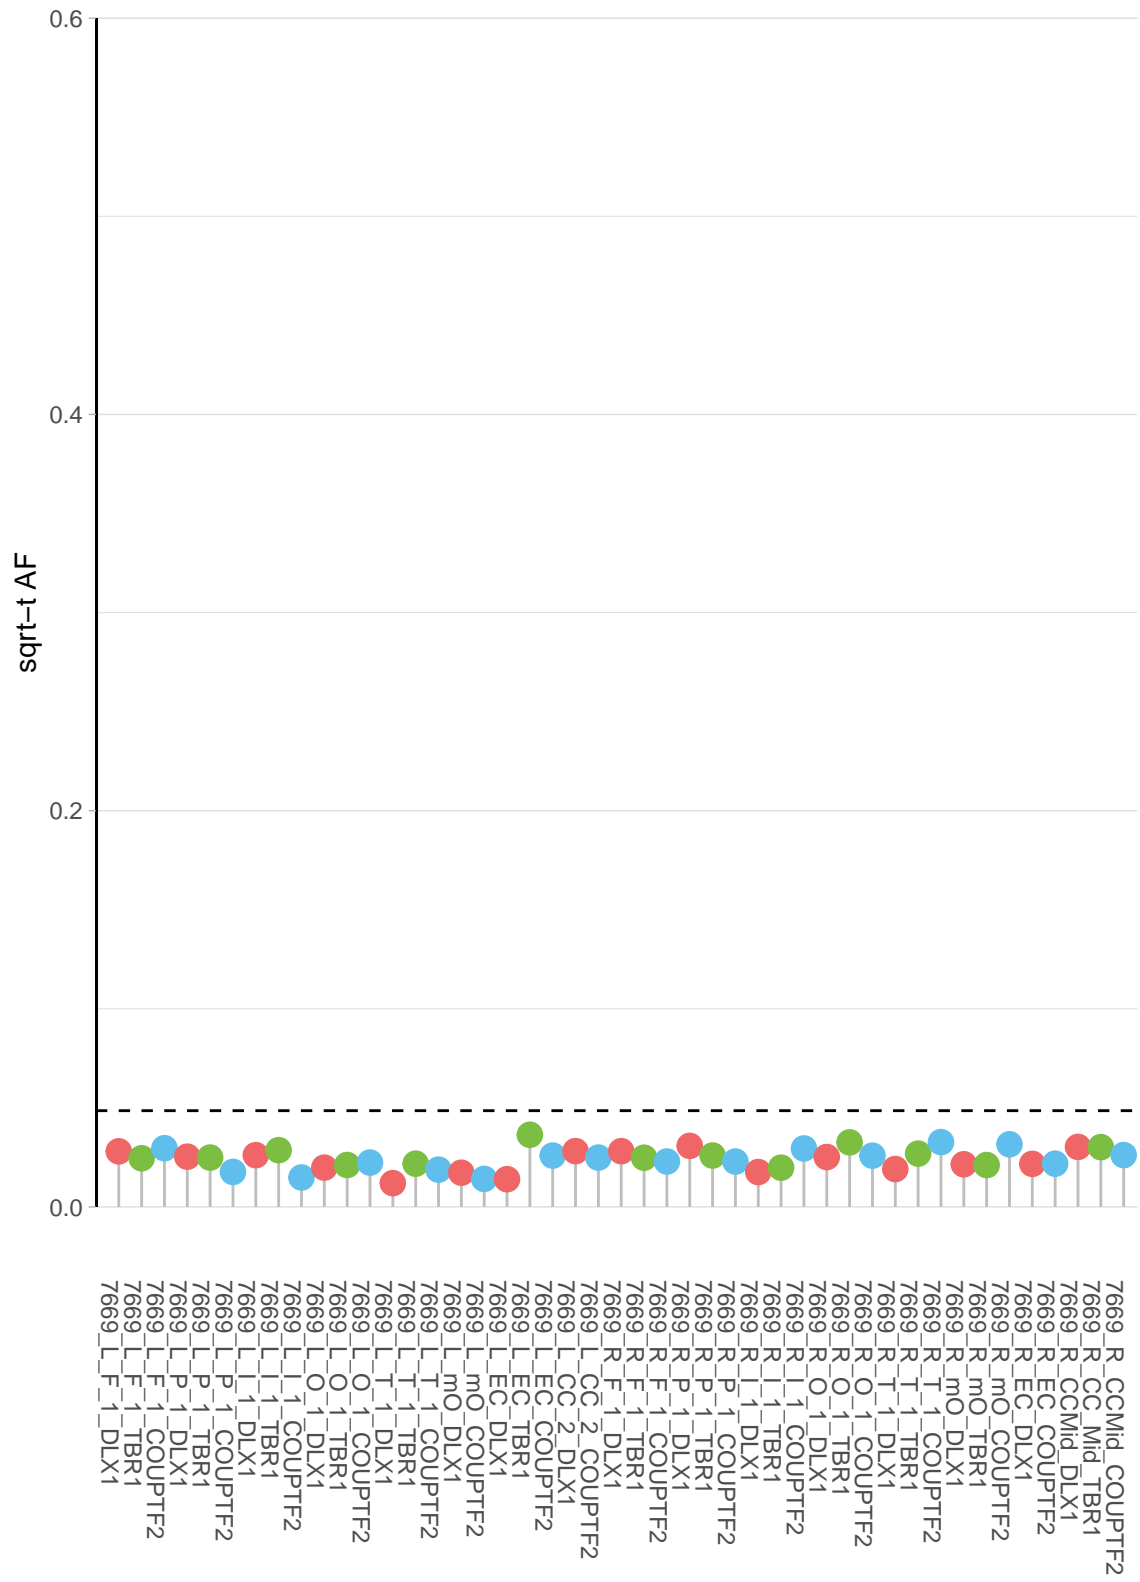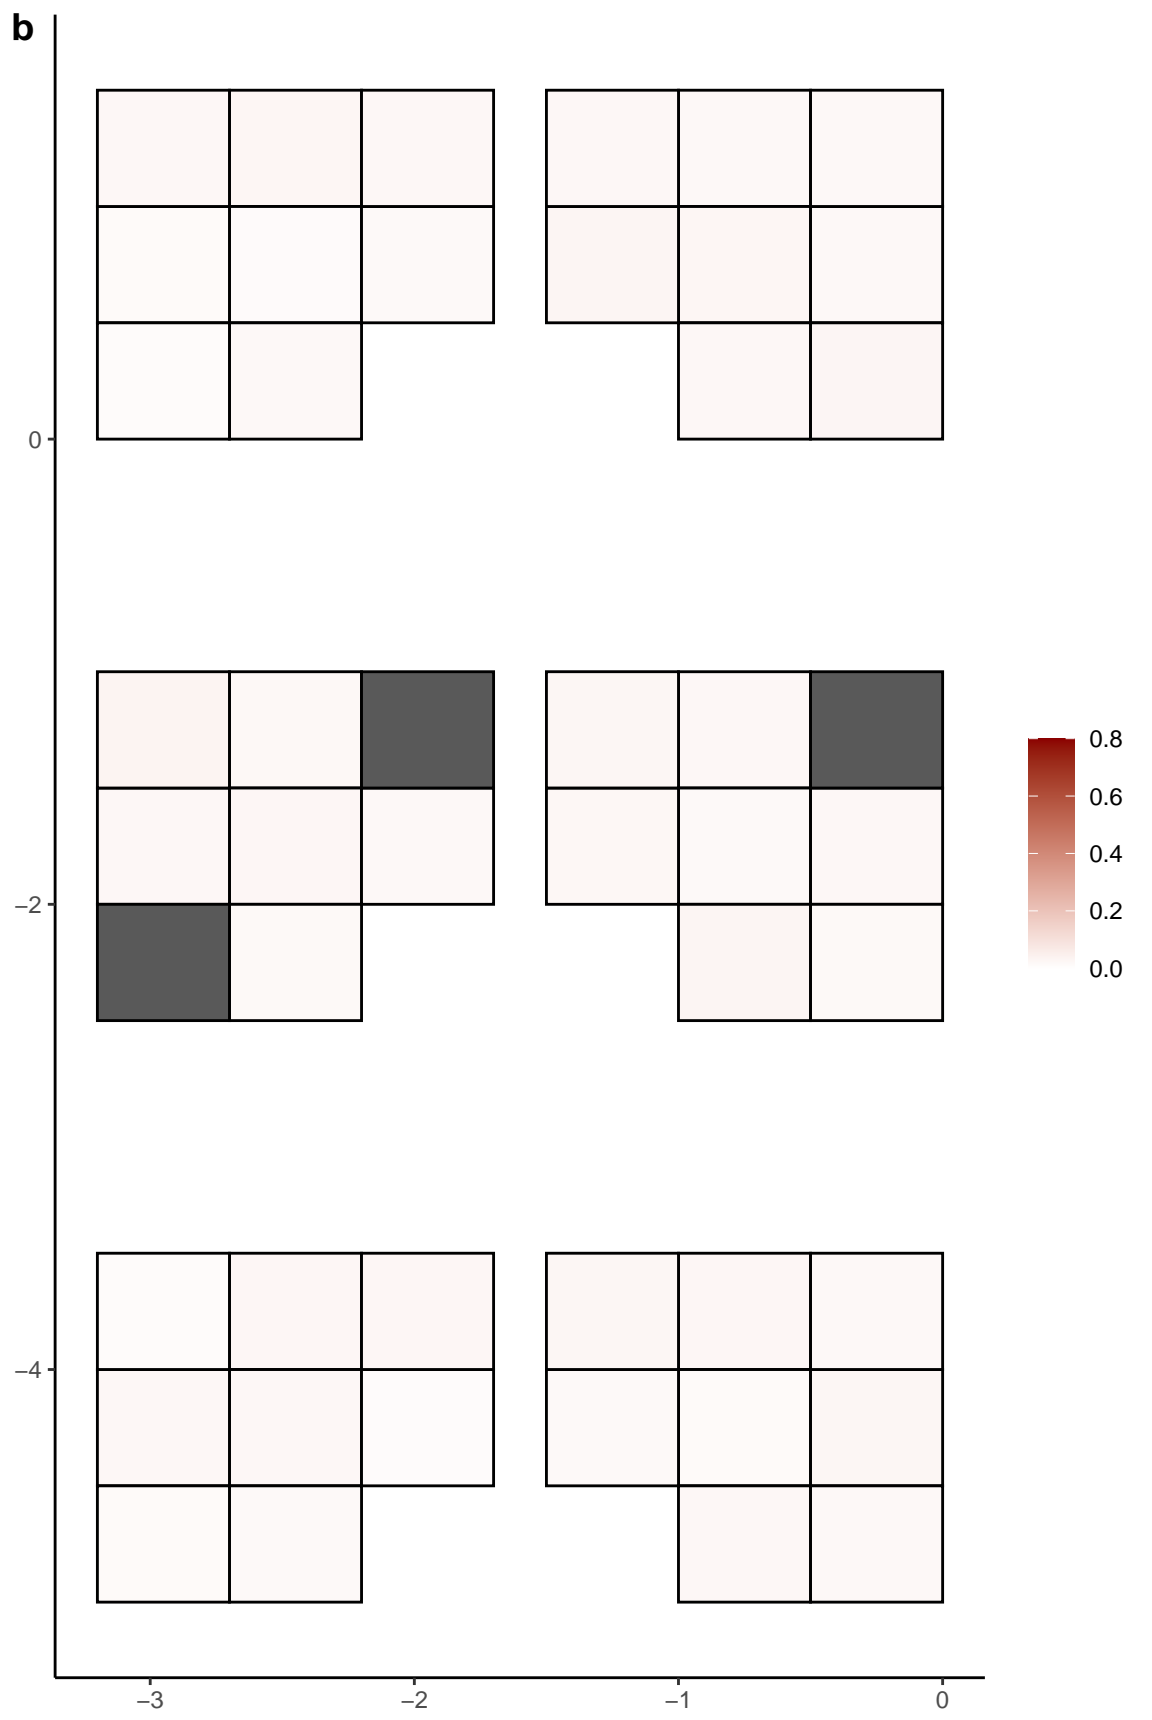



**a** ID05 3-82072417-C-T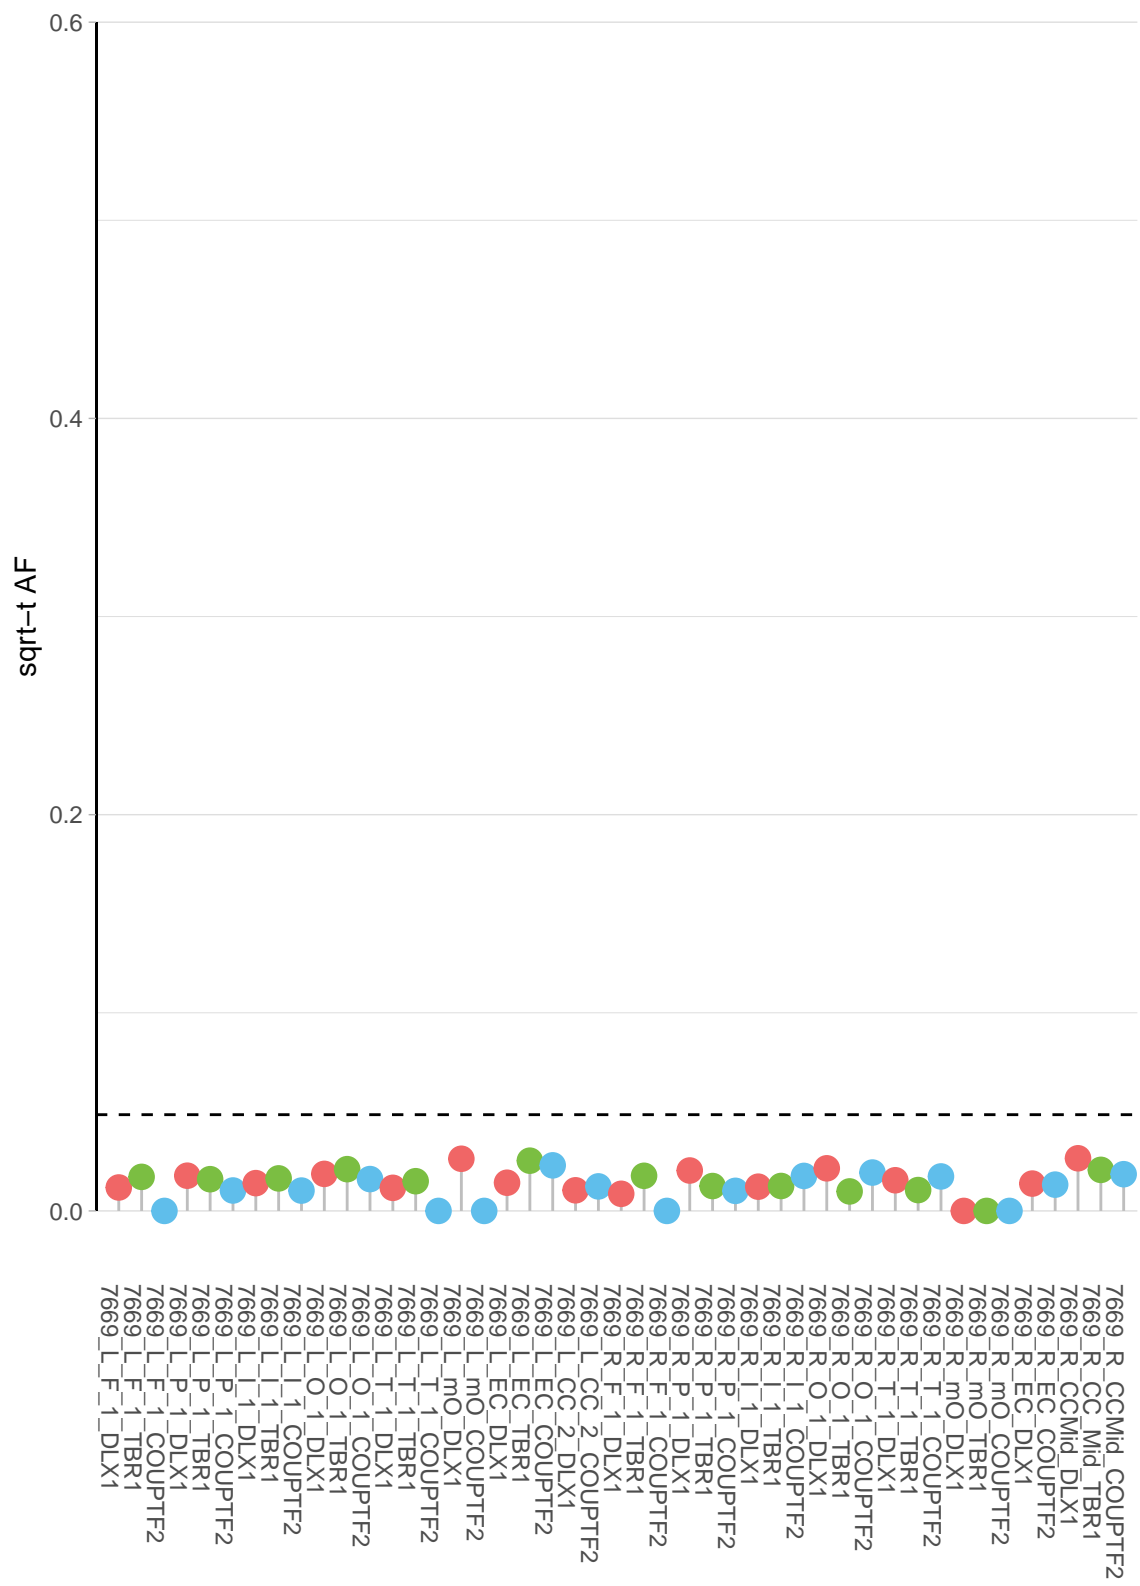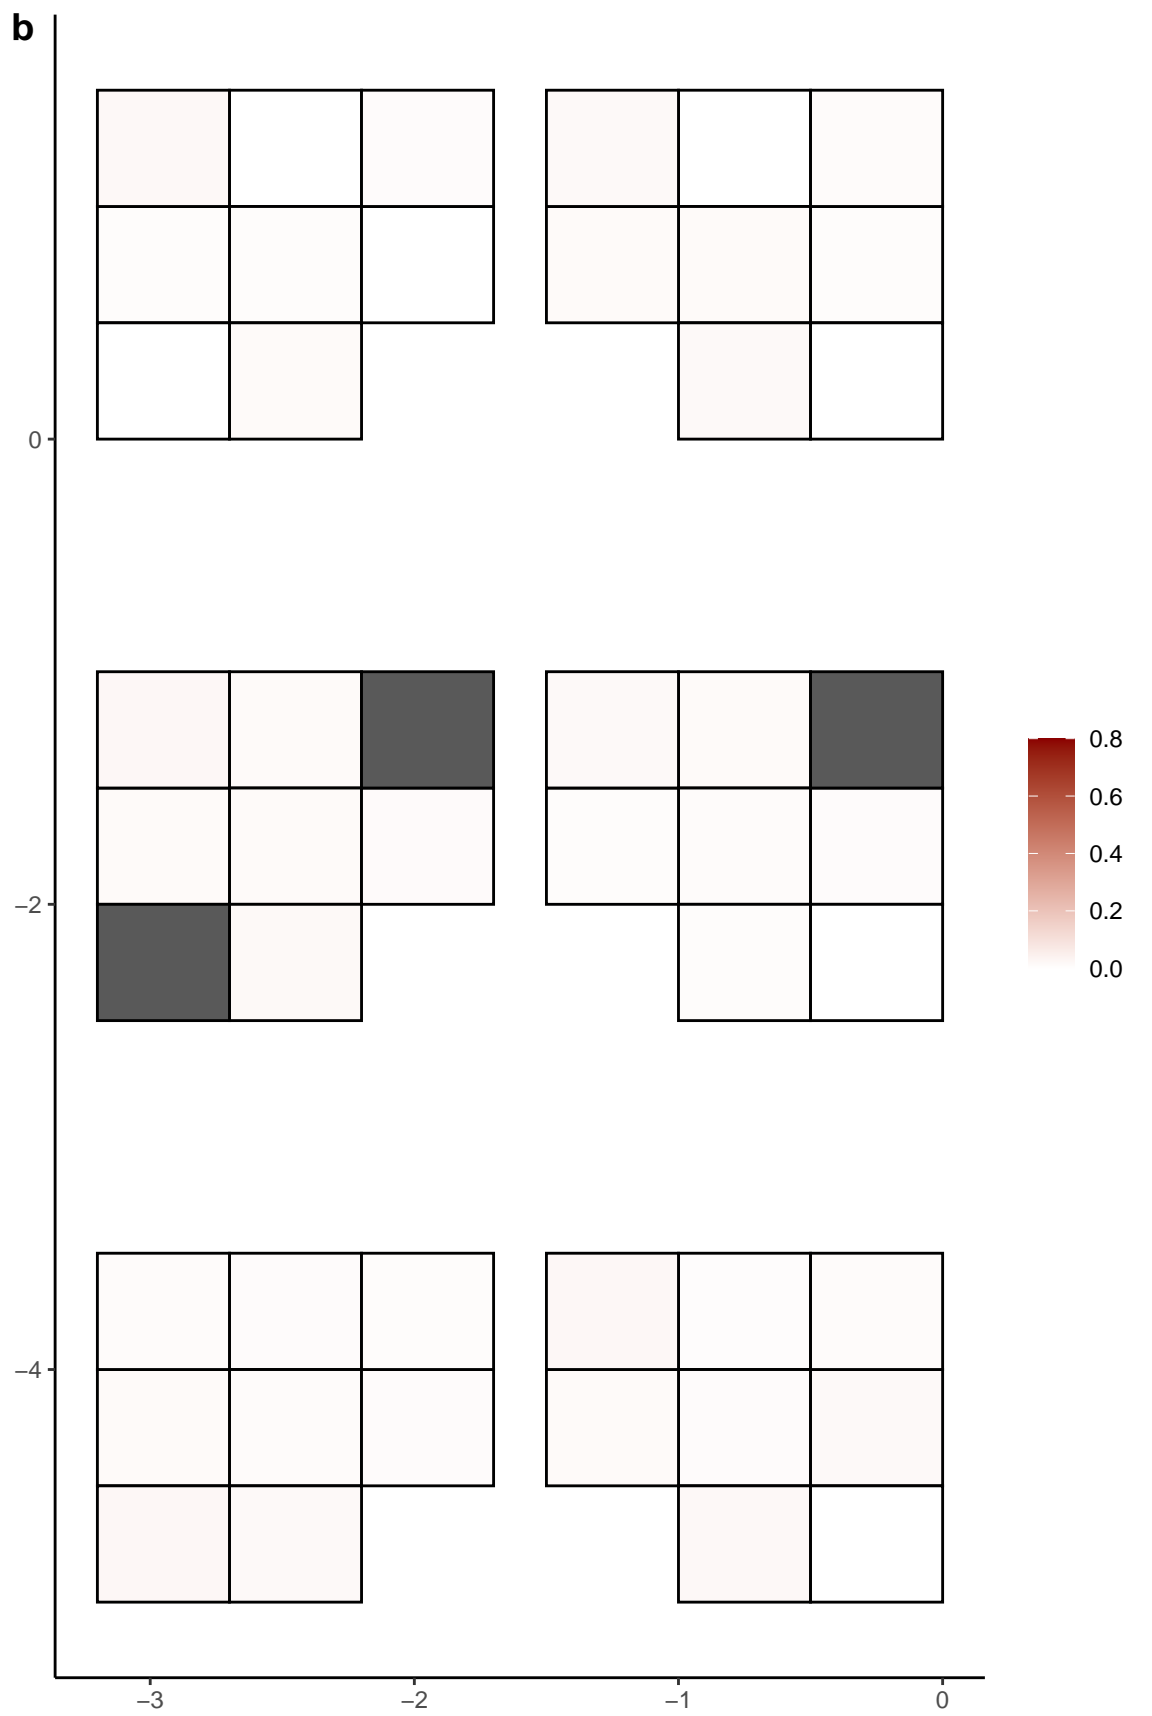

**a** ID05 3-82901114-C-T

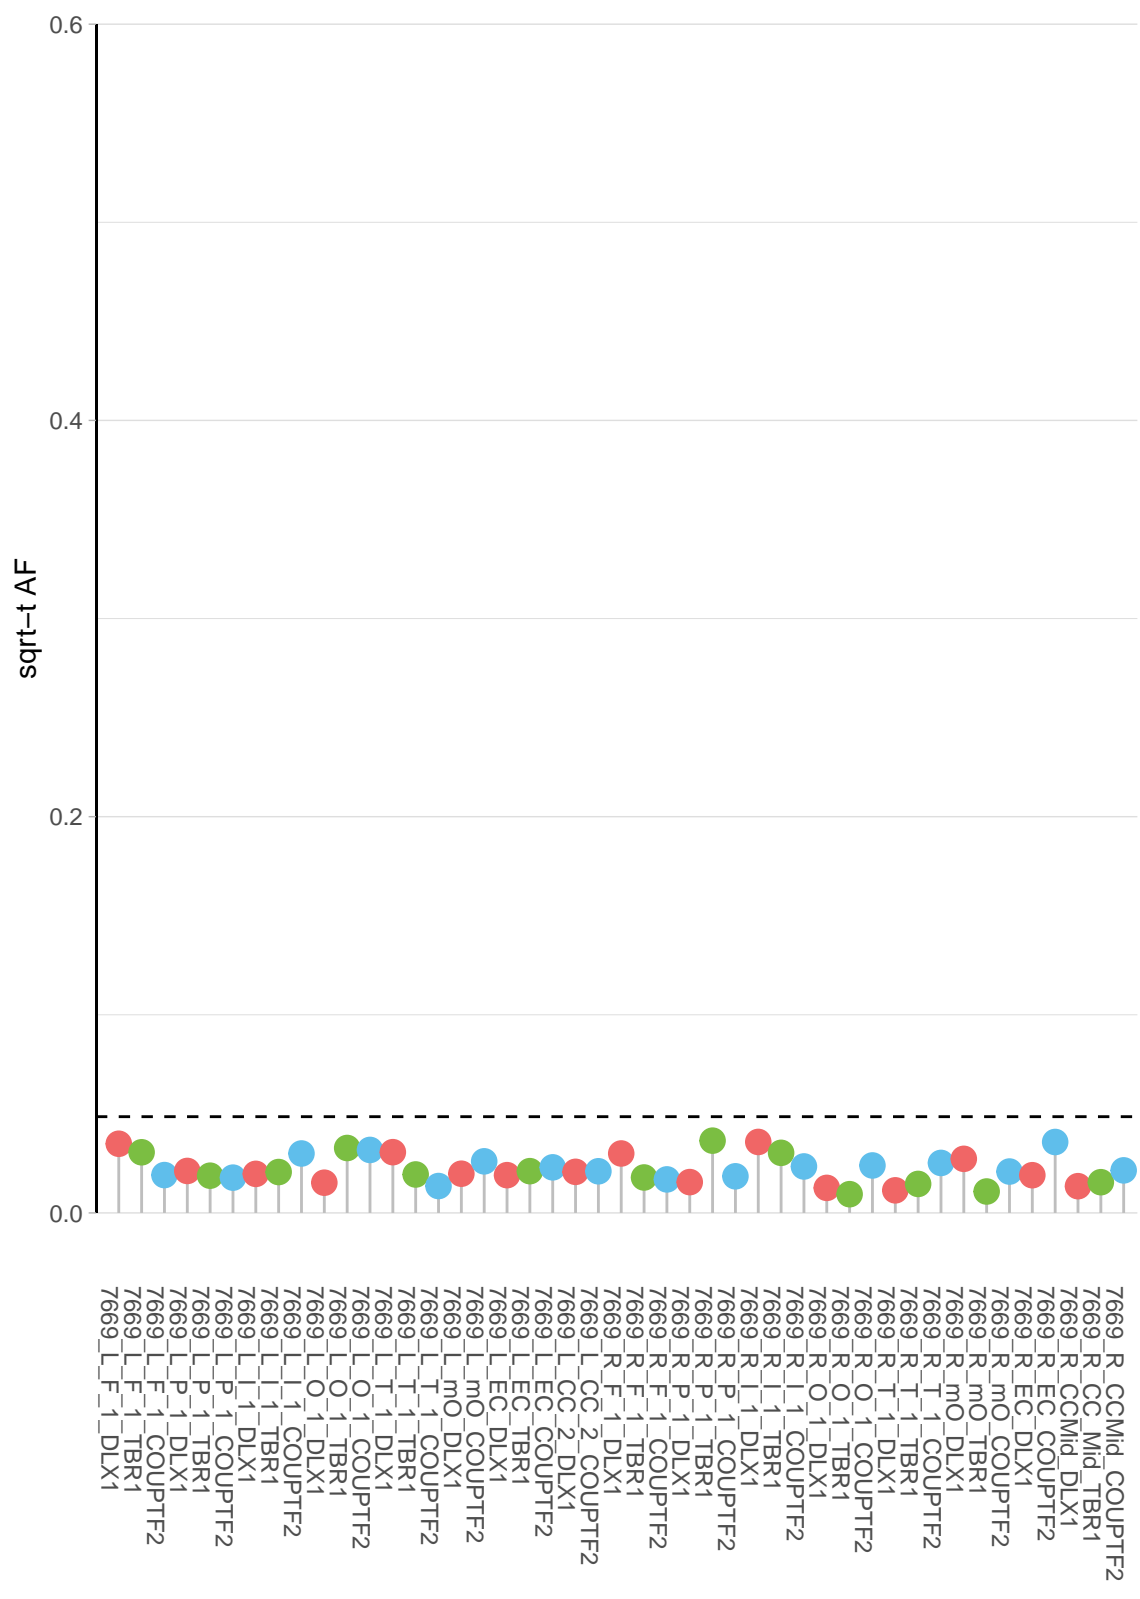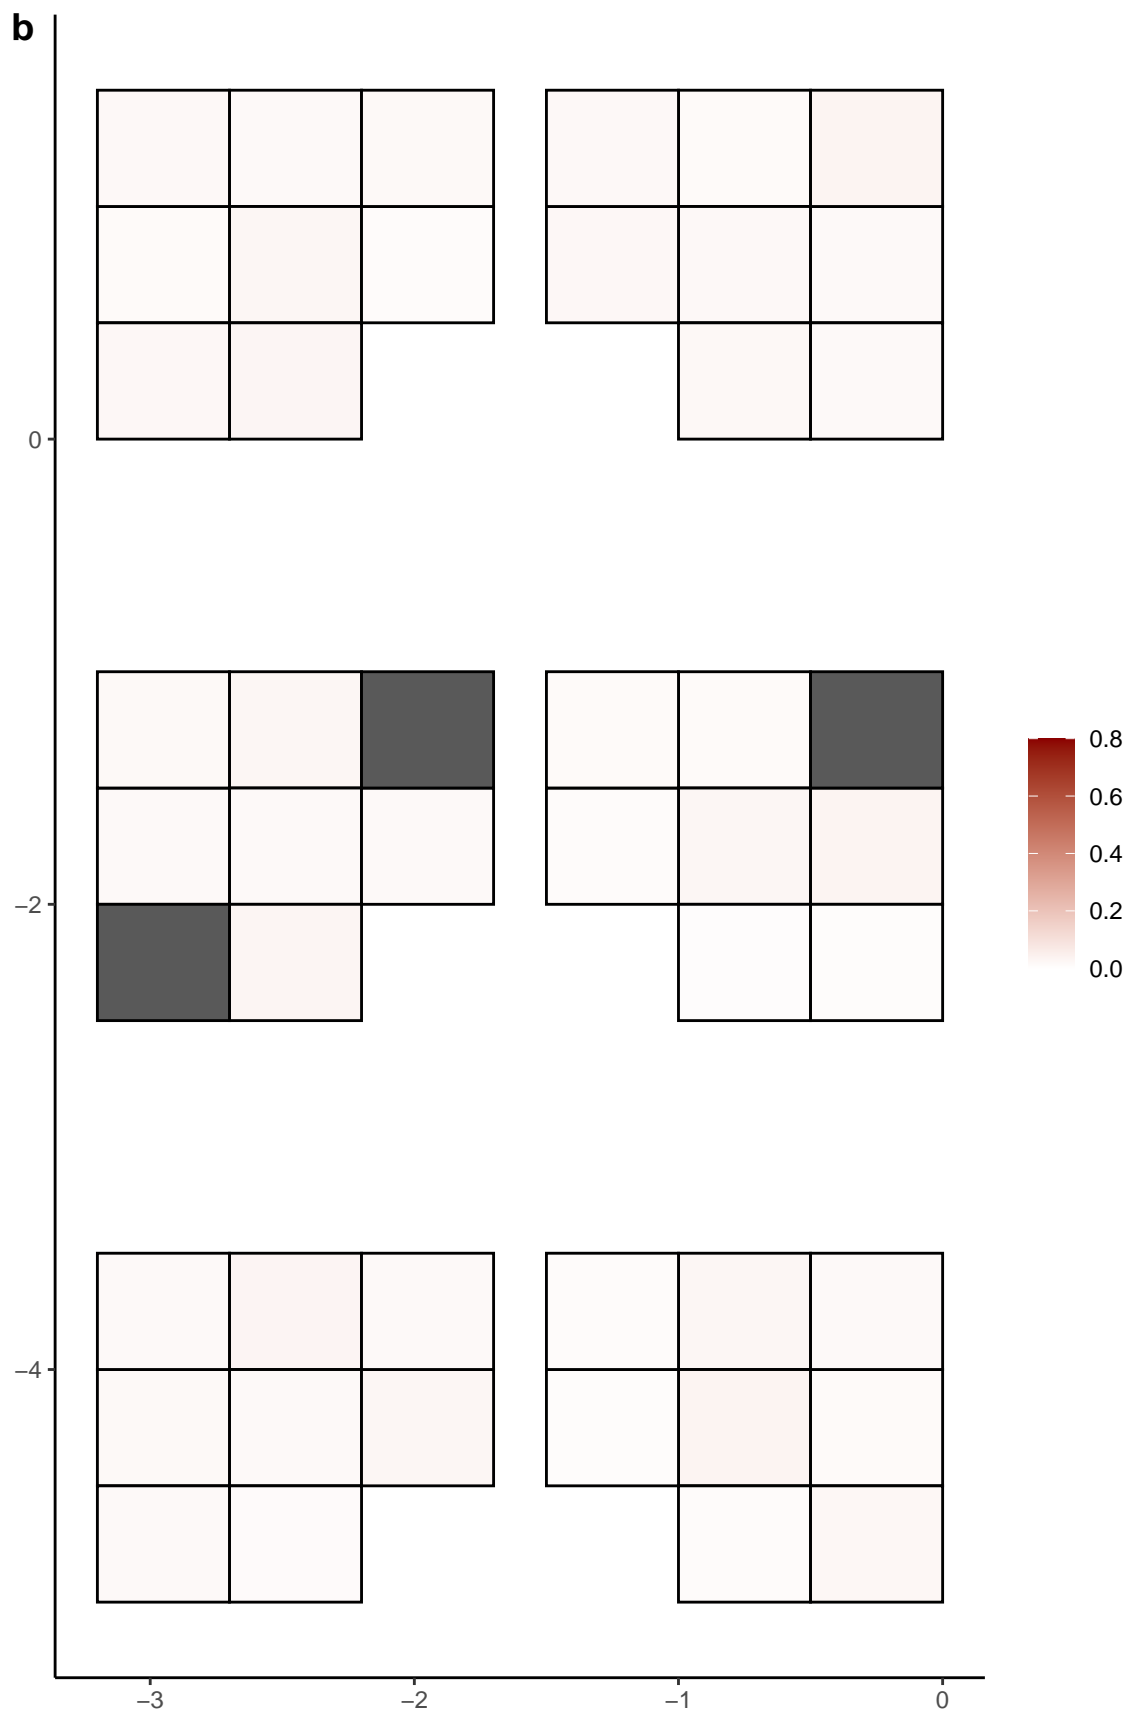

**a** ID05 3-83516288-A-C

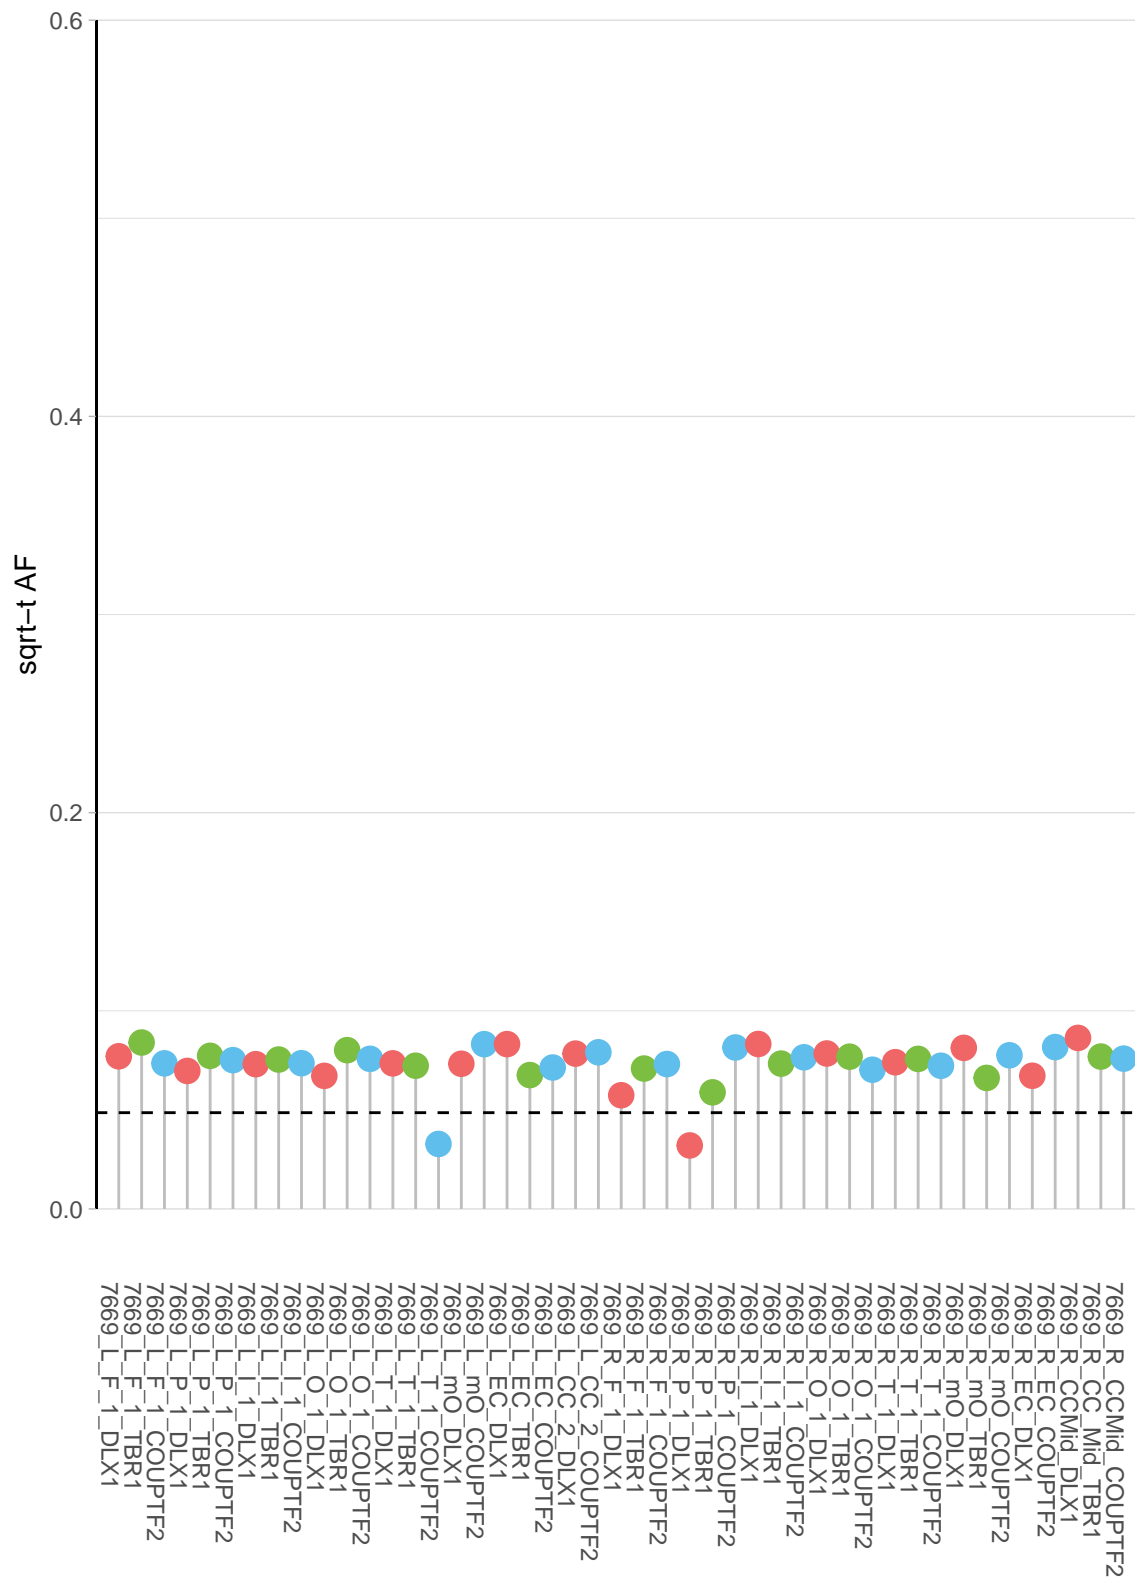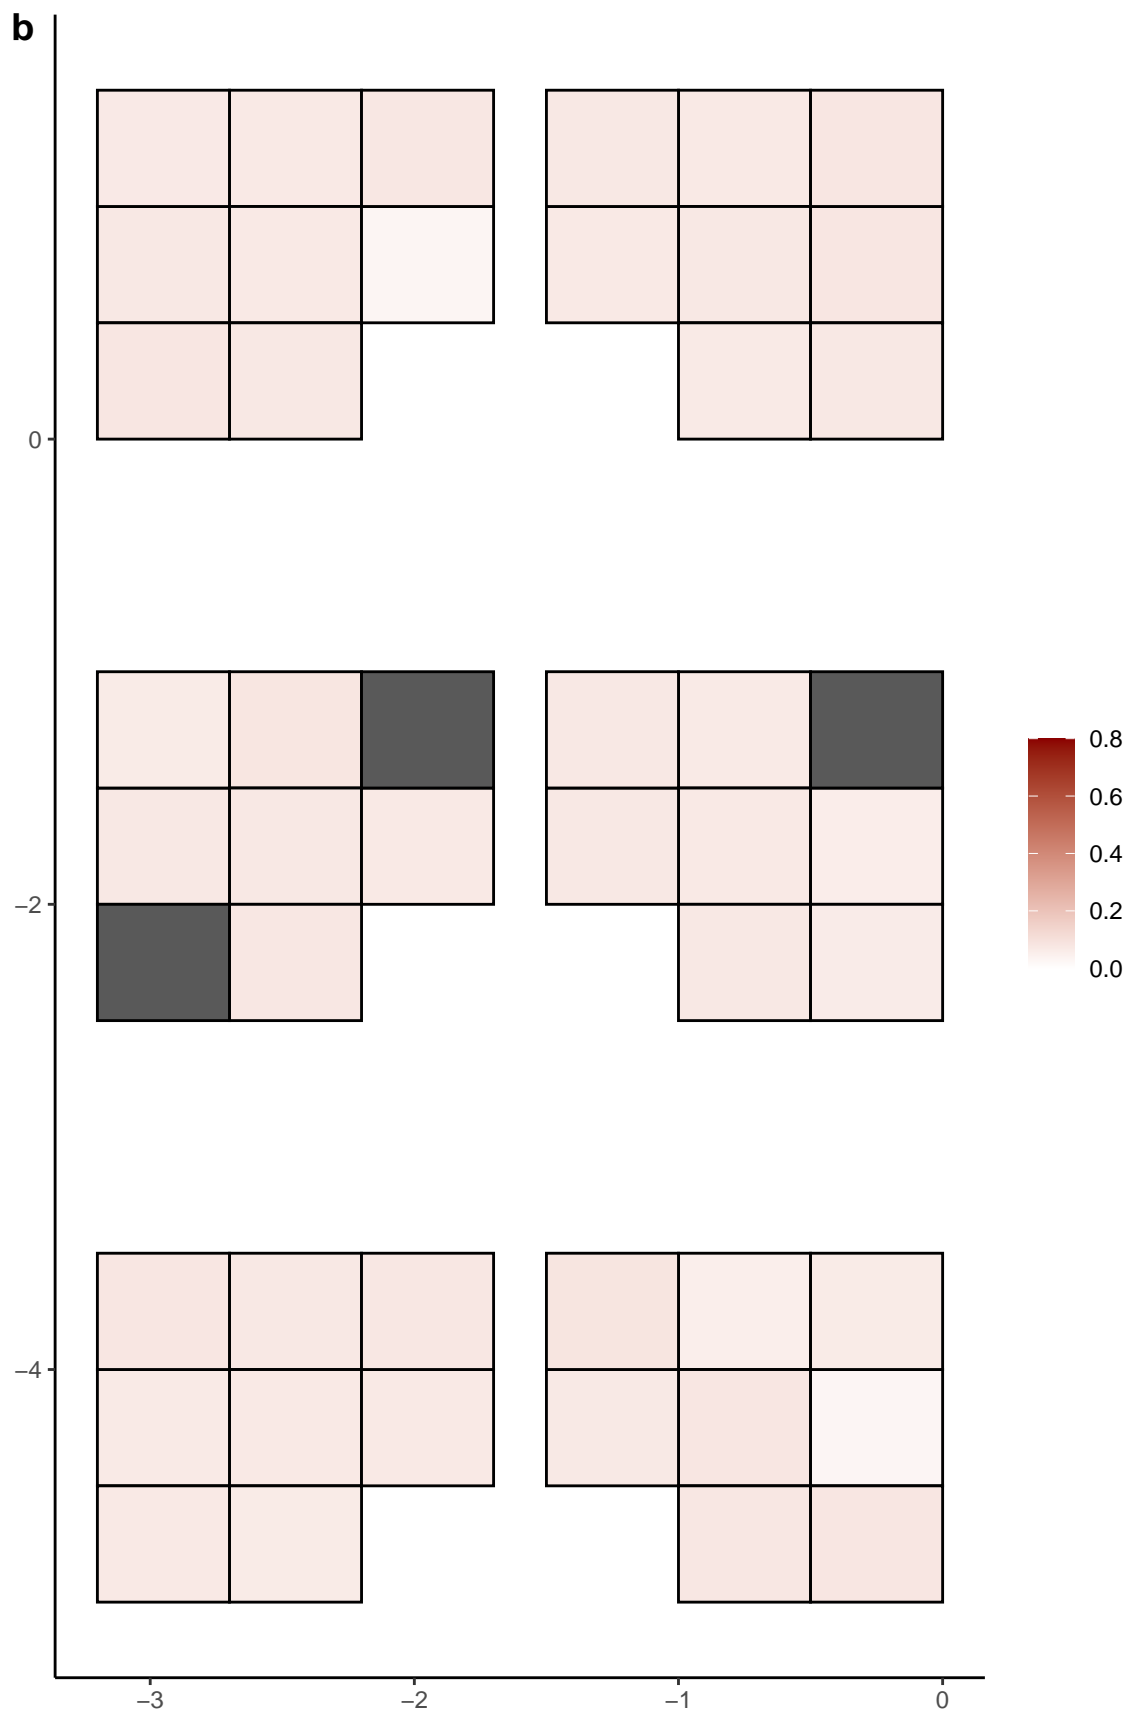

**a** ID05 3-88303744-T-C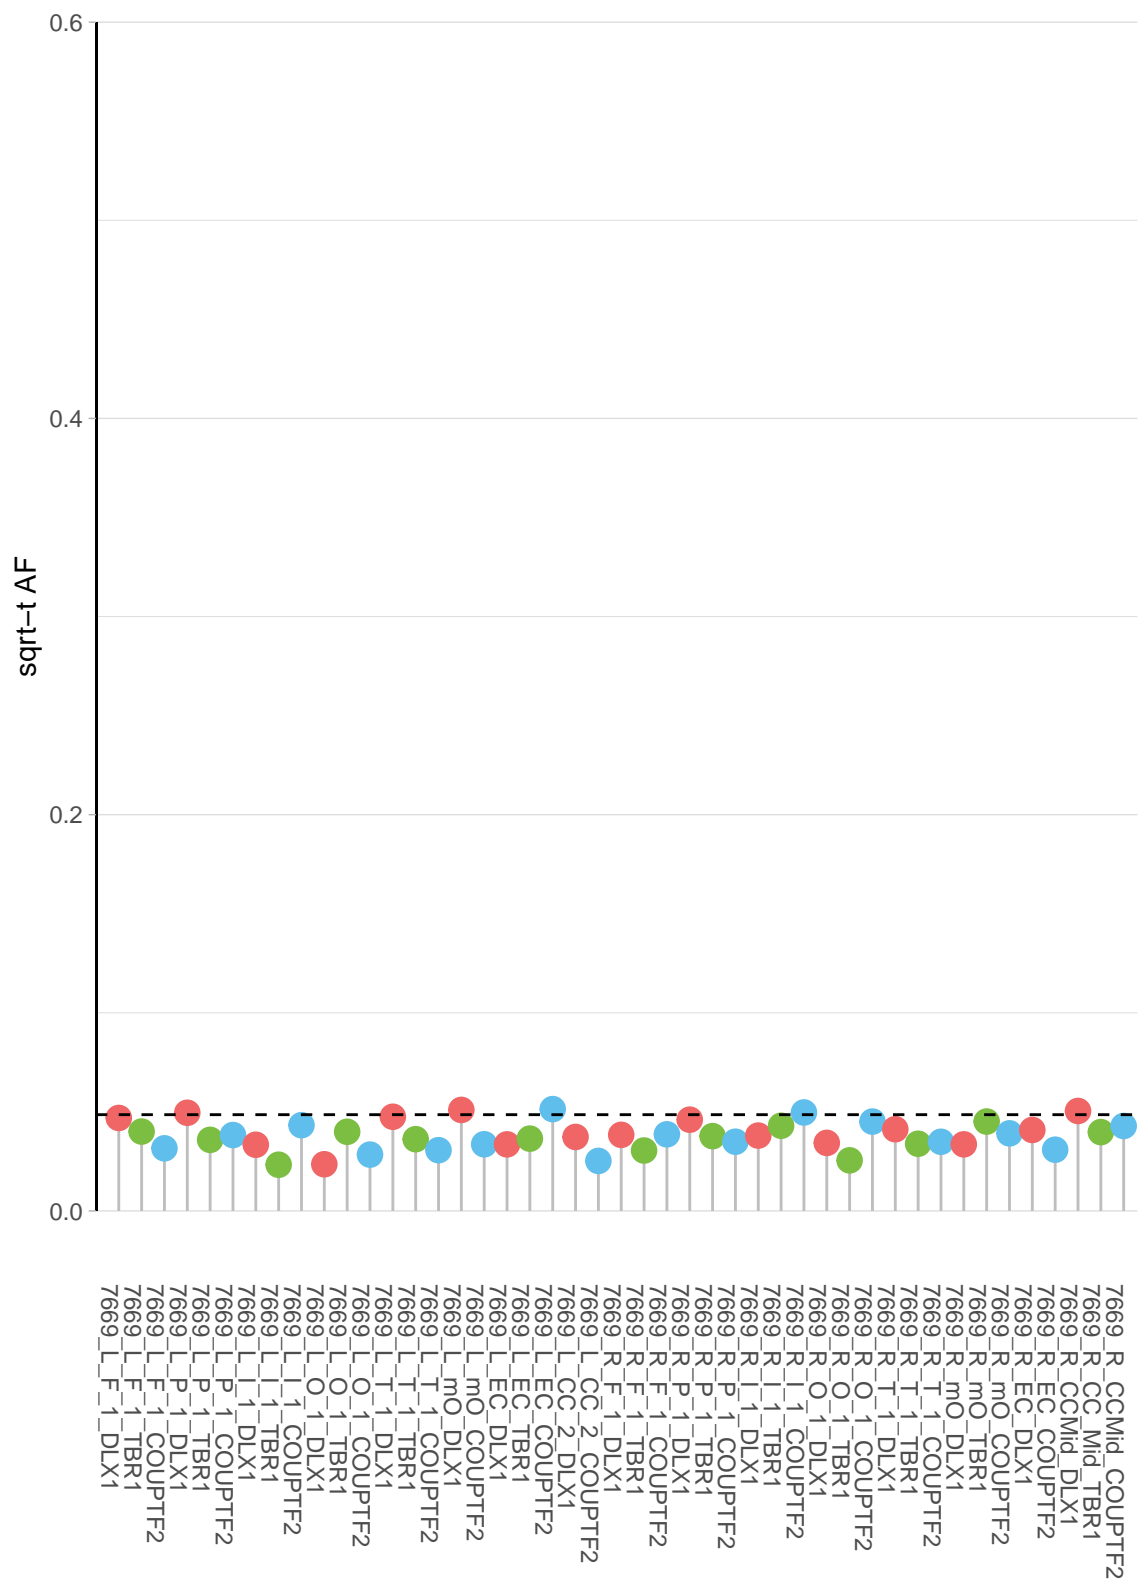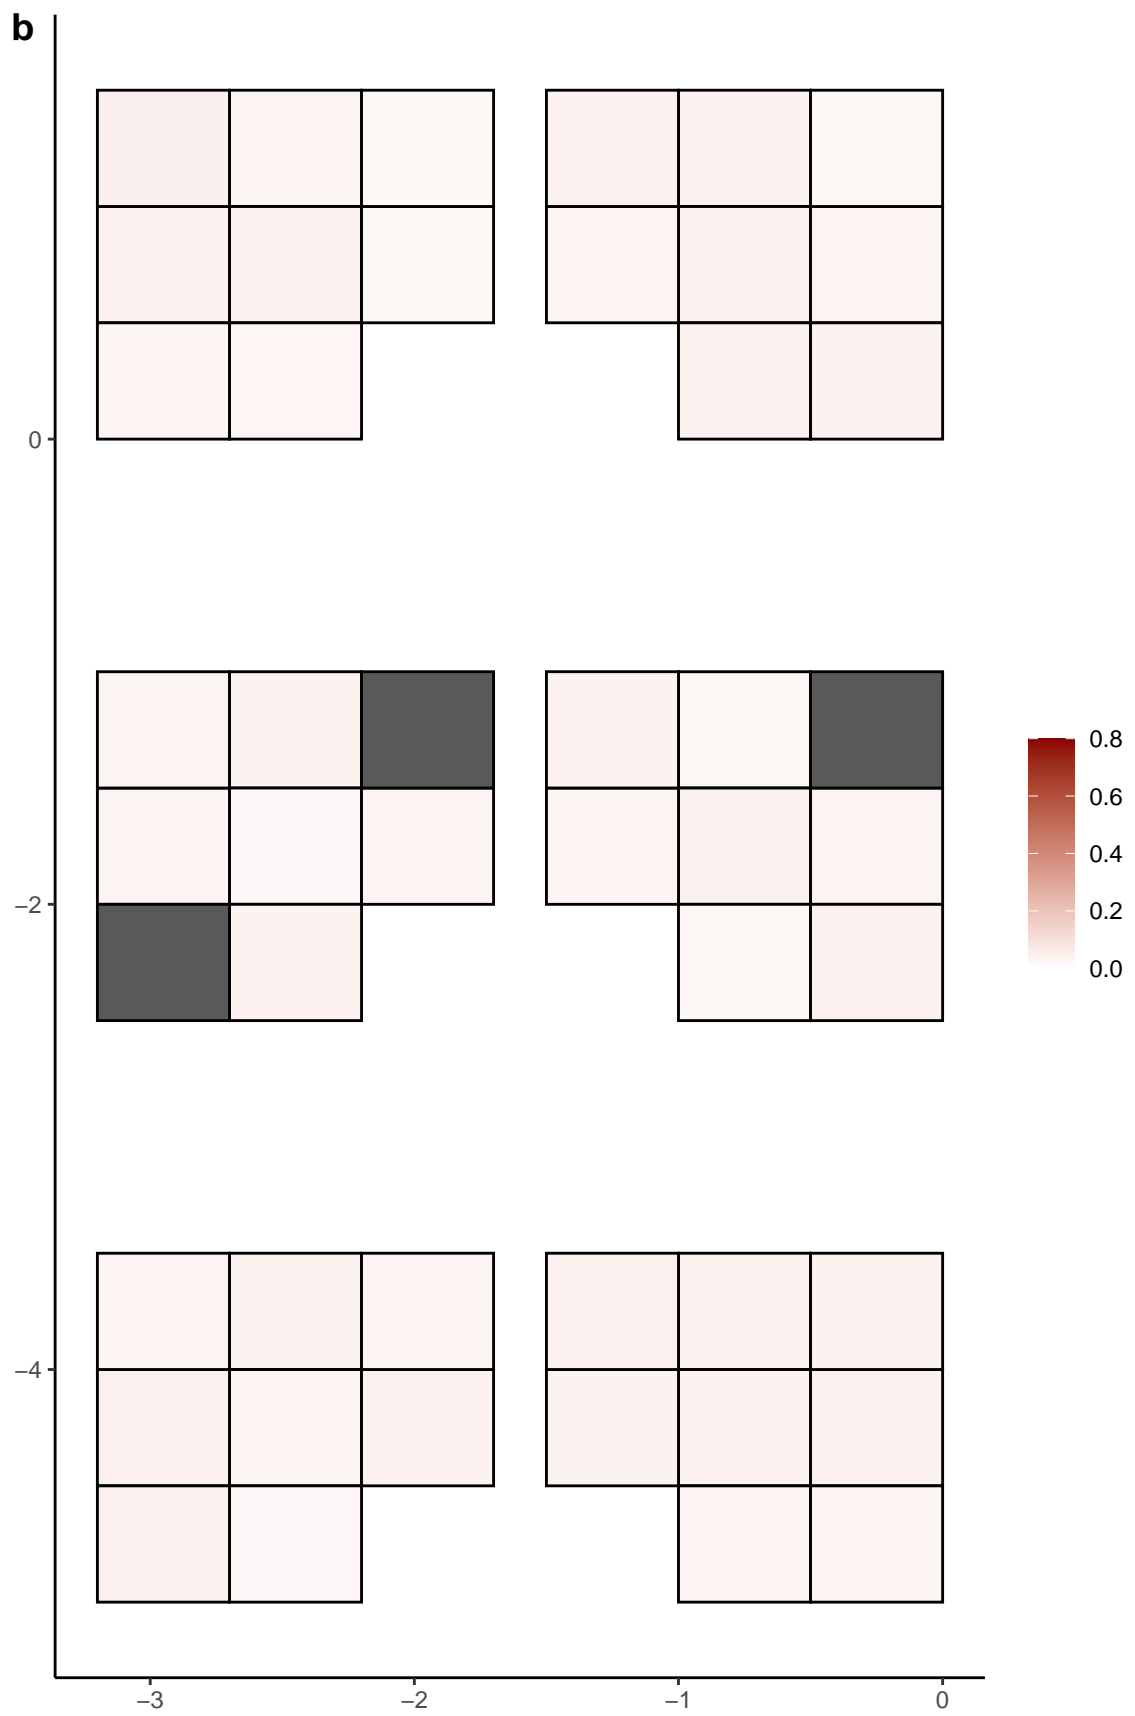

**a** ID05 3-9195857-C-T

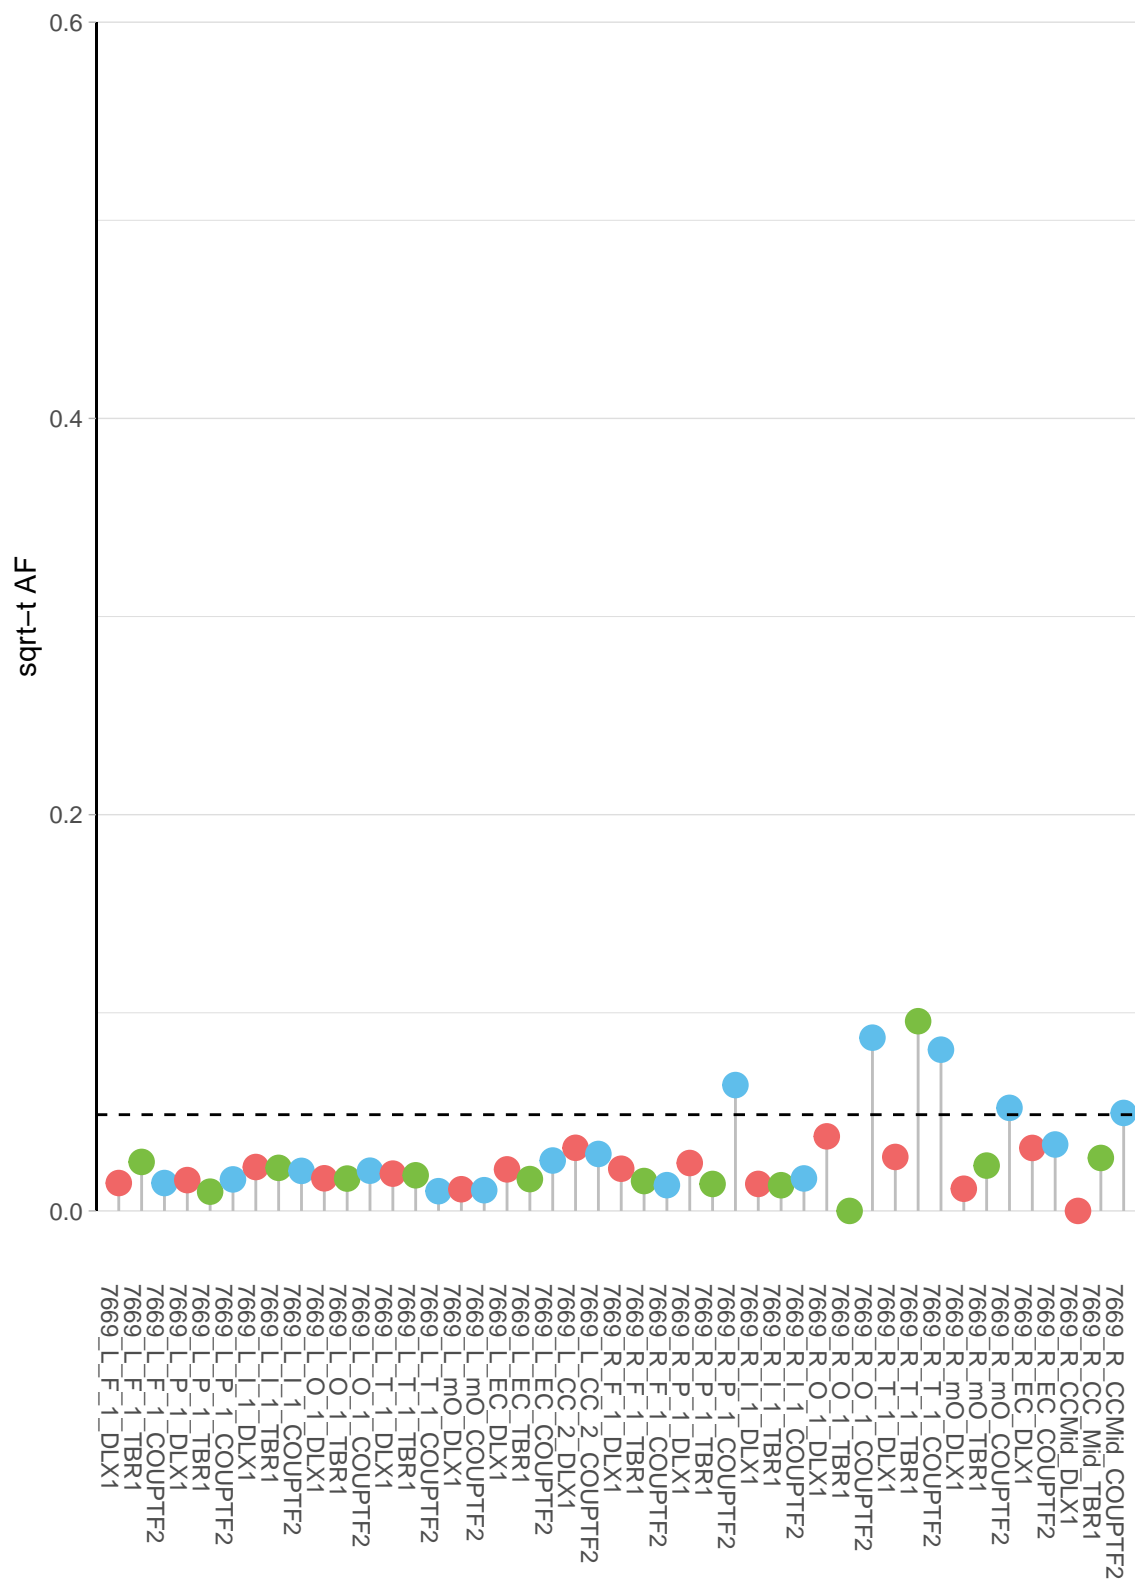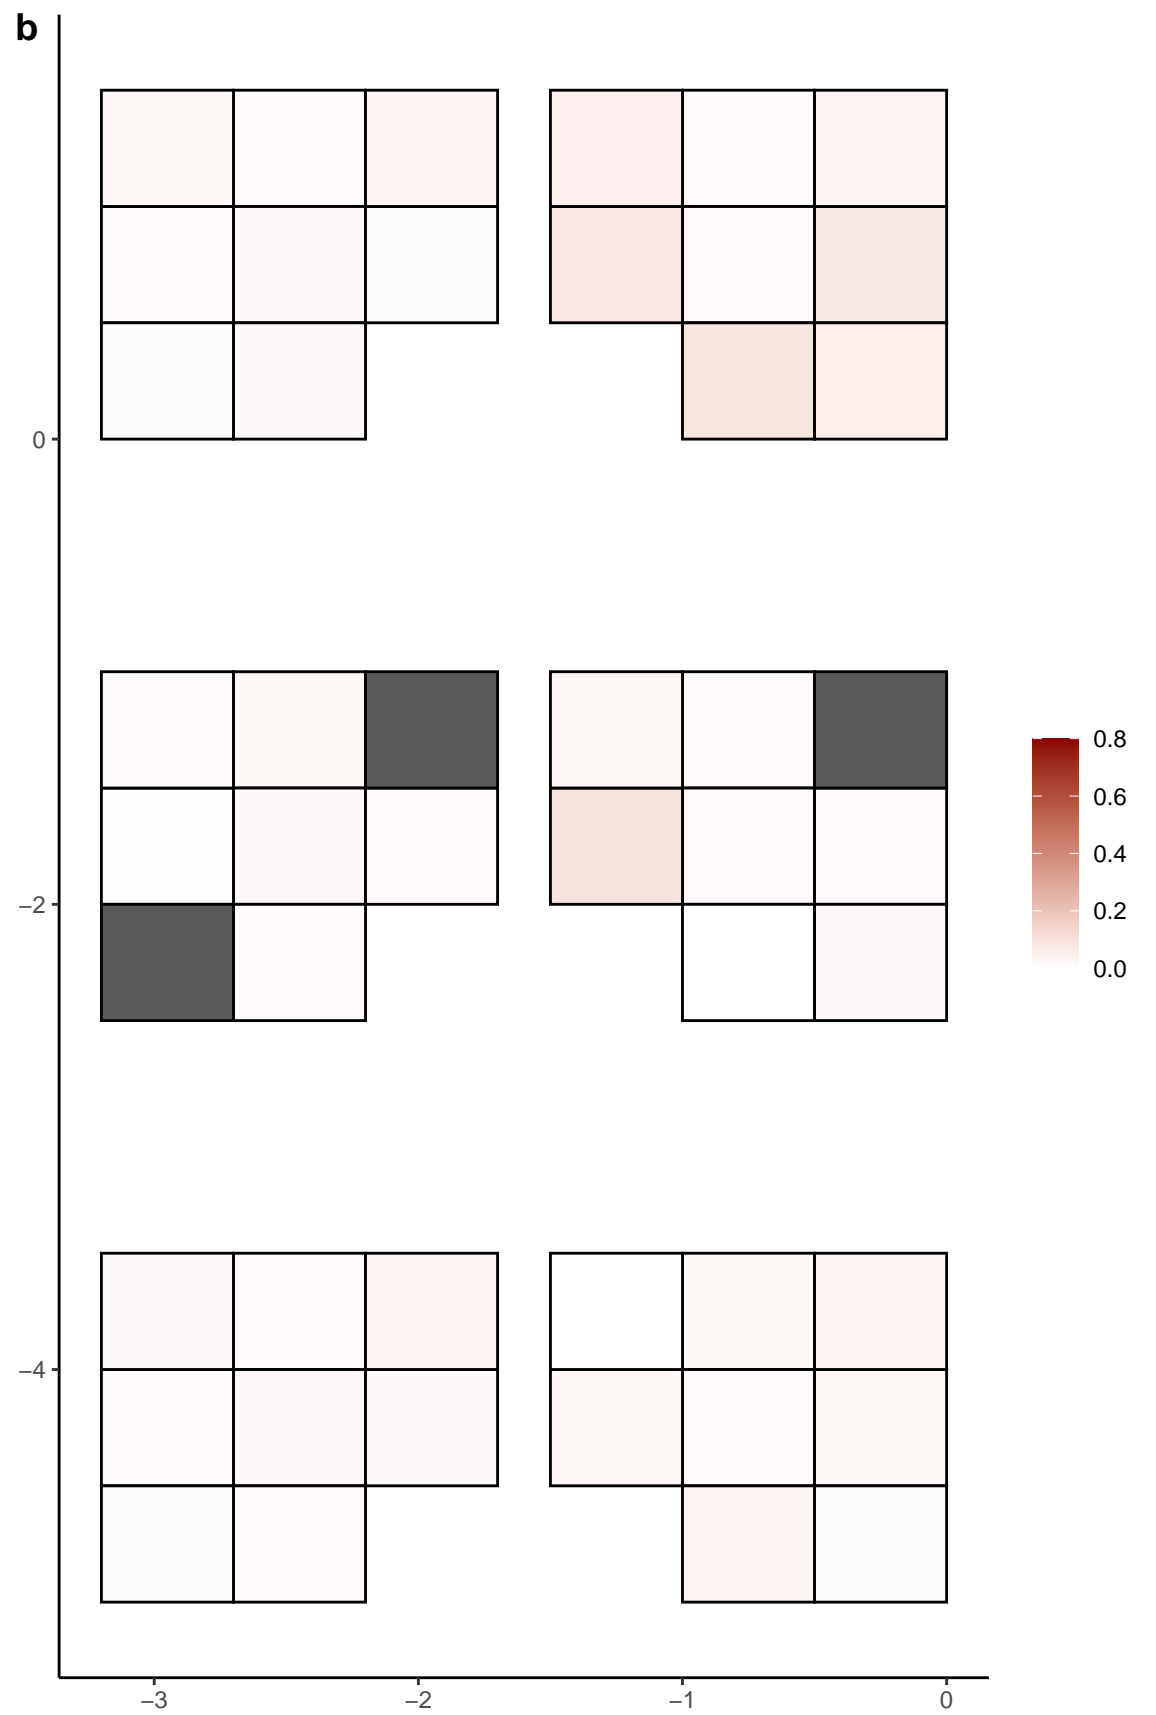



**a** ID05 3-9859360-C-T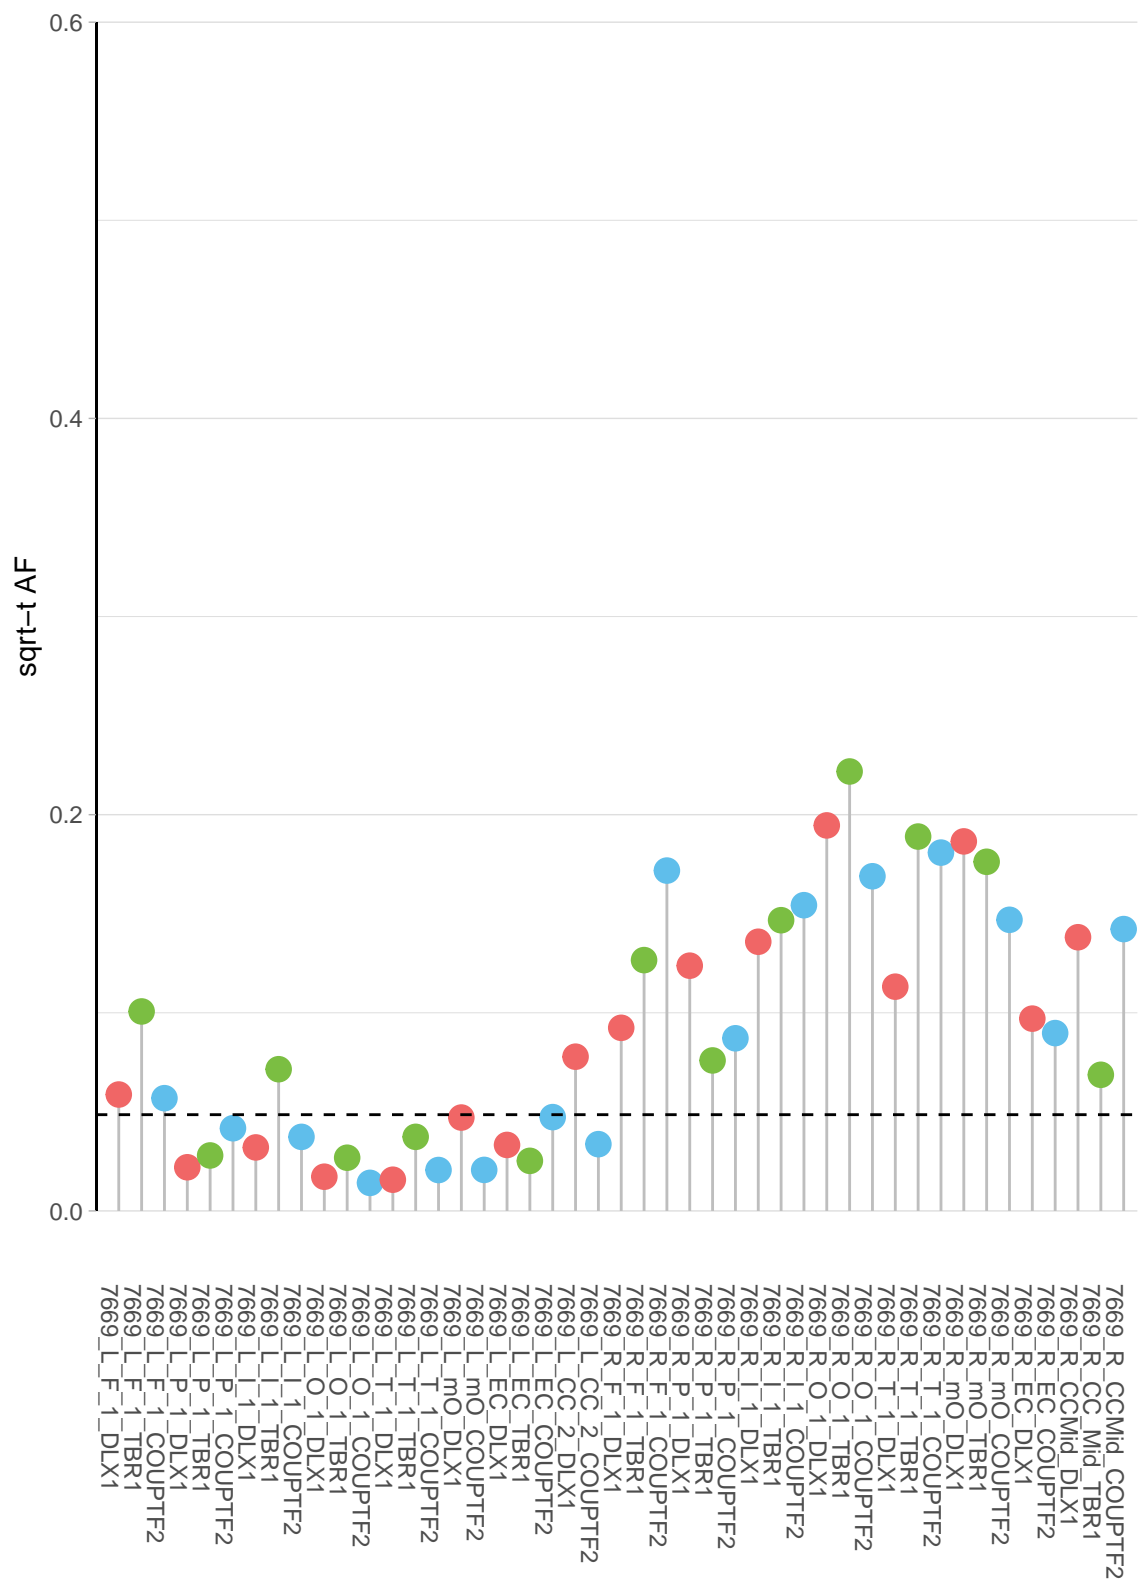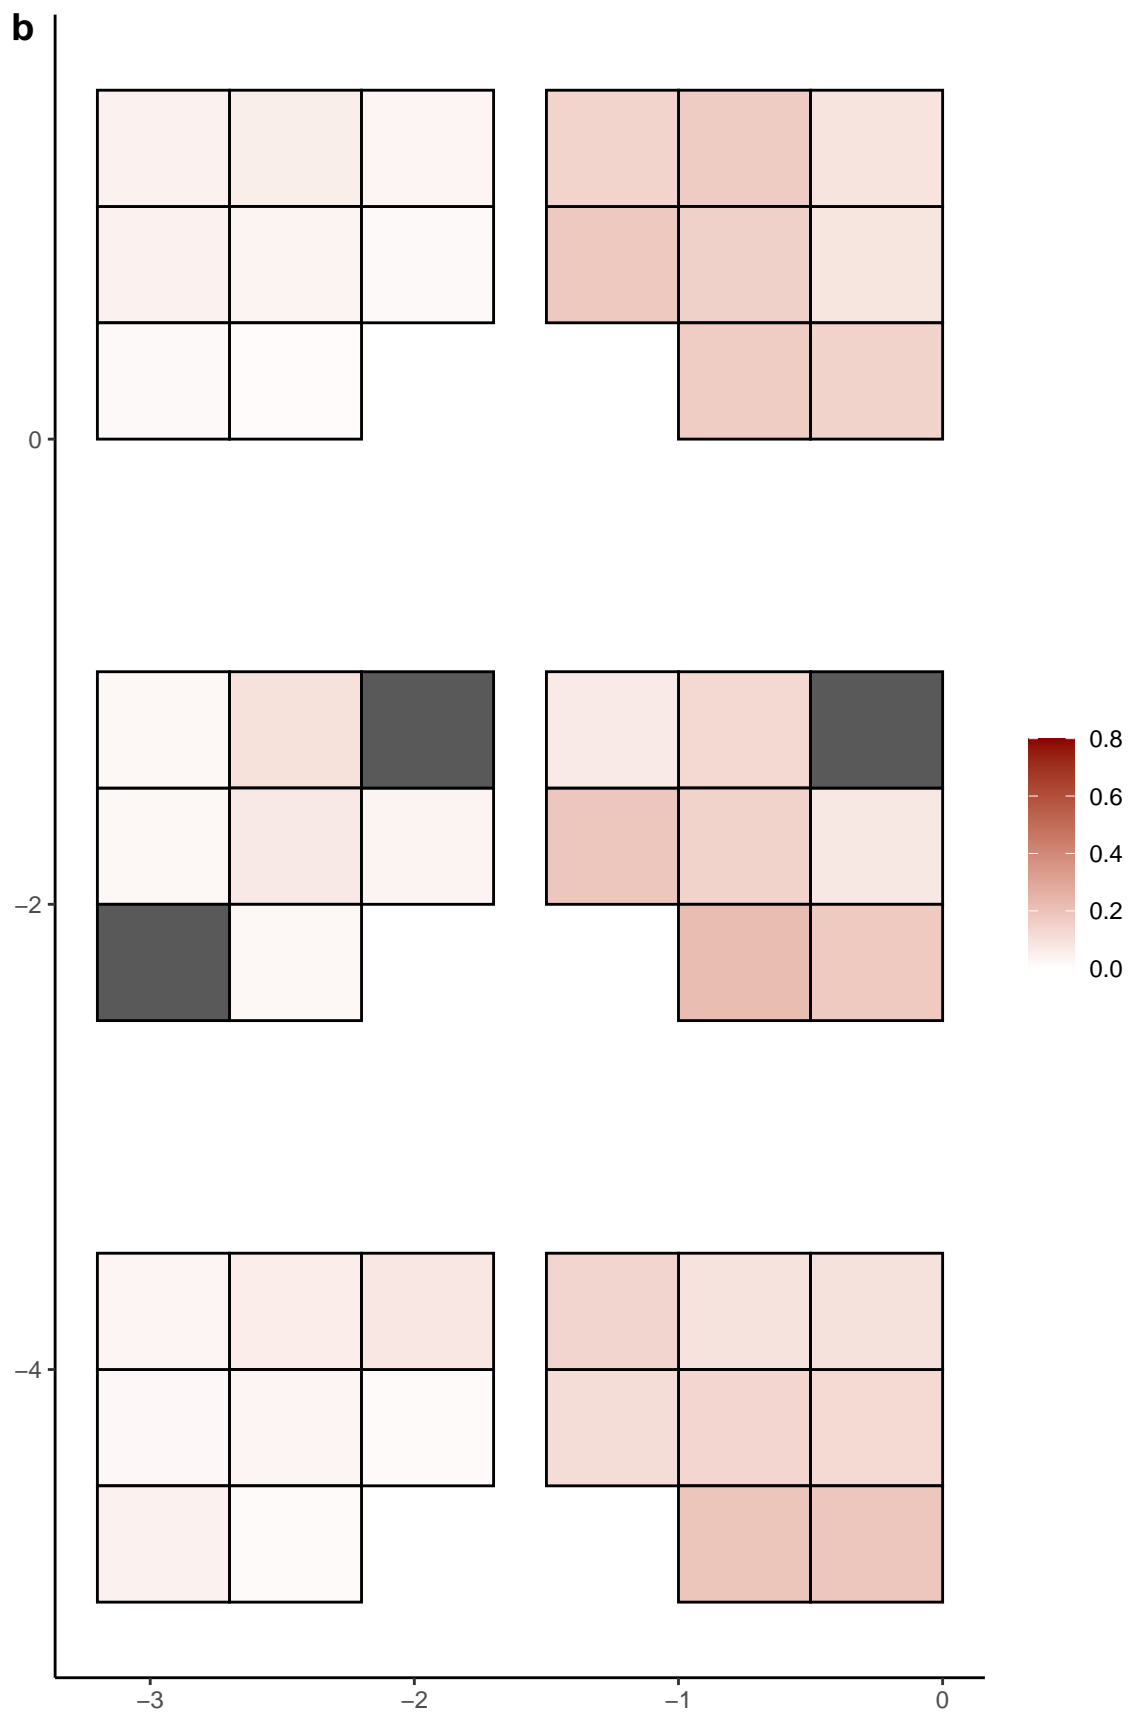

**a** ID05 3-99869280-C-T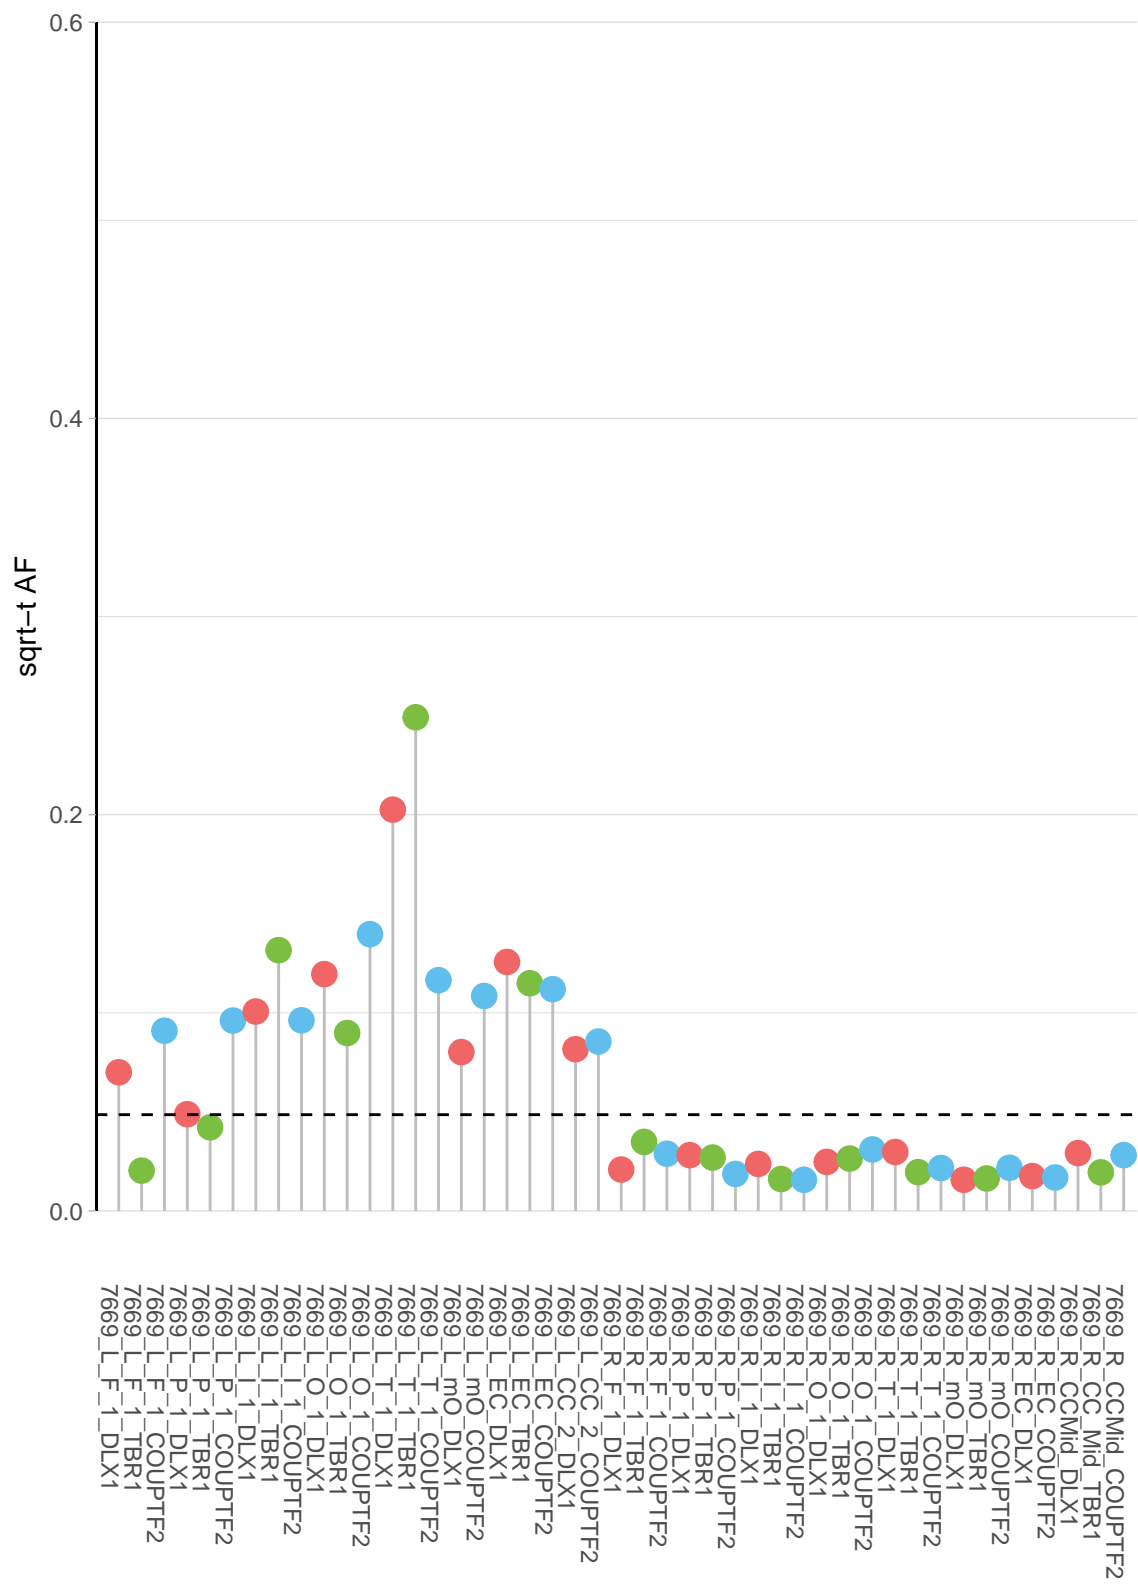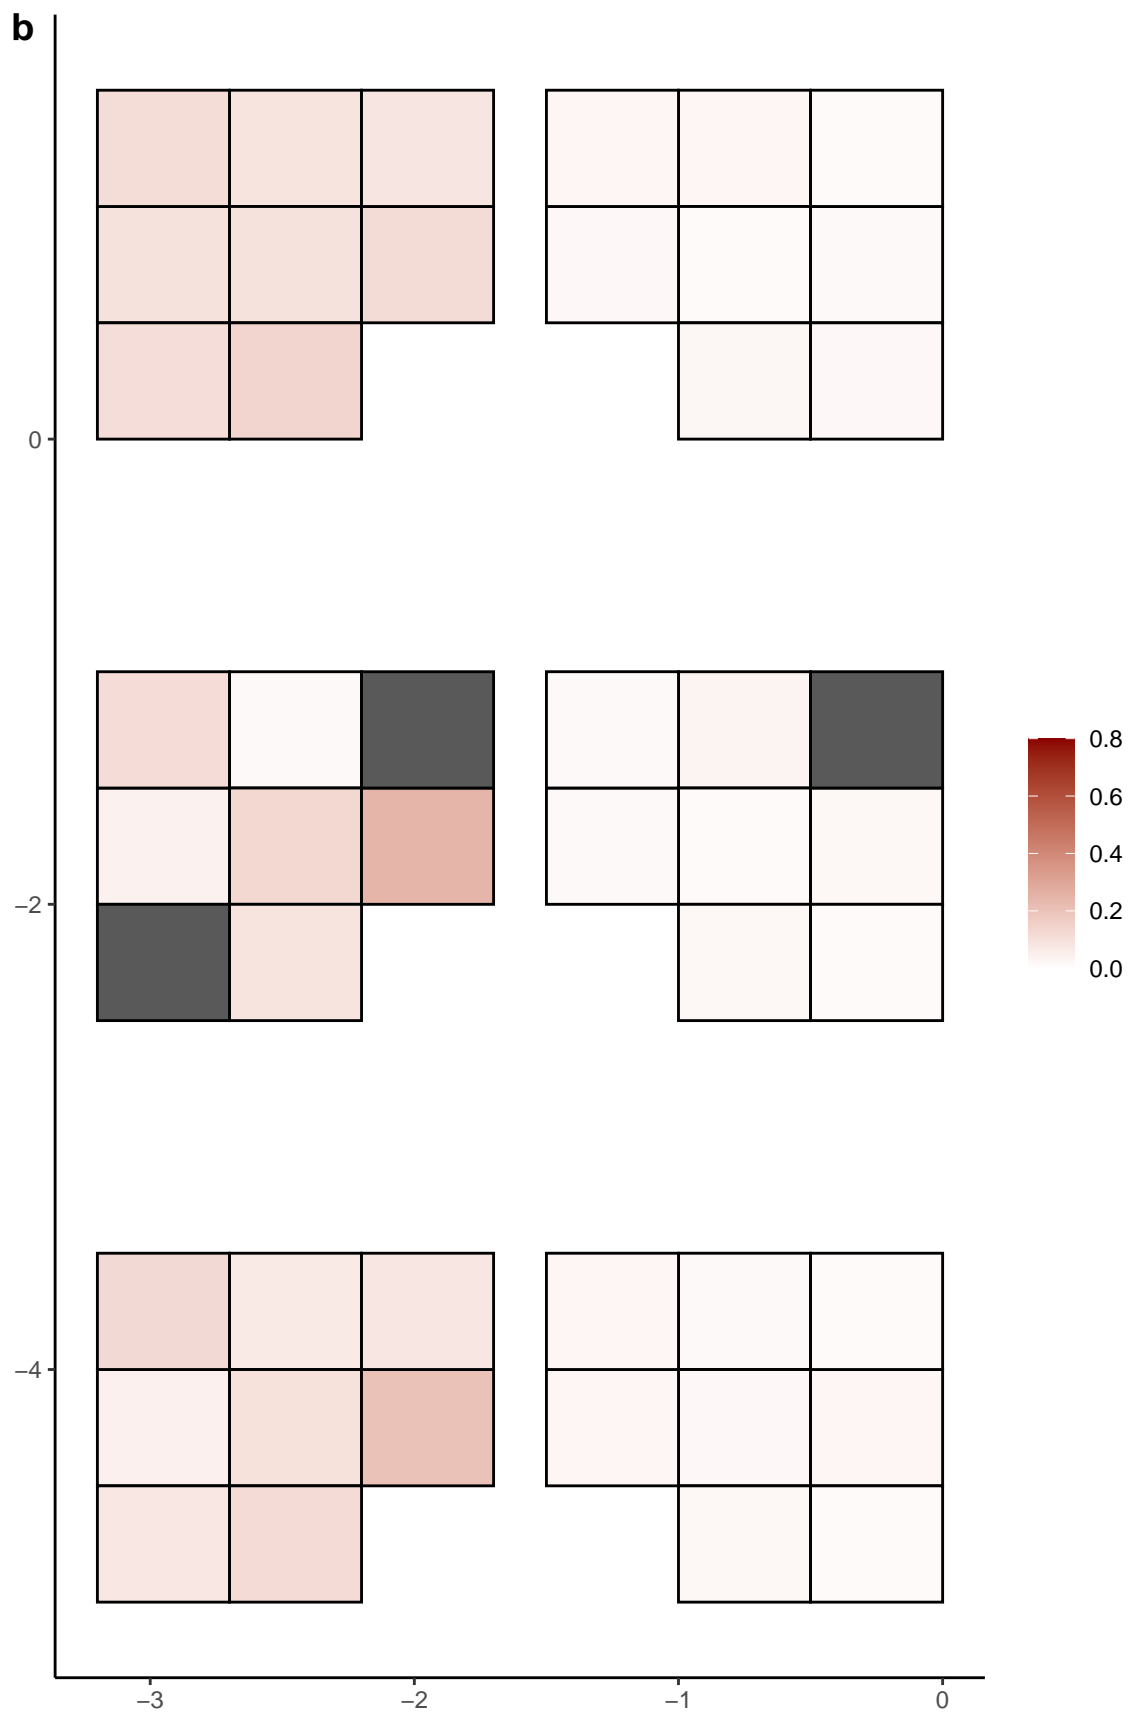



**a** ID05 4-100236559-G-A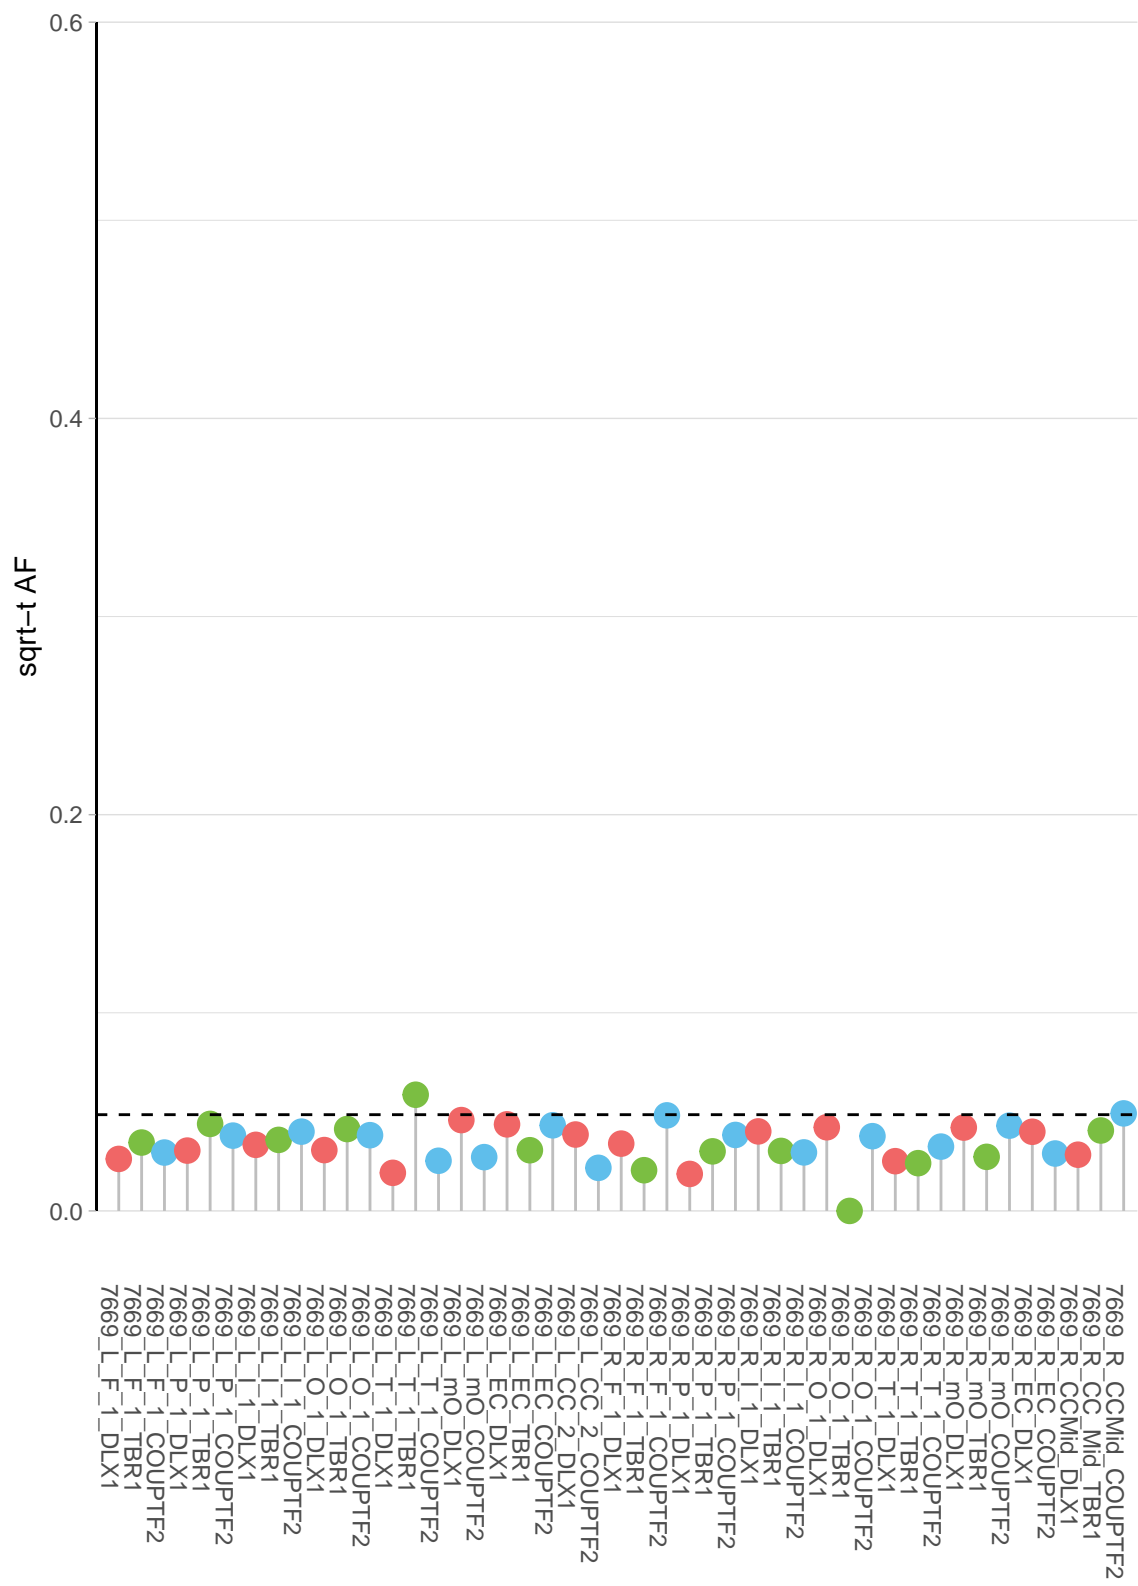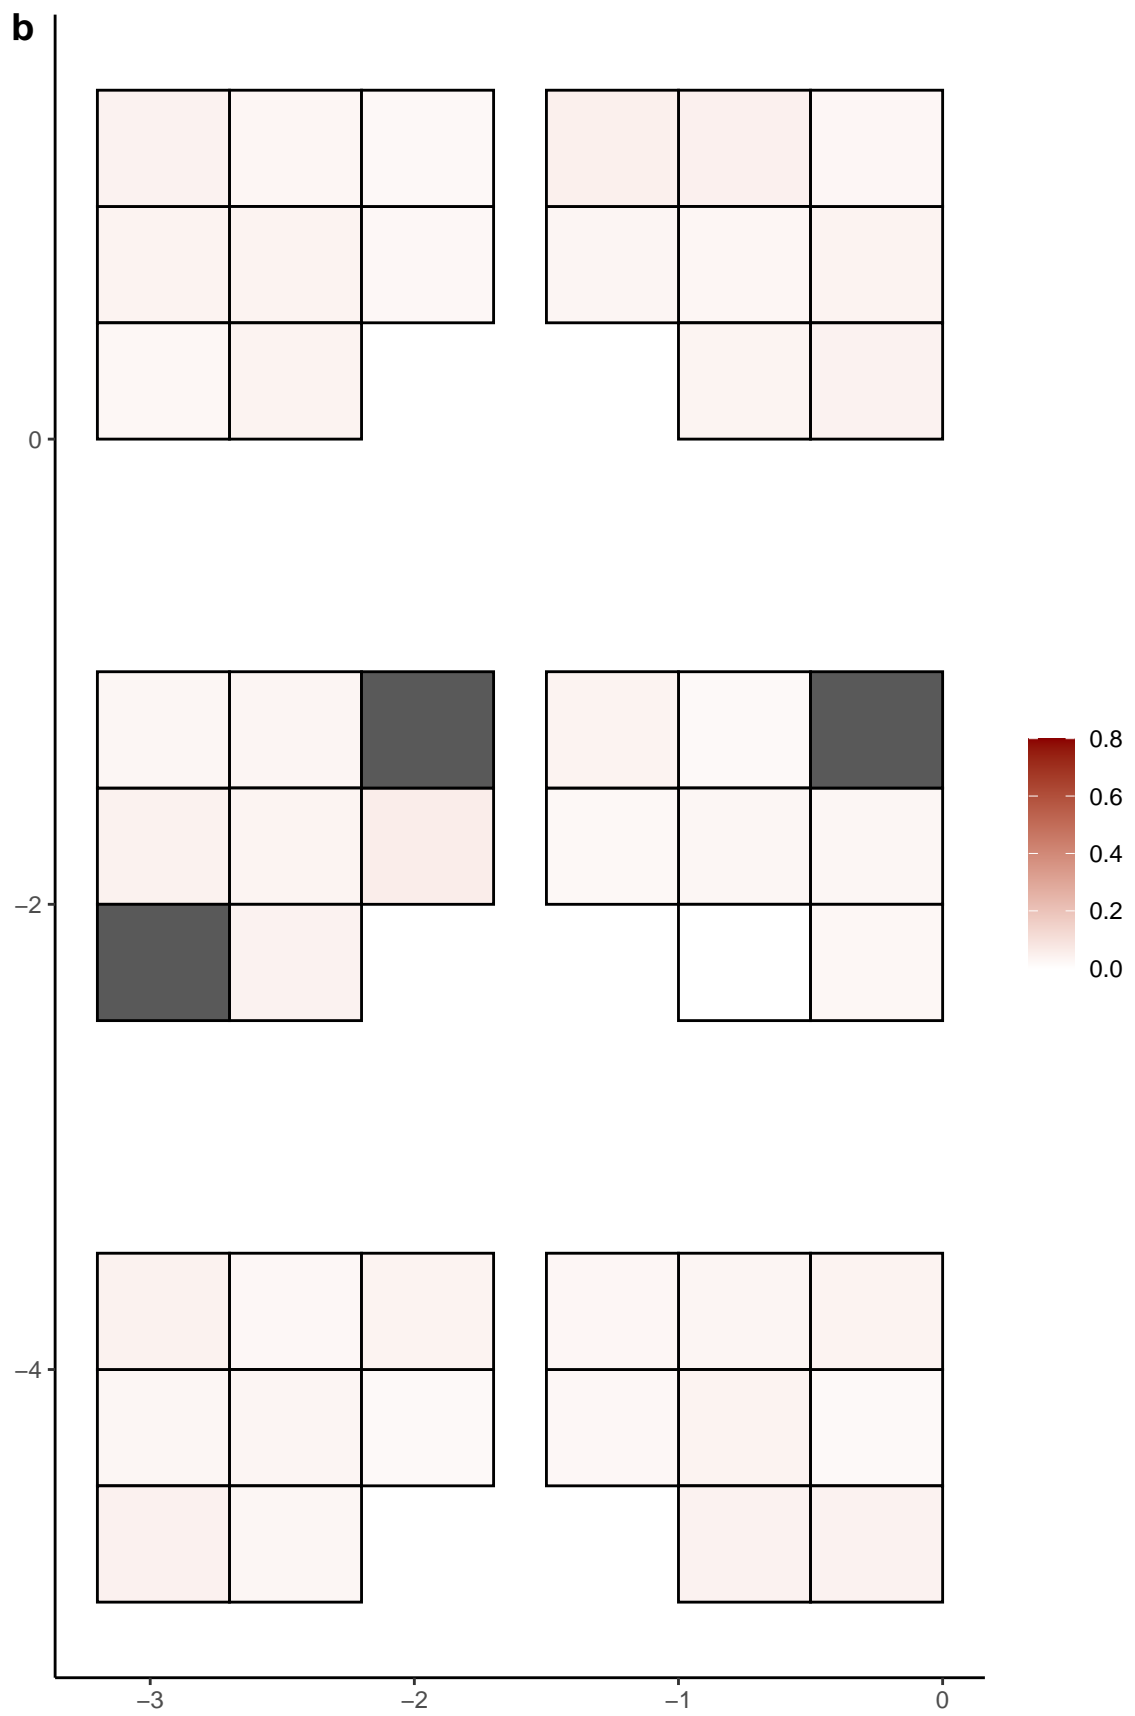



**a** ID05 4-1028303-G-A

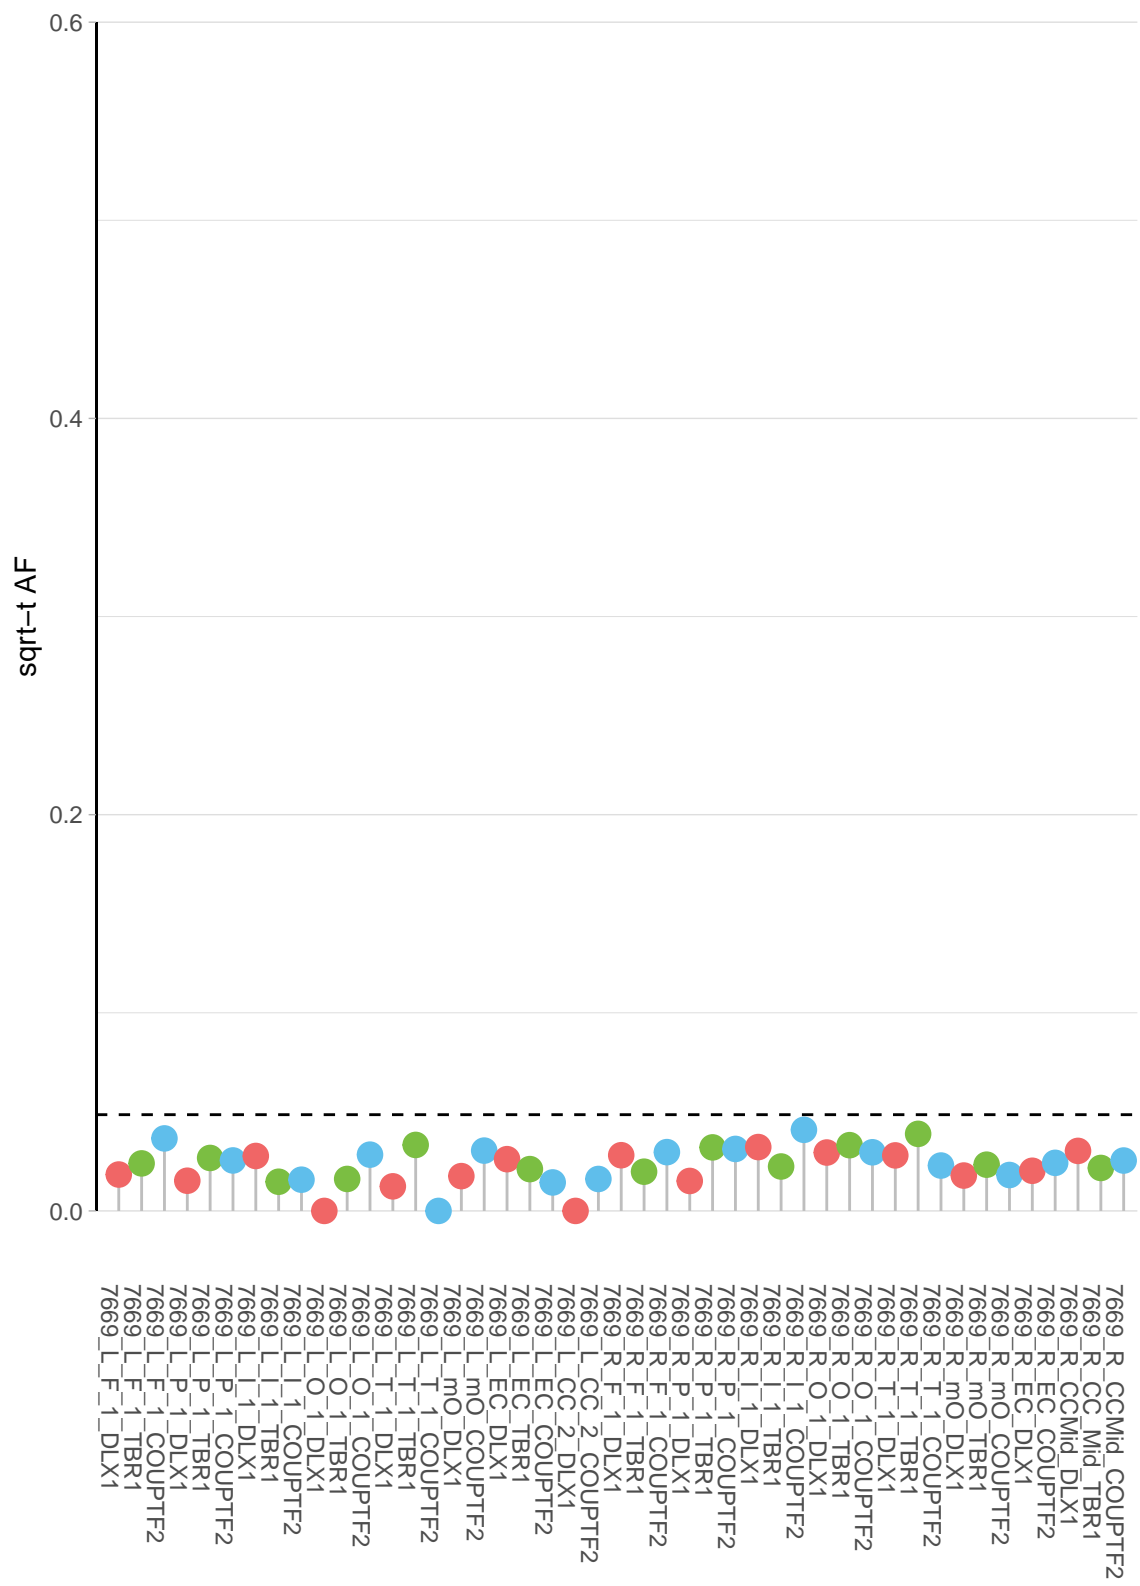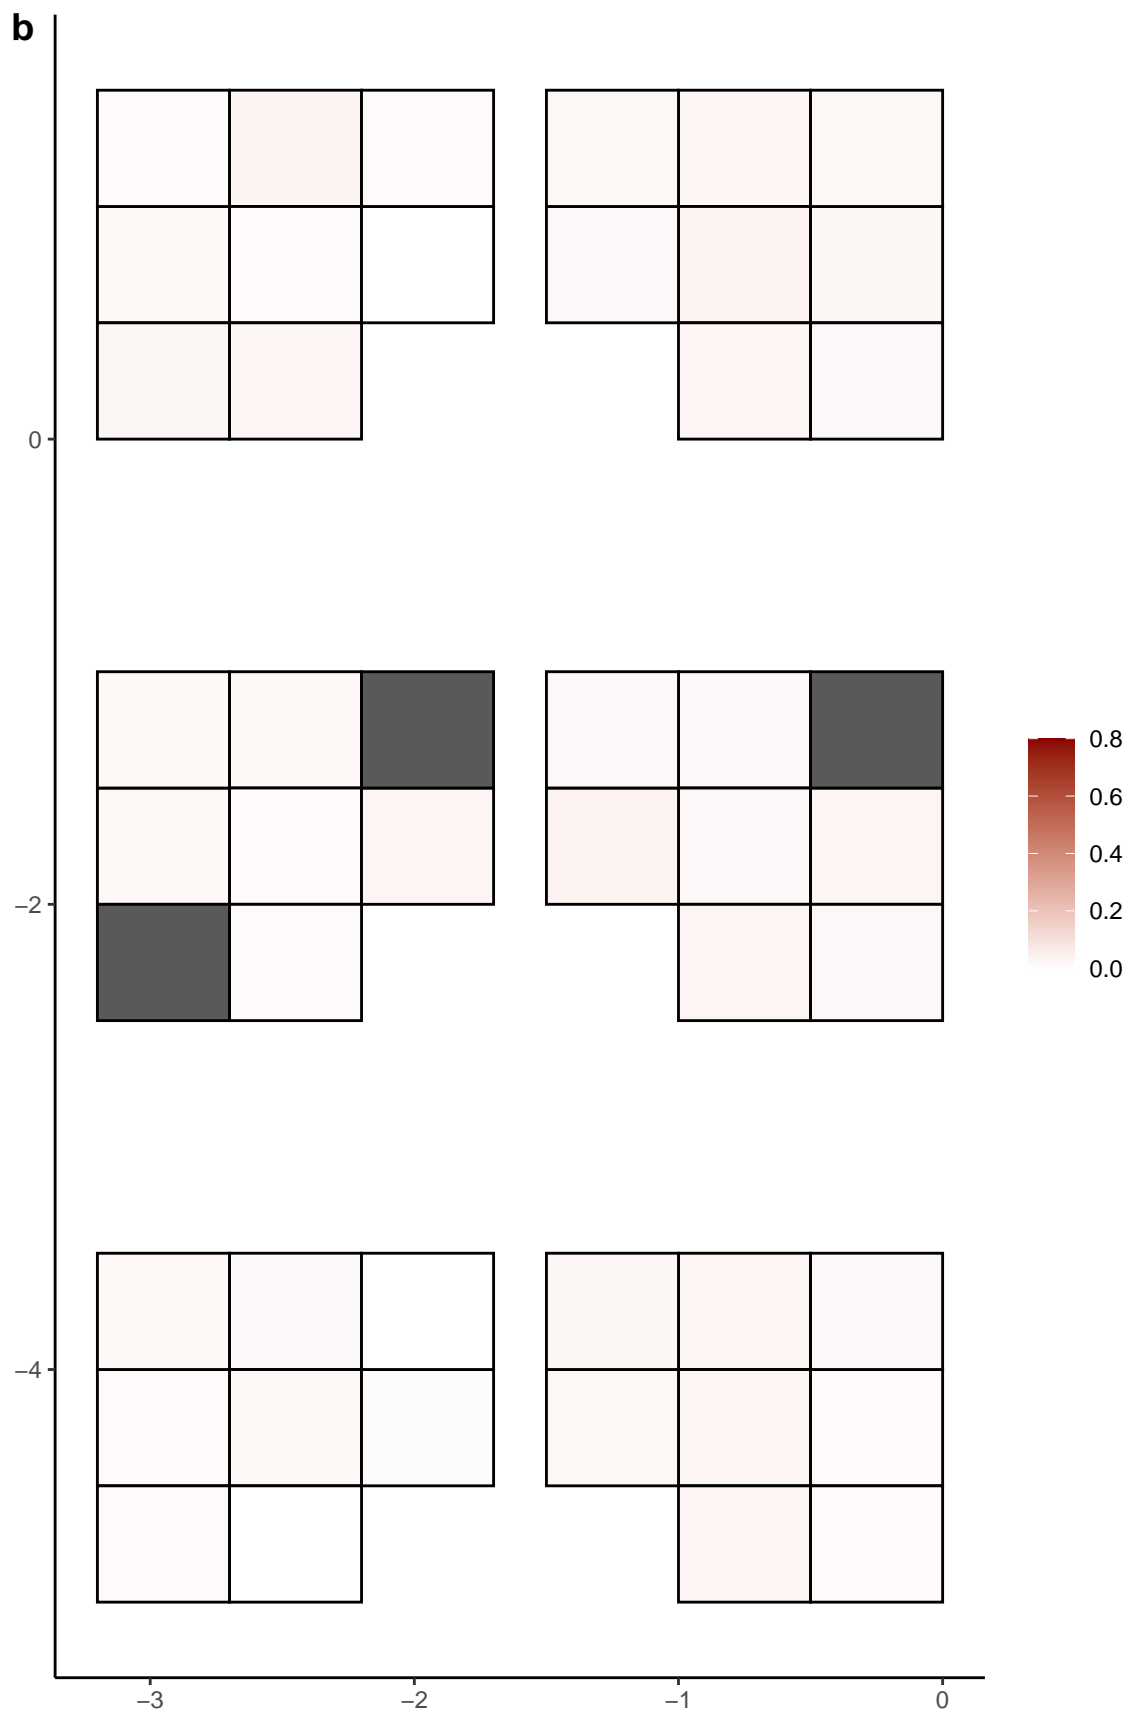



**a** ID05 4-103751165-A-G

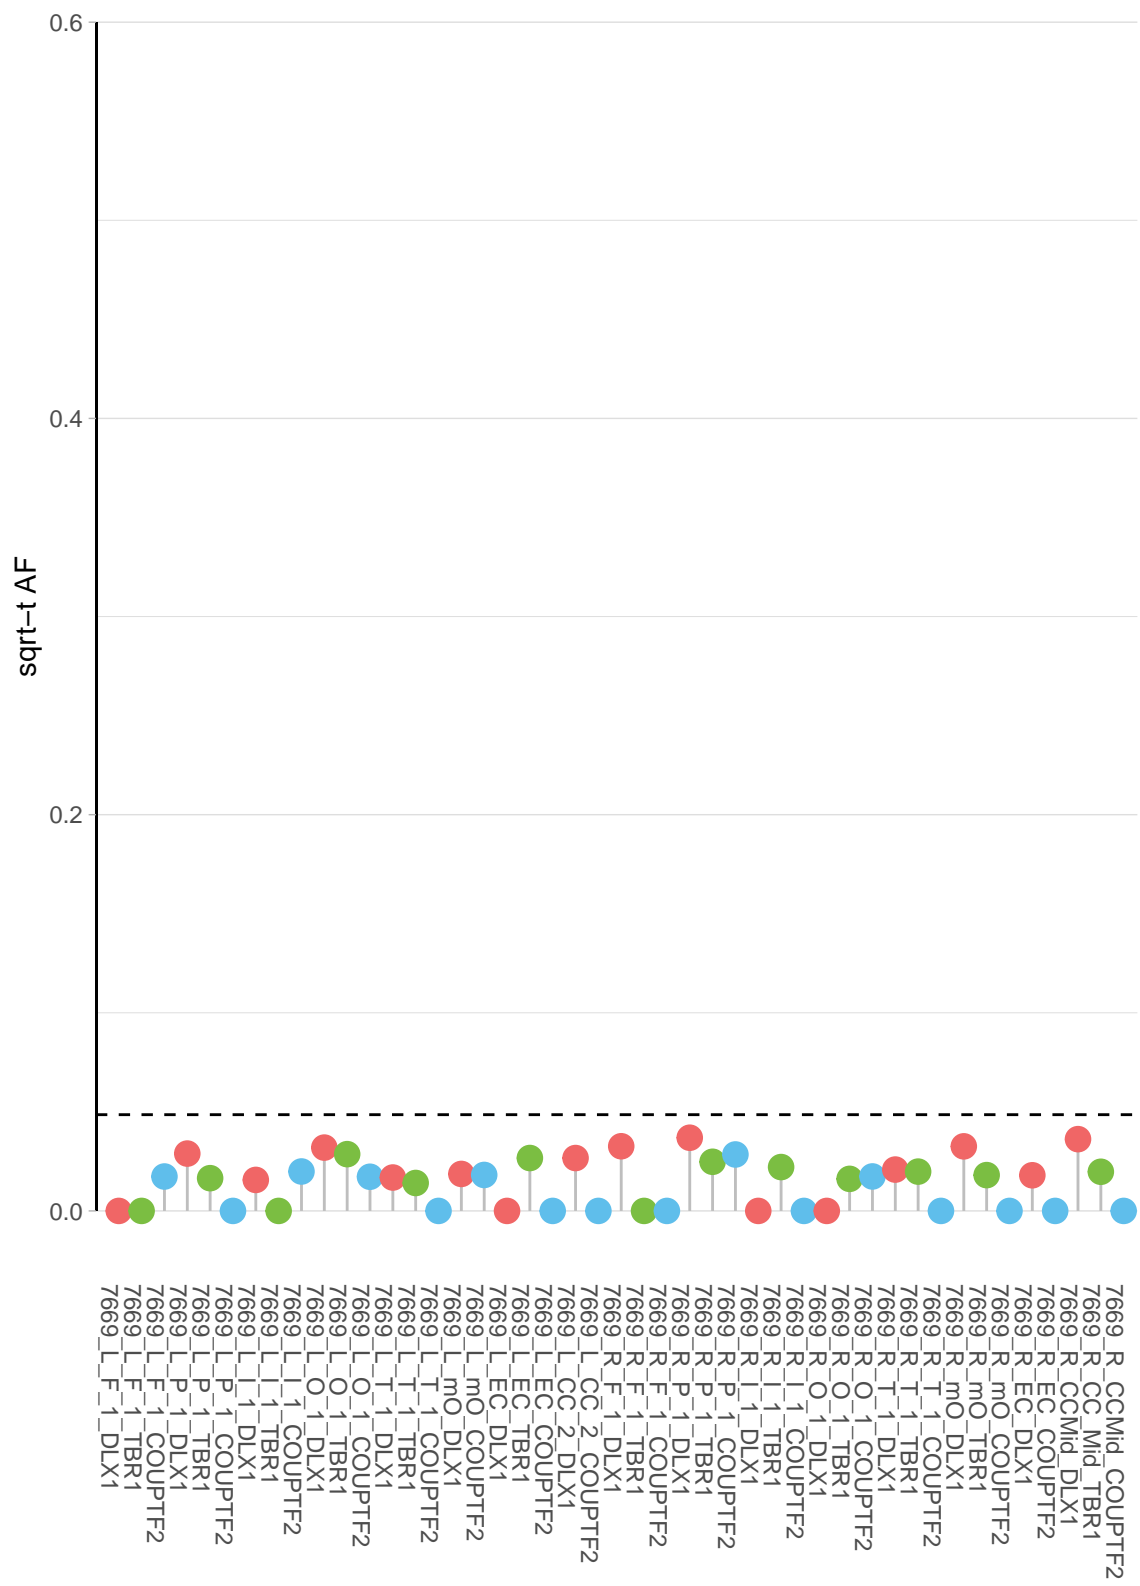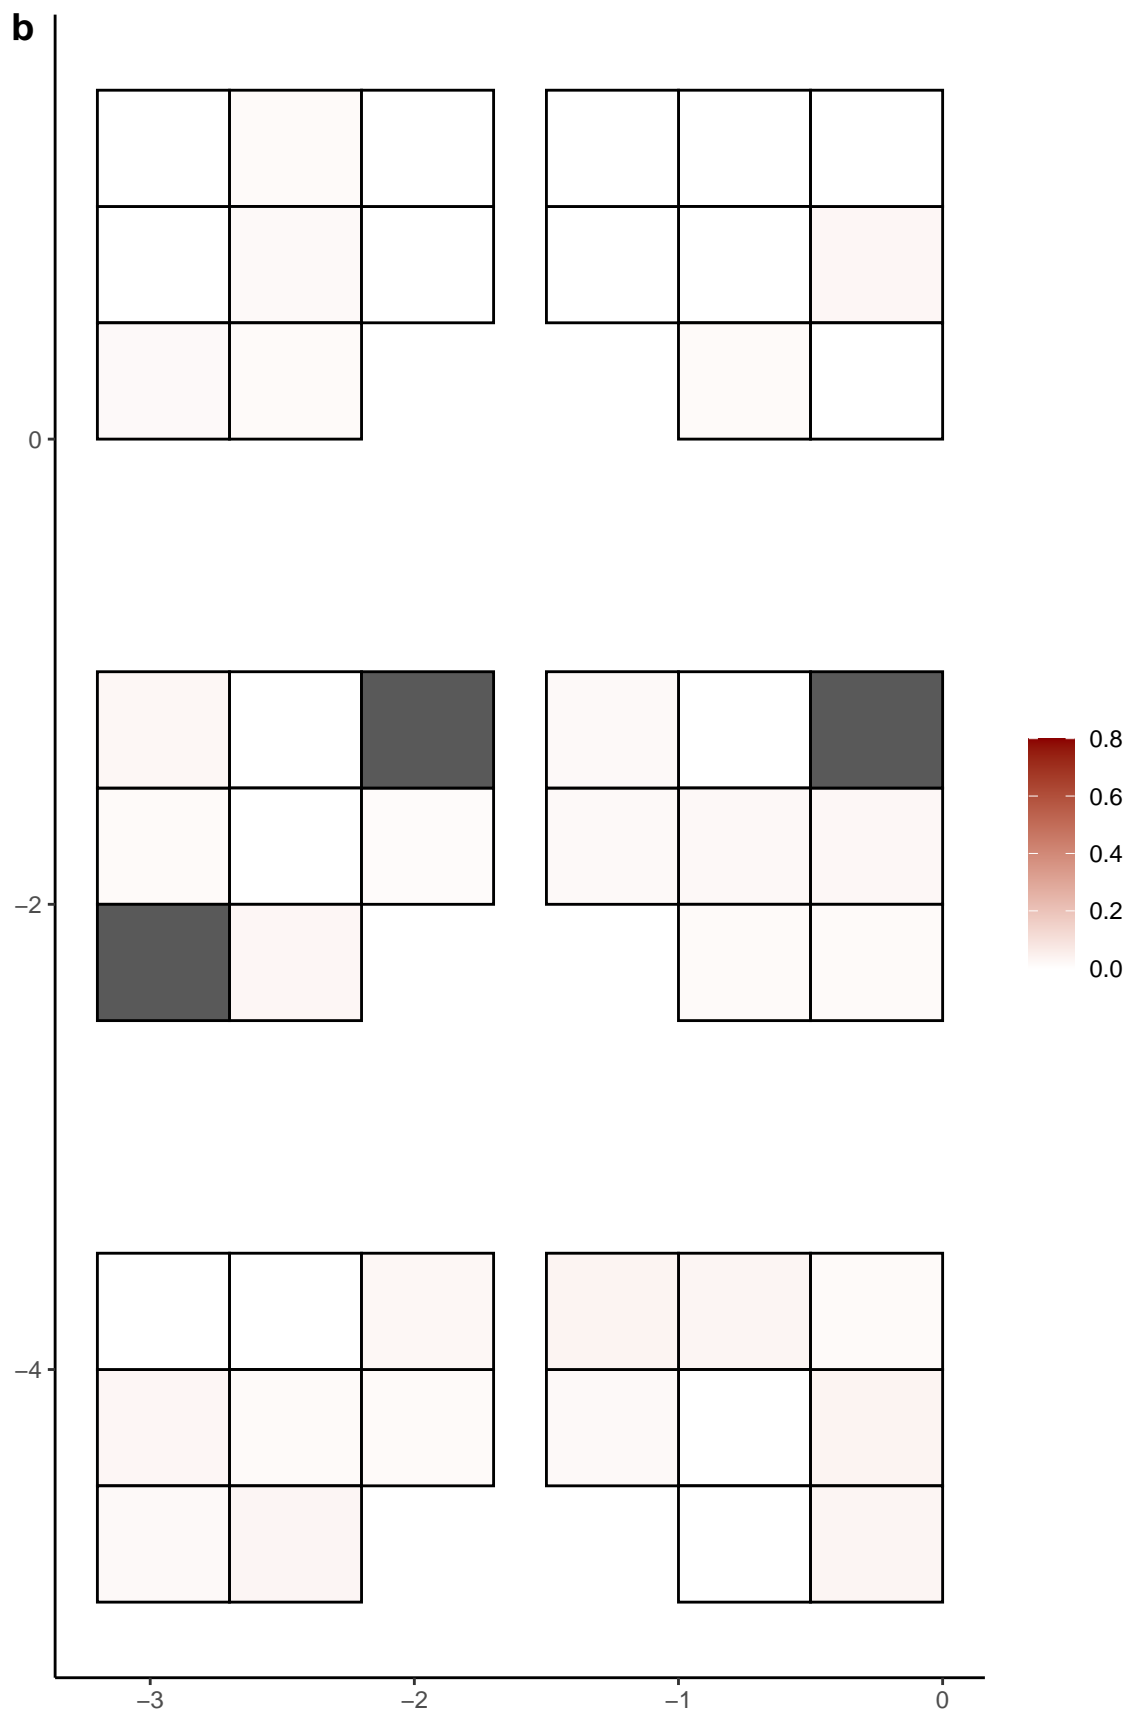

**a** ID05 4-104214112-C-T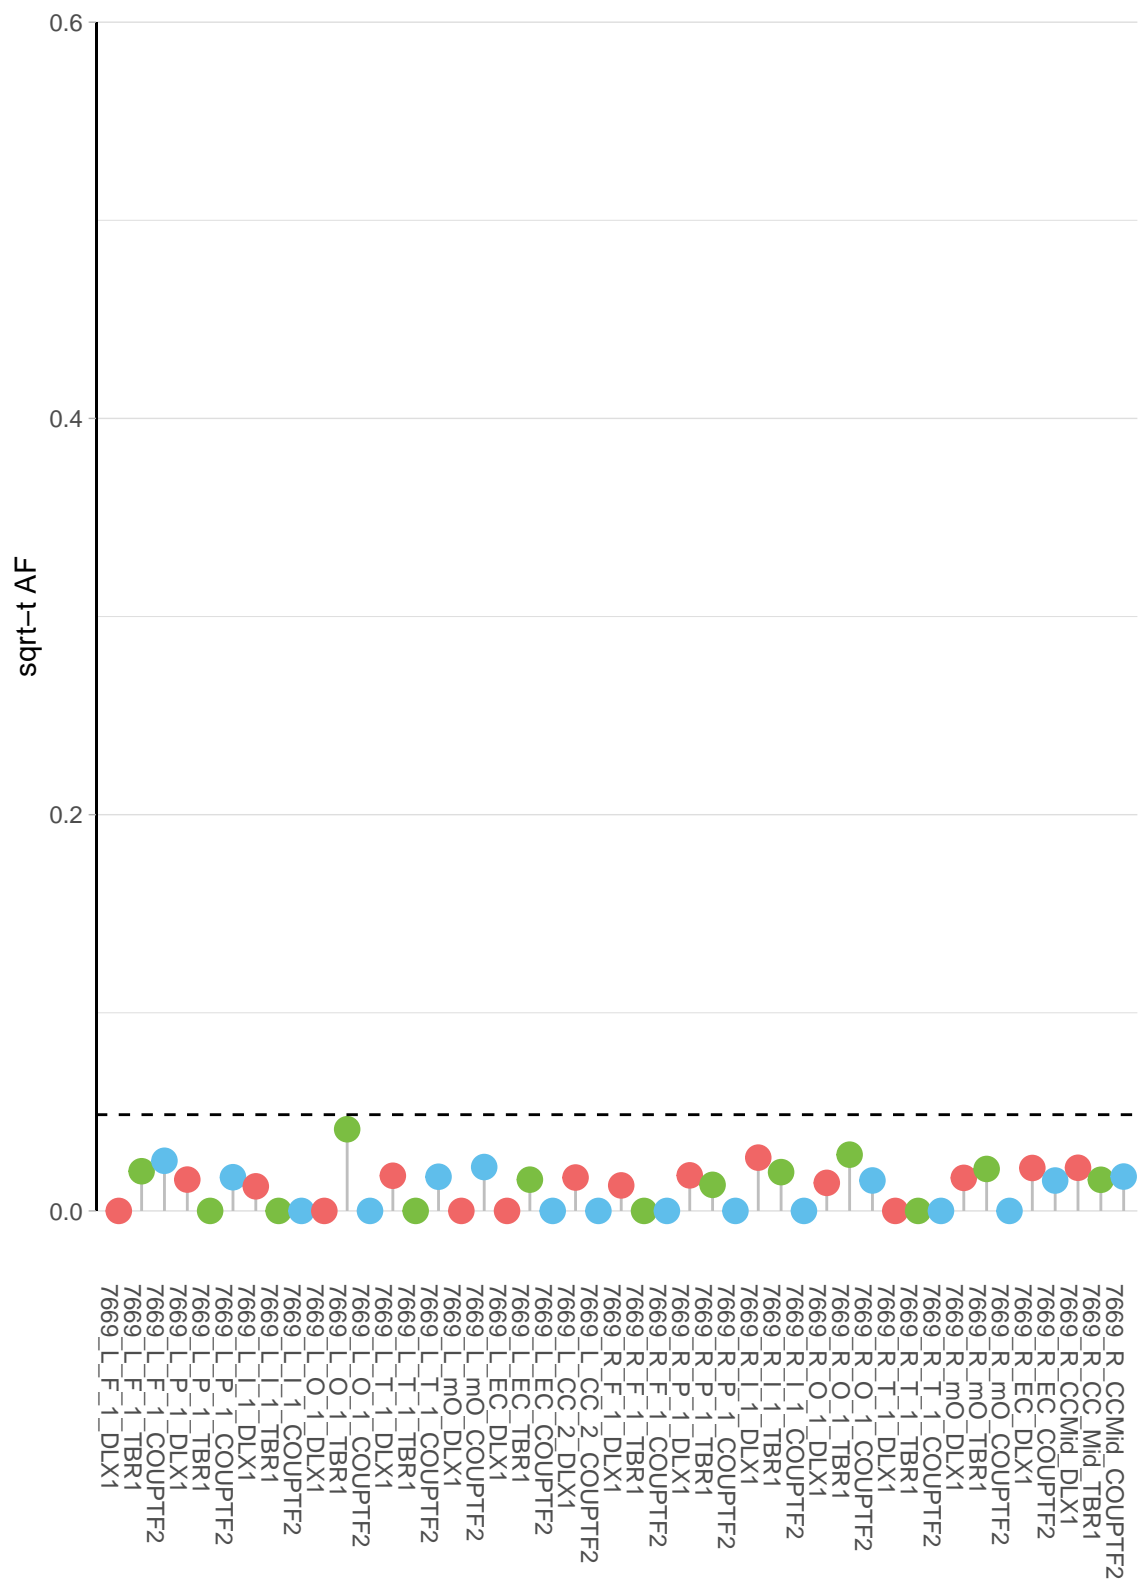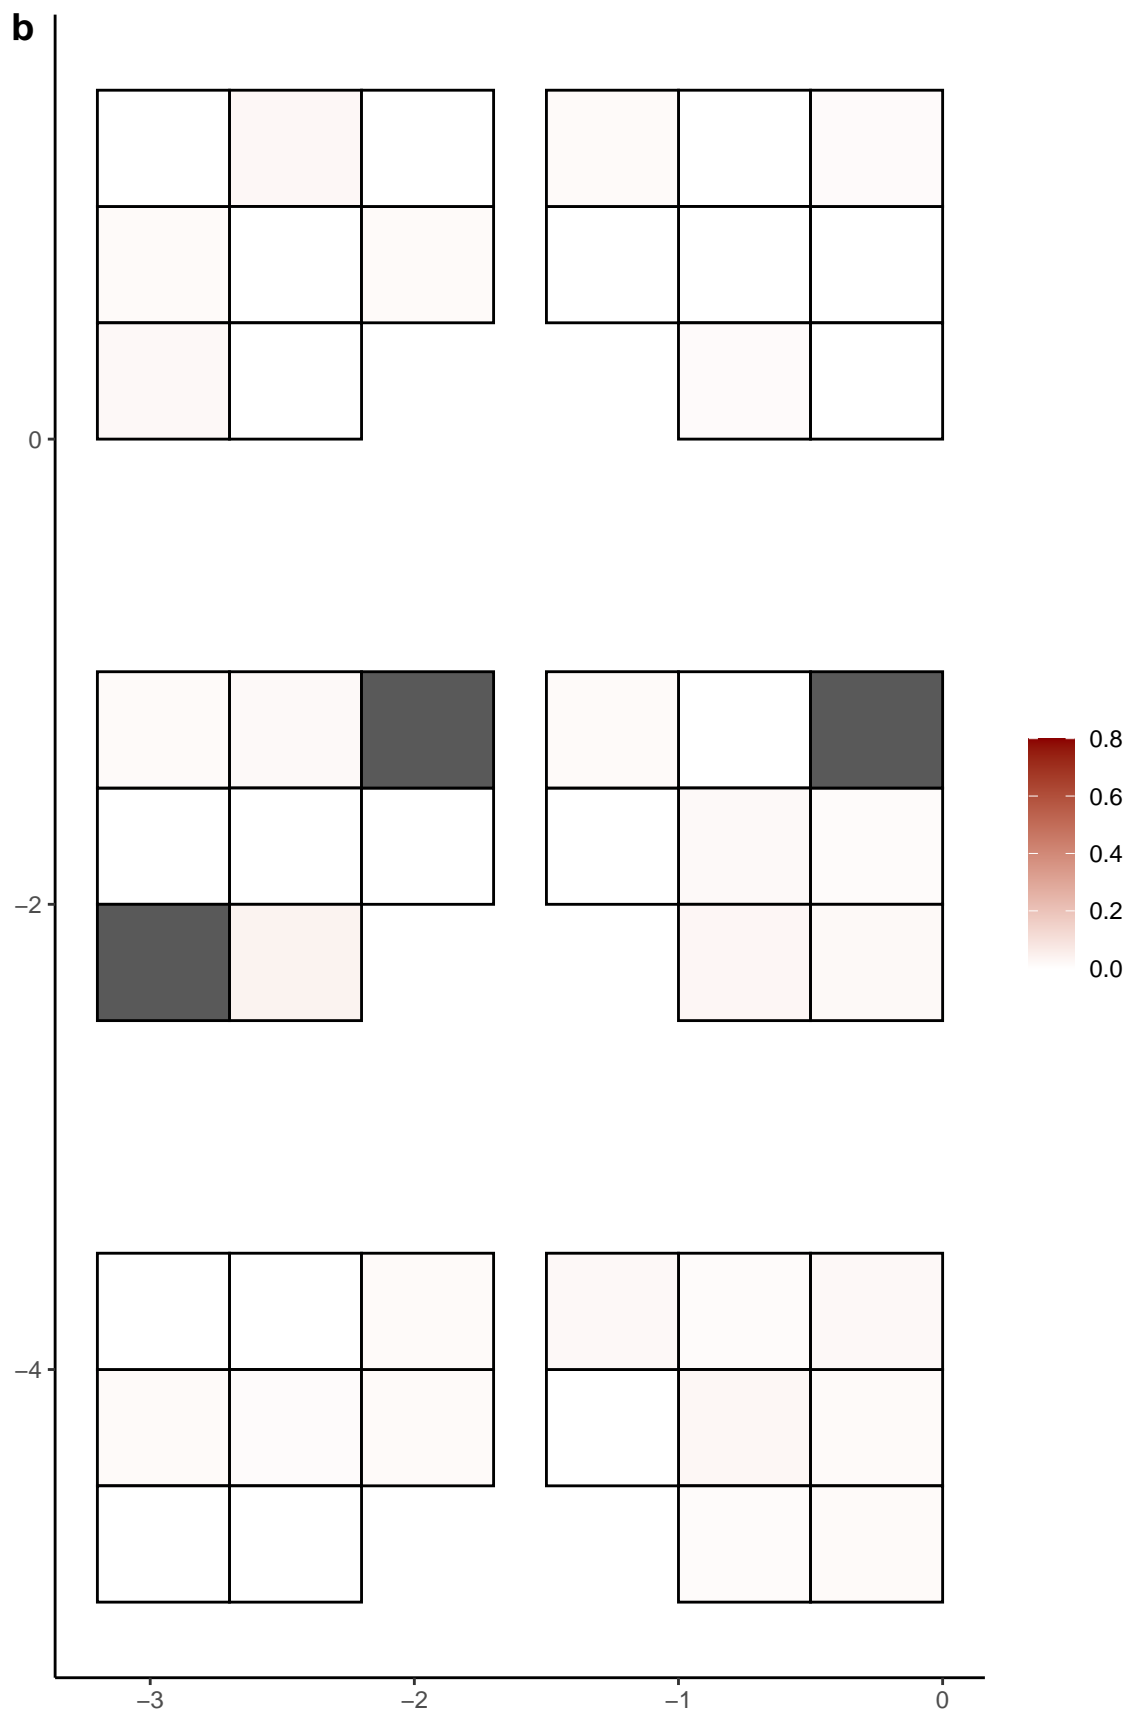

**a** ID05 4-10646818-G-A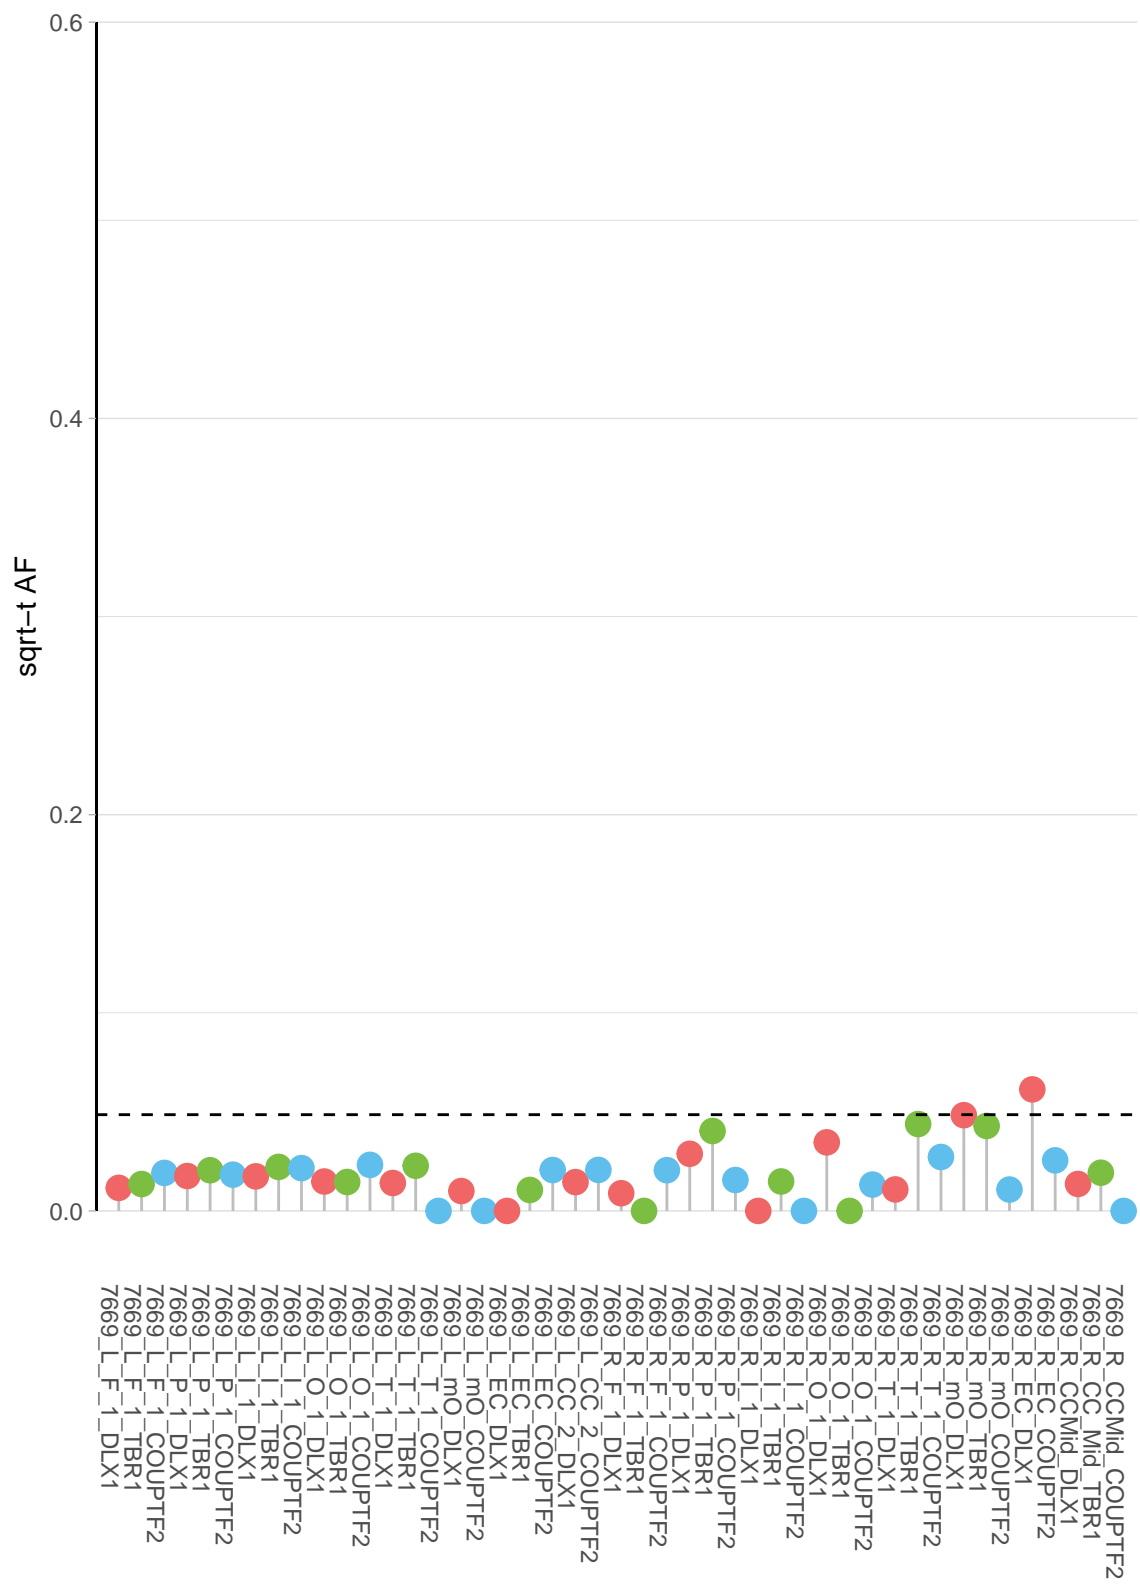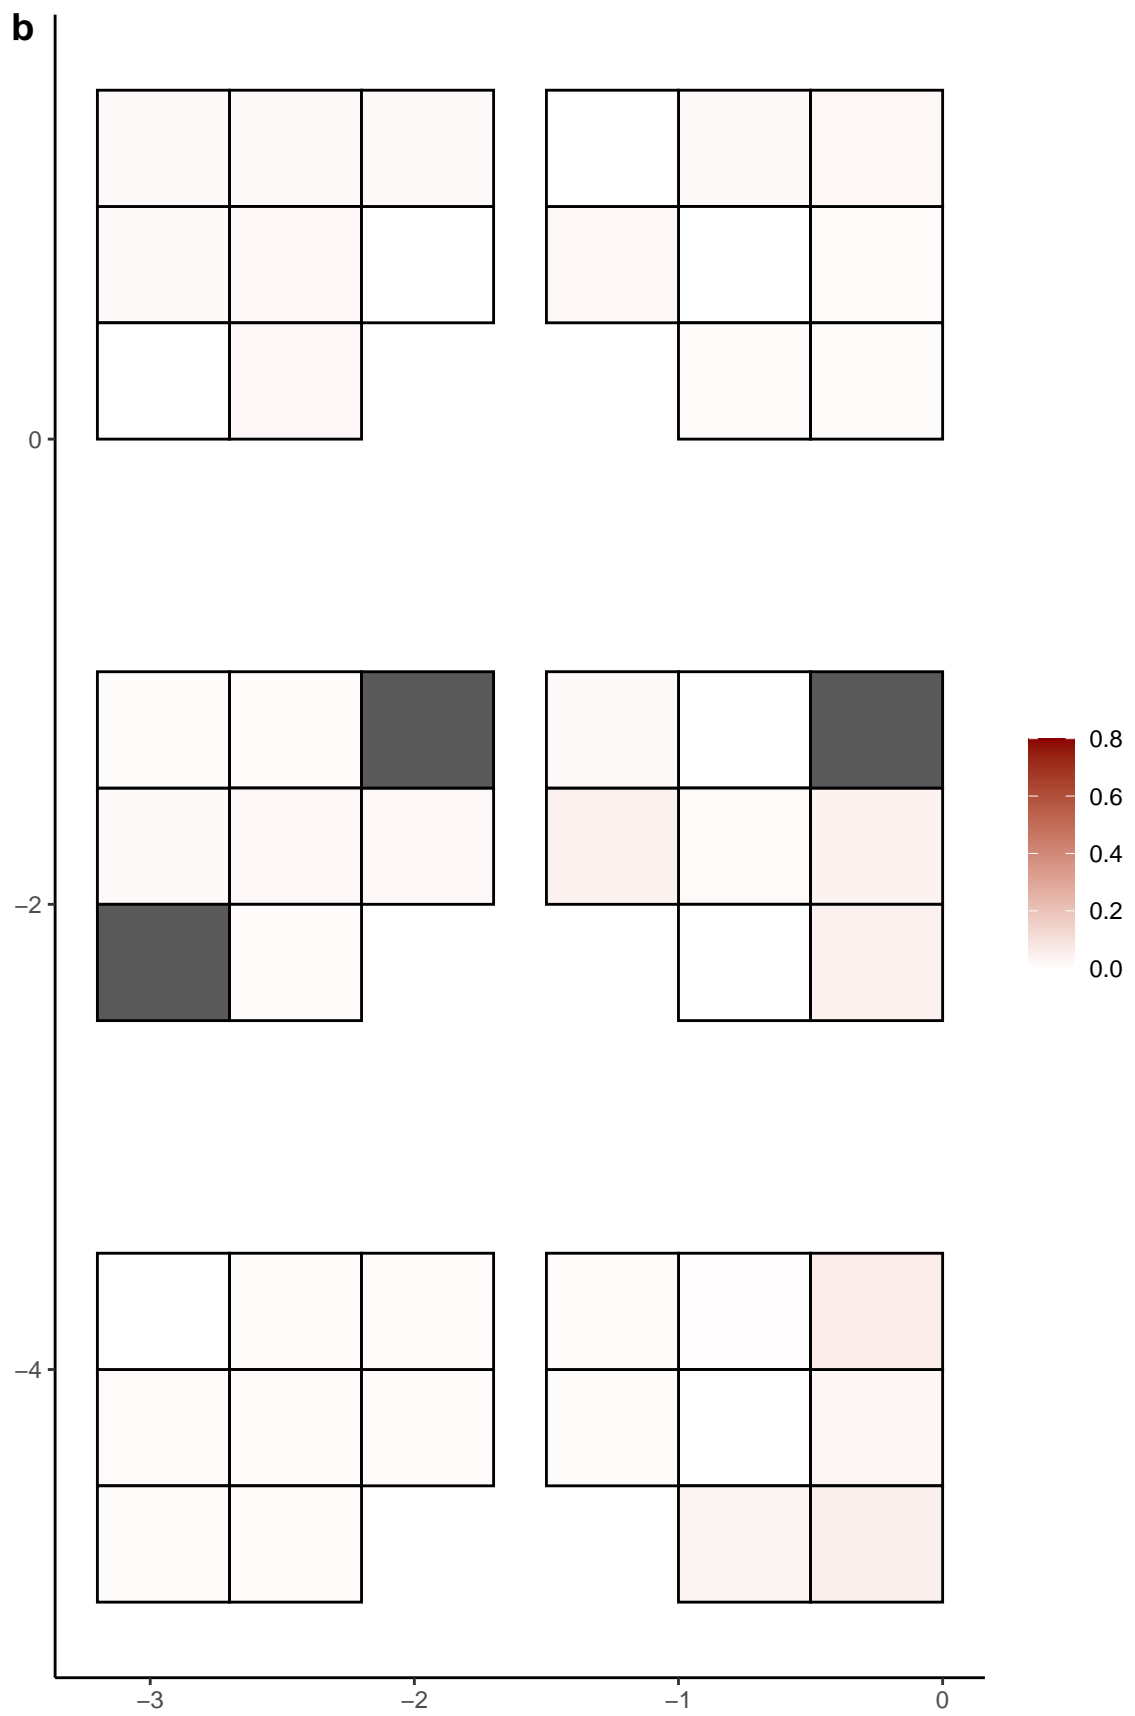

**a** ID05 4-109178107-T-A

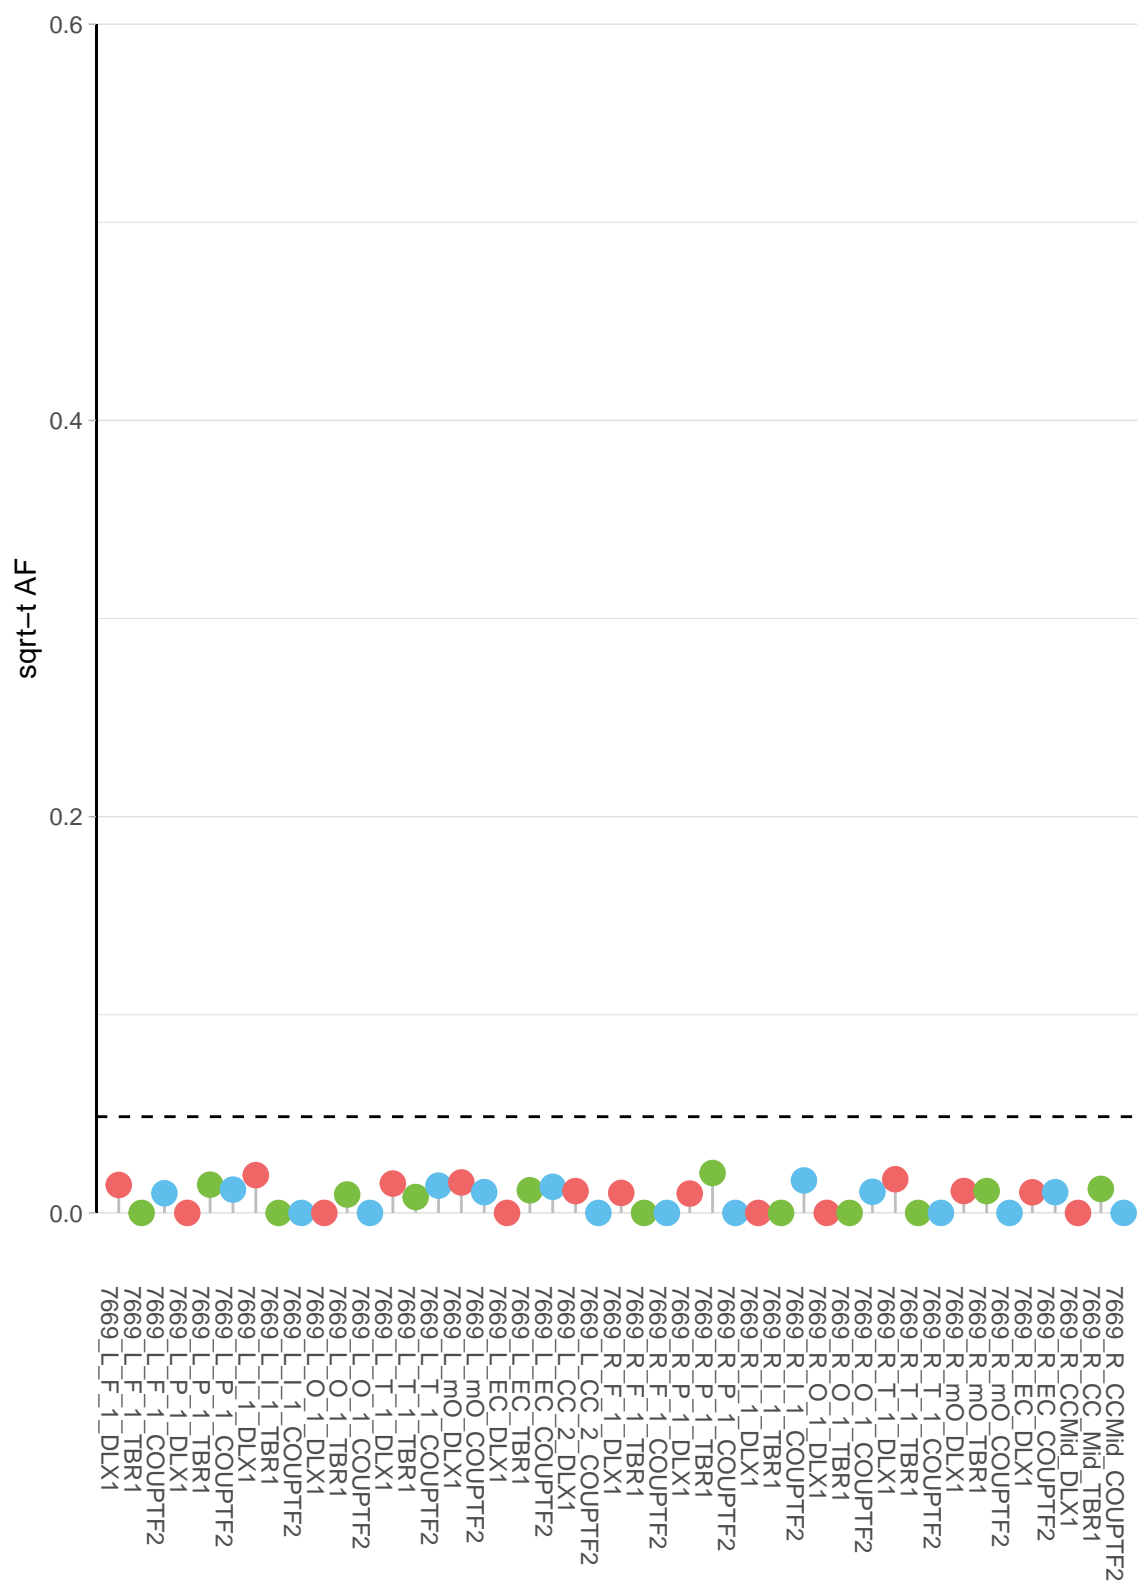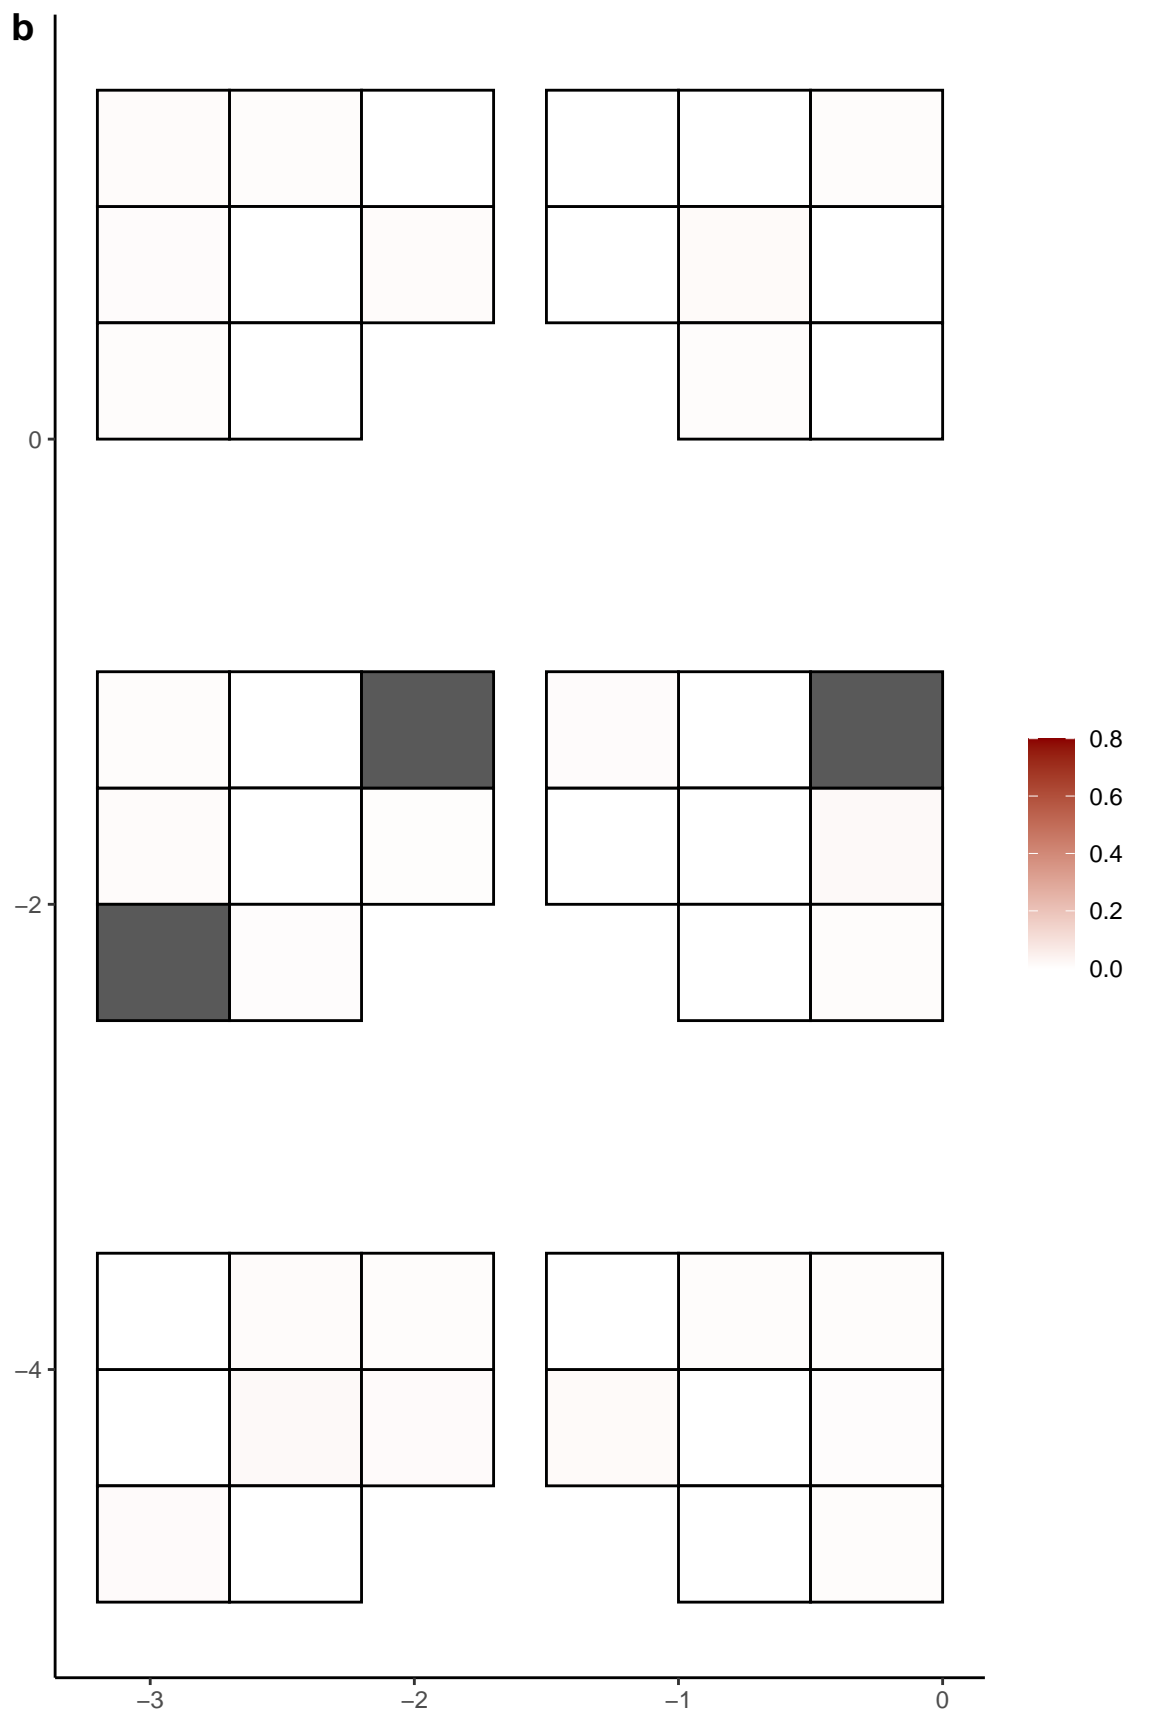



**a** ID05 4-111676042-A-T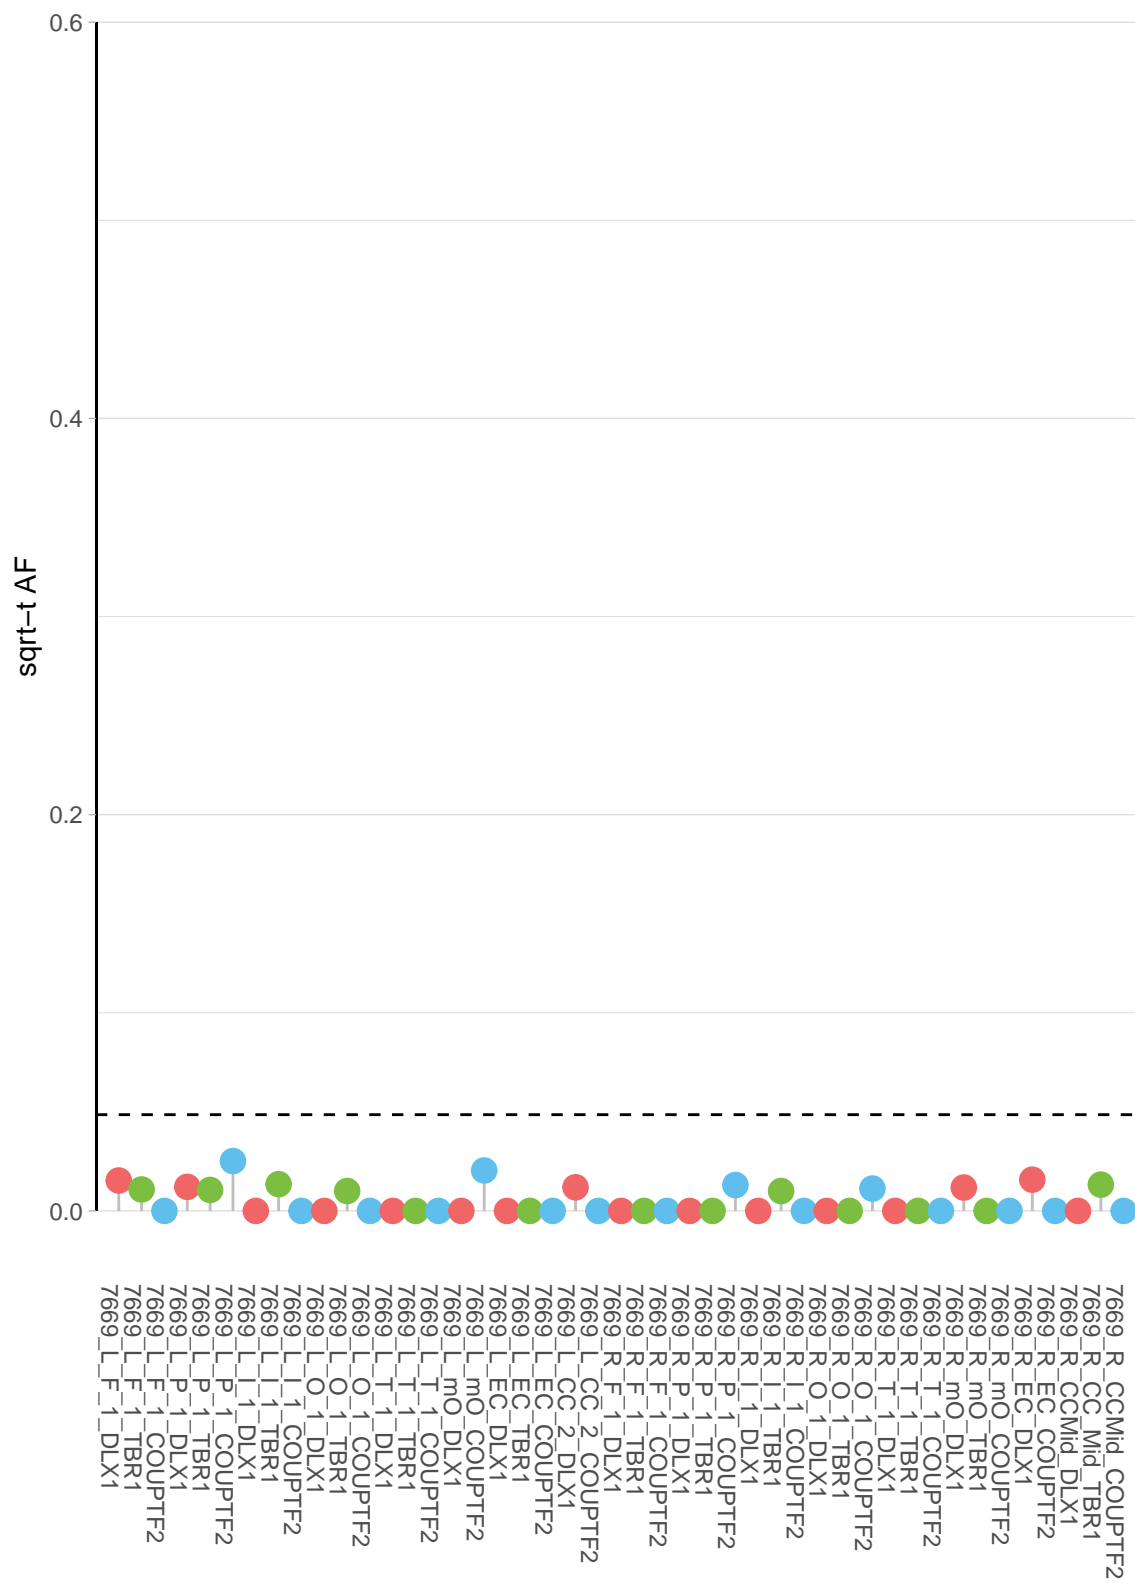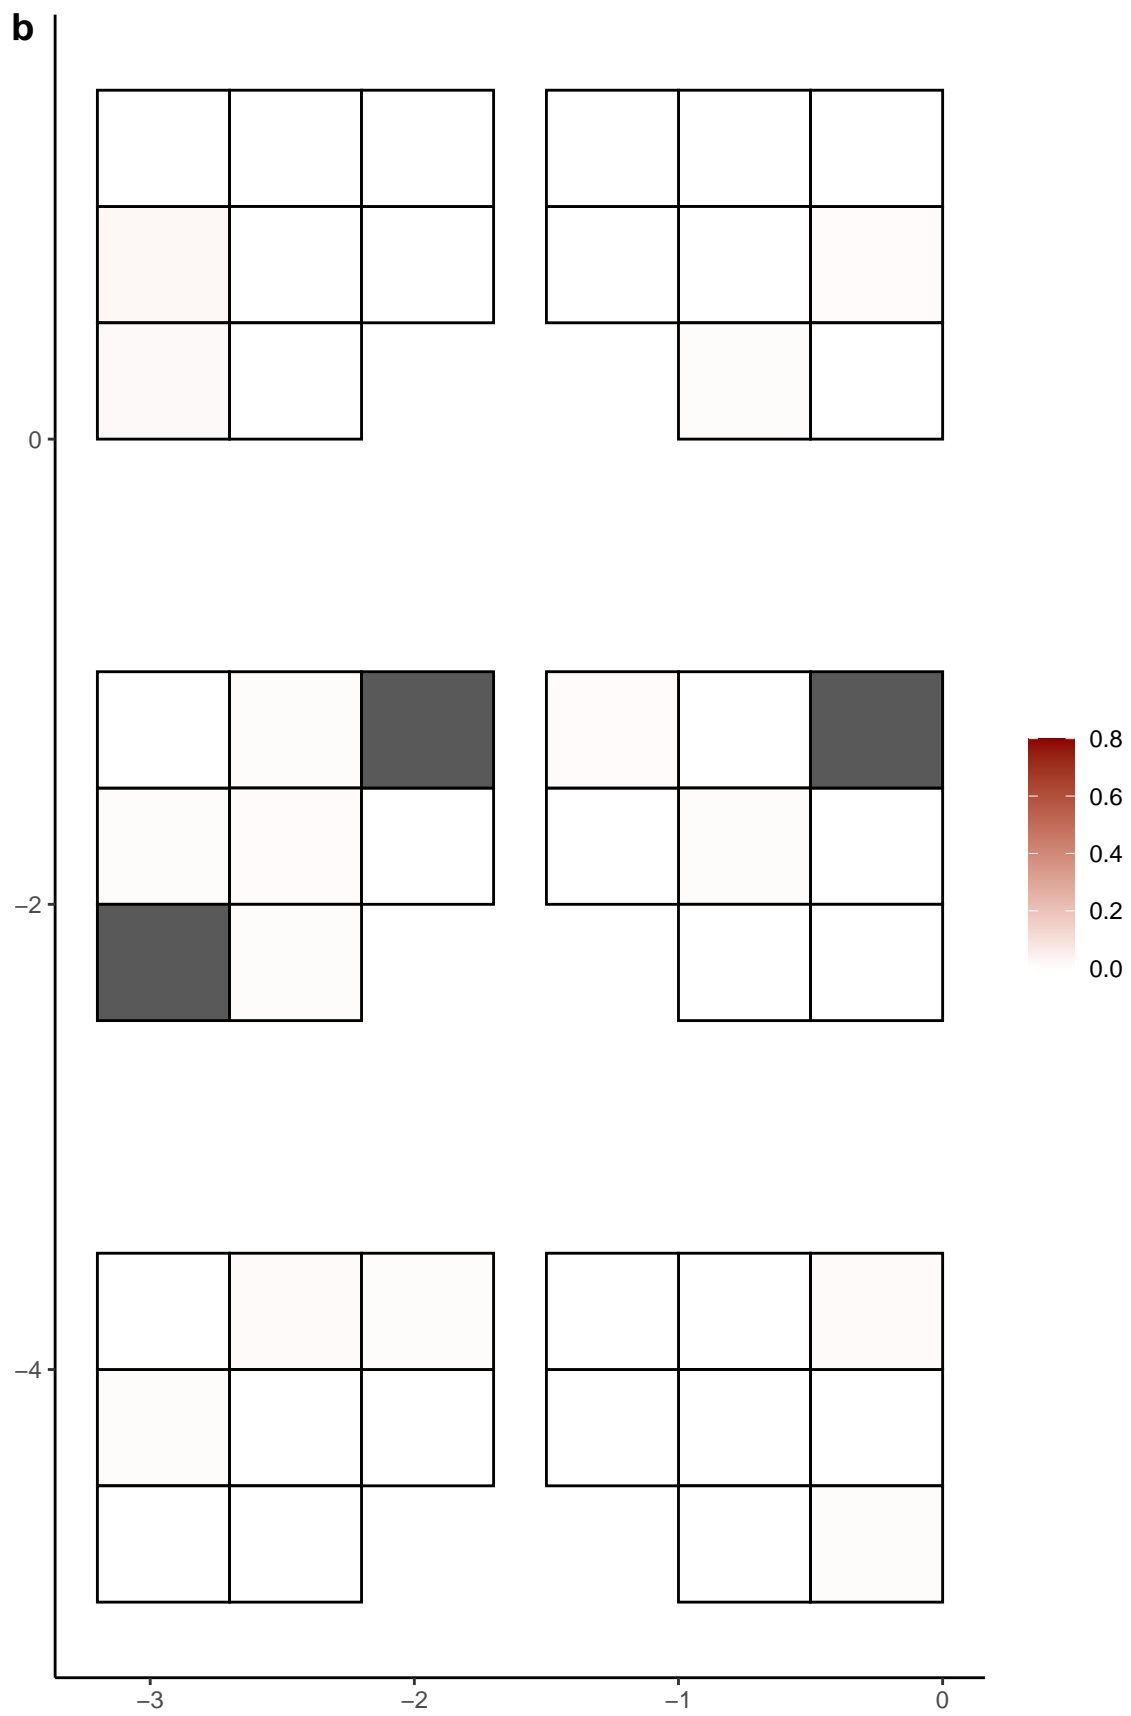

**a** ID05 4-111915329-C-T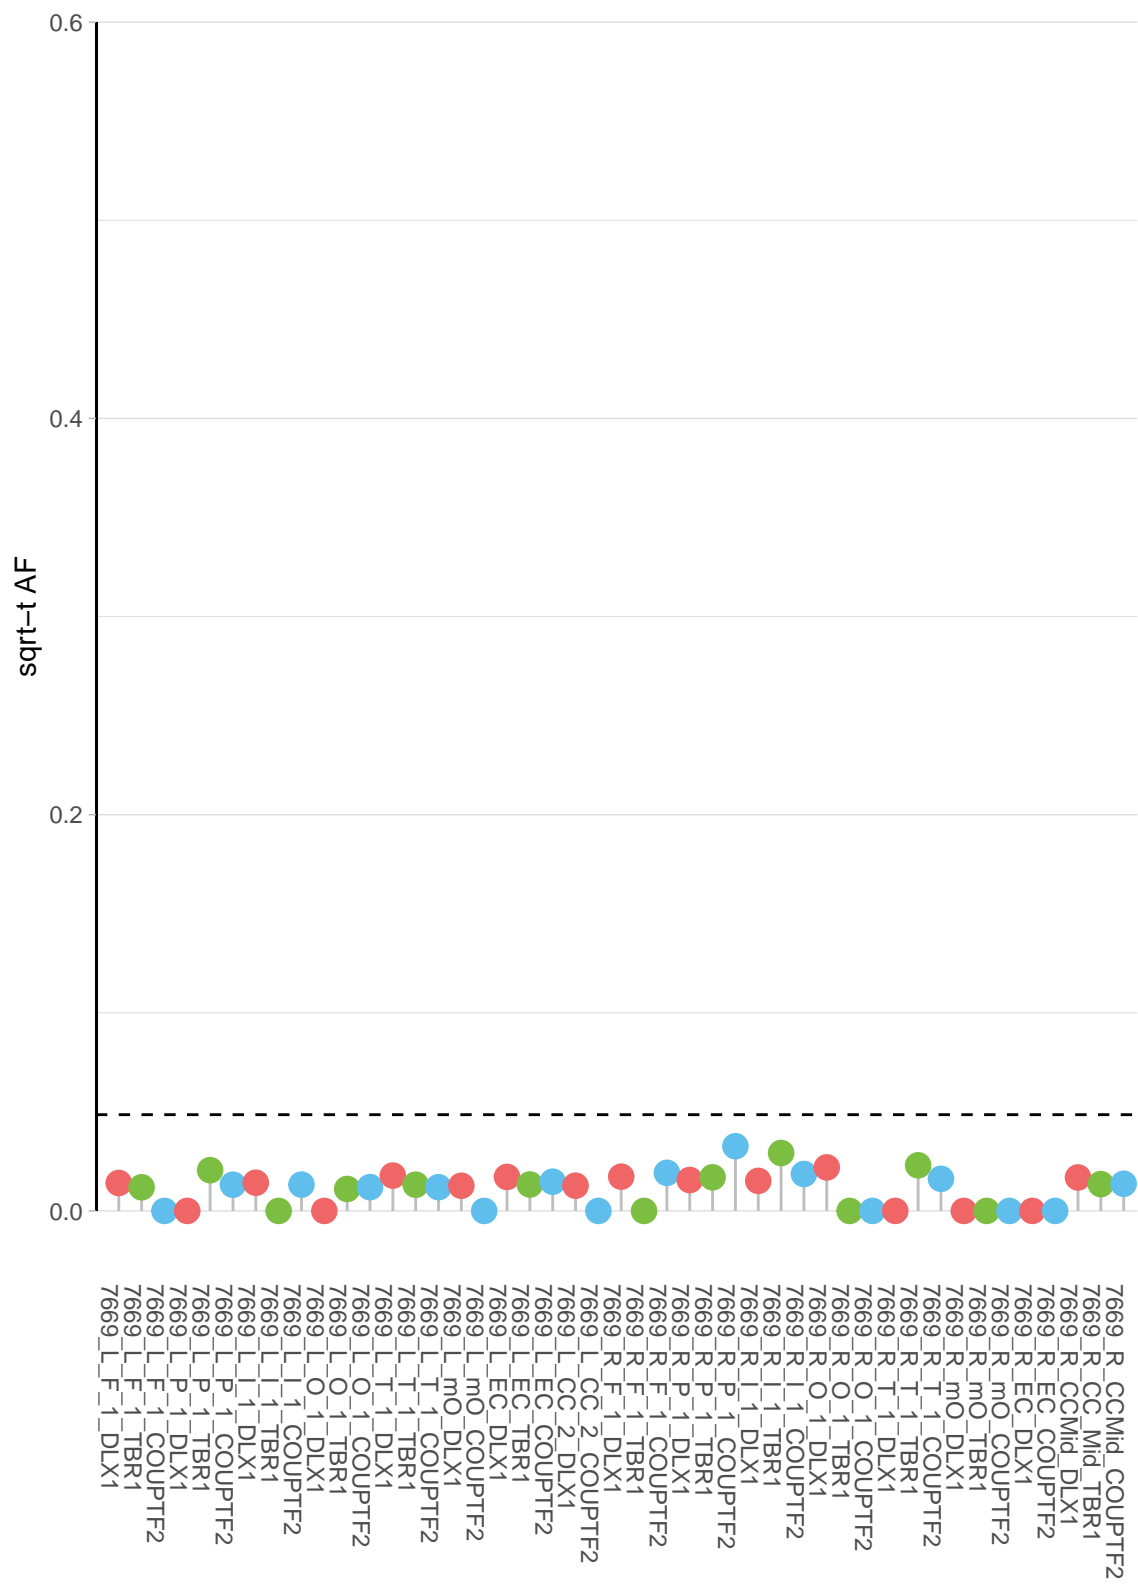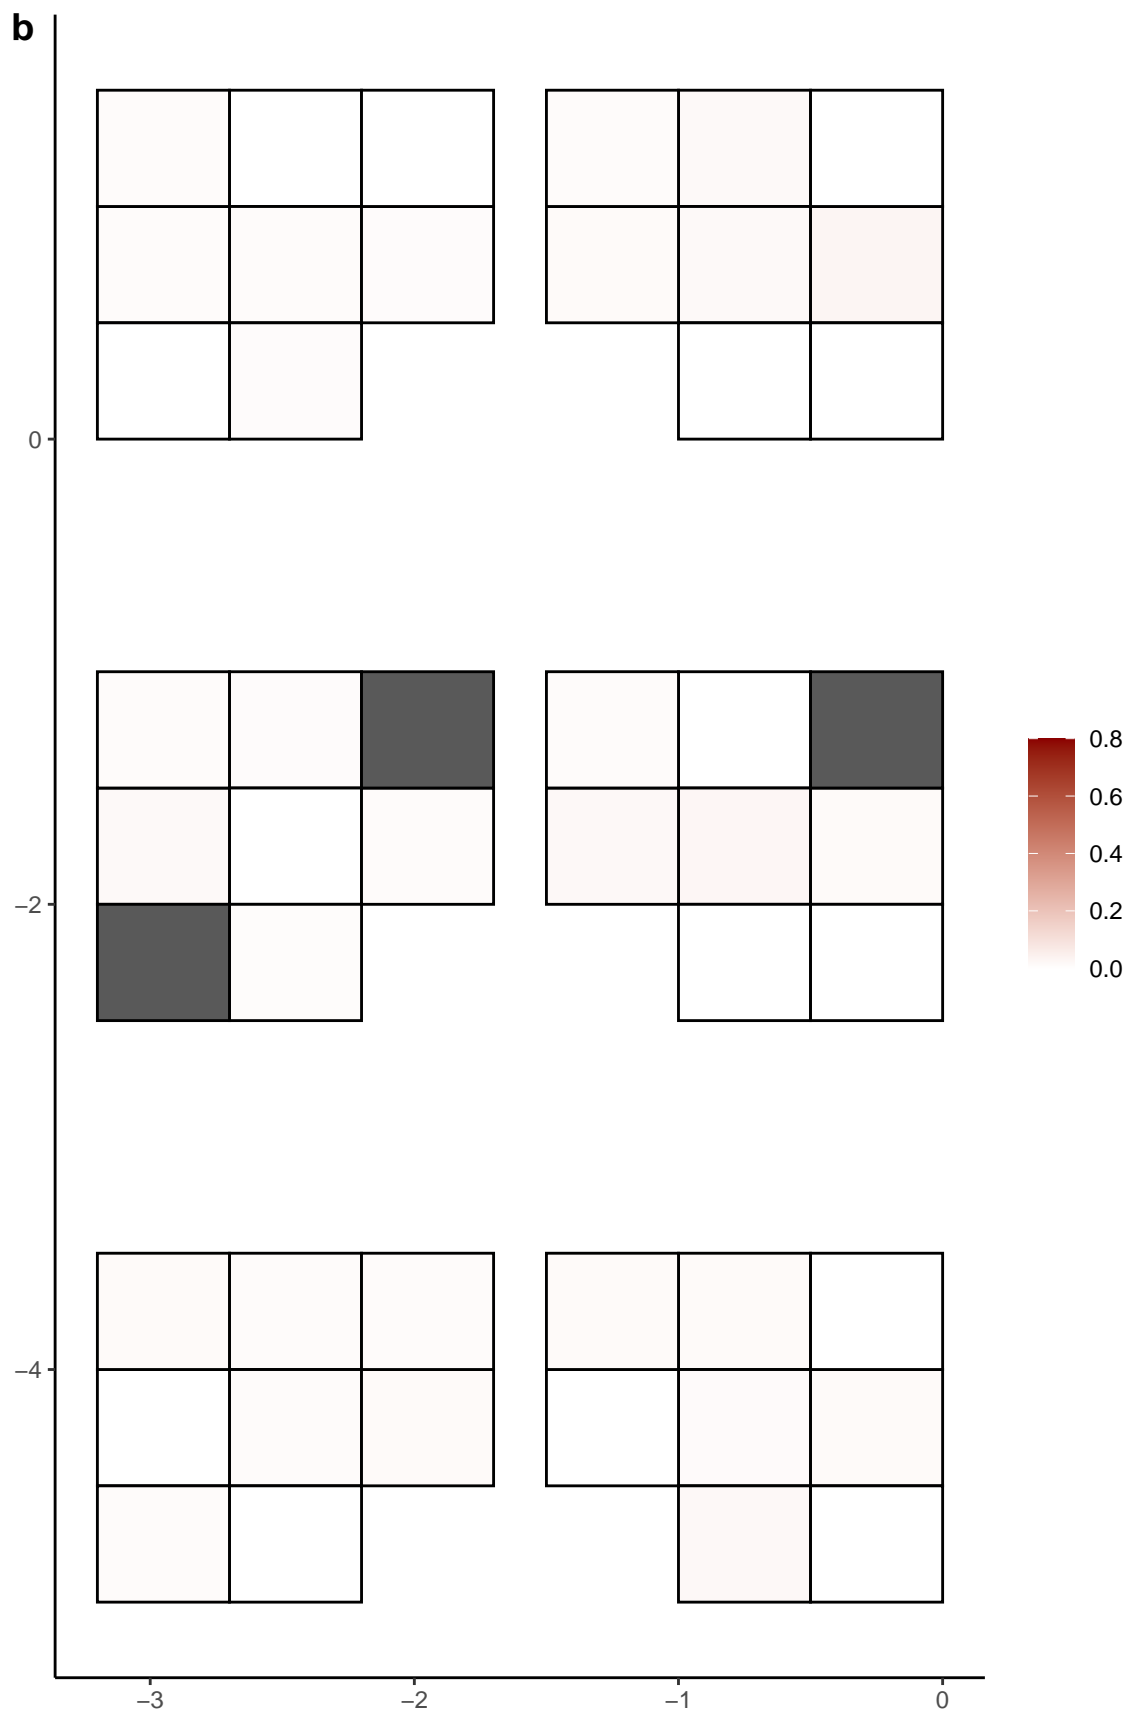

**a** ID05 4-112309482-G-A

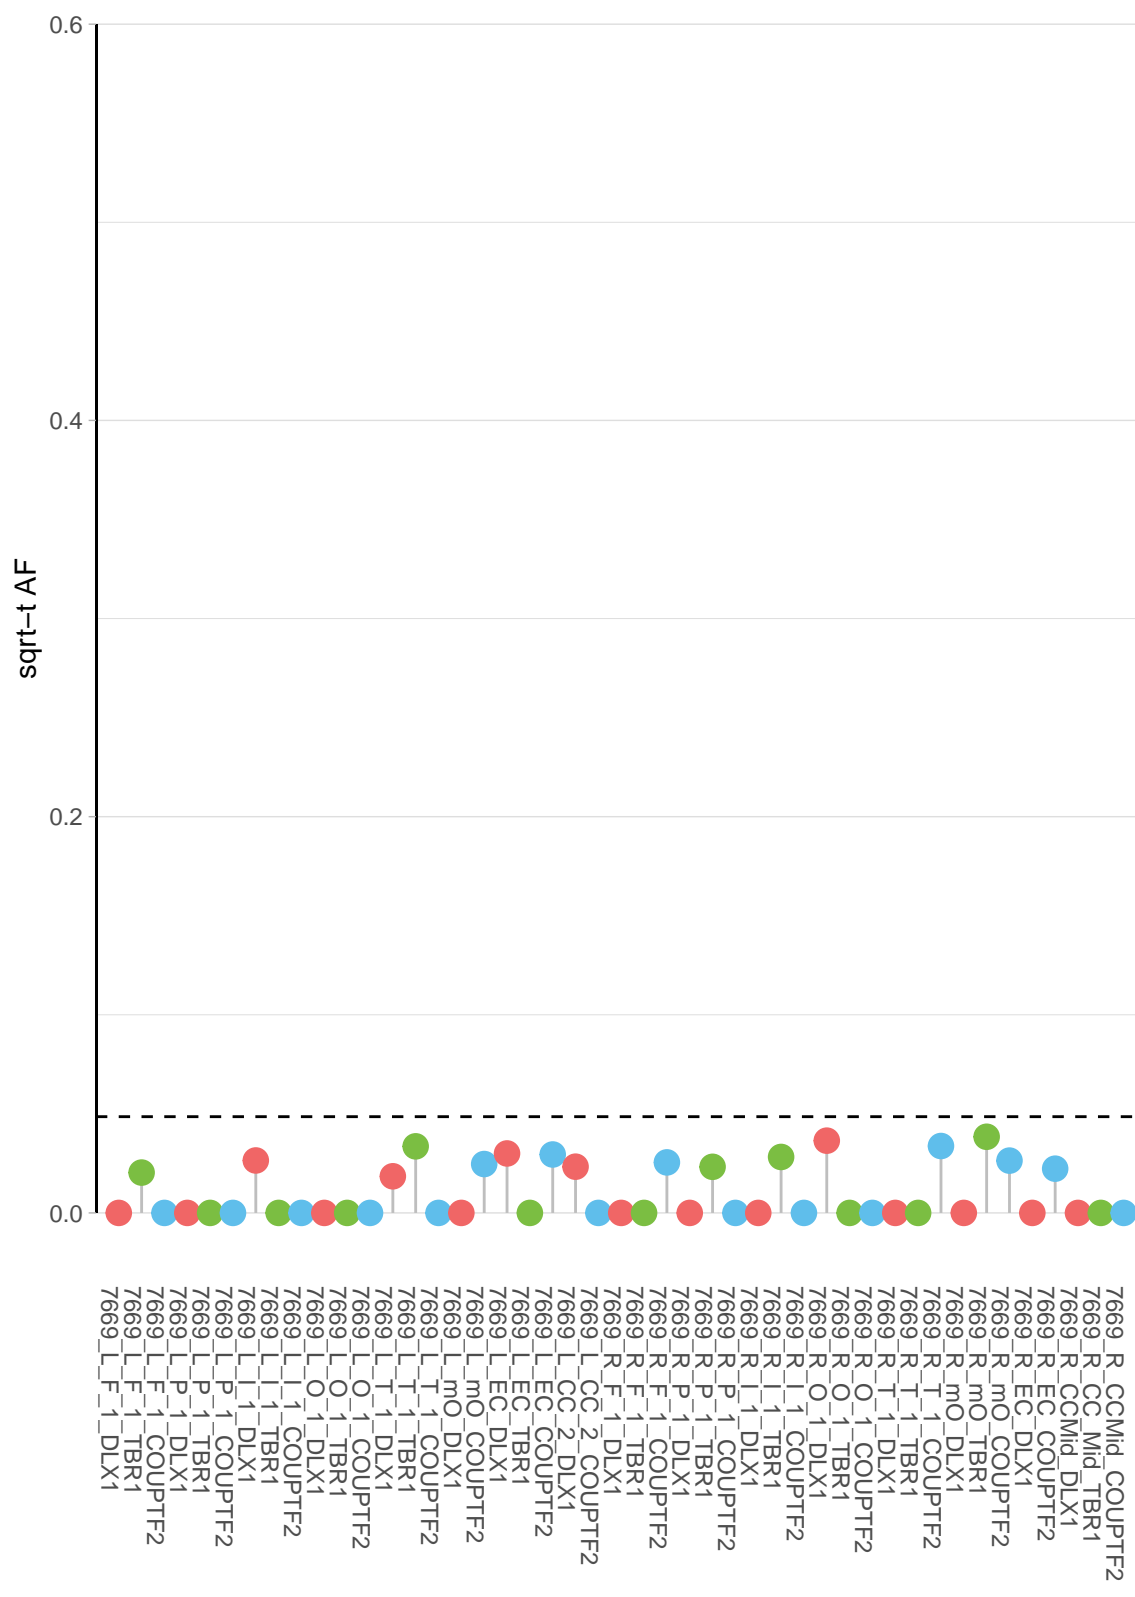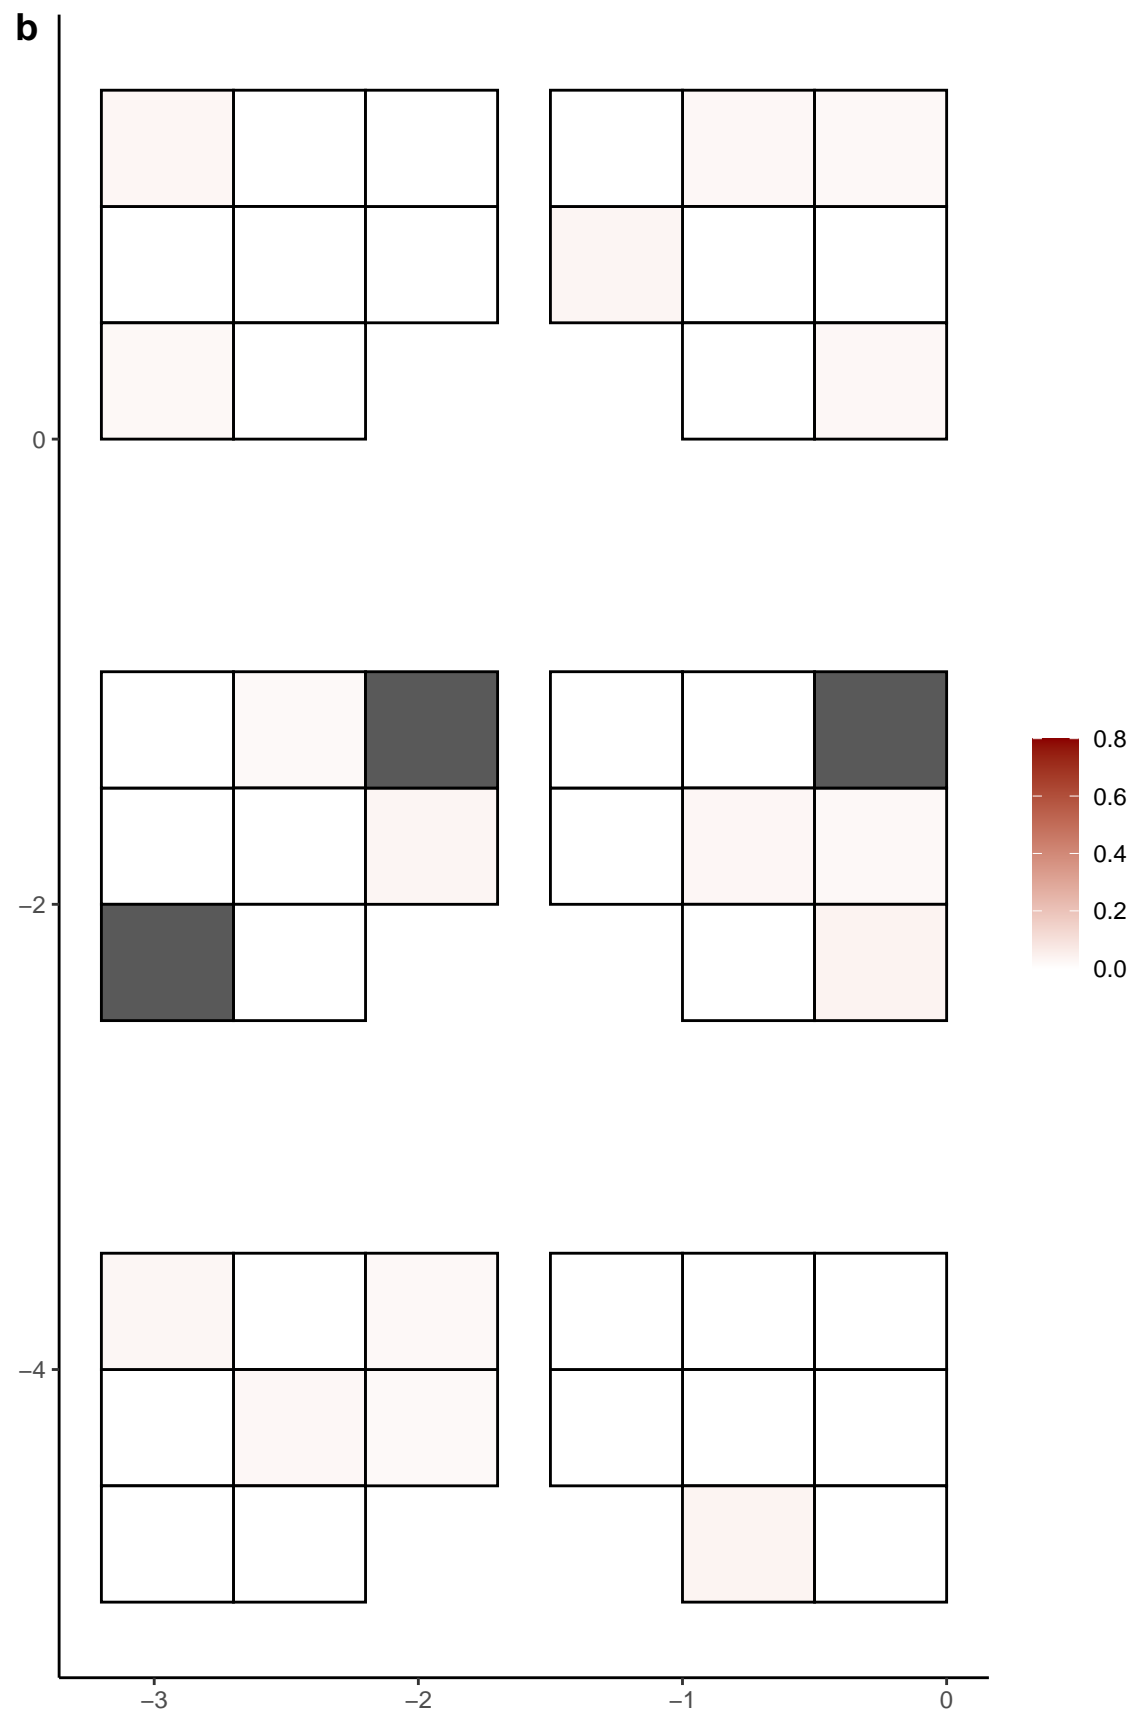

**a** ID05 4-116228416-A-G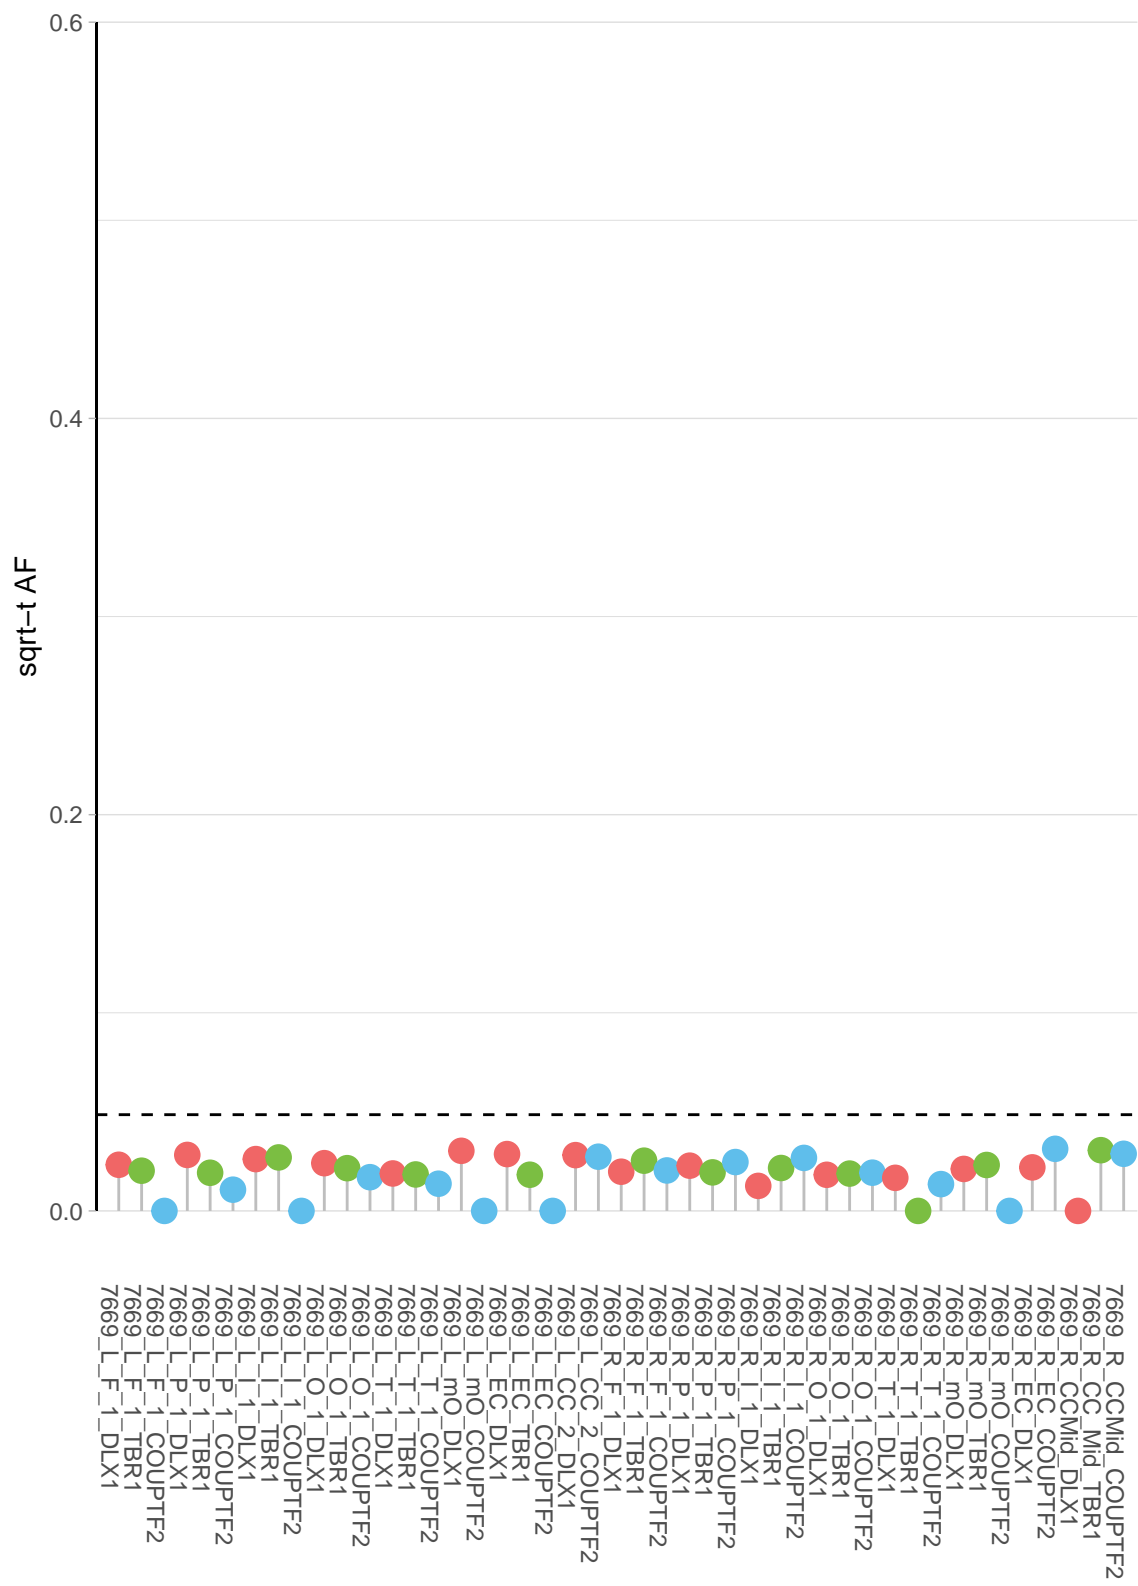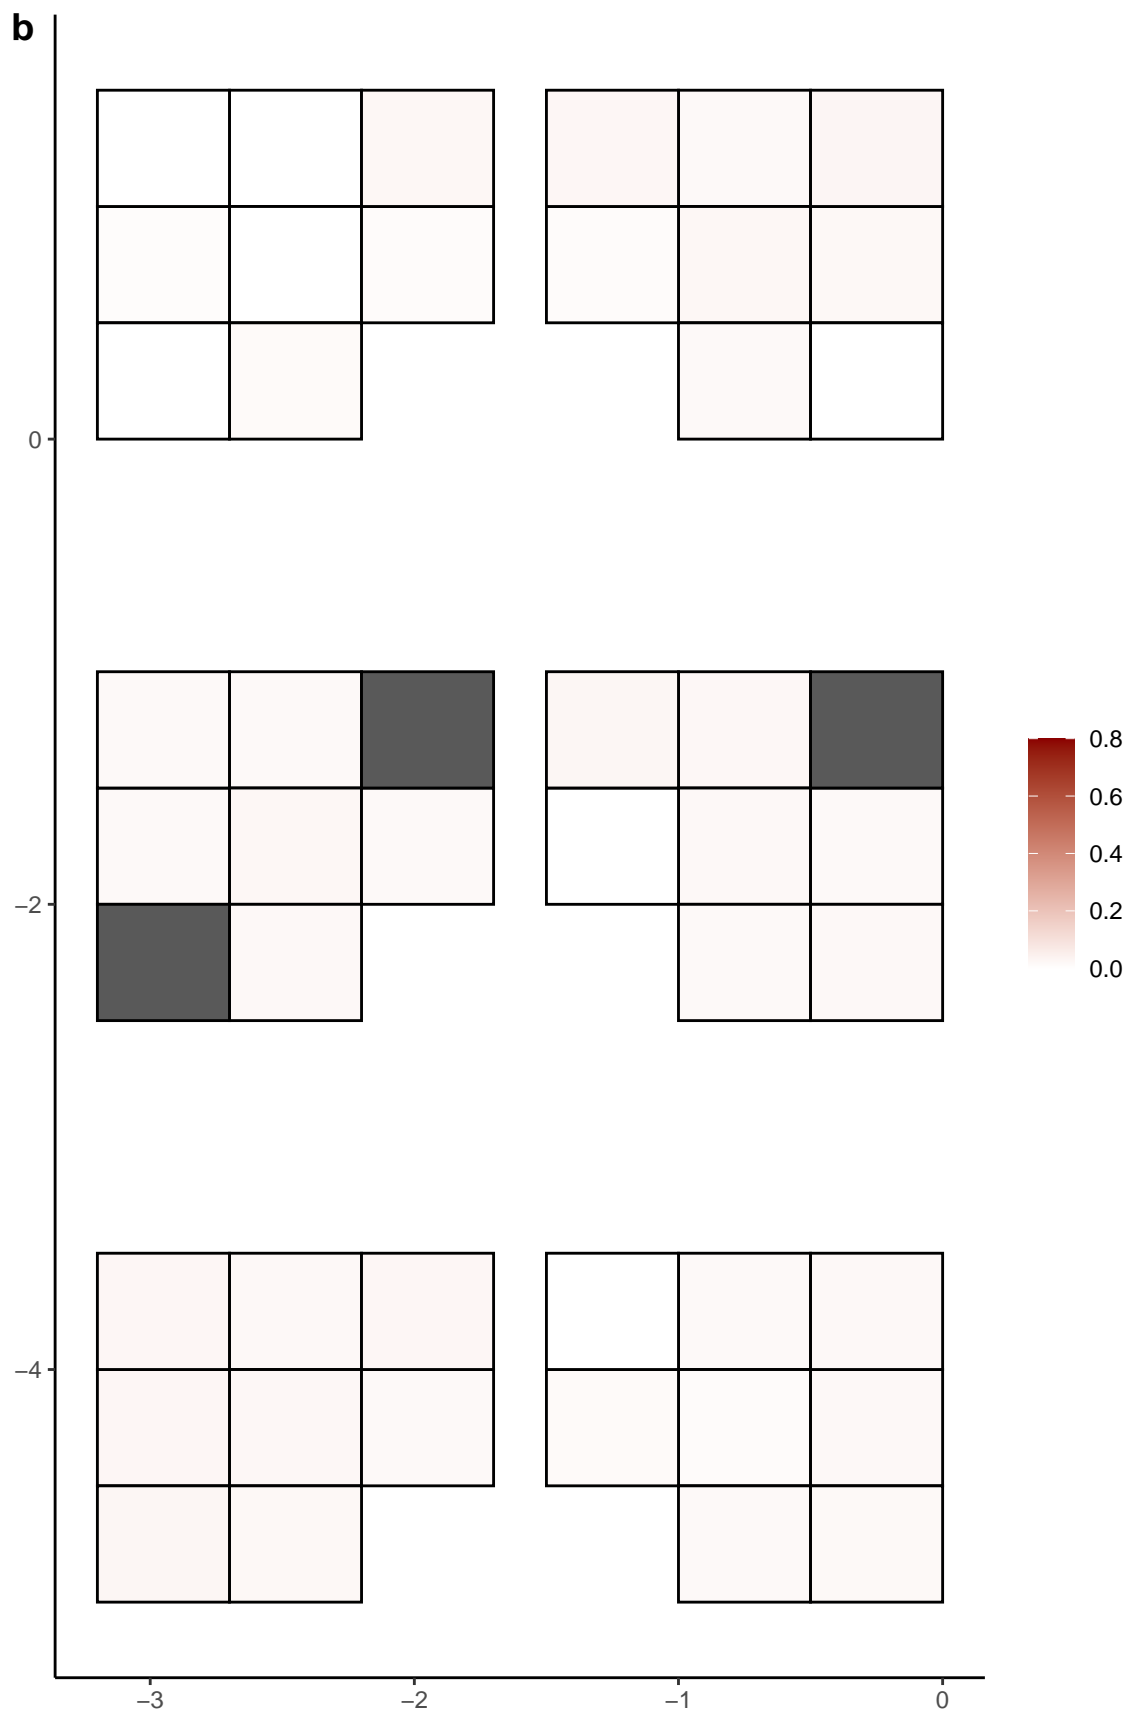



**a** ID05 4-121359392-T-G

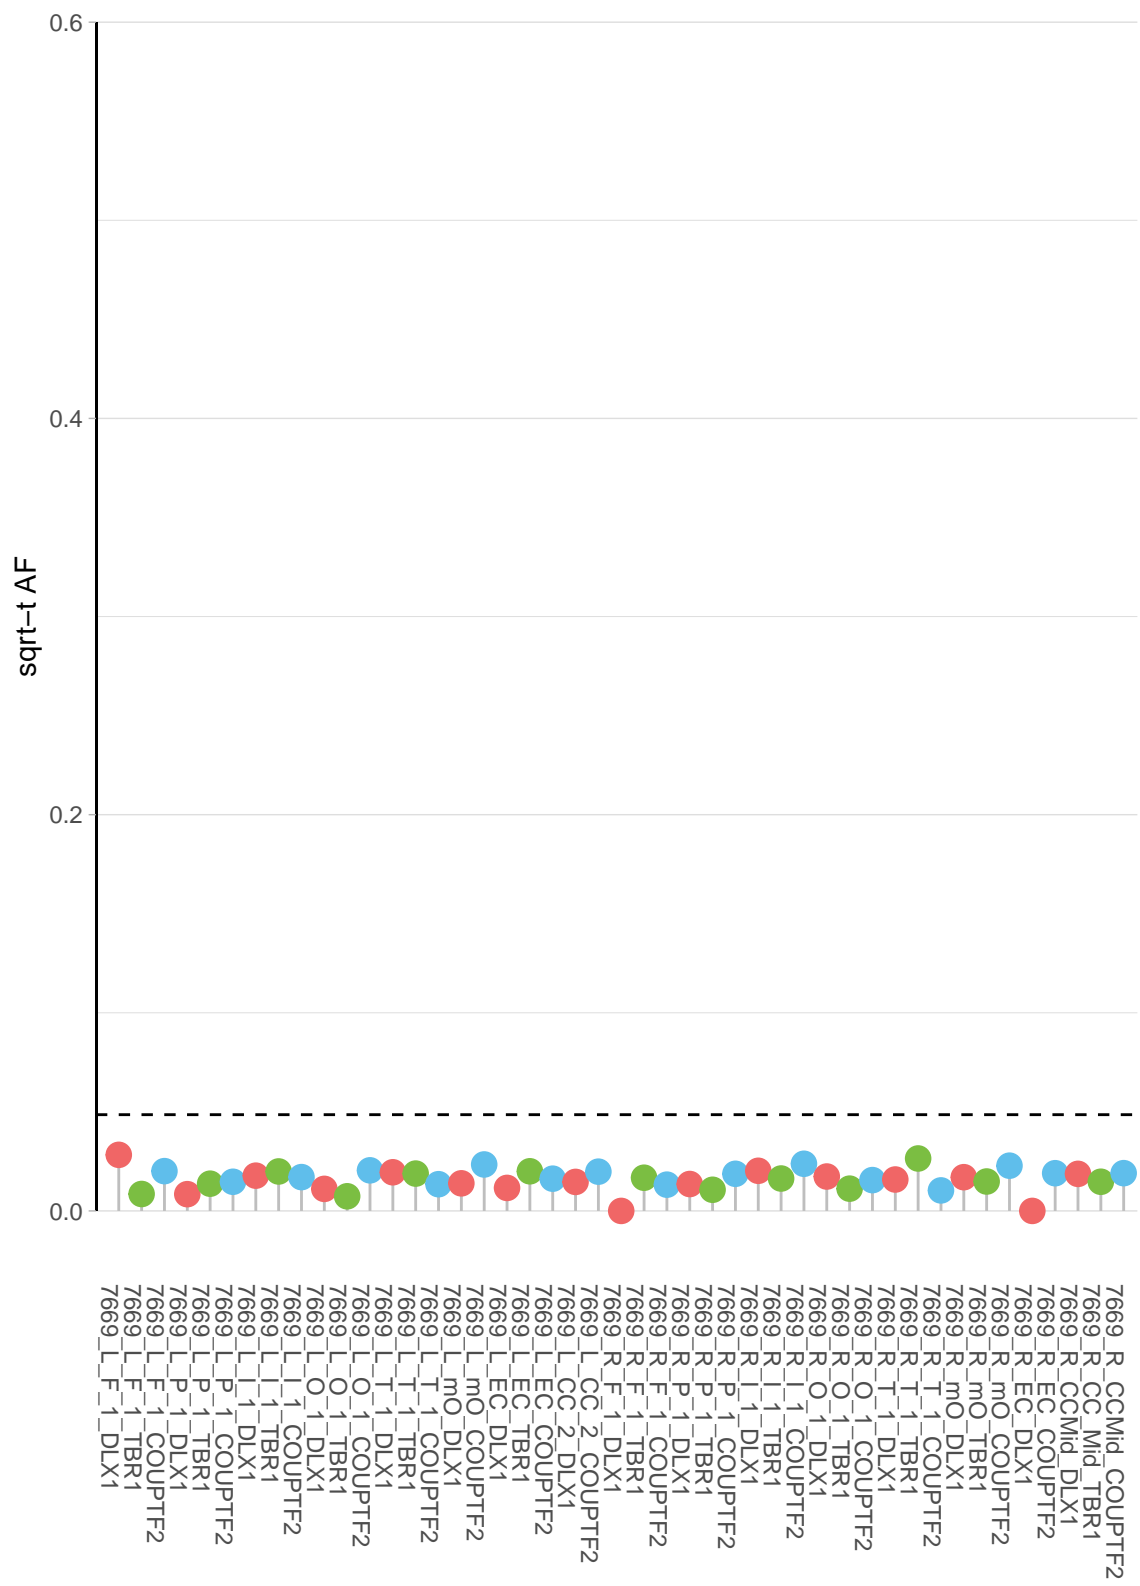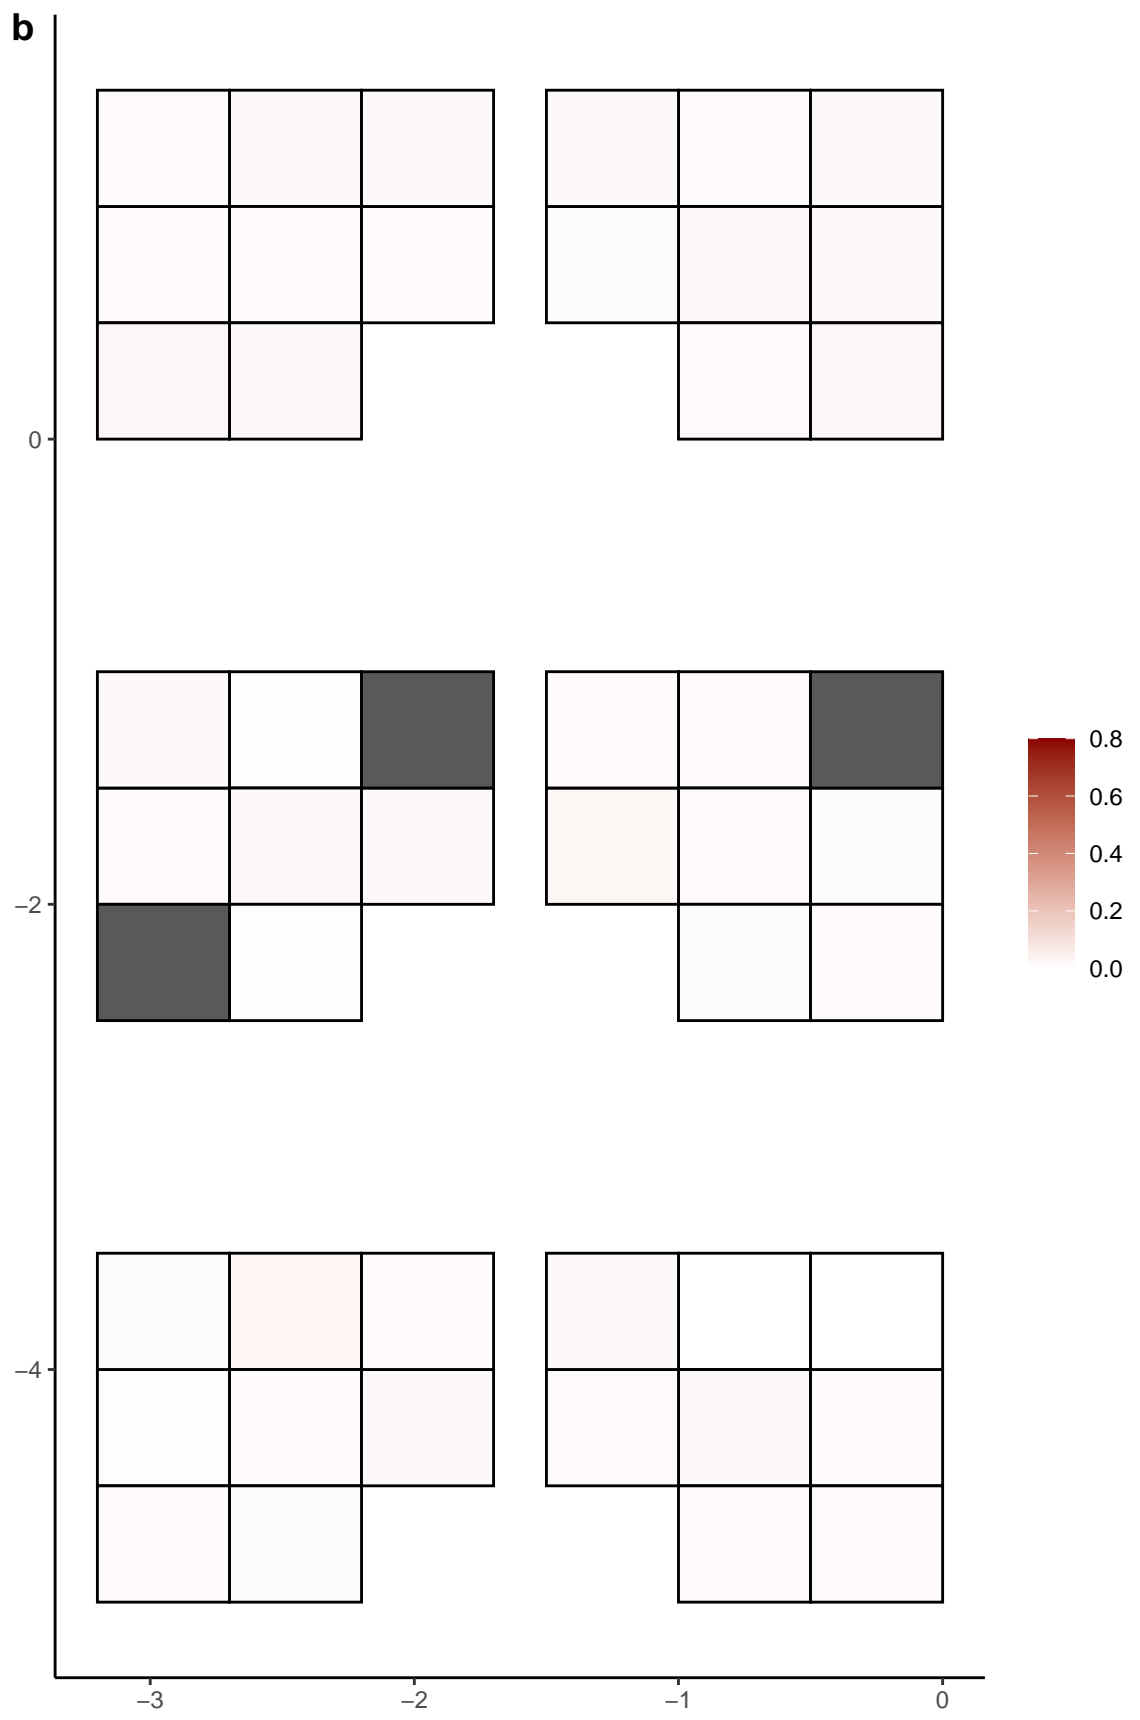

**a** ID05 4-122936525-G-A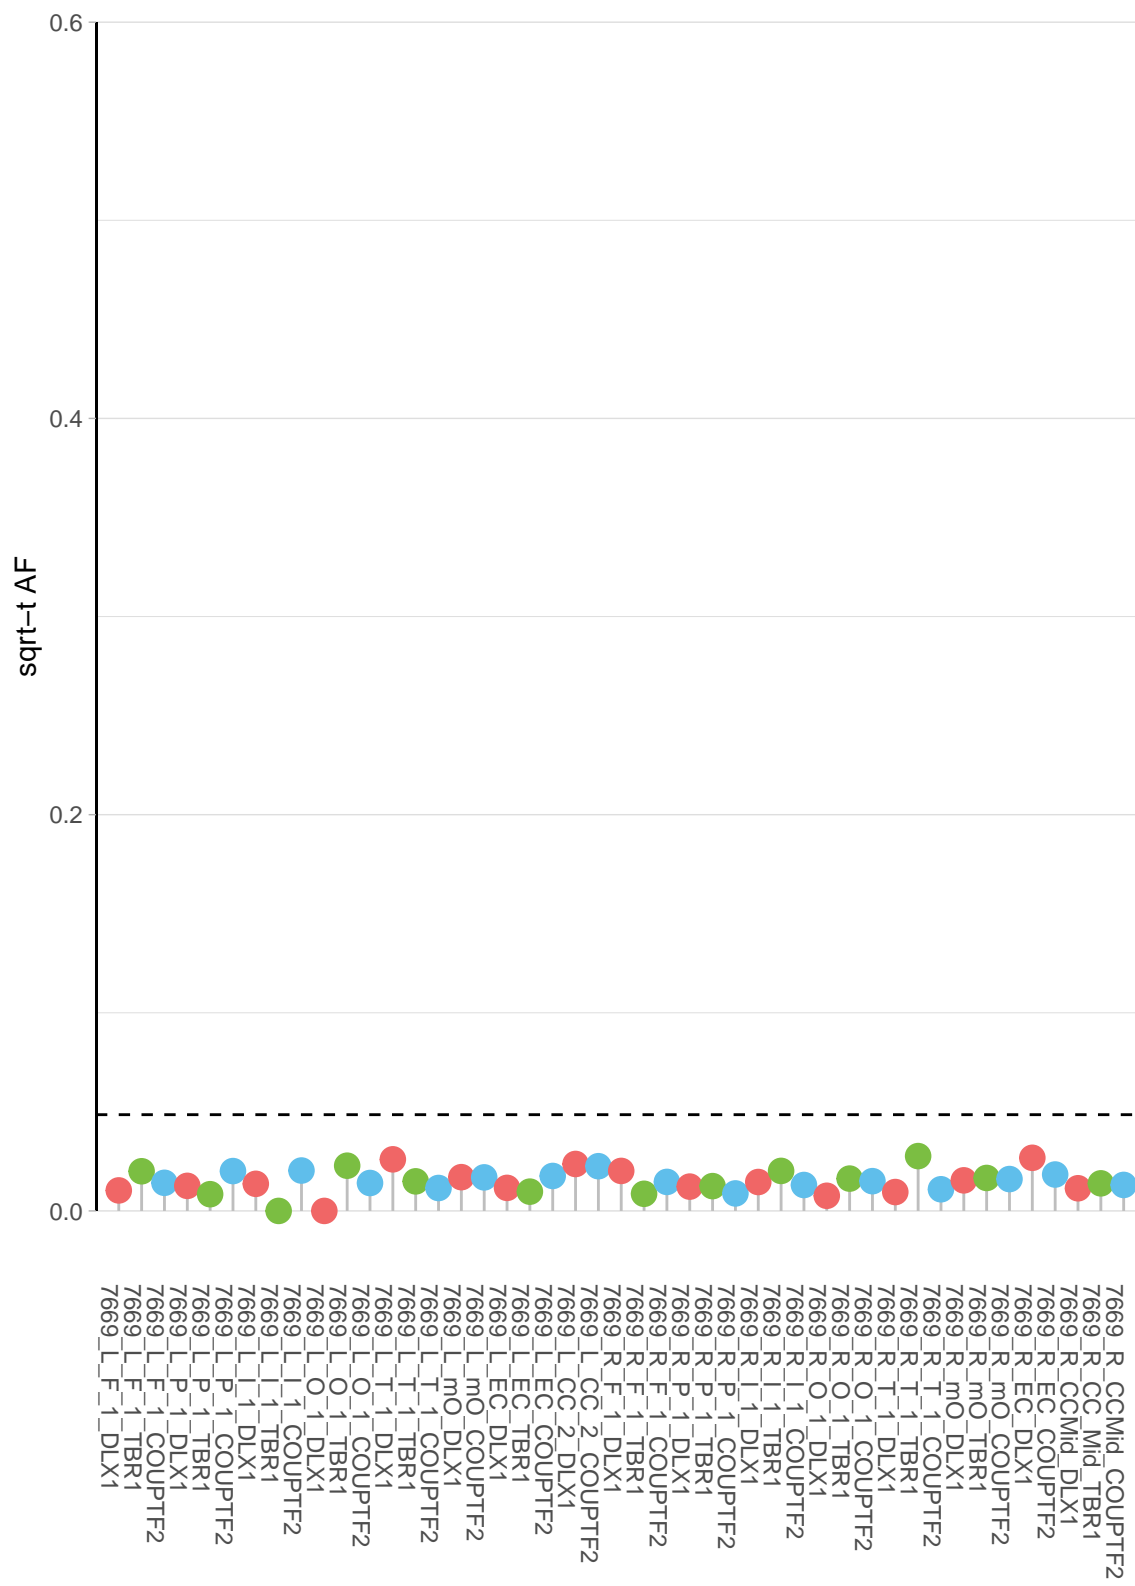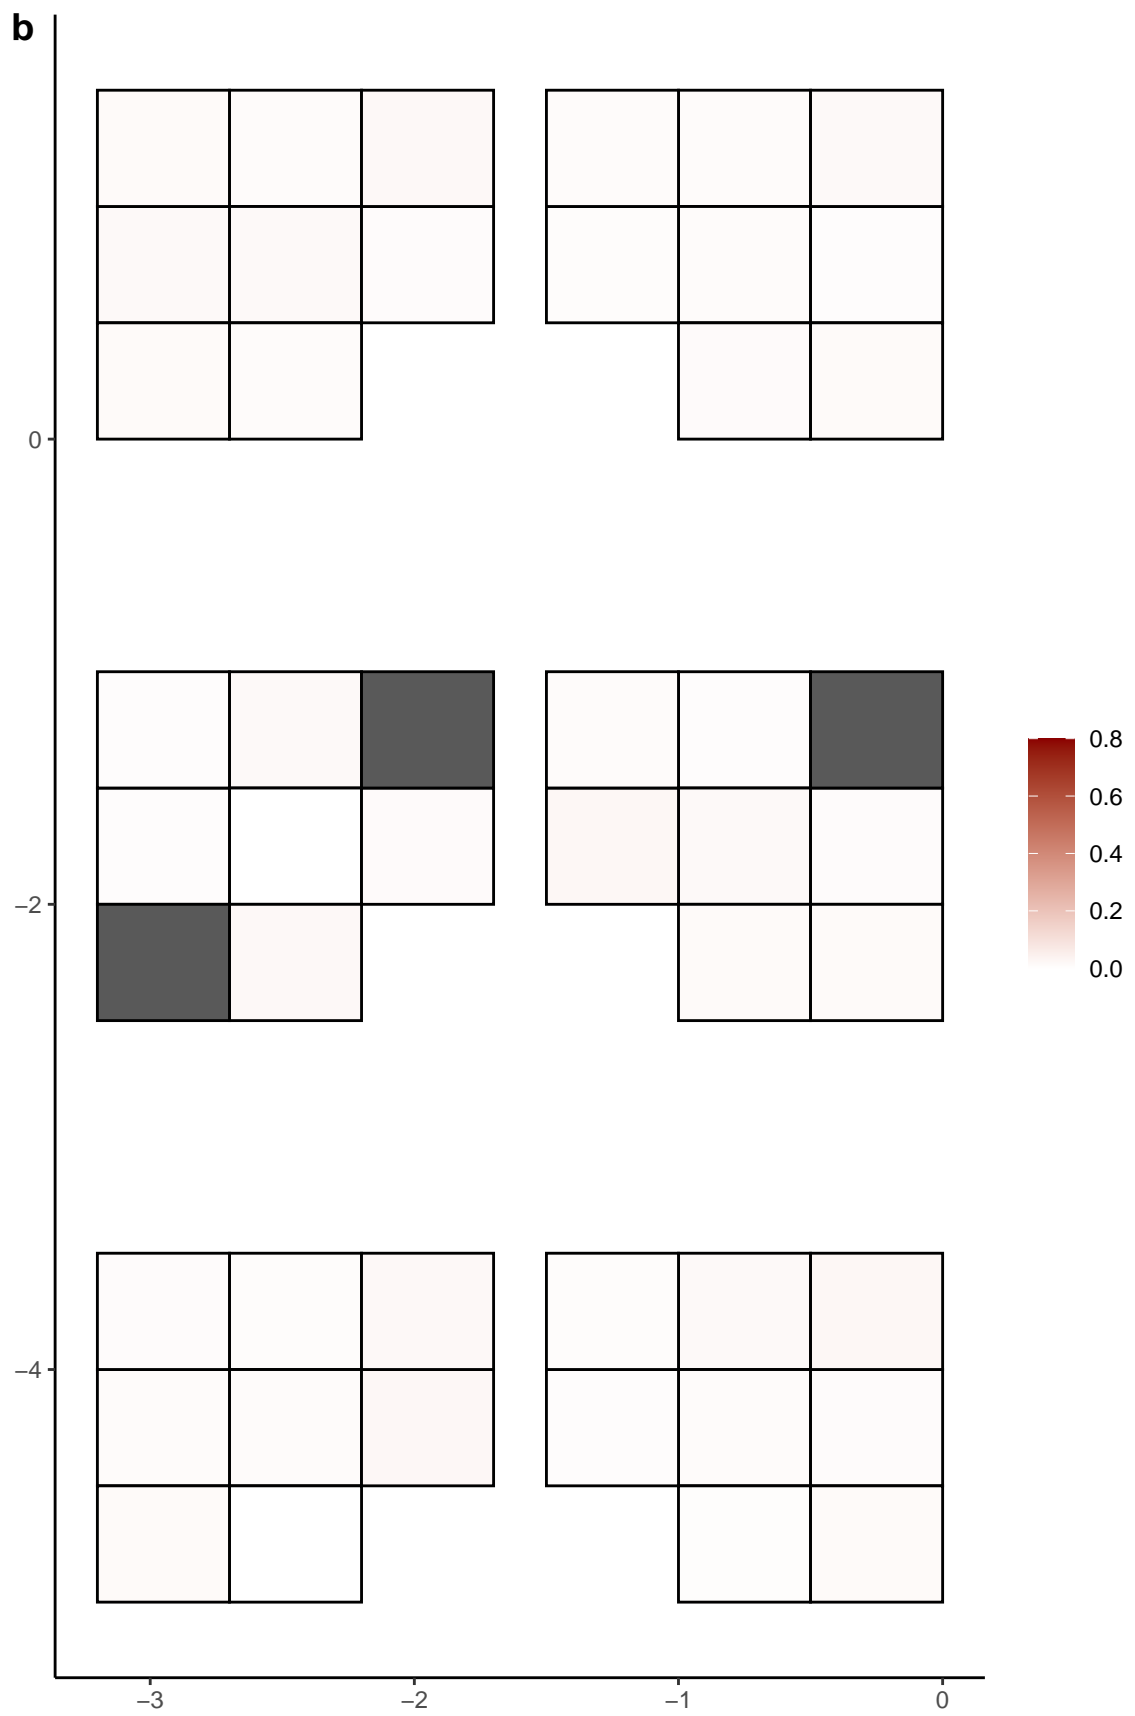

**a** ID05 4-123000327-T-G

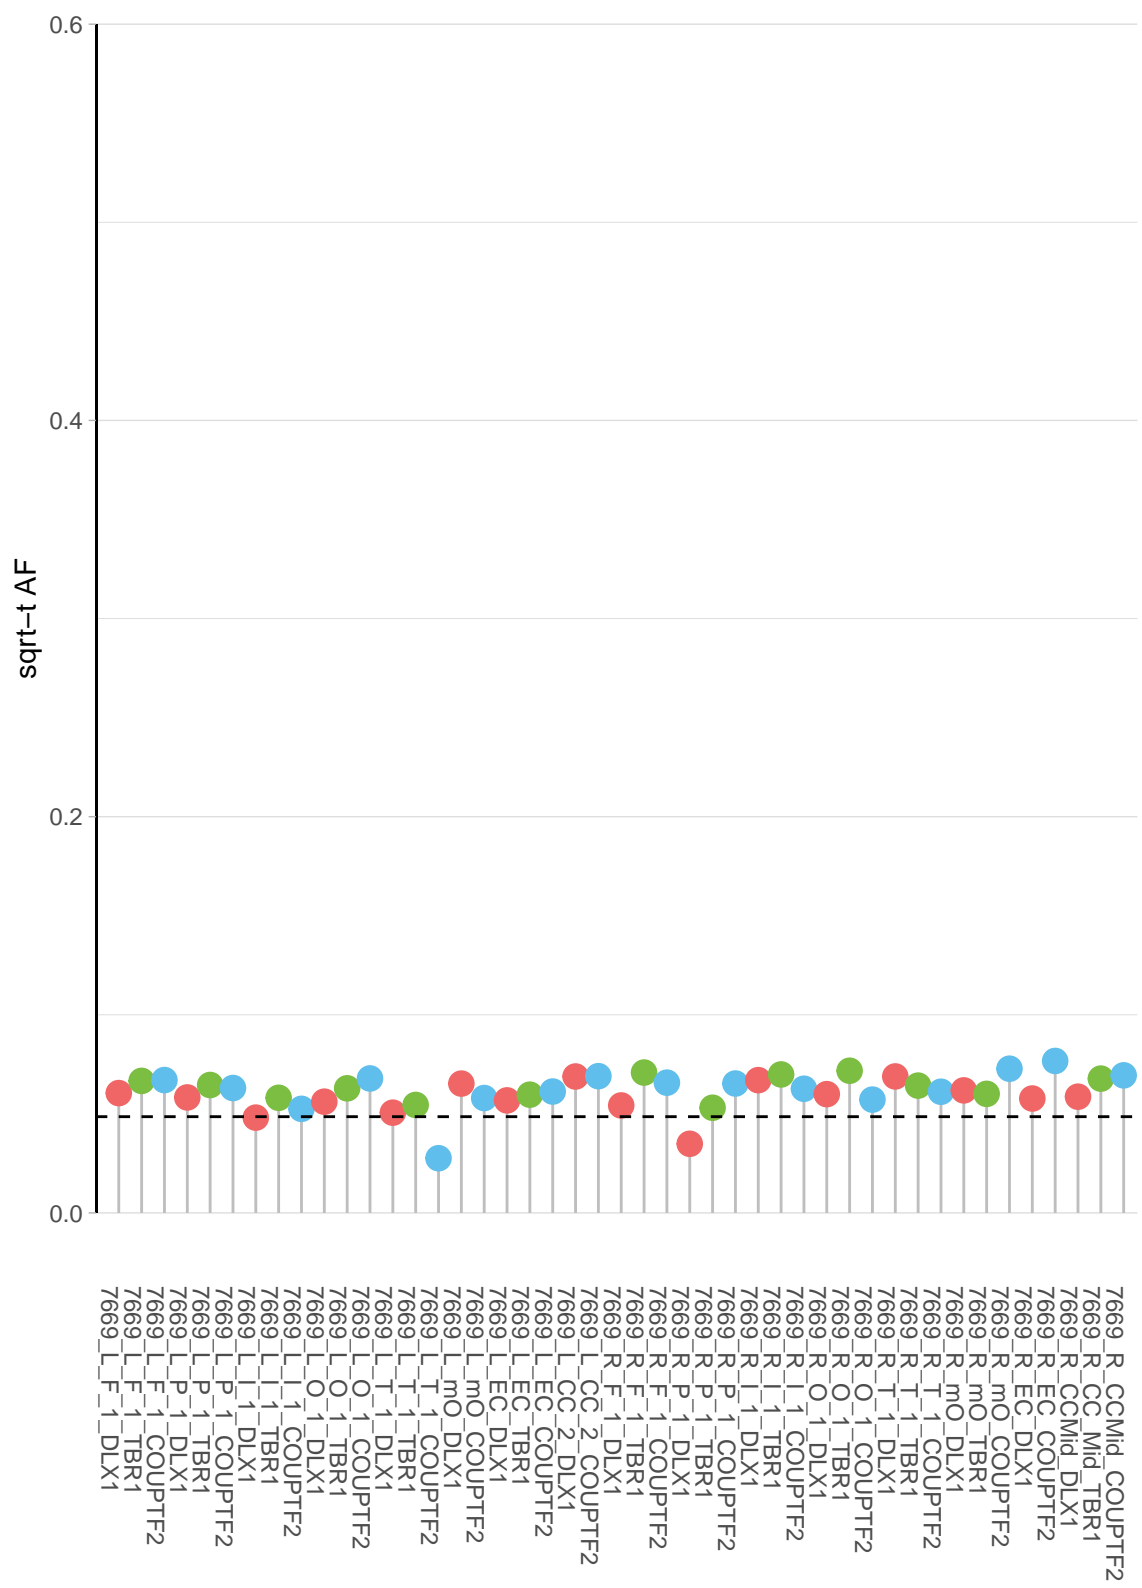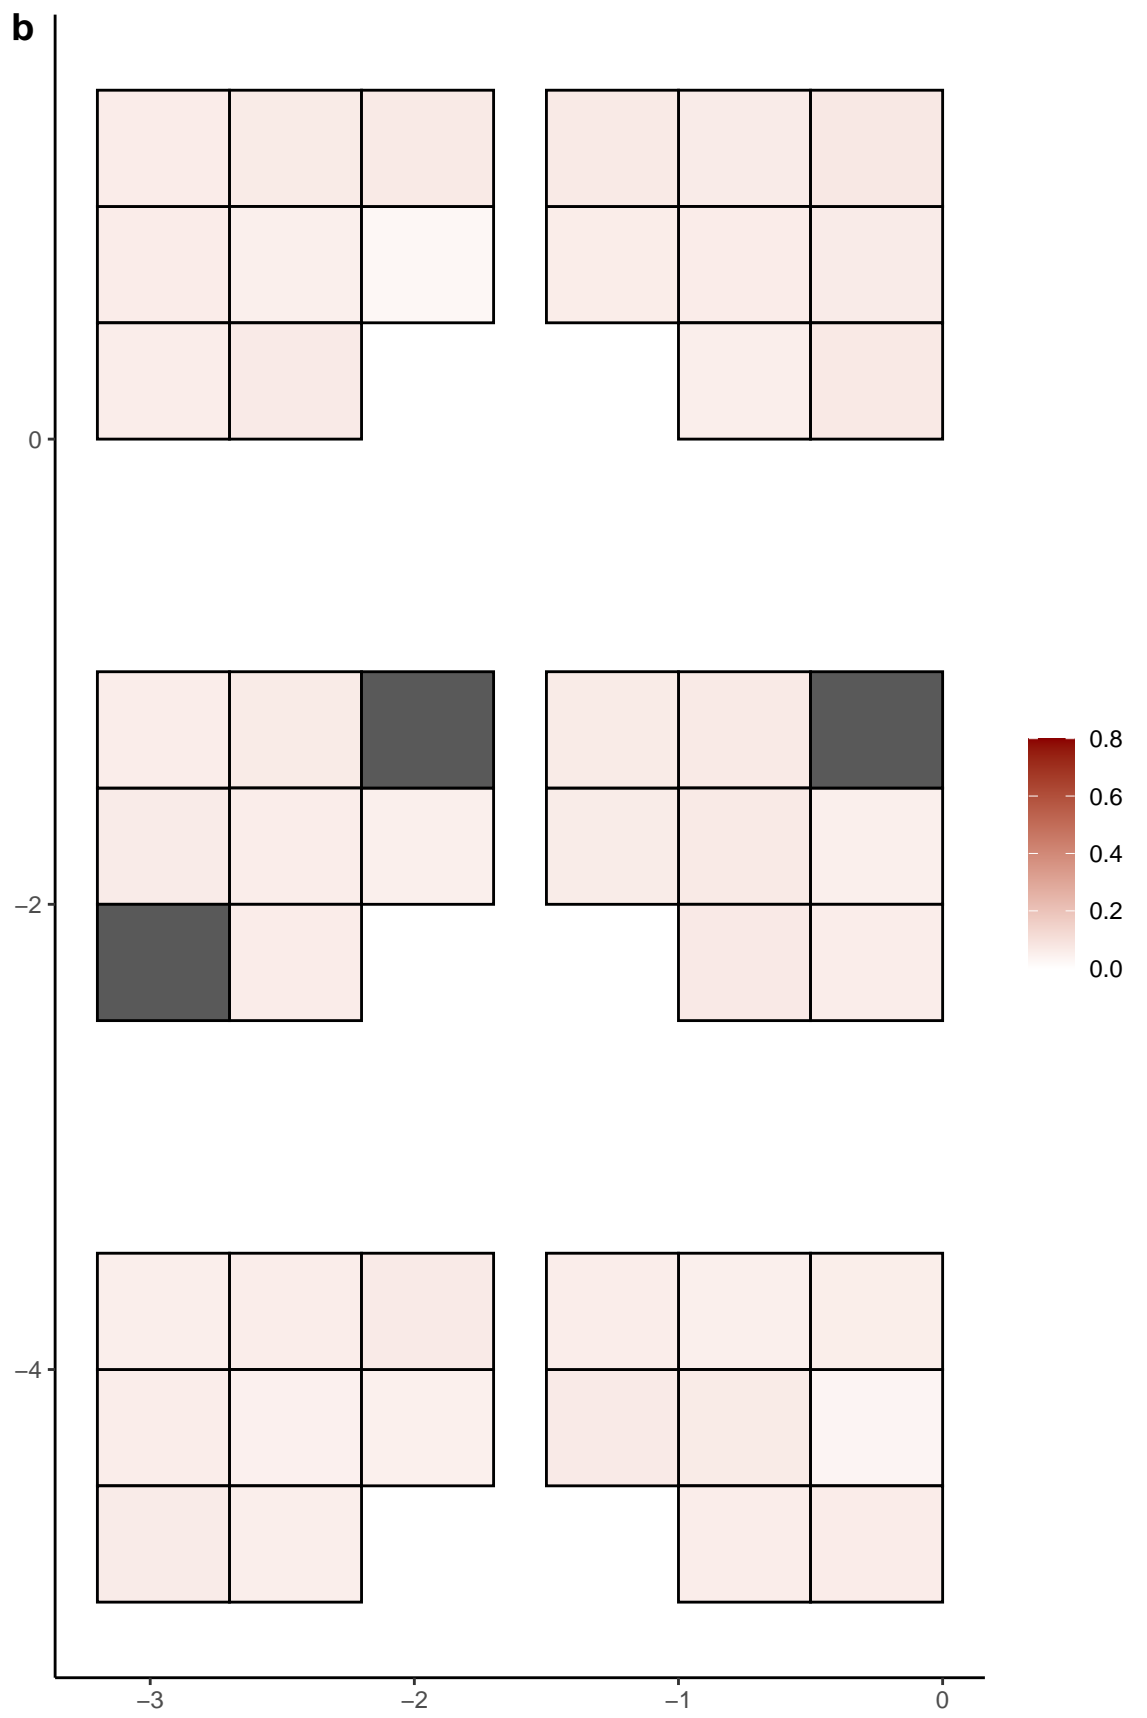



**a** ID05 4-123000328-C-A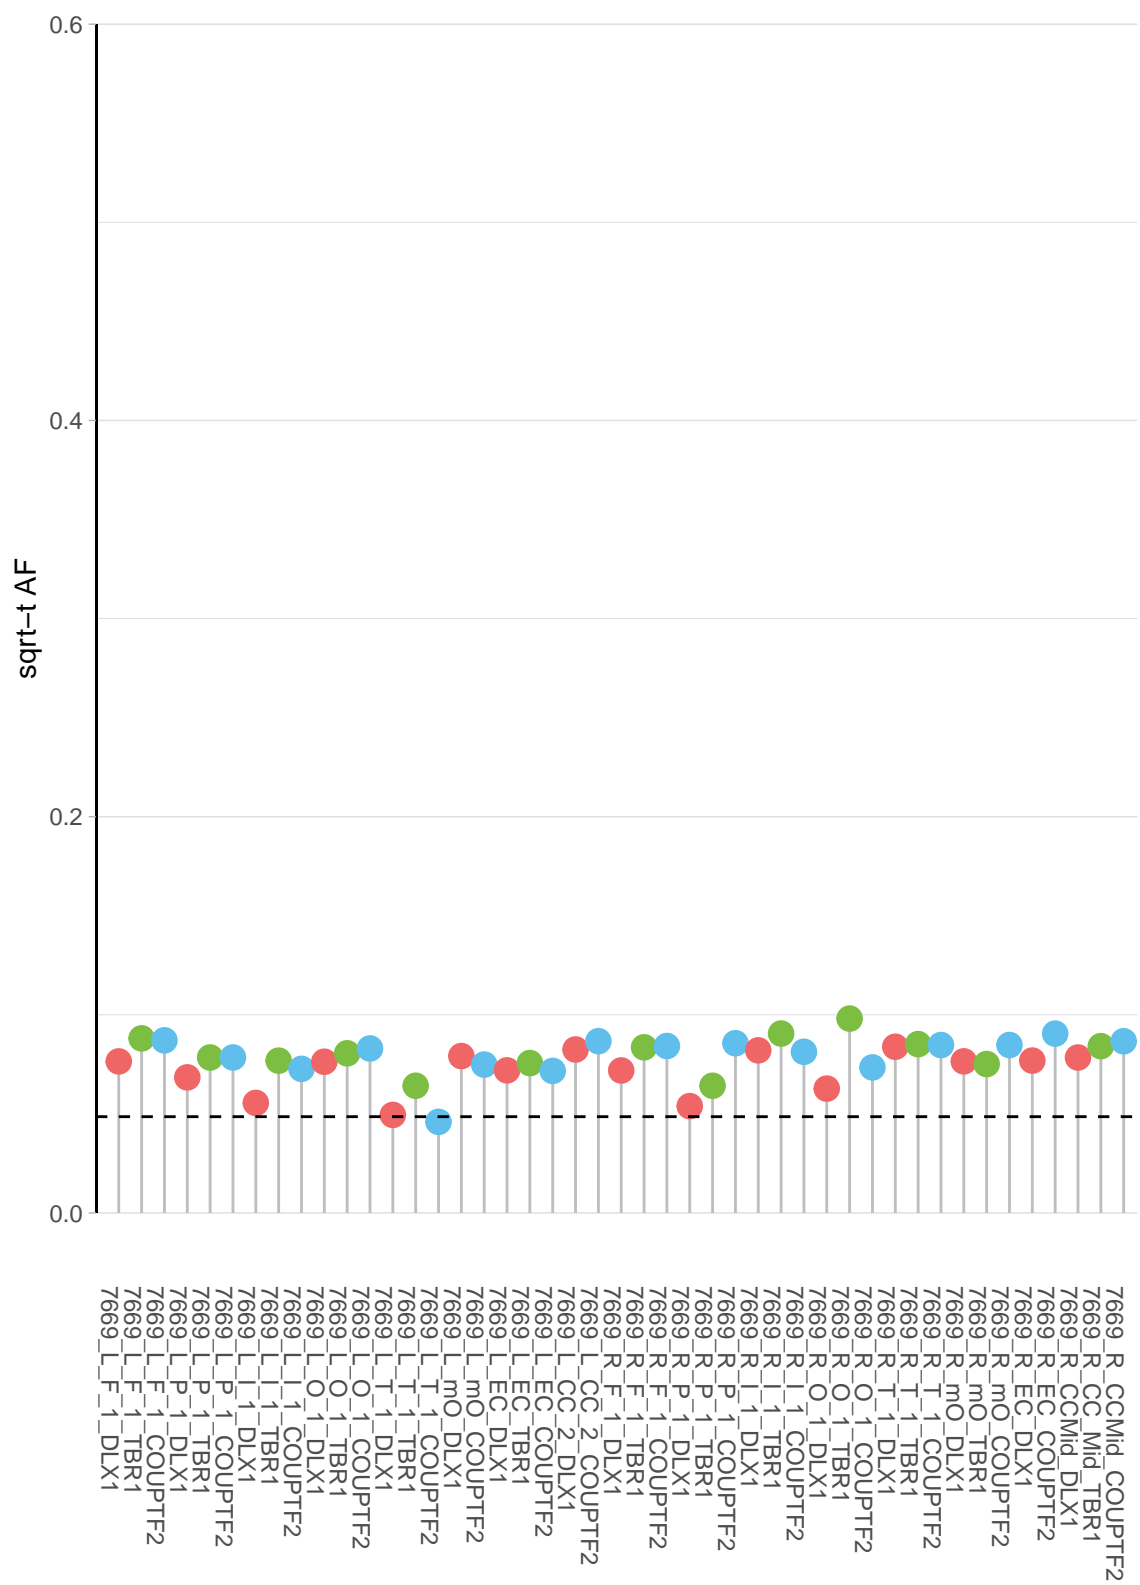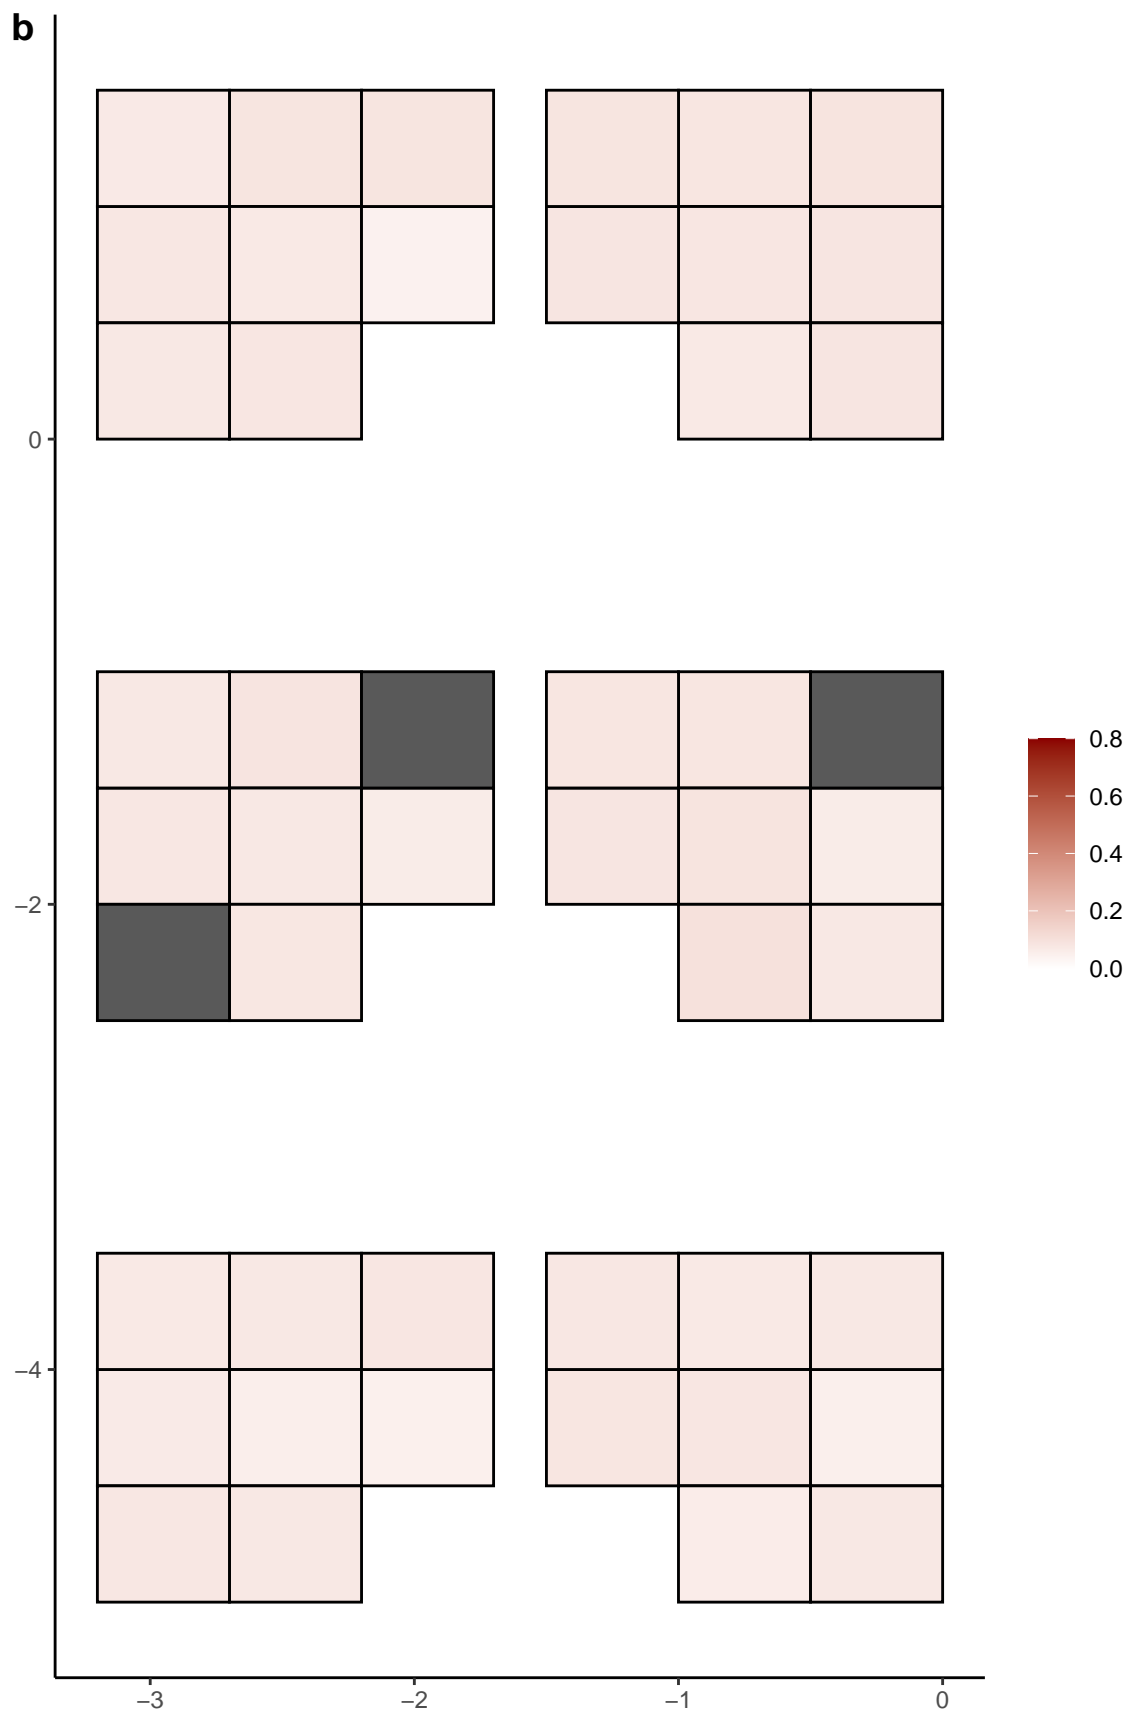

**a** ID05 4-125806400-T-C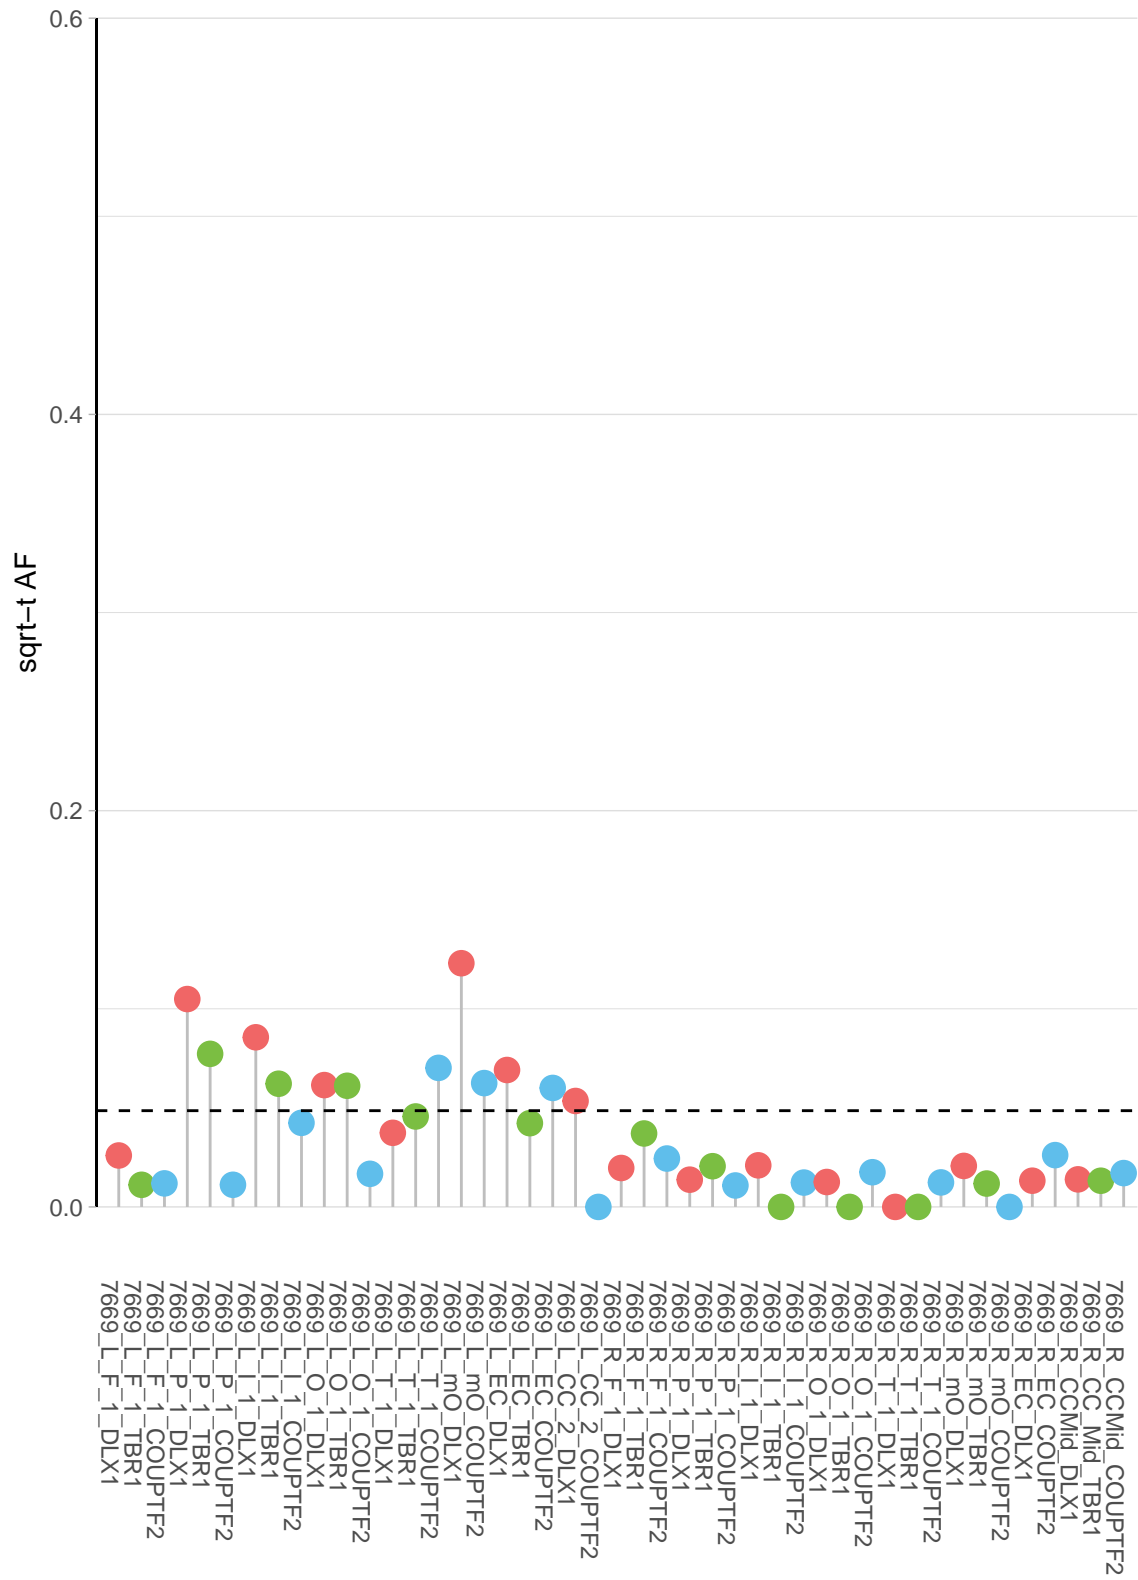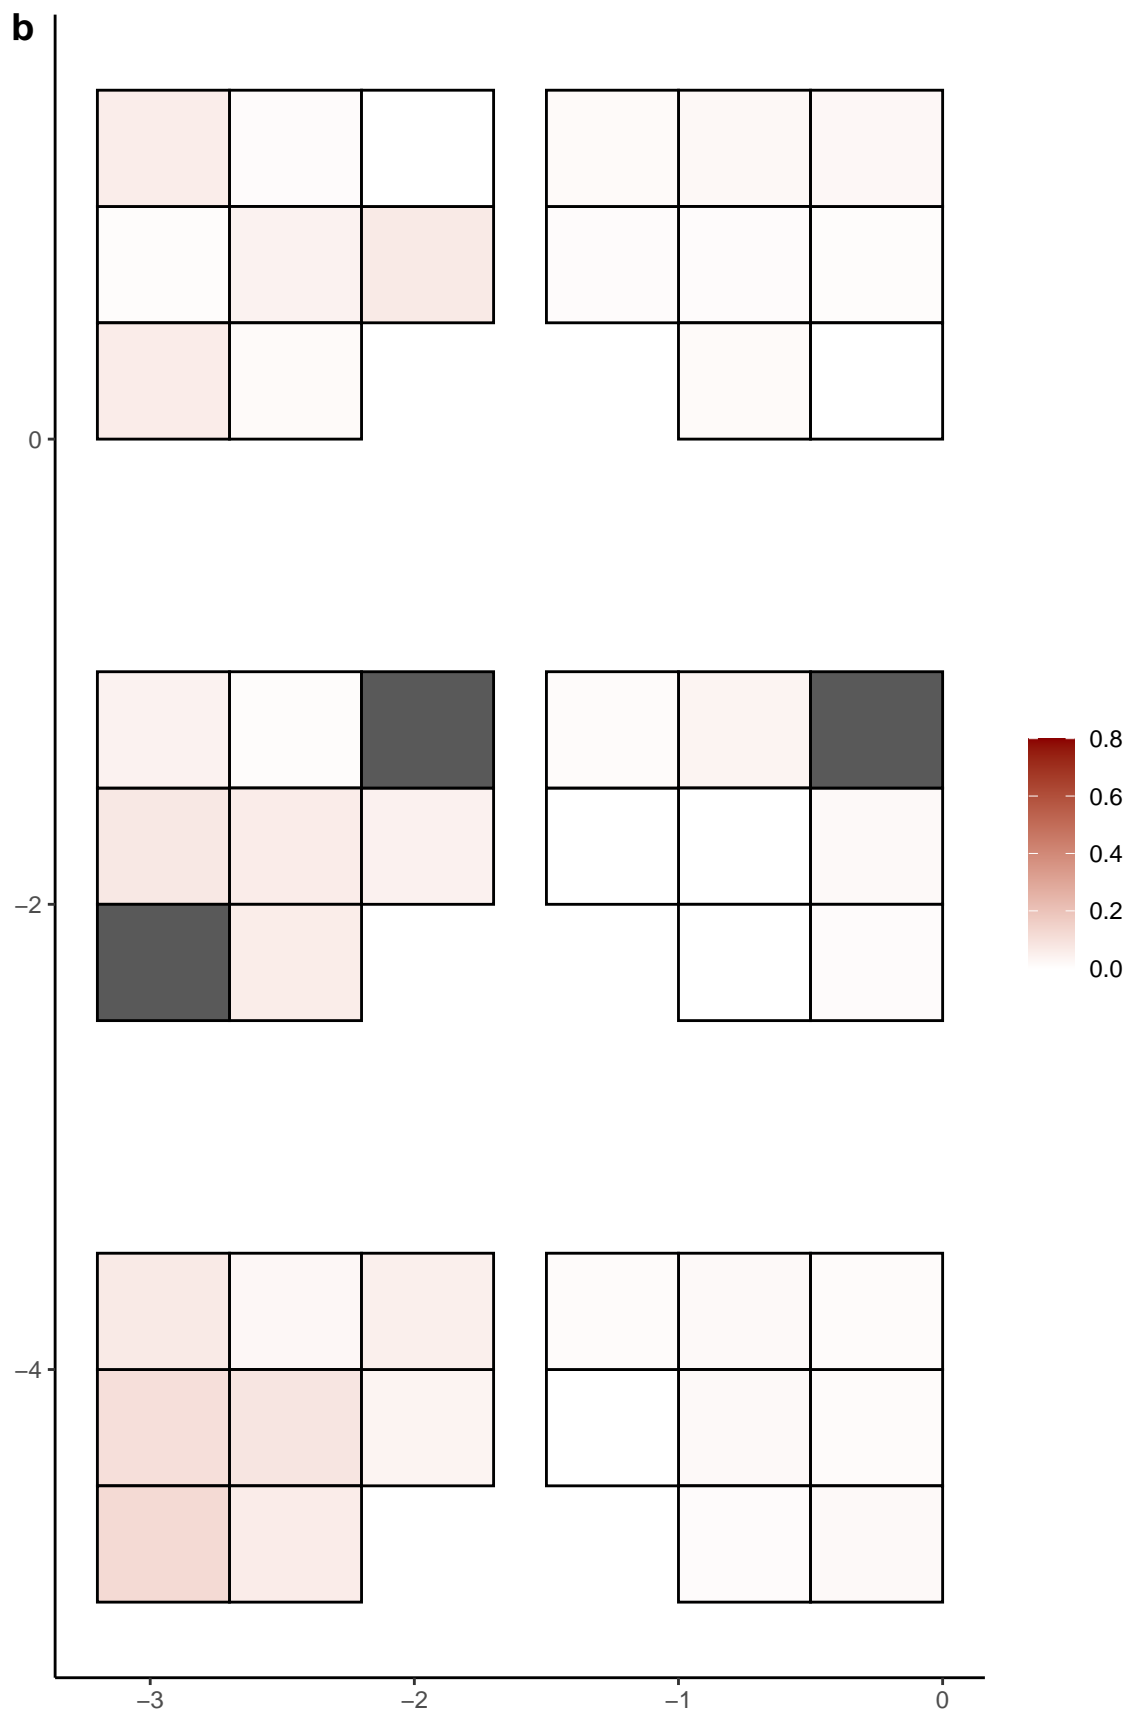

**a** ID05 4-135038063-C-T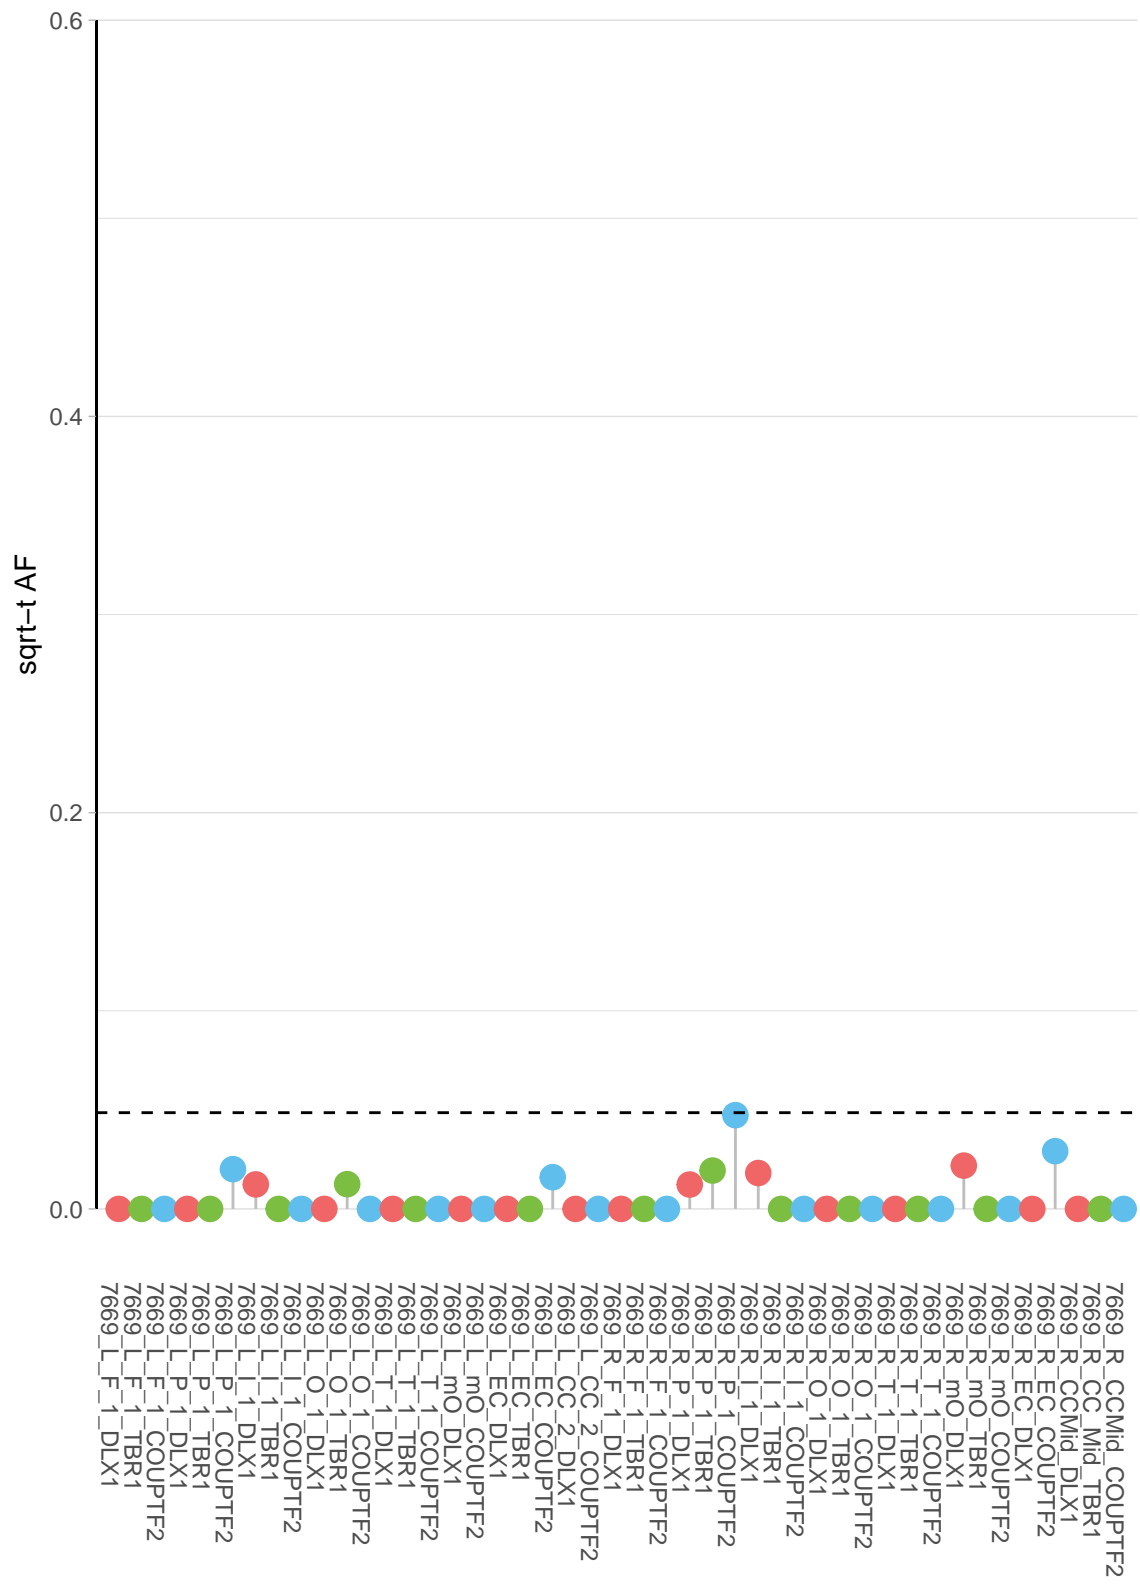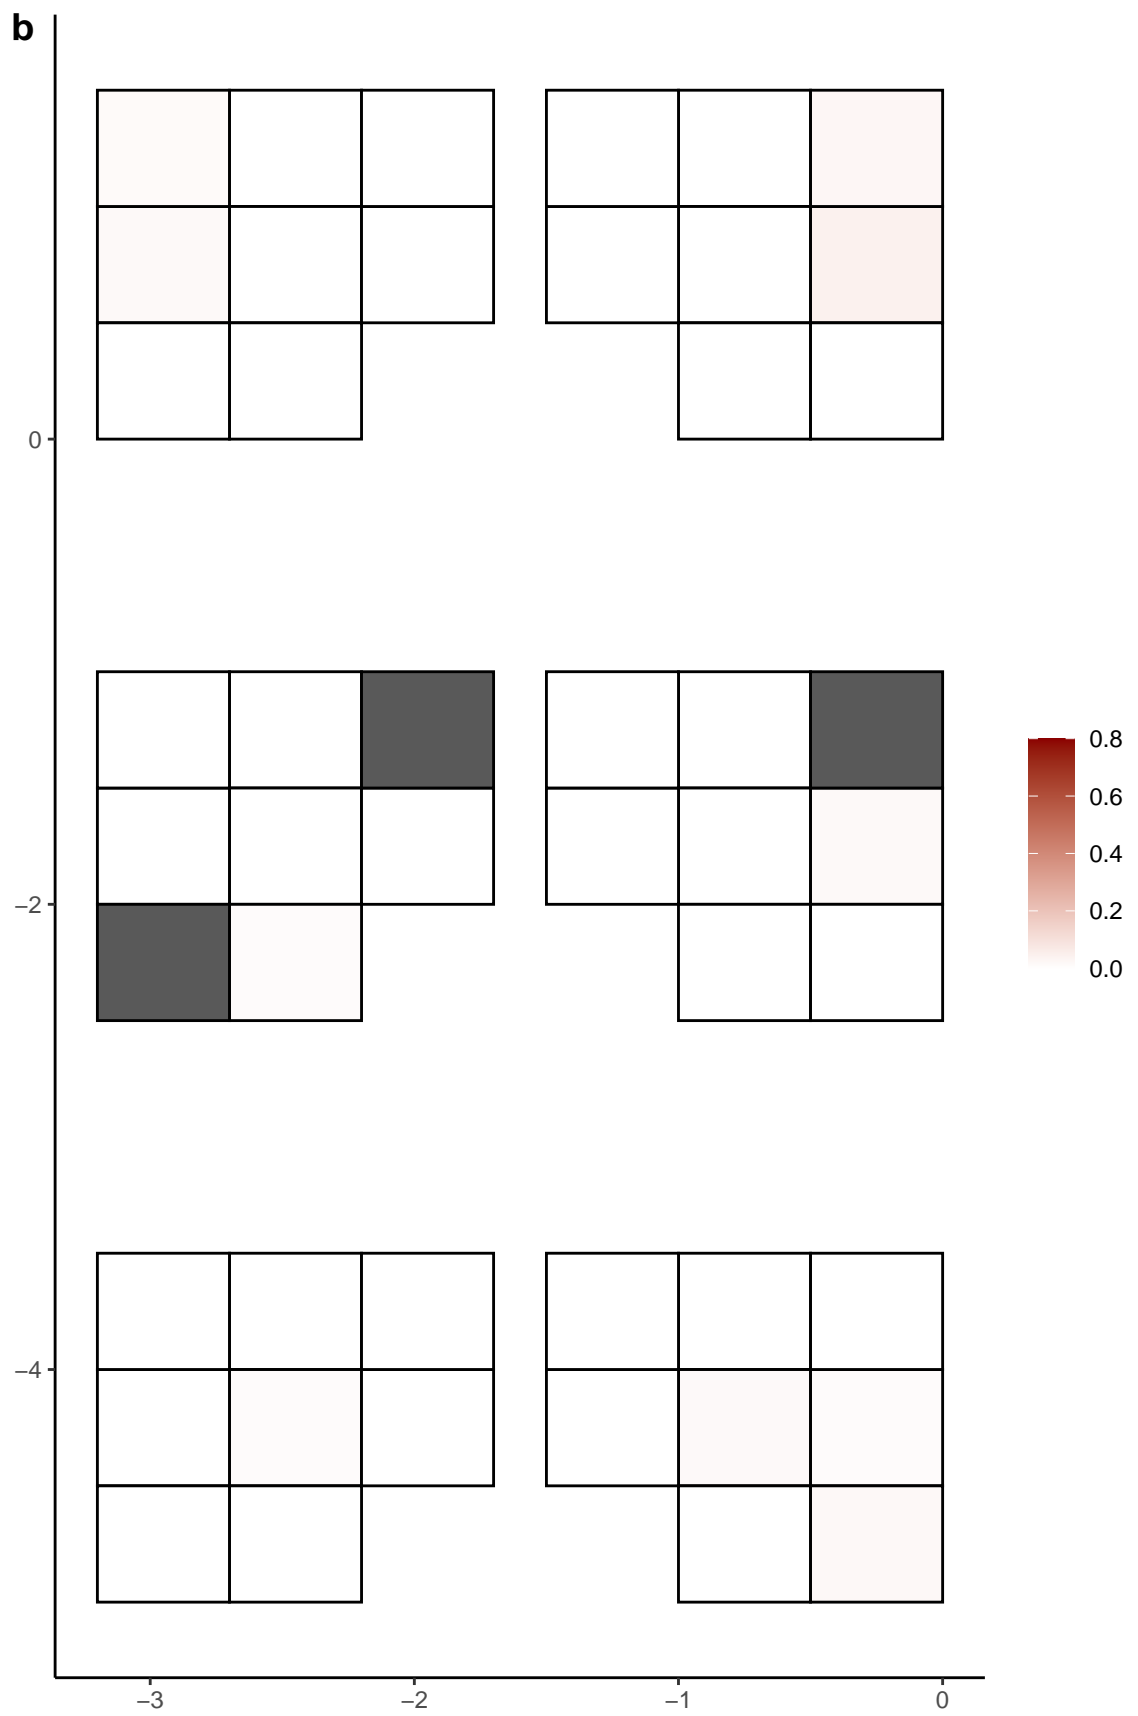



**a** ID05 4-139482903-G-A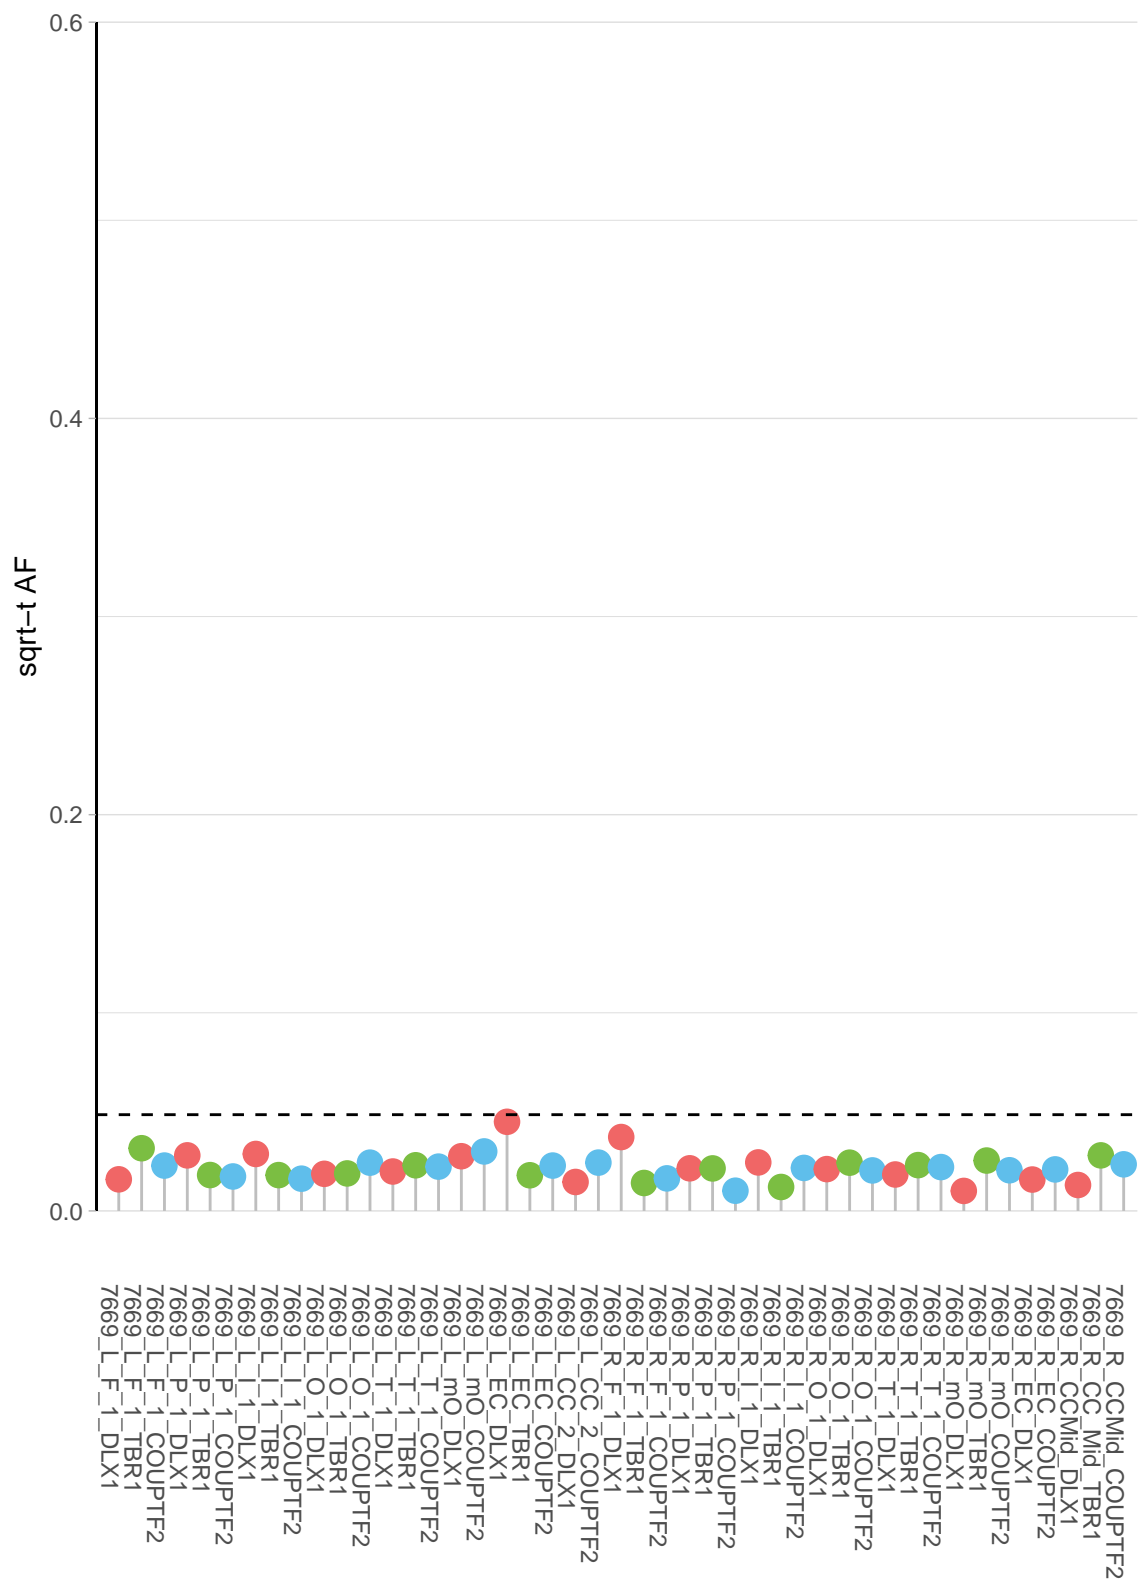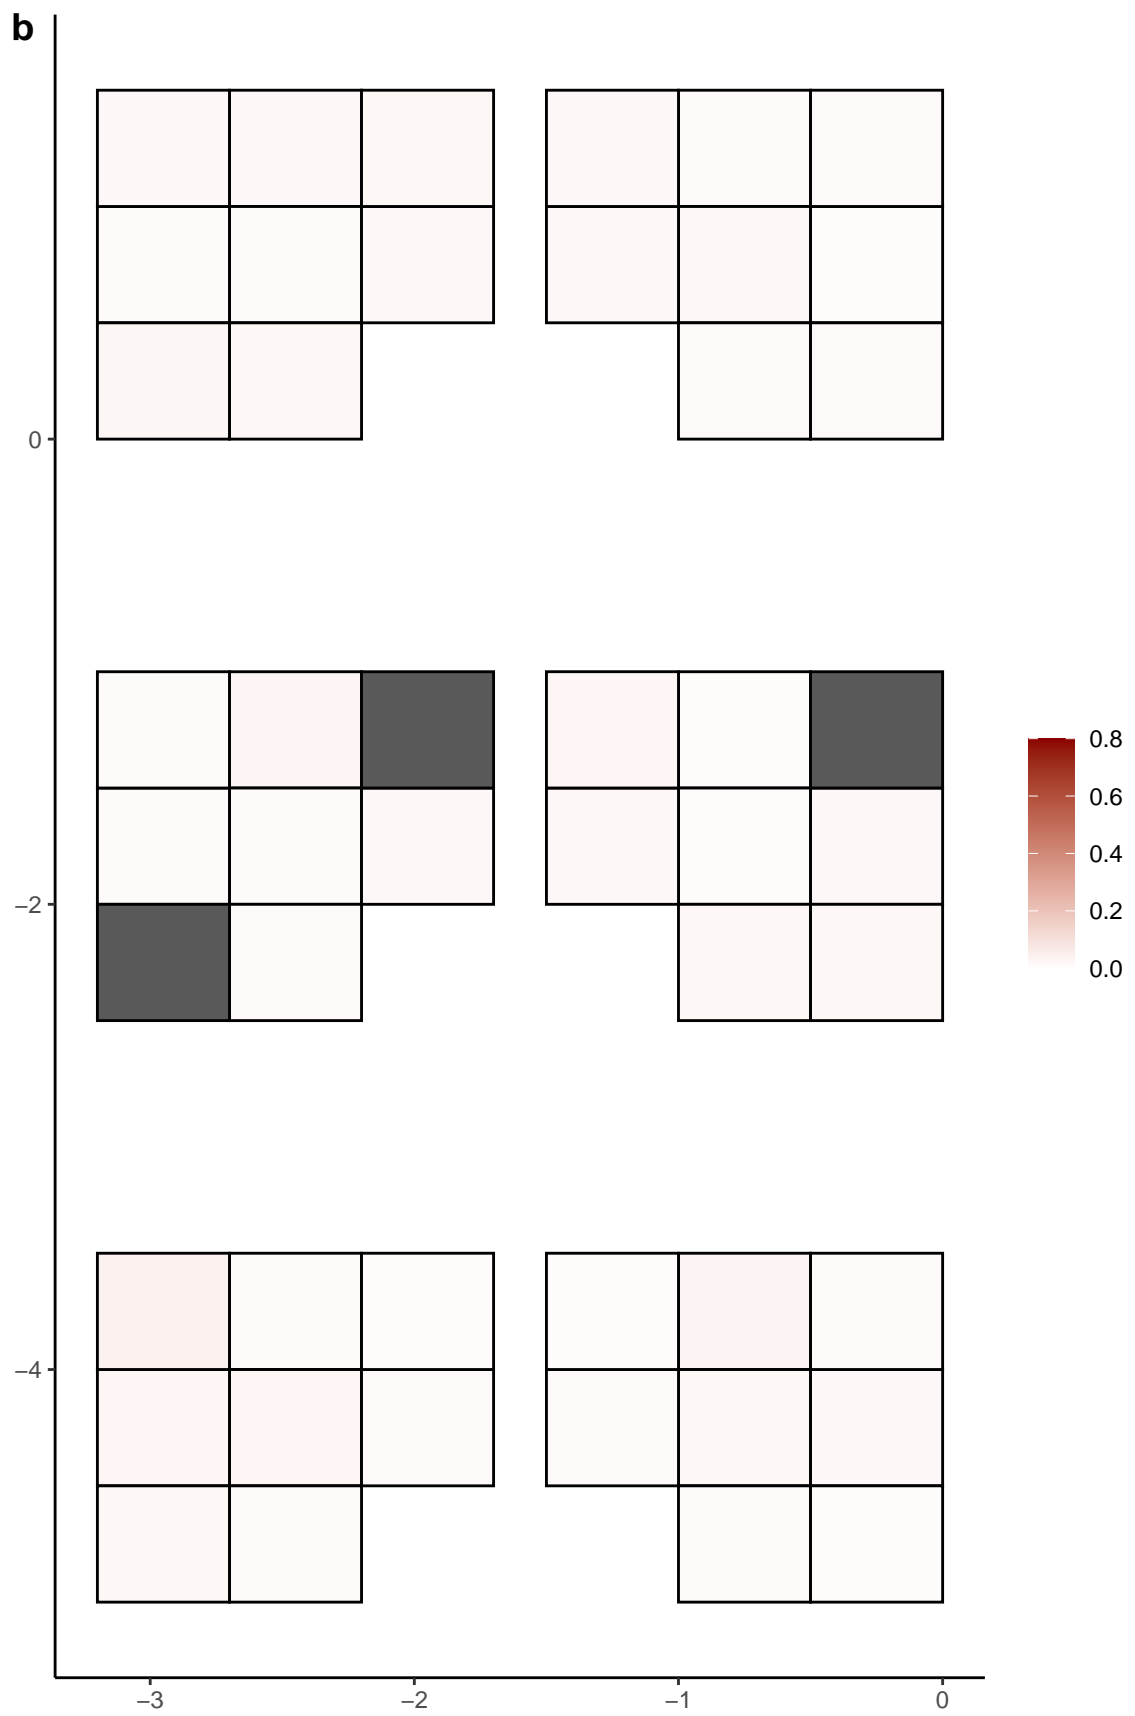



**a** ID05 4-152509643-C-A

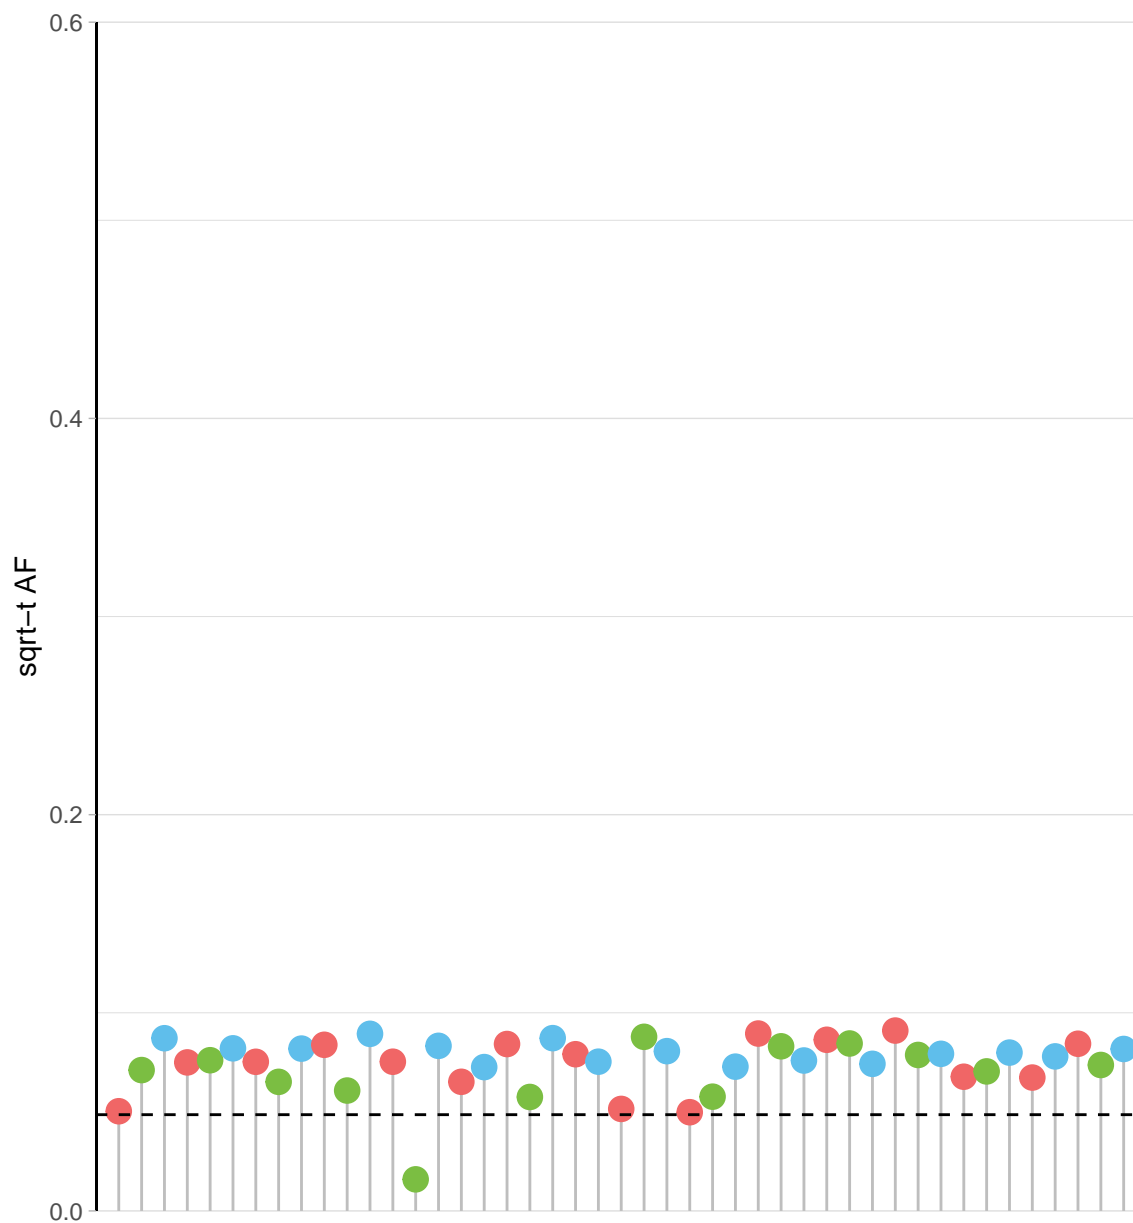

7669\_R\_CC\_Mid\_COUPTF2  
 7669\_R\_CC\_Mid\_TBR1  
 7669\_R\_CCMid\_DLX1  
 7669\_R\_EC\_COUPTF2  
 7669\_R\_EC\_DLX1  
 7669\_R\_MO\_COUPTF2  
 7669\_R\_MO\_TBR1  
 7669\_R\_T1\_COUPTF2  
 7669\_R\_T1\_DLX1  
 7669\_R\_T1\_TBR1  
 7669\_R\_P1\_COUPTF2  
 7669\_R\_P1\_TBR1  
 7669\_R\_P1\_DLX1  
 7669\_L\_F1\_COUPTF2  
 7669\_L\_F1\_TBR1  
 7669\_L\_F1\_DLX1  
 7669\_L\_O1\_COUPTF2  
 7669\_L\_O1\_TBR1  
 7669\_L\_O1\_DLX1  
 7669\_L\_I1\_COUPTF2  
 7669\_L\_I1\_TBR1  
 7669\_L\_I1\_DLX1  
 7669\_L\_P1\_COUPTF2  
 7669\_L\_P1\_TBR1  
 7669\_L\_P1\_DLX1  
 7669\_L\_MO\_COUPTF2  
 7669\_L\_EC\_DLX1  
 7669\_L\_EC\_TBR1  
 7669\_L\_CC\_COUPTF2  
 7669\_L\_CC\_2\_DLX1  
 7669\_L\_CC\_2\_COUPTF2  
 7669\_R\_F1\_TBR1  
 7669\_R\_F1\_DLX1  
 7669\_R\_P1\_COUPTF2  
 7669\_R\_P1\_TBR1  
 7669\_R\_P1\_DLX1  
 7669\_R\_O1\_TBR1  
 7669\_R\_O1\_COUPTF2  
 7669\_R\_O1\_DLX1  
 7669\_R\_T1\_COUPTF2  
 7669\_R\_T1\_TBR1  
 7669\_R\_T1\_DLX1  
 7669\_R\_T1\_COUPTF2  
 7669\_R\_T1\_TBR1  
 7669\_R\_T1\_DLX1  
 7669\_R\_P1\_COUPTF2  
 7669\_R\_P1\_TBR1  
 7669\_R\_P1\_DLX1  
 7669\_R\_MO\_COUPTF2  
 7669\_R\_MO\_TBR1  
 7669\_R\_T1\_COUPTF2  
 7669\_R\_T1\_TBR1  
 7669\_R\_T1\_DLX1

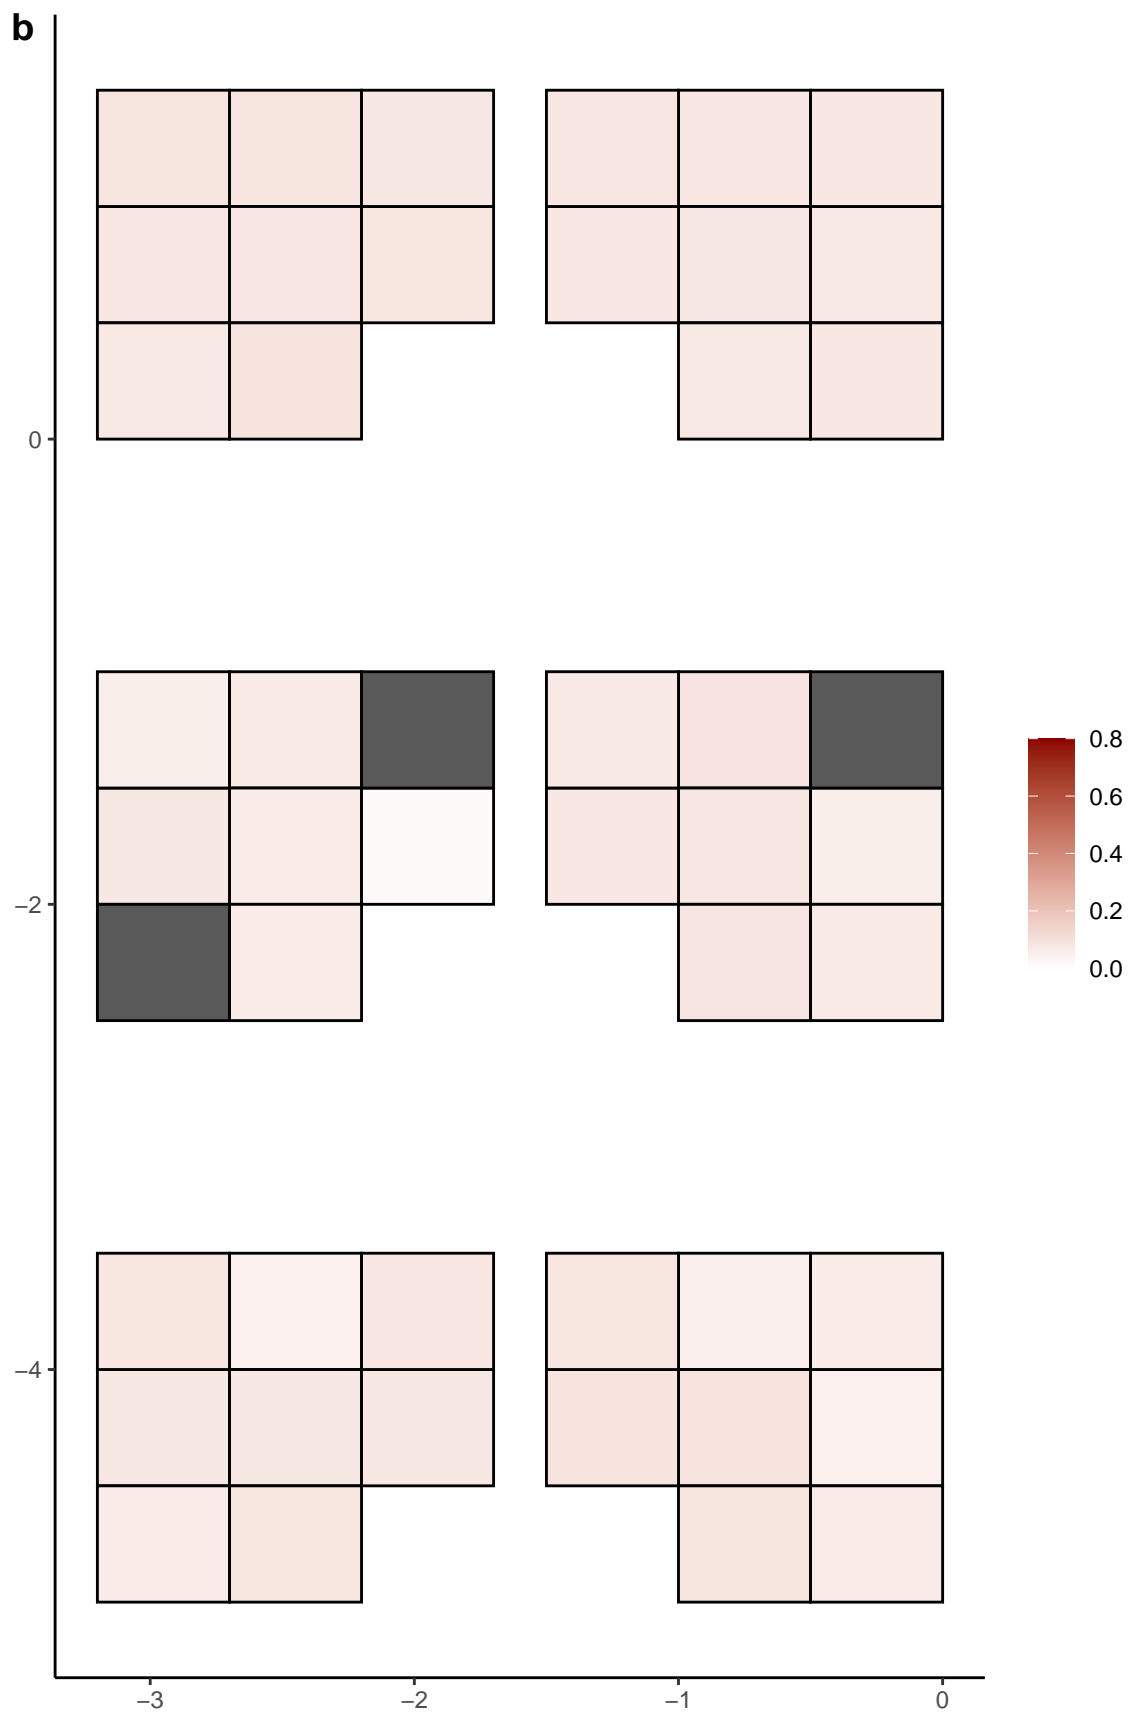

**a** ID05 4-153029643-C-T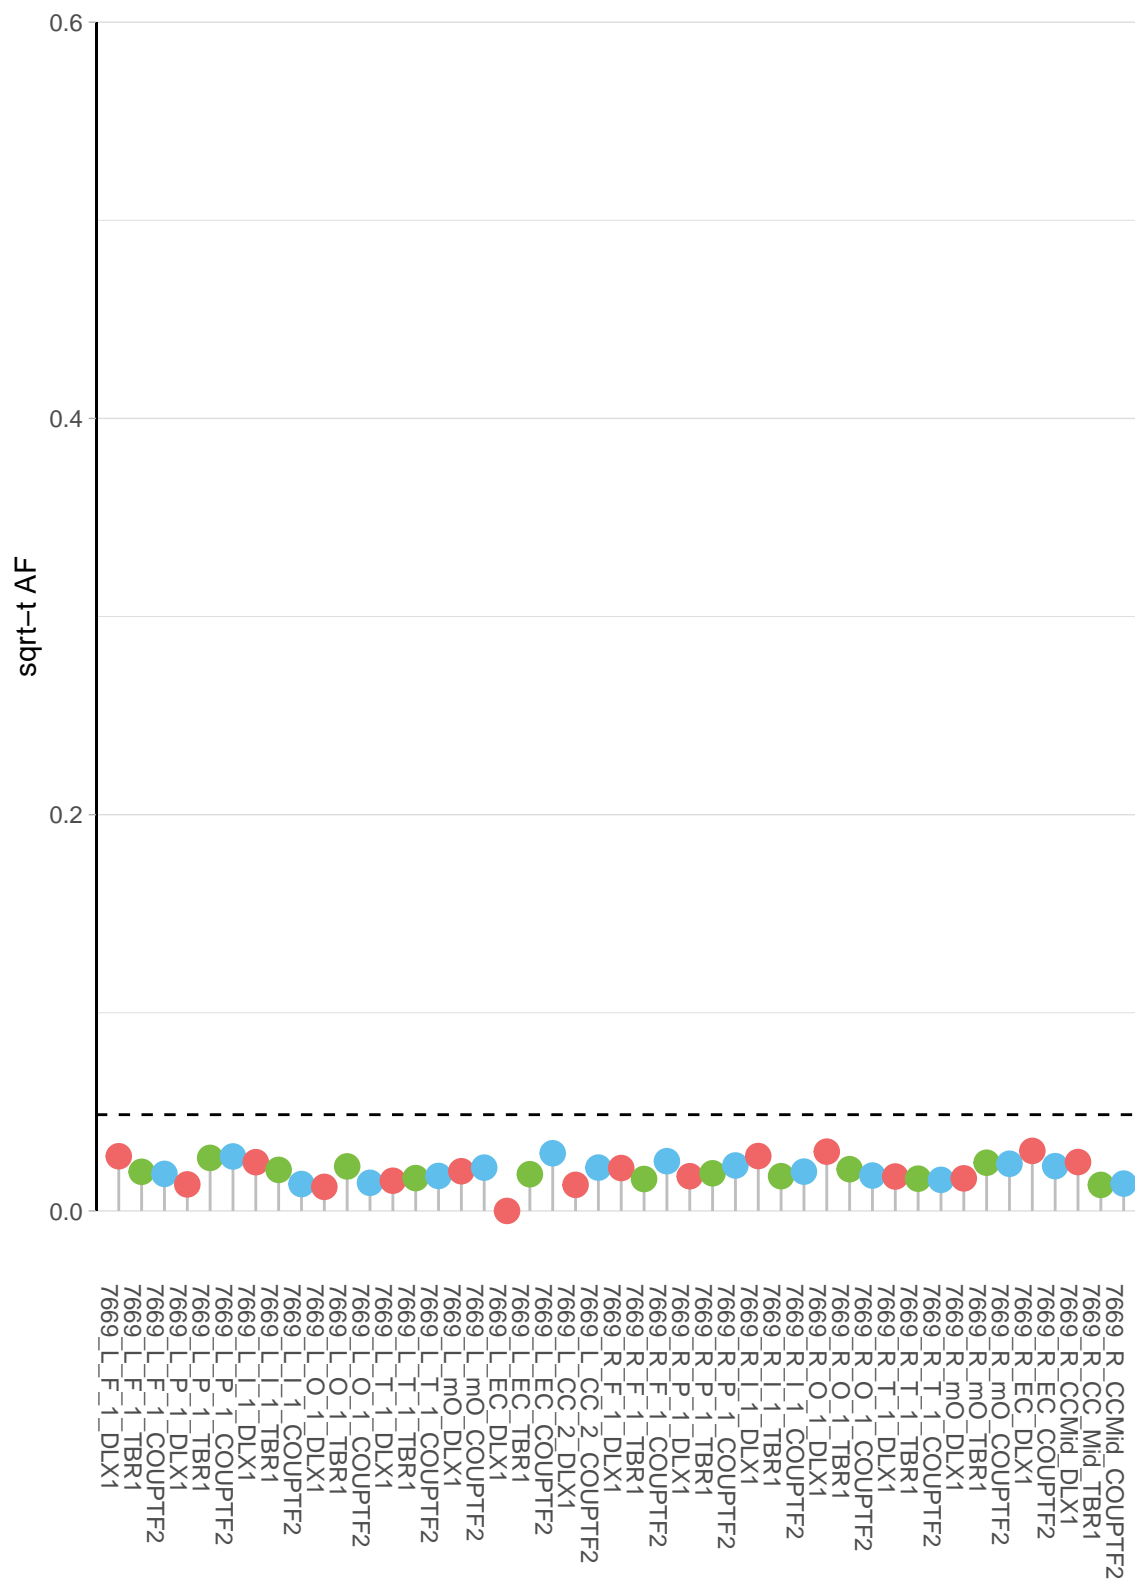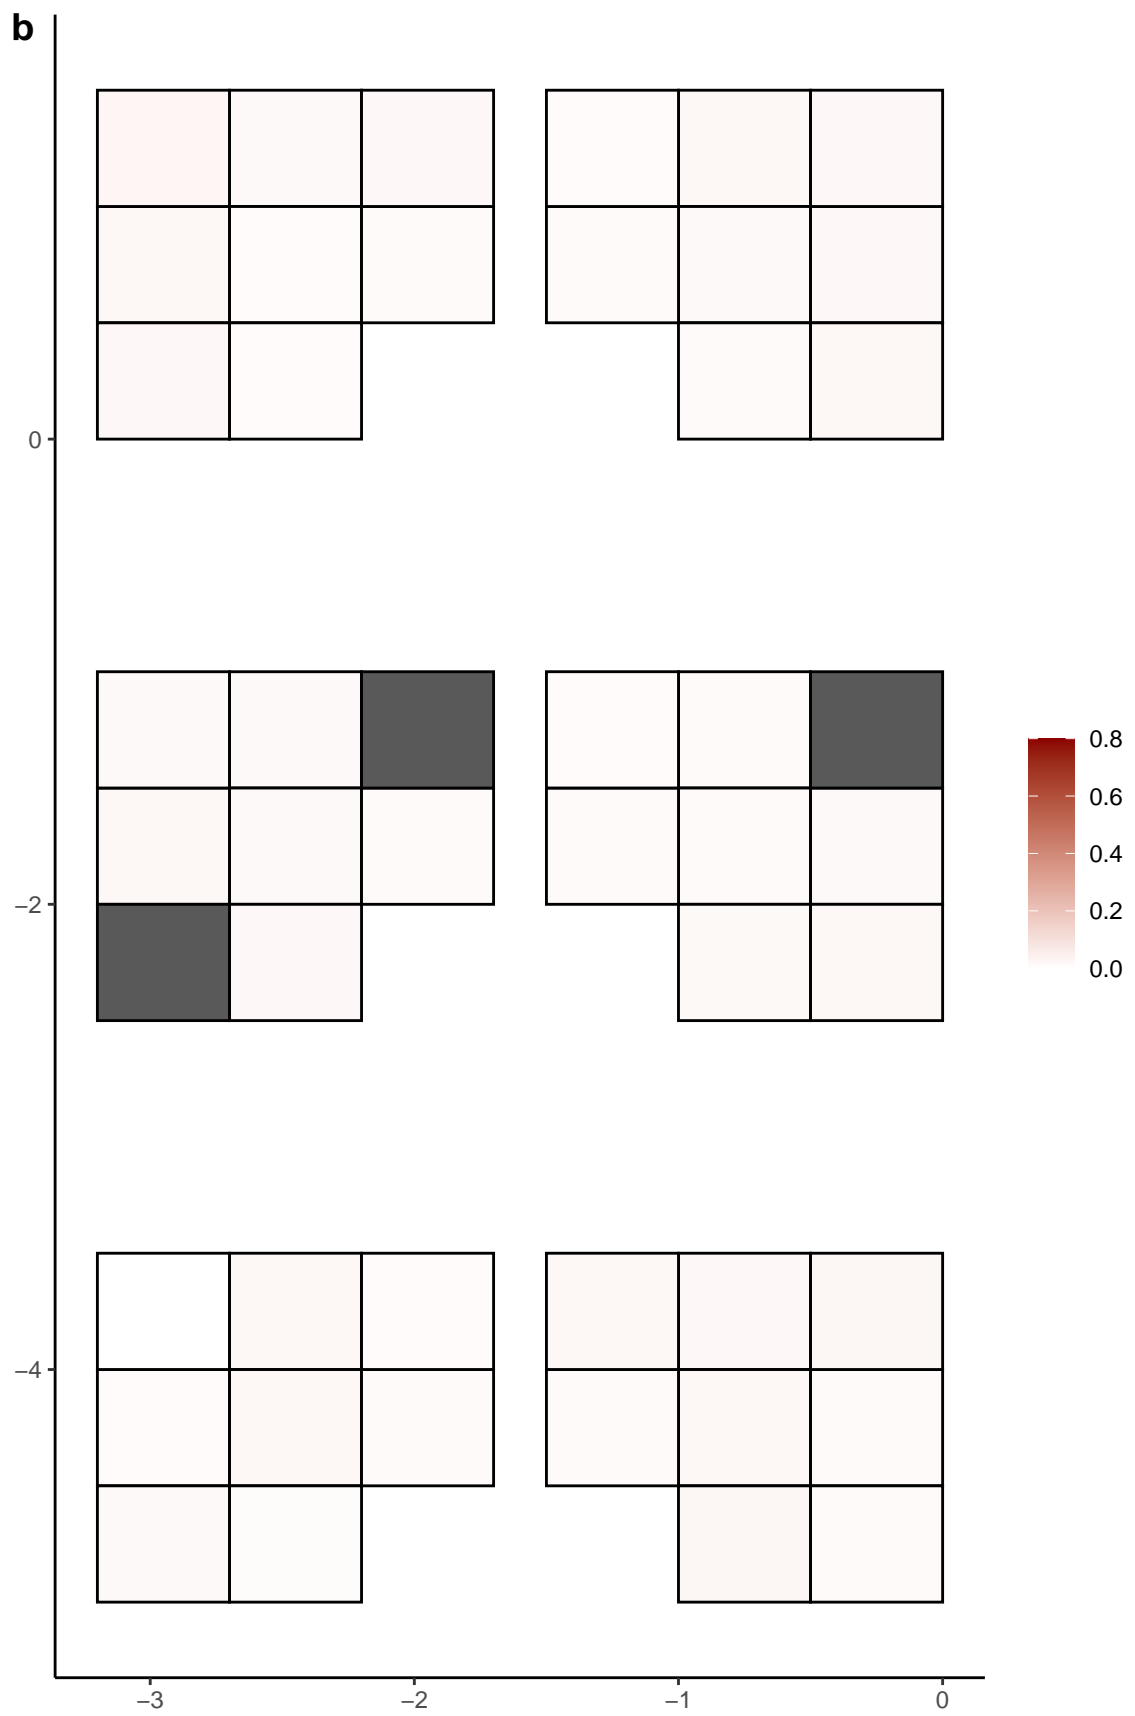



**a** ID05 4-155190936-C-T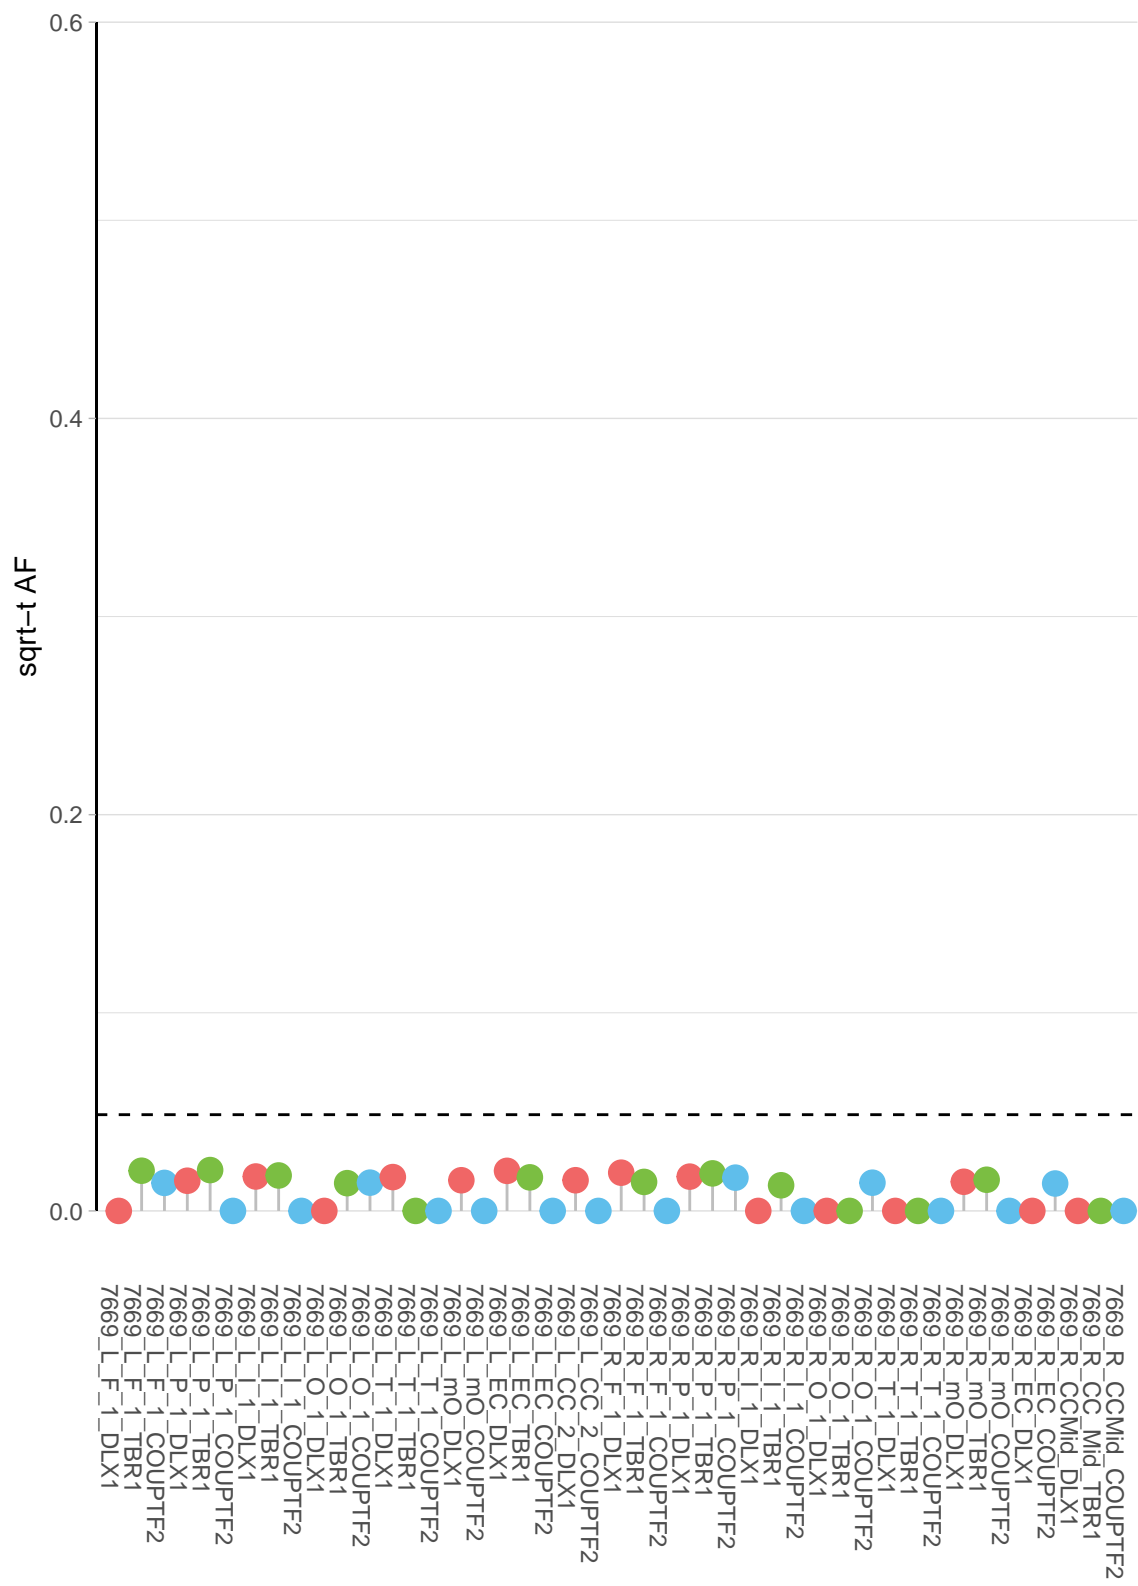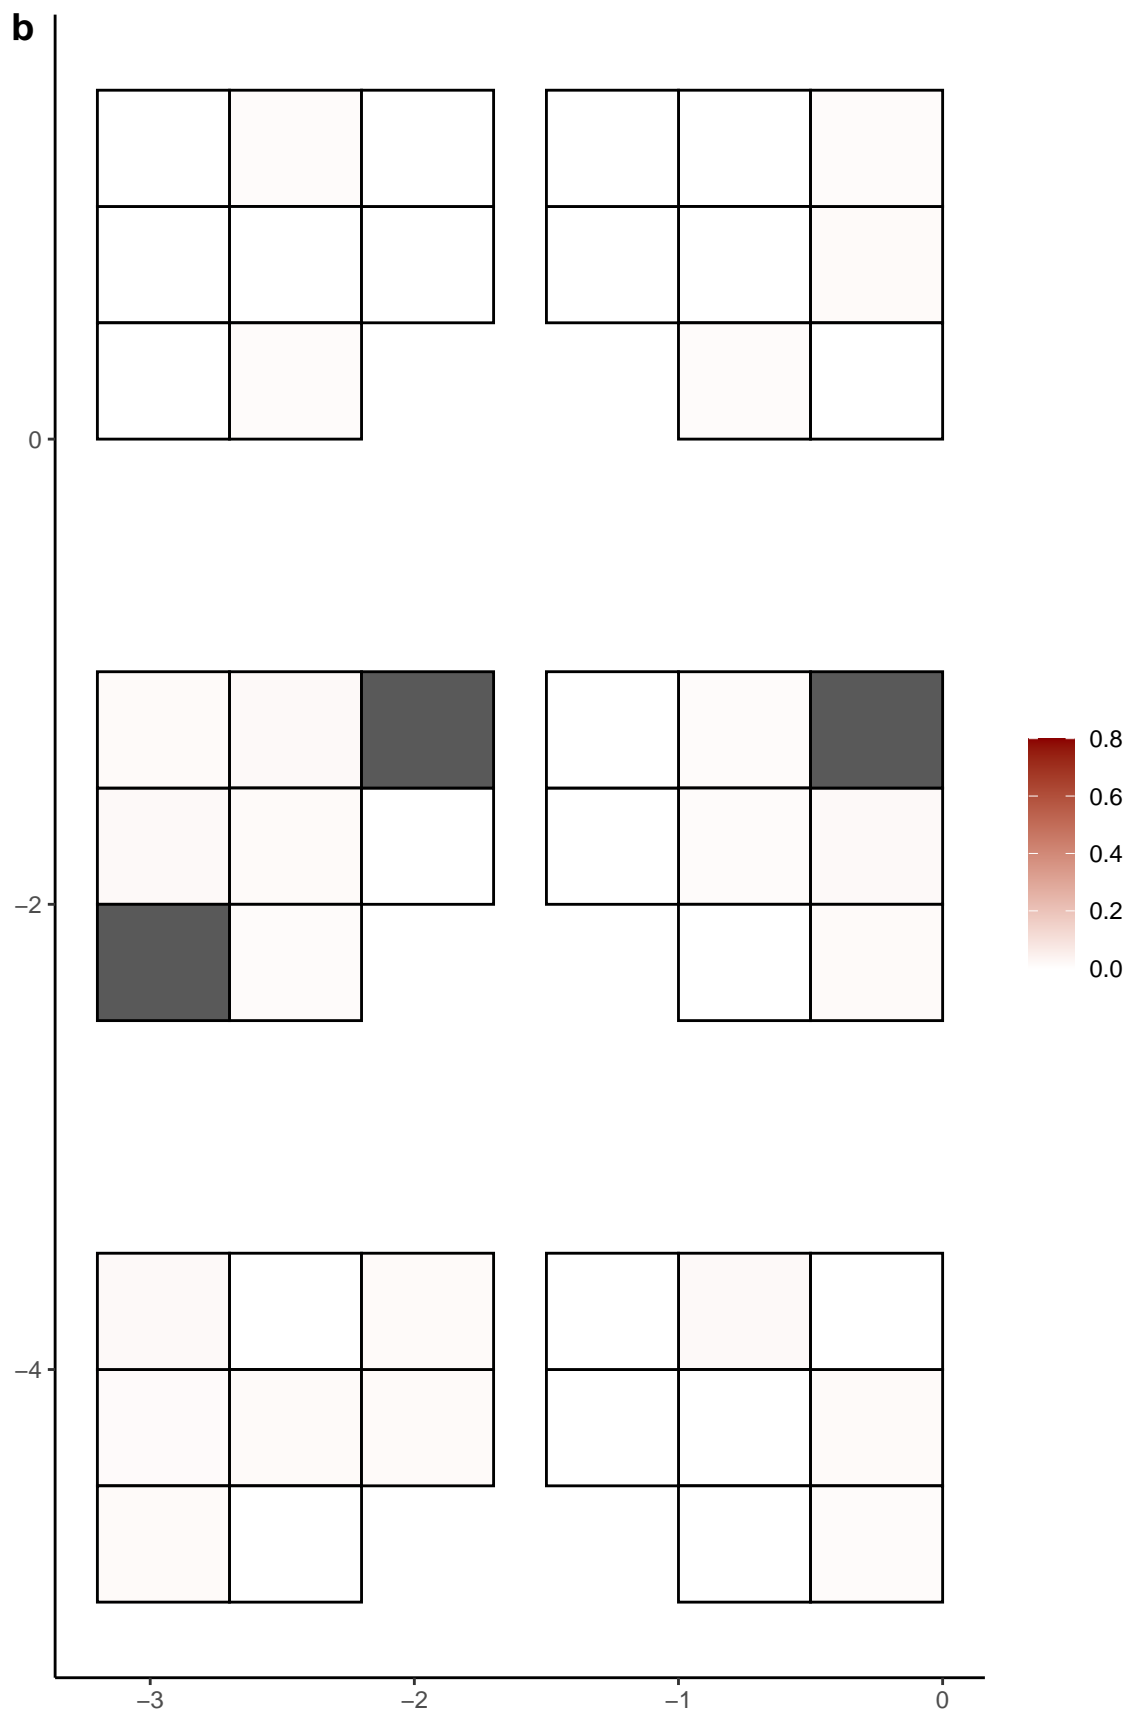

**a** ID05 4-155889870-C-T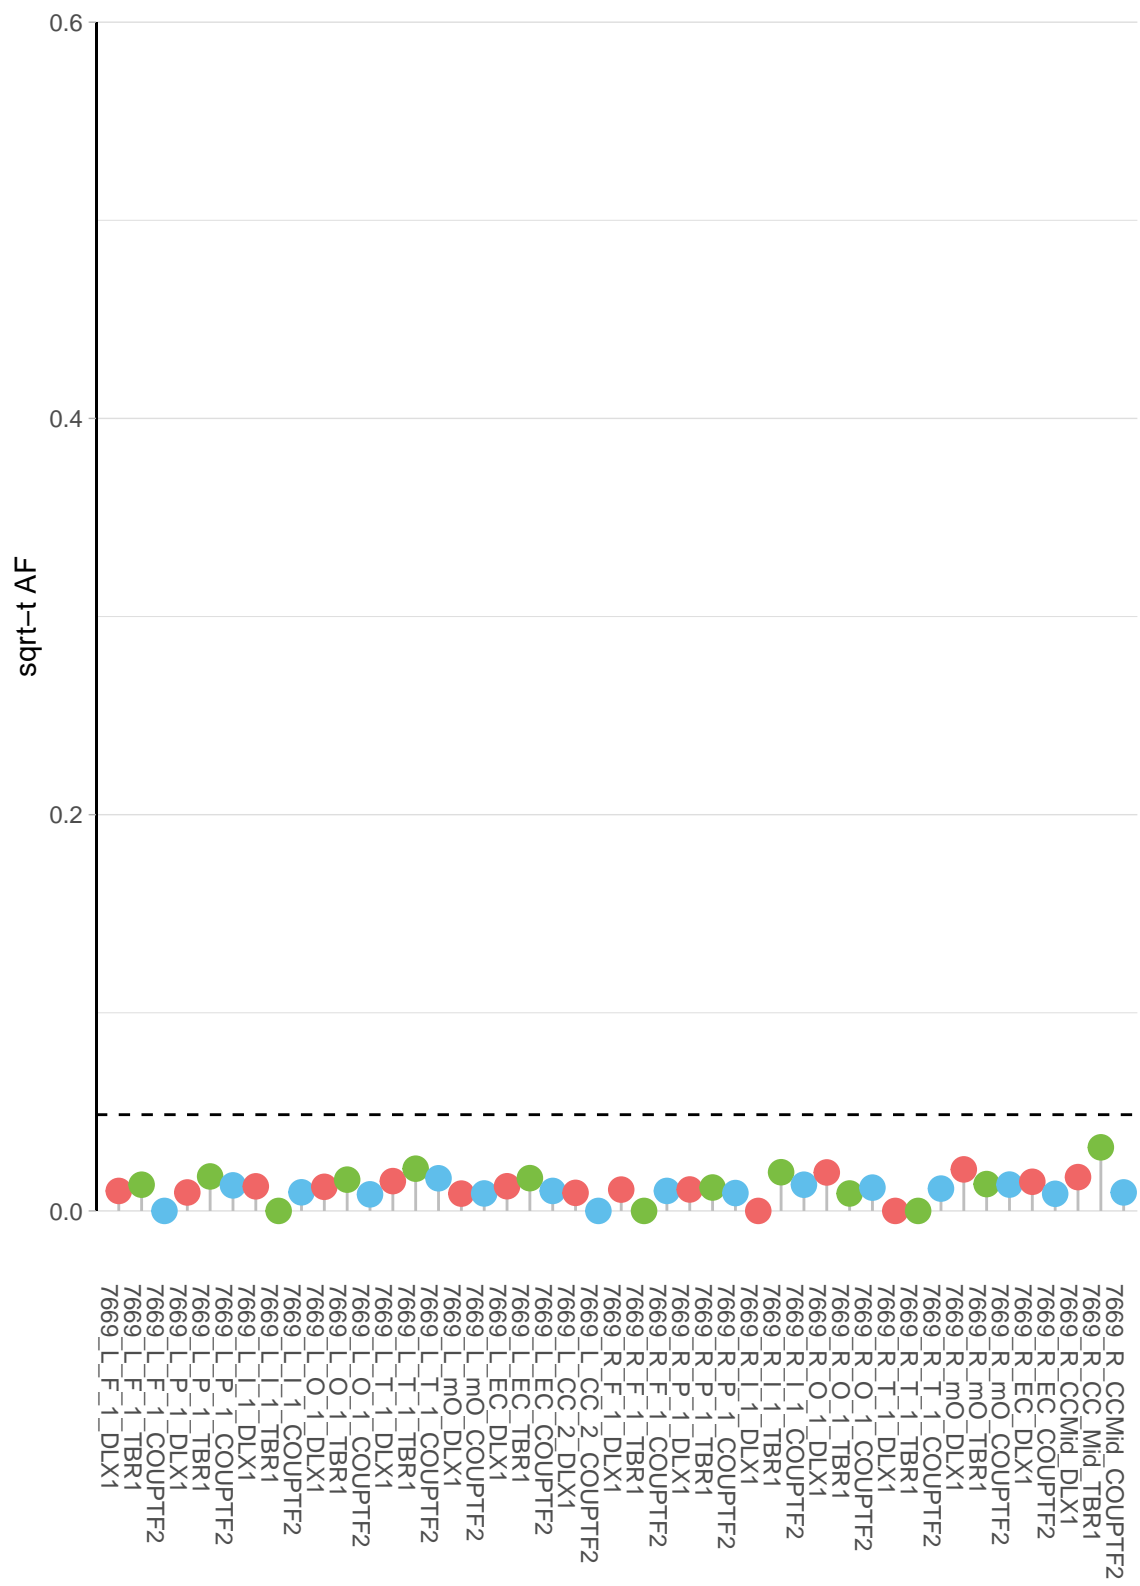**b**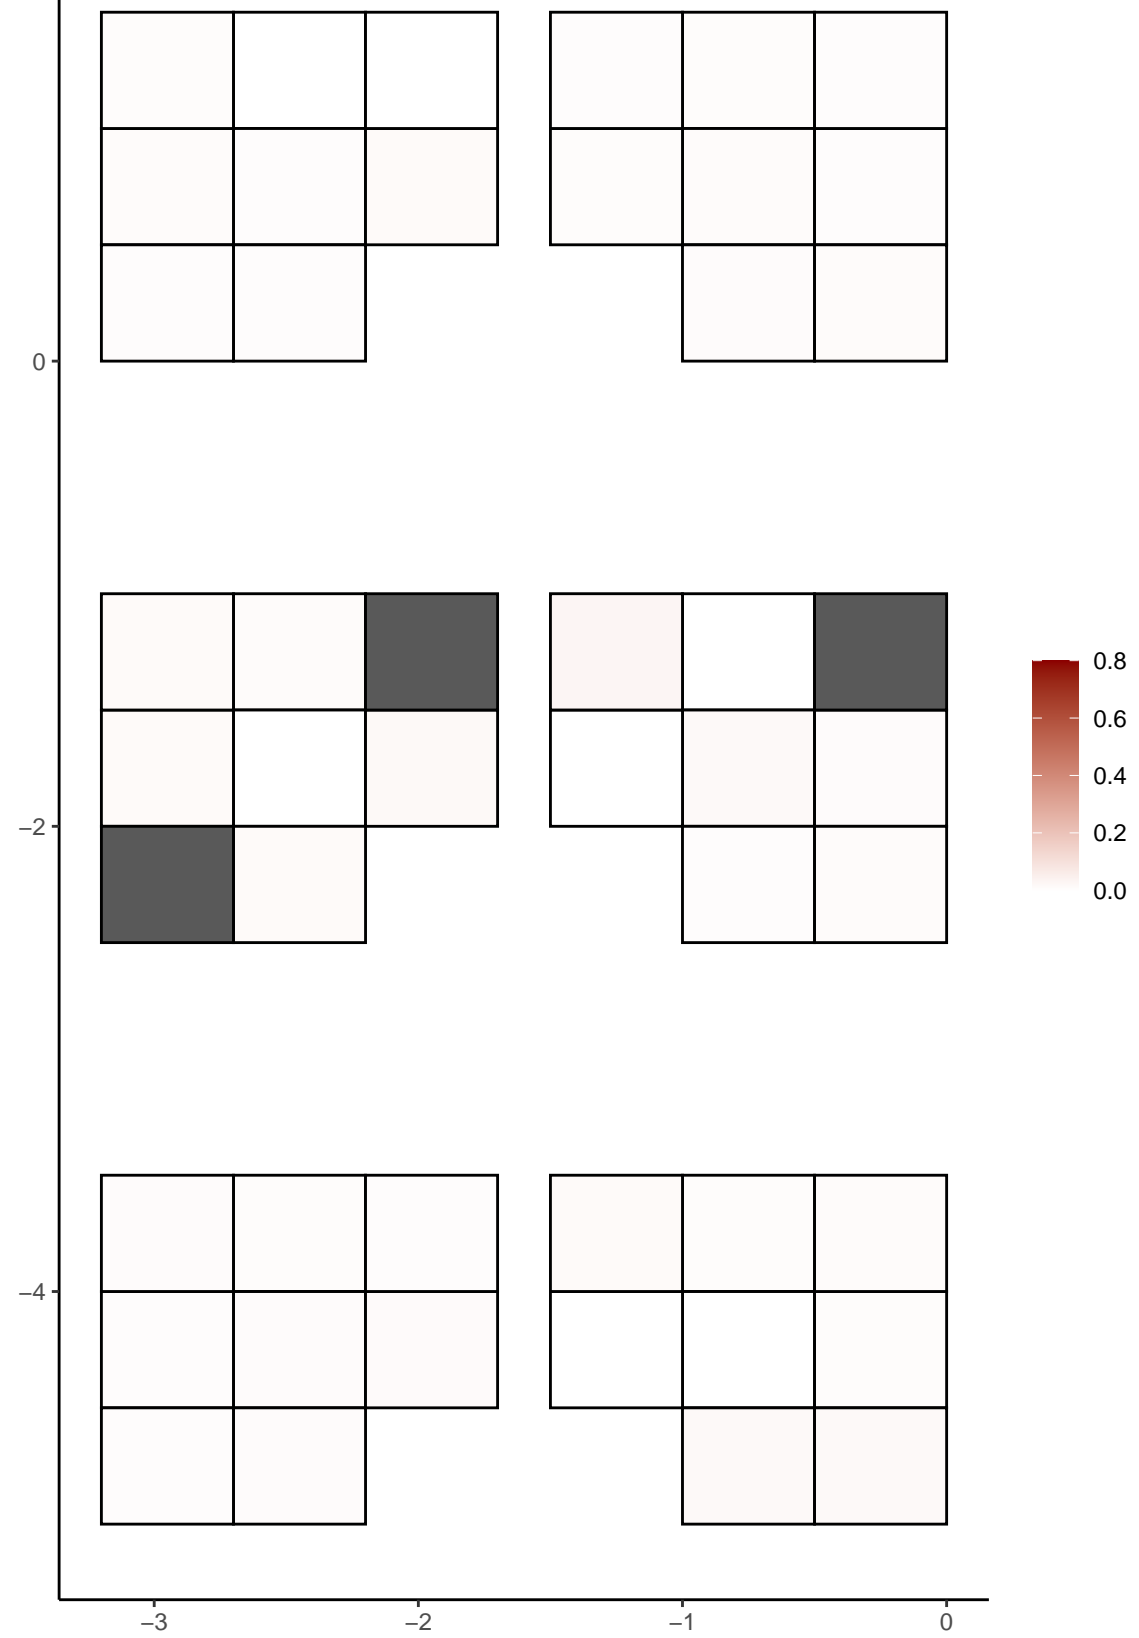

**a** ID05 4-155904014-T-G

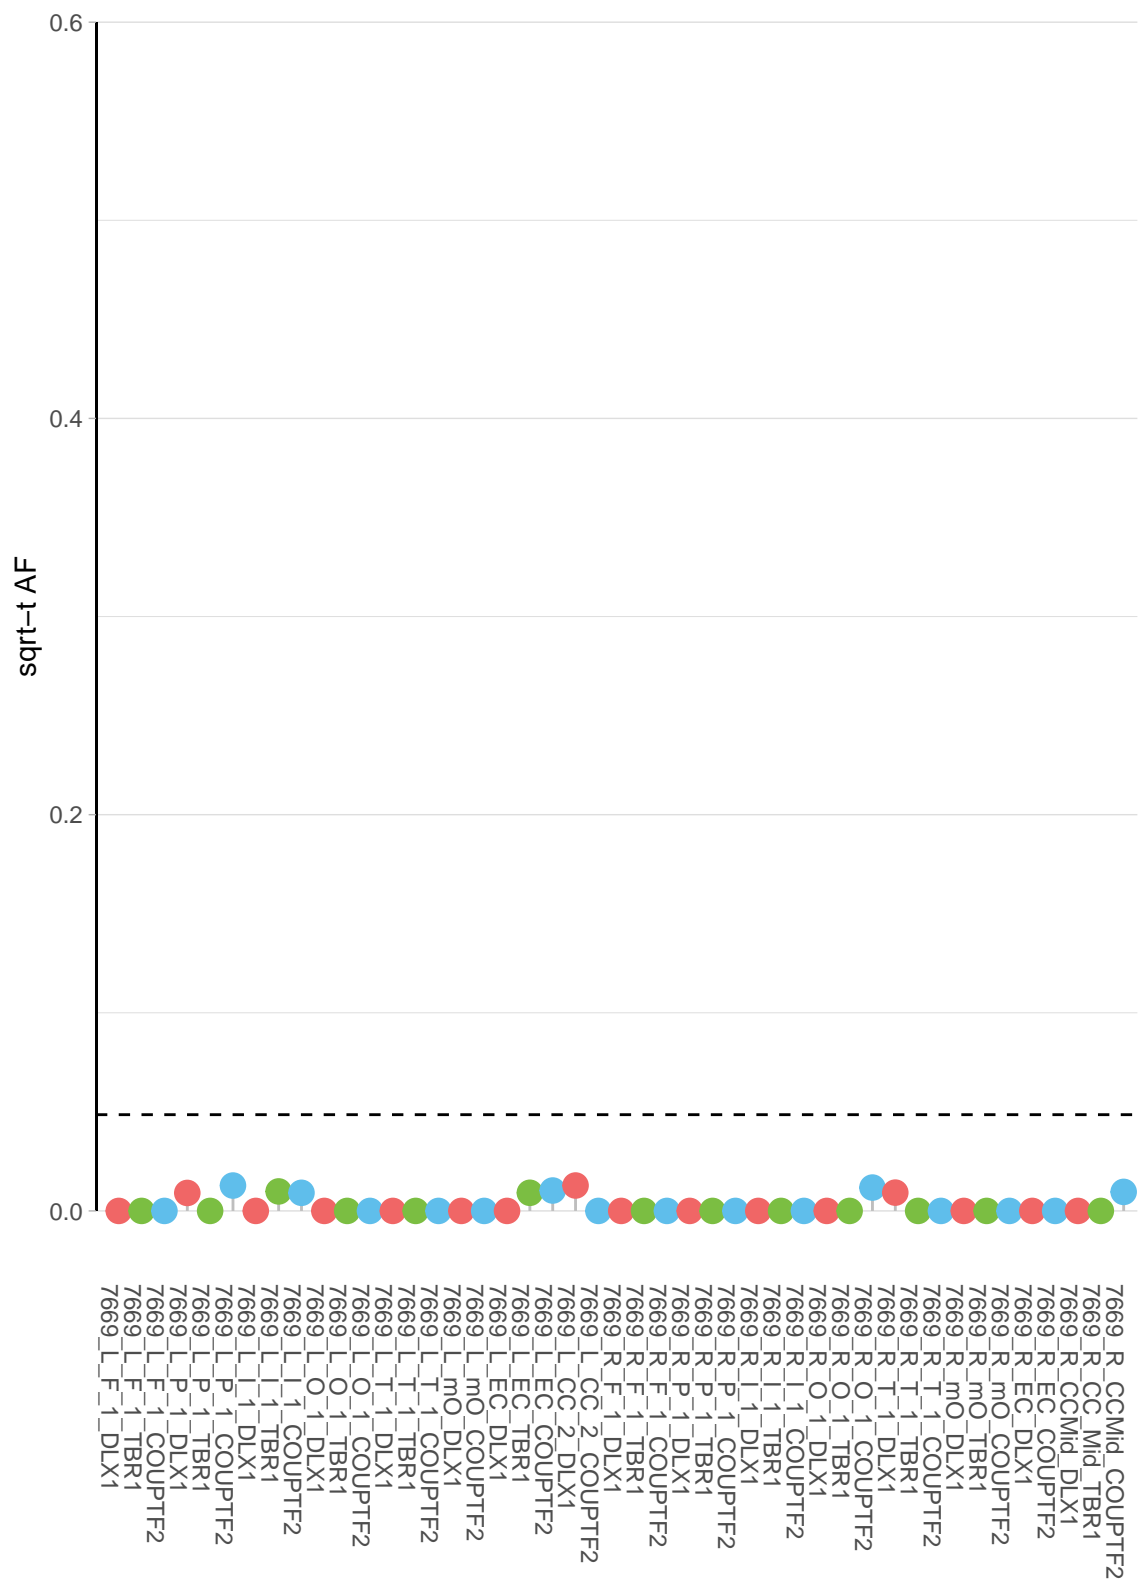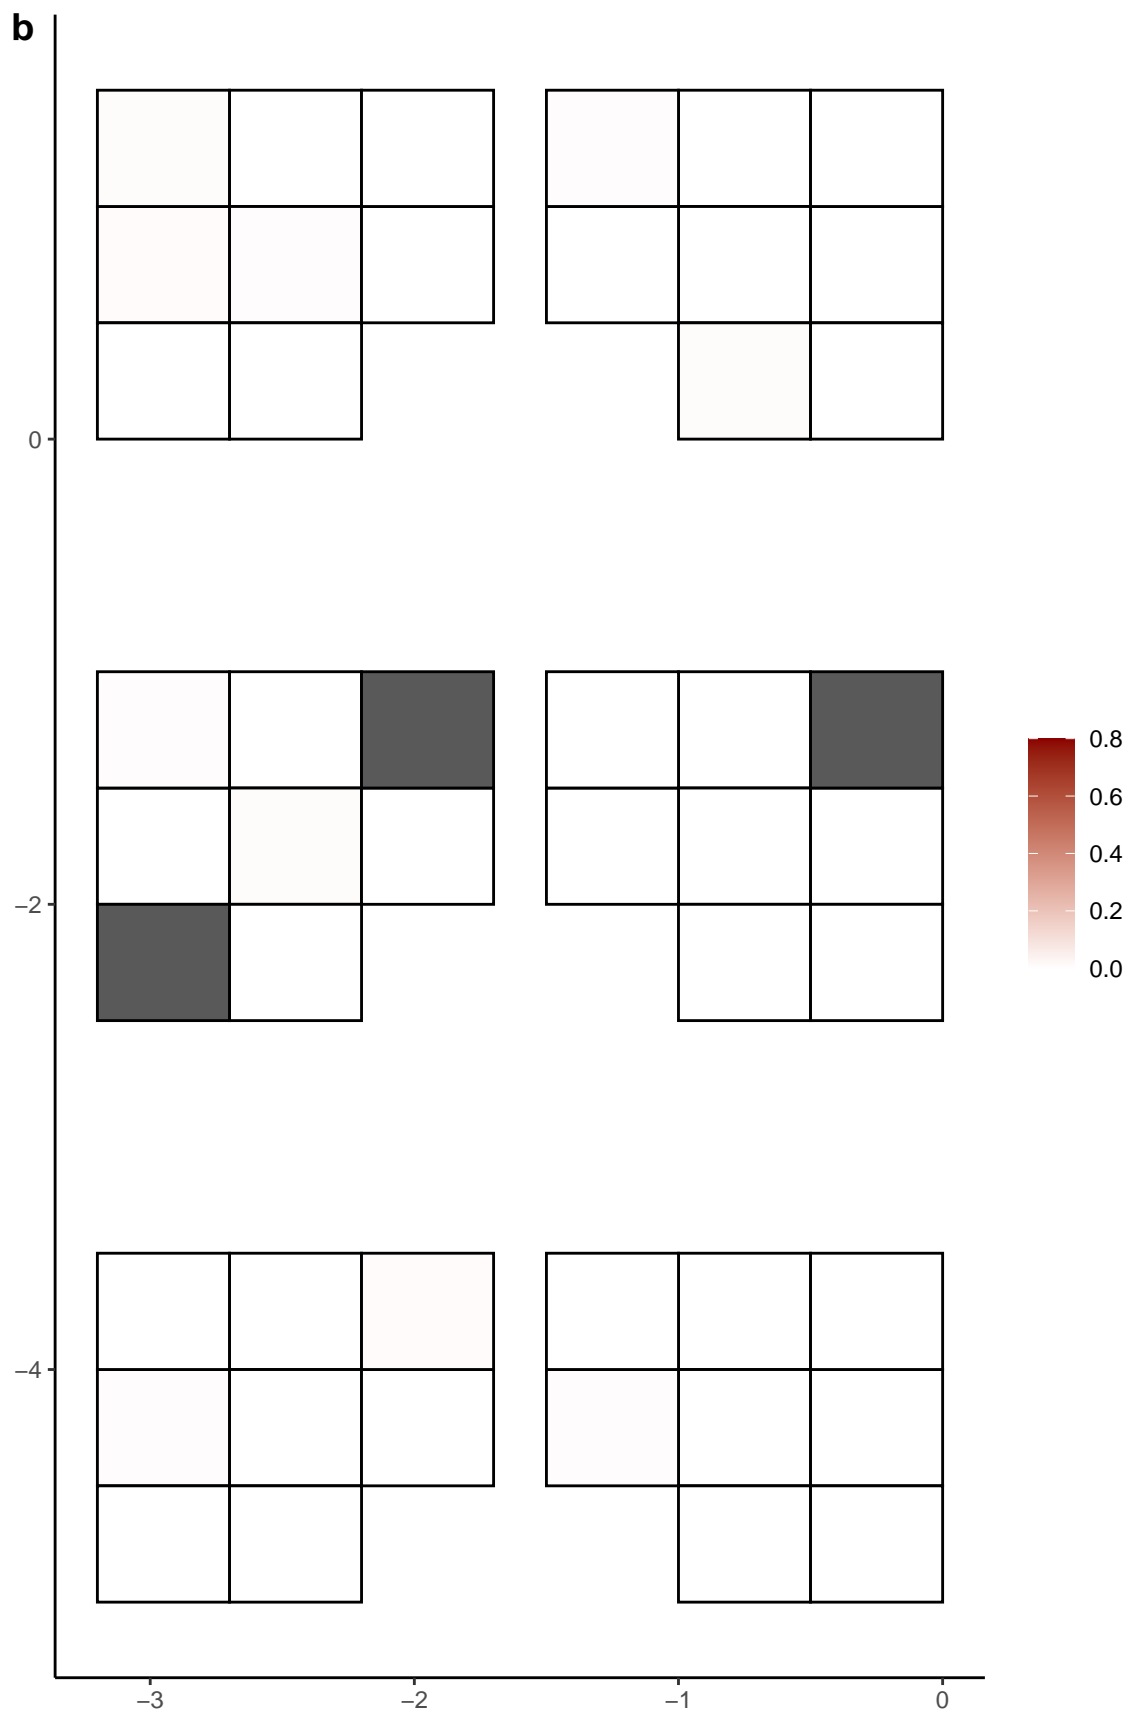

**a** ID05 4-165952565-A-G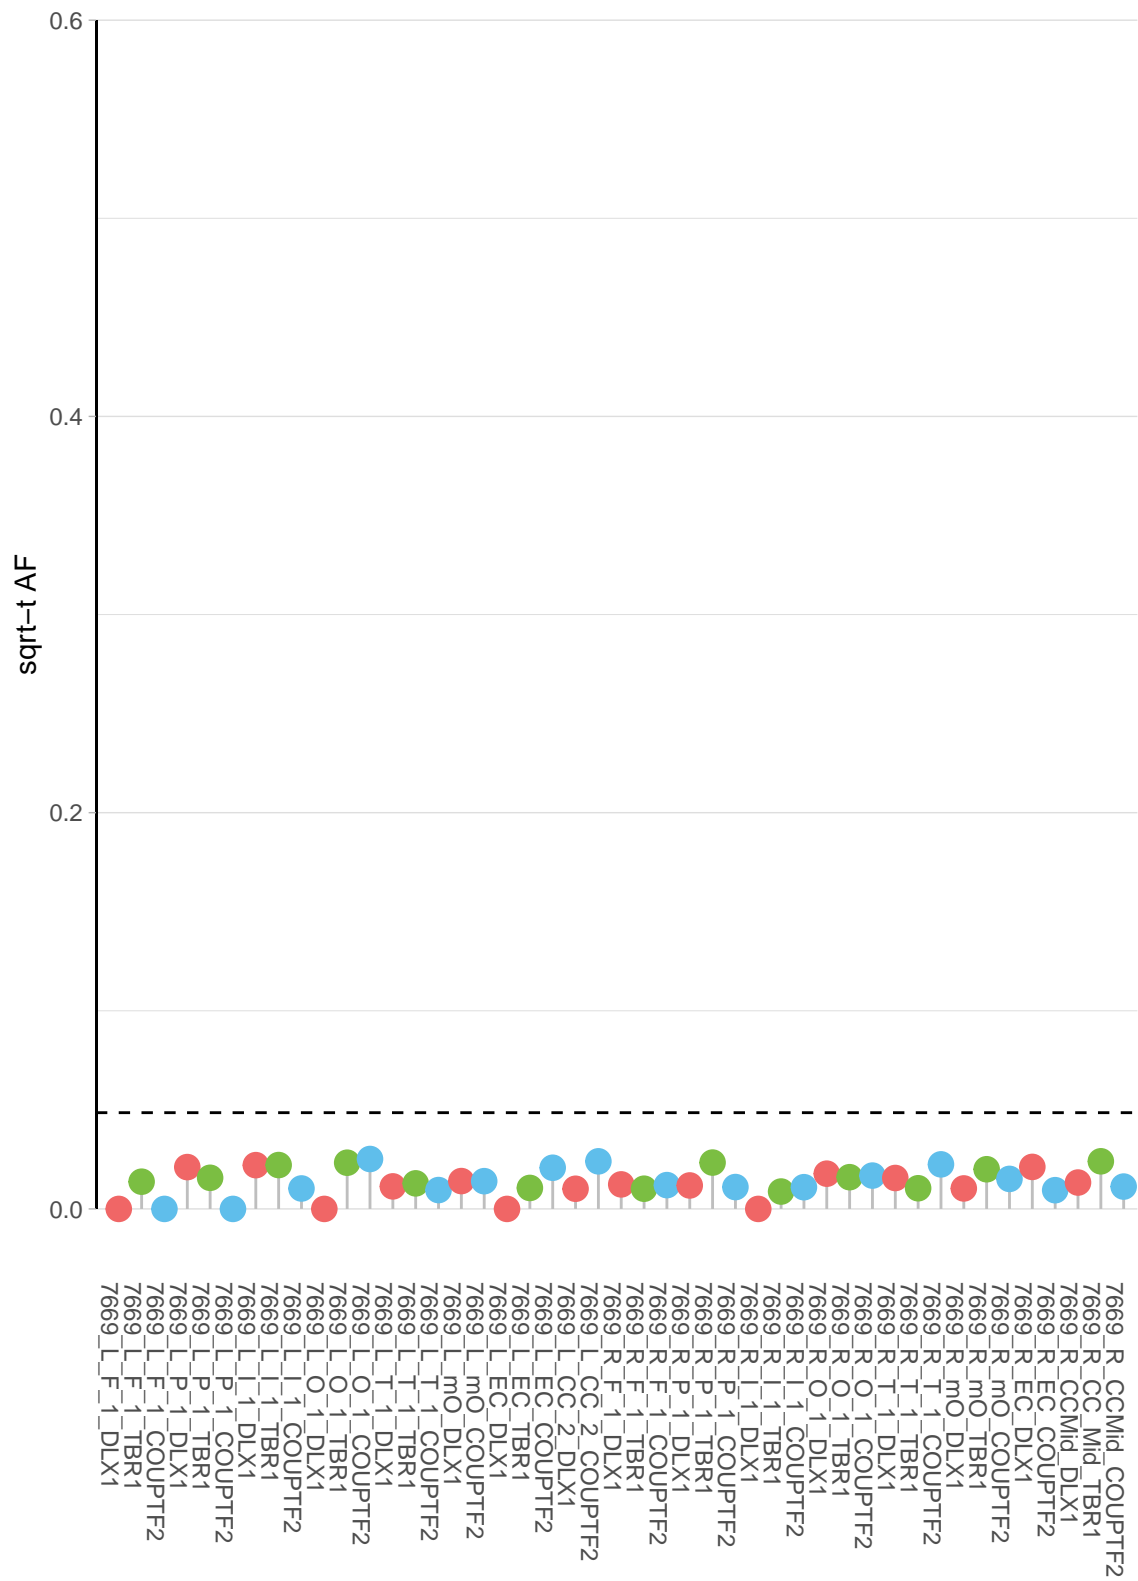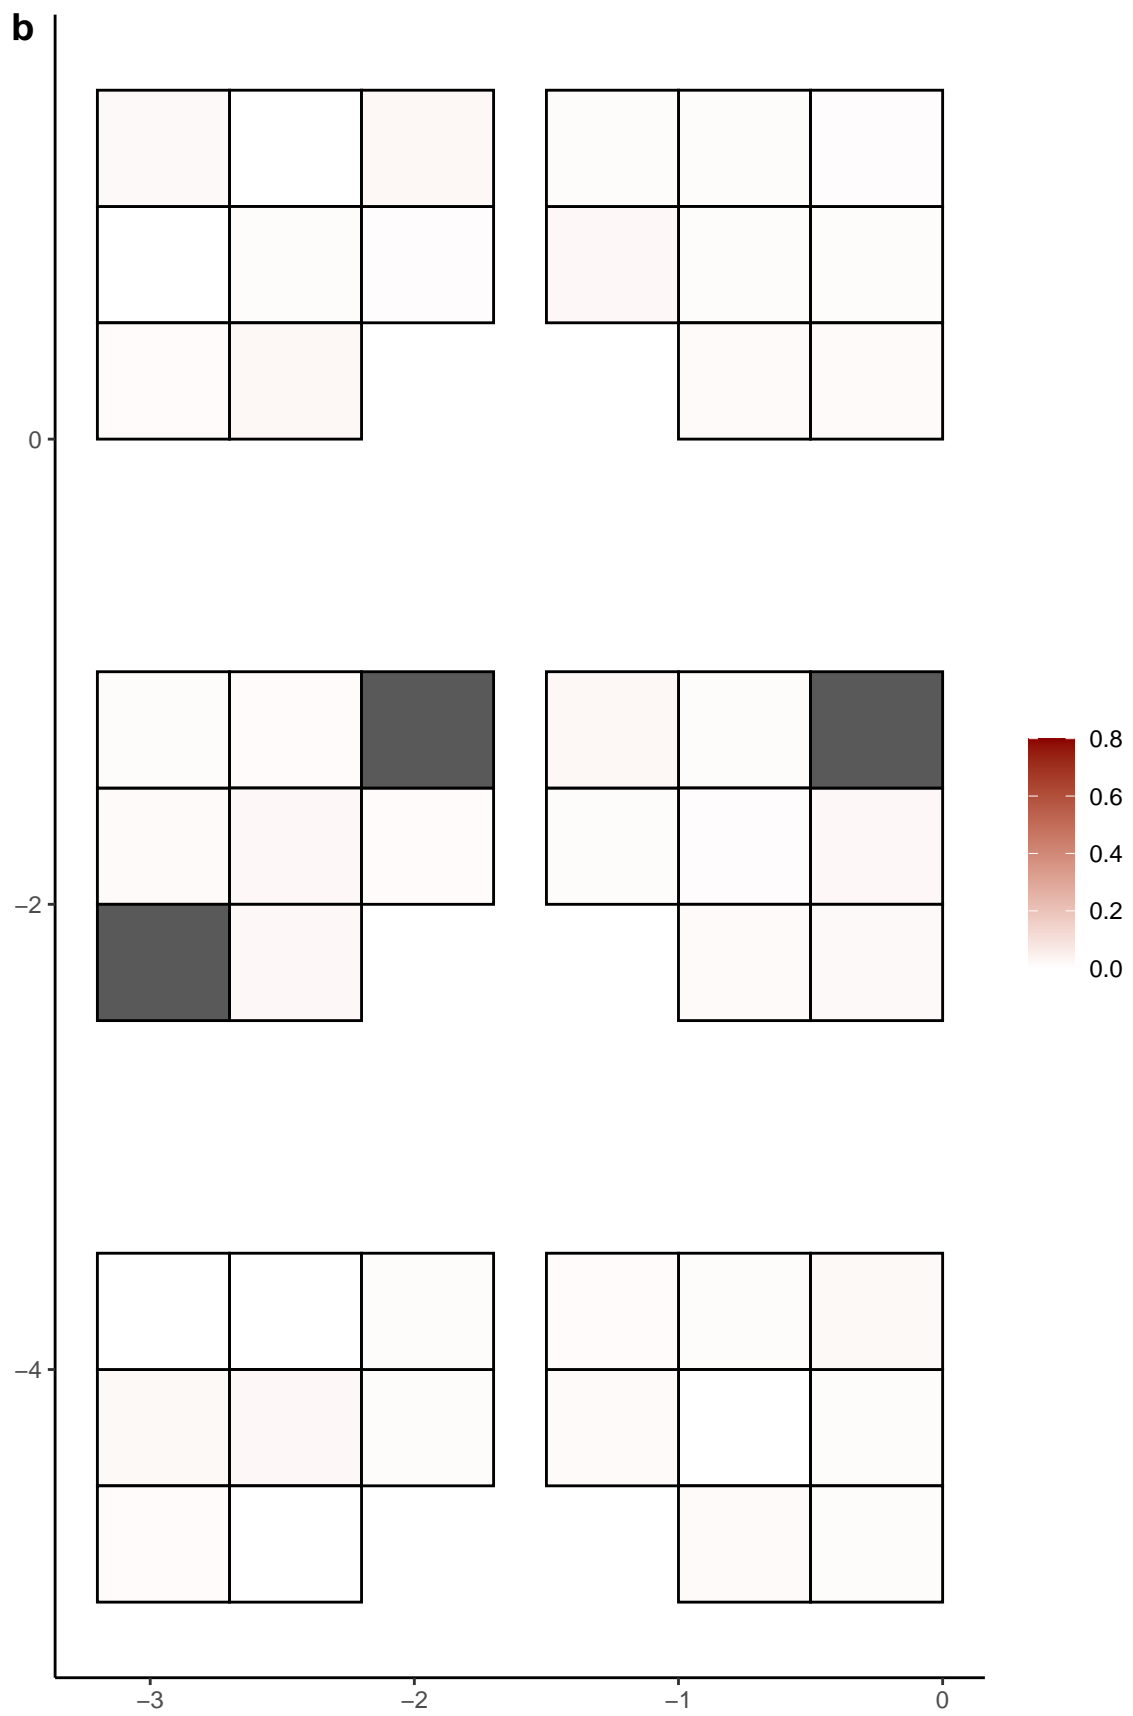

**a** ID05 4-168050168-C-A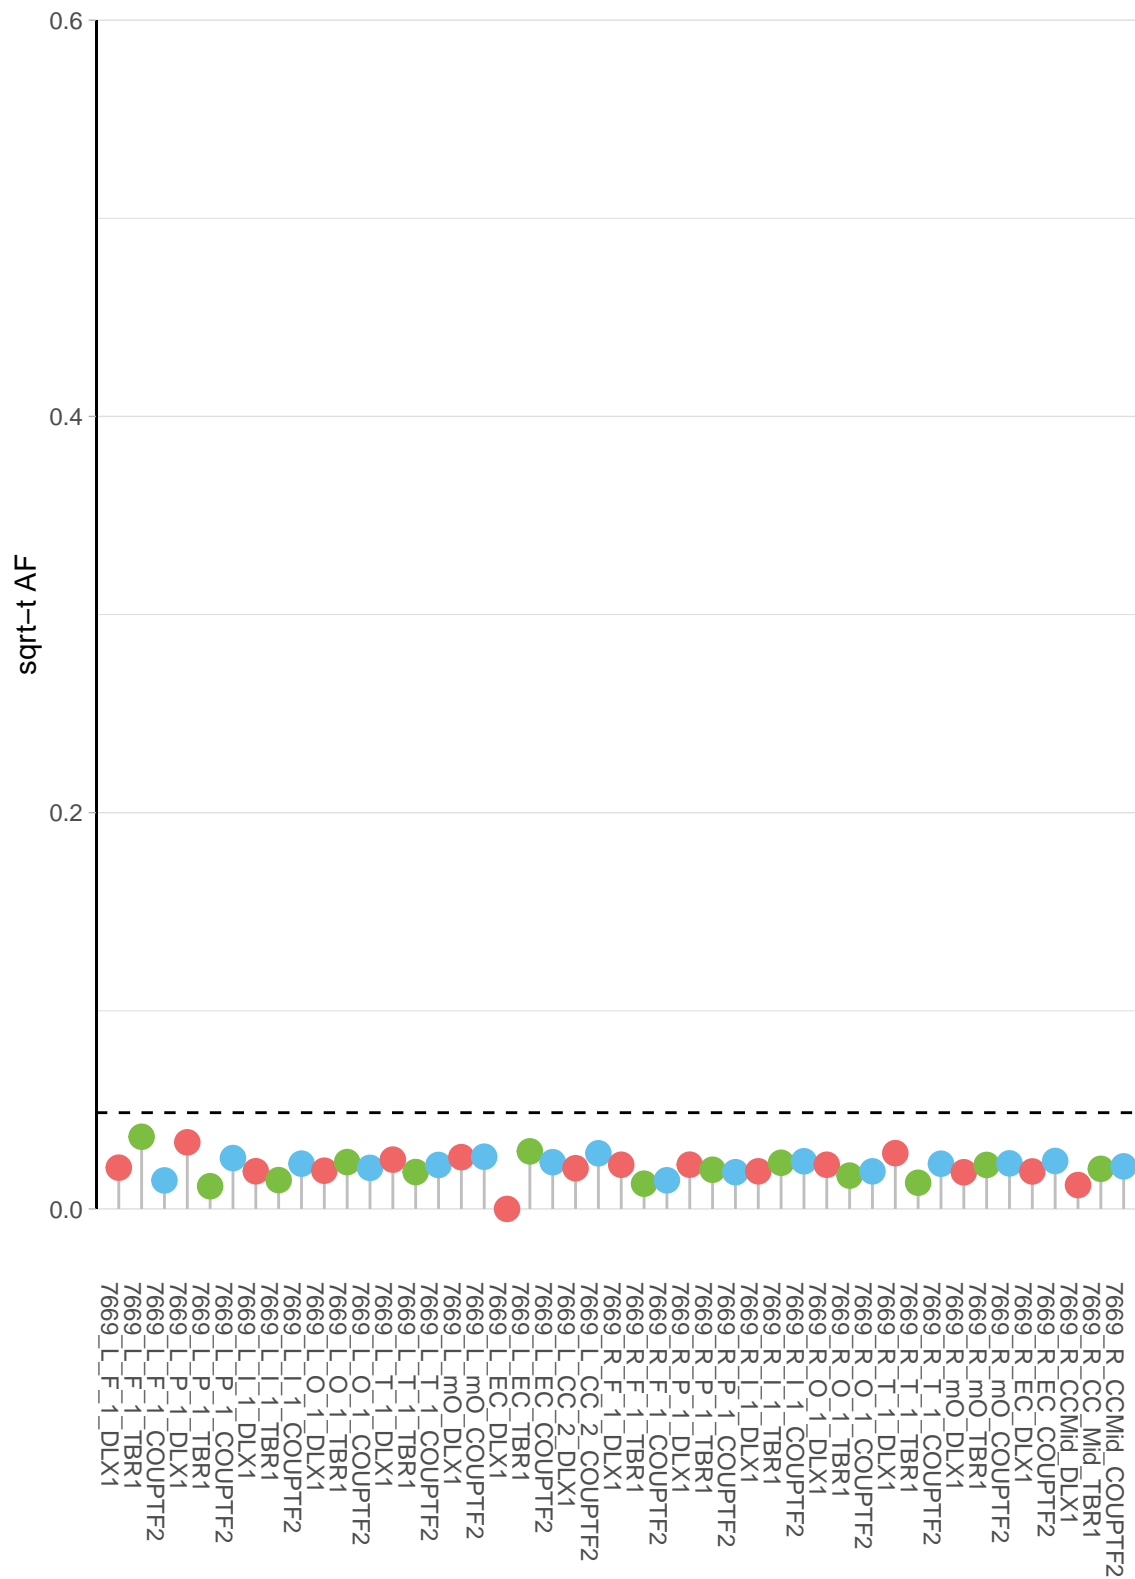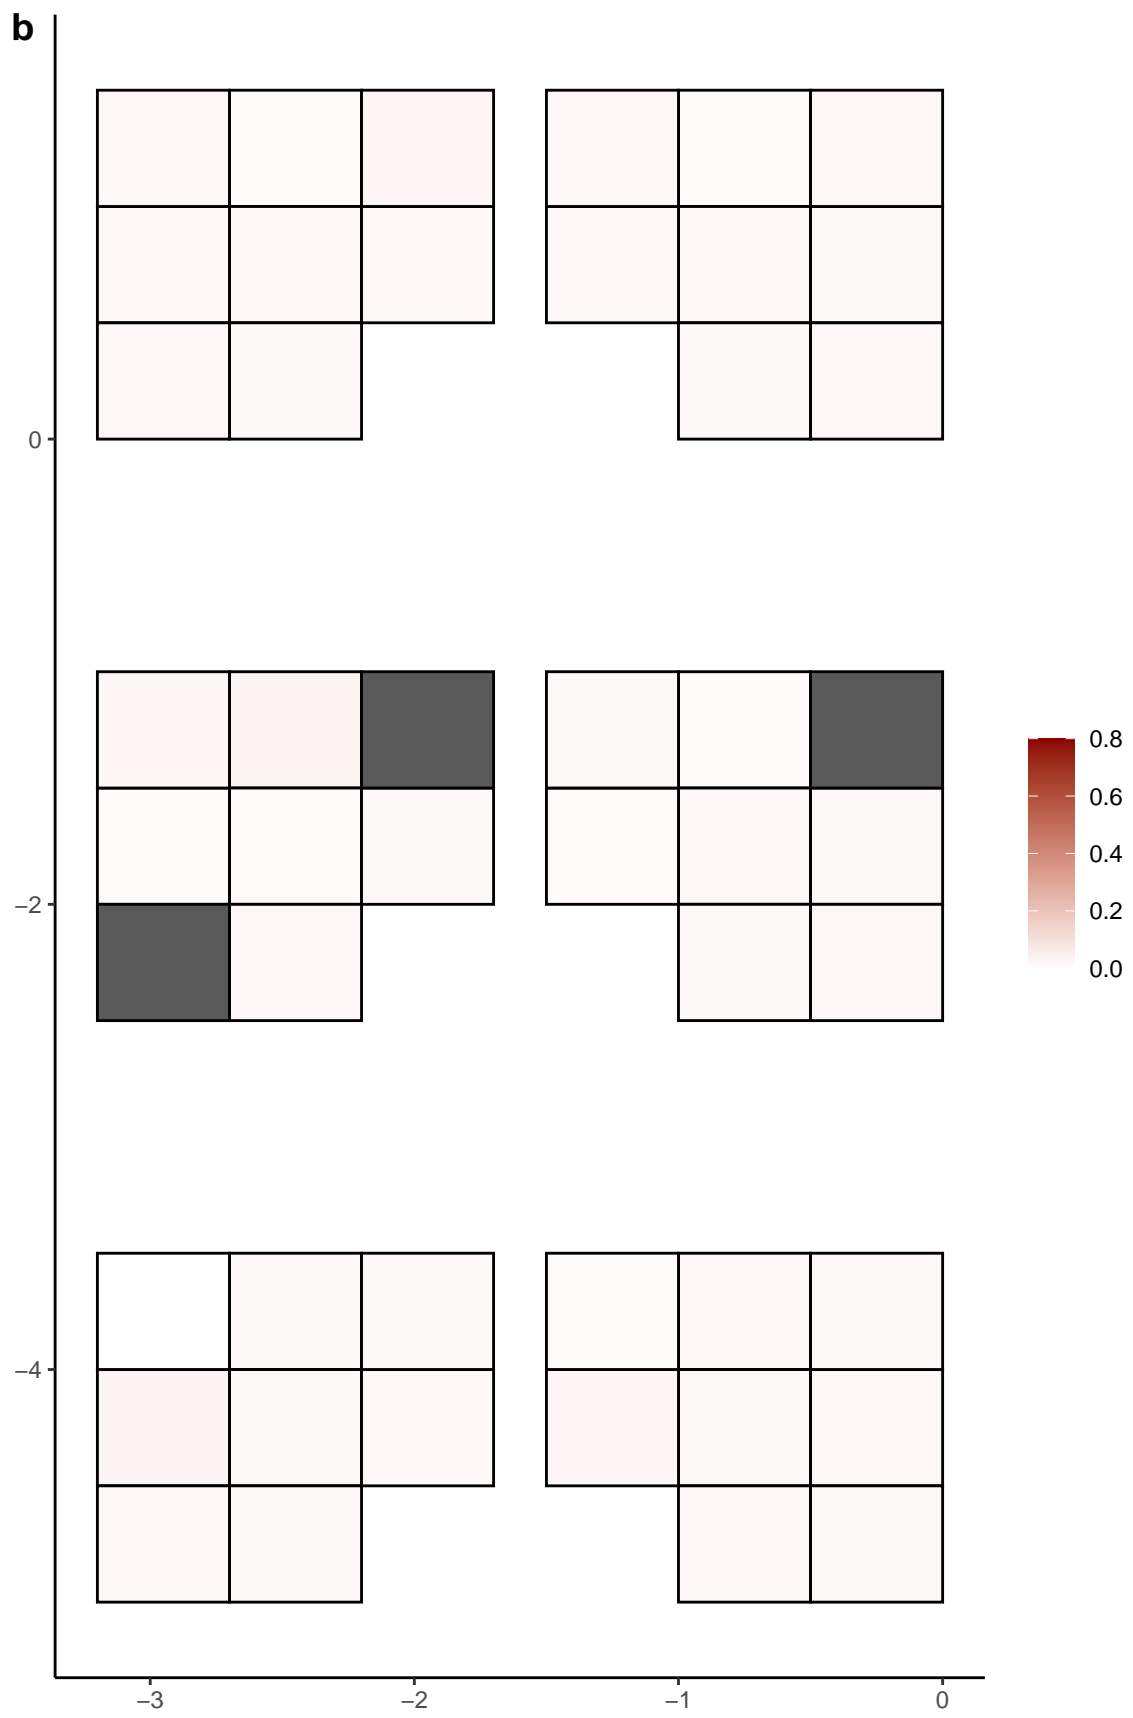

**a** ID05 4-183244212-C-T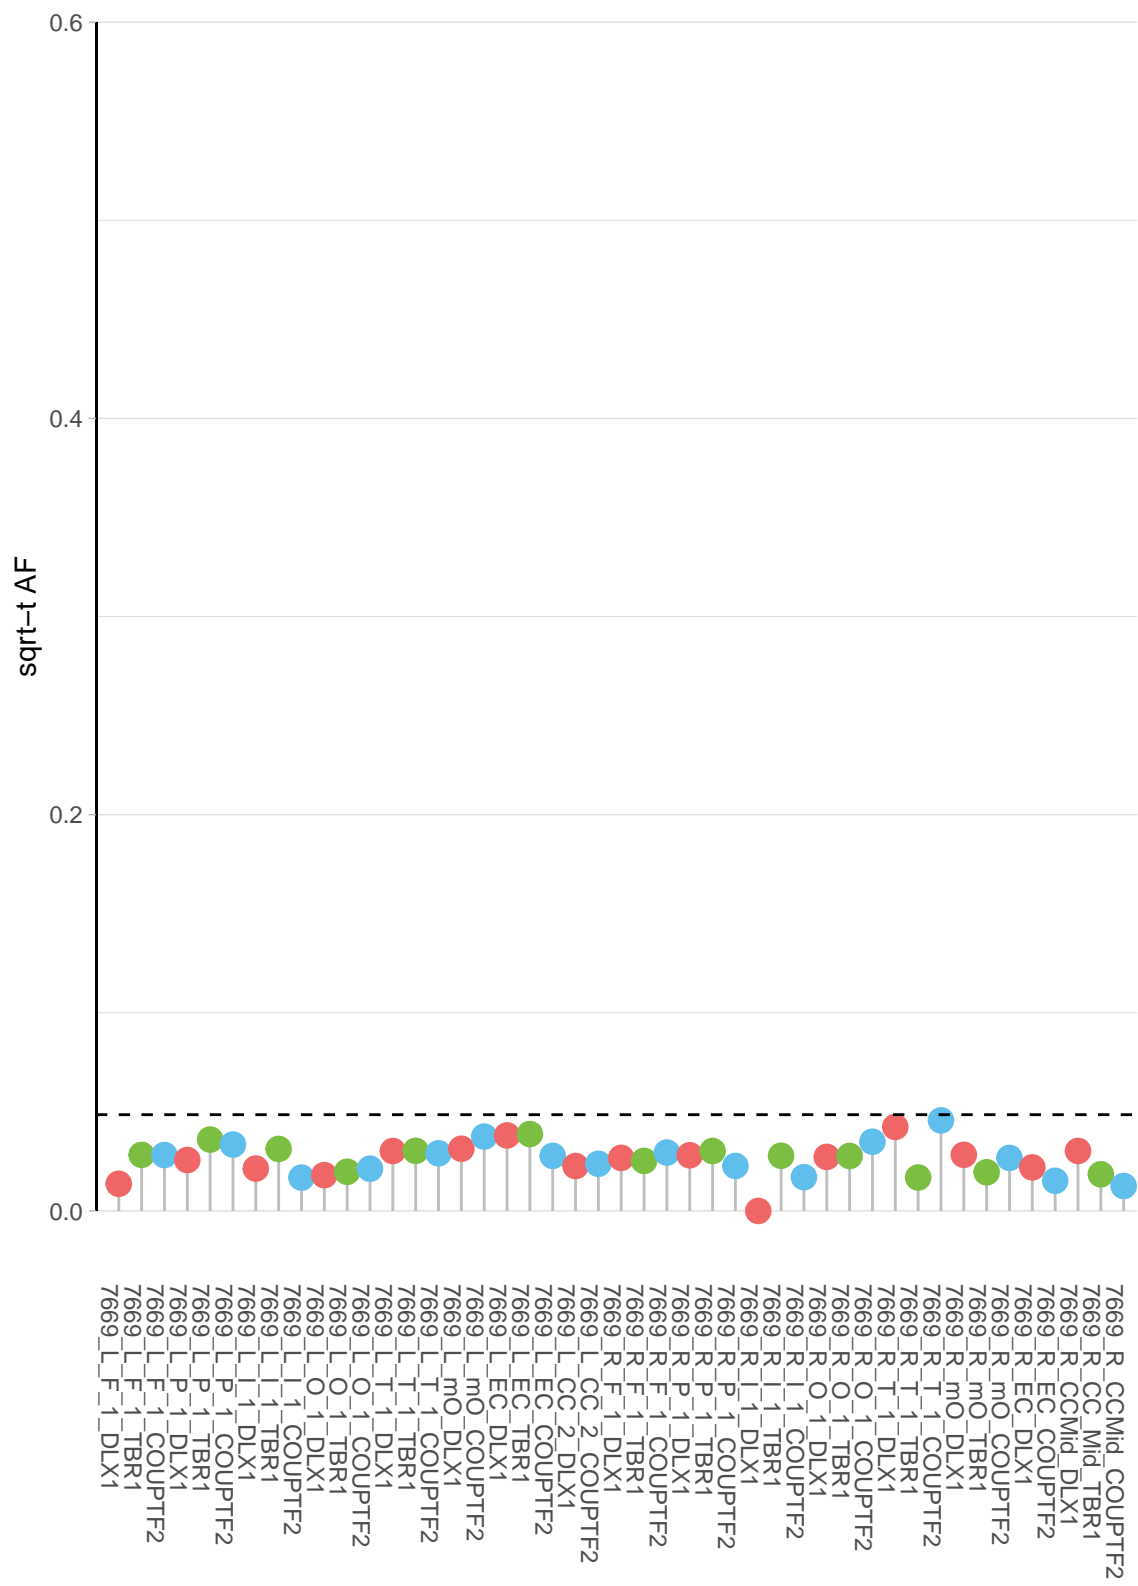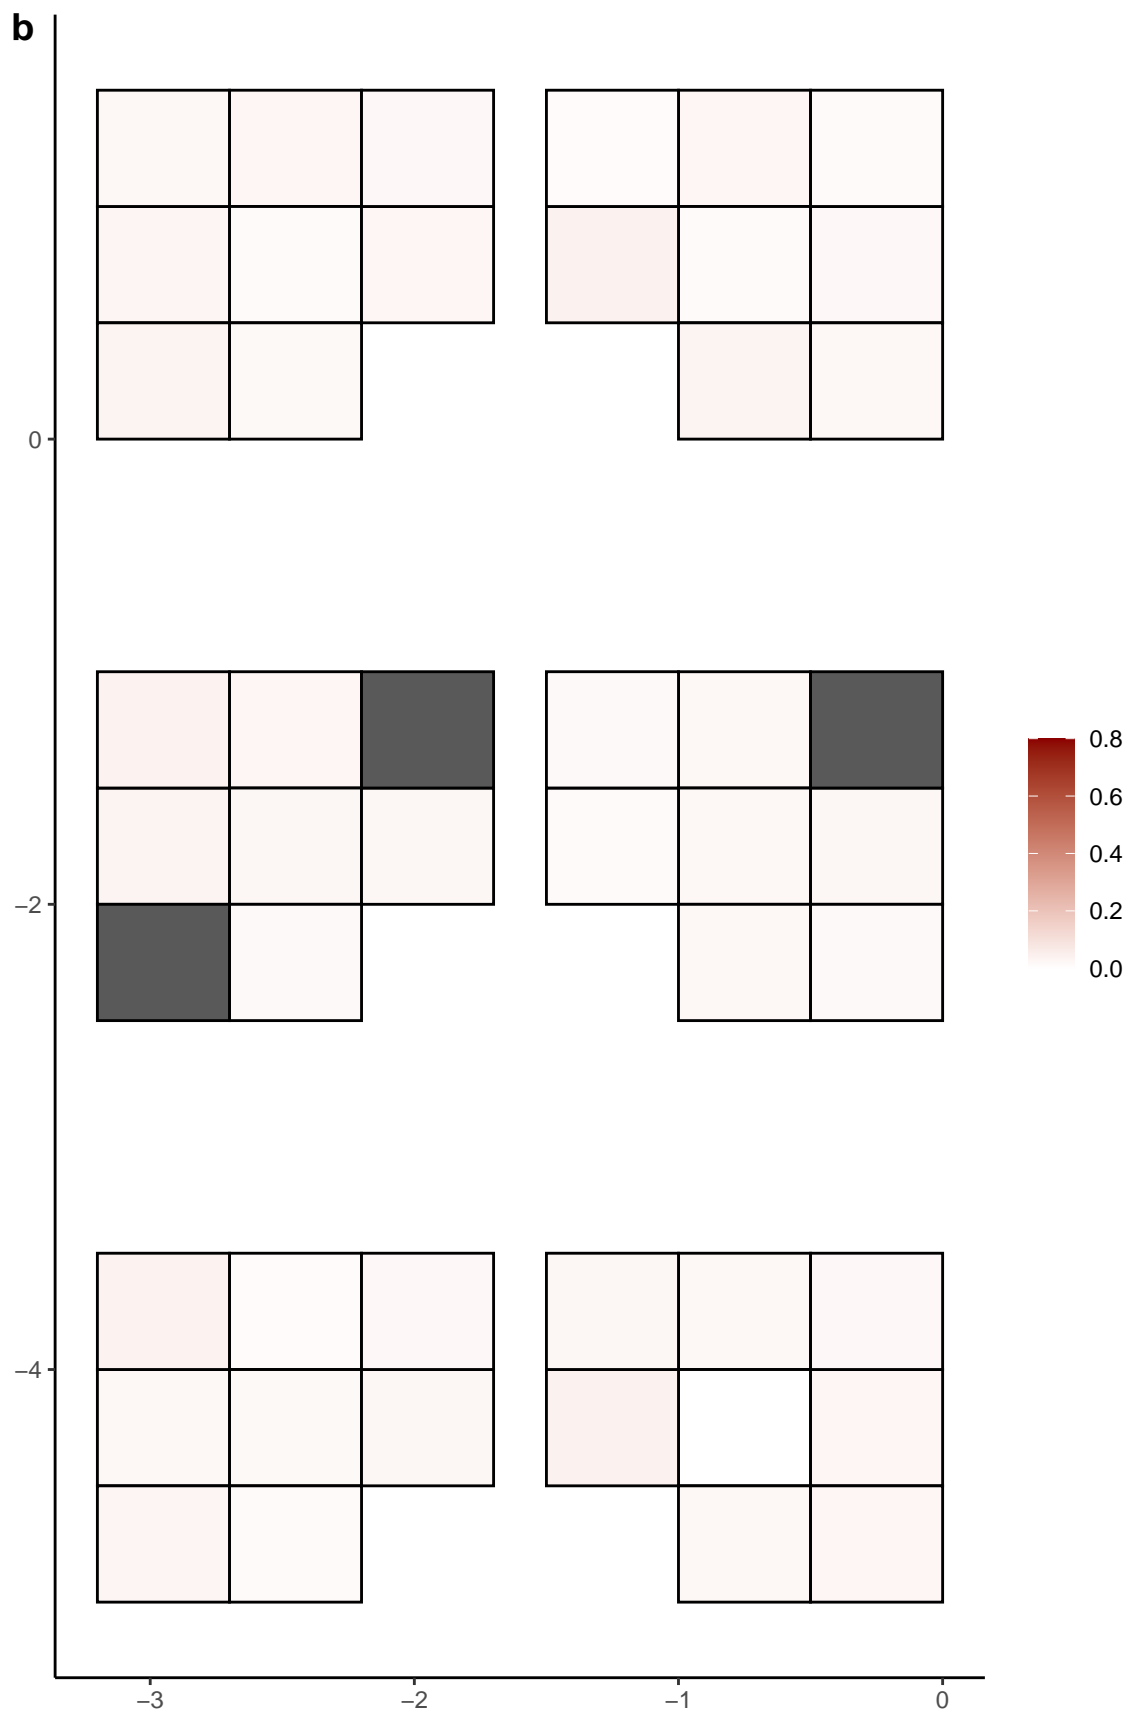

**a** ID05 4-187491429-G-A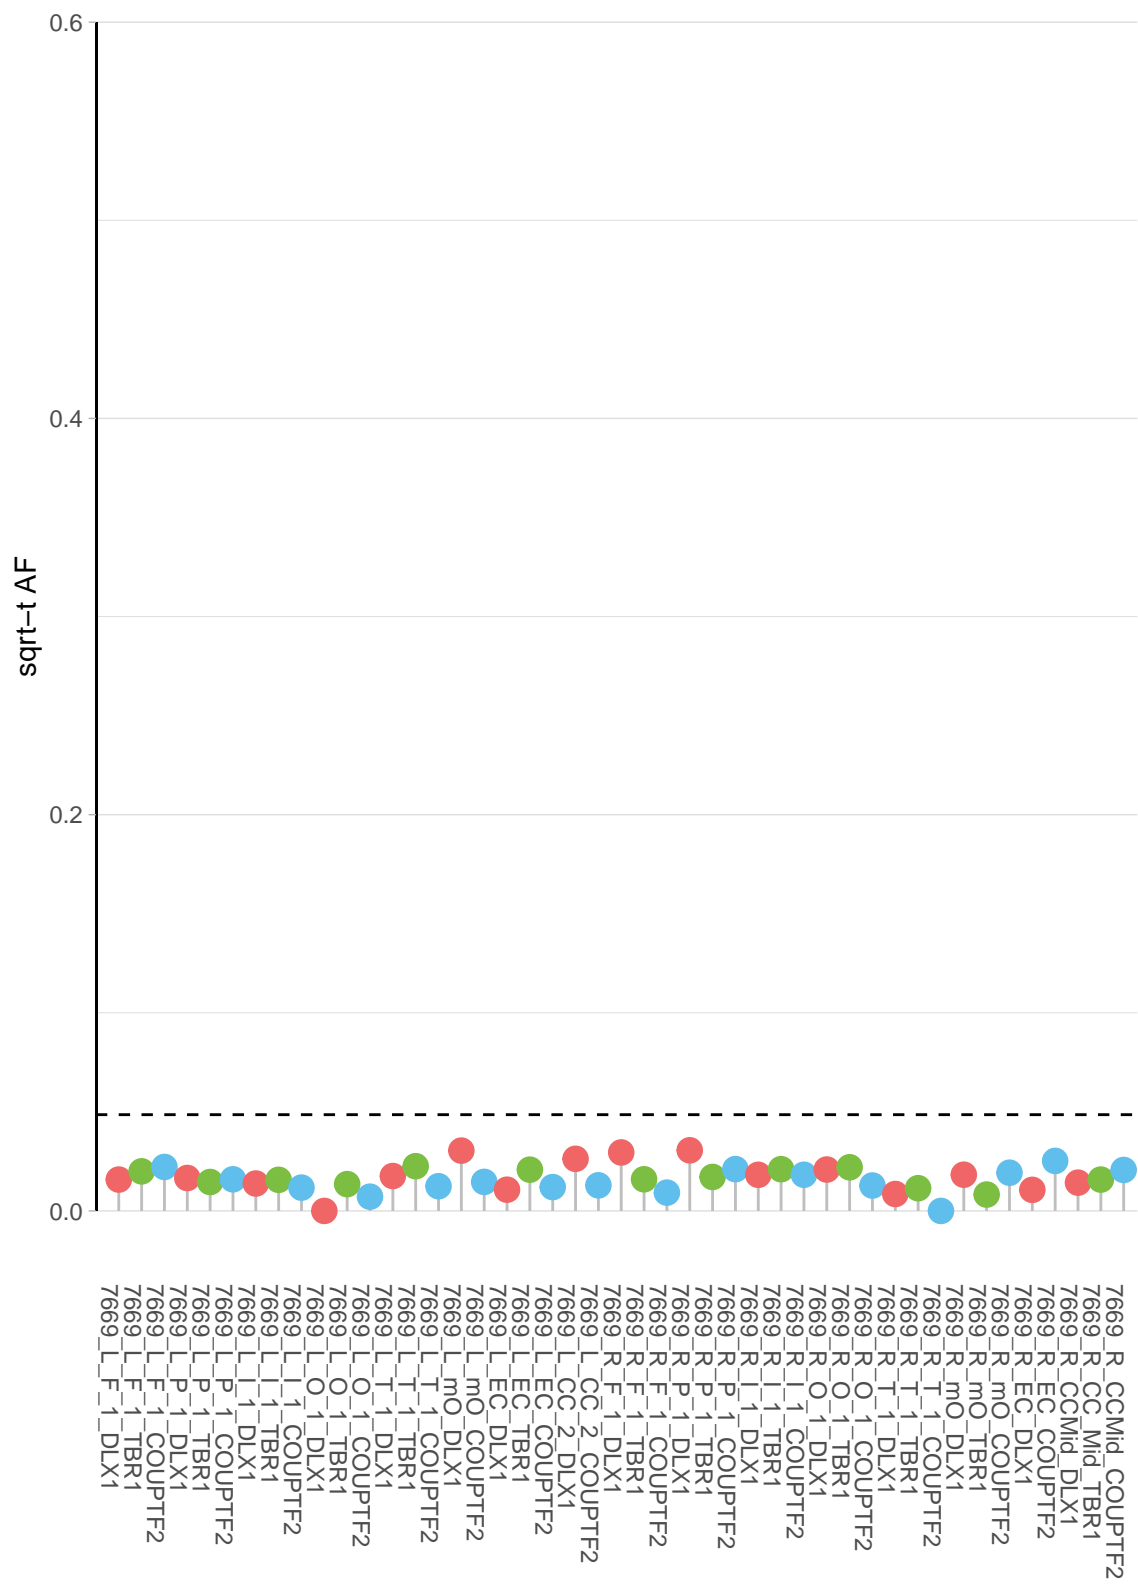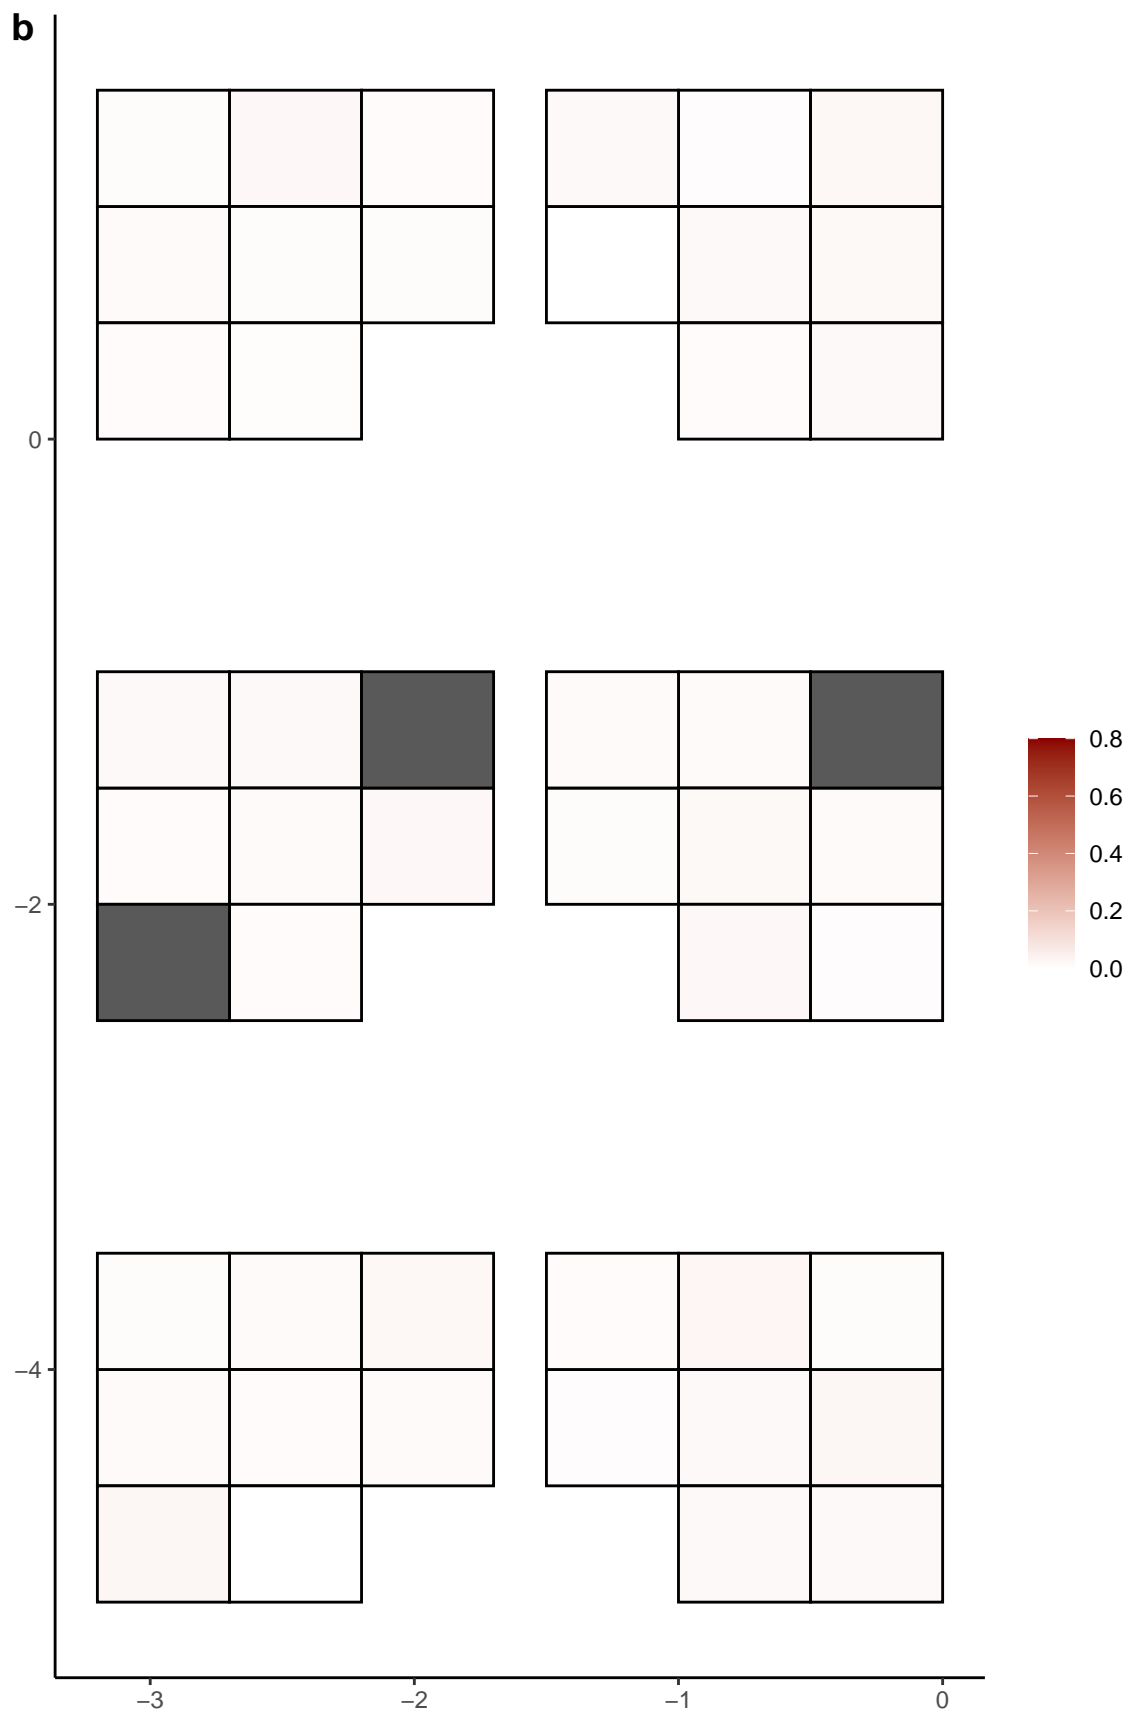

**a** ID05 4-187539951-G-A

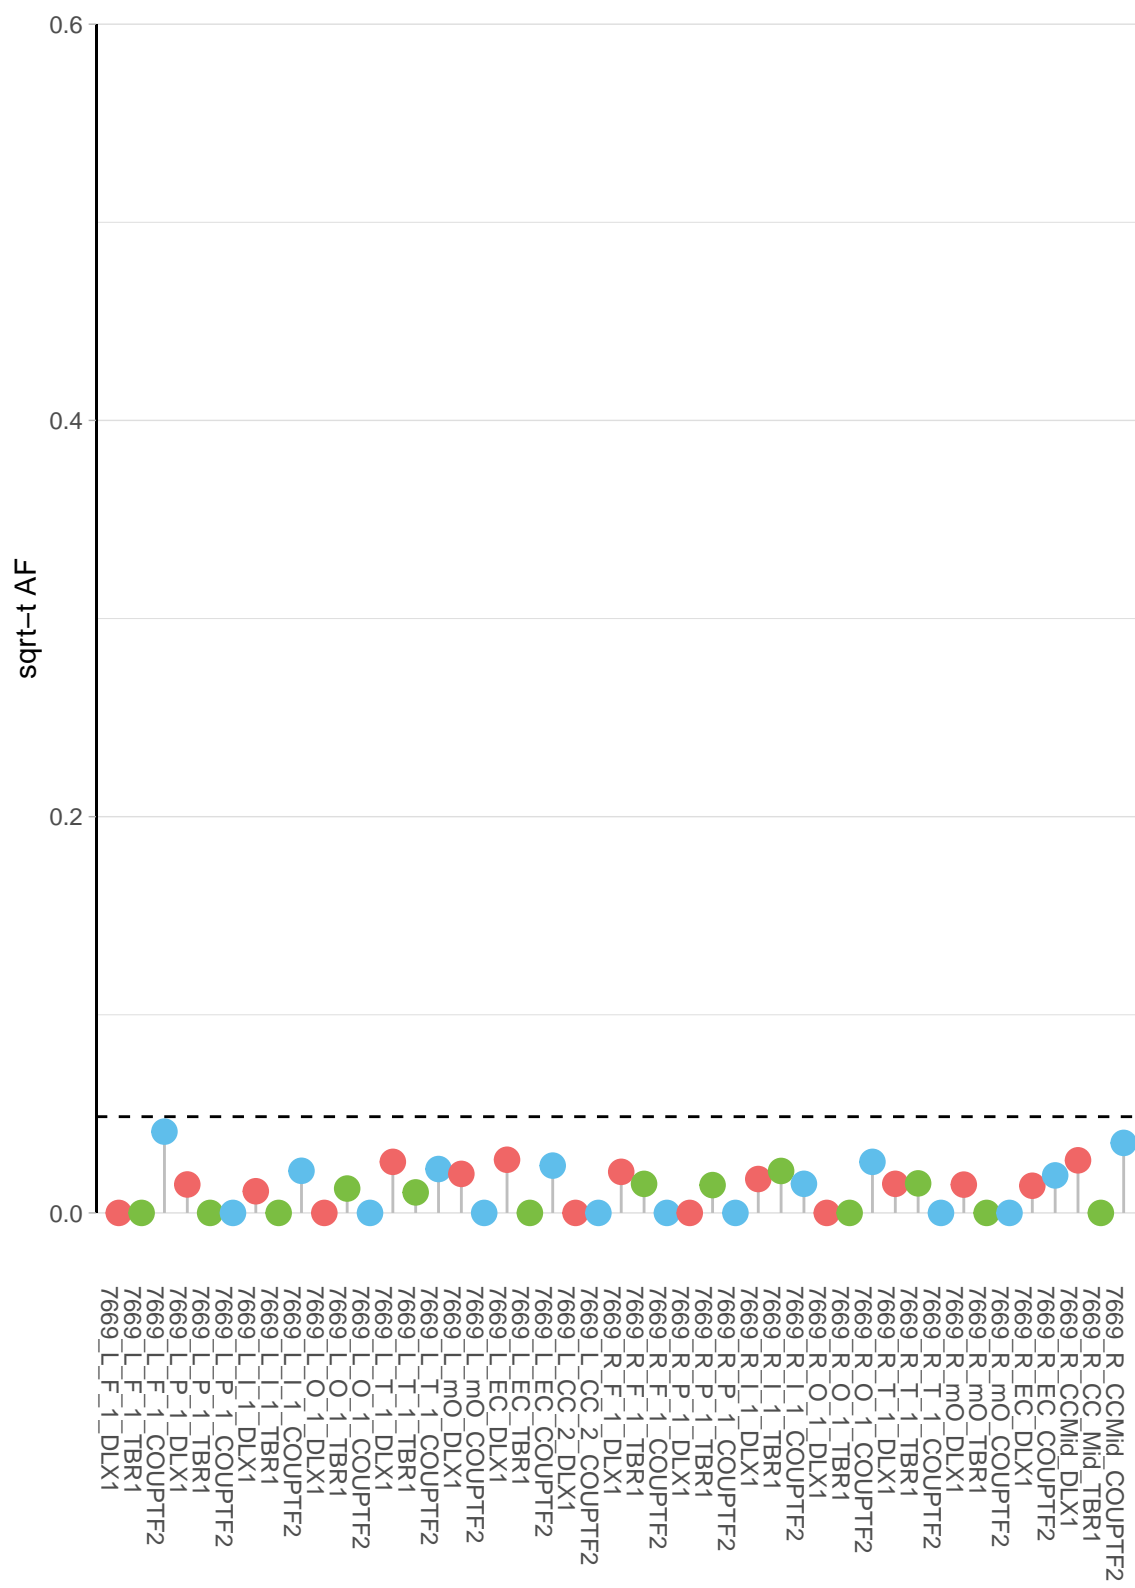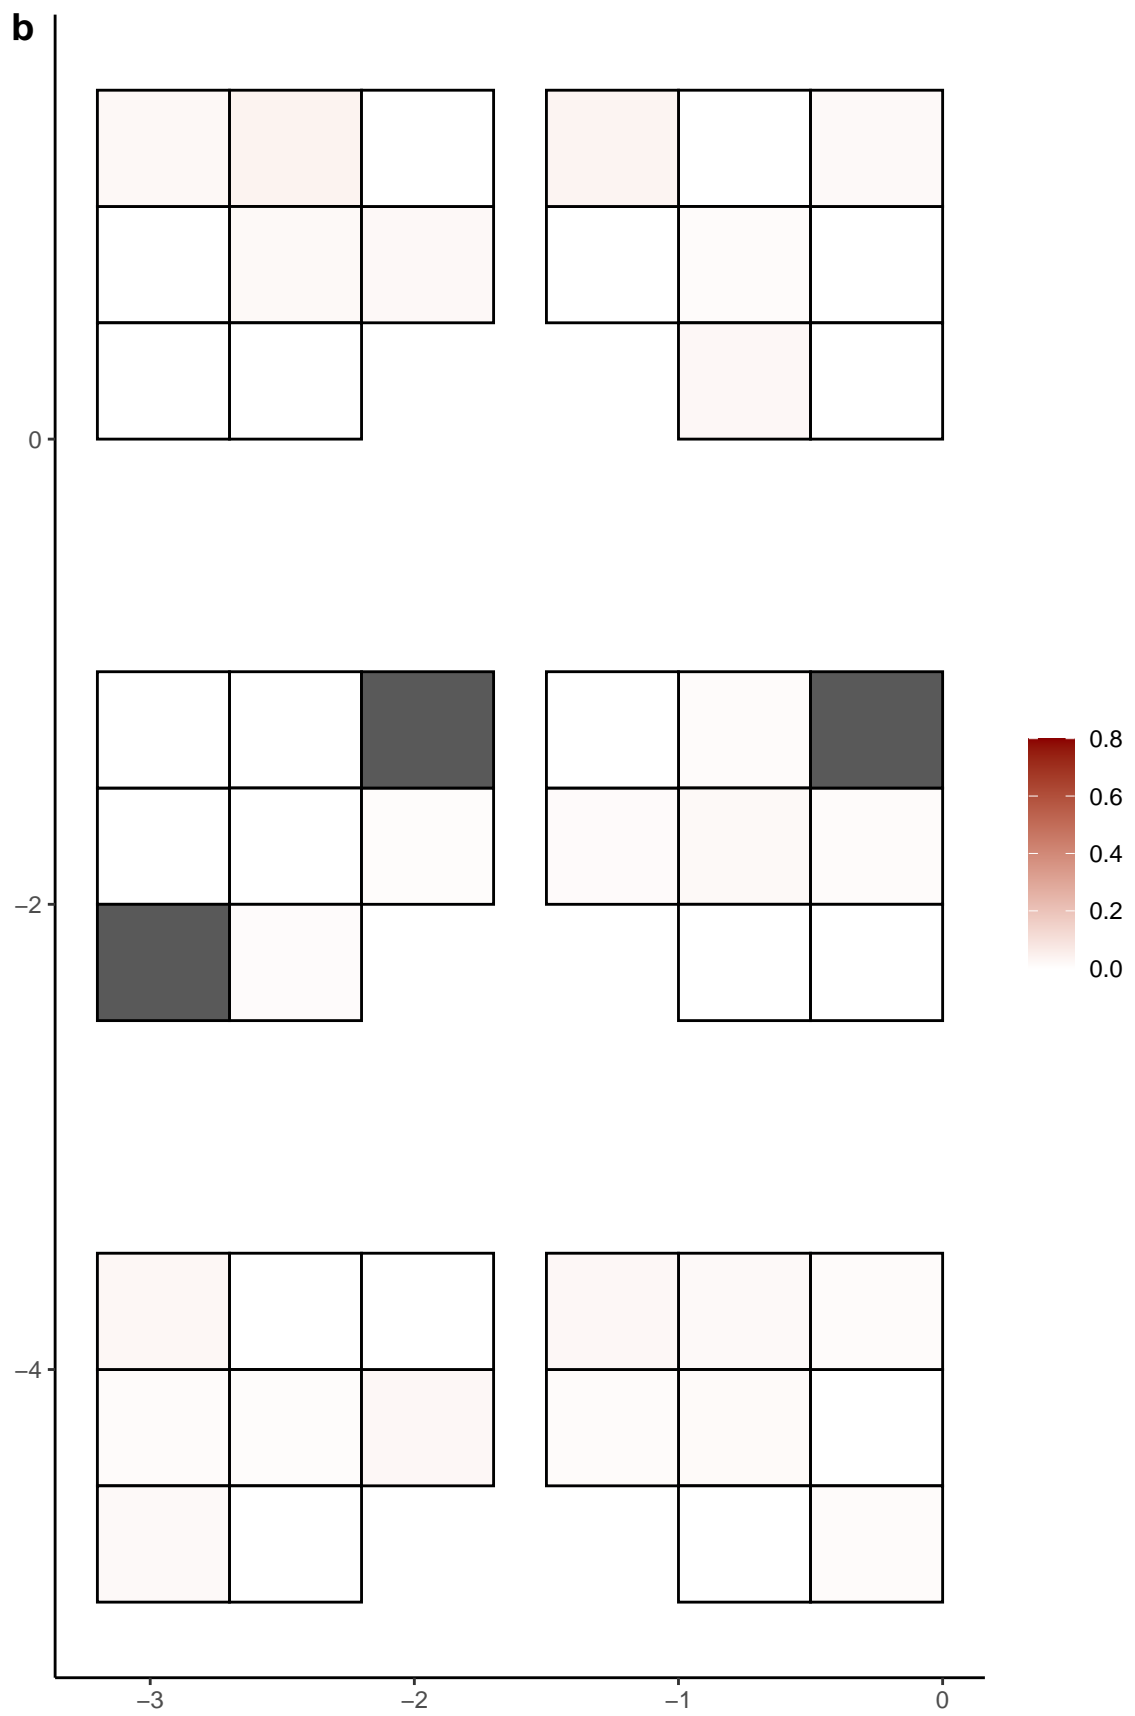



**a** ID05 4-188115218-G-T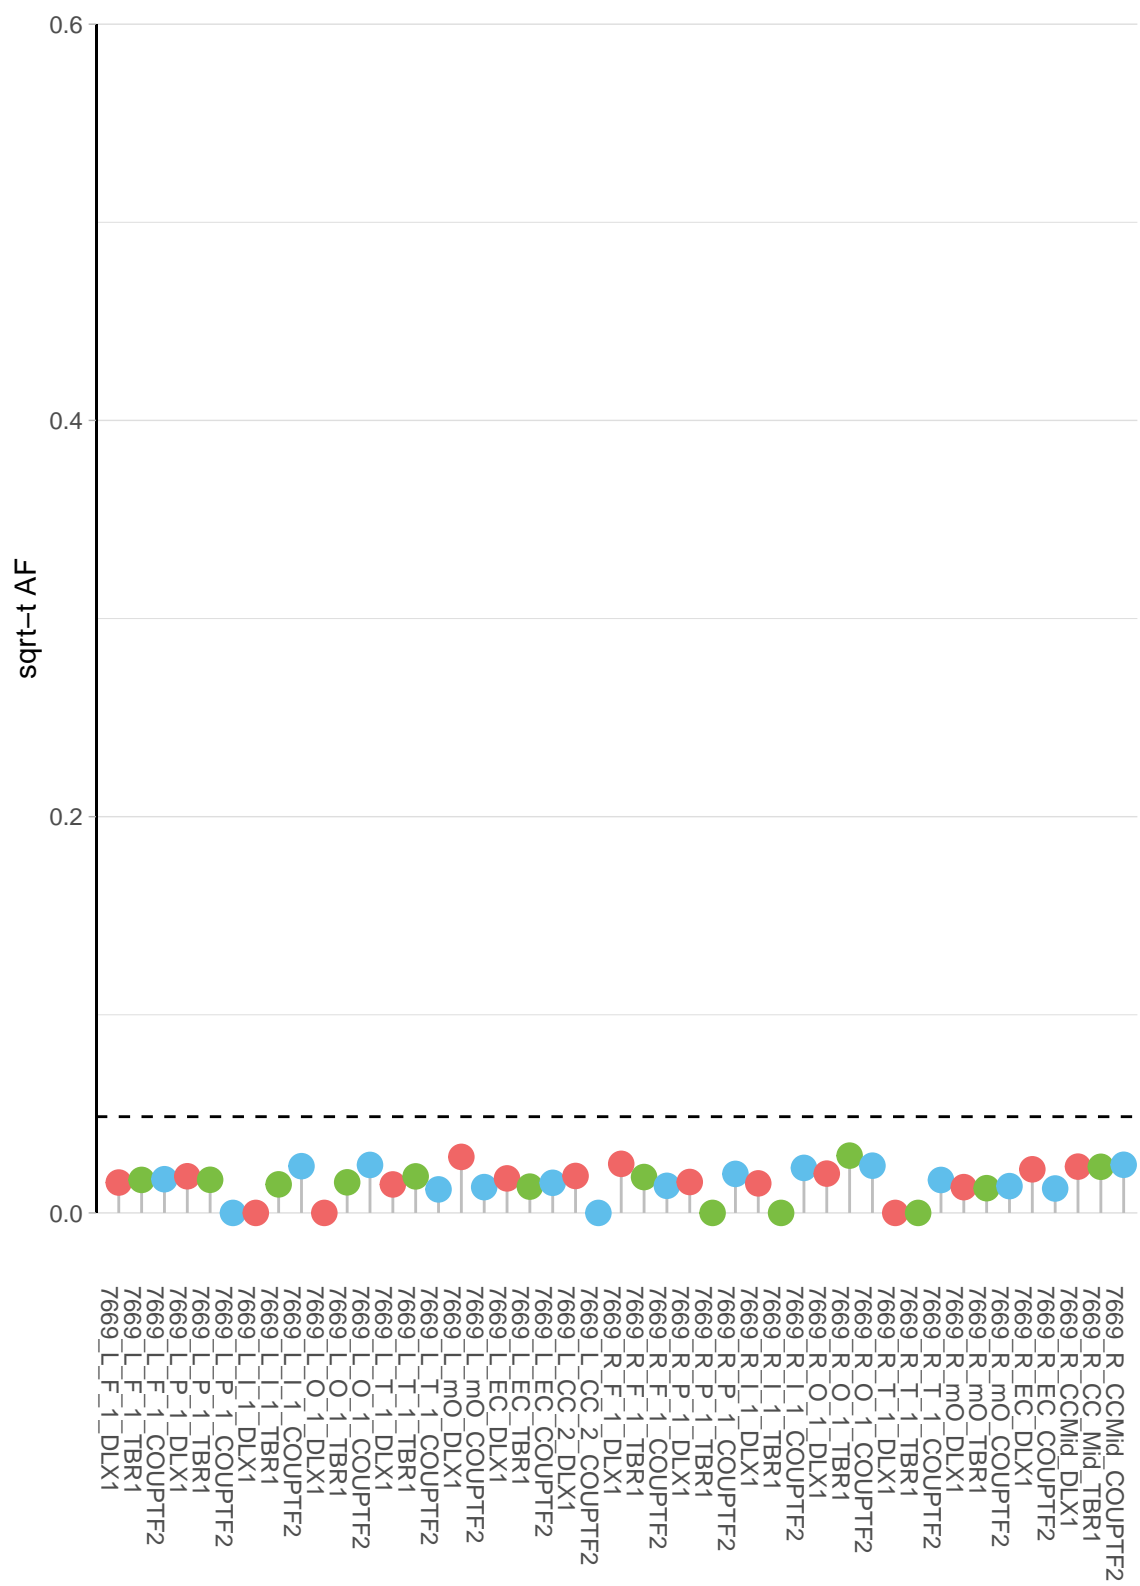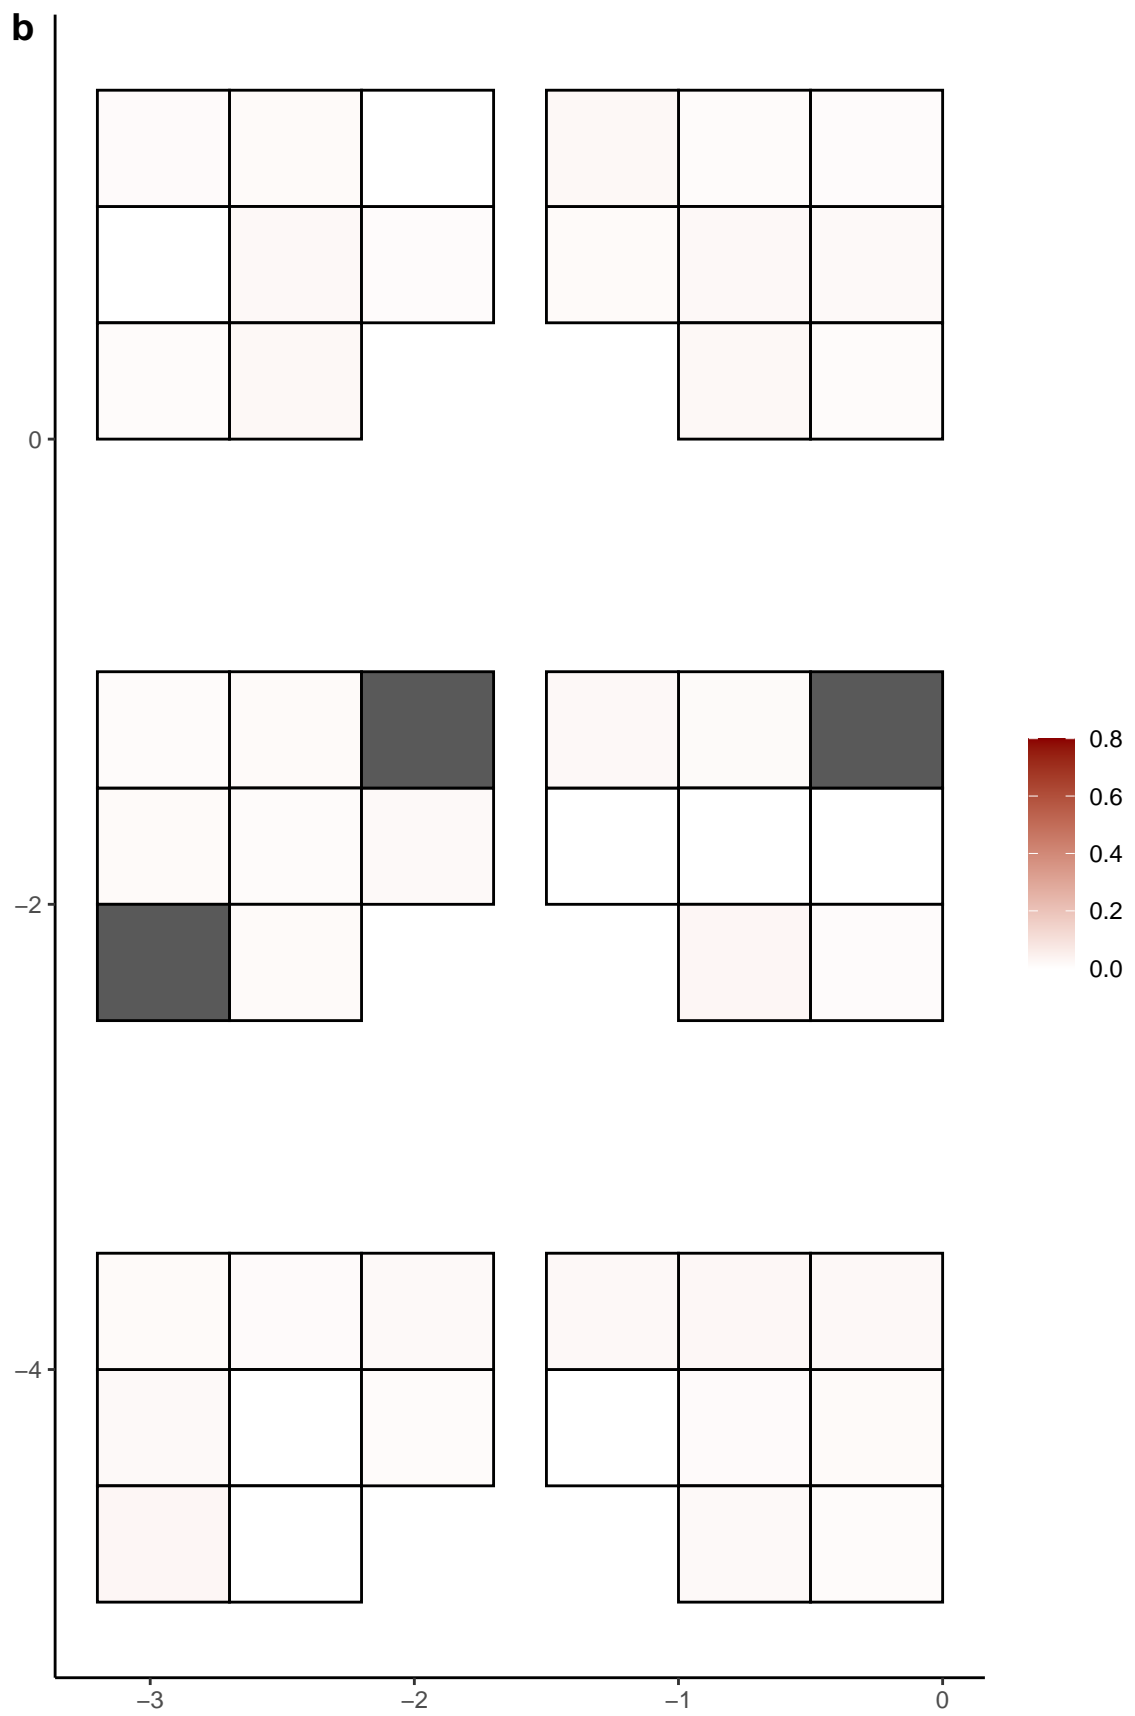

**a** ID05 4-21301357-T-G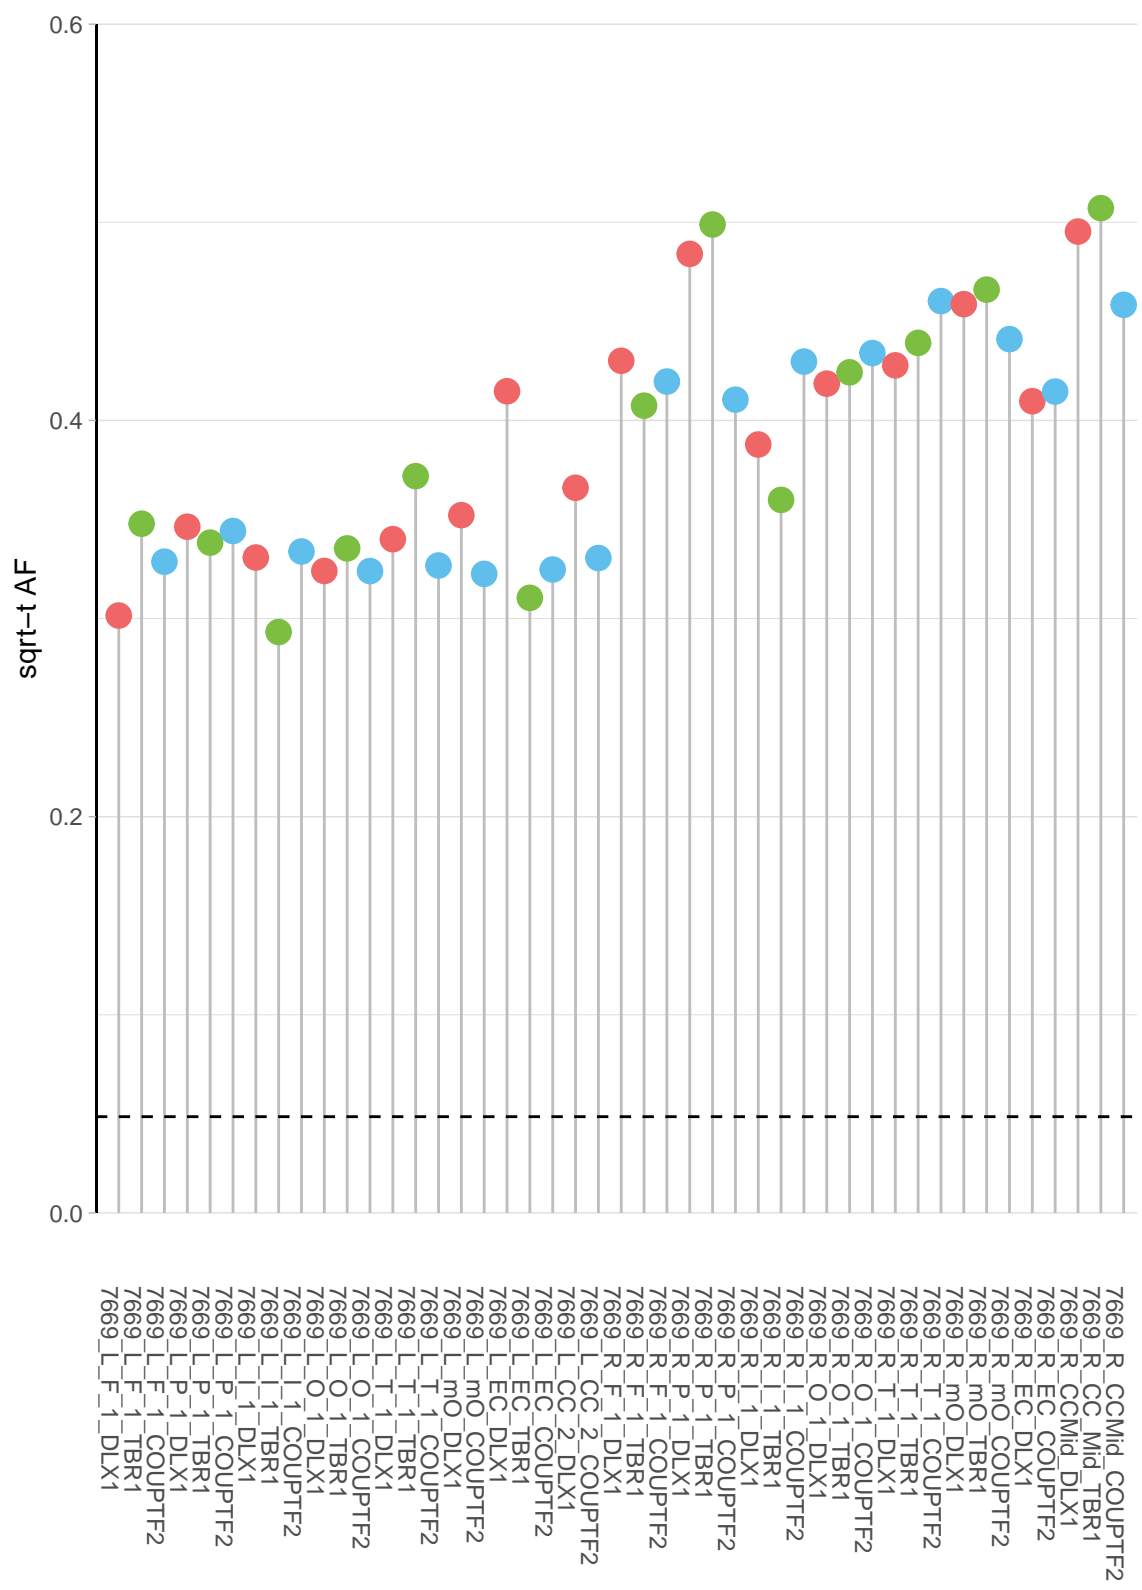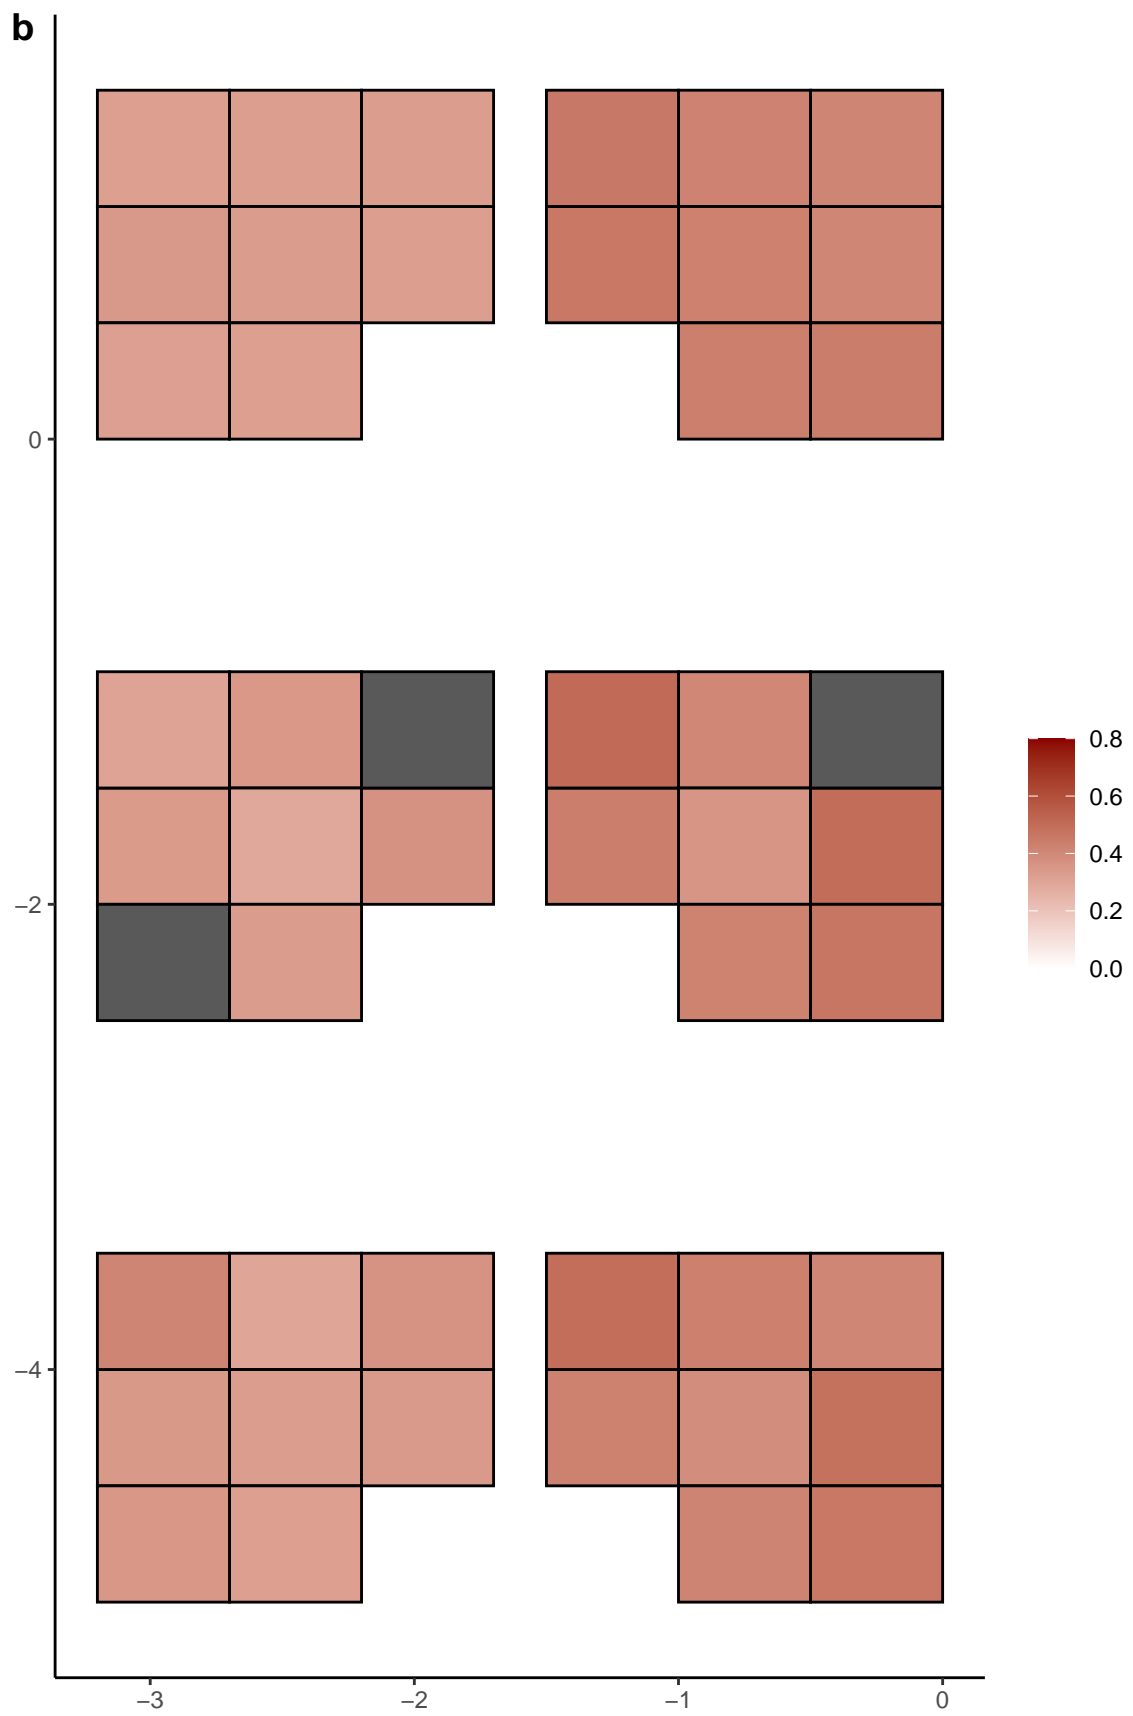

**a** ID05 4-22428363-C-T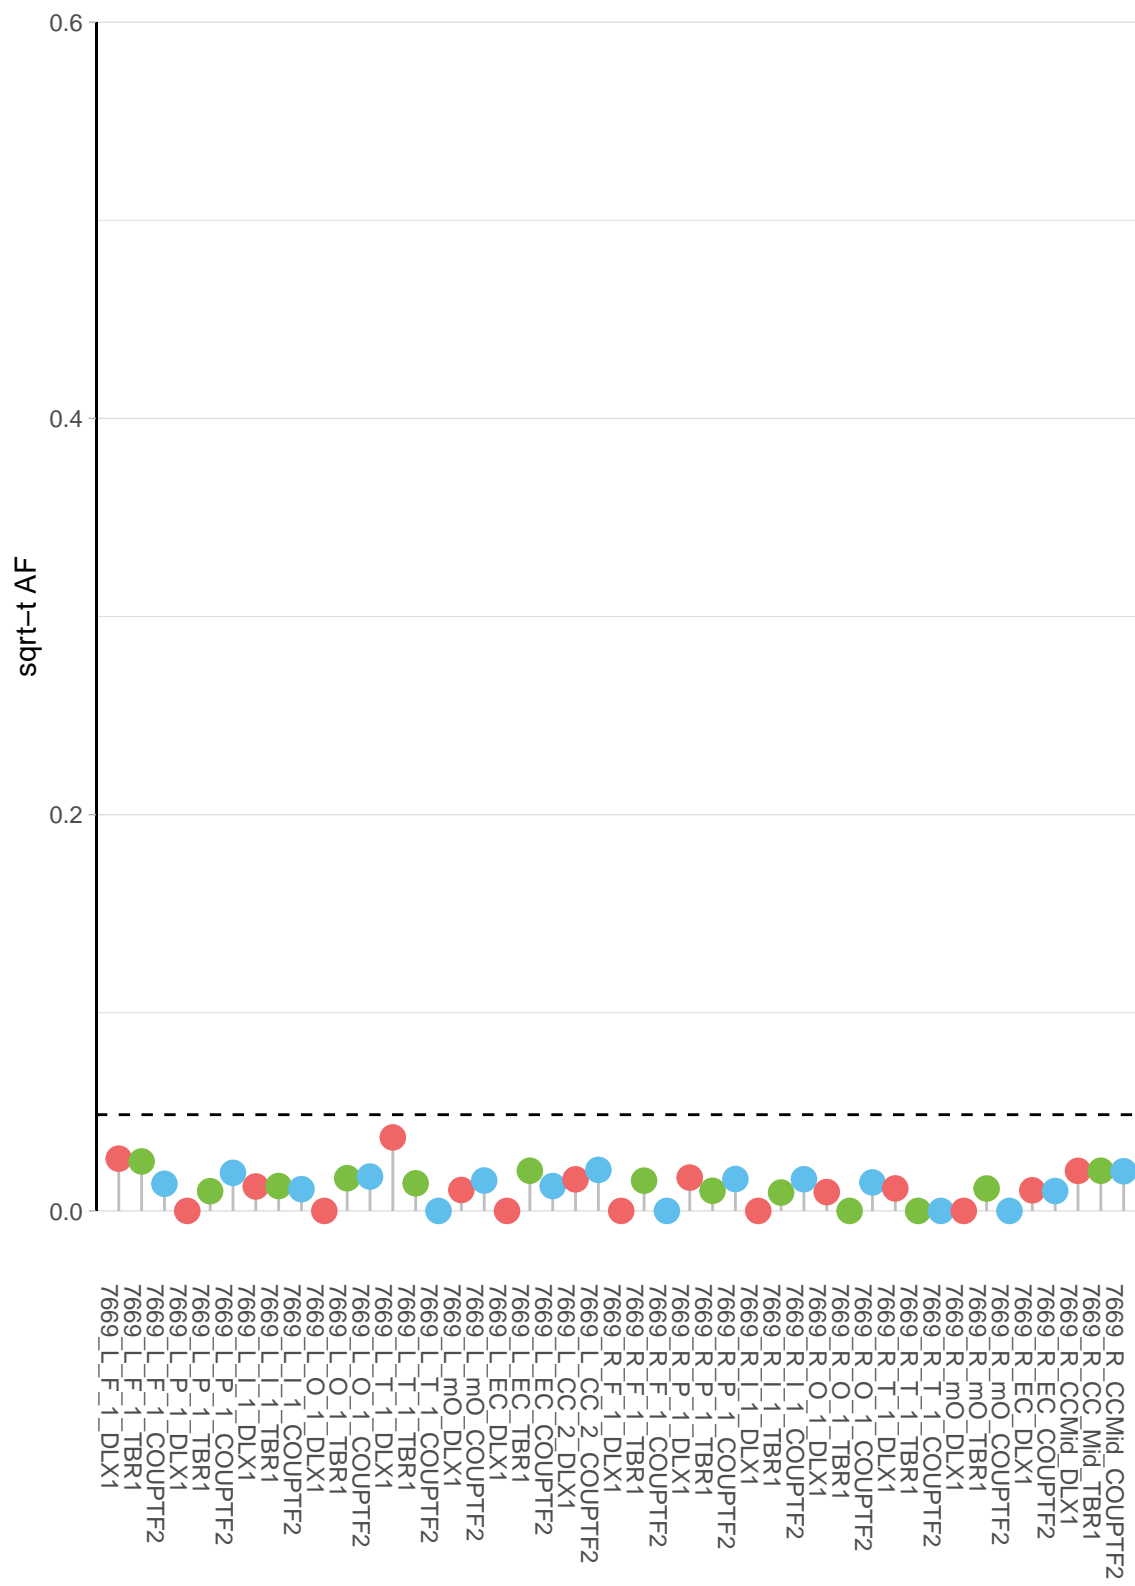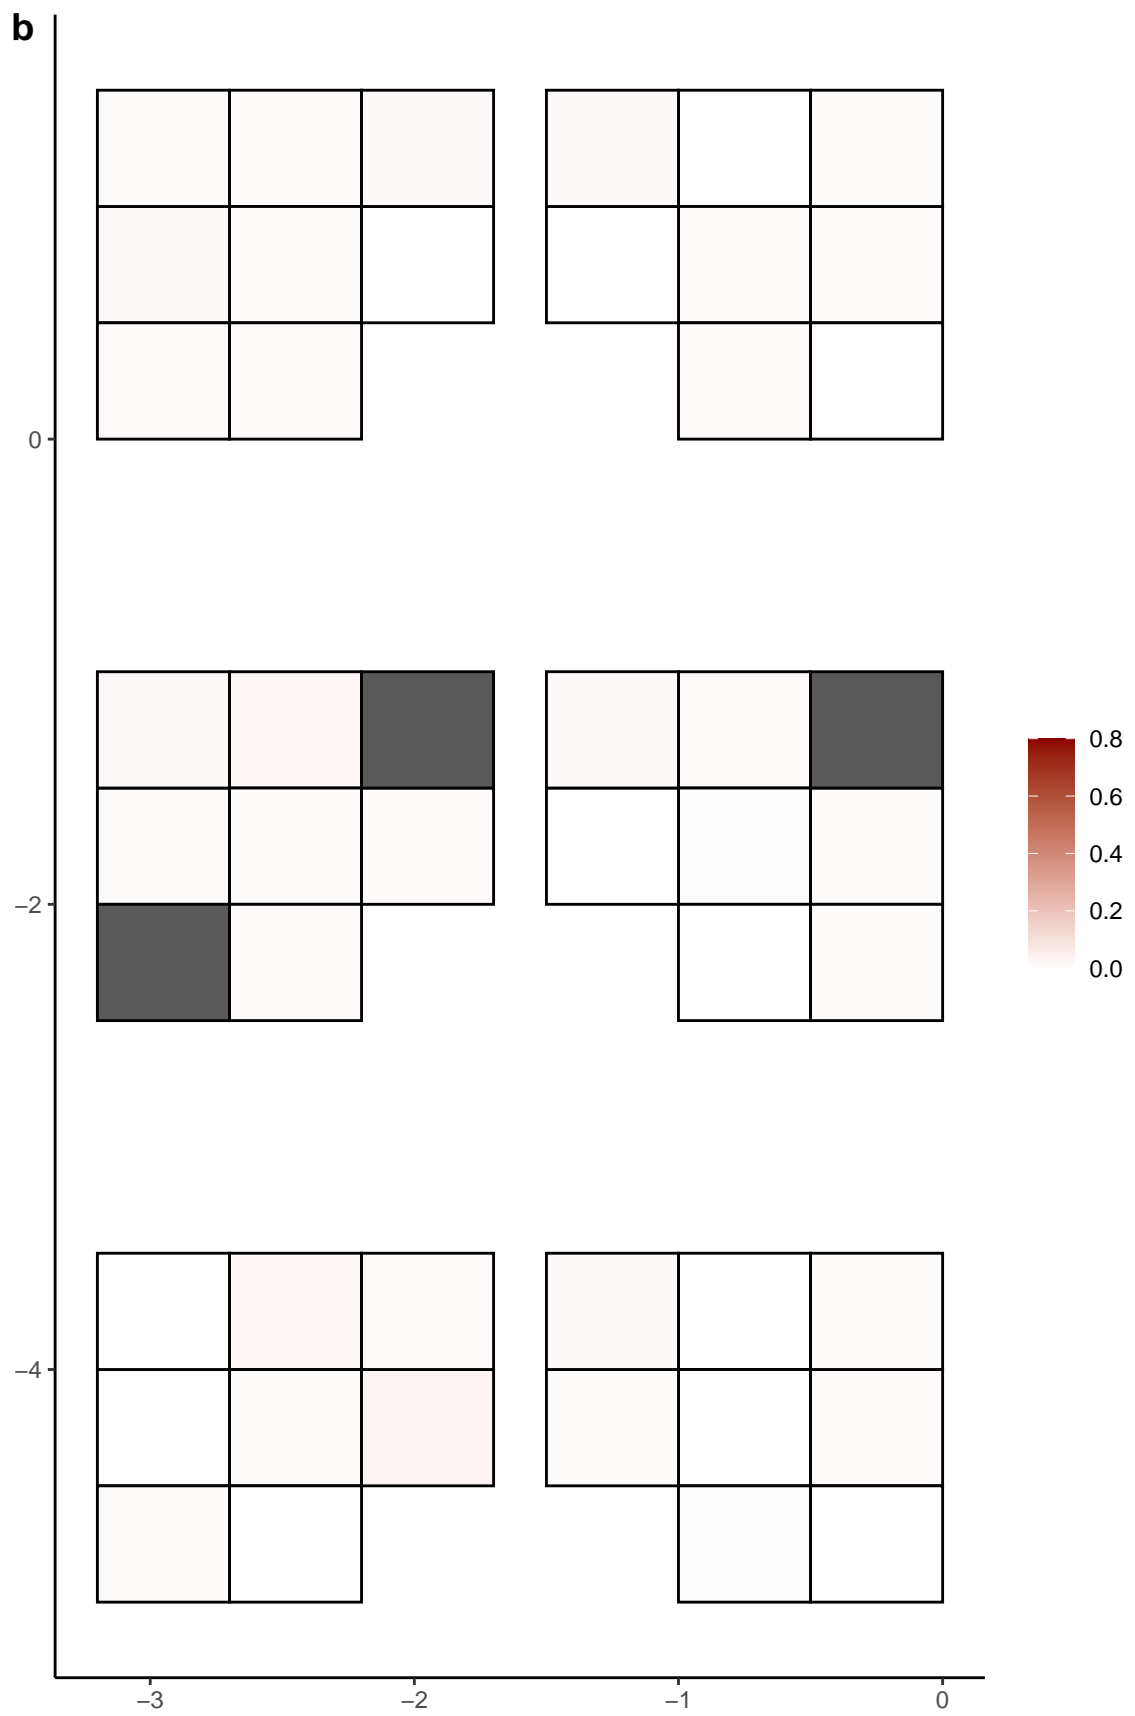

**a** ID05 4-23552226-G-A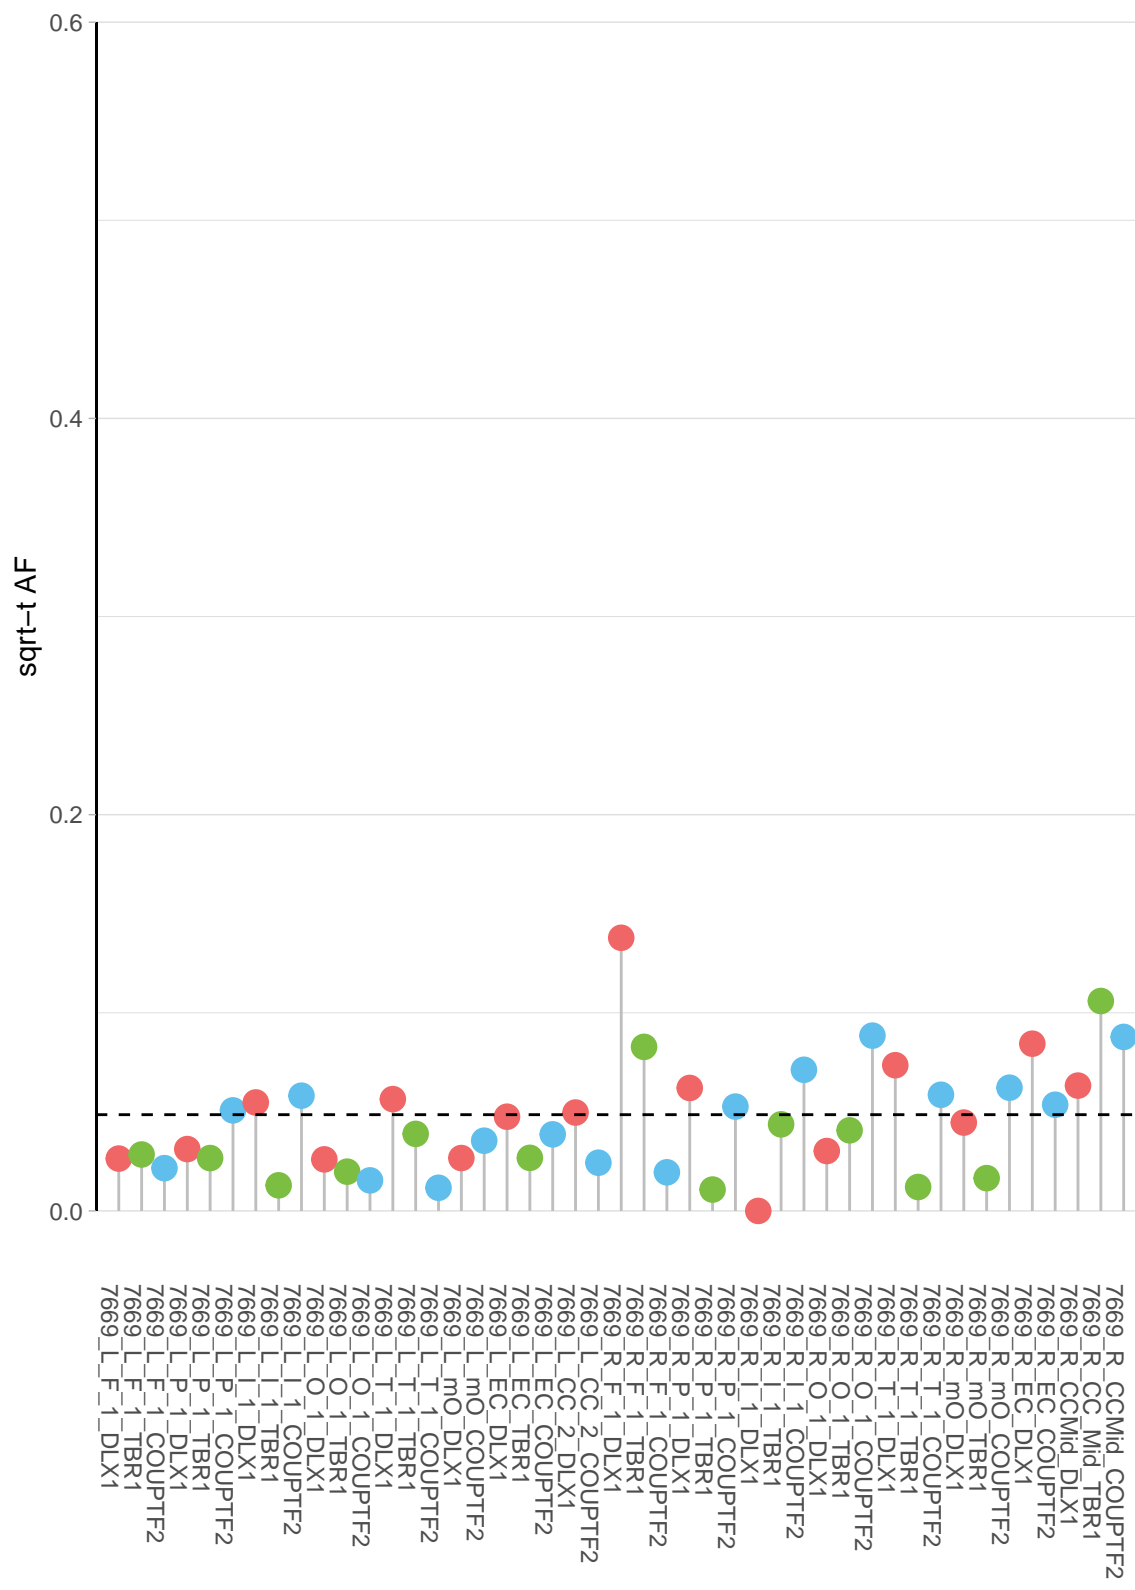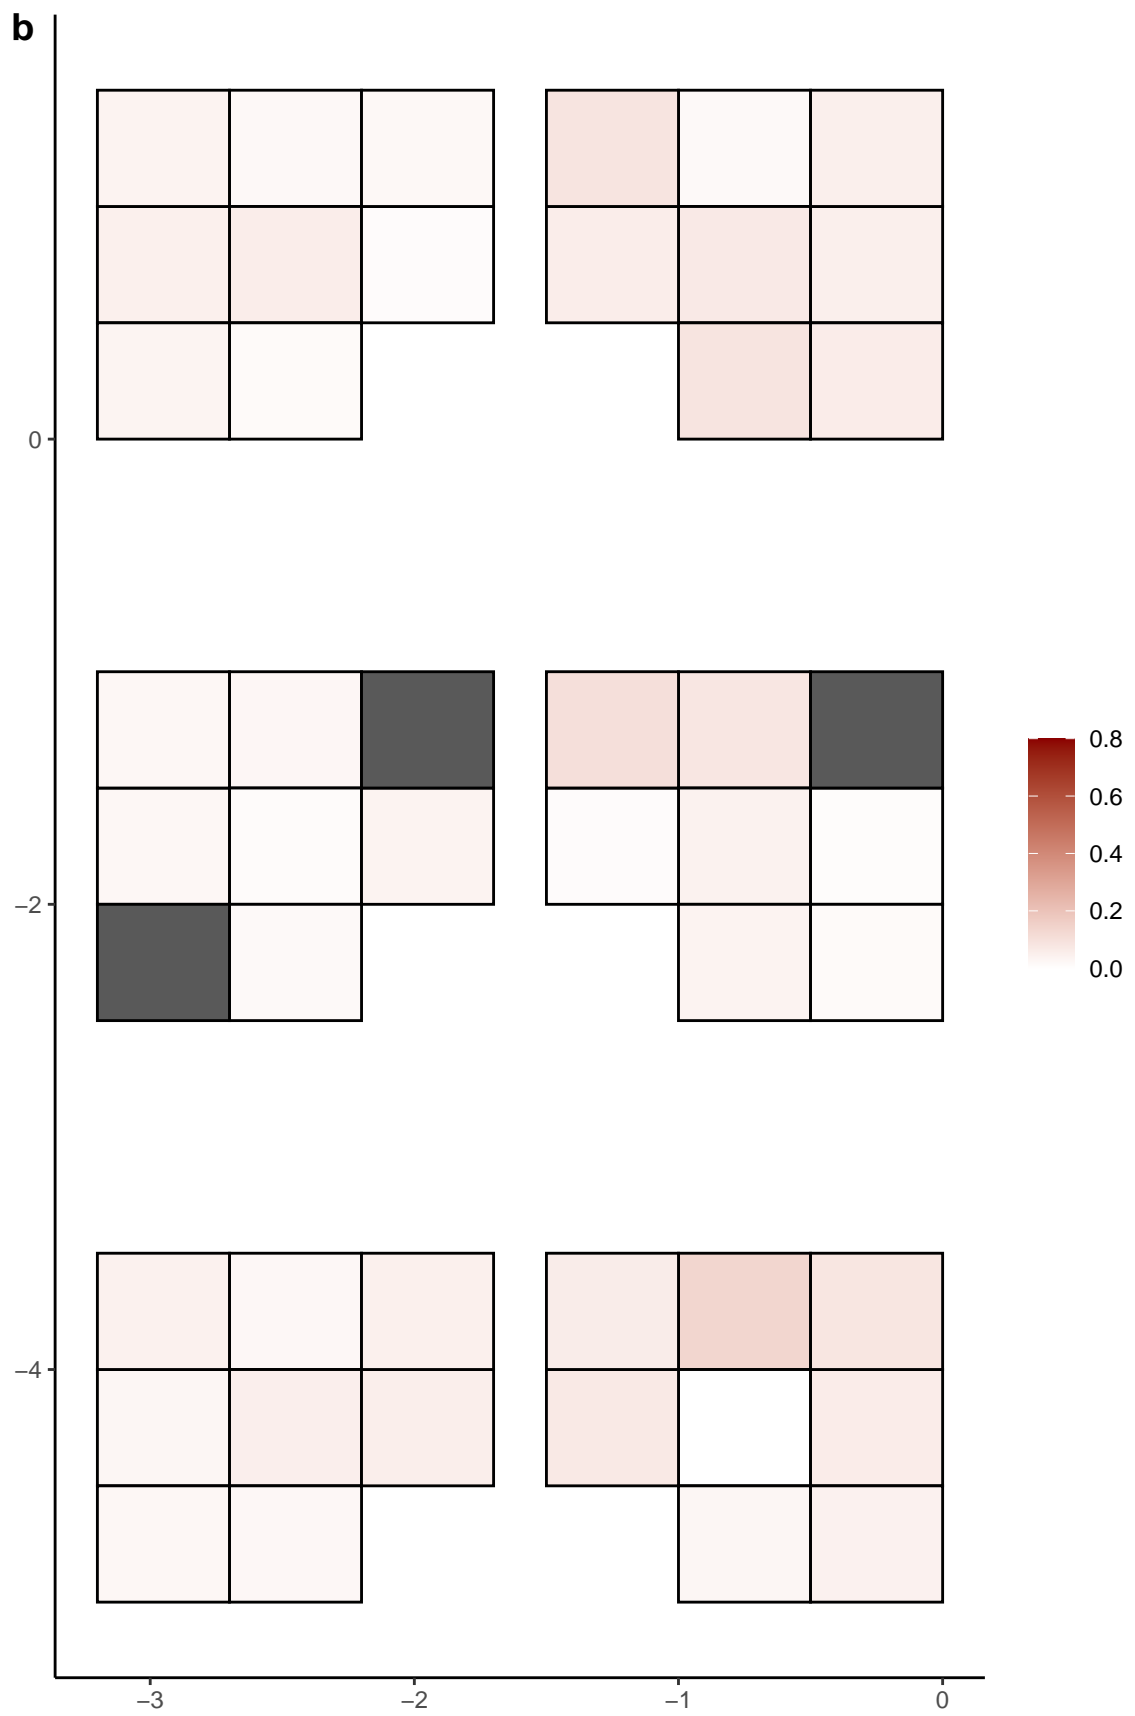

**a** ID05 4-25107945-C-T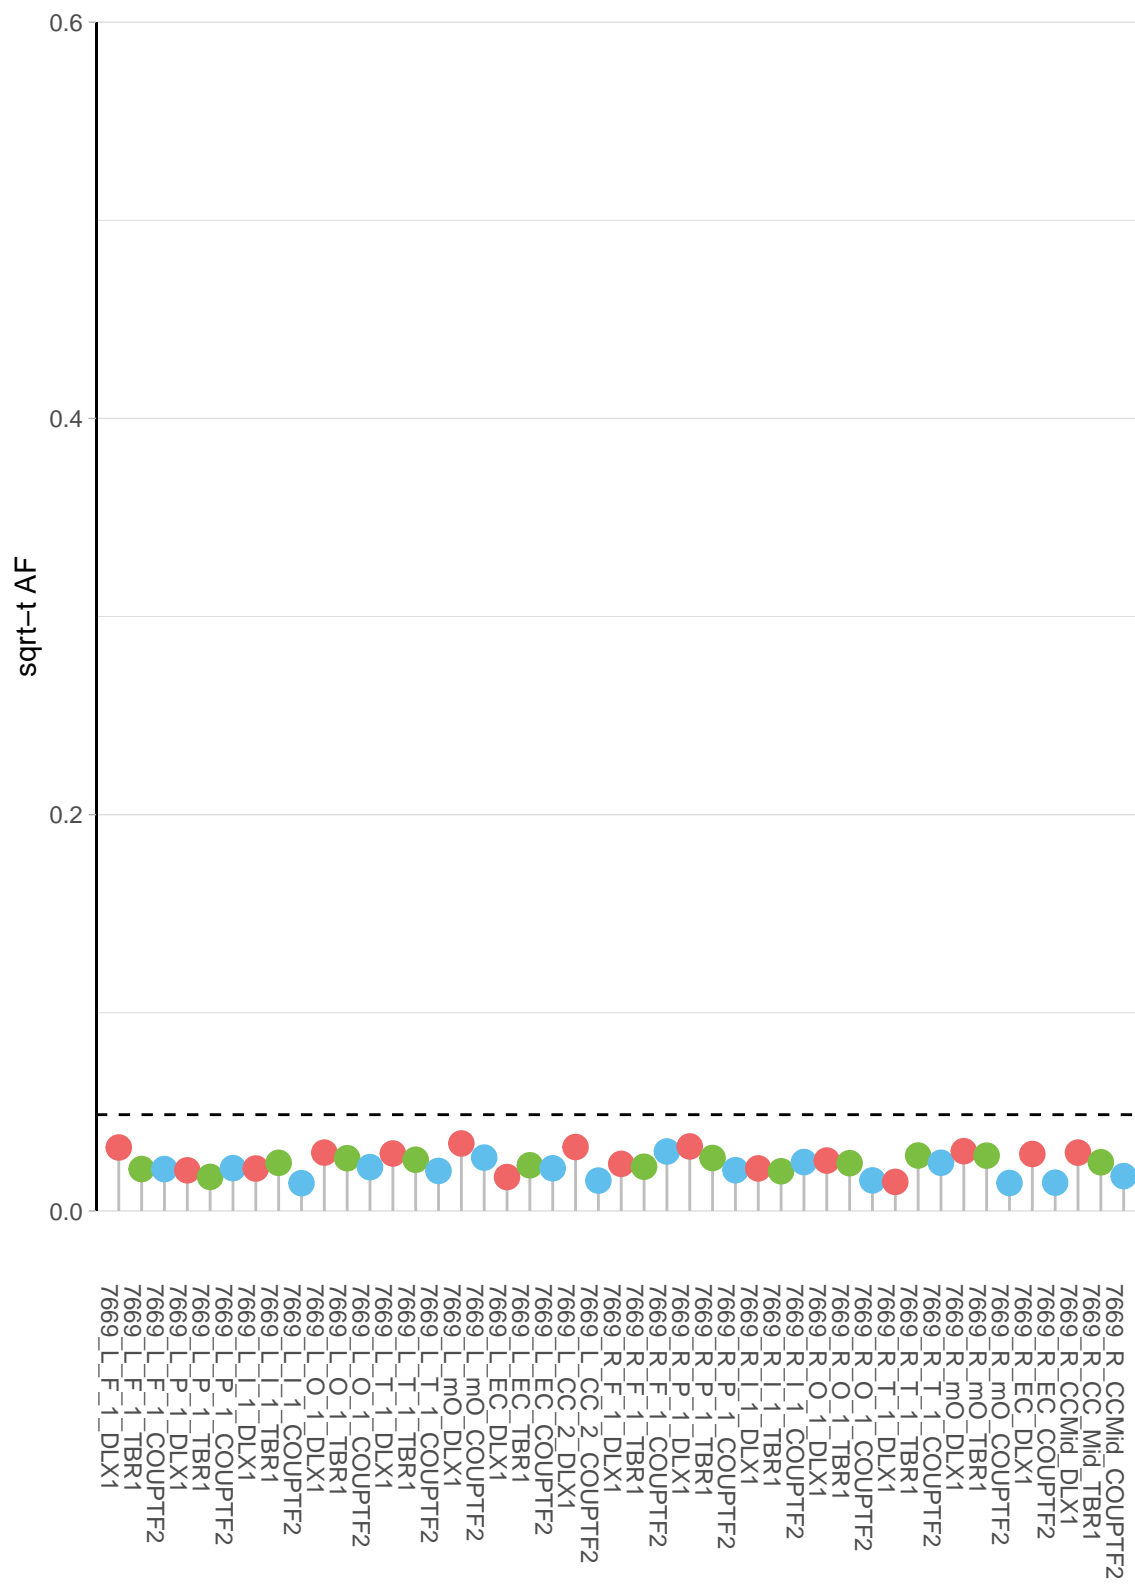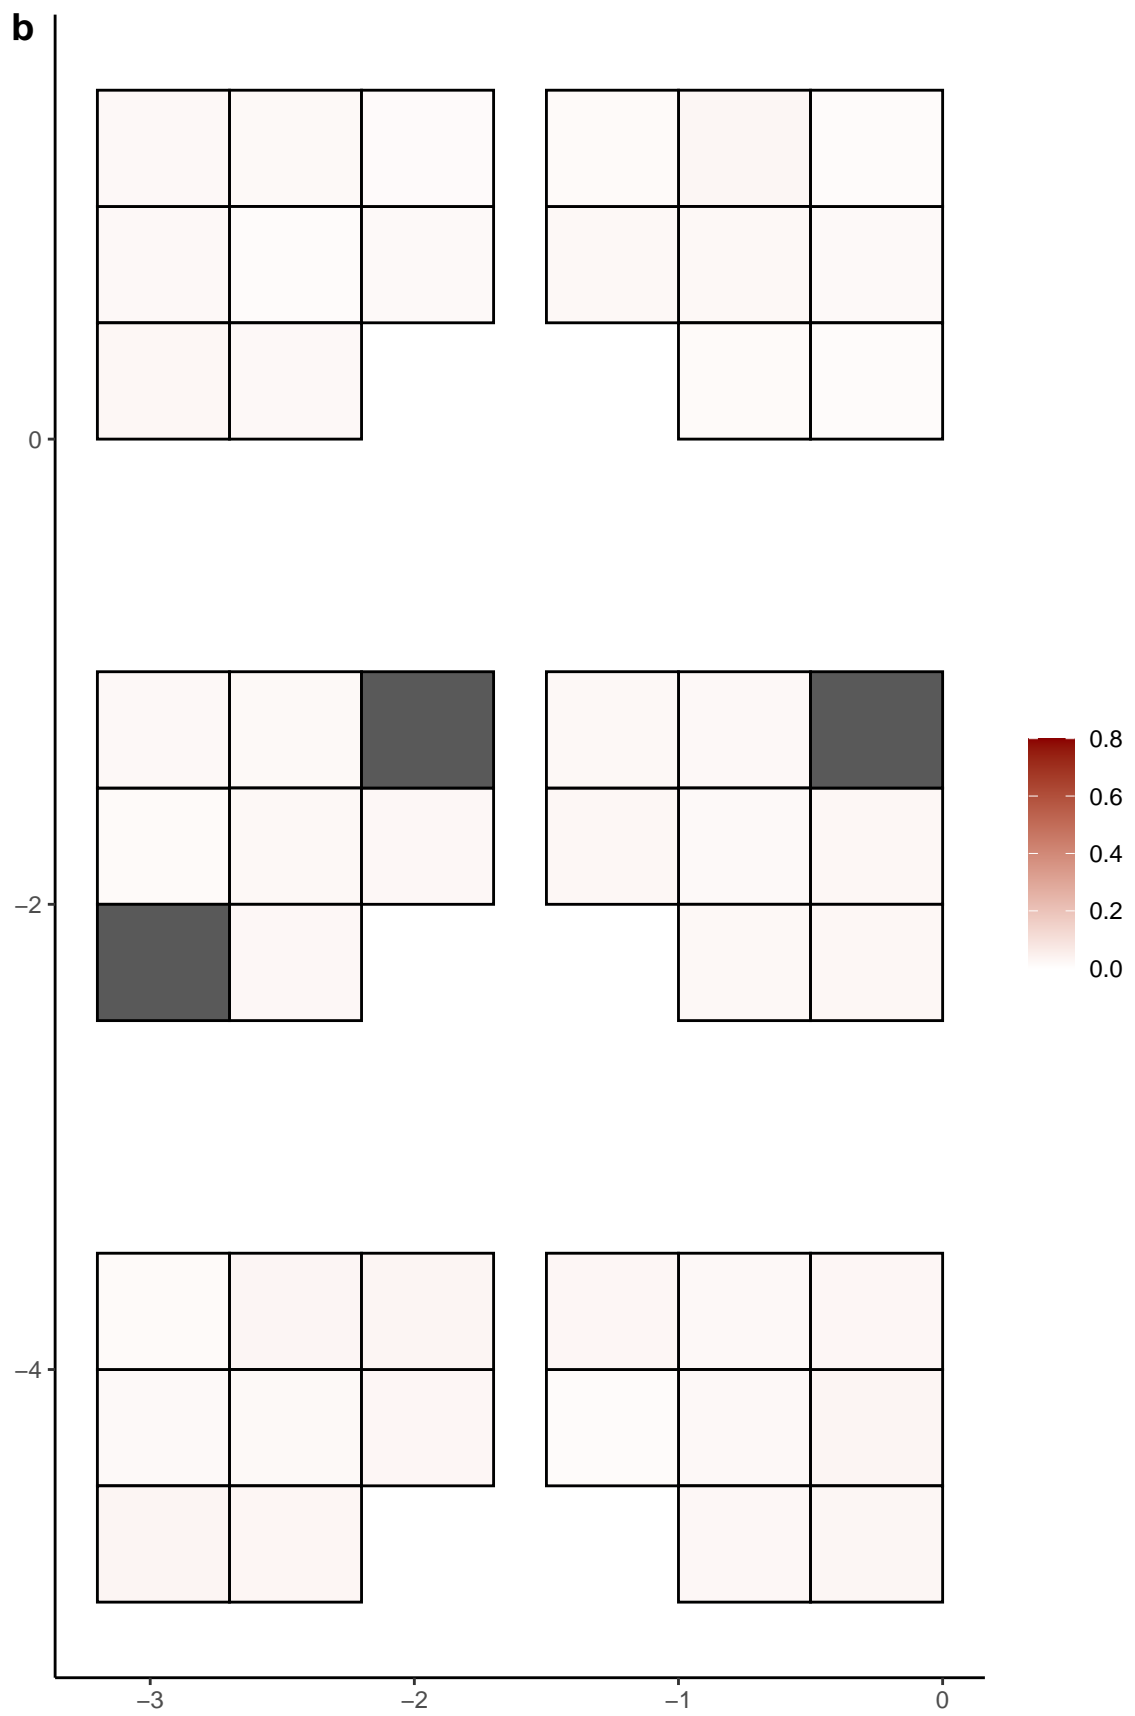

**a** ID05 4-26808694-C-T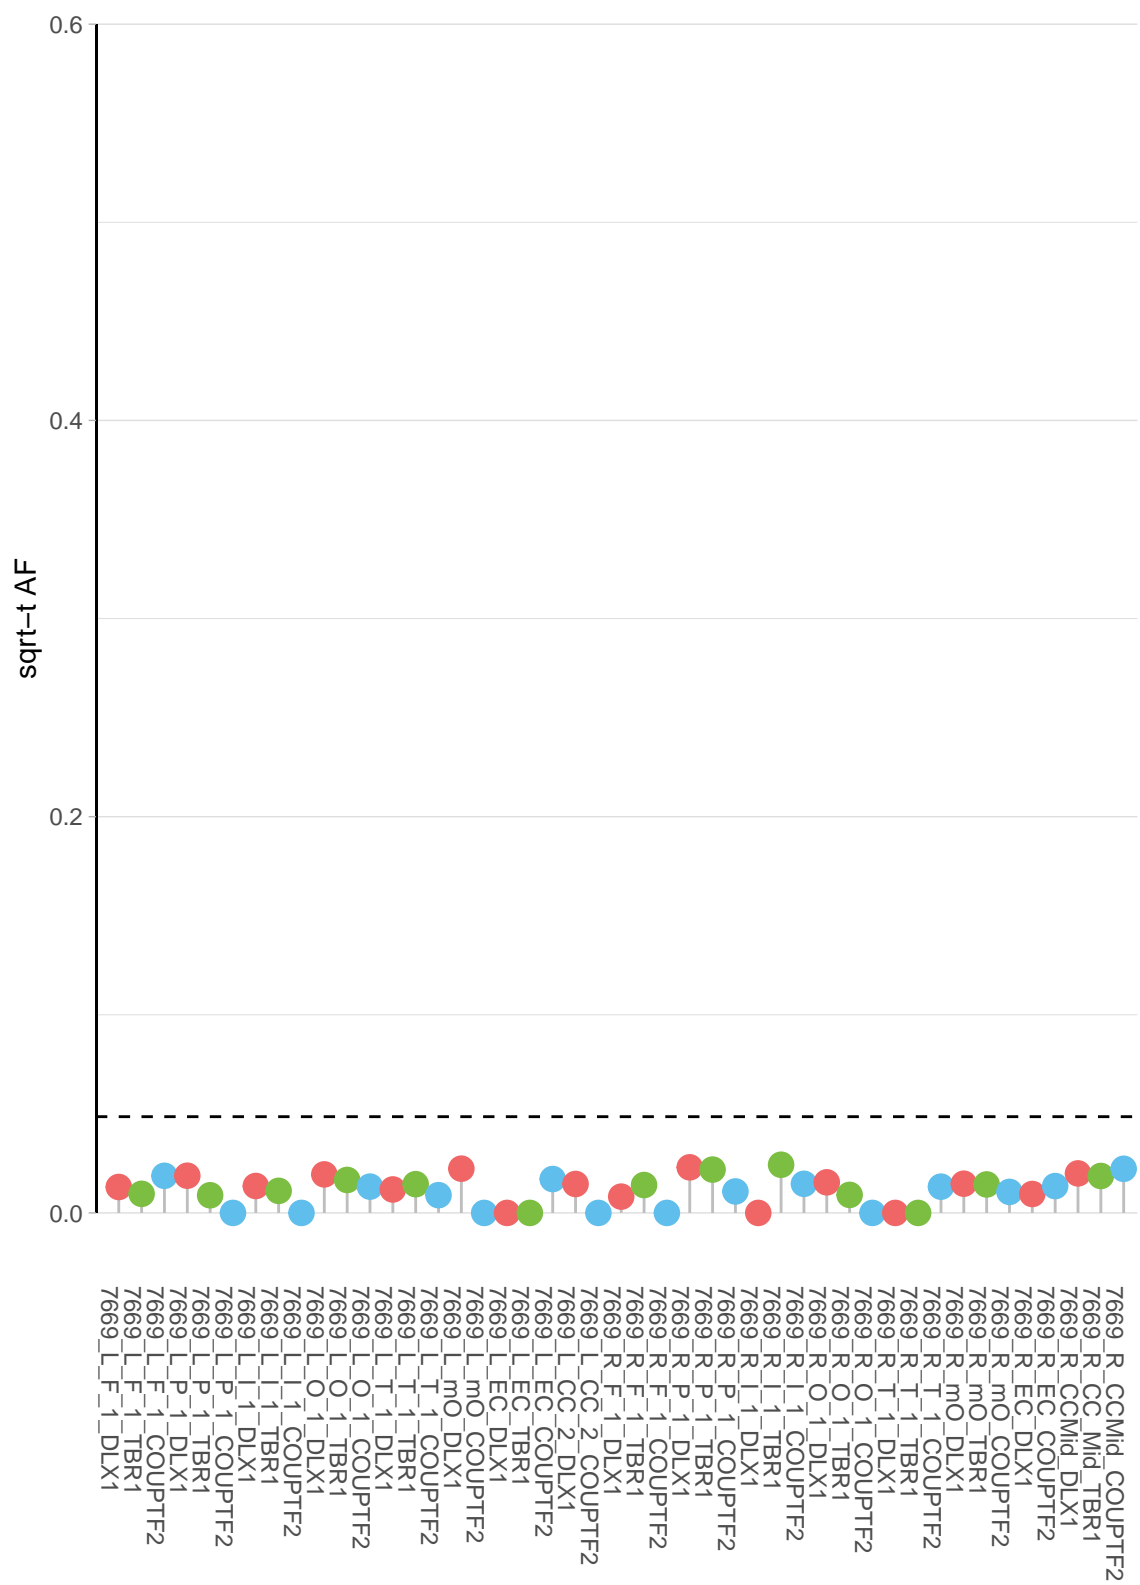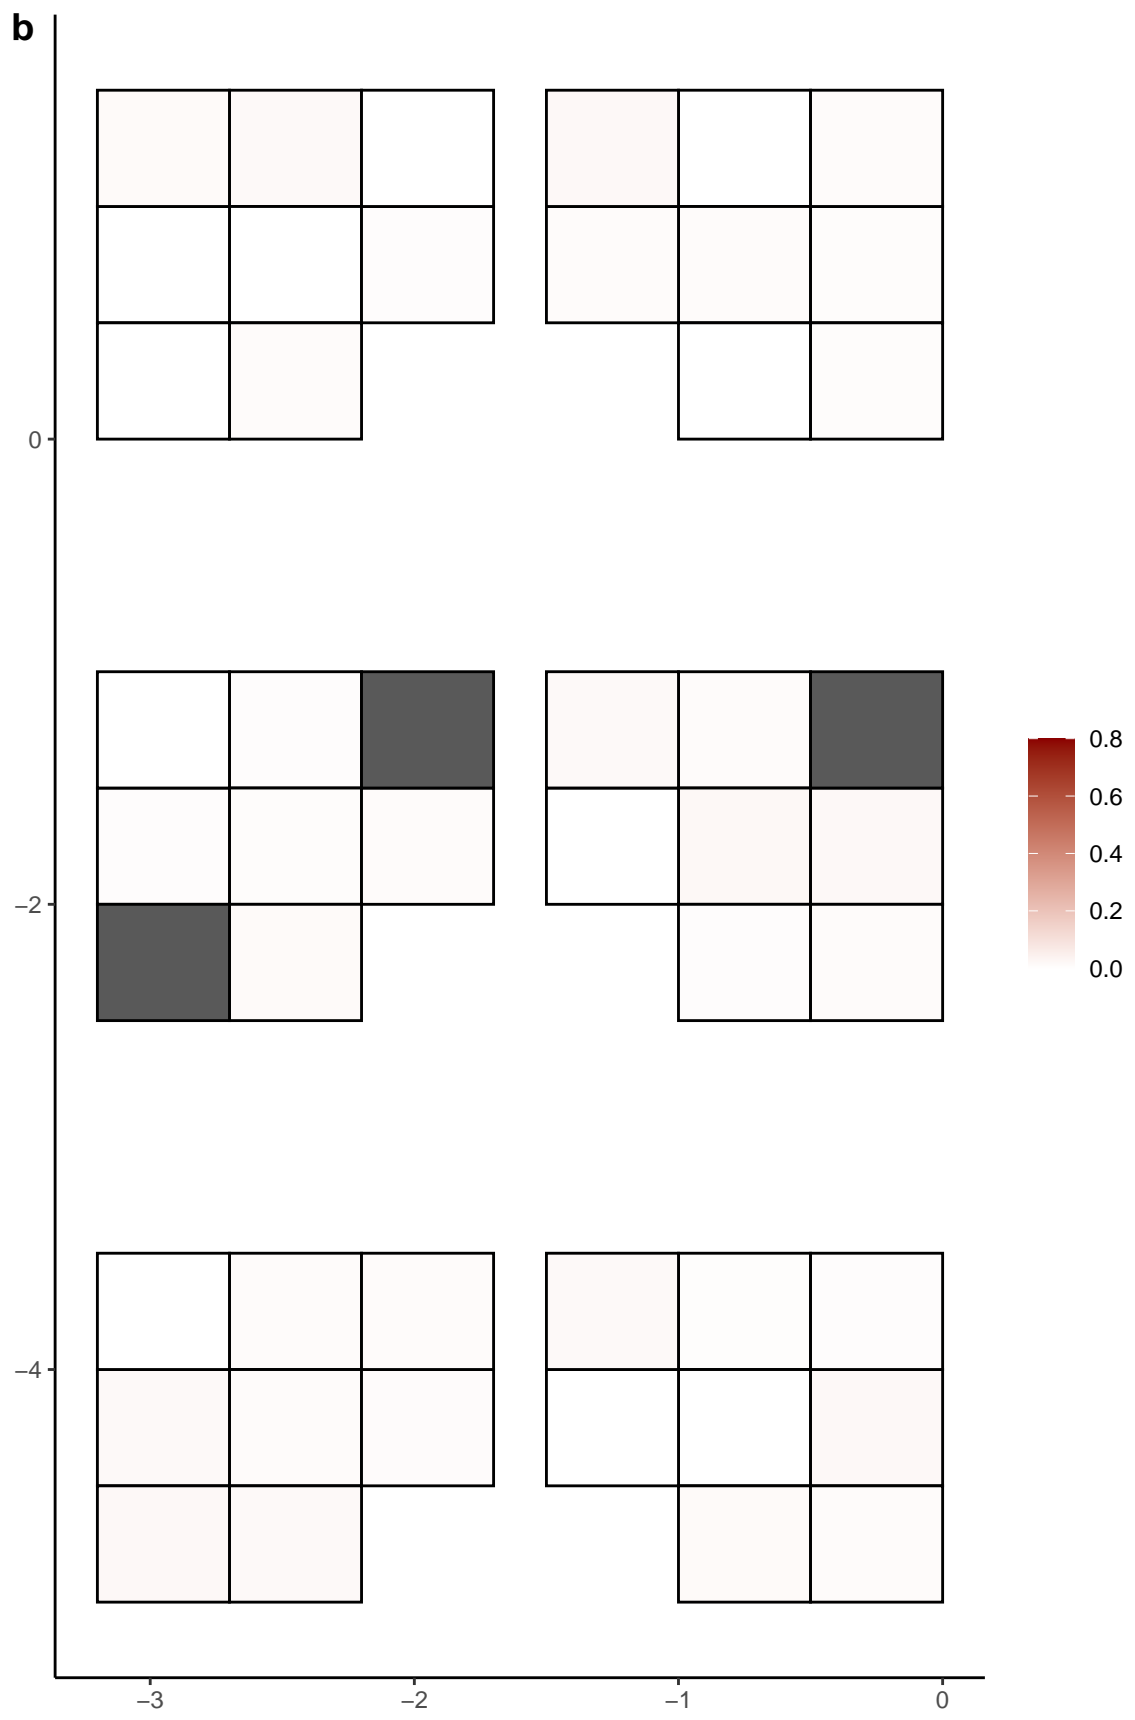

**a** ID05 4-30123079-T-G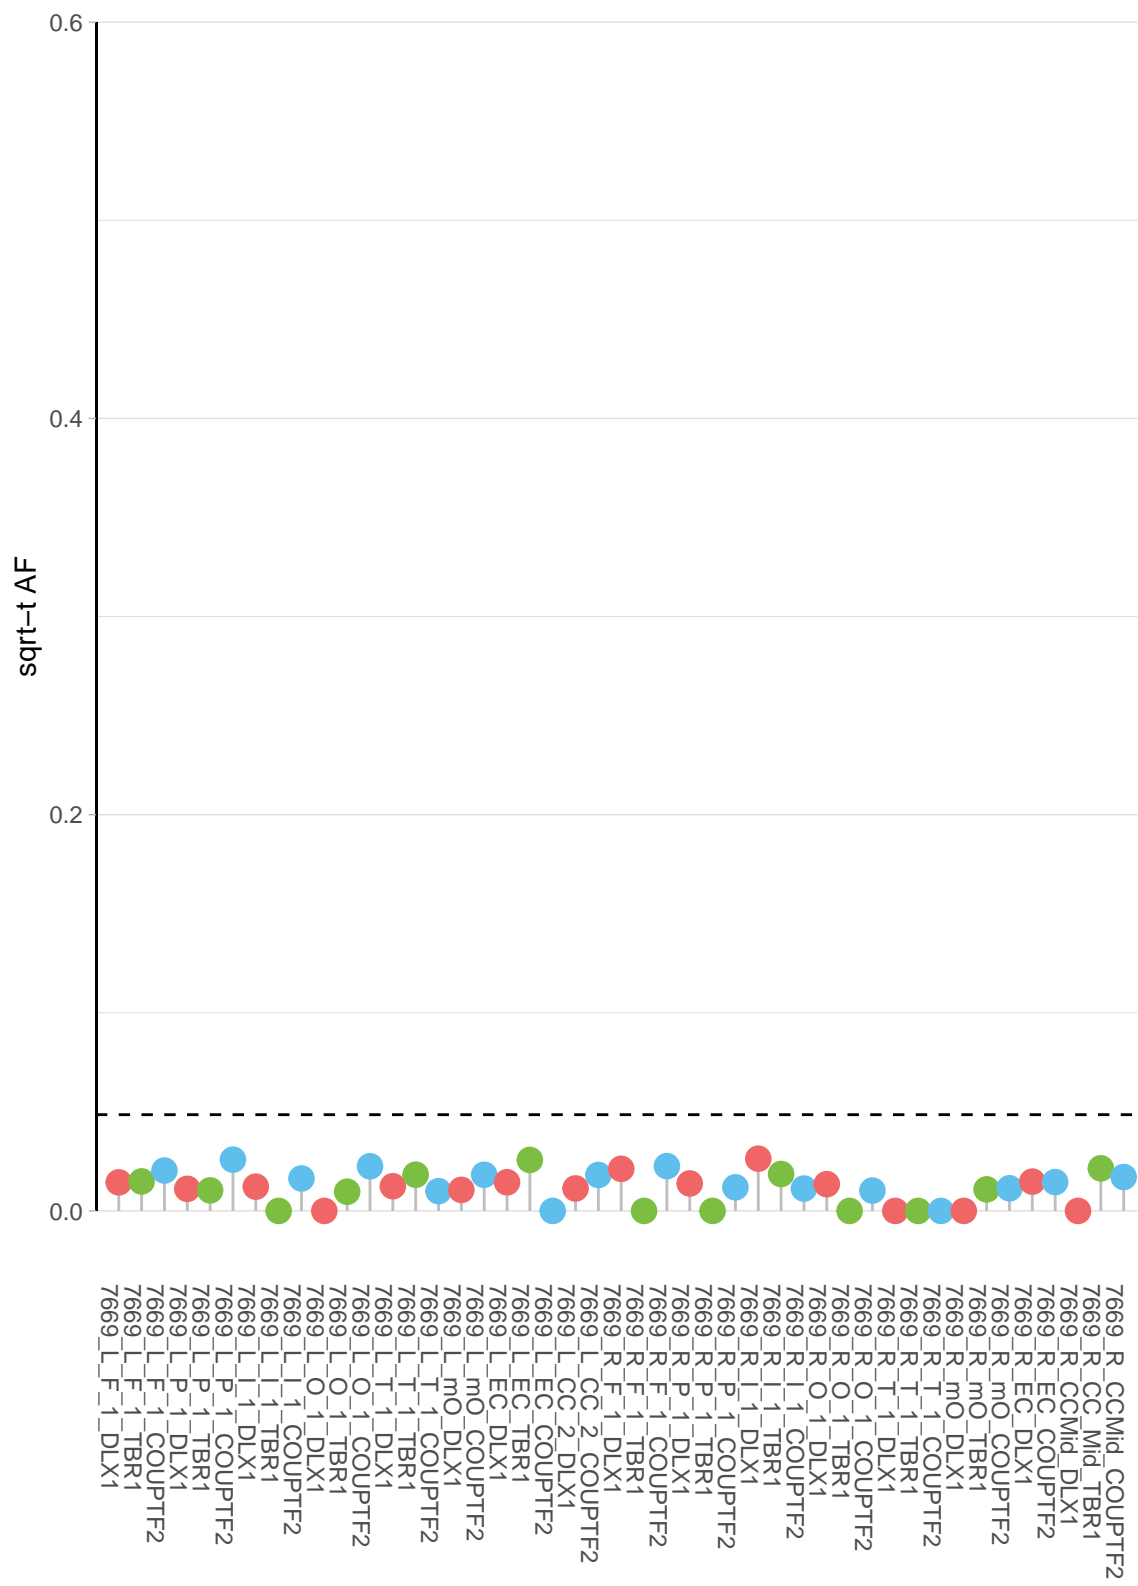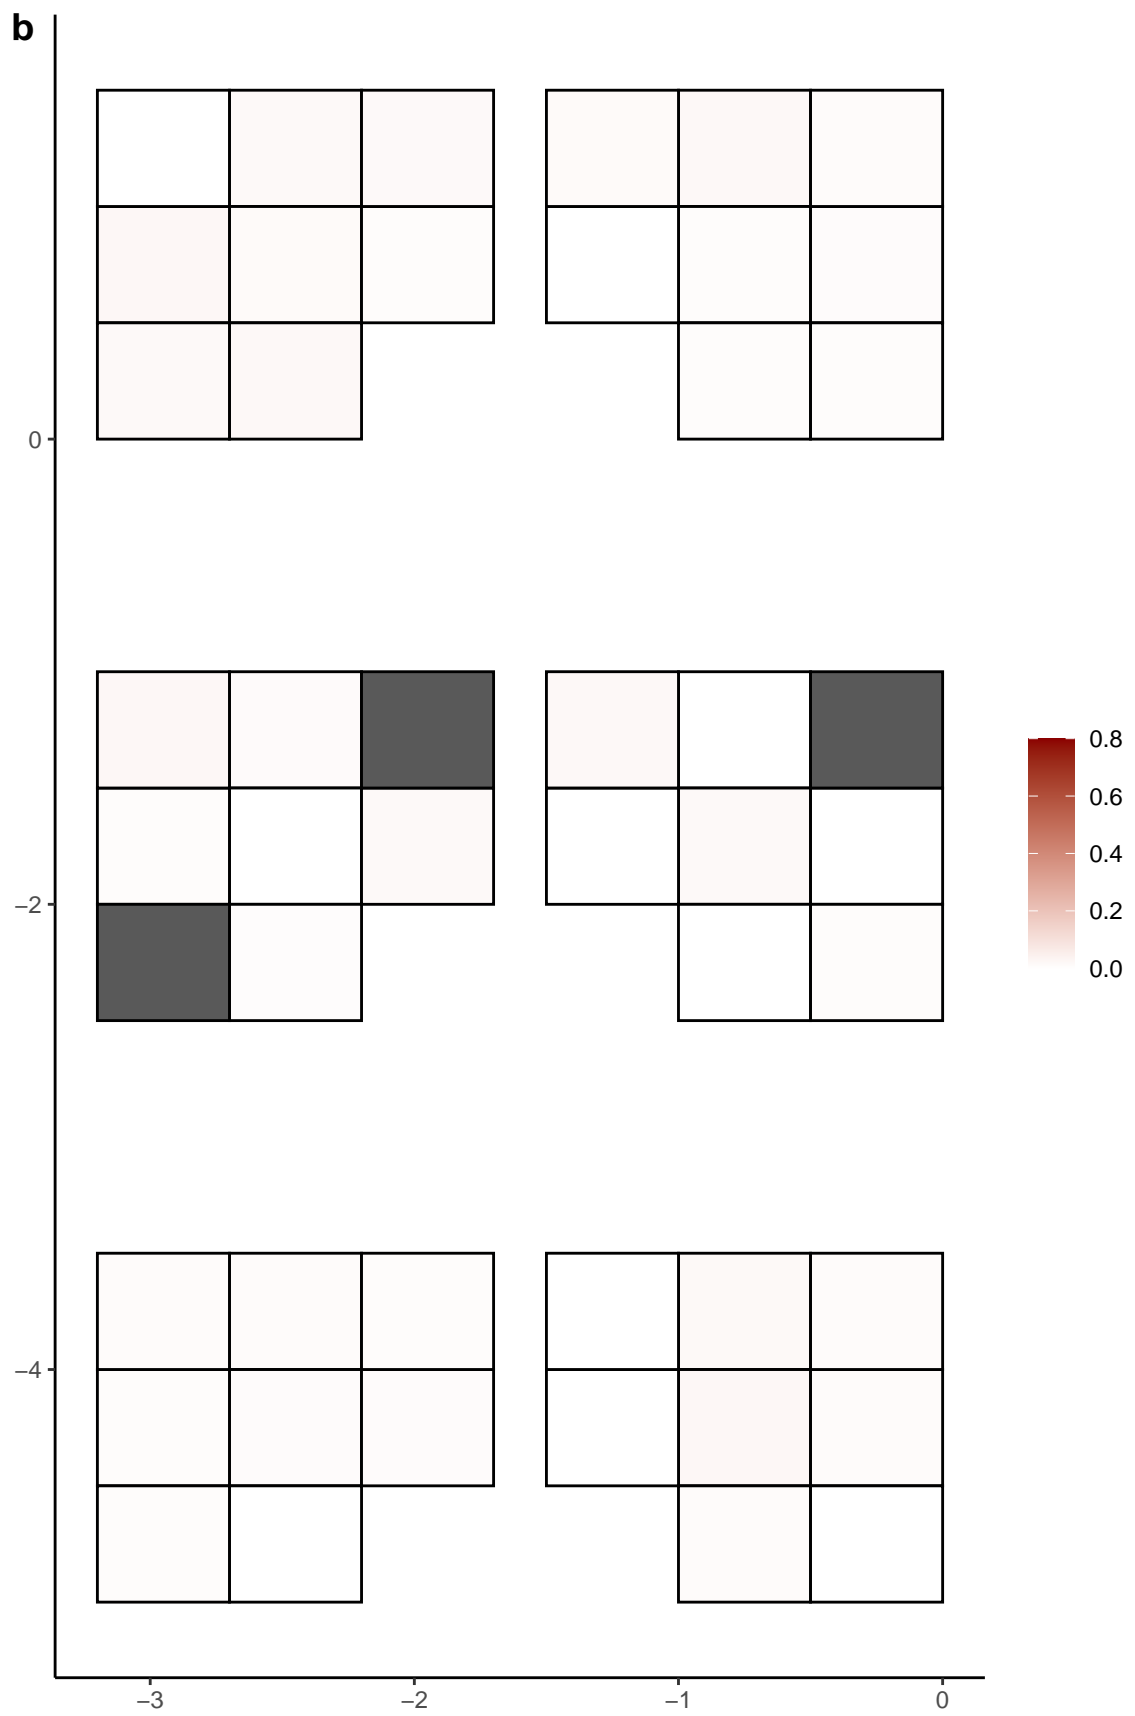

**a** ID05 4-32745748-A-T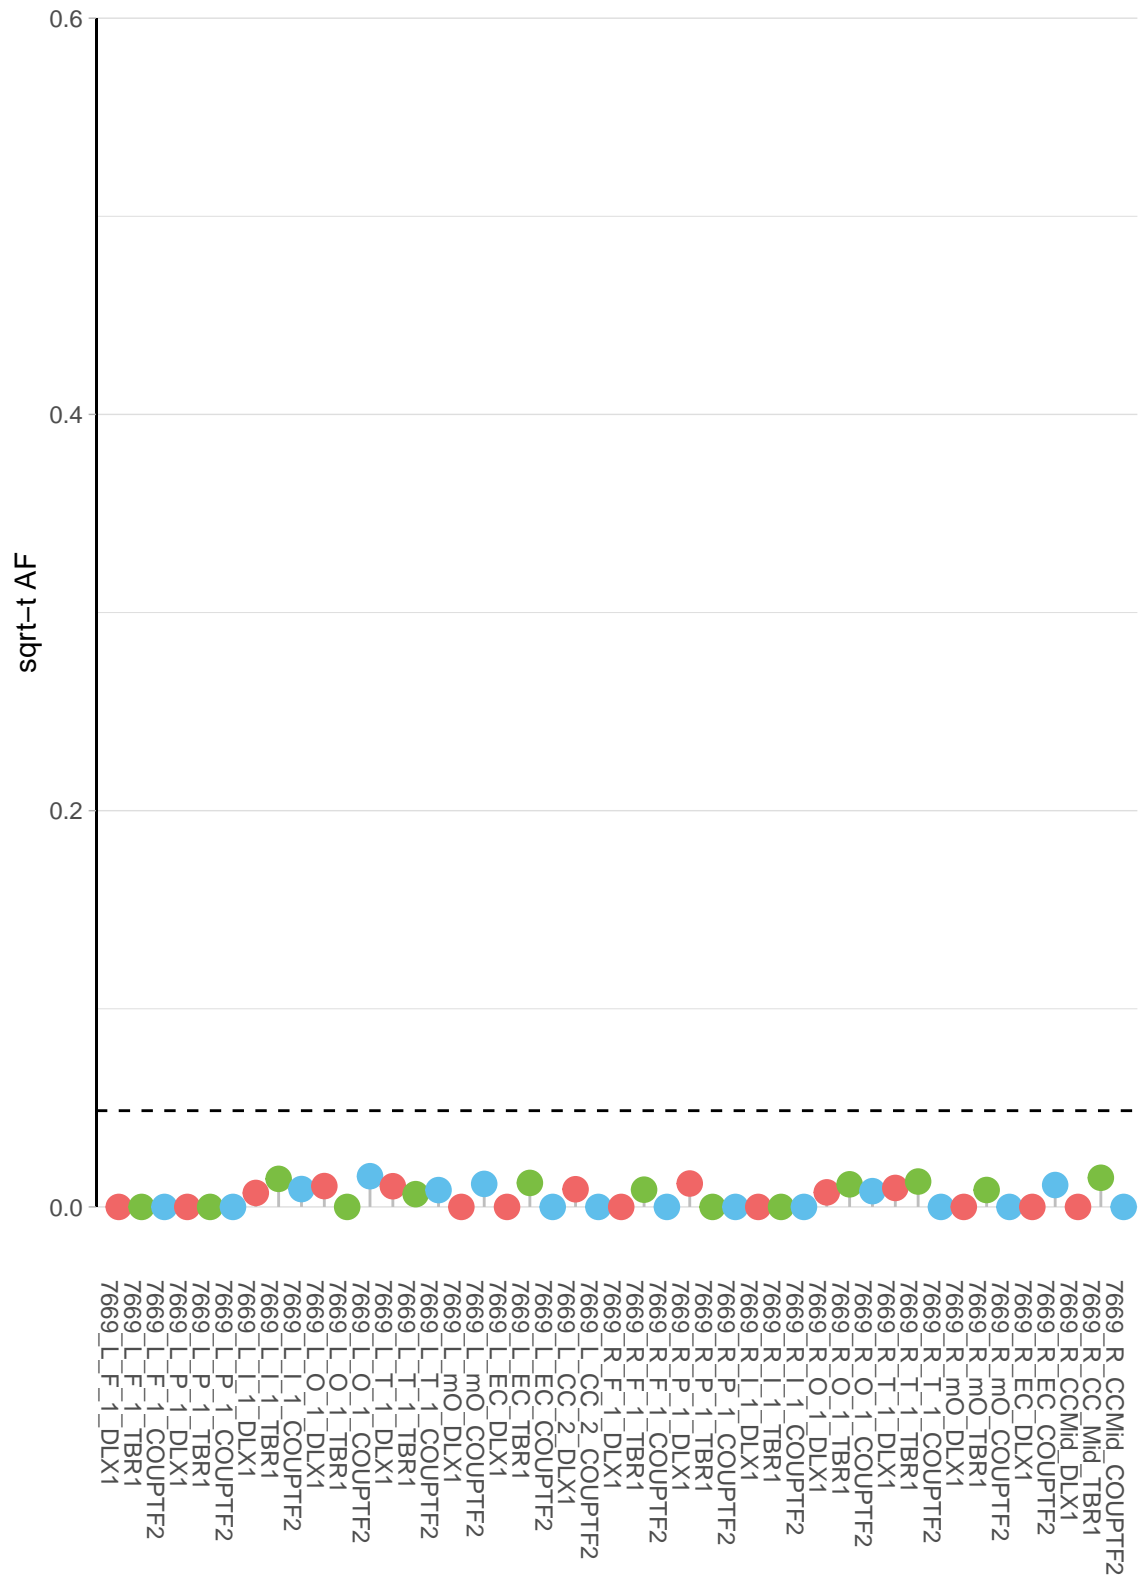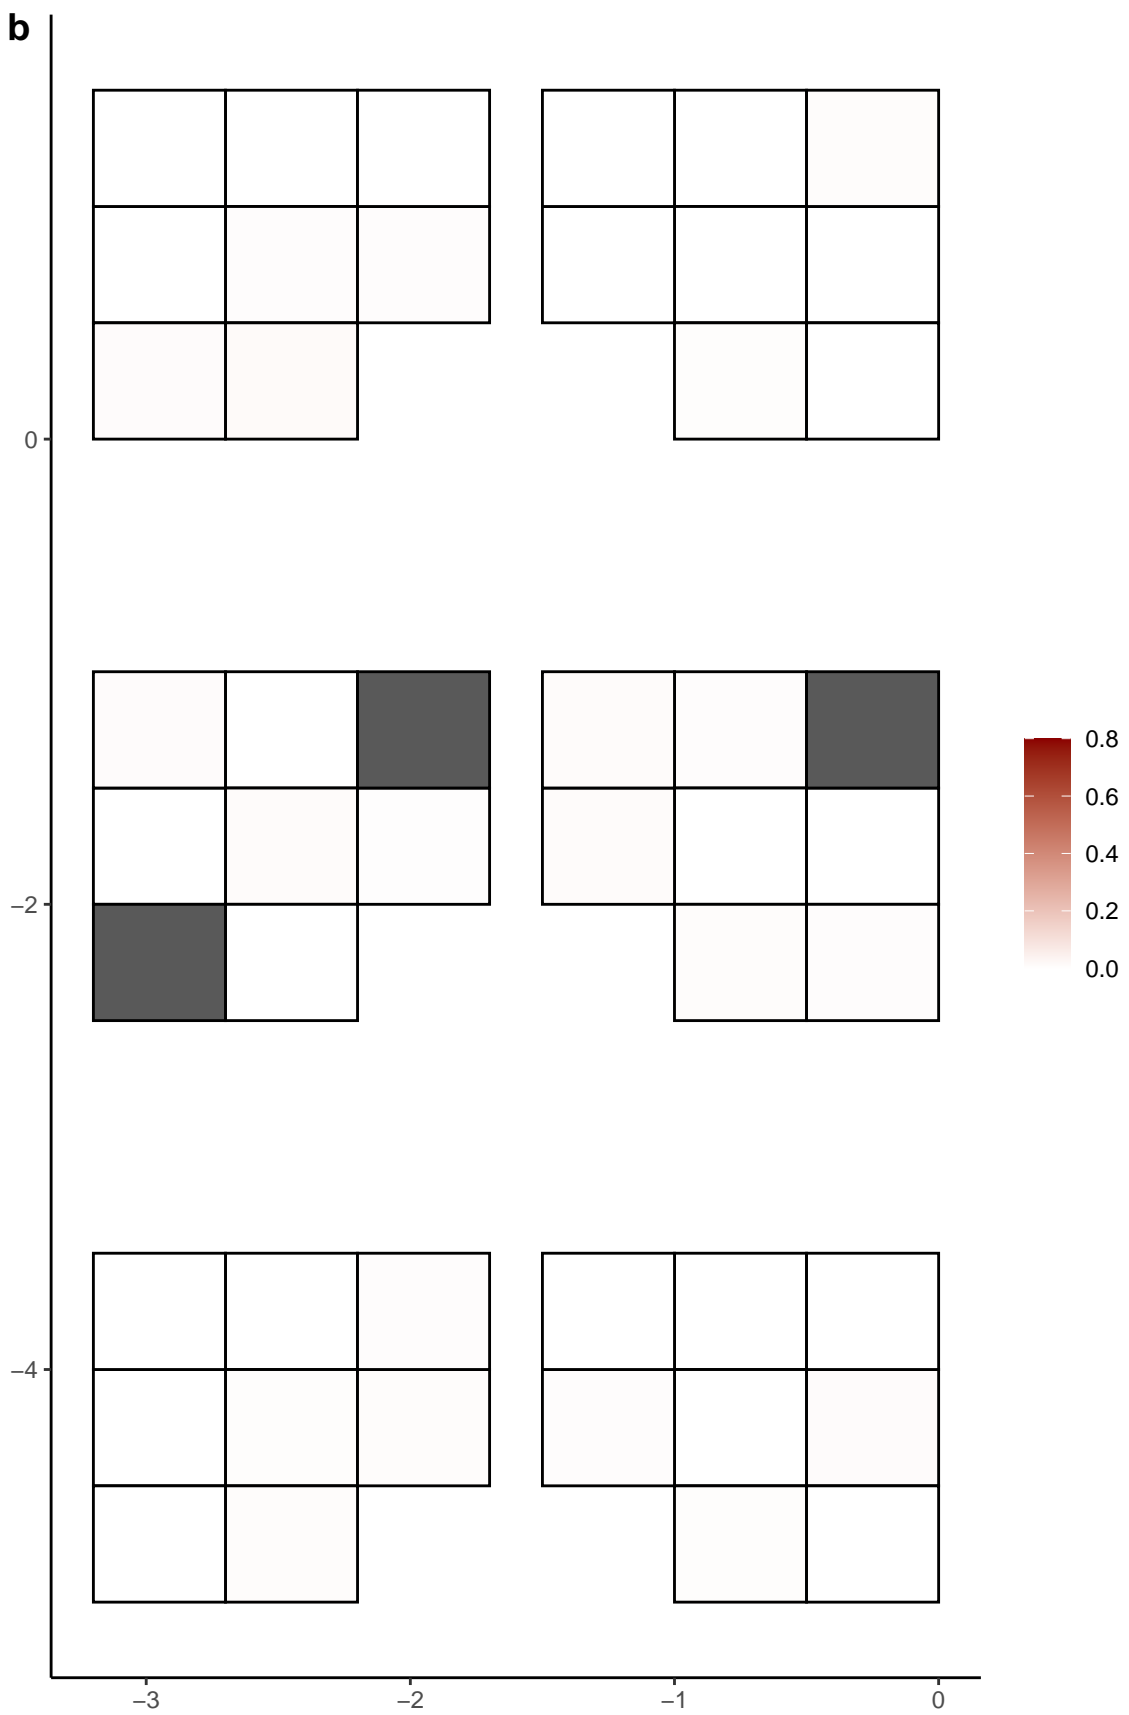



### a ID05 4-34386270-C-T

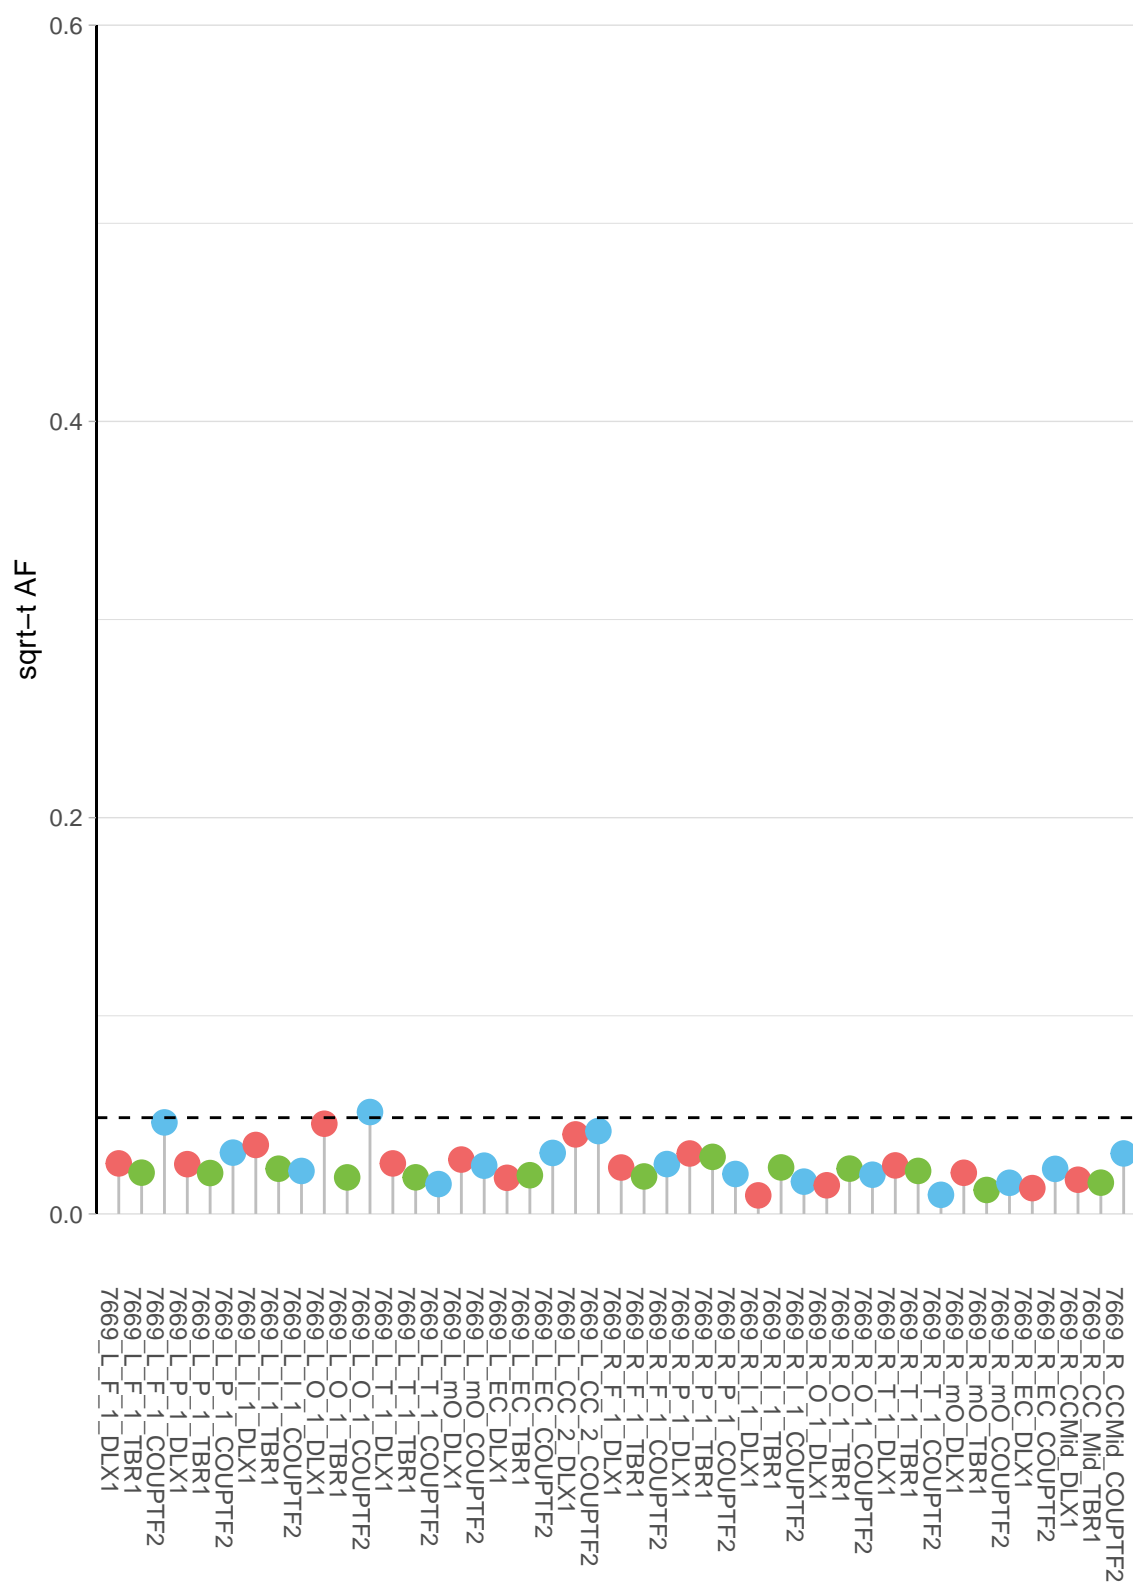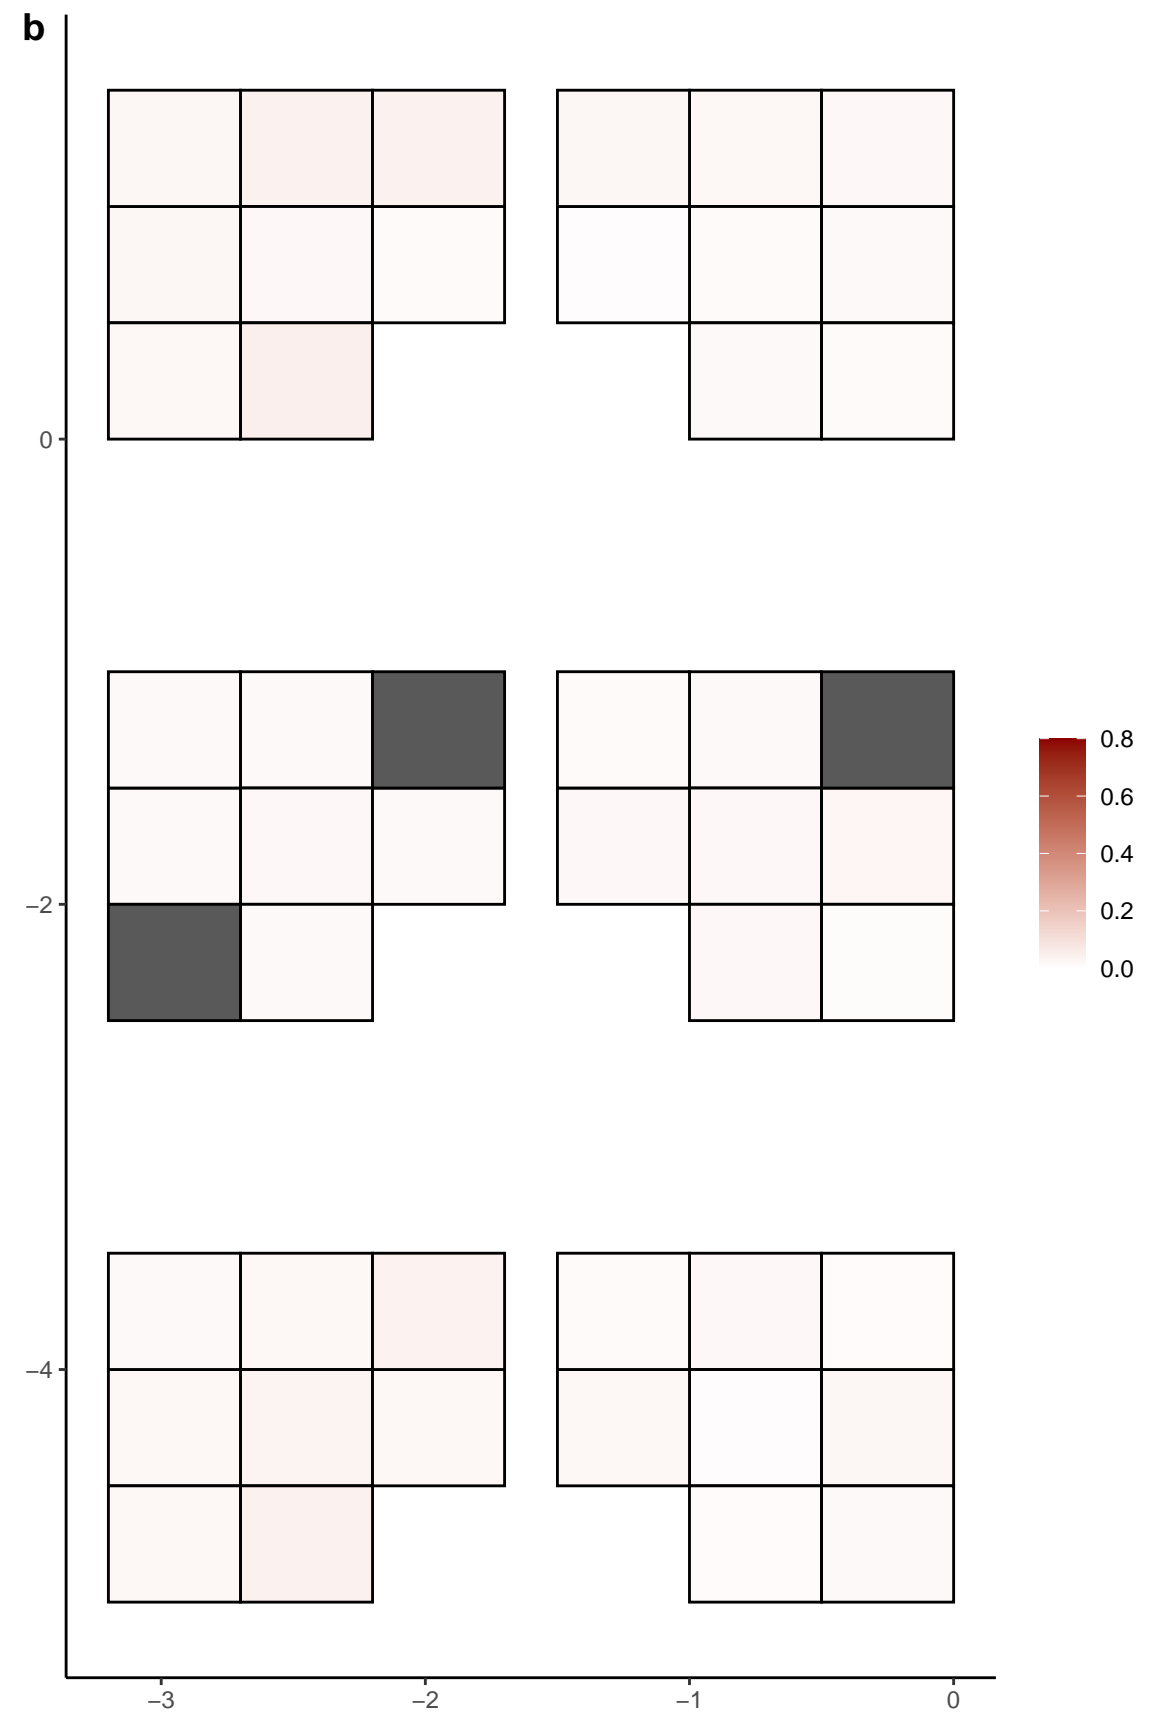

**a** ID05 4-34586097-A-T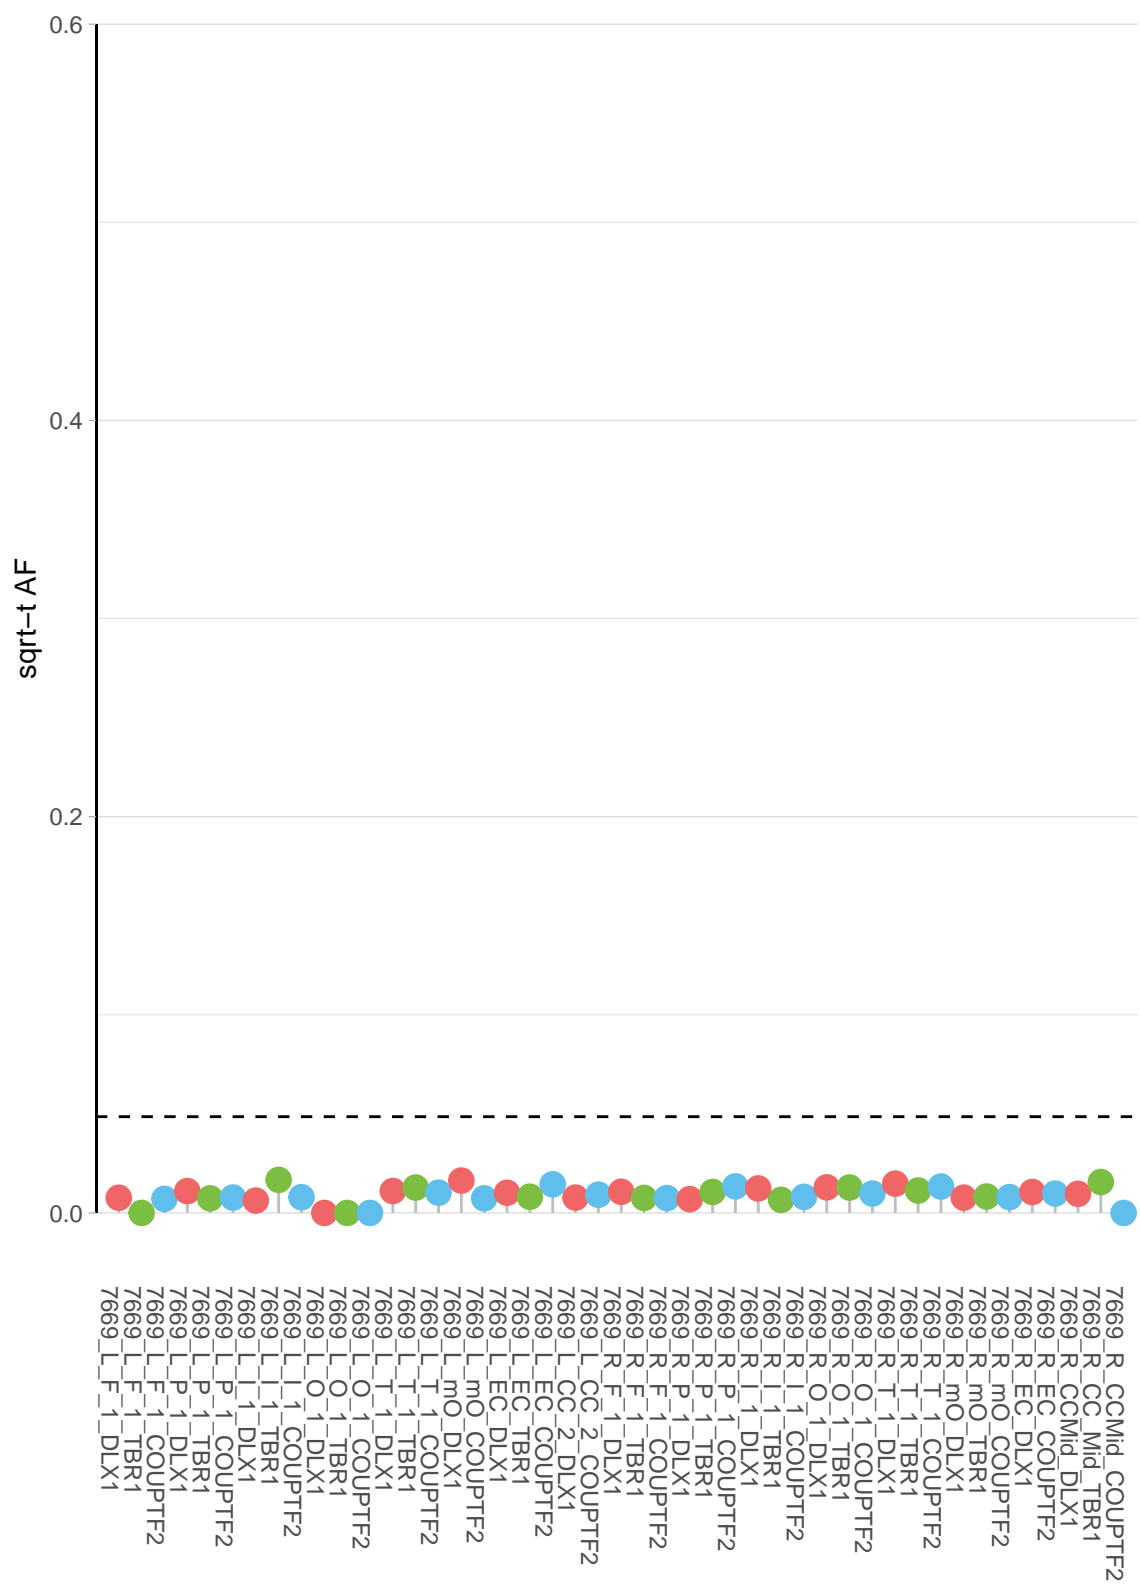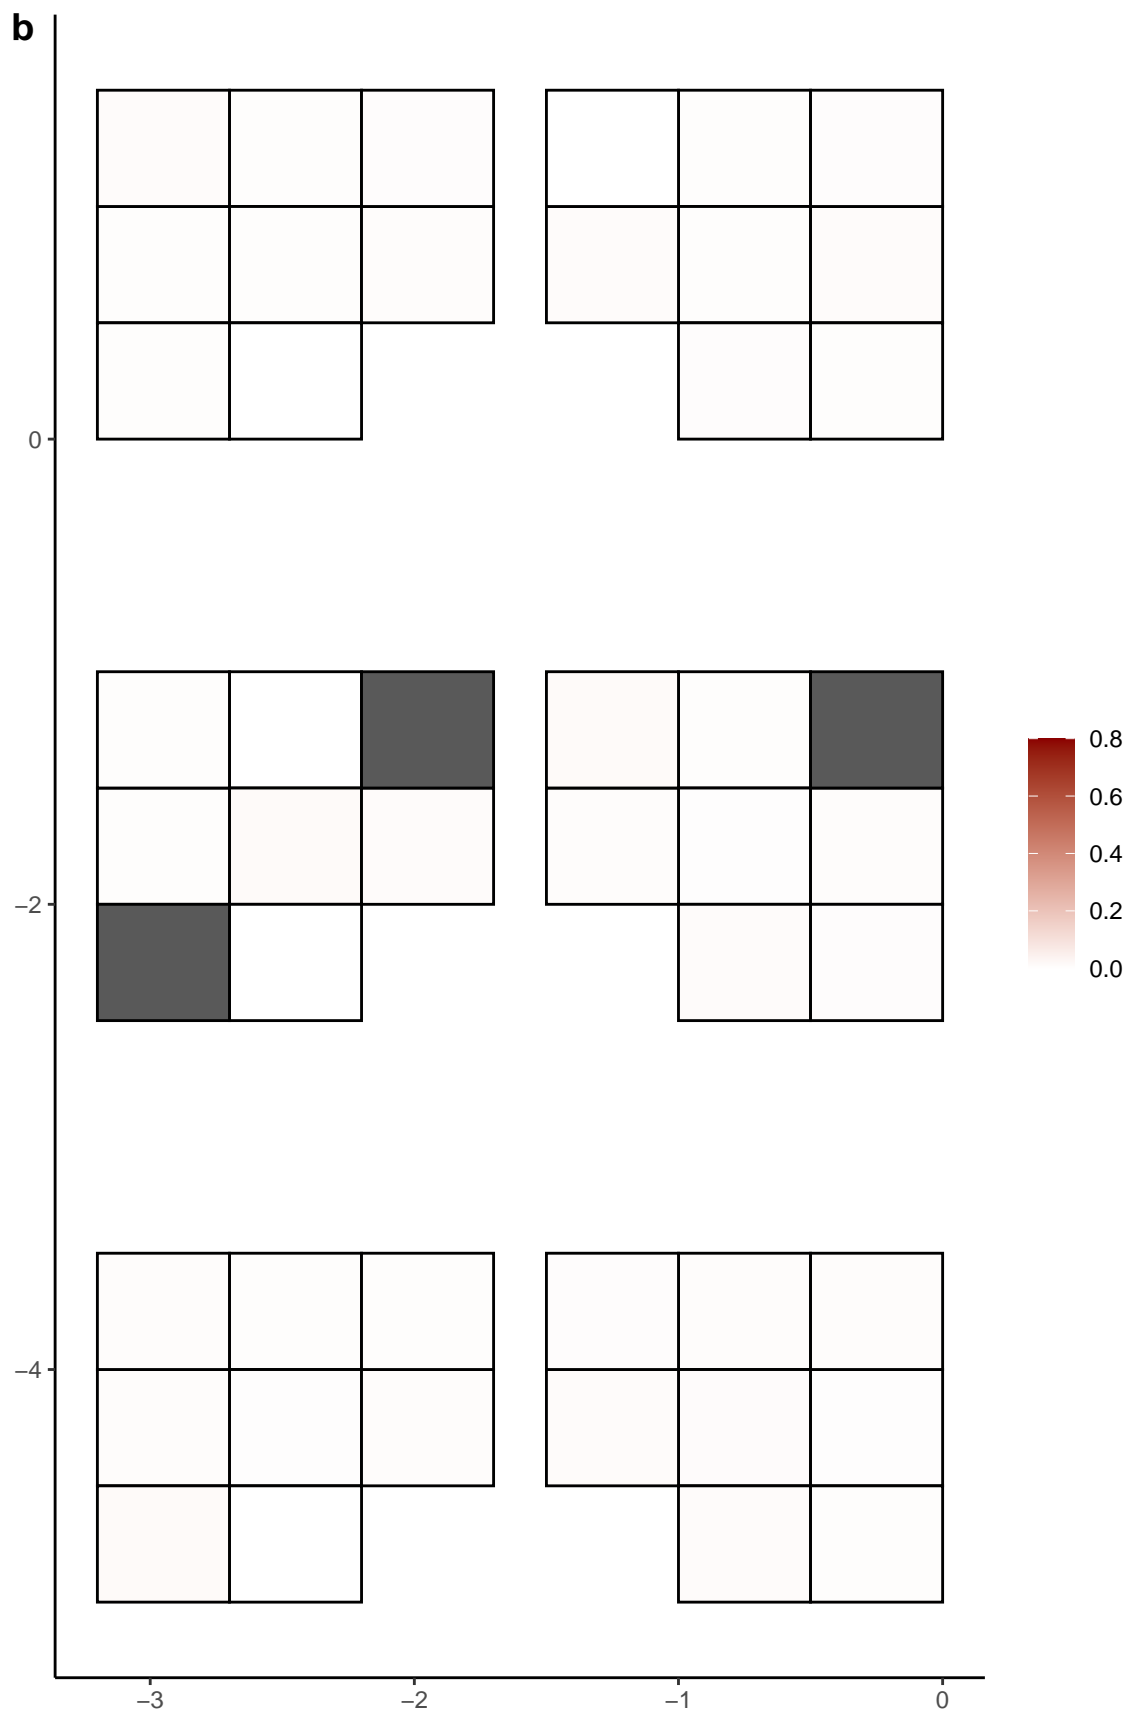



**a** ID05 4-4290986-G-A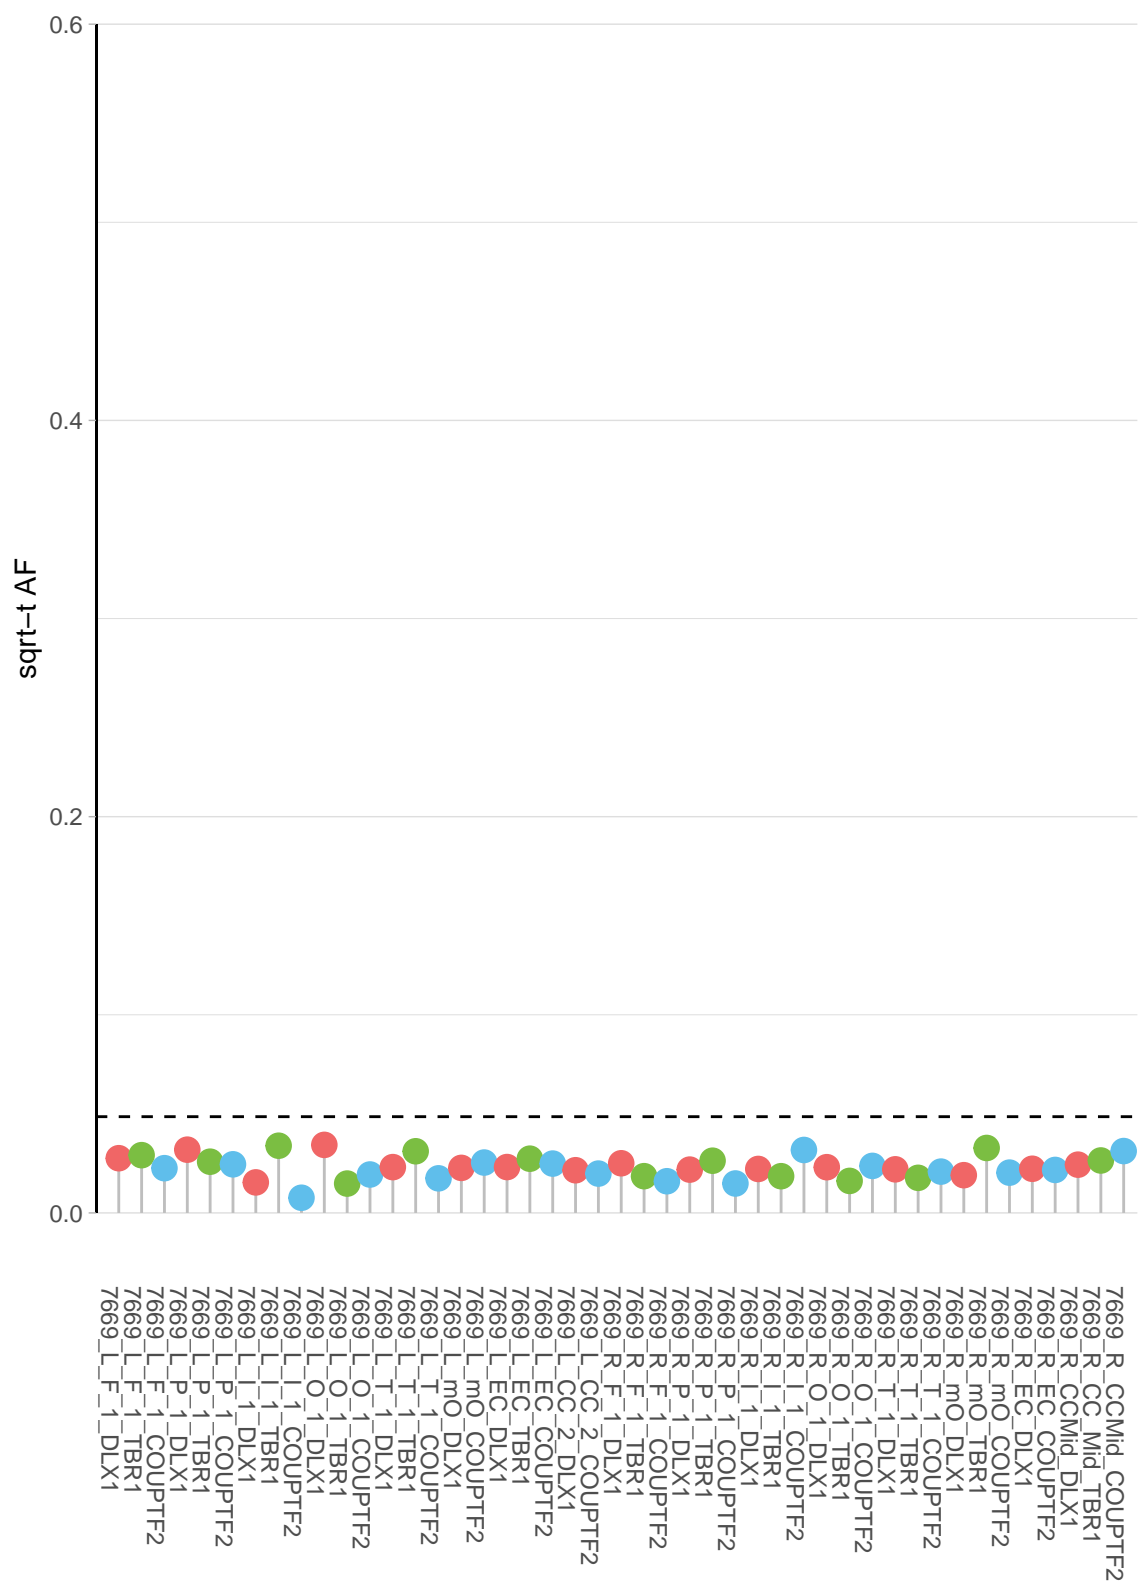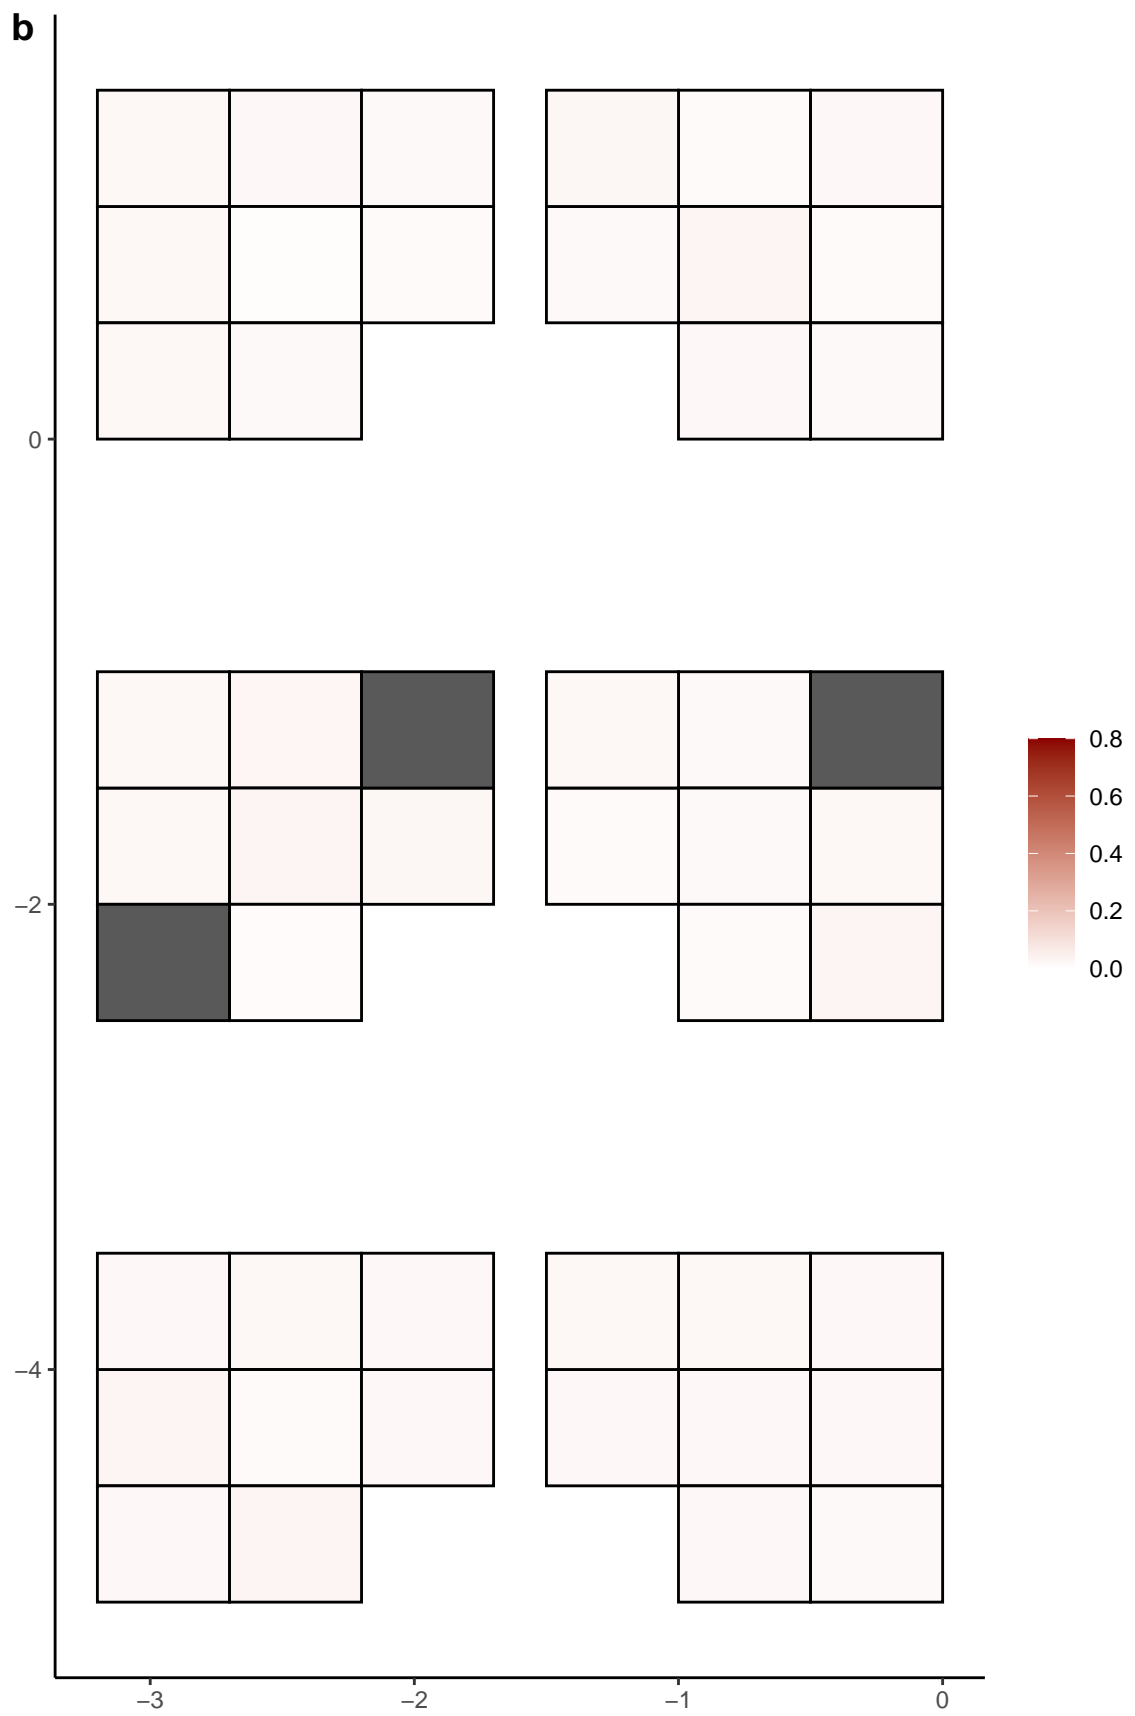





**a** ID05 4-52773-C-T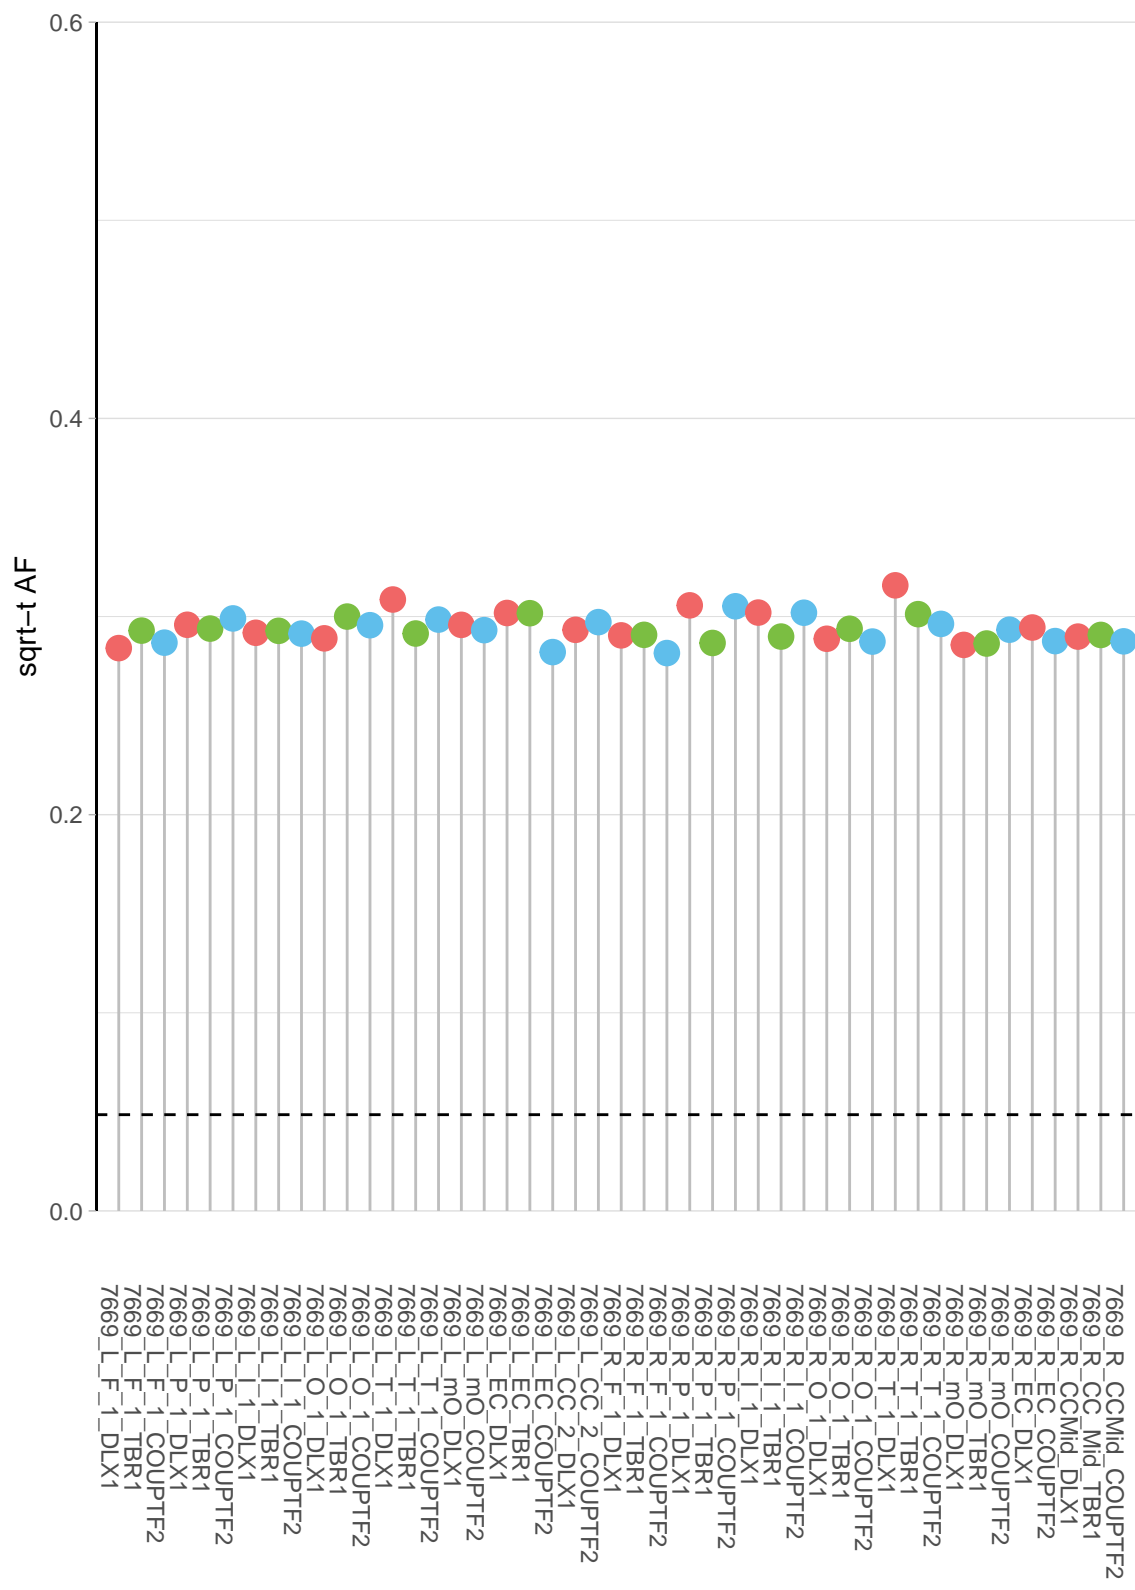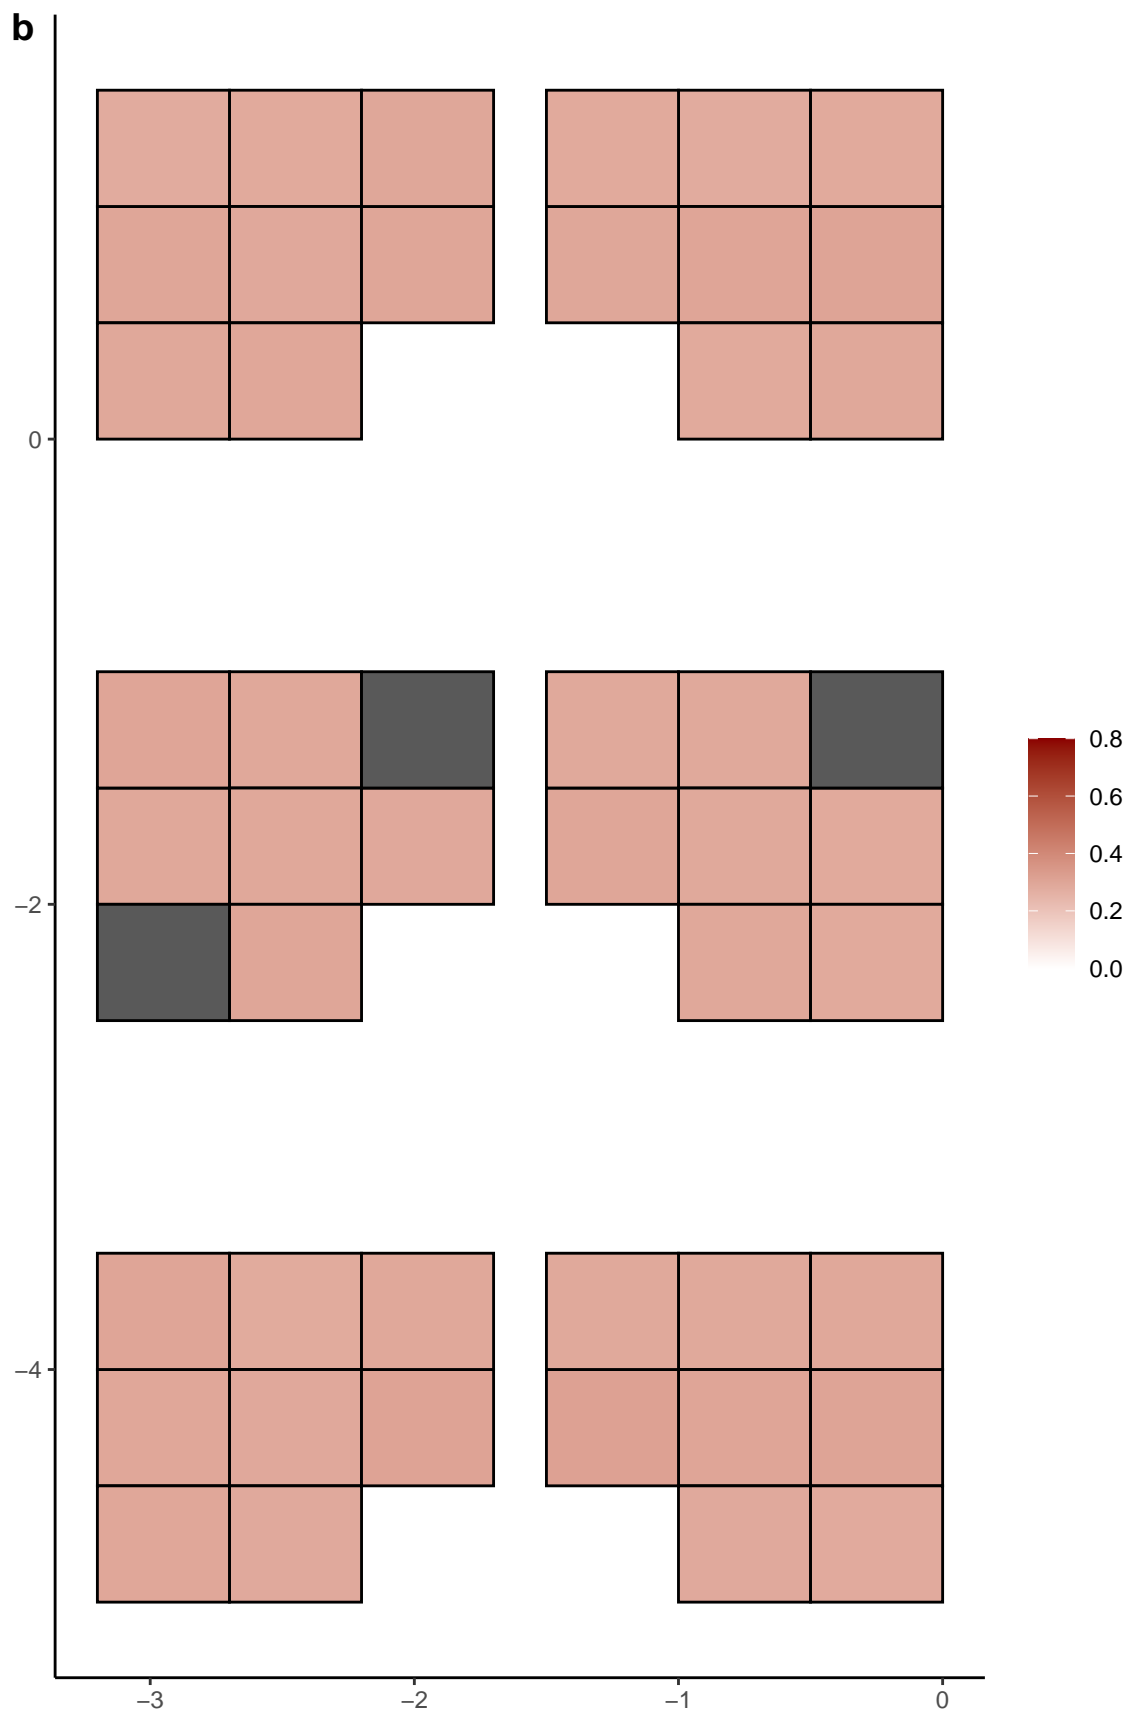

**a** ID05 4-54628-G-T
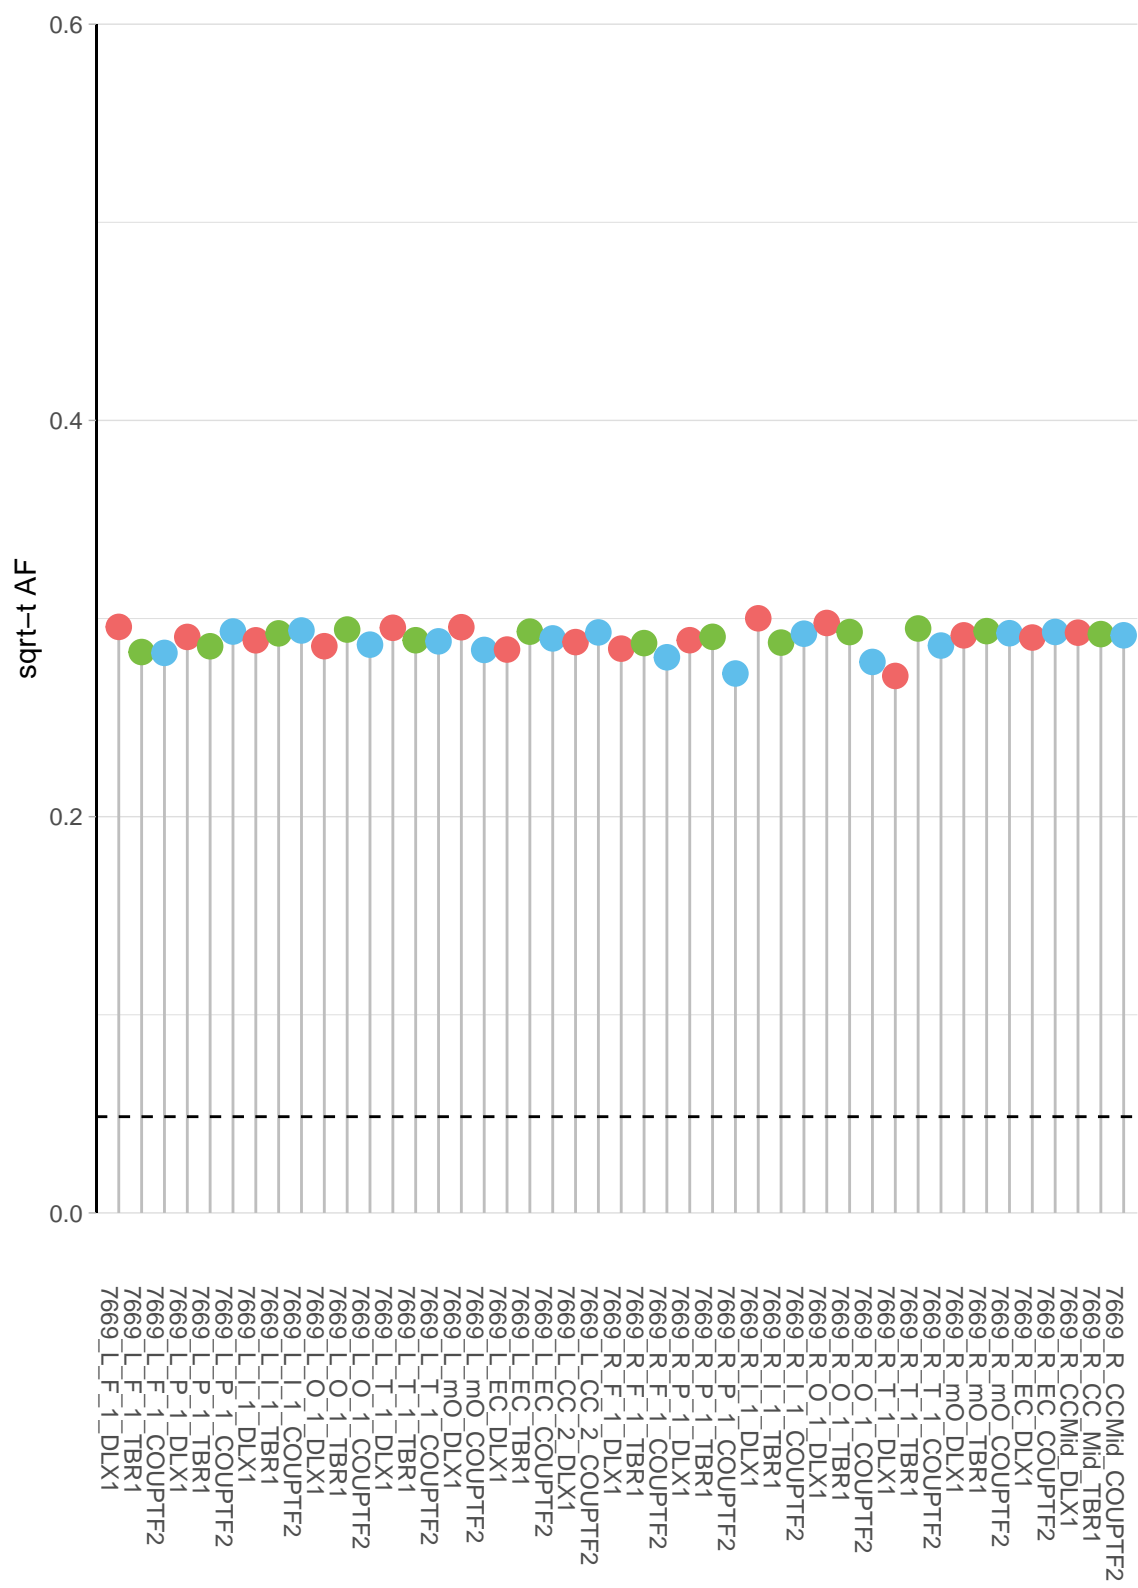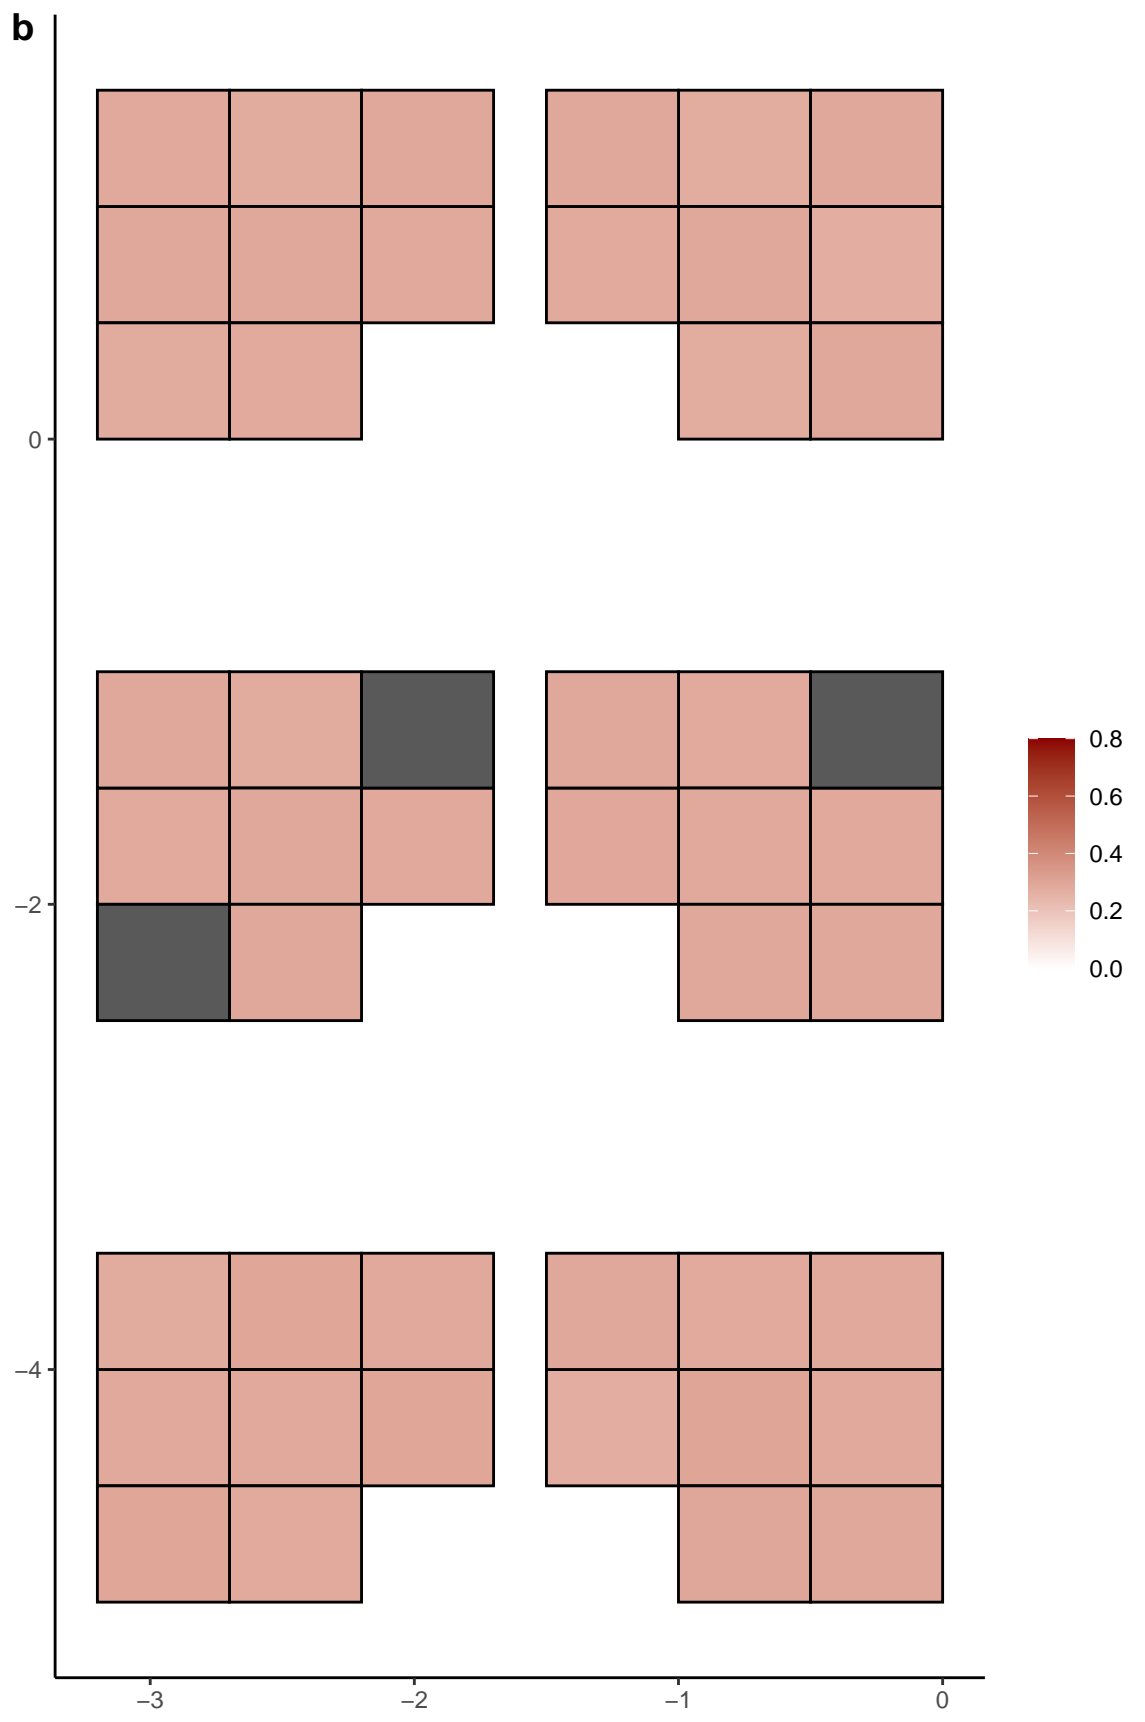



**a** ID05 4-57773855-A-T

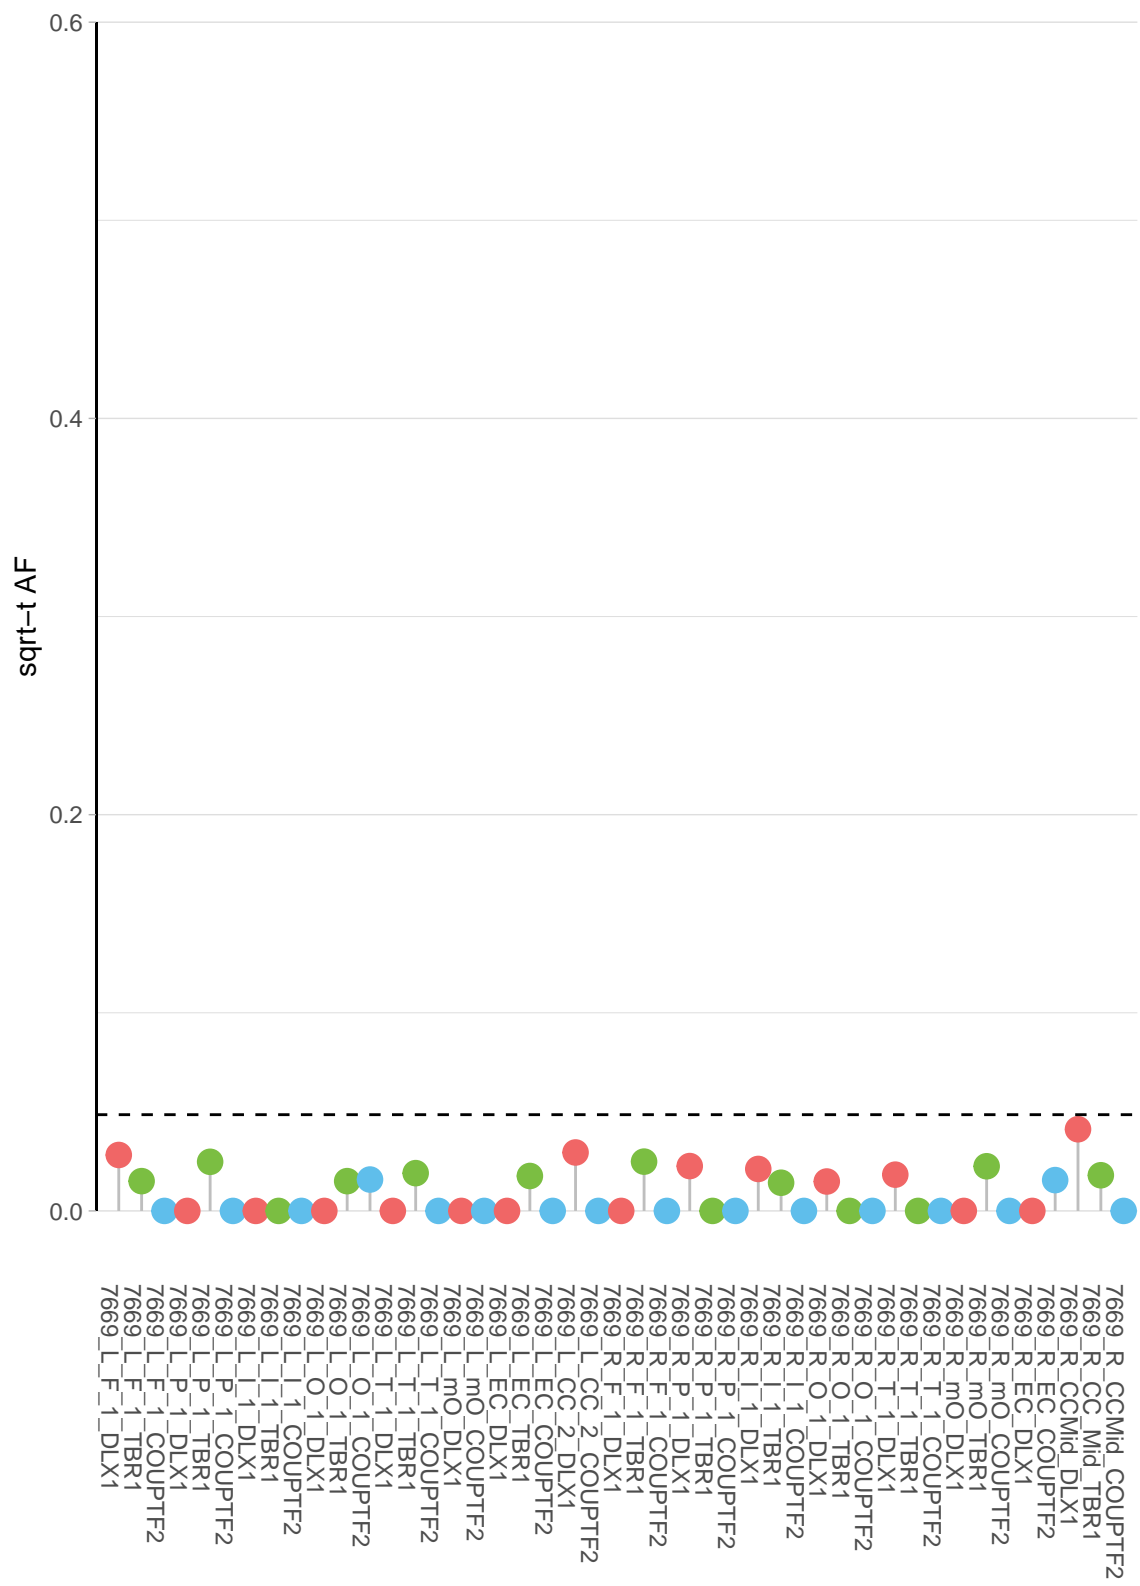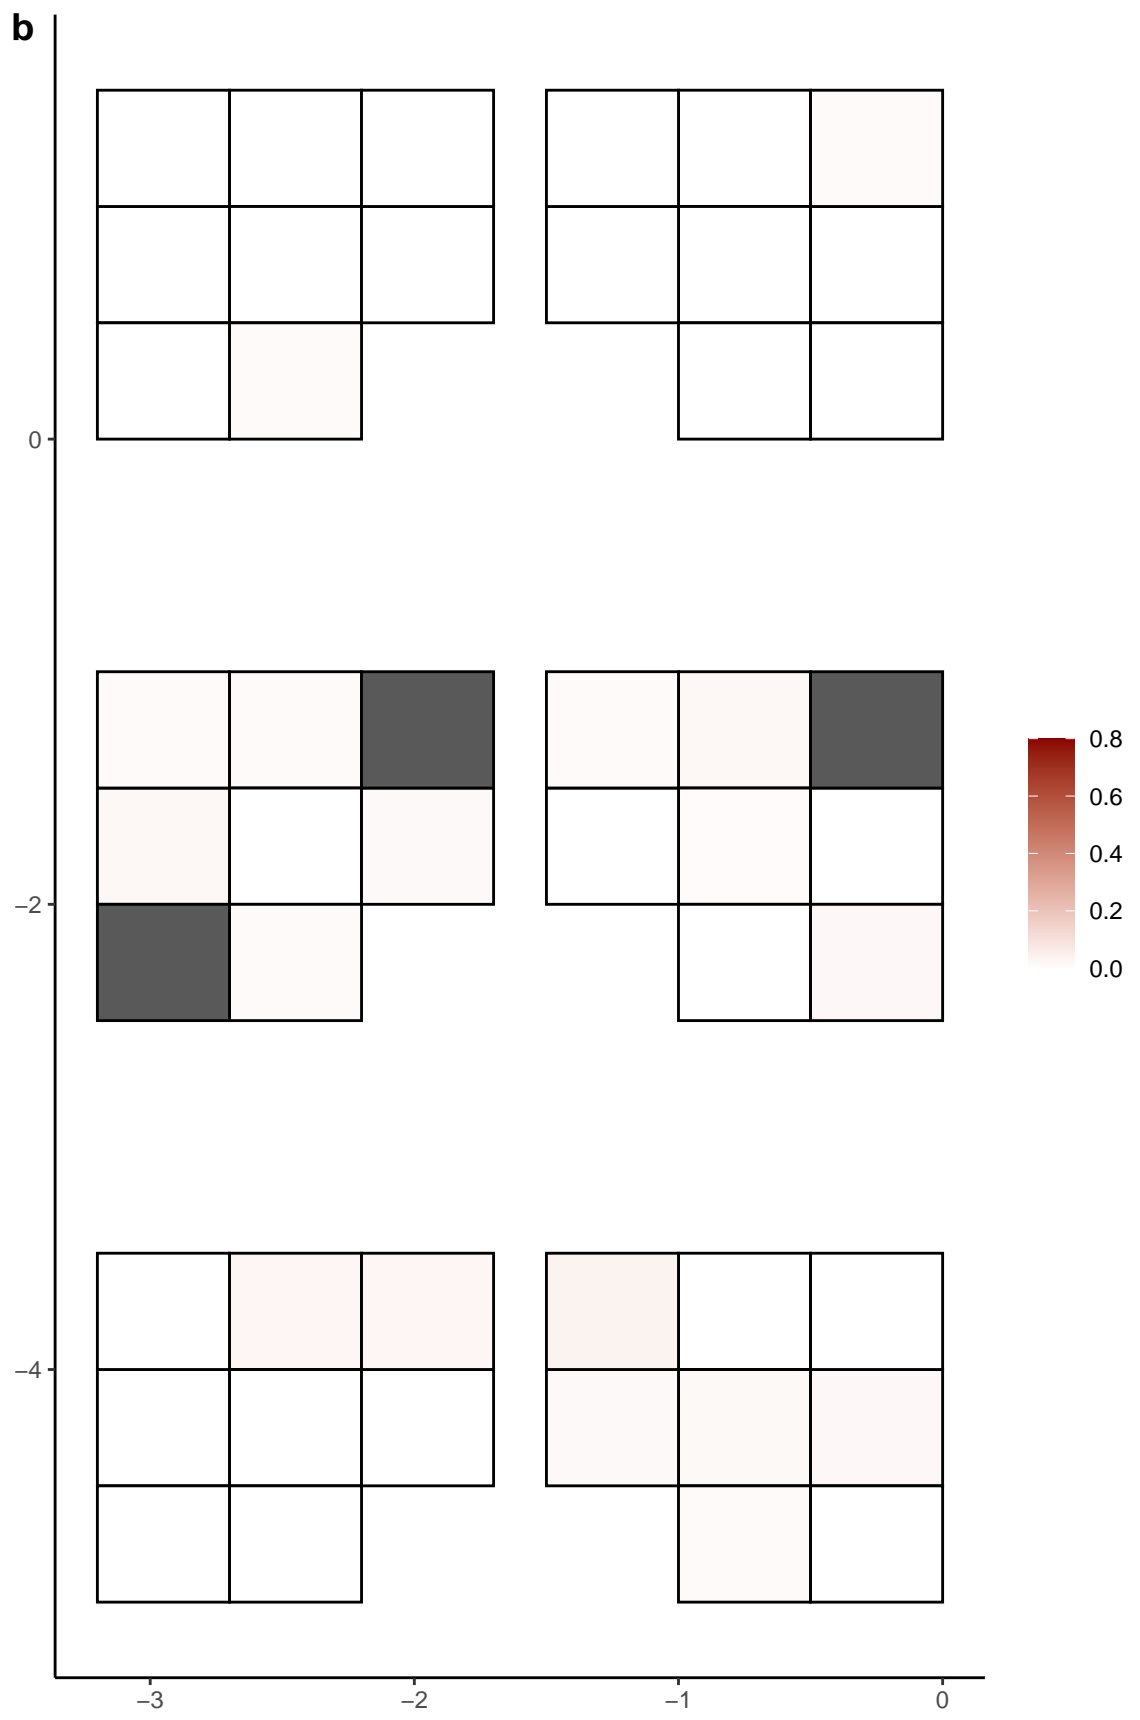

**a** ID05 4-58638686-G-A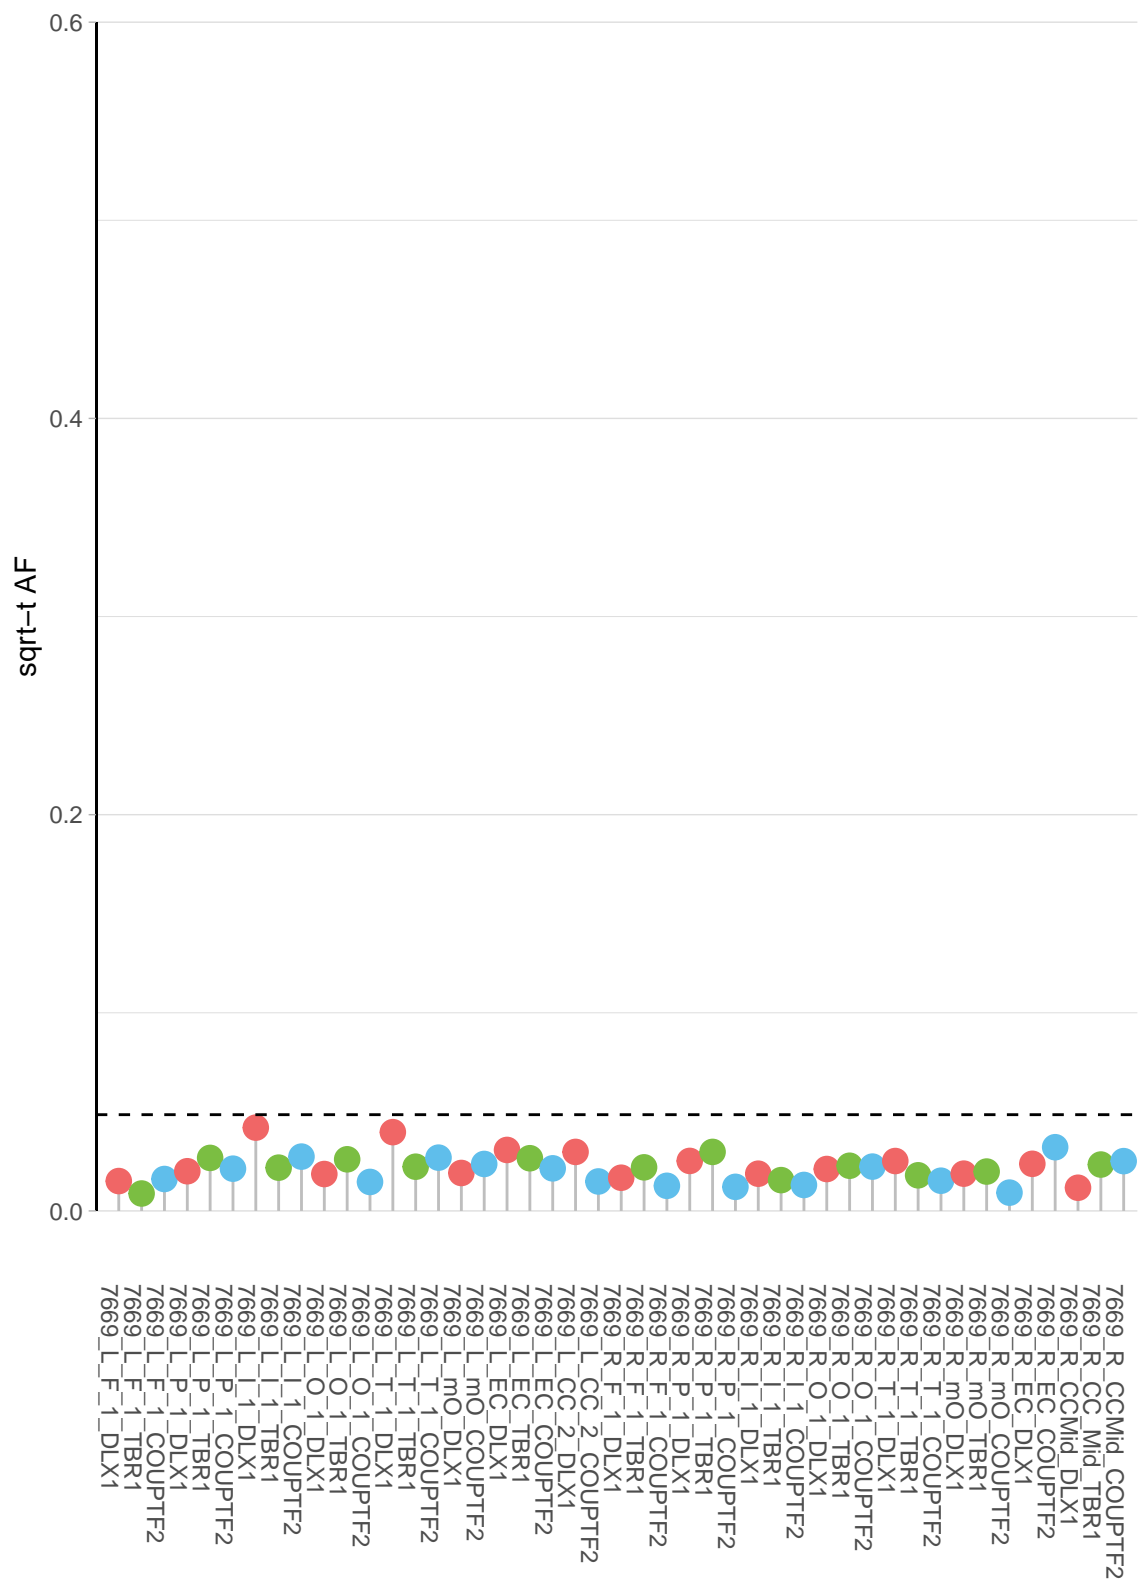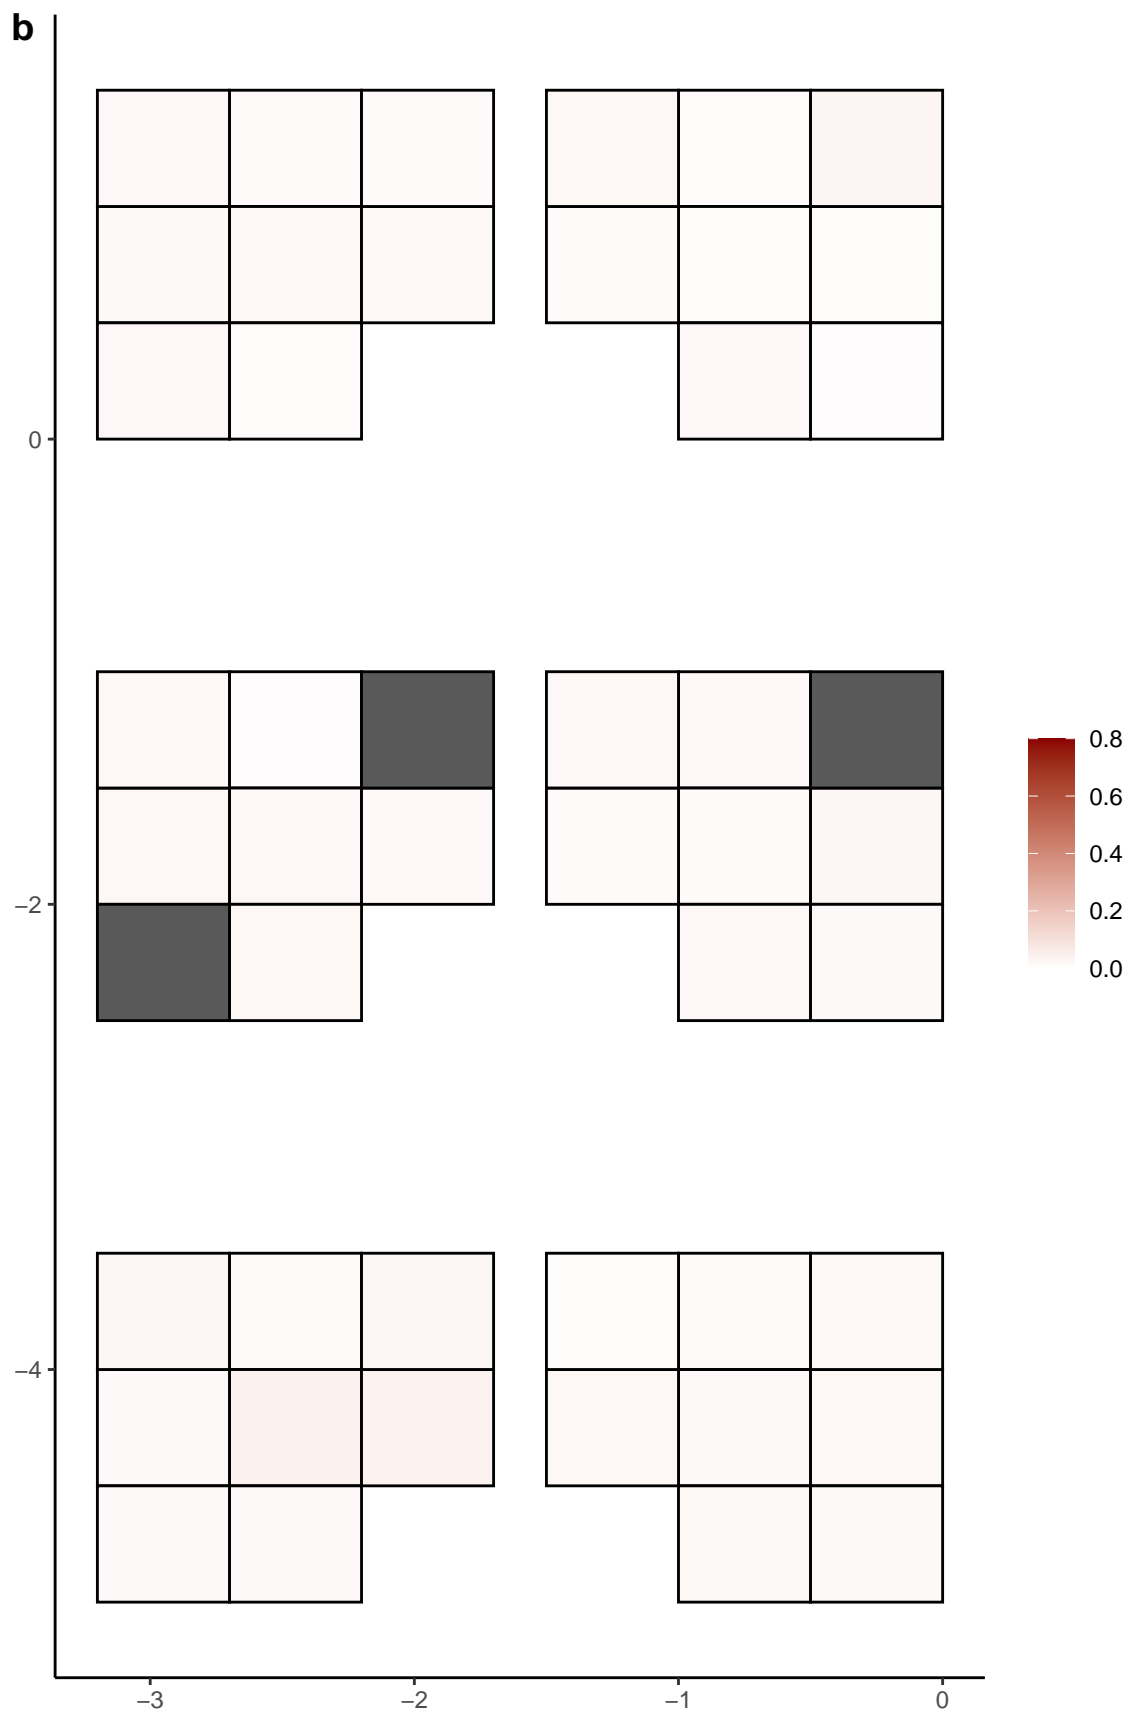

**a** ID05 4-59641558-C-T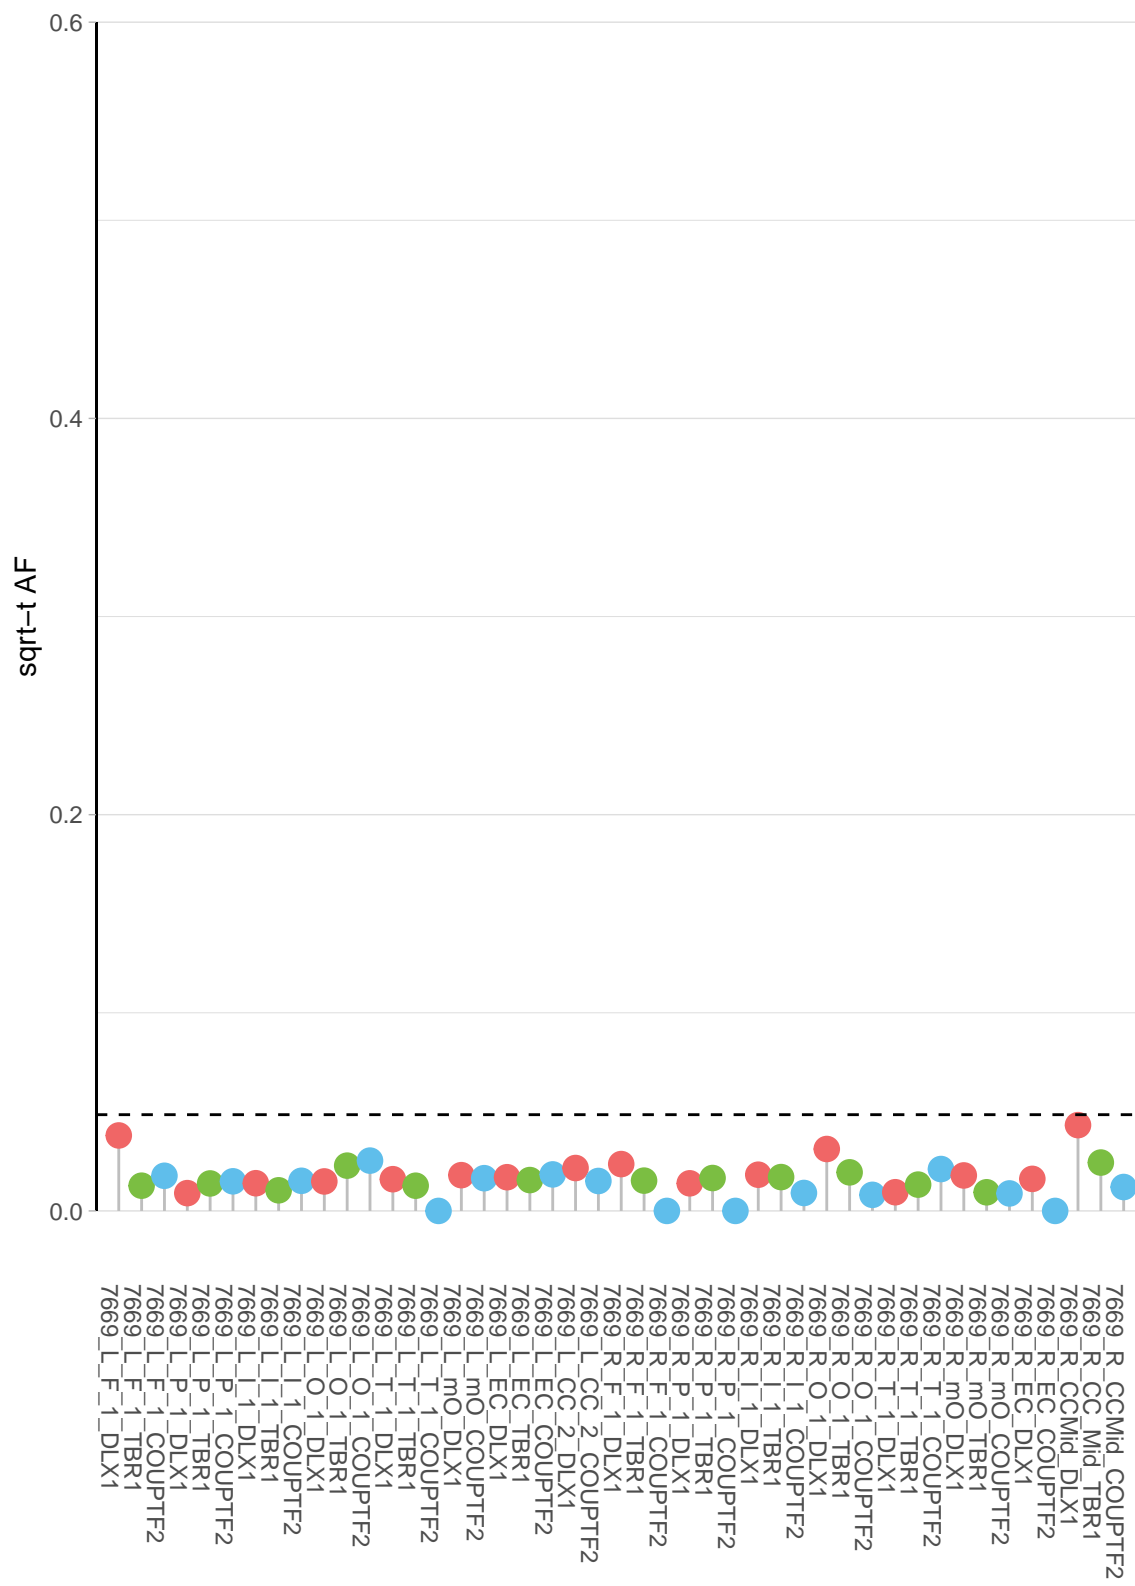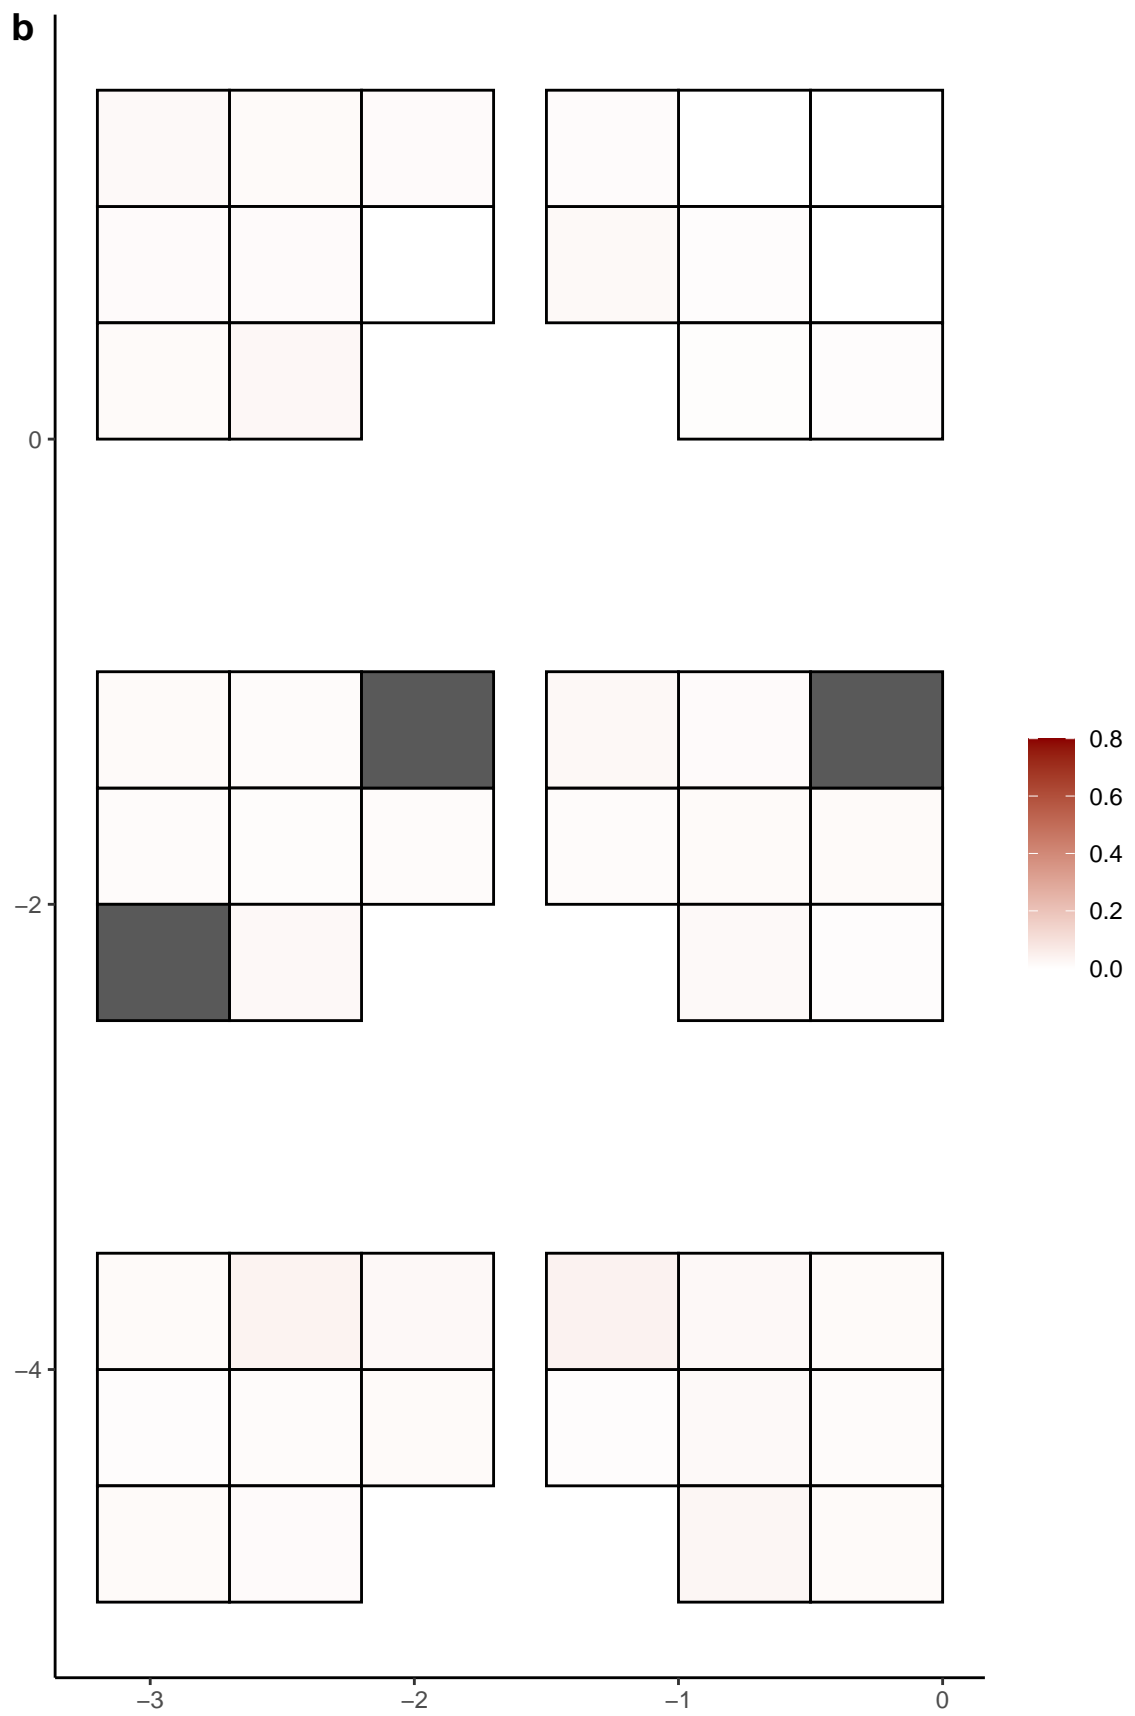

**a** ID05 4-60968373-G-A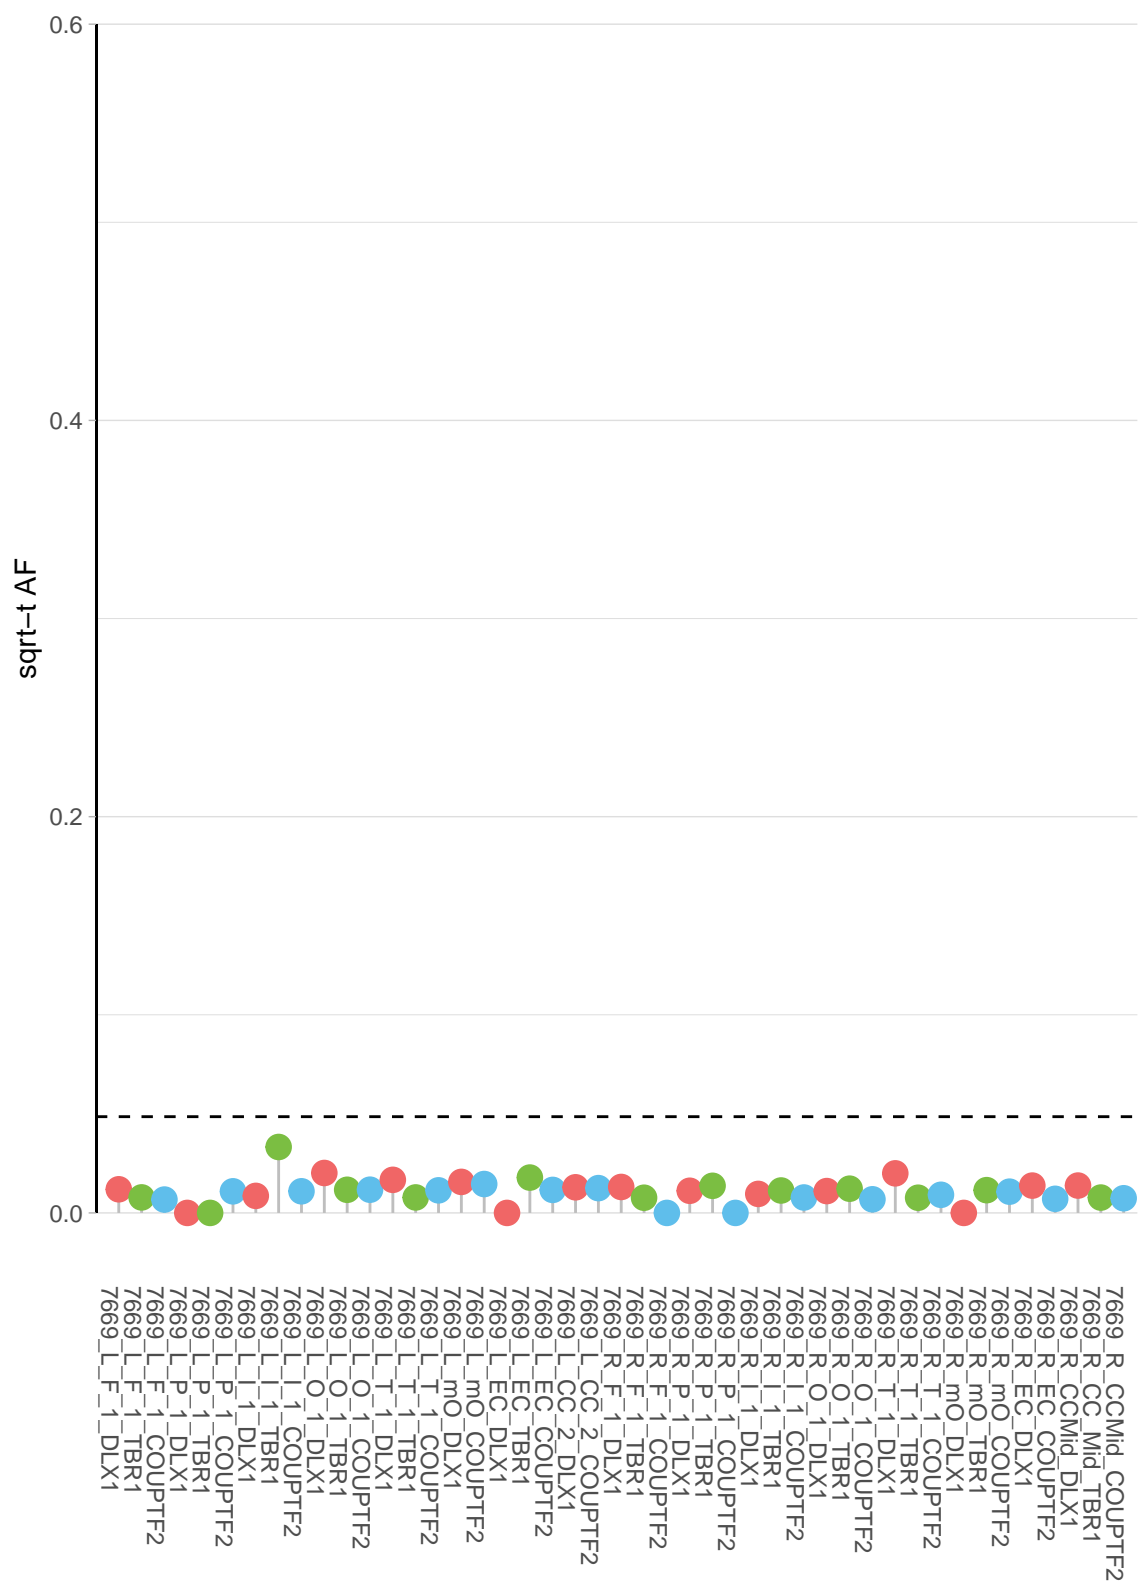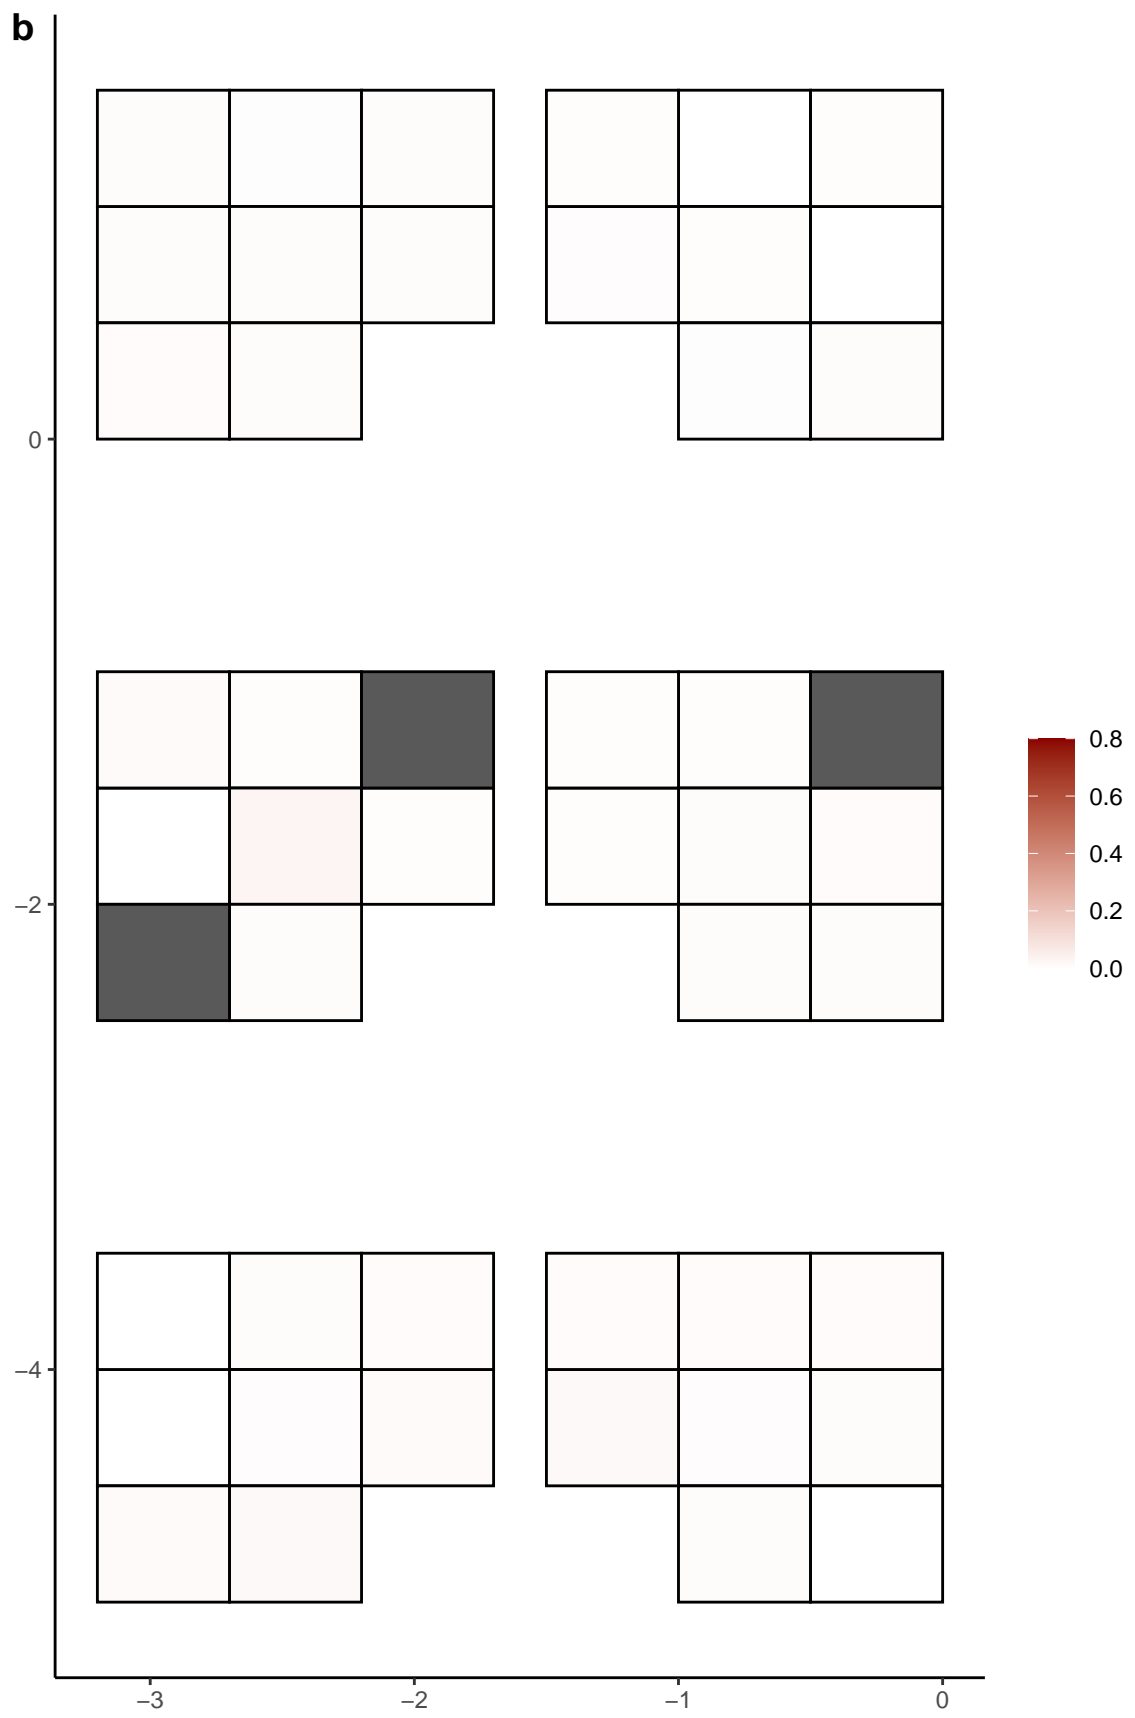

**a** ID05 4-63640827-A-T

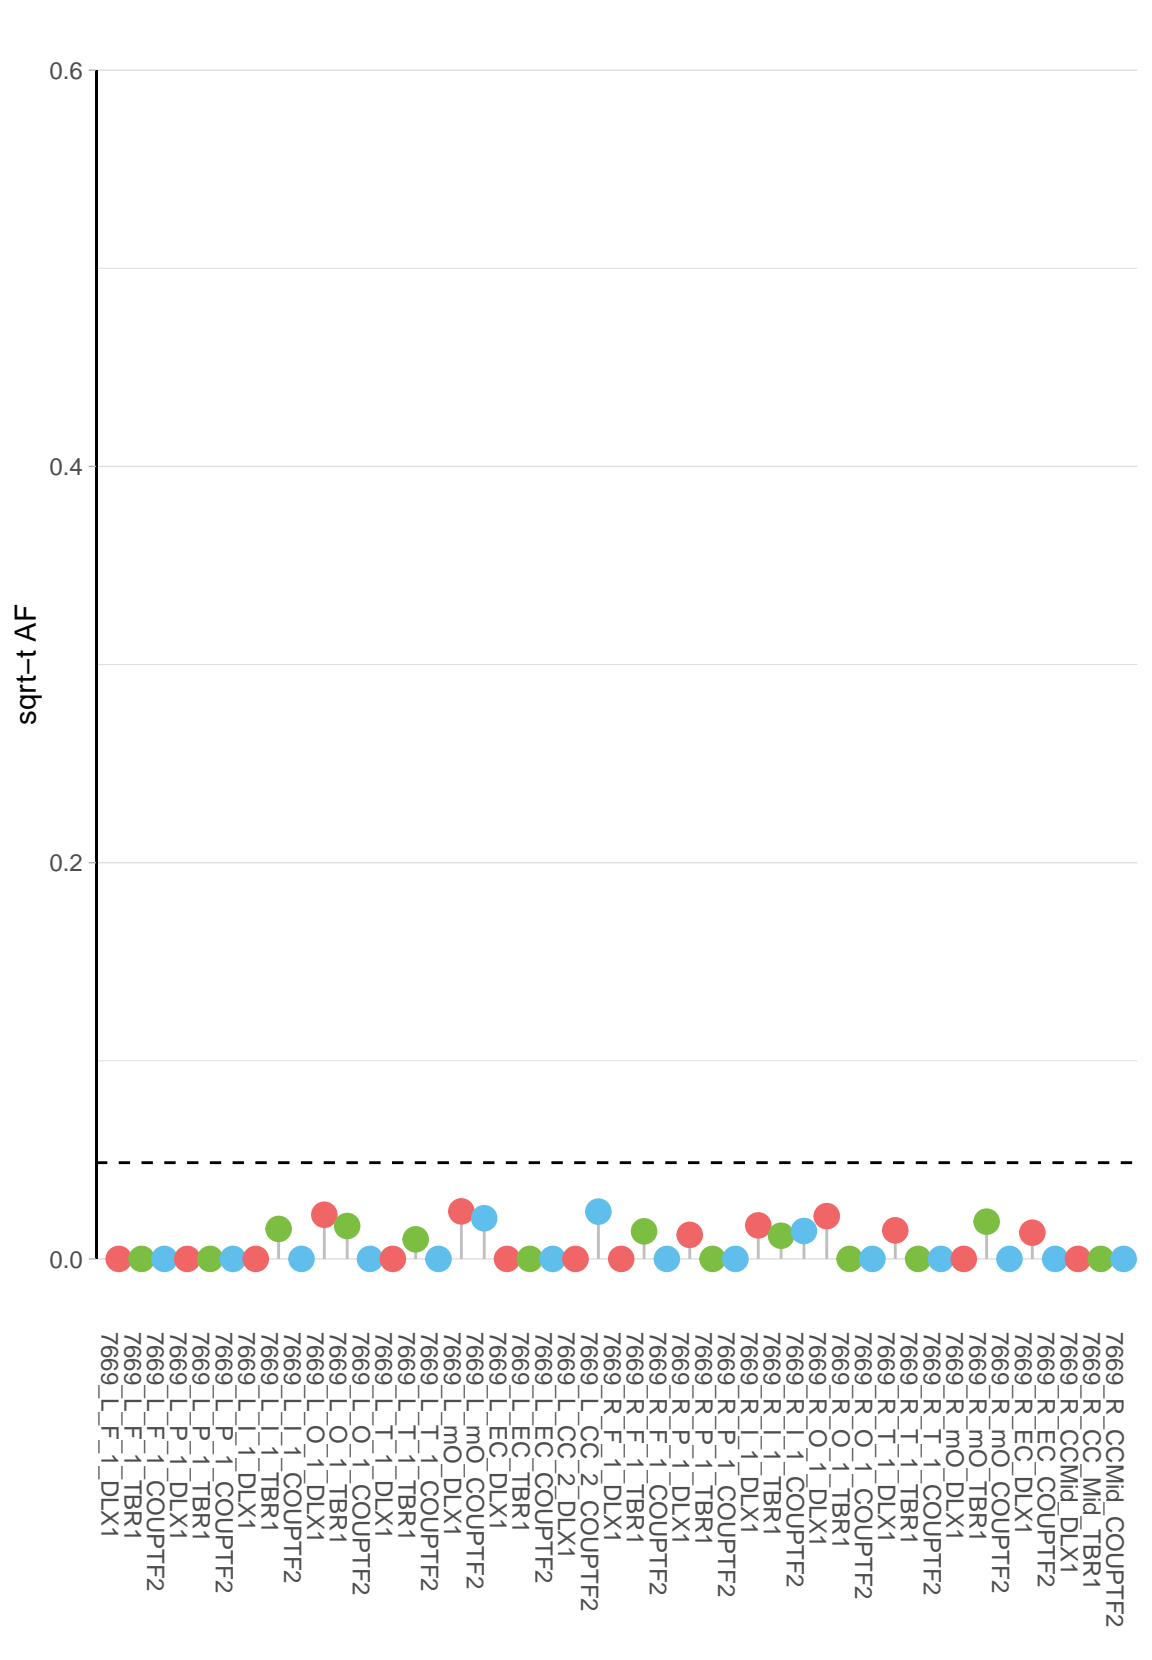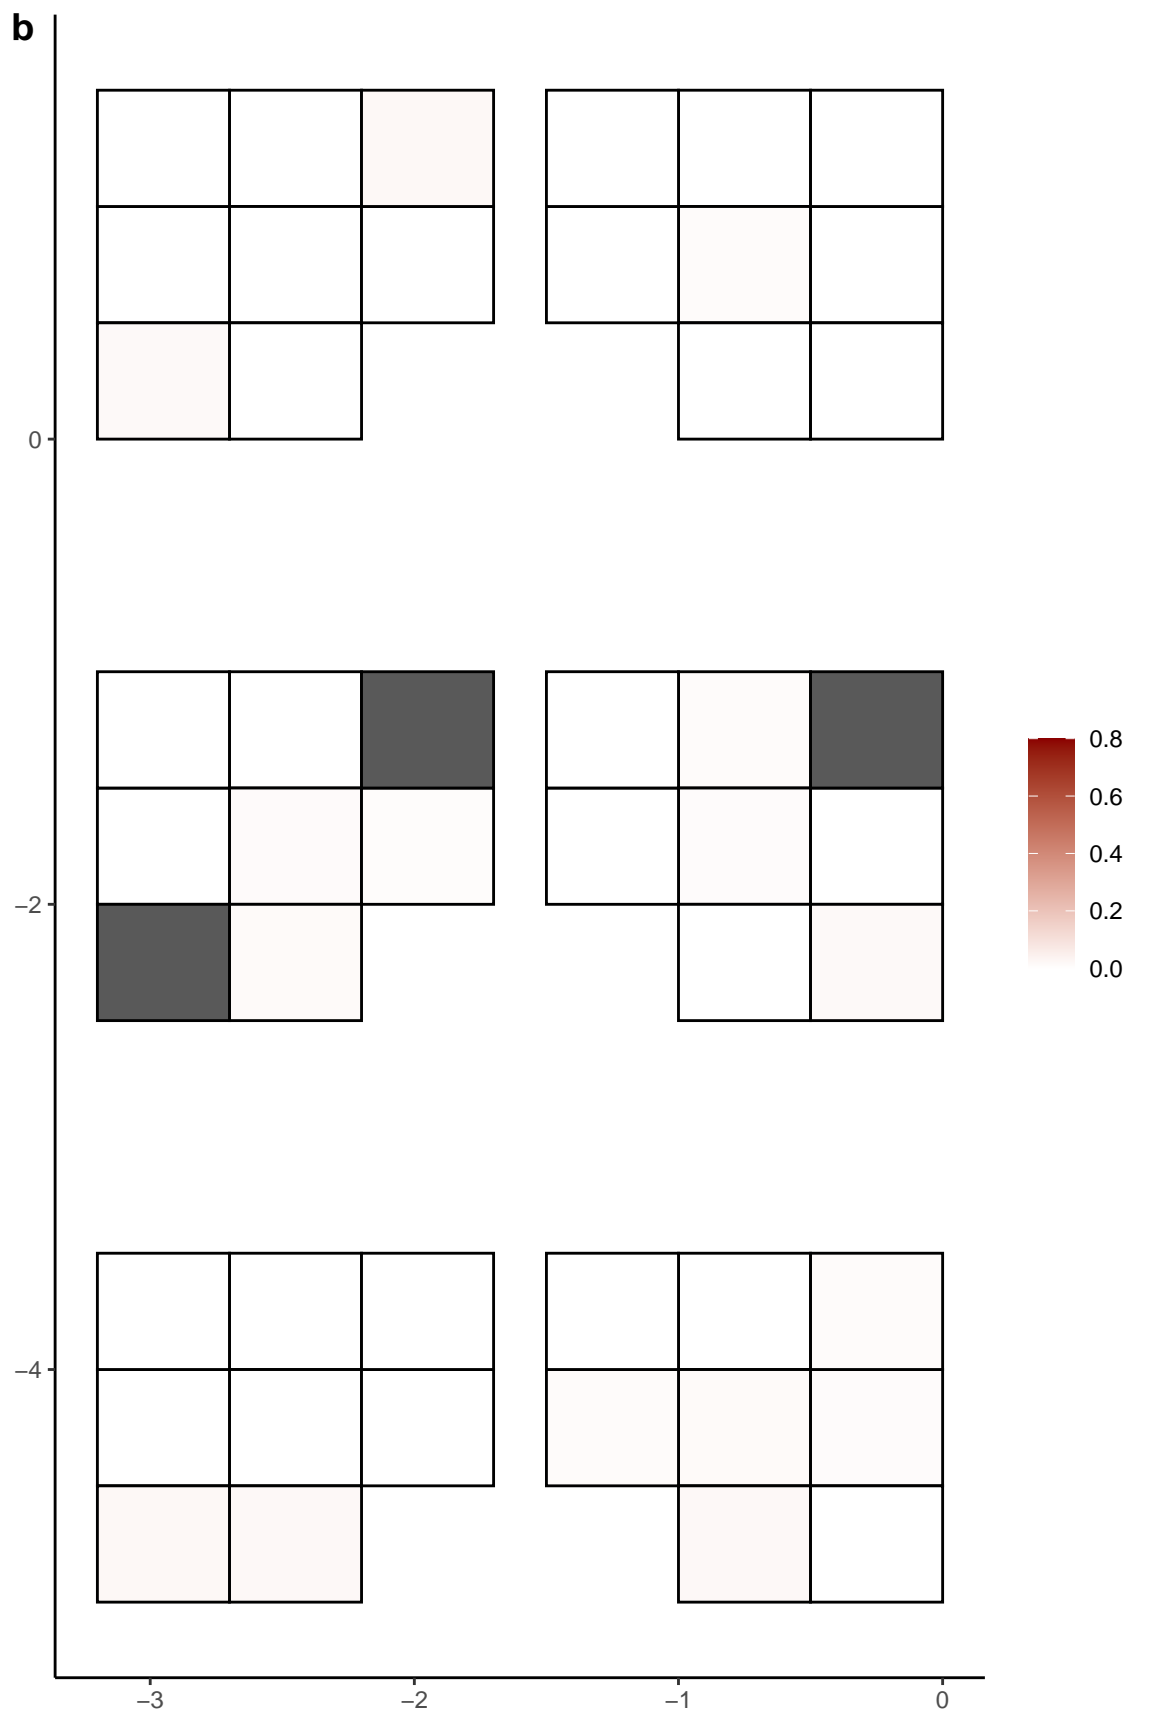



**a** ID05 4-66798015-A-T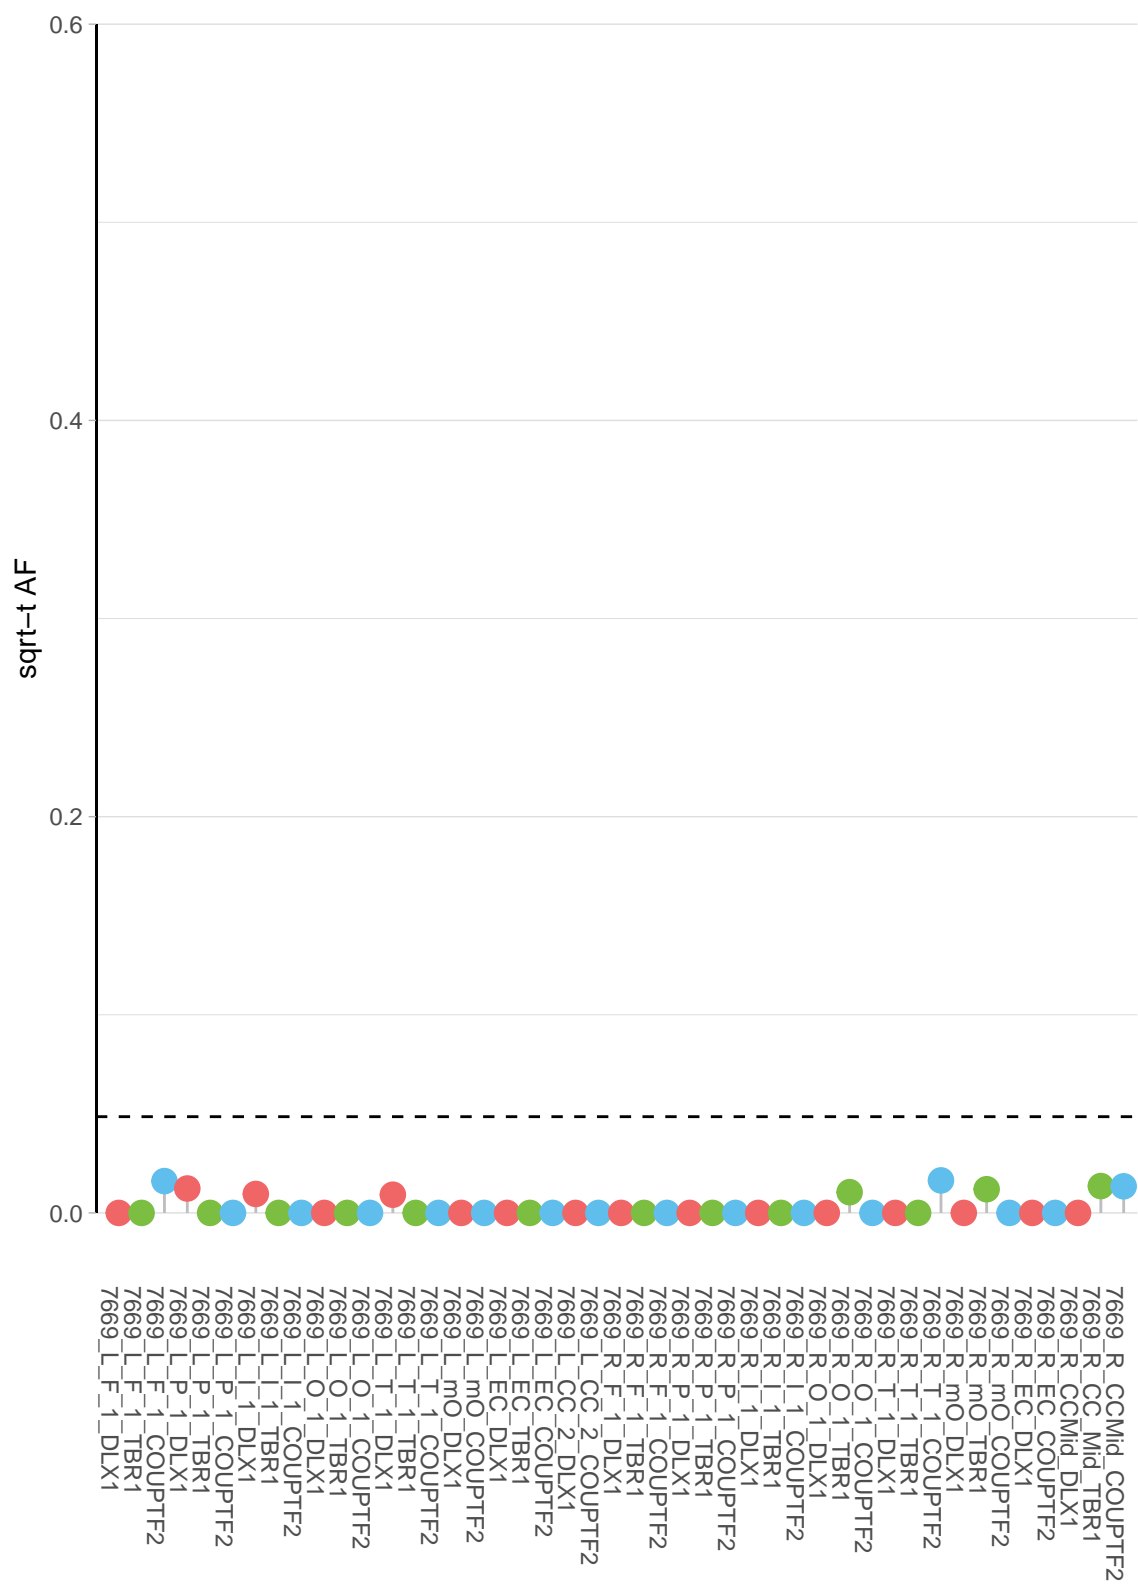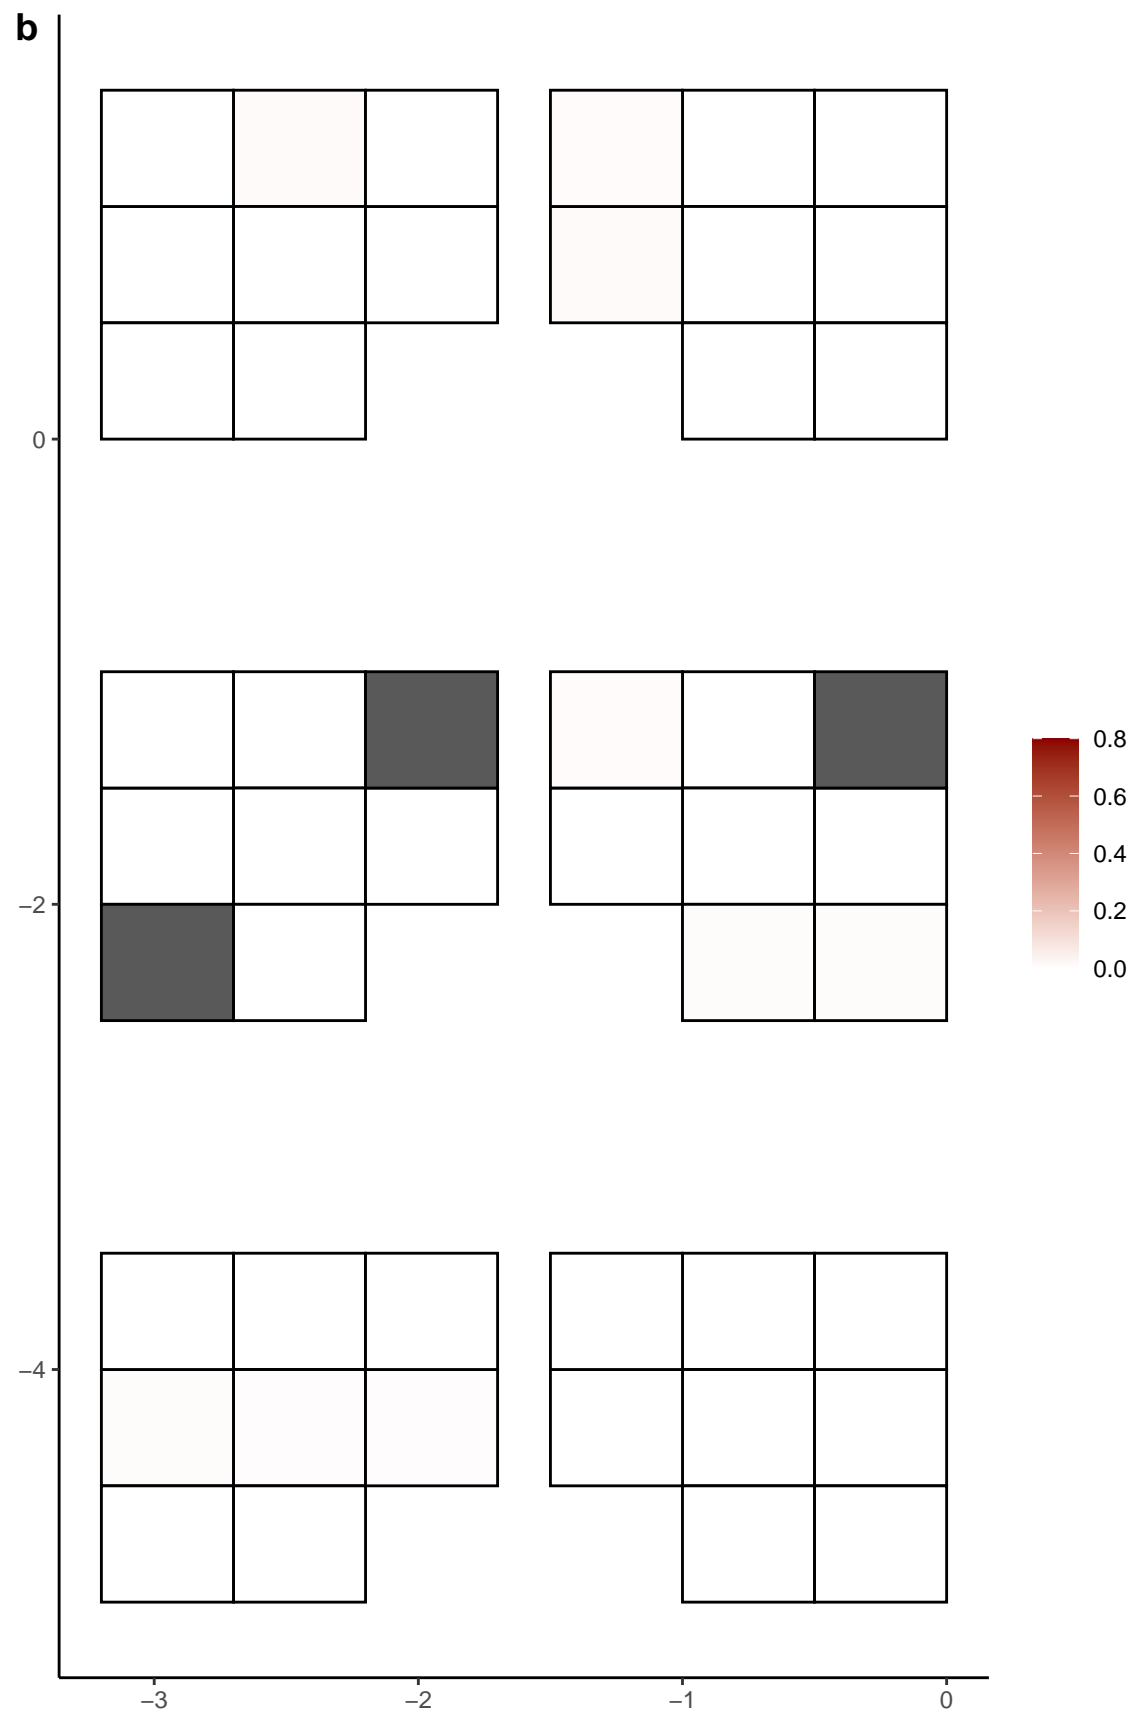

**a** ID05 4-67957618-C-T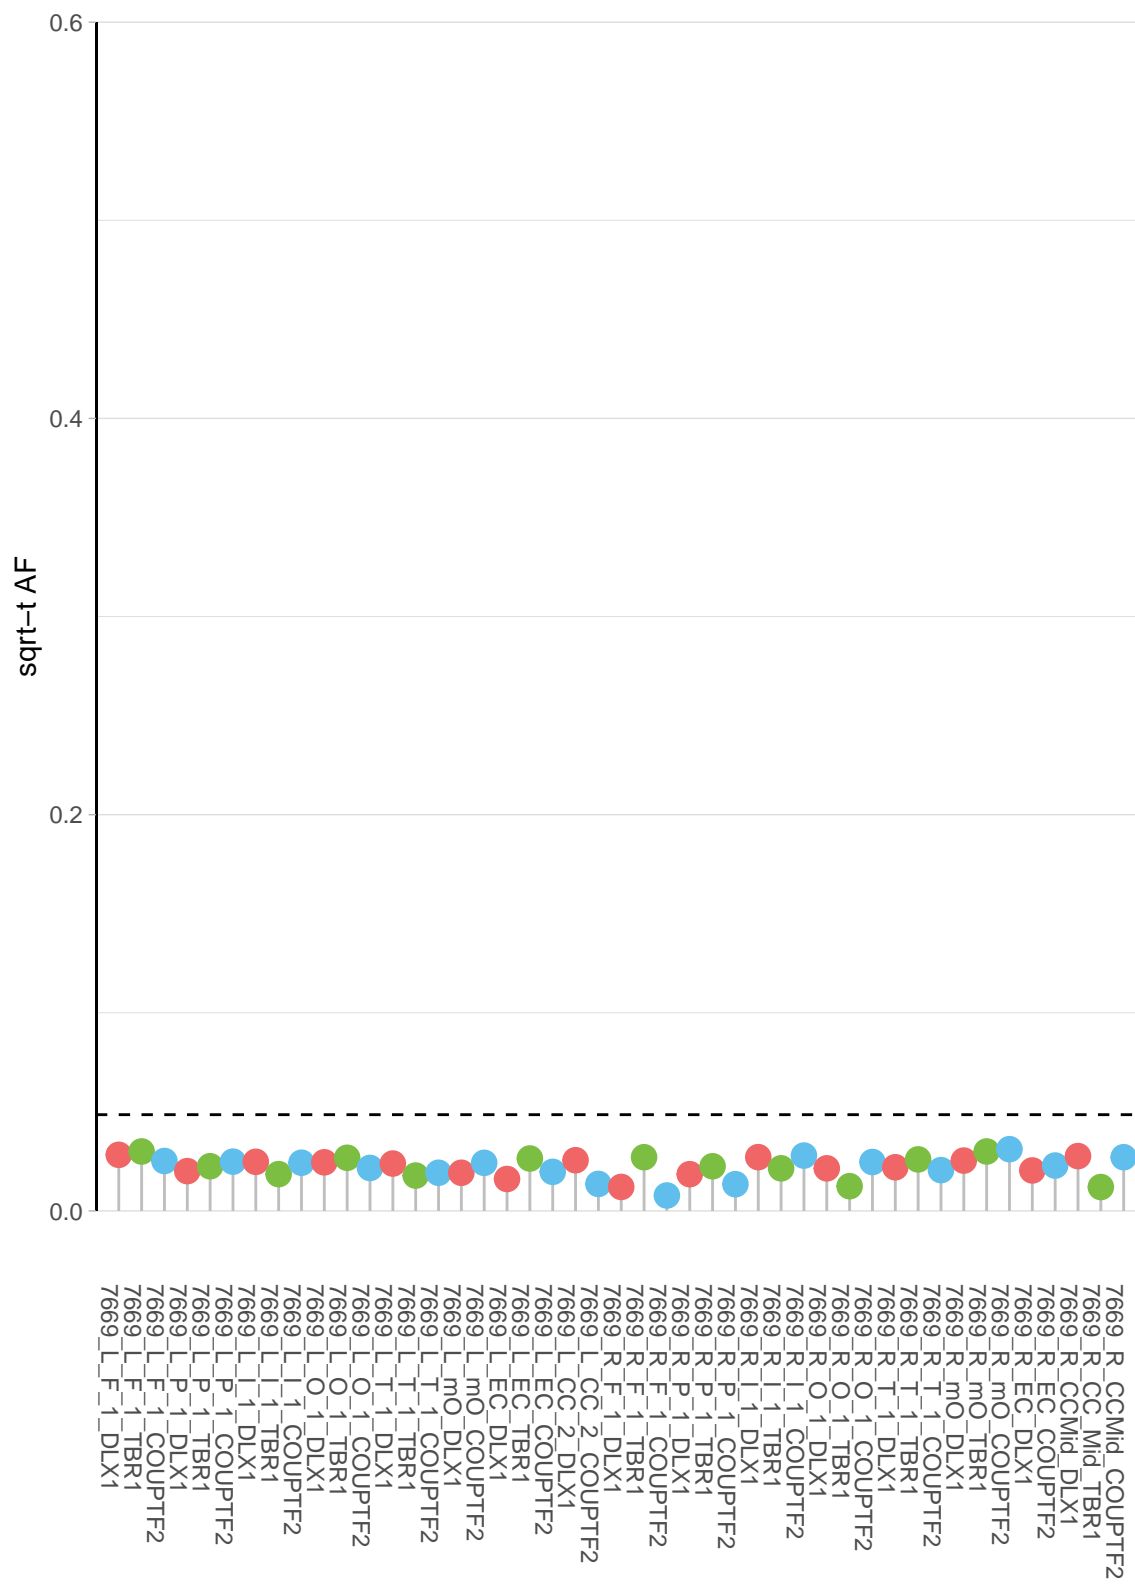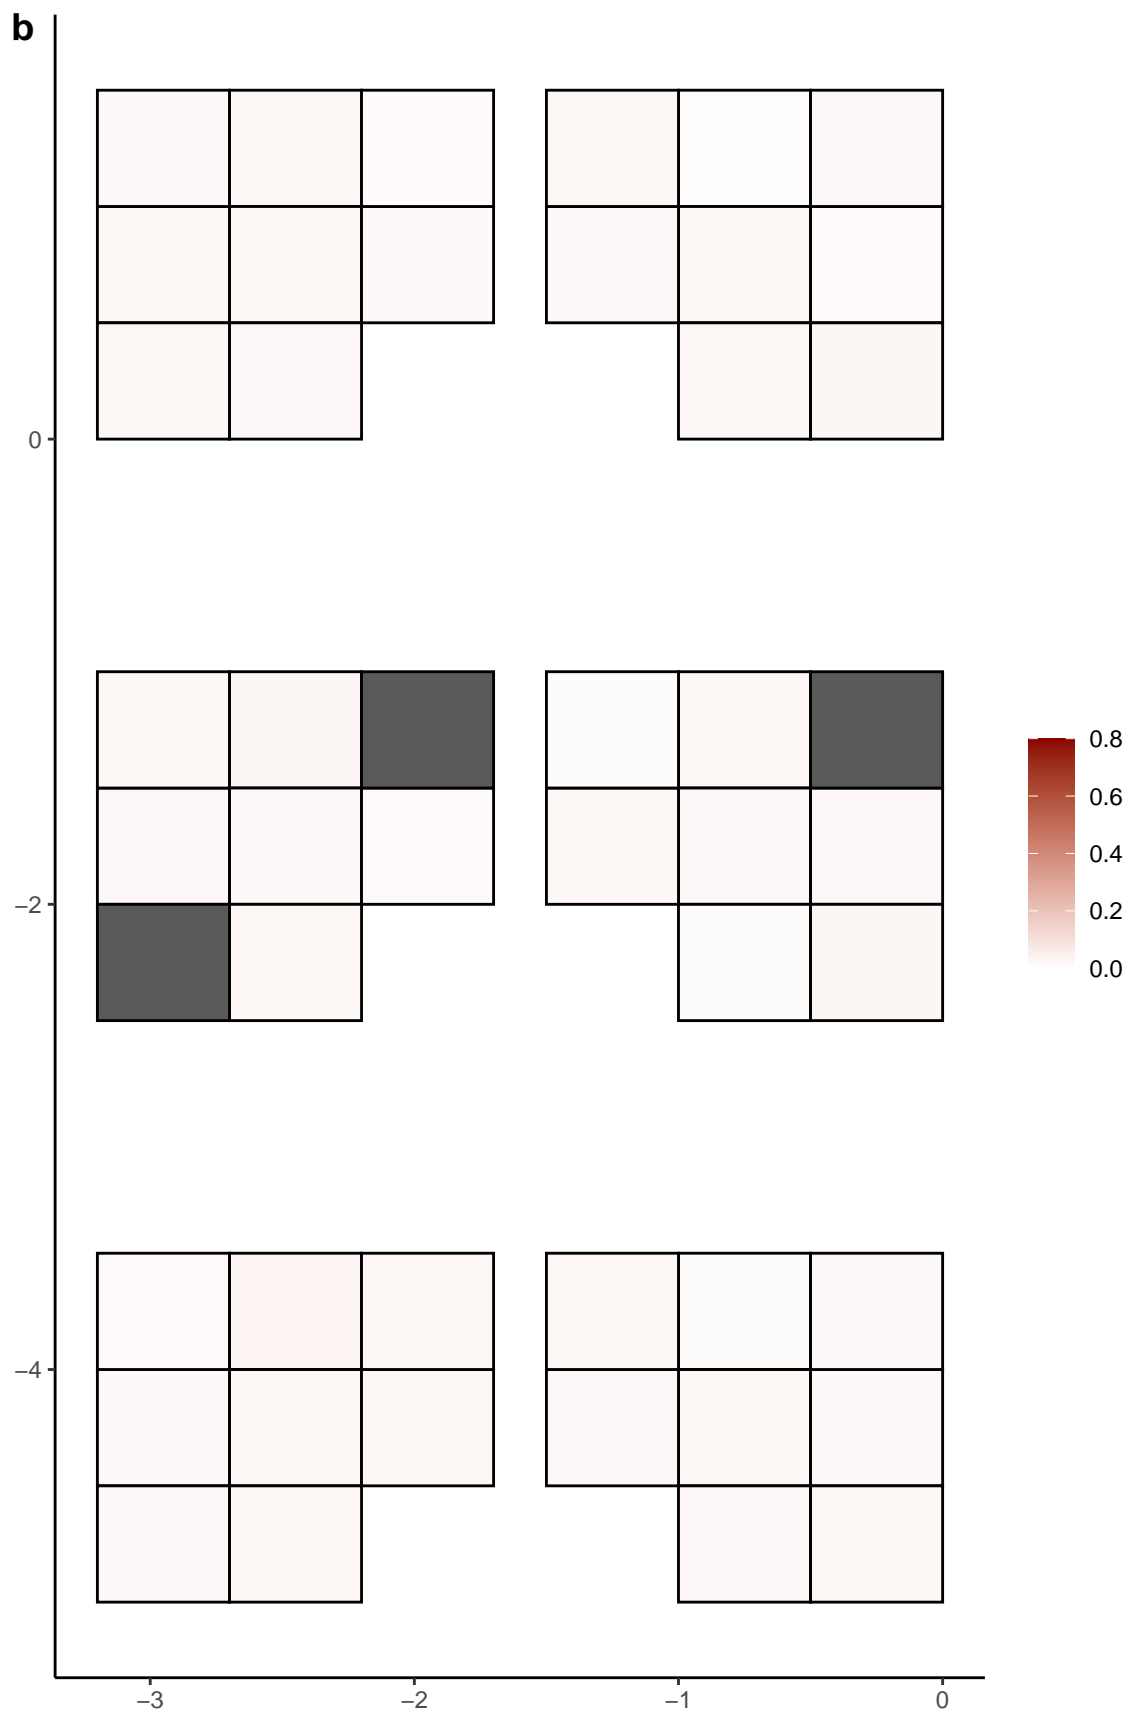



**a** ID05 4-72321186-G-A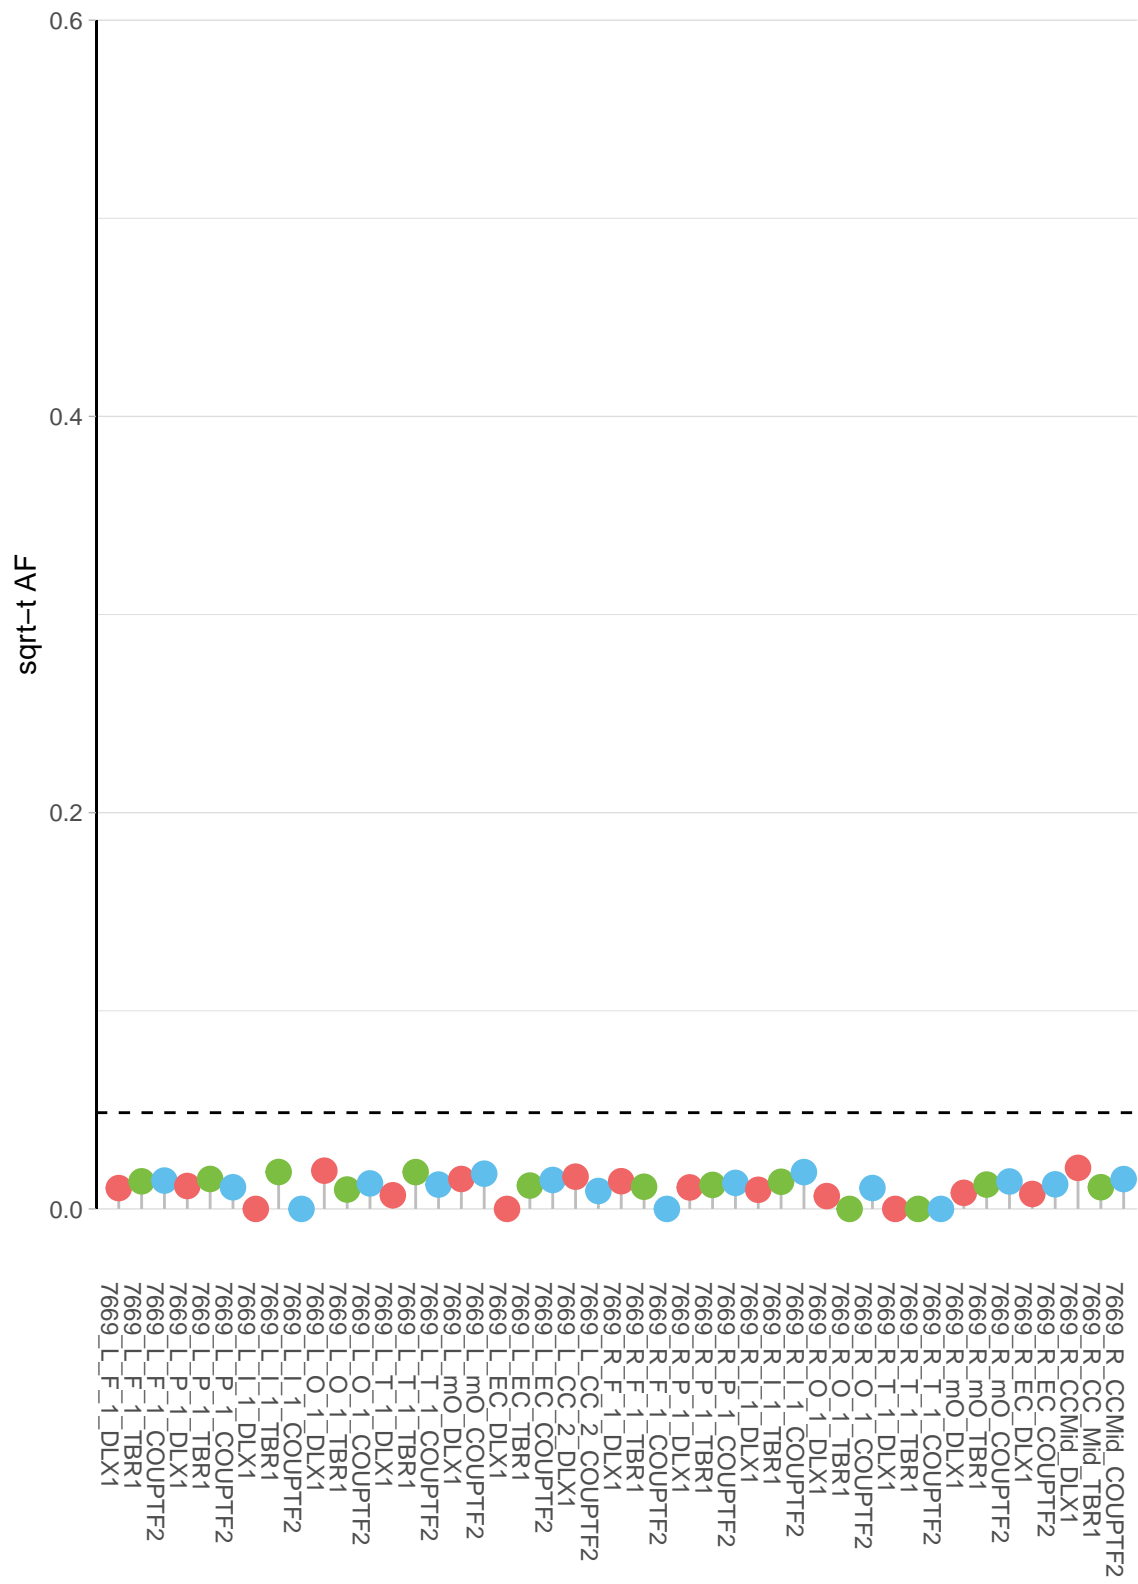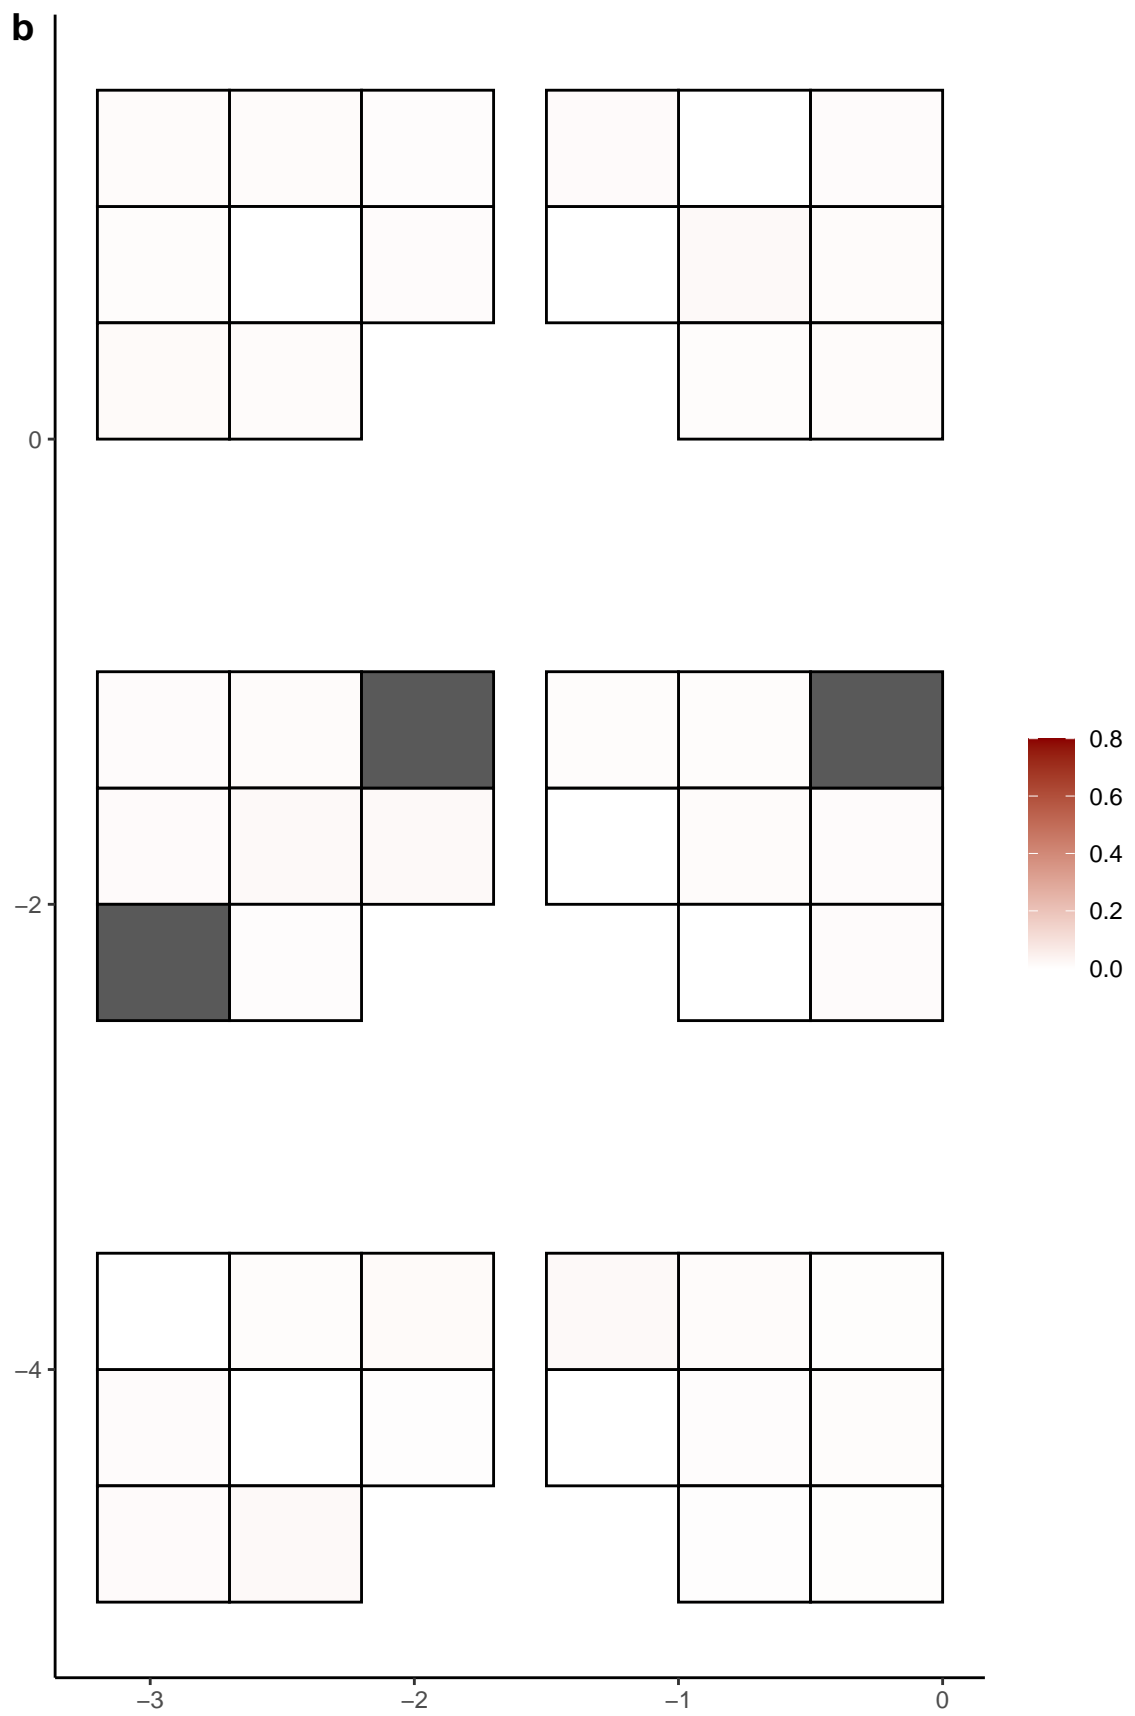





**a** ID05 4-74784894-G-A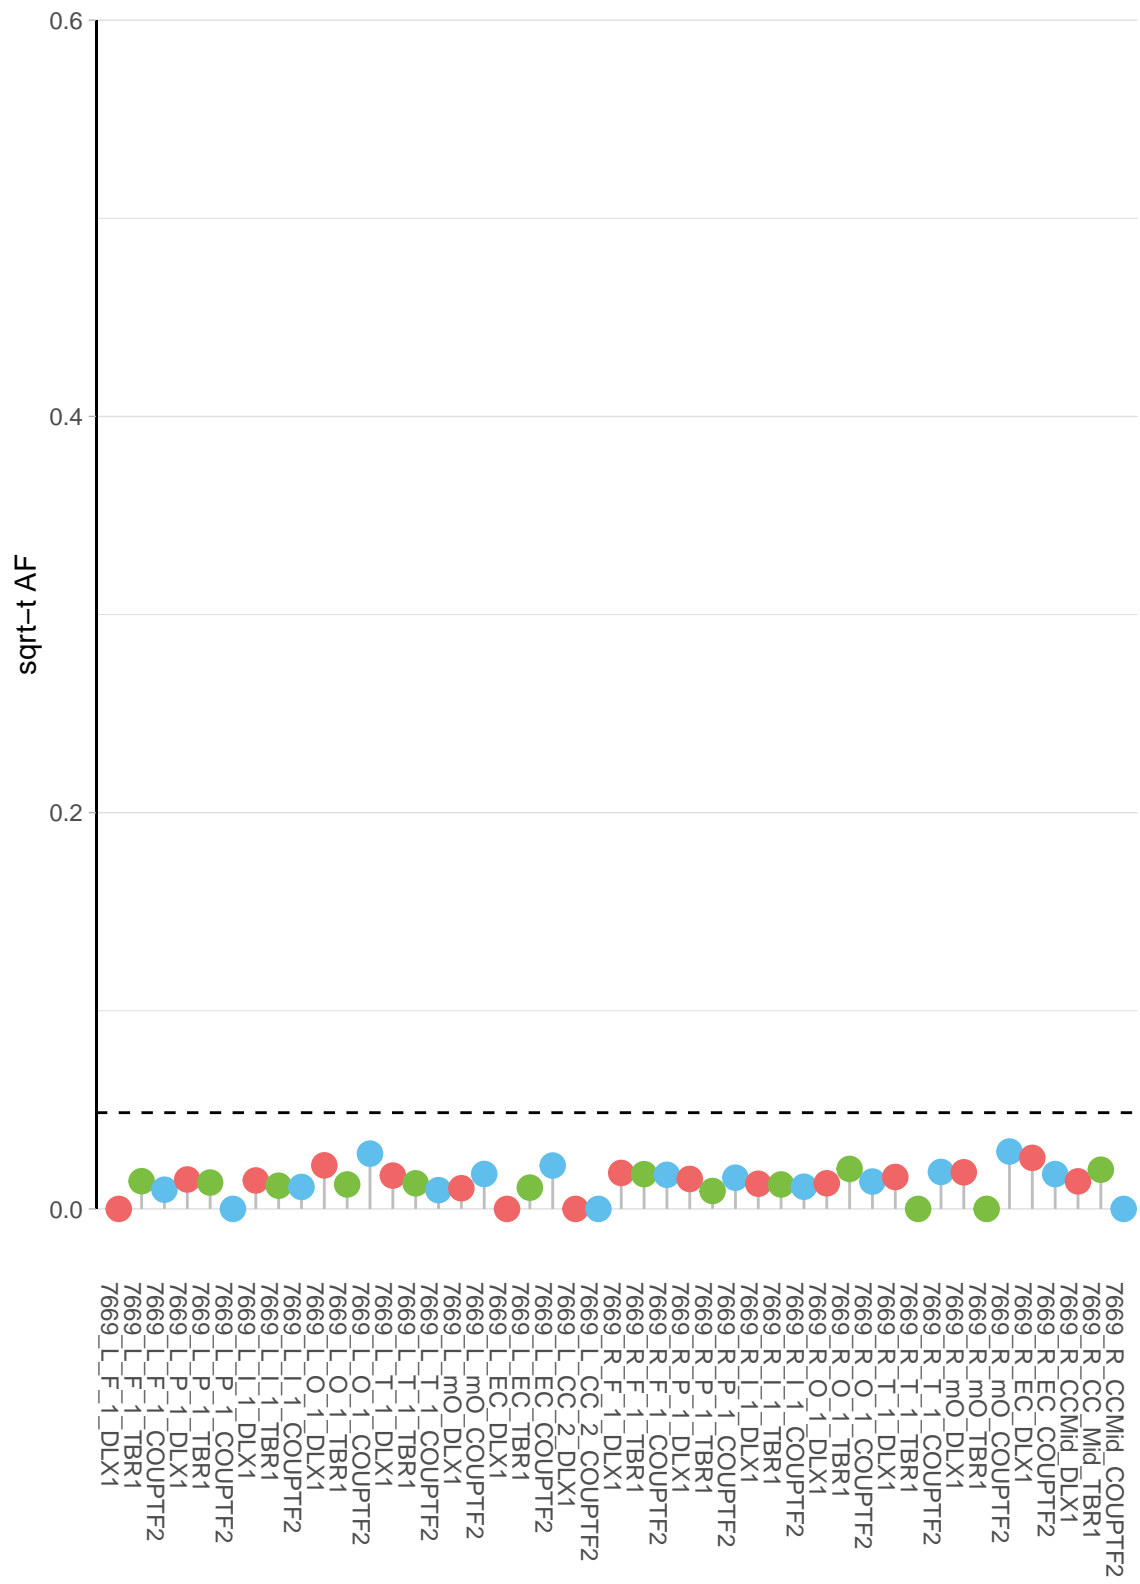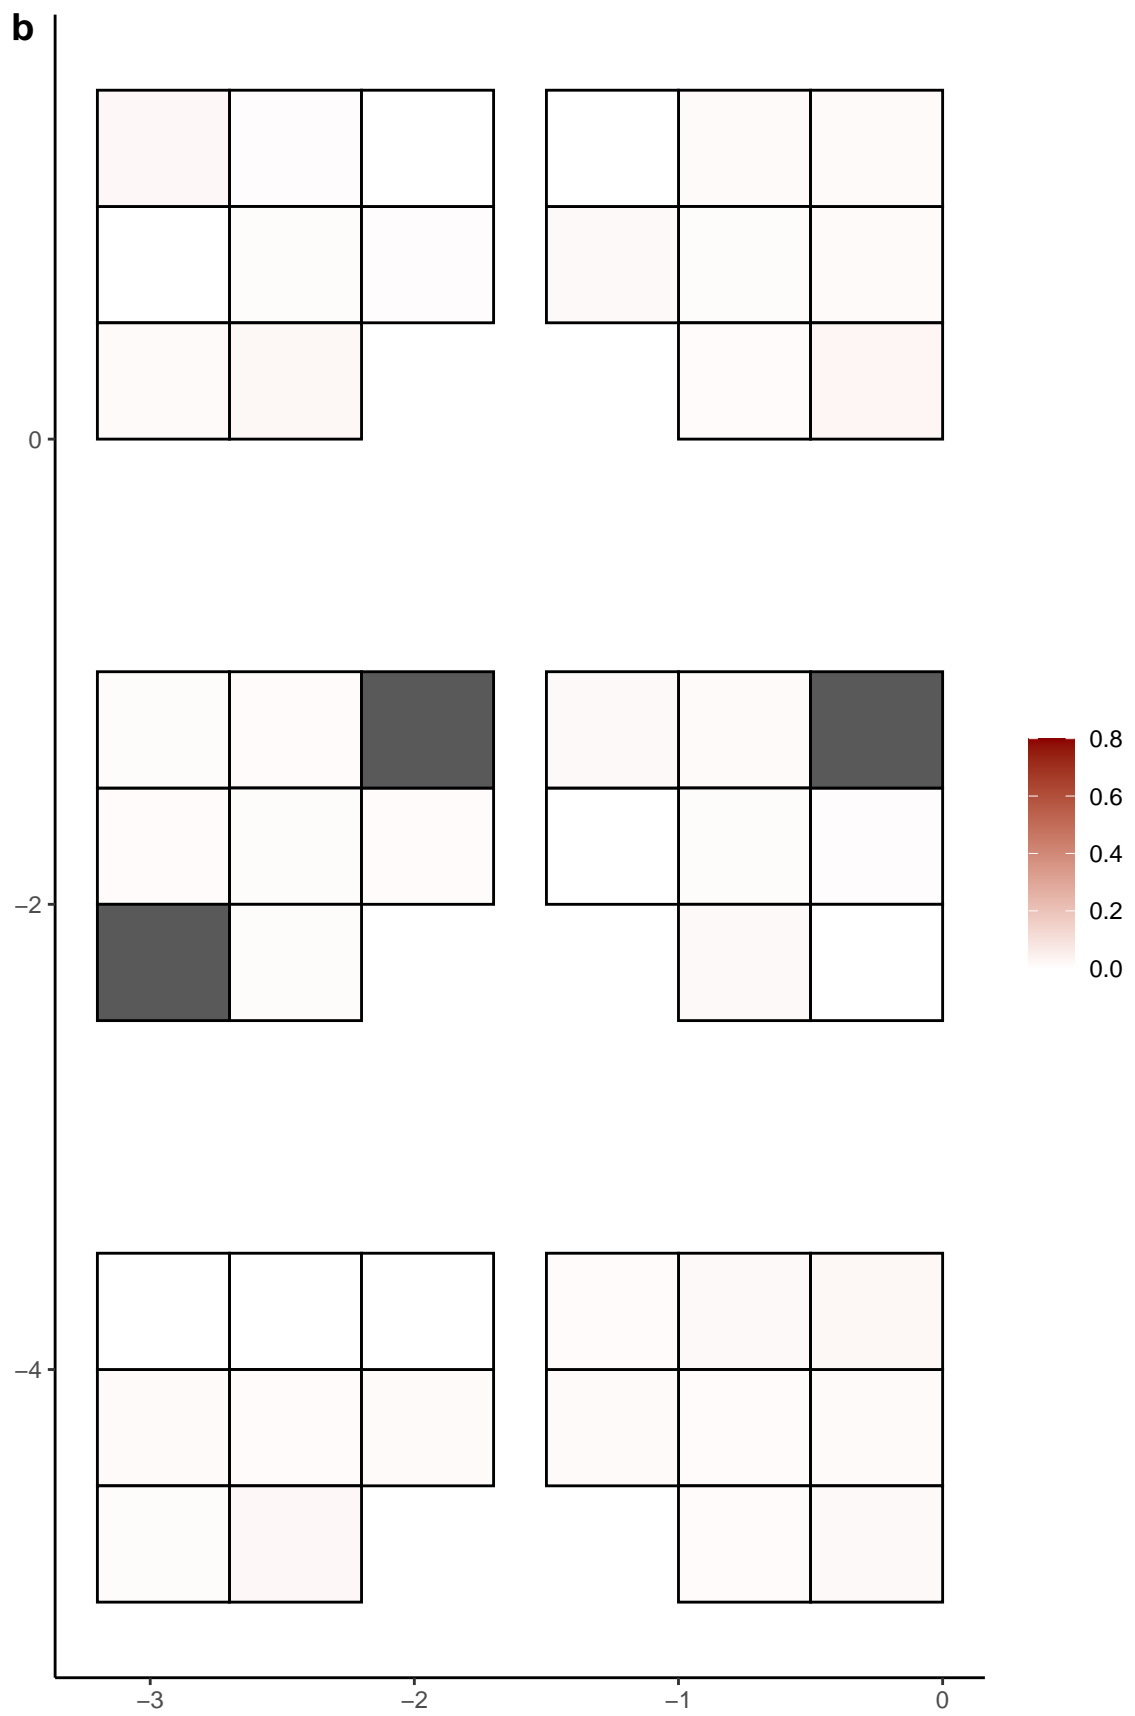

**a** ID05 4-85164675-G-A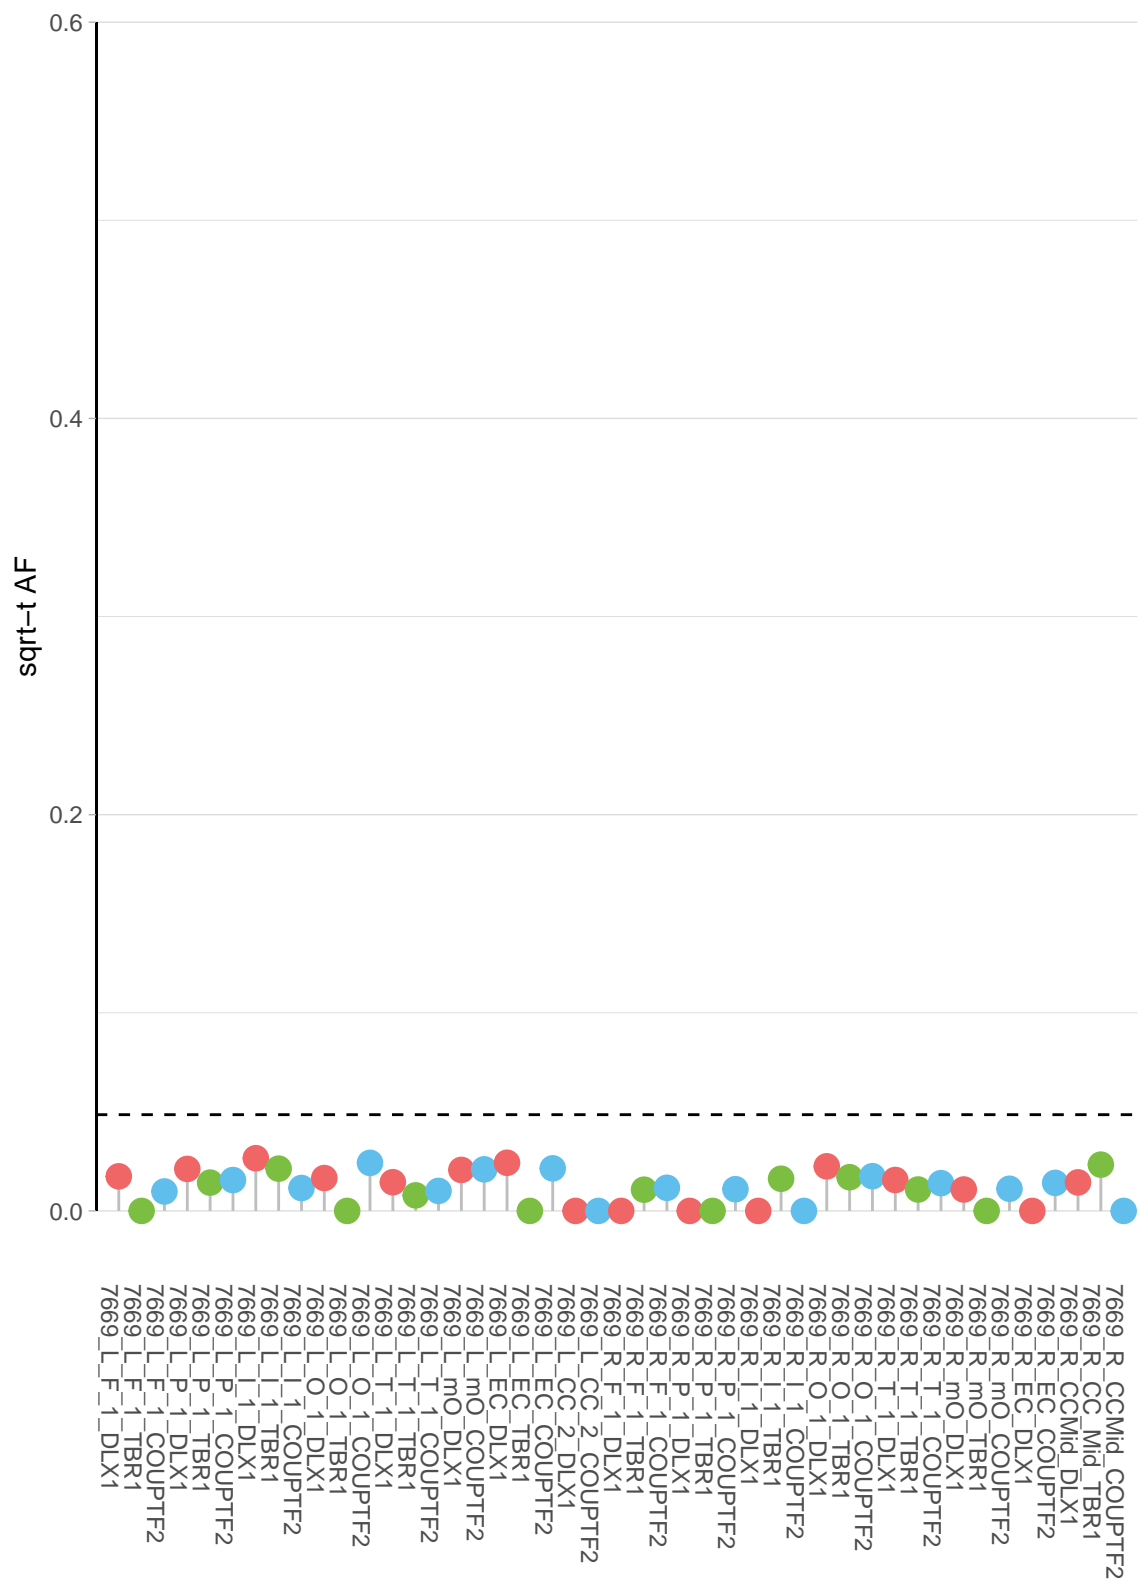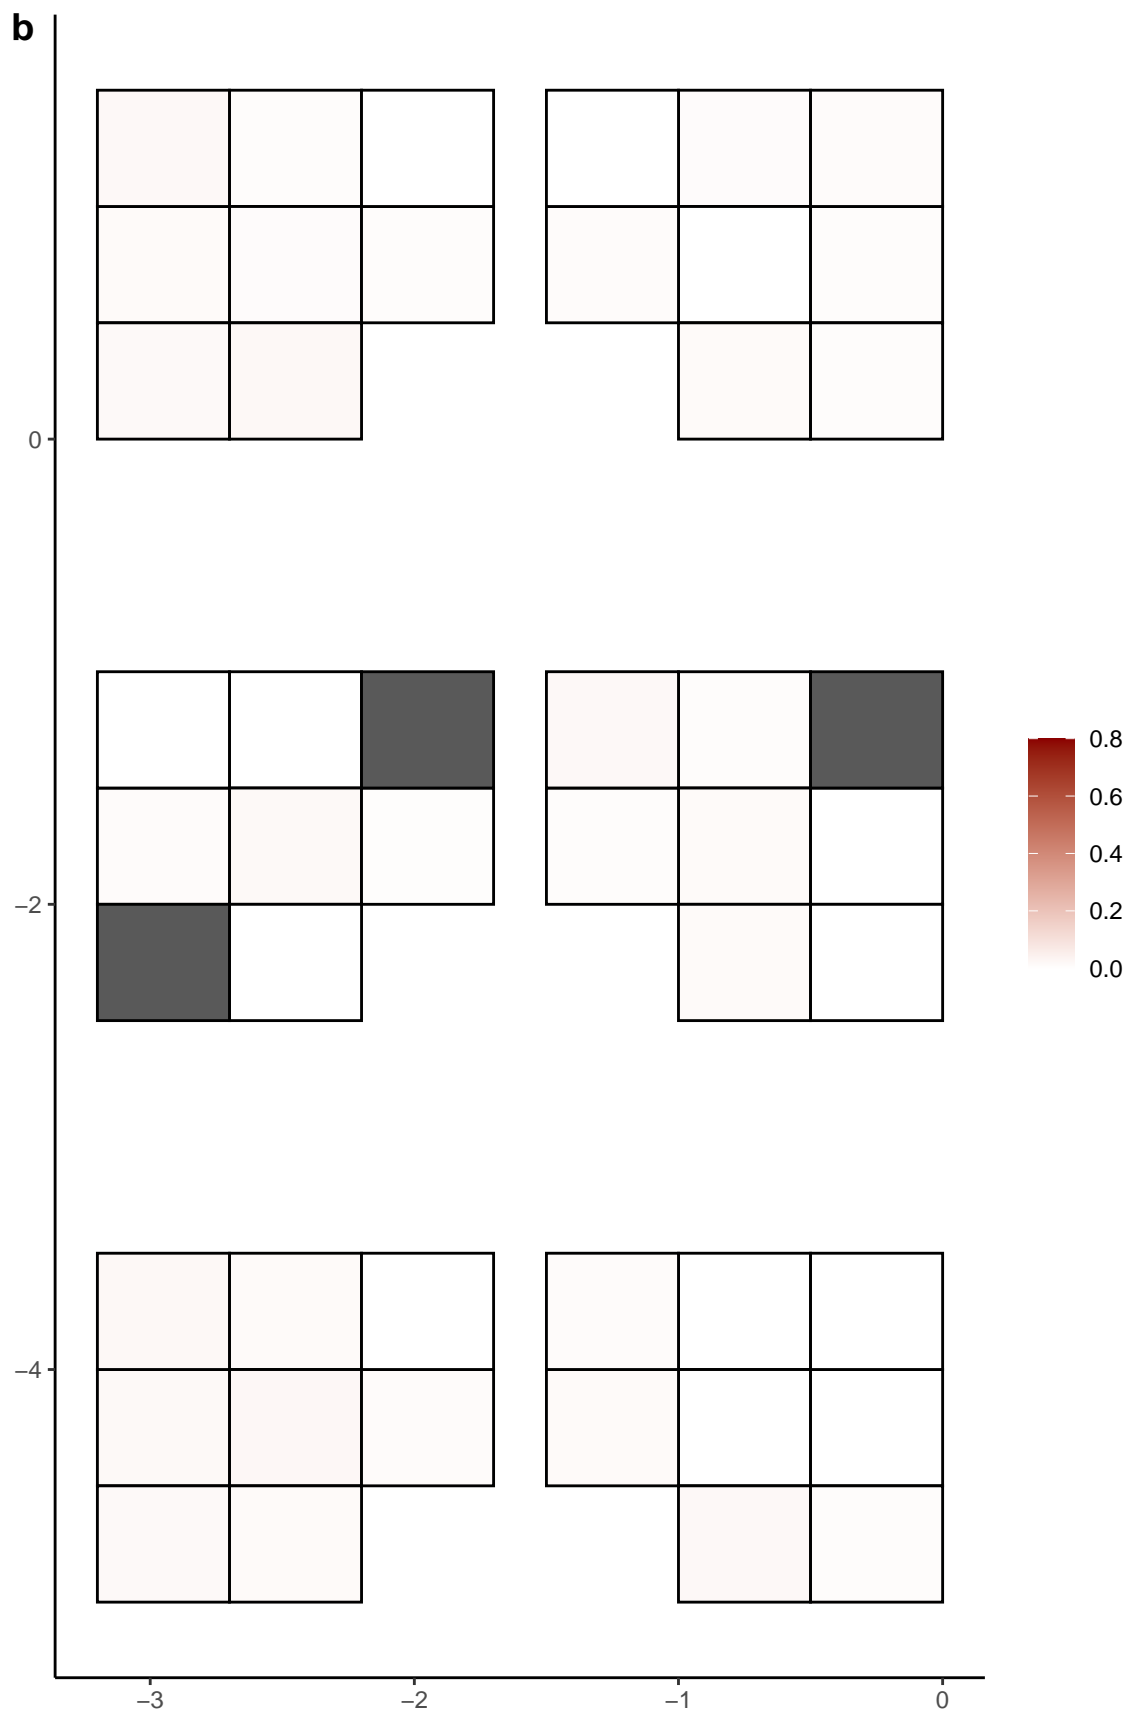









**a** ID05 4-93137328-T-A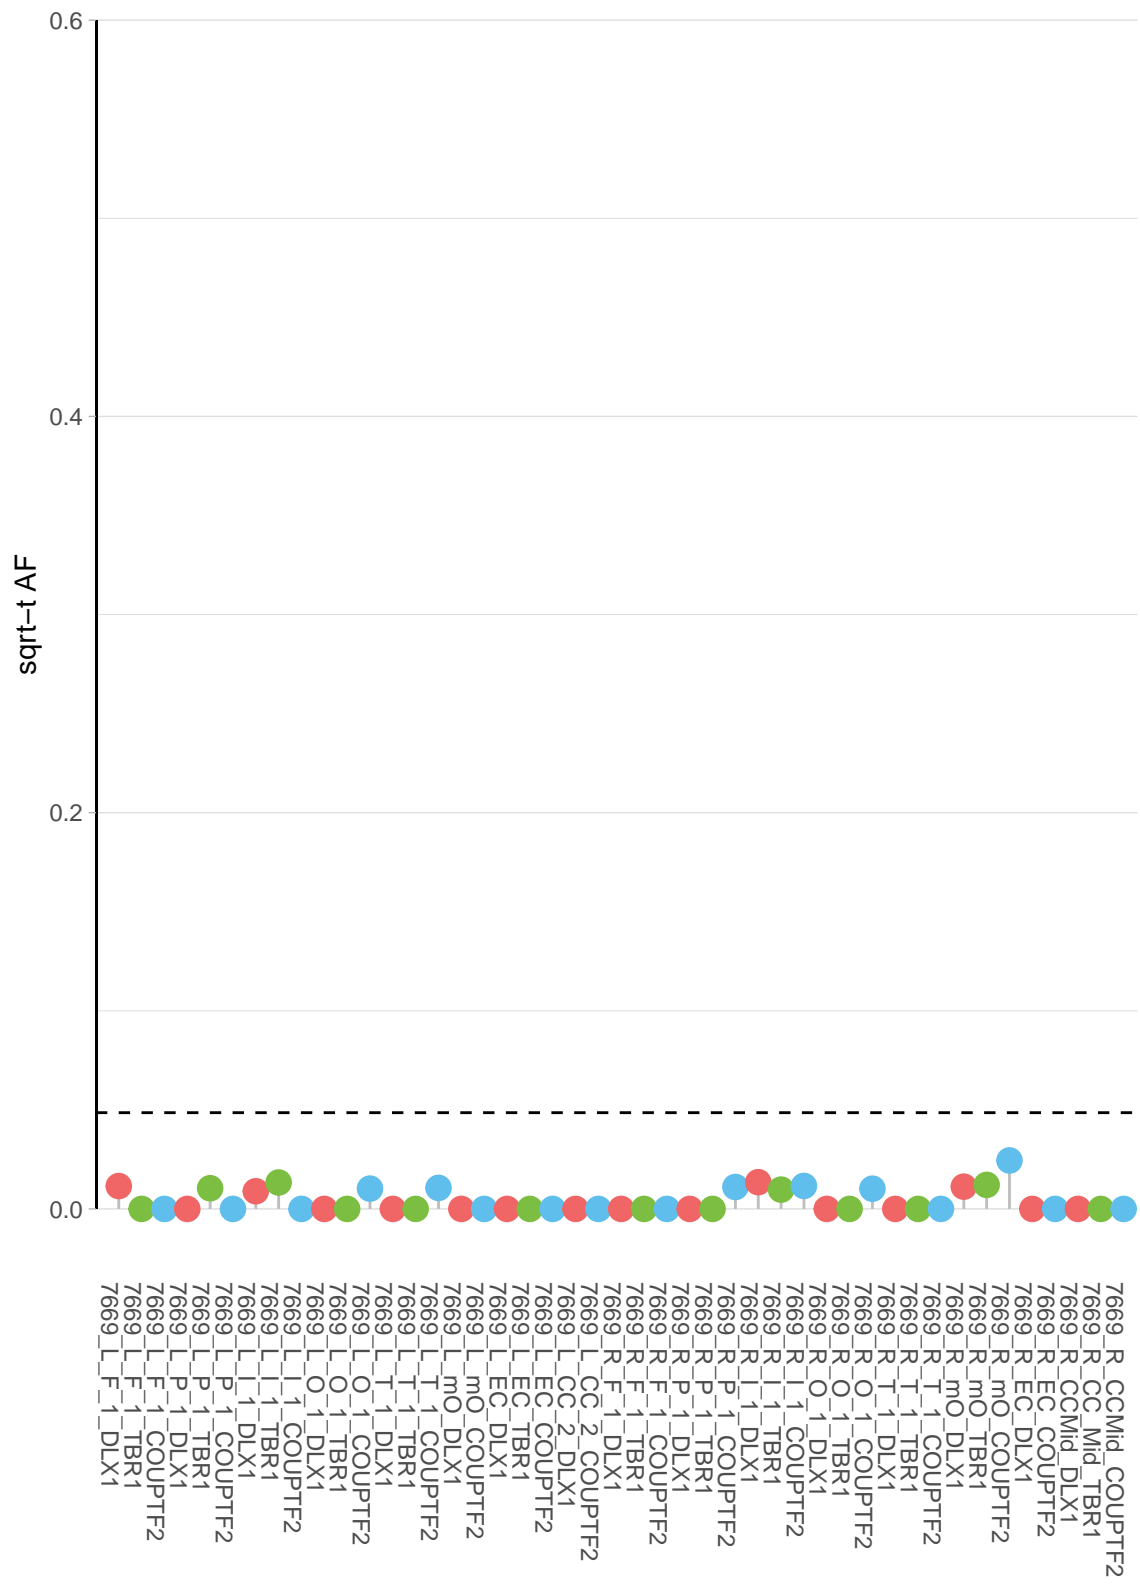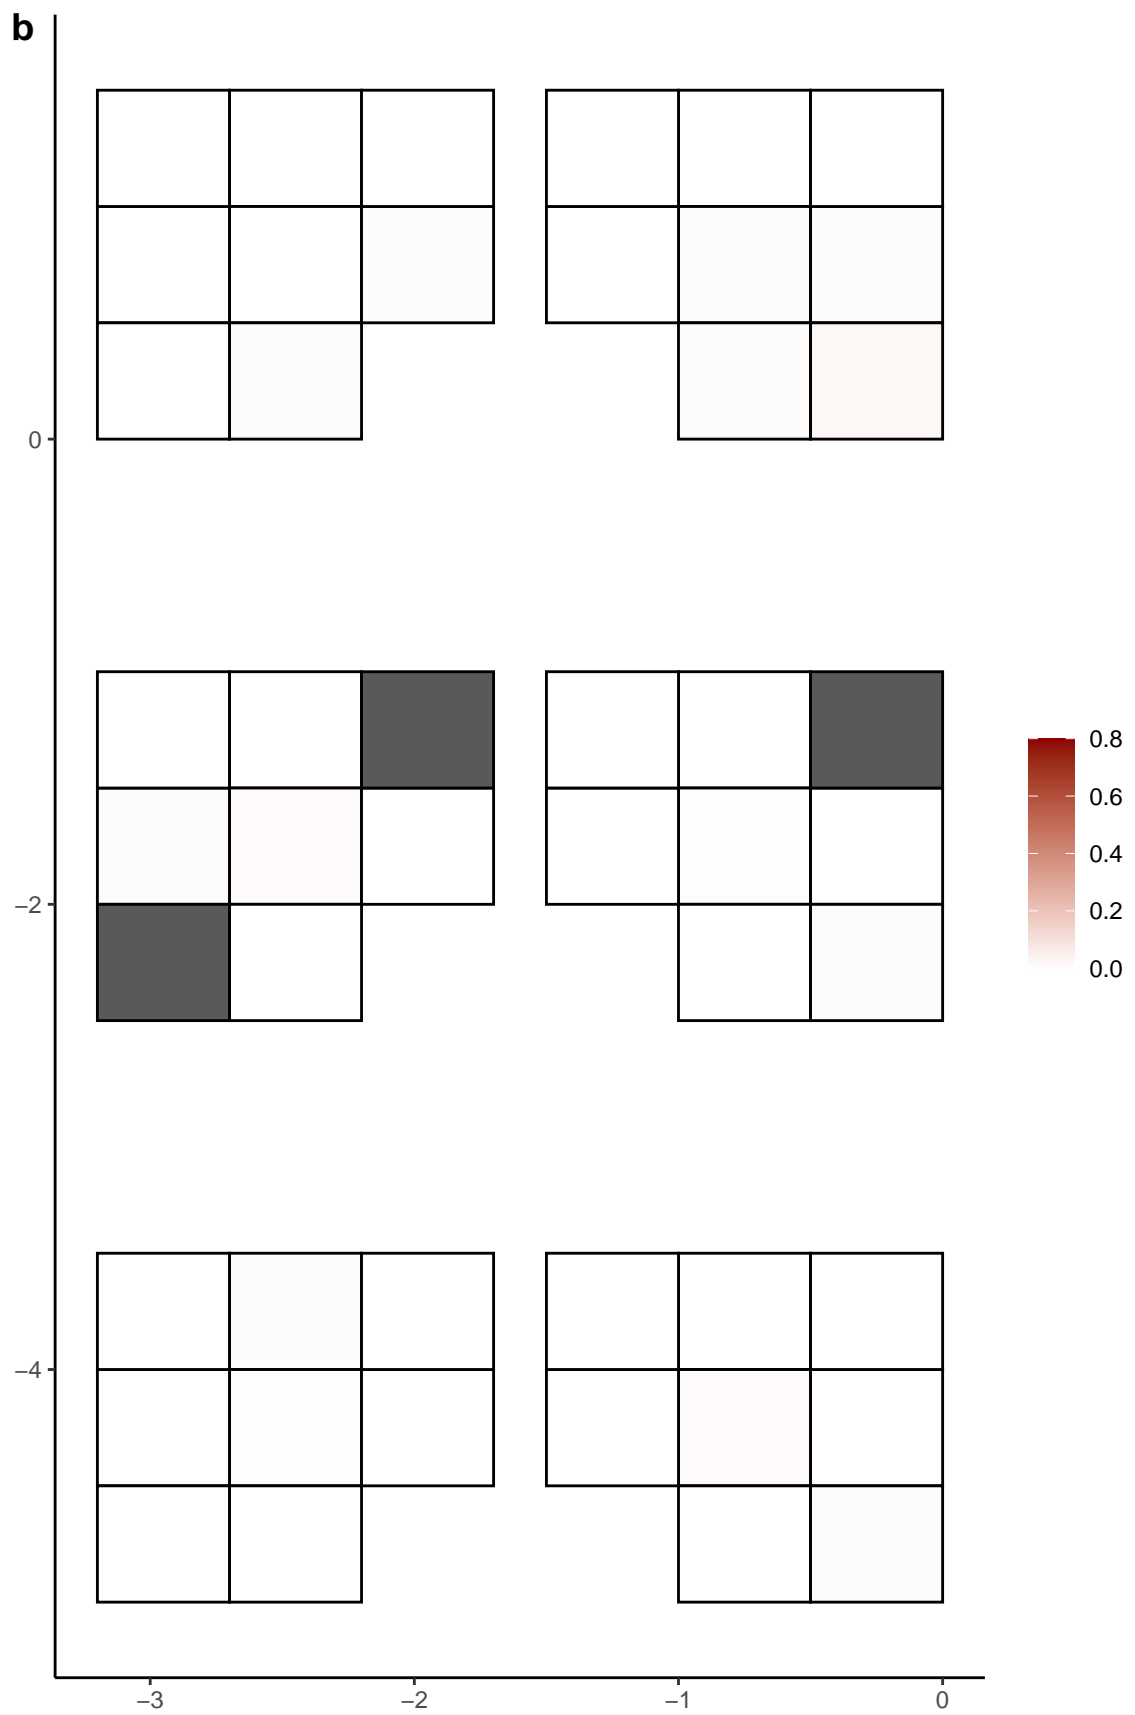

**a** ID05 4-94277150-C-T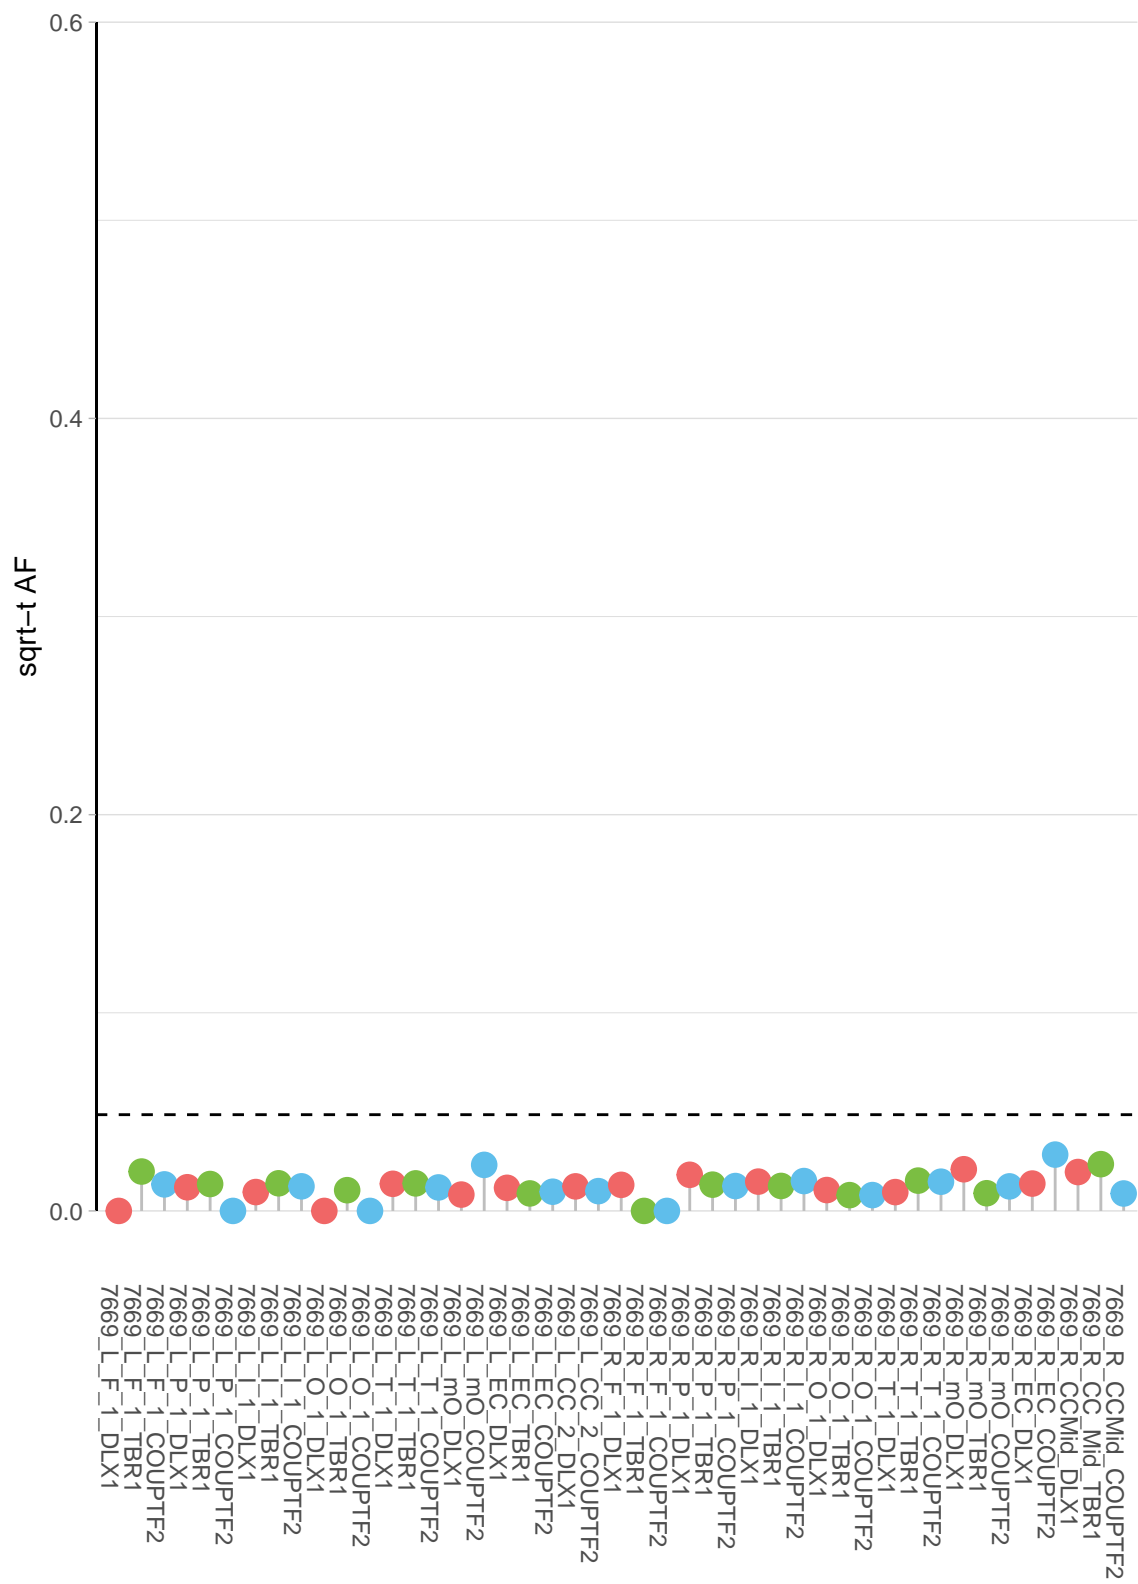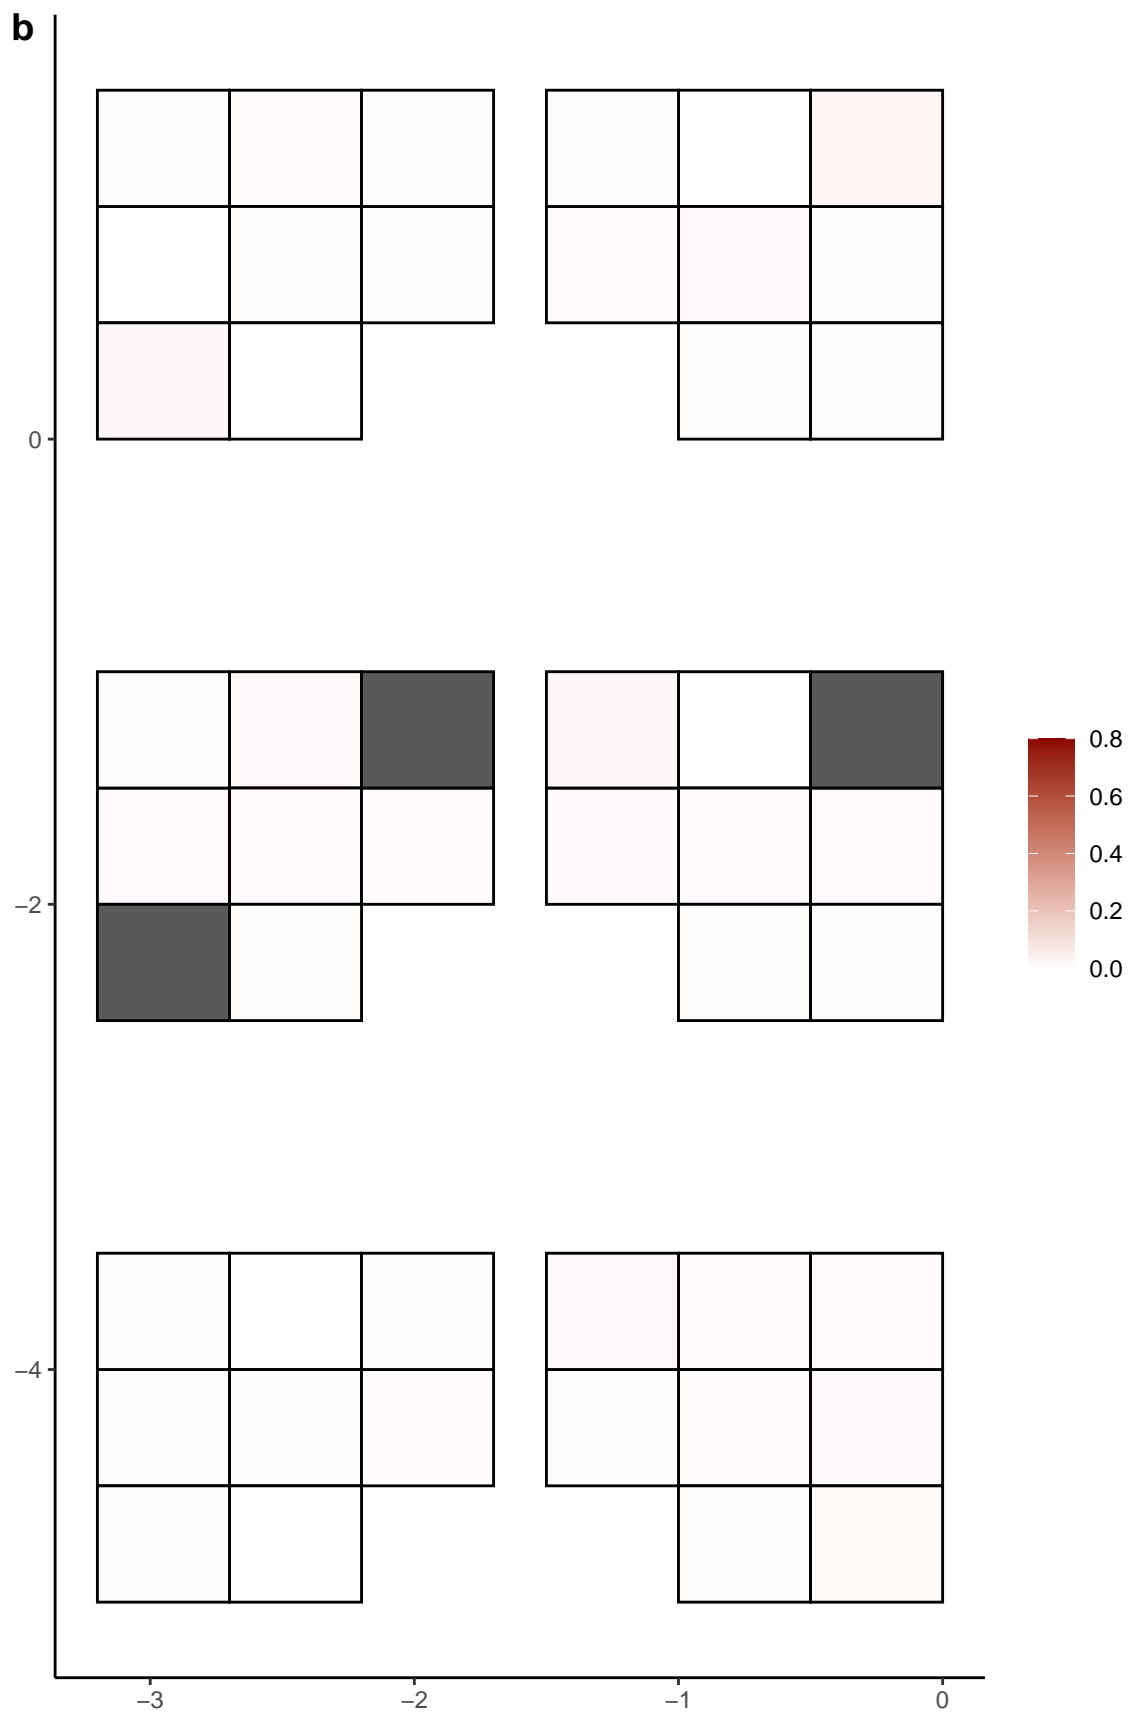

**a** ID05 4-96601800-C-T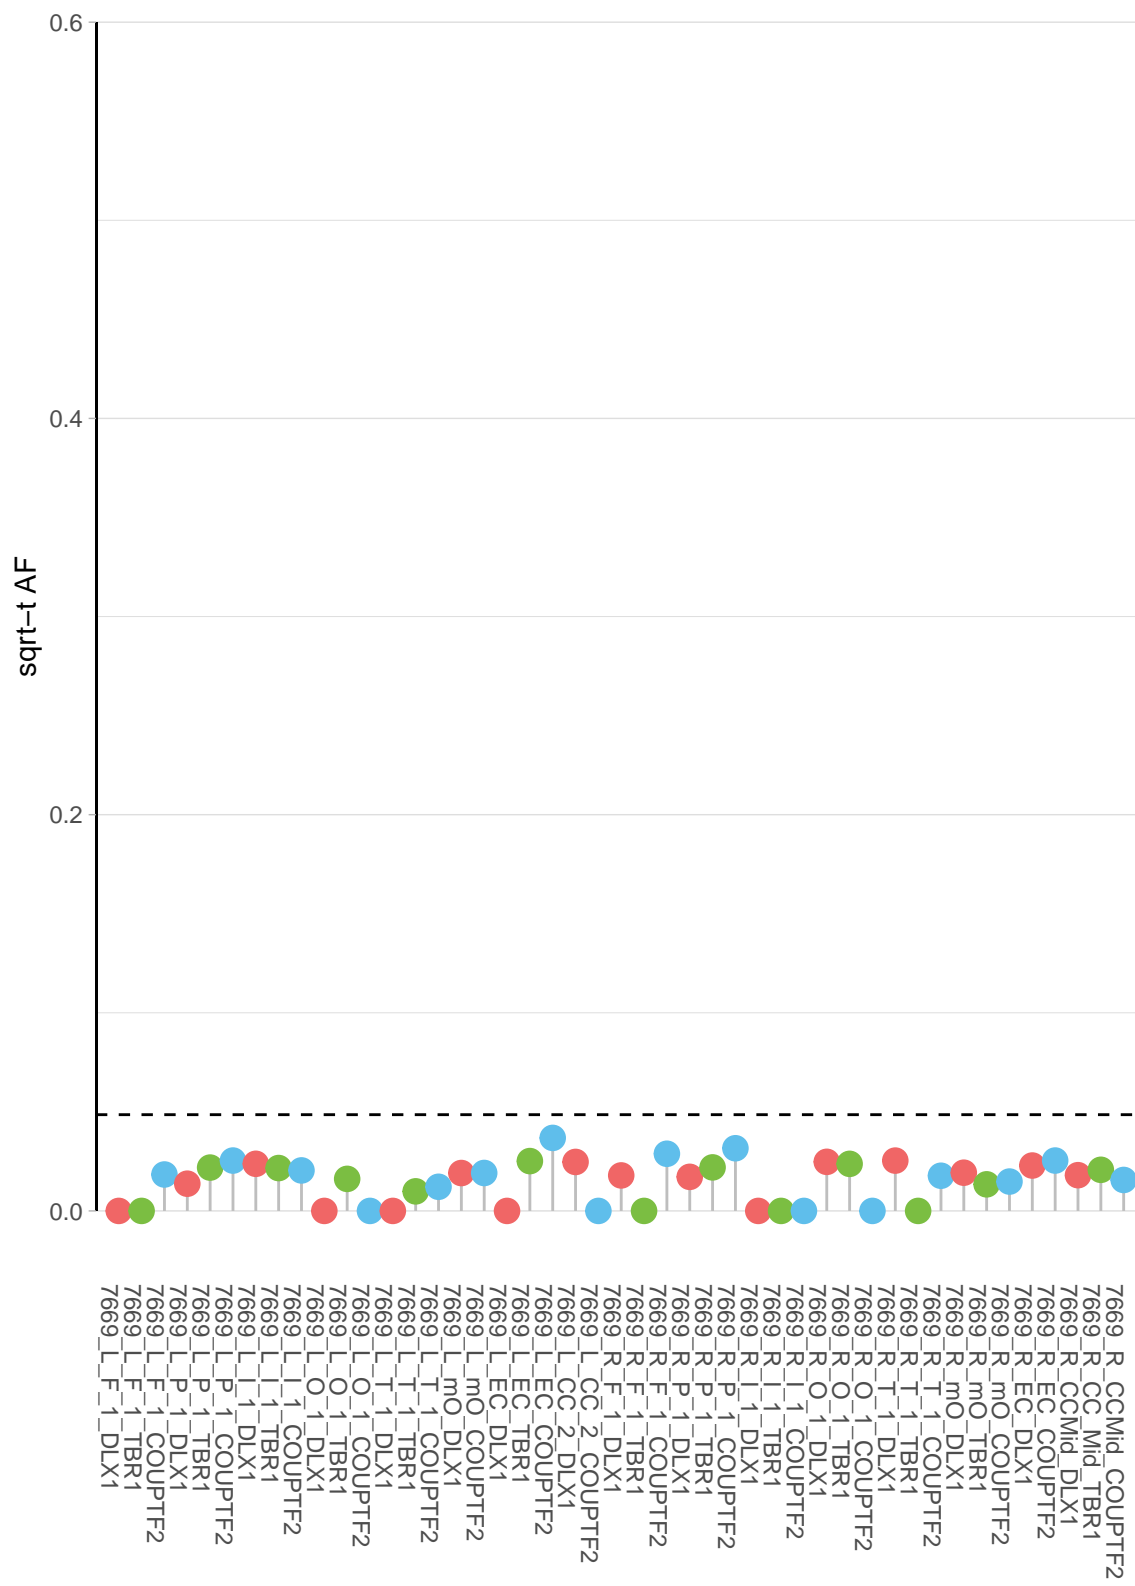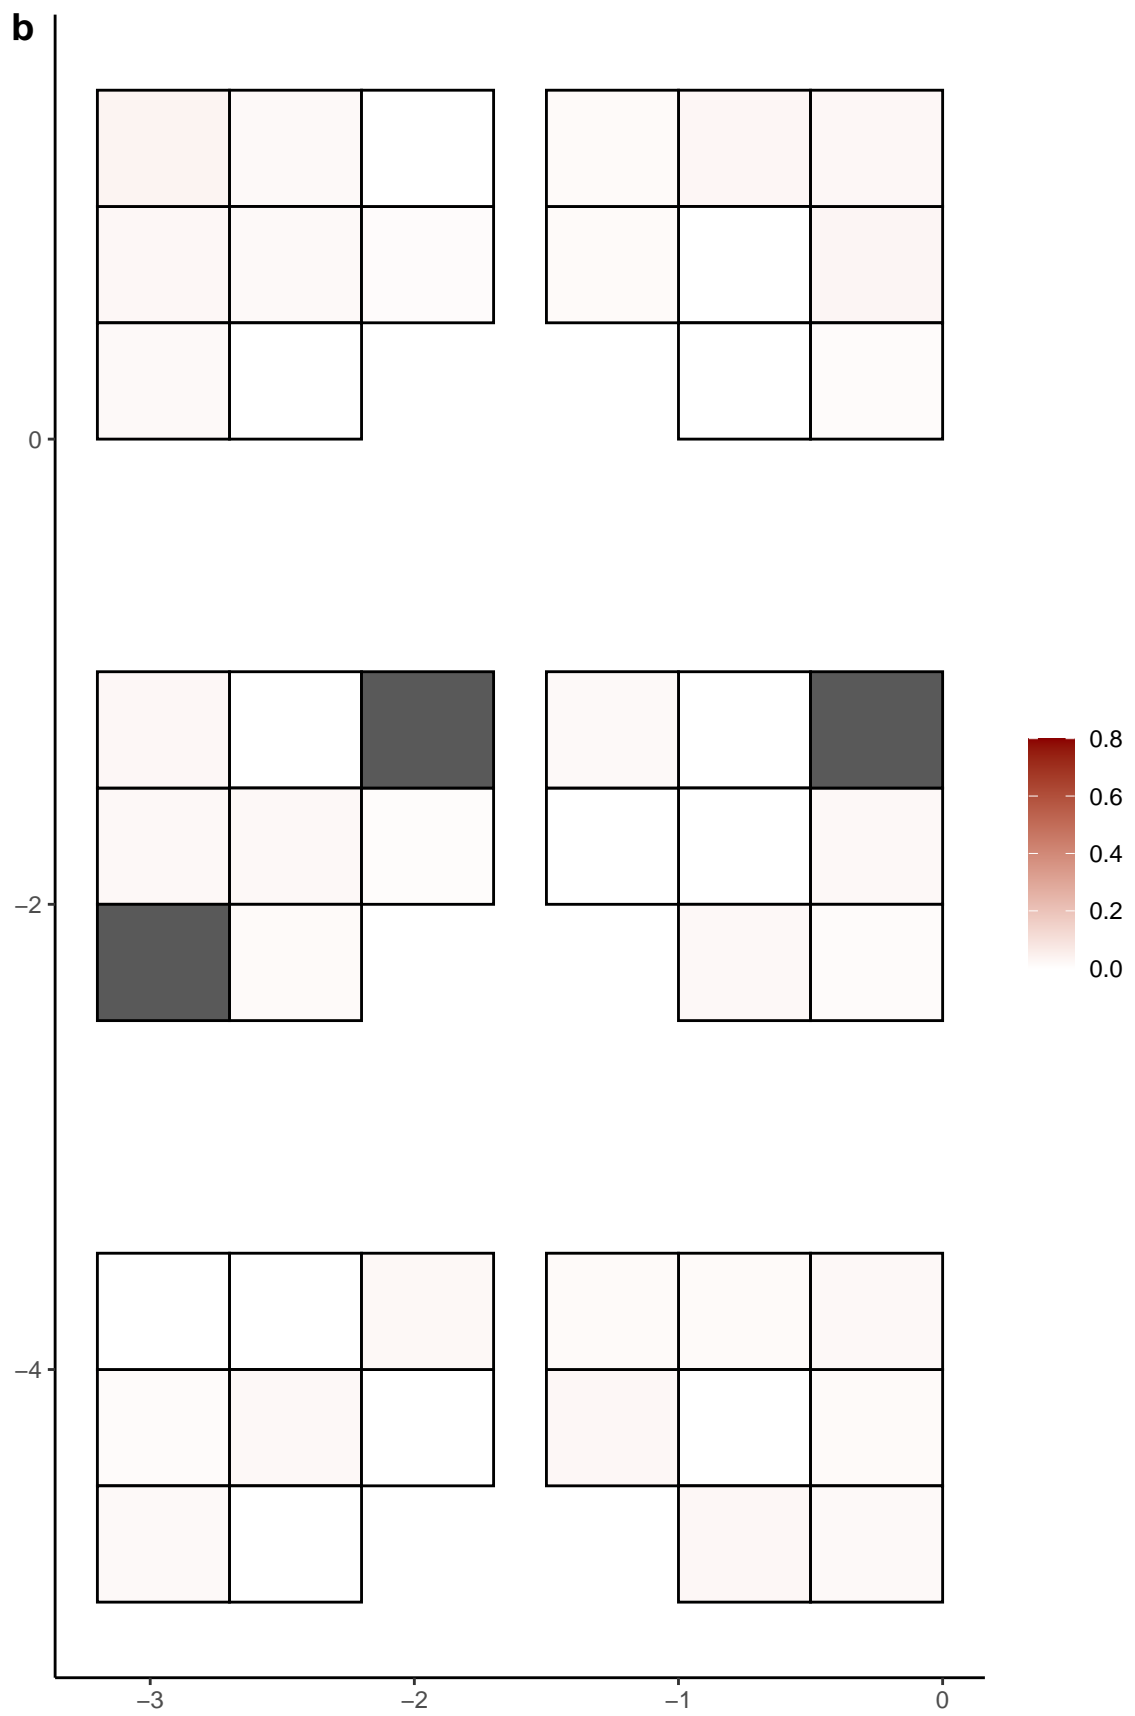

**a** ID05 5-10808399-G-A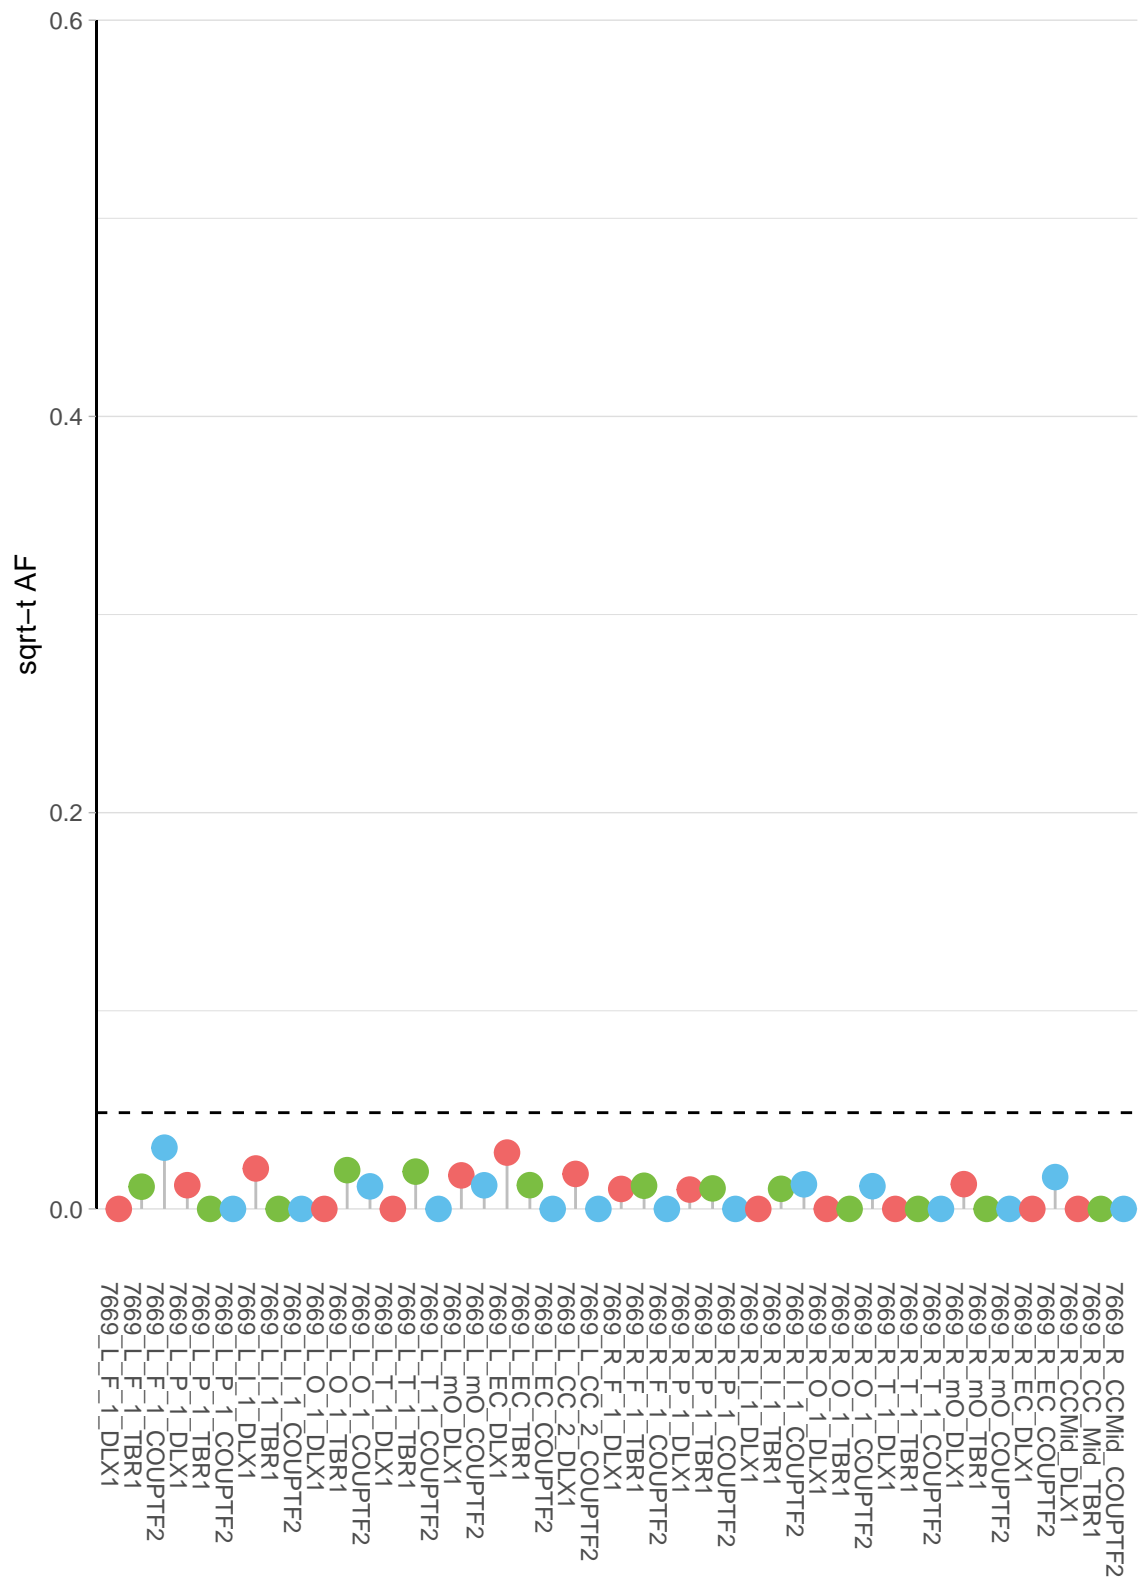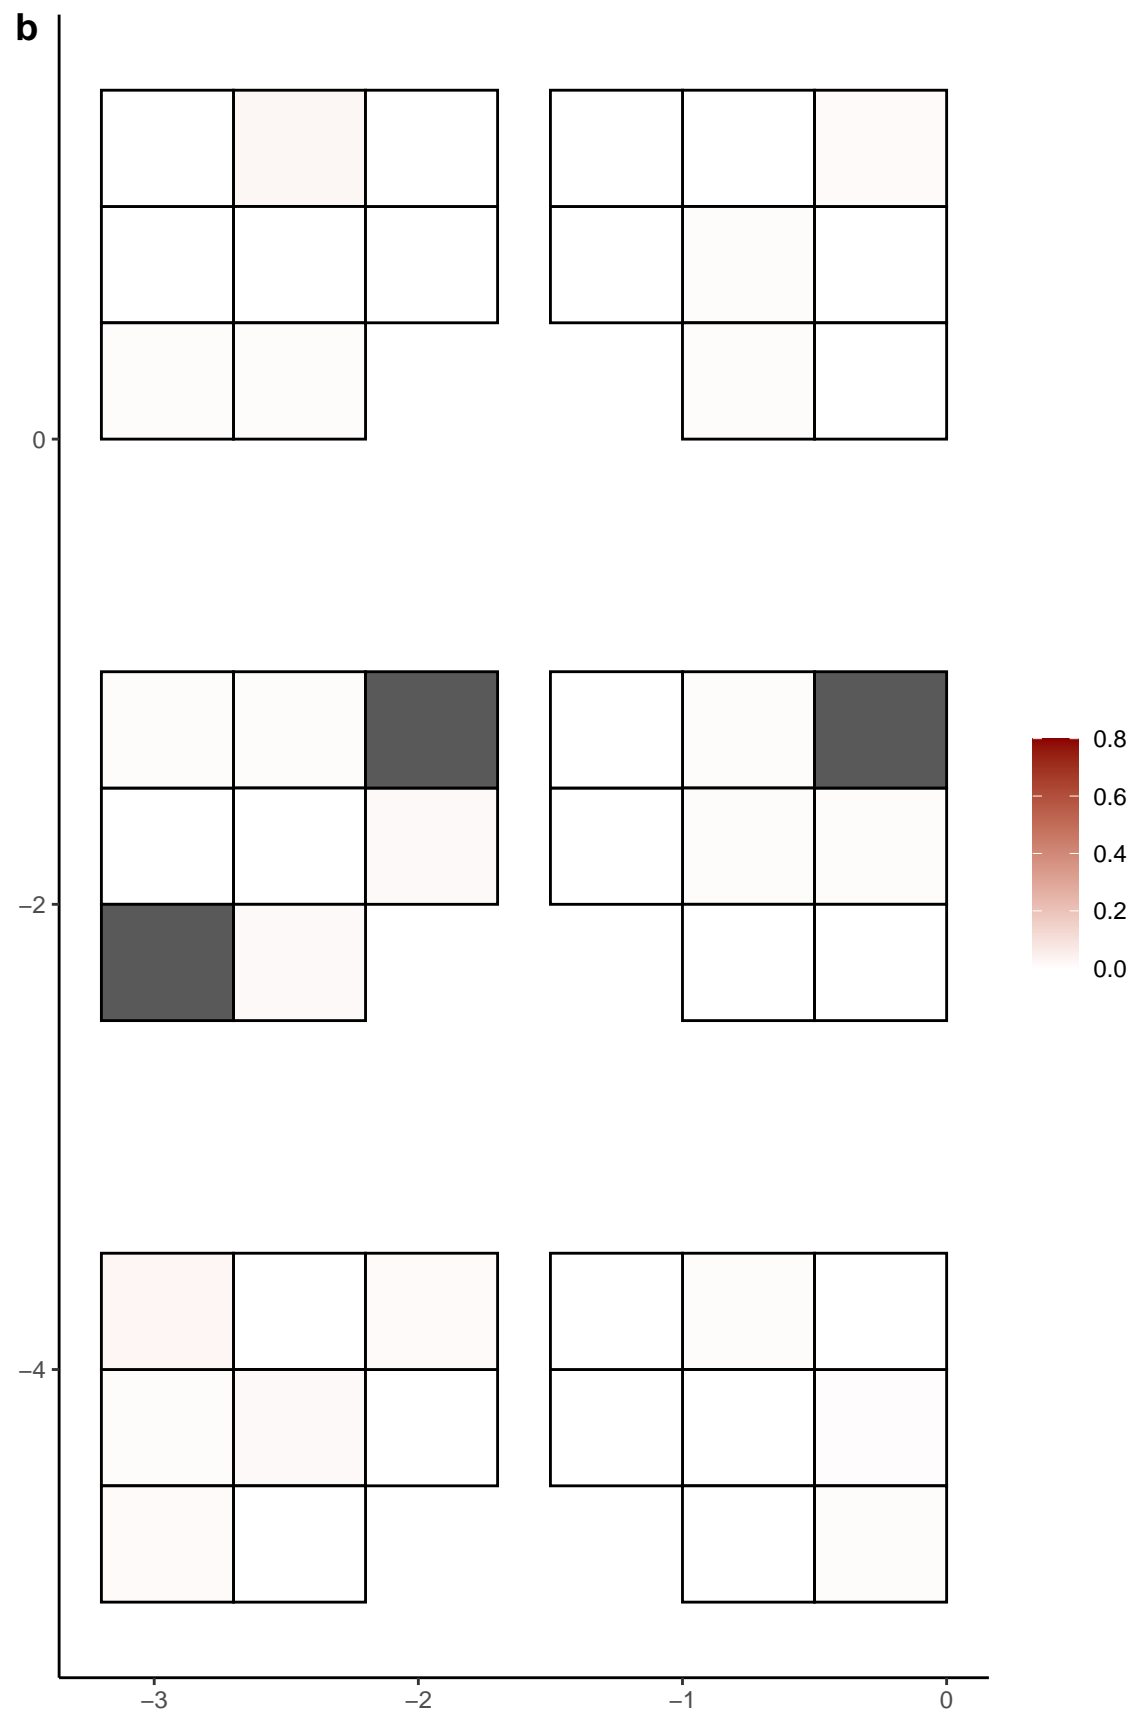

**a** ID05 5-115045074-T-C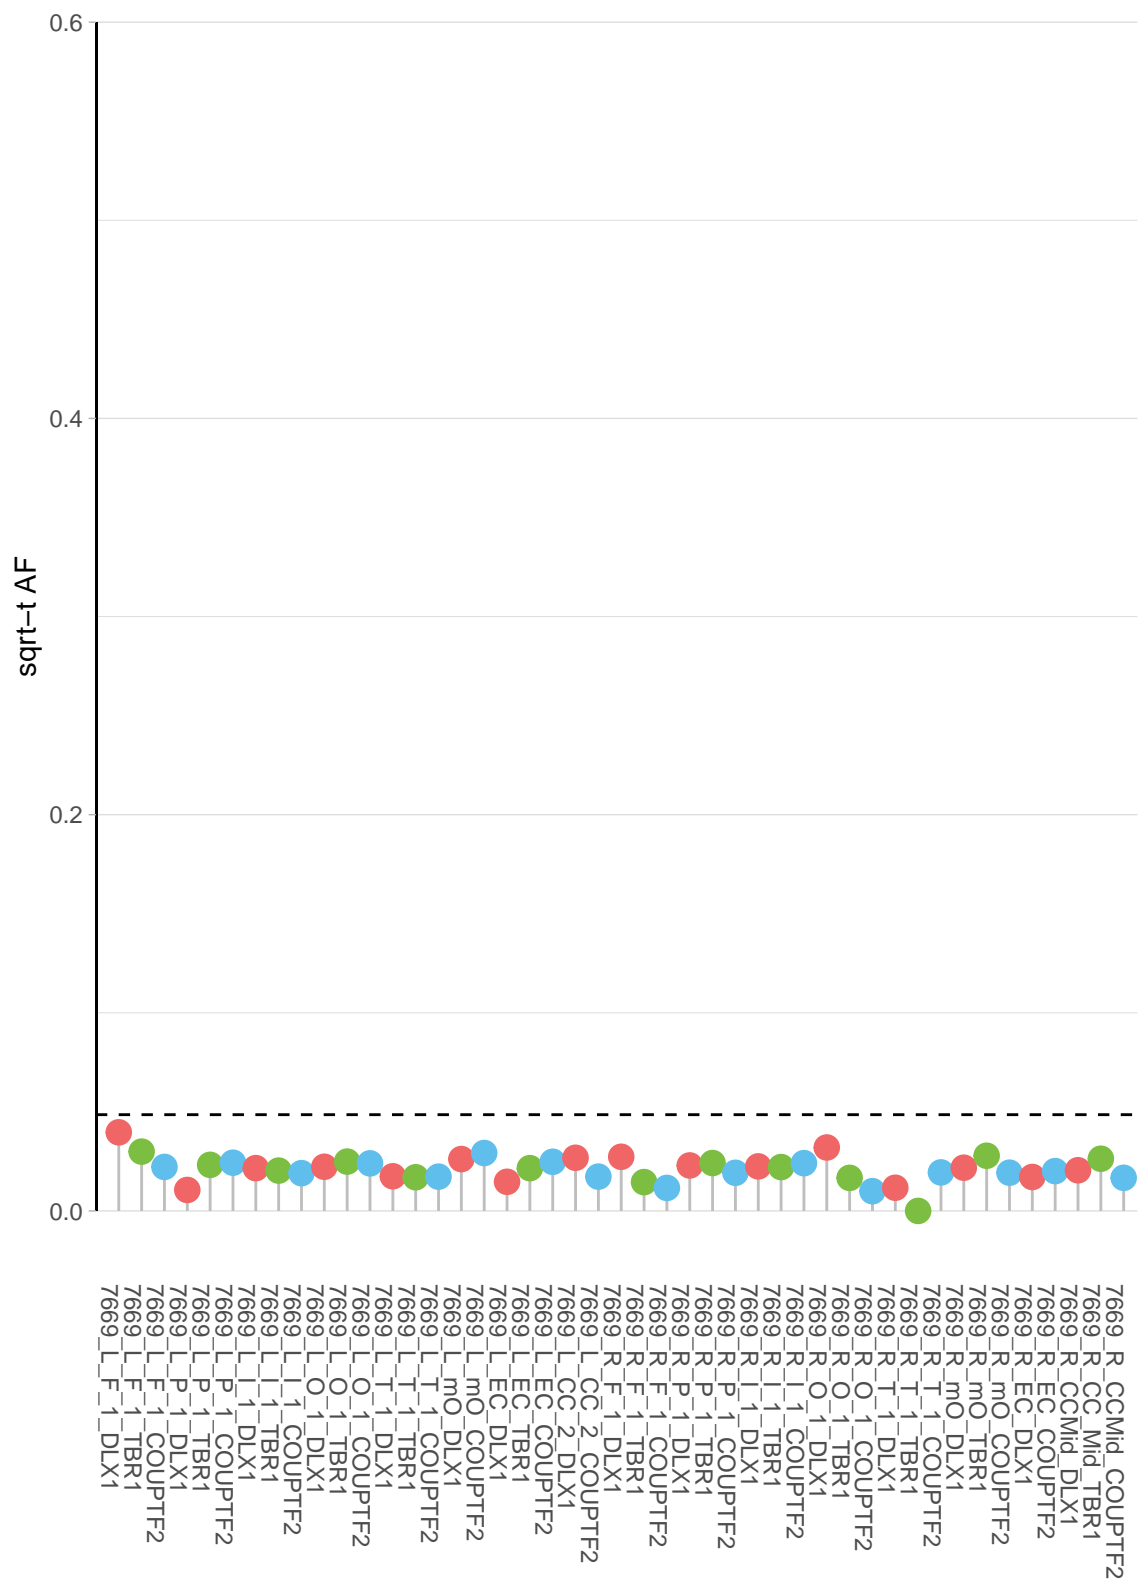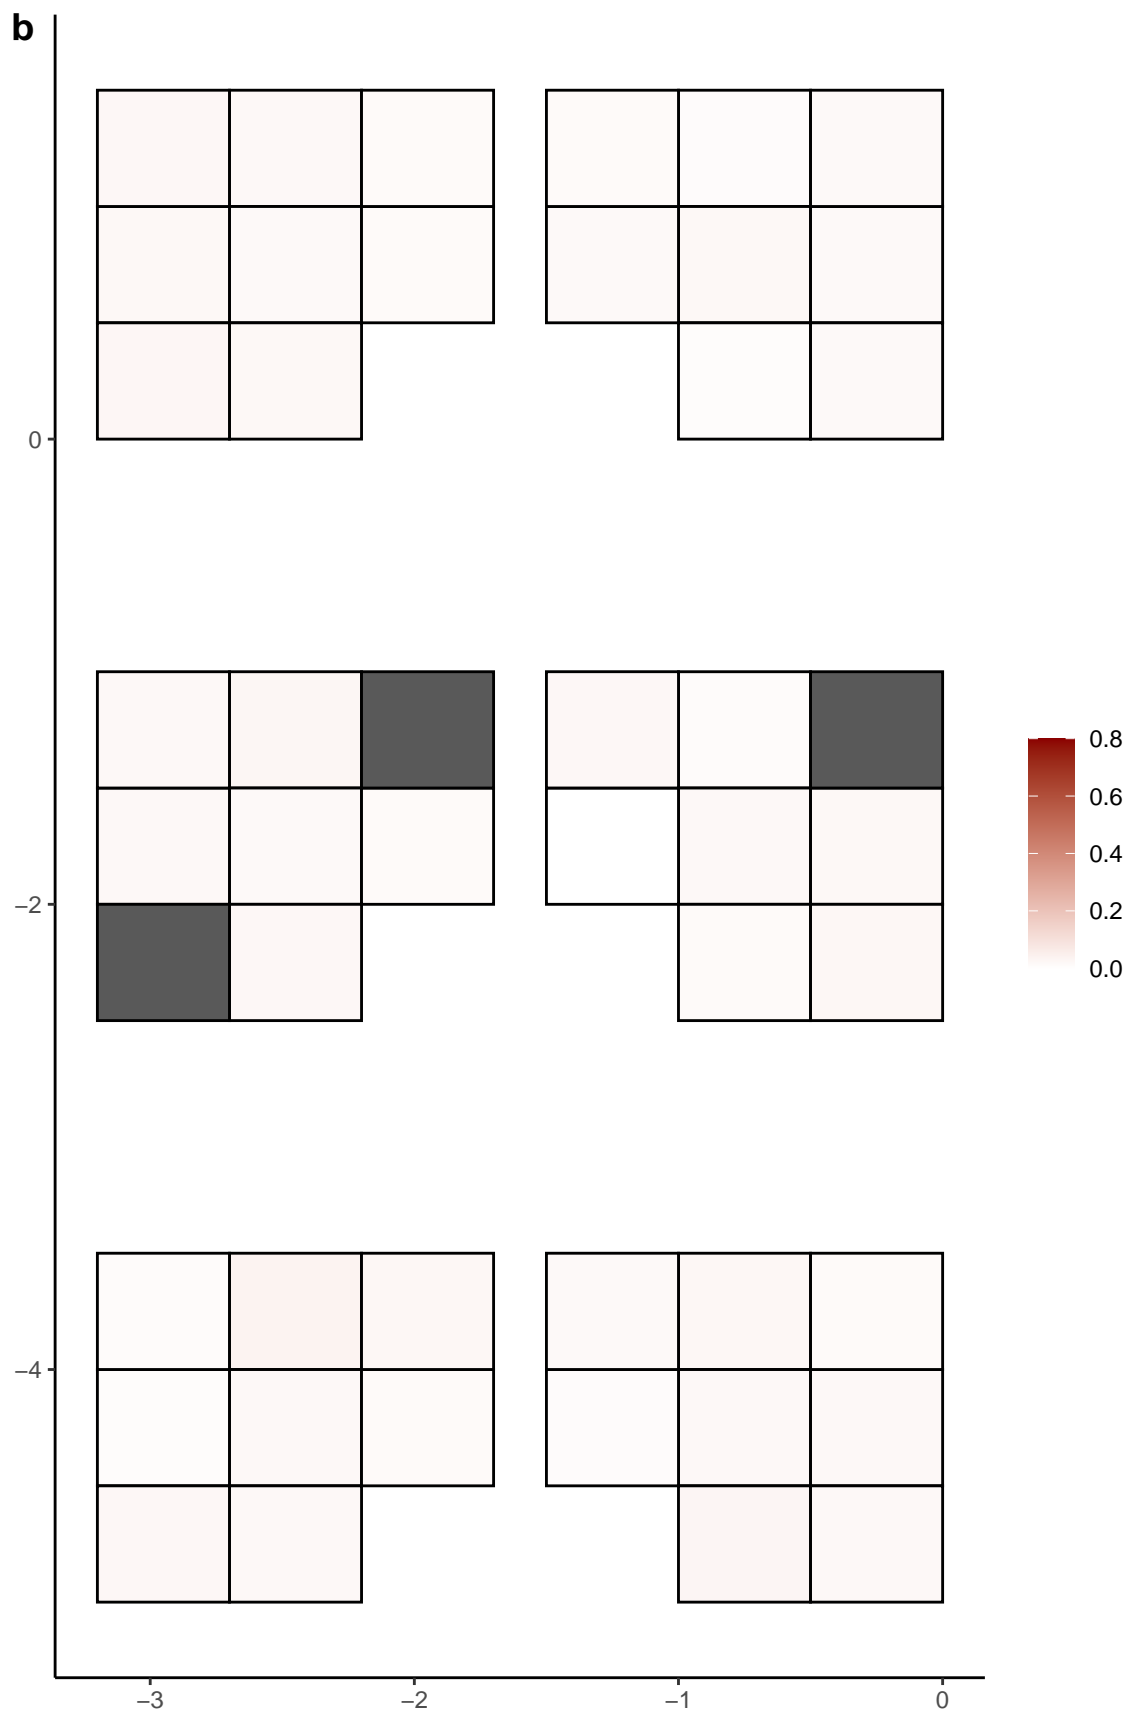

**a** ID05 5-115316467-A-C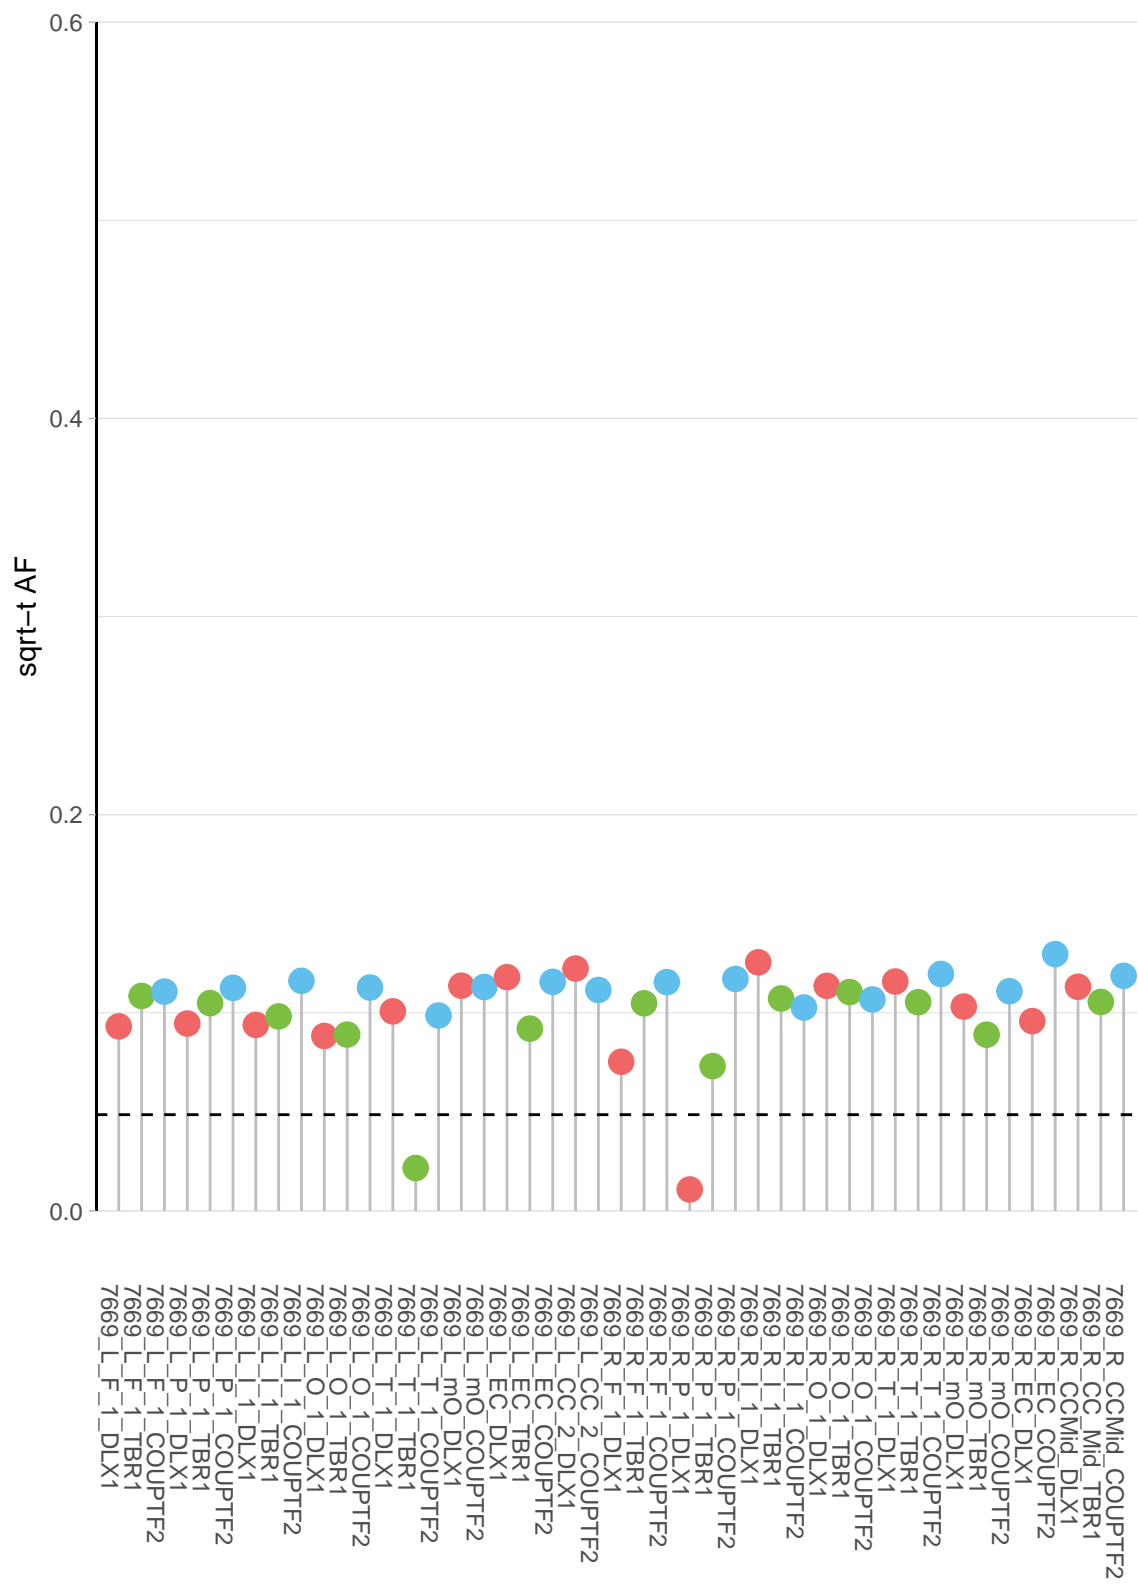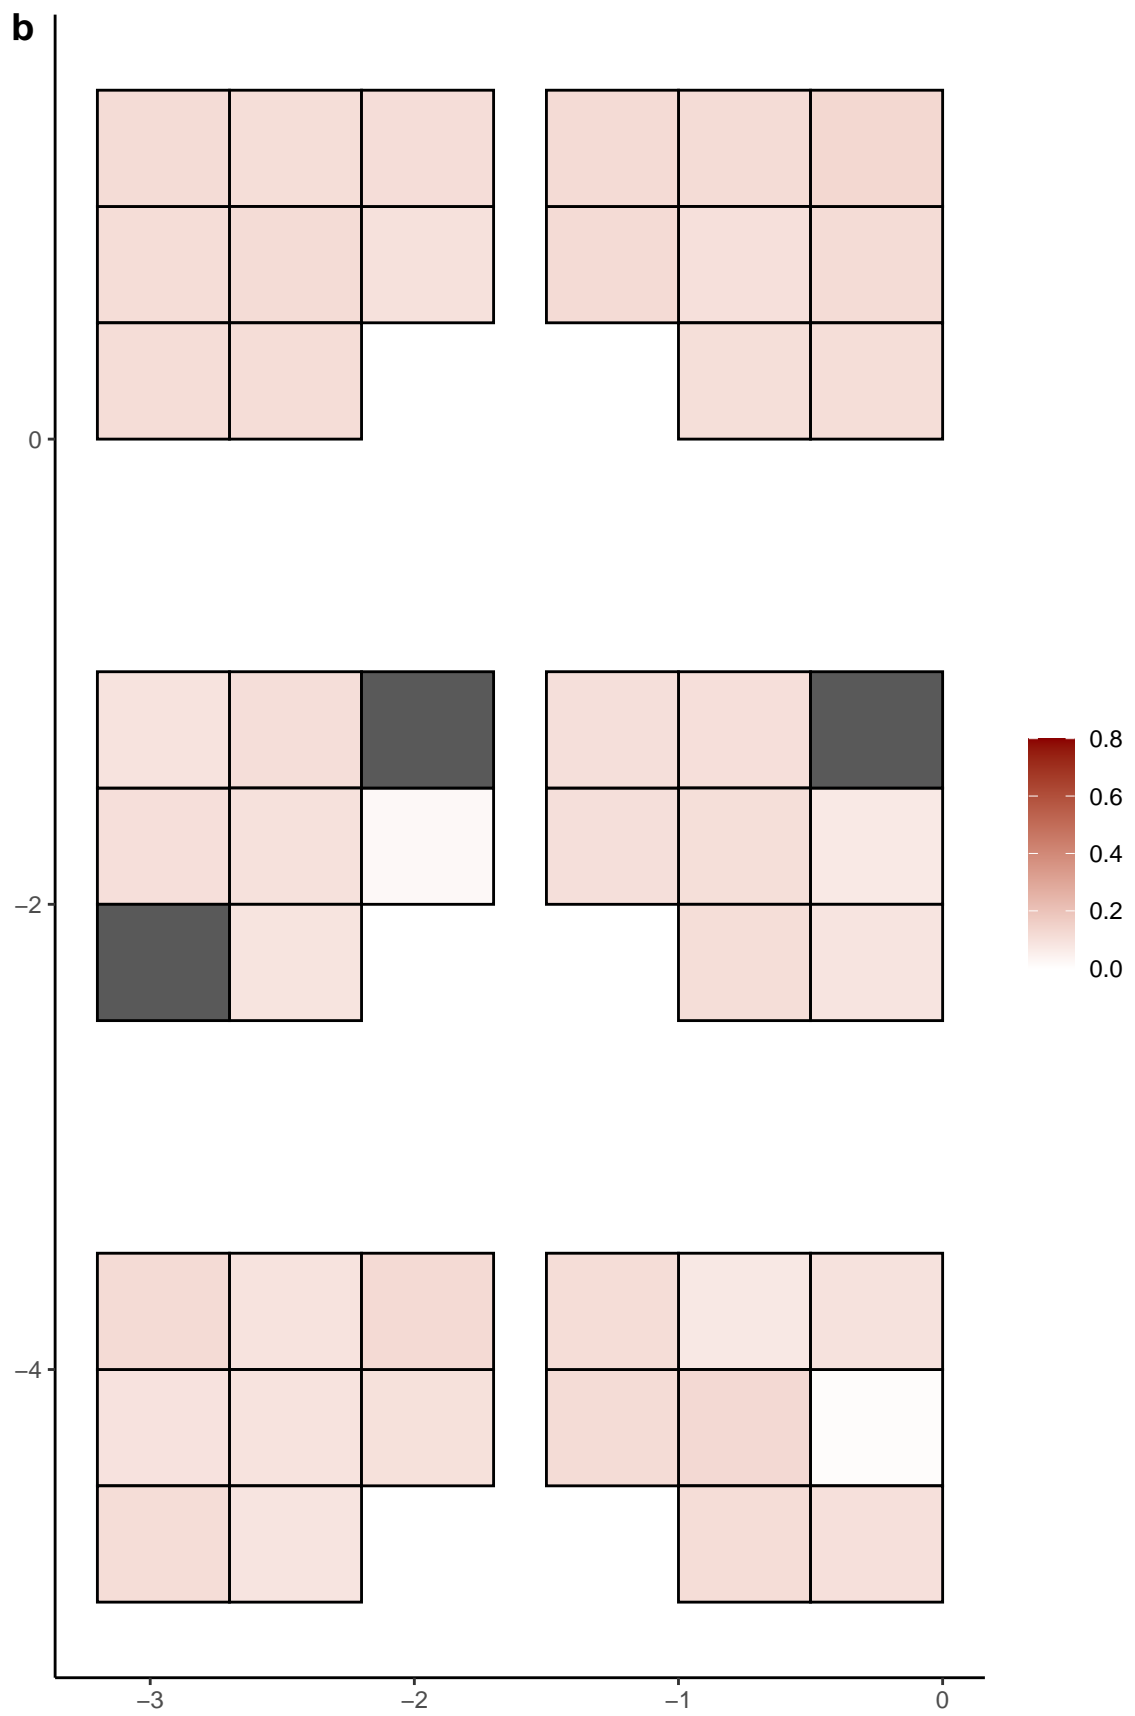

**a** ID05 5-115316468-G-T

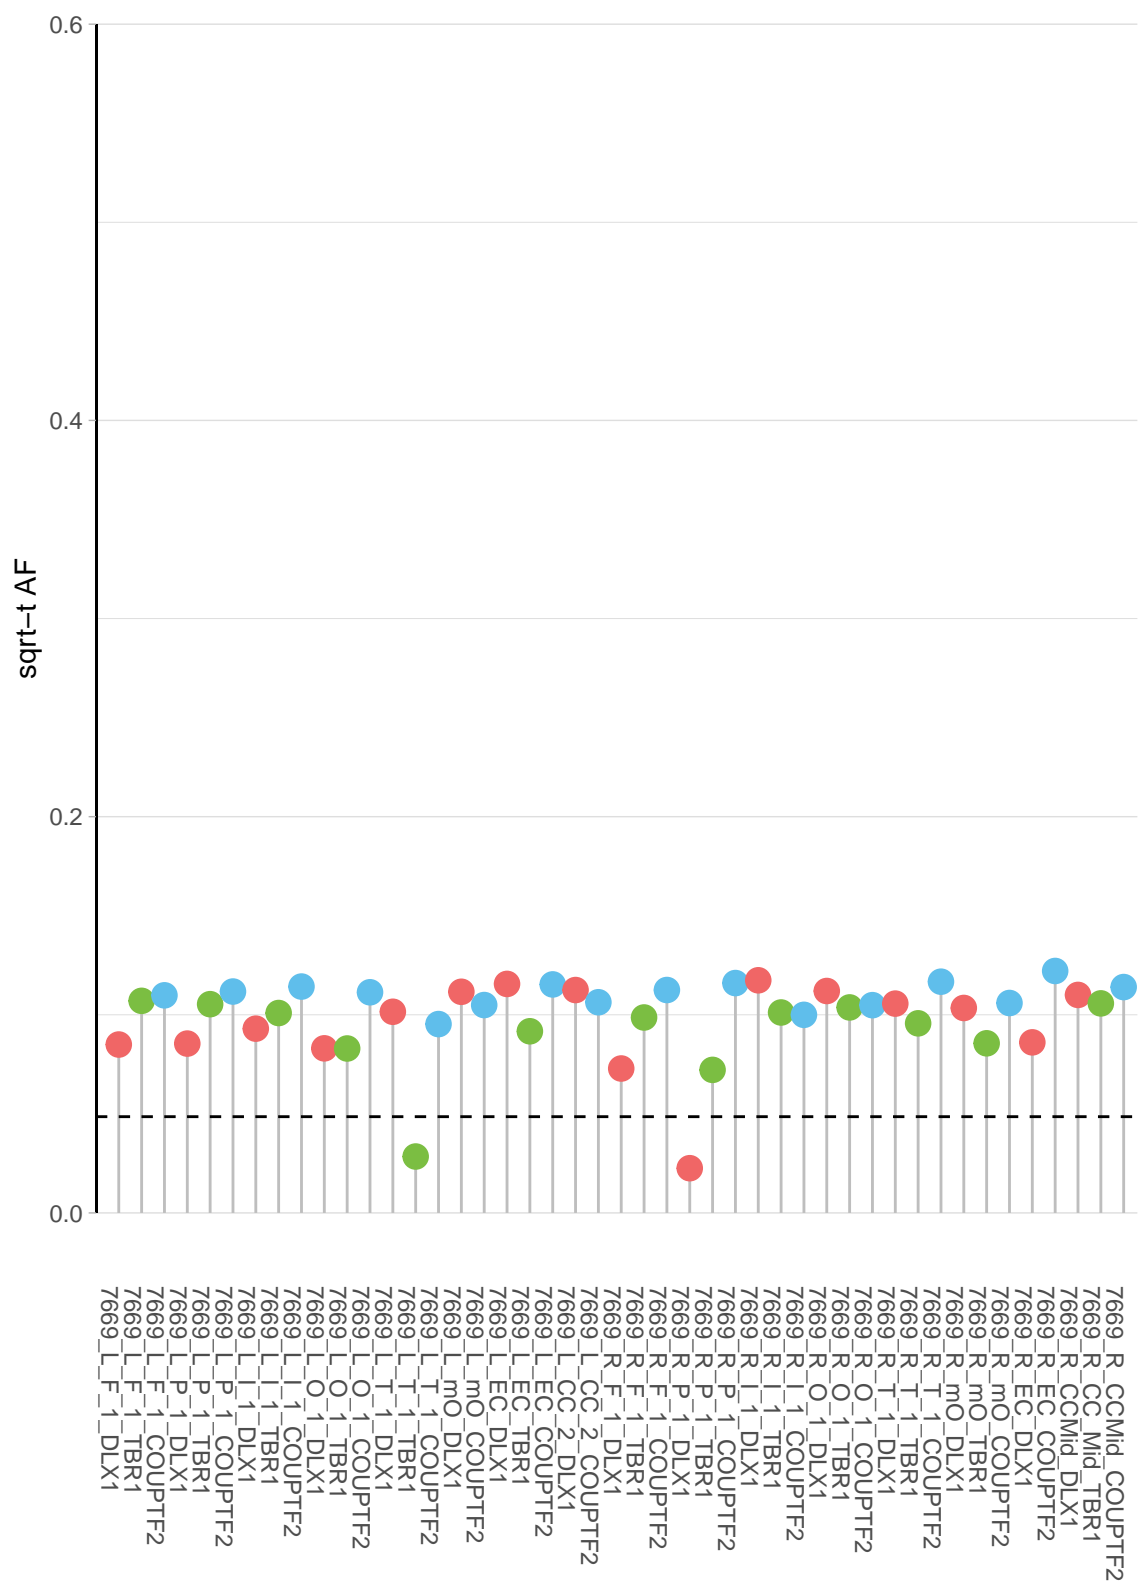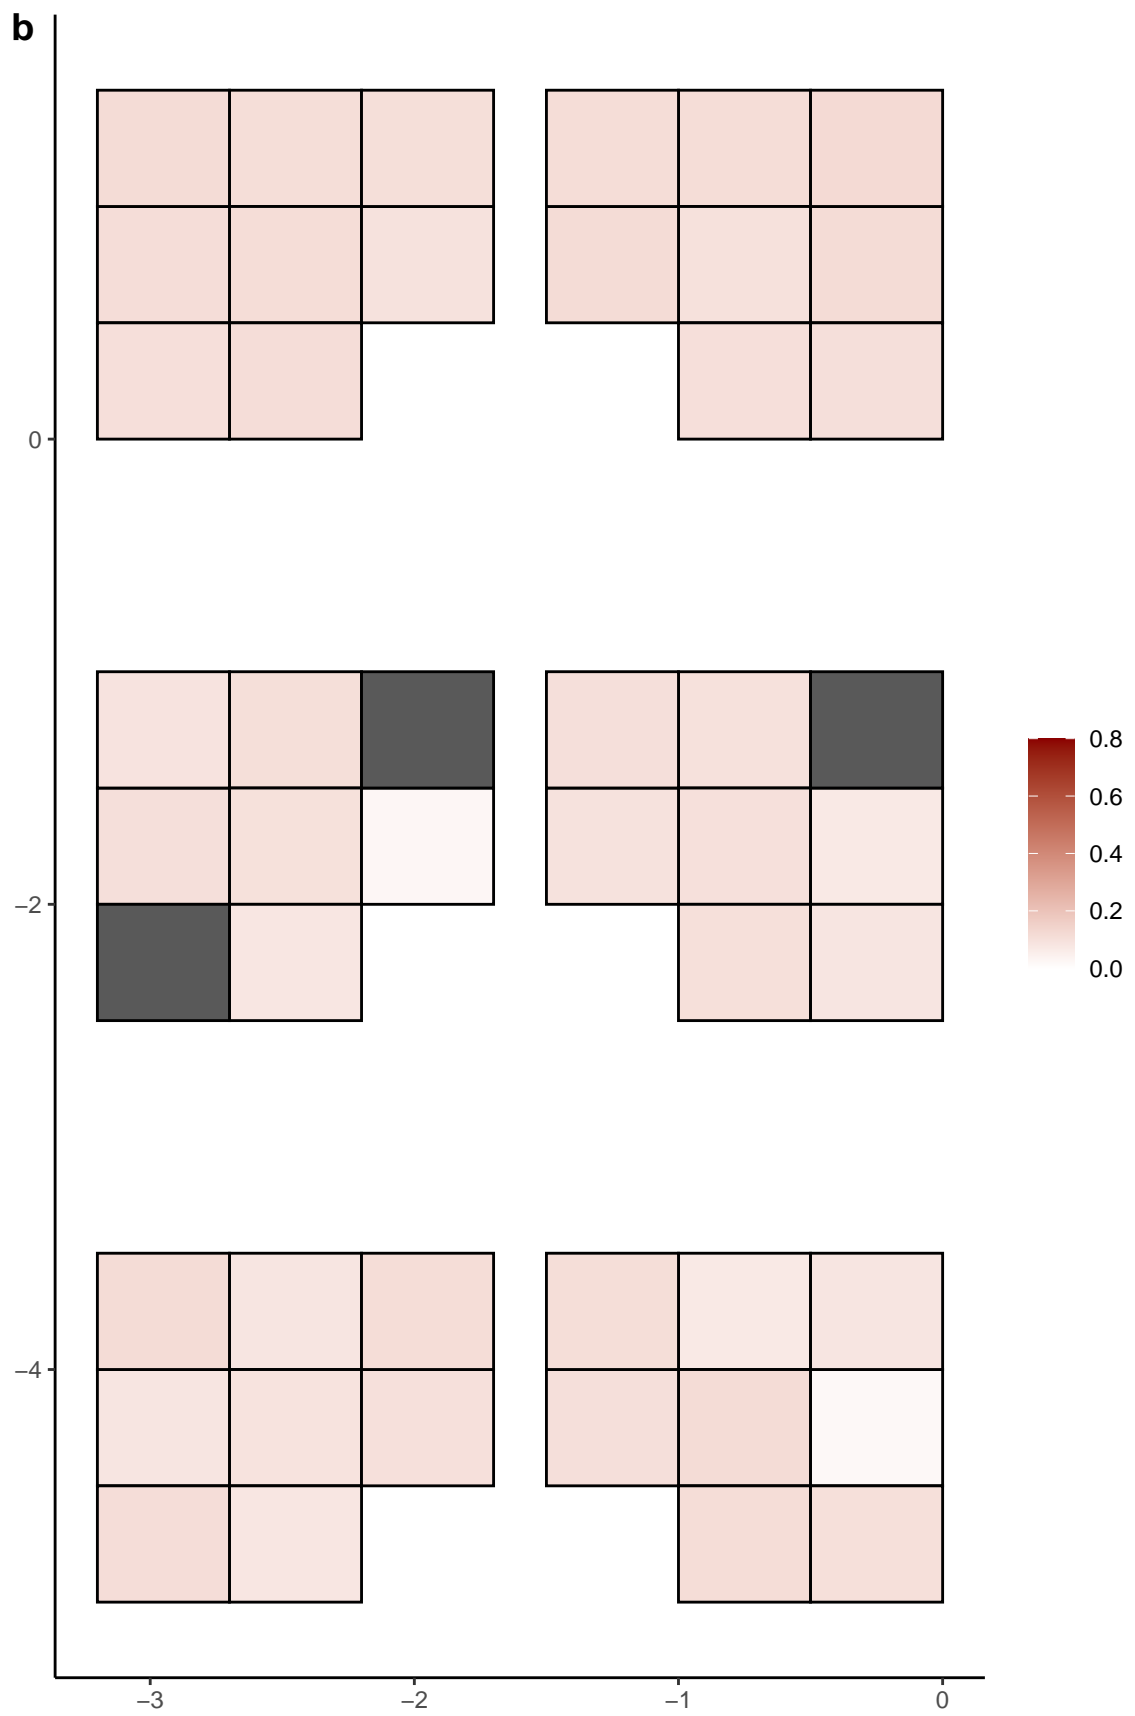

**a** ID05 5-117219941-G-T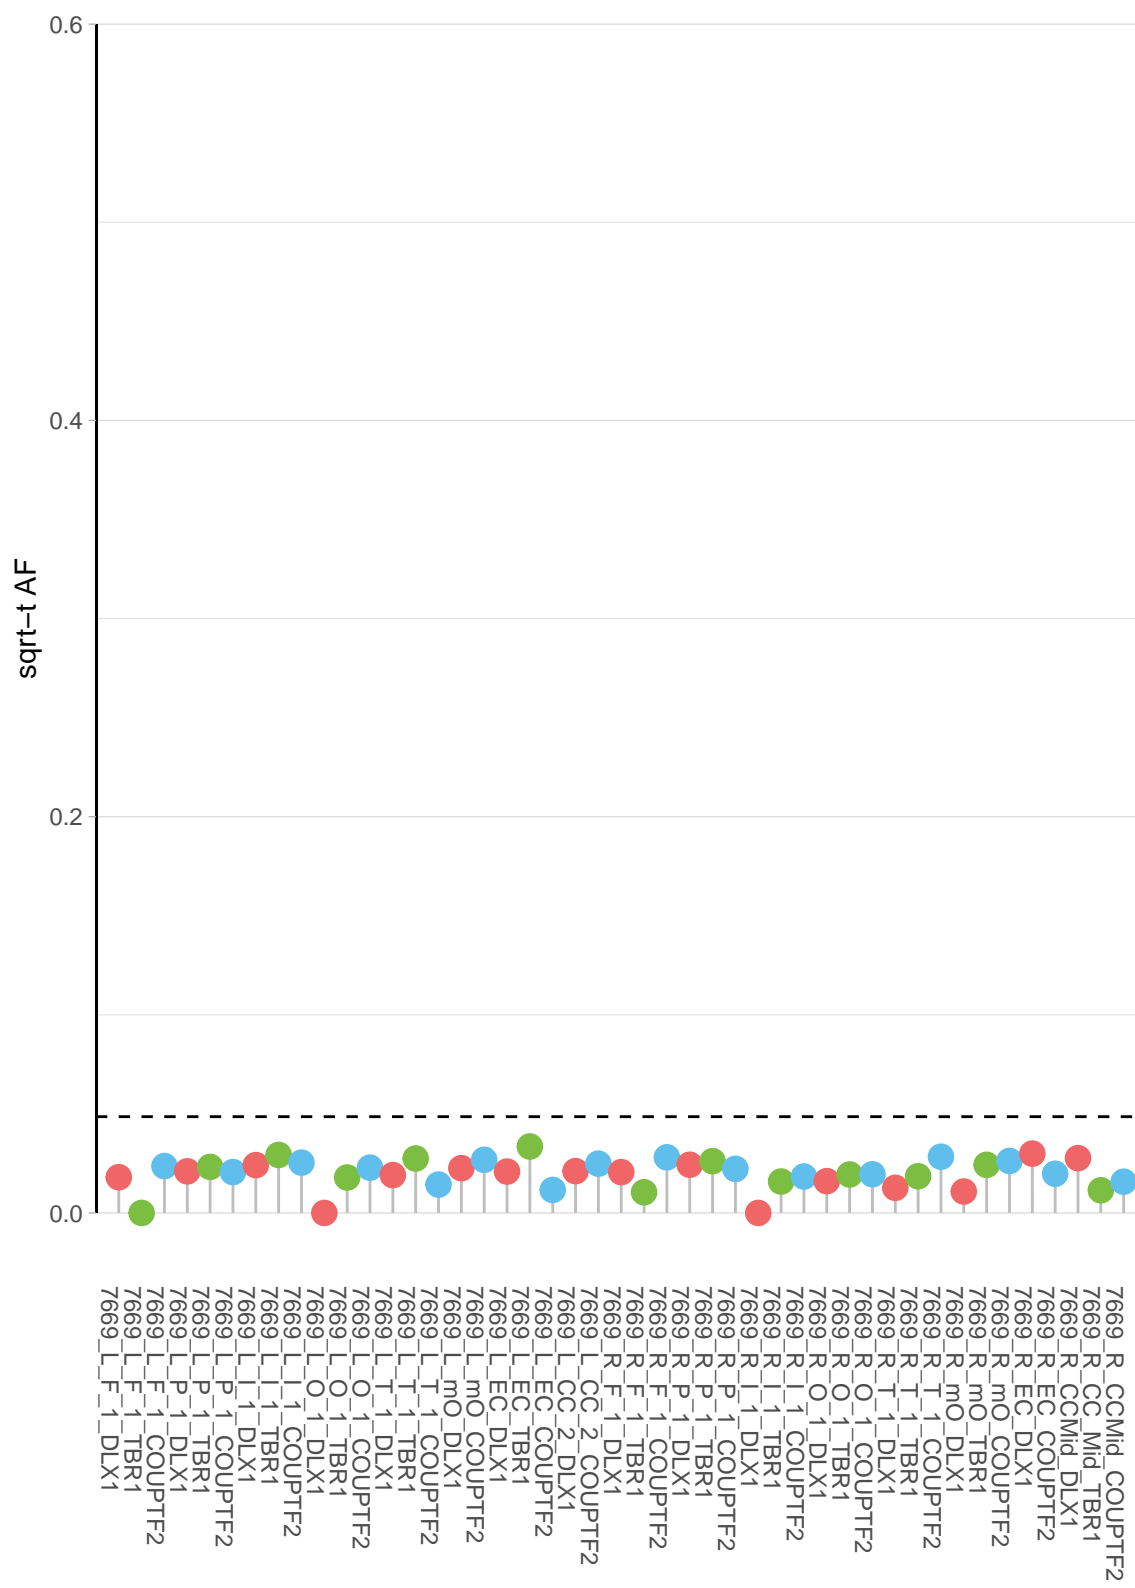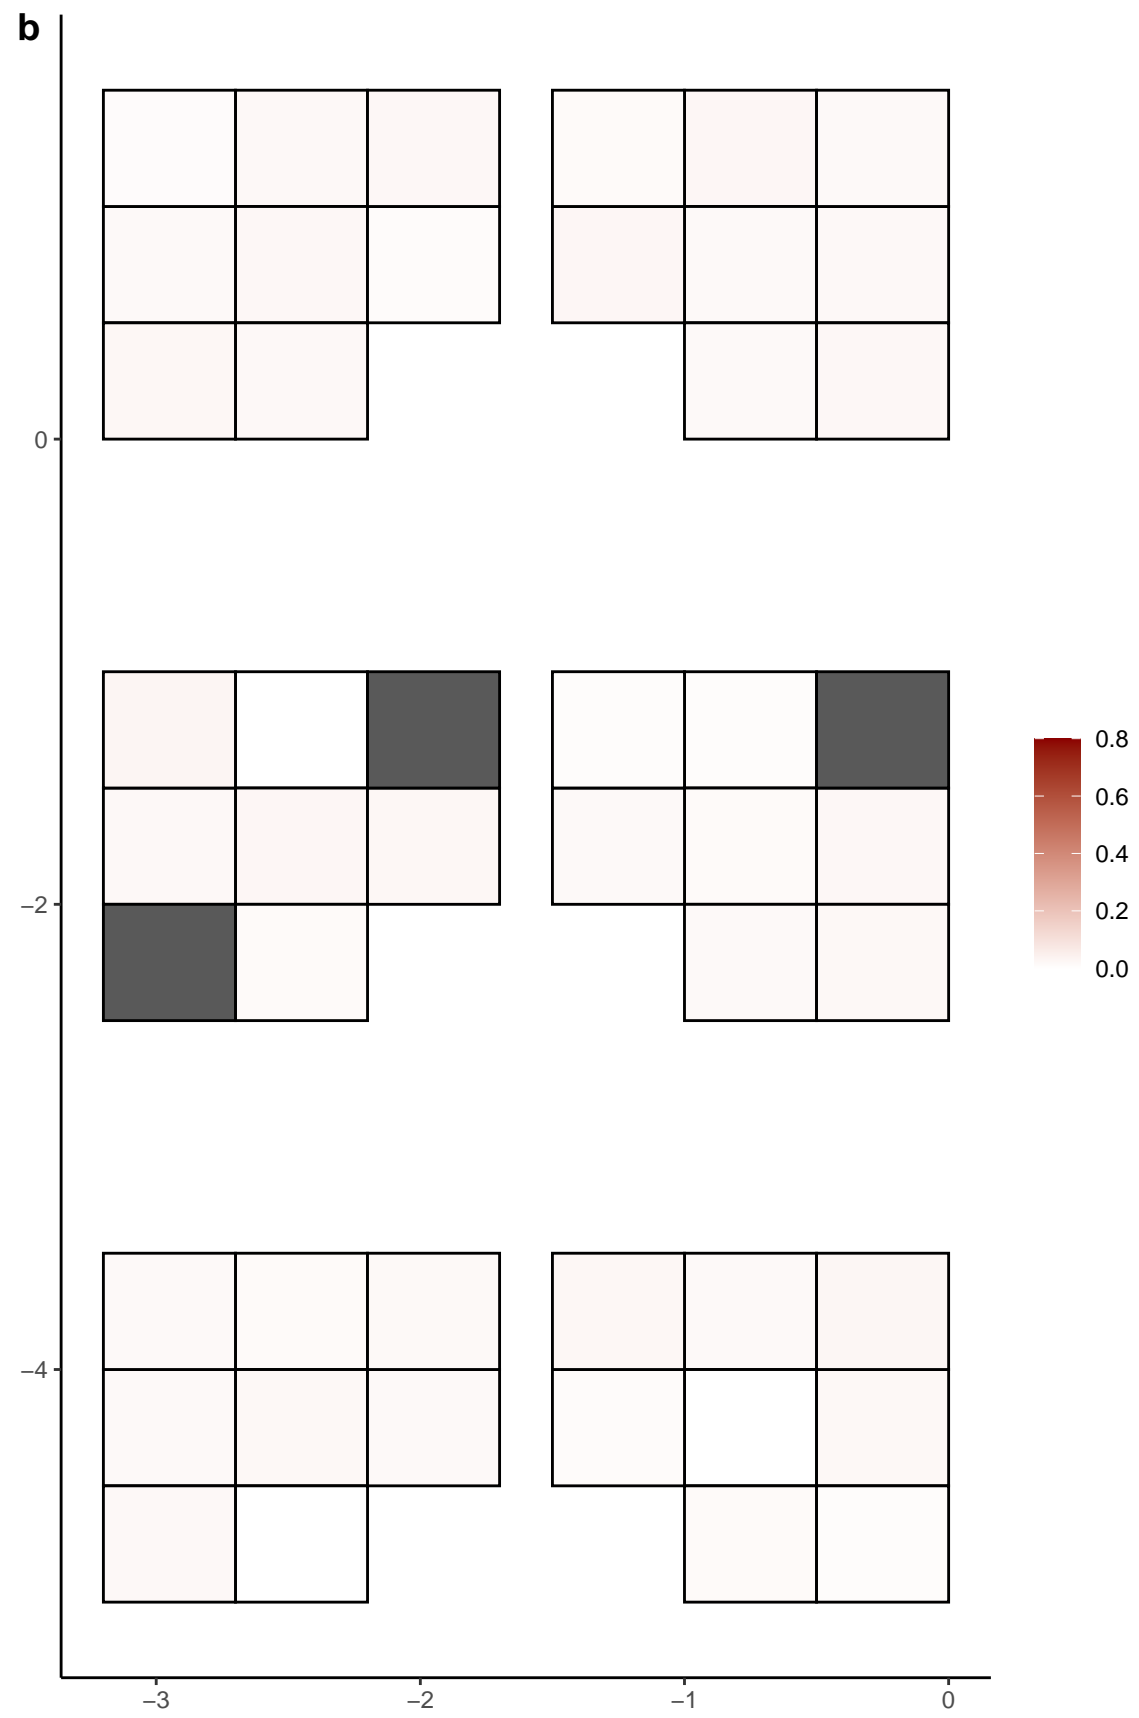



**a** ID05 5-117725395-G-A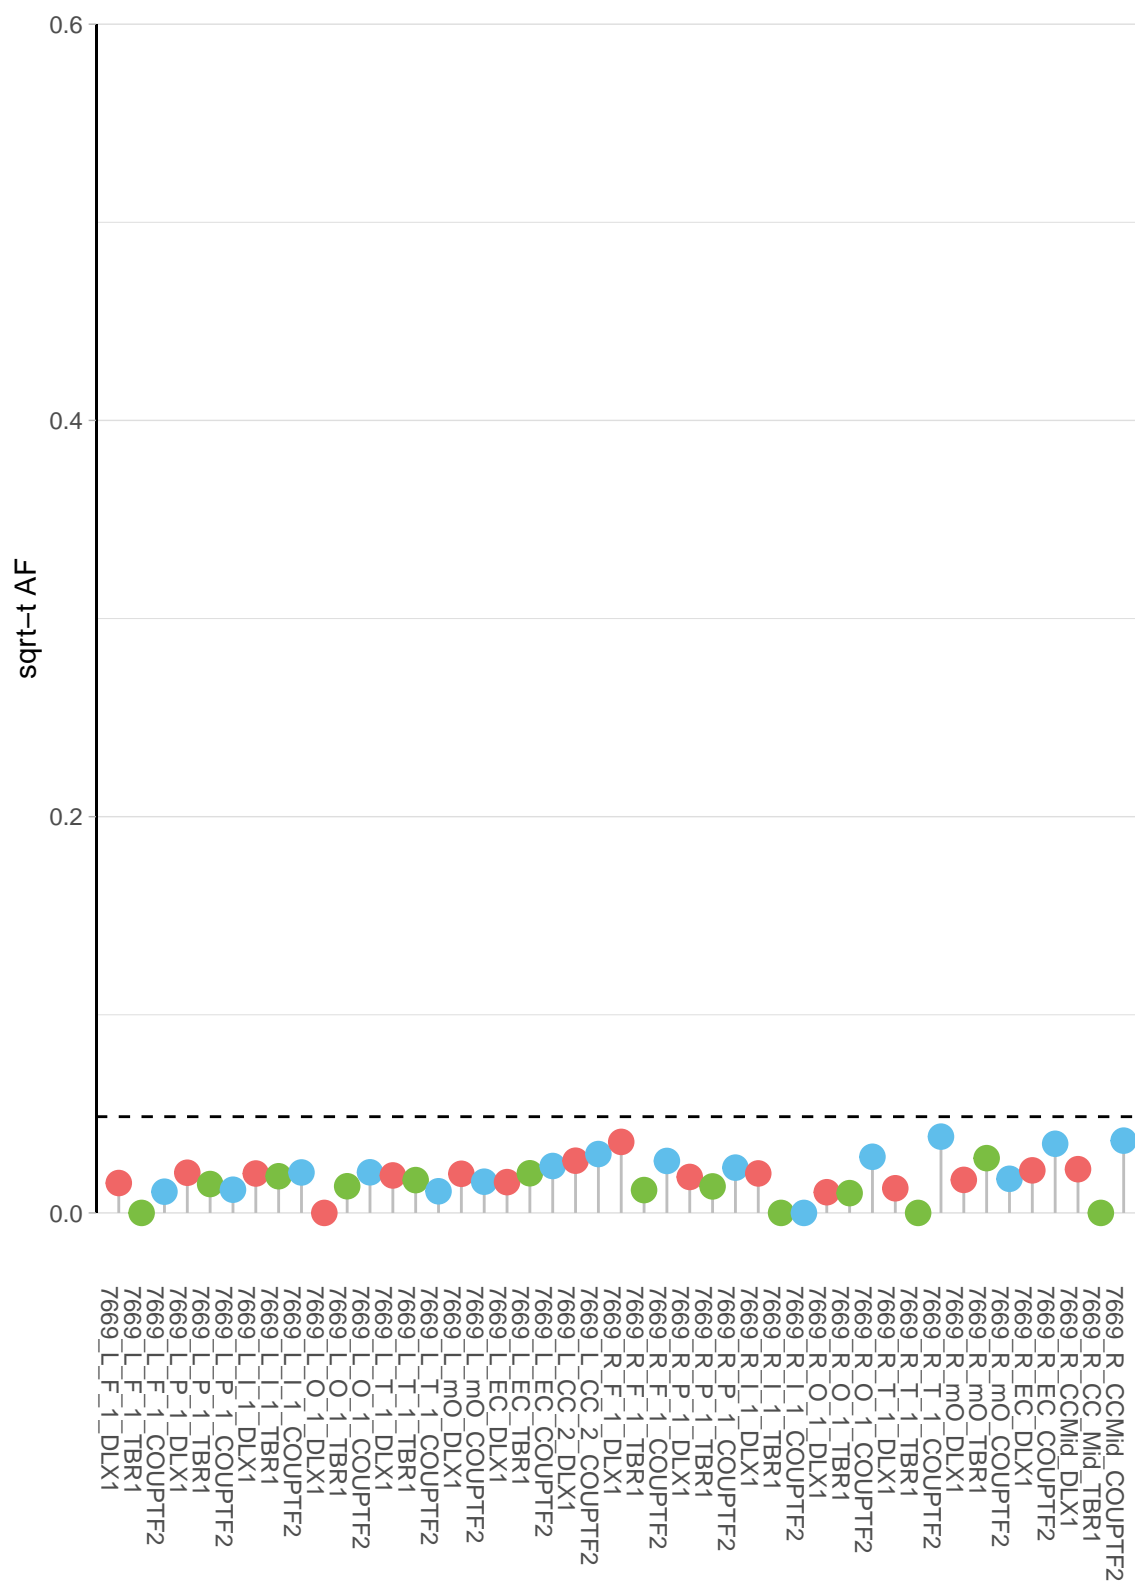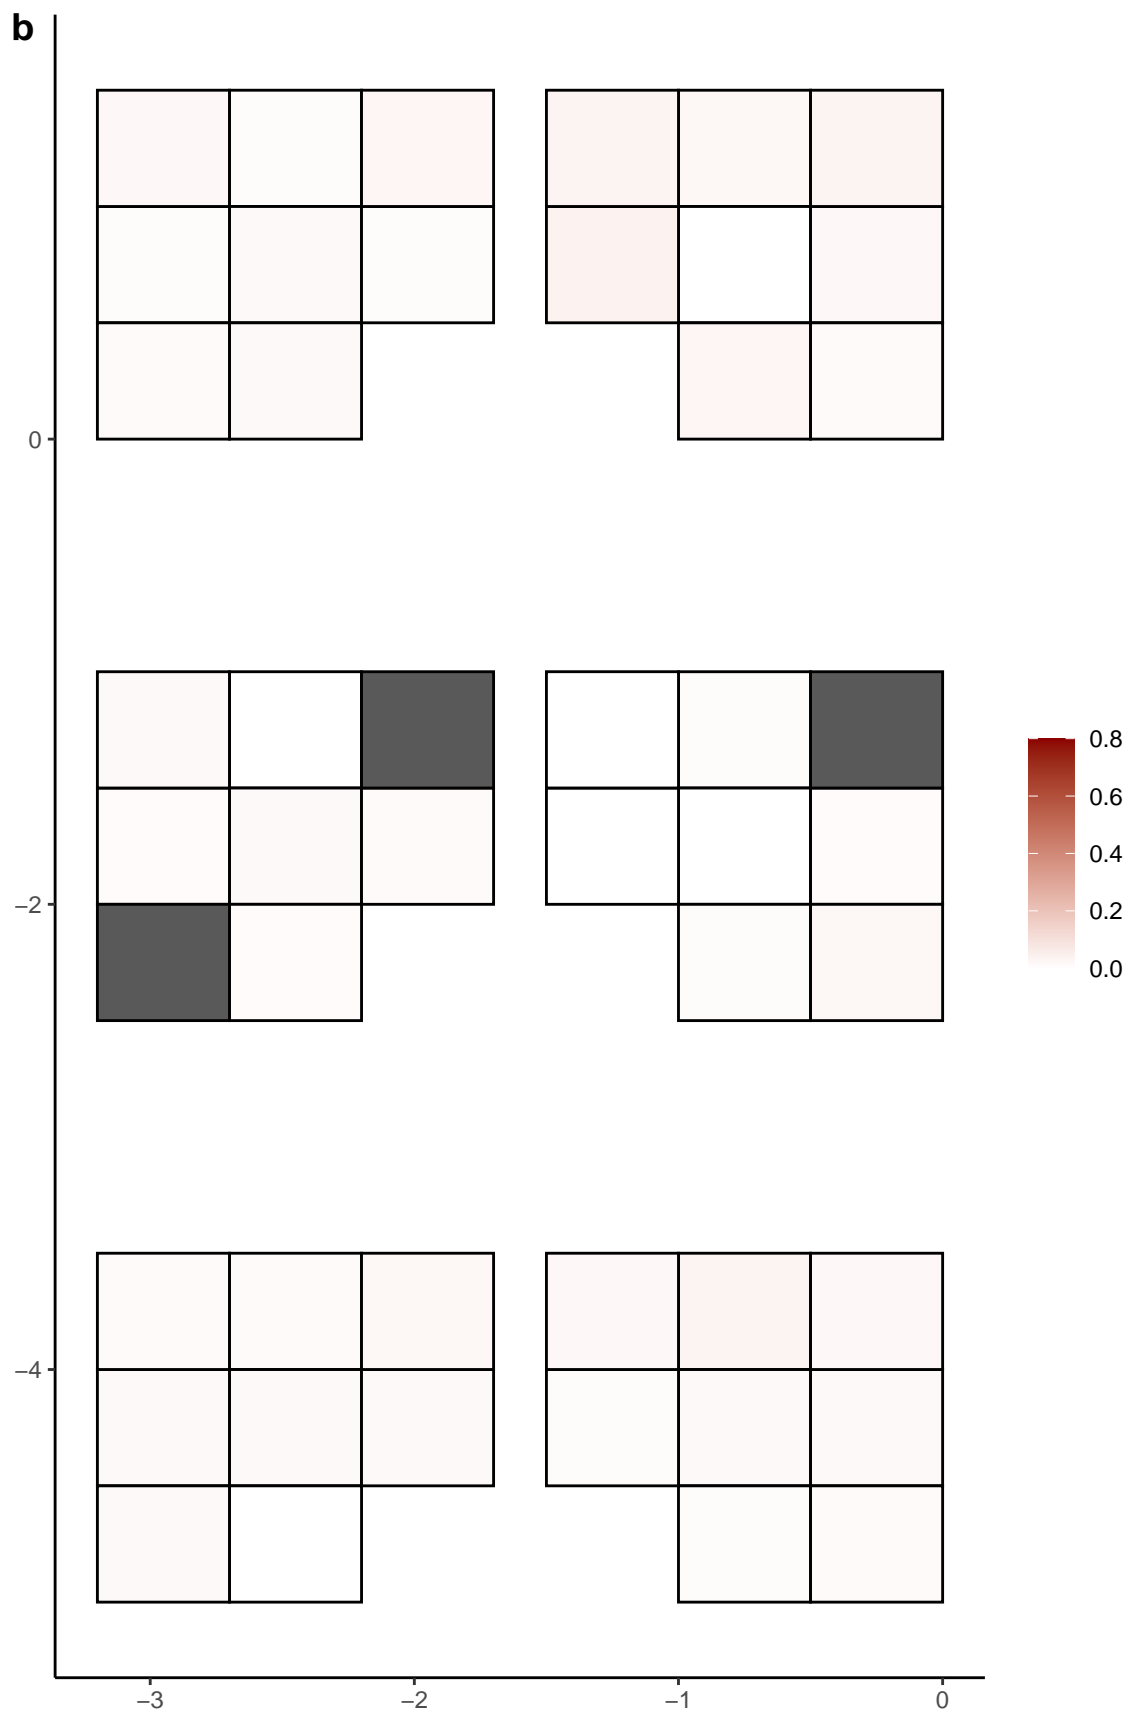

**a** ID05 5-121446225-C-T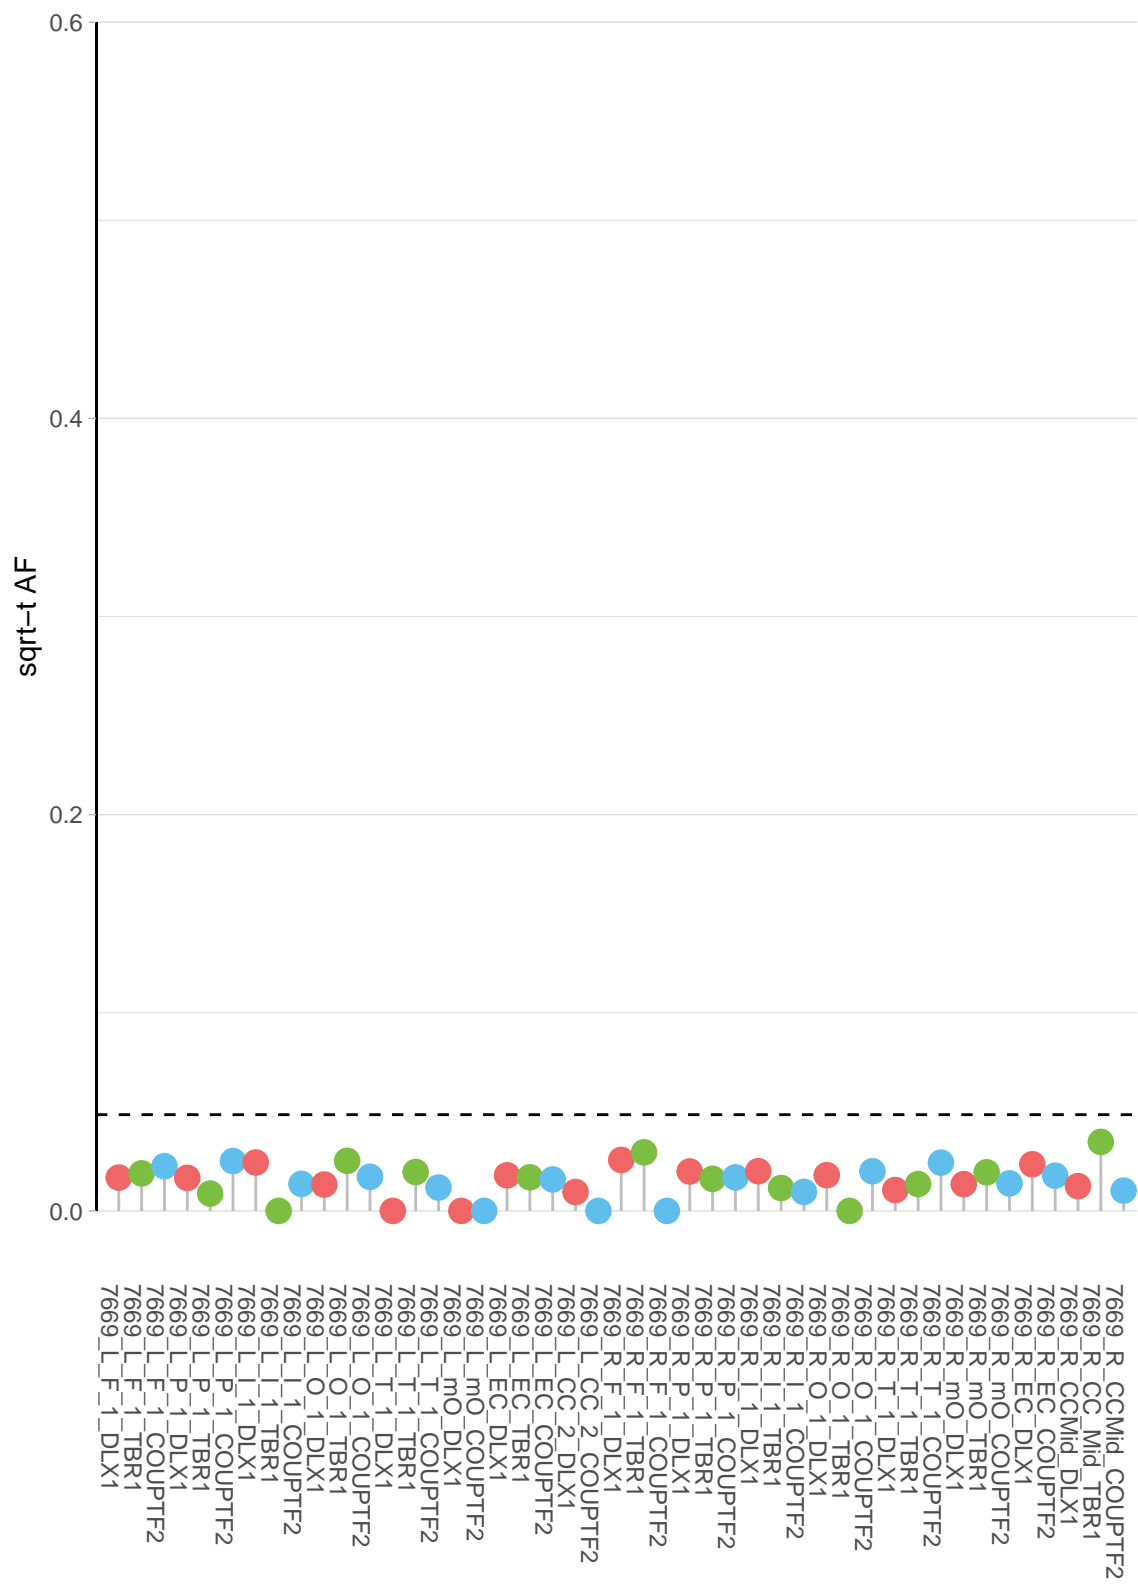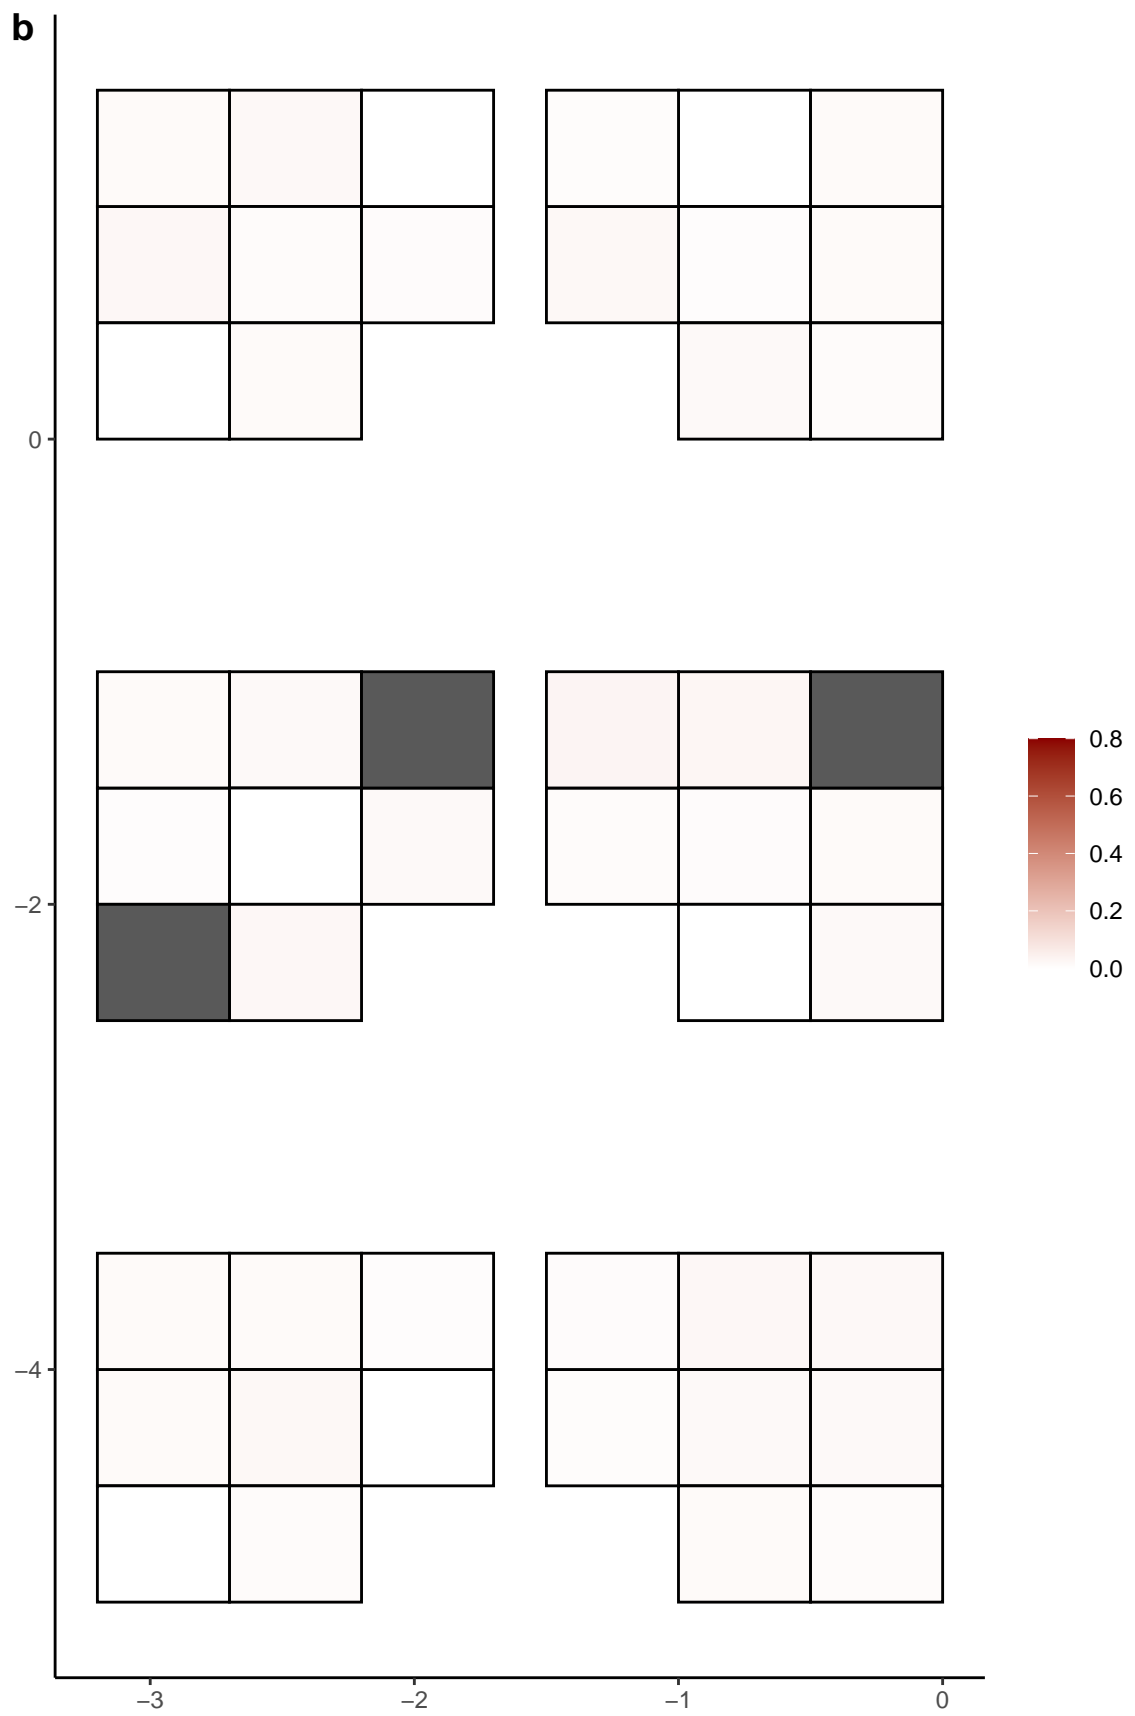

**a** ID05 5-121518814-G-A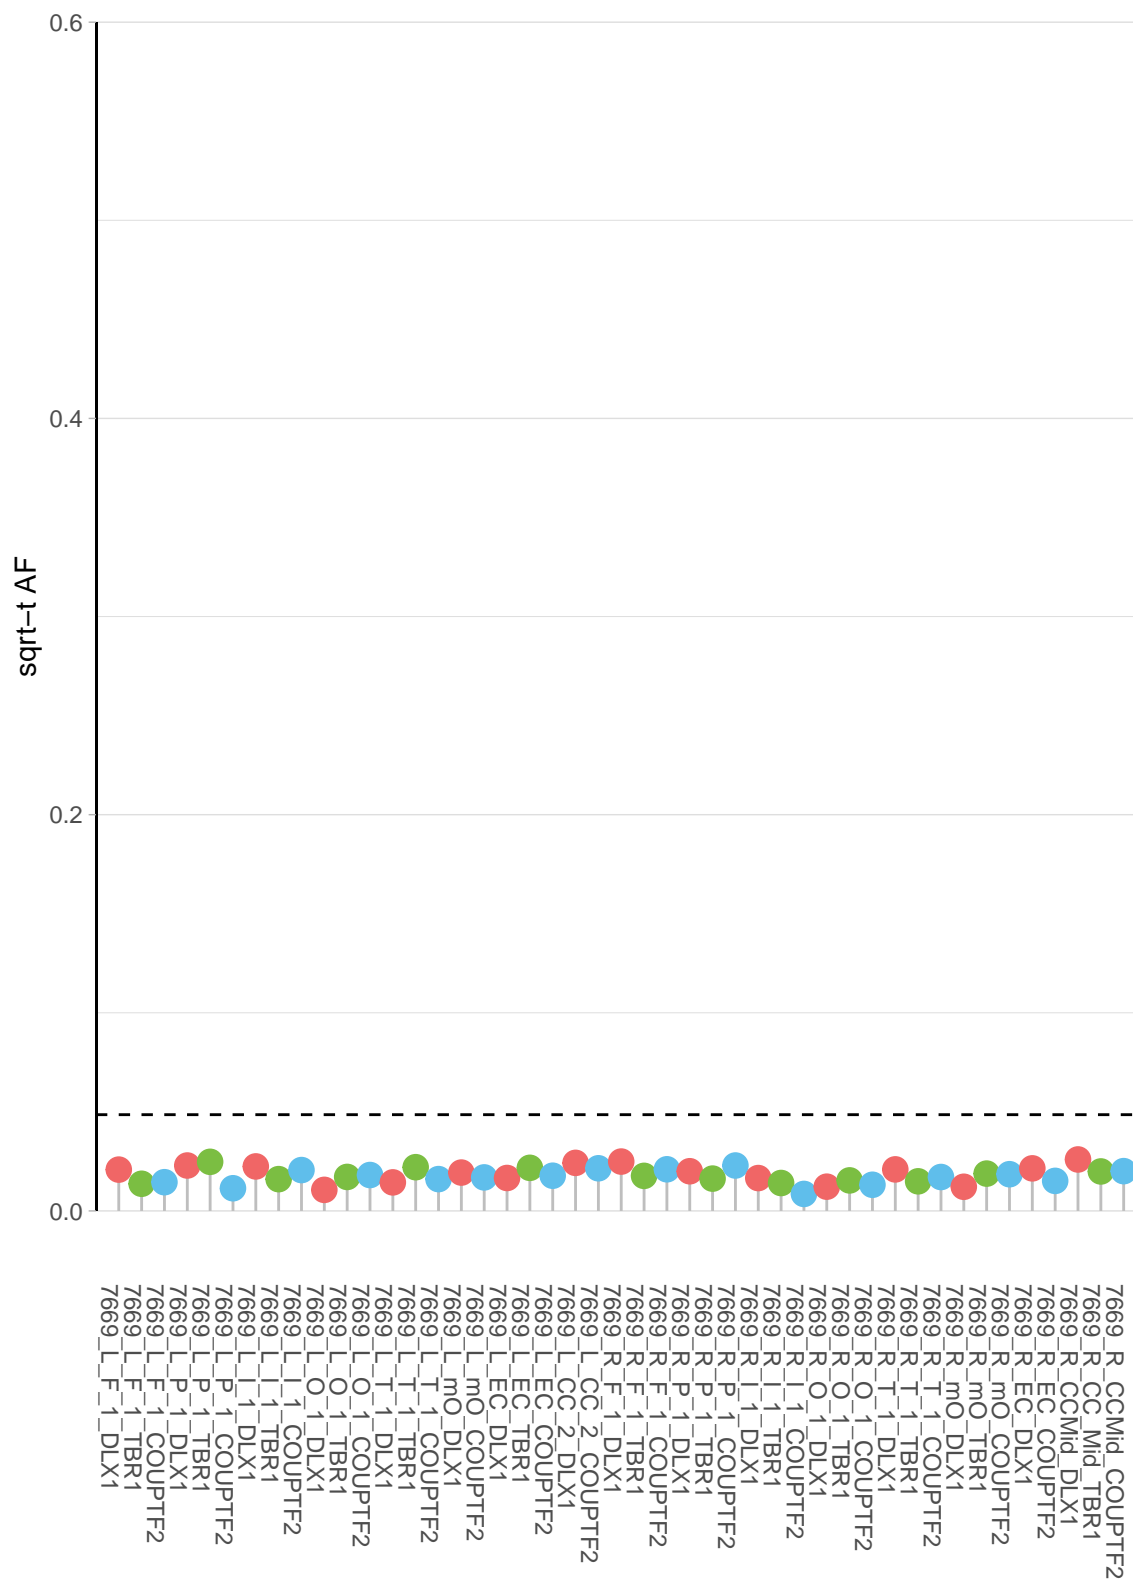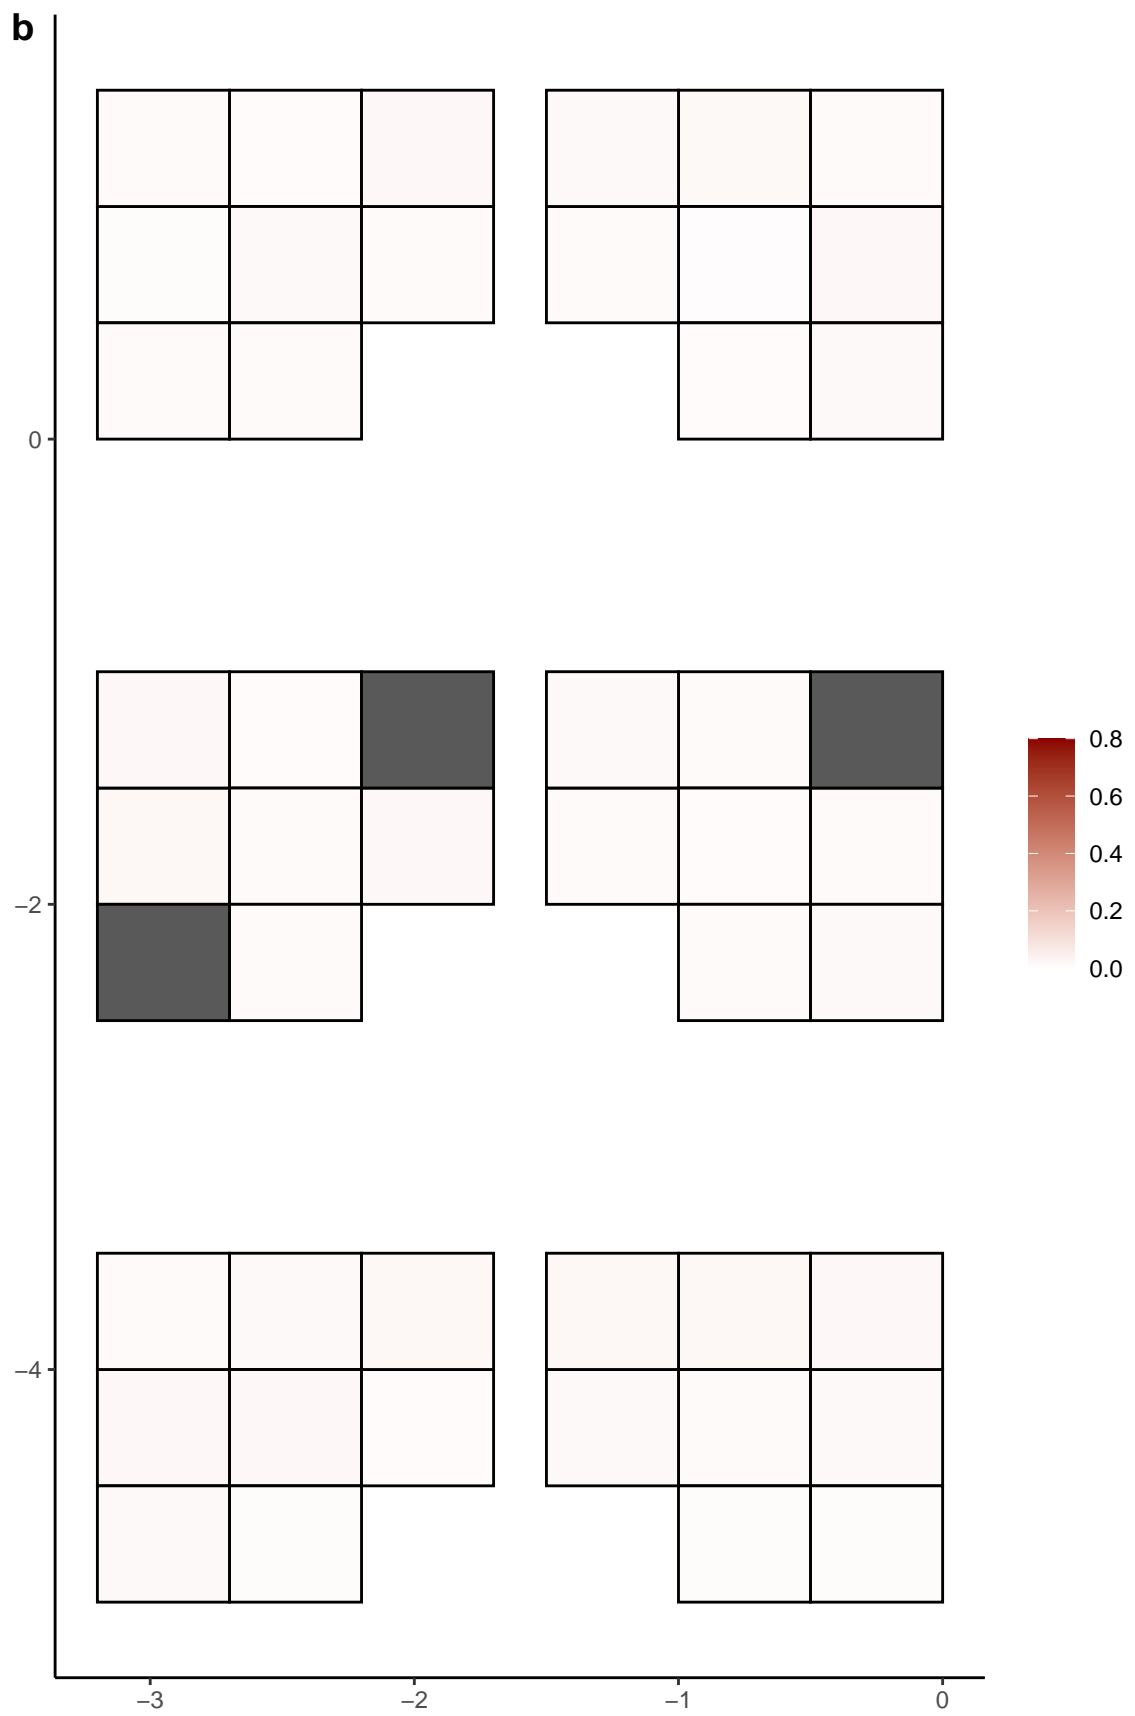

**a** ID05 5-121862406-C-T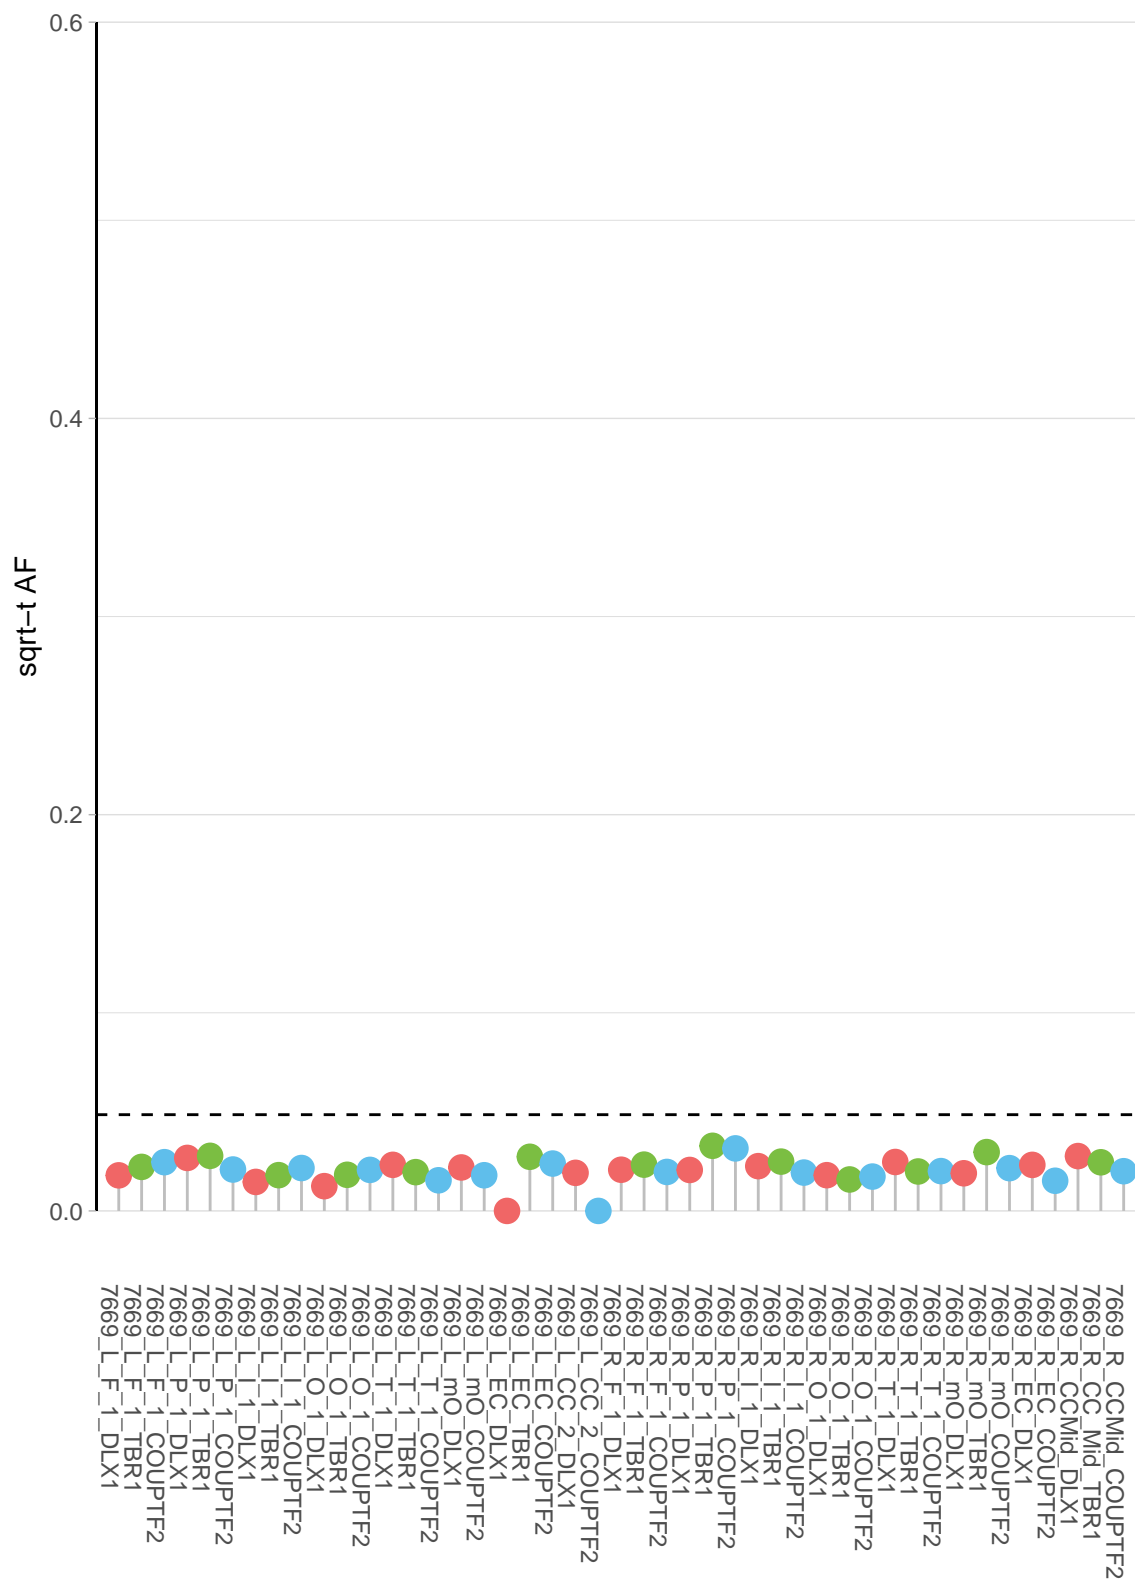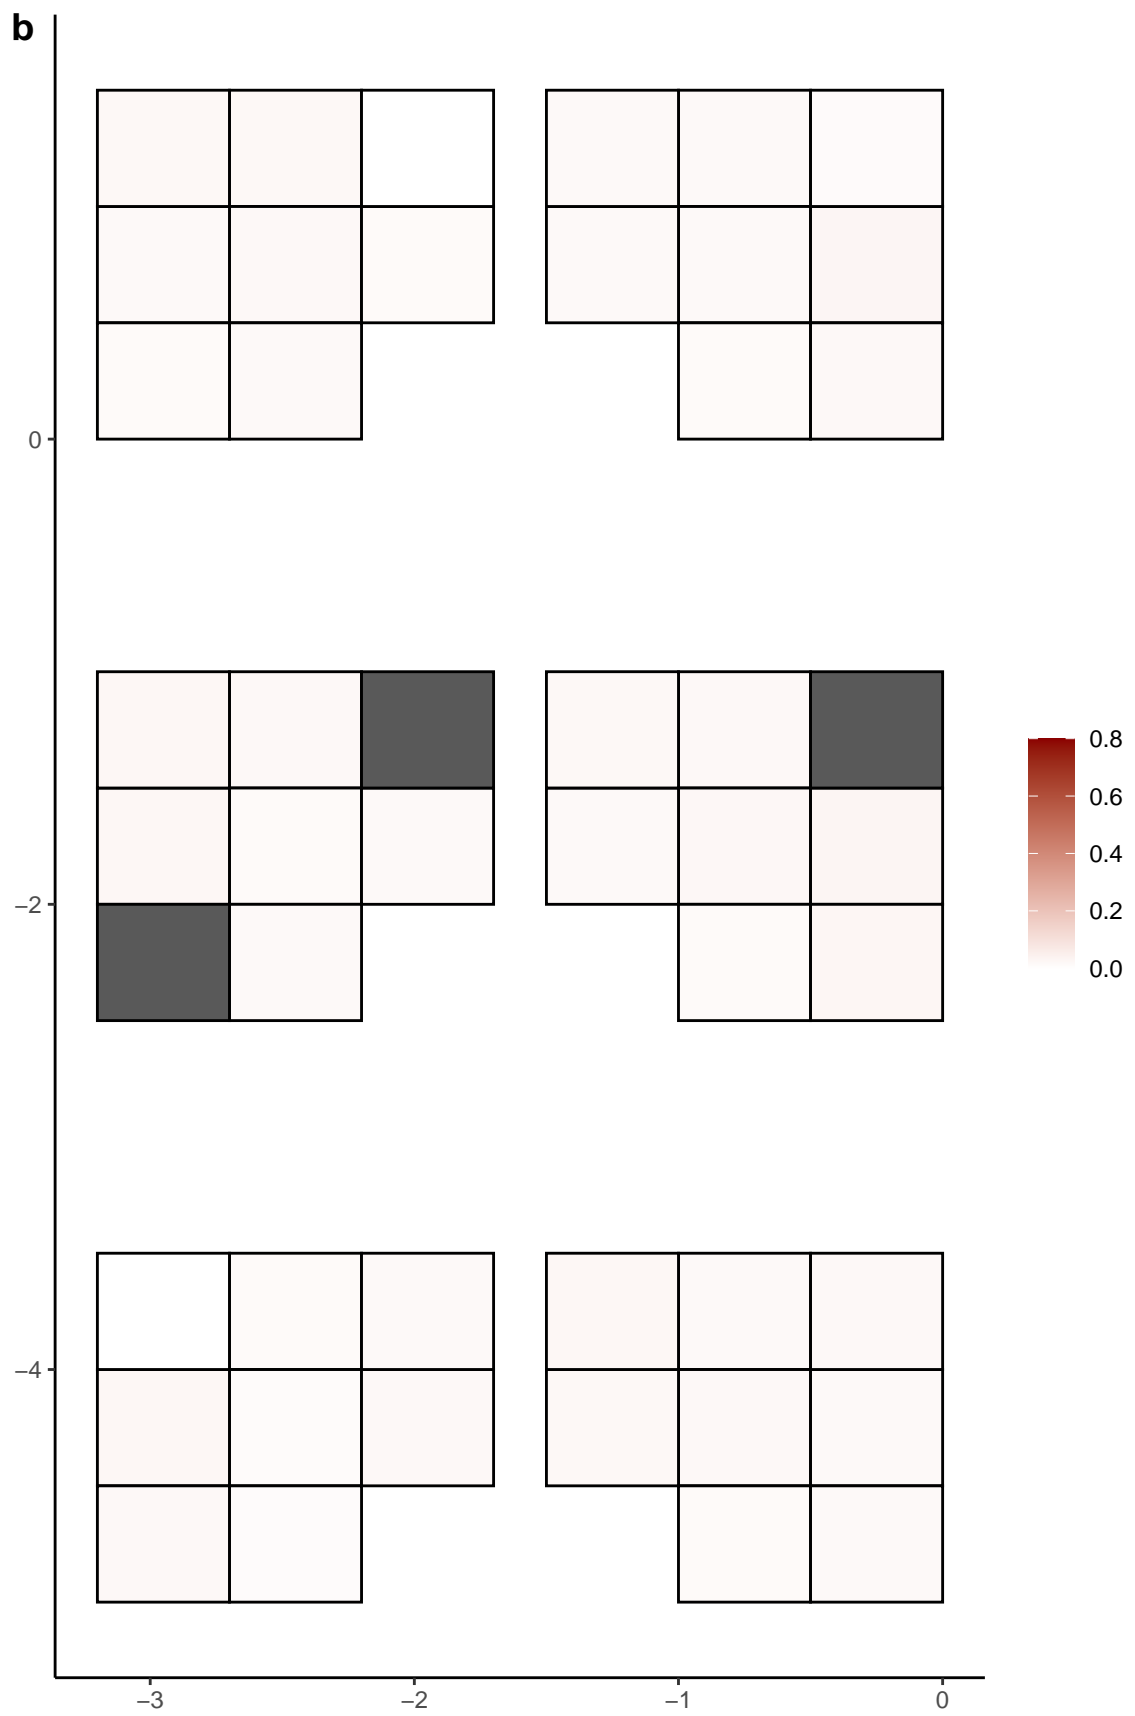

**a** ID05 5-122337591-C-T

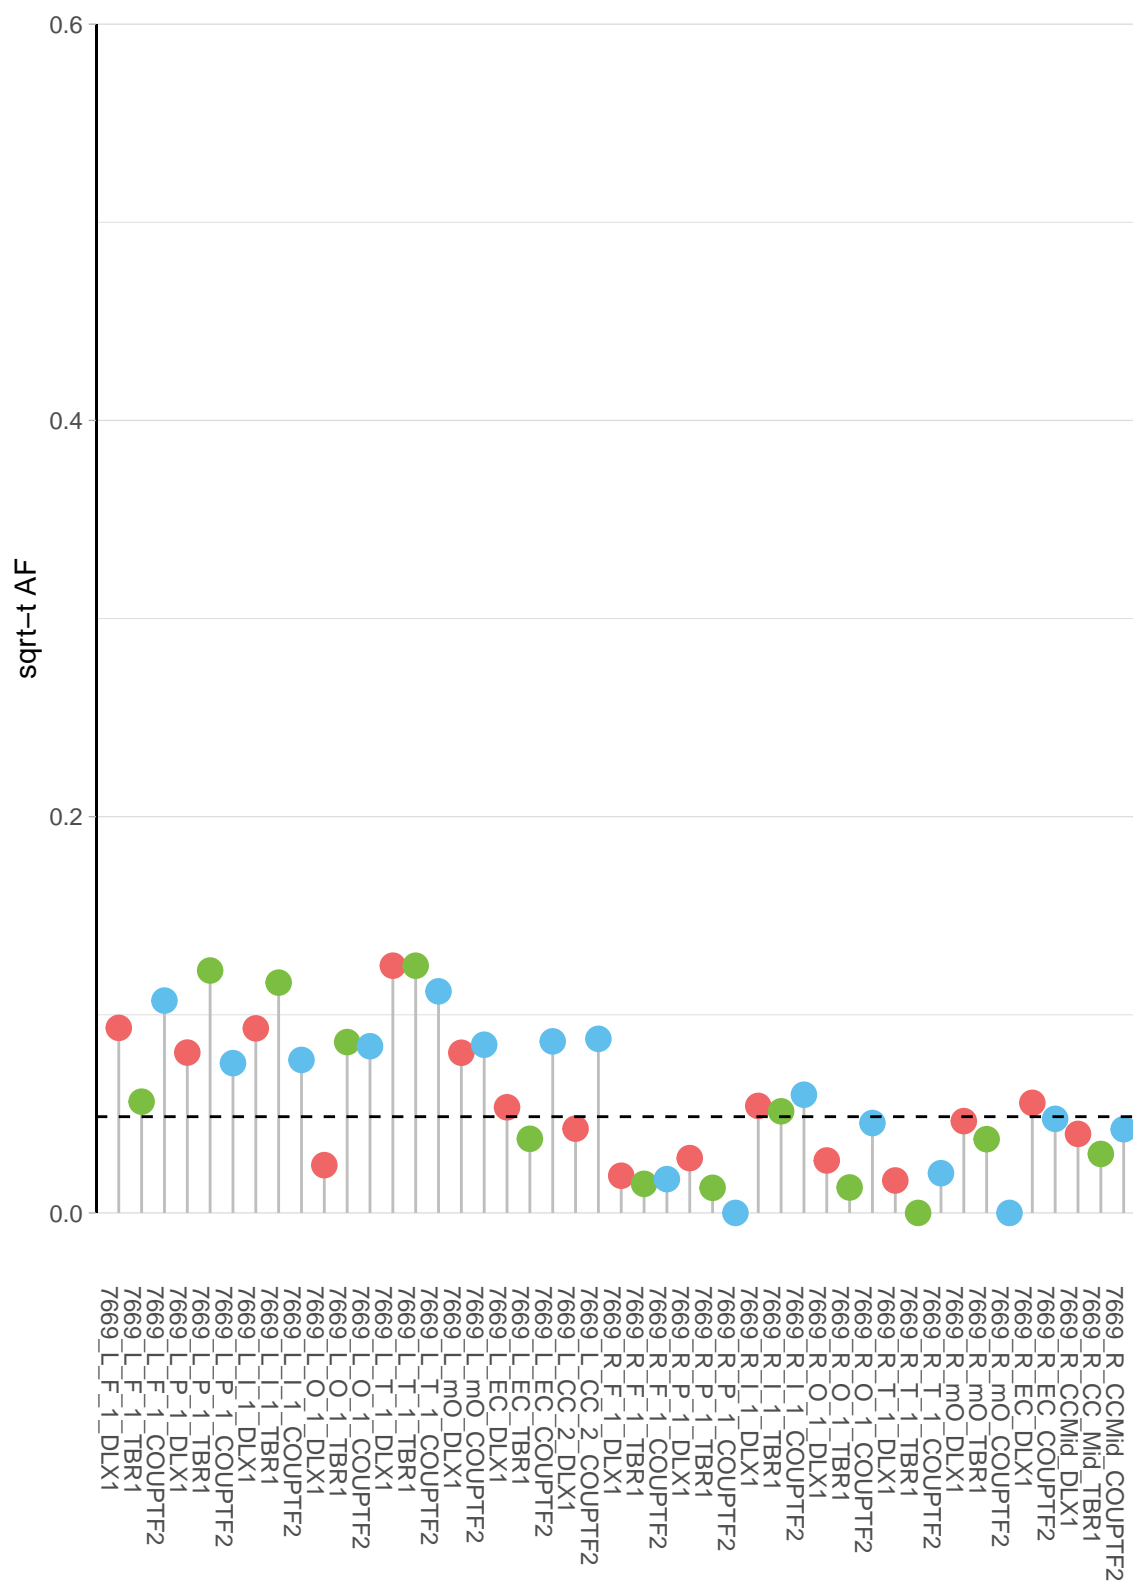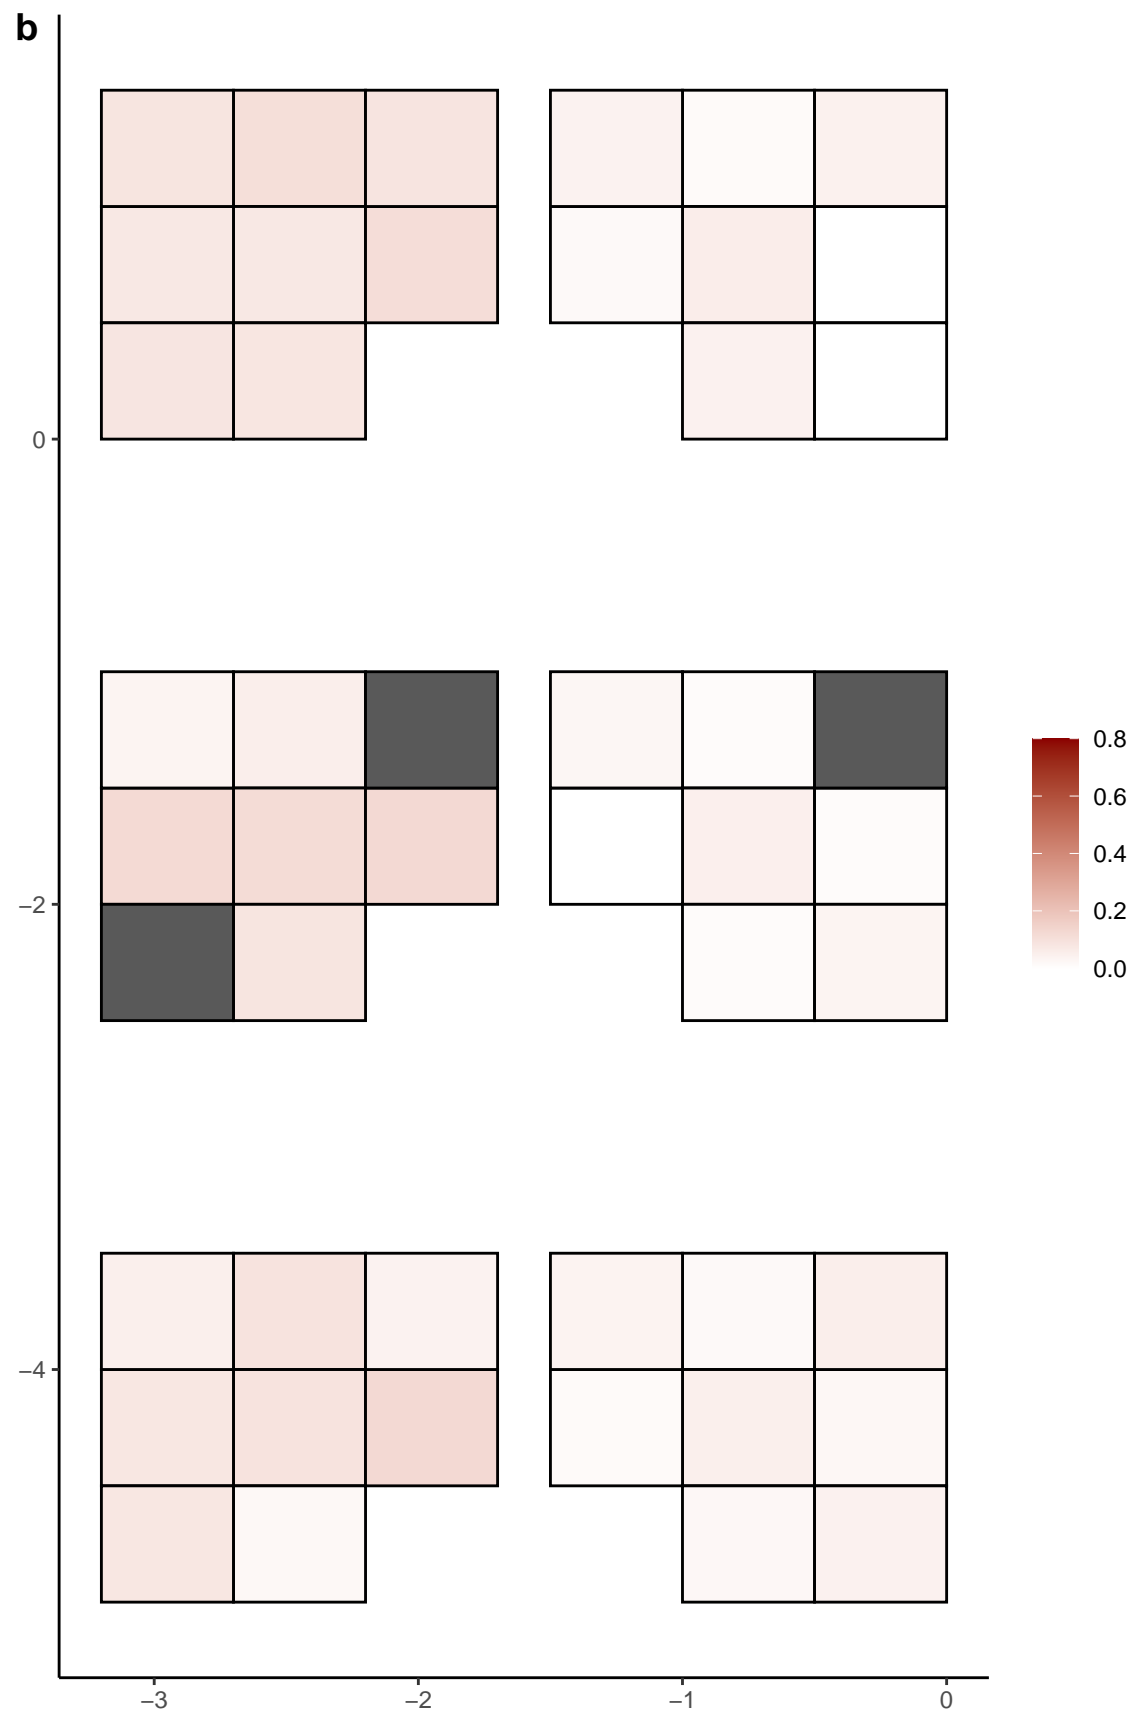

**a** ID05 5-13021088-C-T

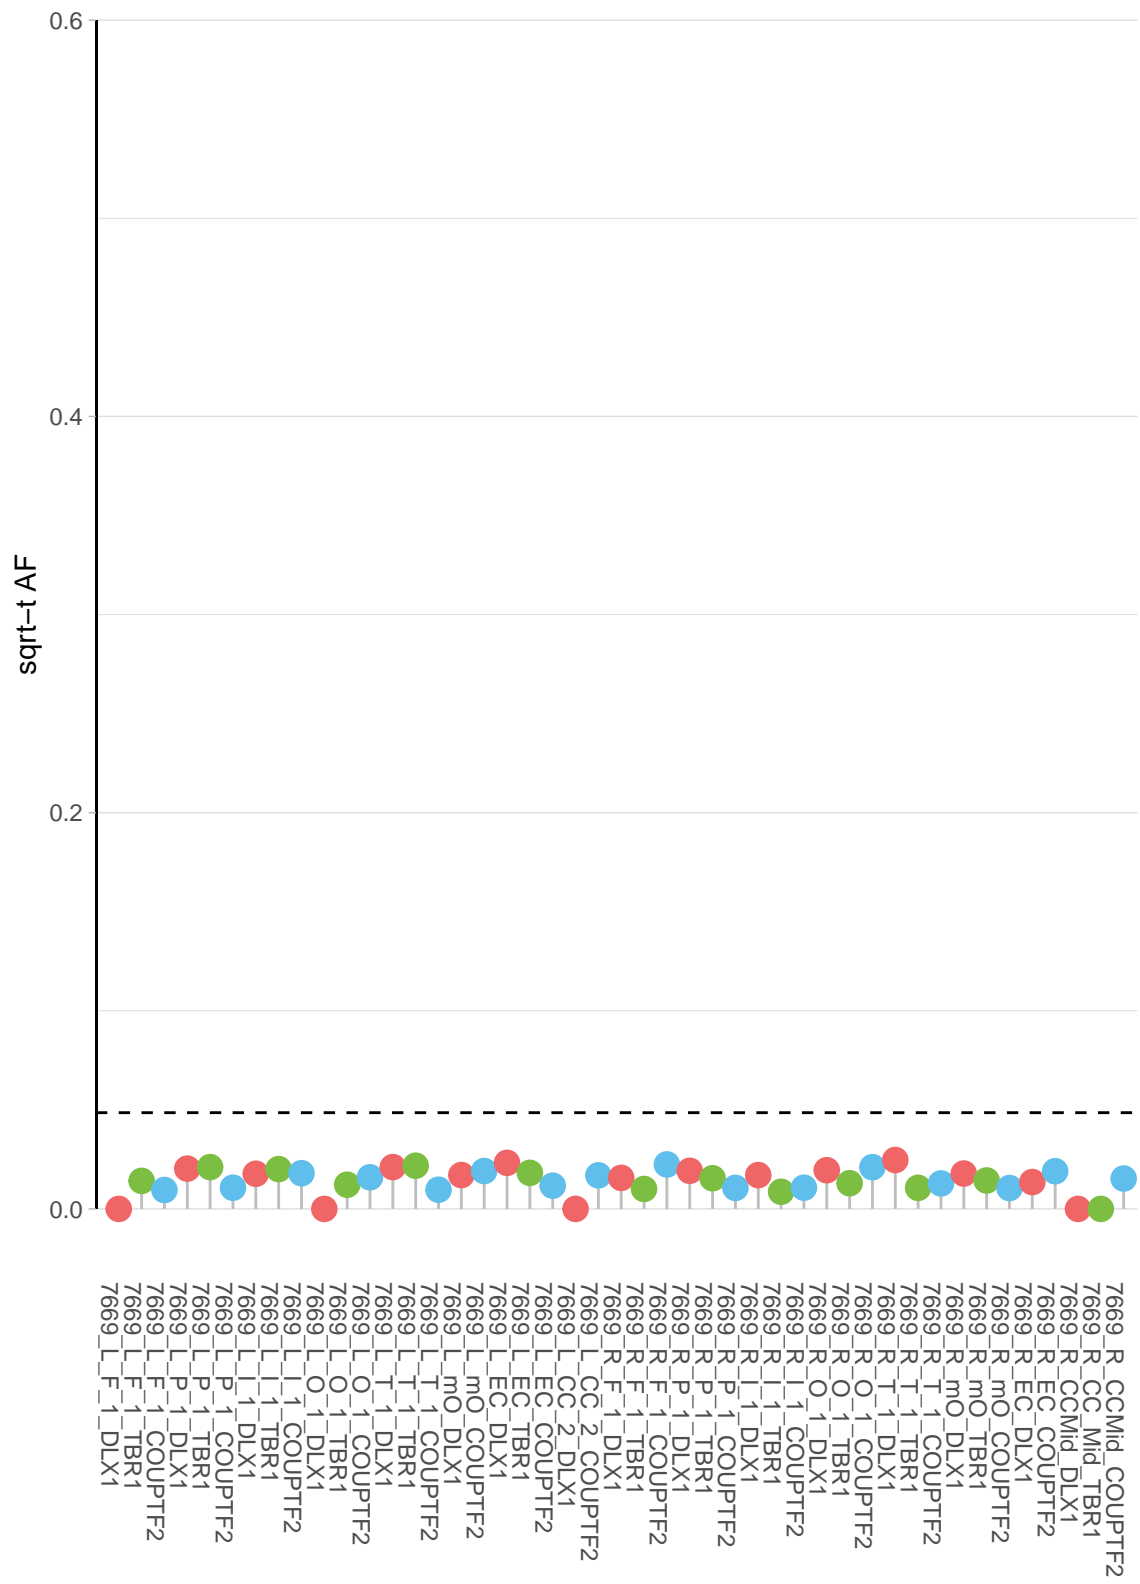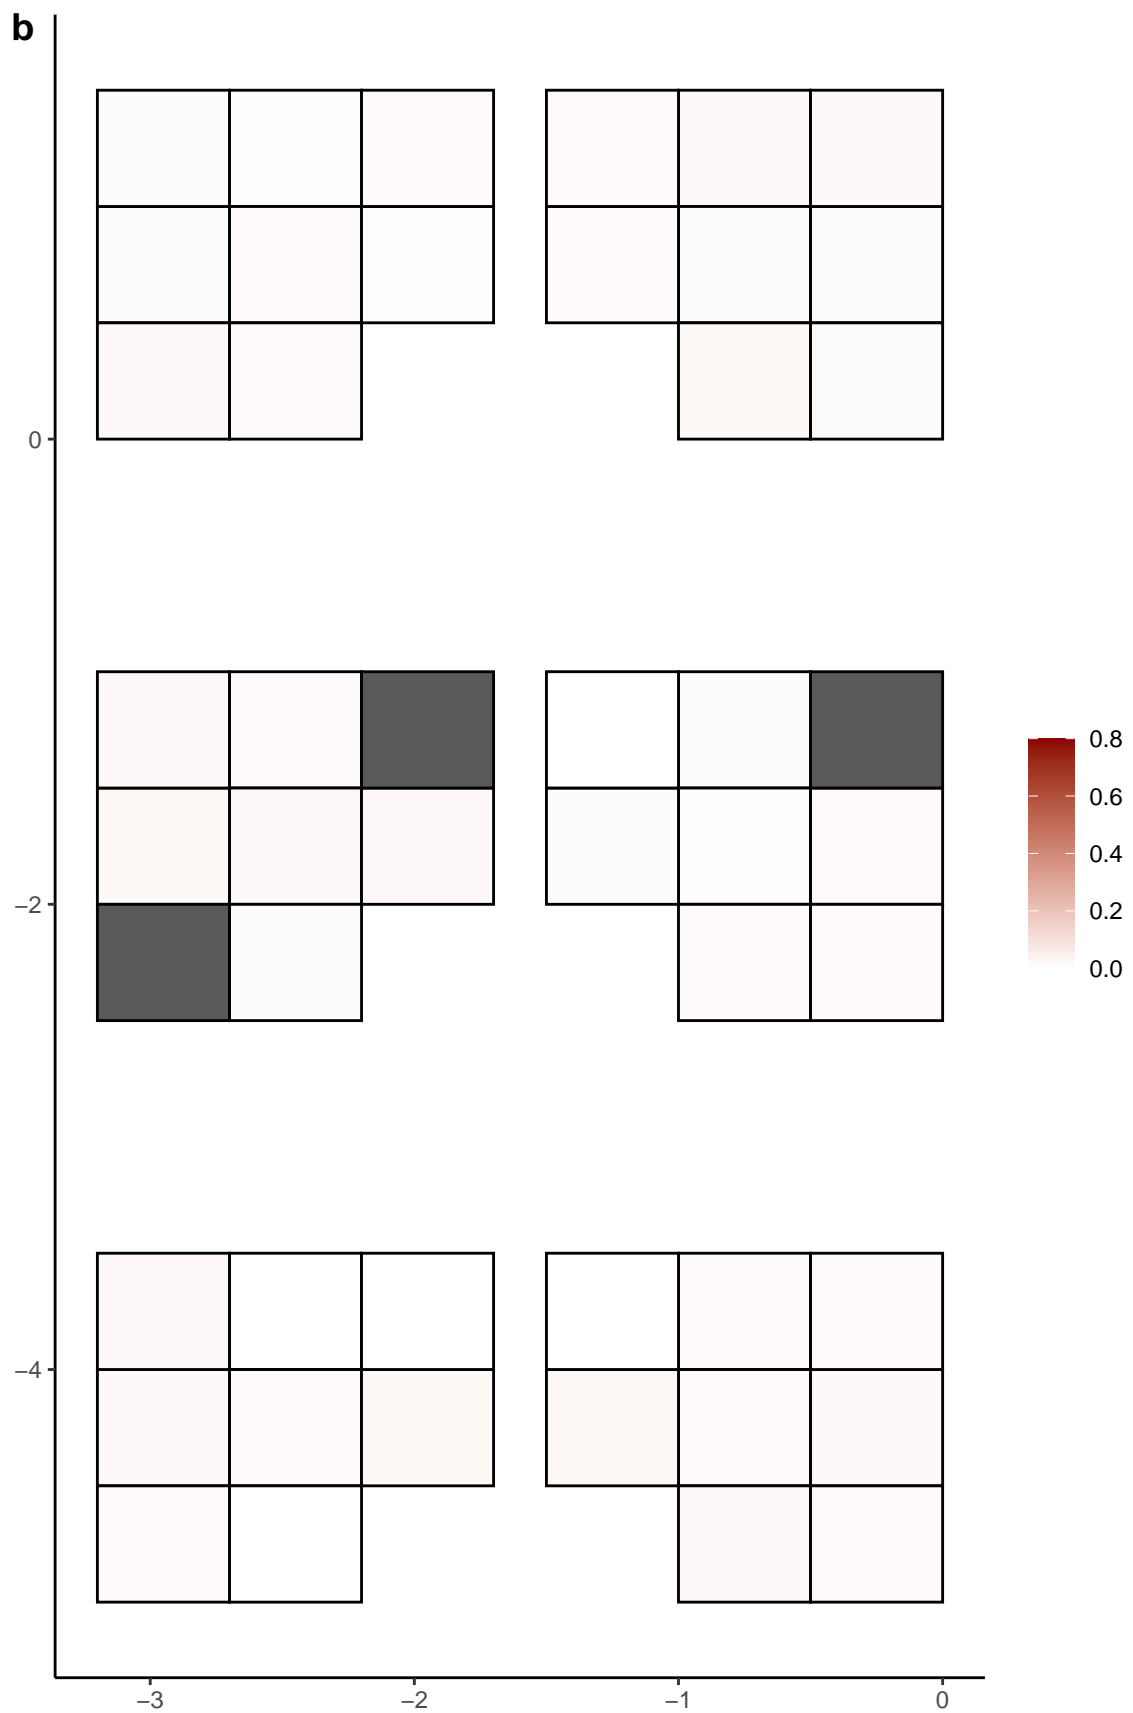

**a** ID05 5-132489779-A-G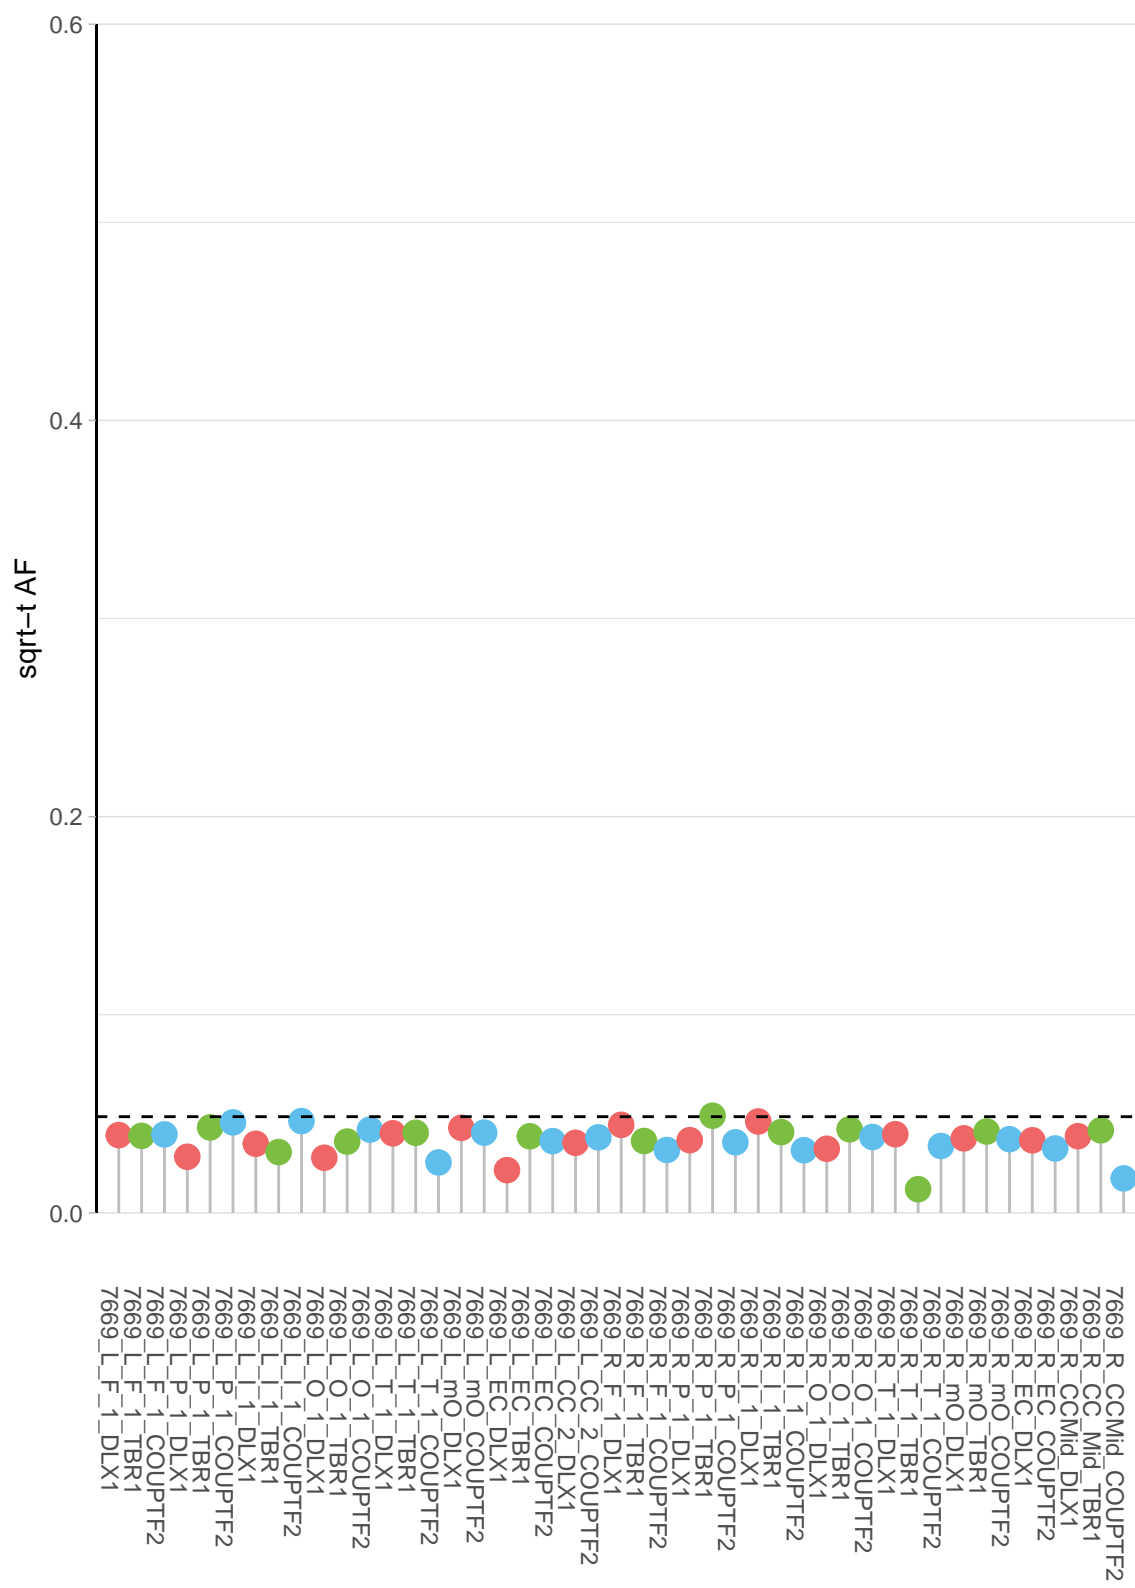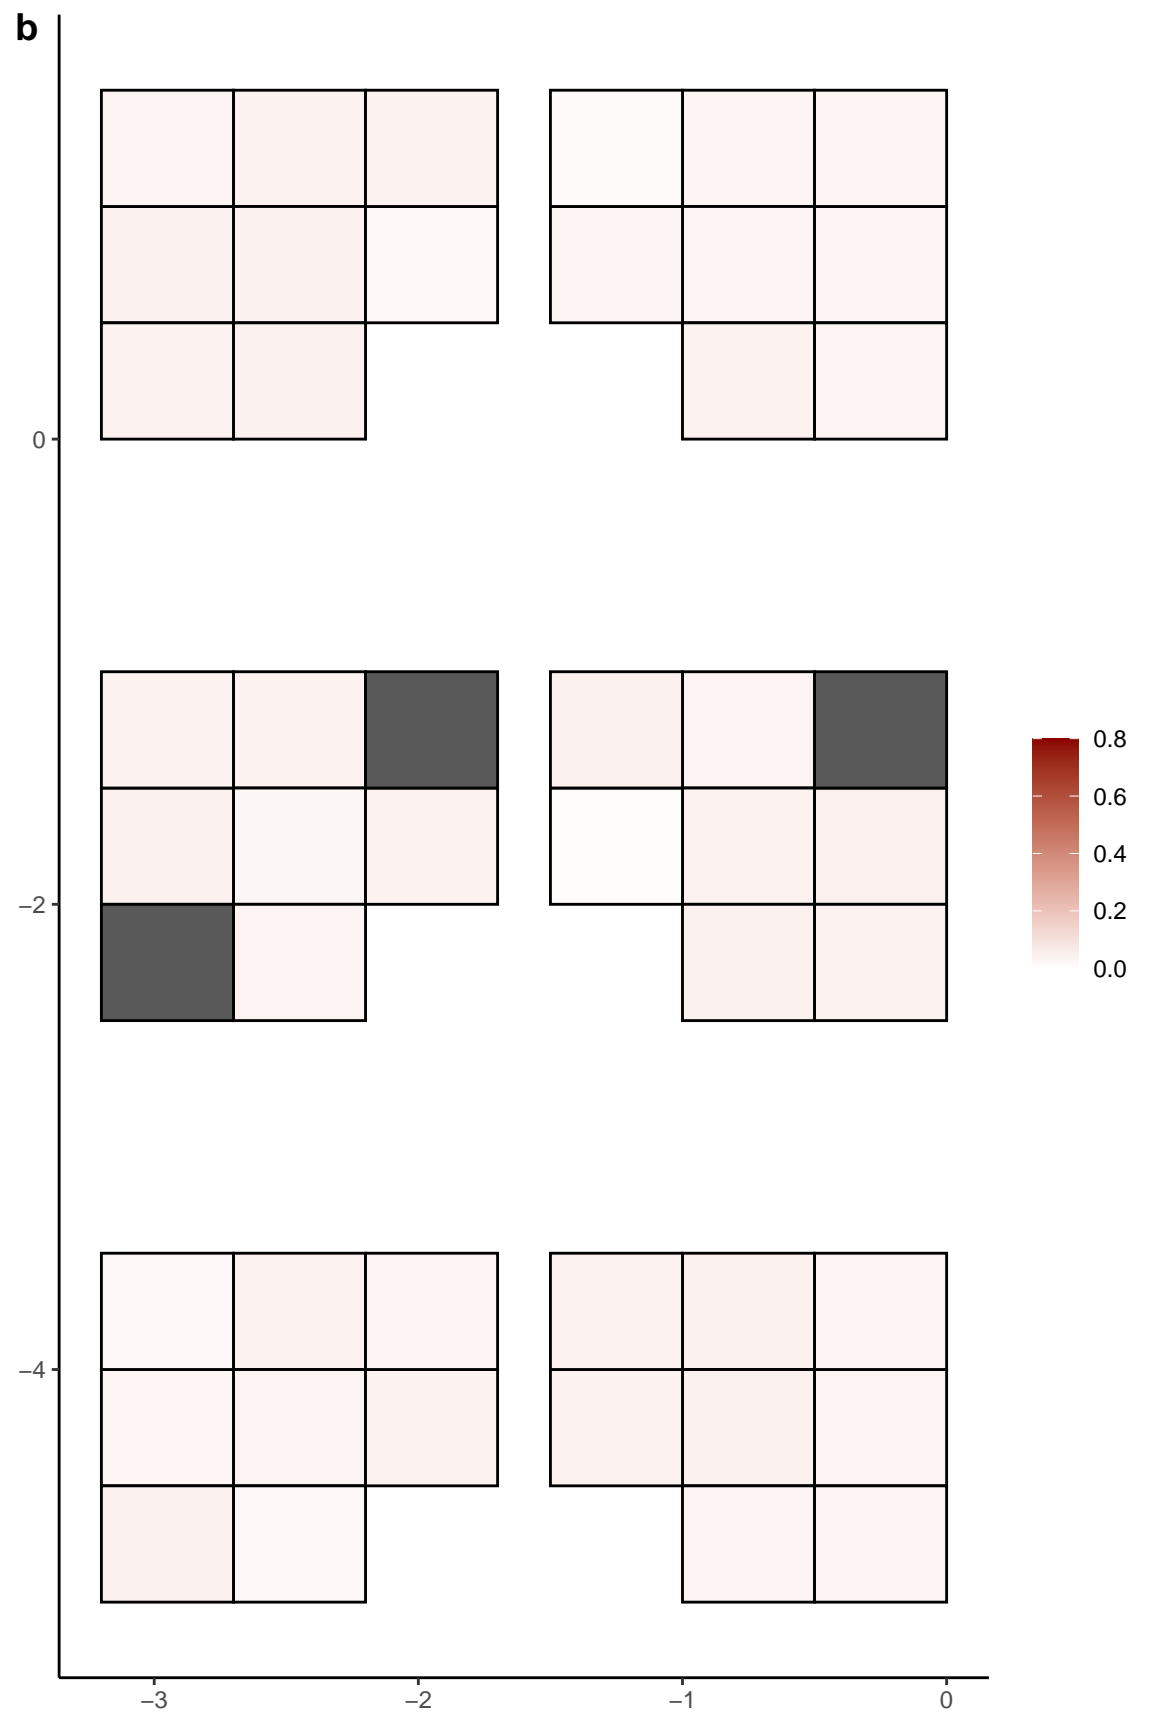

**a** ID05 5-132635696-C-T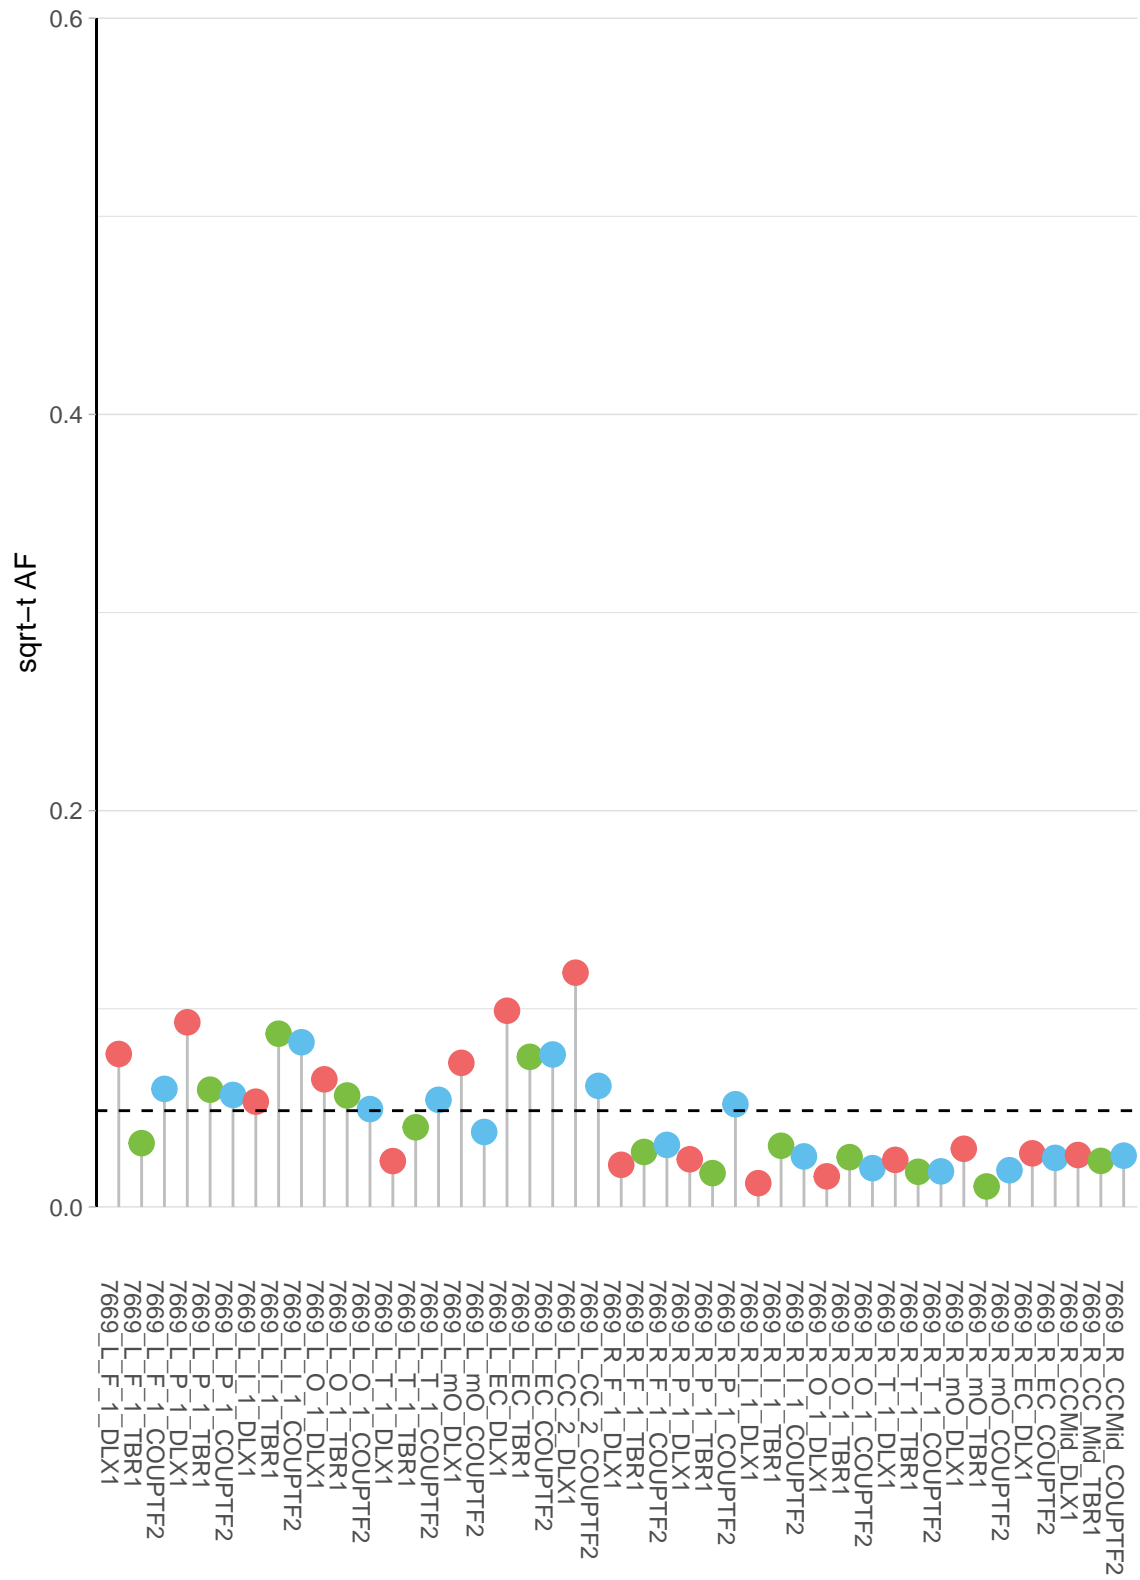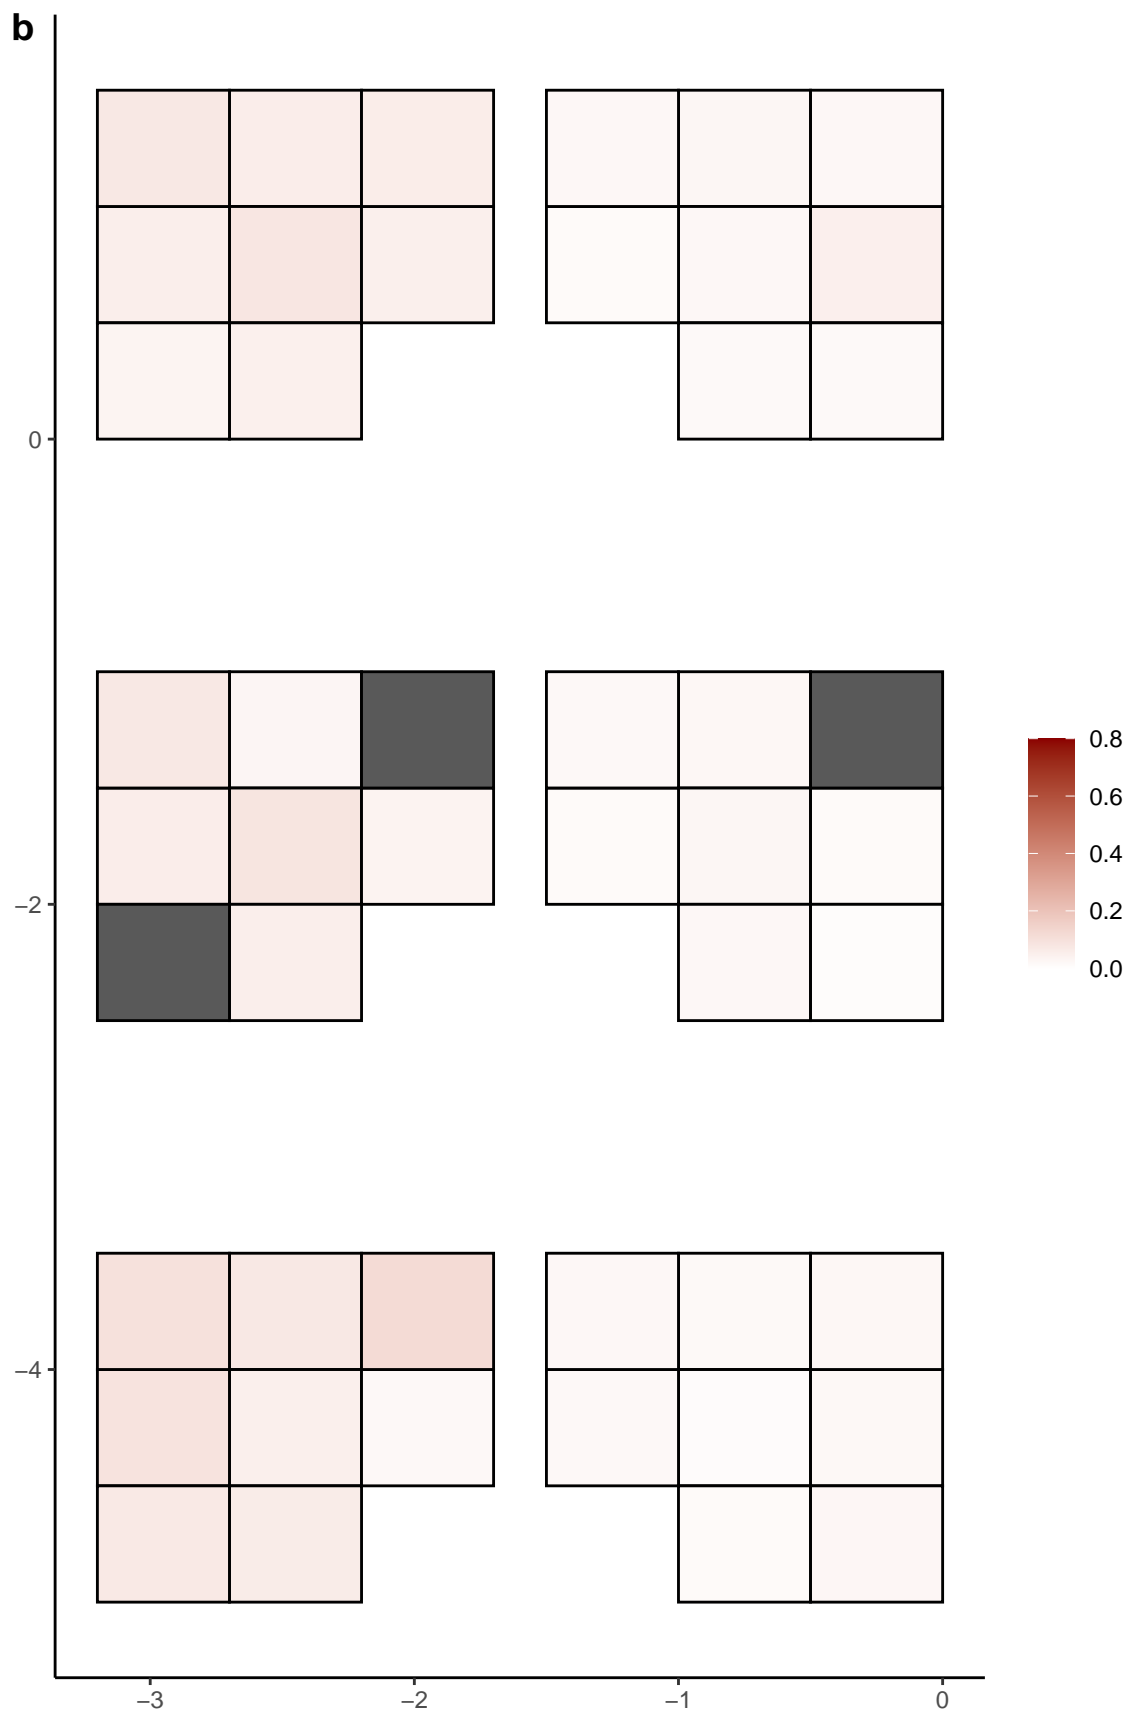



**a** ID05 5-133636296-C-A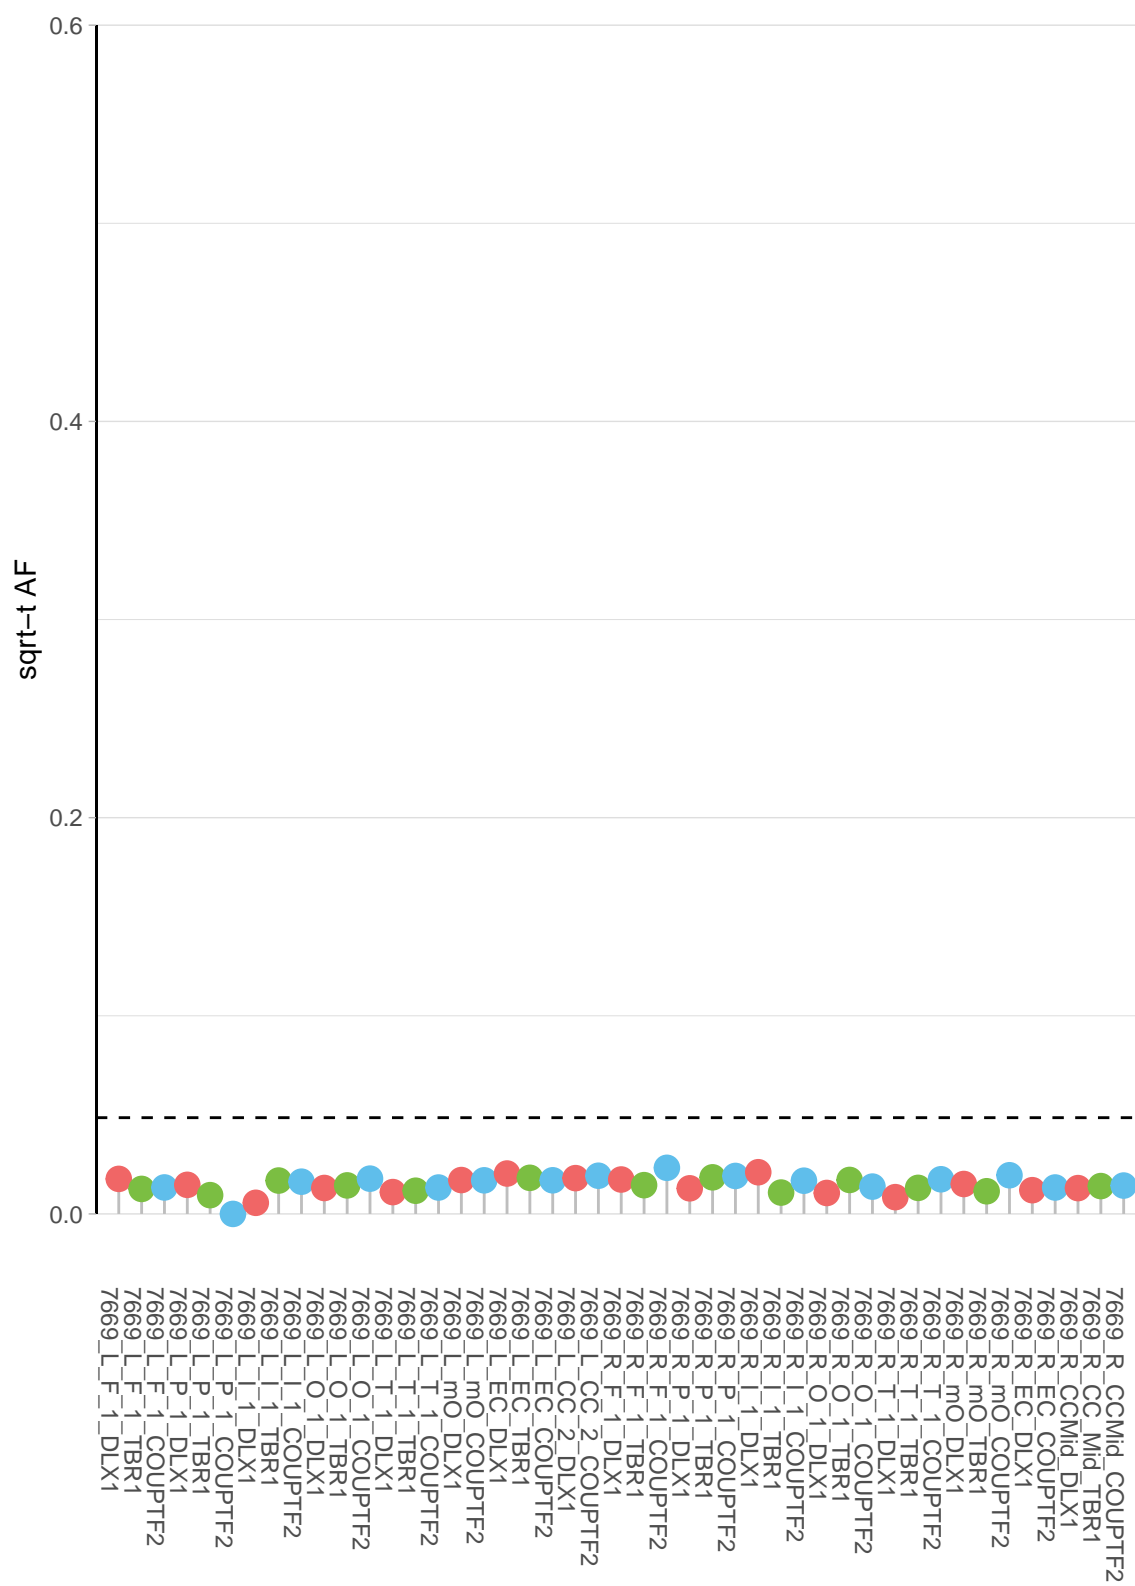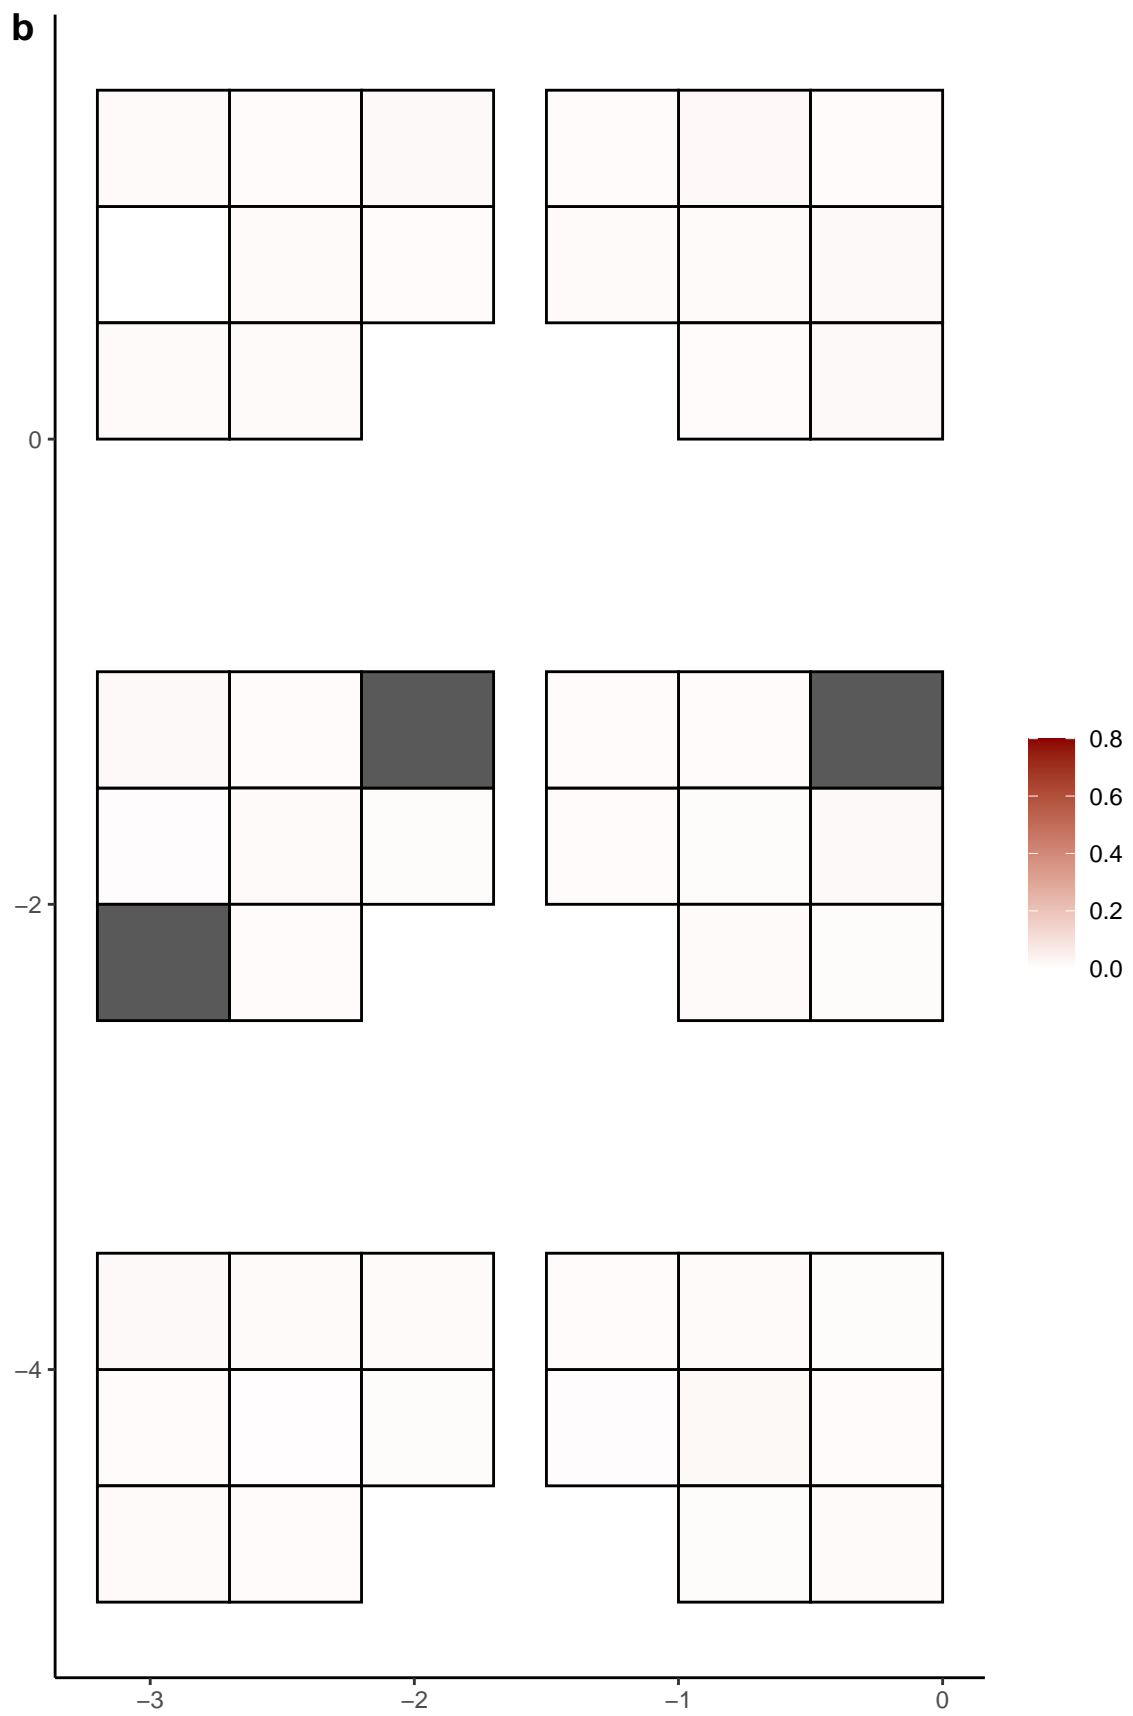

**a** ID05 5-142247168-G-A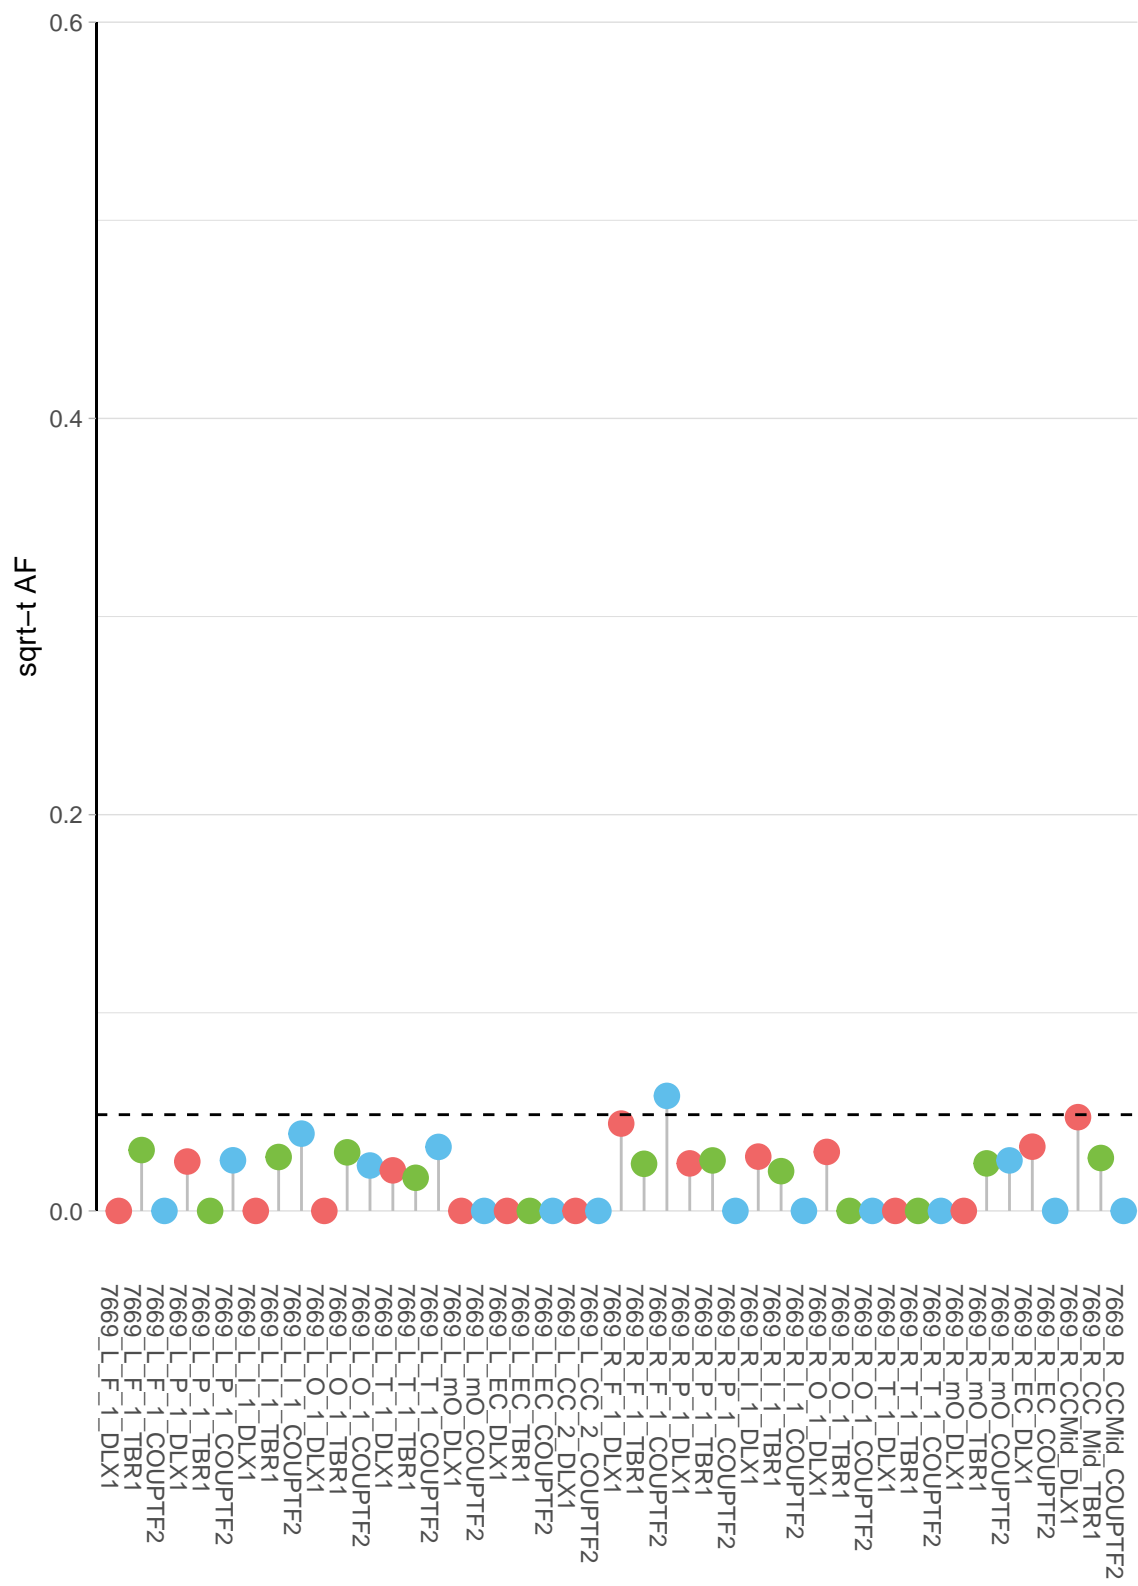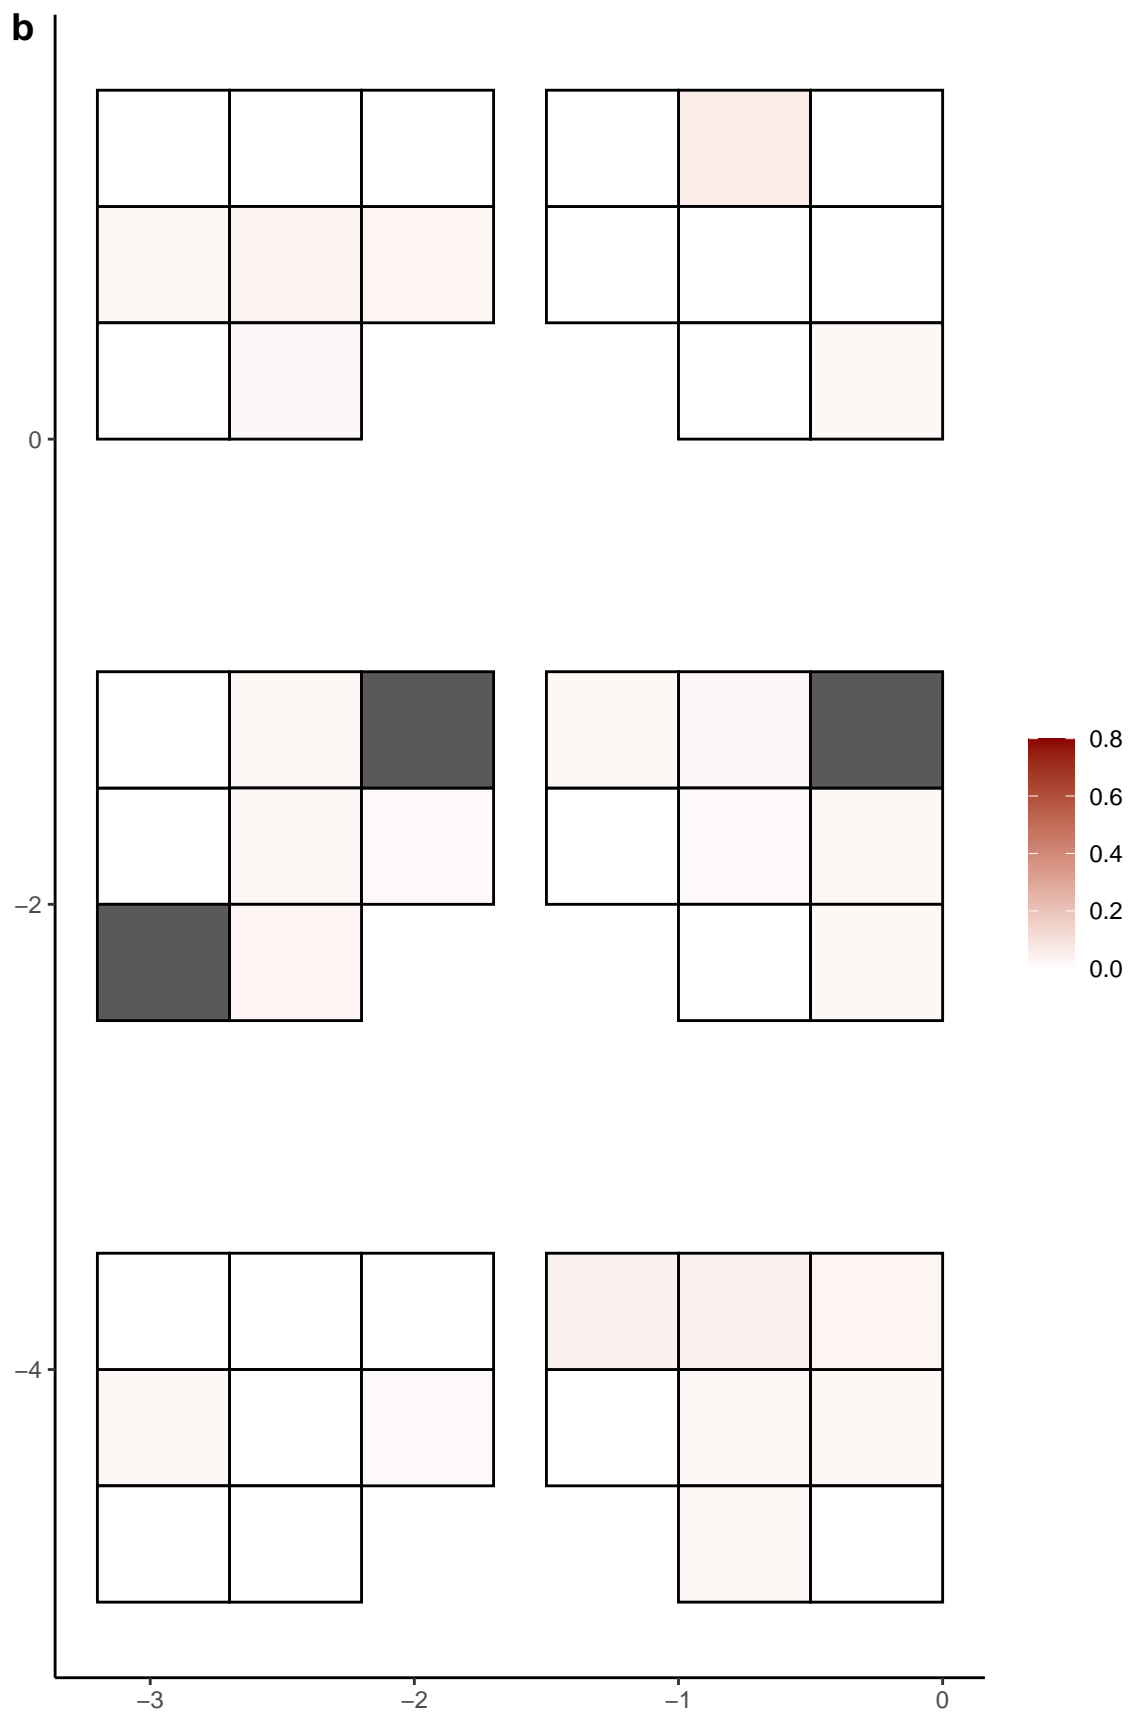

**a** ID05 5-143984939-G-A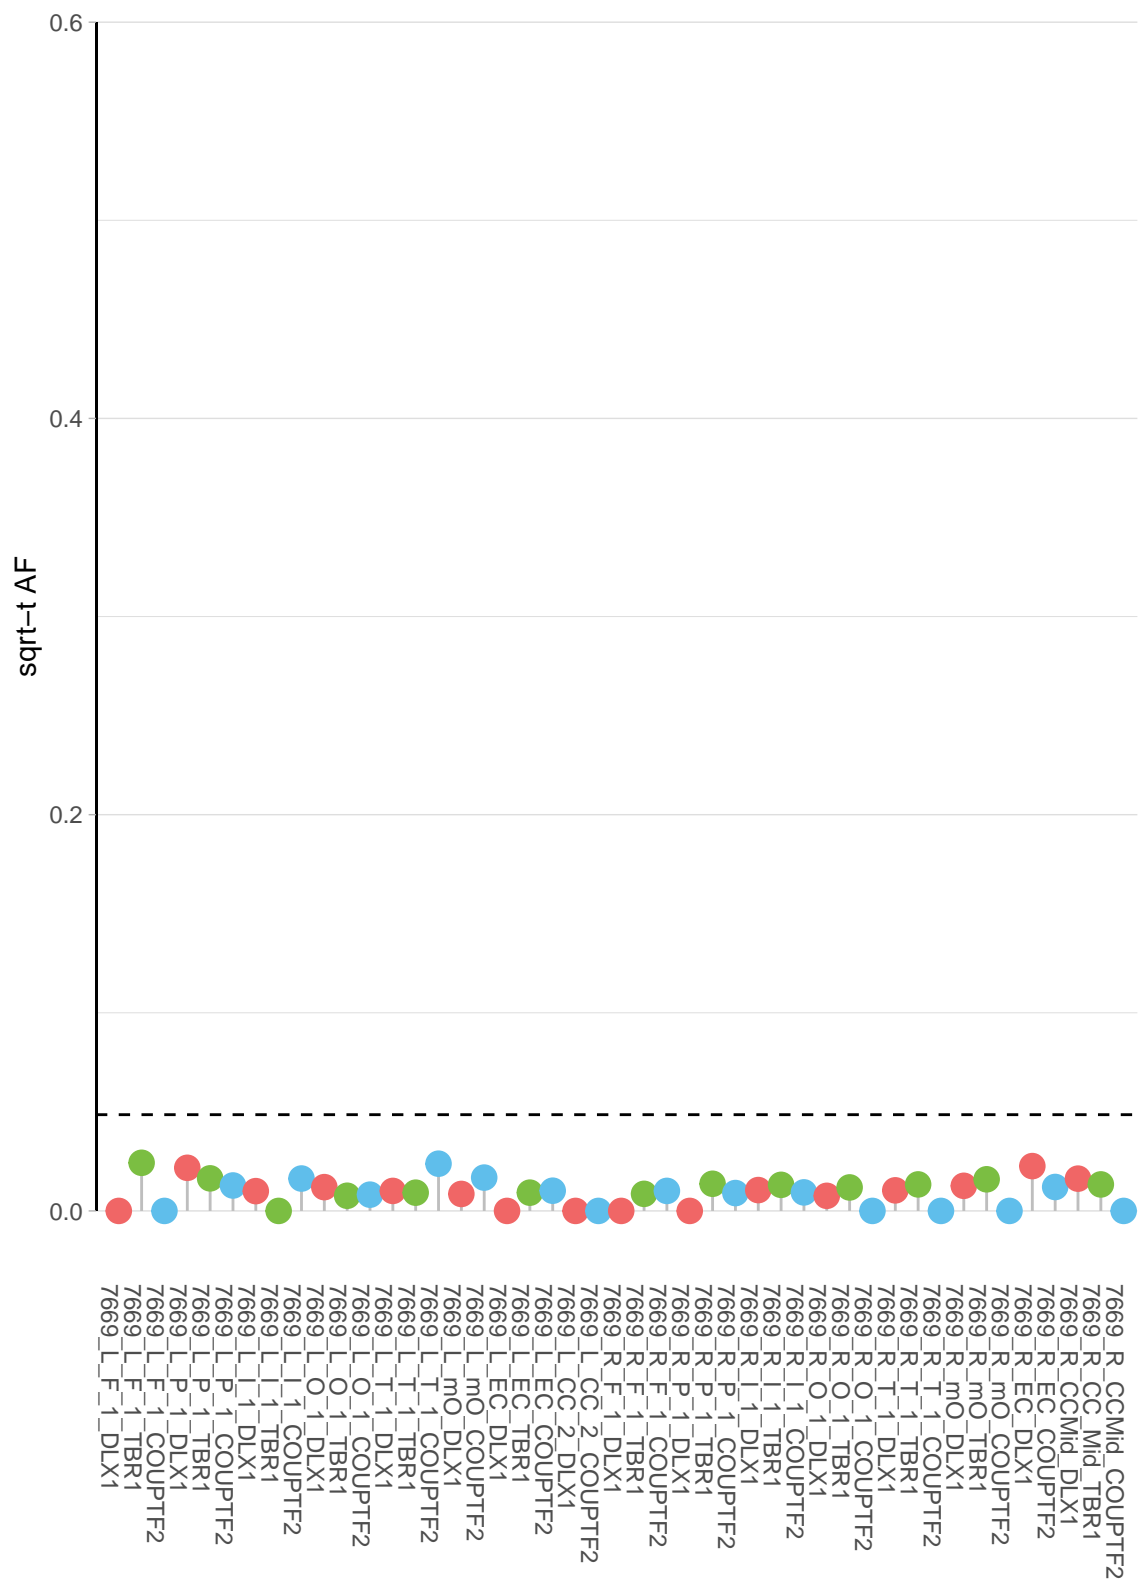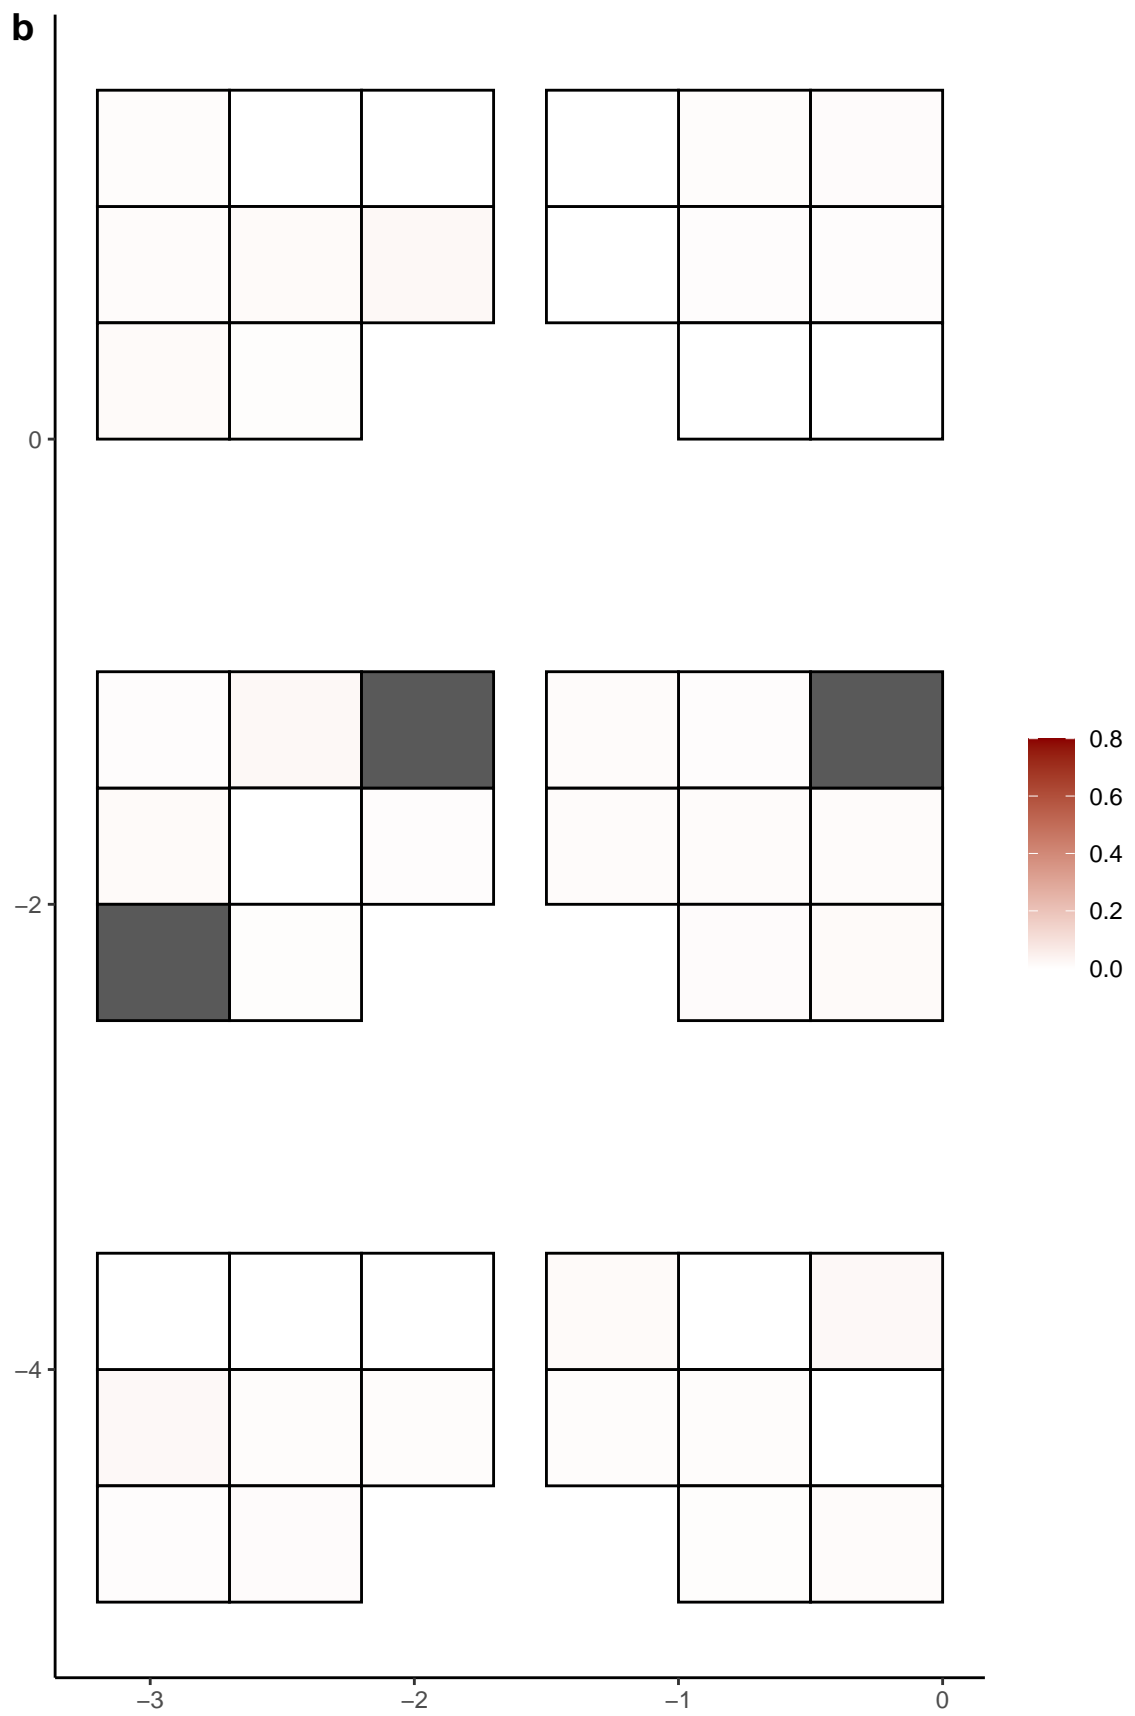

**a** ID05 5-155350078-C-T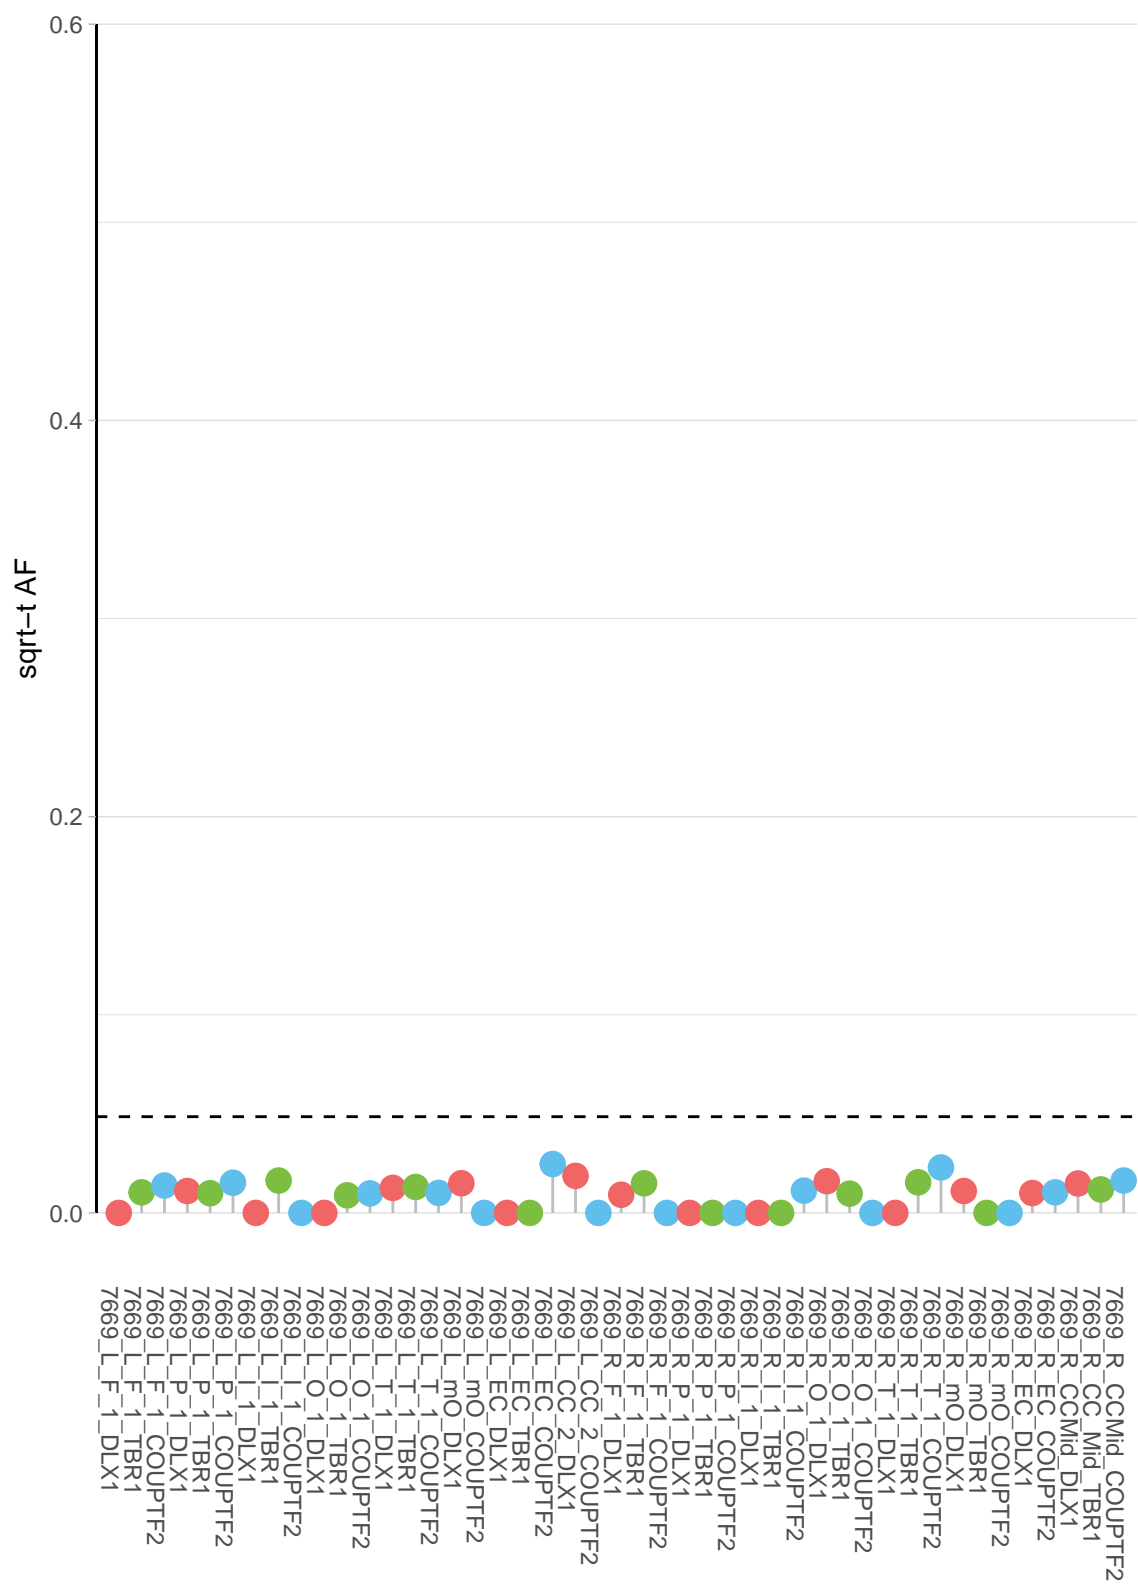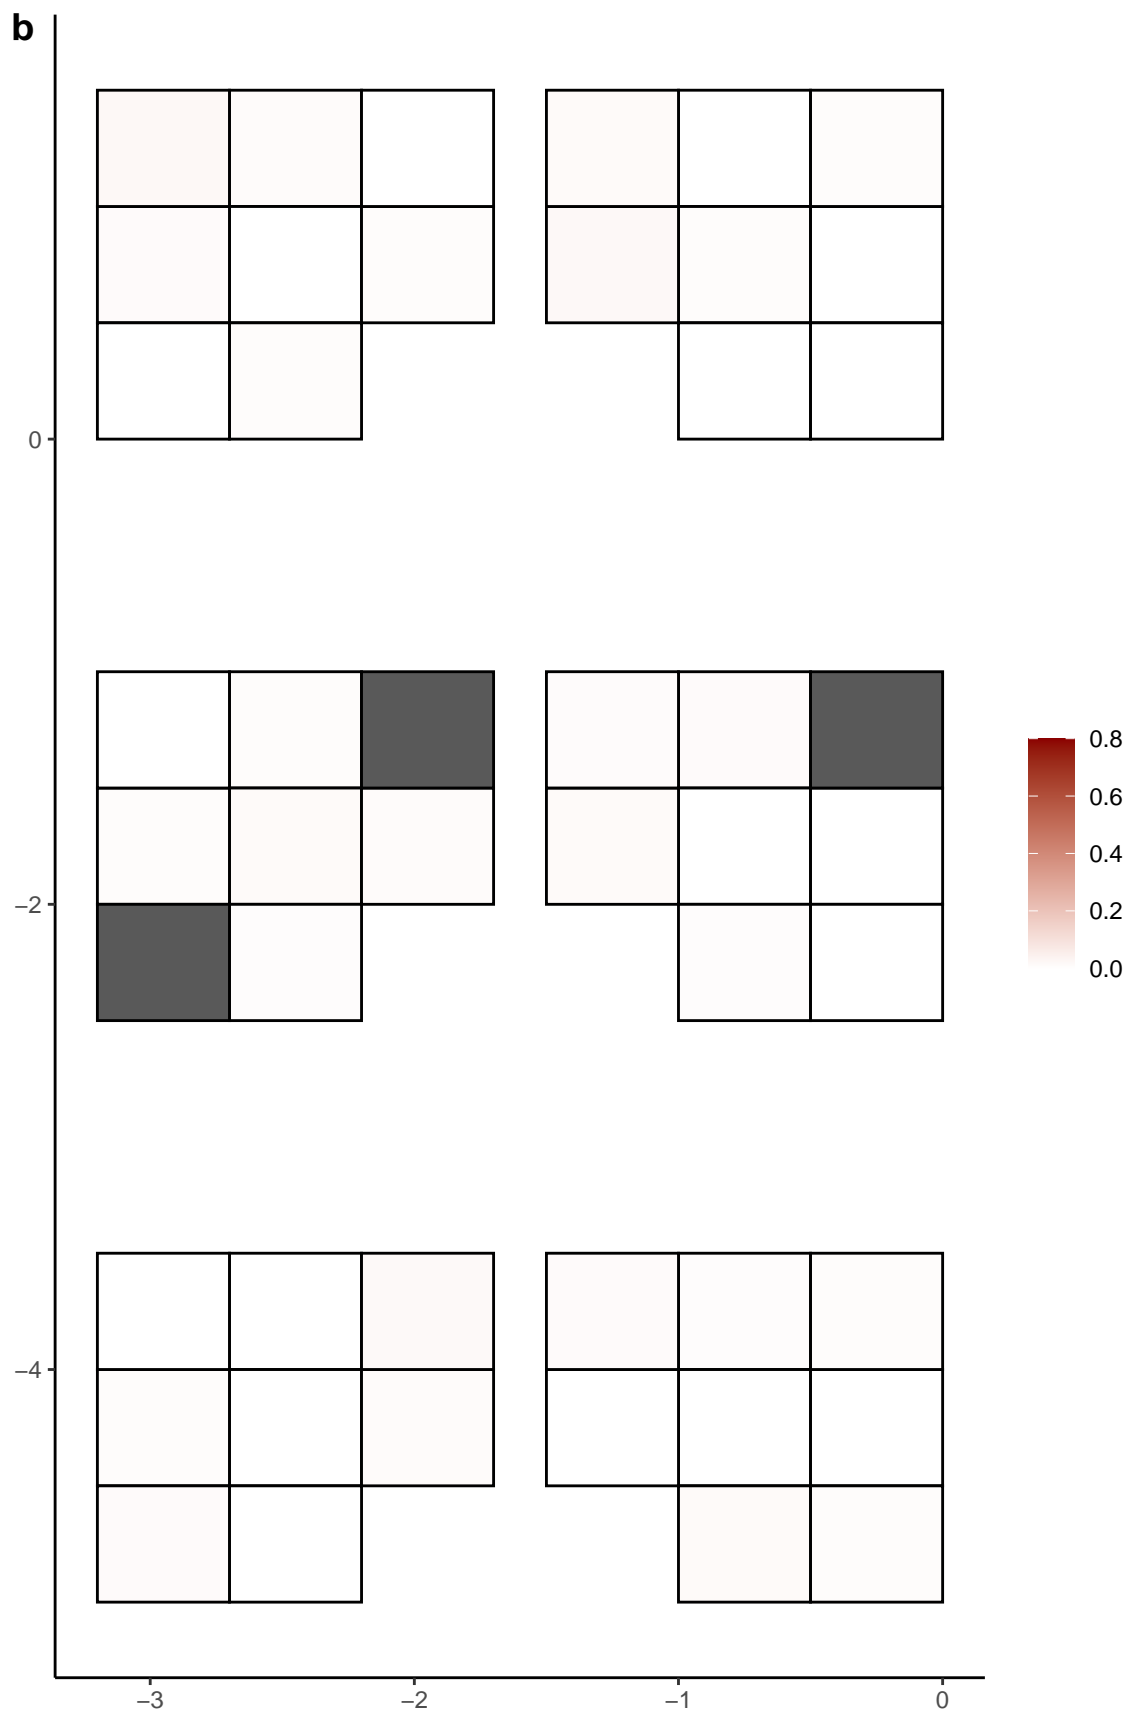

**a** ID05 5-155351365-C-A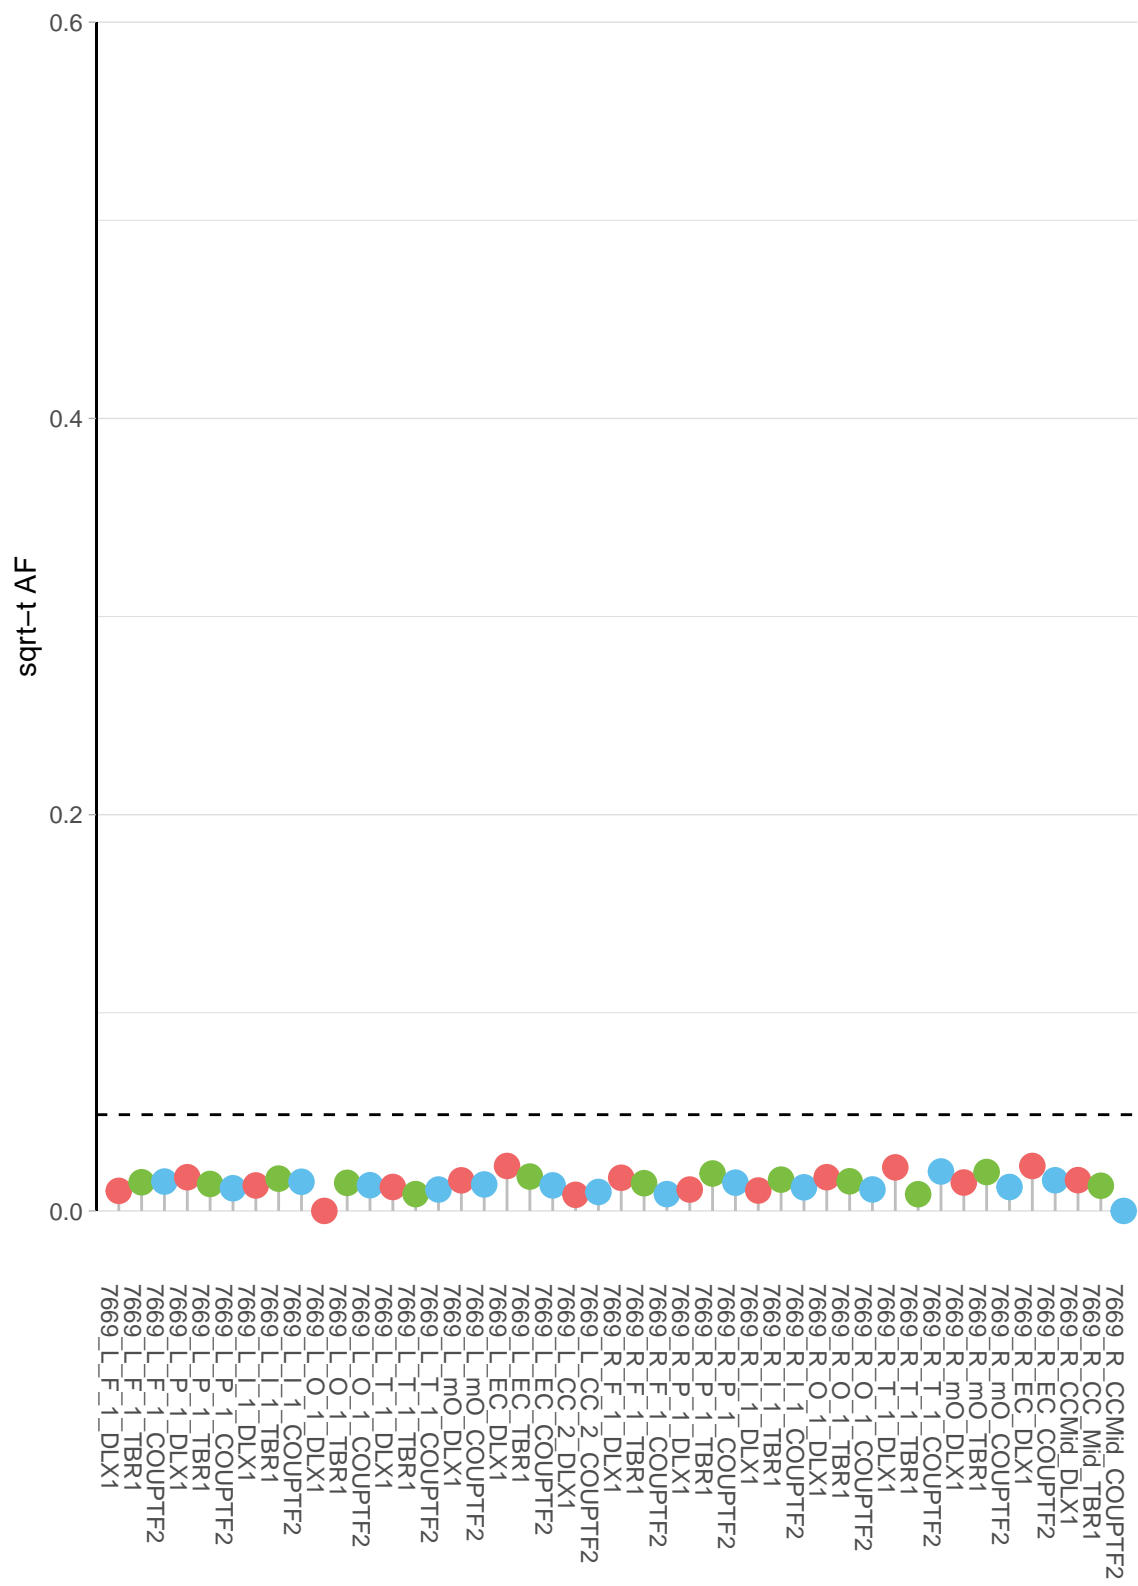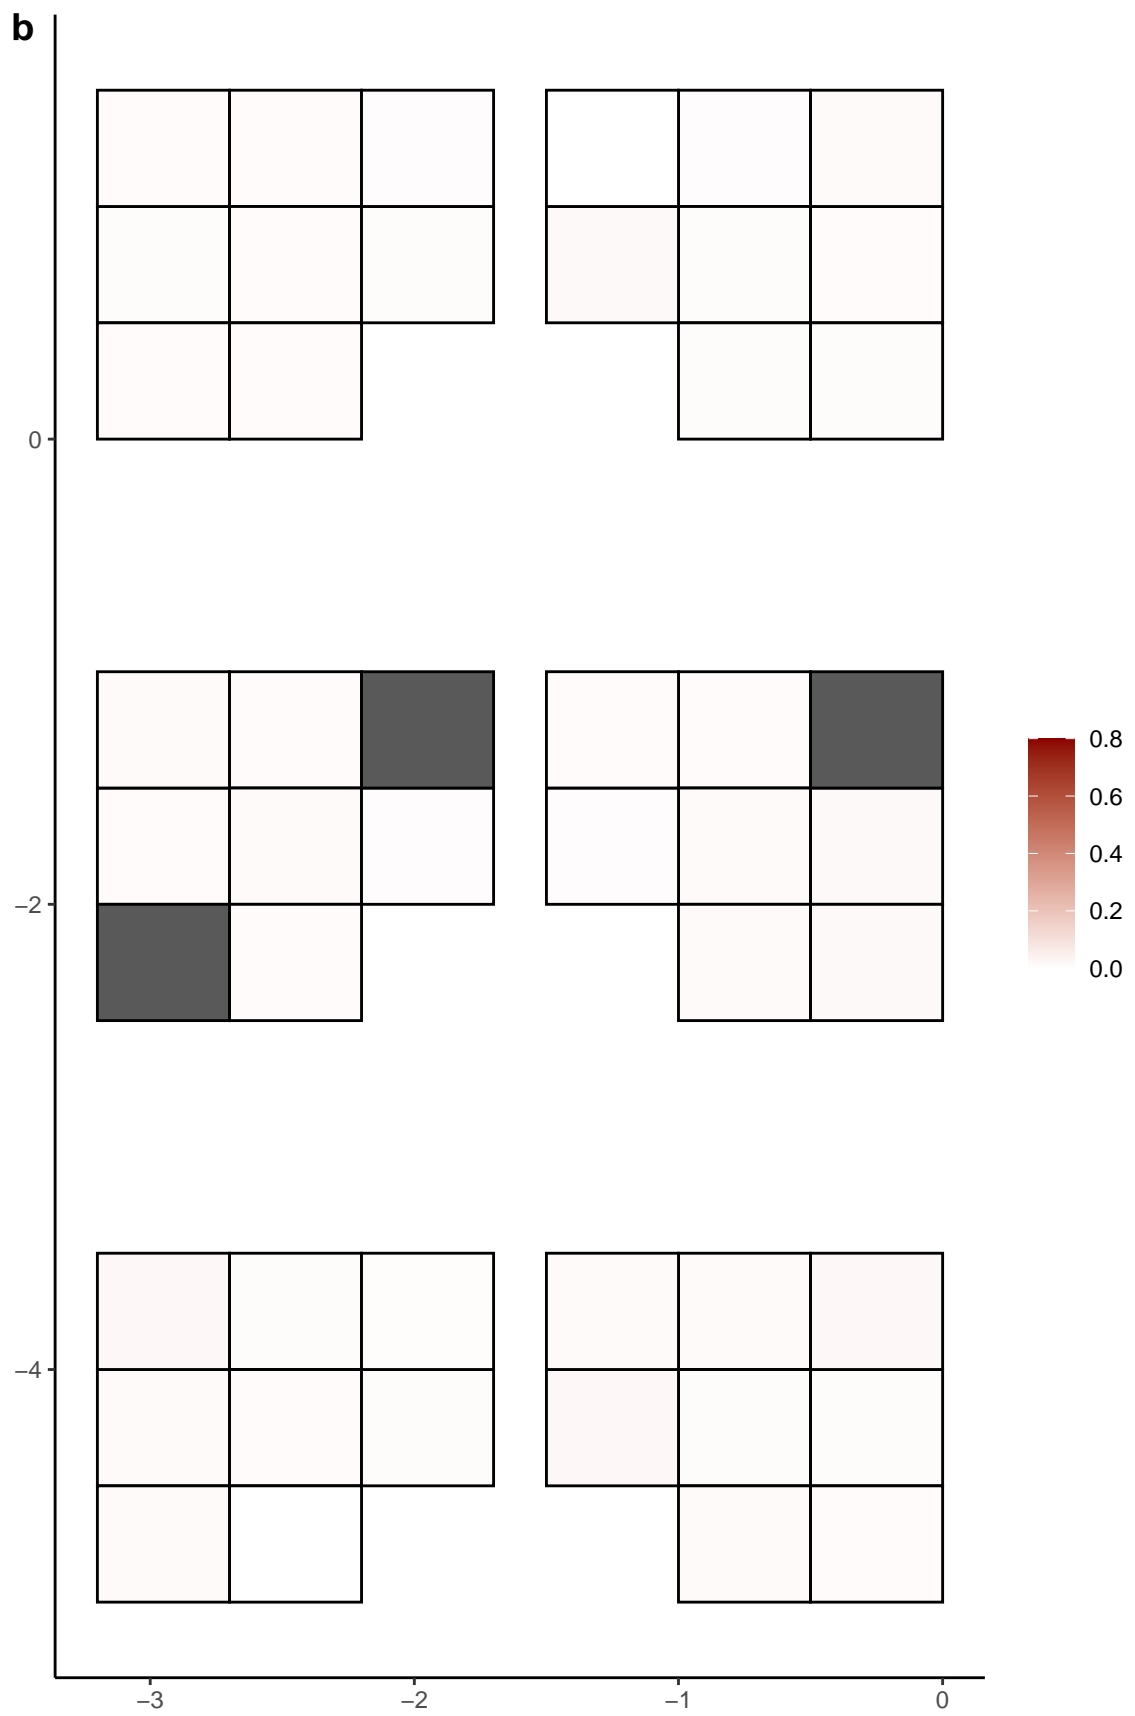

**a** ID05 5-158180215-G-A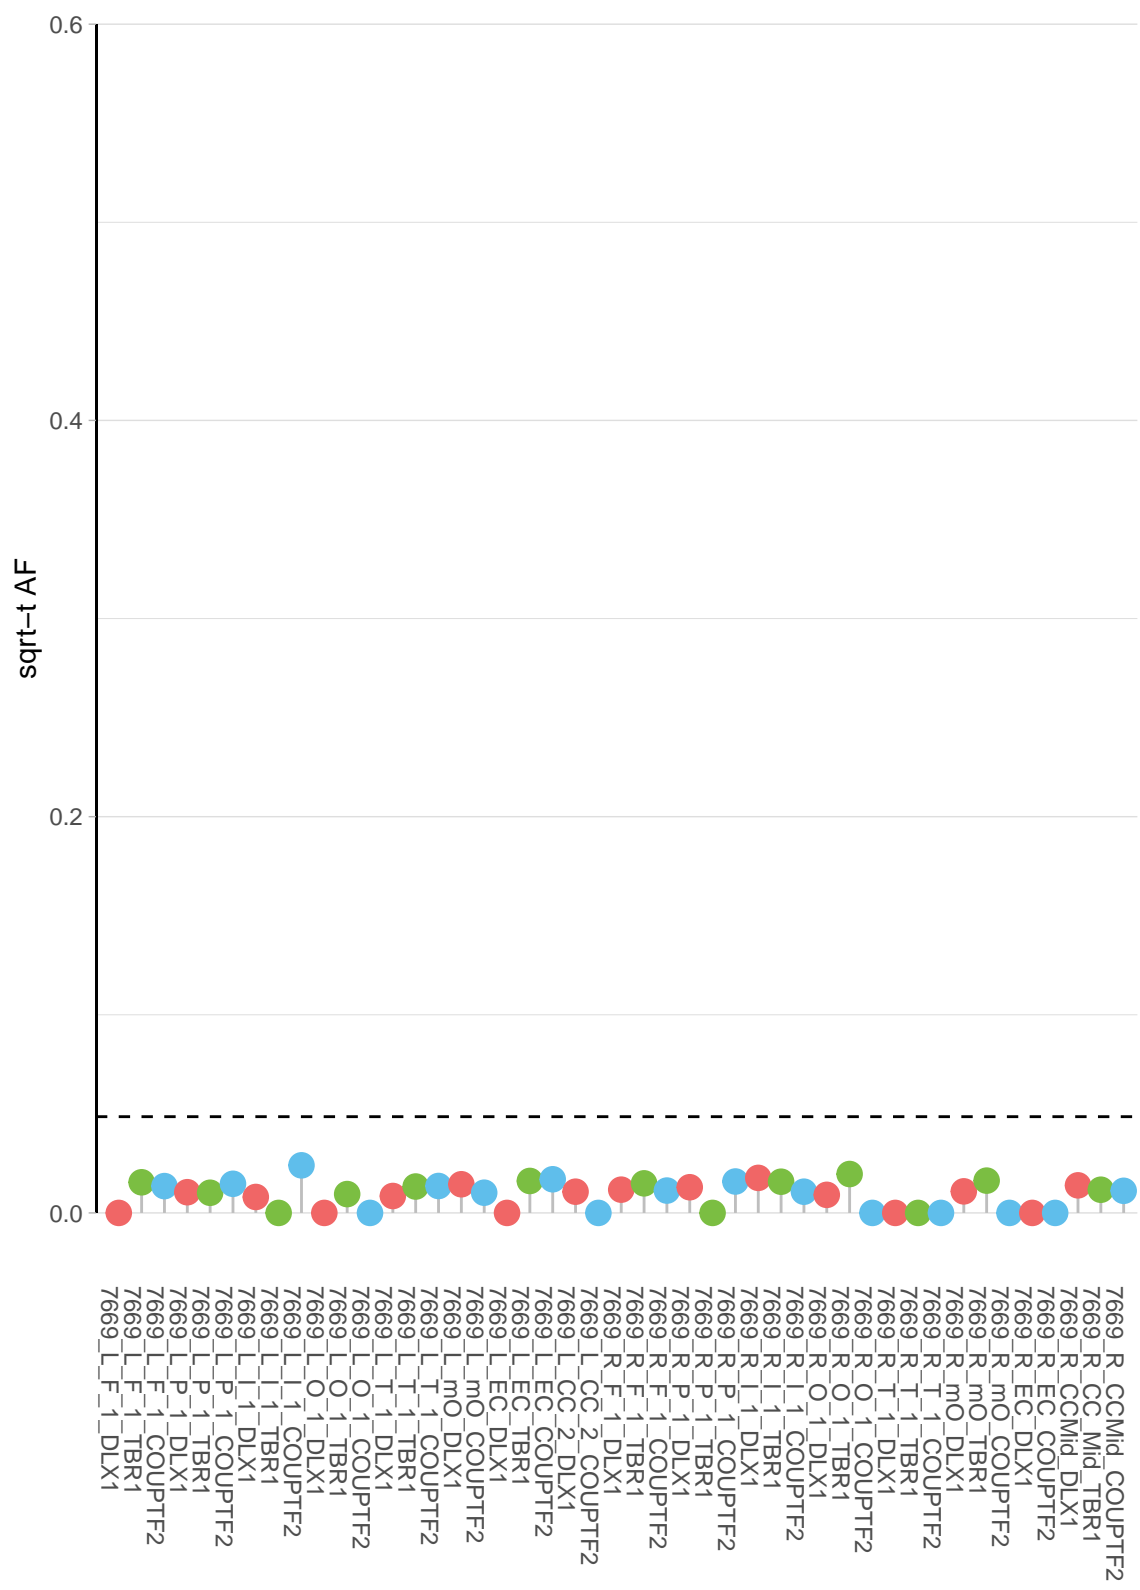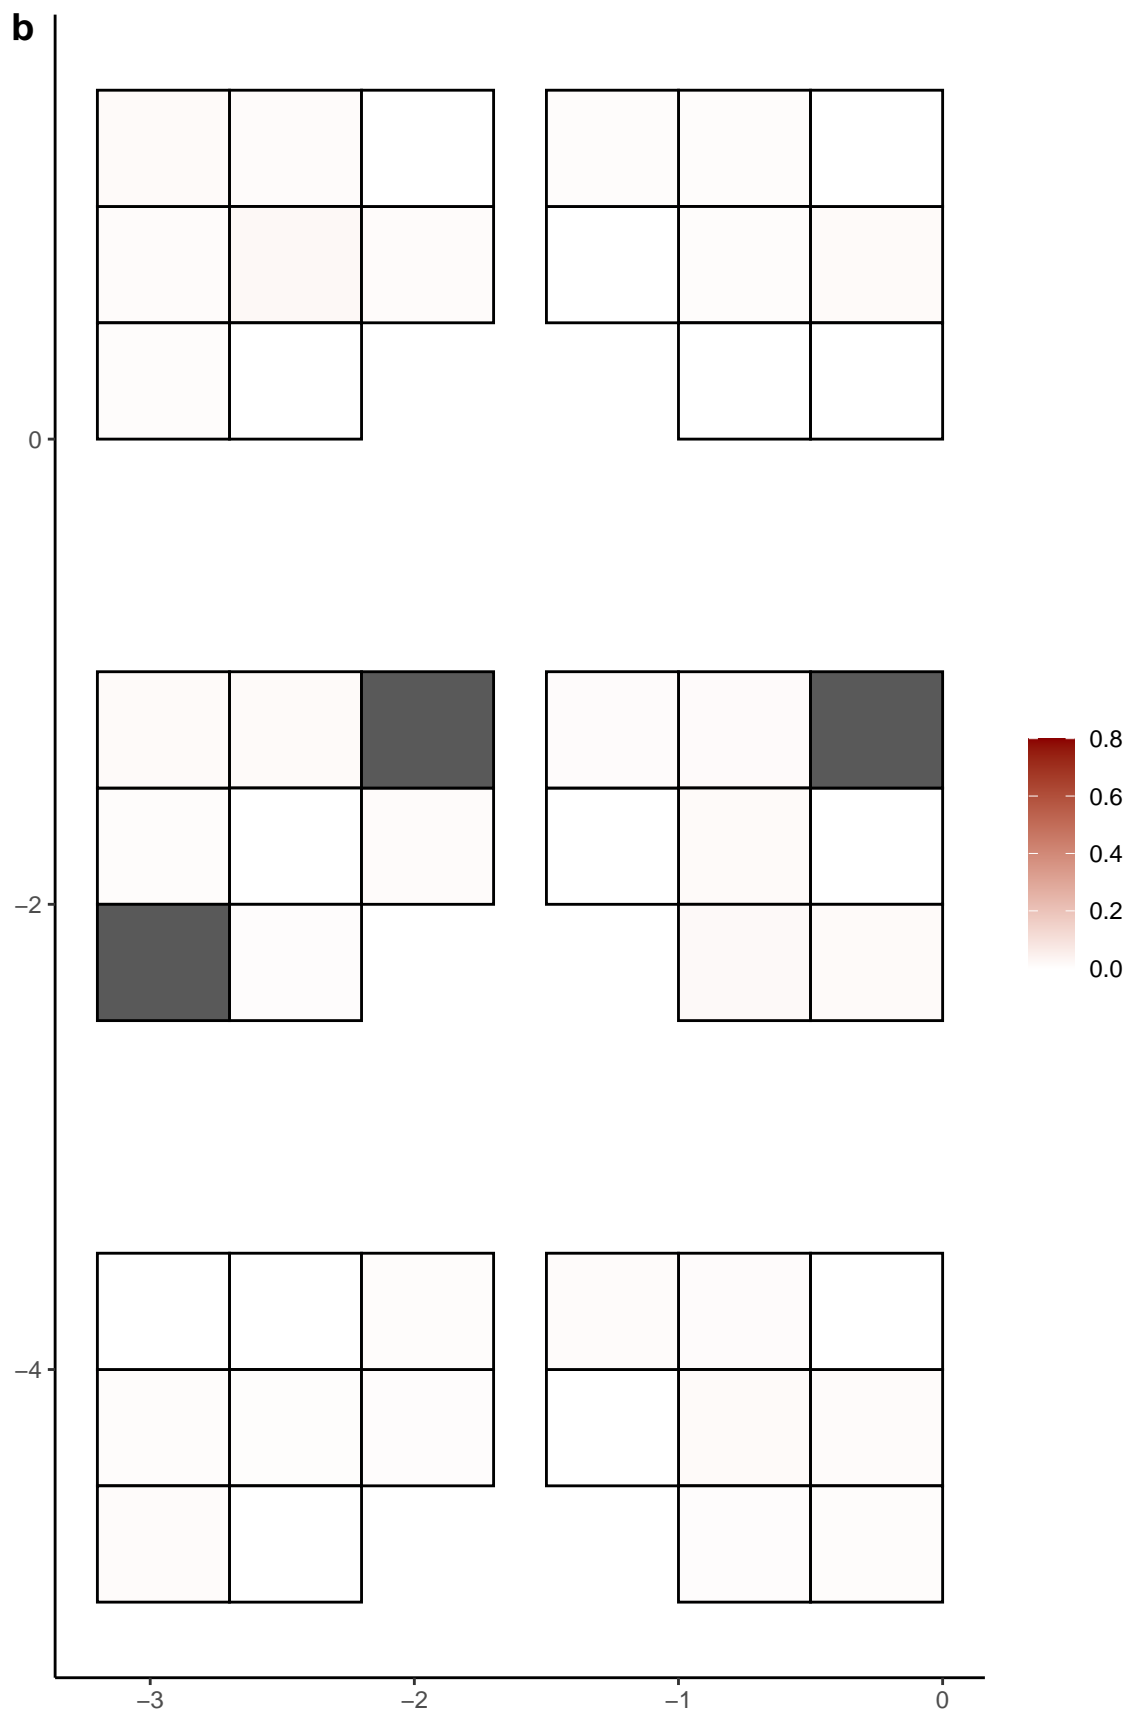

**a** ID05 5-15936810-G-A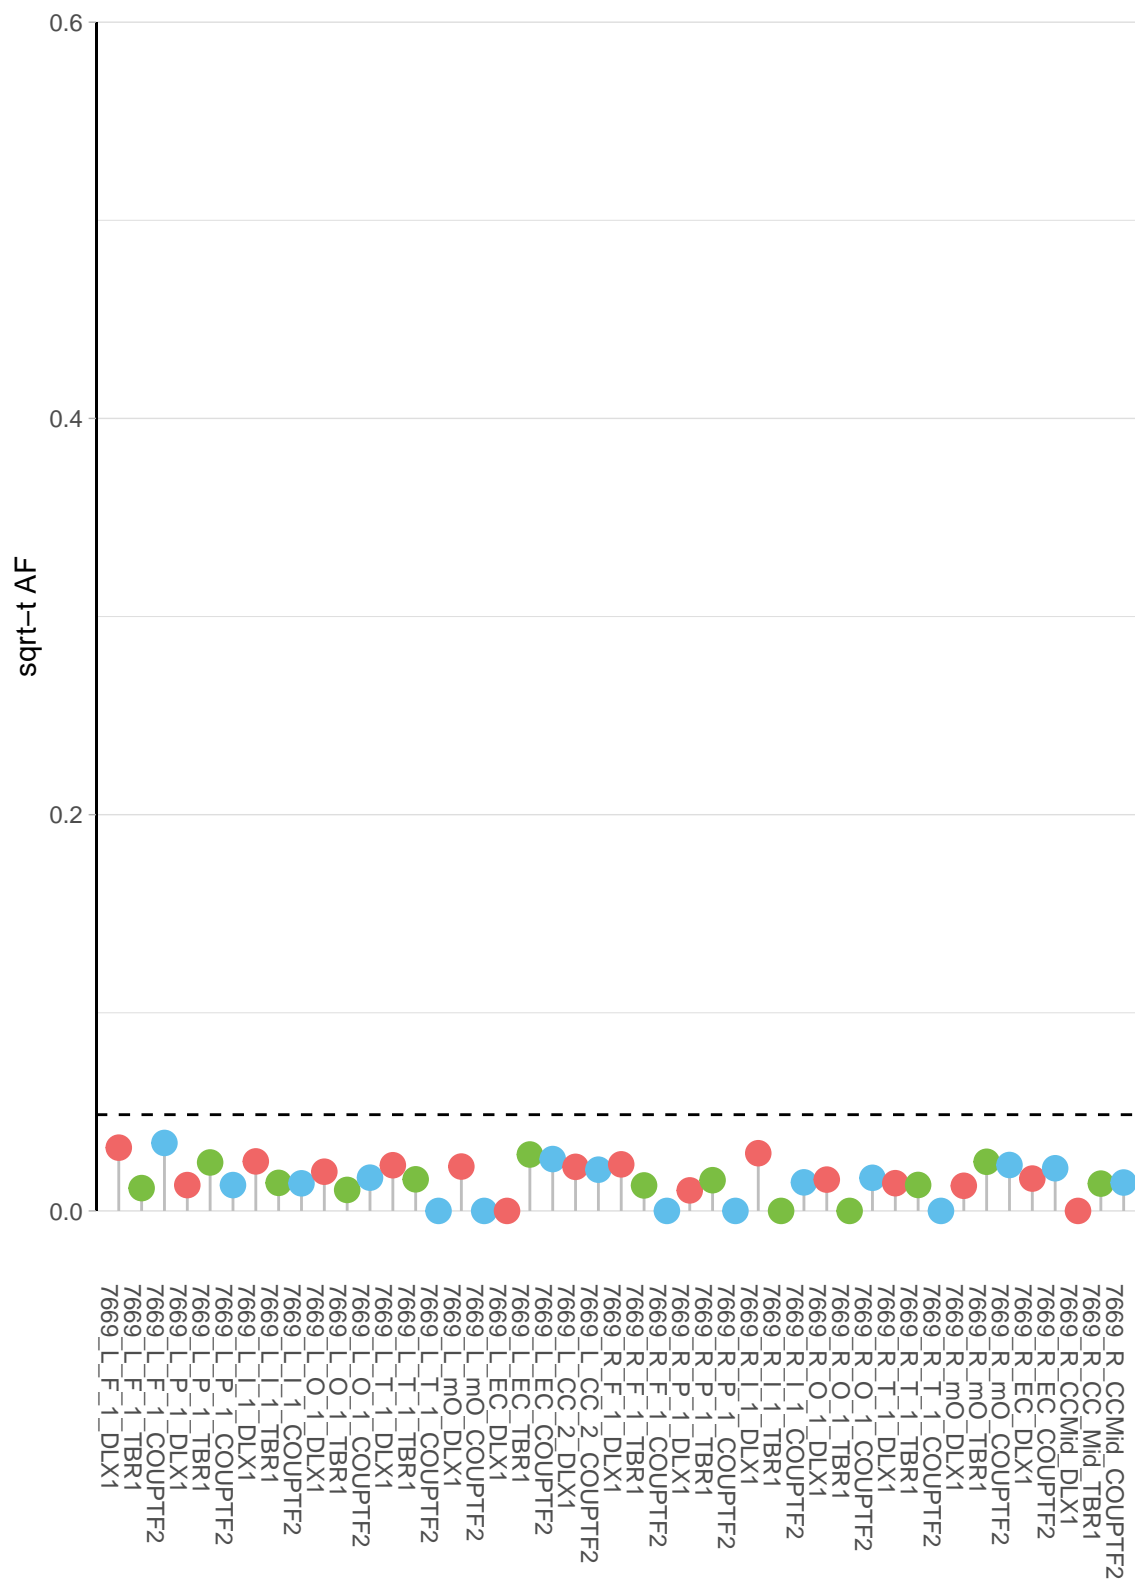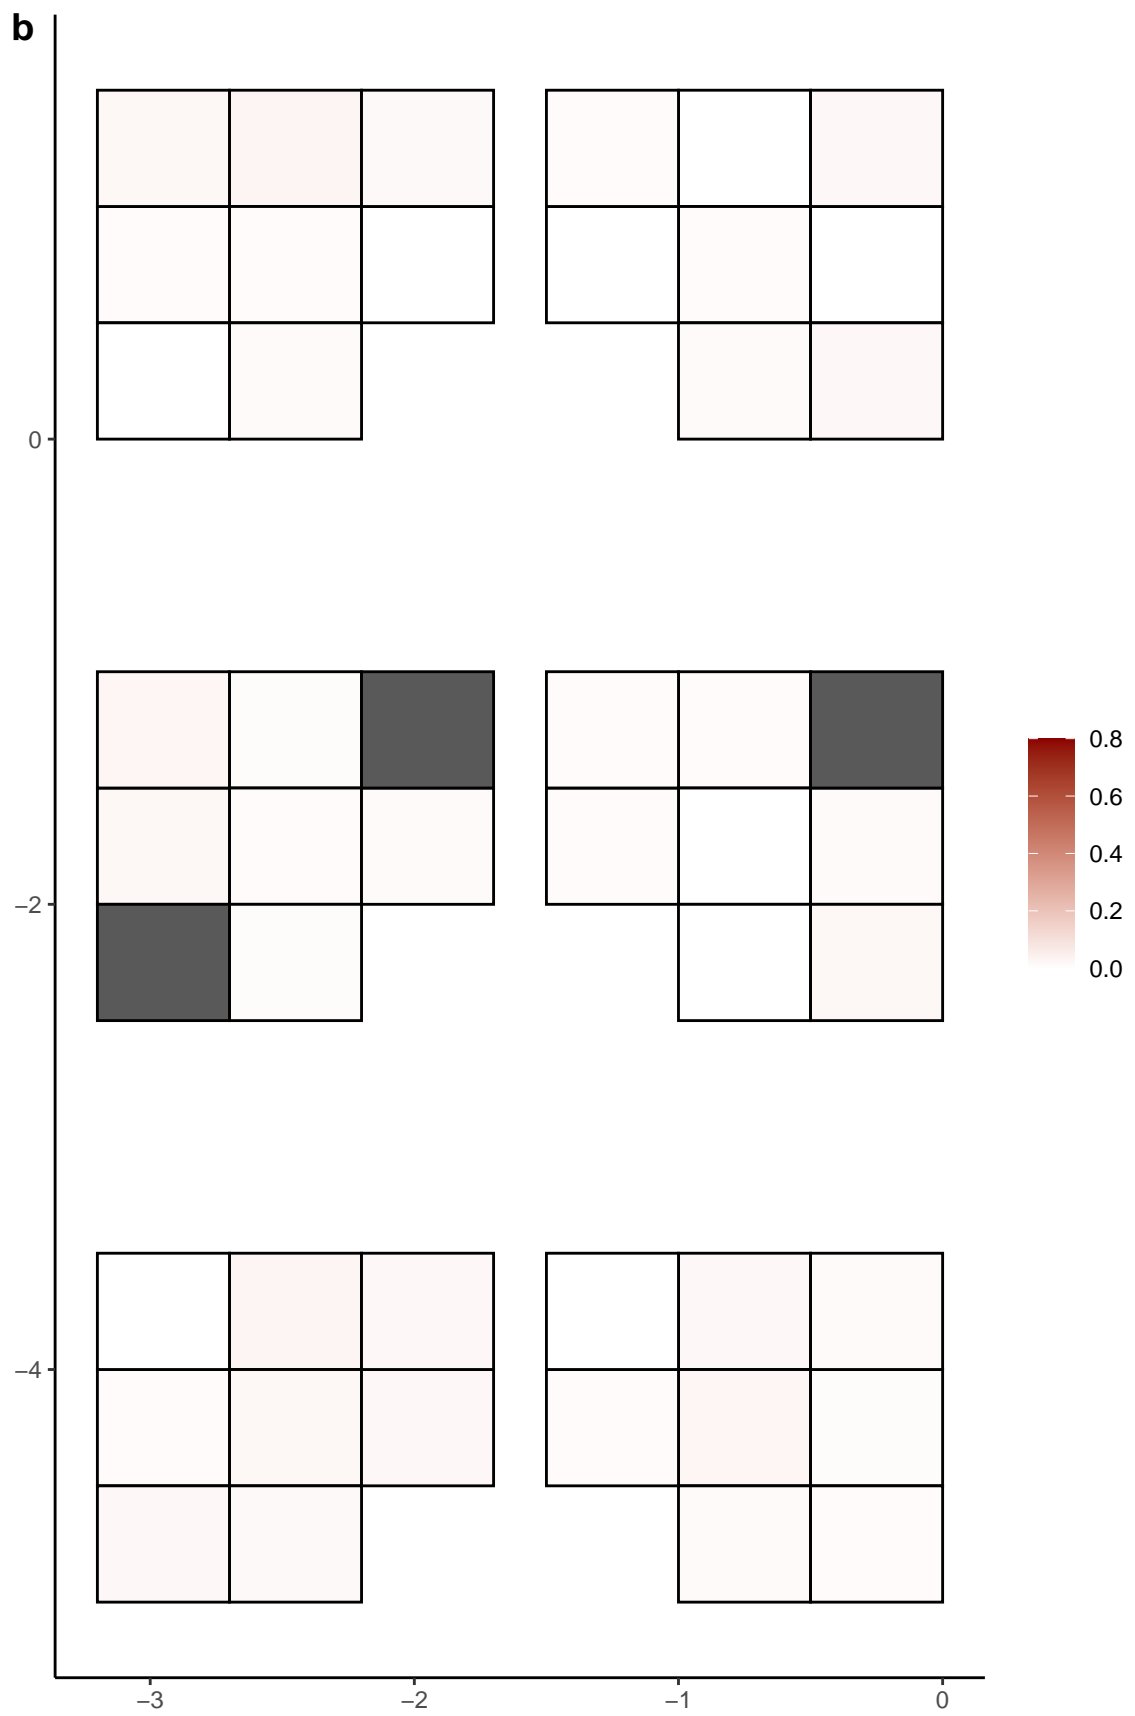

**a** ID05 5-160583527-G-A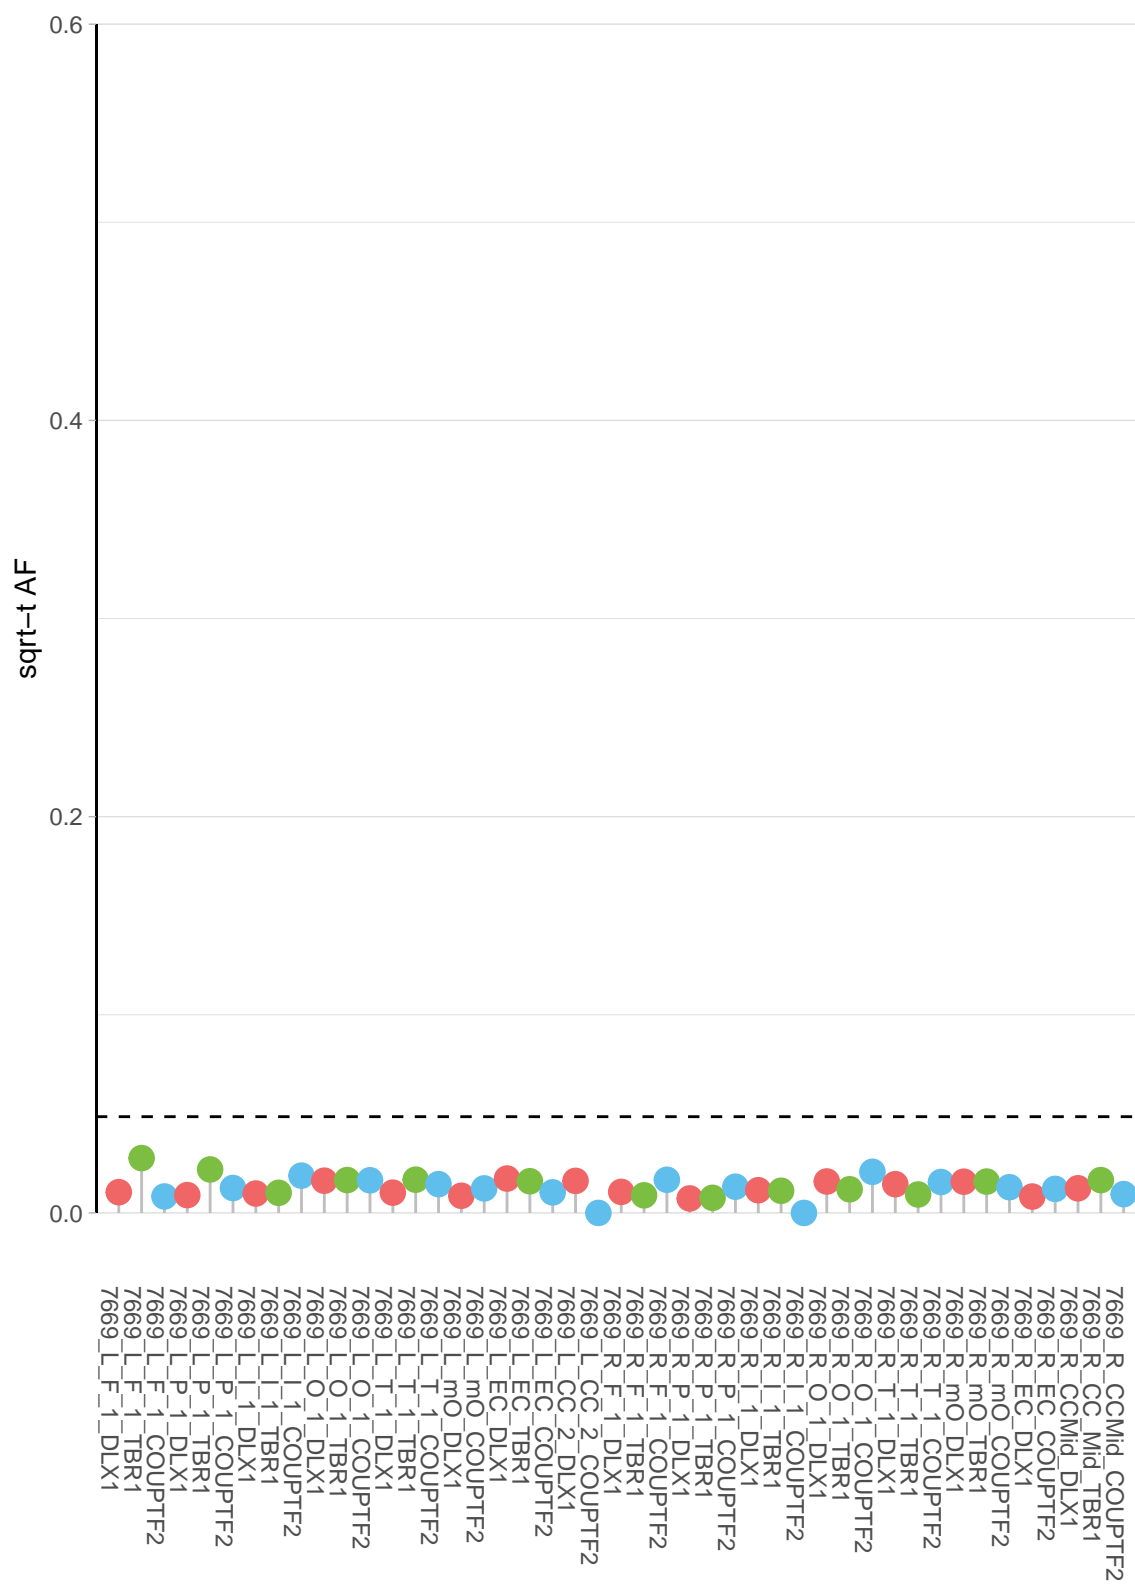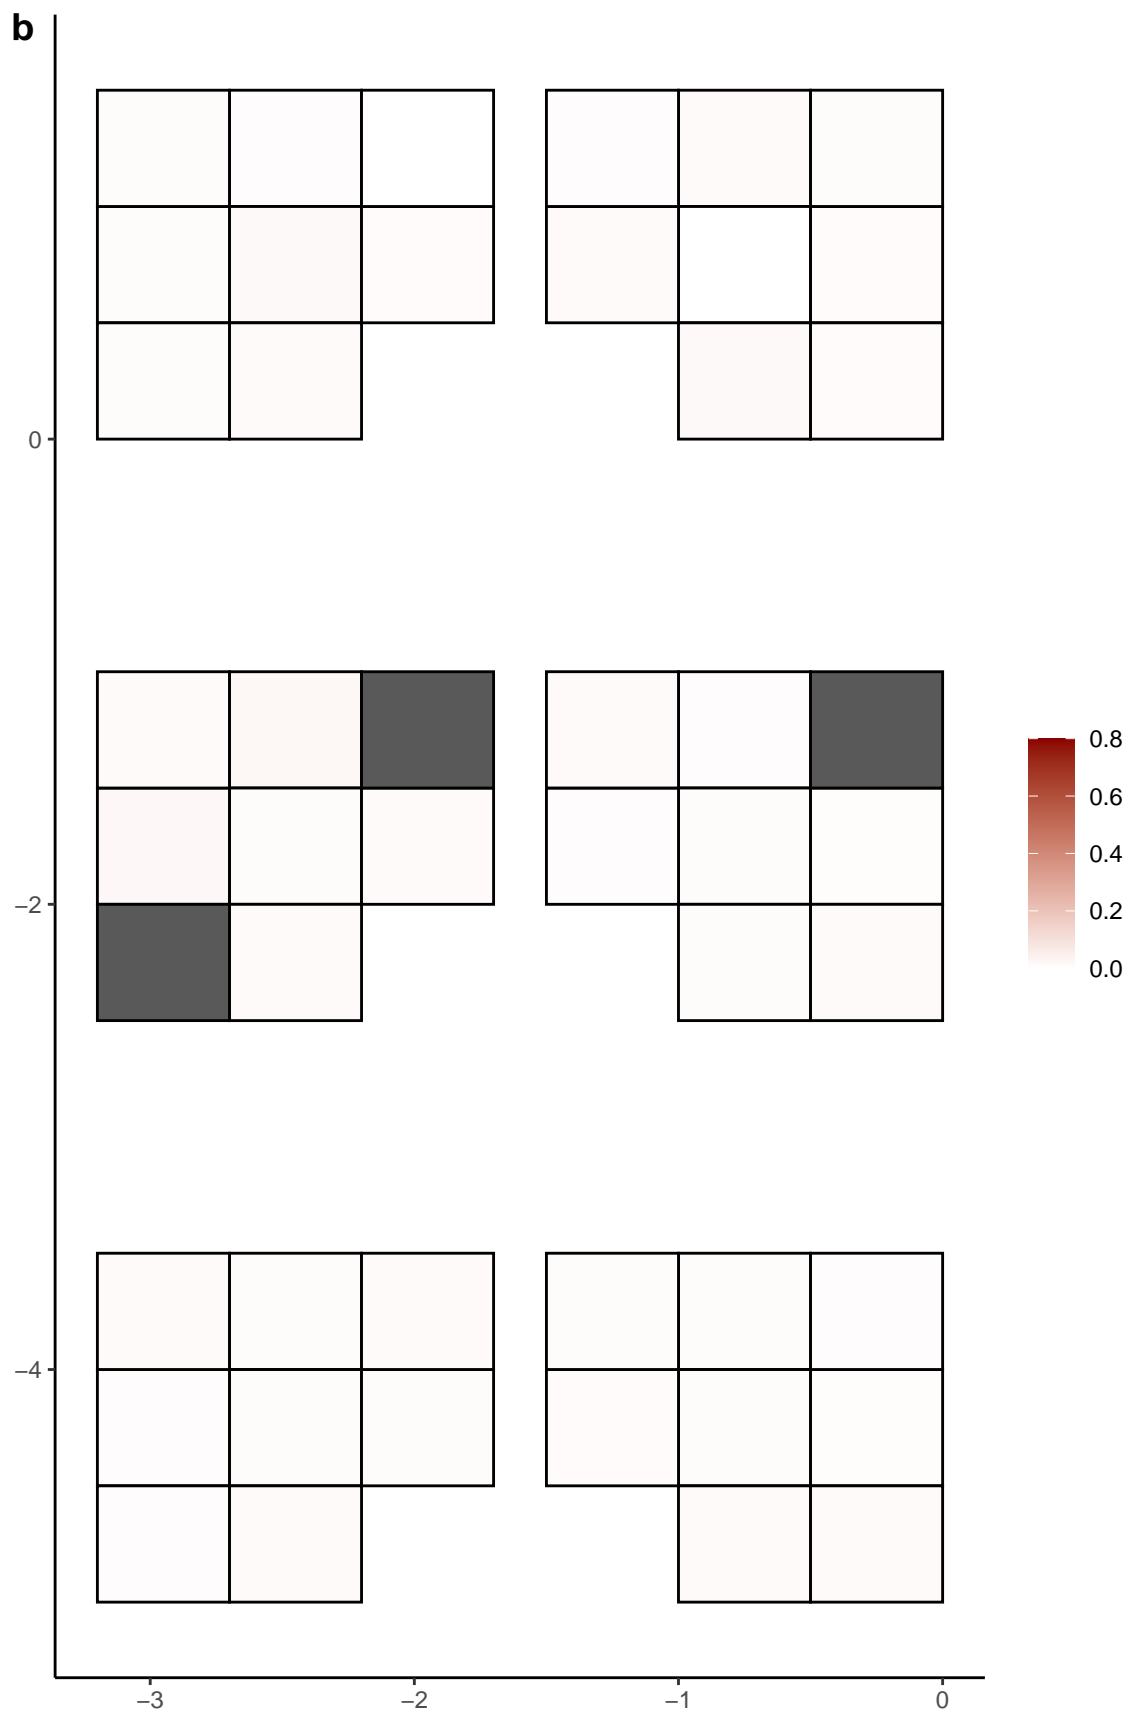



**a** ID05 5-165691201-A-G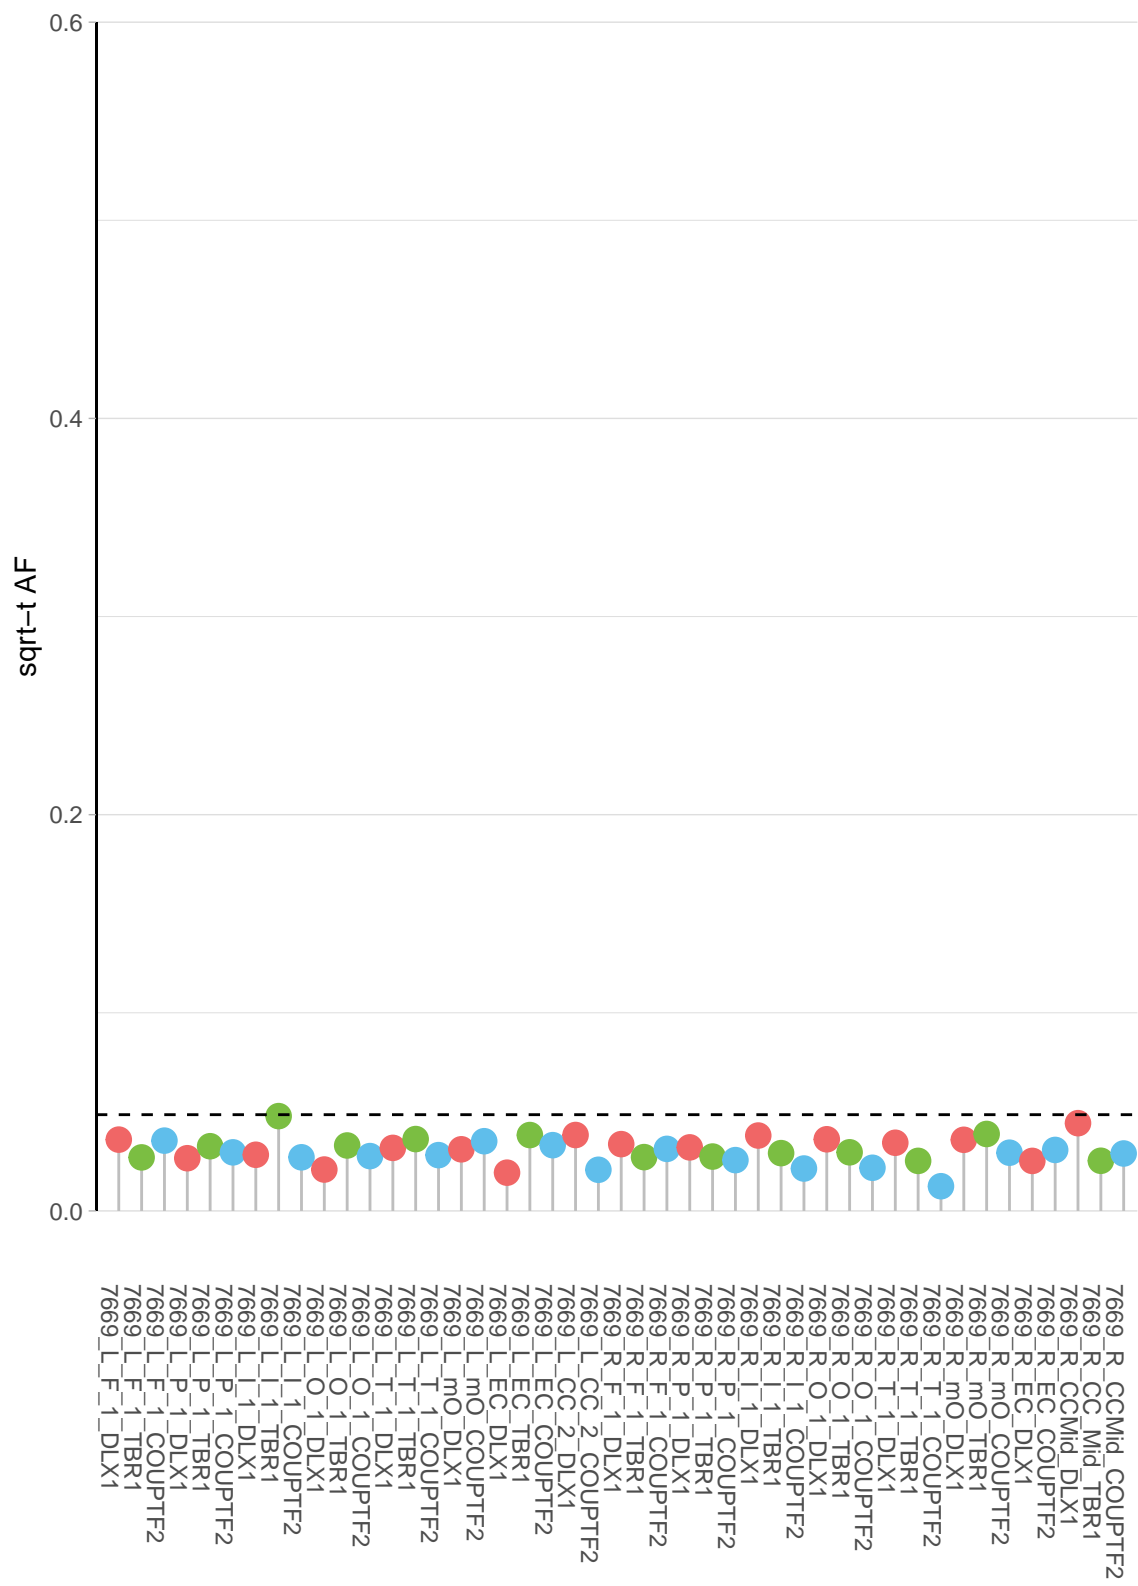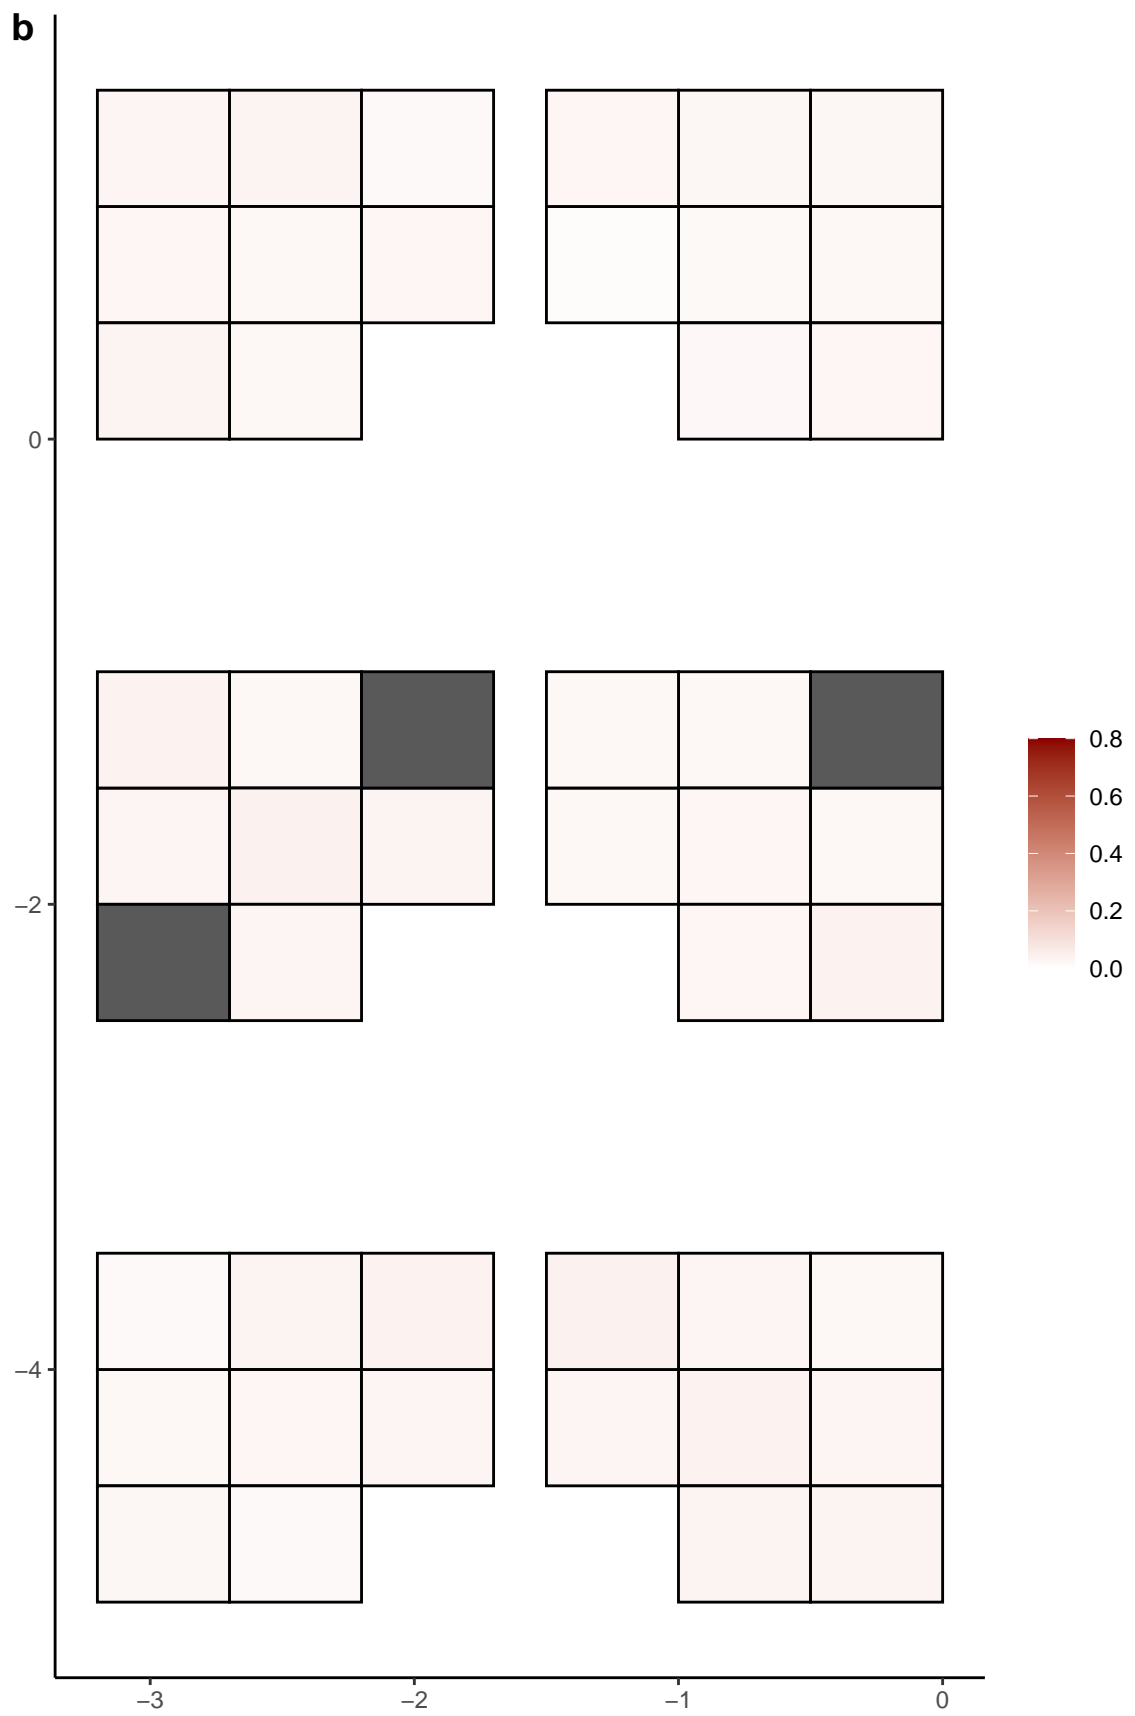

**a** ID05 5-167949614-A-G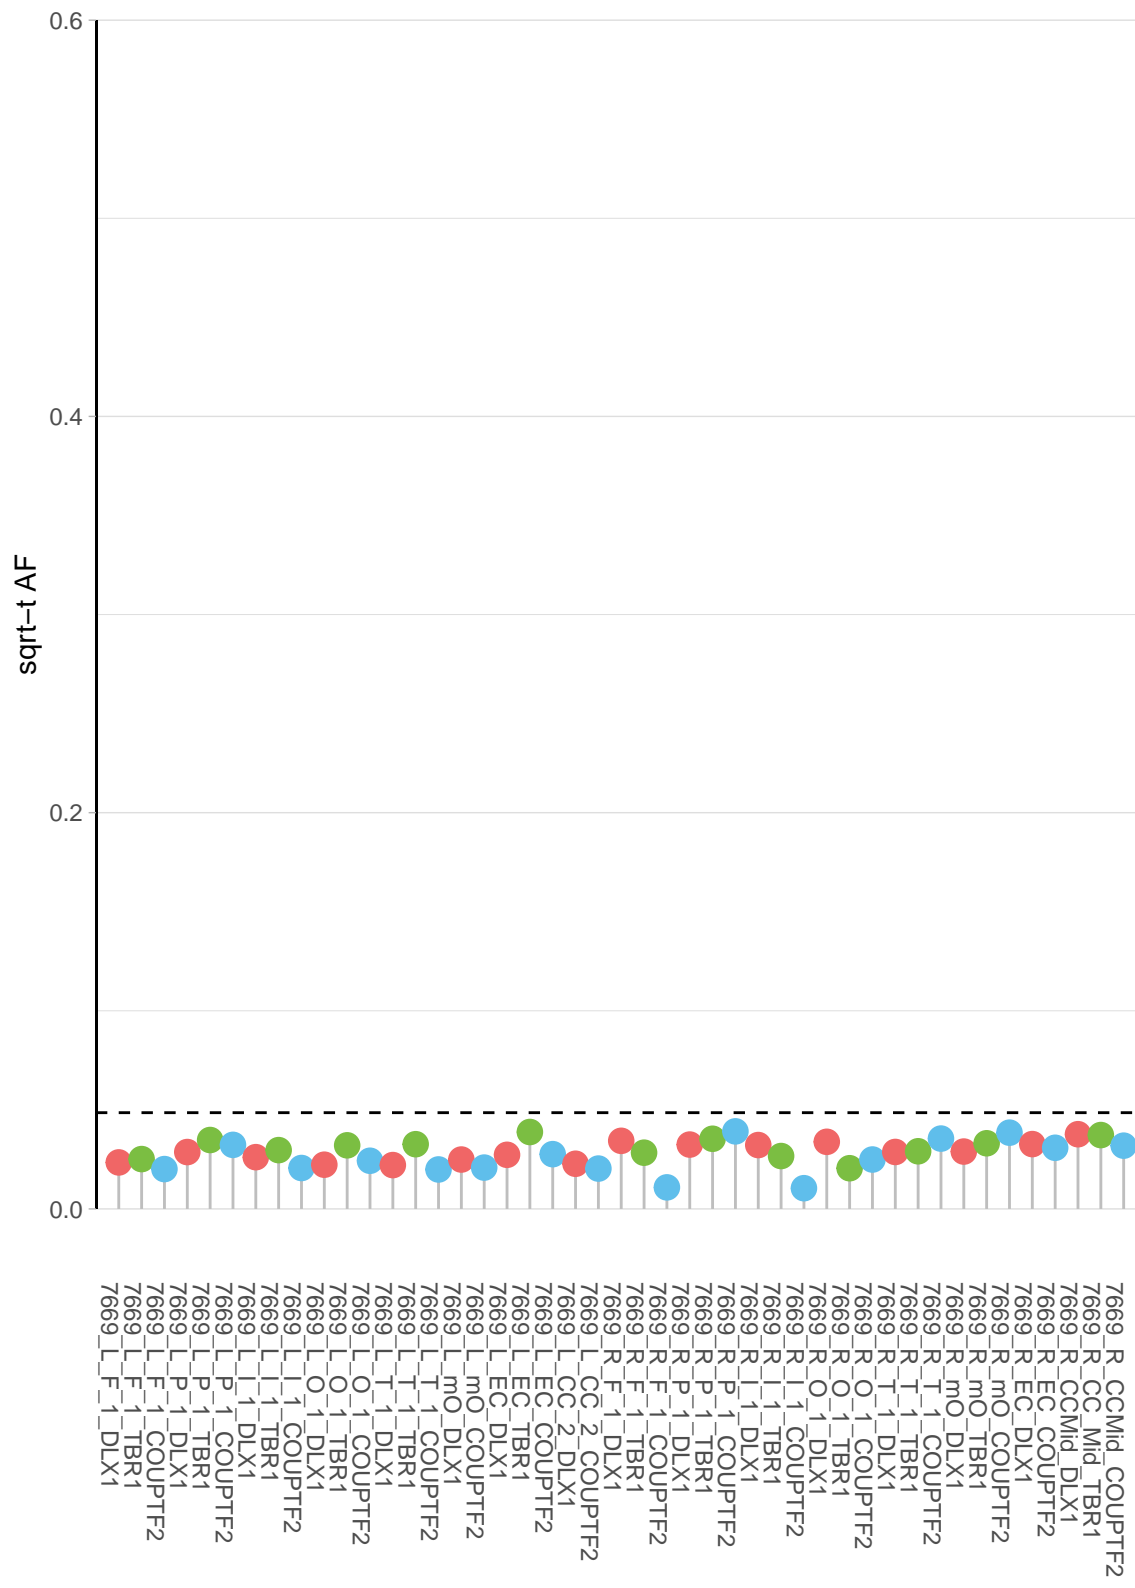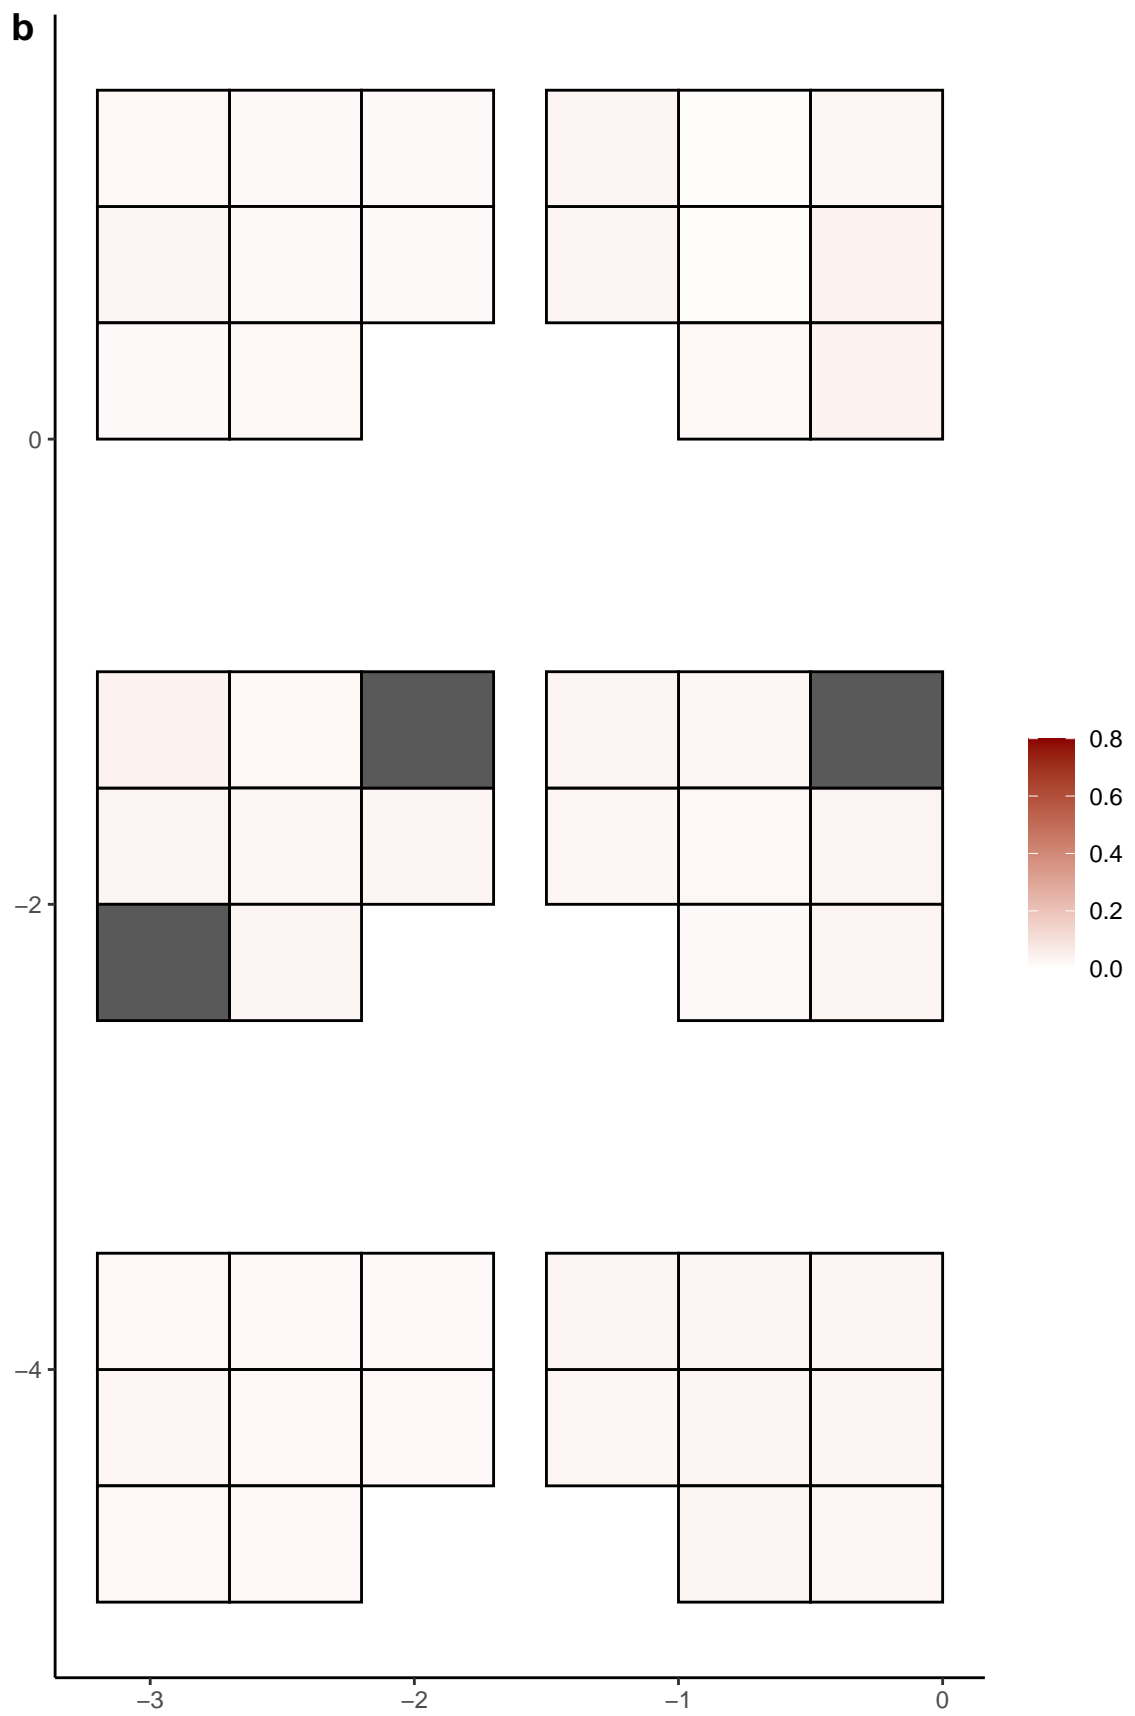

**a** ID05 5-179554887-C-T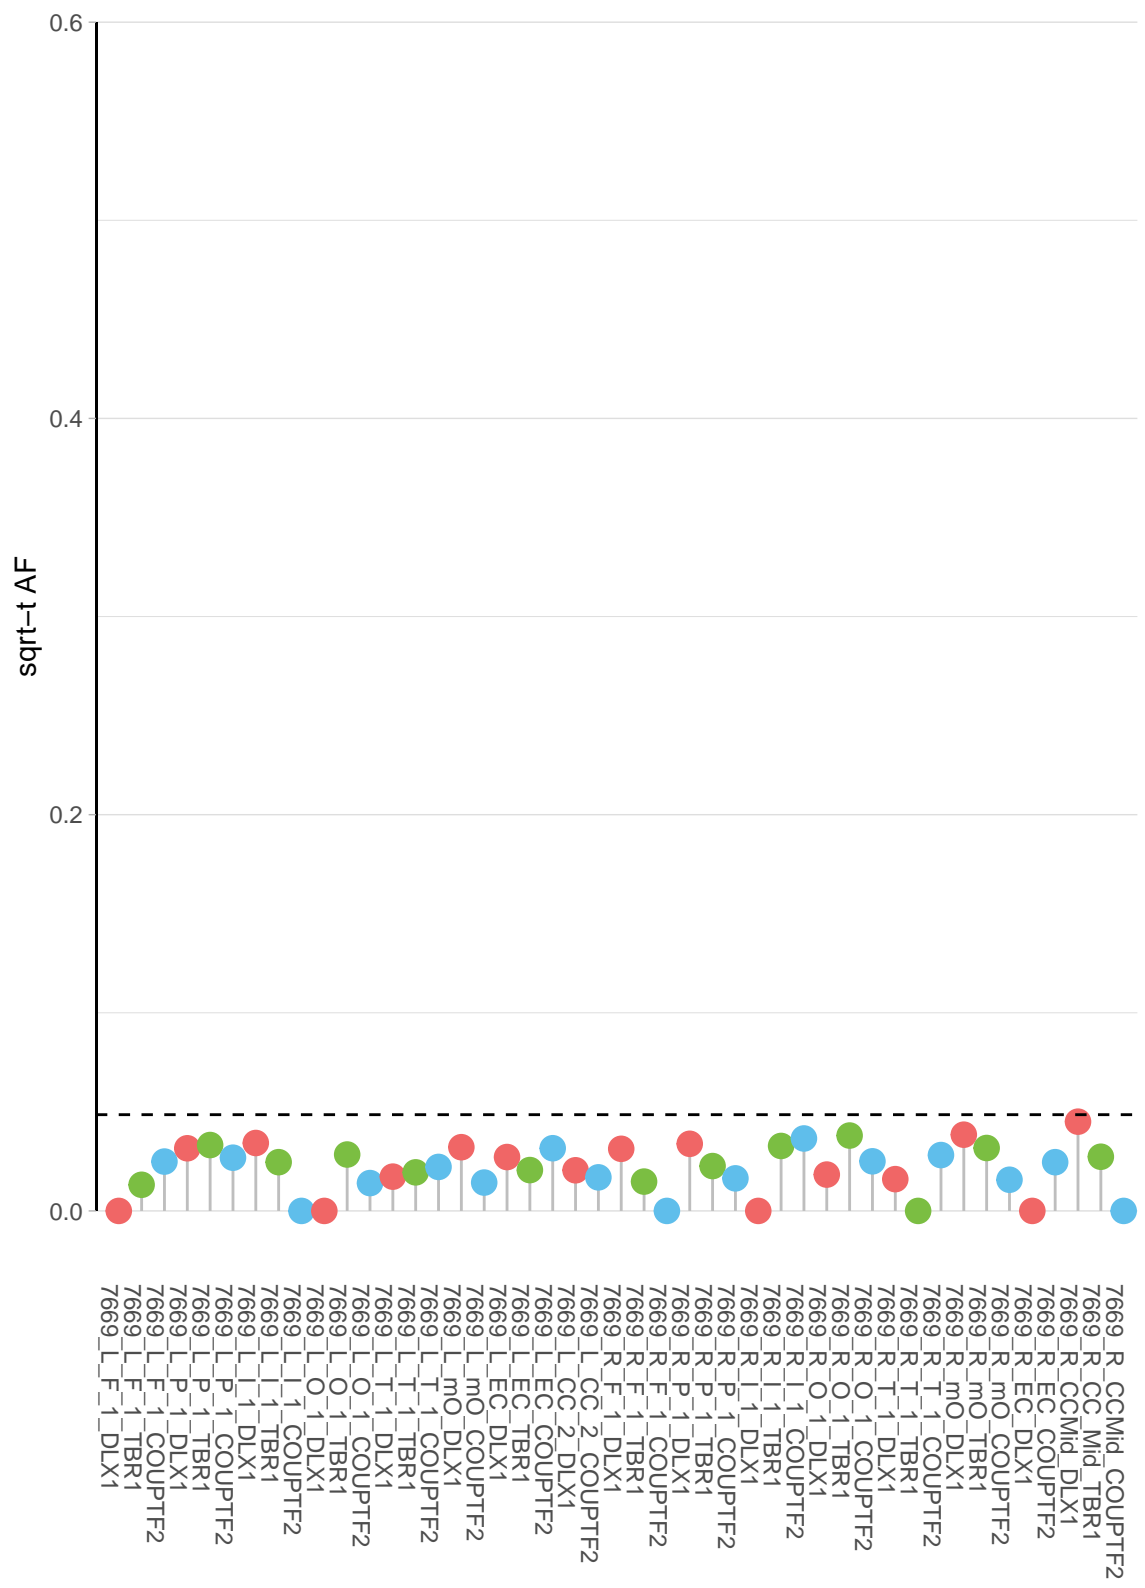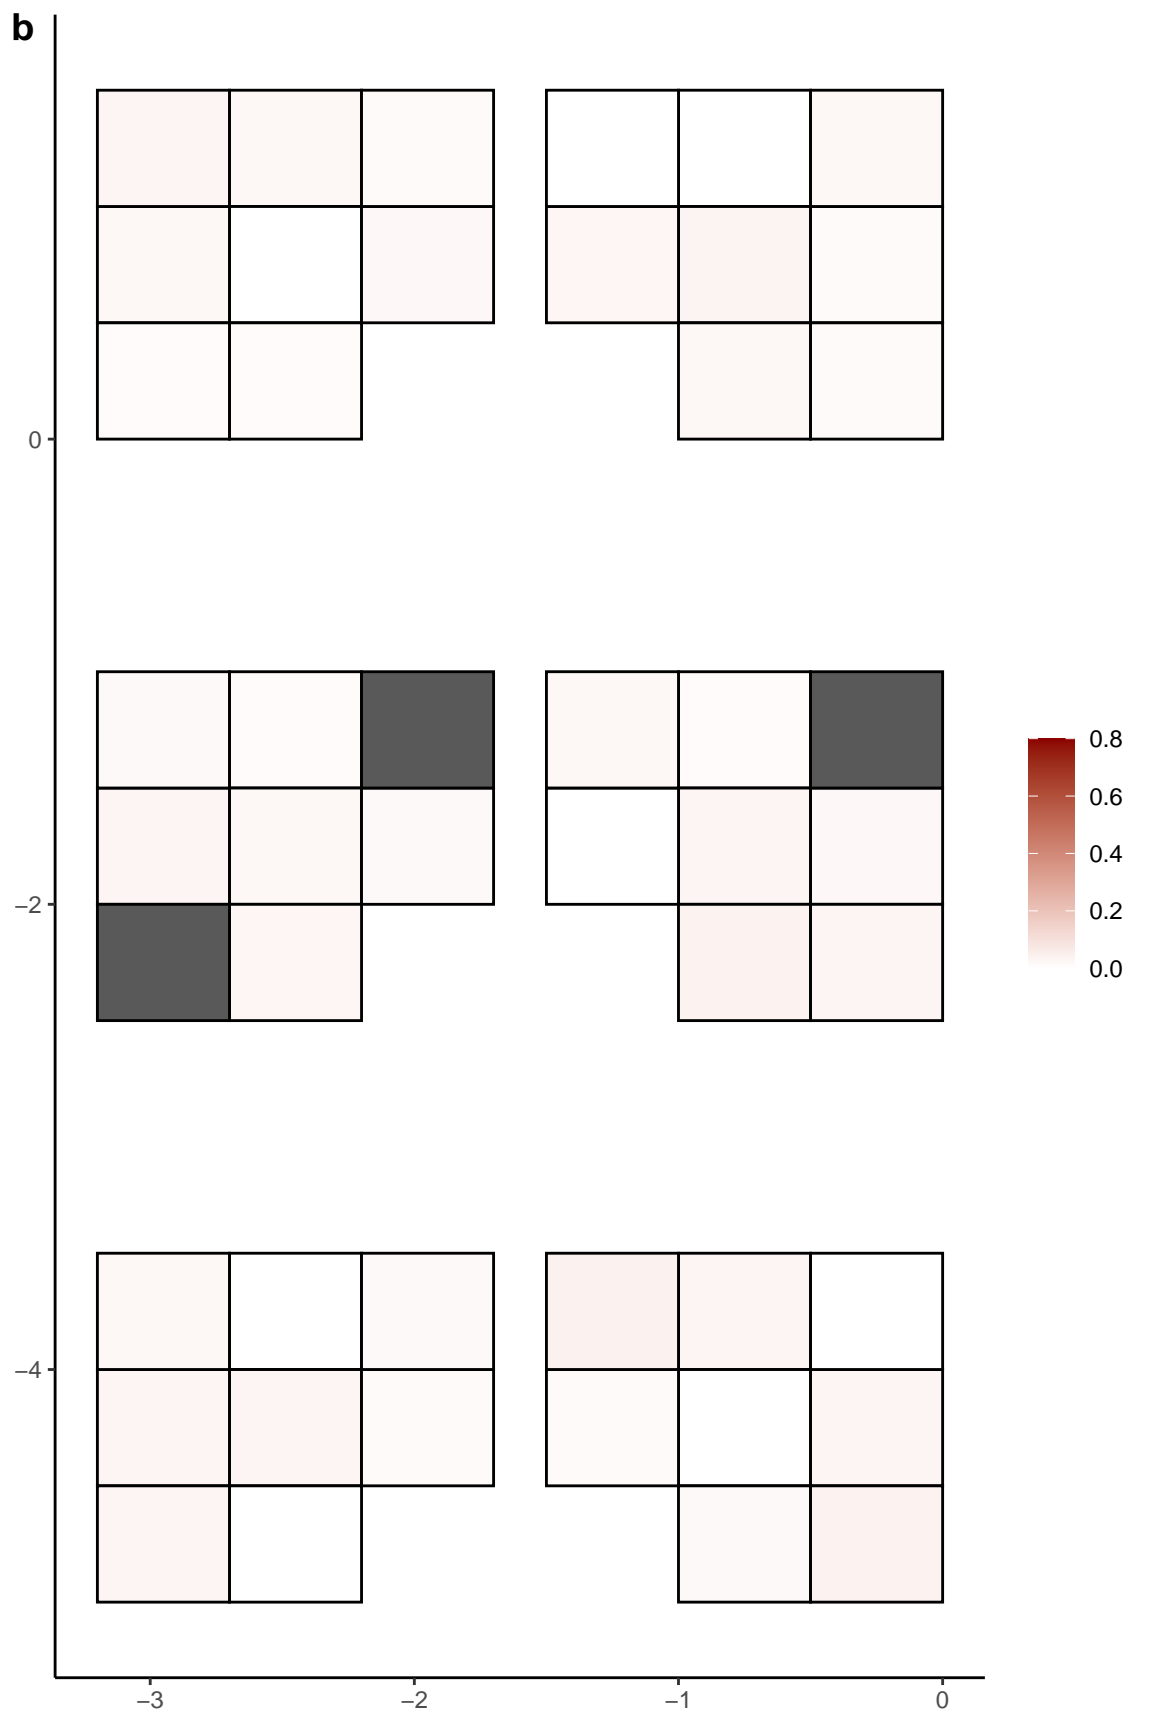

**a** ID05 5-1949773-C-G

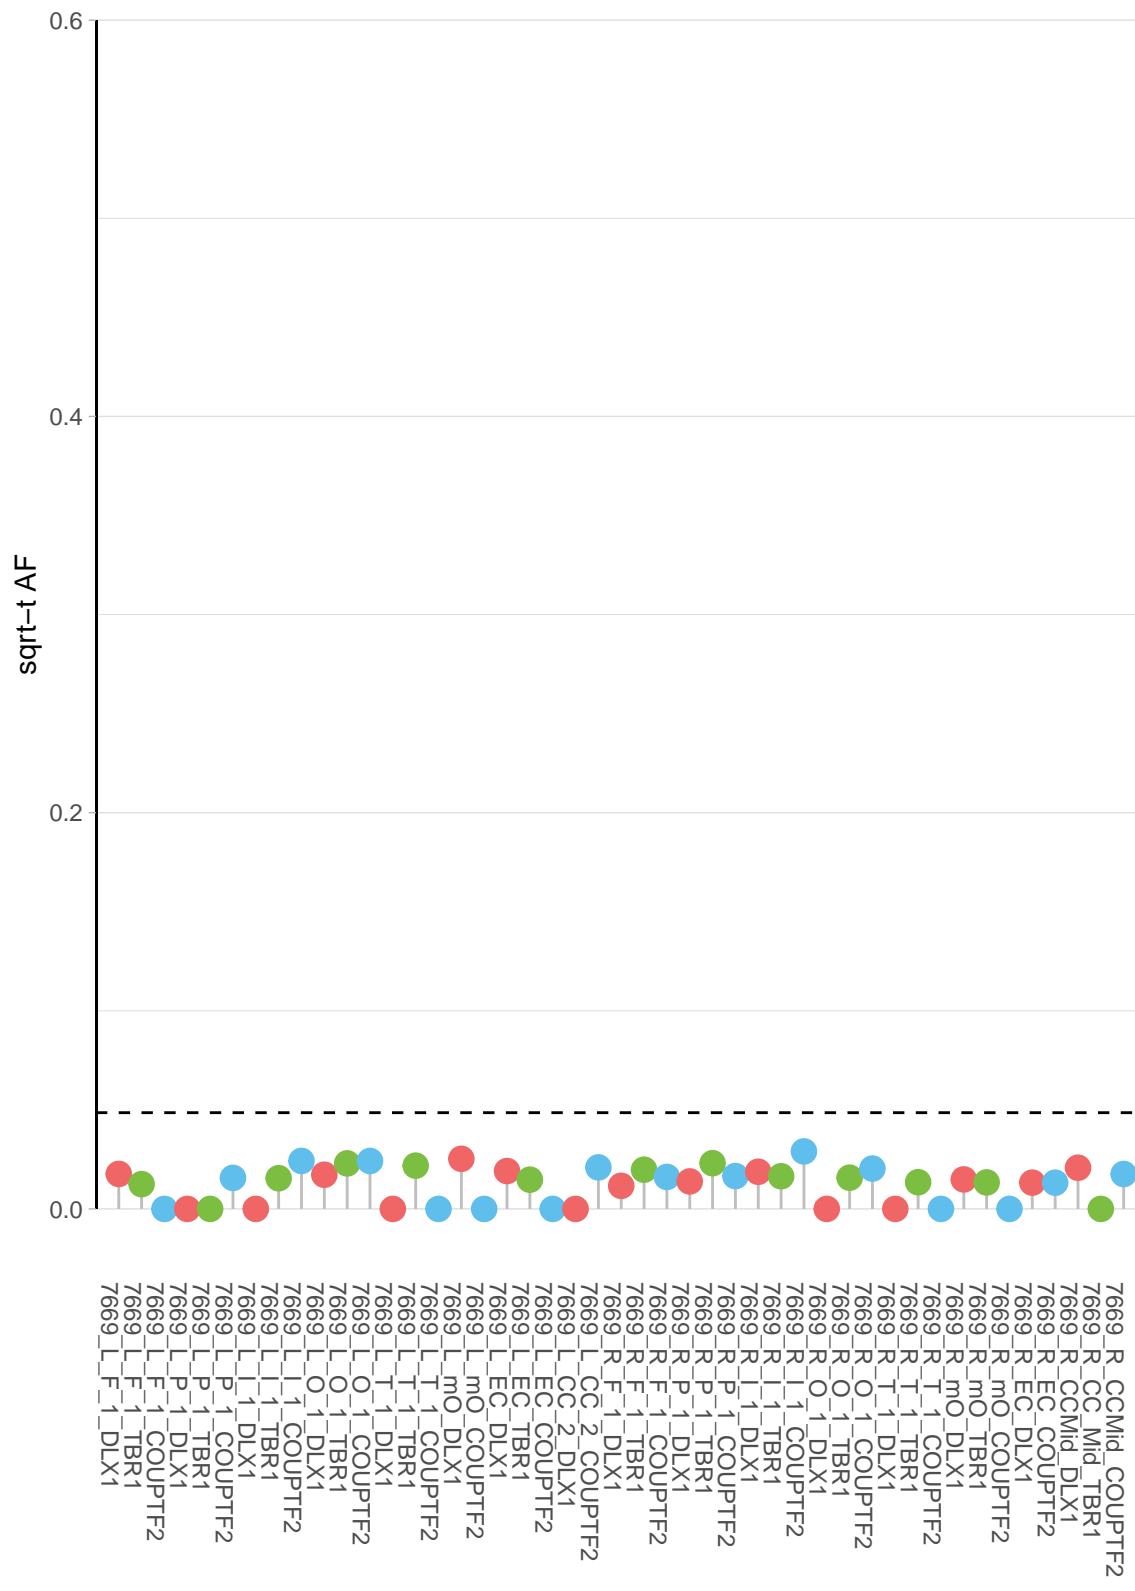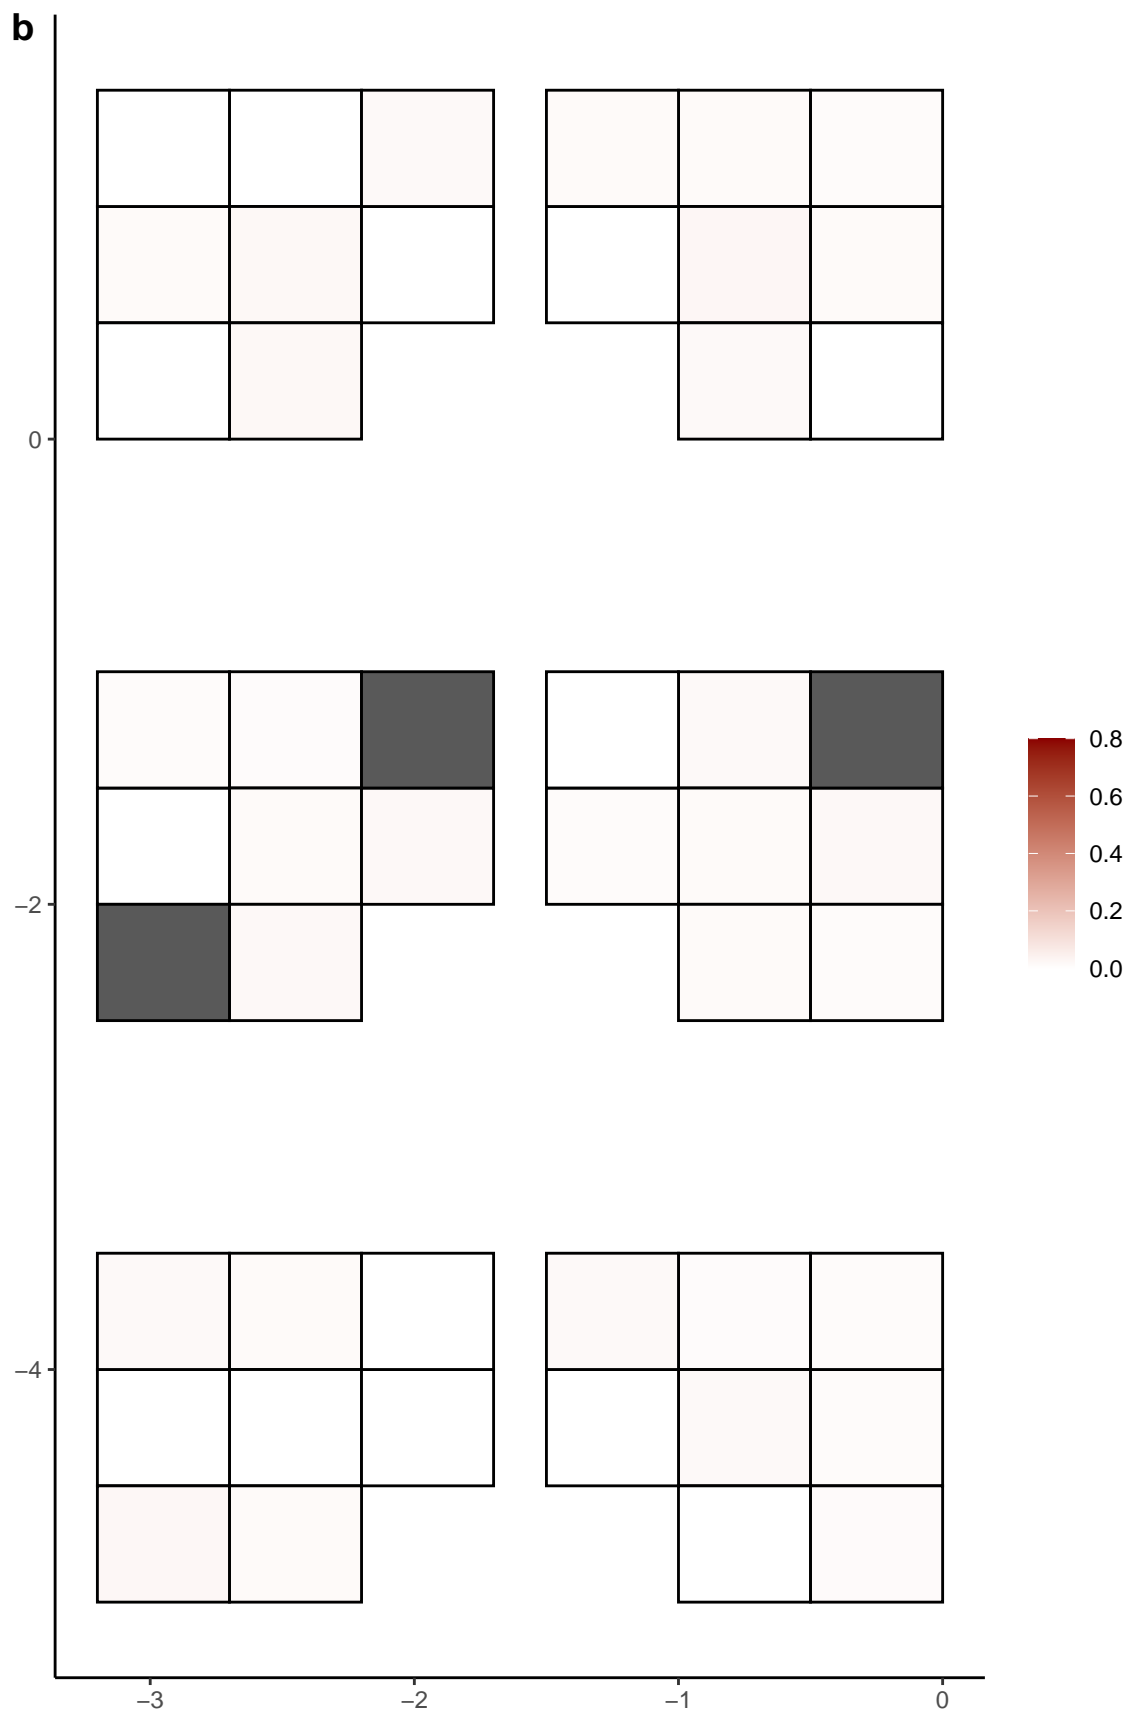



**a** ID05 5-28689952-A-G

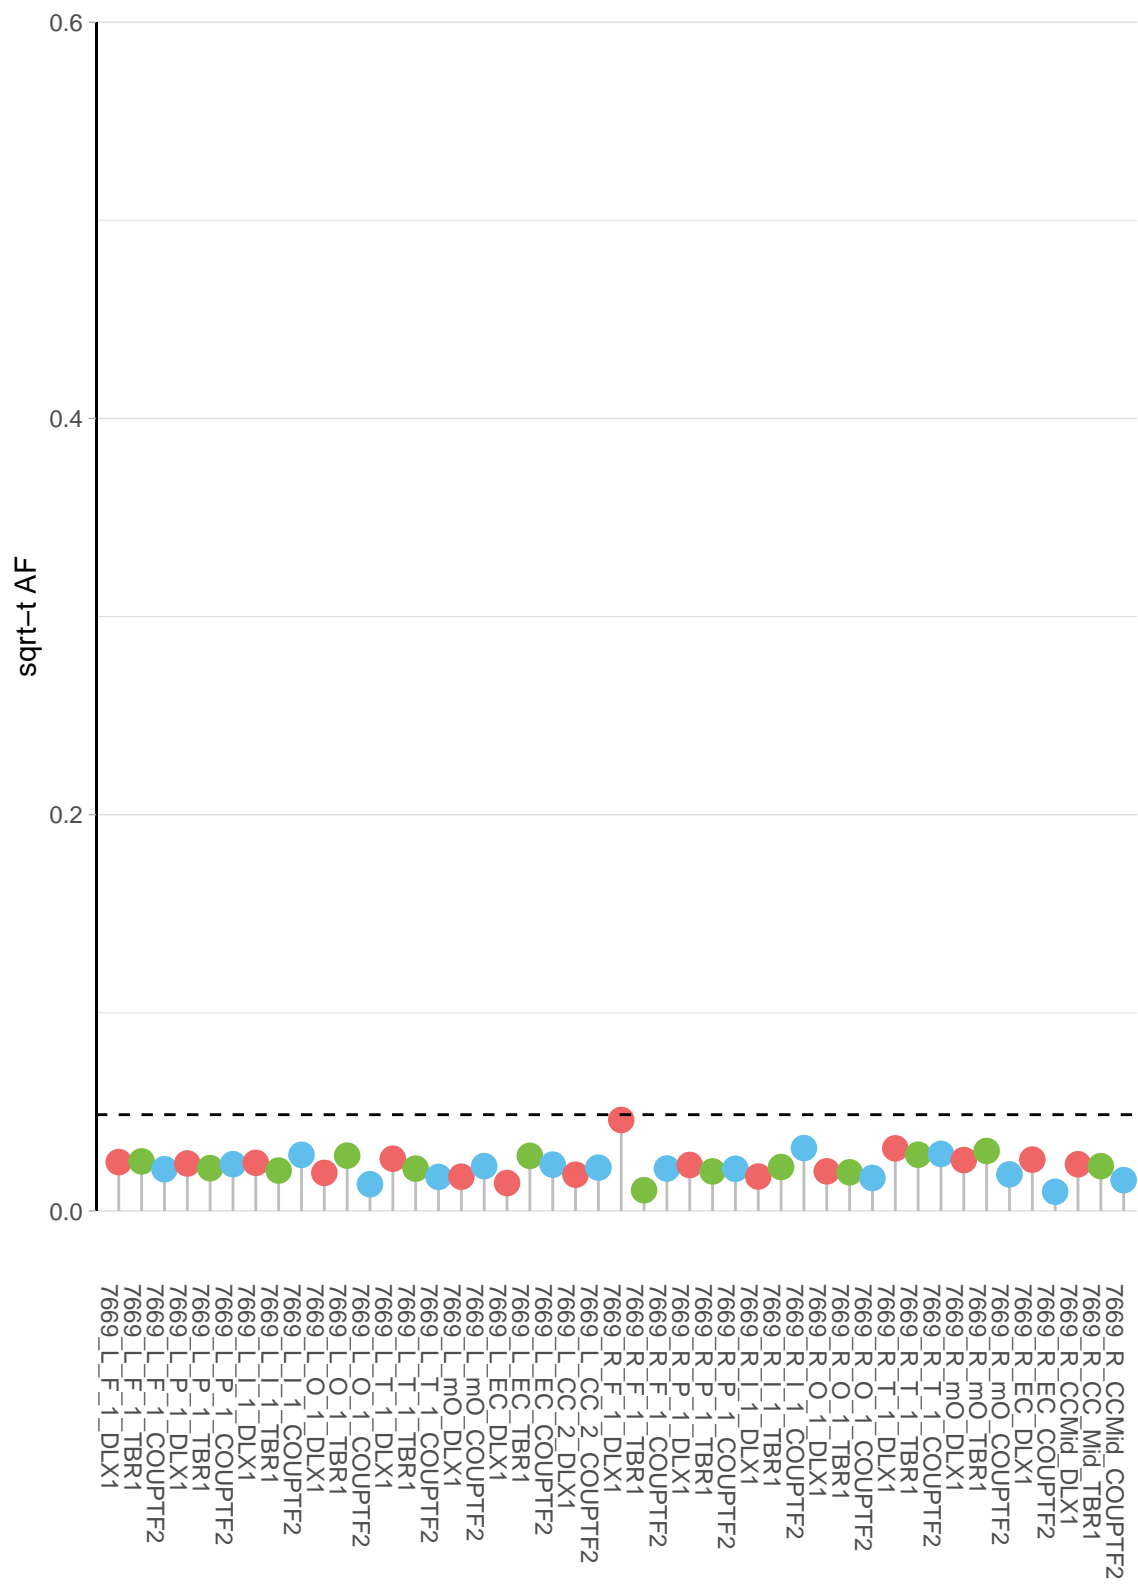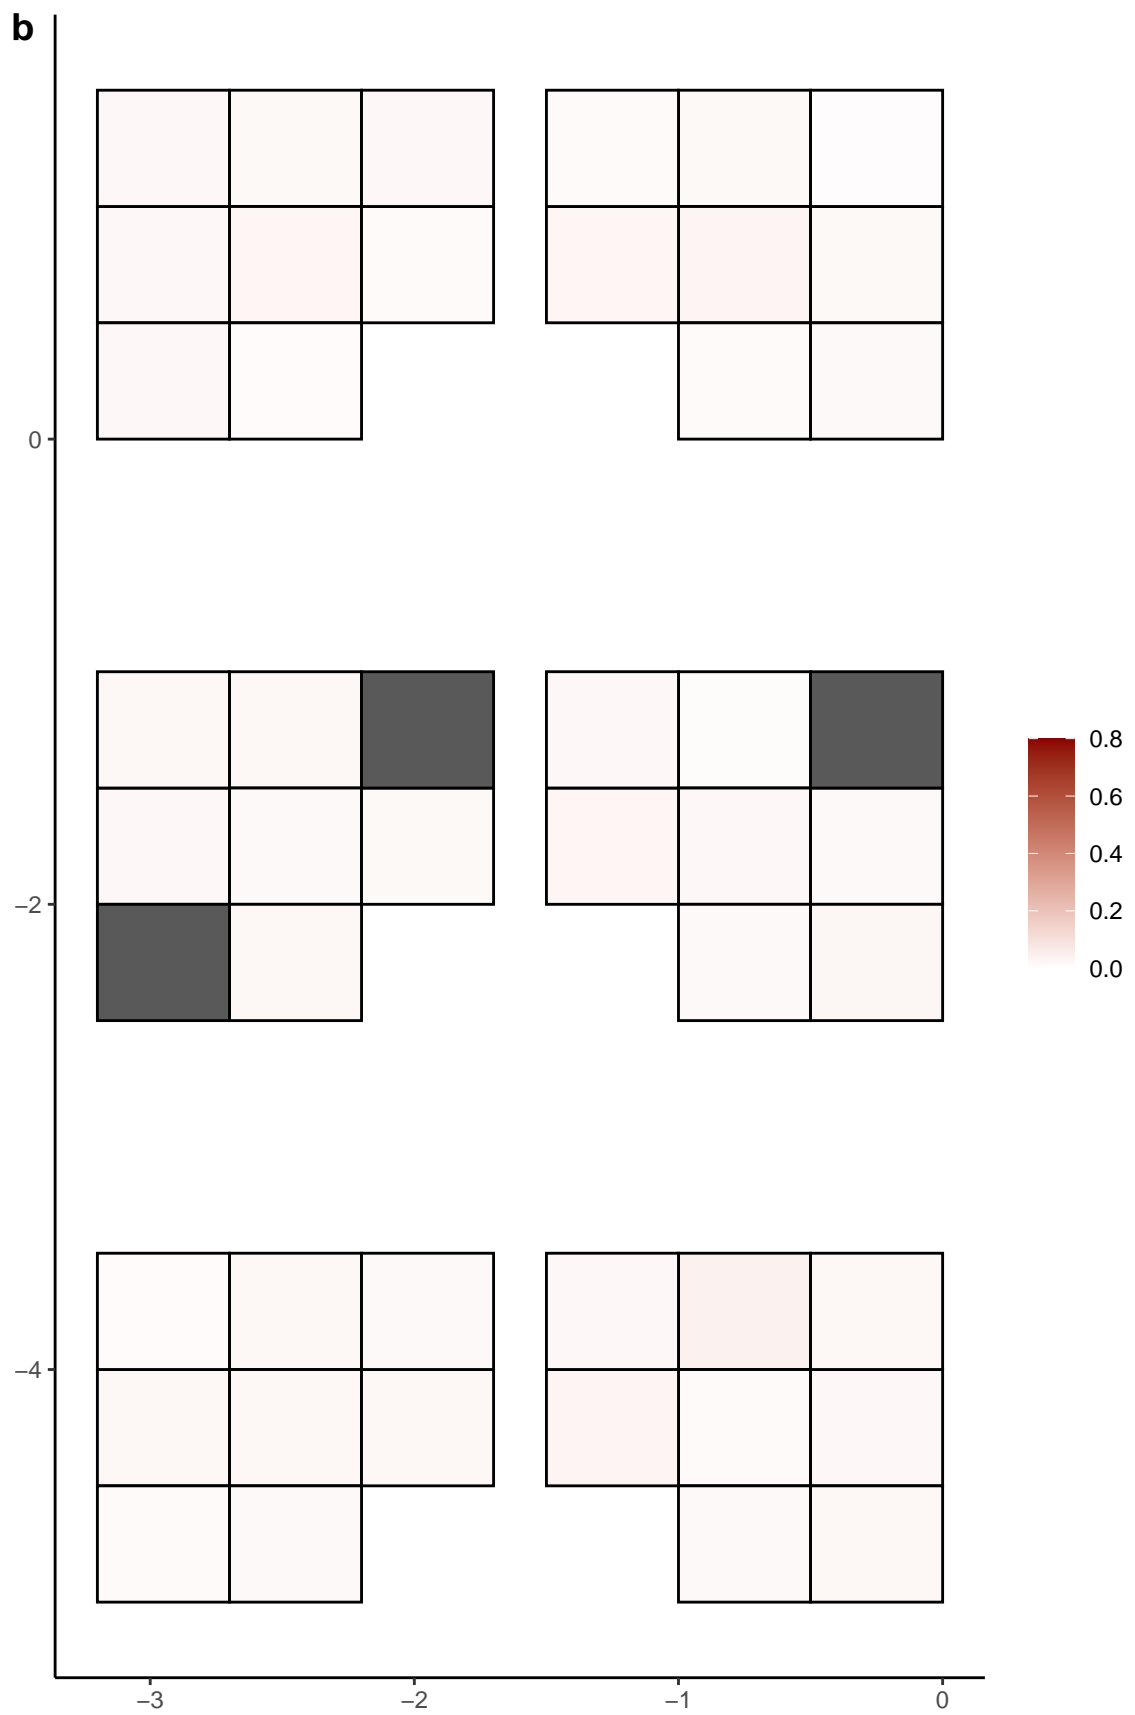

**a** ID05 5-30650591-C-A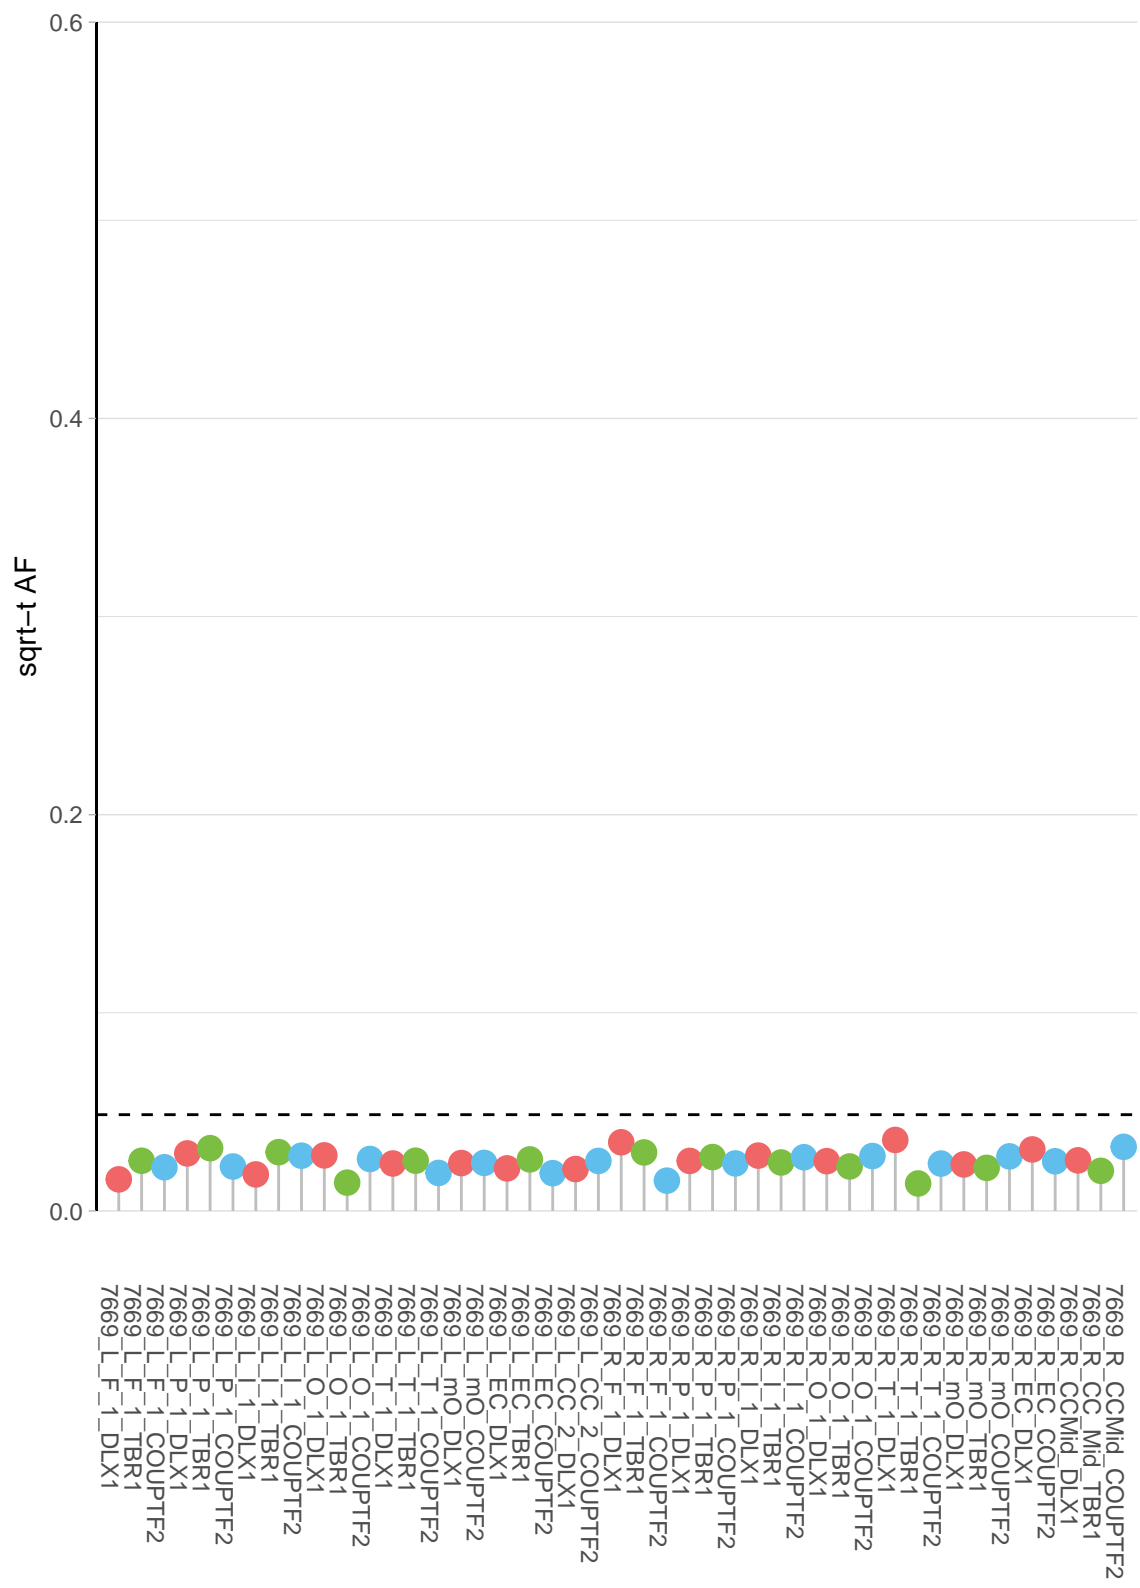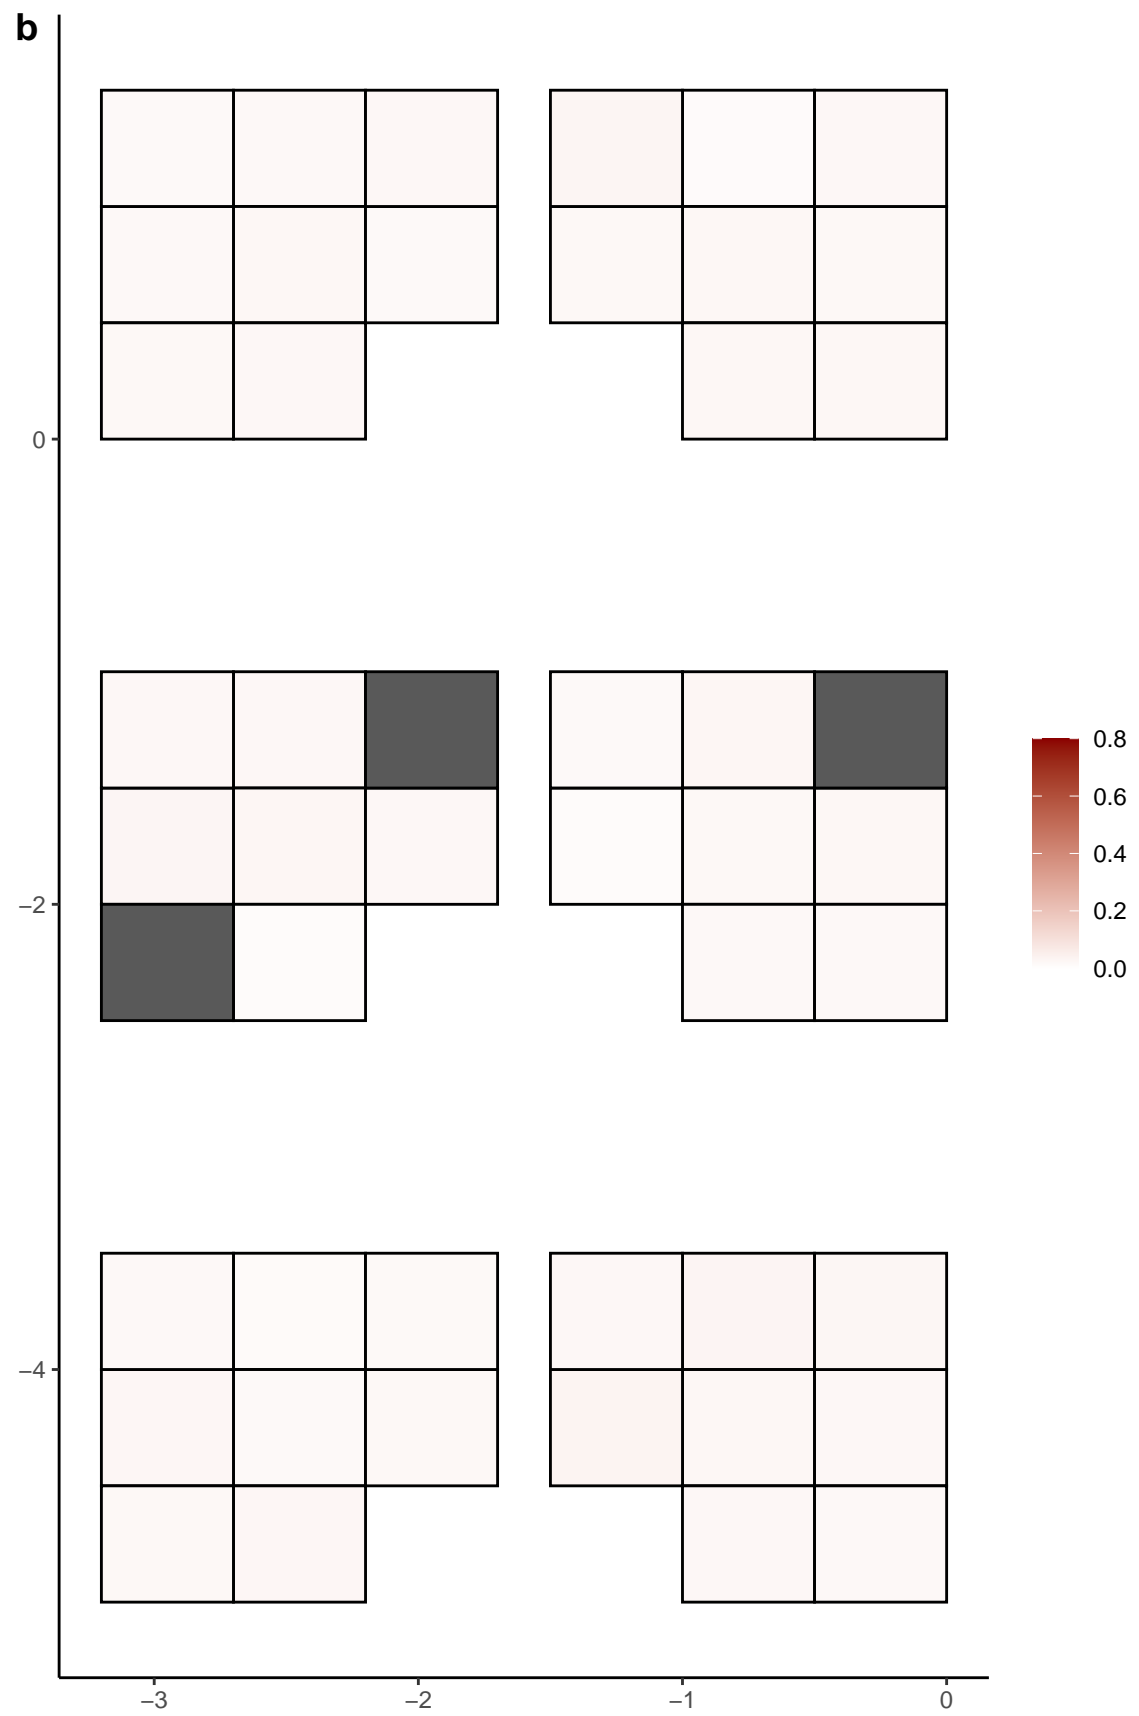

**a** ID05 5-30923233-C-T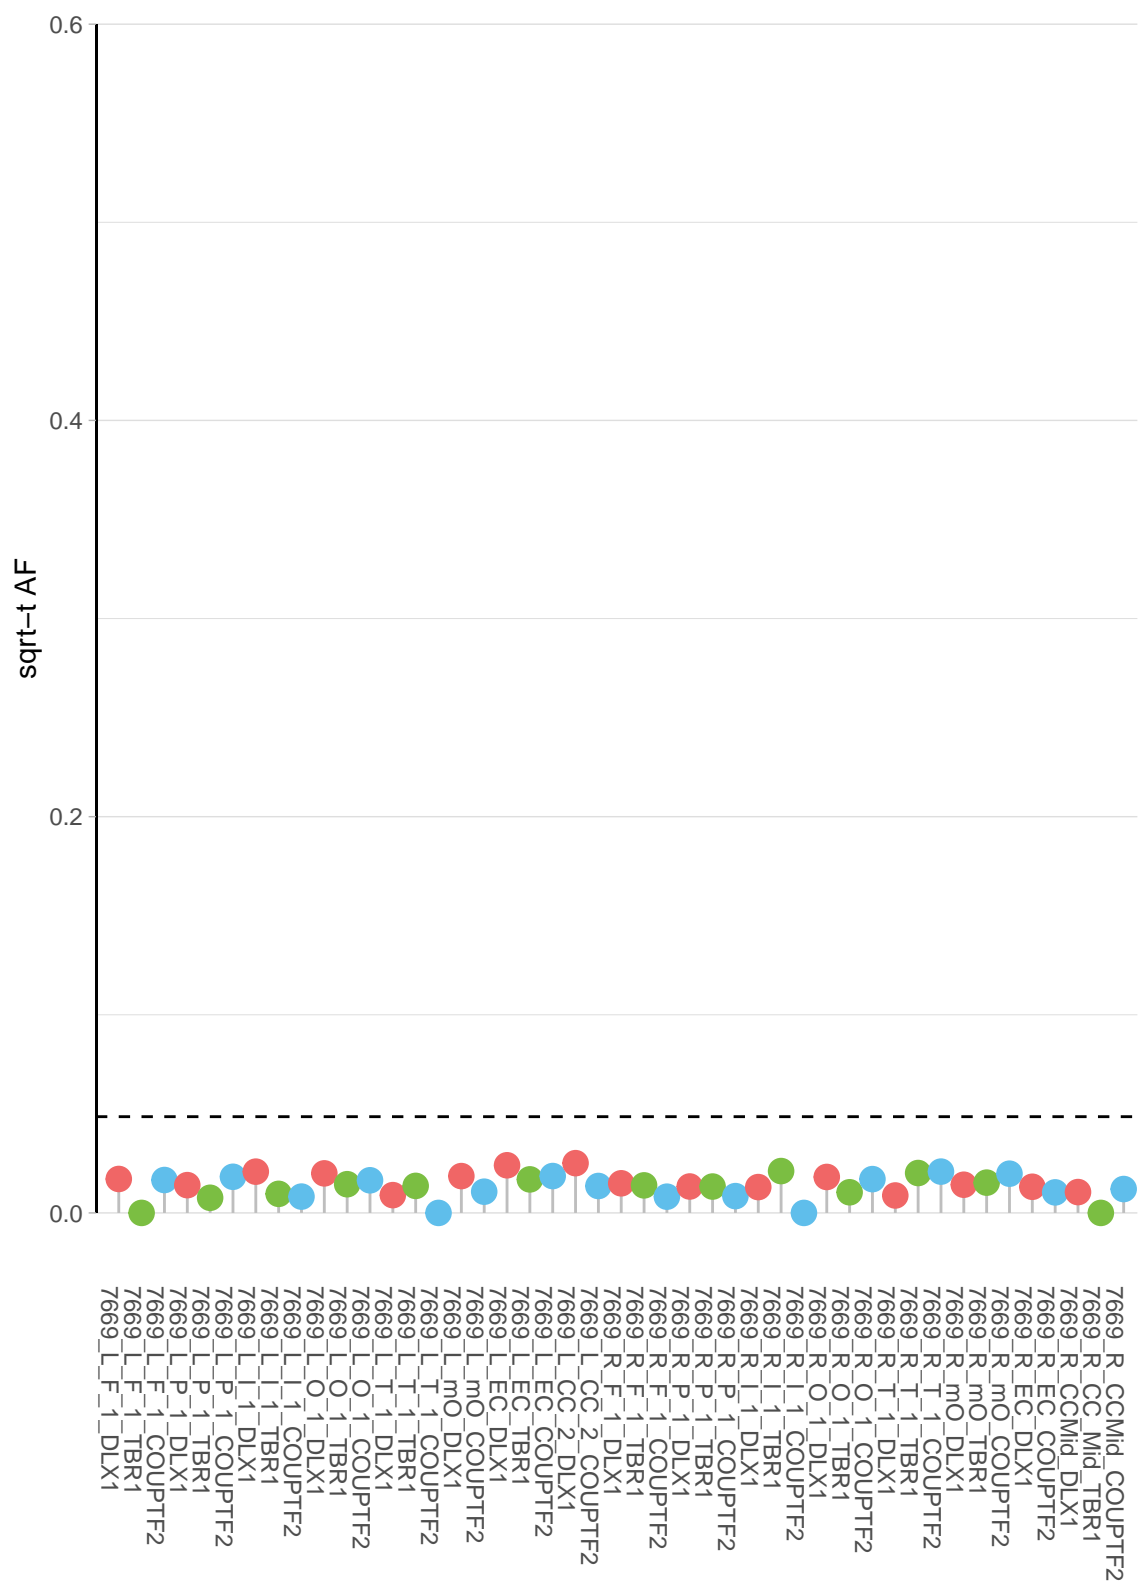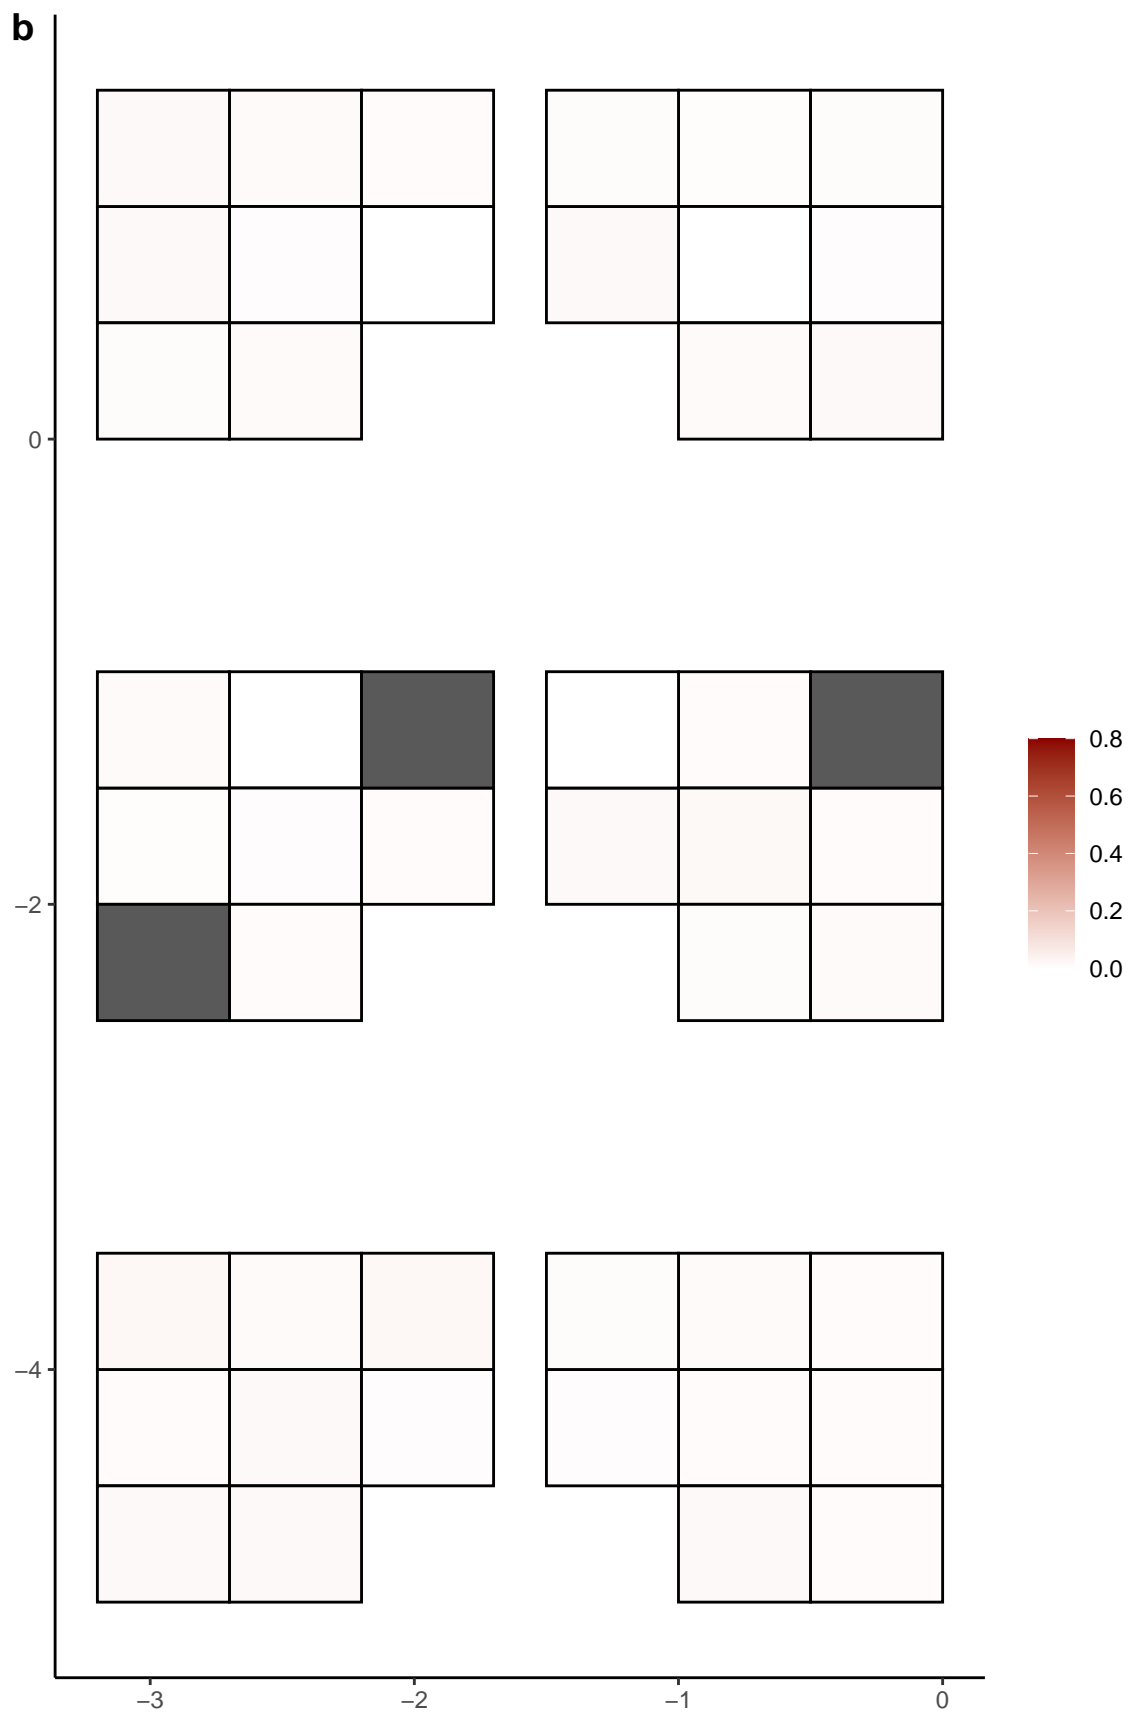



**a** ID05 5-42394330-C-T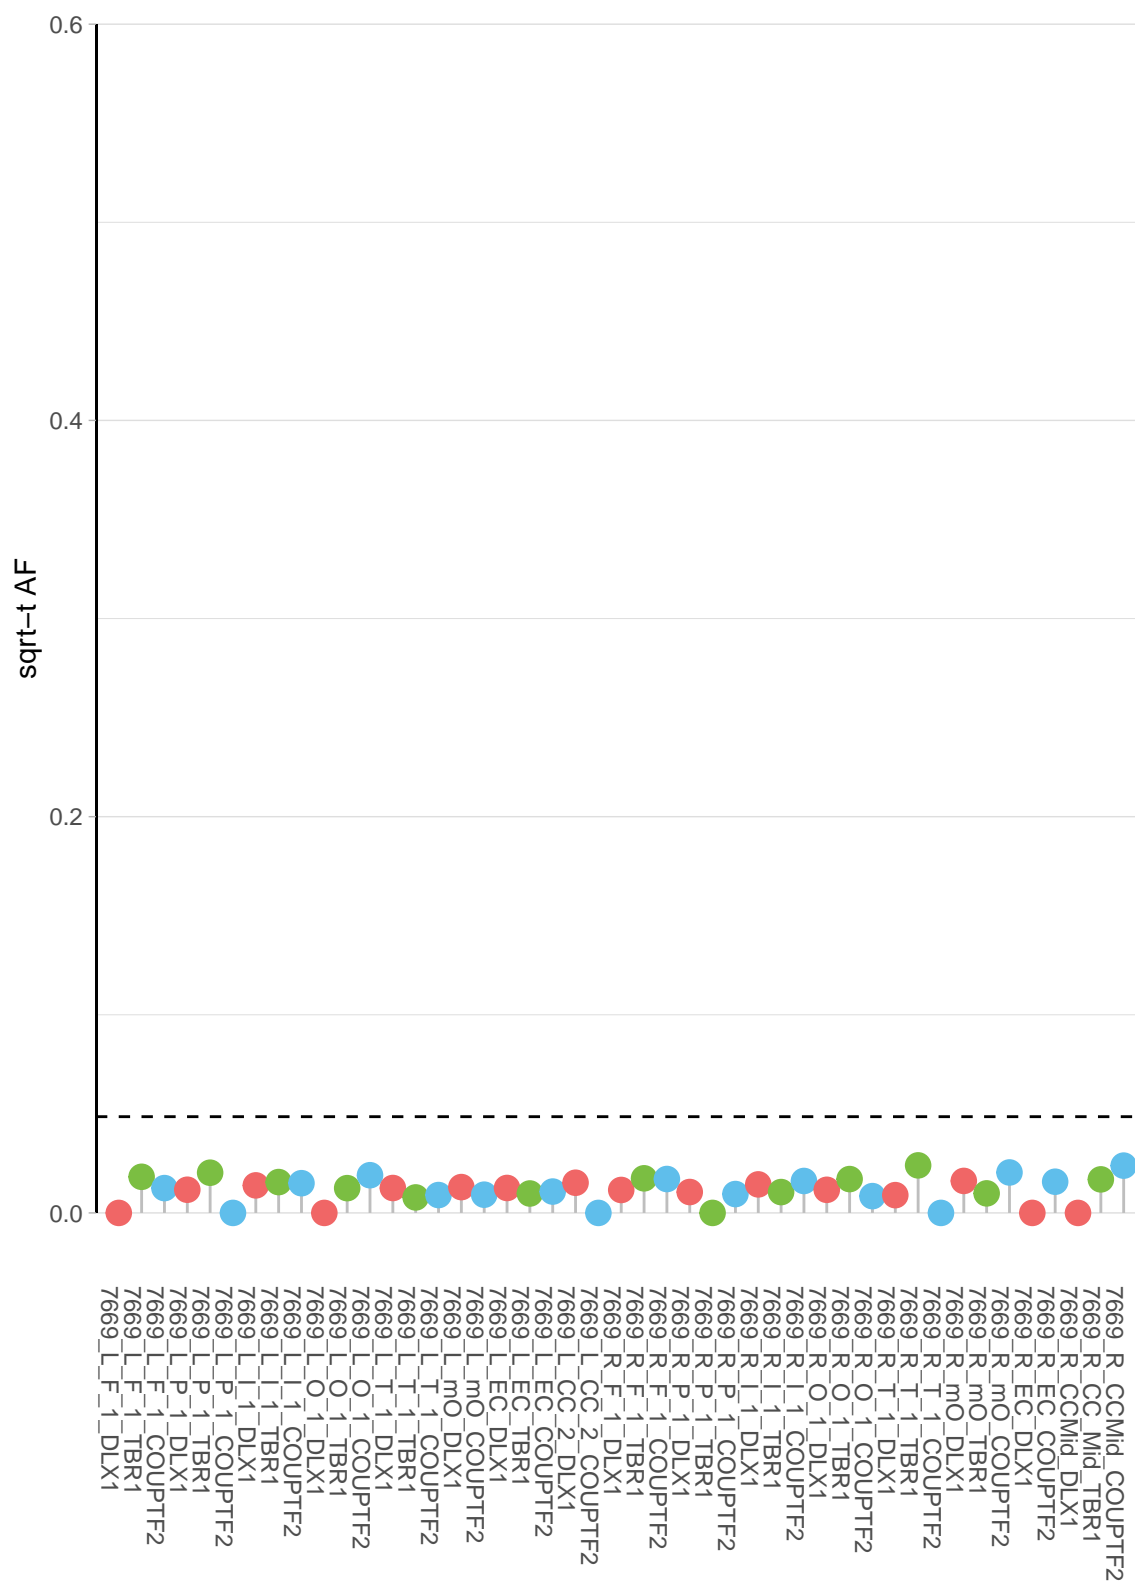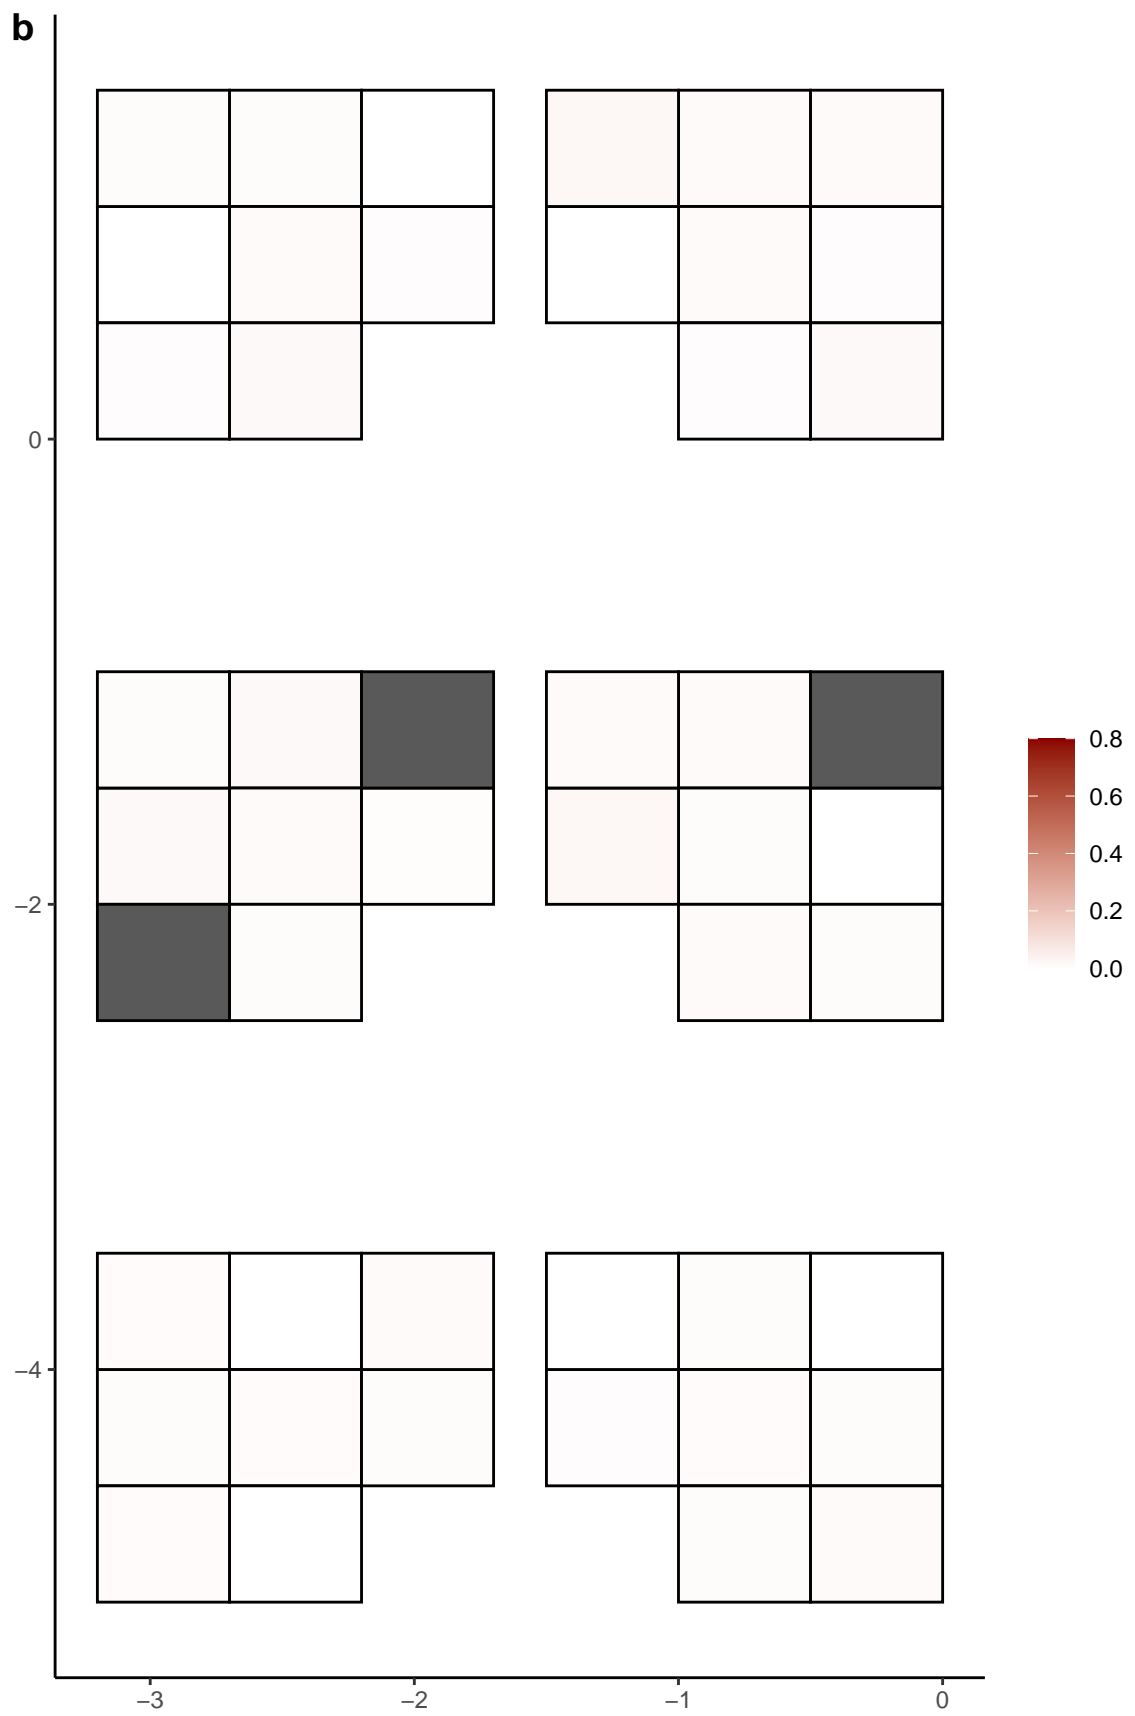

**a** ID05 5-42474677-G-T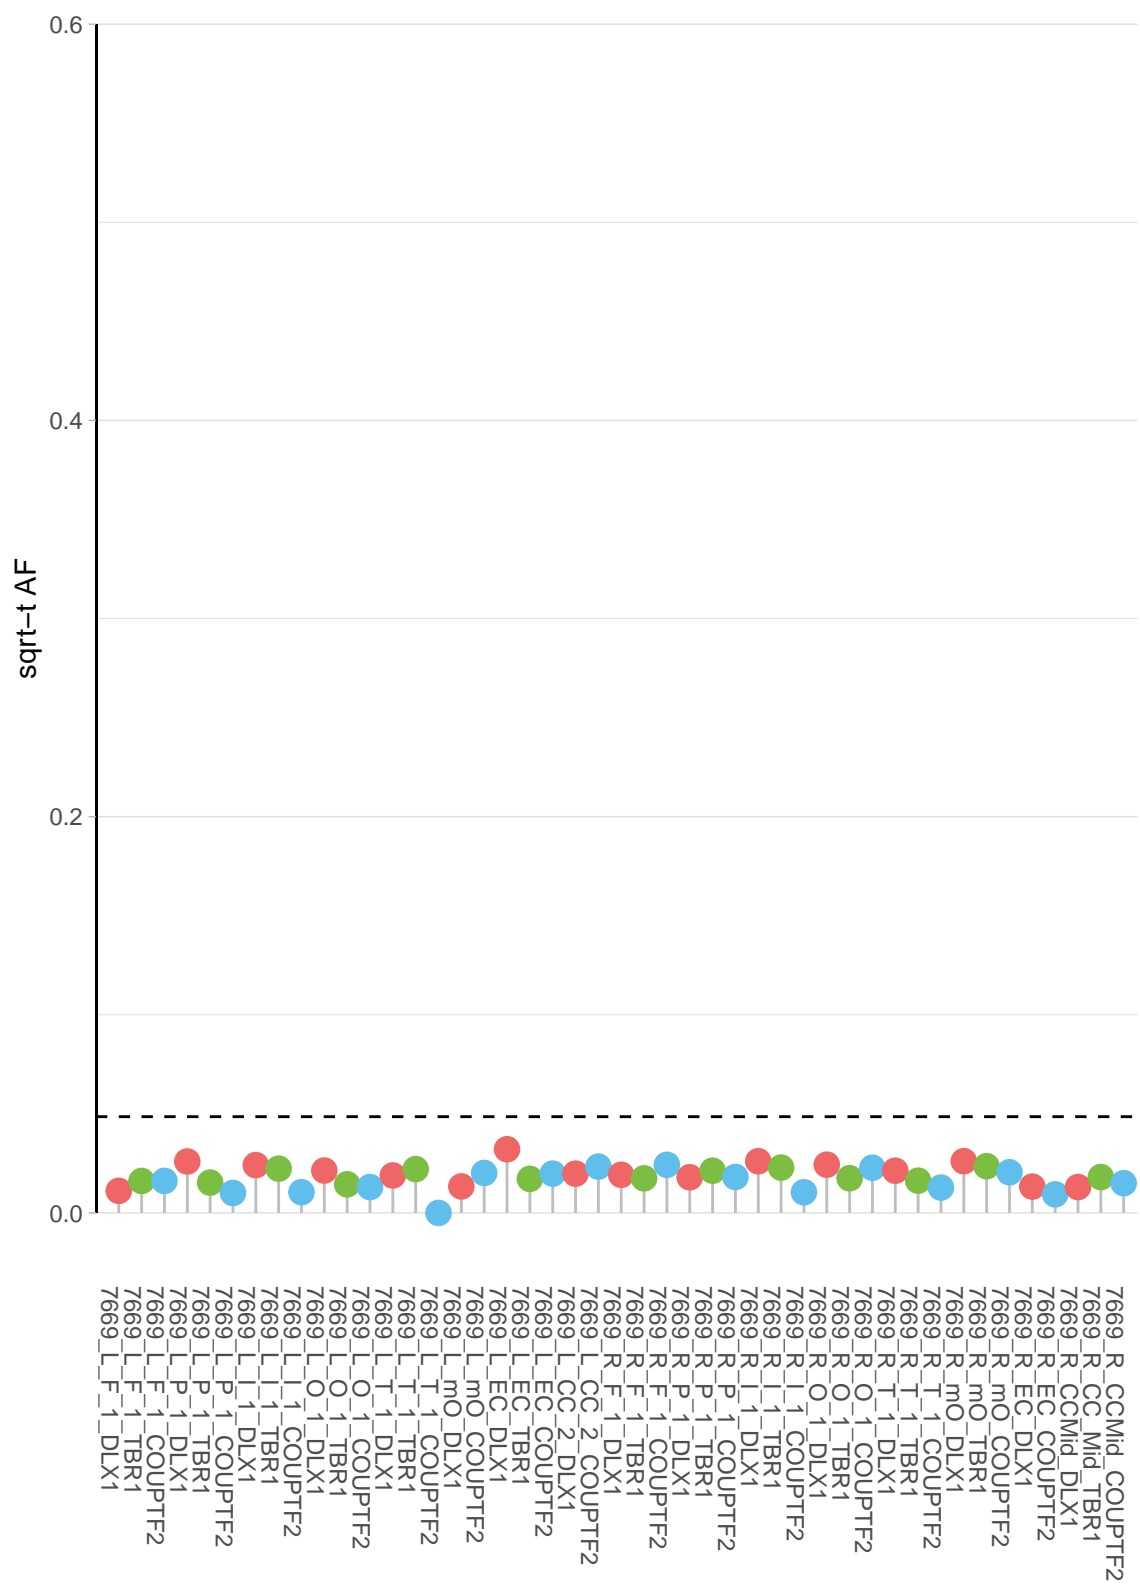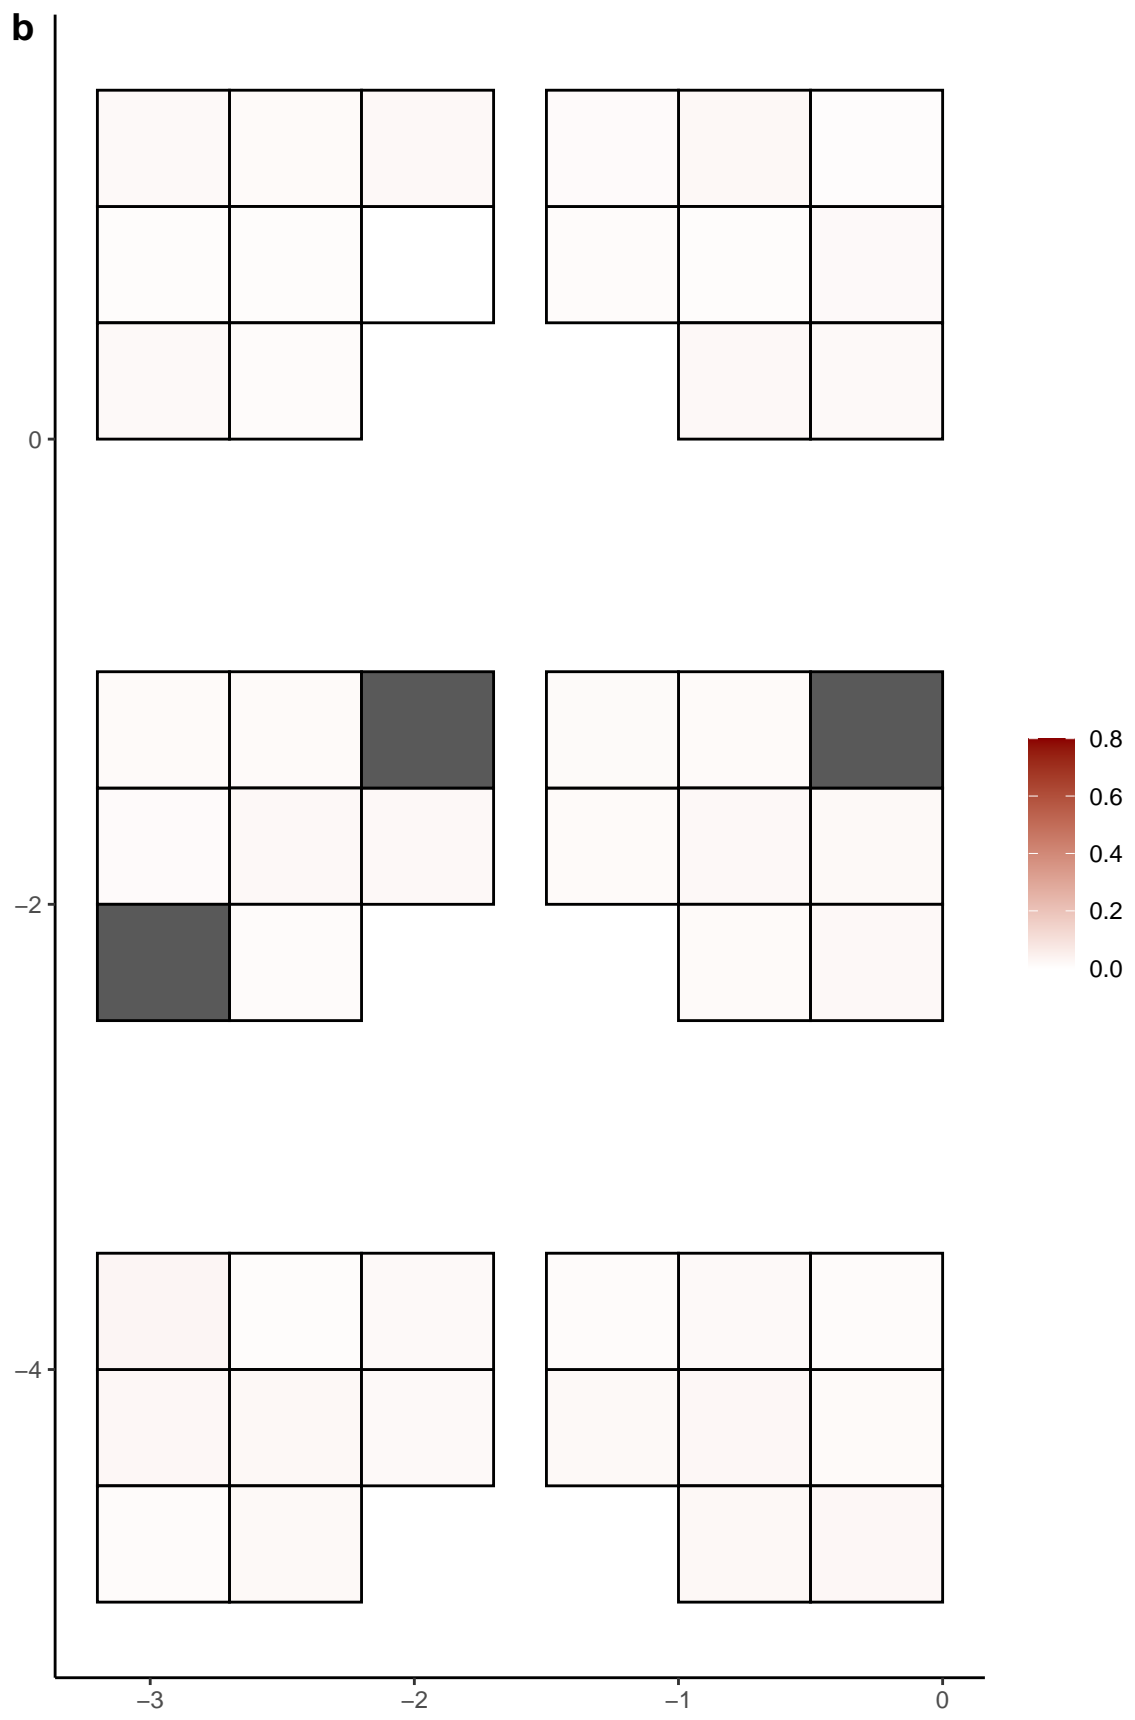

**a** ID05 5-50102837-T-C

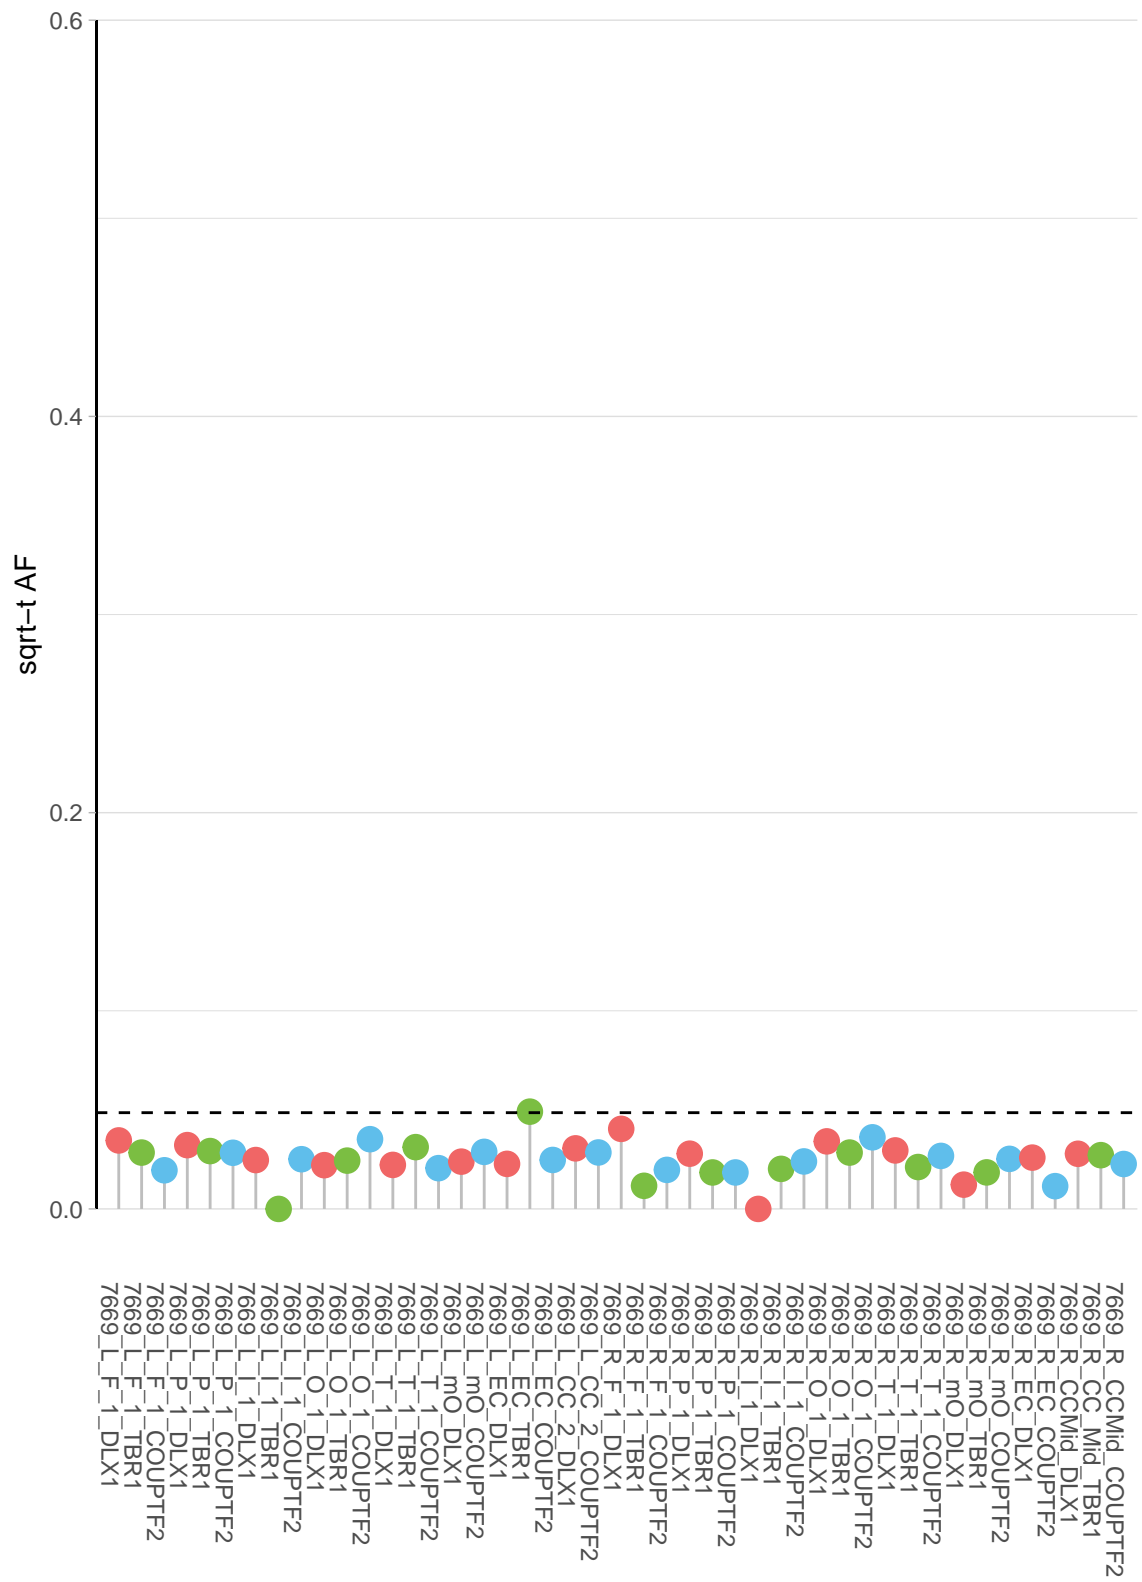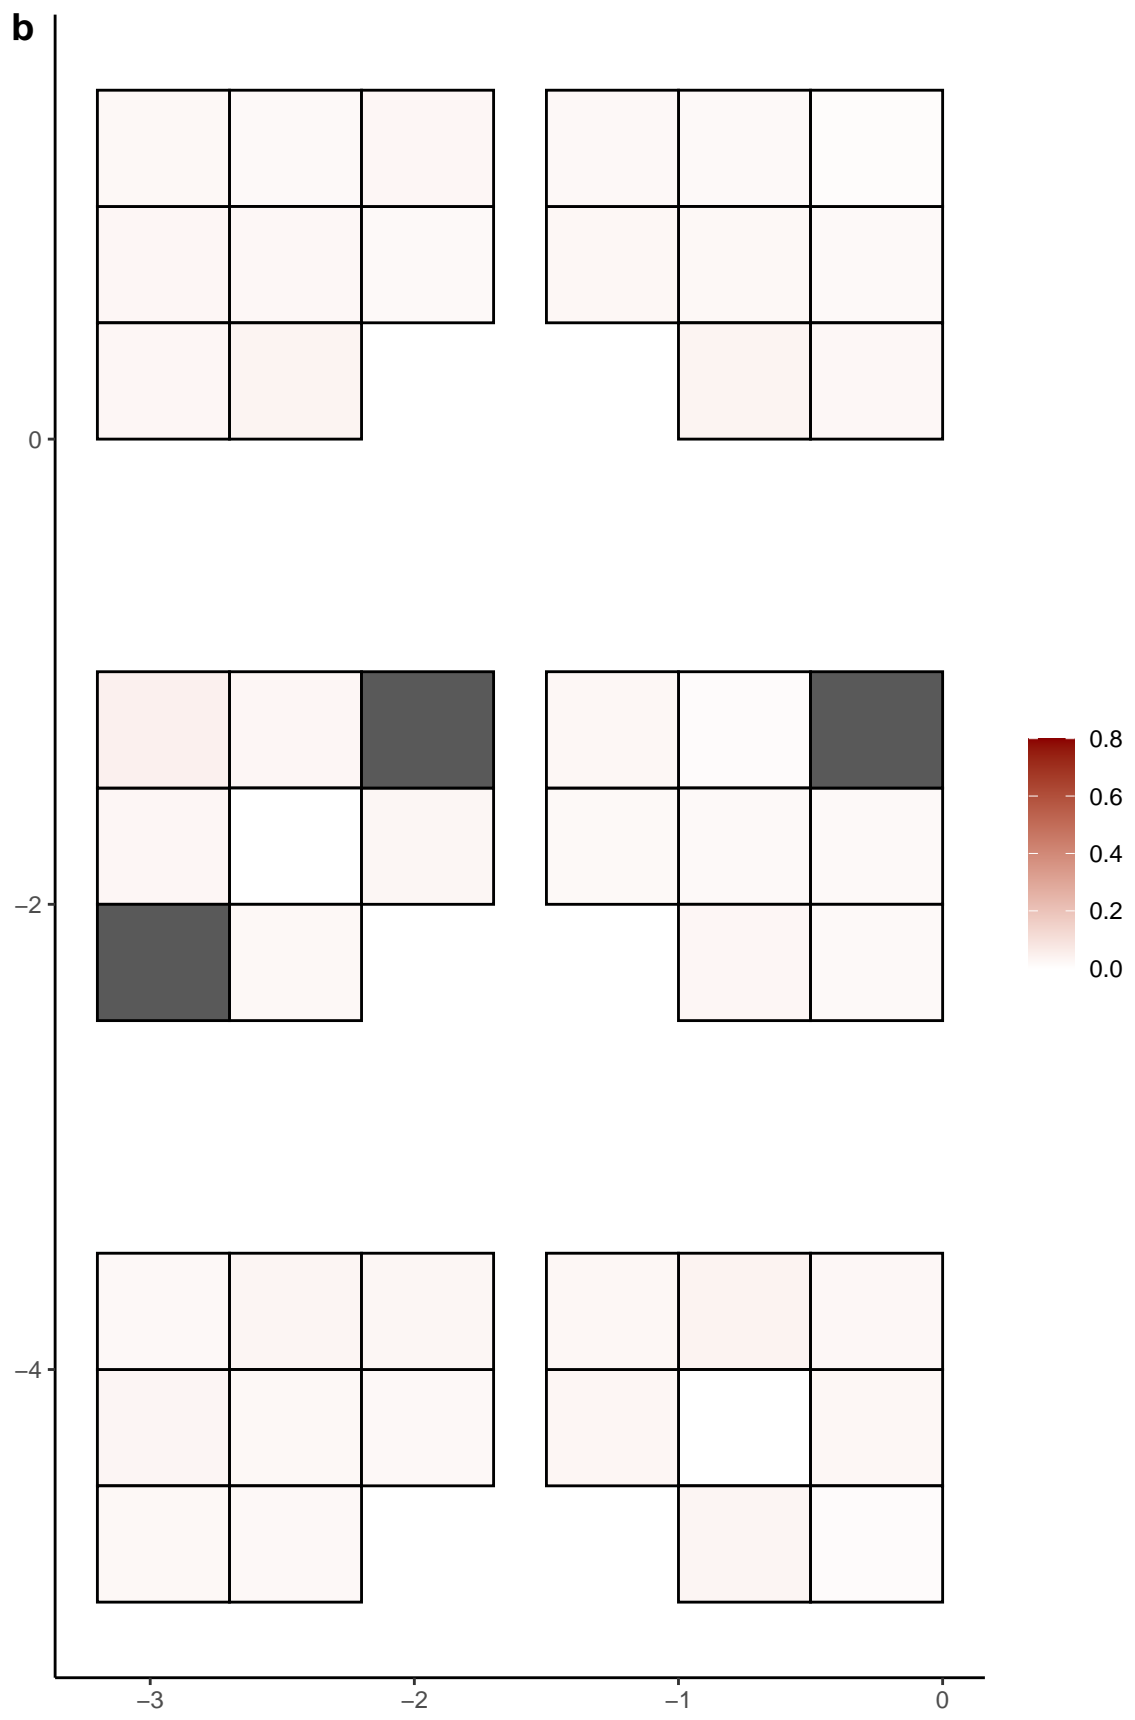

**a** ID05 5-53535260-A-G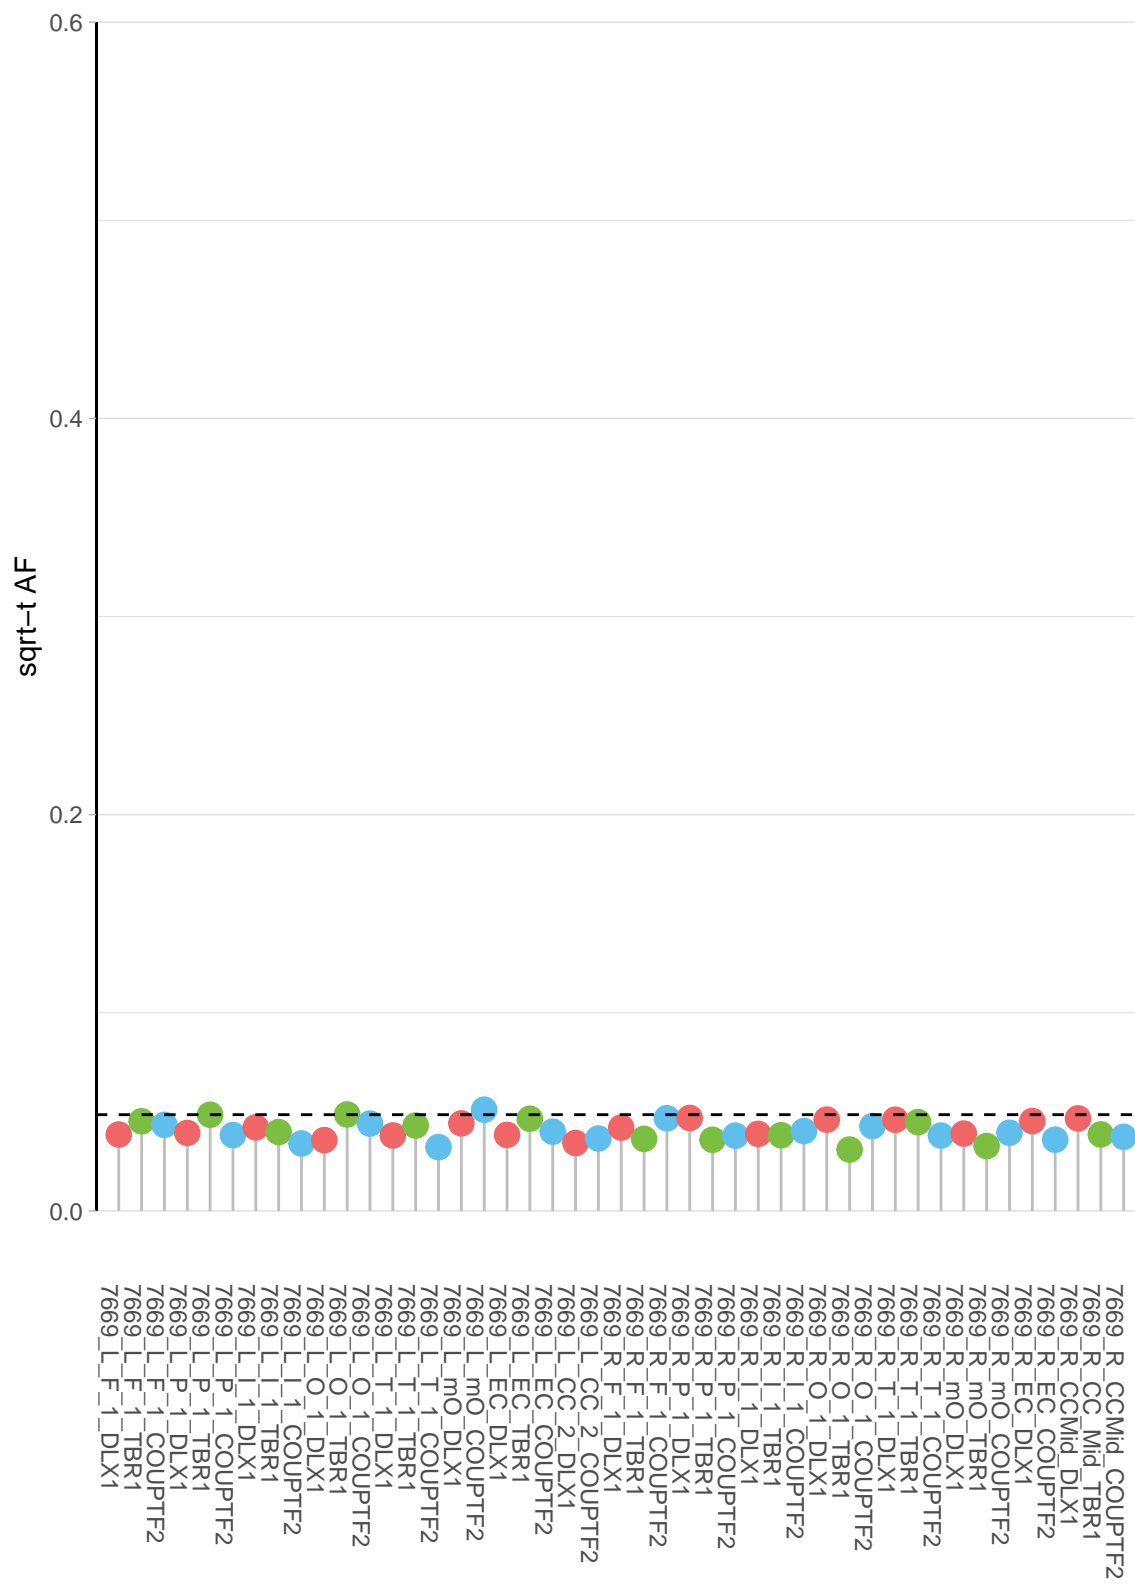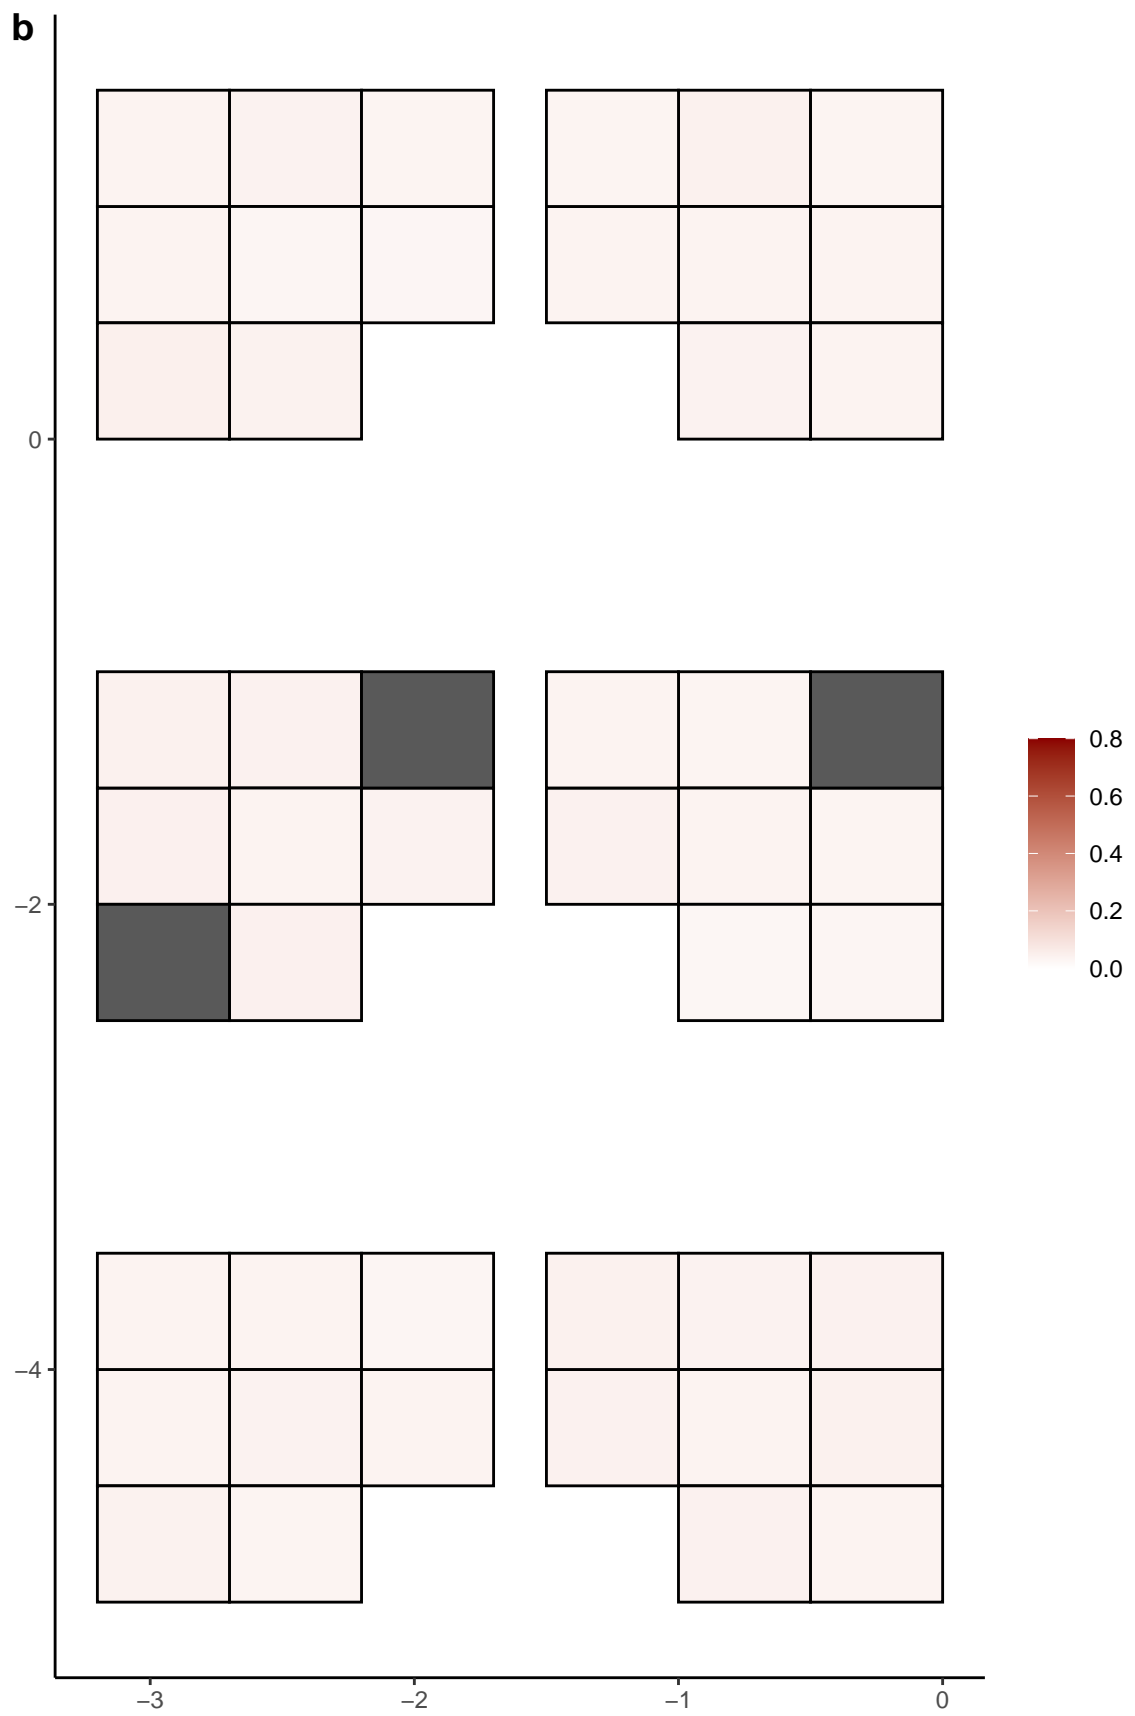

**a** ID05 5-57965108-C-T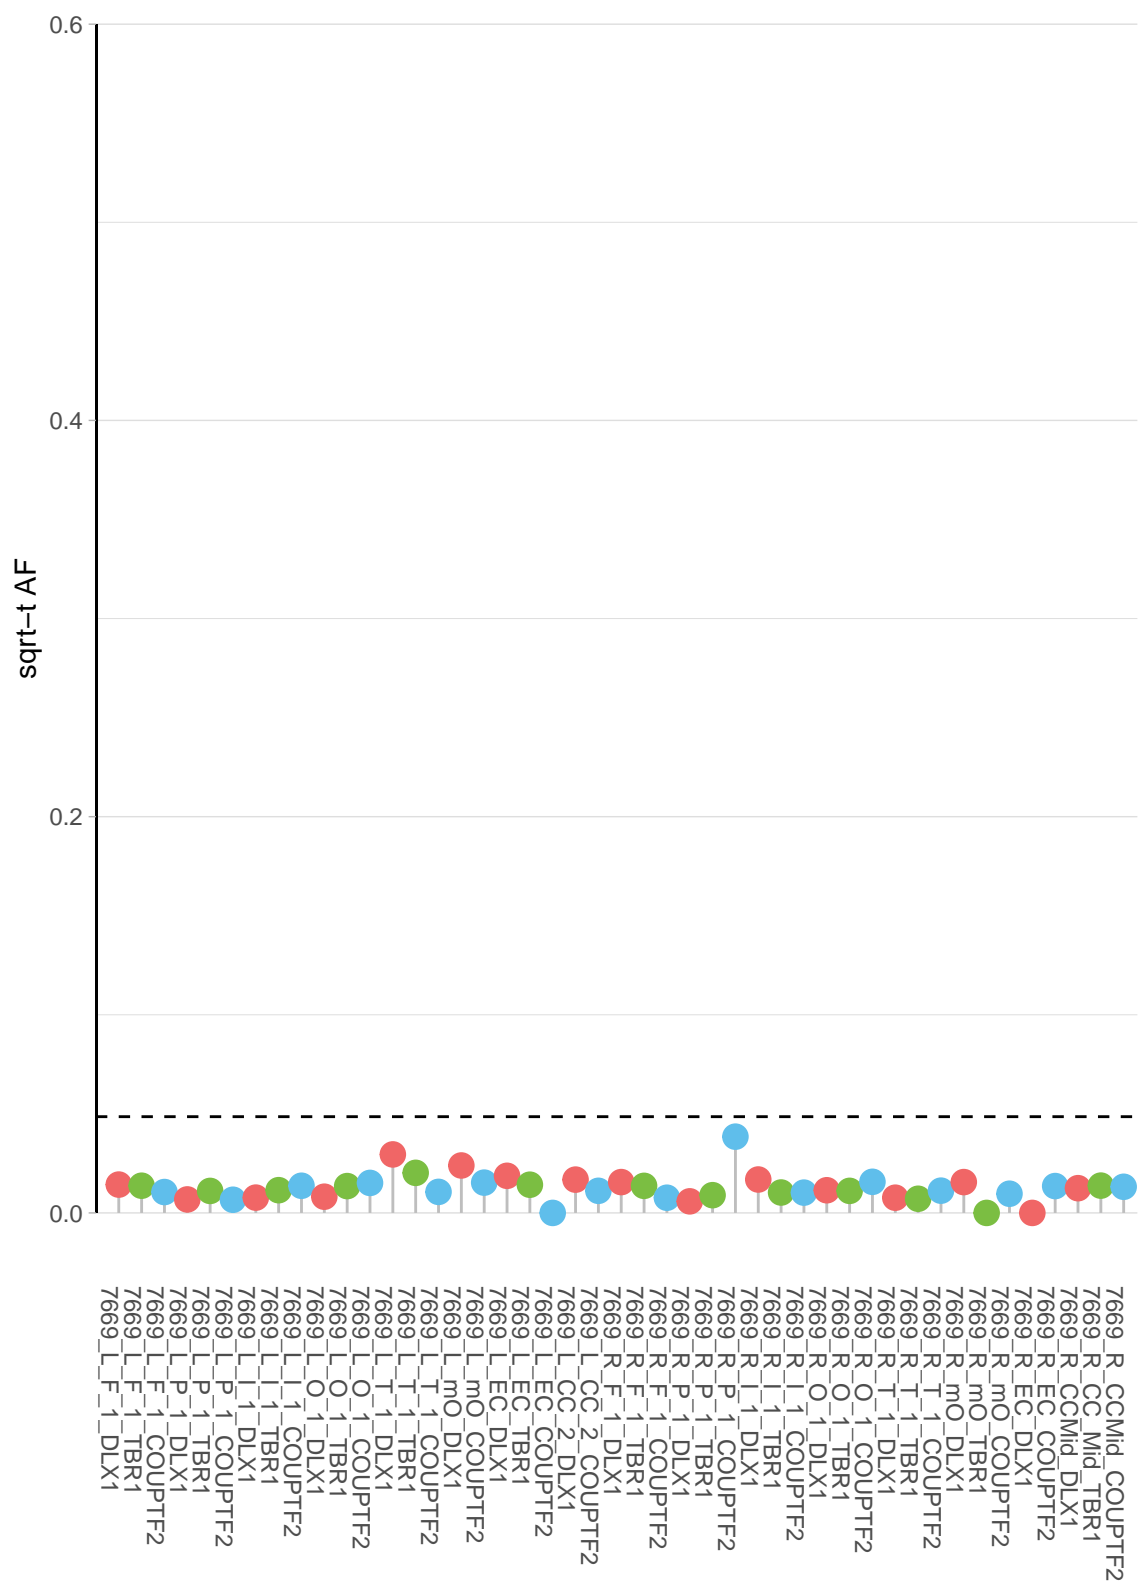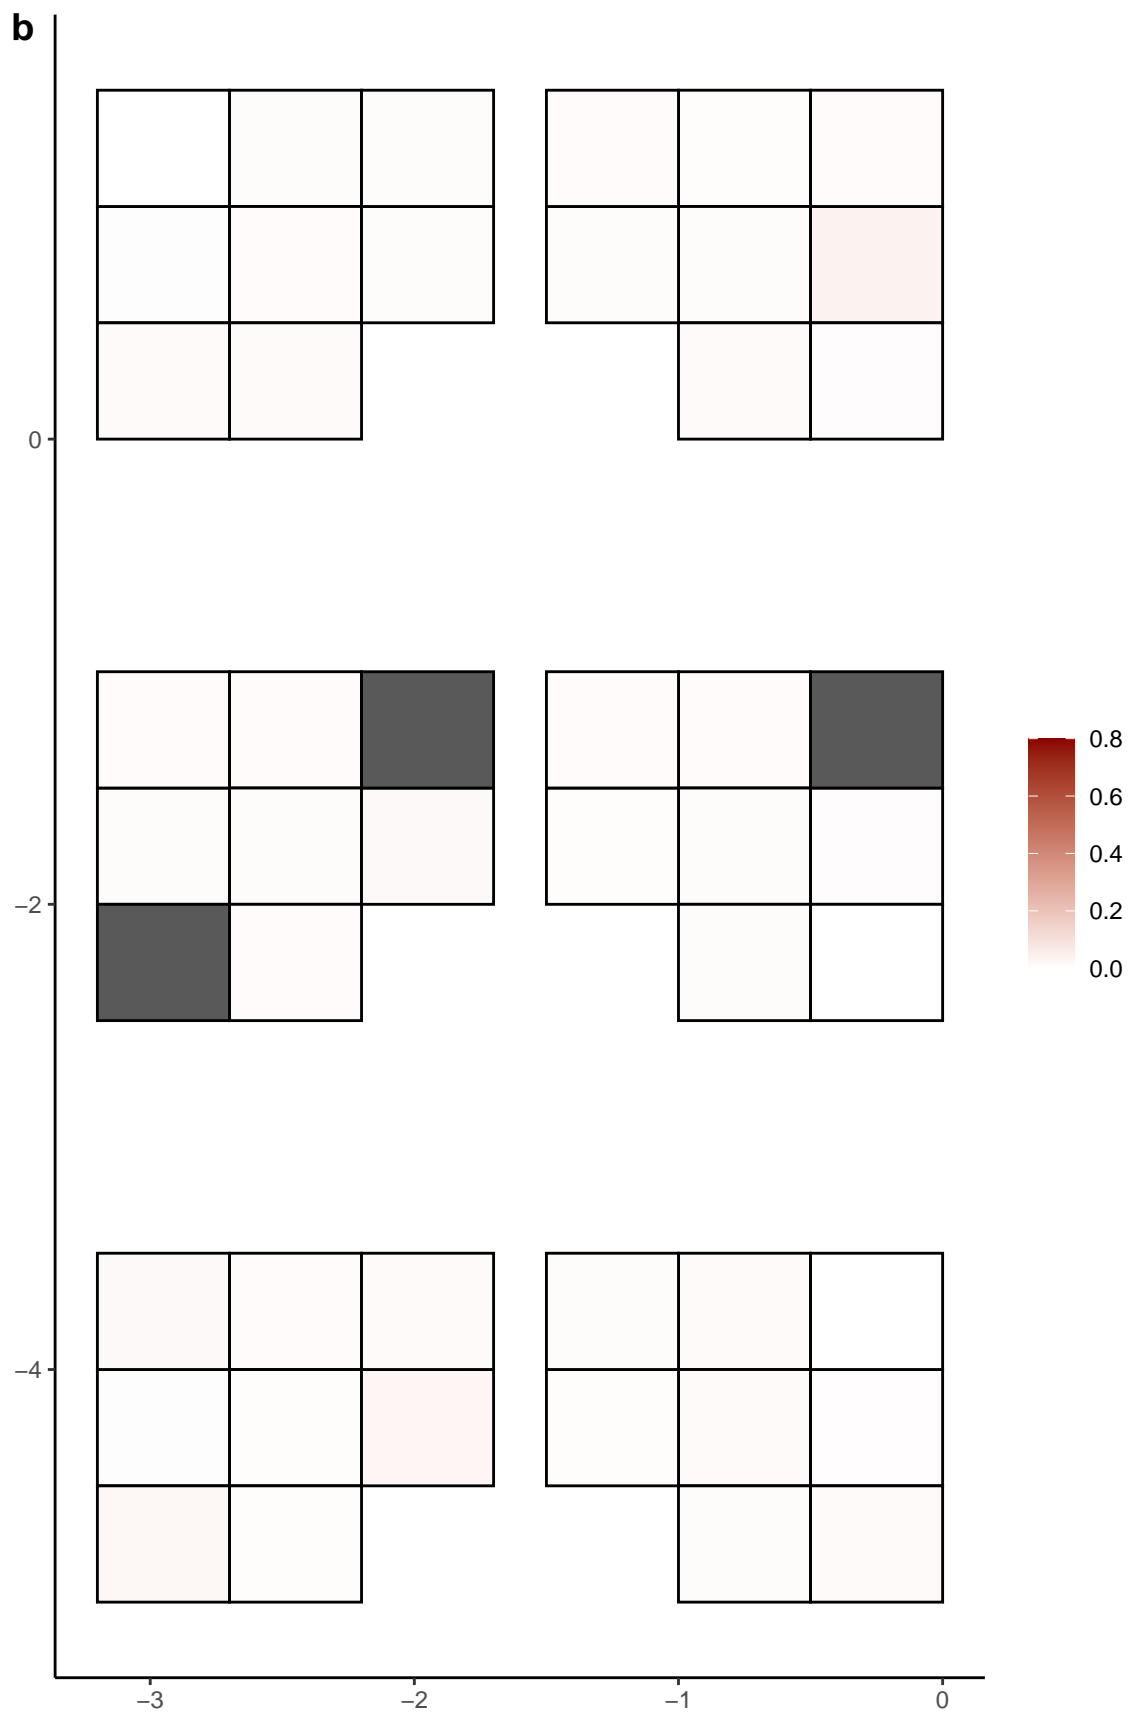

**a** ID05 5-62110494-G-A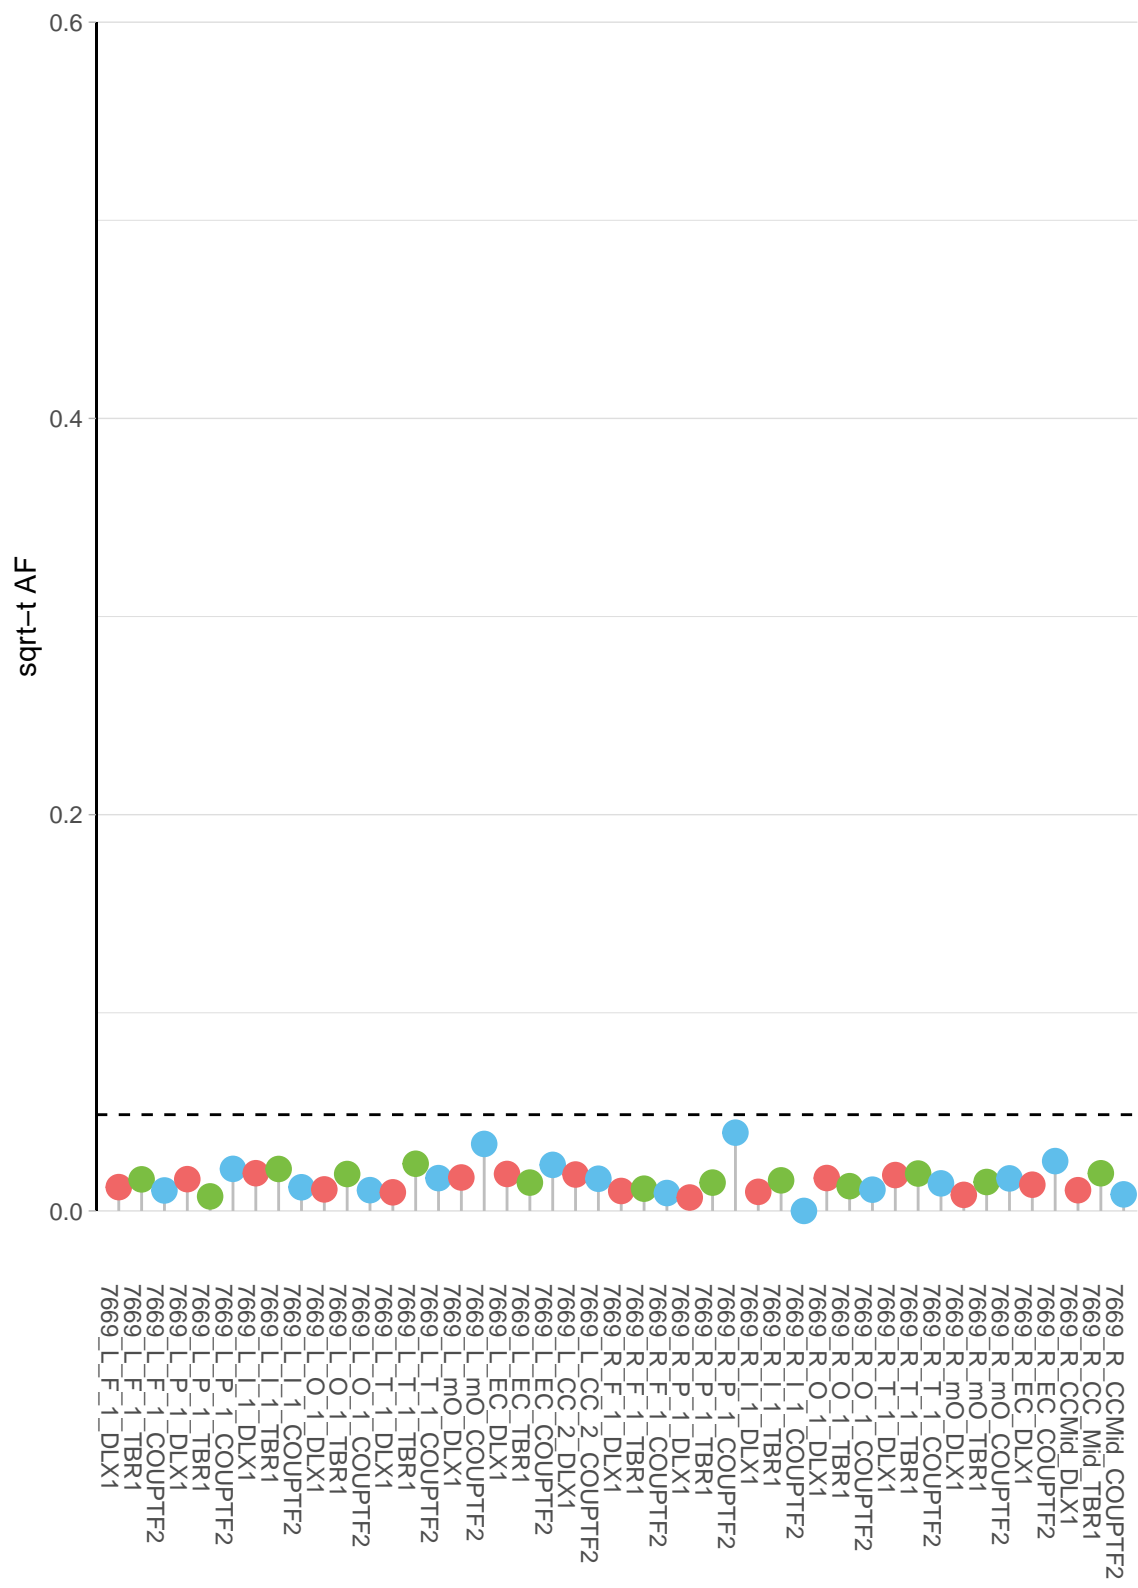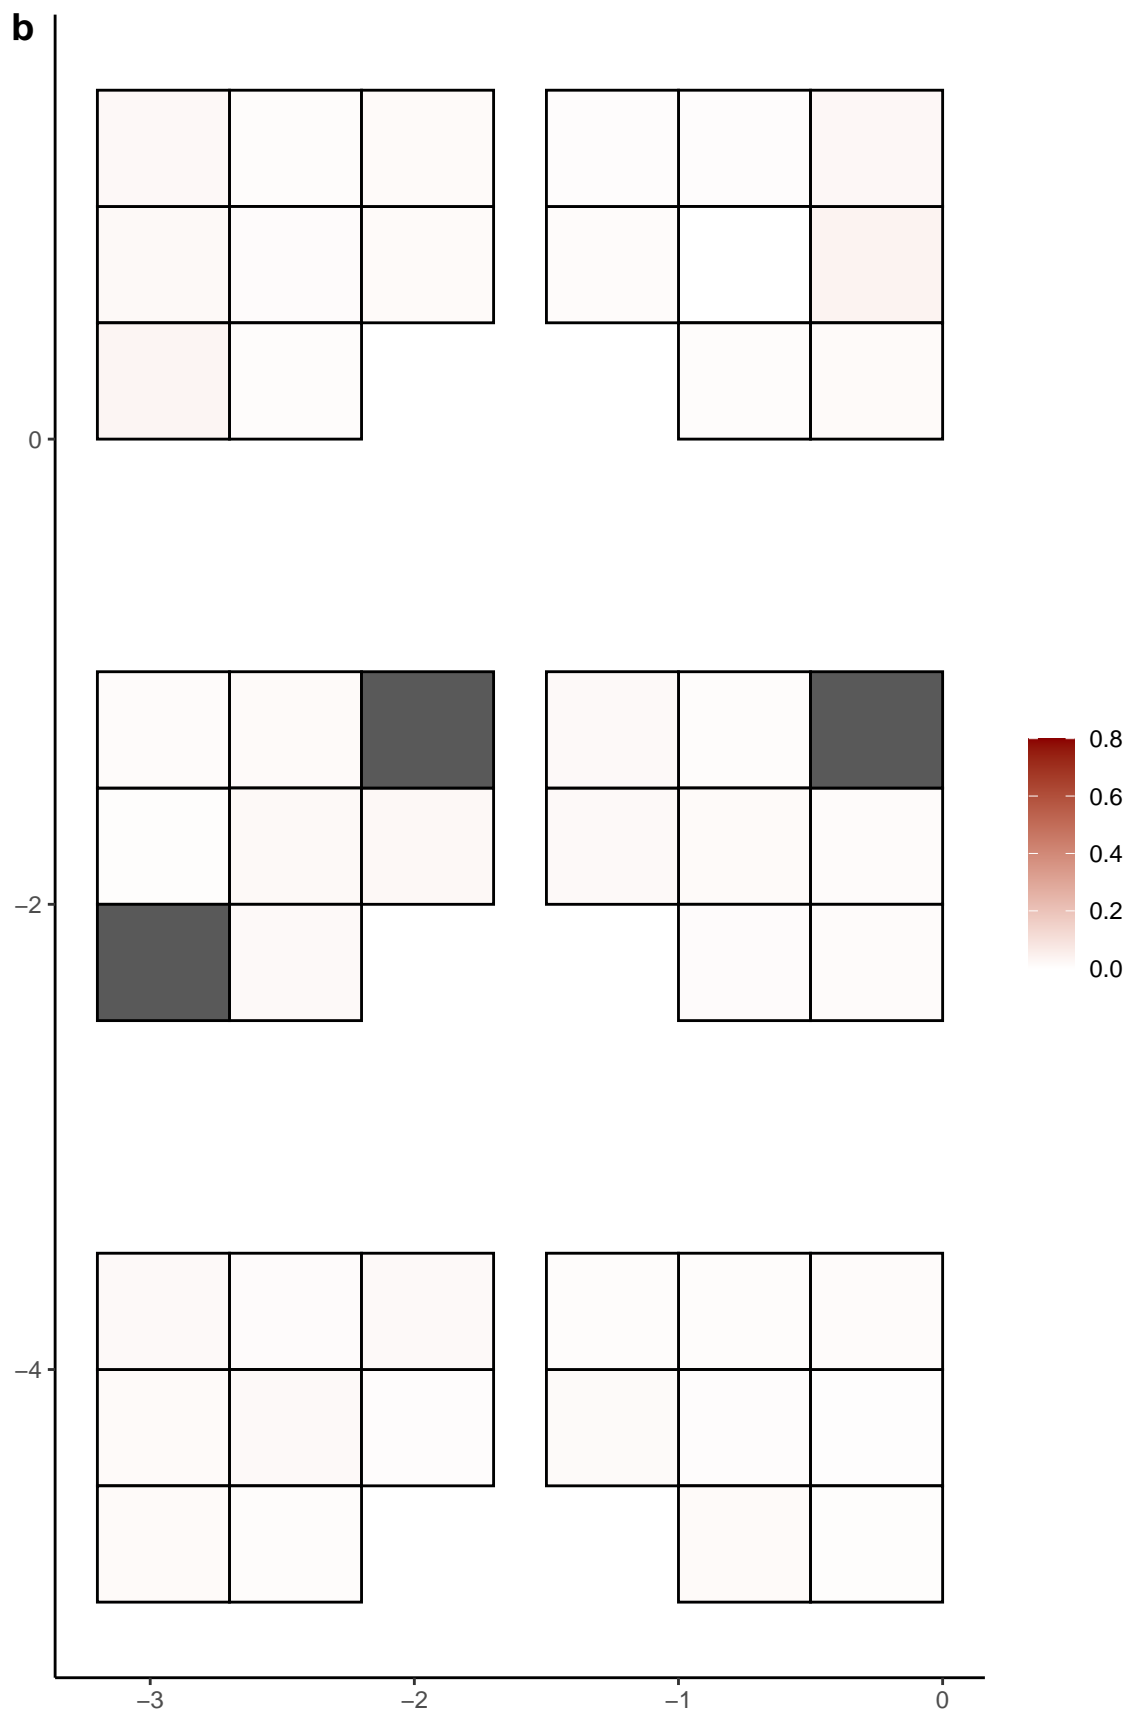

**a** ID05 5-64328747-C-T

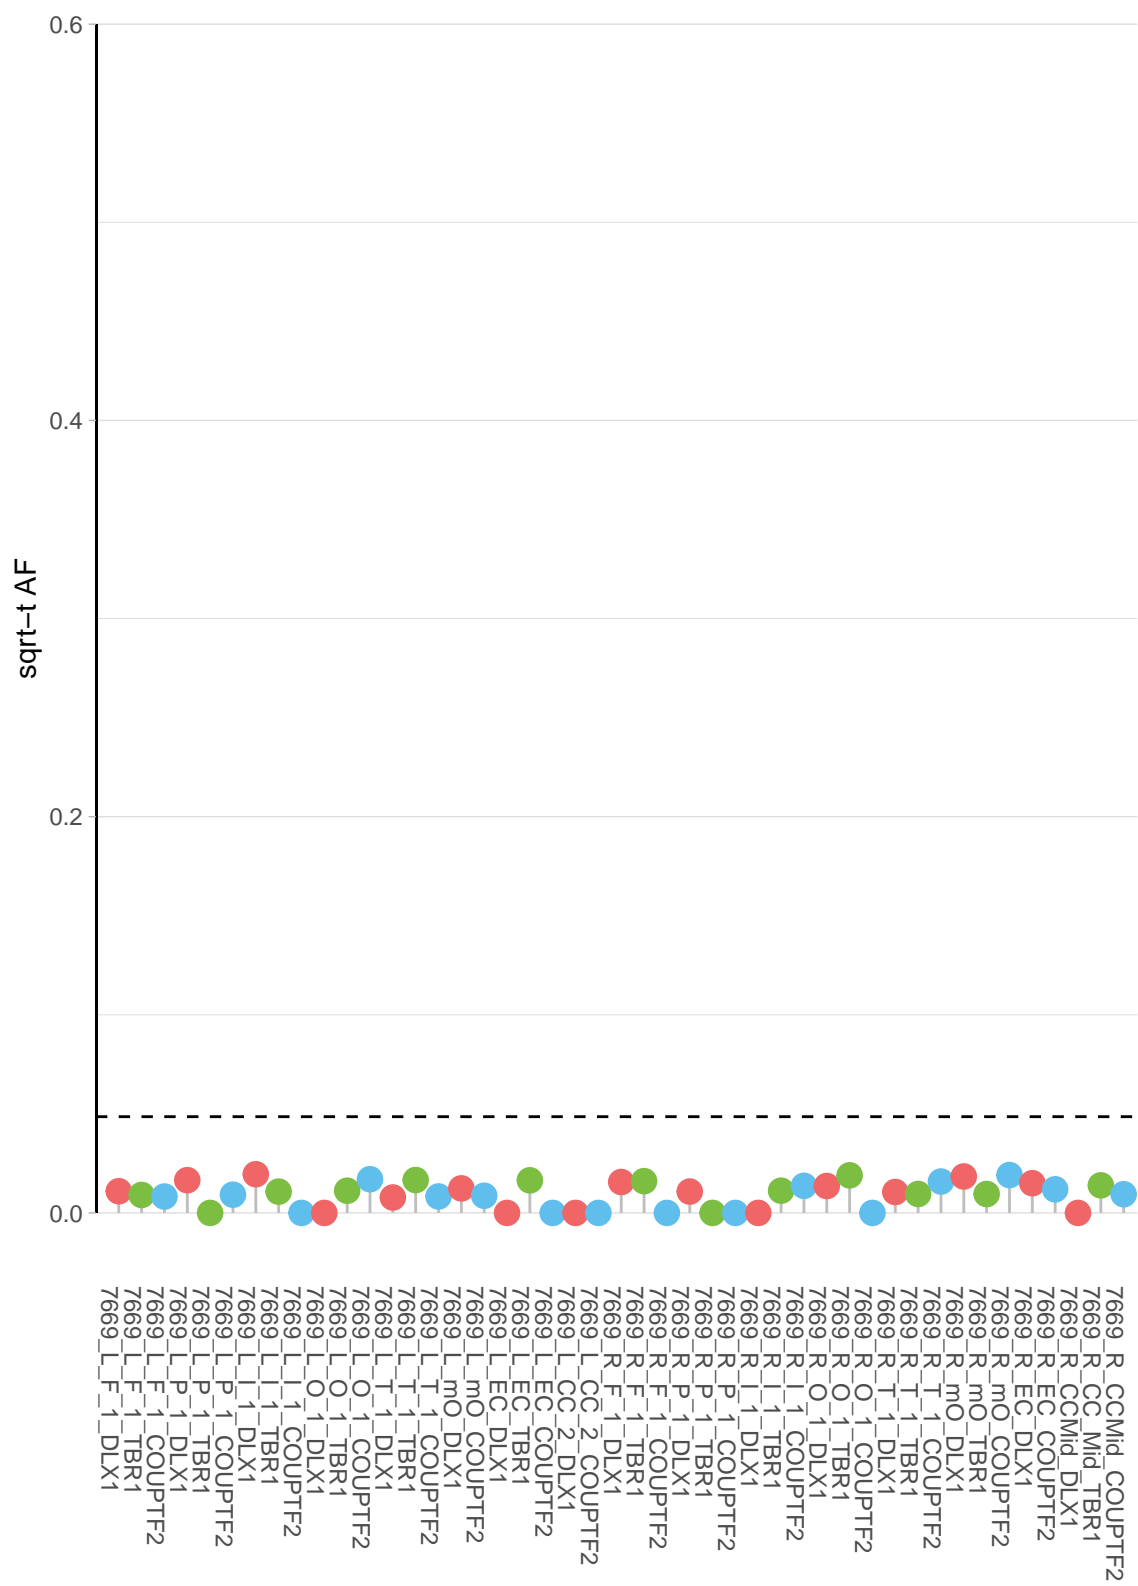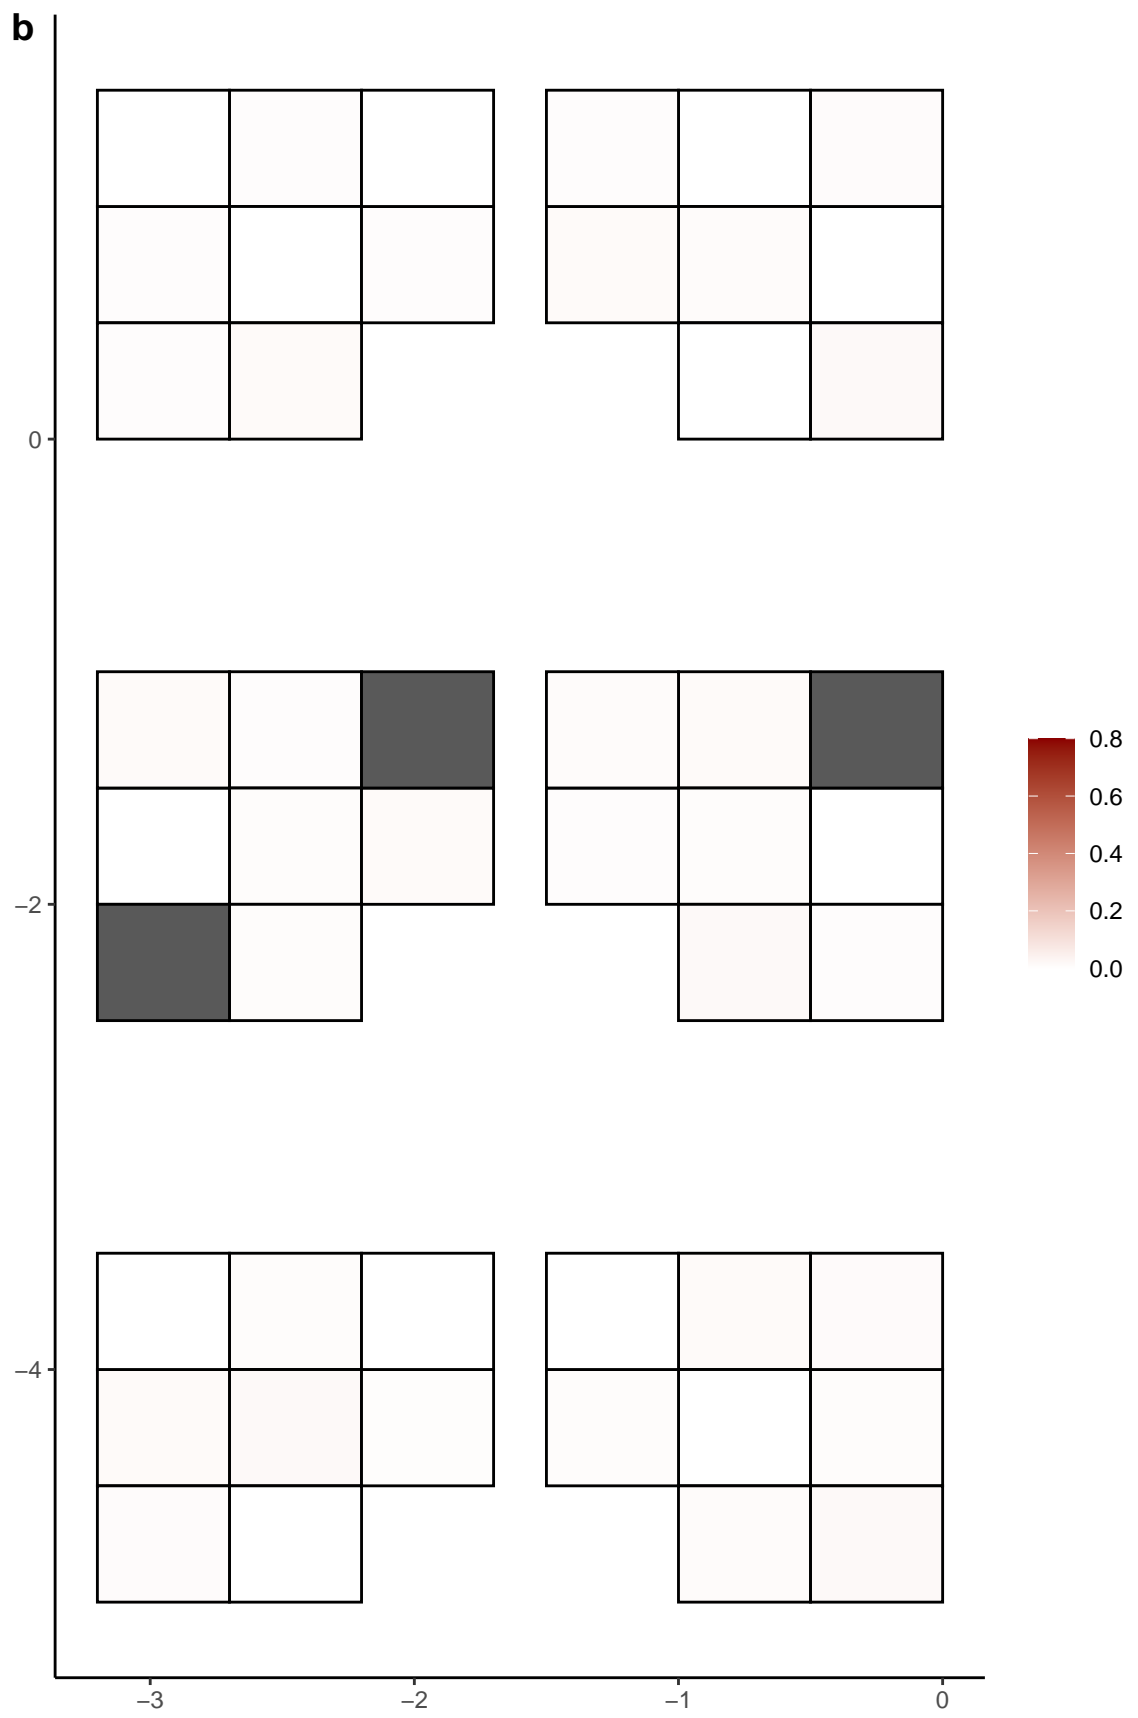

**a** ID05 5-66922121-G-T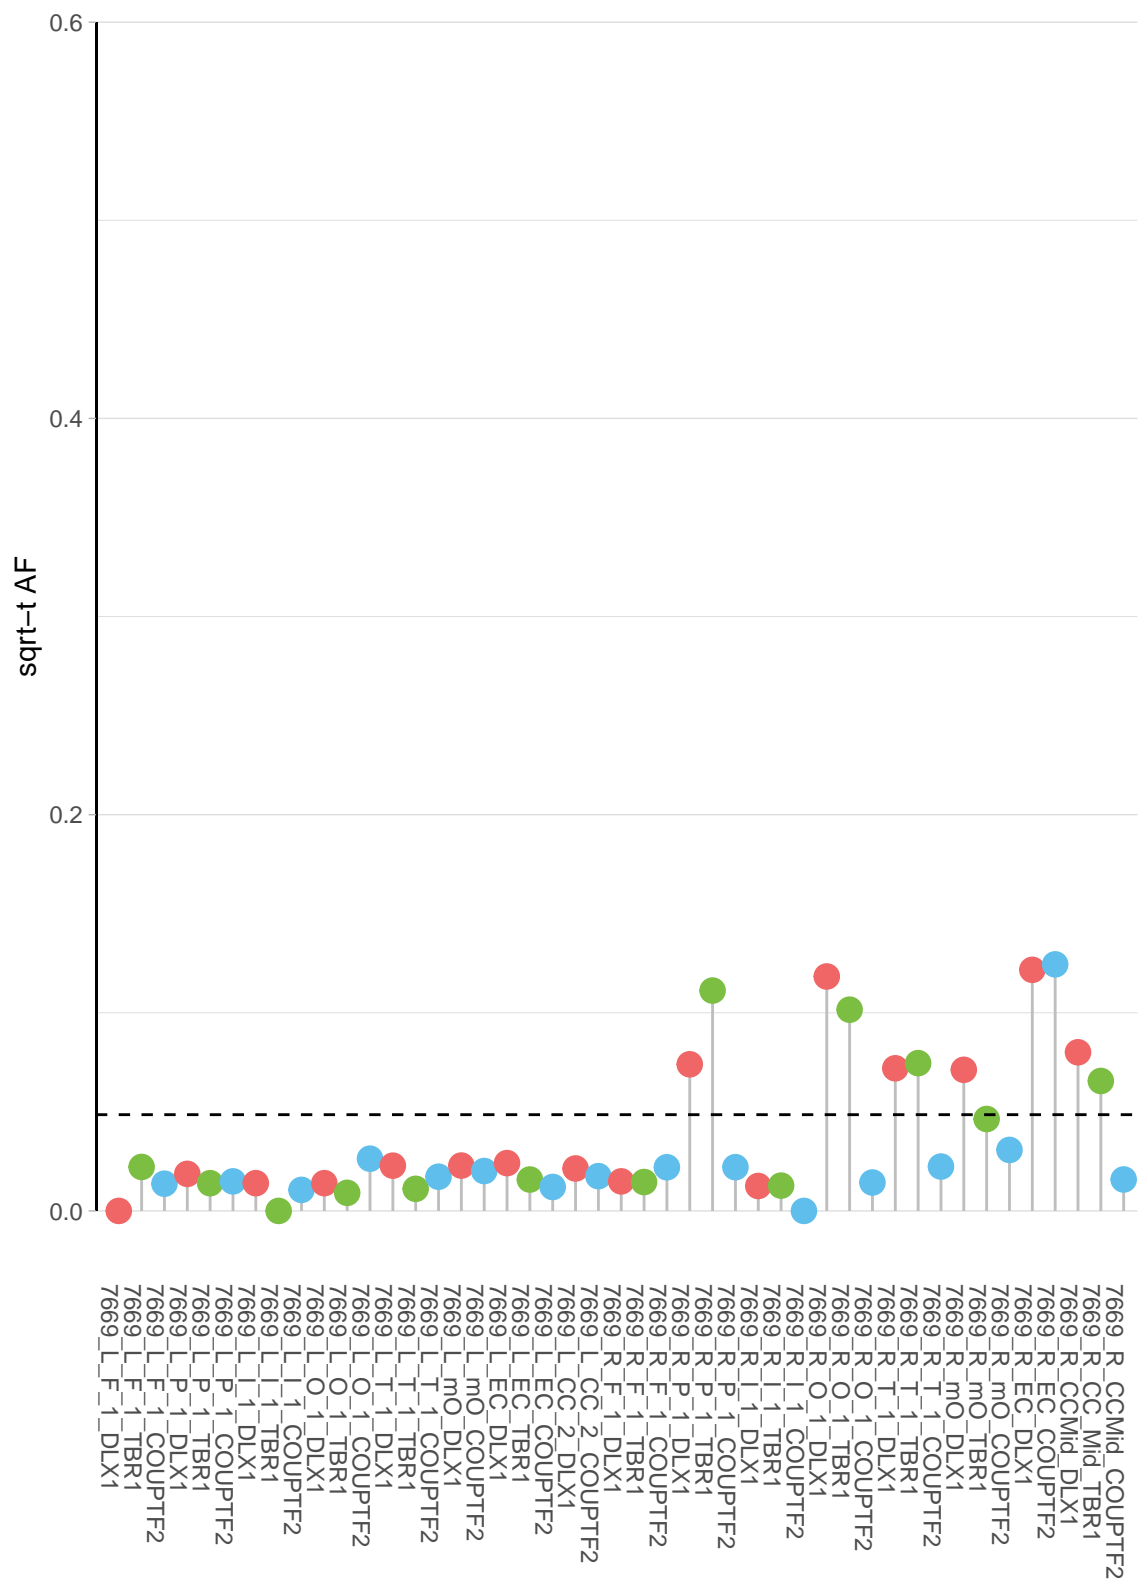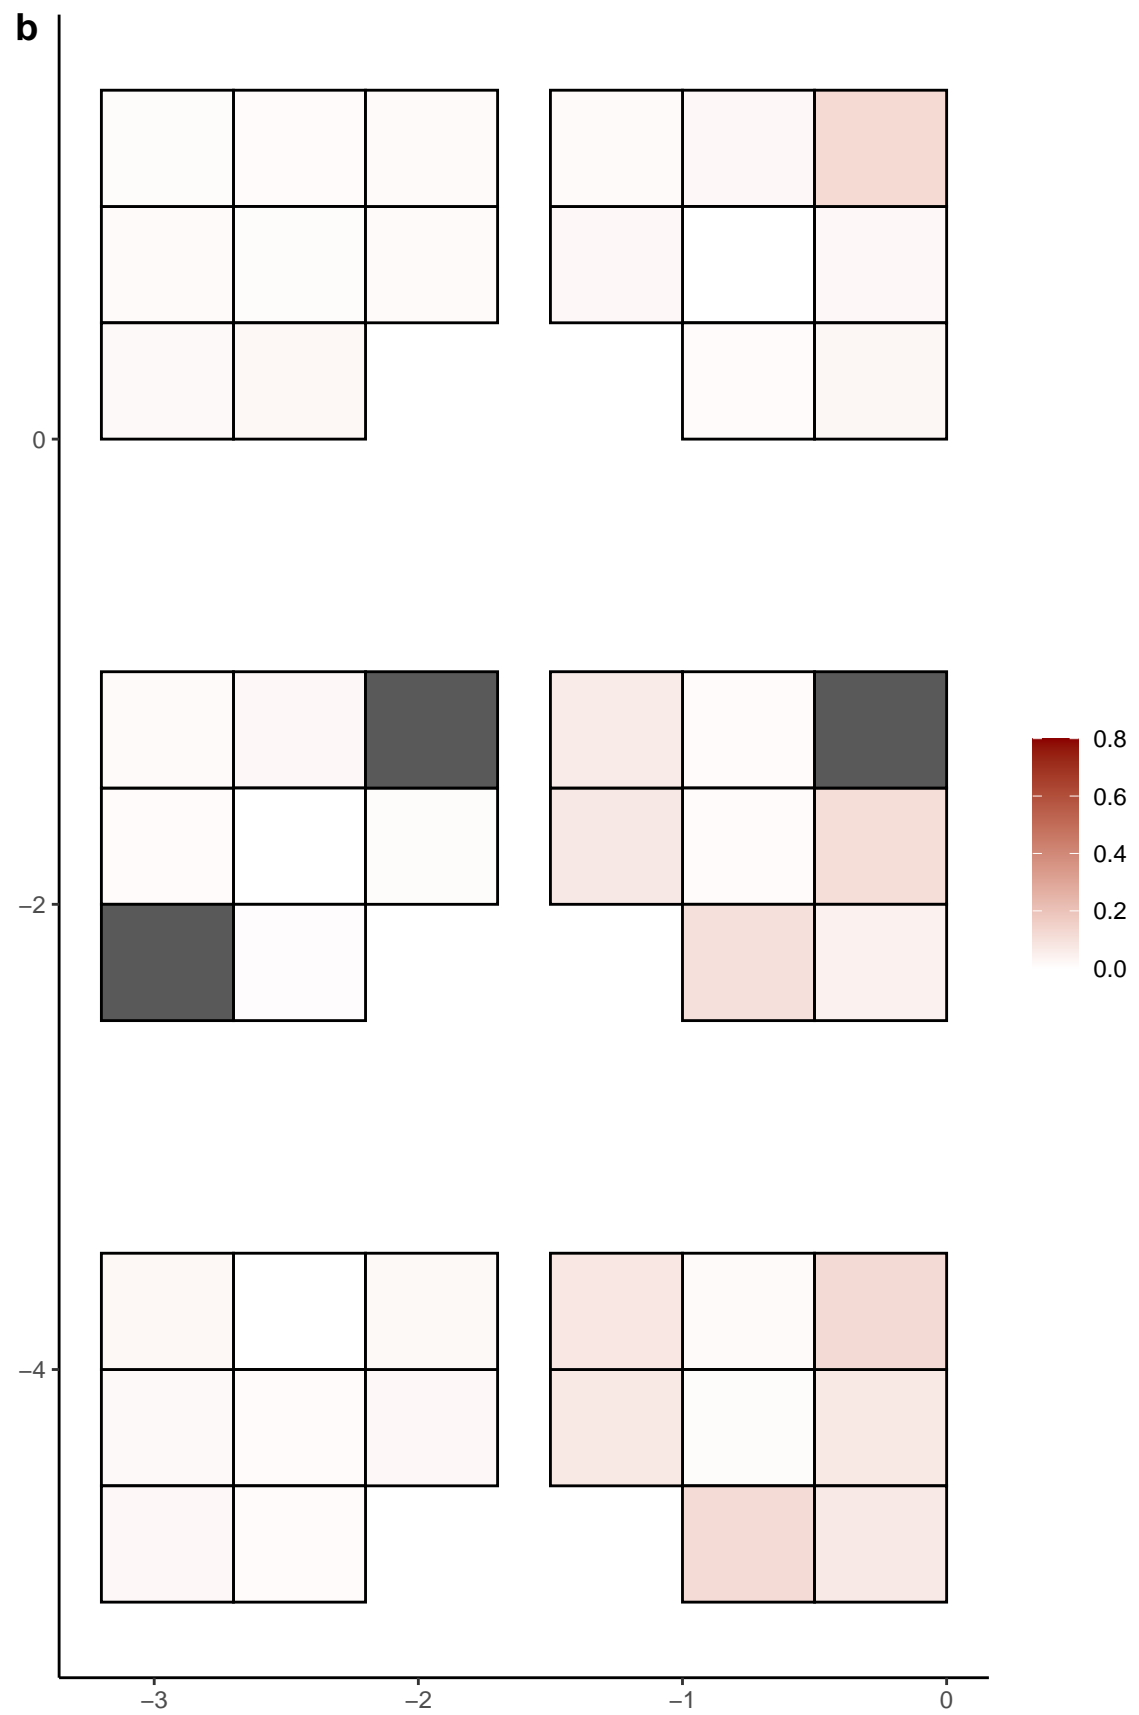



**a** ID05 5-67667744-C-T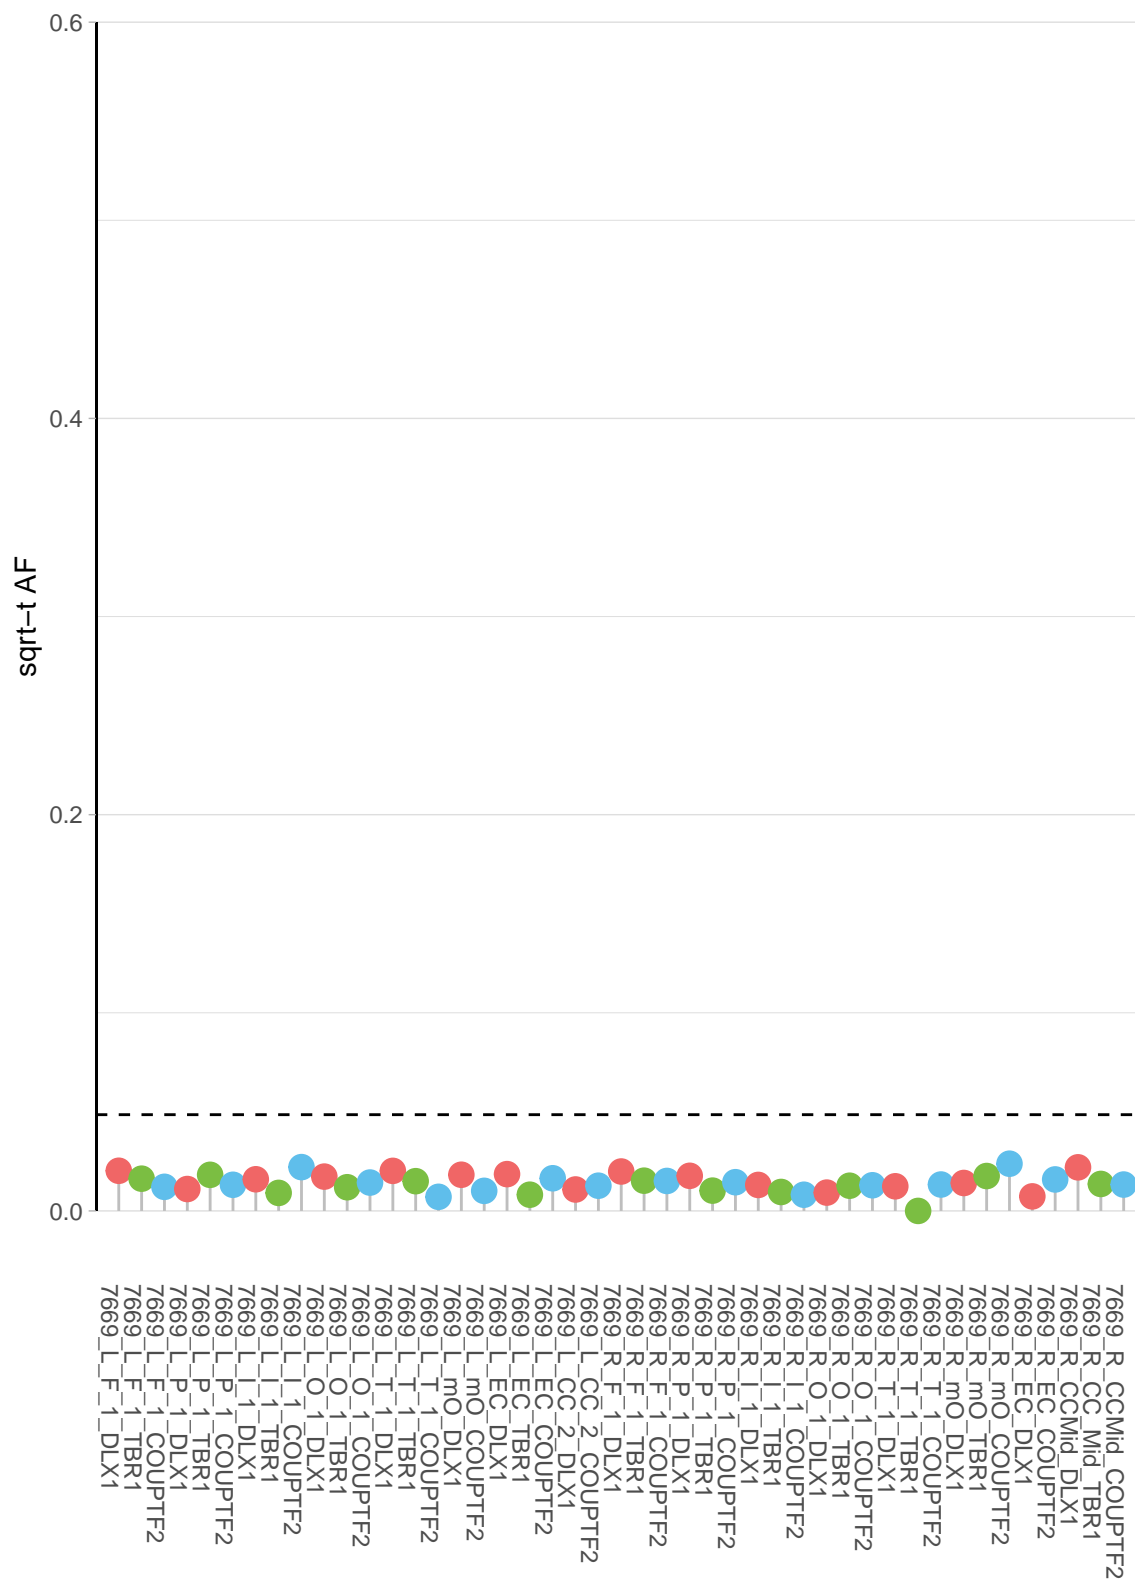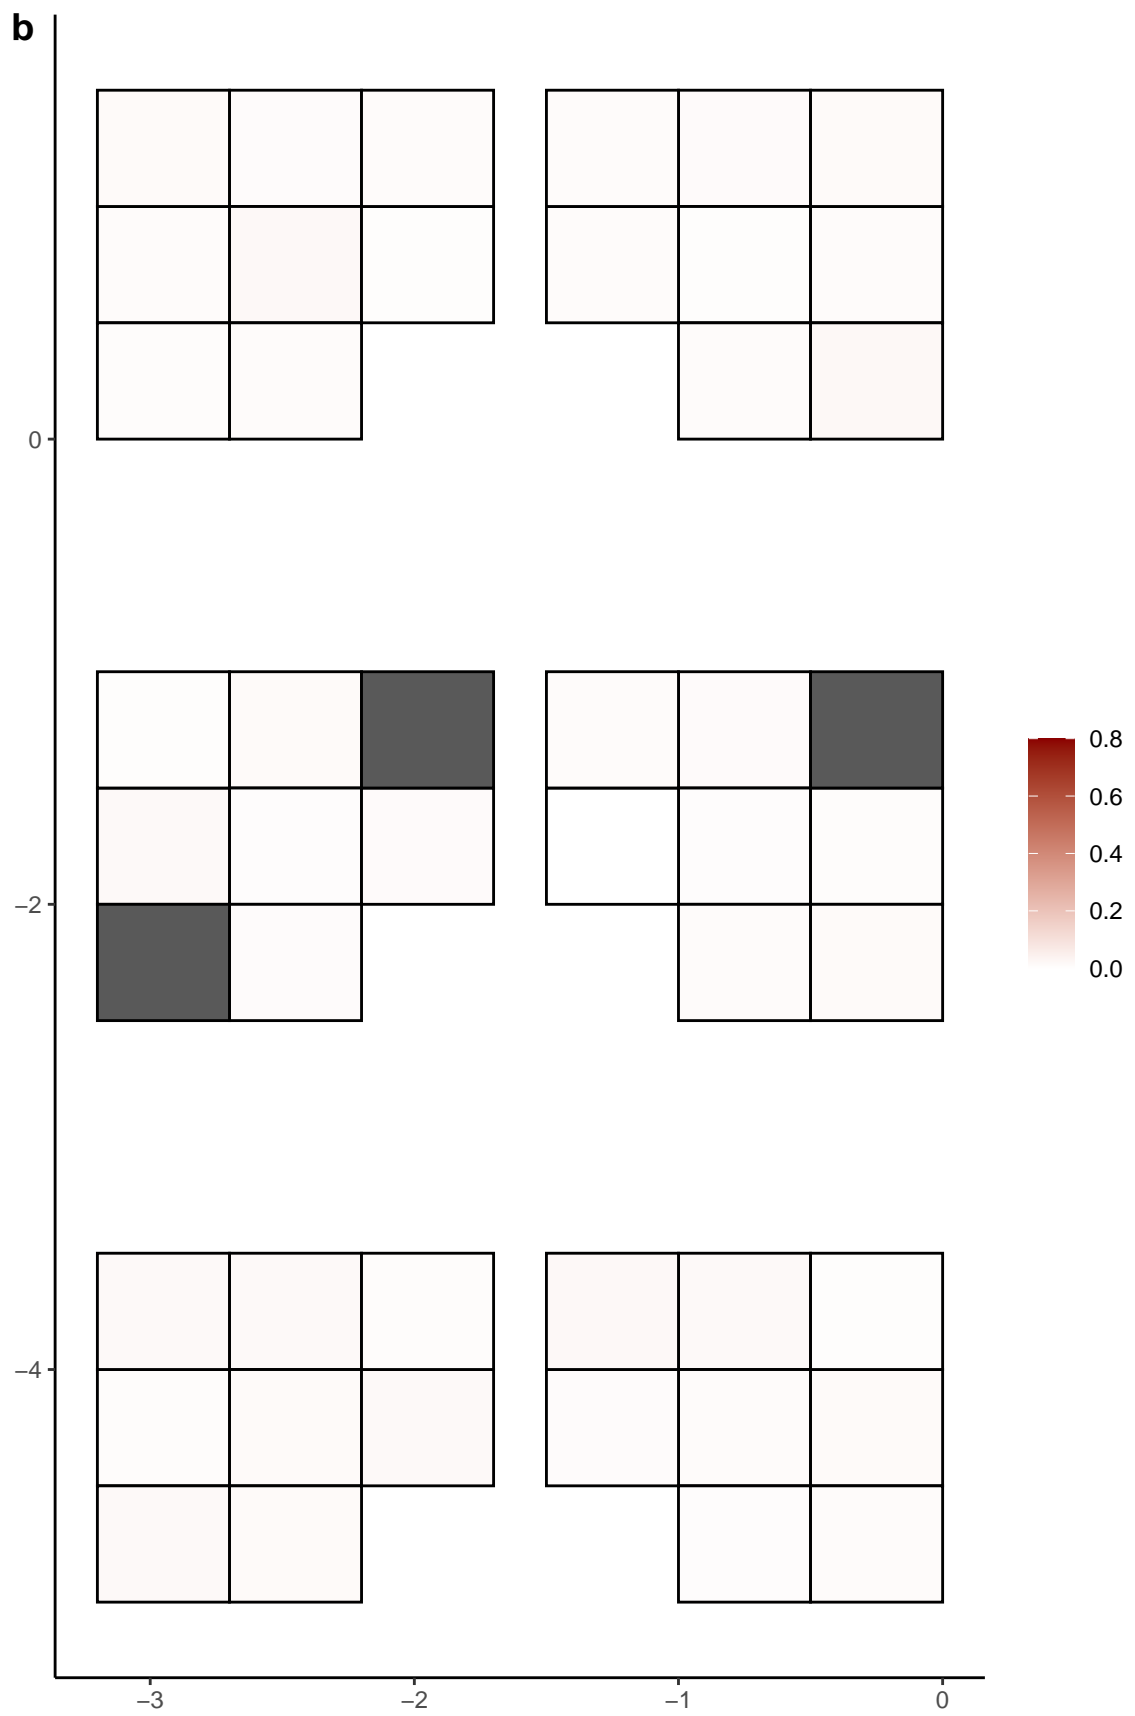



**a** ID05 5-76511703-G-A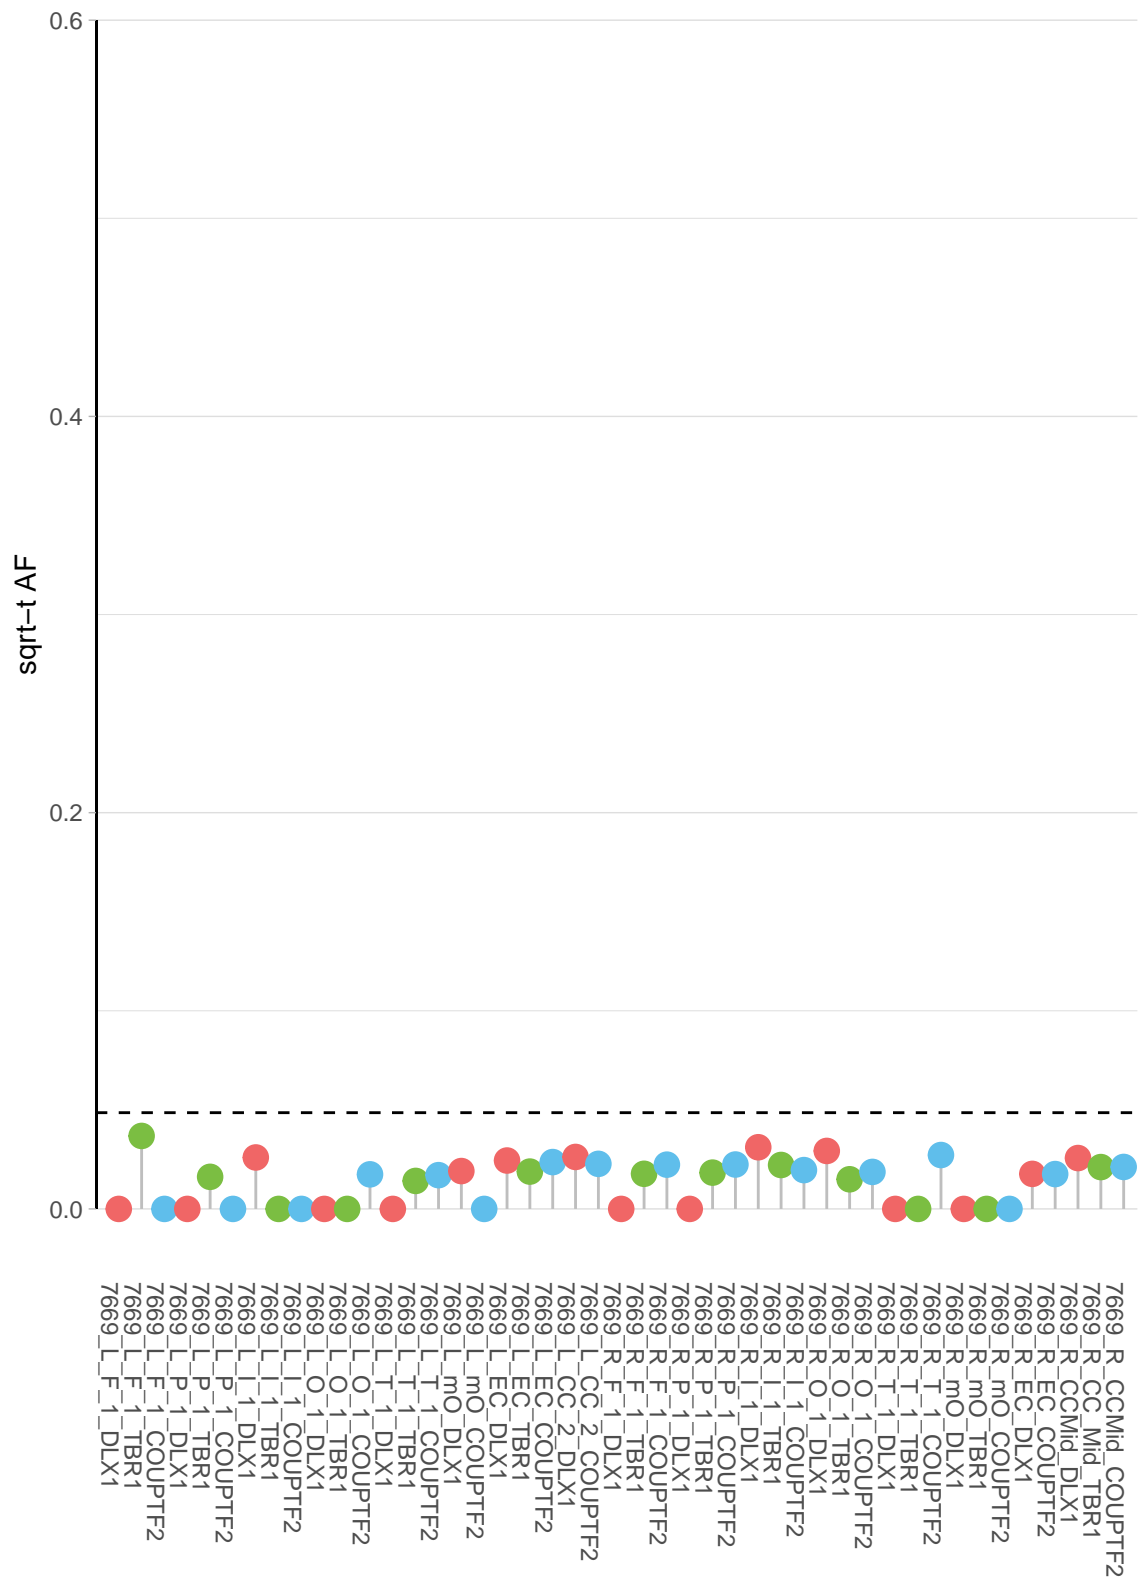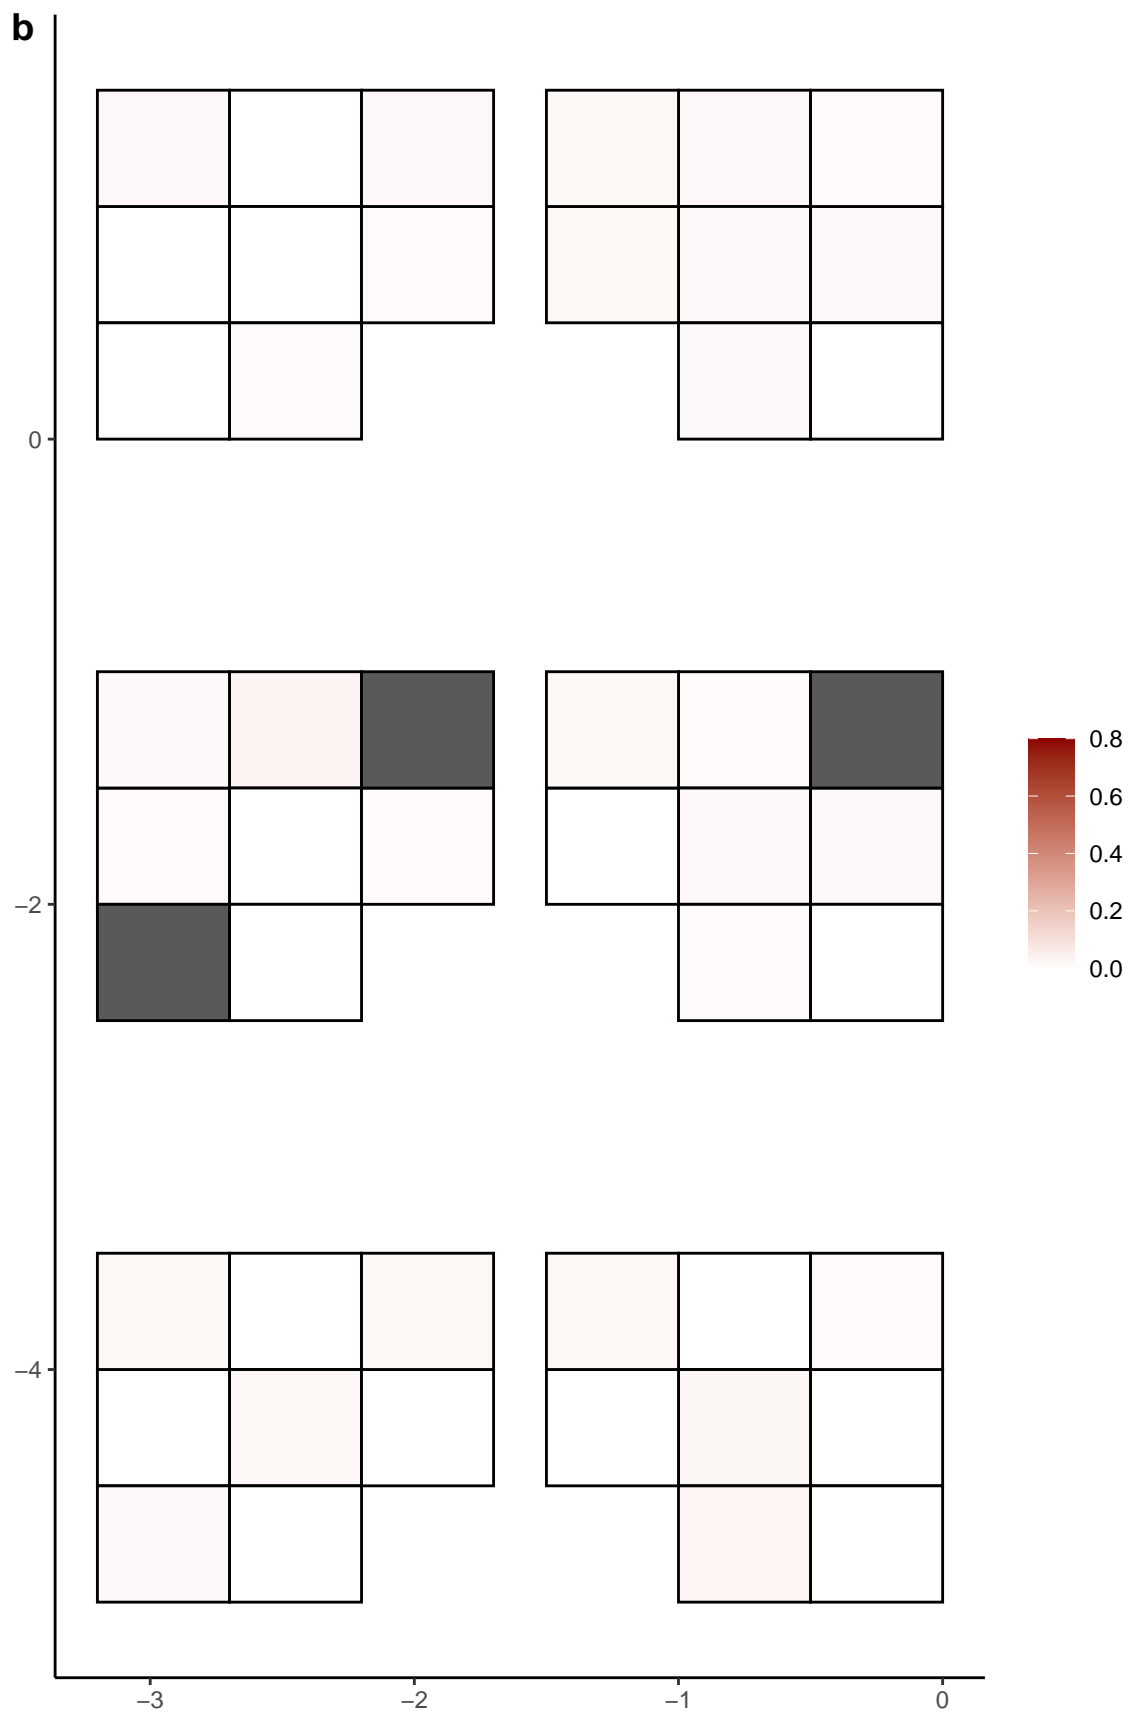

**a** ID05 5-7667409-C-G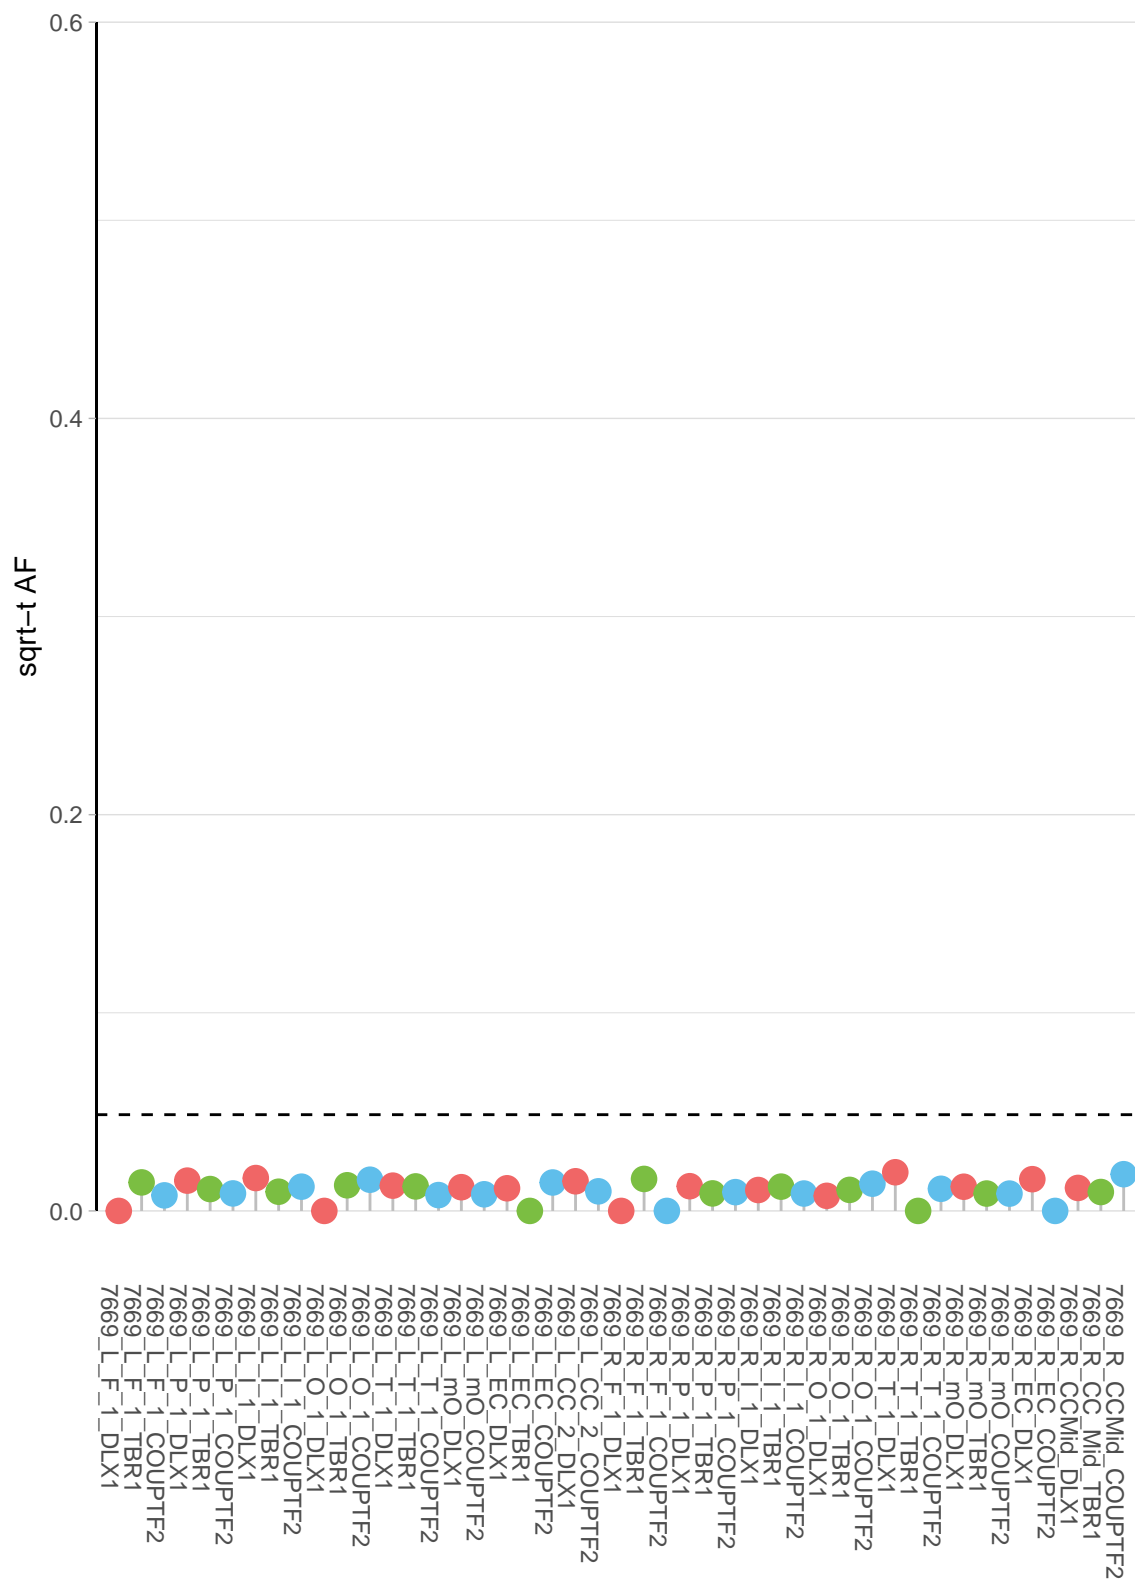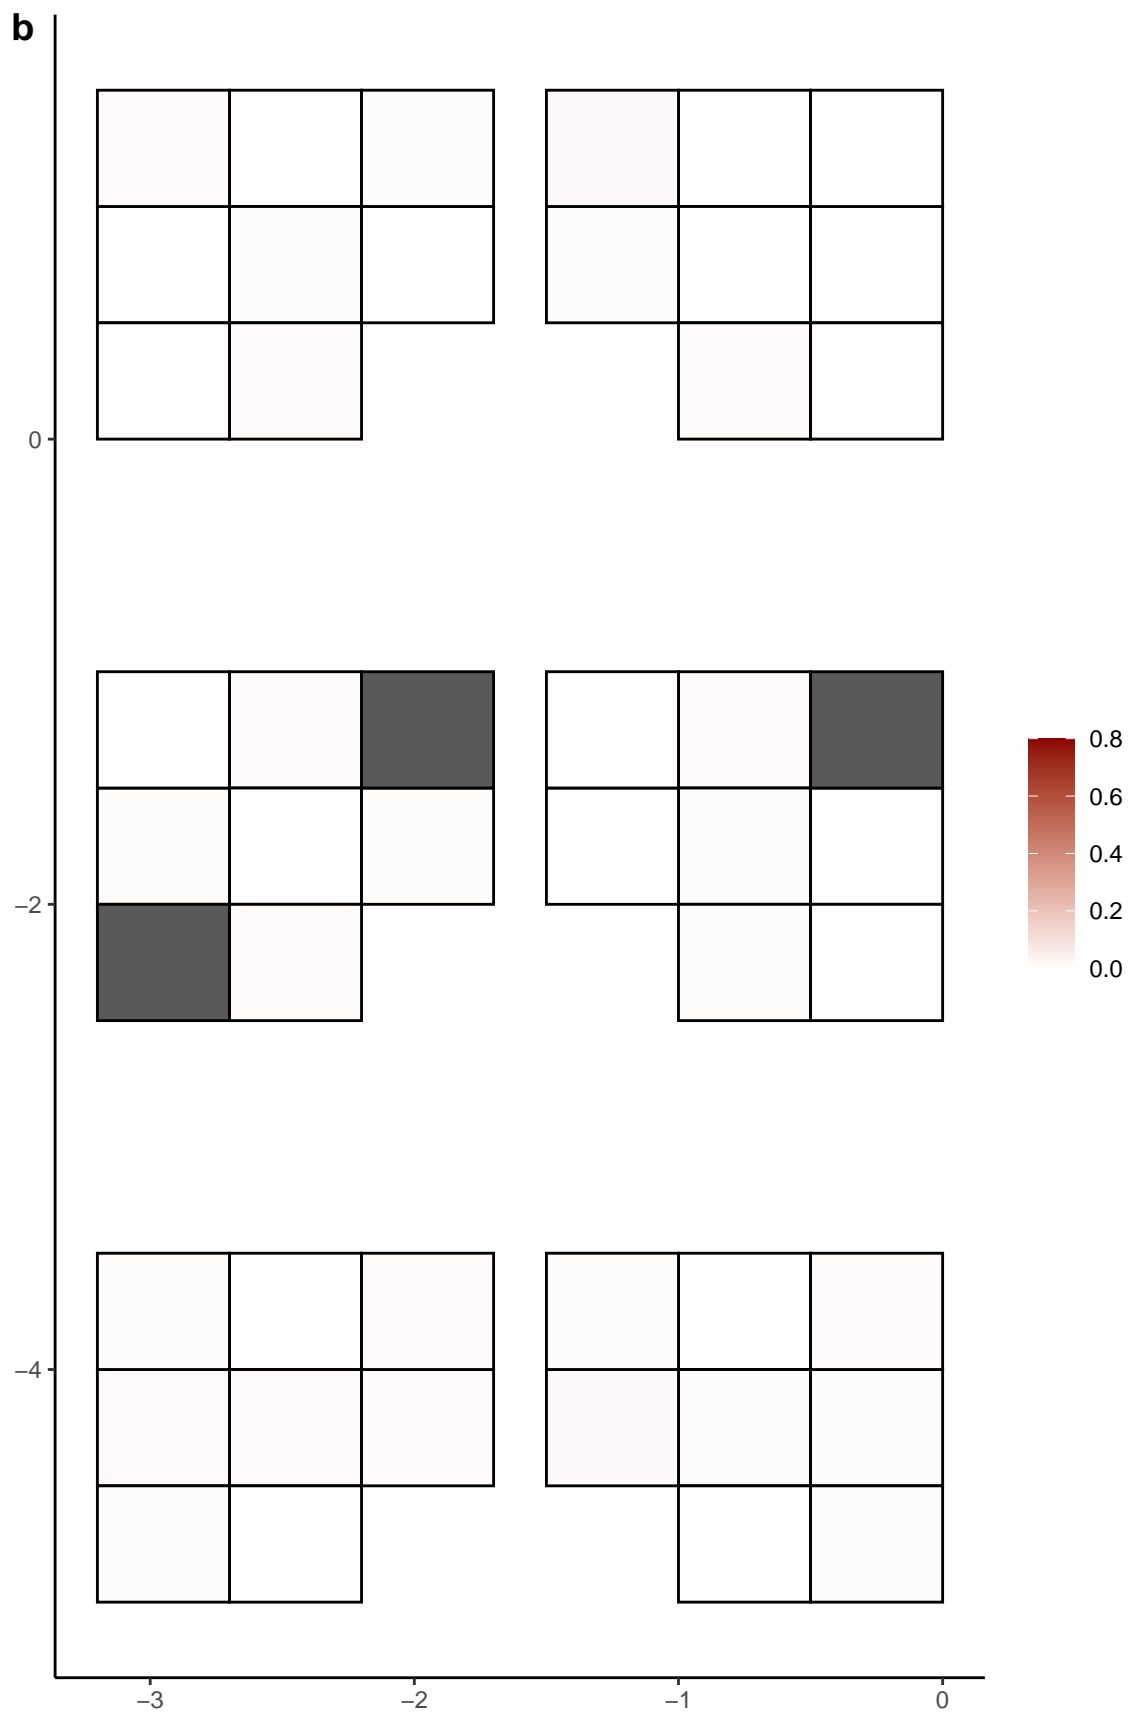

**a** ID05 5-77299567-G-A

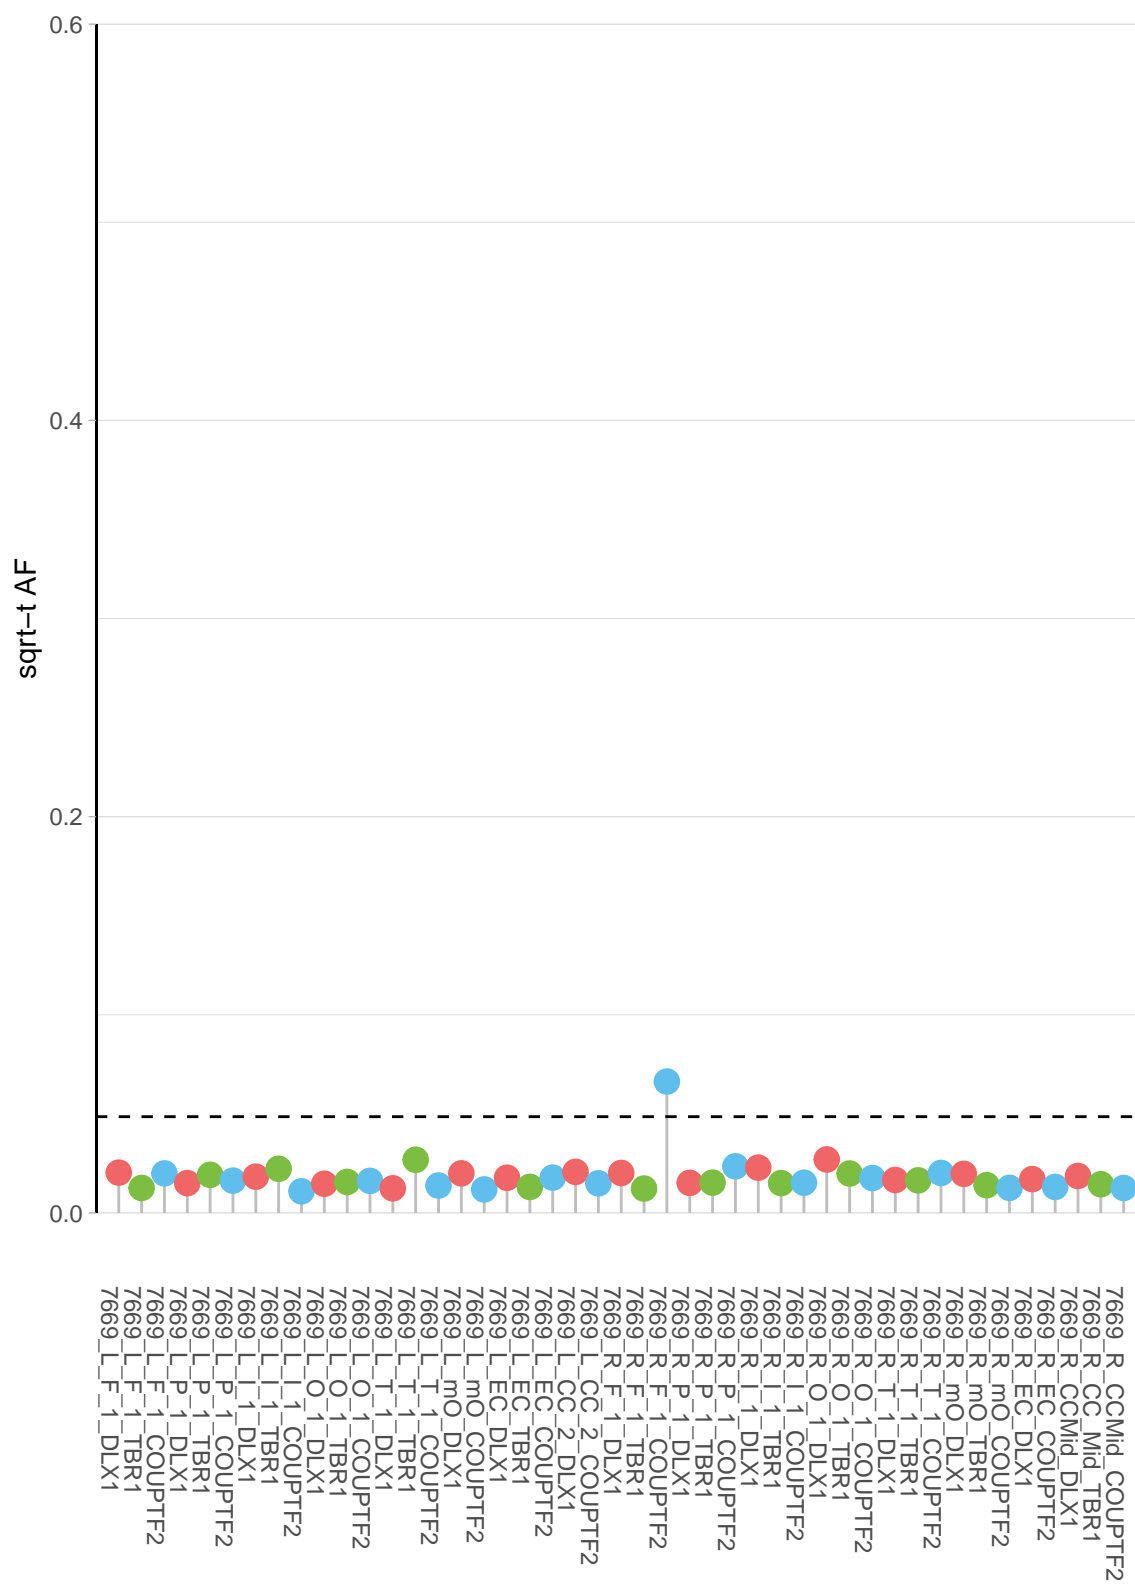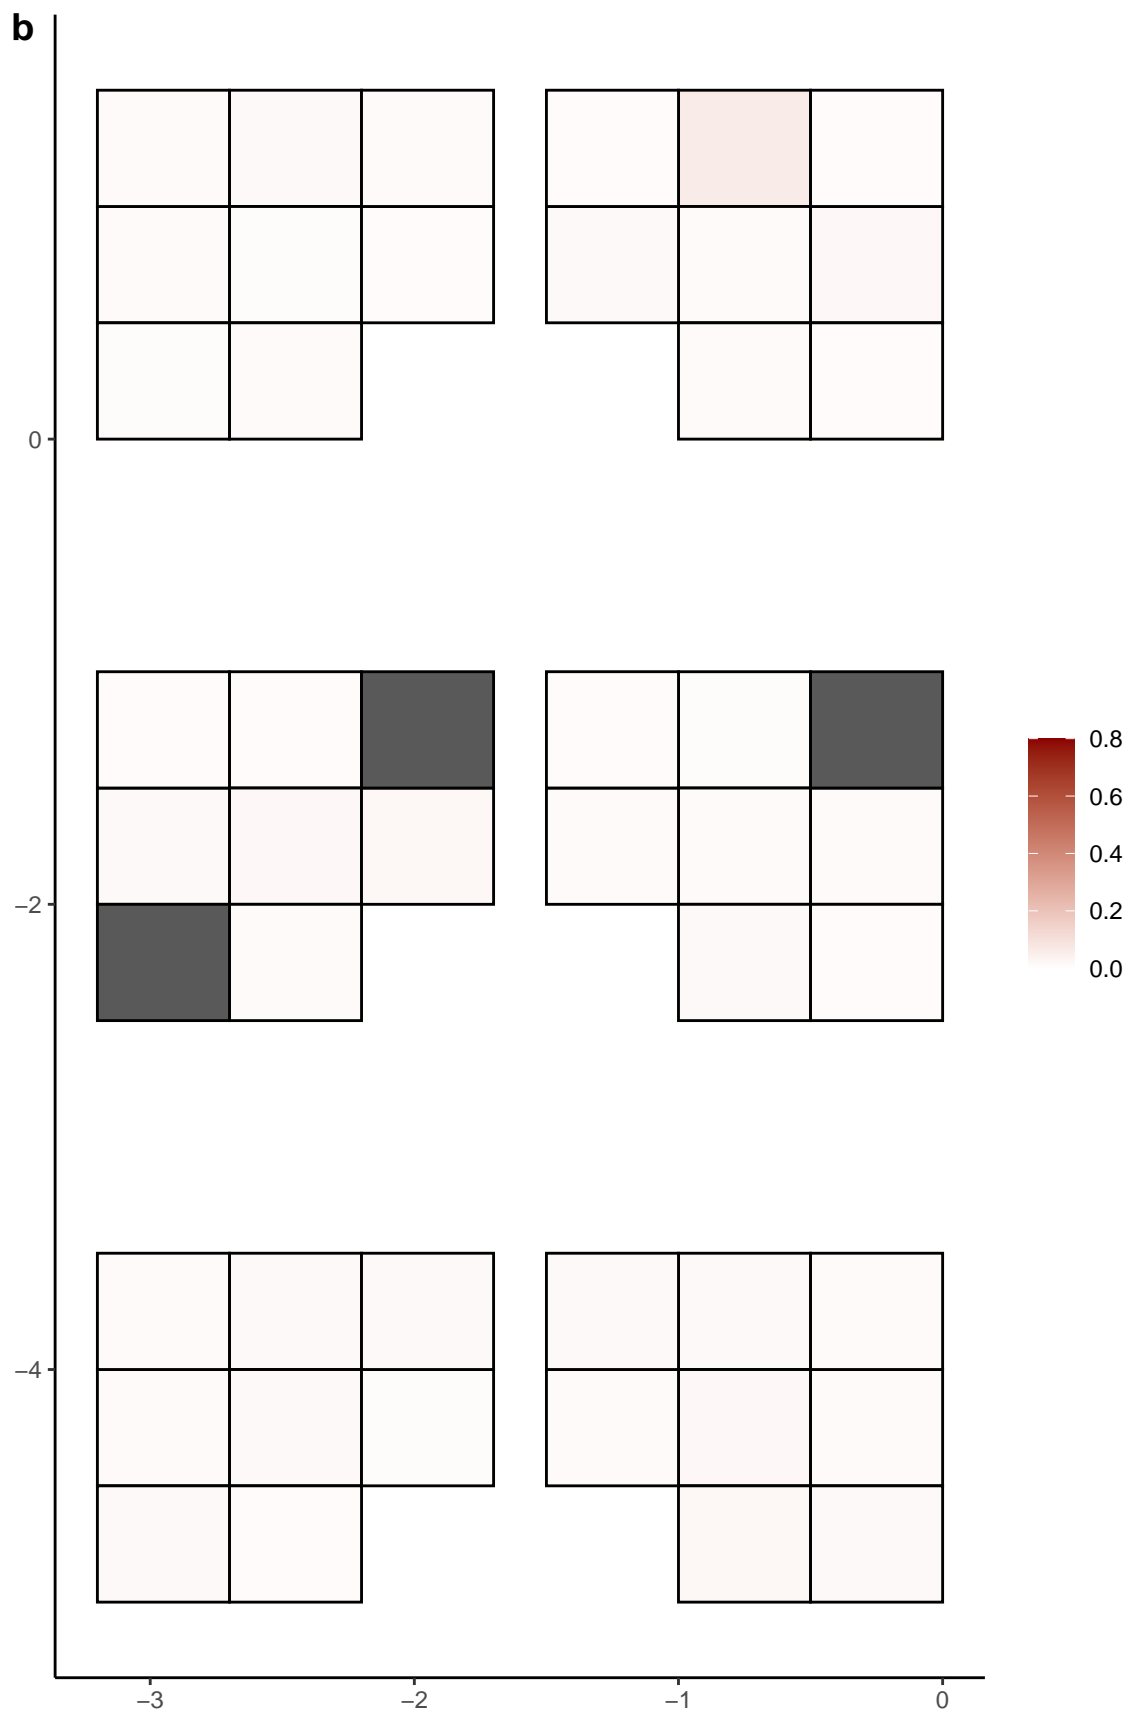

**a** ID05 5-7771752-C-T

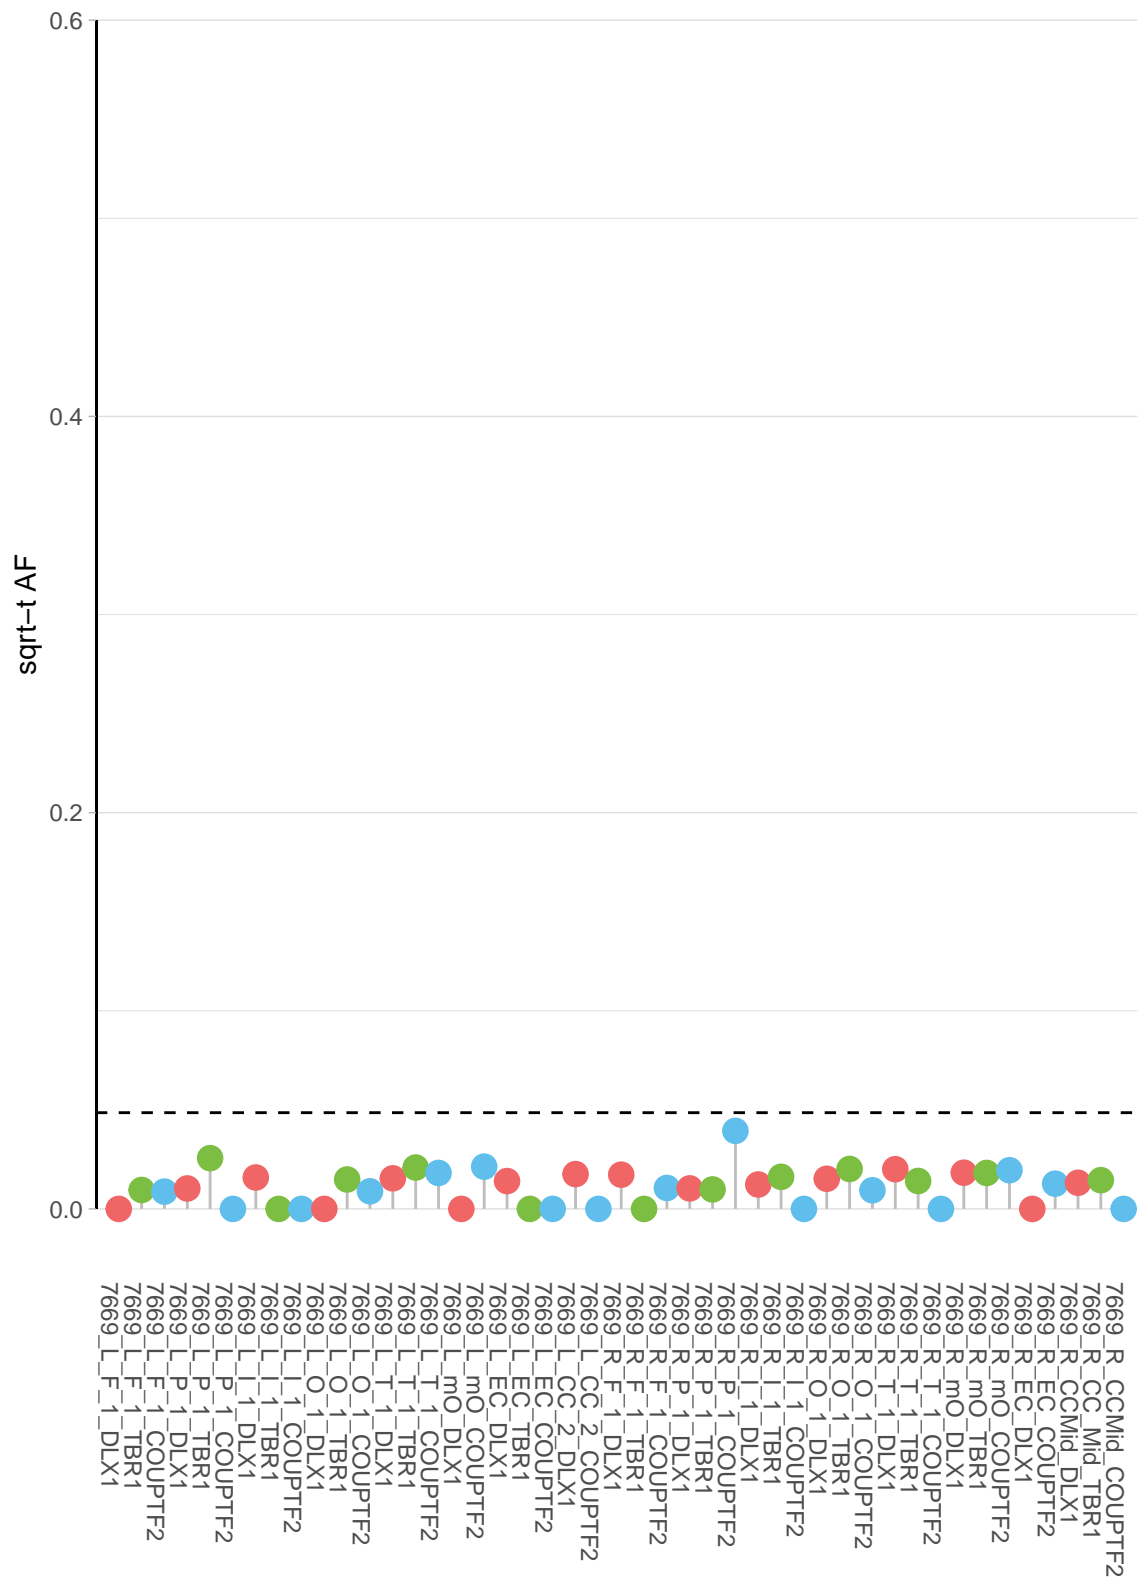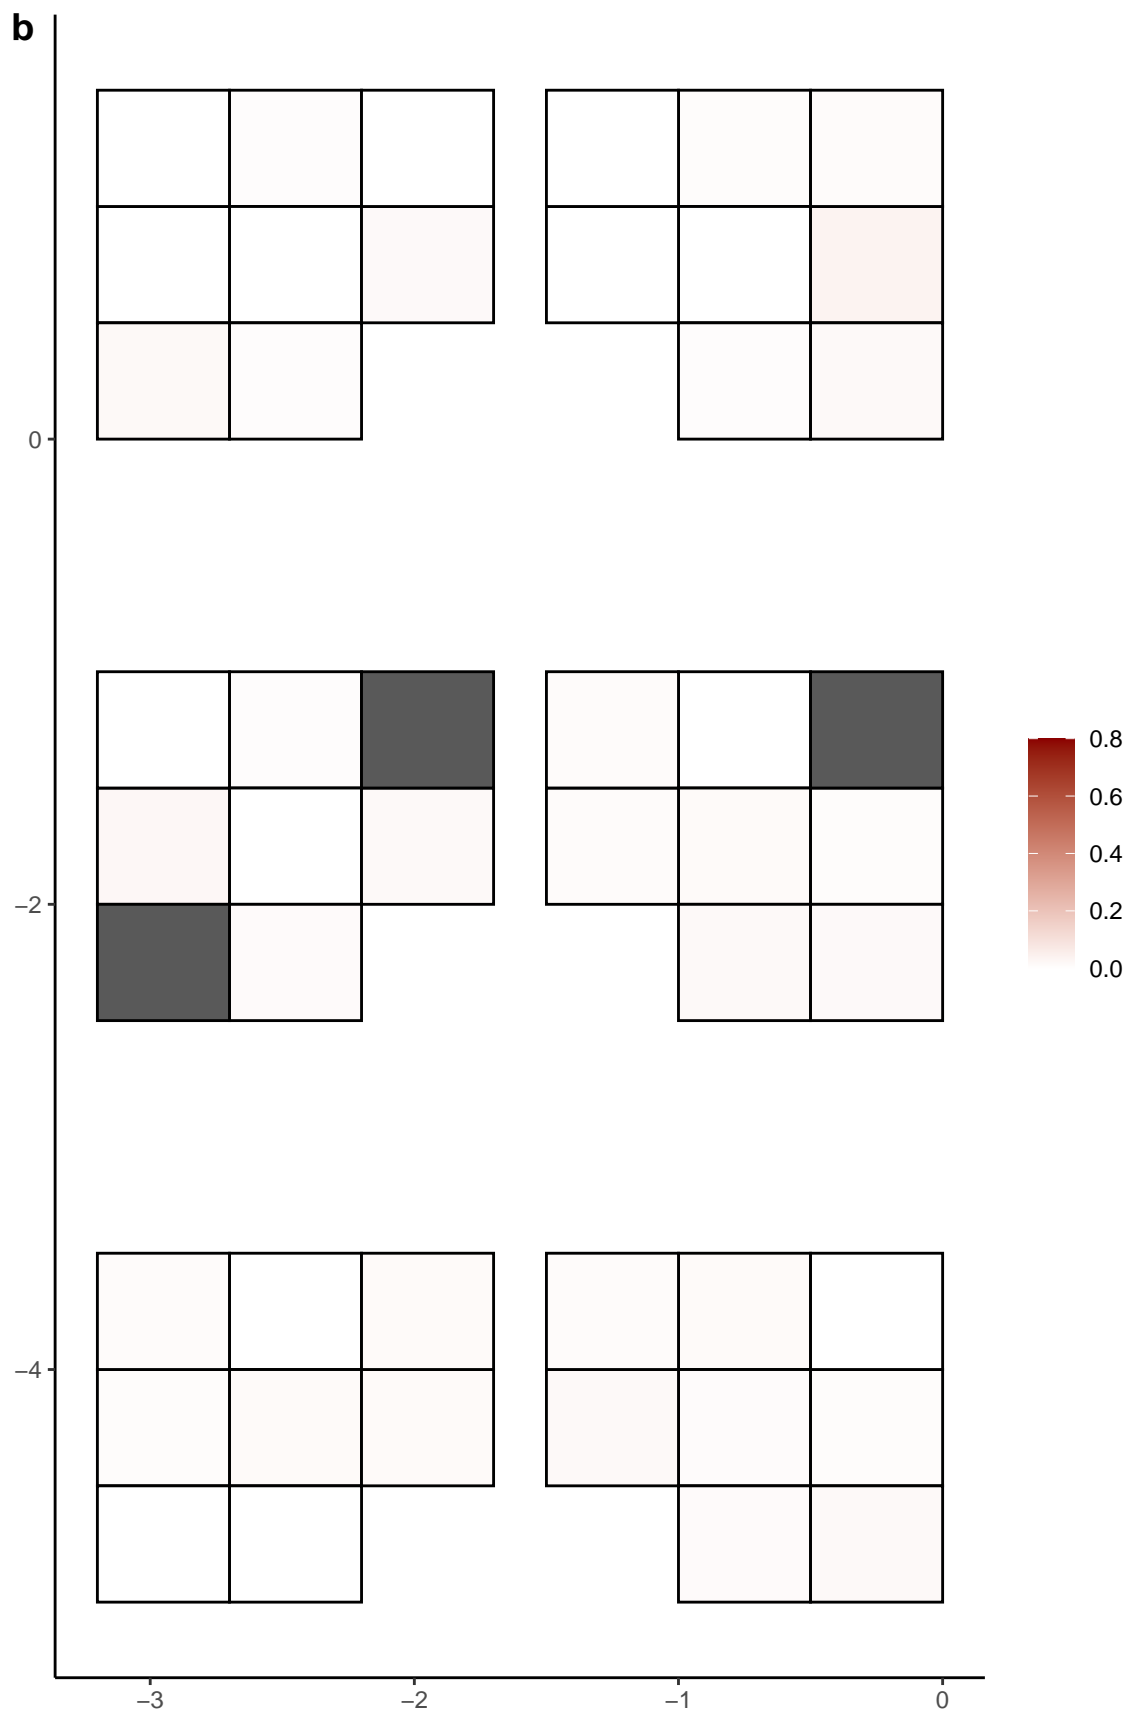







**a** ID05 6-100351687-C-T

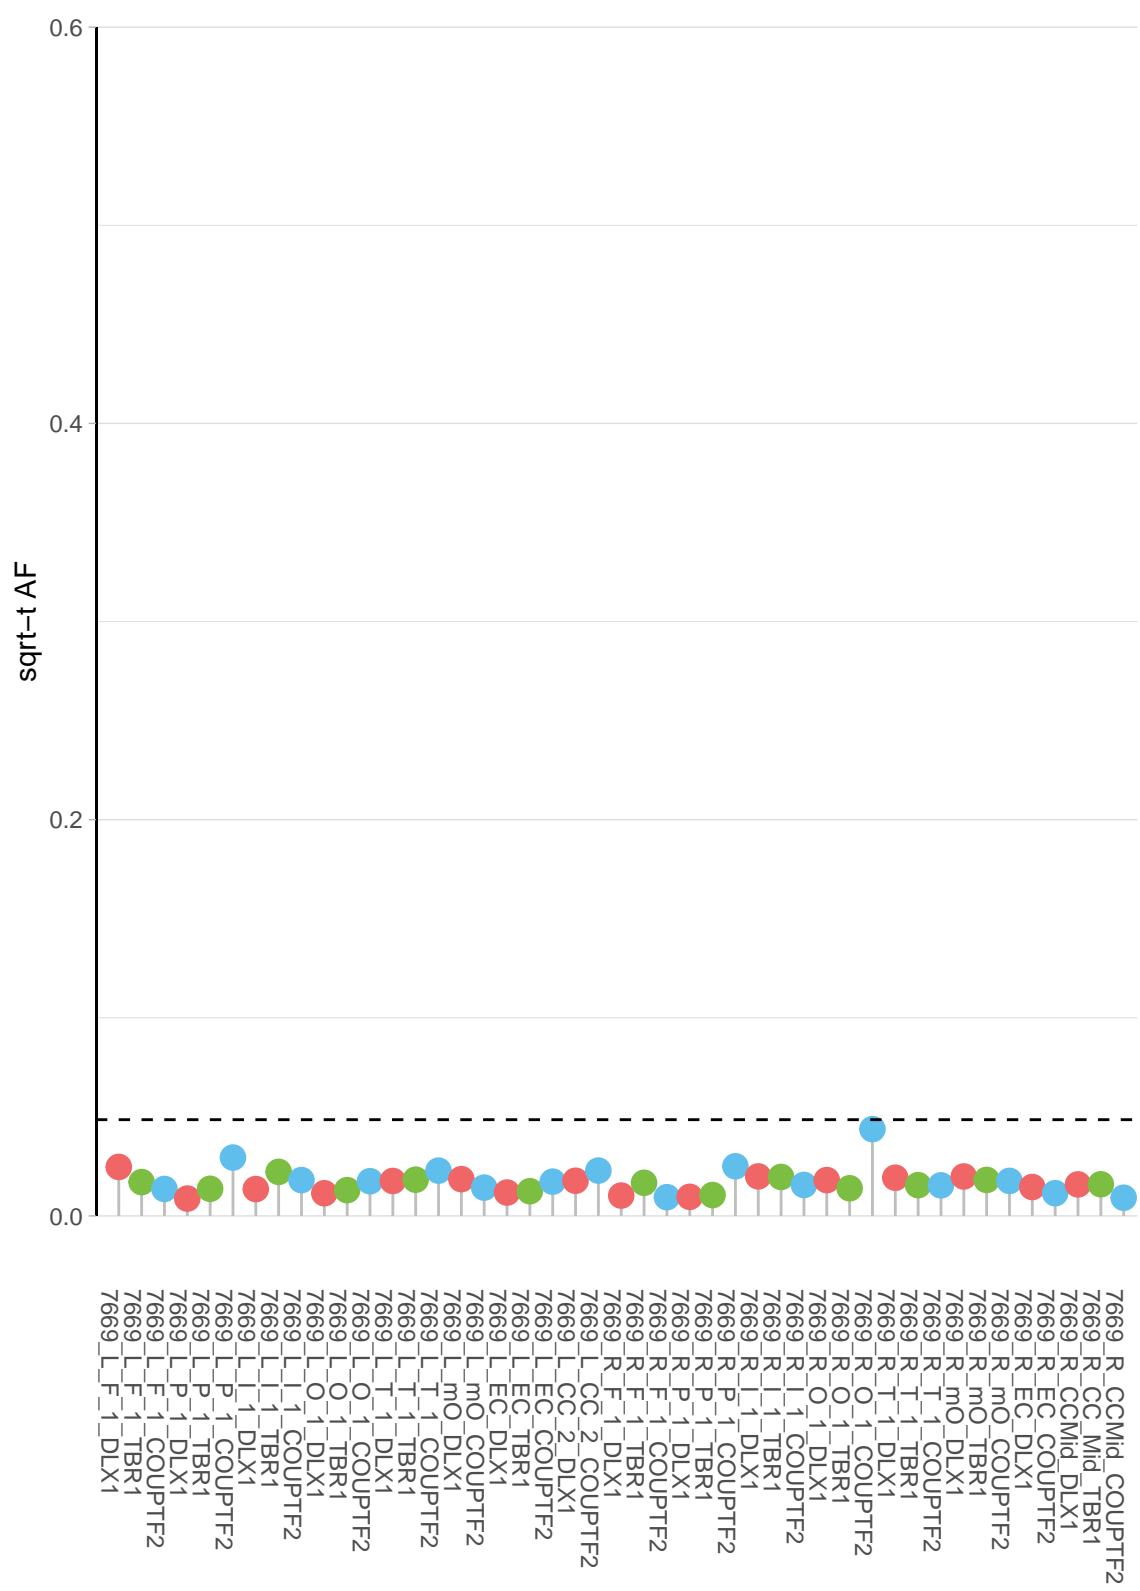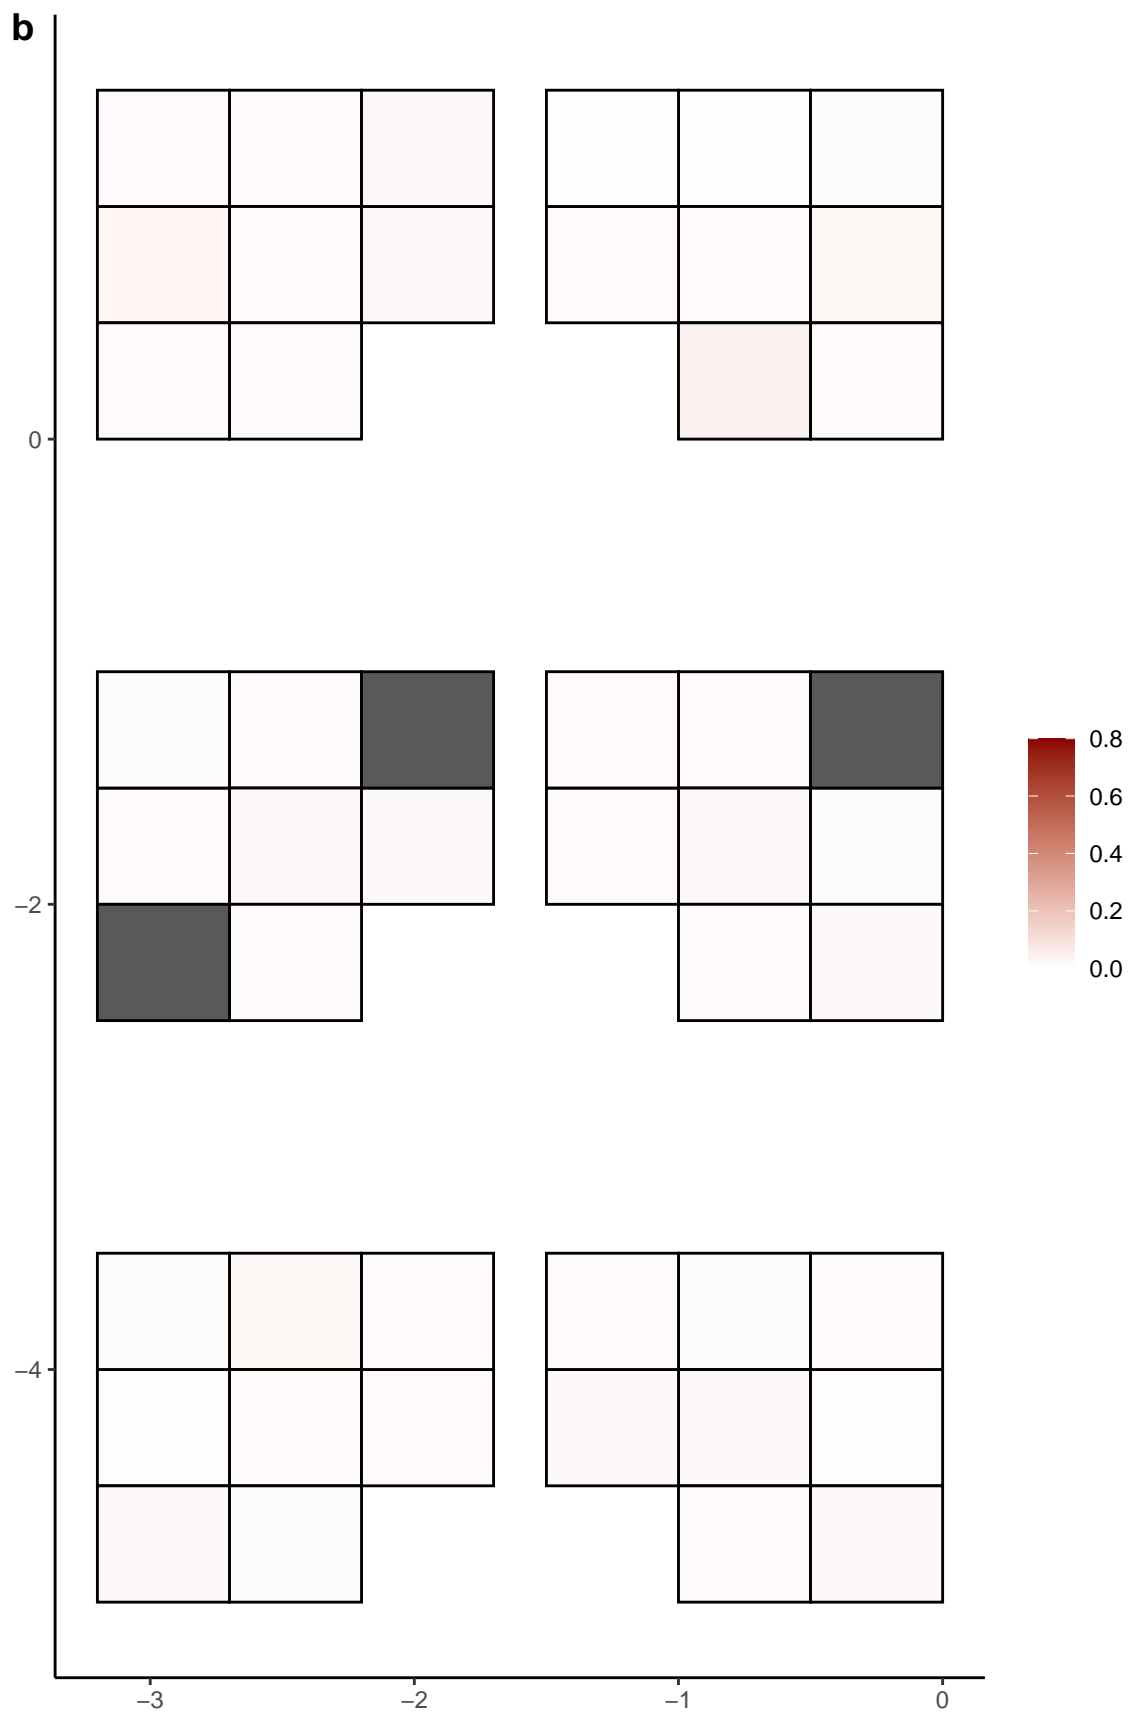

**a** ID05 6-102878754-T-A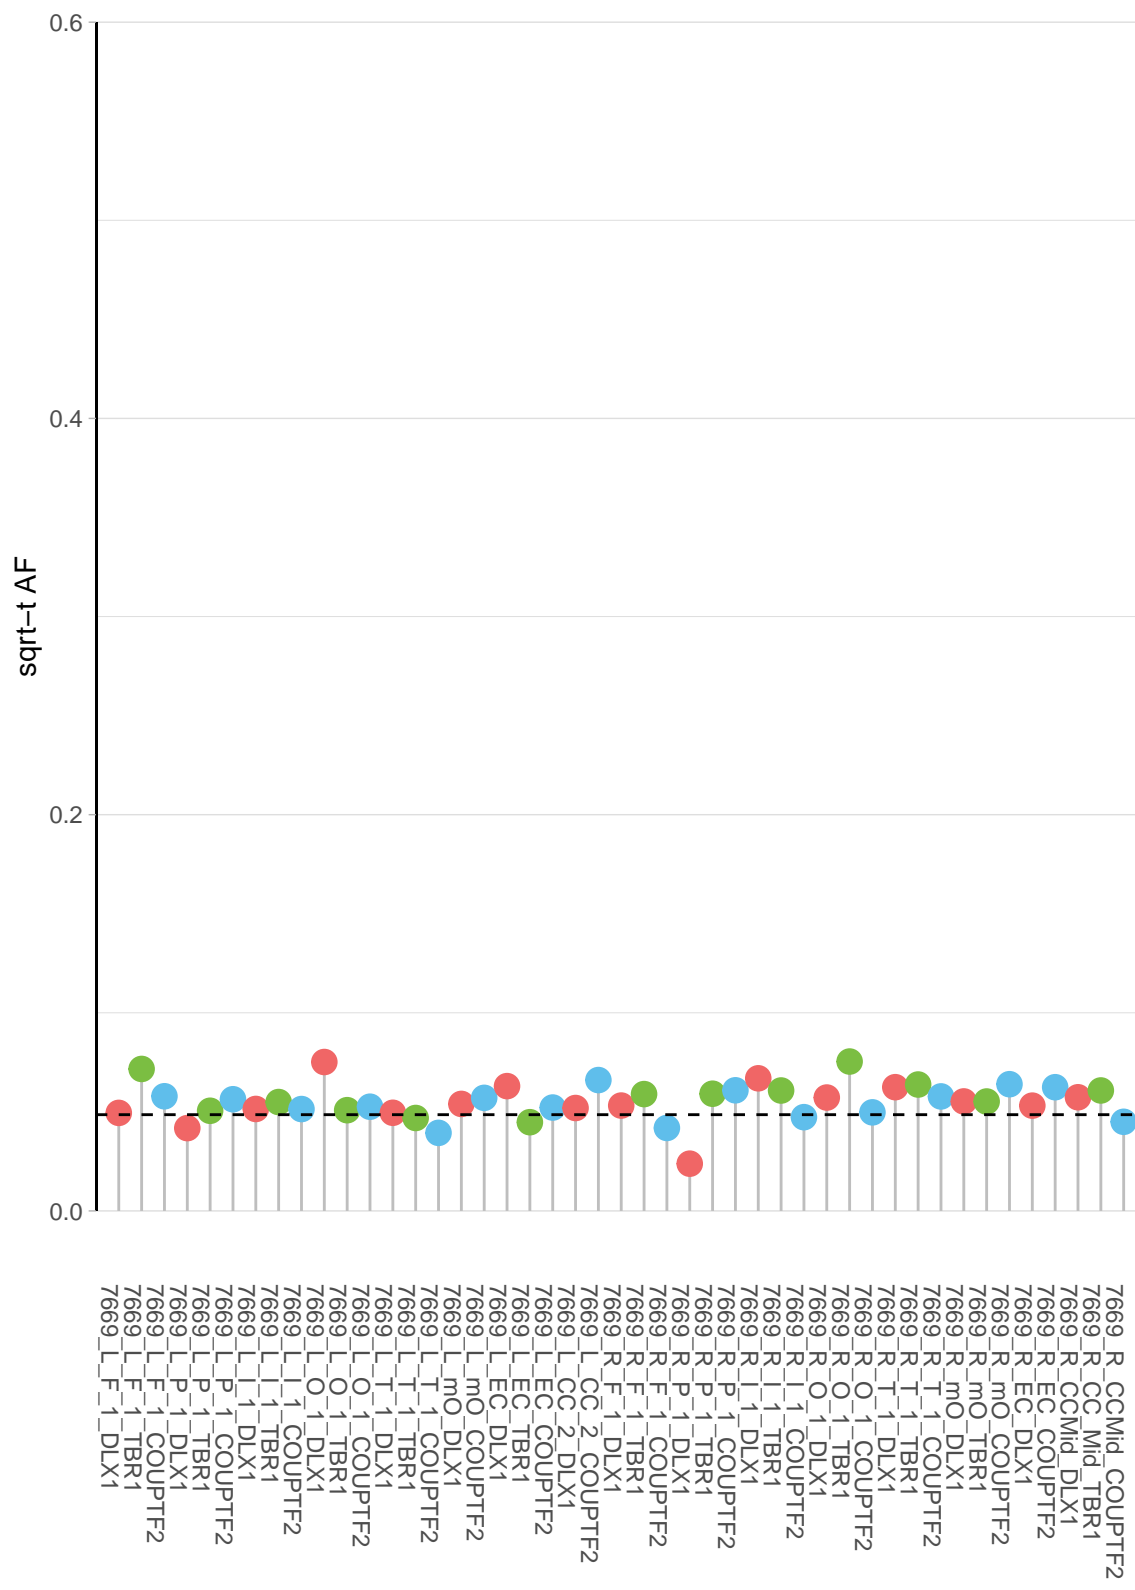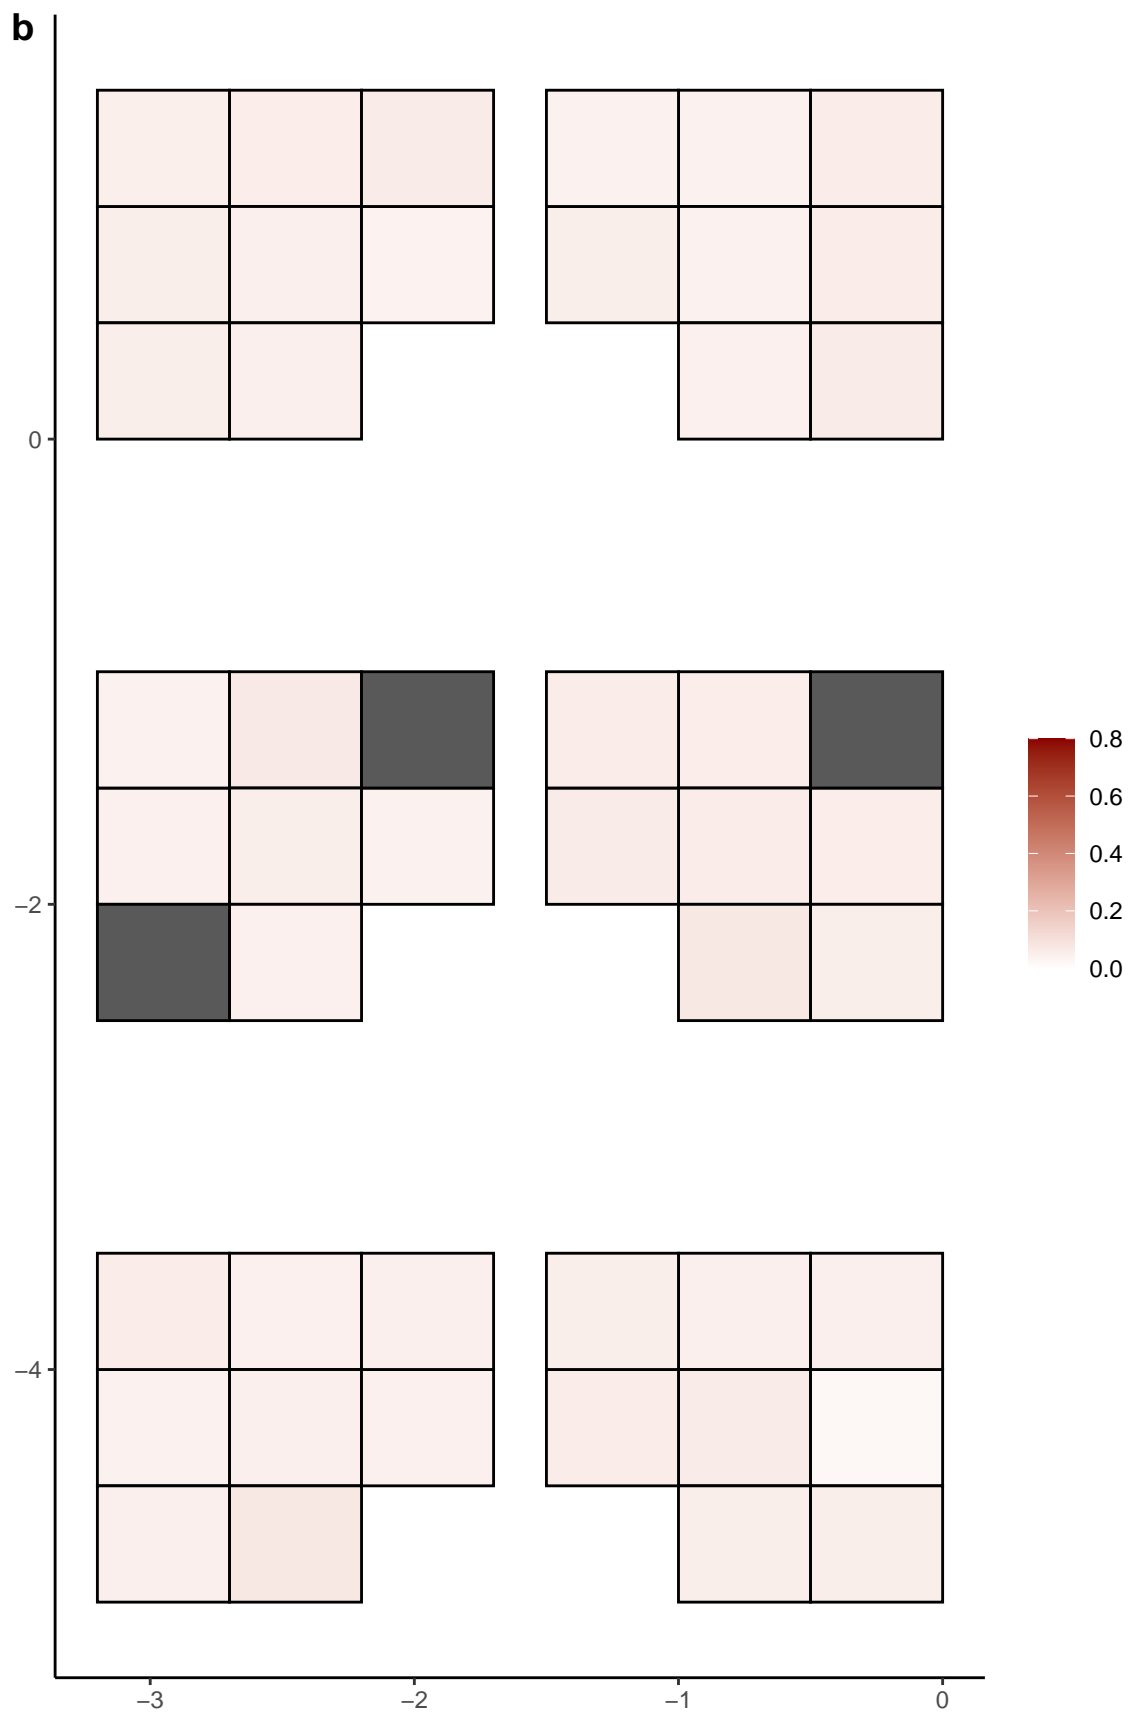

**a** ID05 6-10399242-G-A

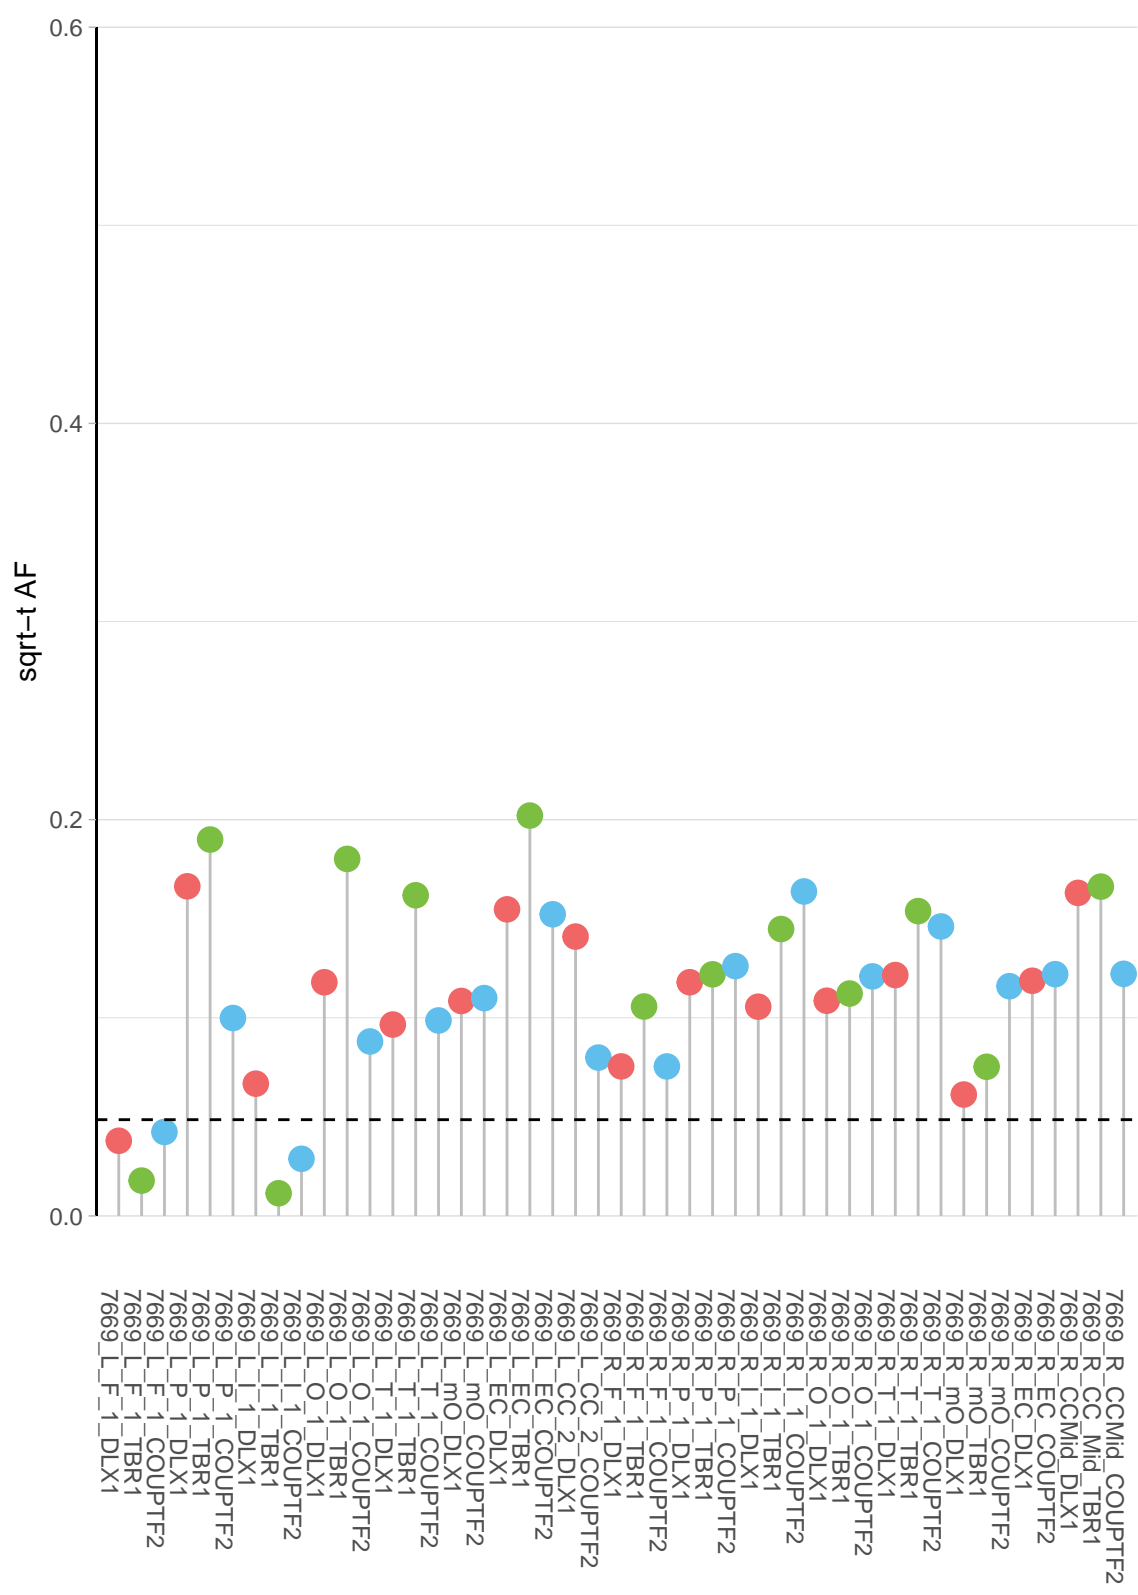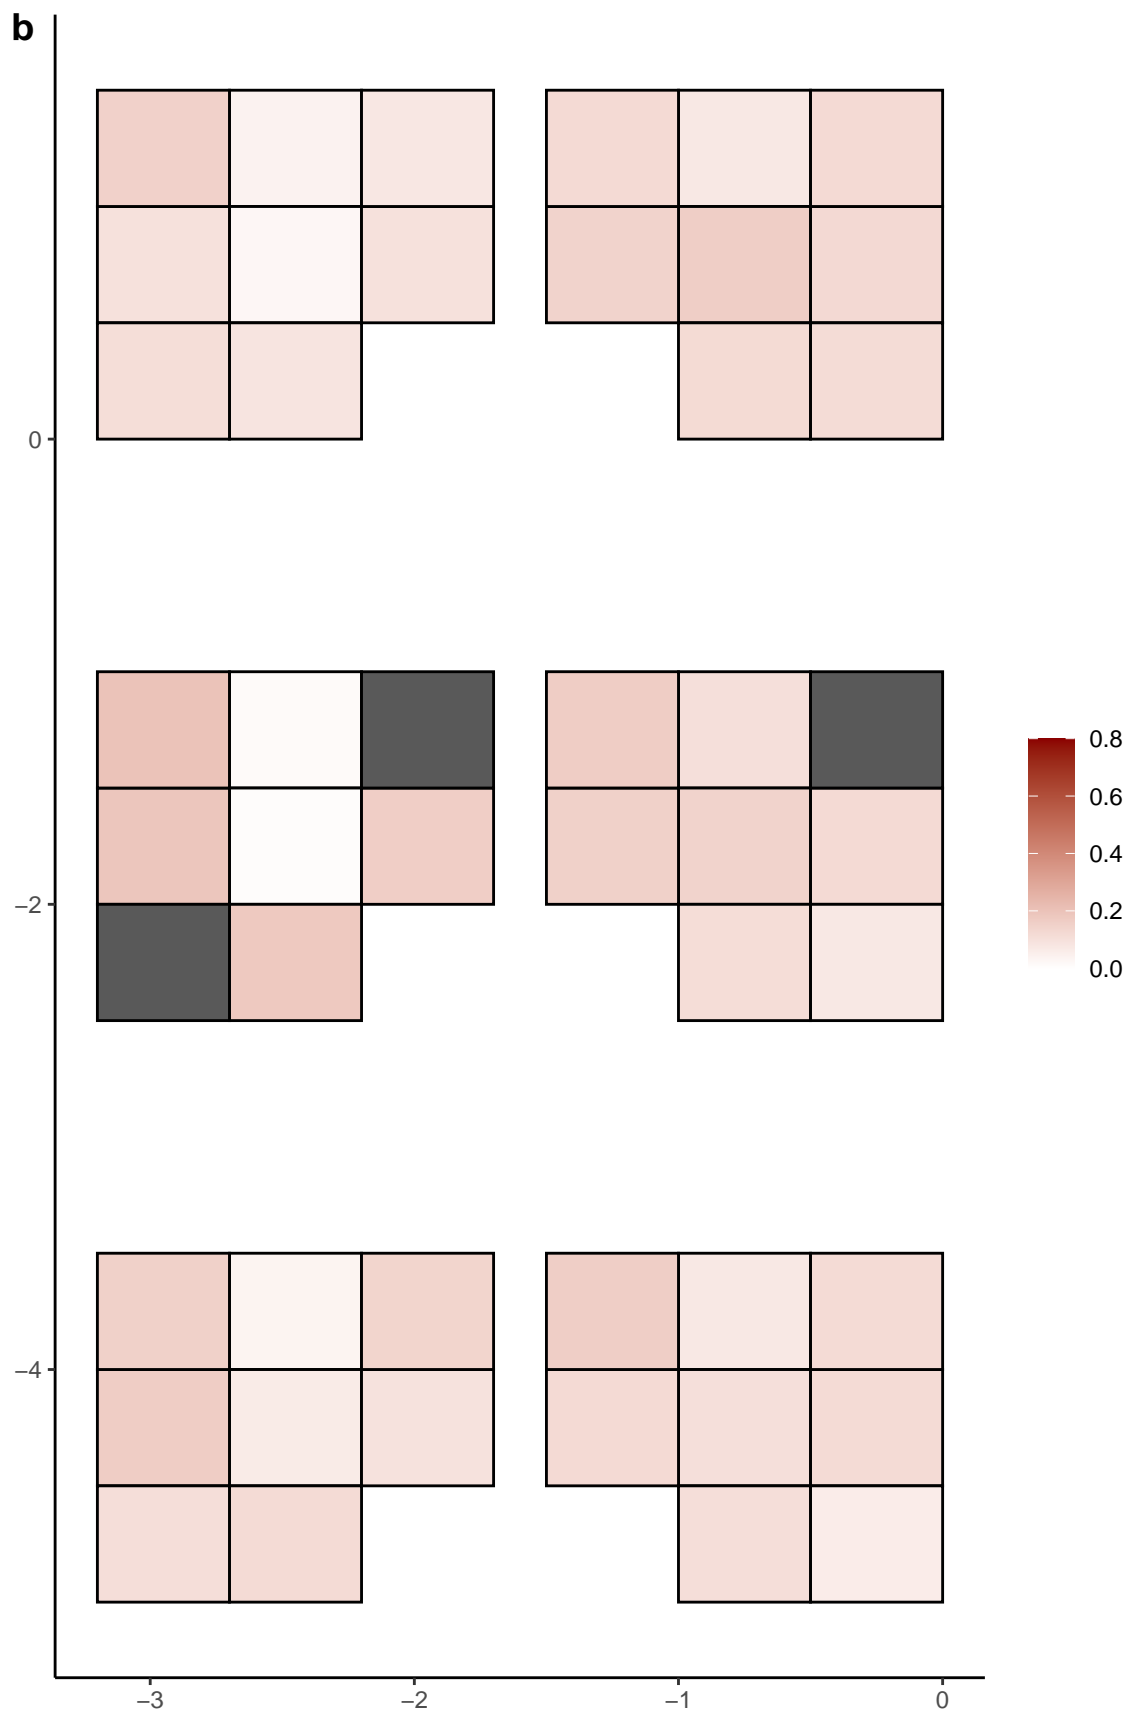





**a** ID05 6-115212381-G-A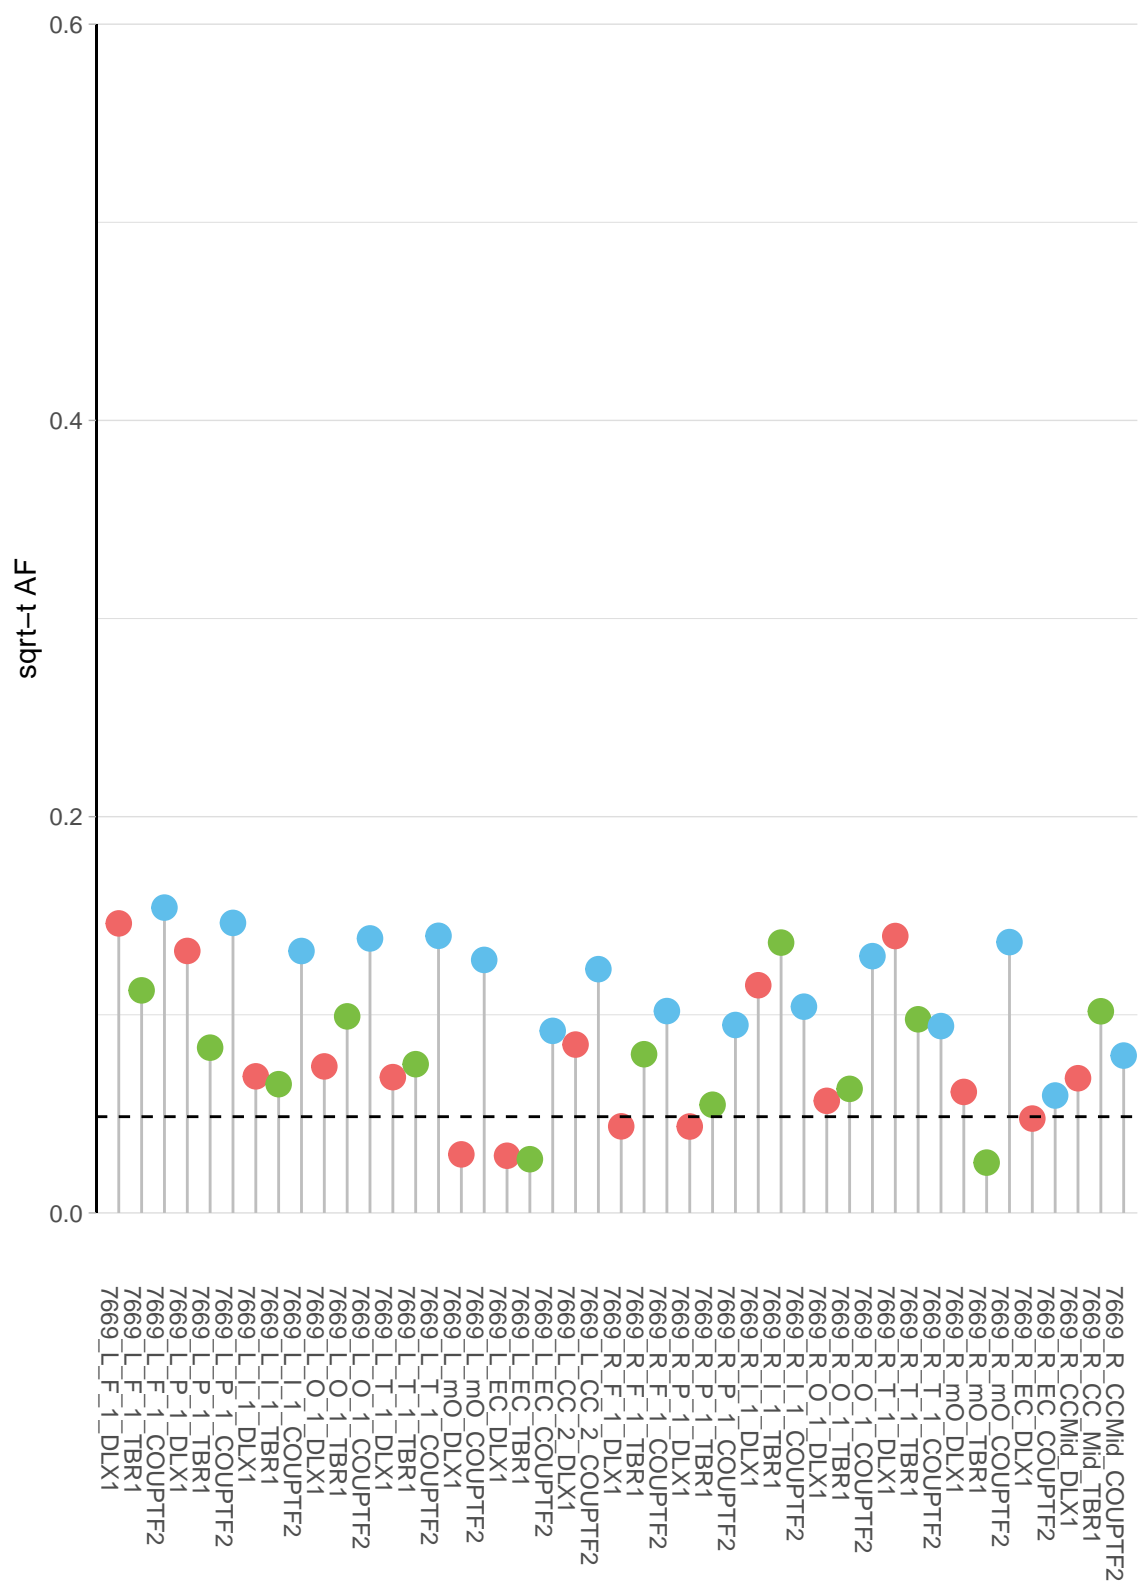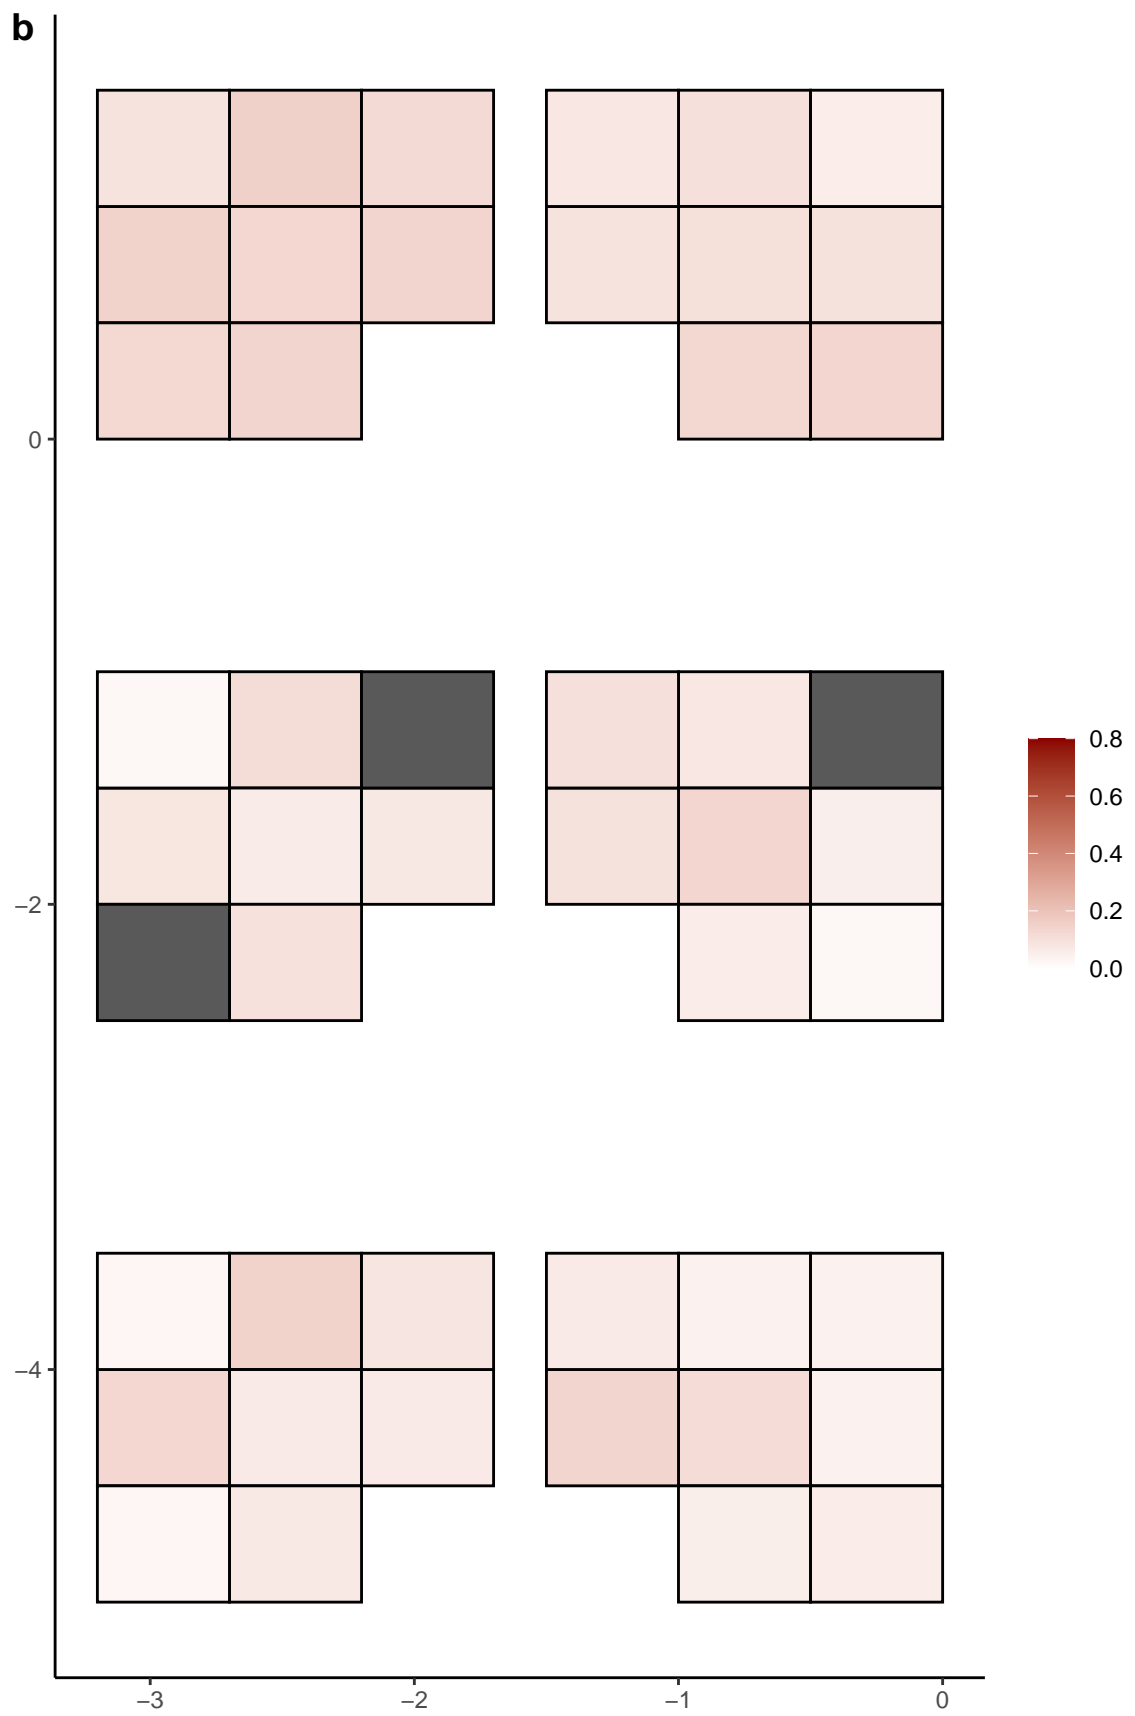

**a** ID05 6-115259744-C-T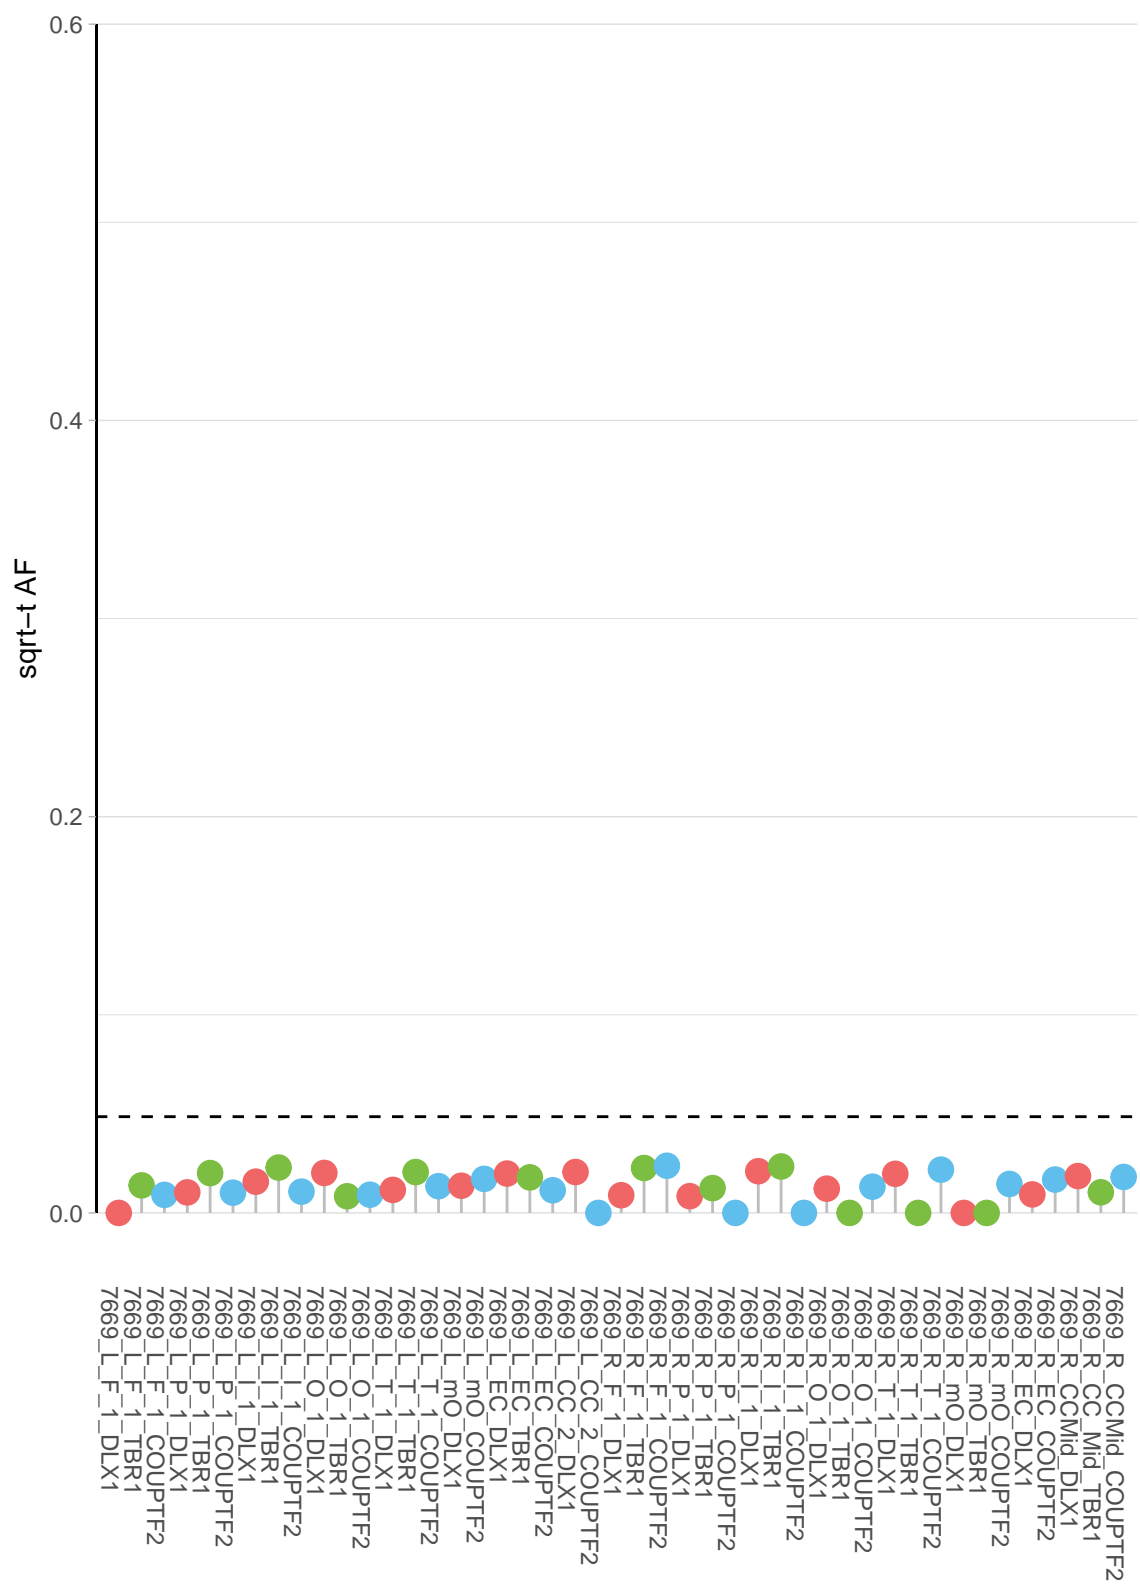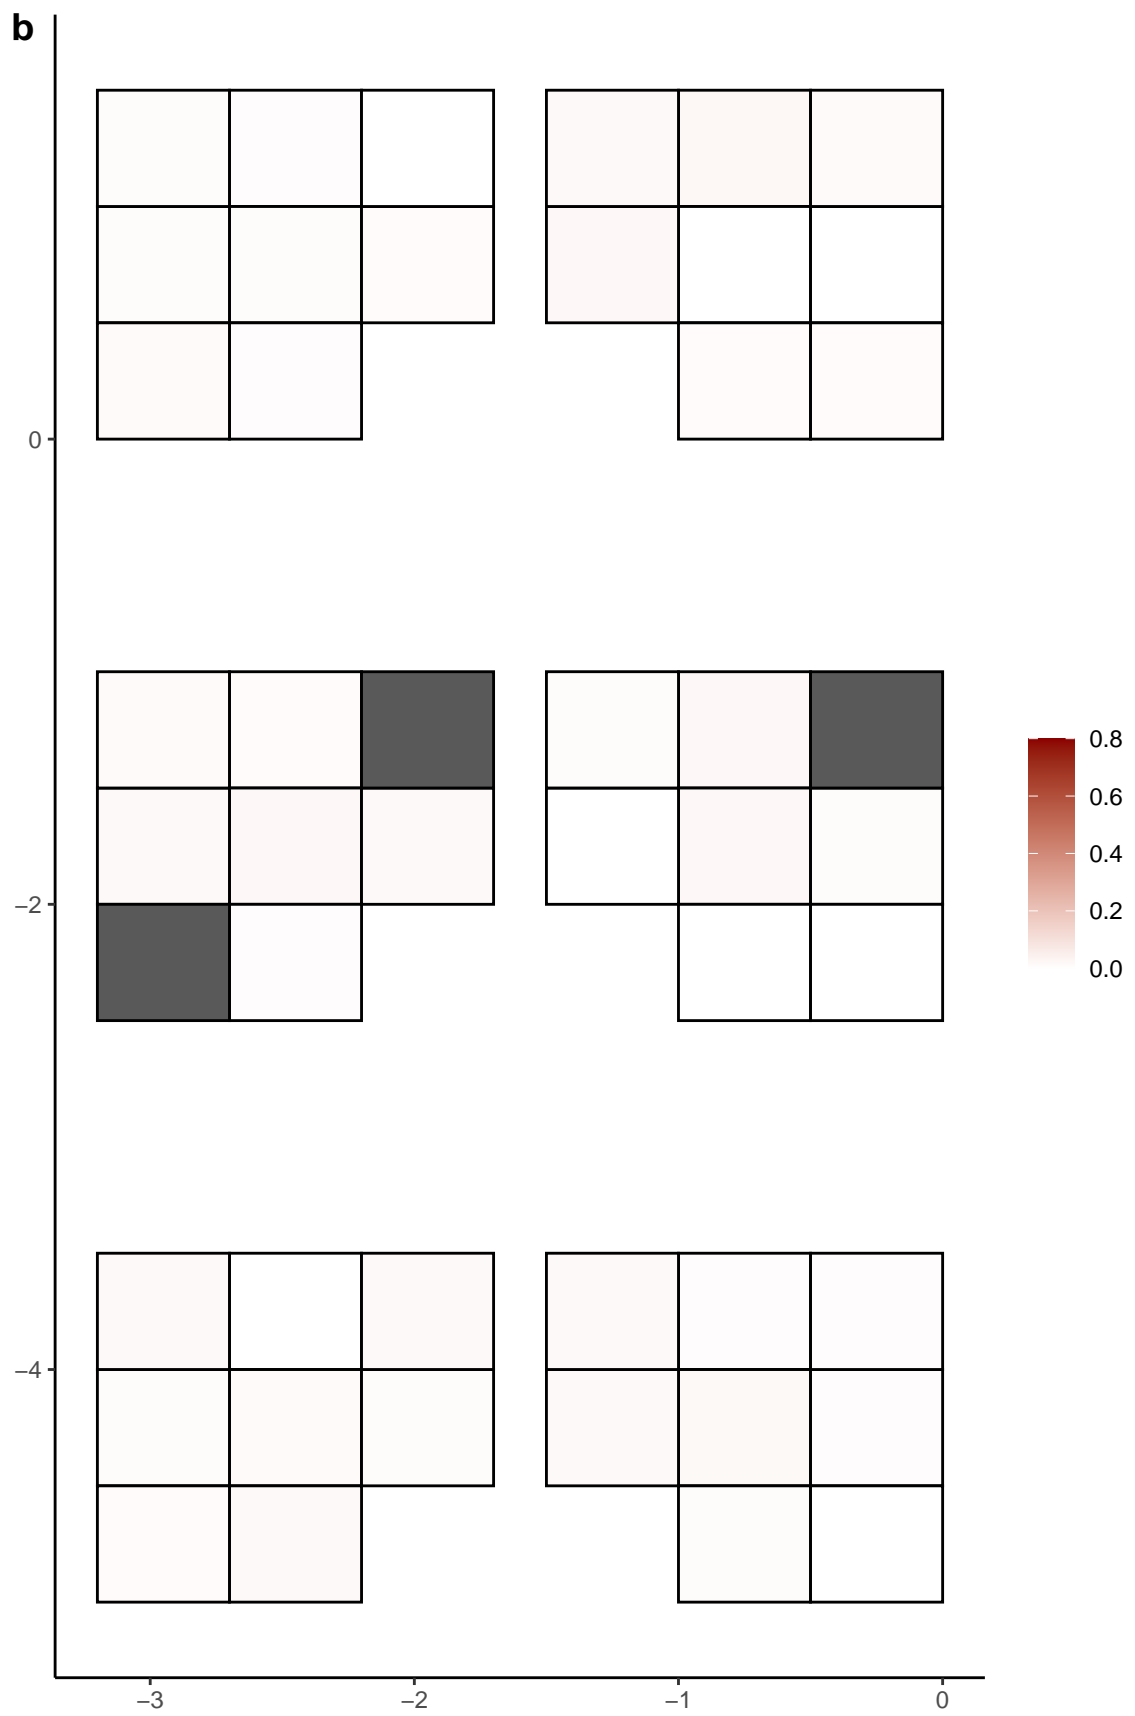

**a** ID05 6-124787238-C-T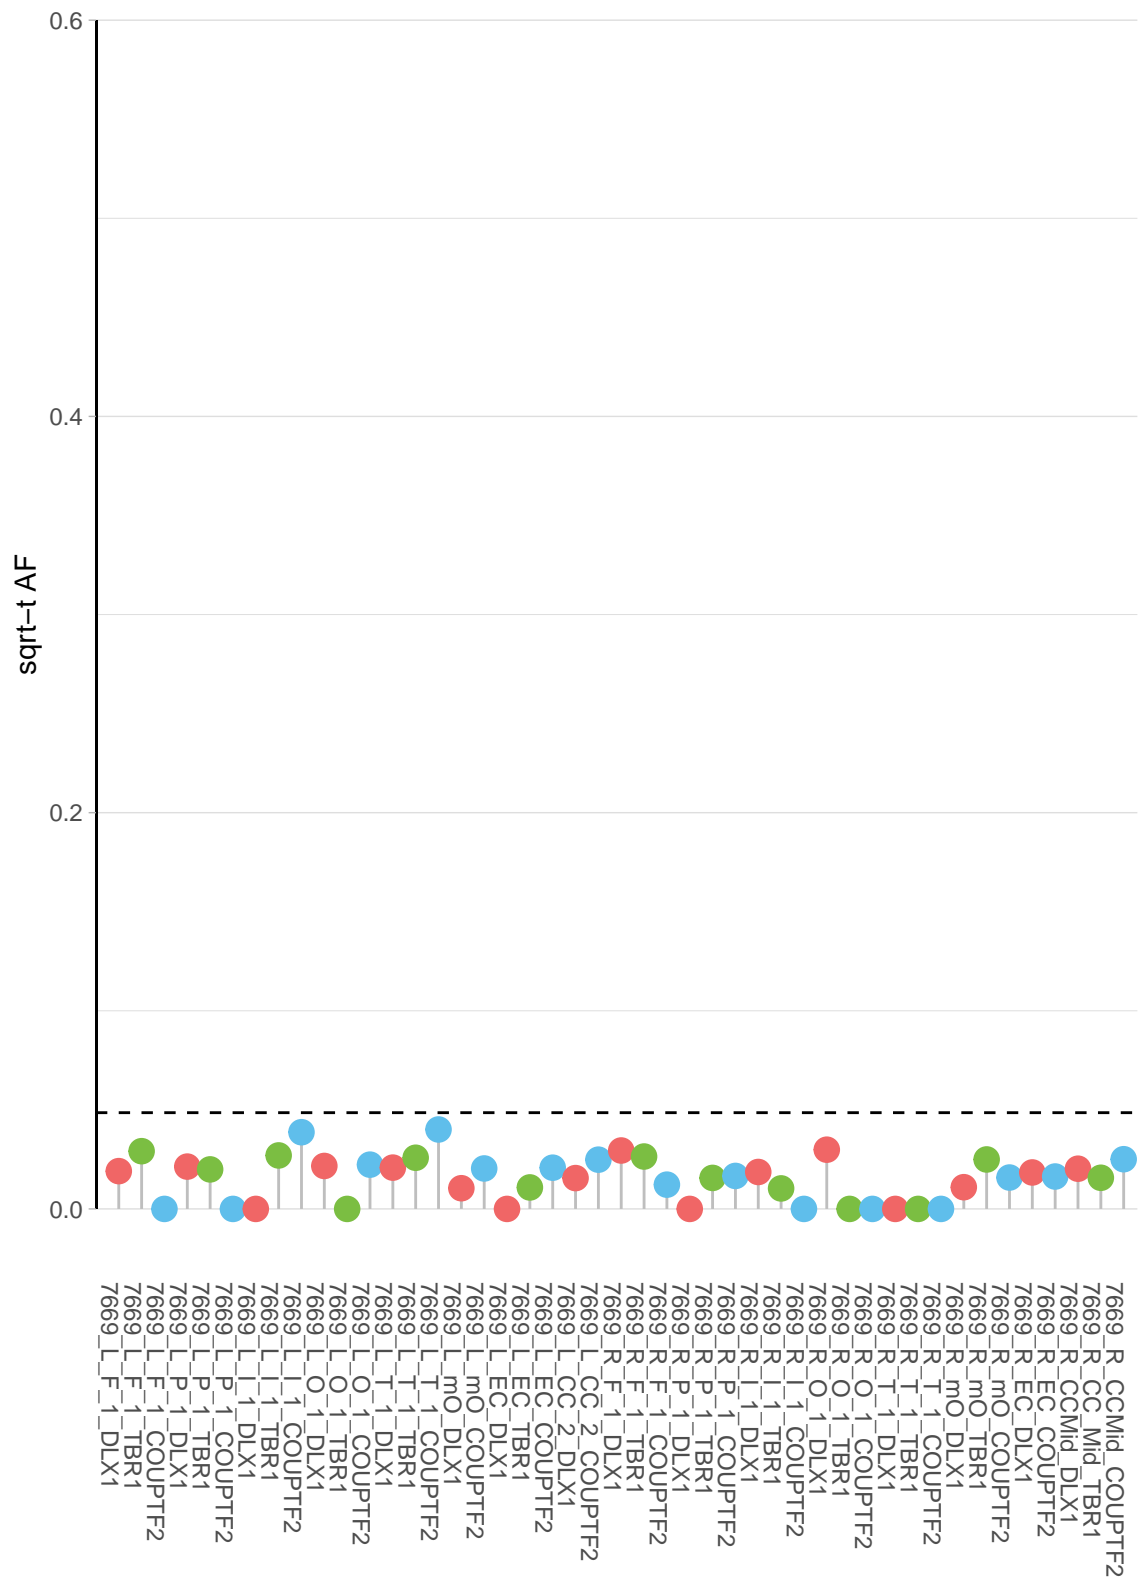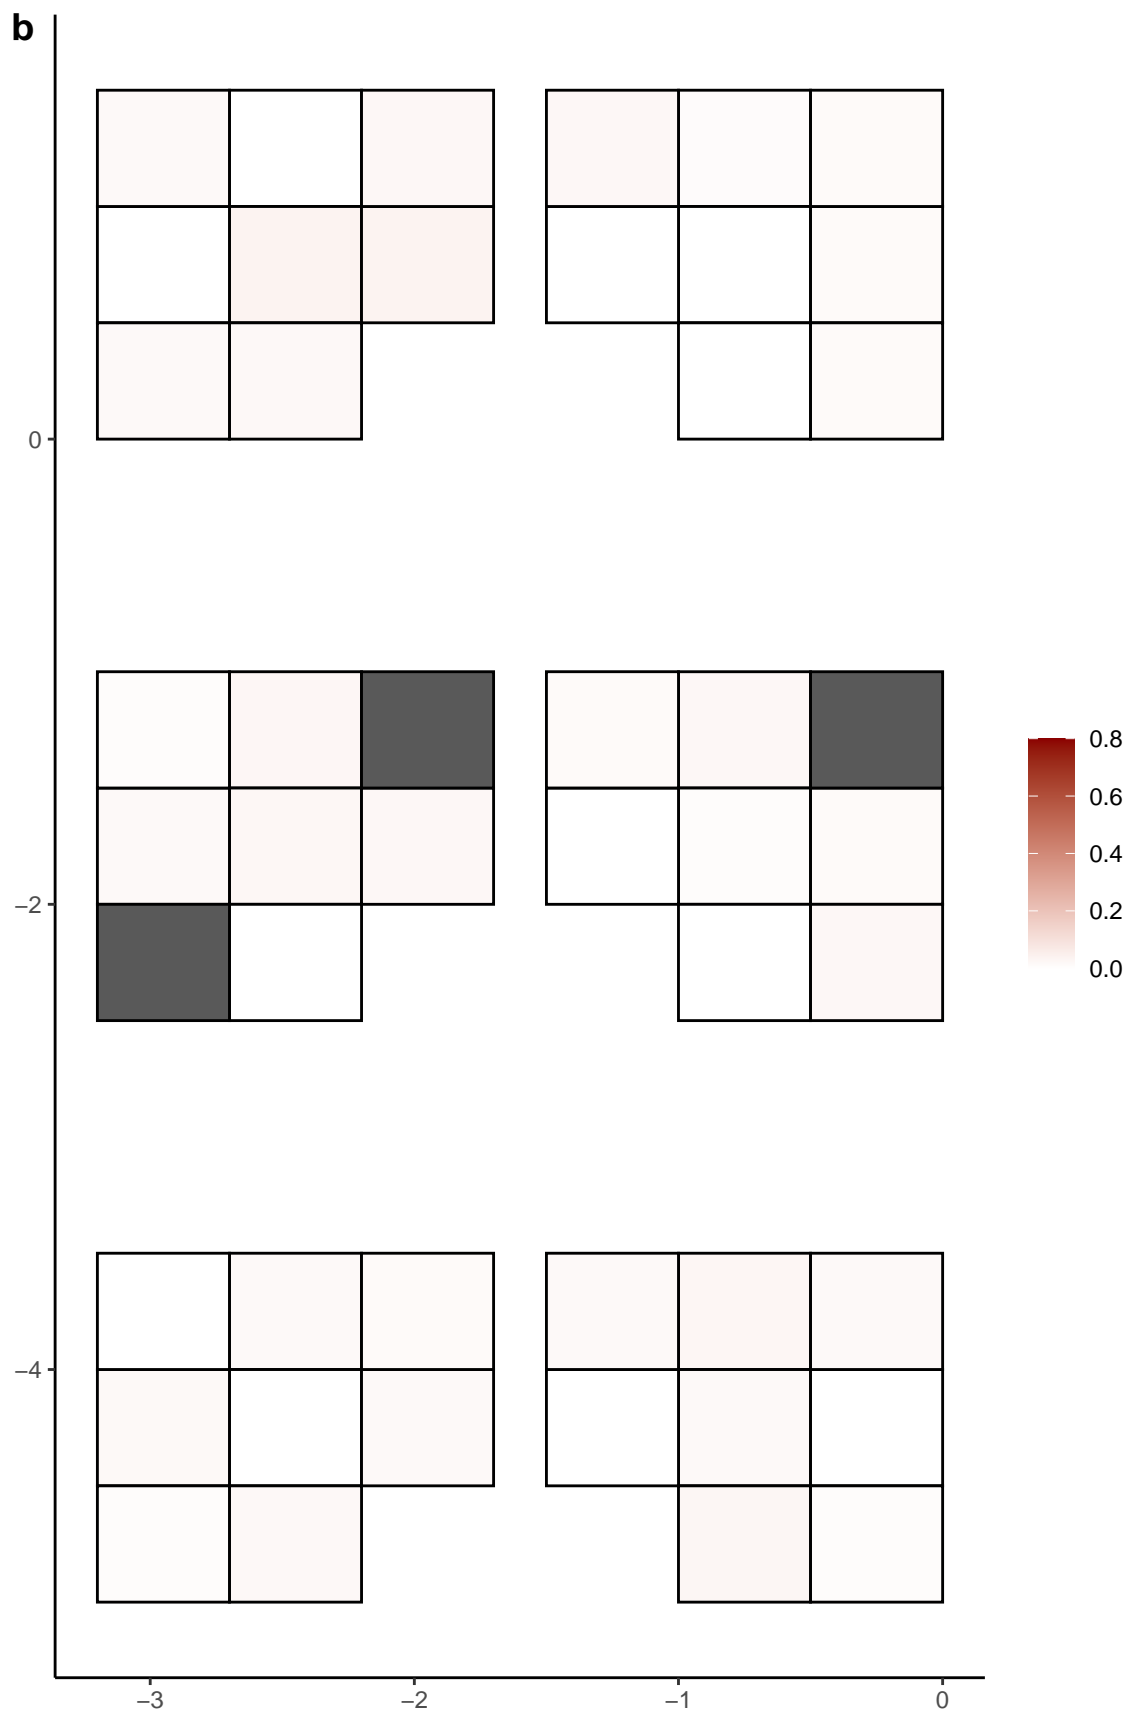





**a** ID05 6-132170864-G-A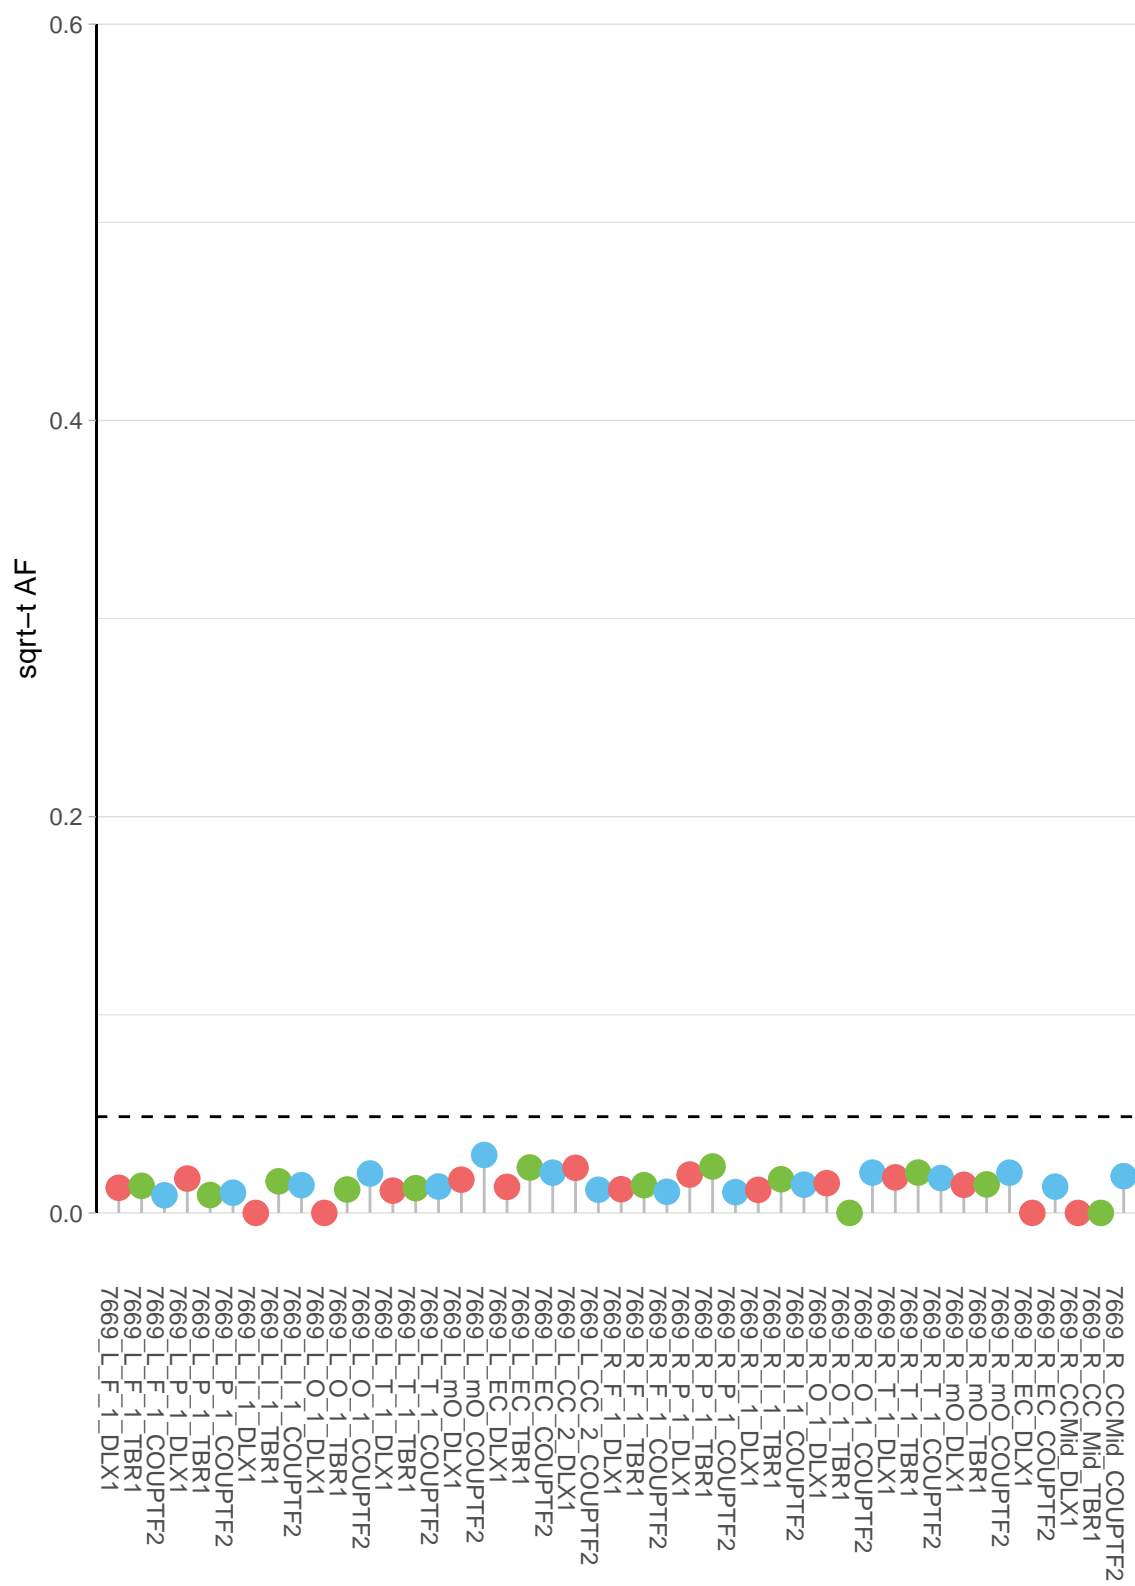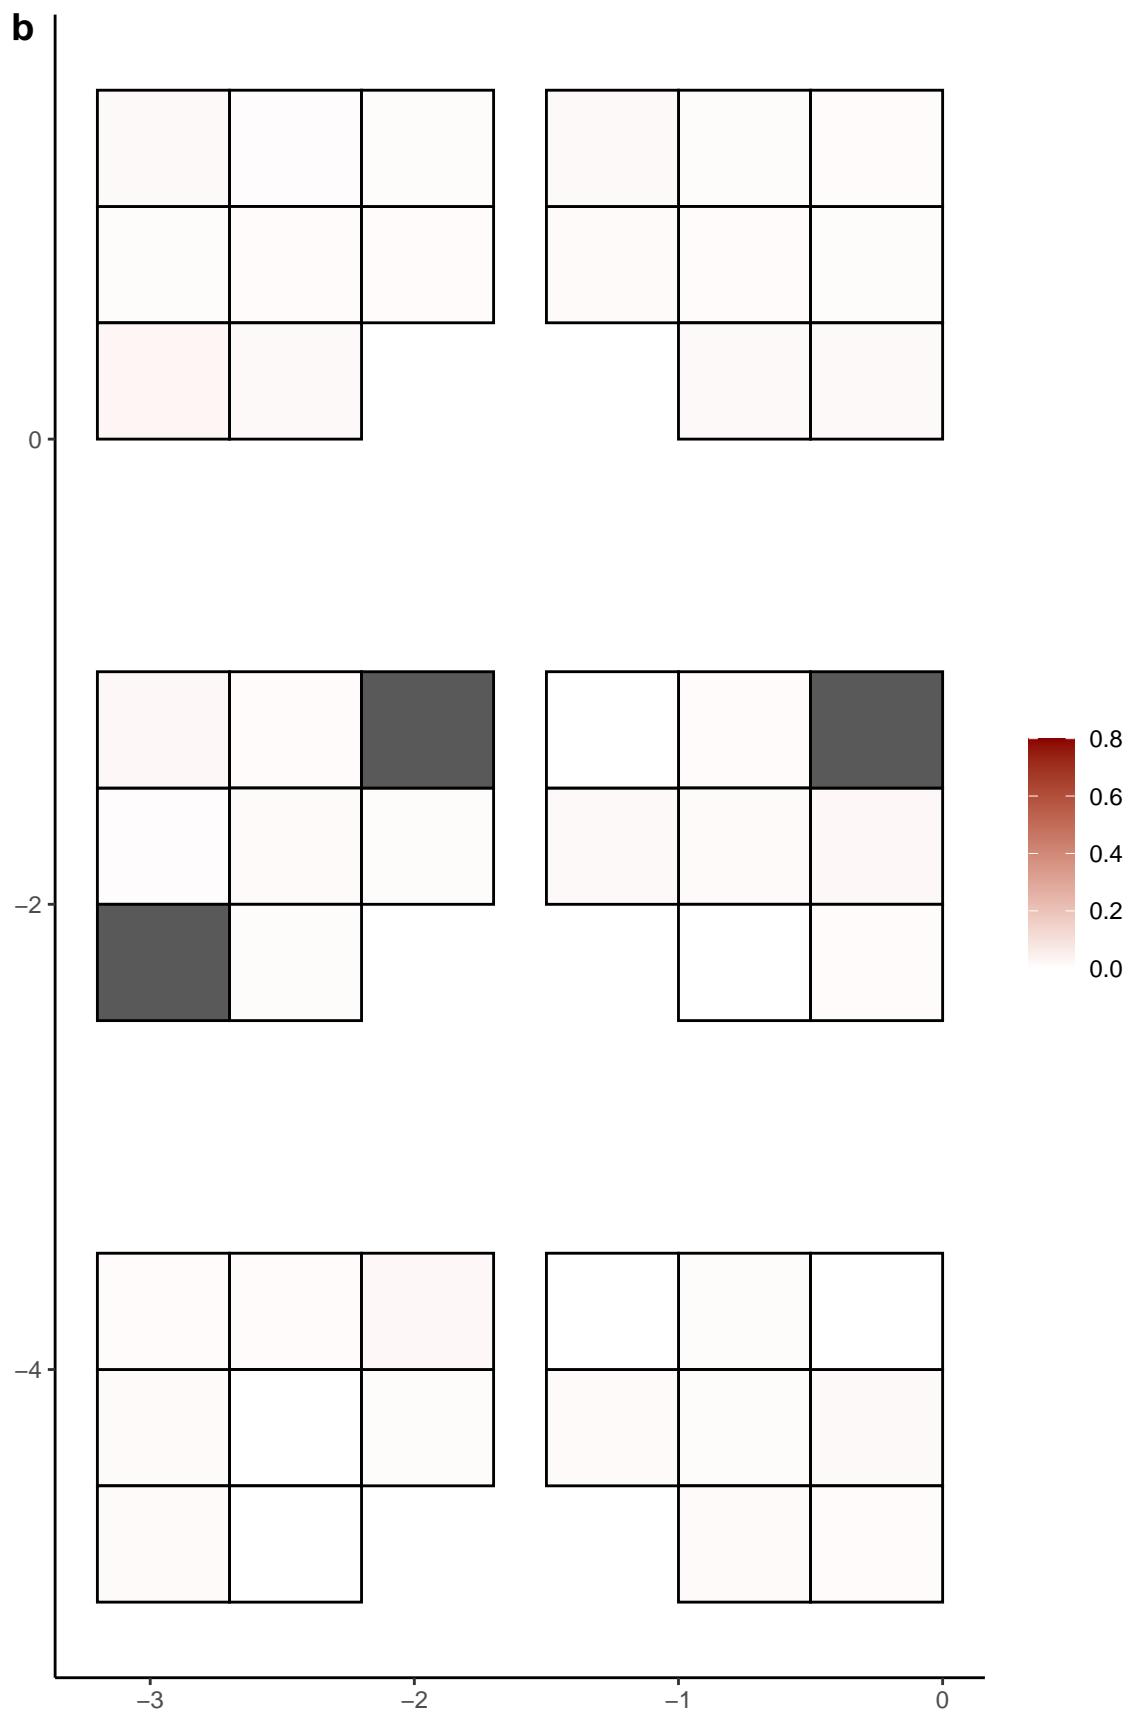

**a** ID05 6-138352132-G-A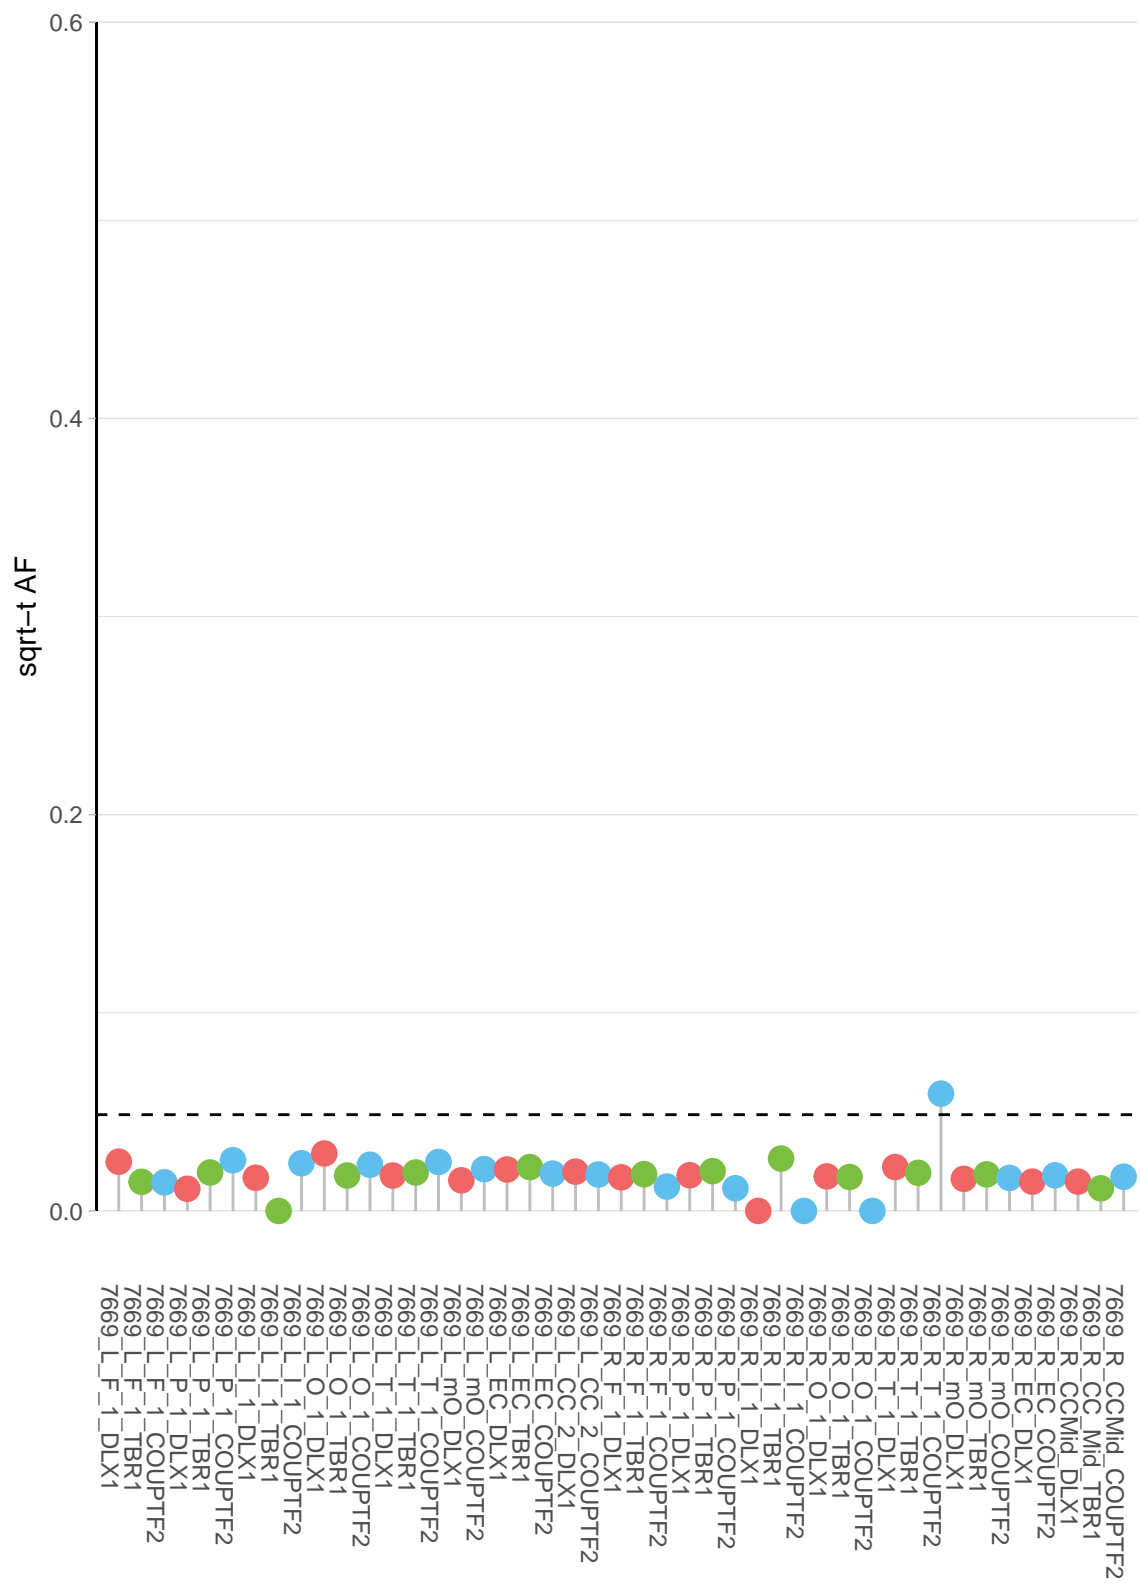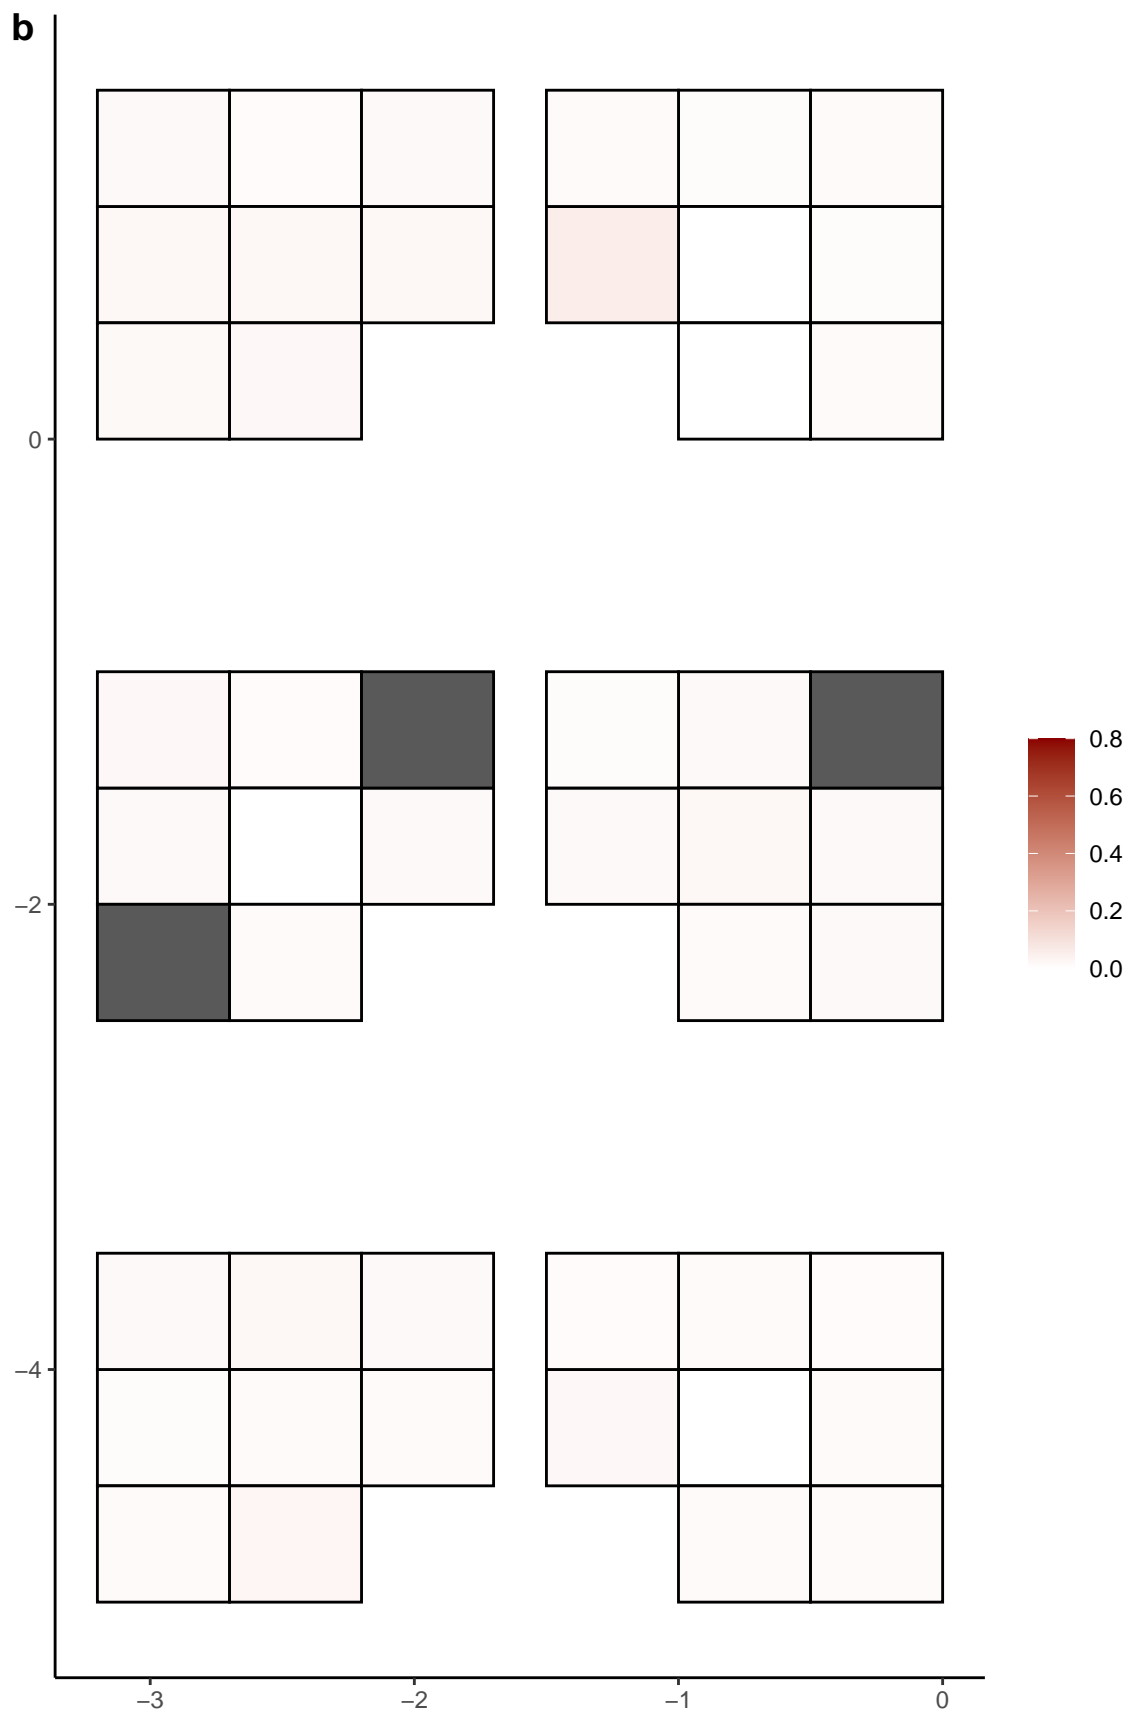

**a** ID05 6-139194275-C-T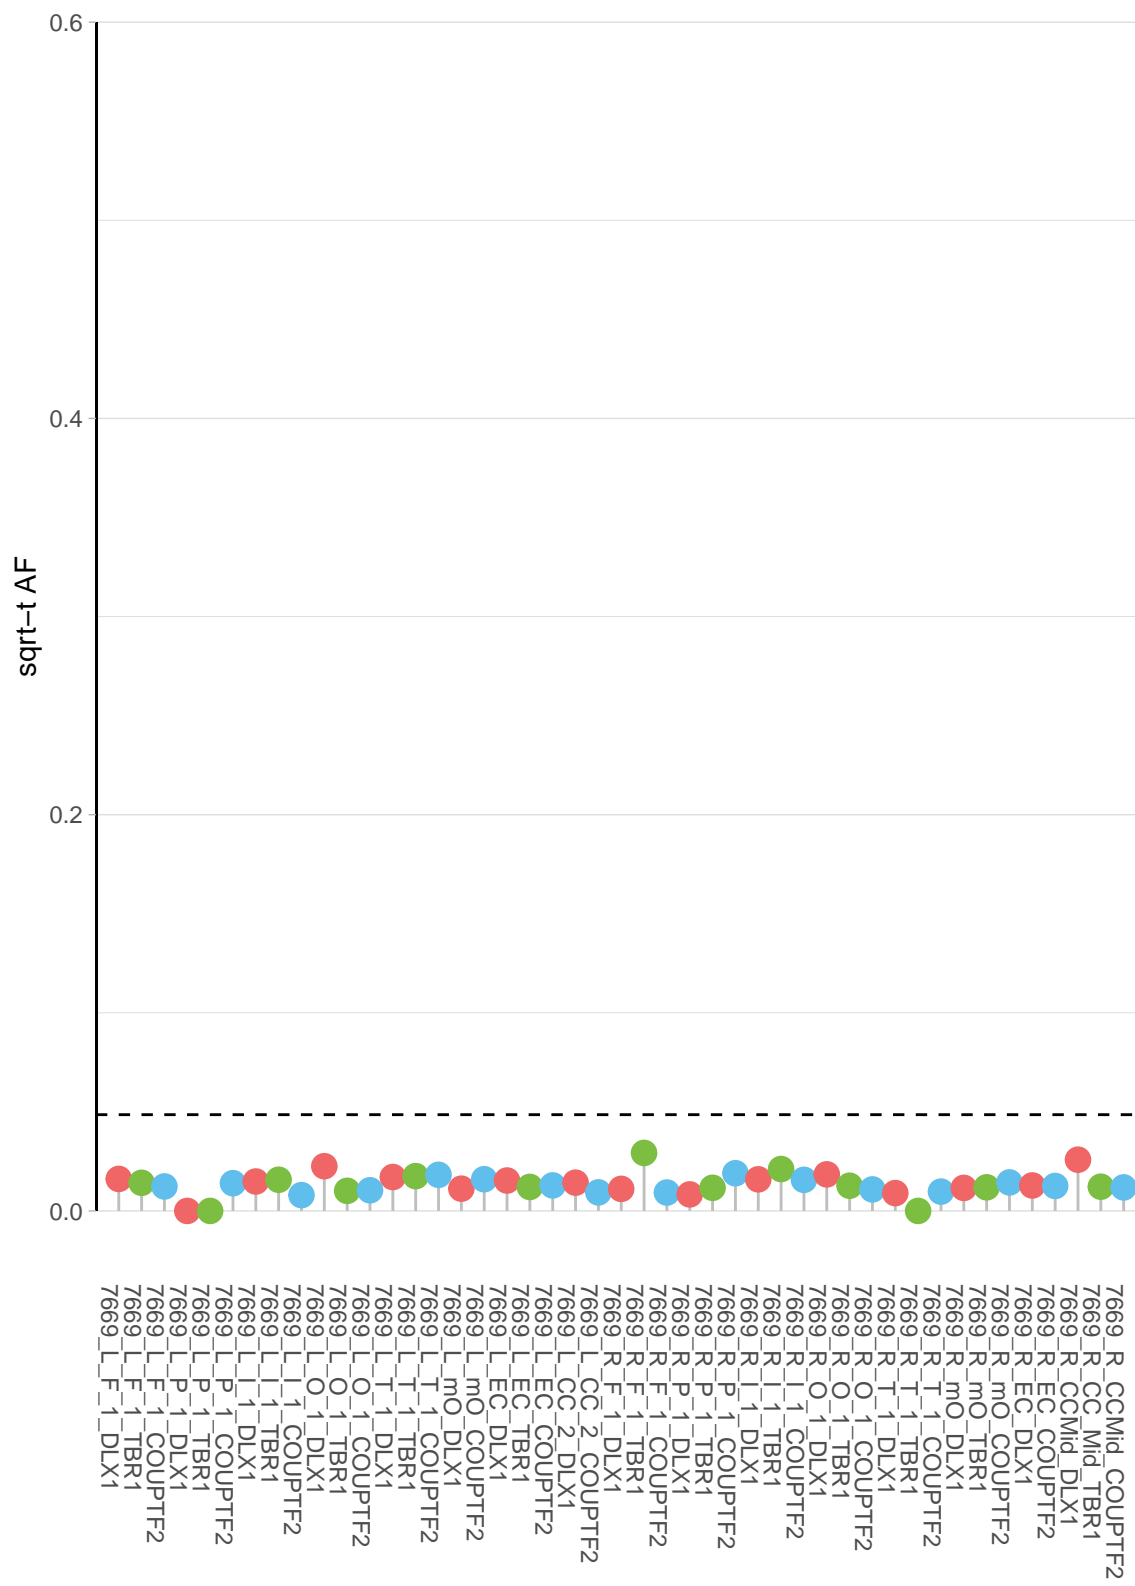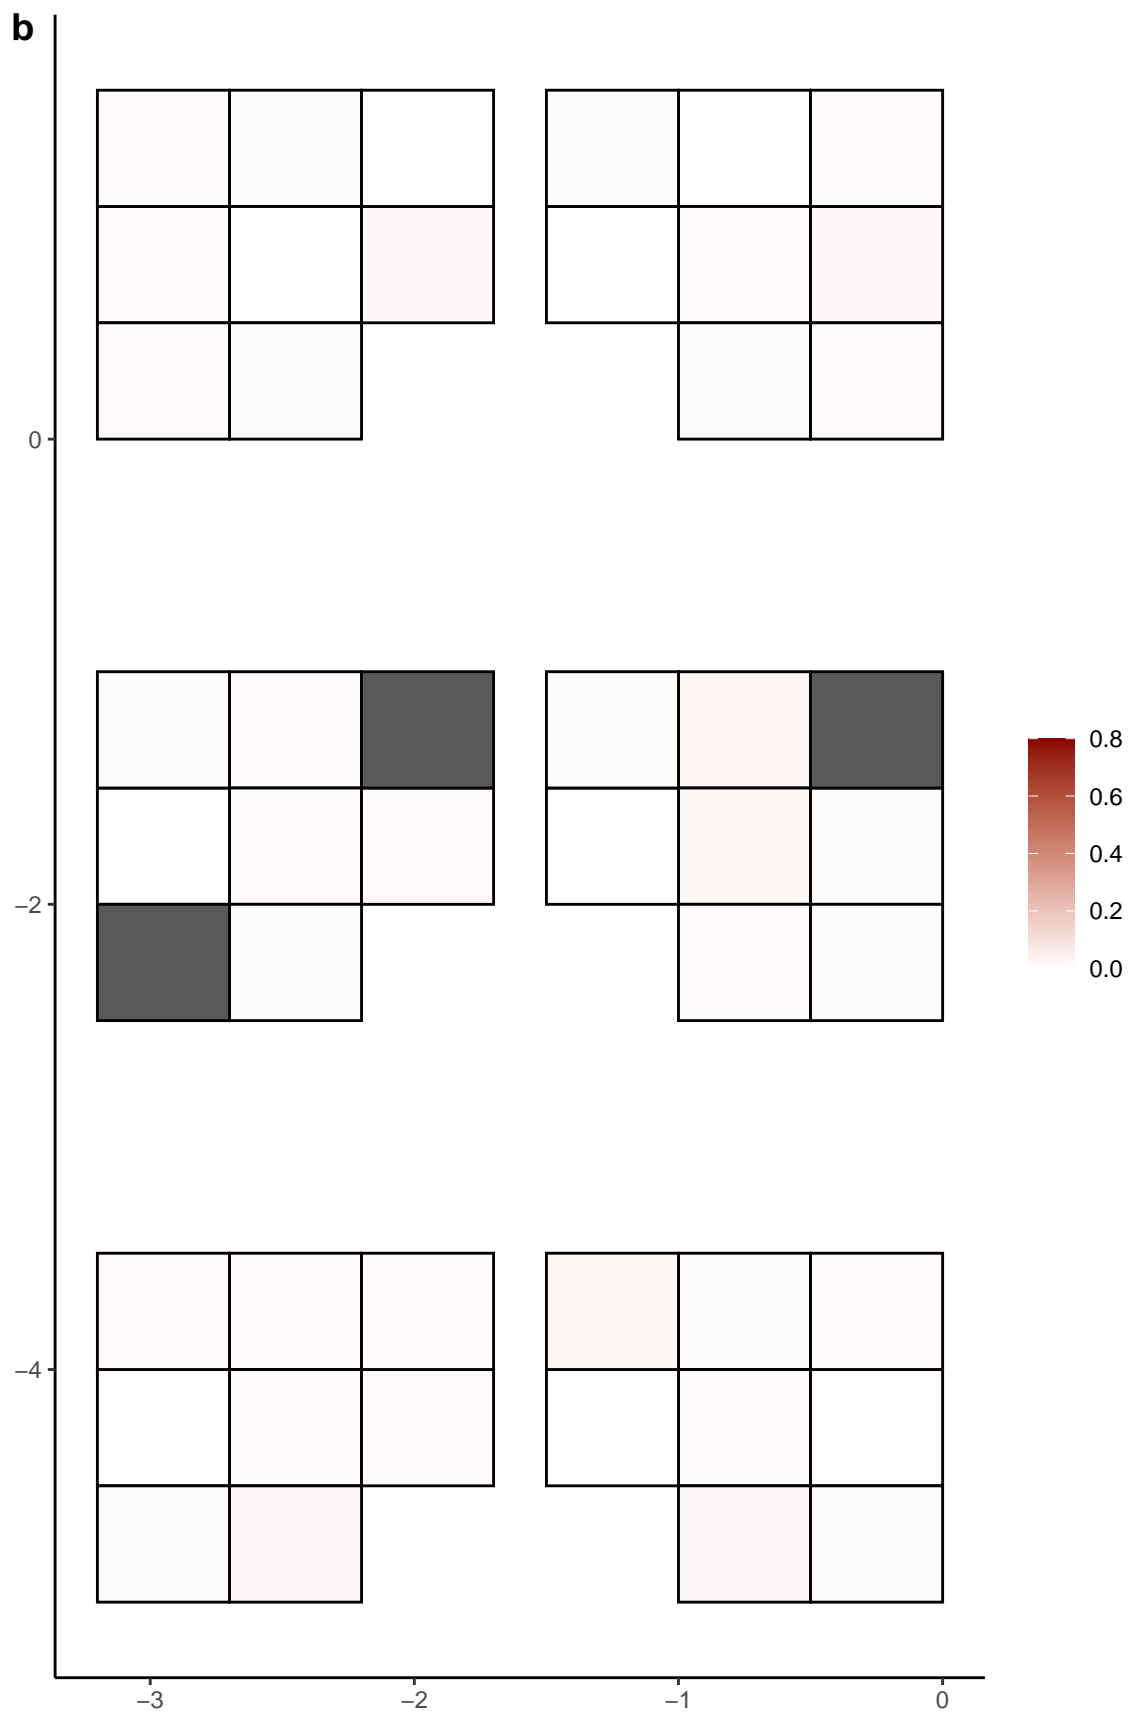

**a** ID05 6-142200306-C-T

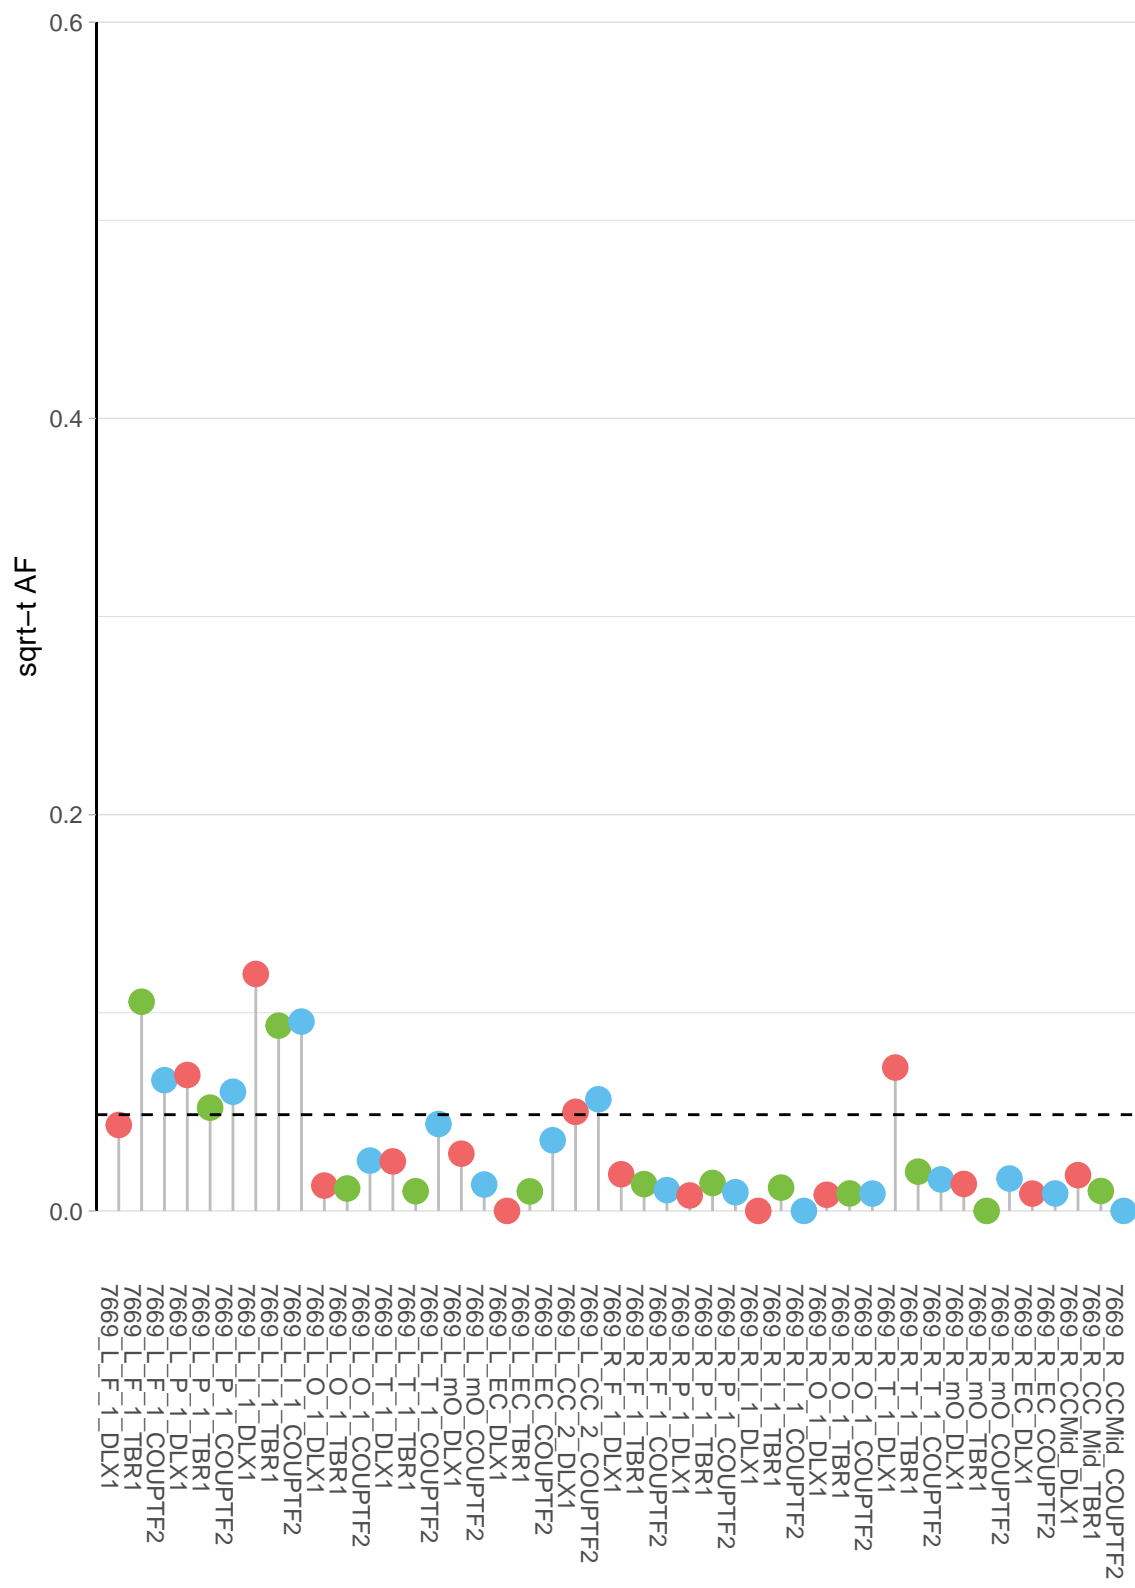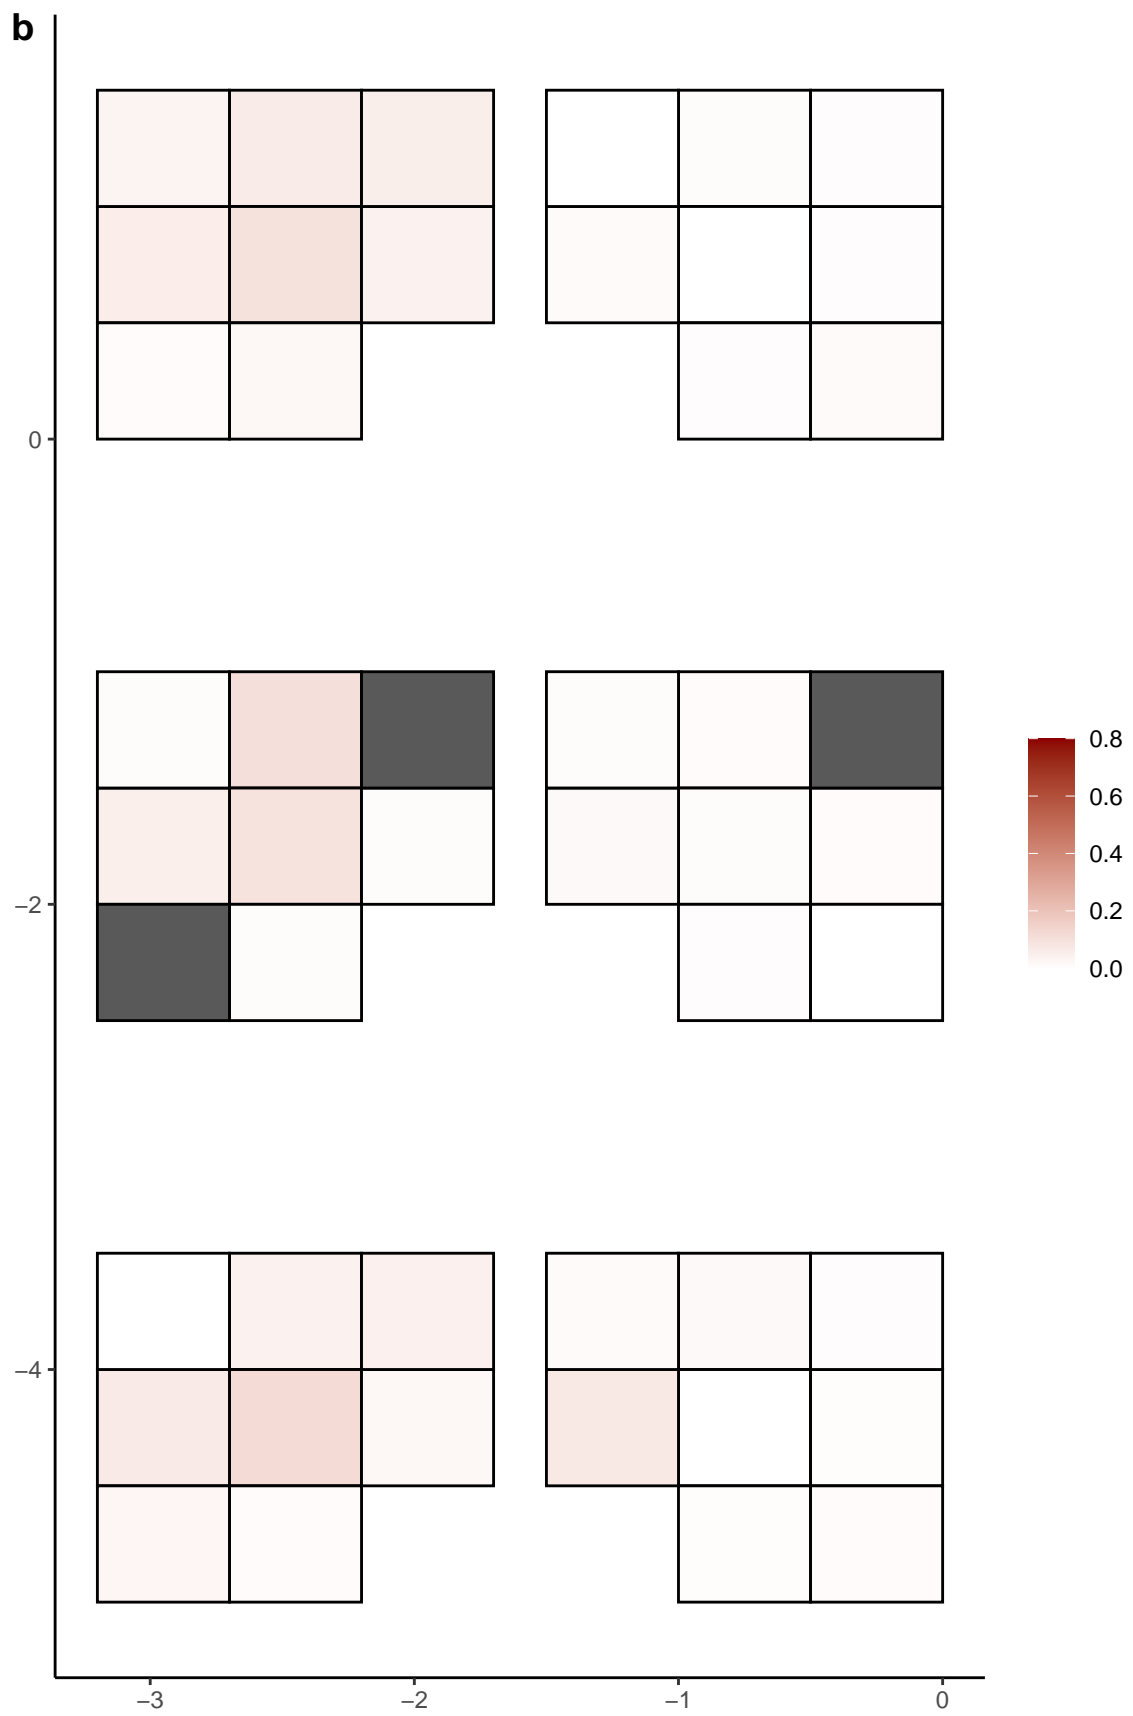

**a** ID05 6-144775505-C-T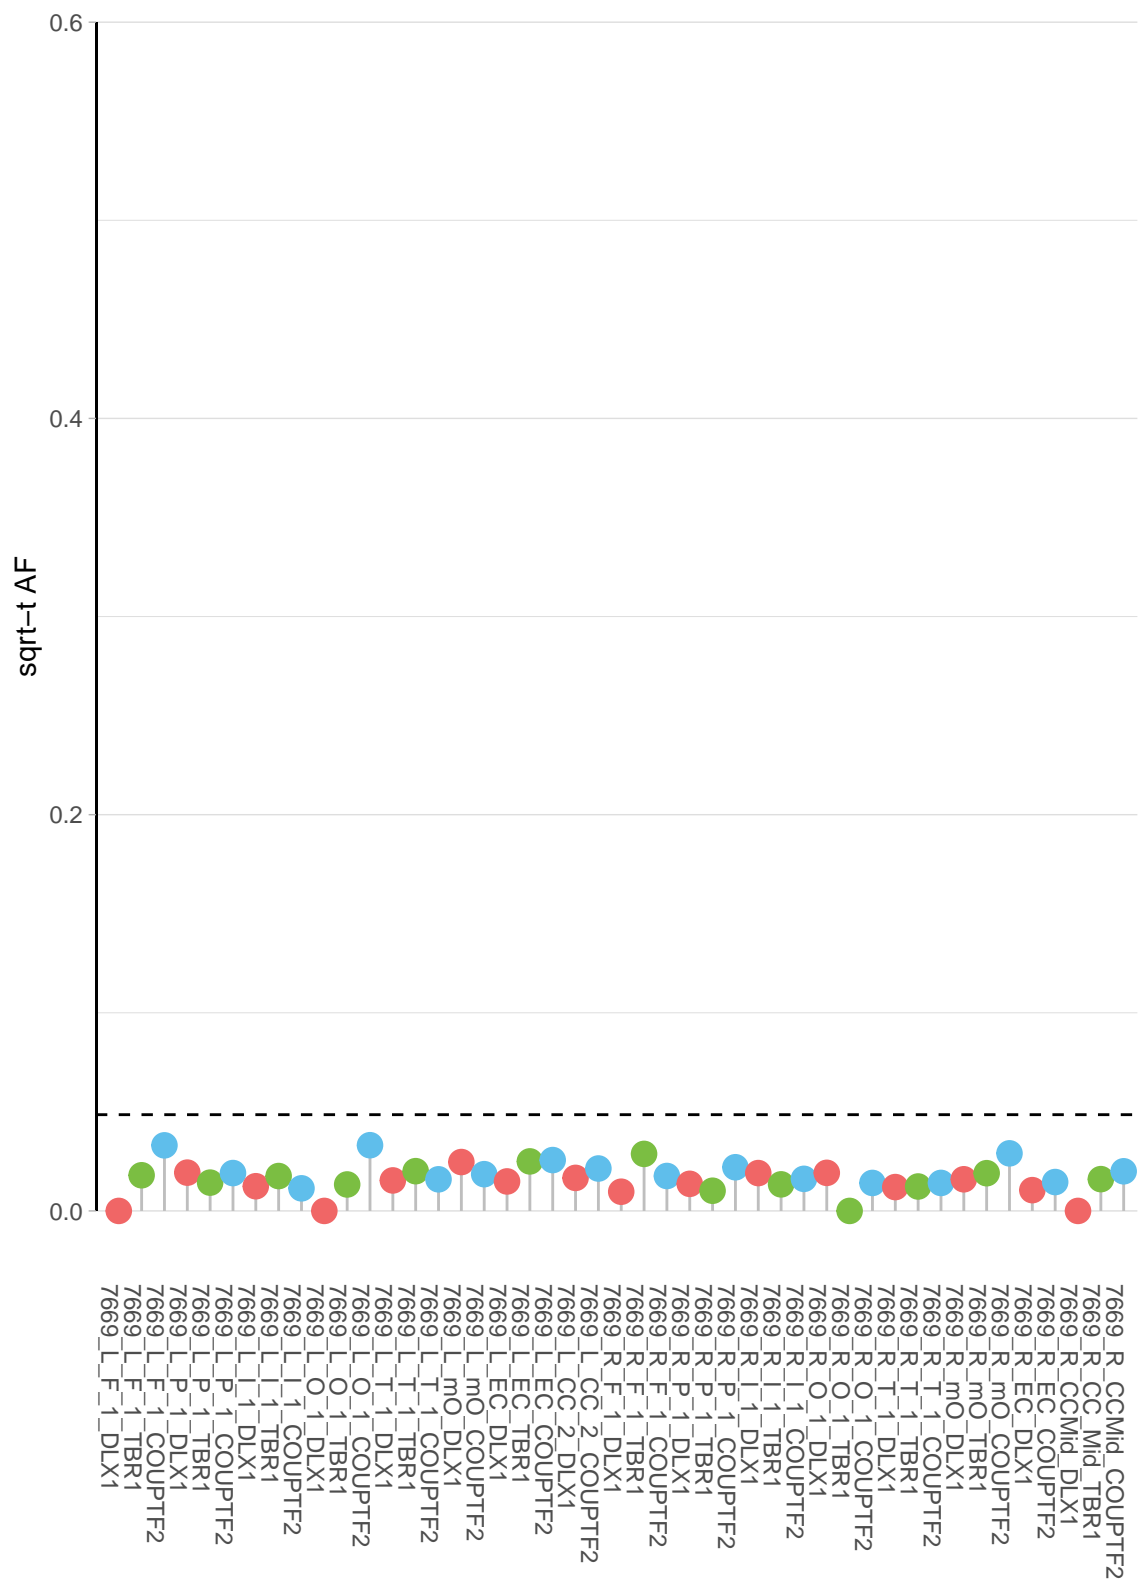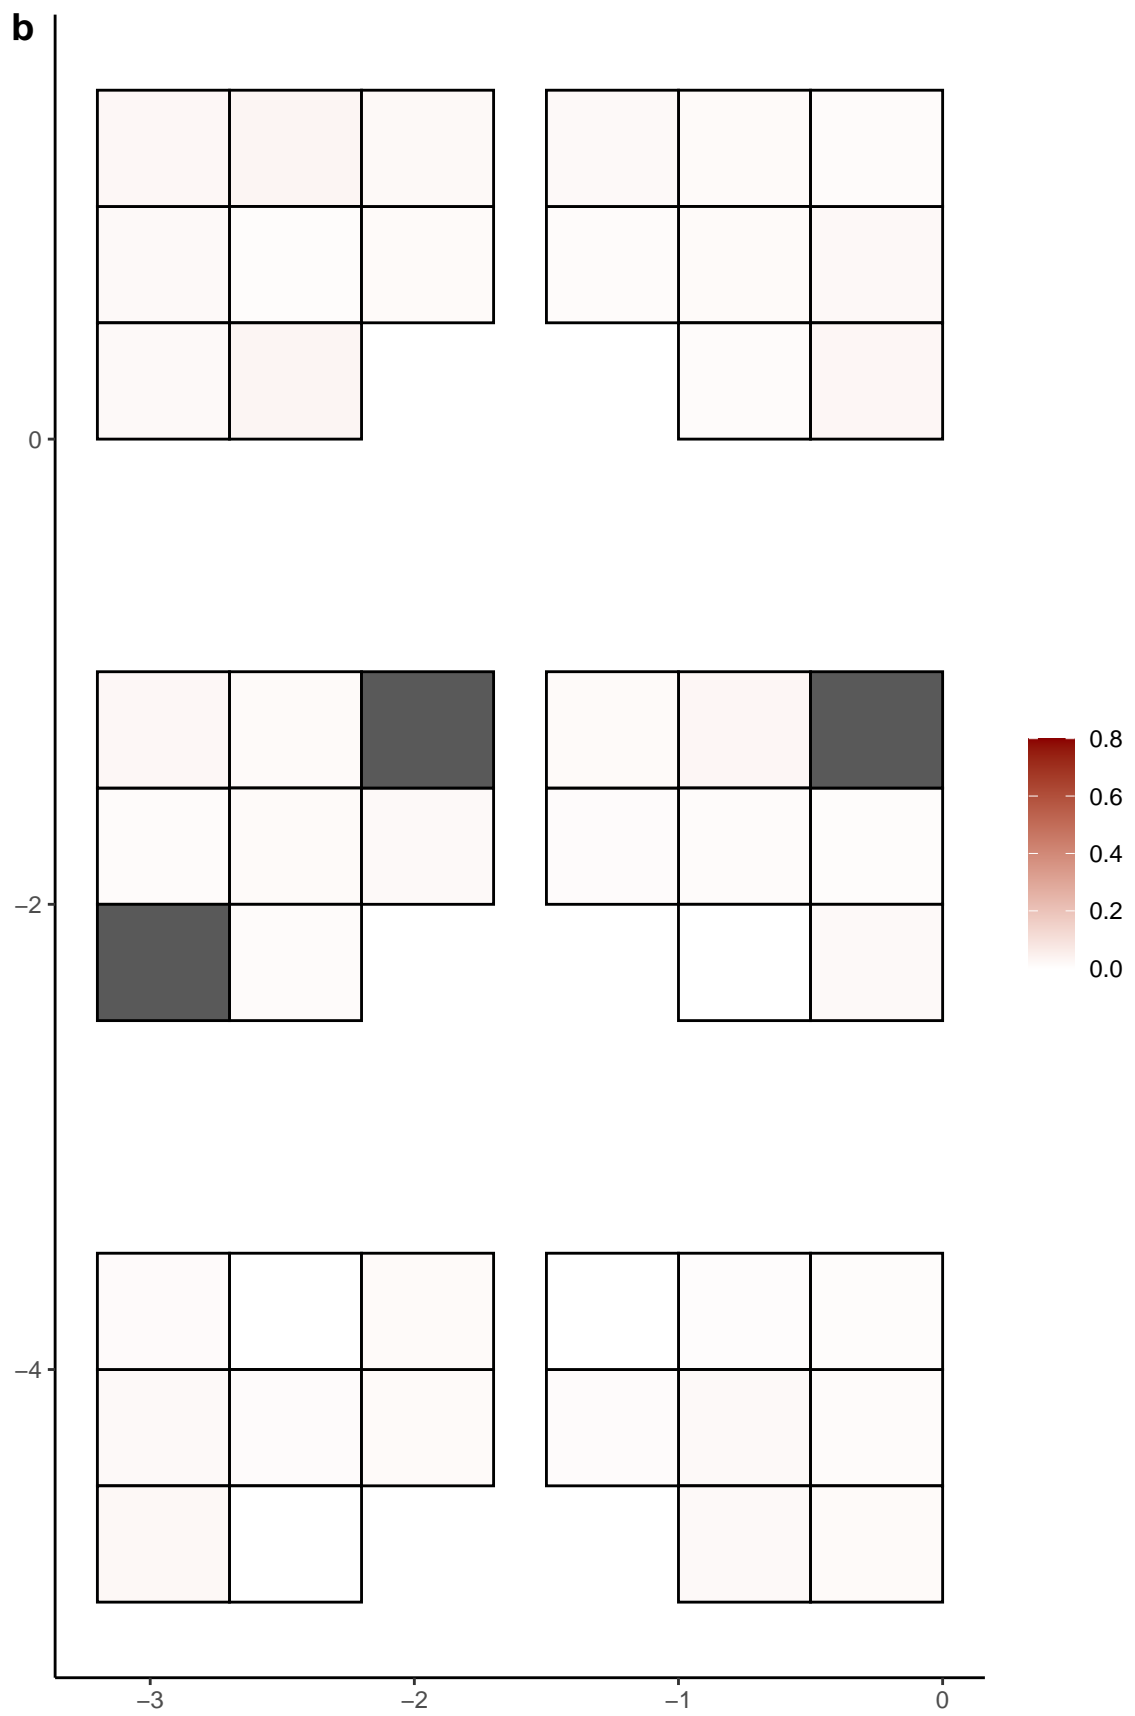

**a** ID05 6-145560357-G-T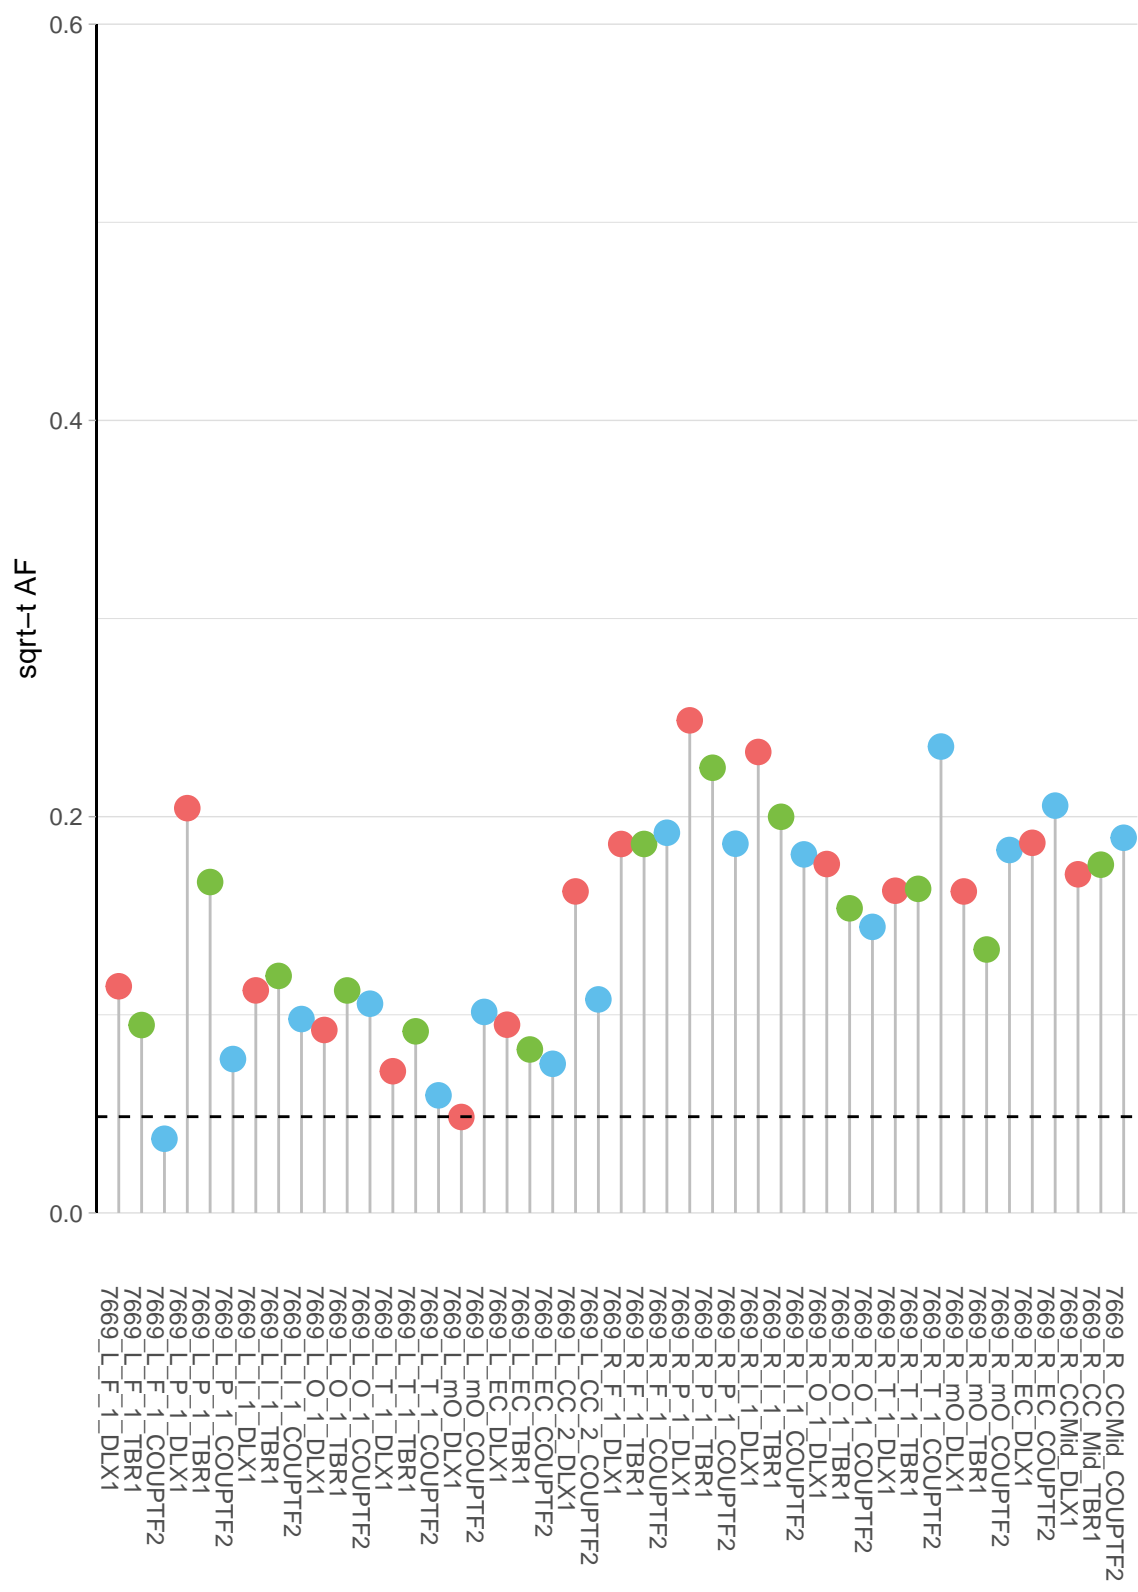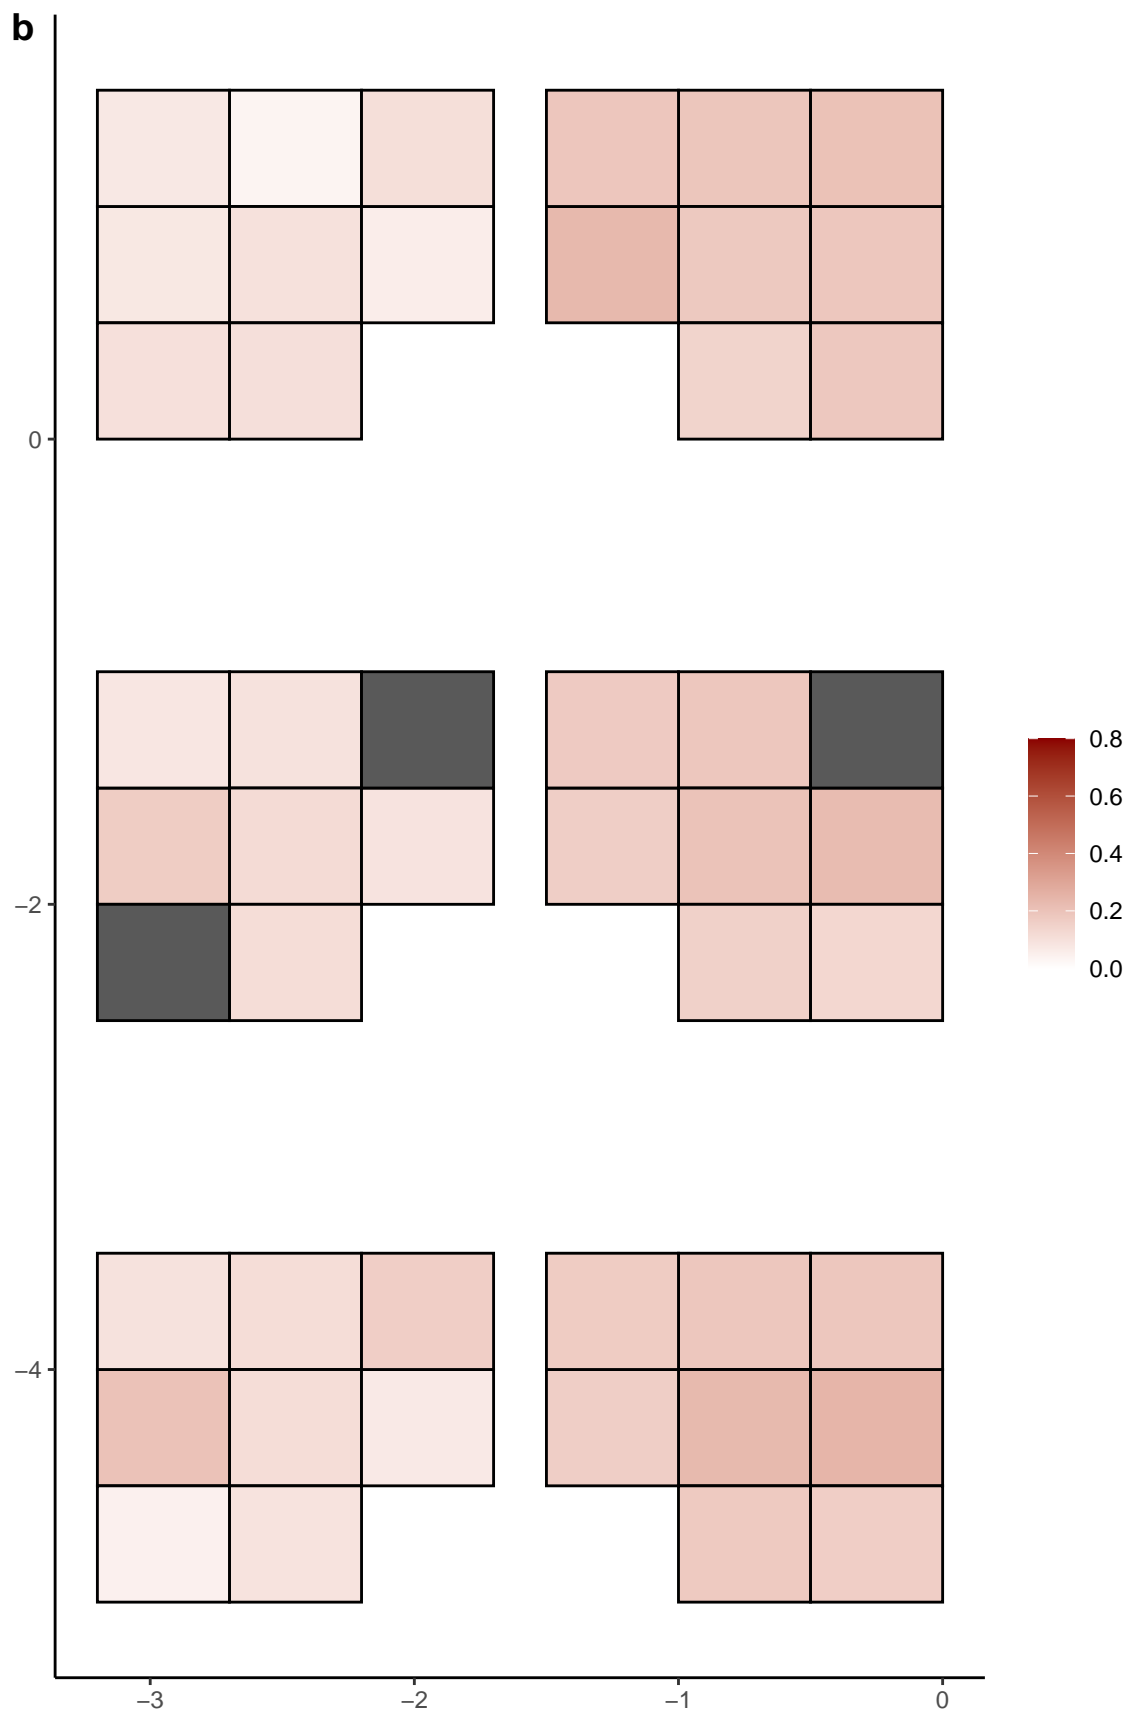

**a** ID05 6-146019805-C-T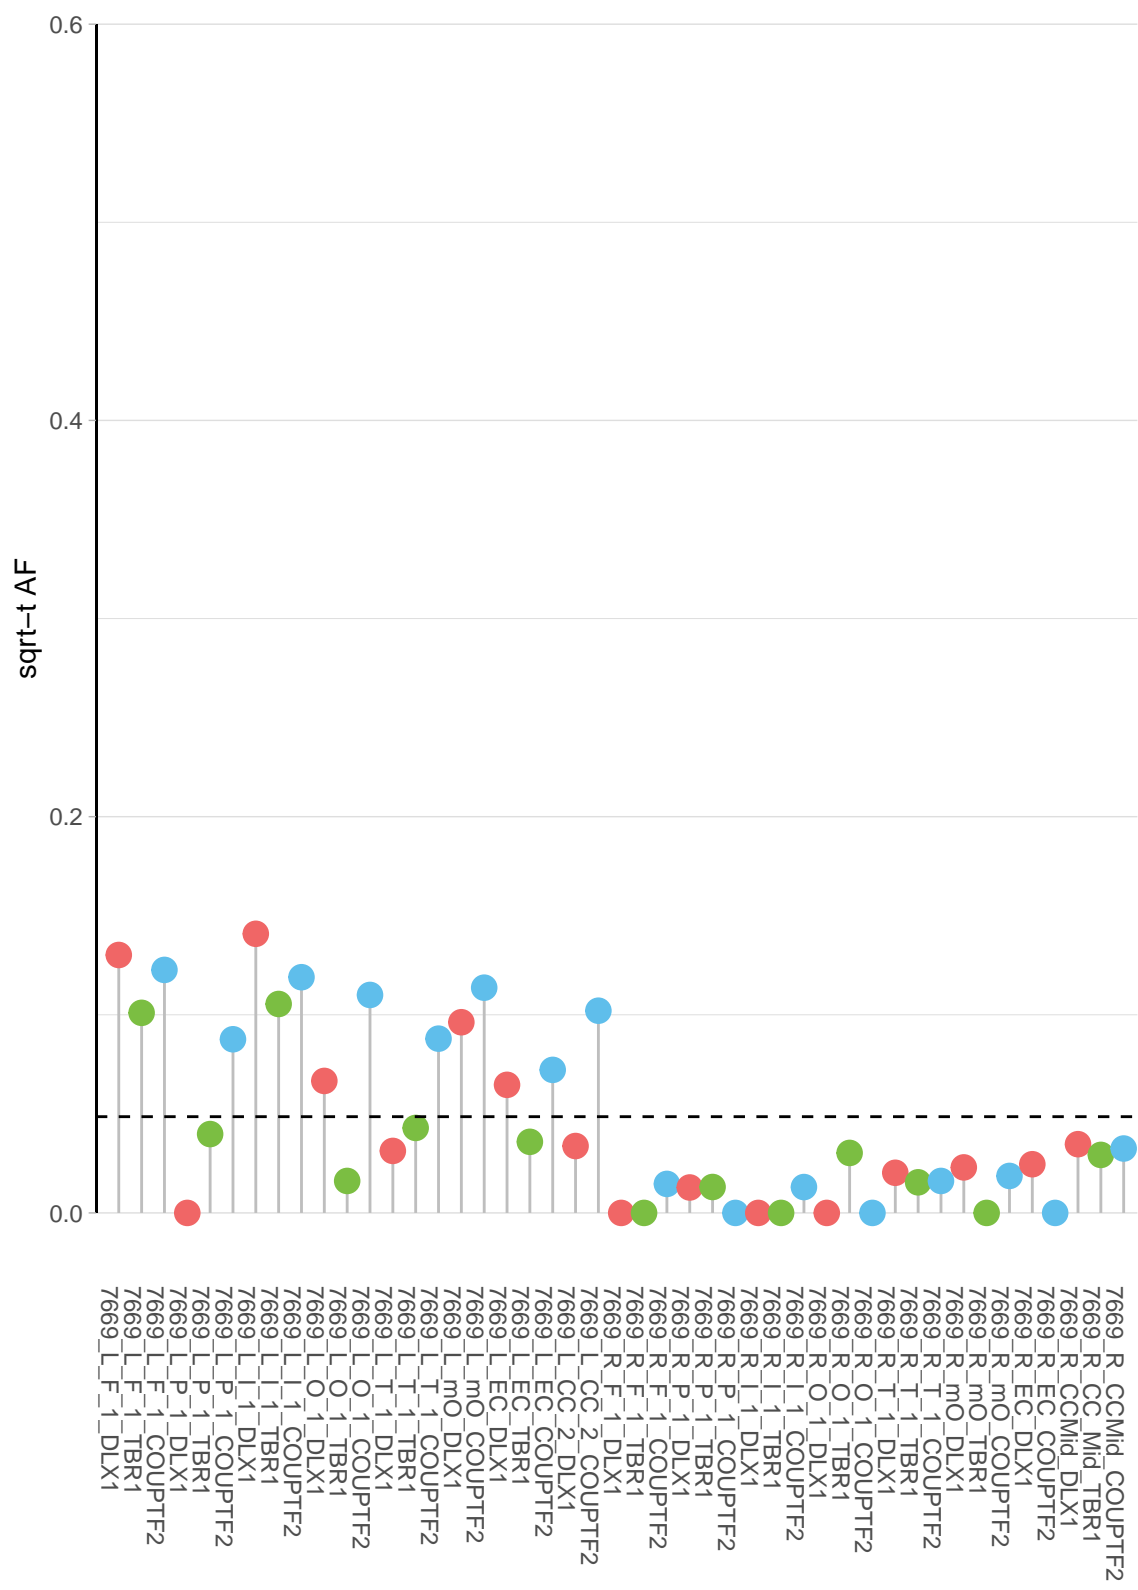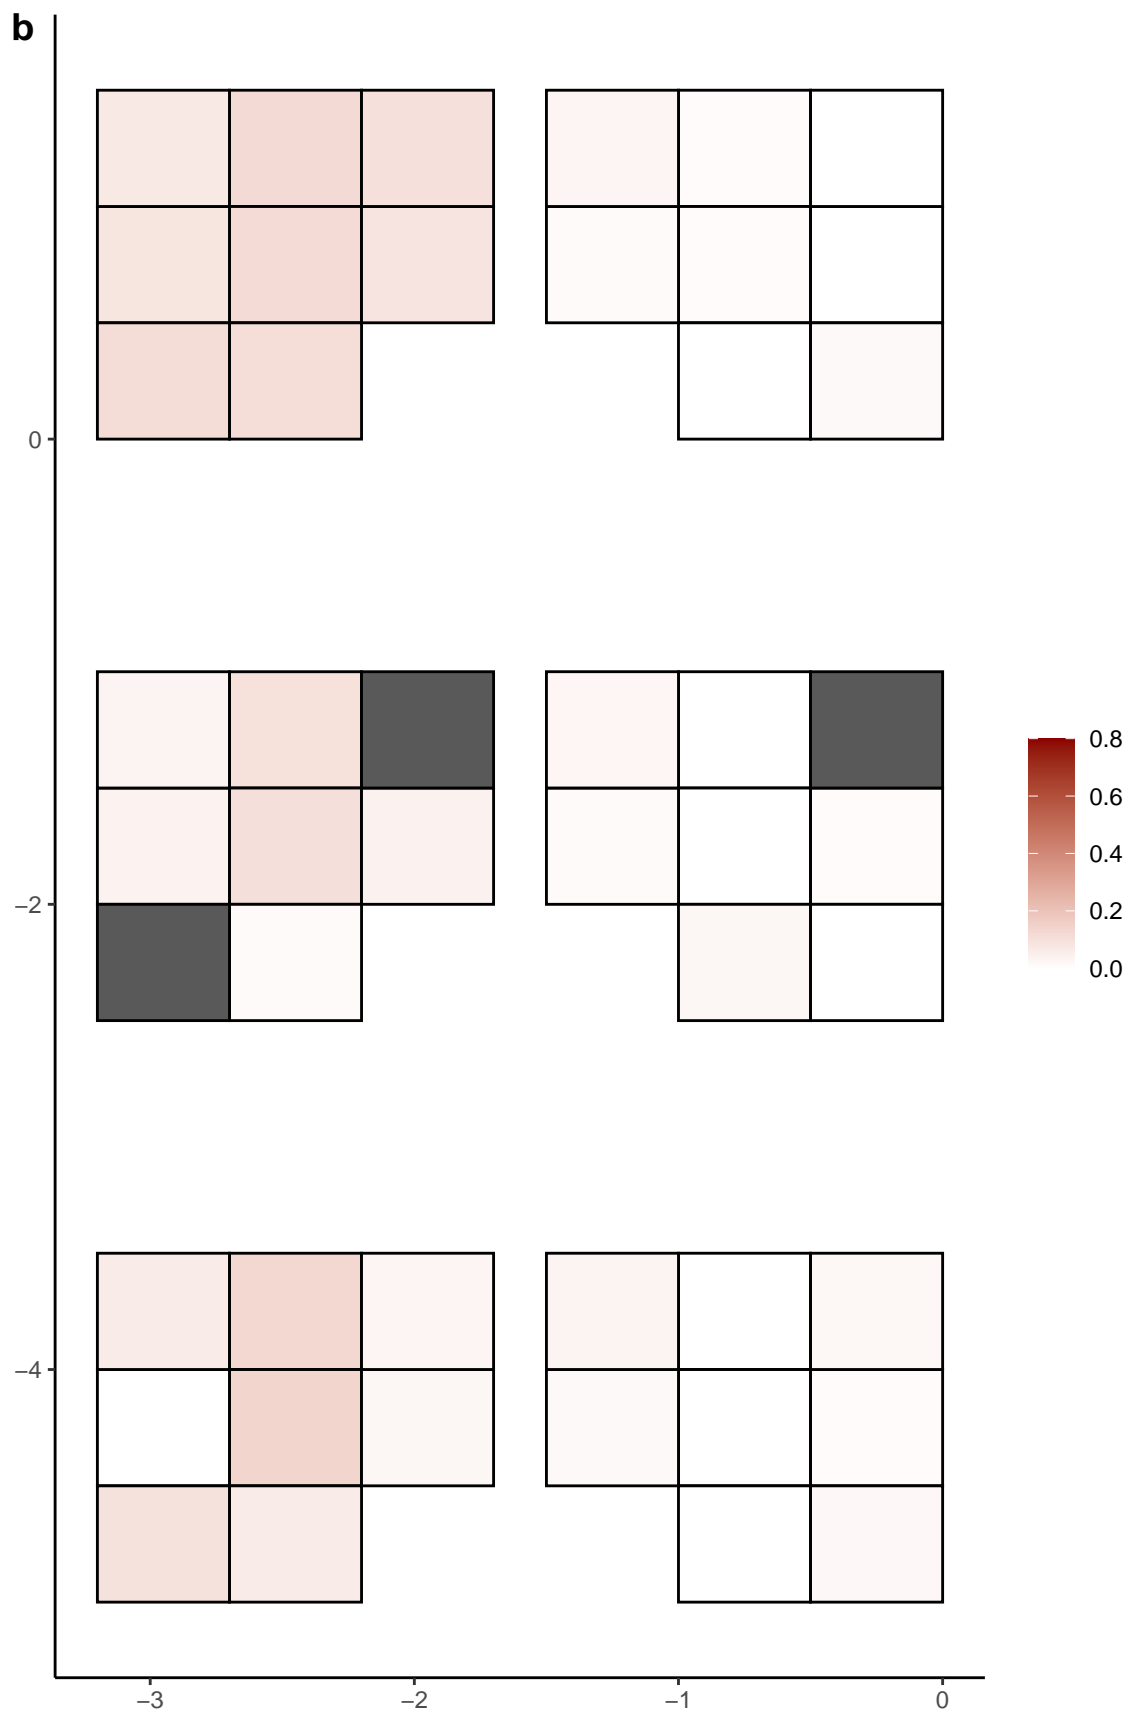



**a** ID05 6-151519709-G-T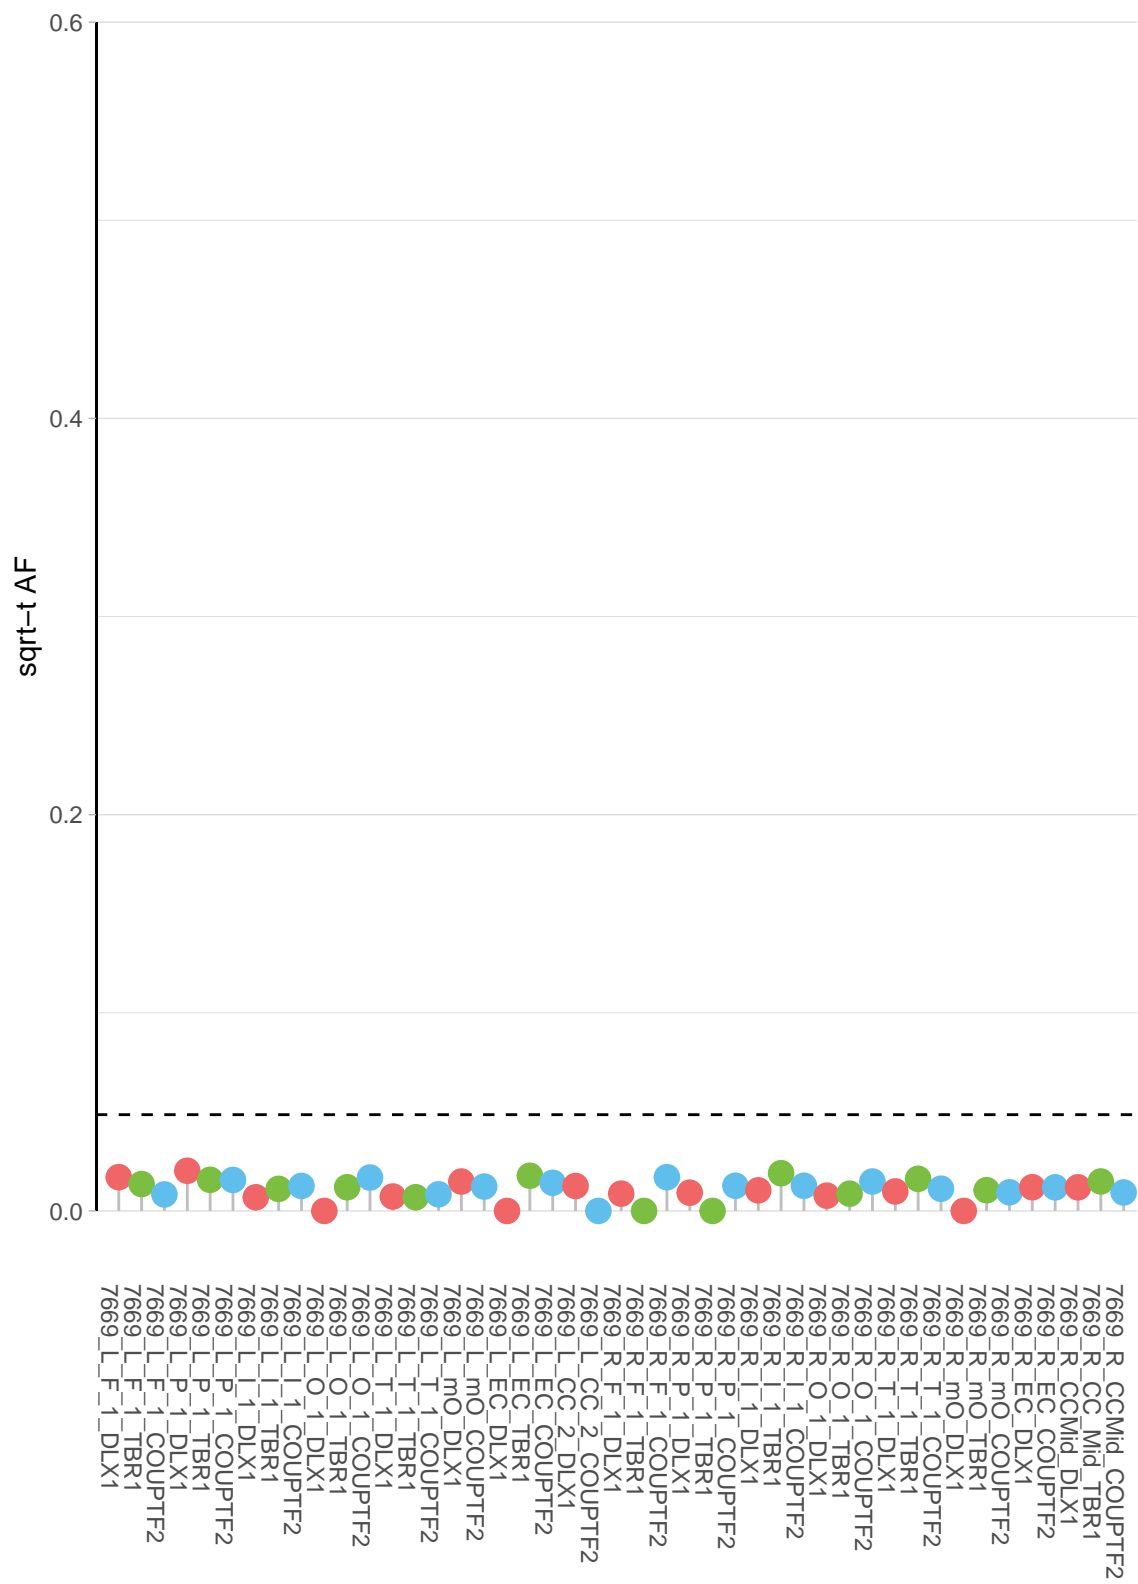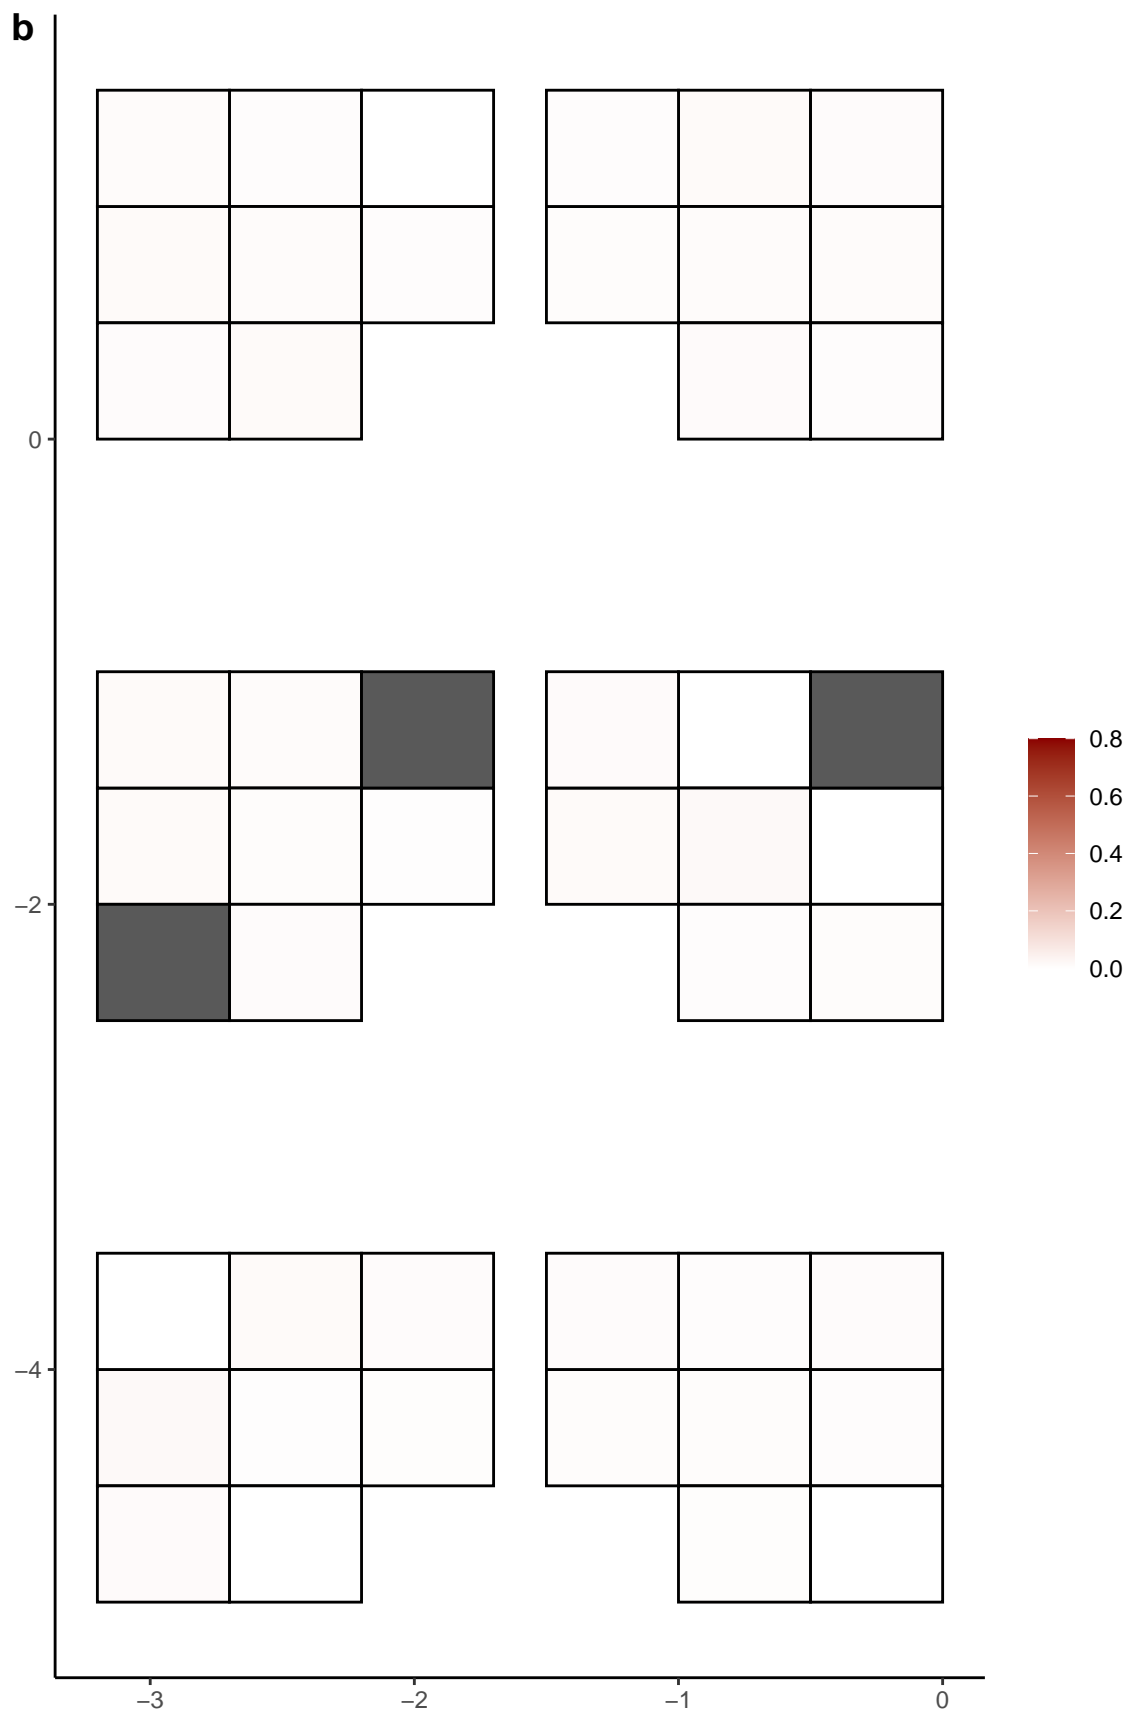

**a** ID05 6-152939173-C-A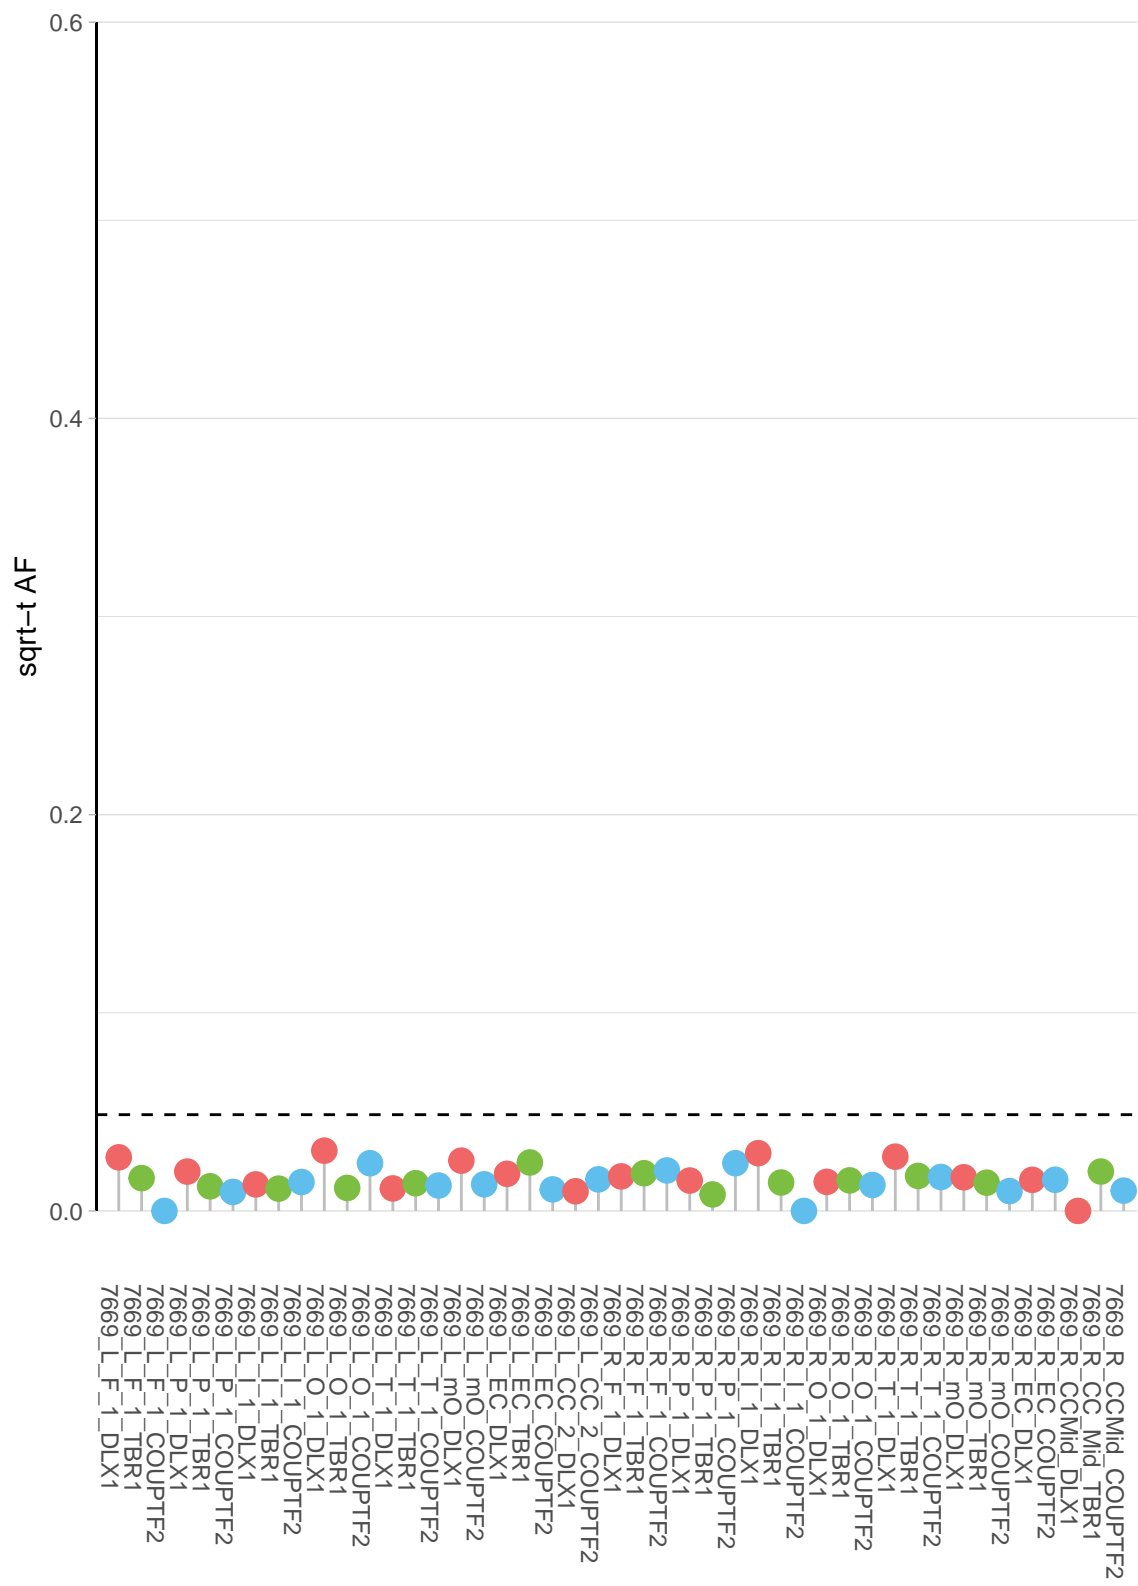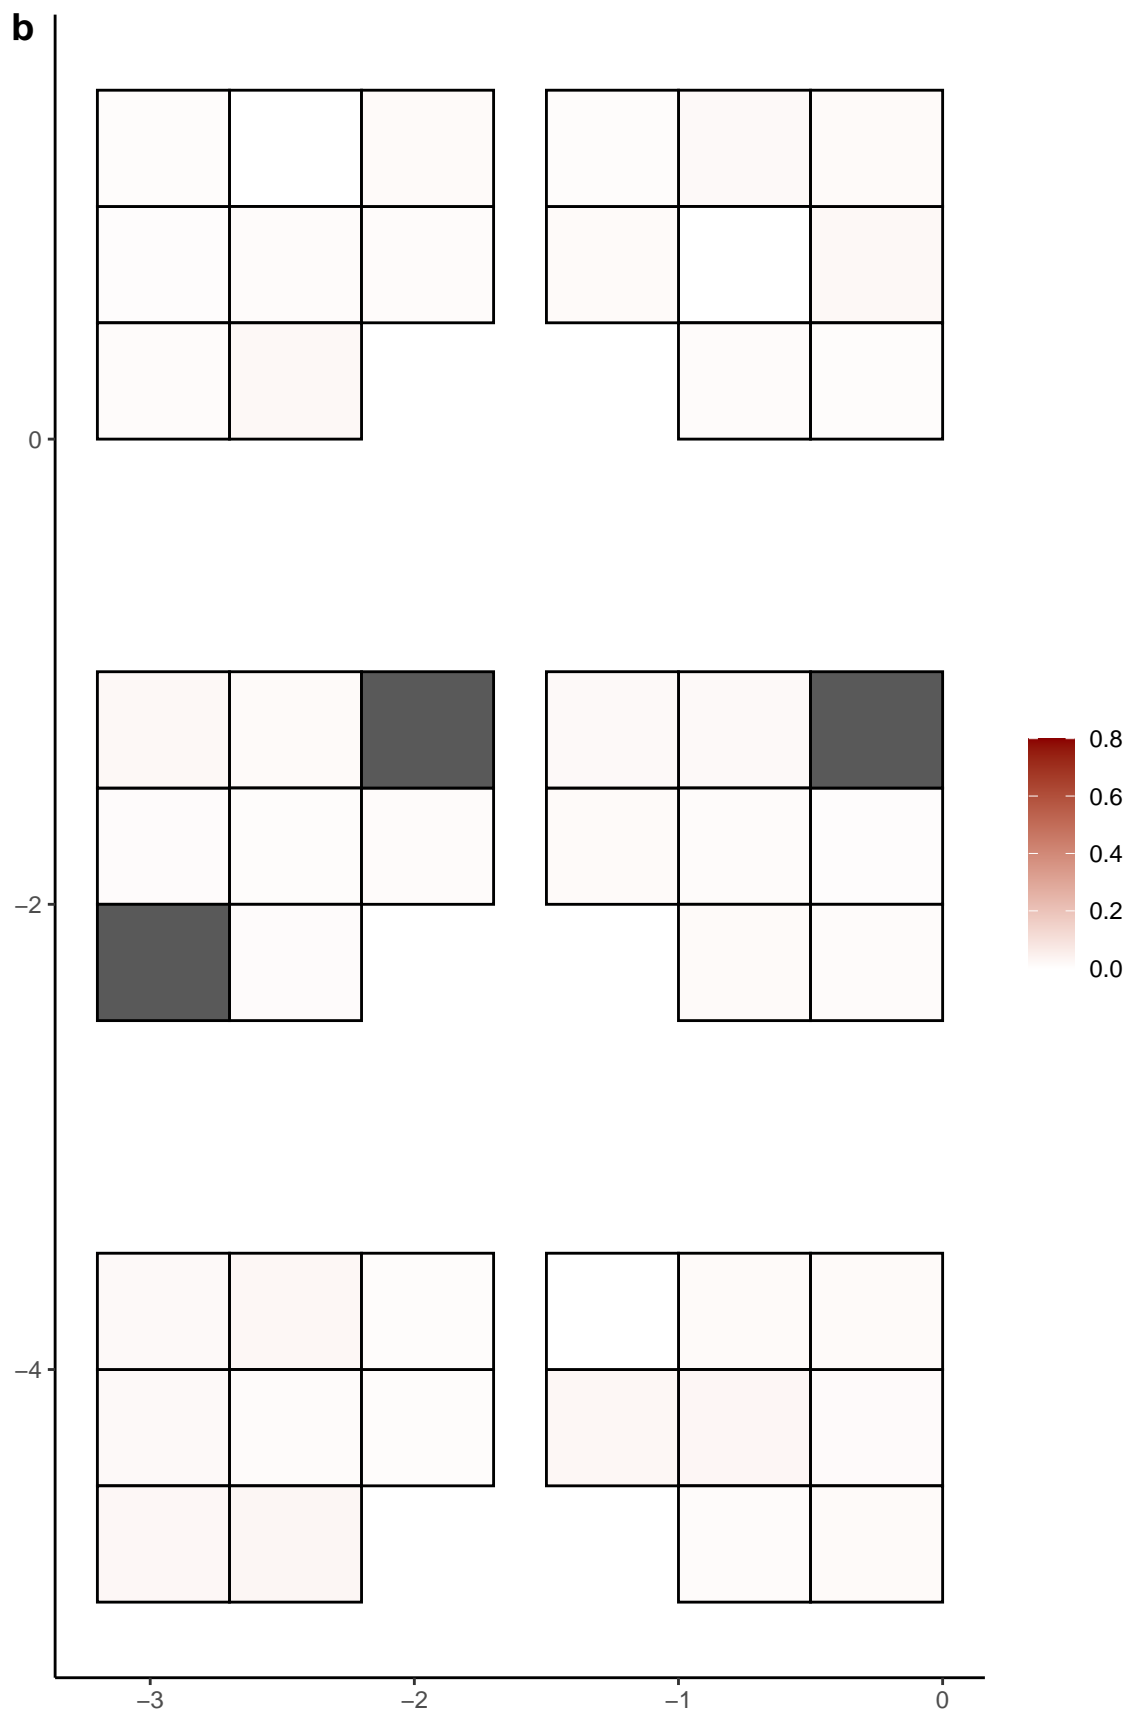

**a** ID05 6-153112948-G-T

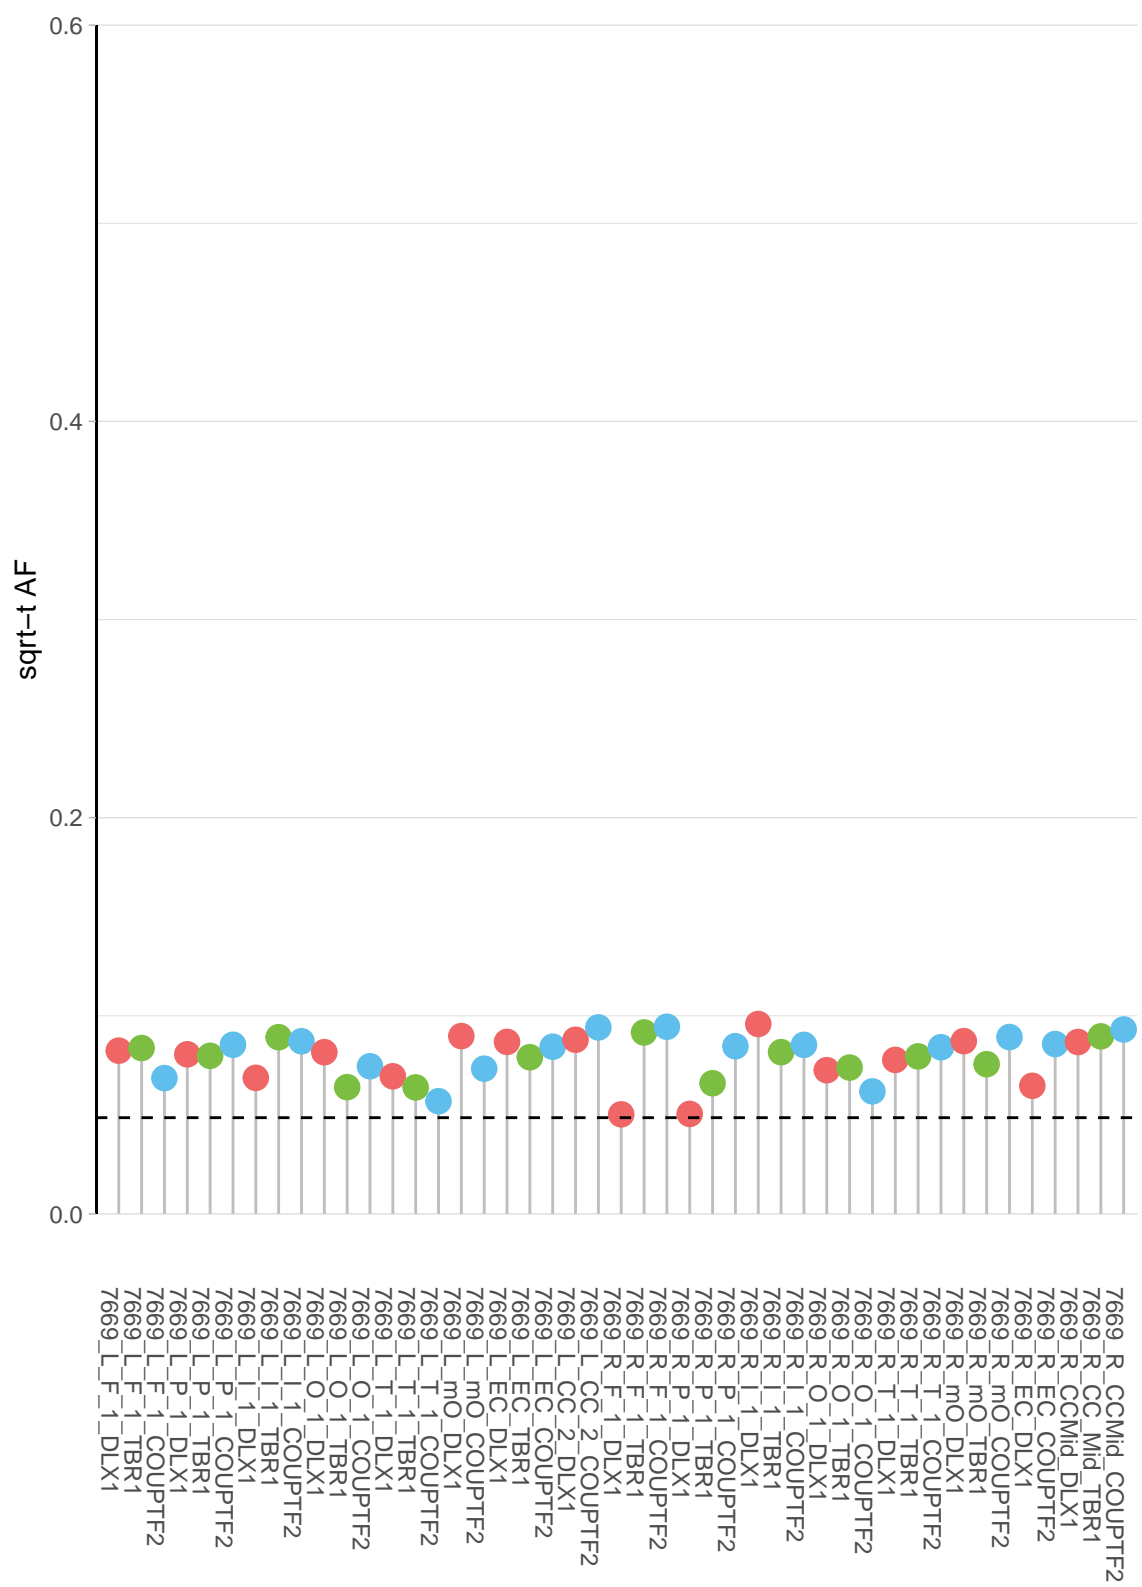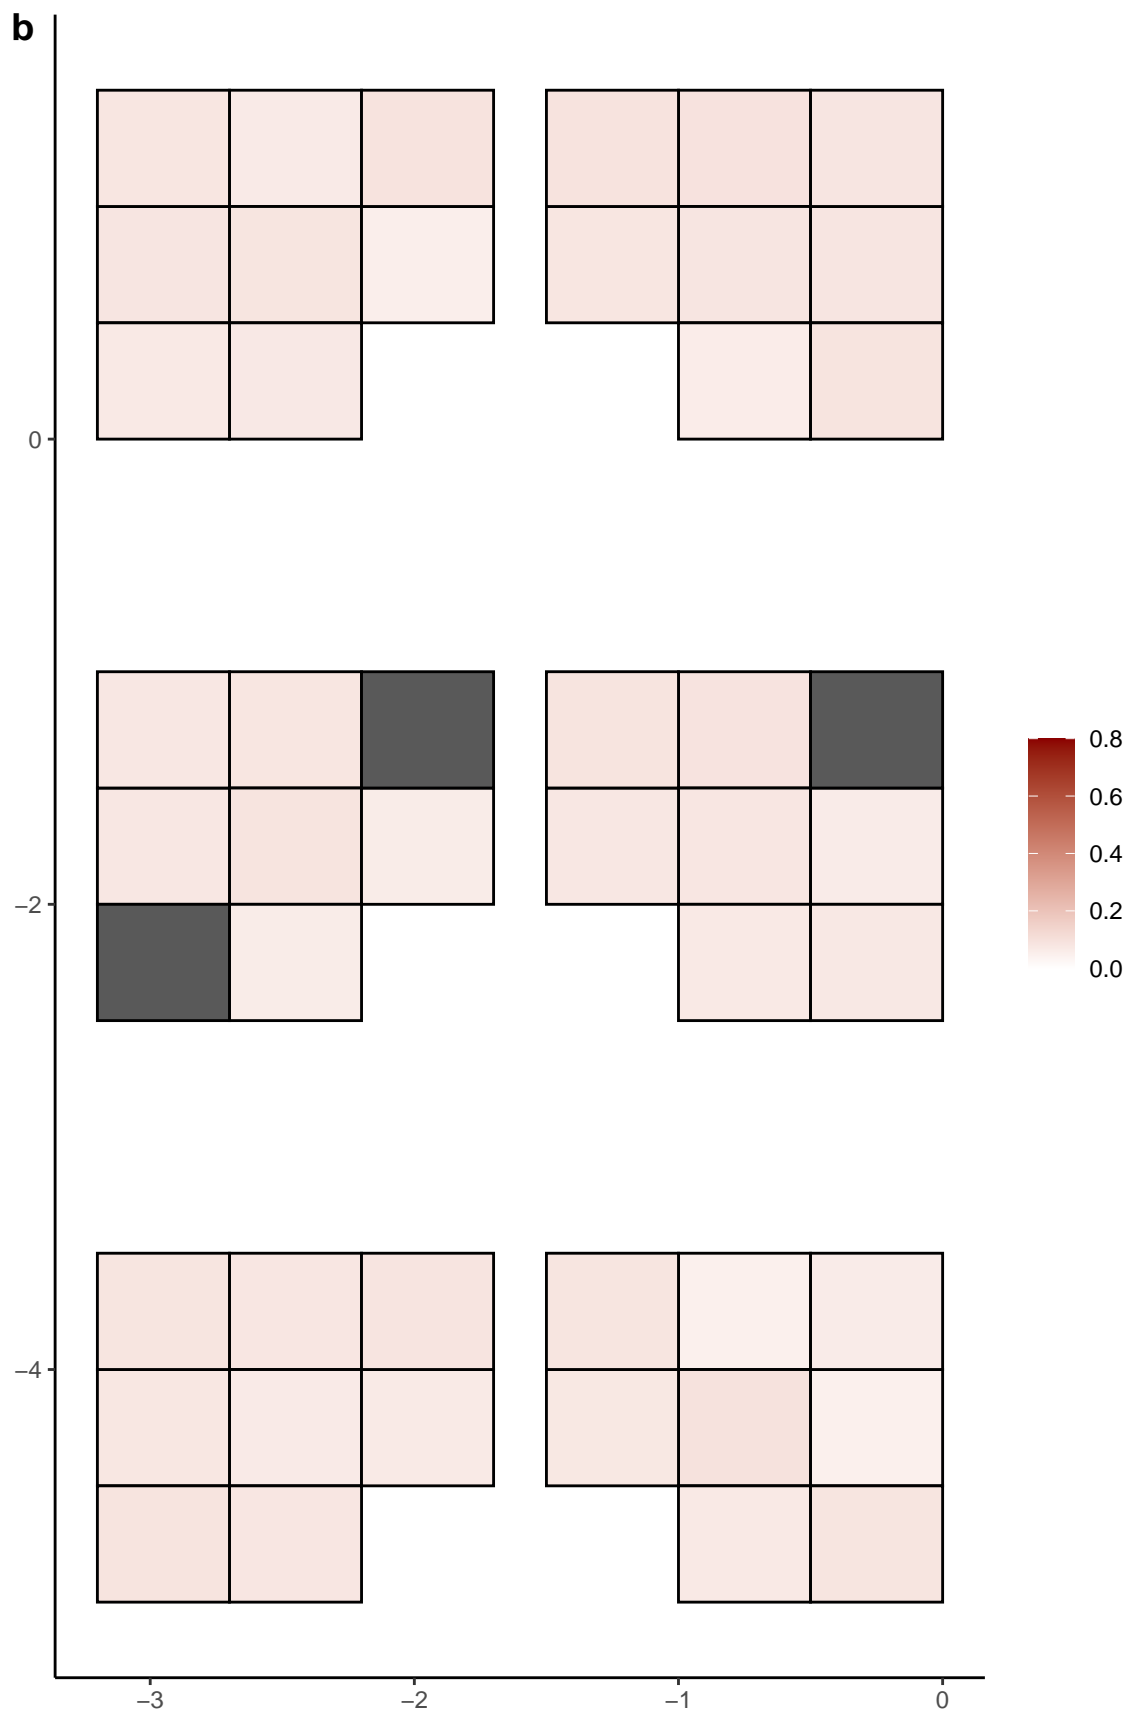

**a** ID05 6-153564460-T-G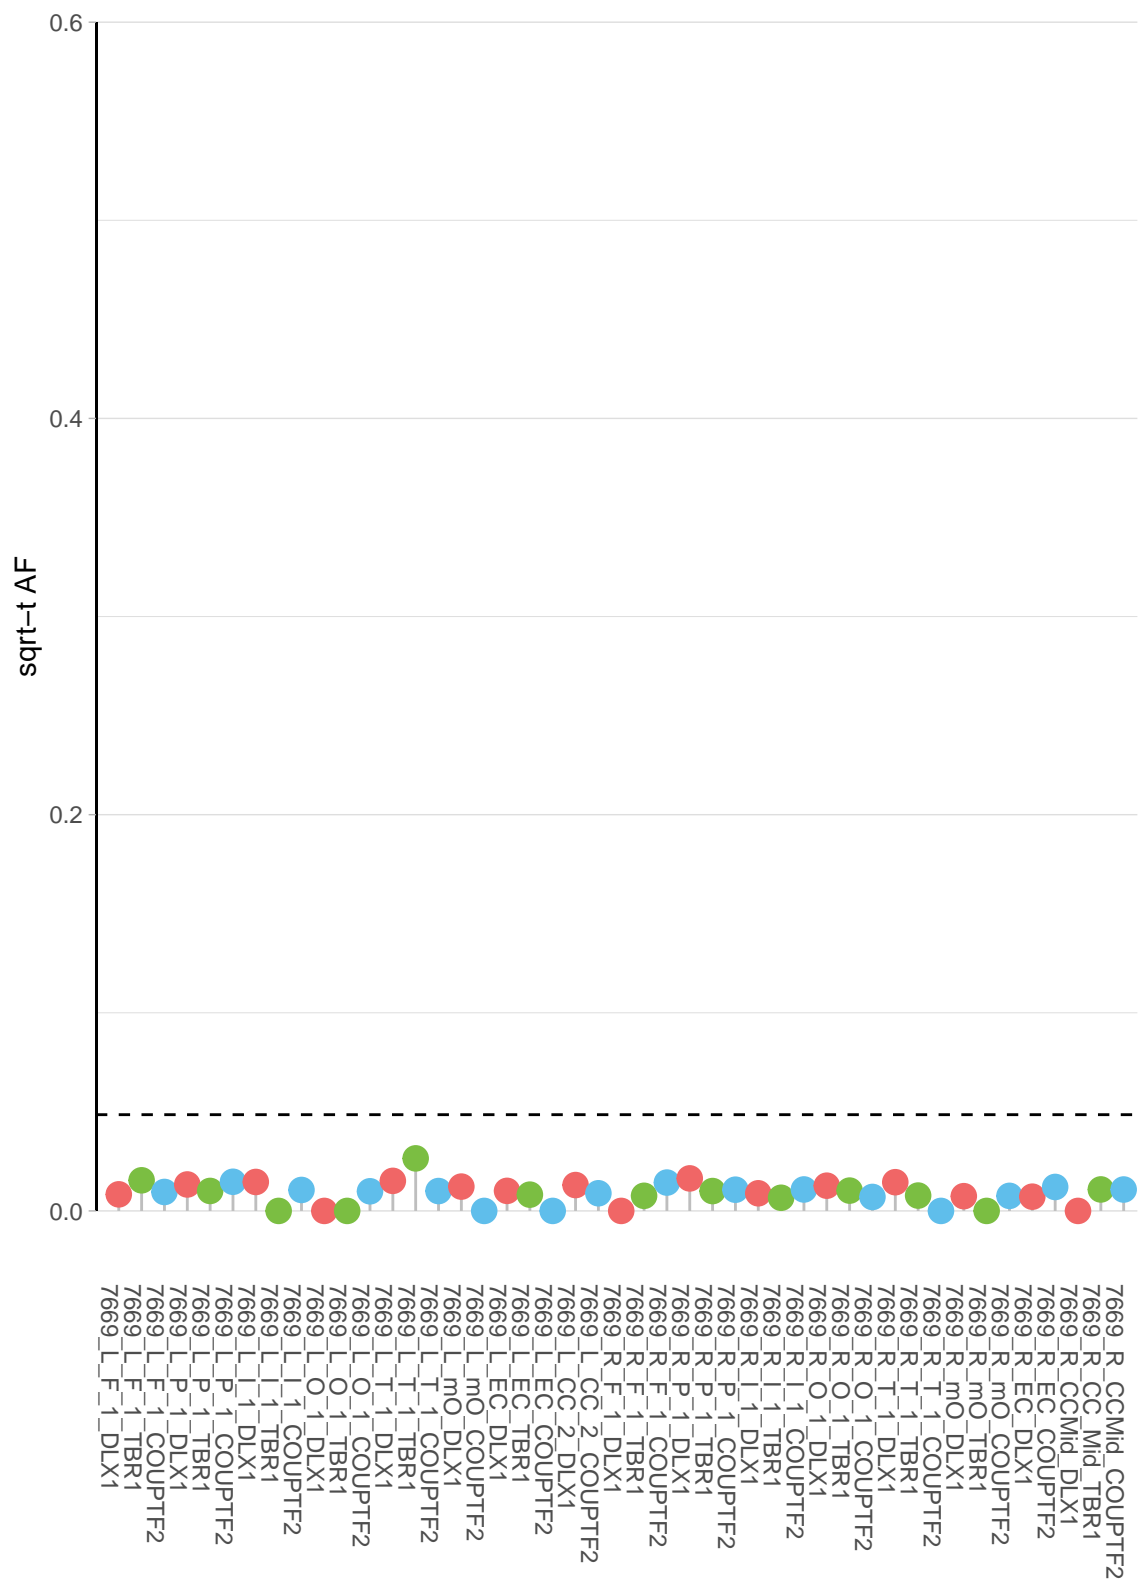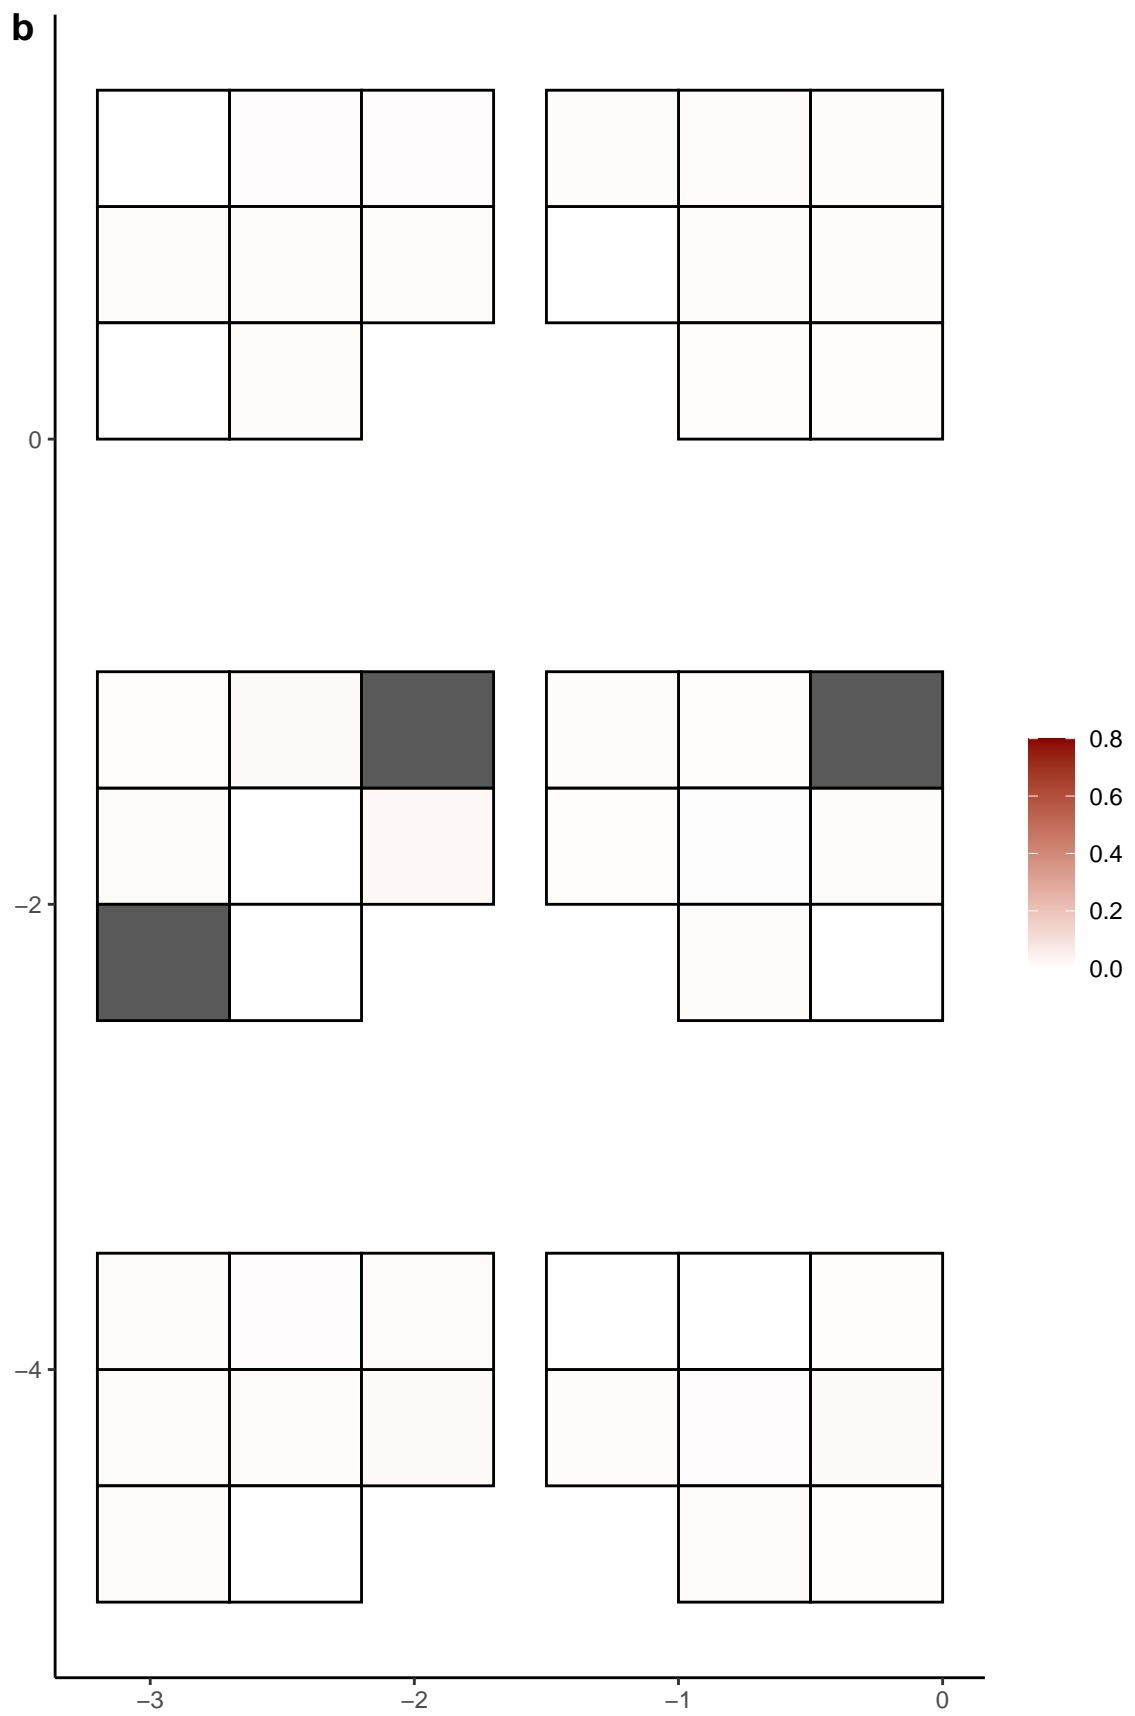





**a** ID05 6-156792200-G-A
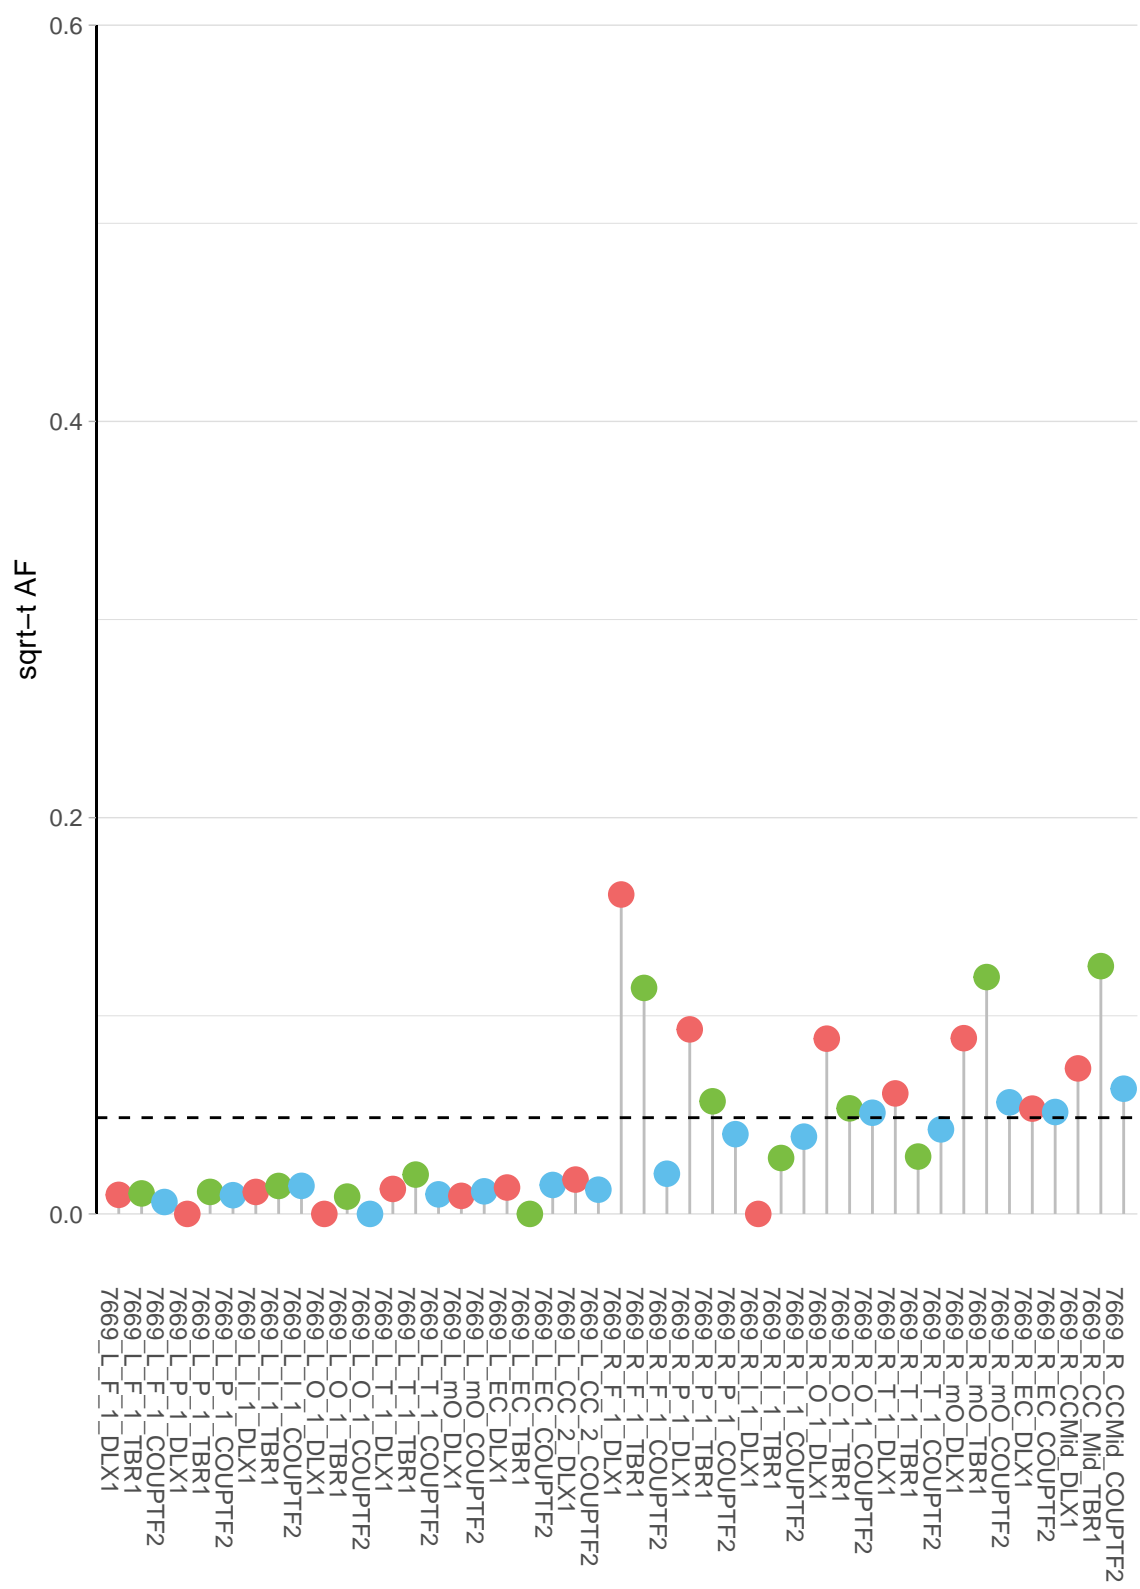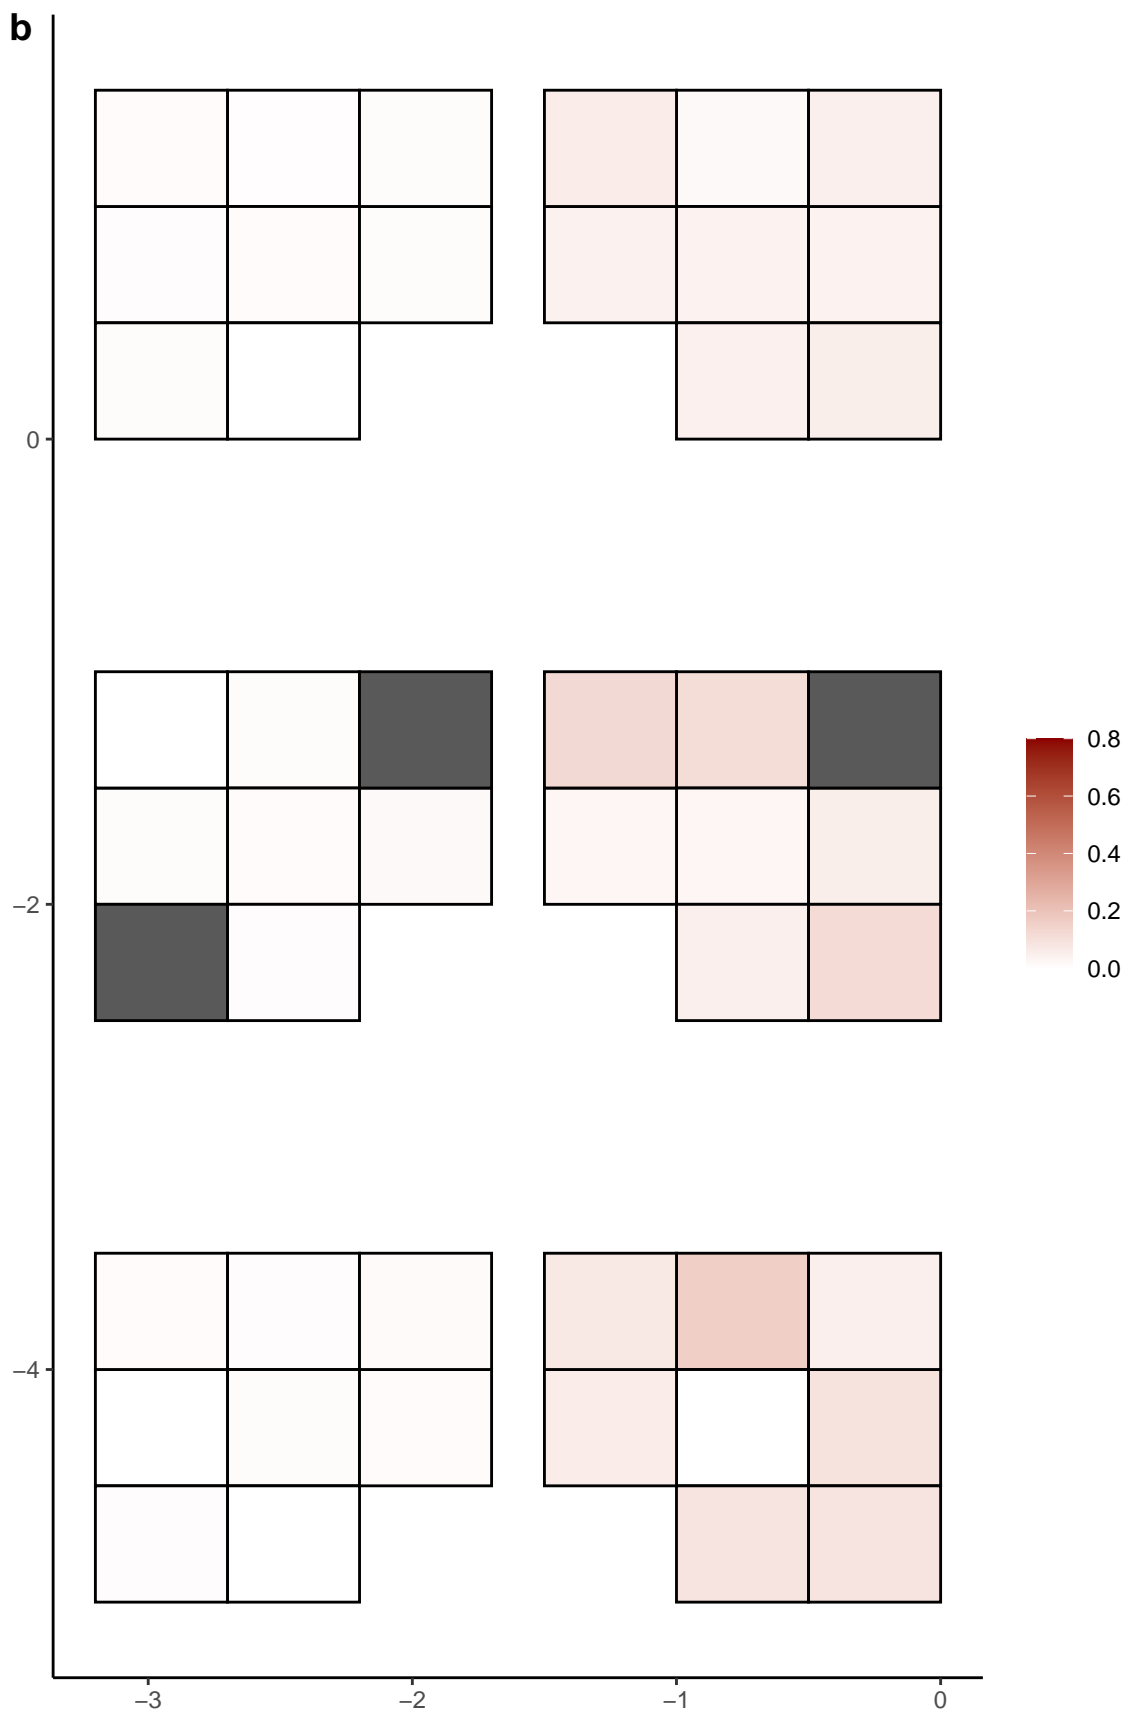





**a** ID05 6-161158616-T-G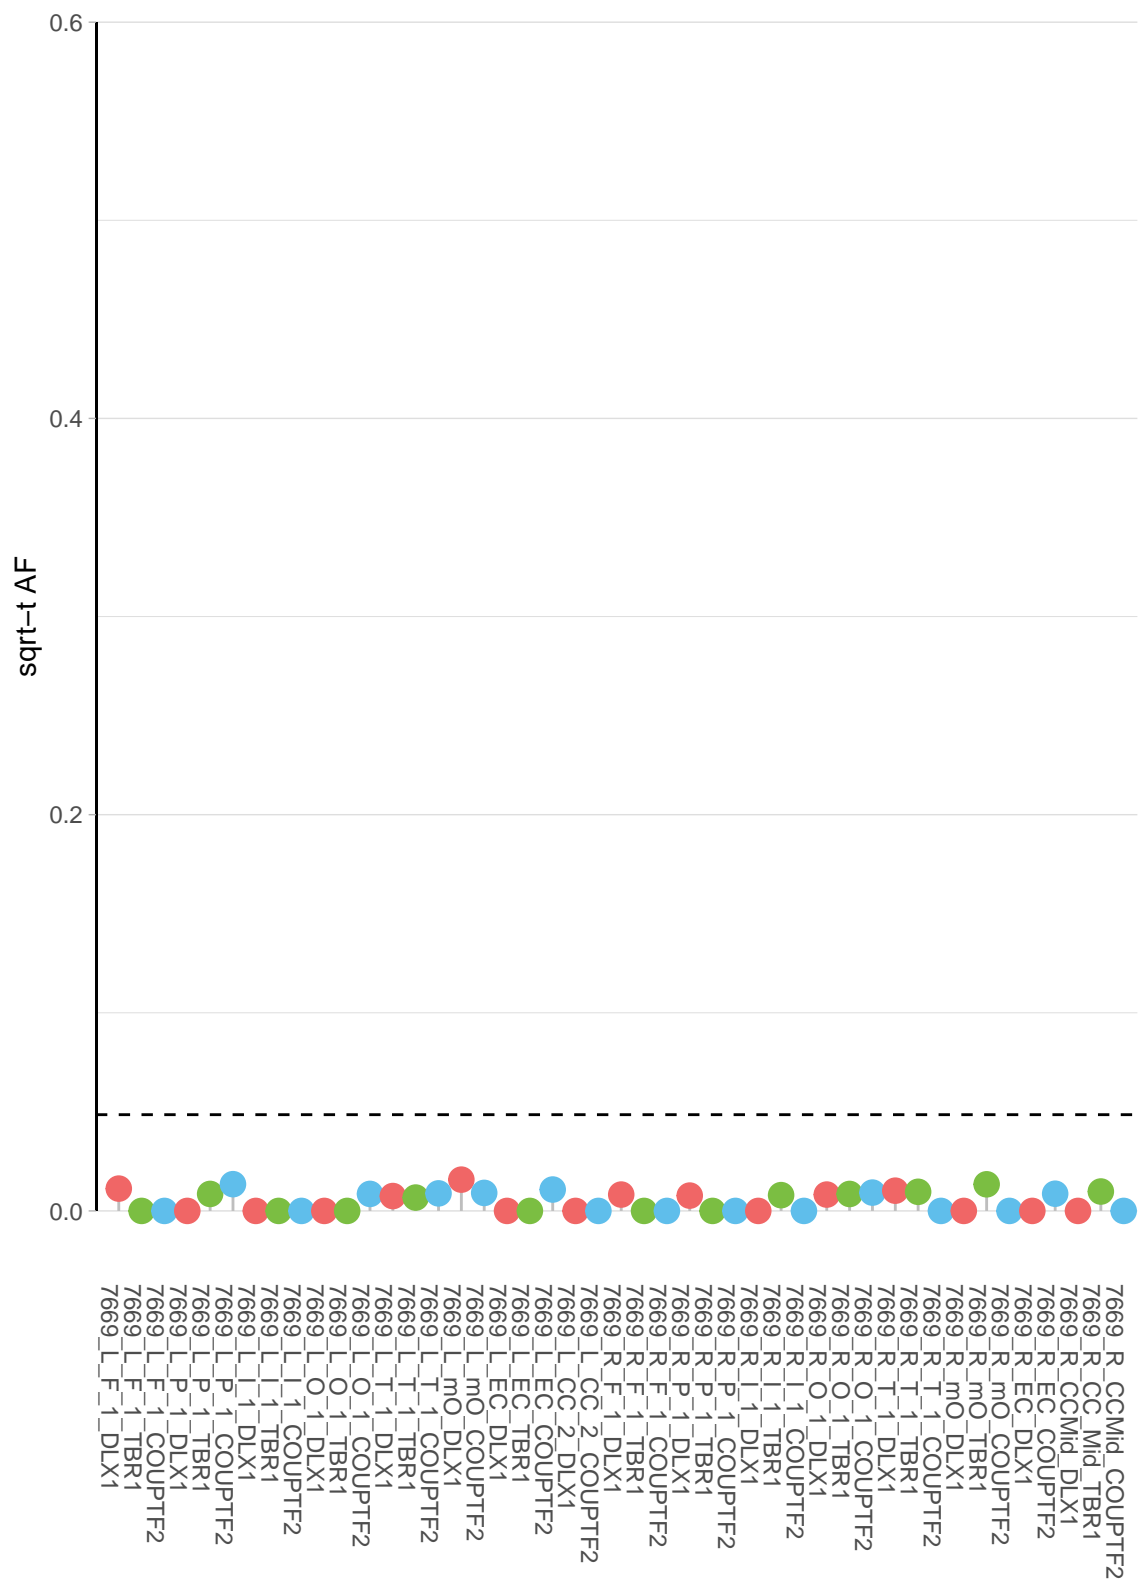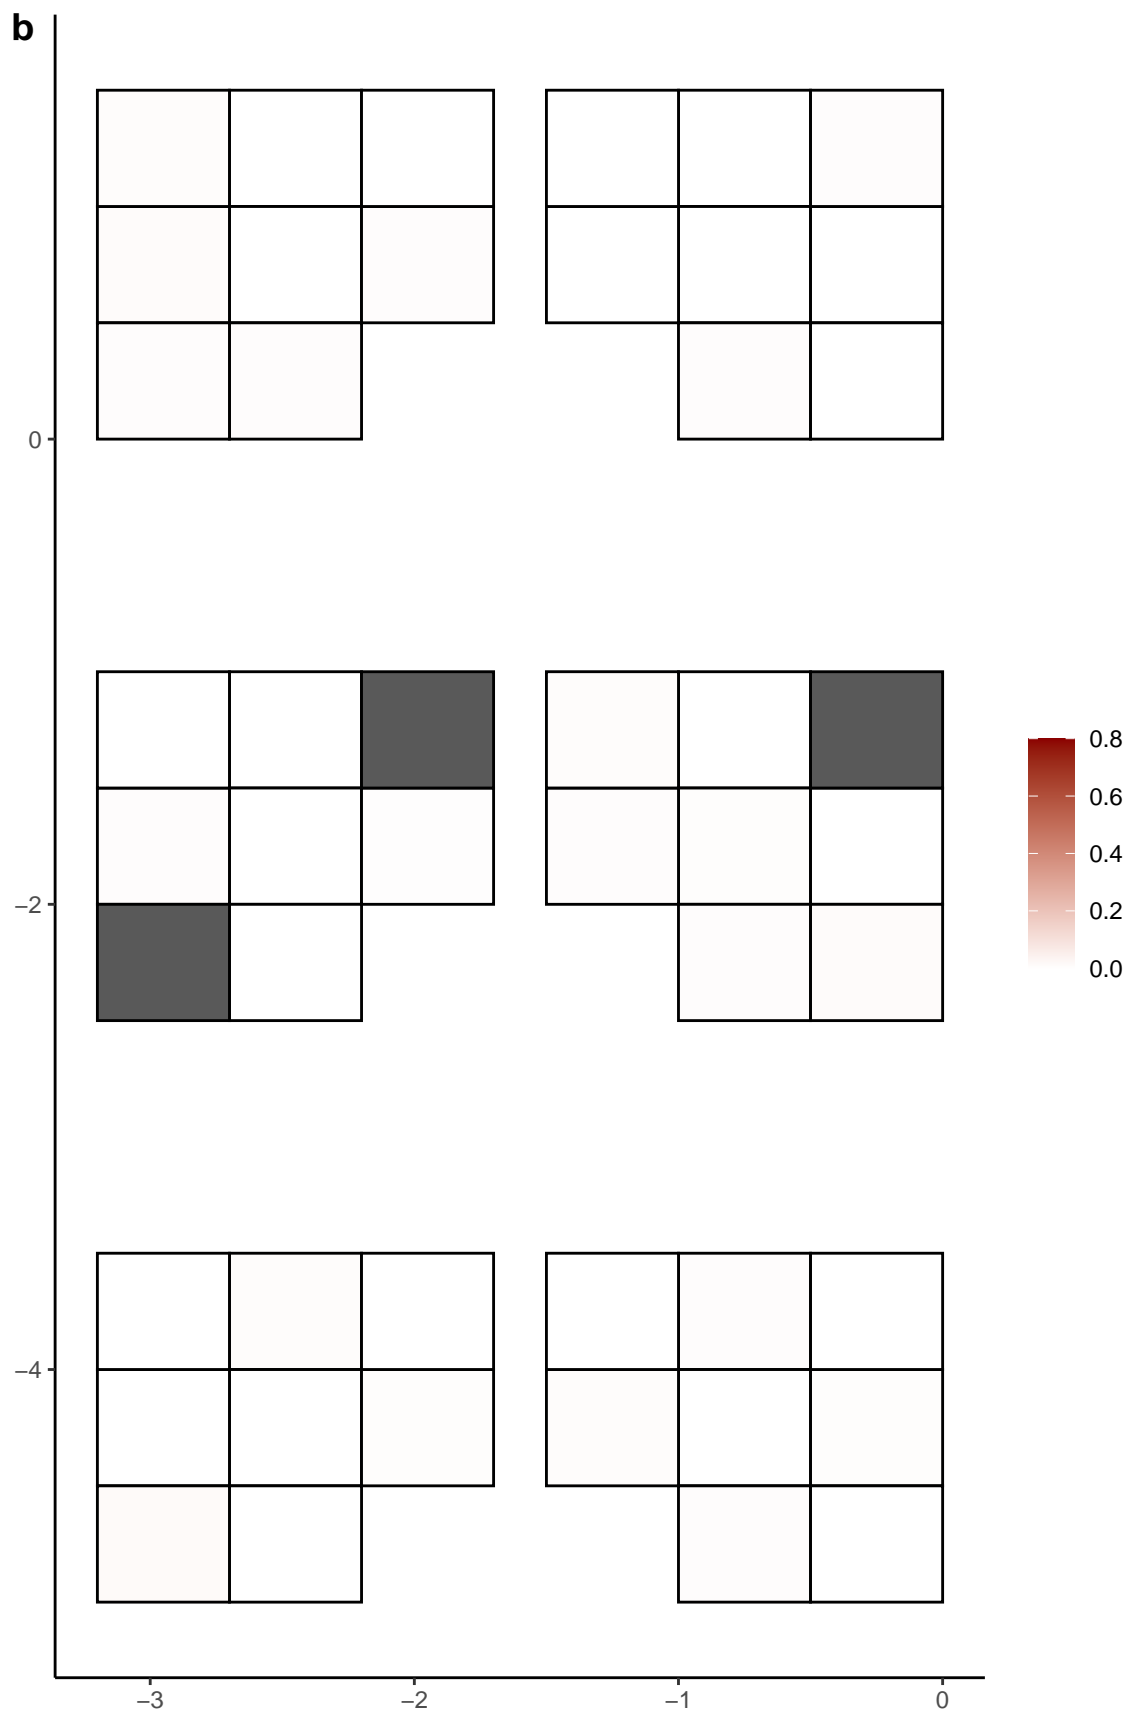

**a** ID05 6-162806617-C-T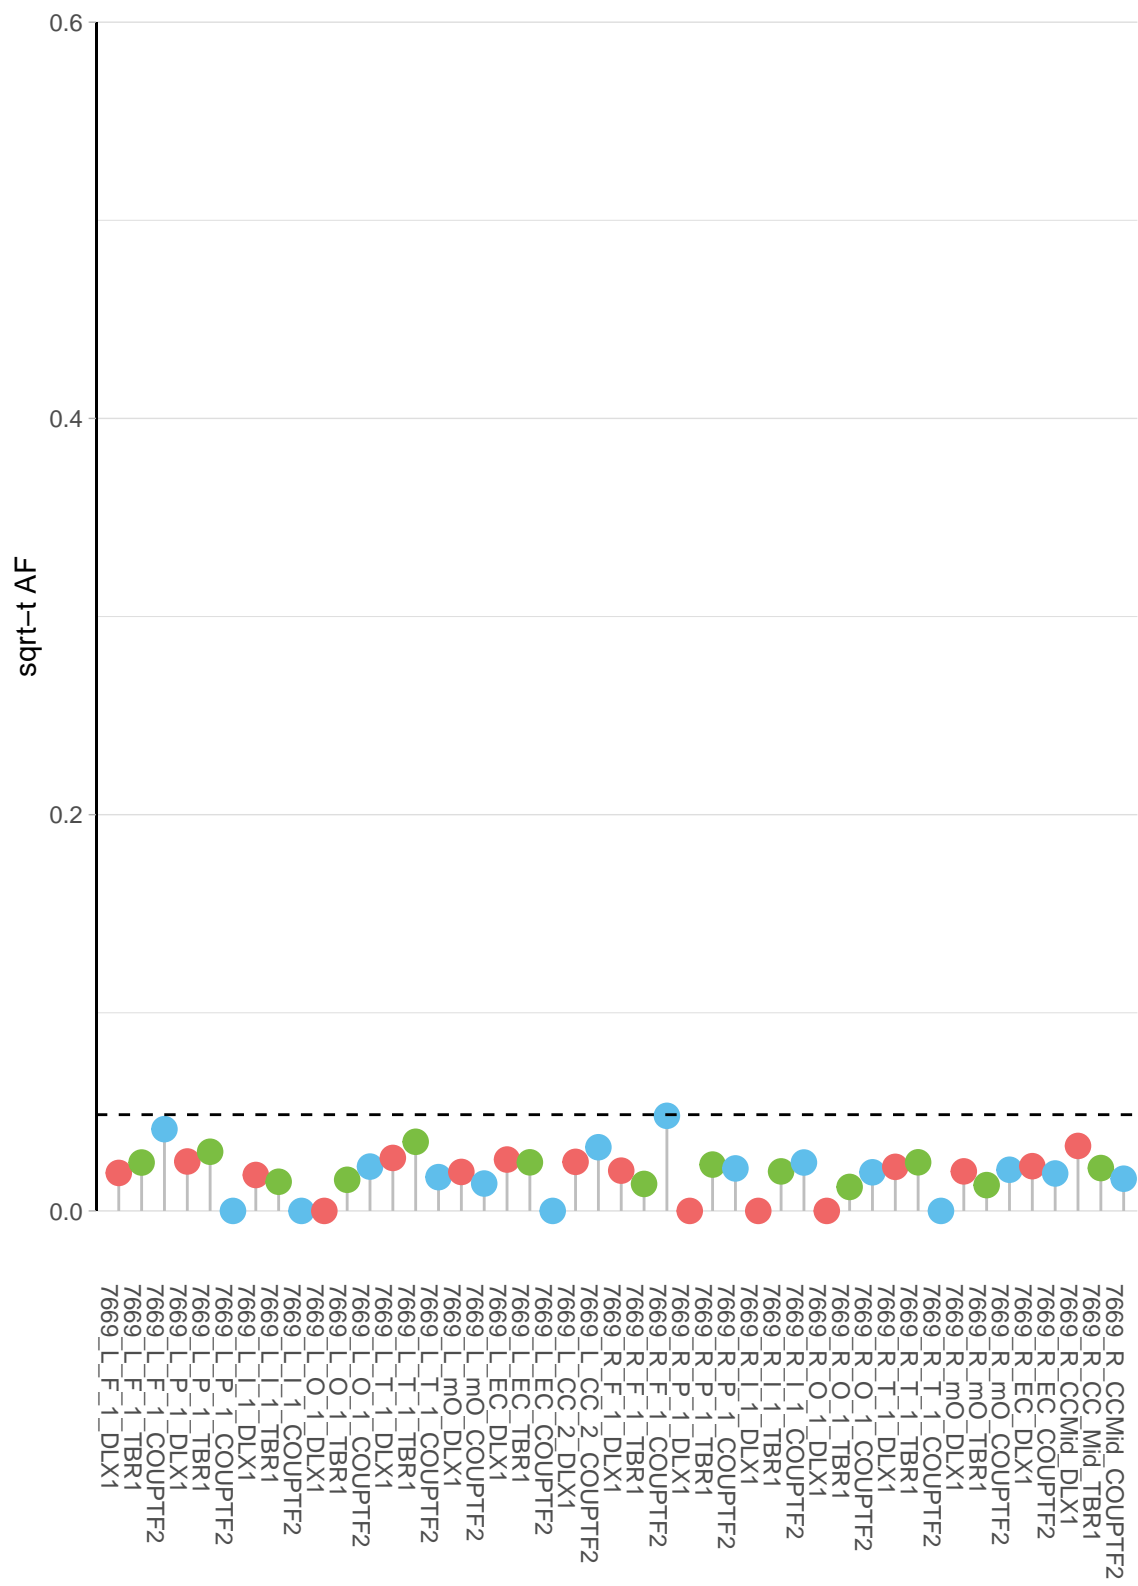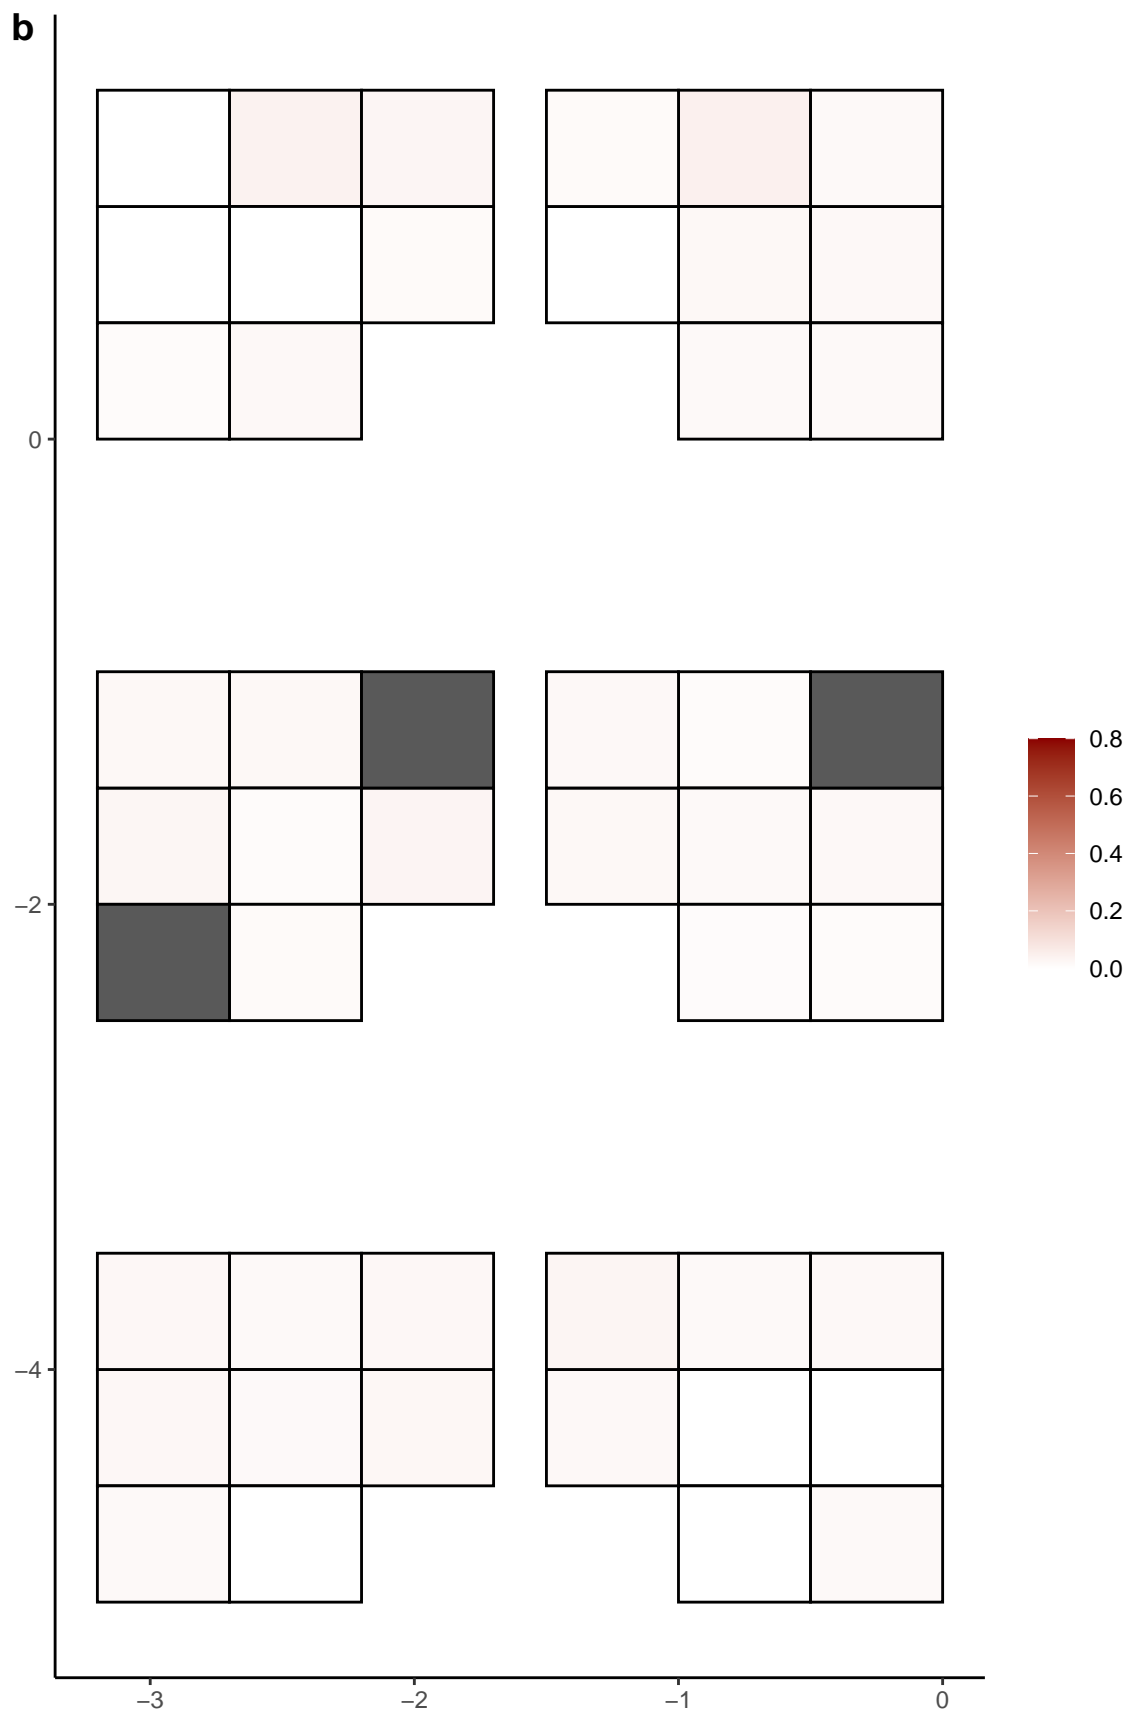

**a** ID05 6-1661827-C-T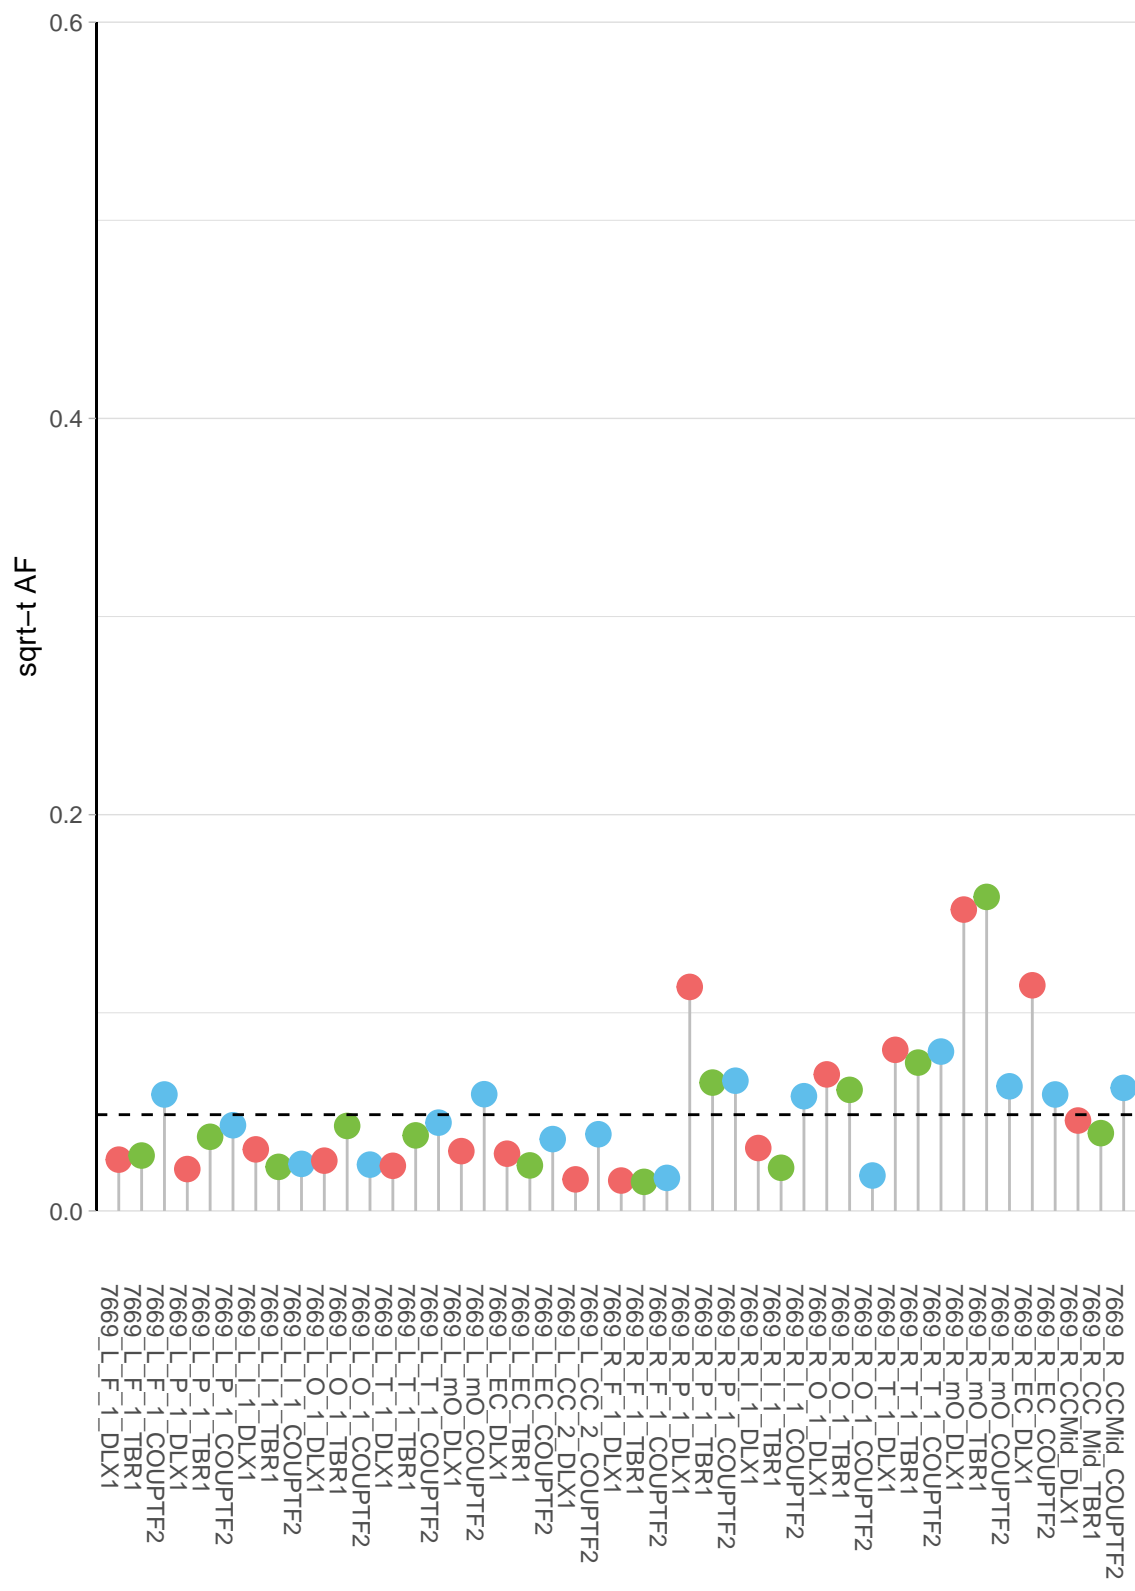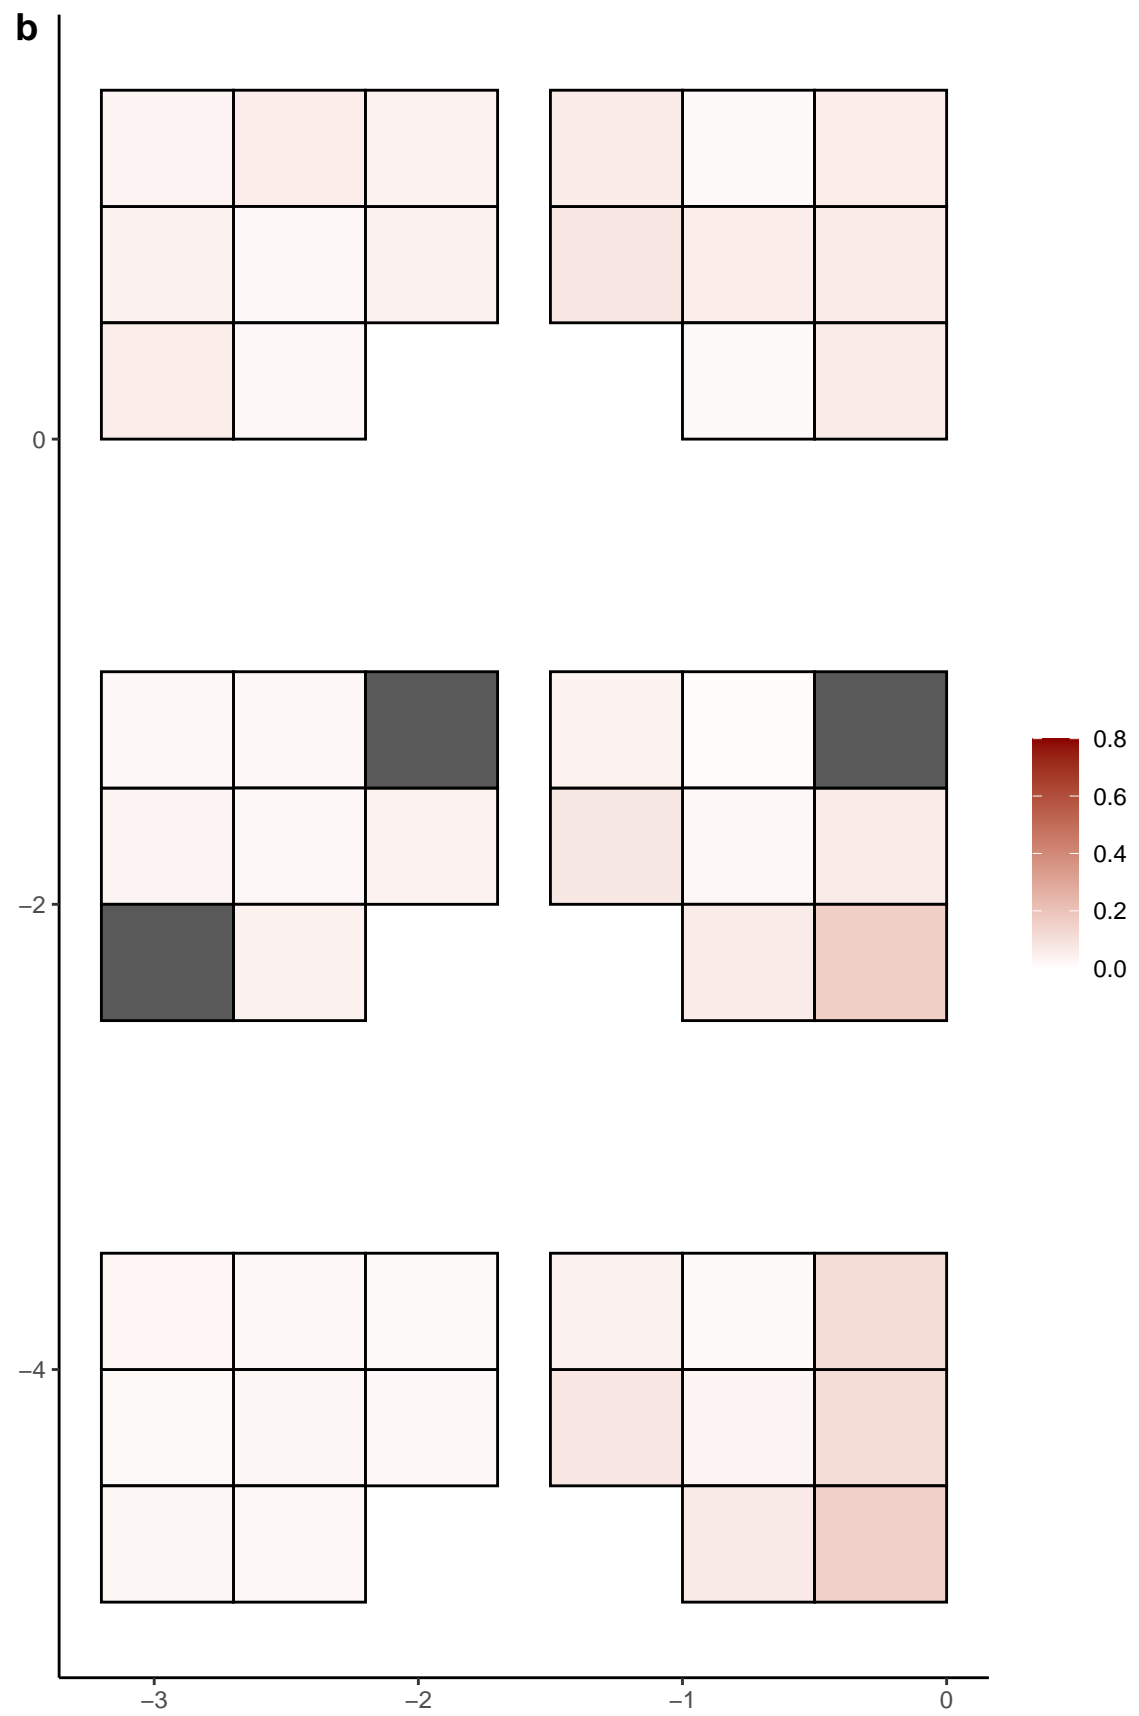

**a** ID05 6-166482454-T-C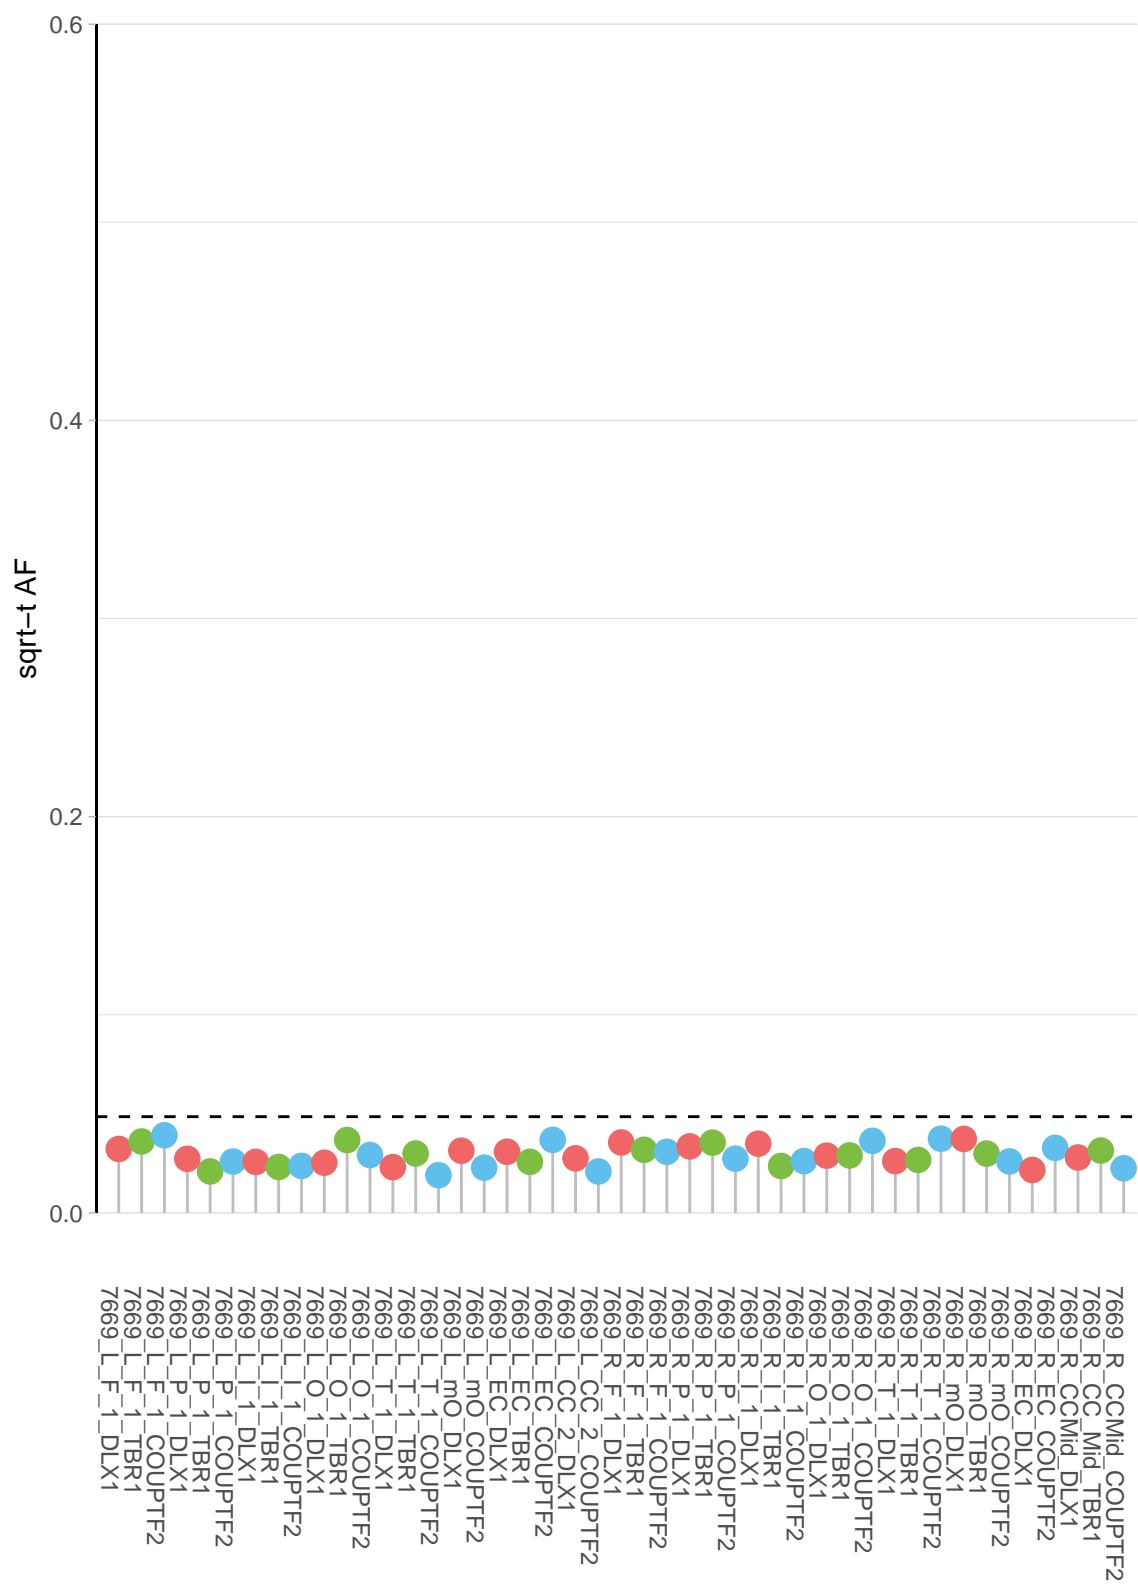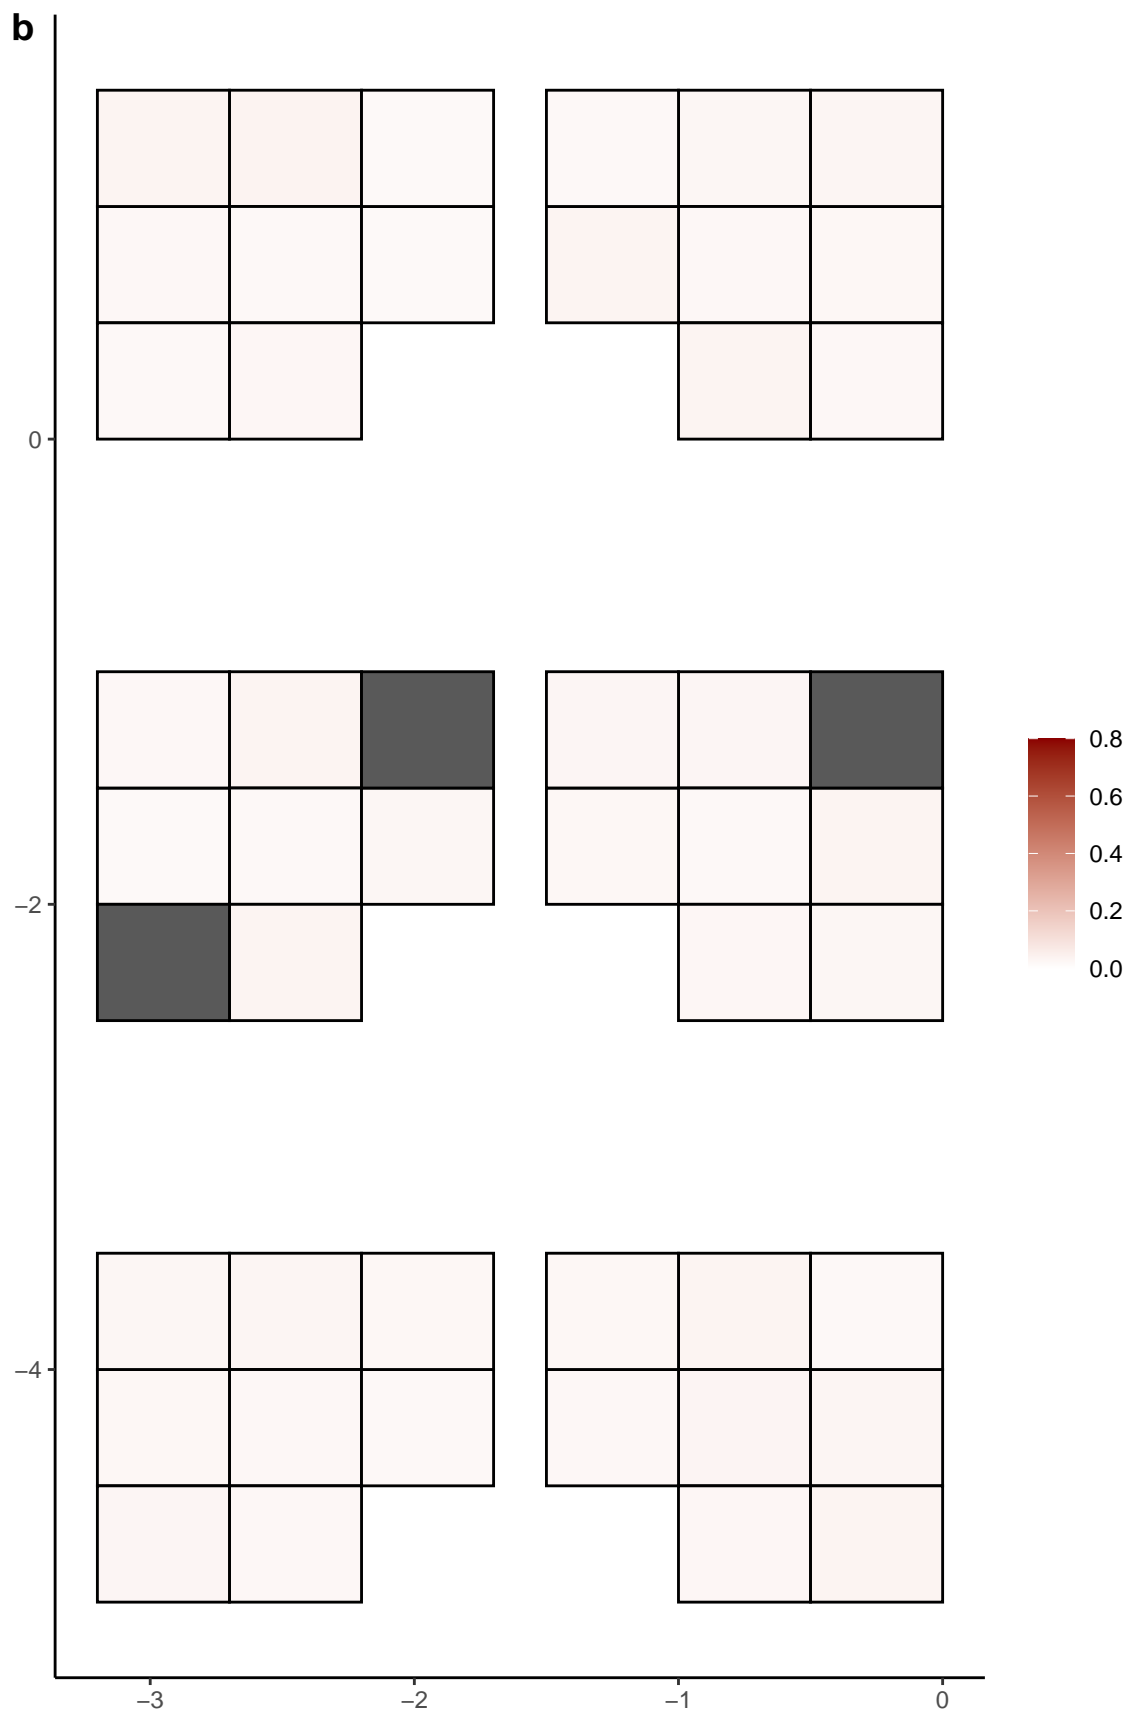

**a** ID05 6-169577791-G-A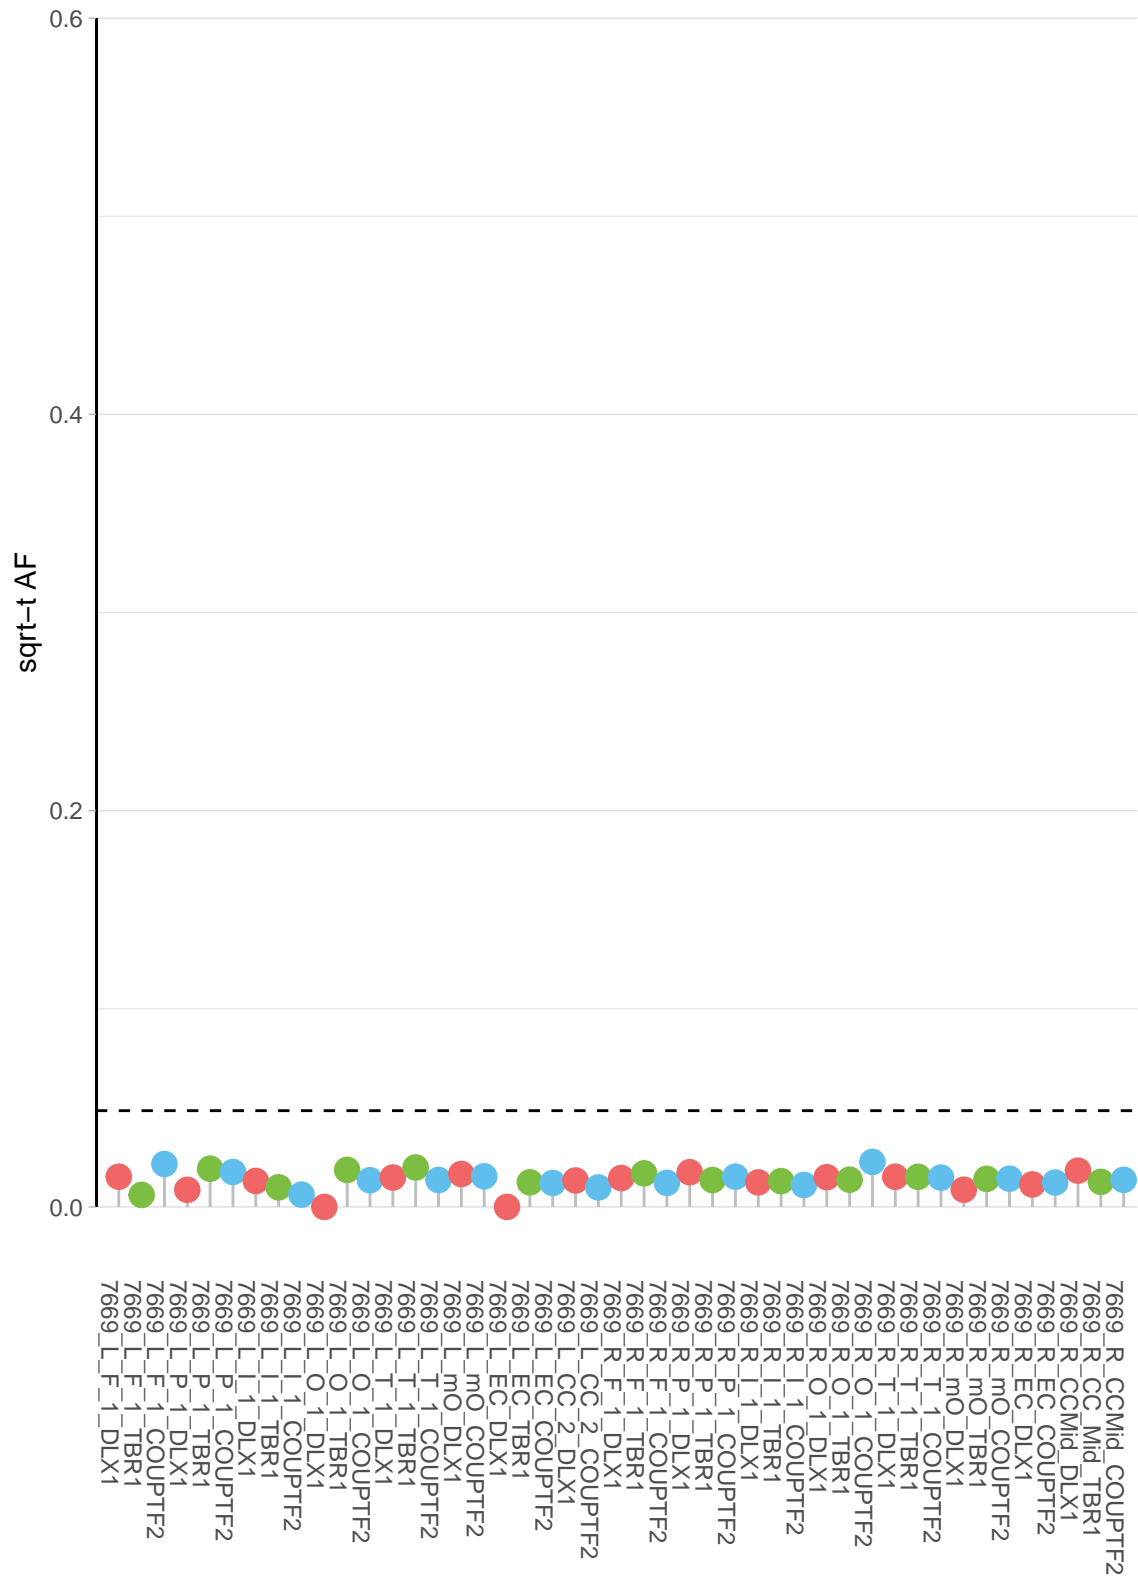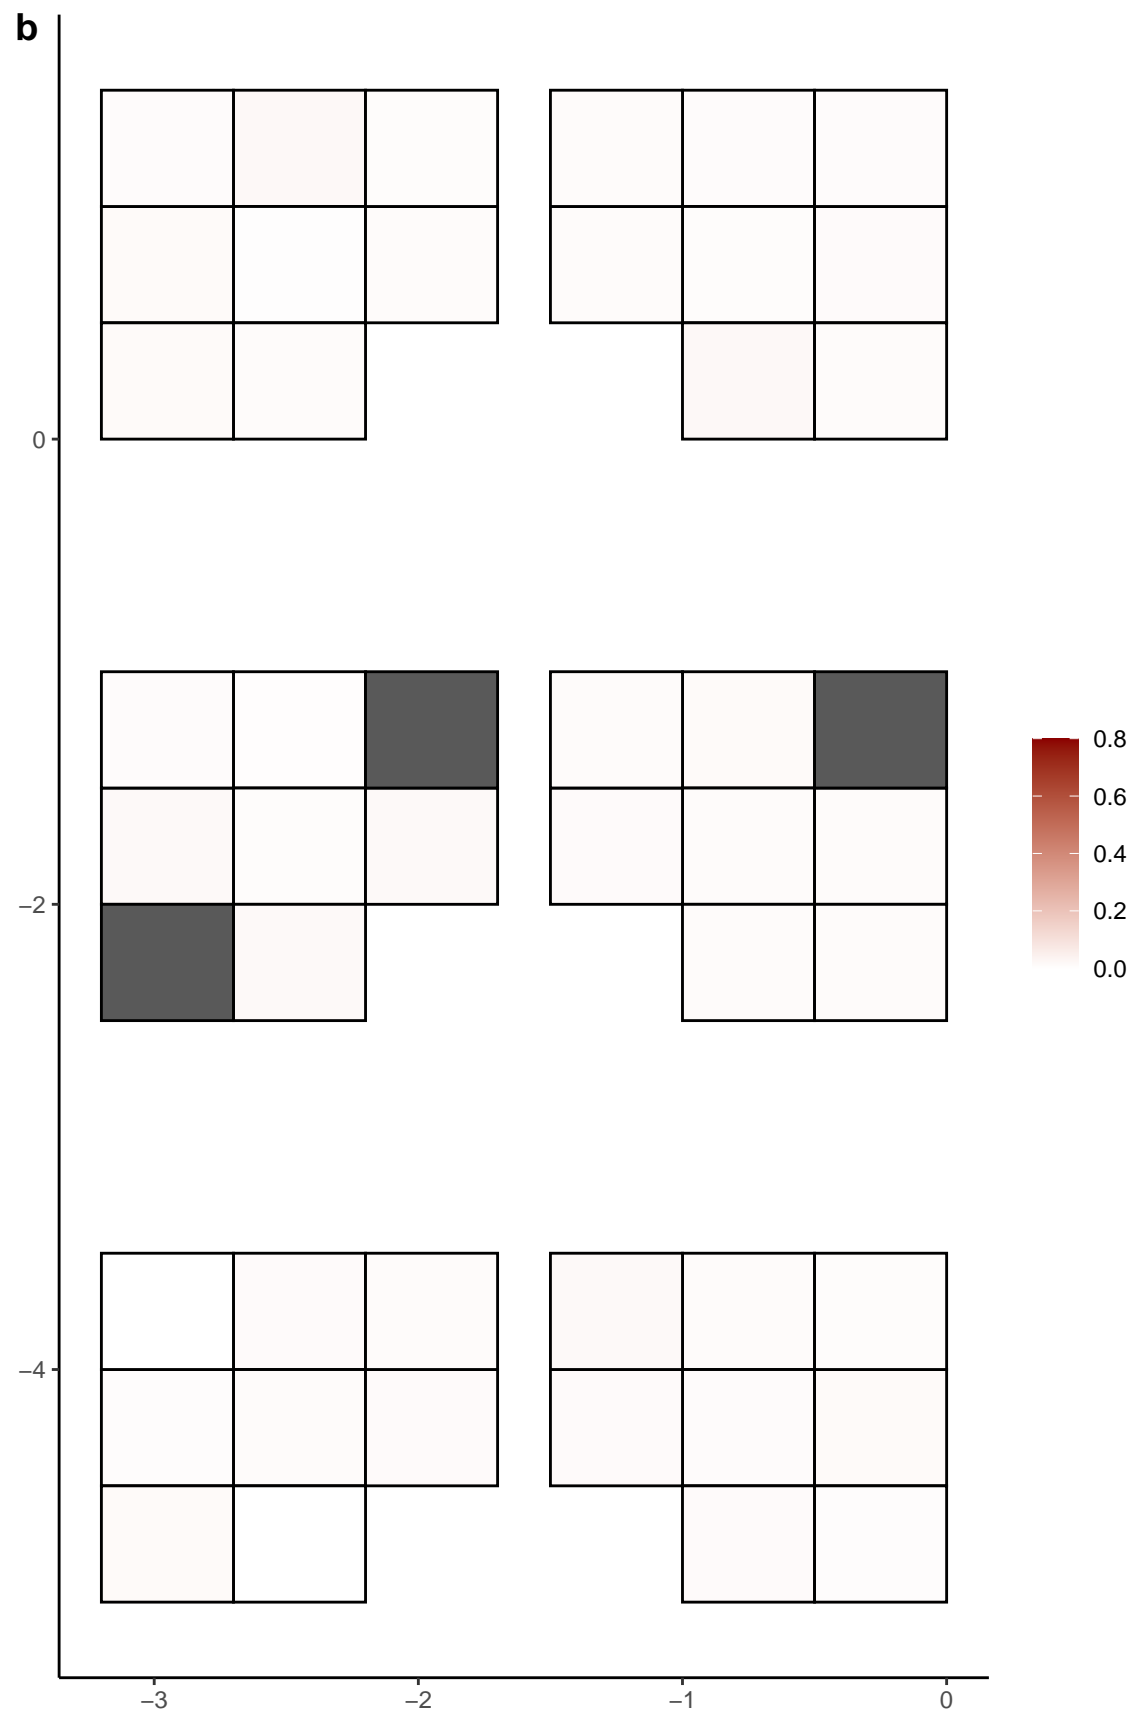

**a** ID05 6-18819400-C-T

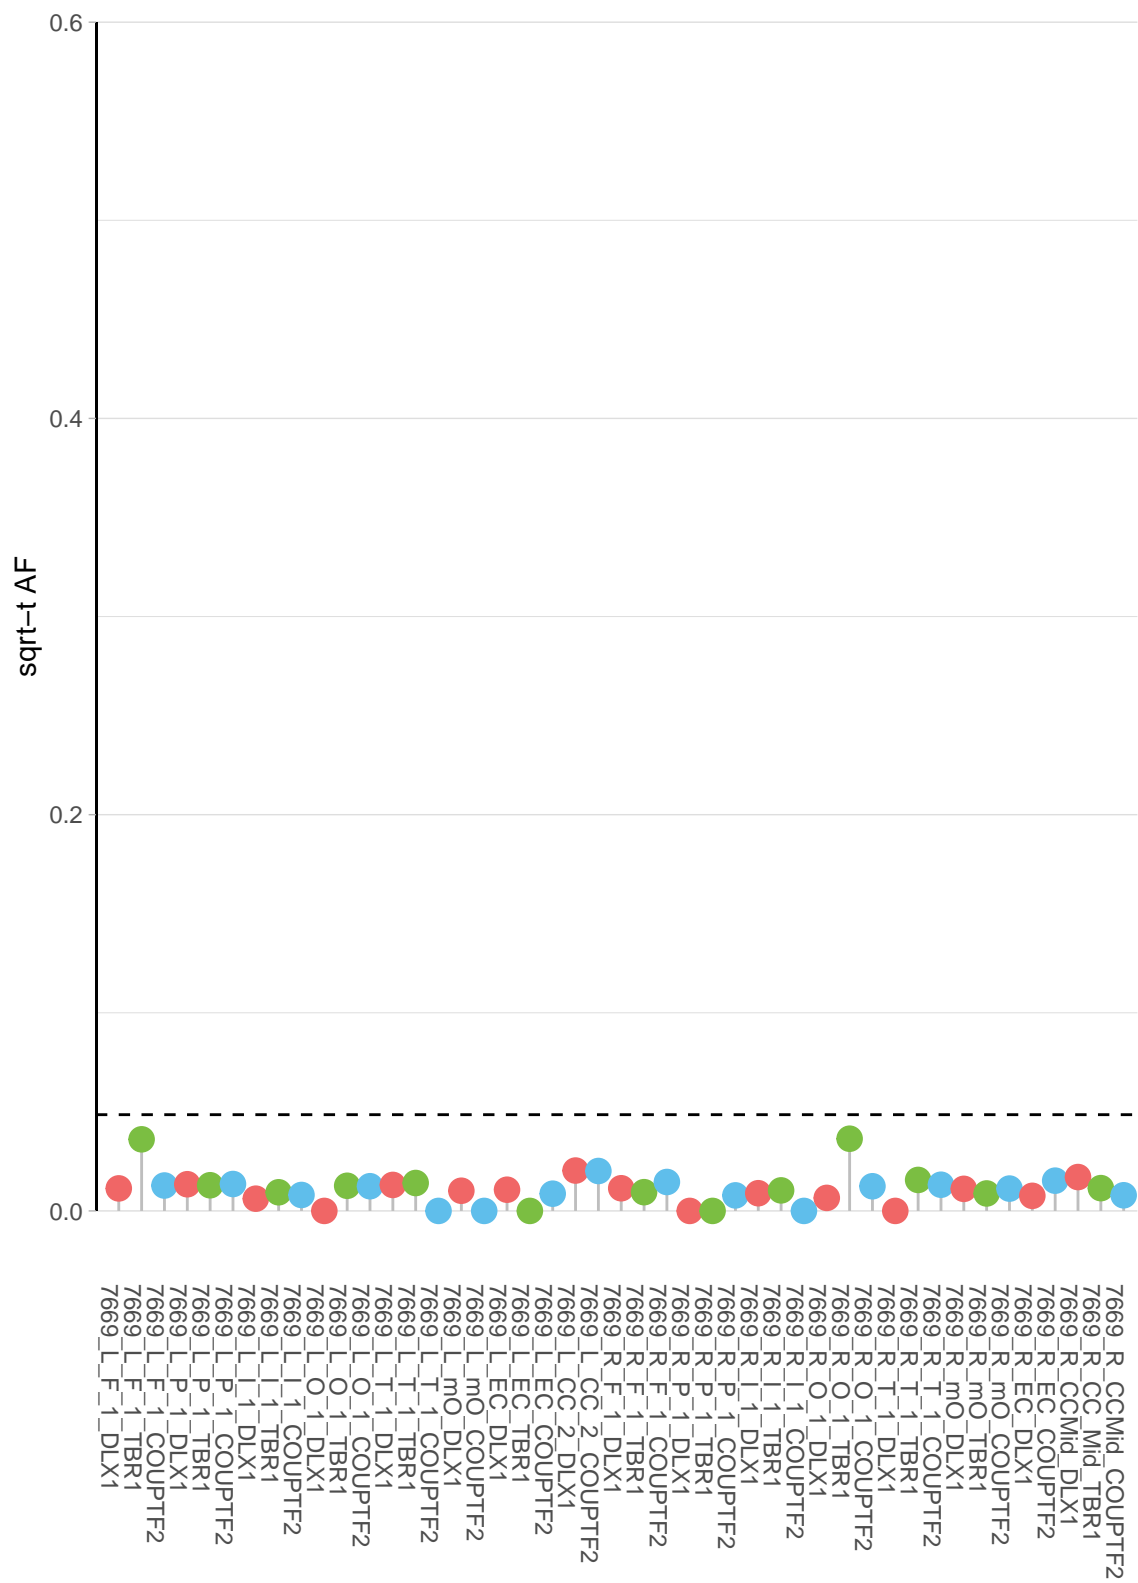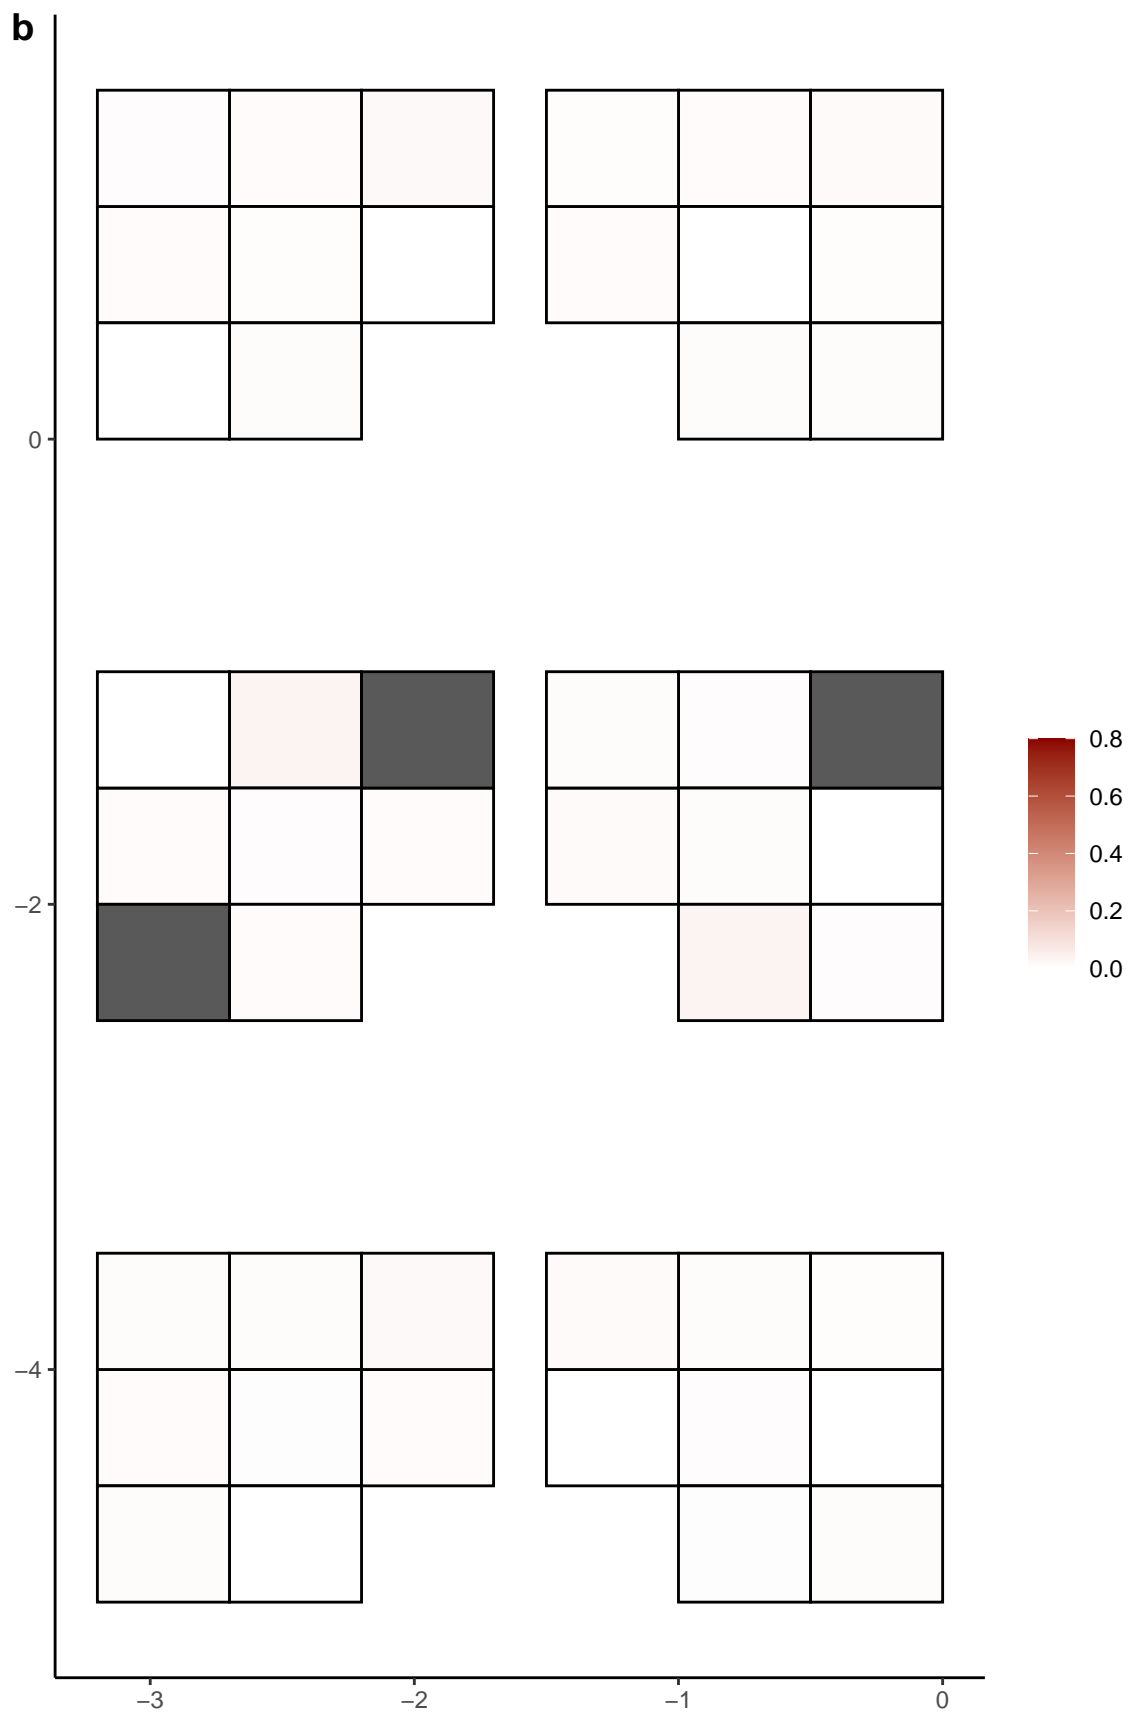

**a** ID05 6-18903997-G-A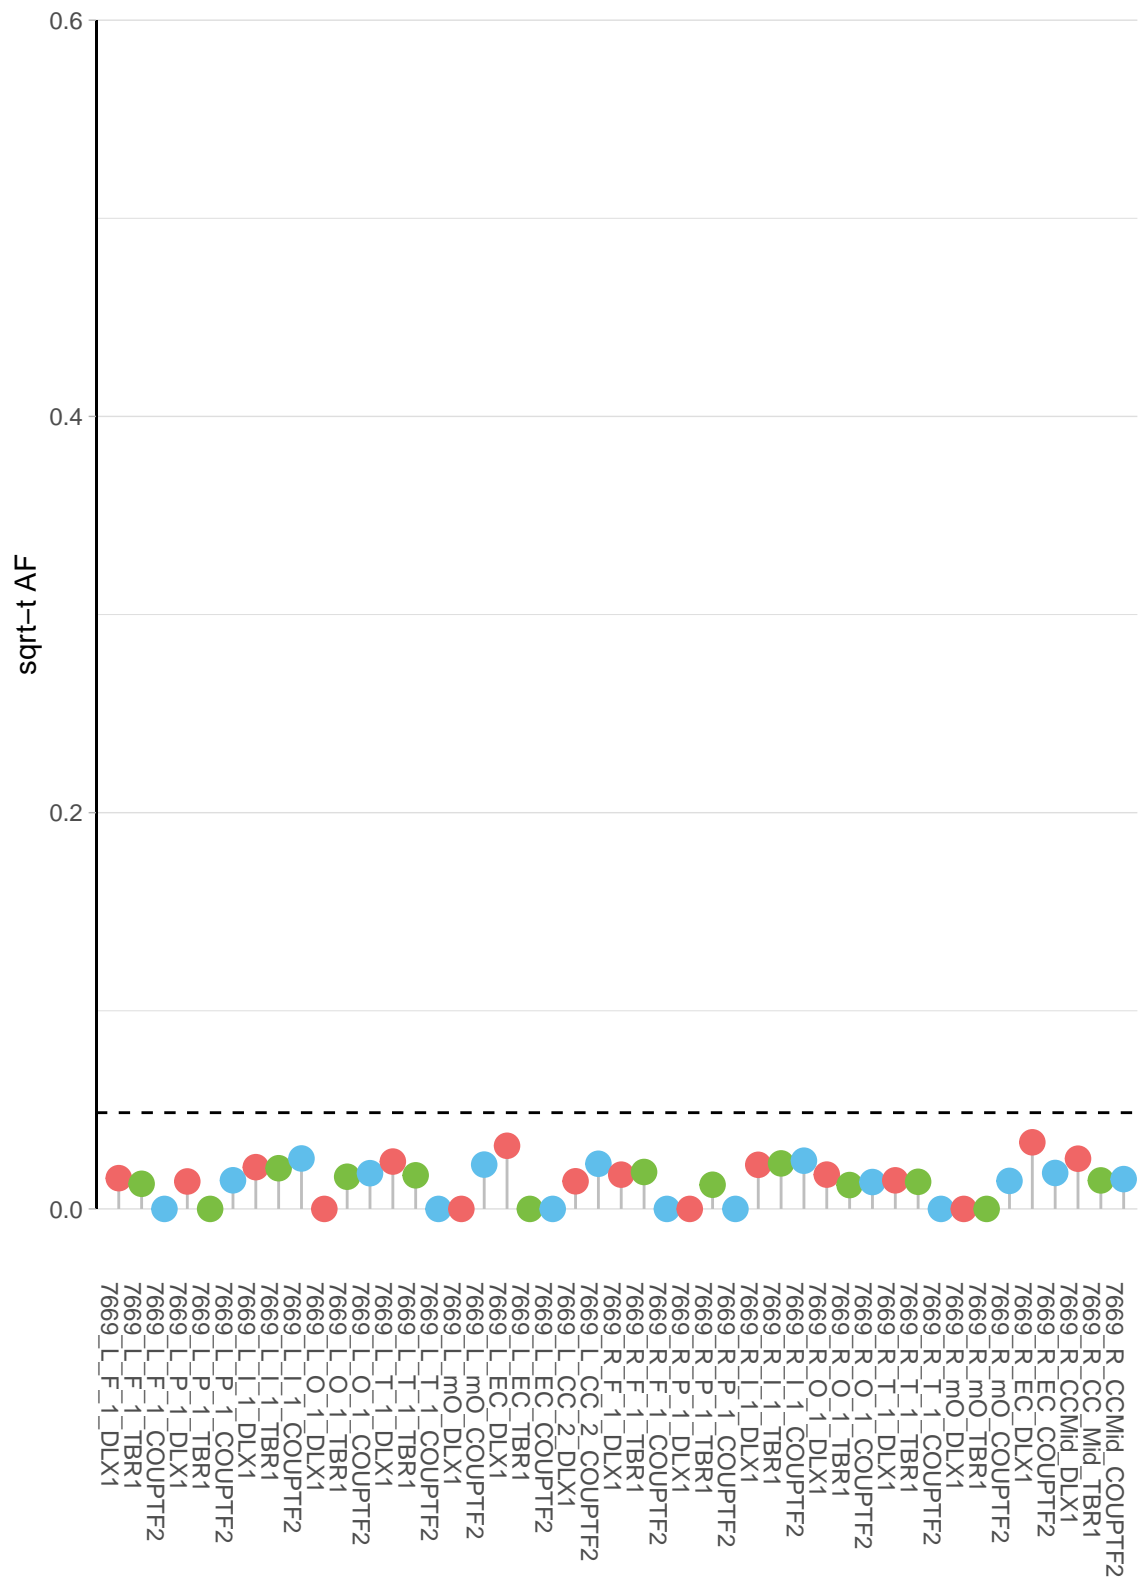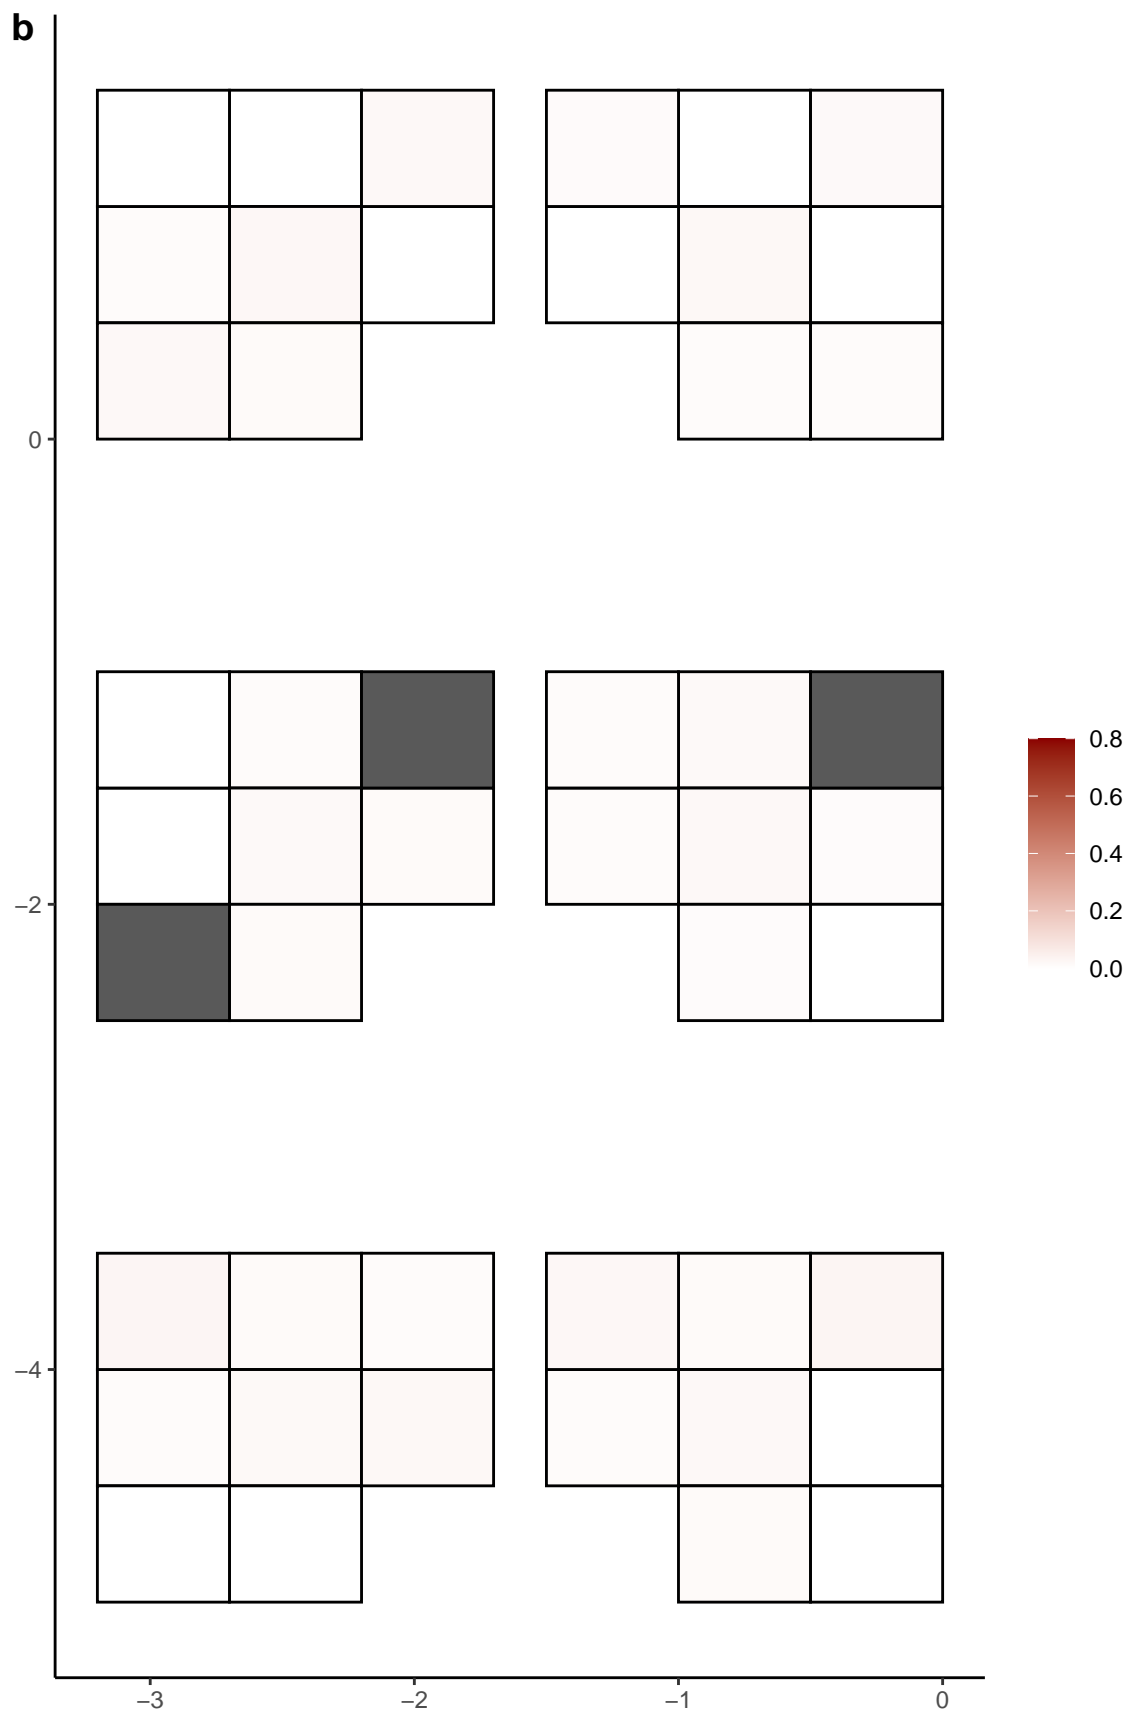

**a** ID05 6-24537268-G-A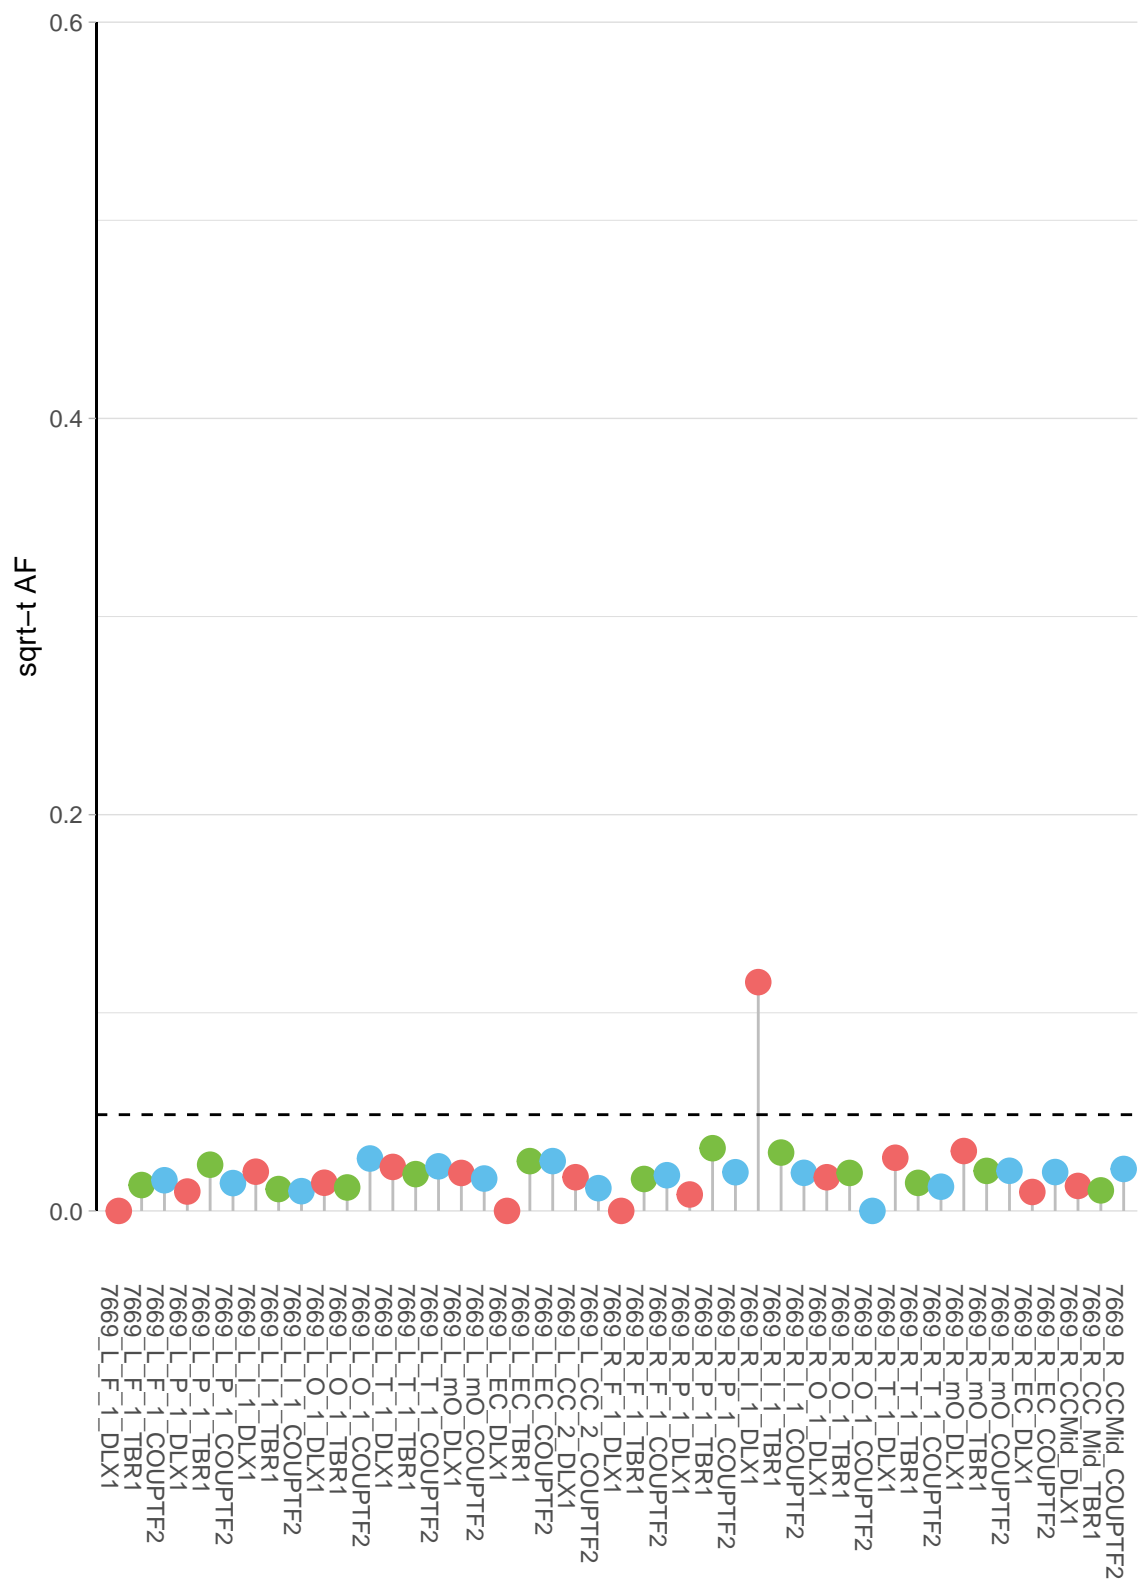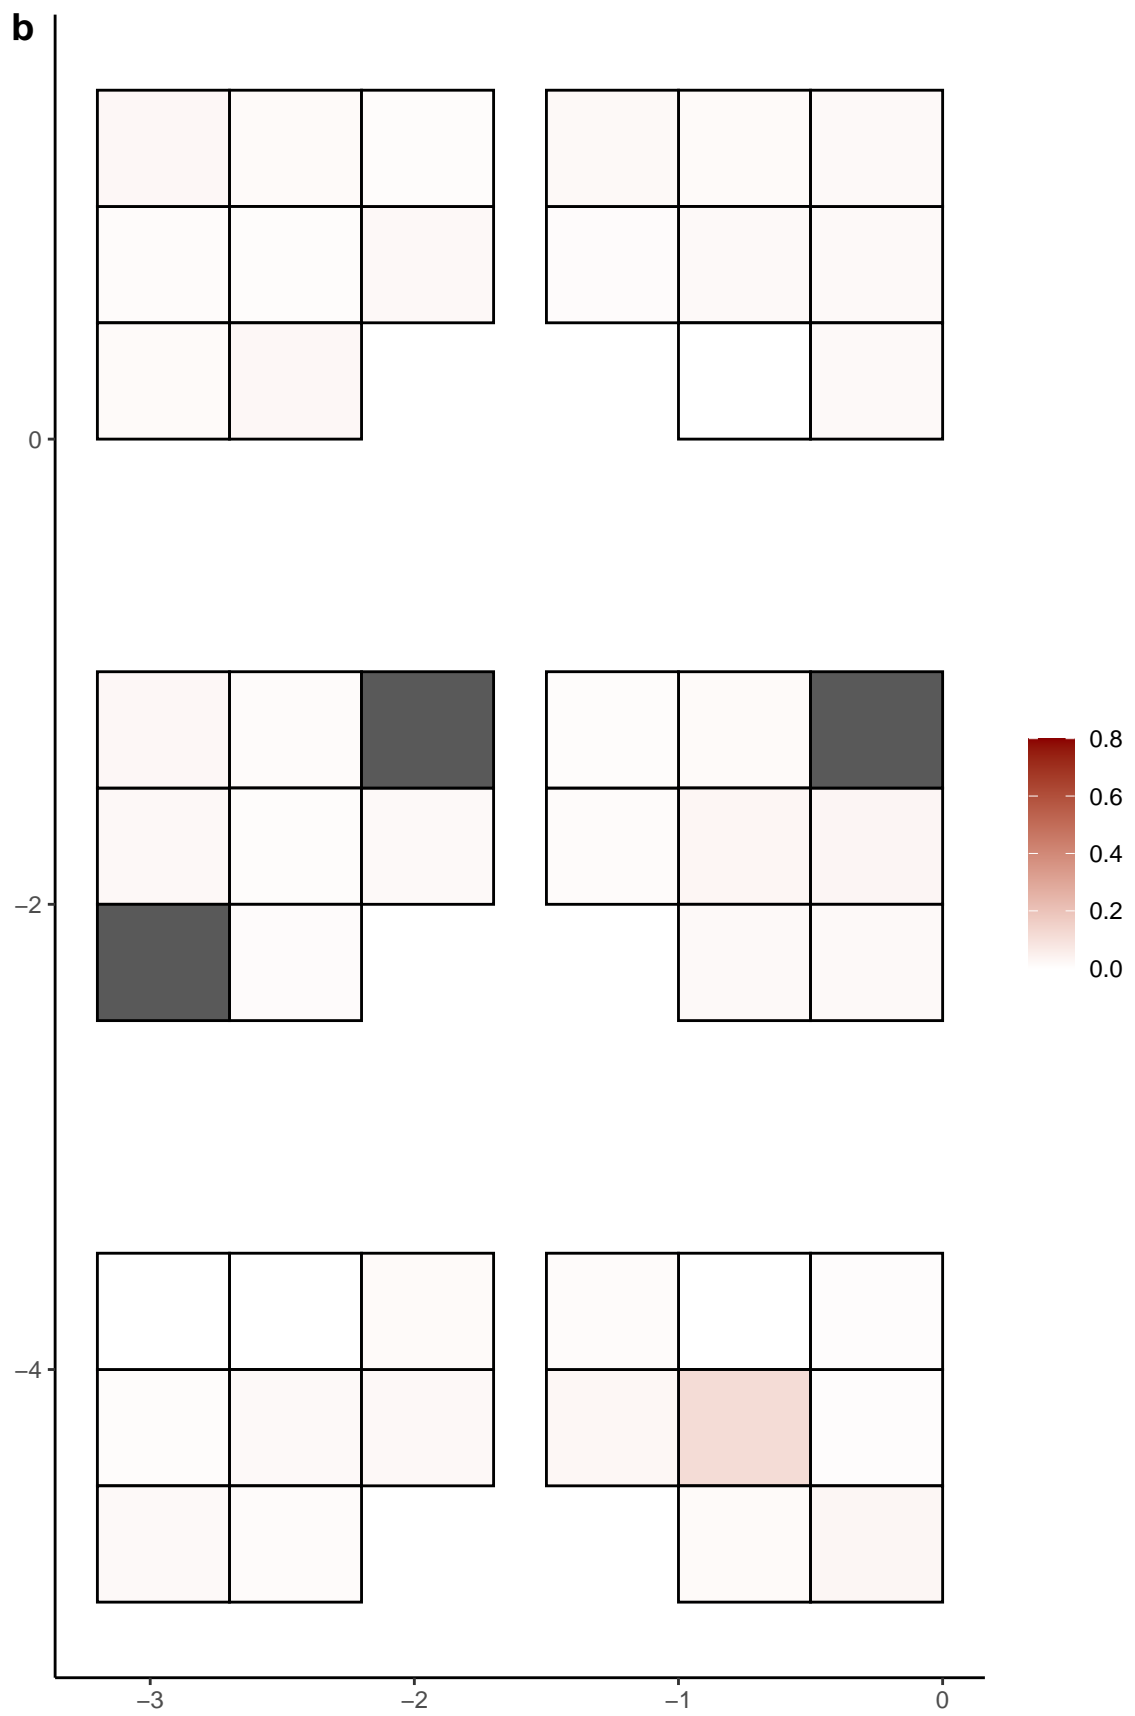



**a** ID05 6-28244213-C-T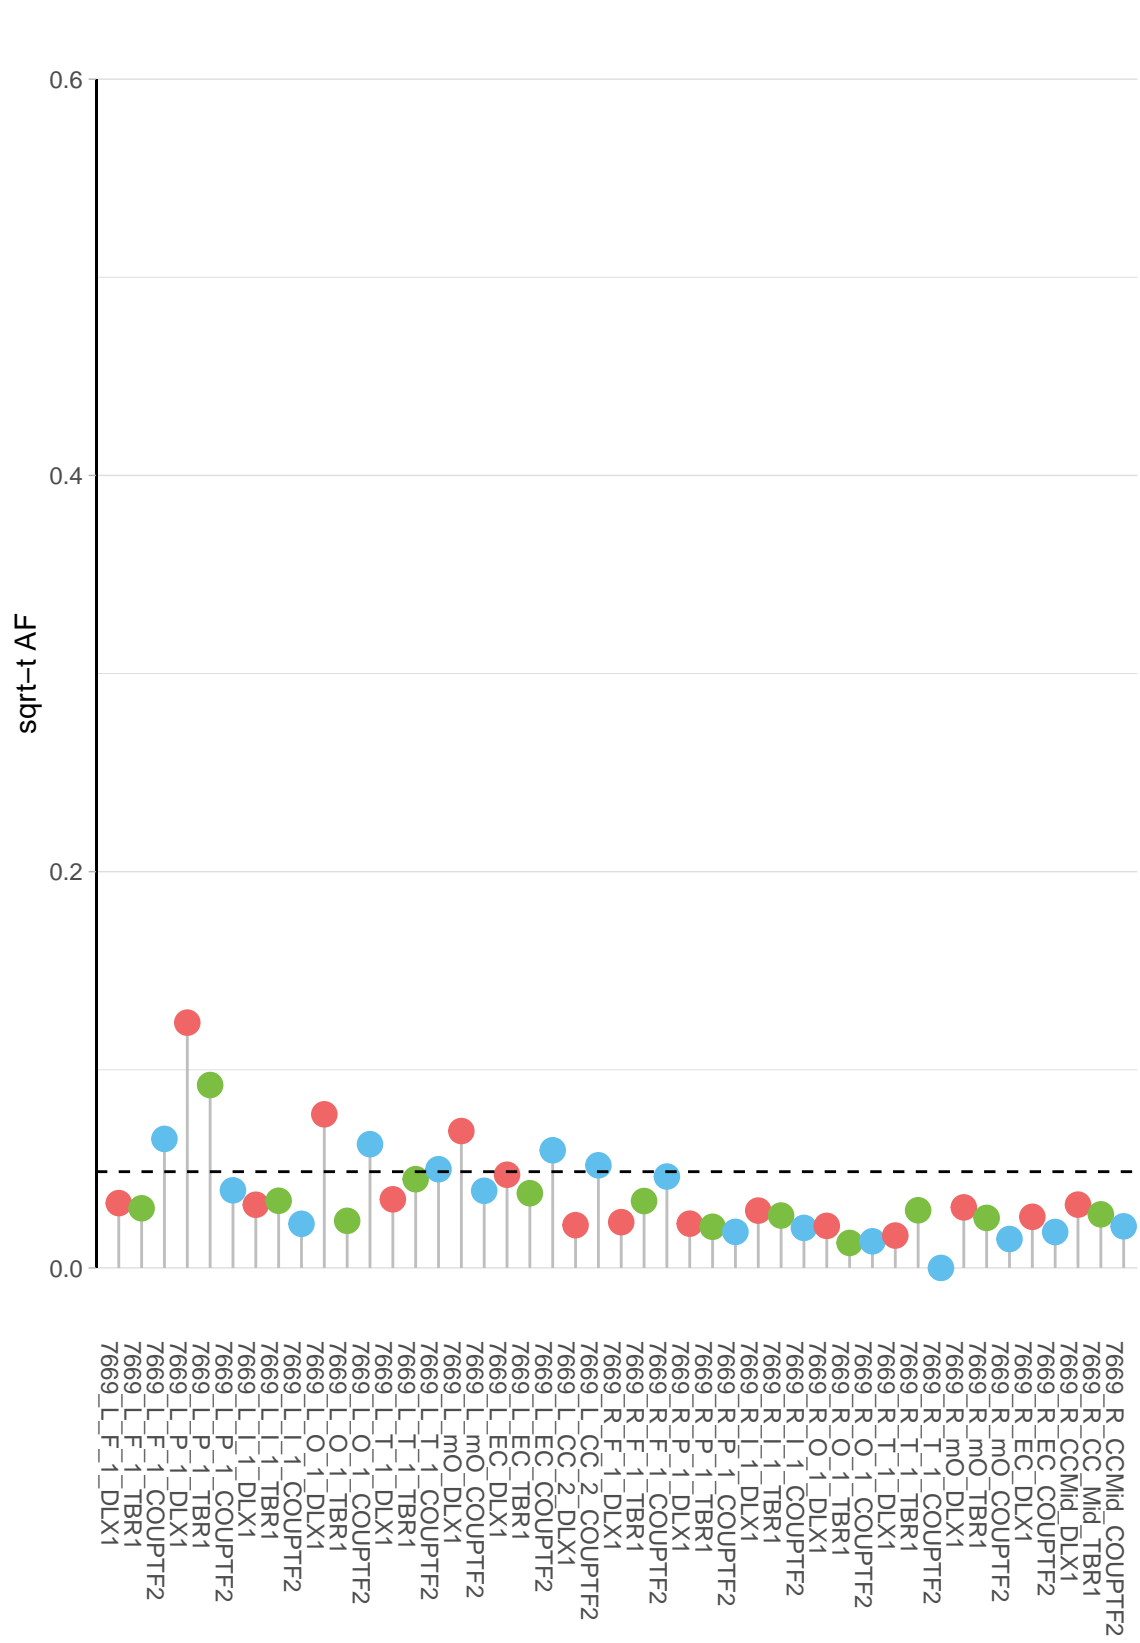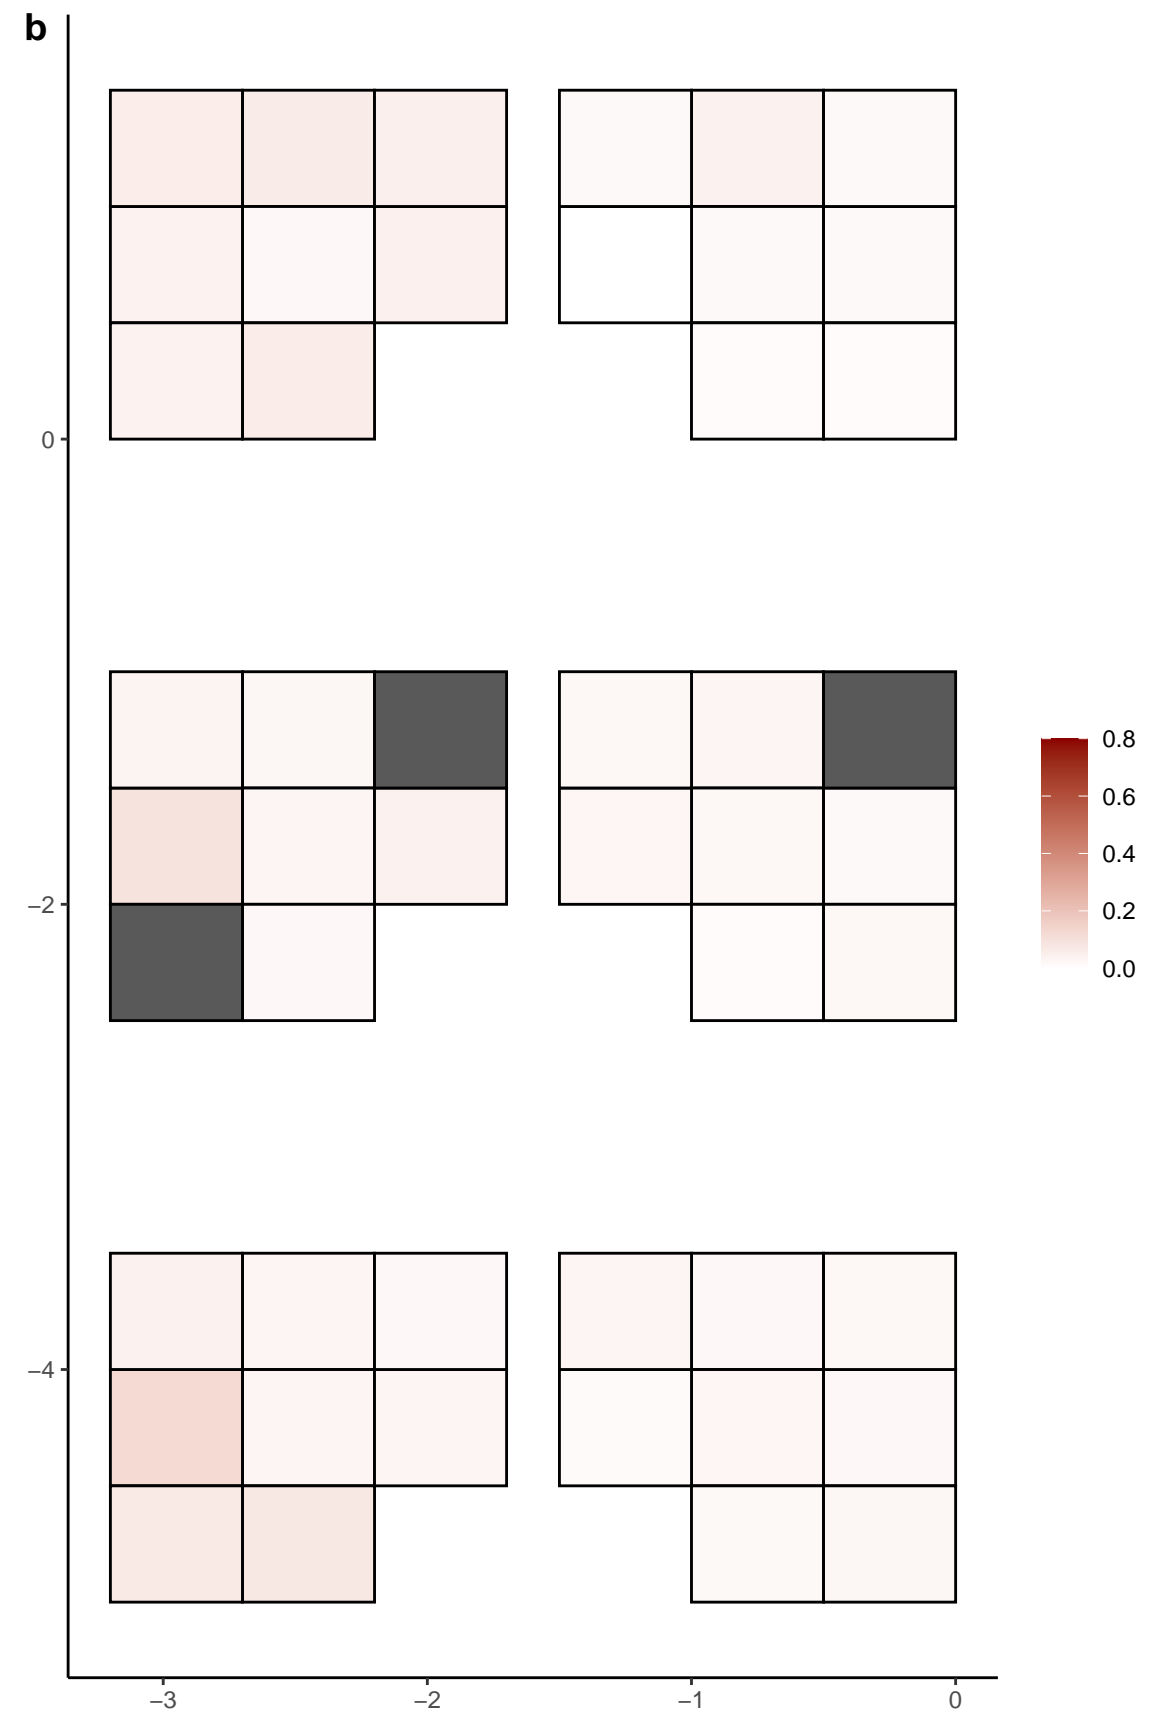

**a** ID05 6-3287273-C-T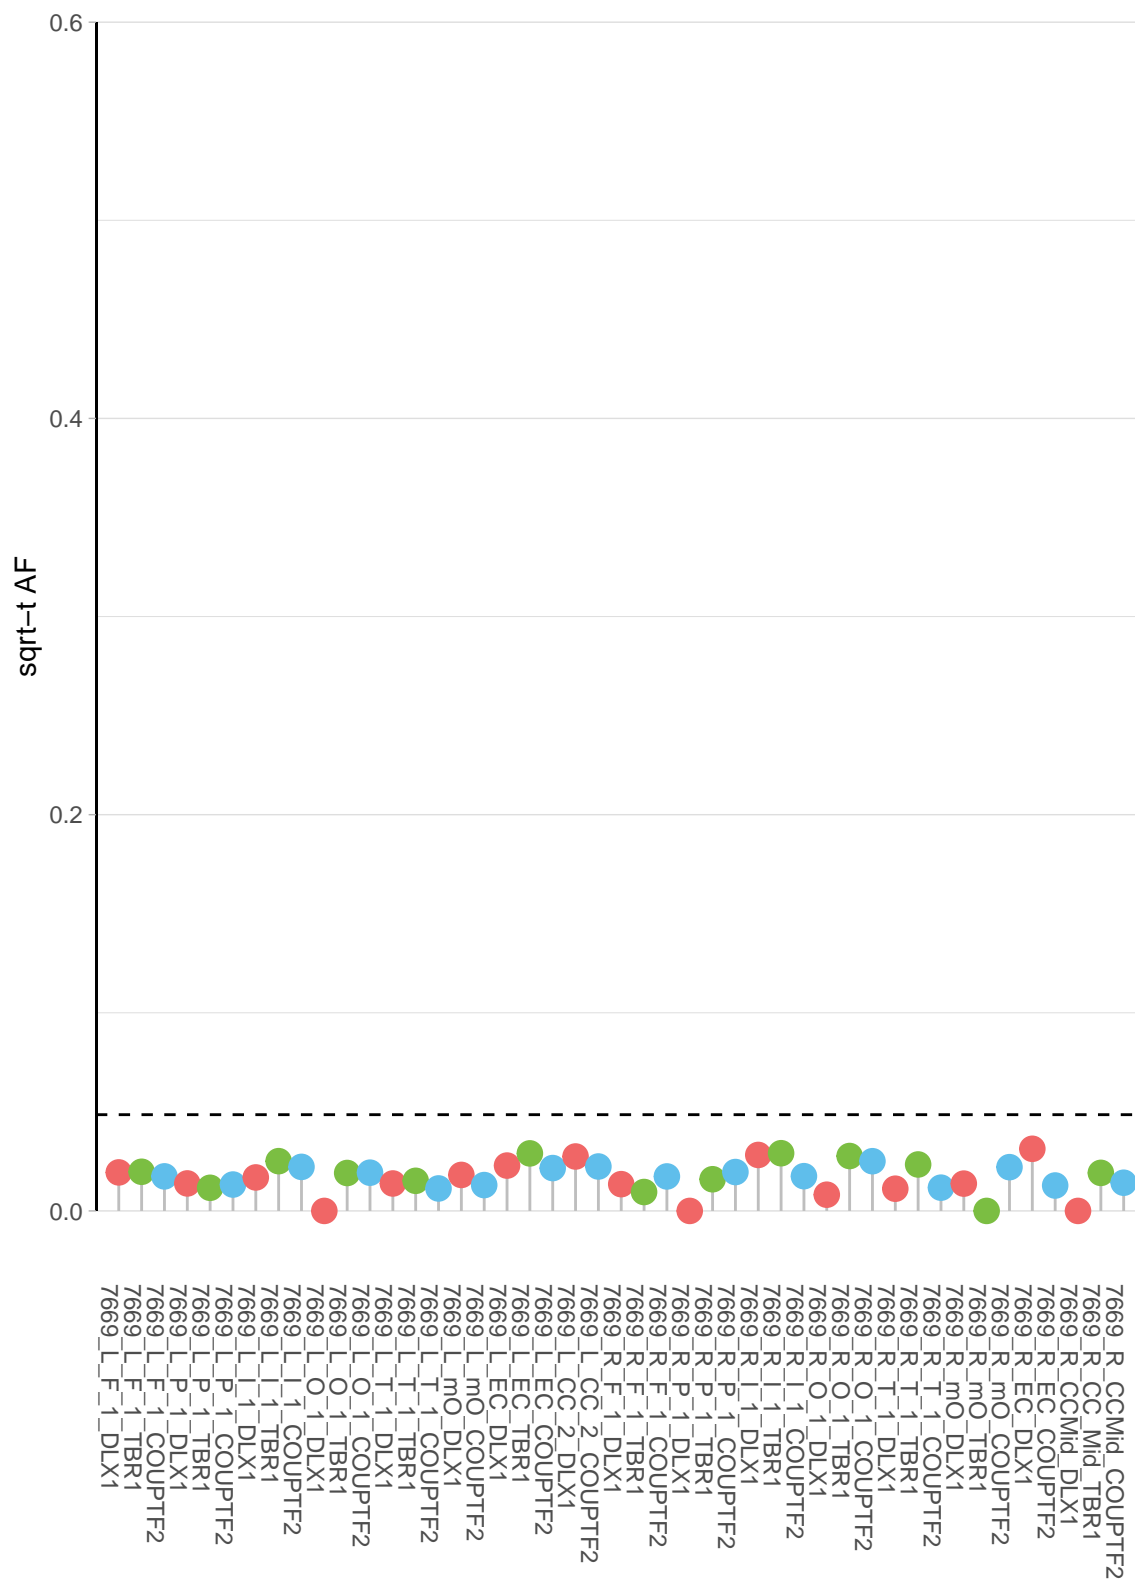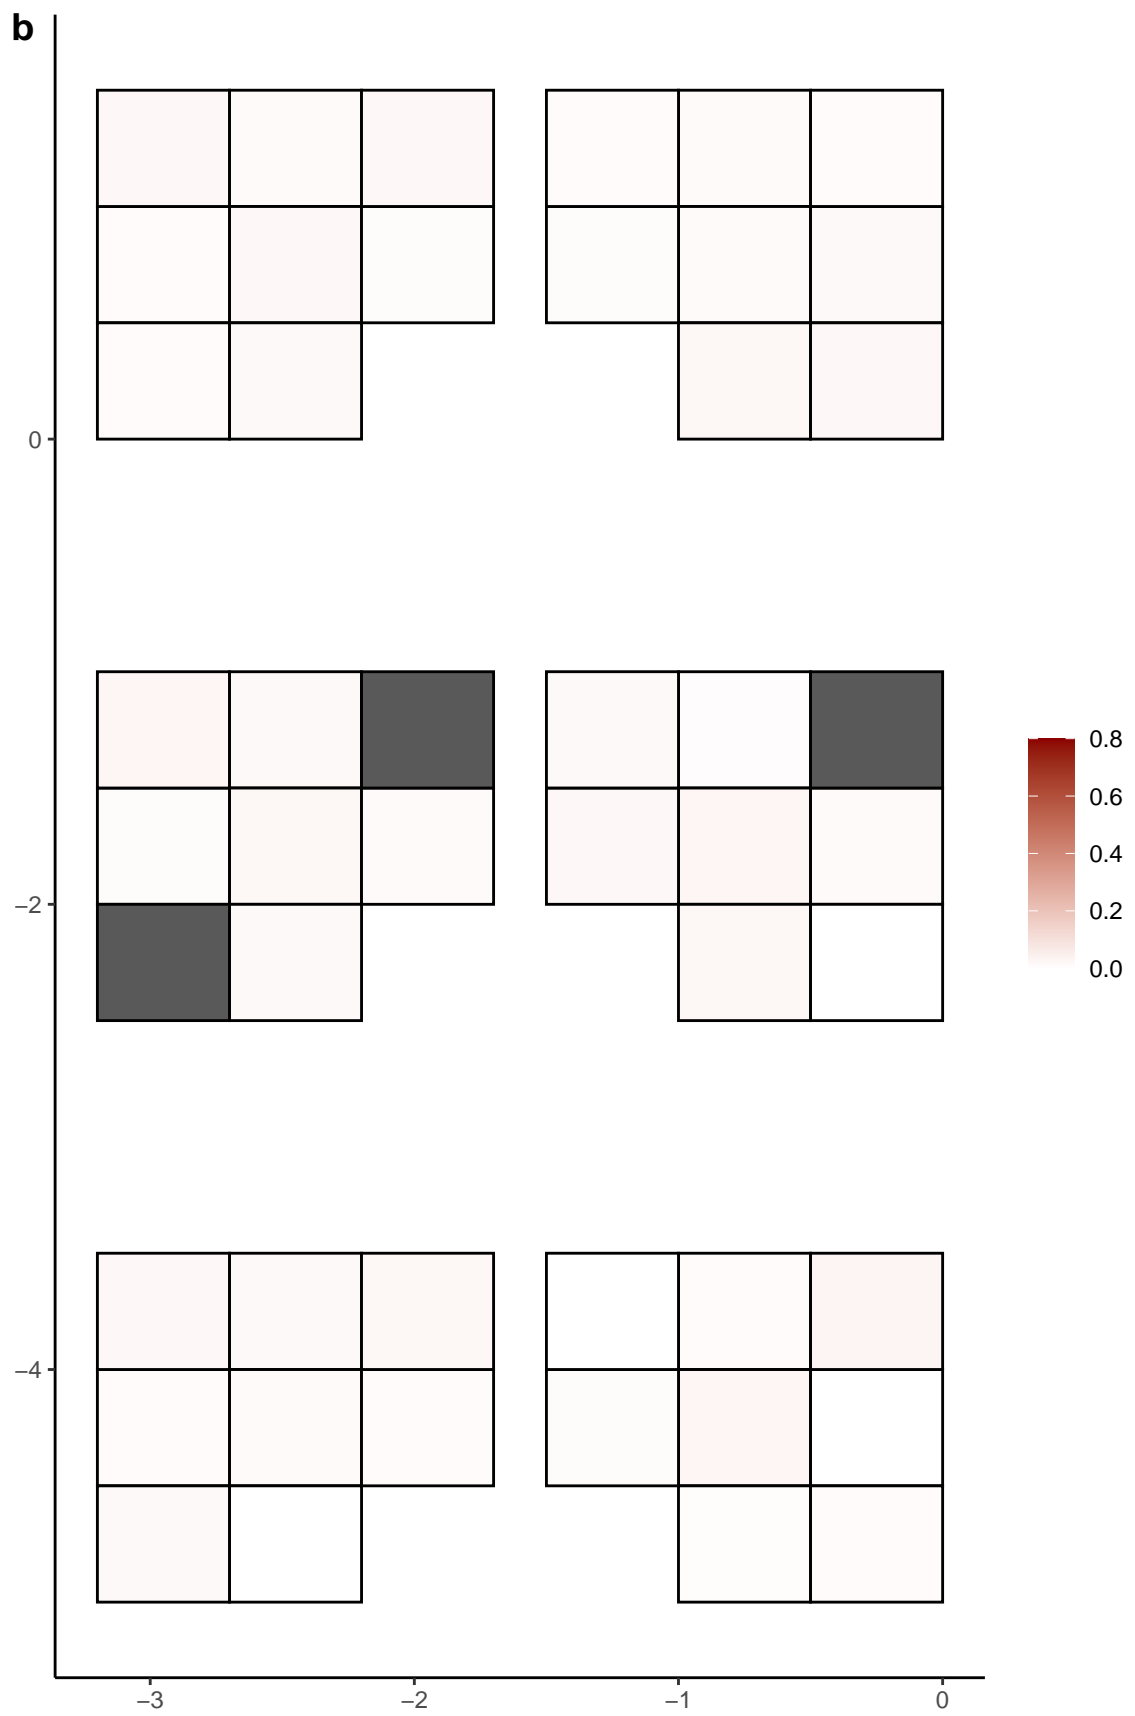

**a** ID05 6-36931639-G-C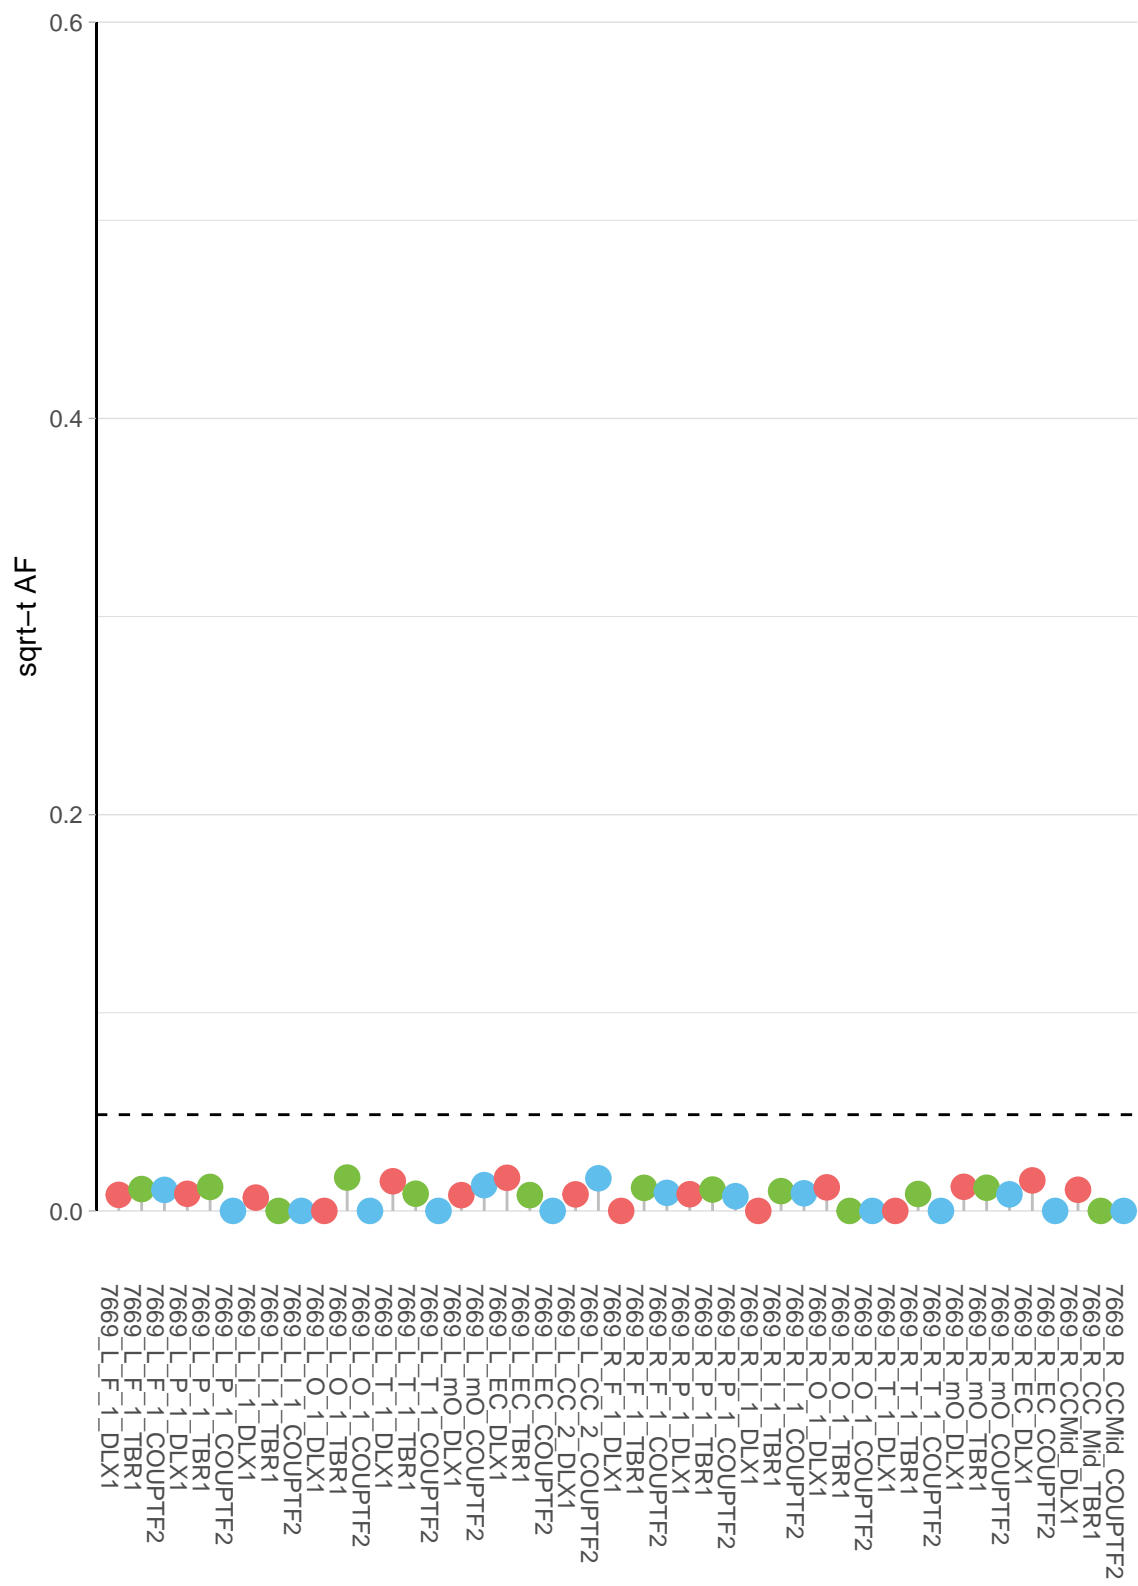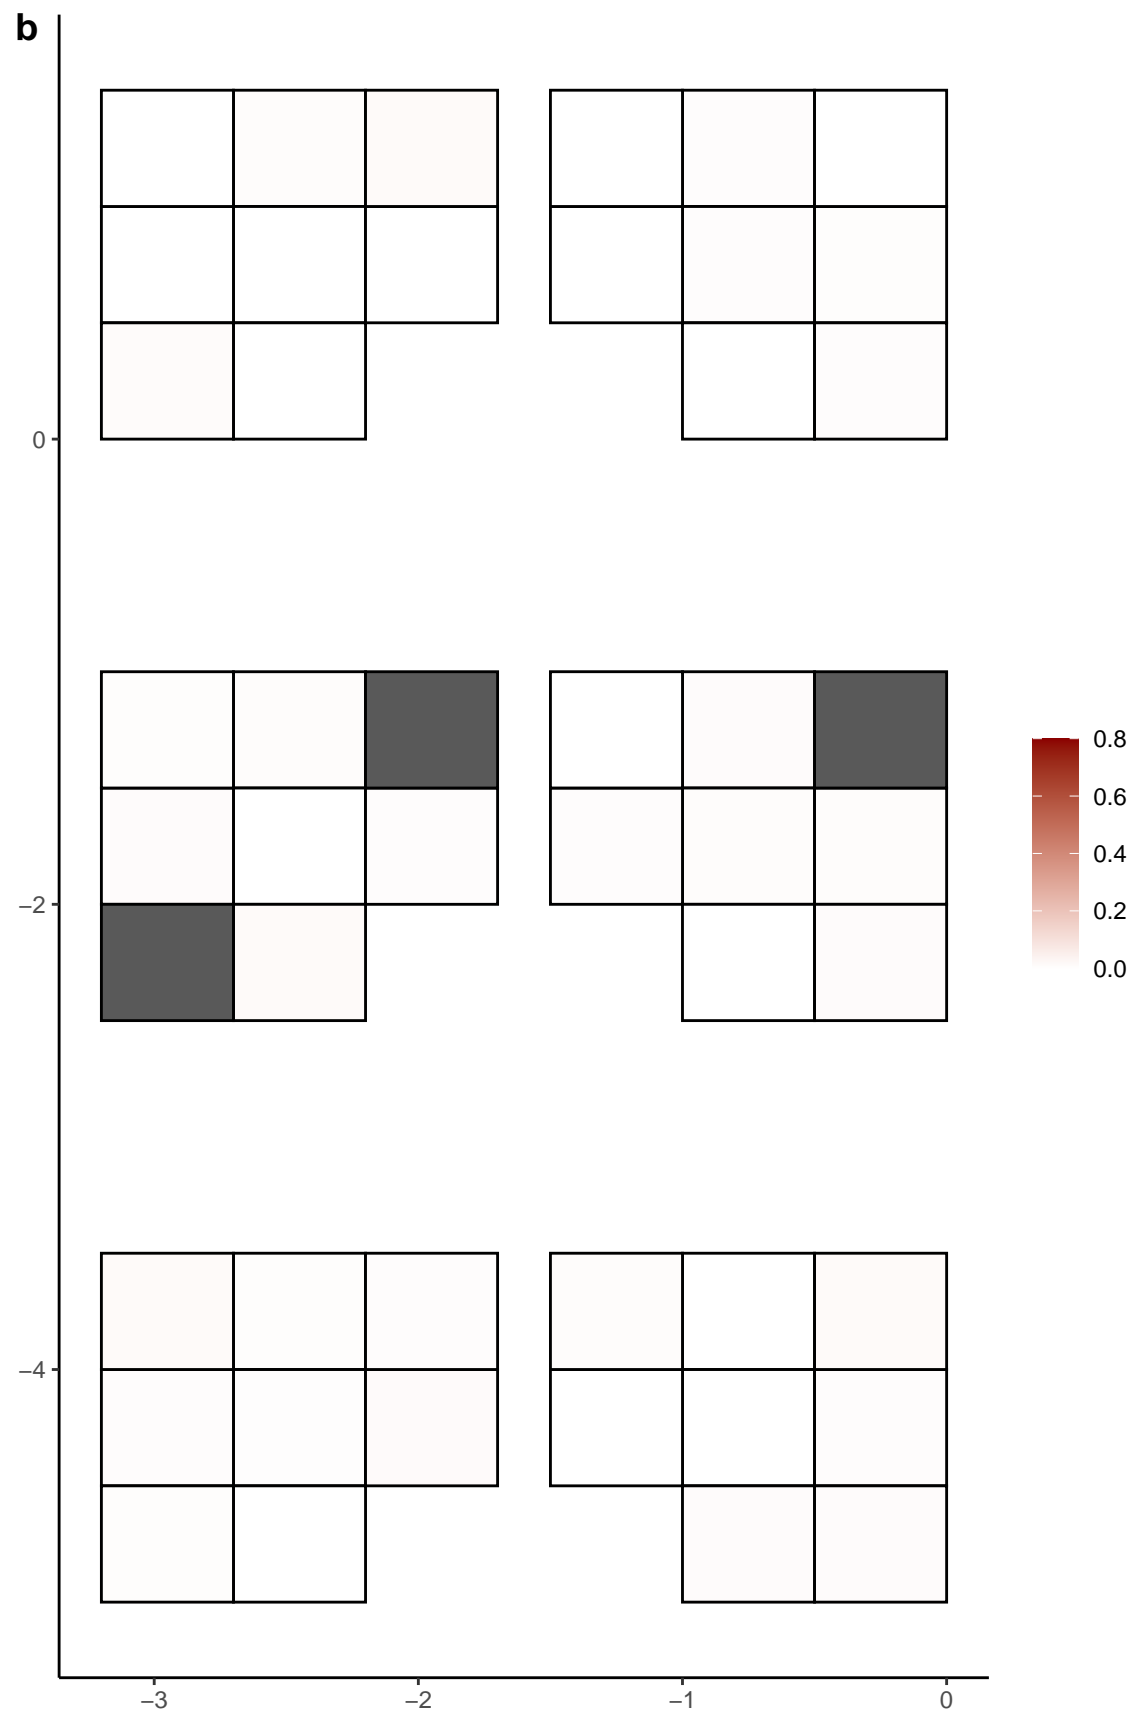

**a** ID05 6-41864337-C-T

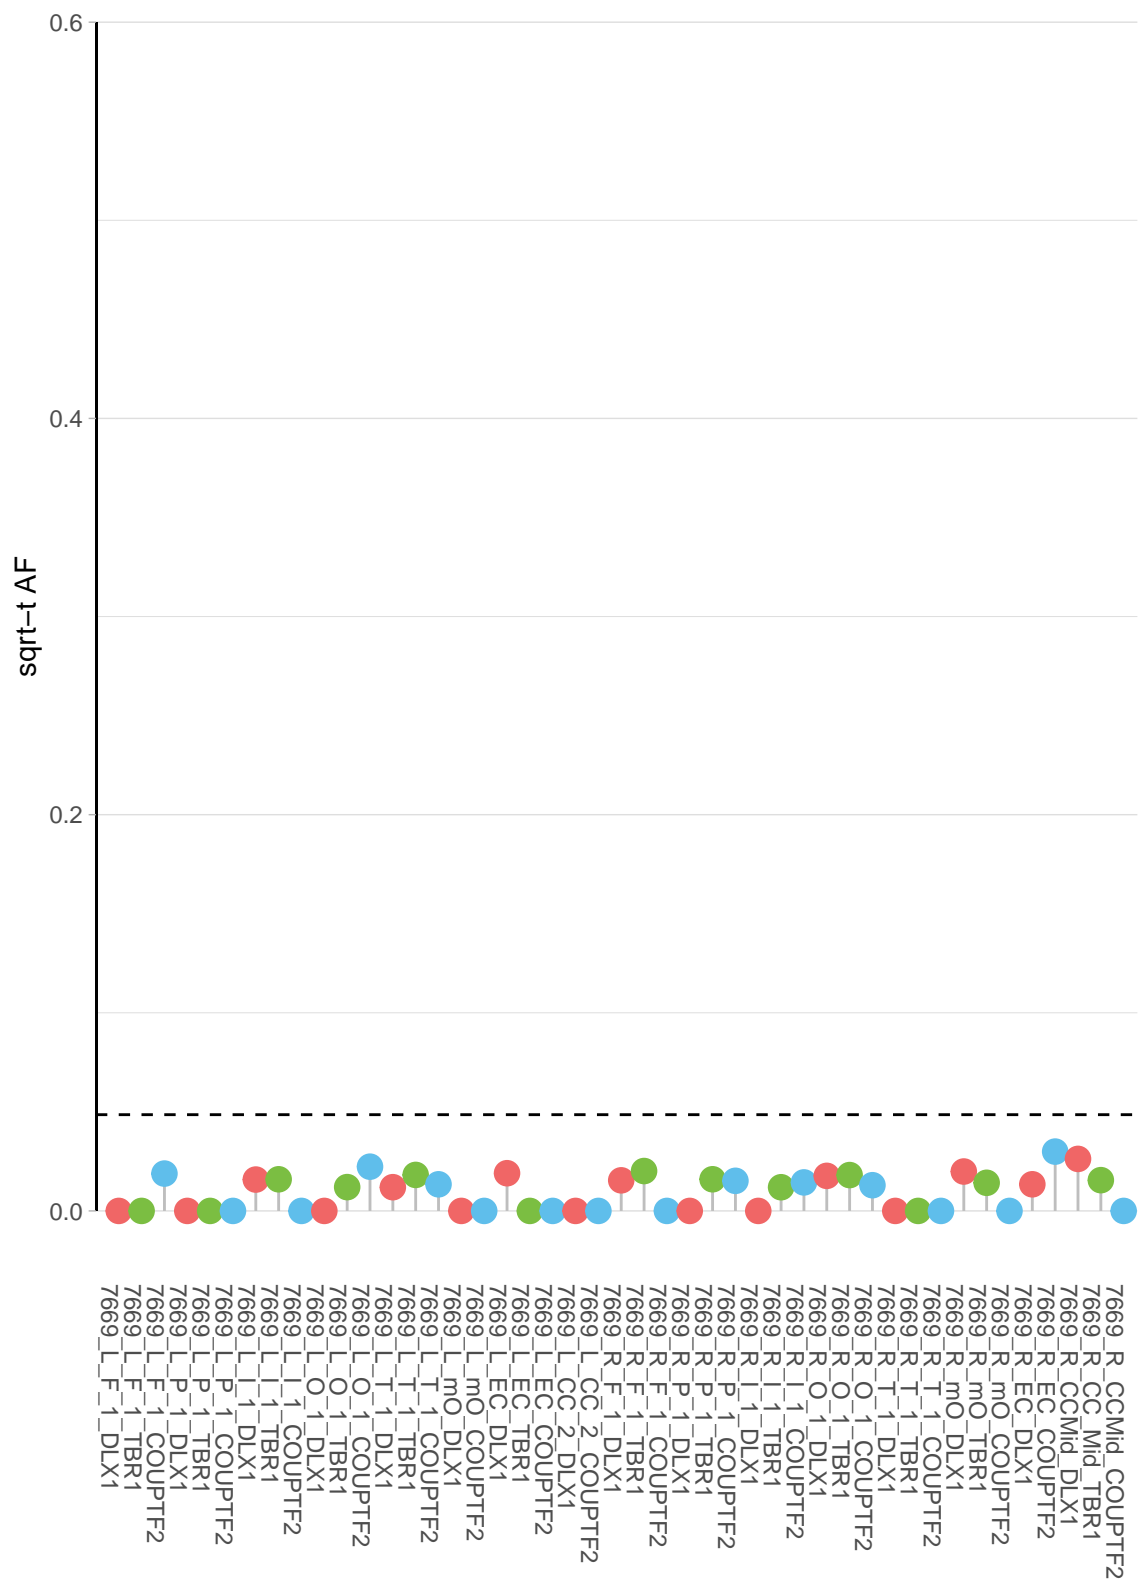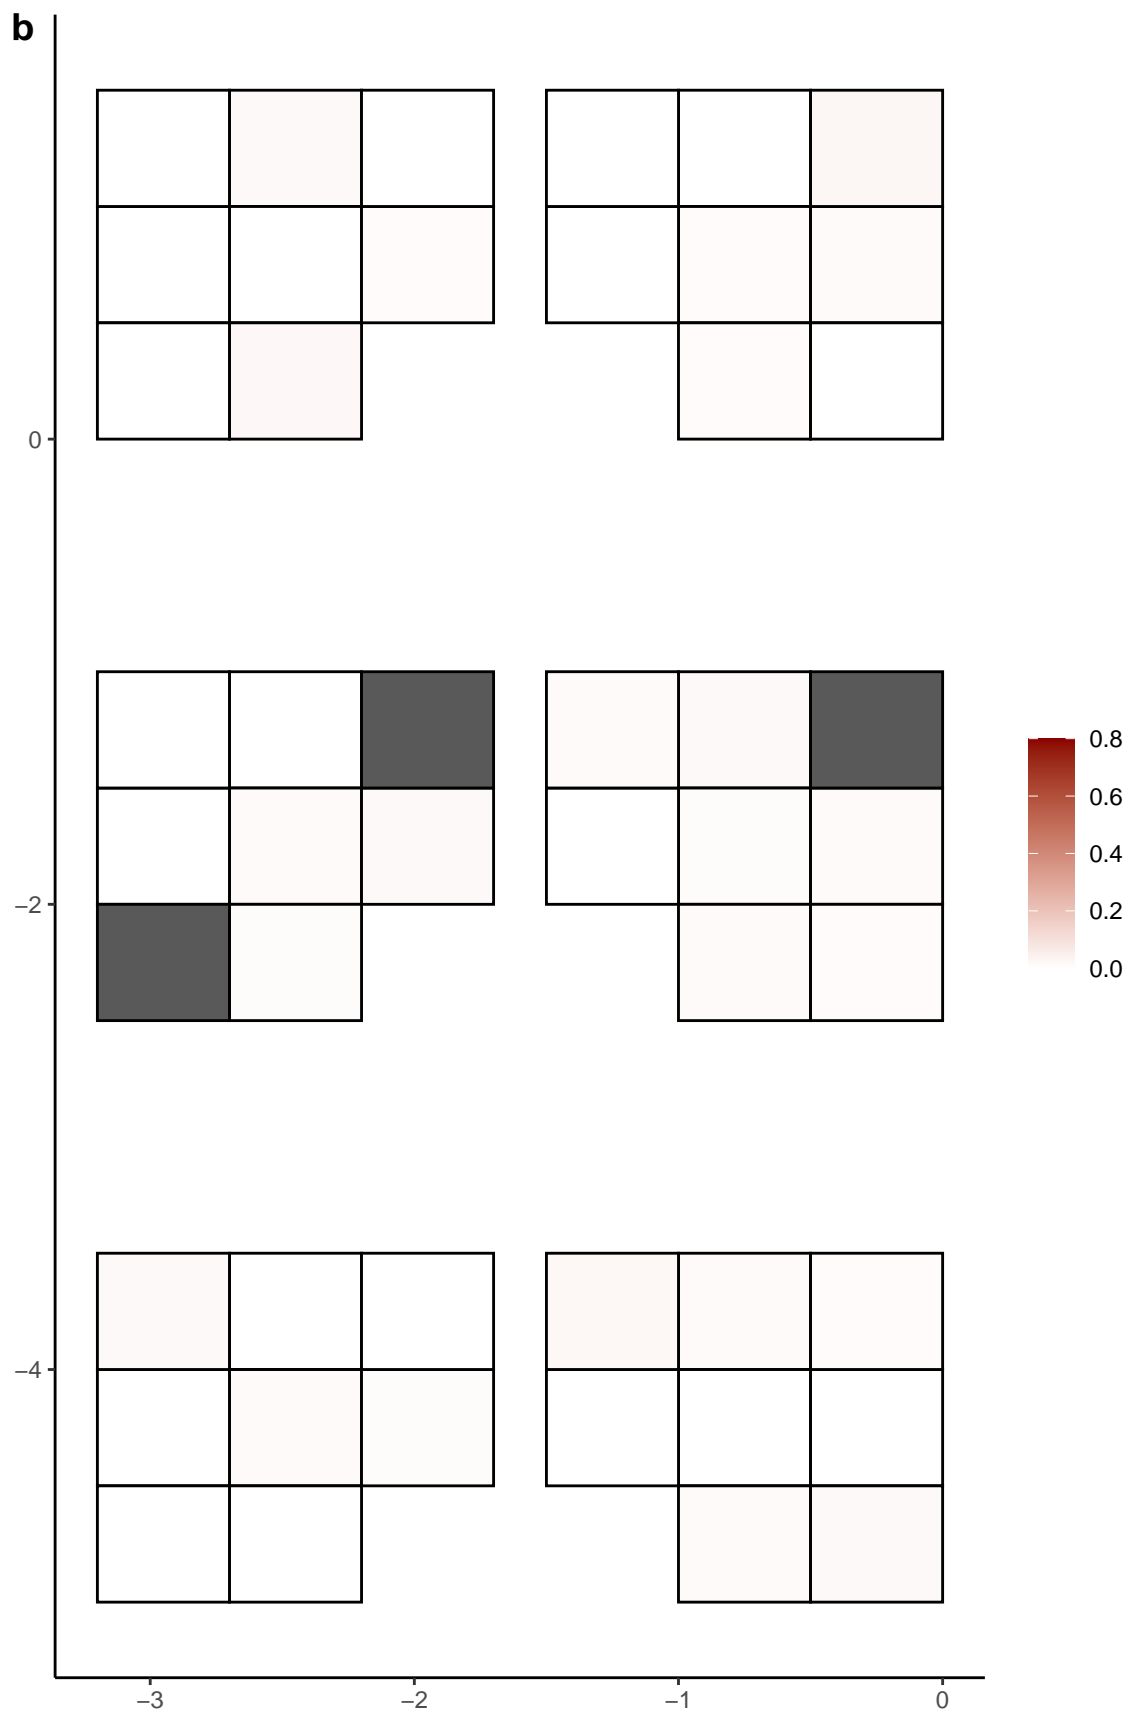

**a** ID05 6-47367037-G-A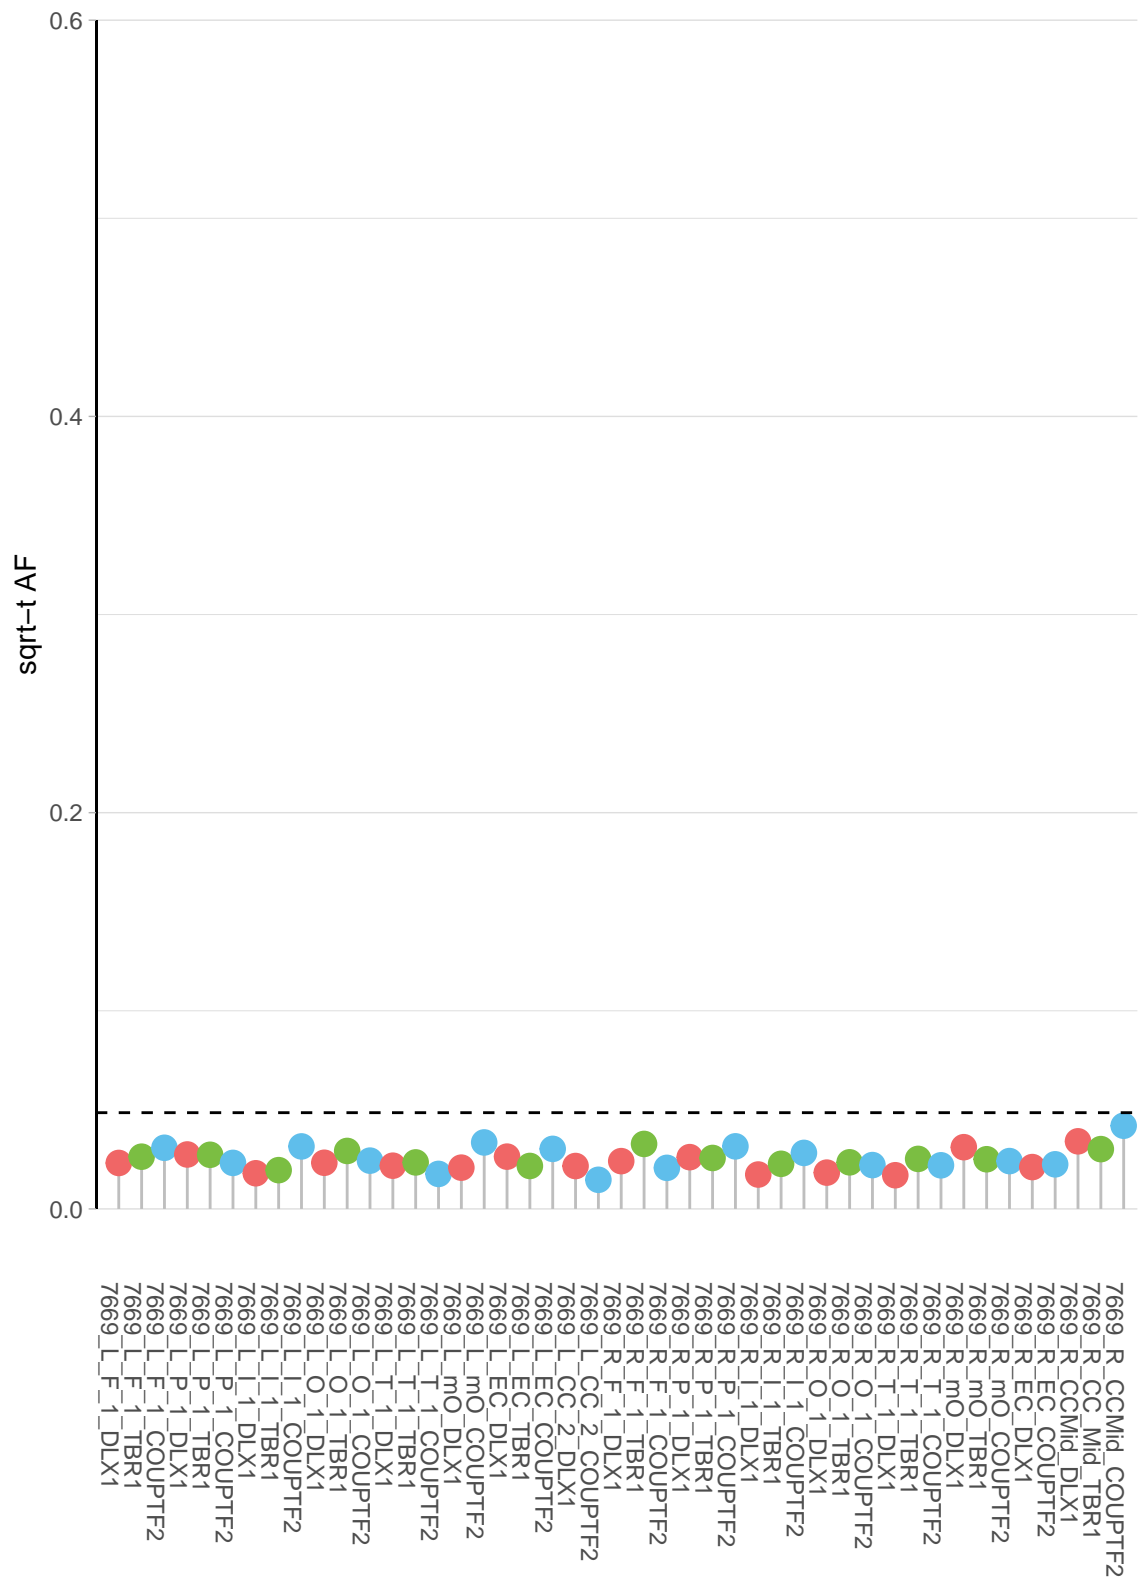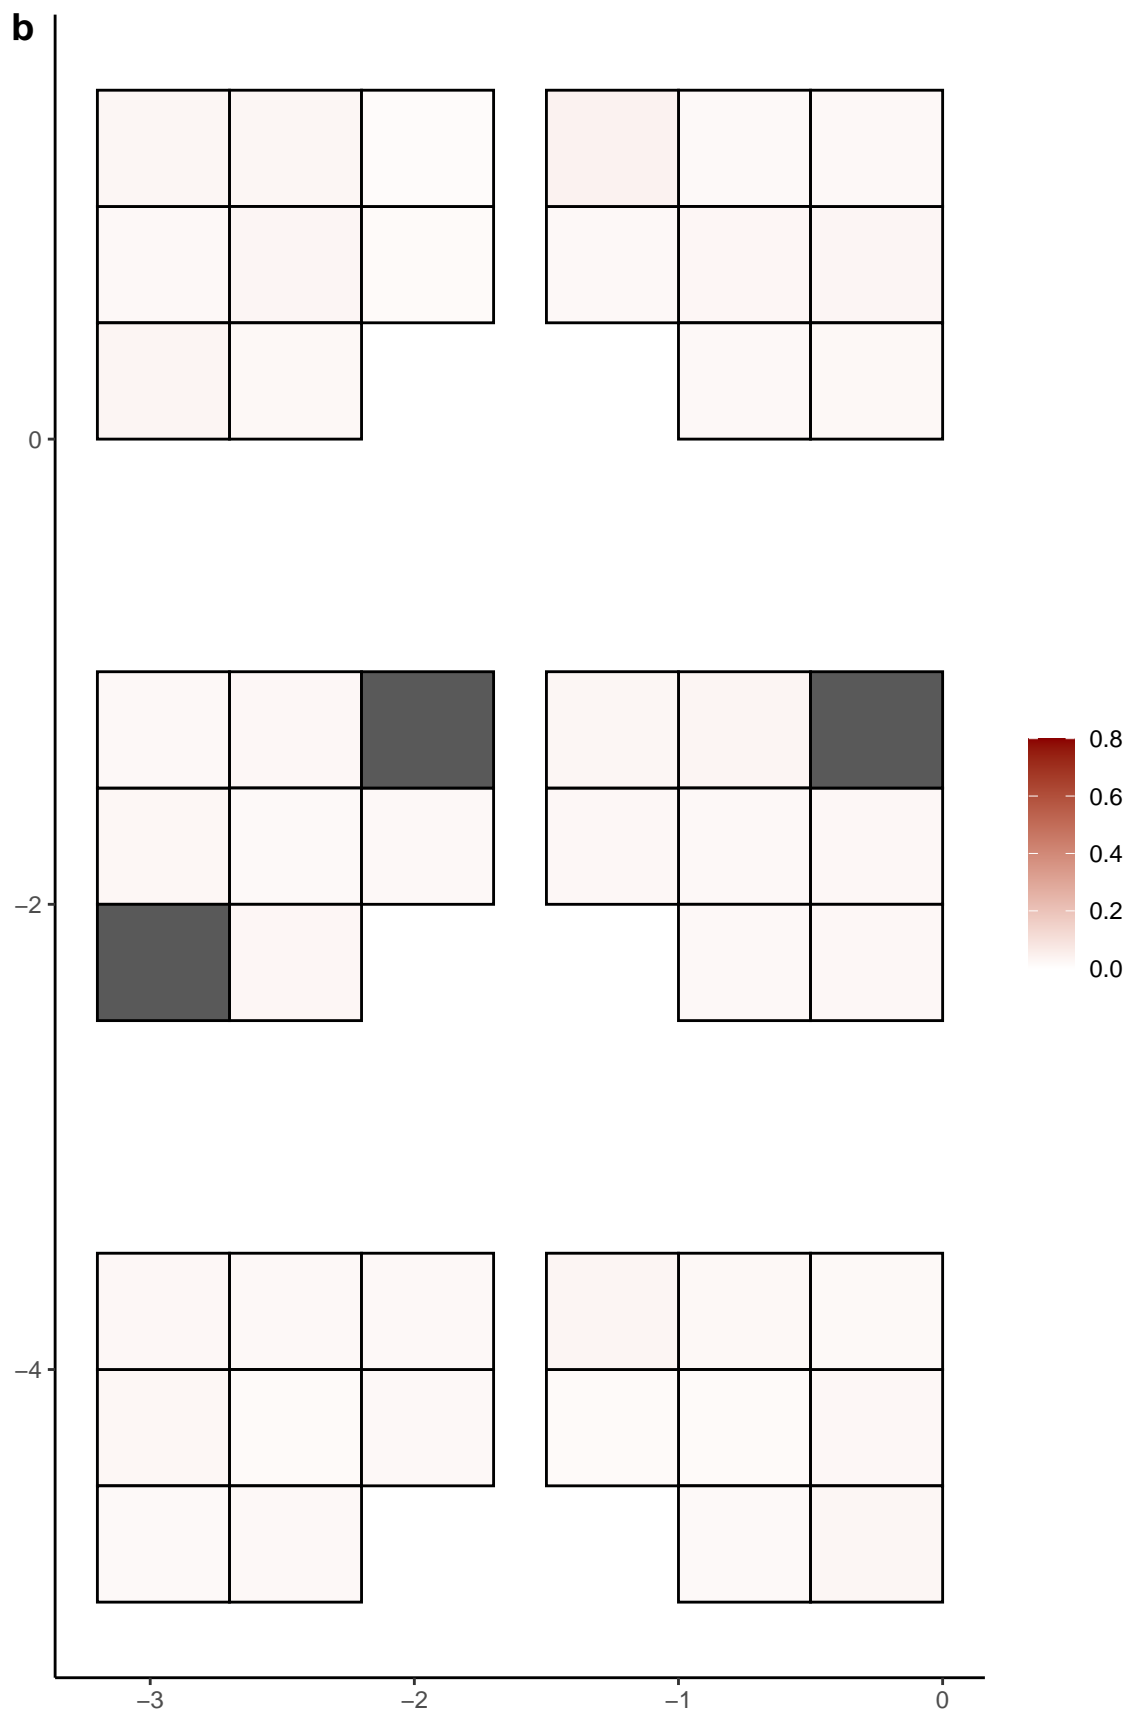

**a** ID05 6-49937325-C-G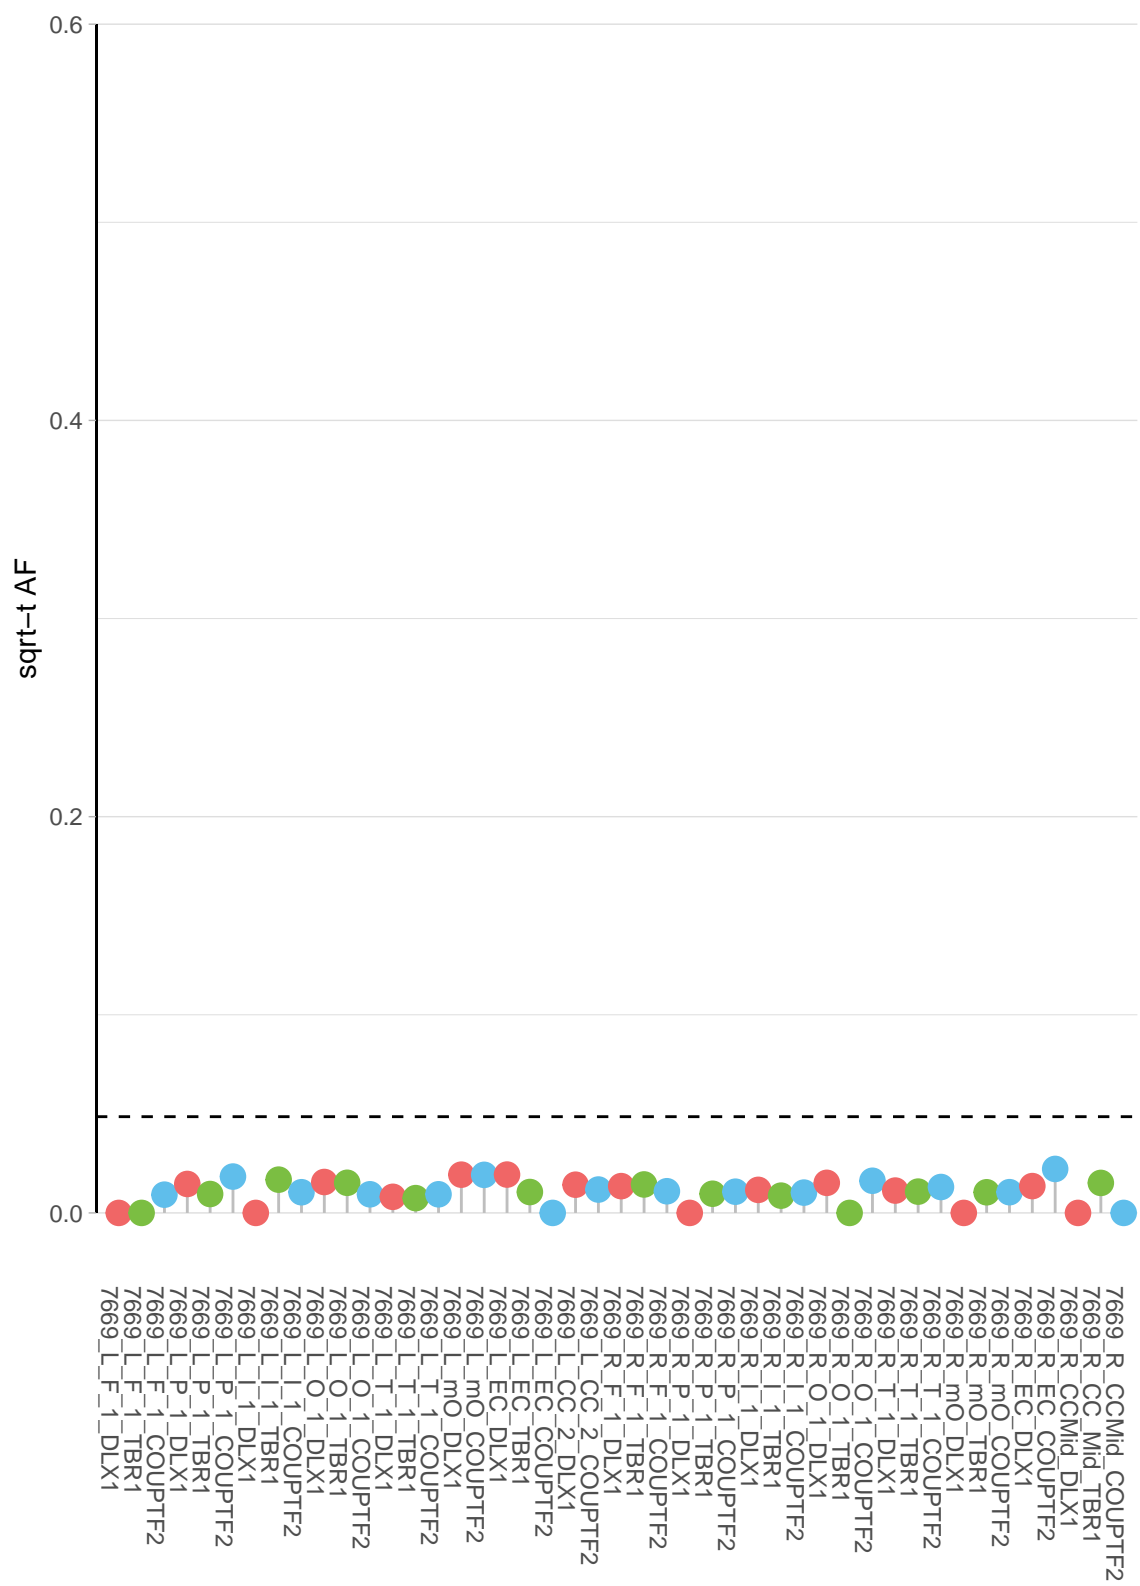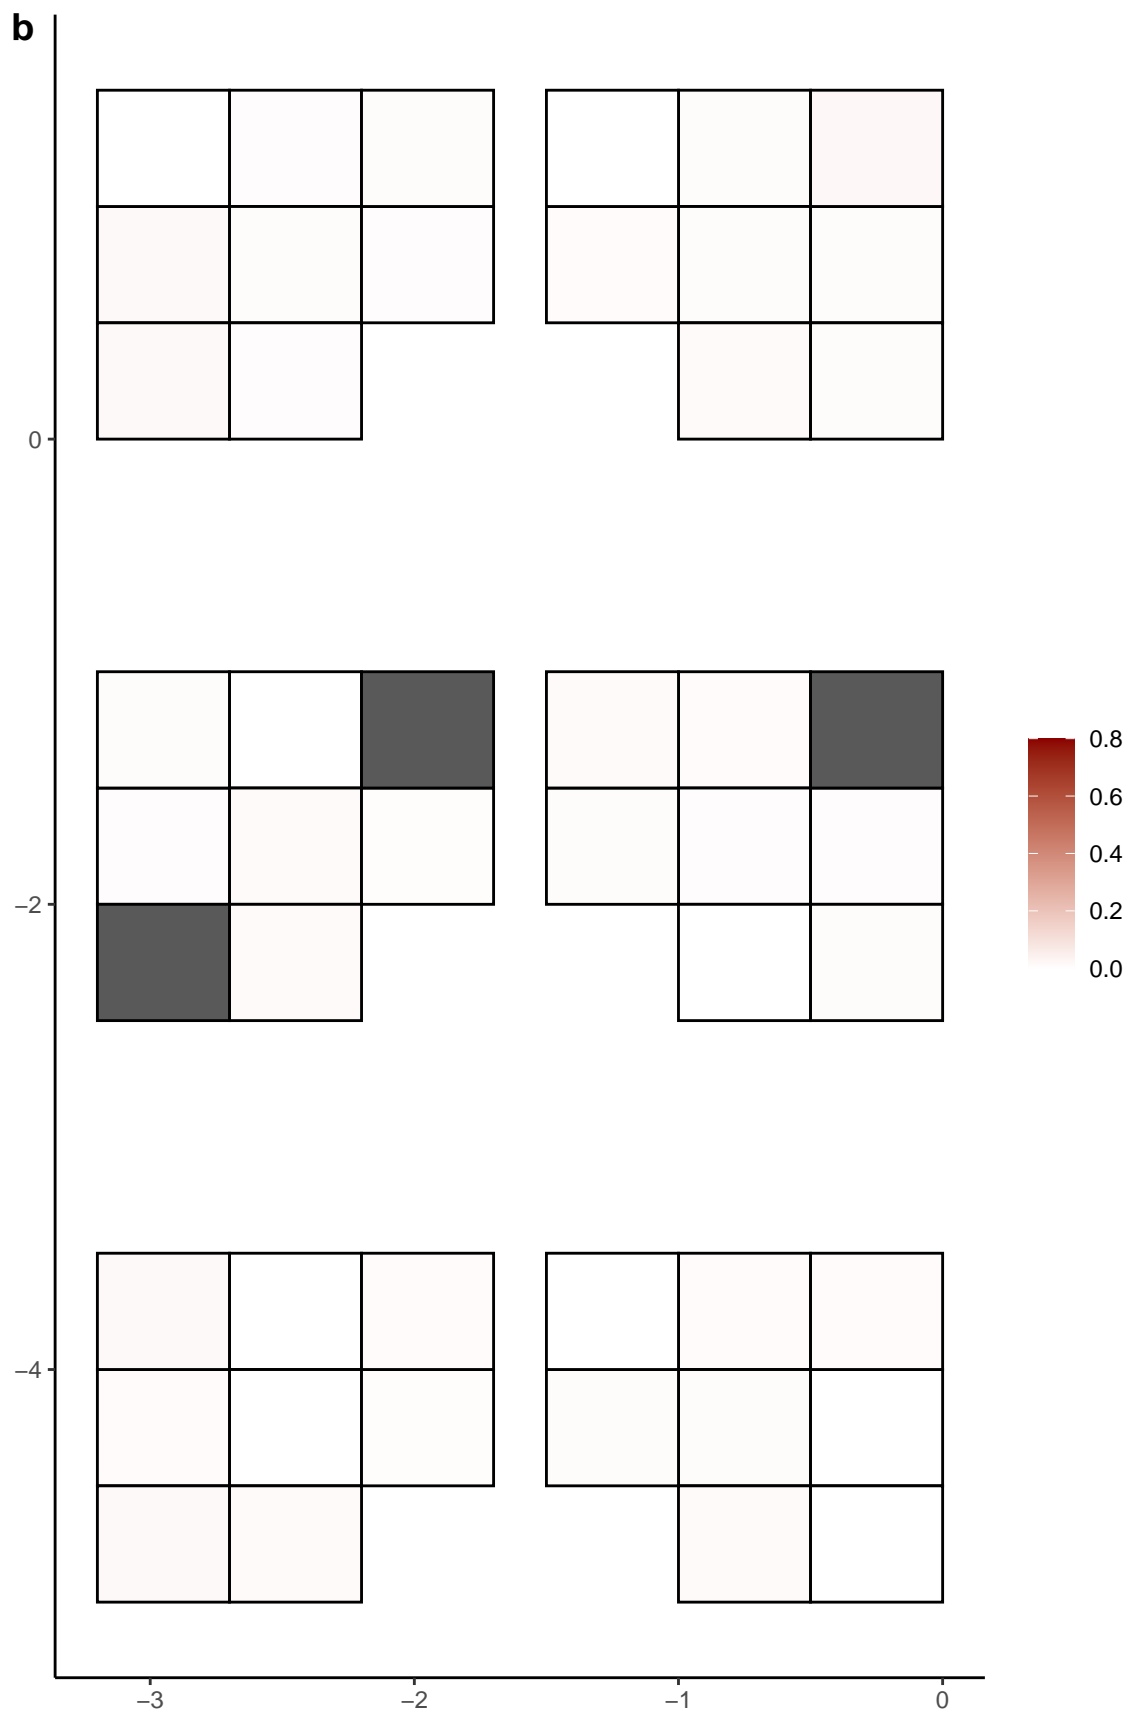

**a** ID05 6-53413261-G-A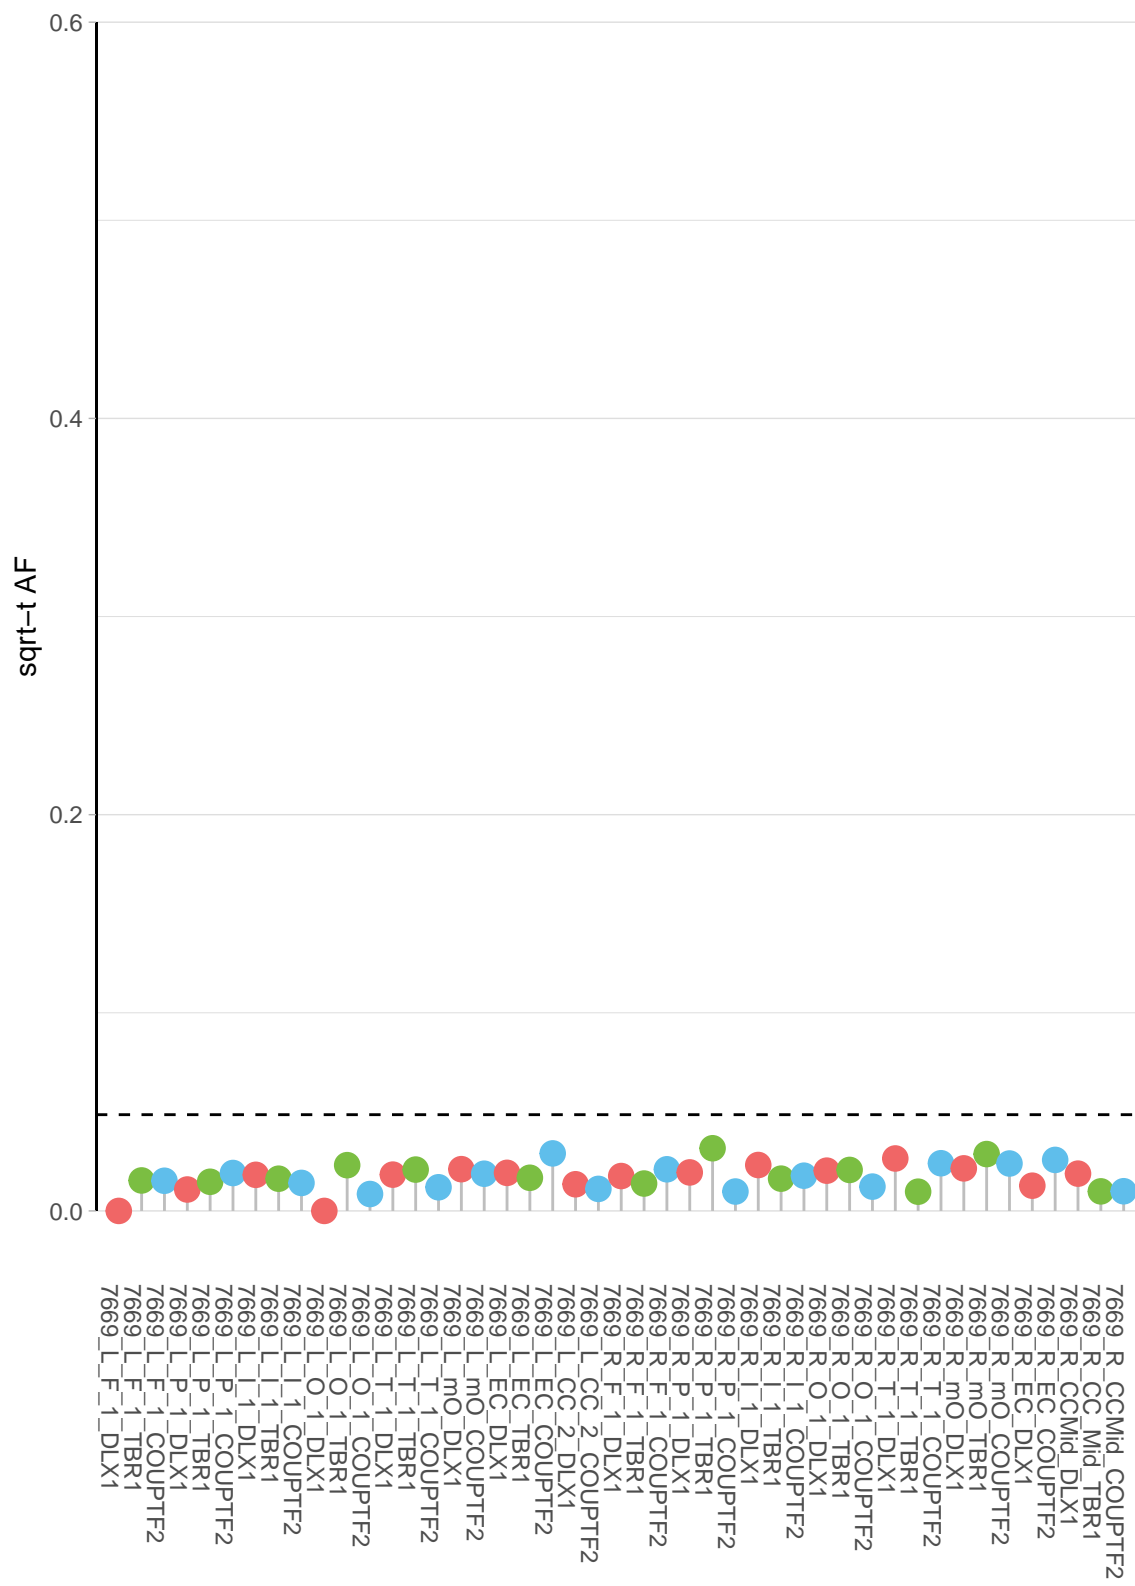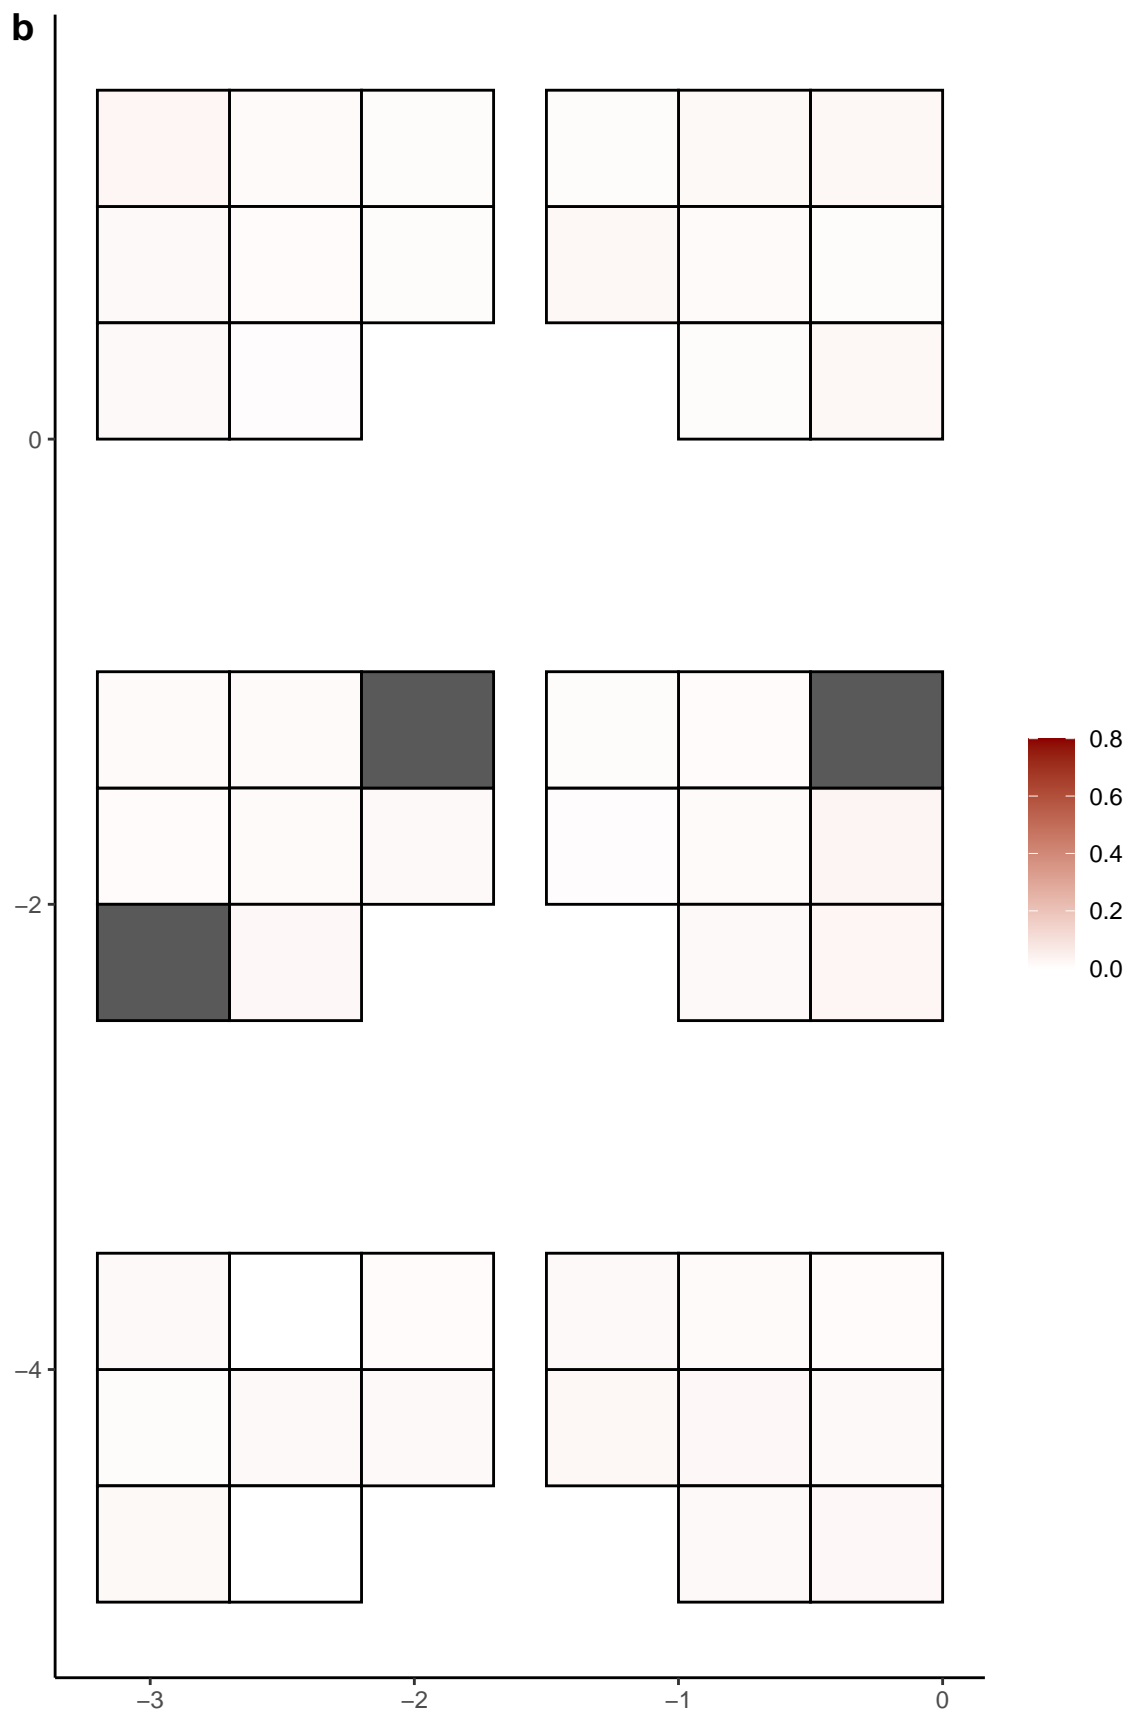

**a** ID05 6-53918630-A-G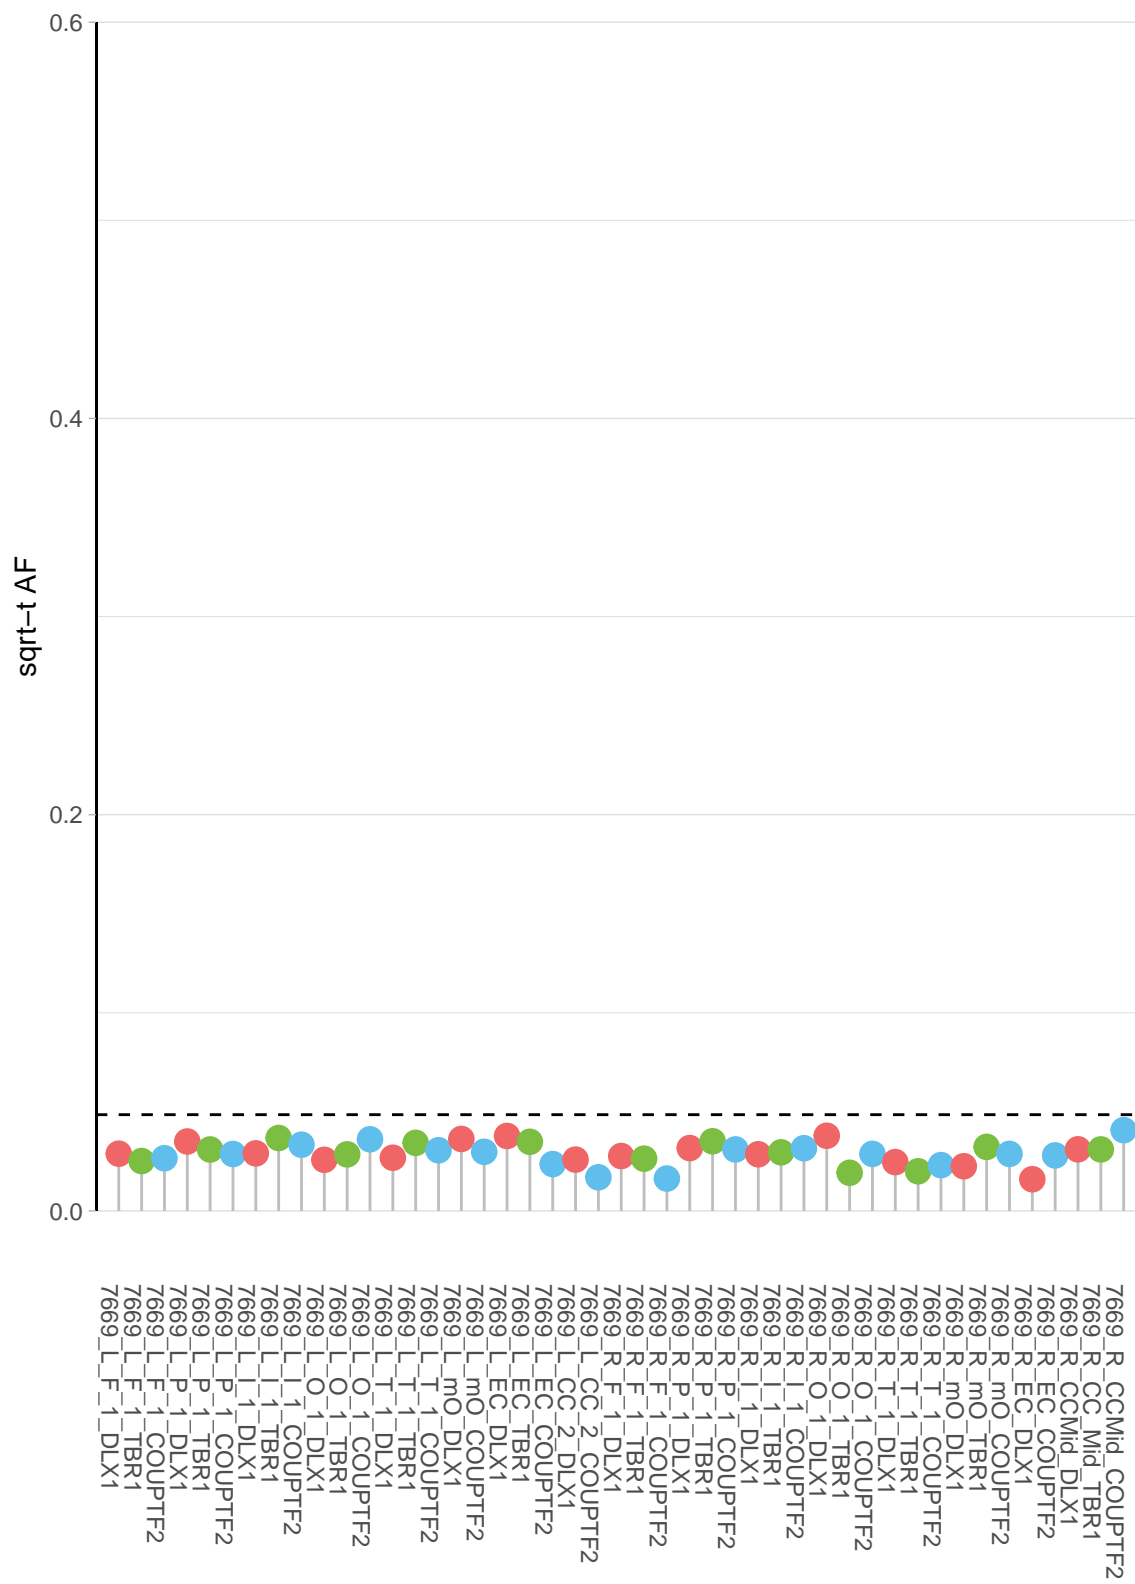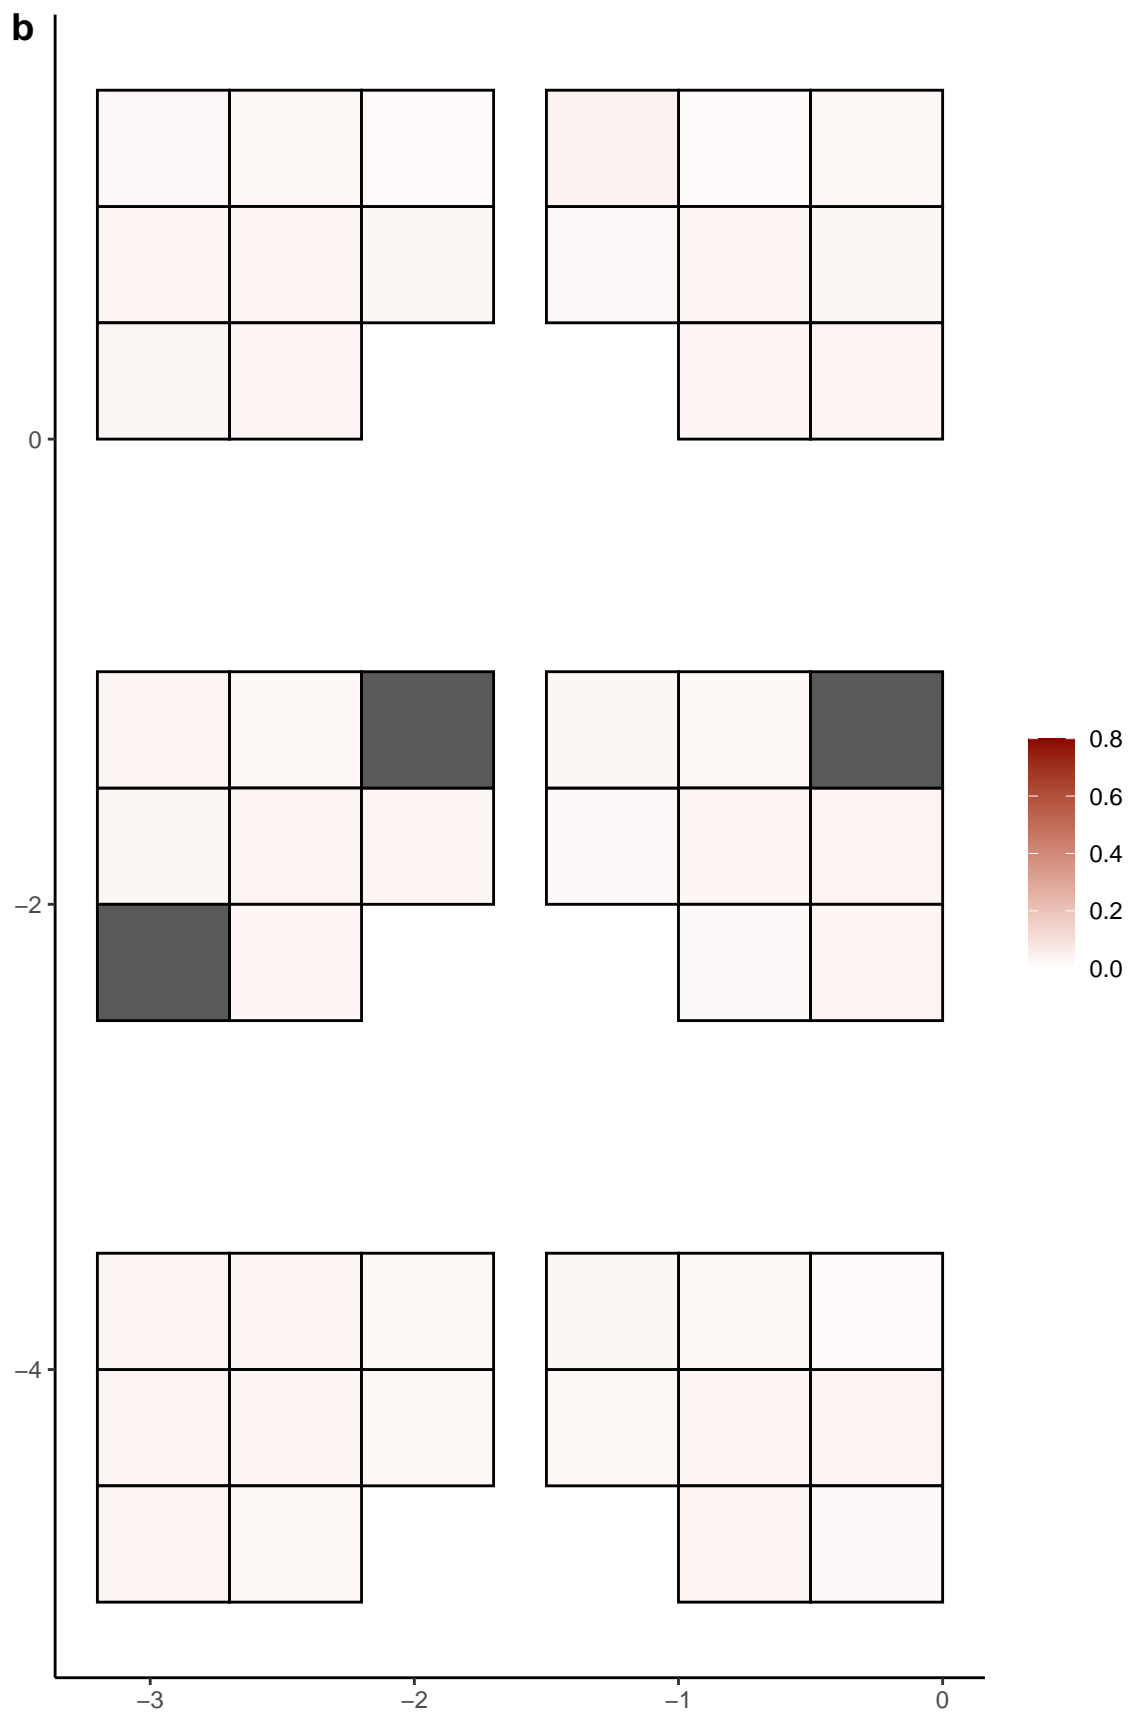





**a** ID05 6-57165516-G-A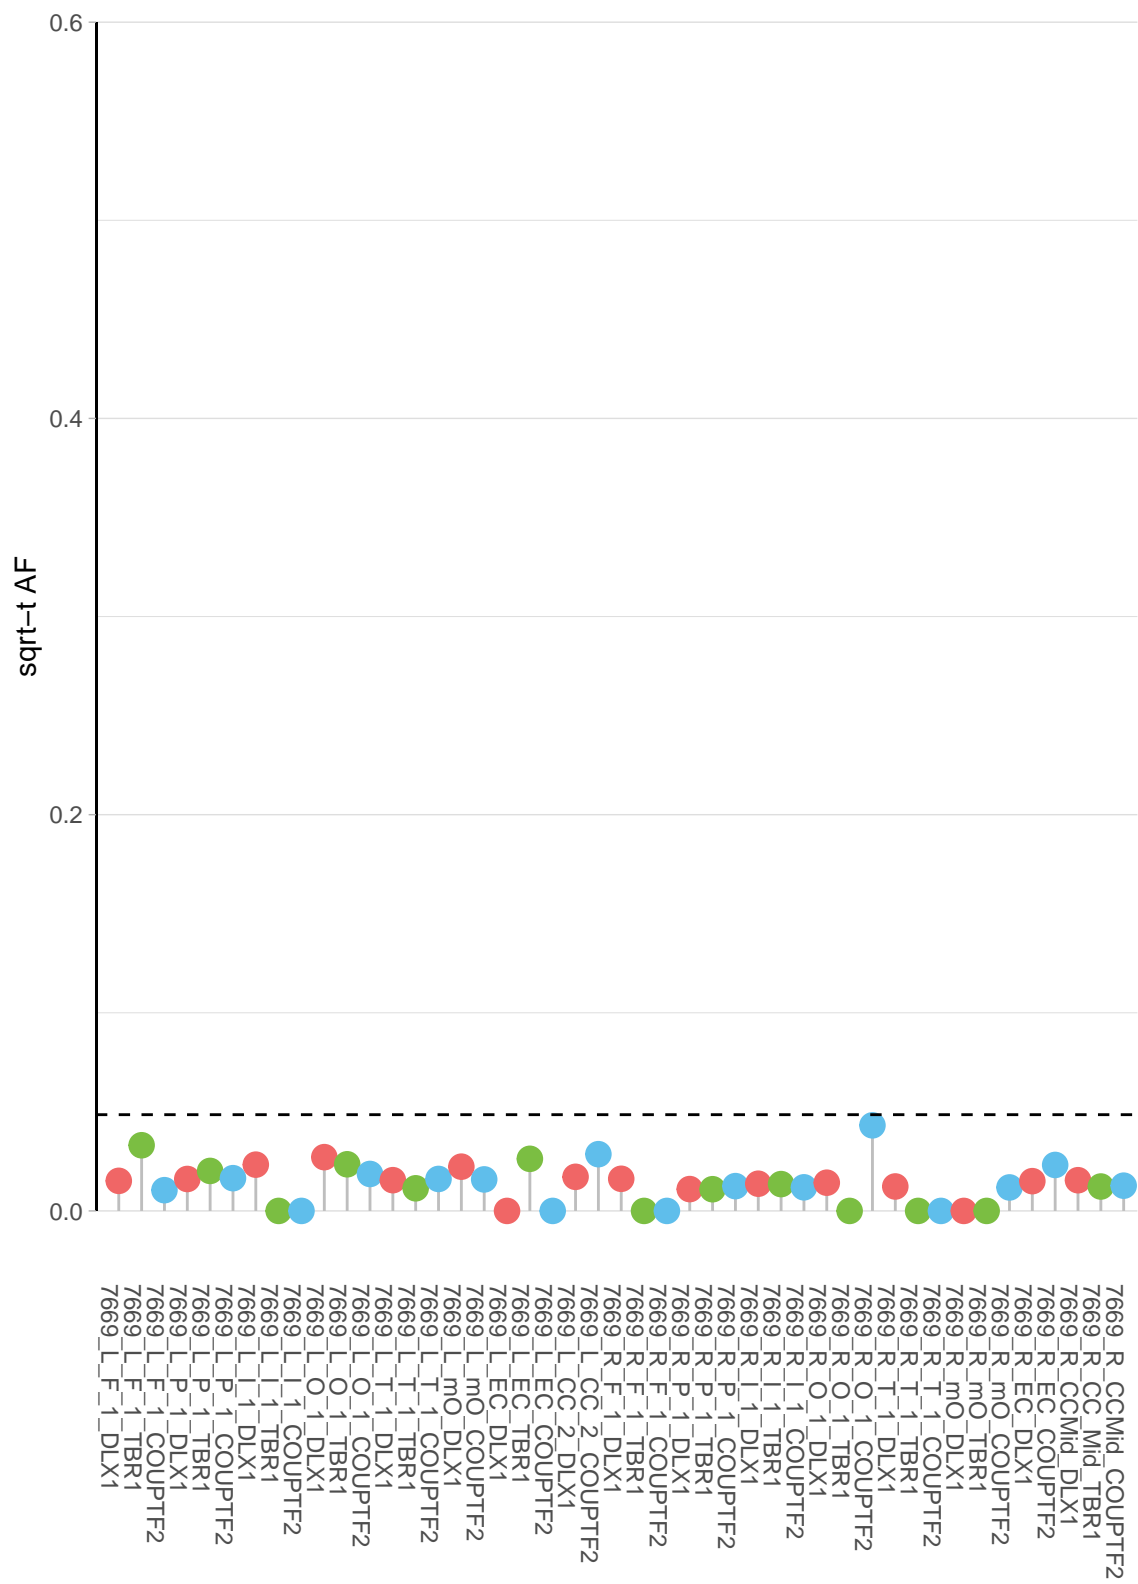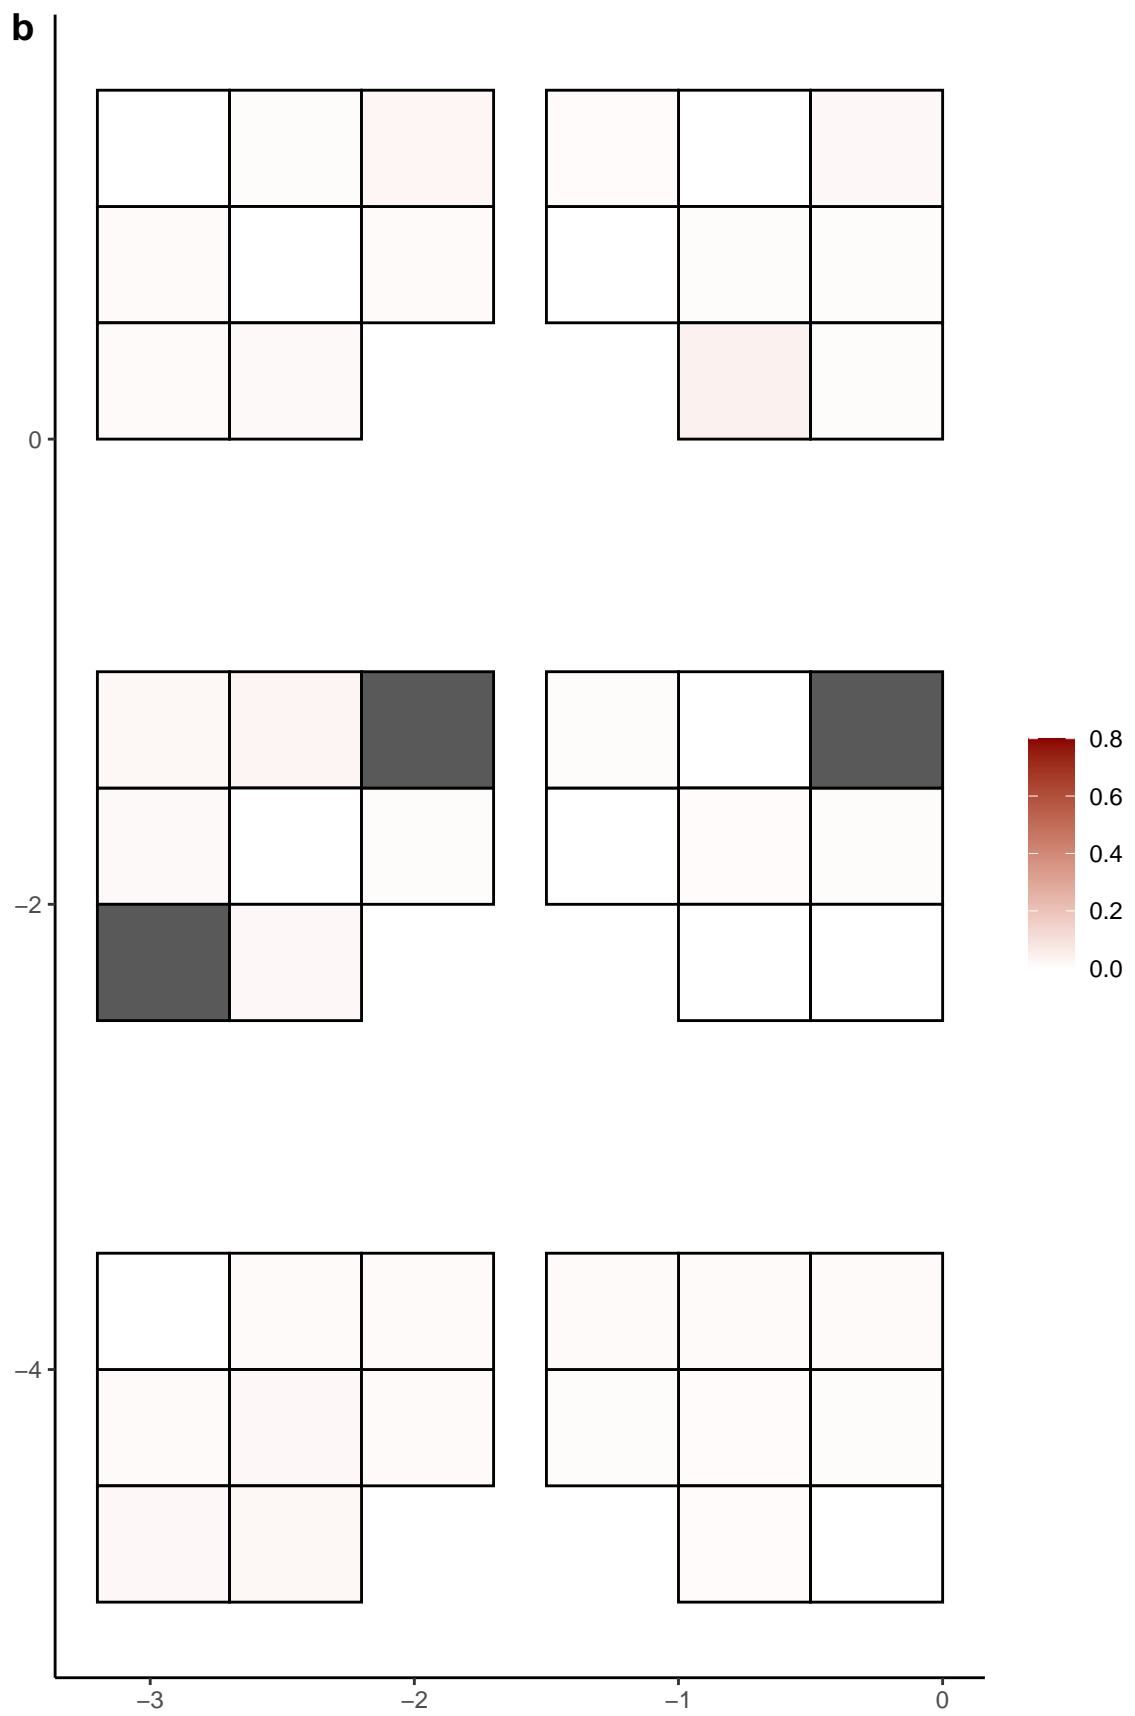

**a** ID05 6-66934852-G-A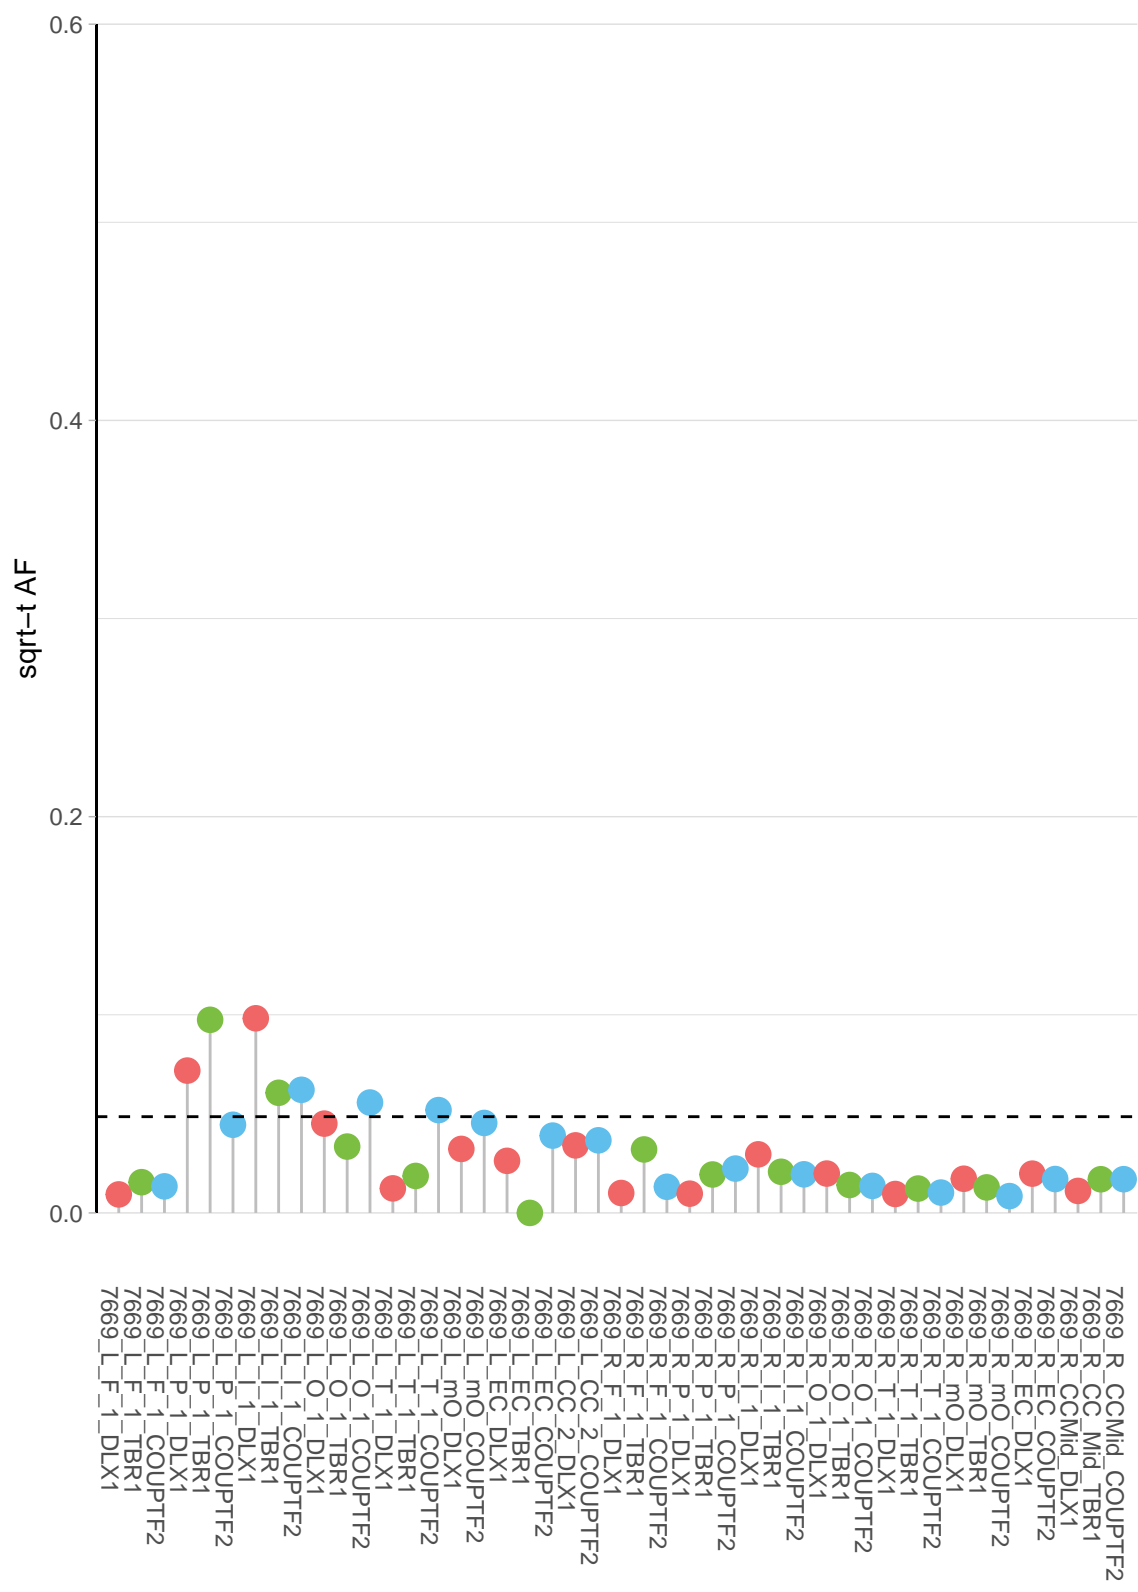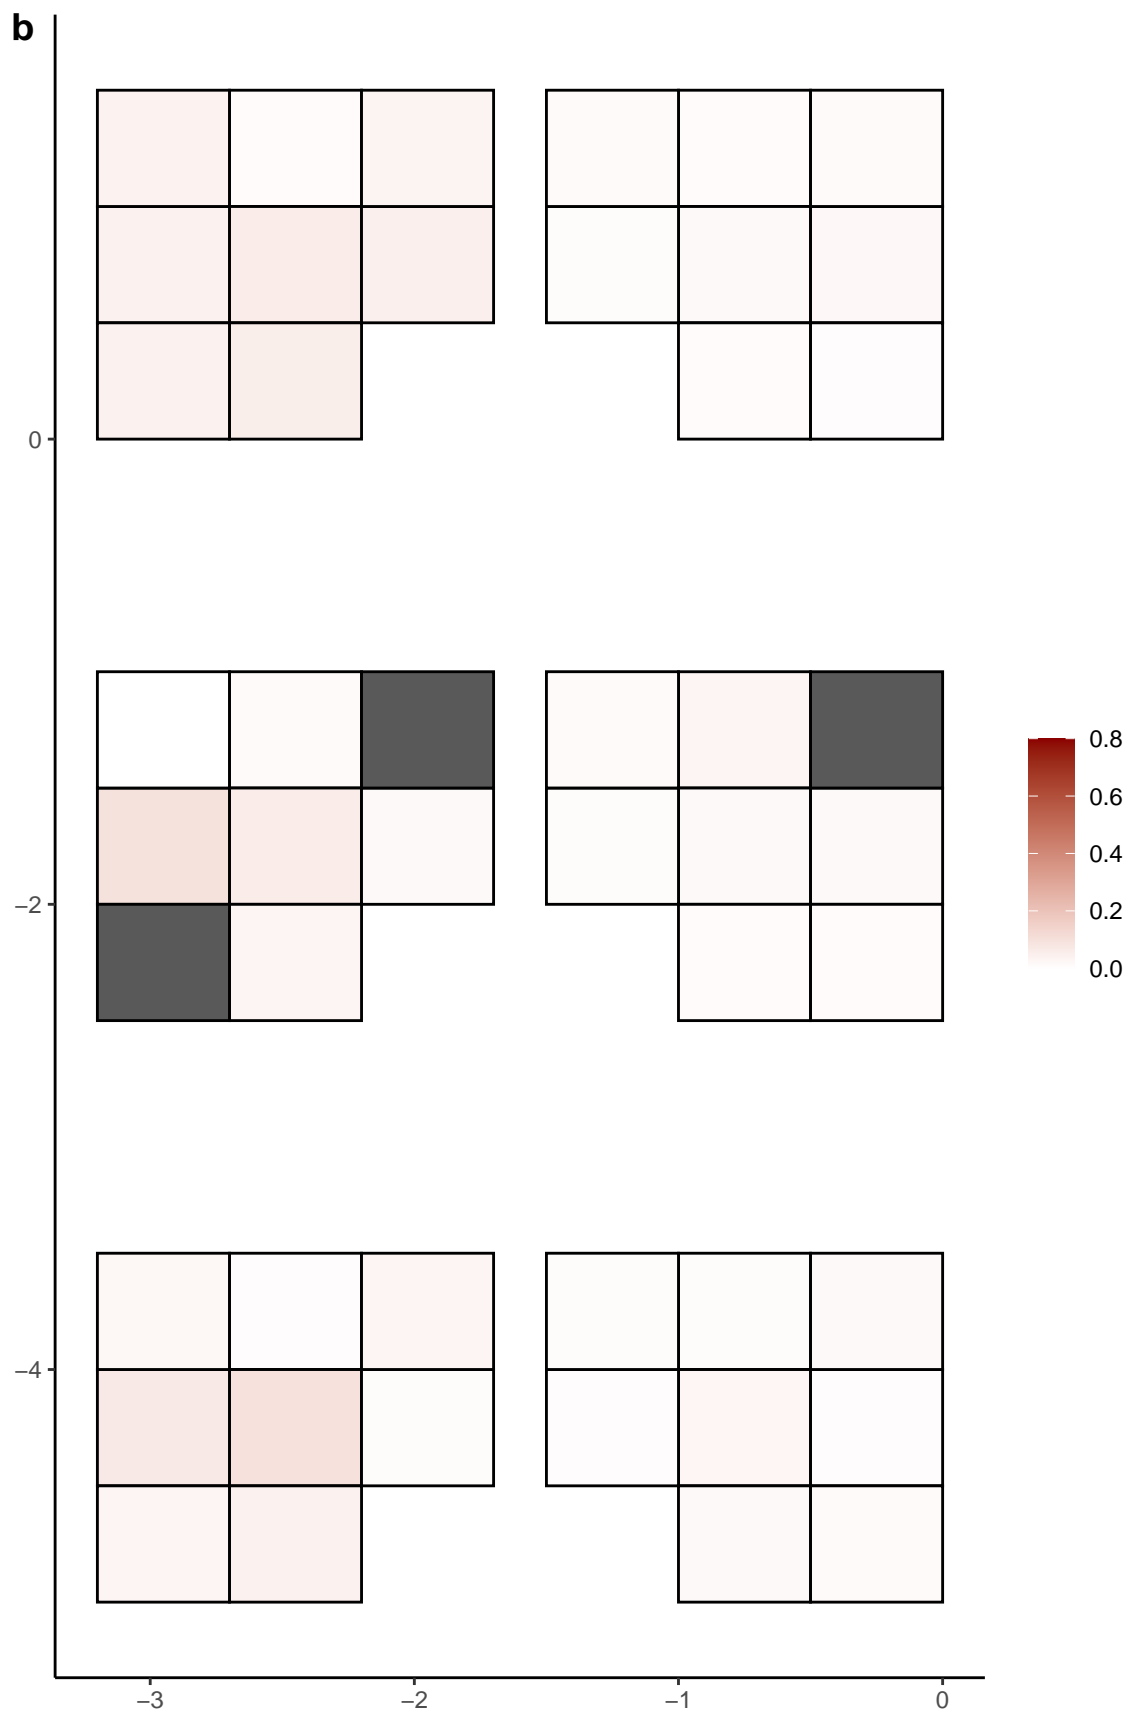

**a** ID05 6-68312890-A-T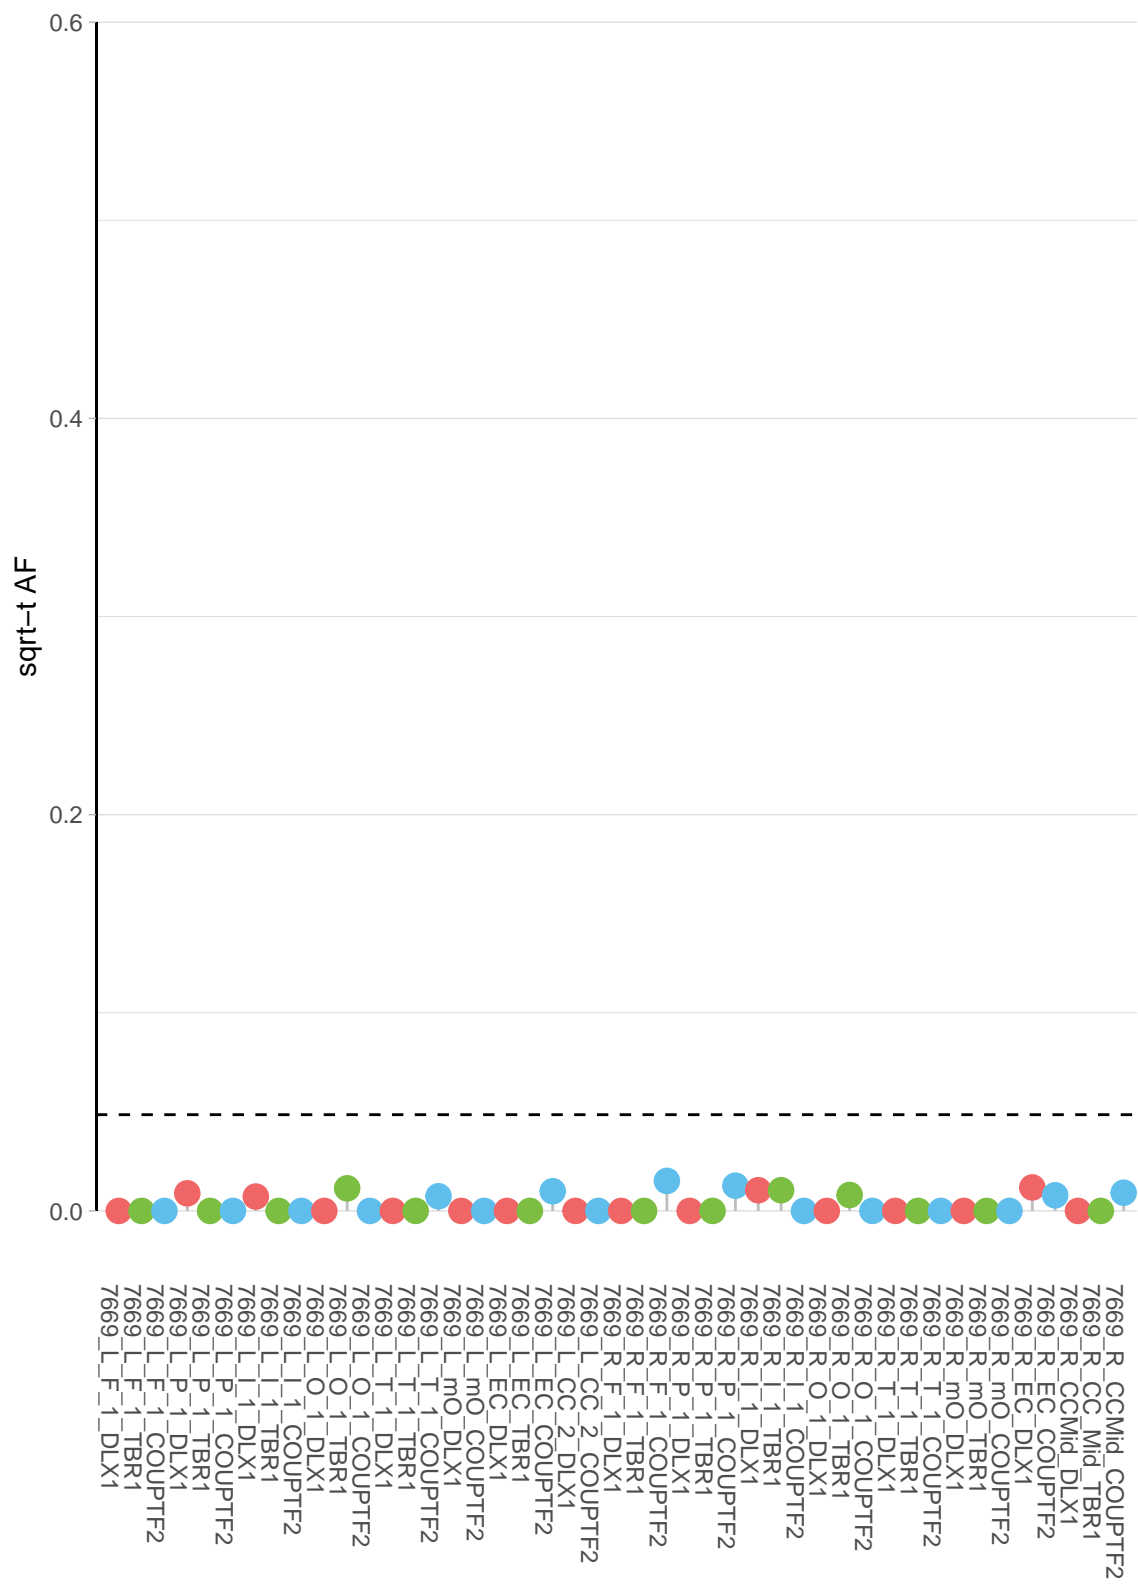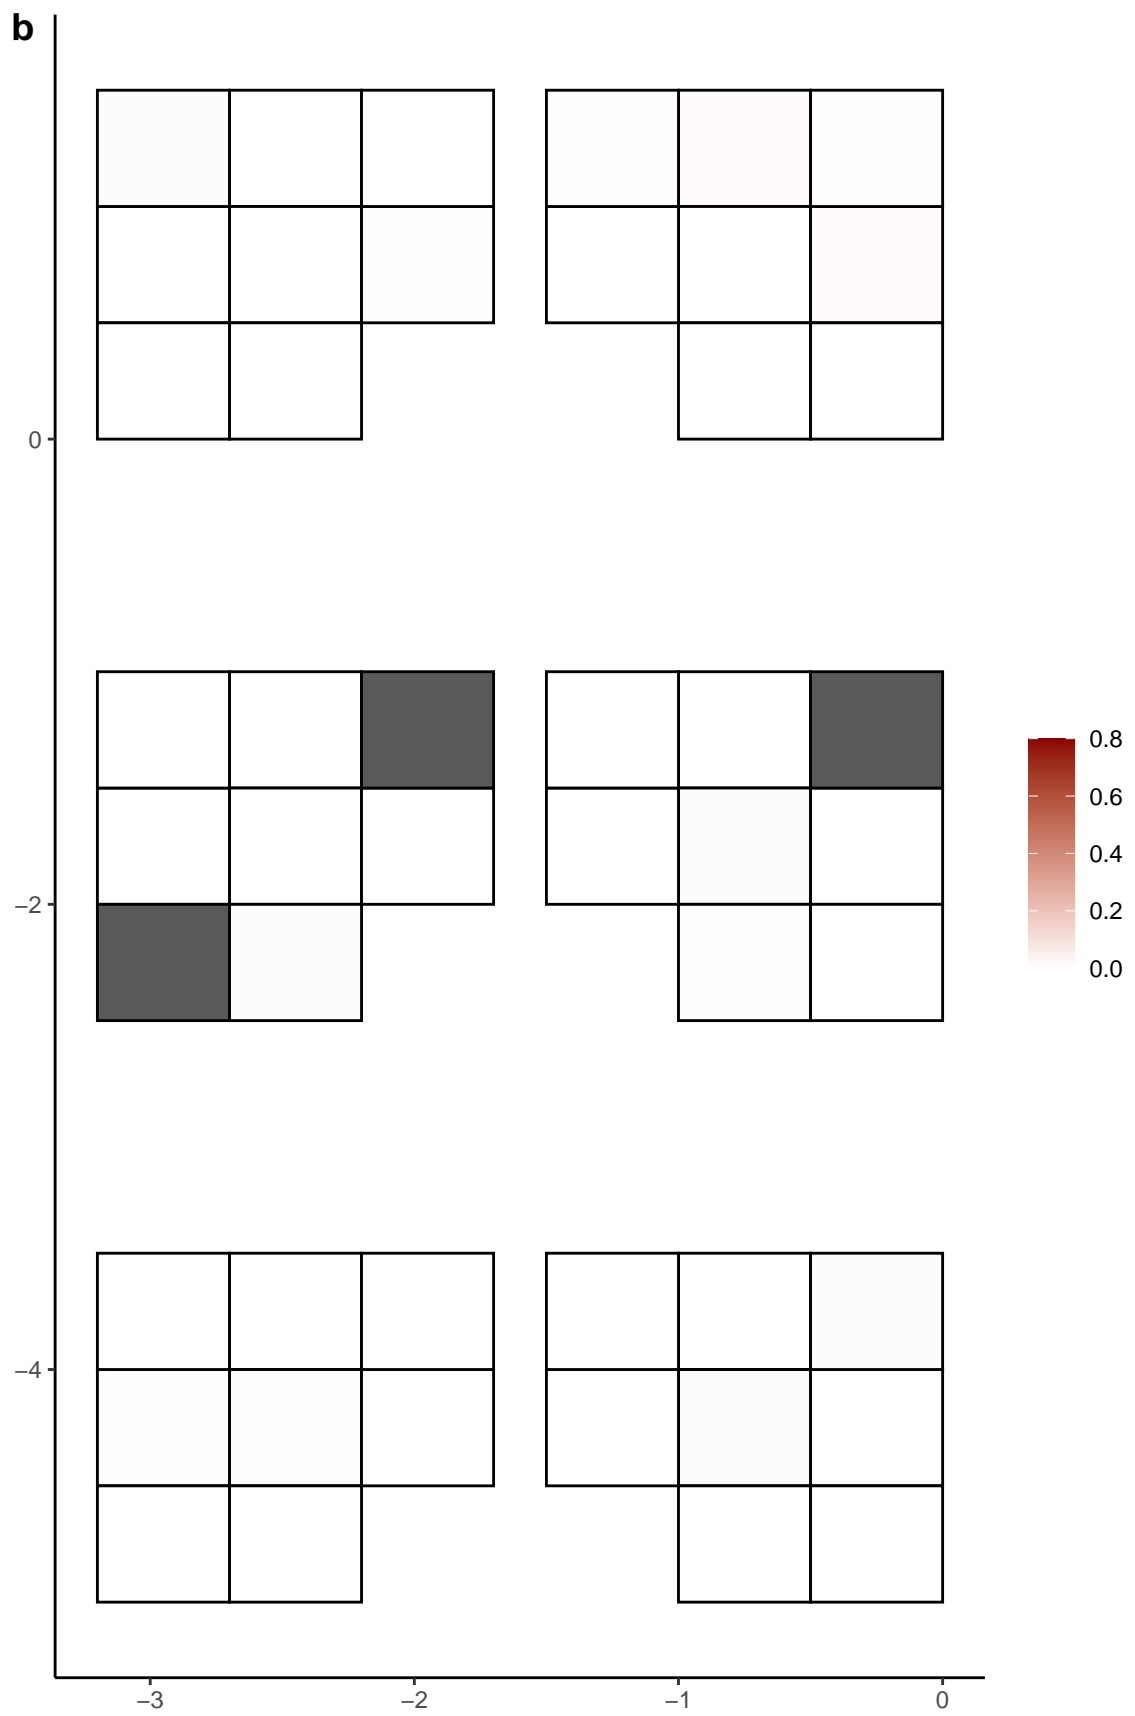



**a** ID05 6-92211371-C-T

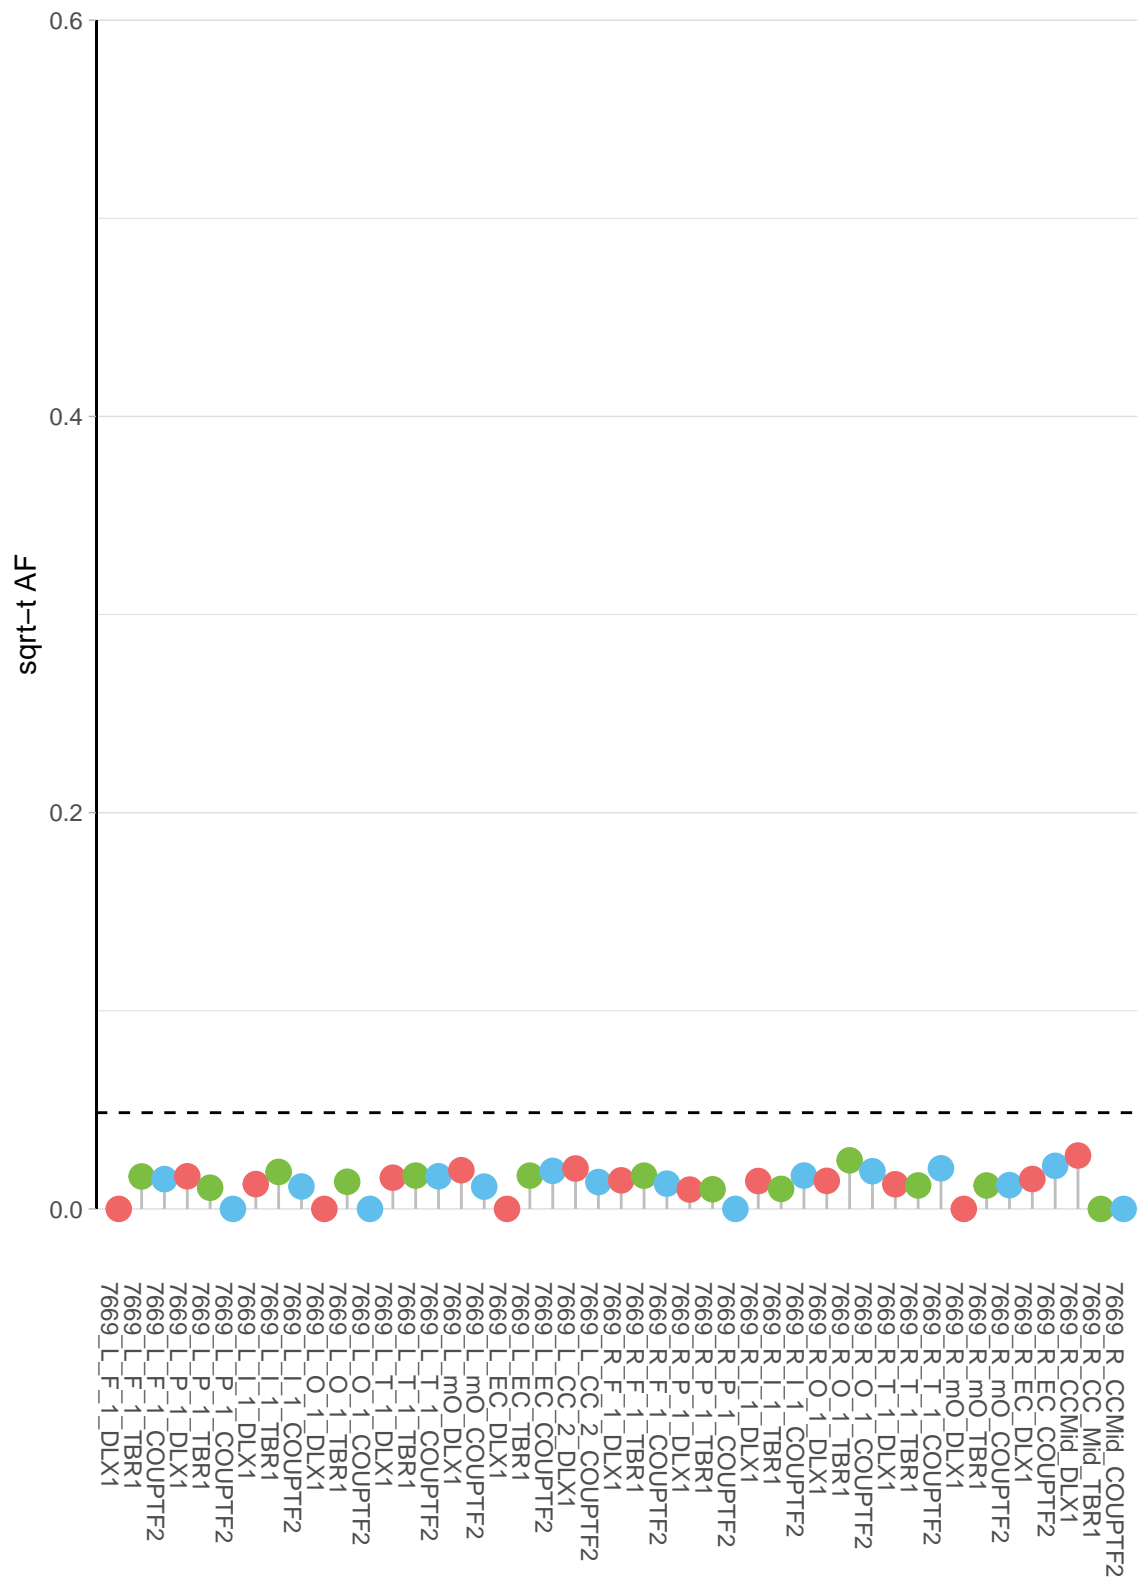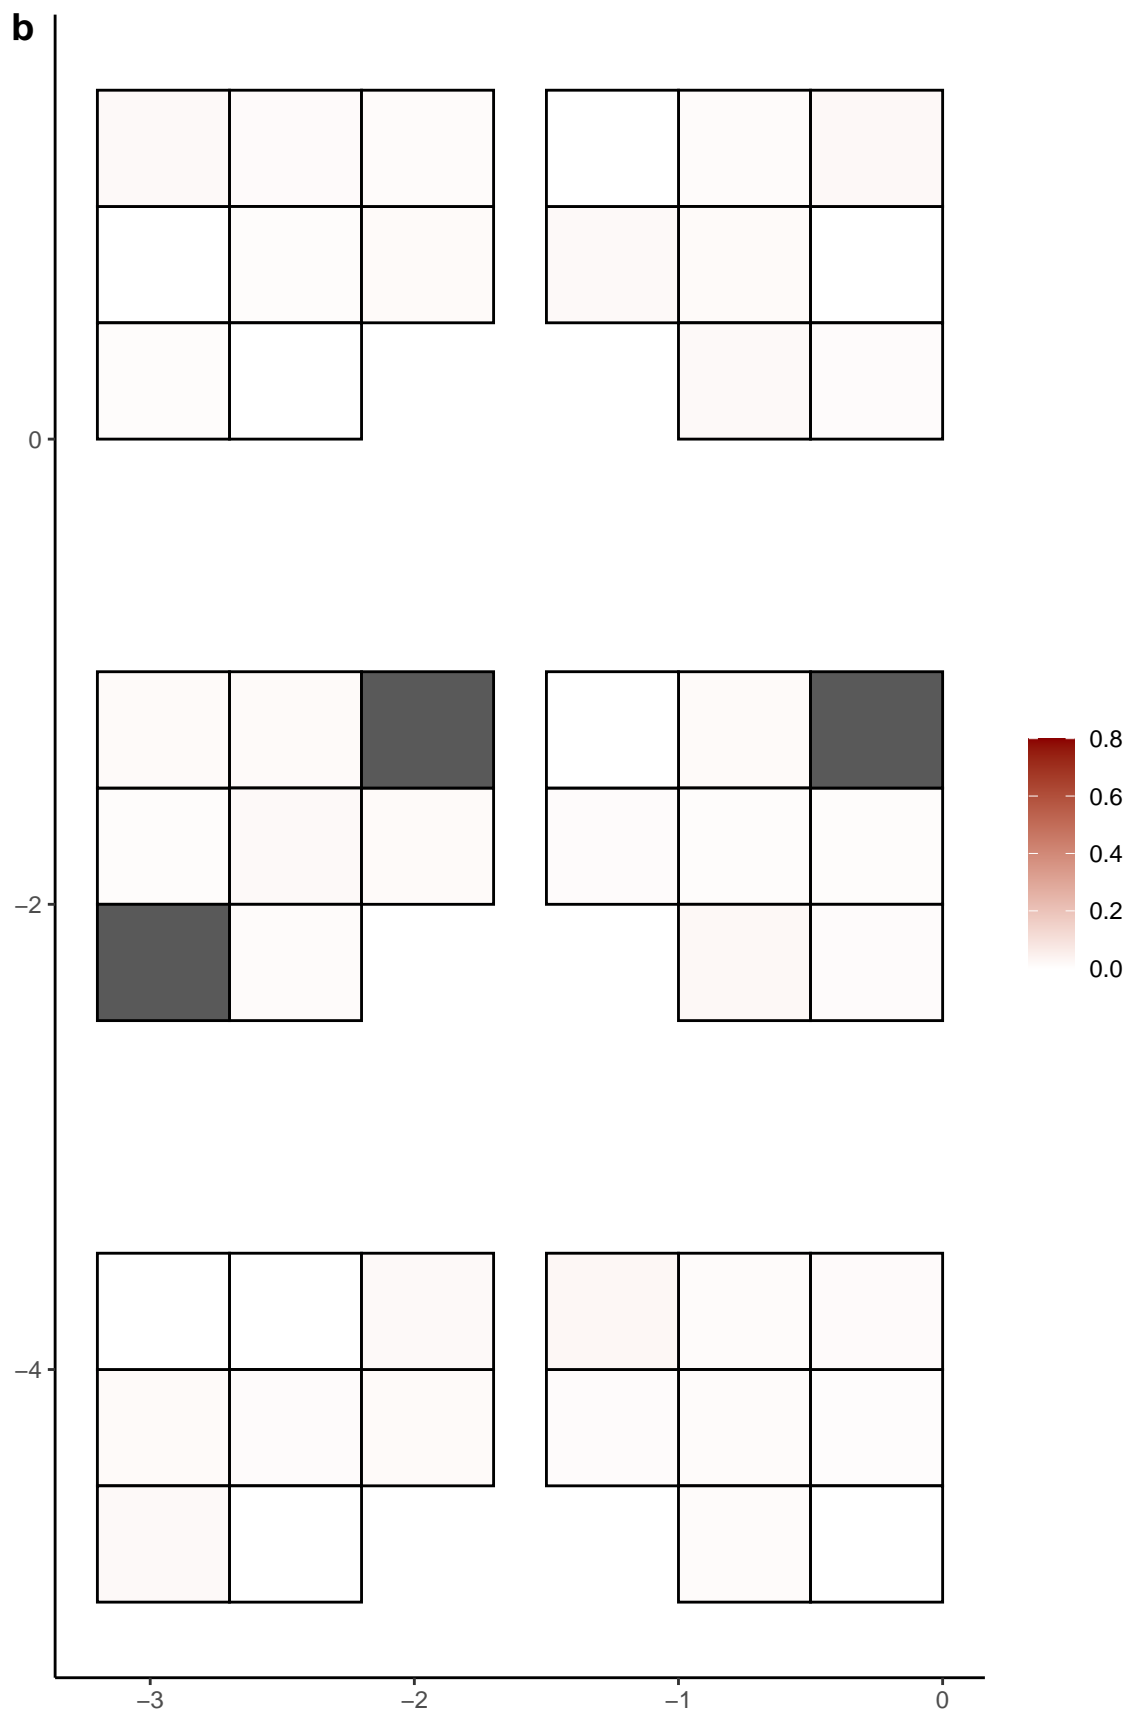

**a** ID05 6-94855972-G-A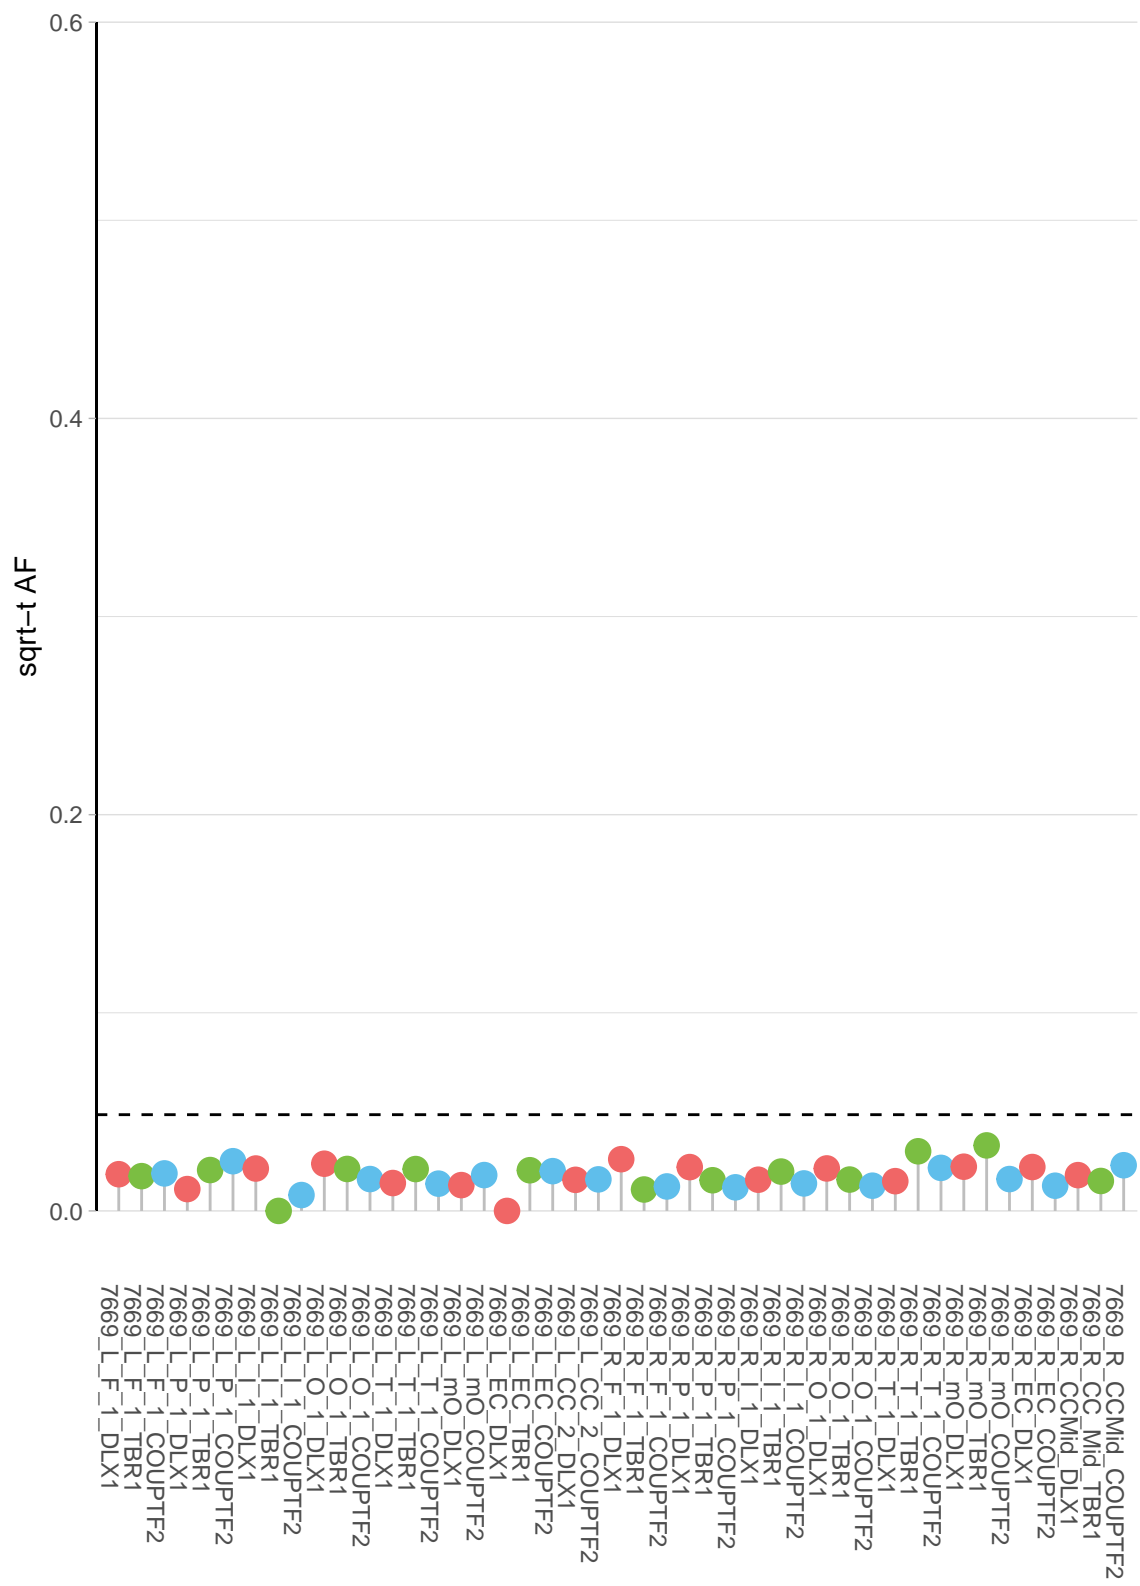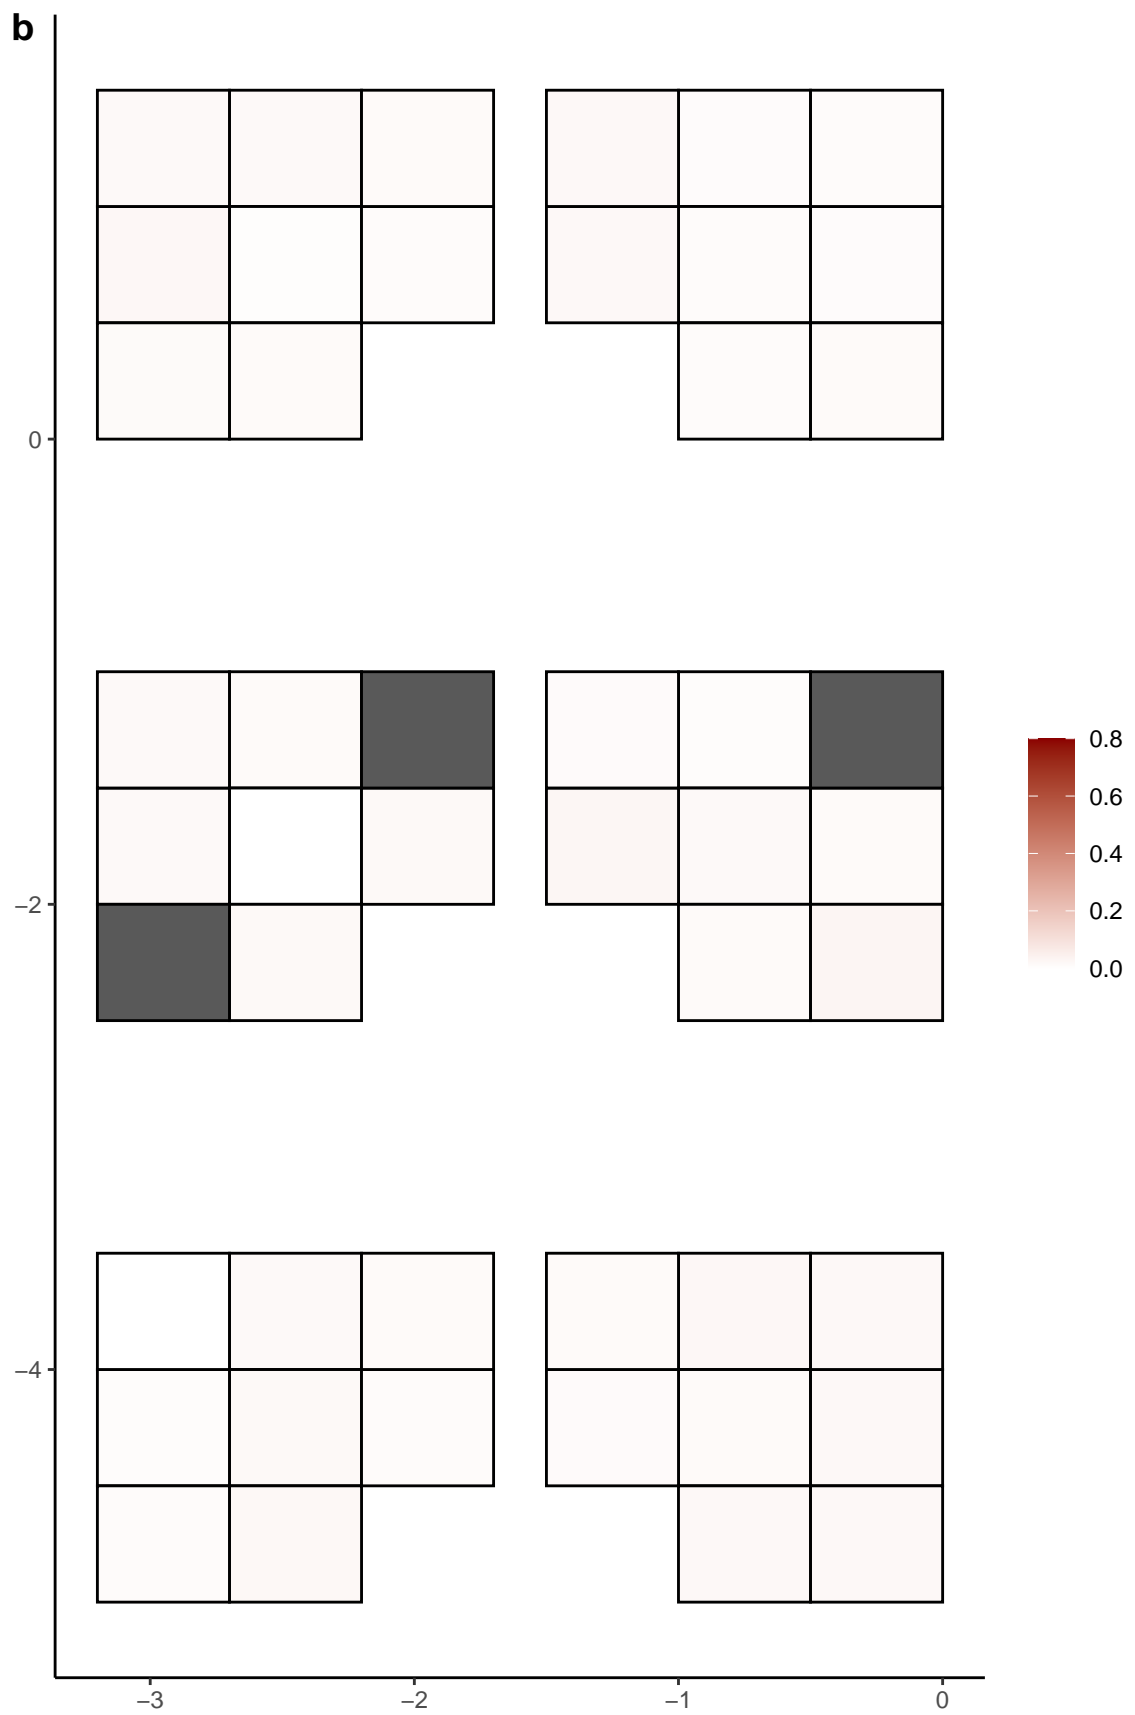







**a** ID05 6–99090478–G–T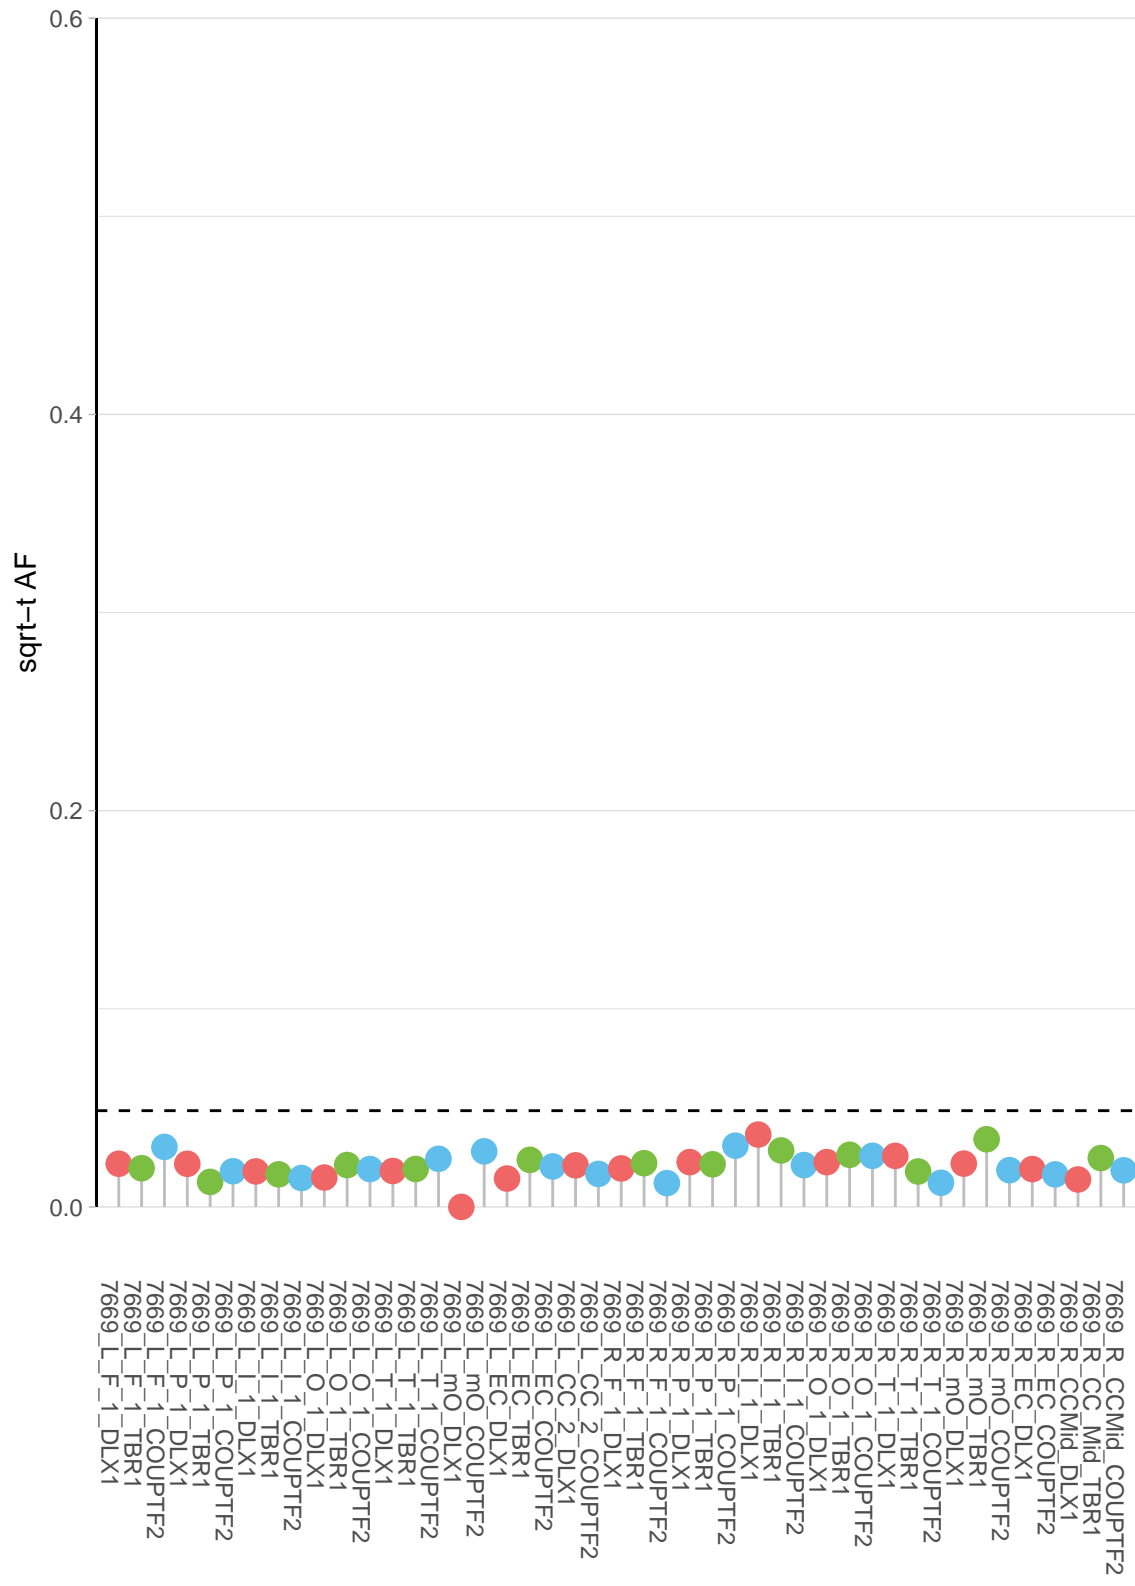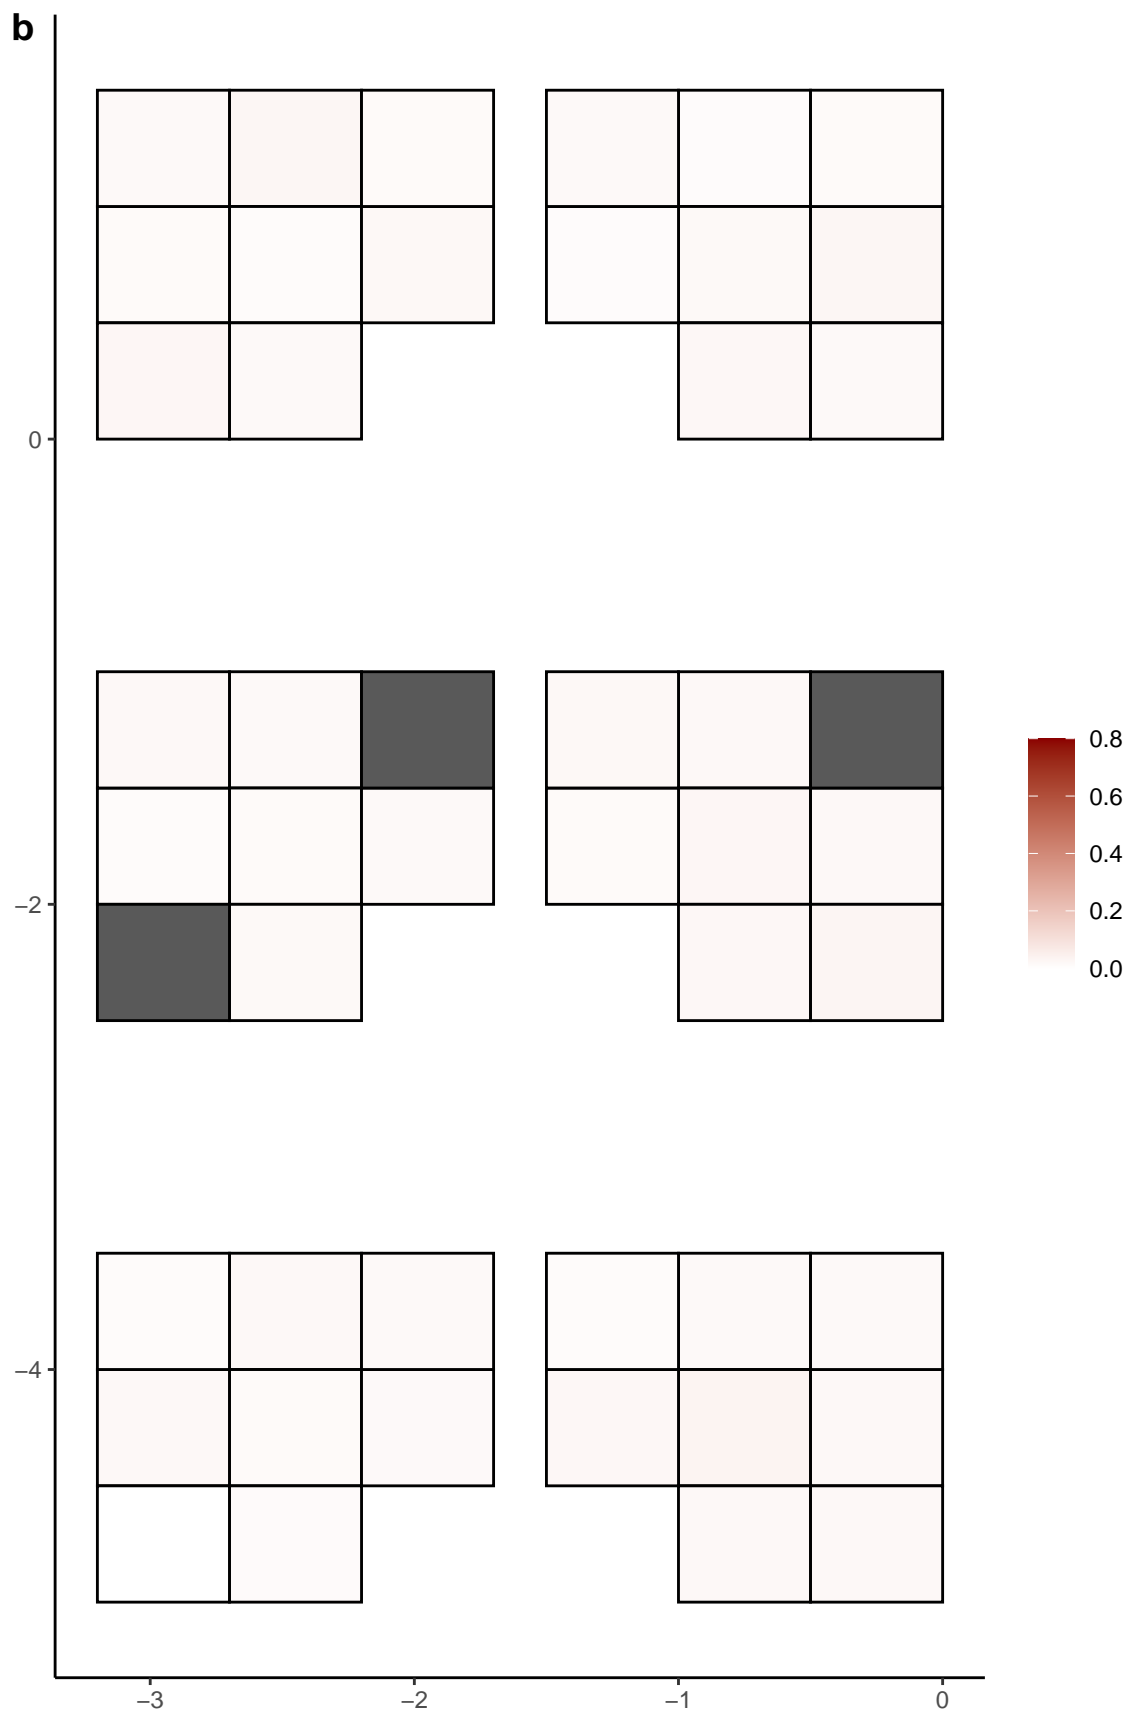



**a** ID05 7-10285800-T-C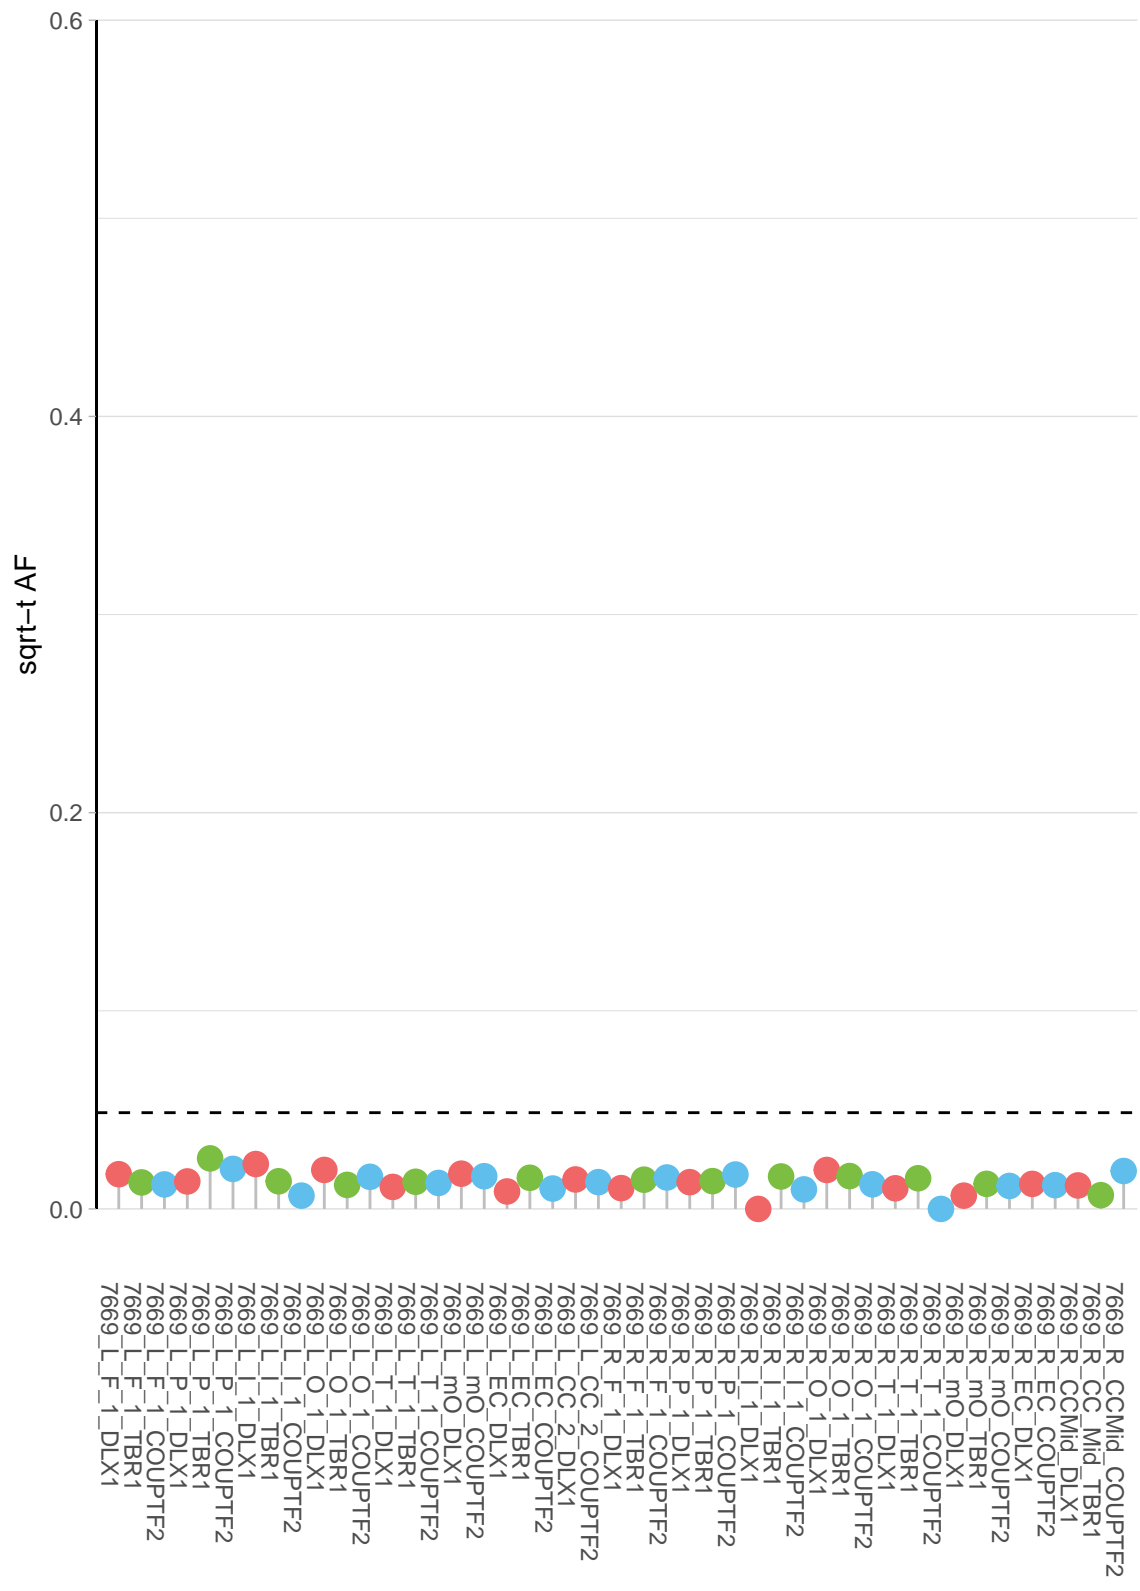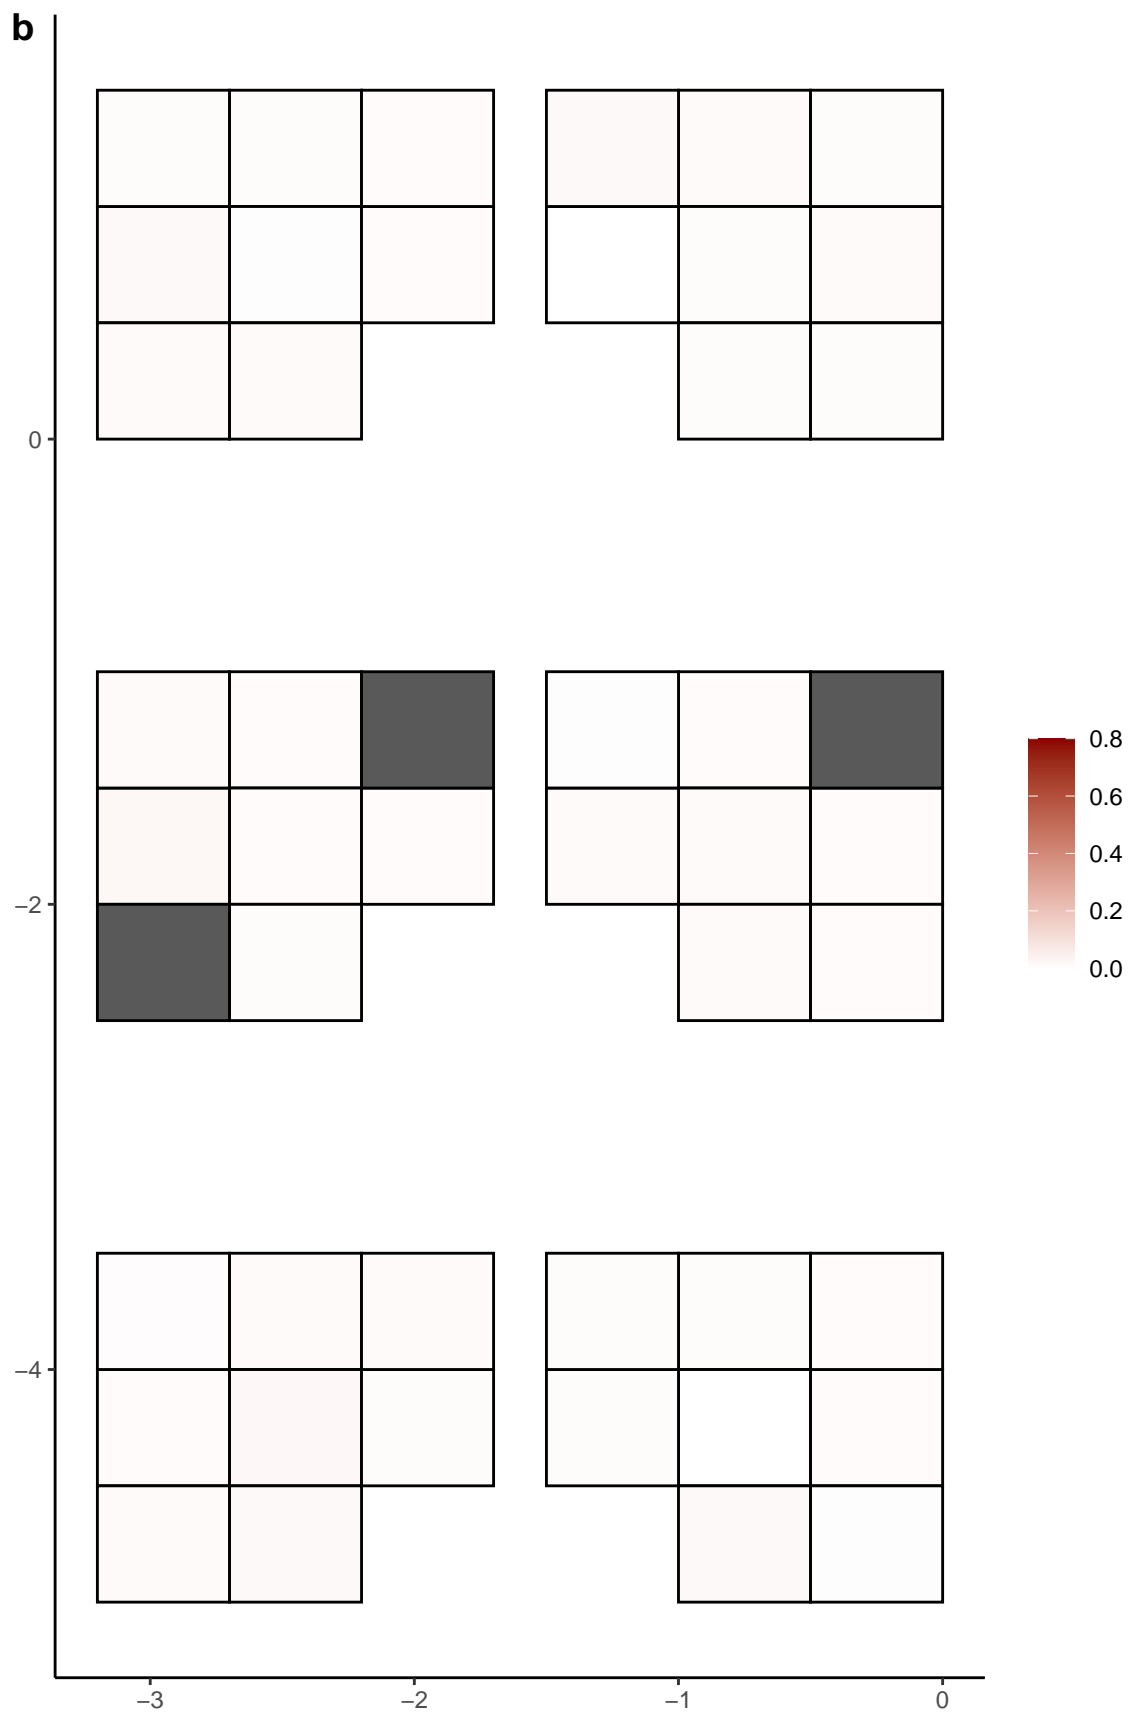

**a** ID05 7-109736410-A-T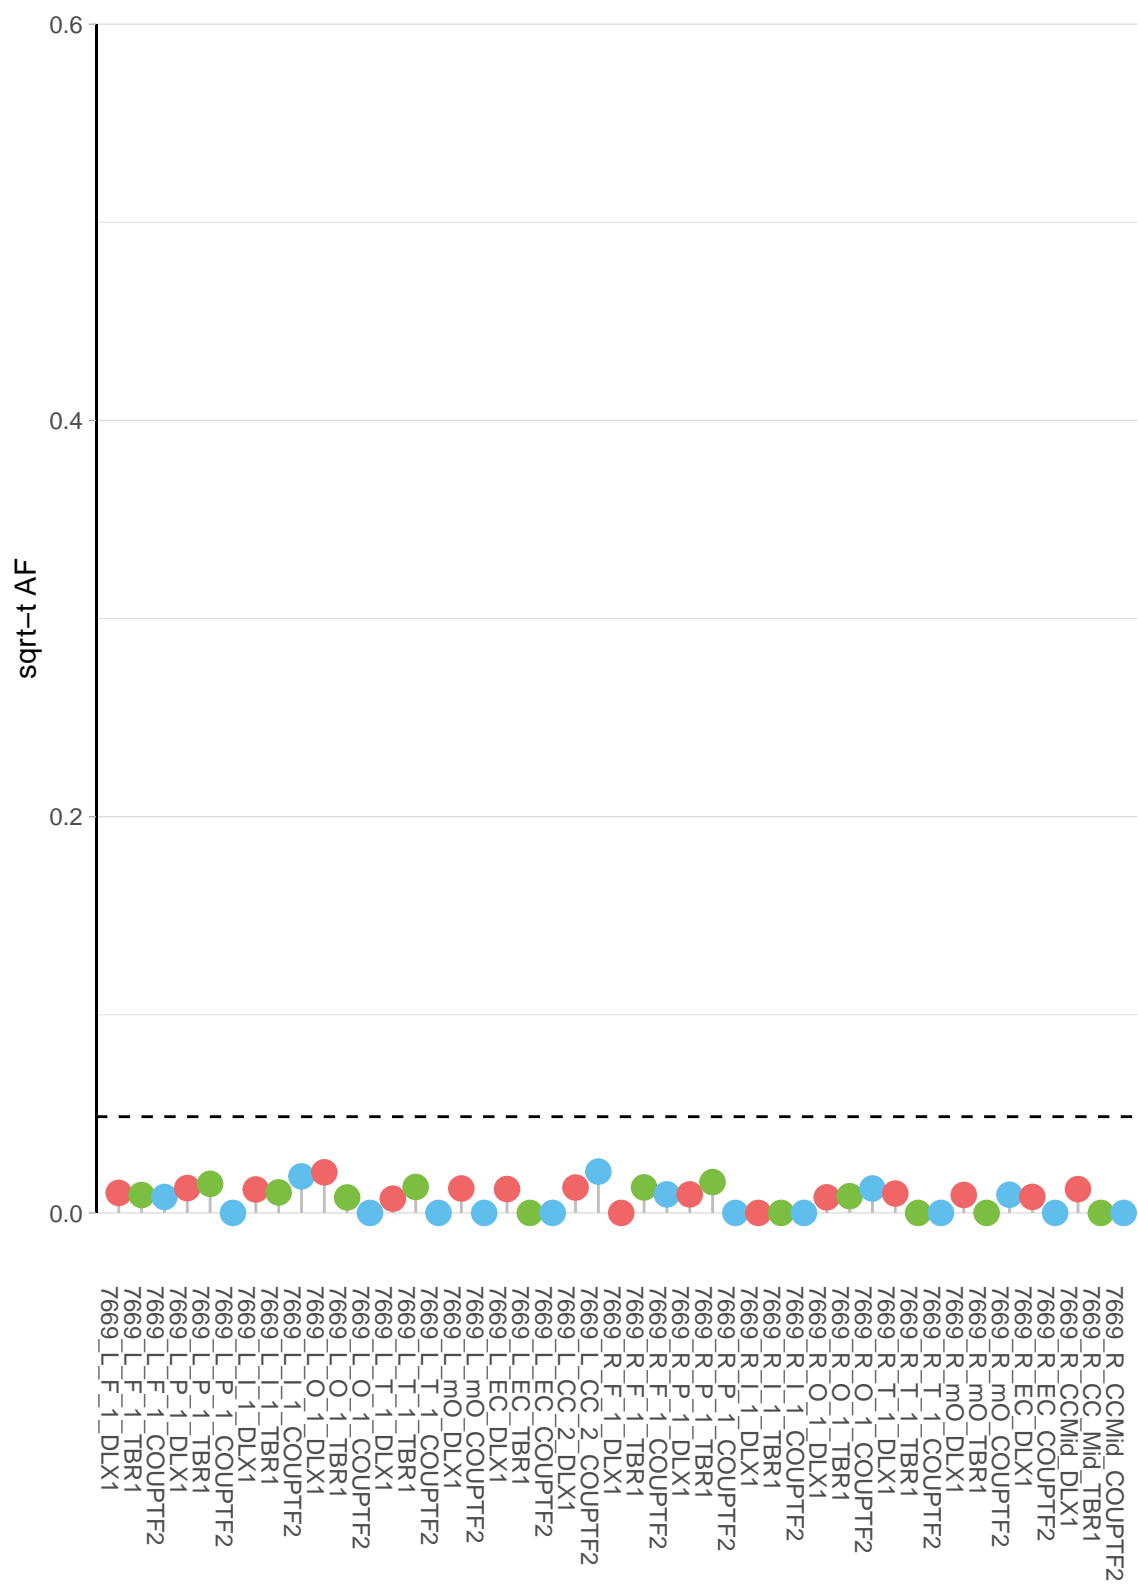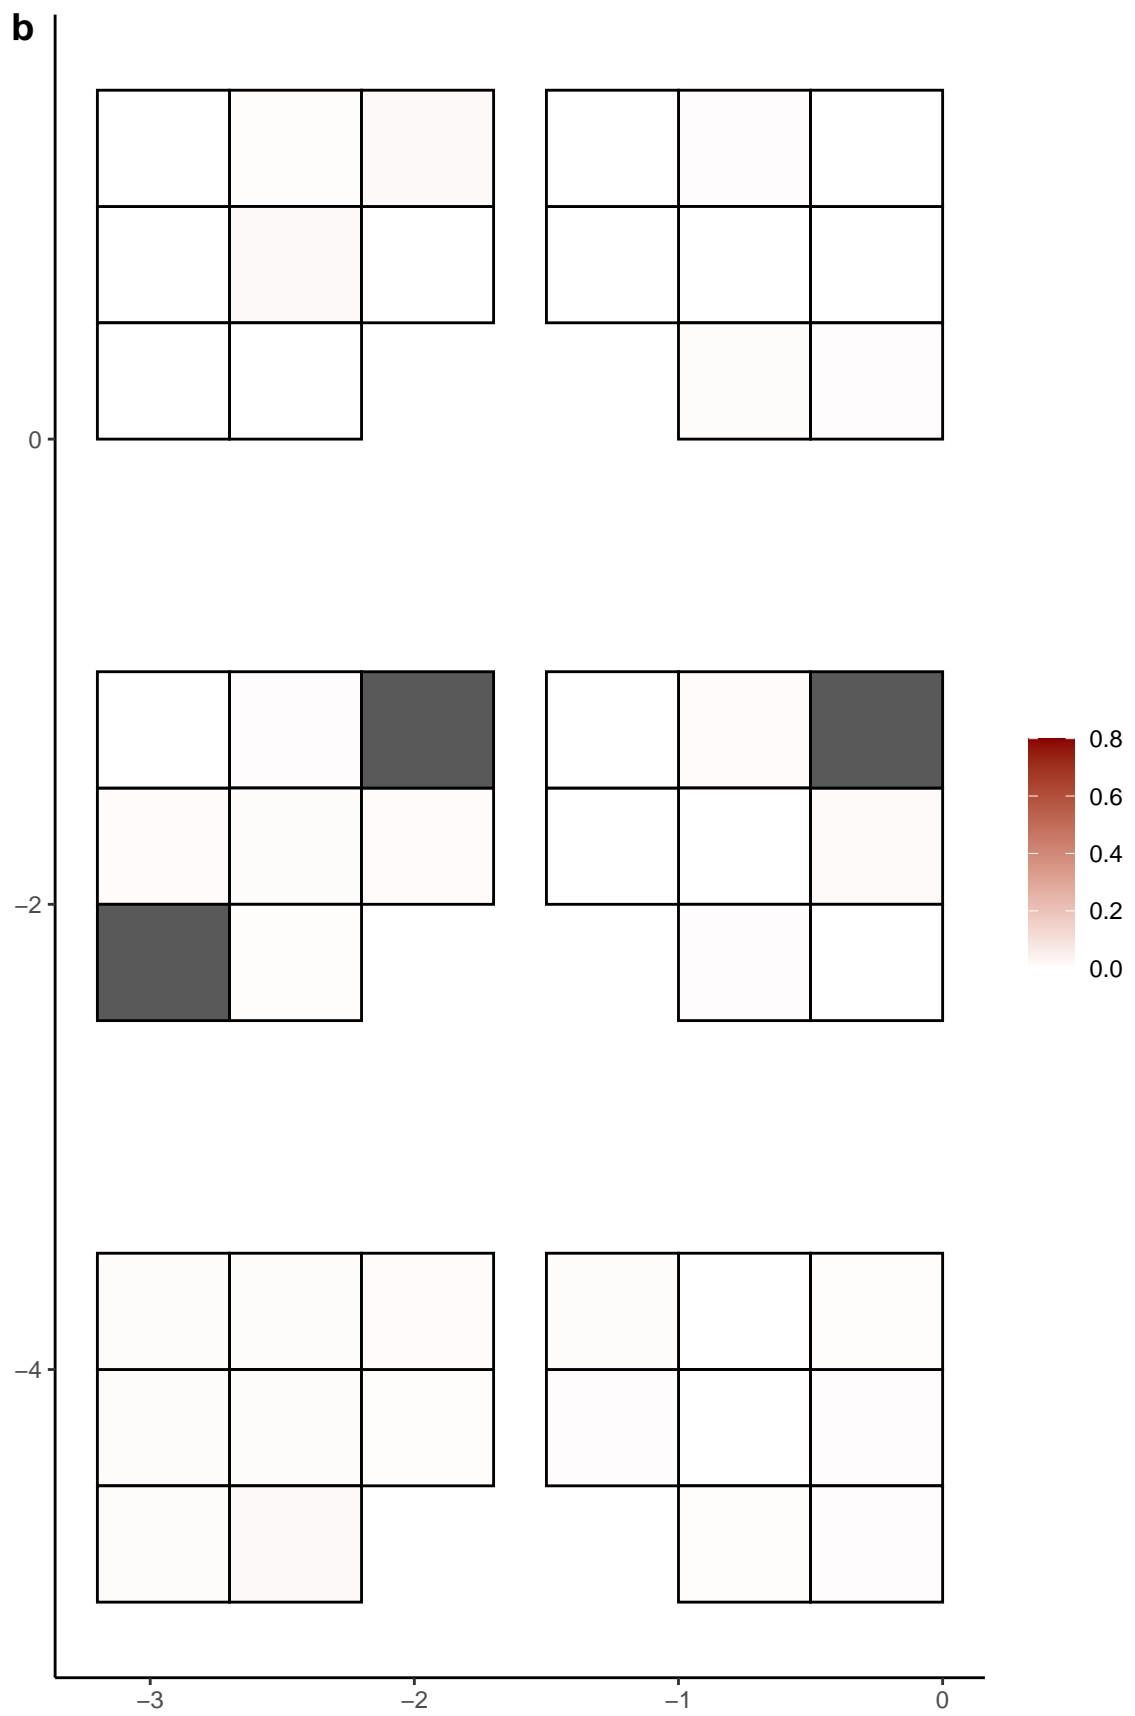

**a** ID05 7-114017234-C-T

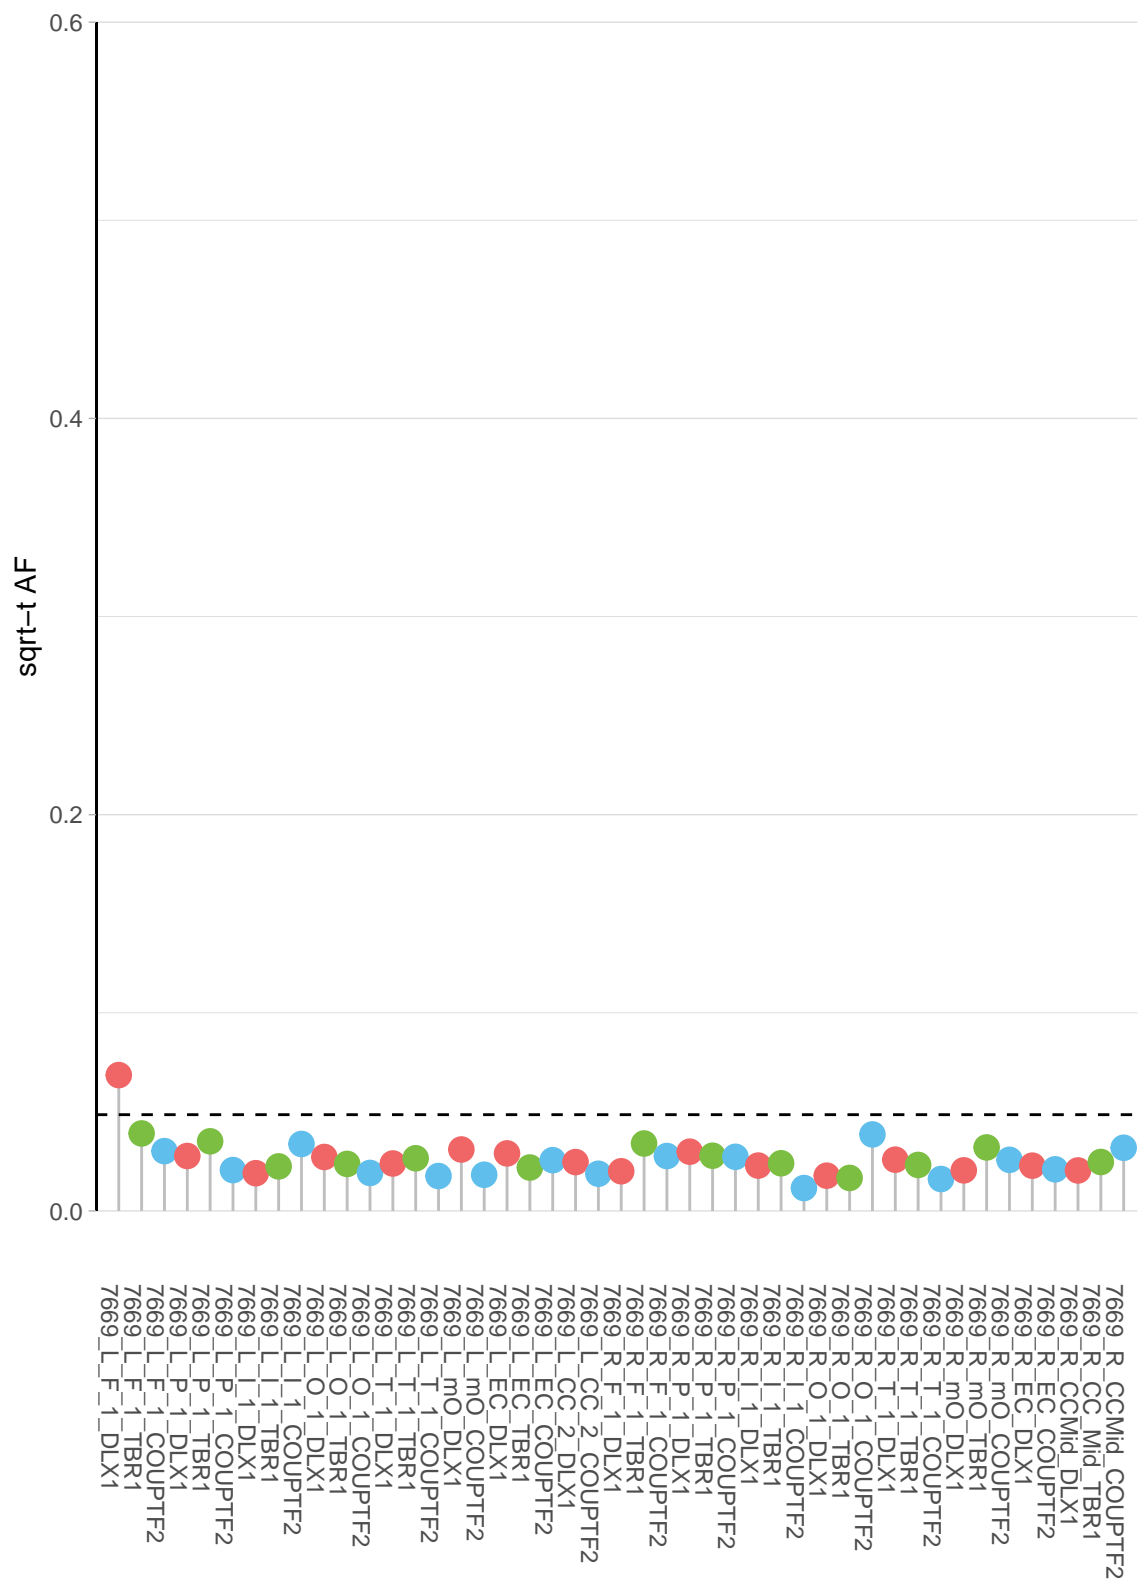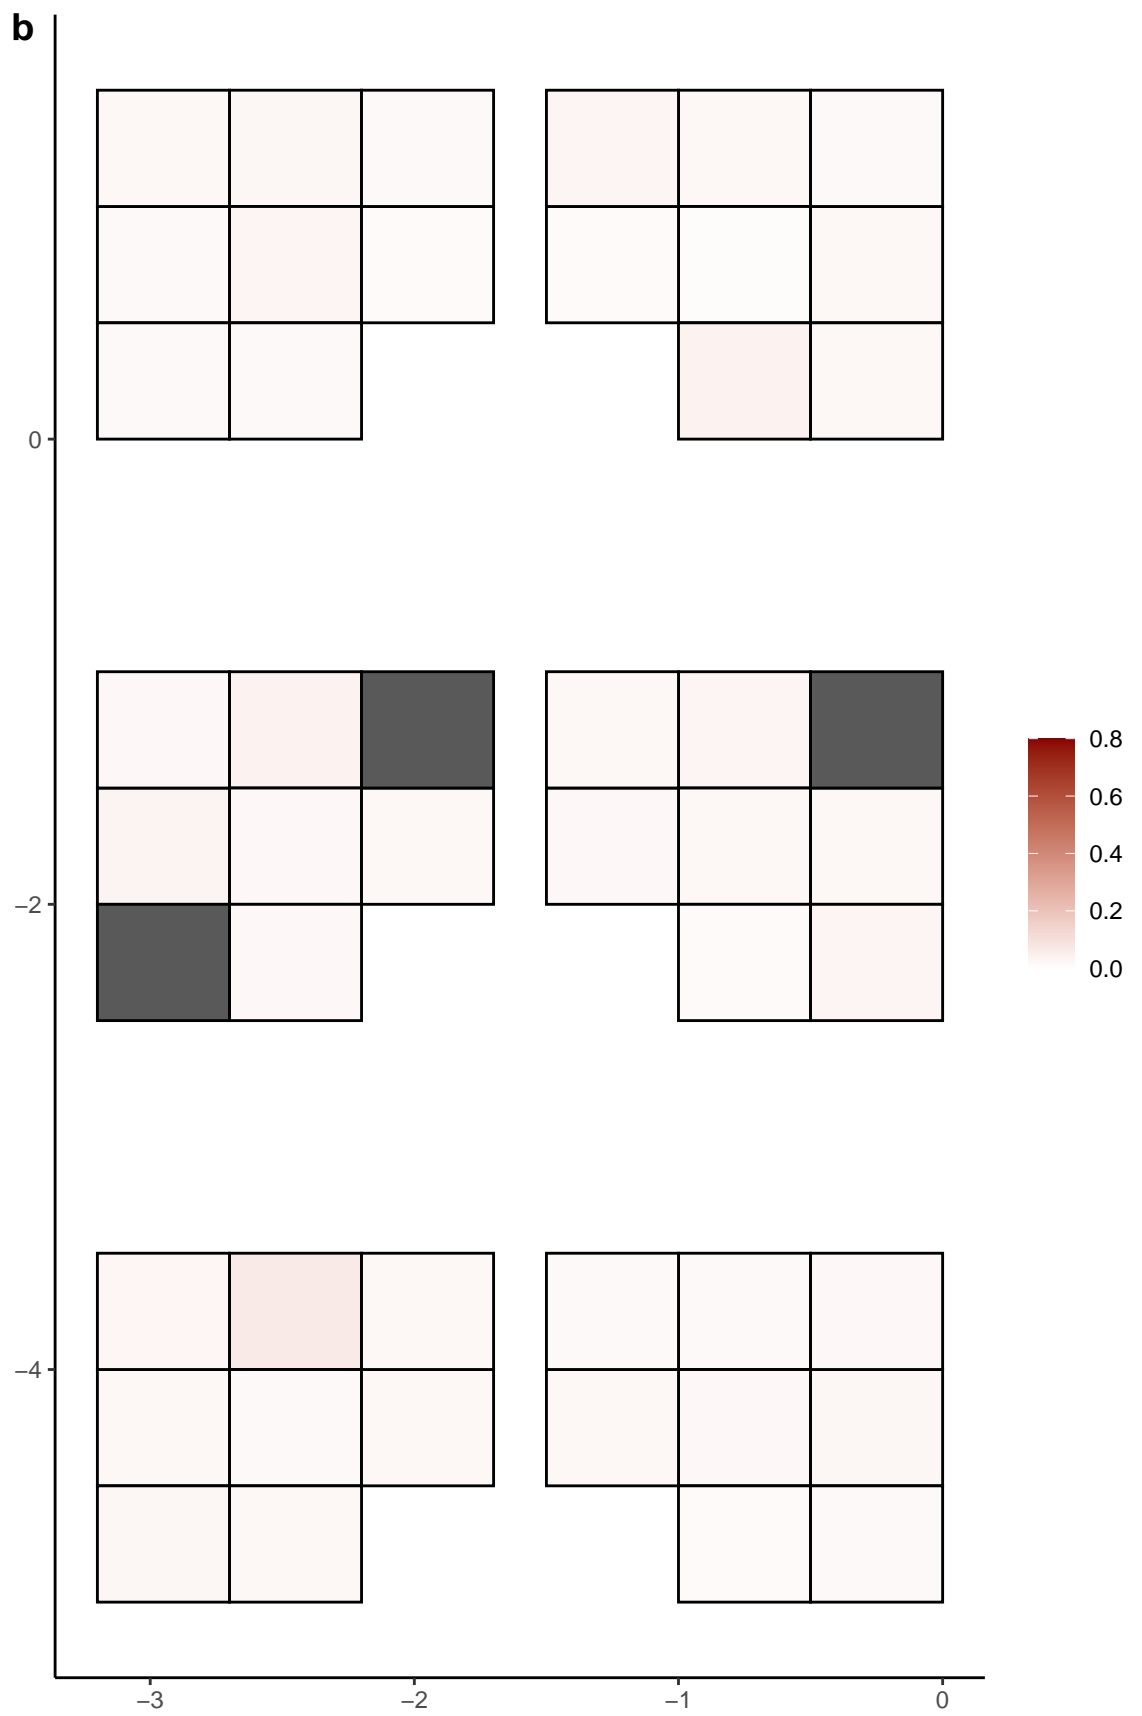







**a** ID05 7-137220703-G-A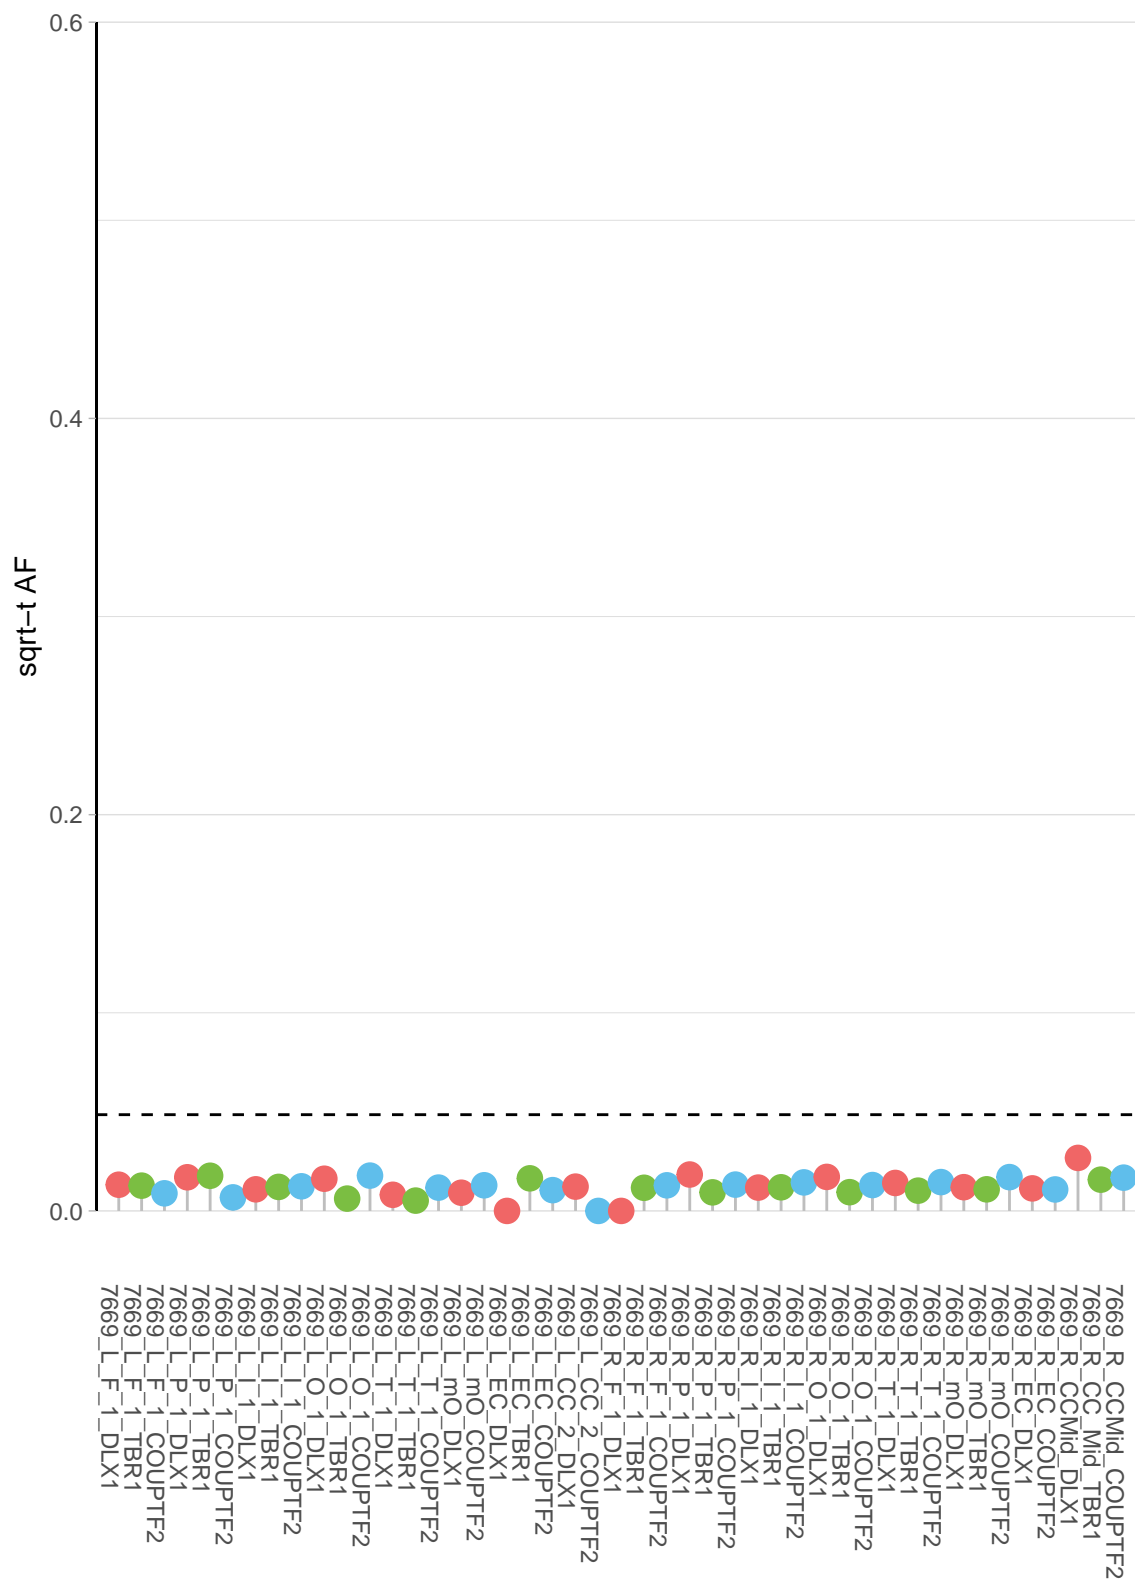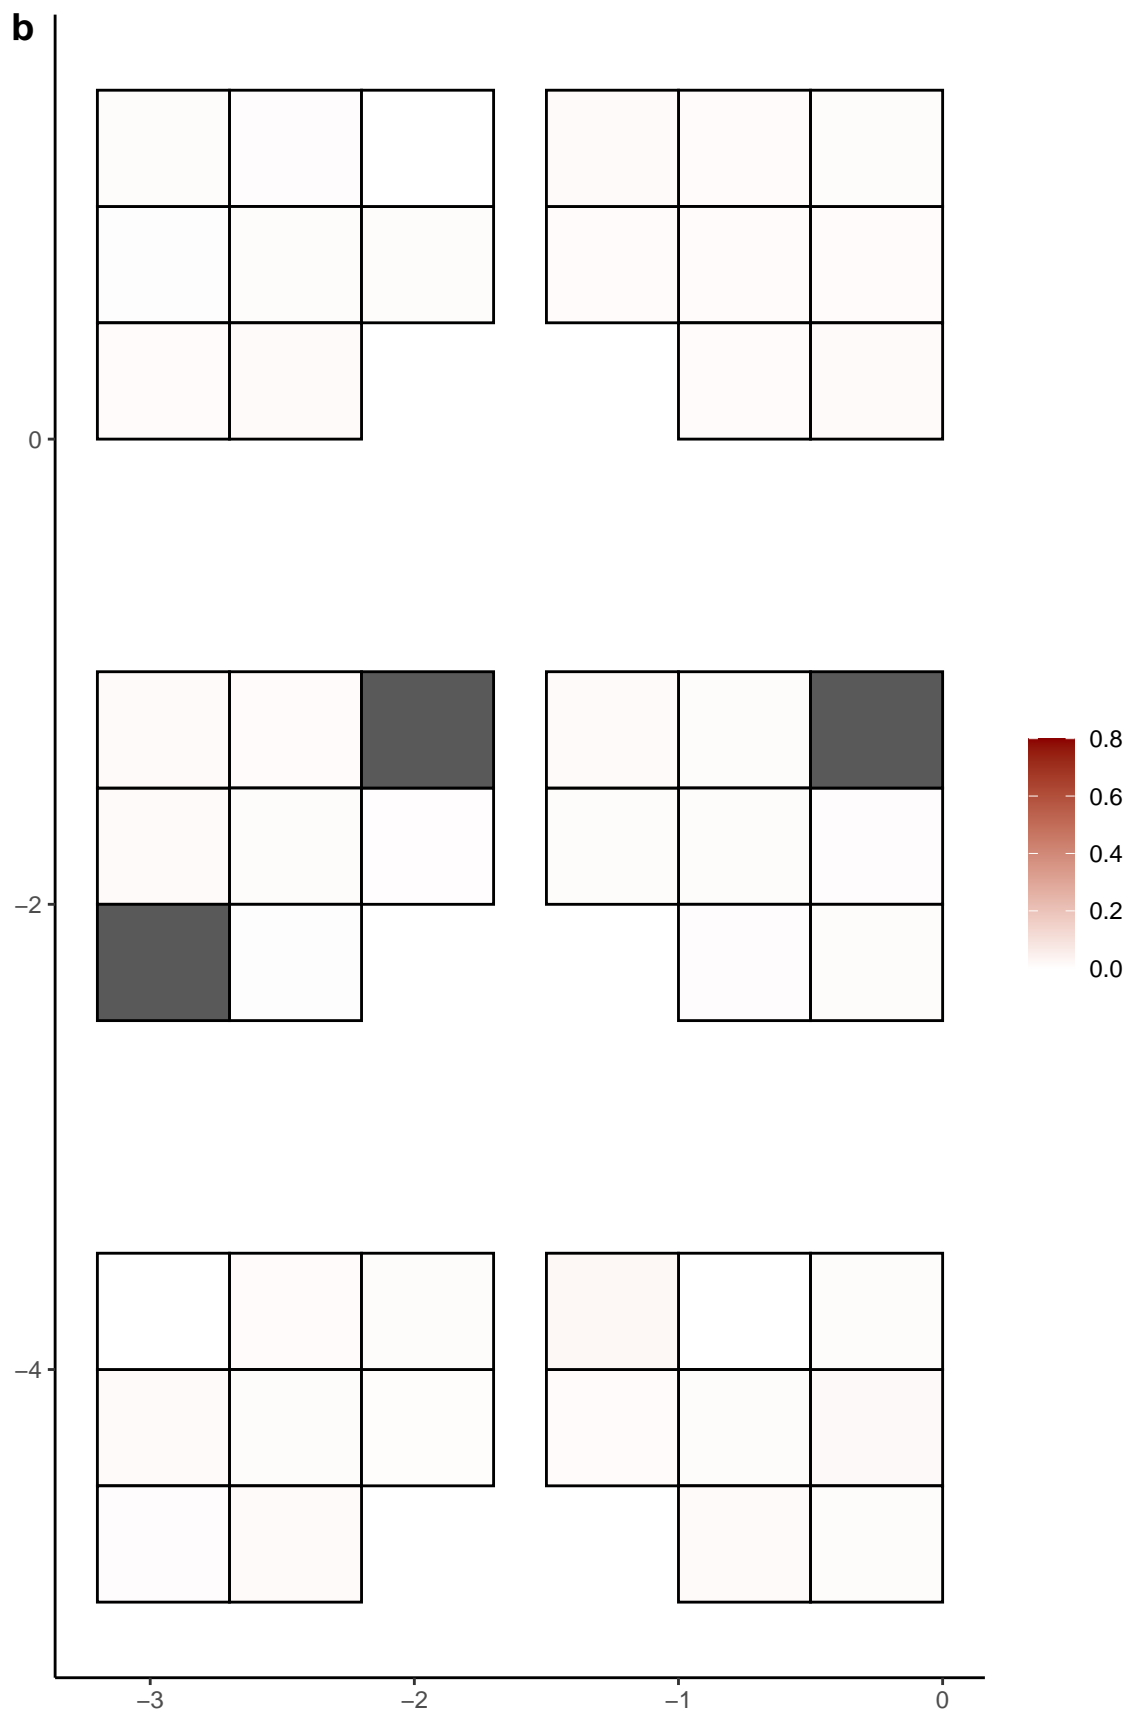

**a** ID05 7-139192862-C-T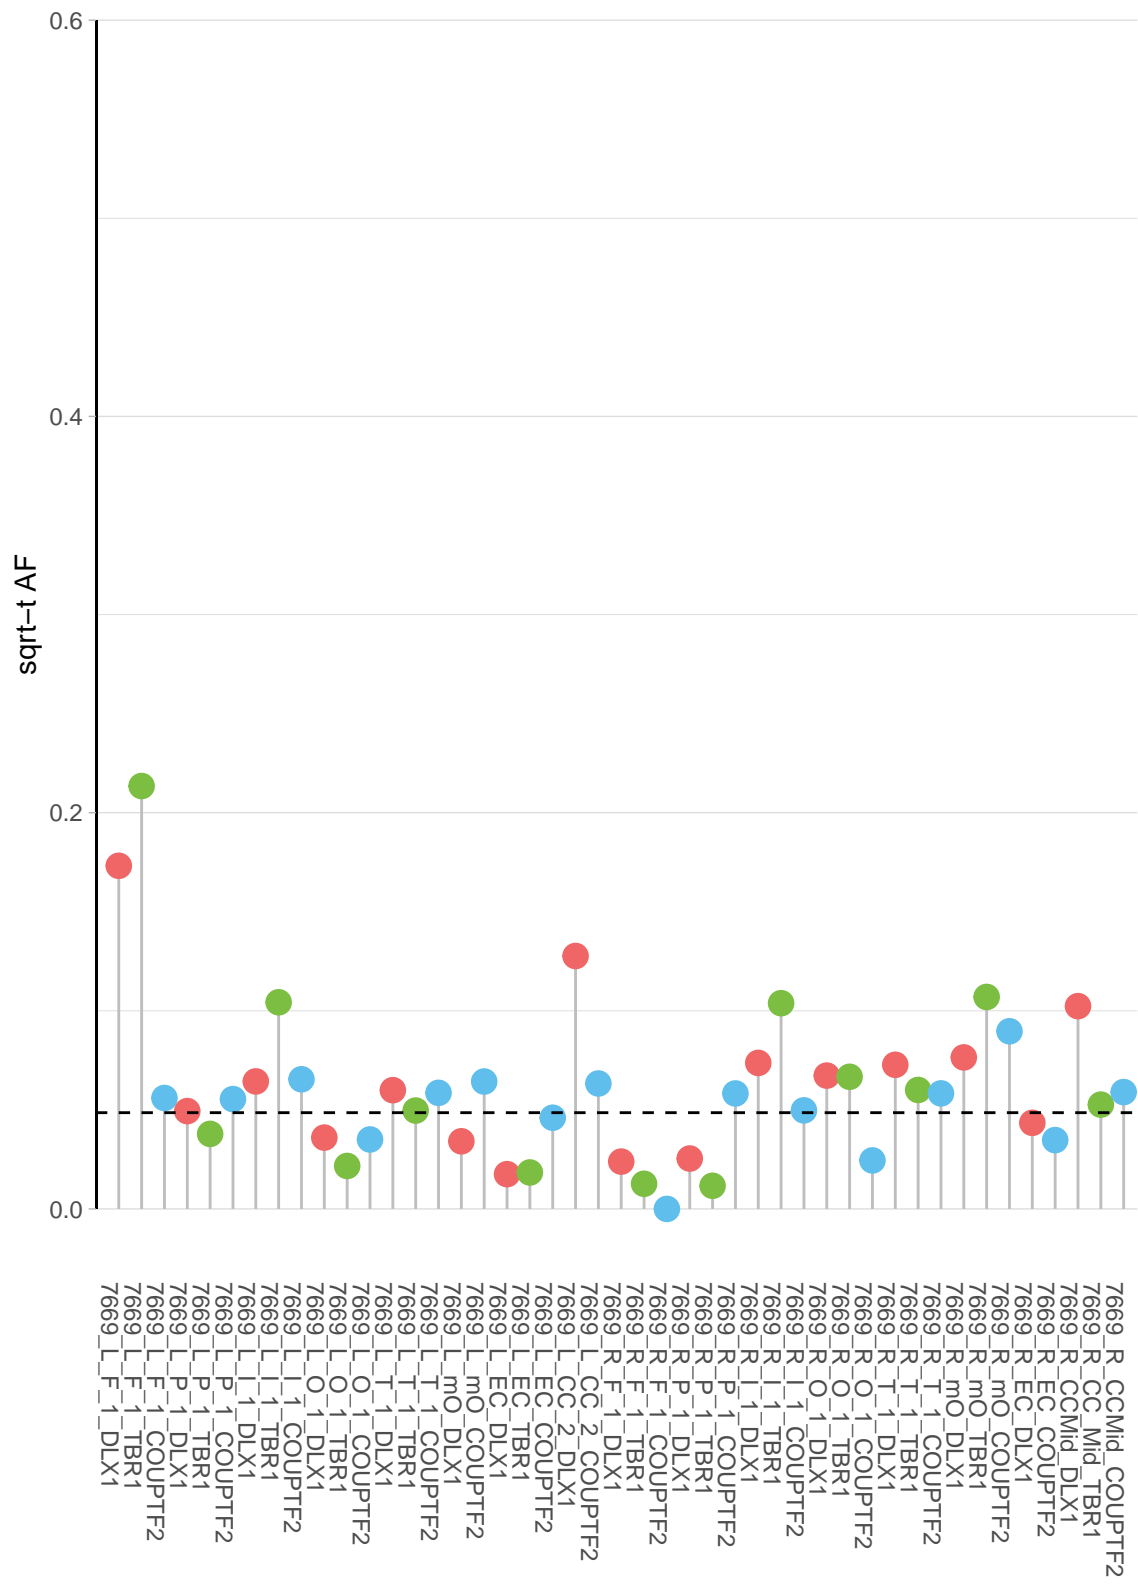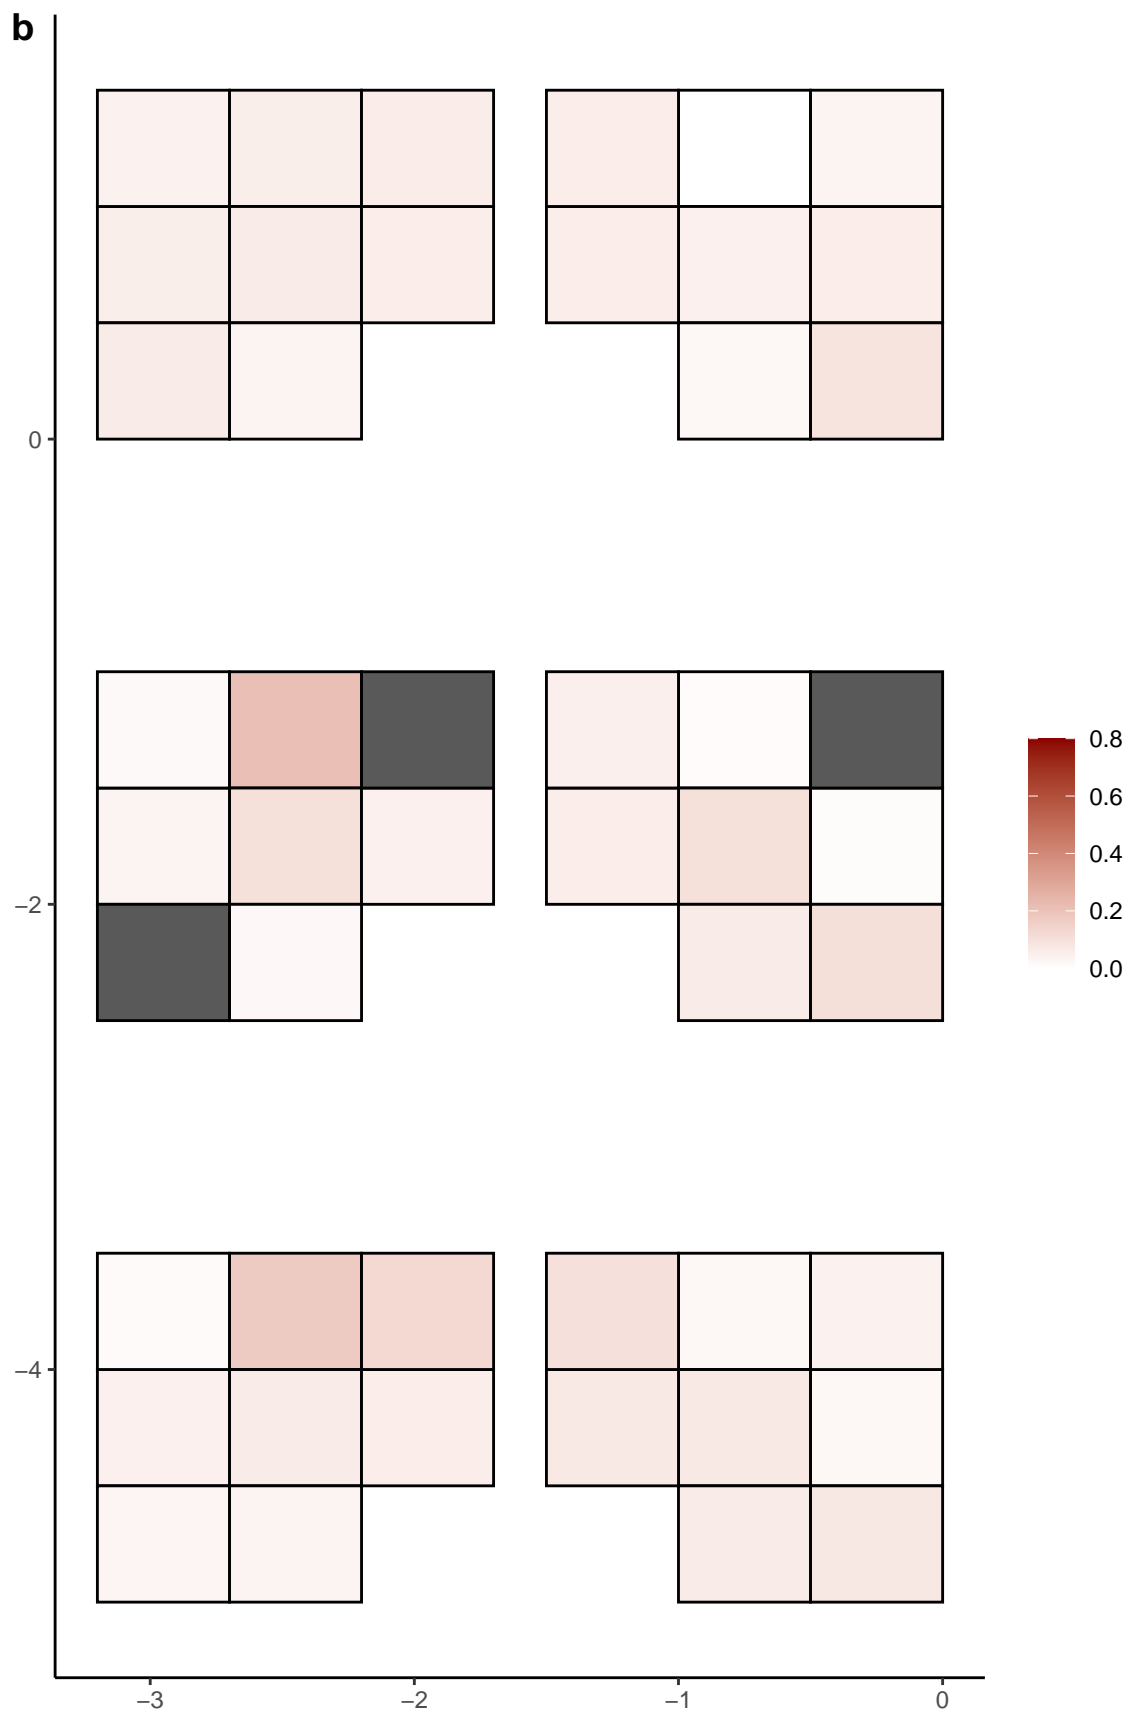

**a** ID05 7-144944639-C-T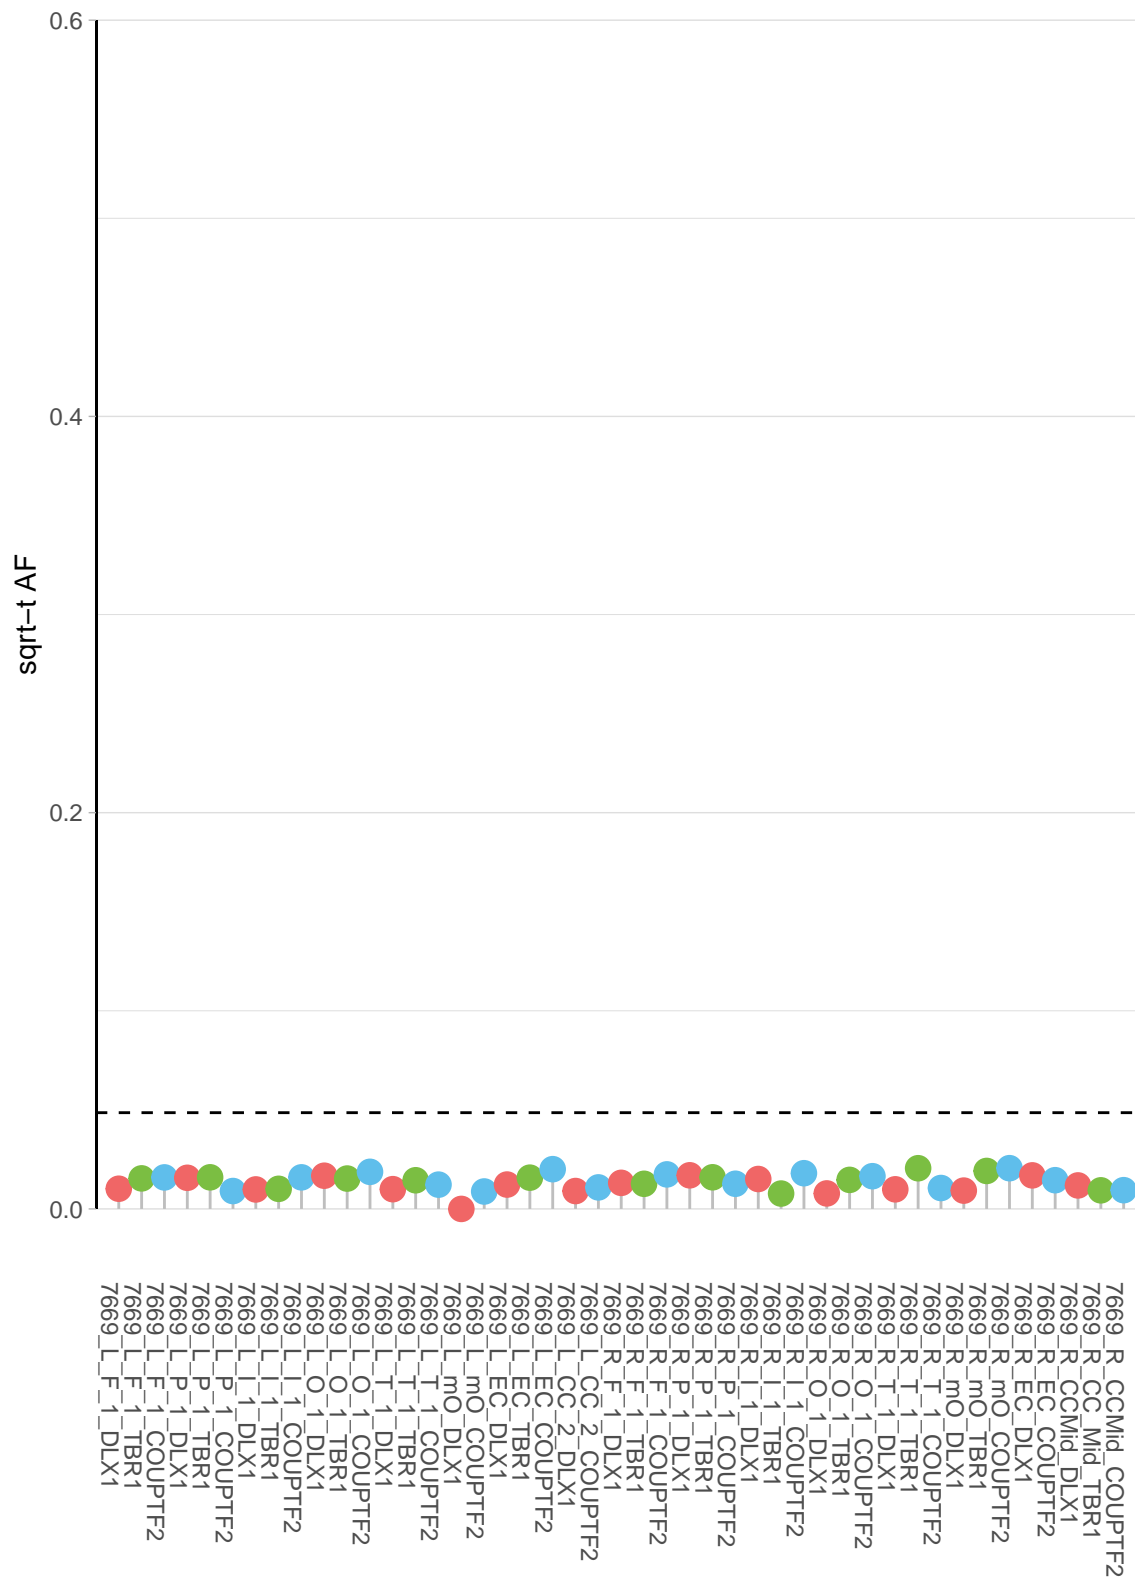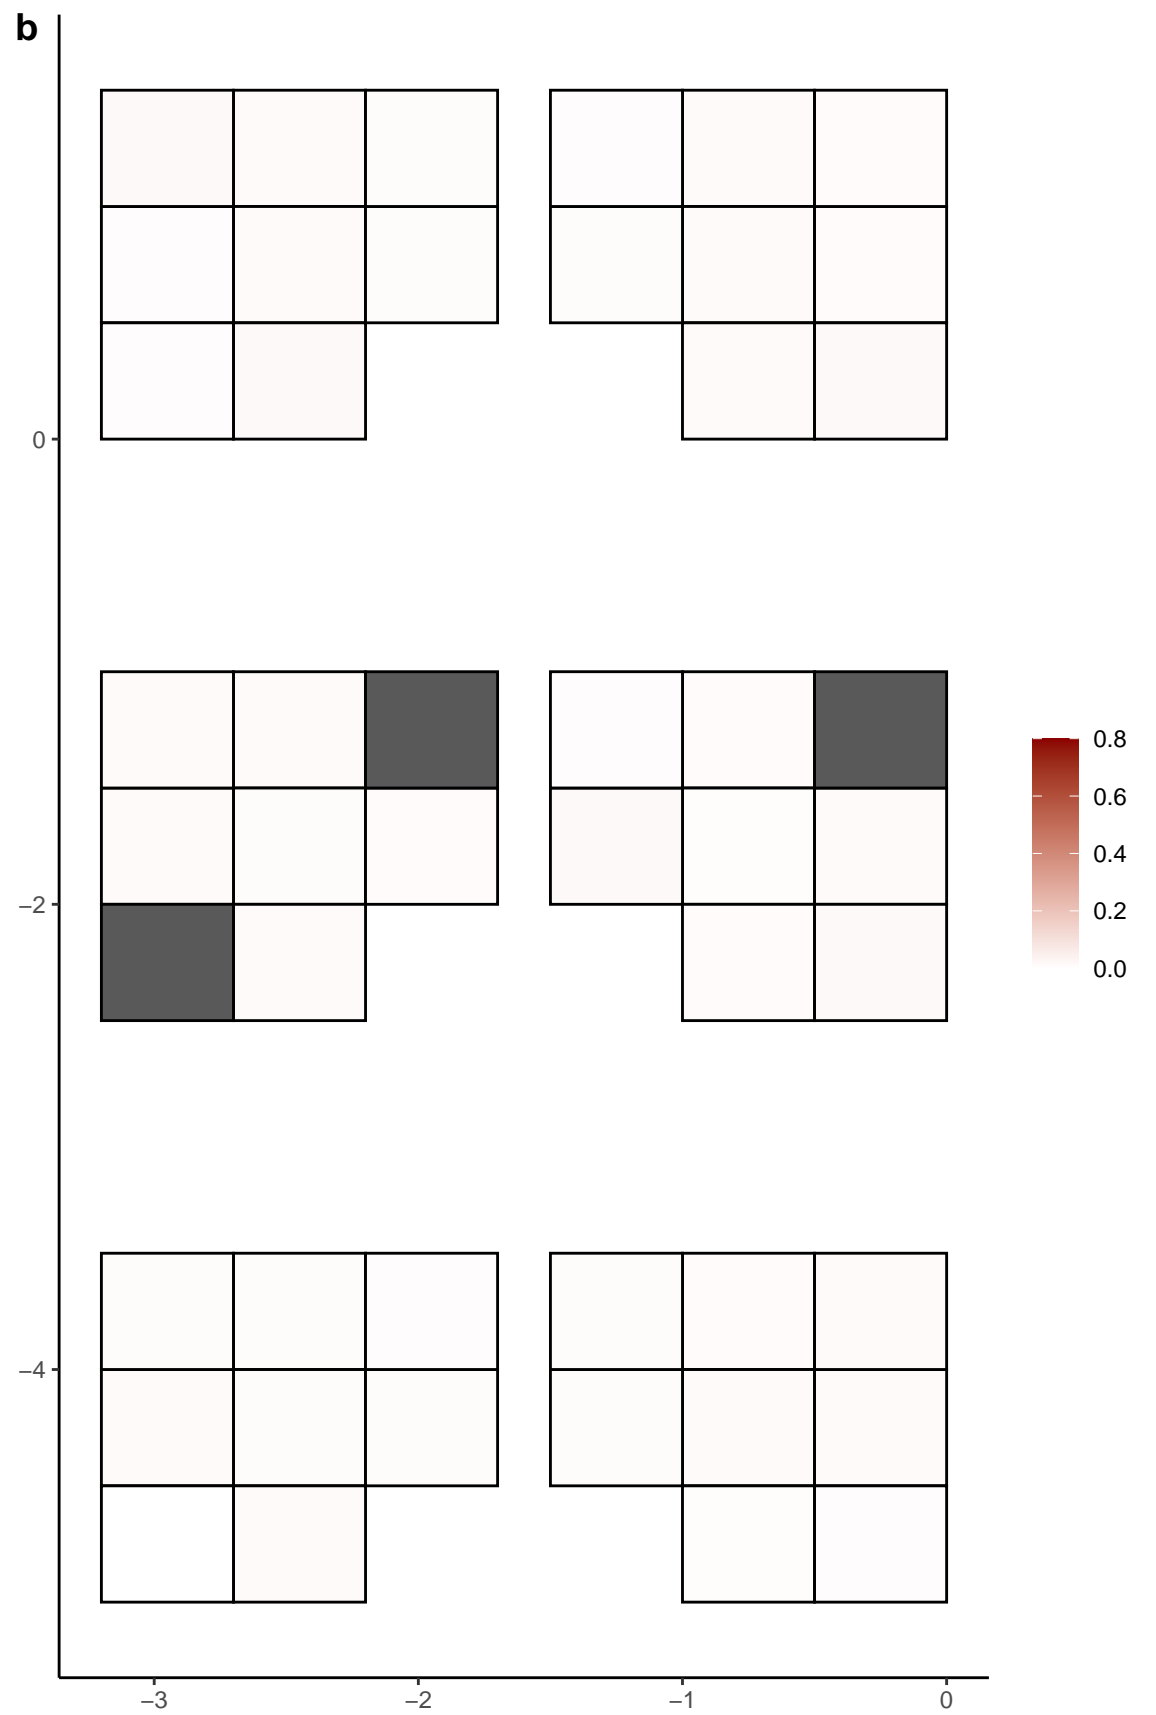

**a** ID05 7-146307789-T-A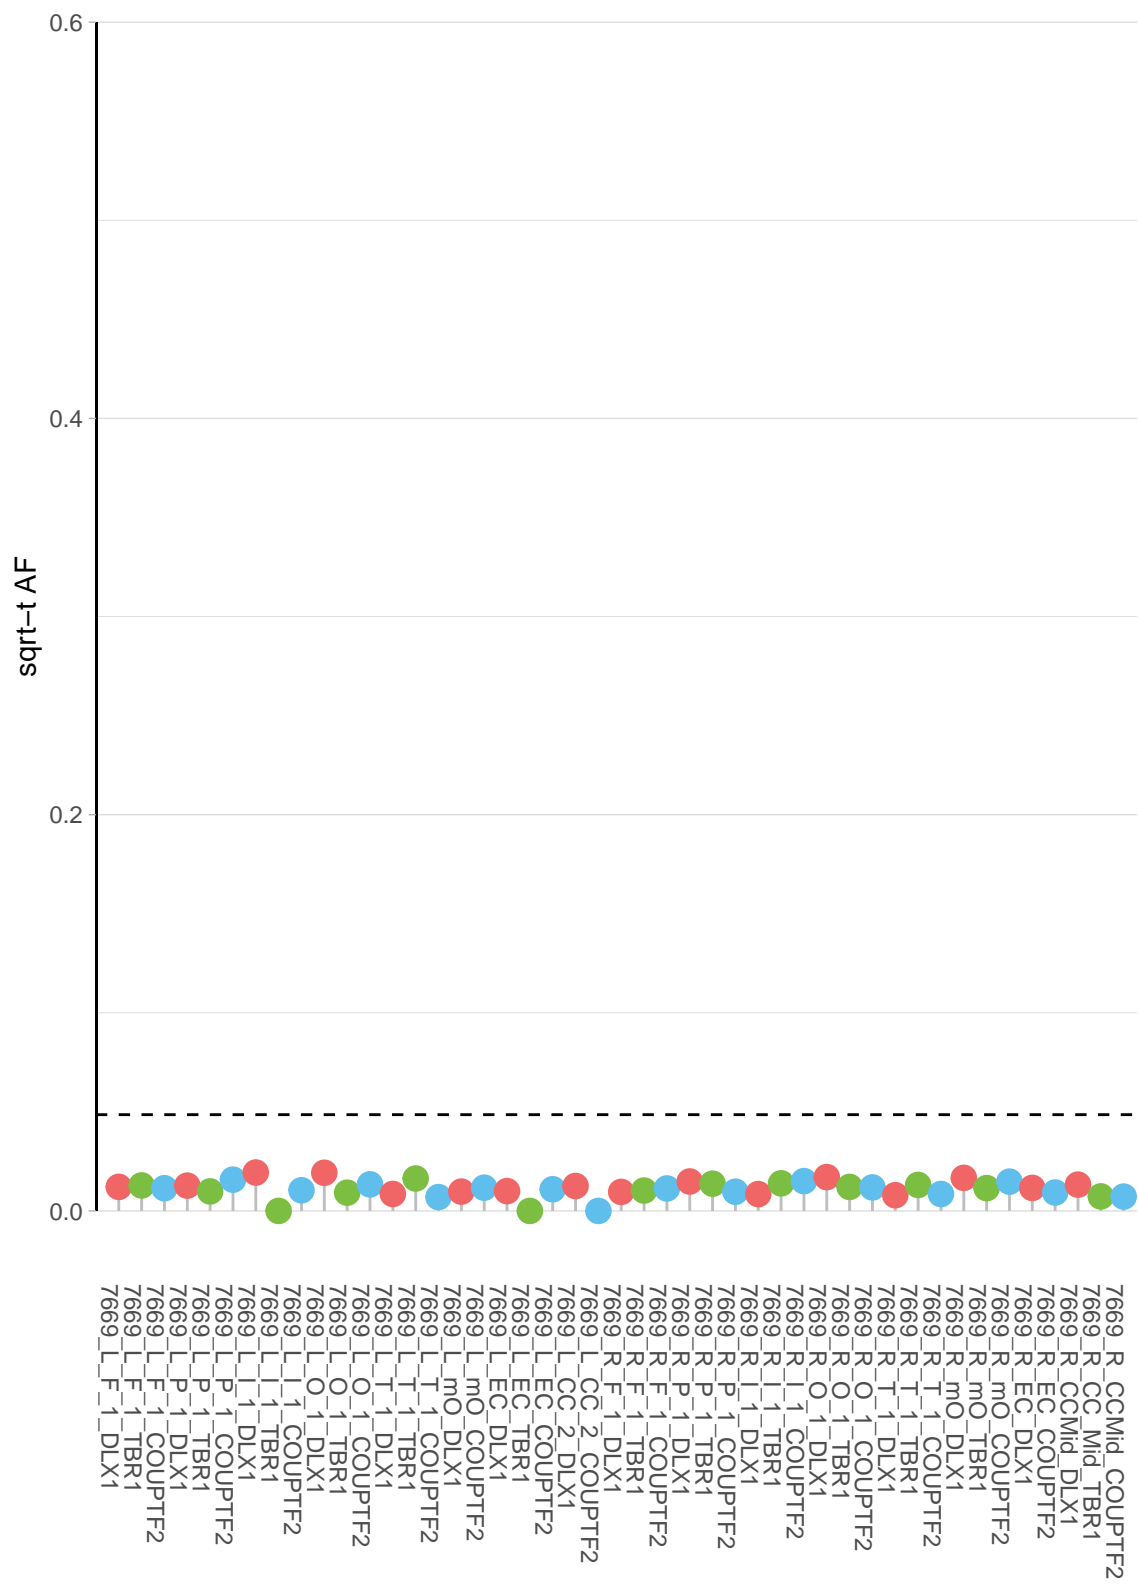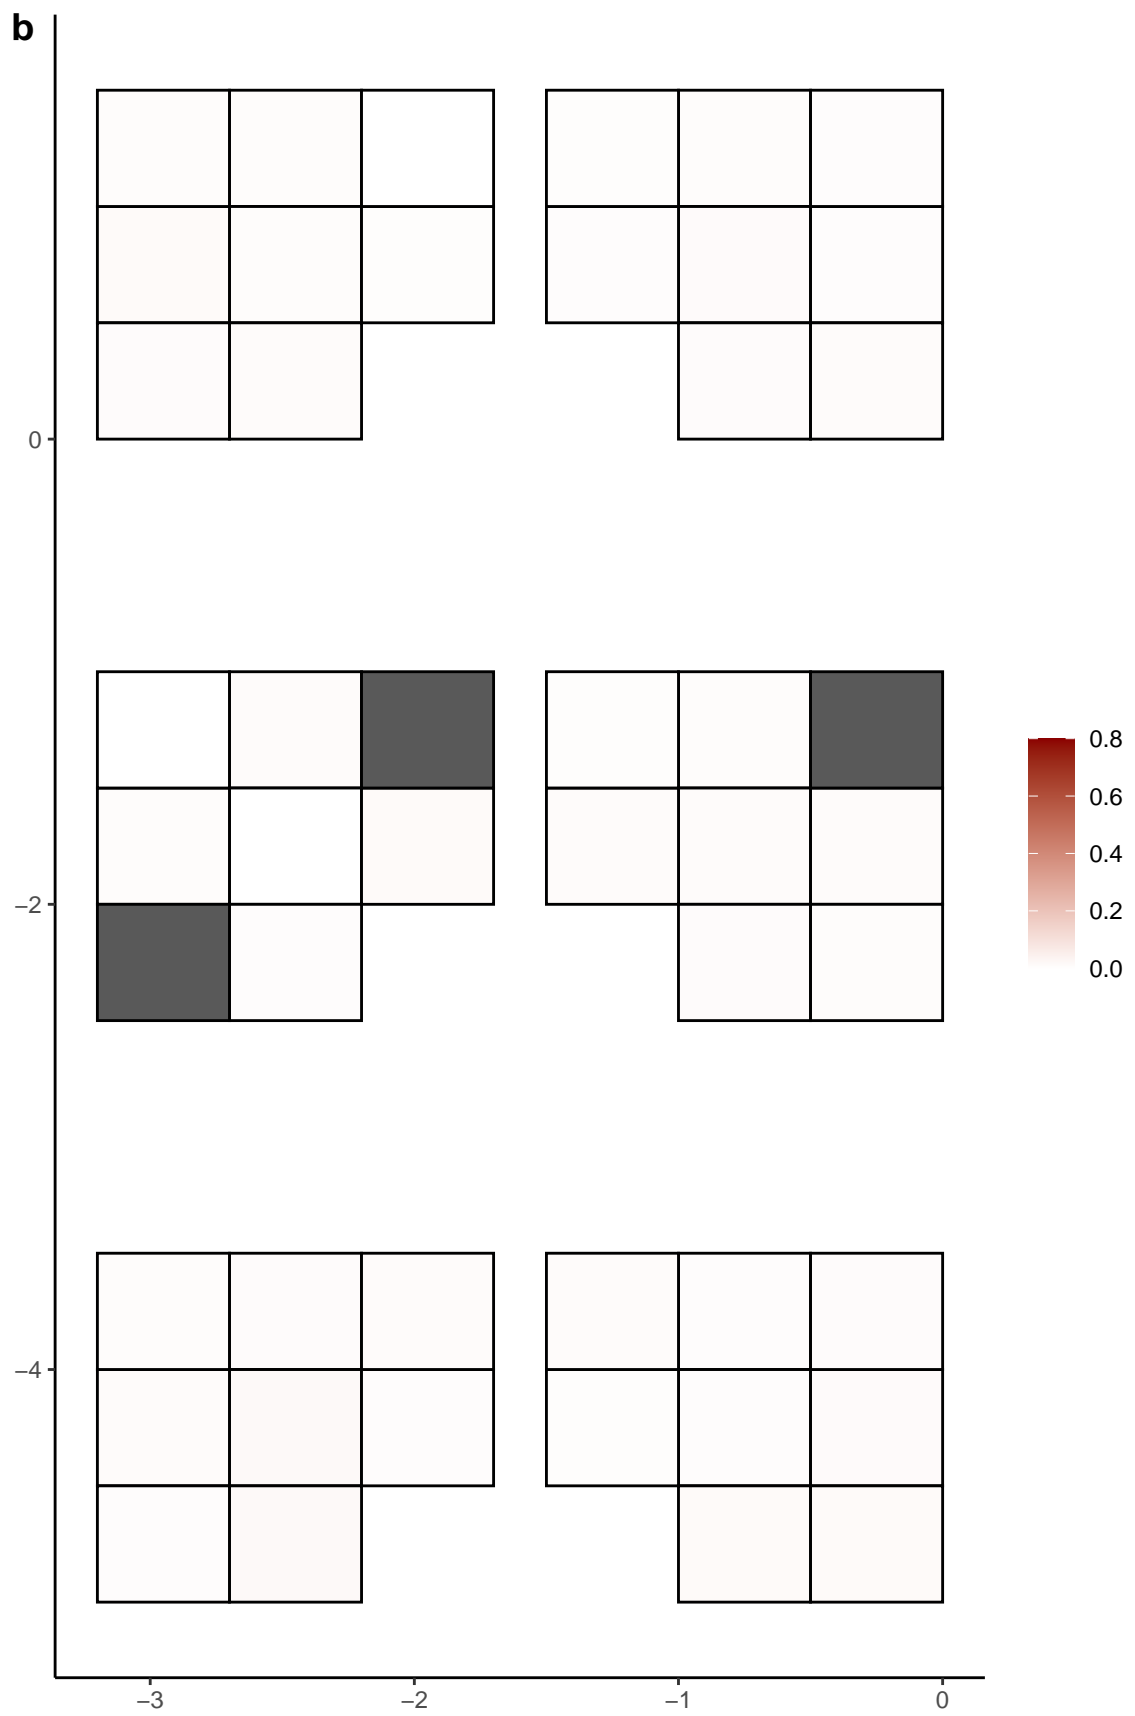

a ID05 7-147380993-G-A

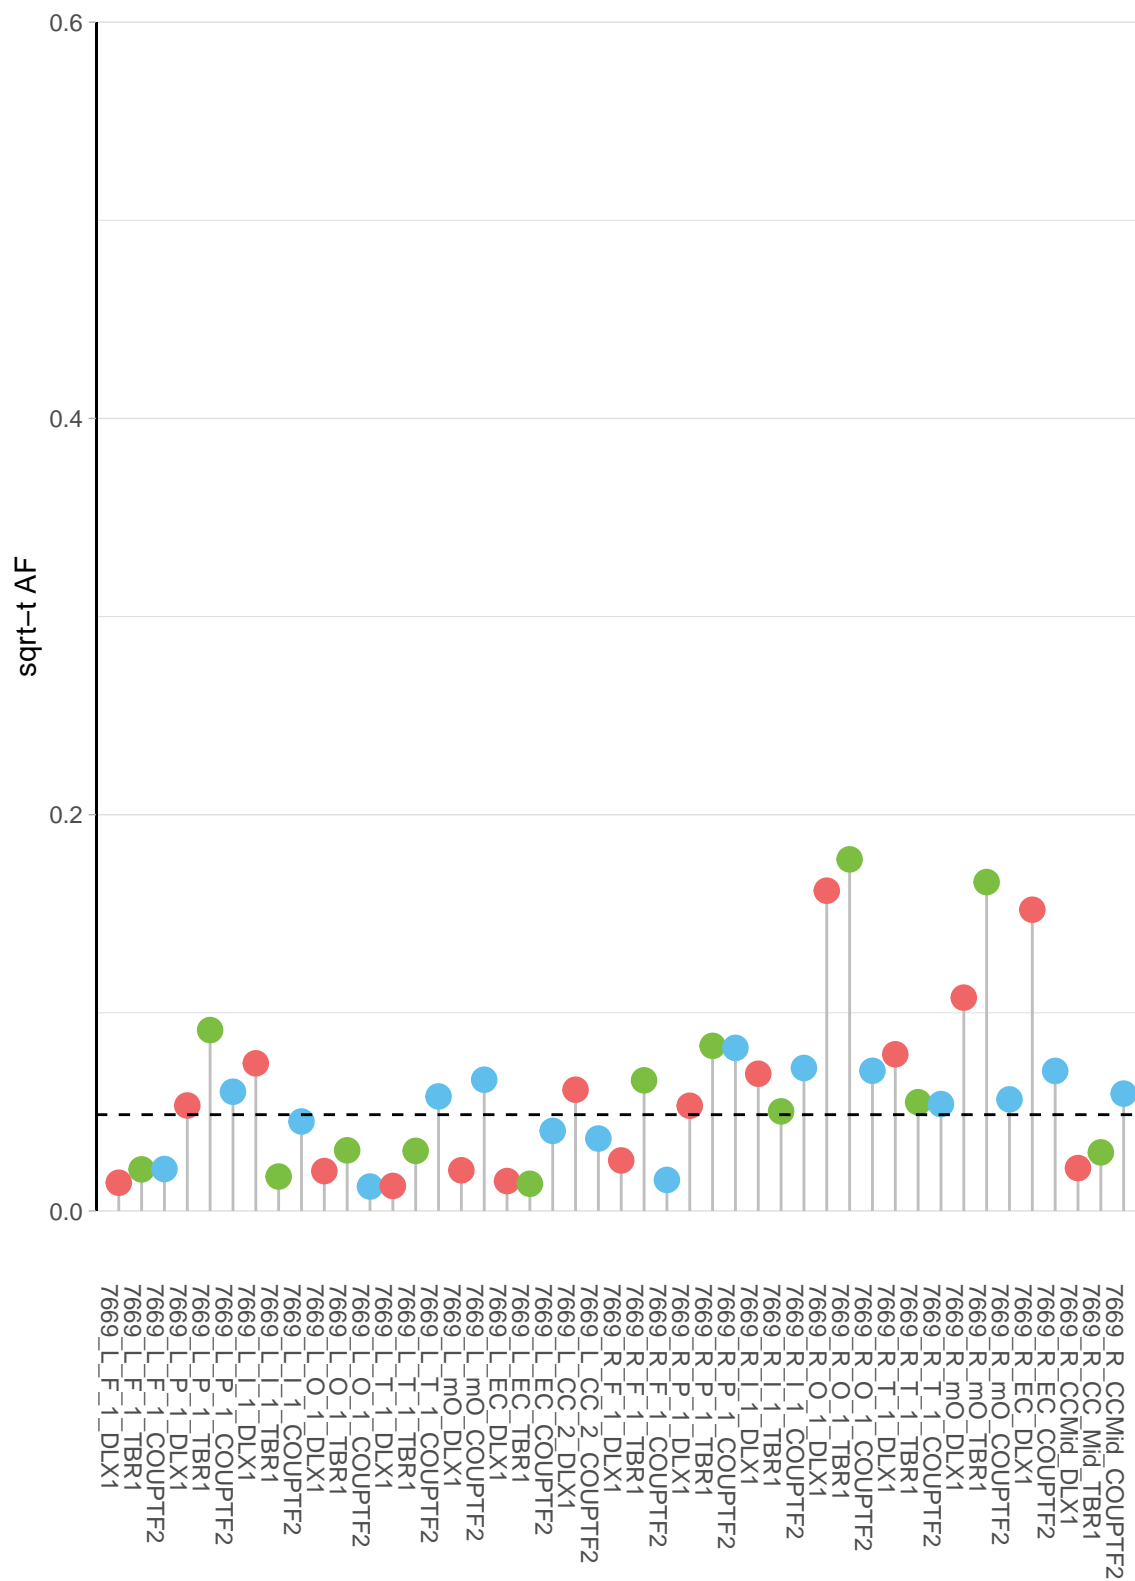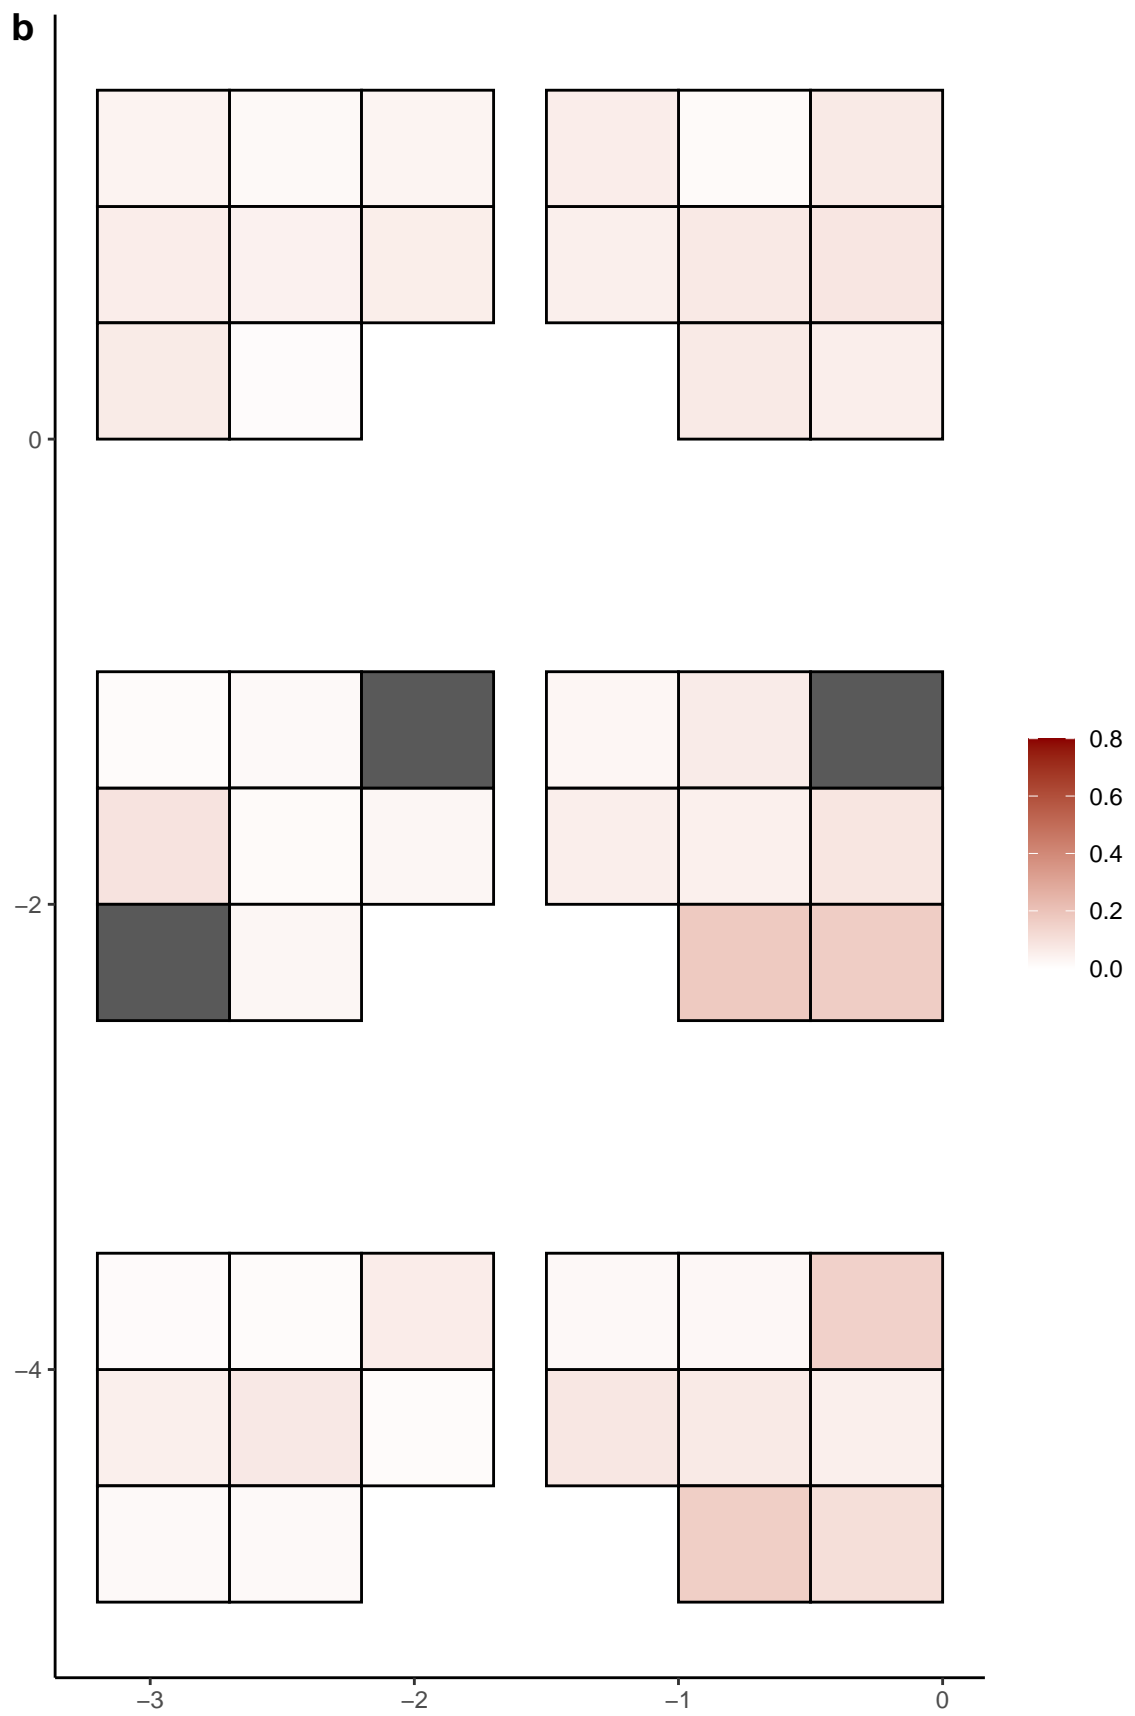

**a** ID05 7-151491278-C-T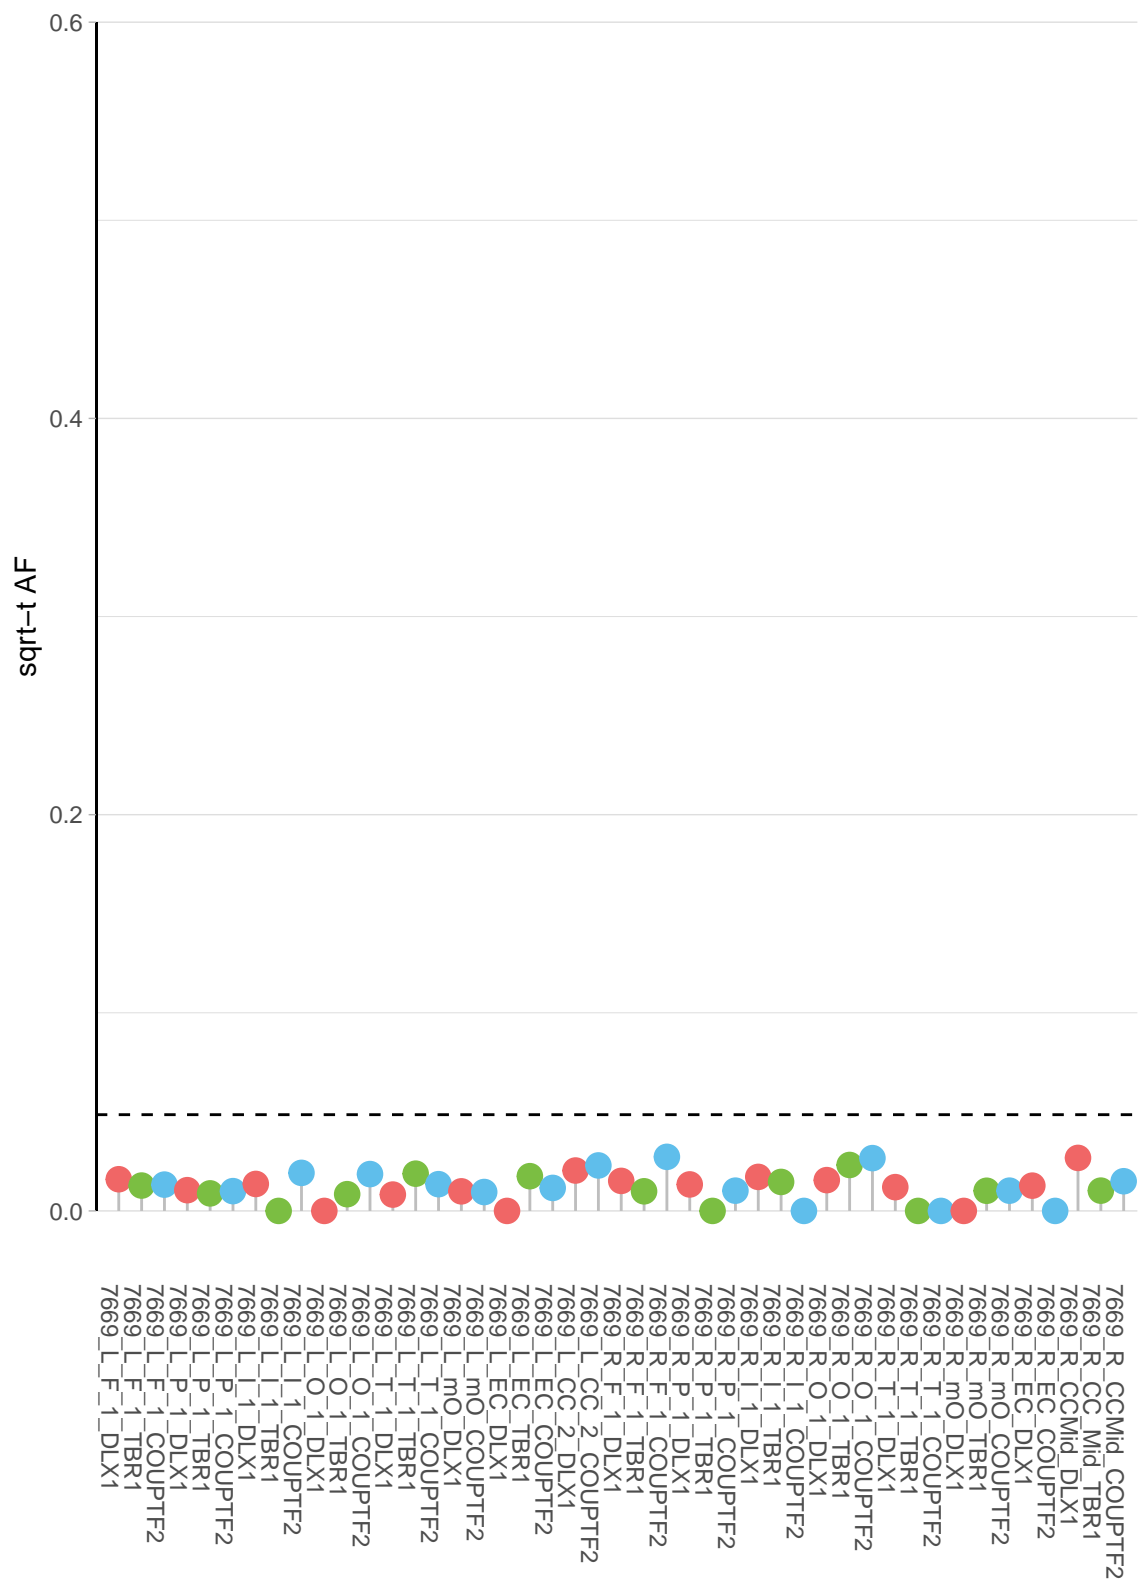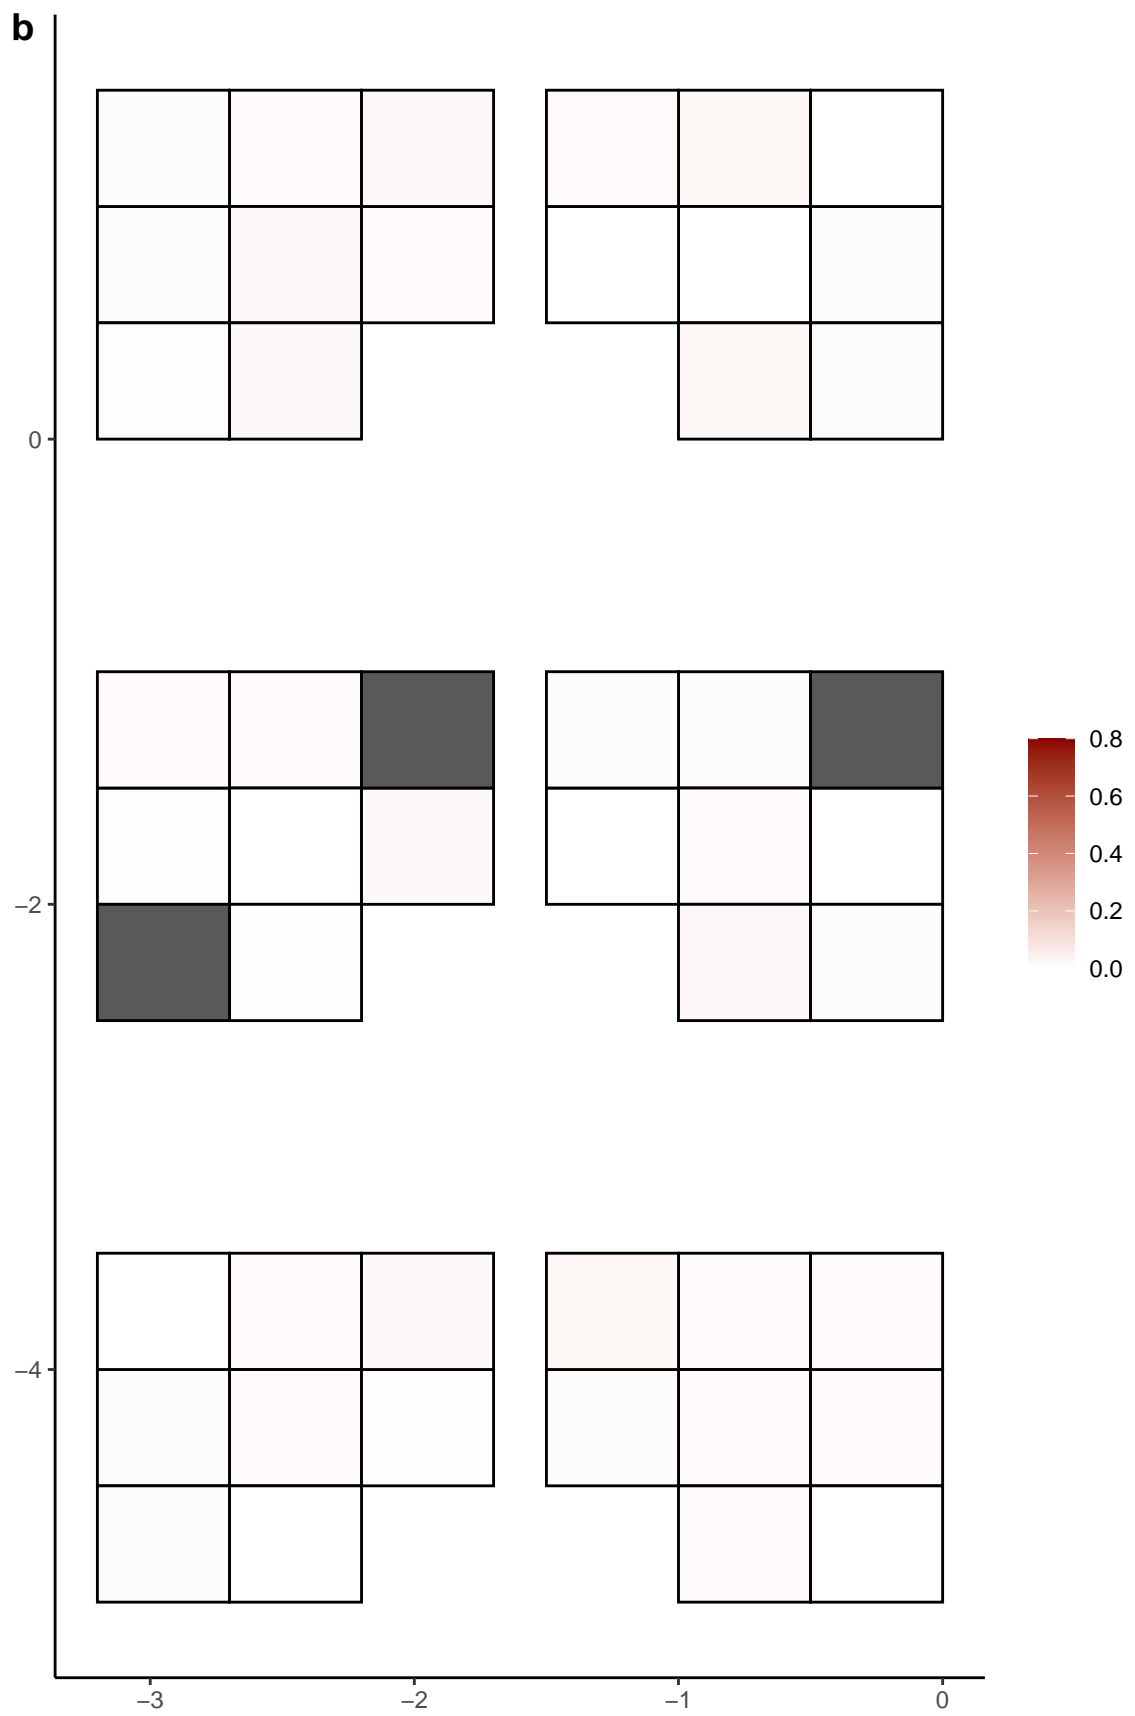

**a** ID05 7-154551172-G-A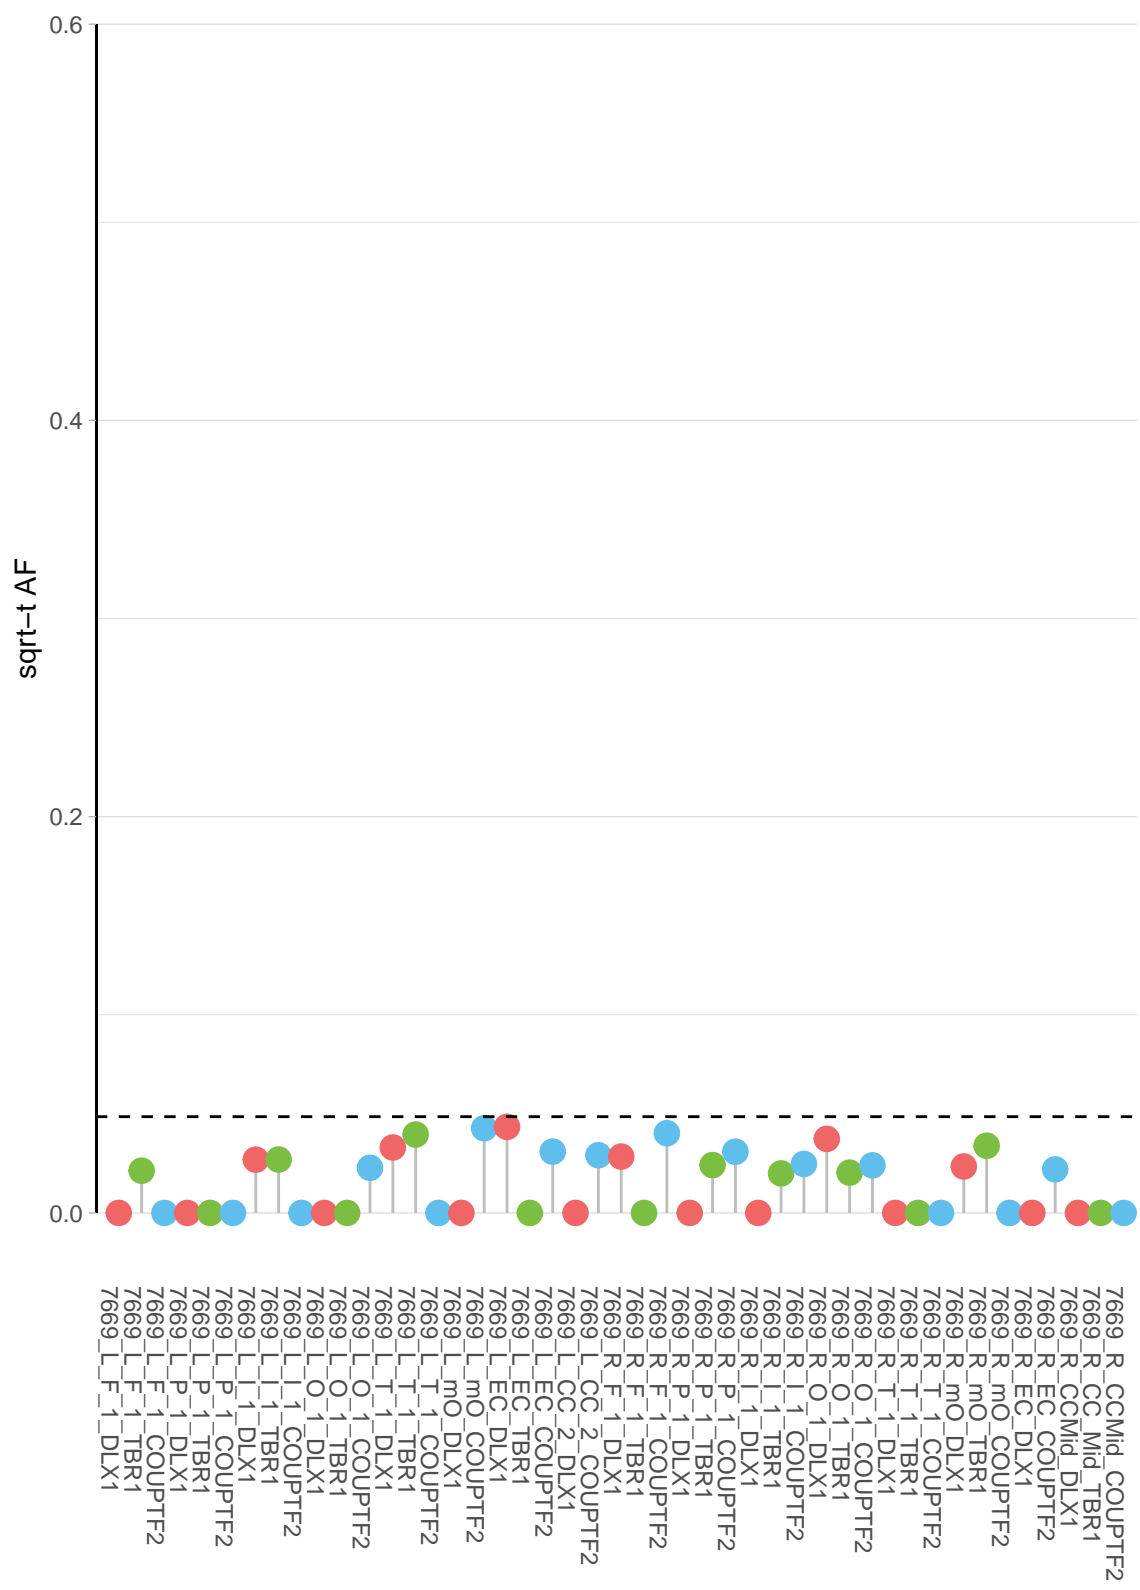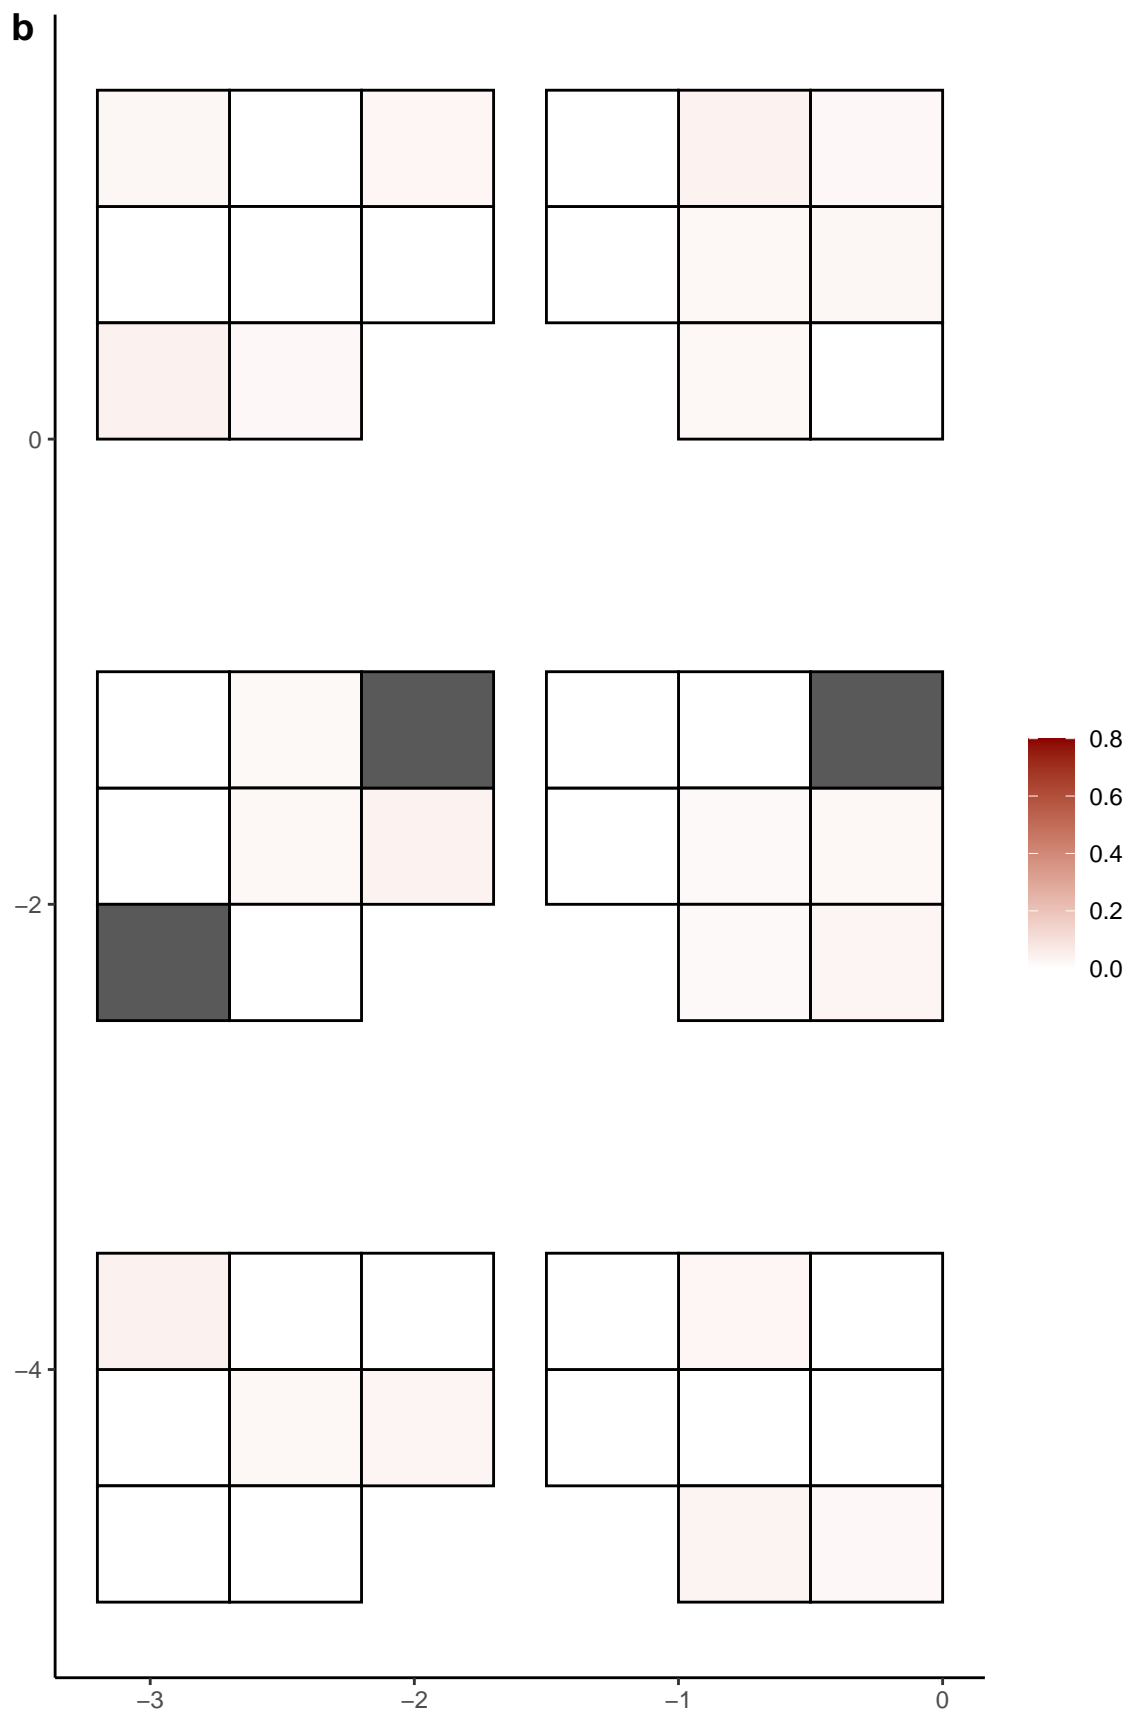





**a** ID05 7-16742061-C-T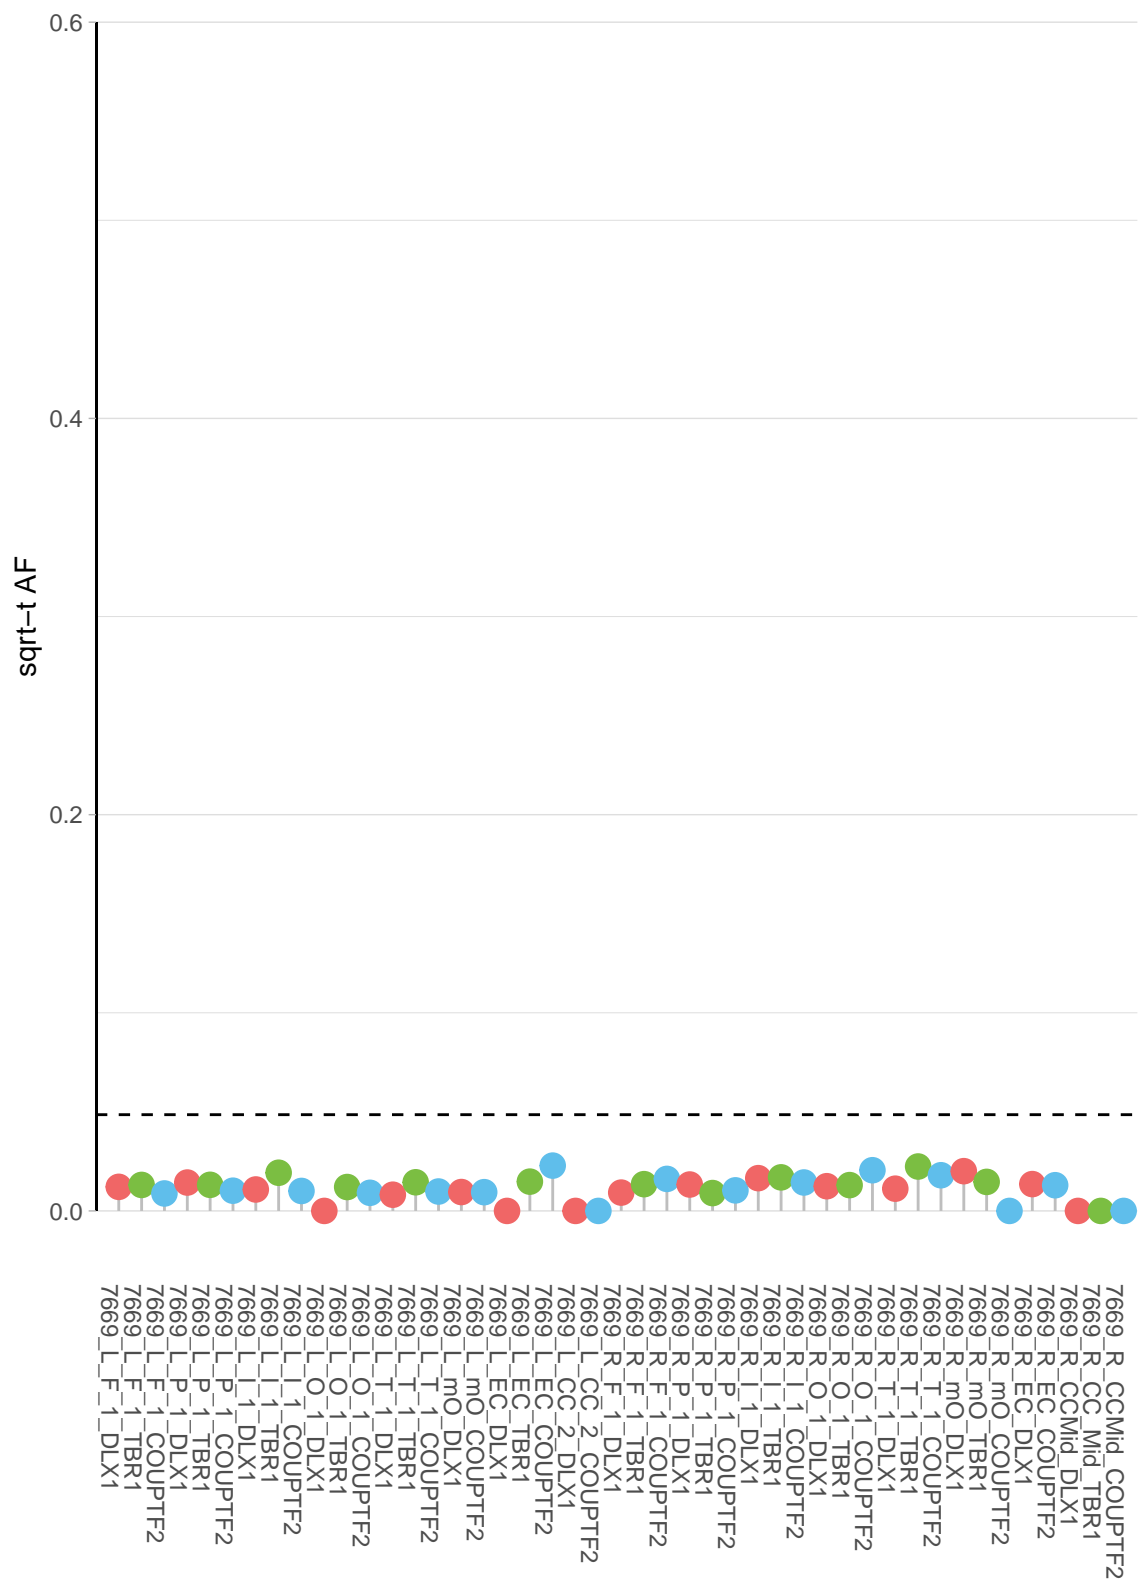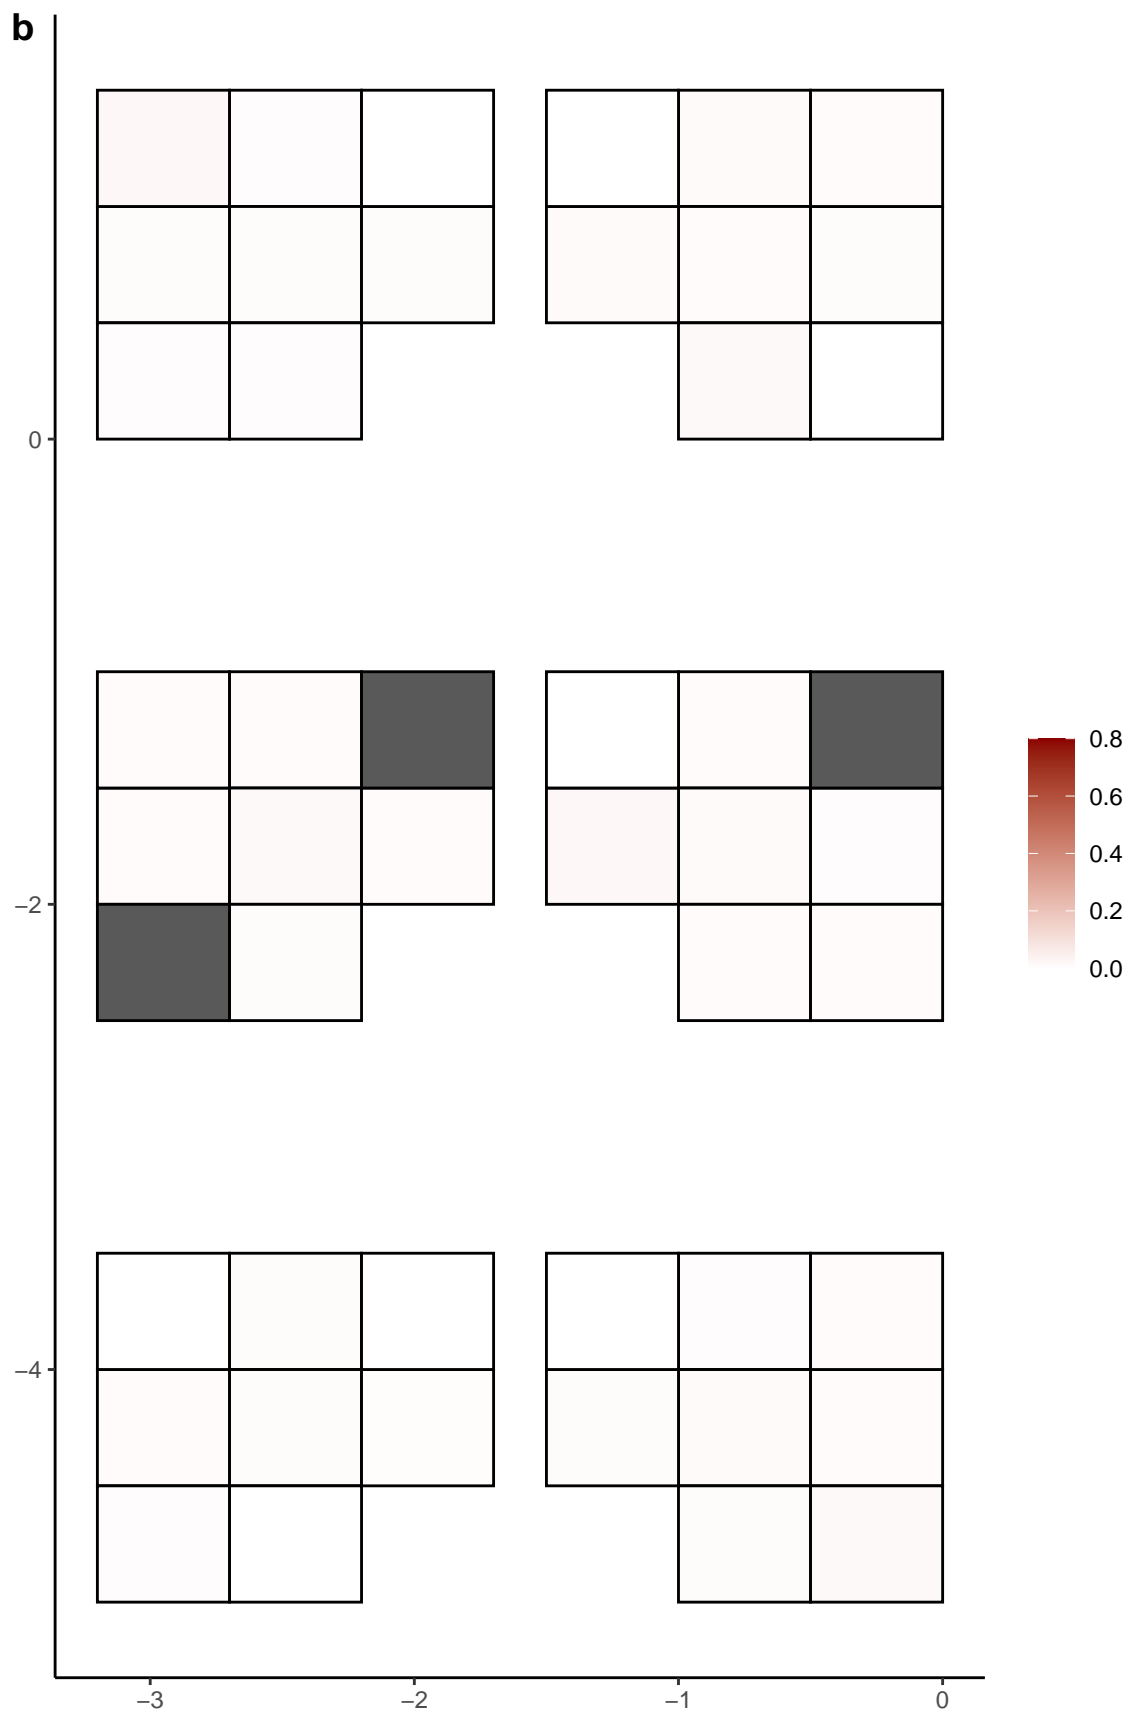

**a** ID05 7-19648848-A-G

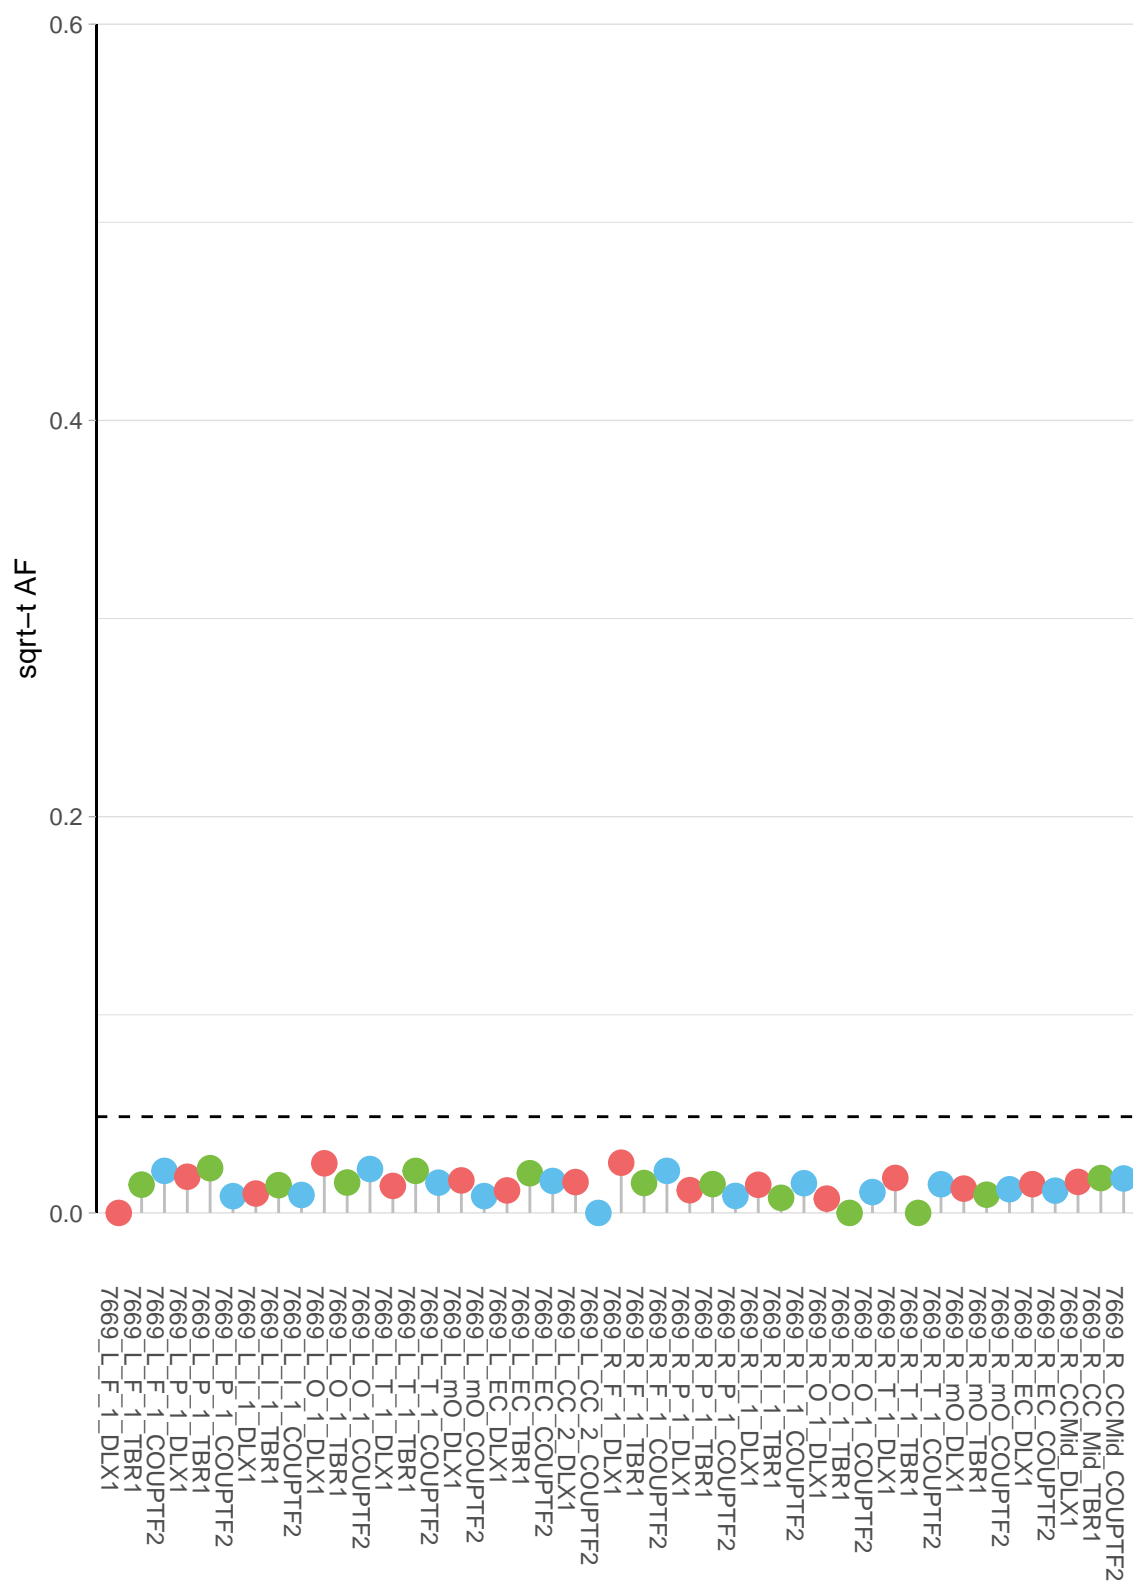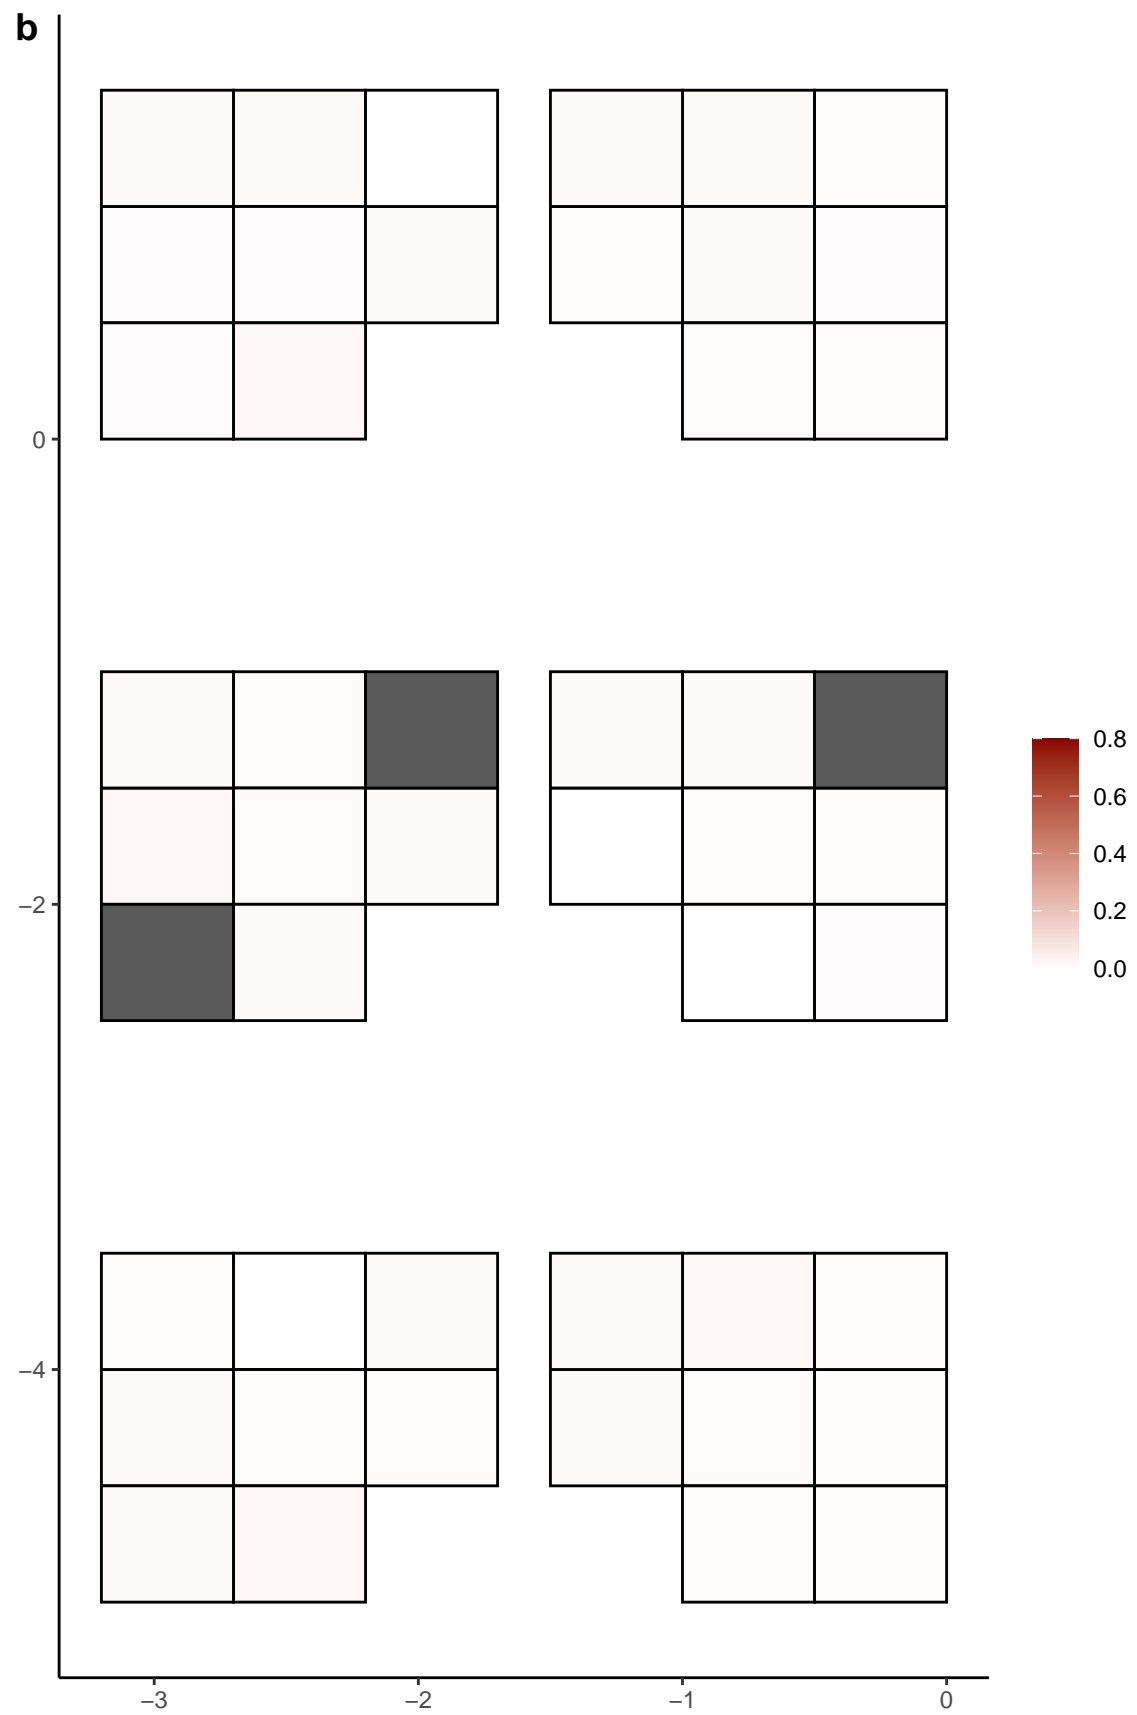

**a** ID05 7-20852978-C-A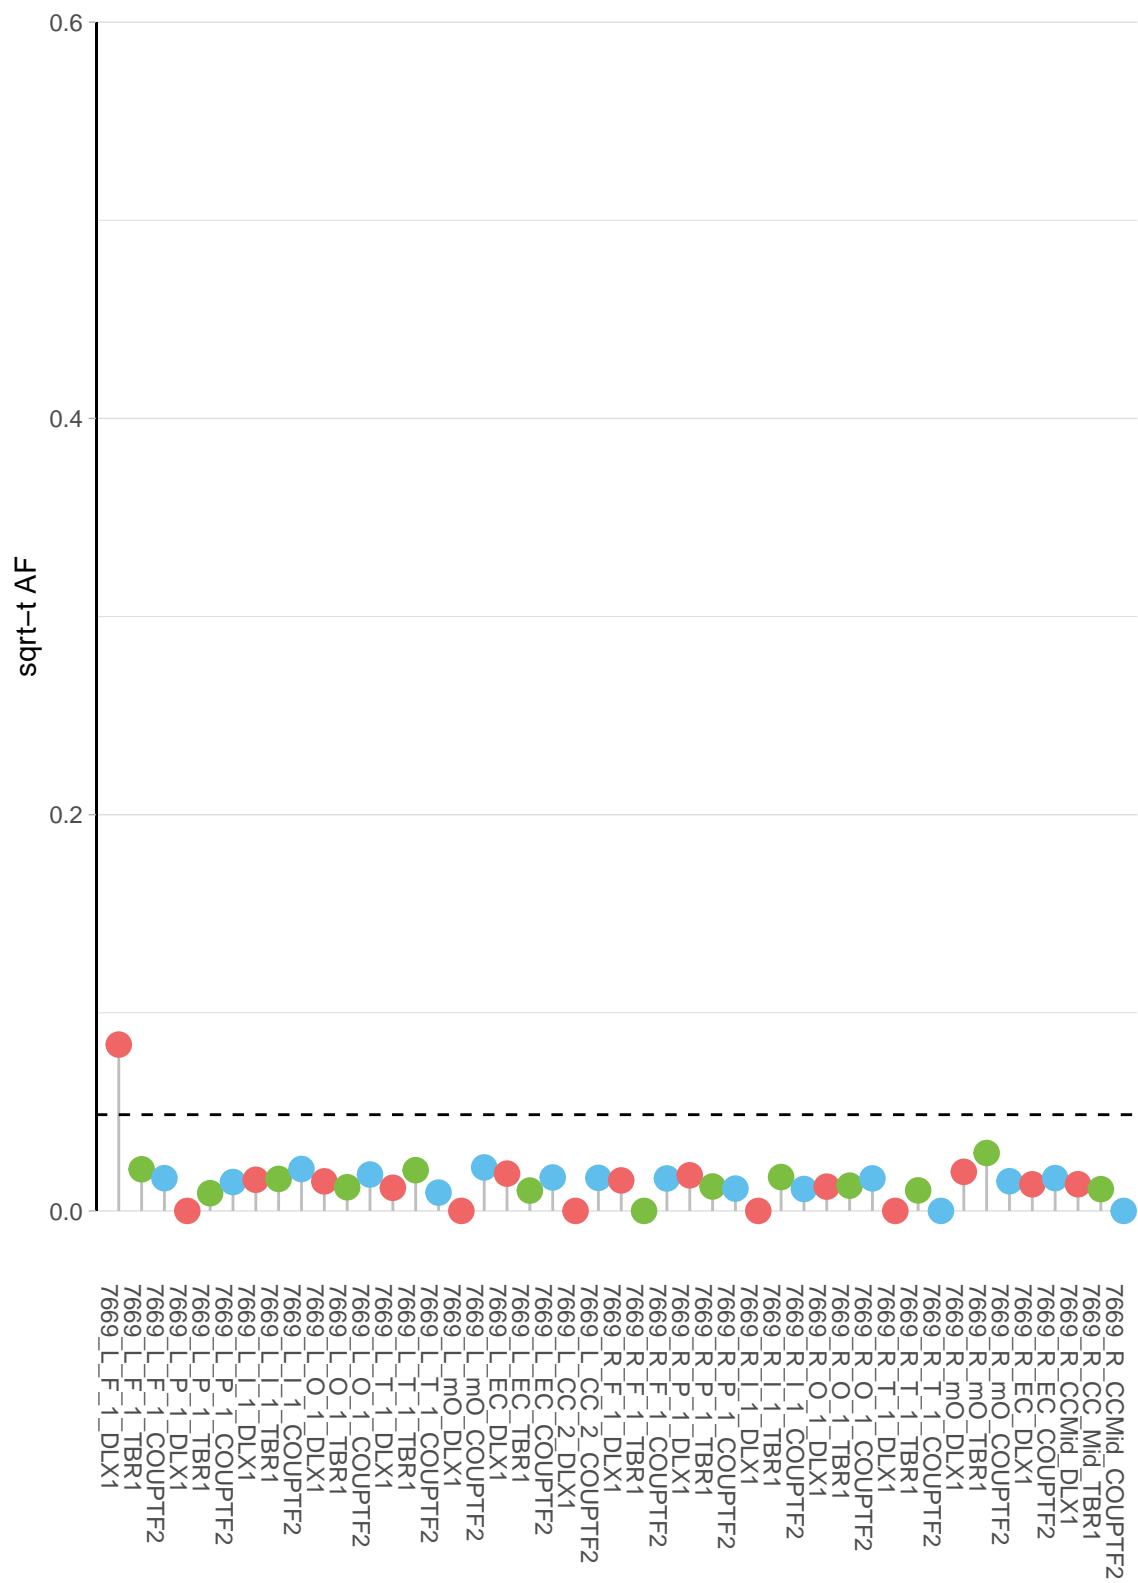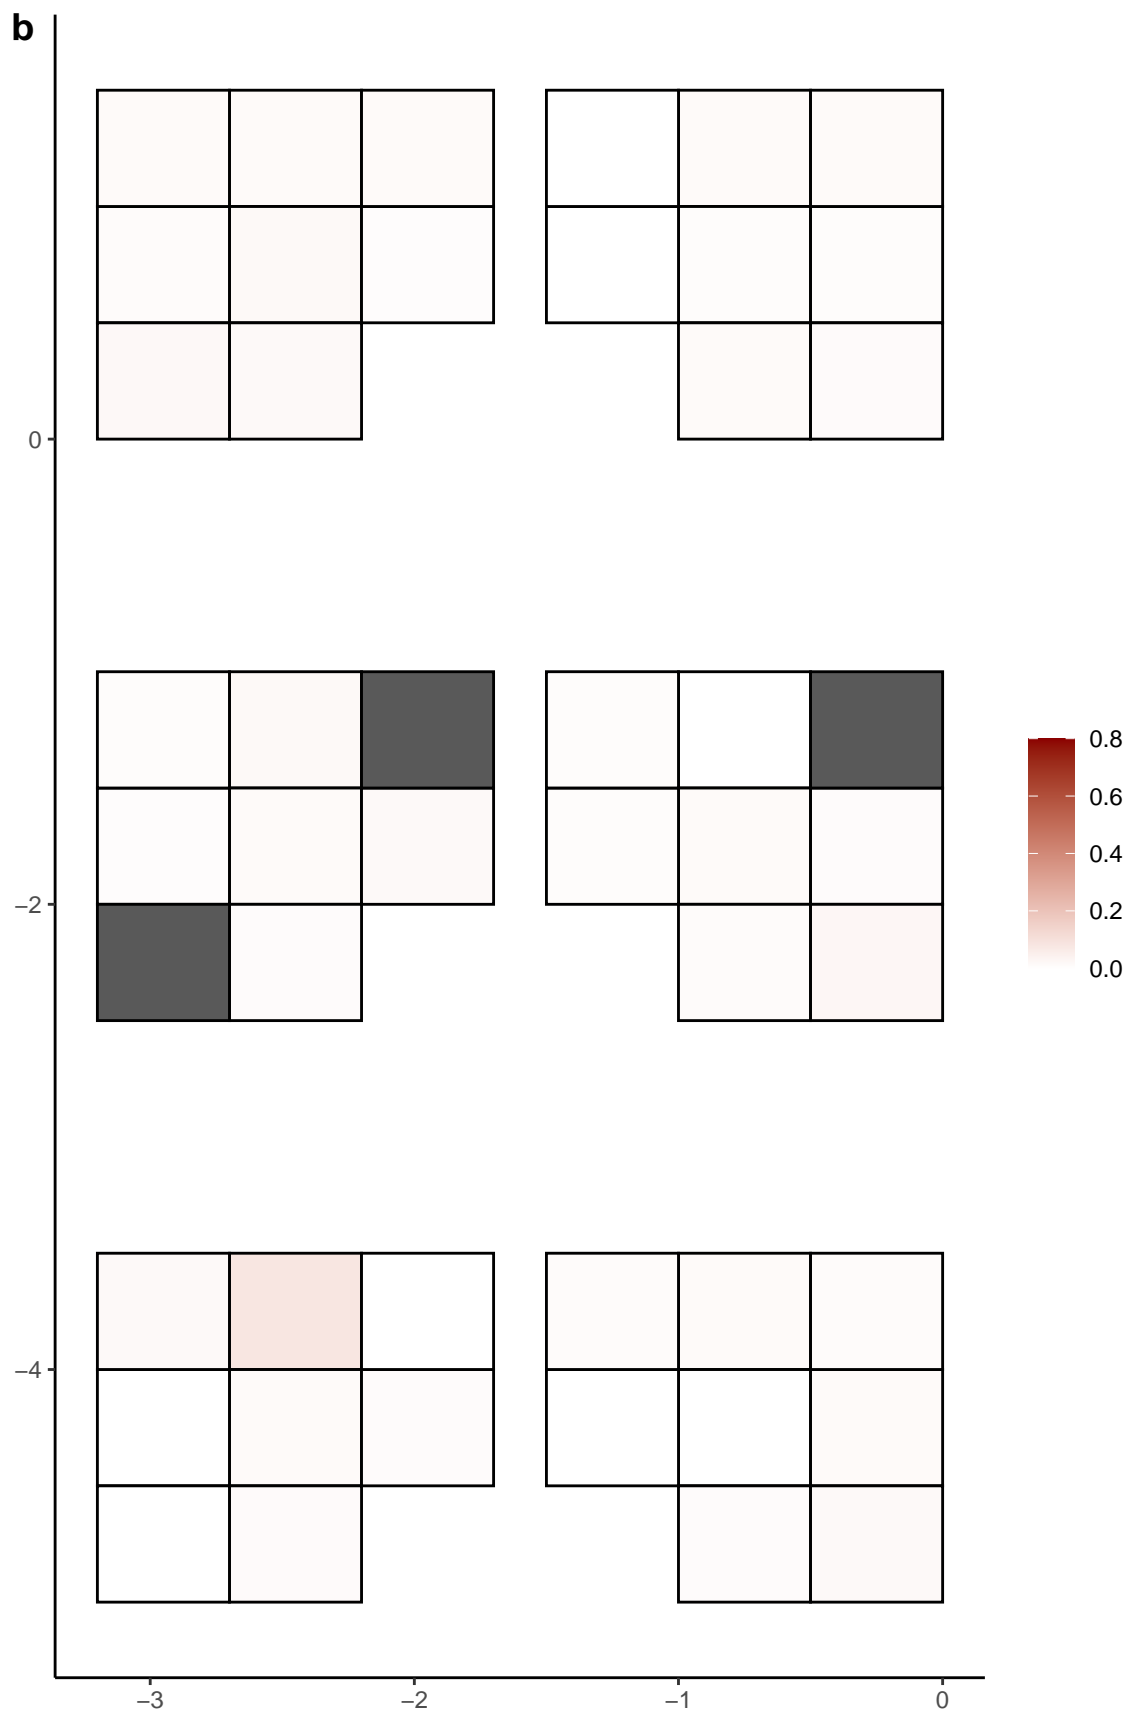

**a** ID05 7-226651-G-A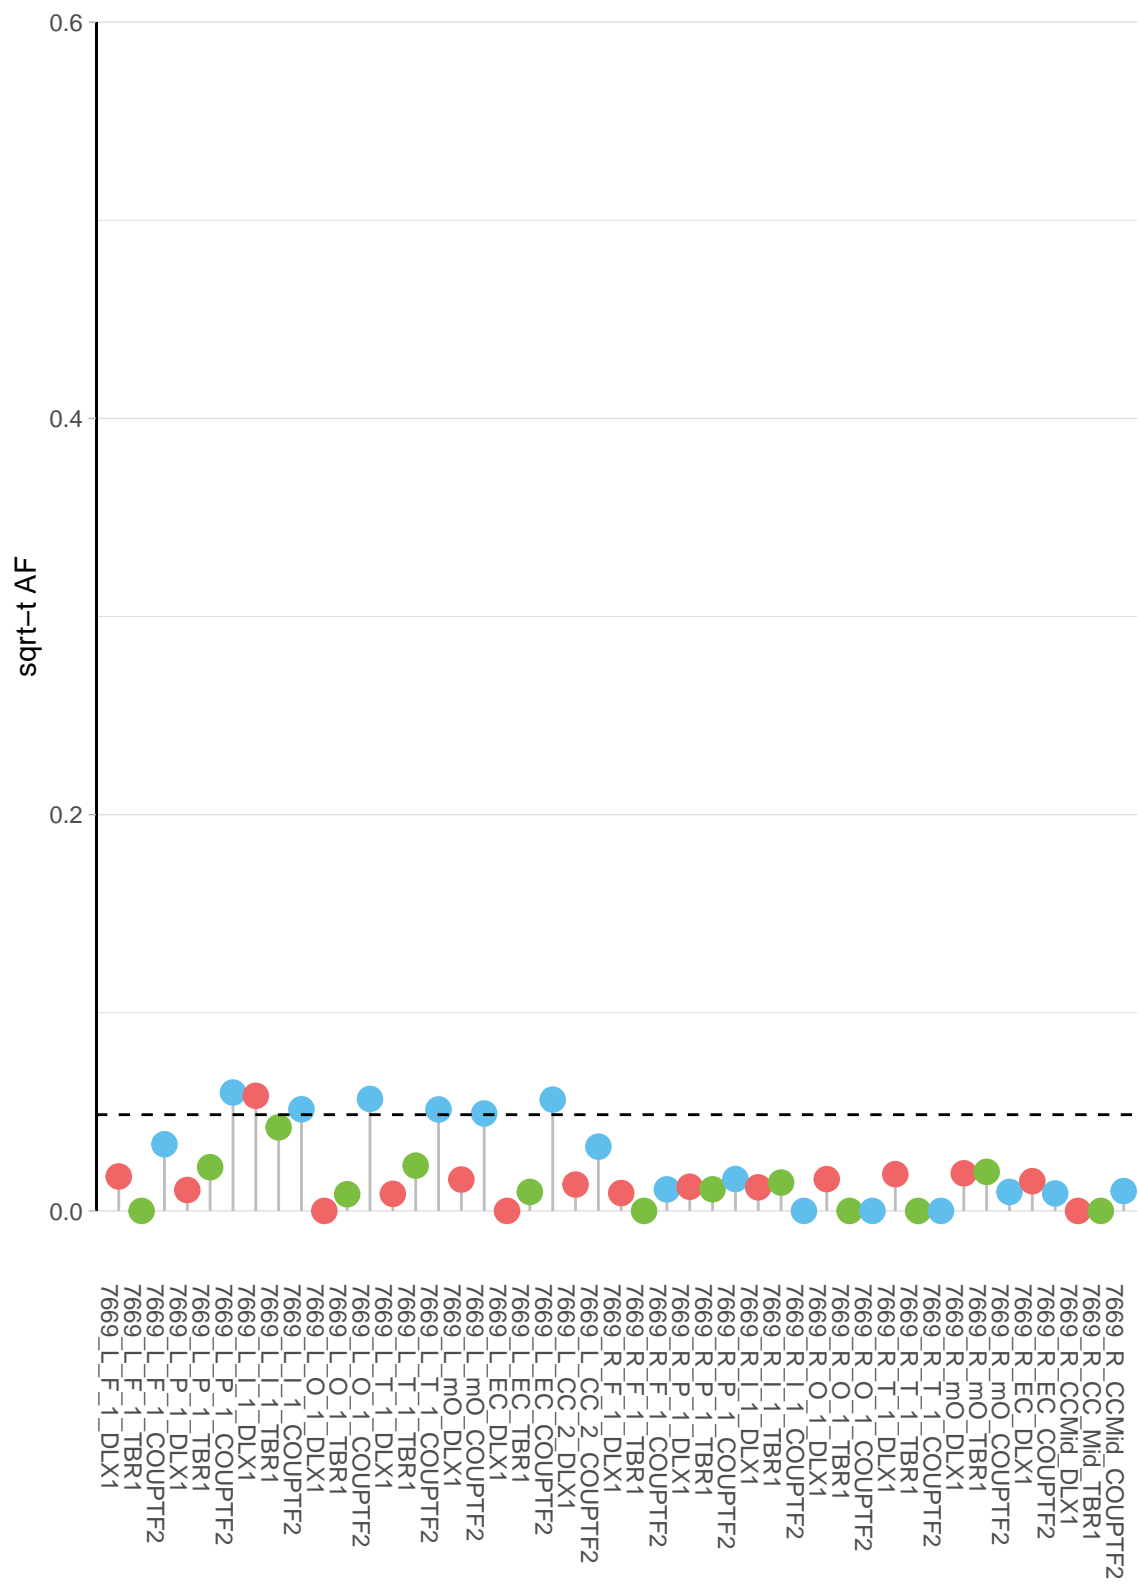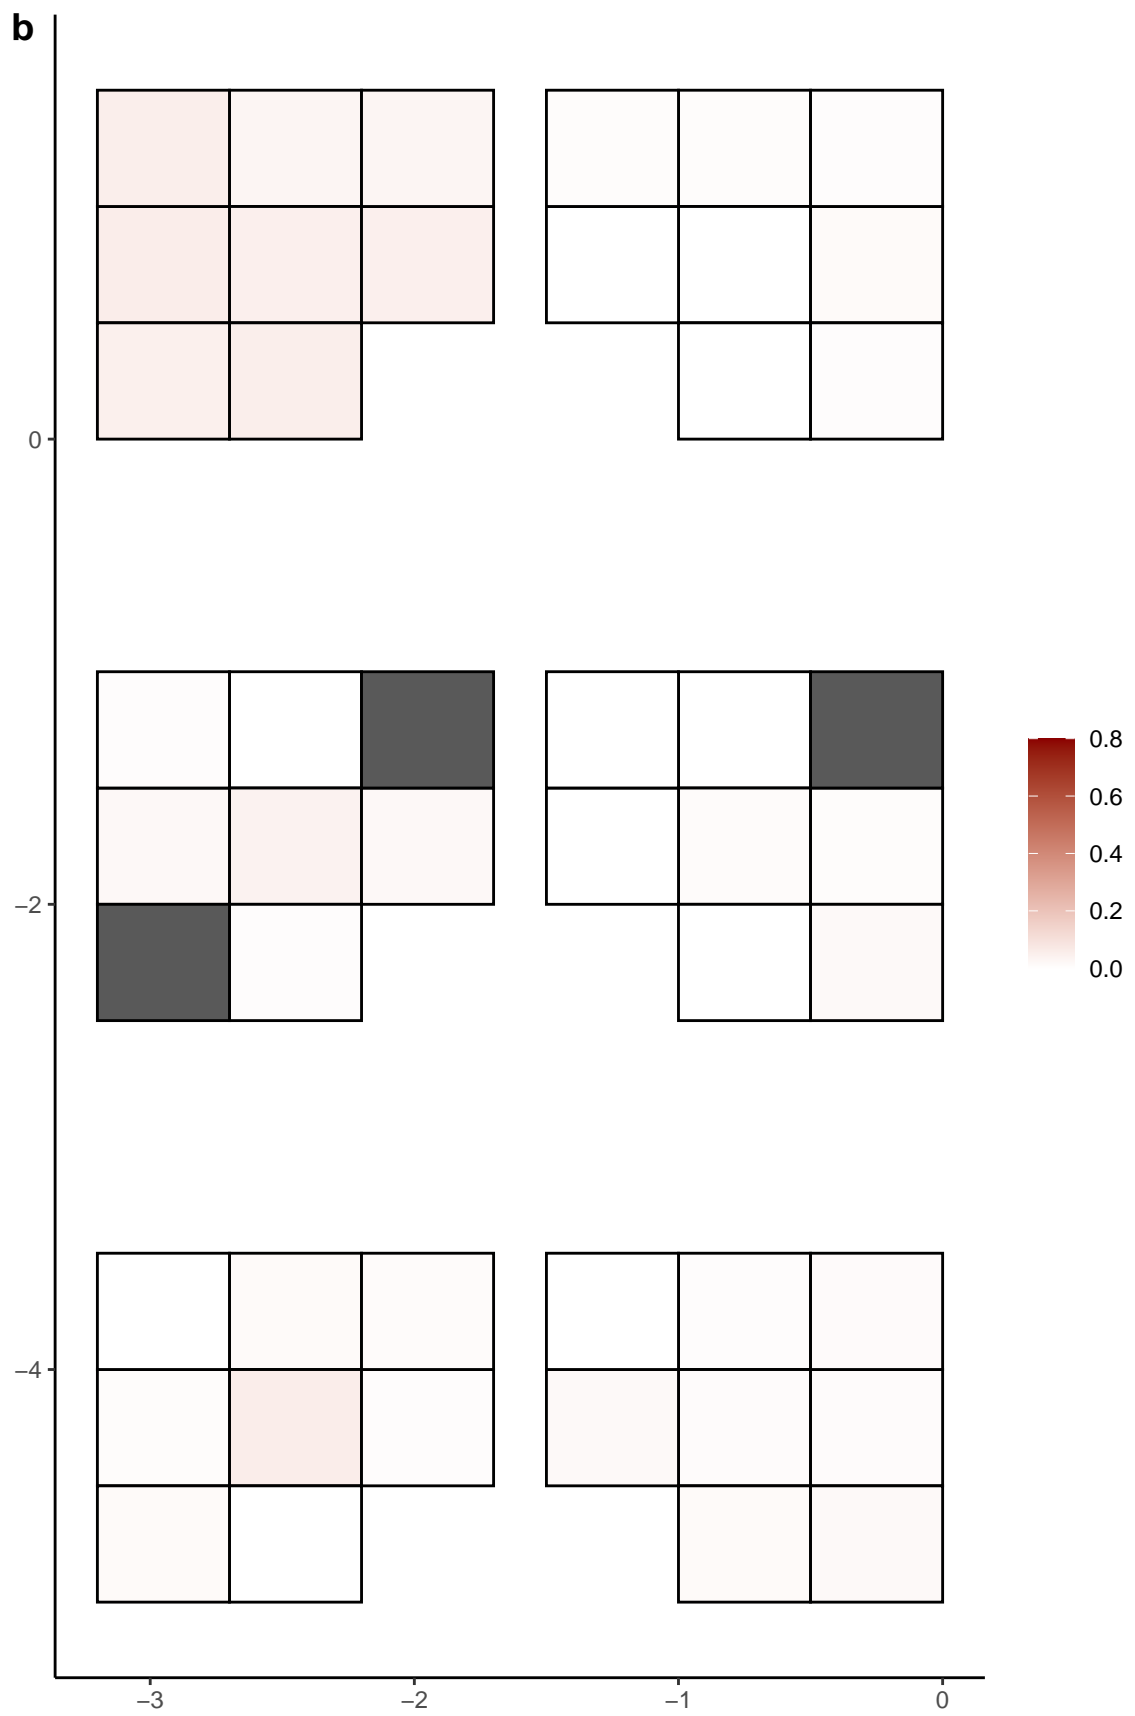

**a** ID05 7-24504428-A-G

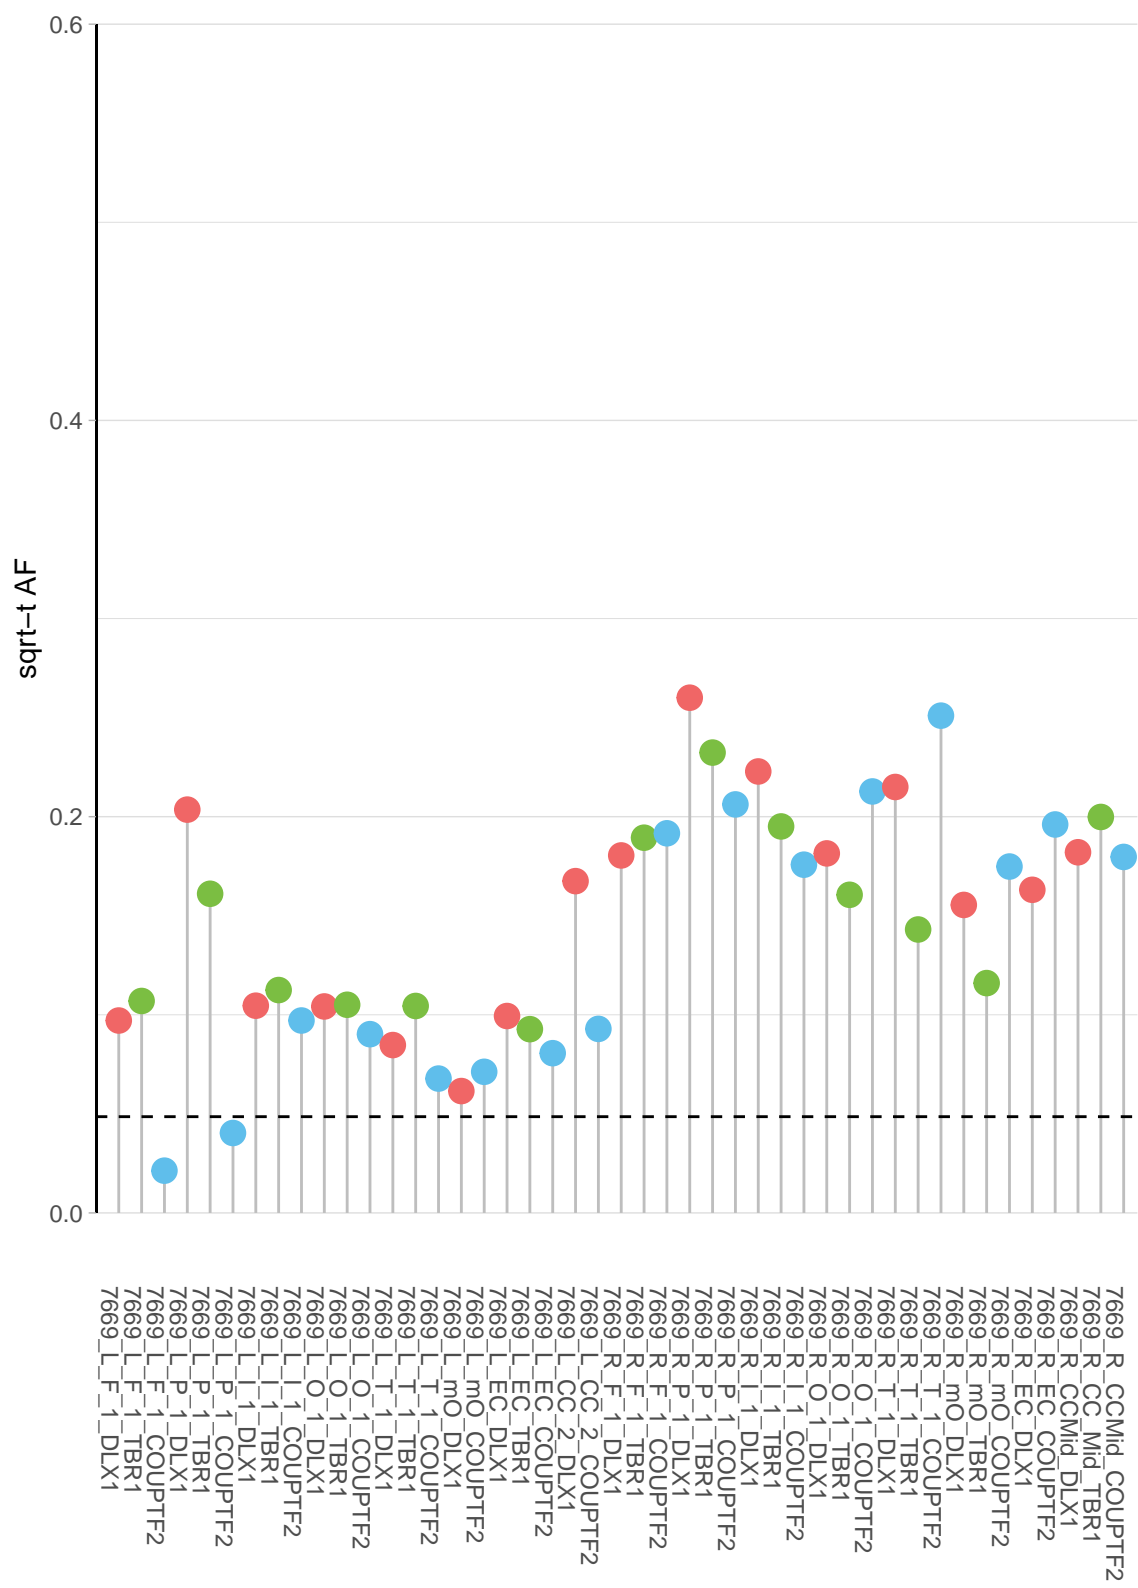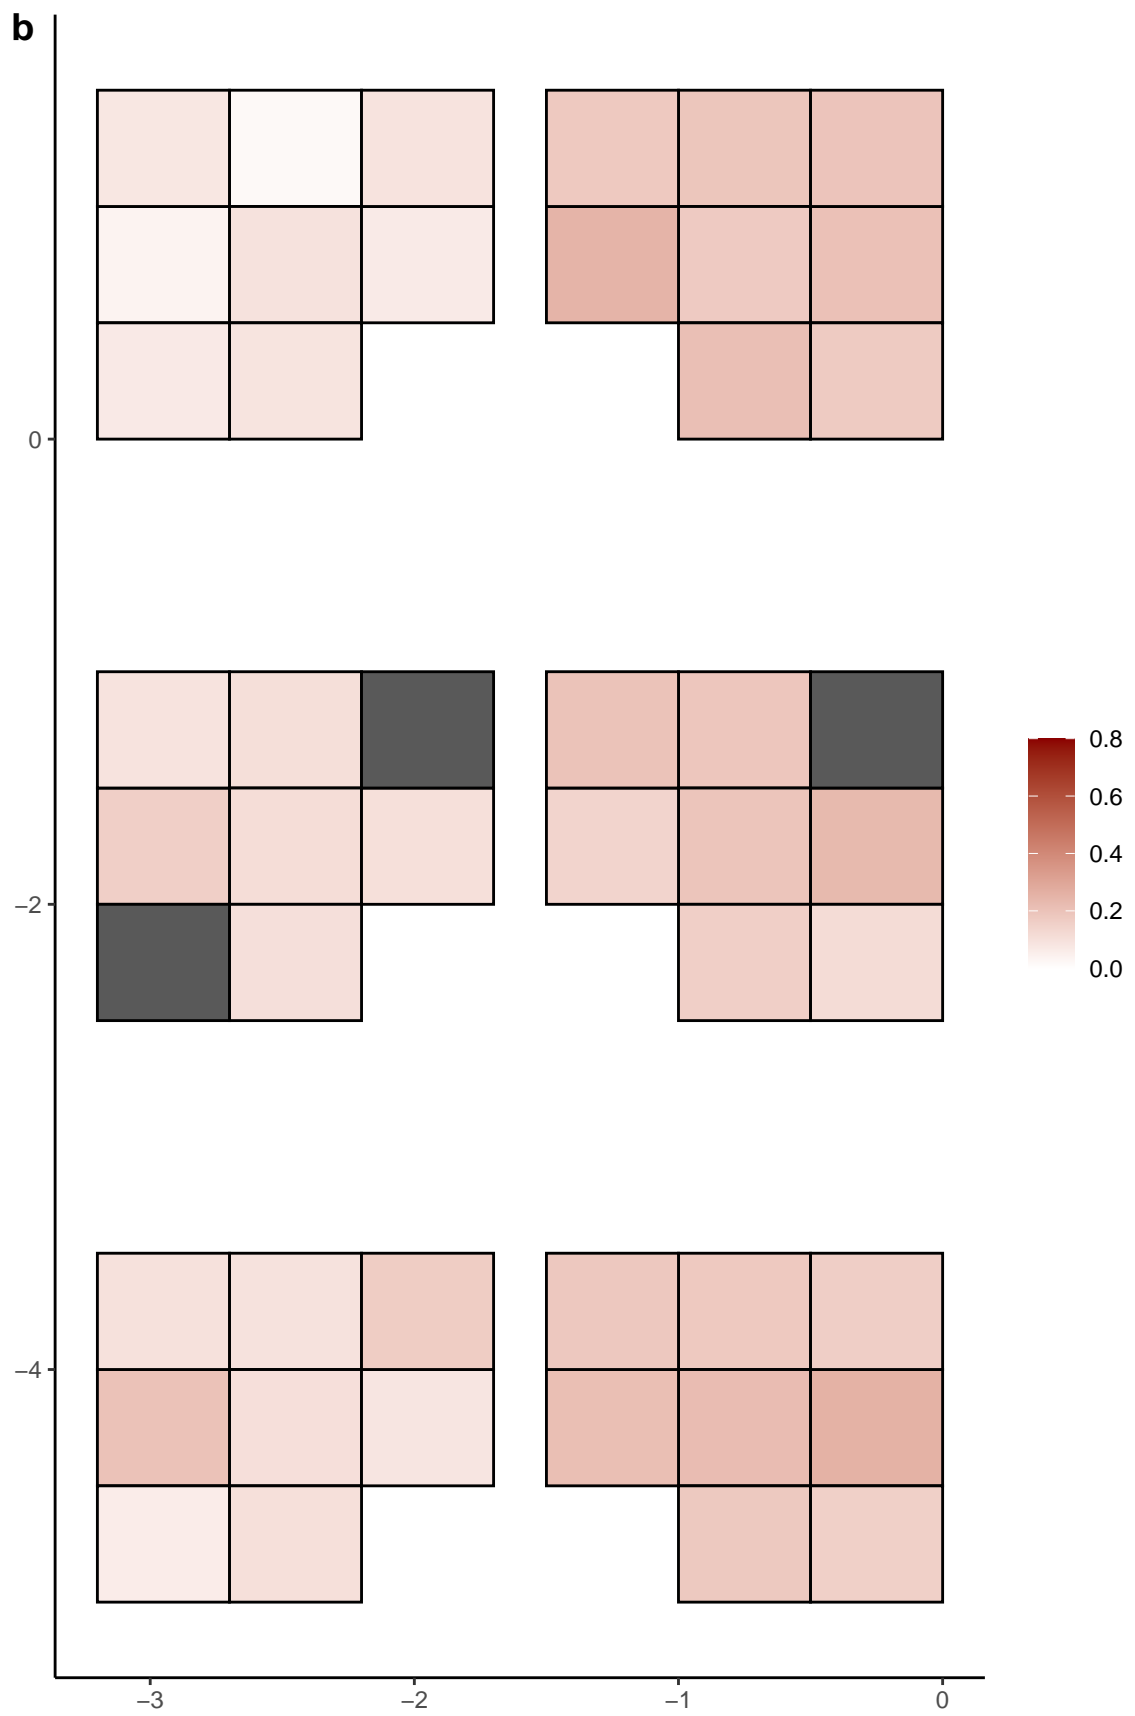



**a** ID05 7-30962886-G-A

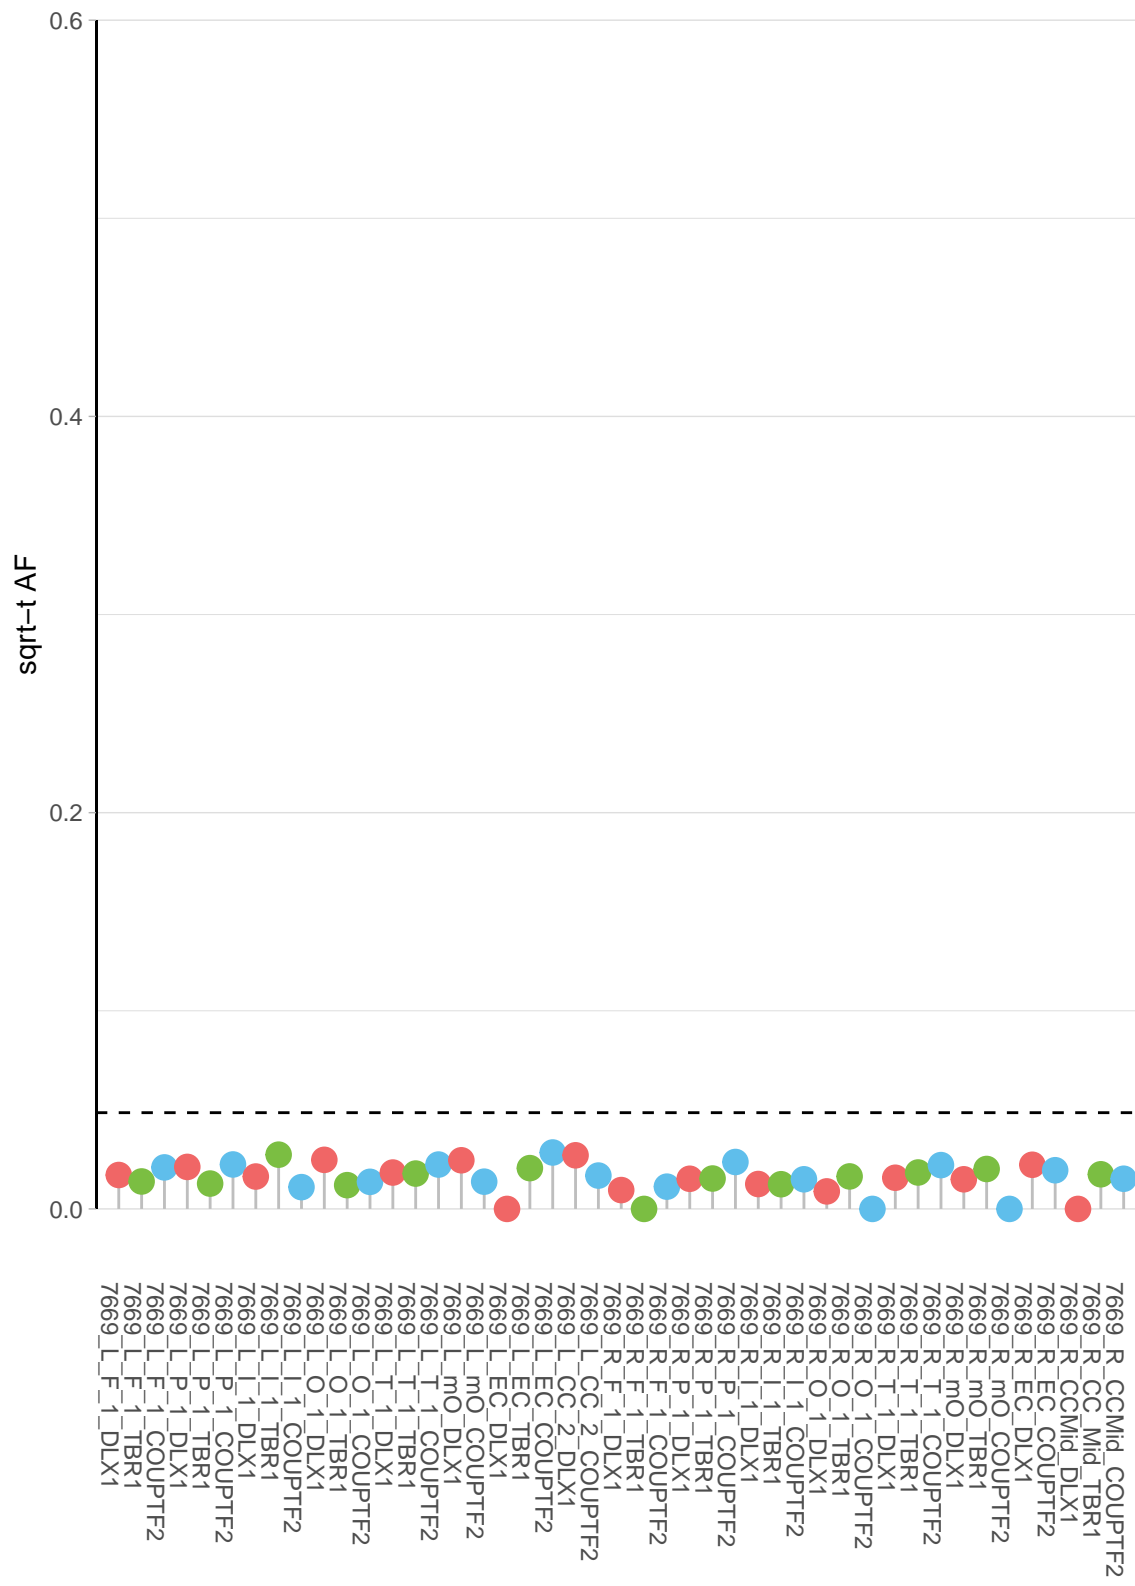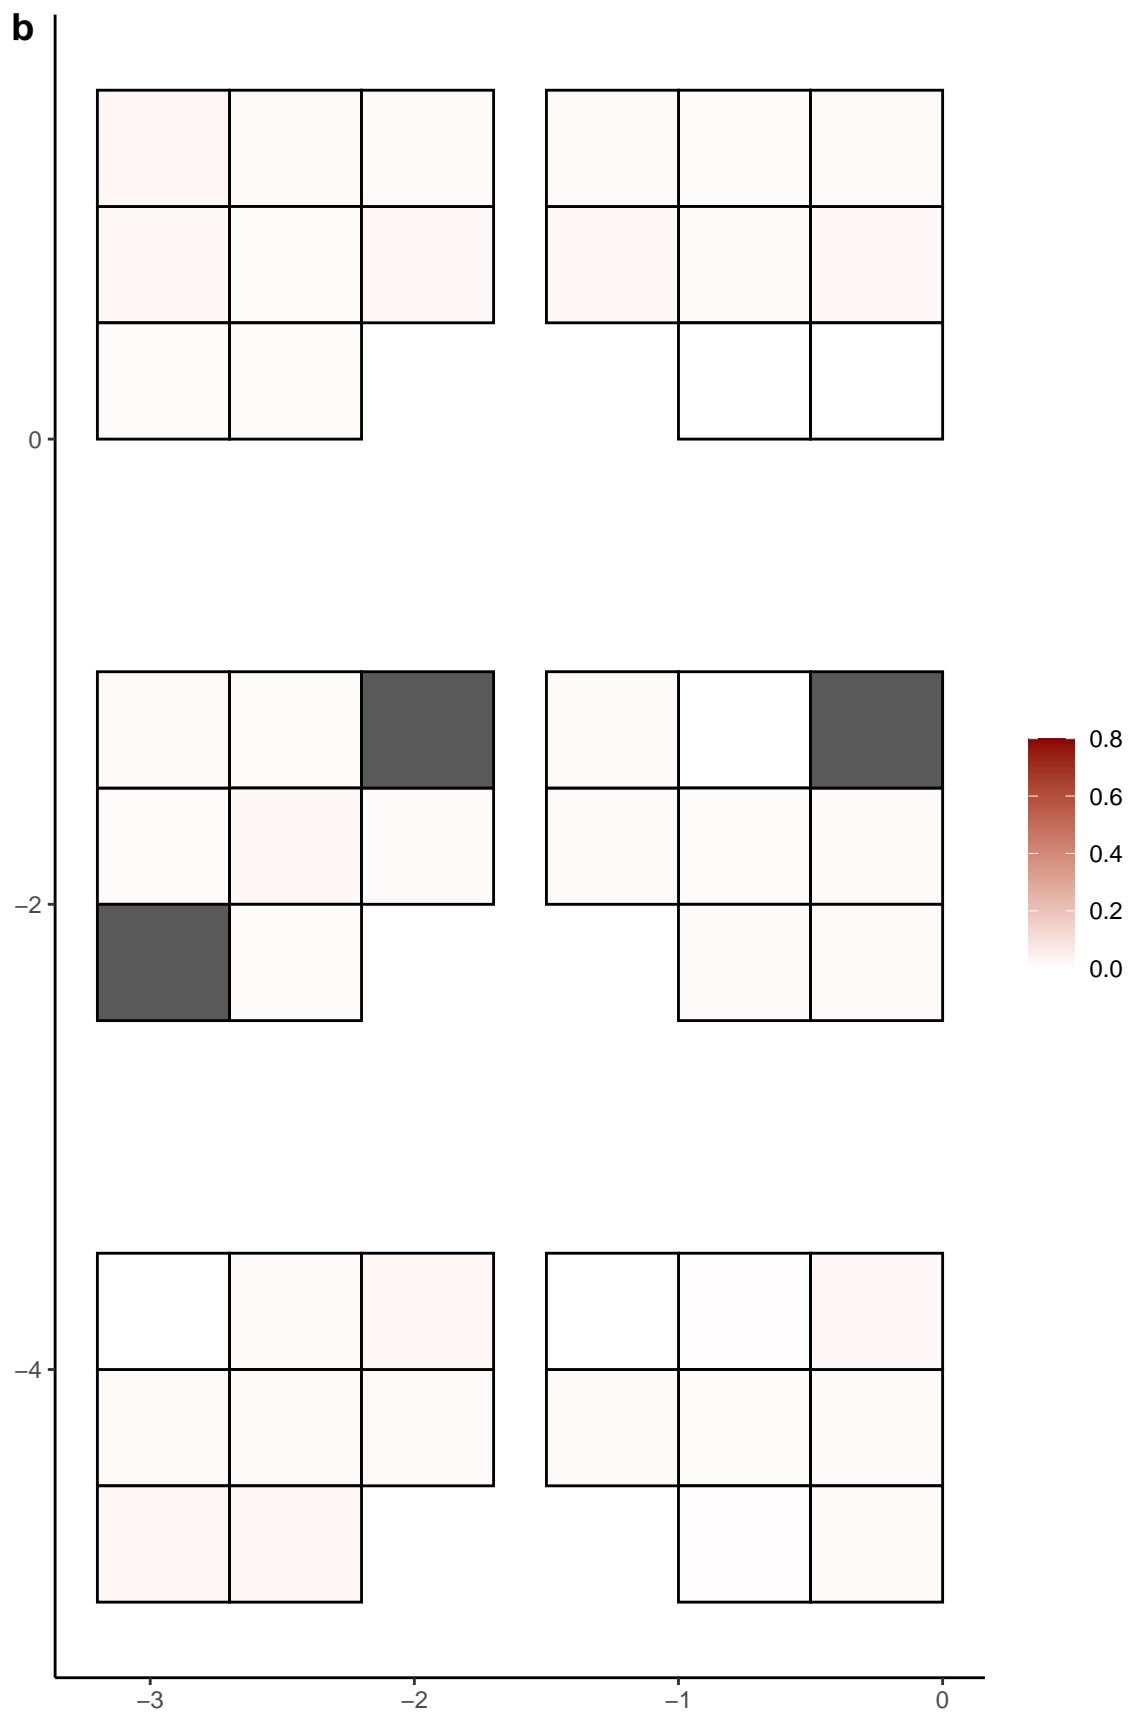

**a** ID05 7-31462228-G-A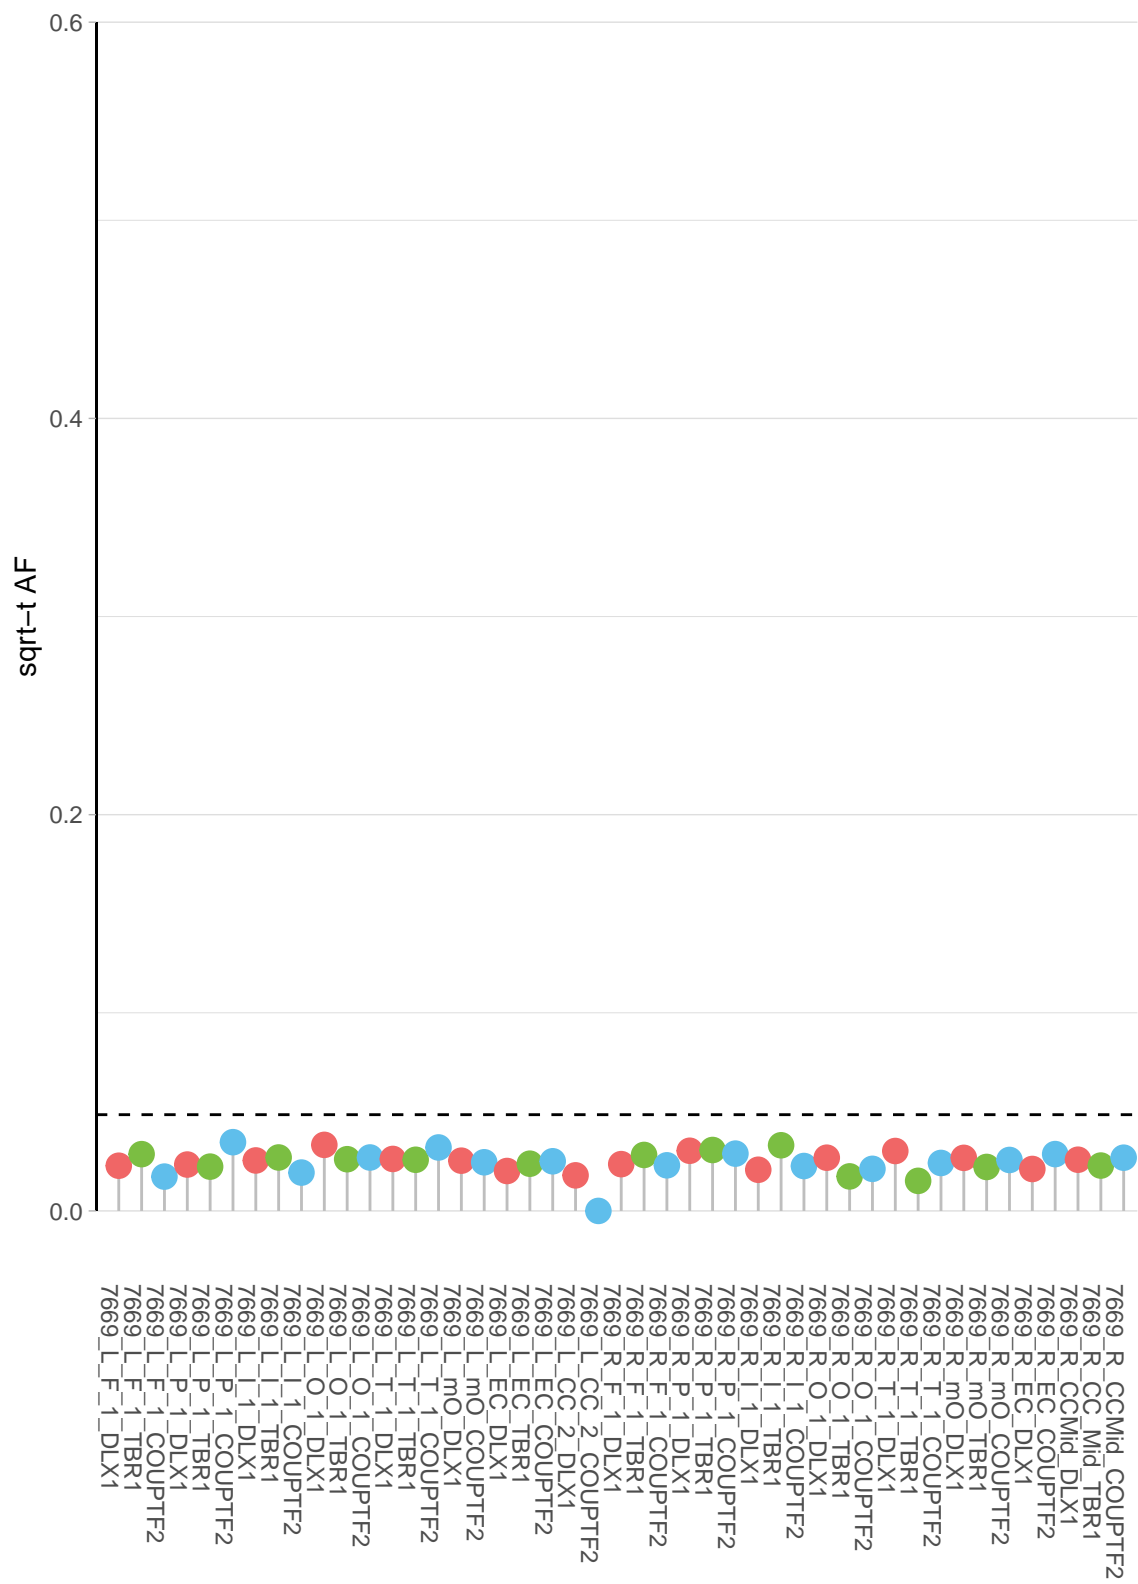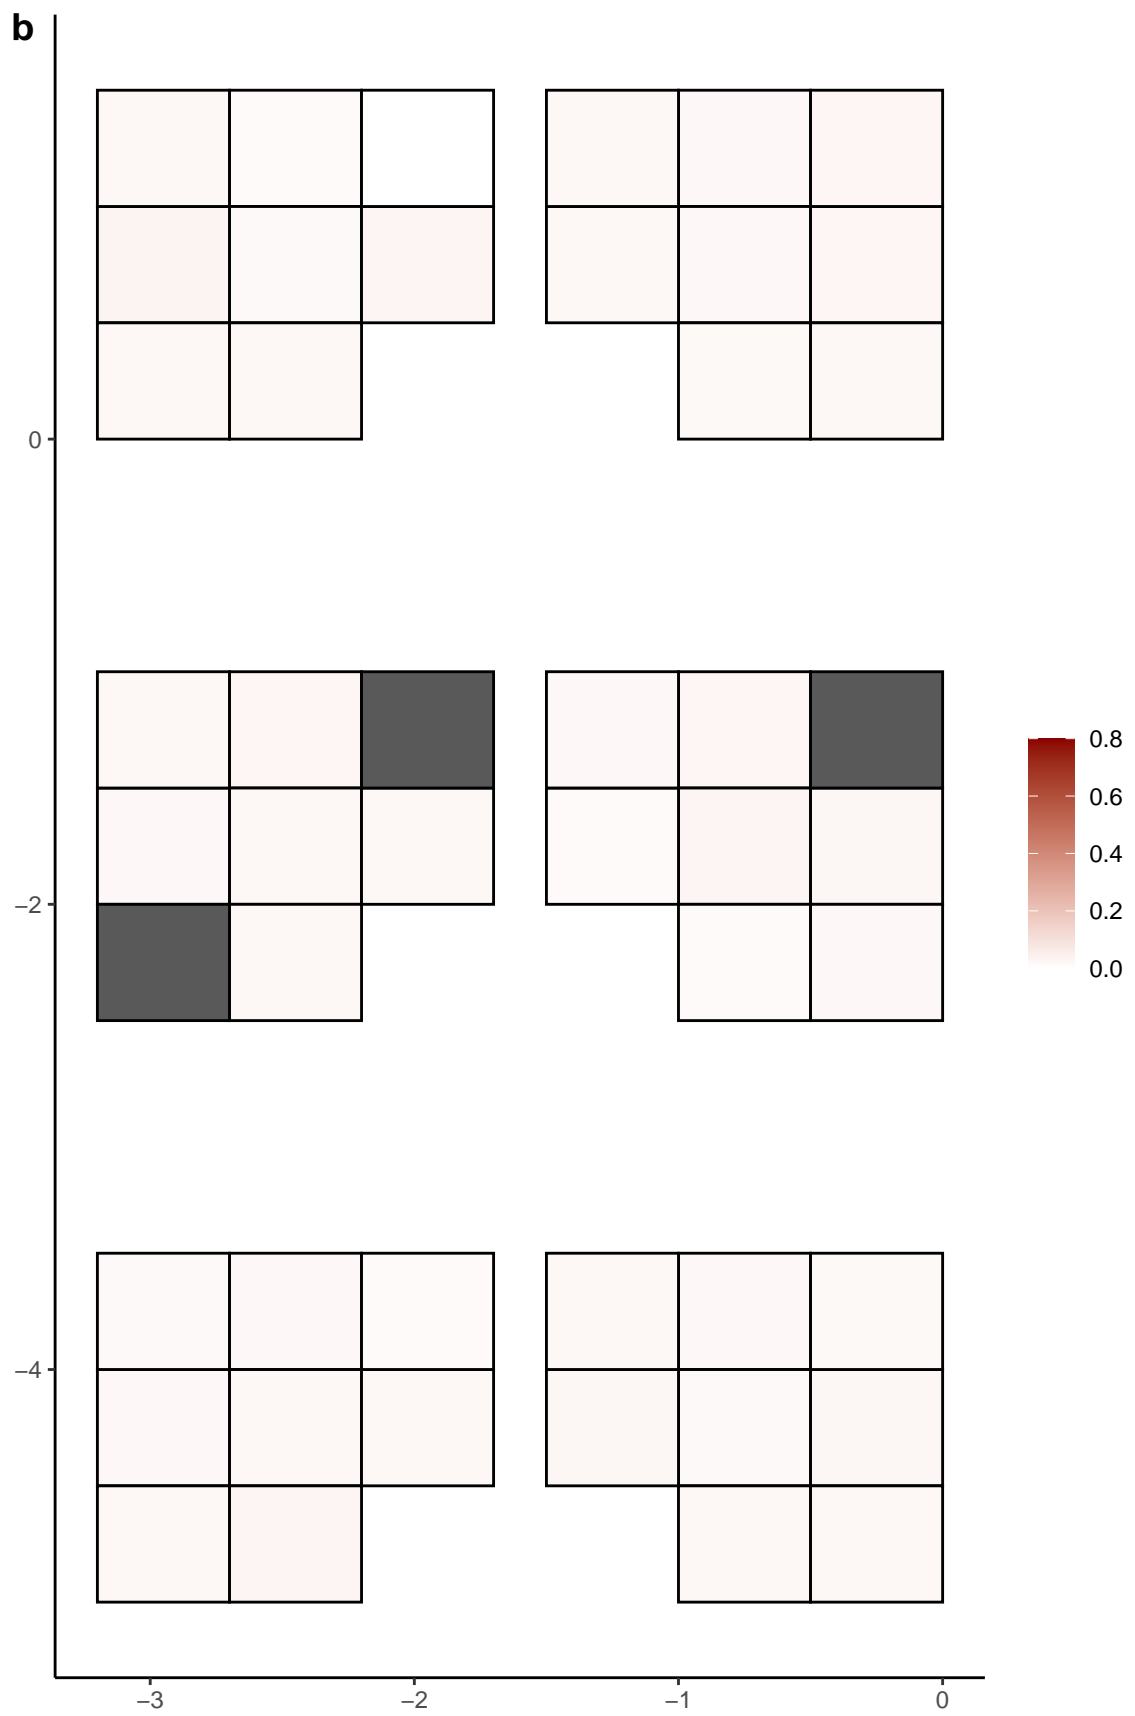



**a** ID05 7-35583026-G-C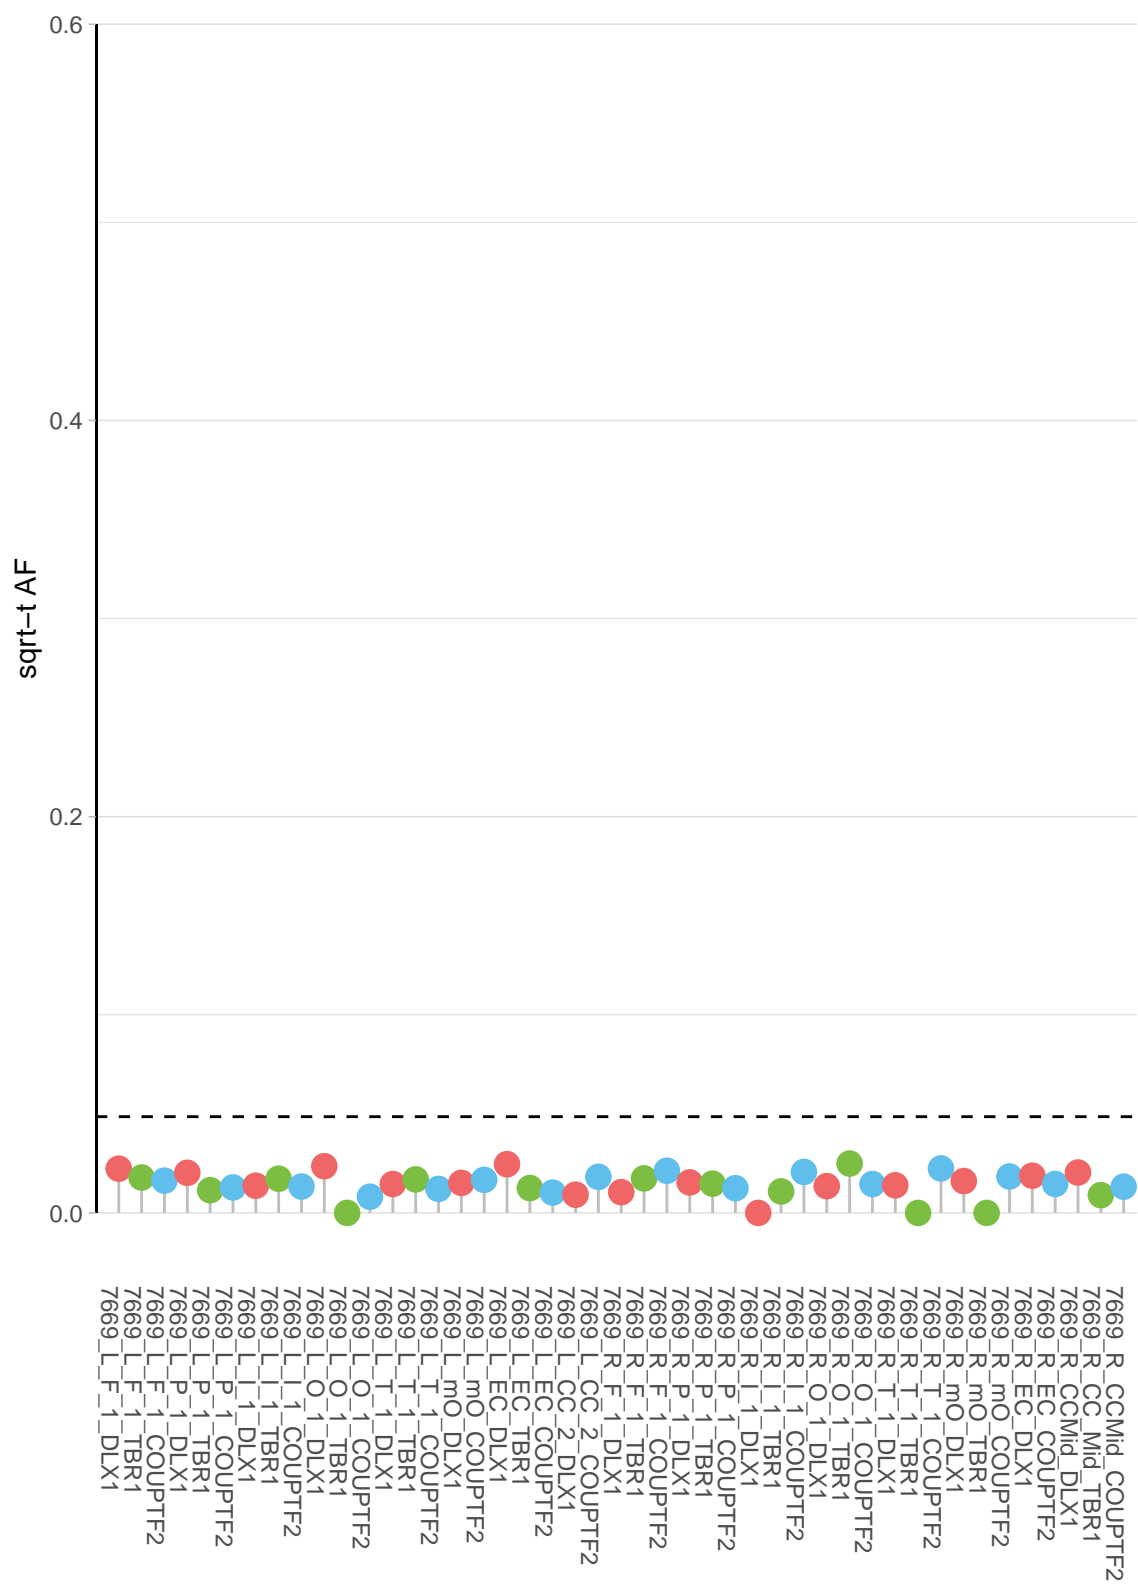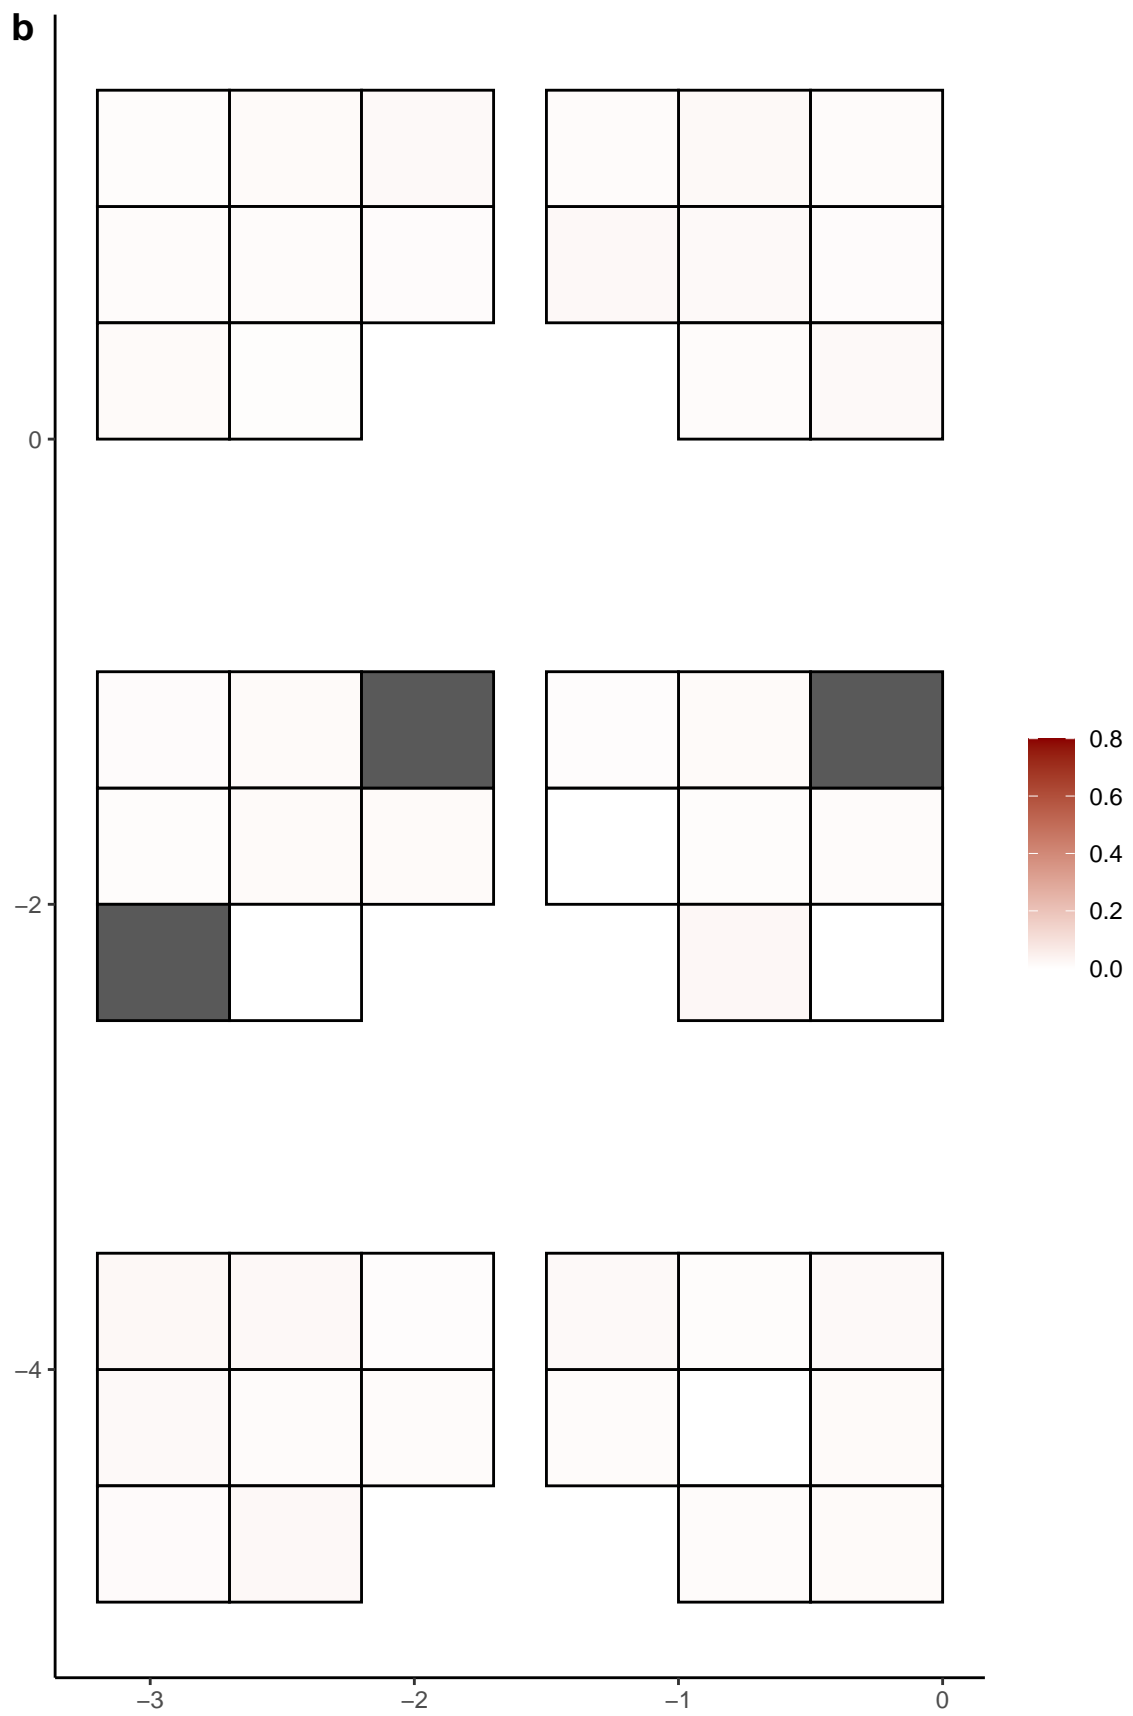



**a** ID05 7-46623362-G-C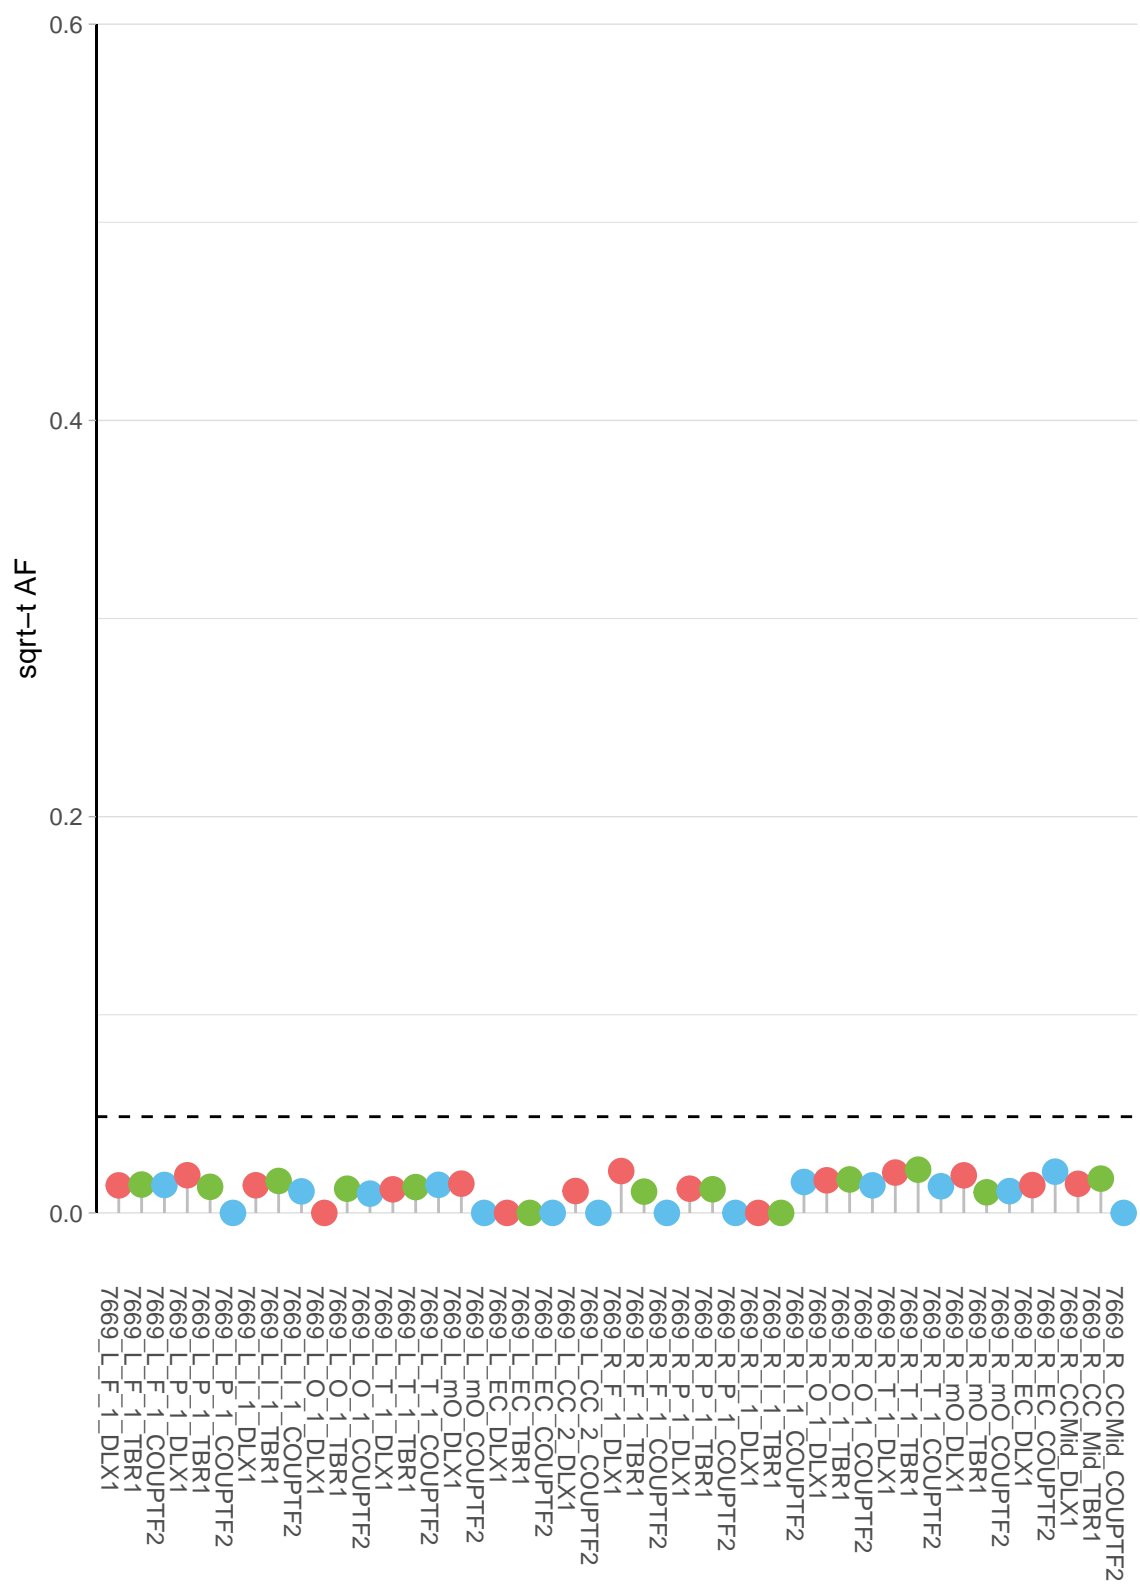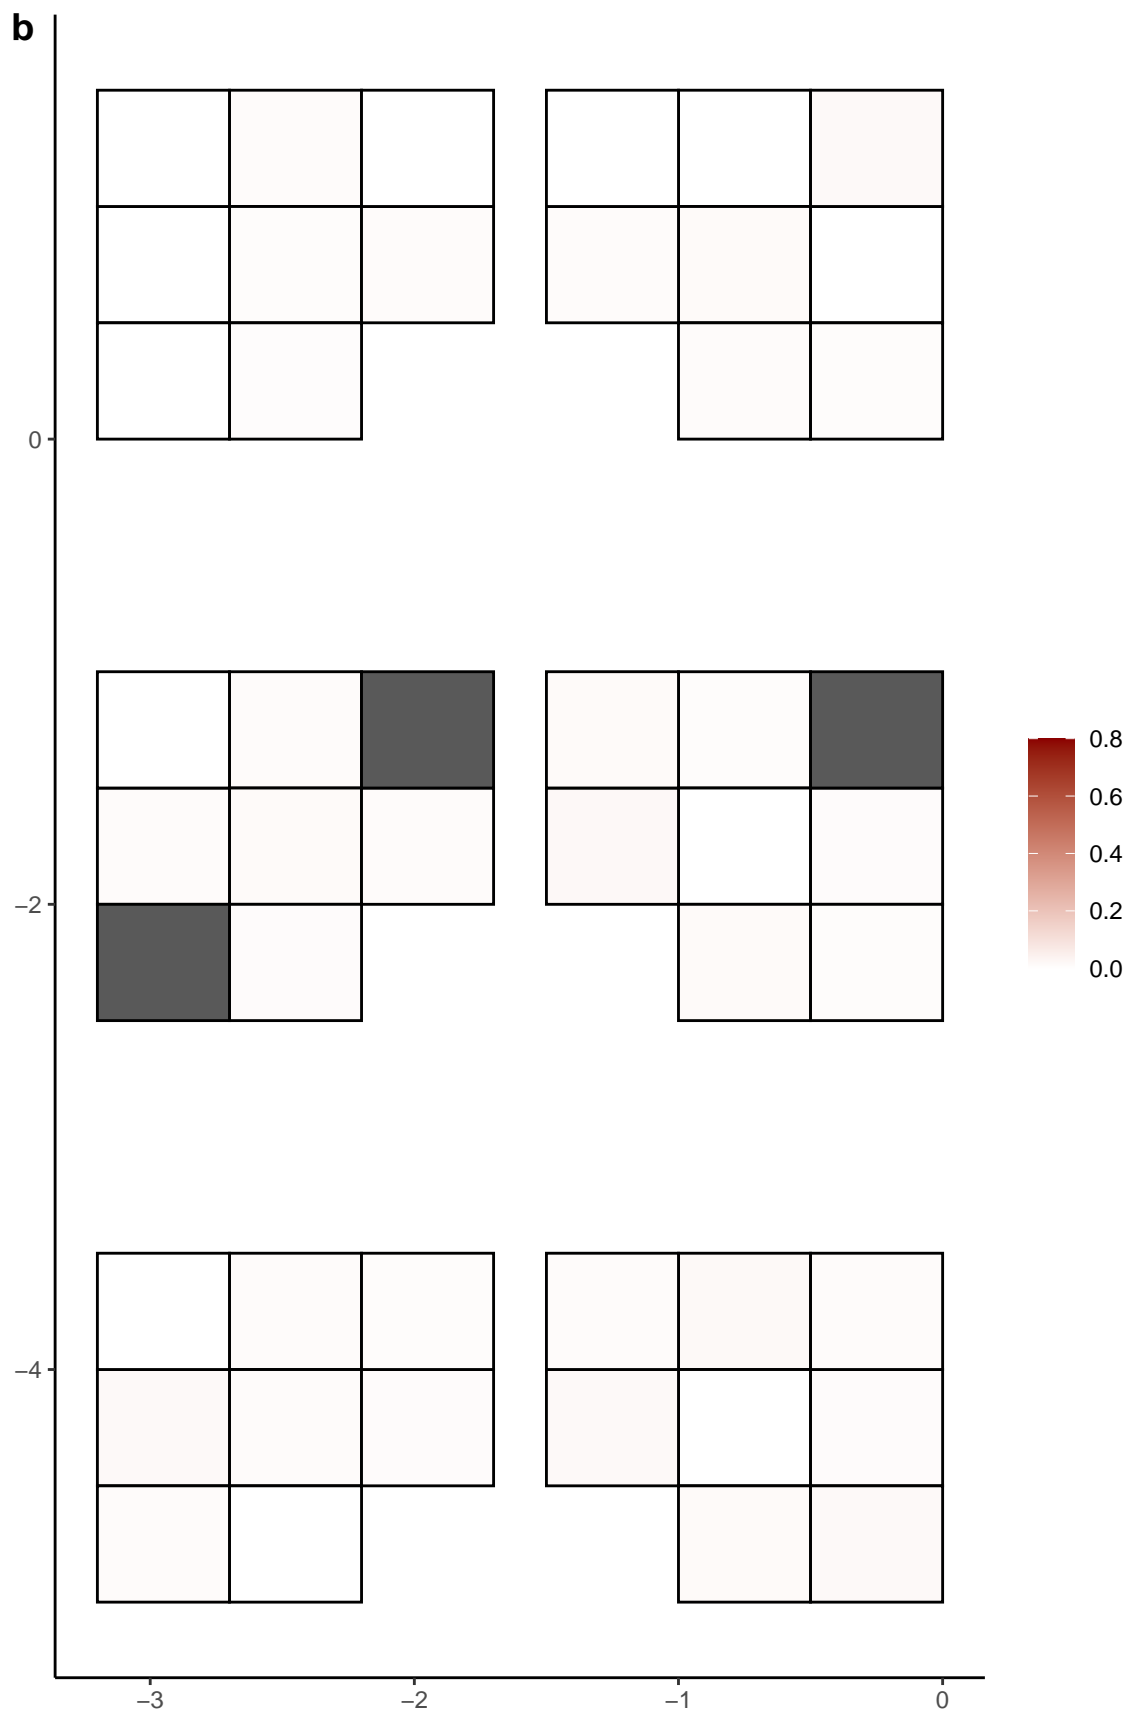



**a** ID05 7-75695715-A-G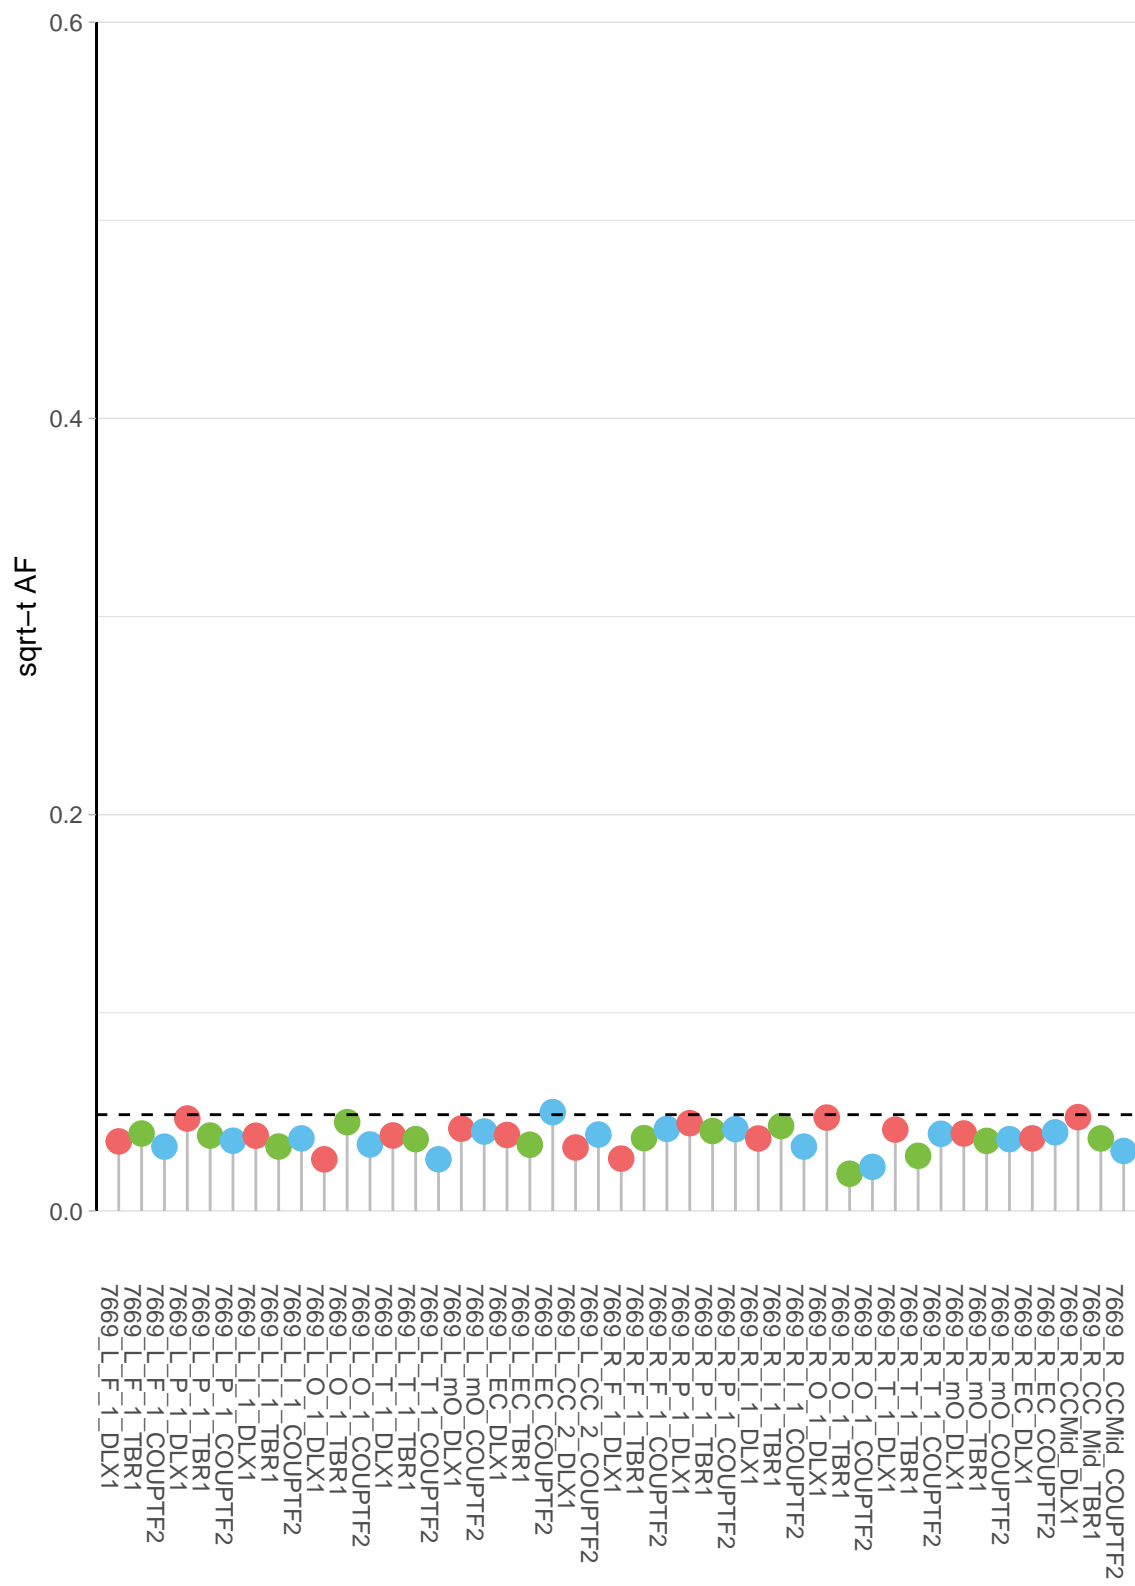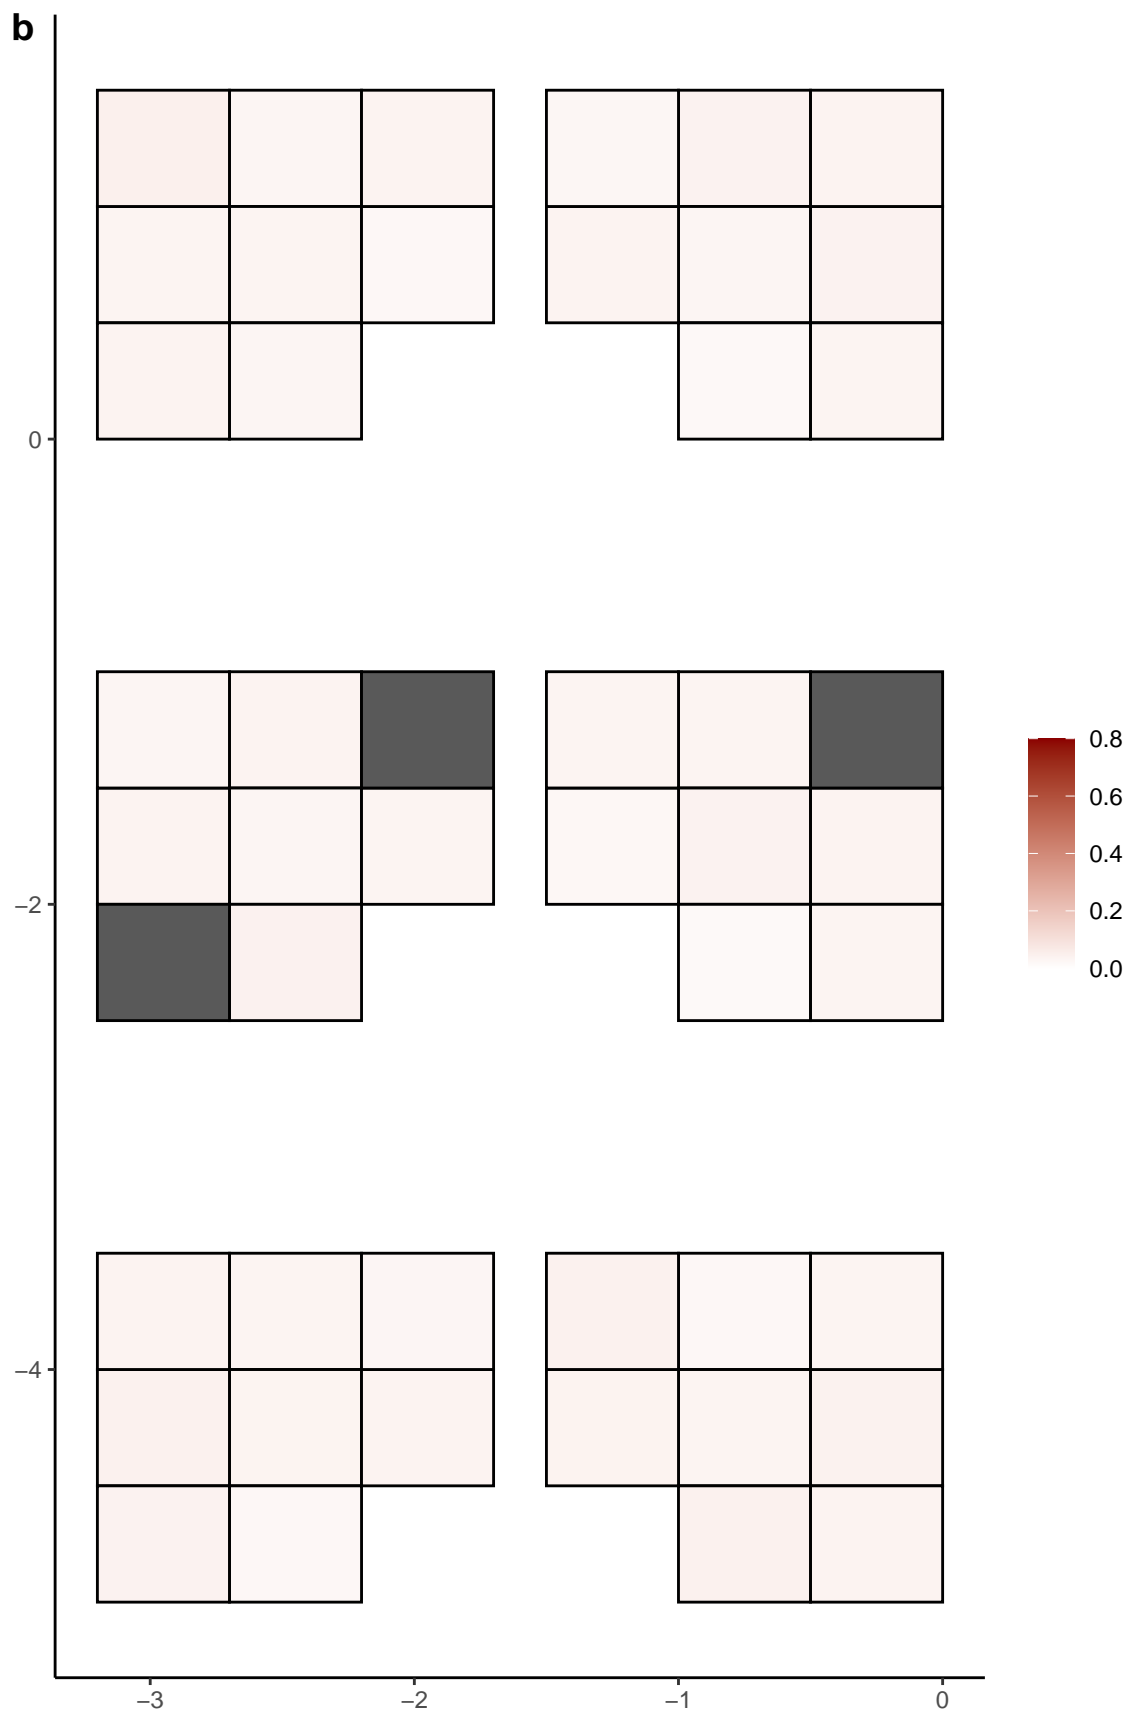

**a** ID05 7-78830807-C-T

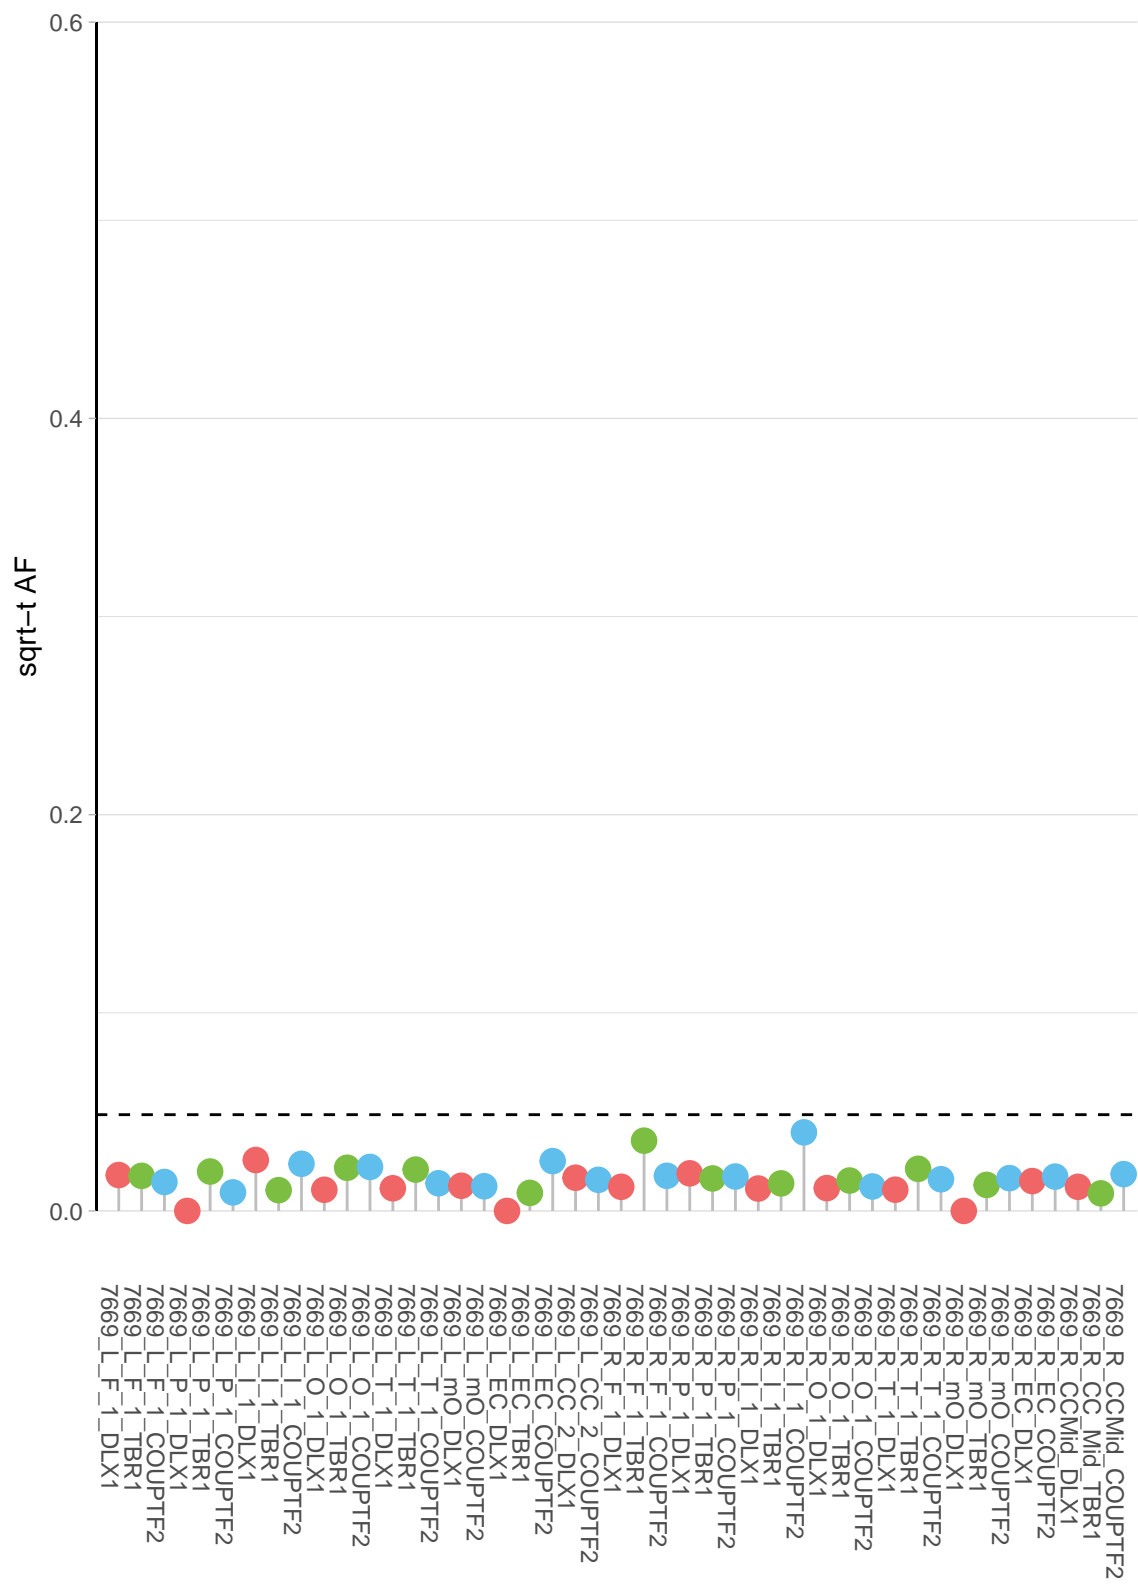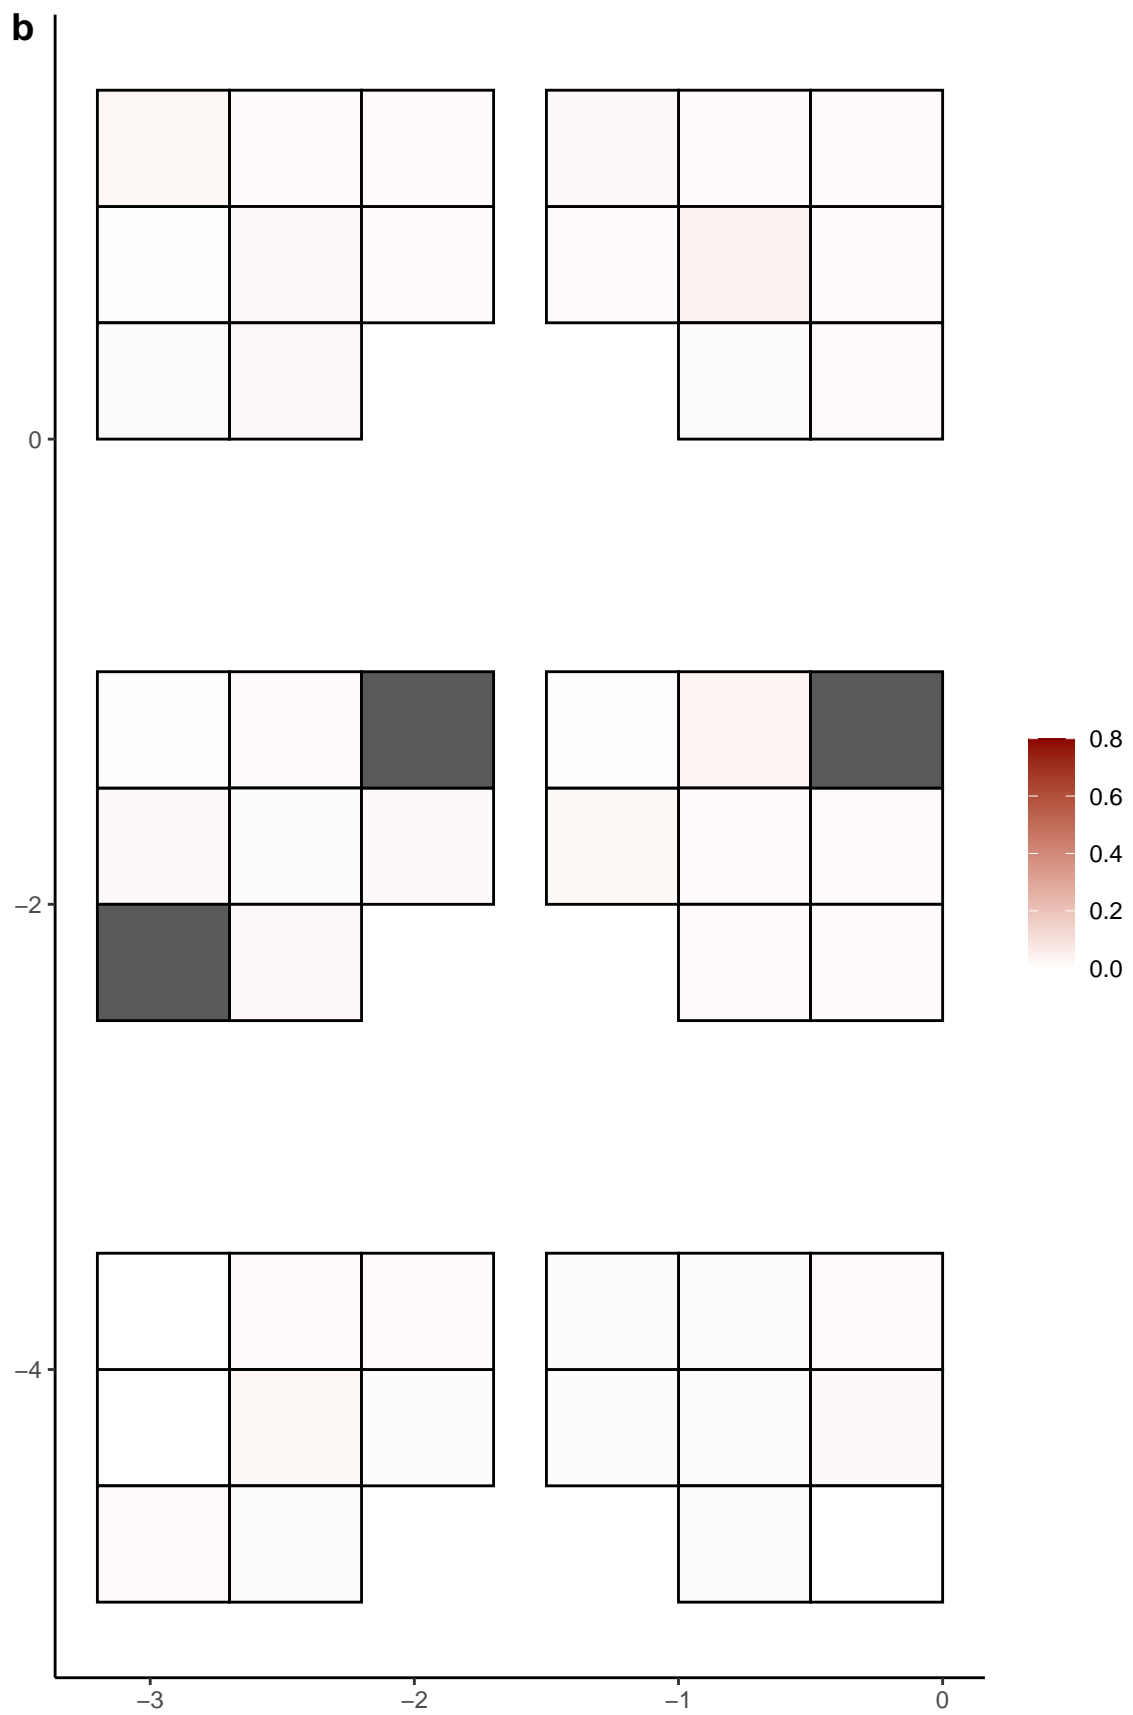







**a** ID05 7-9192631-C-T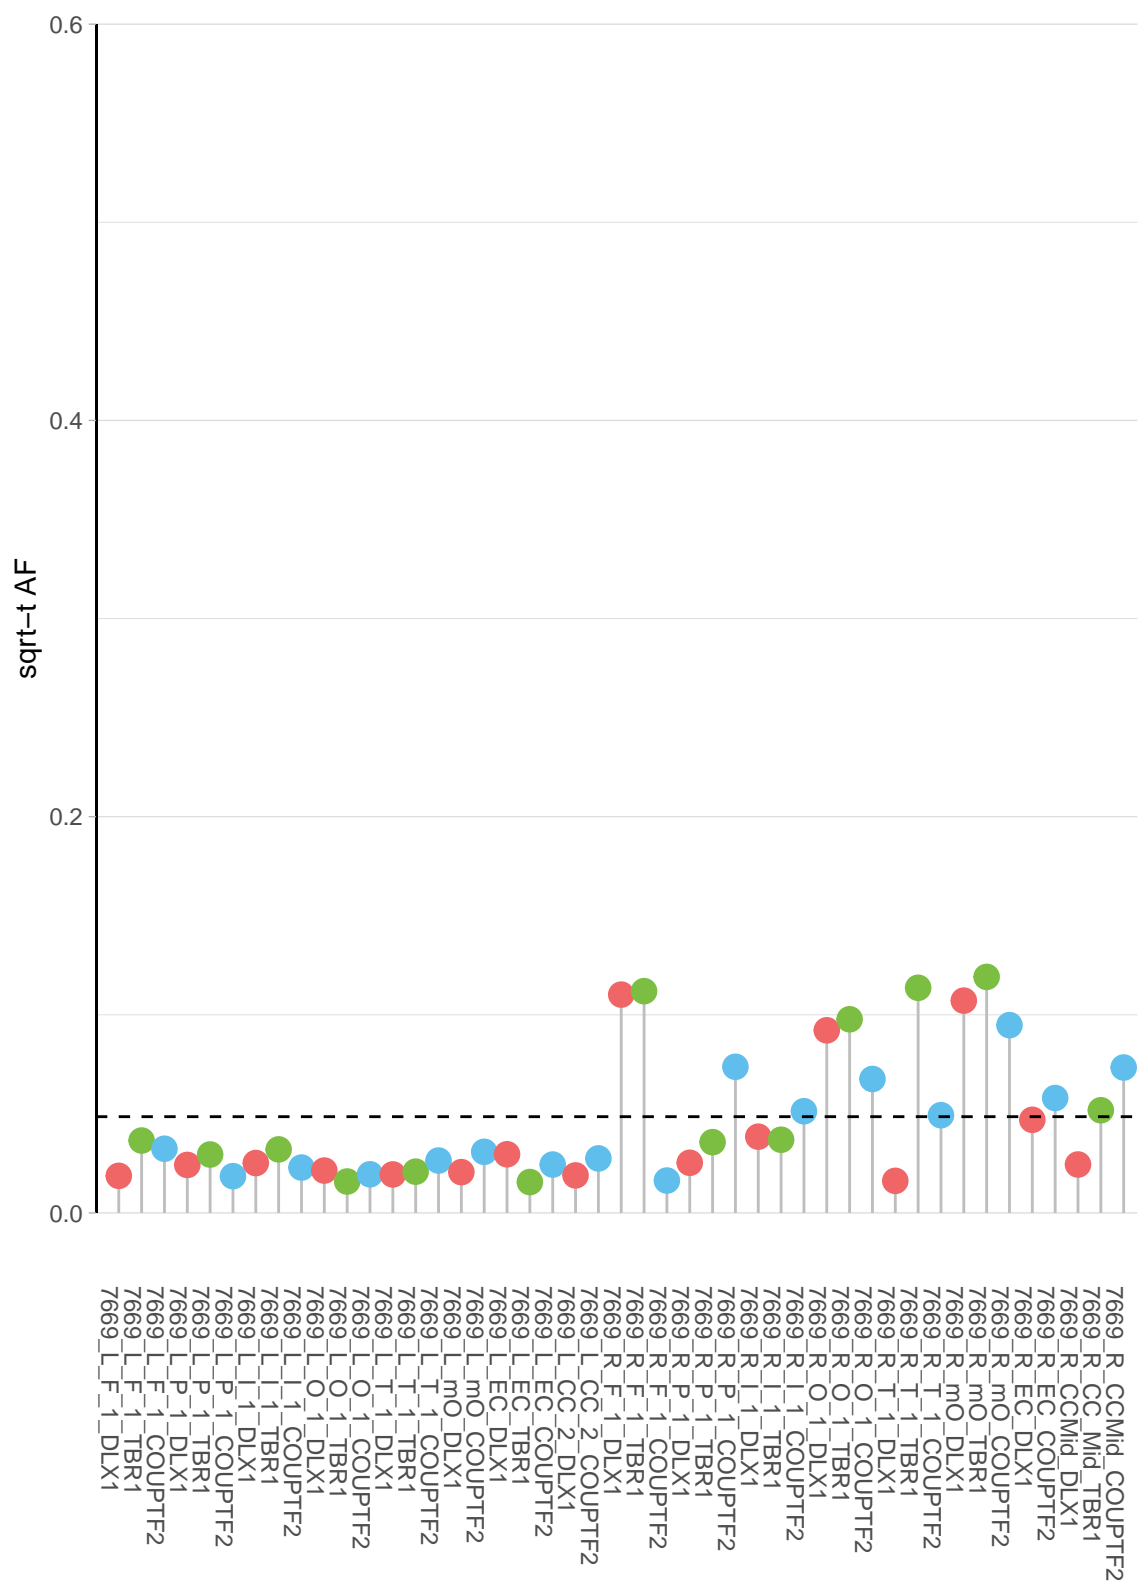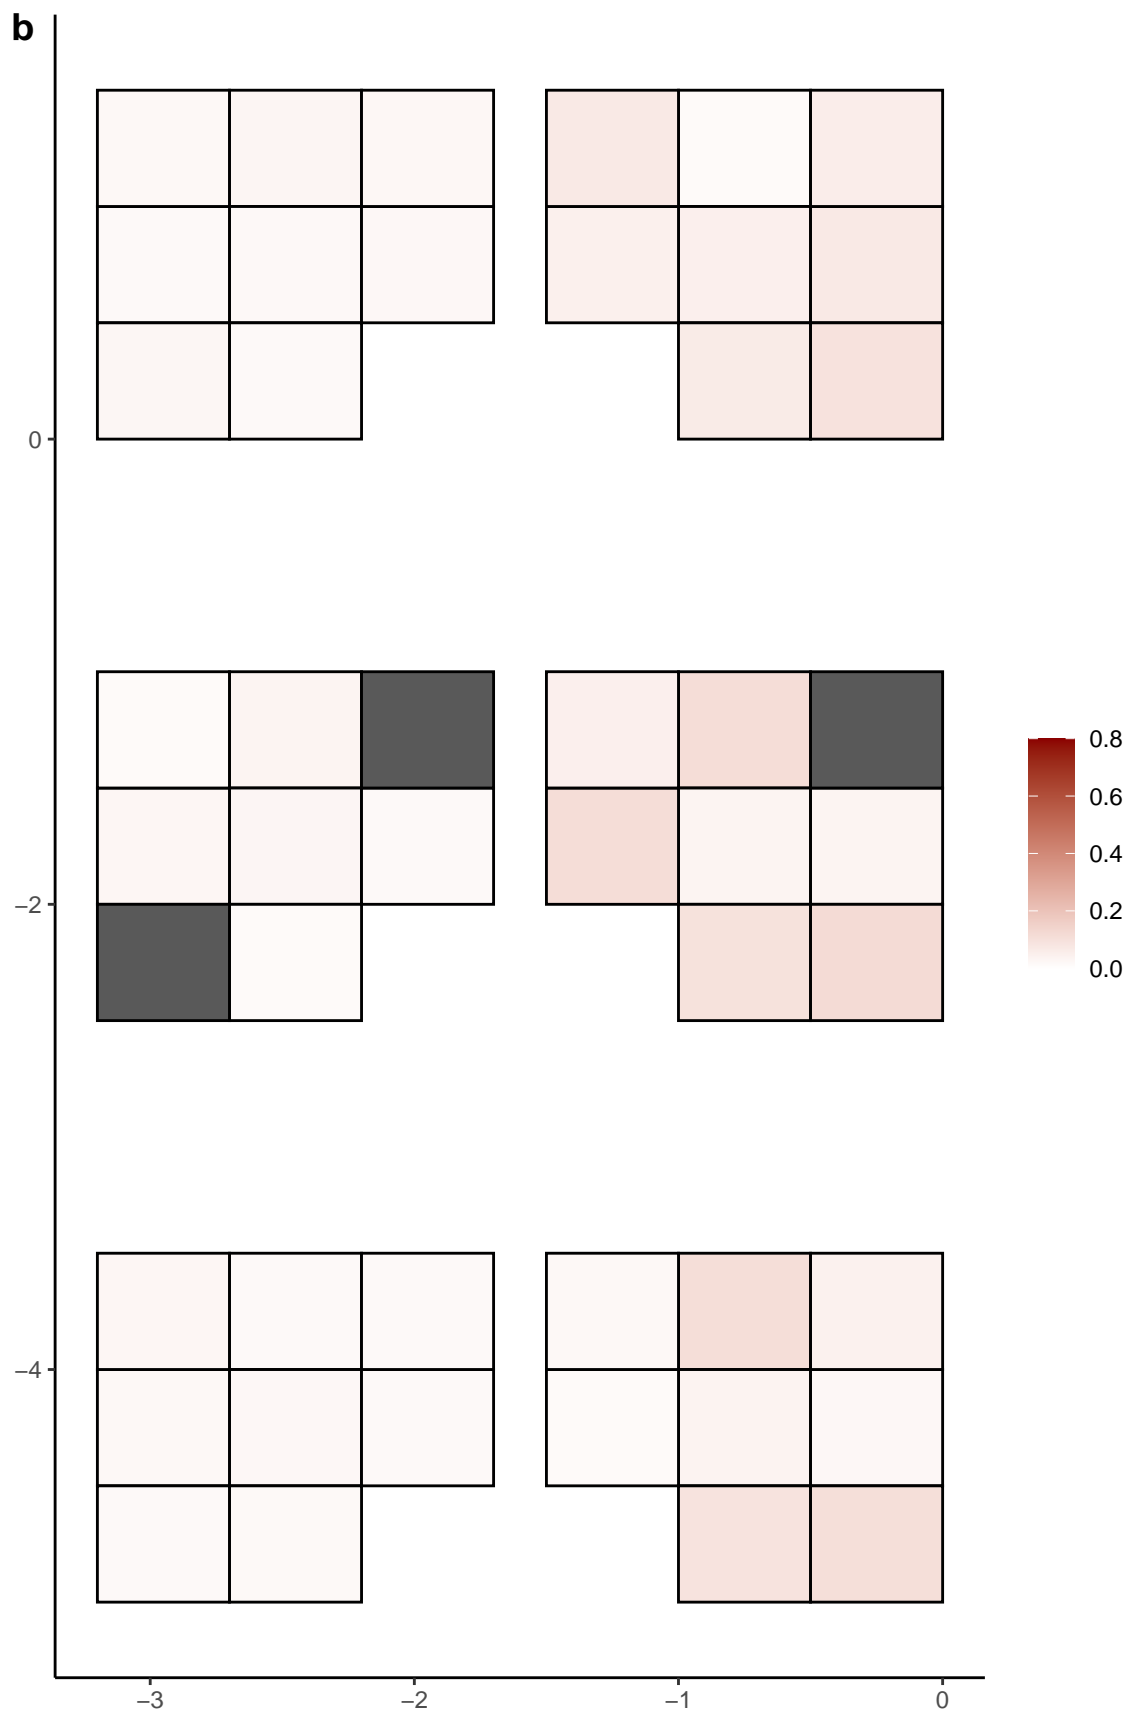

**a** ID05 7-94919994-G-C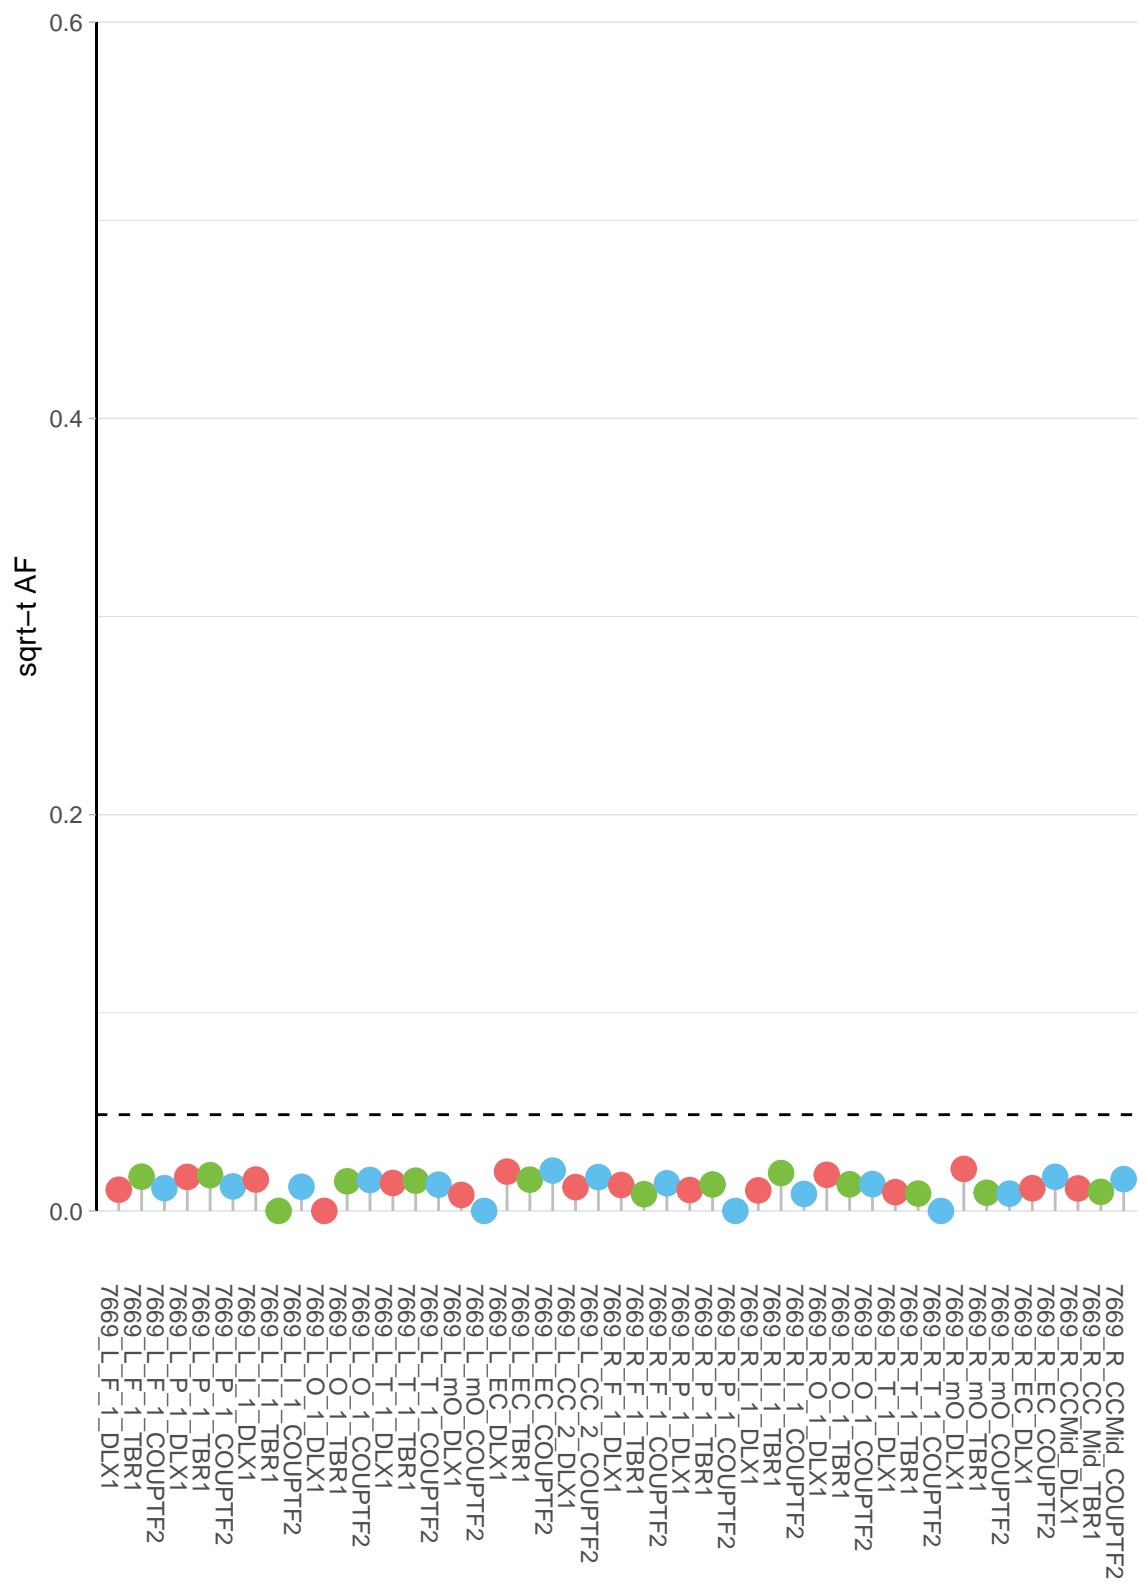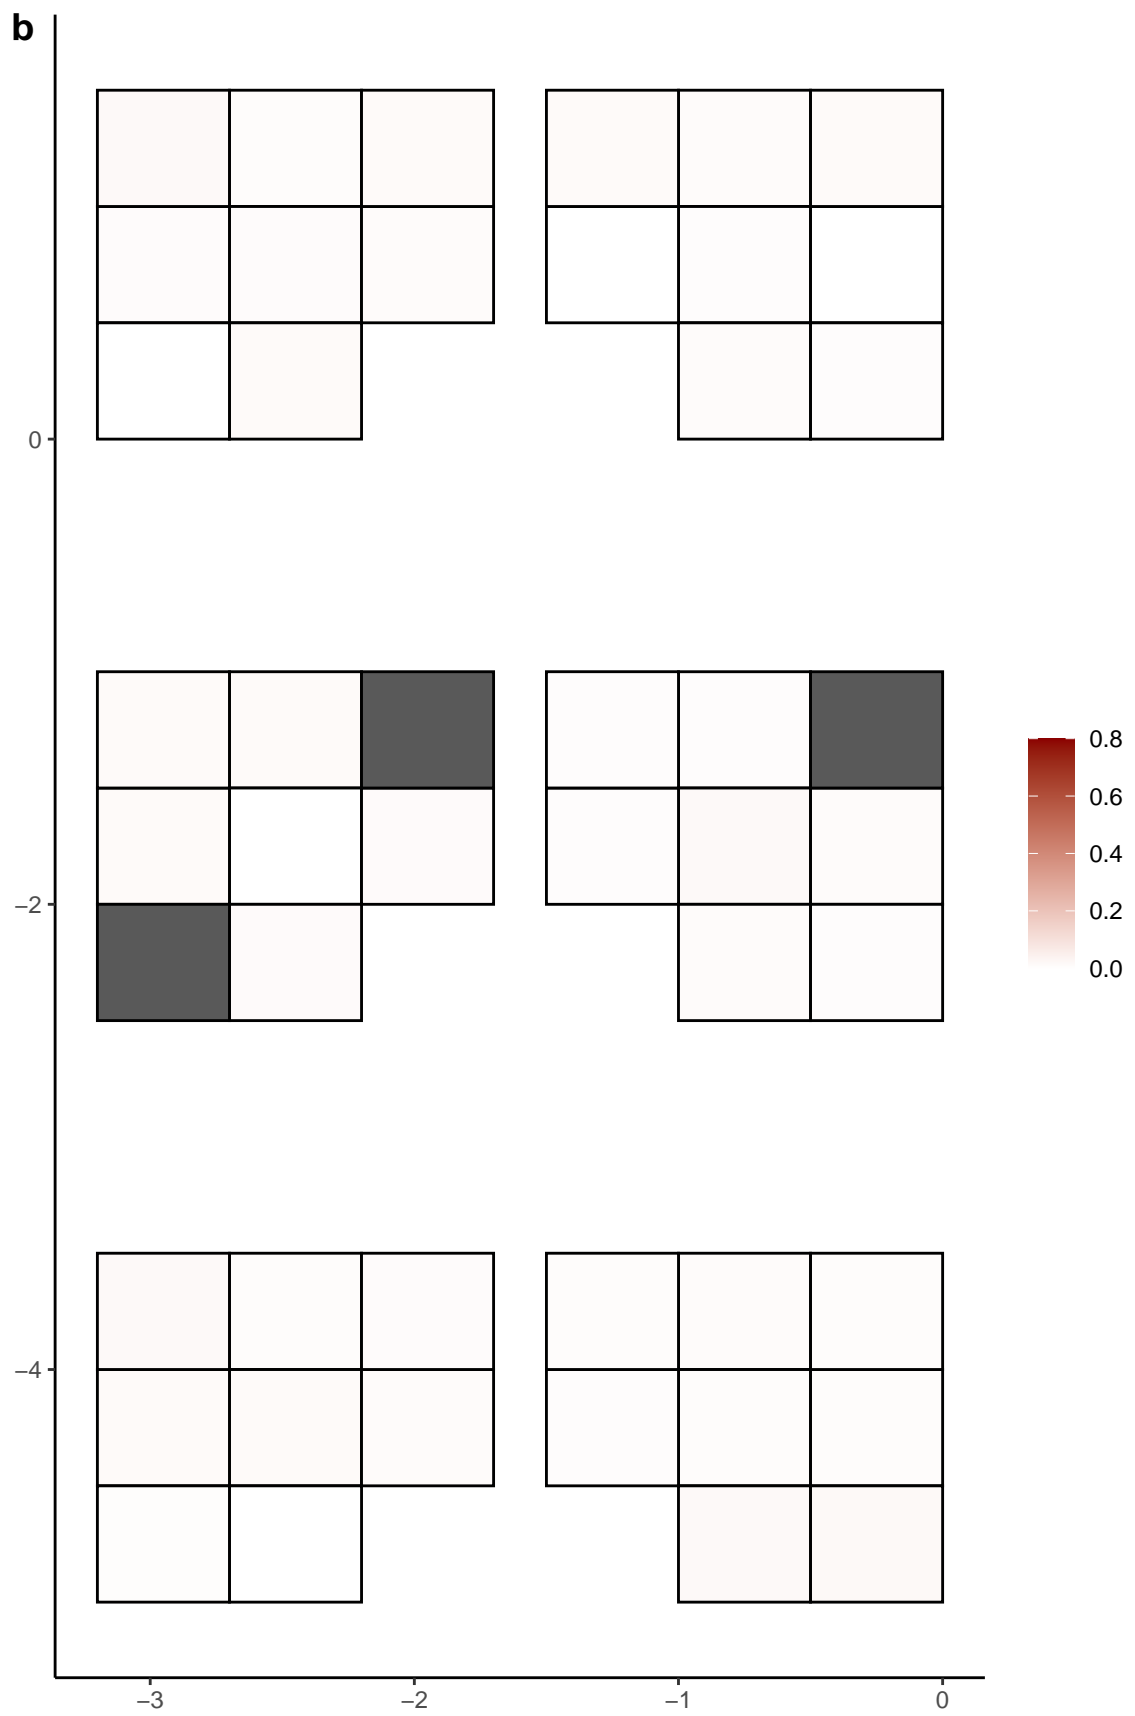

**a** ID05 7-98311420-C-T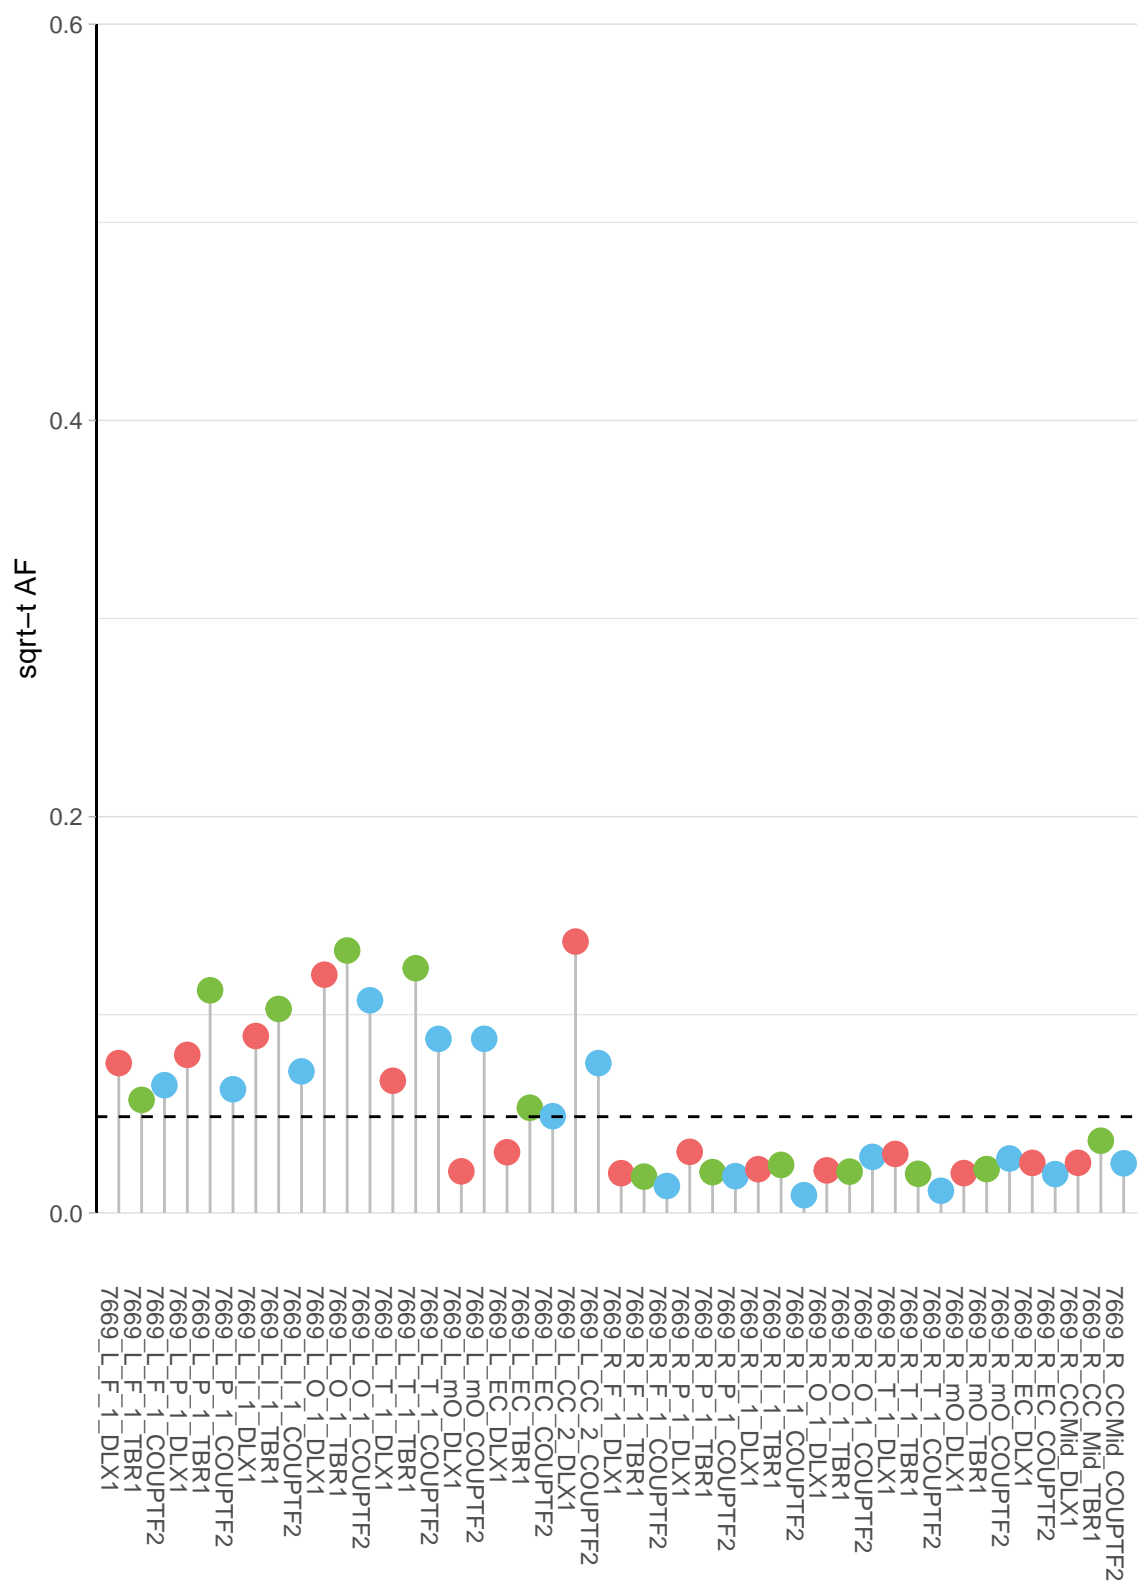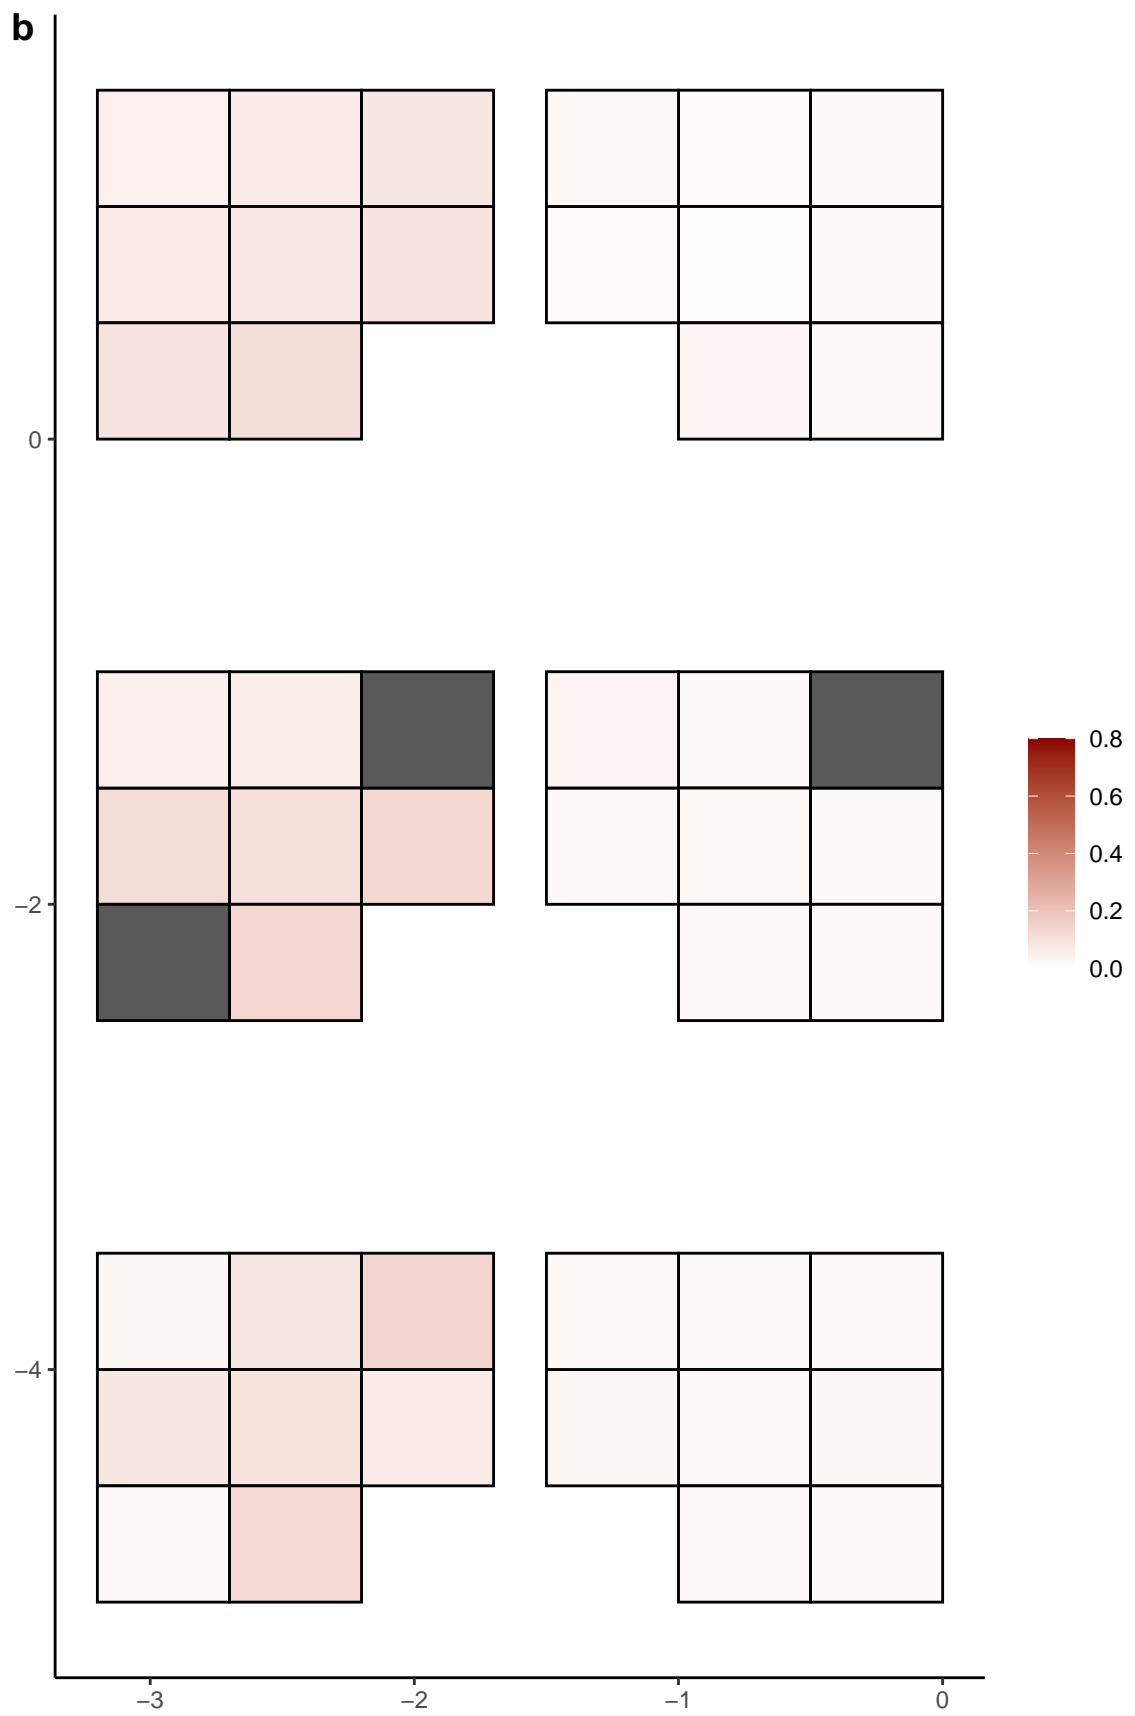

**a** ID05 8-101369438-G-A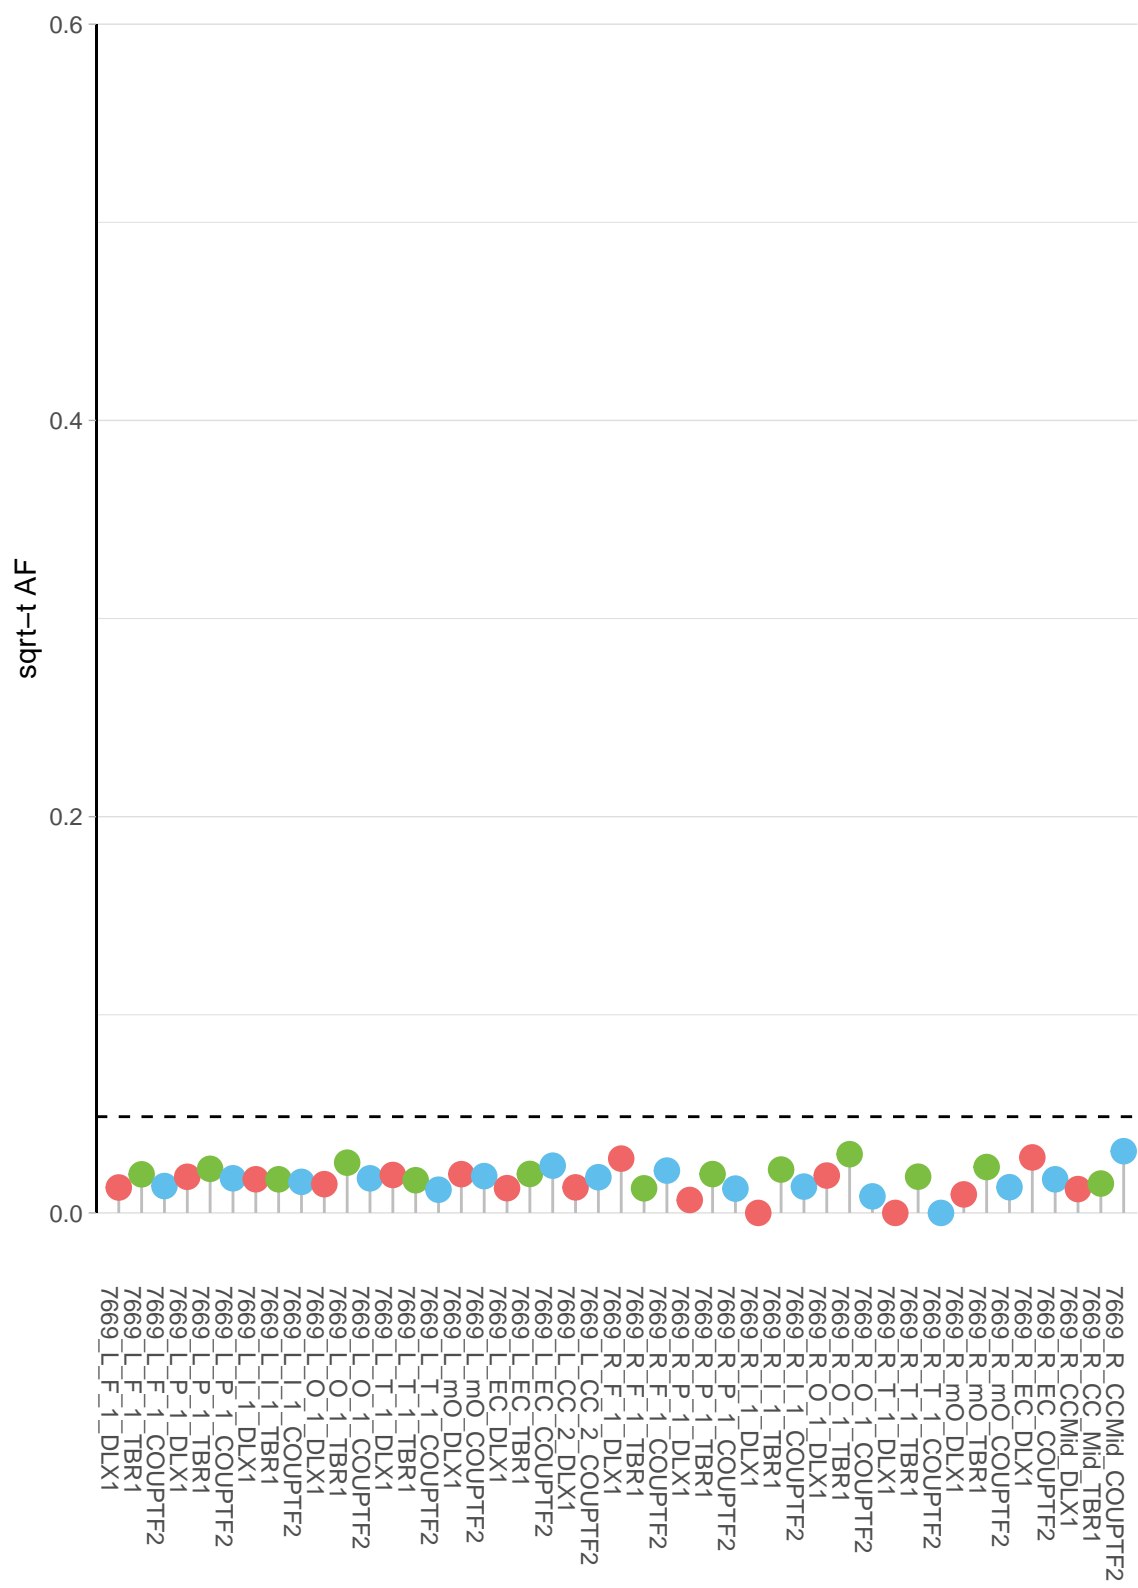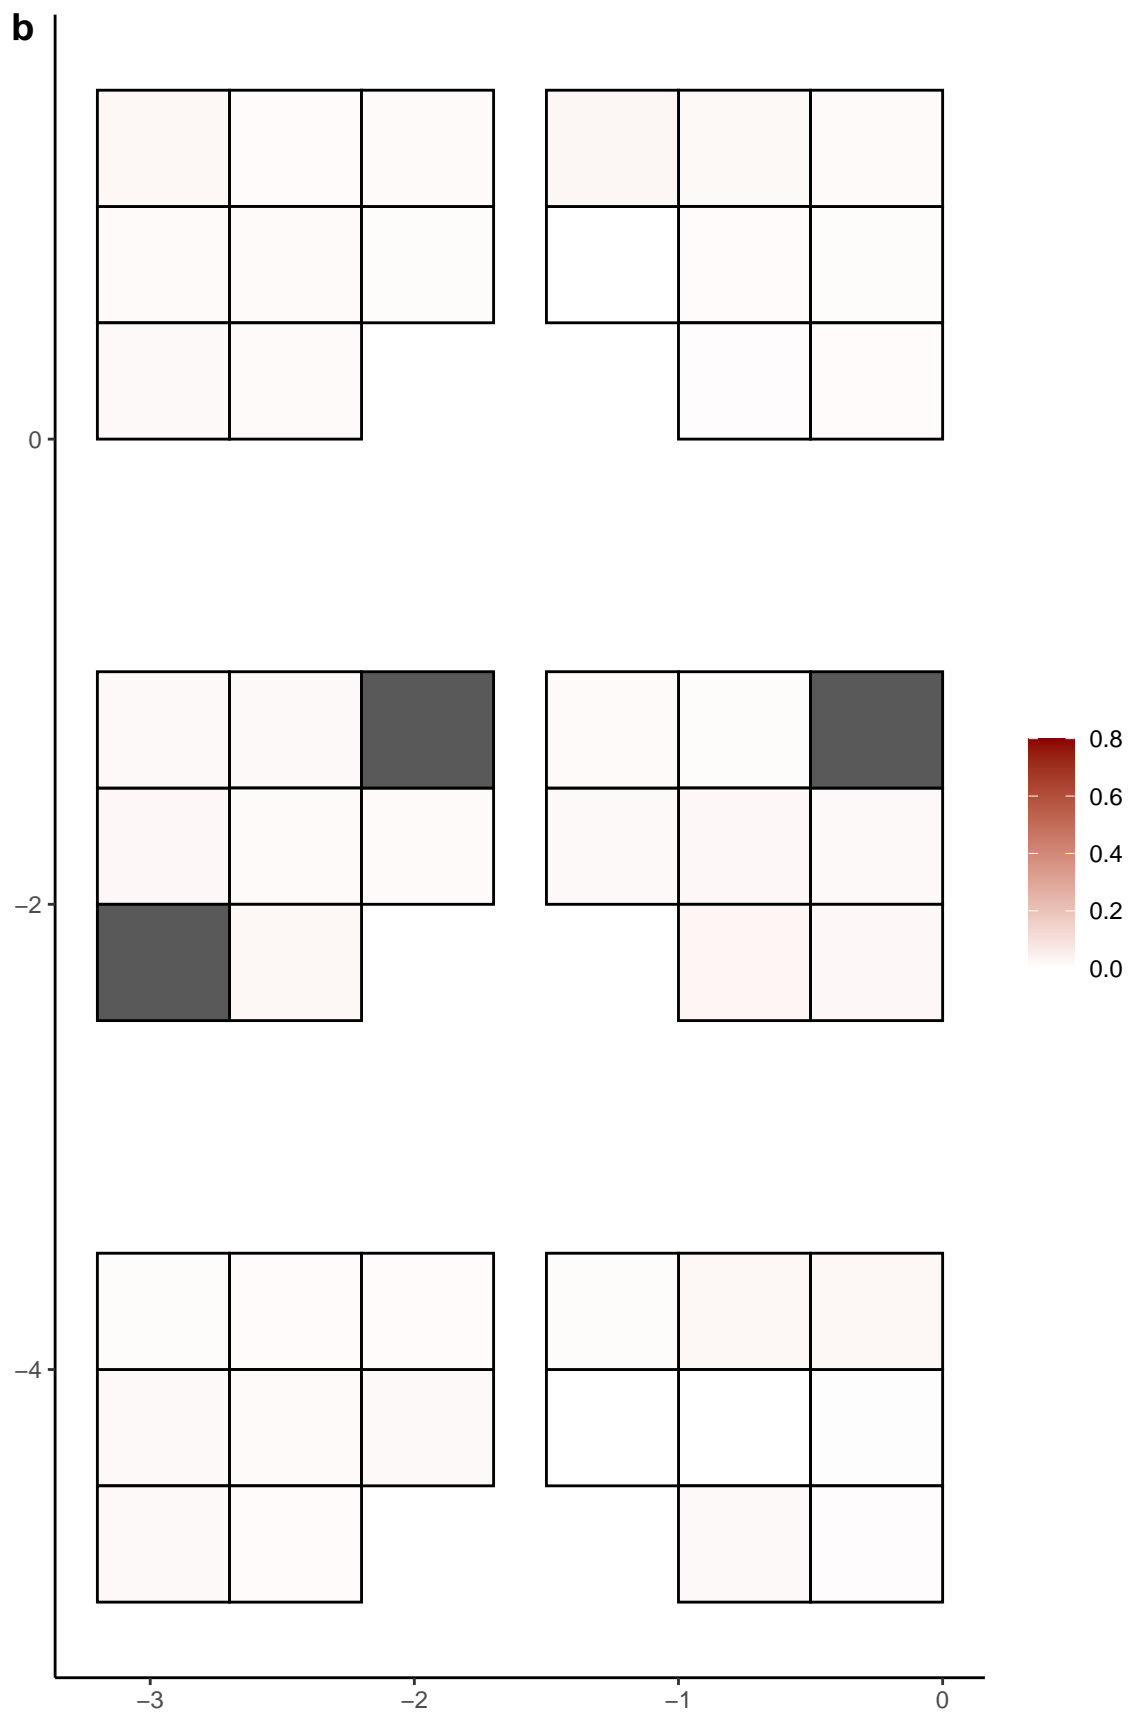

**a** ID05 8-101774660-C-A

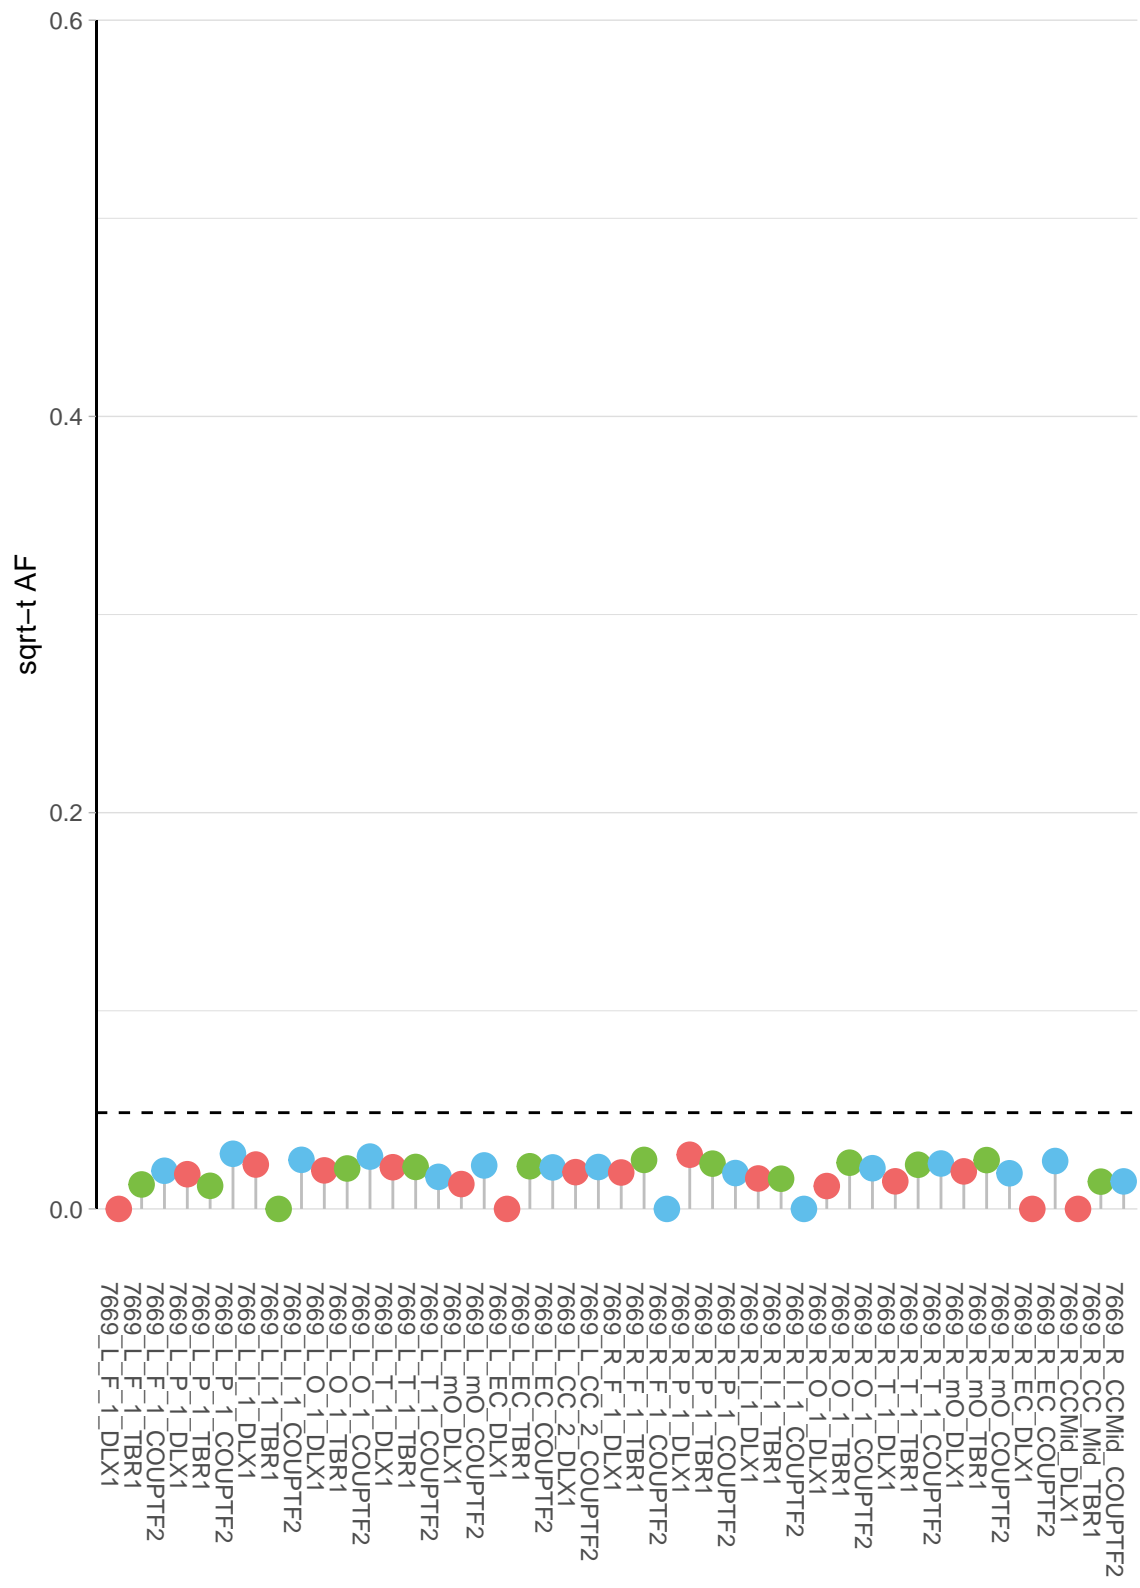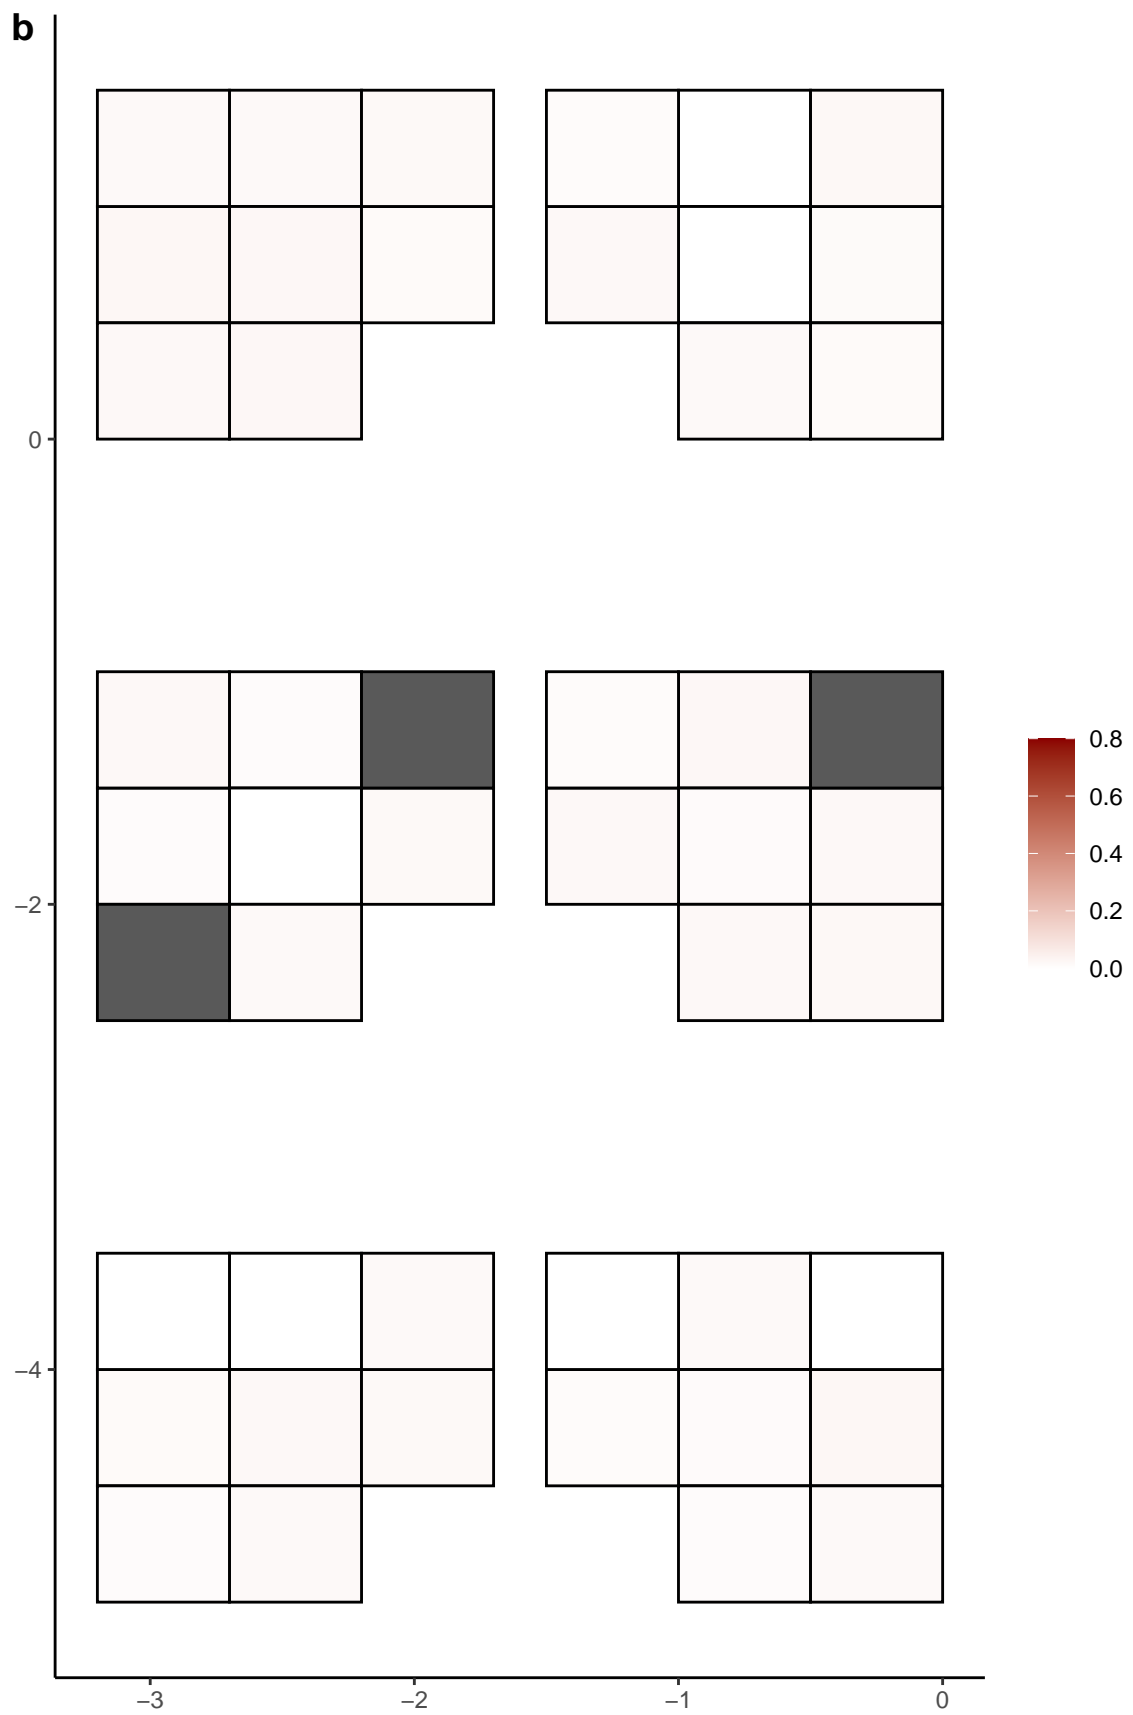

**a** ID05 8-110907861-T-A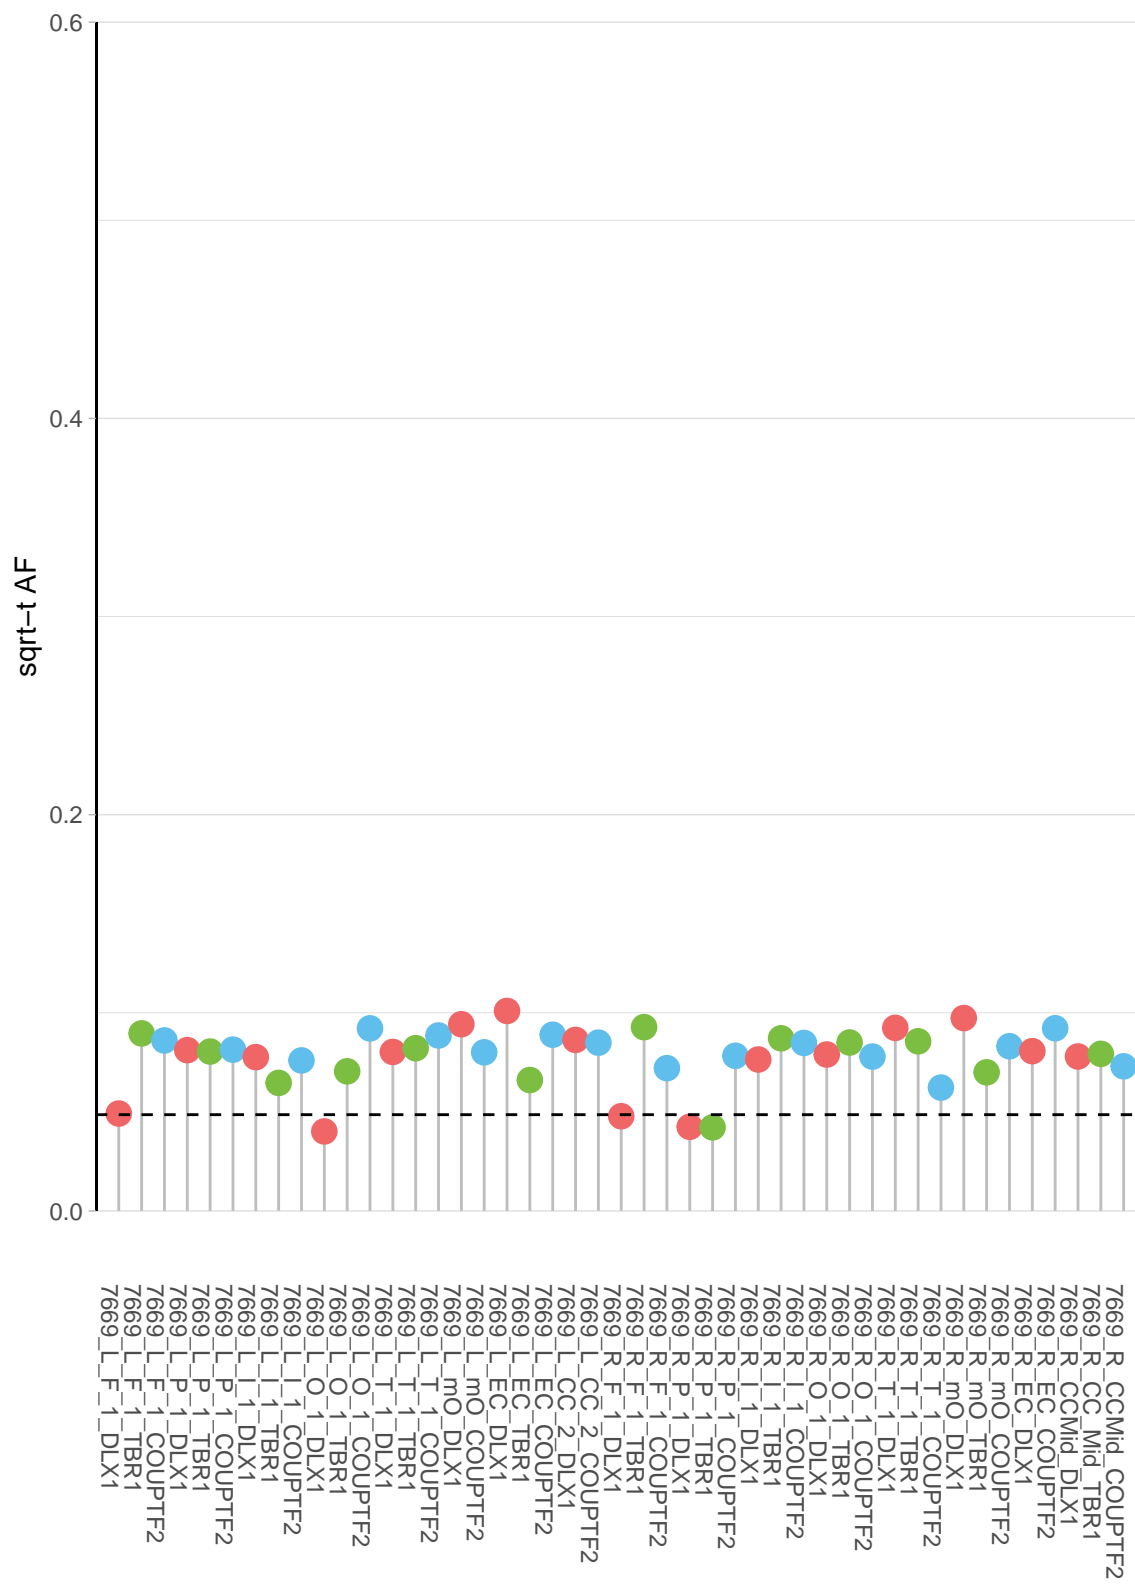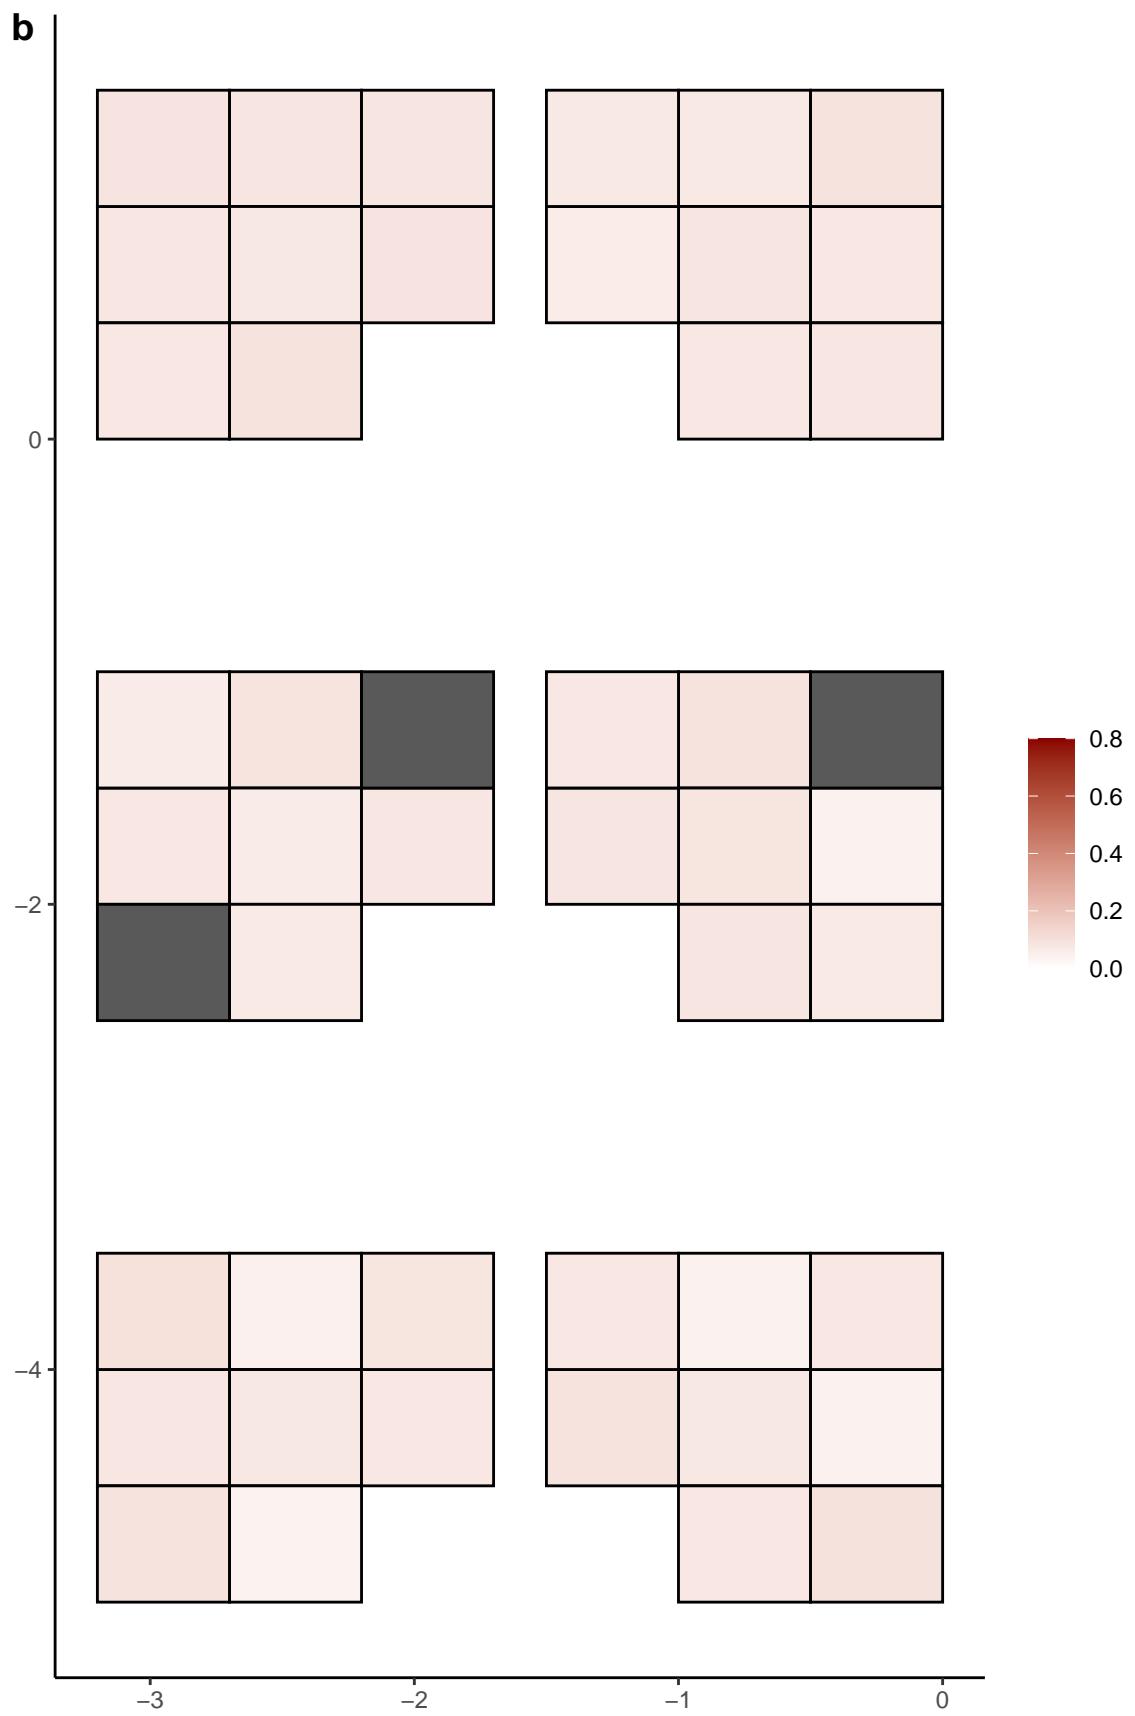

**a** ID05 8-117647581-C-T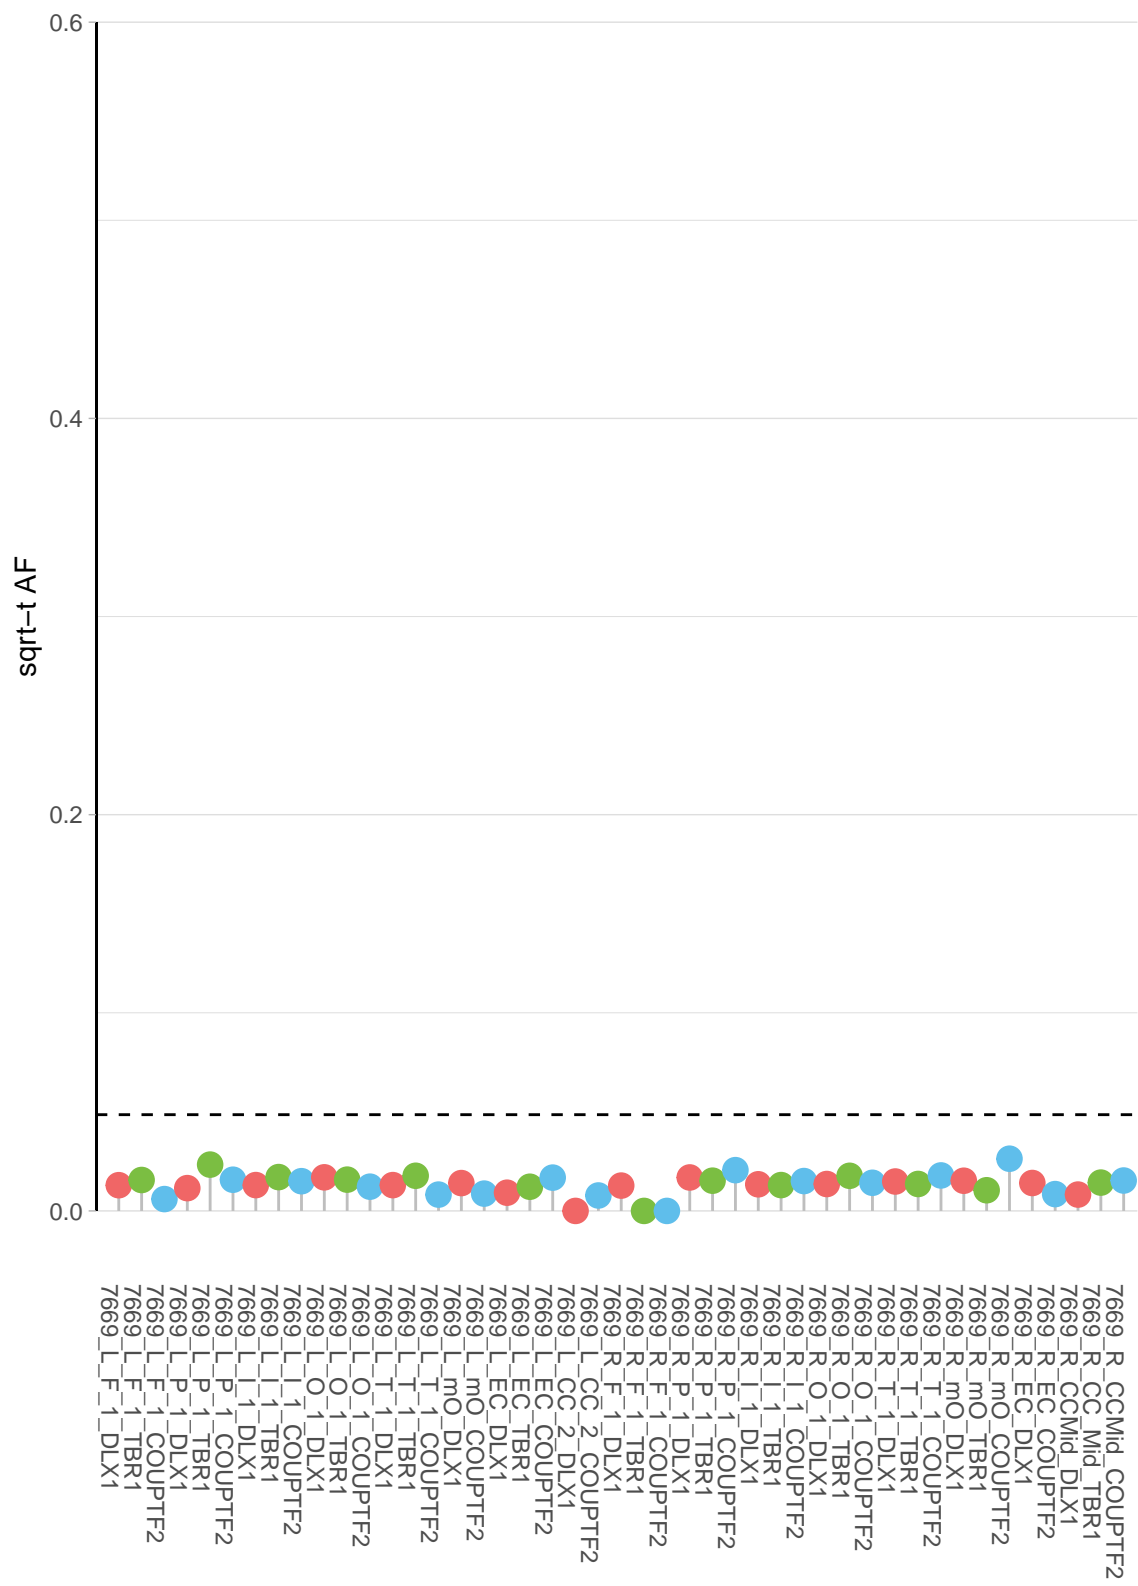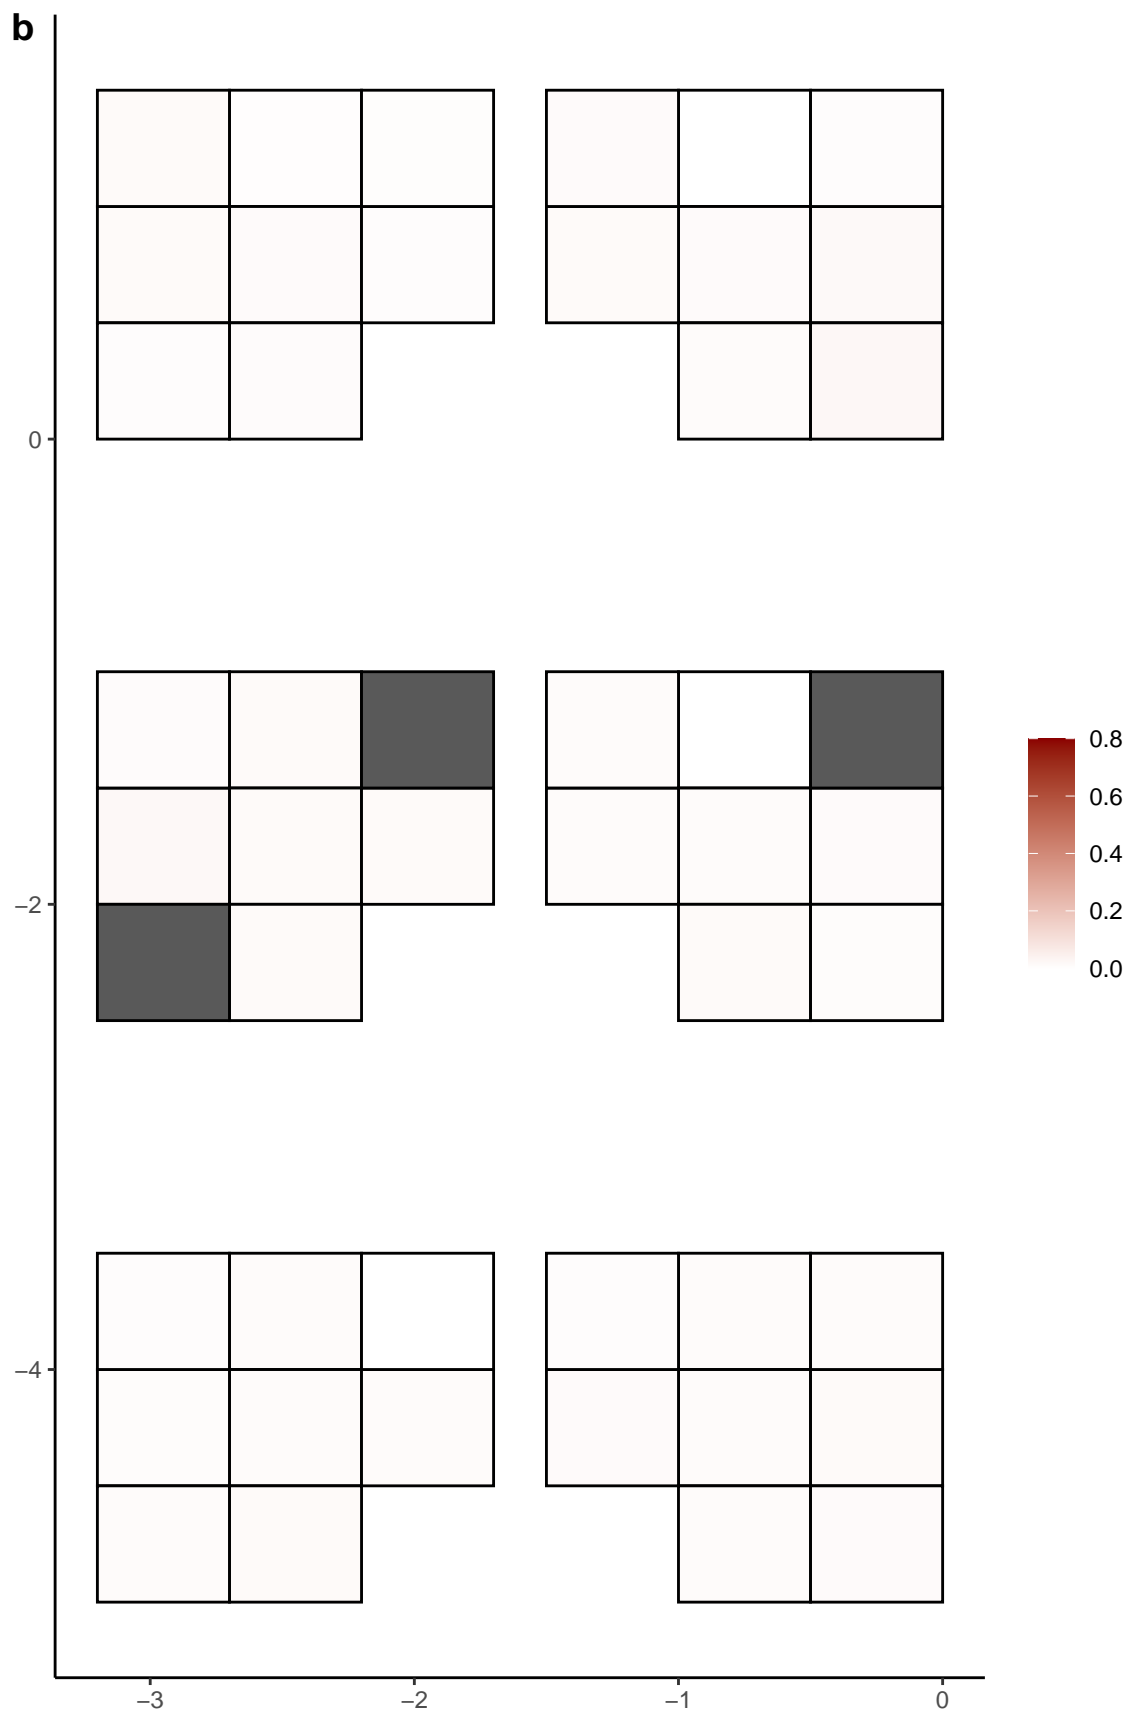

**a** ID05 8-122970954-A-T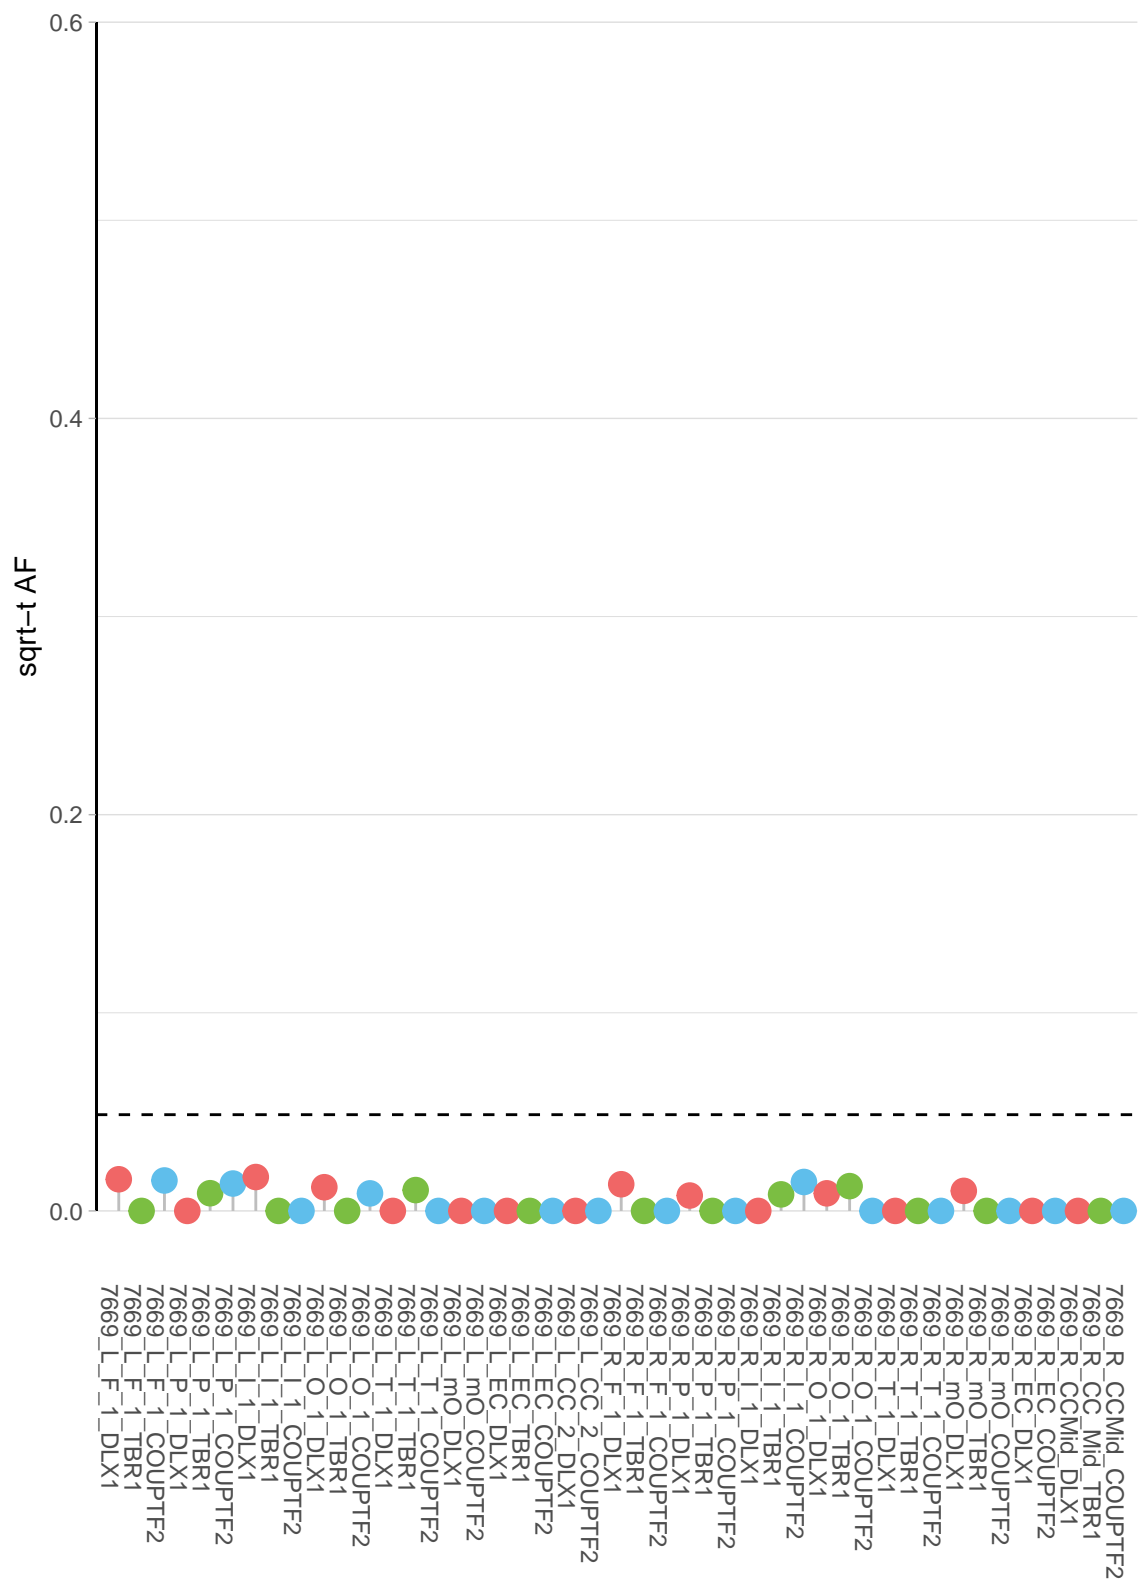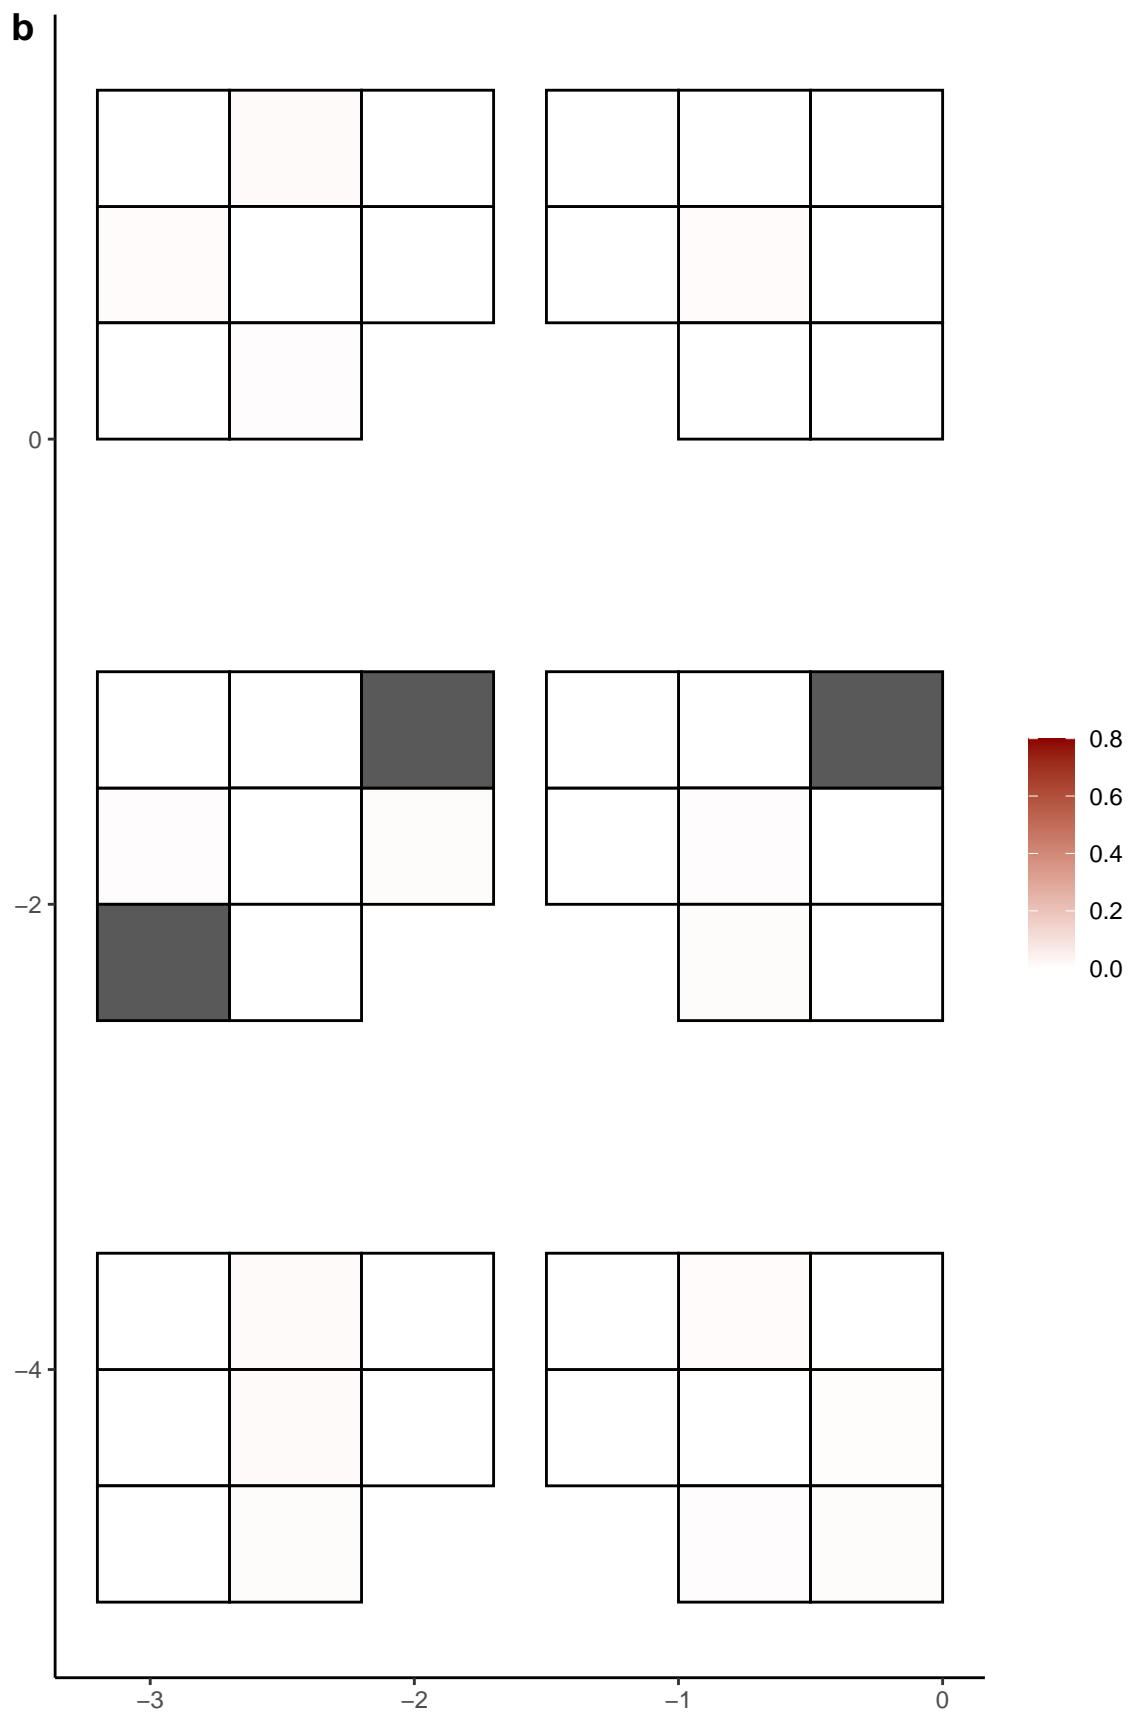



**a** ID05 8-125891540-G-A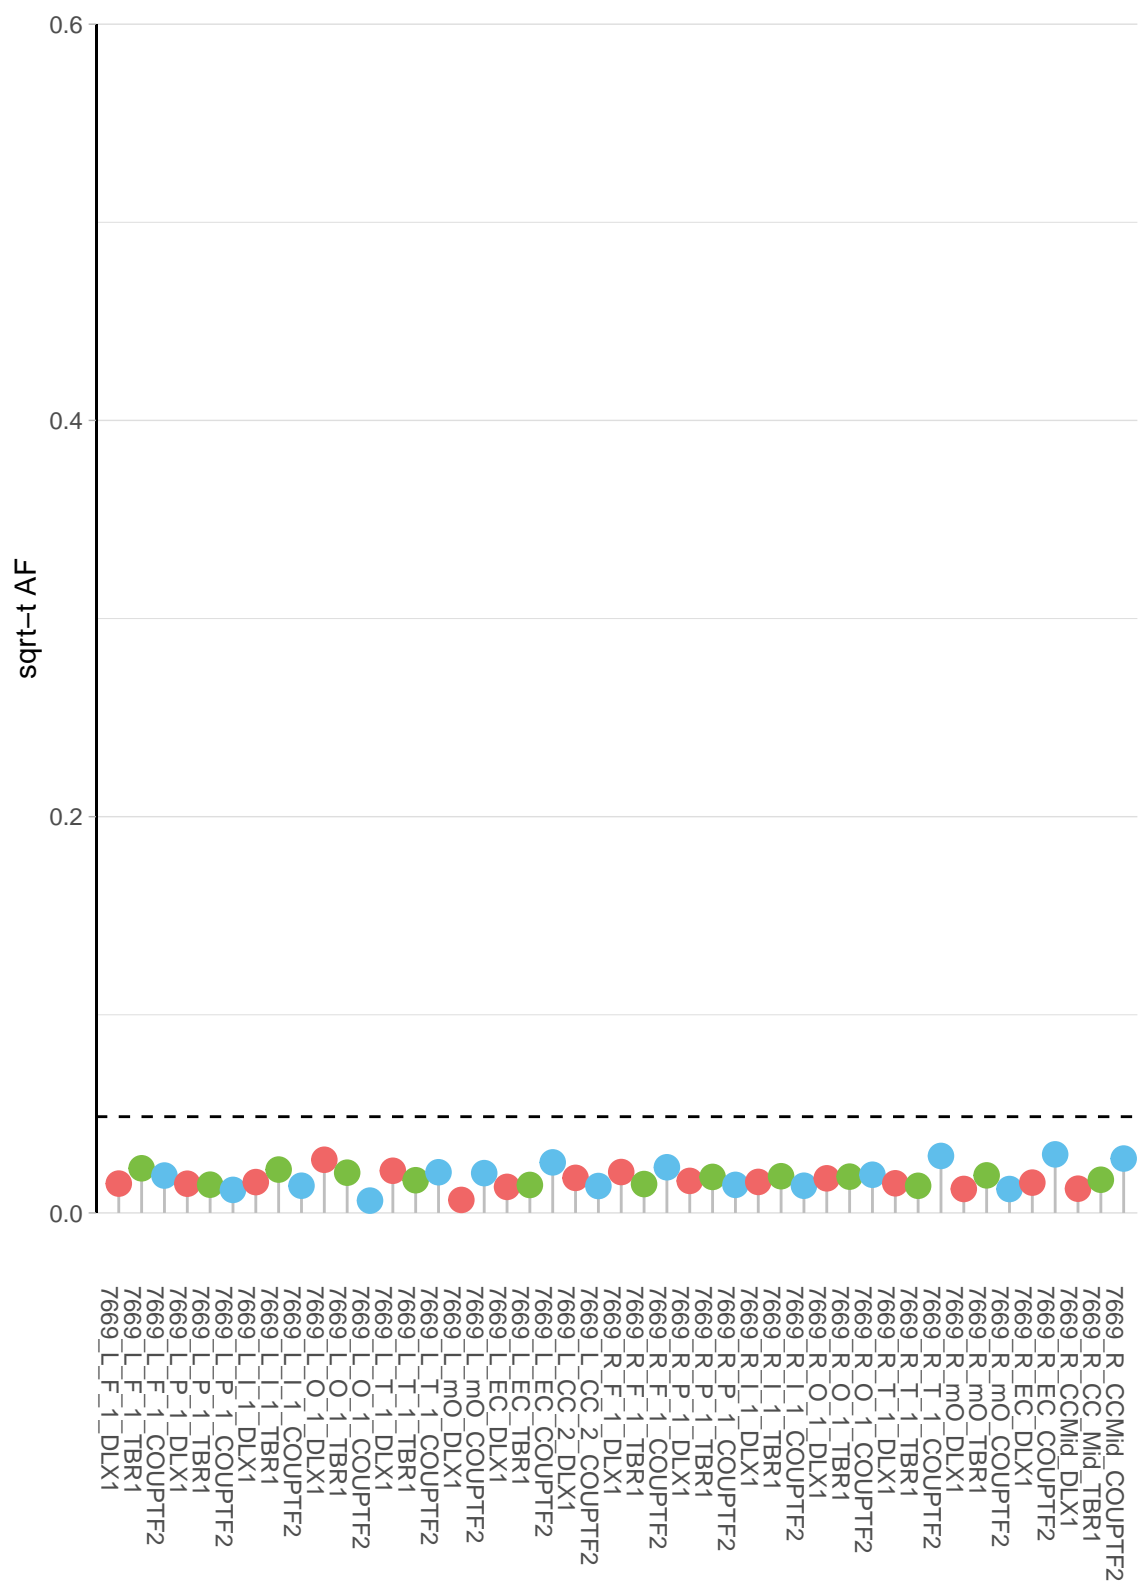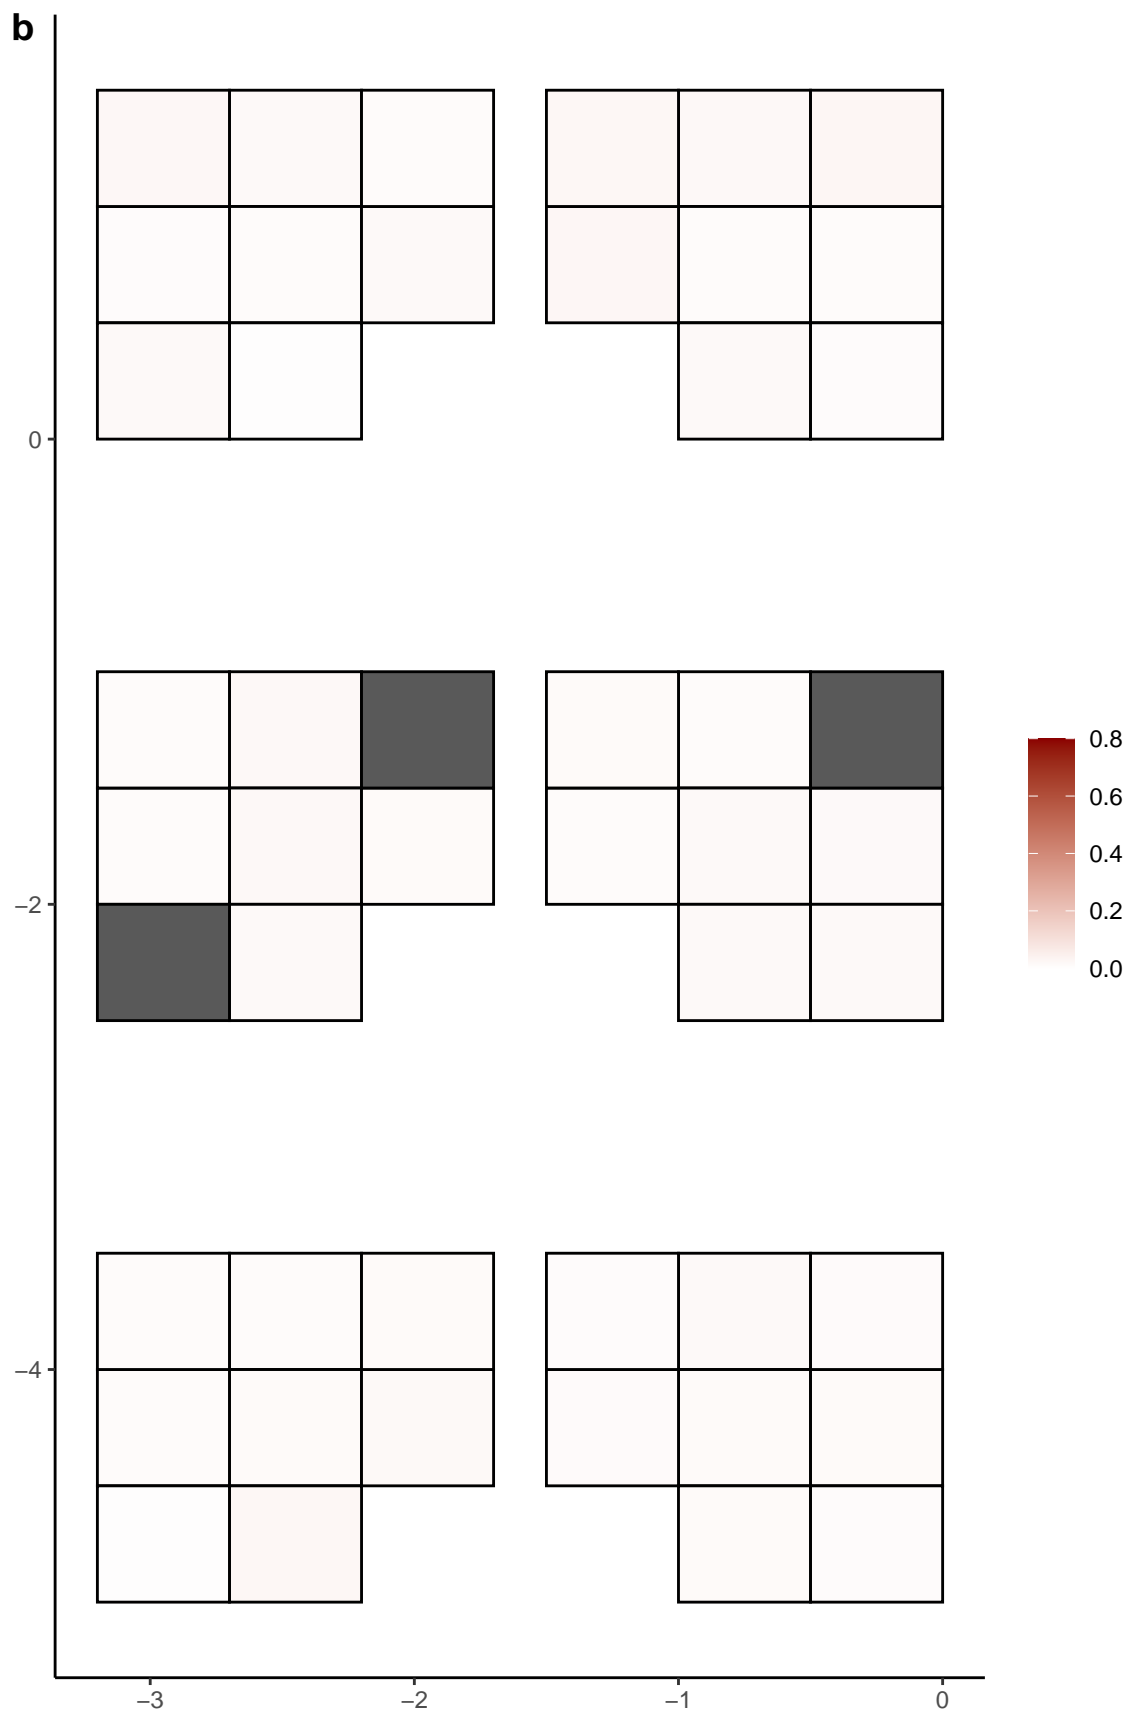



**a** ID05 8-140637848-C-A

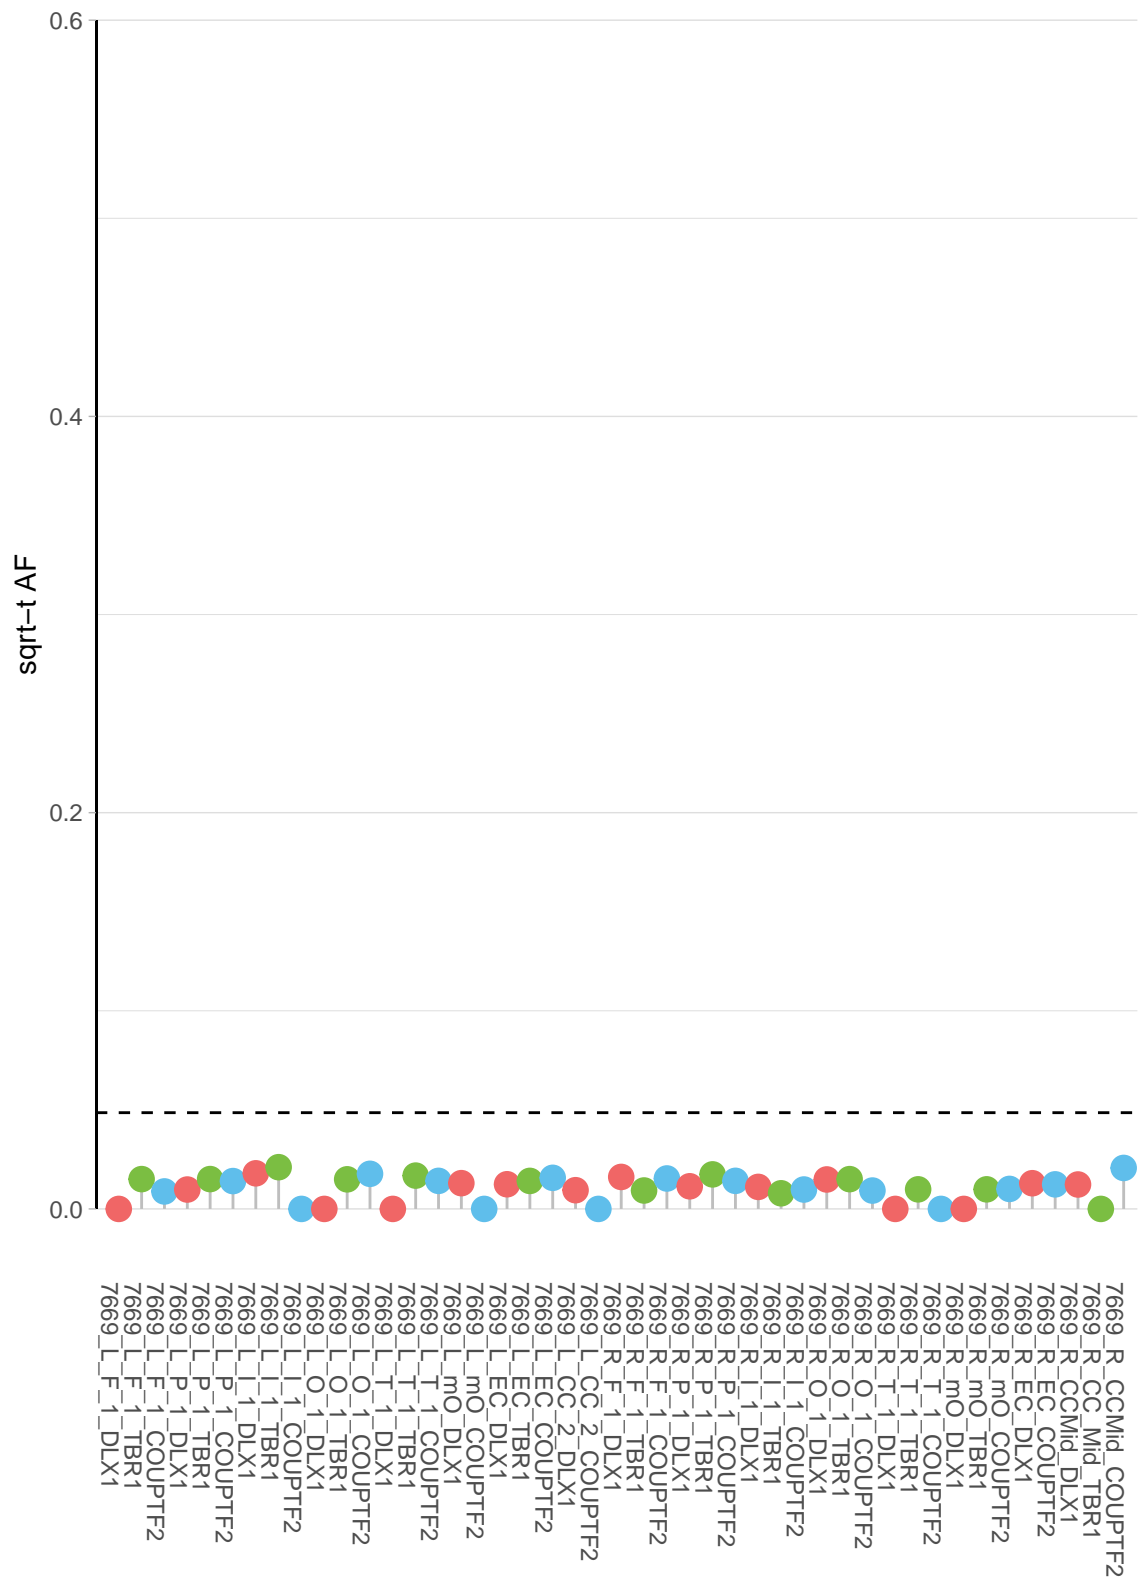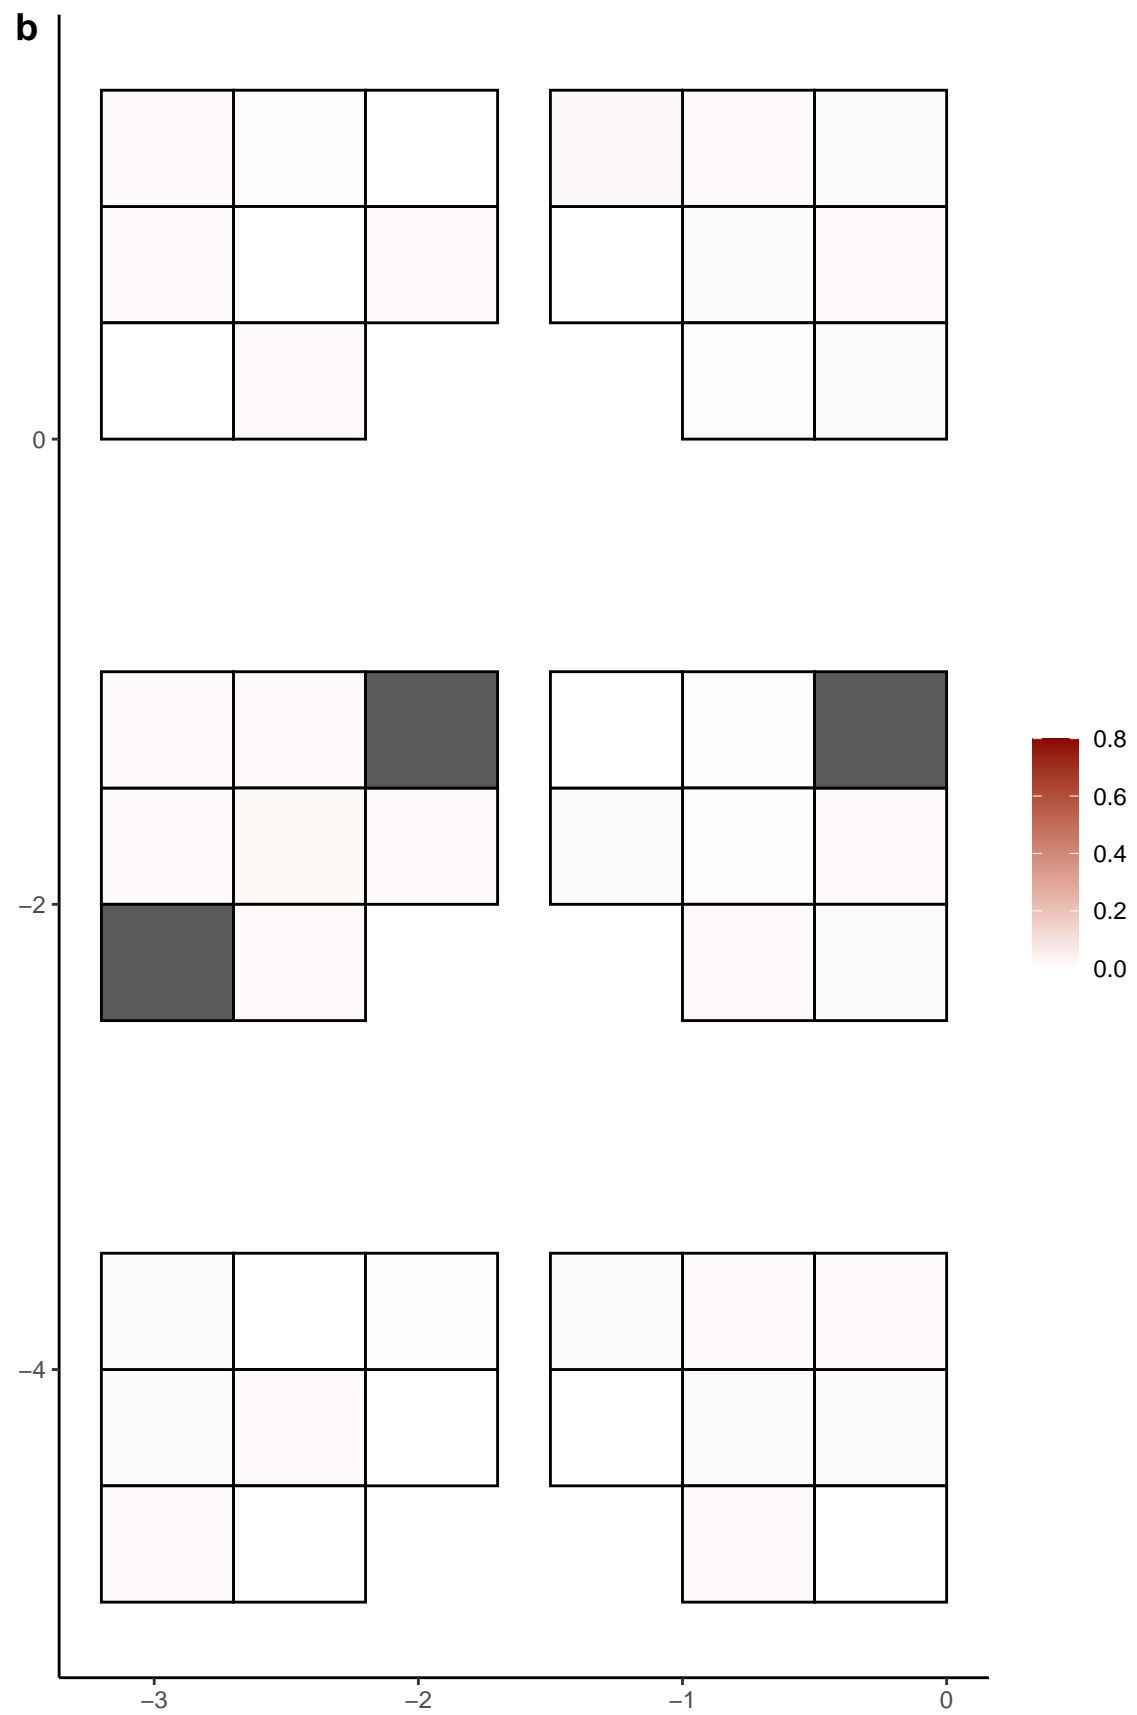

**a** ID05 8-20681102-G-A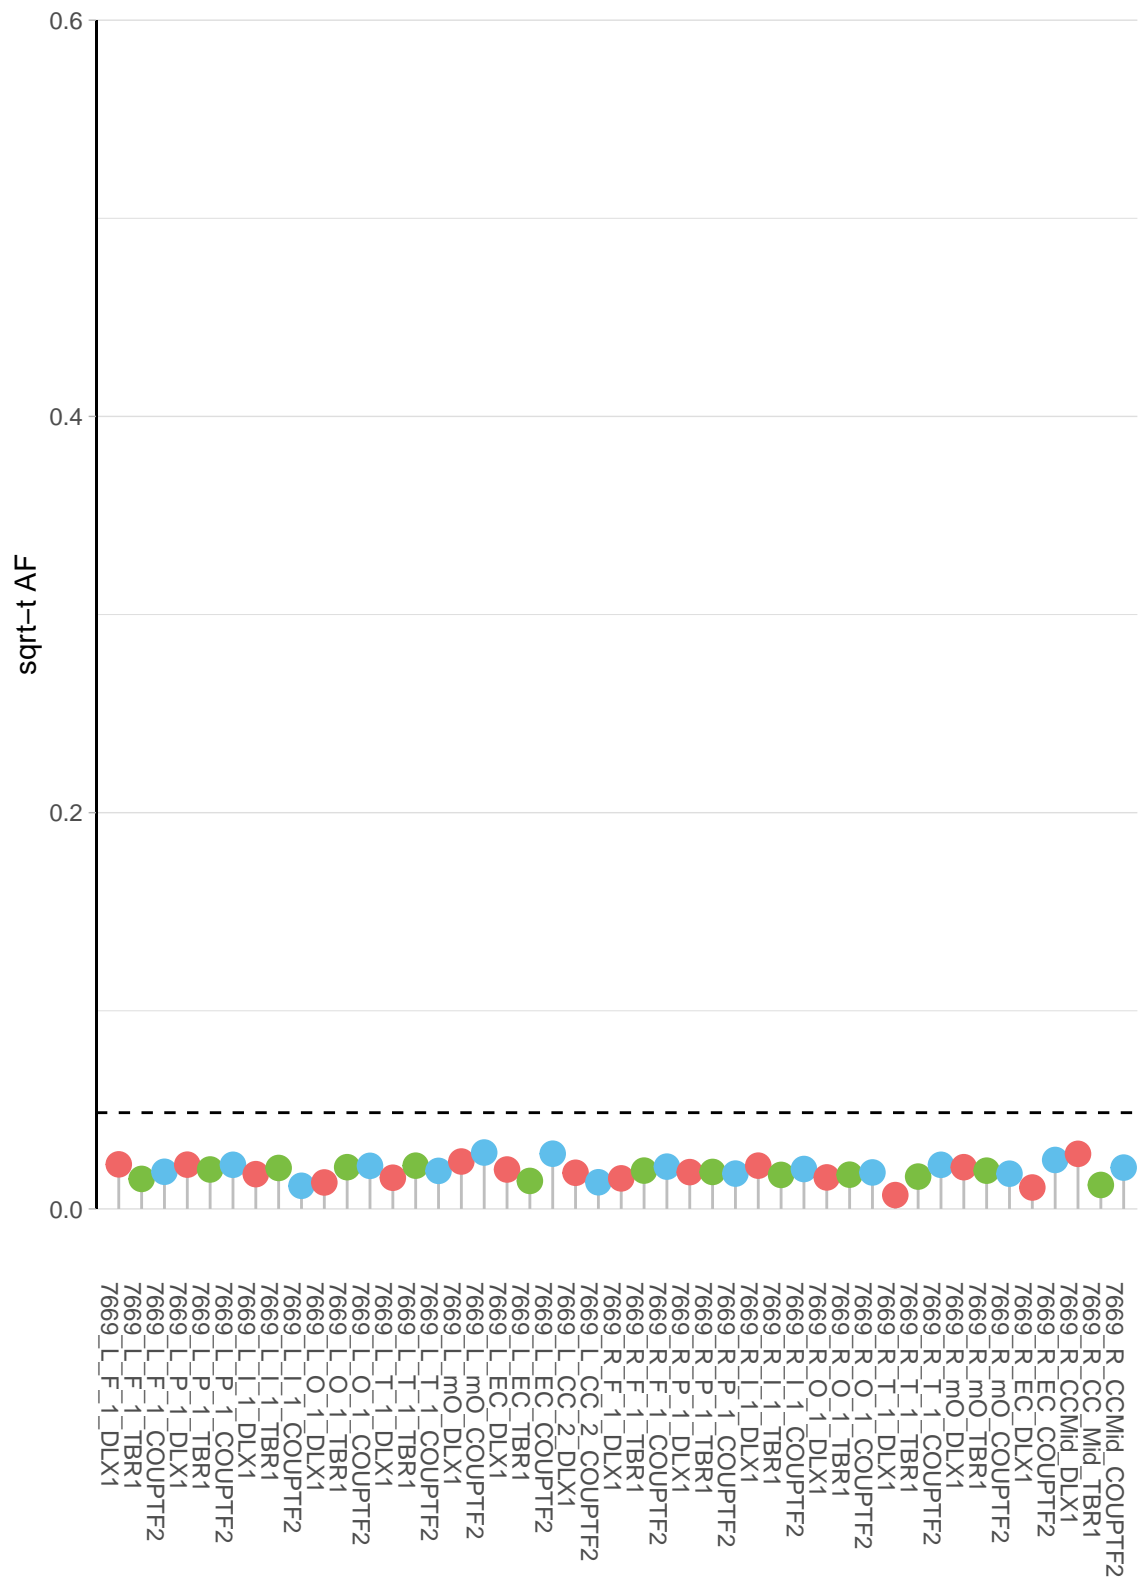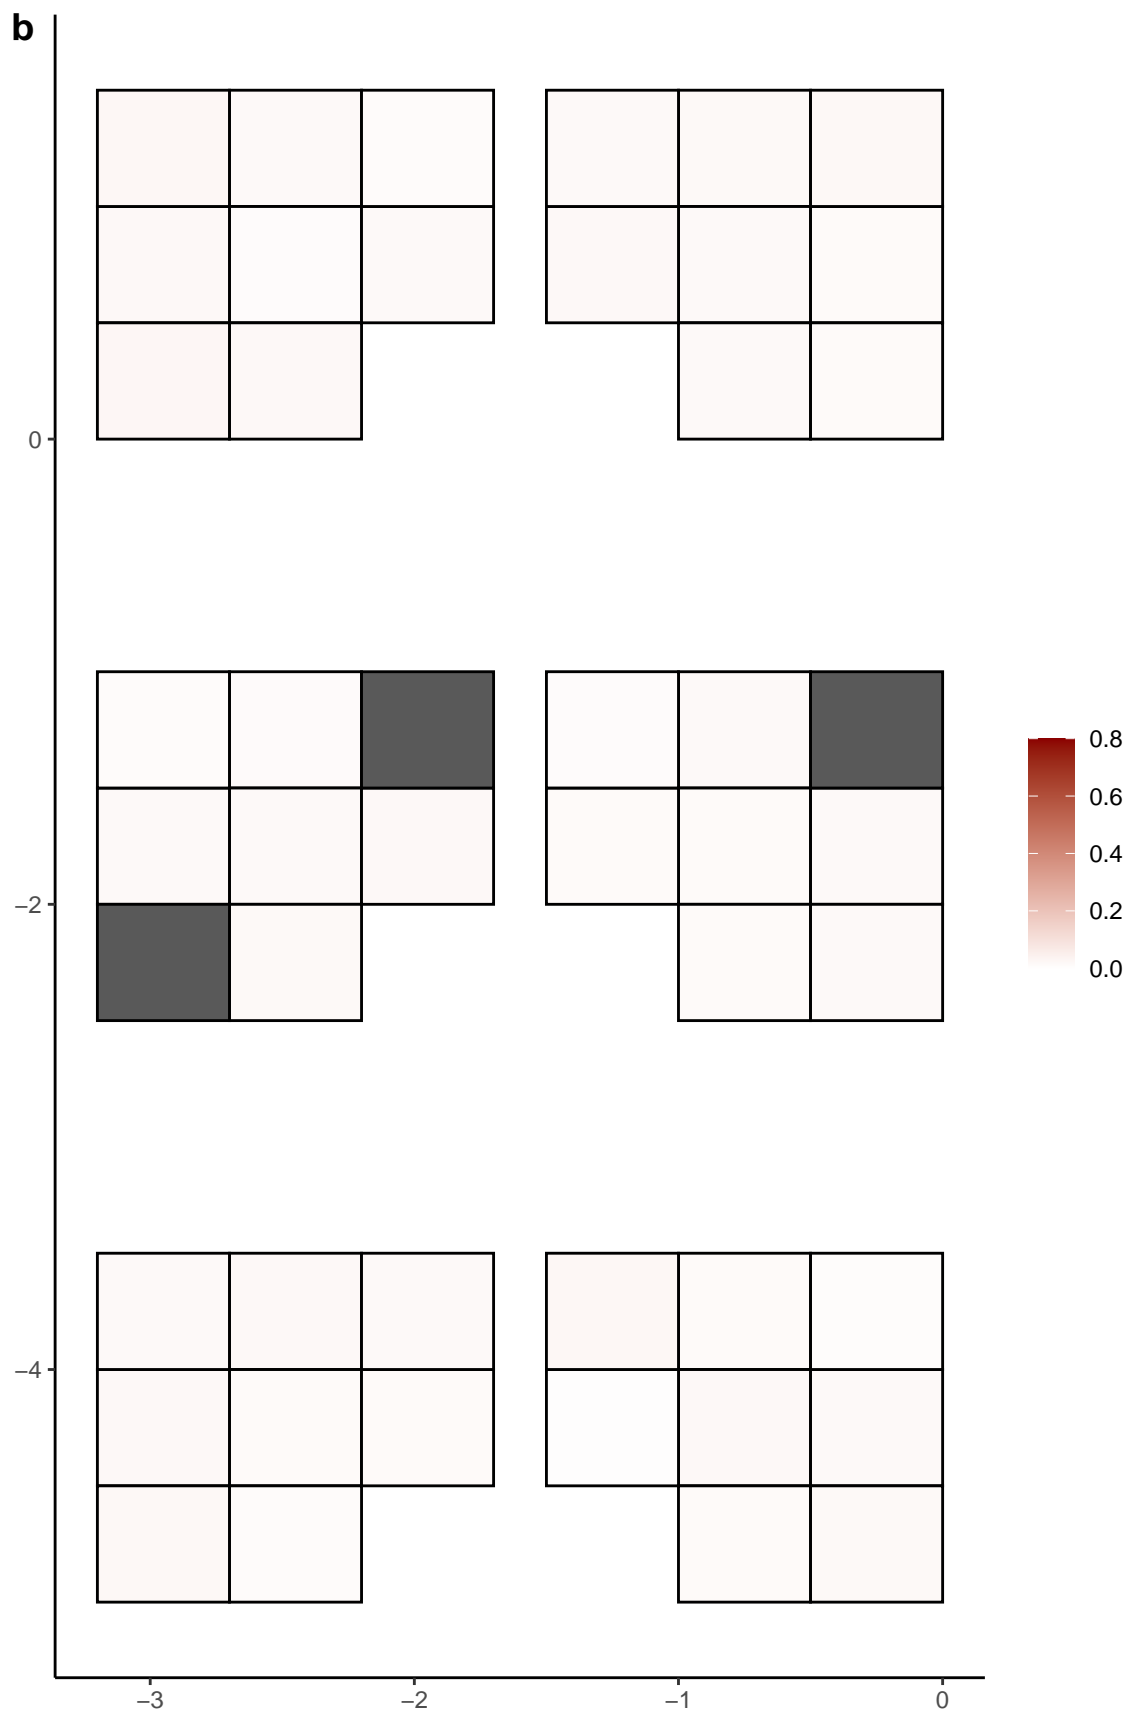

**a** ID05 8-20774226-G-A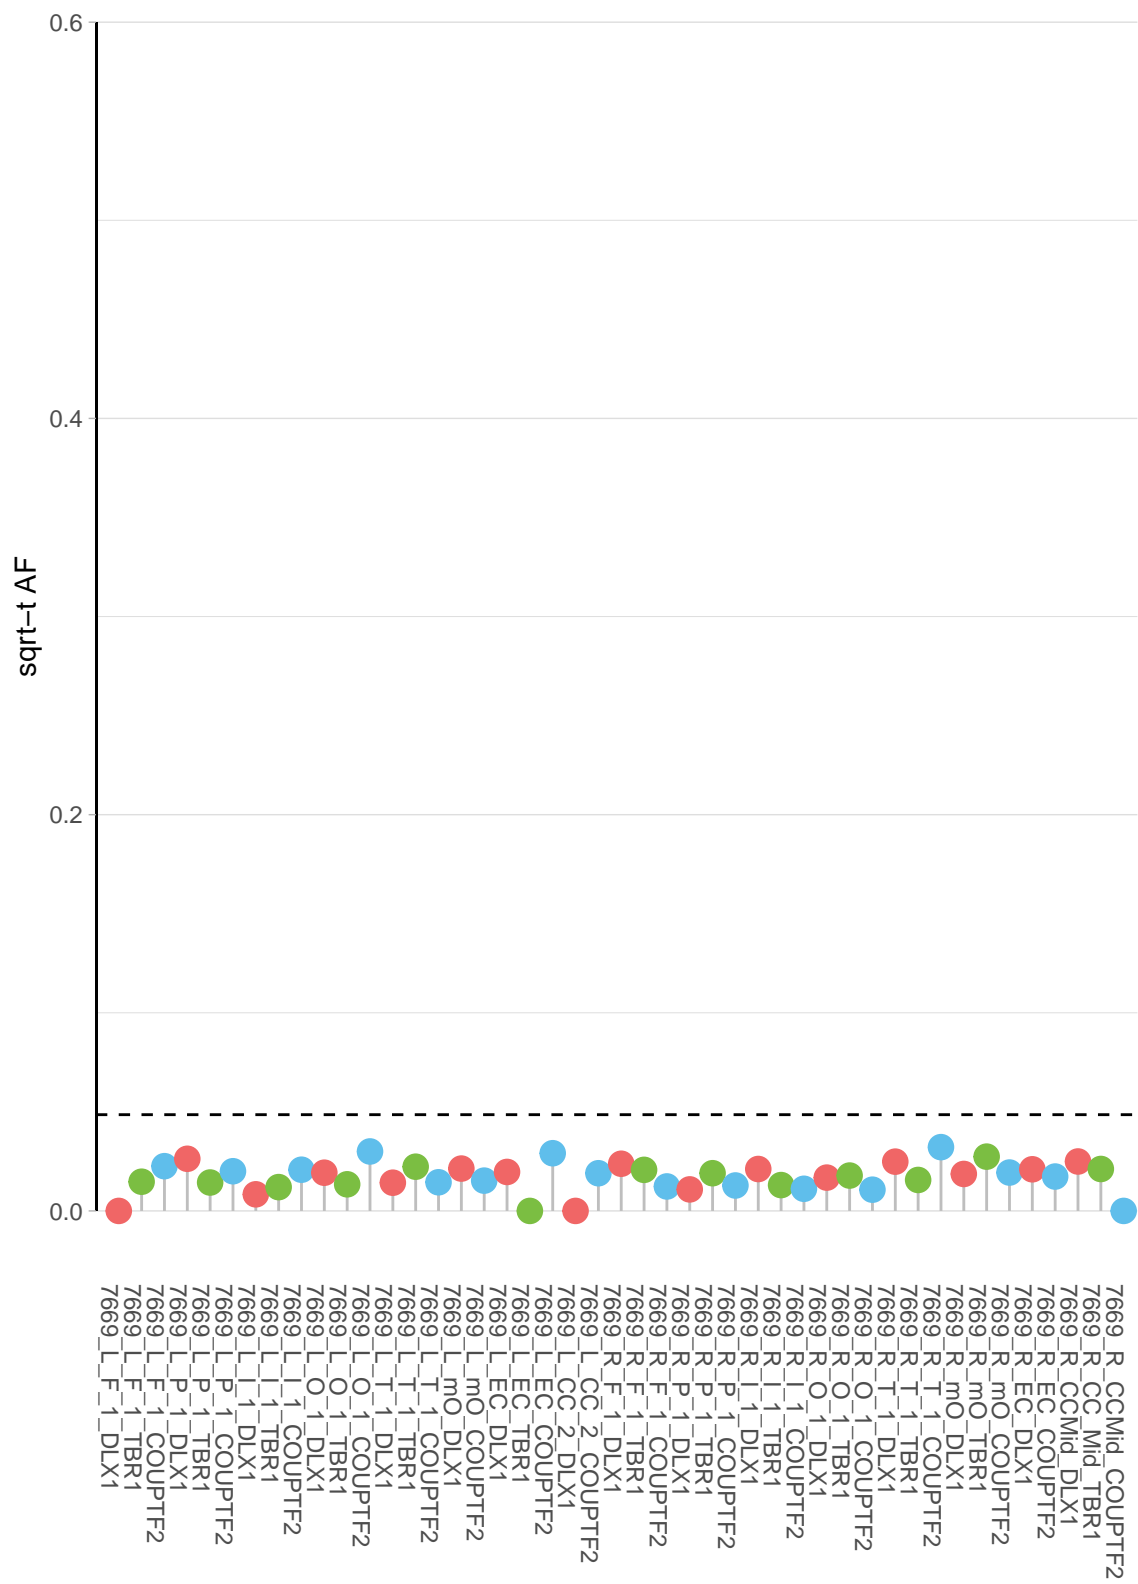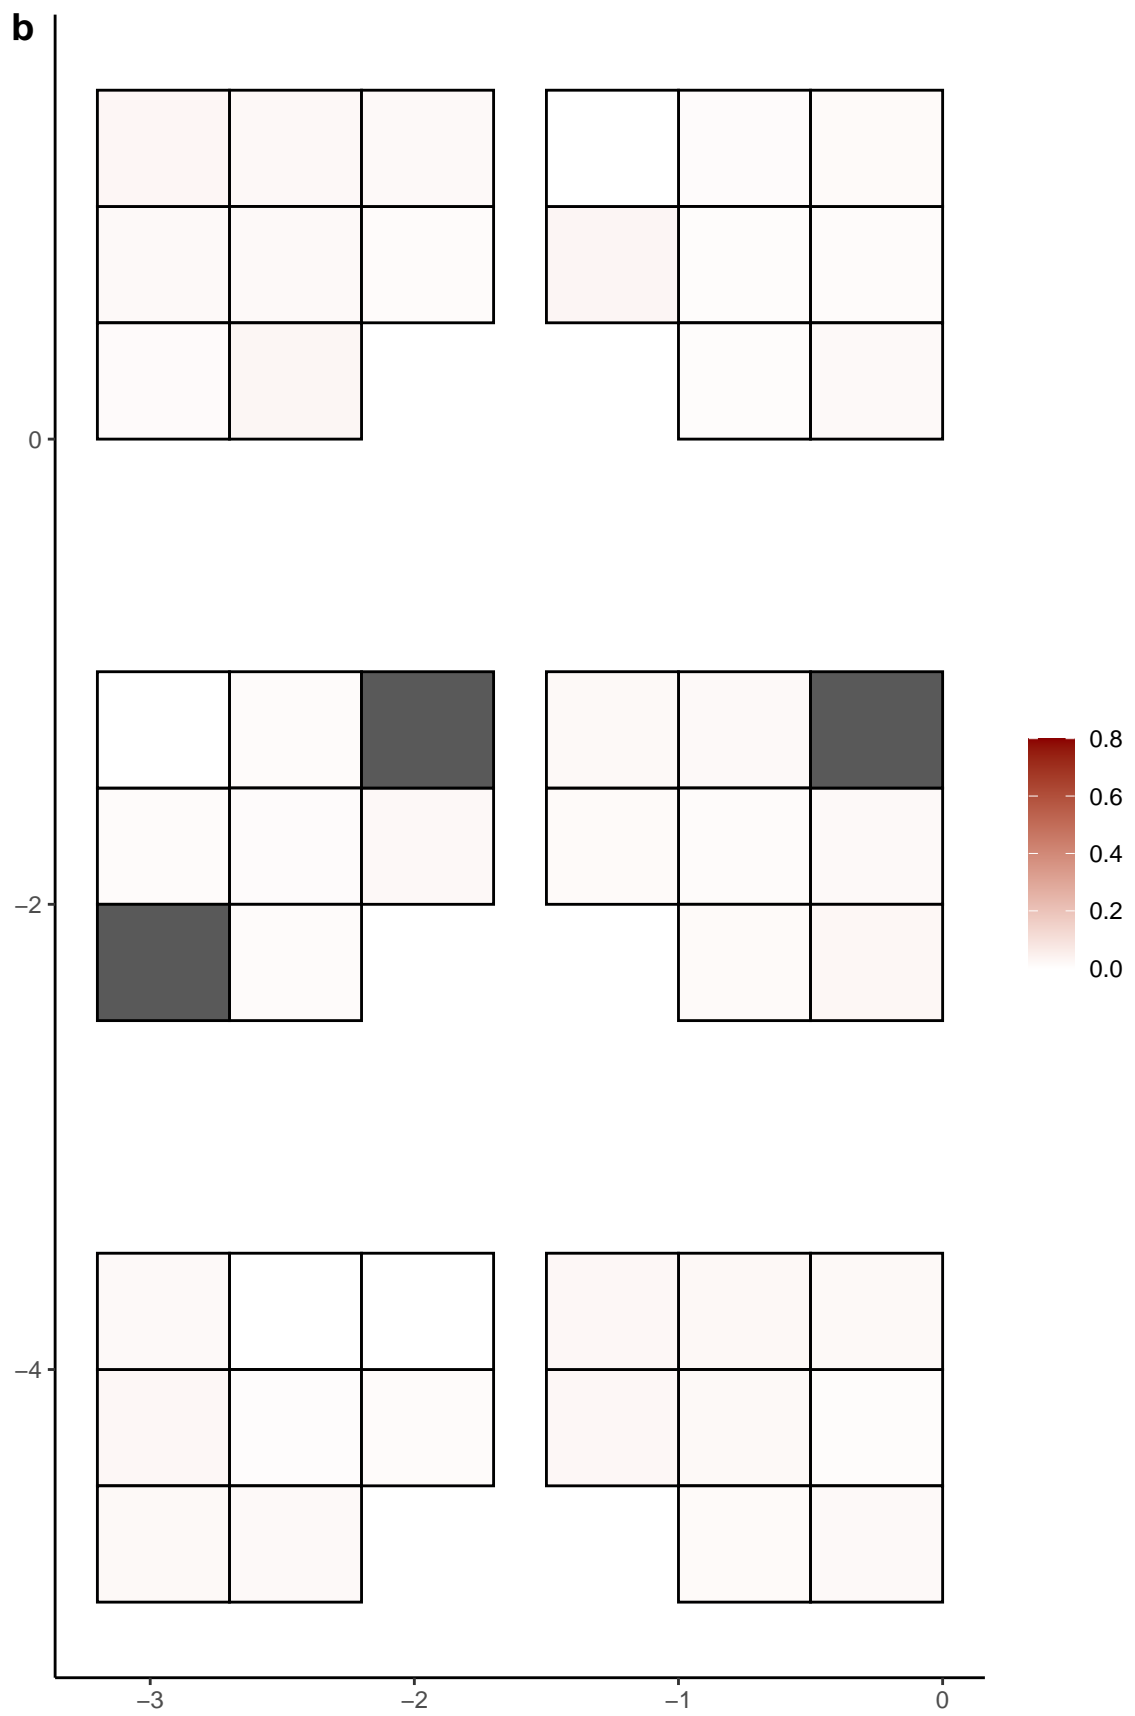



**a** ID05 8-29866666-C-T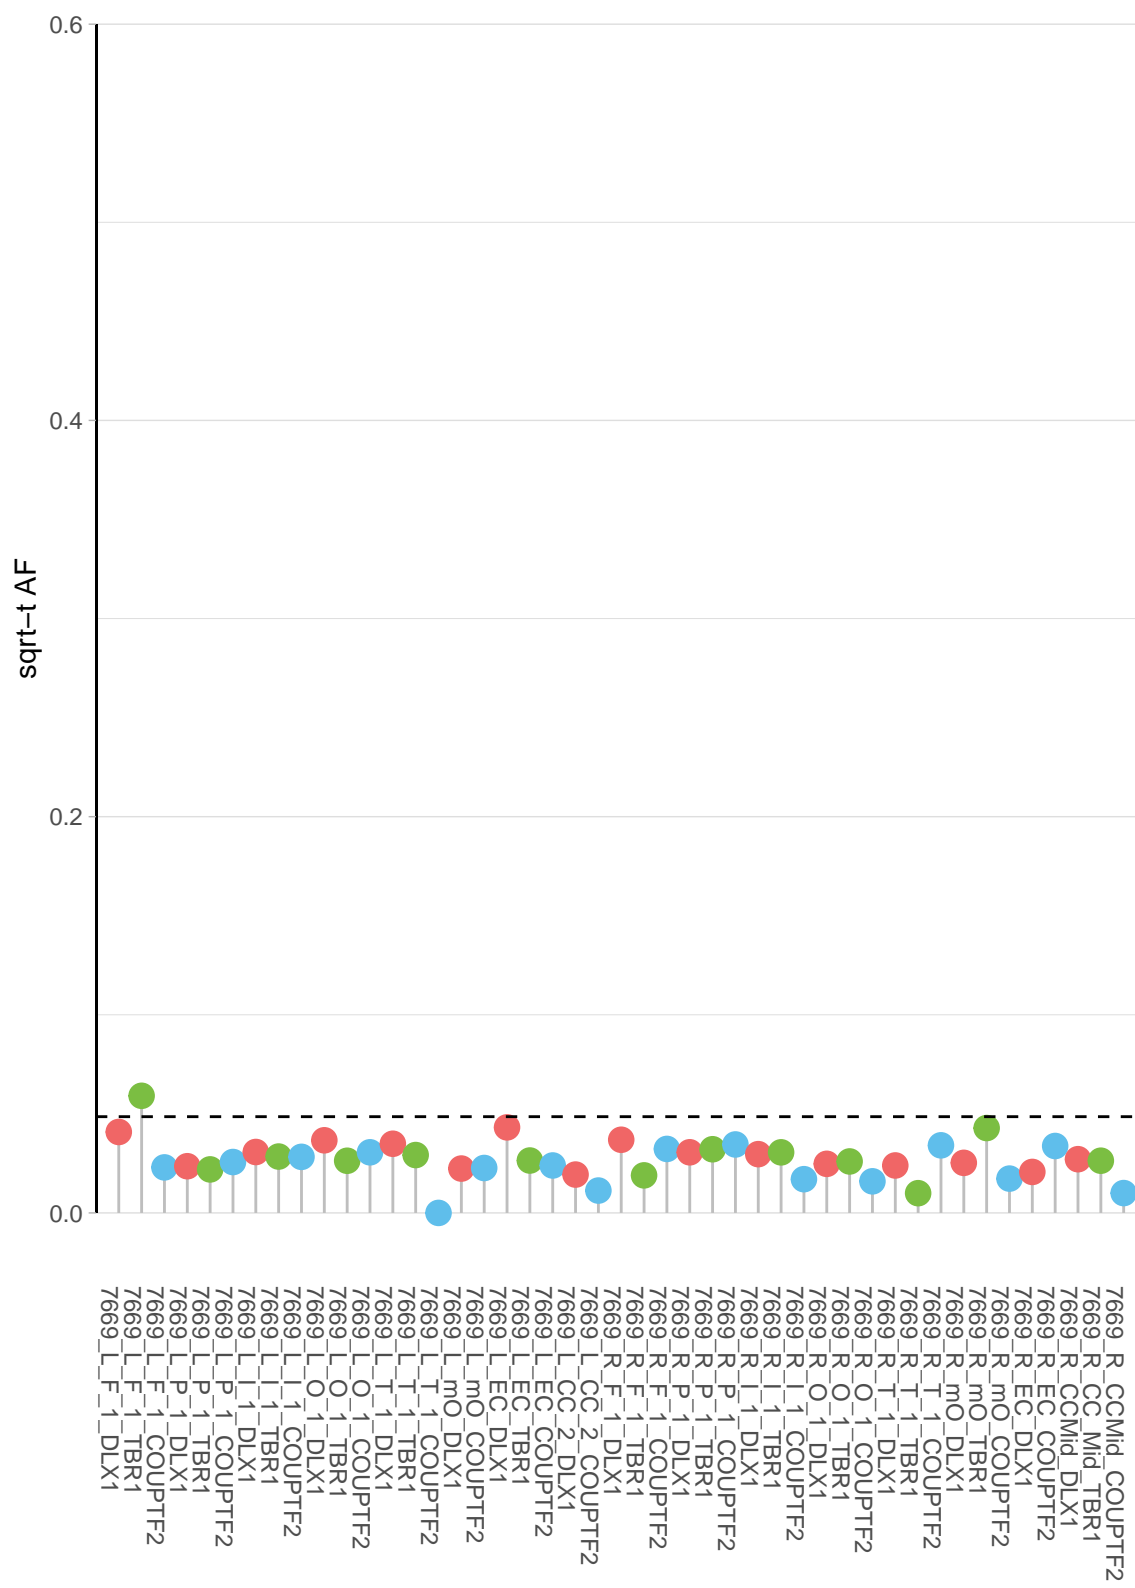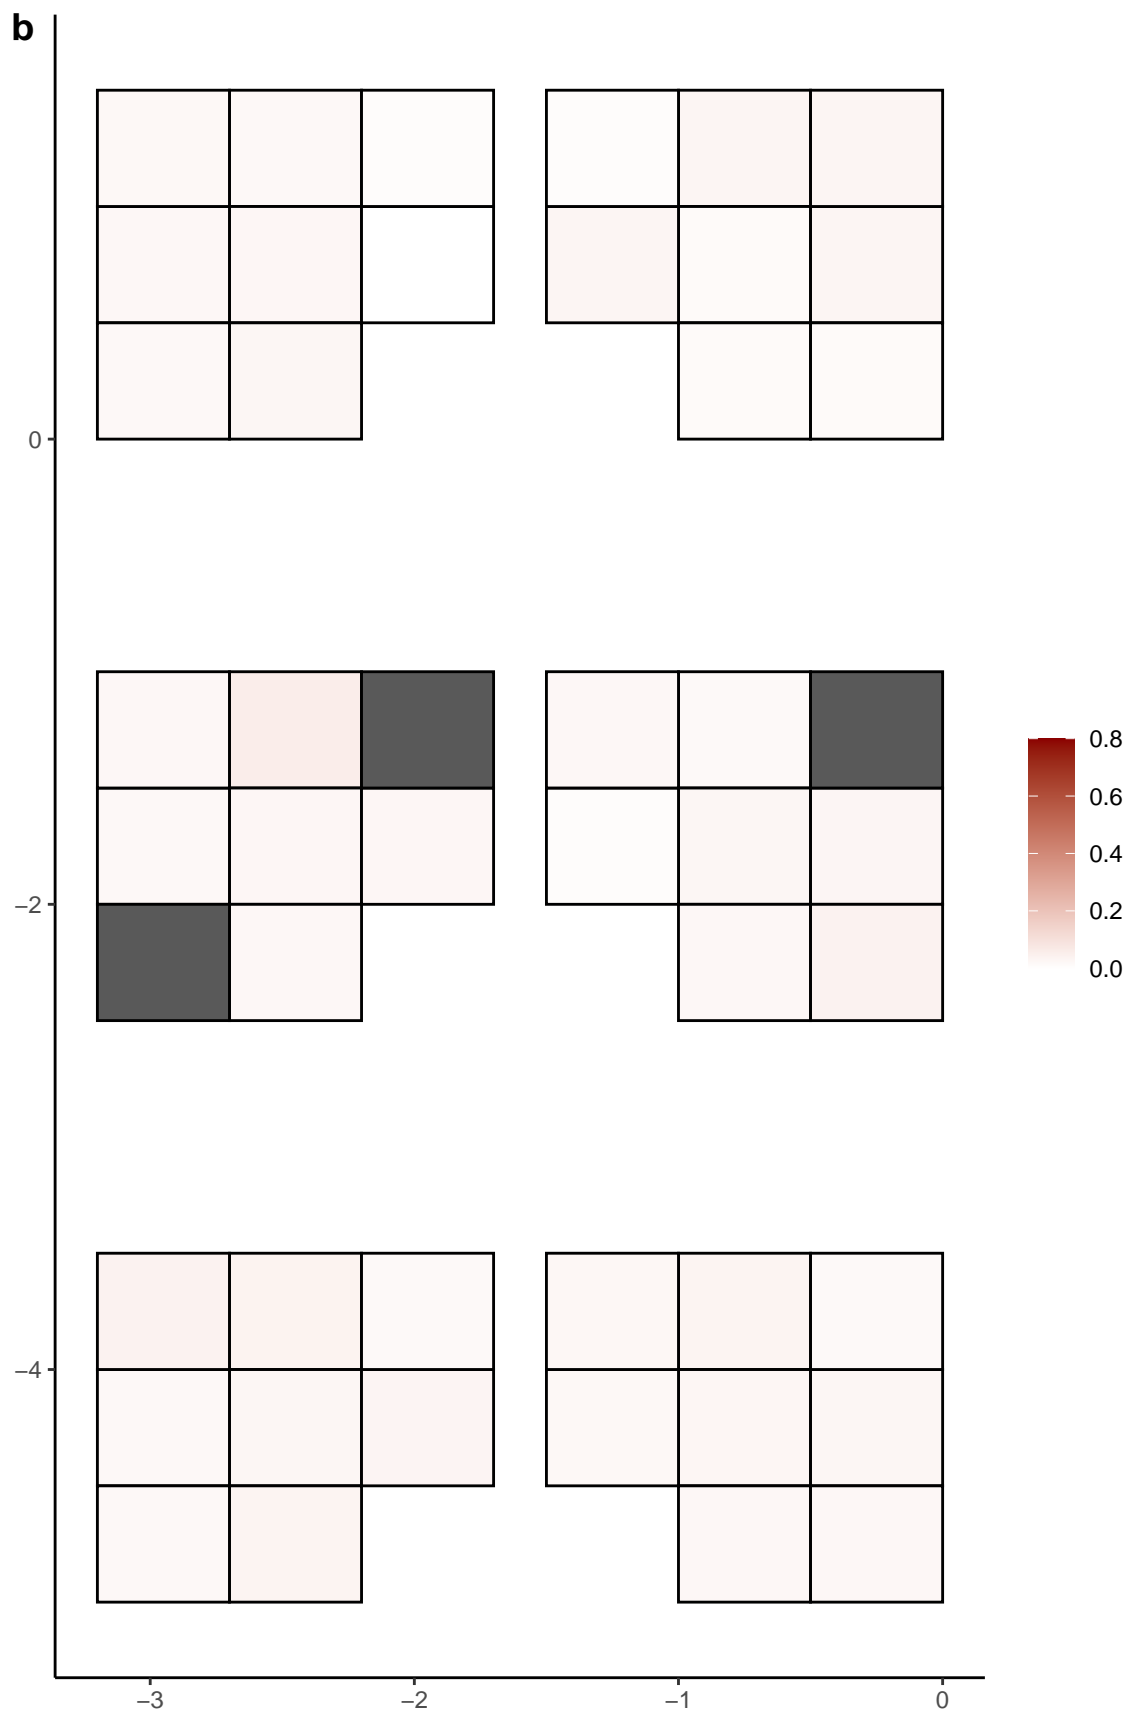

**a** ID05 8-32152493-G-T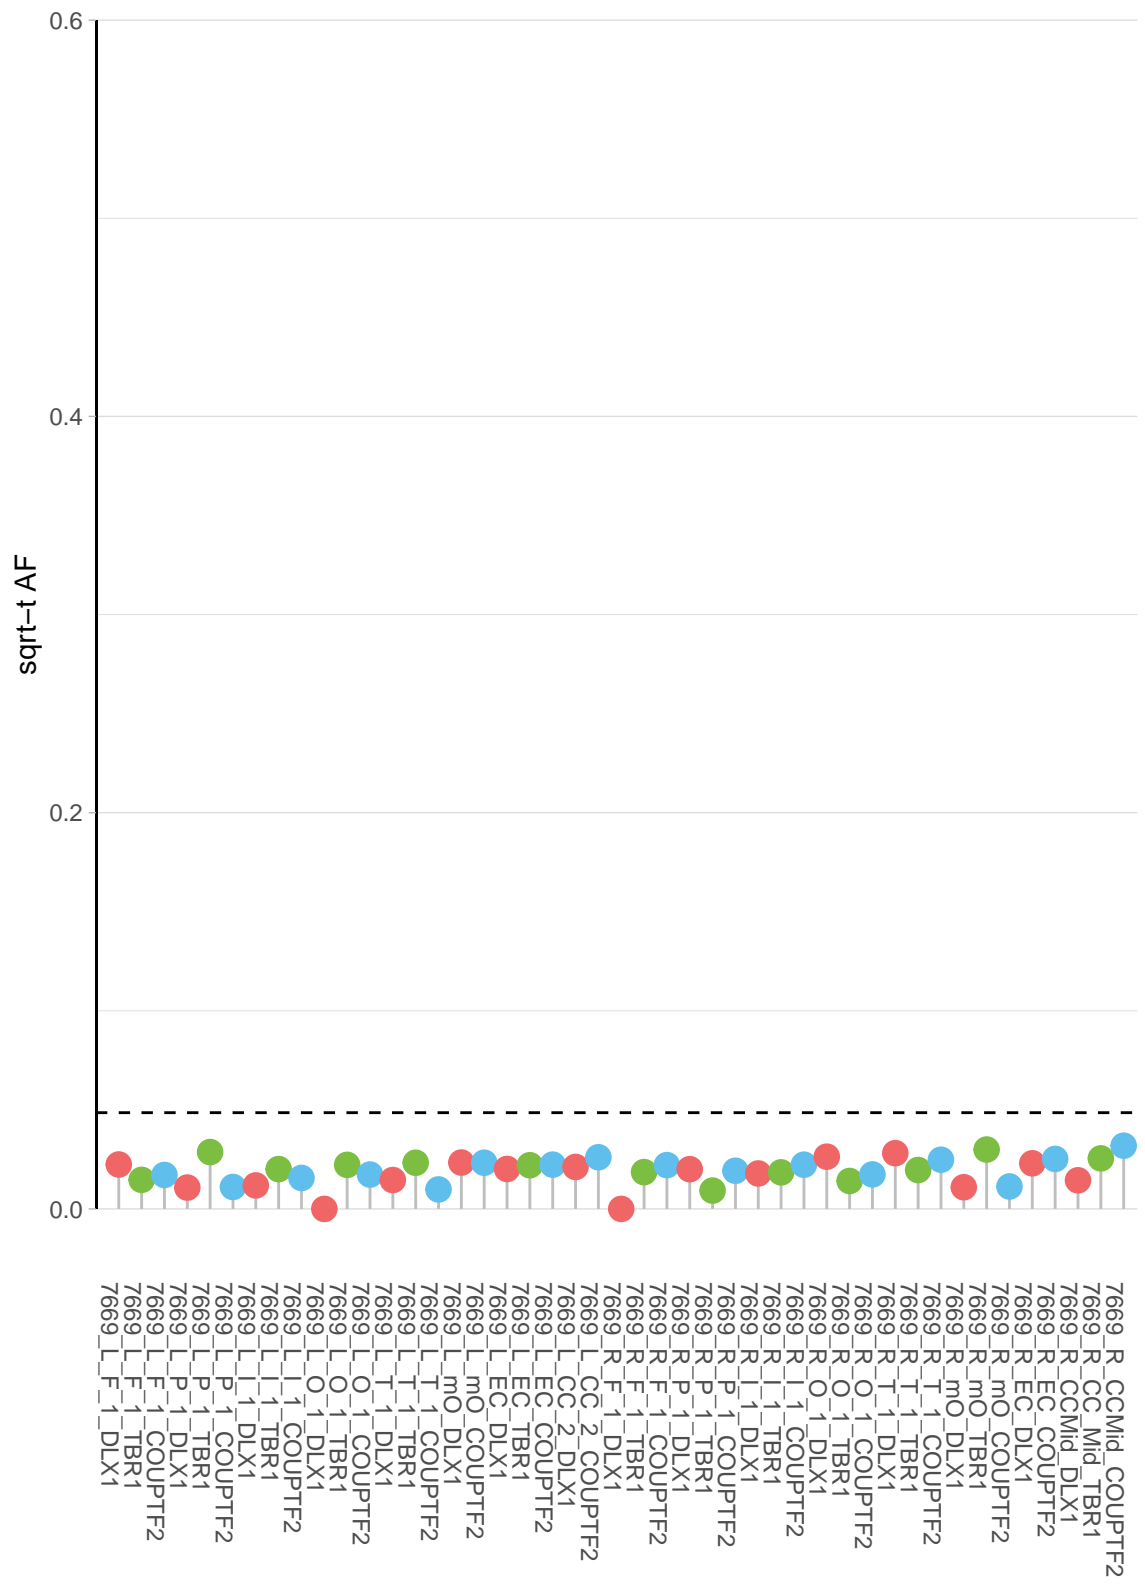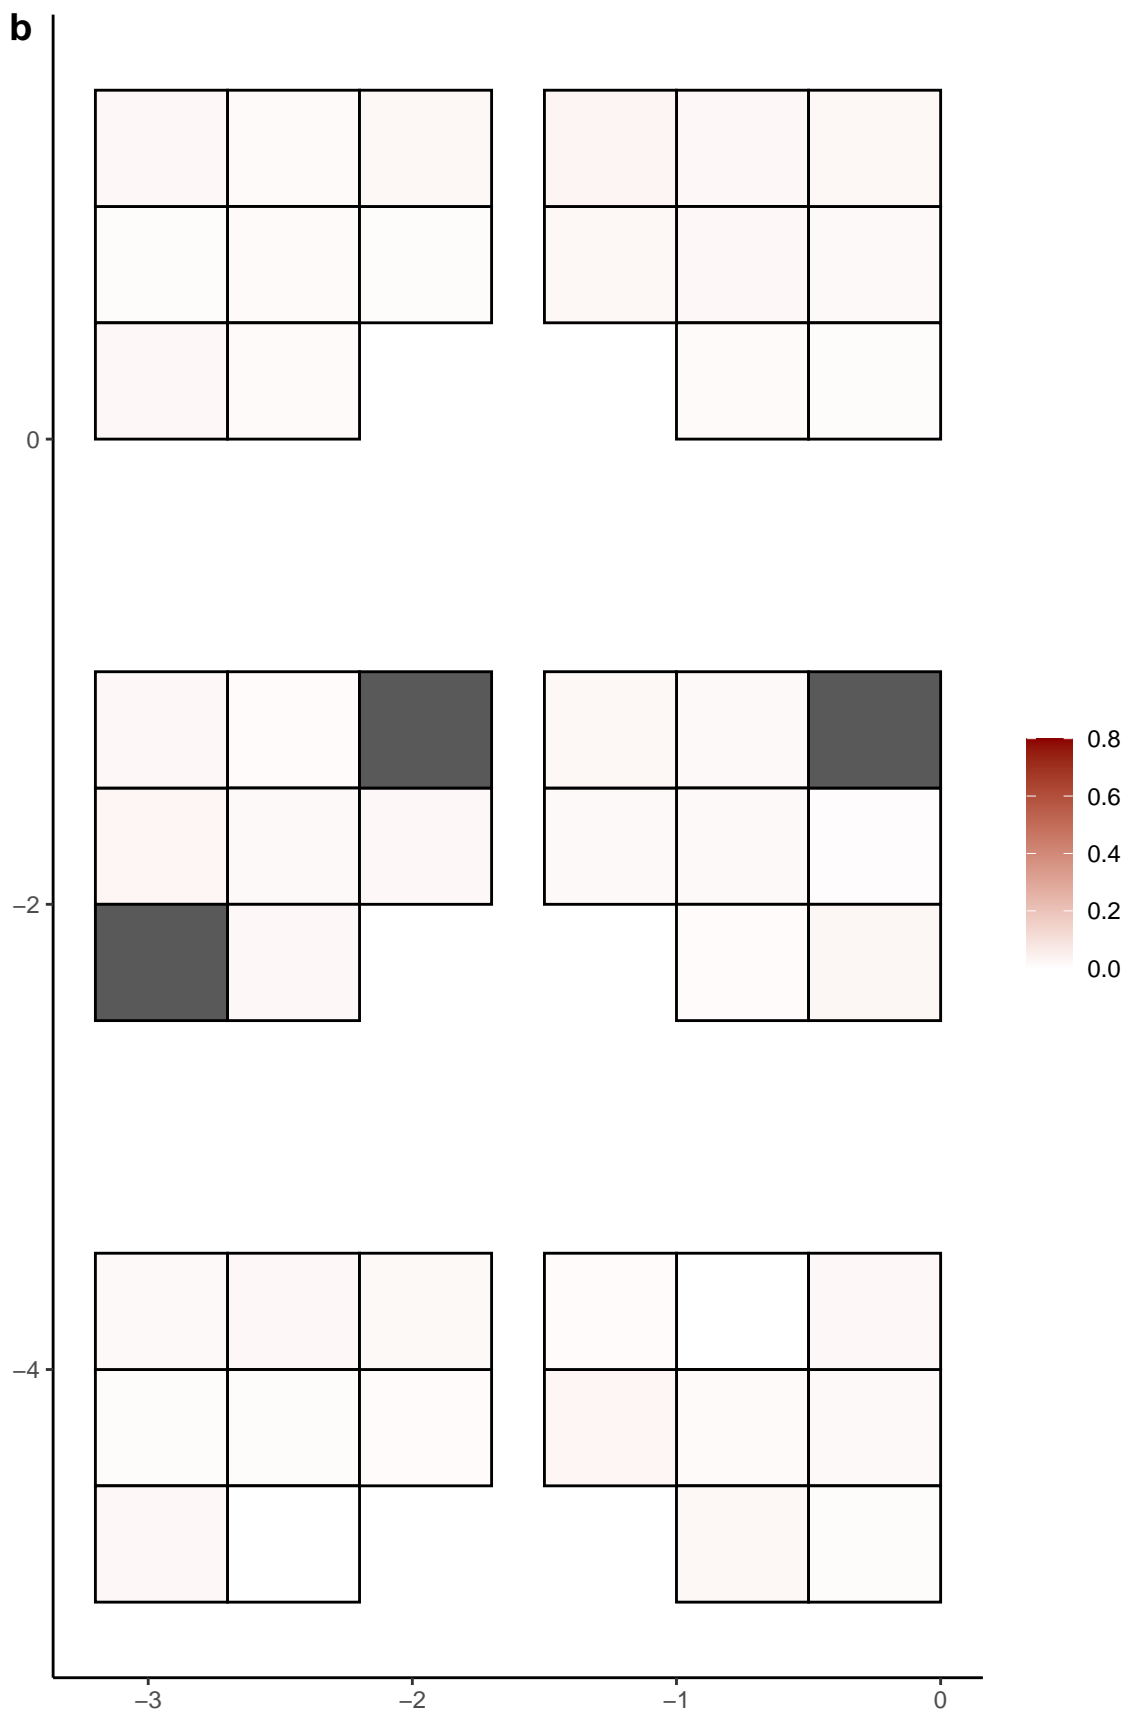



**a** ID05 8-3439977-G-A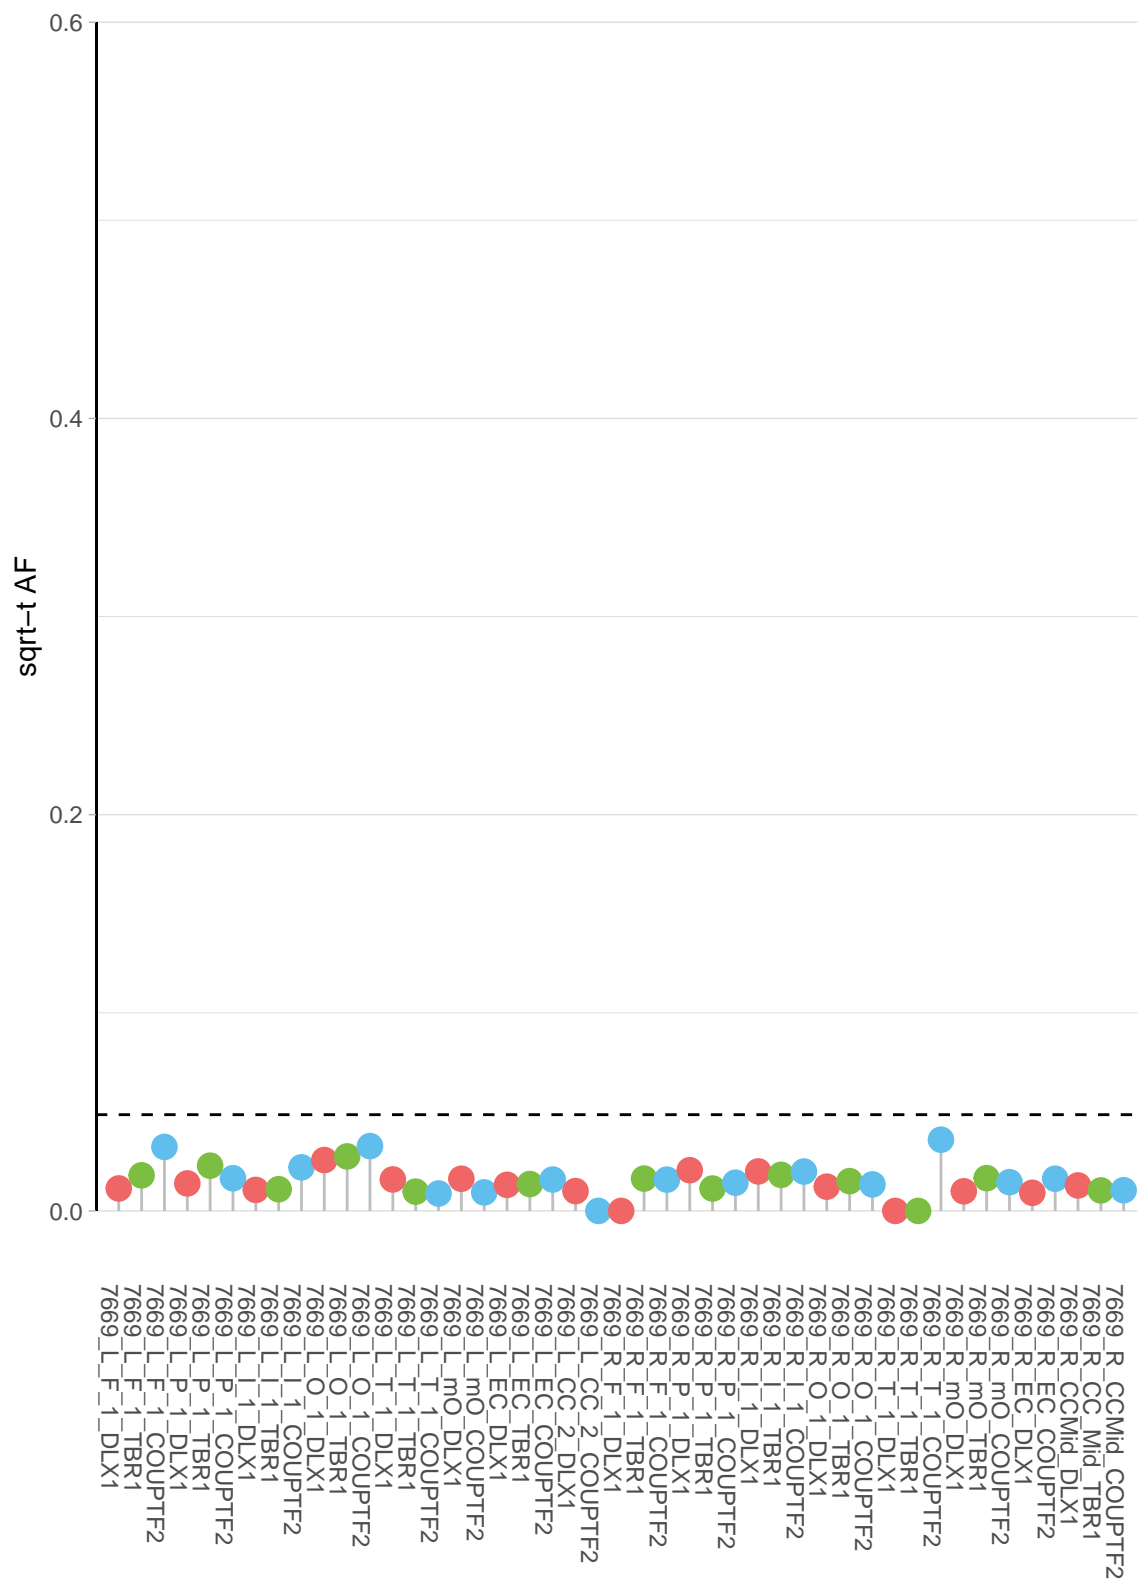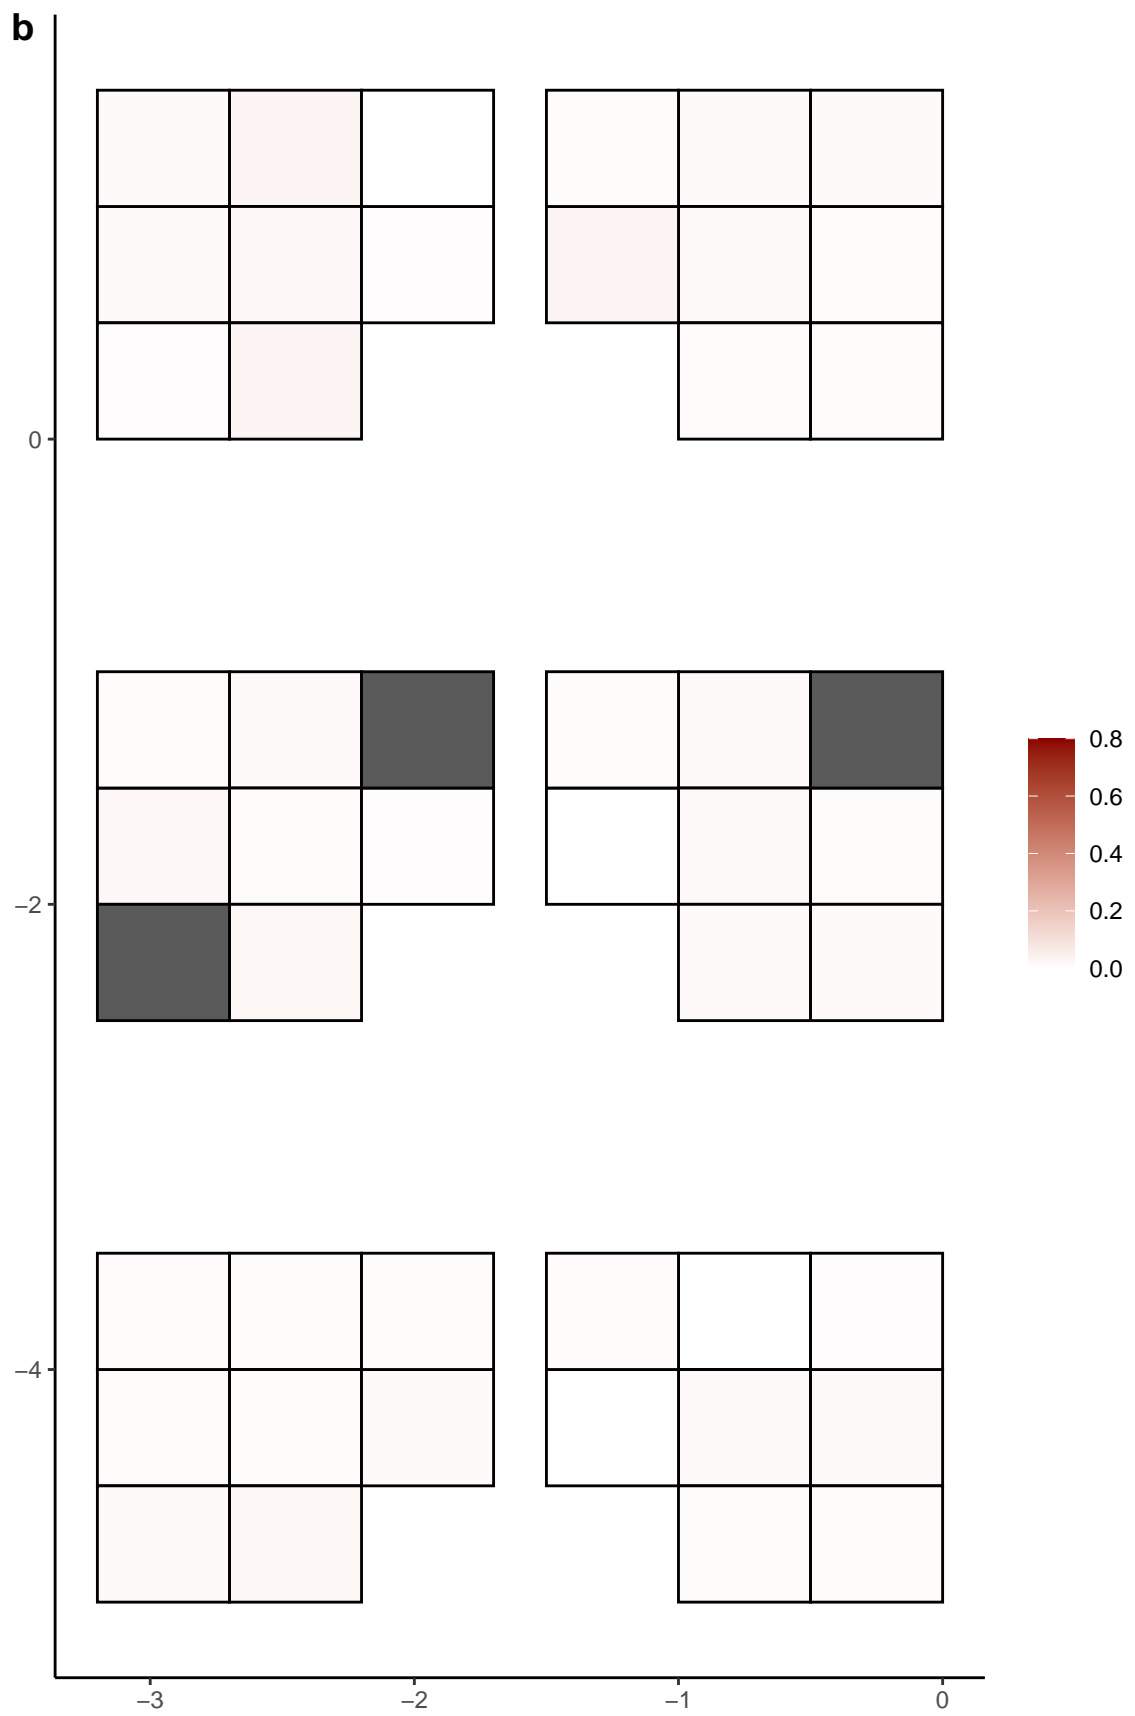

**a** ID05 8-35923762-C-T

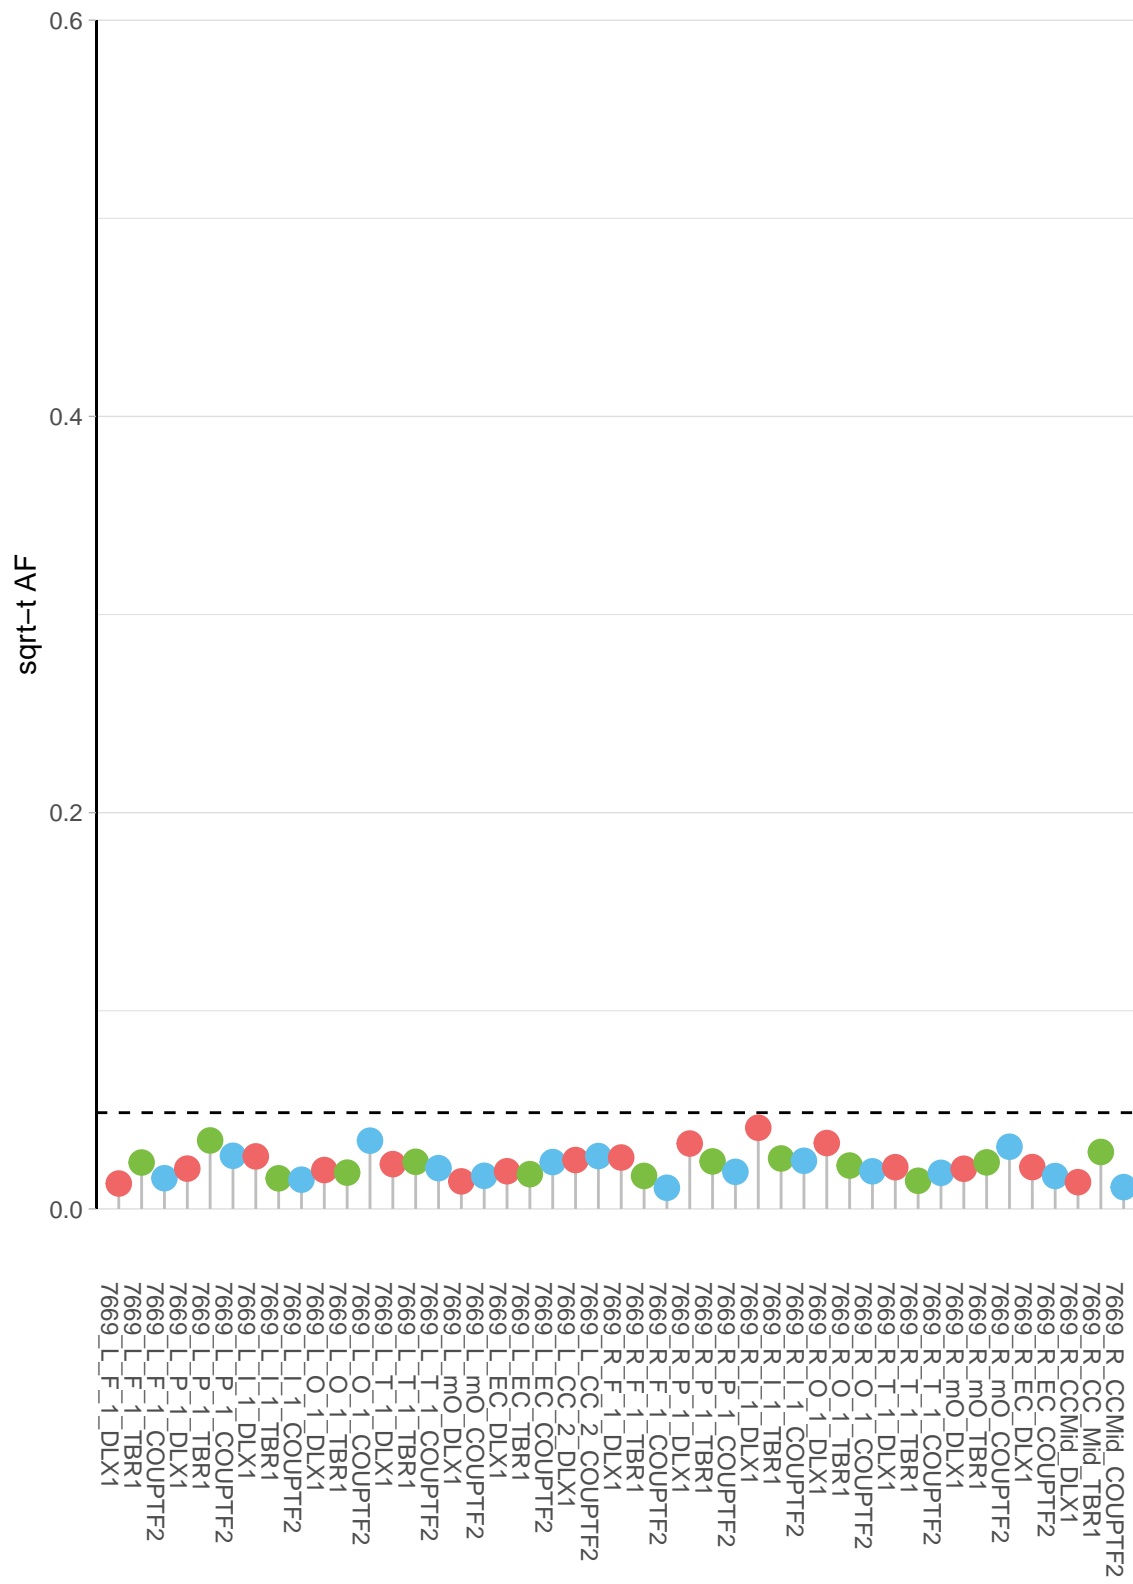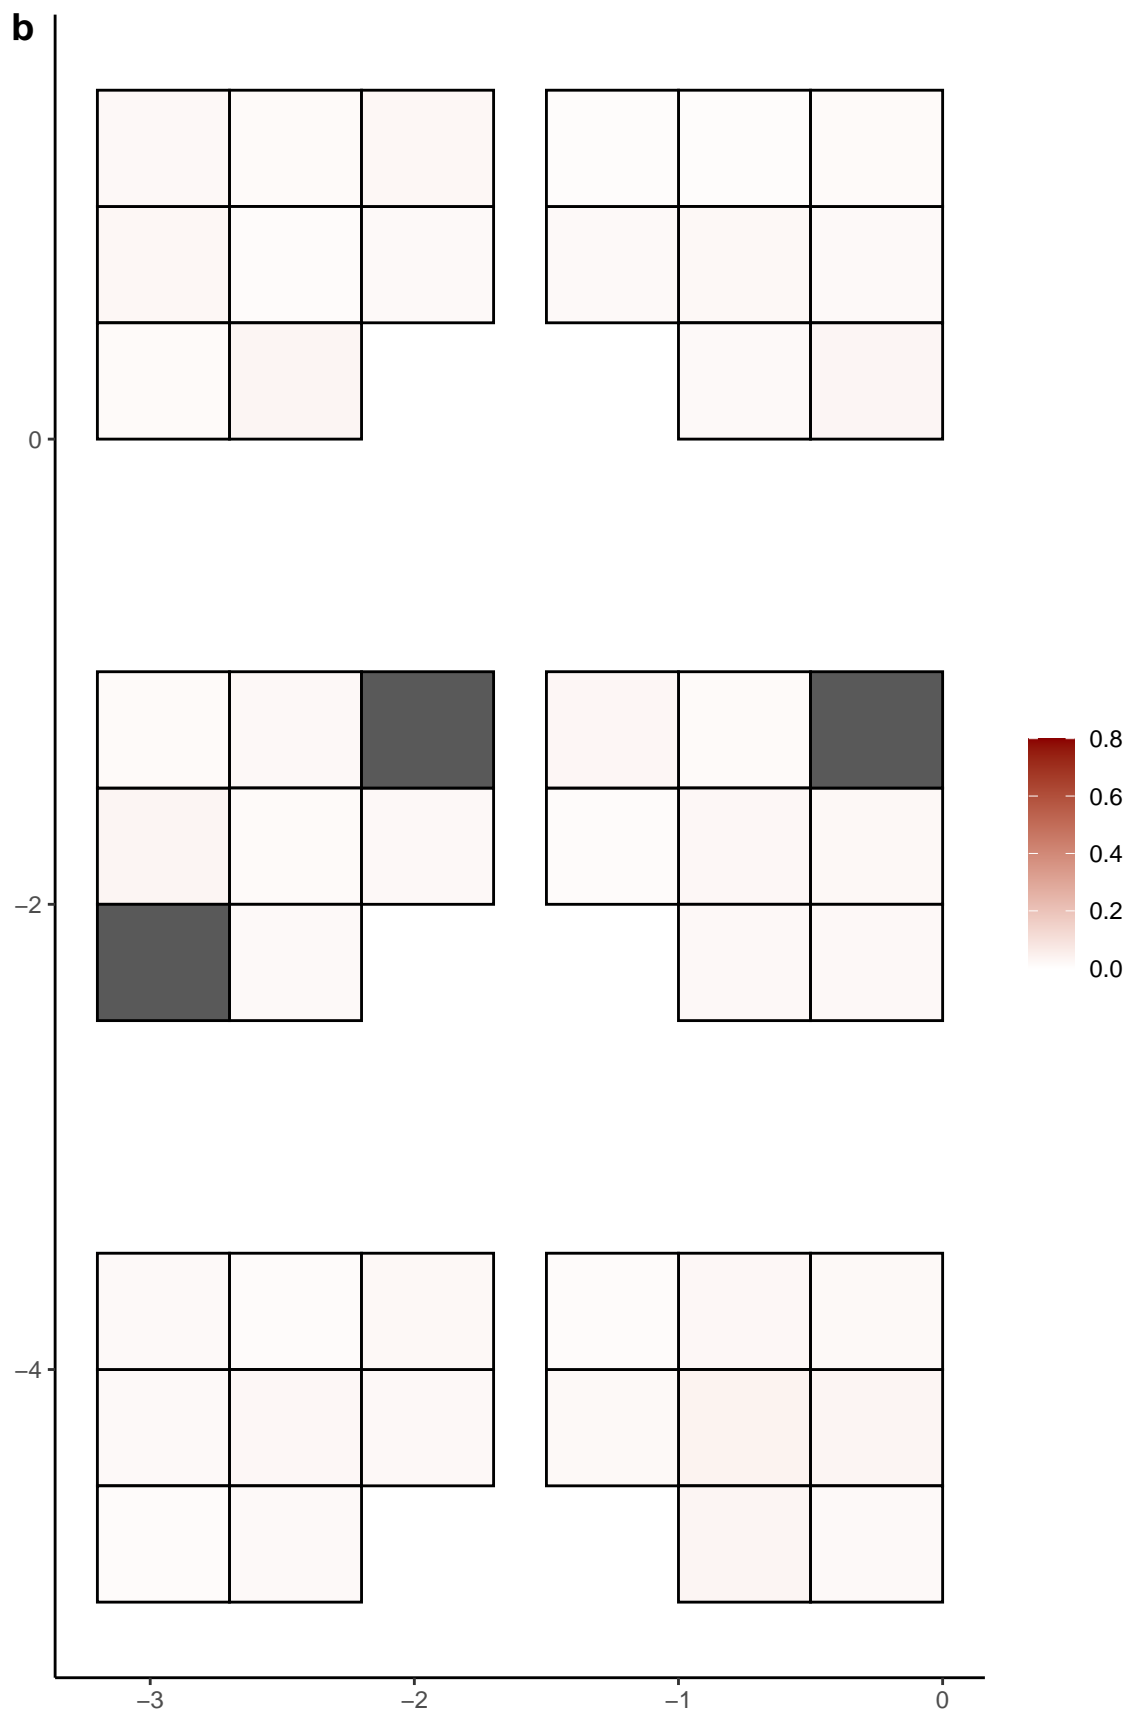

**a** ID05 8-36571735-C-T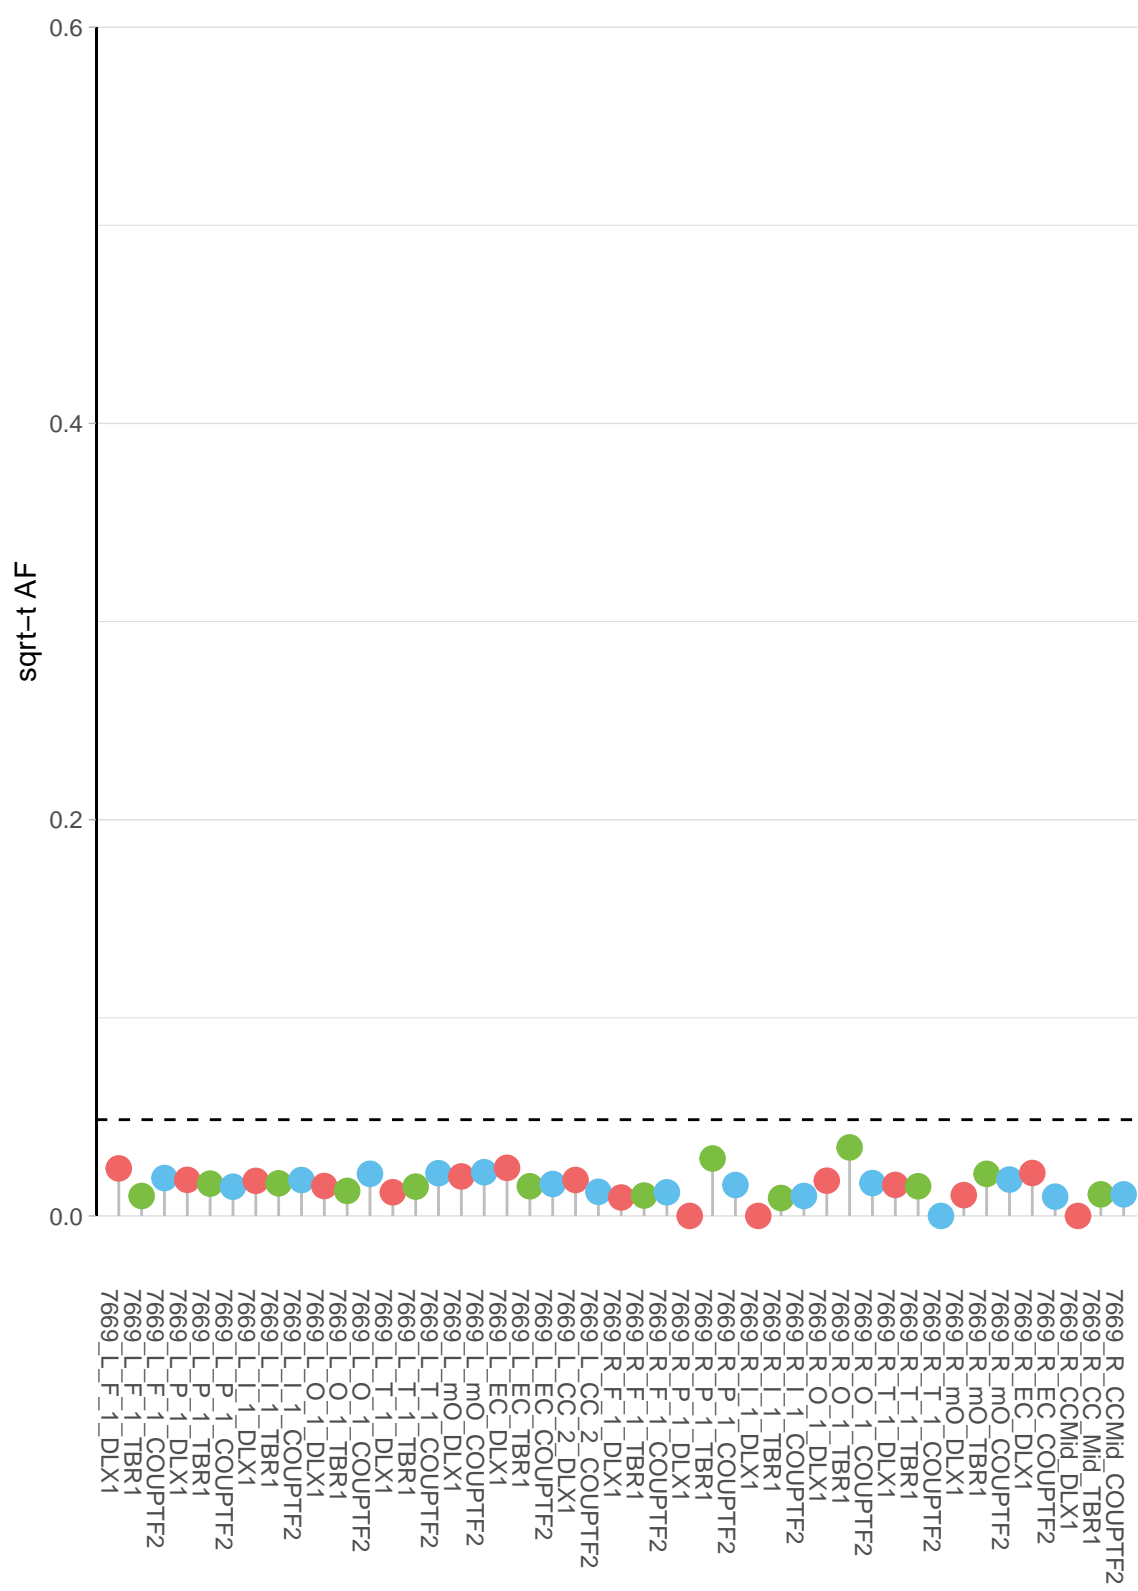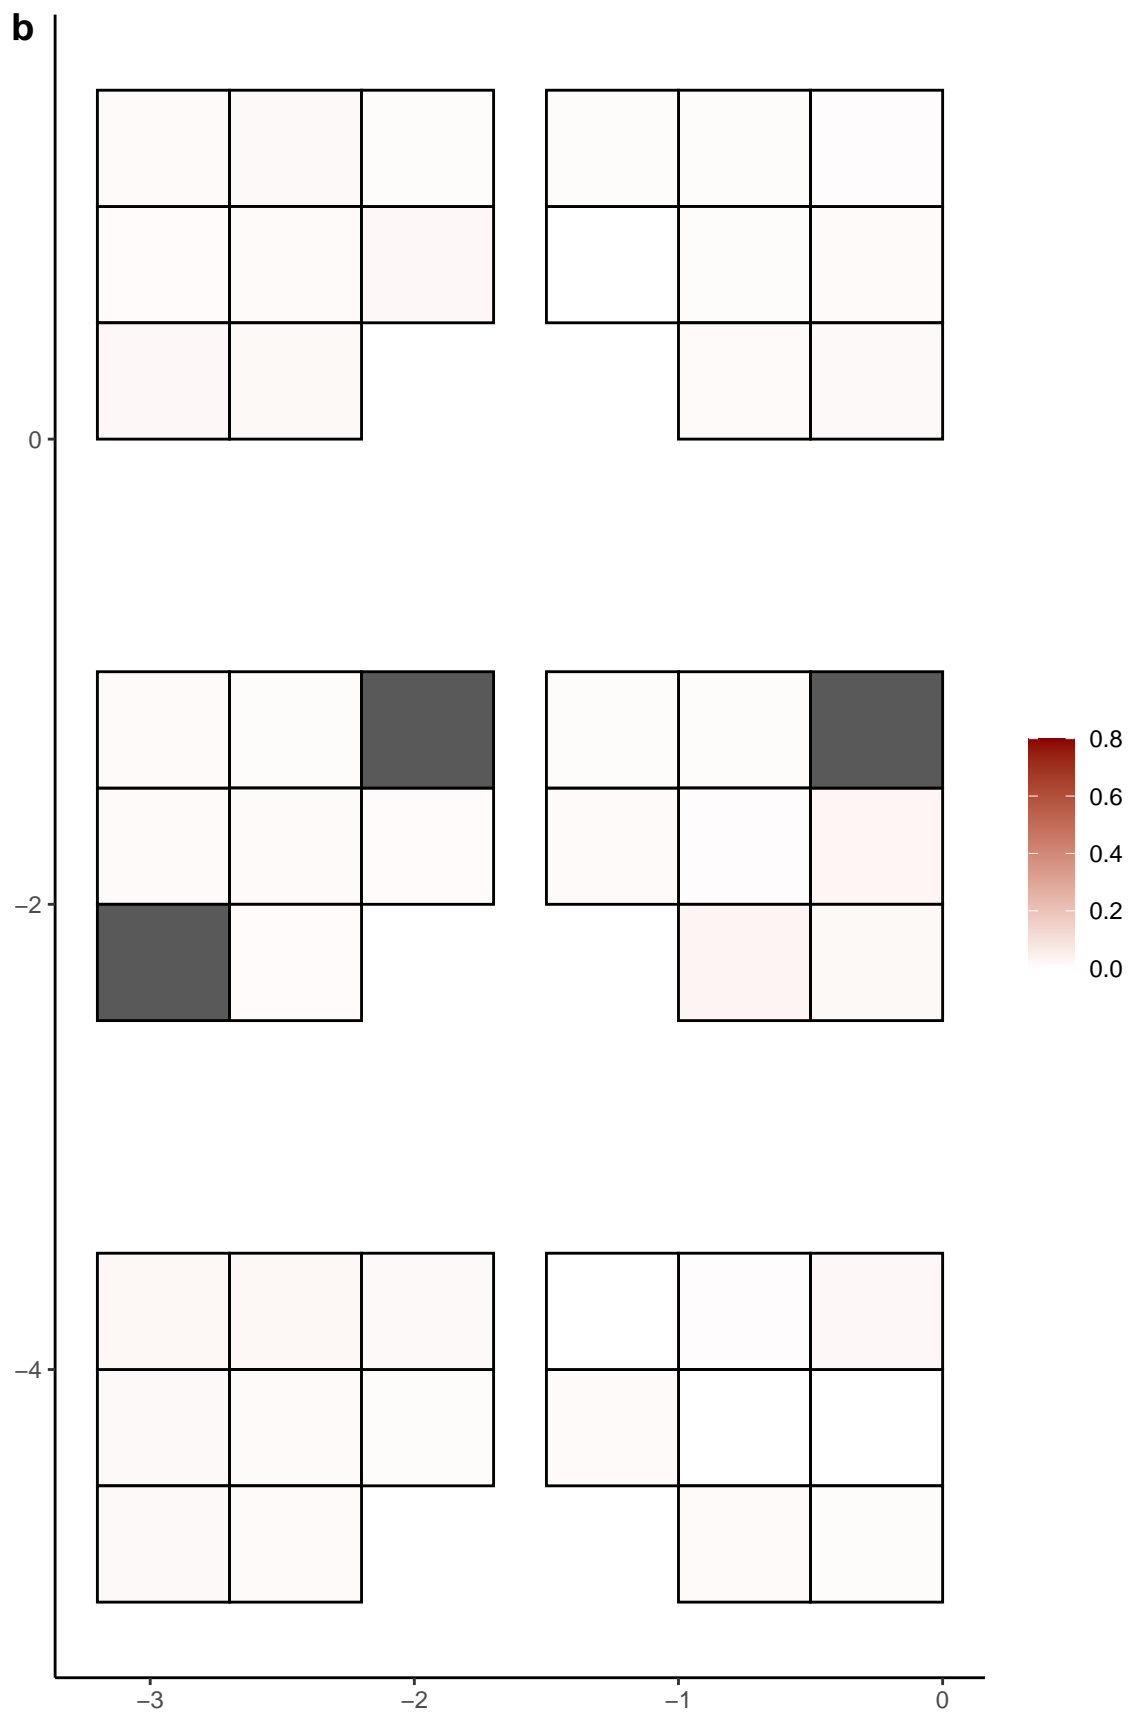

**a** ID05 8-41303253-C-T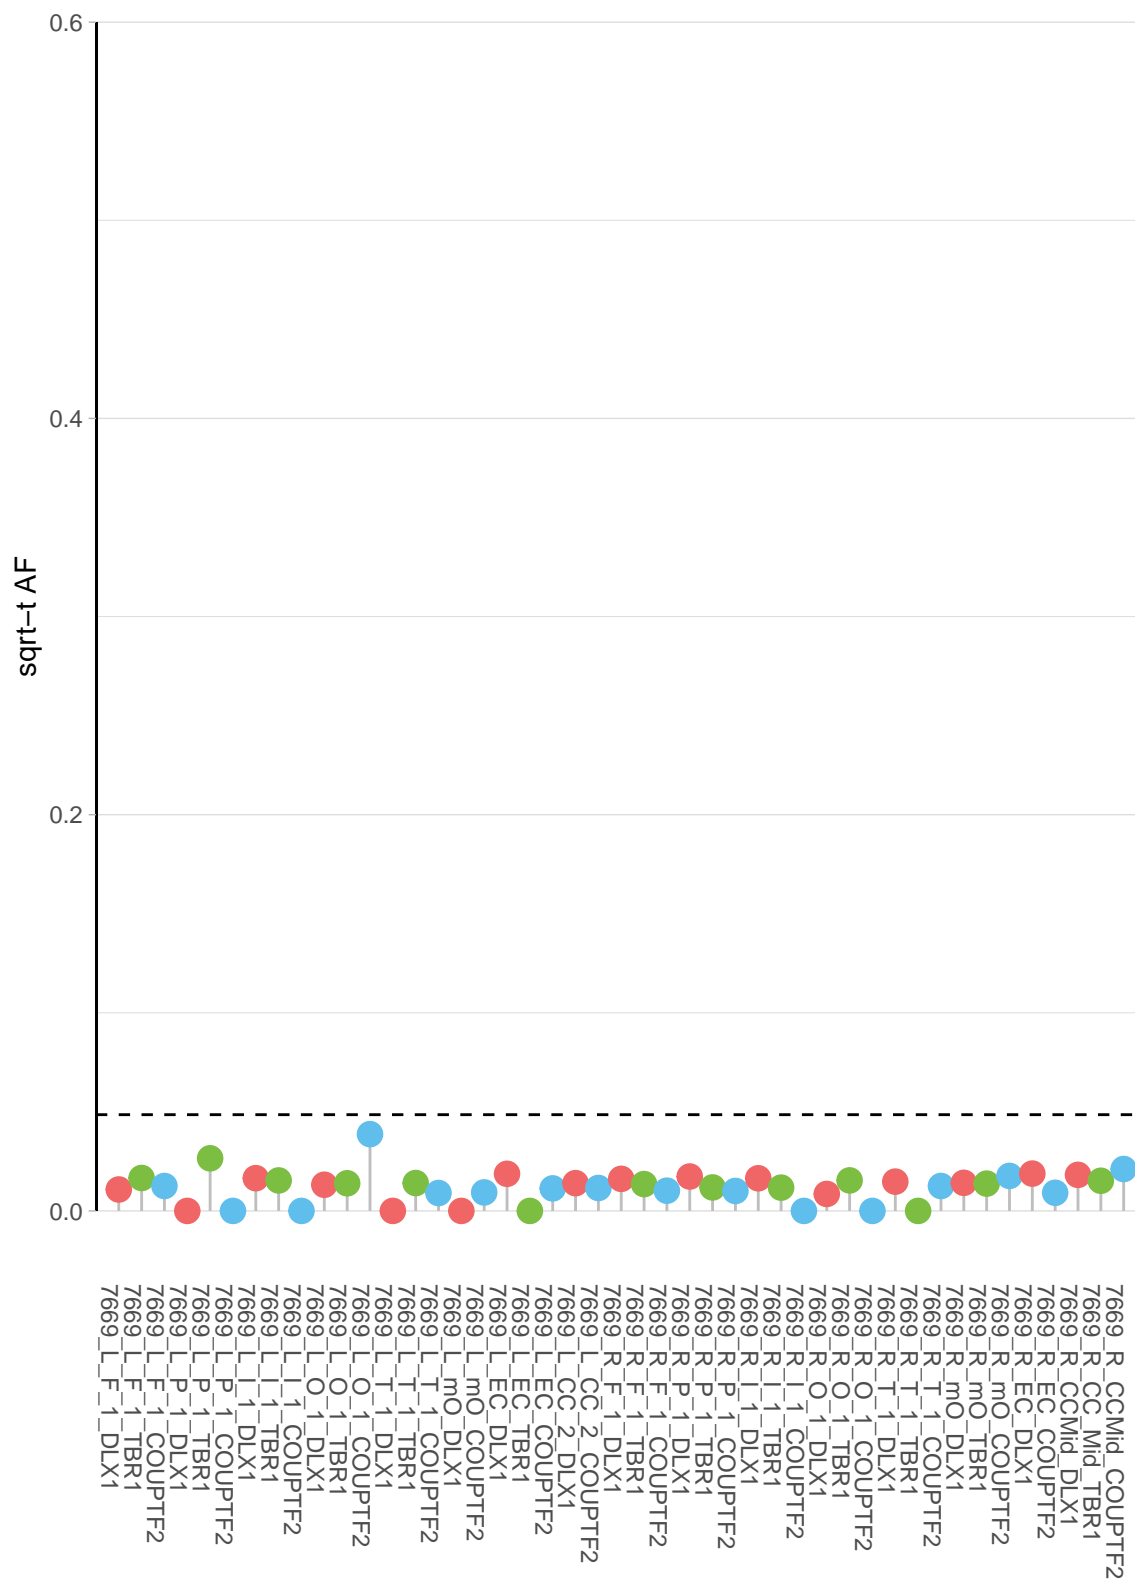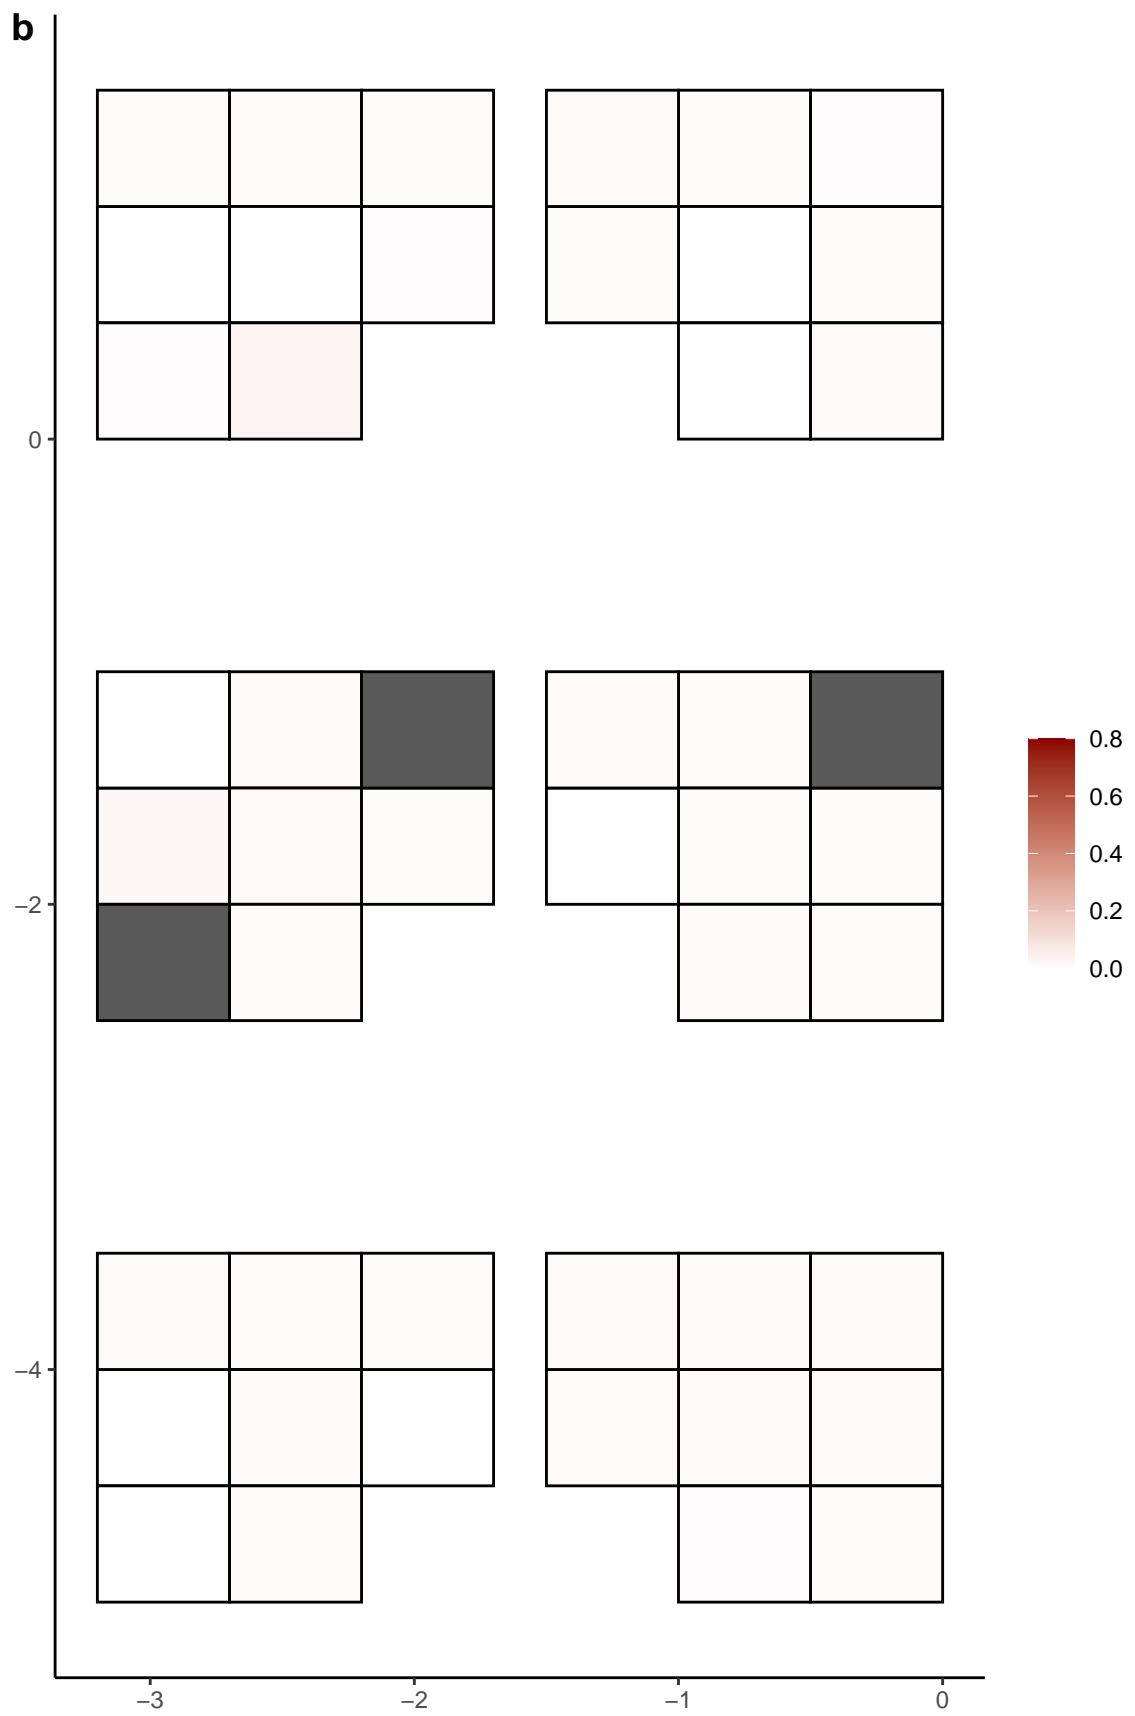

**a** ID05 8-4601722-C-G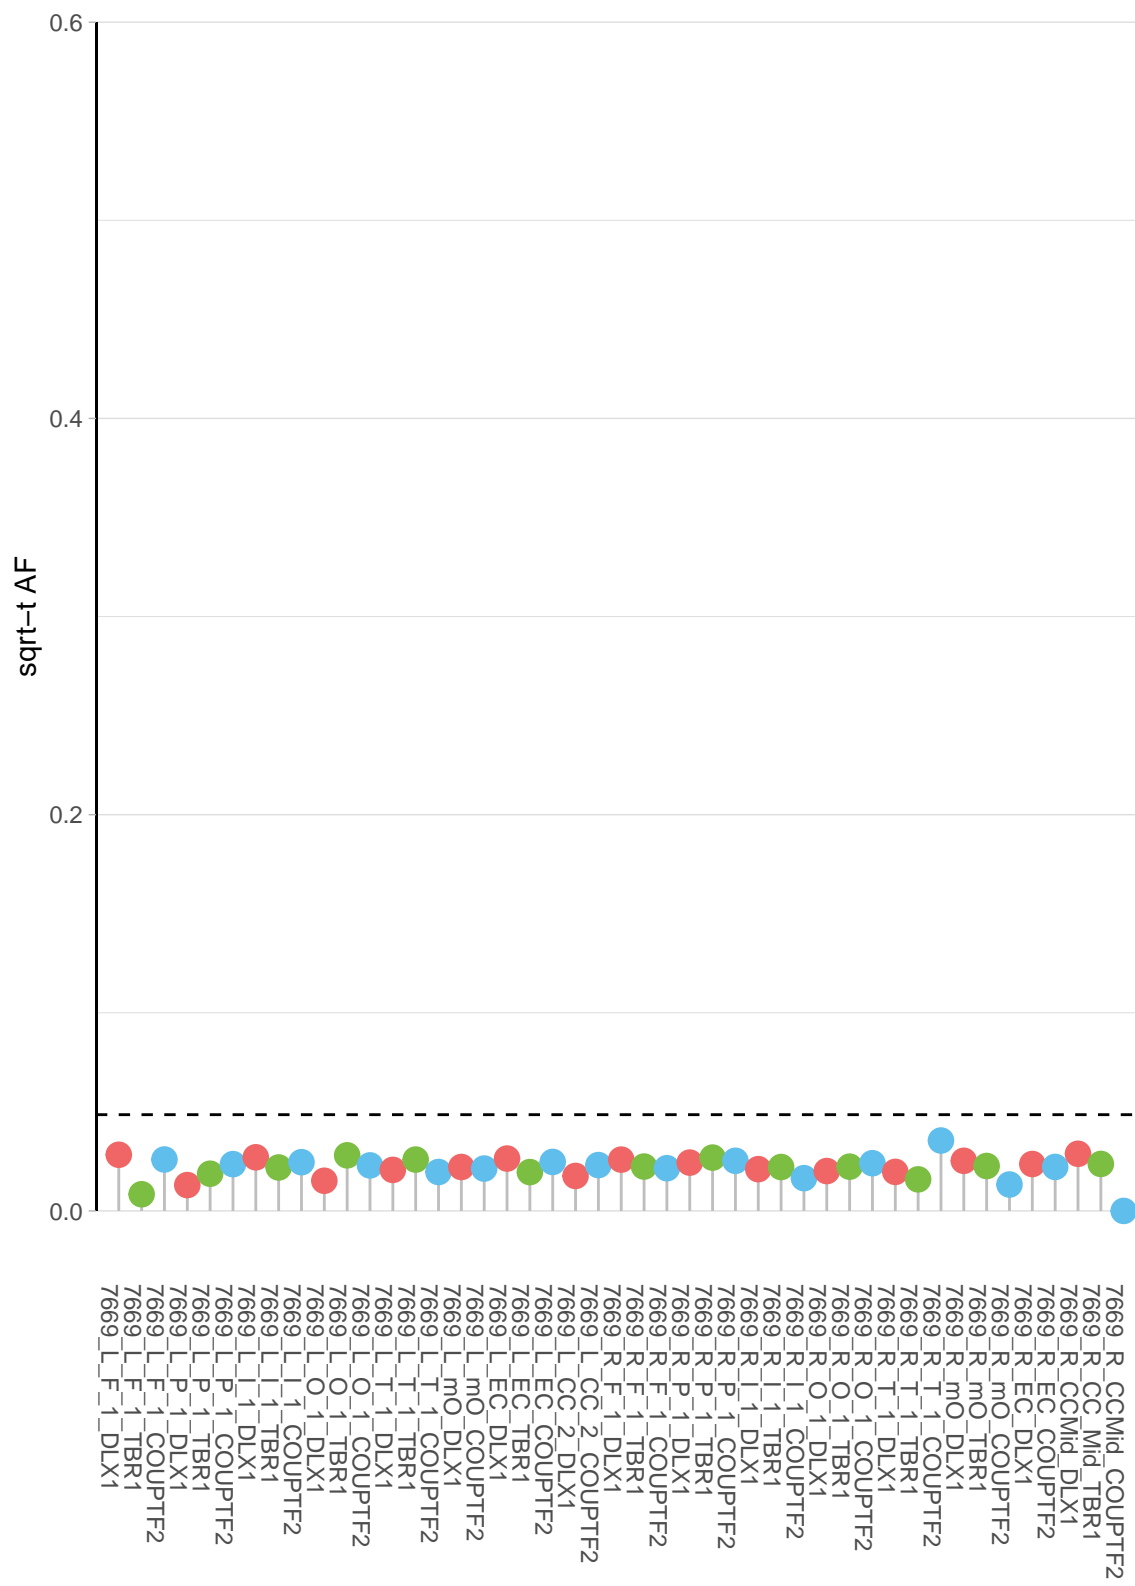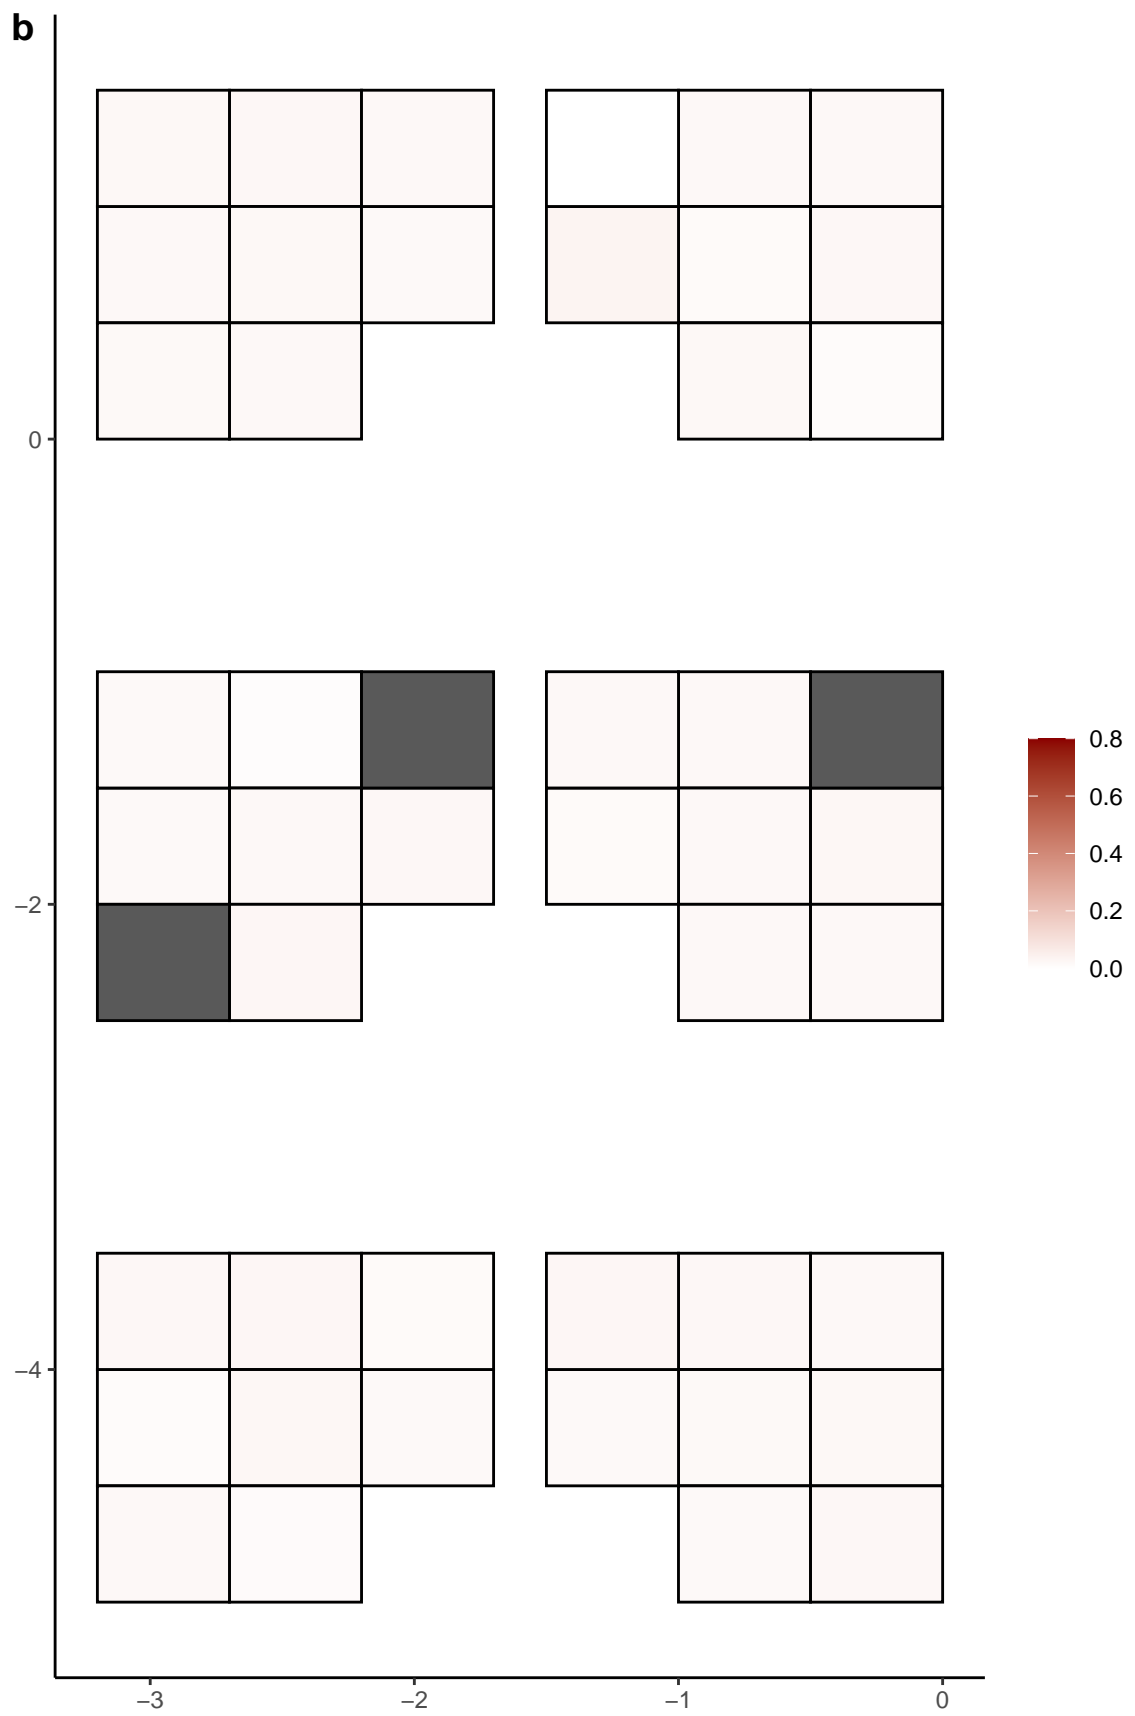

**a** ID05 8-49587201-C-T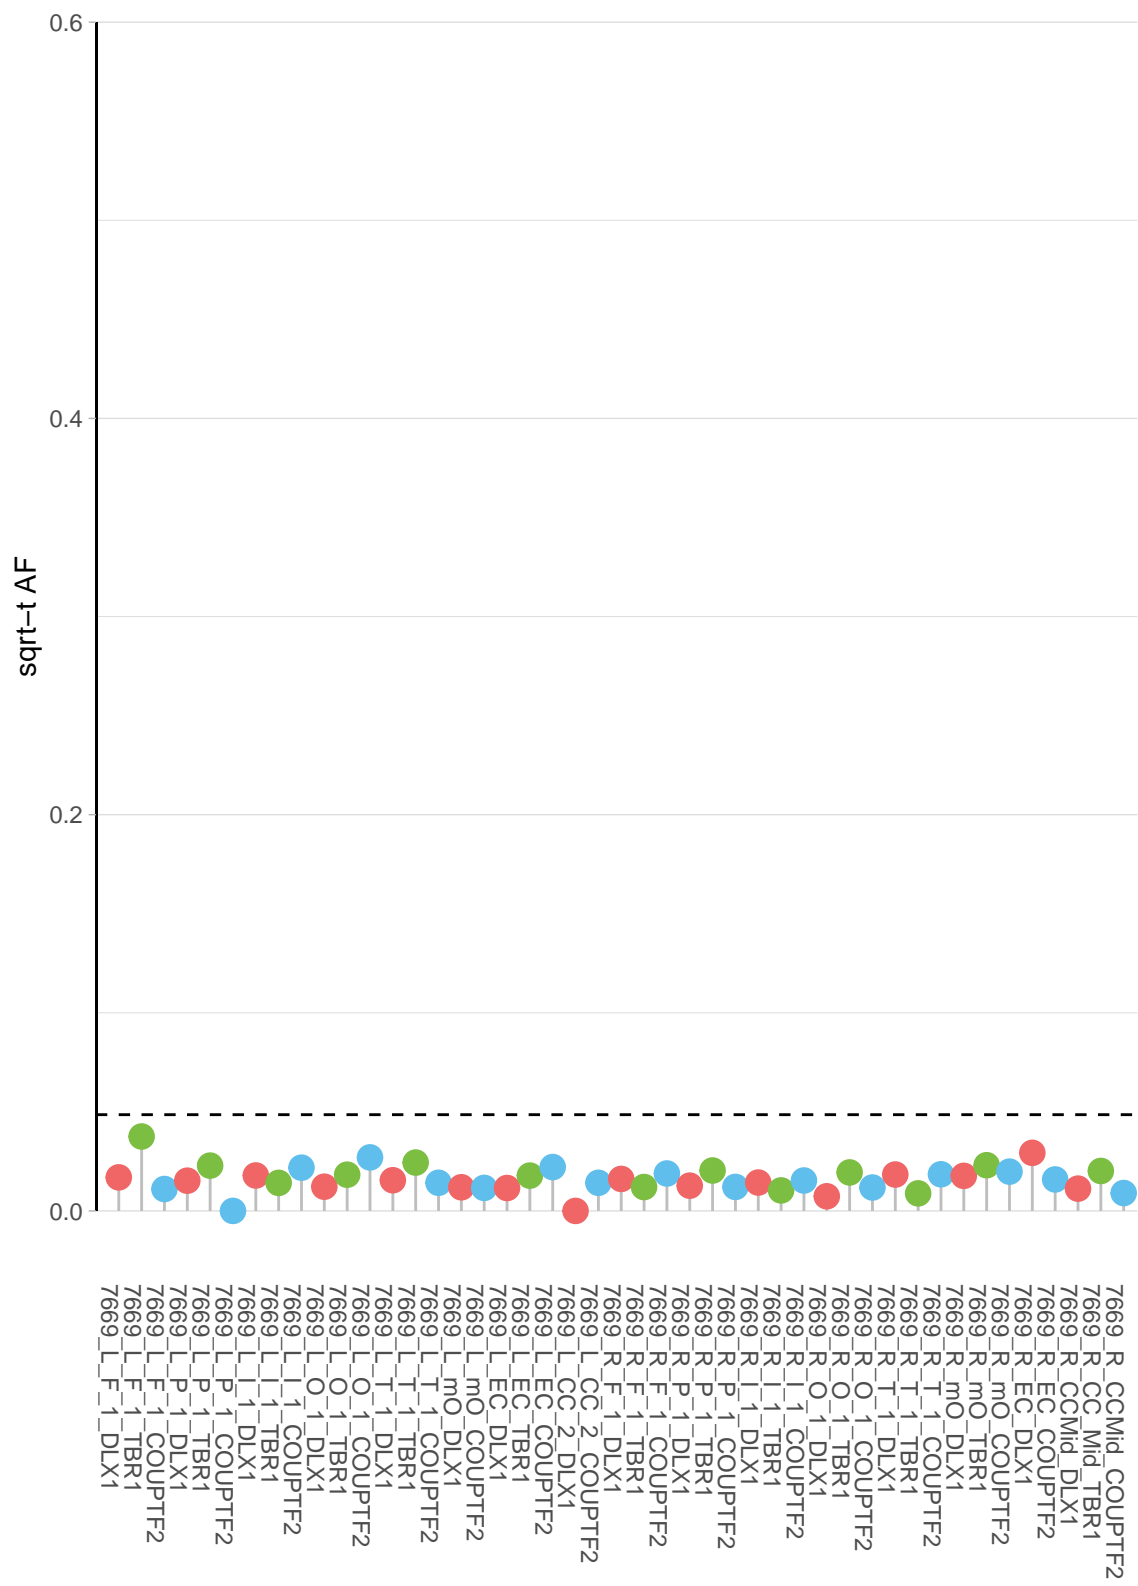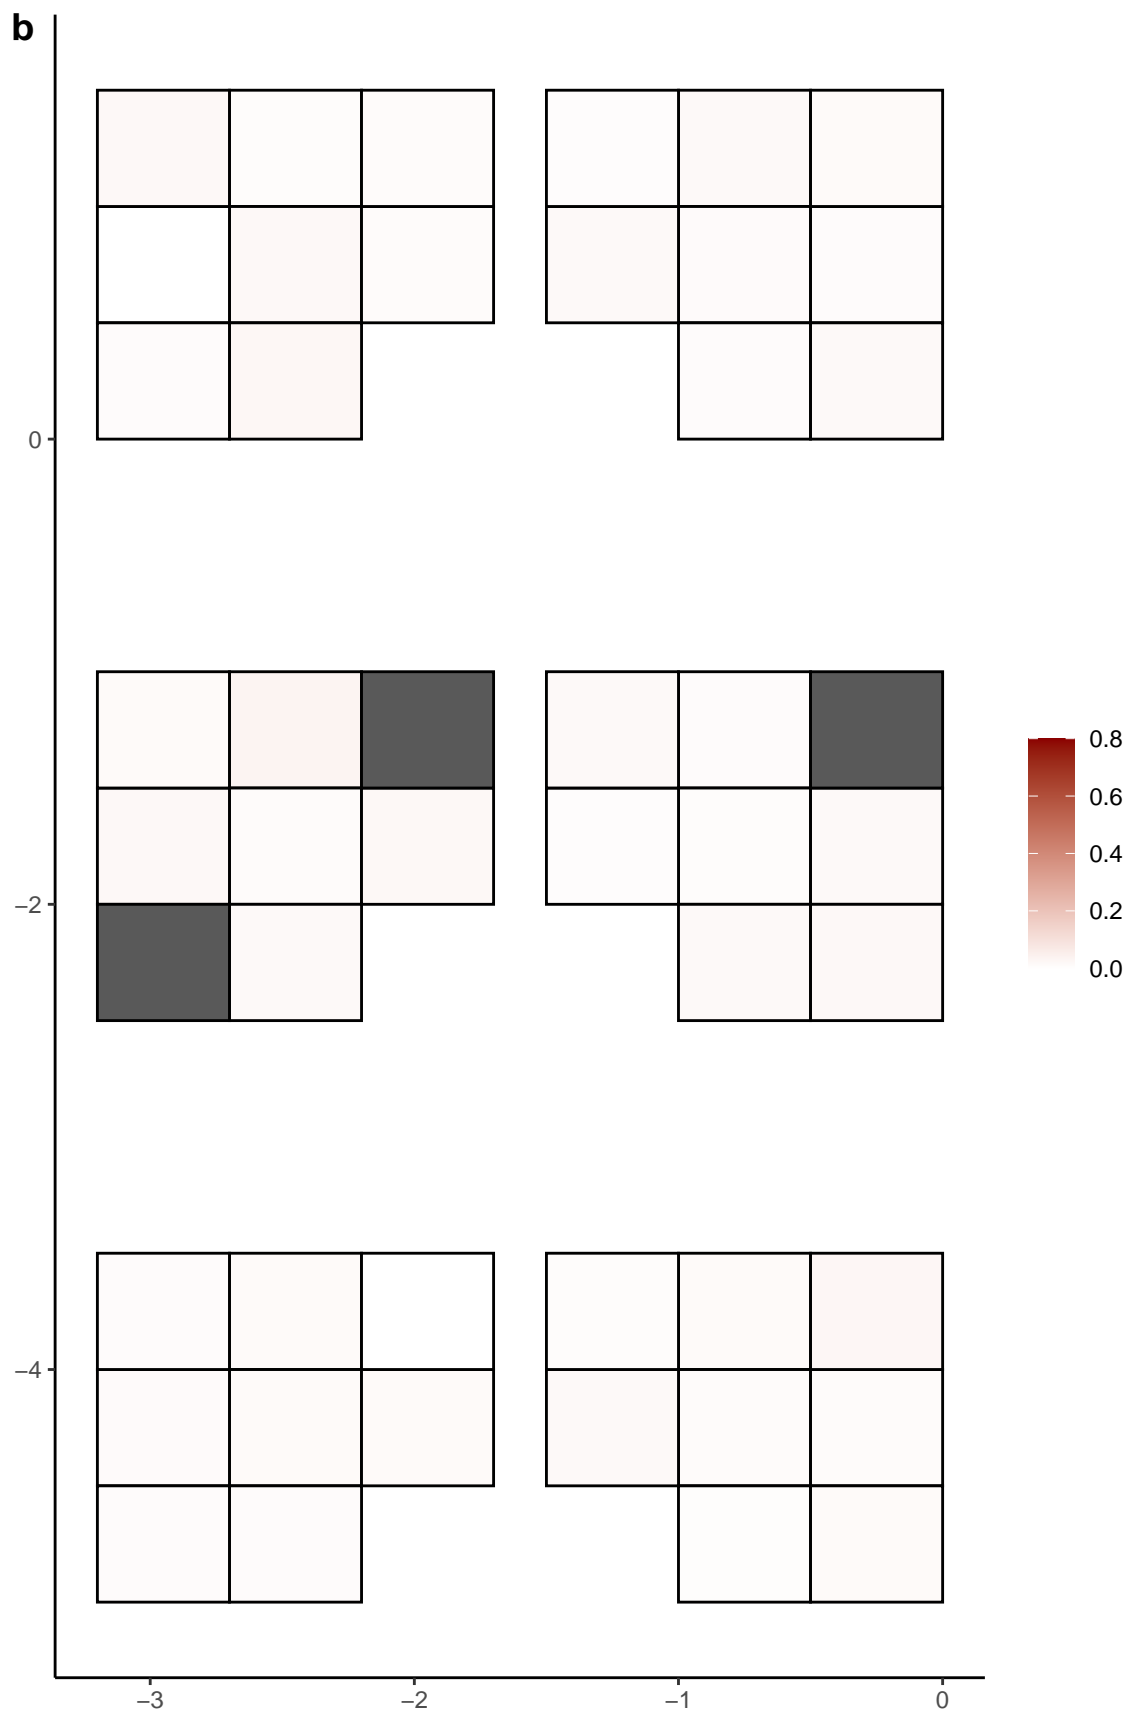

**a** ID05 8-49636775-C-A

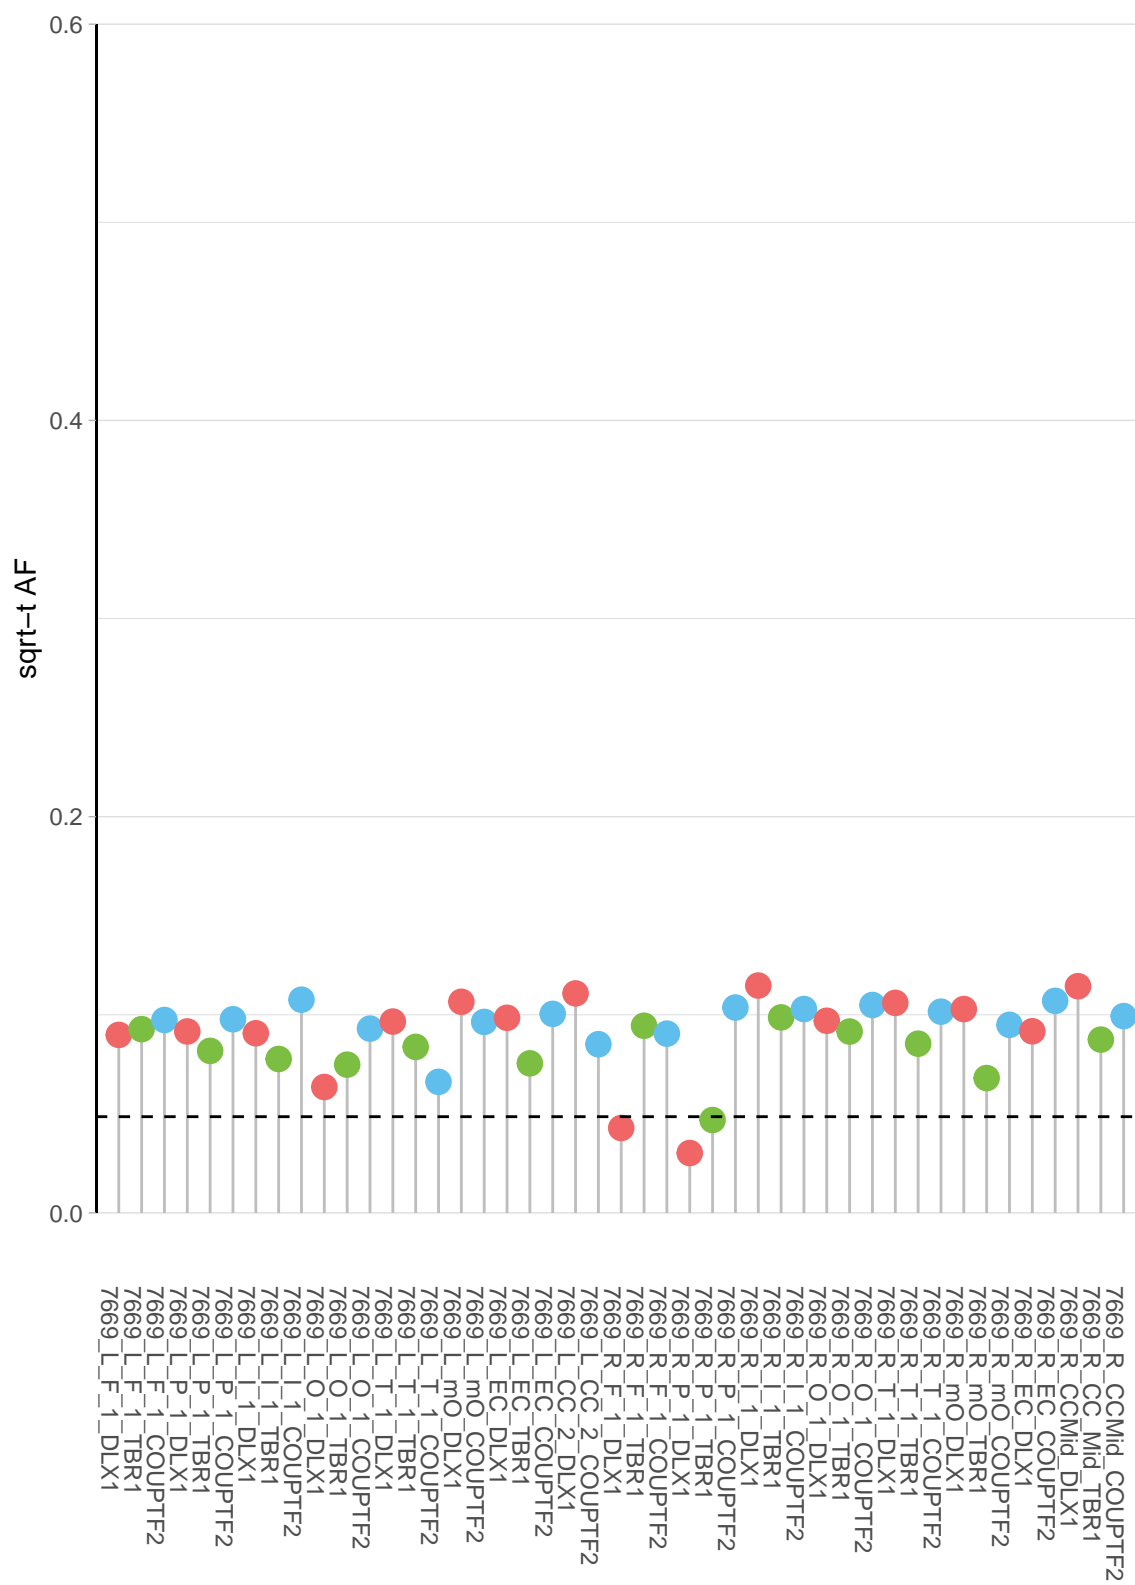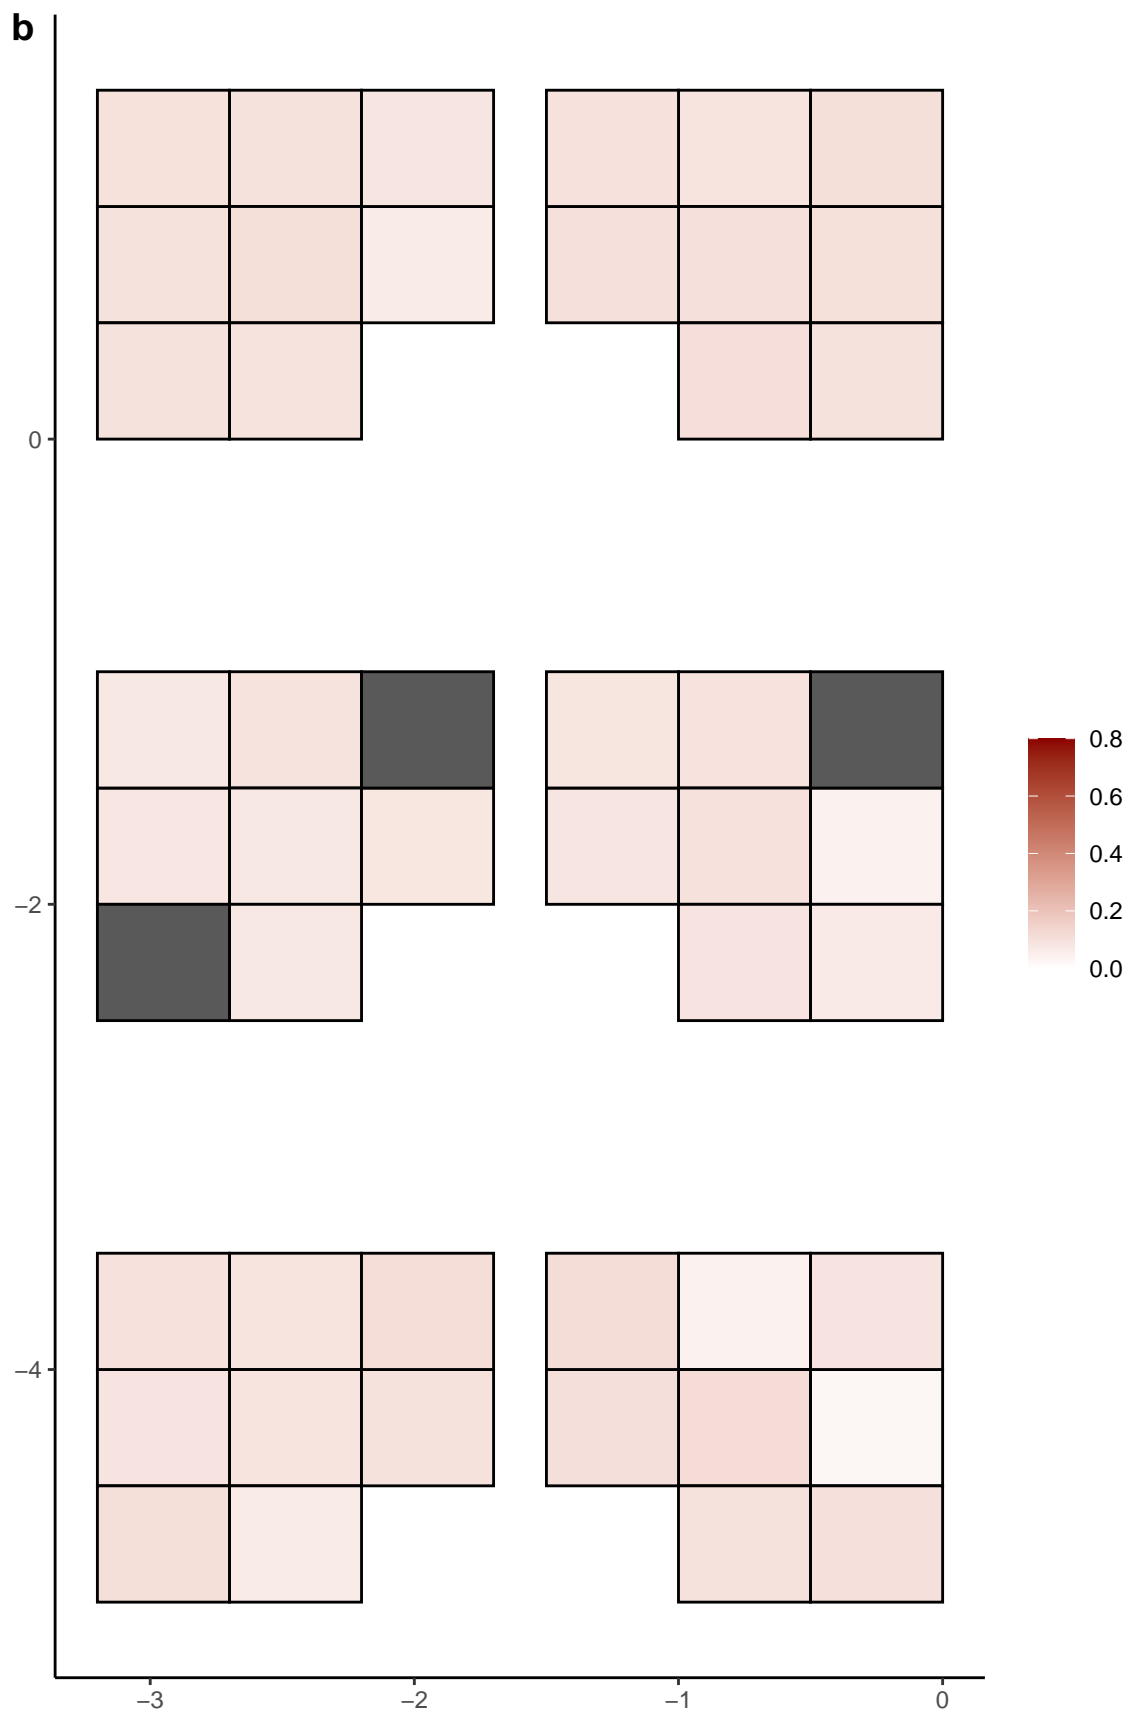

**a** ID05 8-50752909-G-C

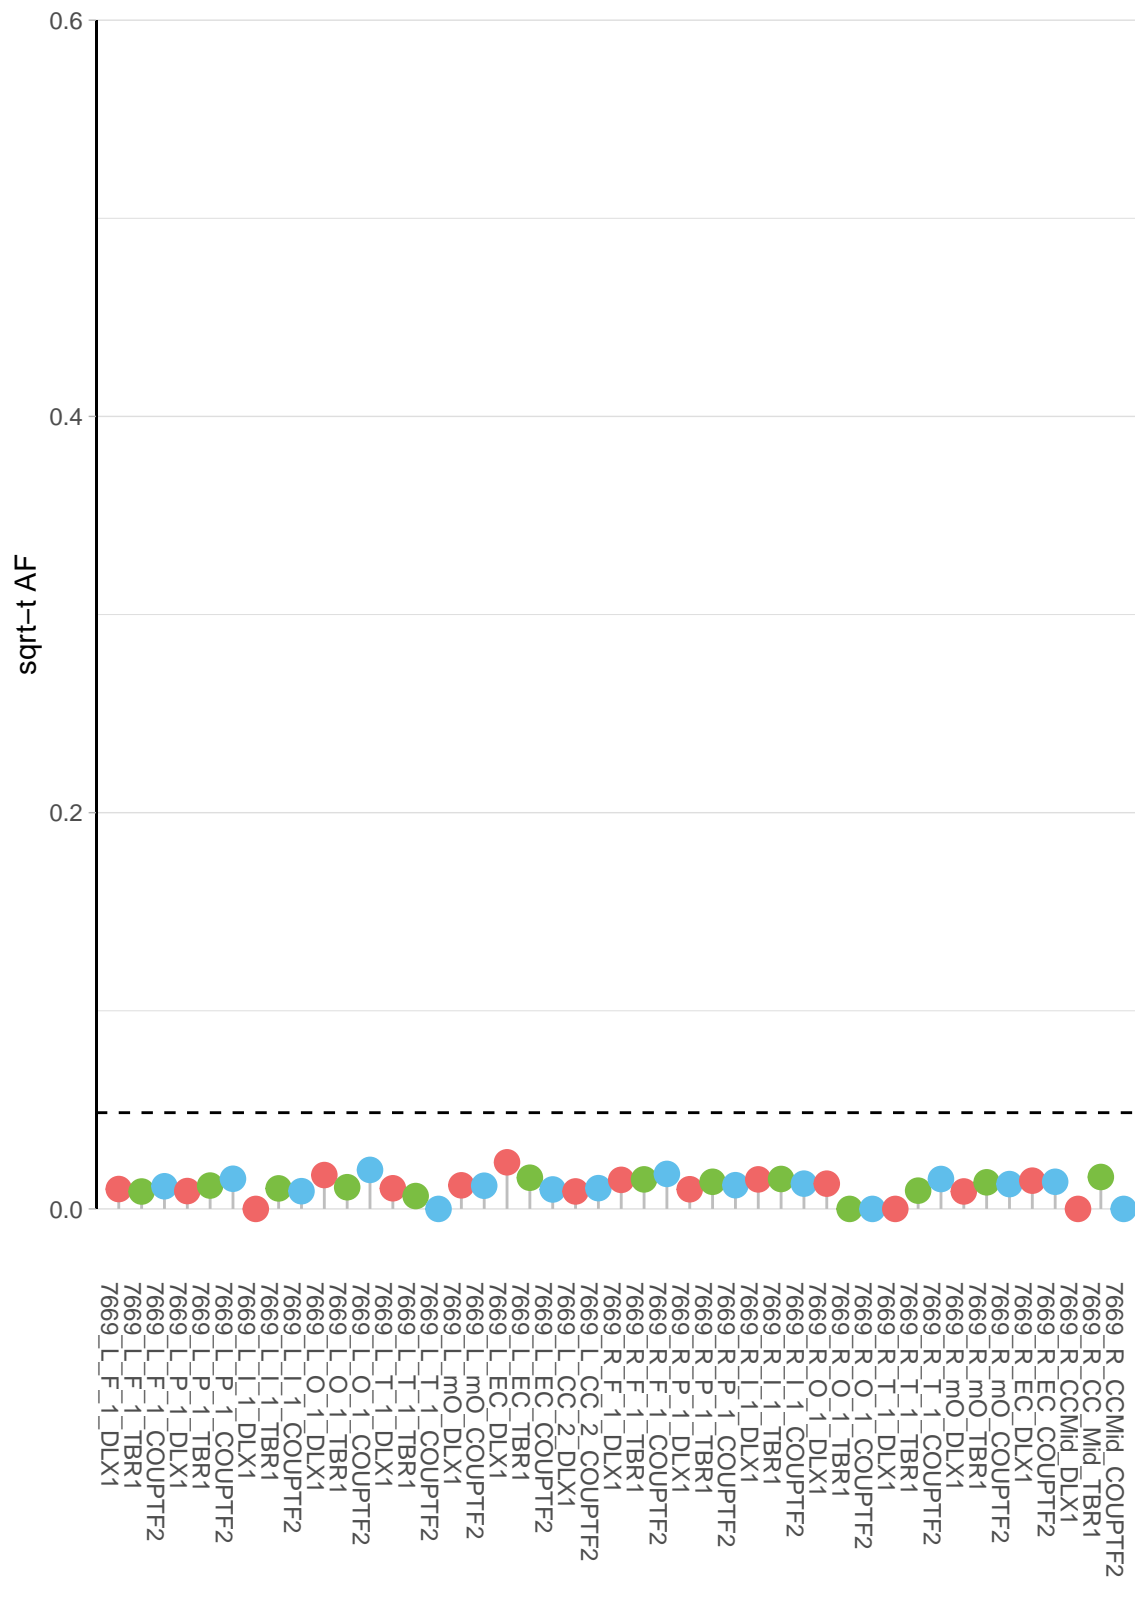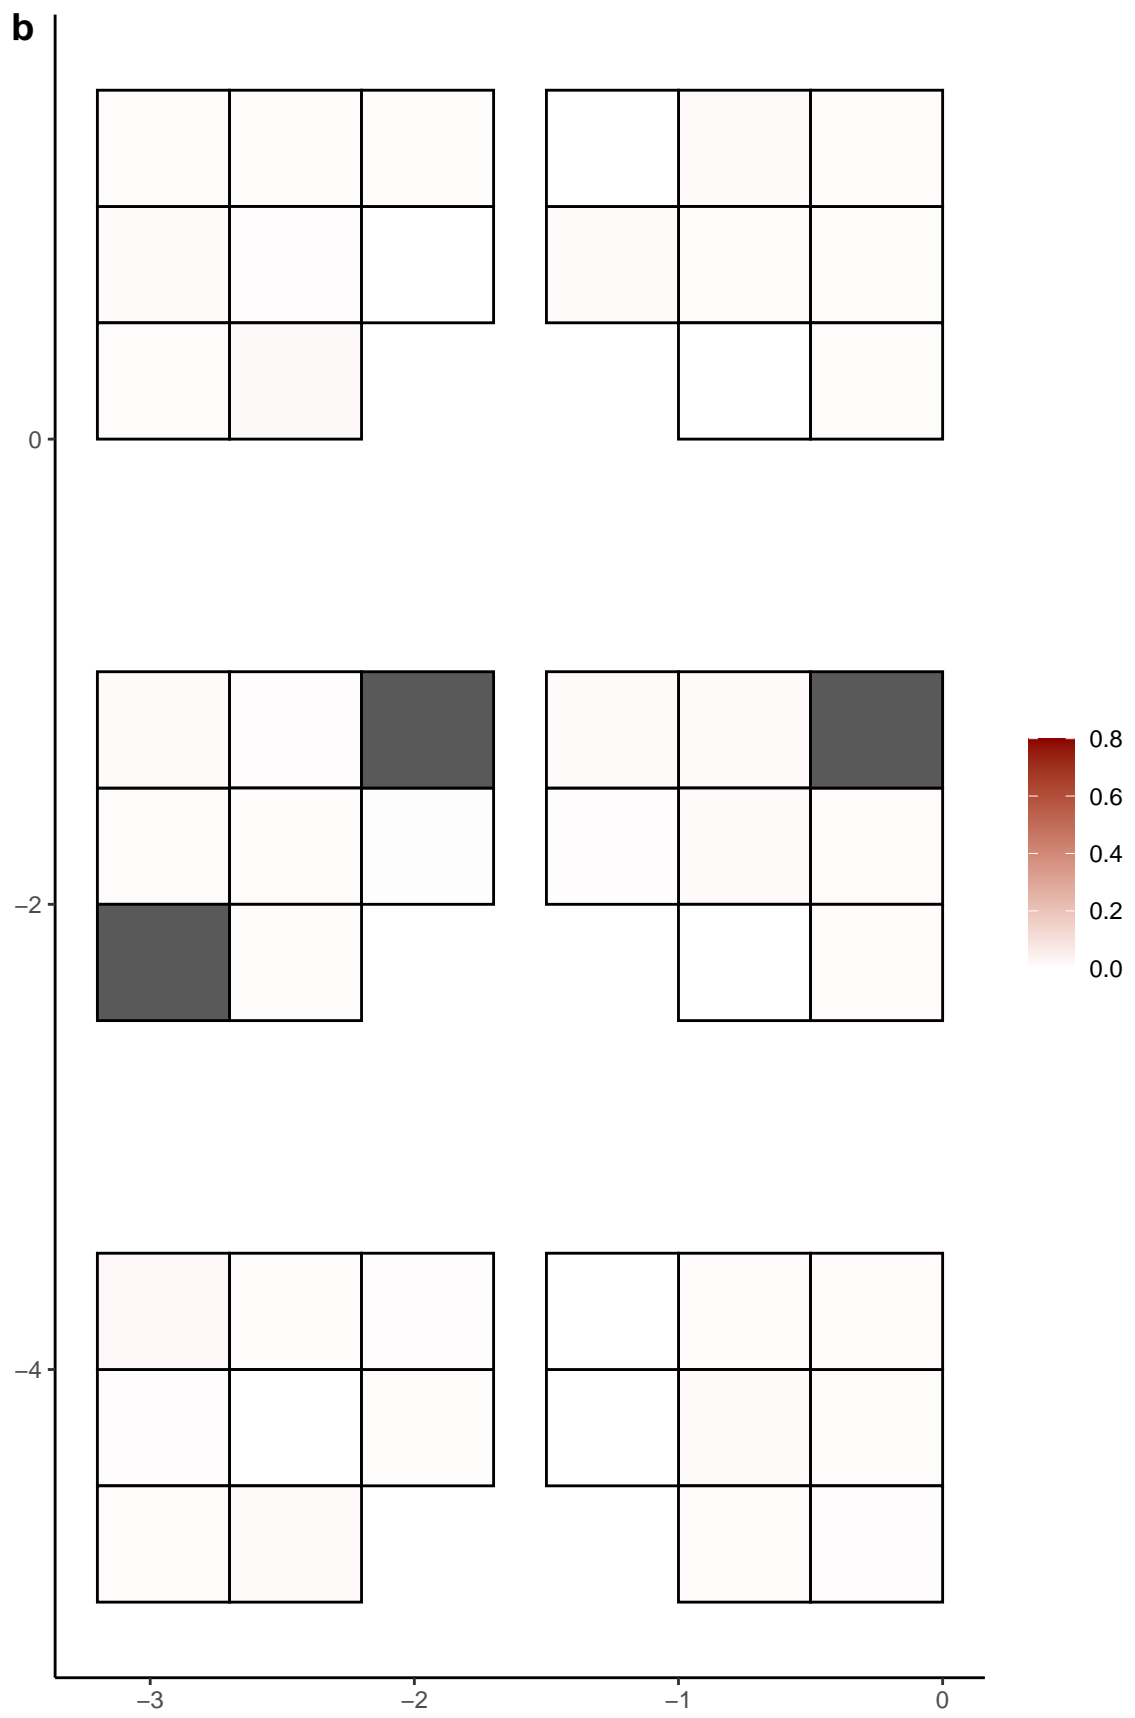



**a** ID05 8-56154213-C-T

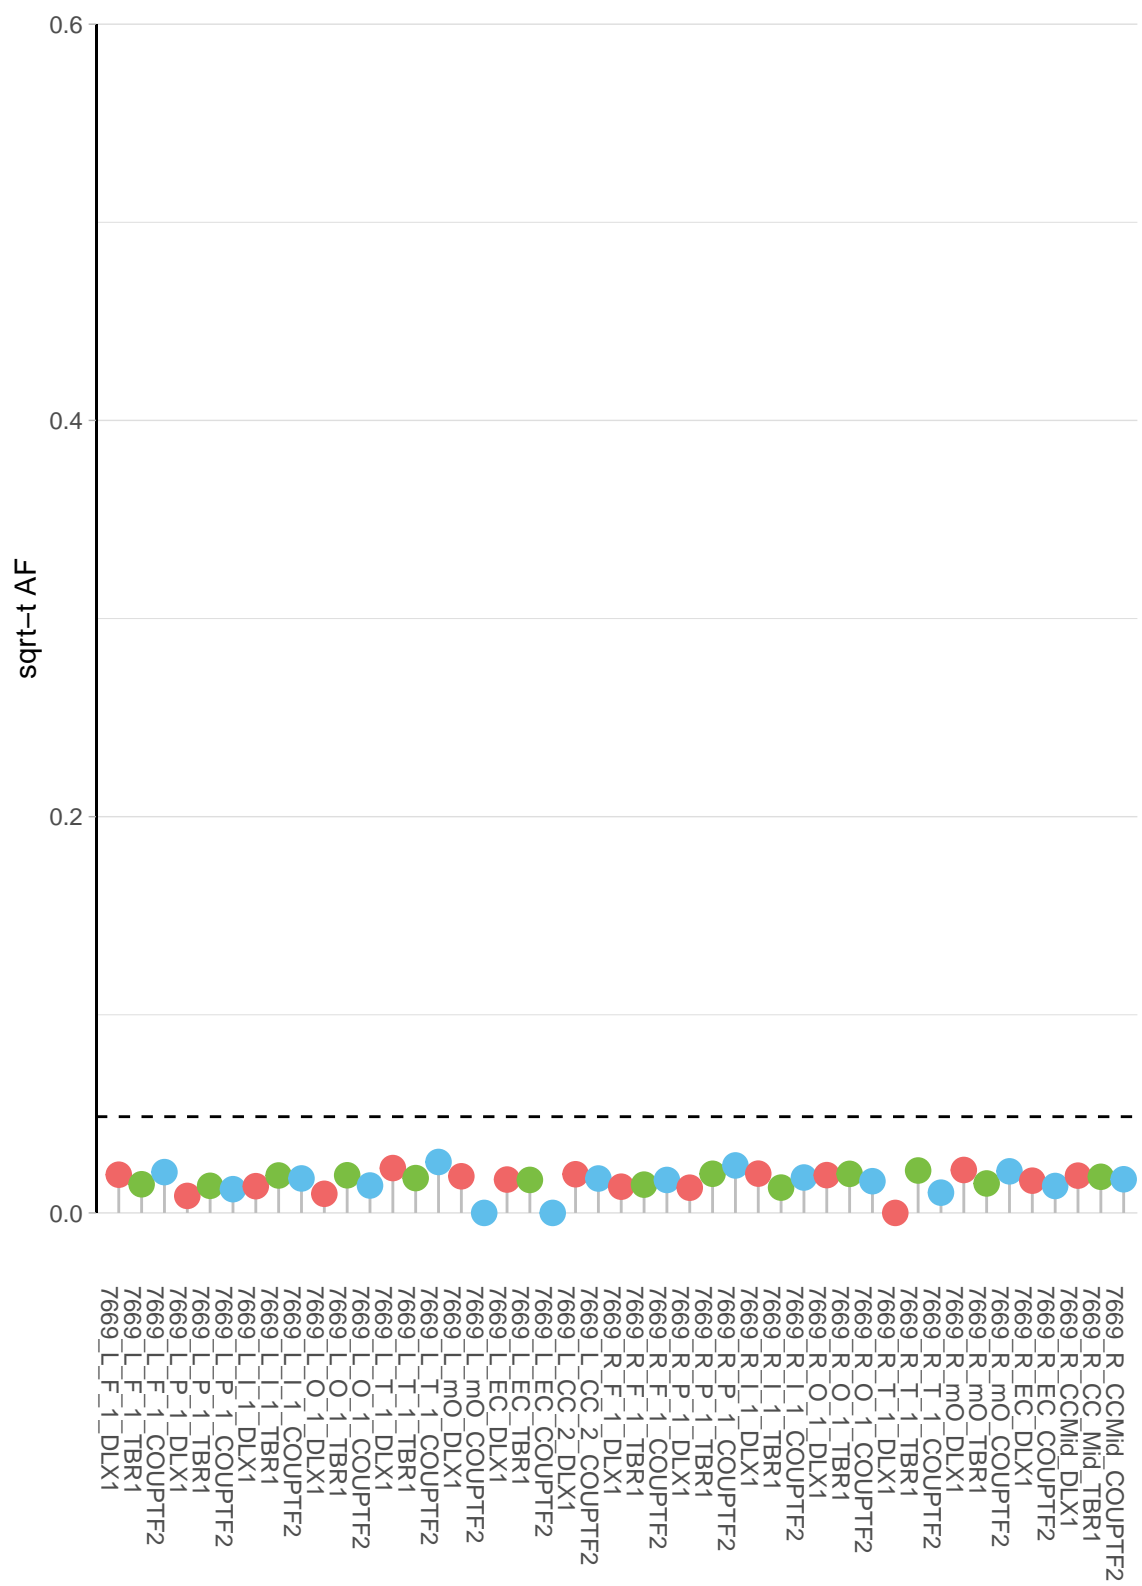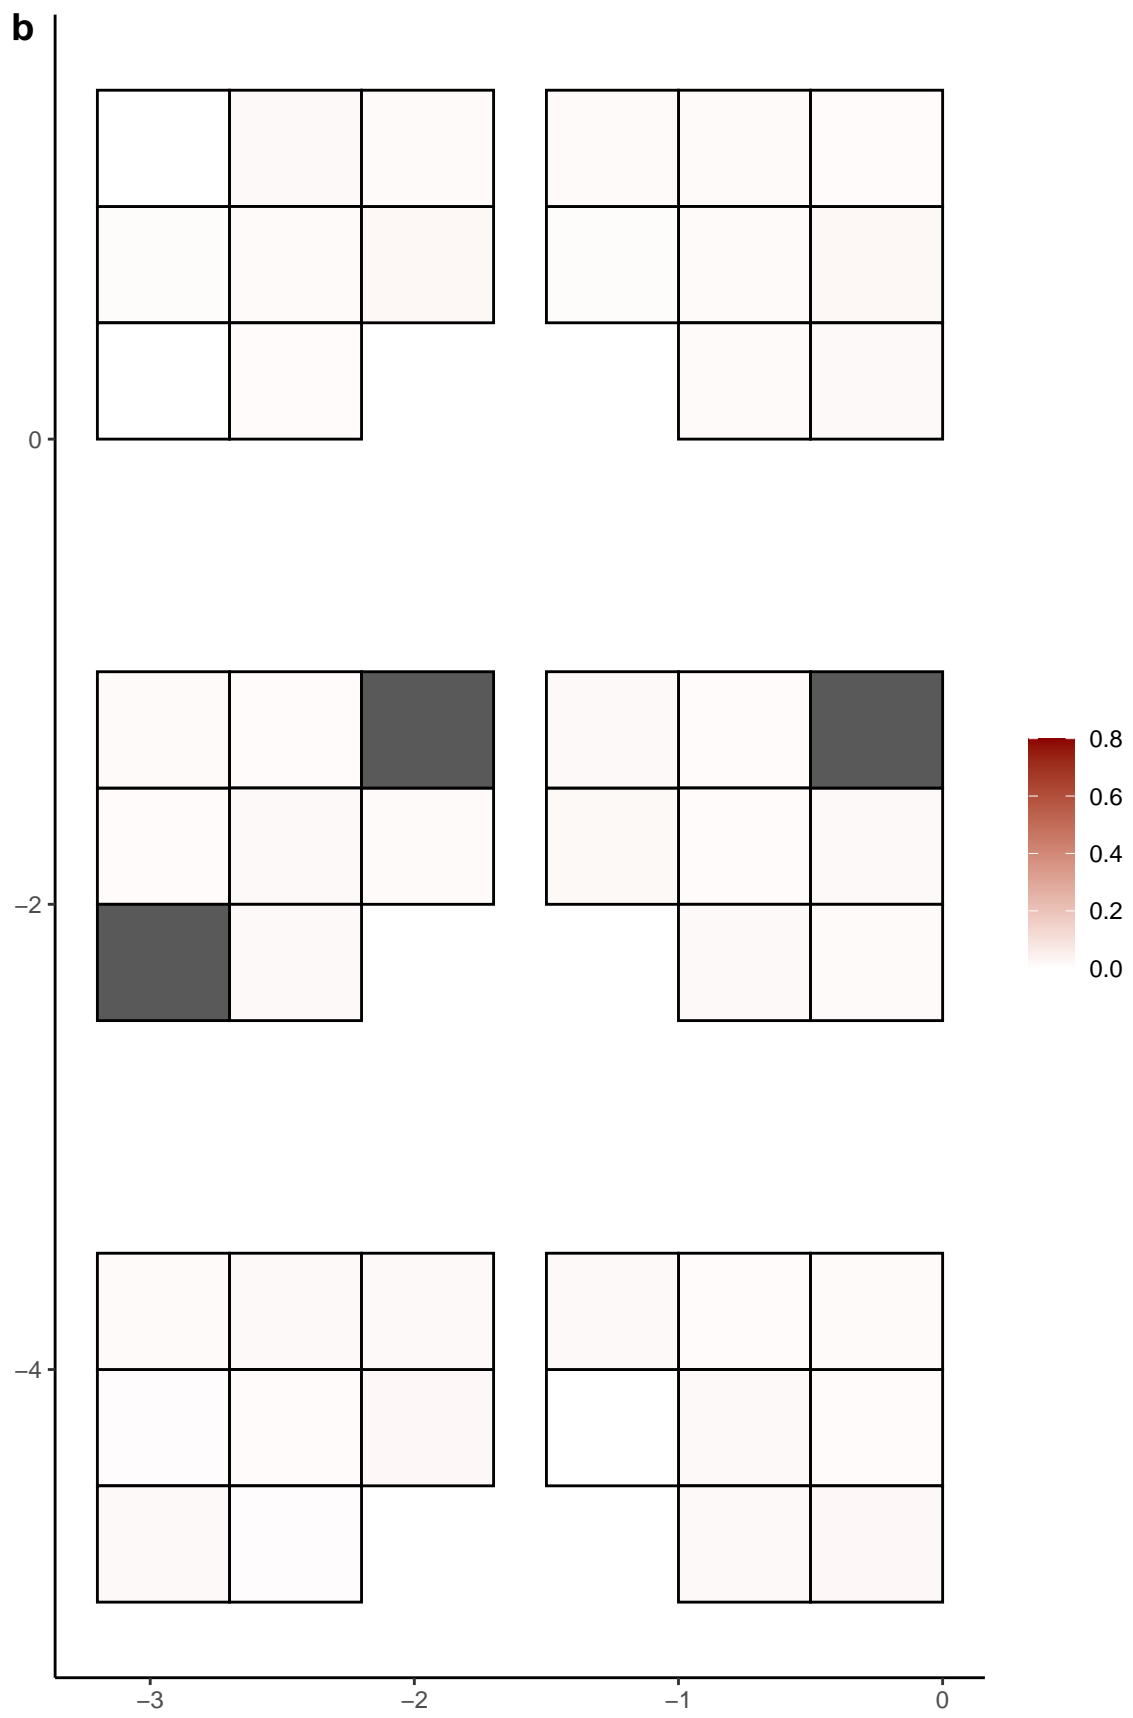





**a** ID05 8-62438170-G-A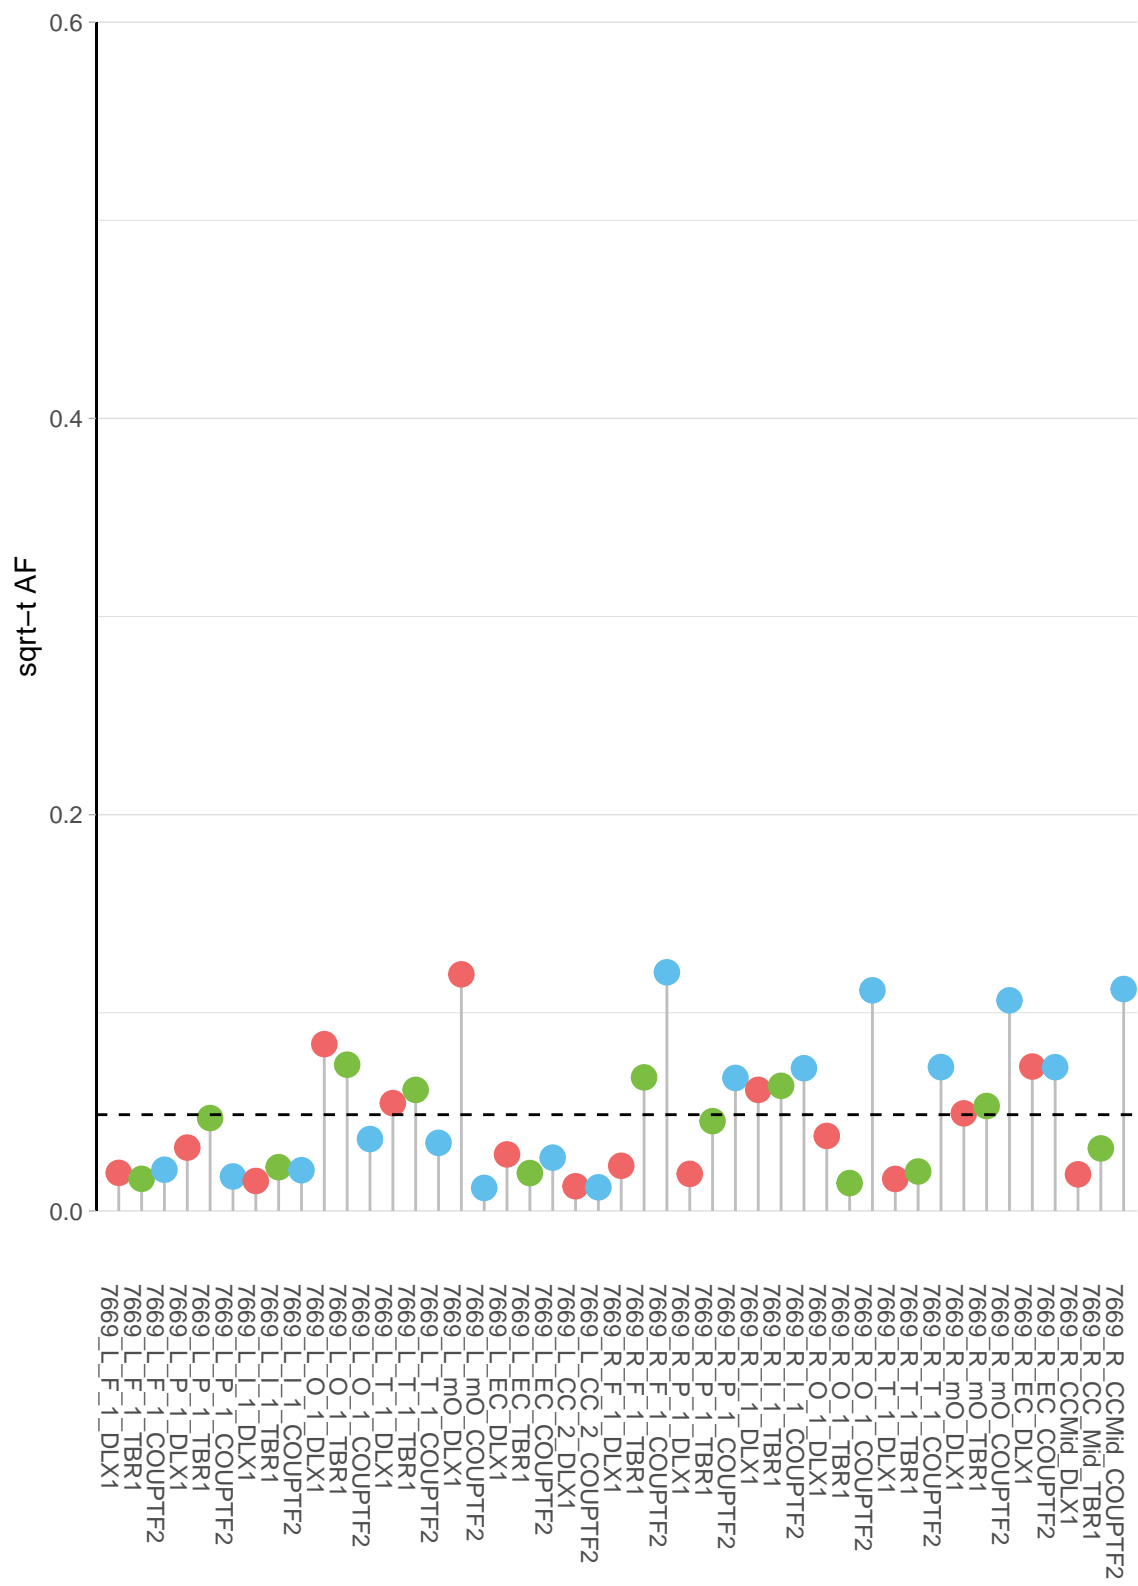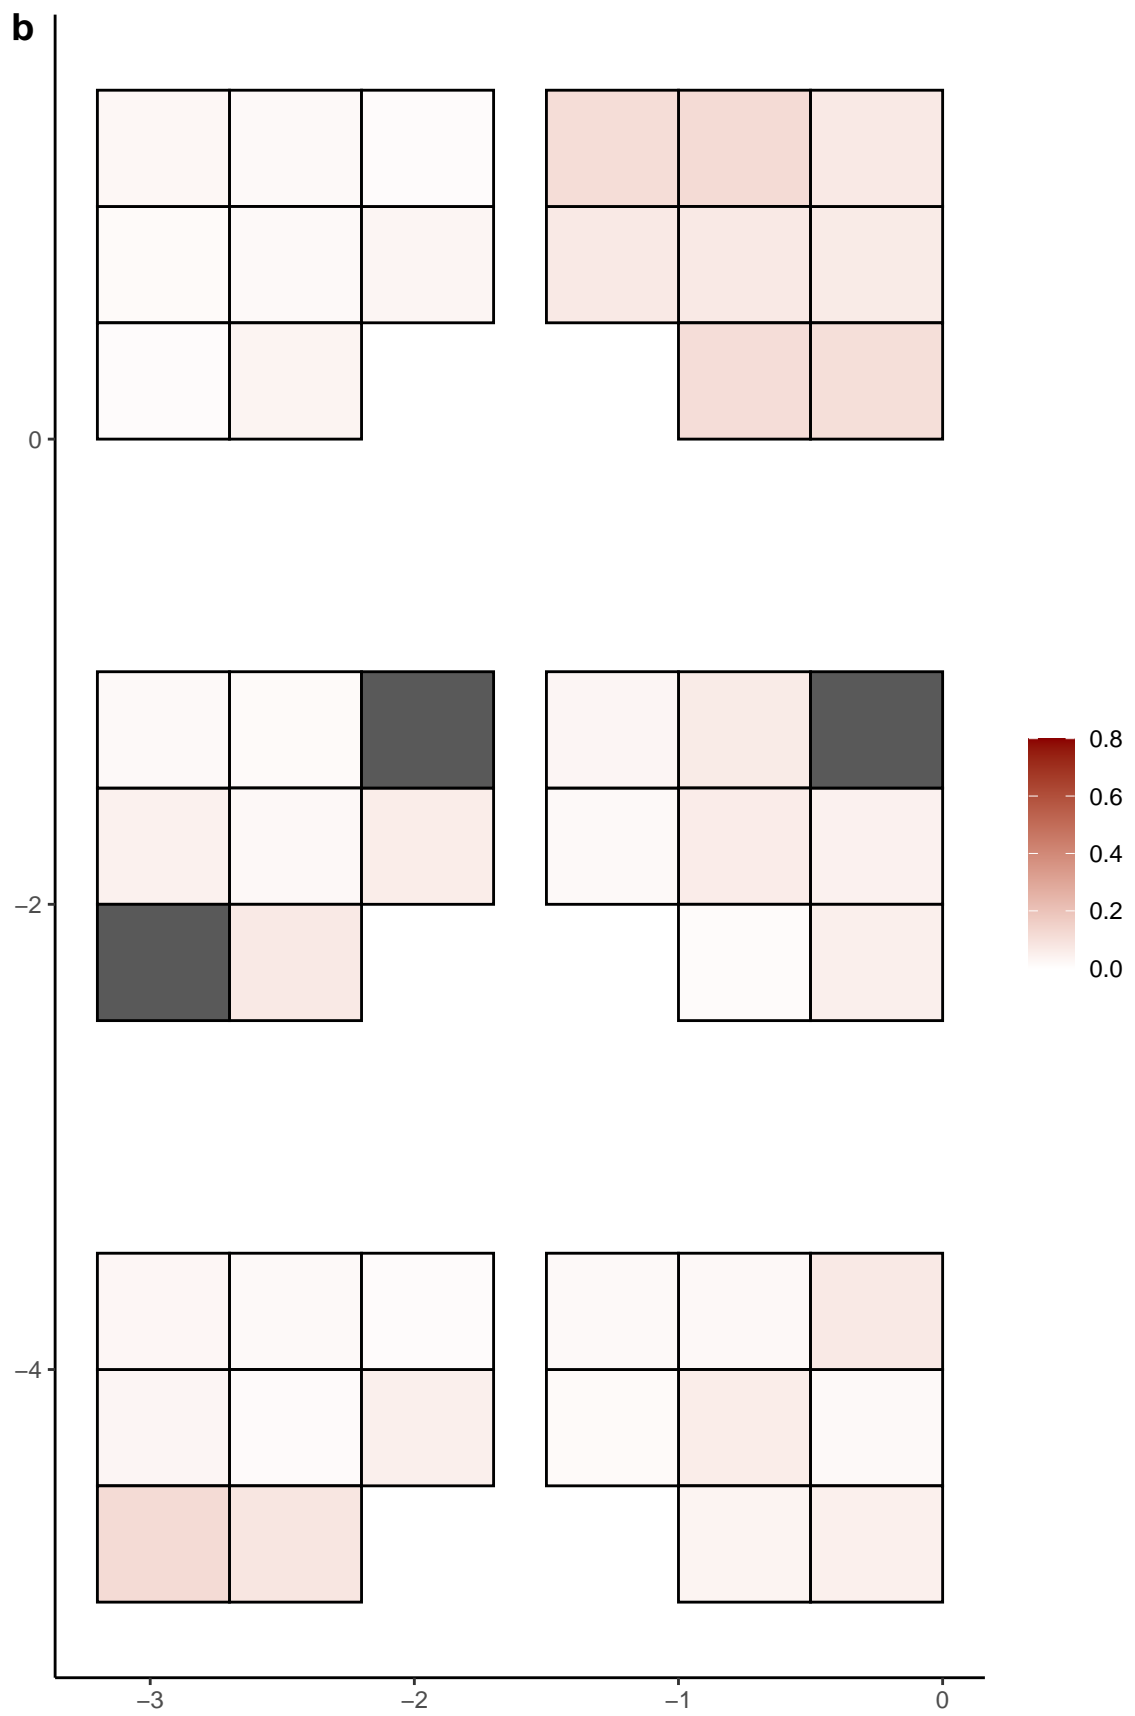

**a** ID05 8-65149924-C-T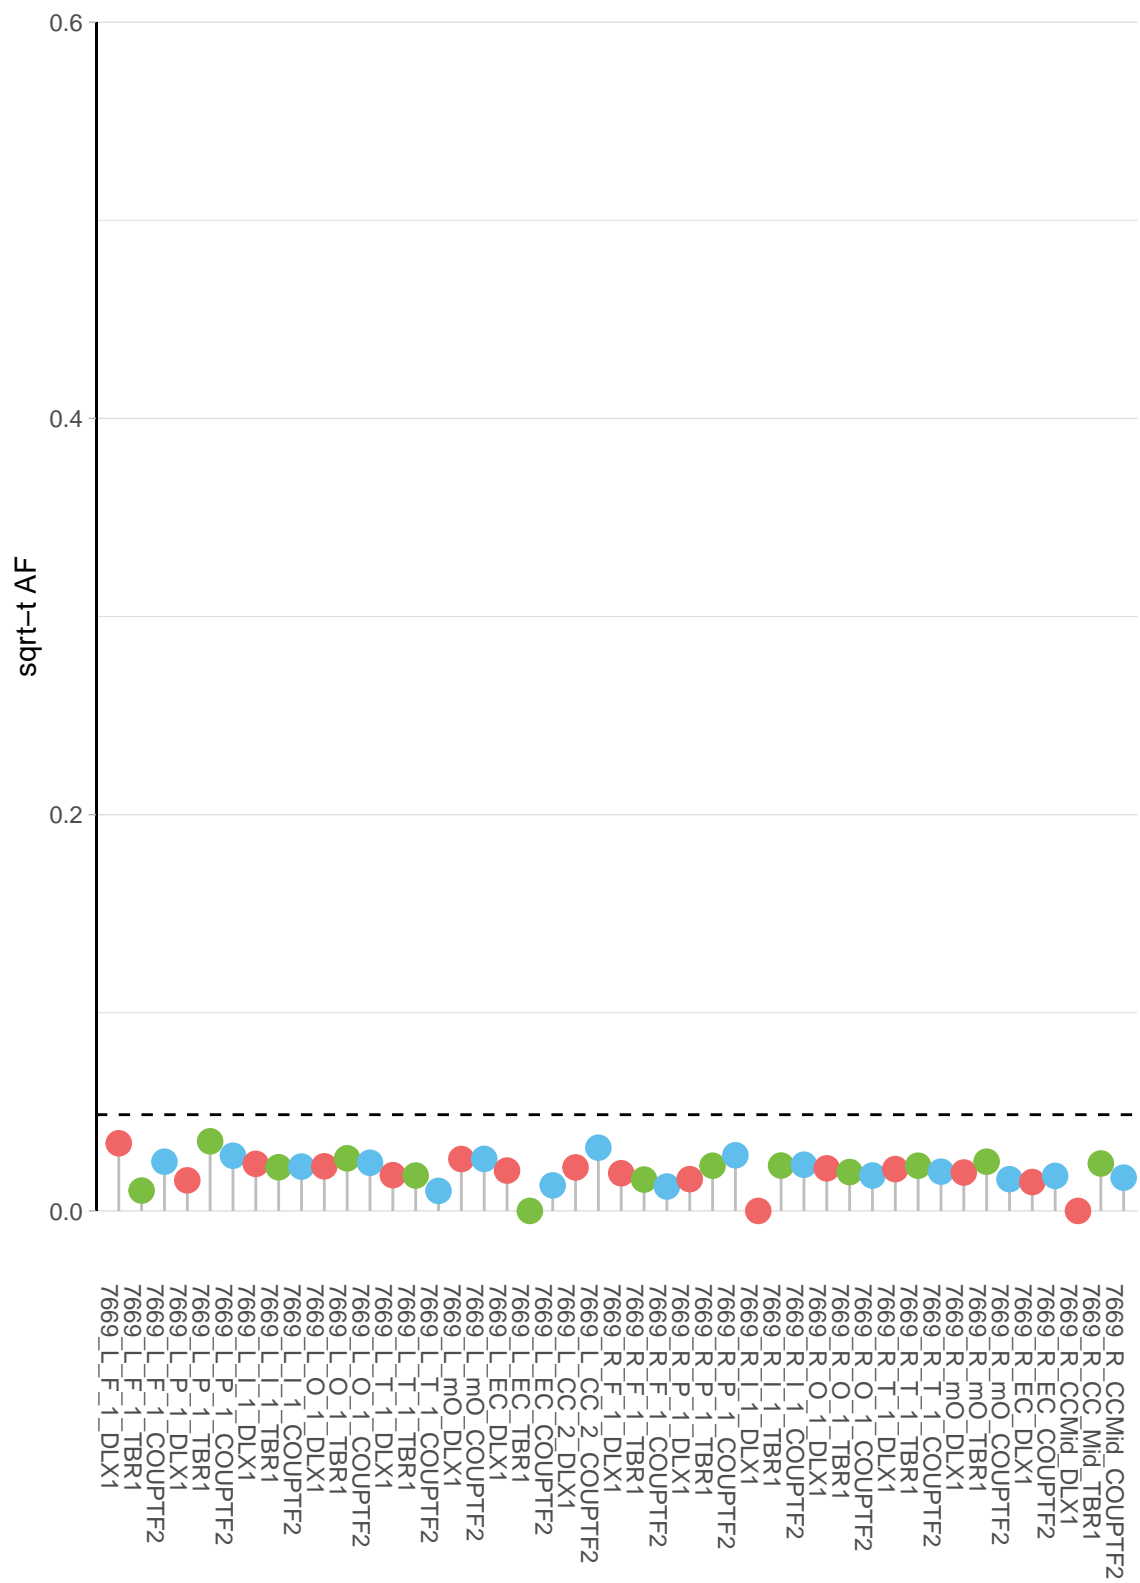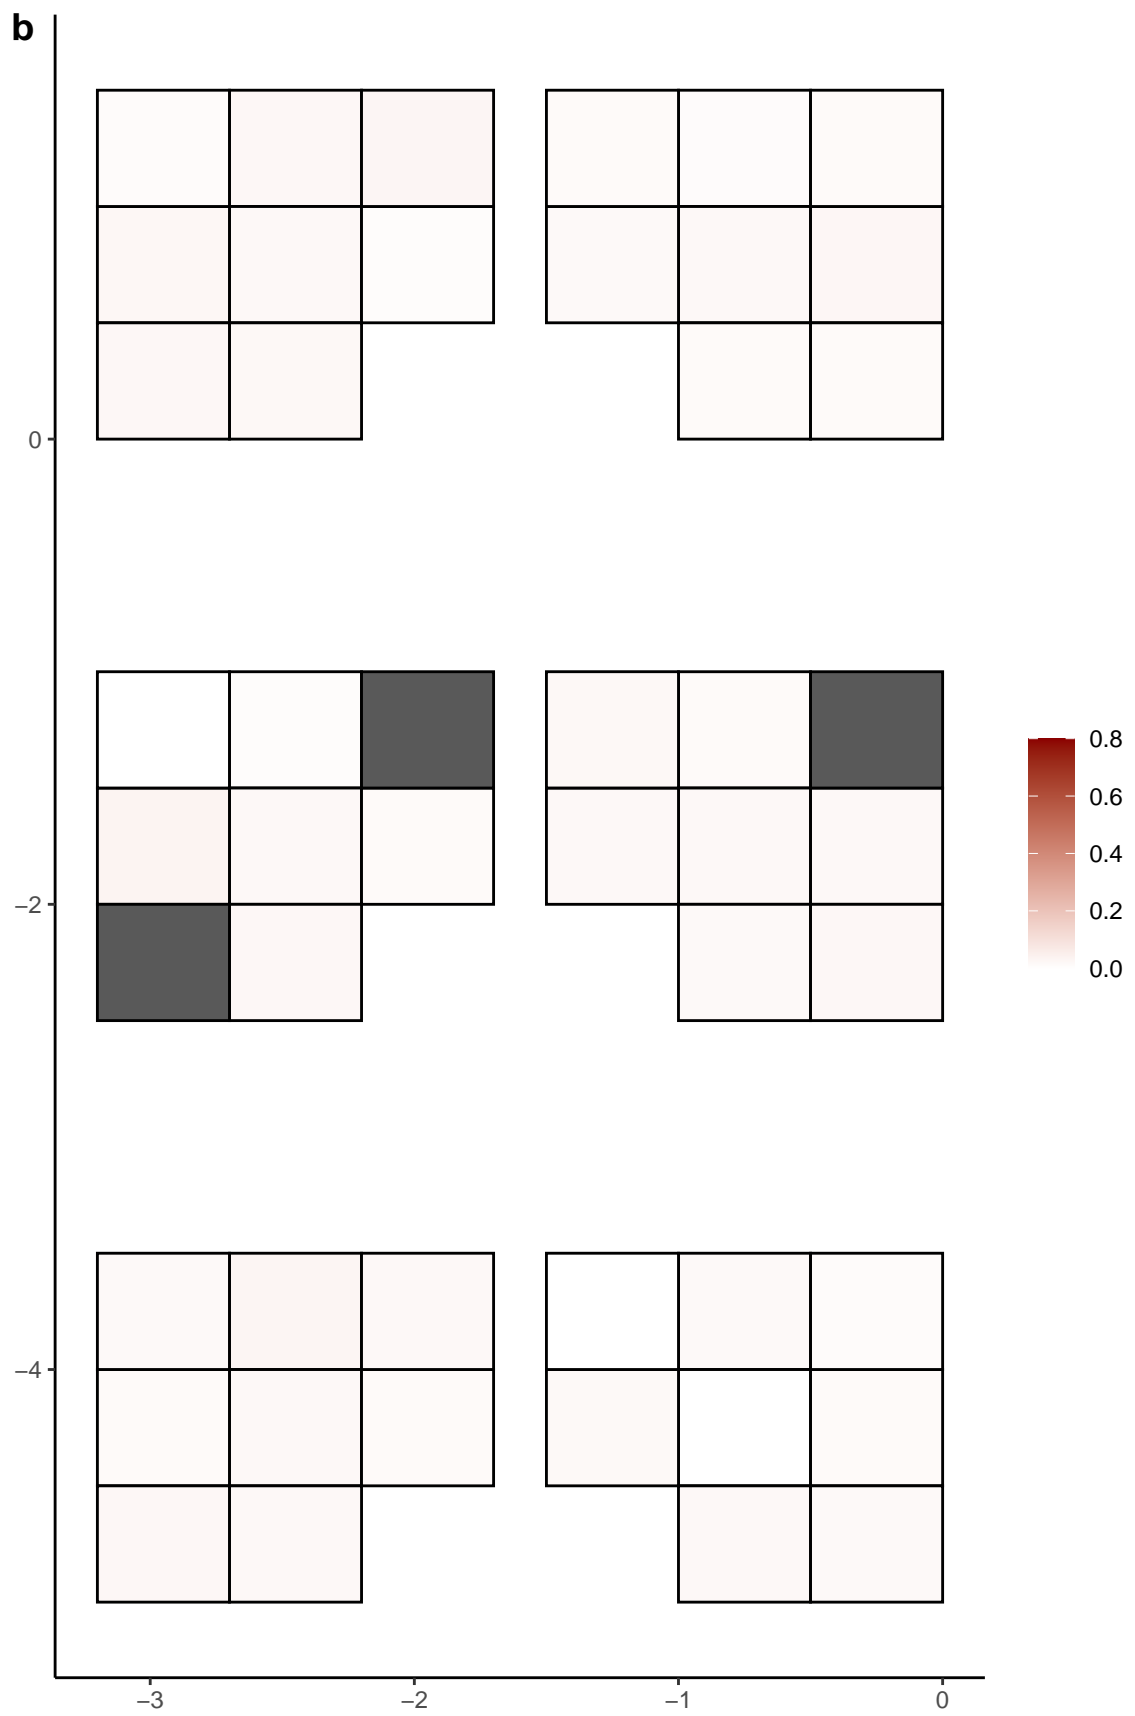

**a** ID05 8-66303042-C-T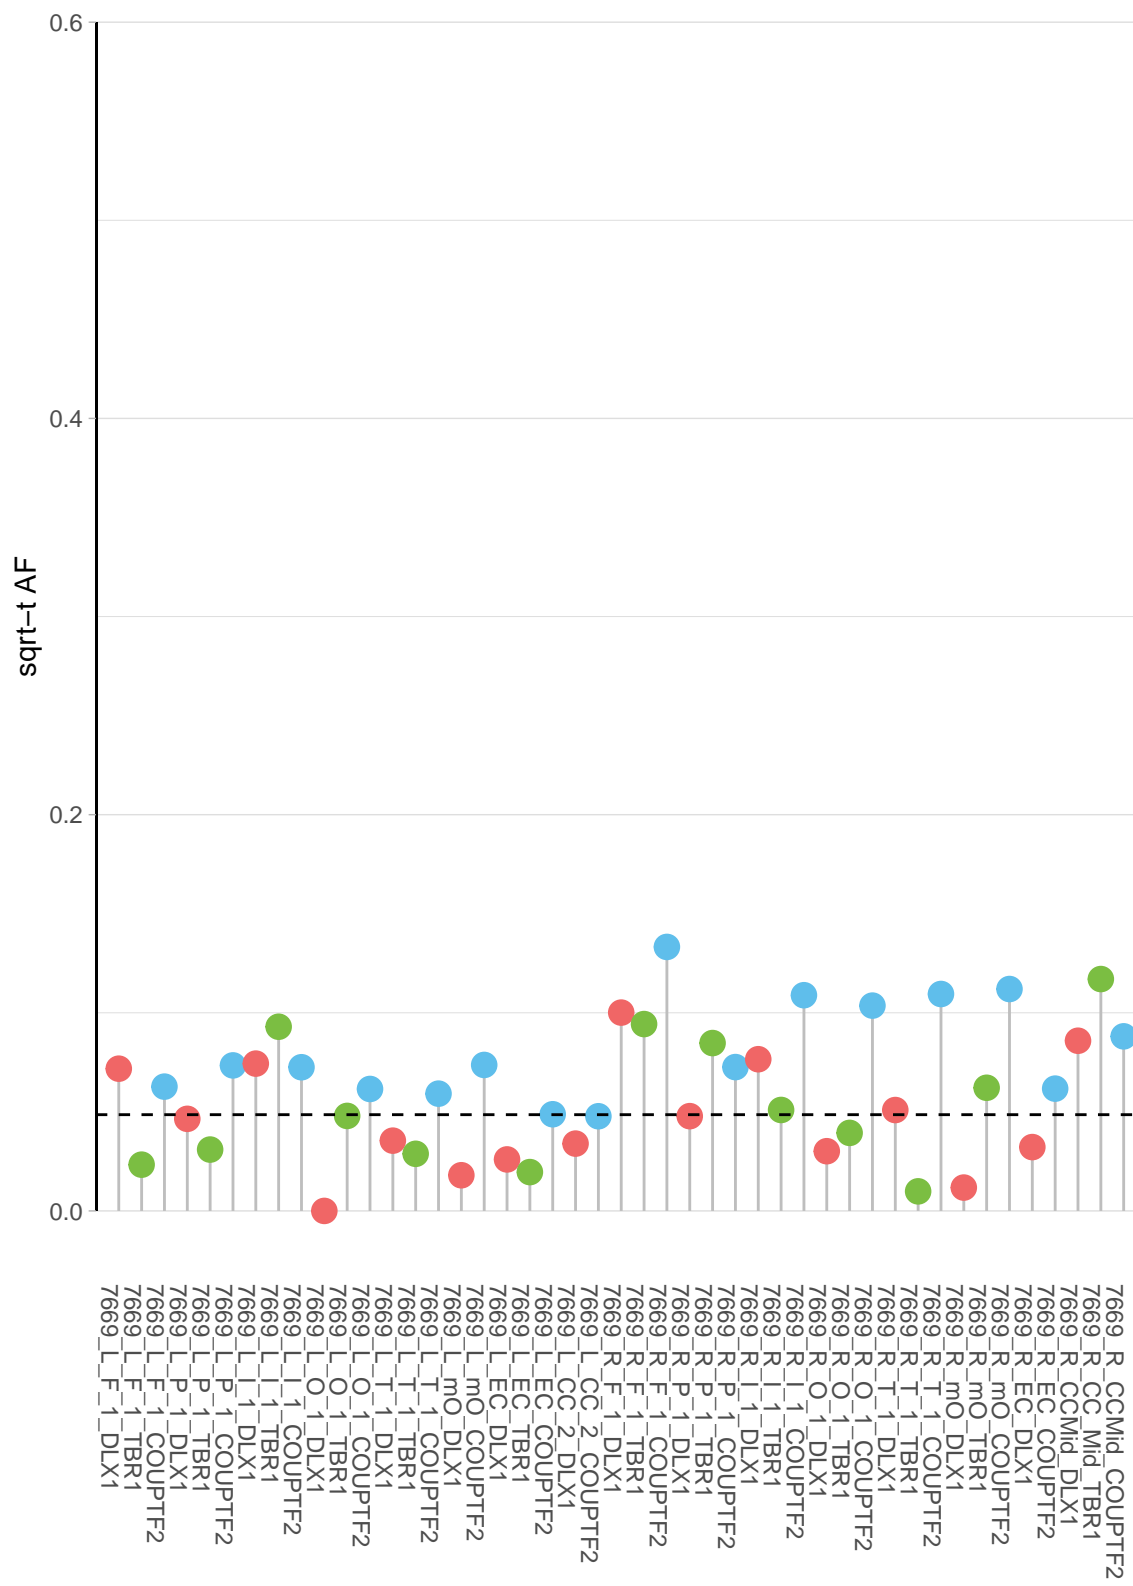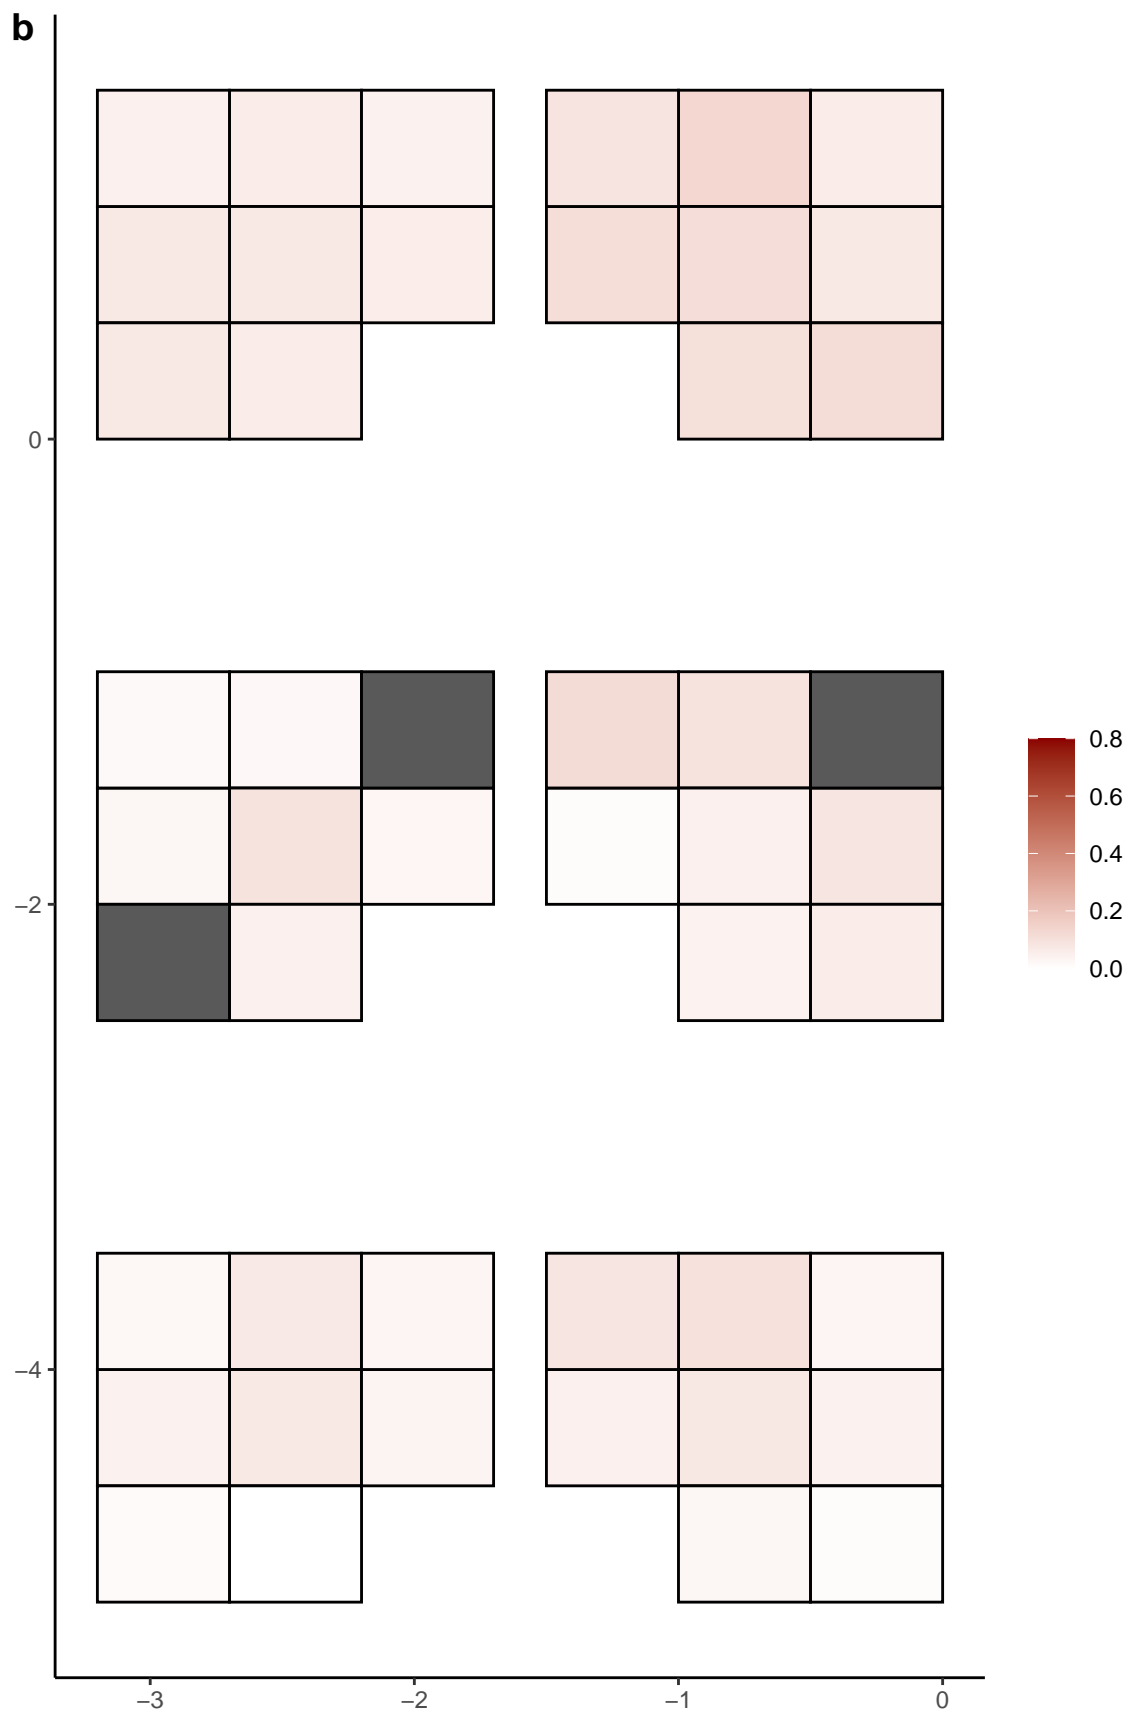

**a** ID05 8-68843802-G-A

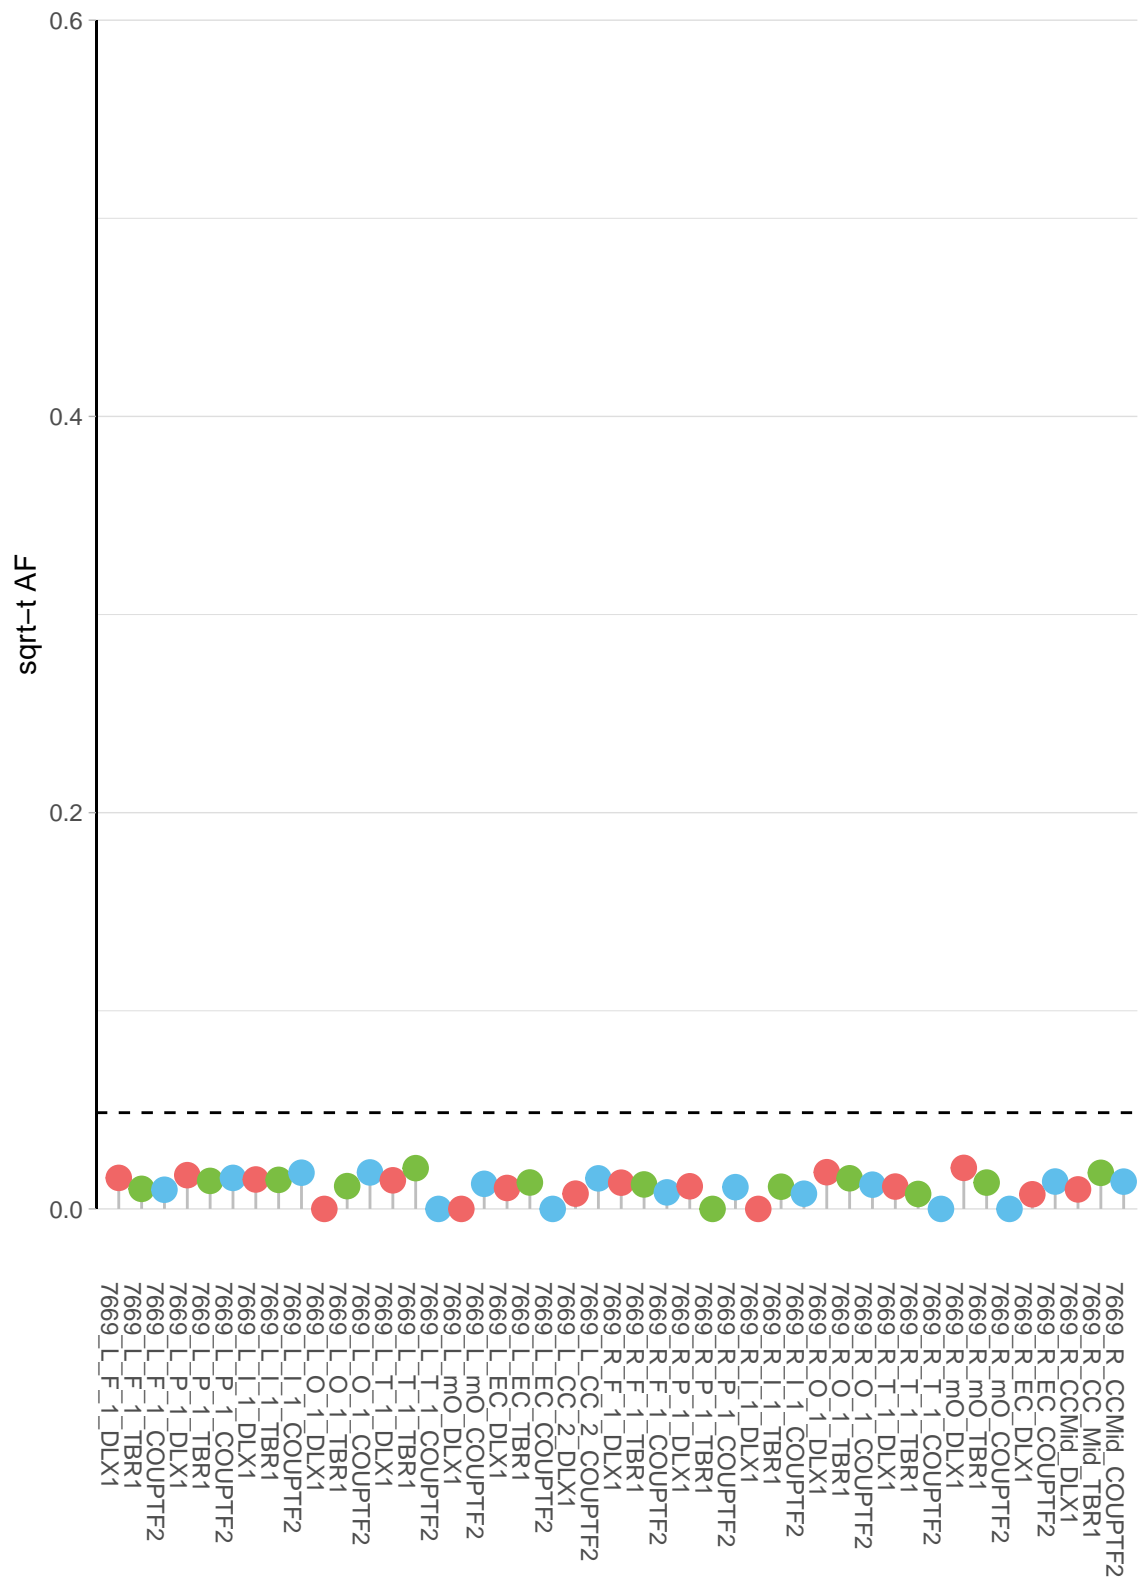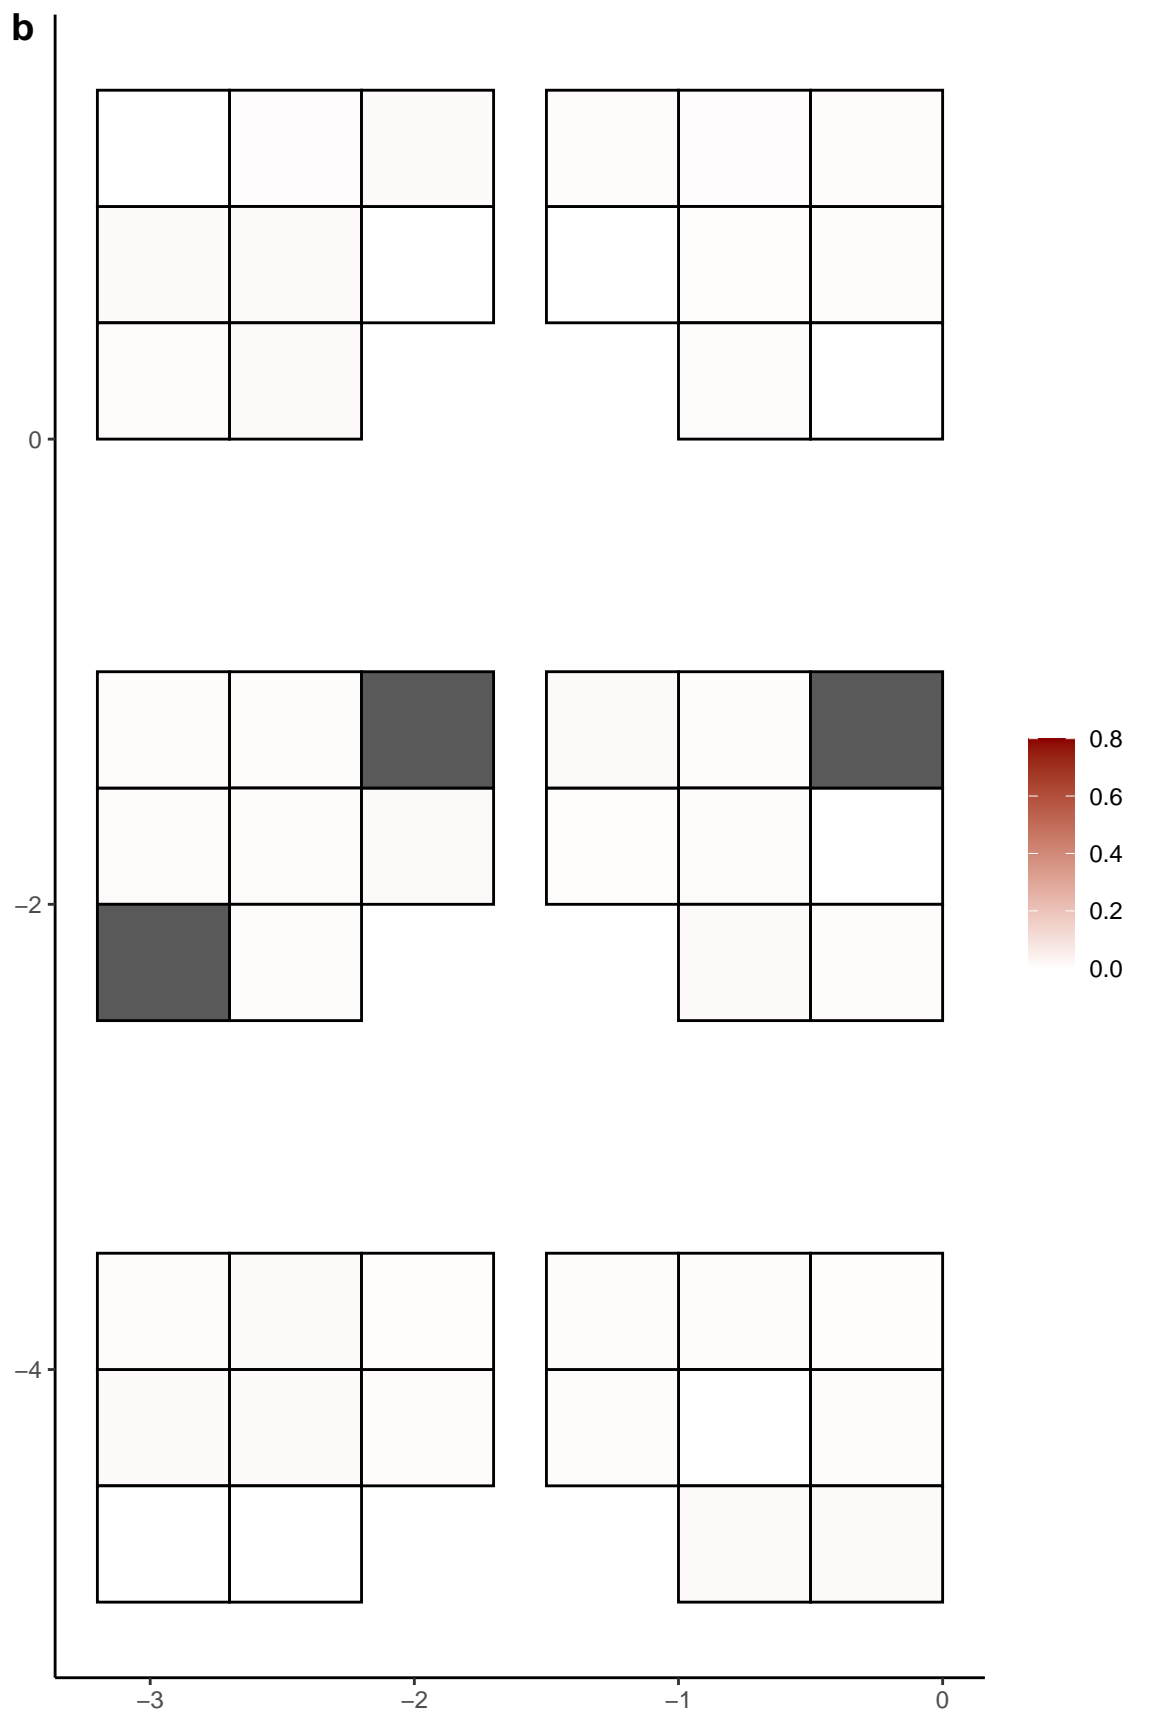

**a** ID05 8-72347819-C-T

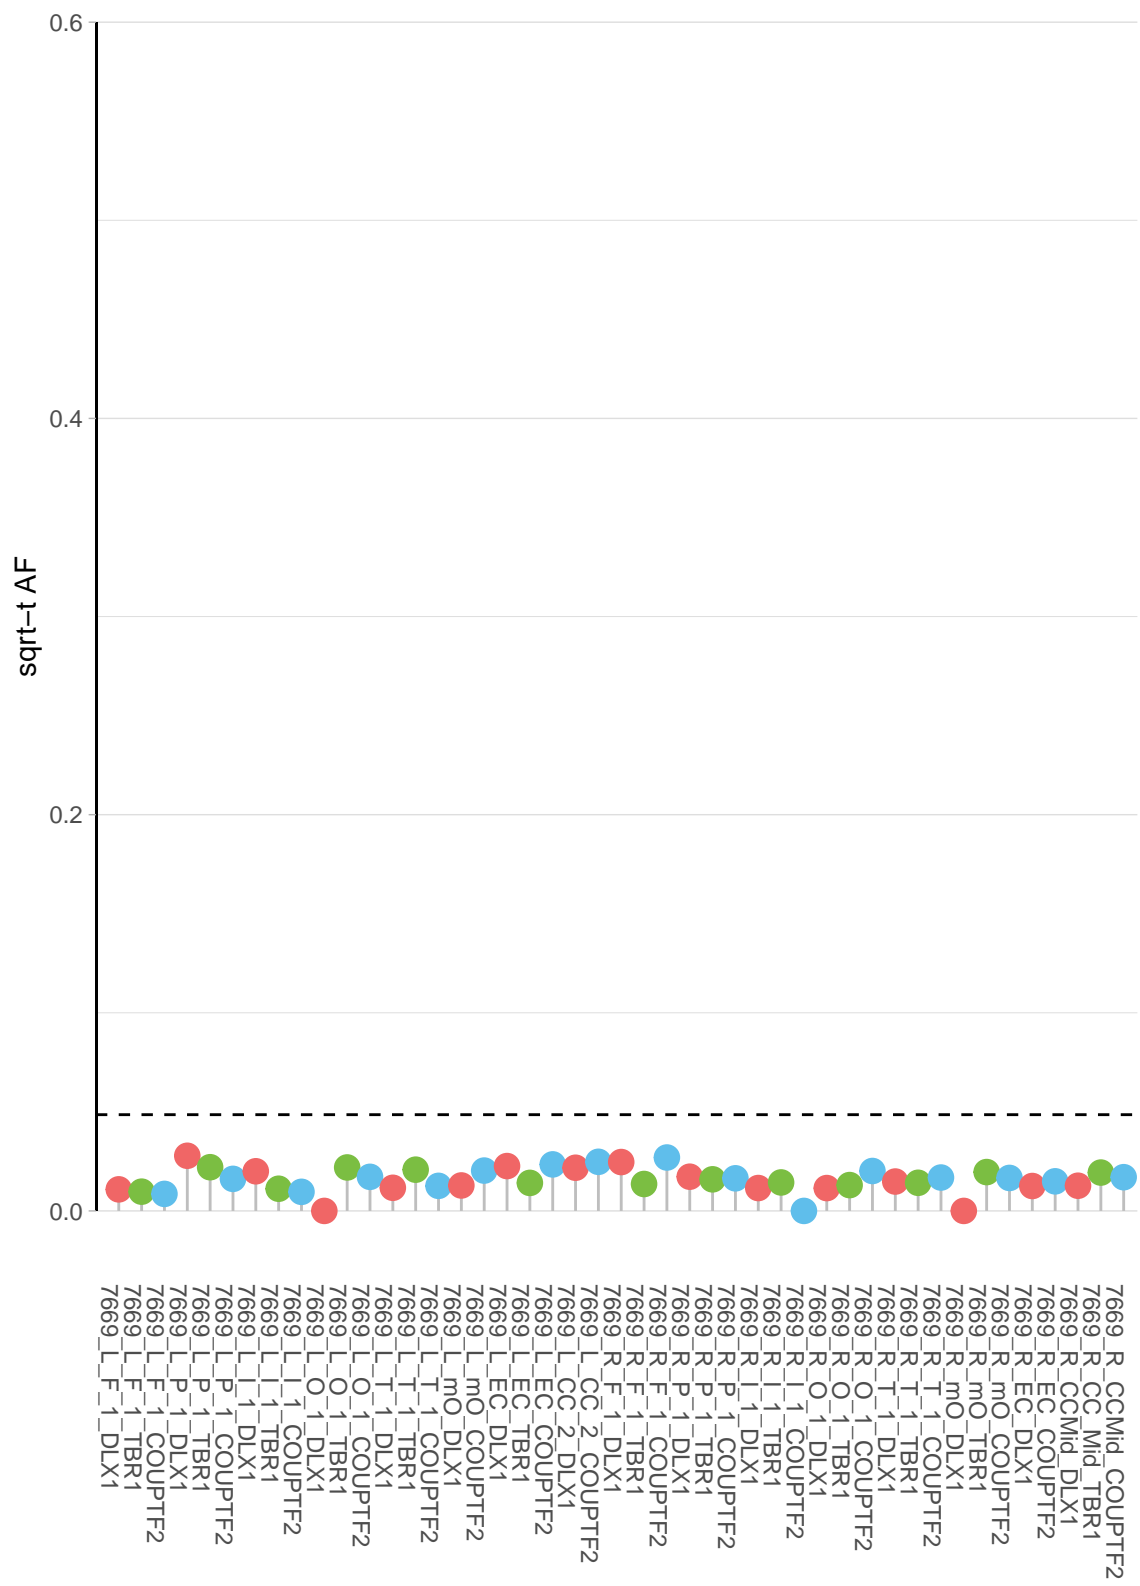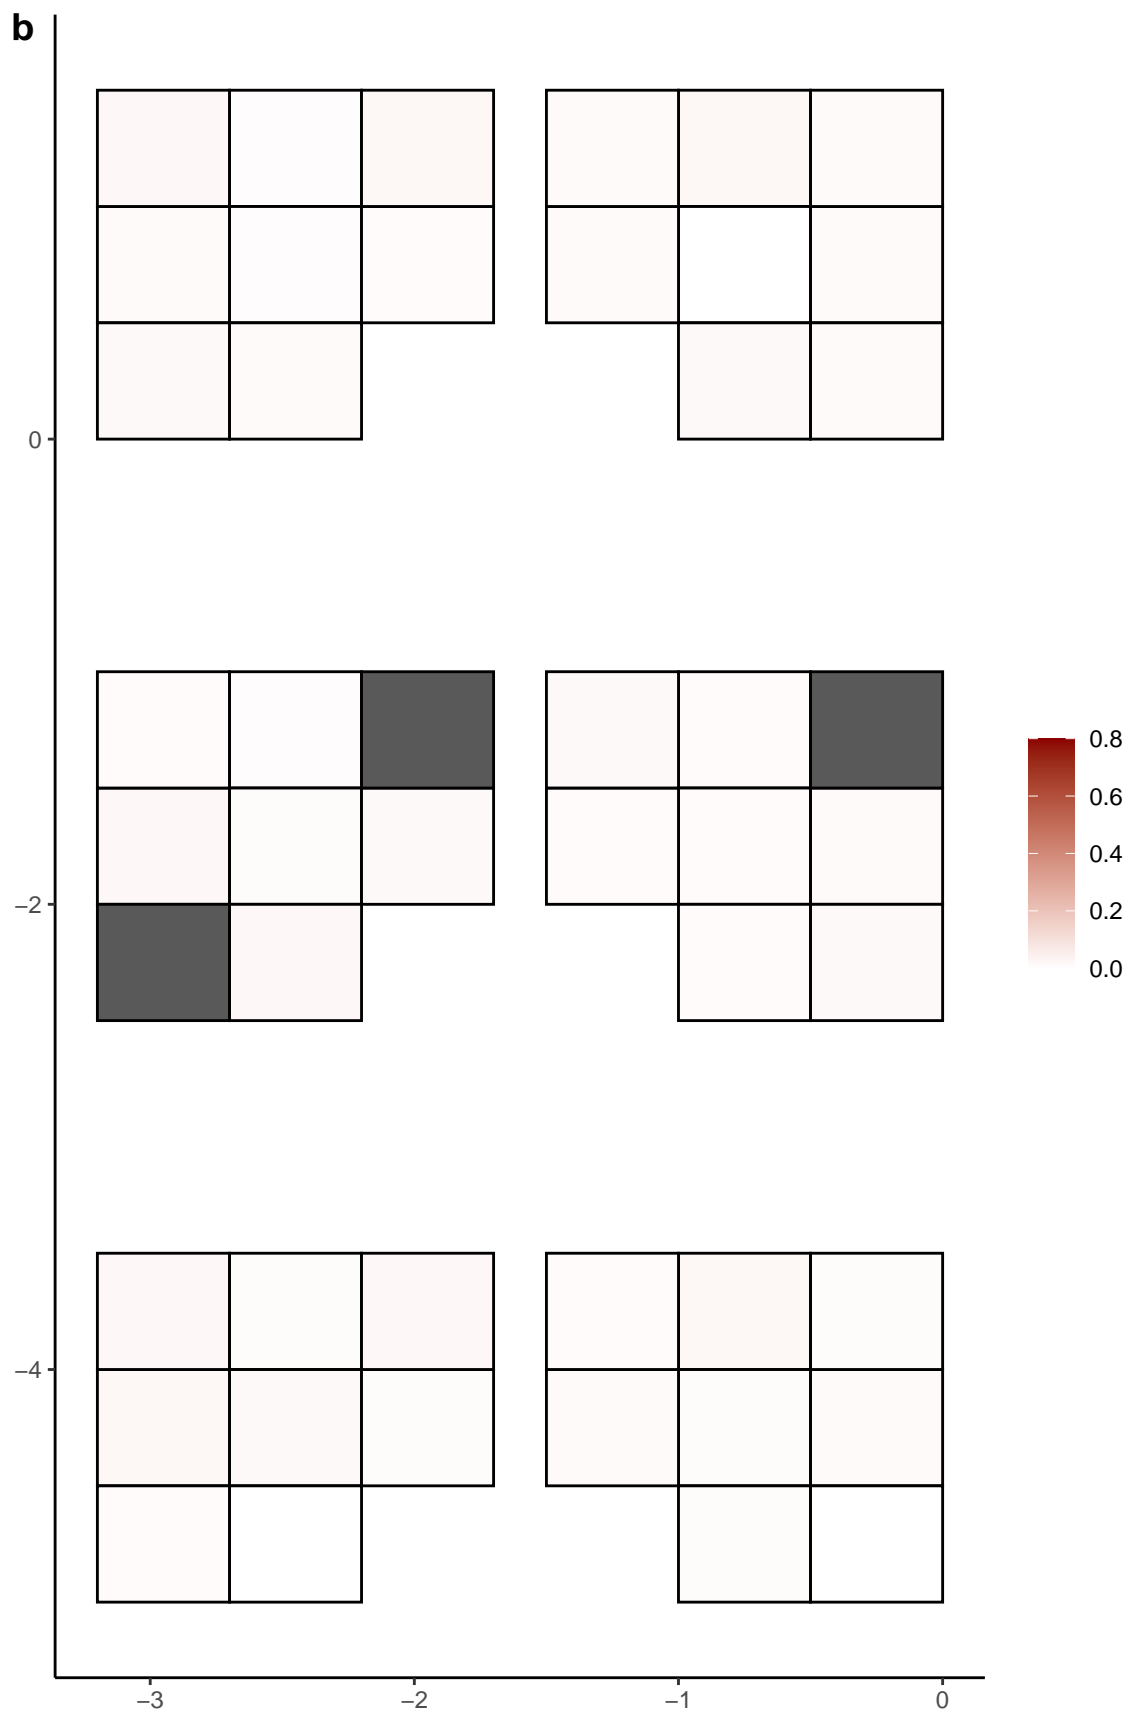



**a** ID05 8-73048428-C-T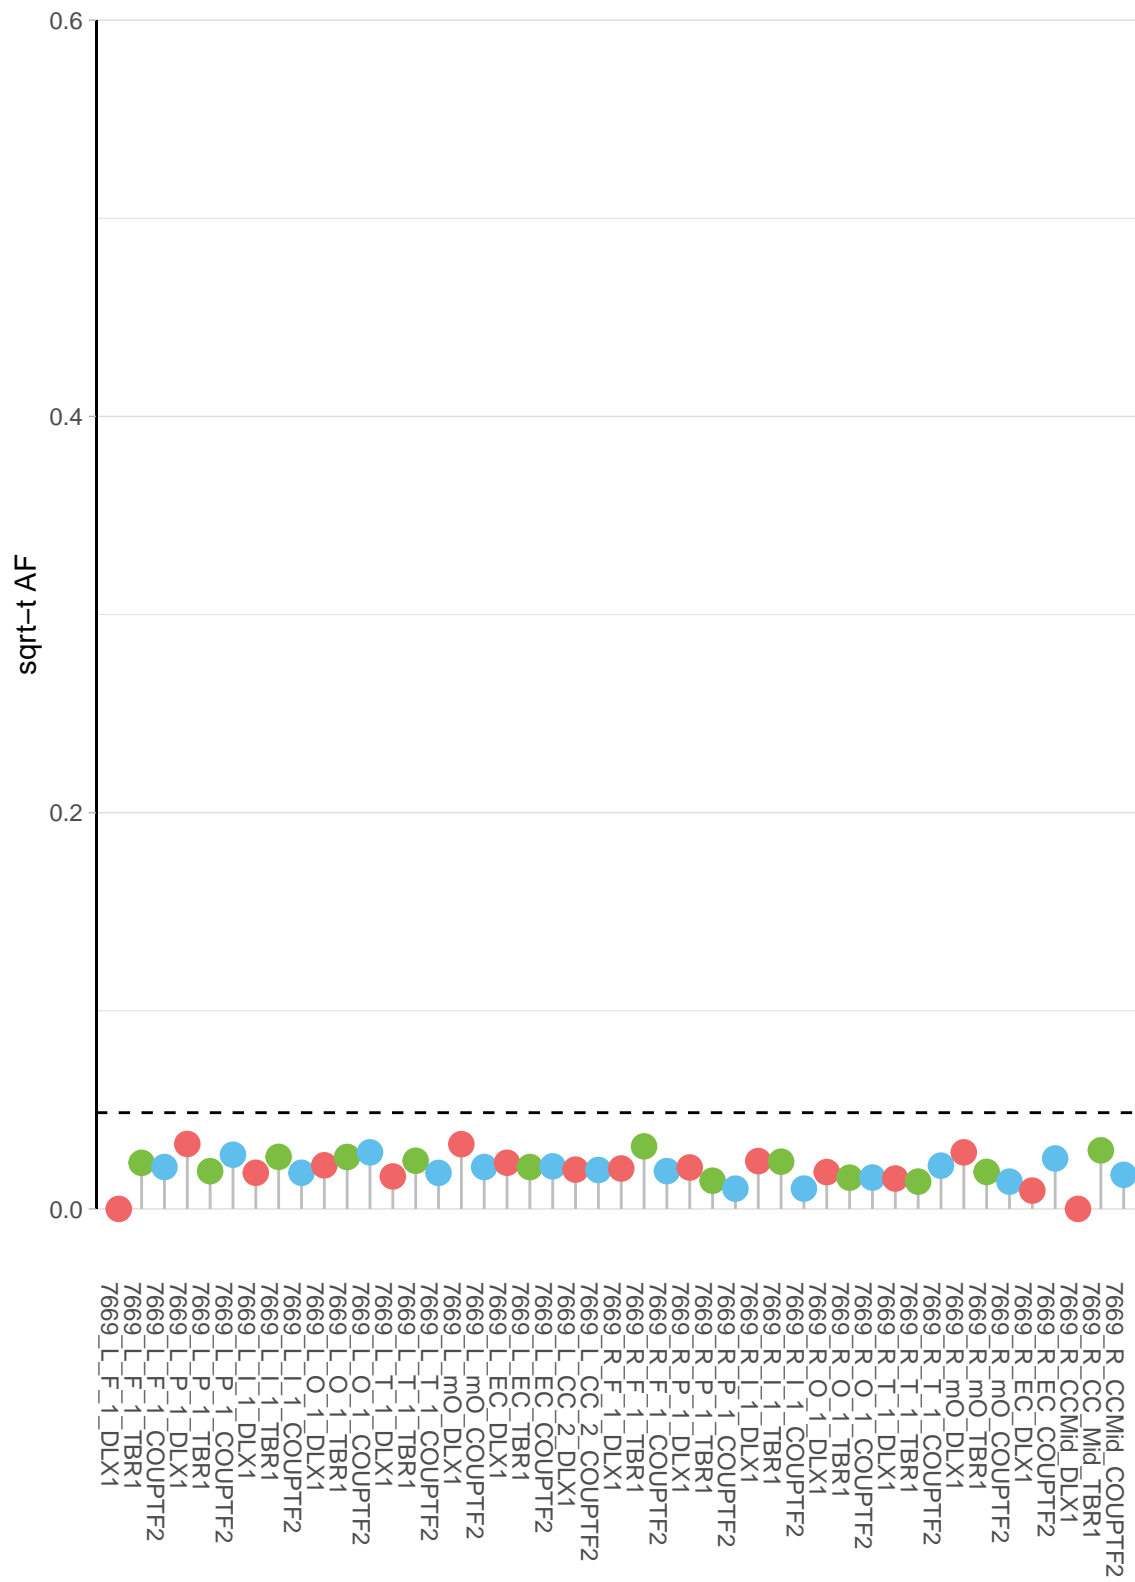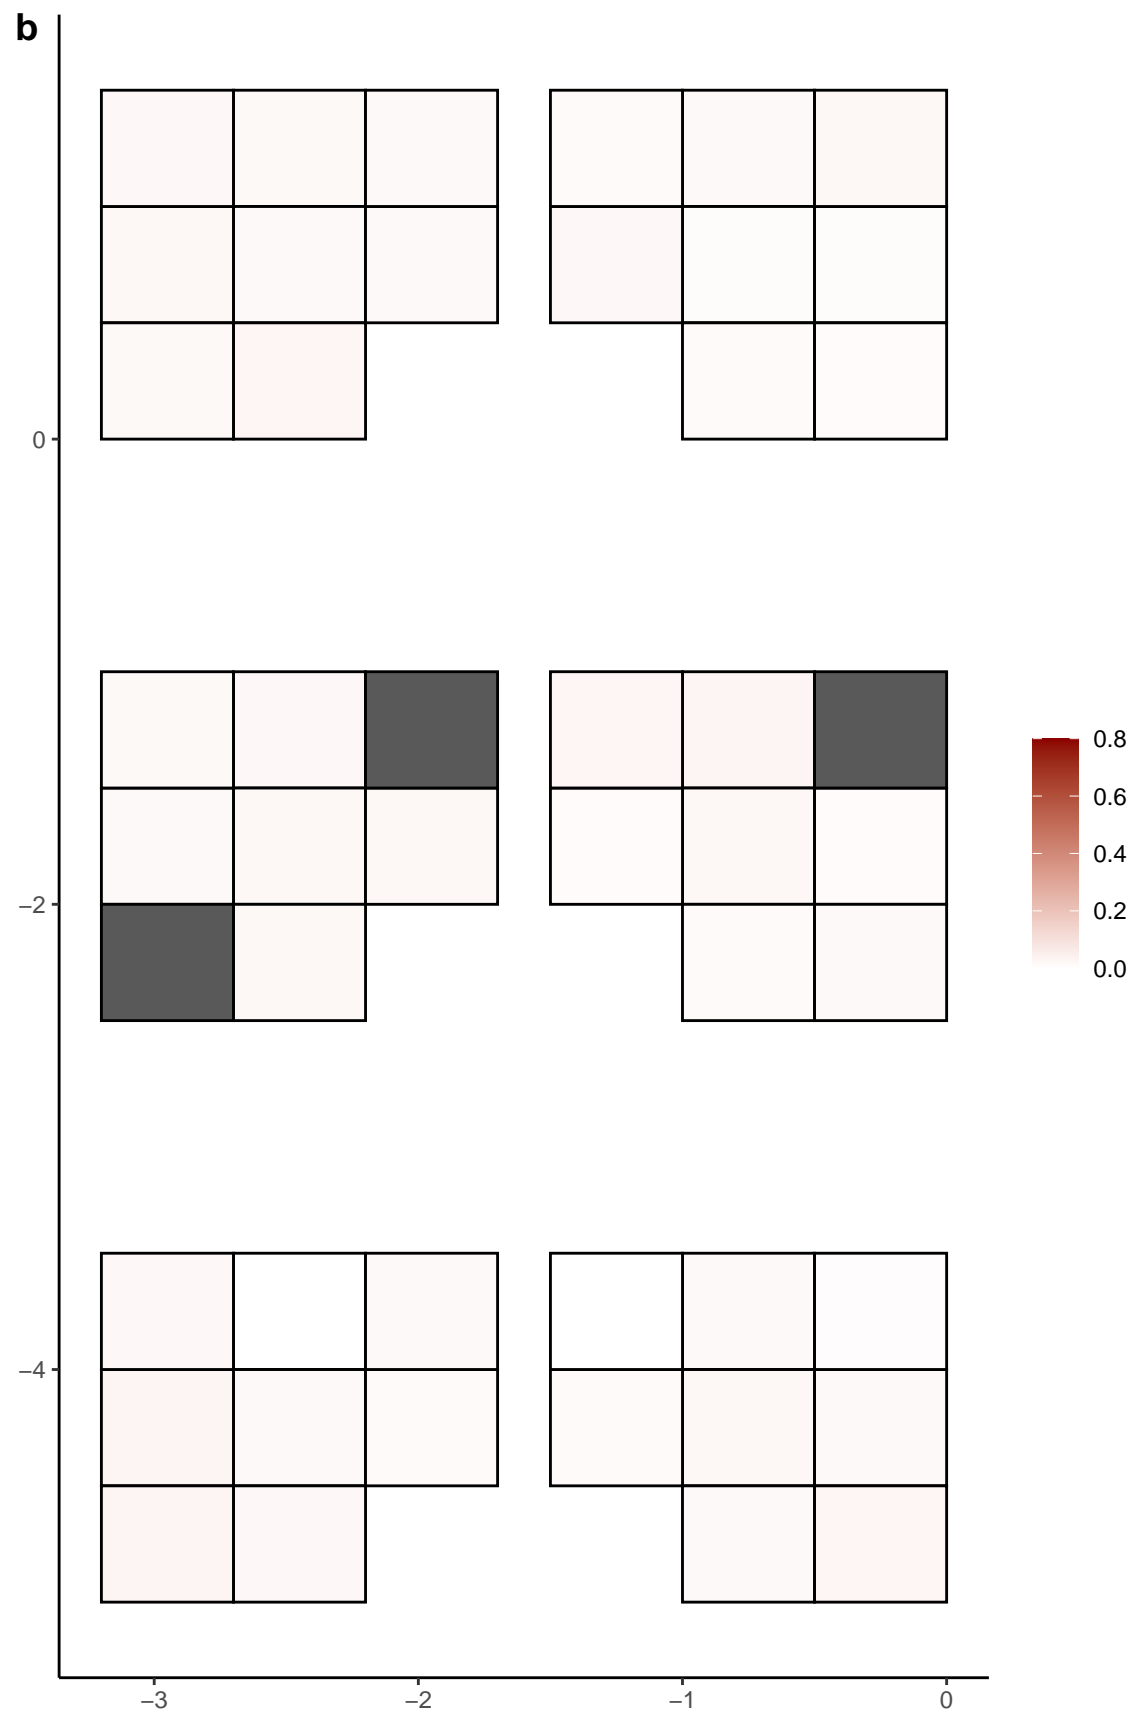

**a** ID05 8-77652300-G-A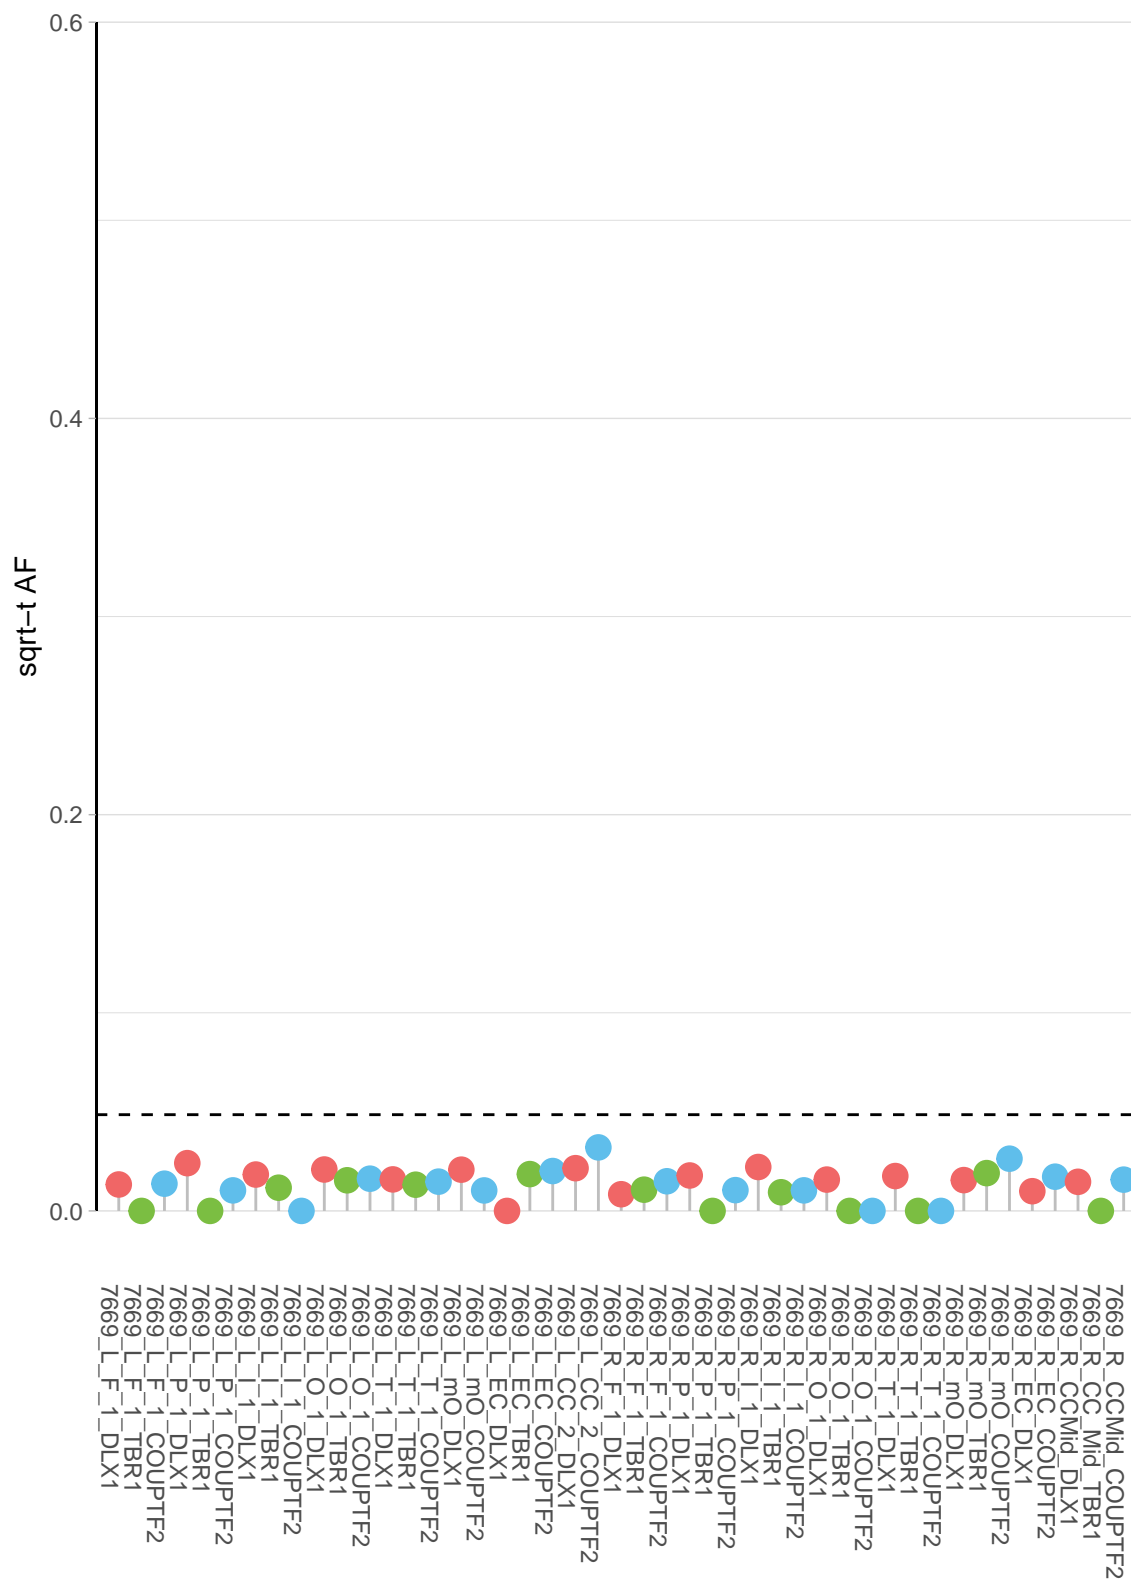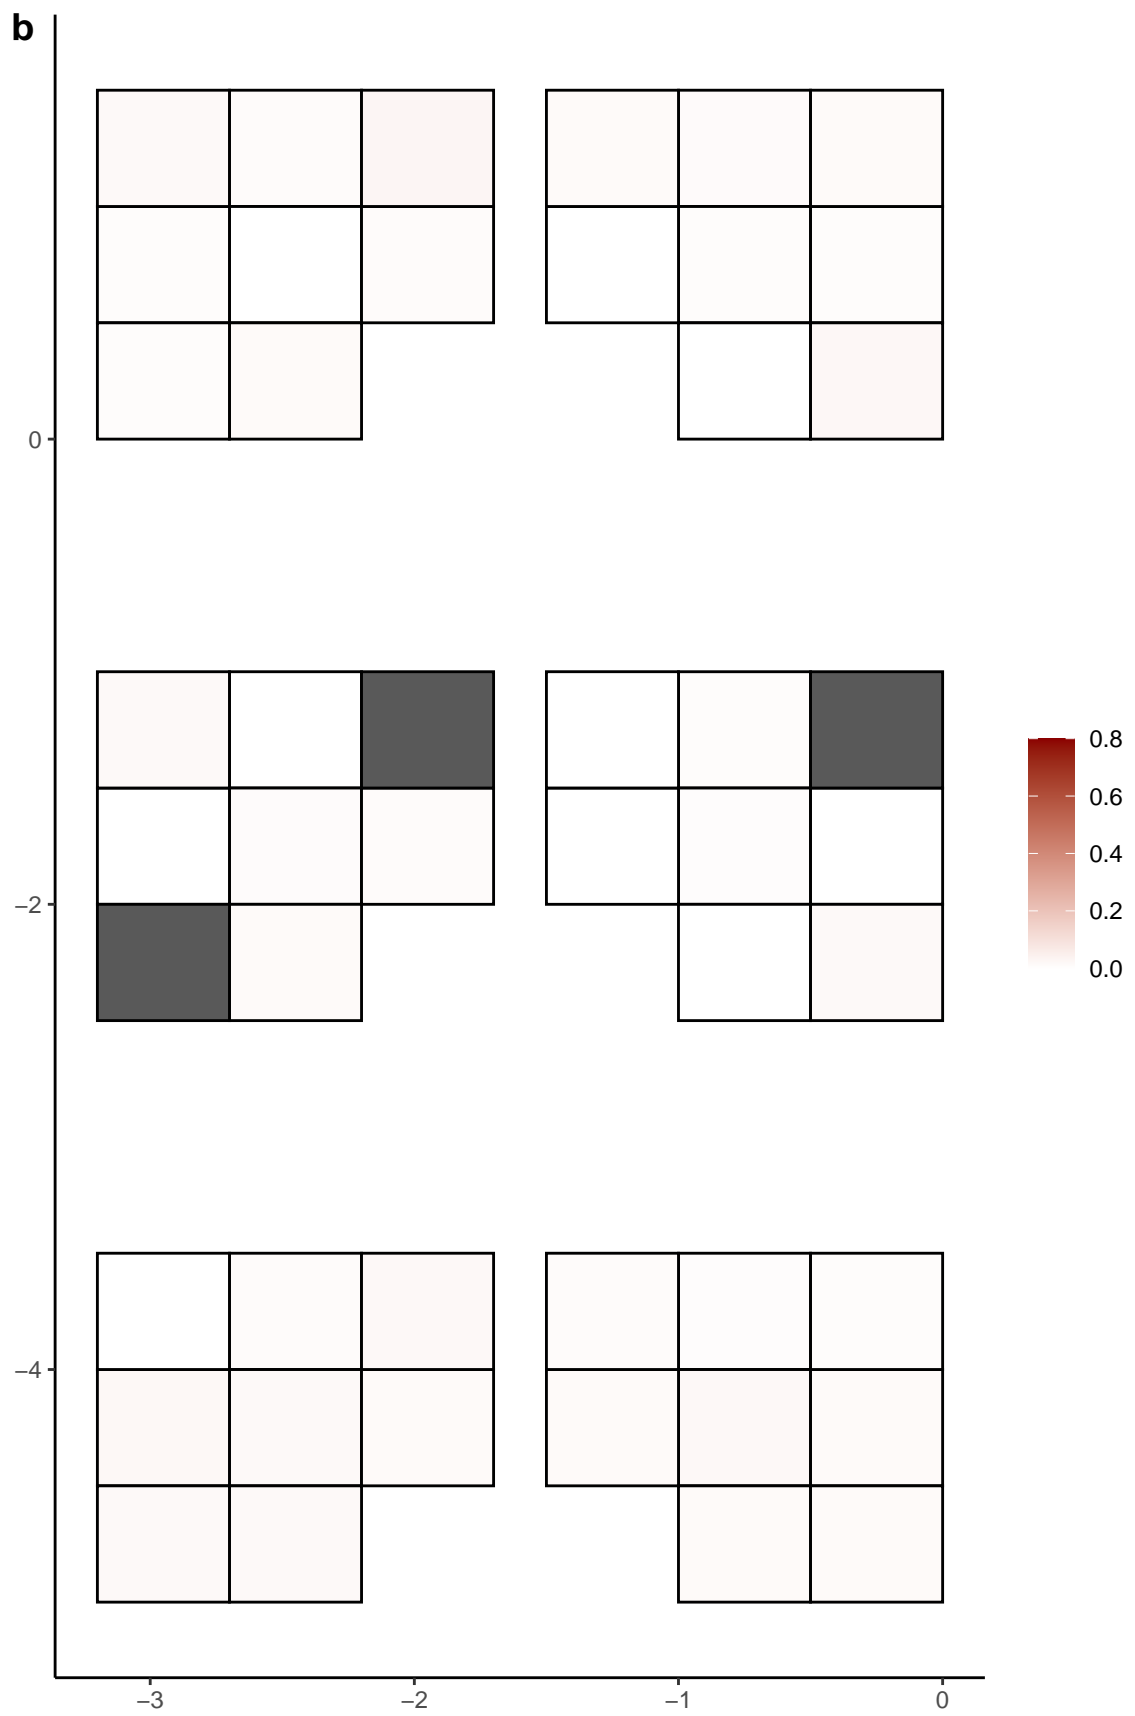

**a** ID05 8-786897-C-G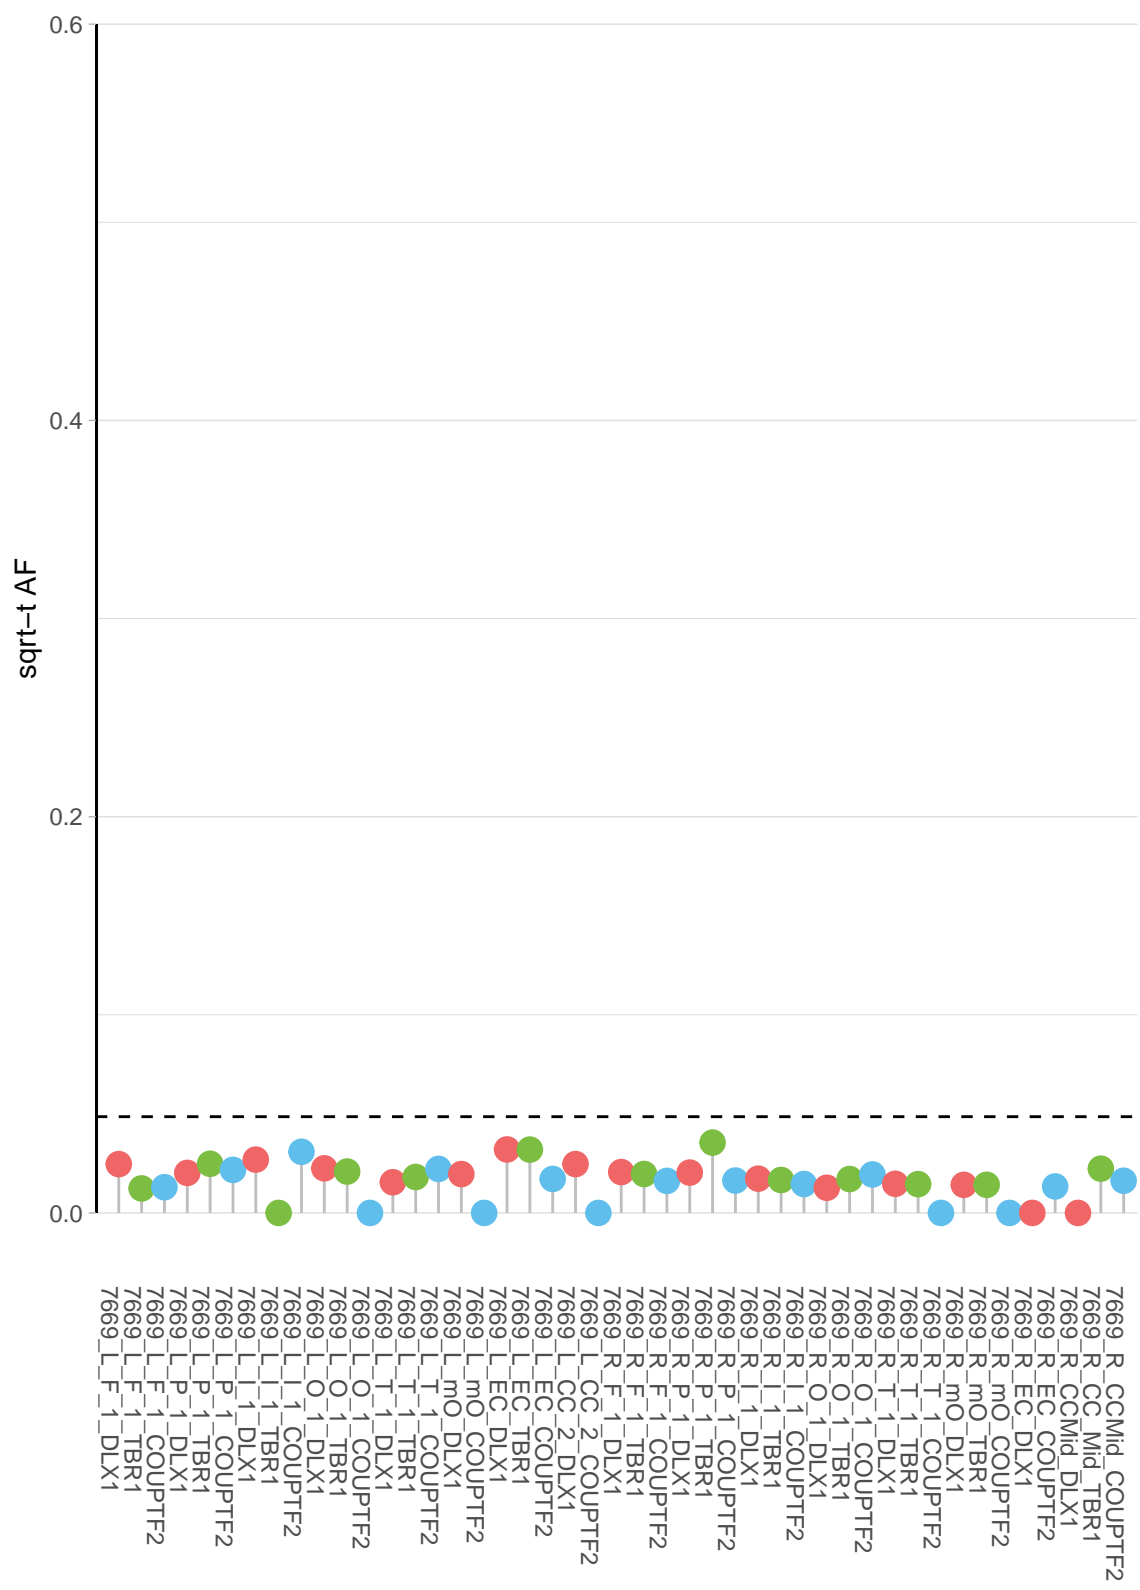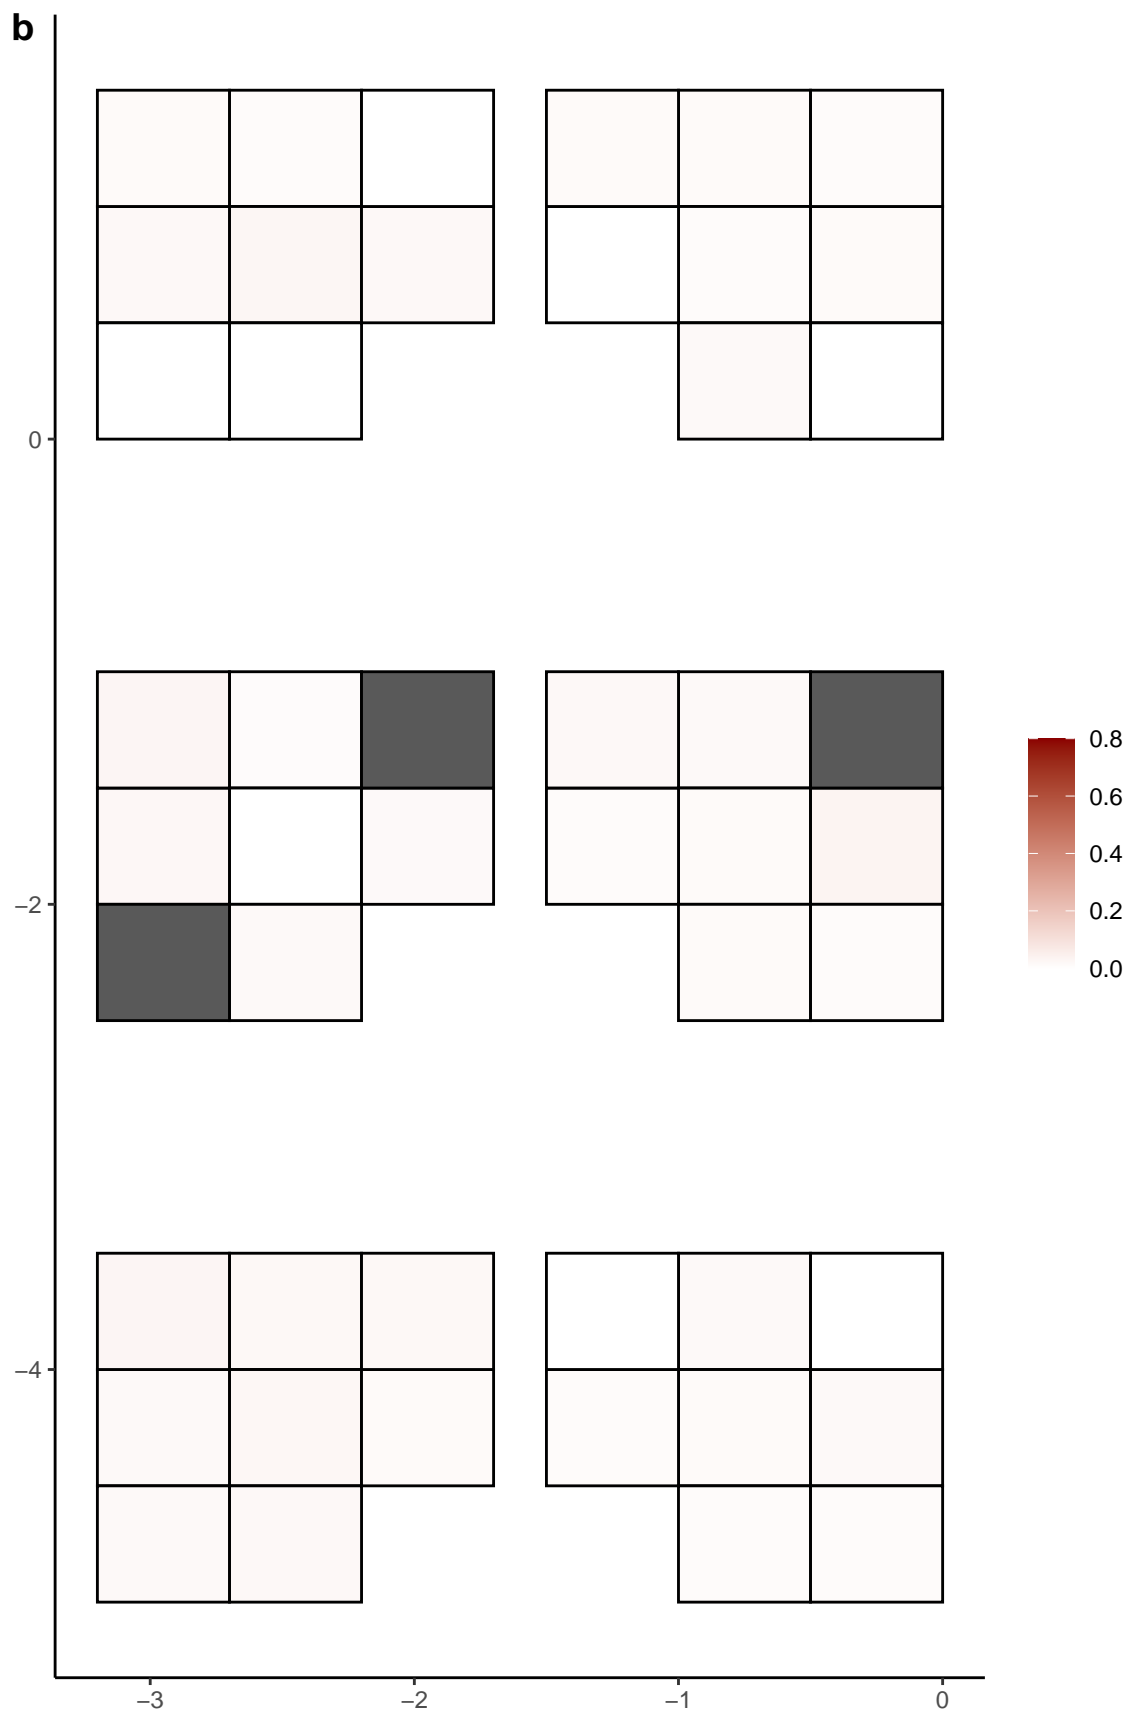

**a** ID05 8-80121537-G-A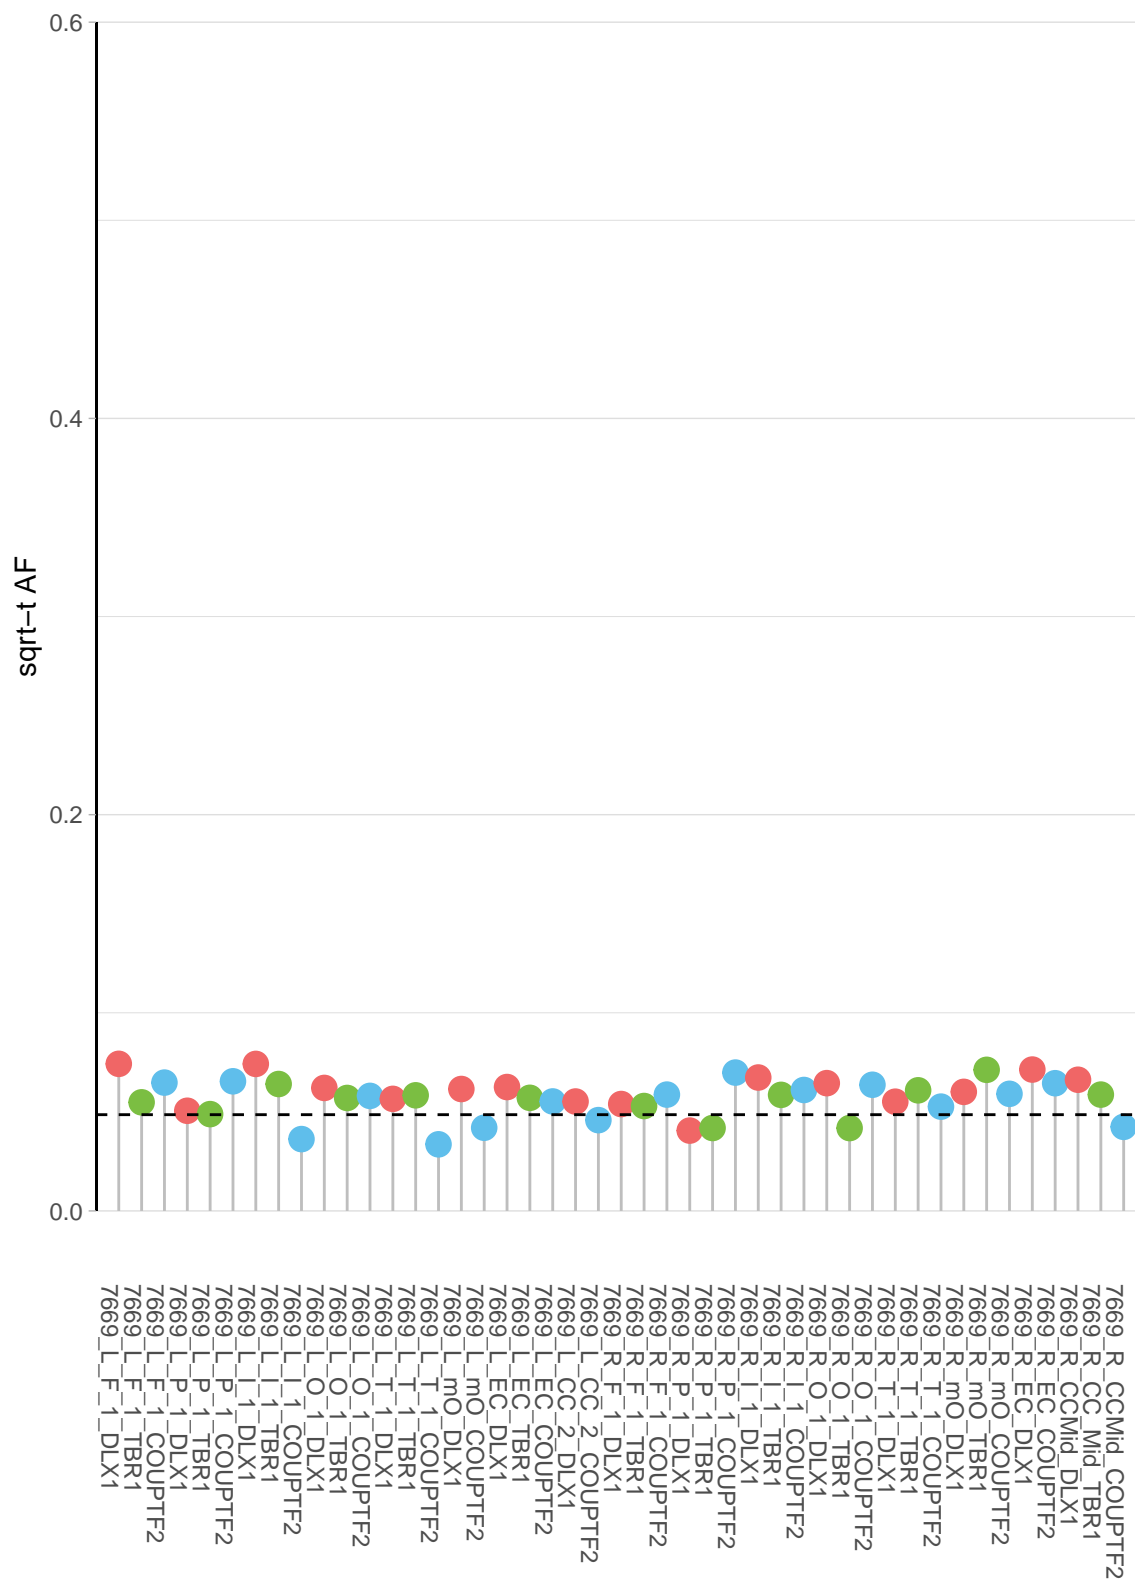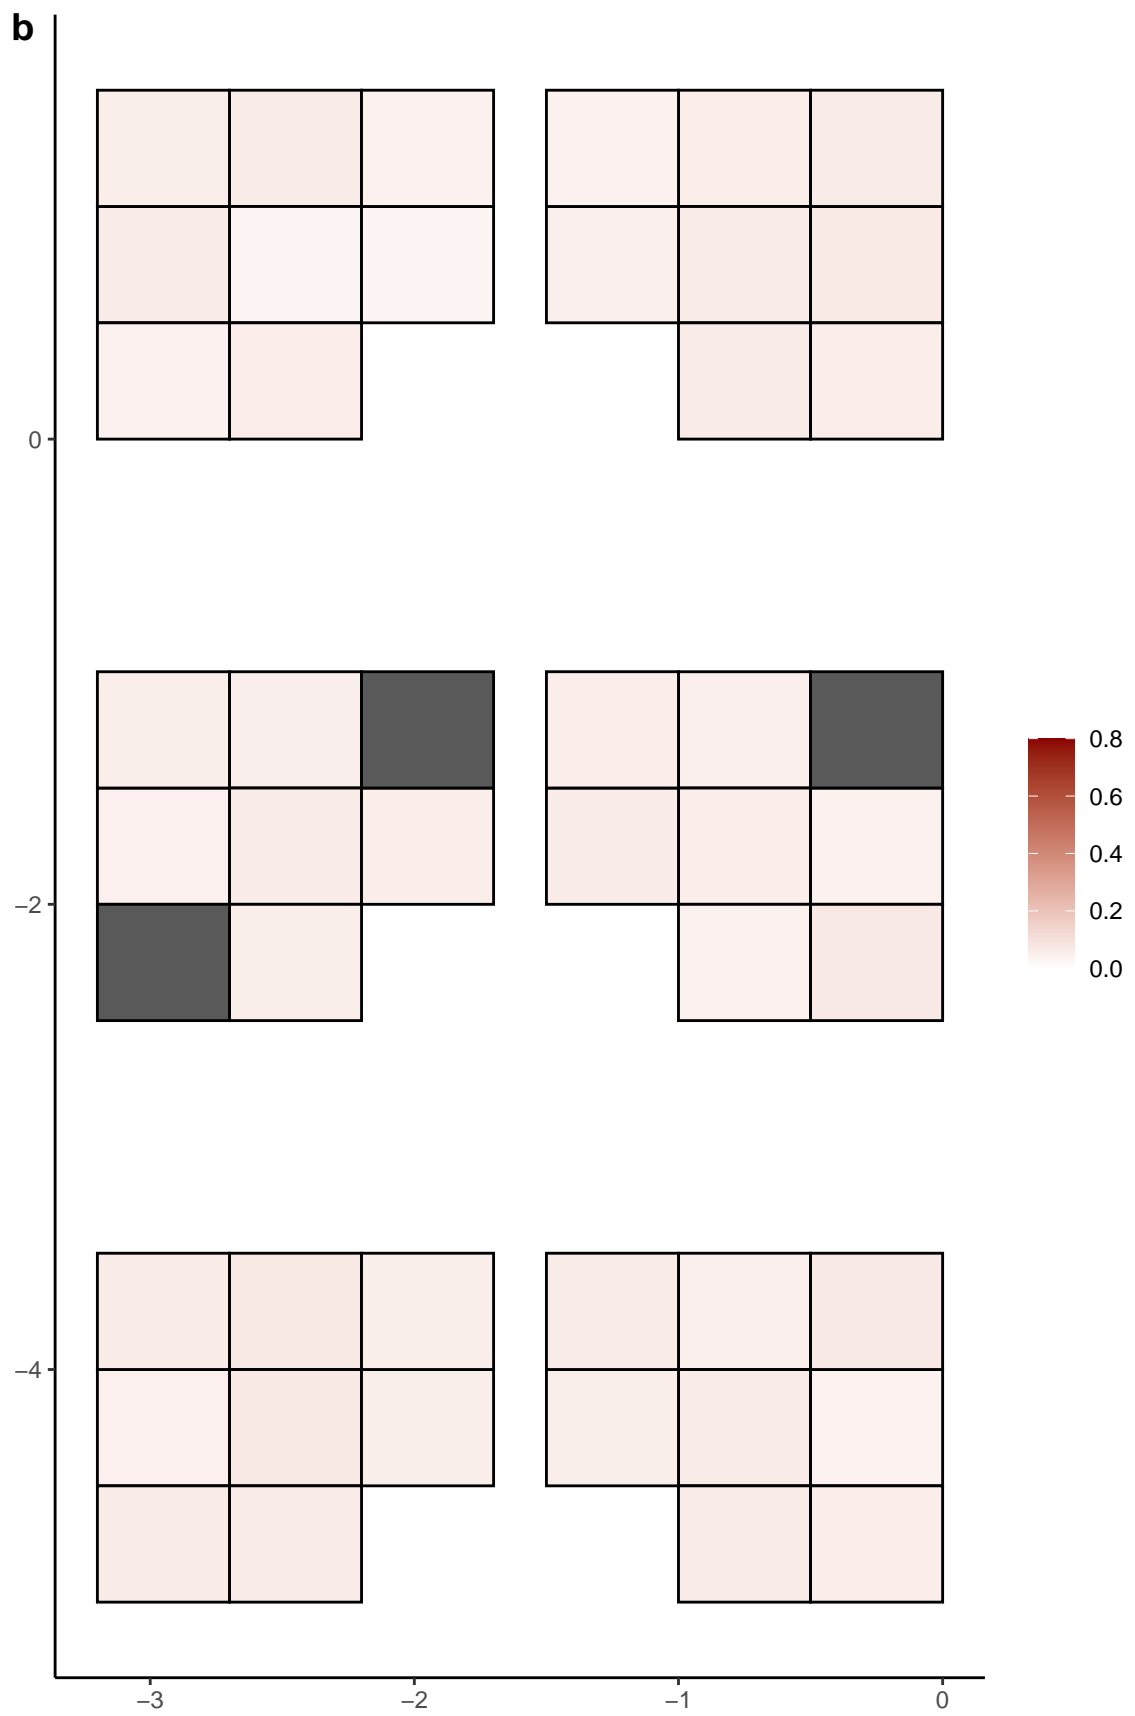

**a** ID05 8-80121538-T-C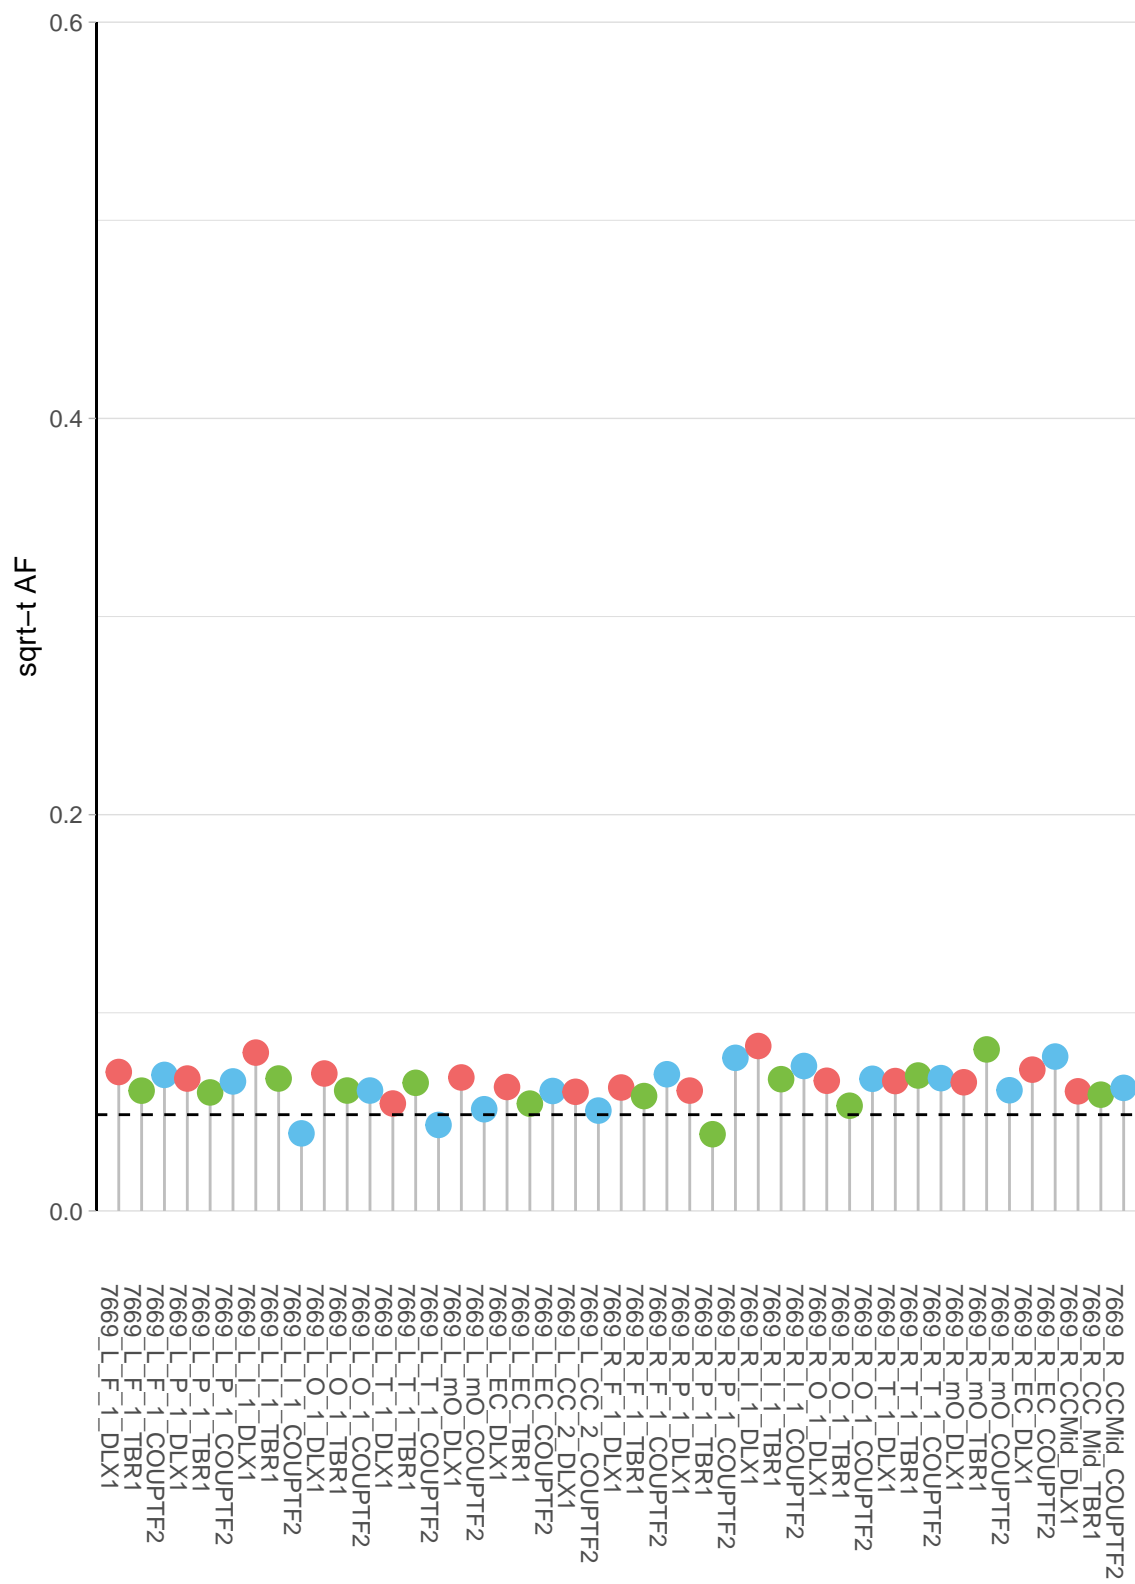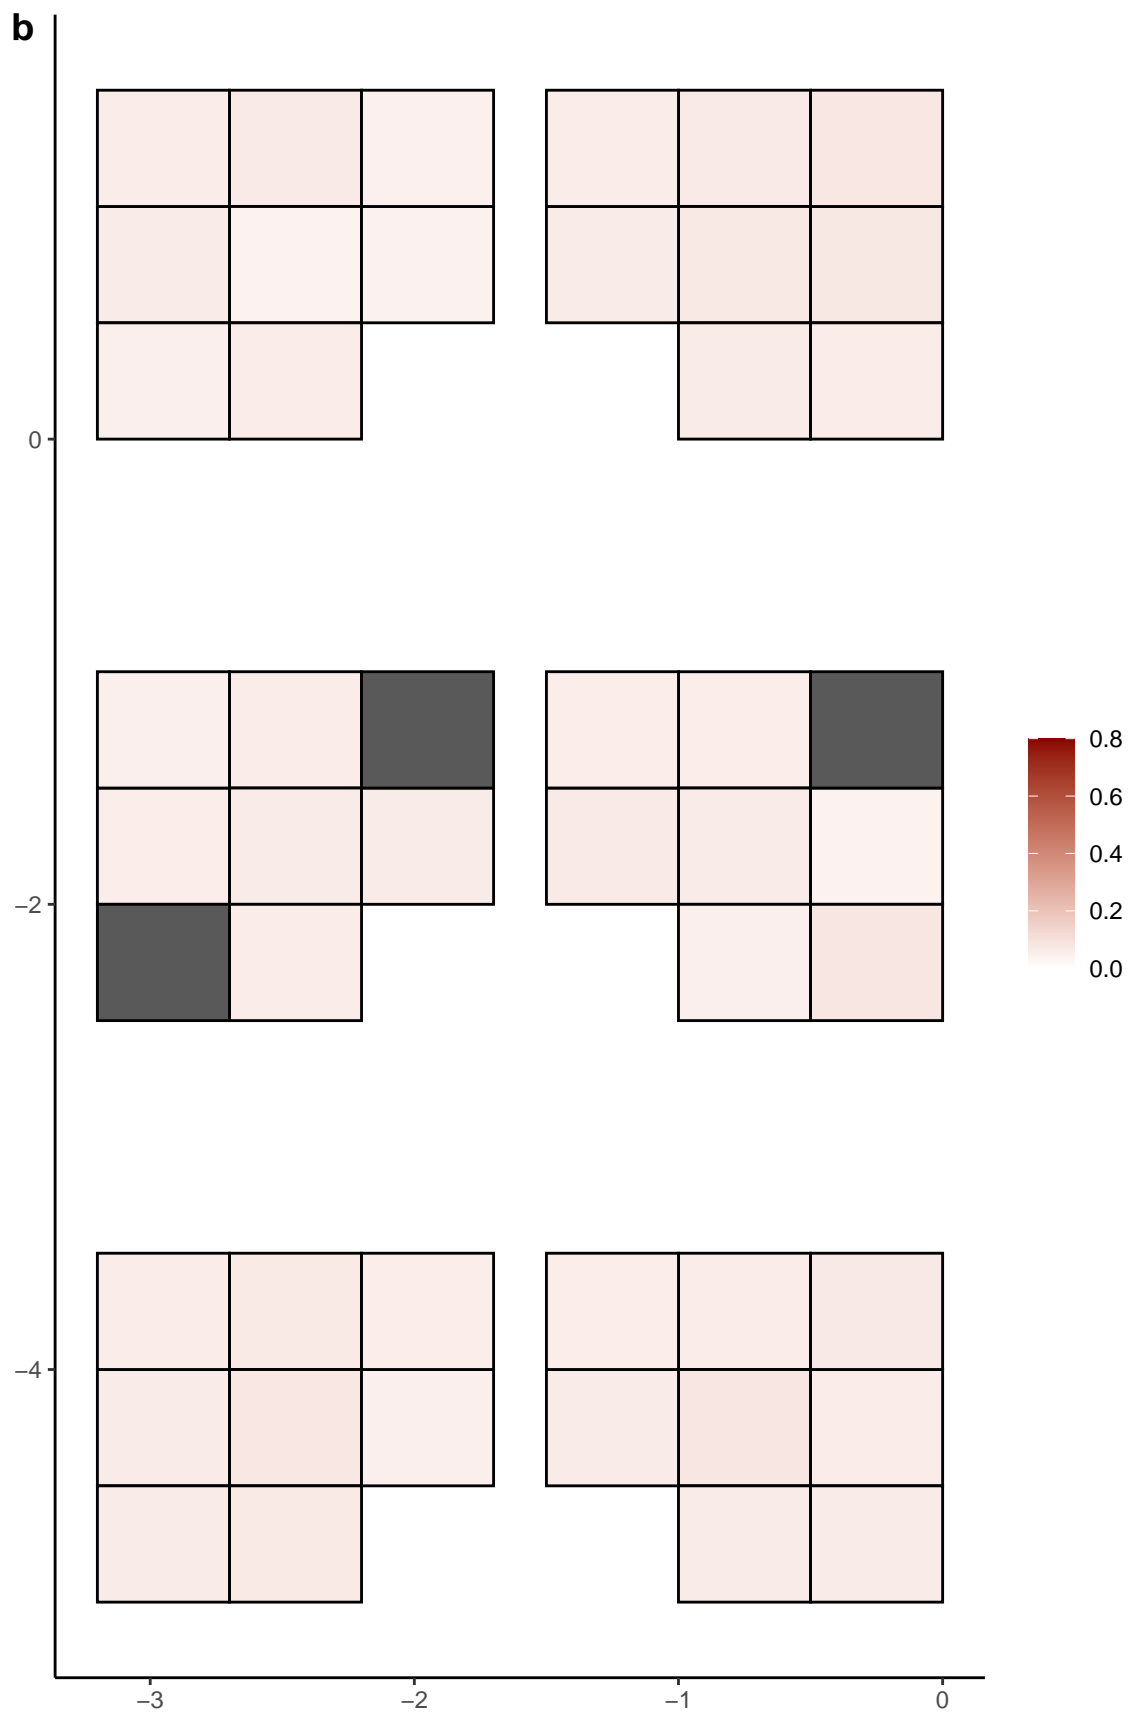

**a** ID05 8-83768131-G-A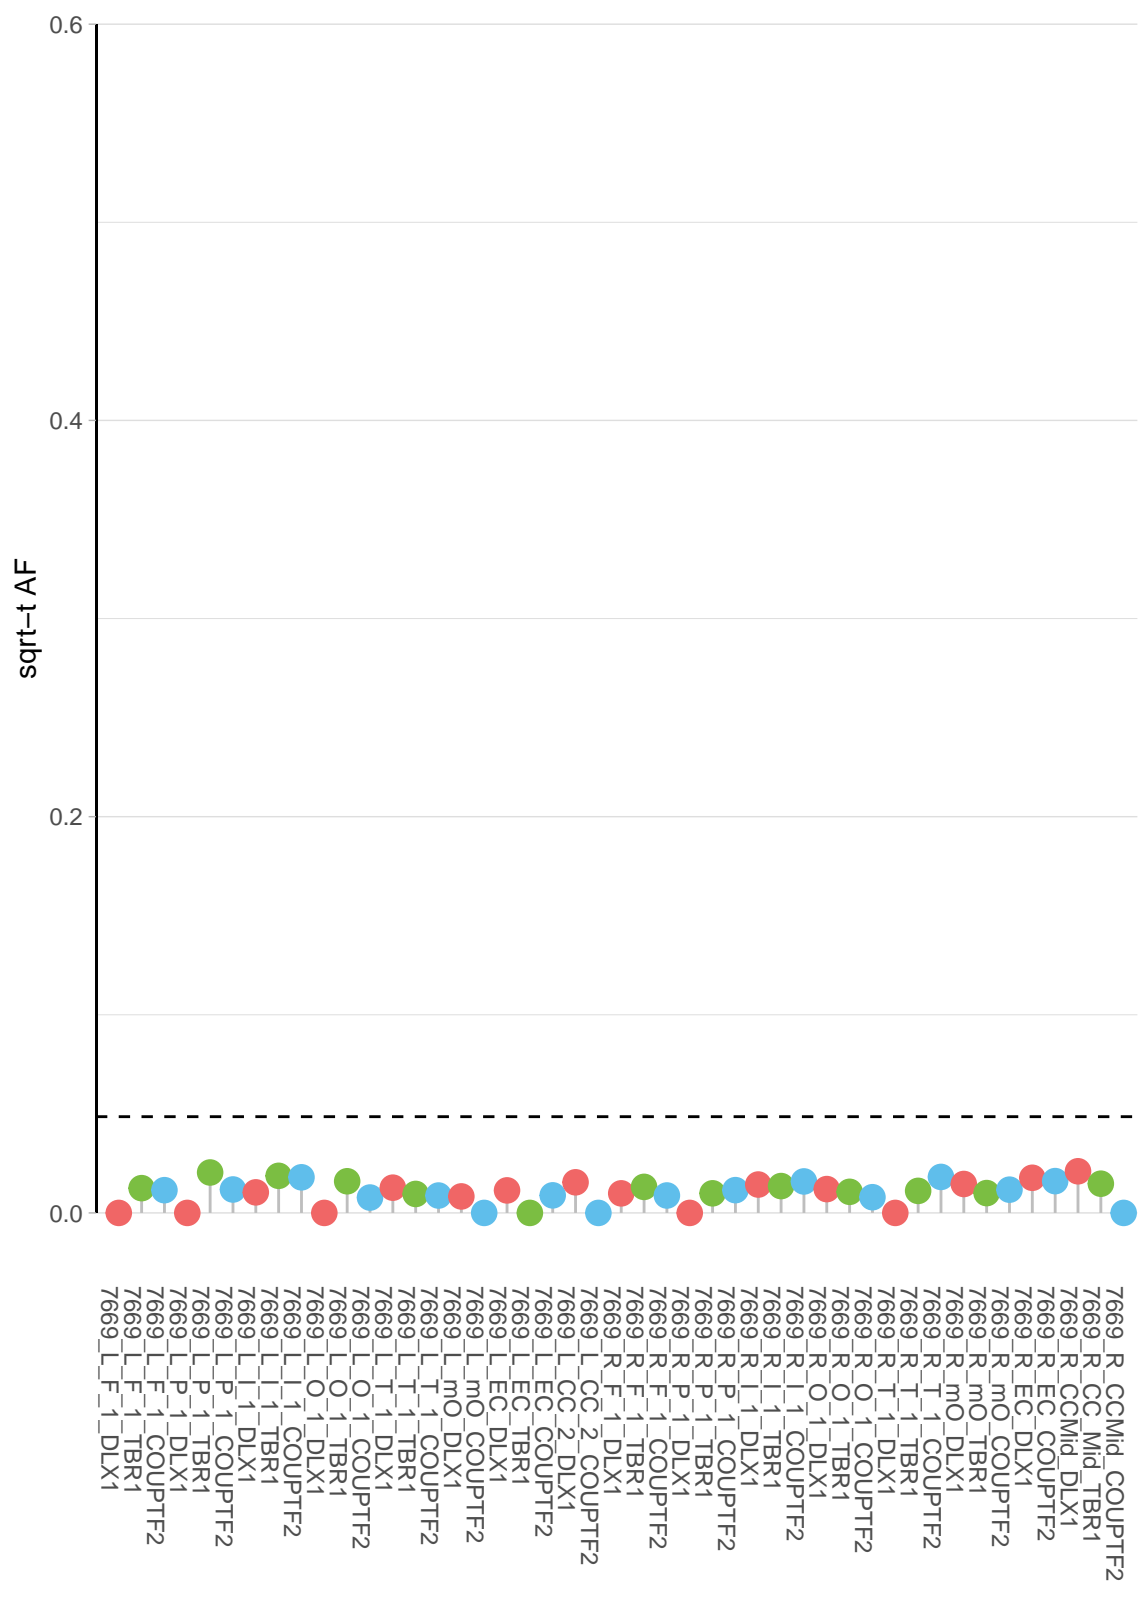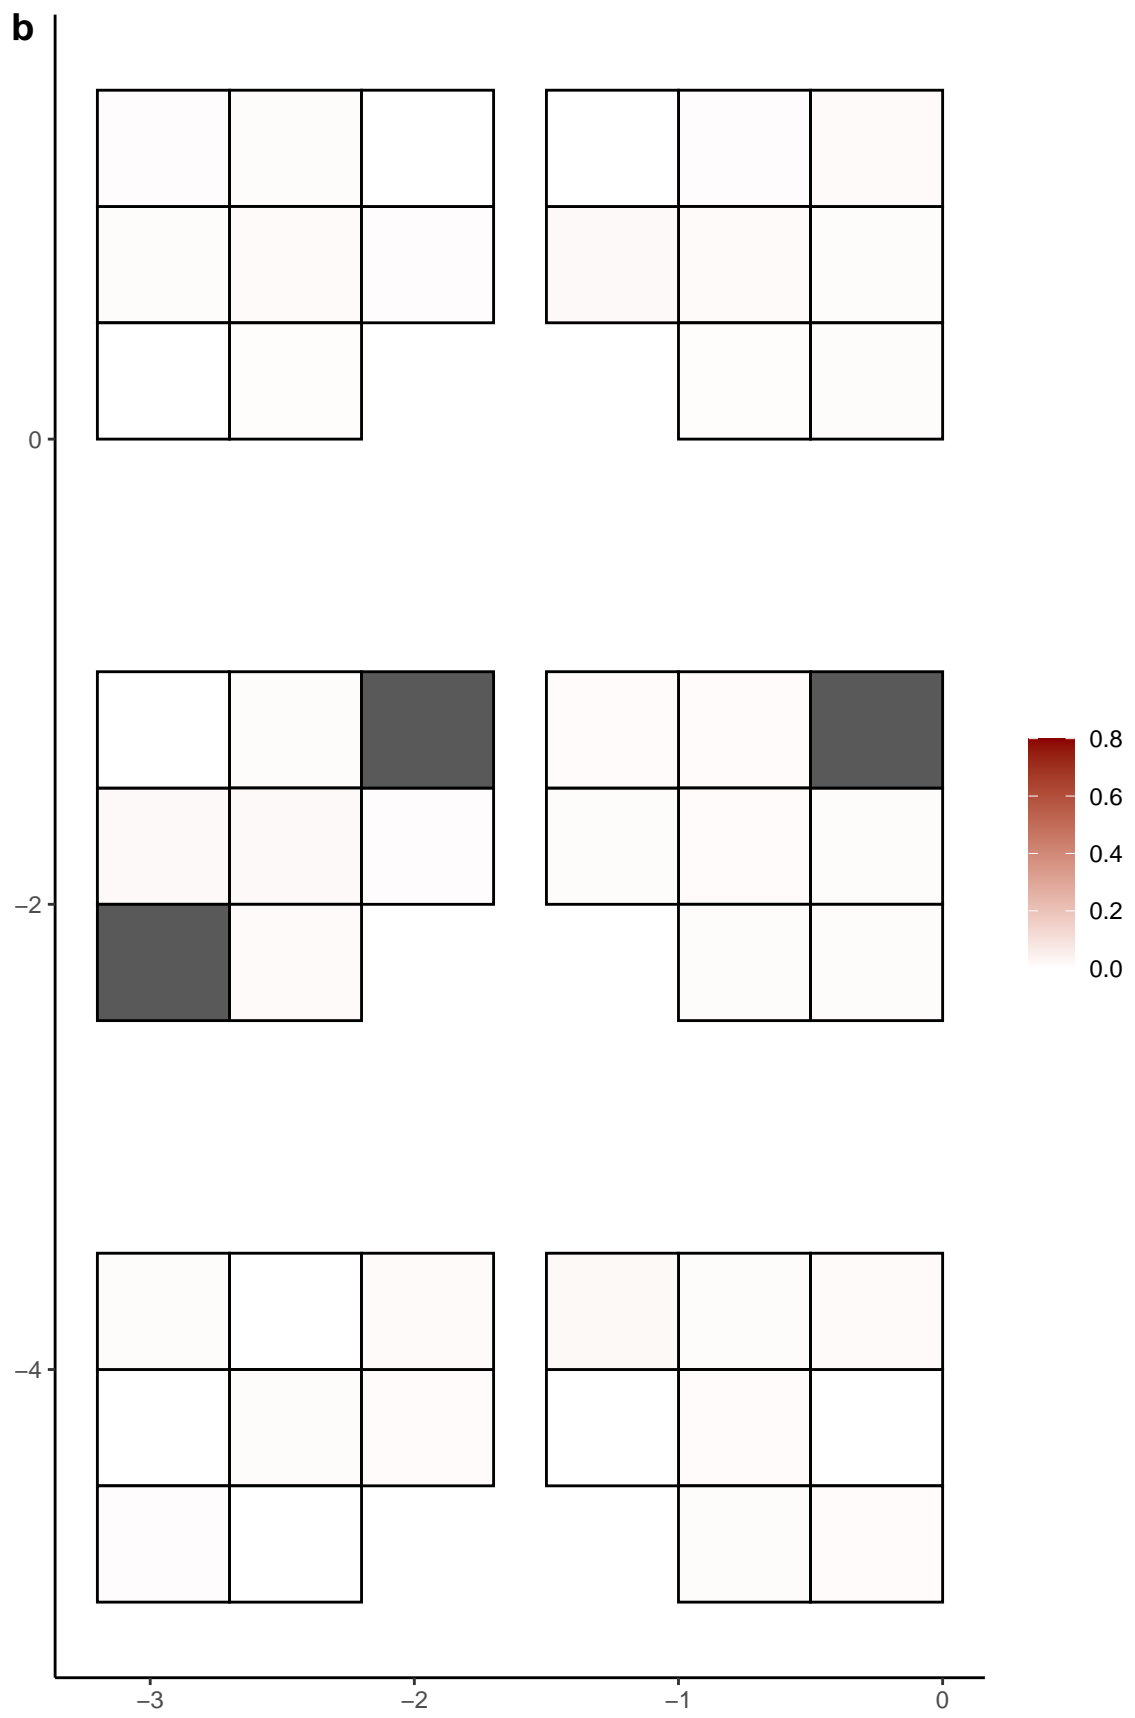

**a** ID05 8-89142864-G-A

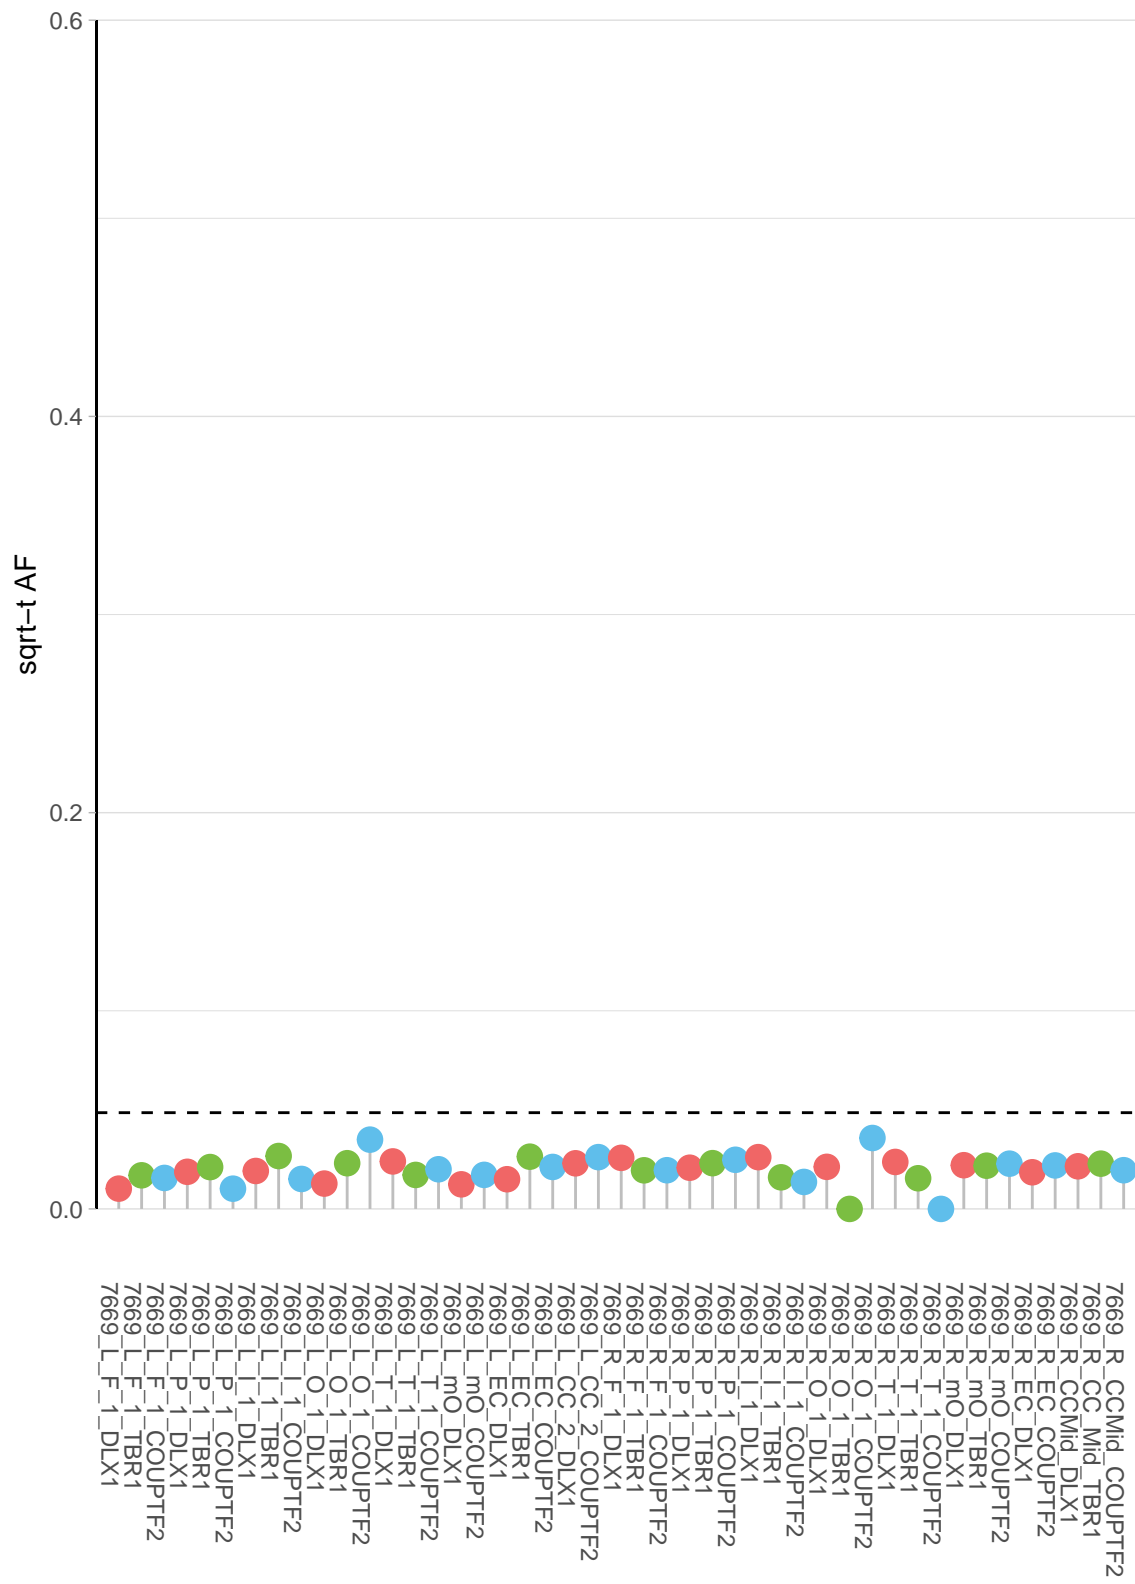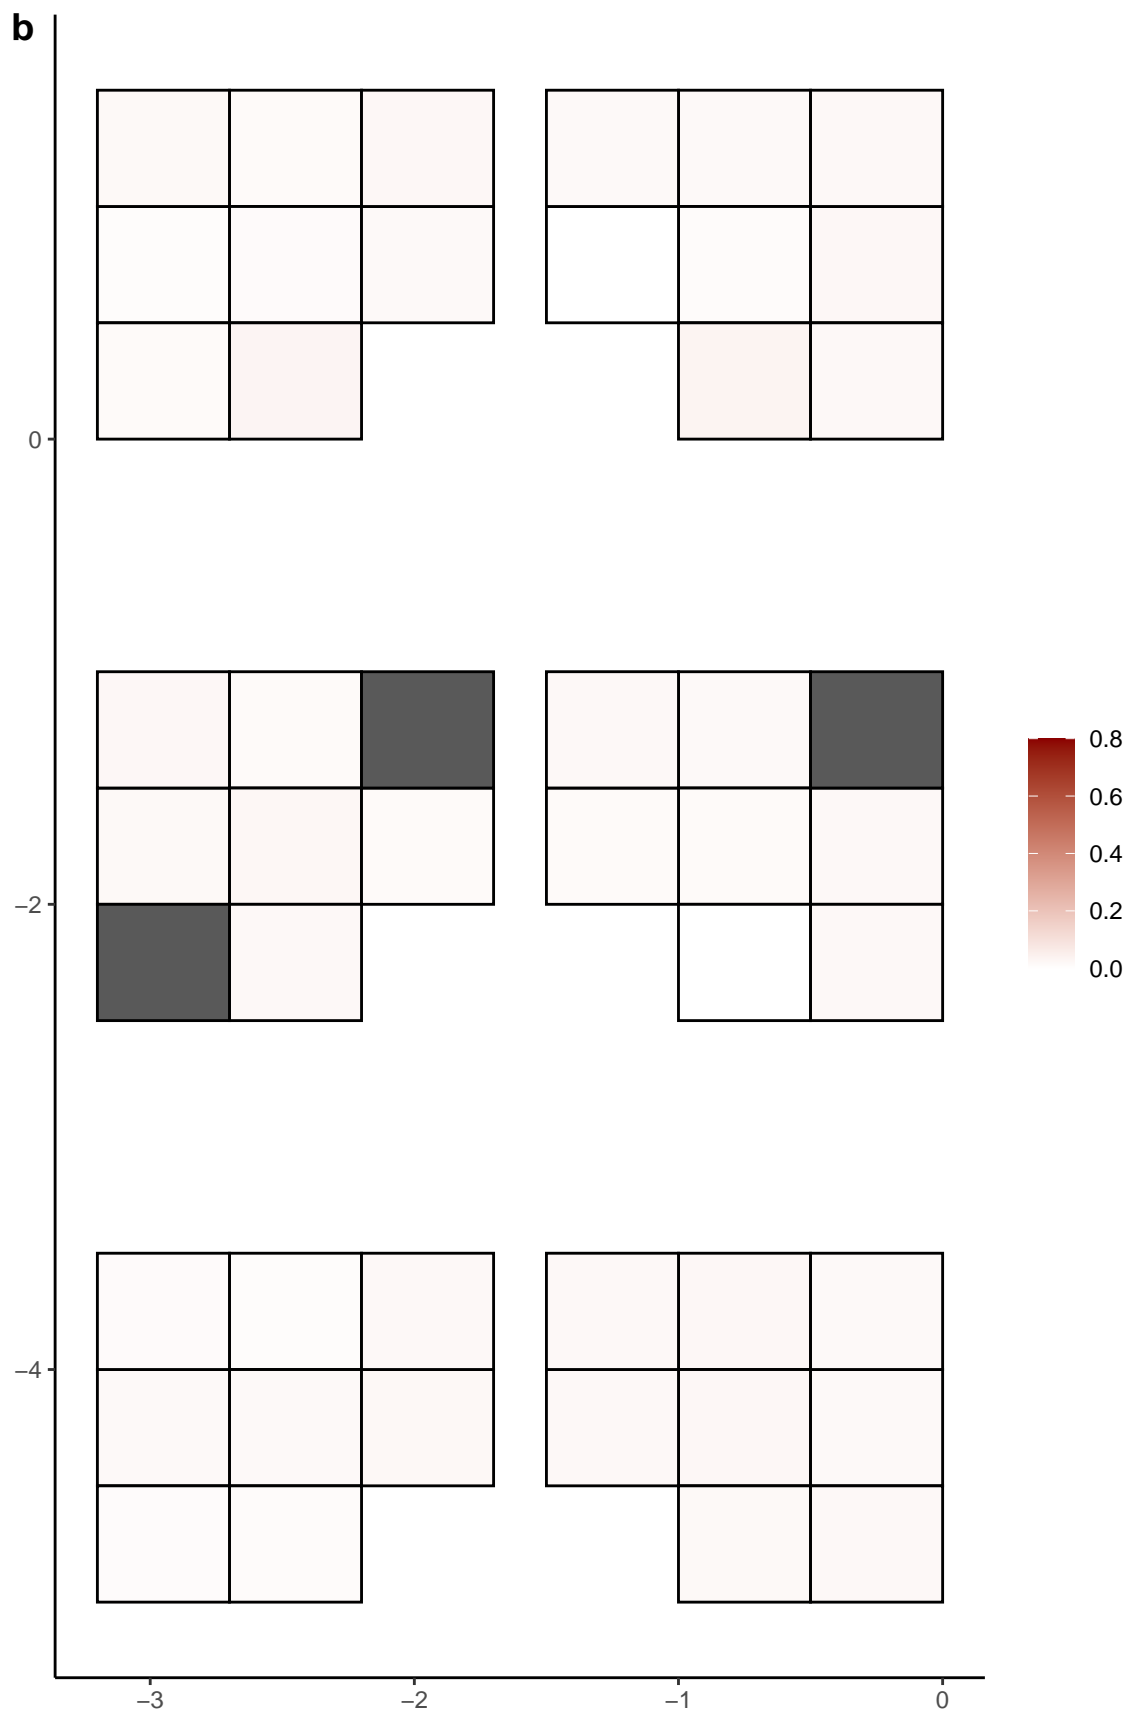

**a** ID05 8-89612305-G-A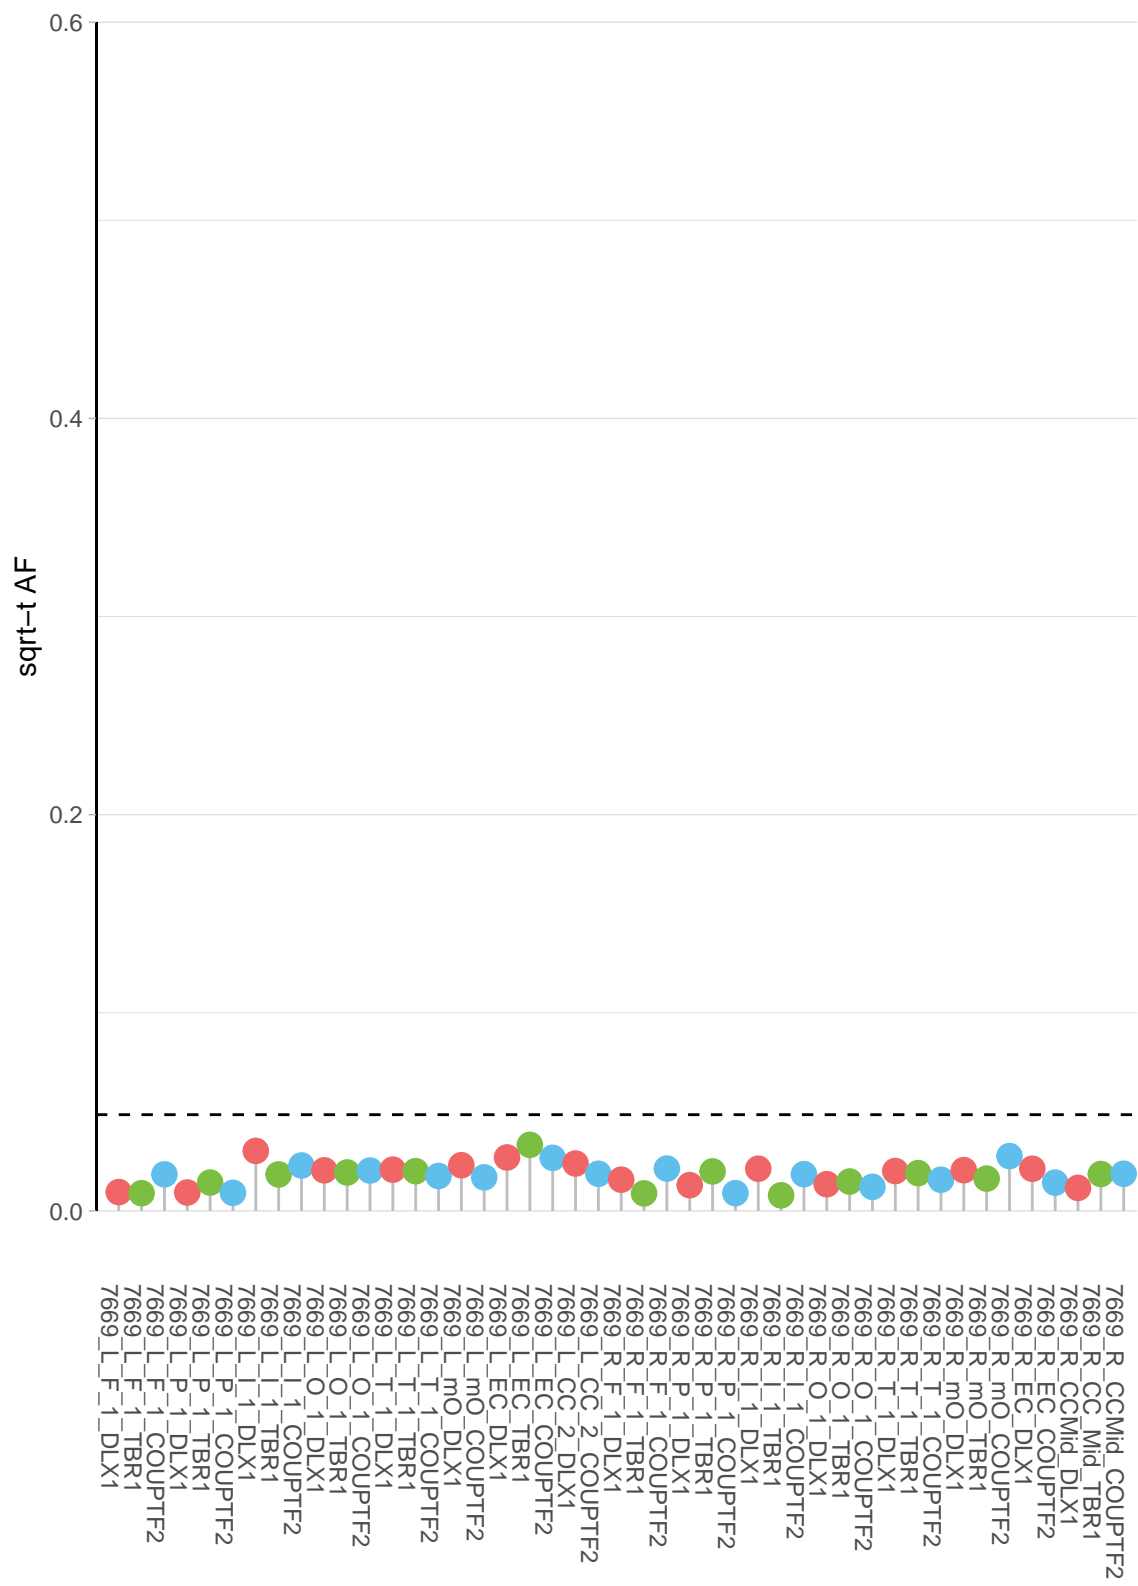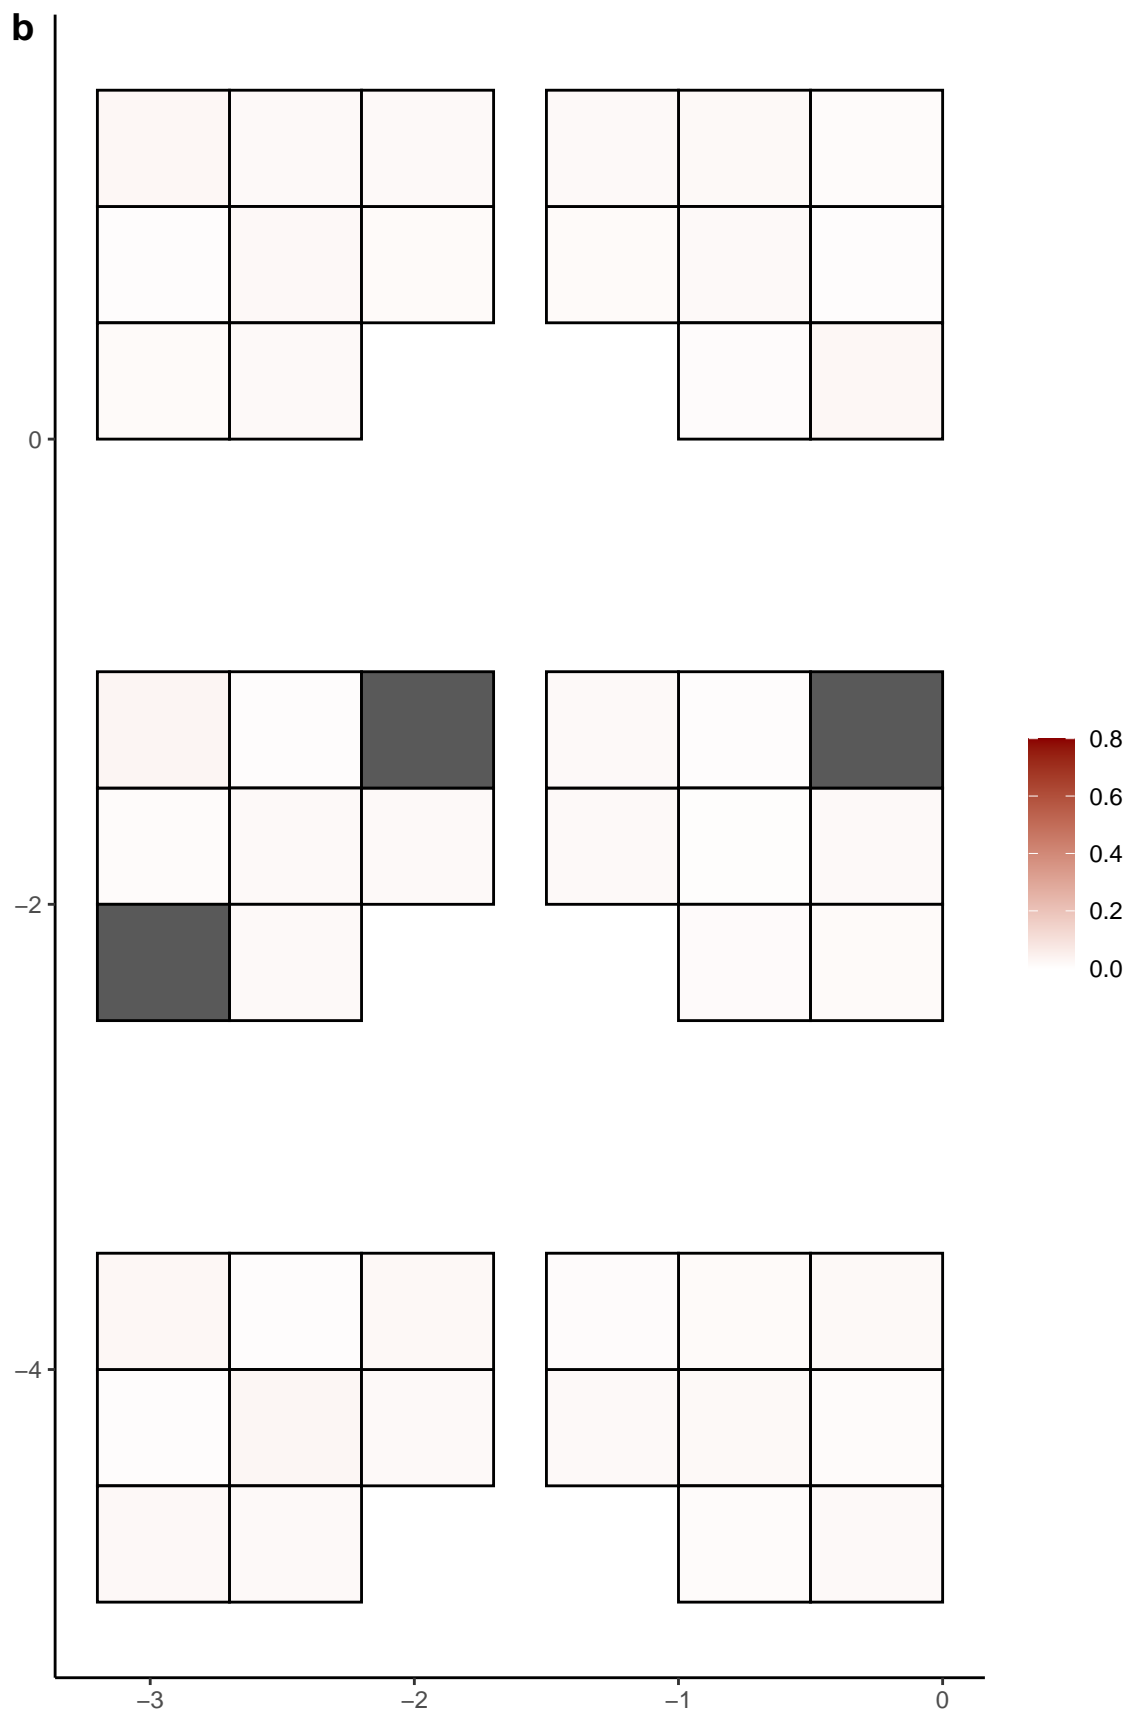





**a** ID05 9-103766822-C-T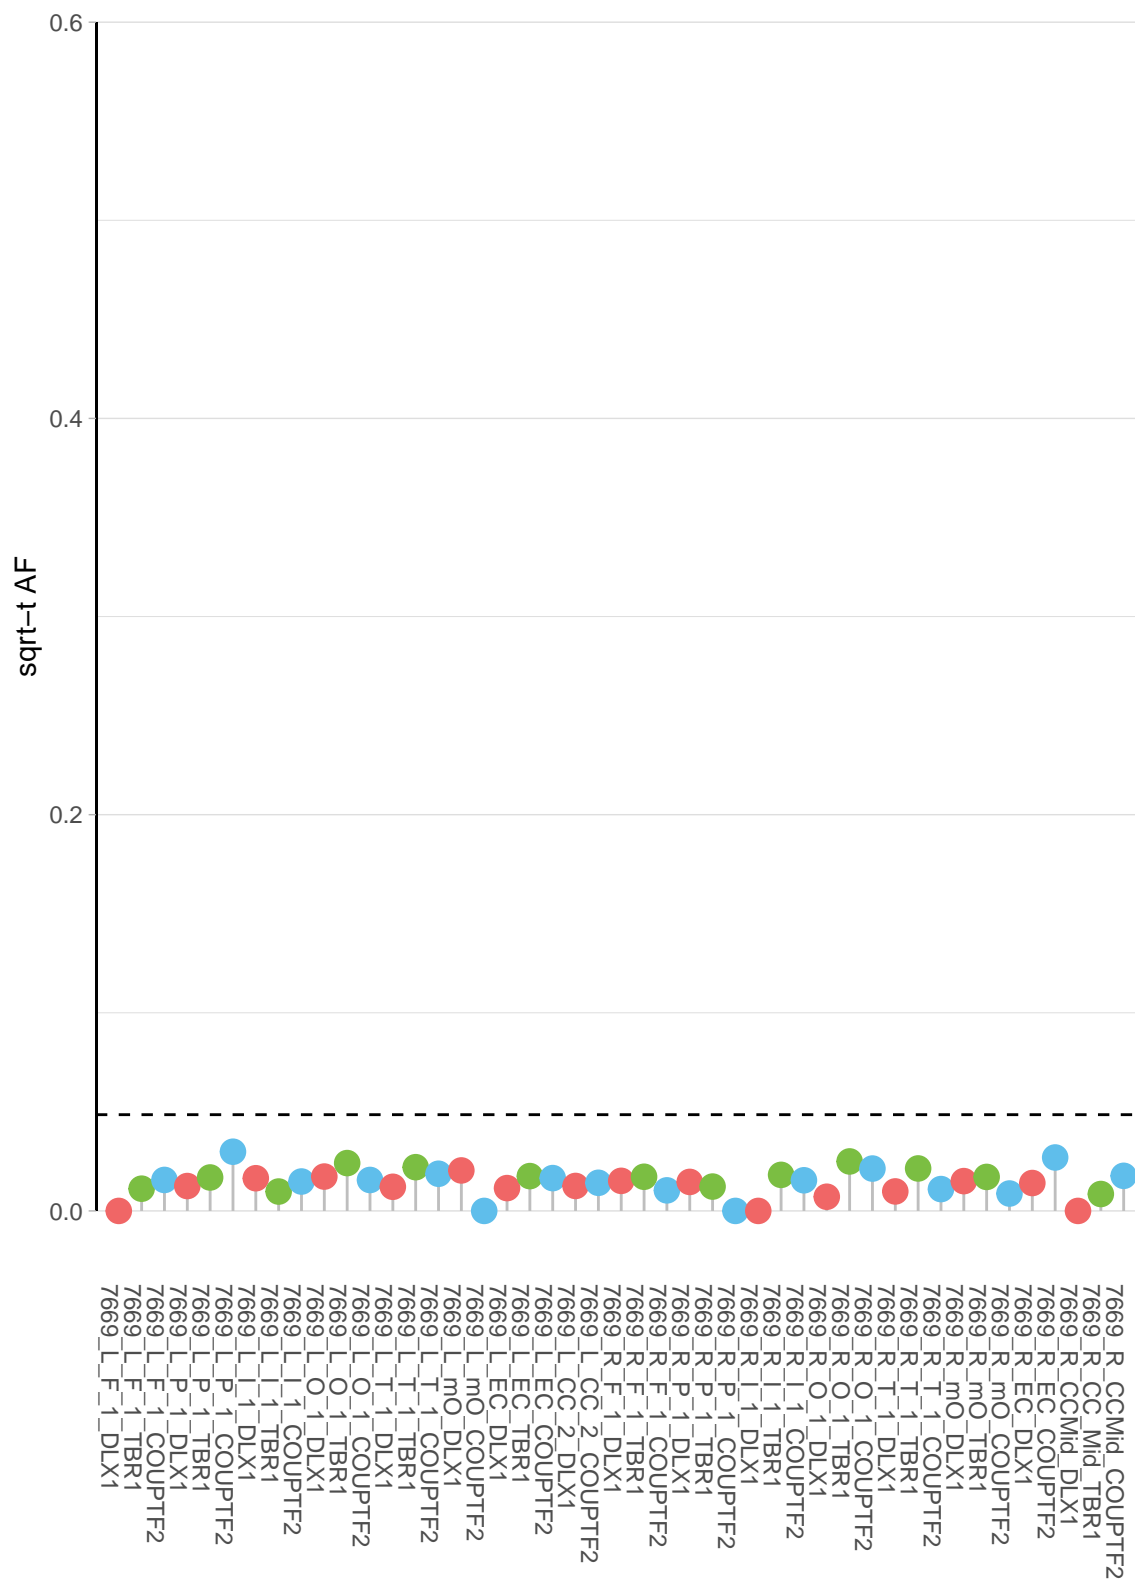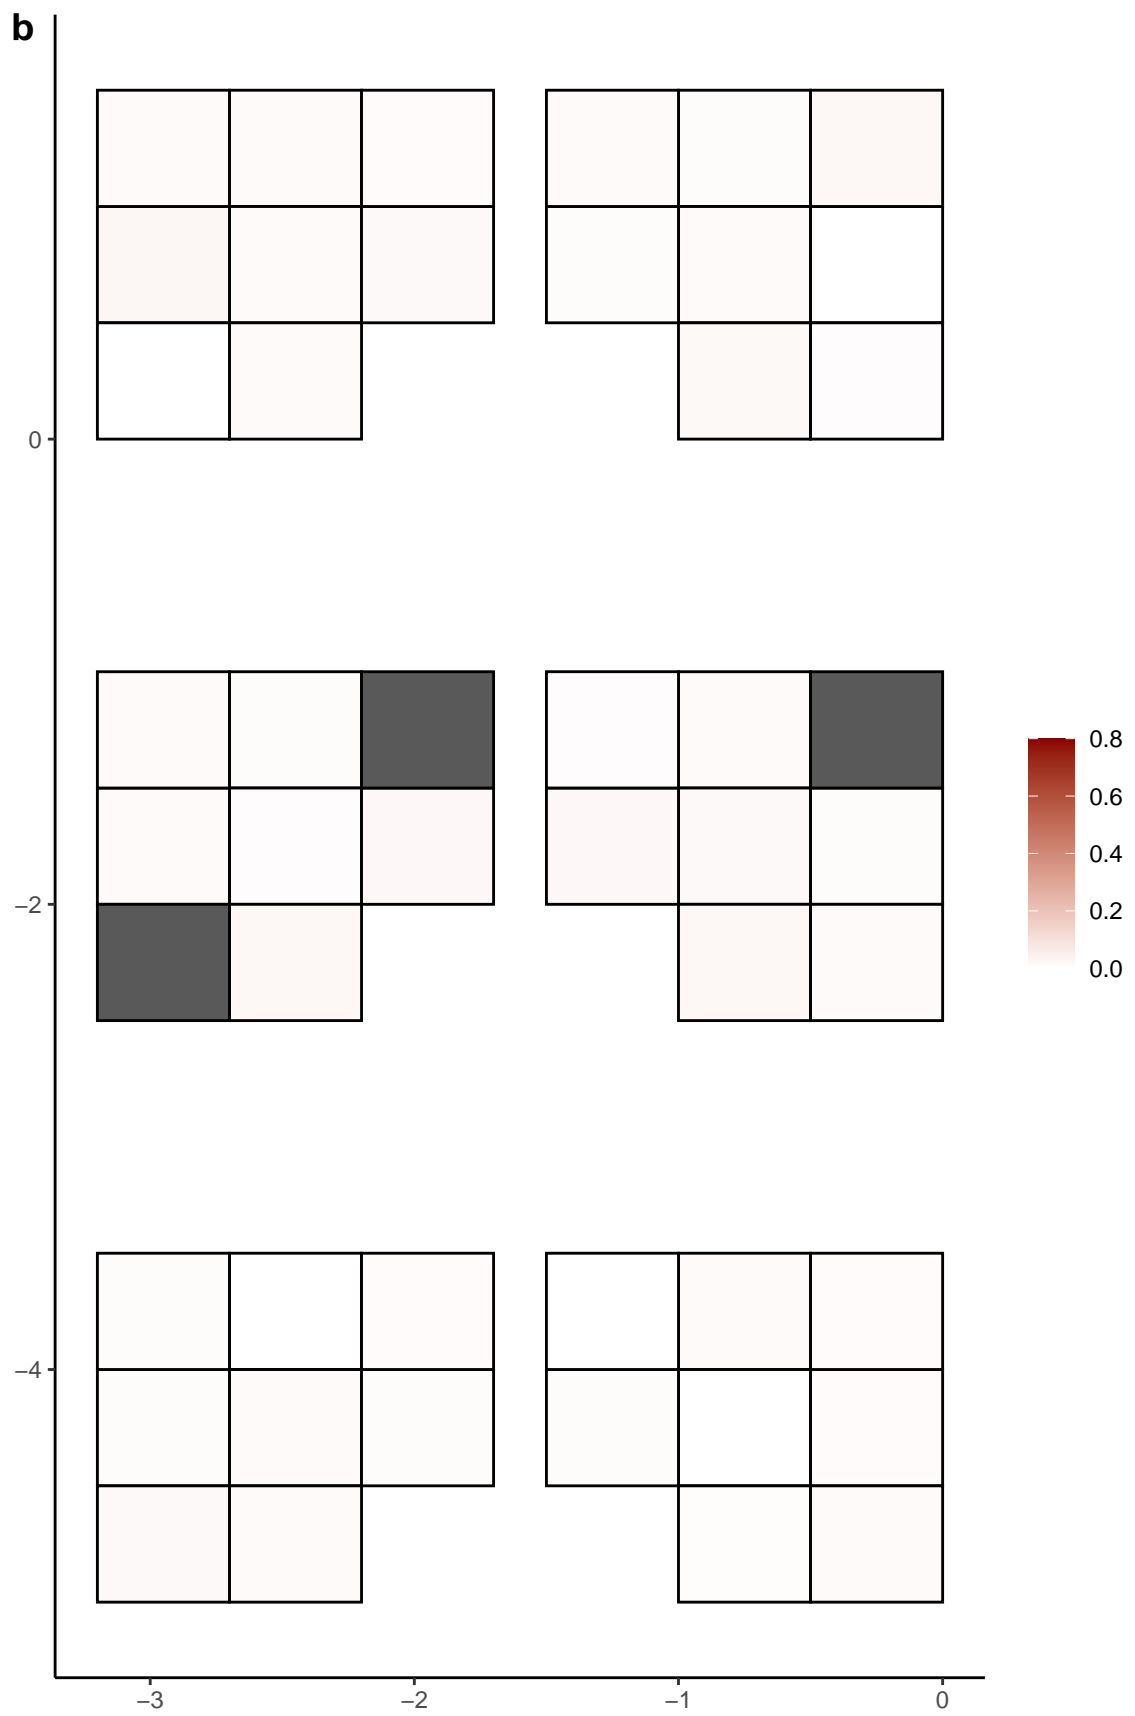



**a** ID05 9-105015839-T-C

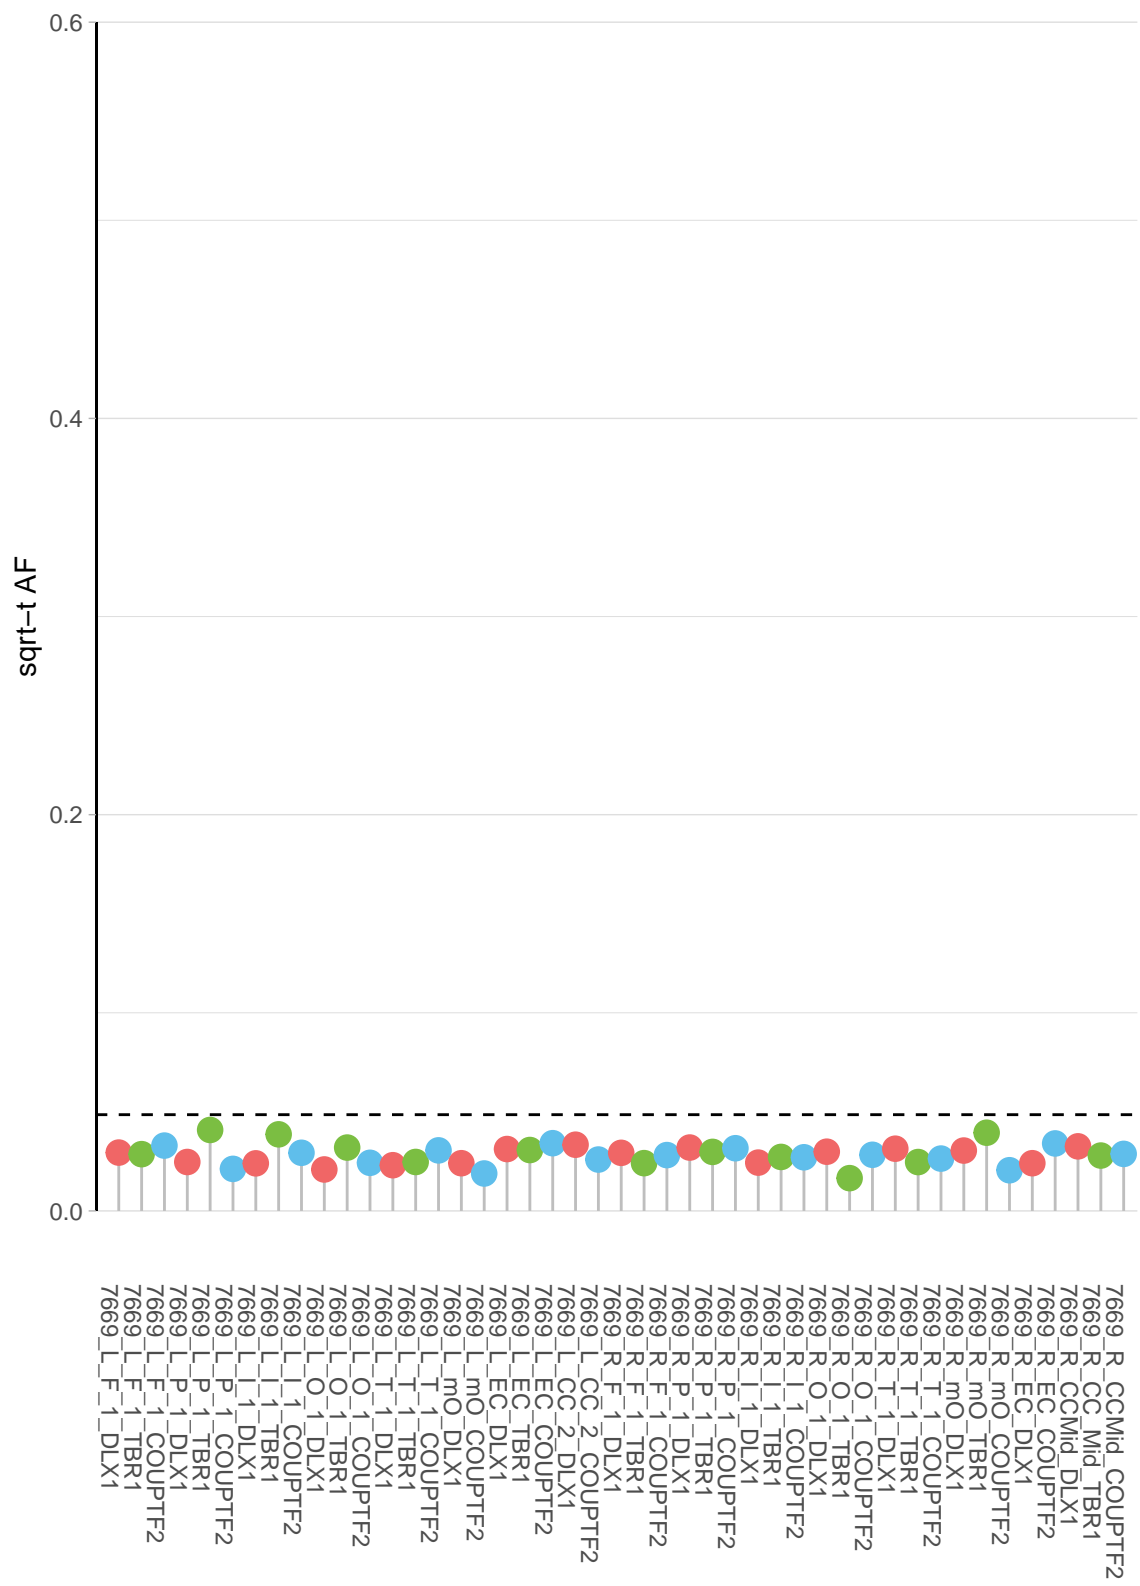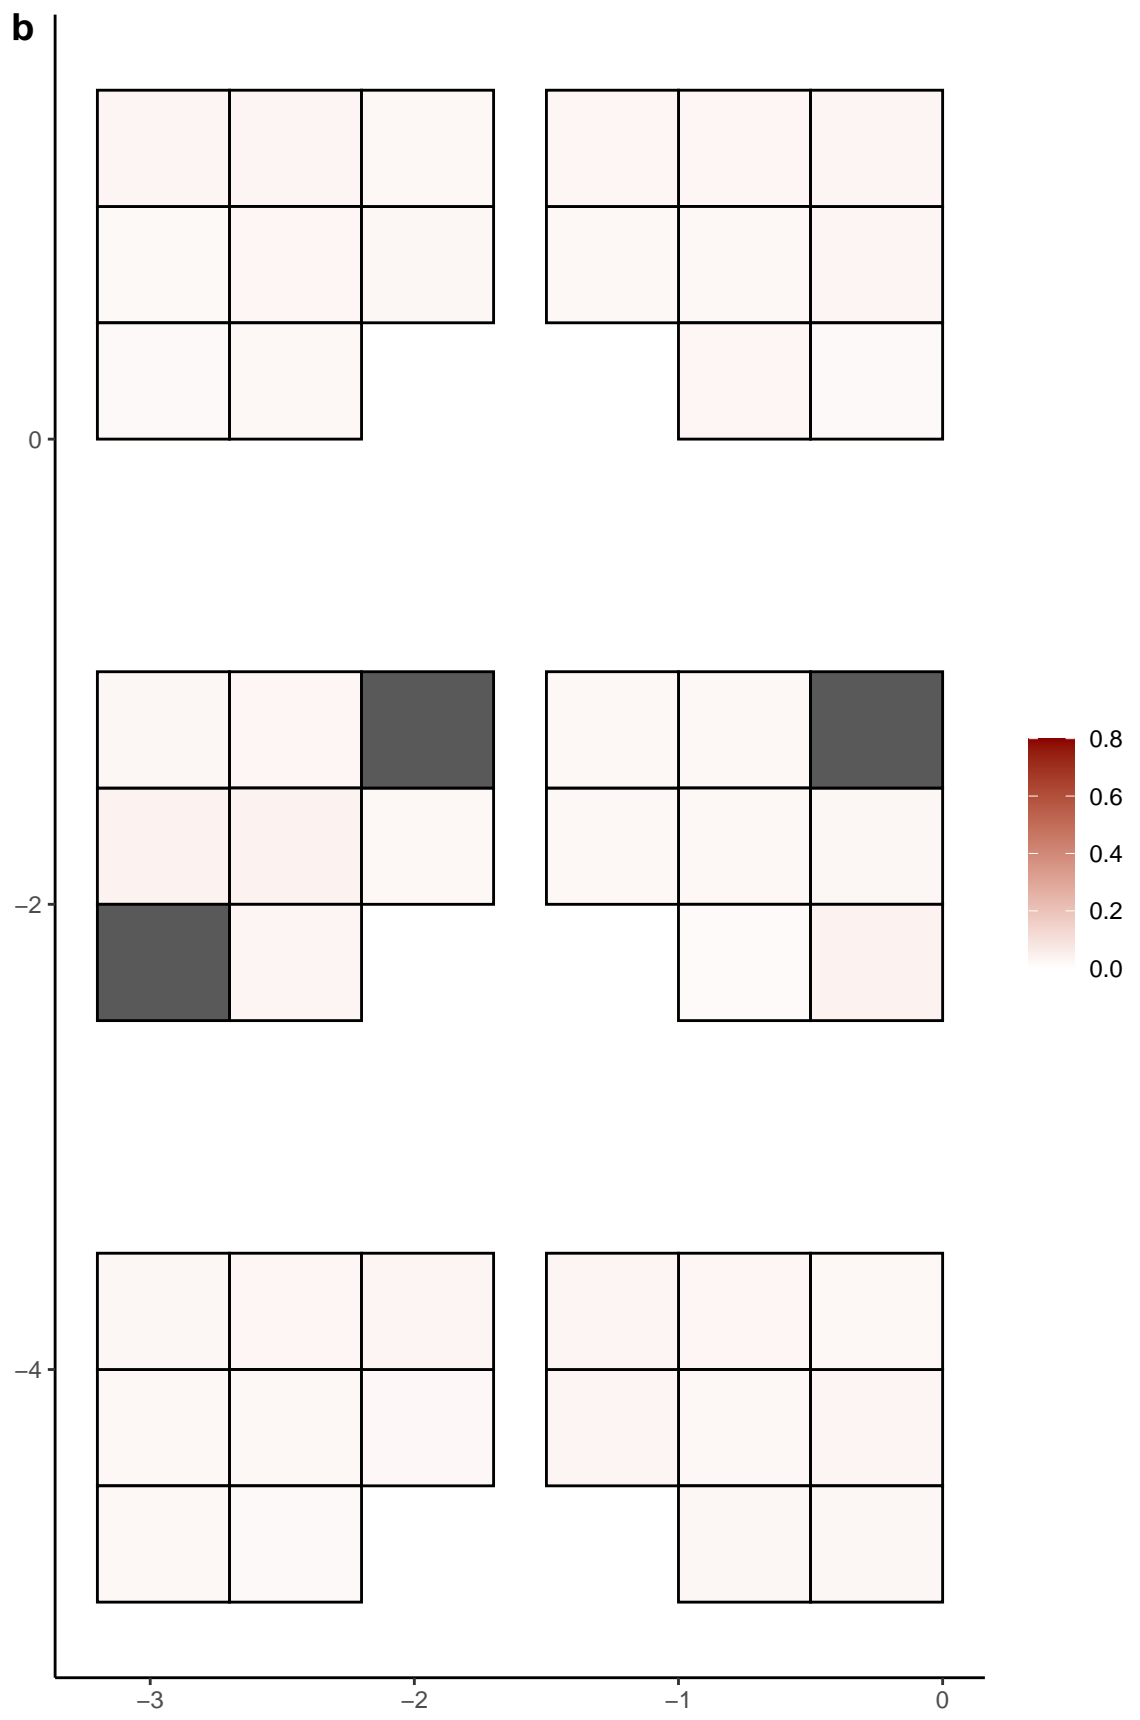

**a** ID05 9-107723679-T-A

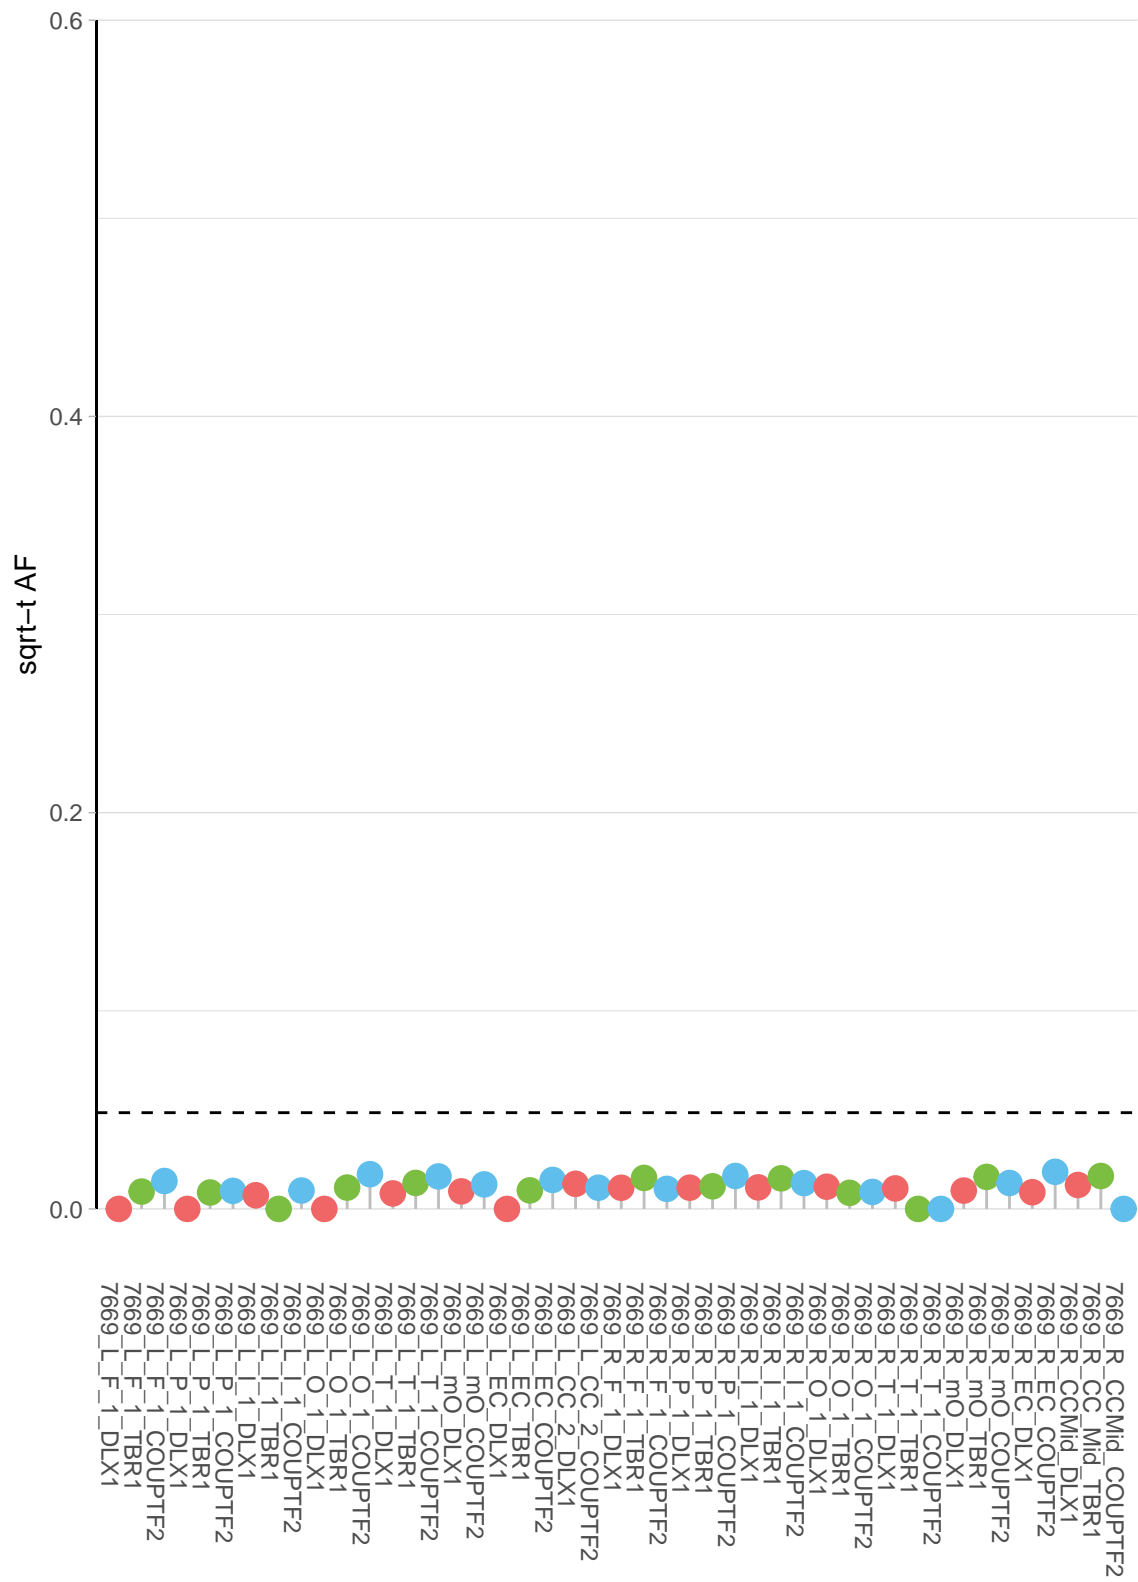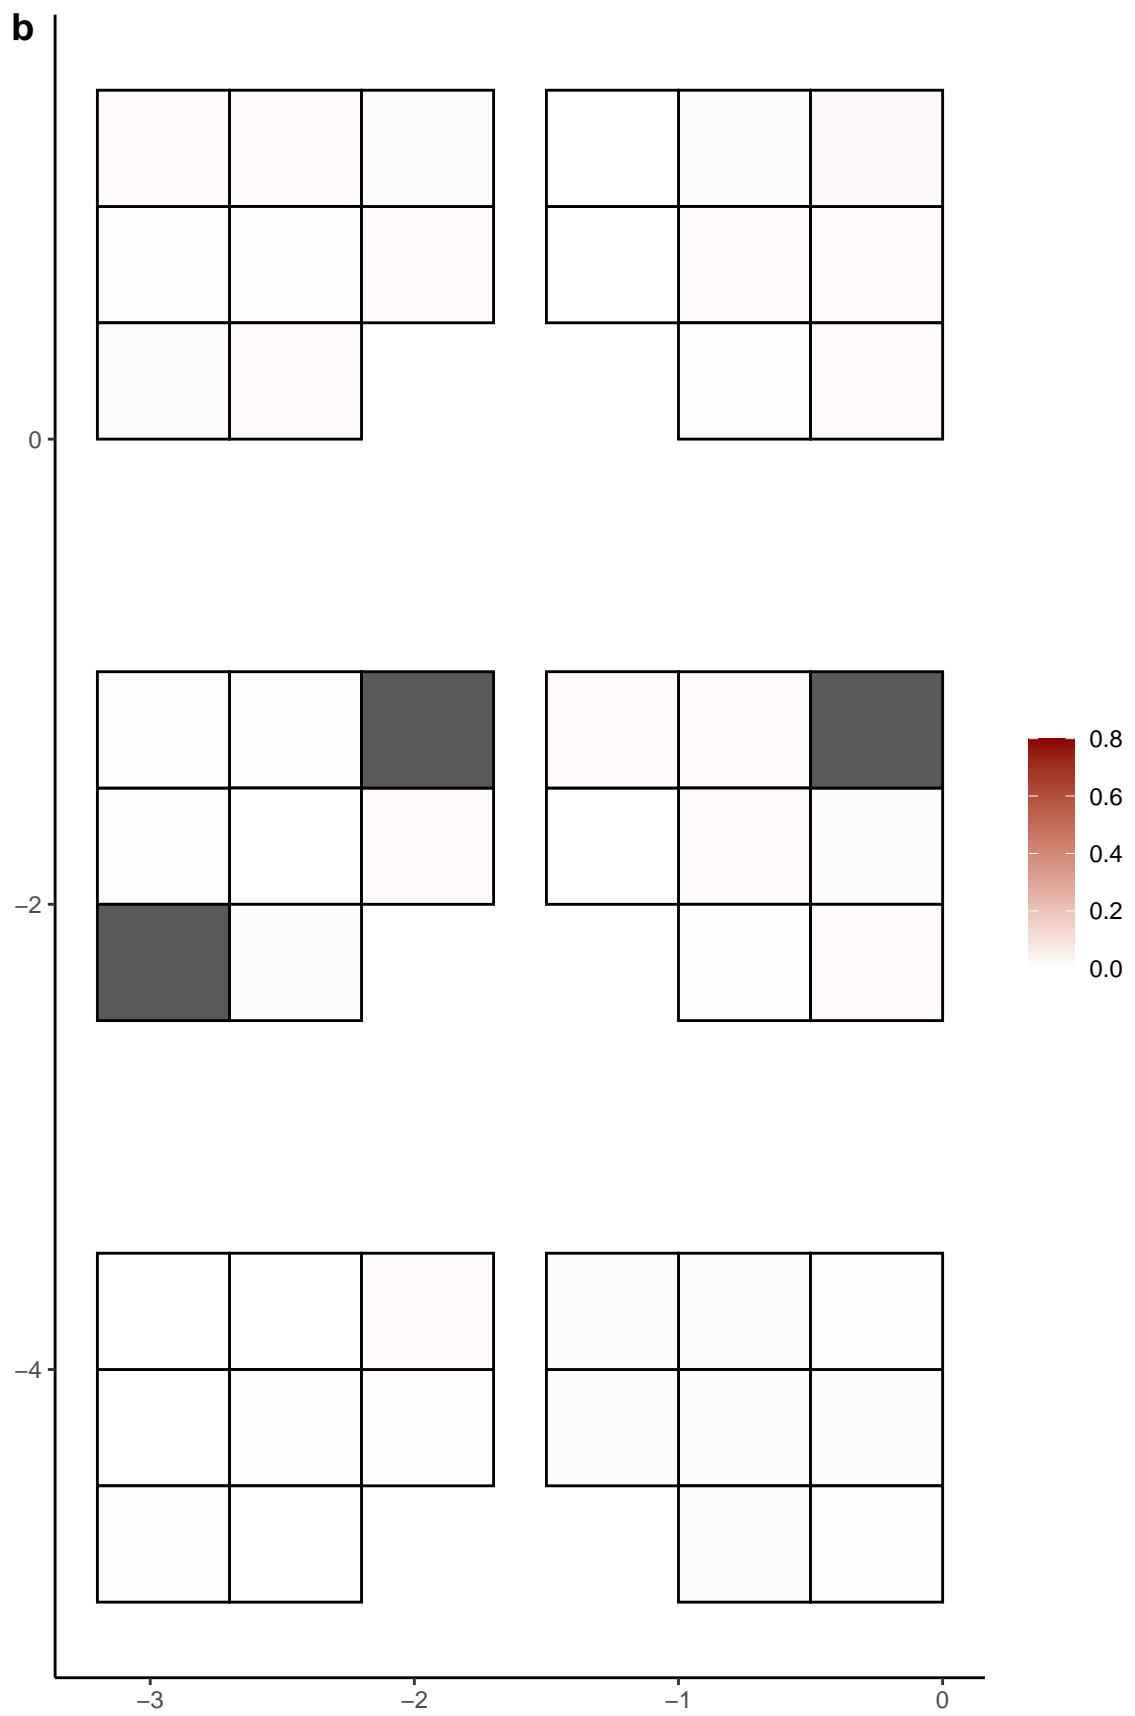

**a** ID05 9-10773884-G-A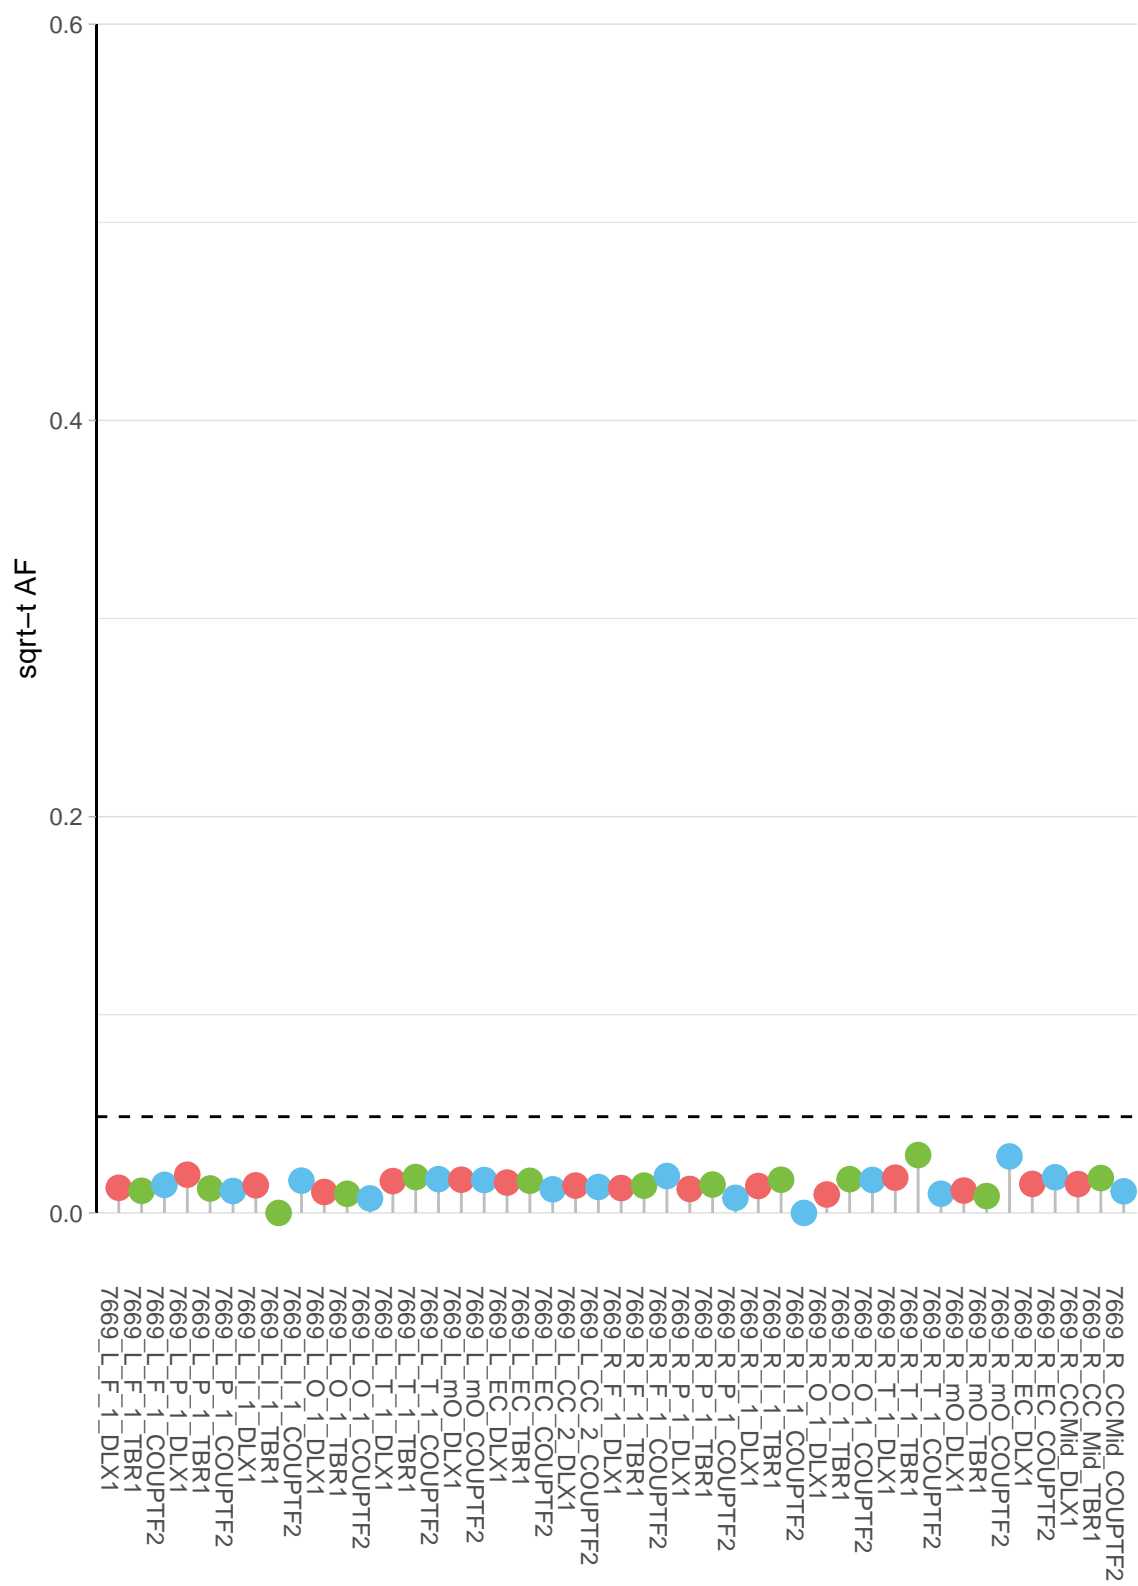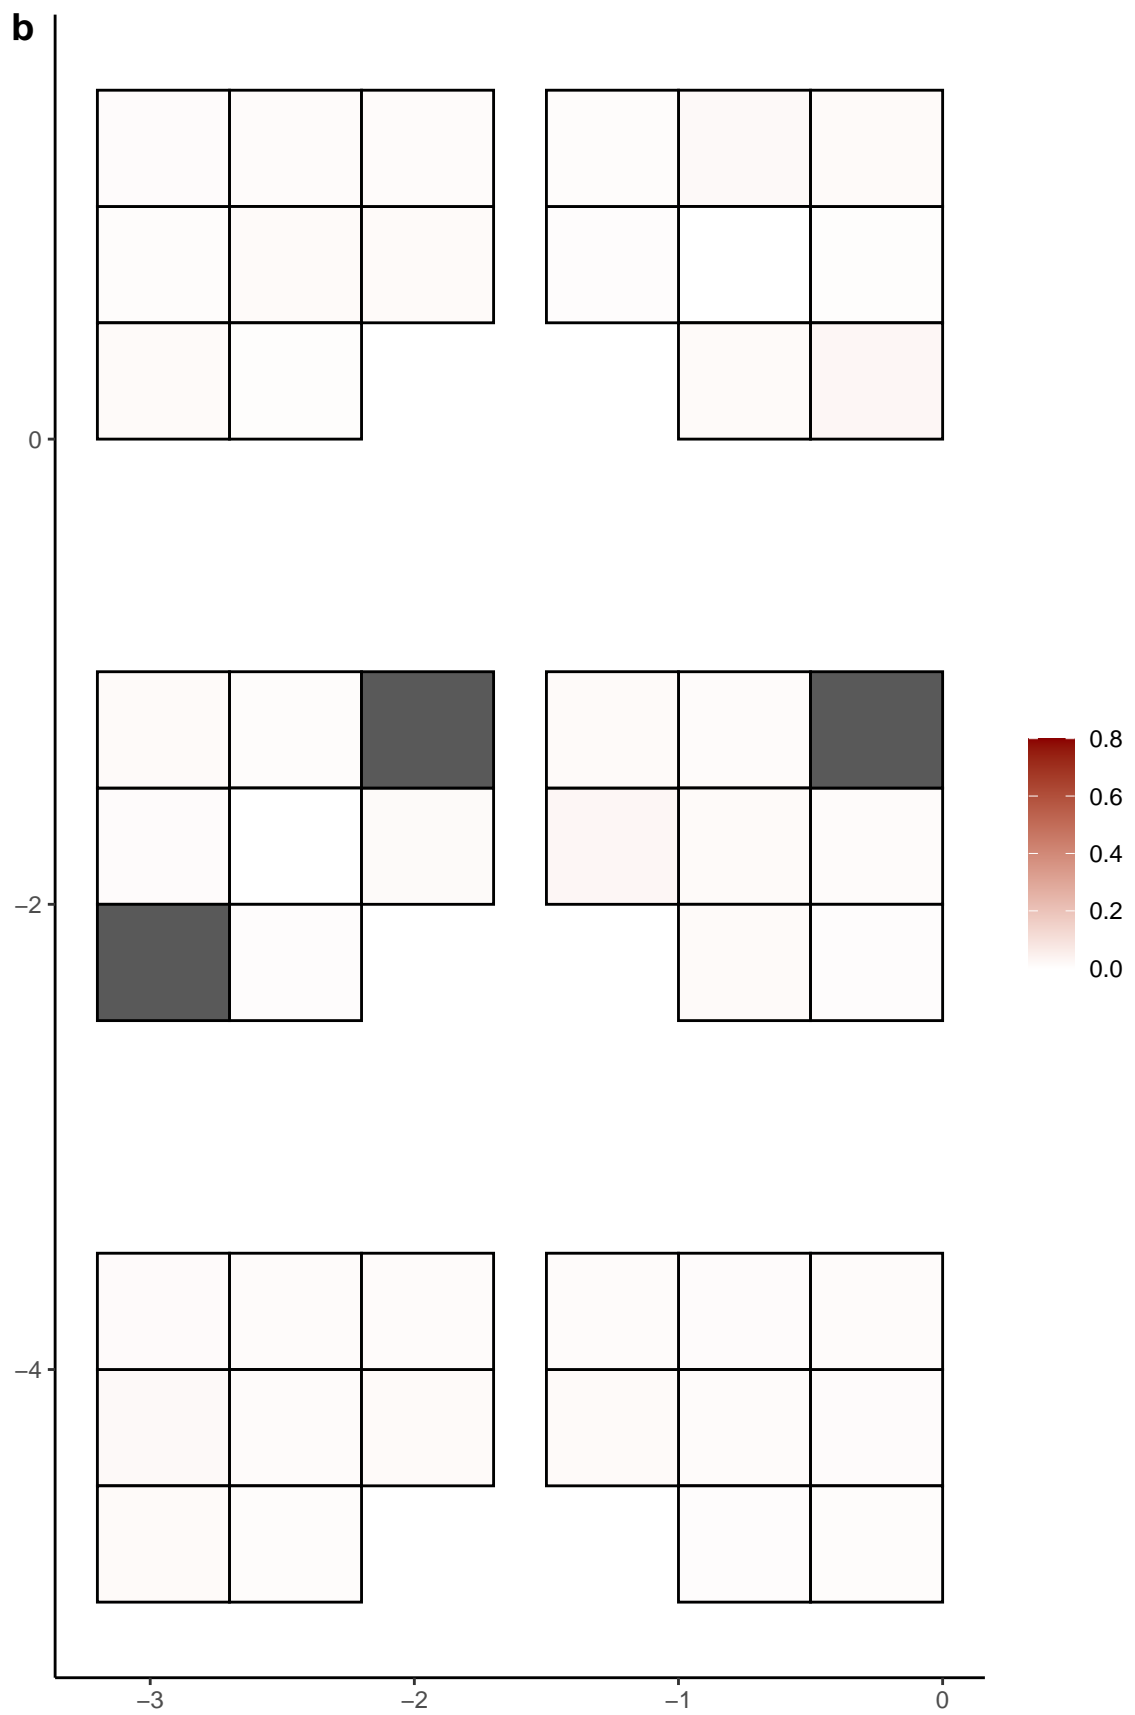

**a** ID05 9-119721731-C-T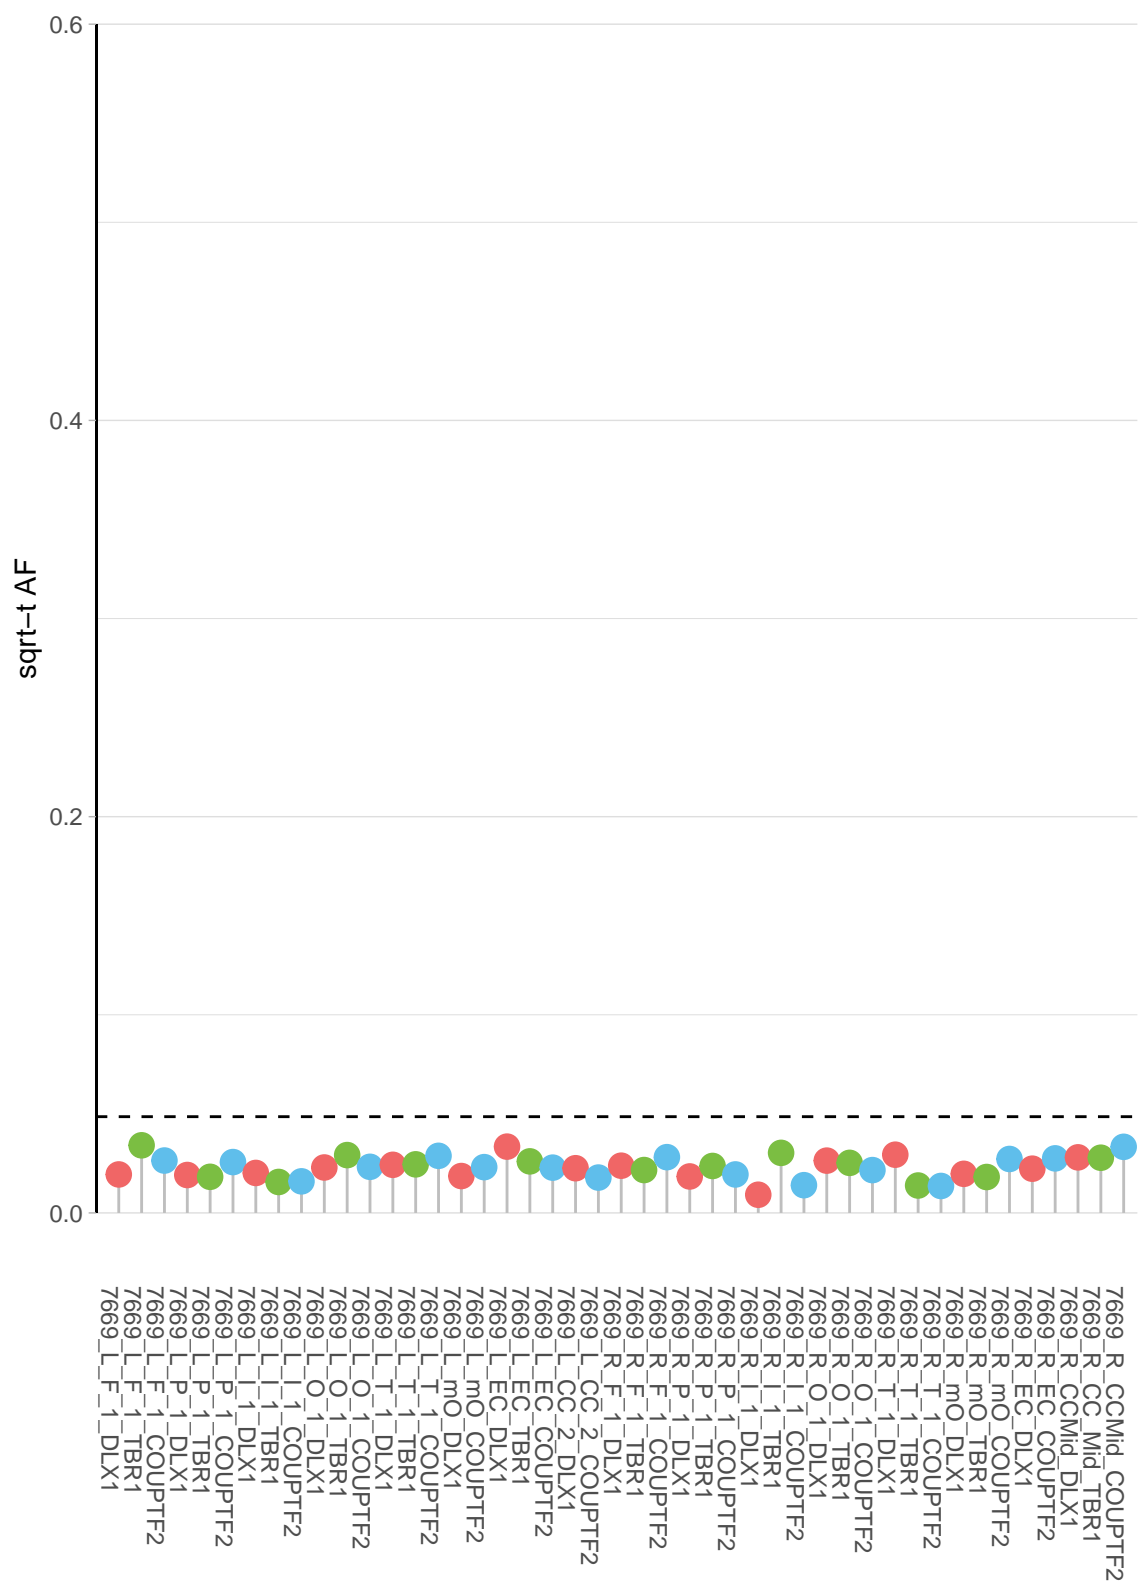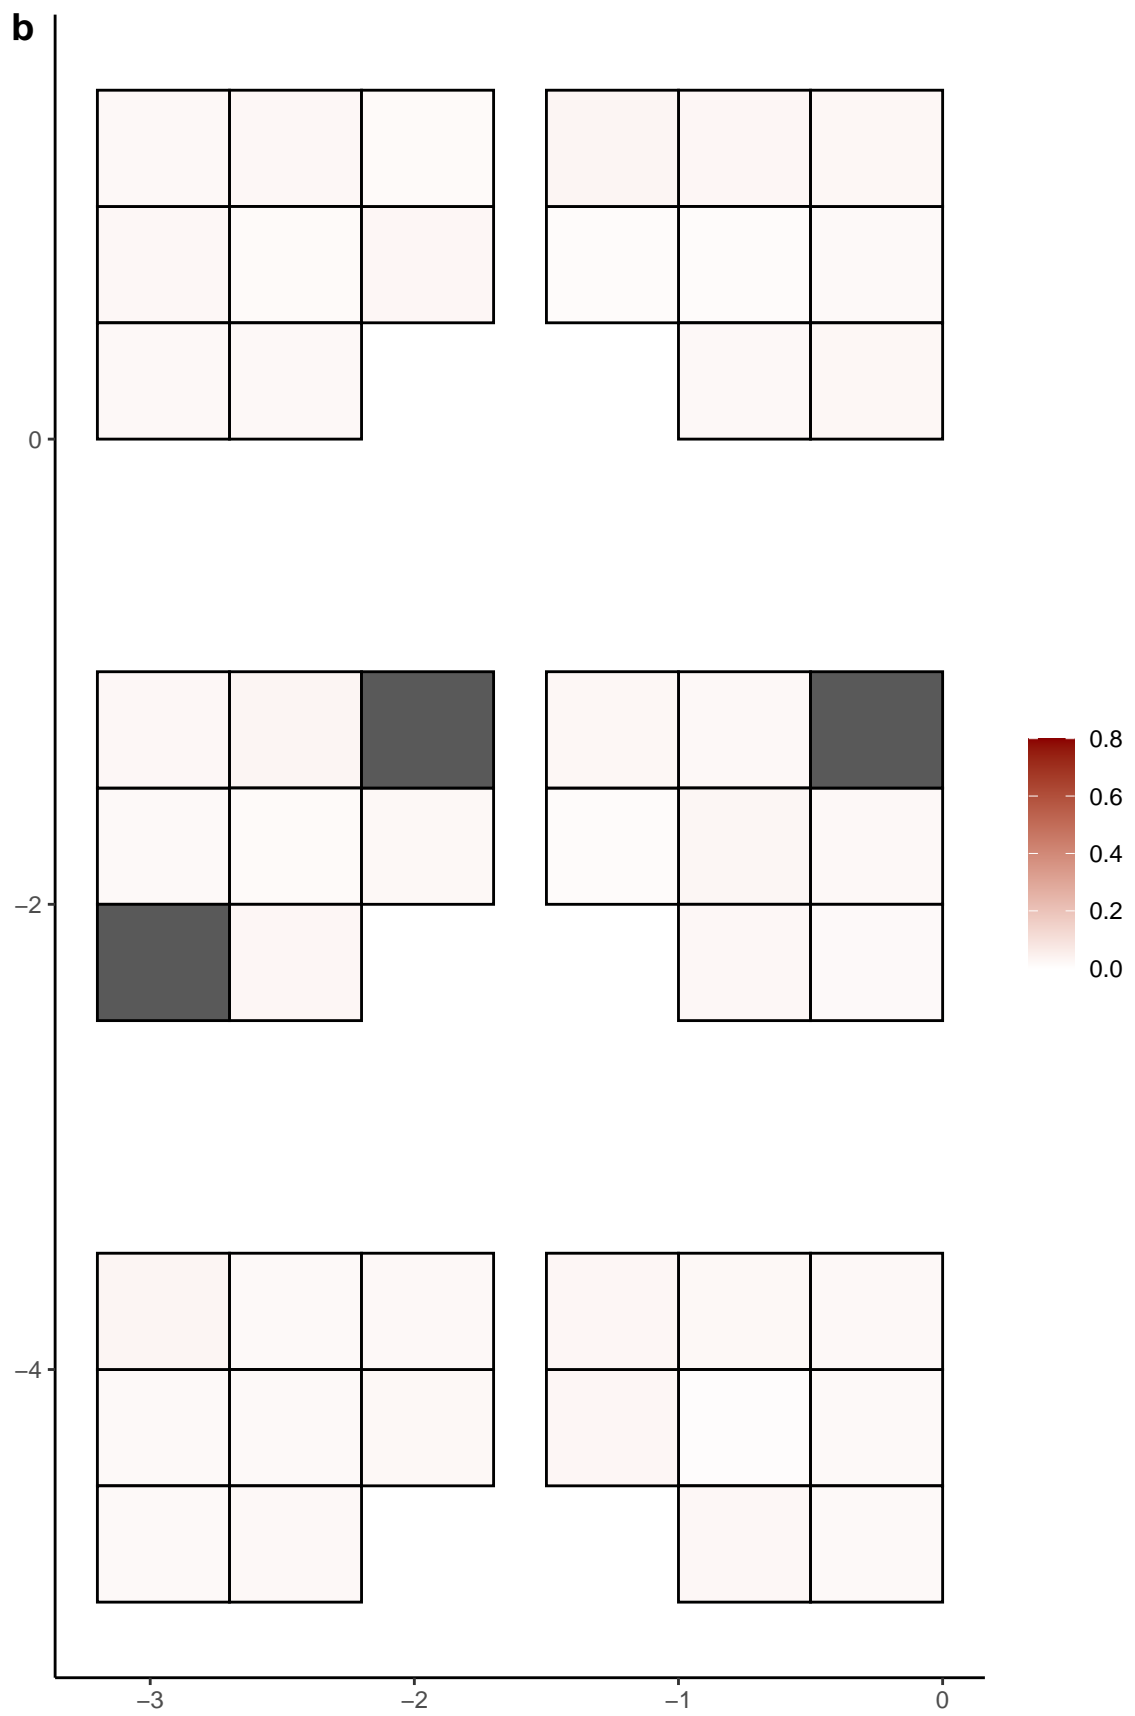





**a** ID05 9-121997207-C-T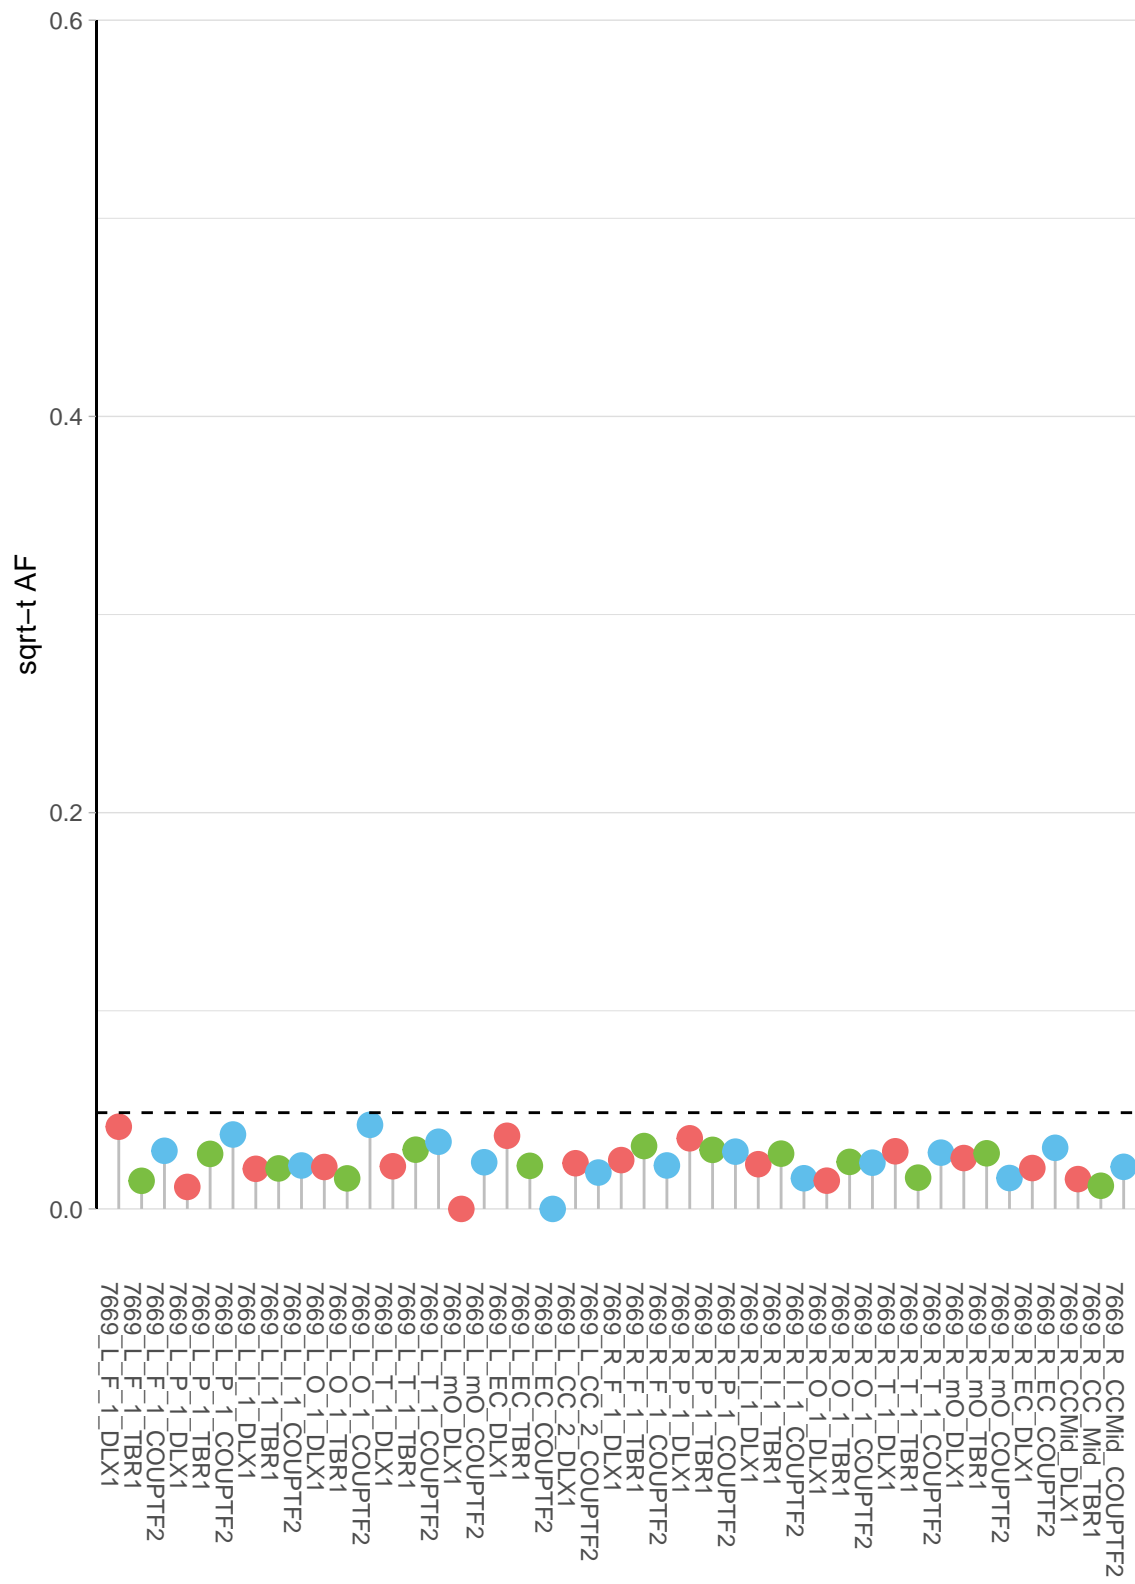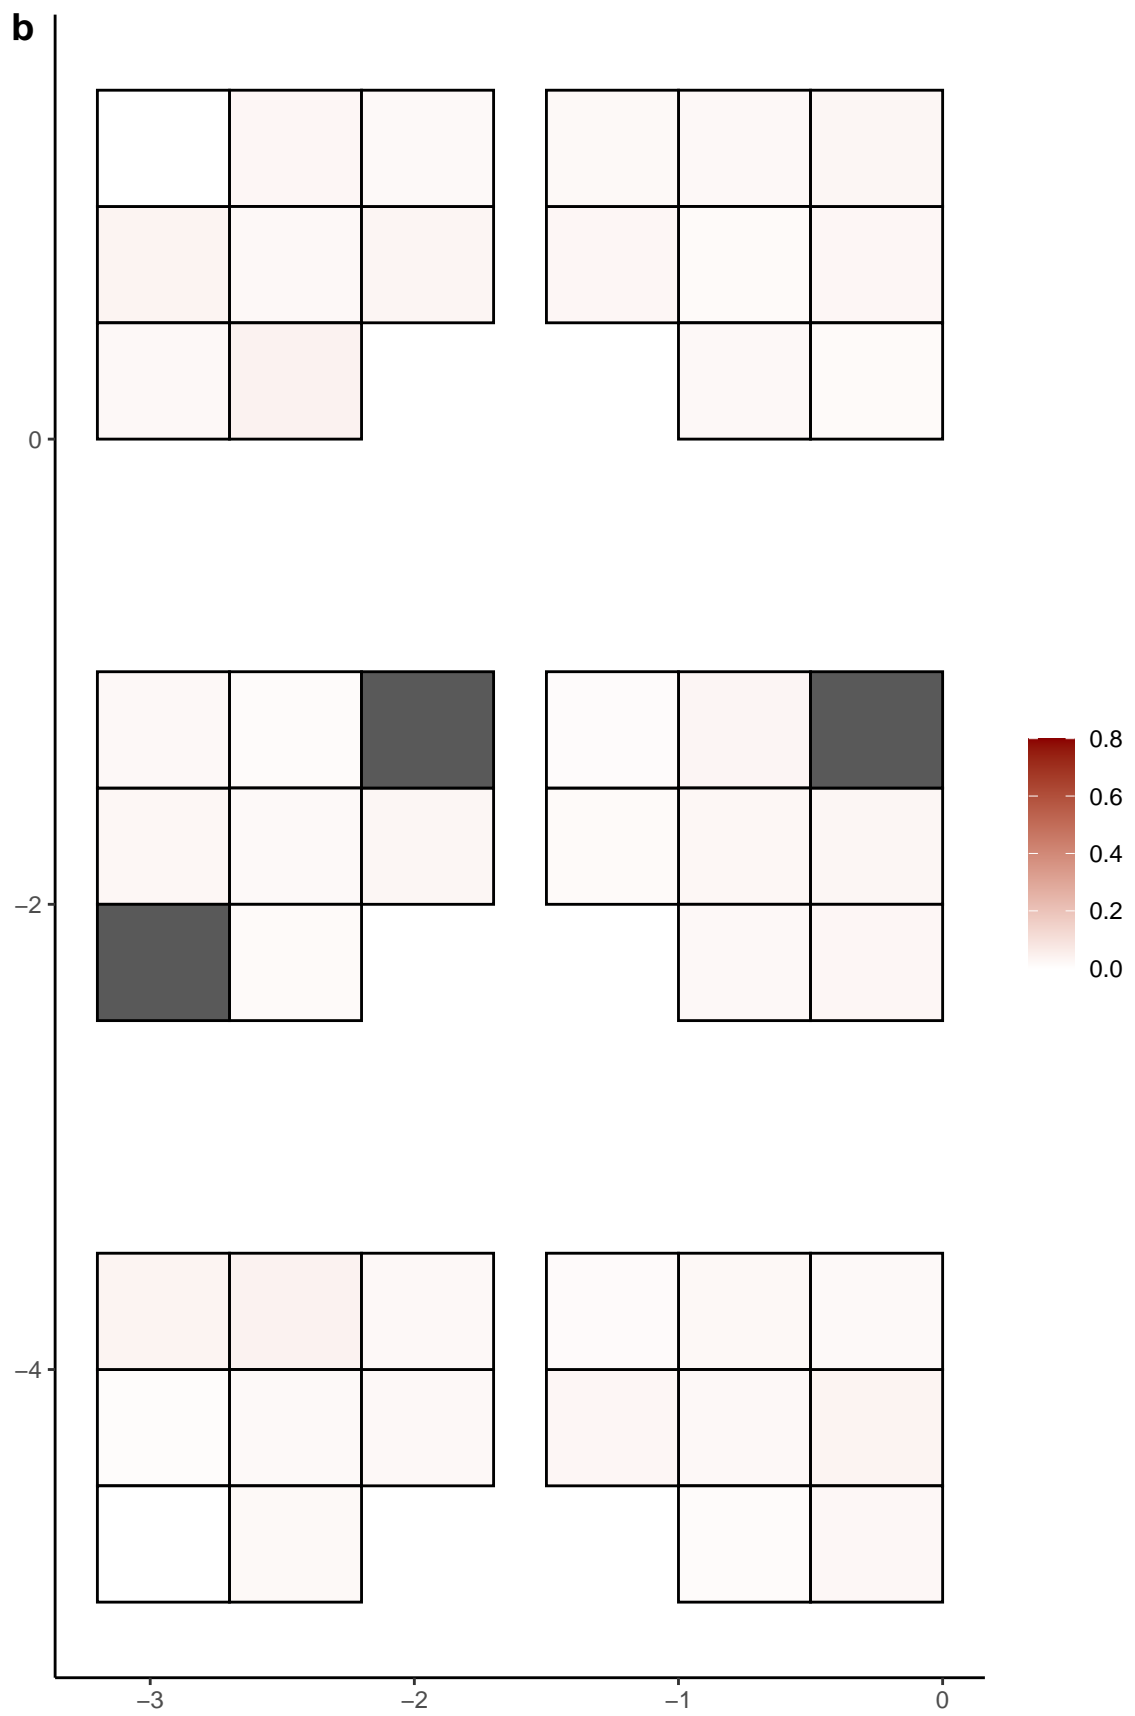

**a** ID05 9-12287979-T-C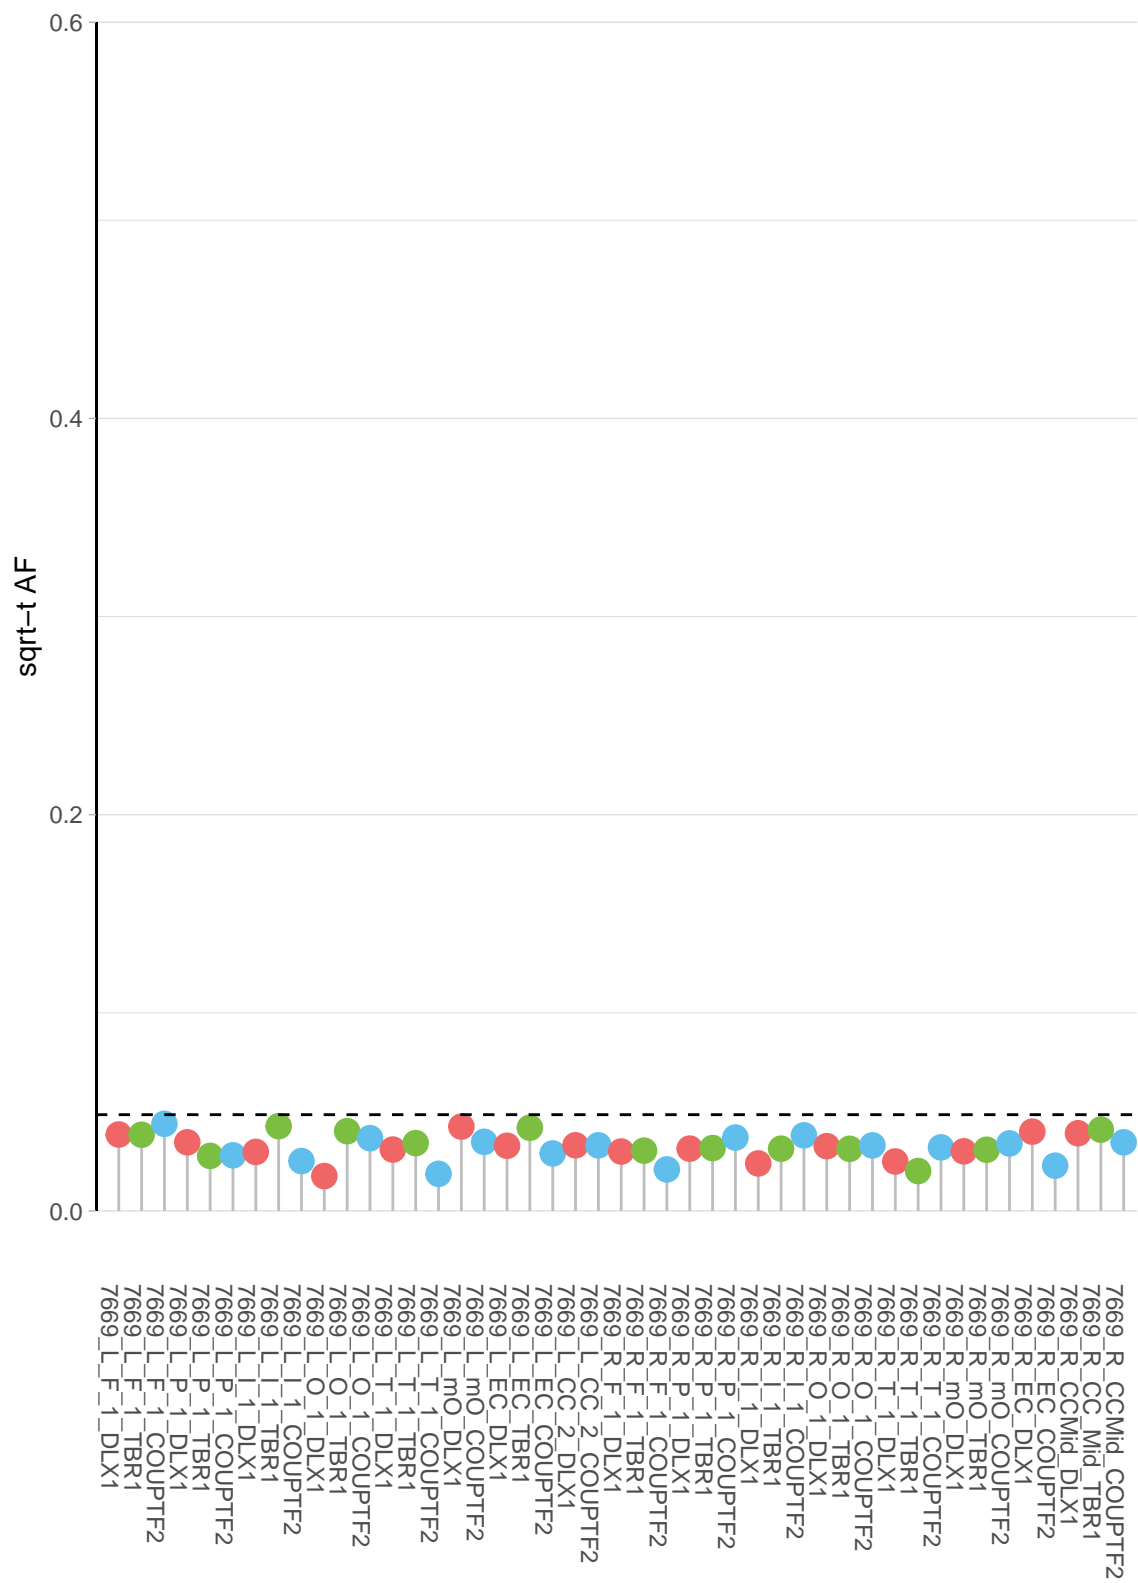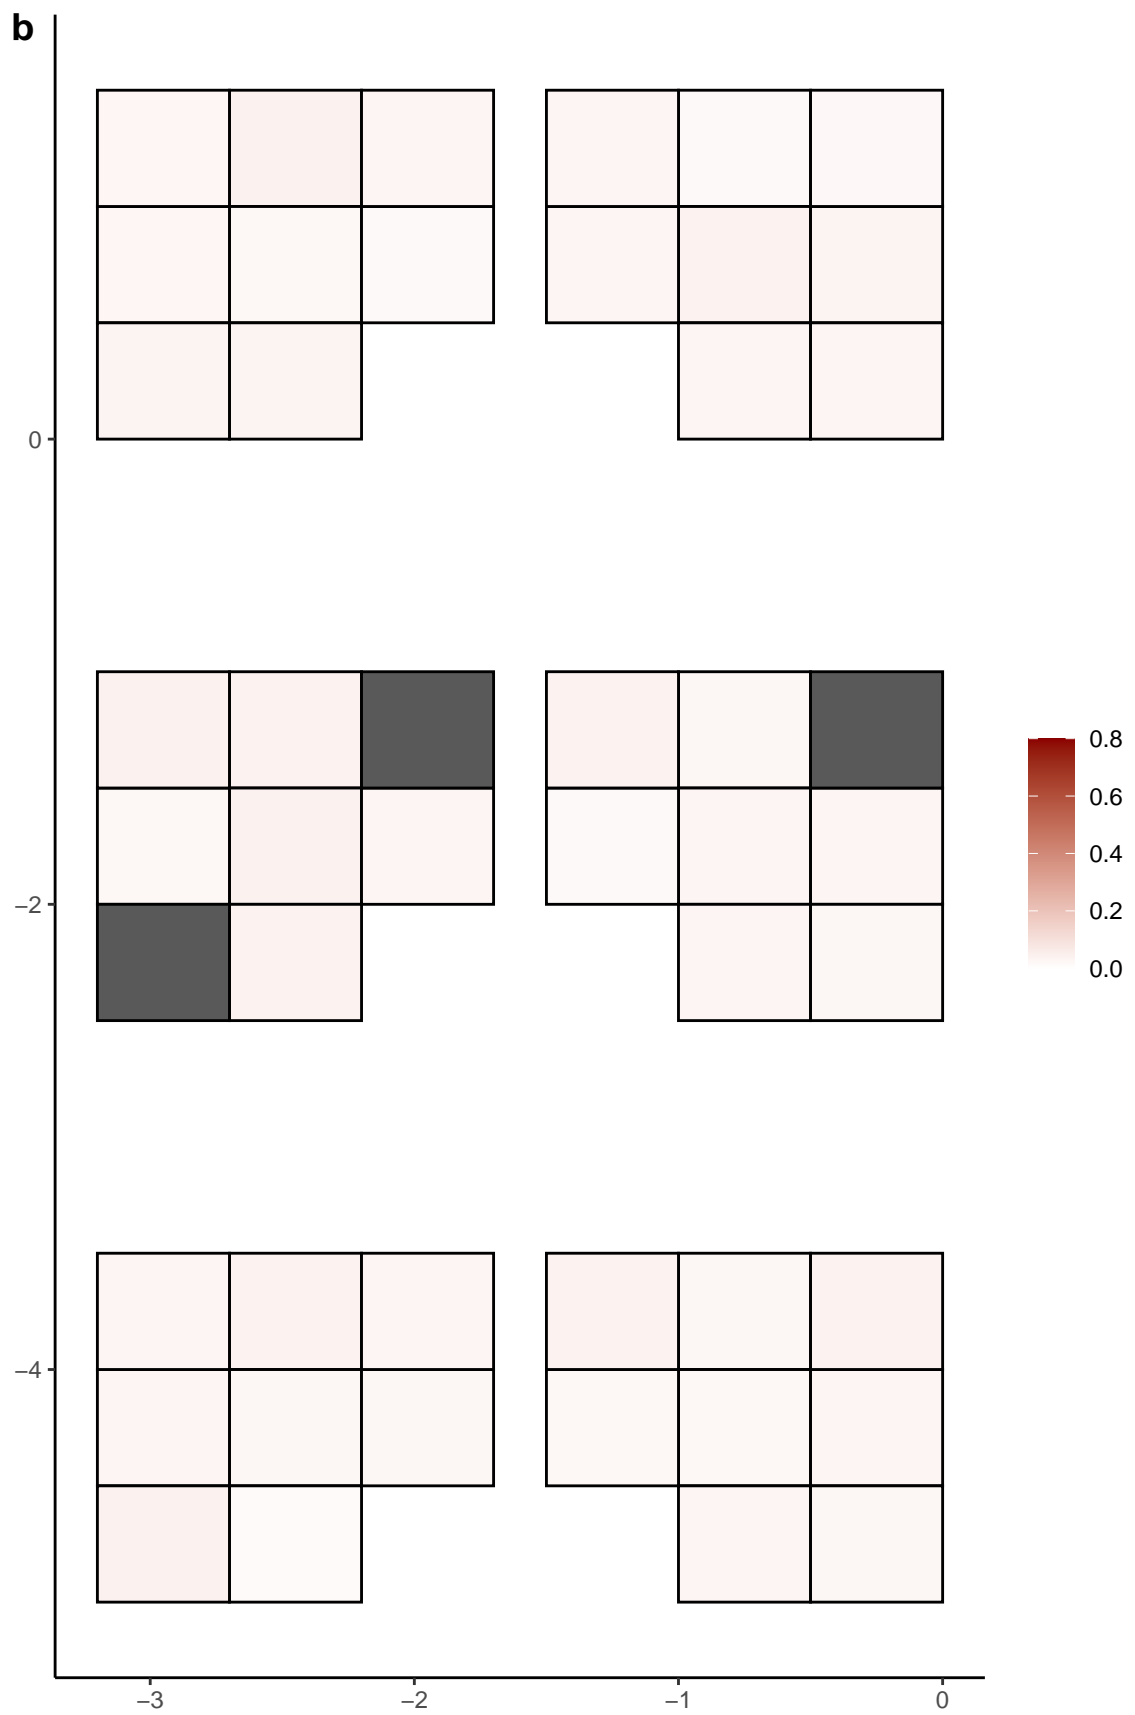

**a** ID05 9-126795616-G-A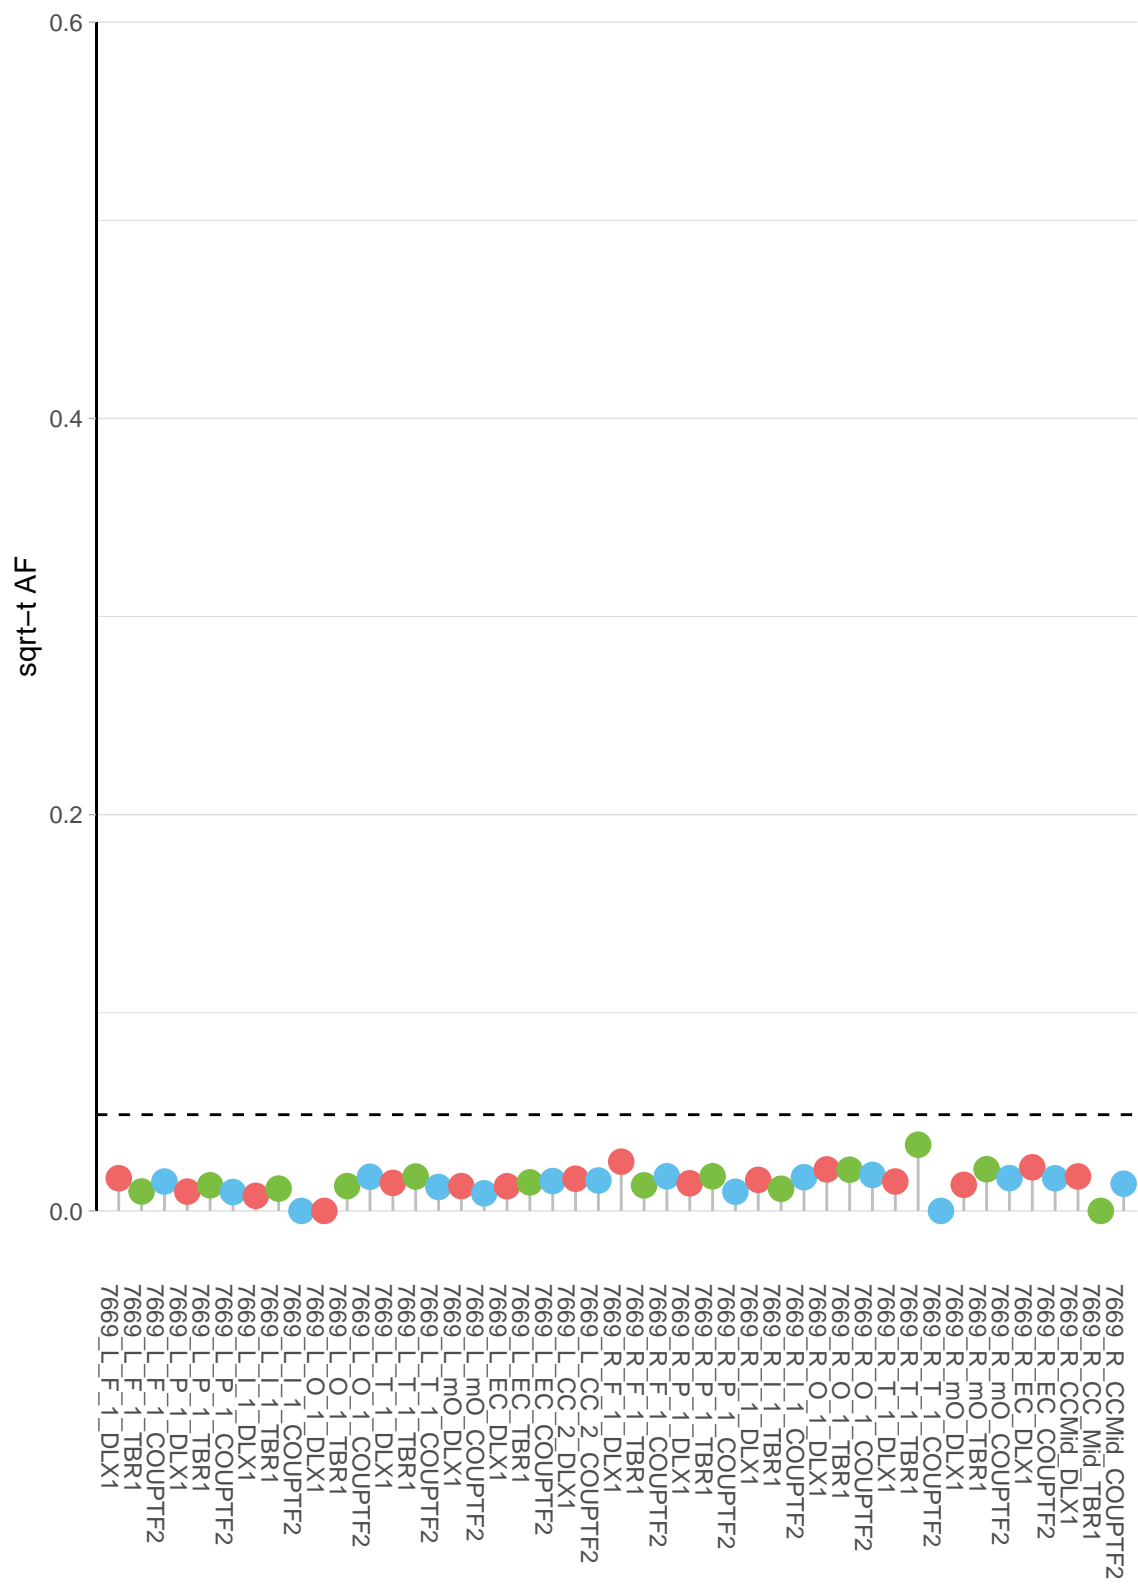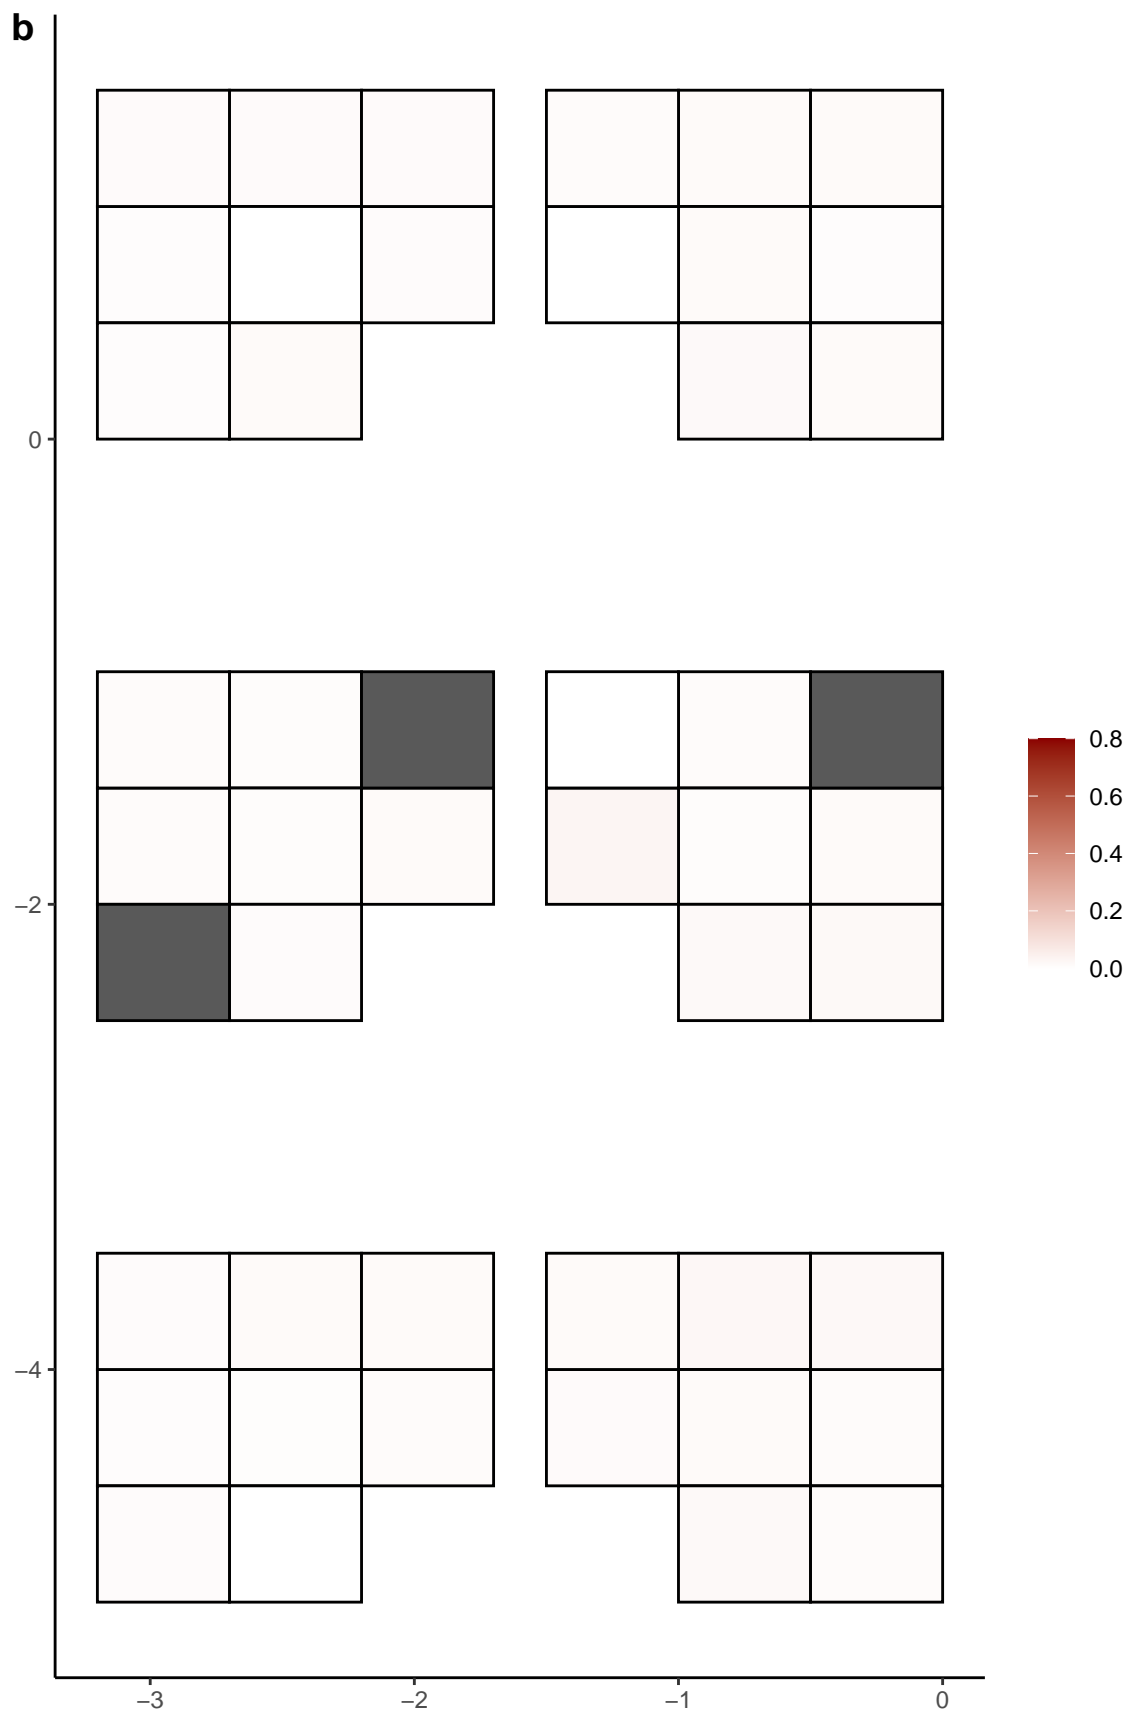

**a** ID05 9–134621051–C–T

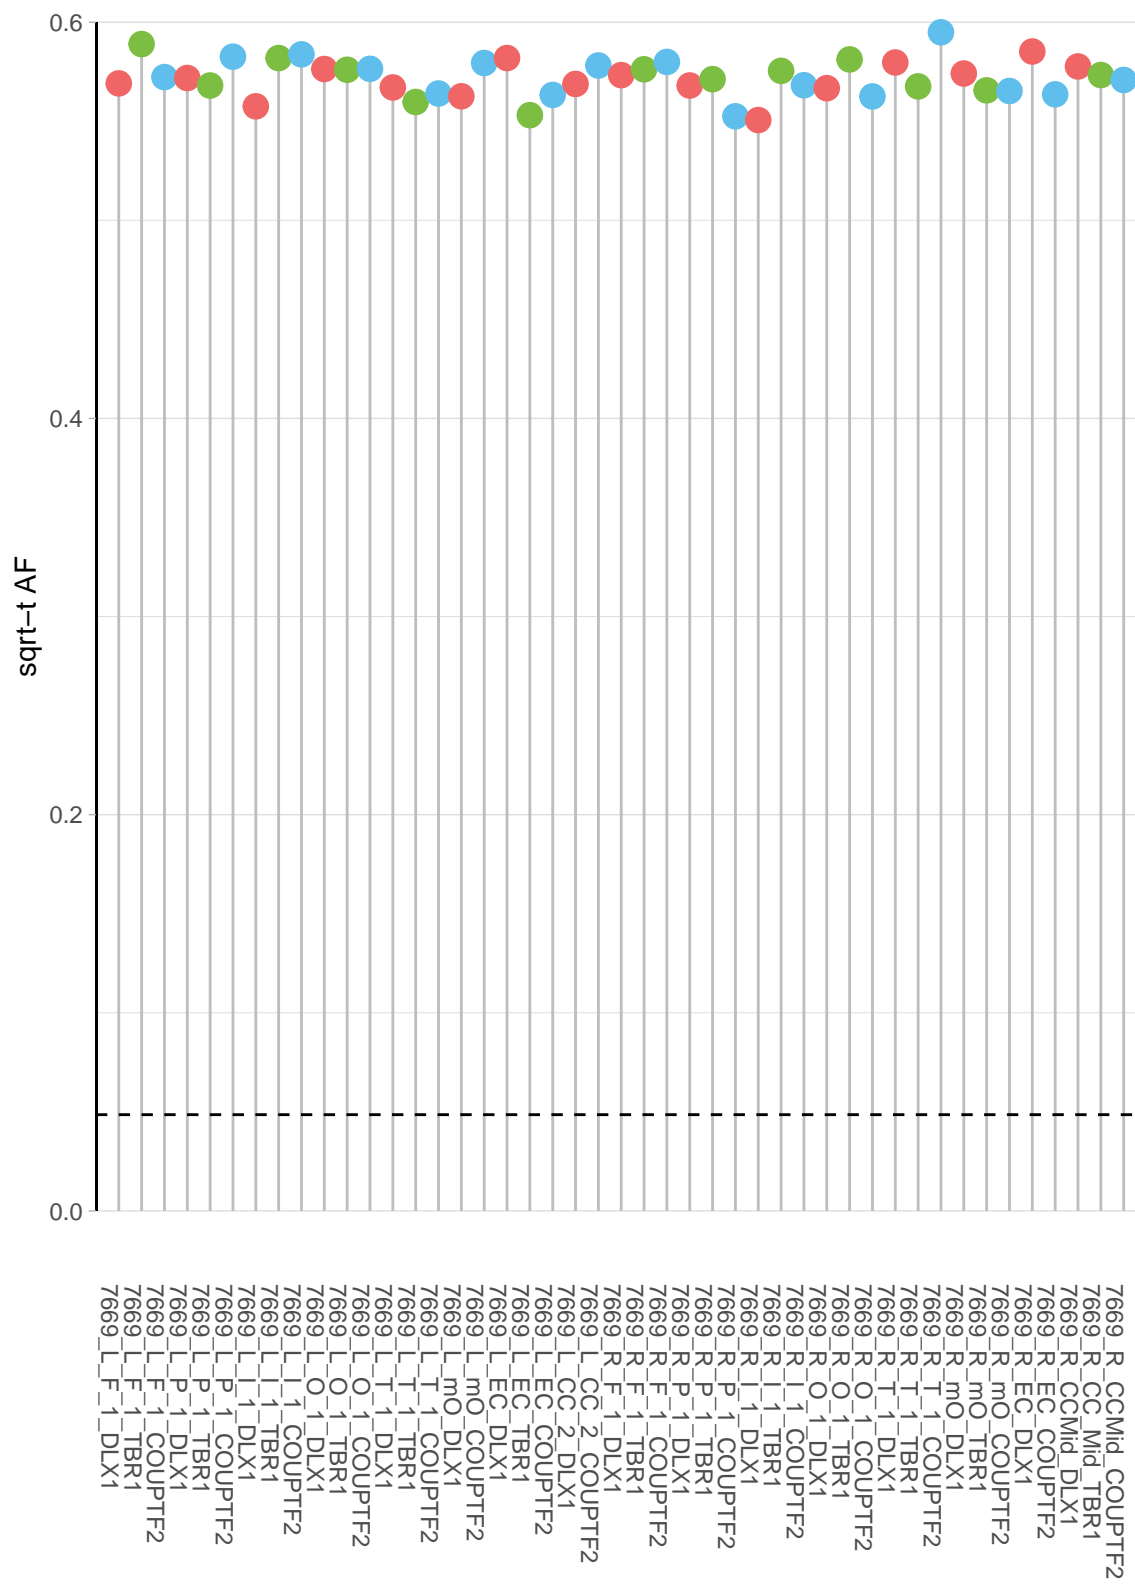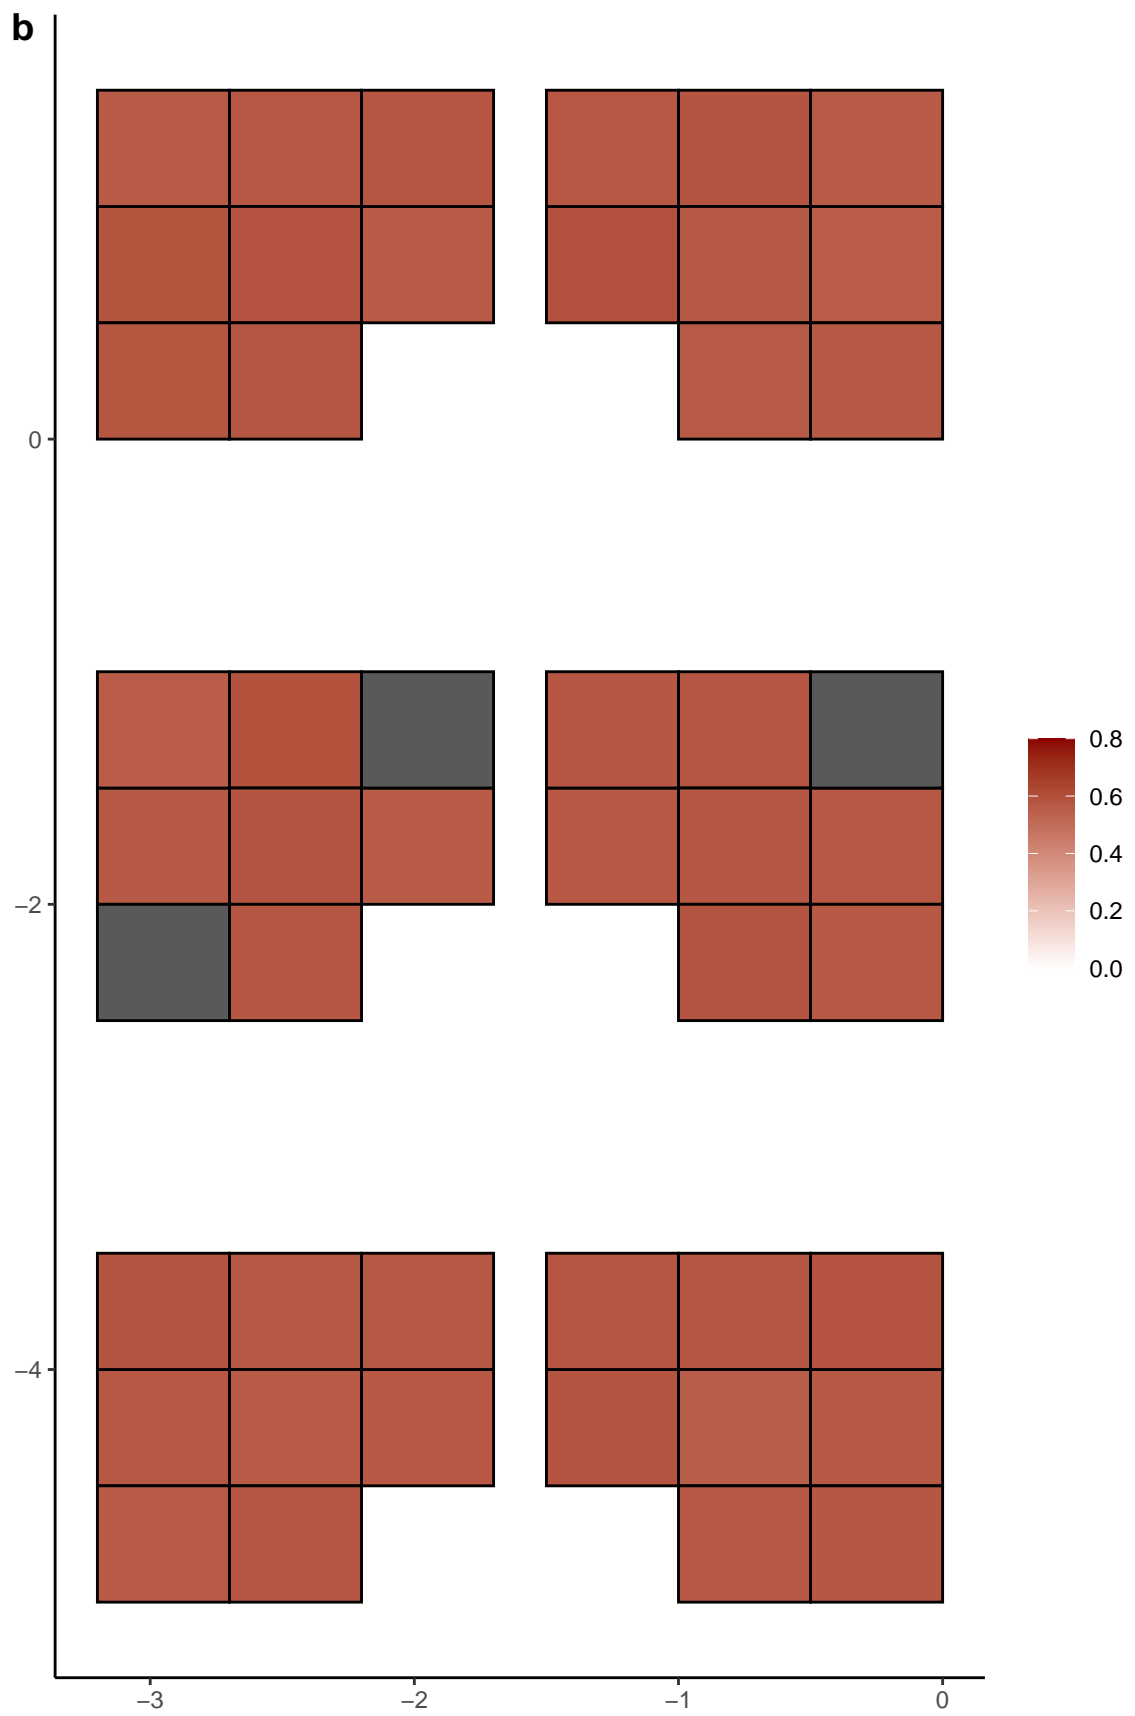



**a** ID05 9-138162523-G-A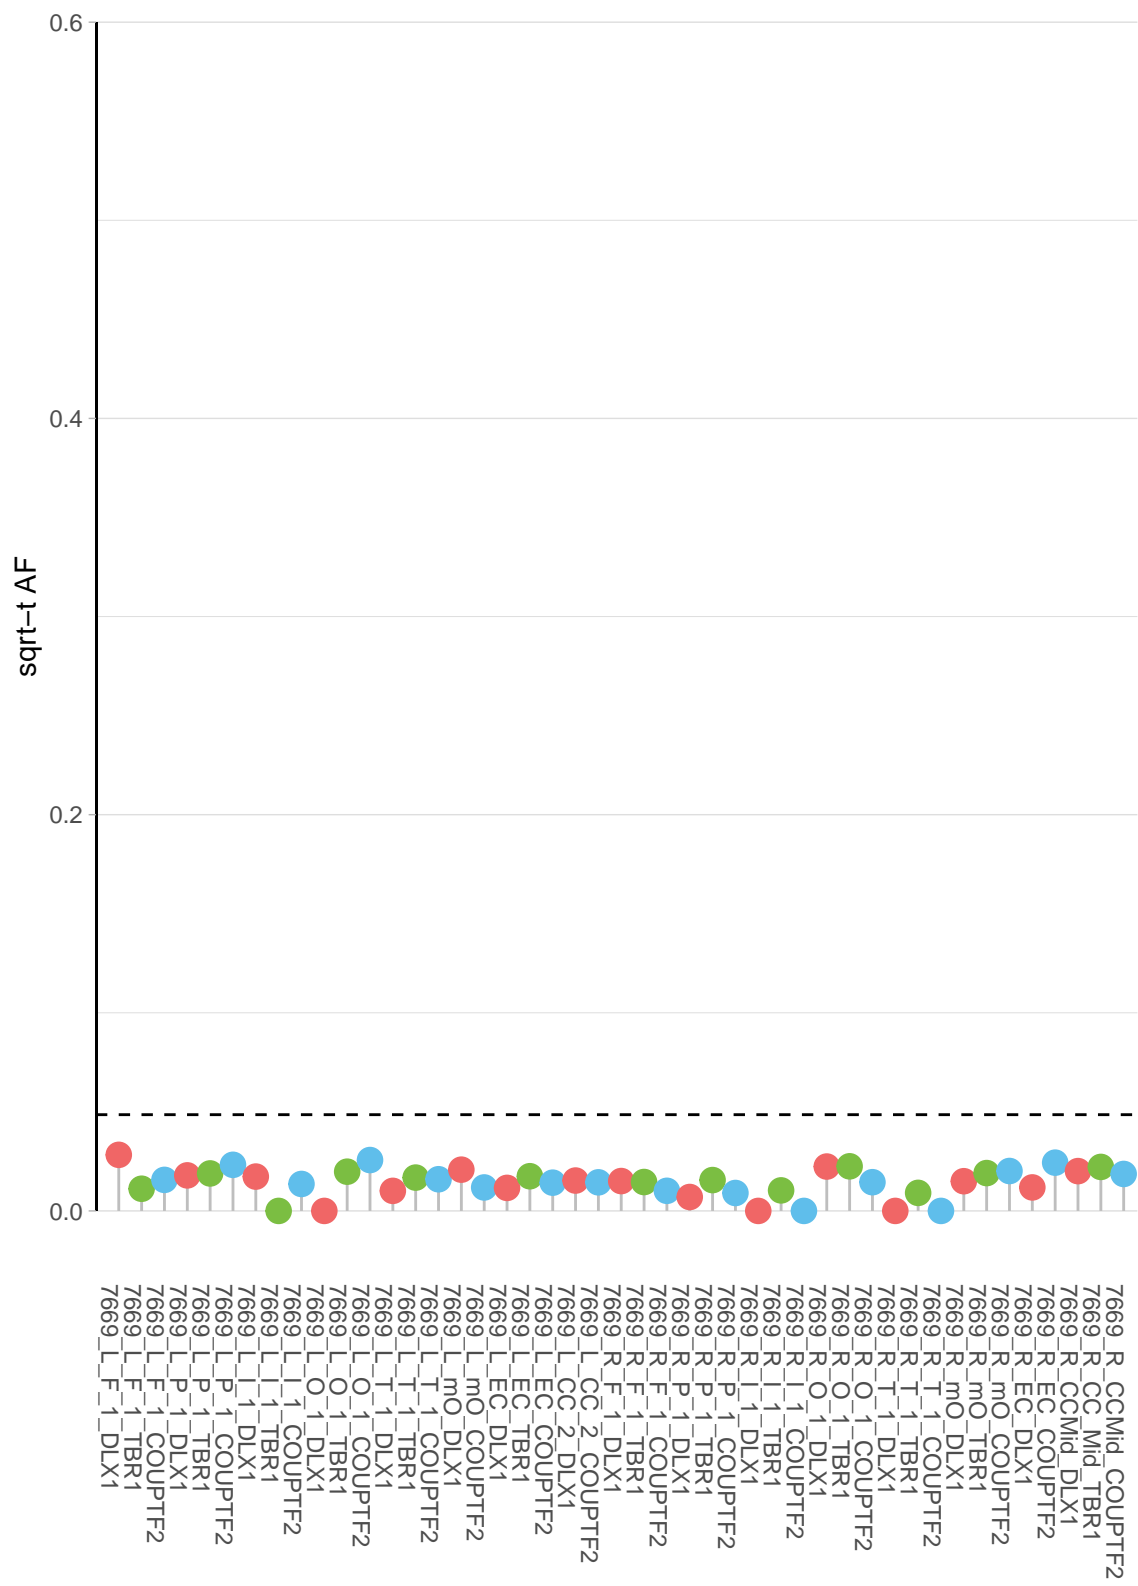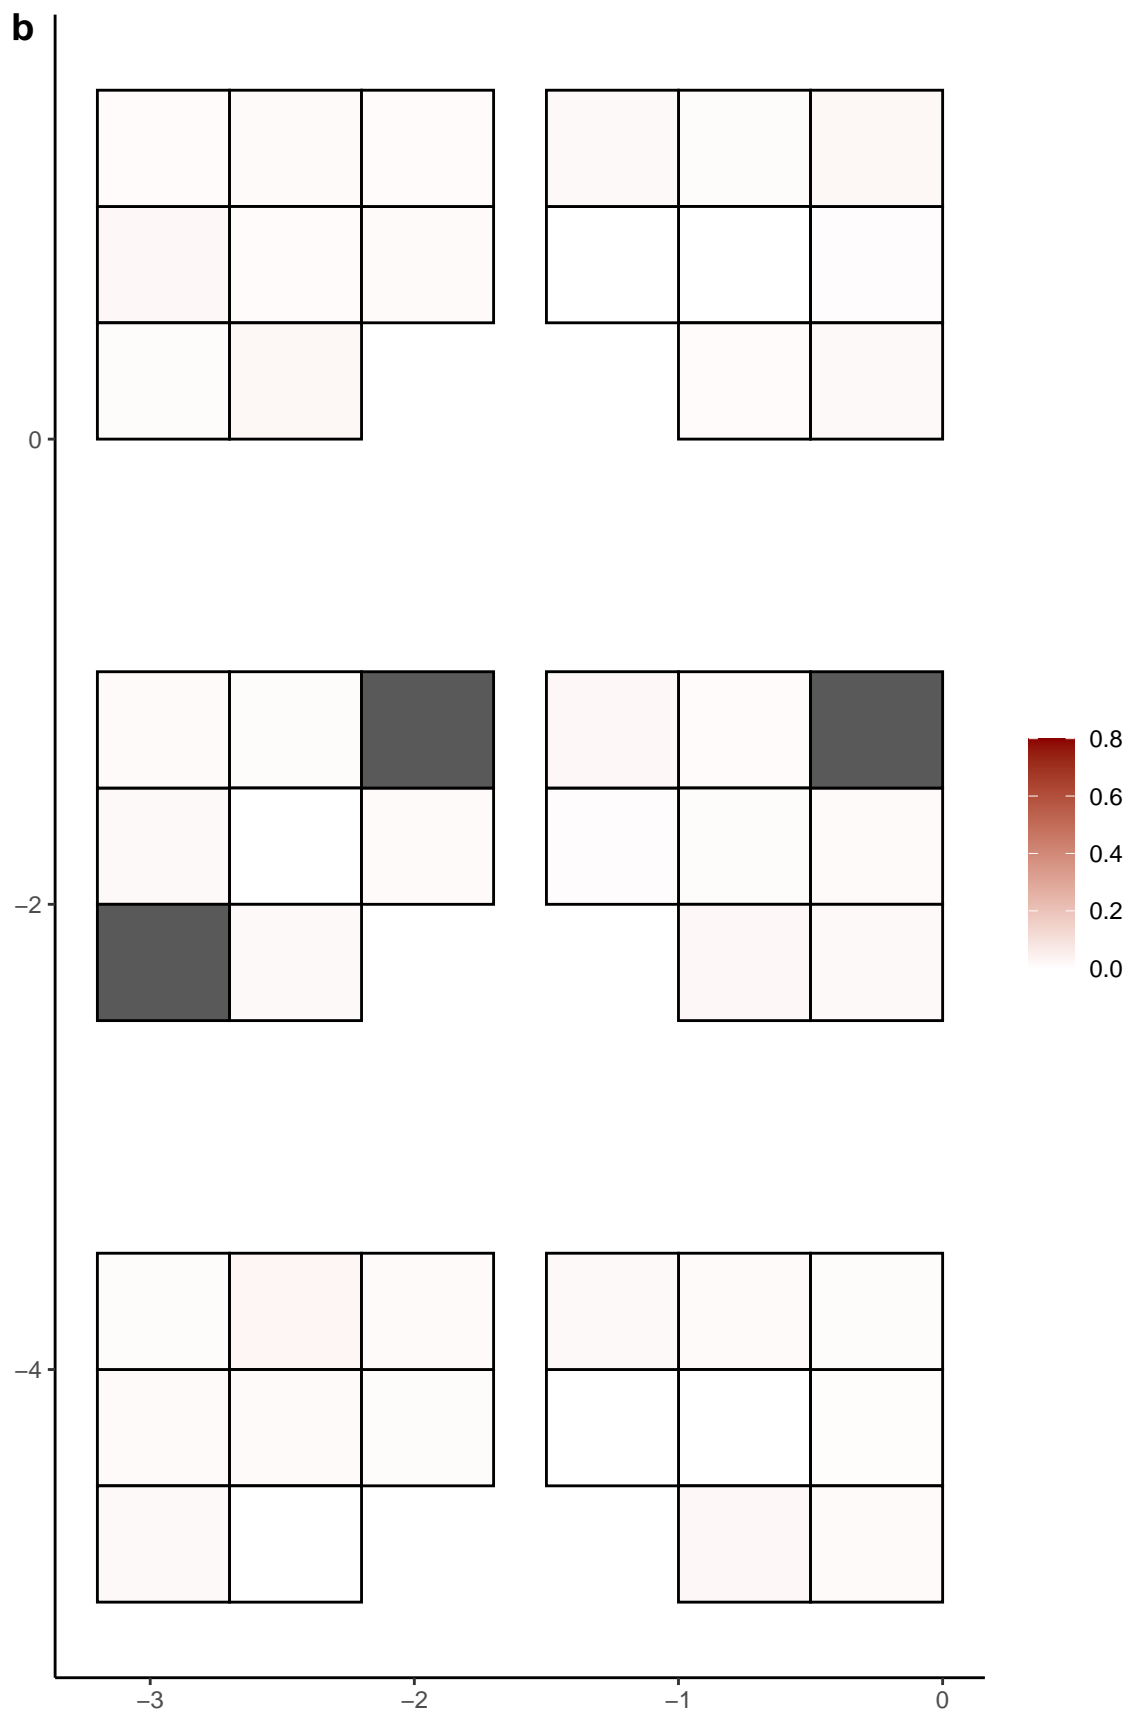

**a** ID05 9-14510306-G-A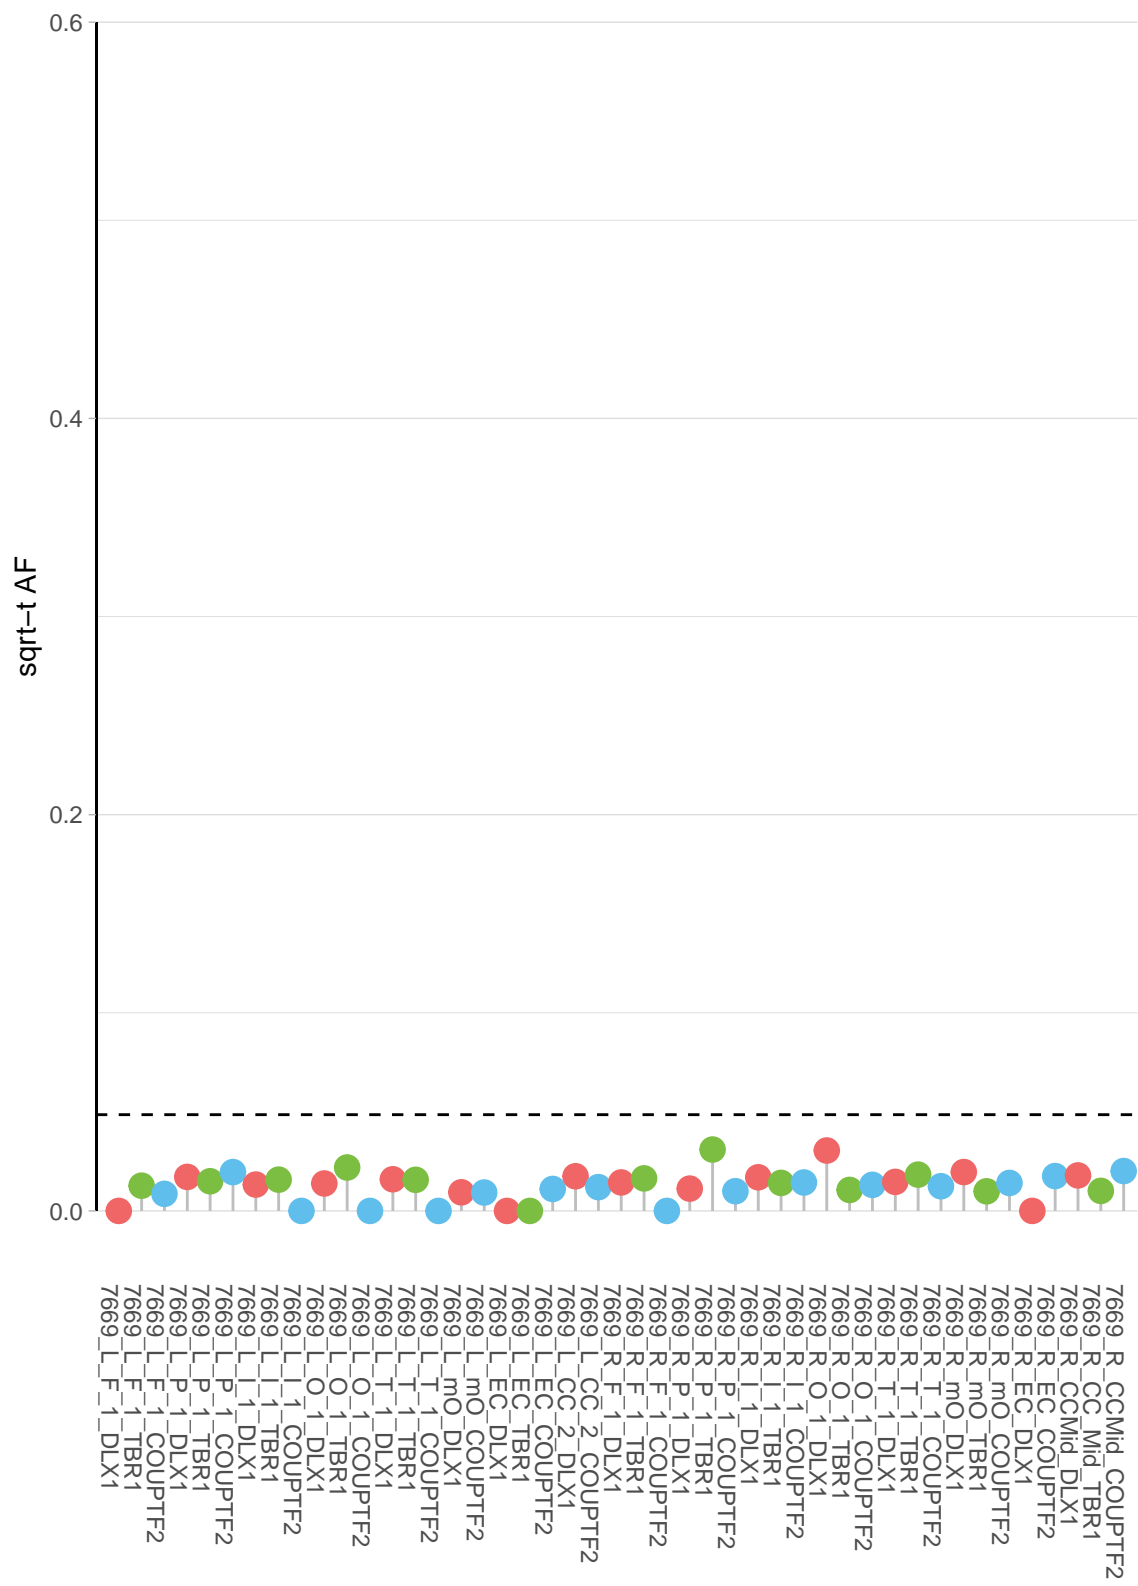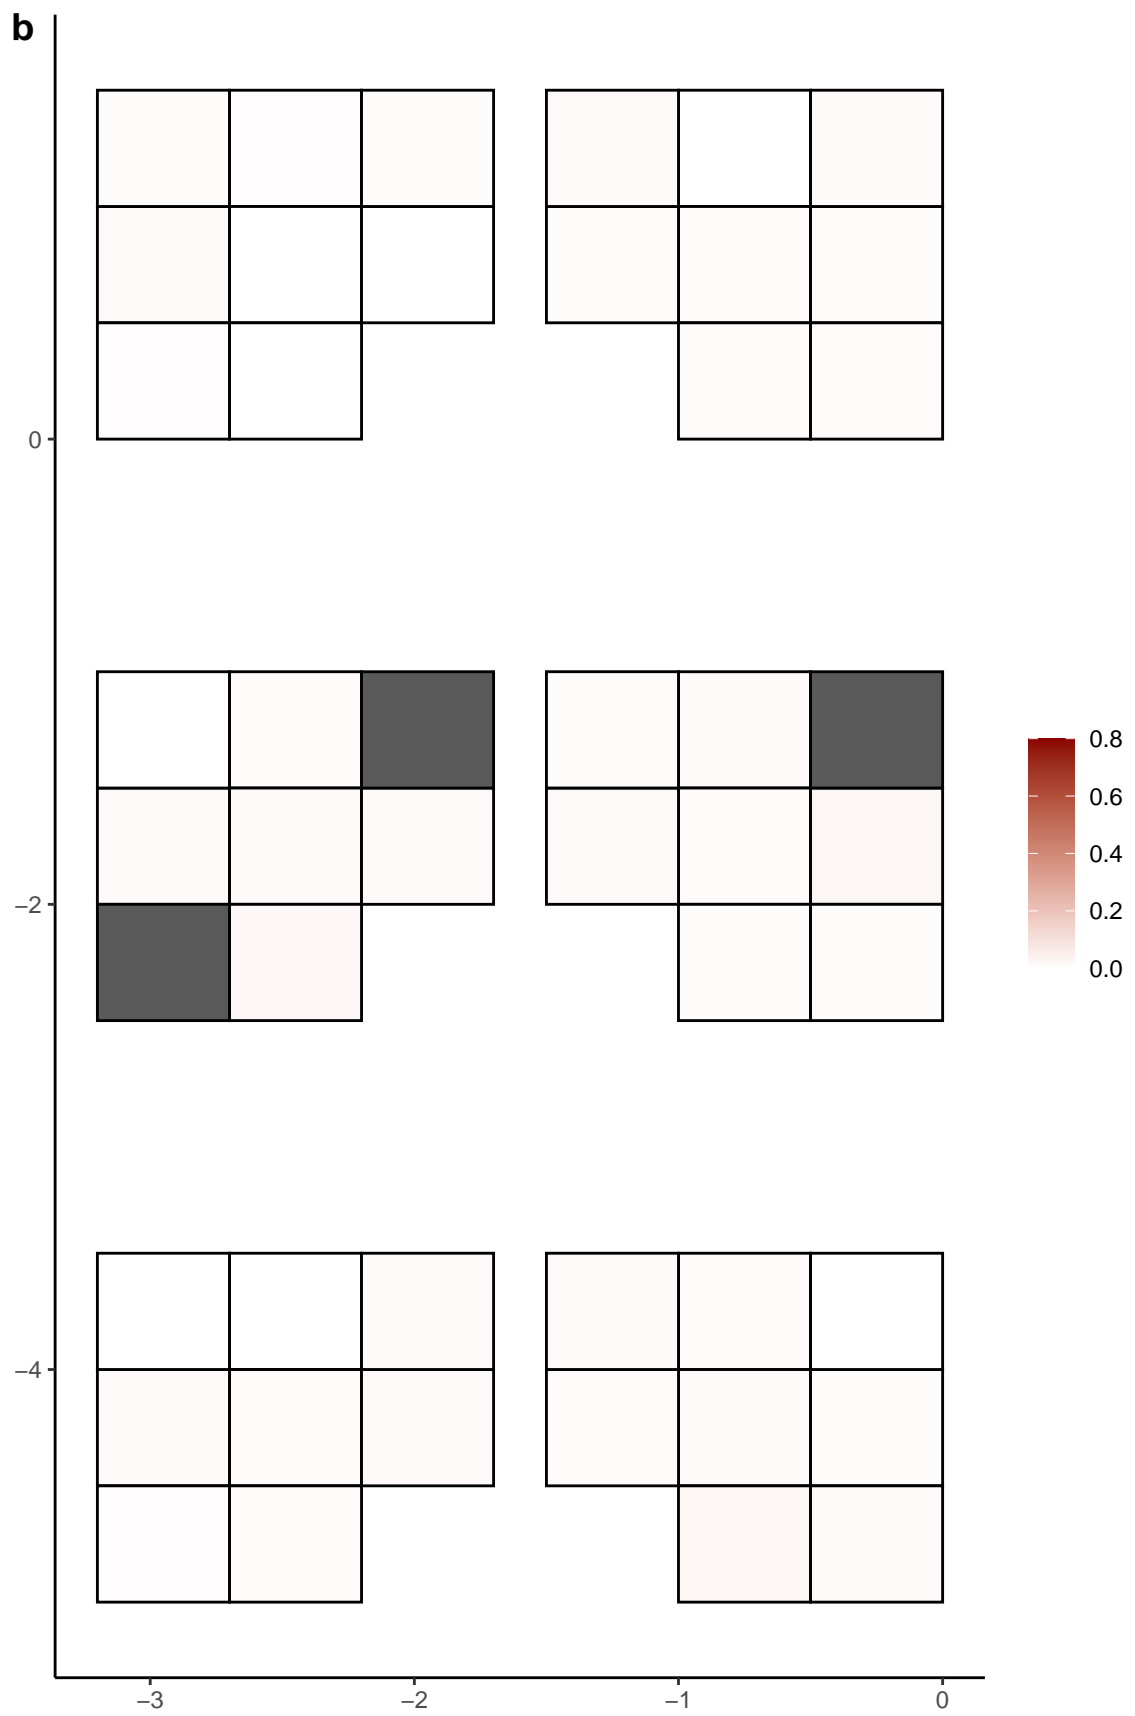

**a** ID05 9-19957121-C-T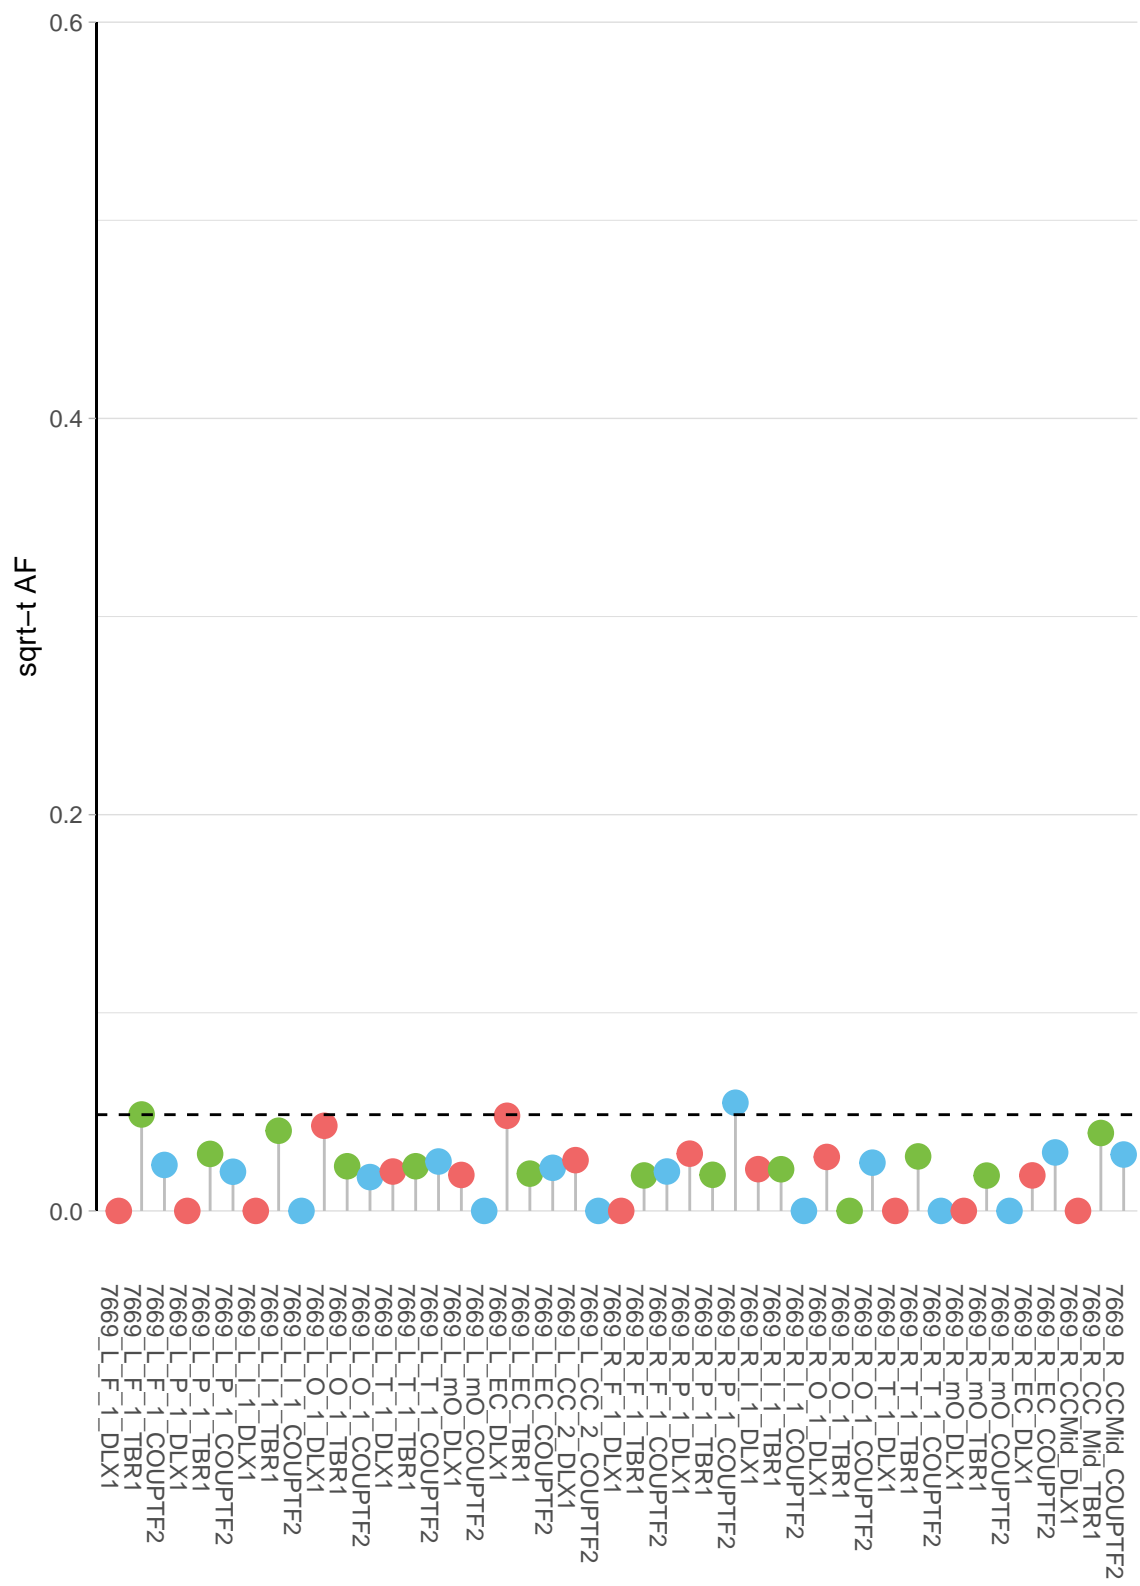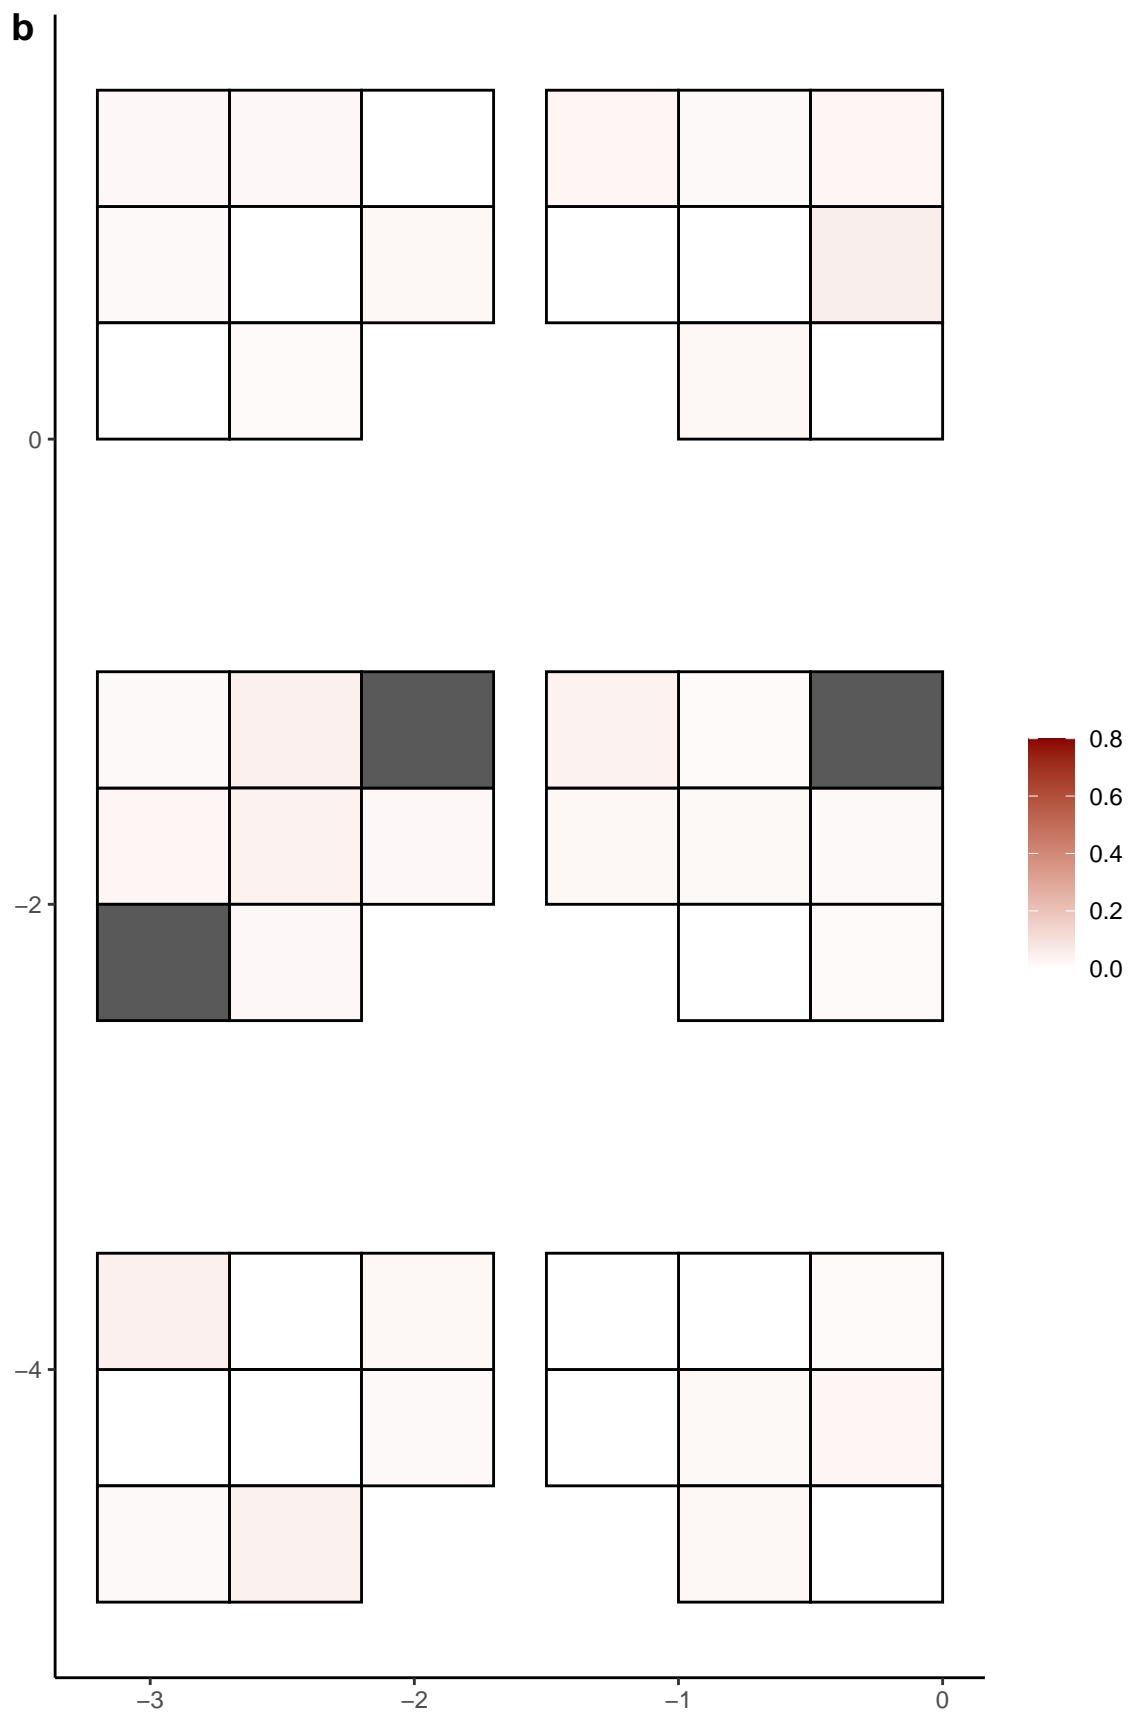



**a** ID05 9-21154273-T-C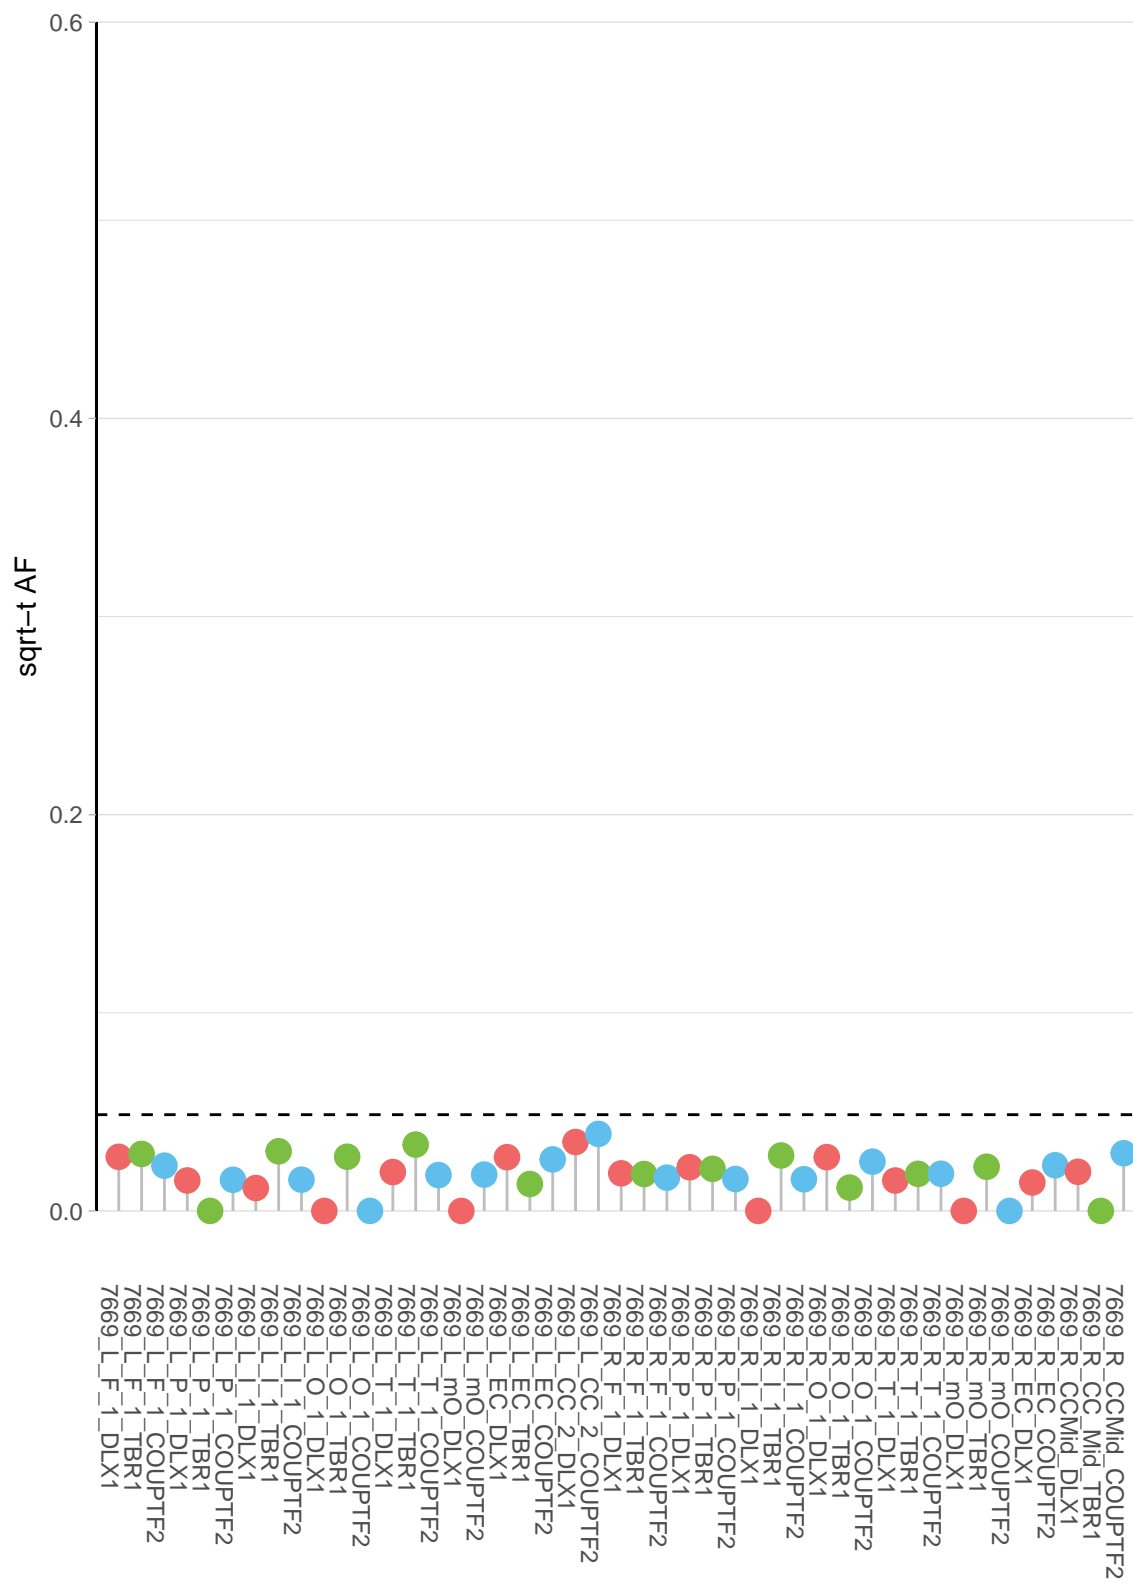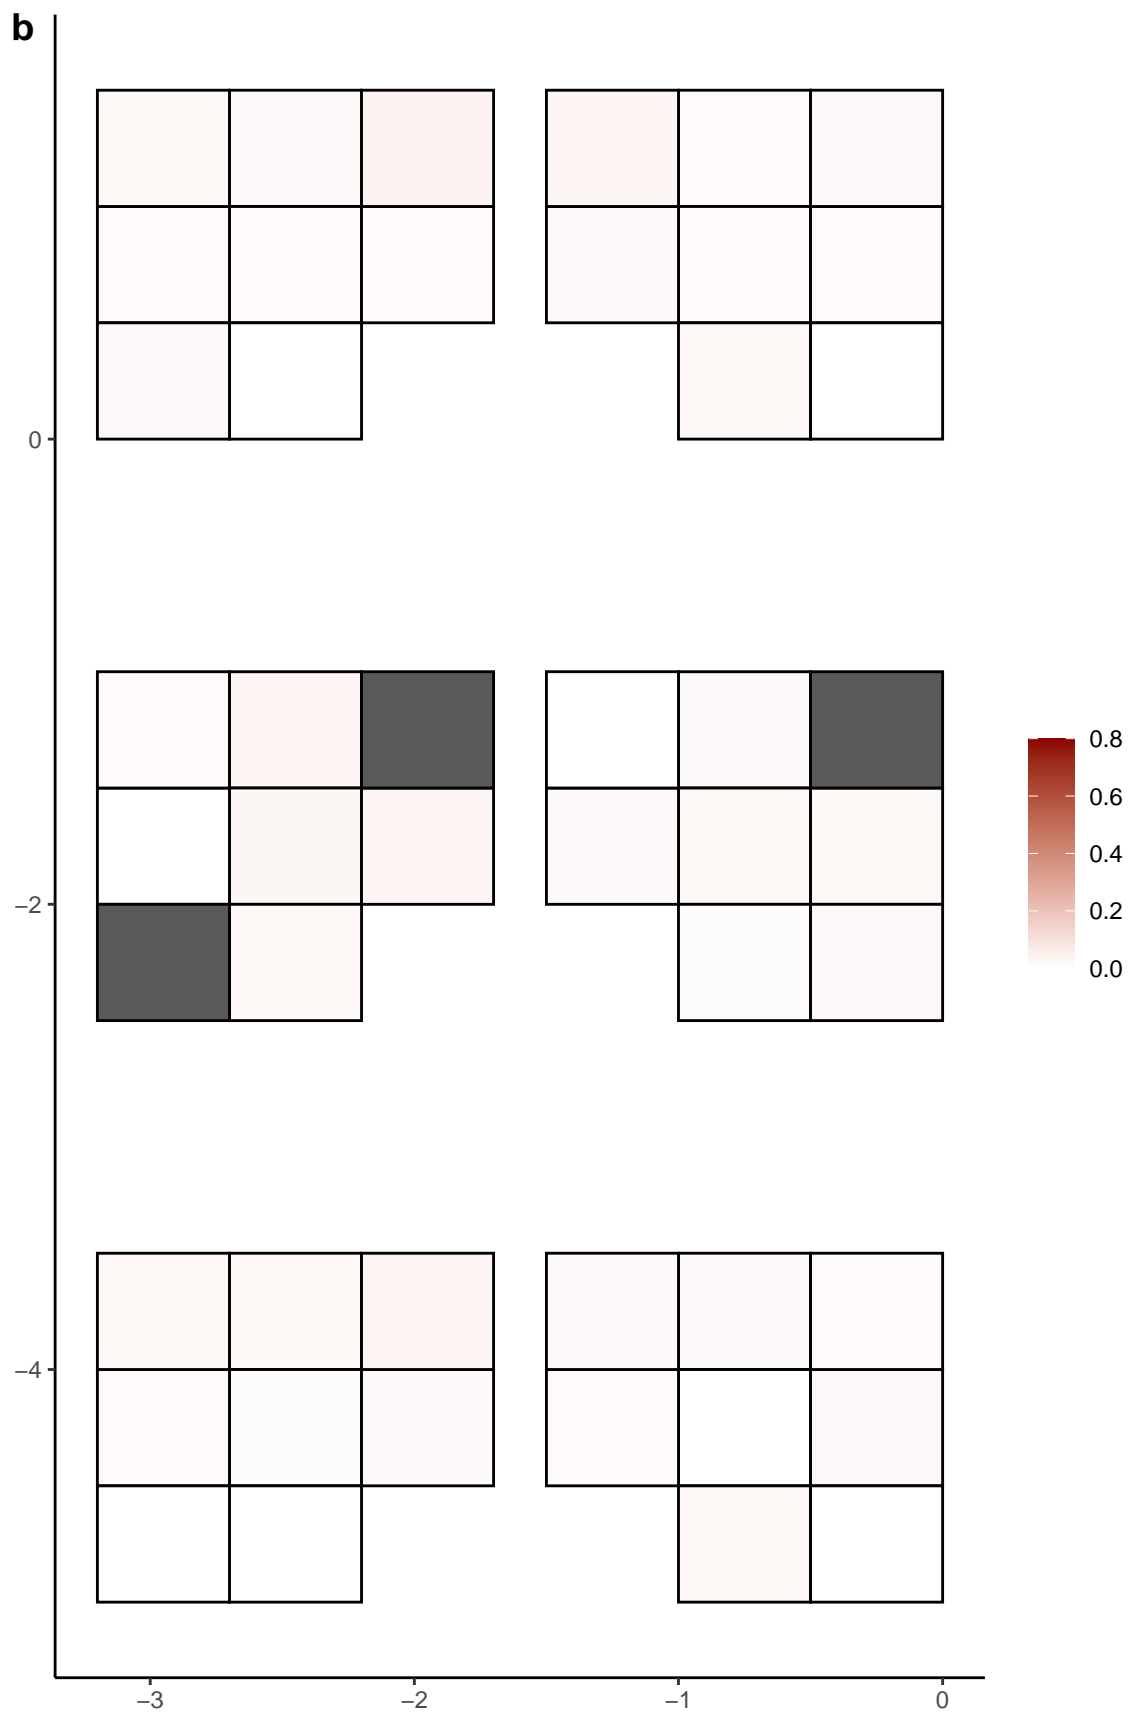



**a** ID05 9-23041281-C-T

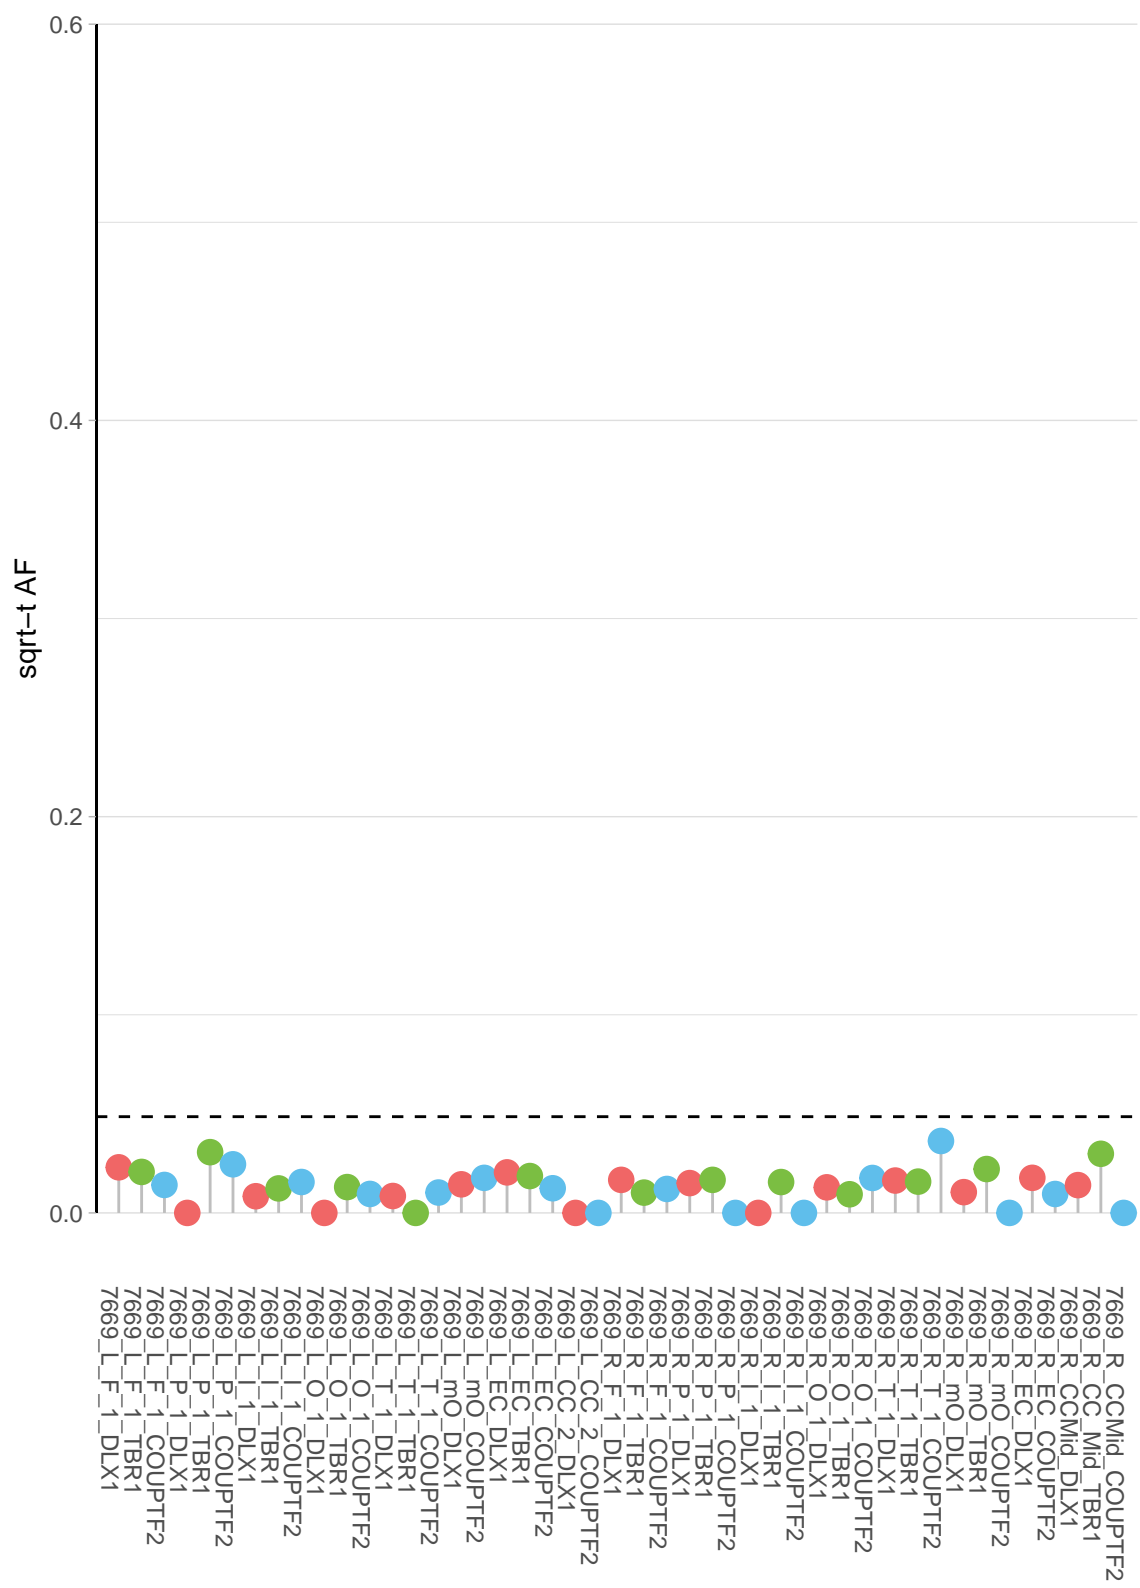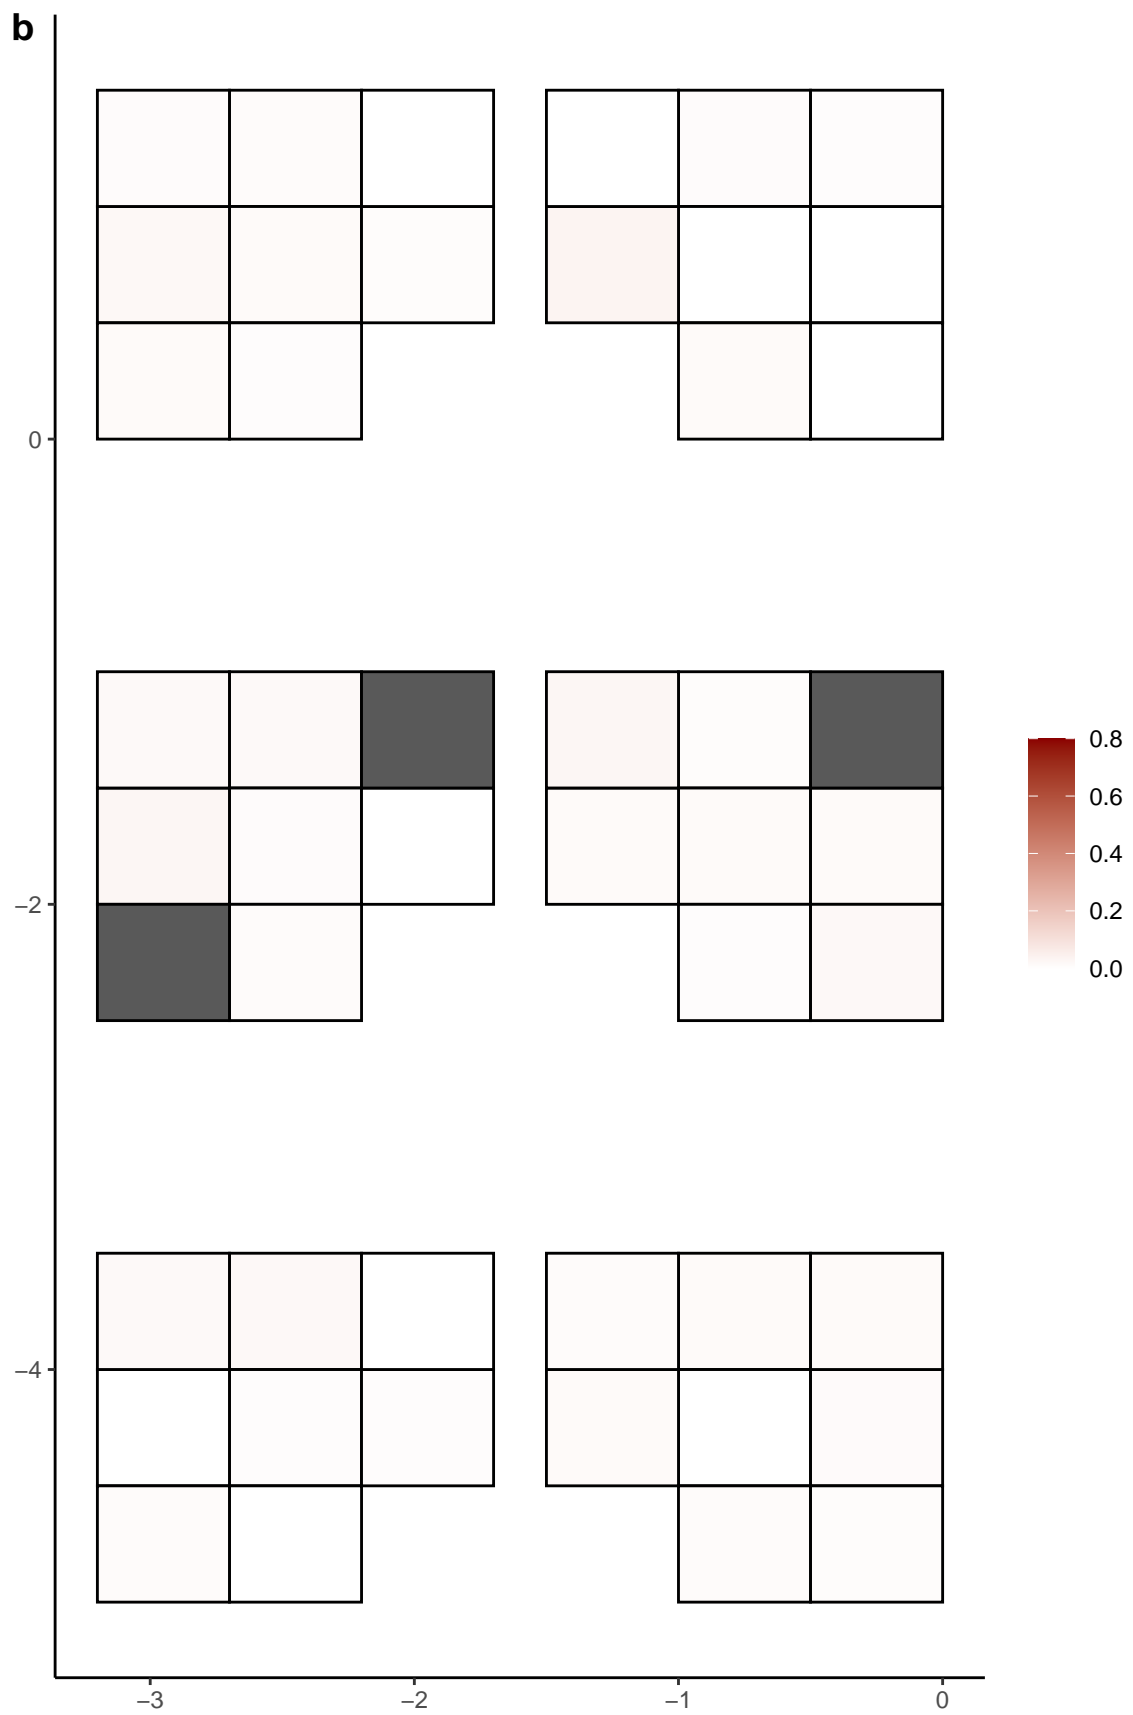

**a** ID05 9-28561999-C-T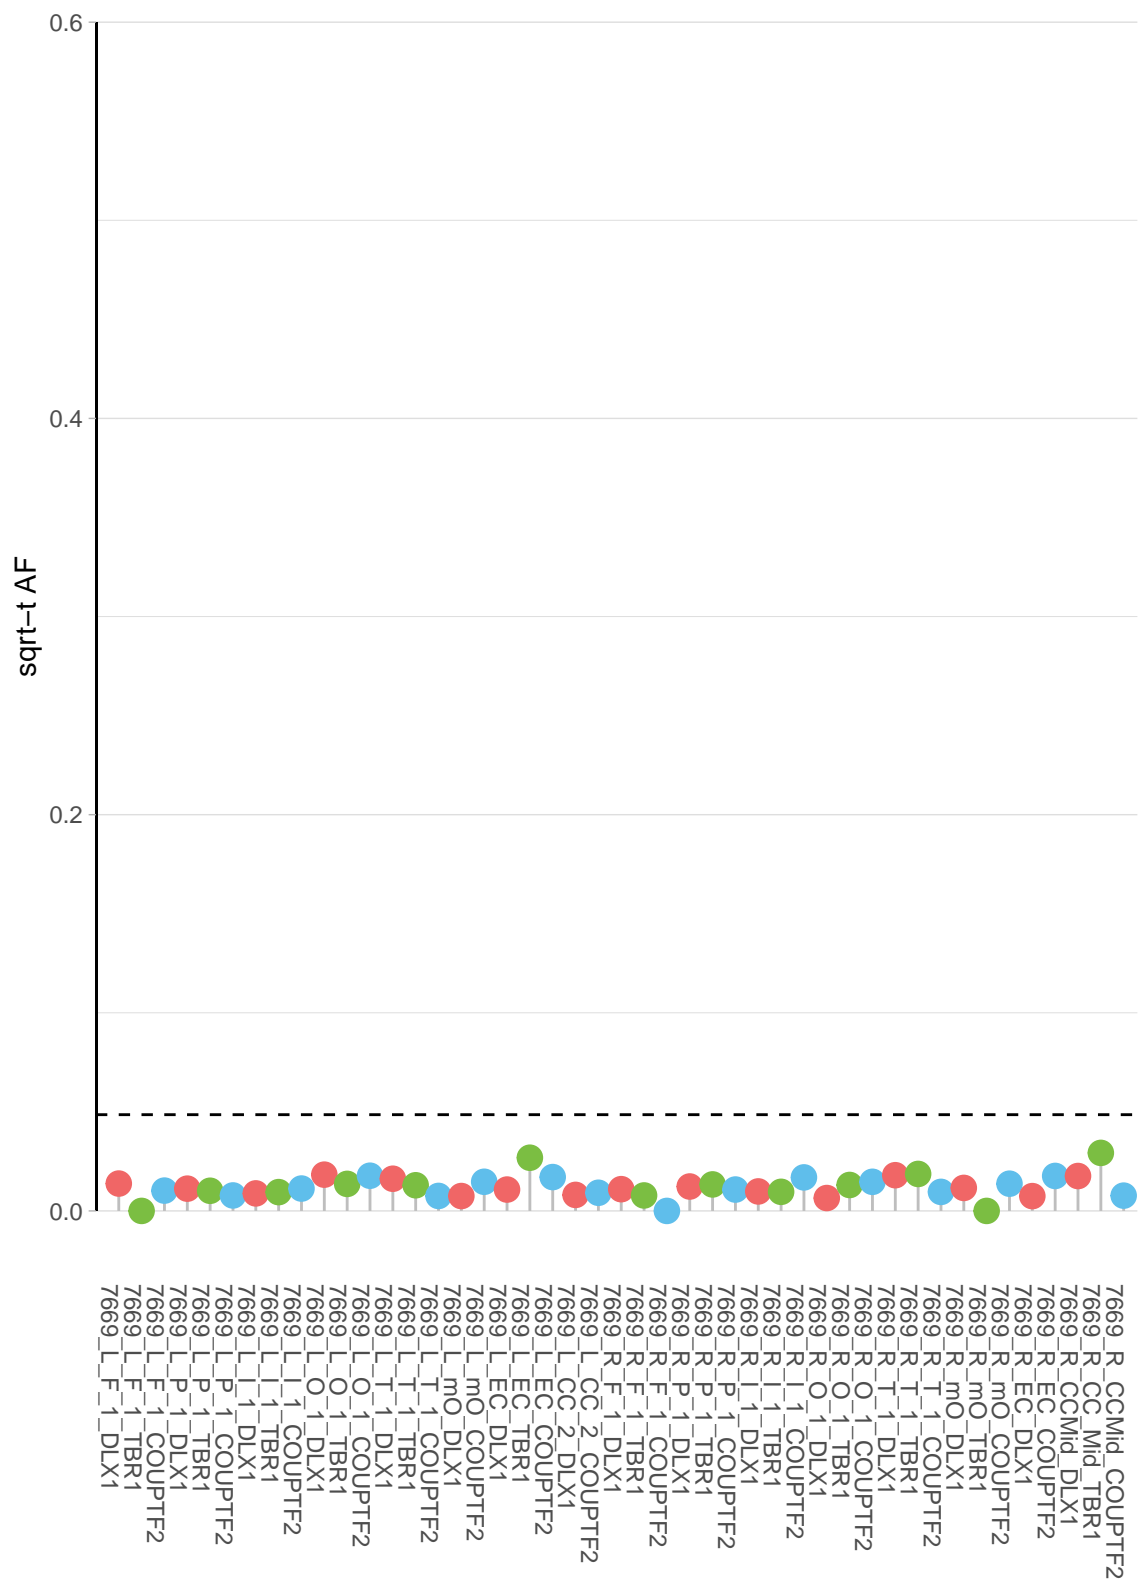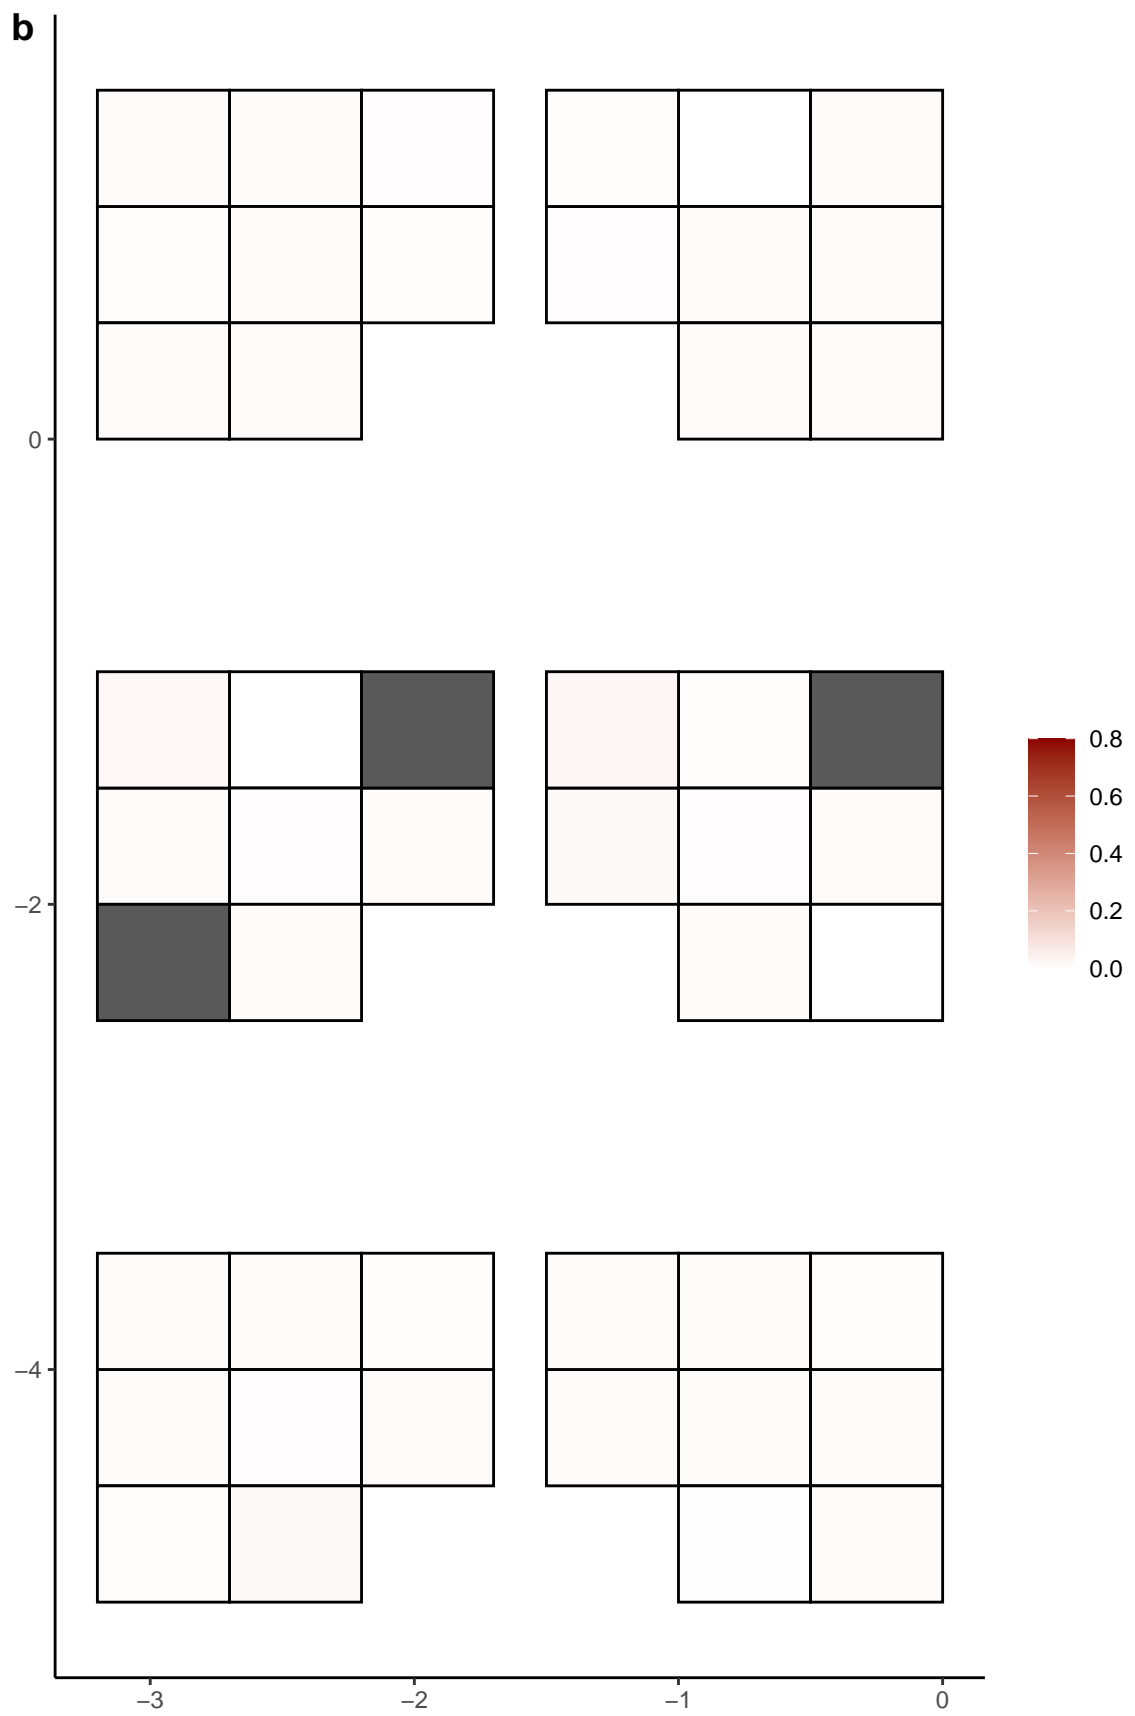

**a** ID05 9-31039053-G-T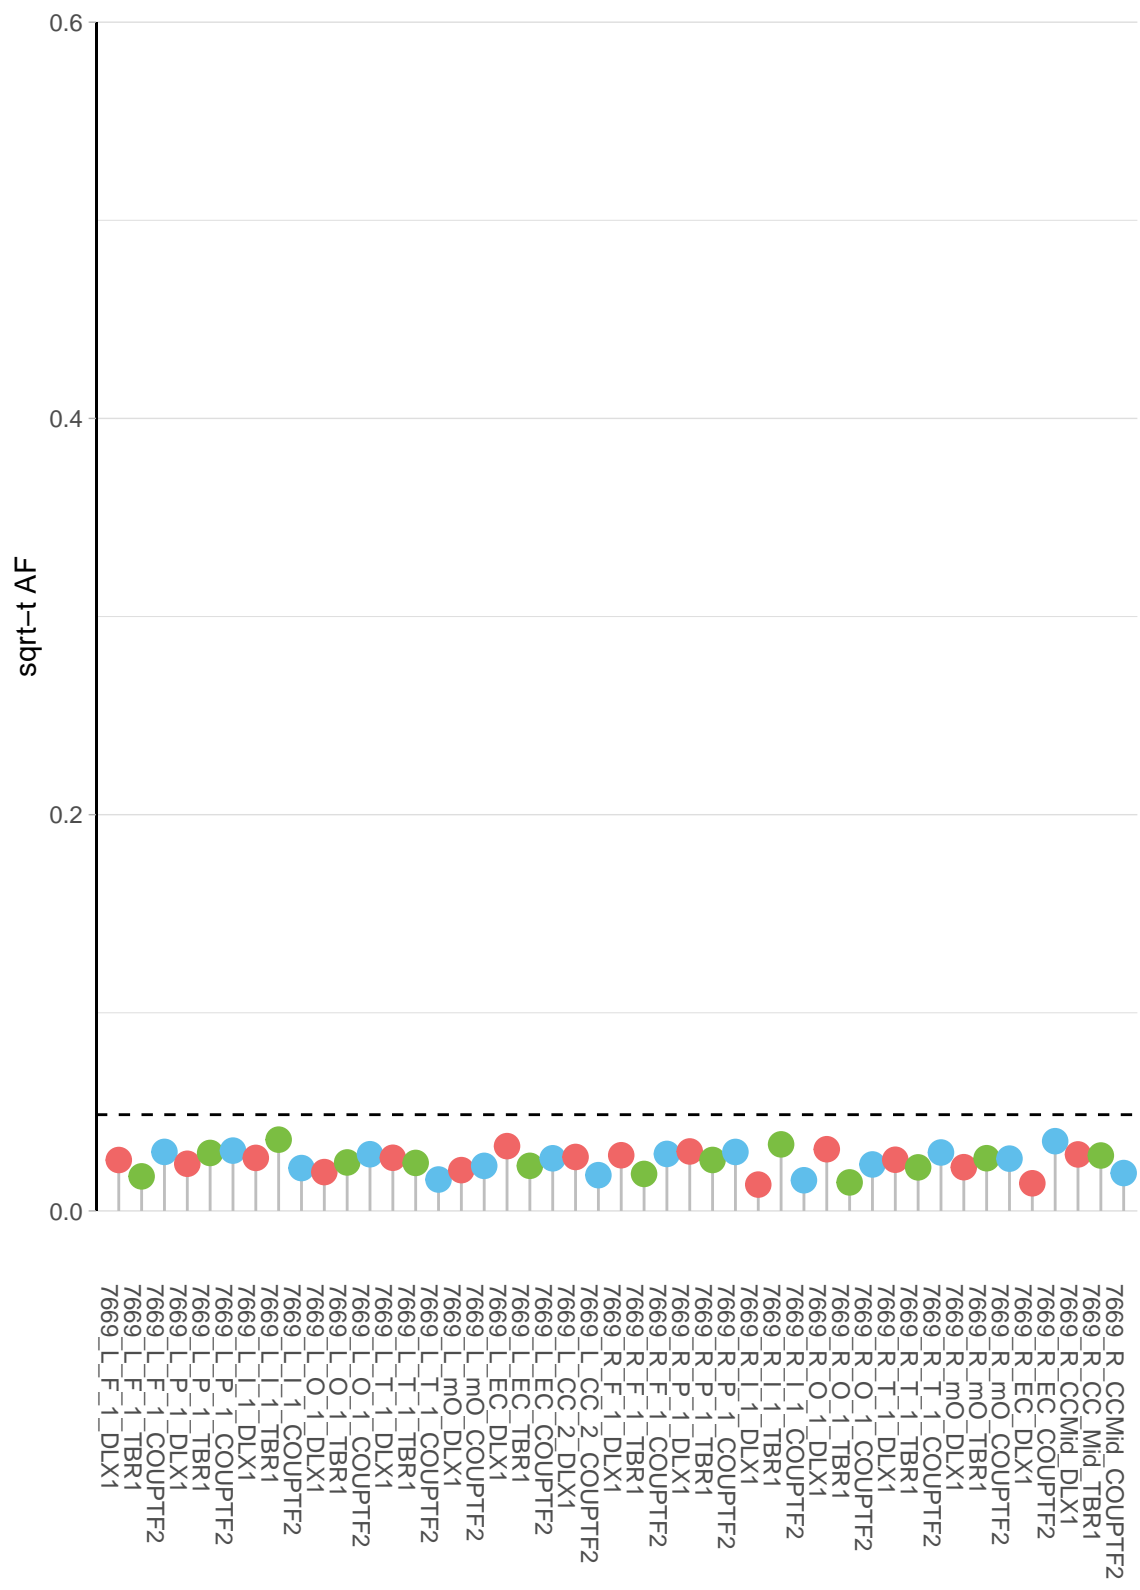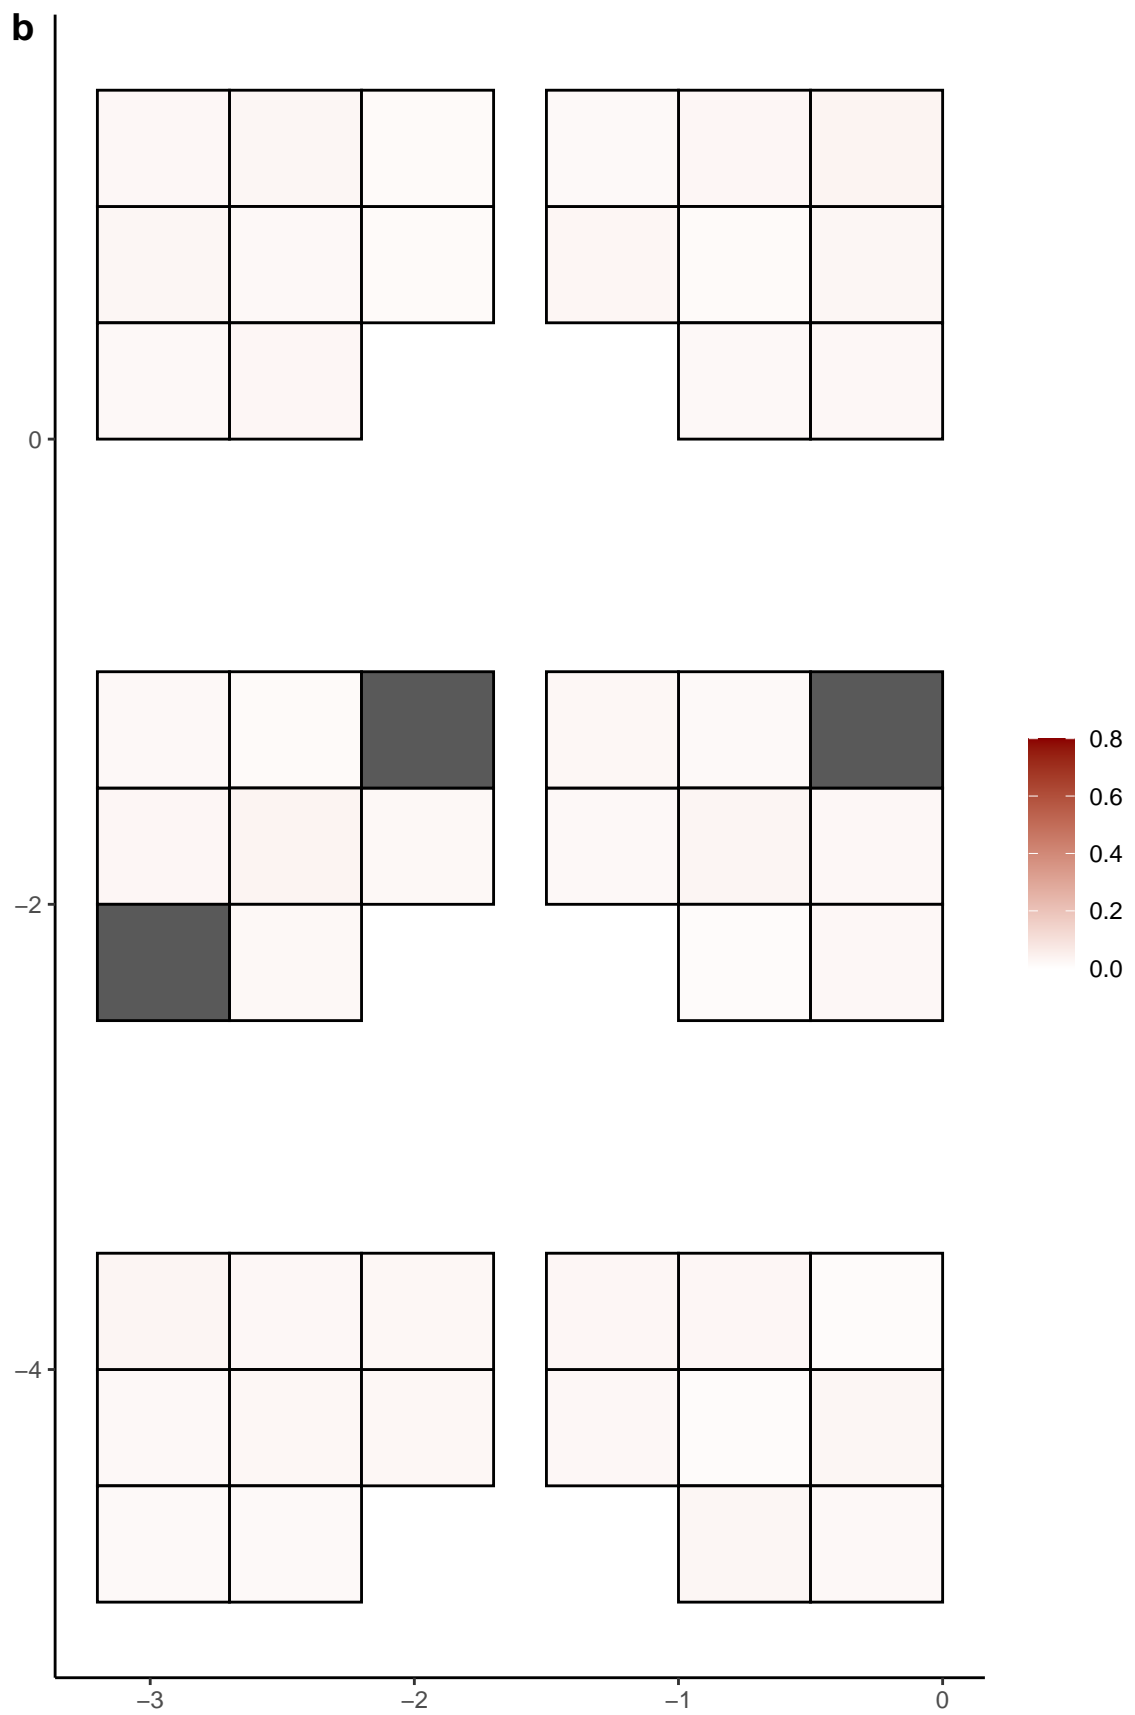

**a** ID05 9-36967923-G-A

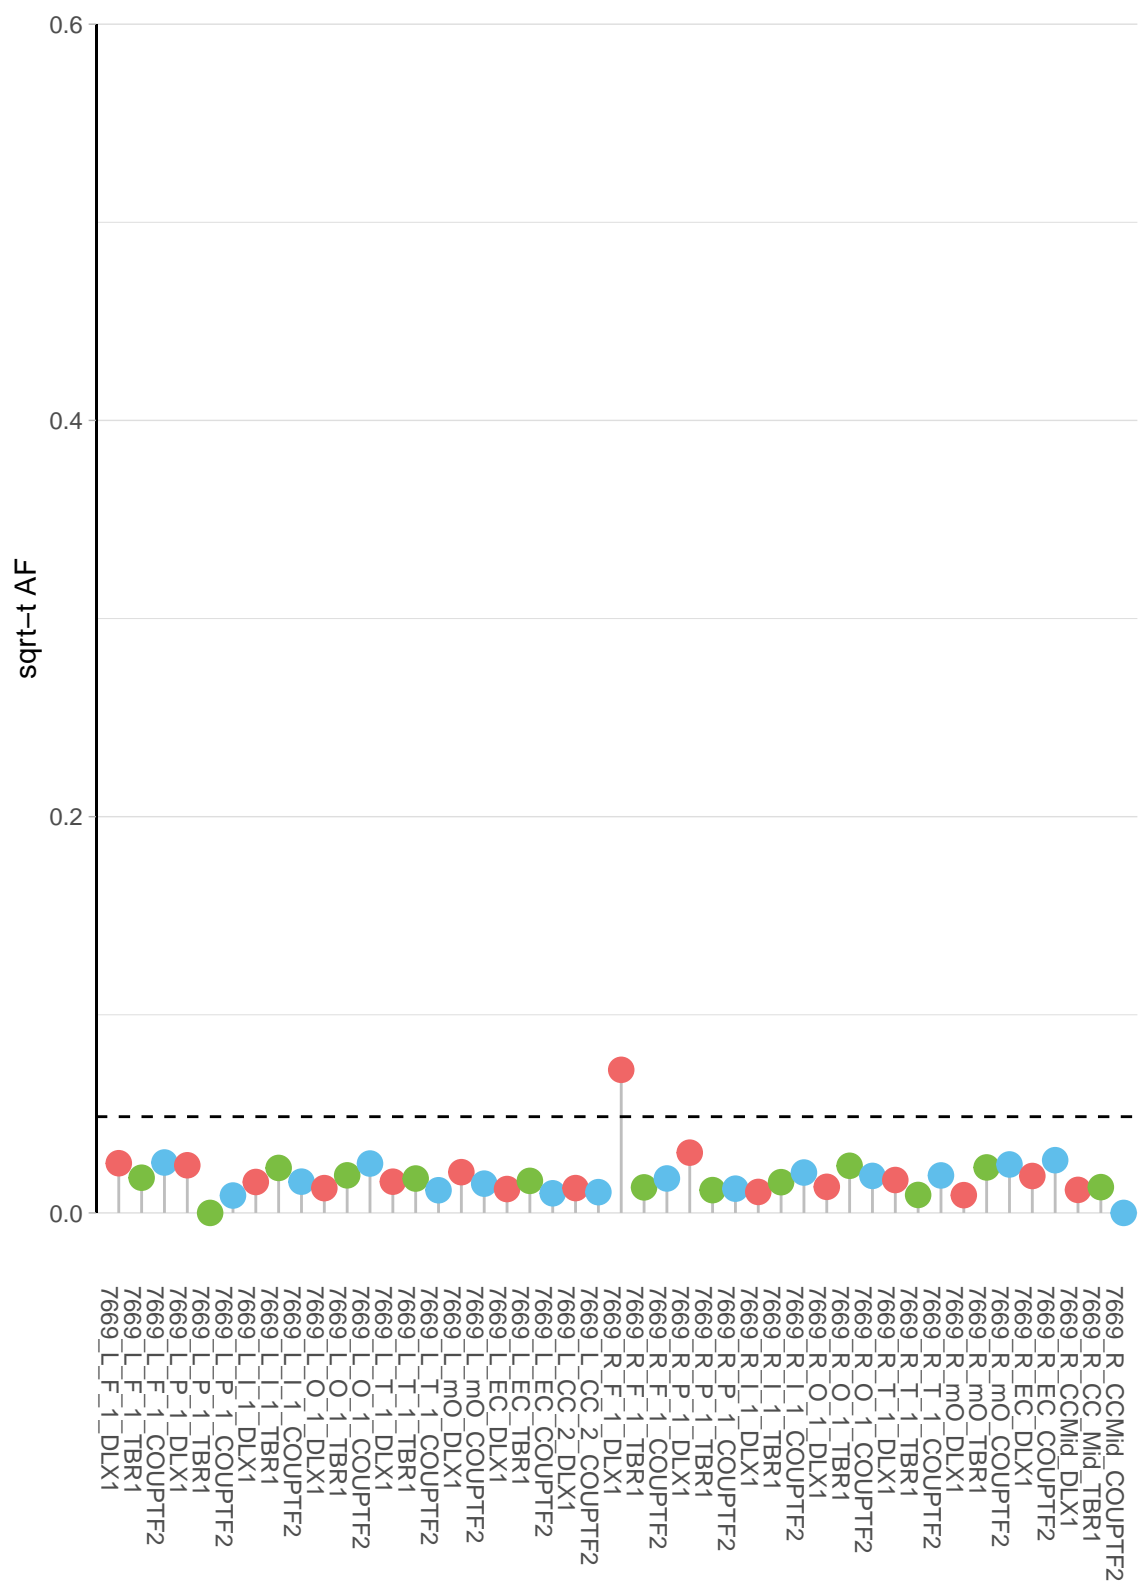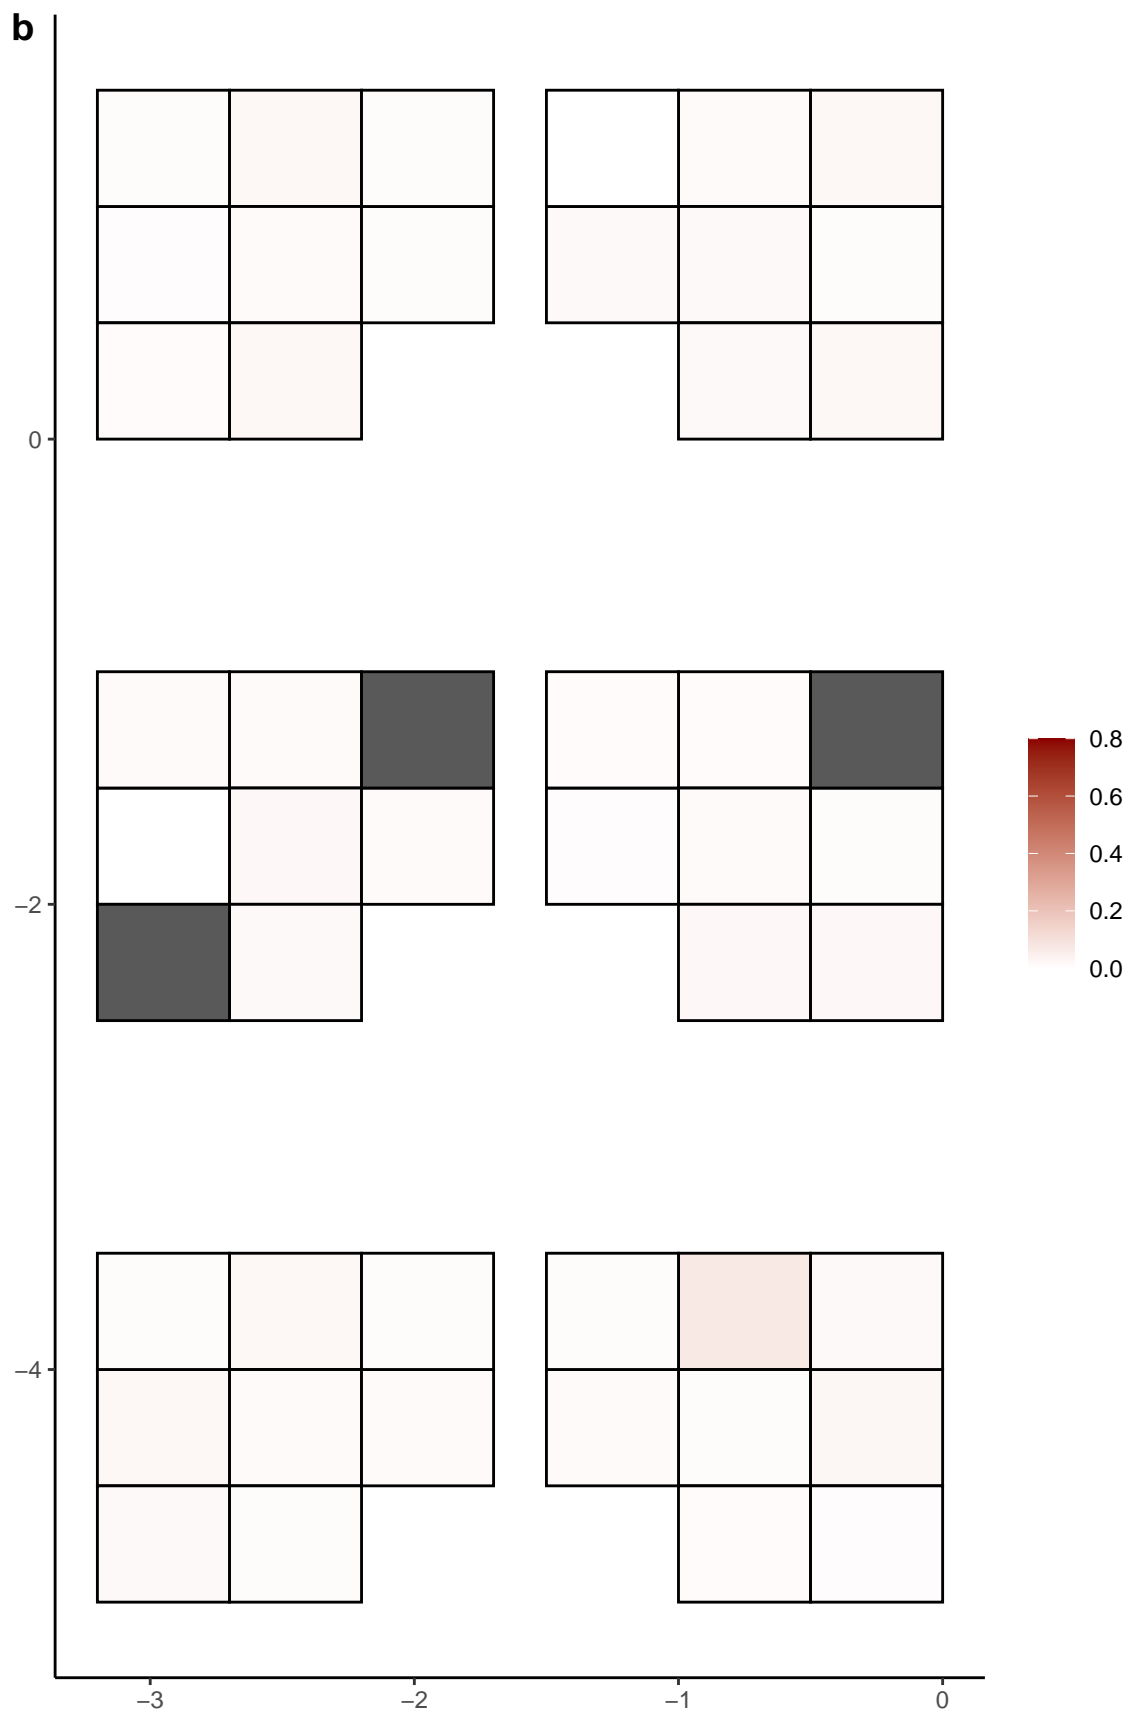

**a** ID05 9-559661-C-T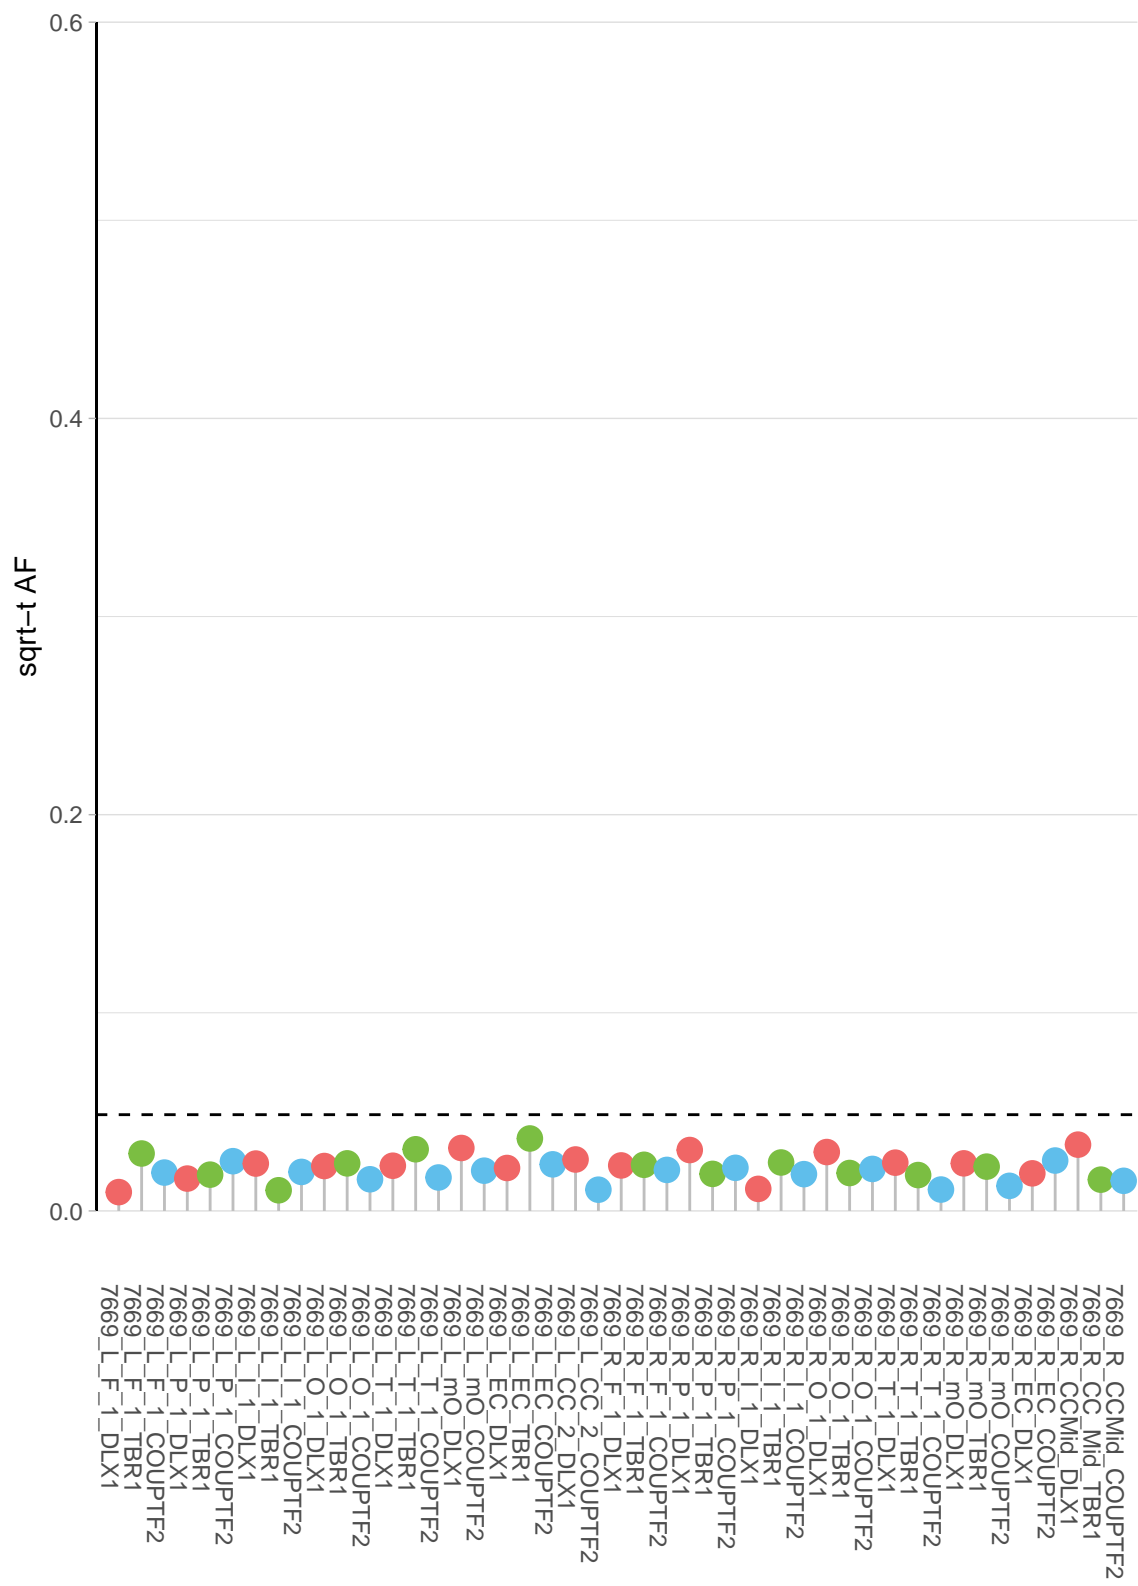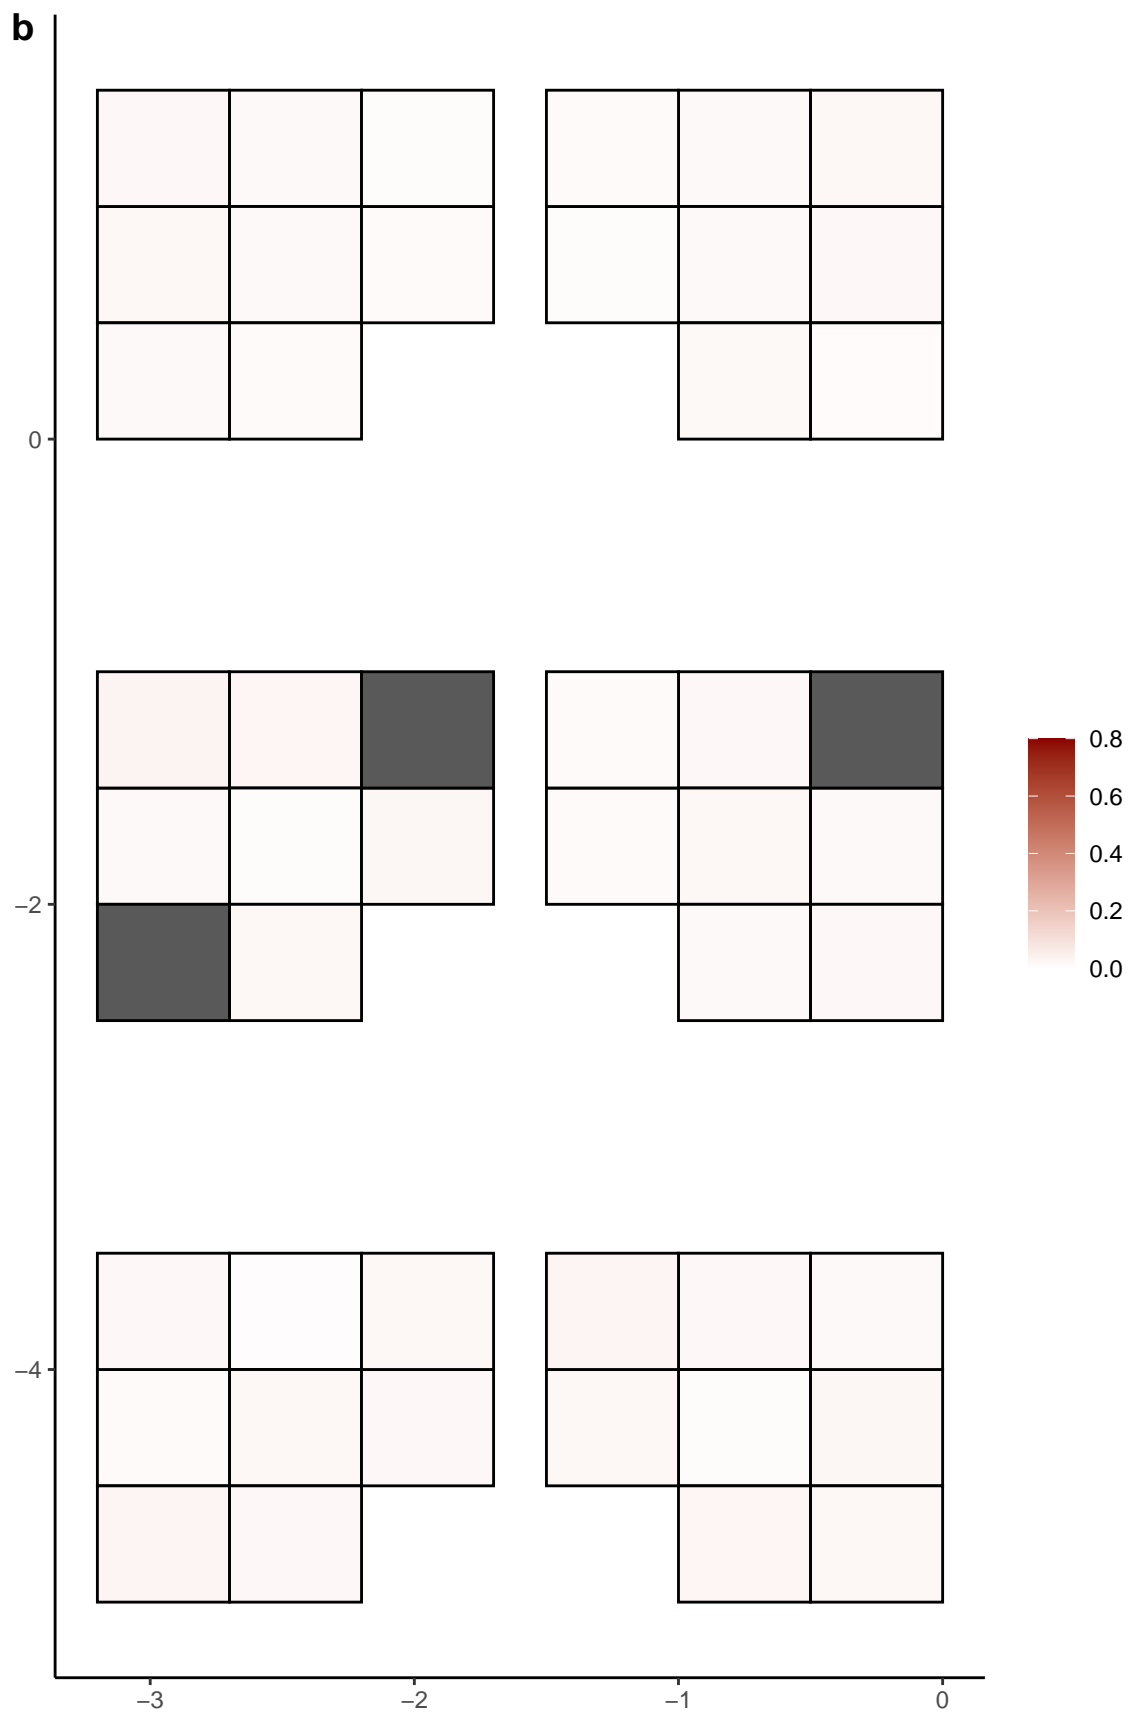

**a** ID05 9-74407663-G-A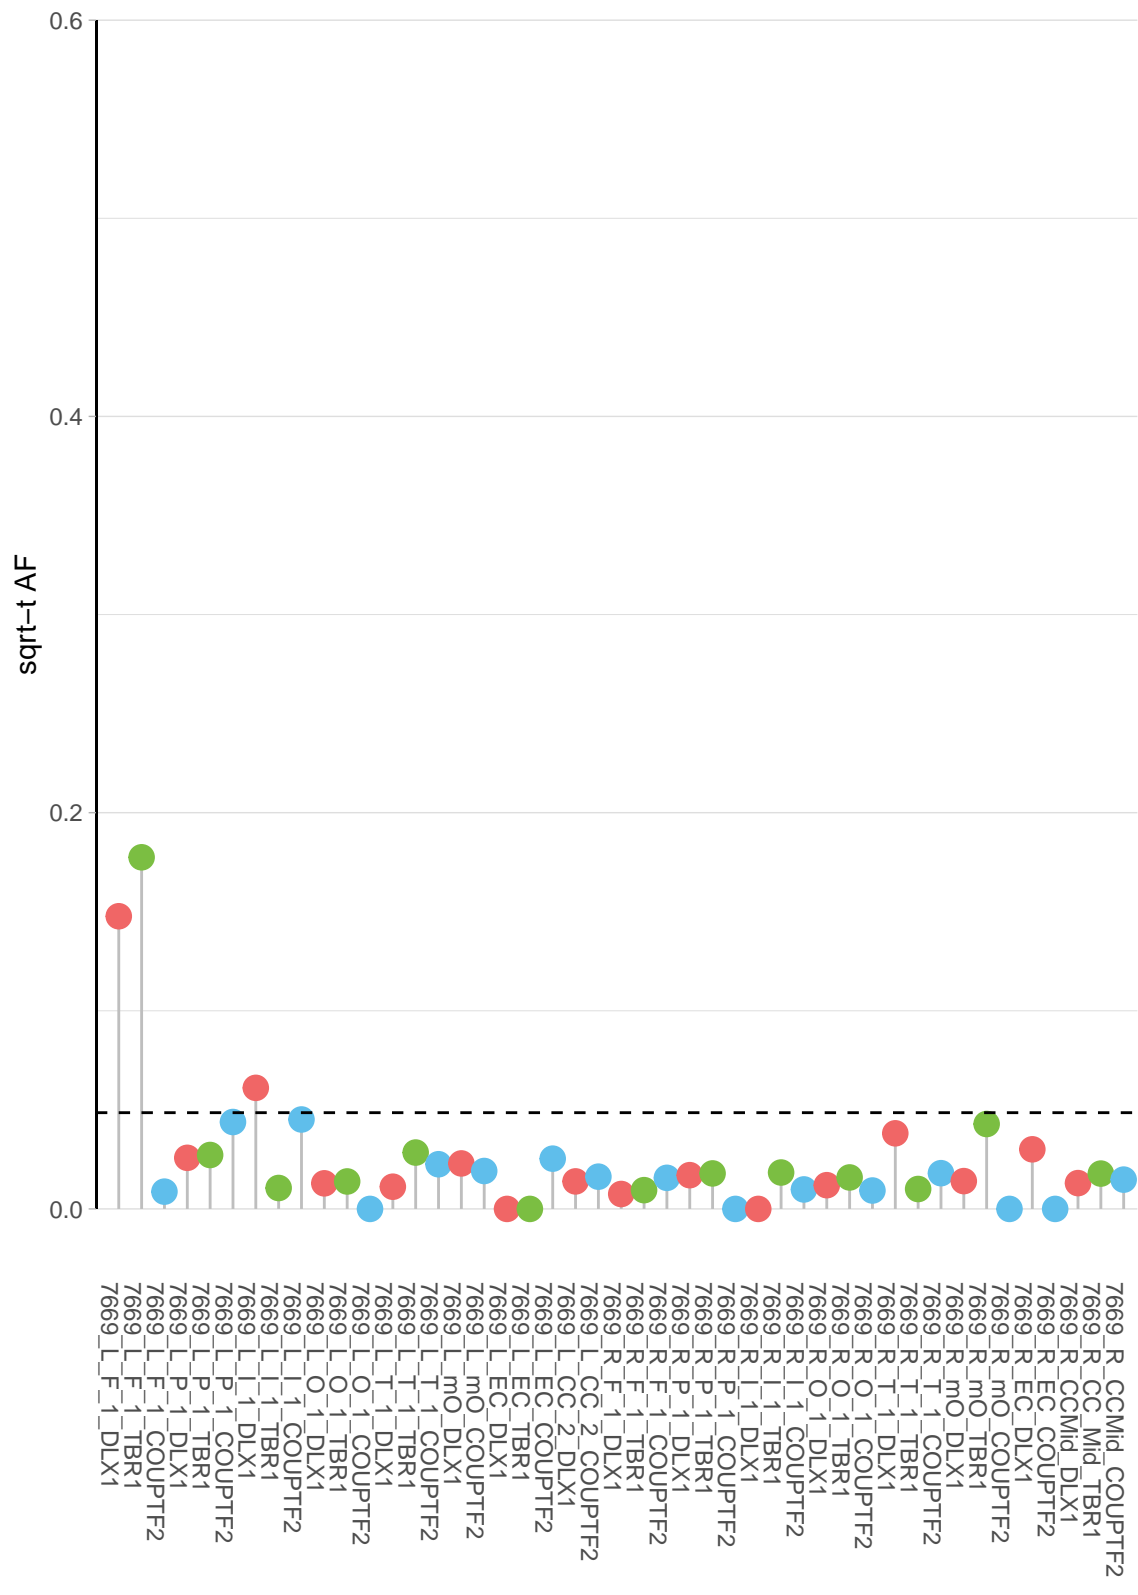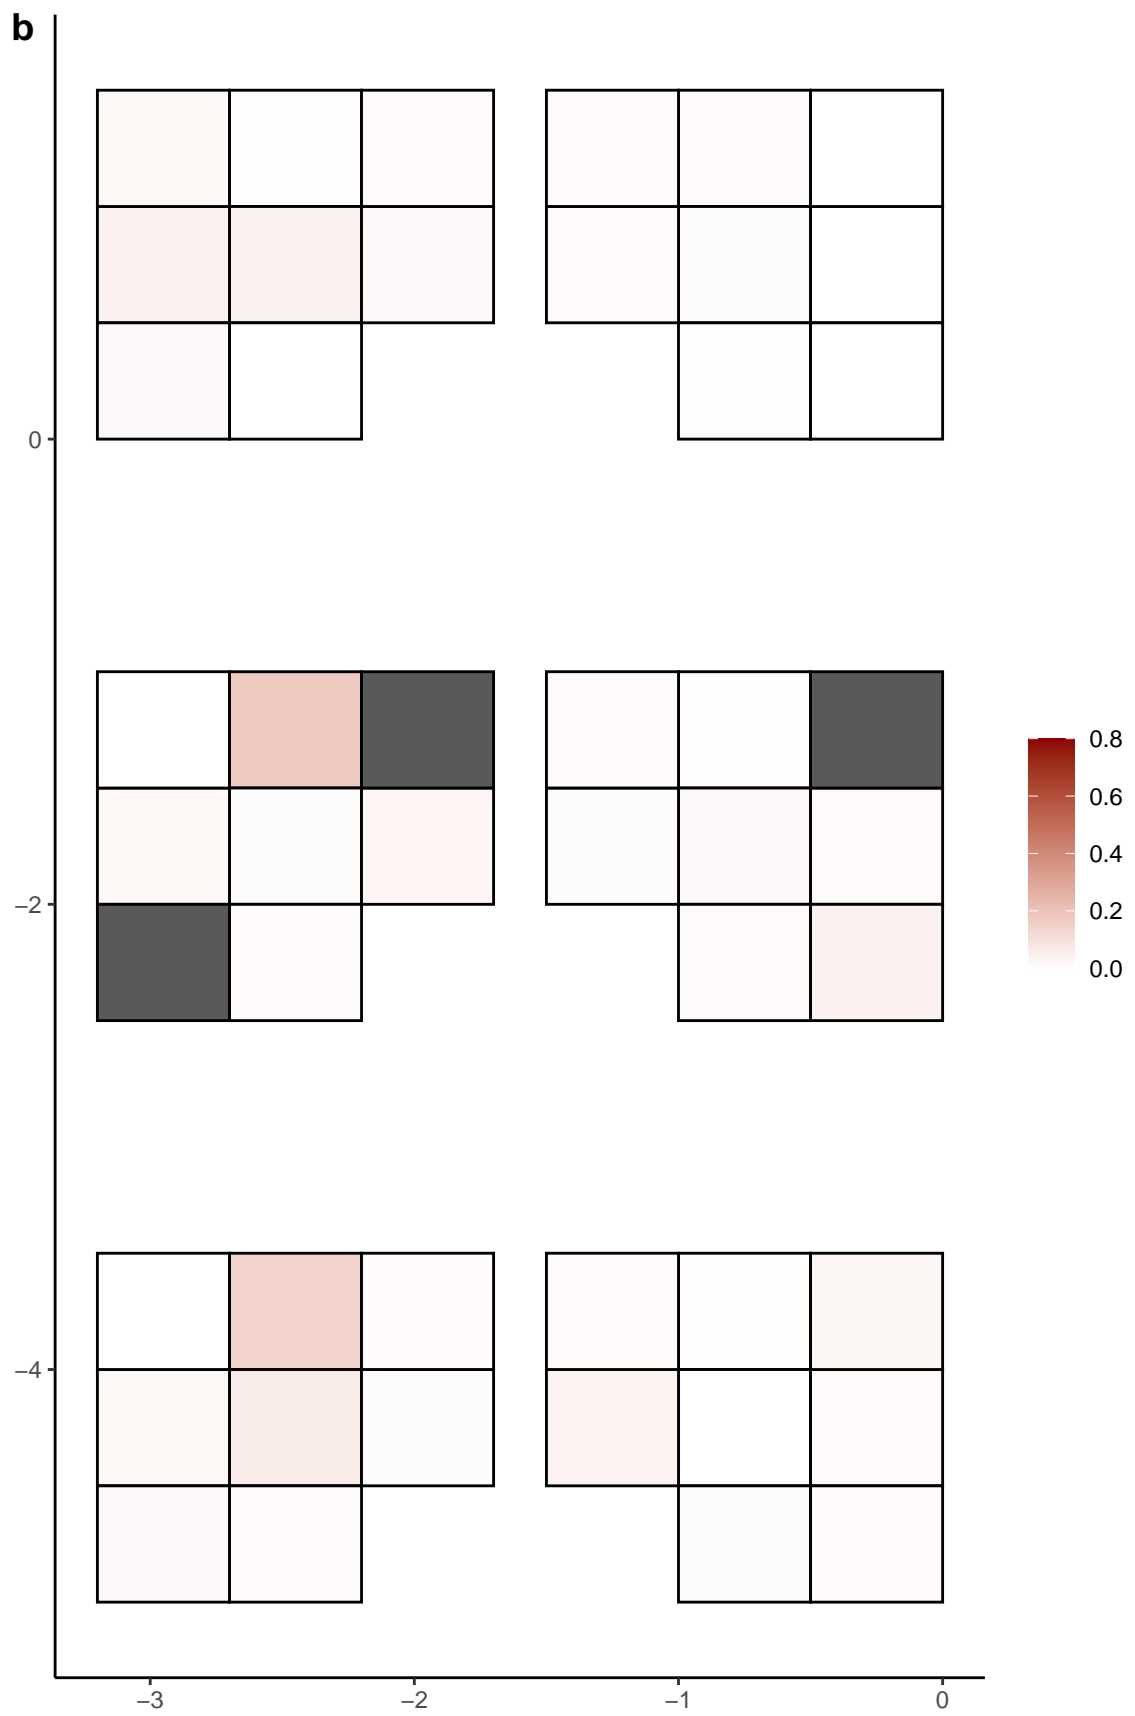



**a** ID05 9-76169299-T-C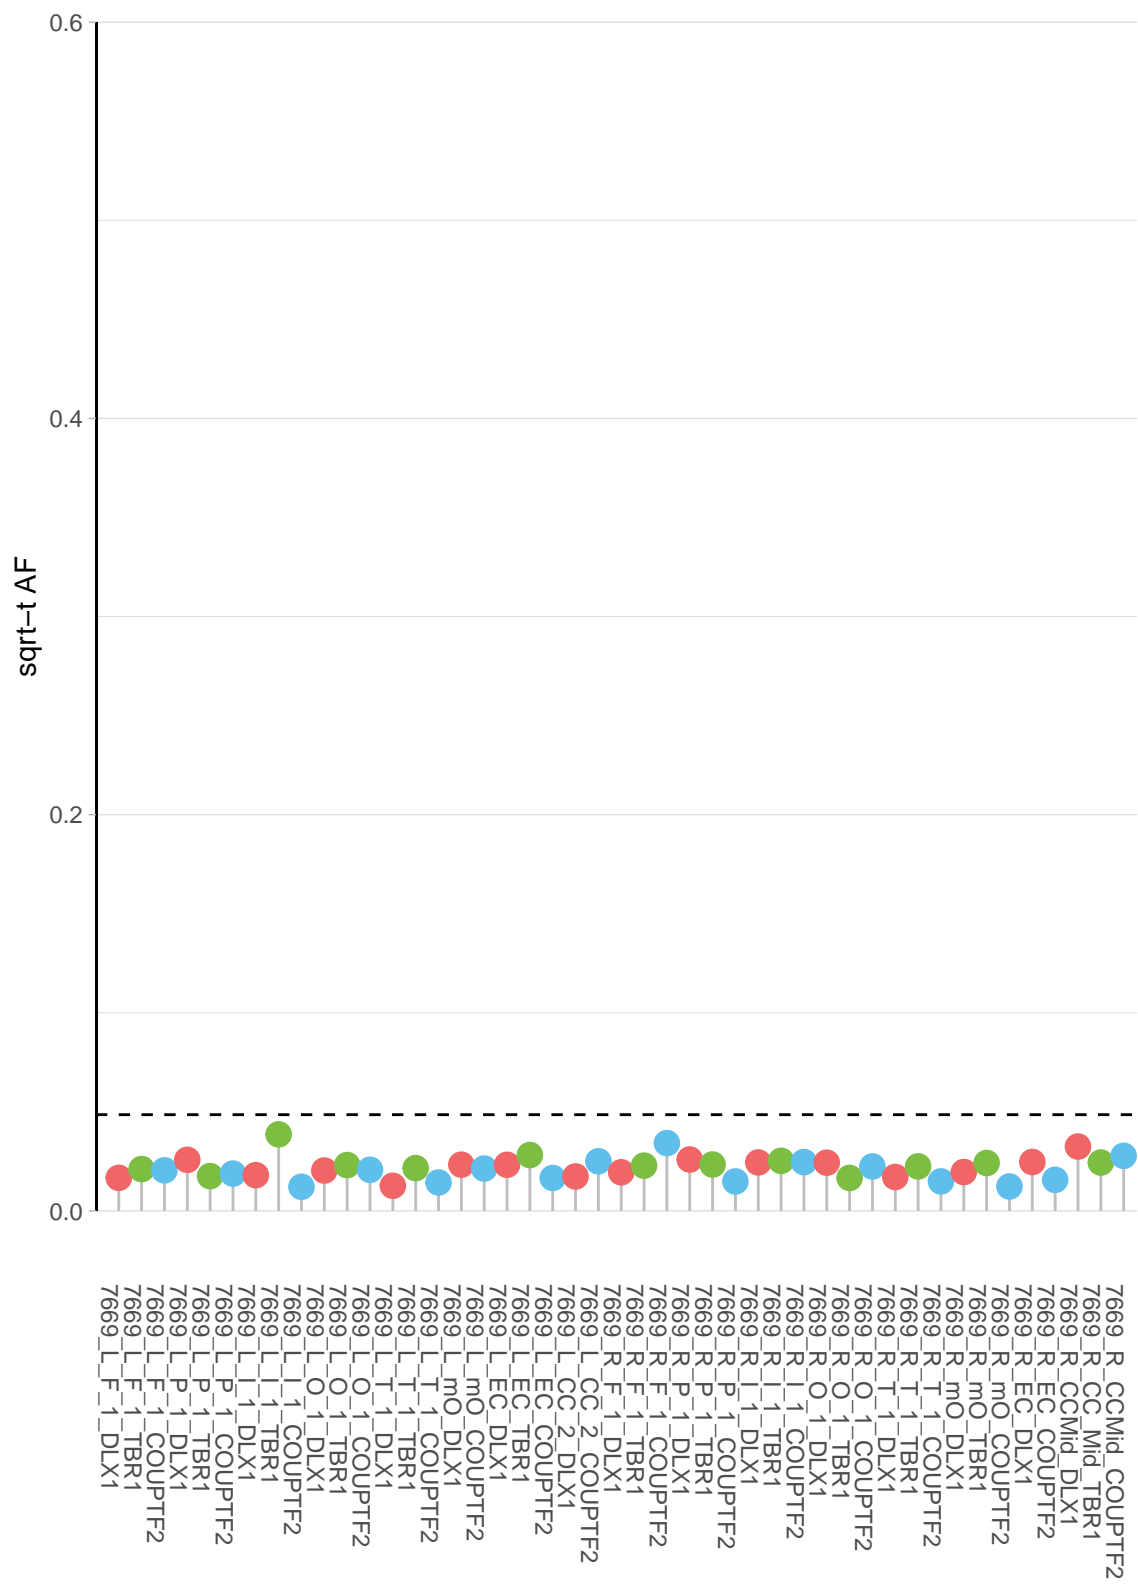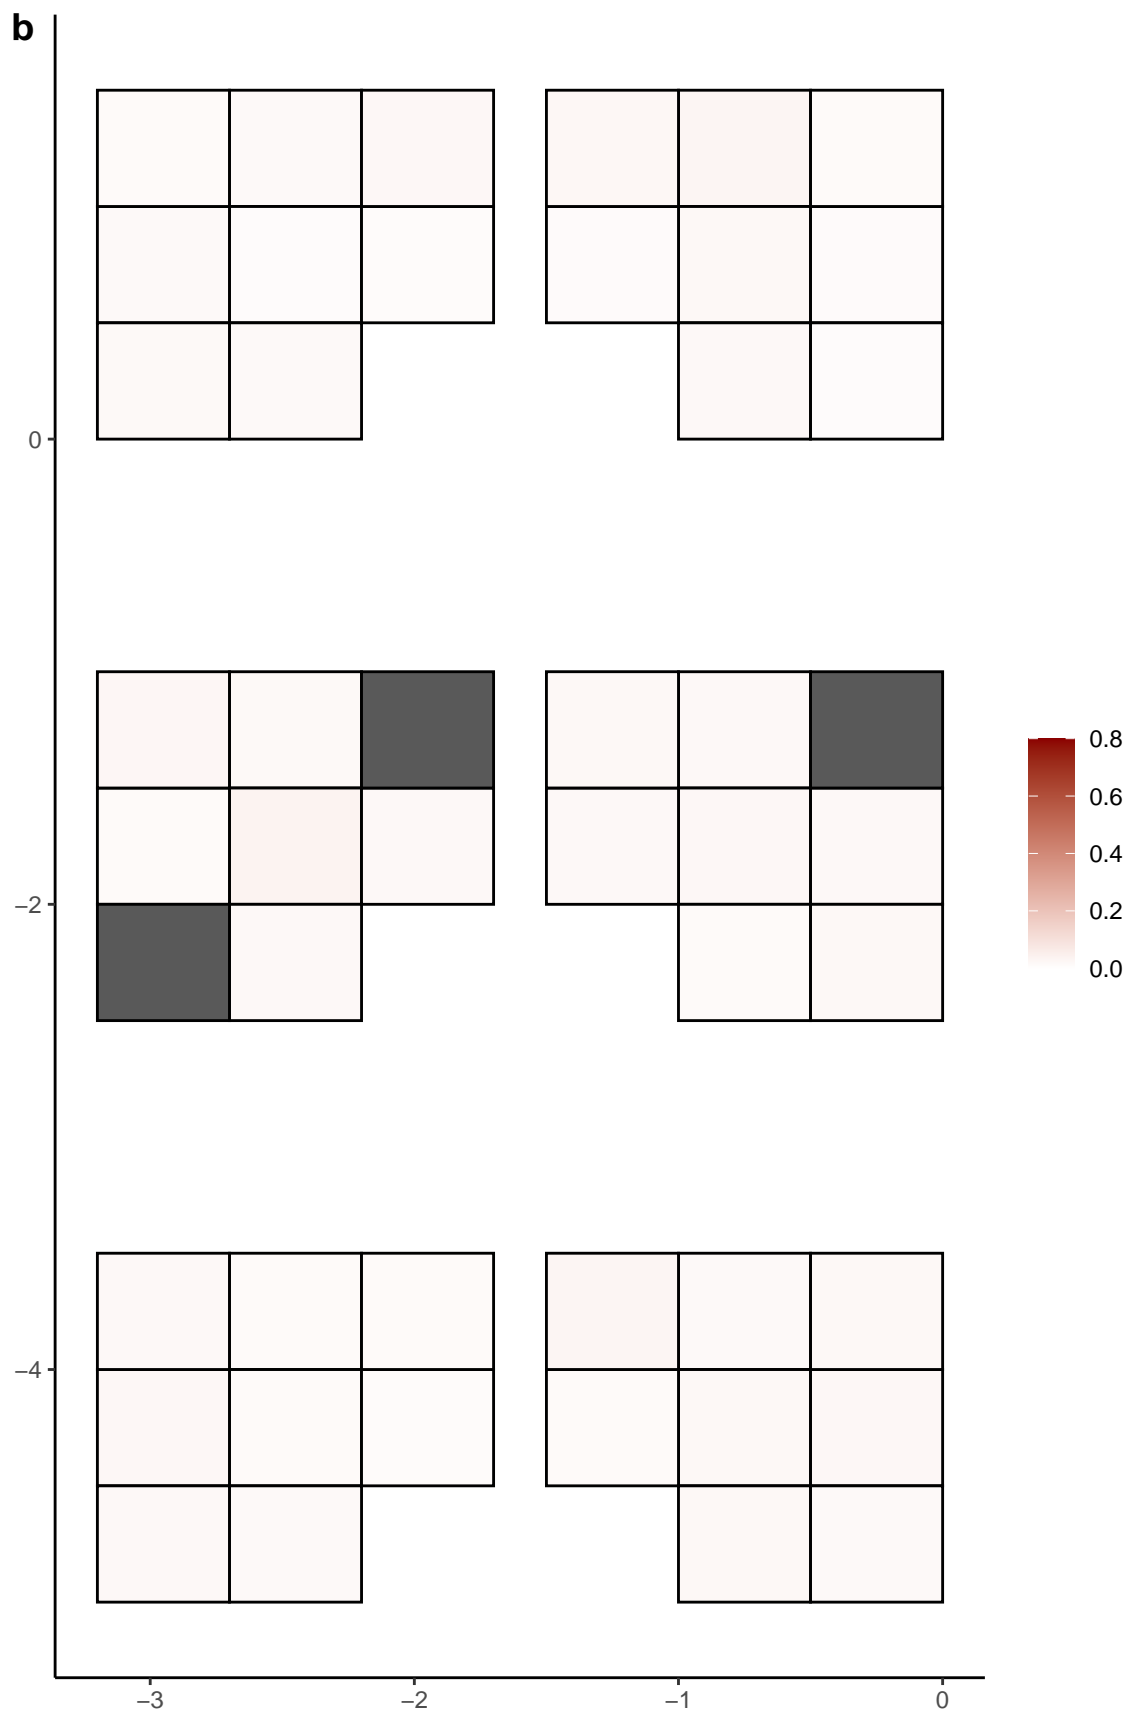

**a** ID05 9-77140705-C-T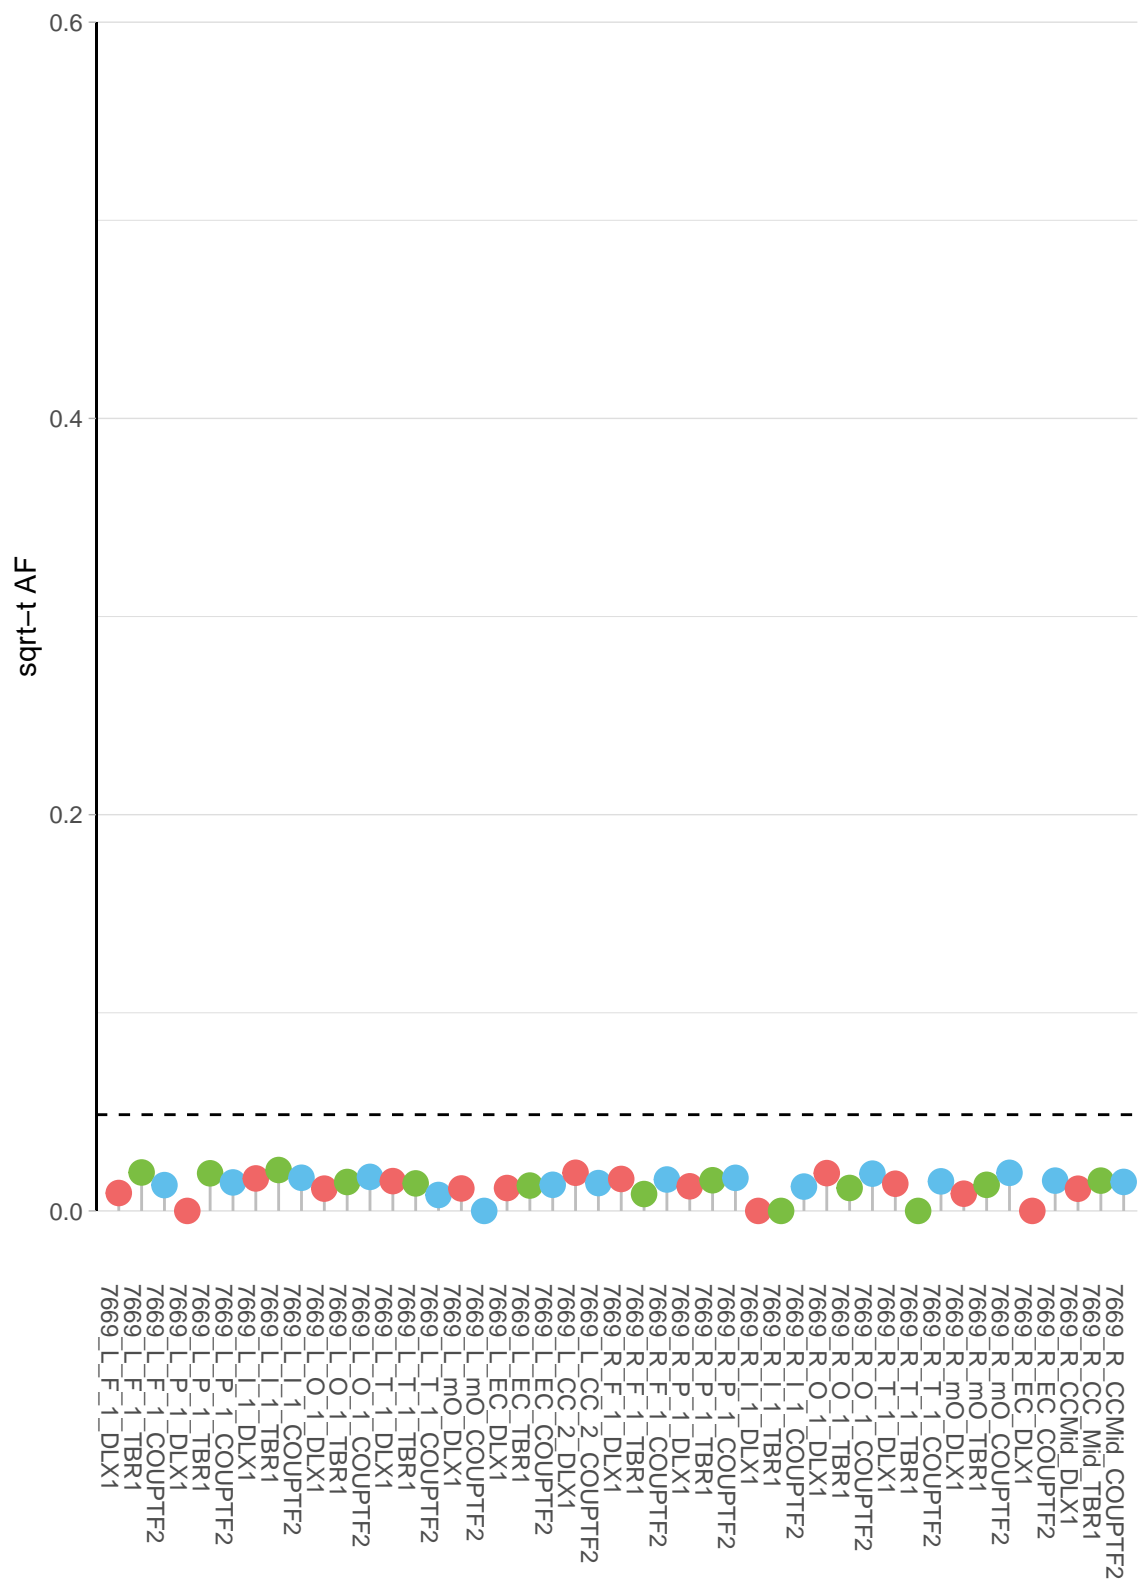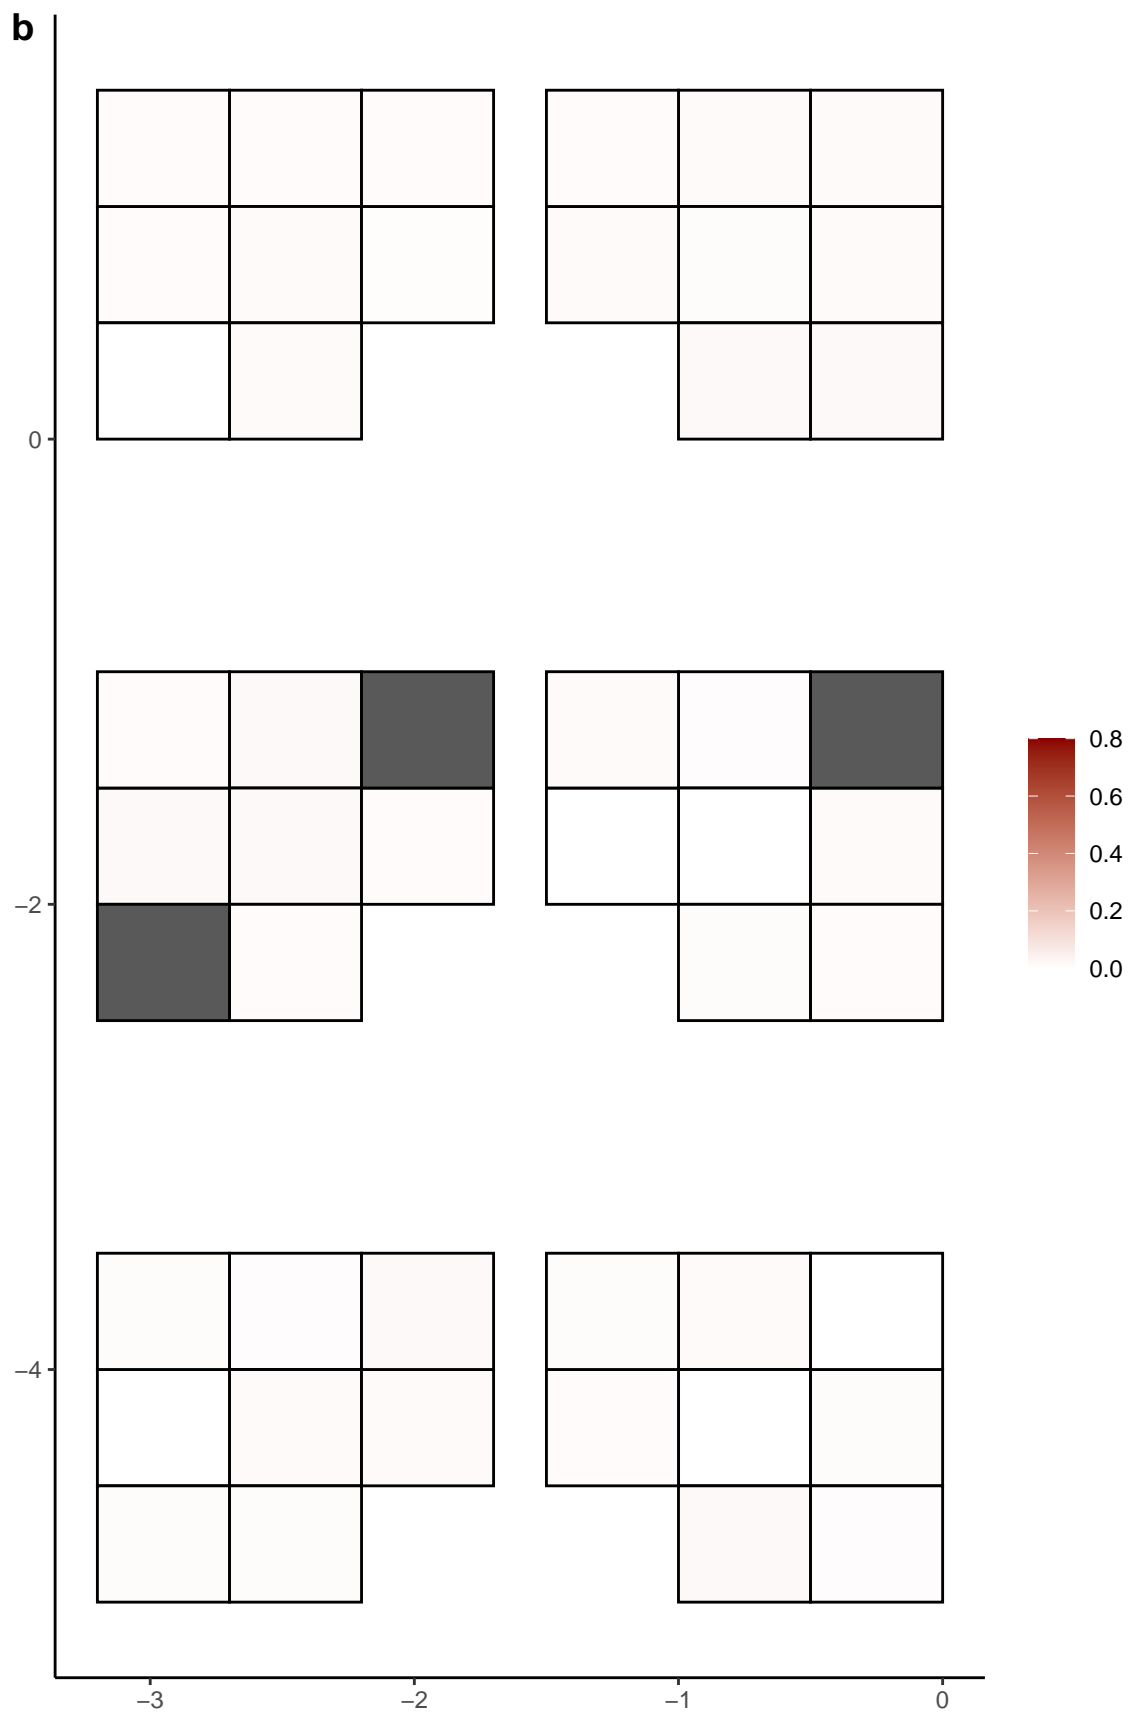

**a** ID05 9-81603782-C-T

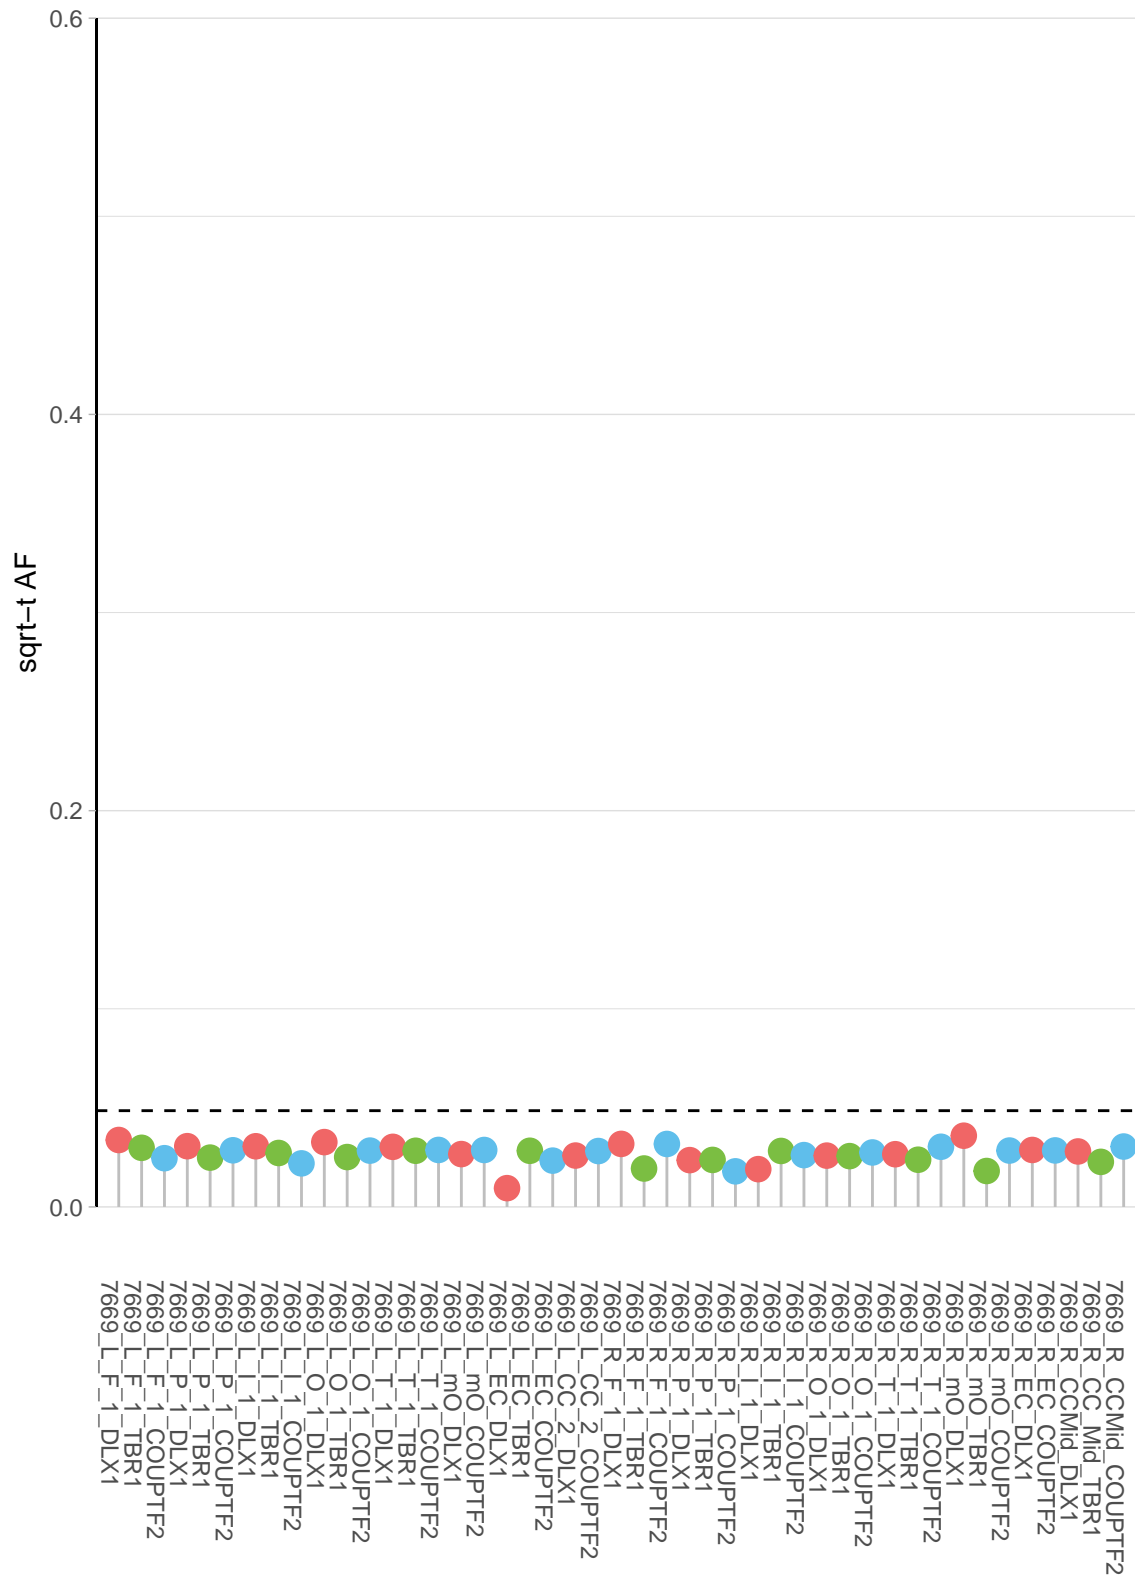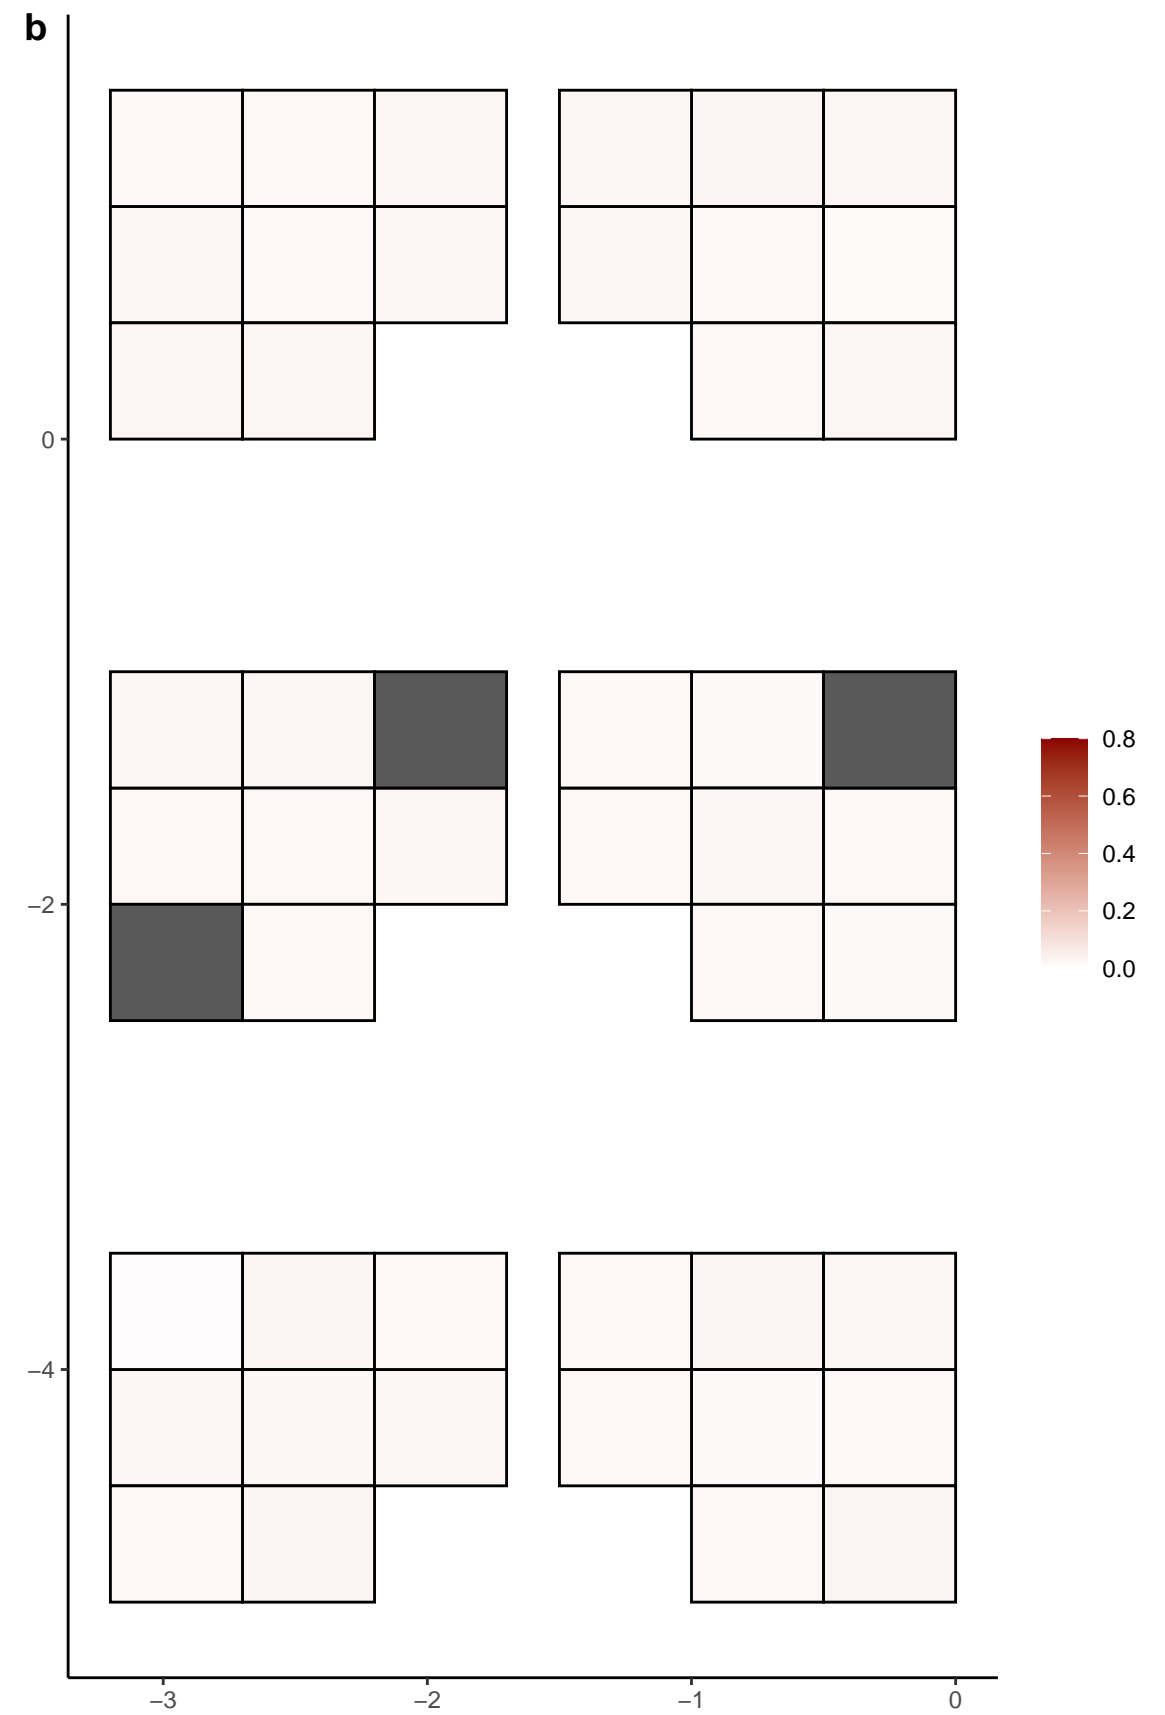

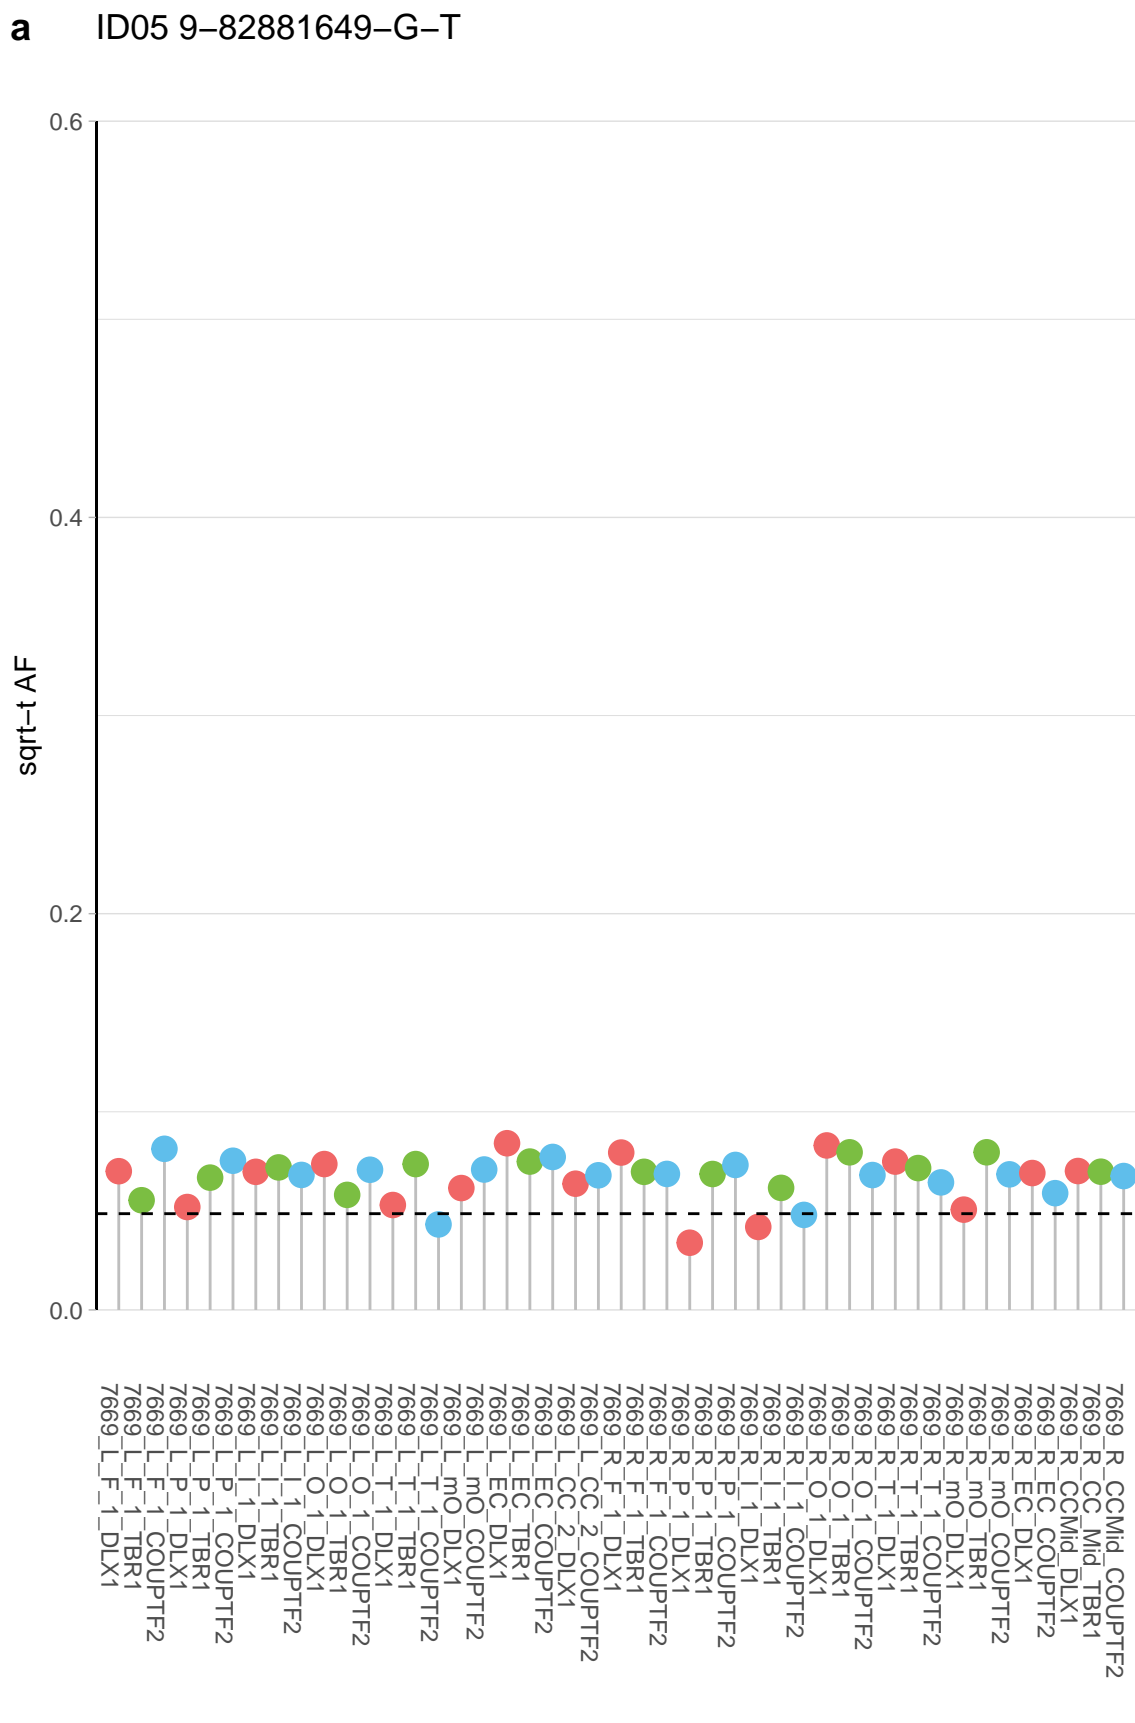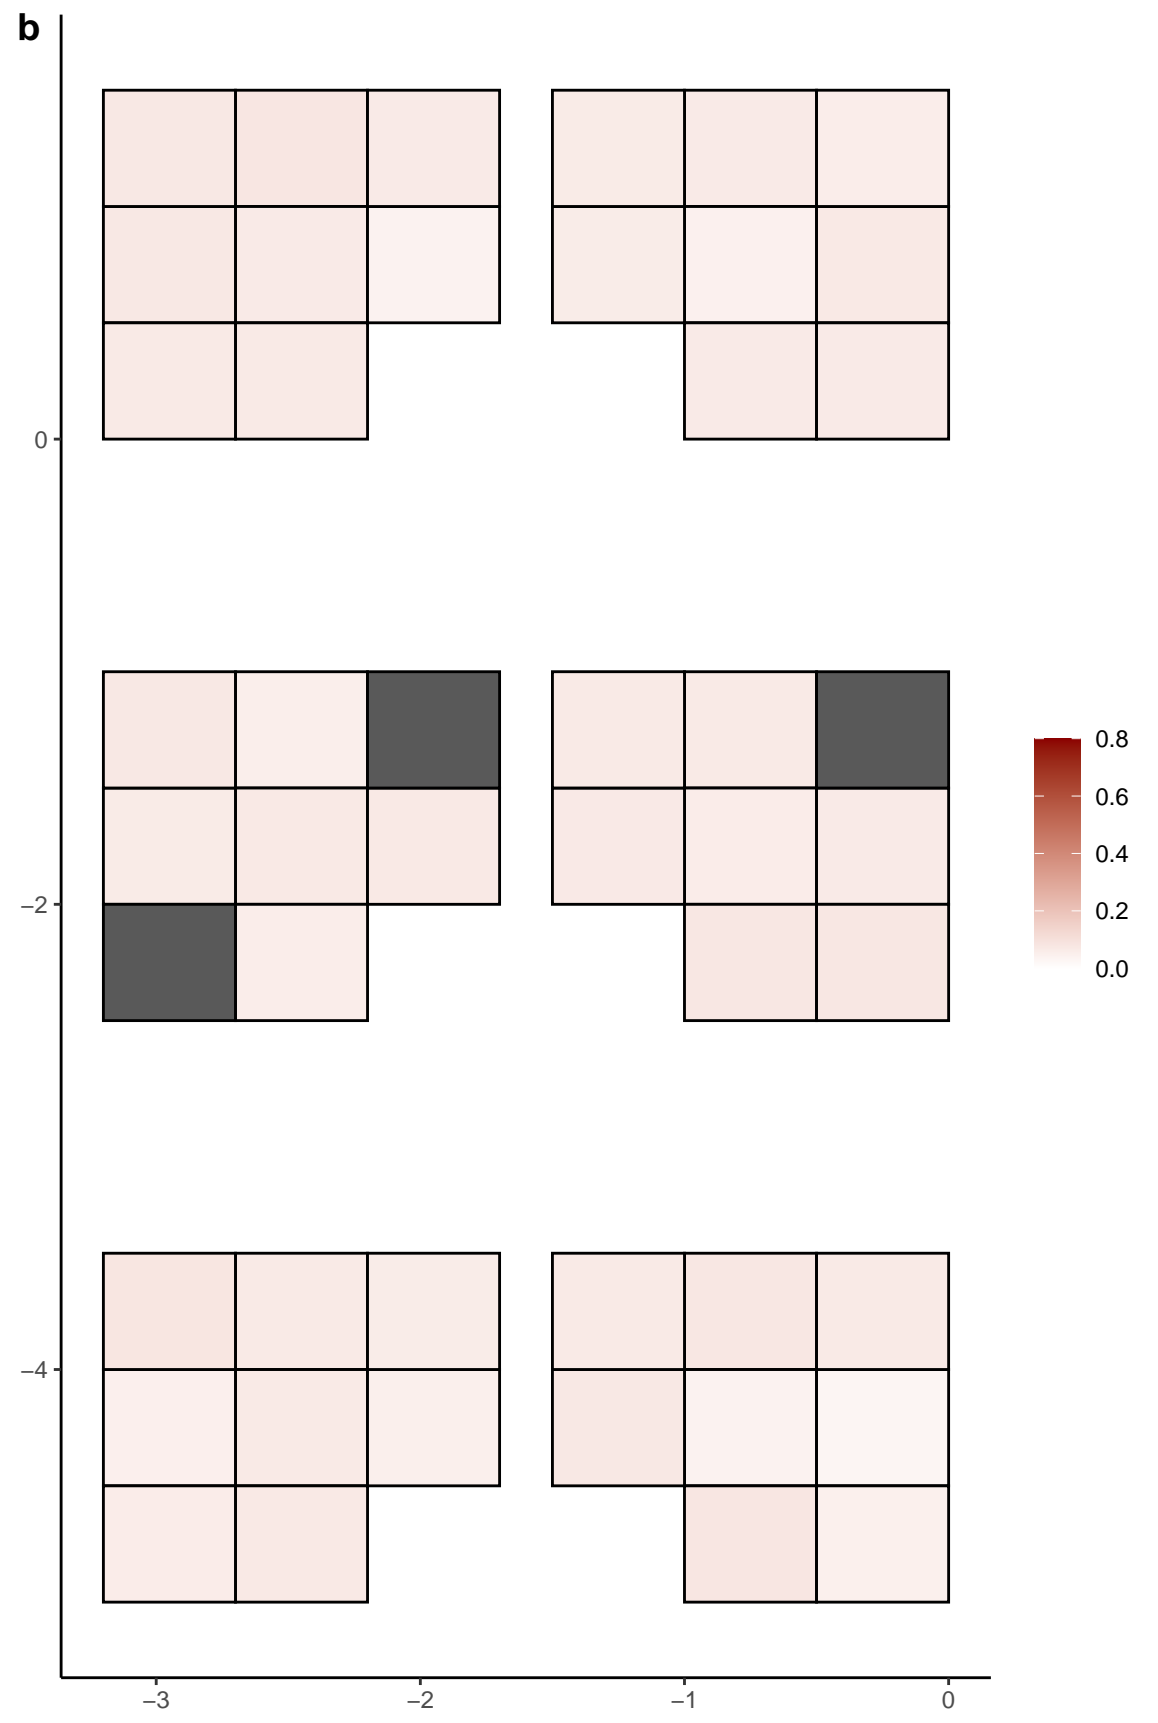

**a** ID05 9-82881654-A-C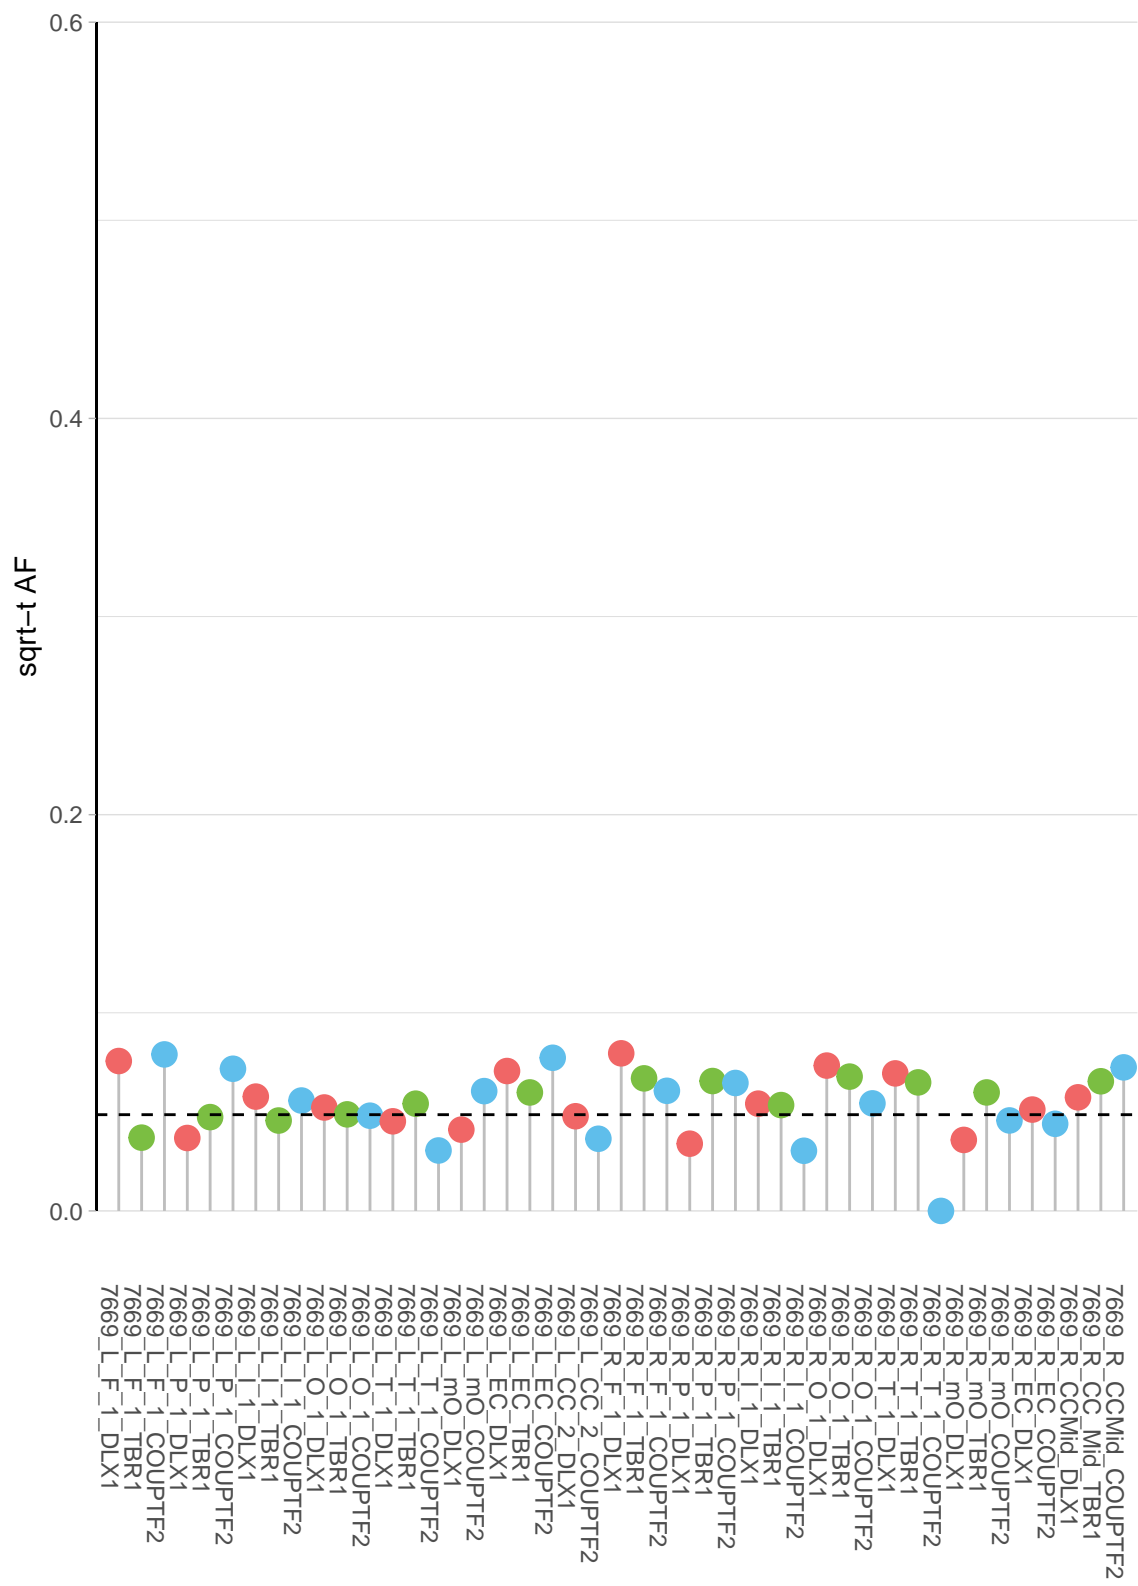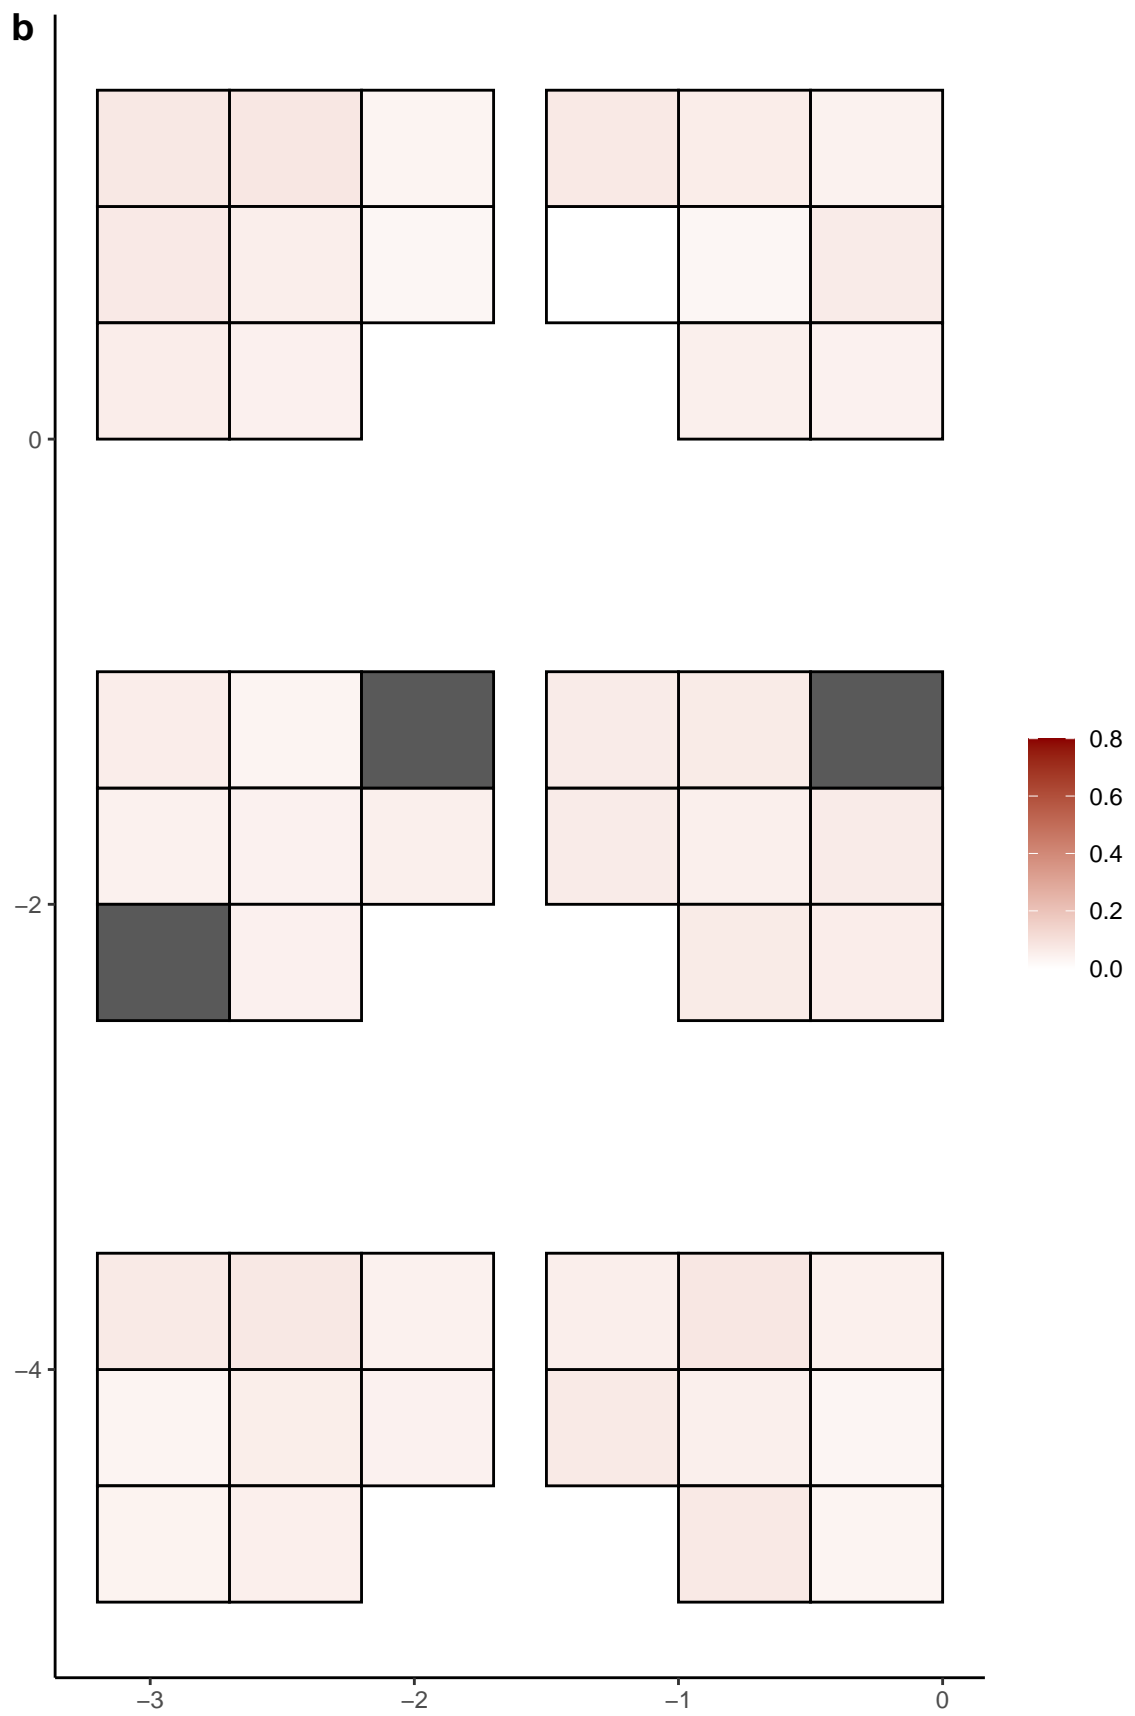

**a** ID05 9-83044793-C-A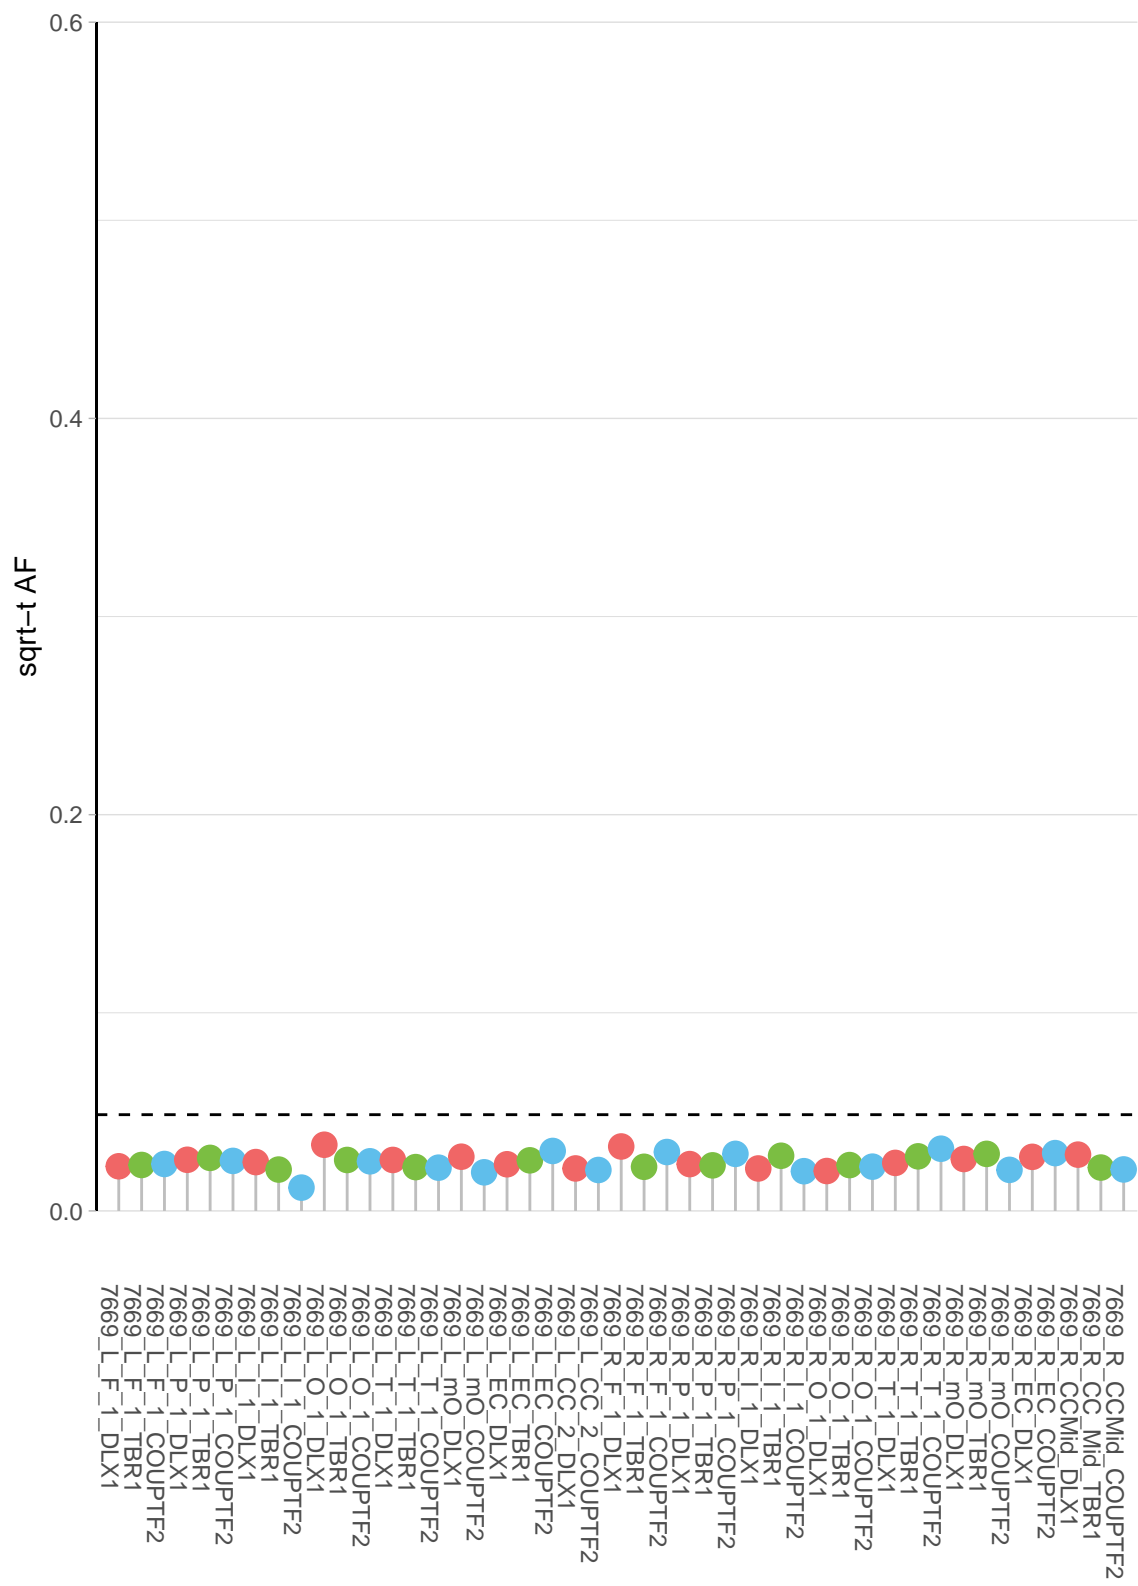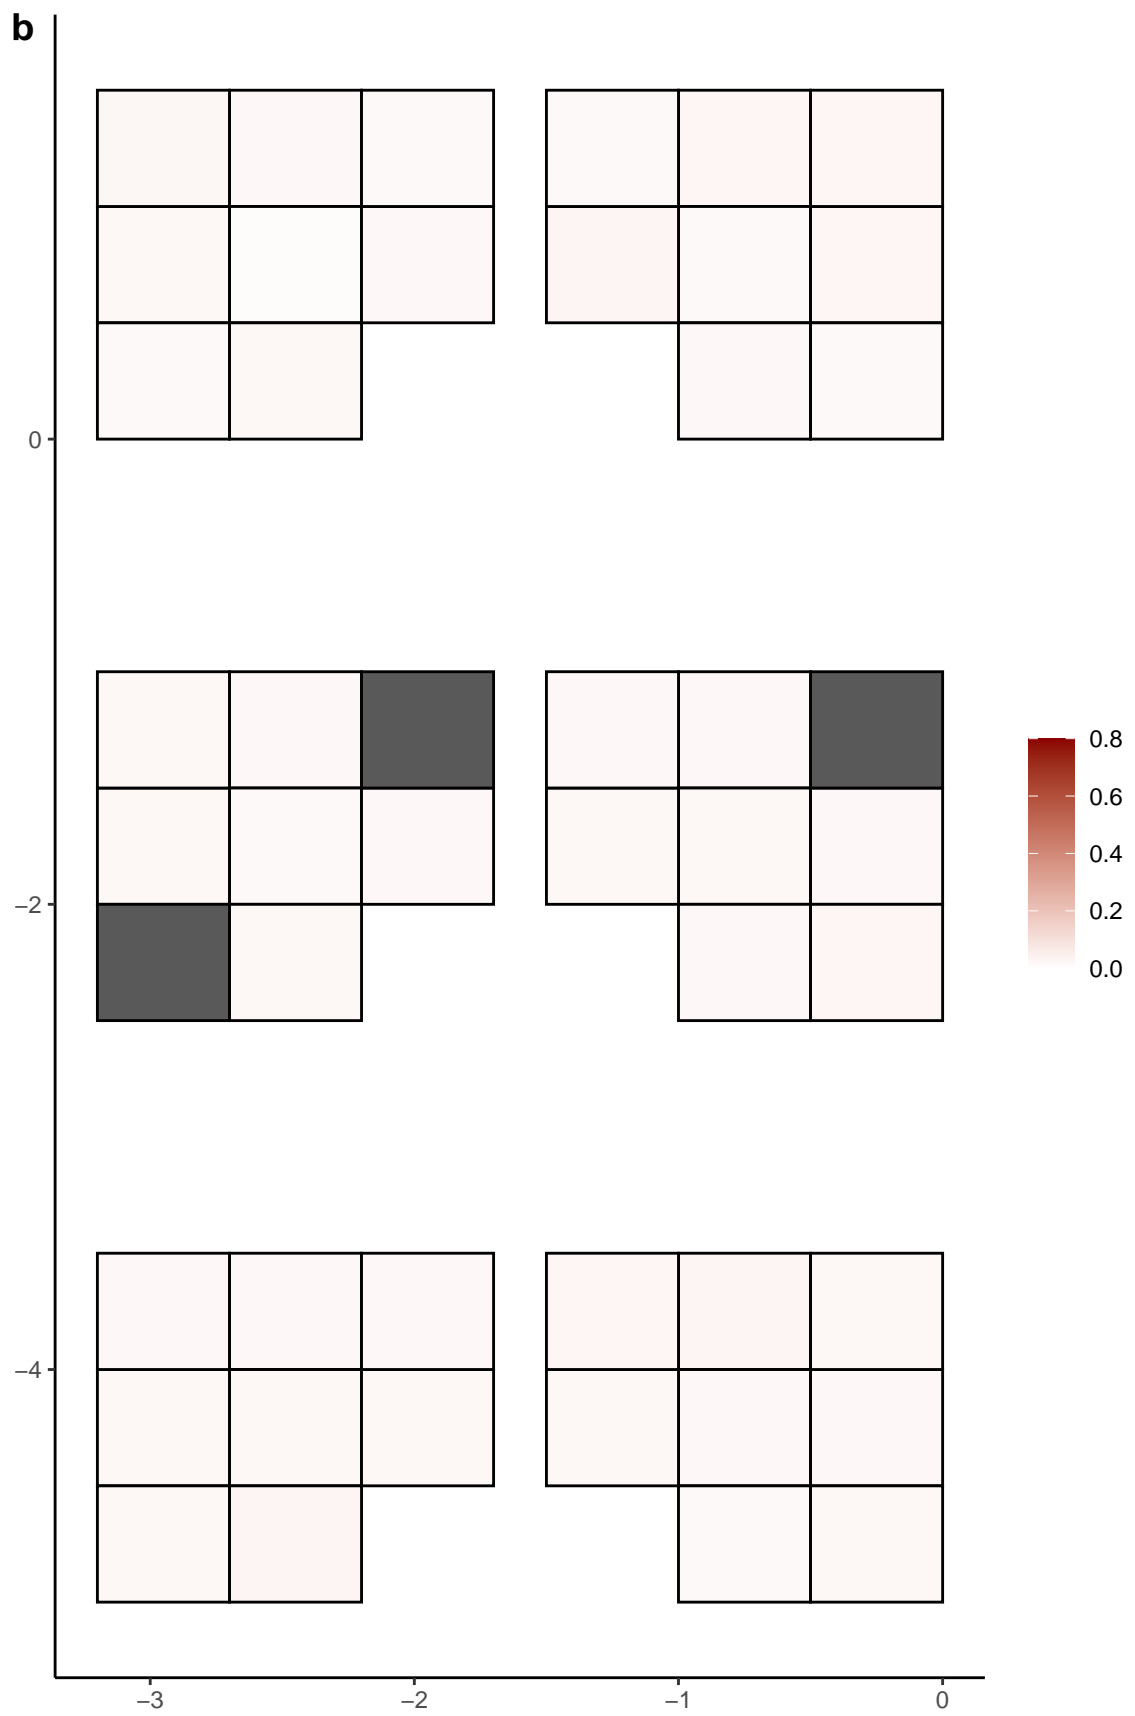



**a** ID05 9-96677164-G-A

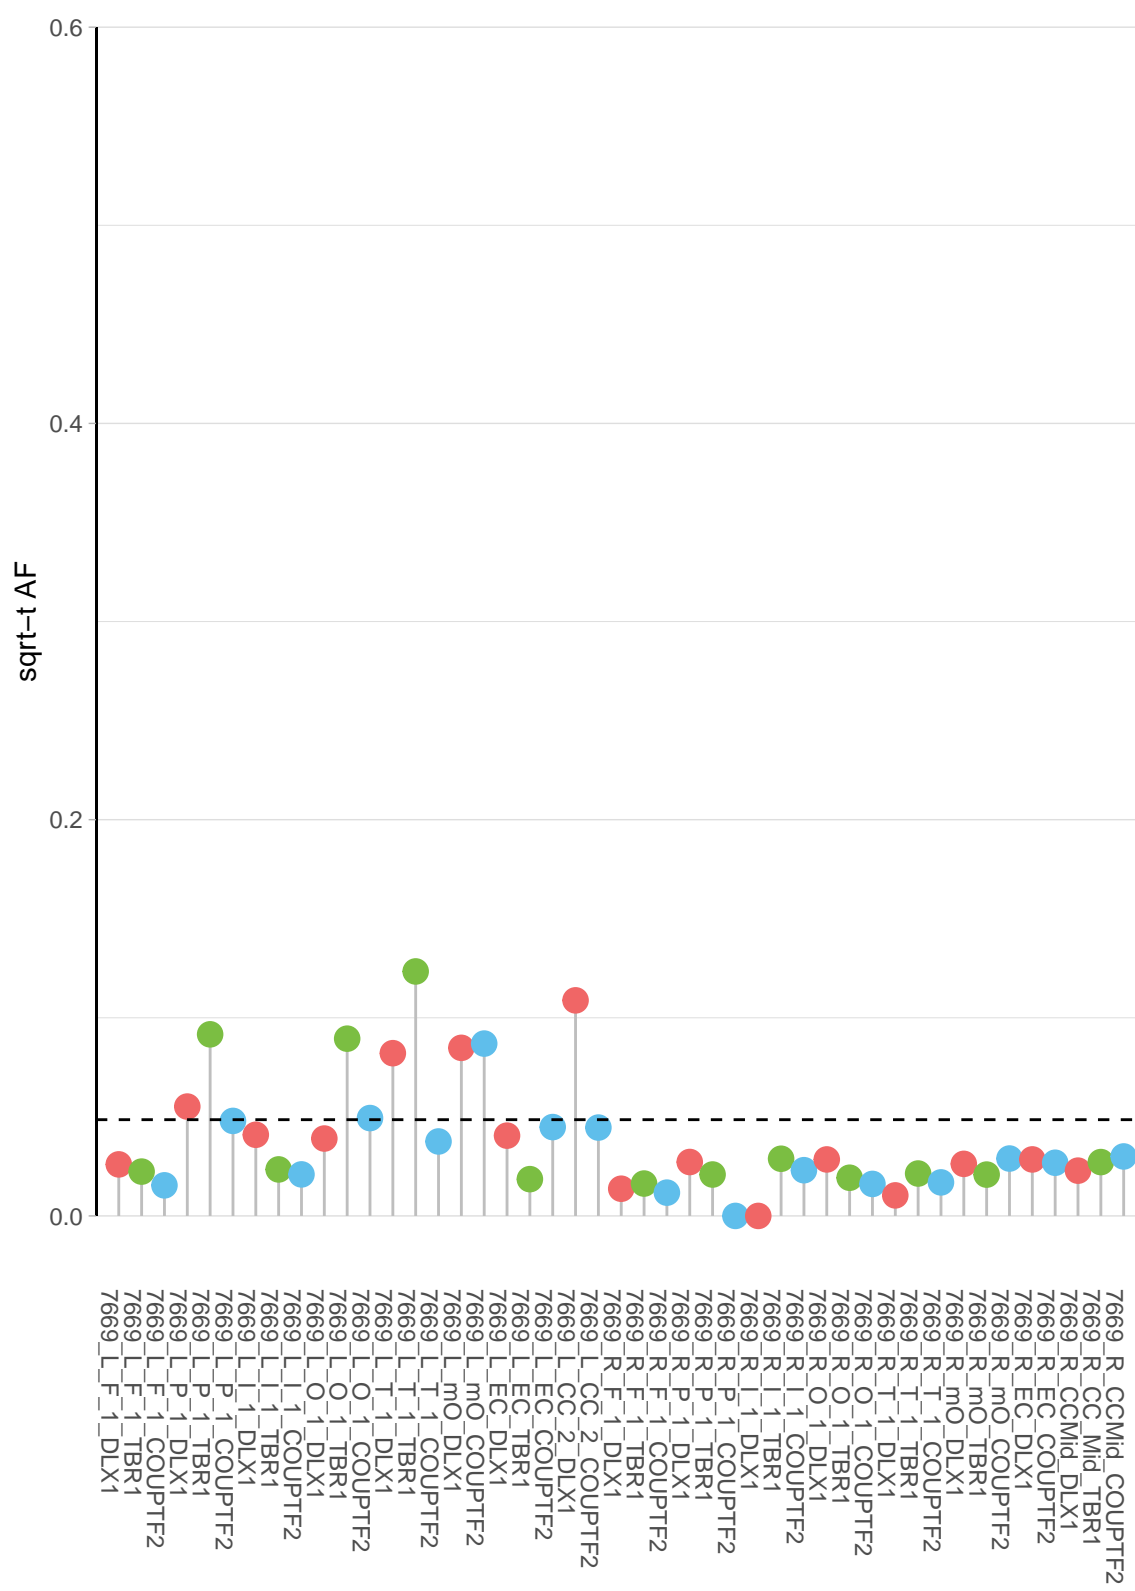

**b**

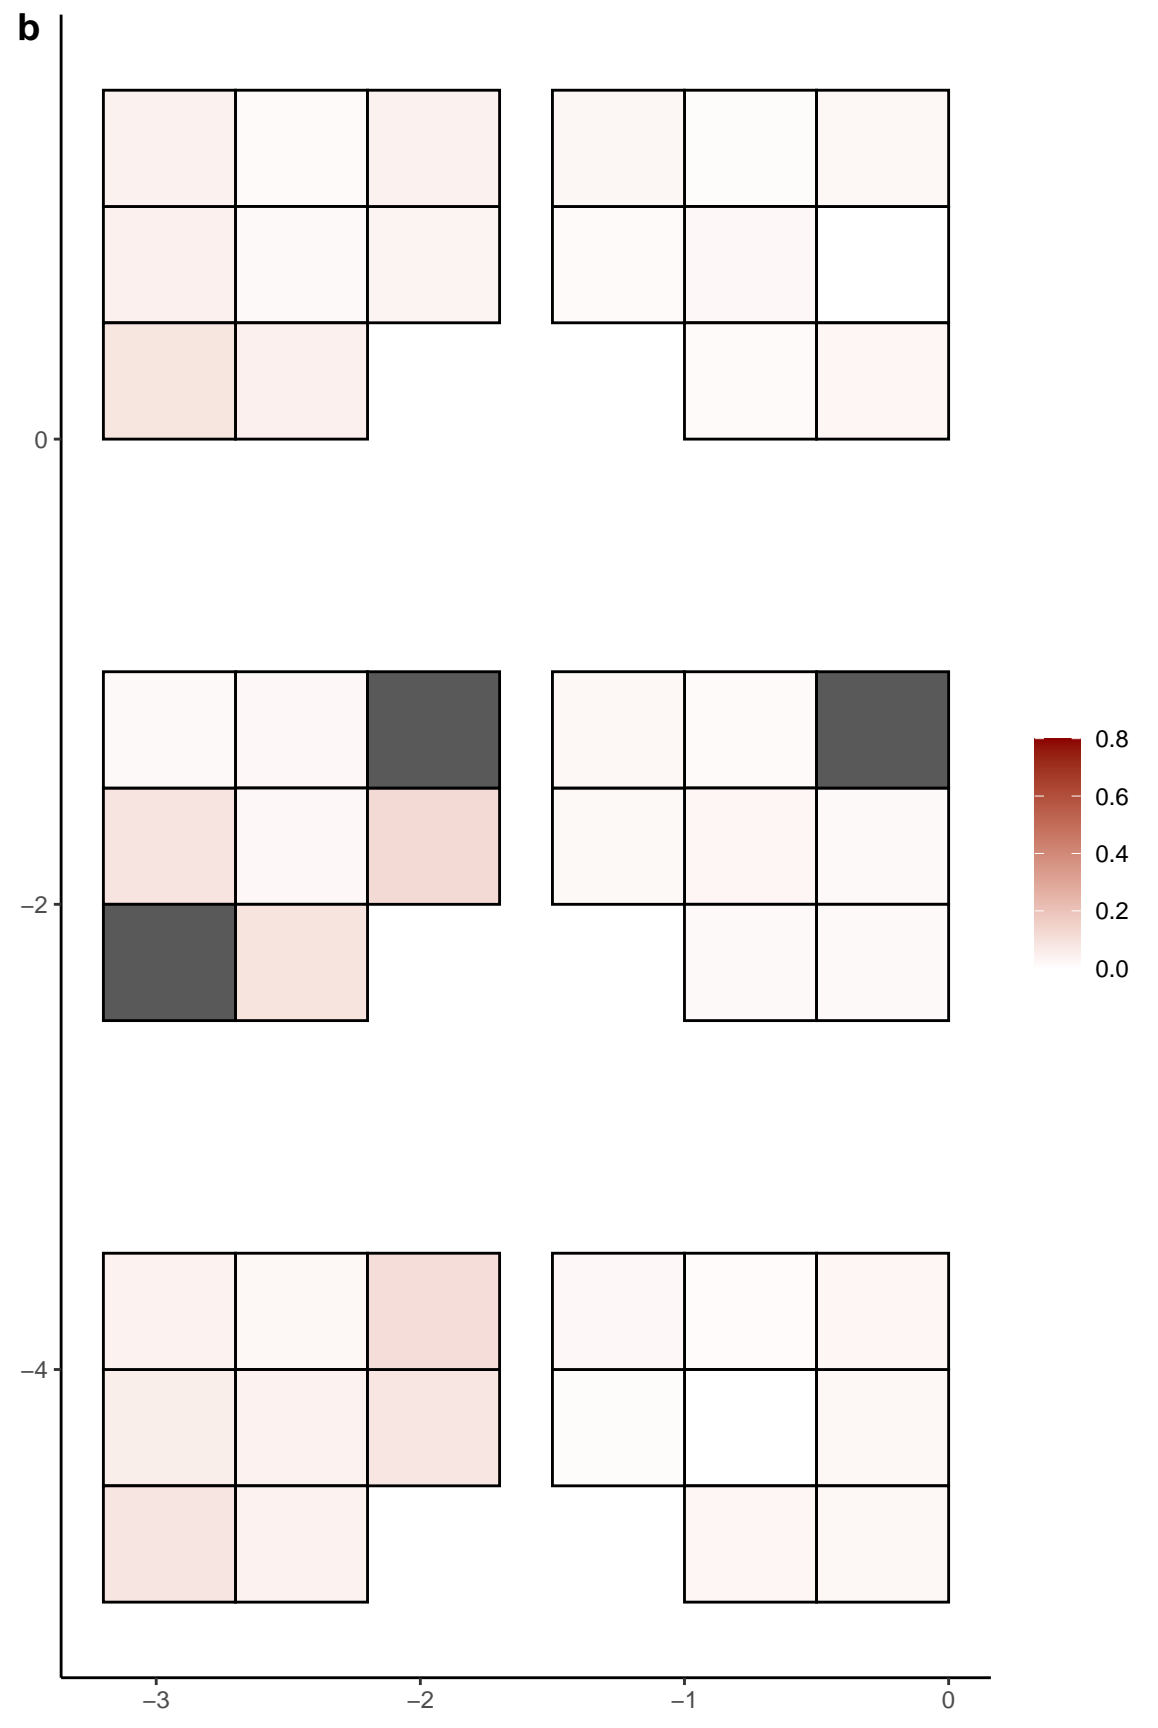



**a** ID05 9-9971800-C-T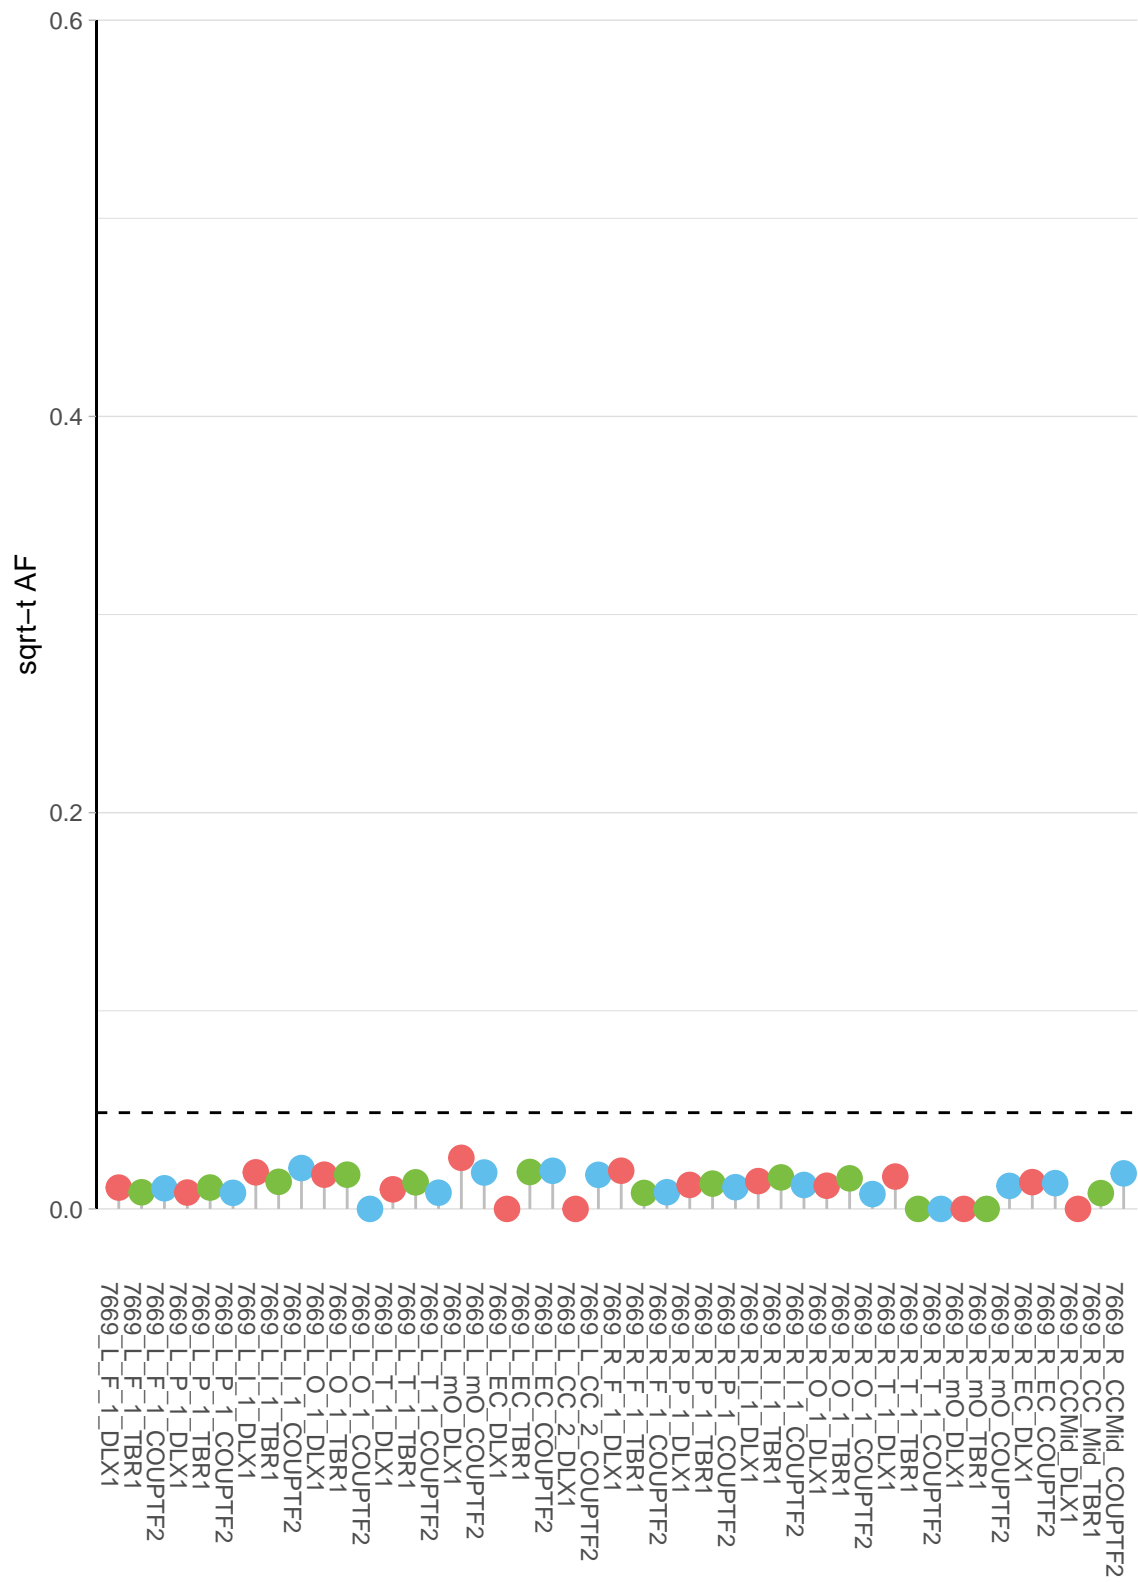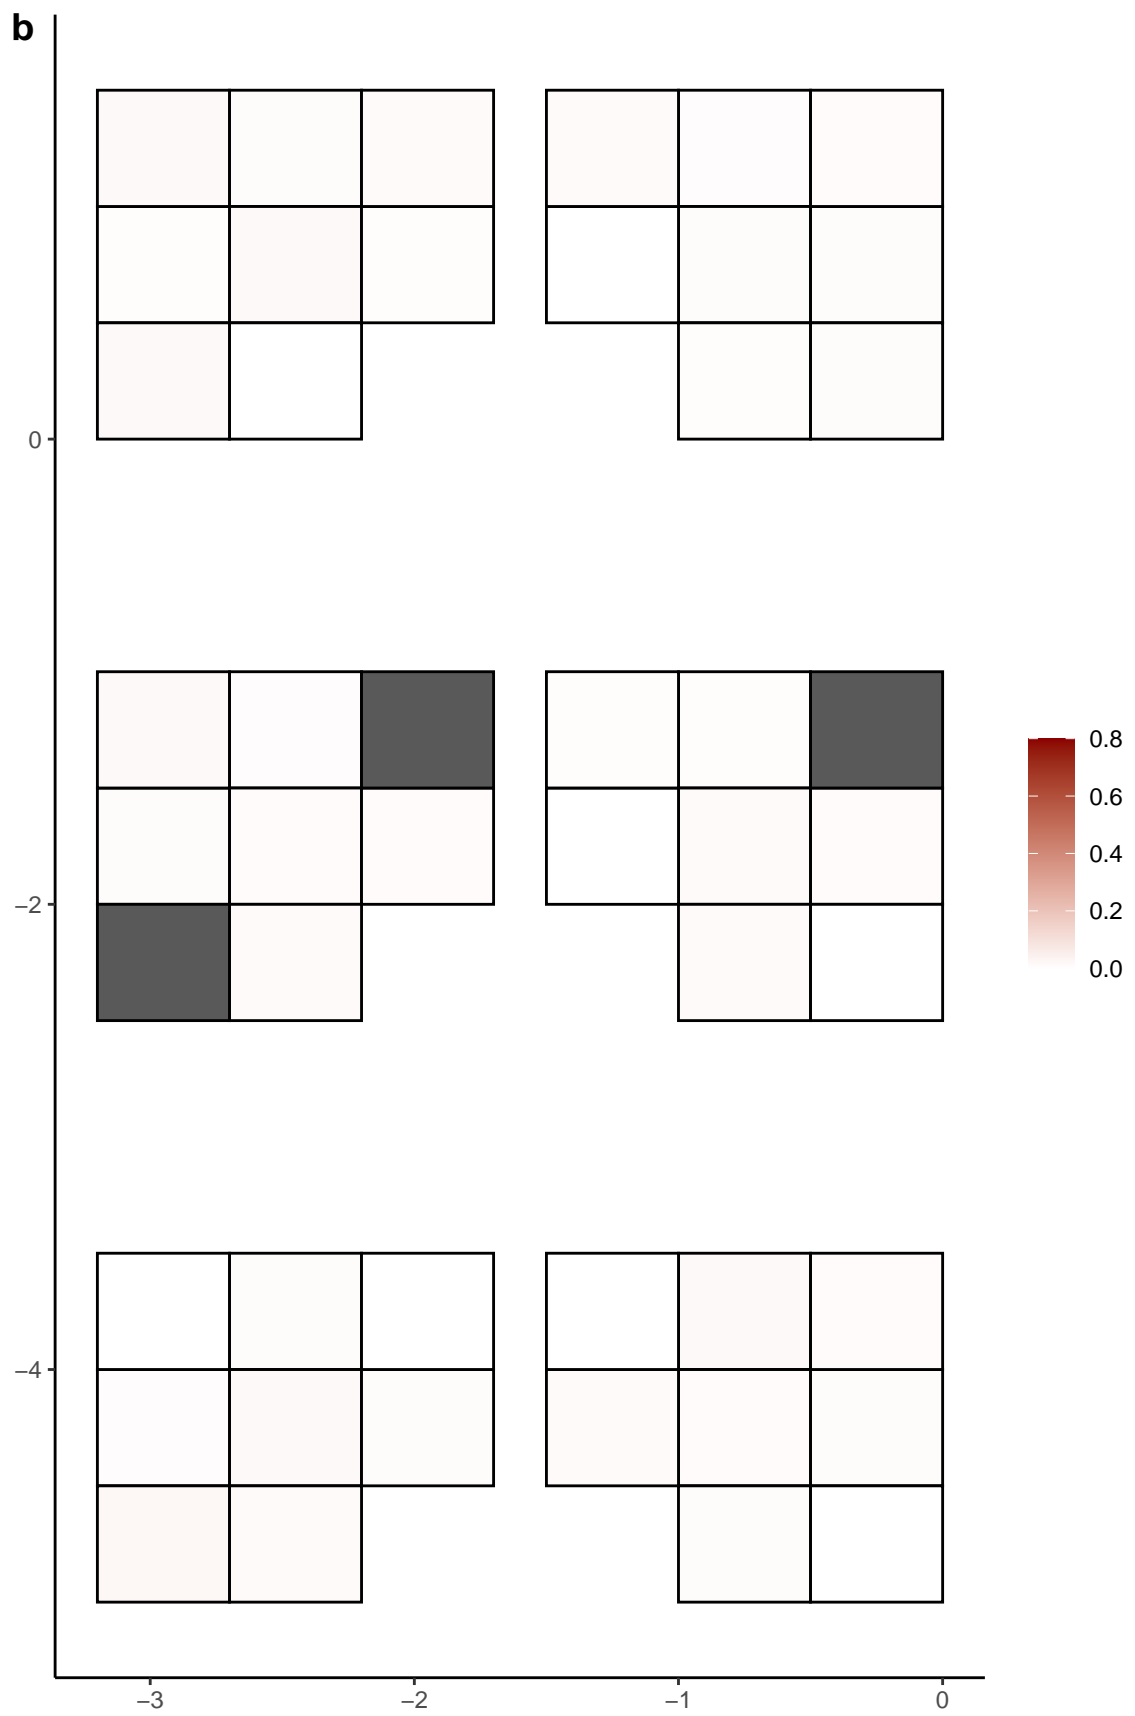

**a** ID05 X-107301303-G-T

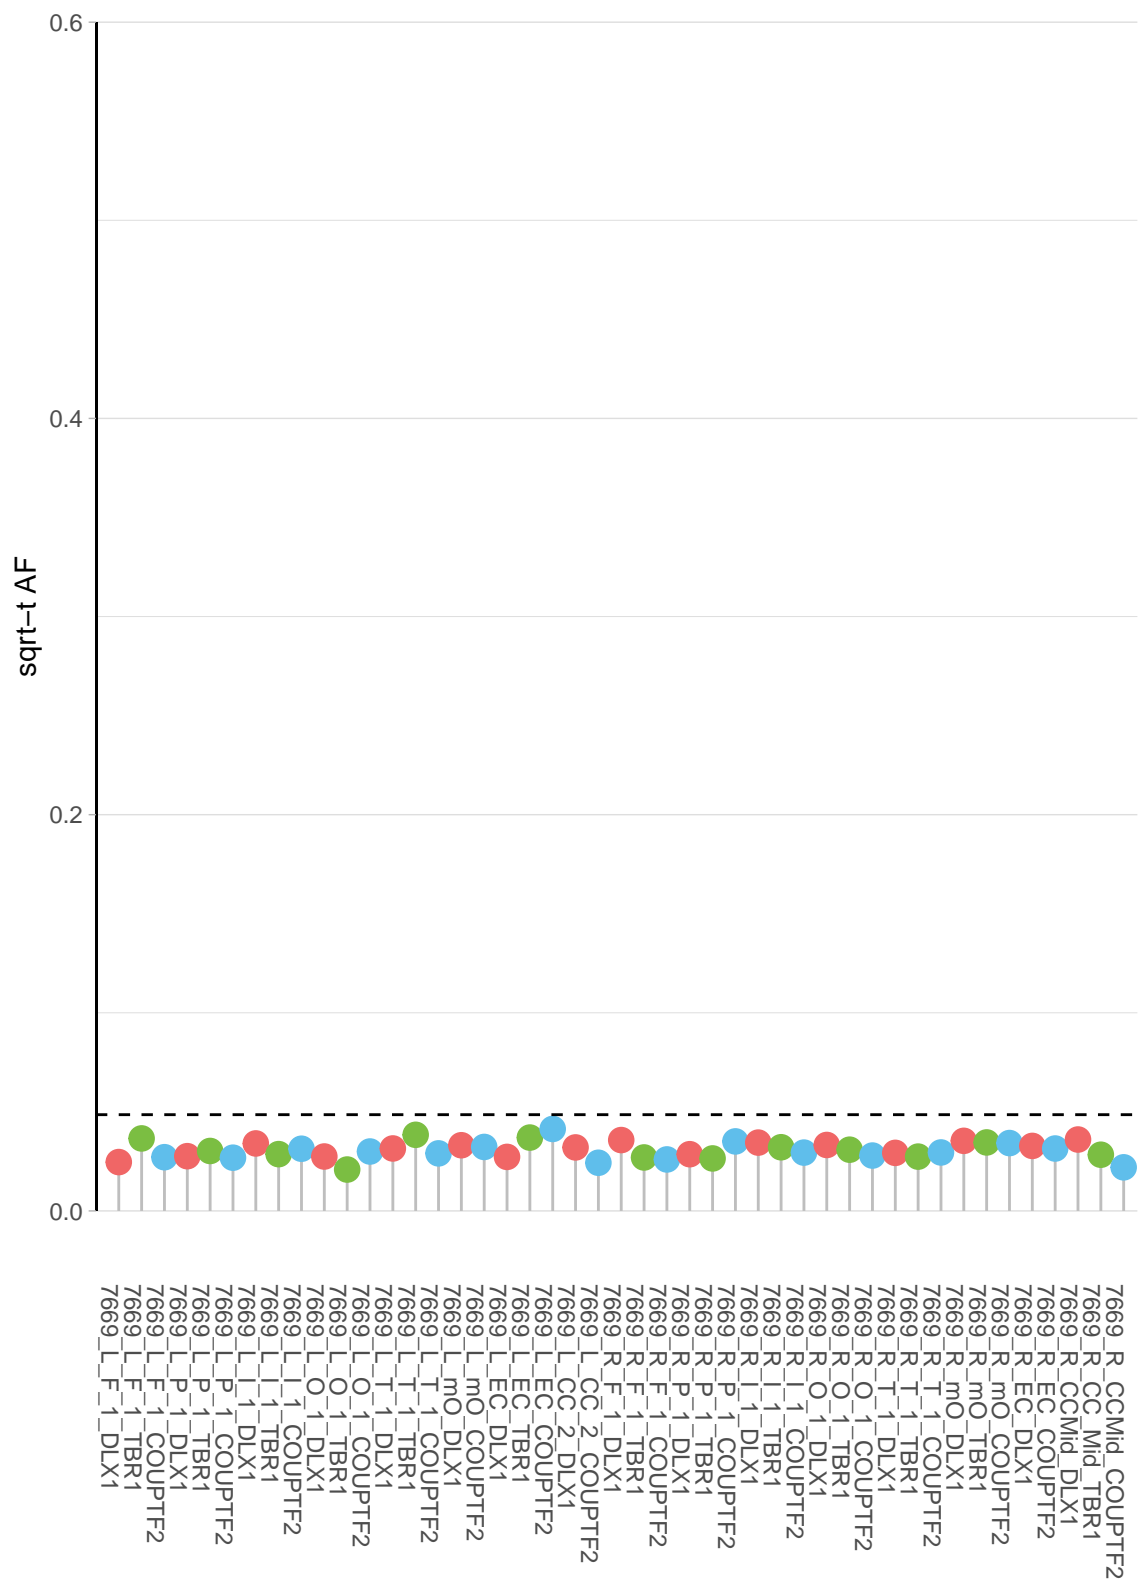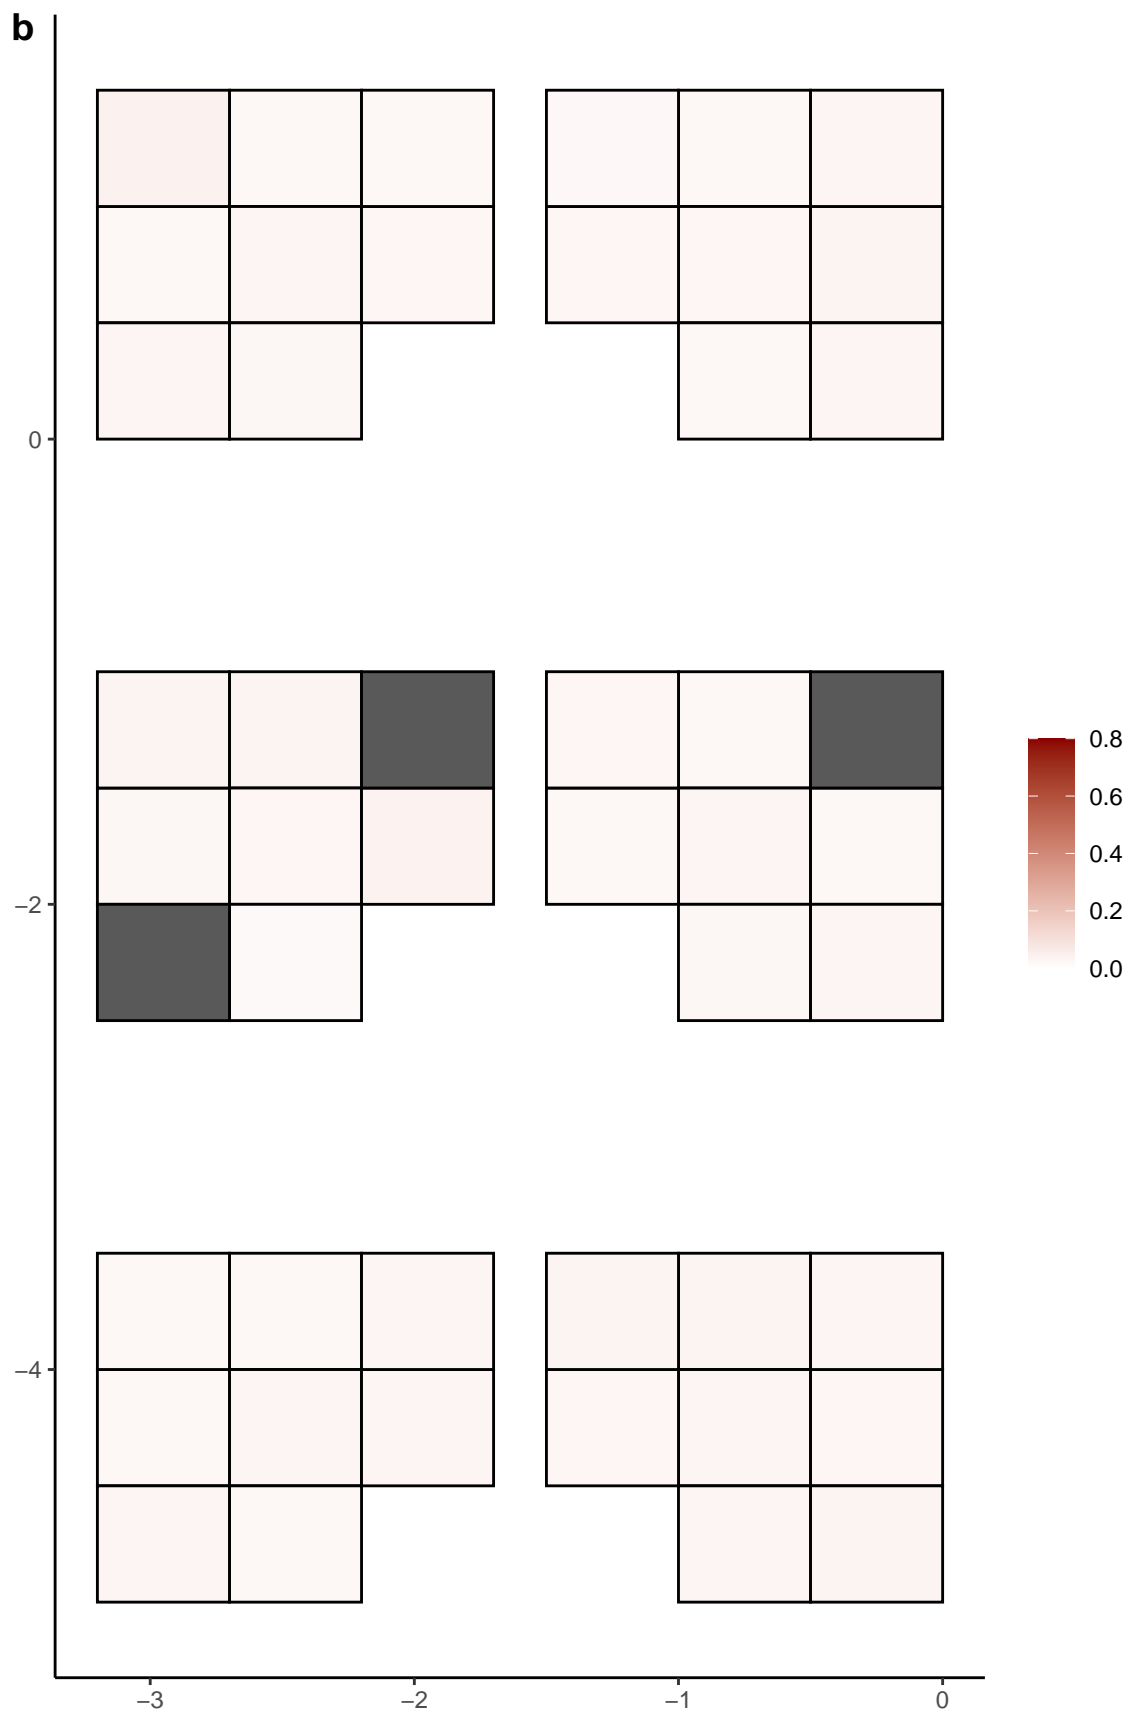



**a** ID05 X-109939493-G-A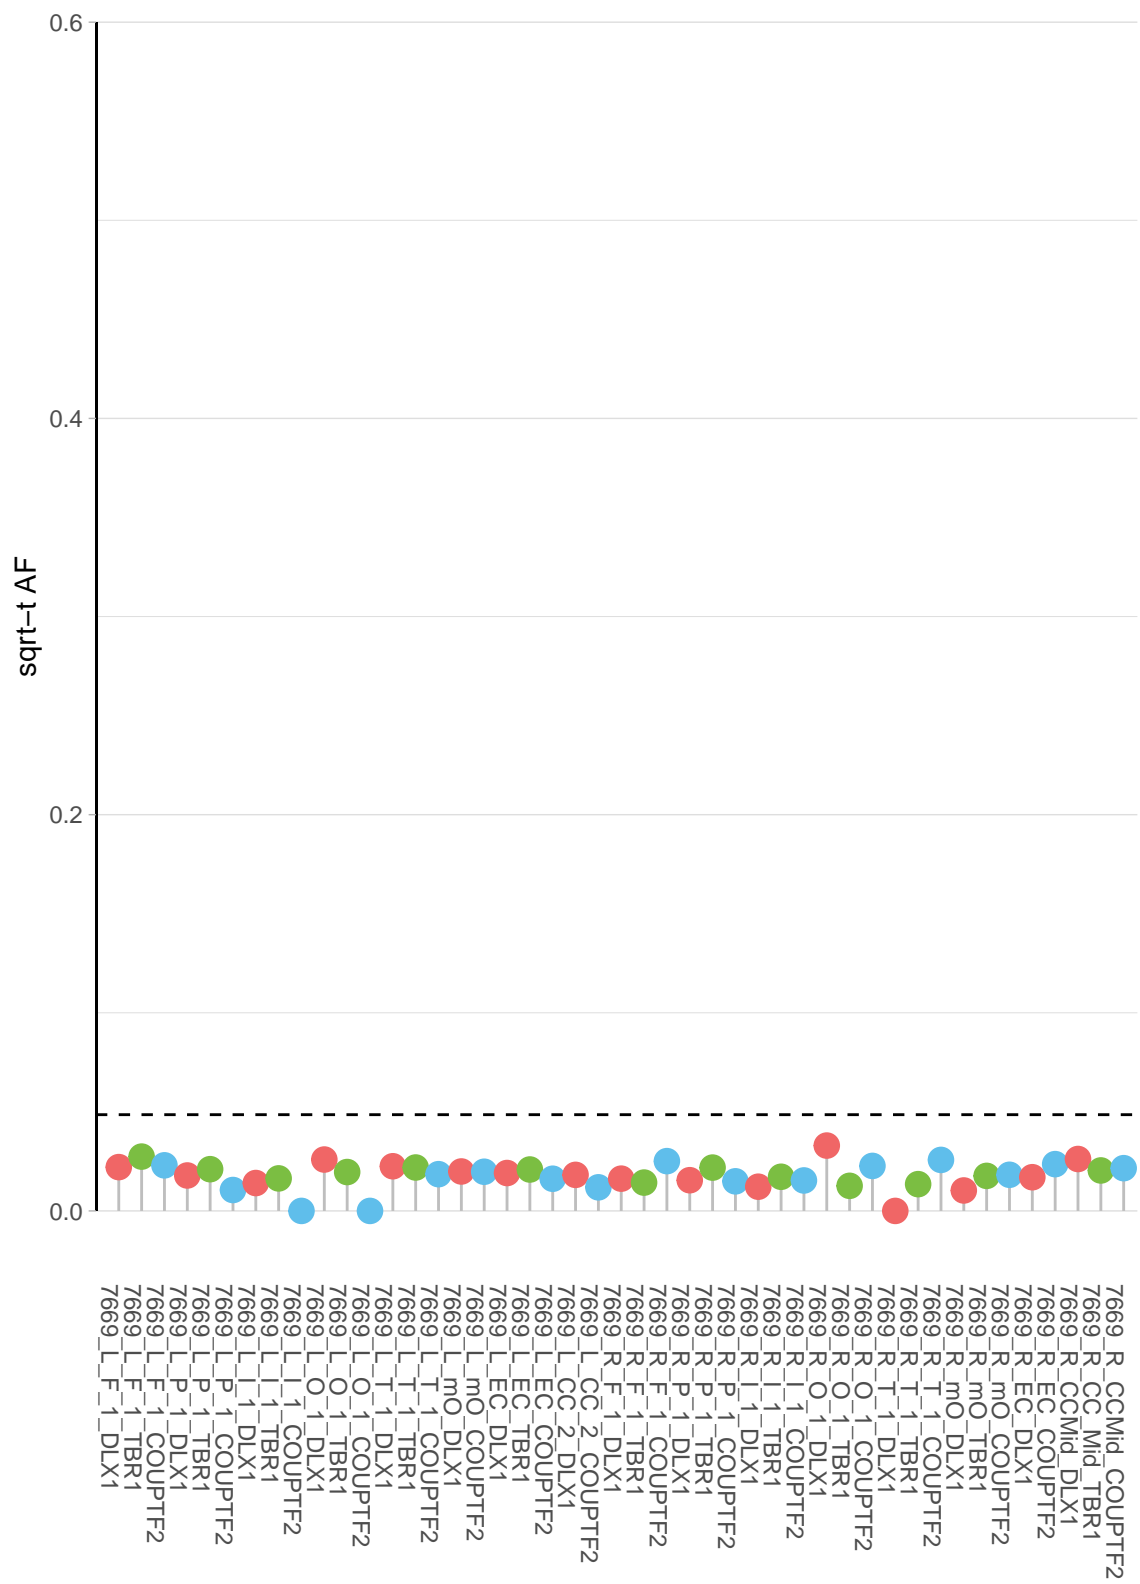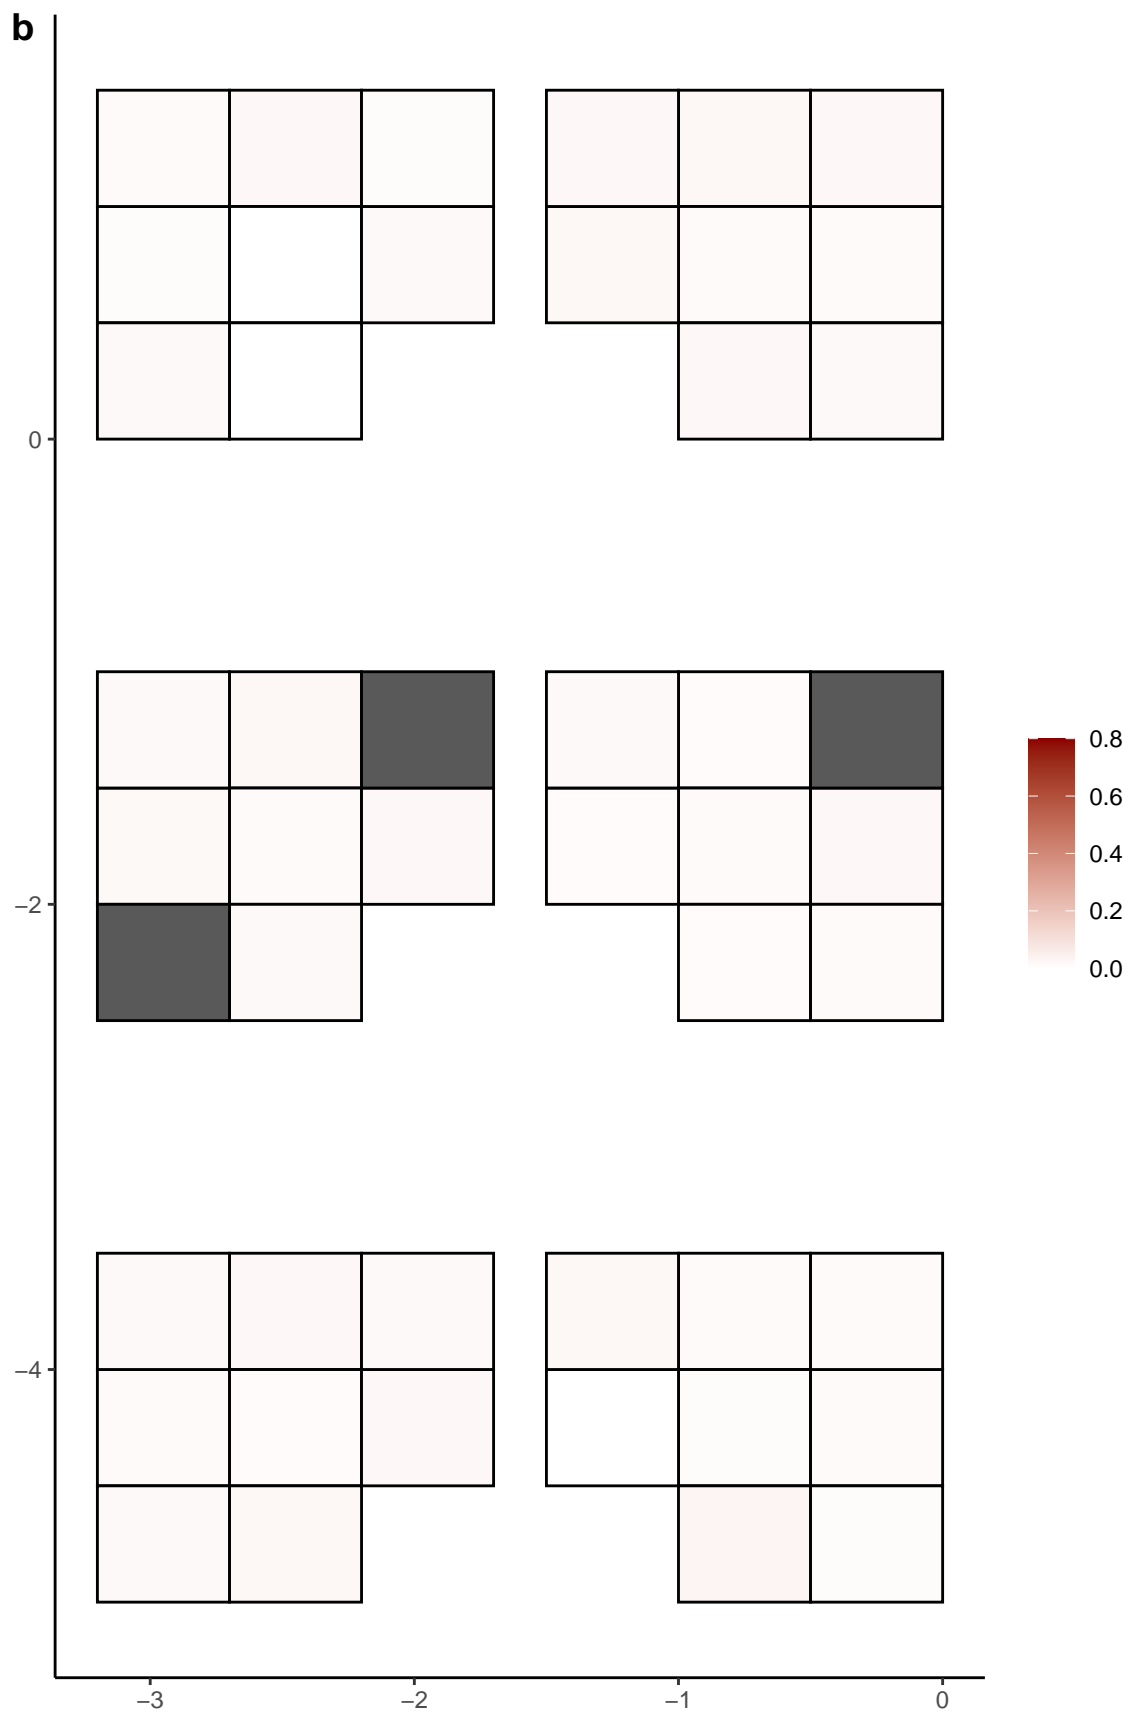

**a** ID05 X-117240525-A-C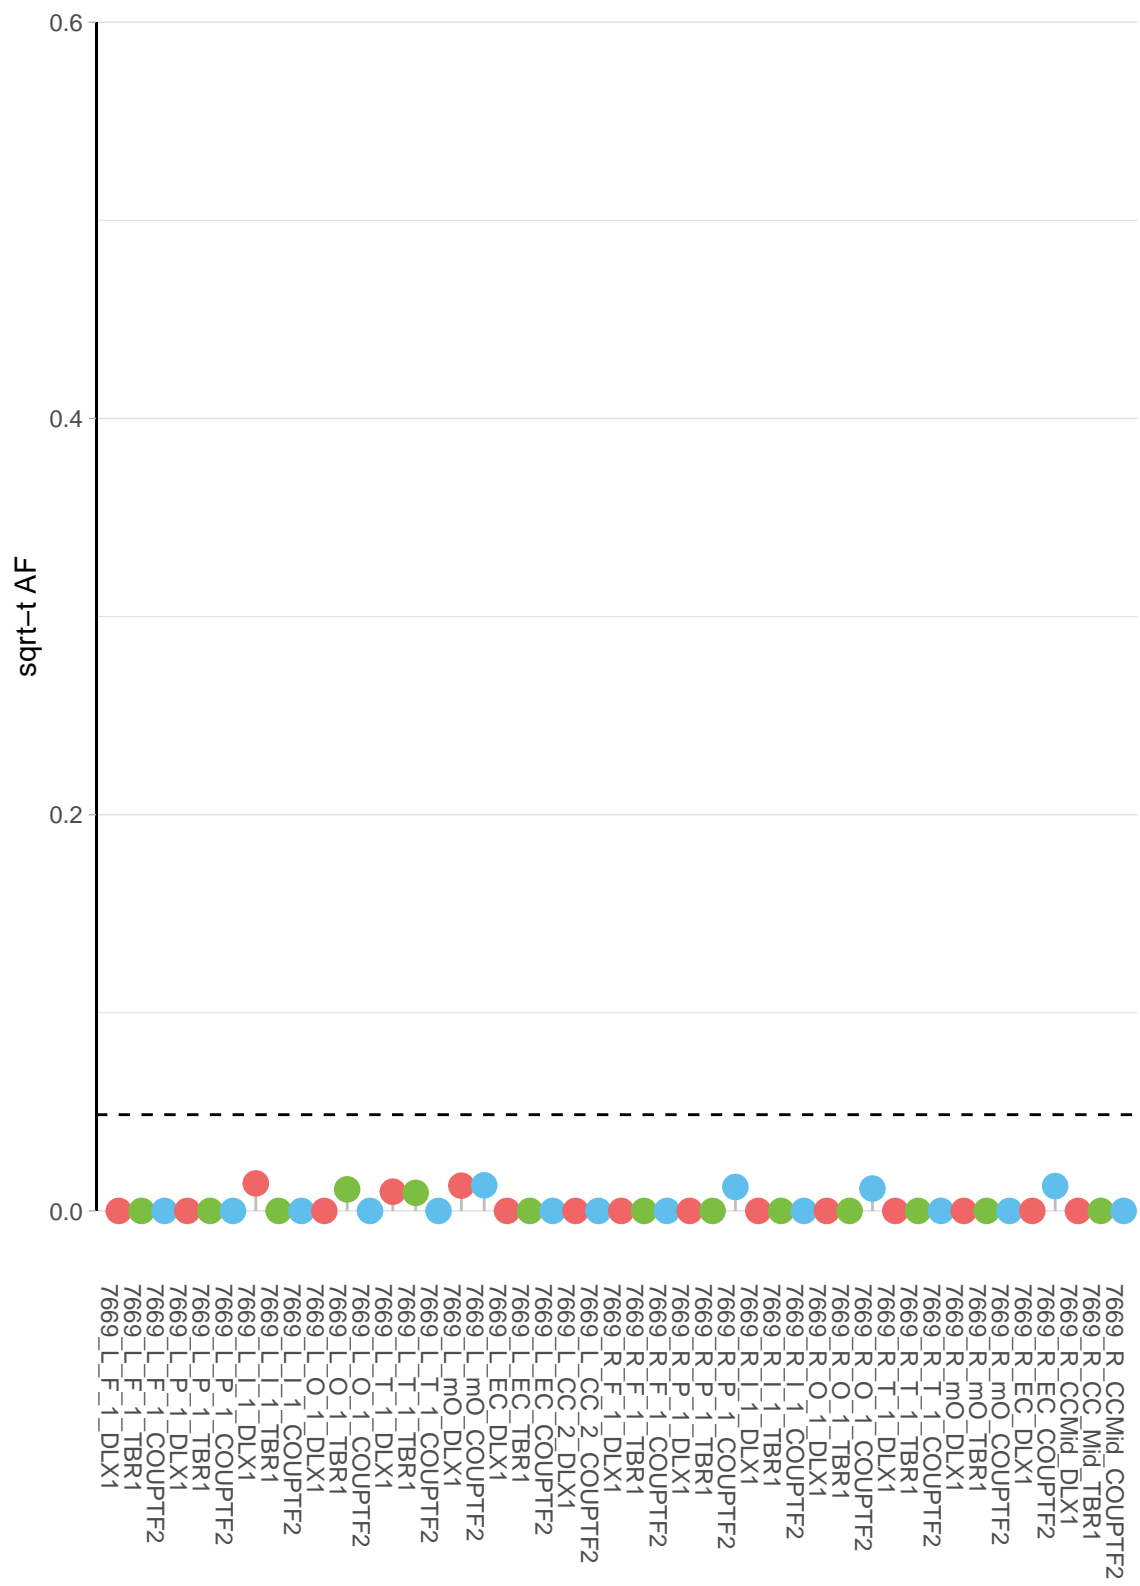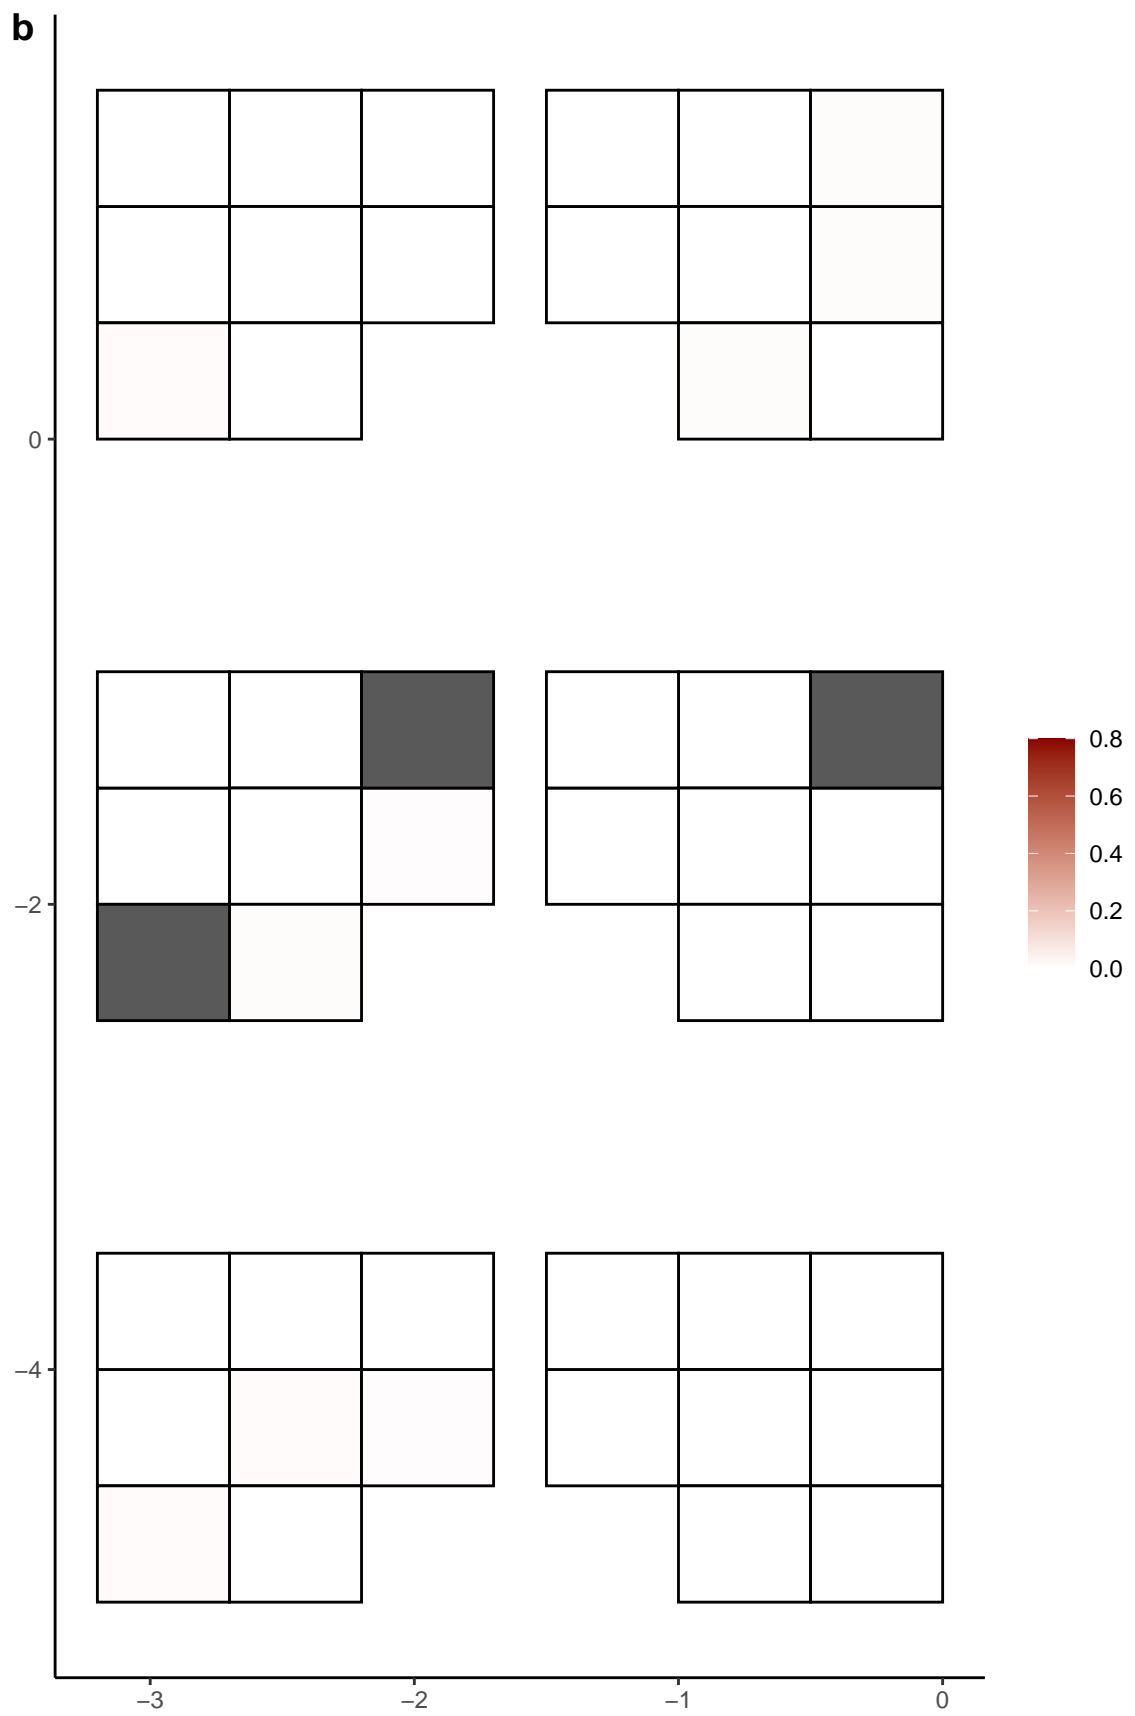

**a** ID05 X-122220079-G-A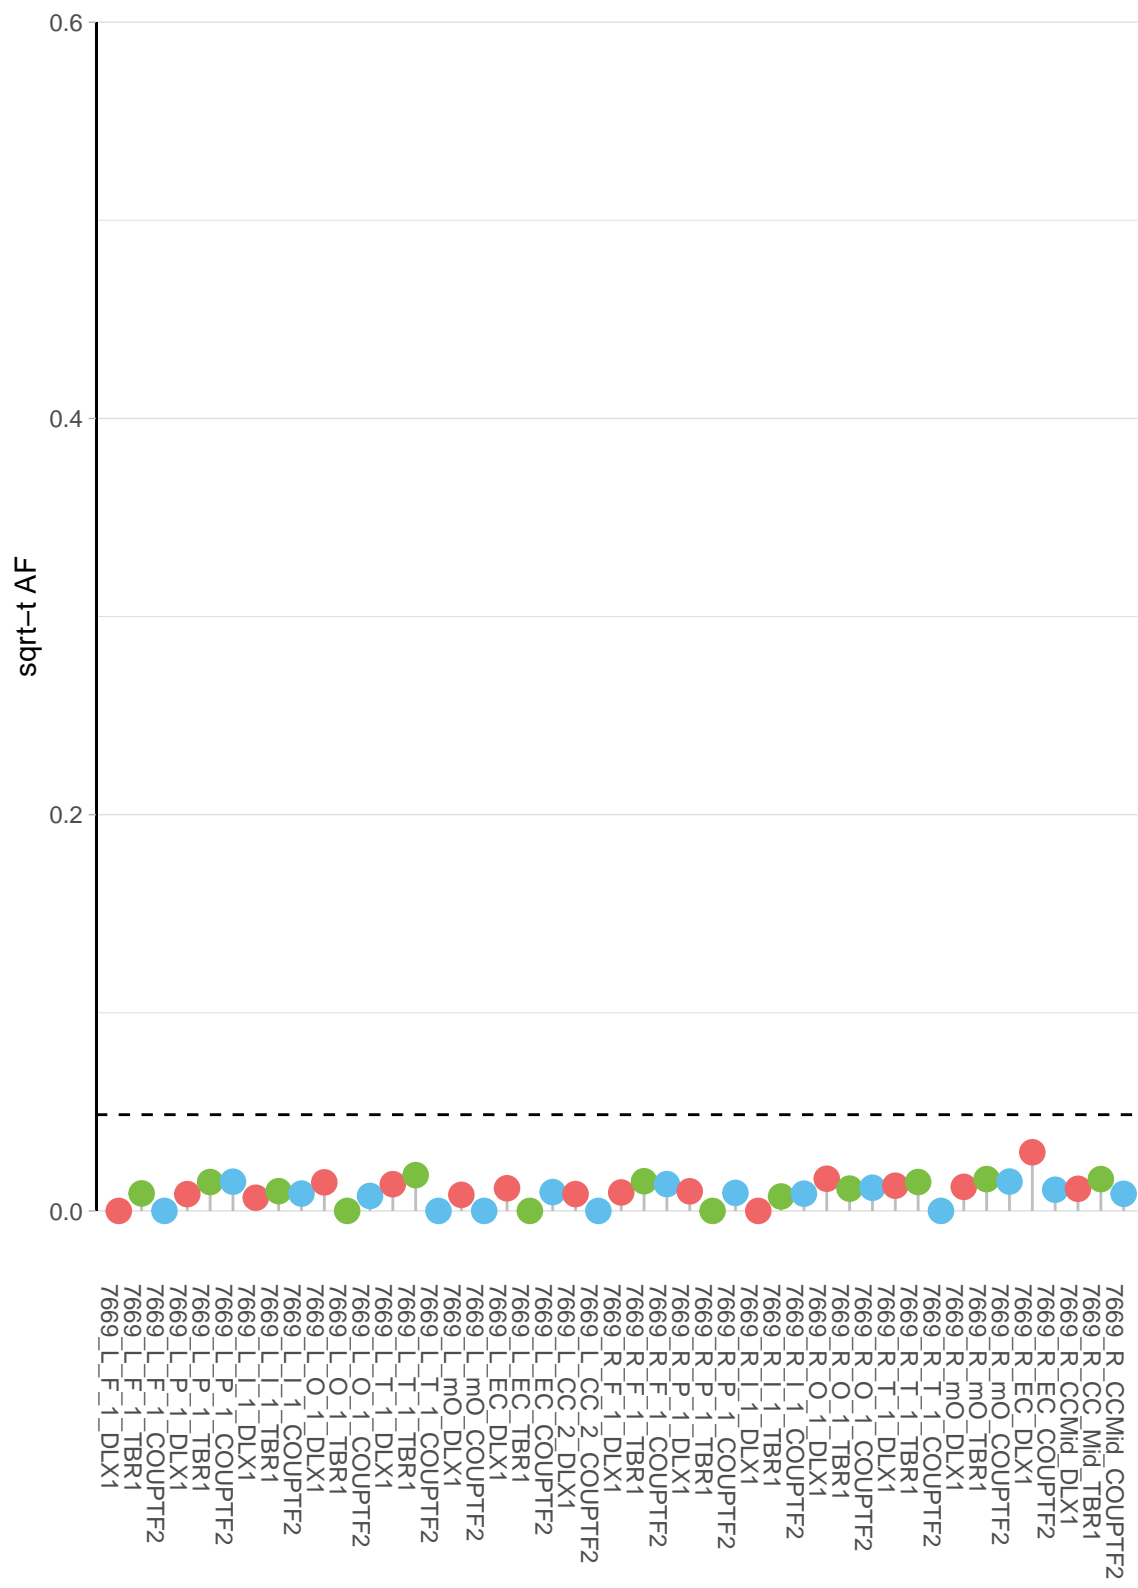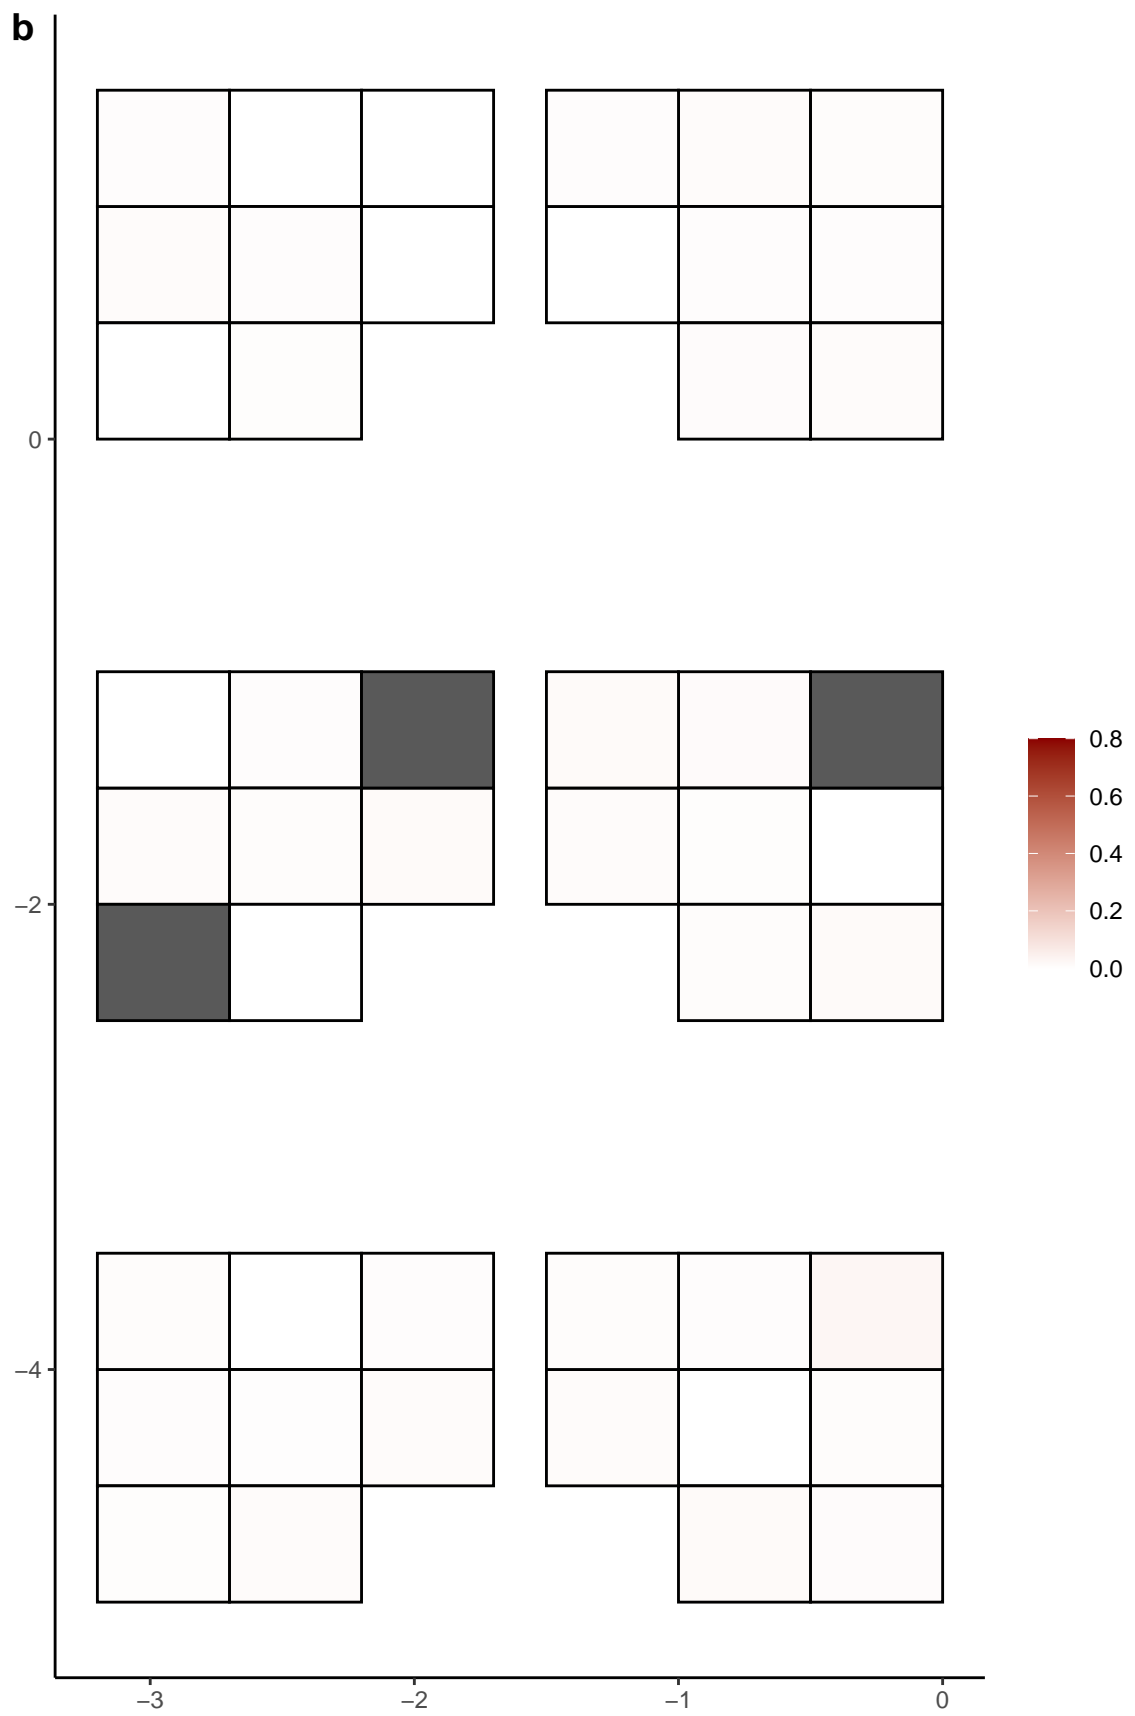

**a** ID05 X-125464024-G-A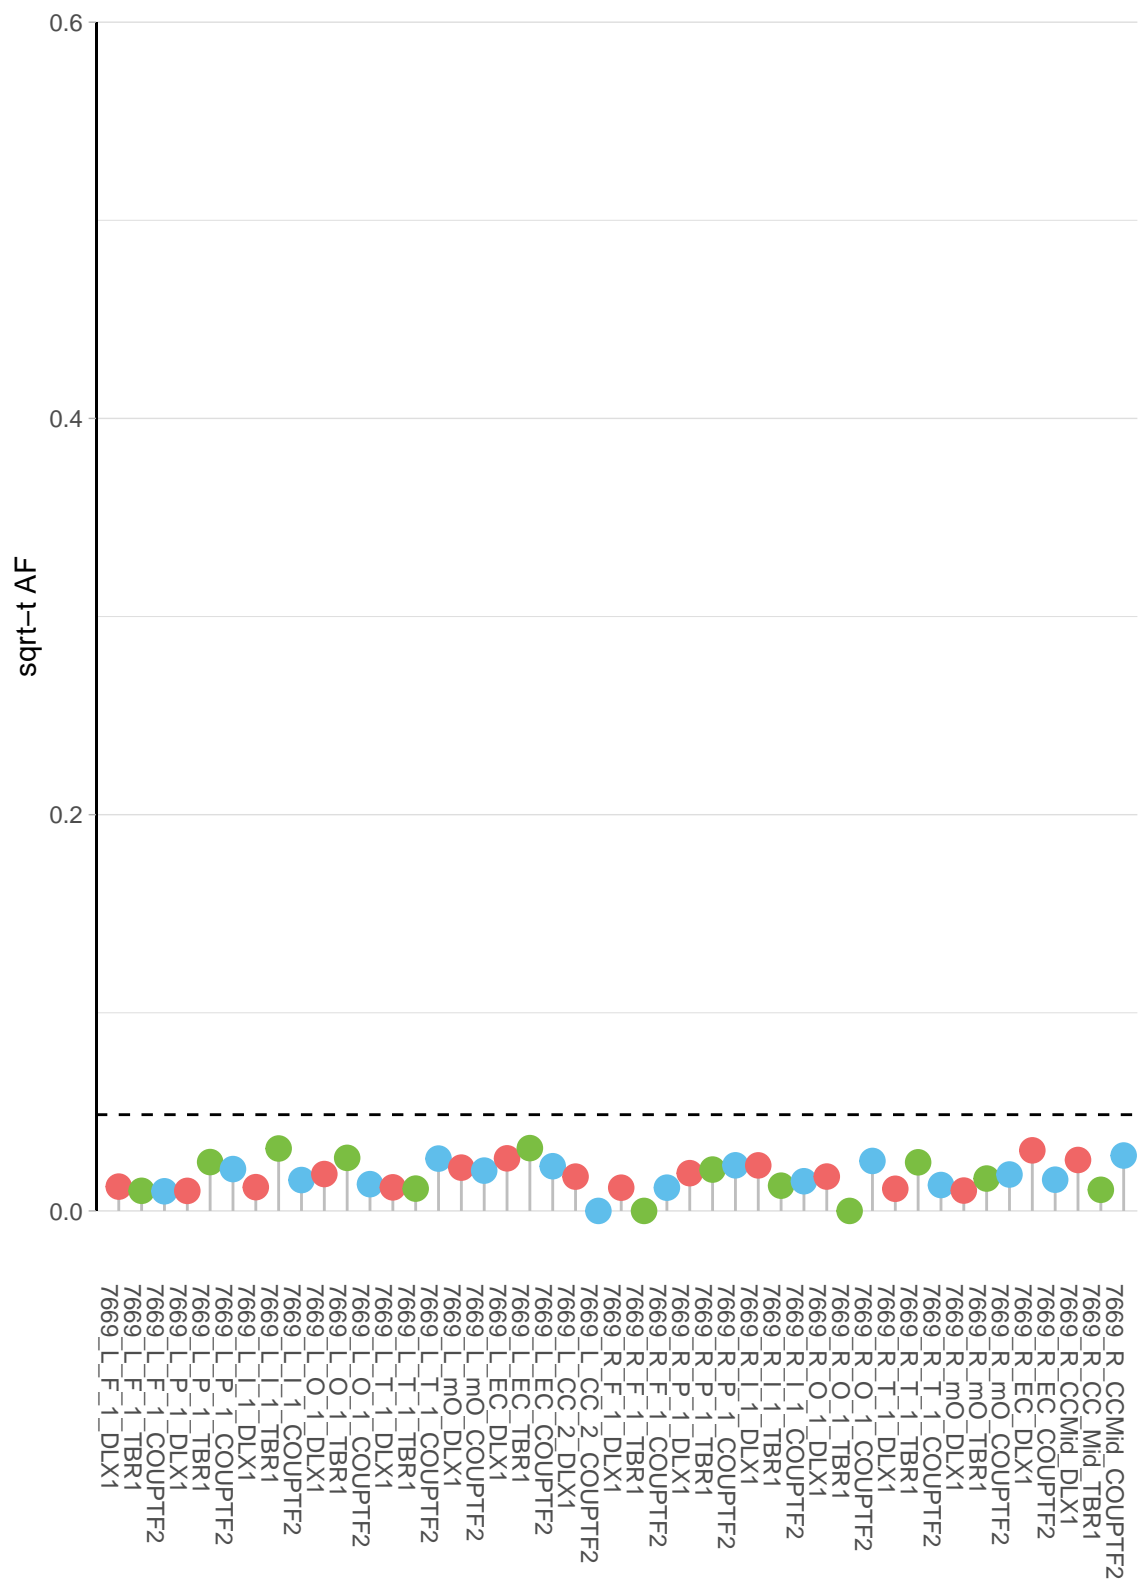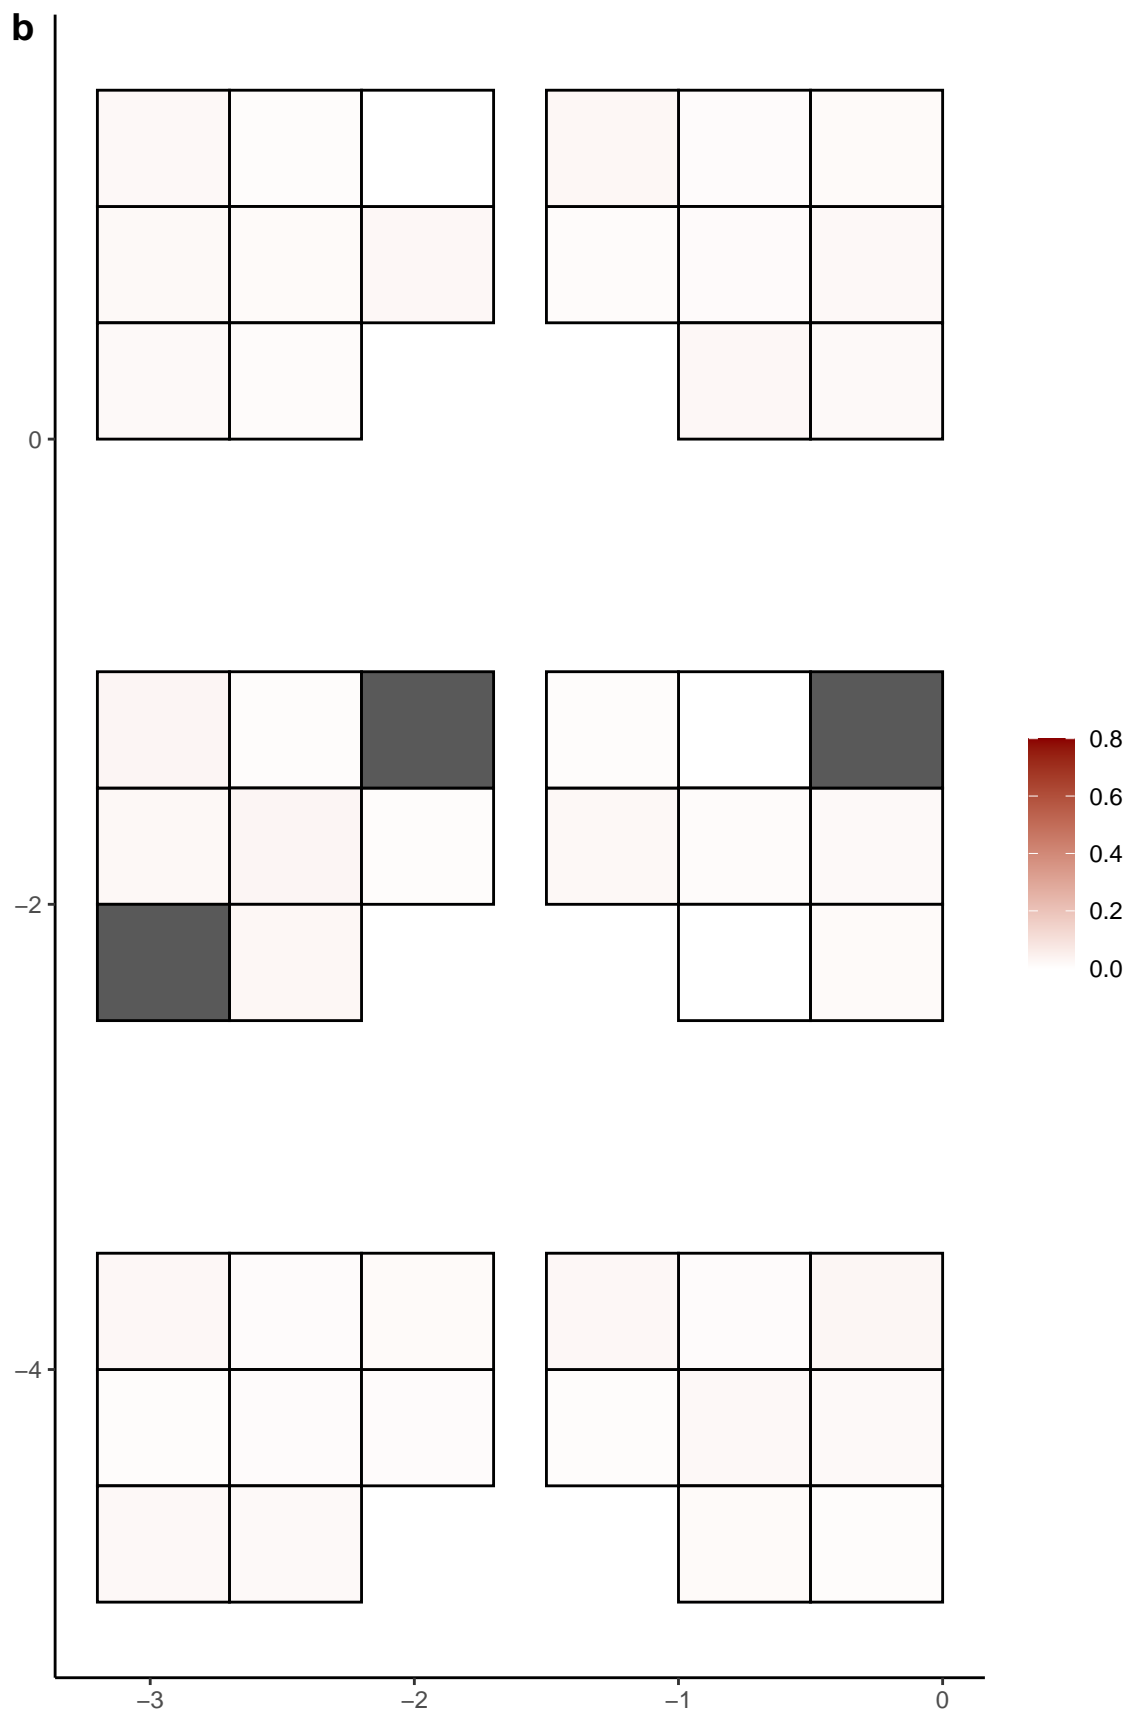

**a** ID05 X-129536409-G-A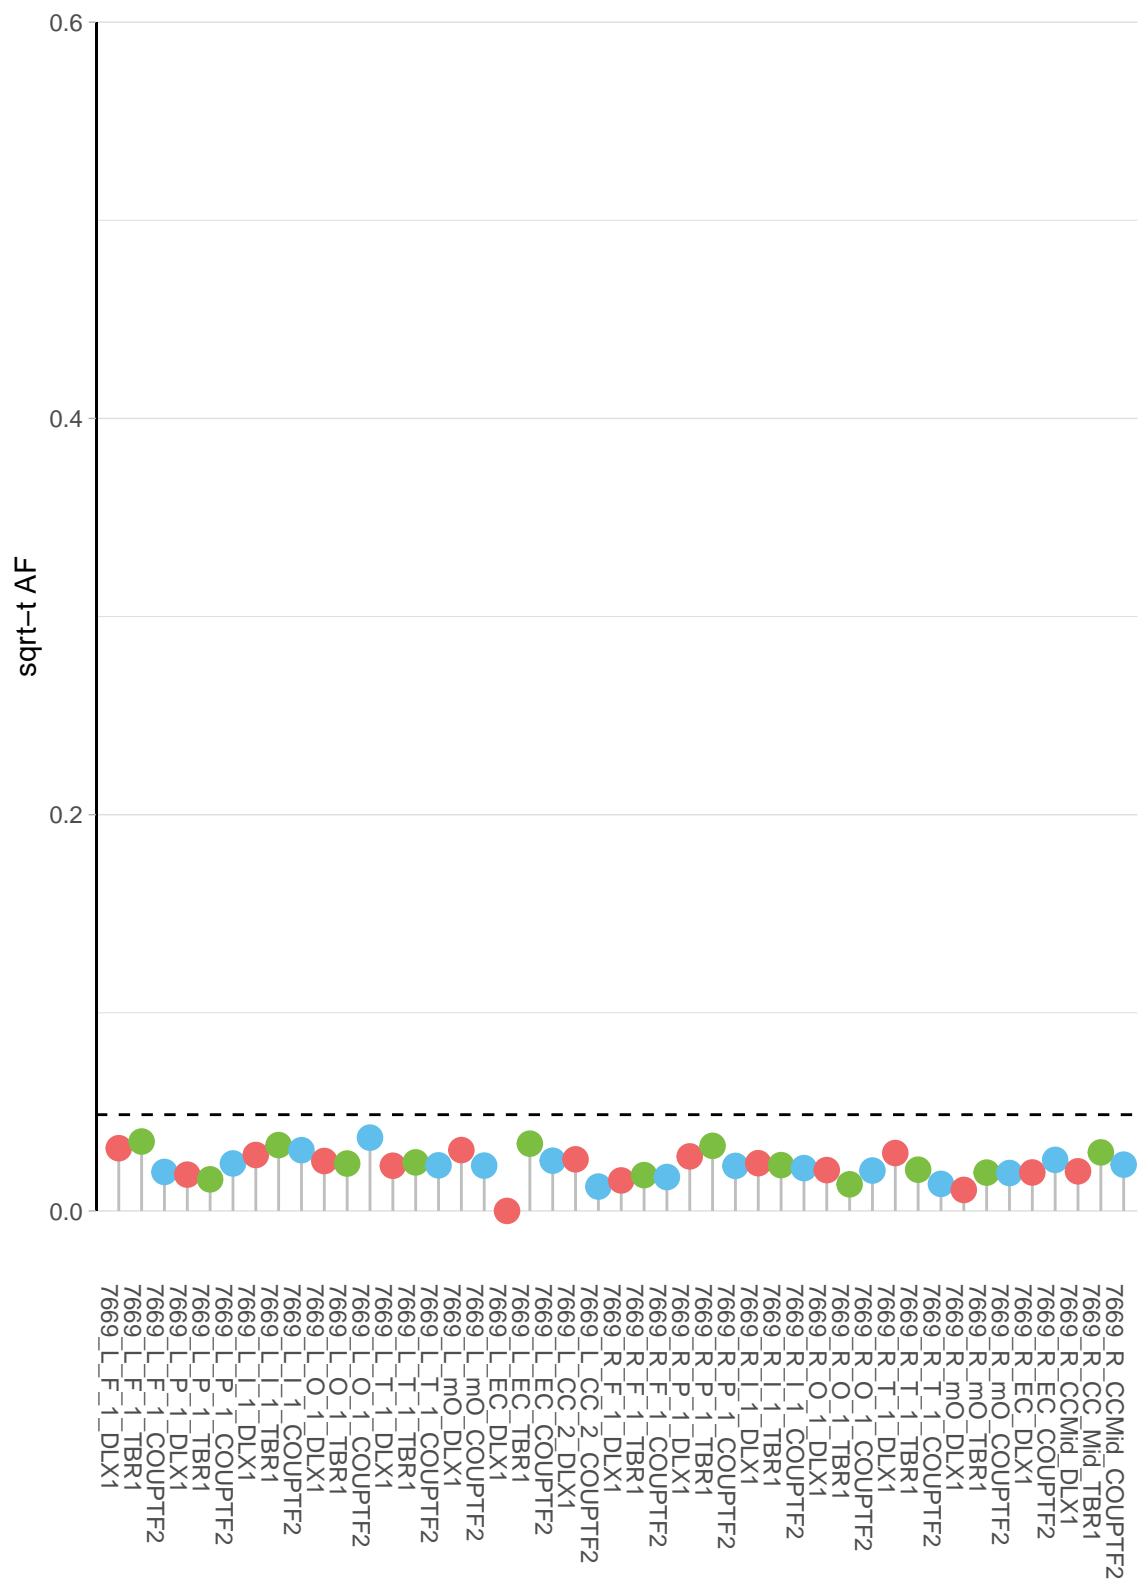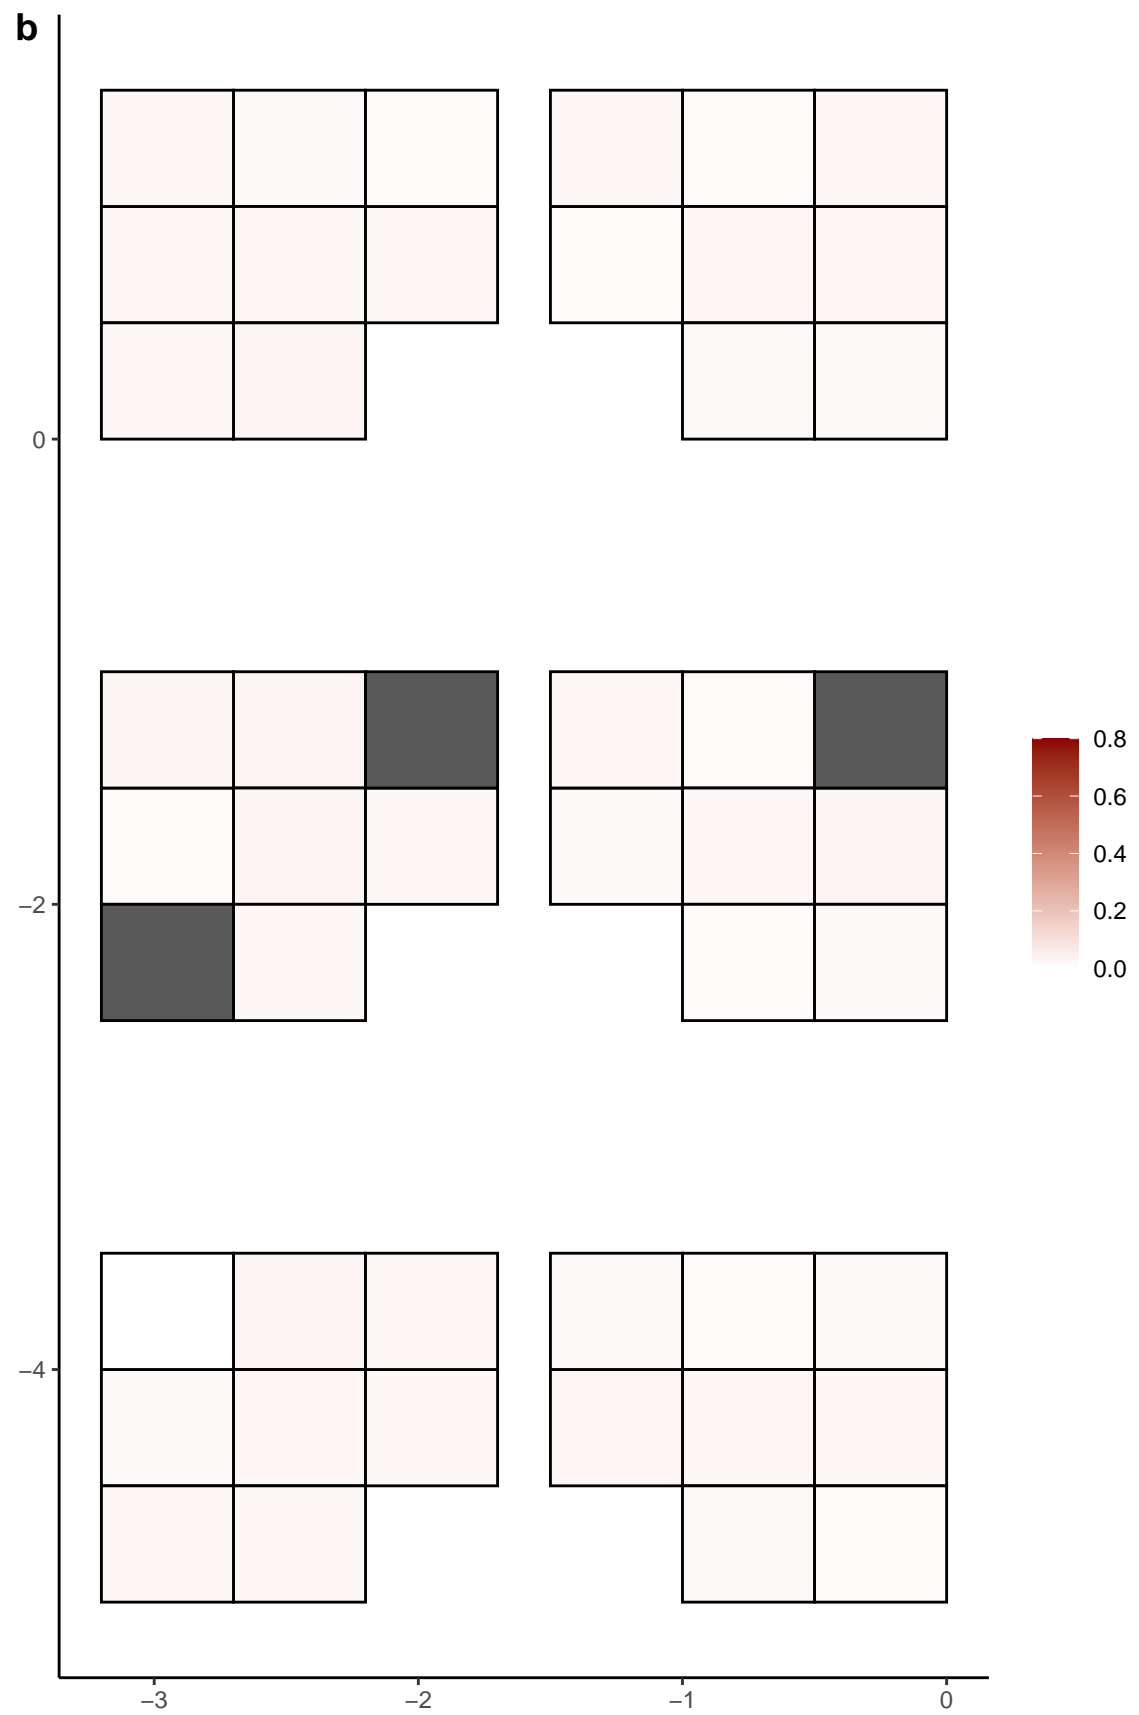



**a** ID05 X-131850019-A-T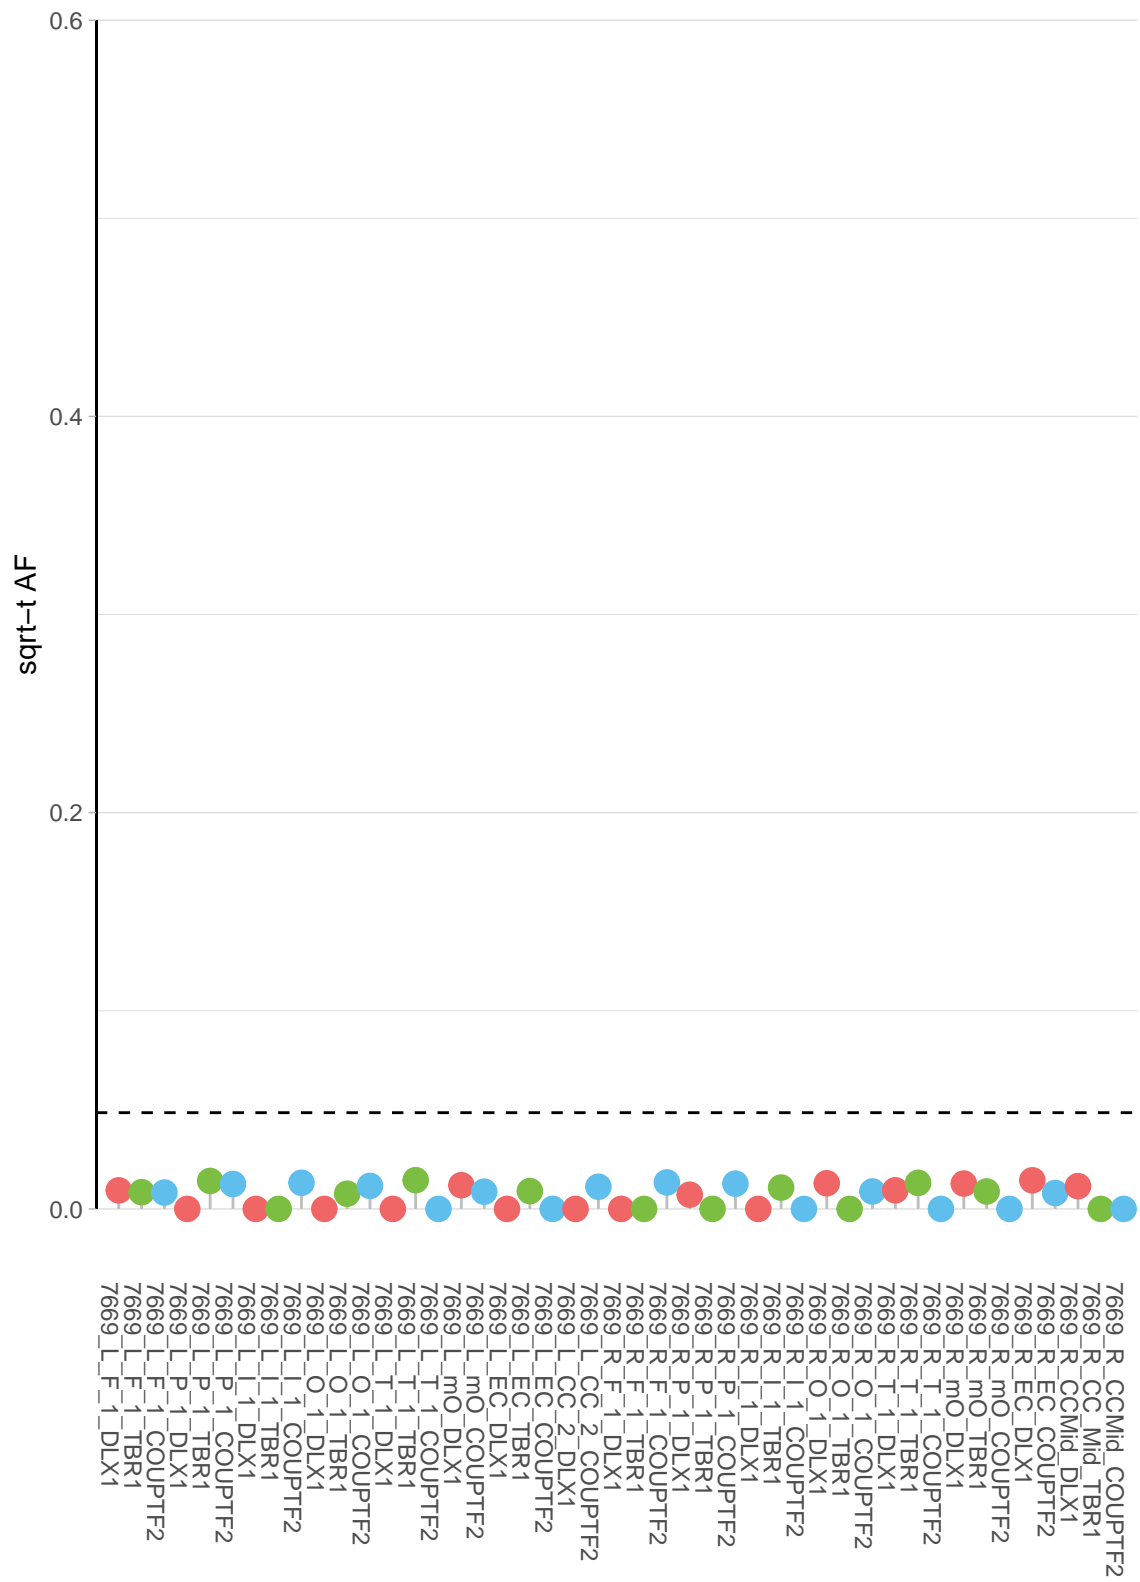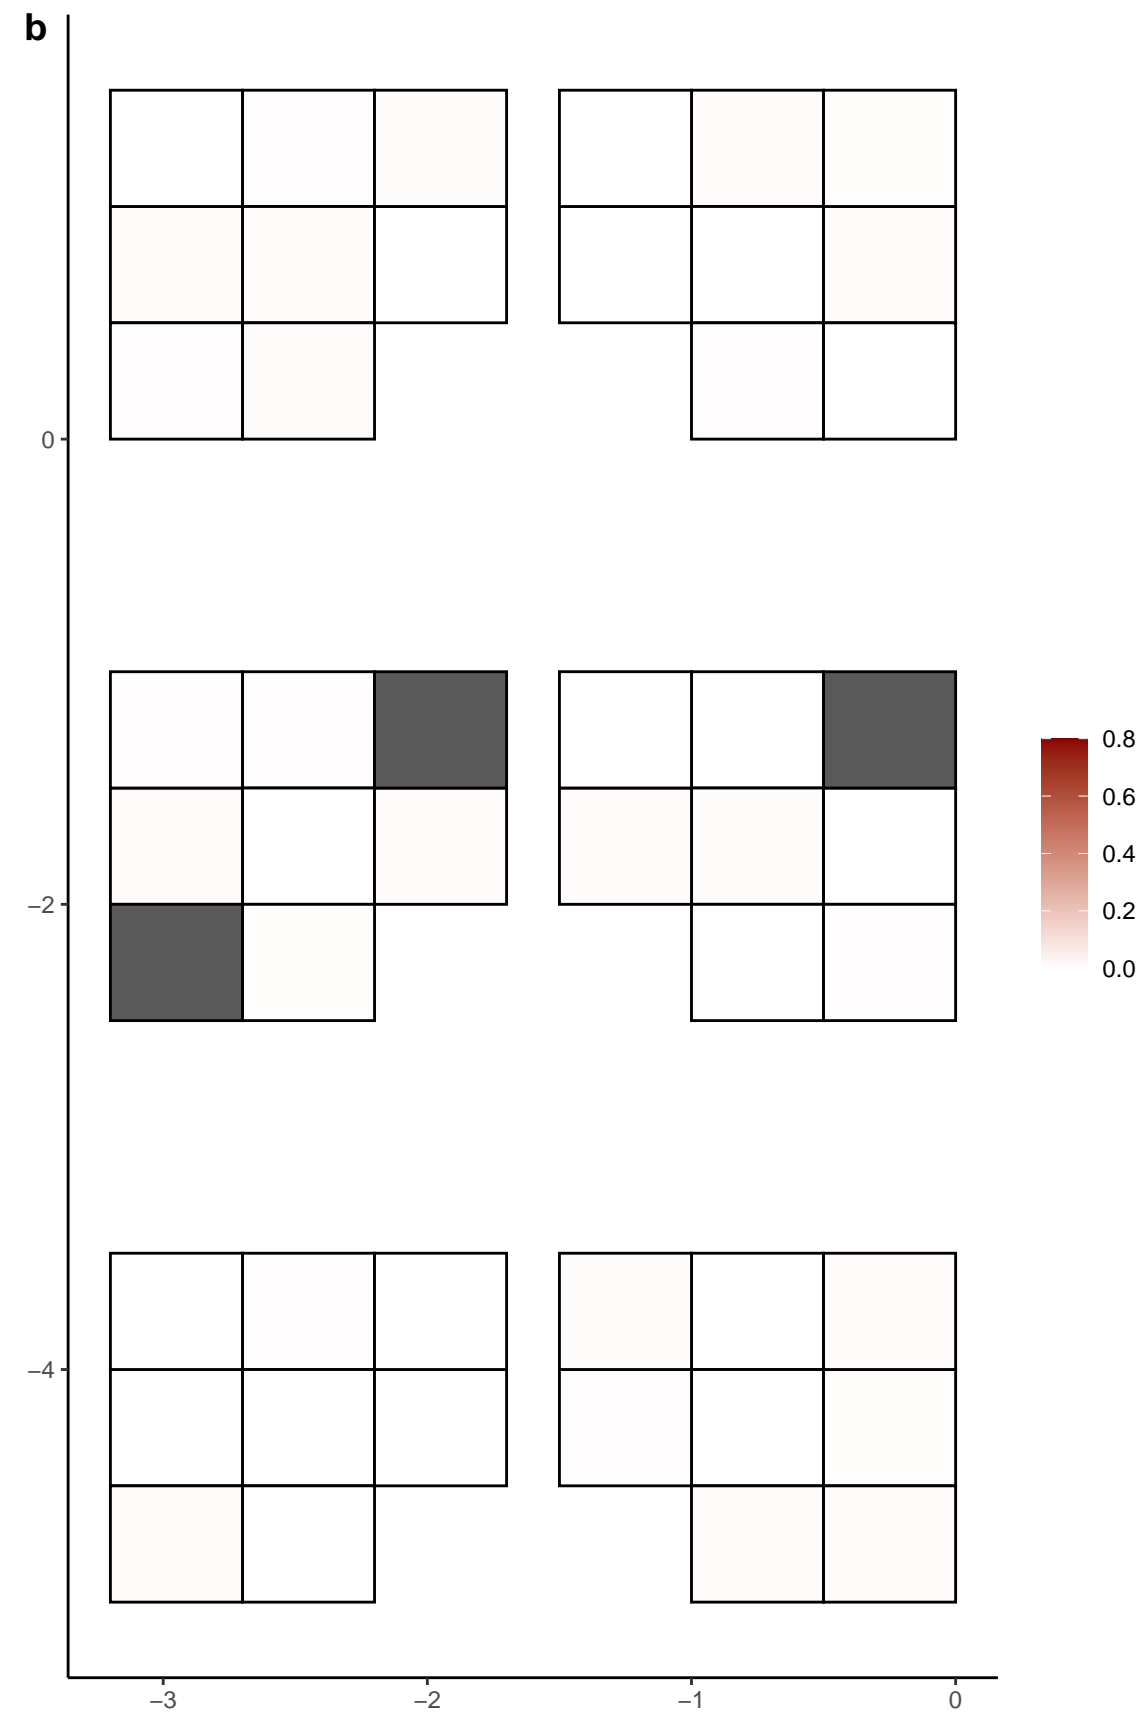

**a** ID05 X-138211912-G-A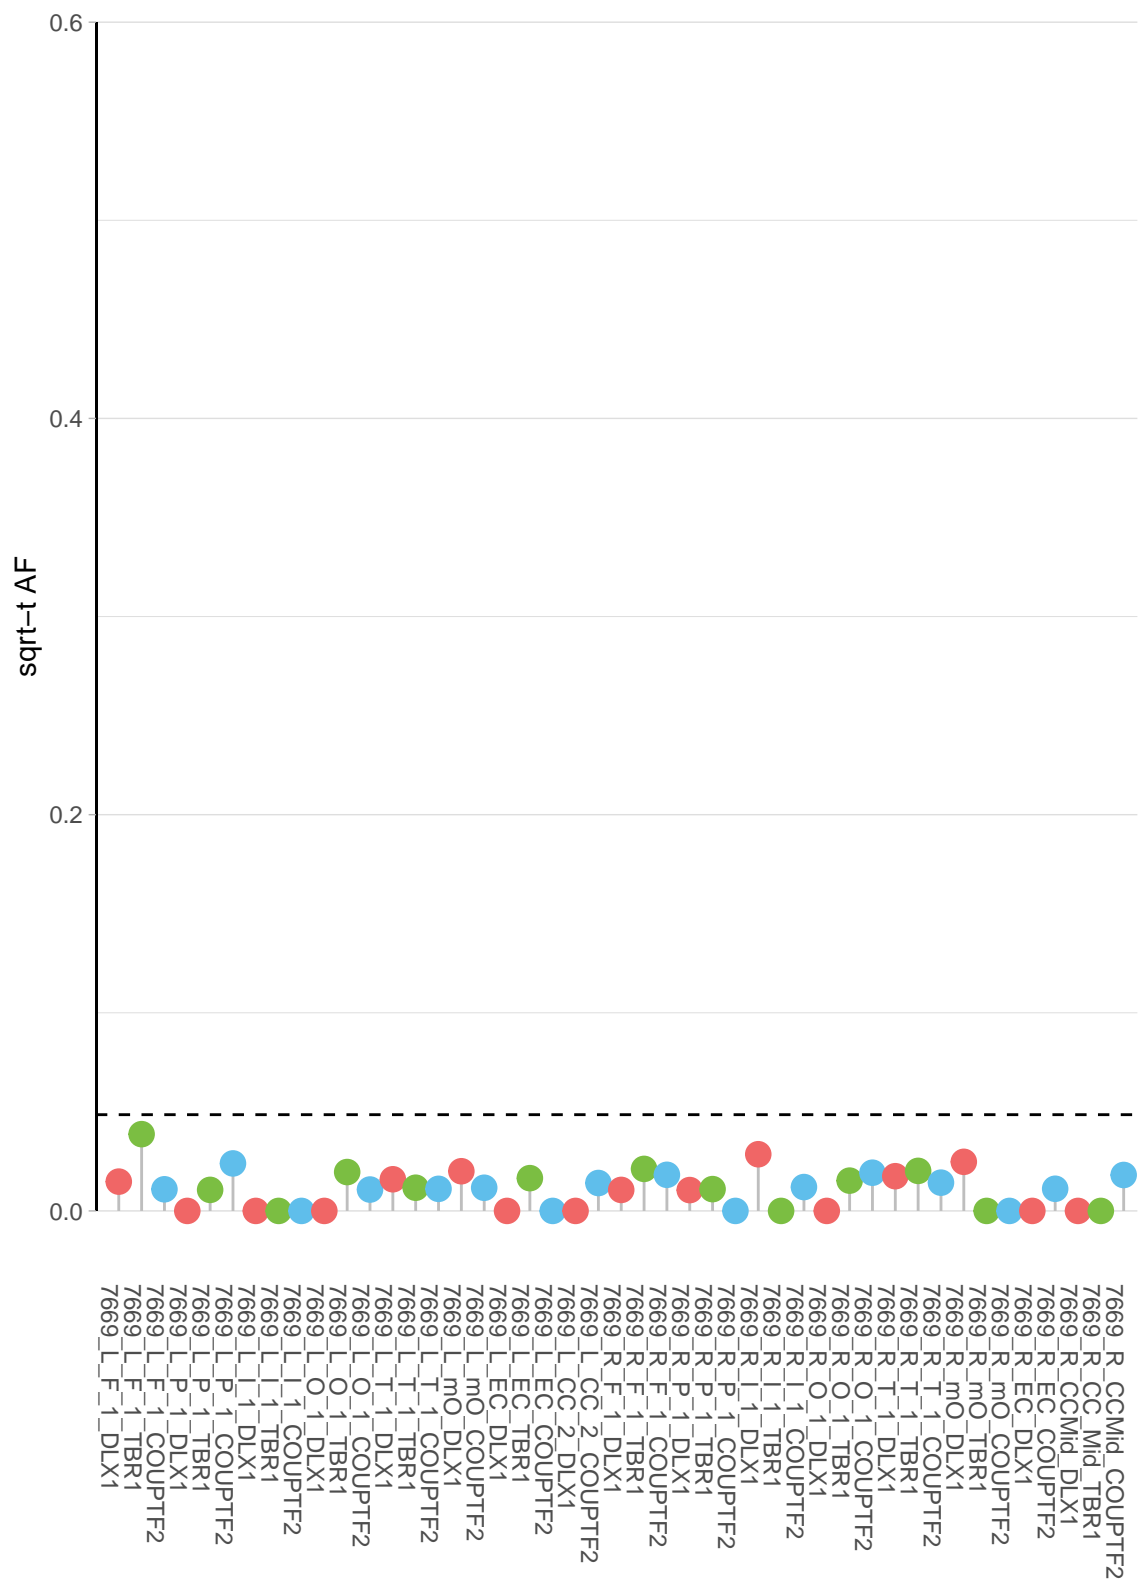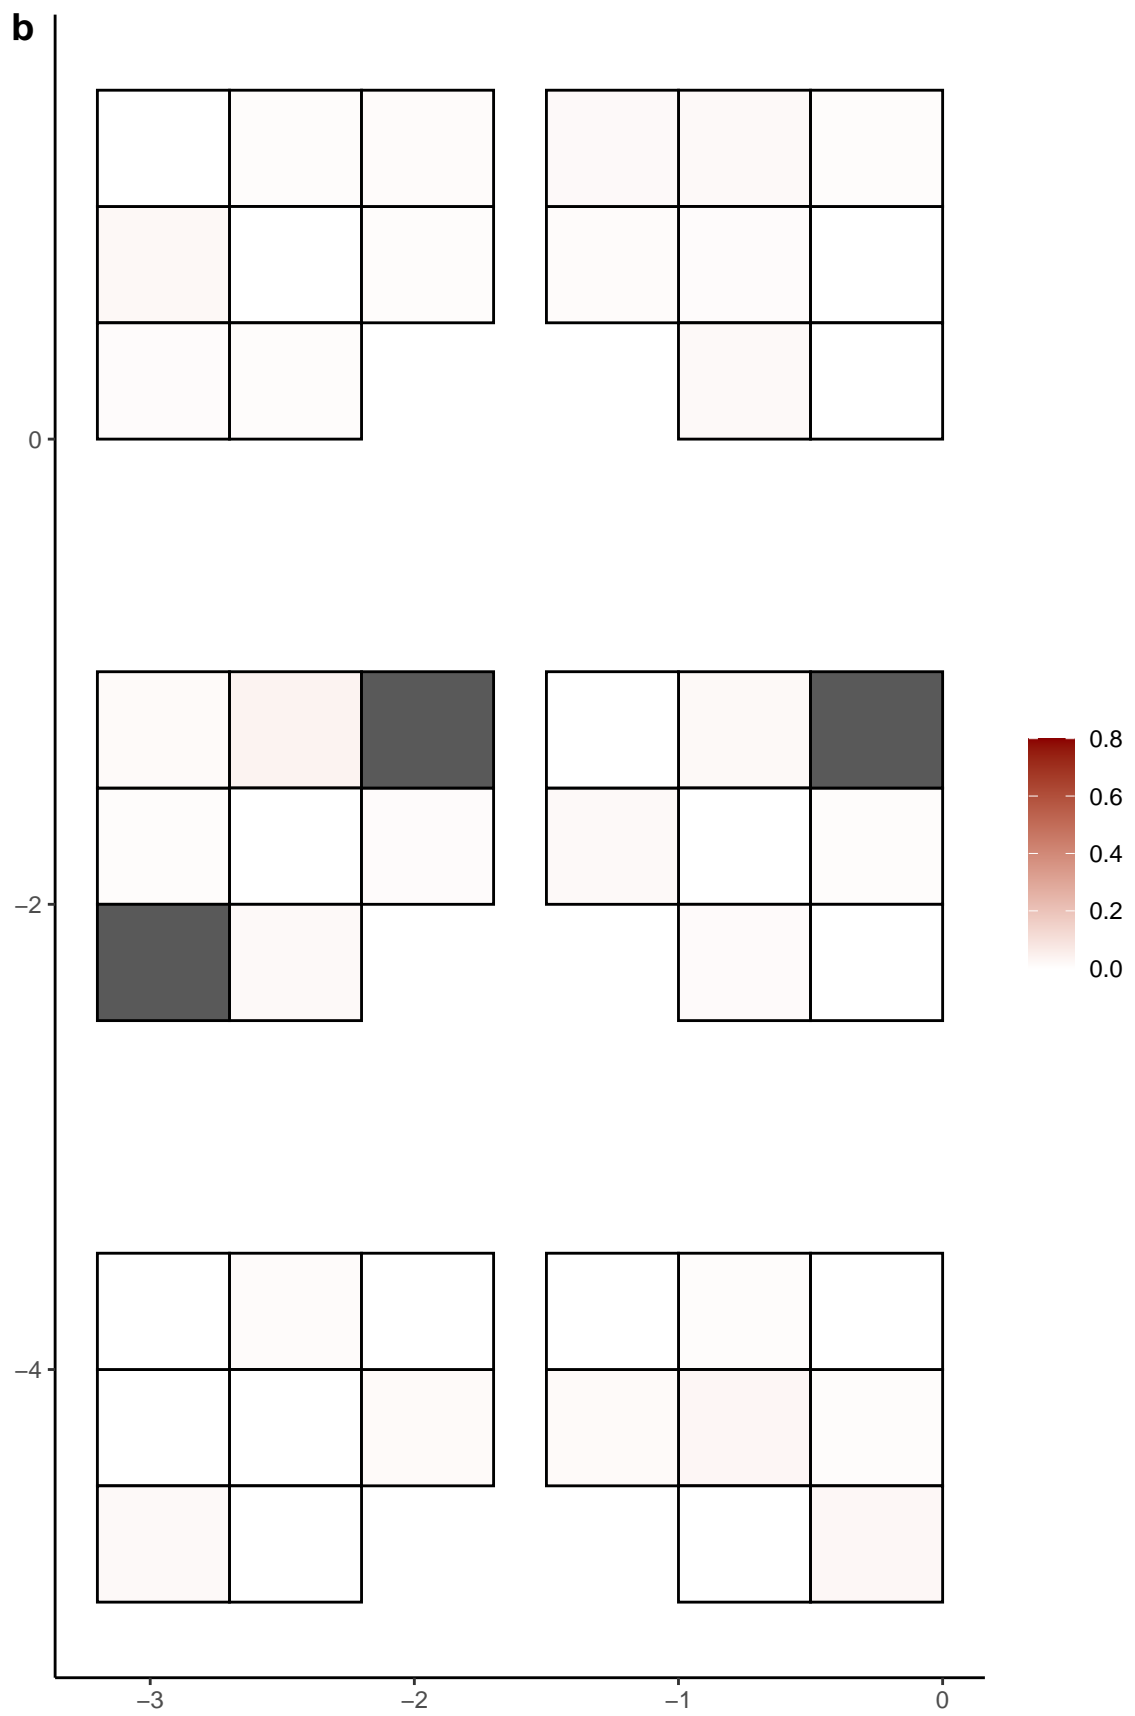

**a** ID05 X-139604228-A-G

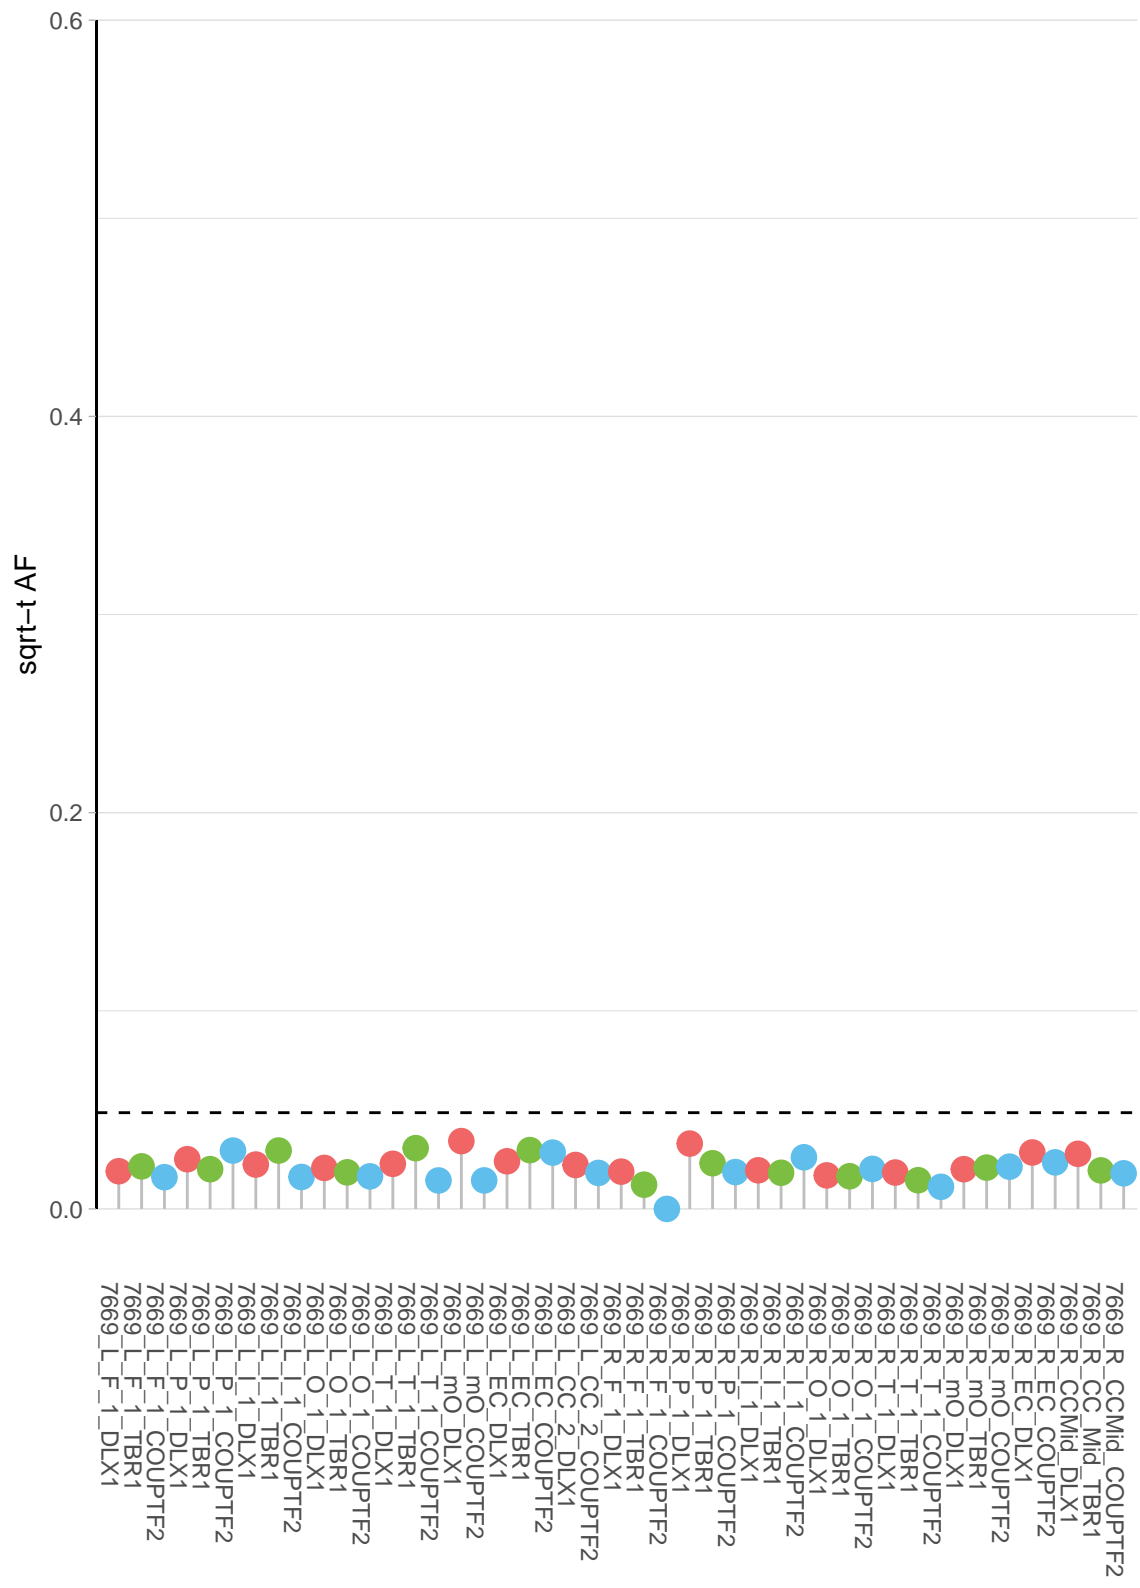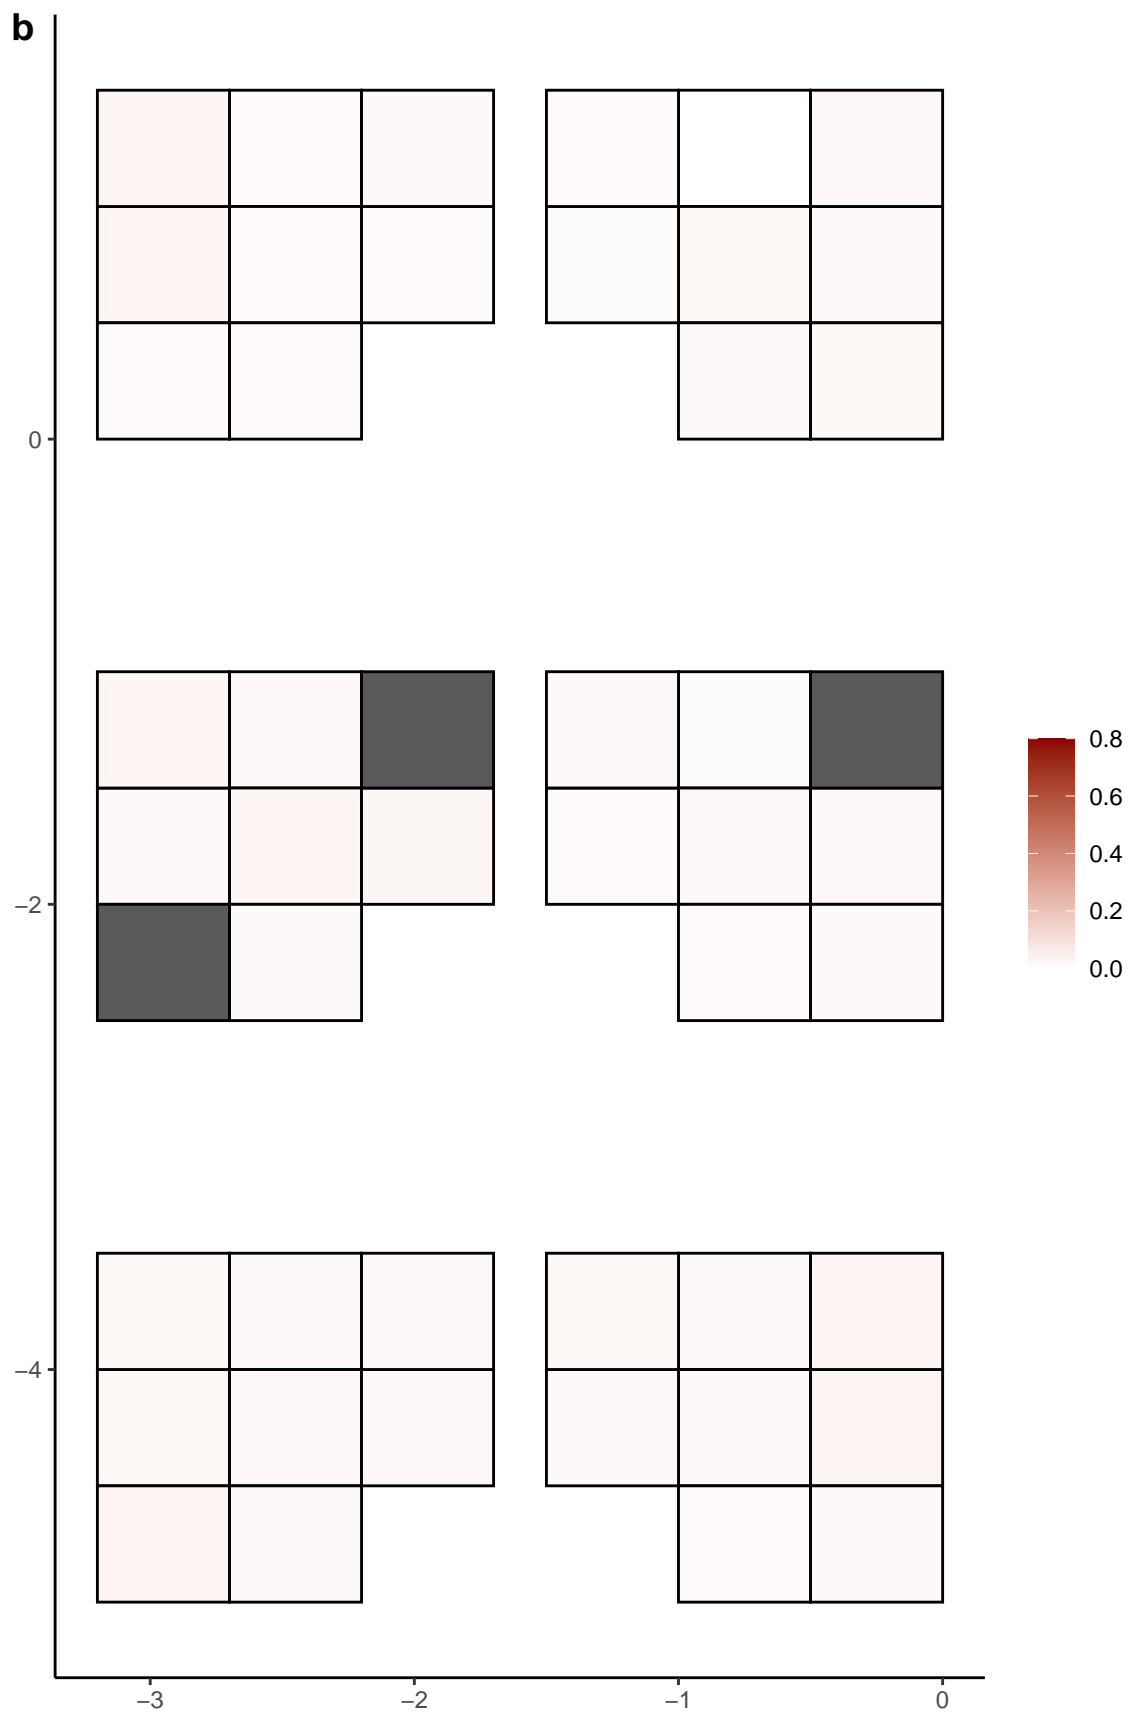



**a** ID05 X-141738997-A-G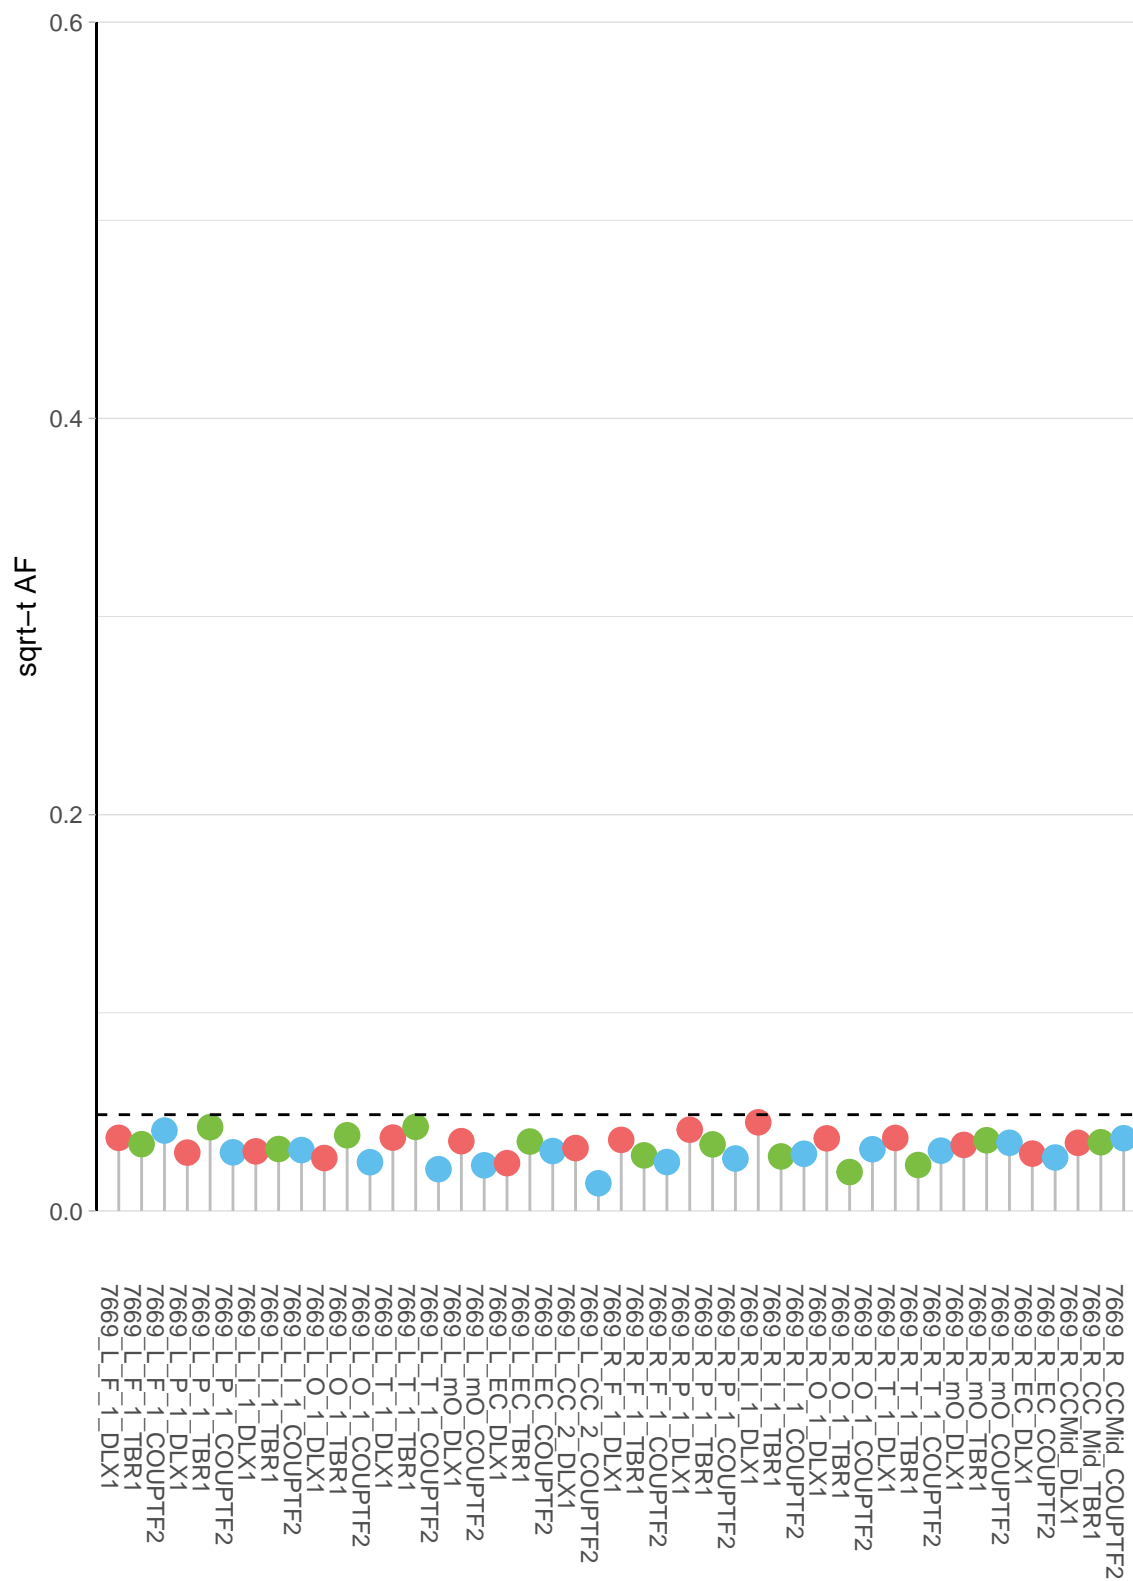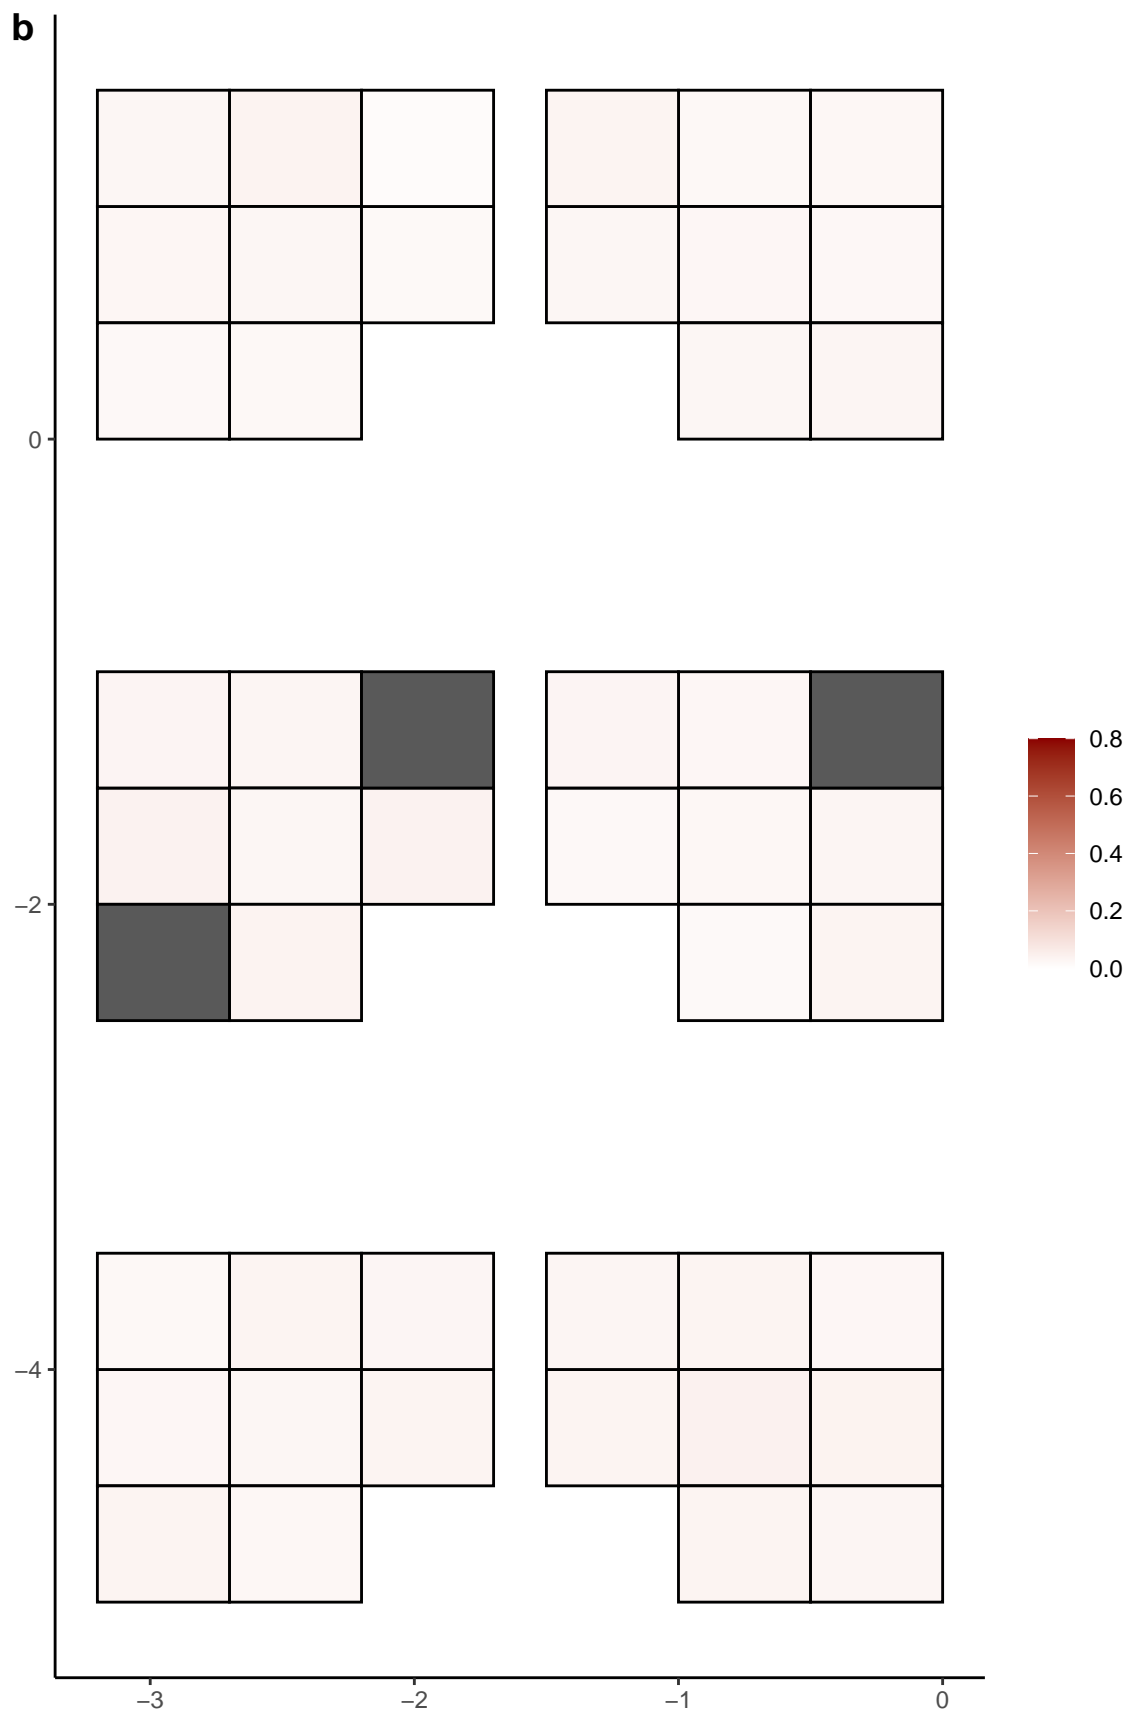





**a** ID05 X-150945179-C-A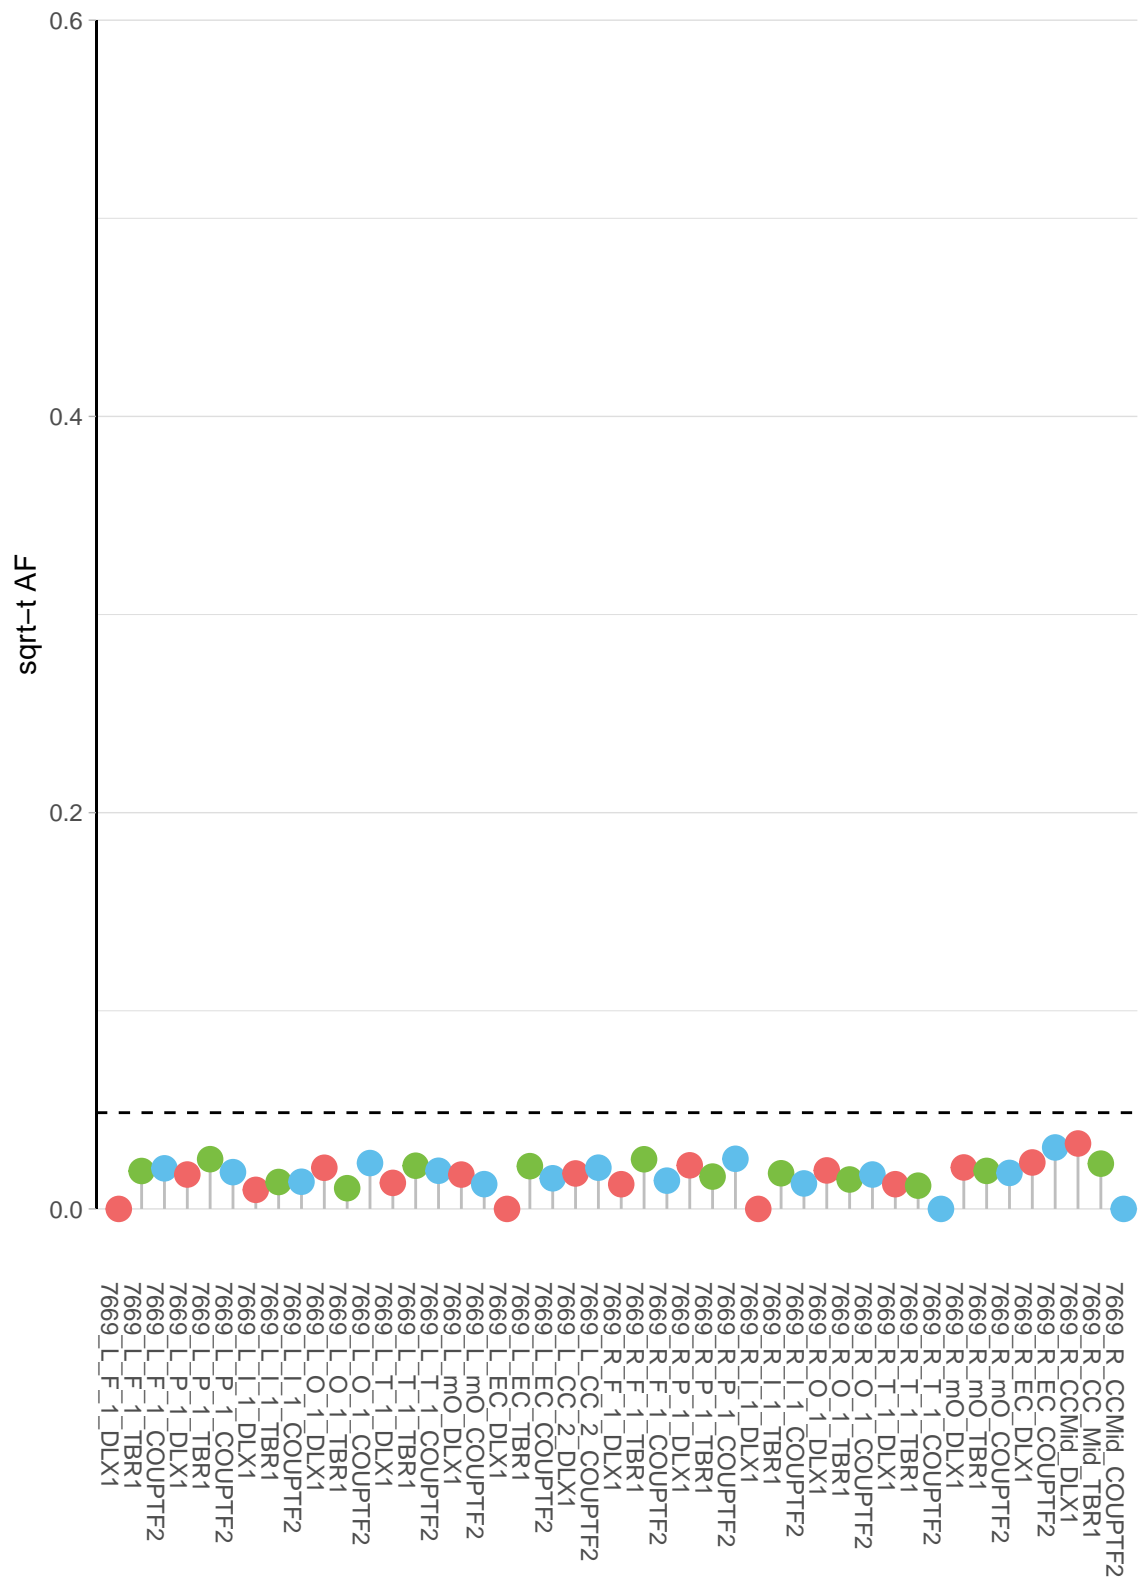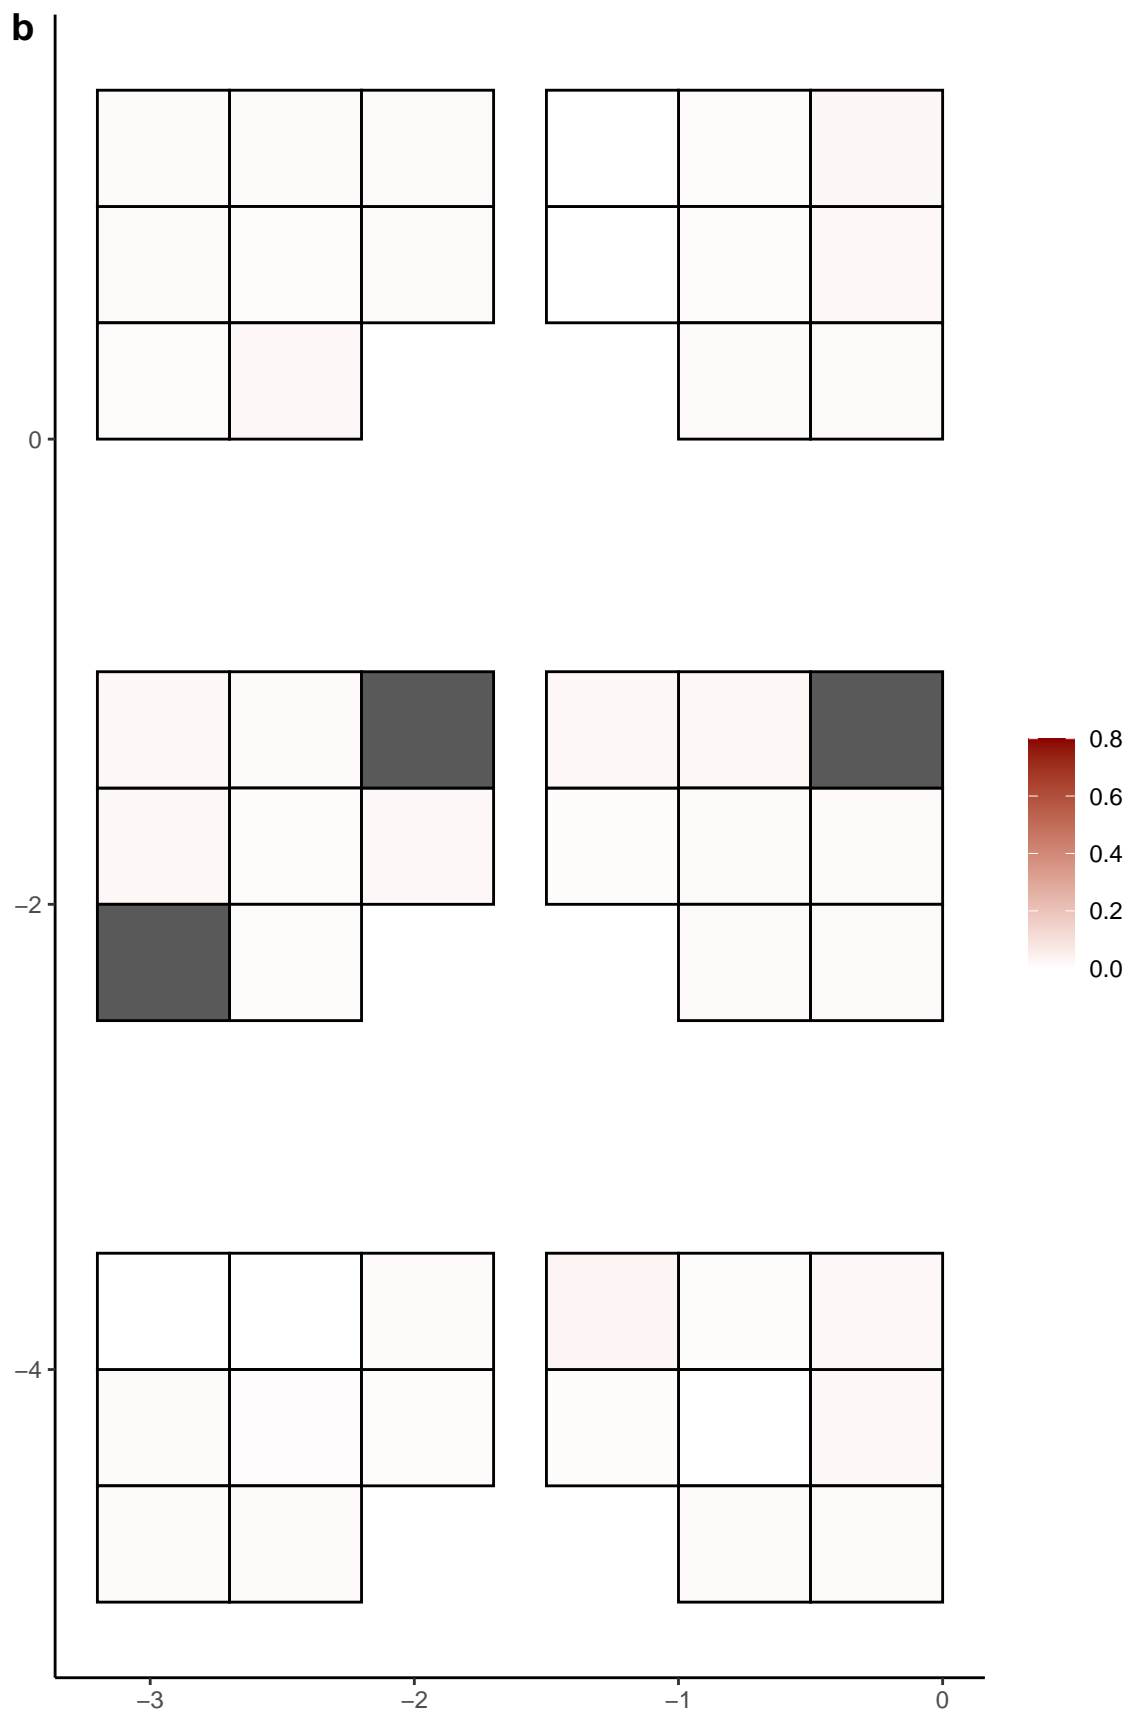



**a** ID05 X-151132909-G-A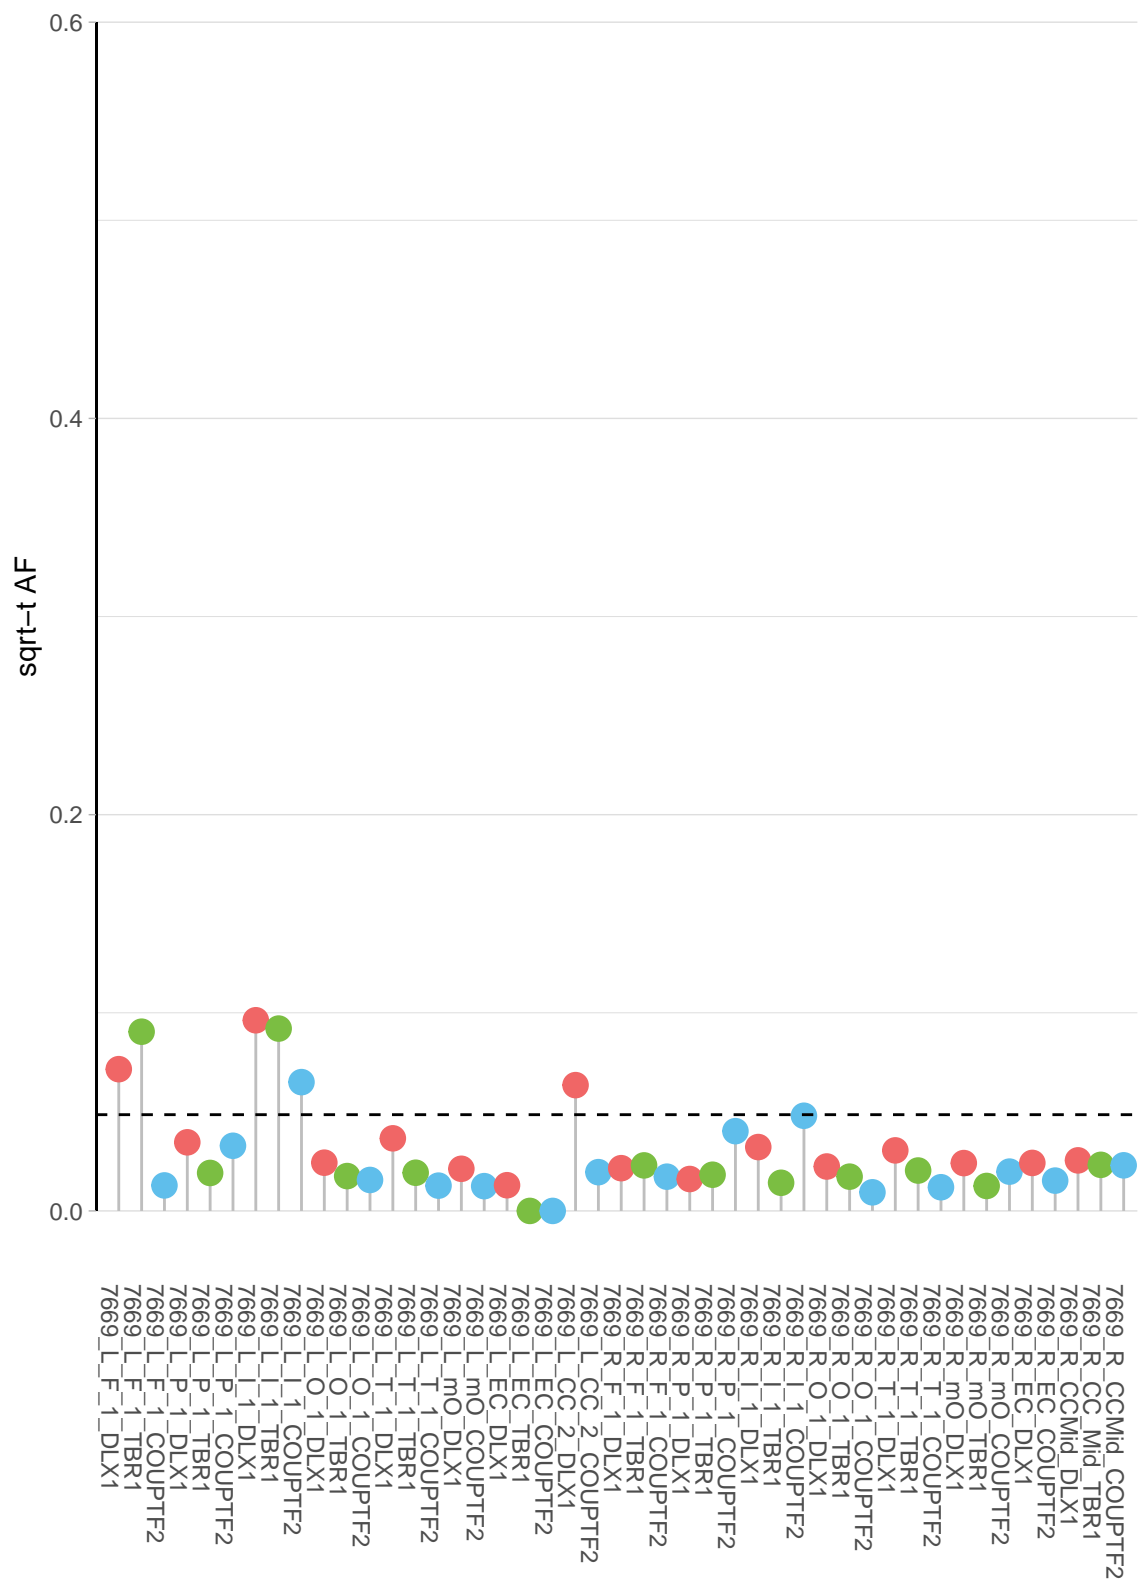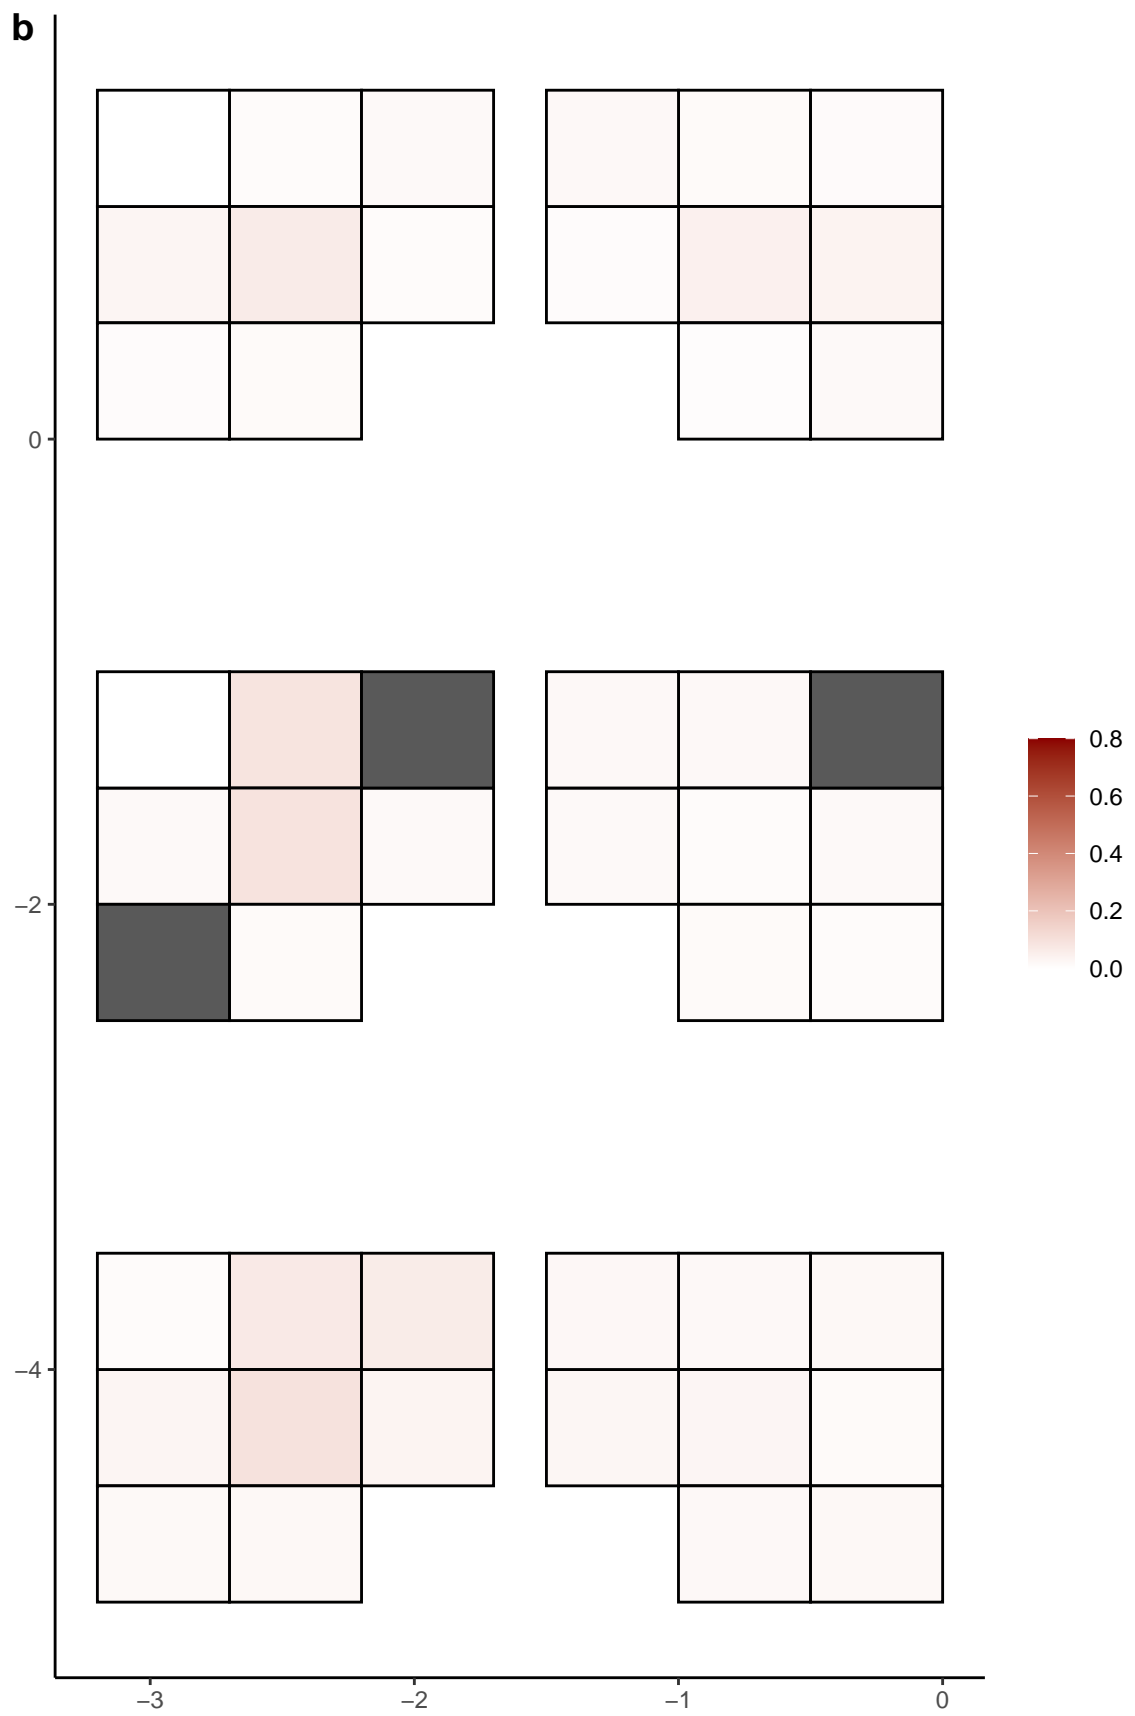

**a** ID05 X-16444039-G-A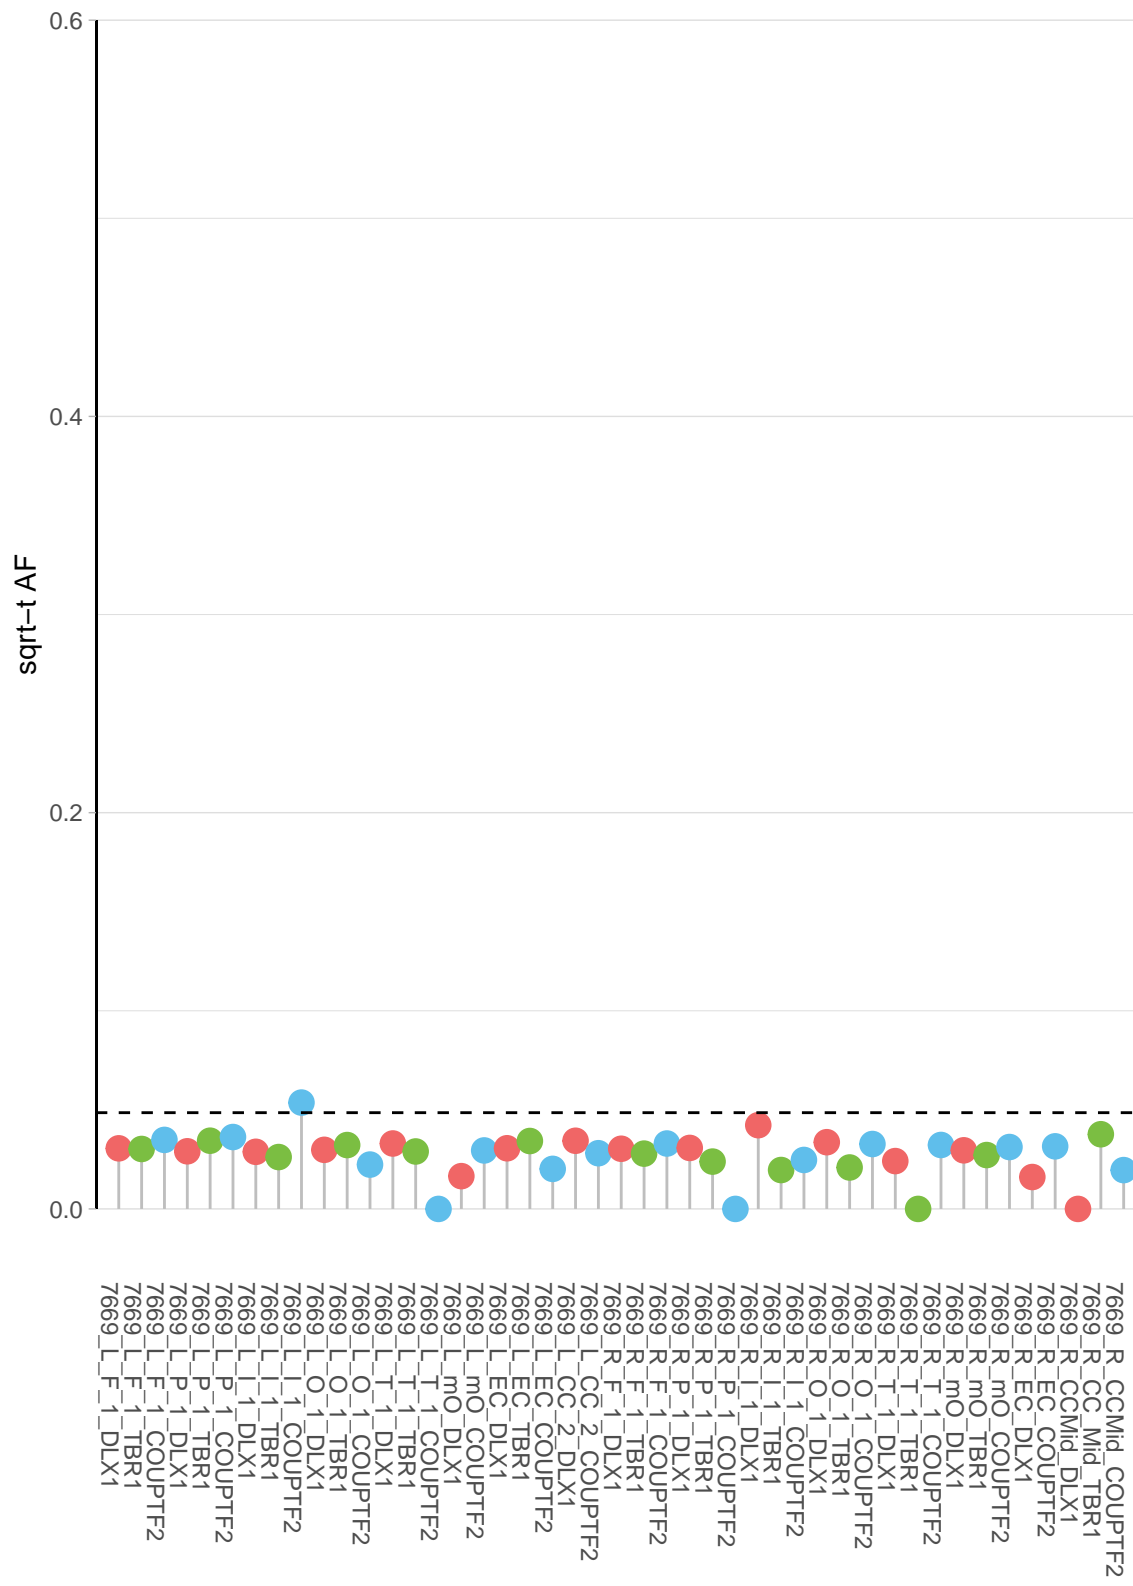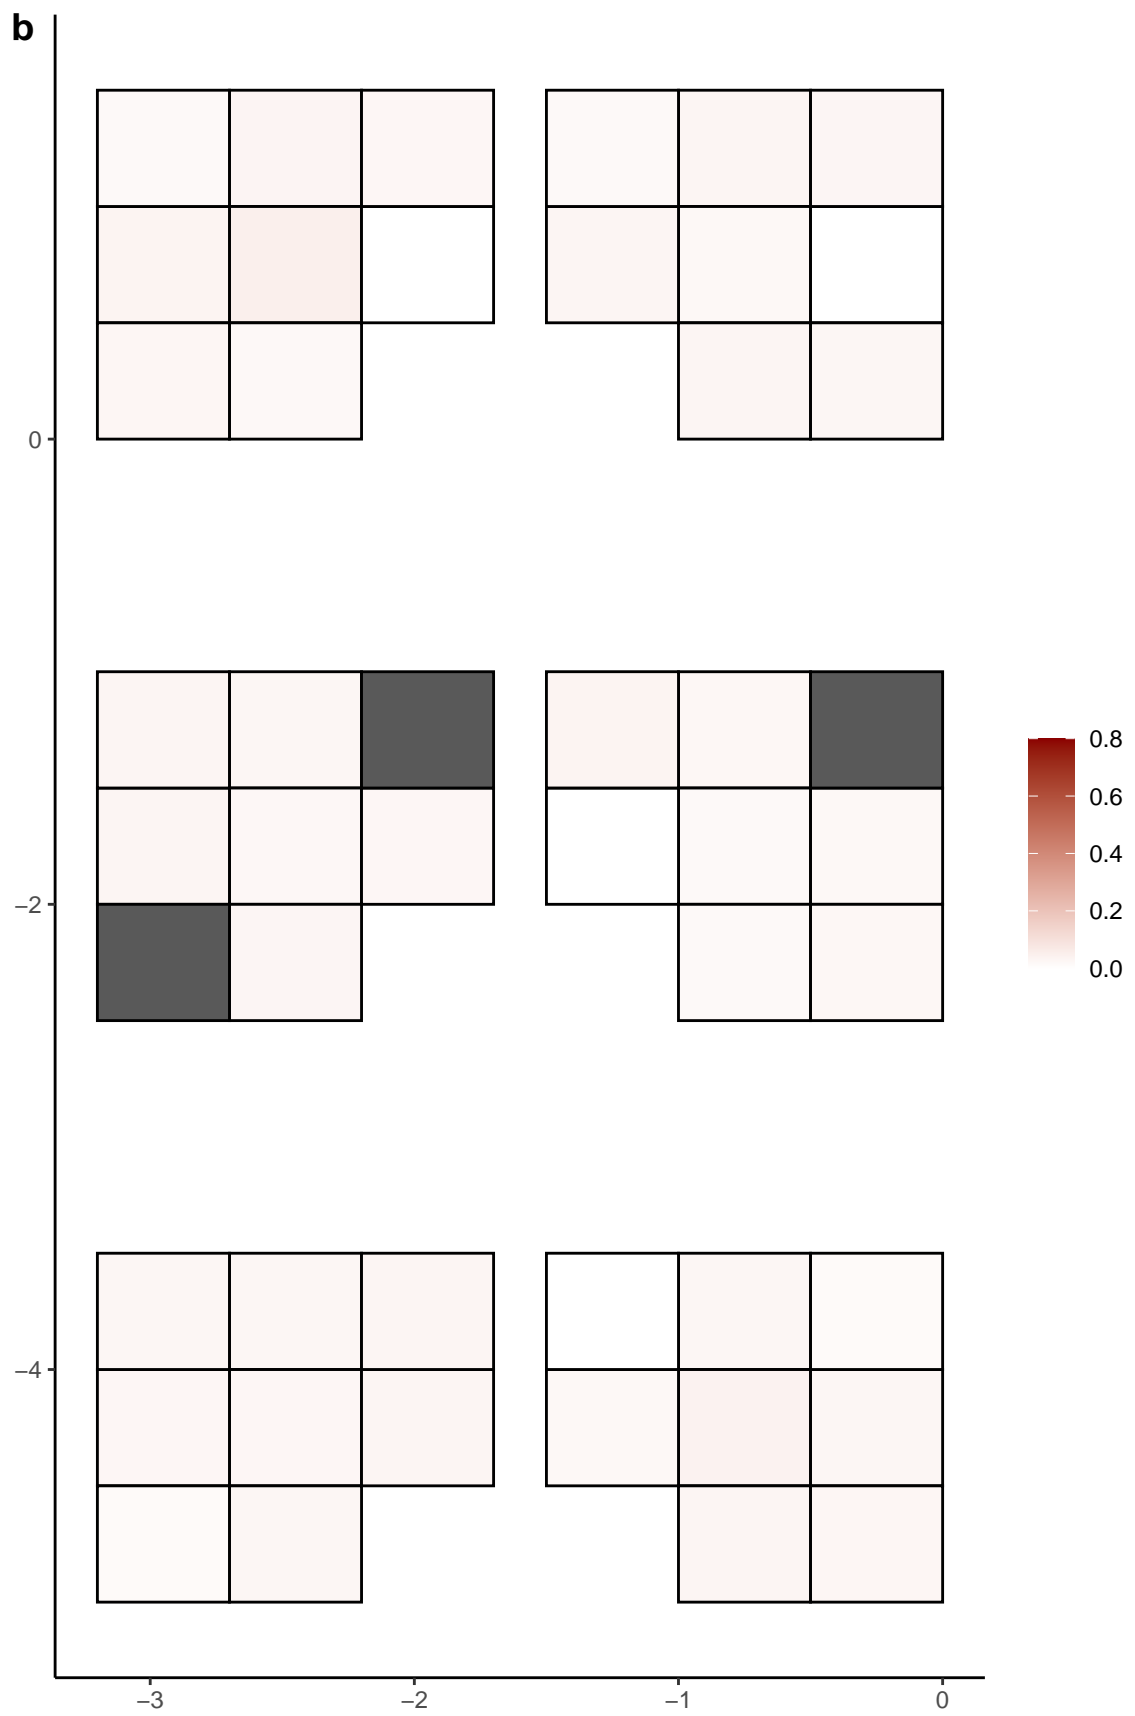

**a** ID05 X-17021591-G-A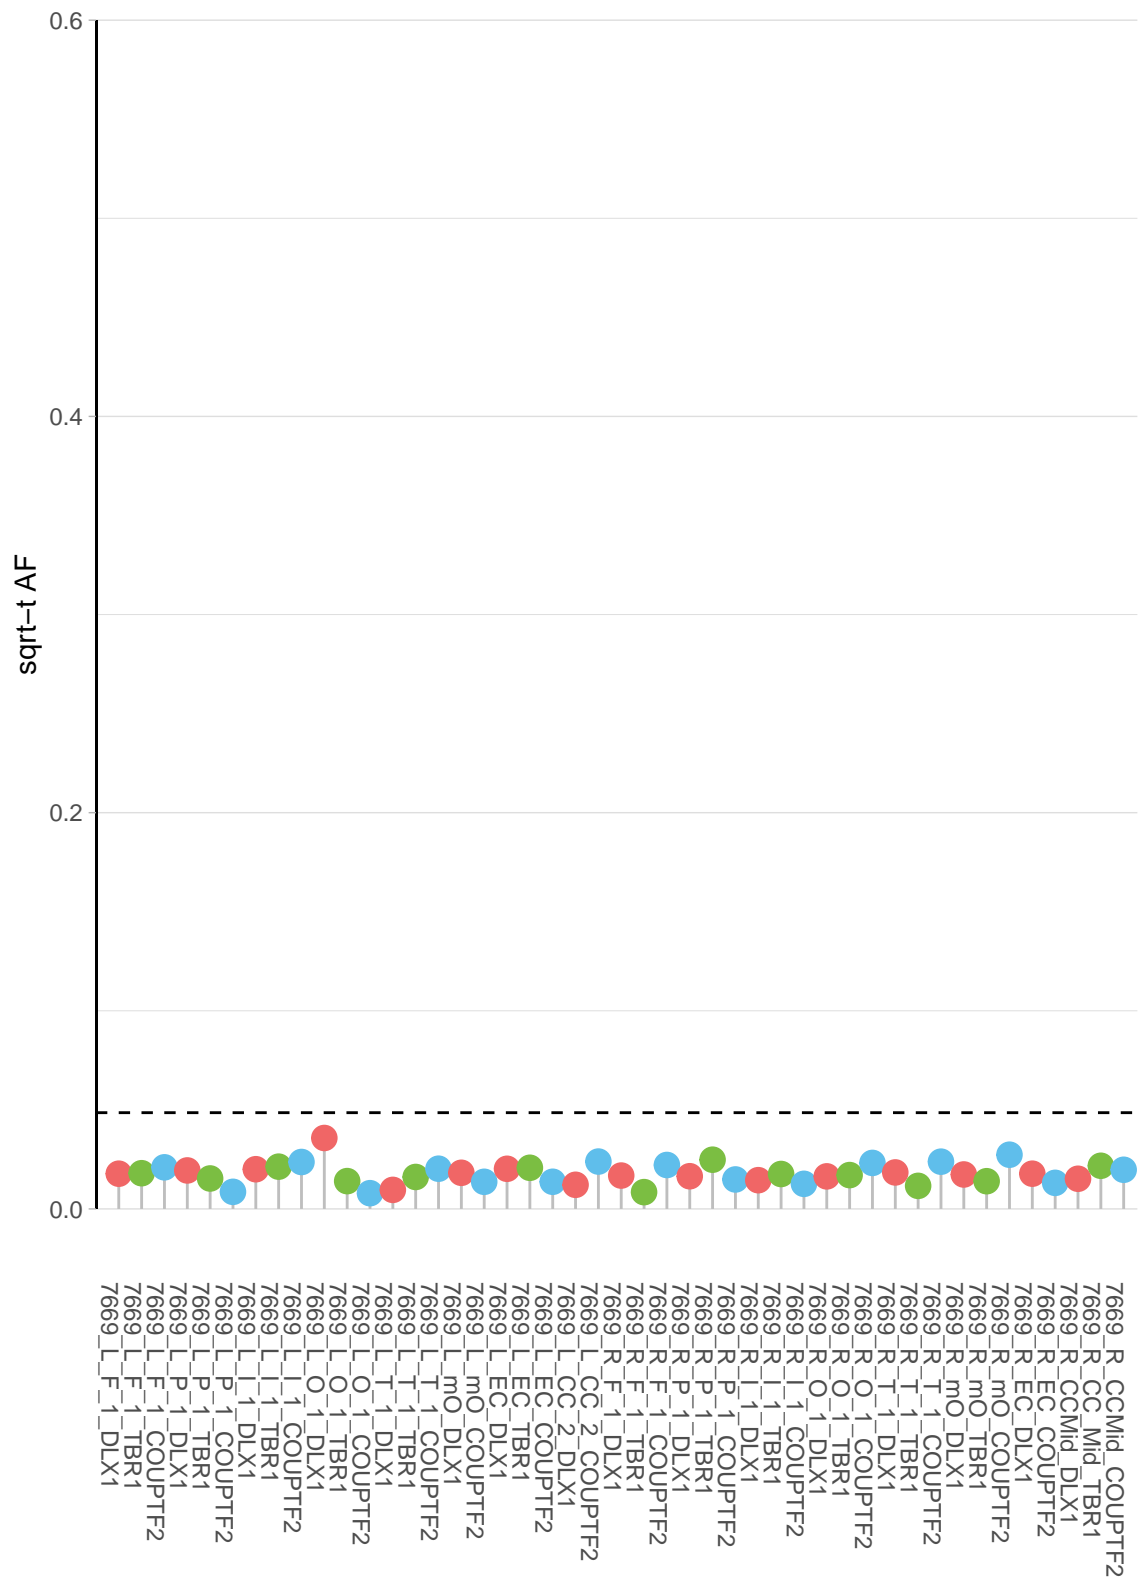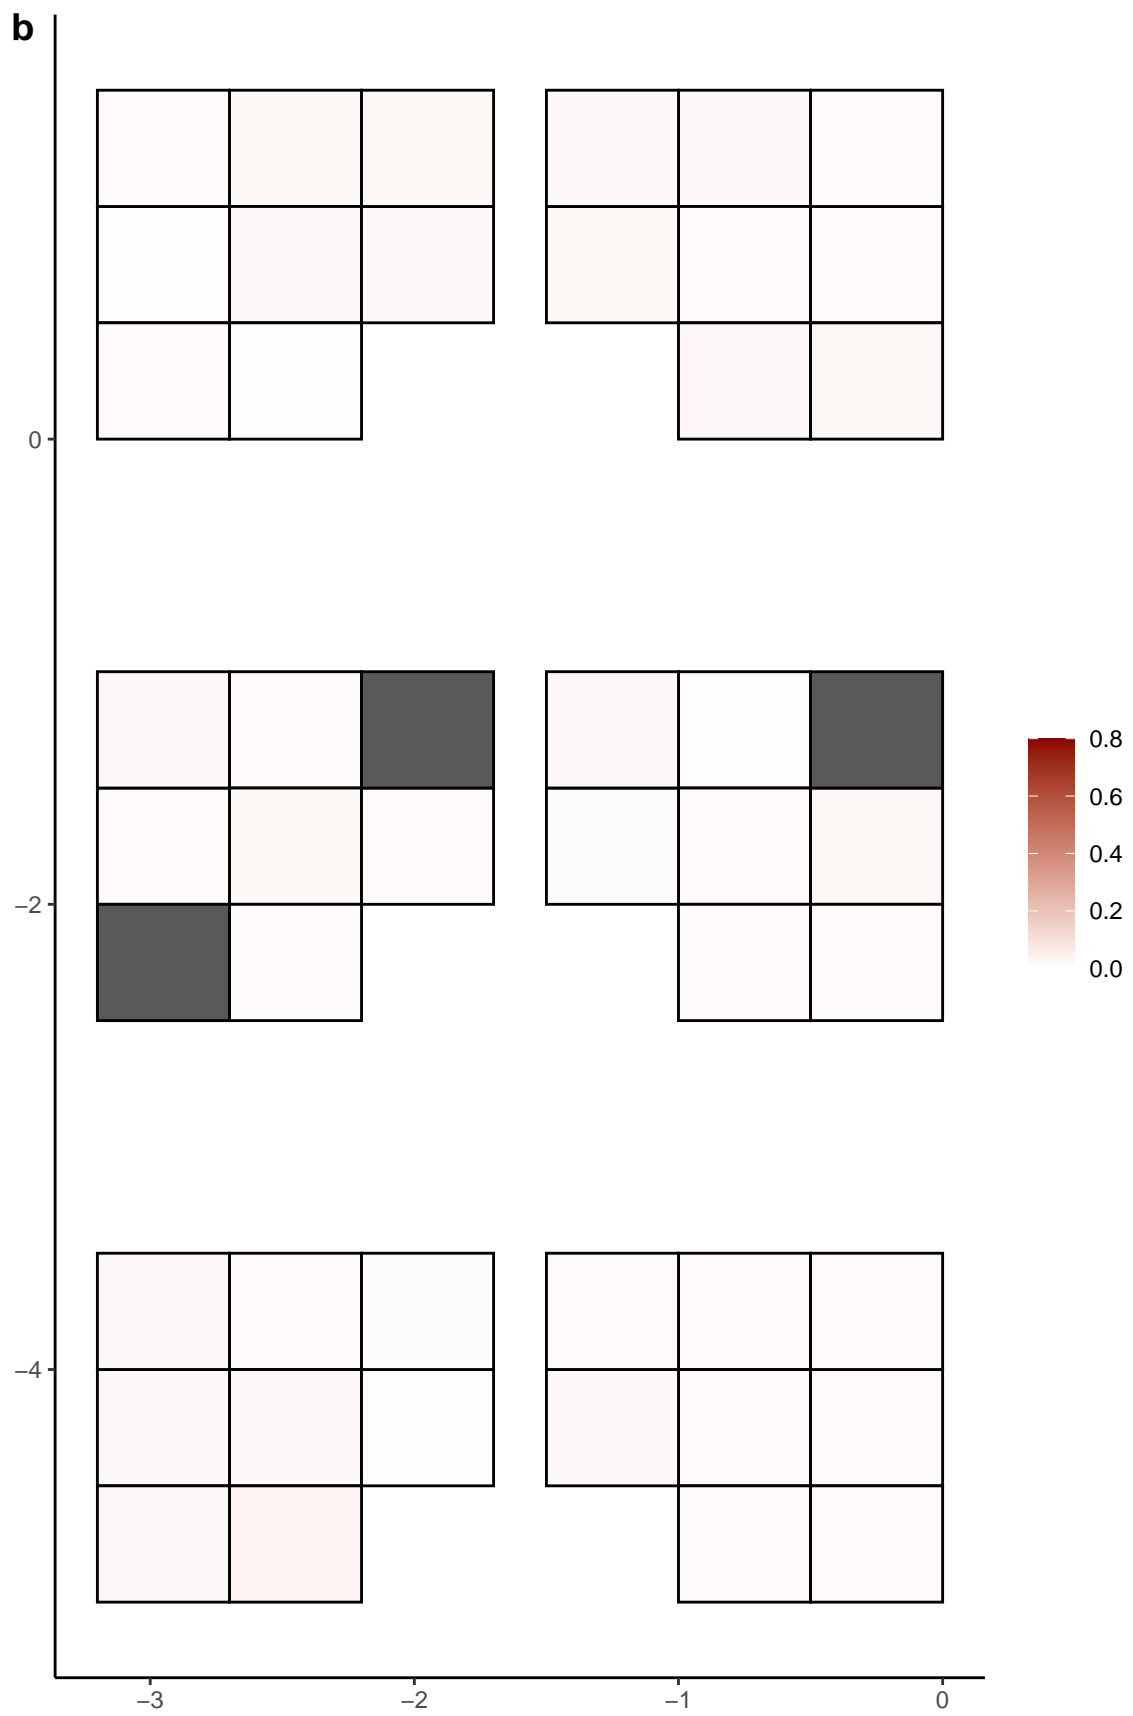



**a** ID05 X-17091942-C-A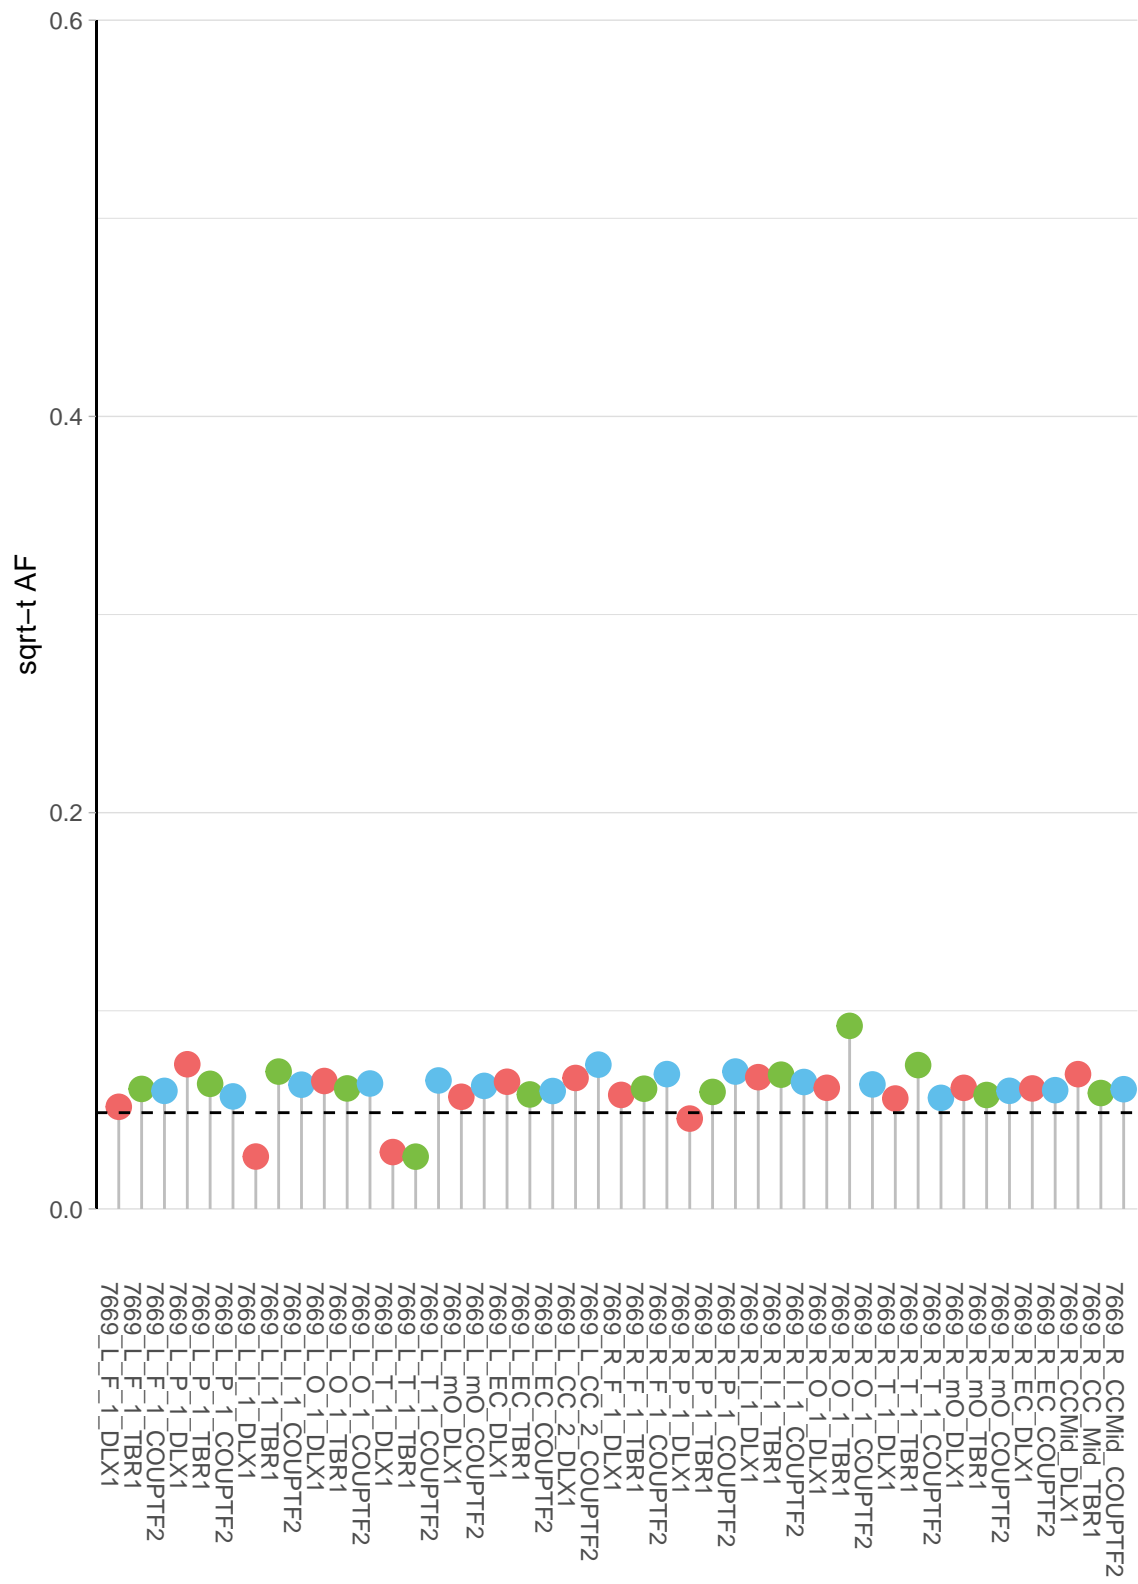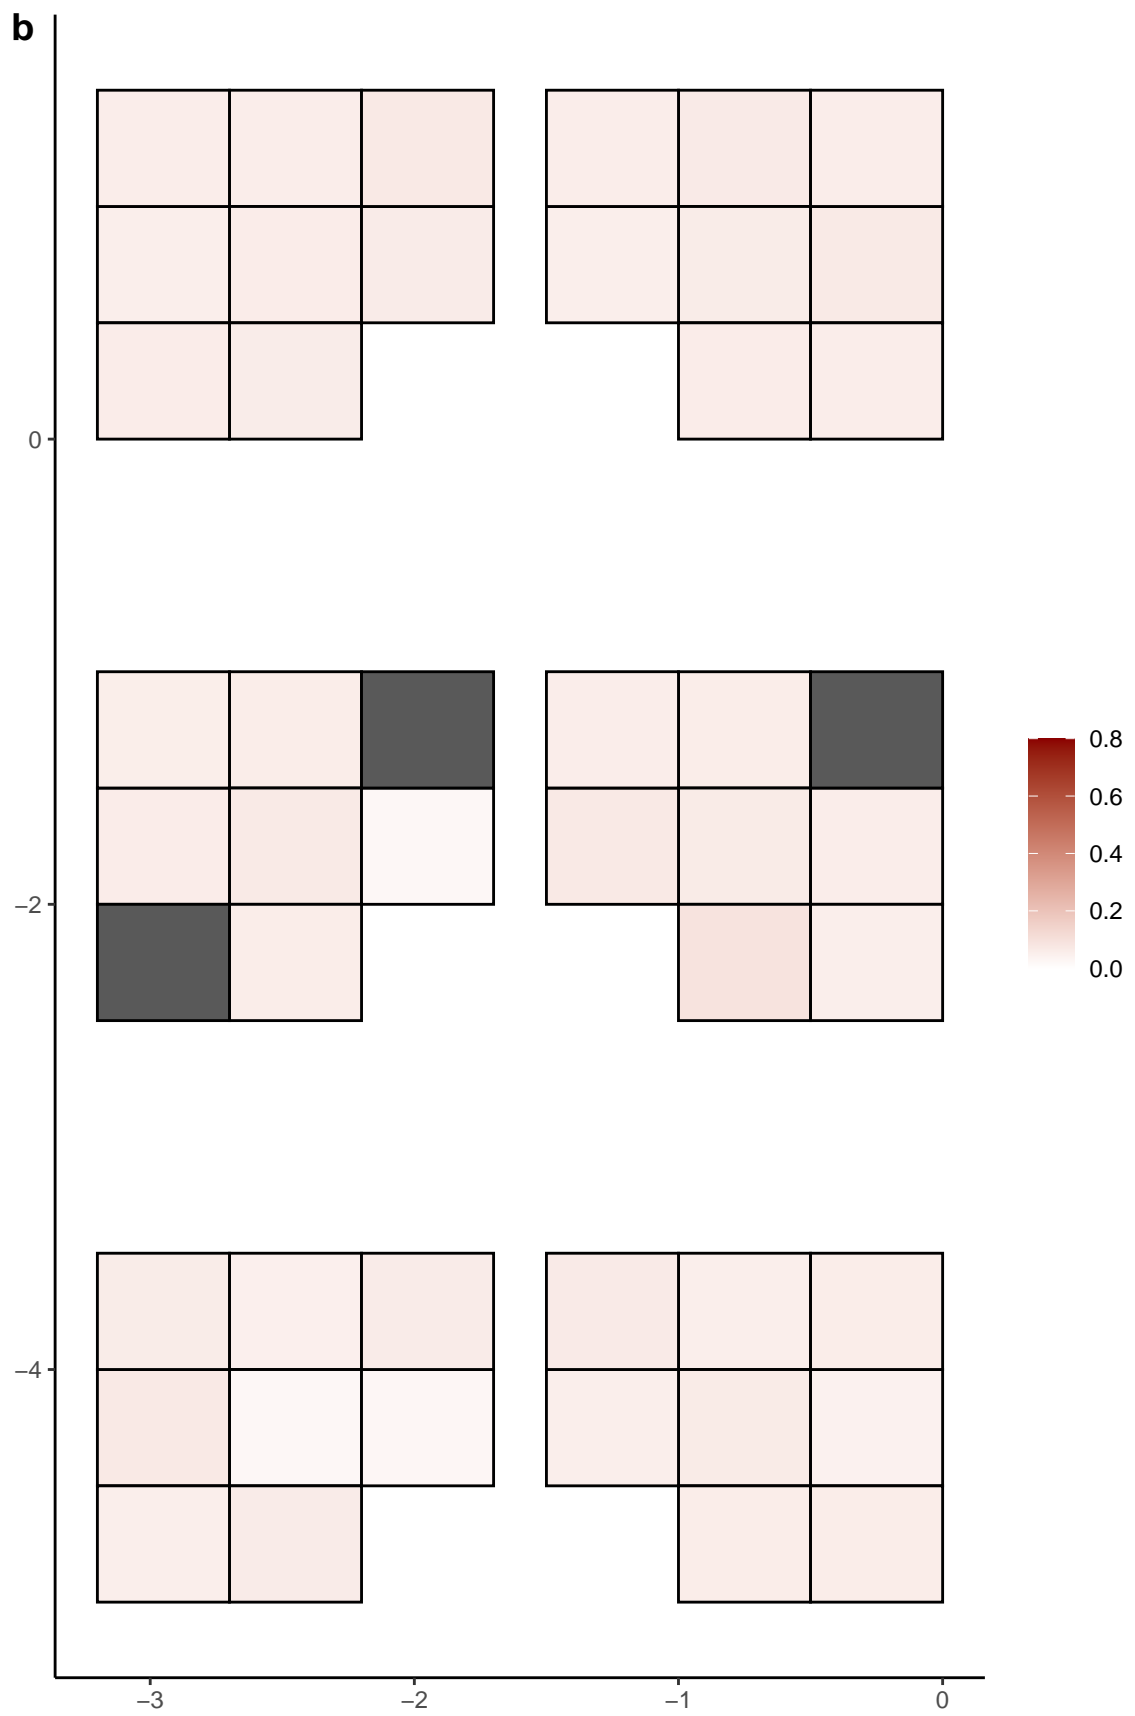

**a** ID05 X-21528963-A-C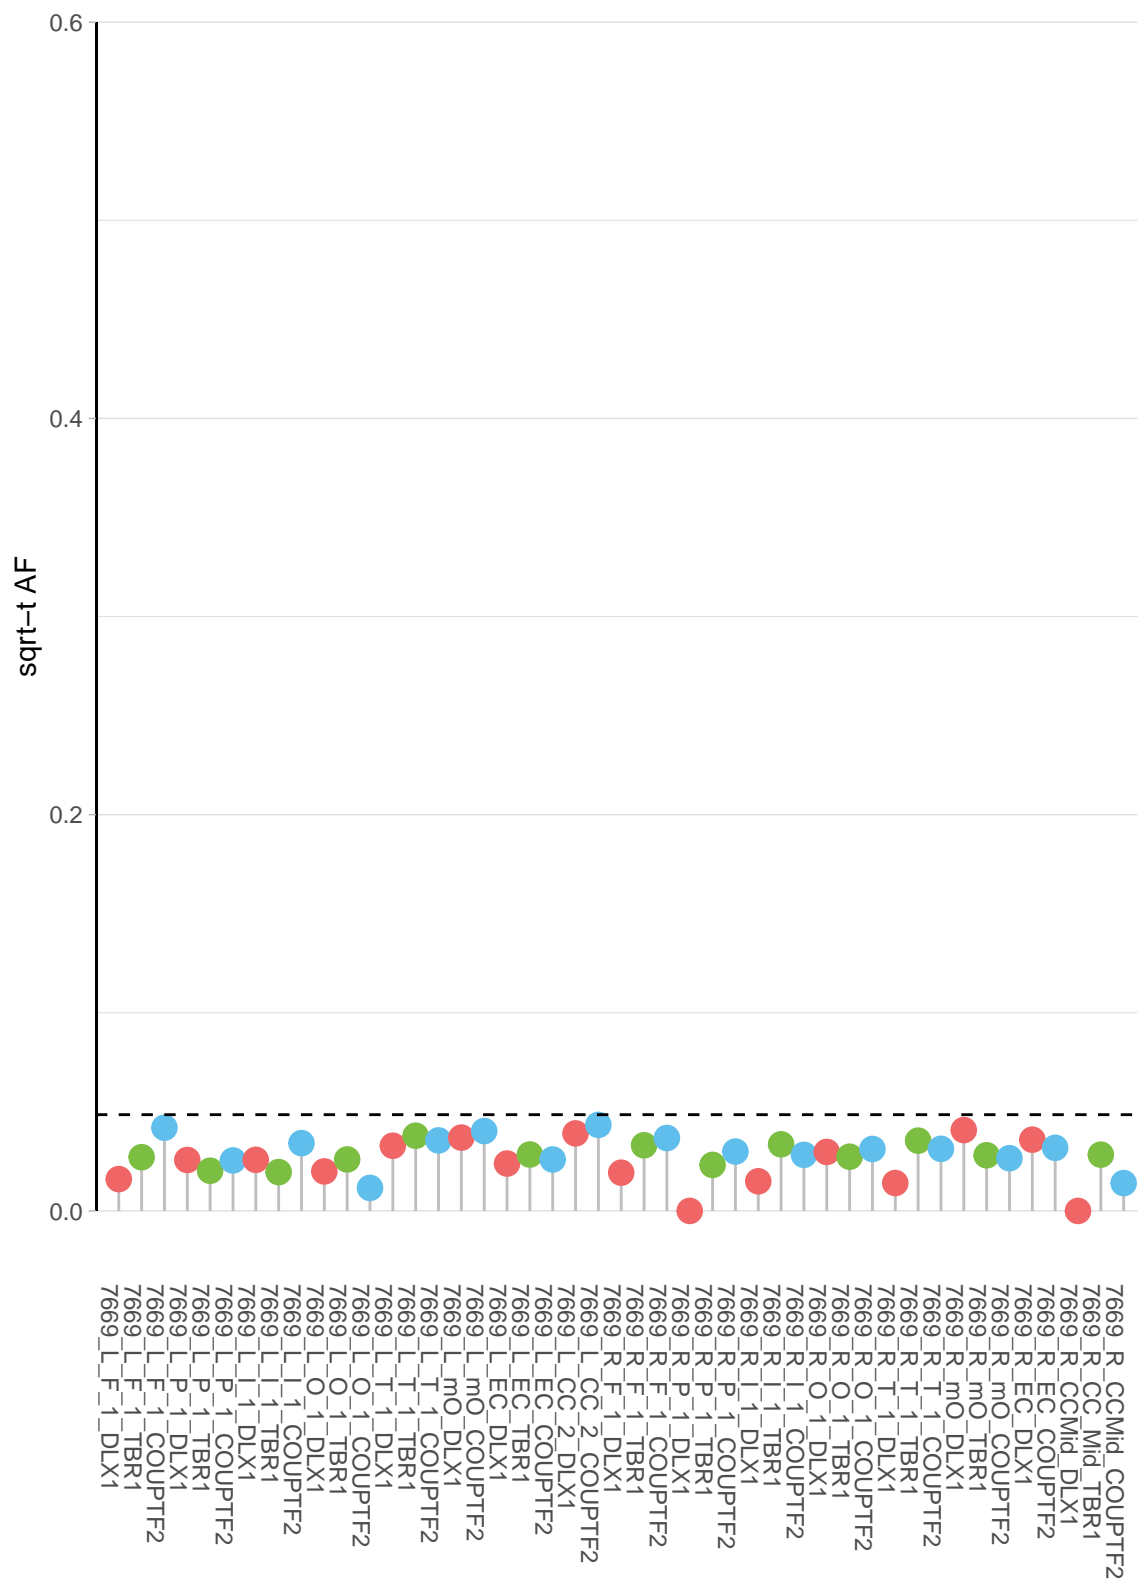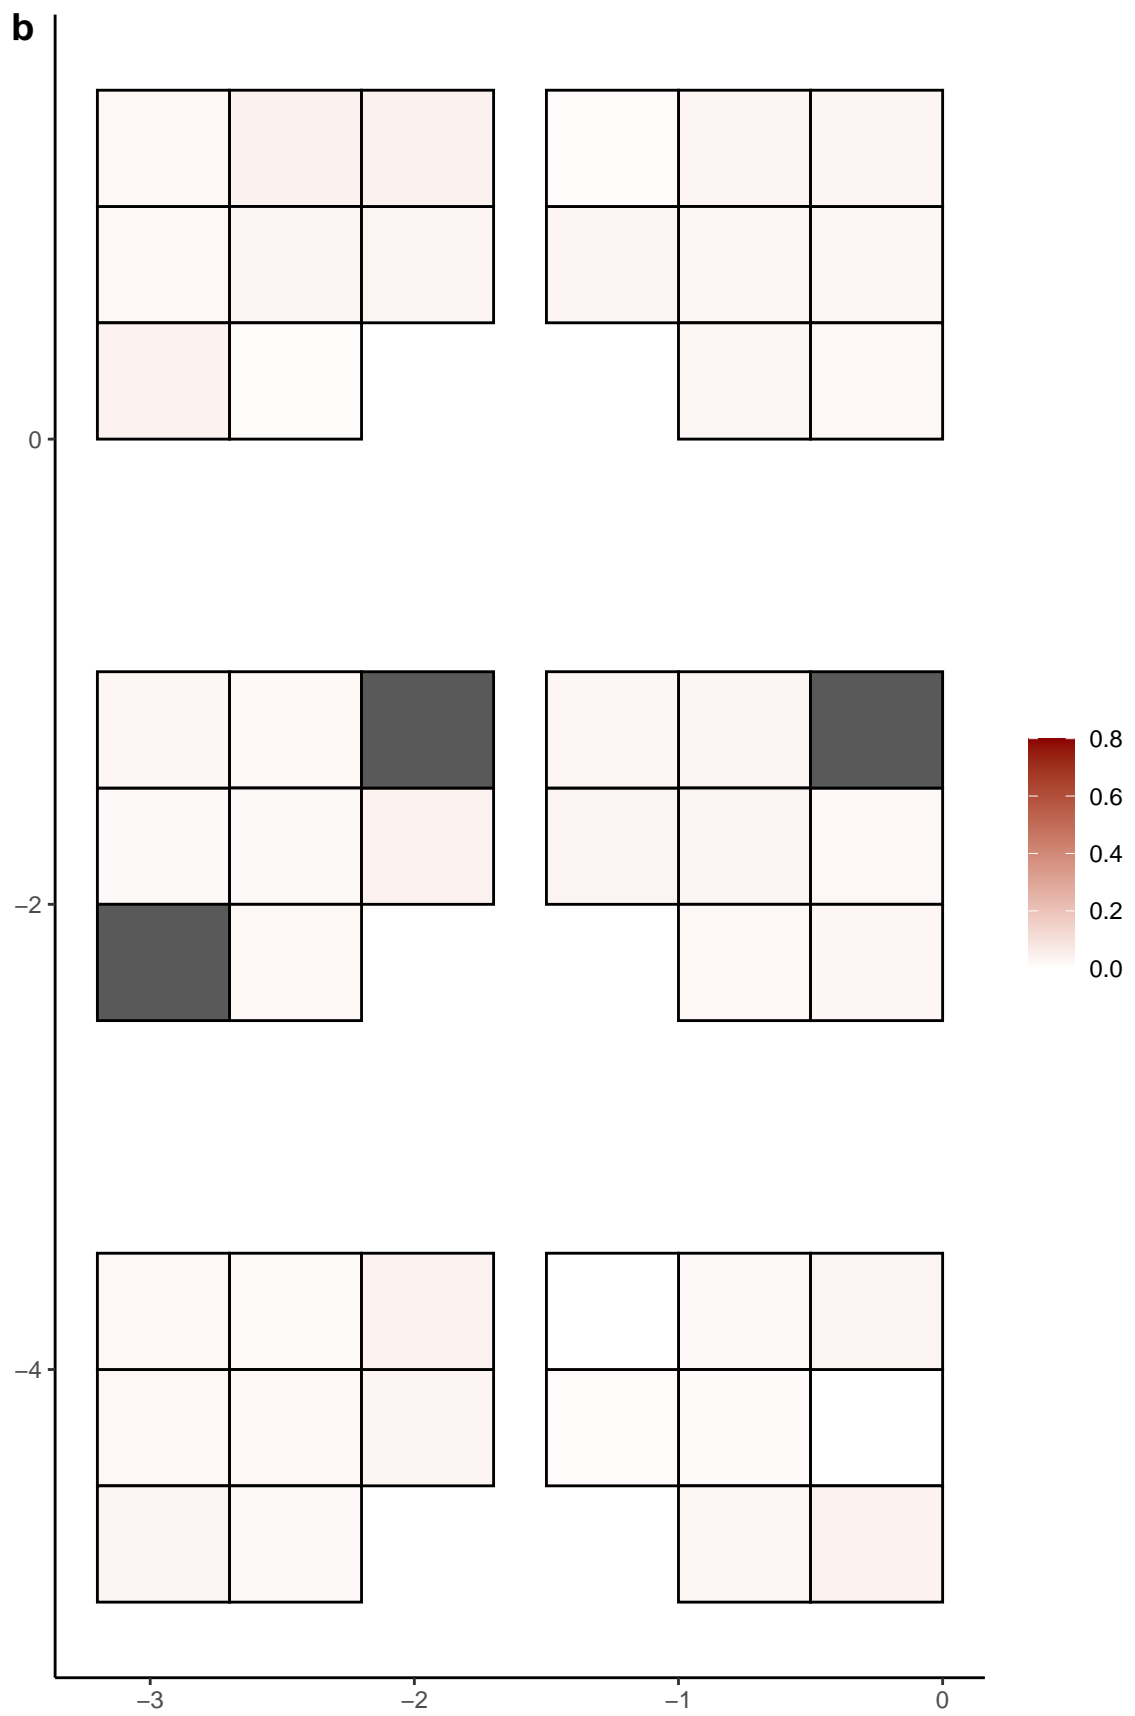

**a** ID05 X-24541835-C-A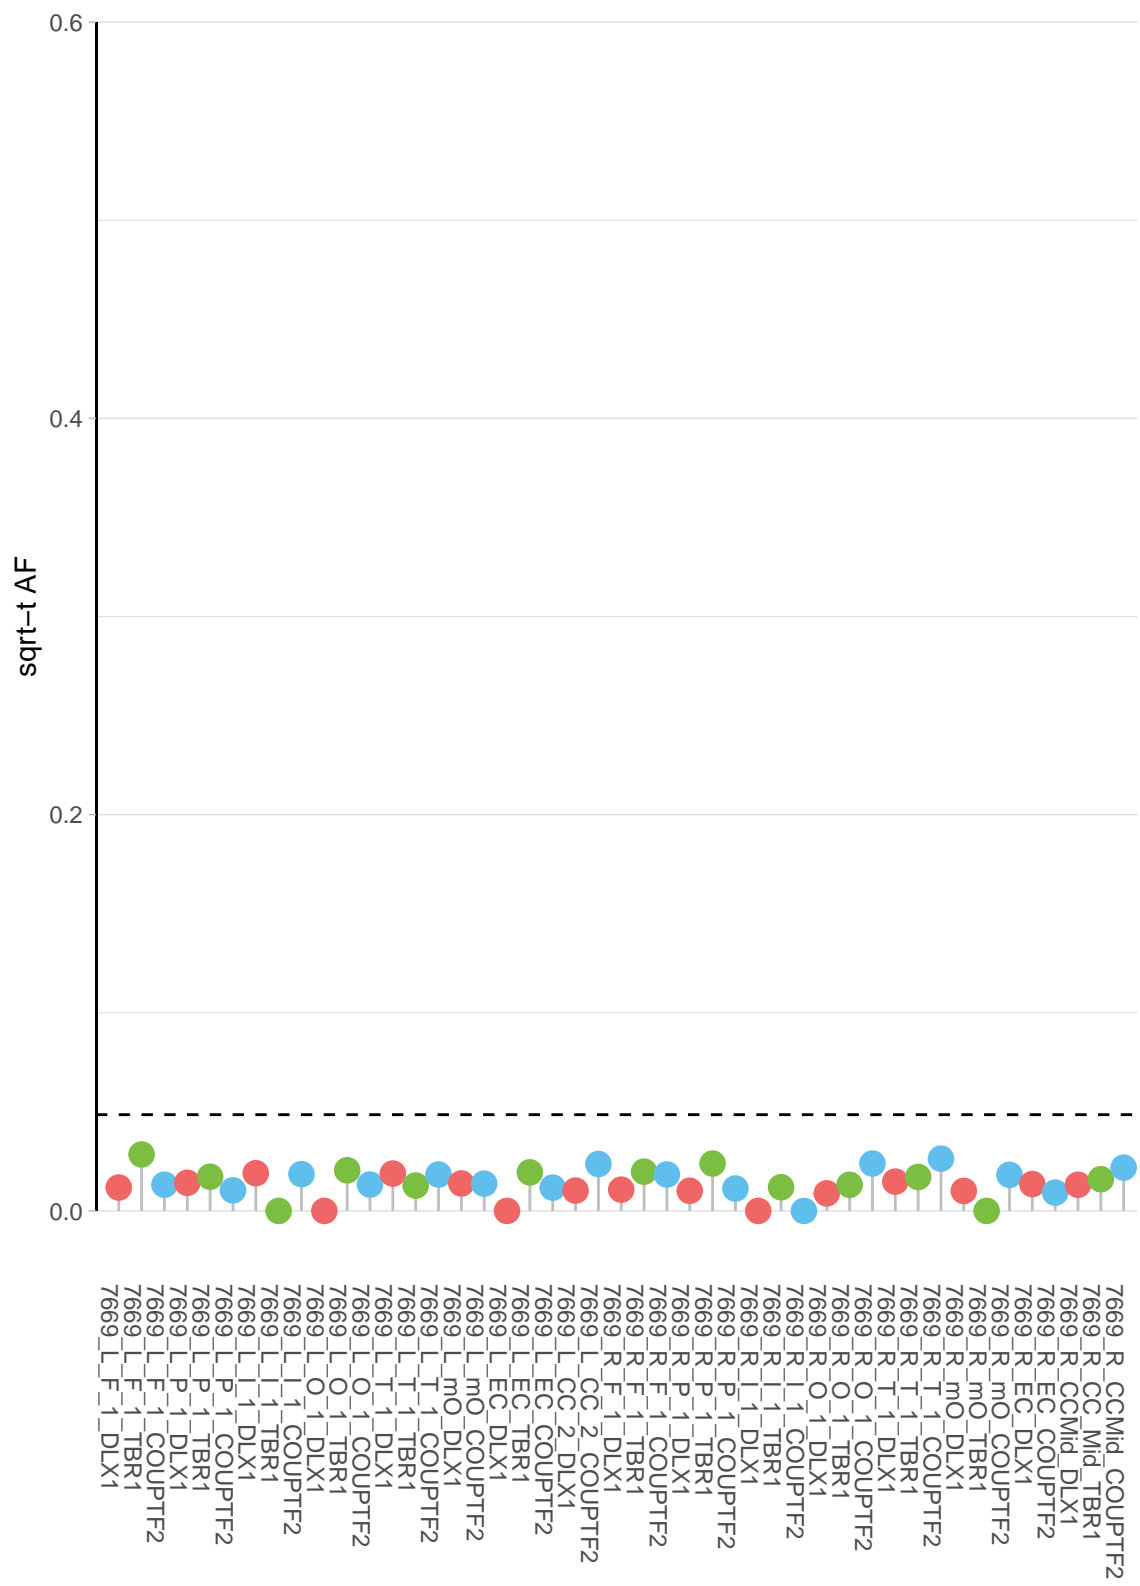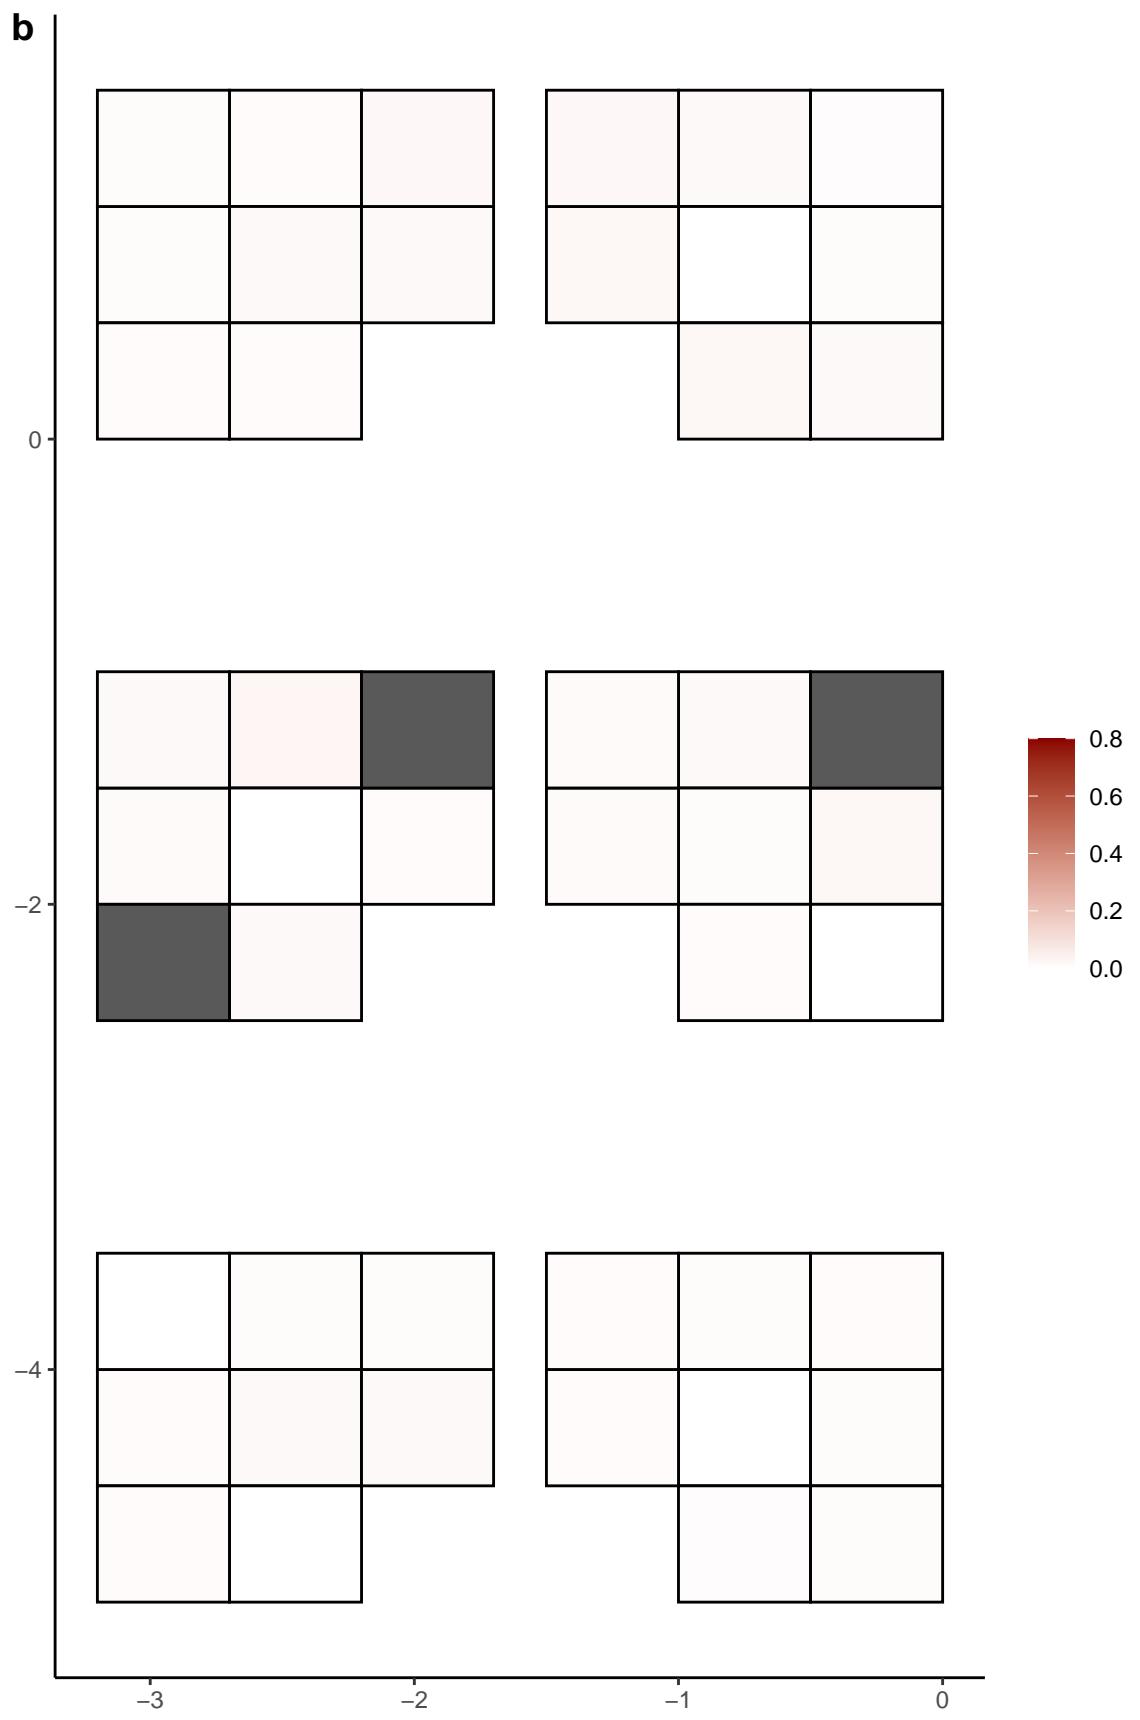

**a** ID05 X-27063252-A-G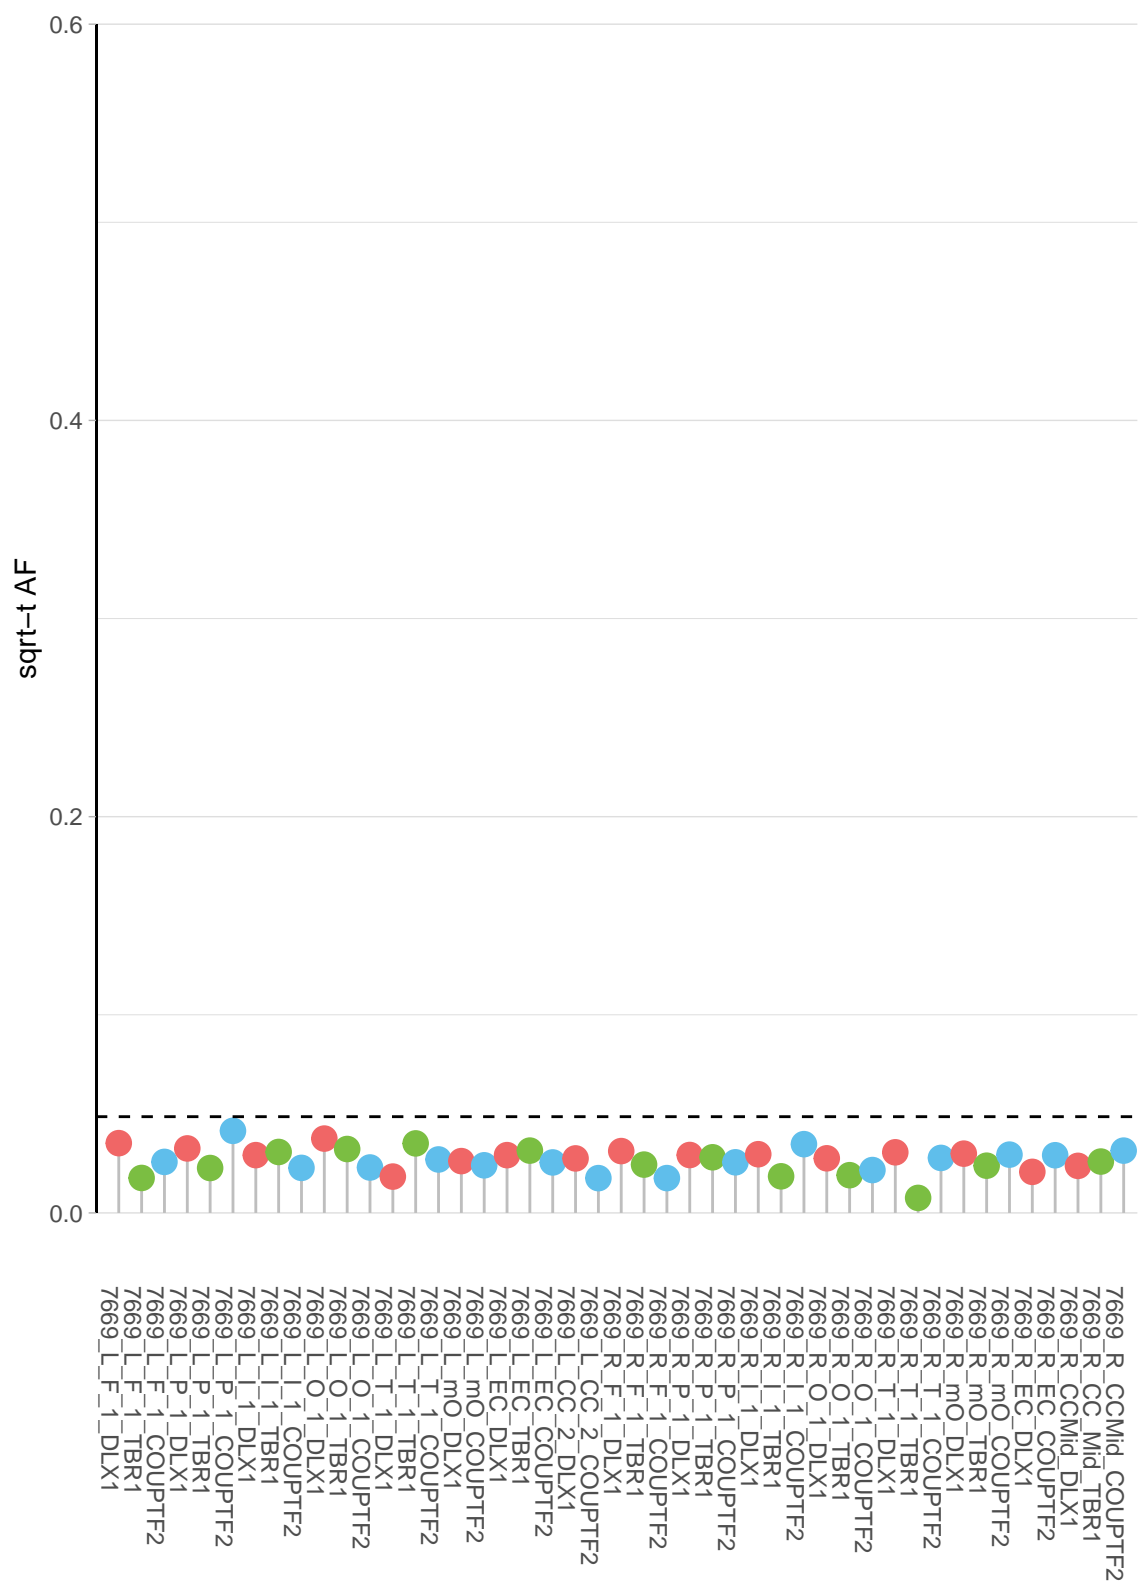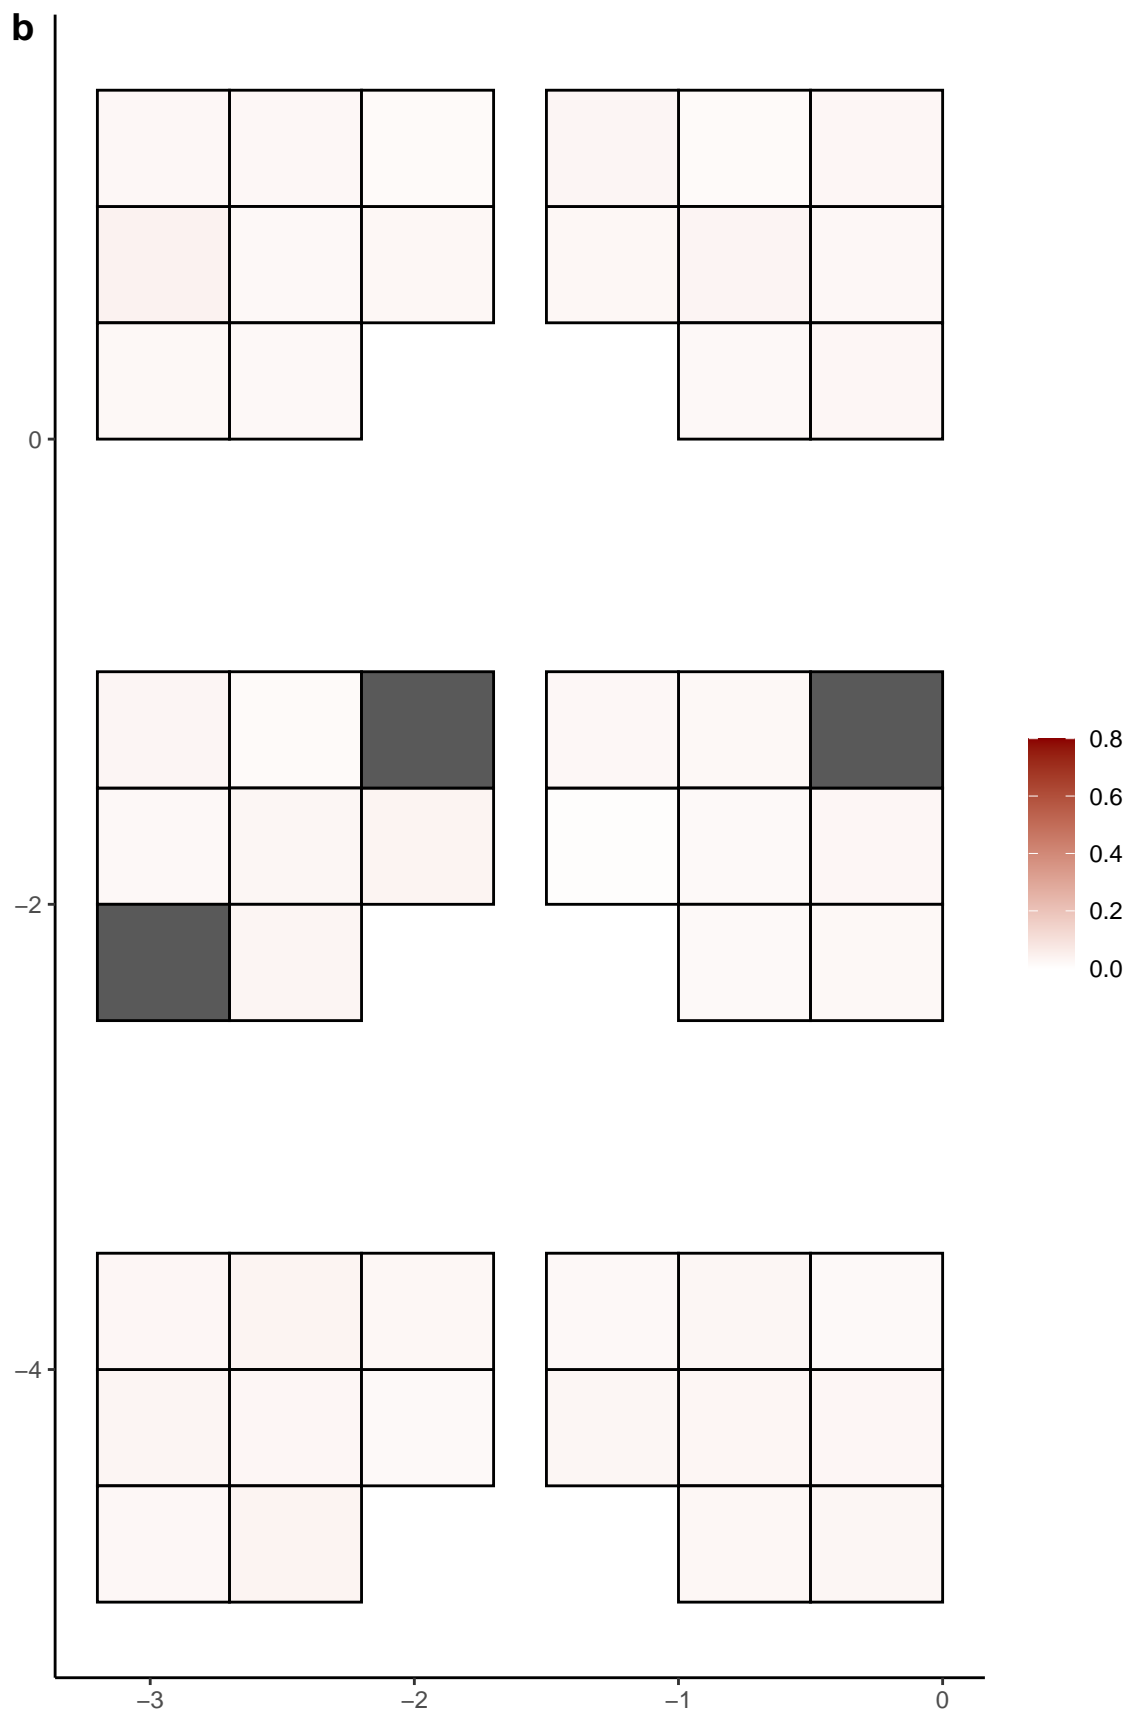



**a** ID05 X-28357791-T-A

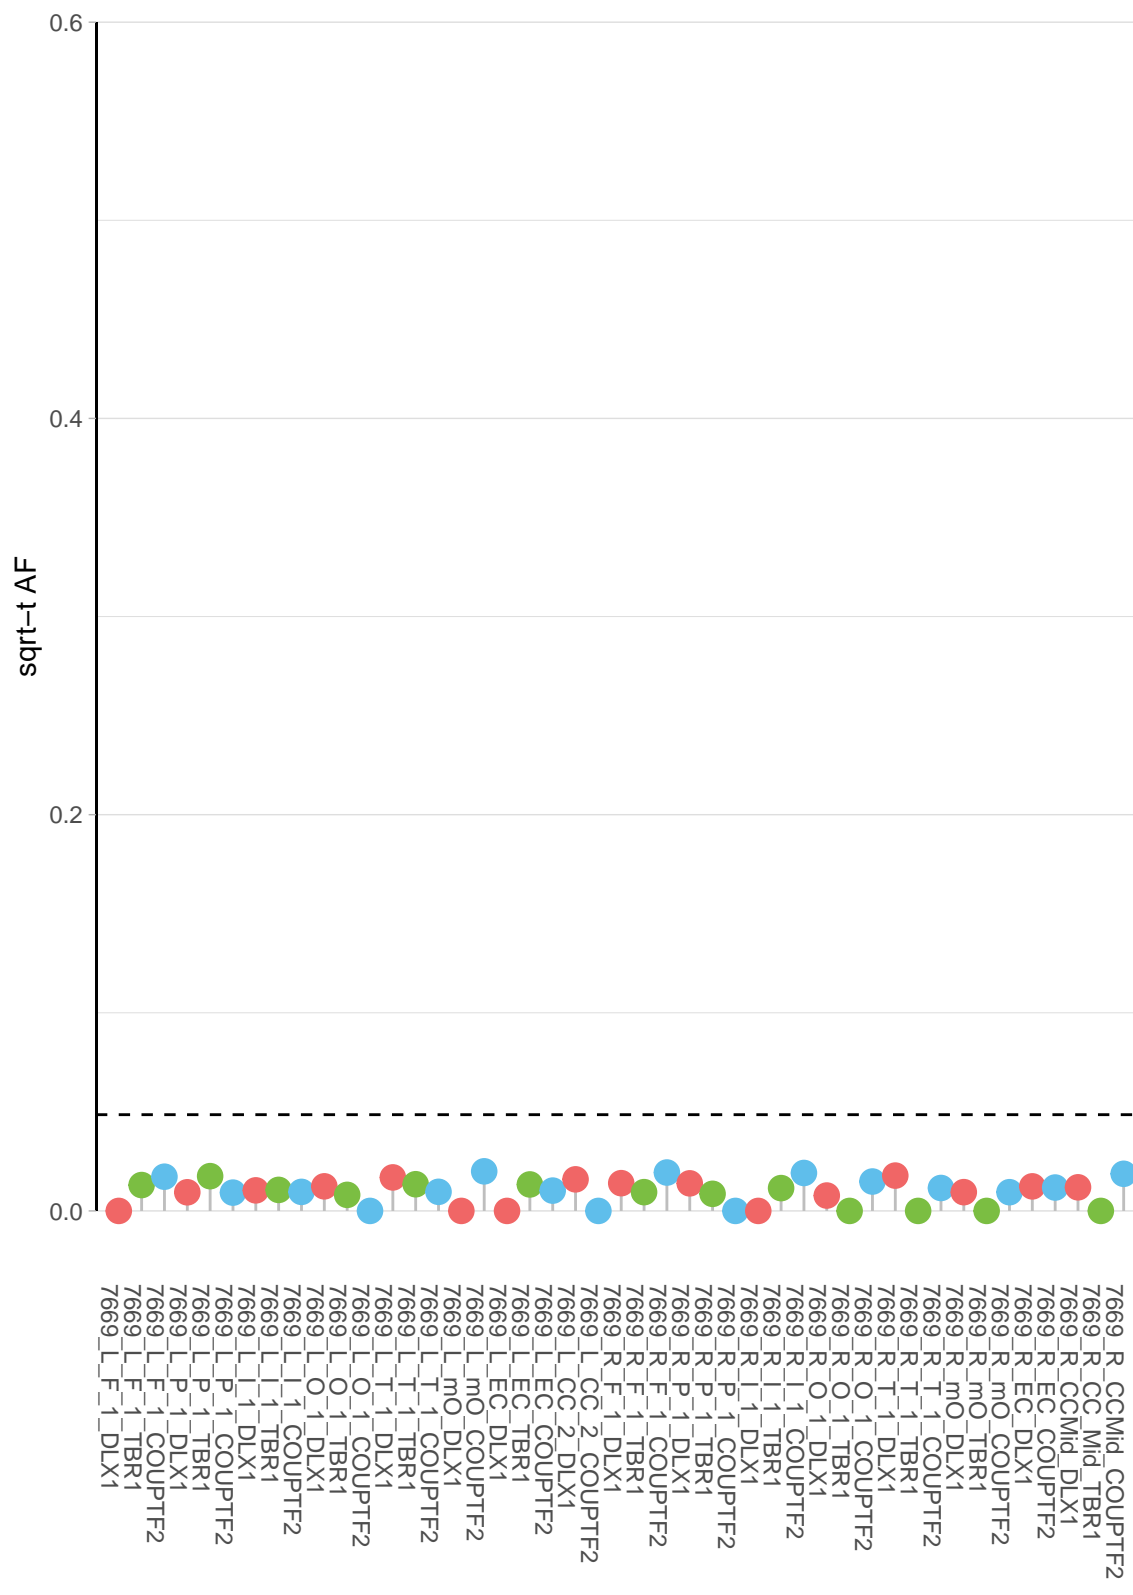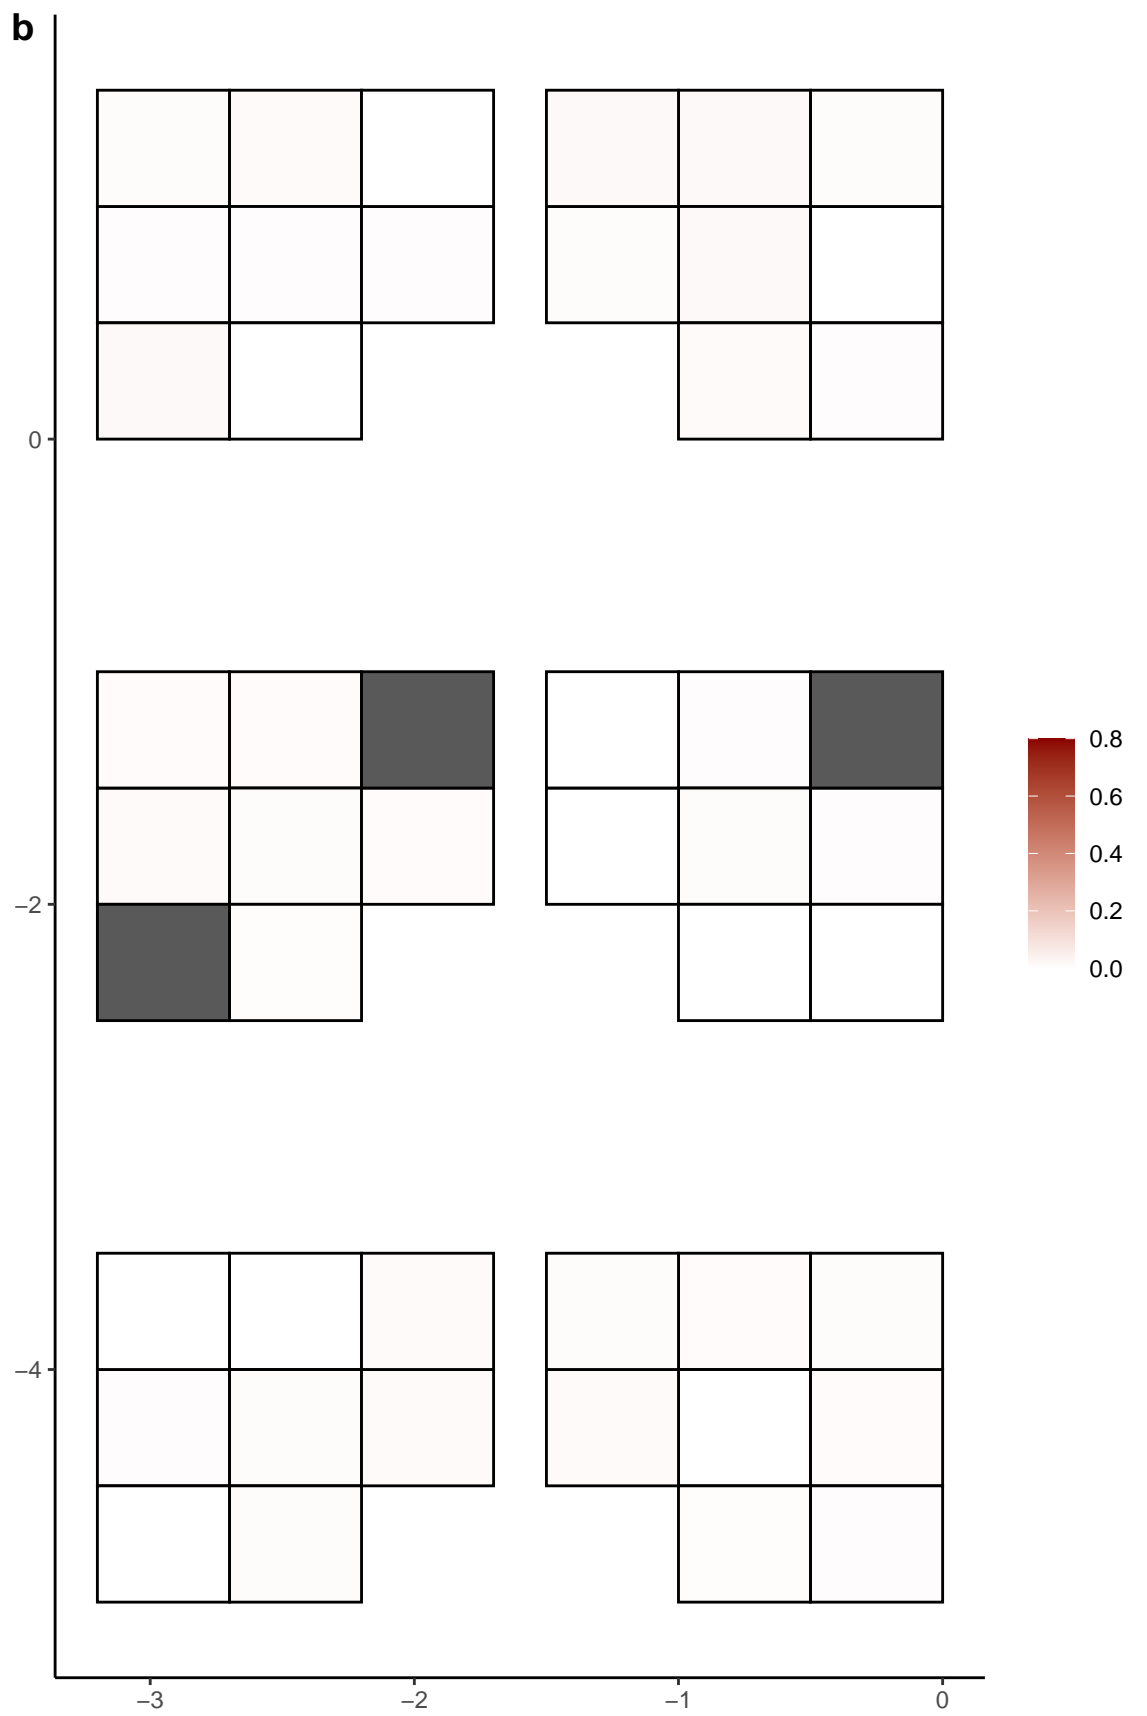



**a** ID05 X-33444958-G-A

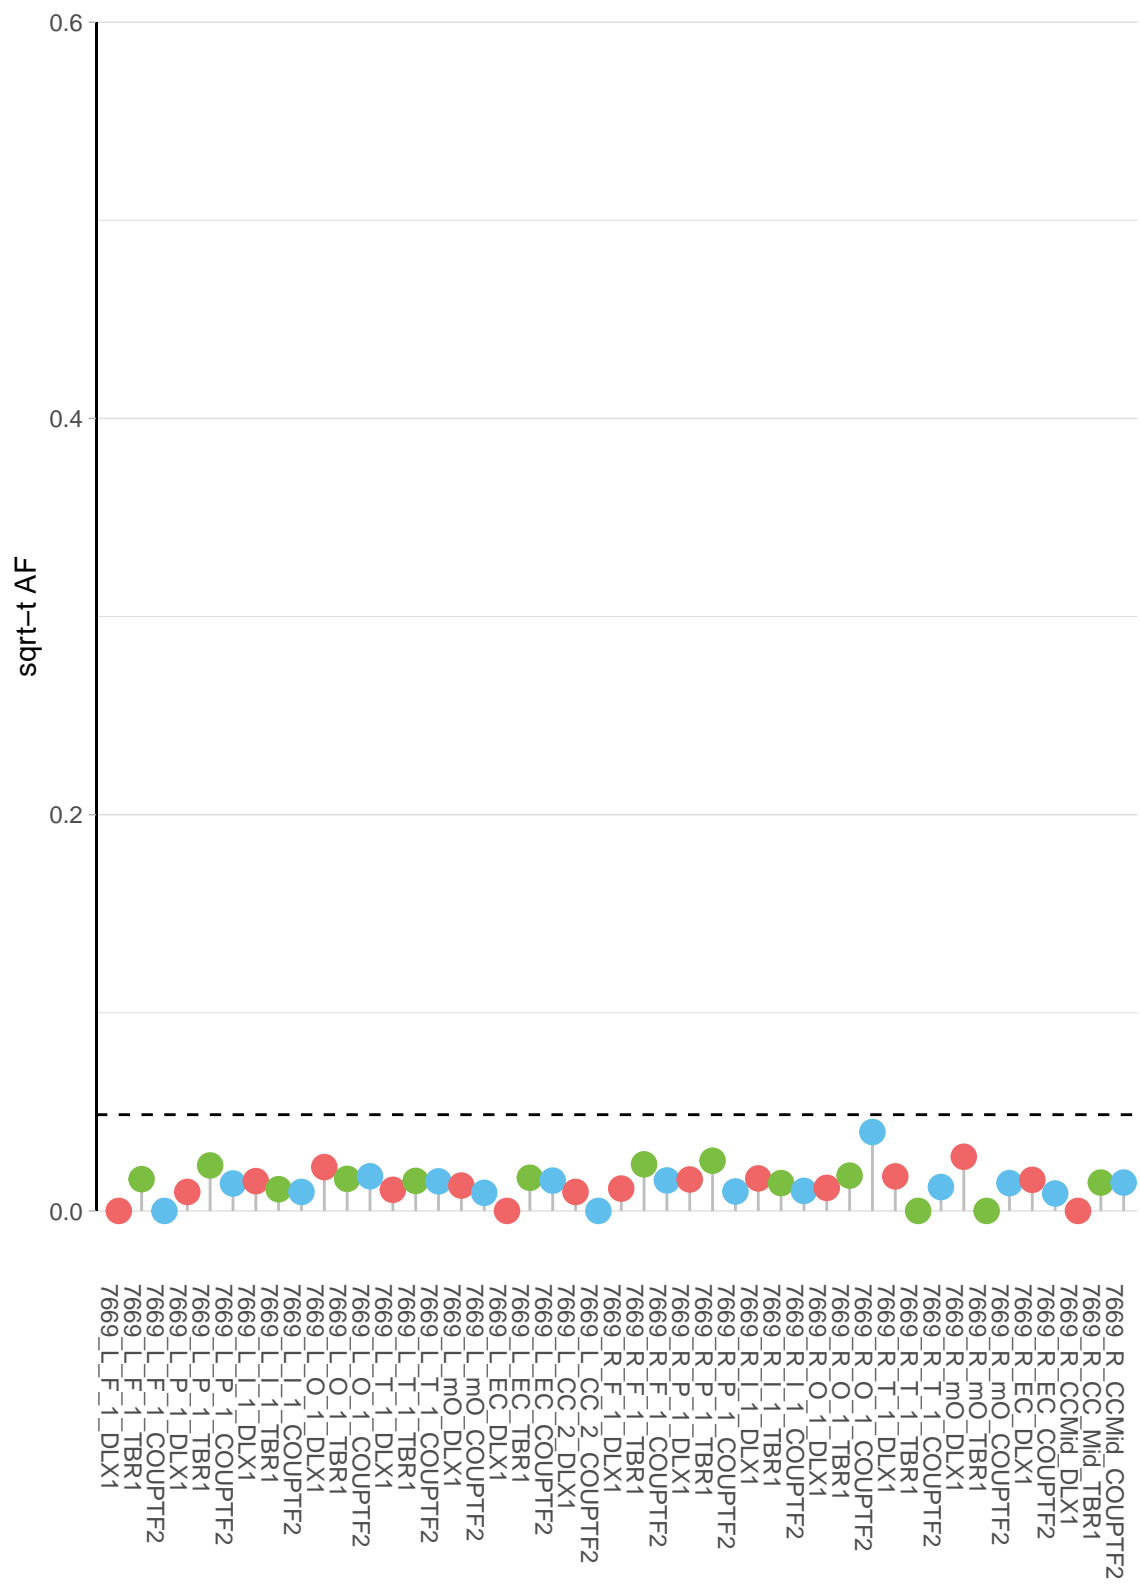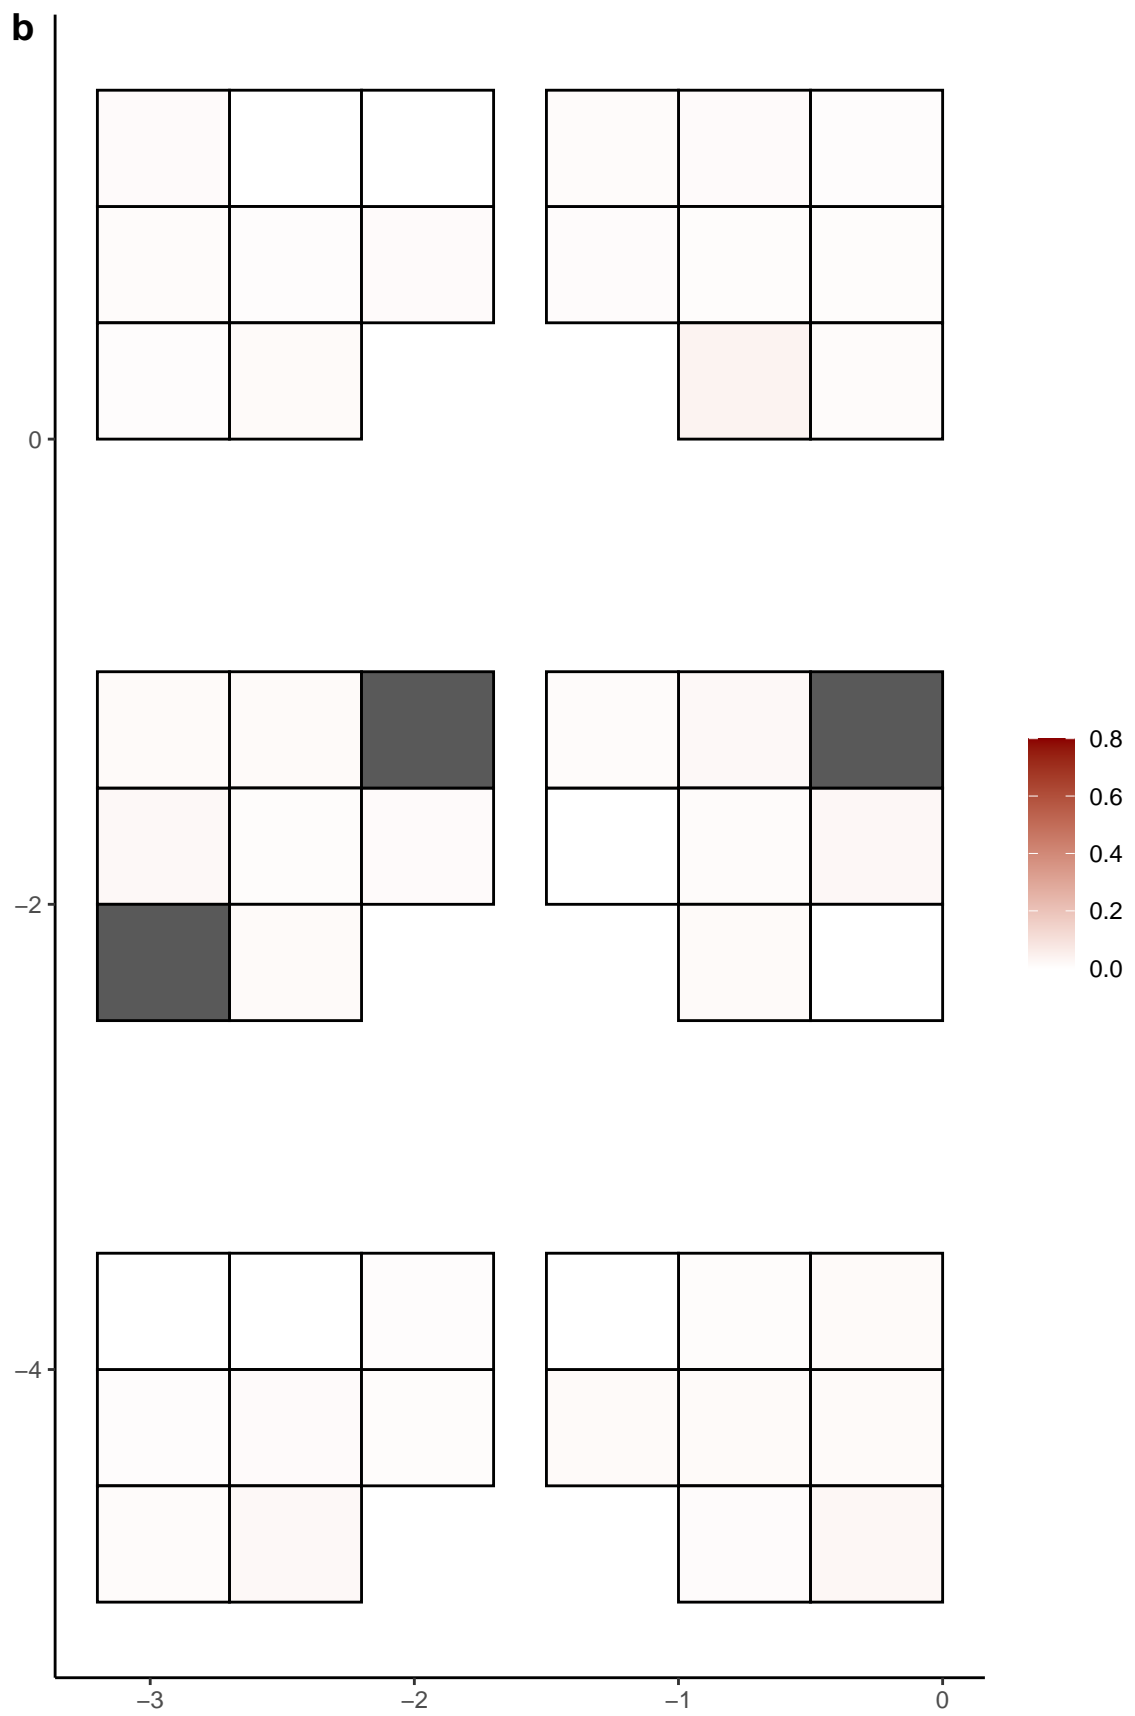

**a** ID05 X-34424349-A-T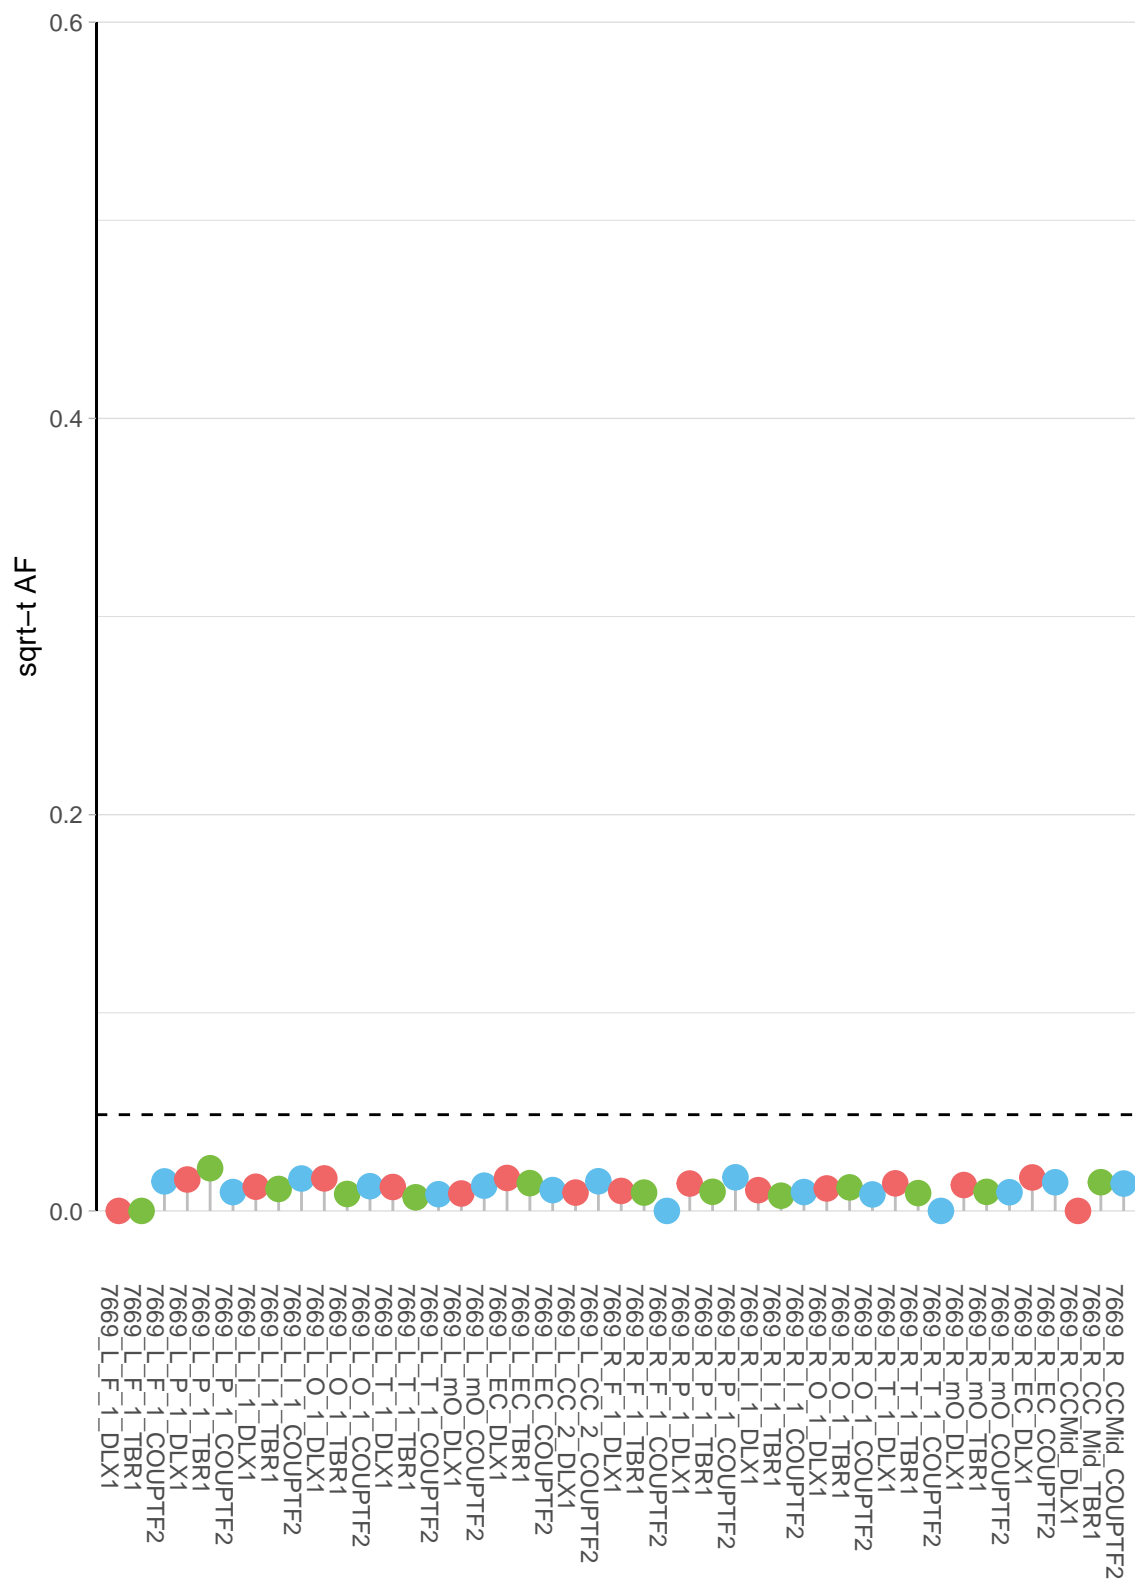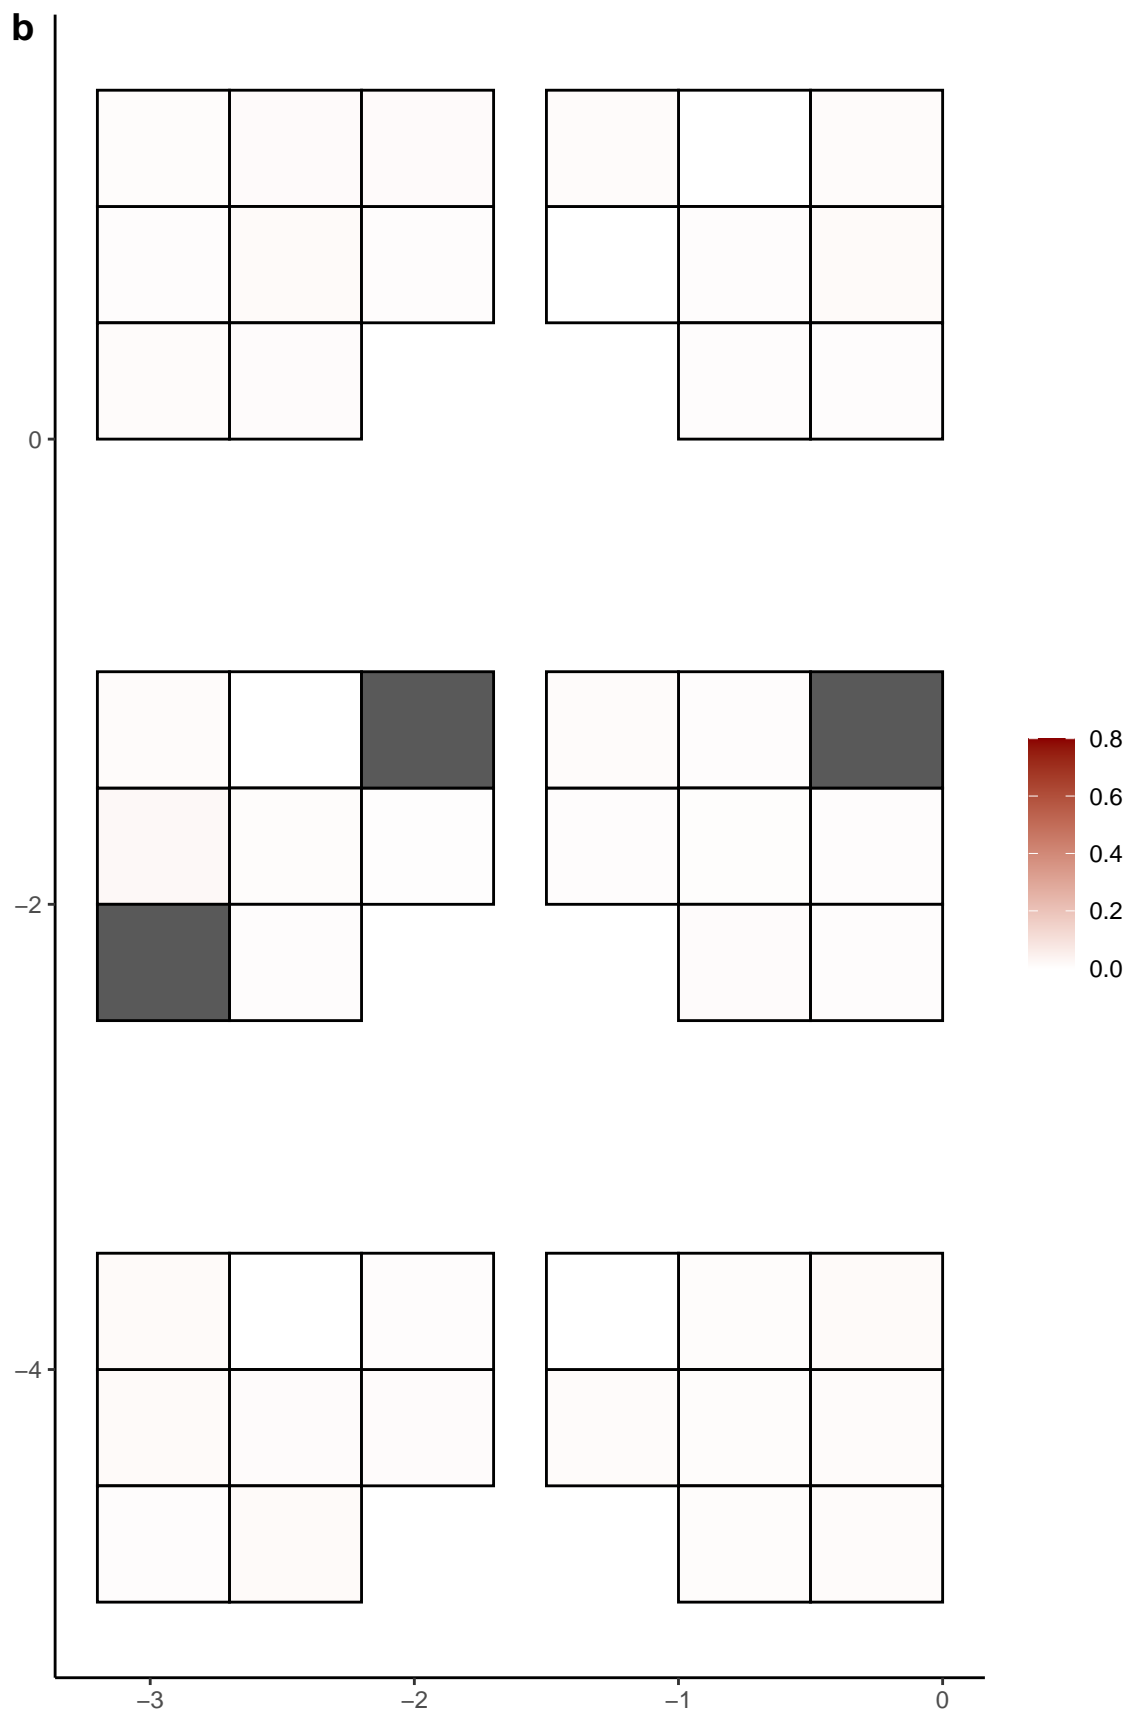

**a** ID05 X-34664512-A-G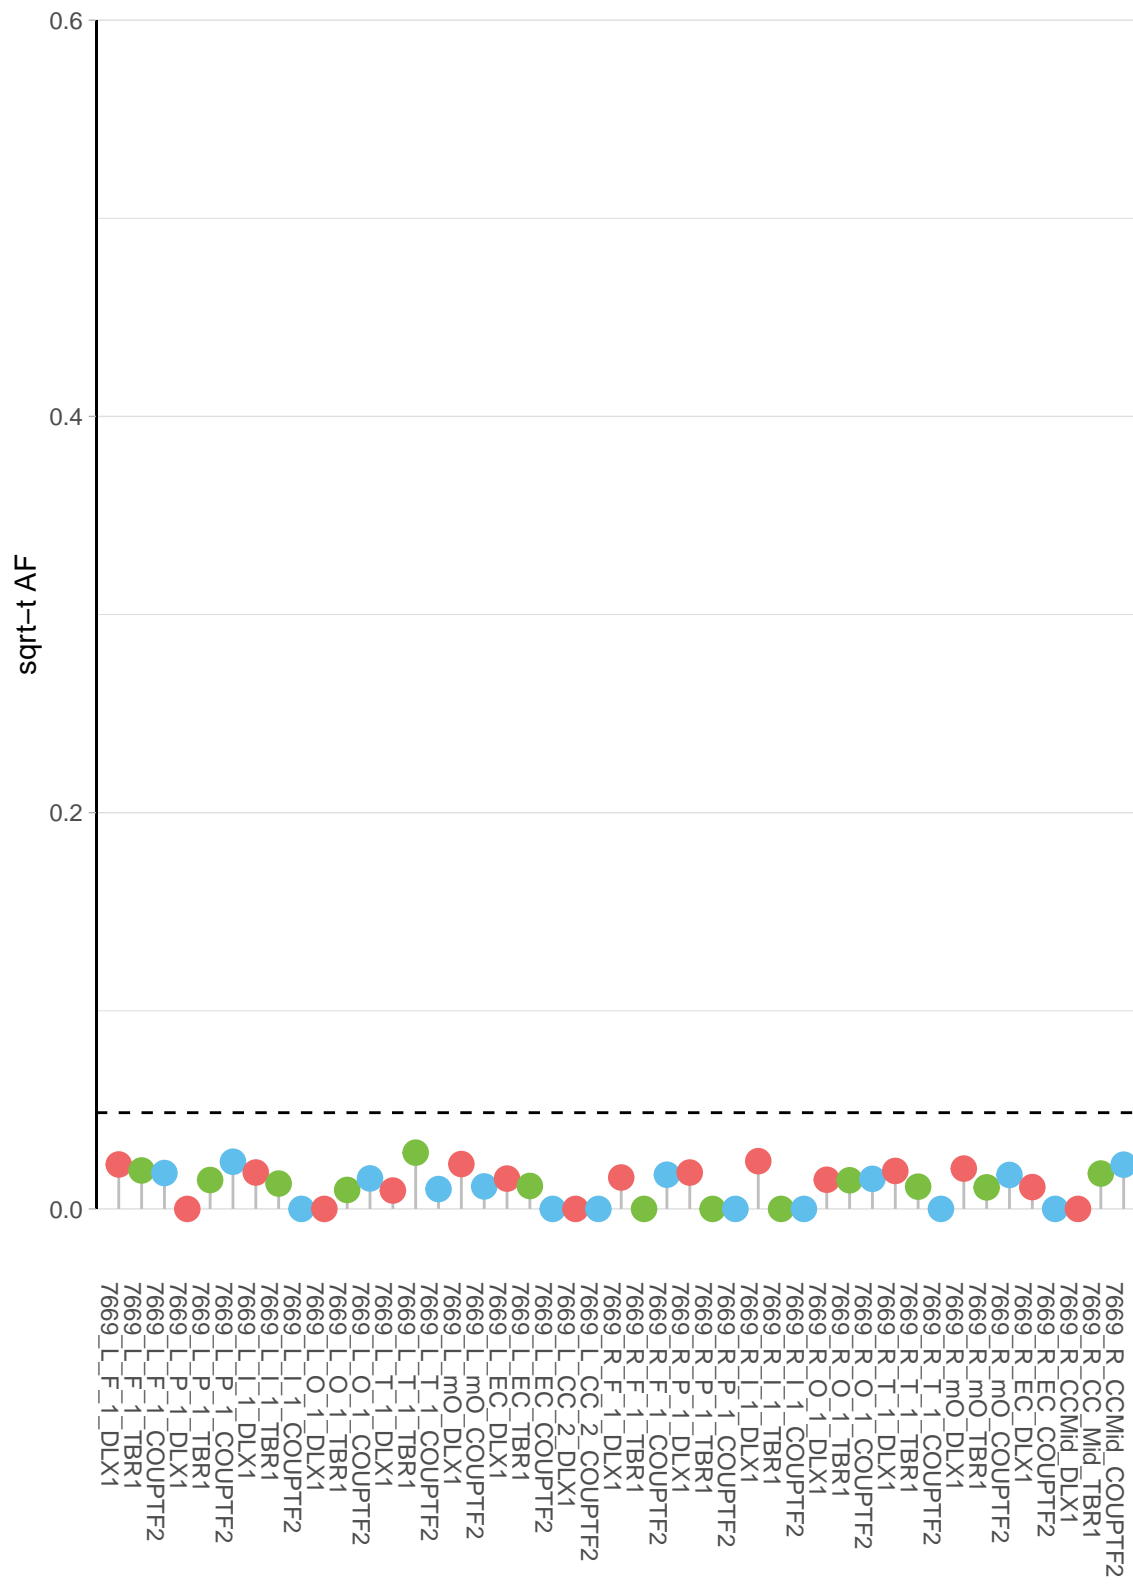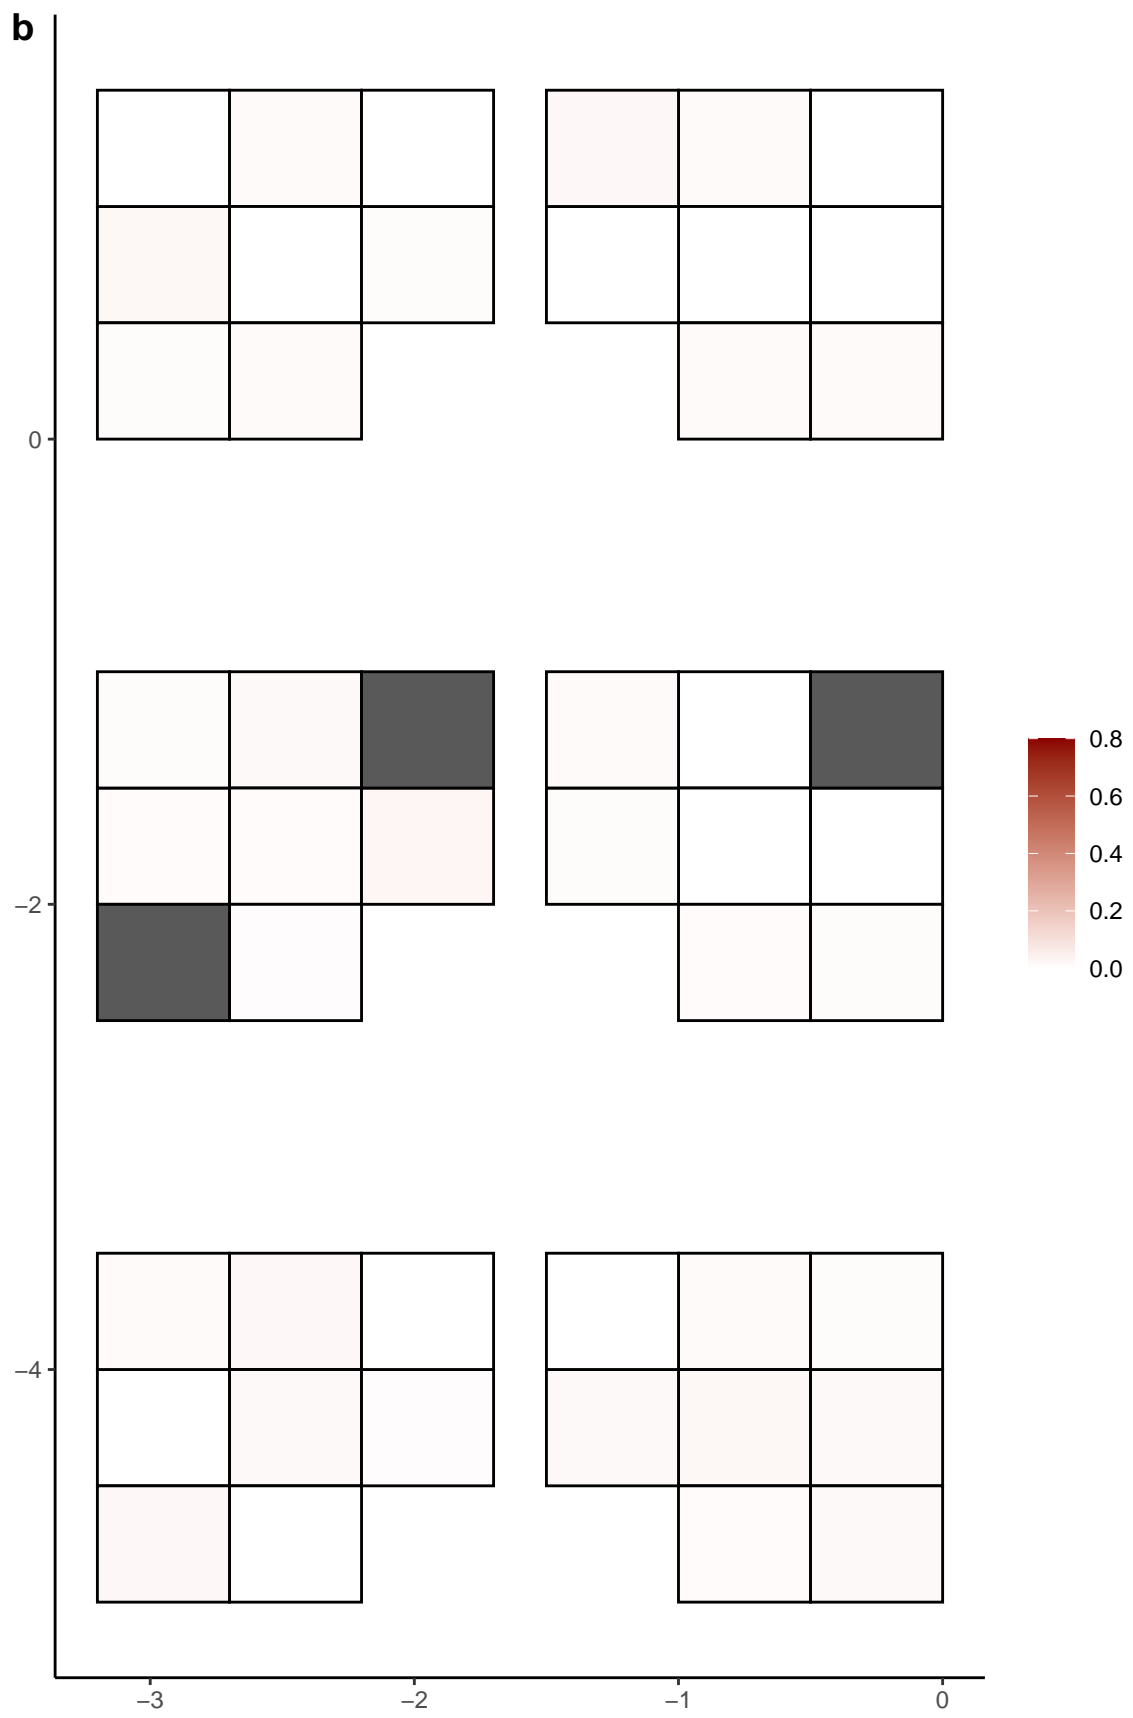

**a** ID05 X-34801213-T-C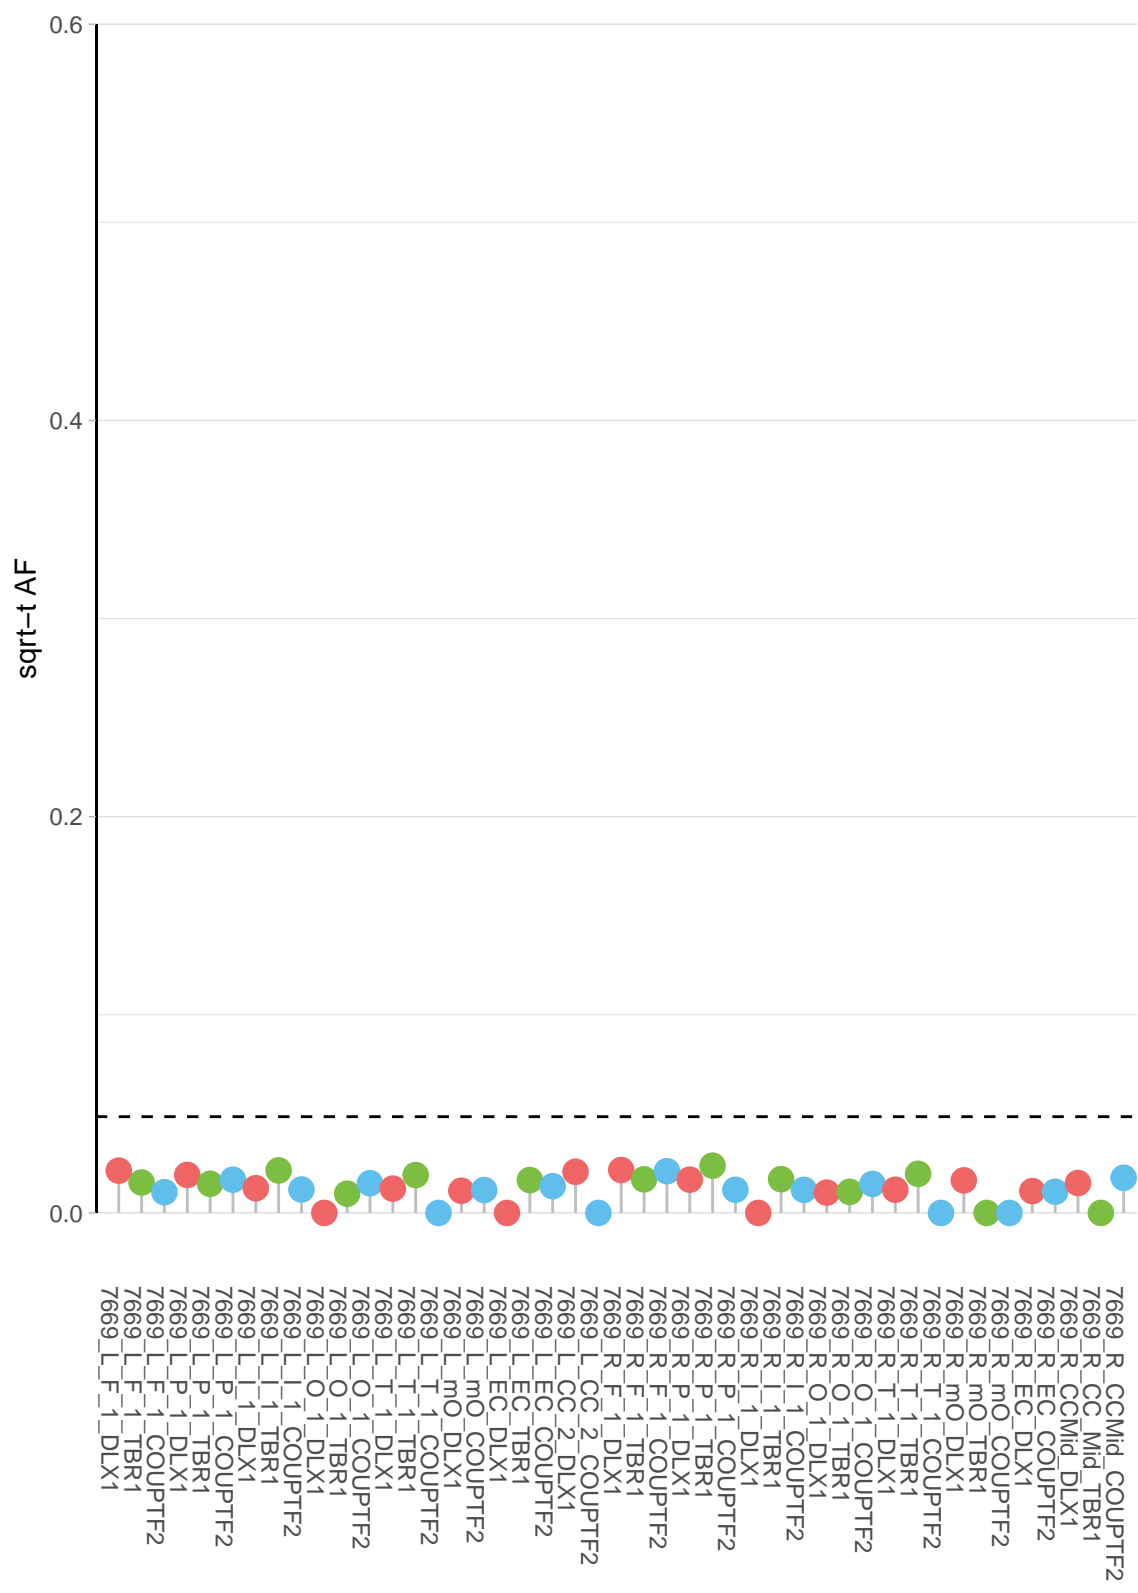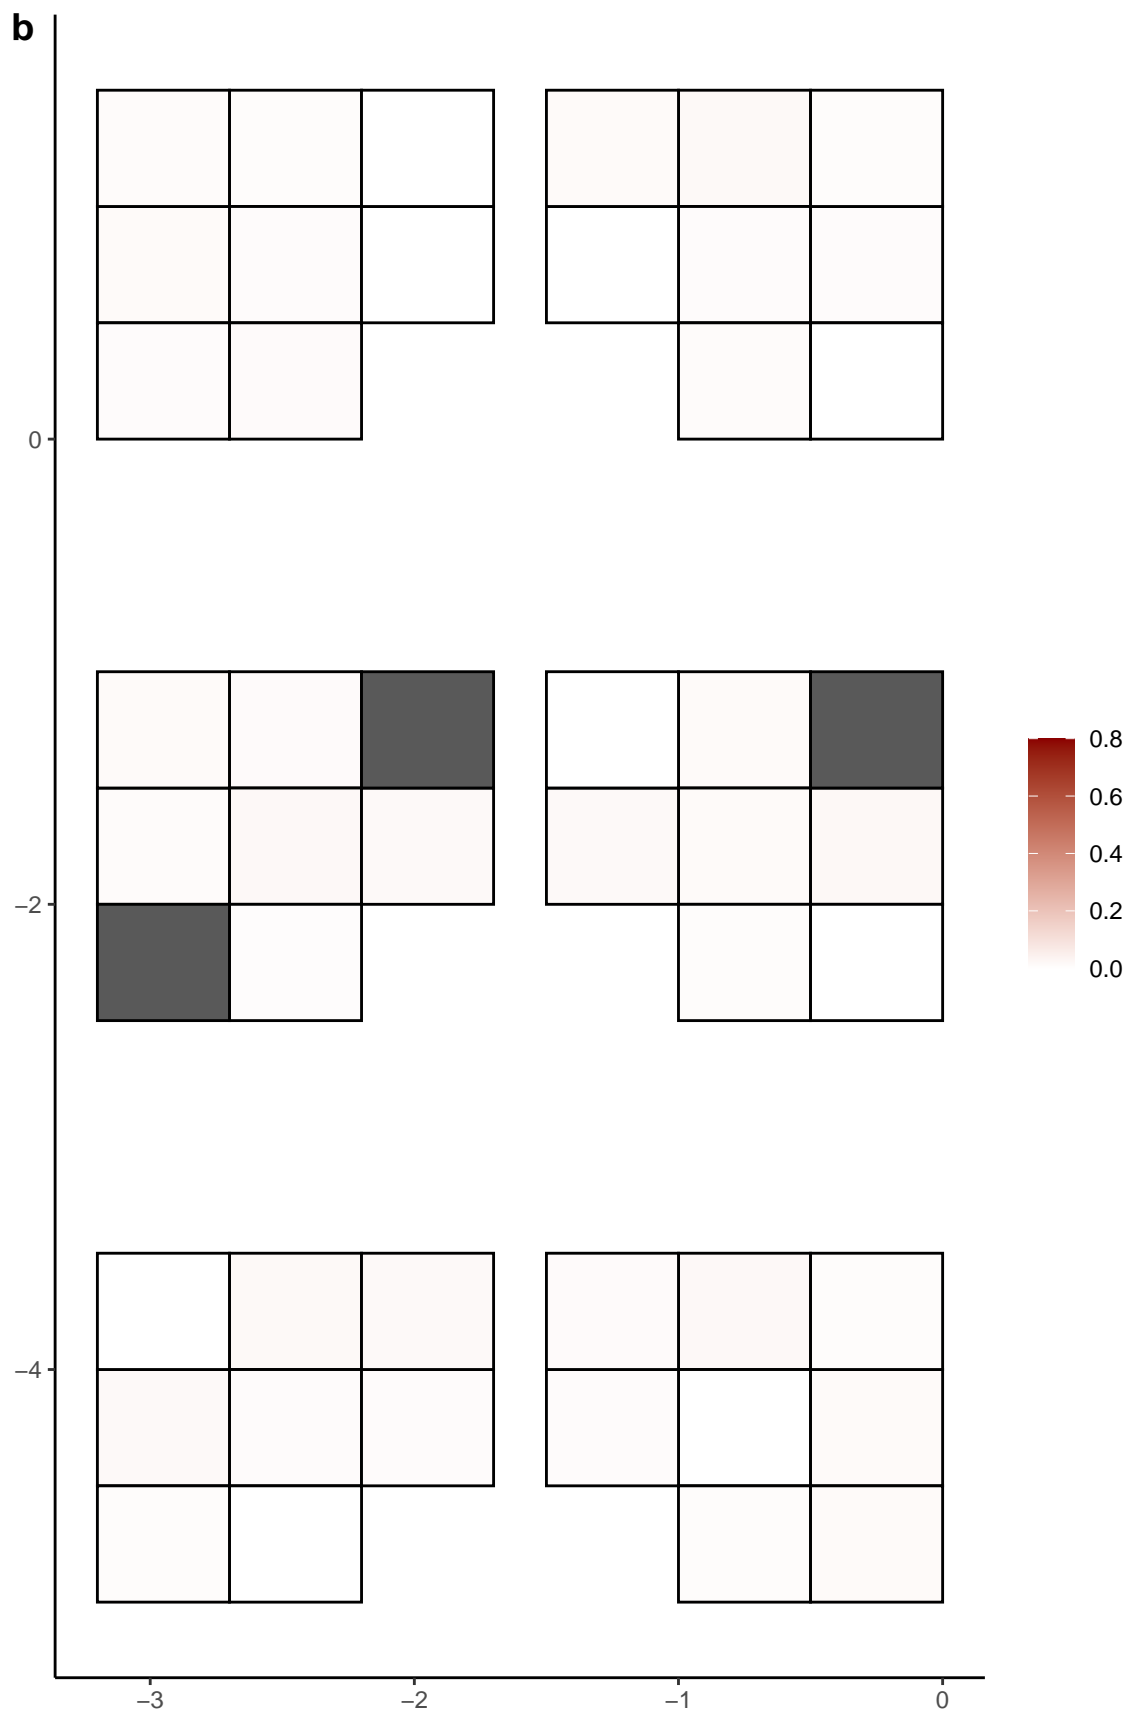

**a** ID05 X-35362338-C-T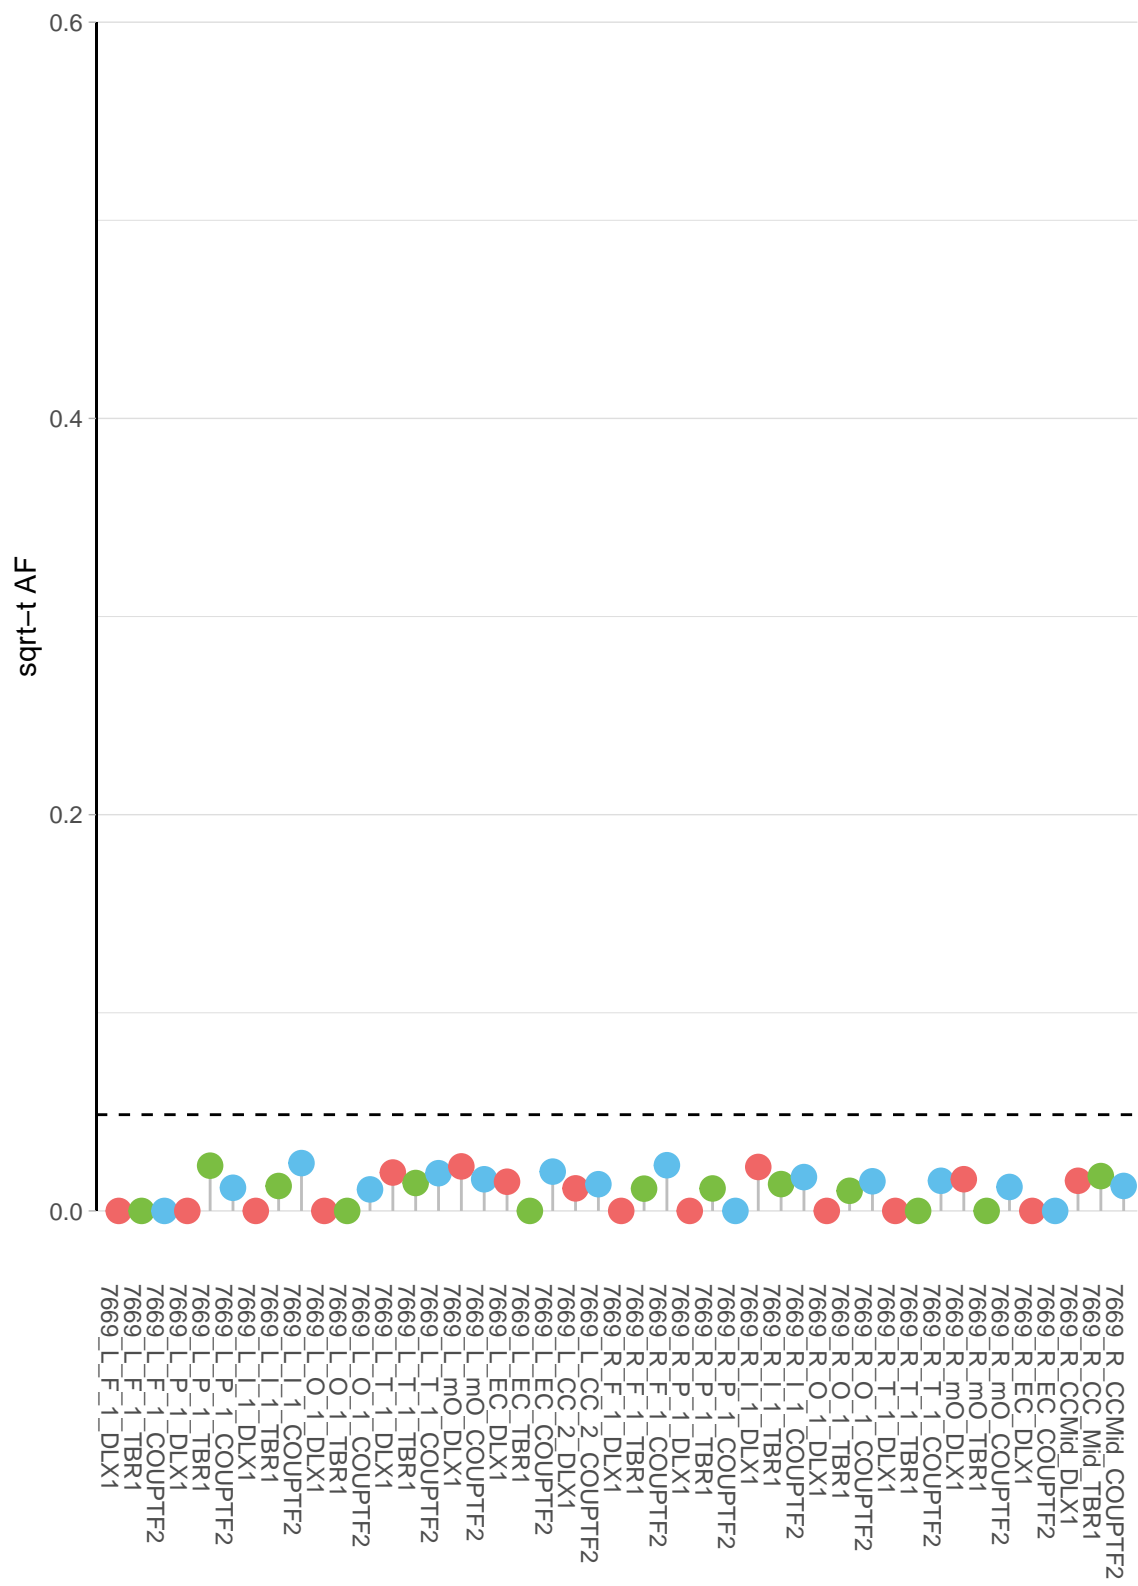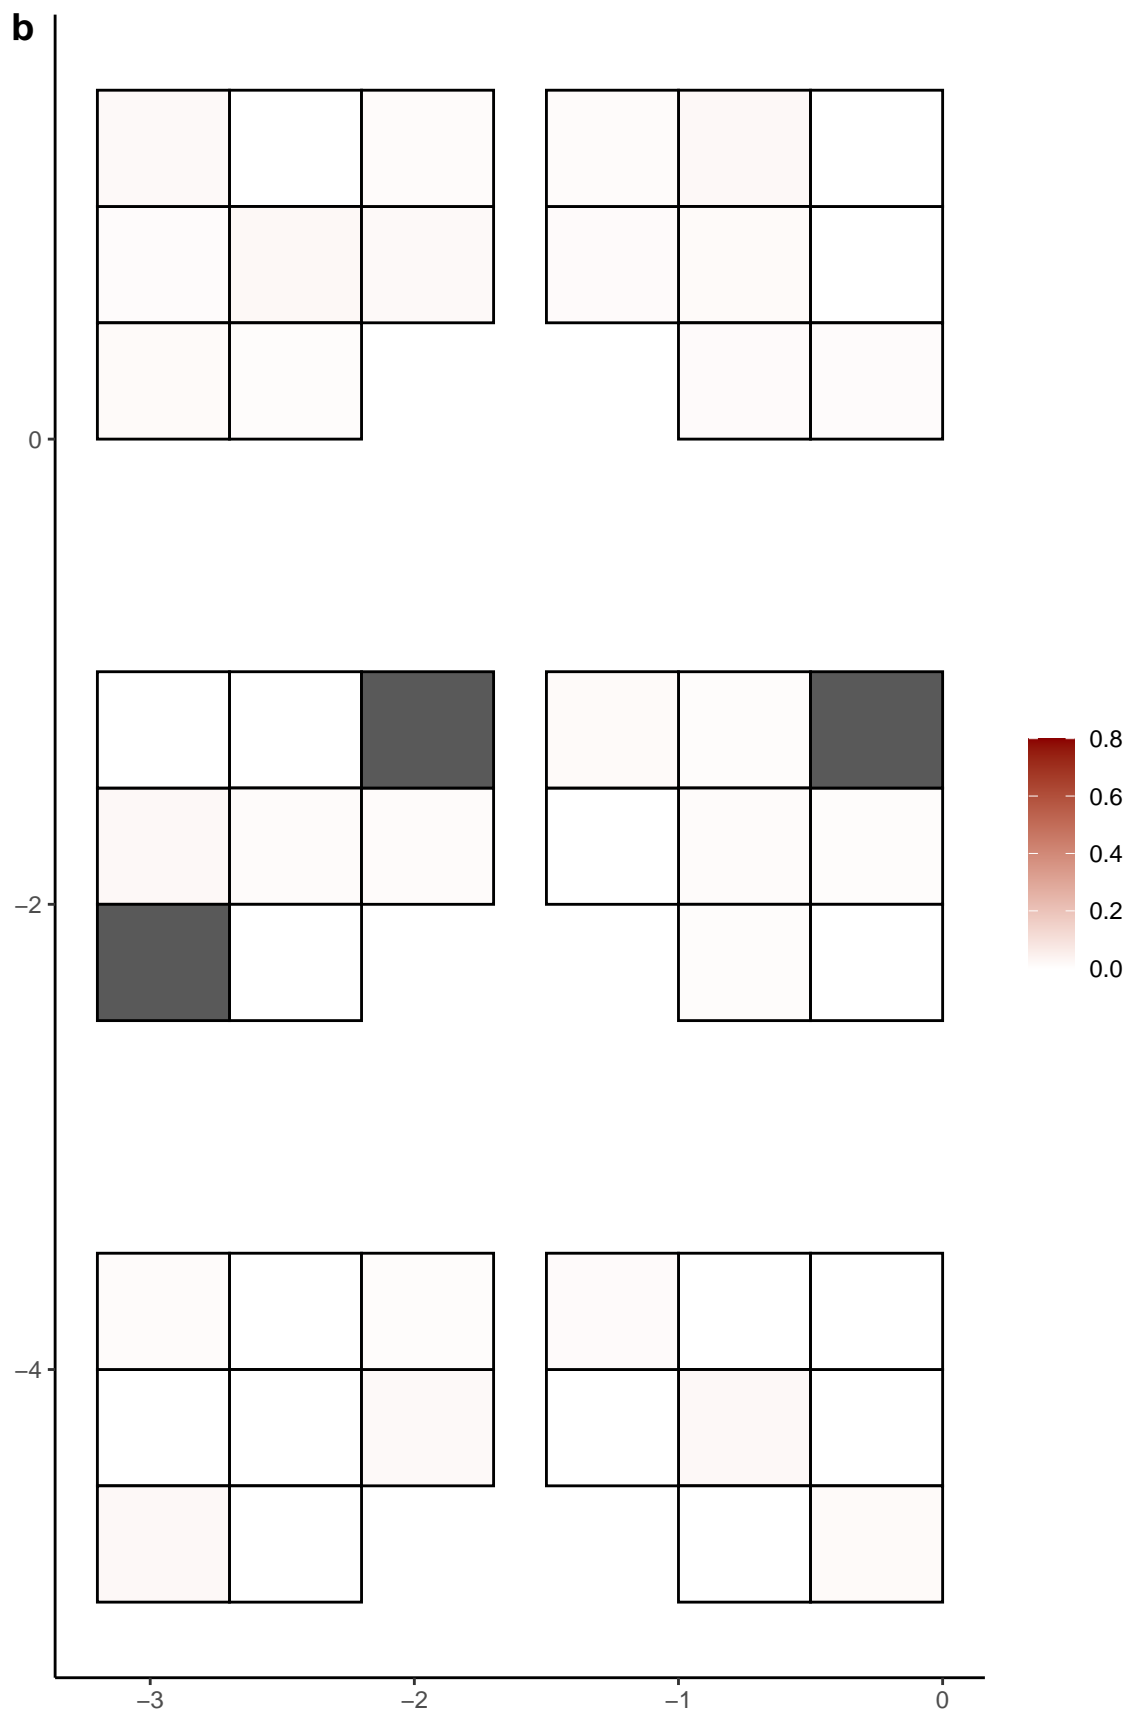

**a** ID05 X-35471077-C-T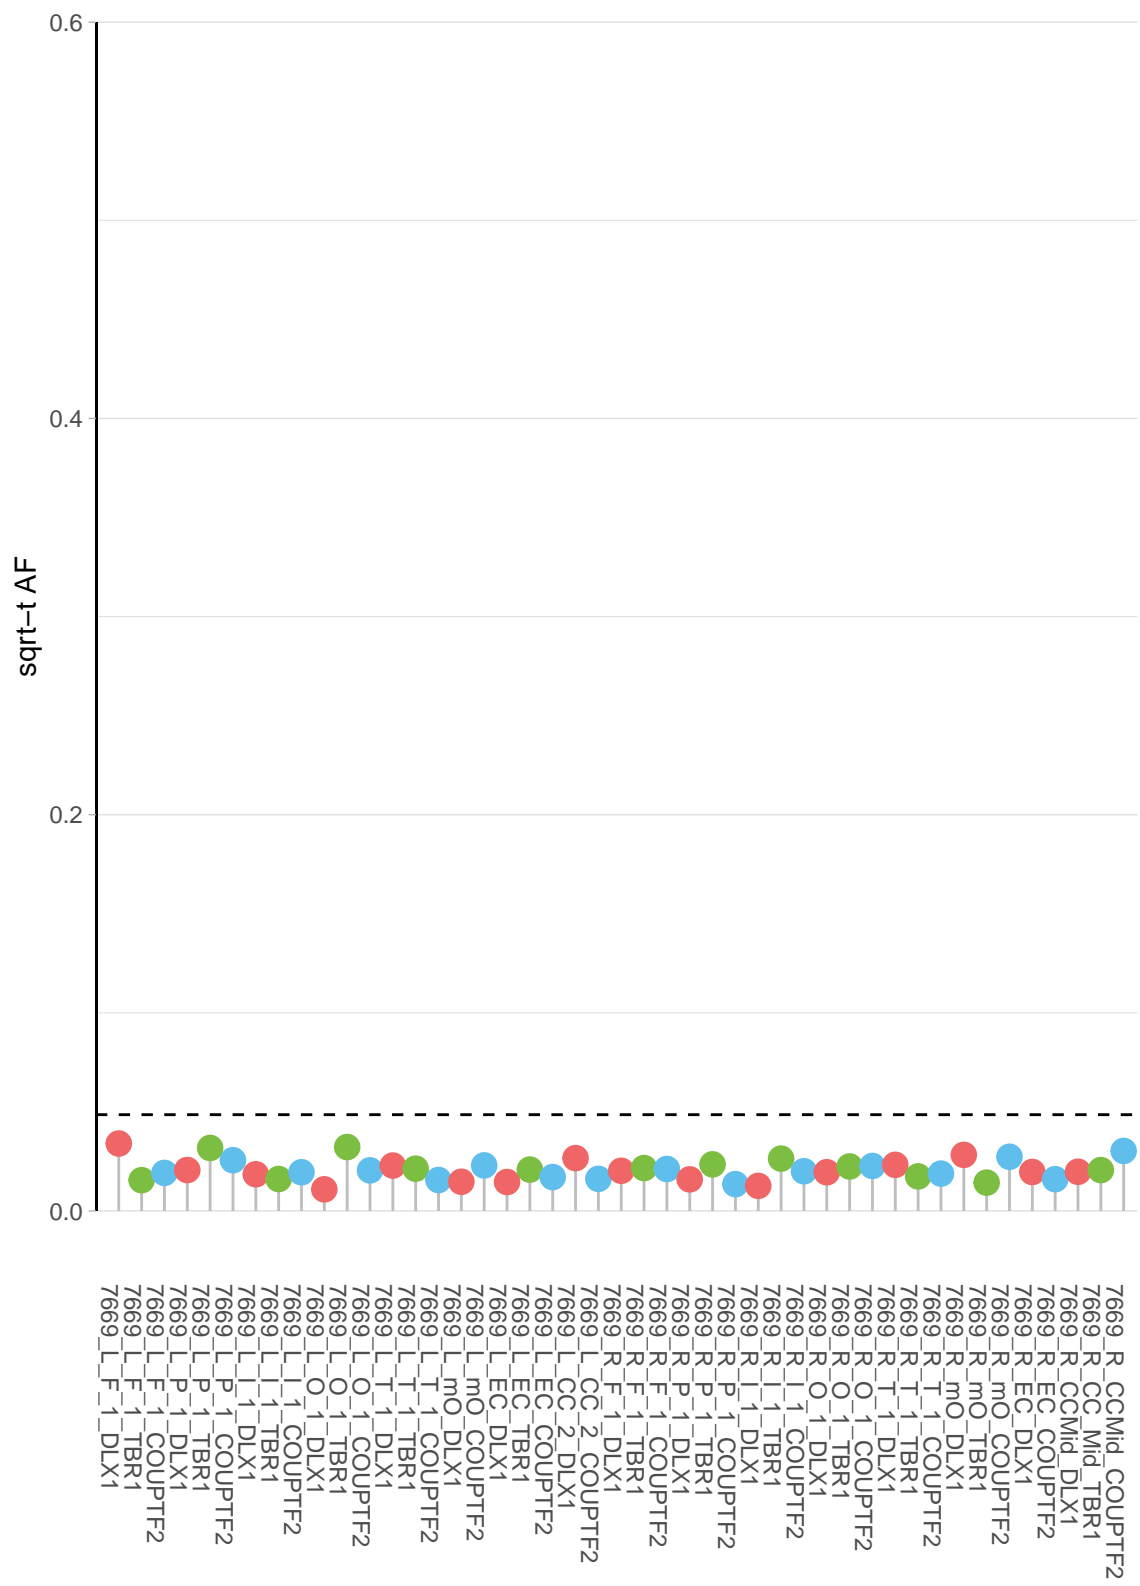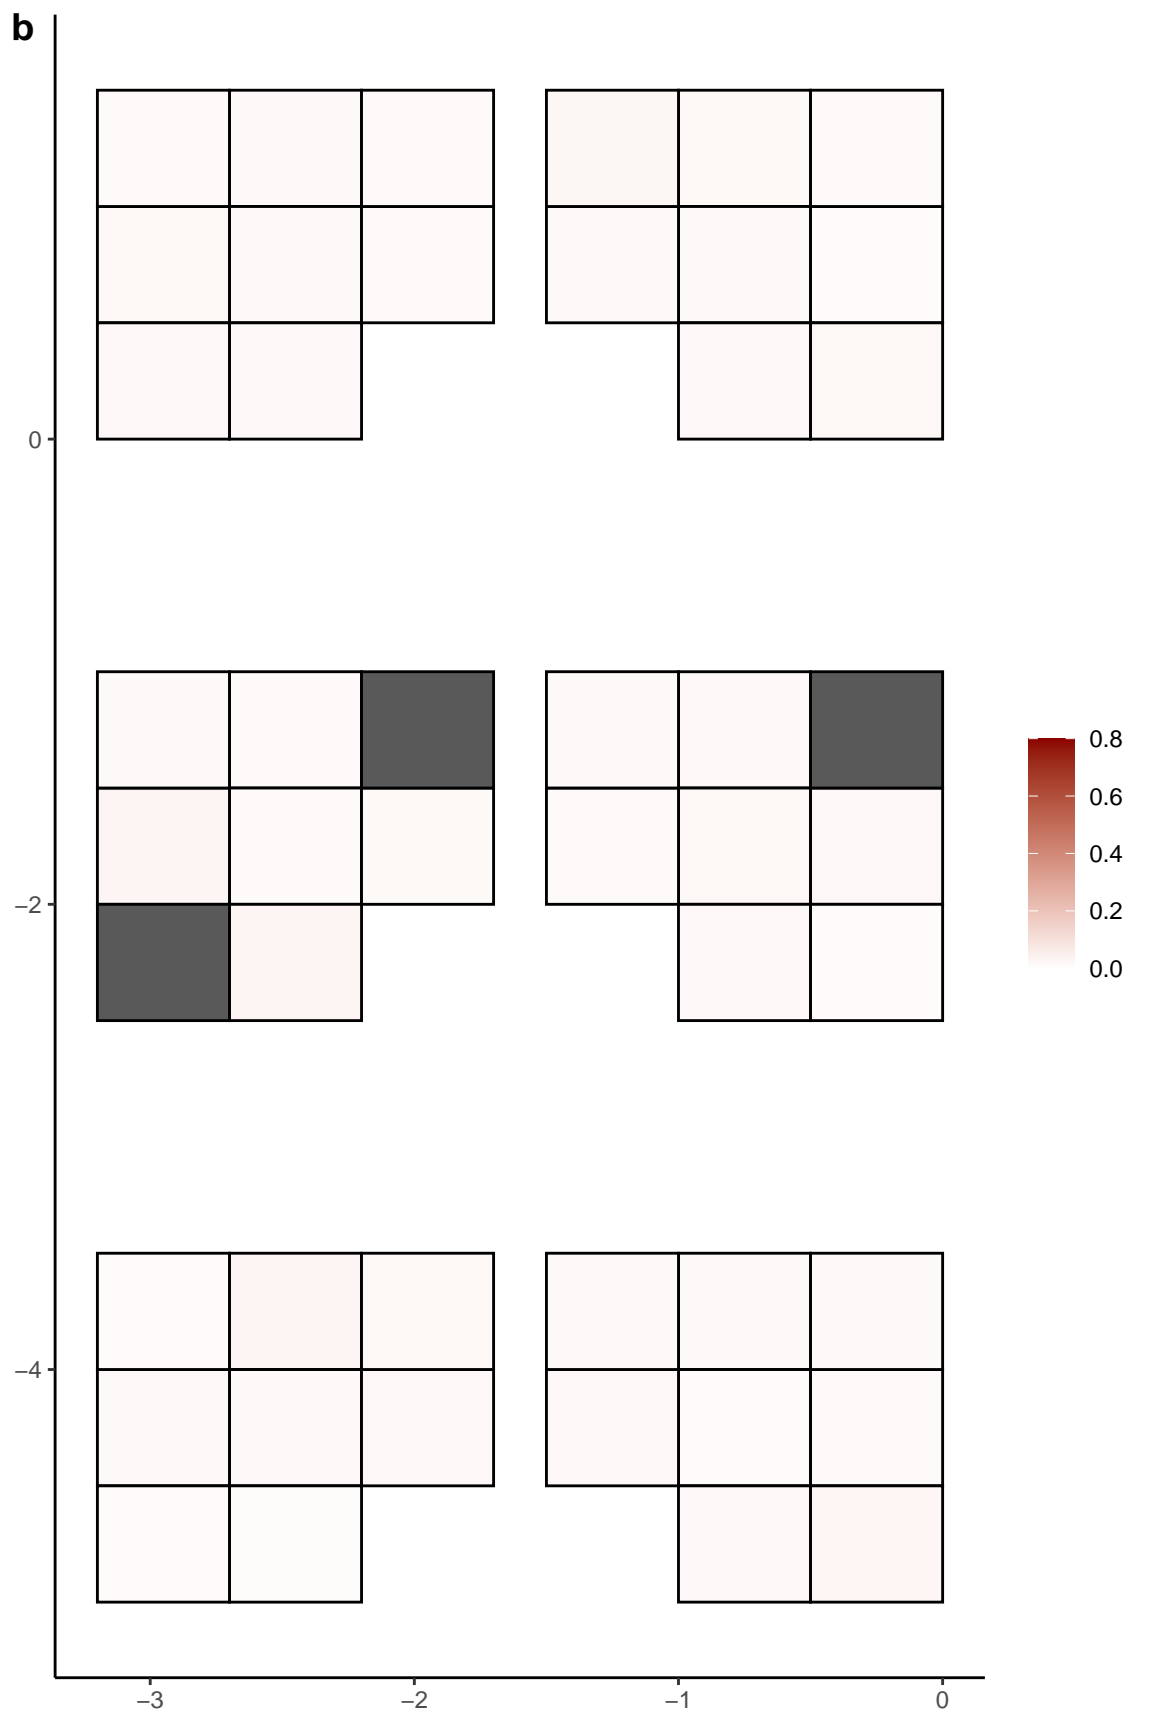



**a** ID05 X-36528250-G-T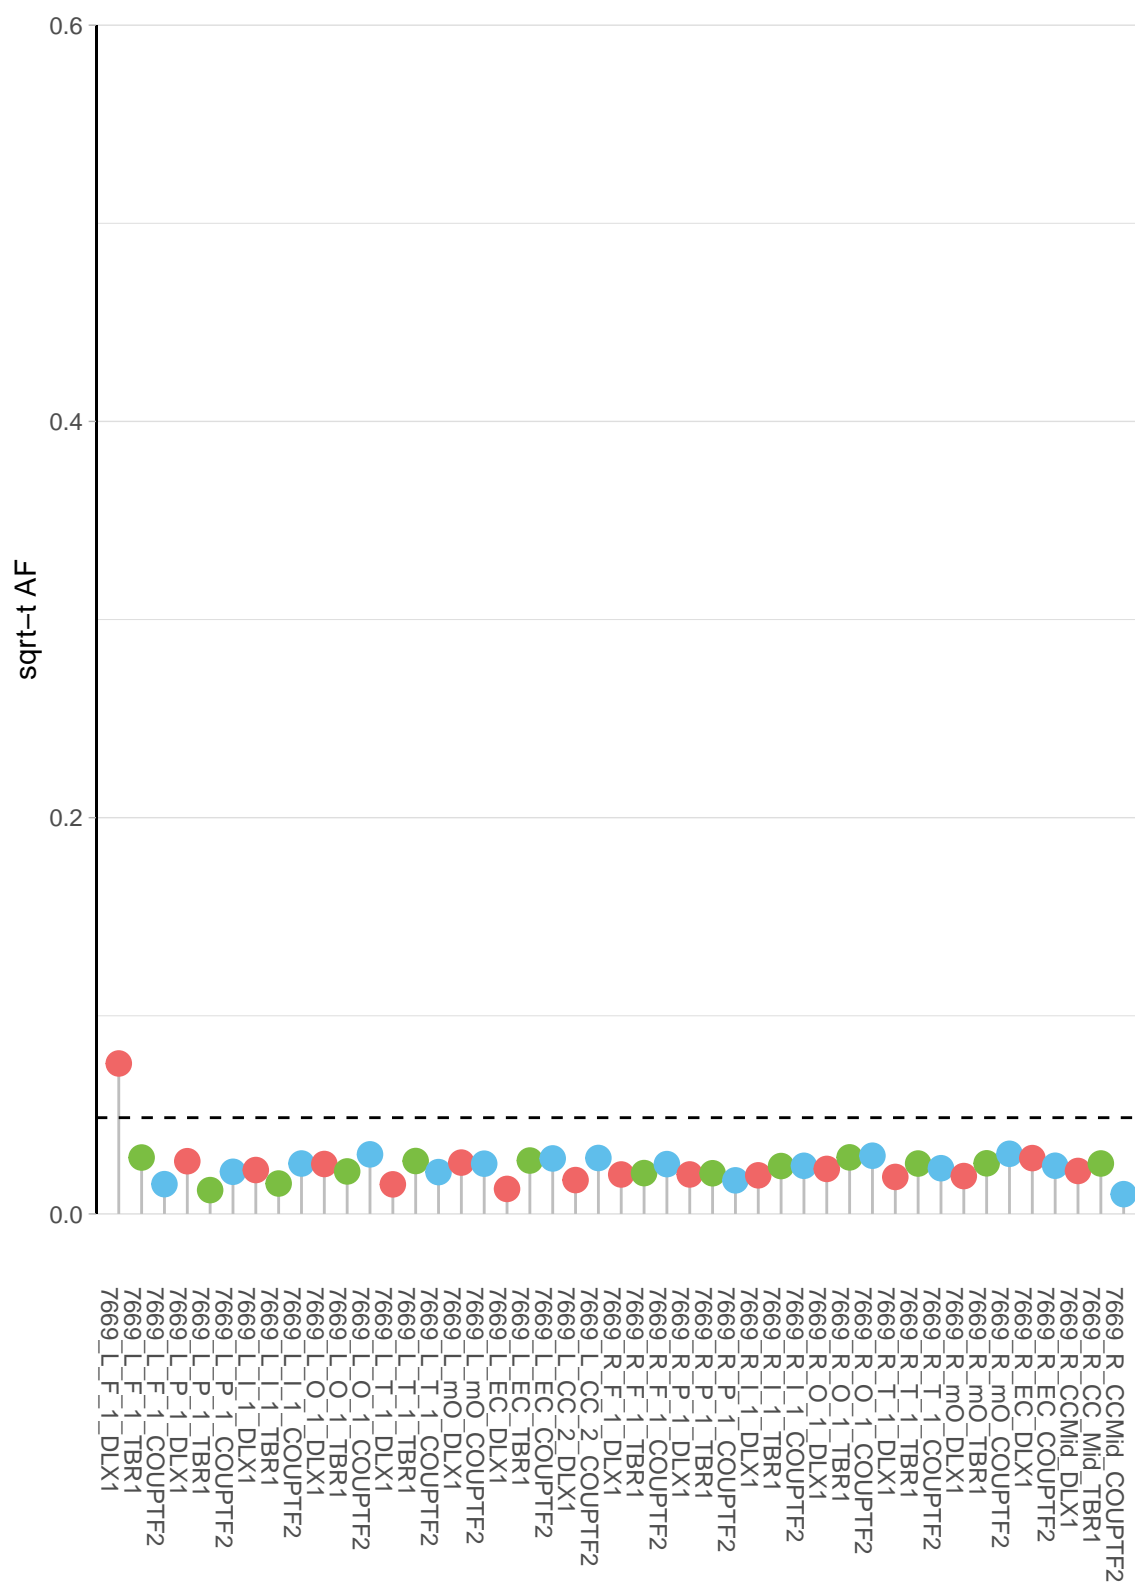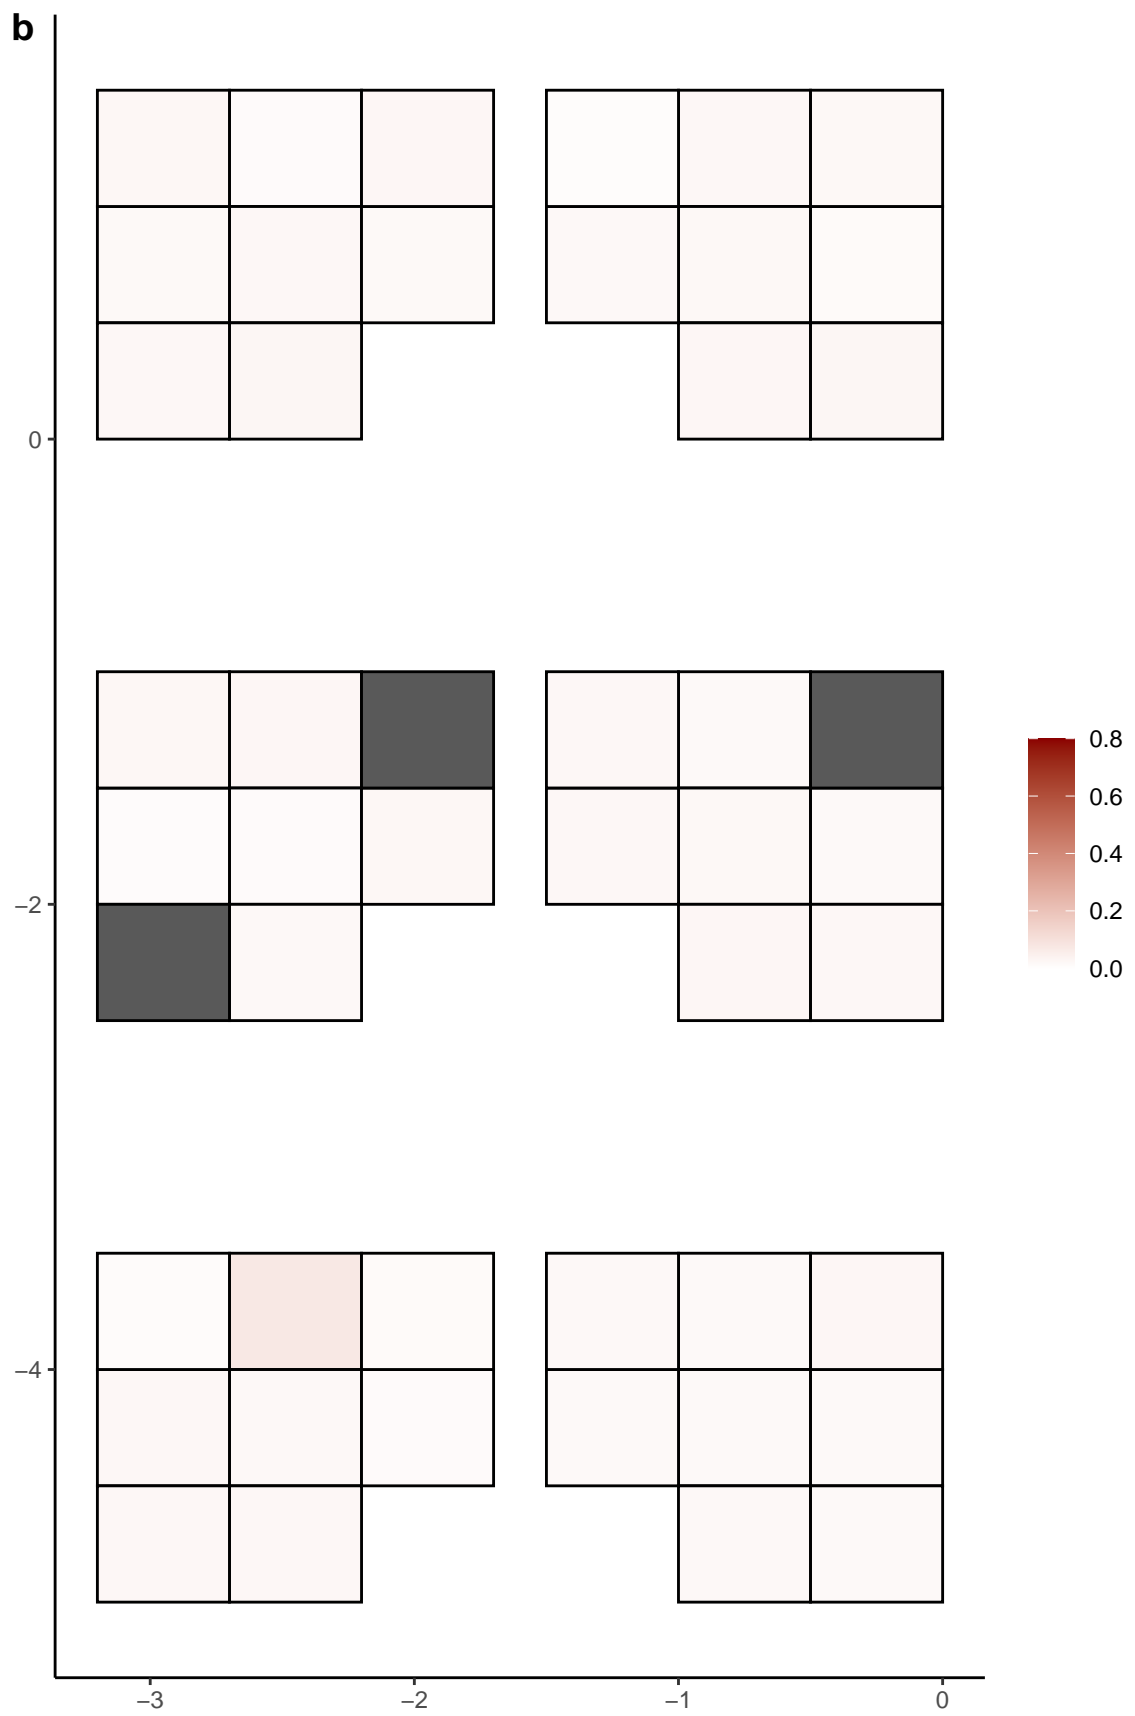





**a** ID05 X-40790933-G-A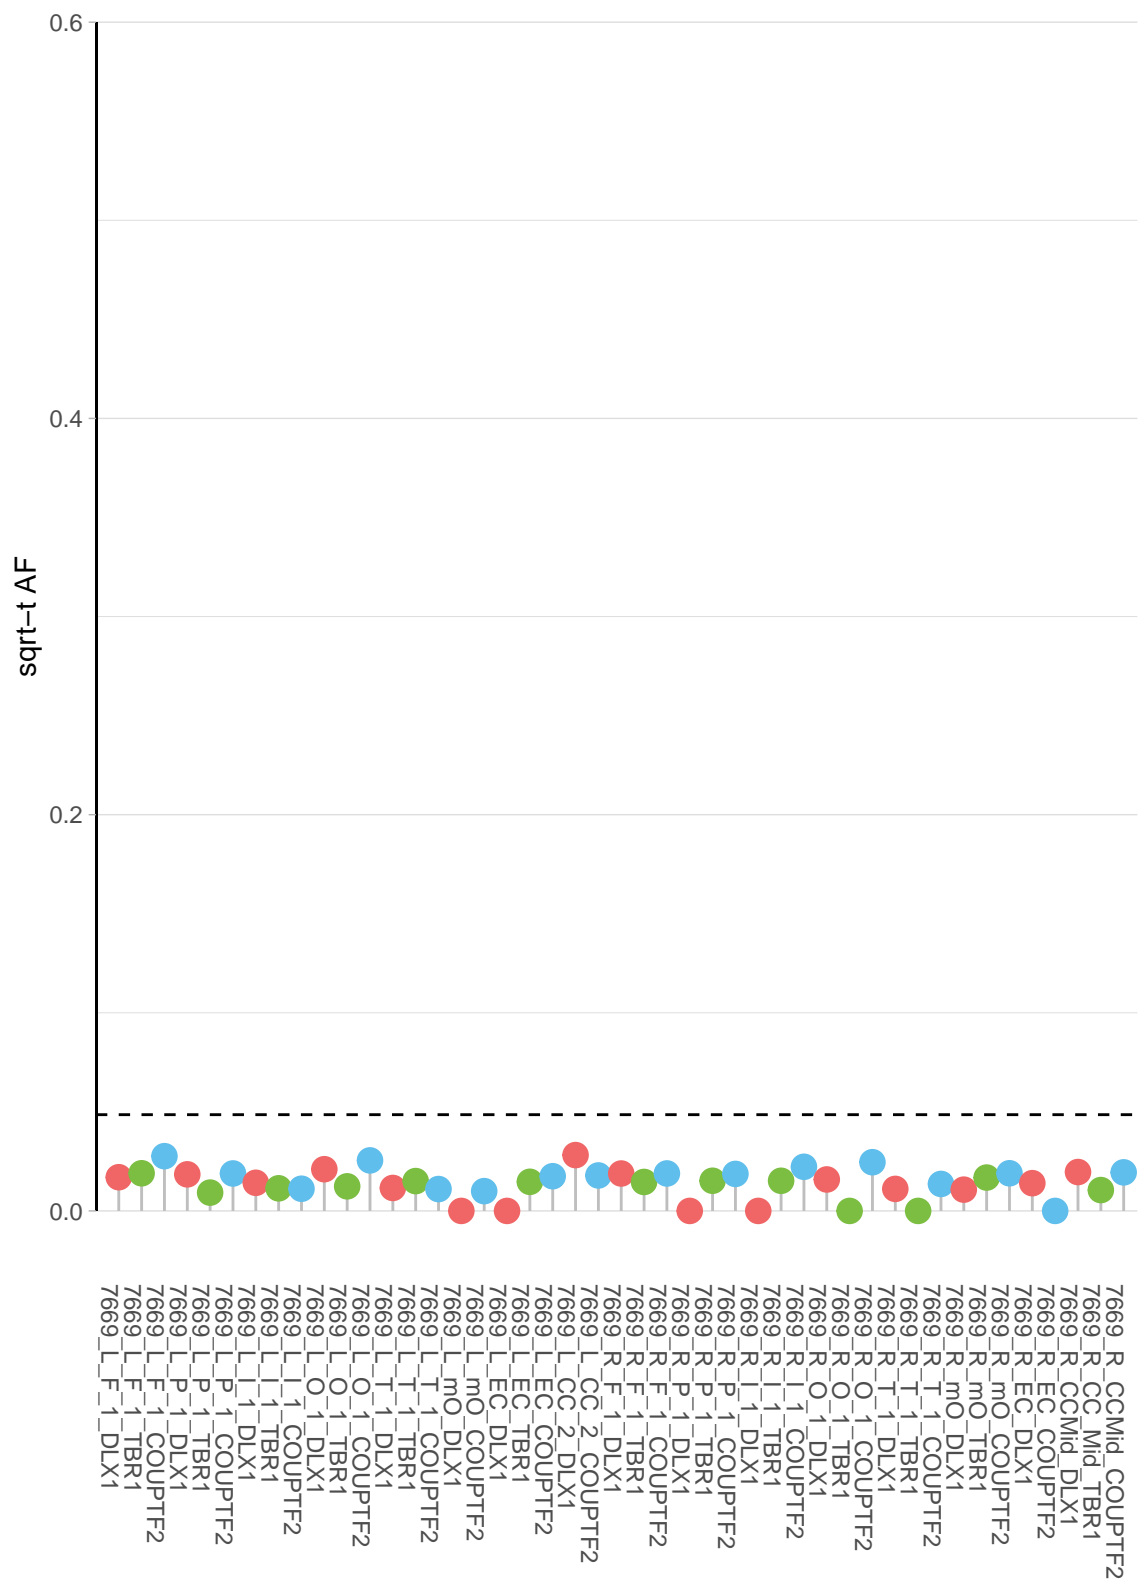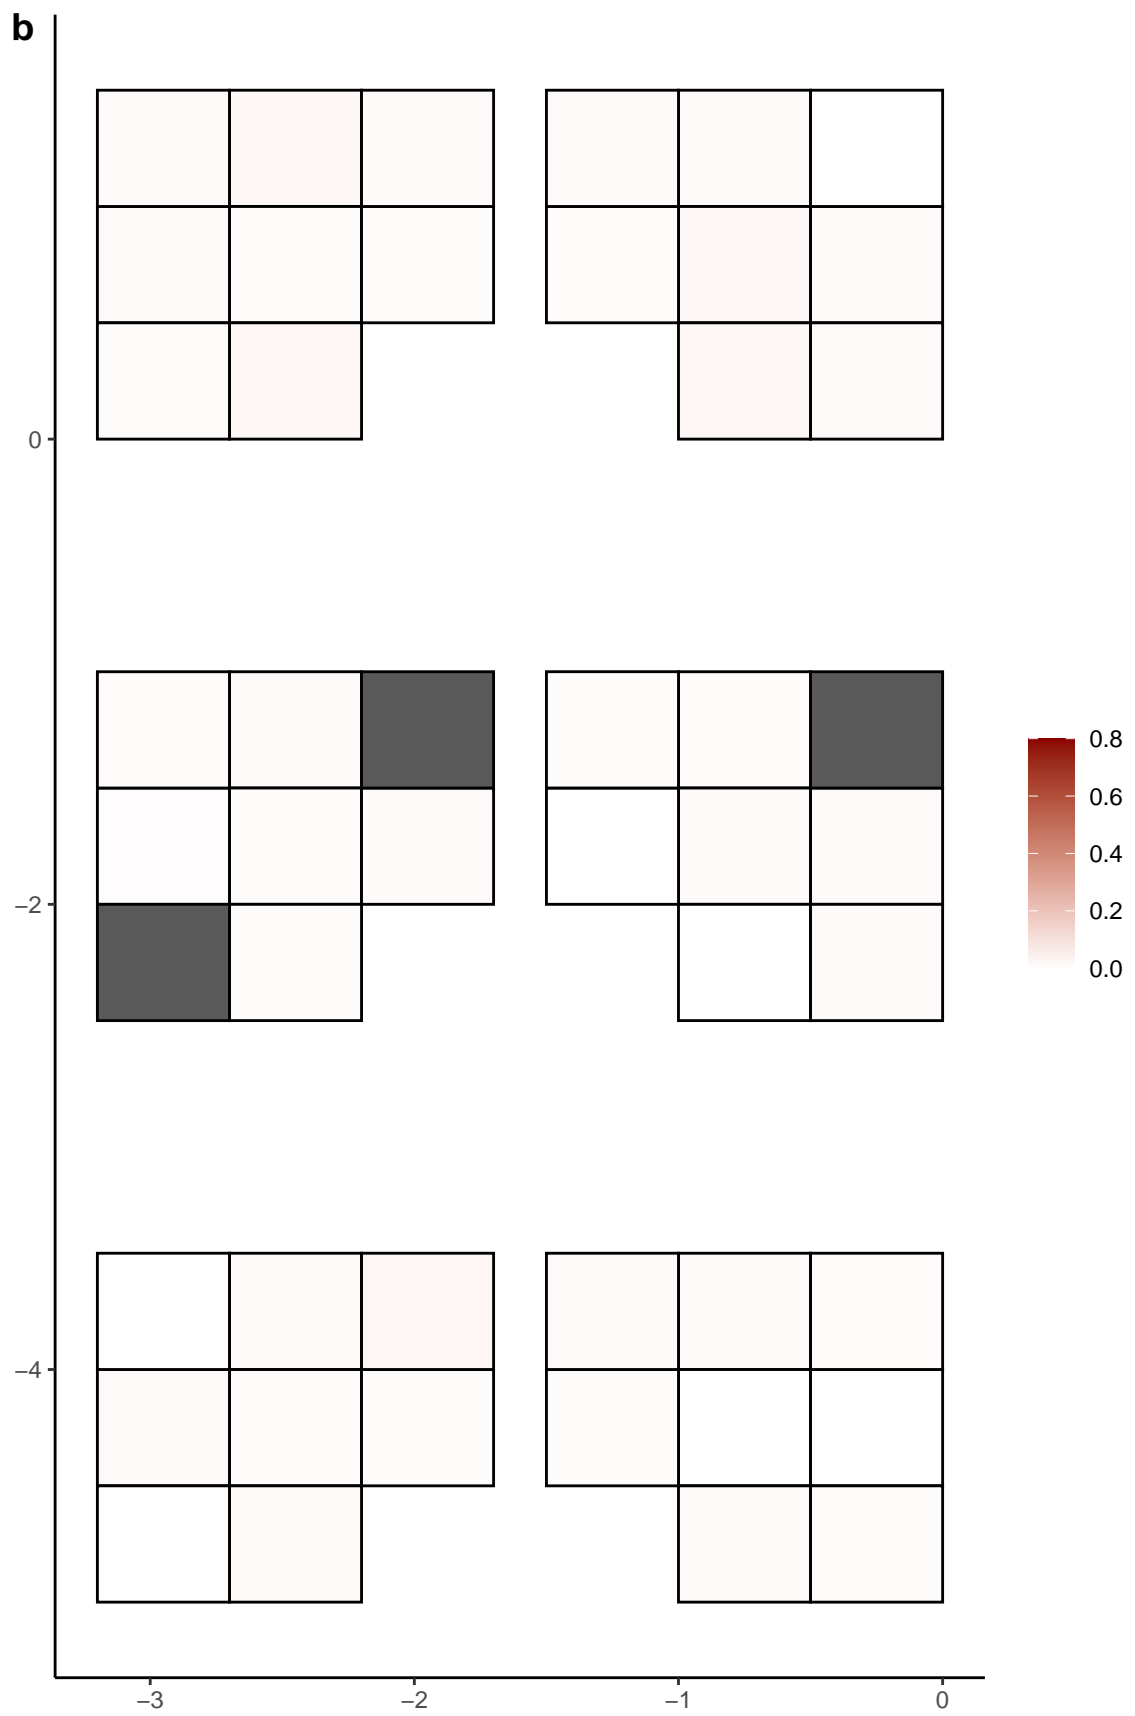

**a** ID05 X-41029320-G-A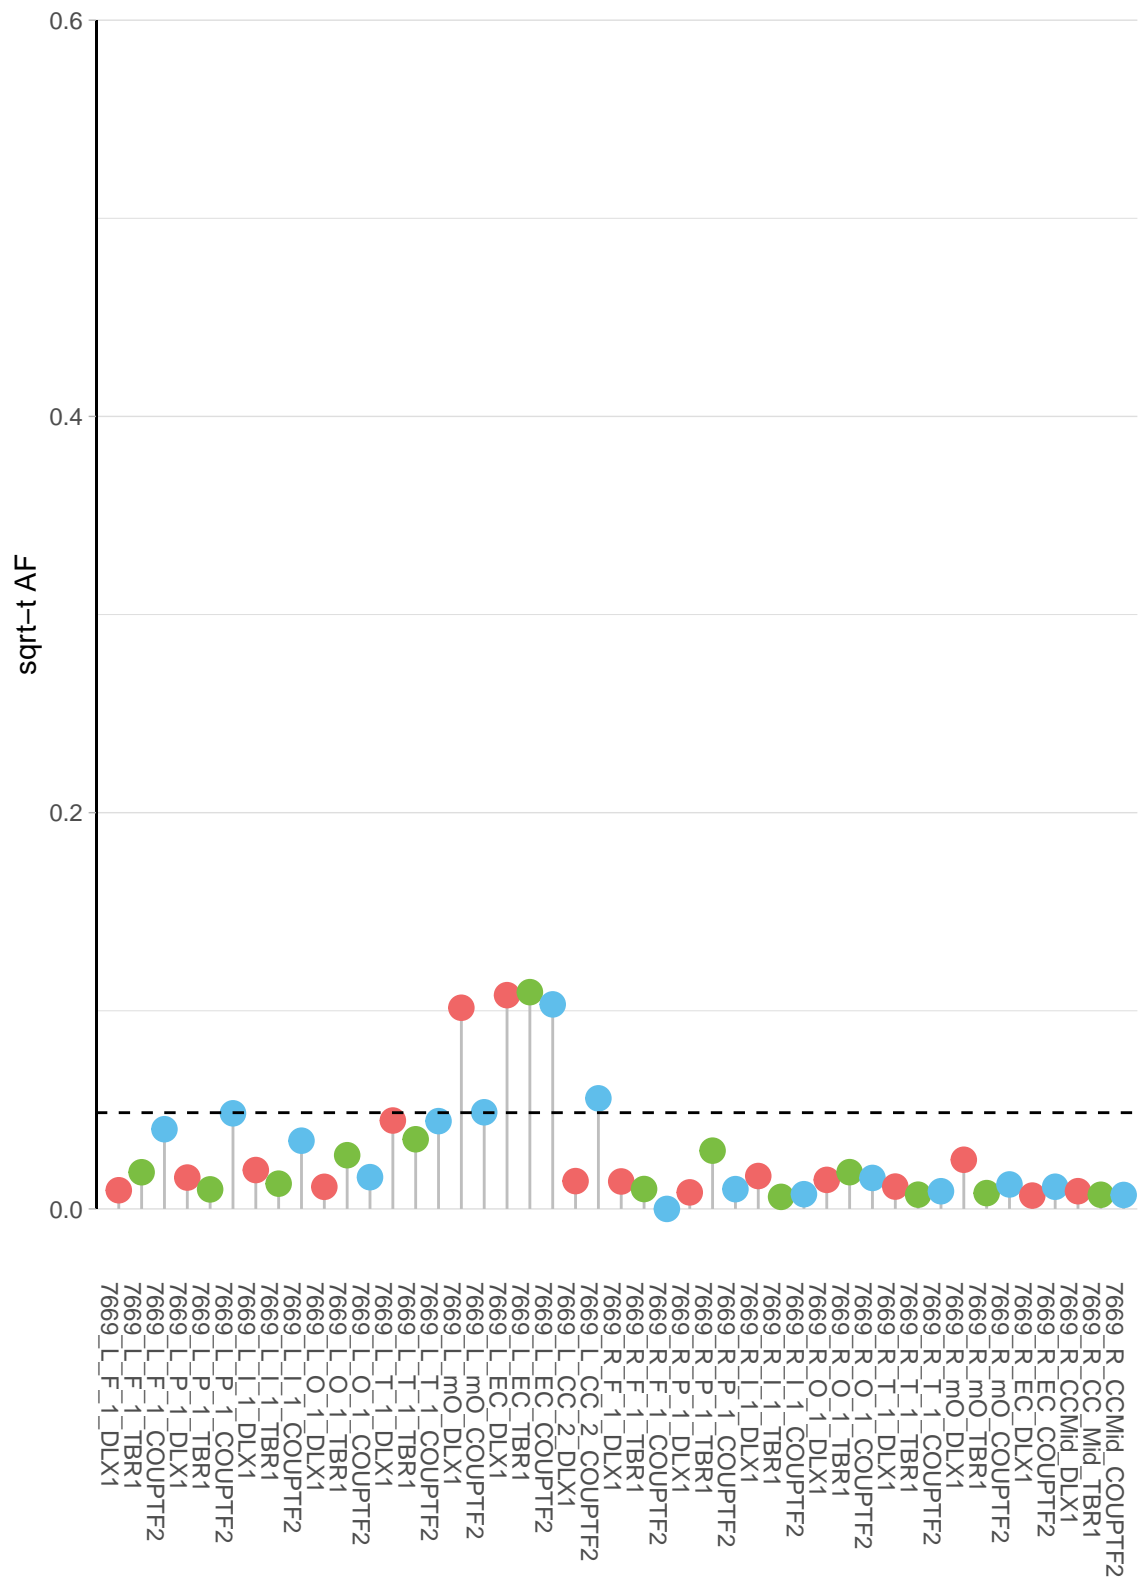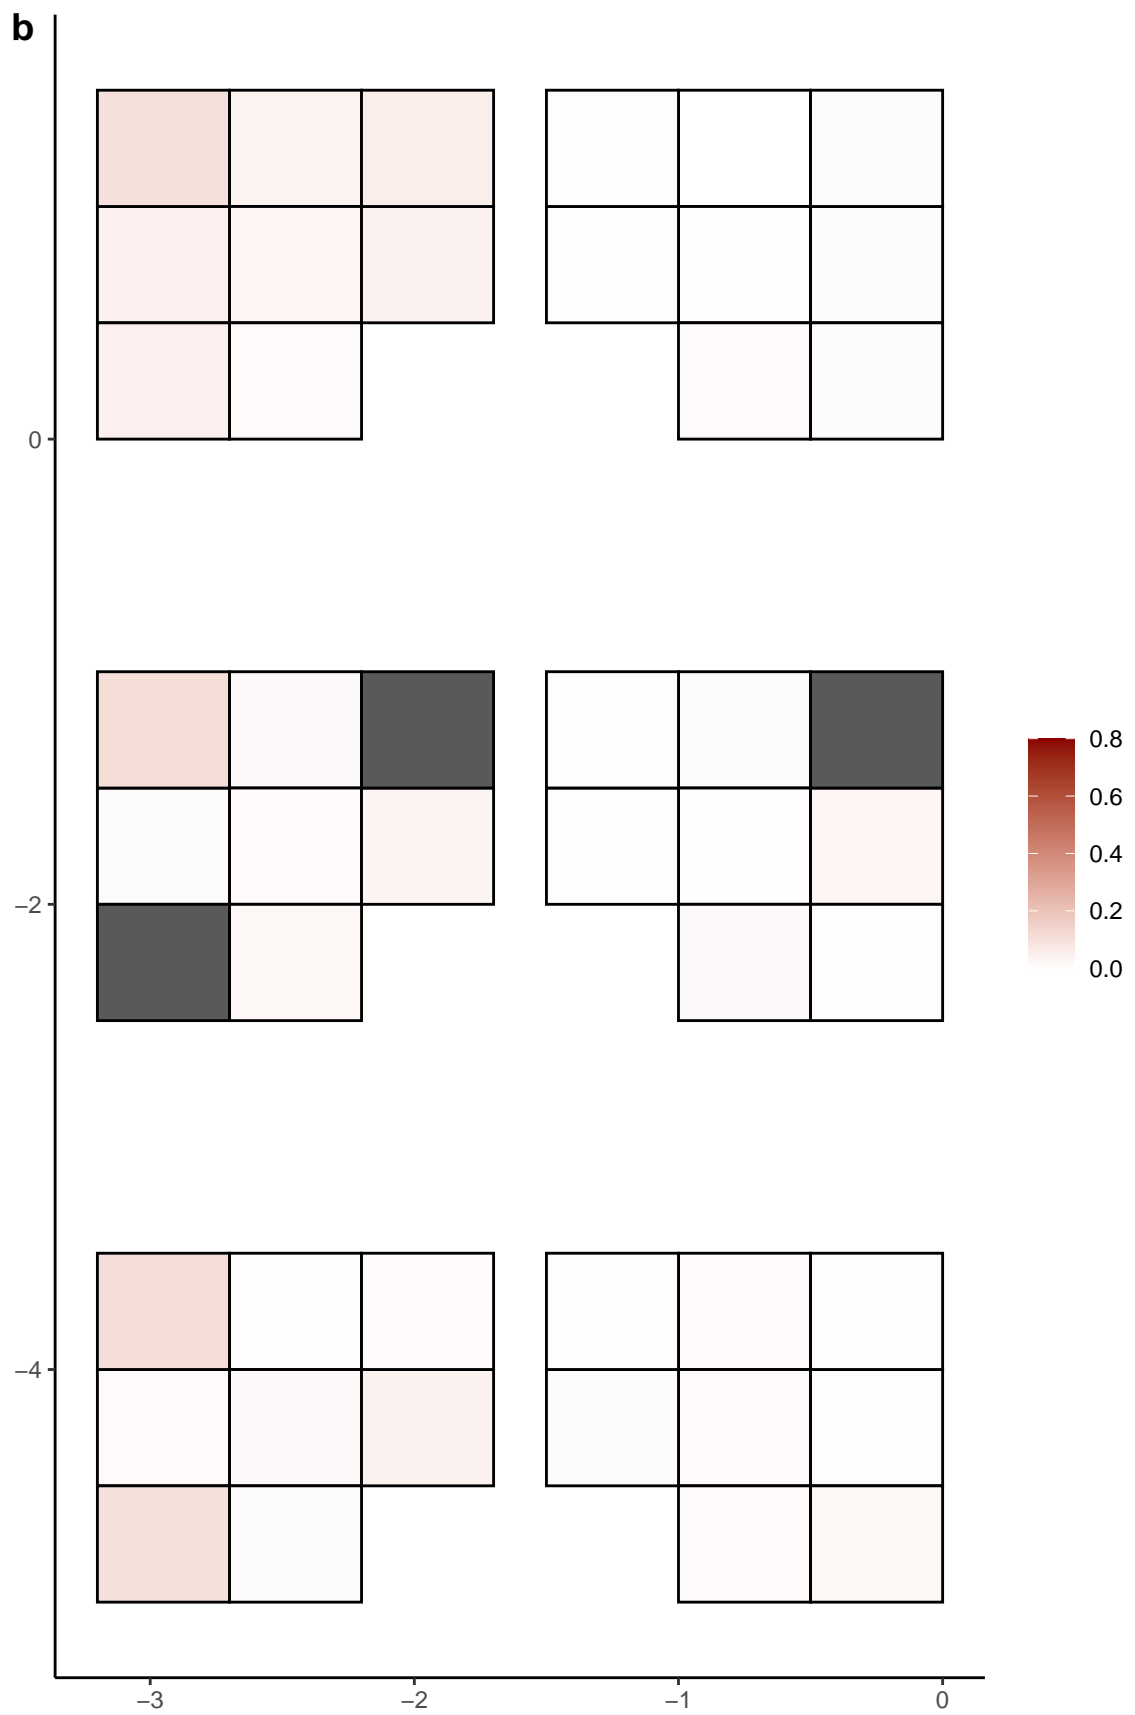



**a** ID05 X-49135150-G-T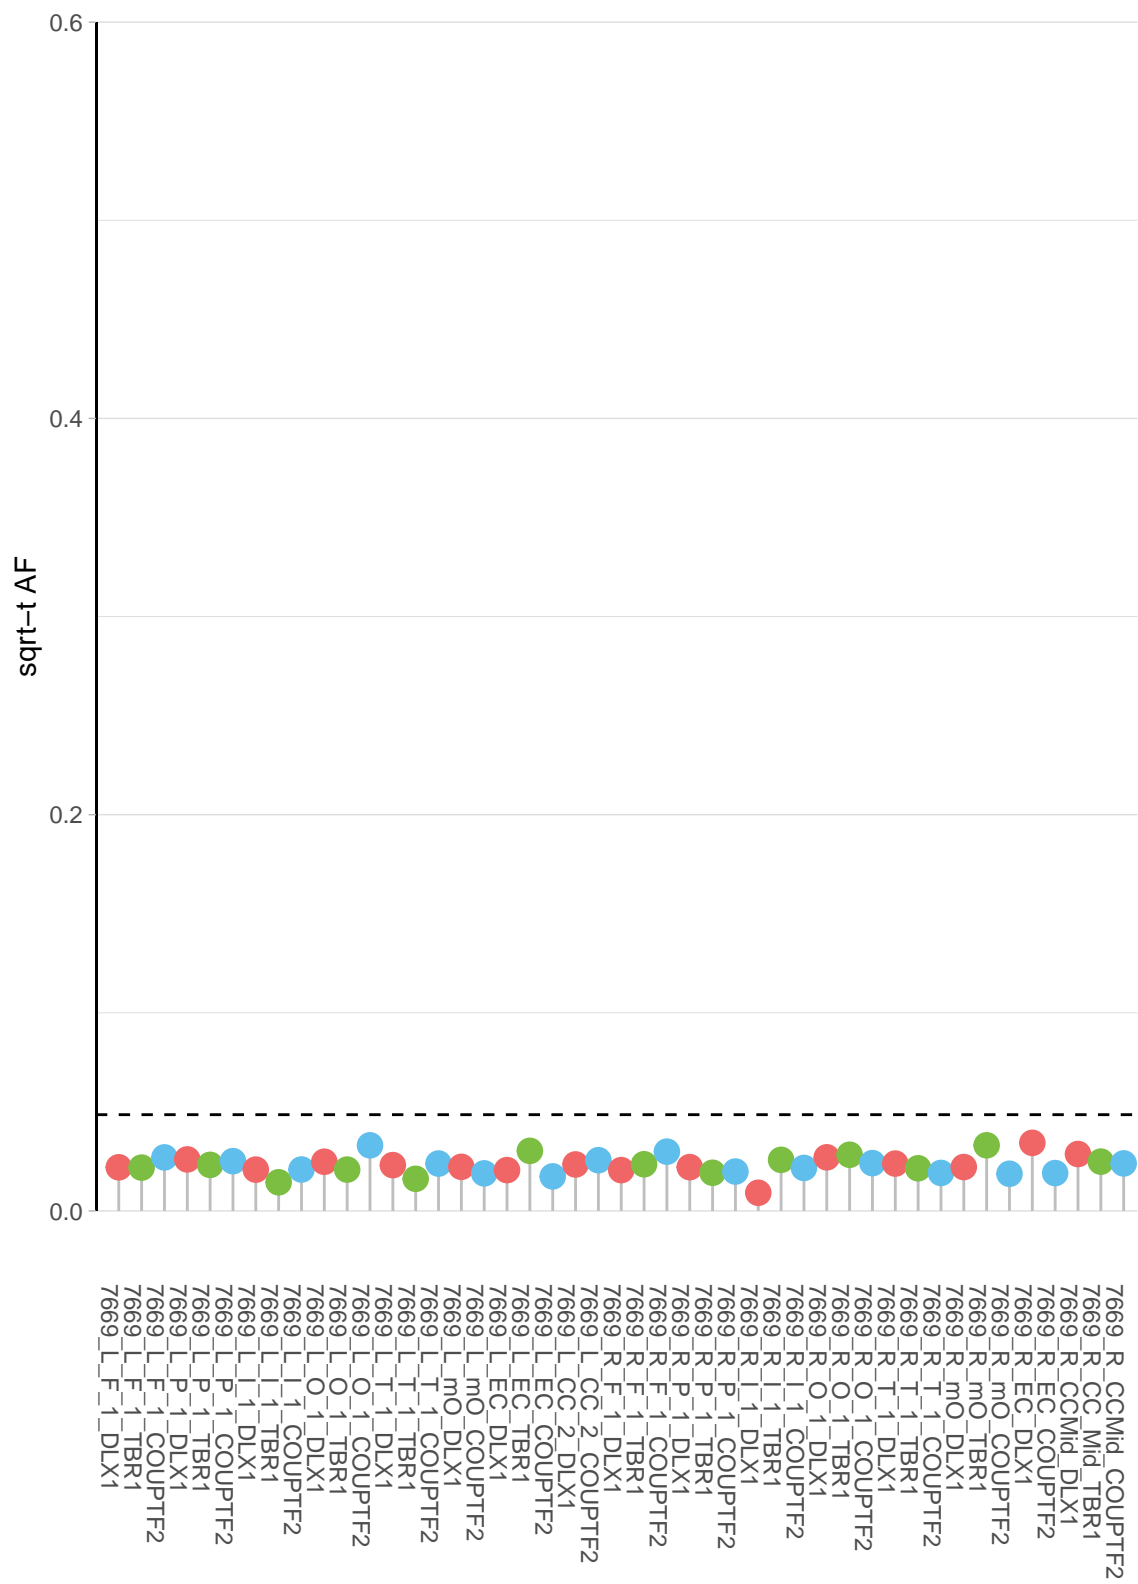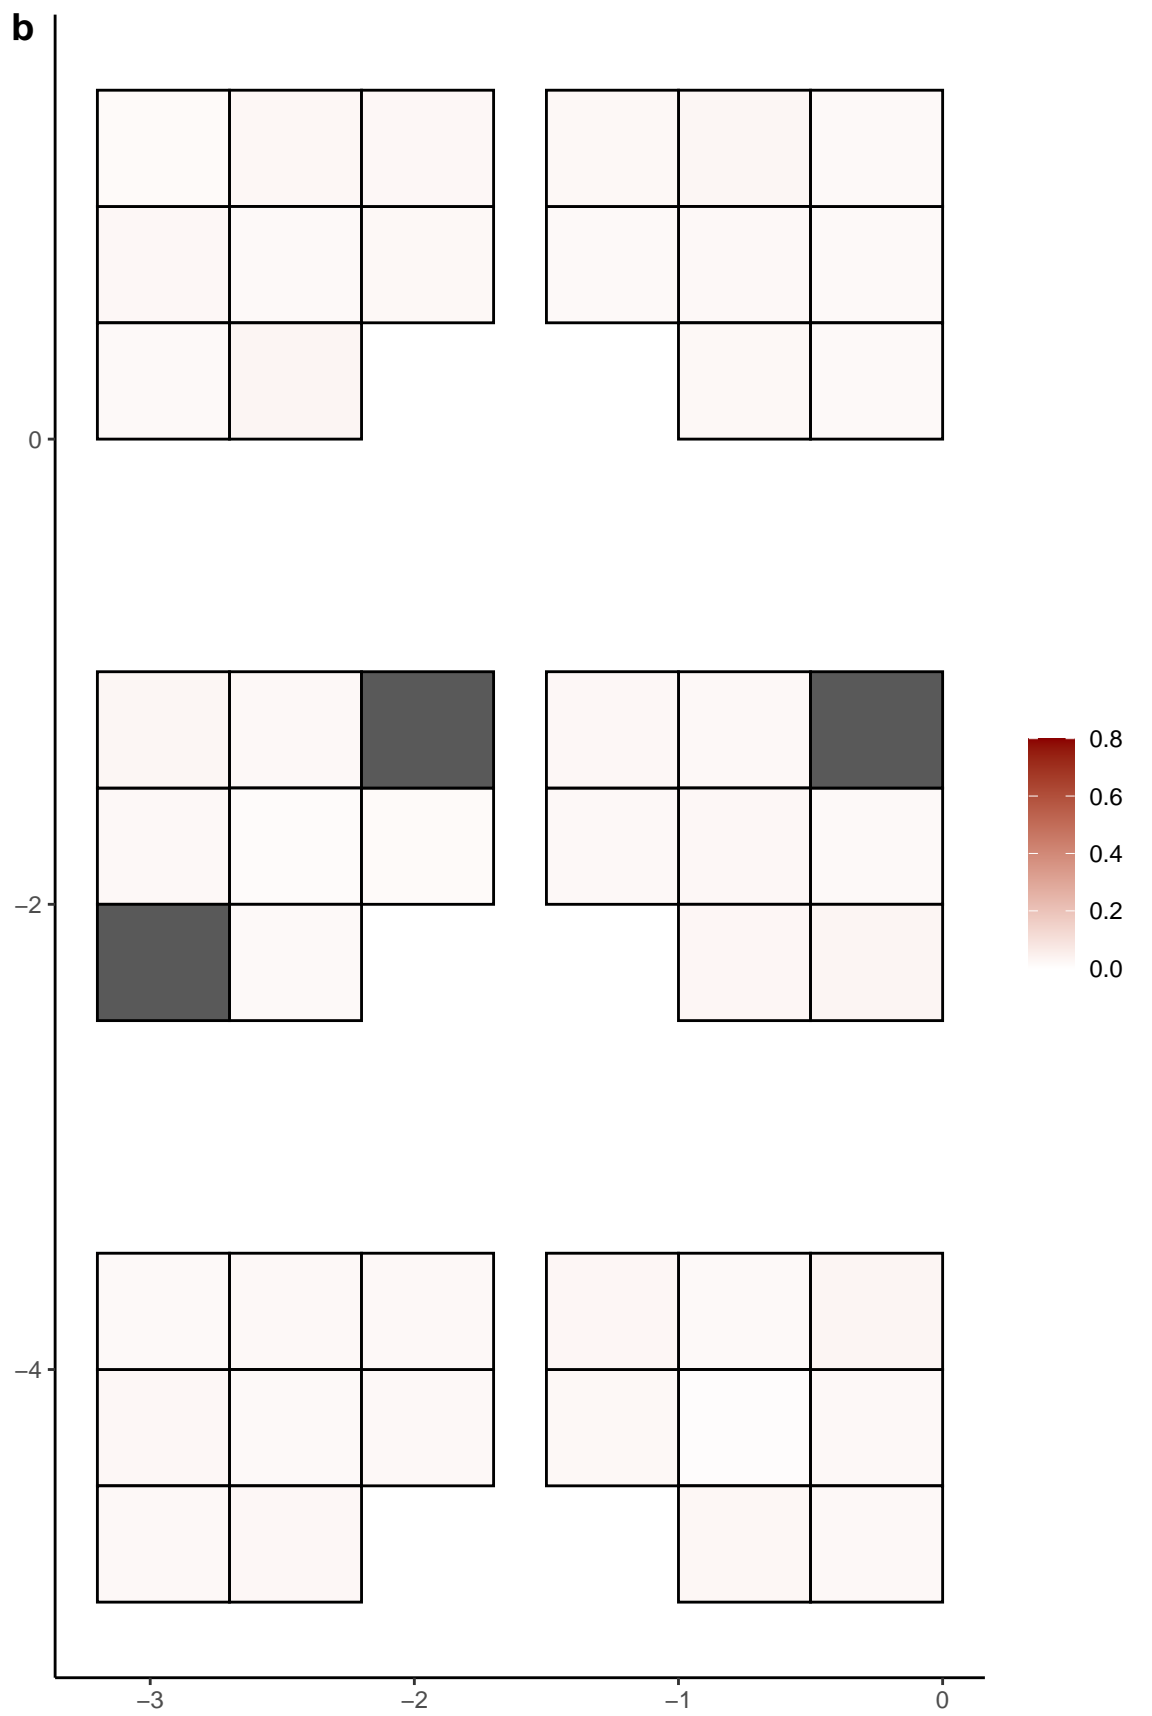

**a** ID05 X-53927483-G-A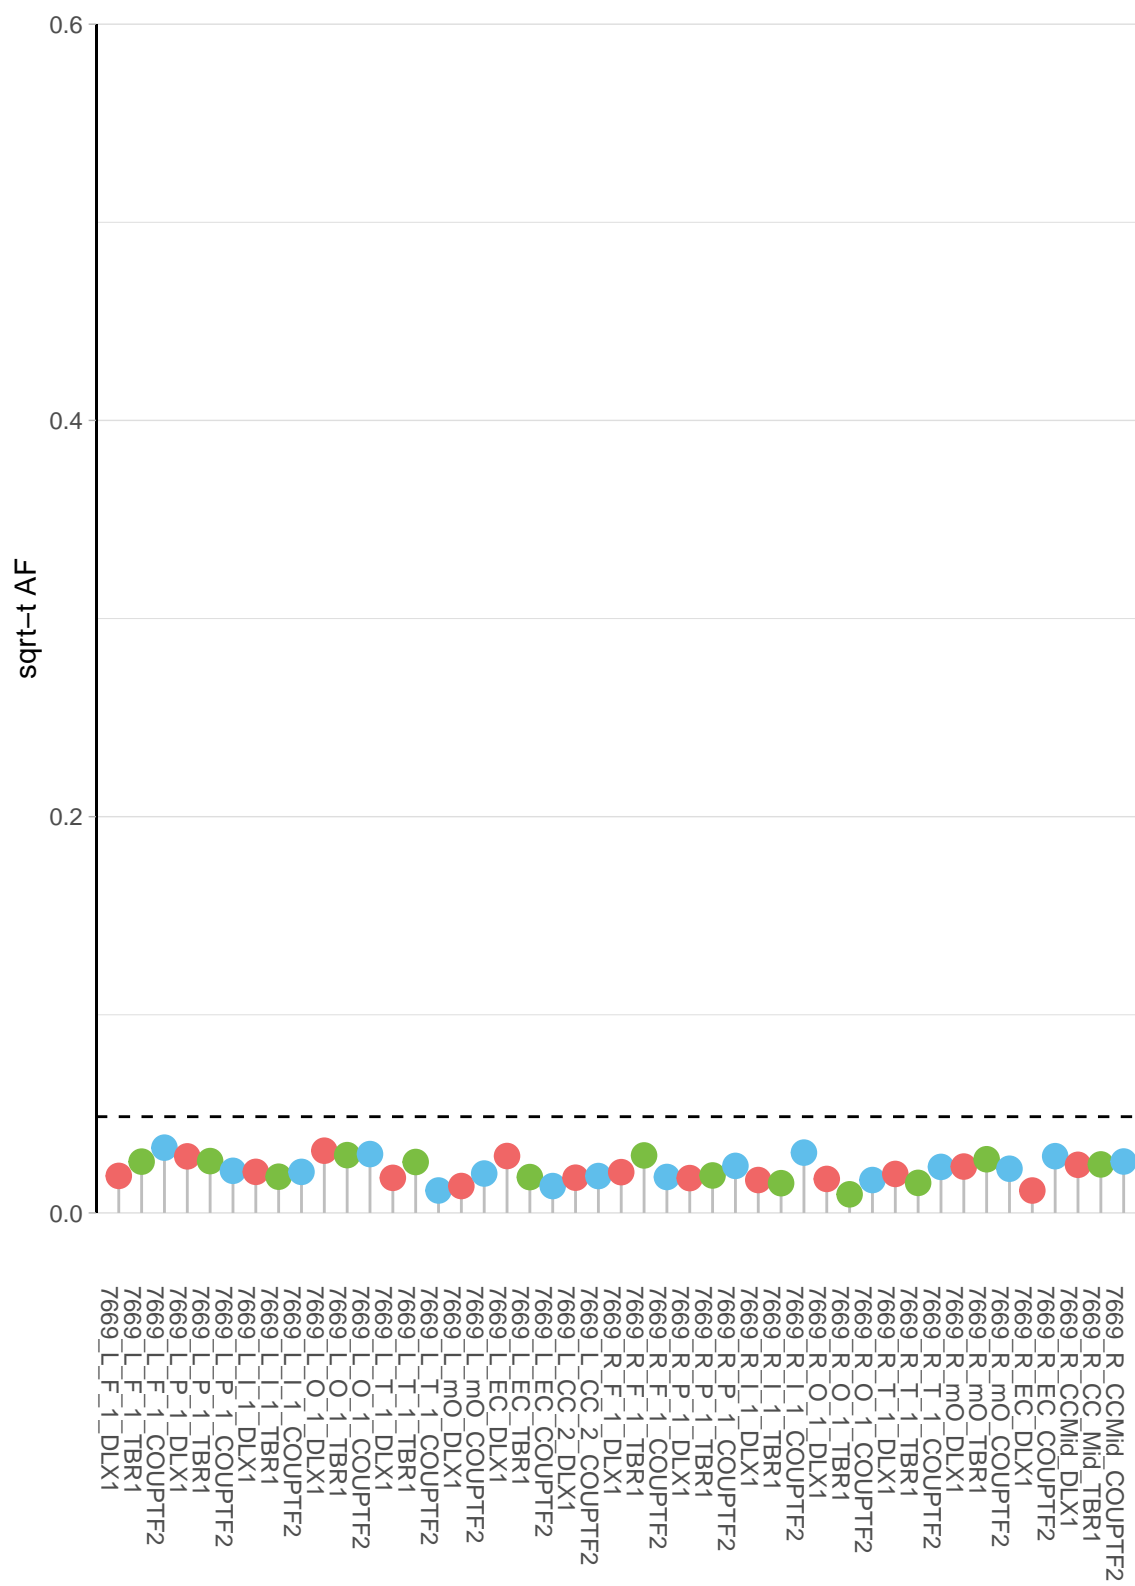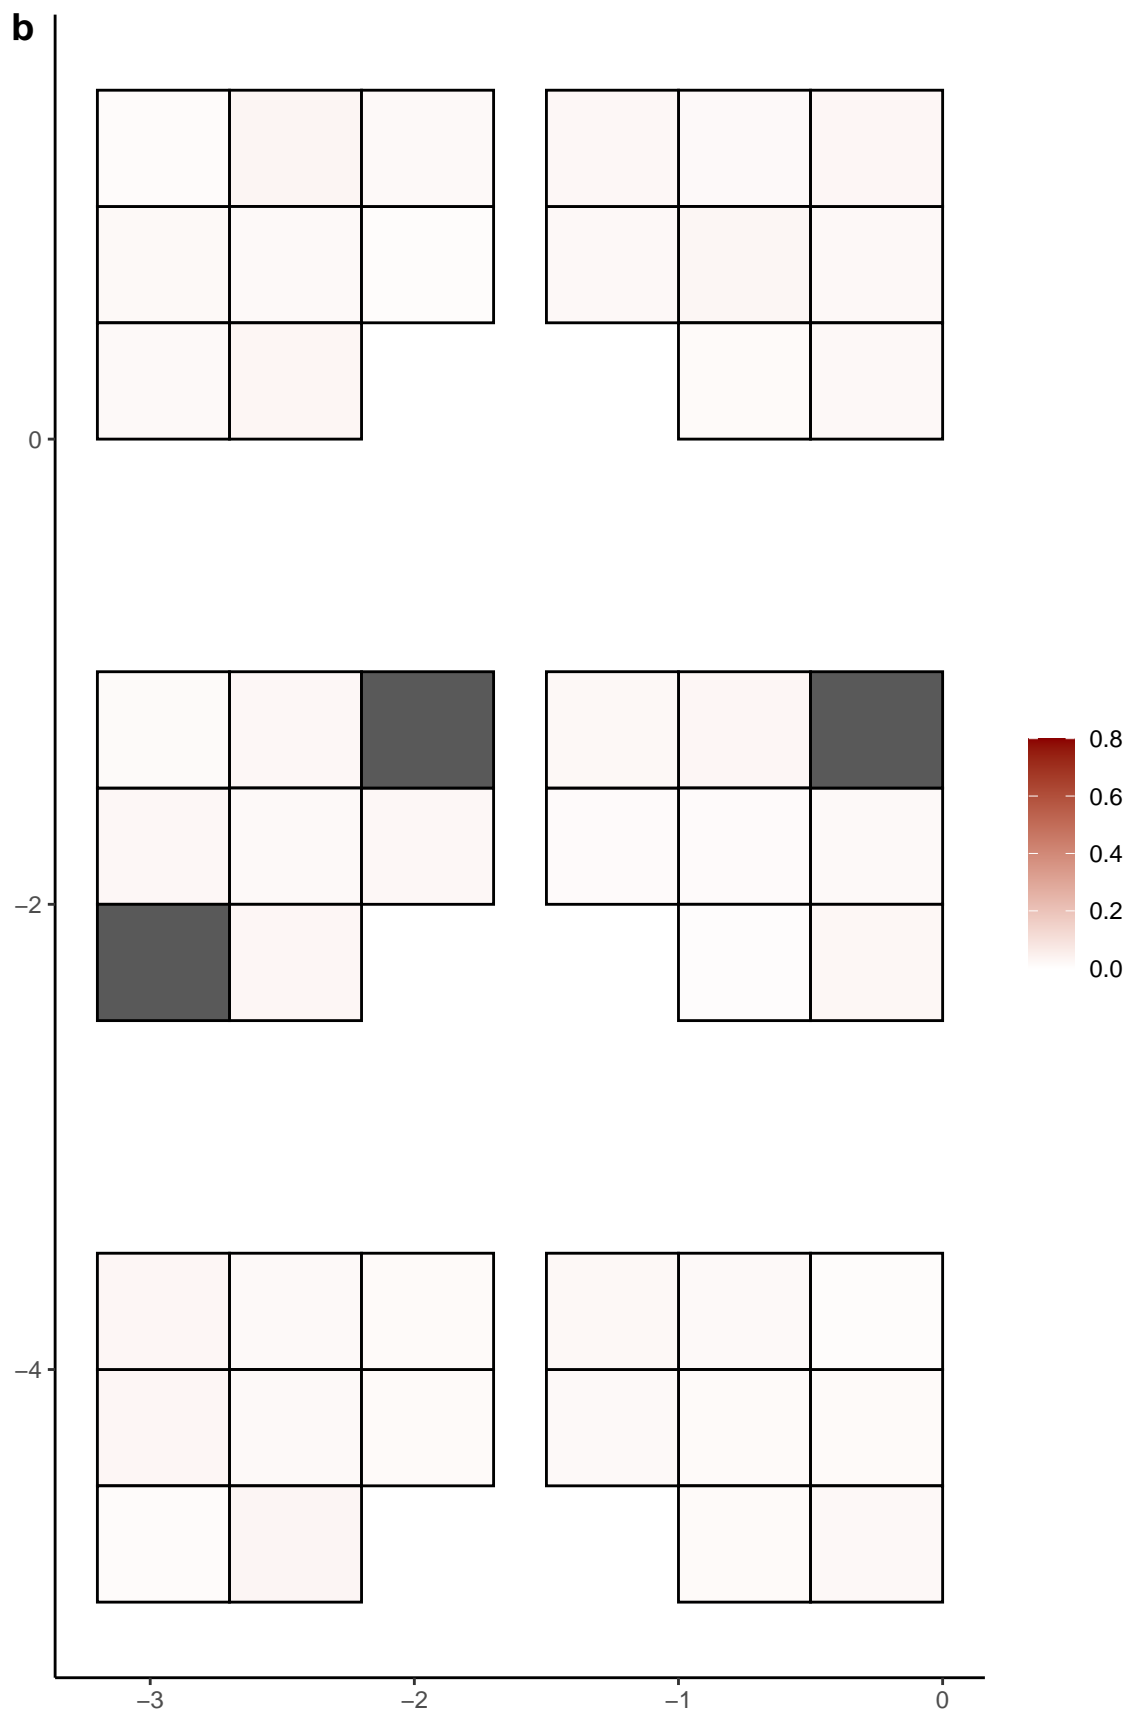



**a** ID05 X-5452716-T-A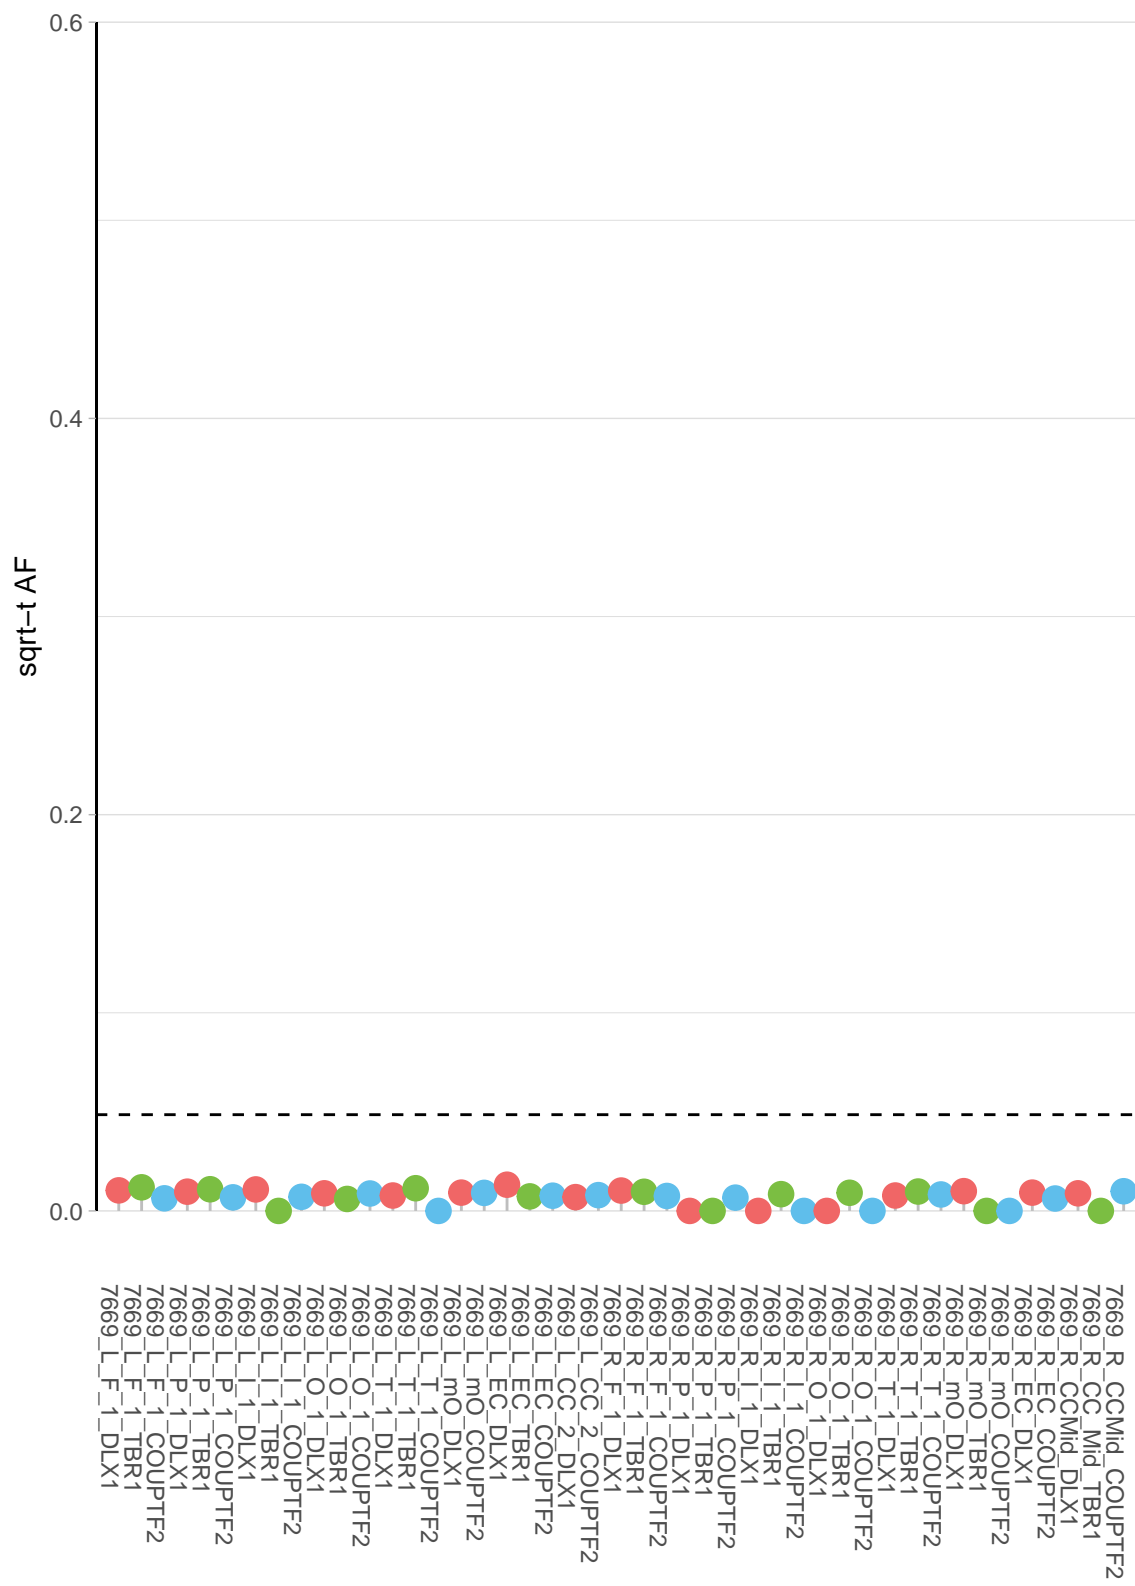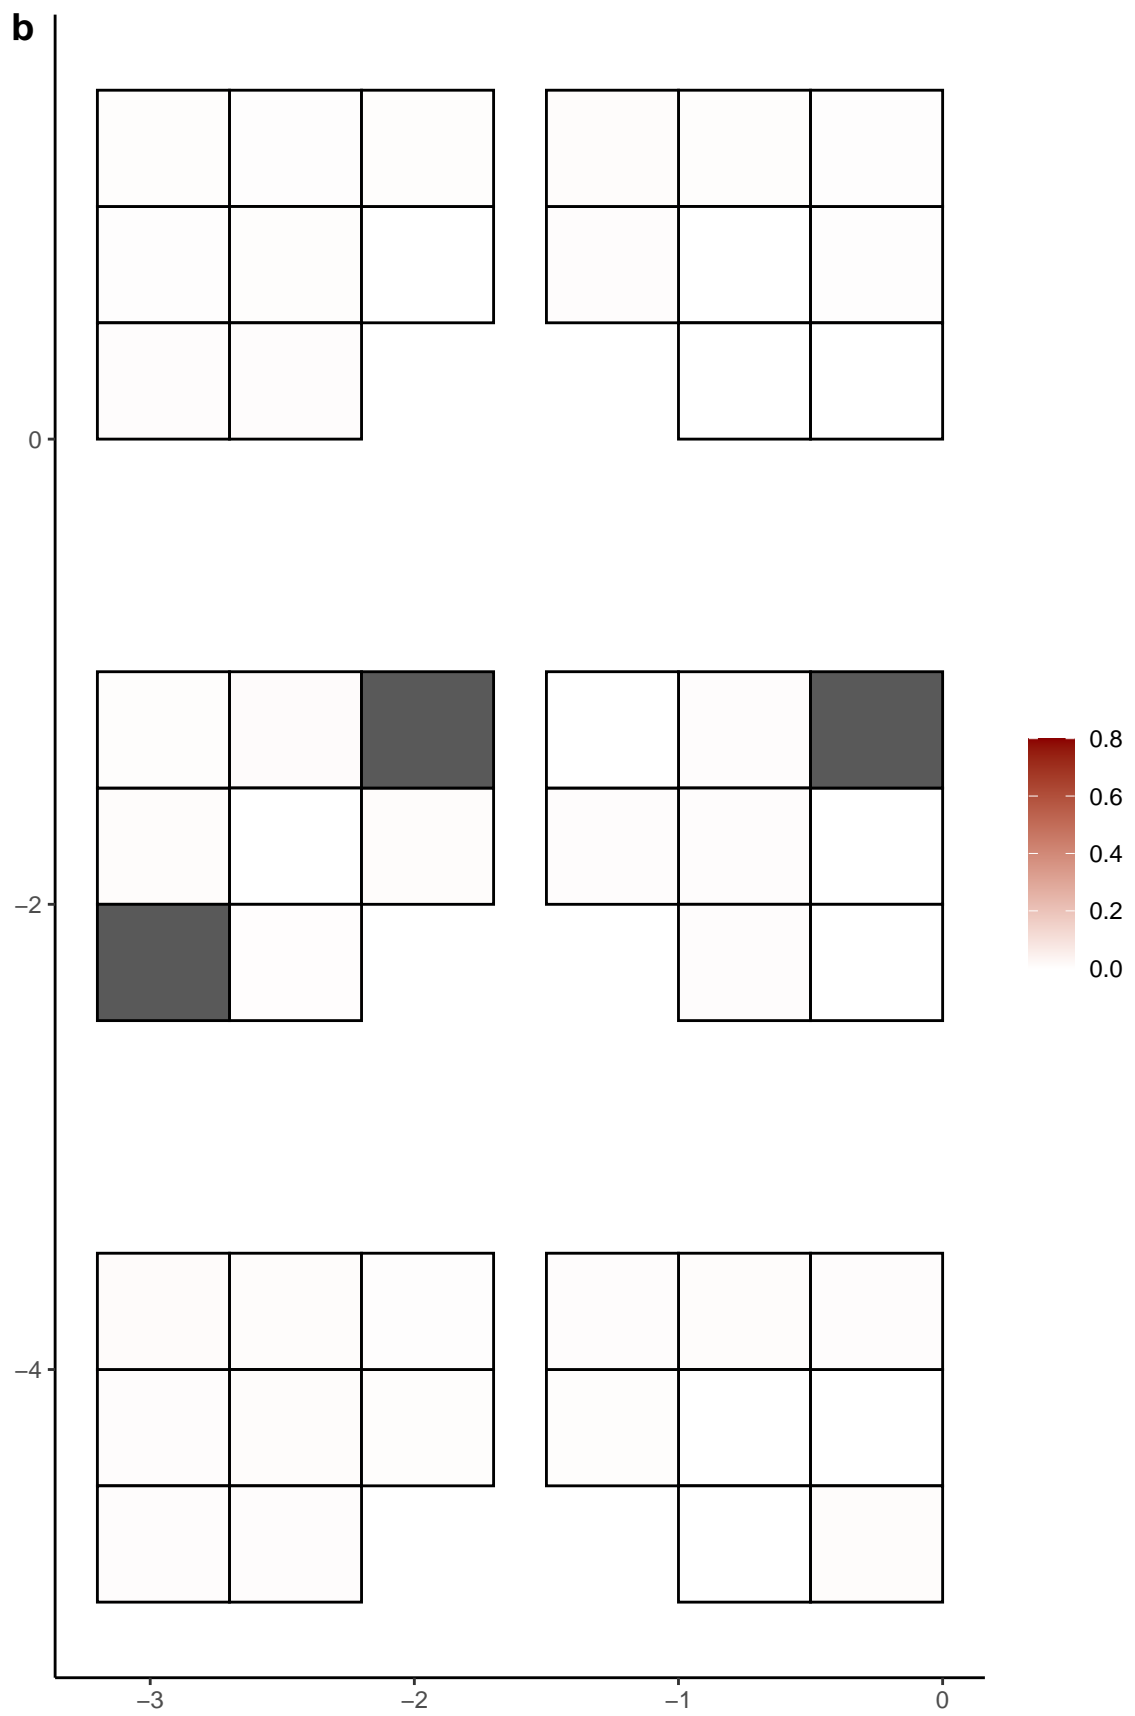

**a** ID05 X-6657783-T-A

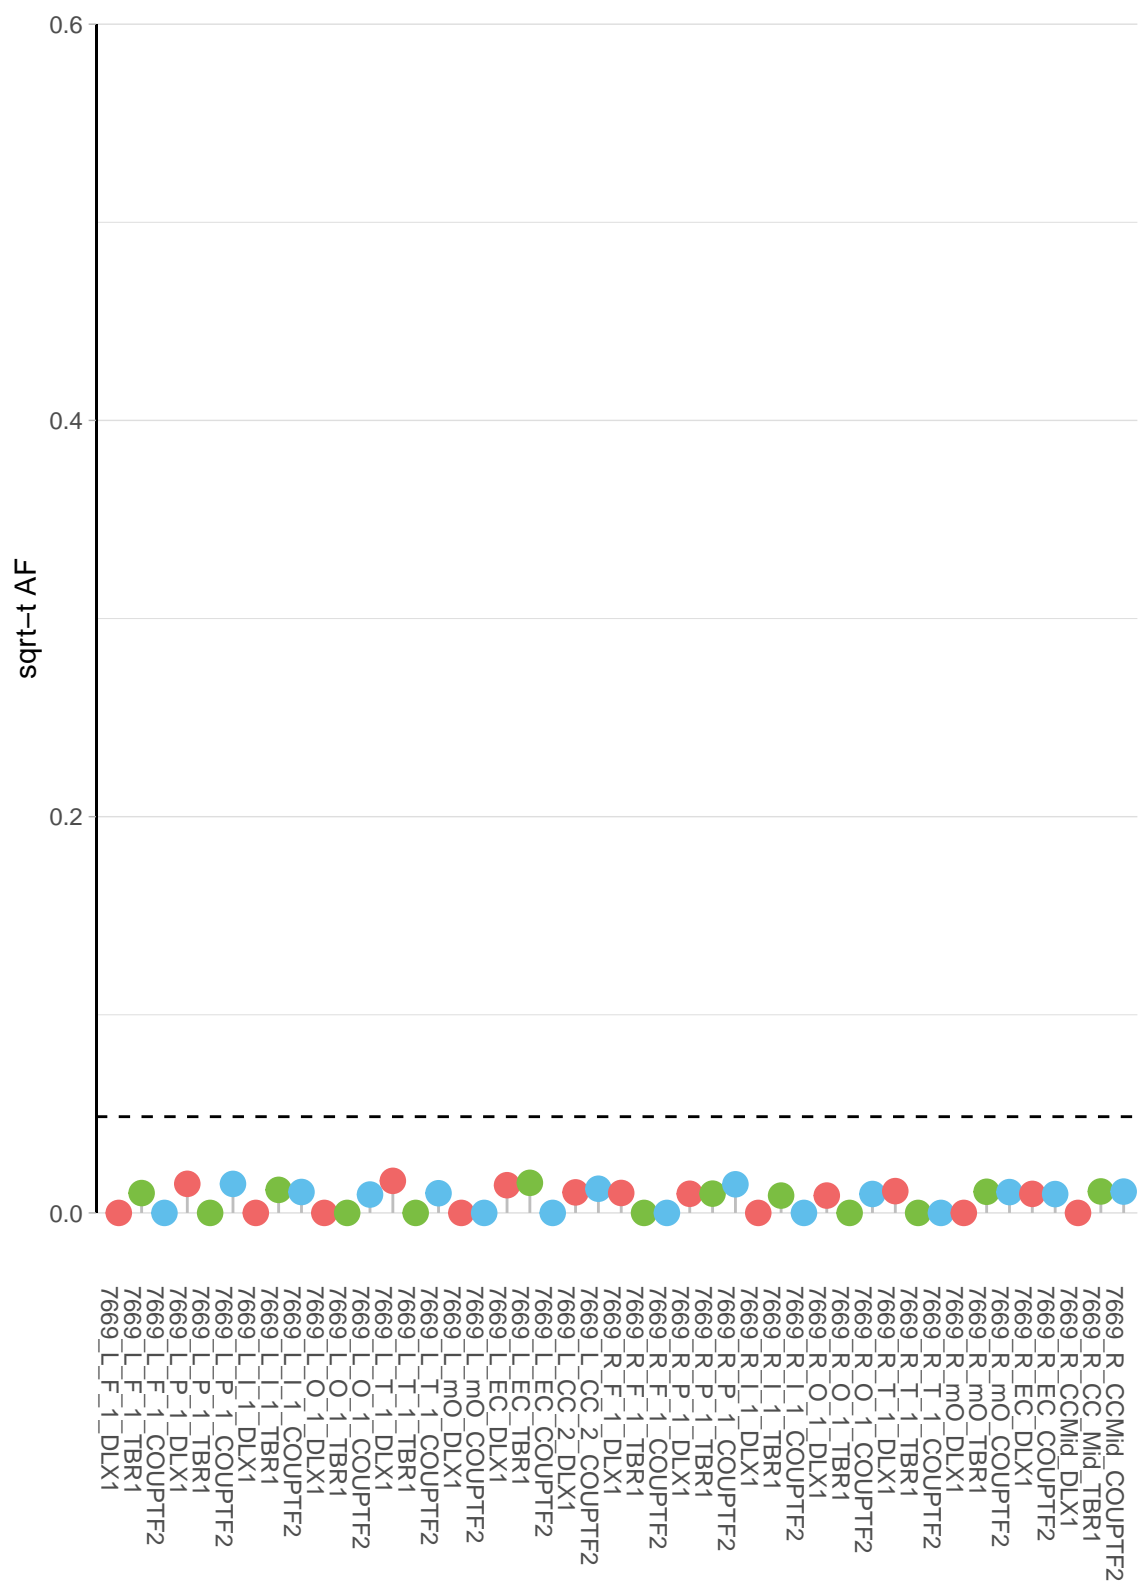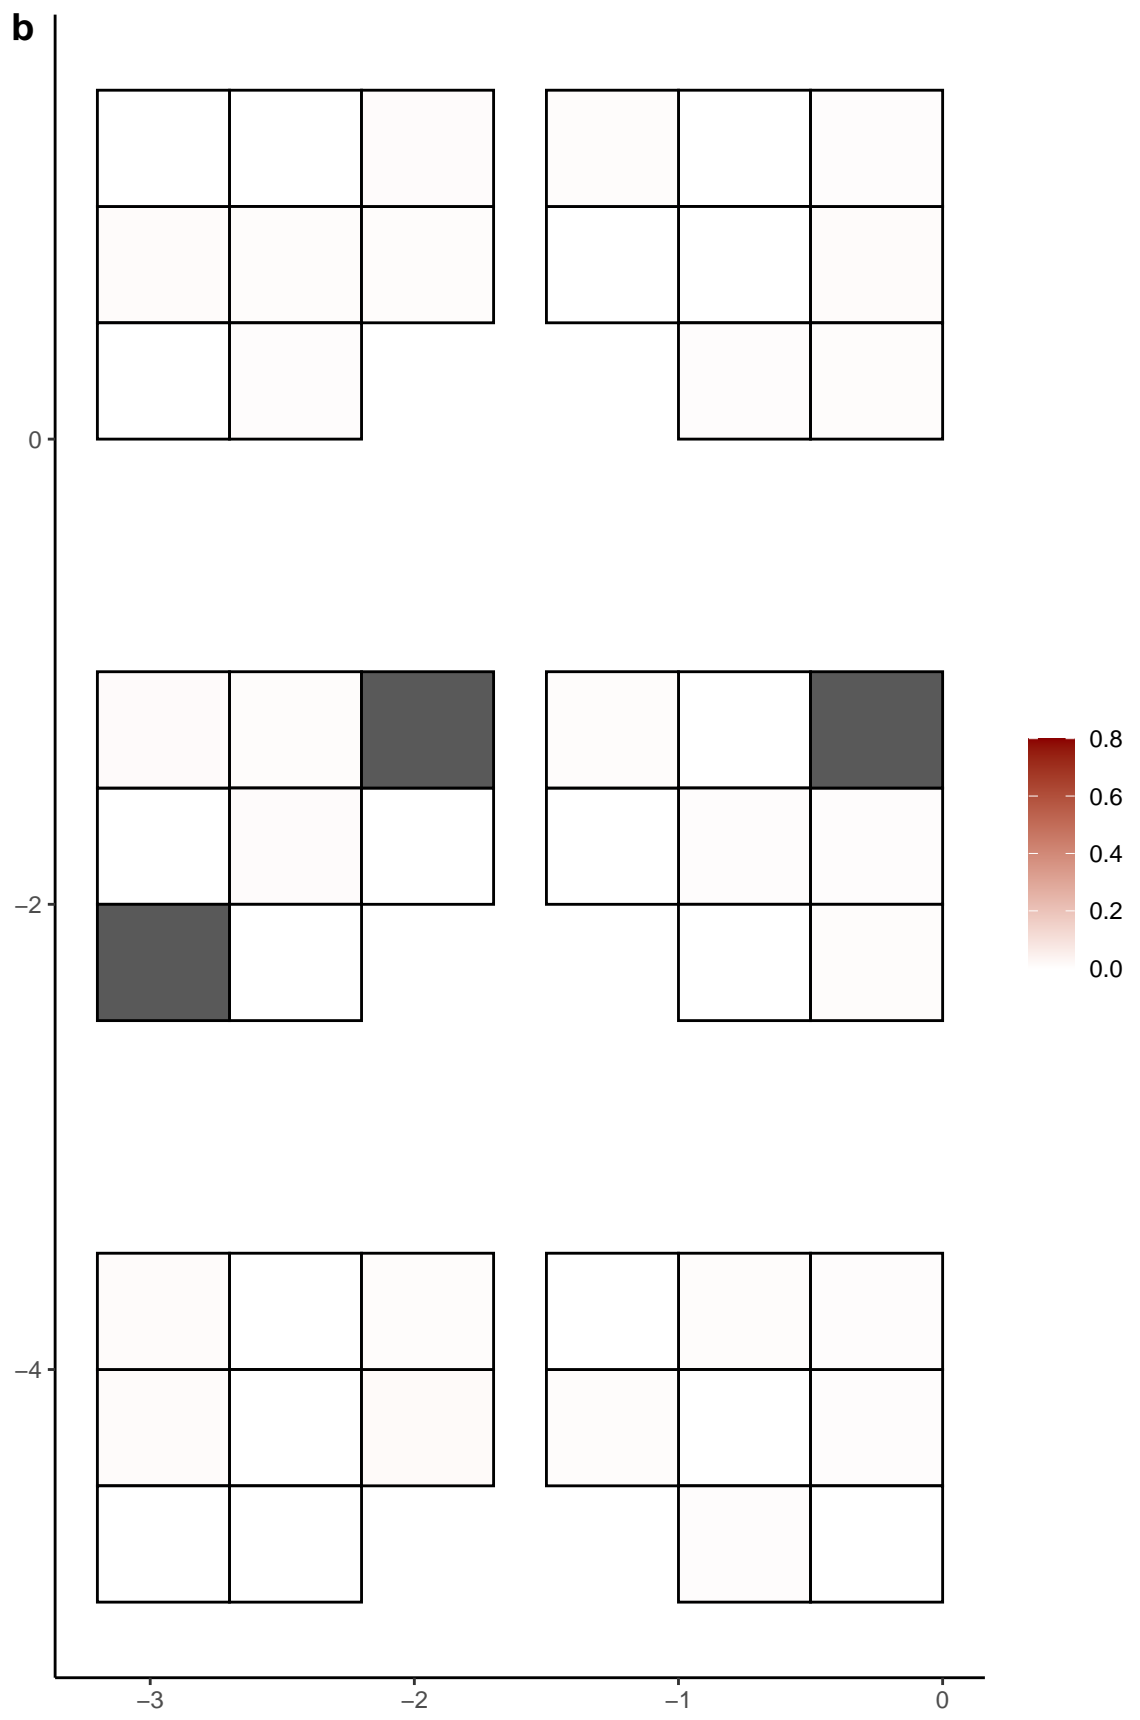

**a** ID05 X-6657784-C-A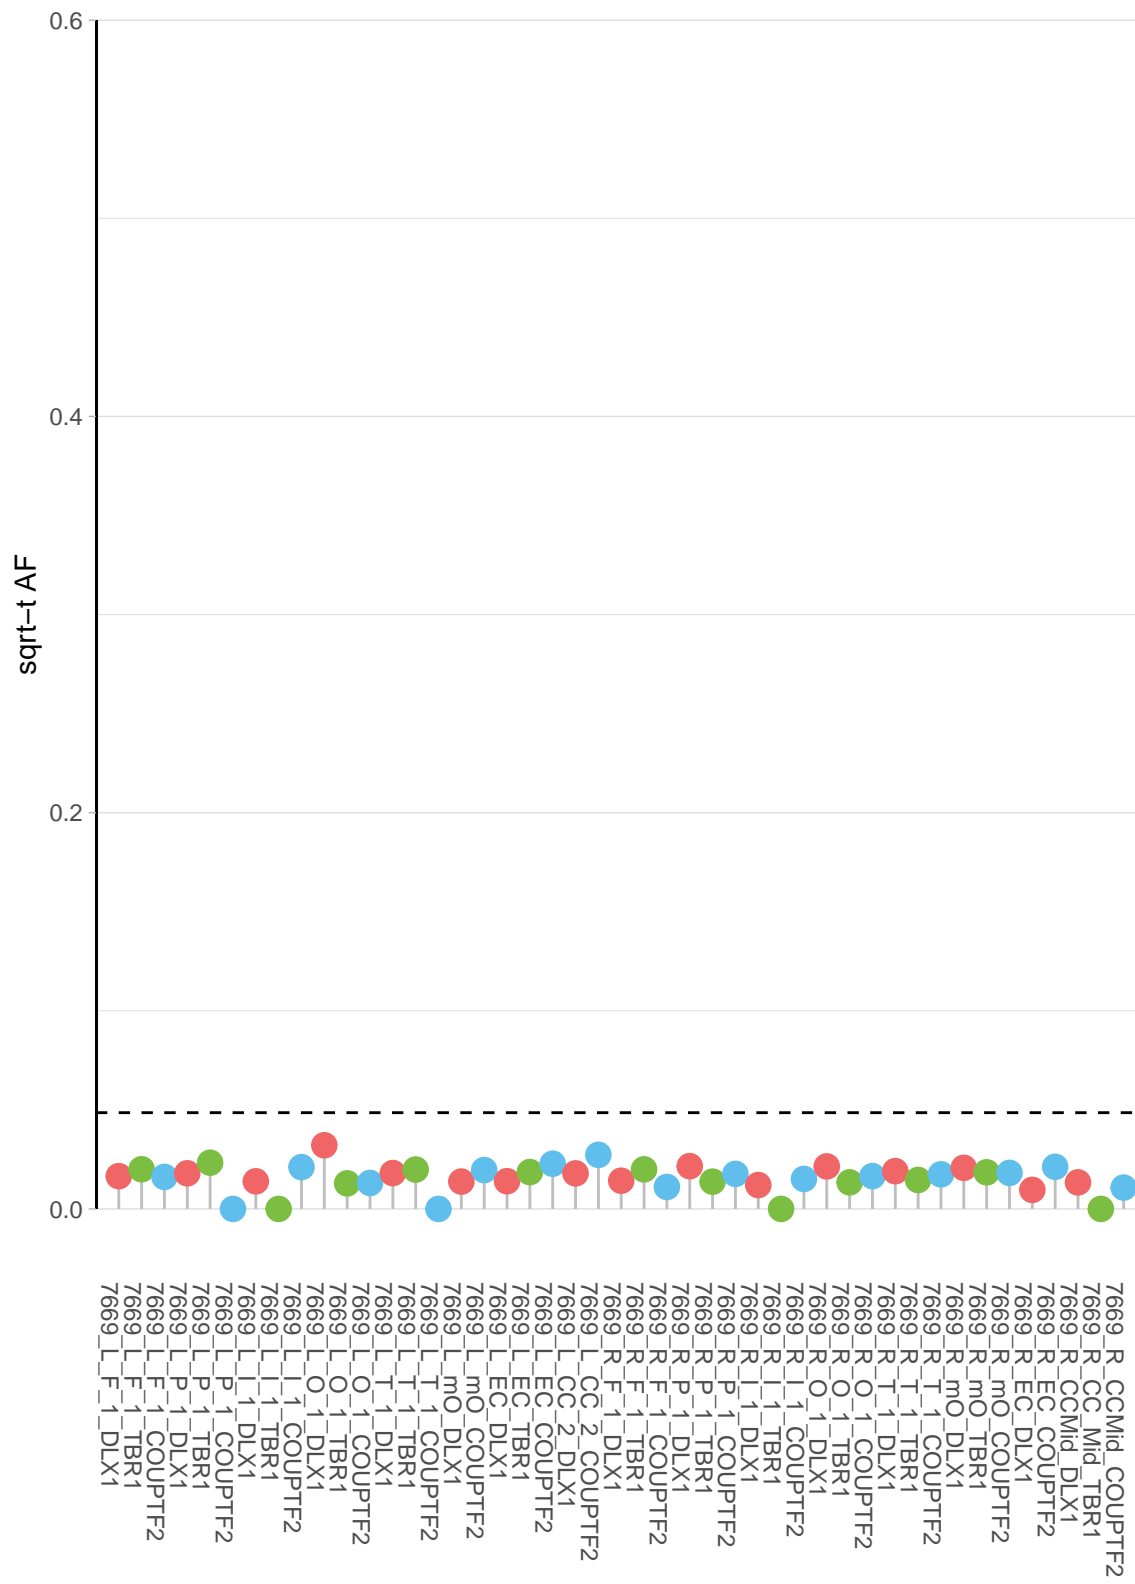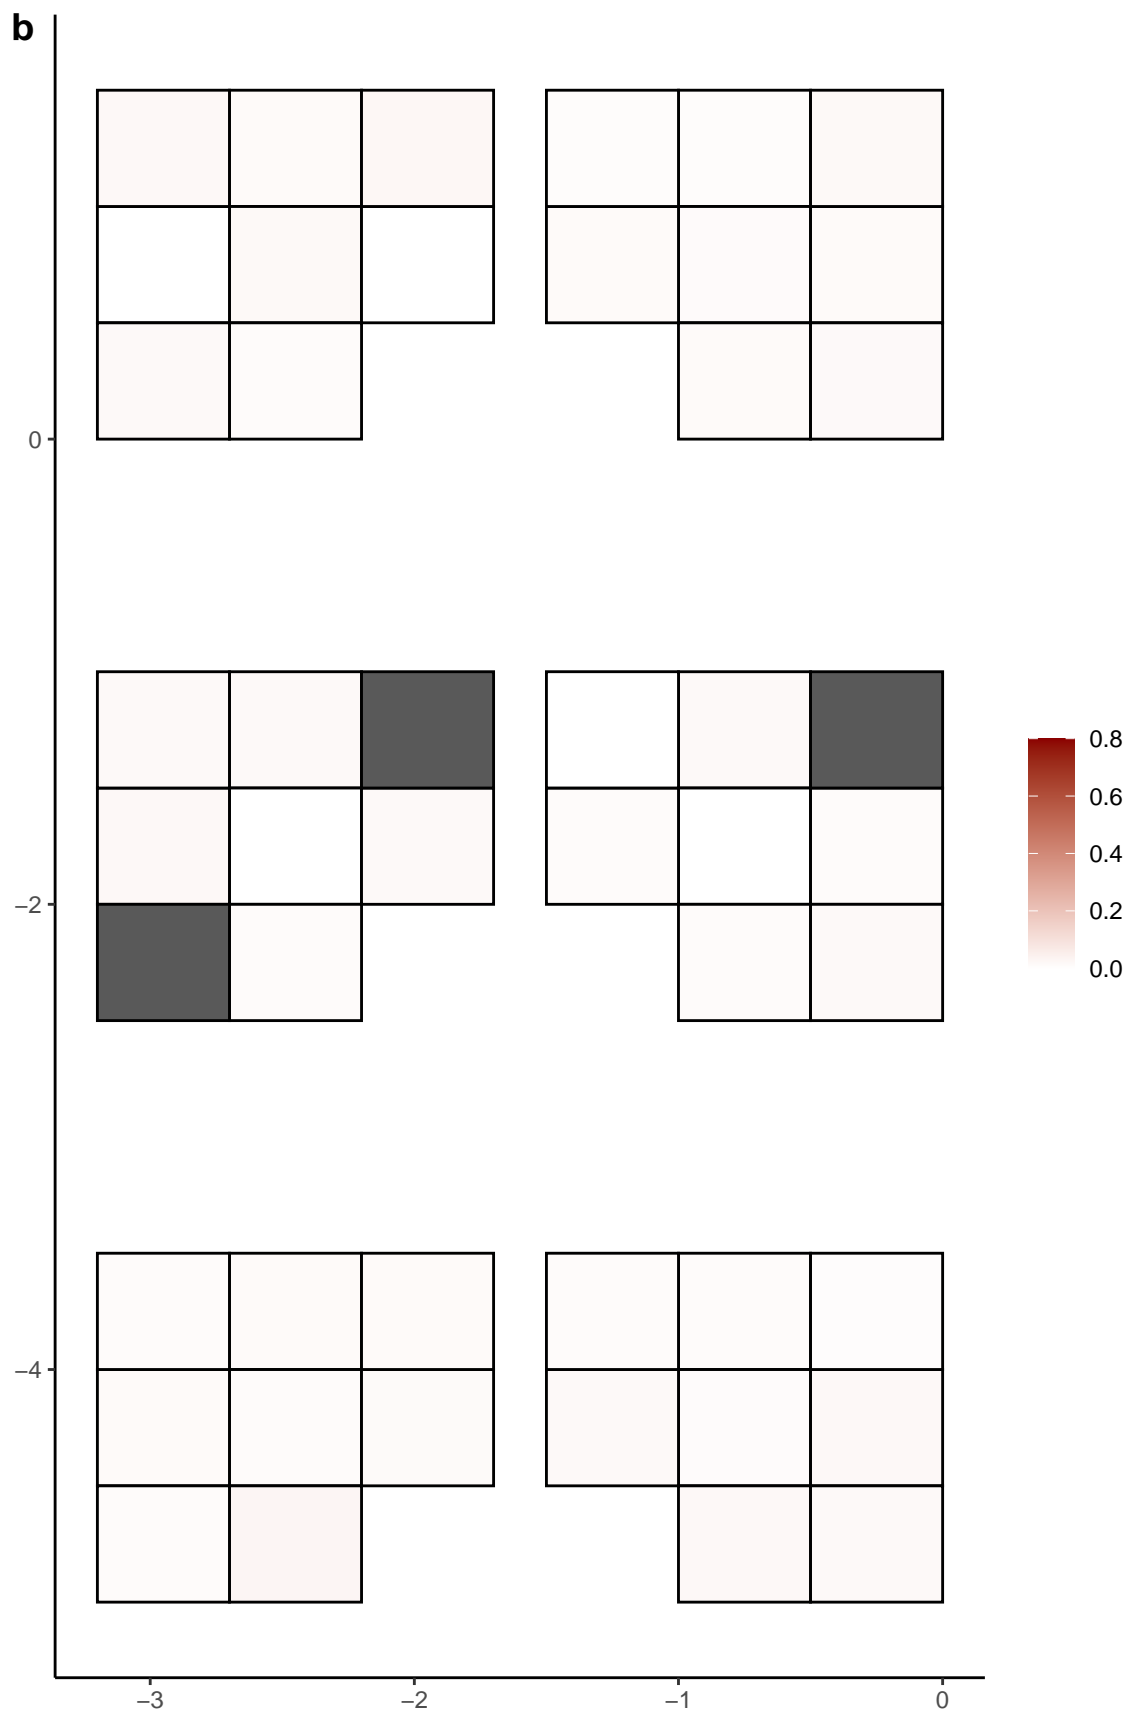

**a** ID05 X-69258884-G-A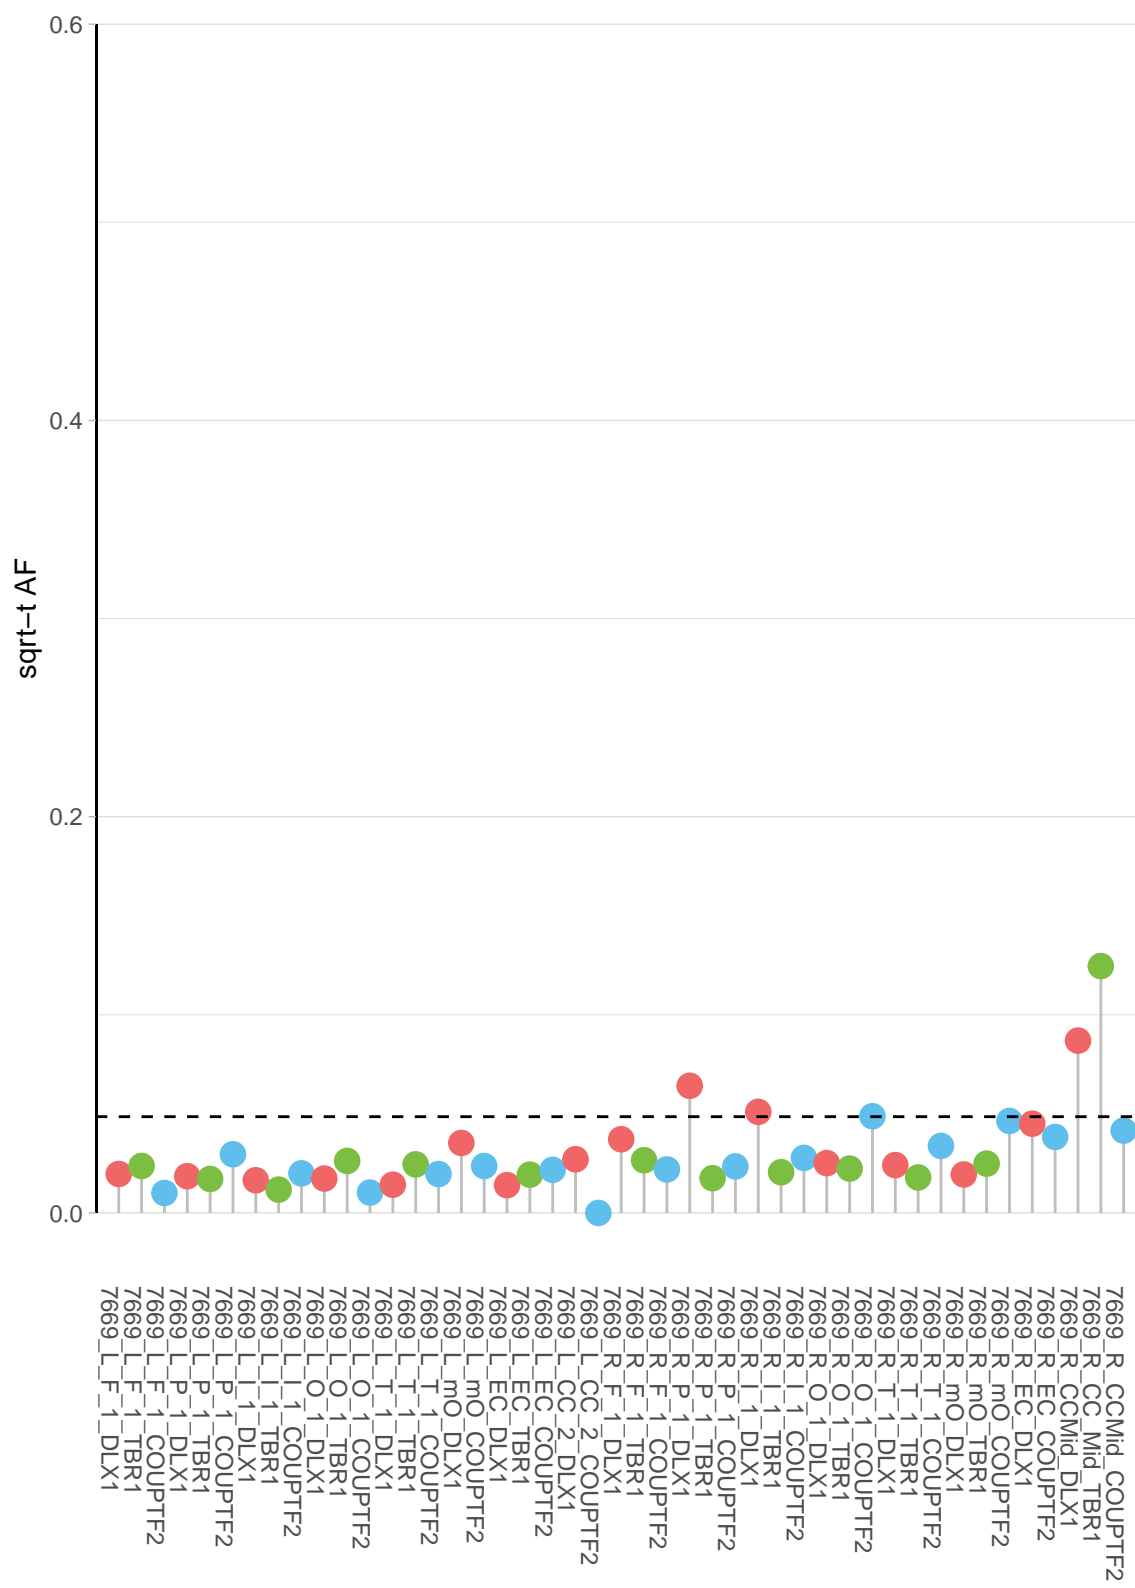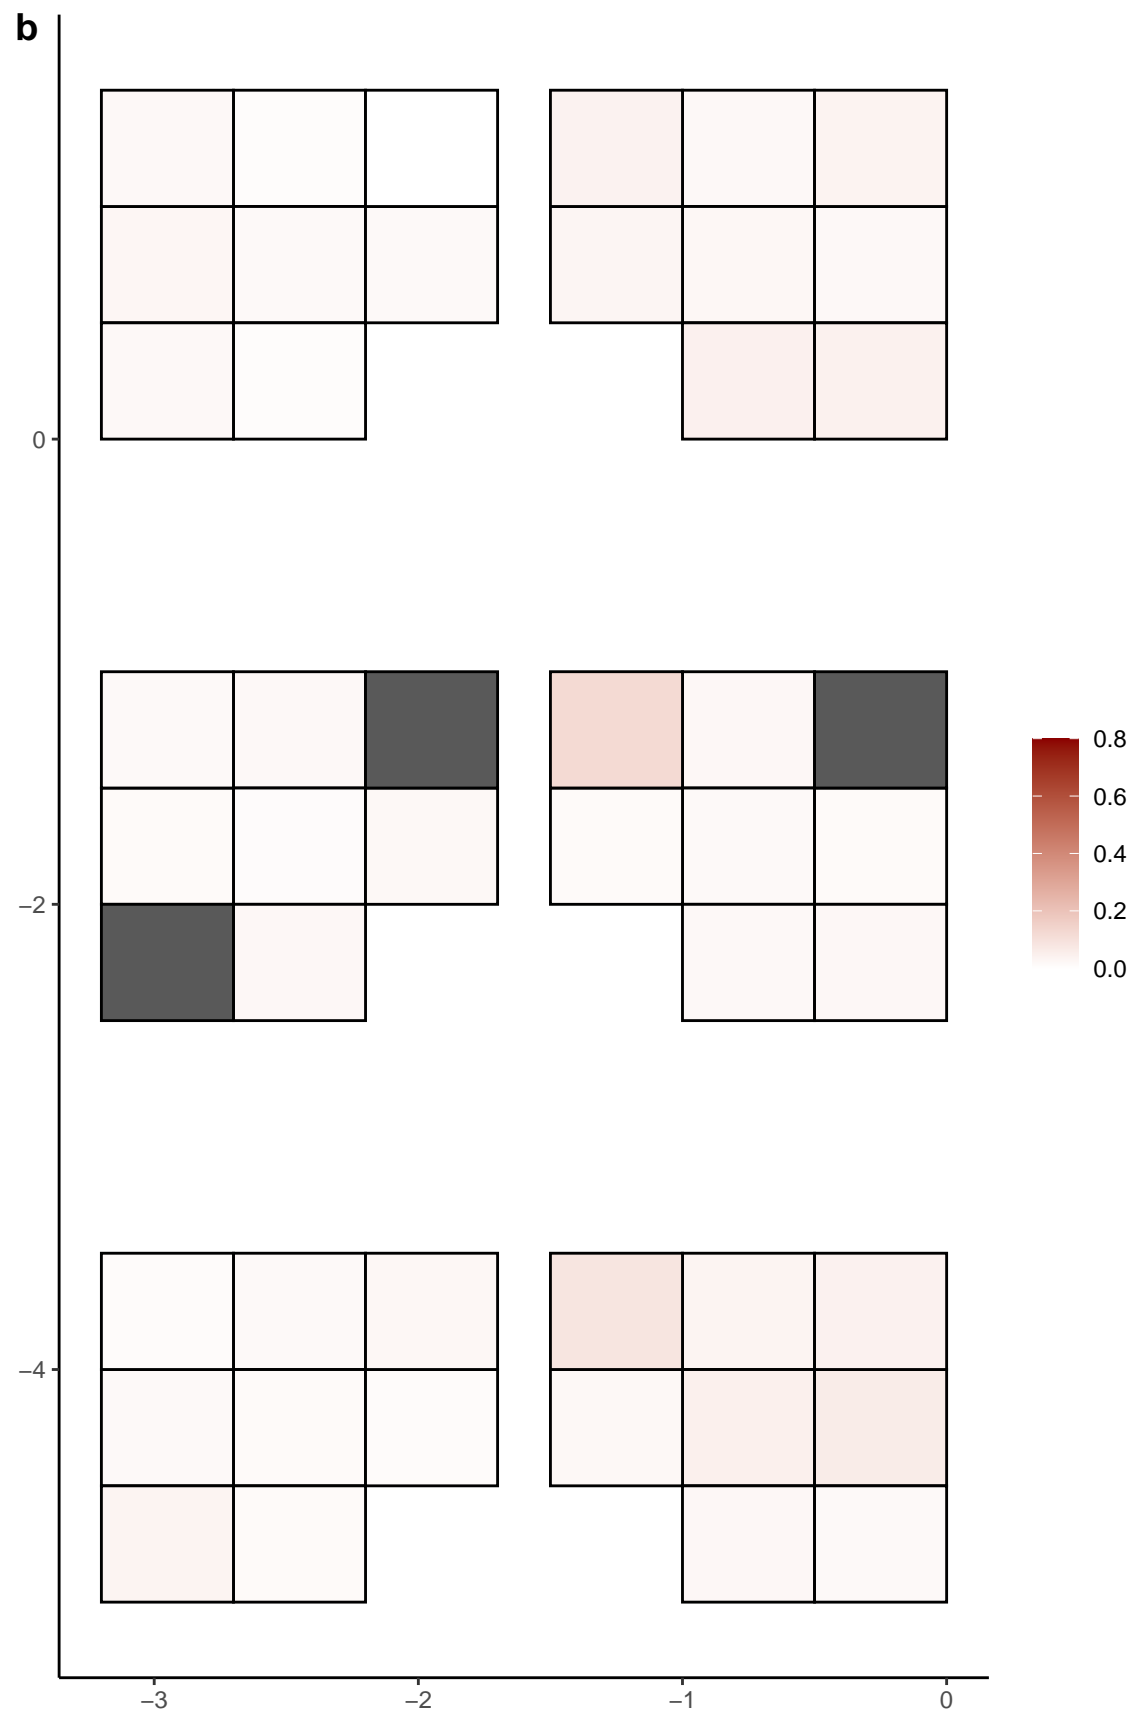

**a** ID05 X-69794428-G-A

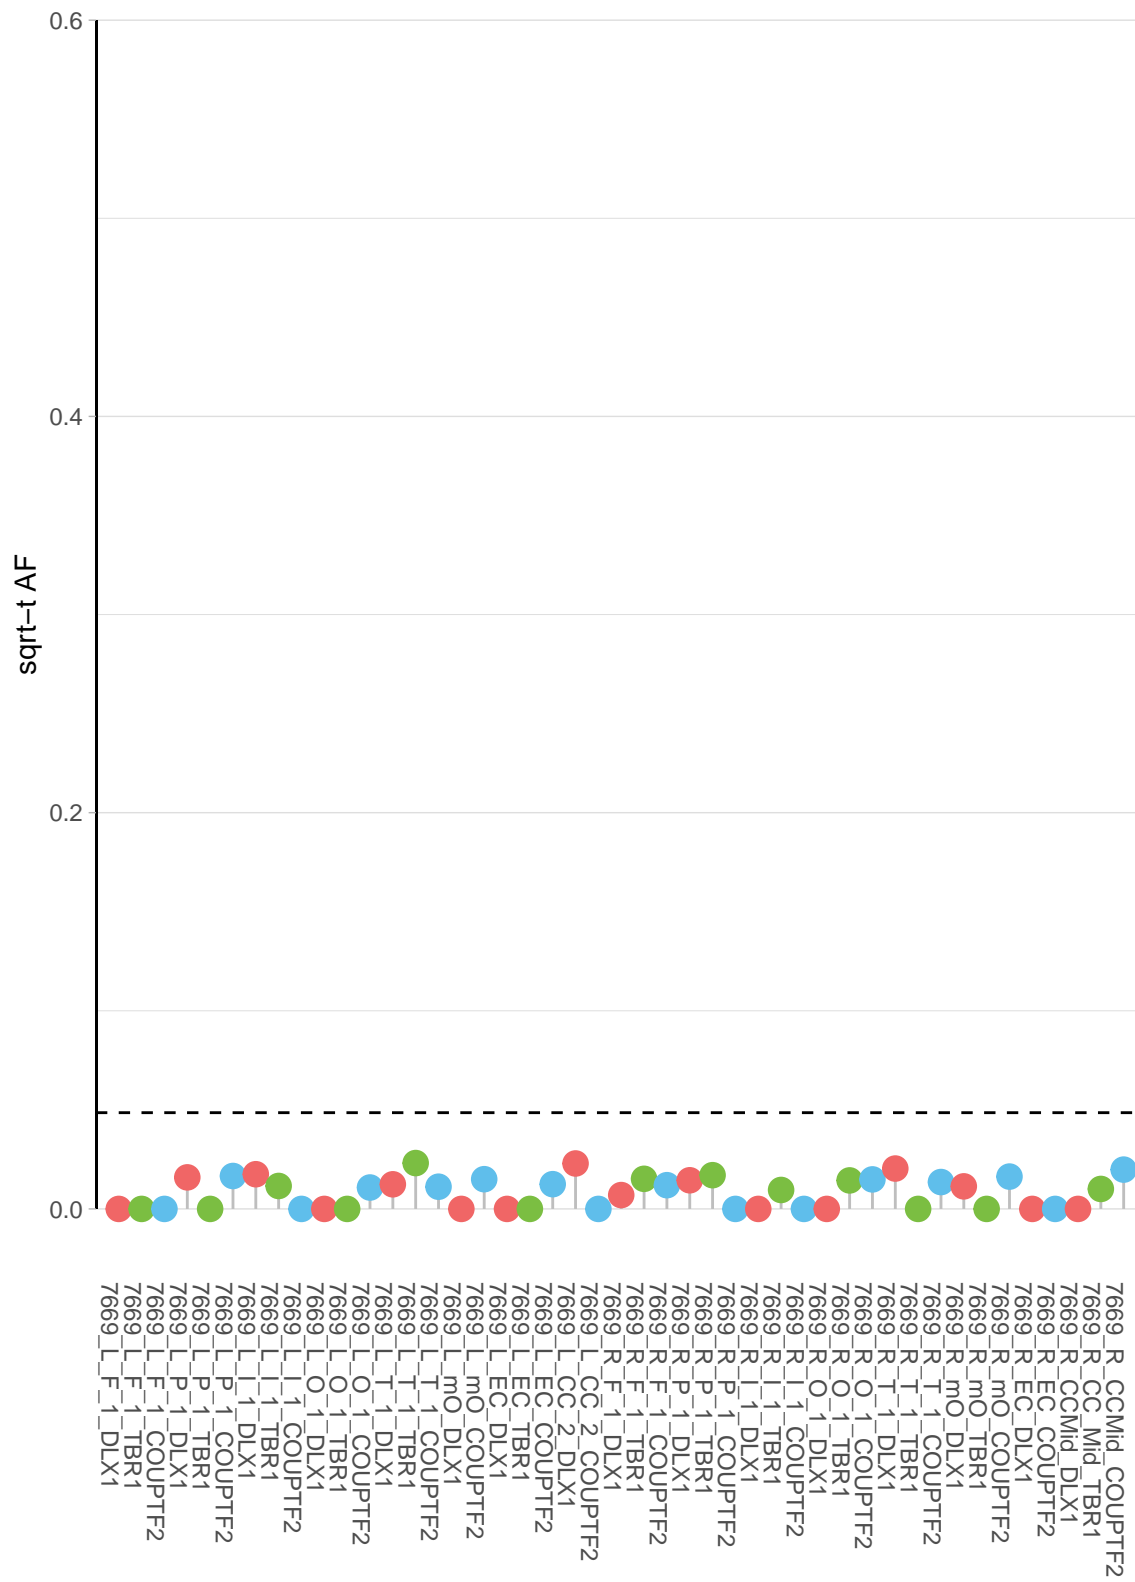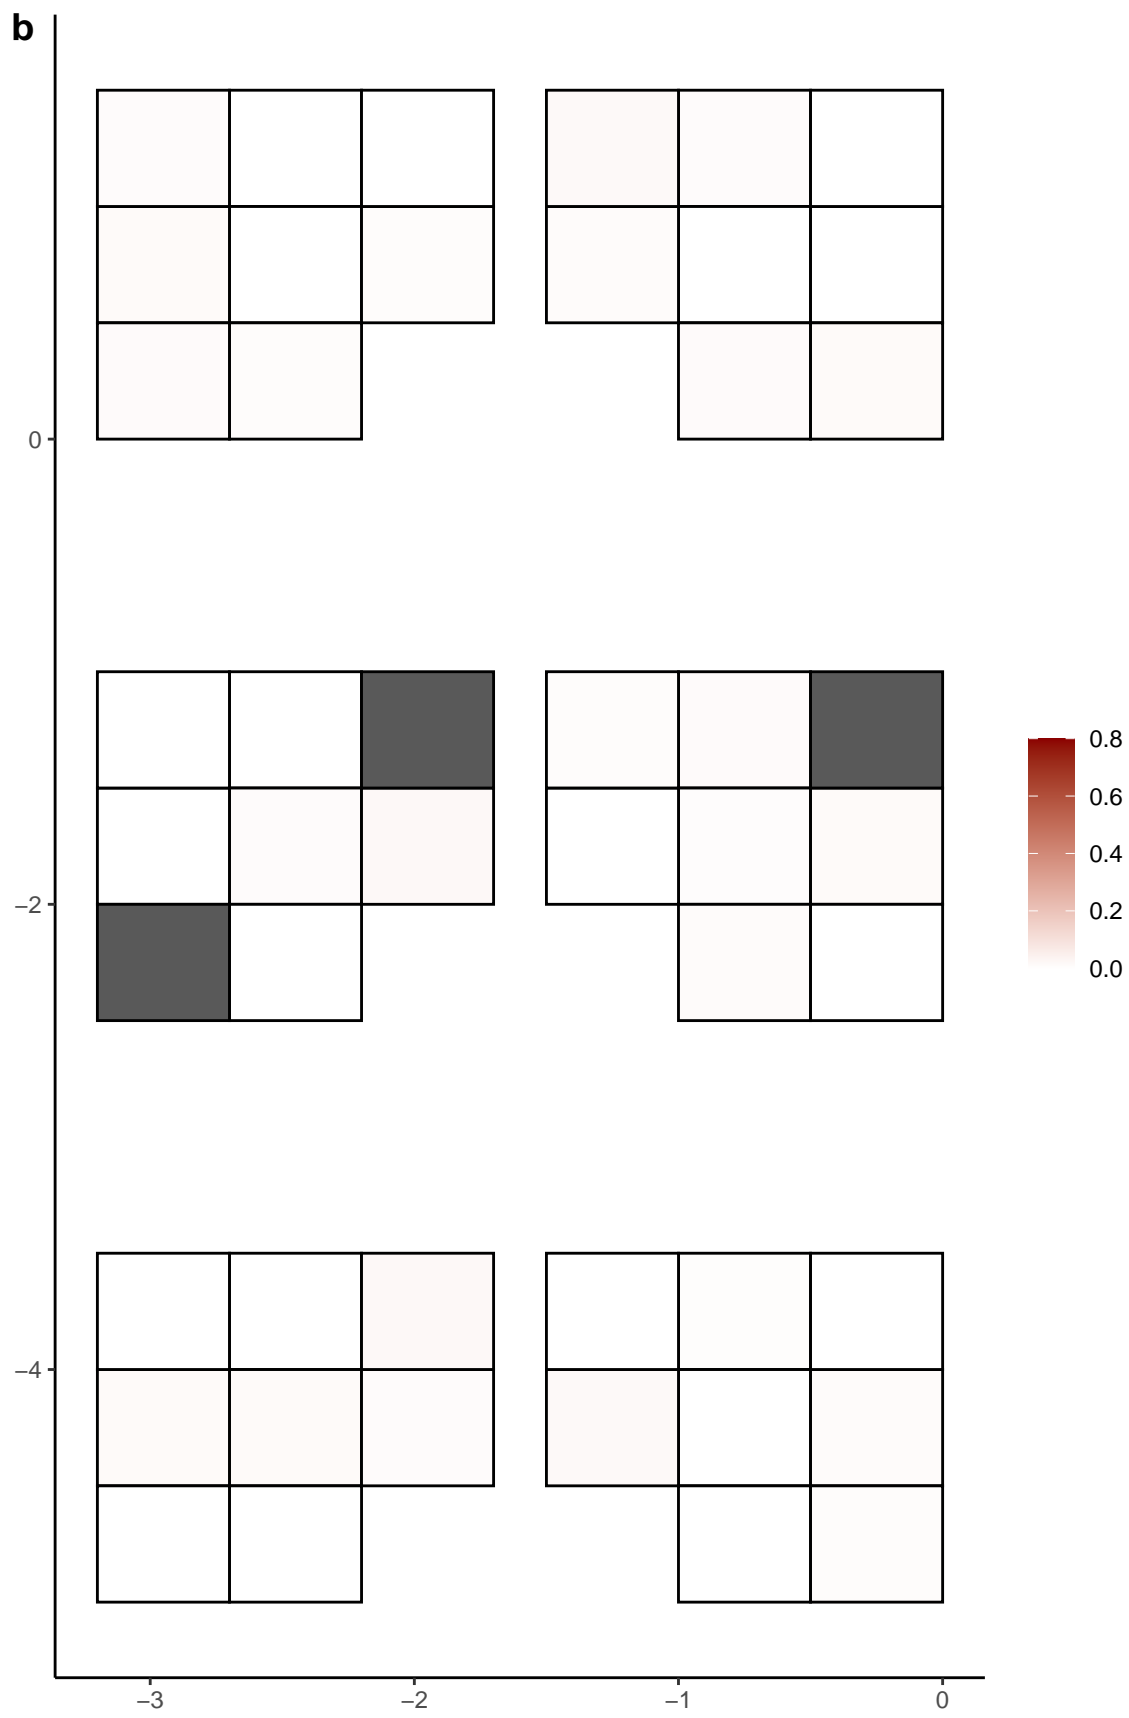

**a** ID05 X-70346122-G-A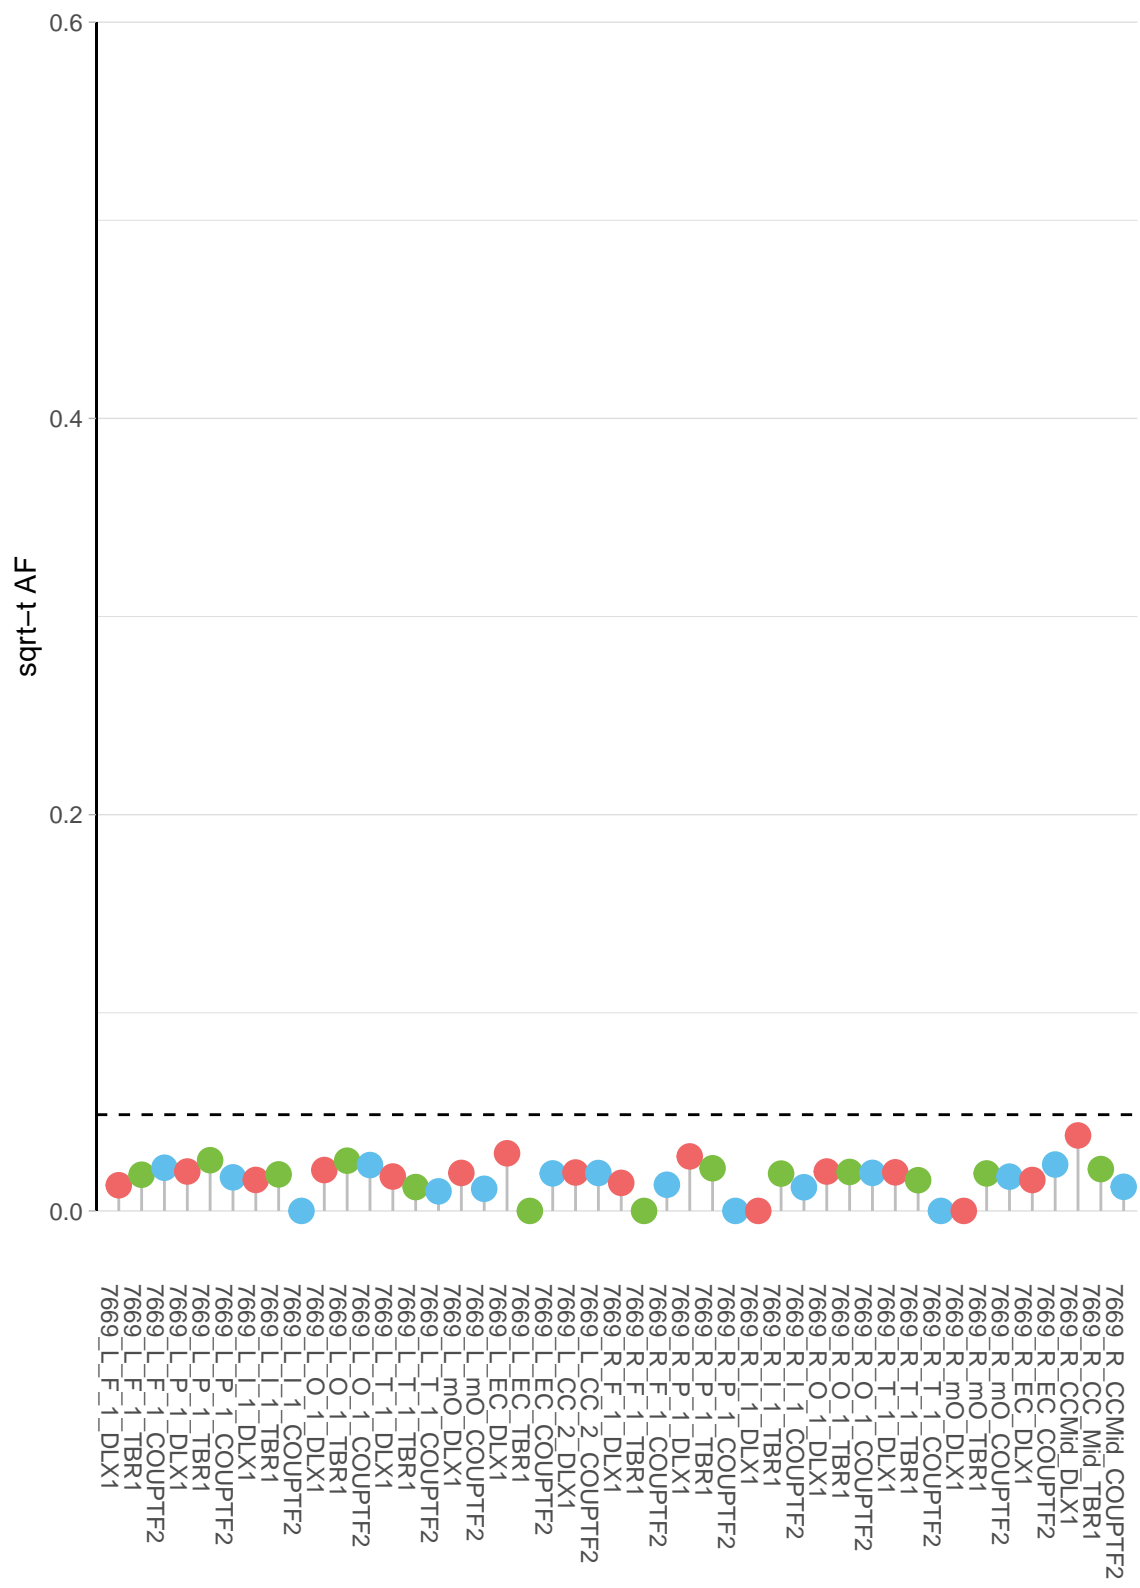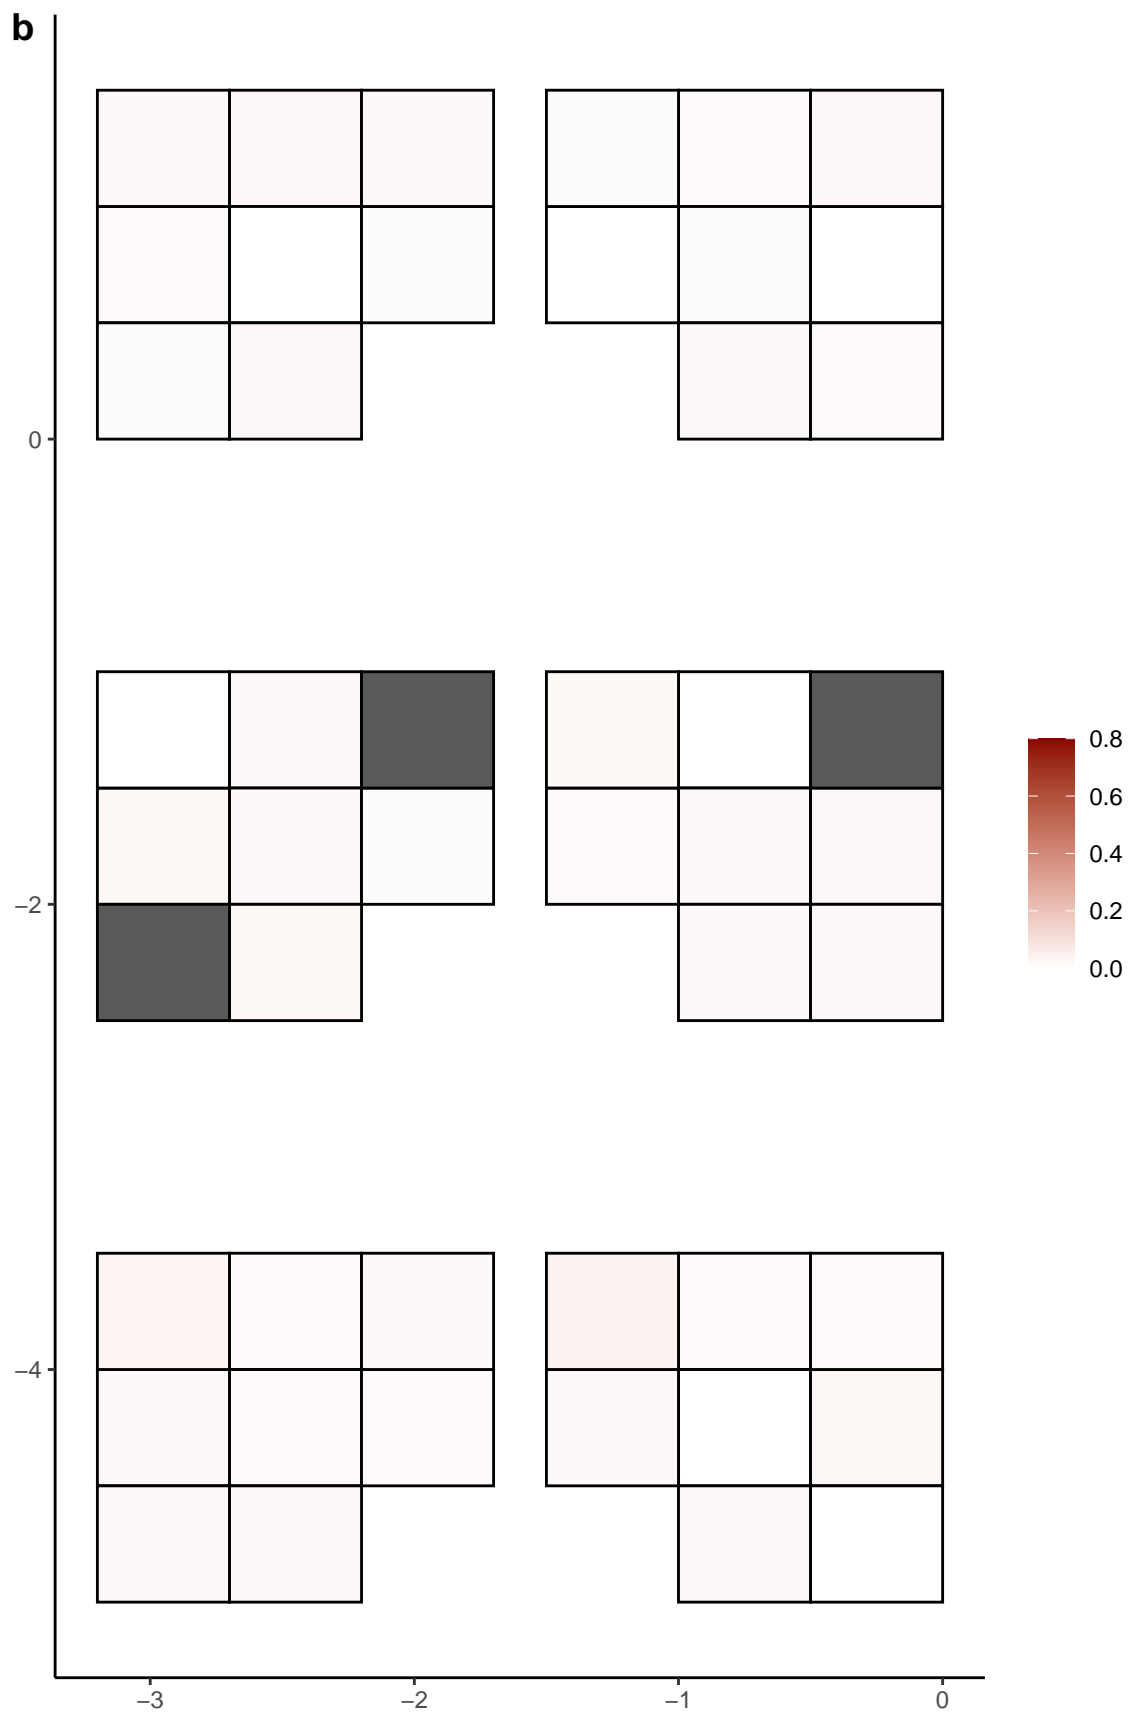

**a** ID05 X-72495149-C-A

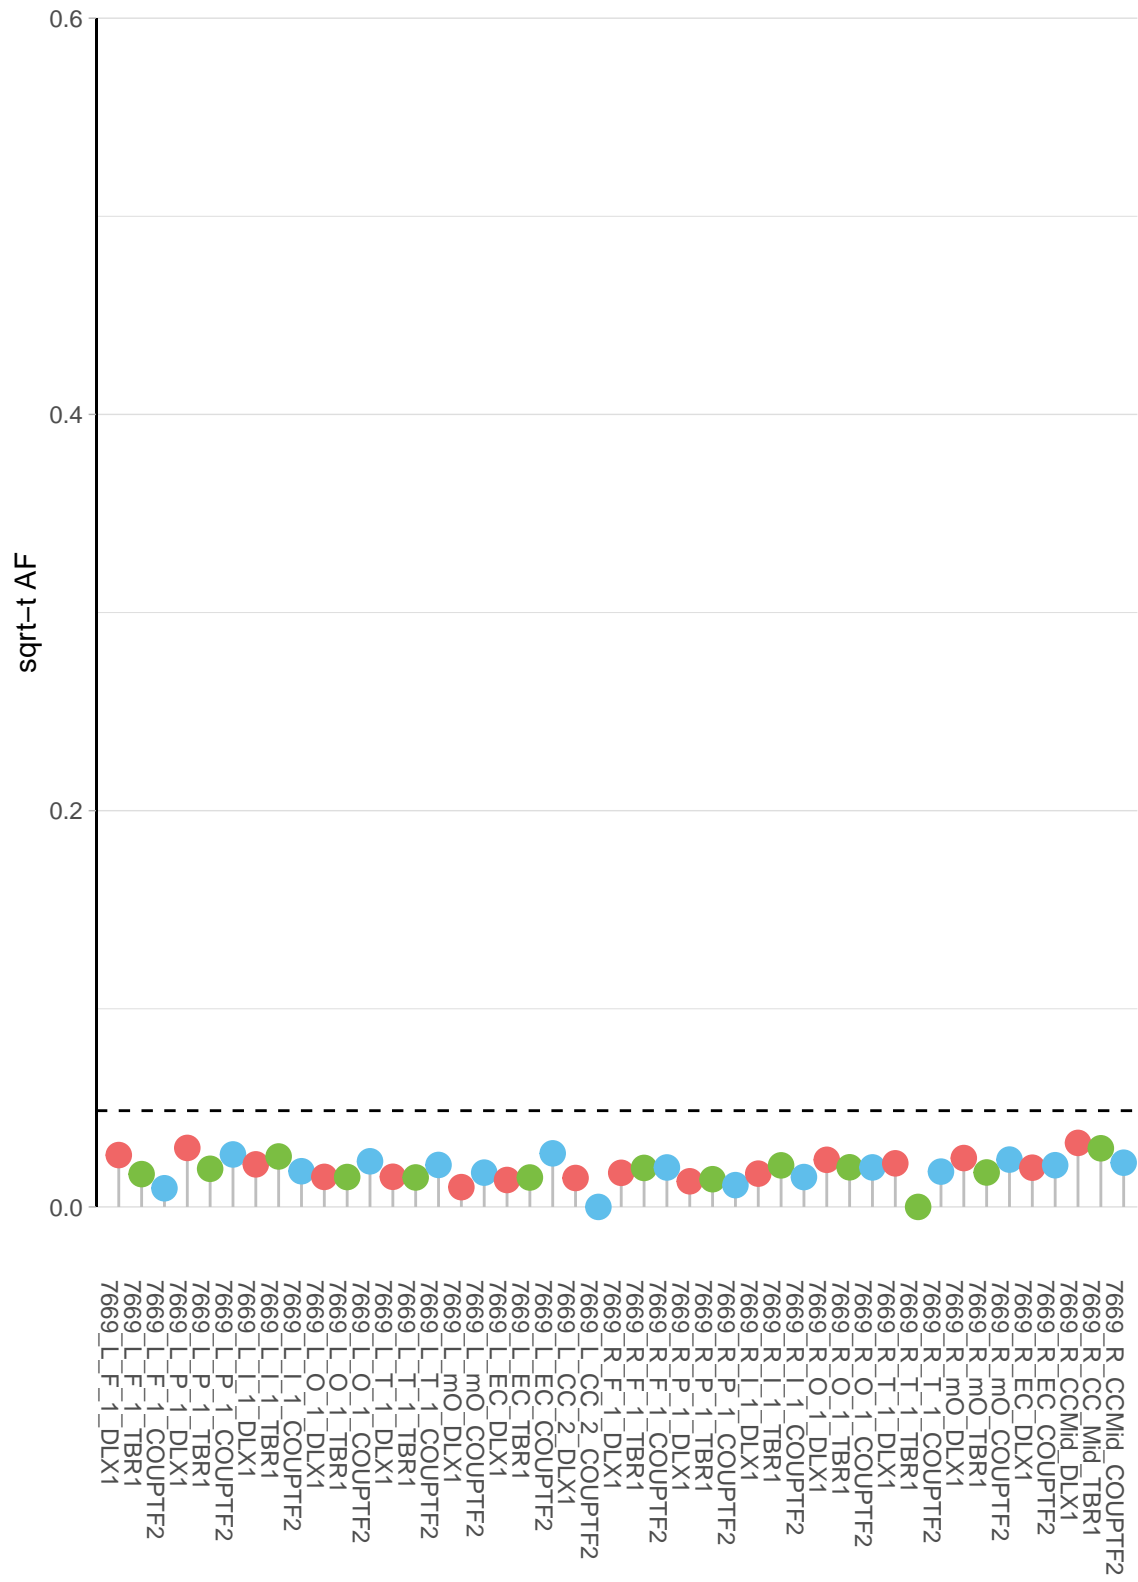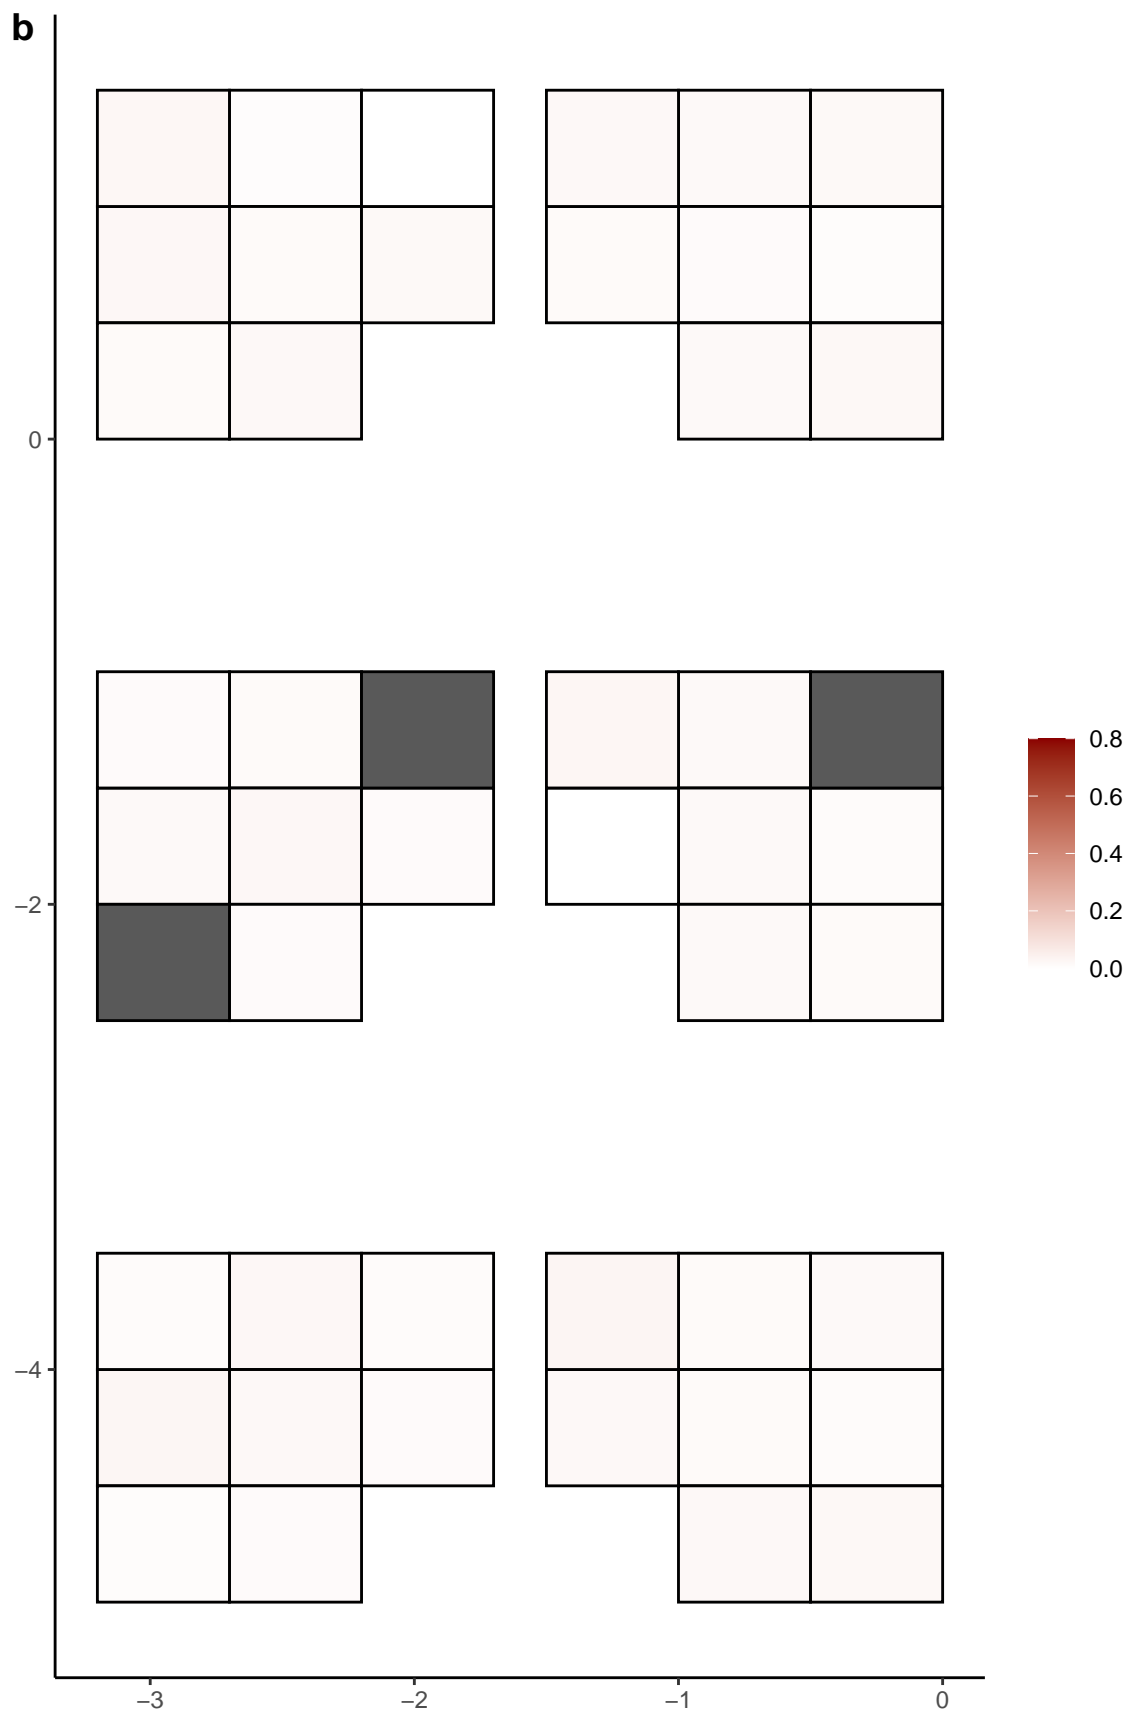

**a** ID05 X-7883974-C-T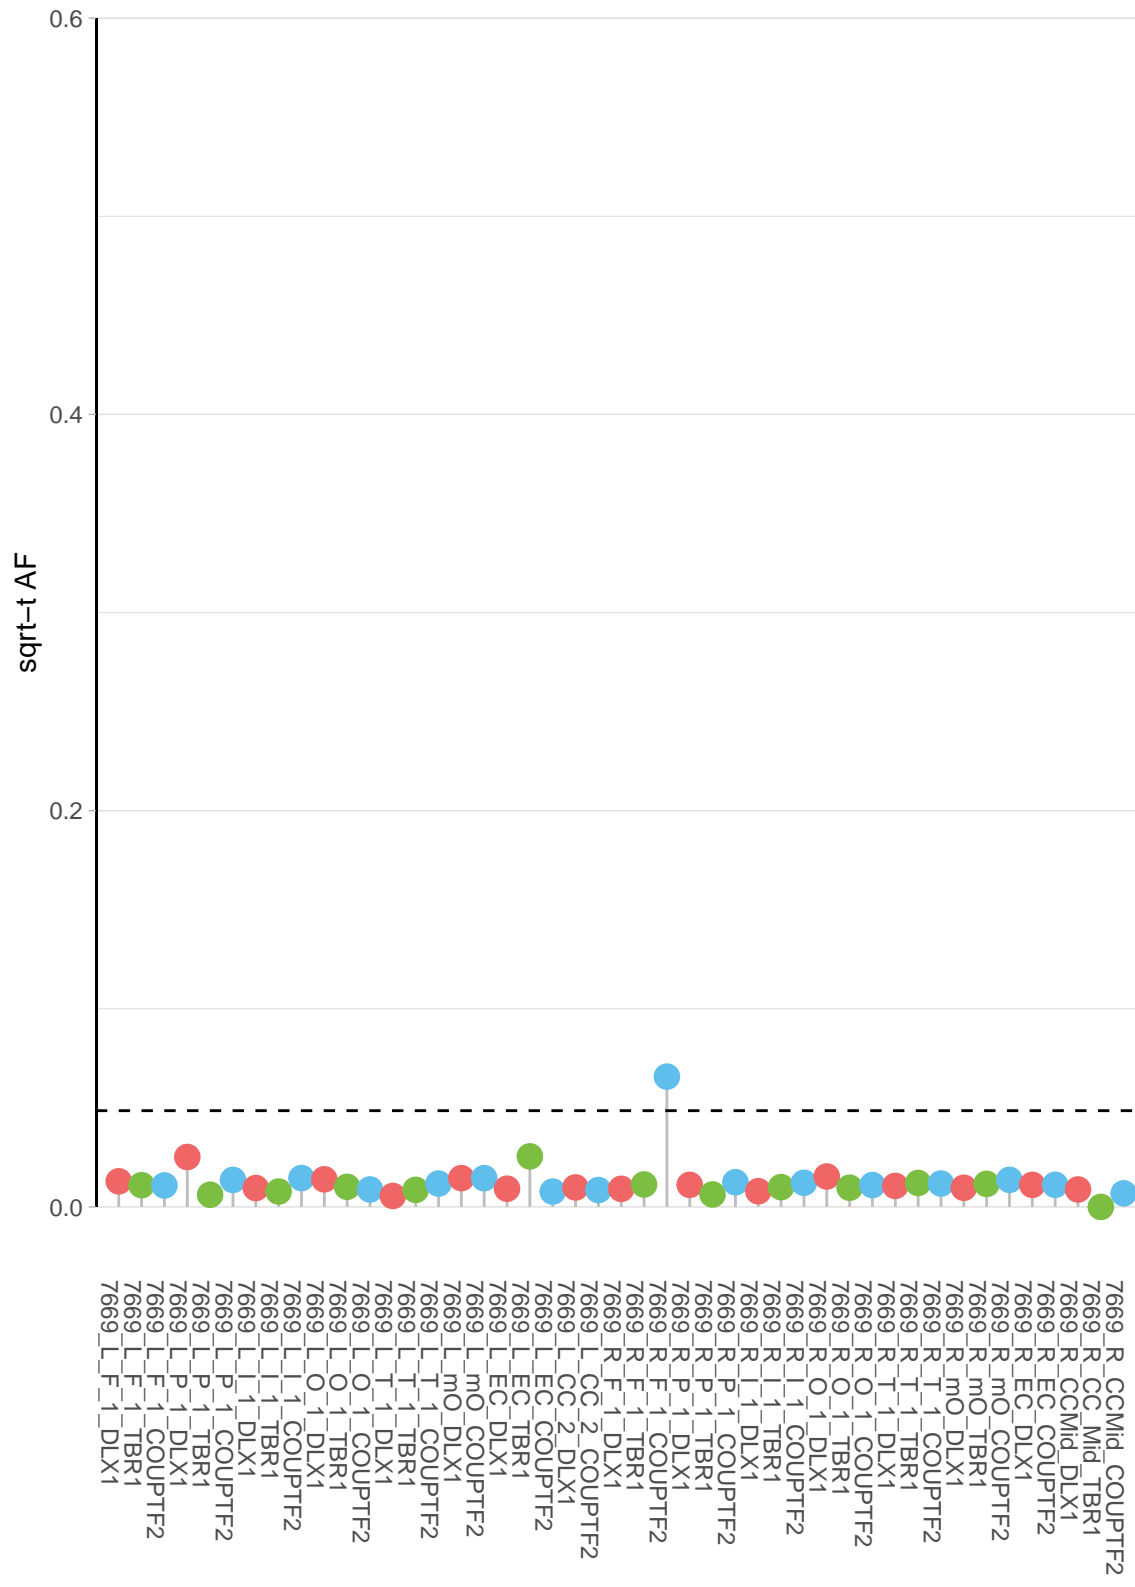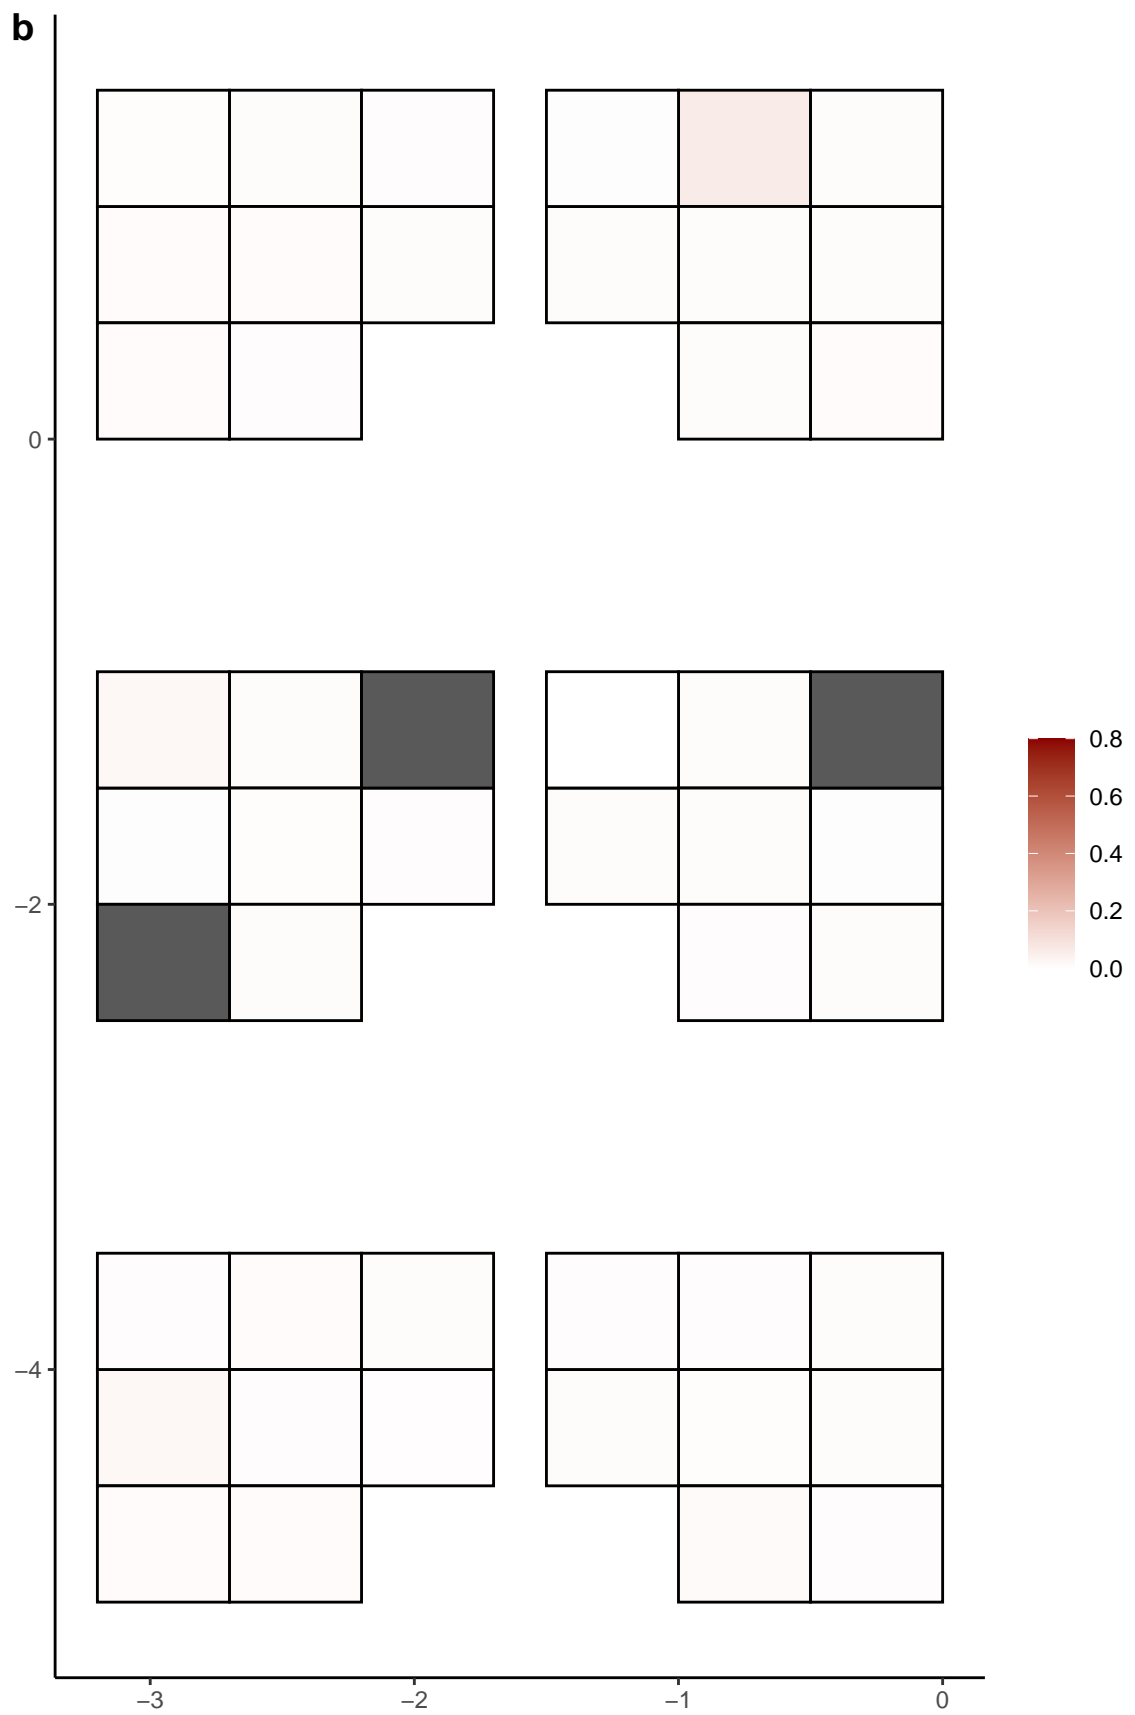



**a** ID05 X-79691731-A-T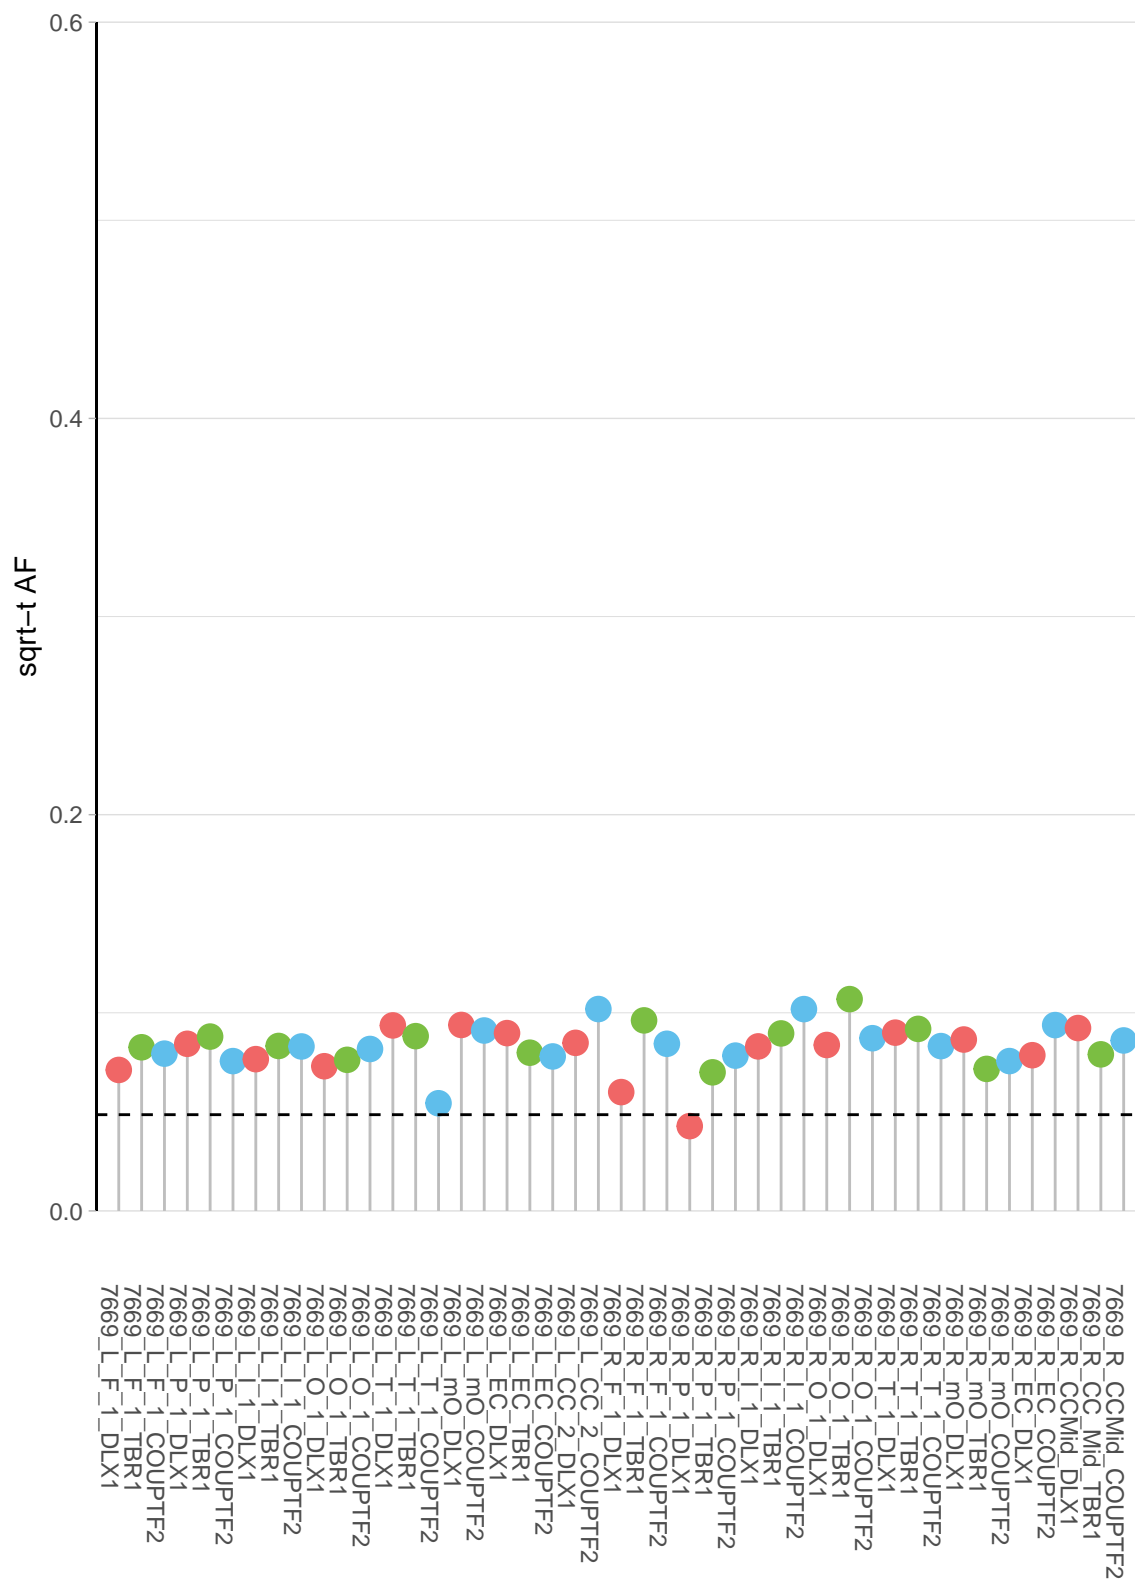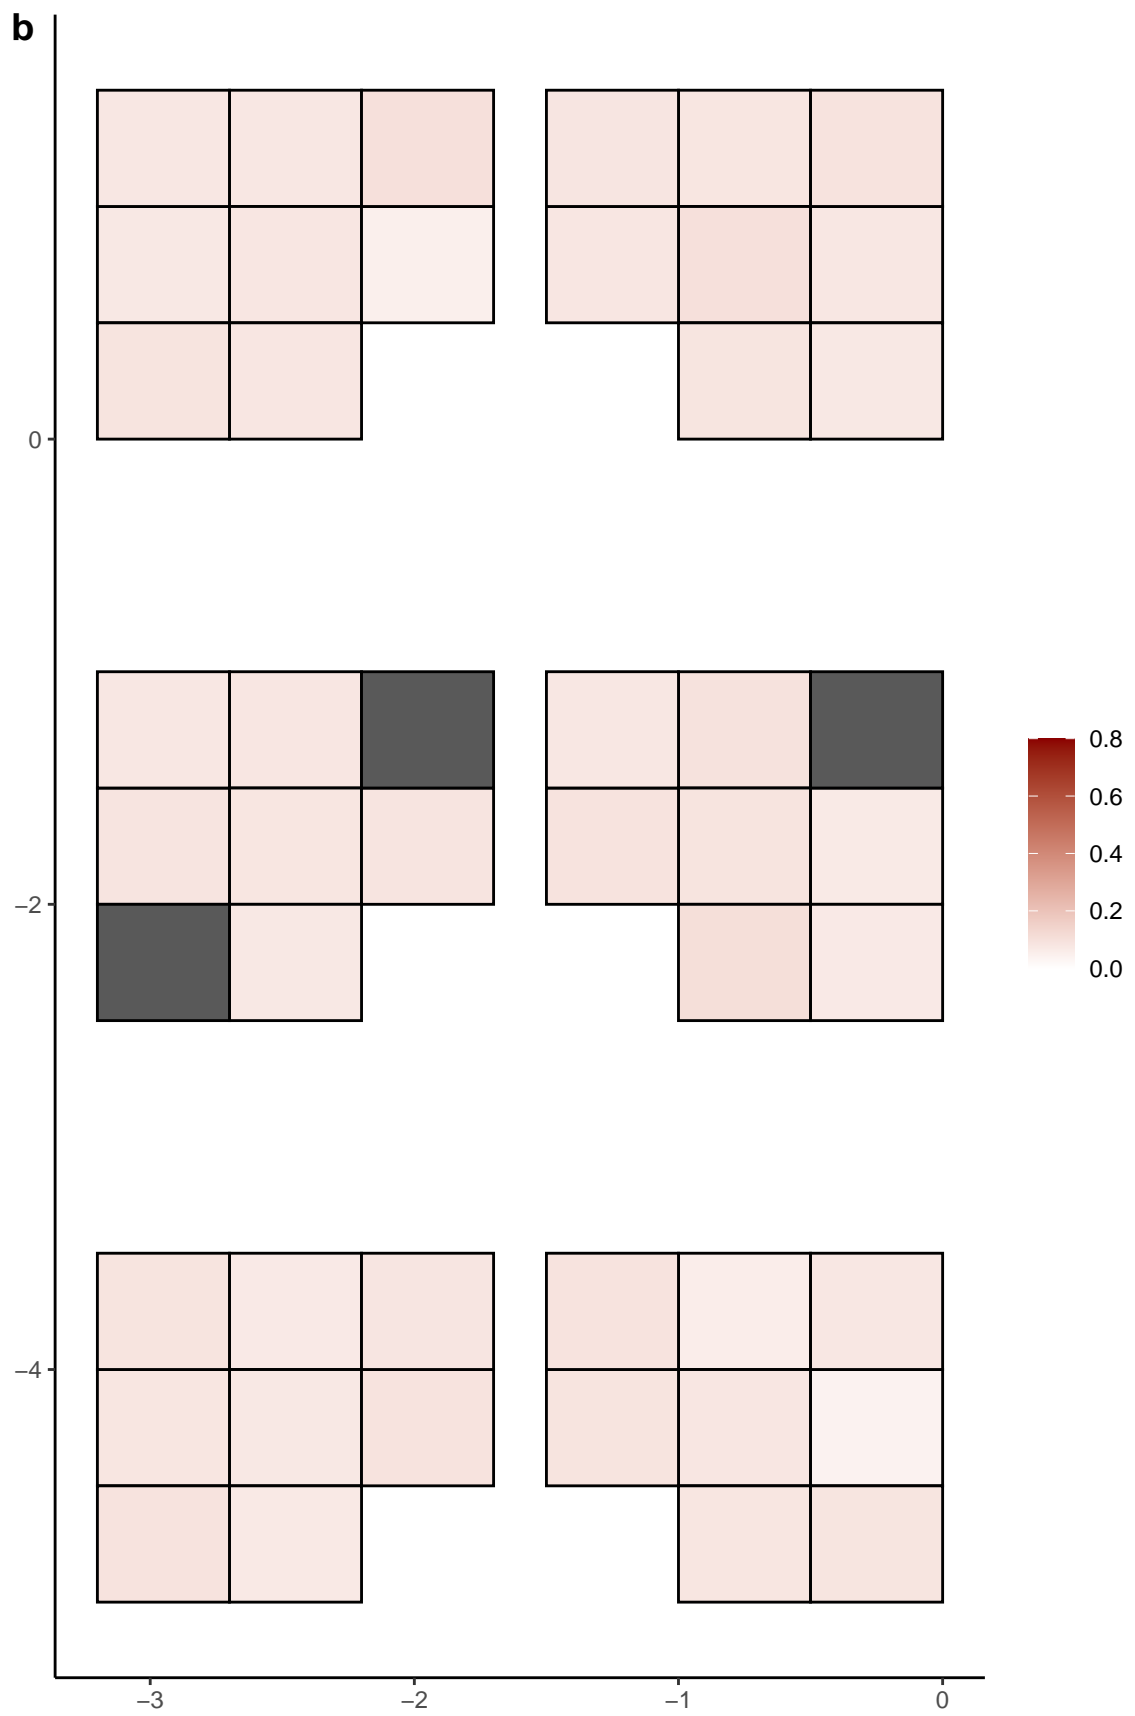

**a** ID05 X-79691734-A-T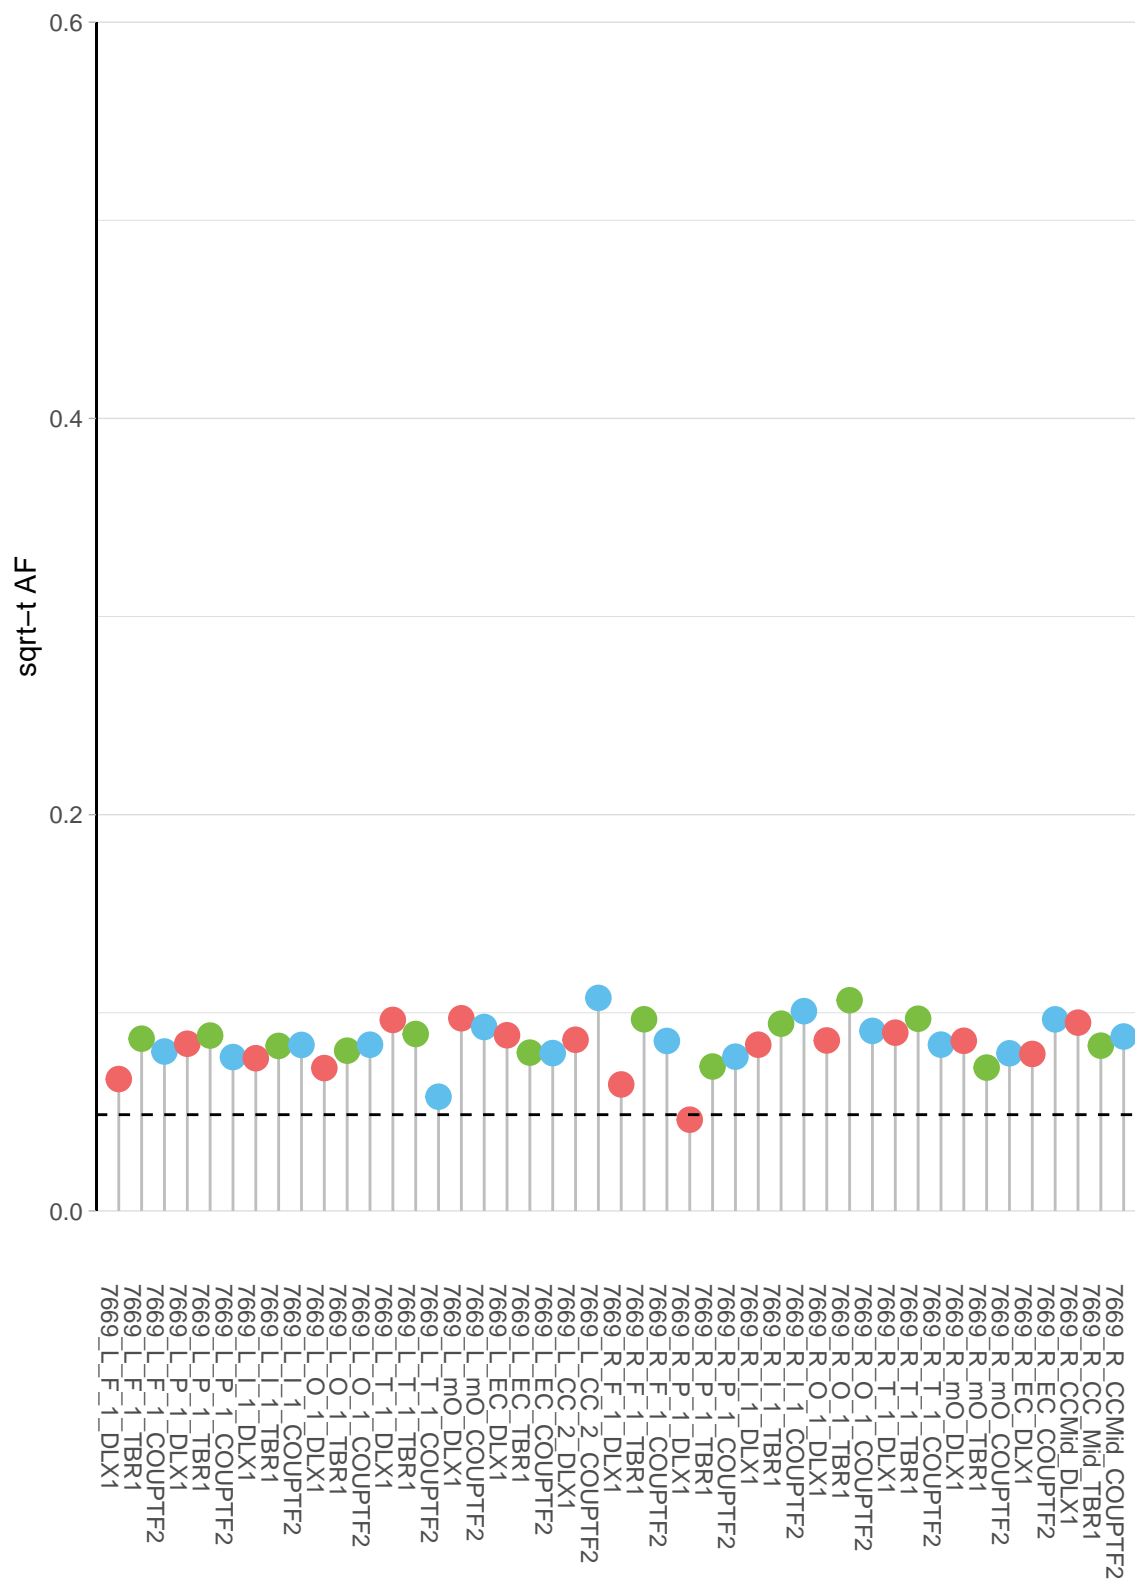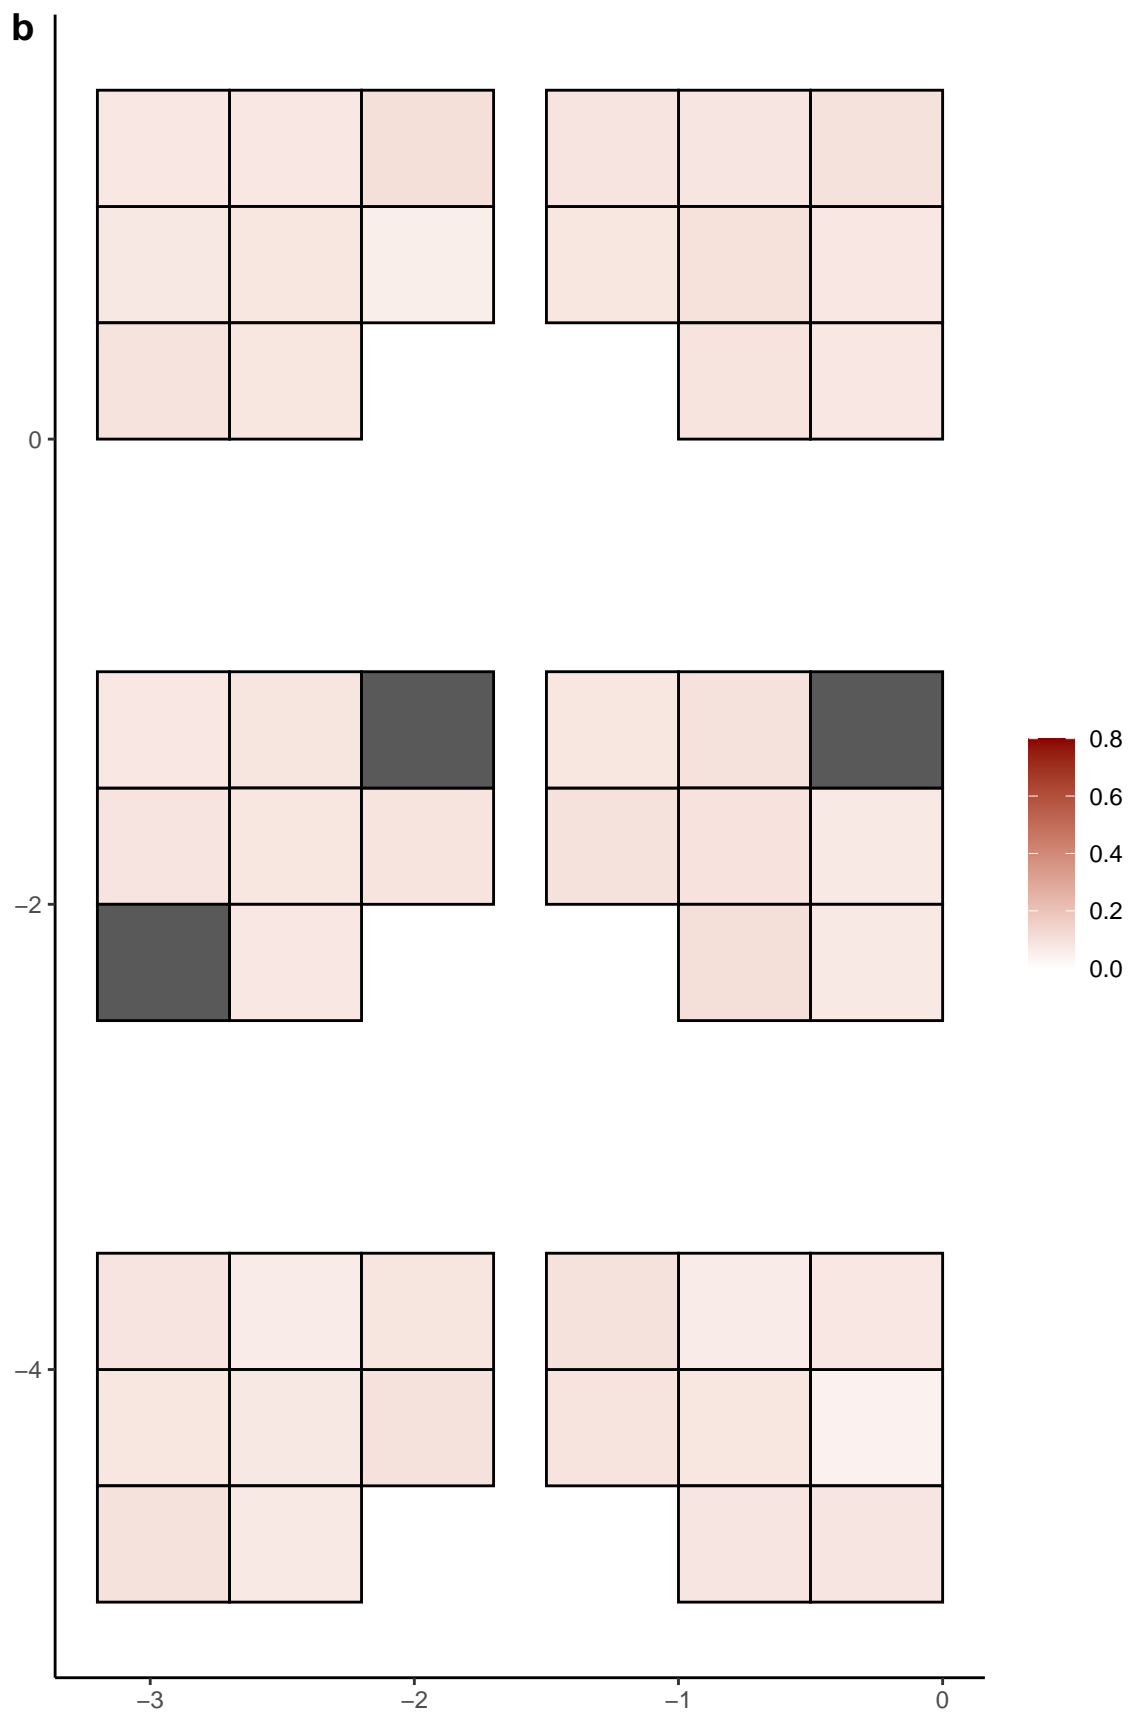



**a** ID05 X-88323908-T-G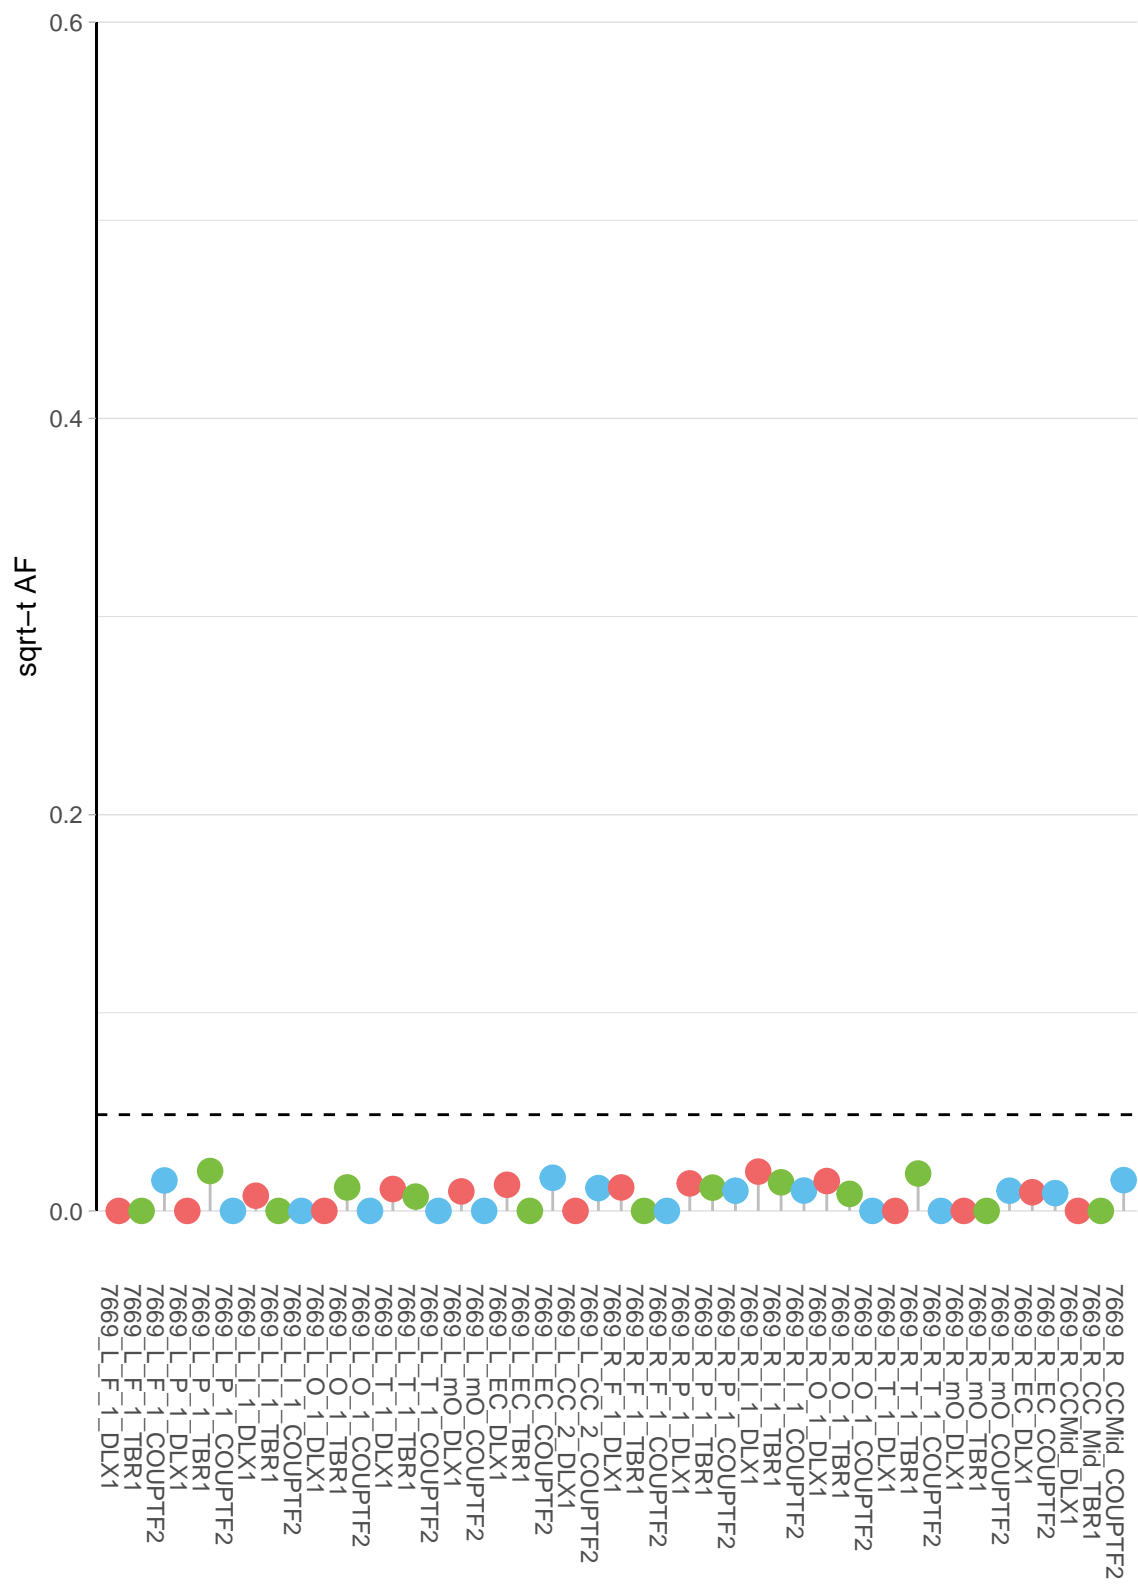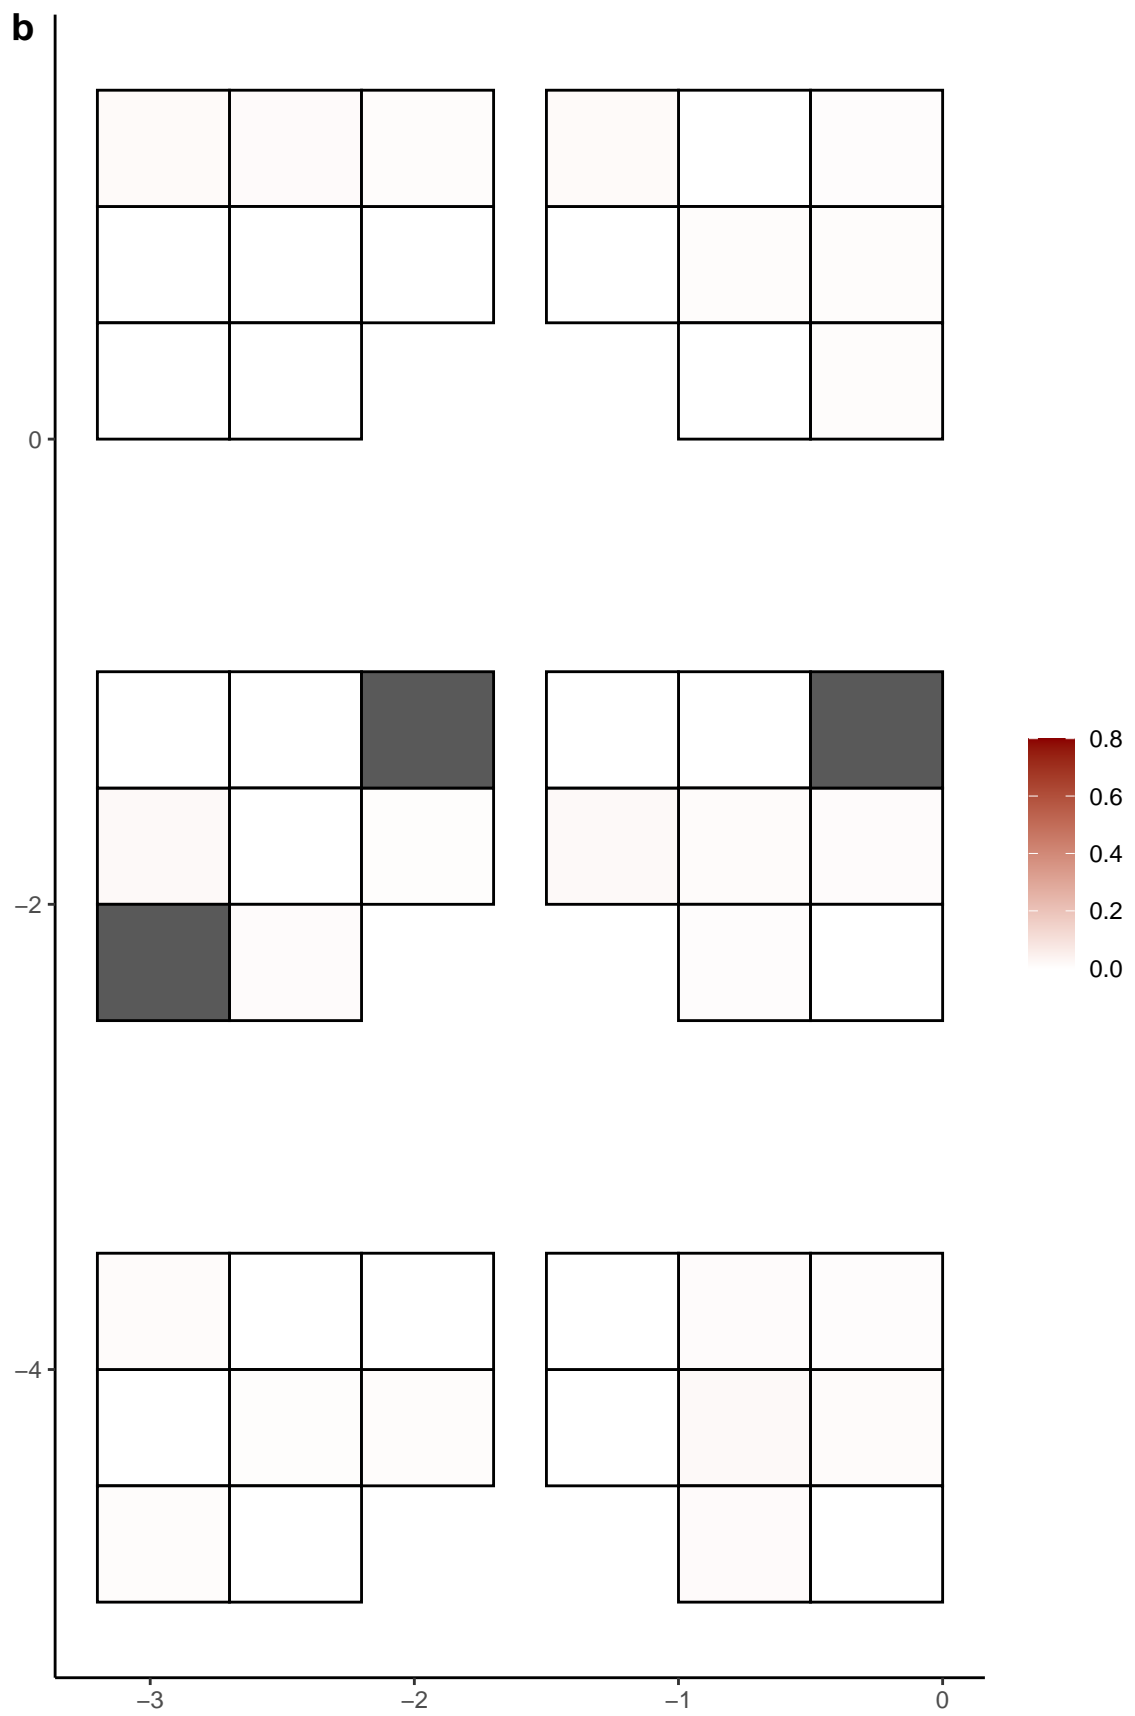

**a** ID05 X-95198288-C-T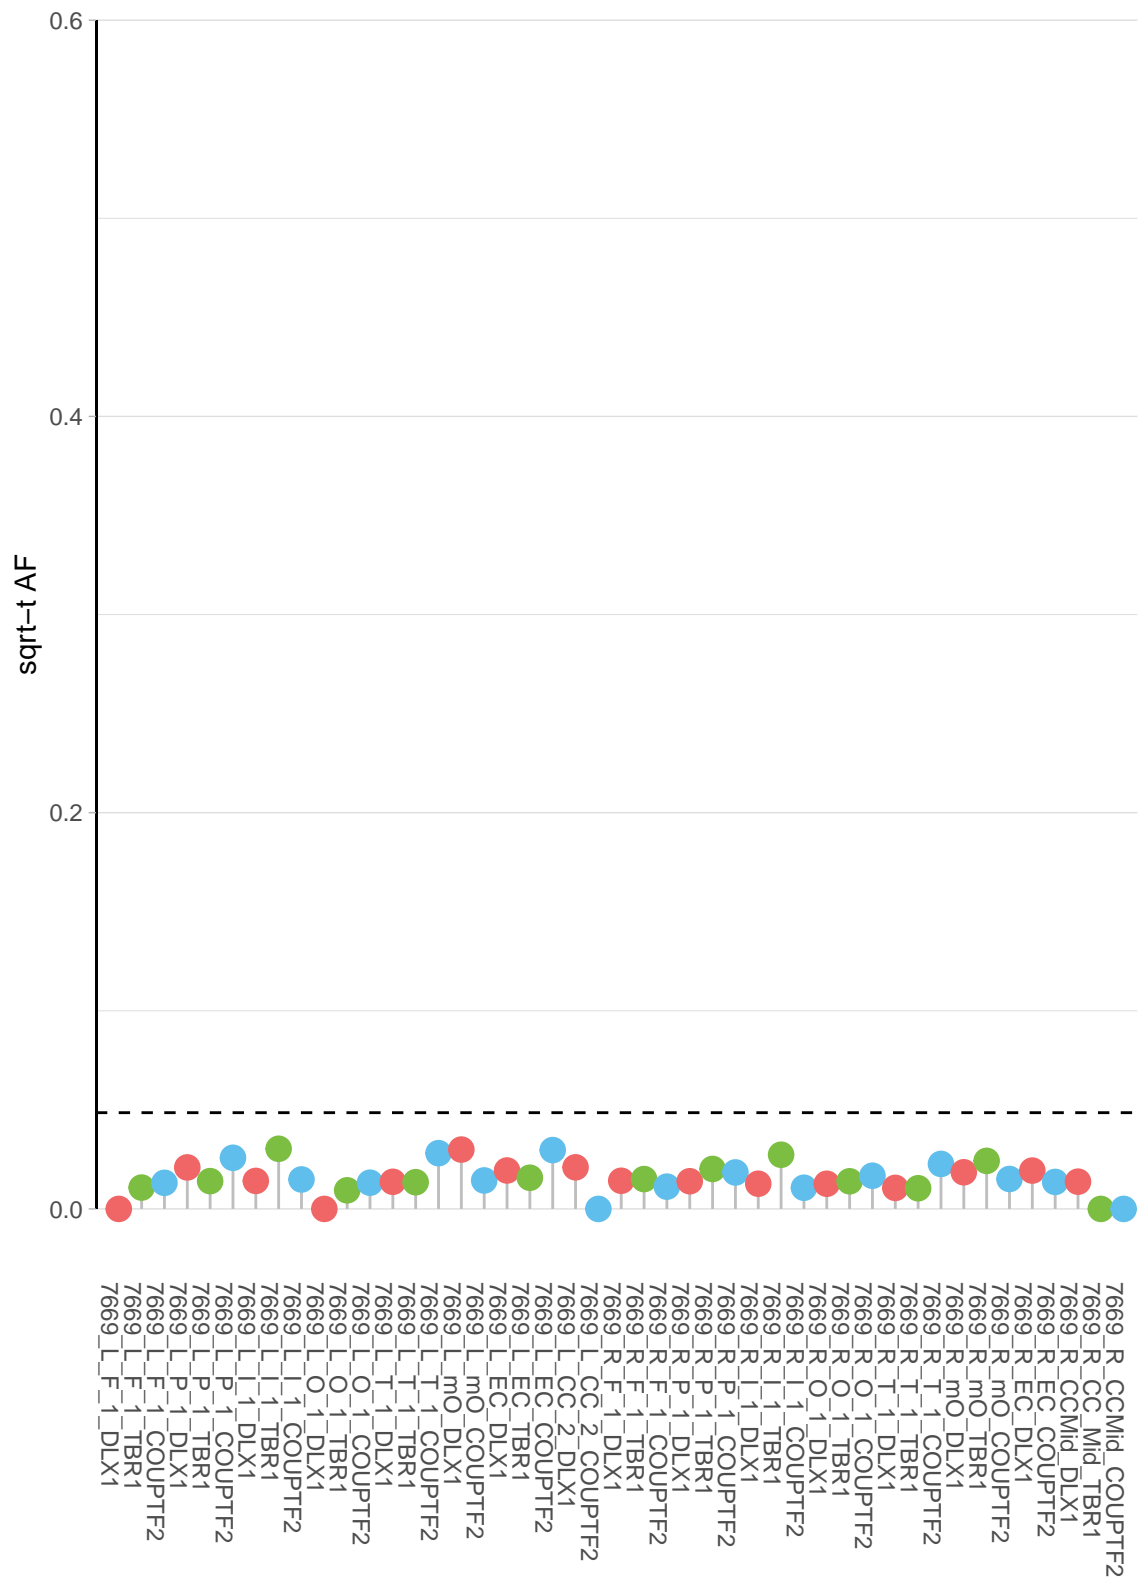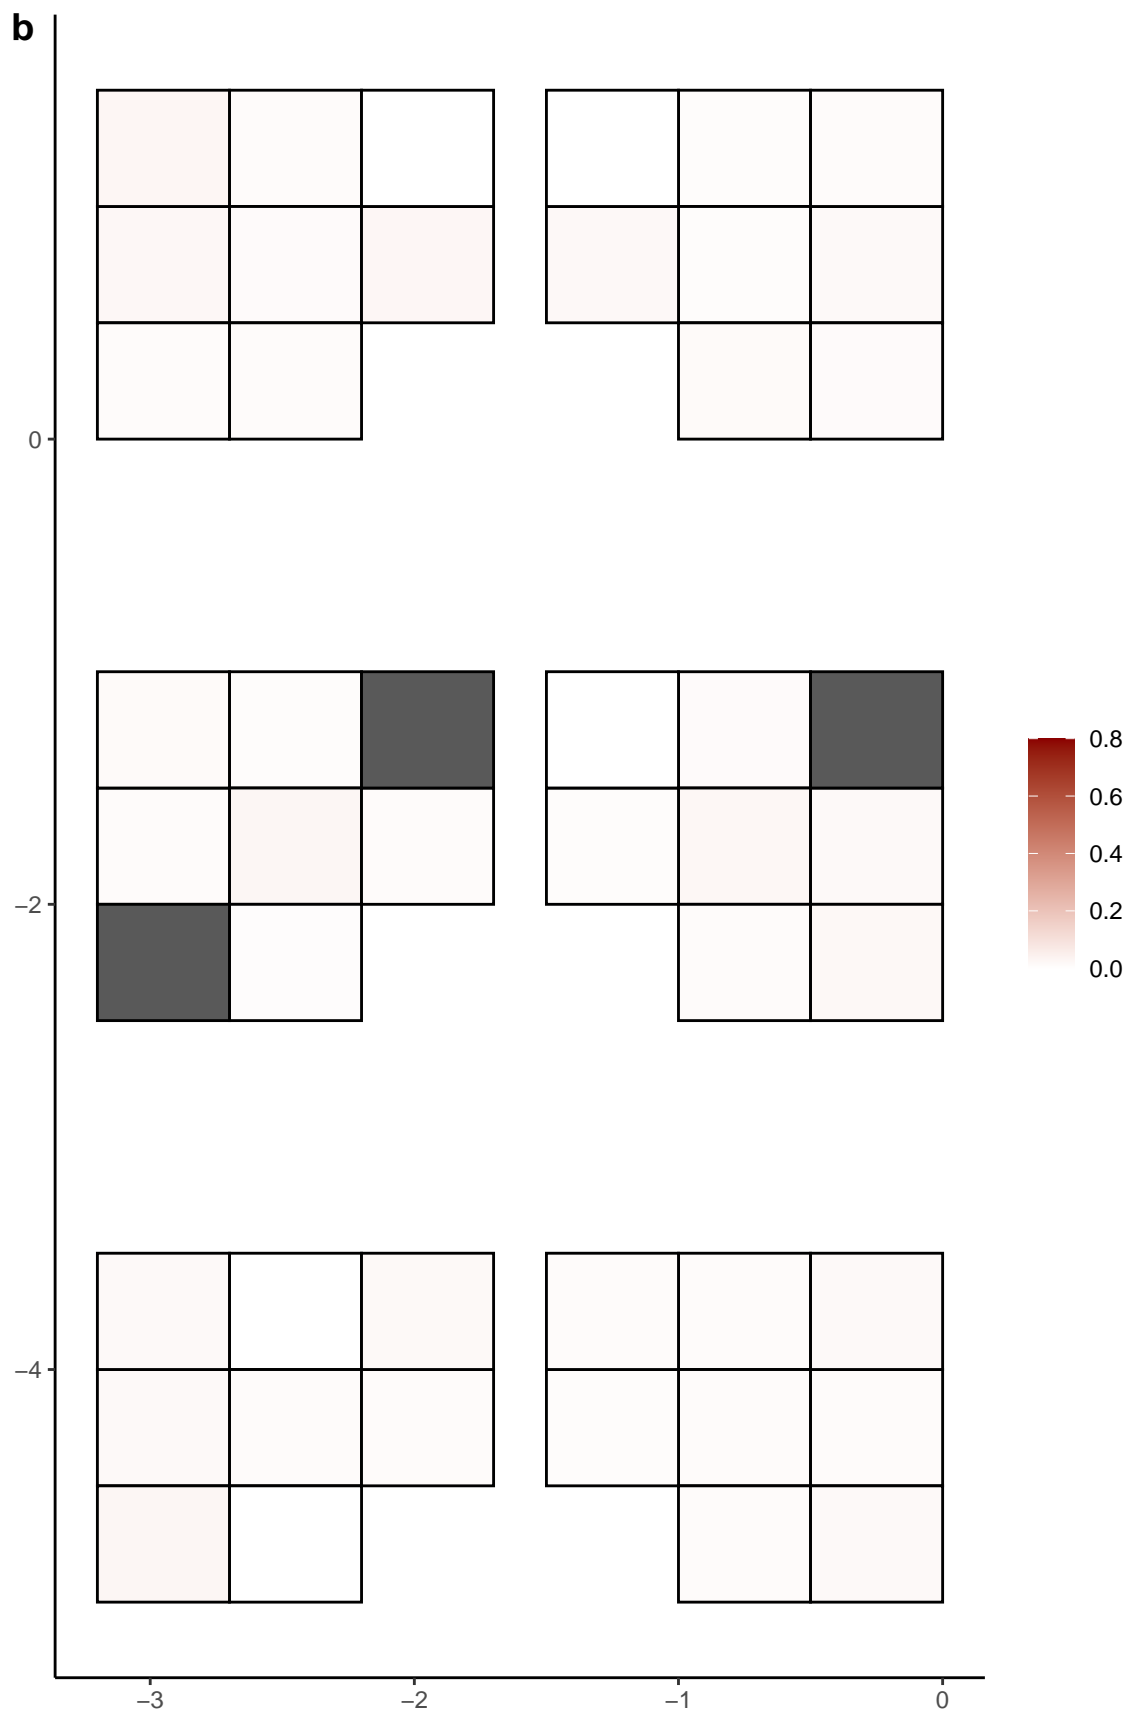

**a** ID05 X-96237346-G-A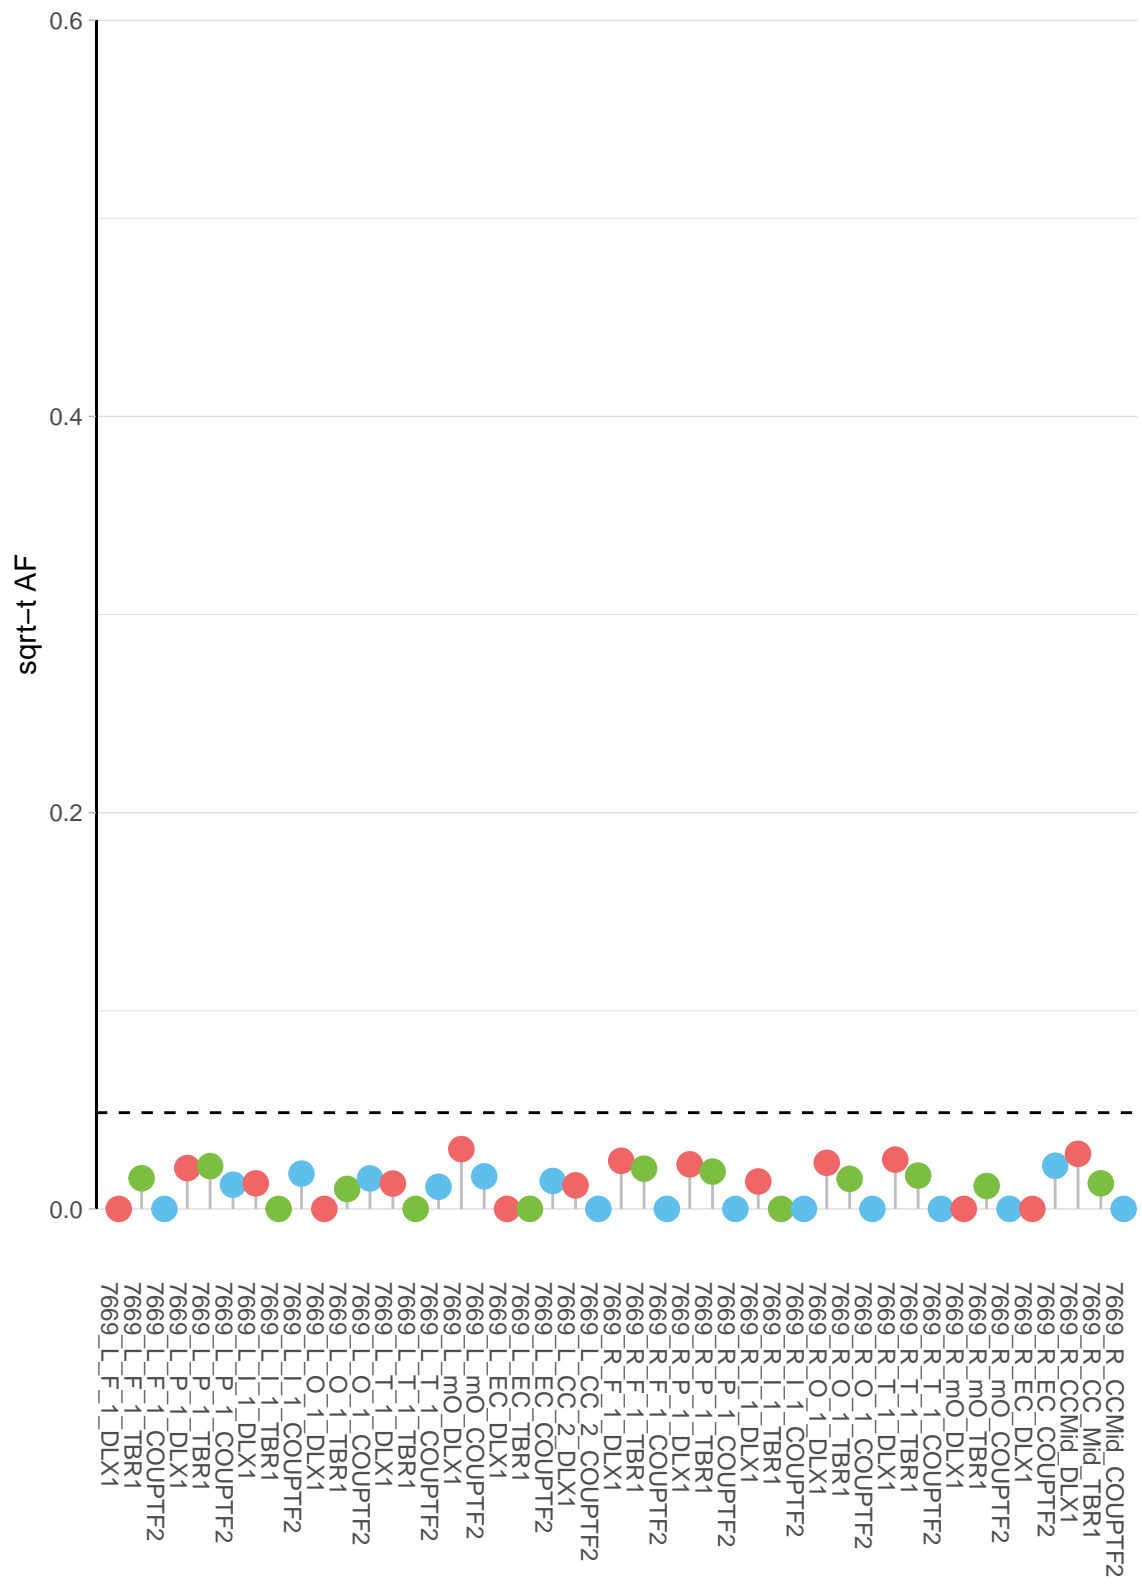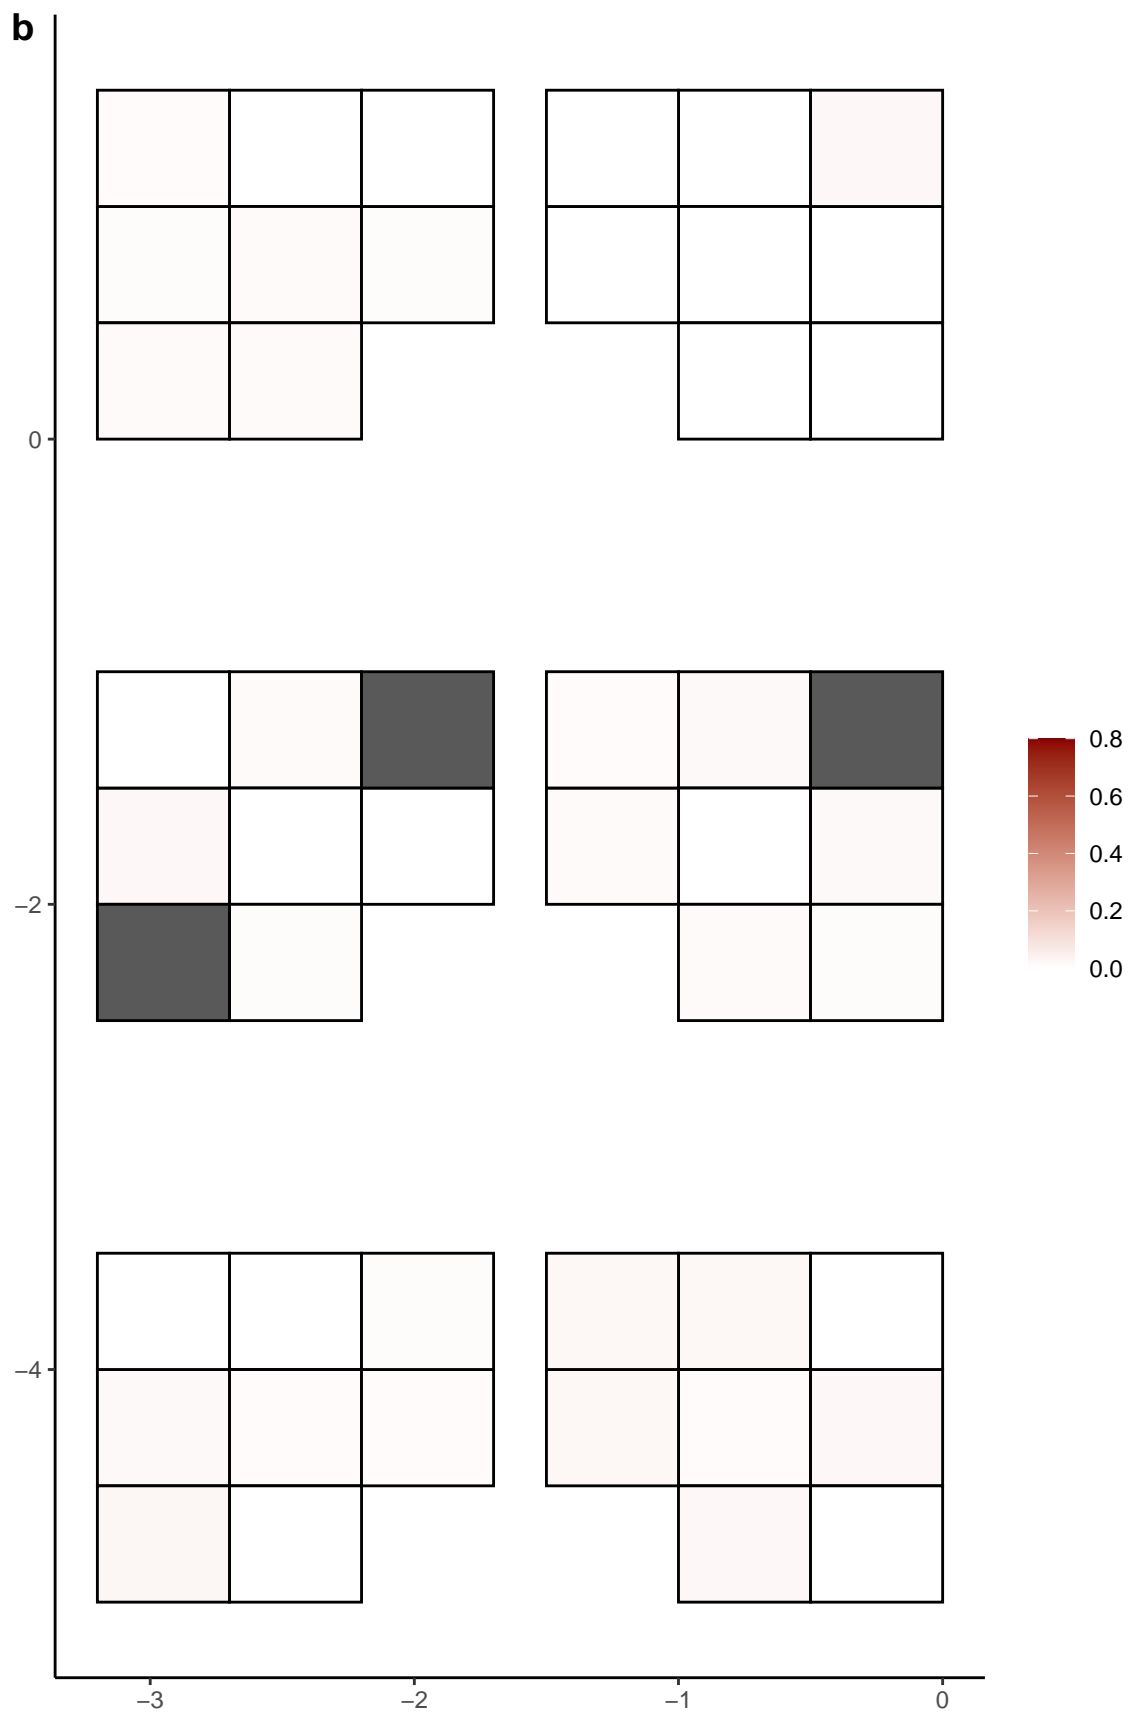

**a** ID05 X-98261573-C-T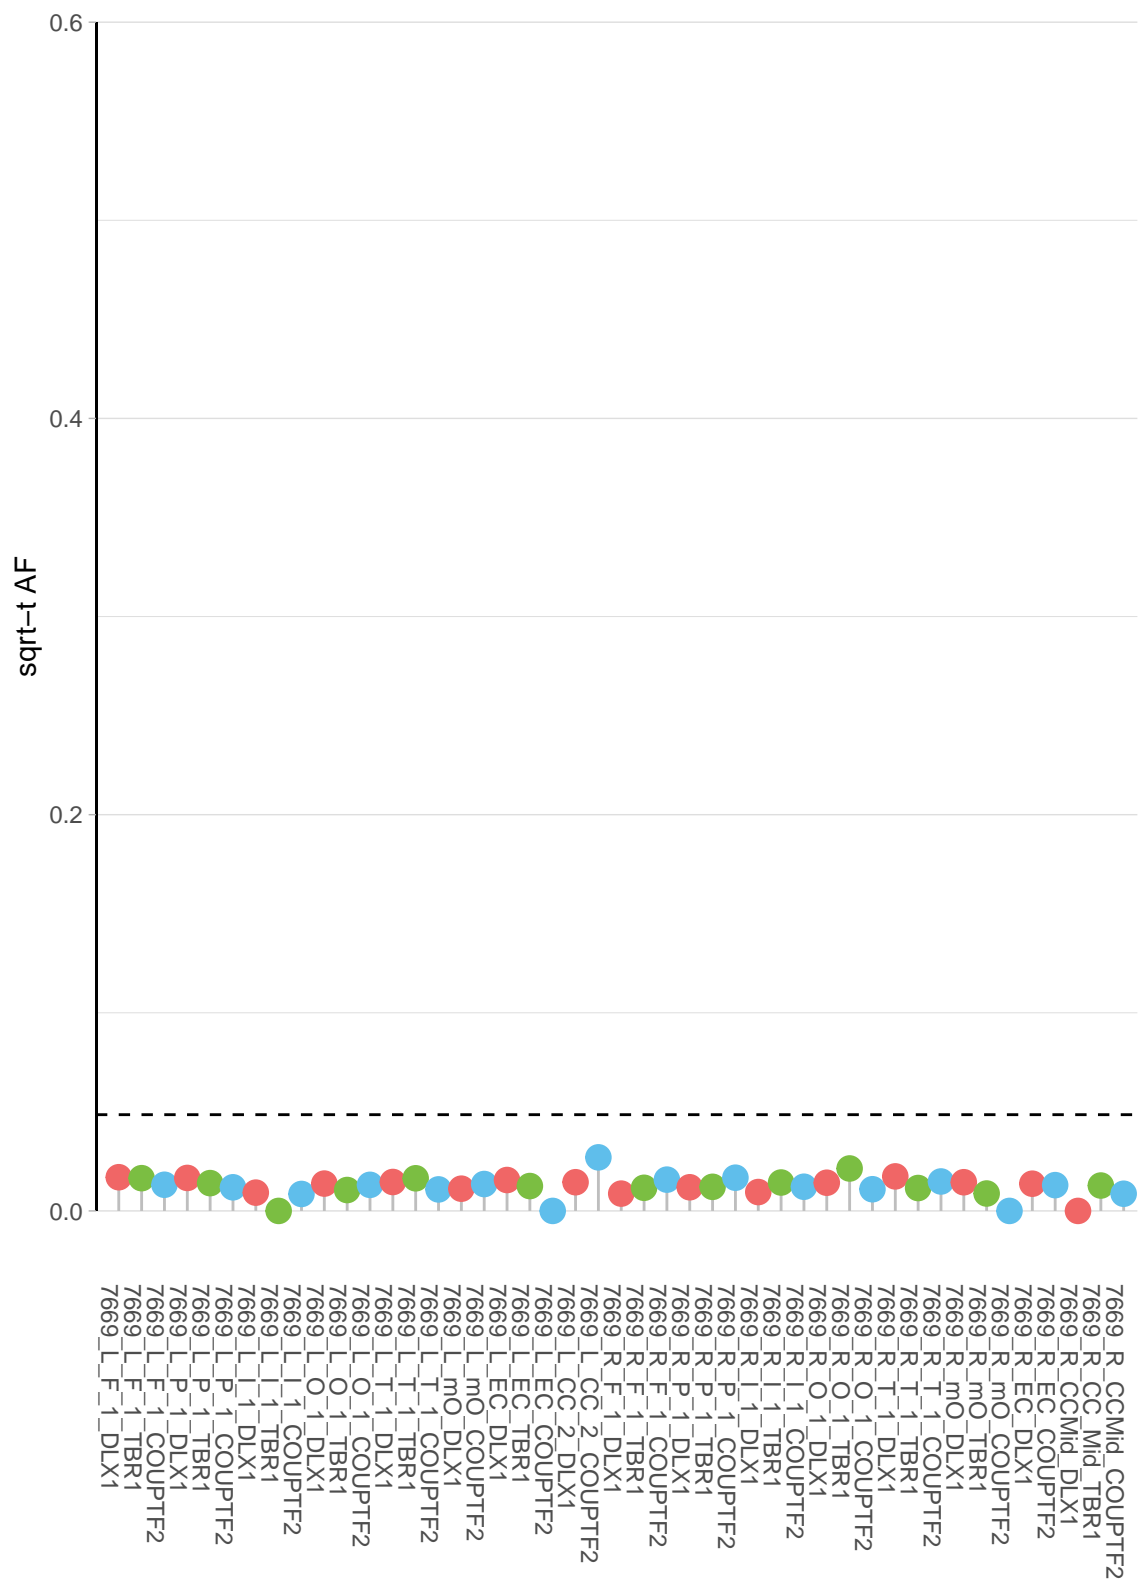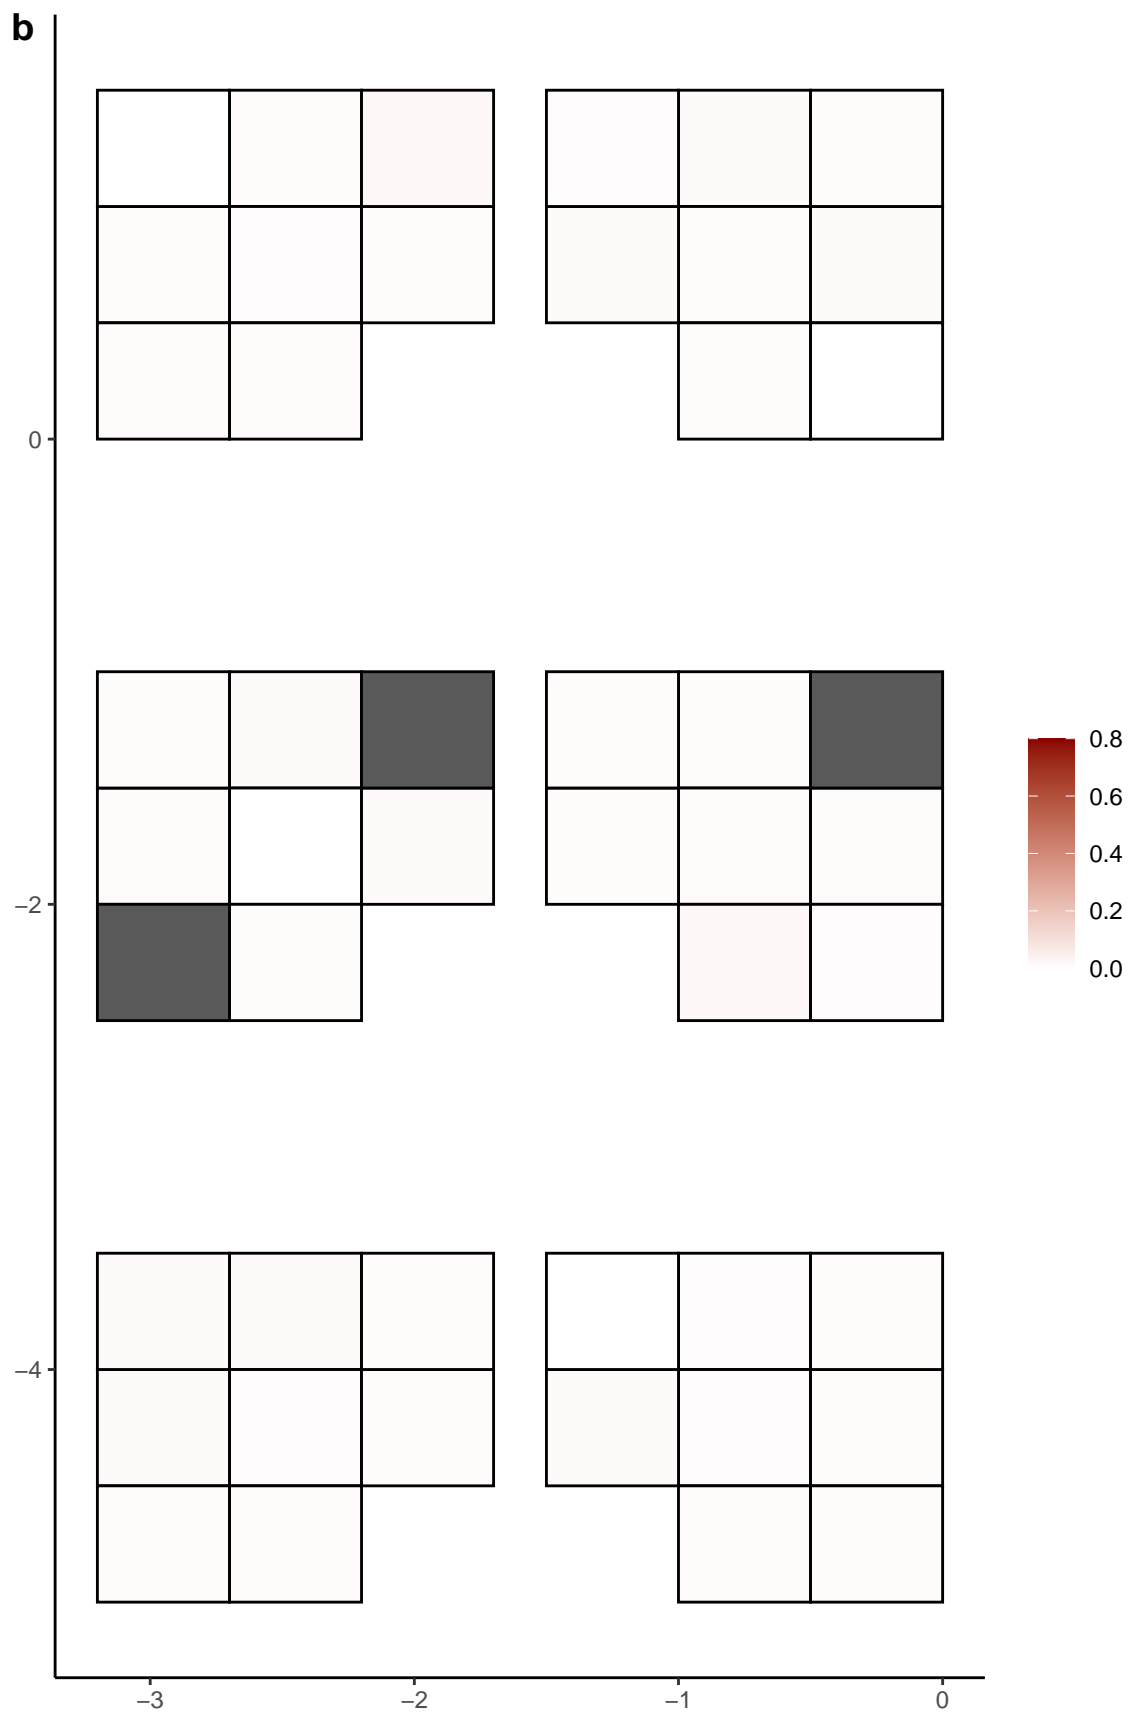

**a** ID05 X-98520292-C-A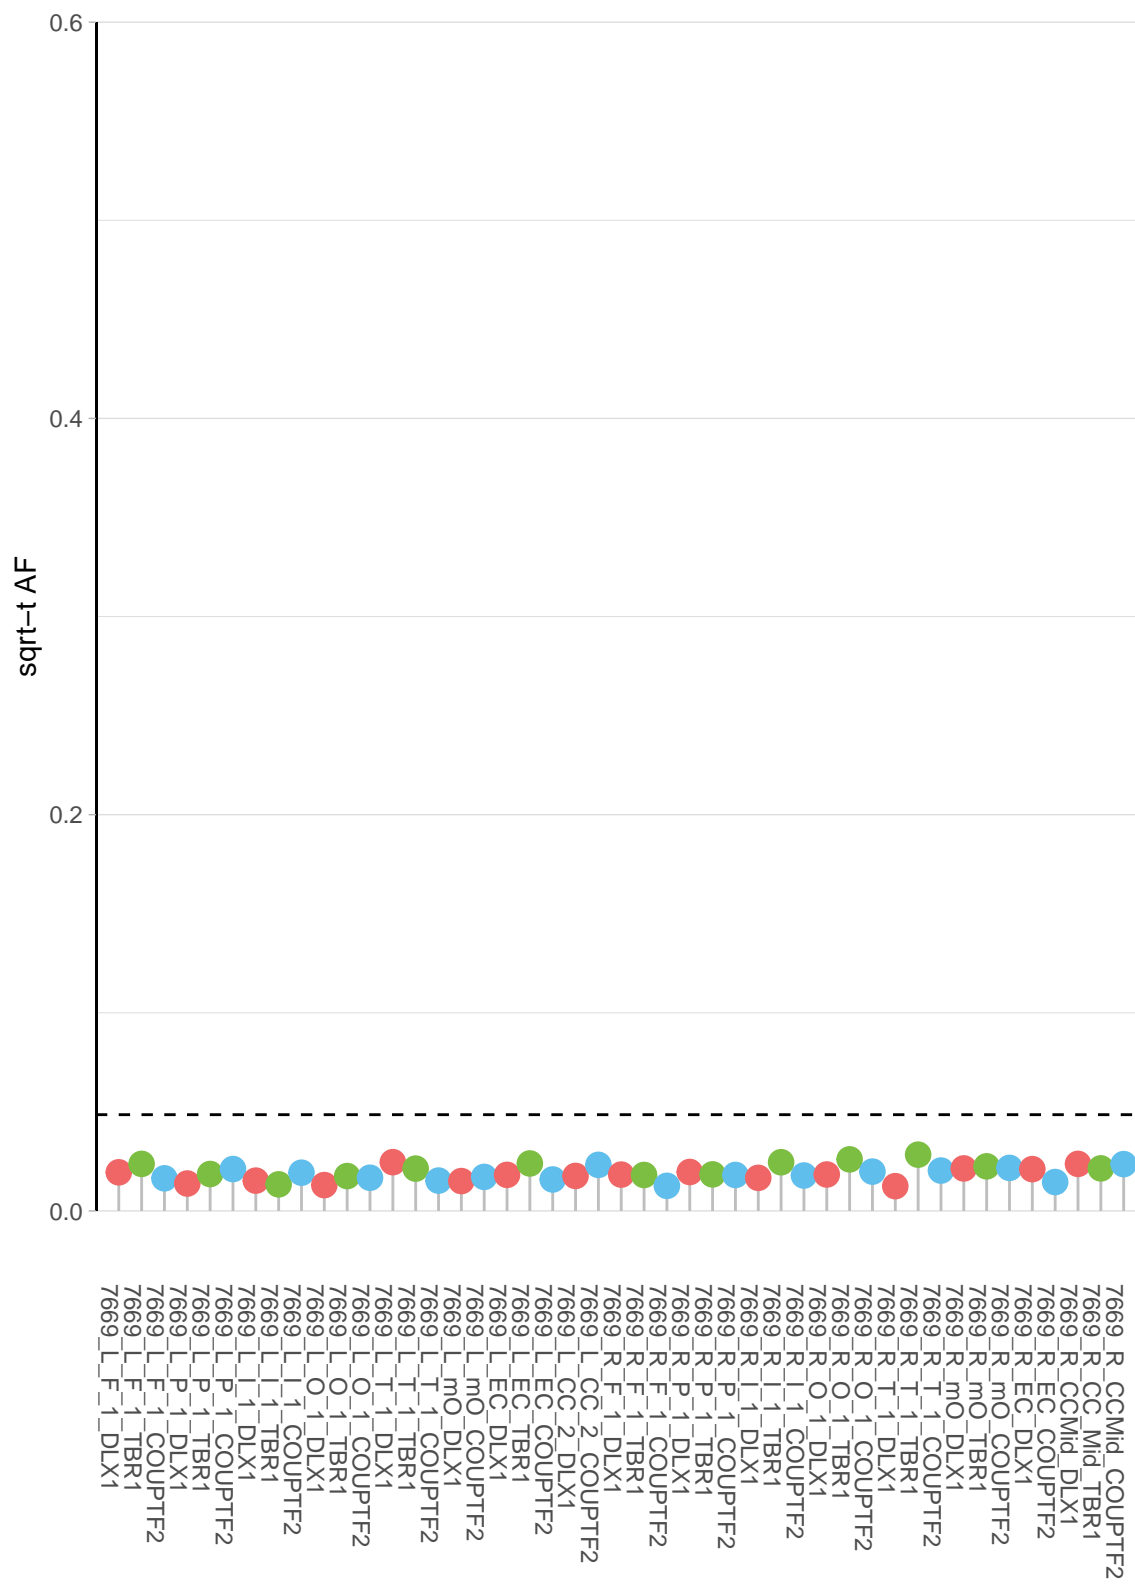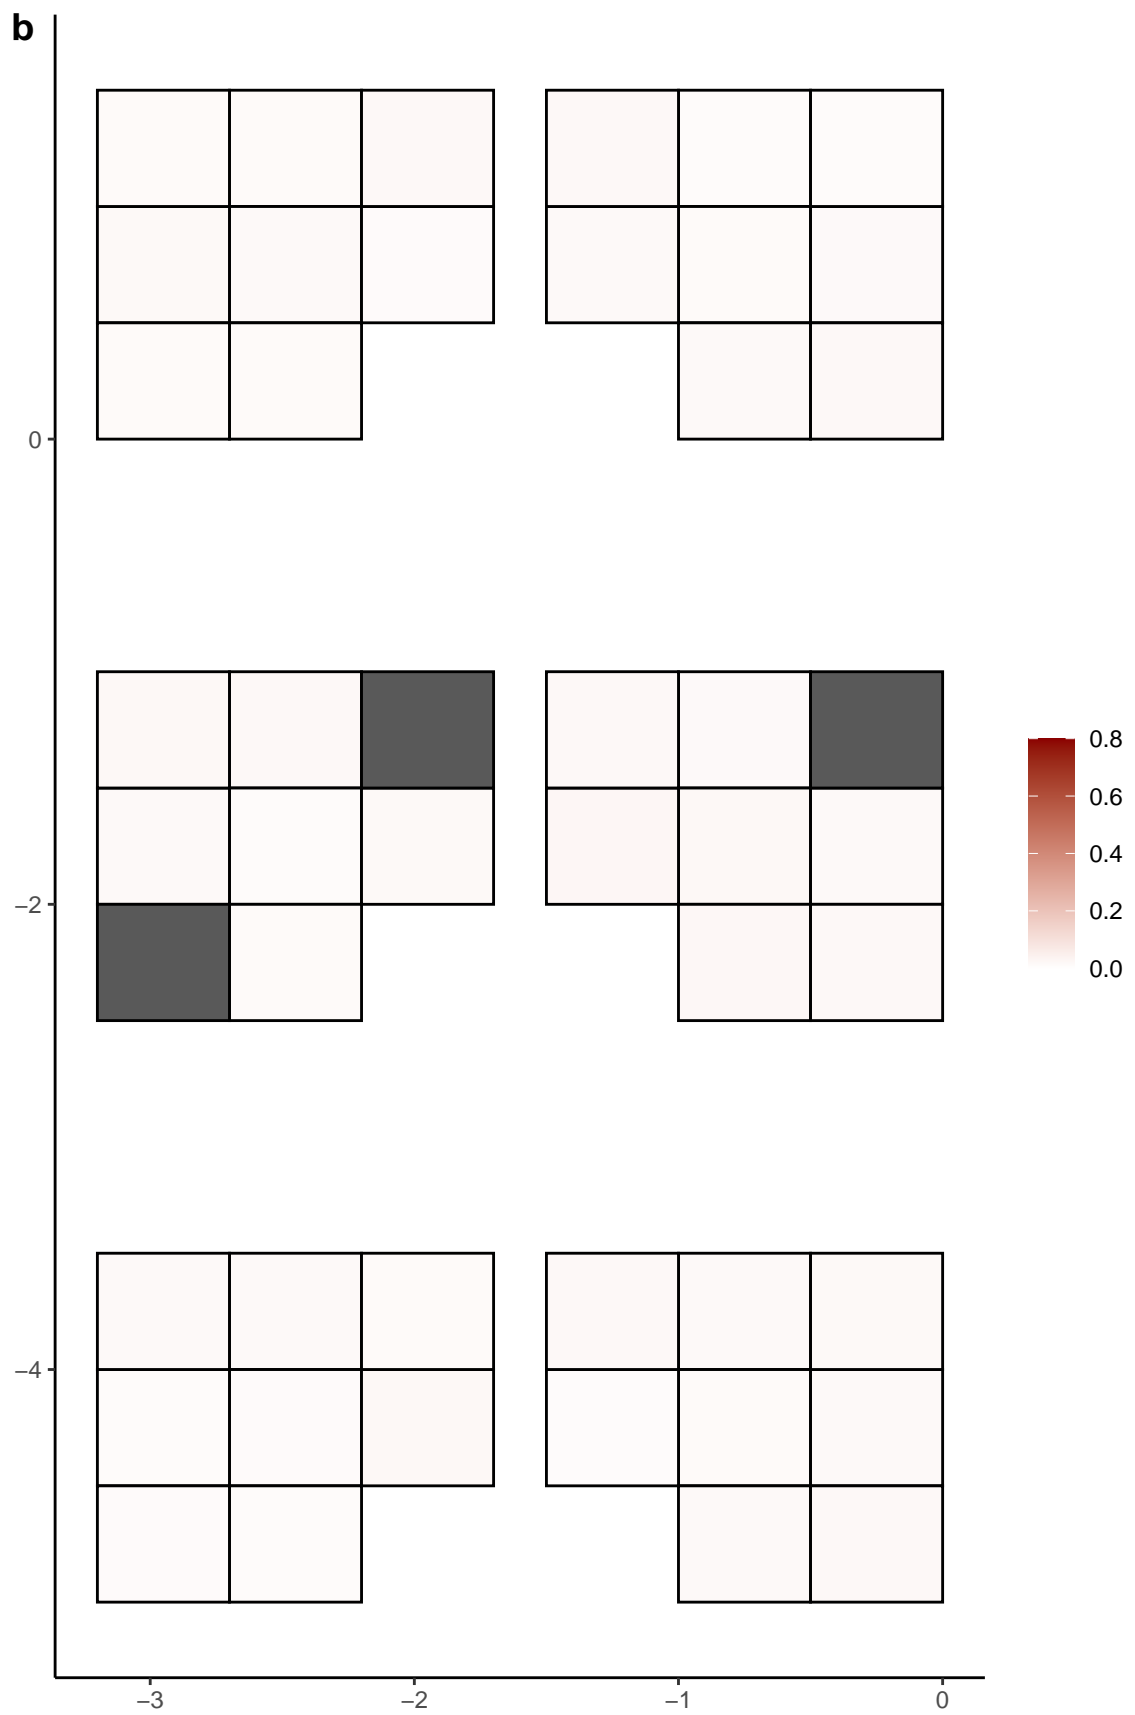





**a** ID05 X-99571049-A-C

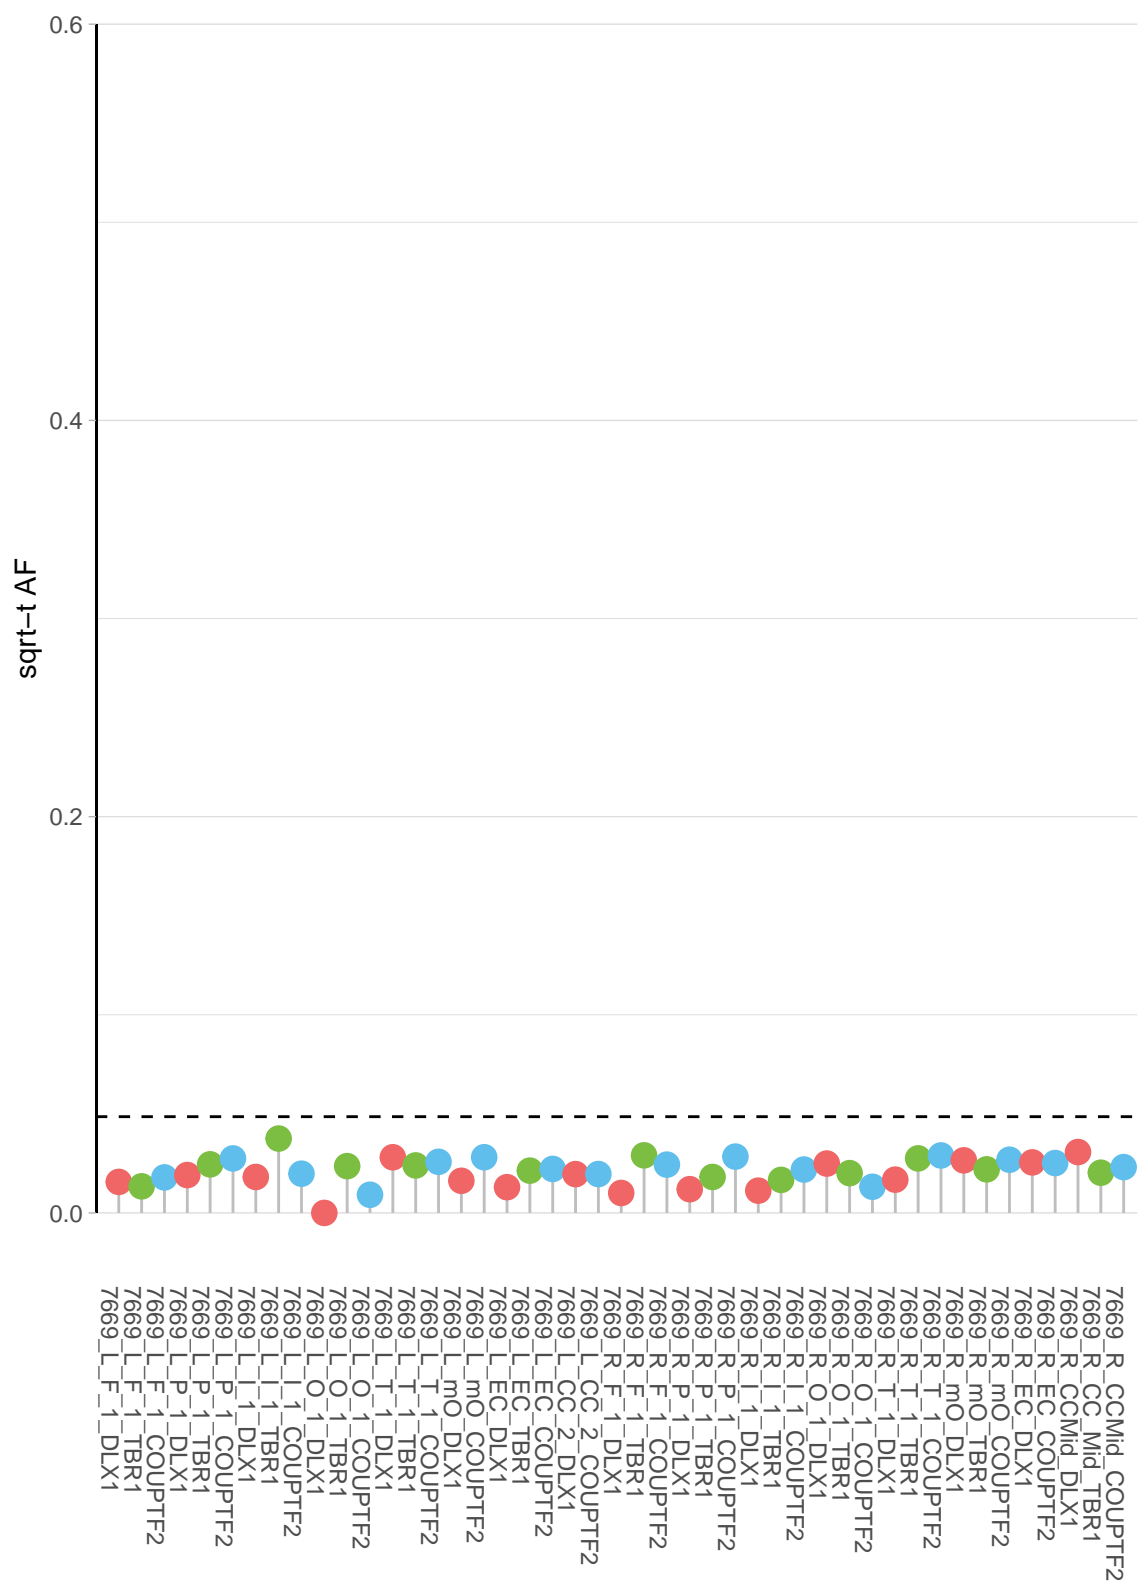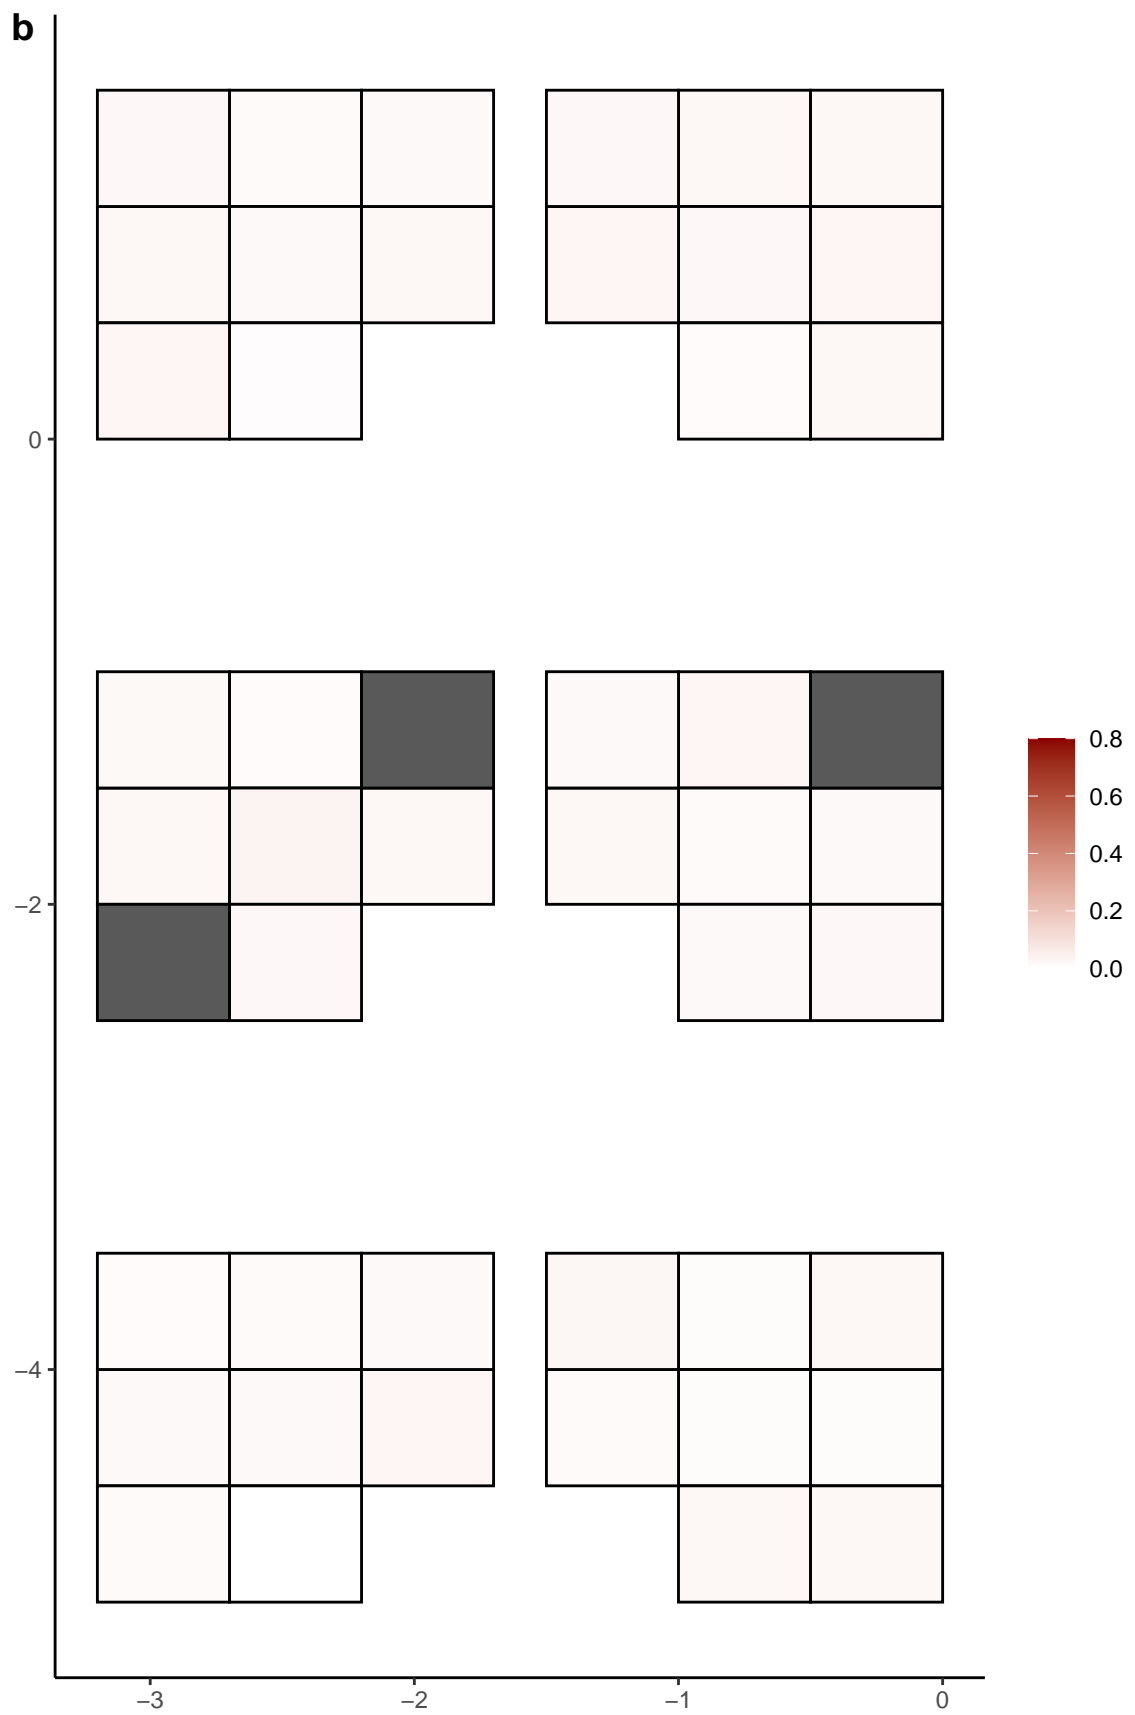

**a** ID05 X-99890064-T-C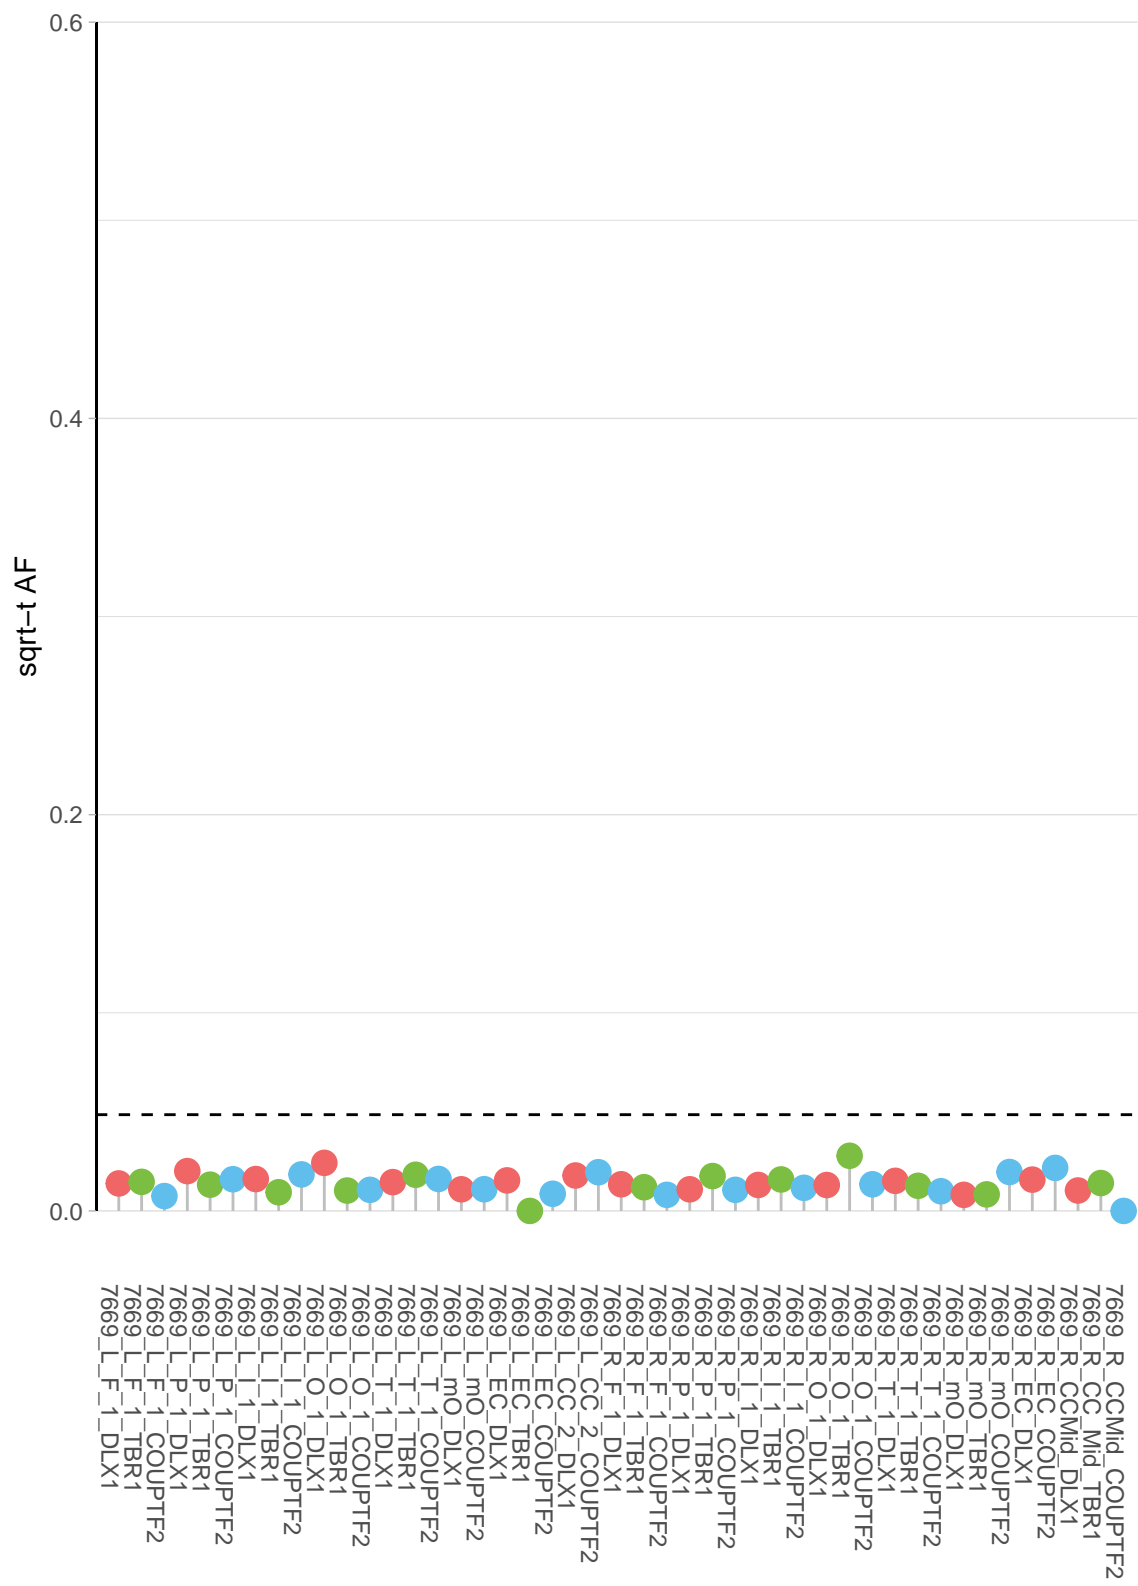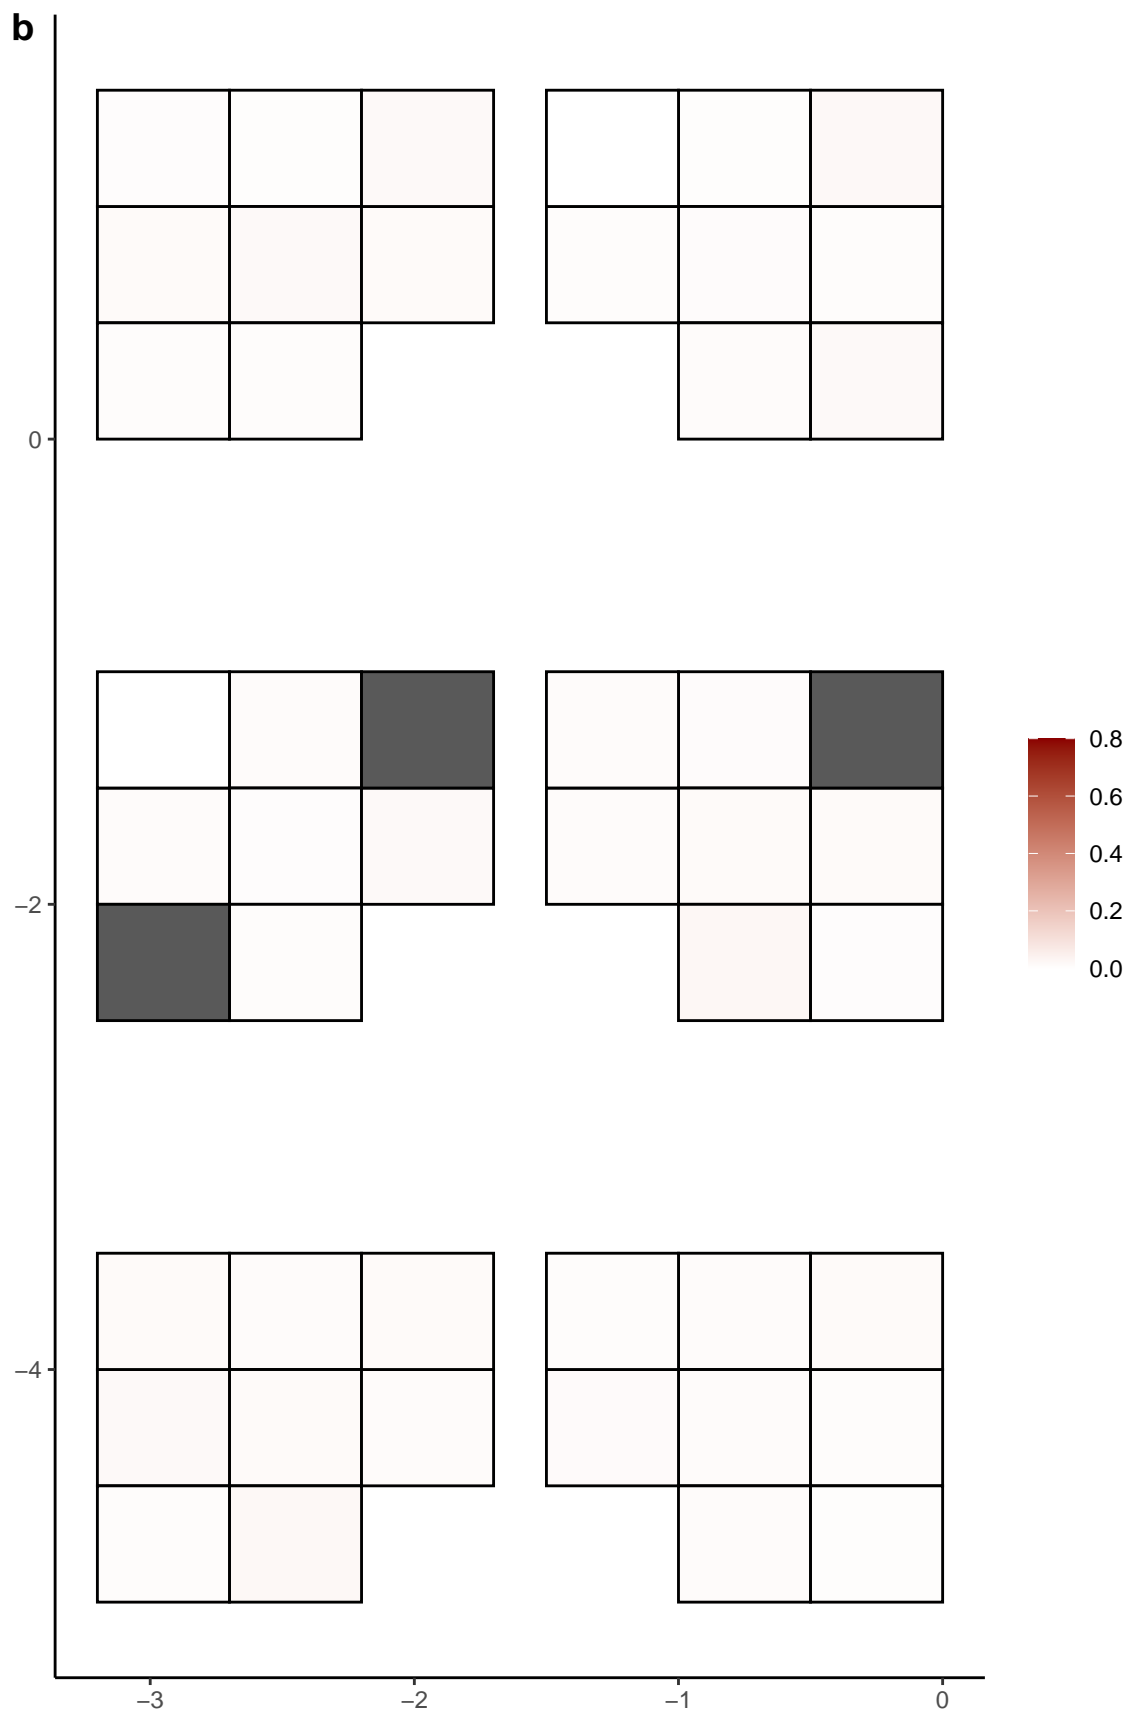

Supplement: media-1.pdf [file media-1.pdf]
