# Supplementary material for: Cell-type-resolved somatic mosaicism reveals clonal dynamics of the human forebrain
Source: PubMed Central journal article supplement — bioRxiv. 2023 Oct 26:2023.10.24.563814. Preprint. [Version 2] doi: 10.1101/2023.10.24.563814 (PMC10634852; doi:10.1101/2023.10.24.563814), 2023-10-26

17 small punches P  $\begin{matrix} \uparrow D \\ \leftarrow P \rightarrow A \\ \downarrow V \end{matrix}$

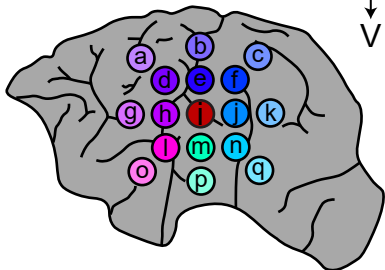

TBR1

|   |   |   |   |   |
|---|---|---|---|---|
| a |   | b |   | c |
|   | d | e | f |   |
| g | h | i | j | k |
|   | l | m | n |   |
| o |   | p |   | q |

DLX1

|   |   |   |   |   |
|---|---|---|---|---|
| a |   | b |   | c |
|   | d | e | f |   |
| g | h | i | j | k |
|   | l | m | n |   |
| o |   | p |   | q |

1-102152318-C-T

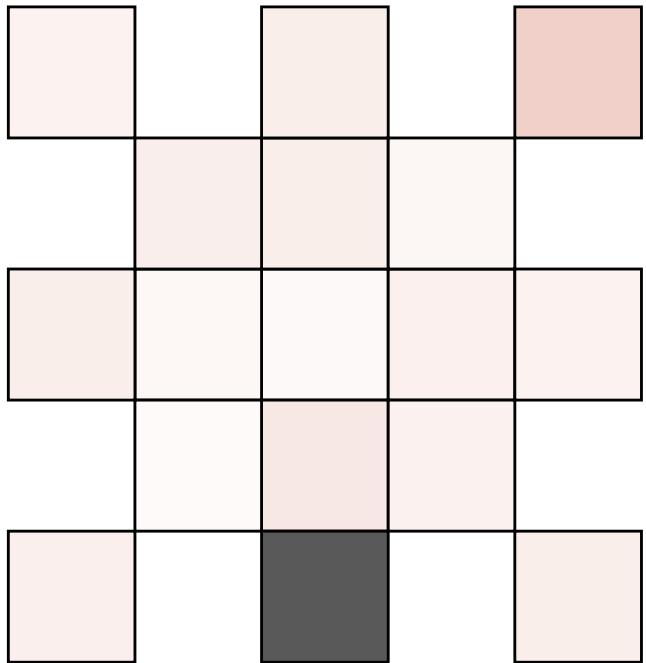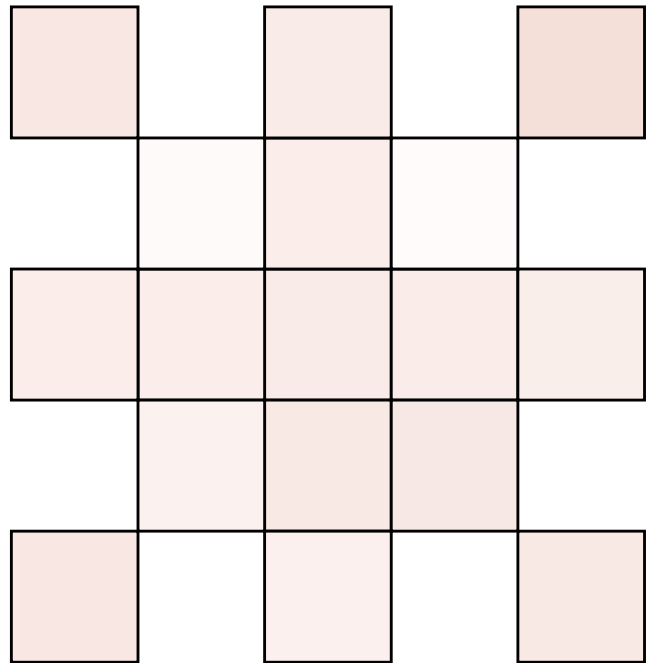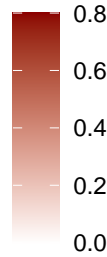

1-102299198-G-T

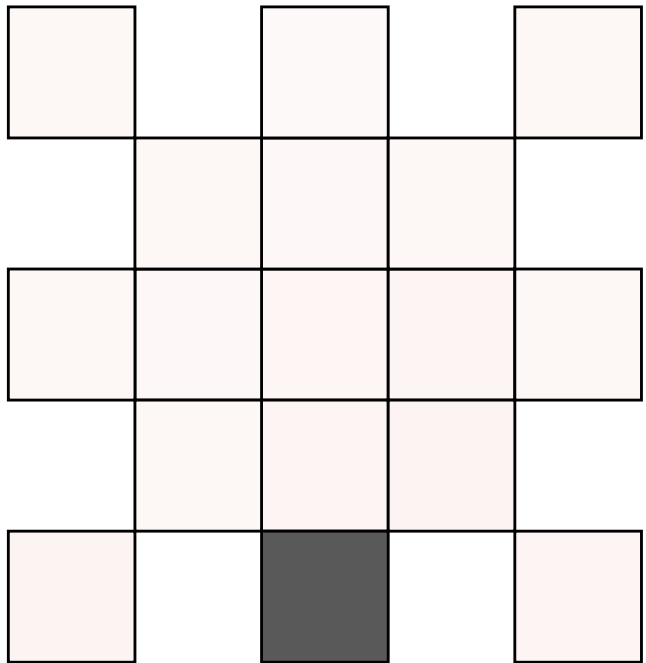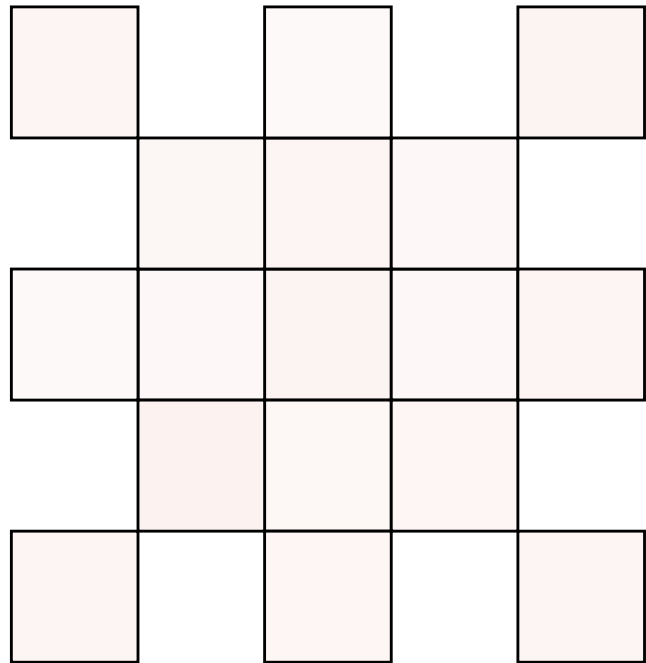

1-103746984-A-T

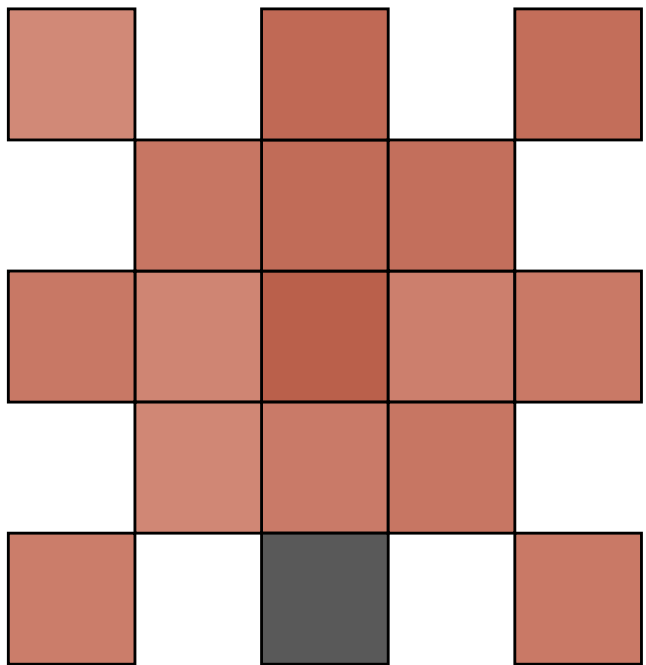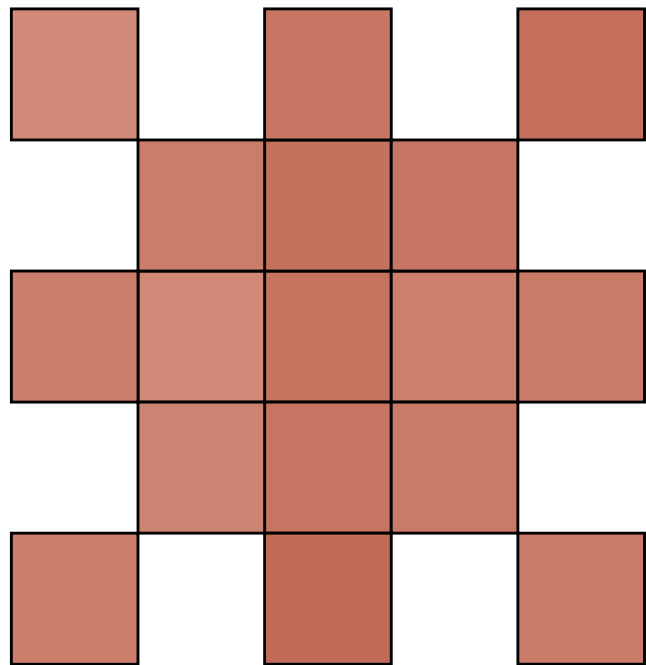

1-104816417-G-A

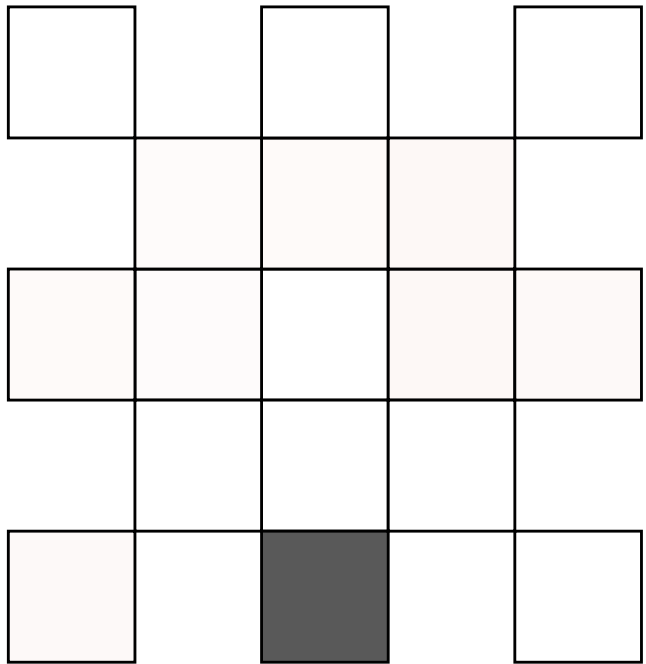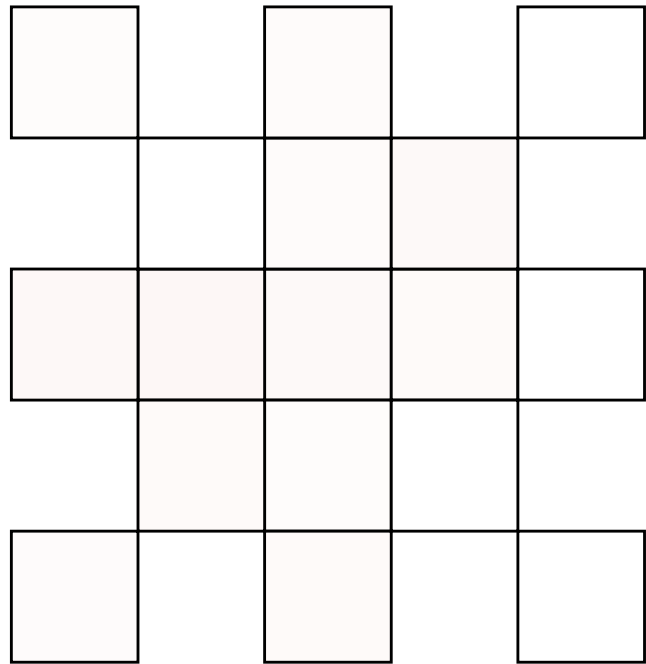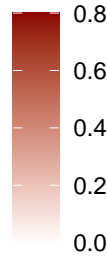

1-105448120-C-T

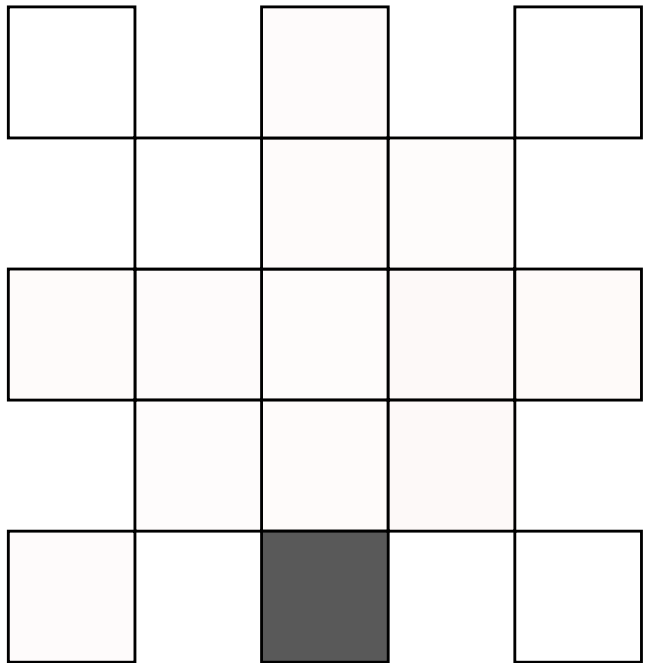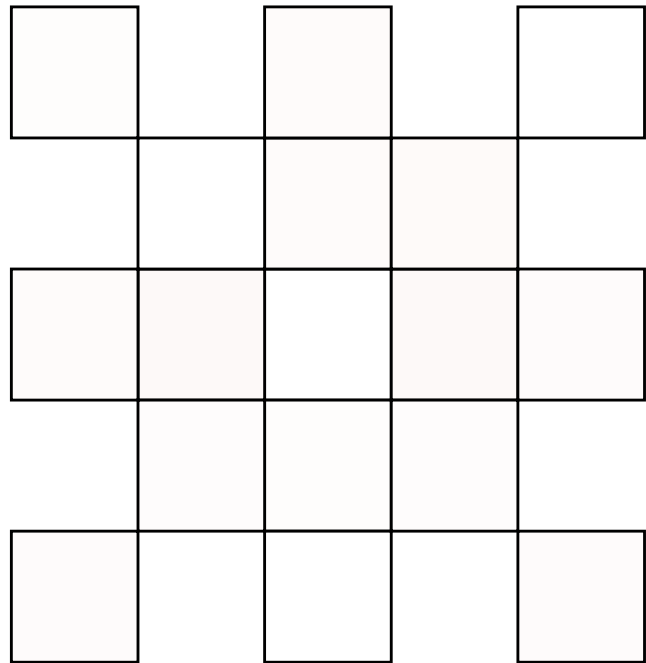

1-113168020-C-T

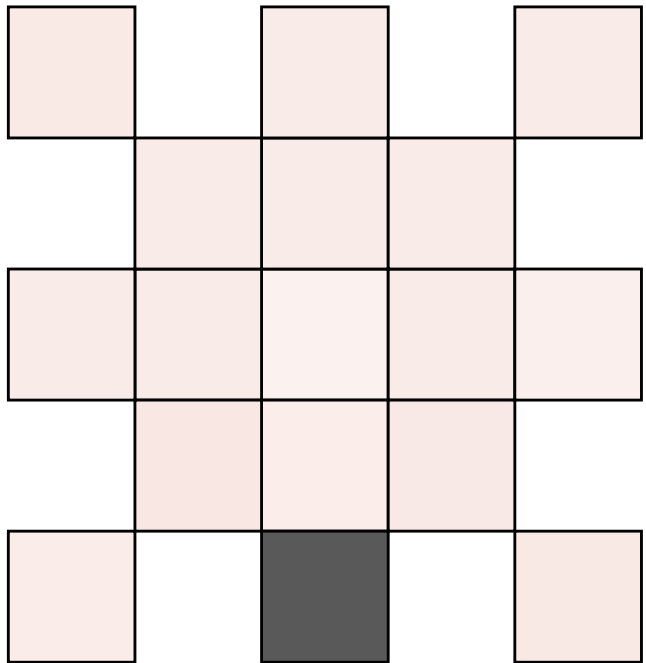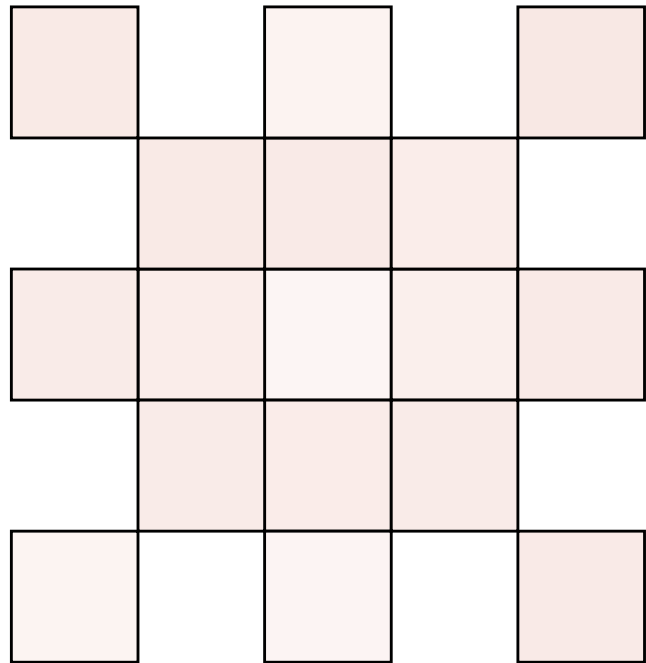

1-113168021-A-G

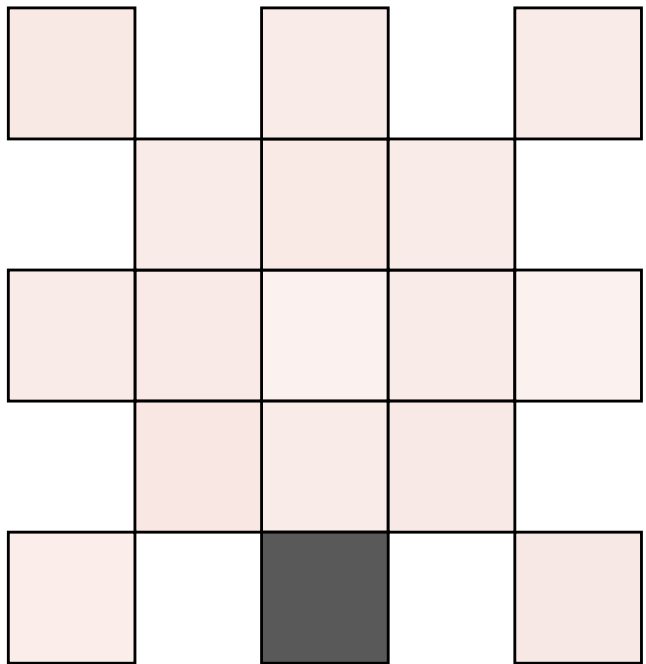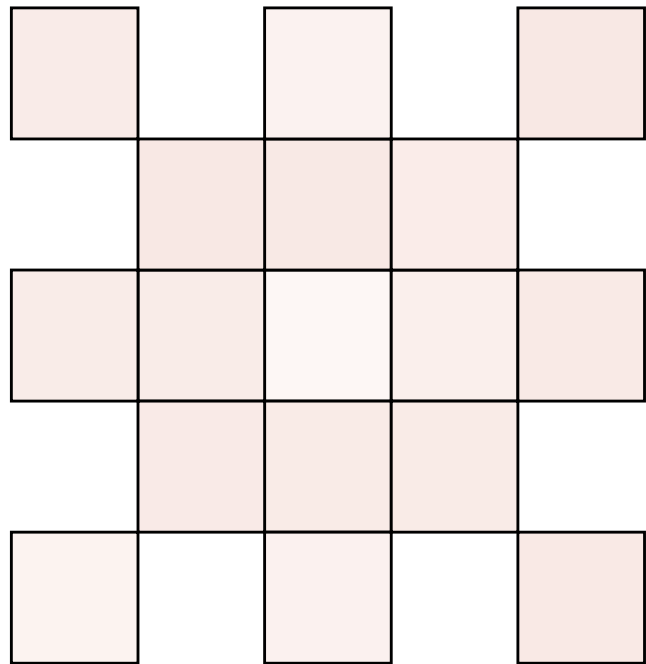



1-116835962-G-A

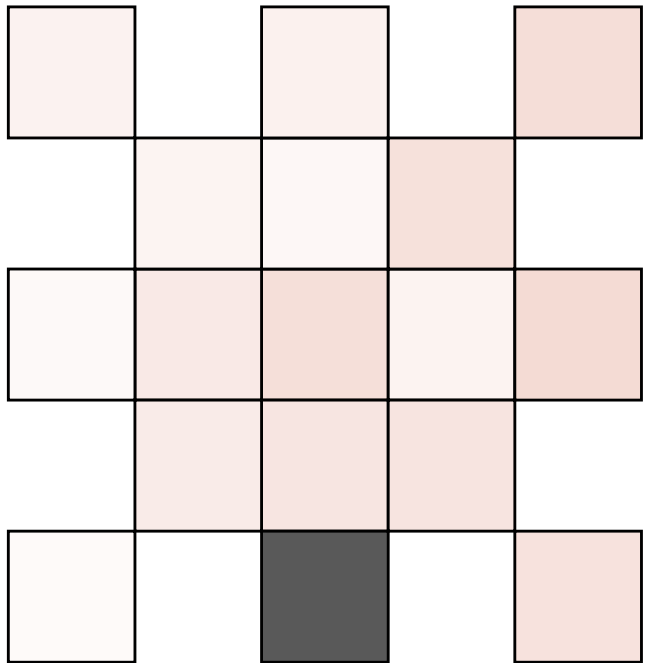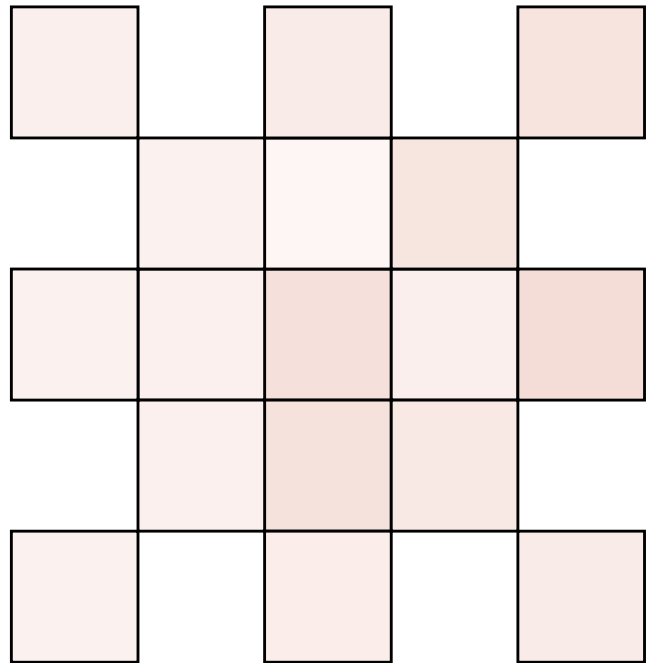

1-117129159-C-T

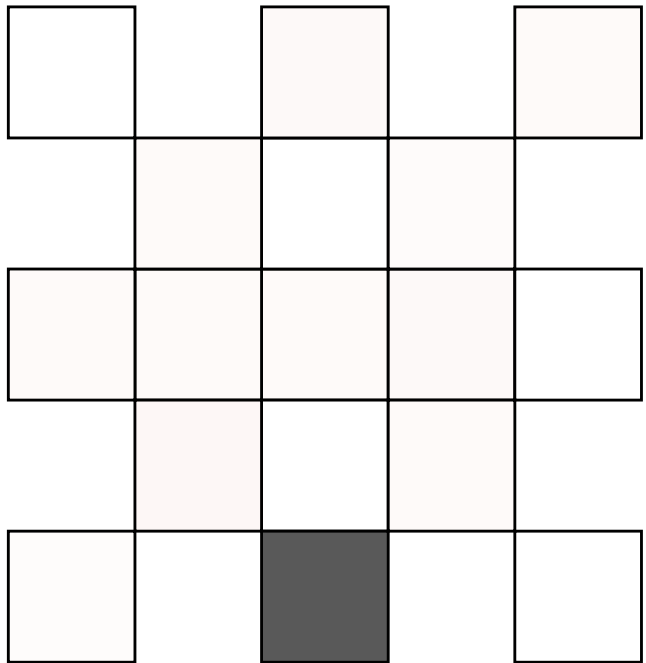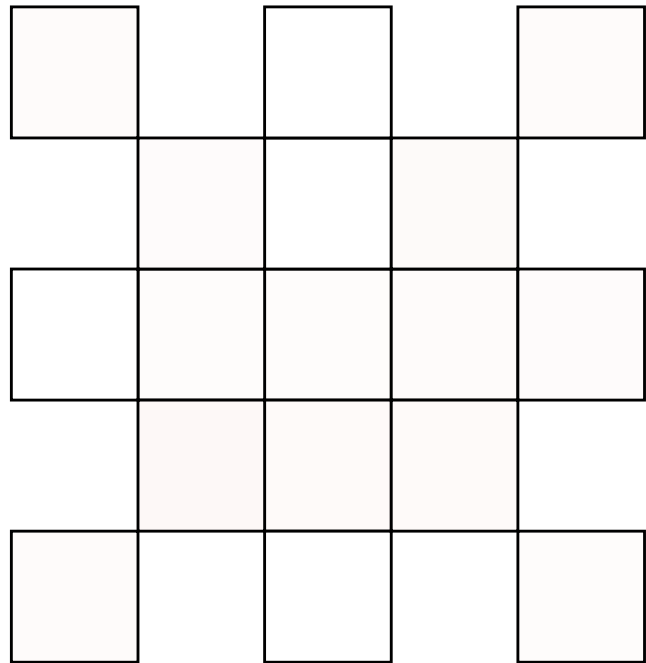

1-117326750-G-T

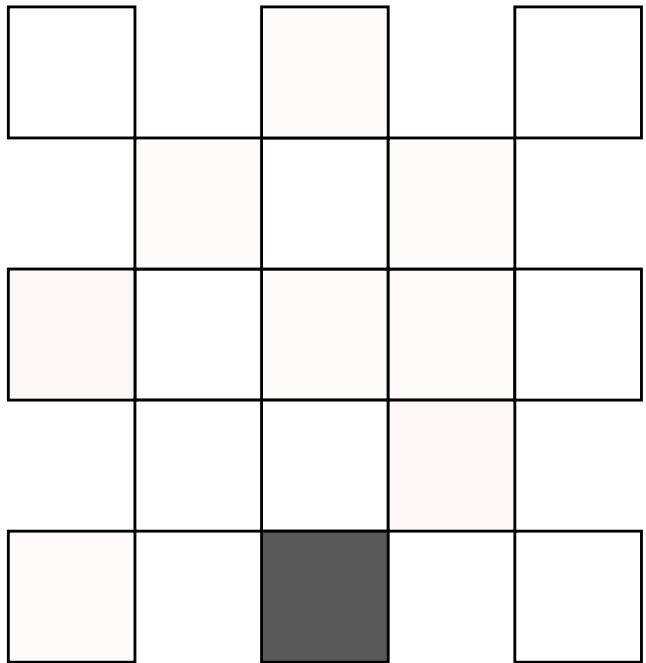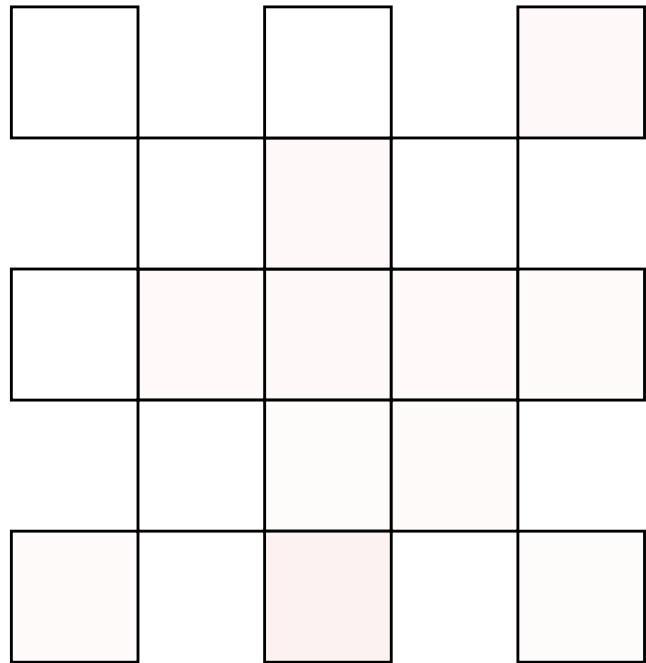

1-1196724-A-T

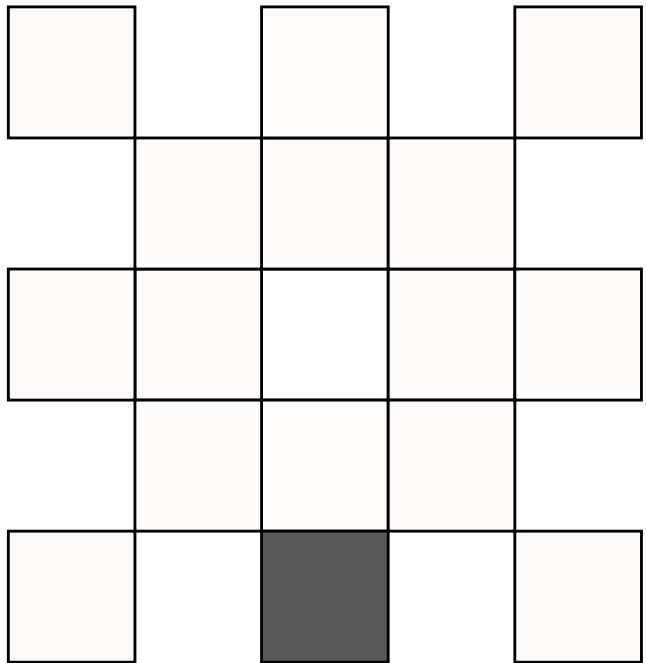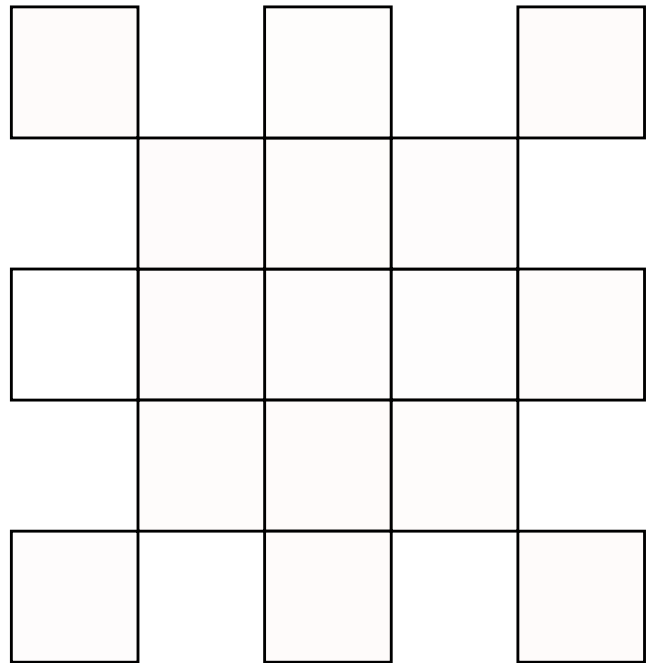

1-154786631-G-A

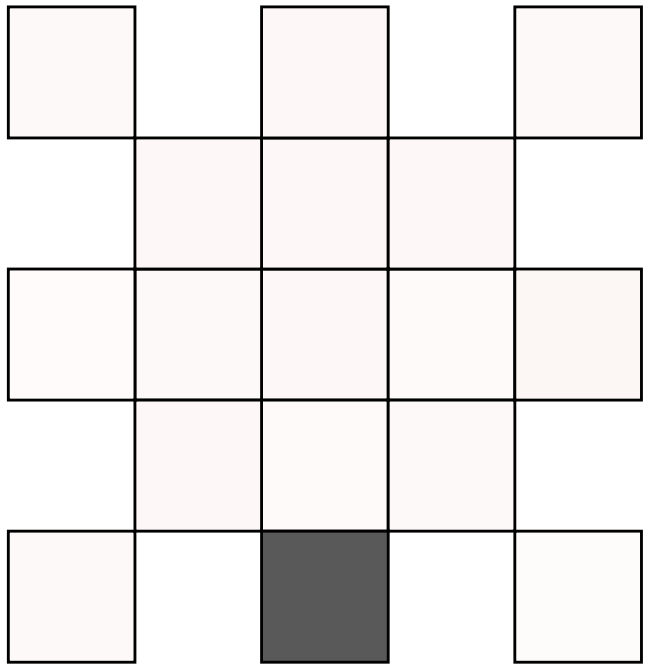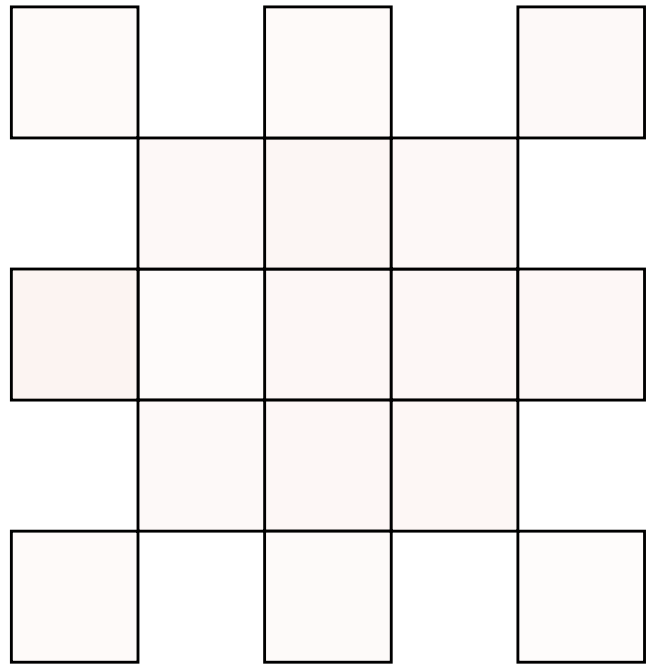

1-159646818-C-T

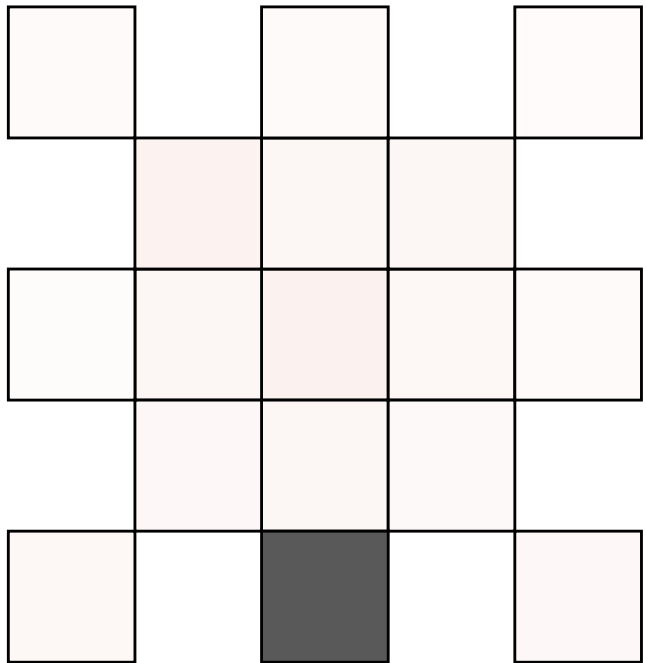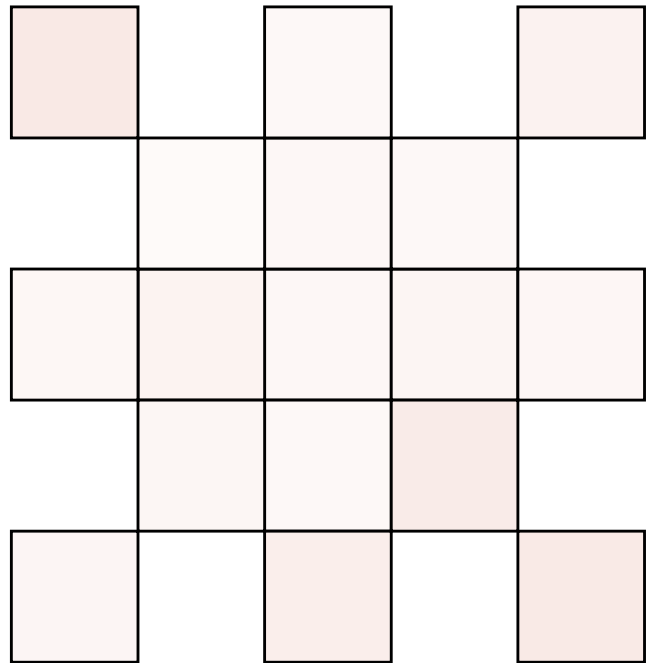

1-163766298-T-C

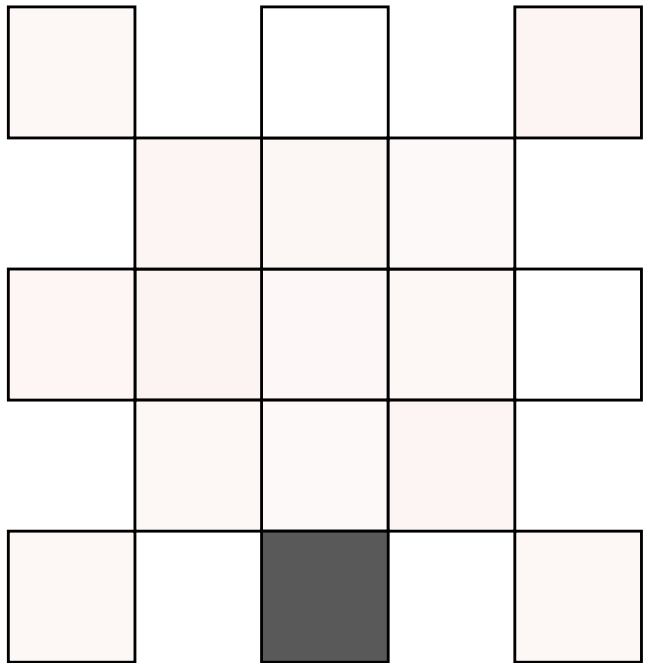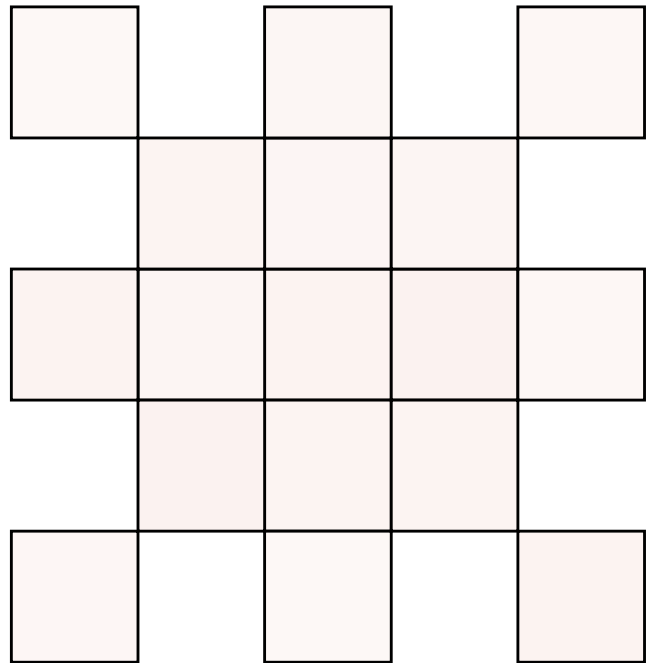

1-163770532-T-A

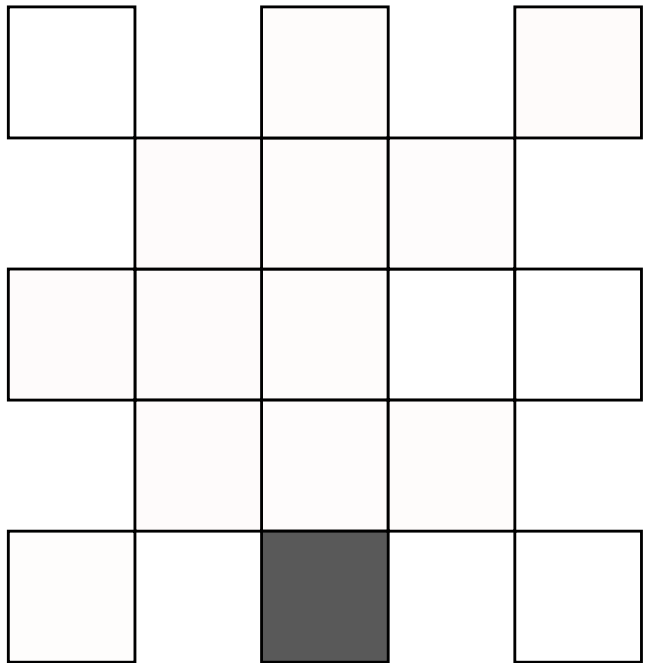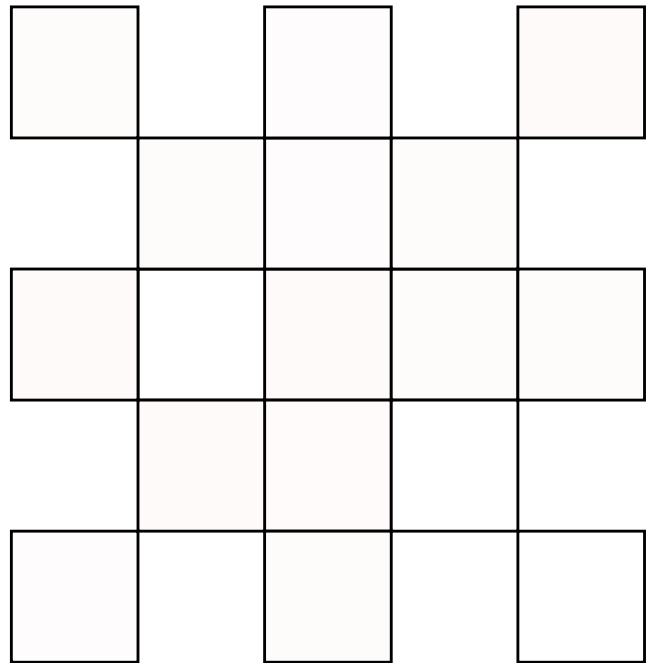



1-177430967-T-C

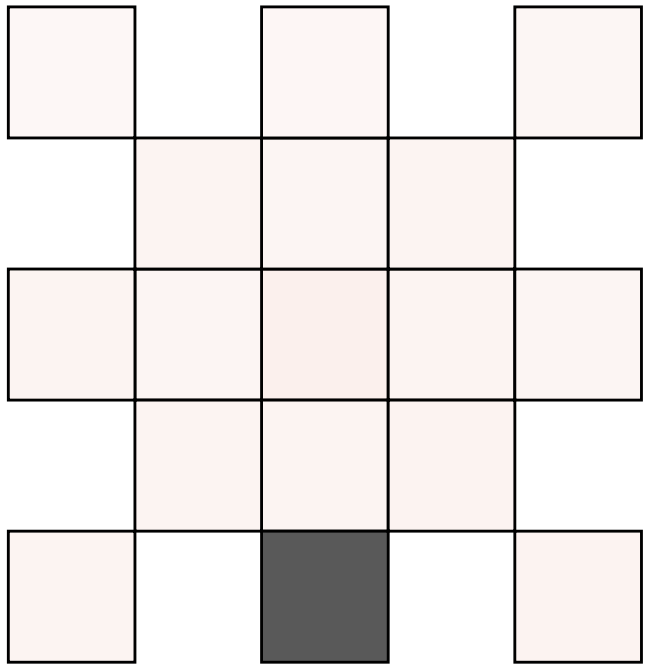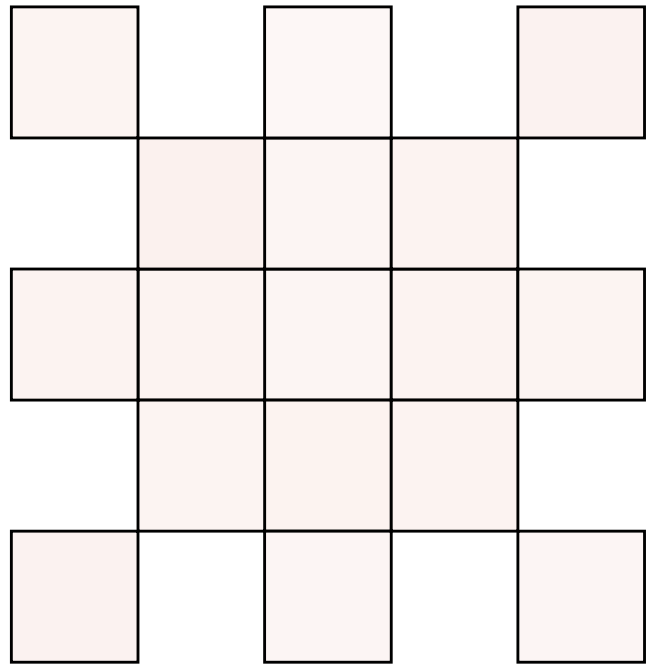

1-18387130-C-T

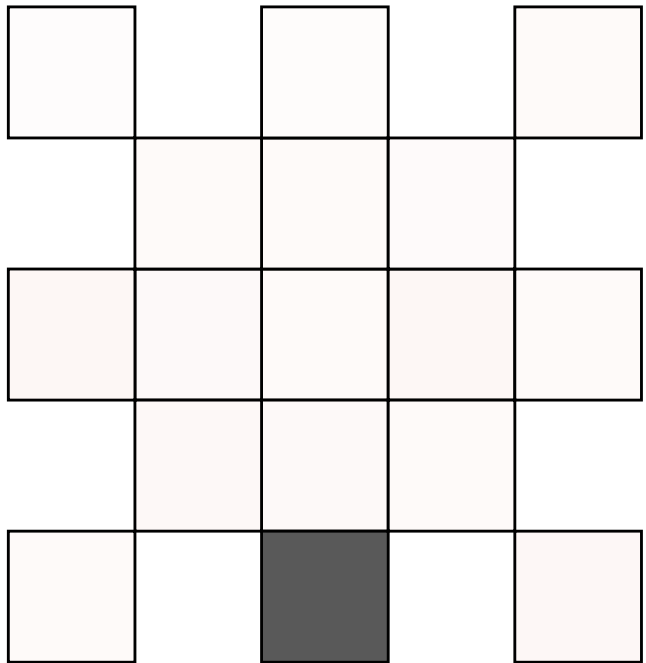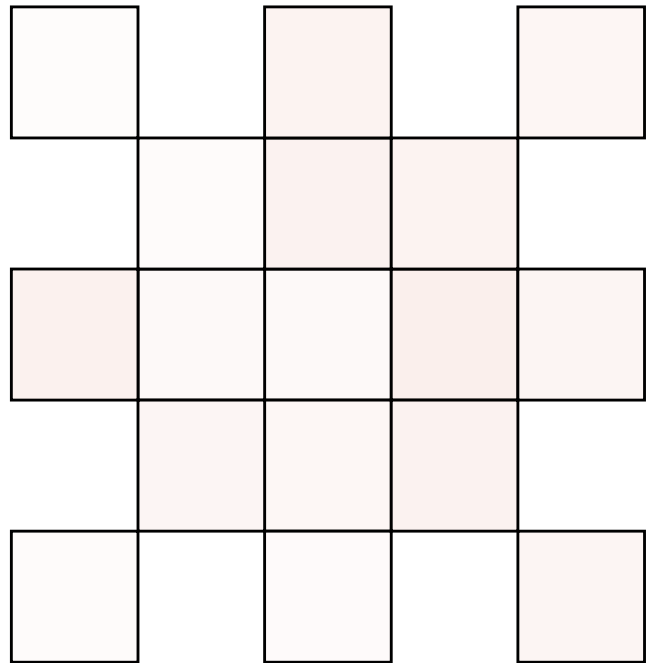

1-18400310-C-T

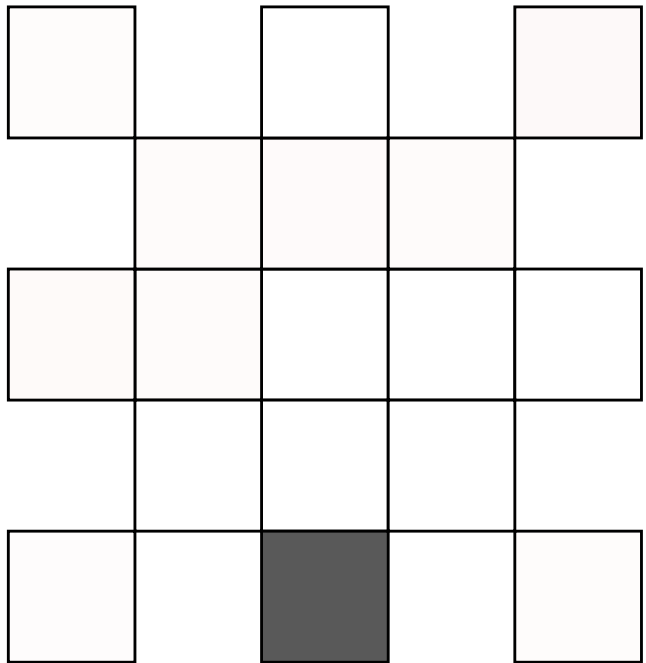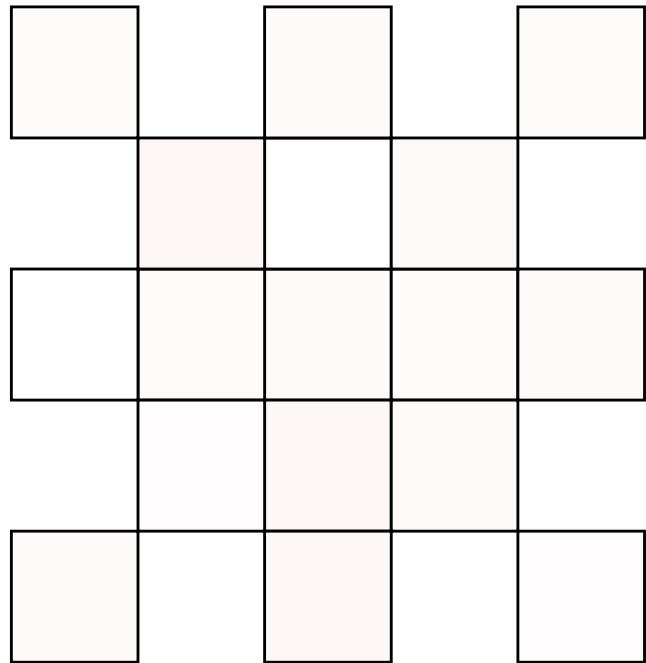

1-188074317-T-C

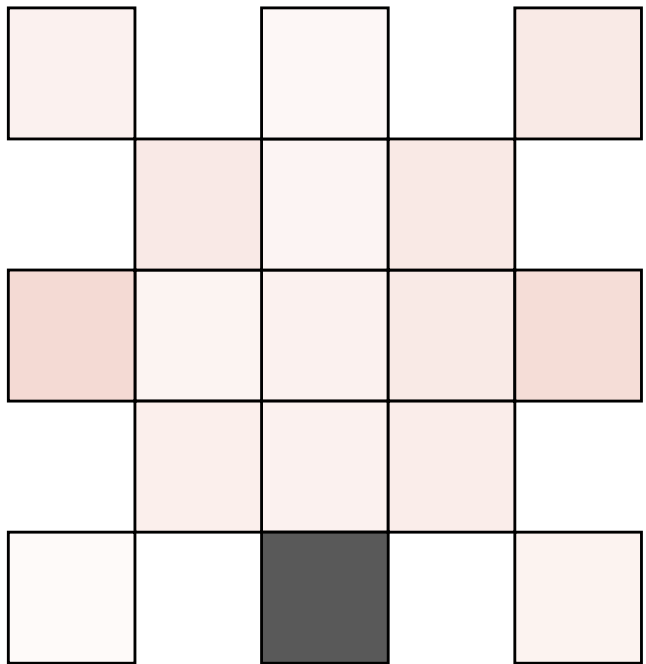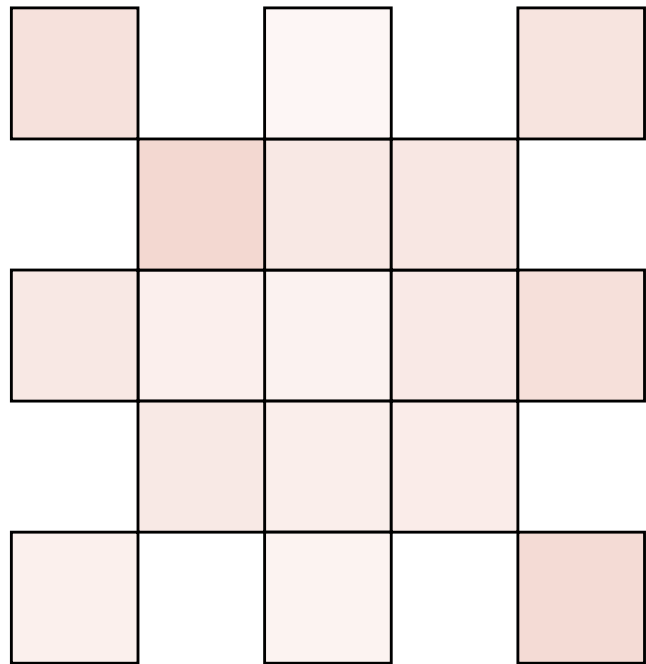

1-191248571-G-A

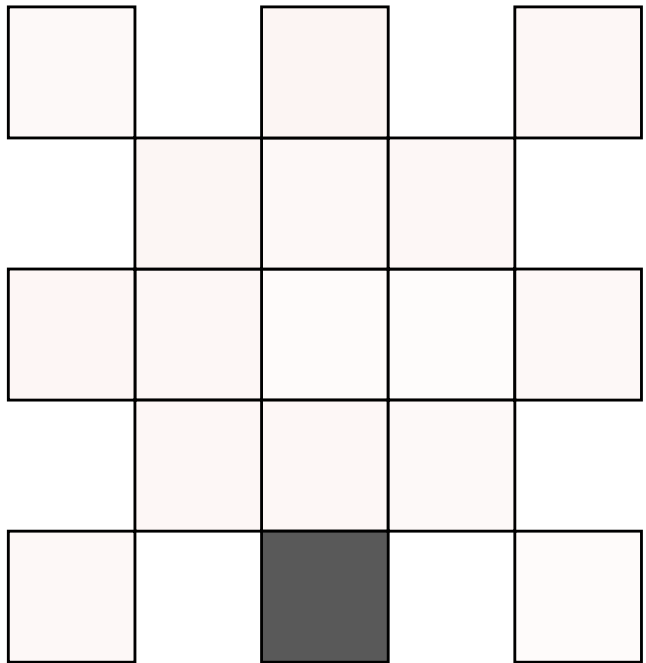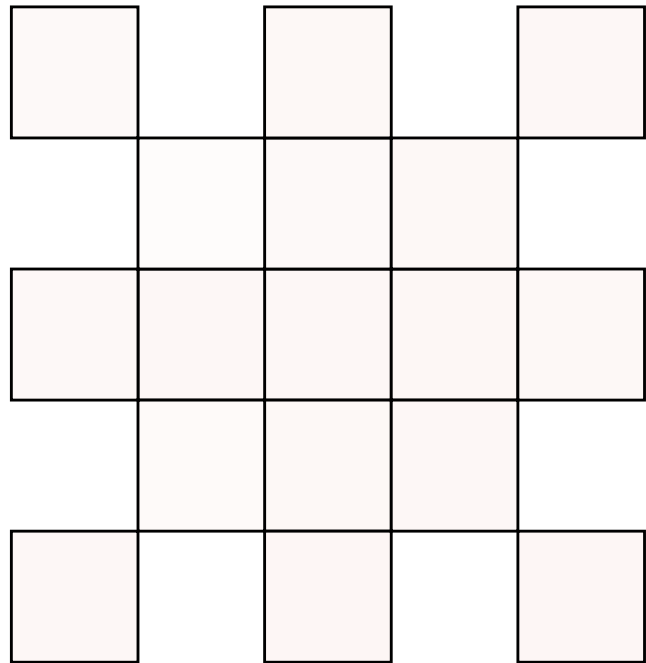

1-192646091-A-G

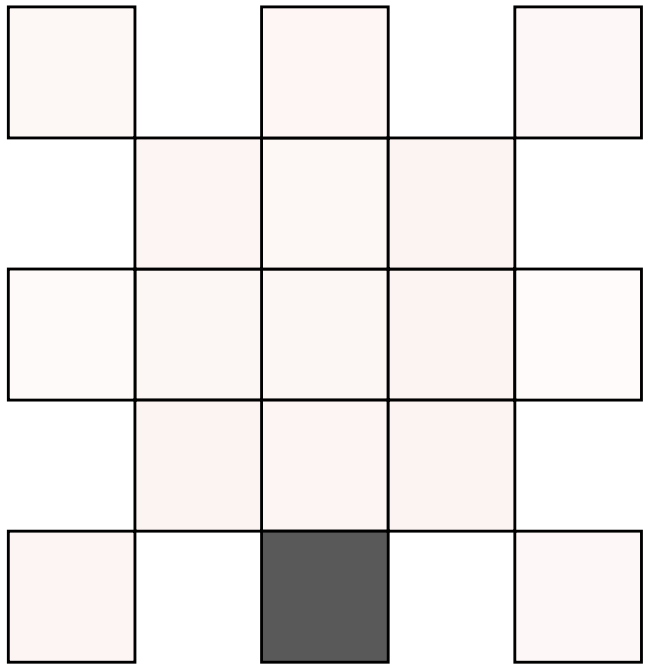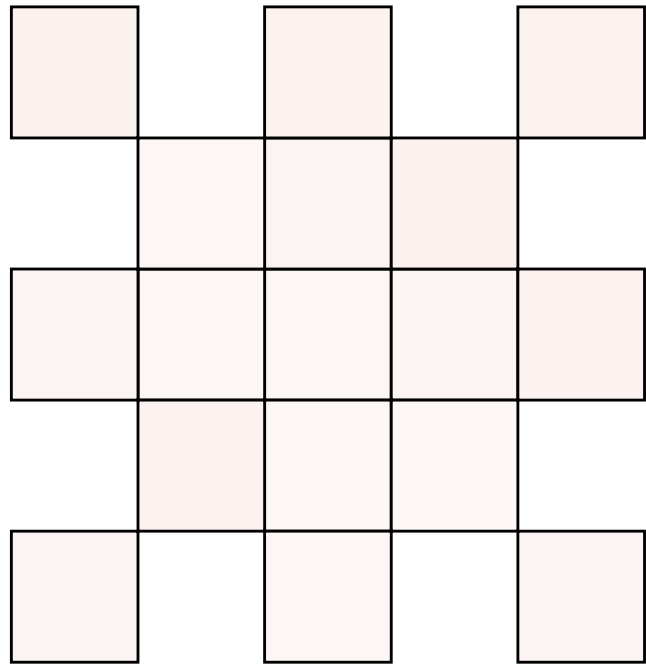

1-200010012-C-T

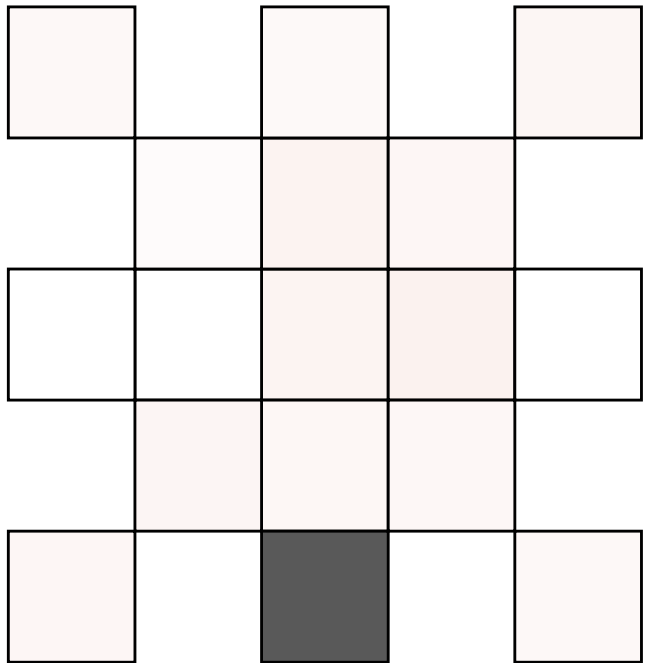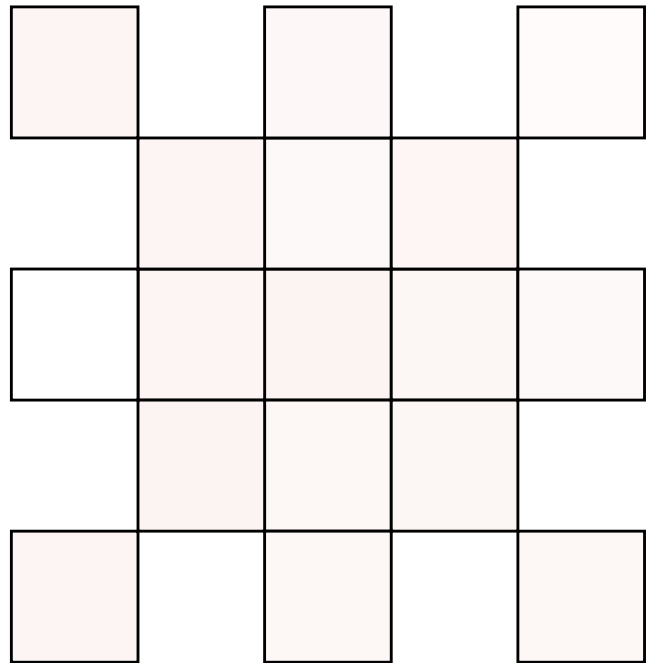

1-201266932-C-T

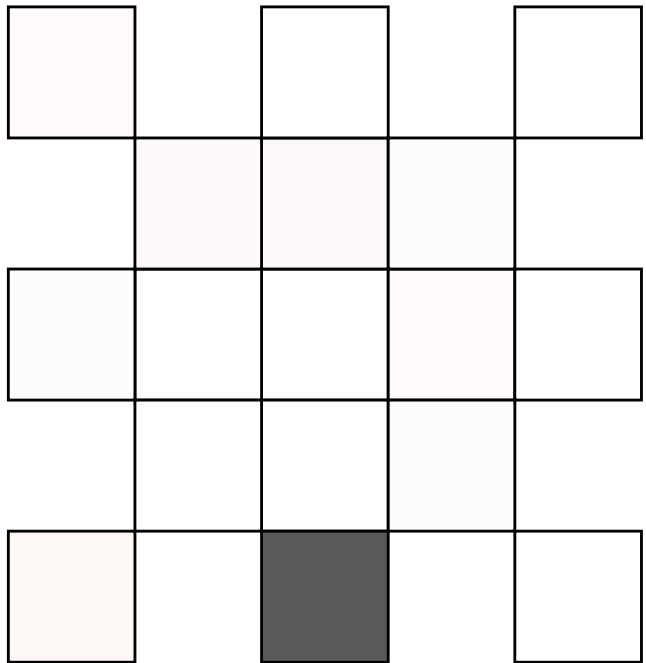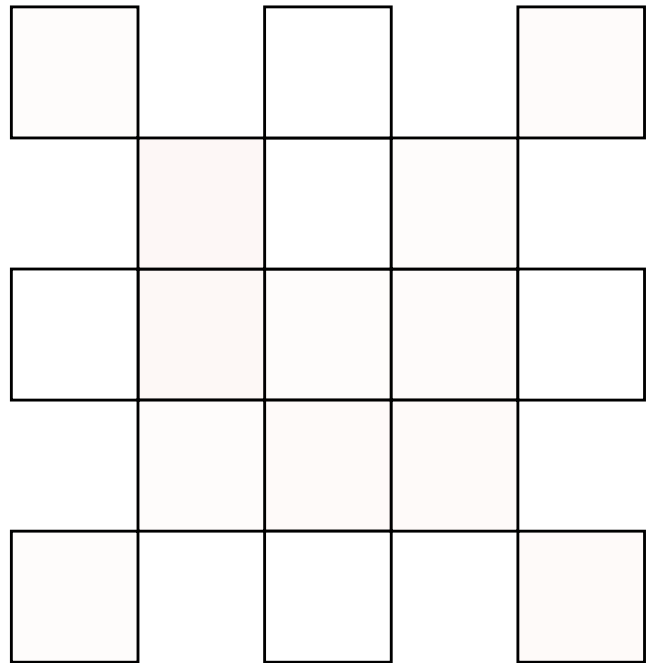



1-206627079-G-A

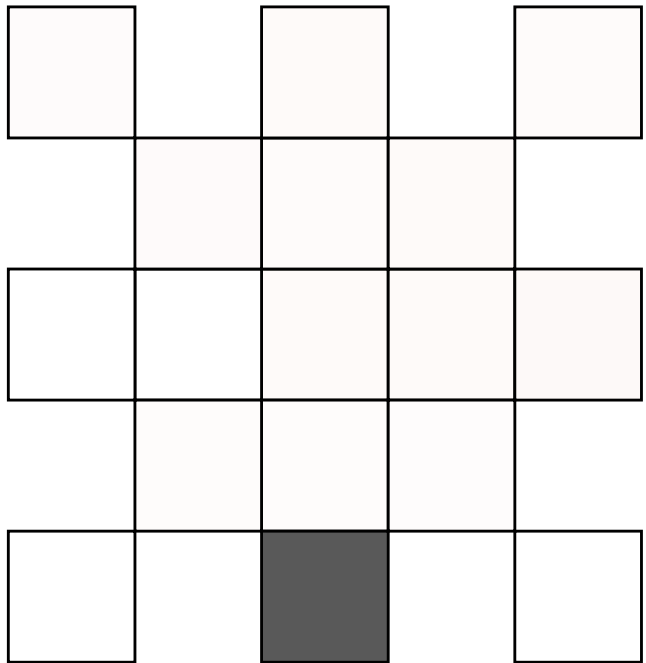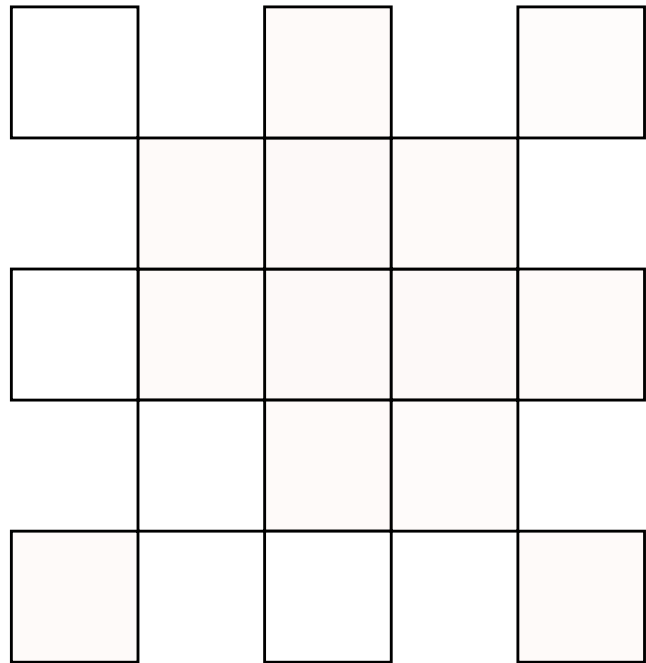

1-207759144-C-T

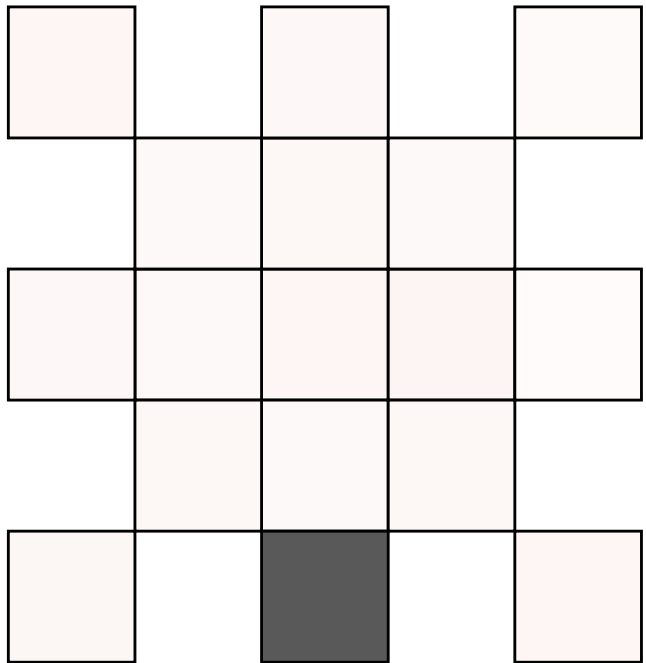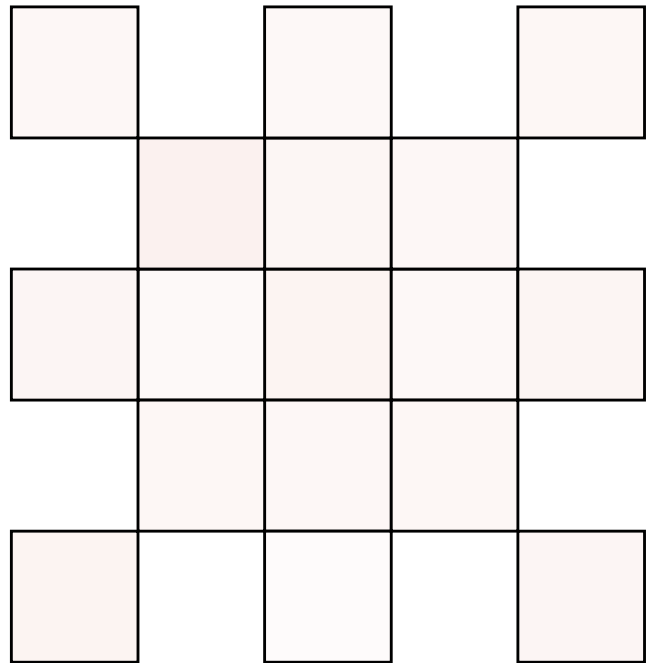

1-210808944-G-A

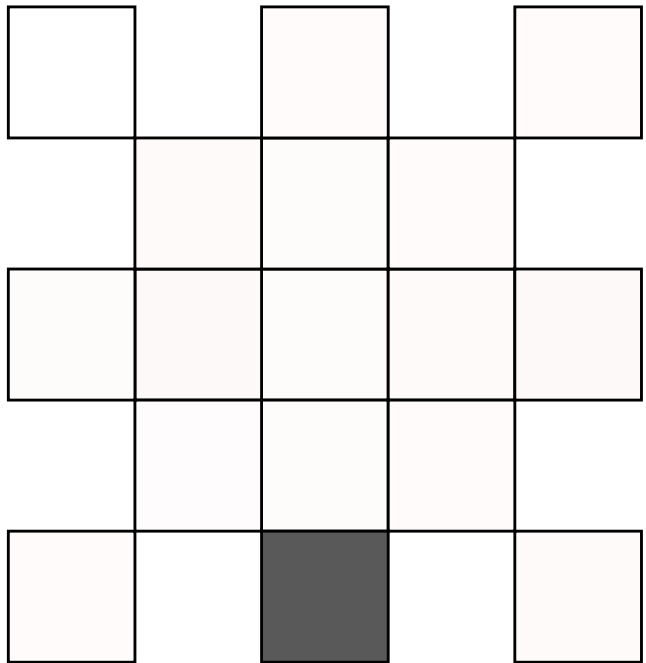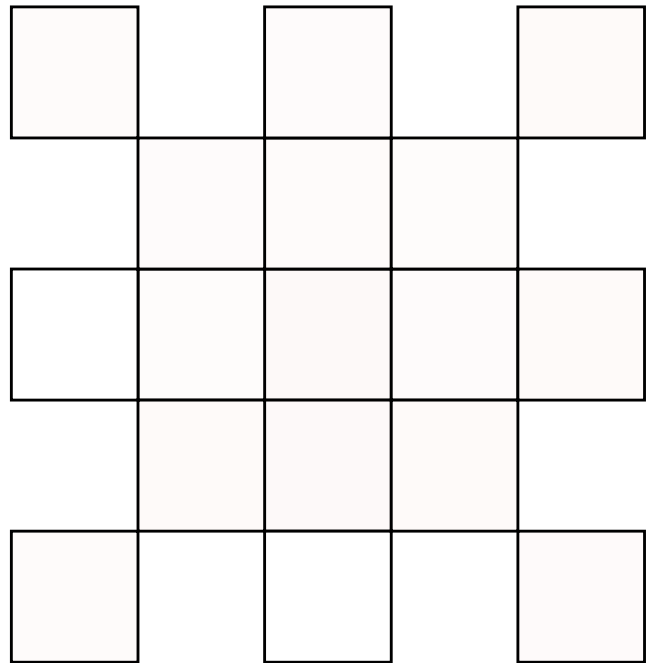

1-237812348-C-T

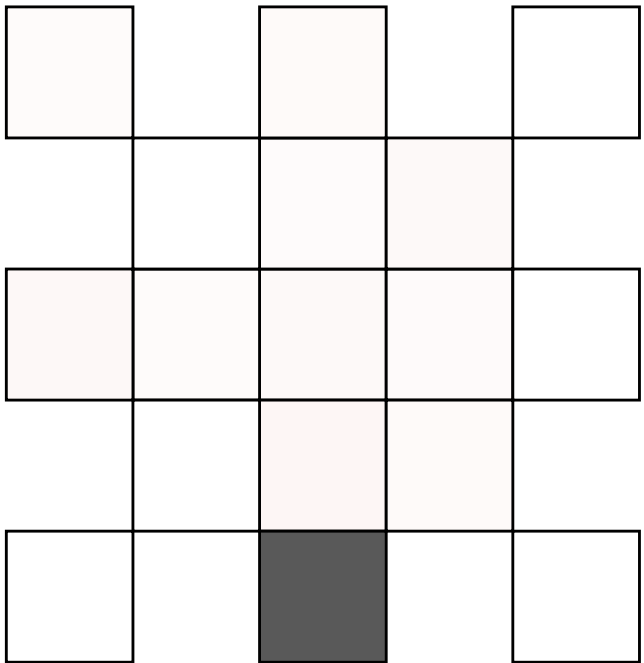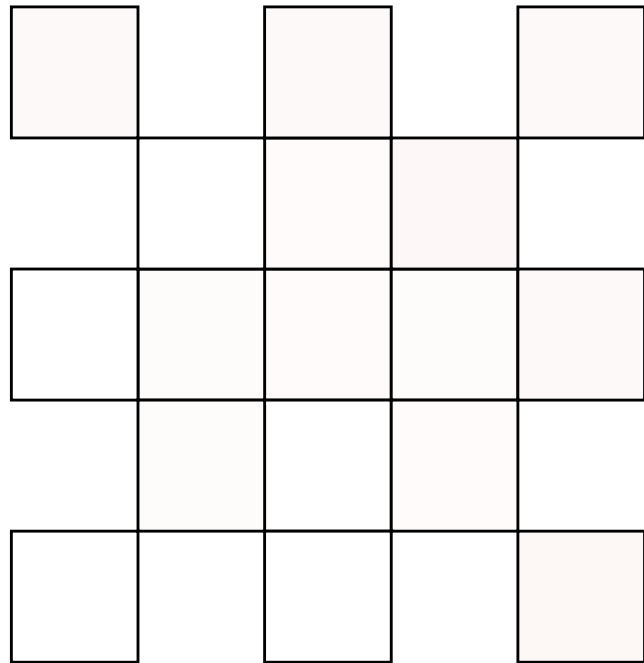

1-245457480-G-A

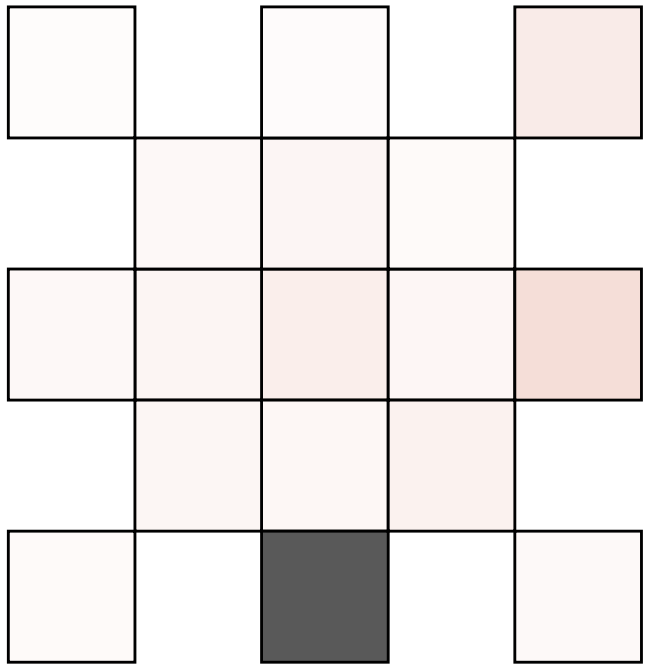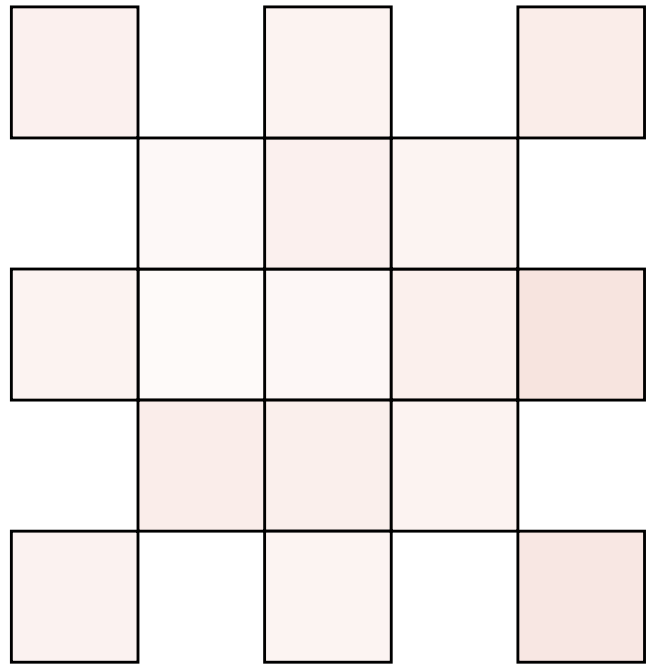

1-248261416-C-T

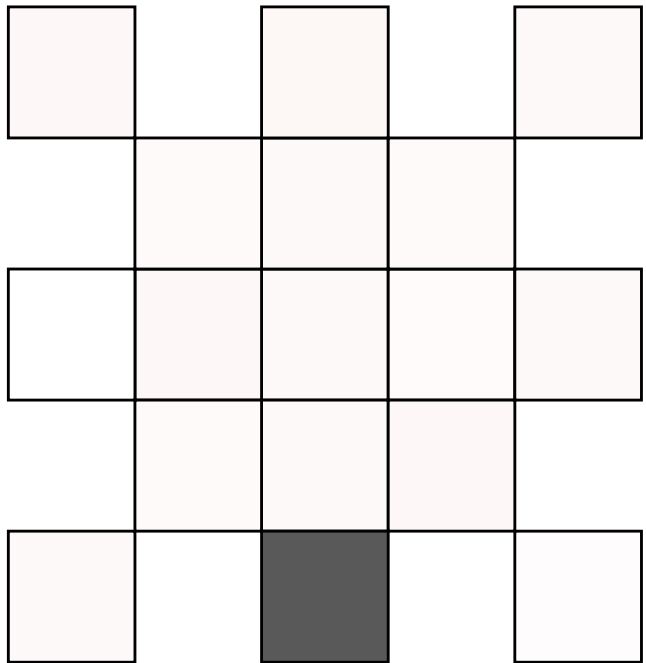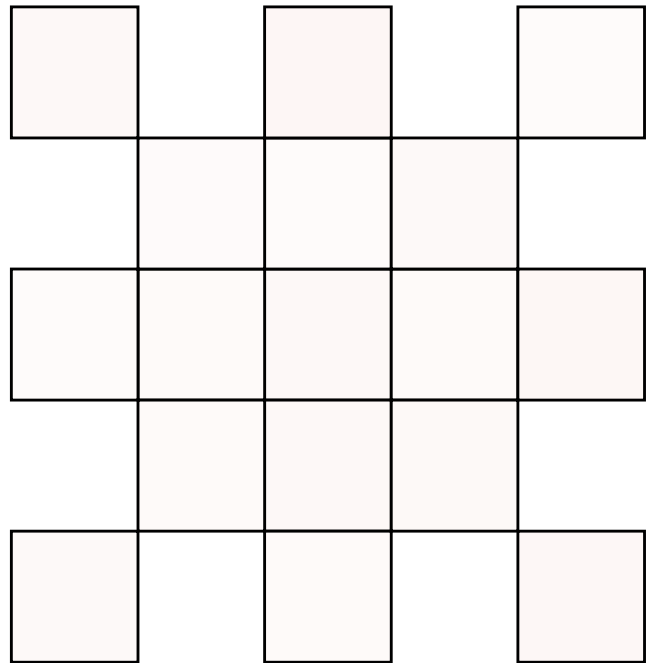

1-35110389-G-T

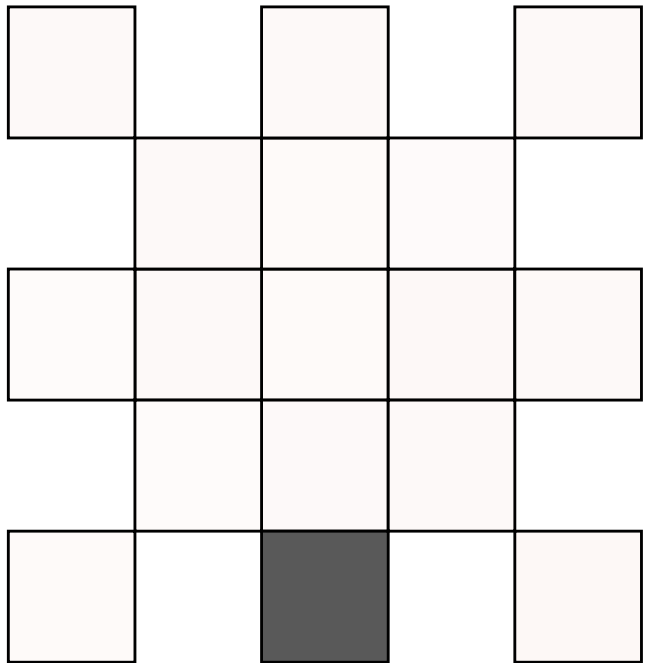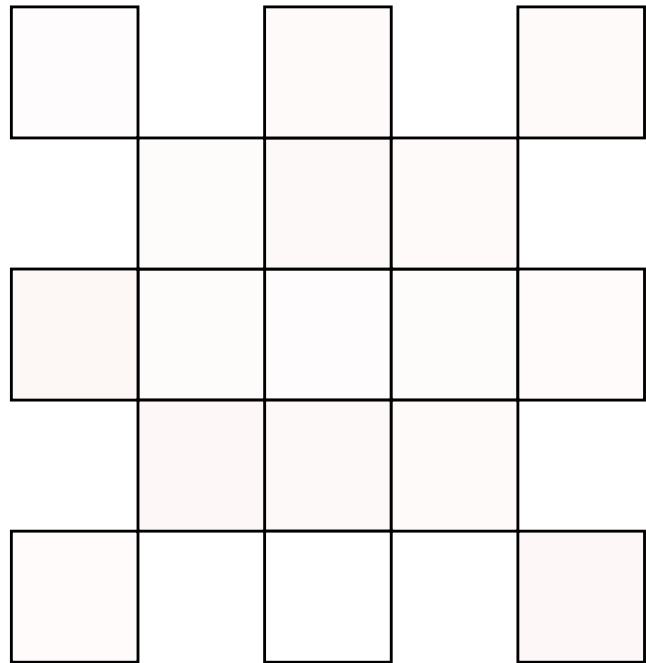

1-4450513-G-A

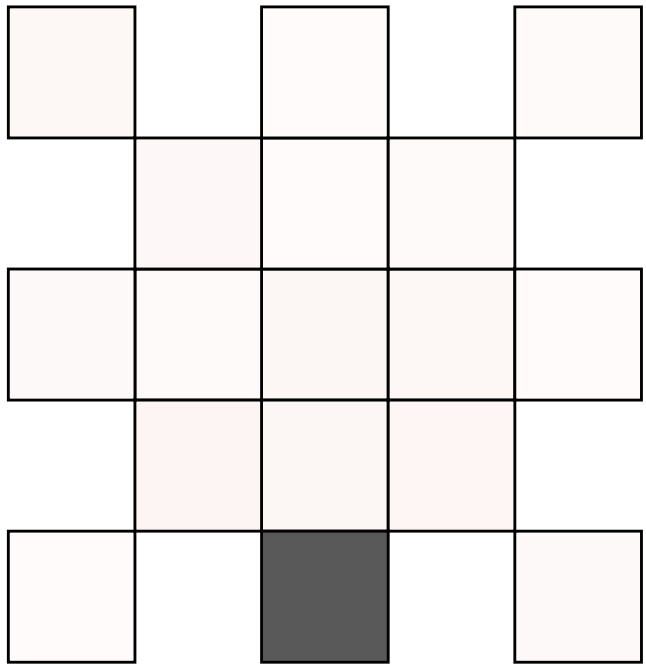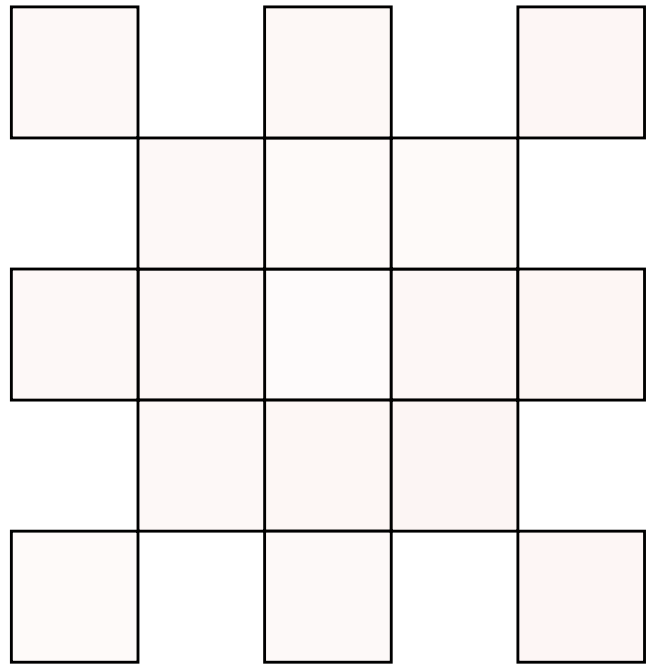



1-4465349-T-G

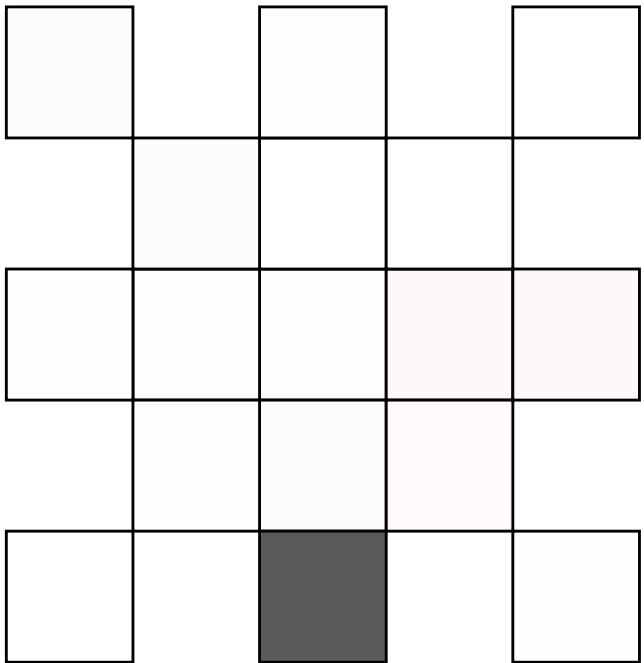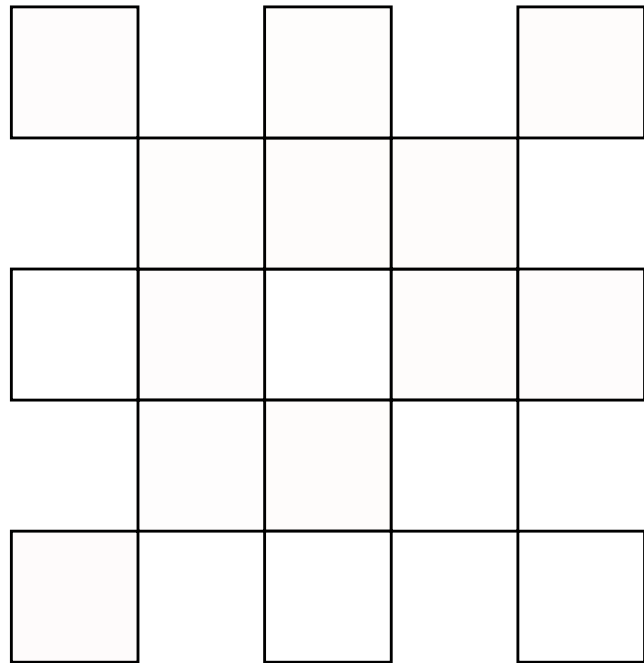

1-50289297-G-A

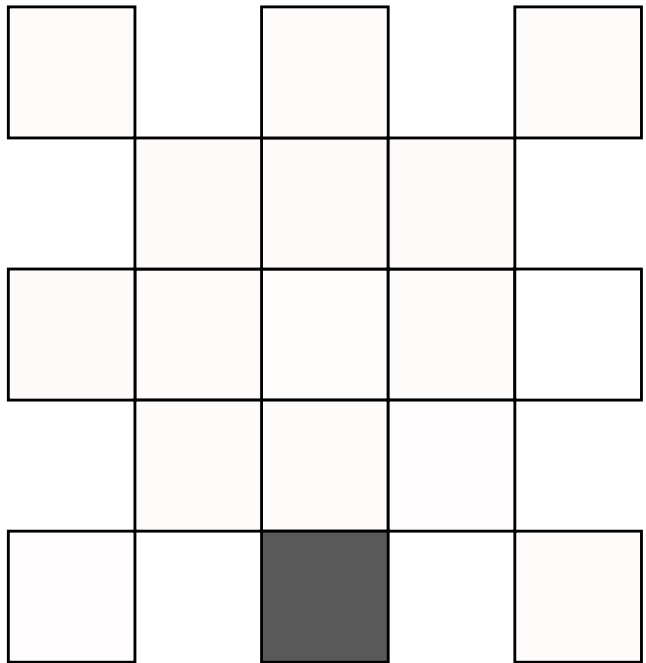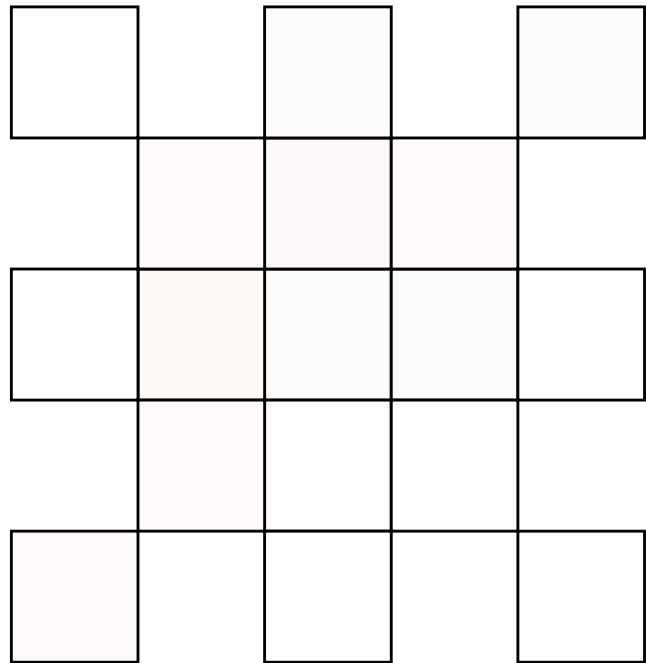

1-53912650-G-A

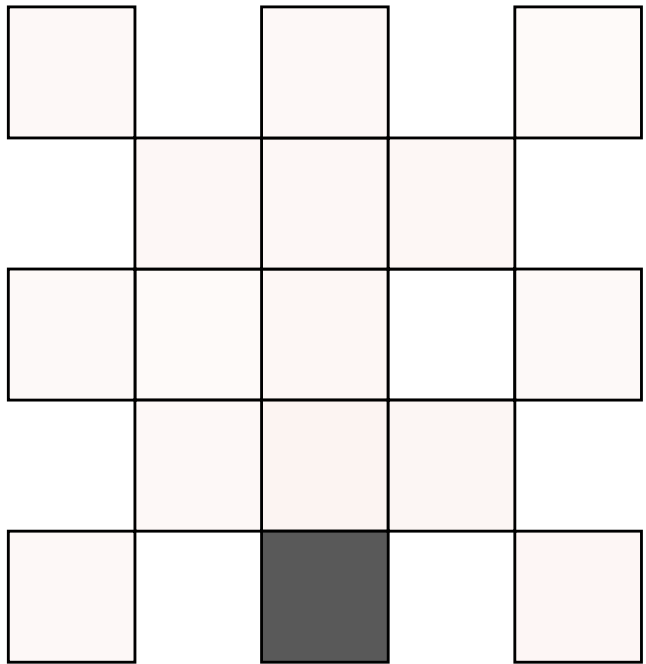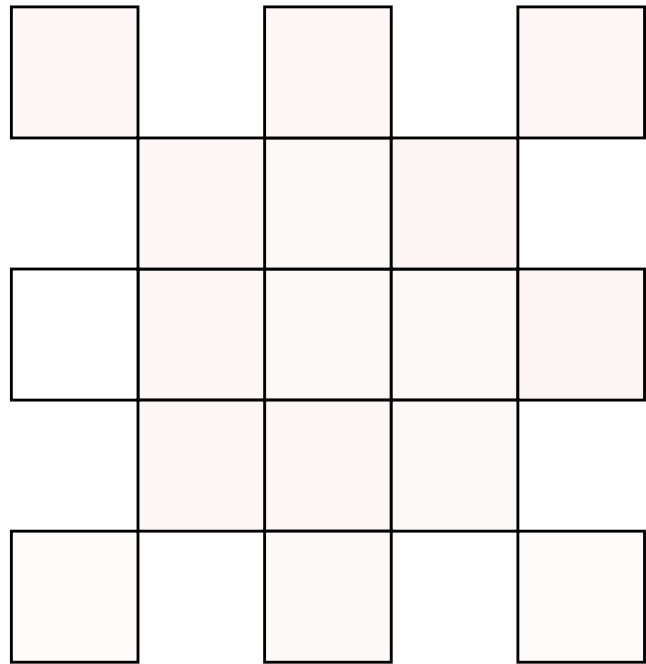

1-55567901-G-T

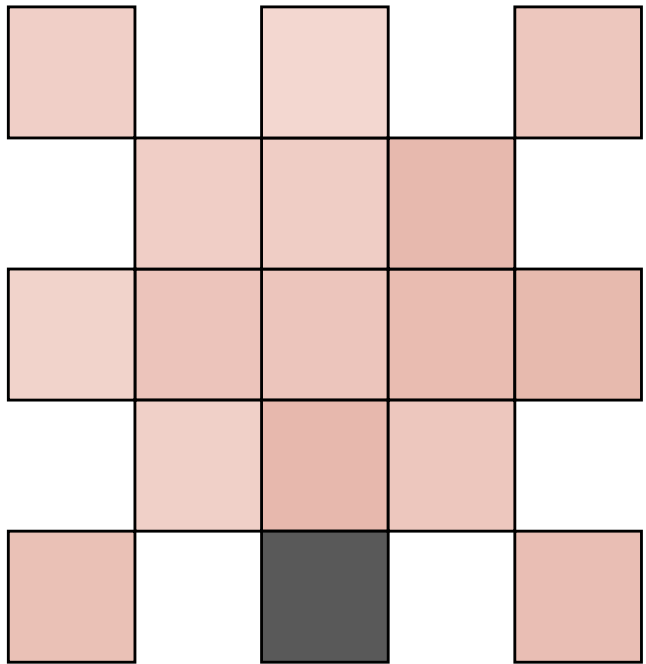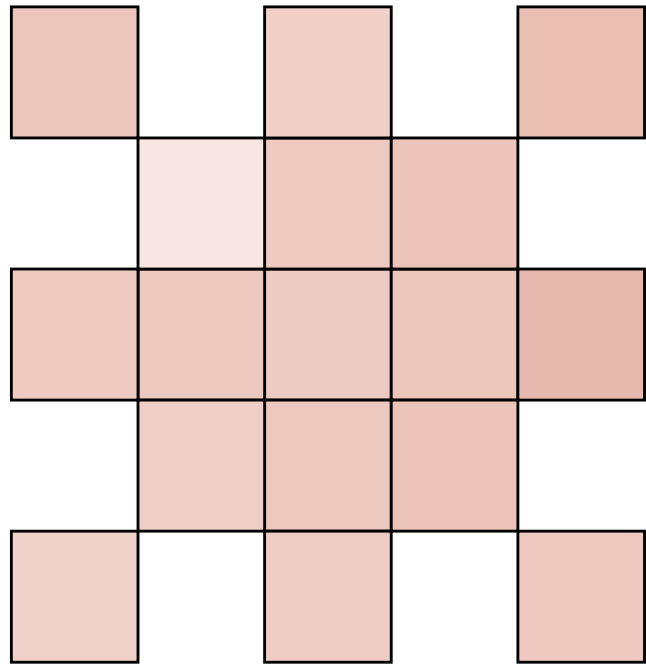

1-57886702-C-T

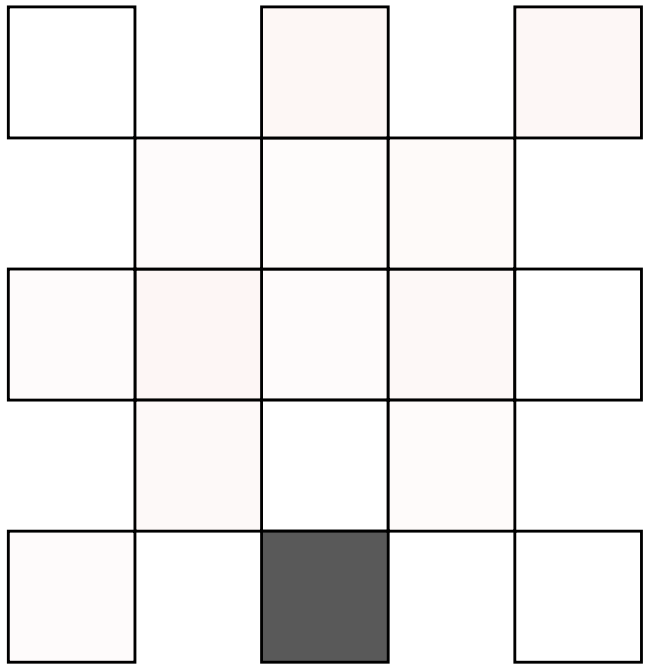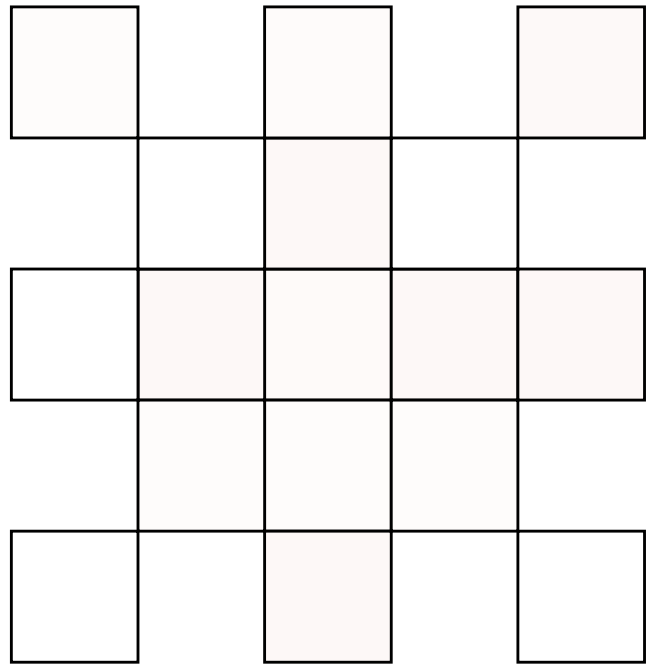

1-62675365-T-TTA

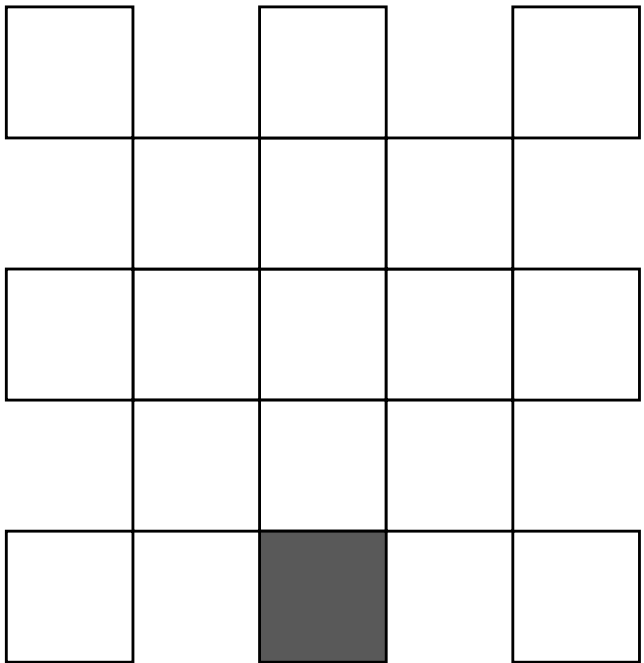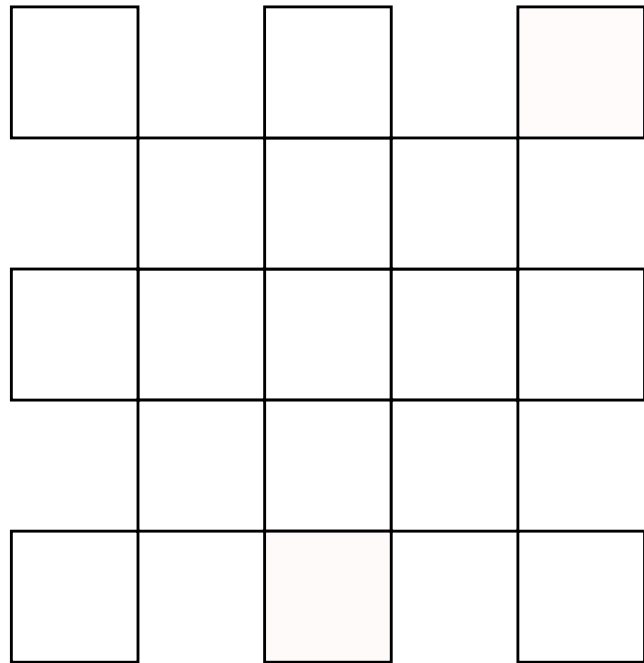

1-66719051-G-A

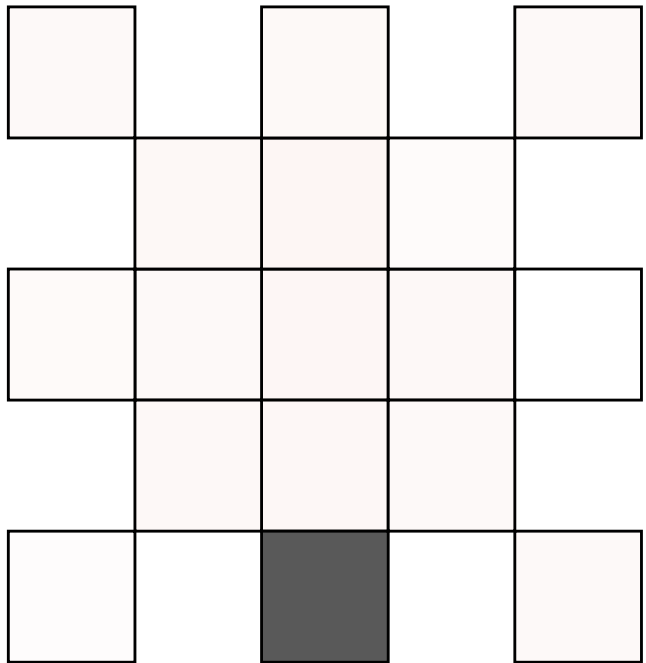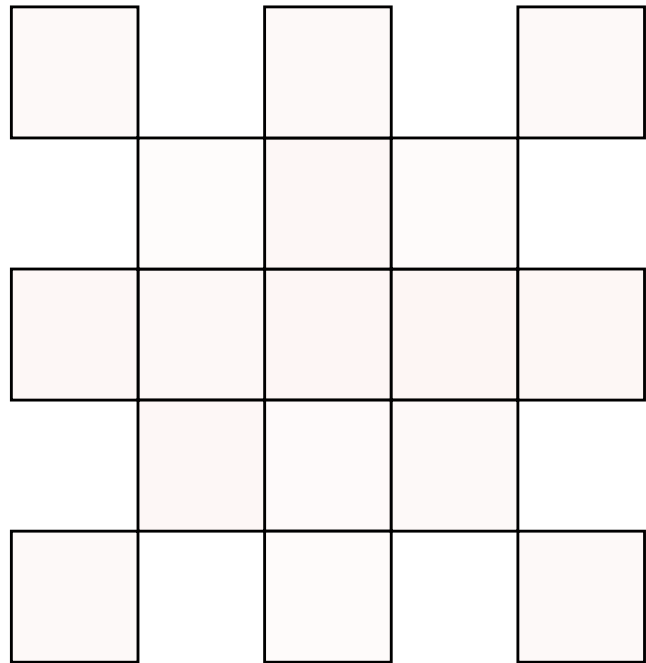

1-6772227-C-A

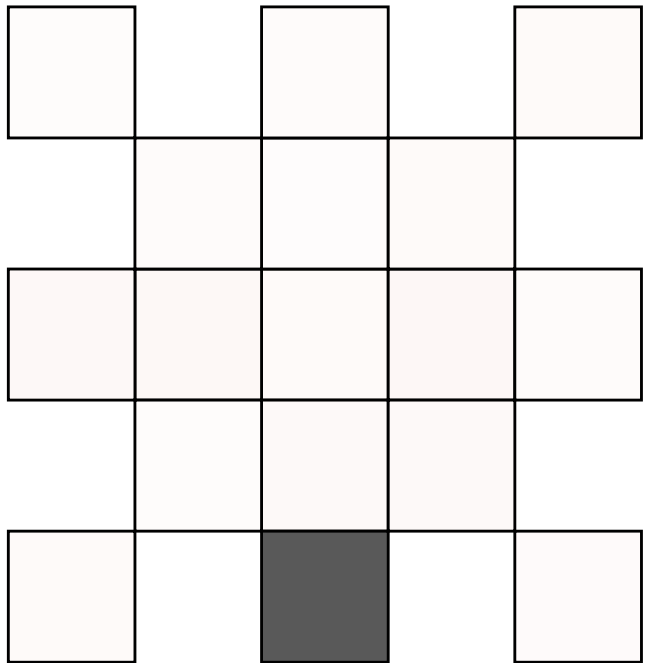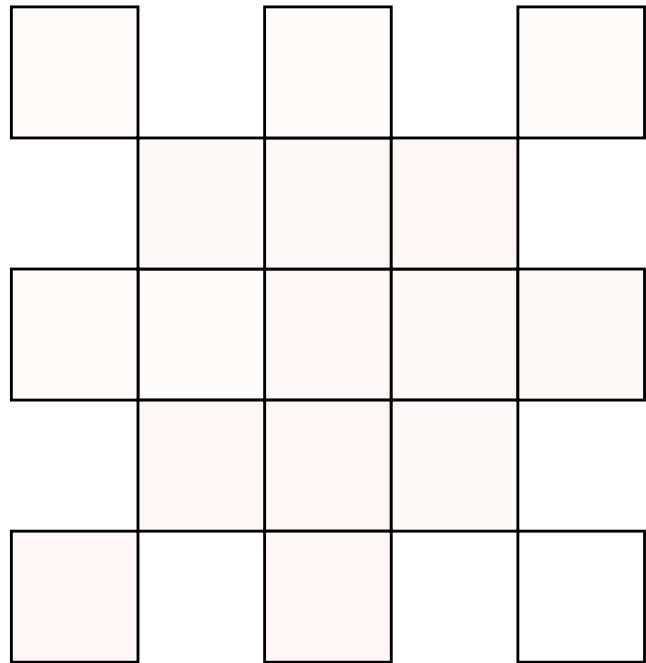



1-72003630-G-T

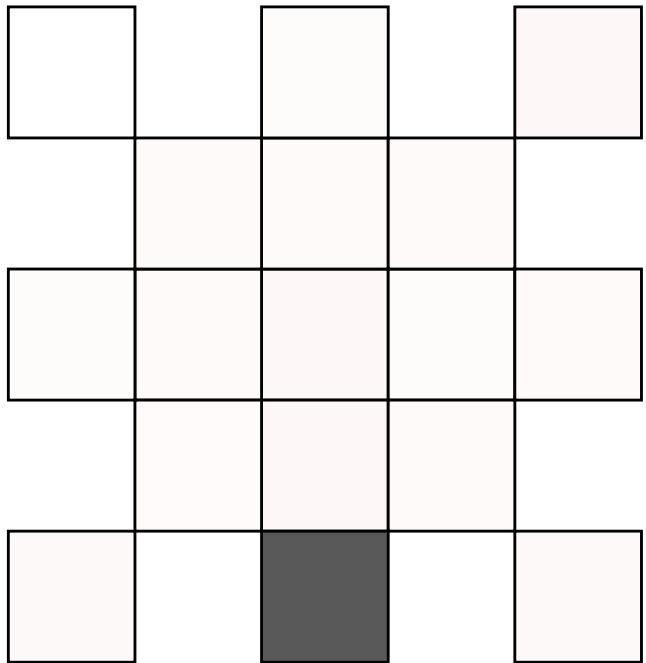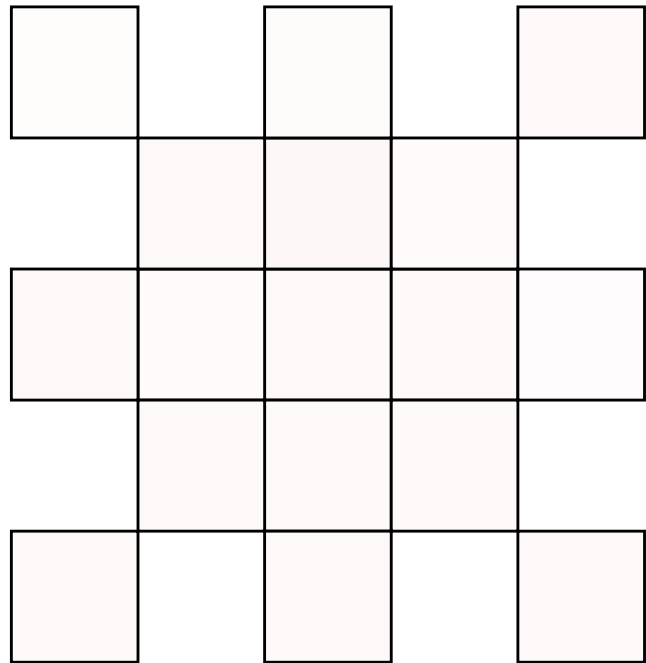

1-74501501-C-T

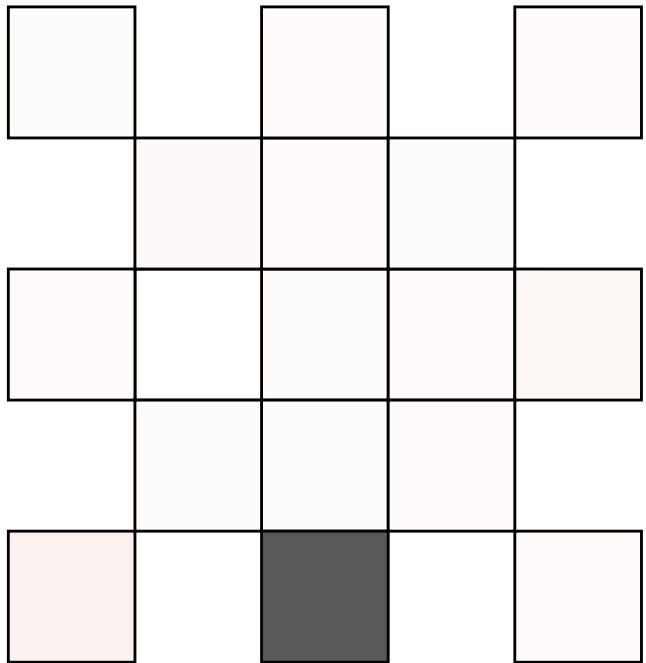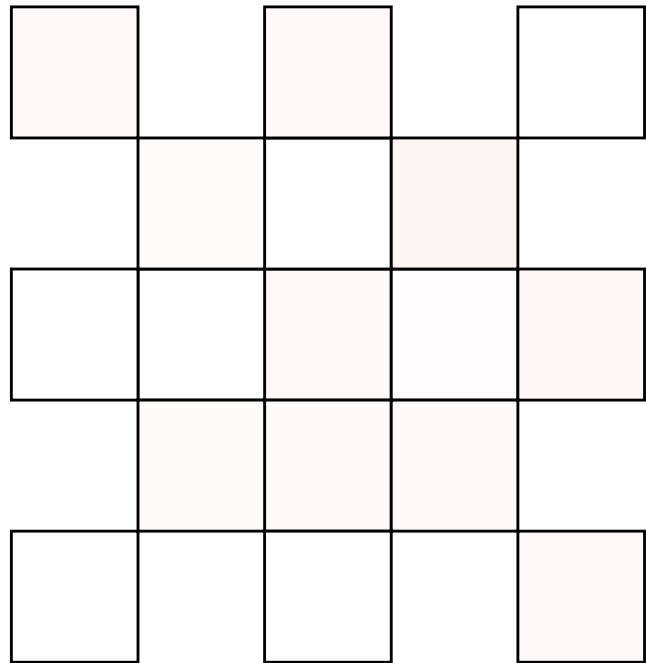

1-79102619-G-A

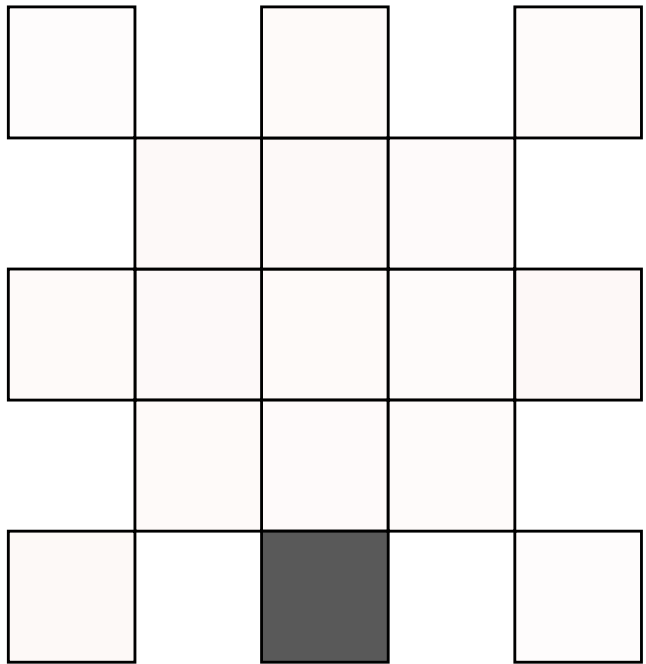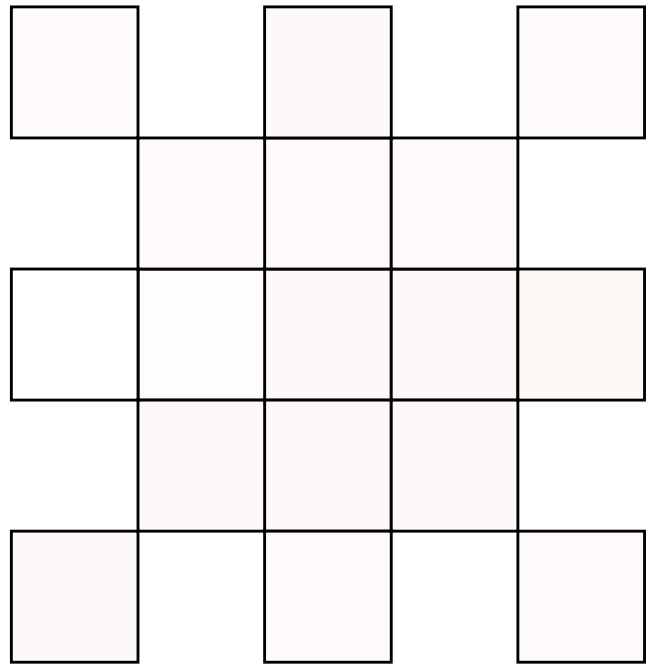

1-83361707-GC-G

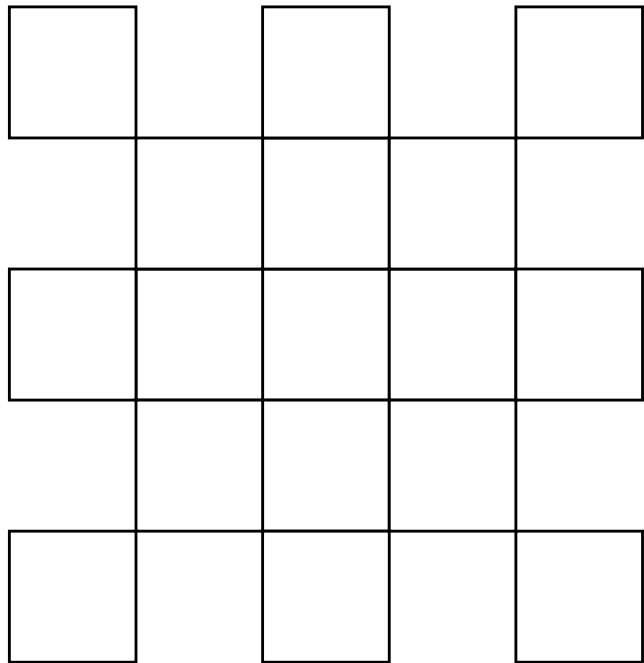

1-9049289-T-C

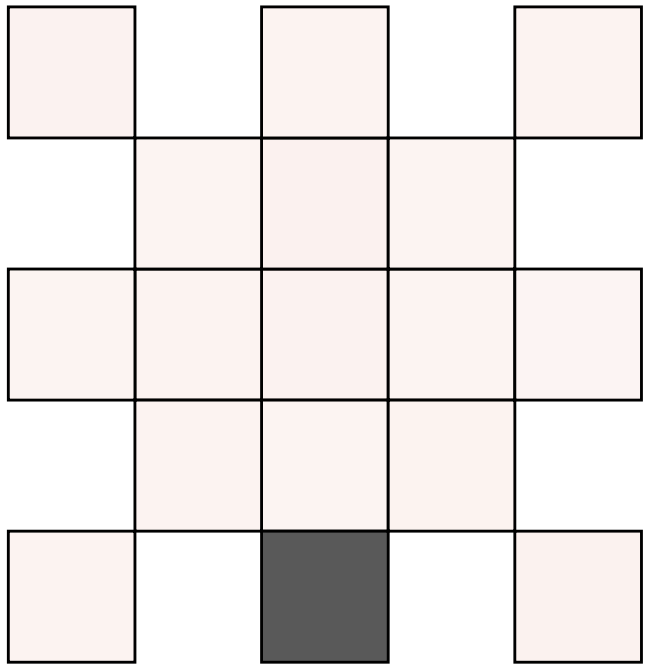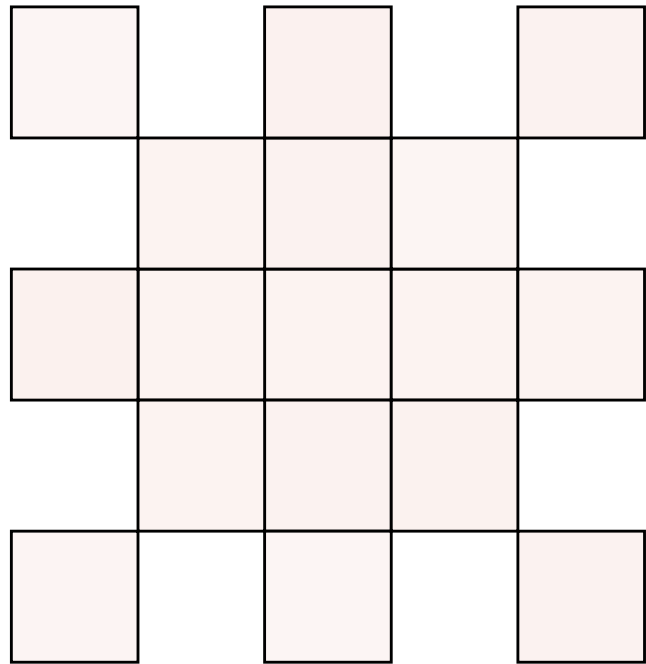

1-93387994-G-A

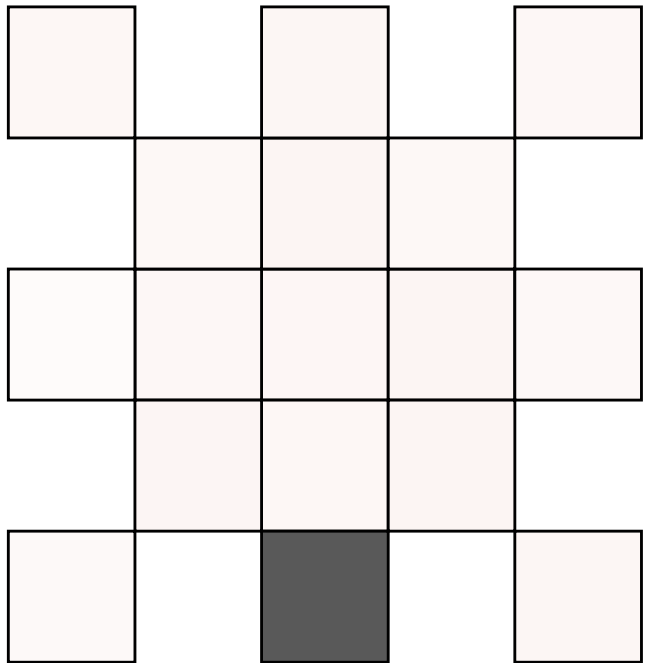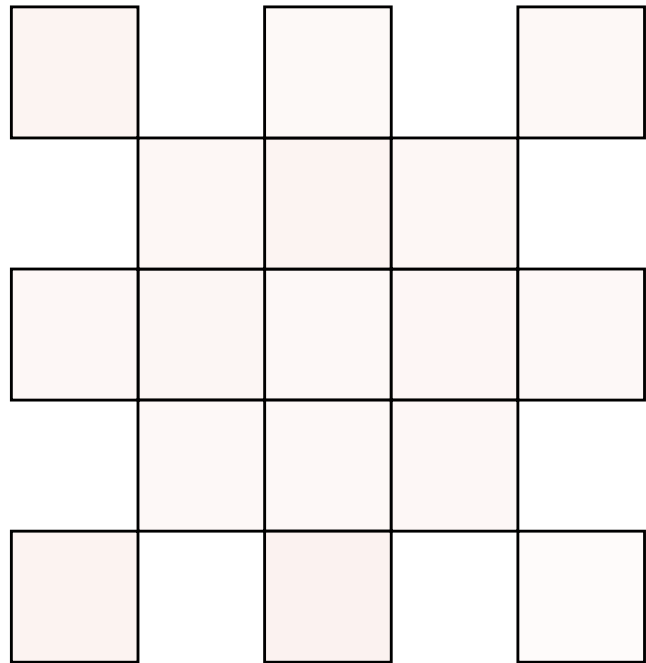

1-94219312-G-A

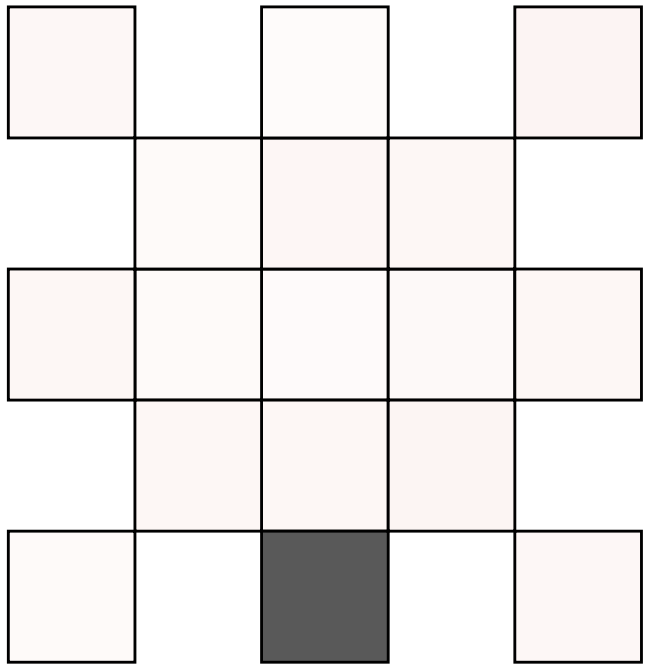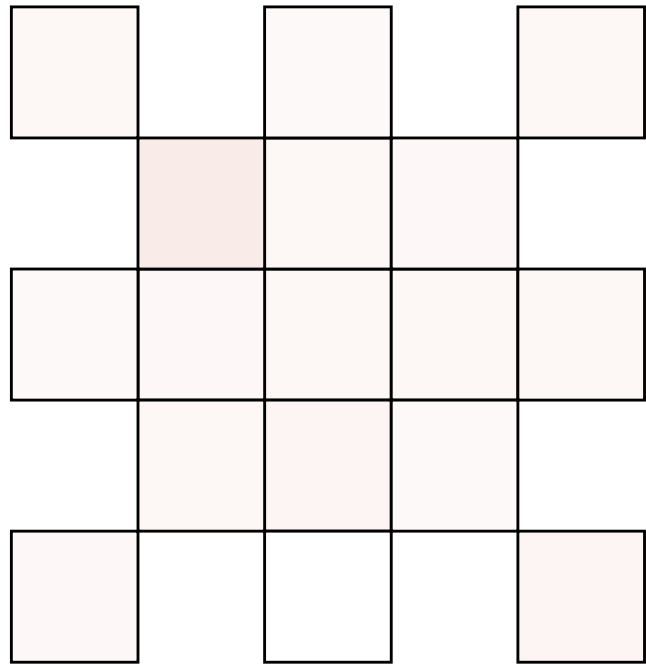

1-9516326-C-T

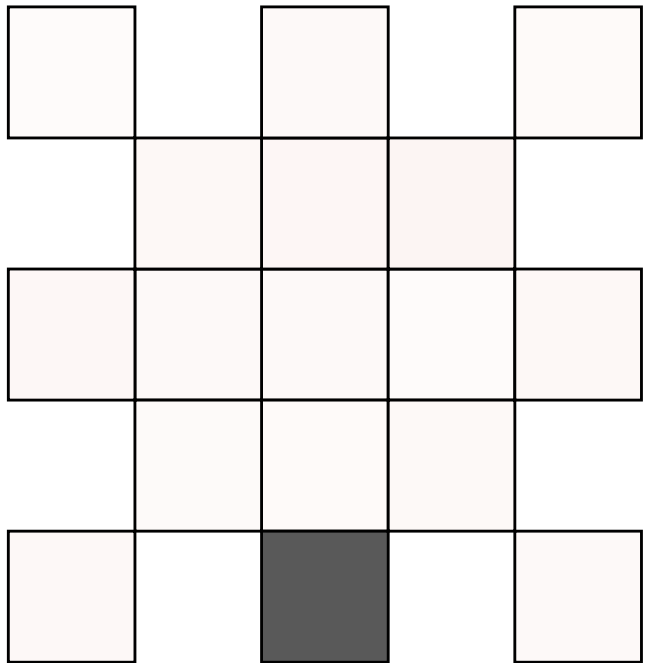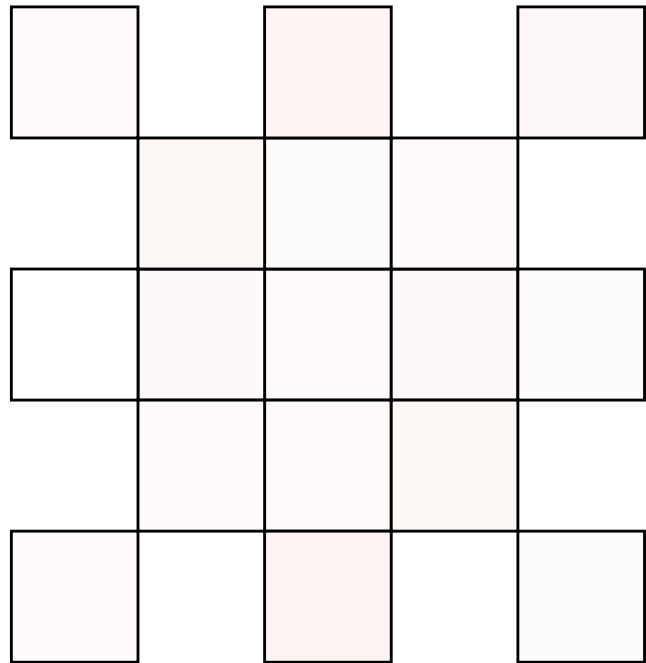



1-96224459-G-A

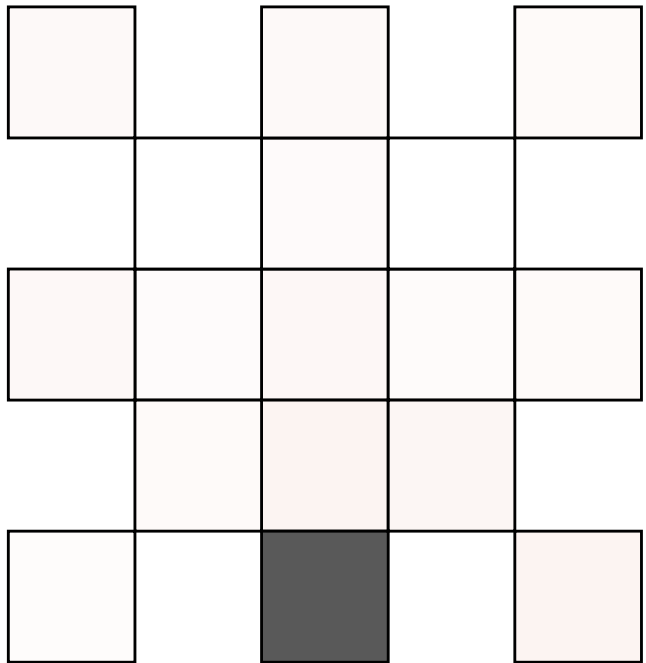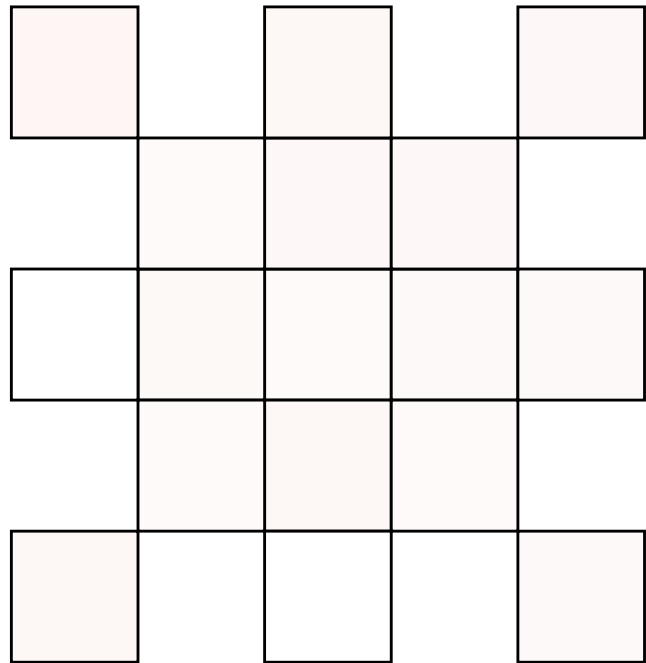

1-9672930-G-A

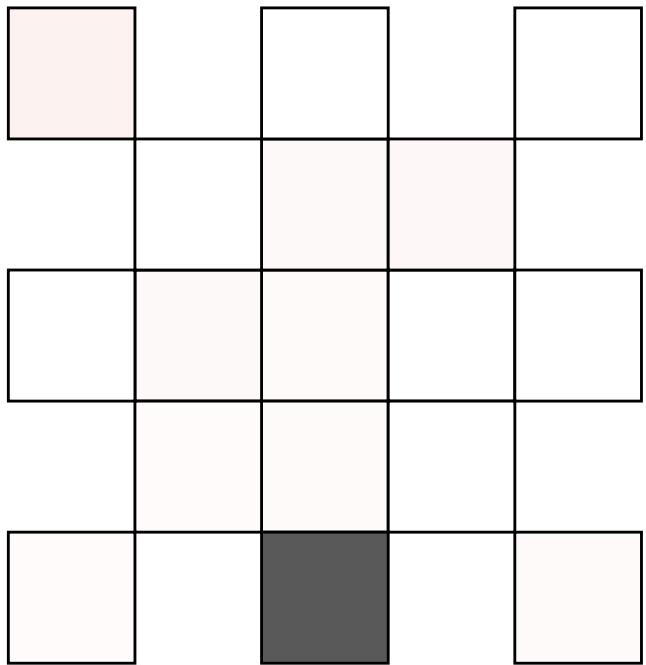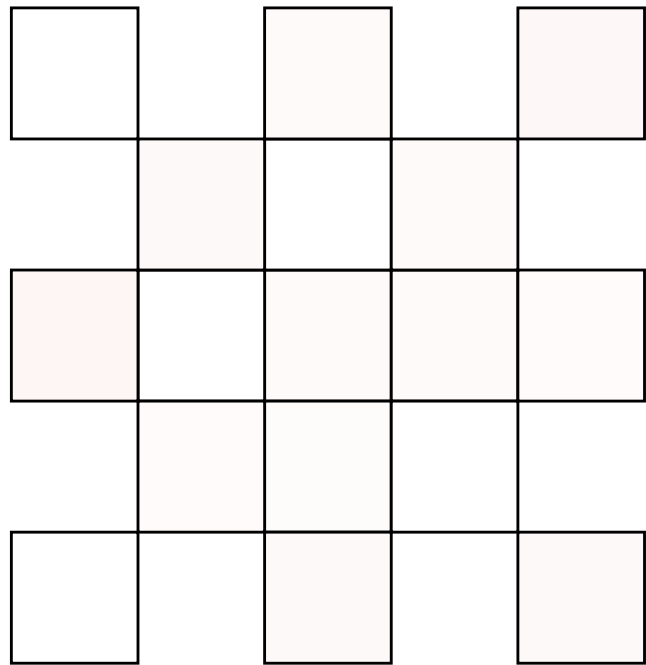

1-98301896-T-C

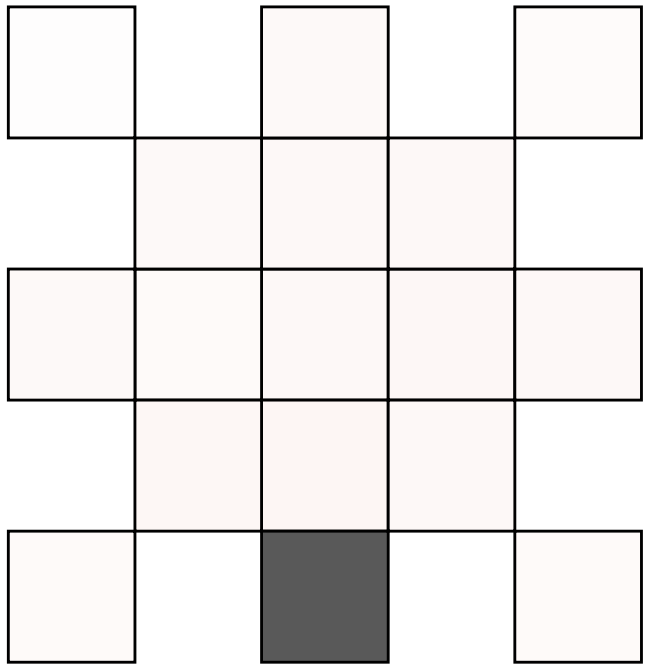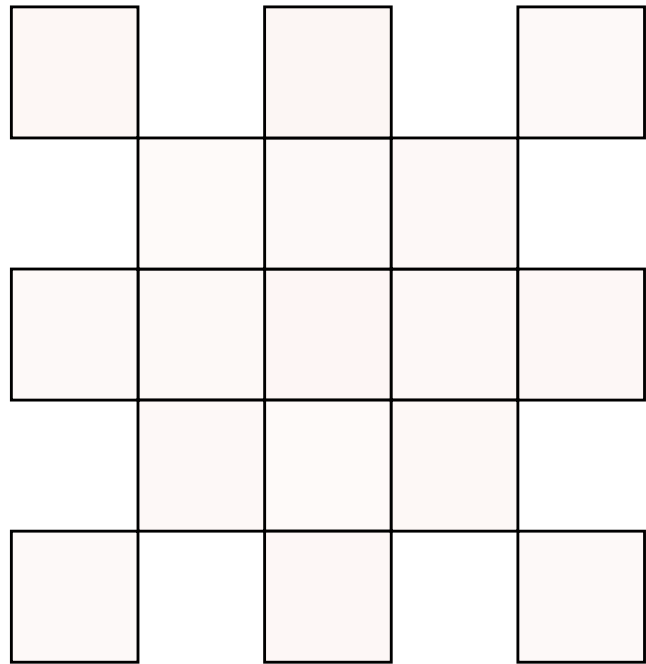

10-105764174-A-G

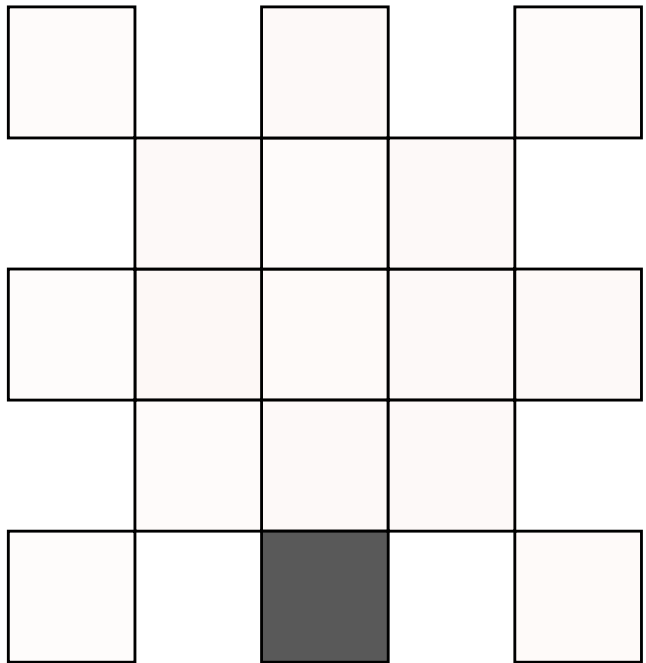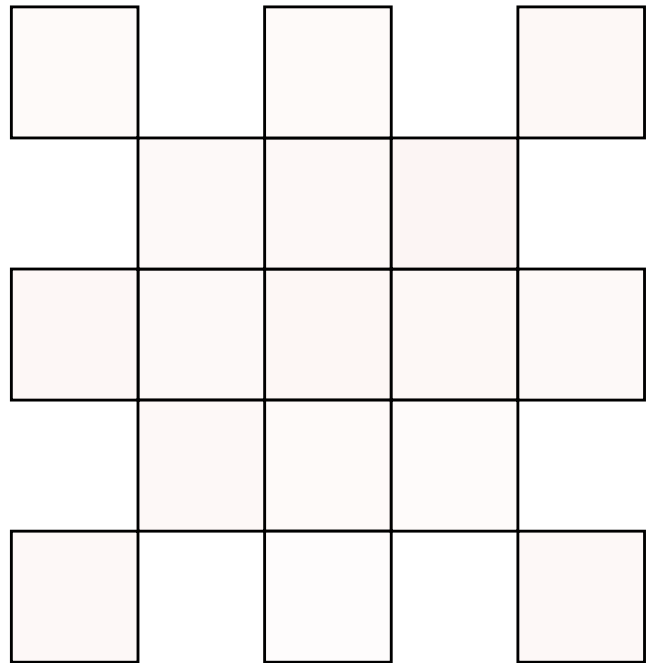

10-107355222-C-A

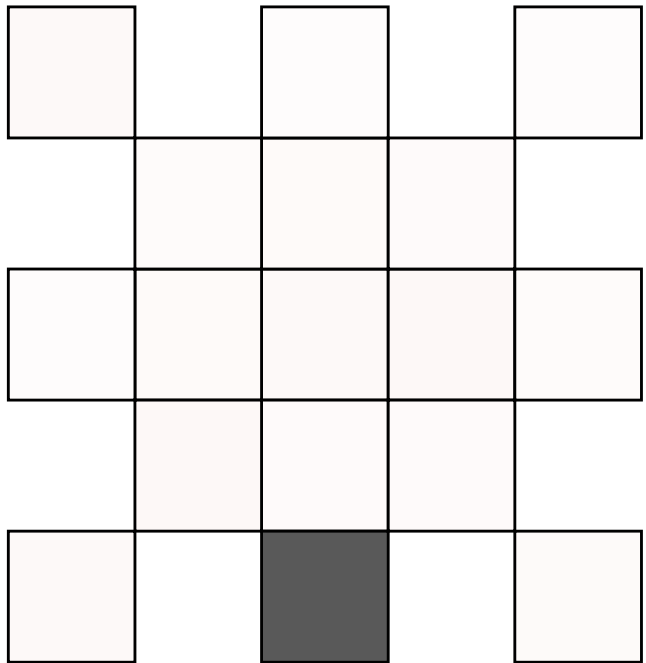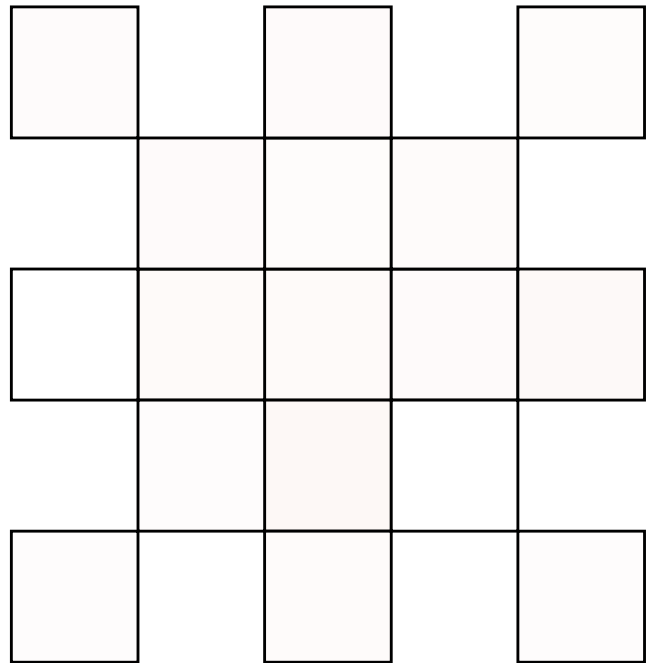

10-108671103-C-T

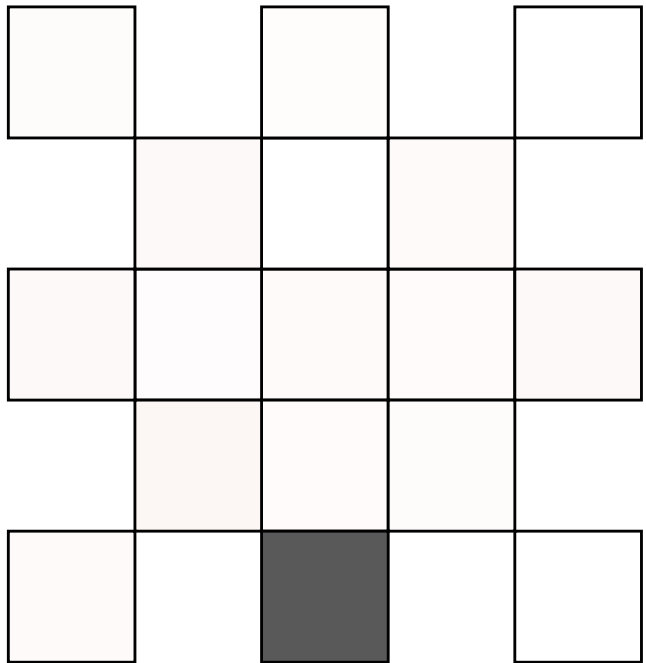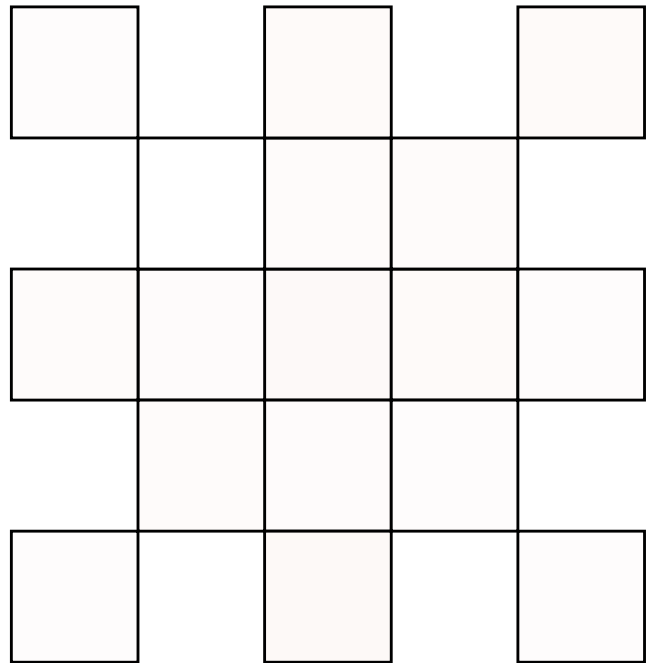

10-109795130-C-G

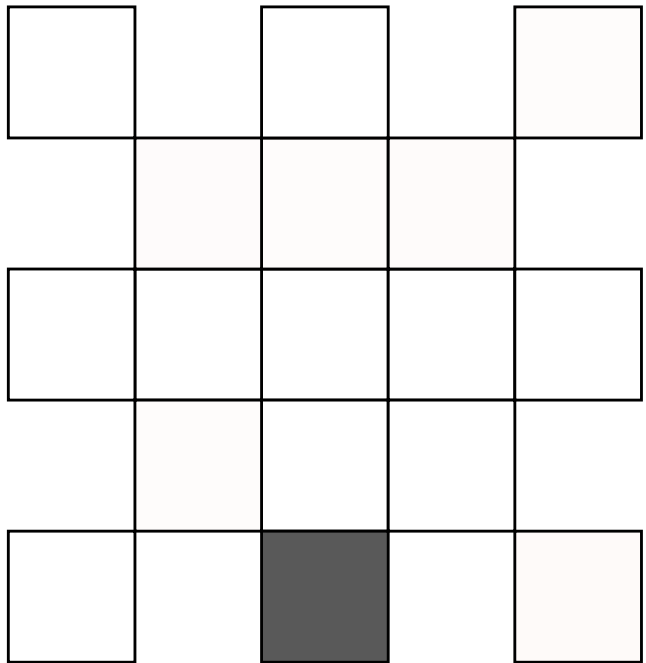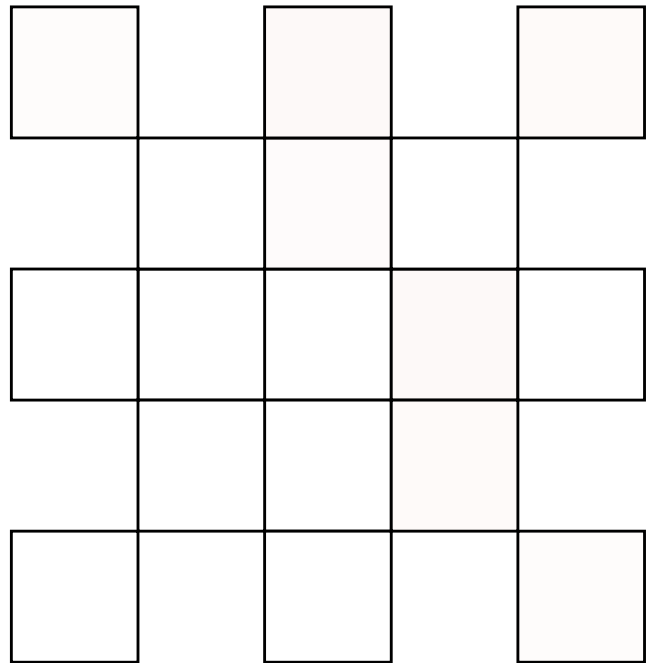

10-113404344-G-A

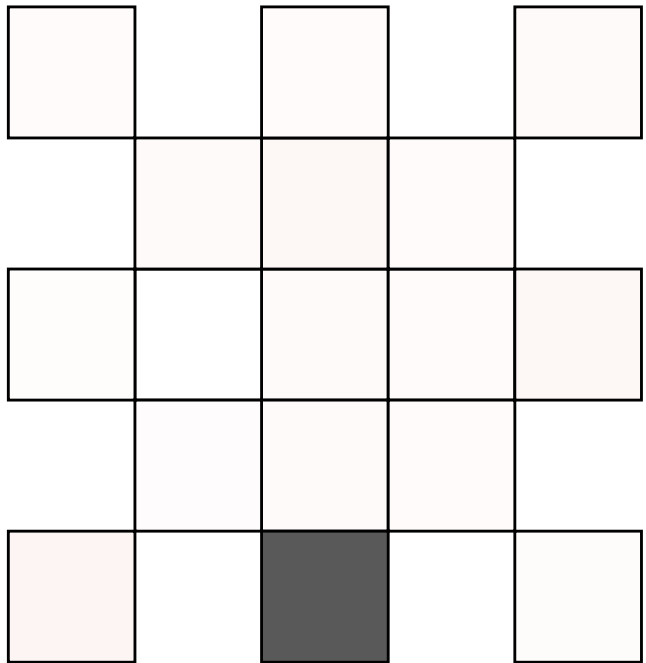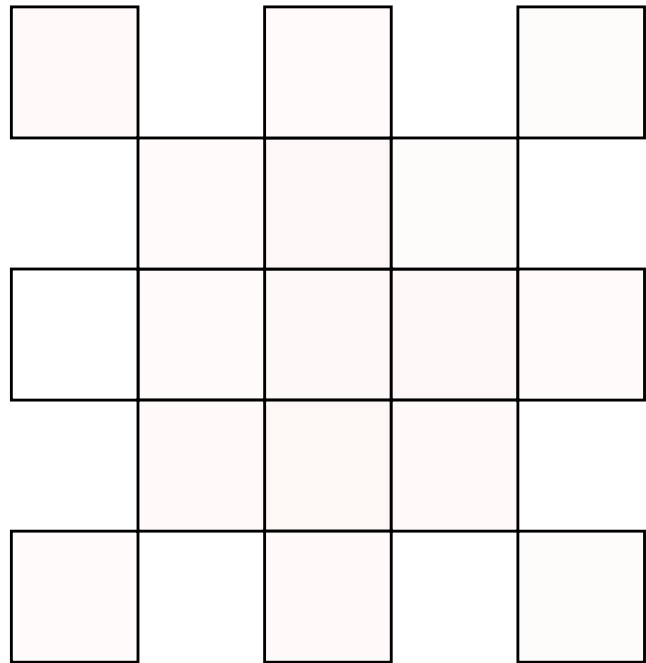



10-116677604-C-T

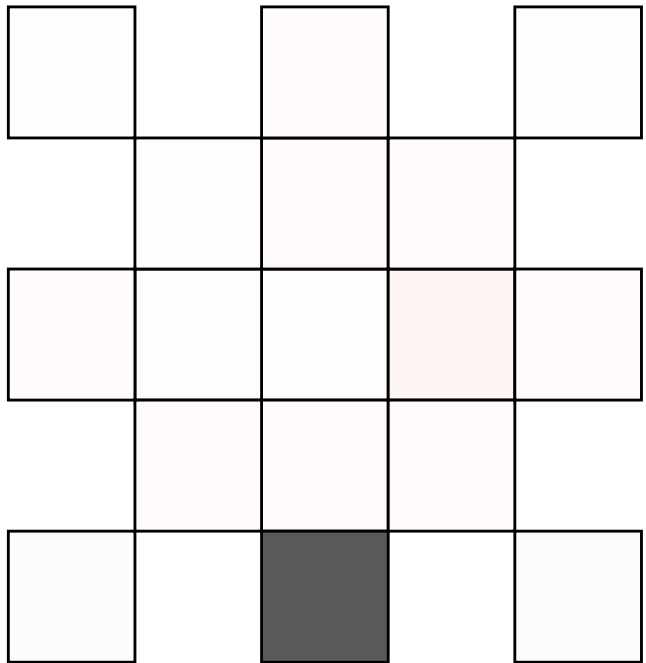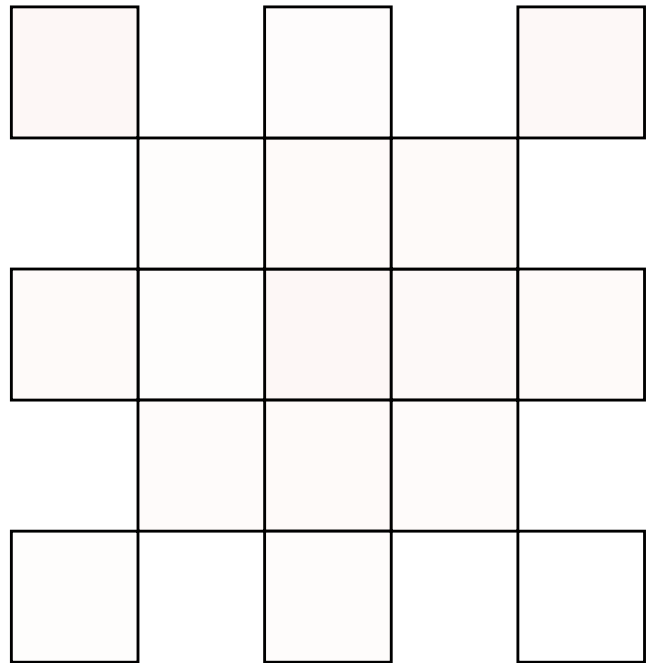

10-117540461-G-A

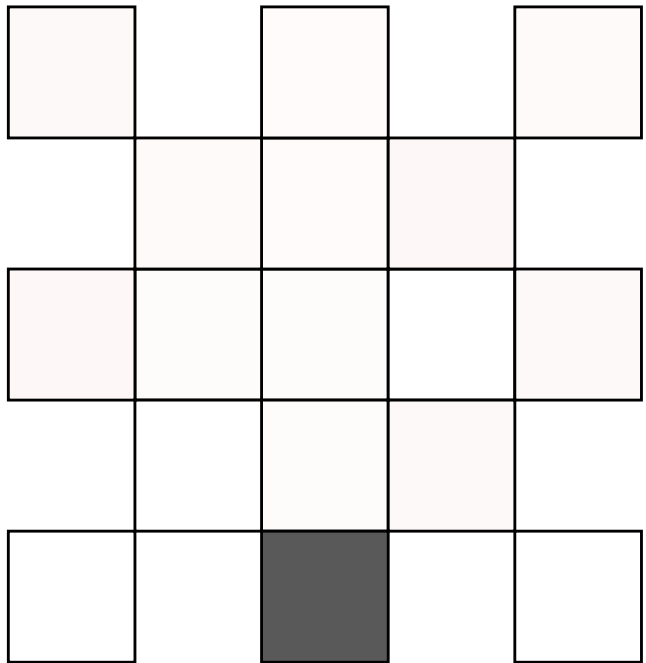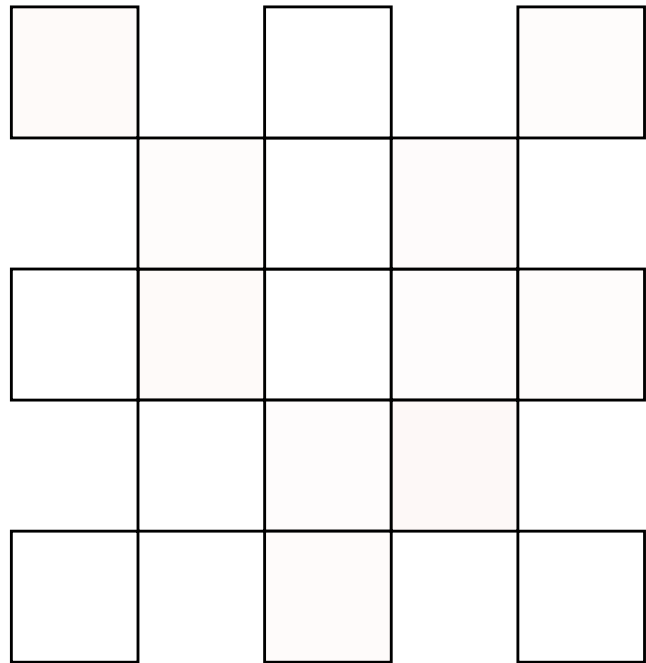

10-121073761-C-T

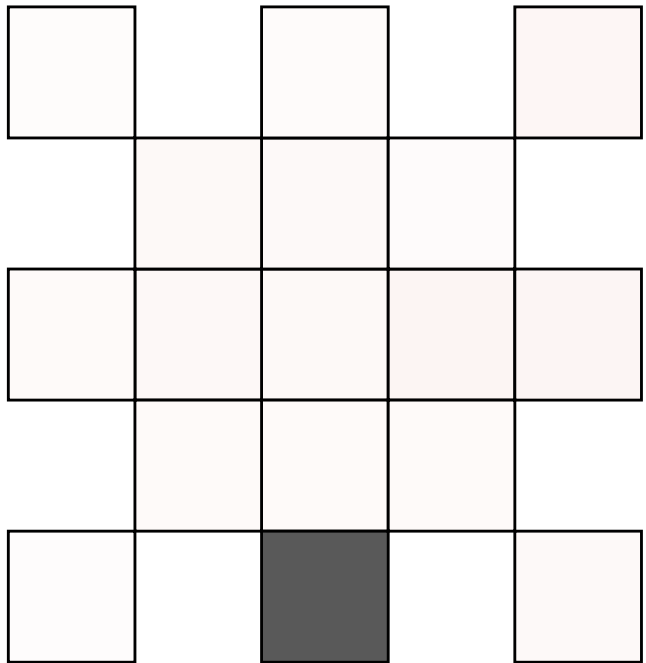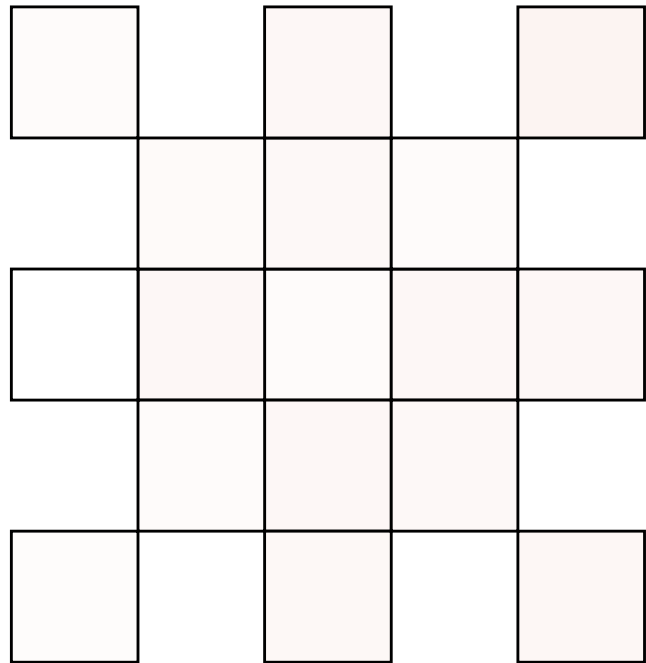

10-123873718-C-T

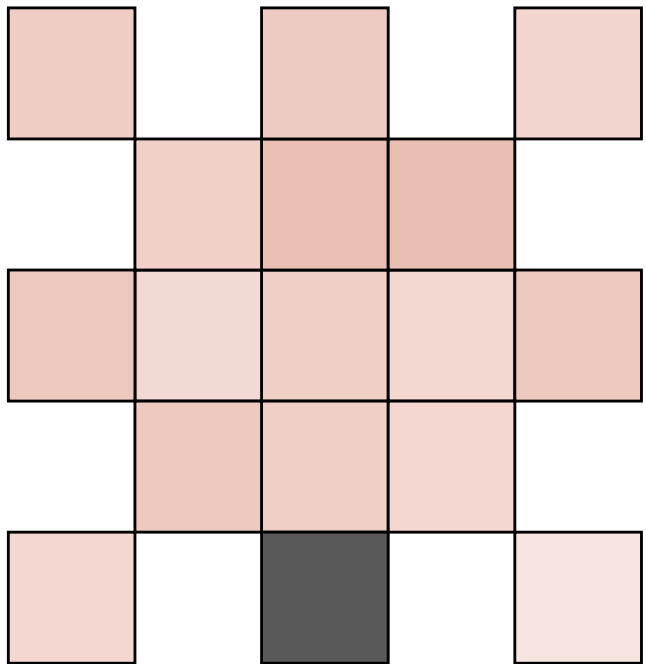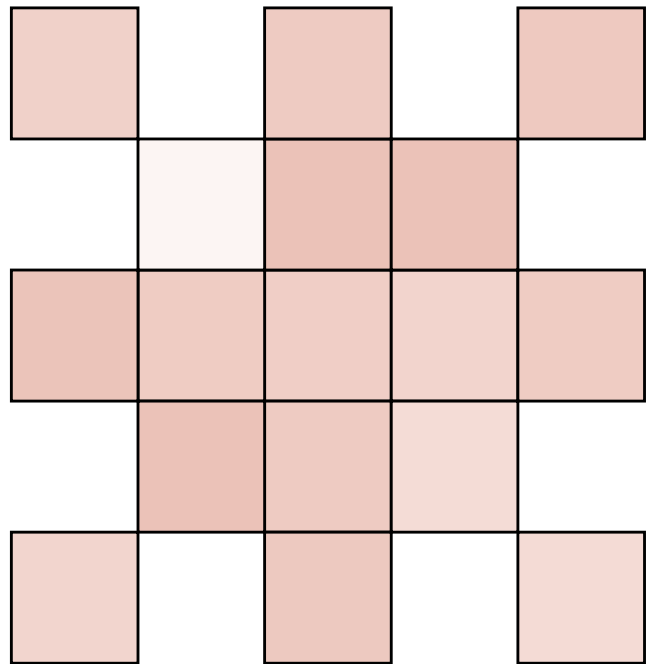

10-125075590-G-A

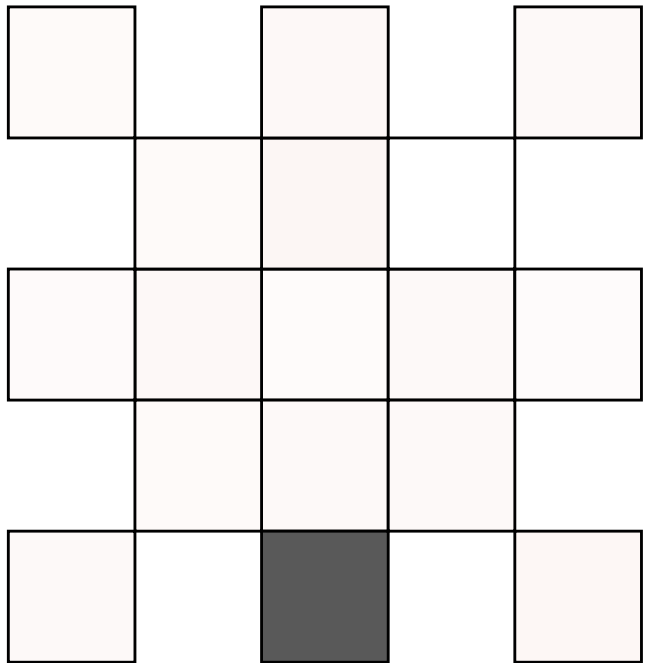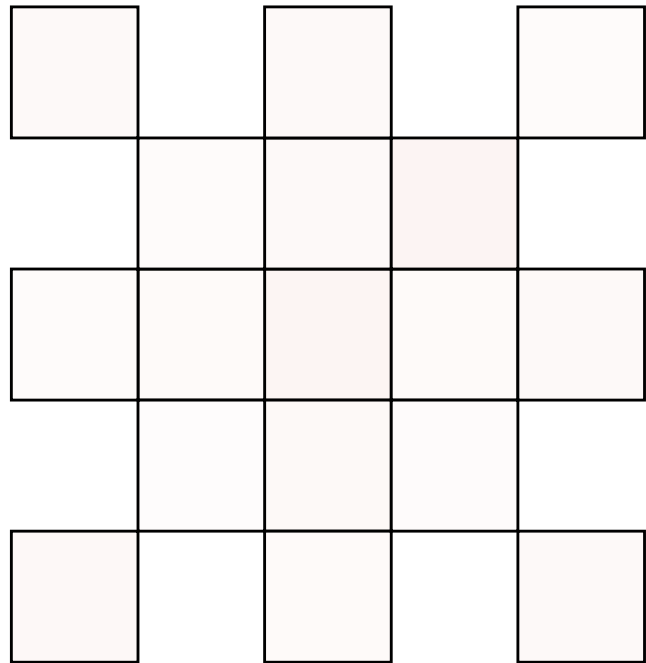

10-126824209-G-A

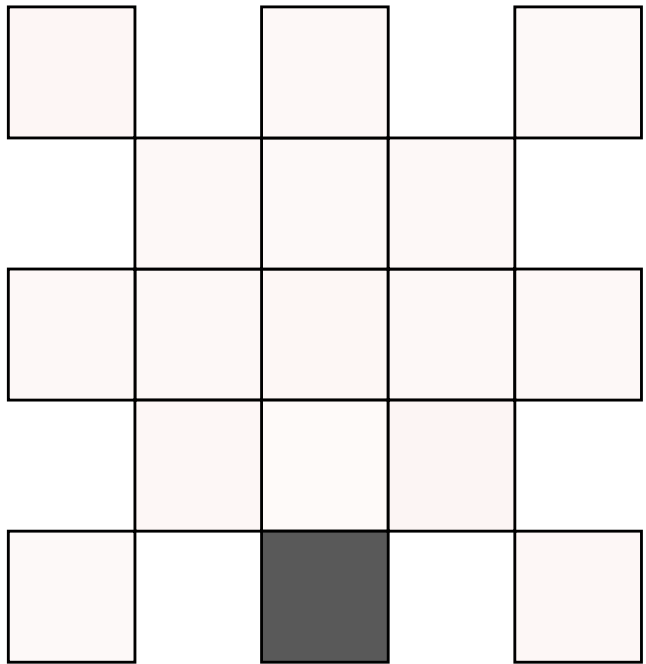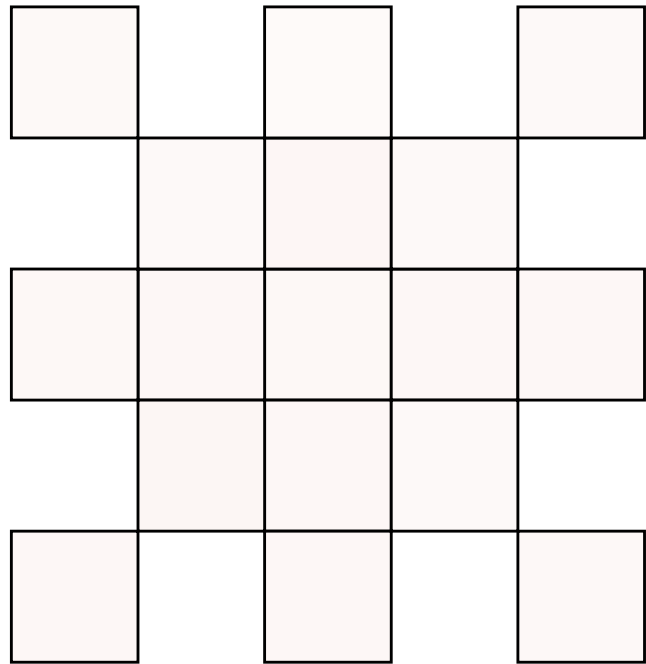

10-12696593-A-G

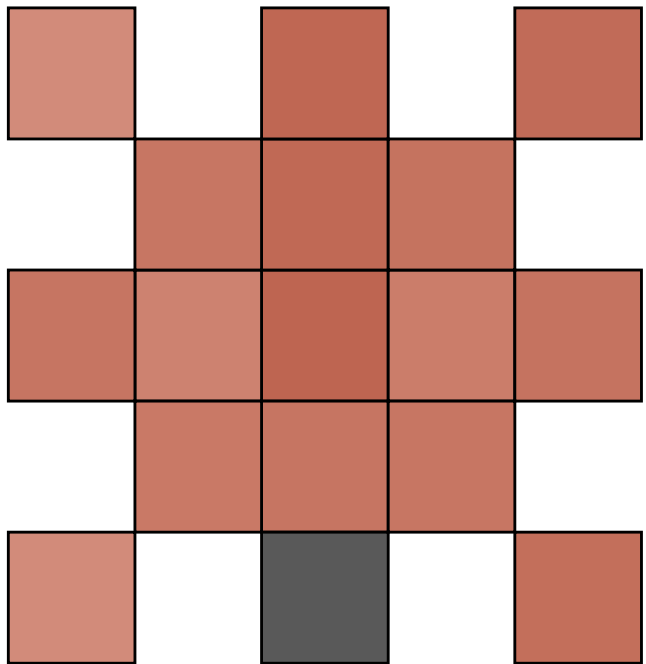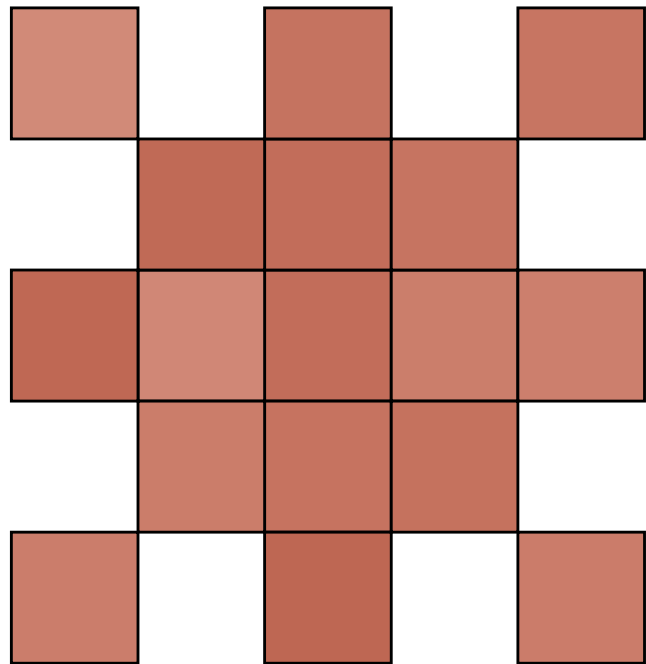

10-128097755-C-T

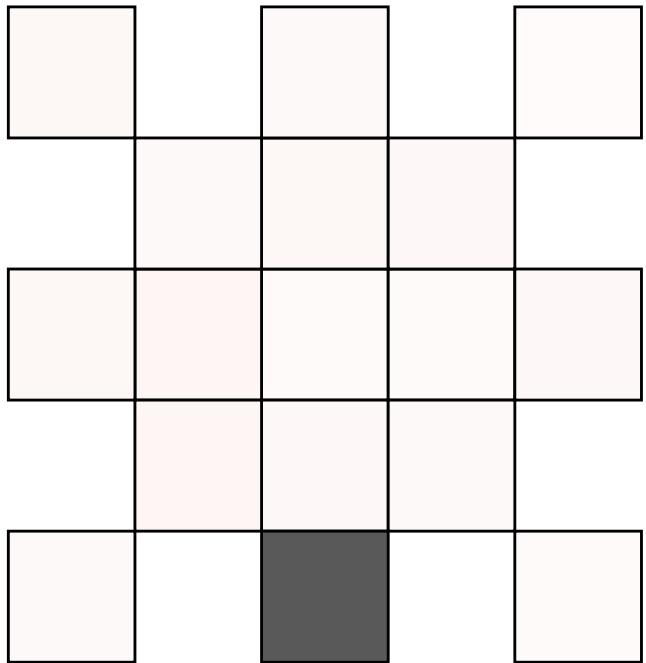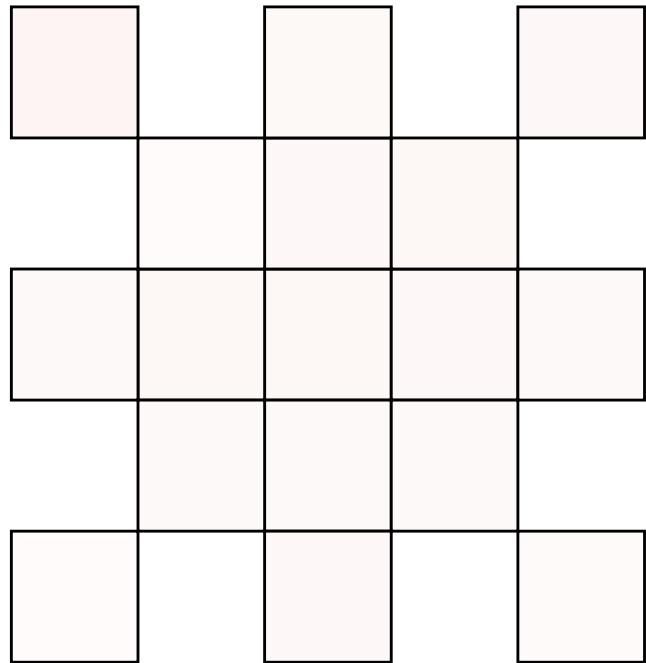



10-128228322-C-T

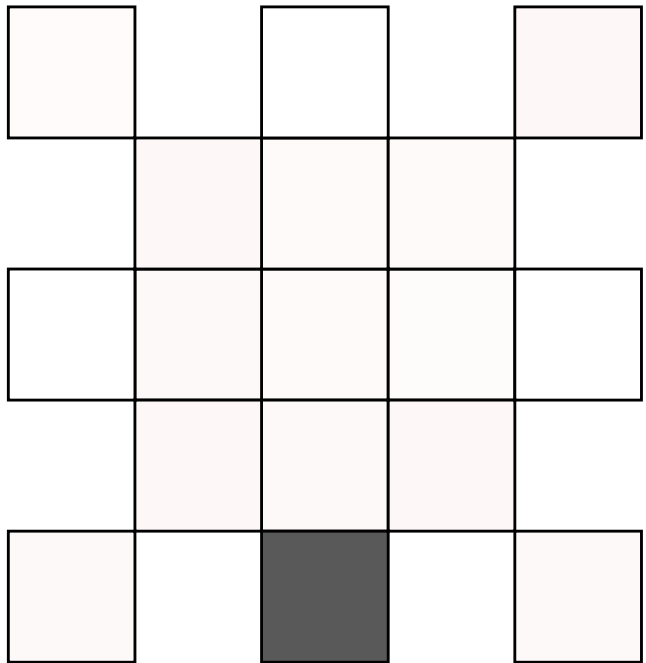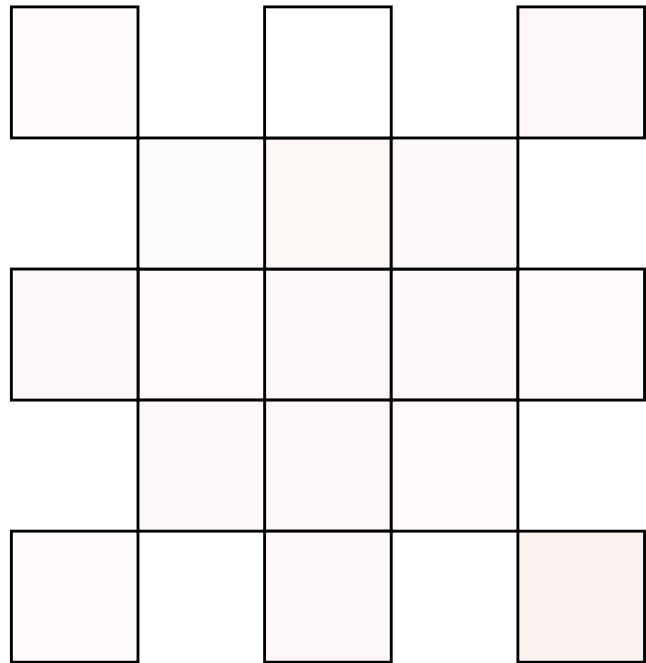

10-129376060-T-G

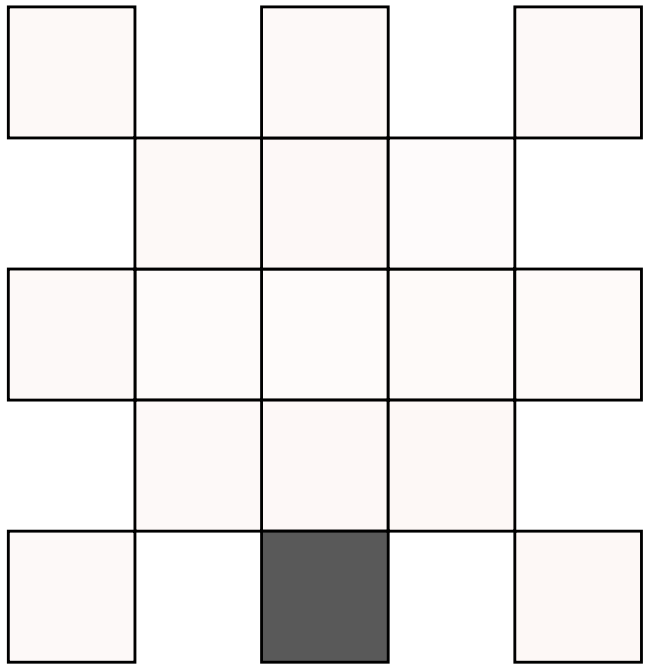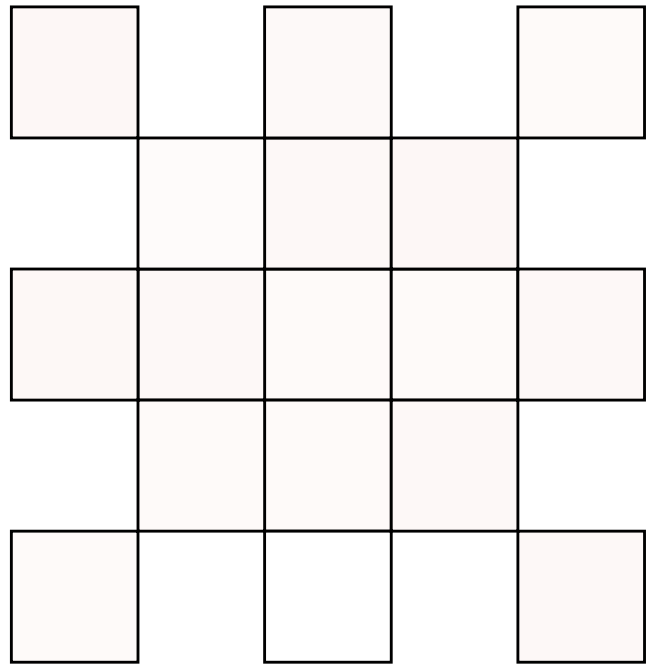

10-133221443-A-T

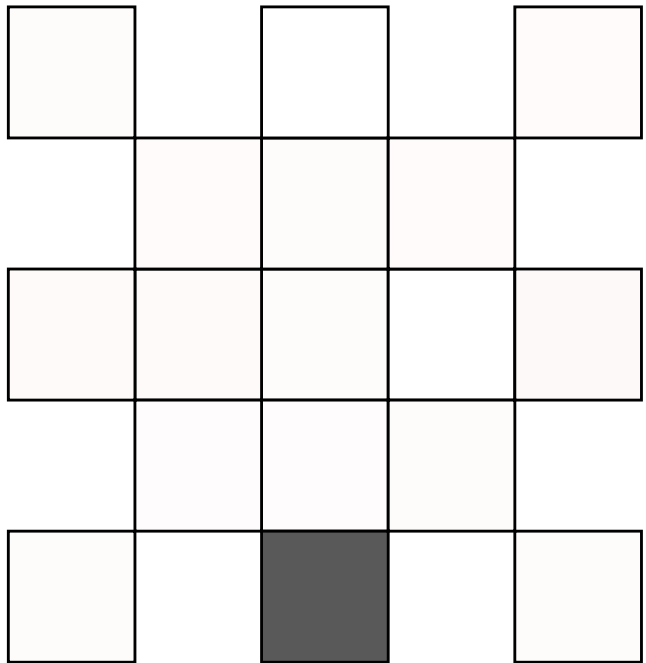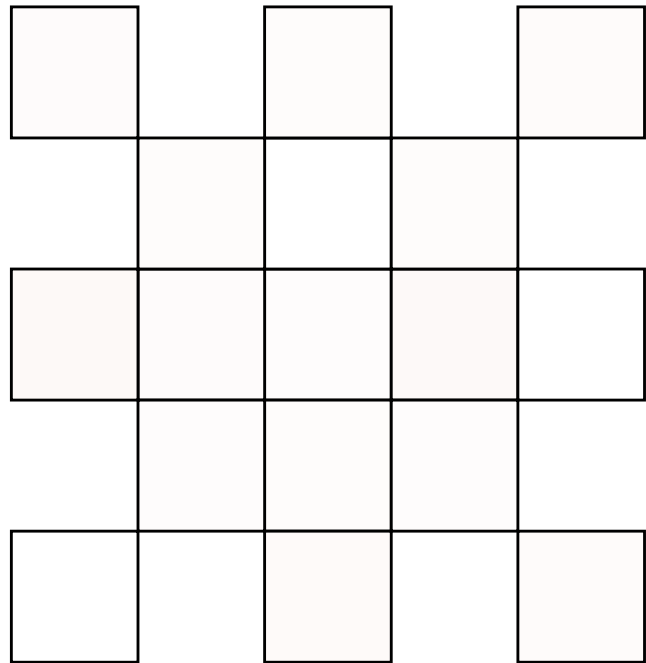

10-134211625-C-T

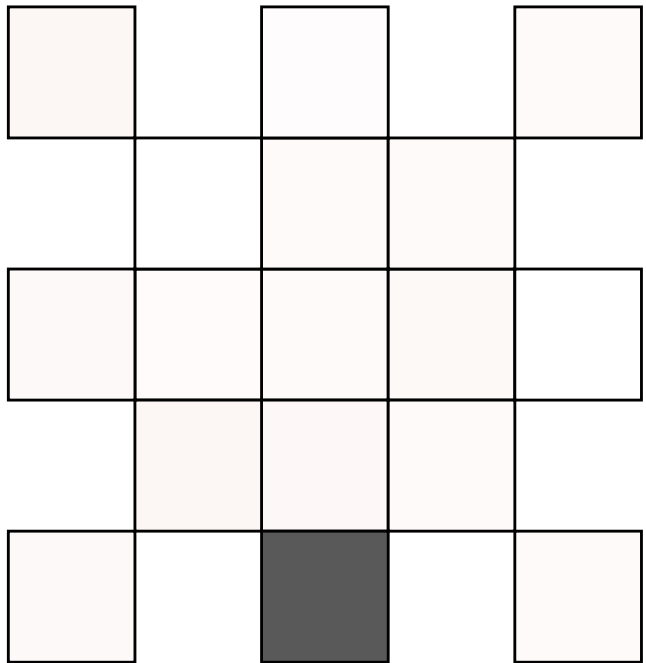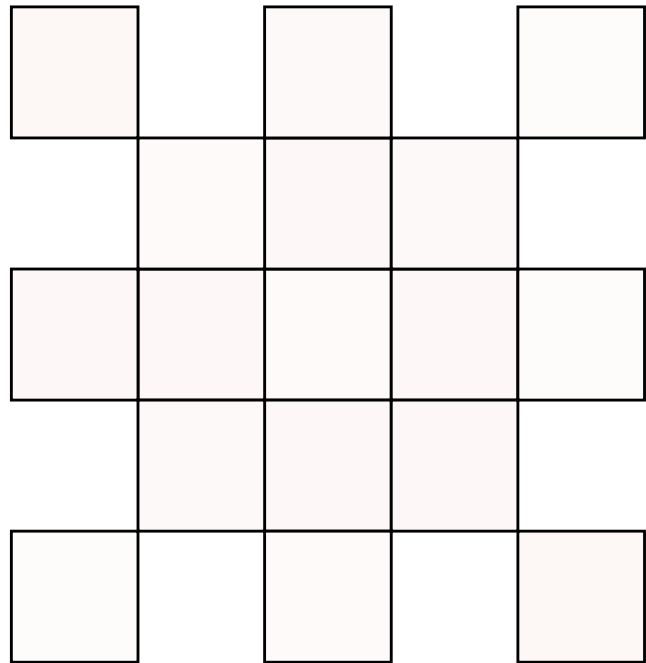

10-134280713-A-G

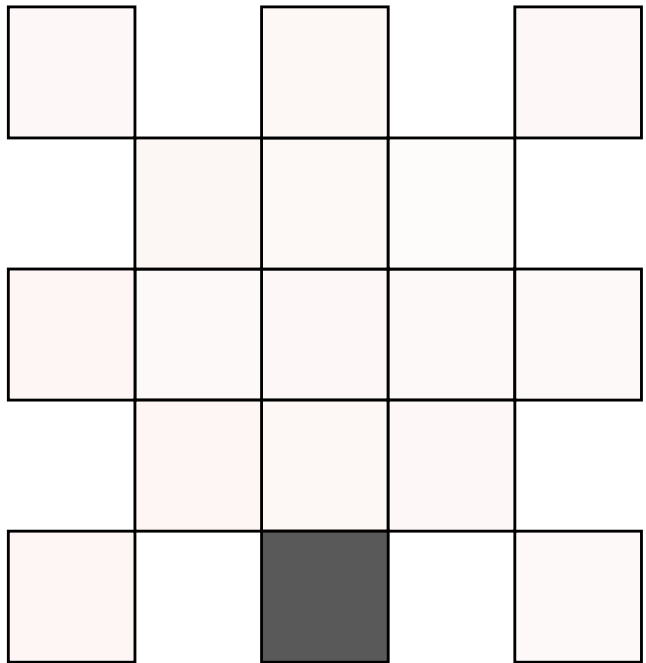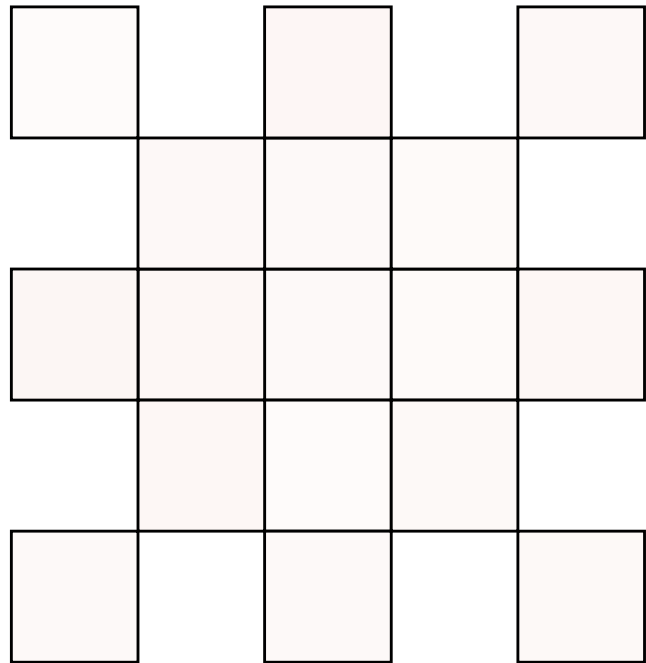

10-13796054-C-T

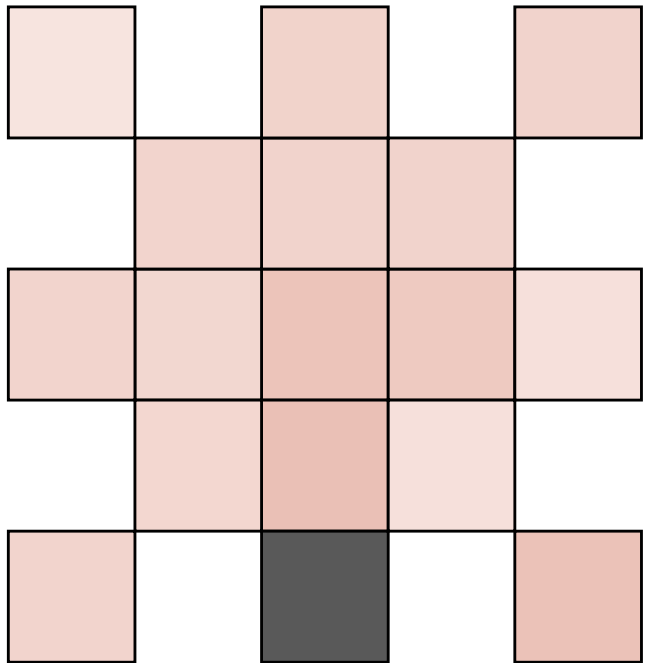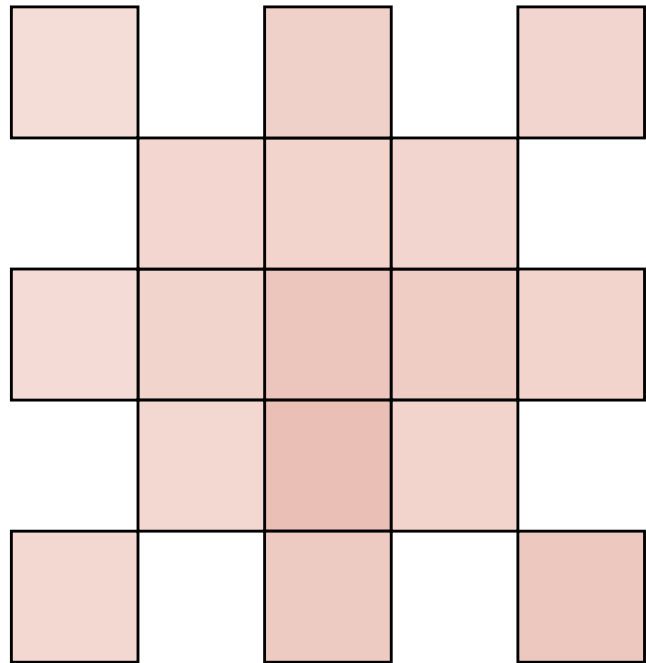

10-14490737-G-A

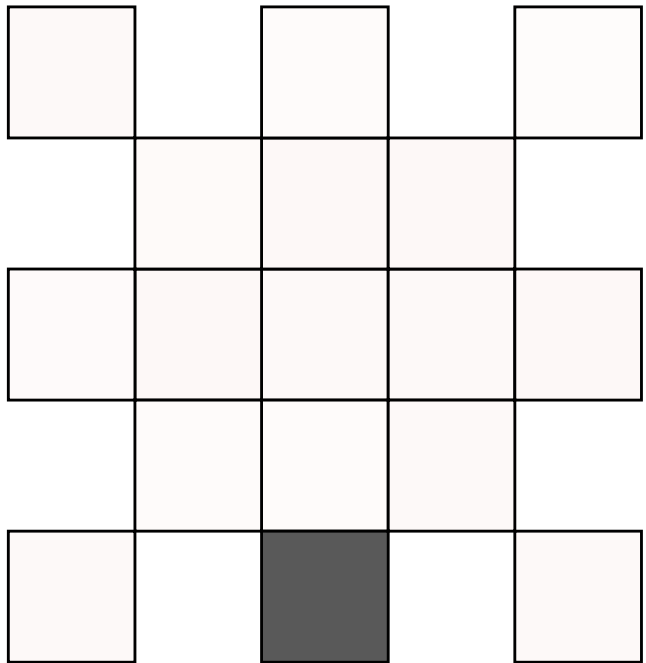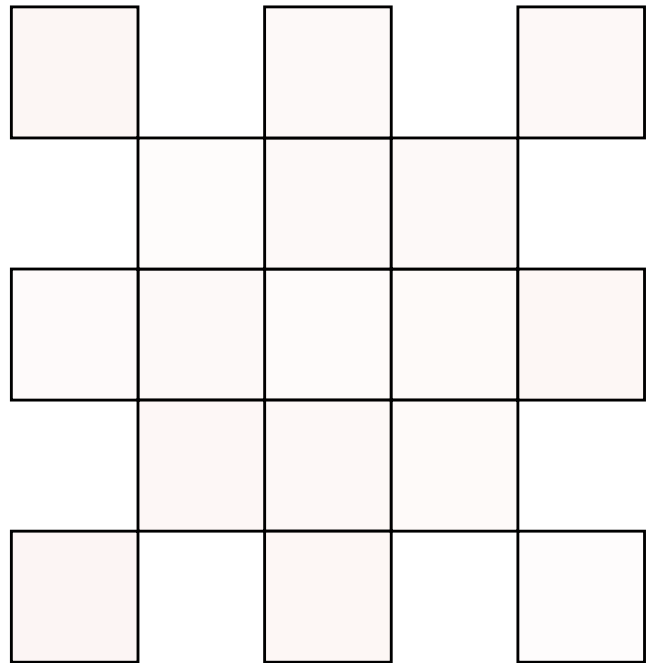

10-18693563-A-G

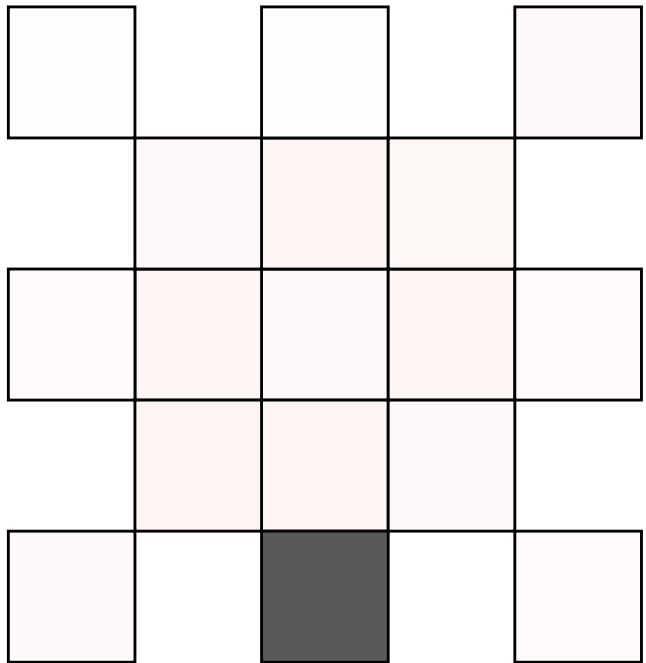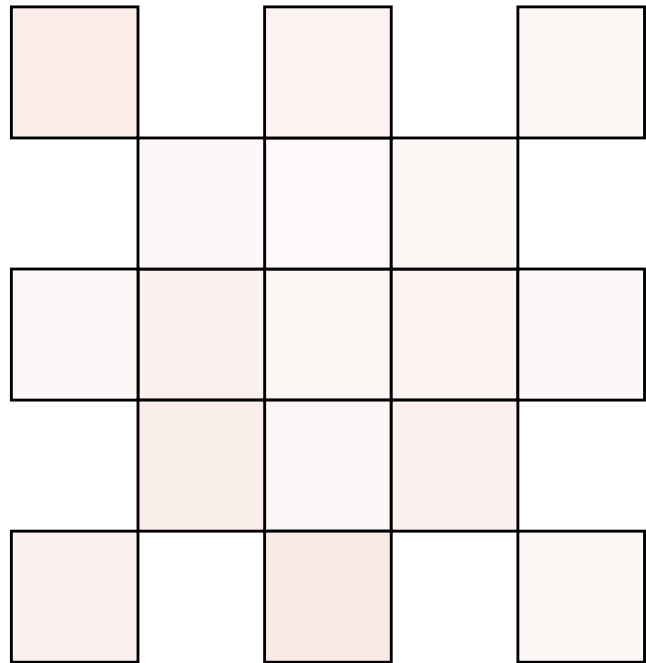



10-18760480-C-T

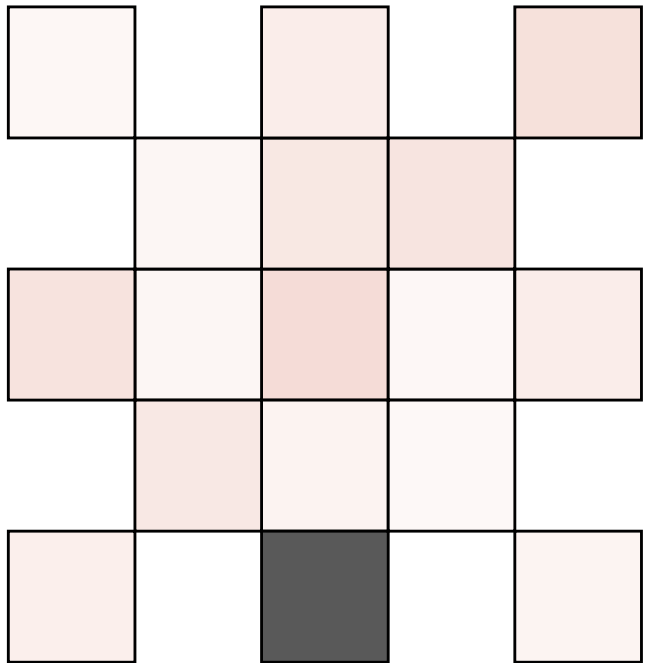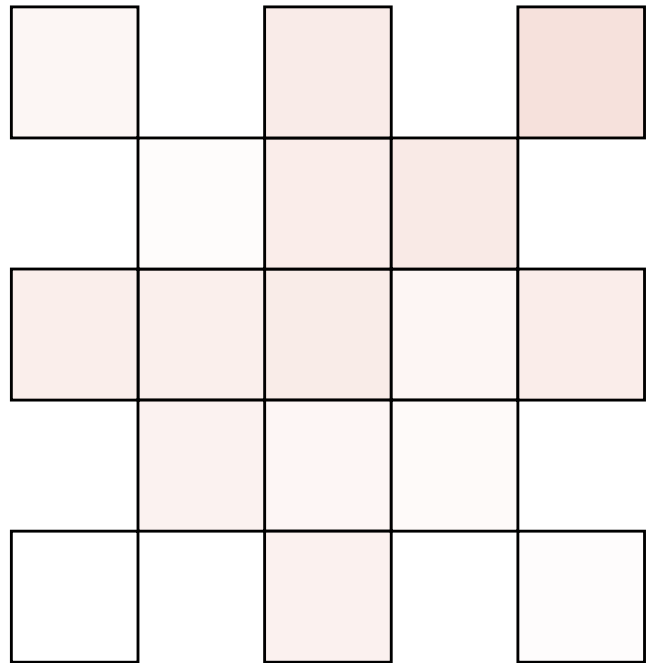

10-2261697-A-C

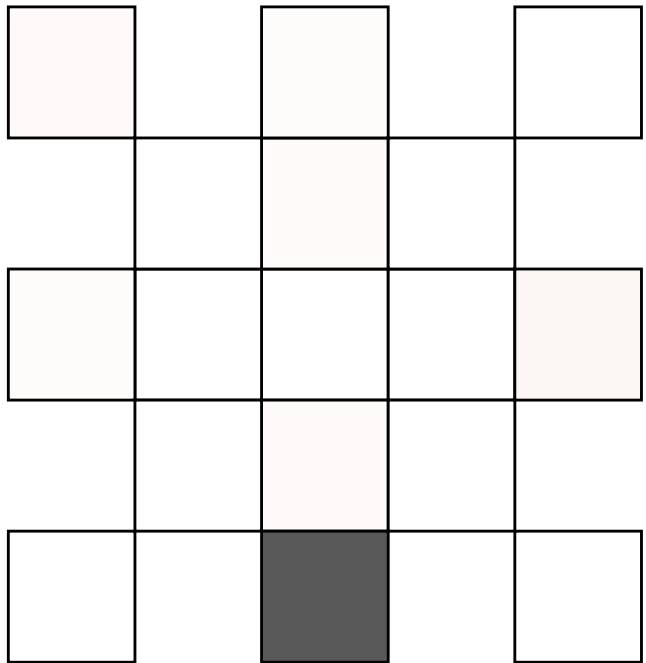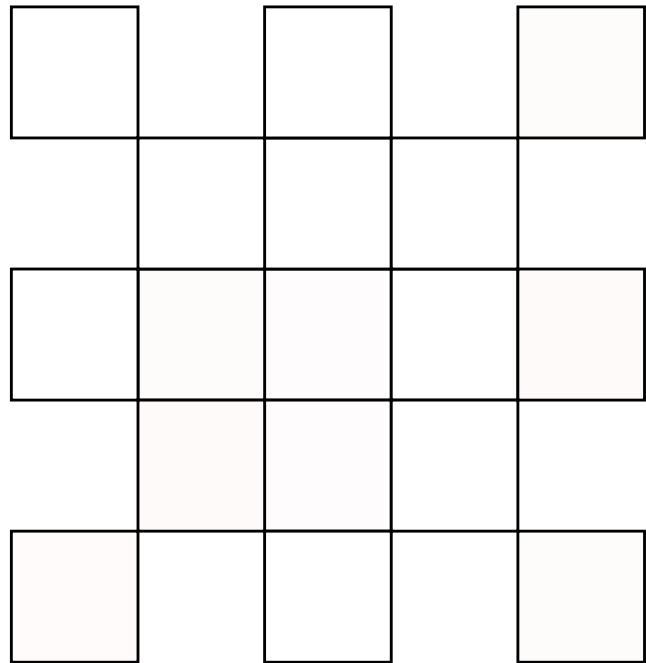

10-2261700-AT-A

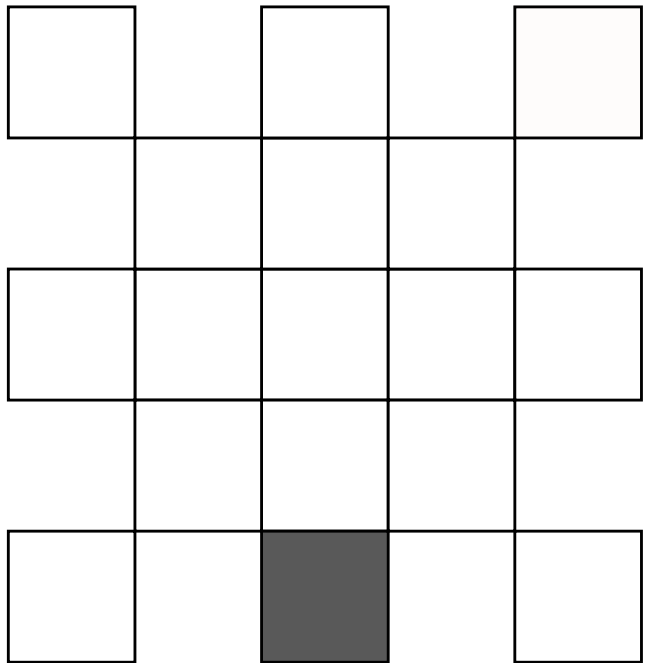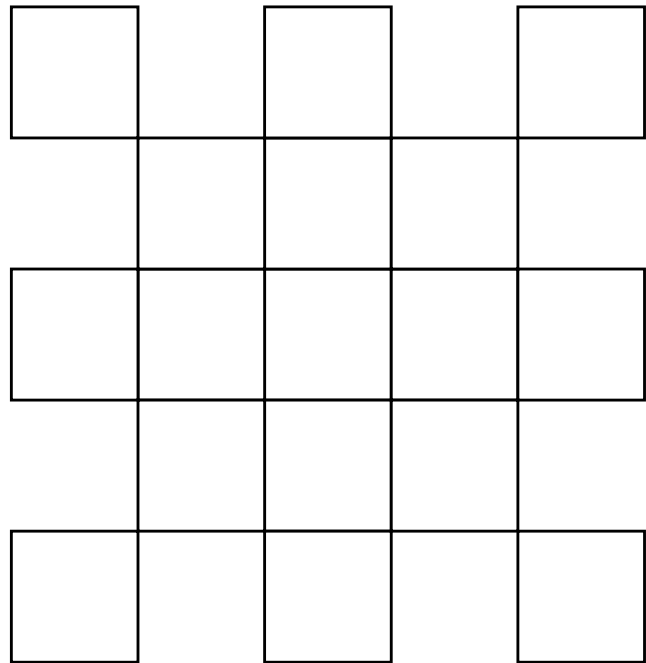

10-22765172-A-T

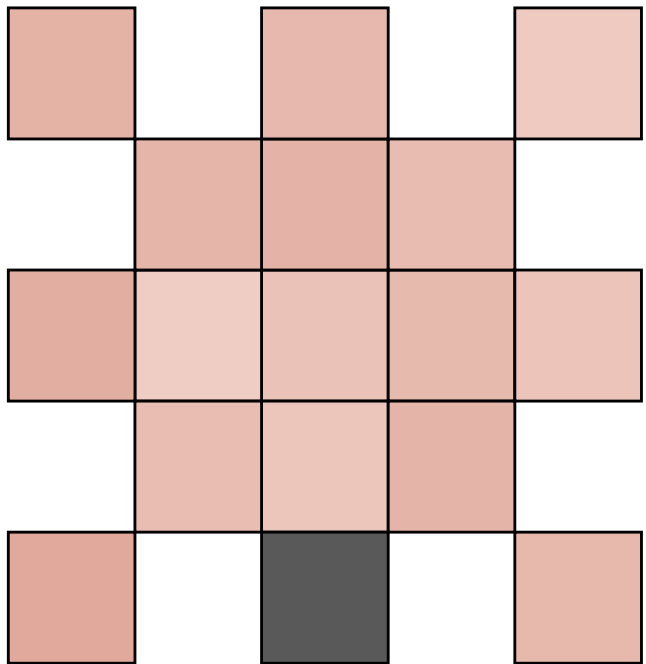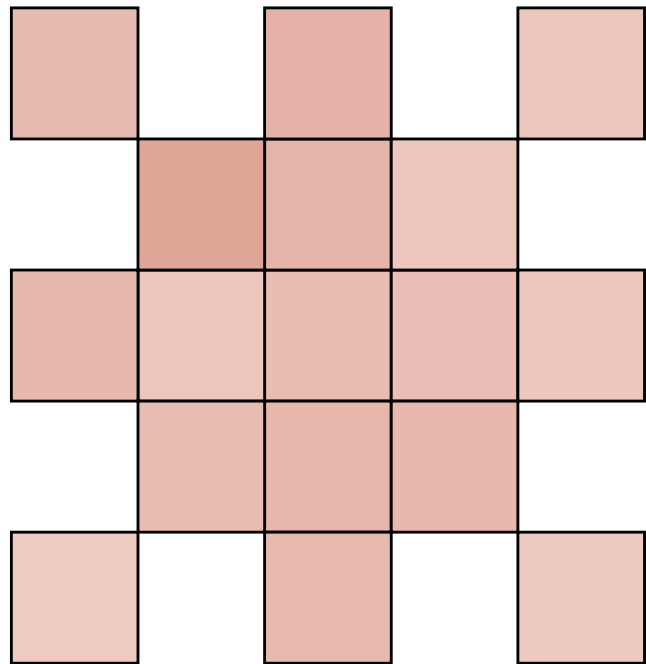

10-23976083-C-A

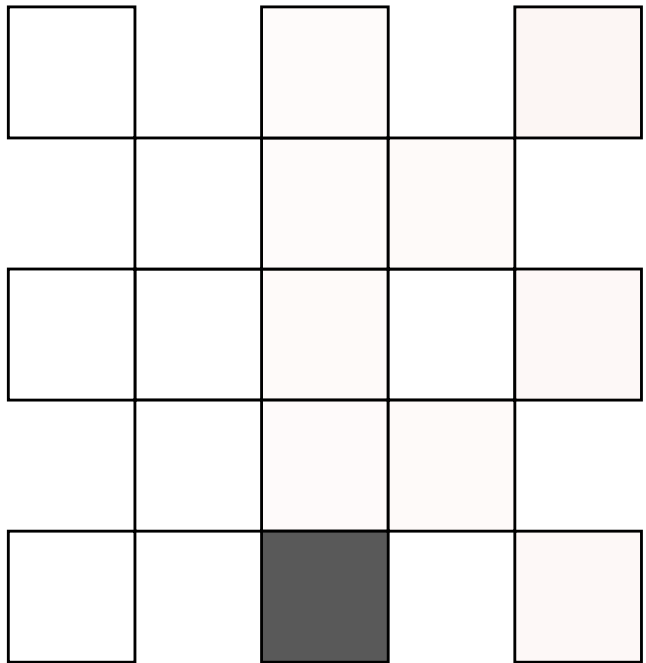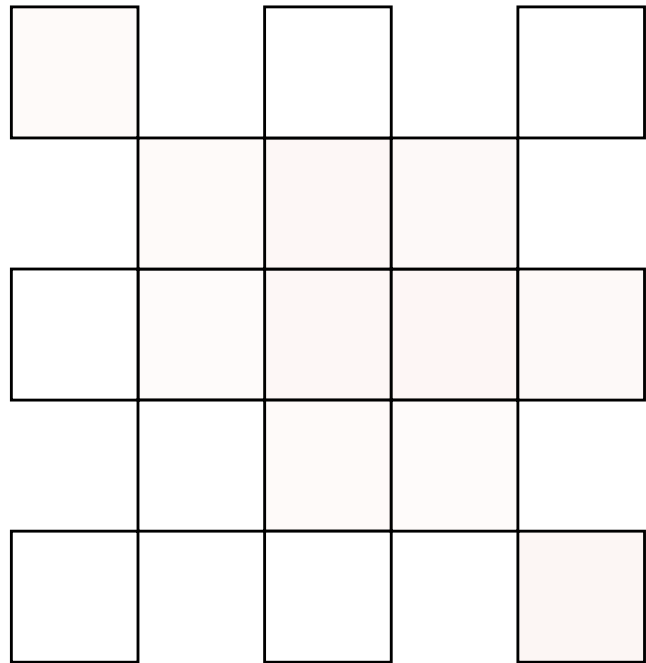

10-25457893-C-T

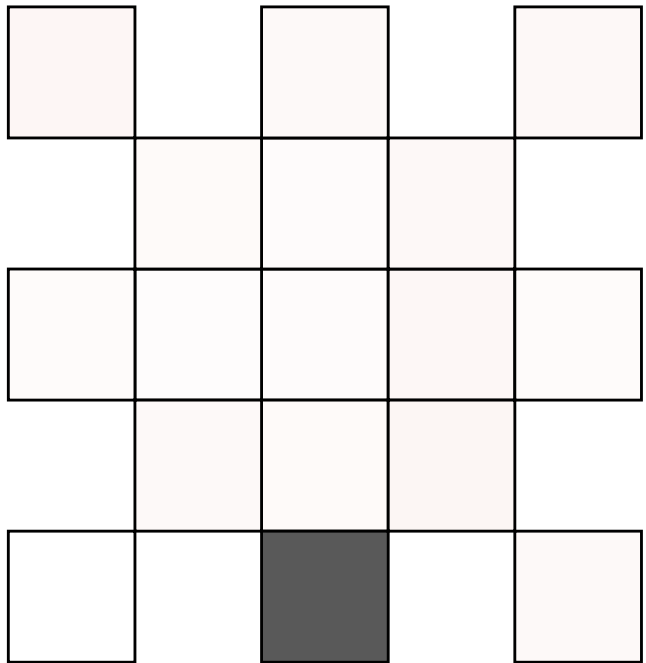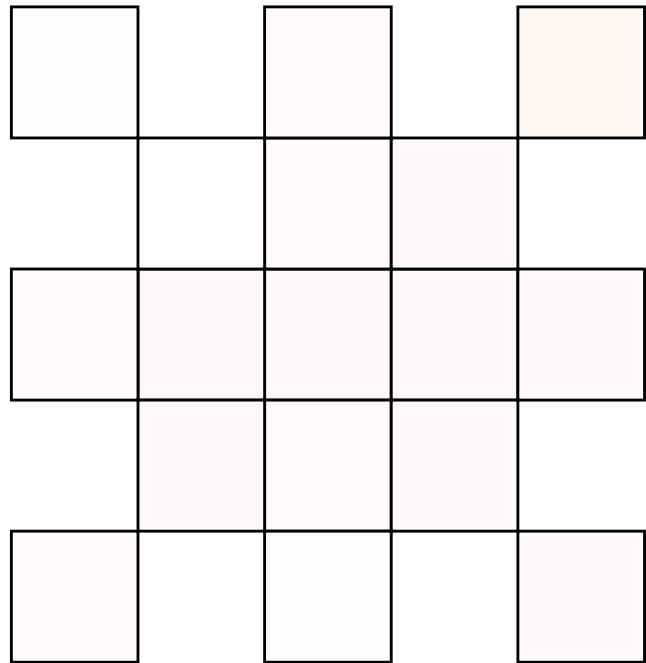

10-25610159-G-A

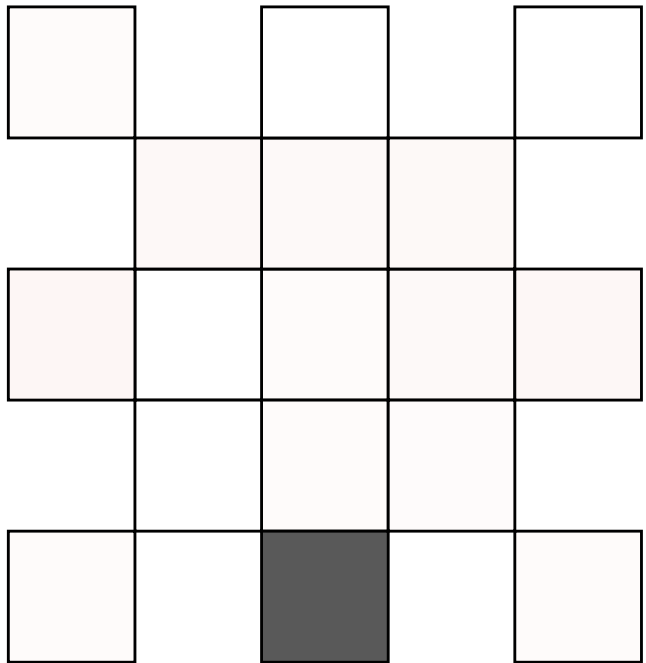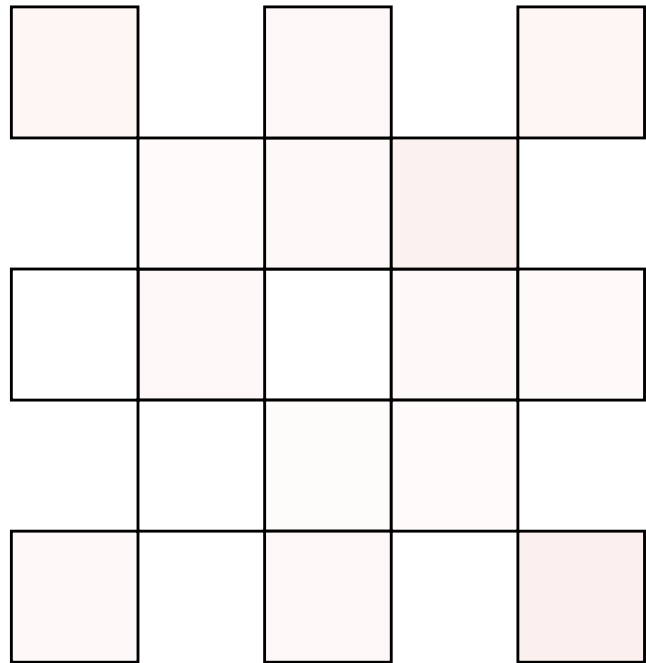

10-34121088-A-G

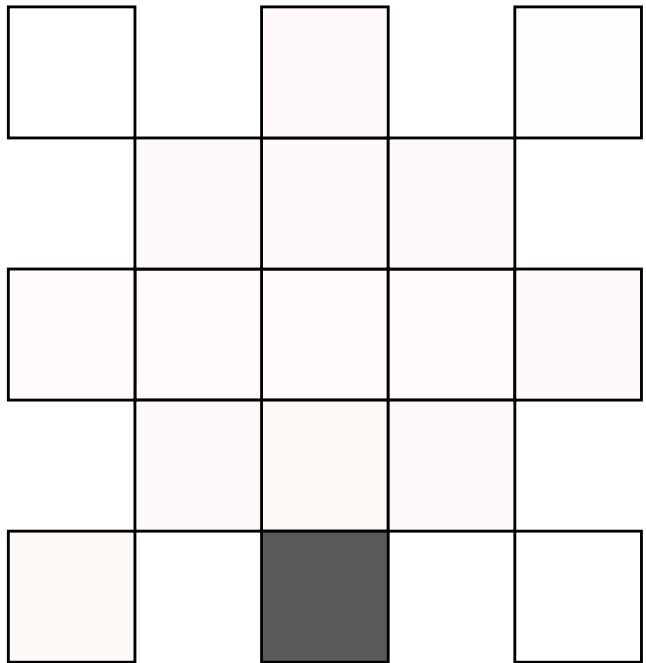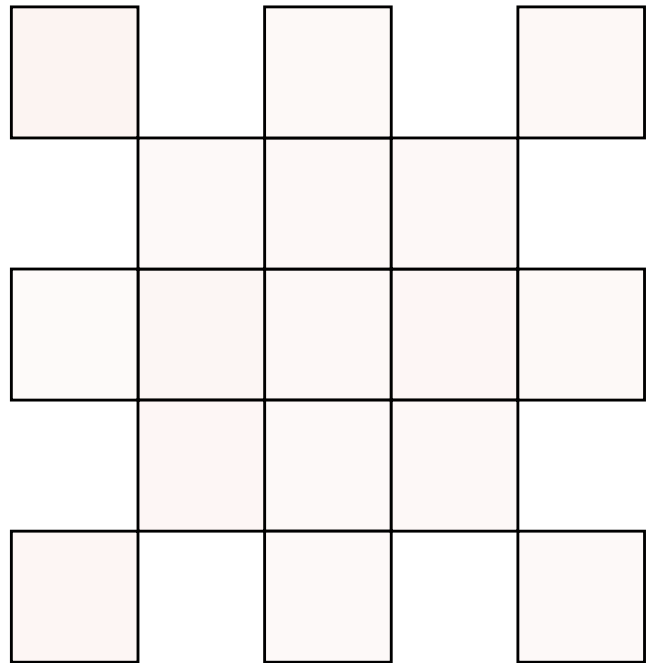



10-36039114-G-A

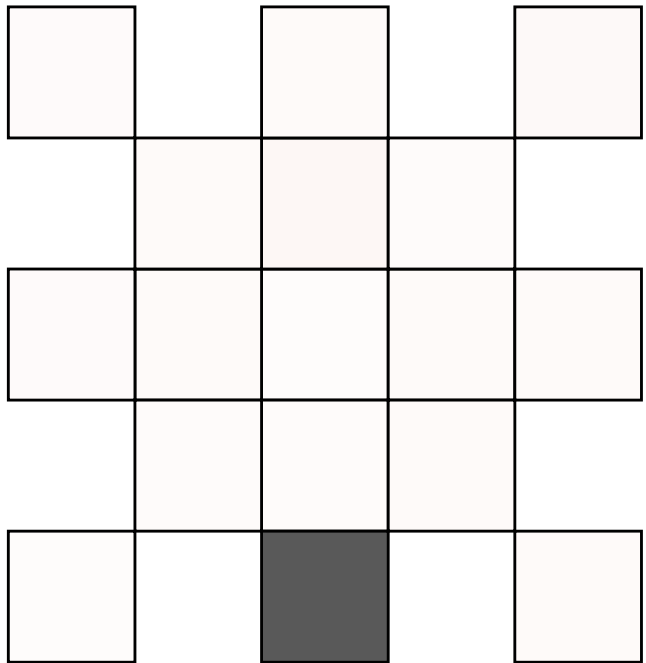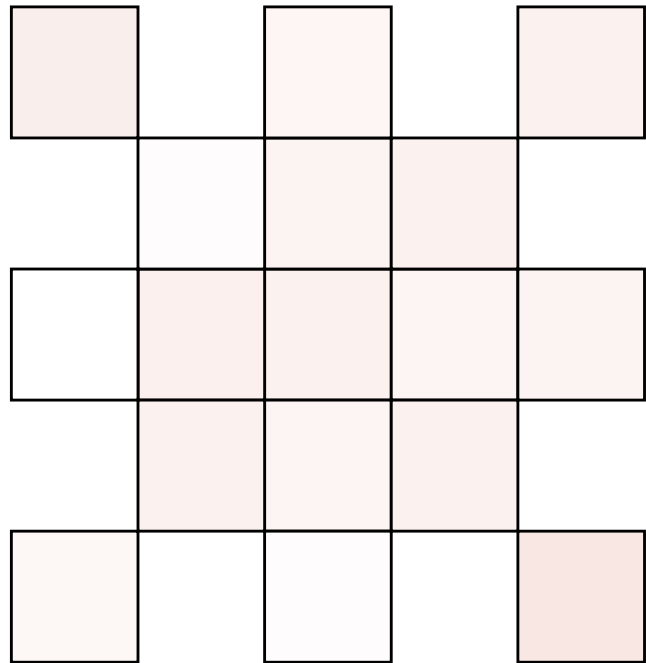

10-58152659-C-T

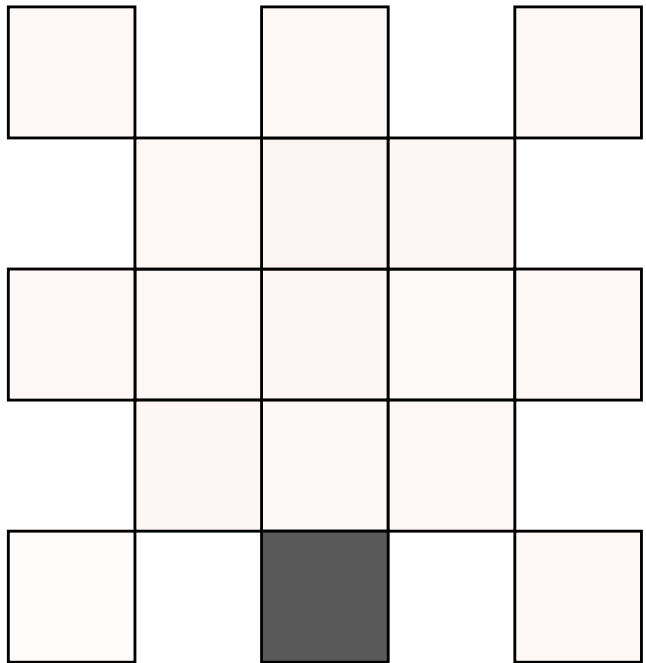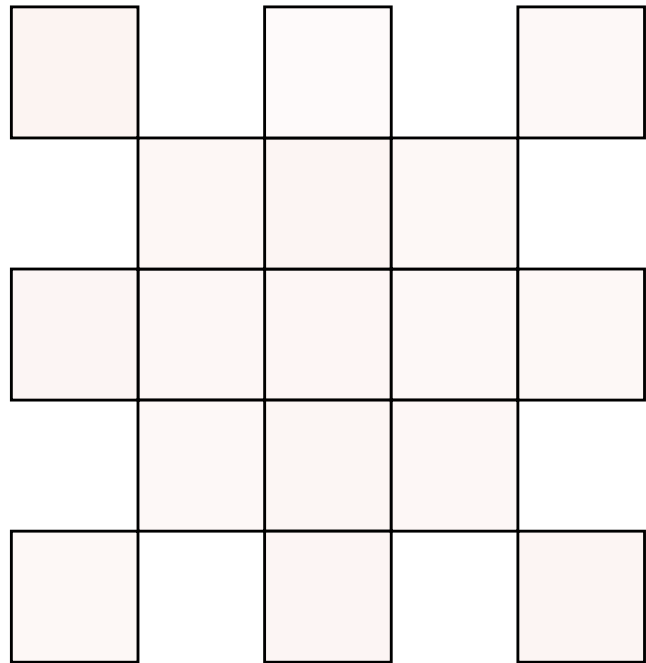

10-58457040-T-G

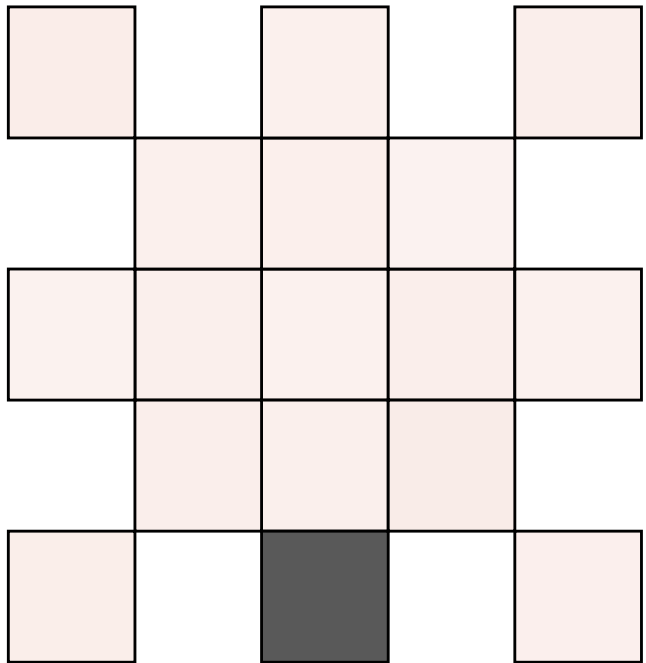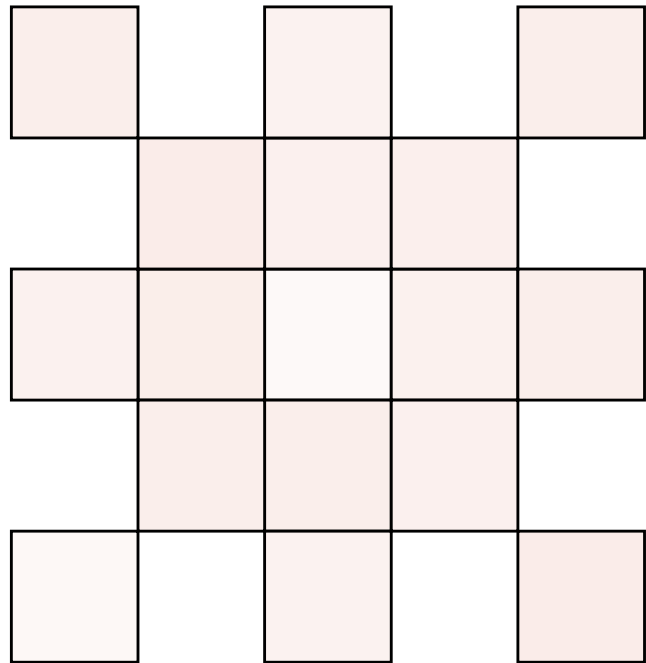

10-60559957-C-T

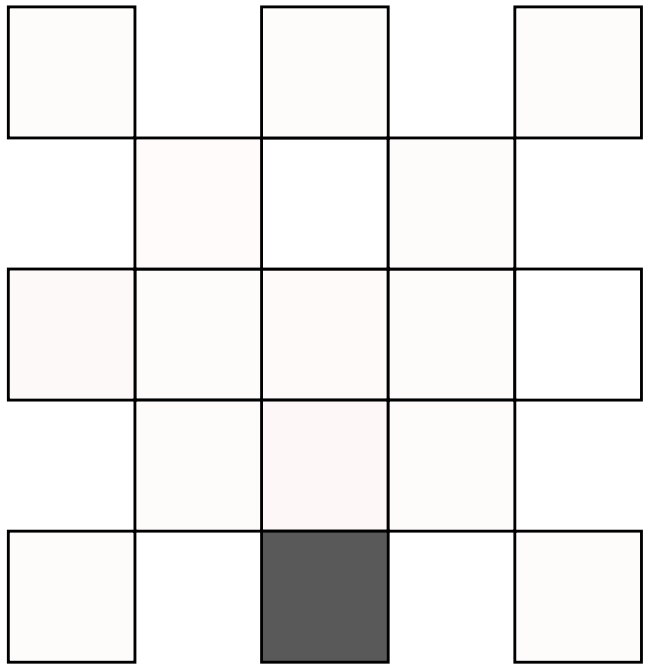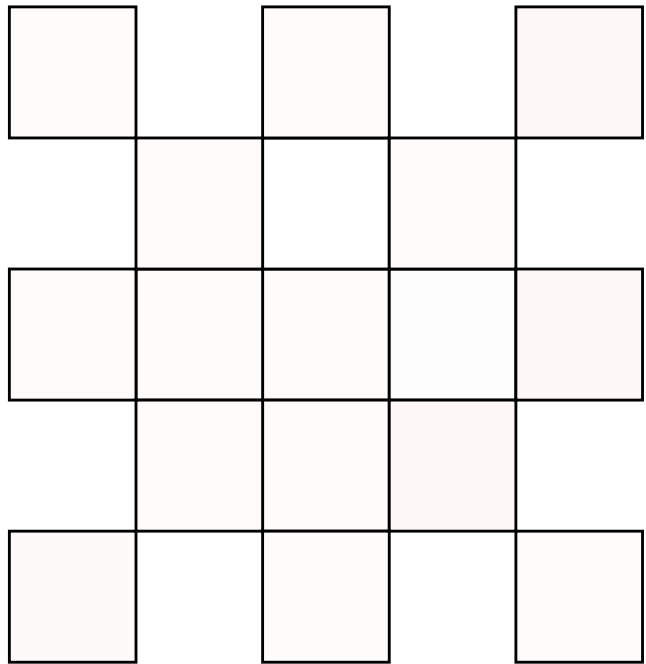

10-7459695-G-A

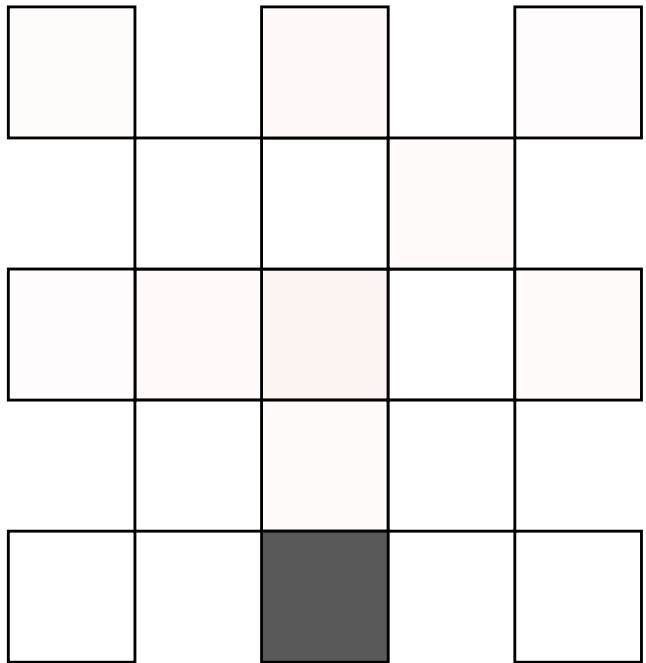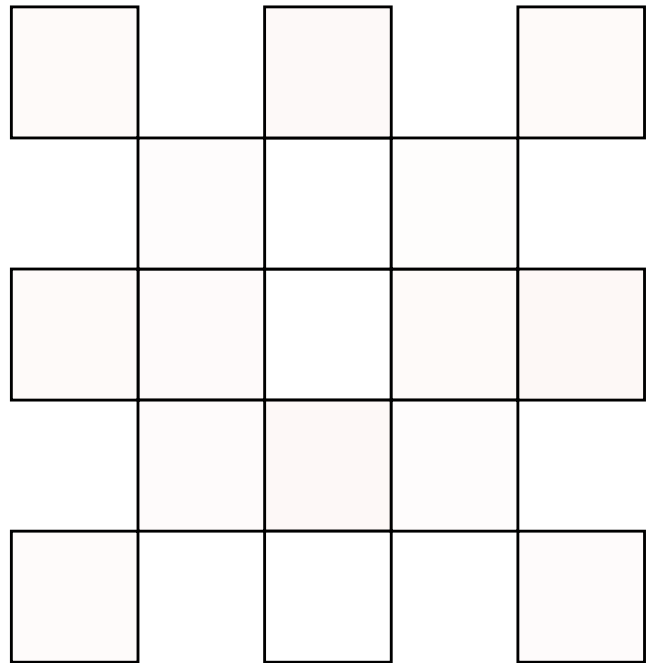

10-79843135-G-A

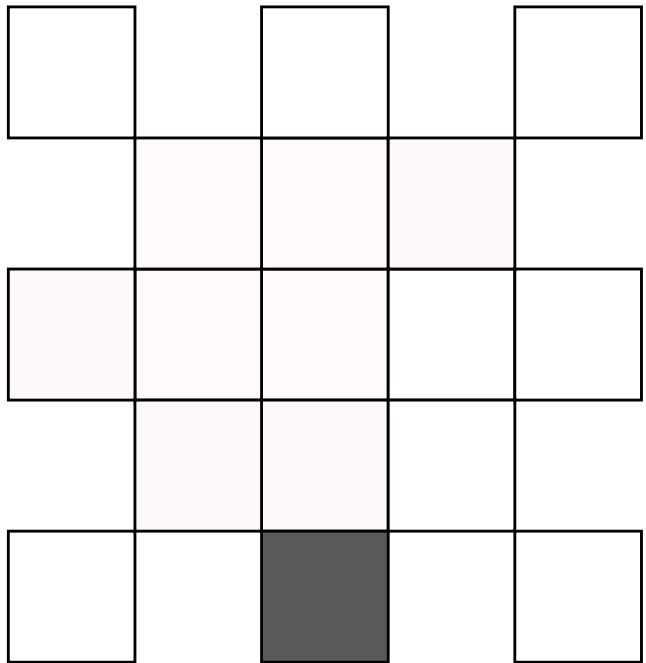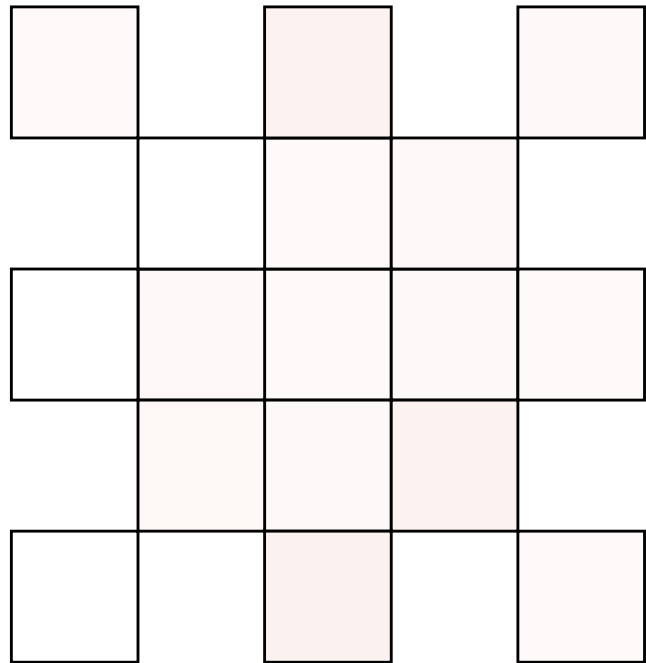

10-86000116-G-A

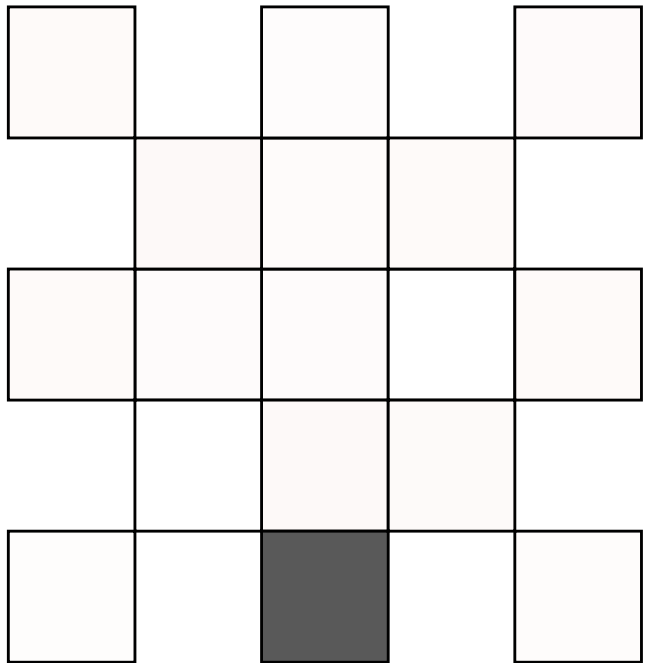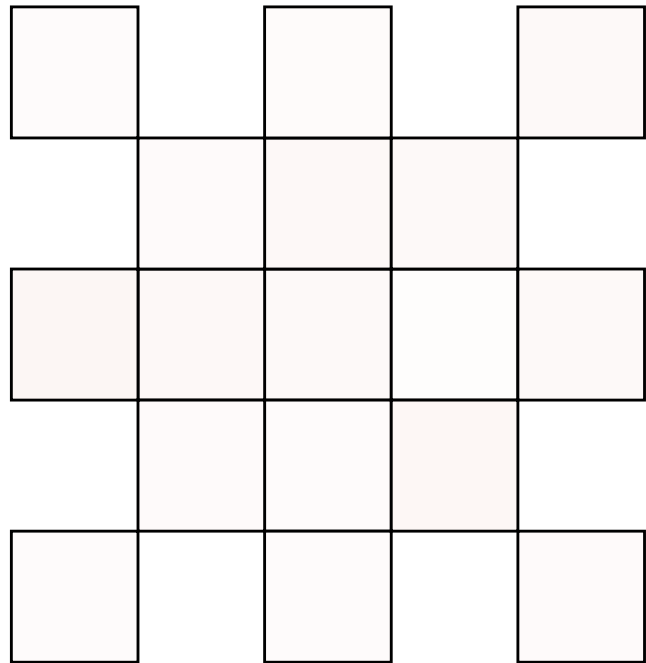

10-90743647-G-T

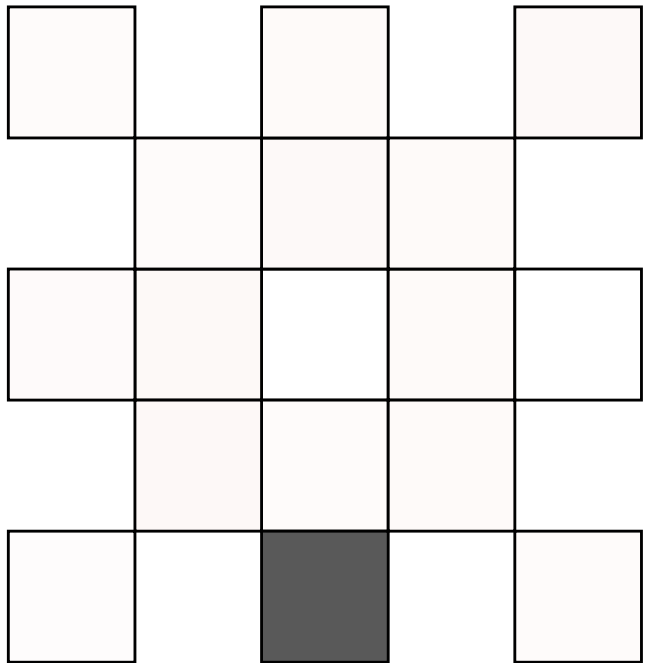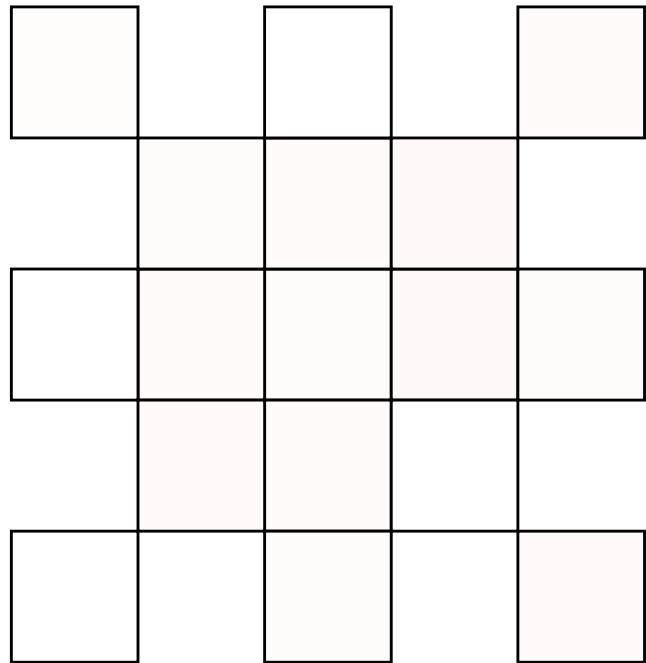



10-92052309-G-A

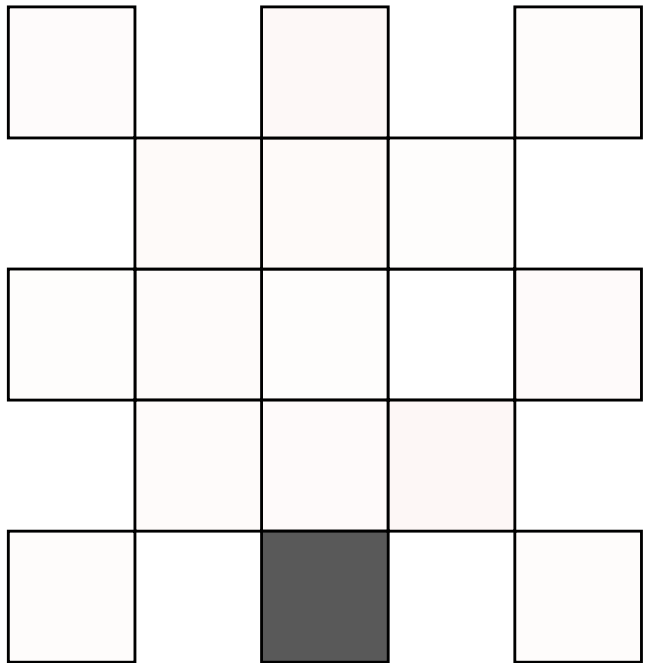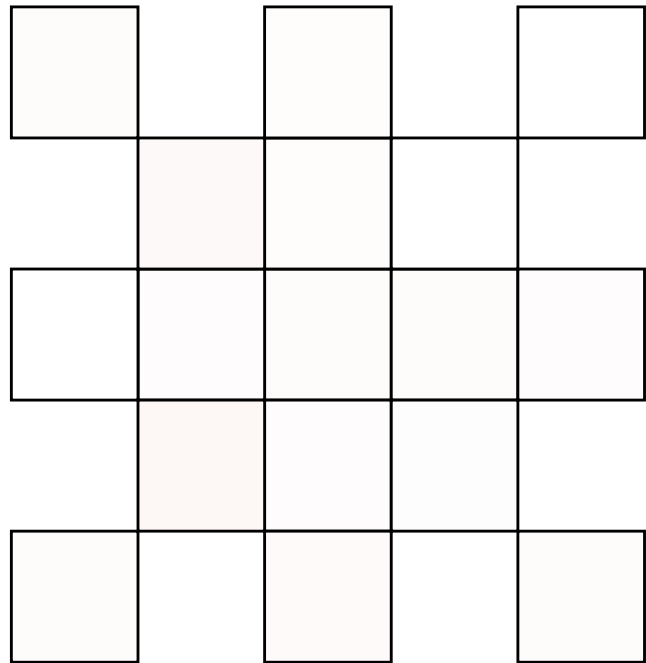

10-98832334-C-T

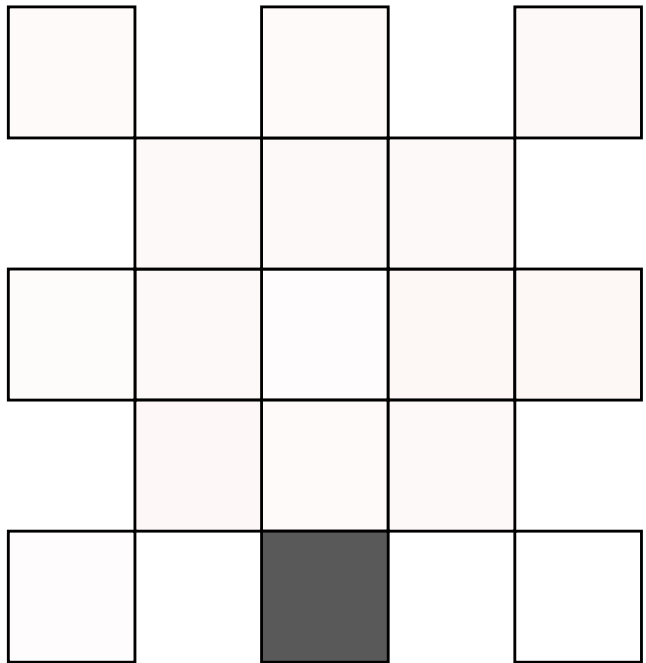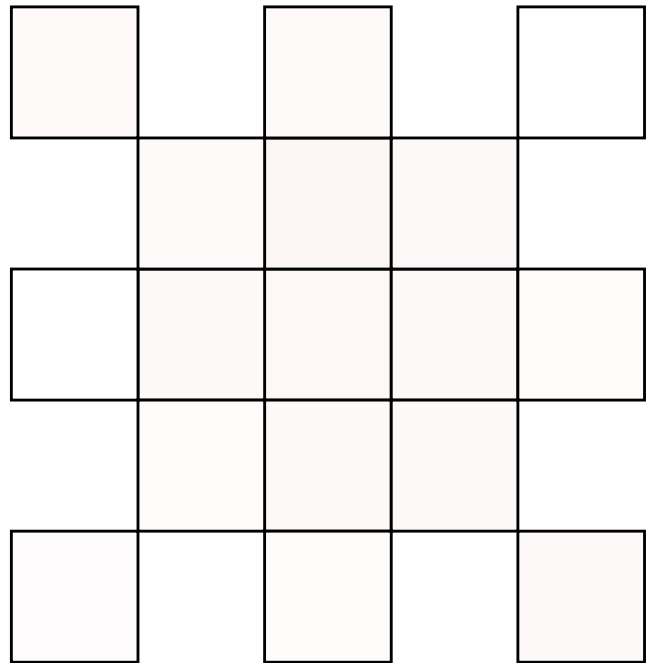

10-98832335-C-A

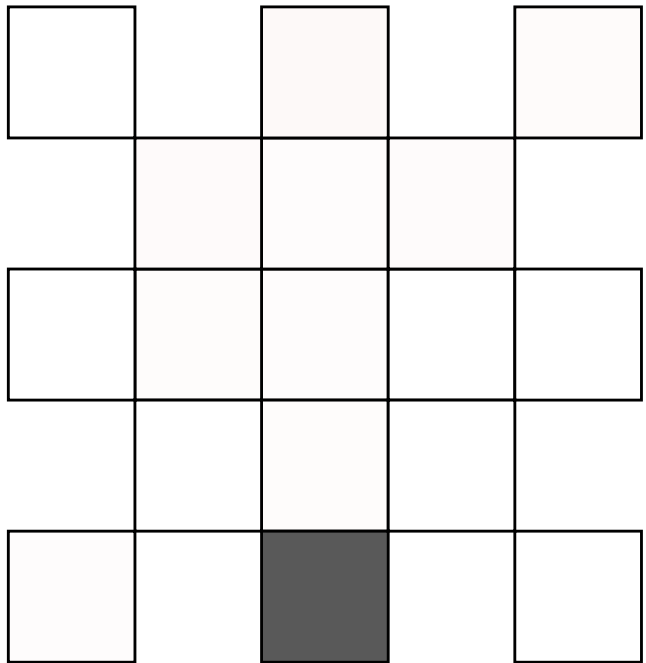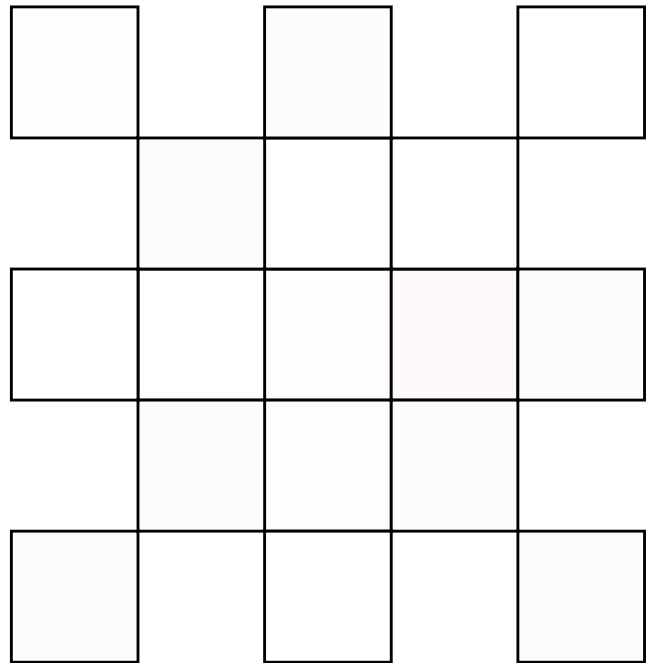

11-105769654-T-C

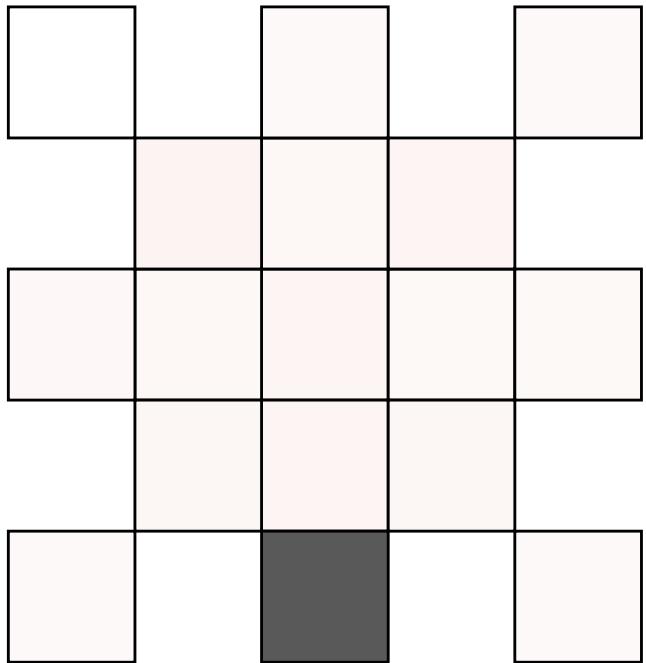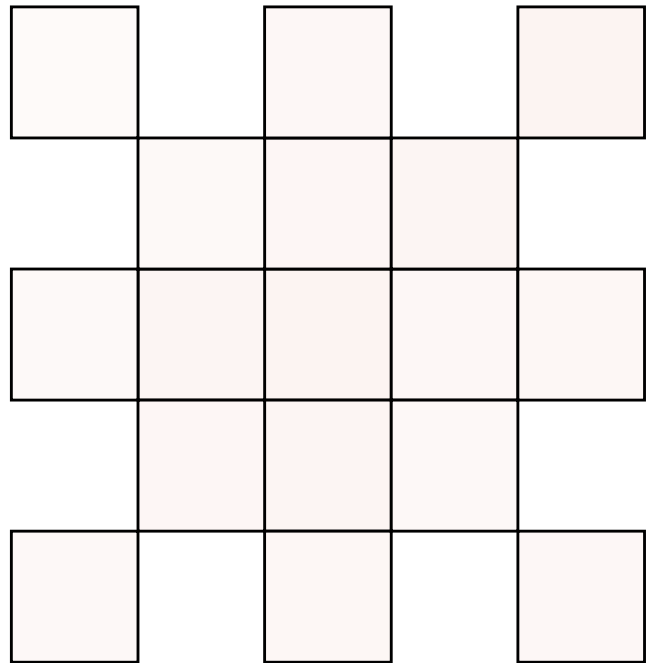

11-109546001-G-C

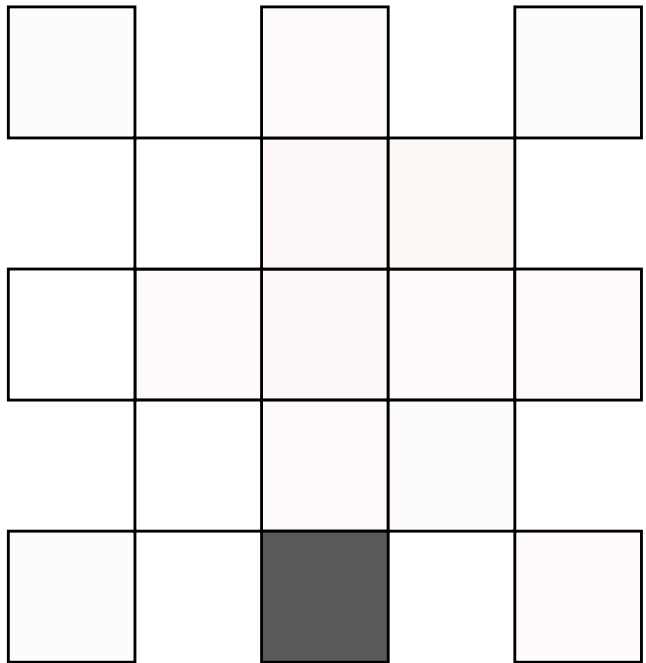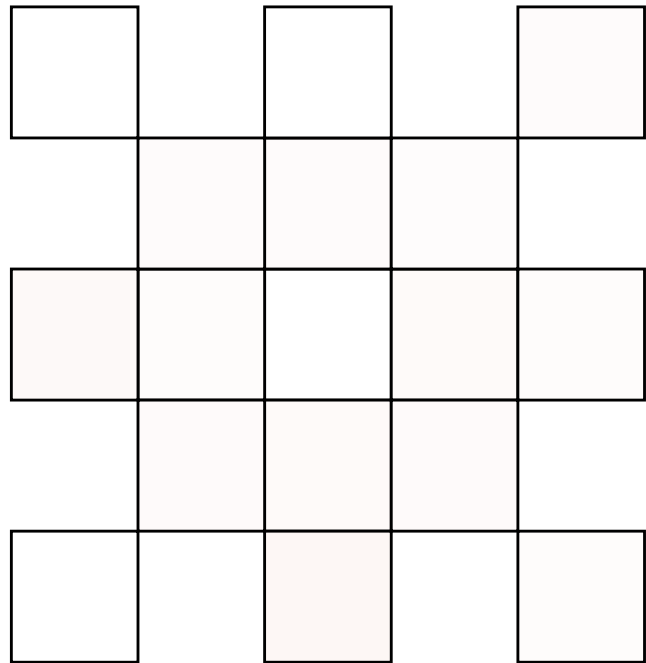

11-111580997-G-A

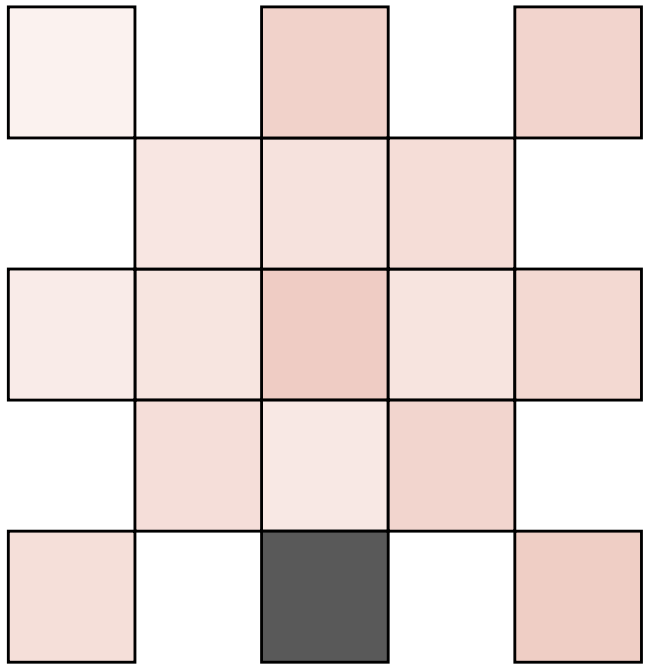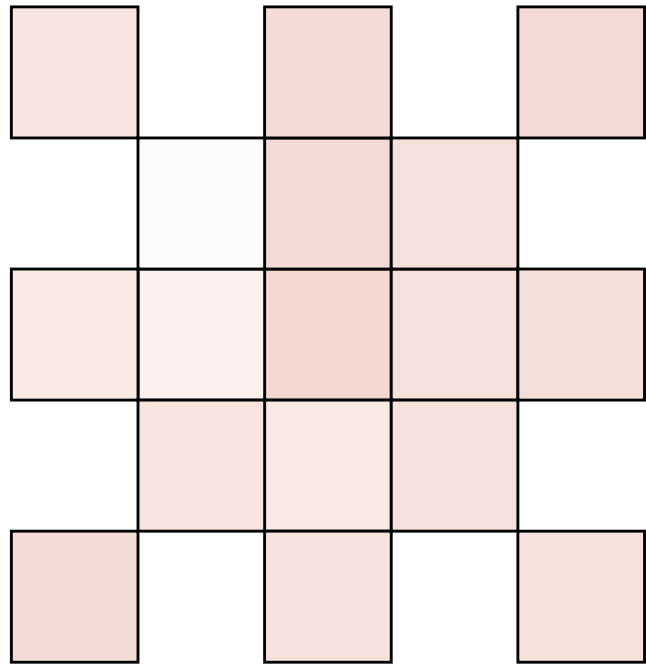

11-112581116-G-A

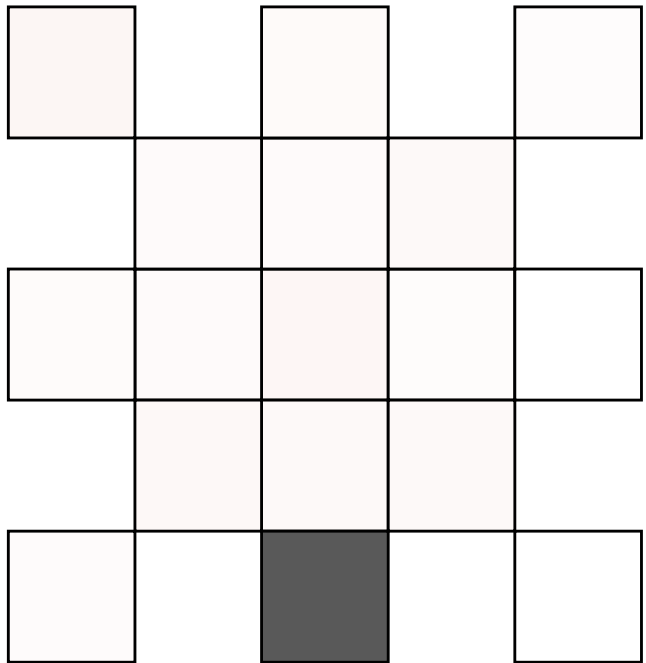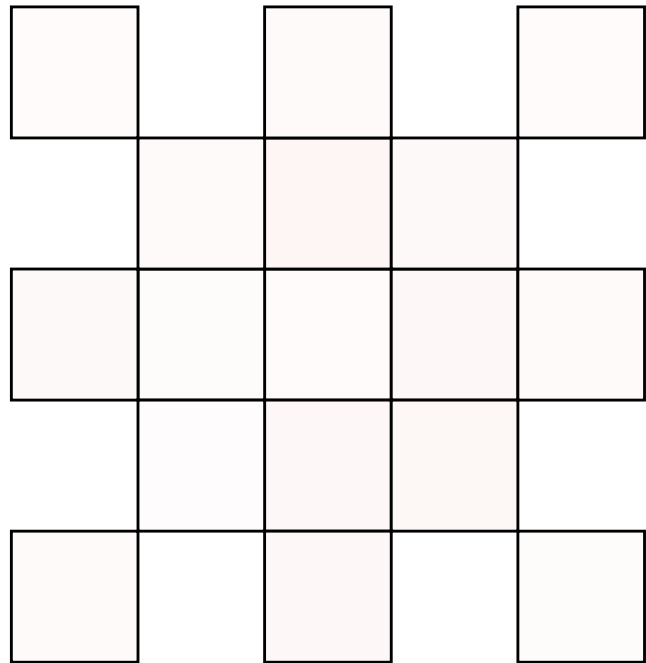

11-112824453-C-T

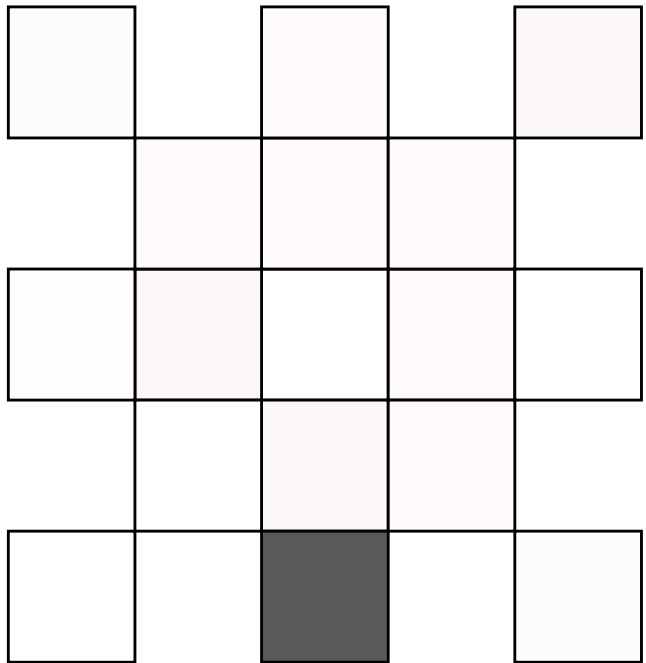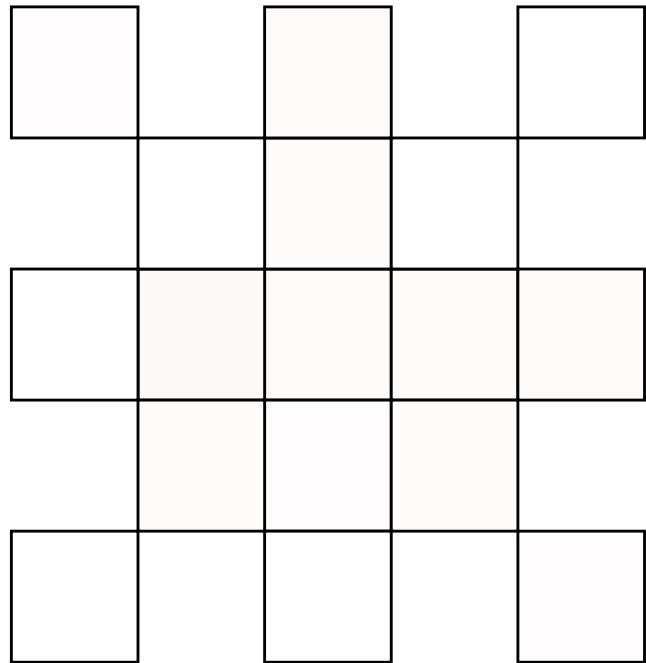



11-11681099-G-C

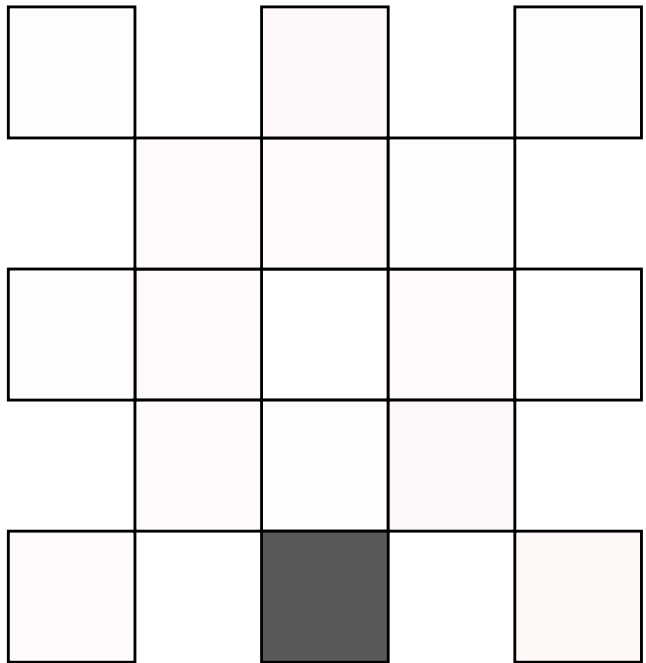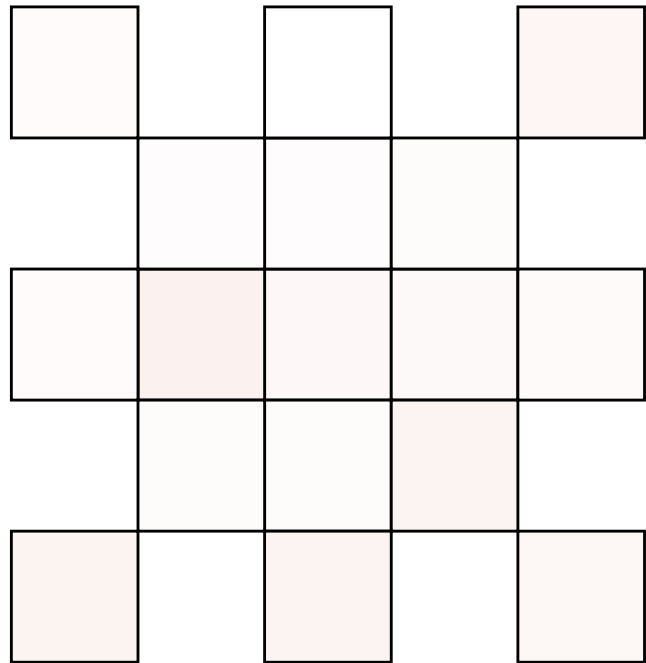

11-123817821-G-A

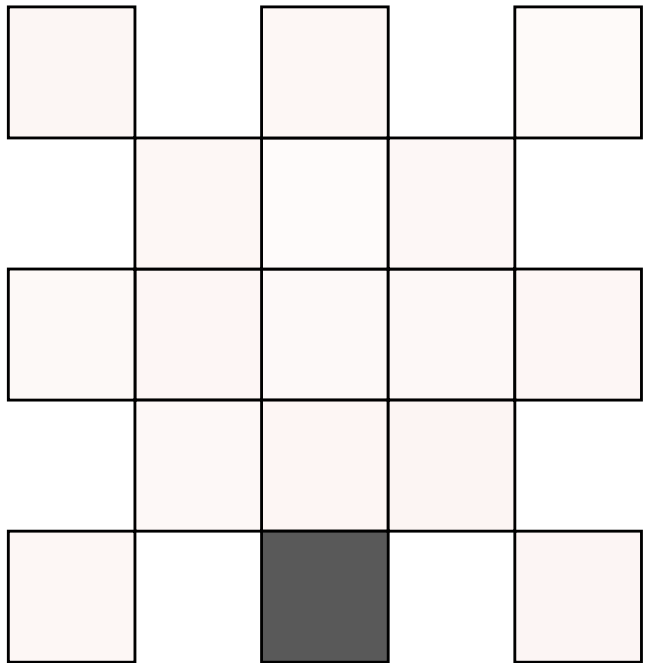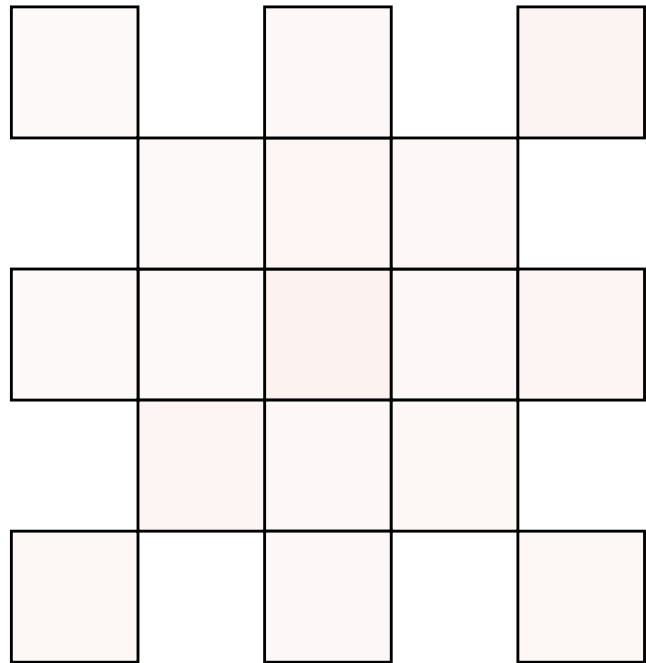

11-125271170-G-C

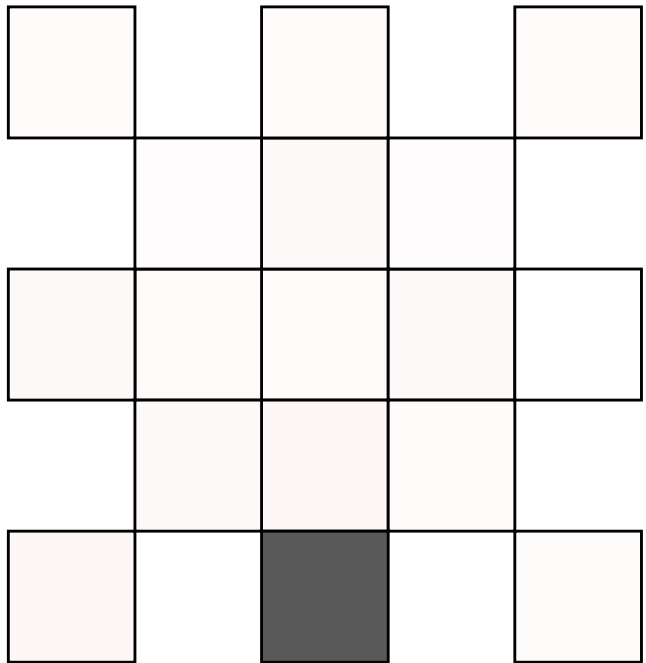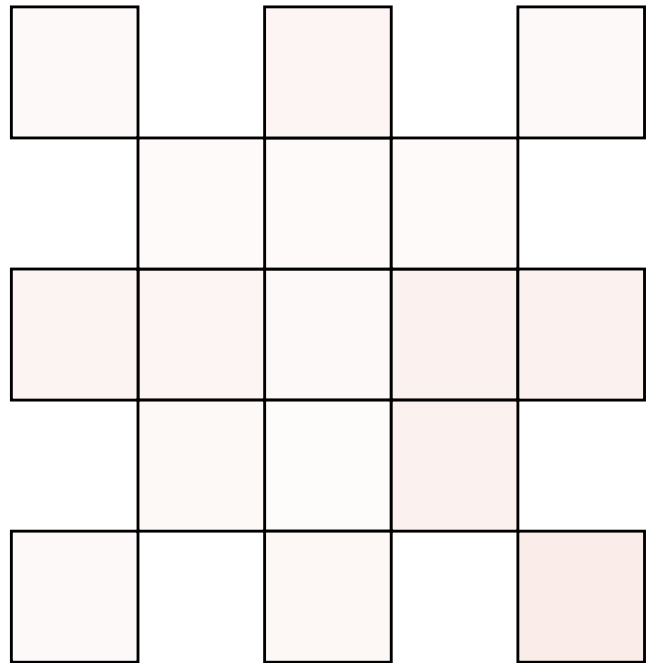

11-127350815-C-T

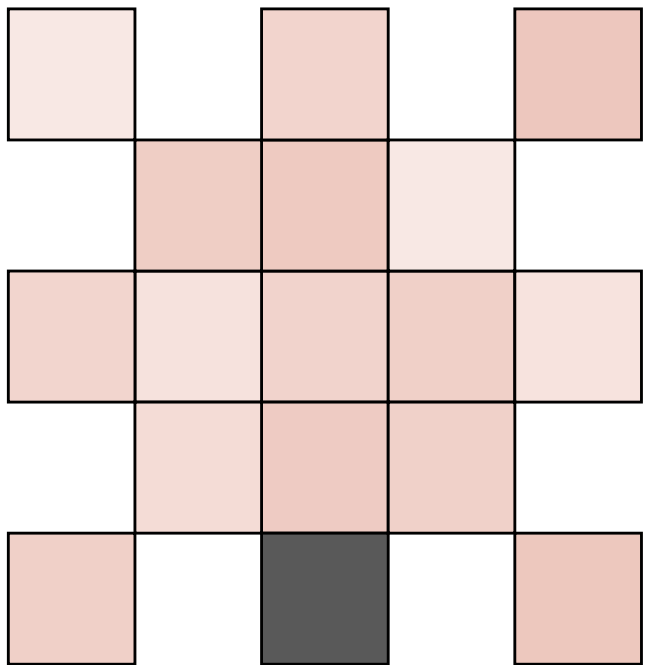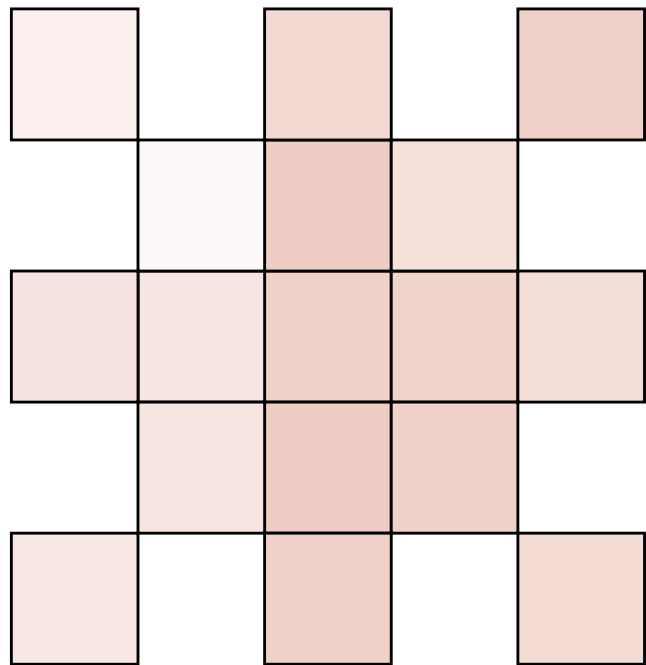

11-133014880-G-C

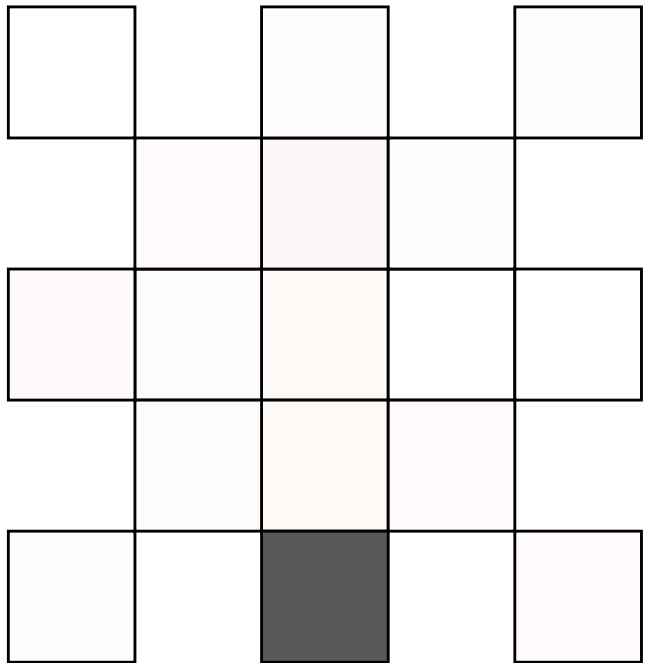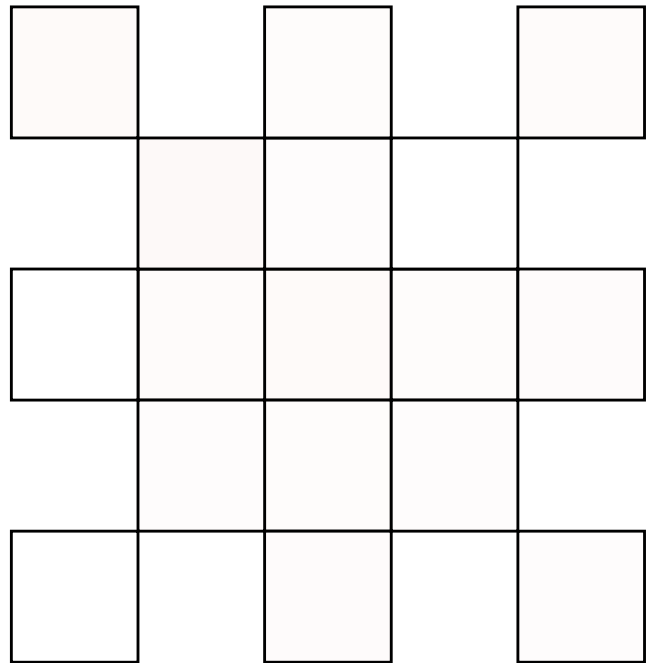

11-21194438-G-A

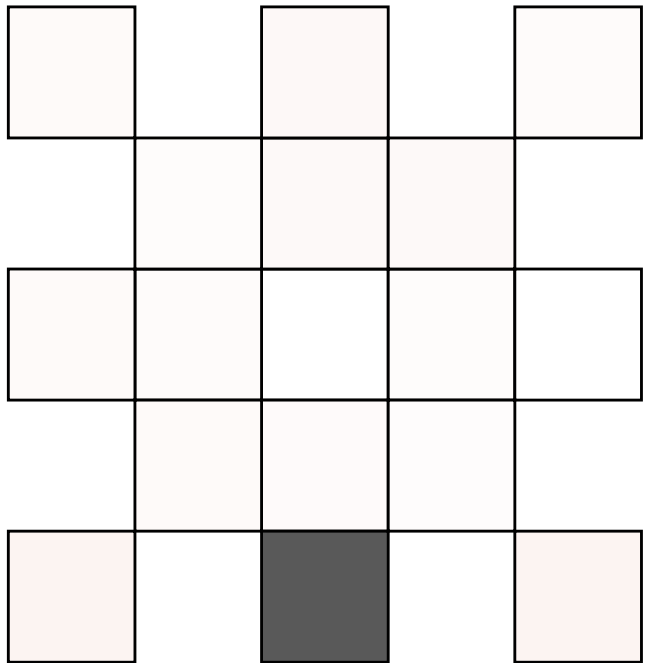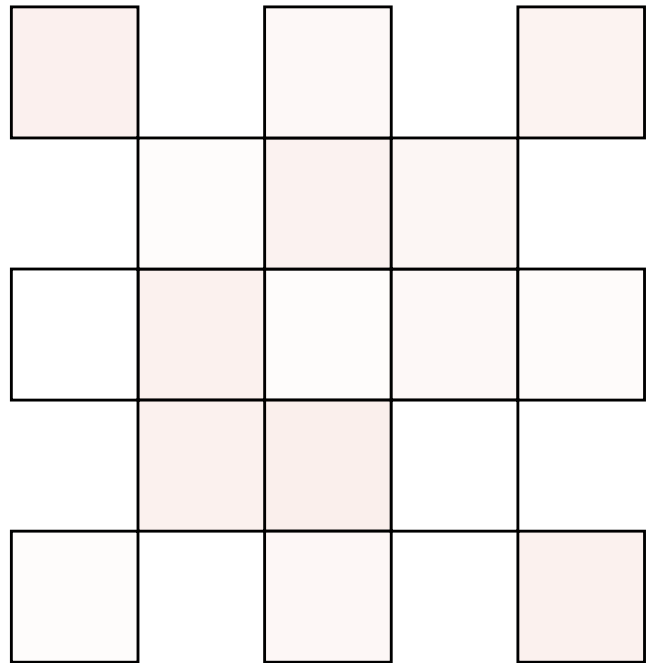

11-22211258-C-T

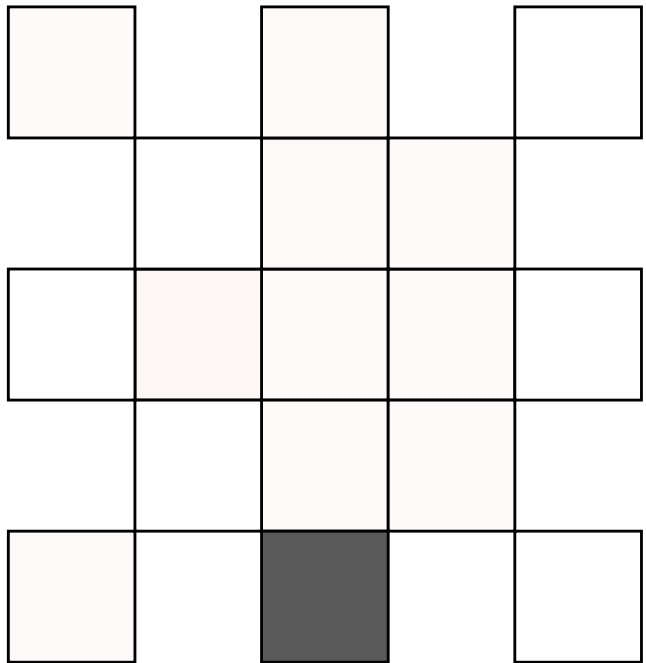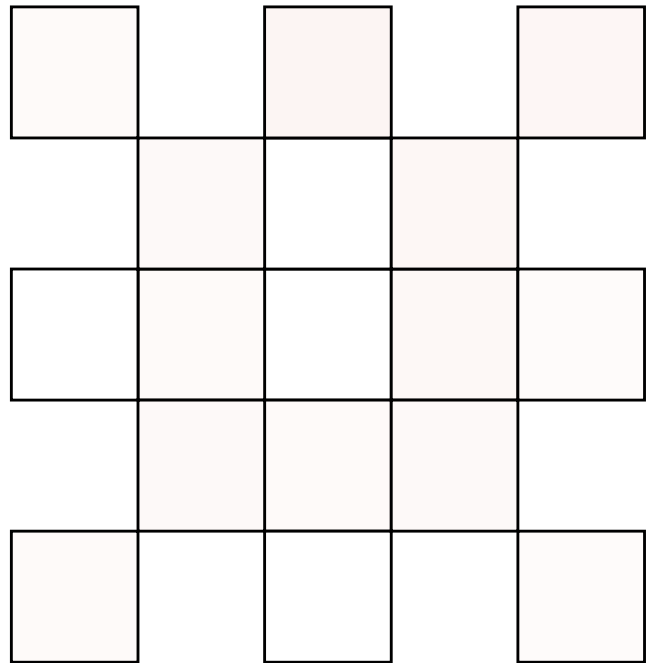

11-25958939-C-T

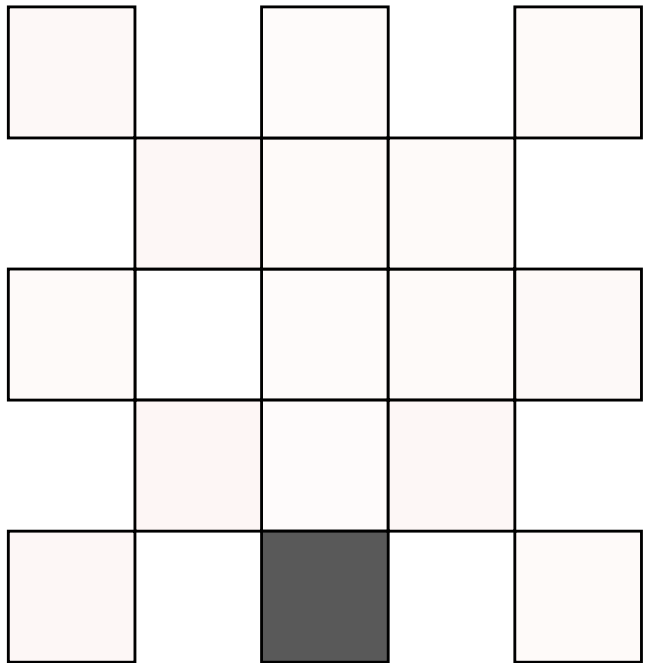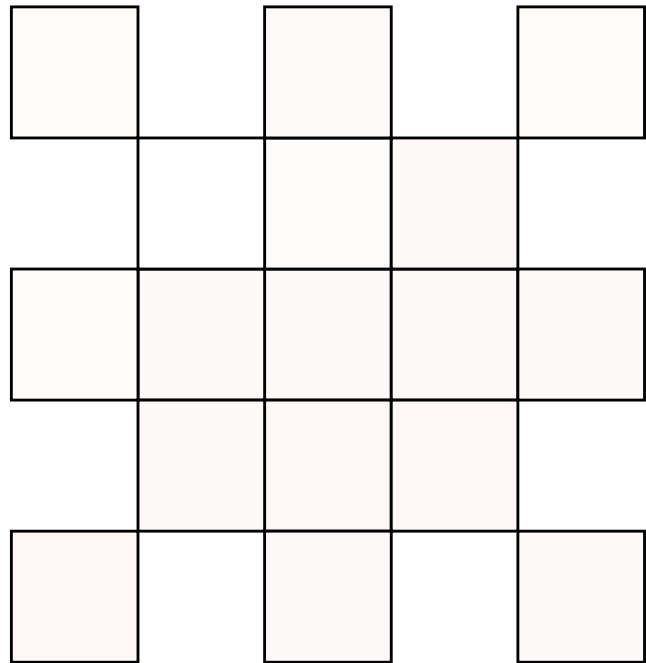



11-31054132-T-C

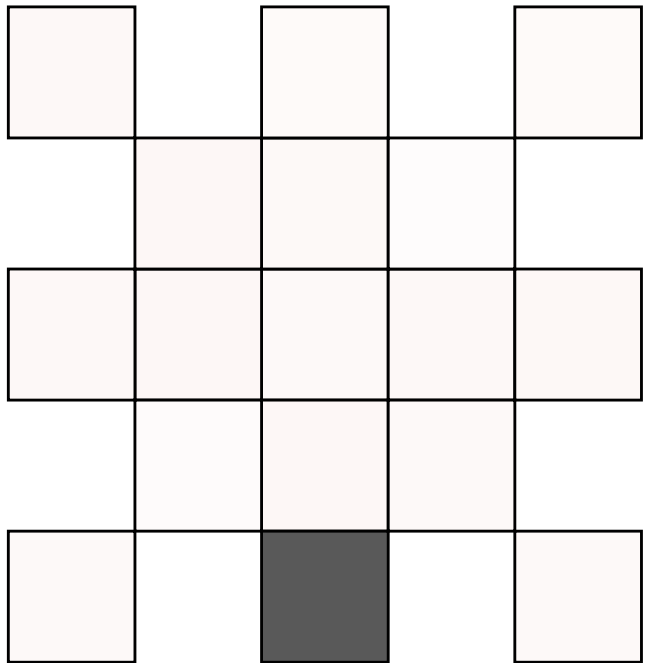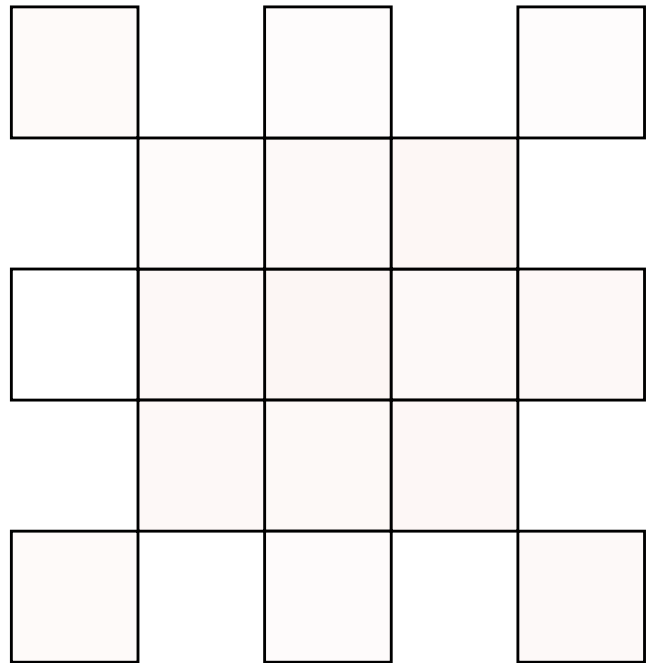

11-32349753-T-A

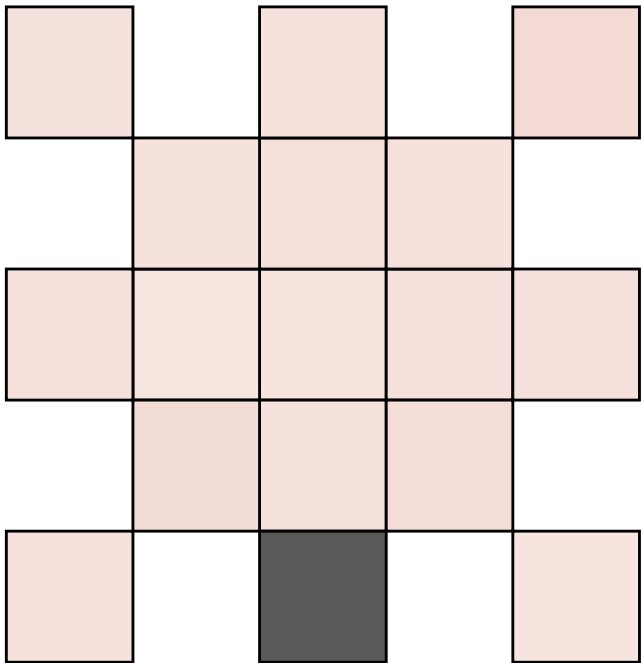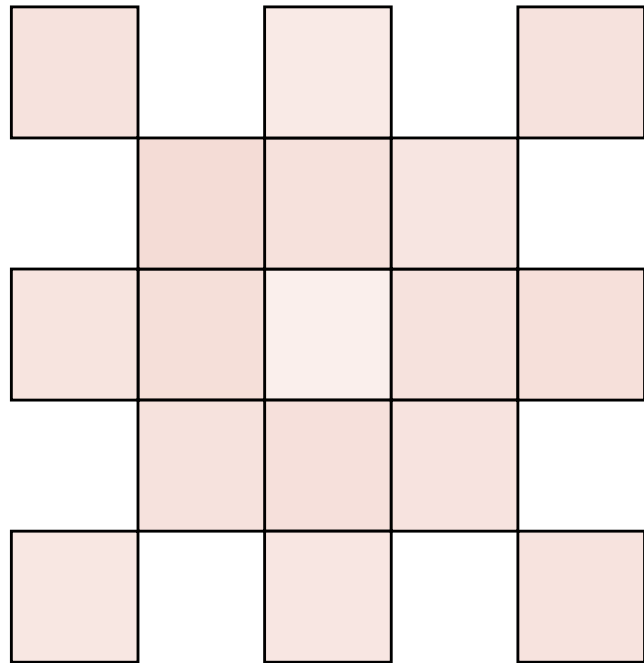

11-32349754-T-A

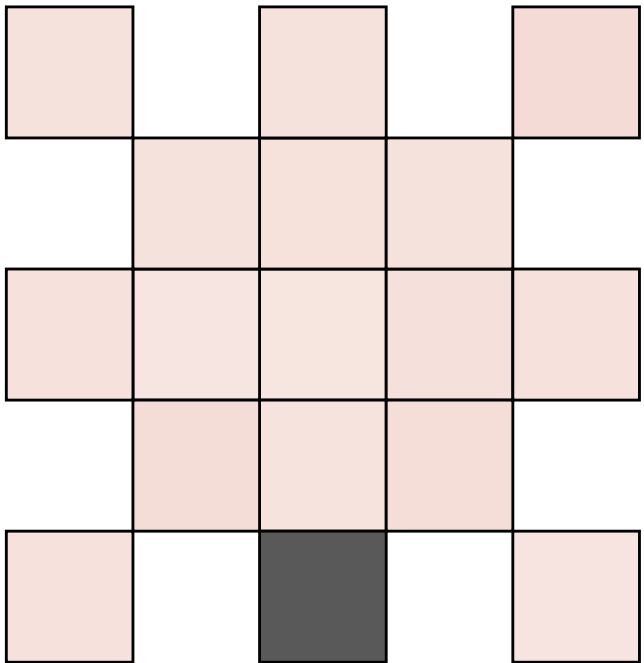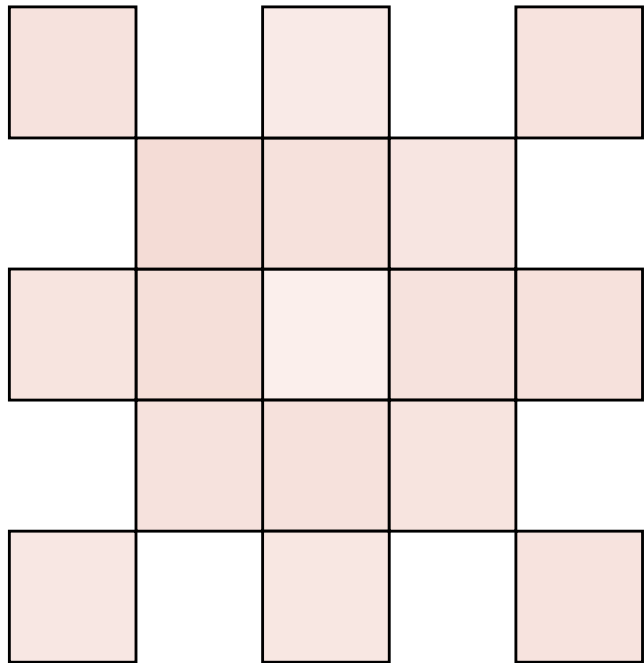

11-35512752-C-T

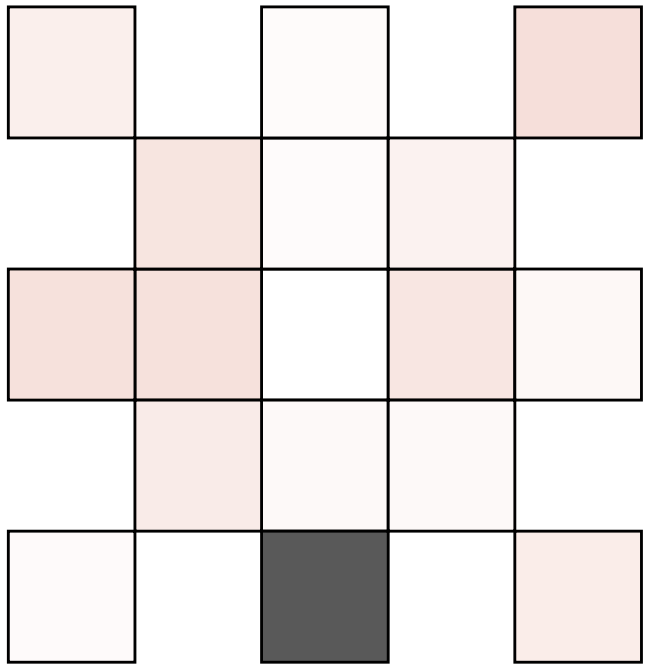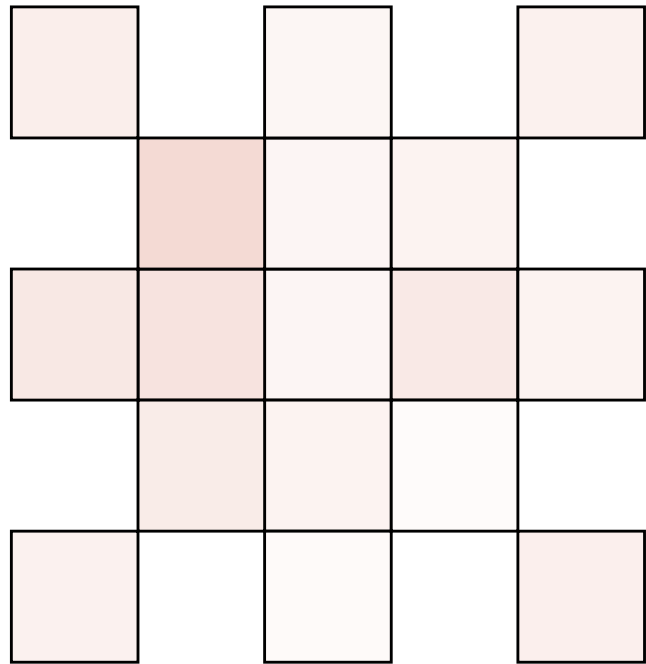

11-44221191-C-G

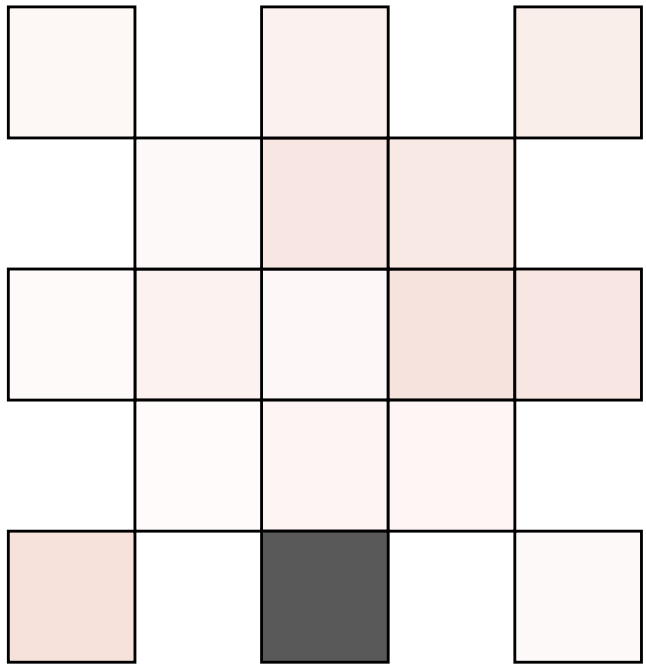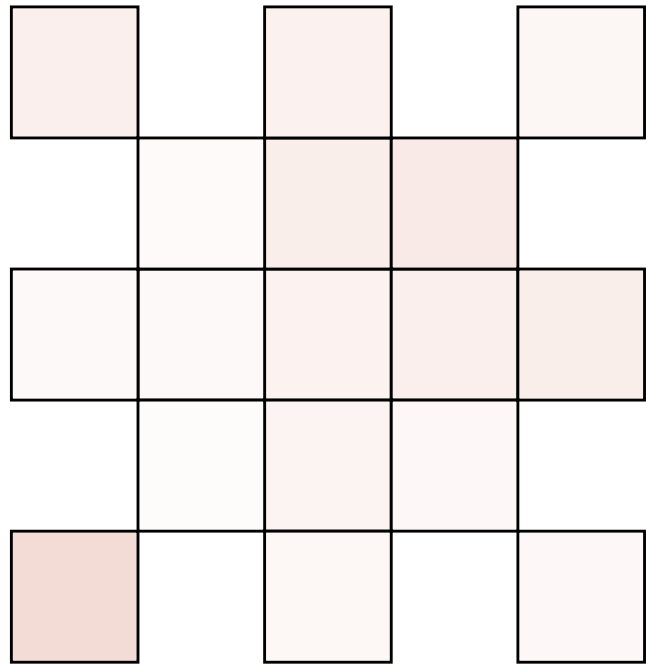

11-45873419-G-A

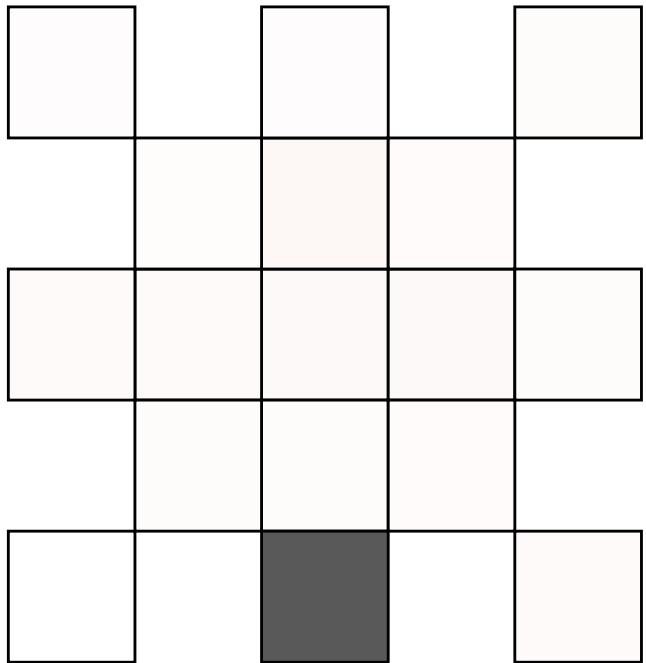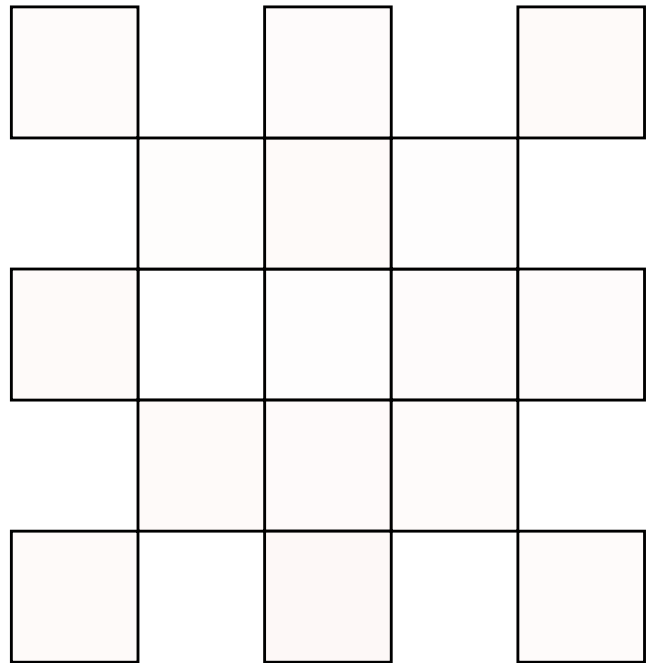

11-55838876-G-T

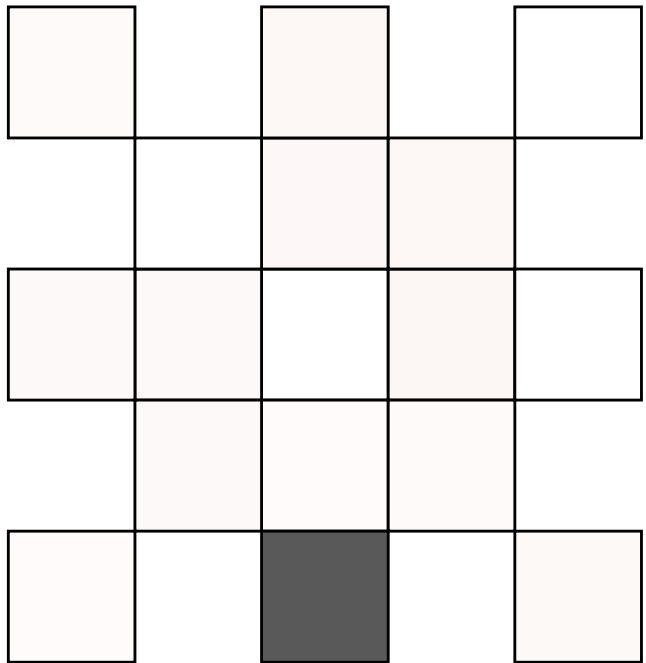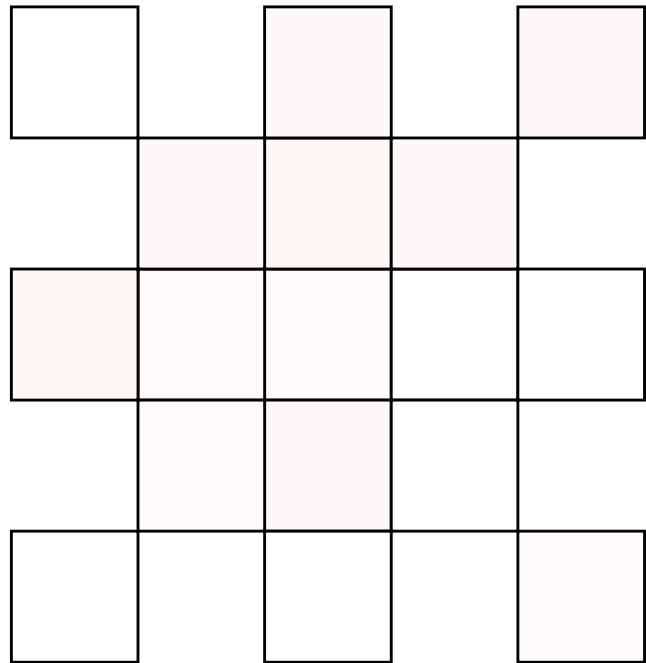

11-55997990-C-T

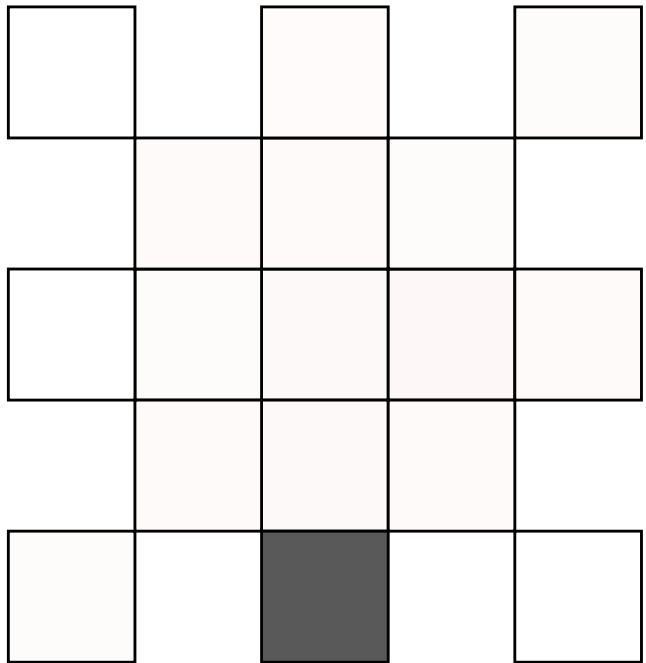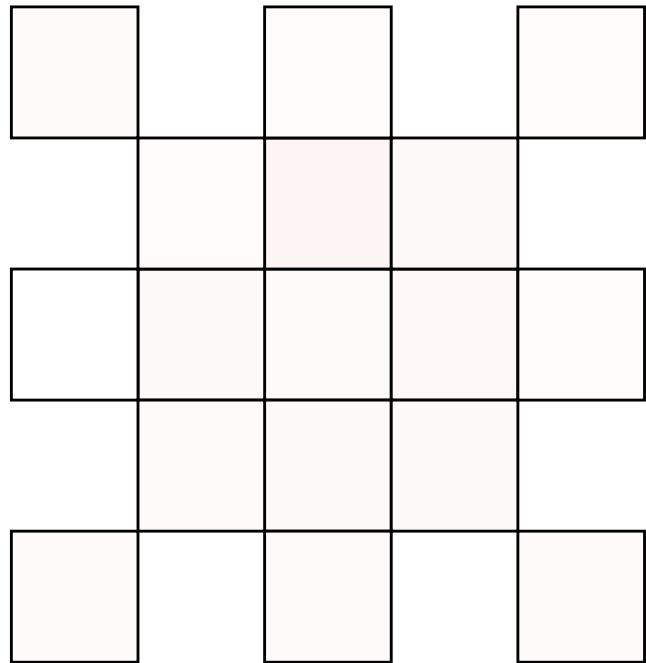



11-56409116-C-T

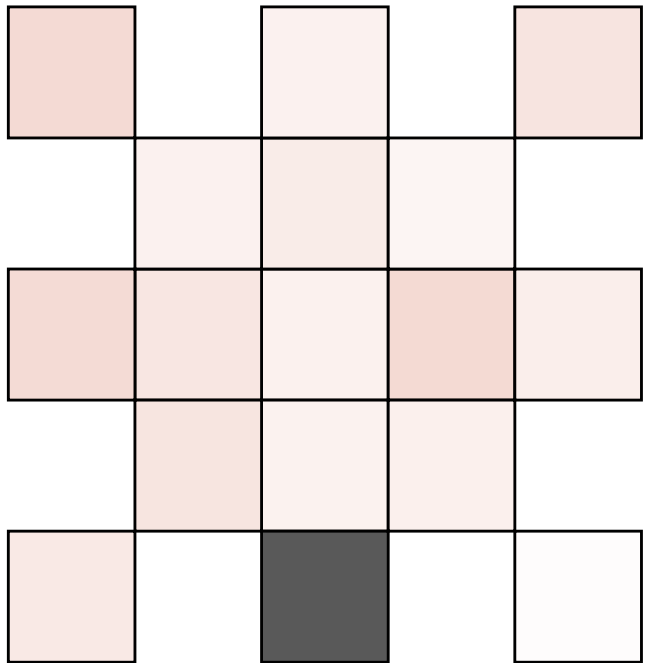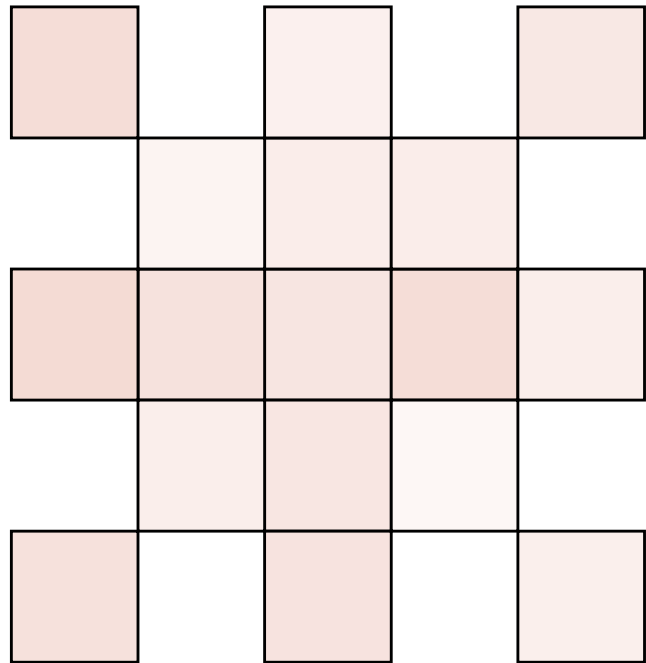

11-57985375-T-C

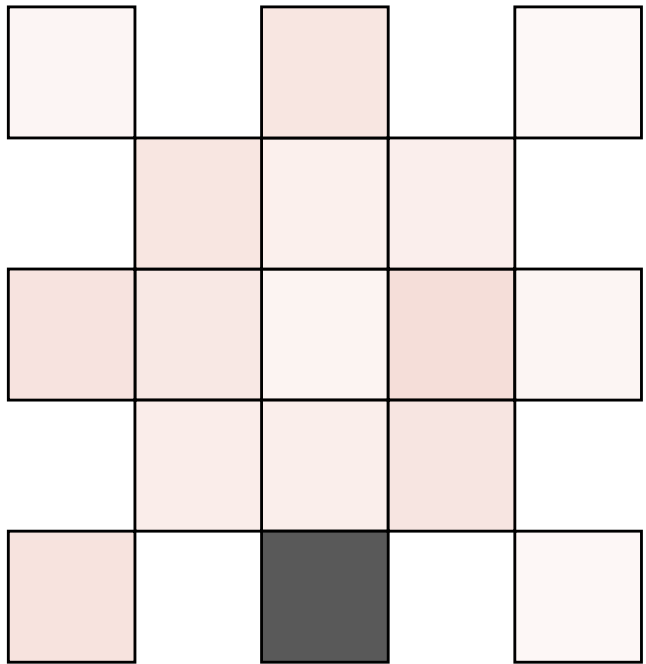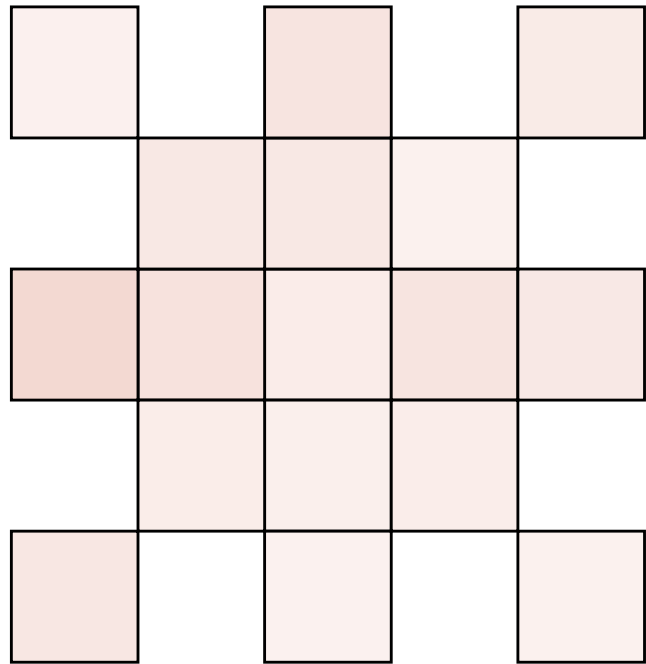

11-79785519-G-T

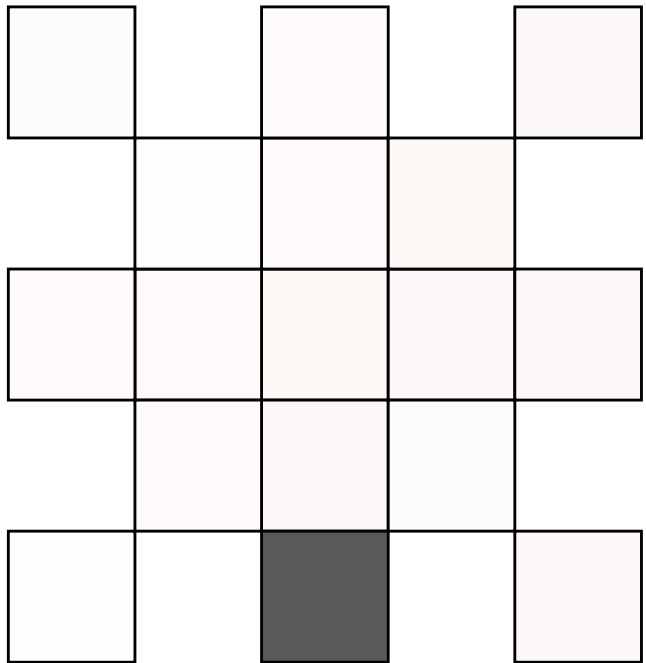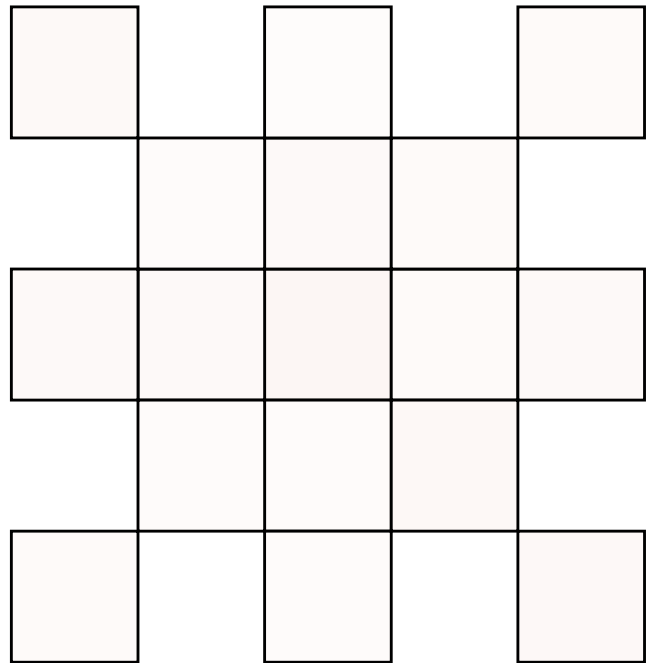

11-8331108-C-T

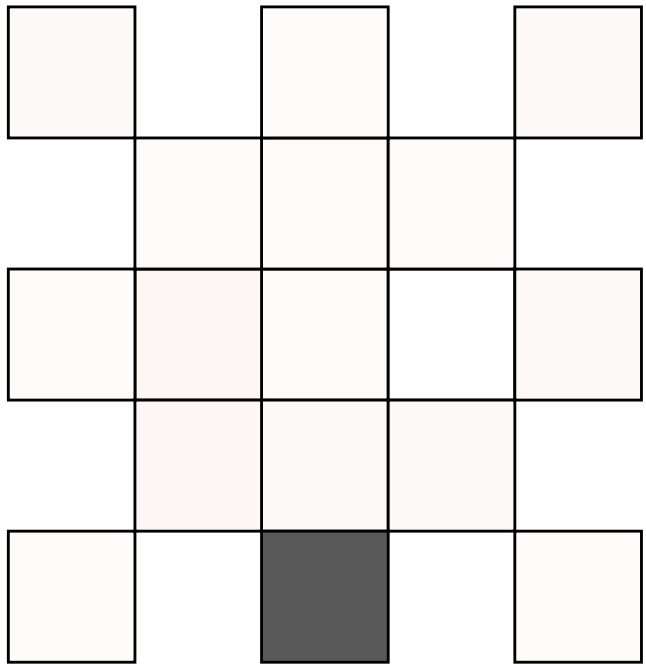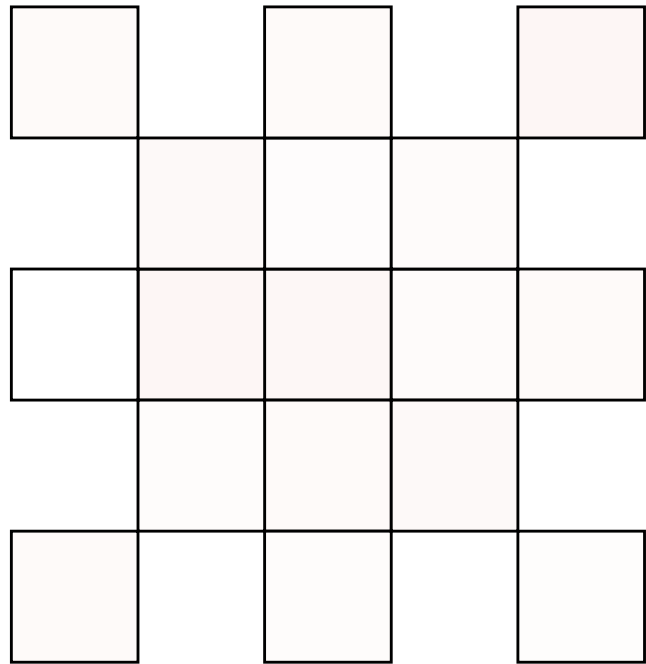

11-91169265-C-T

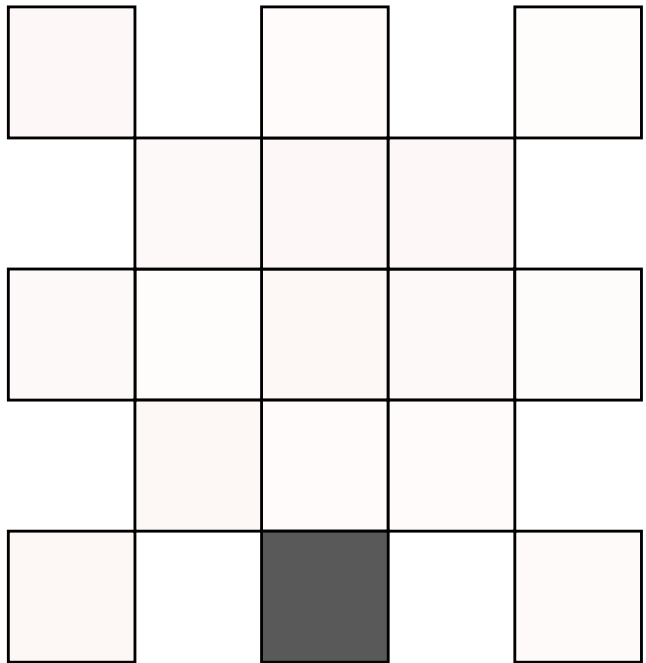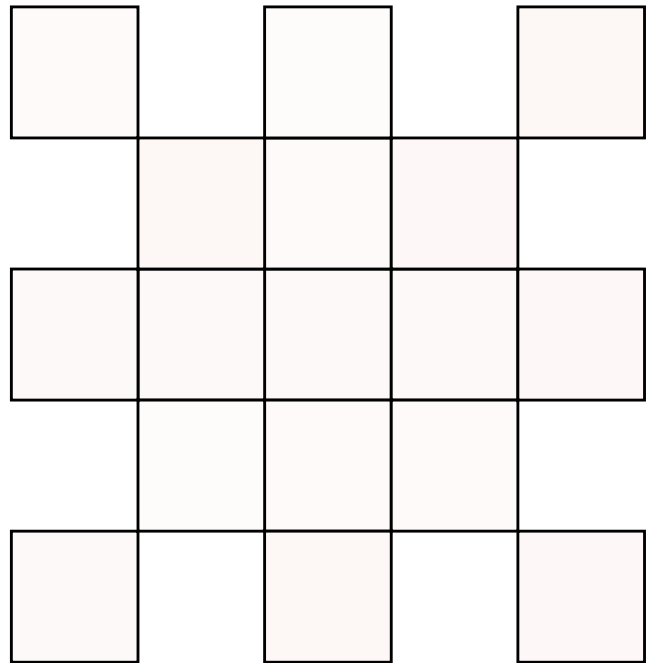

11-93547360-G-A

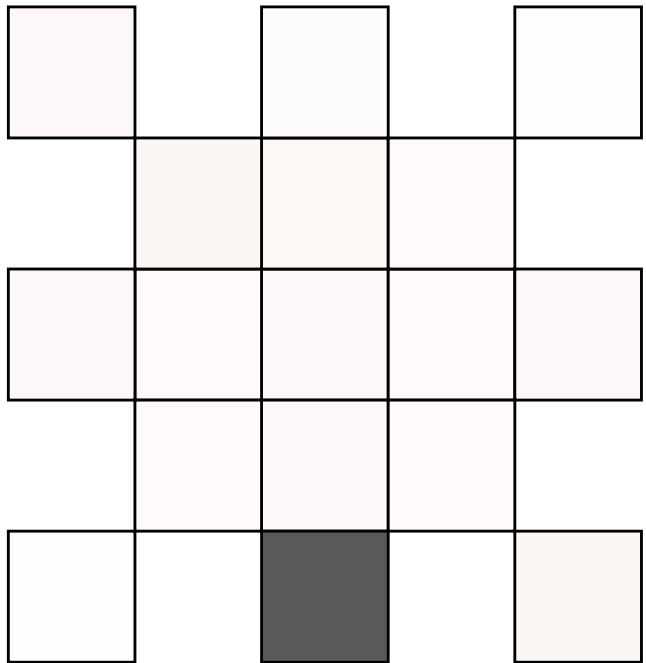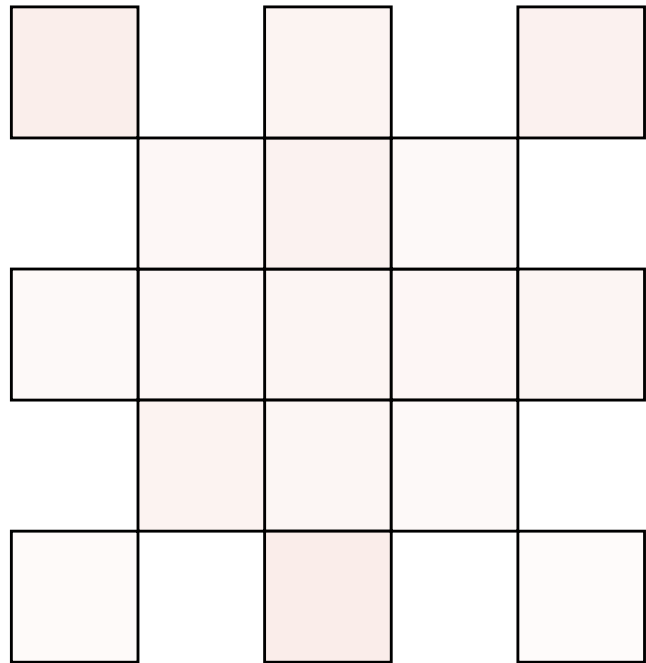

11-98811391-C-T

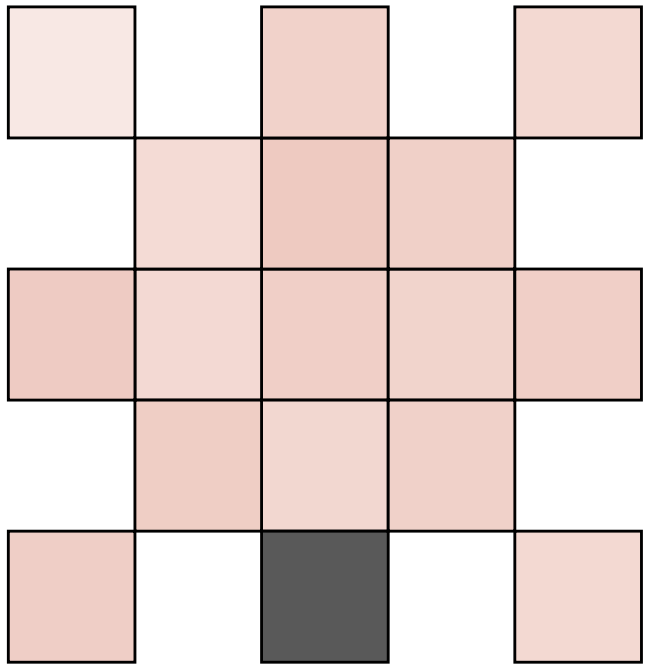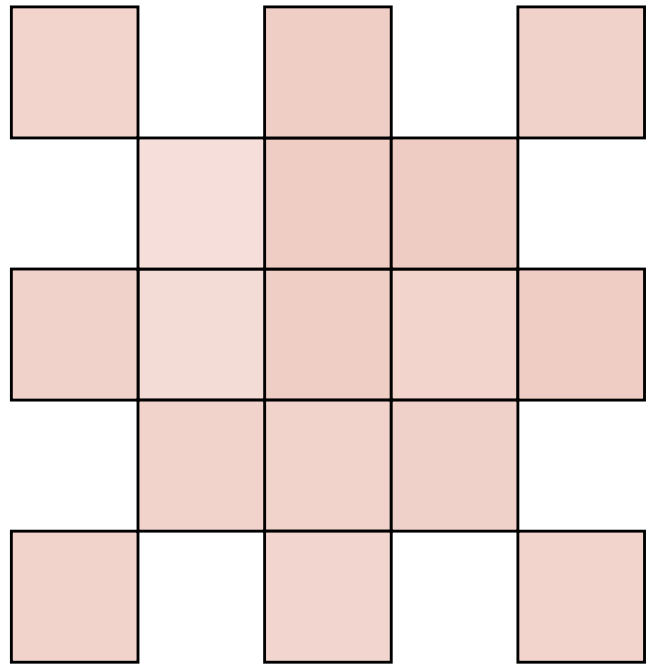

11-99288625-T-A

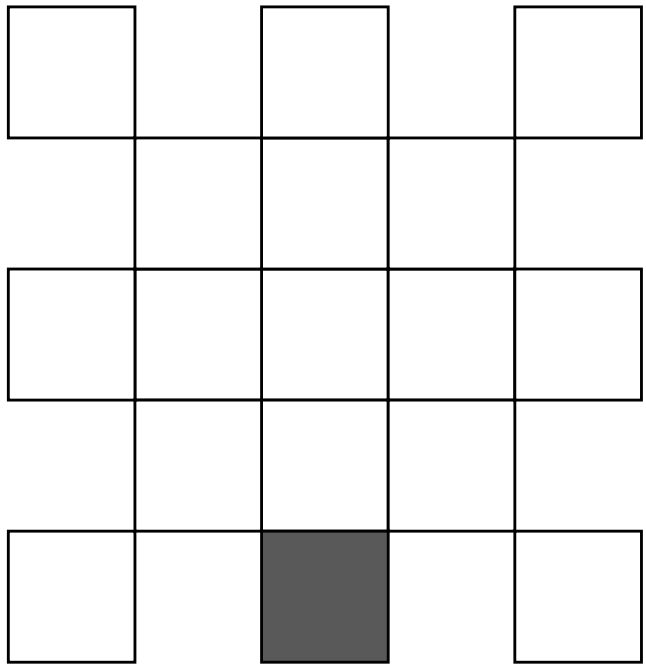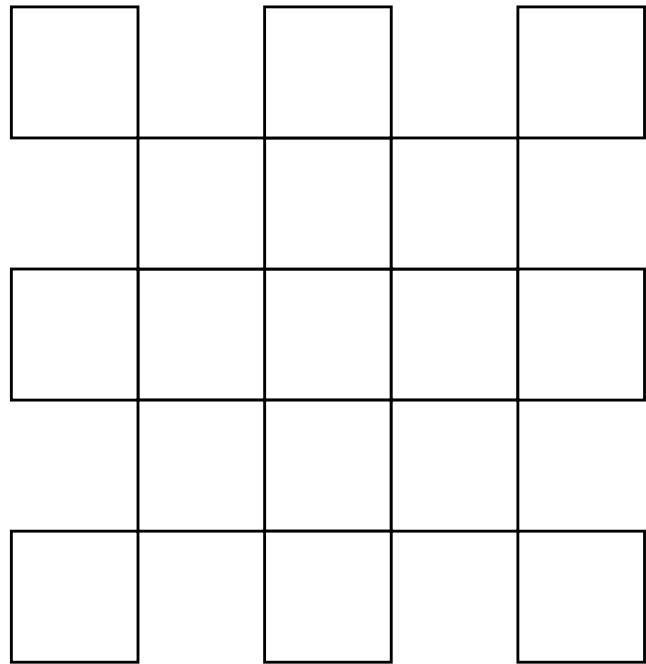



12-100202897-A-G

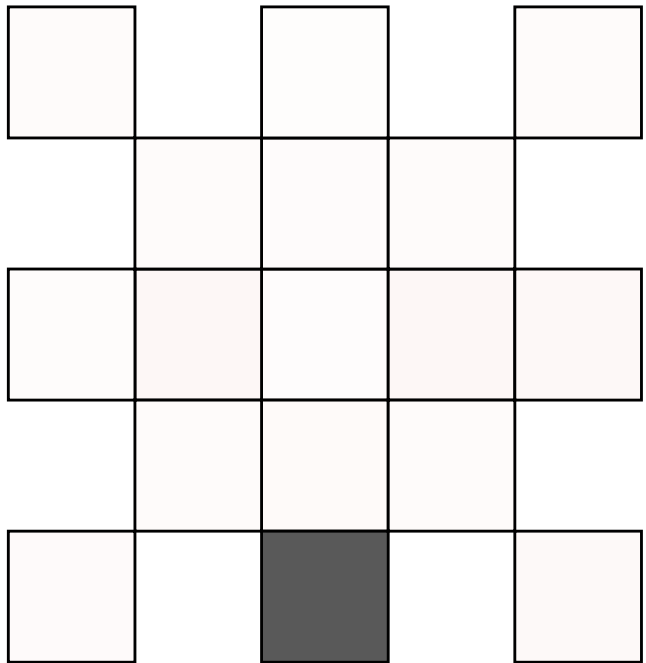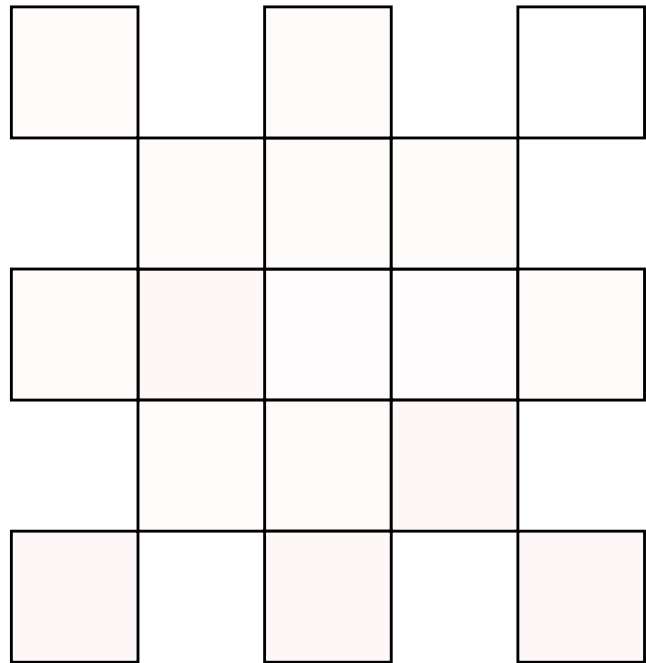

12-110209050-G-A

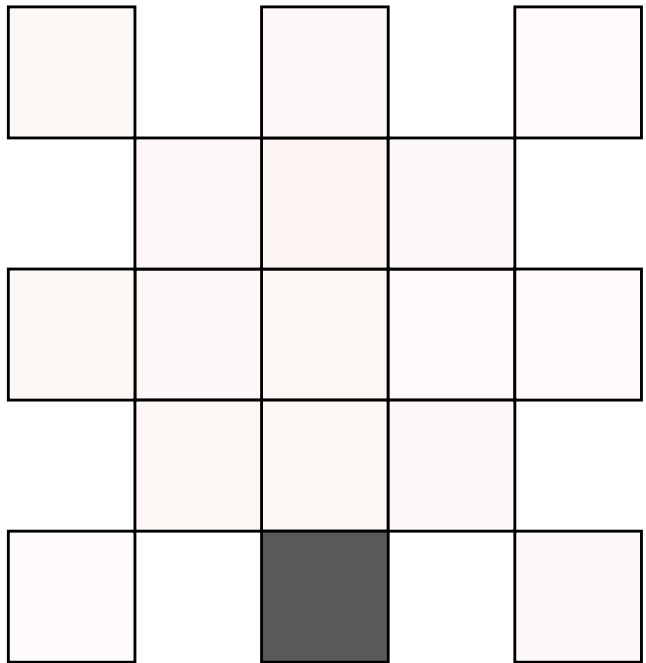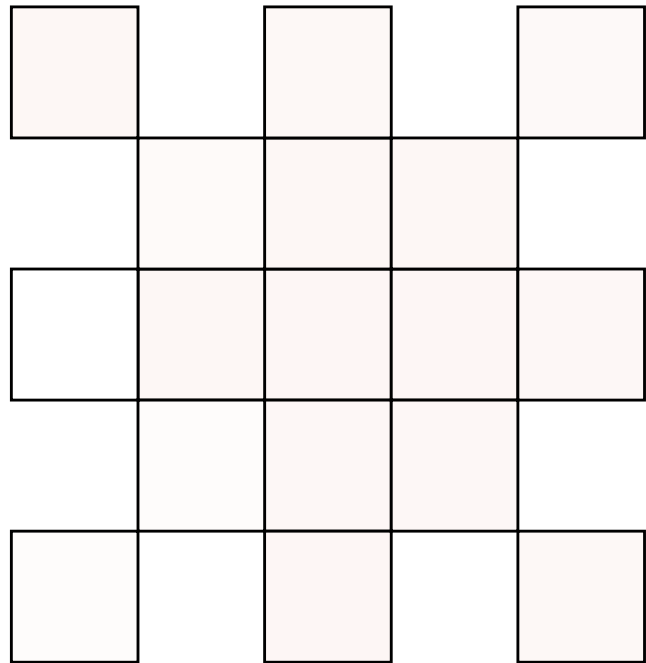

12-112926872-C-T

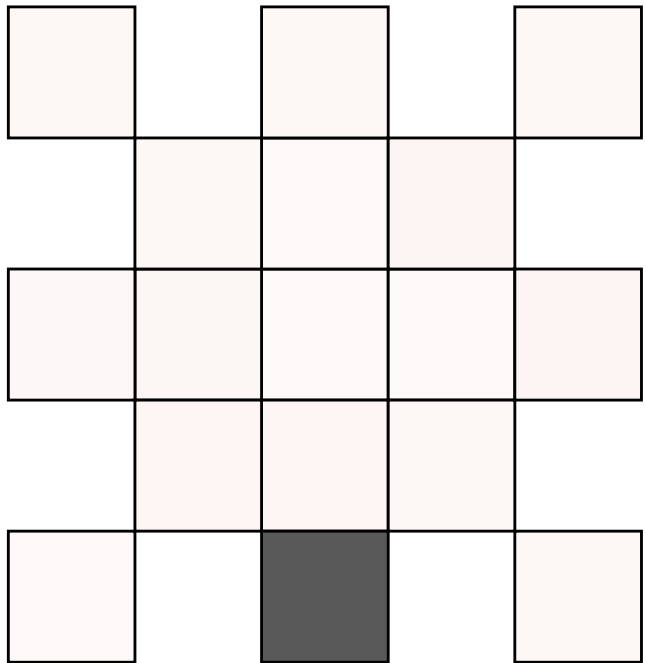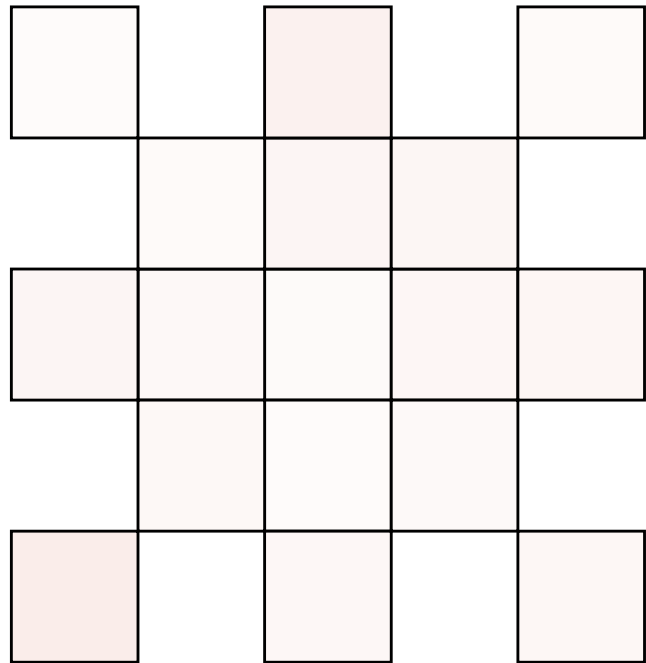

12-121682145-G-A

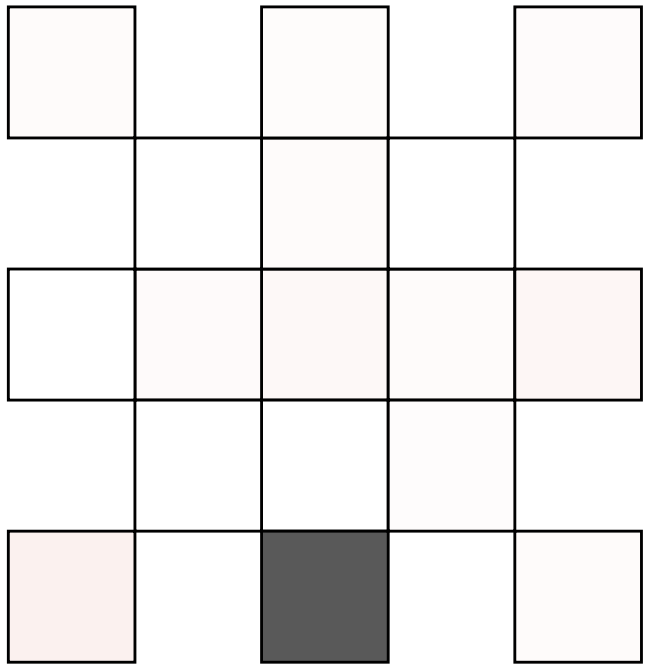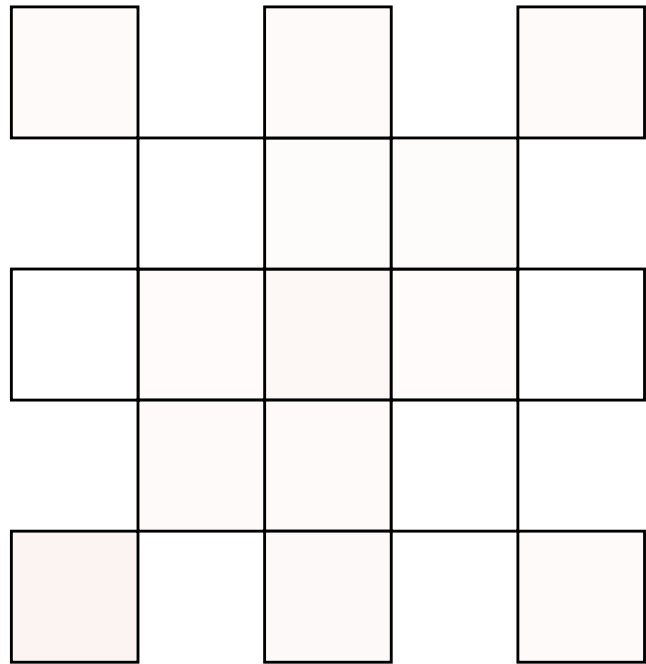

12-121707377-T-C

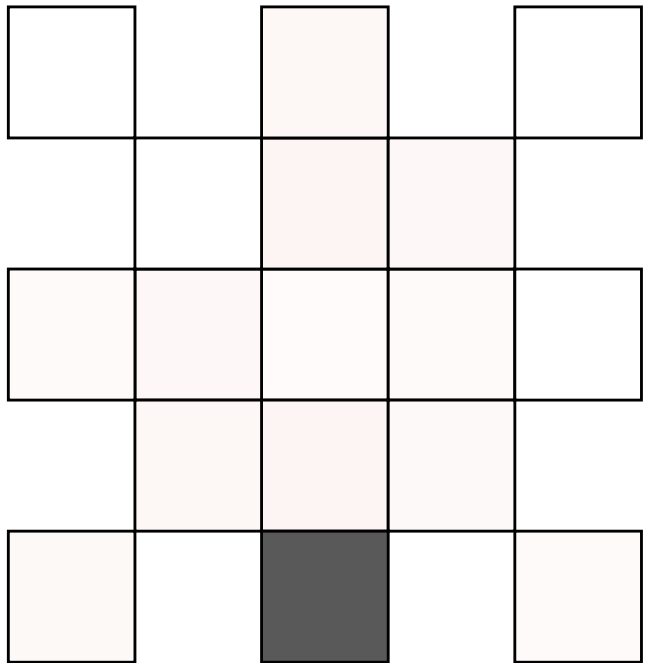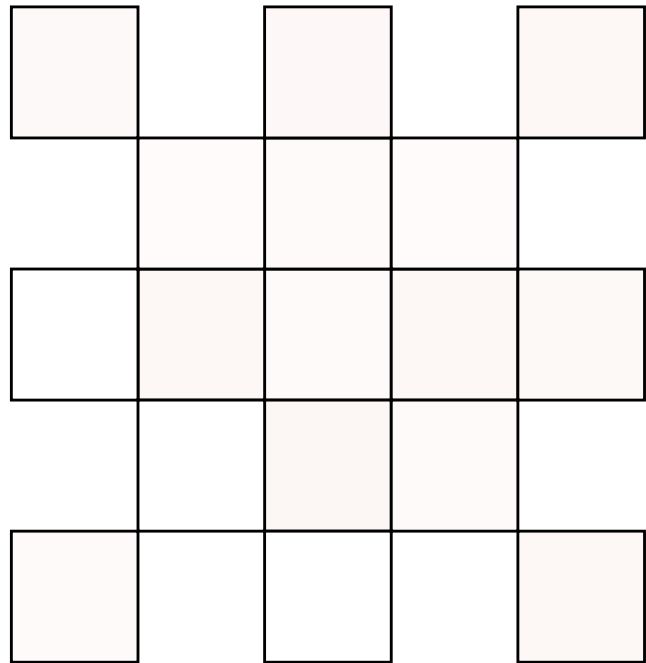

12-127258051-G-T

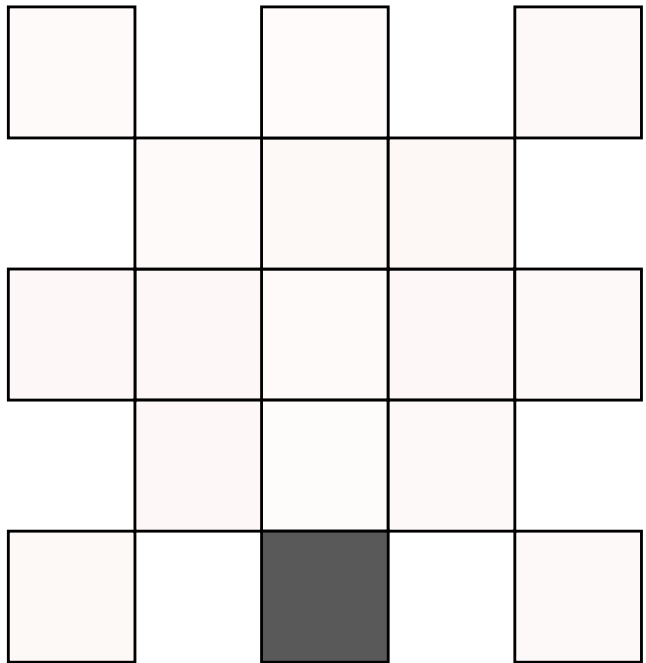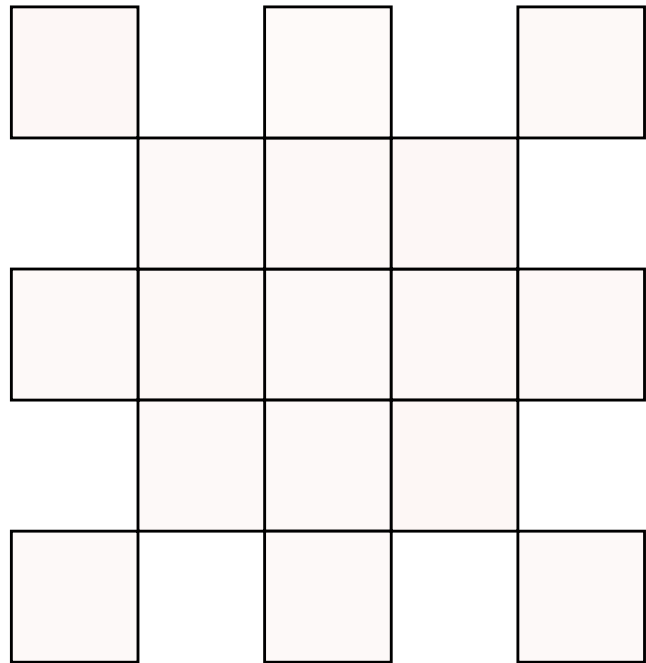

12-128703875-C-T

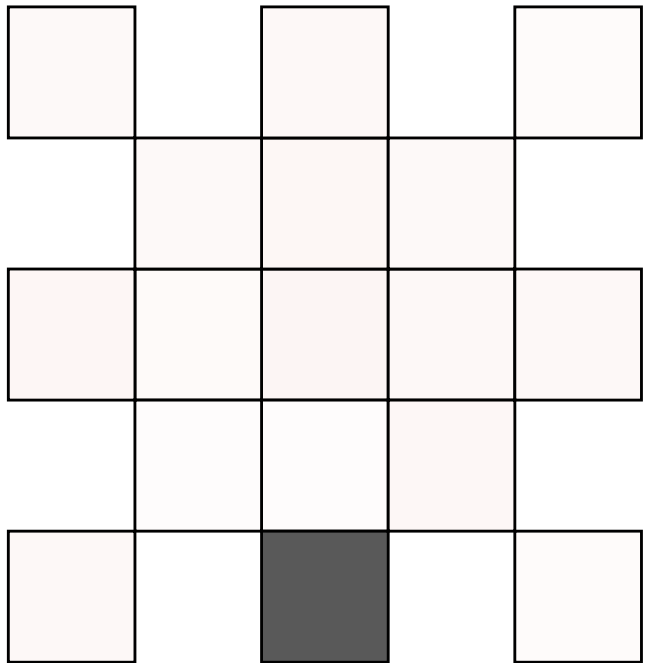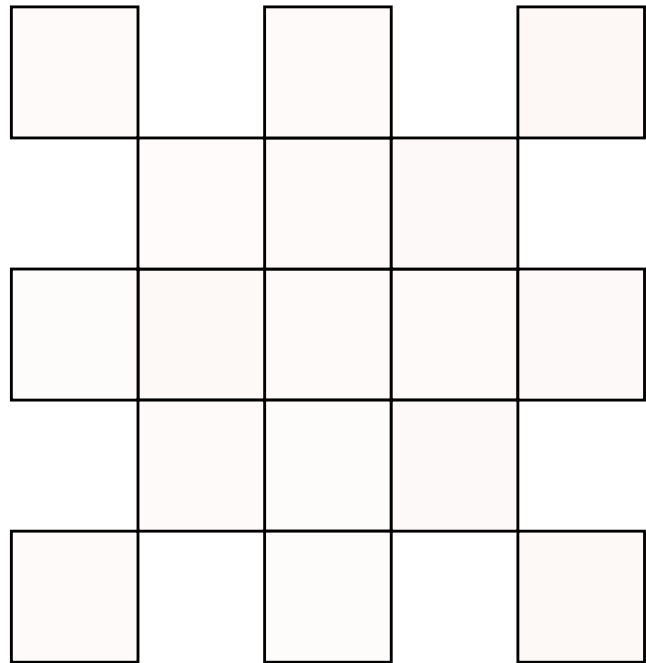

12-130892713-C-T

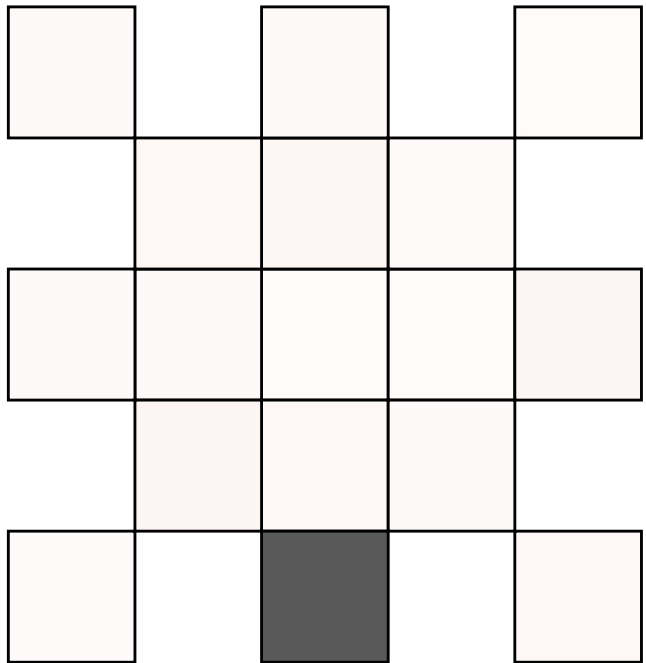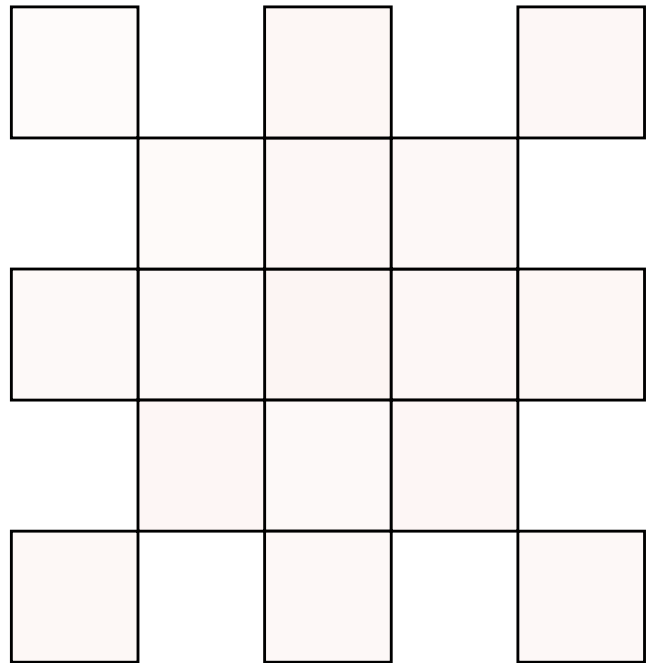



12-131906235-G-A

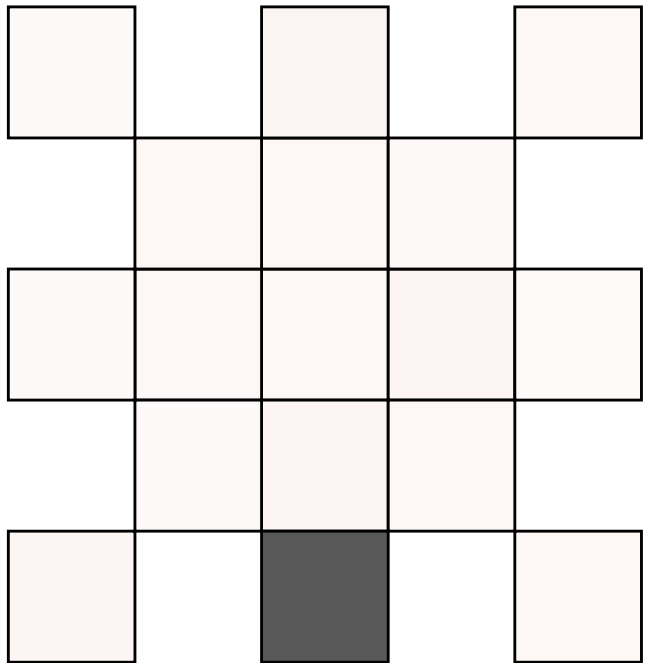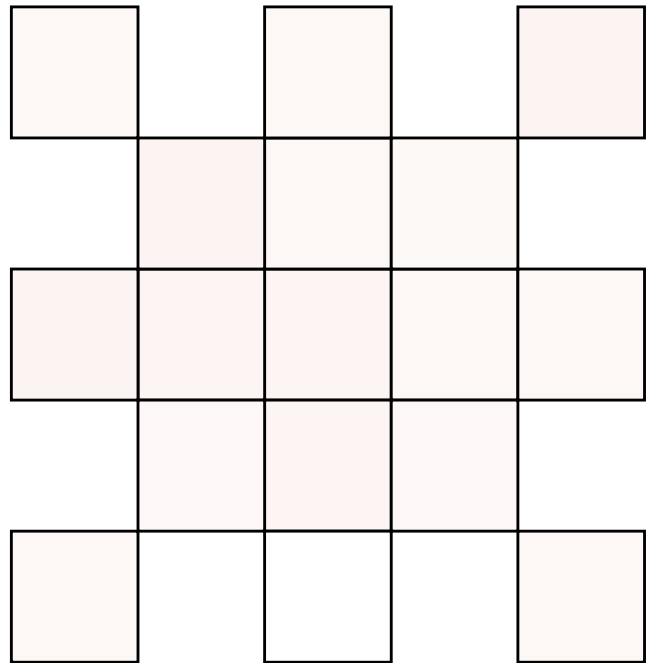

12-16325538-C-T

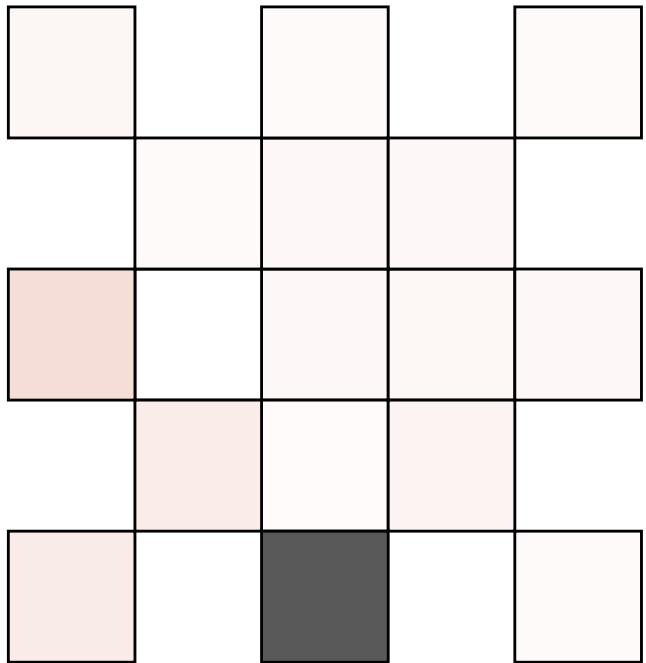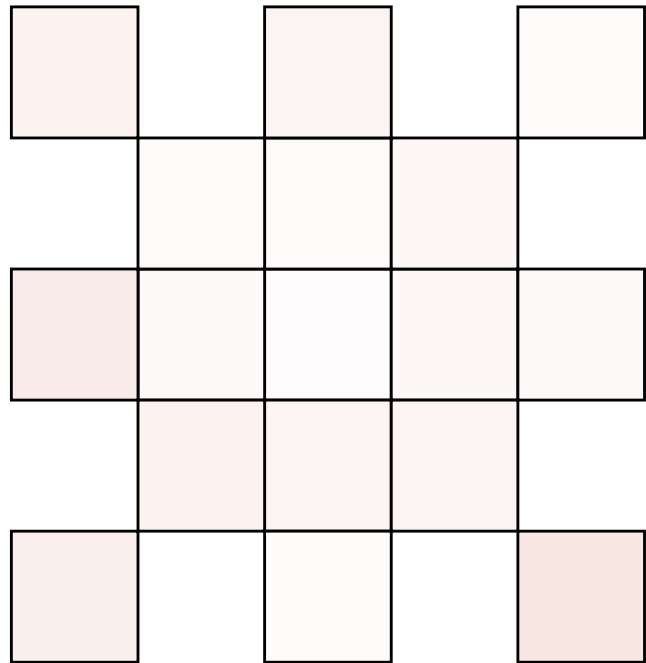

12-17467014-G-T

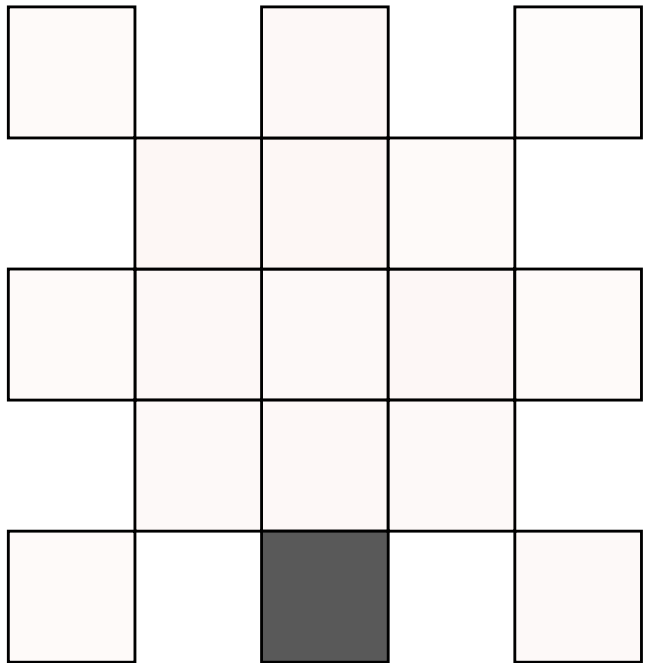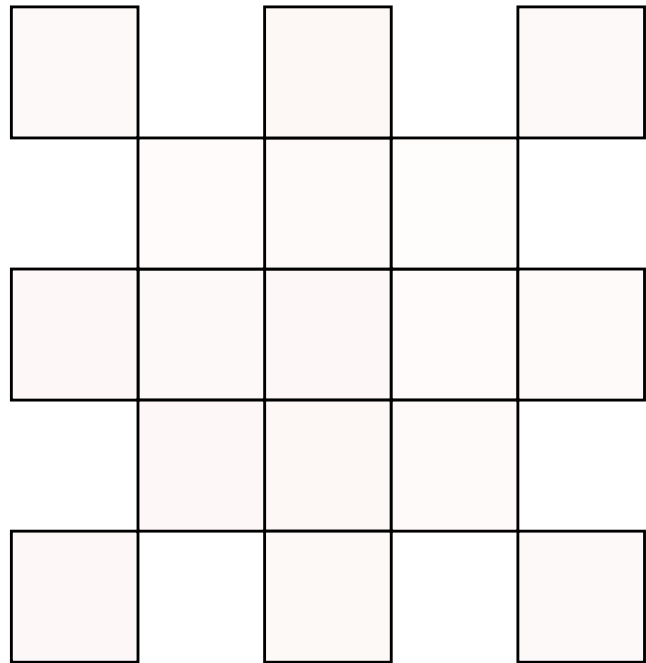

12-19615034-G-T

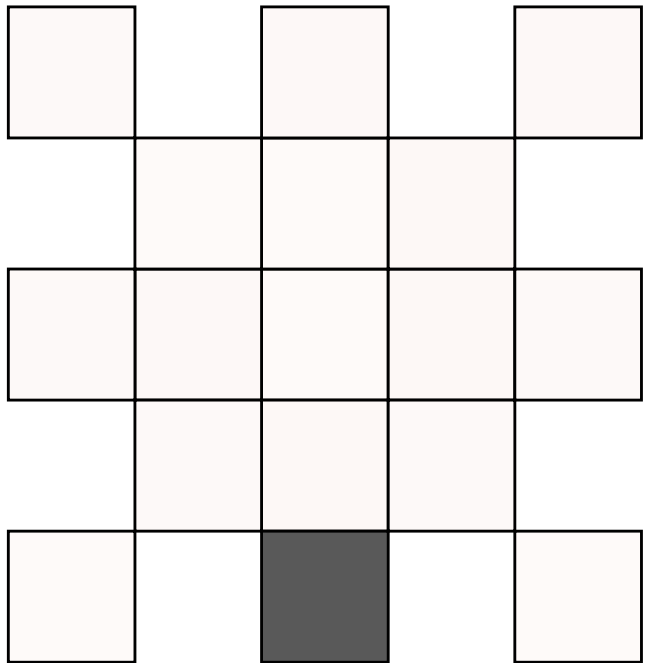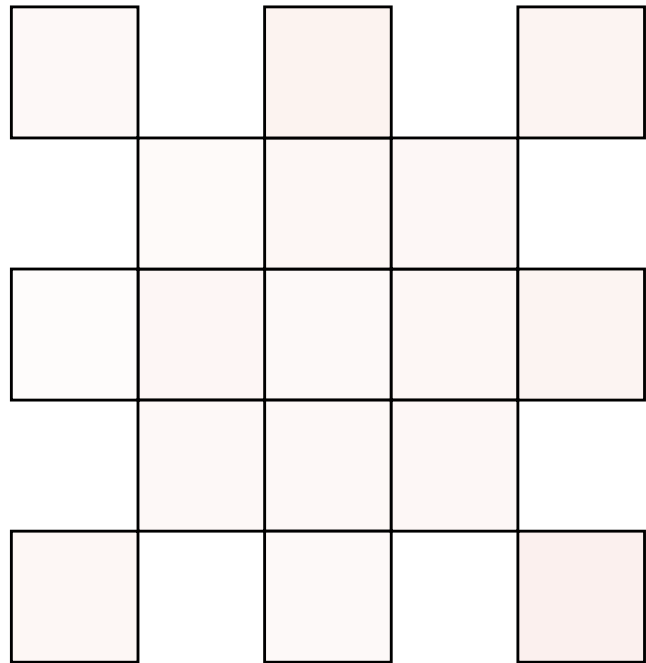

12-20421175-G-A

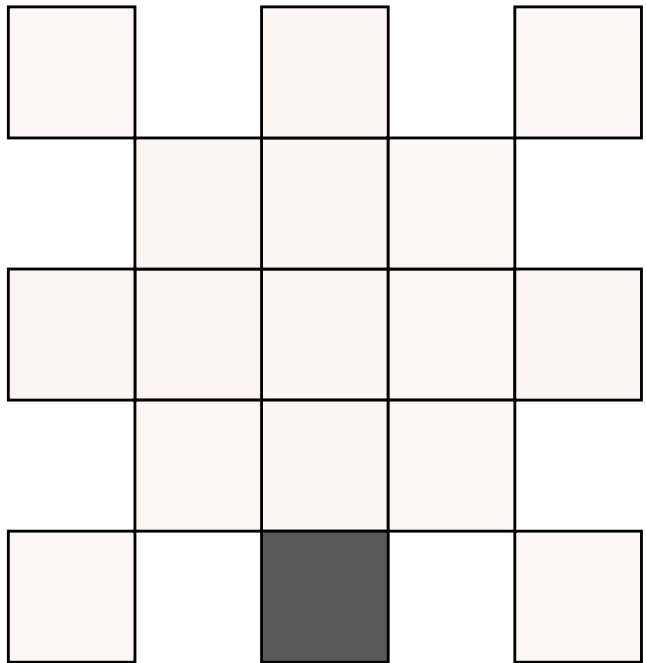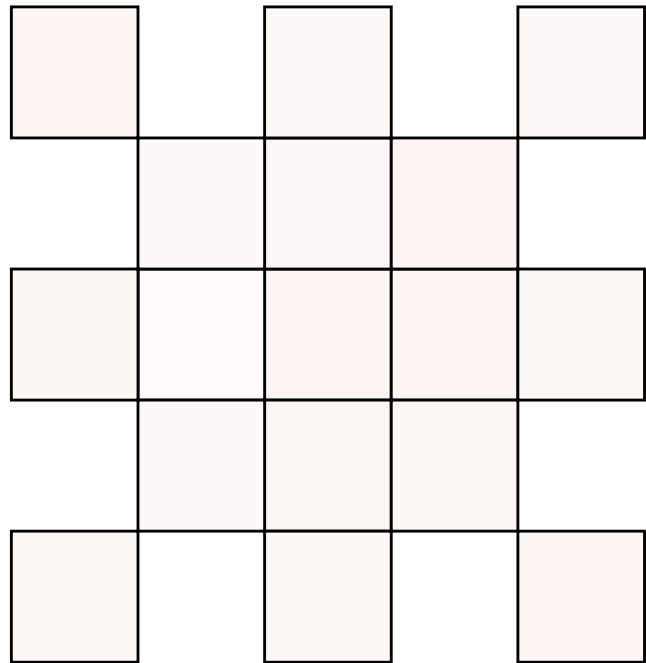

12-2204021-A-G

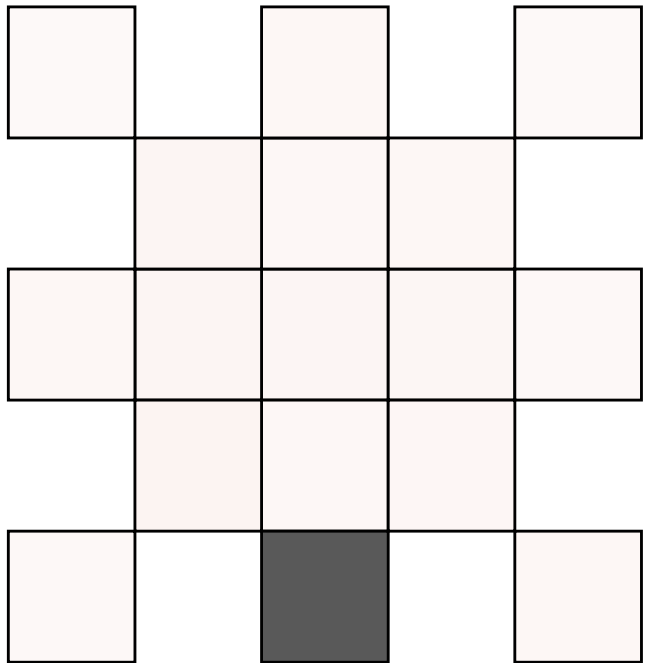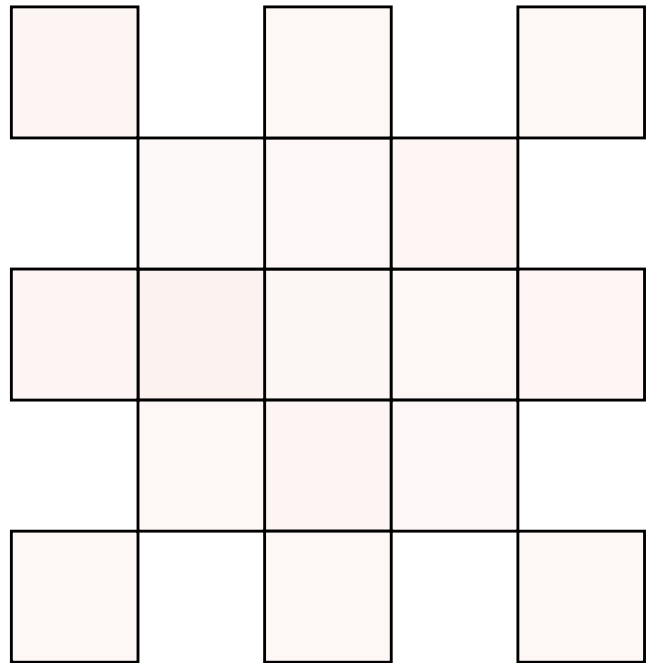

12-24436884-C-T

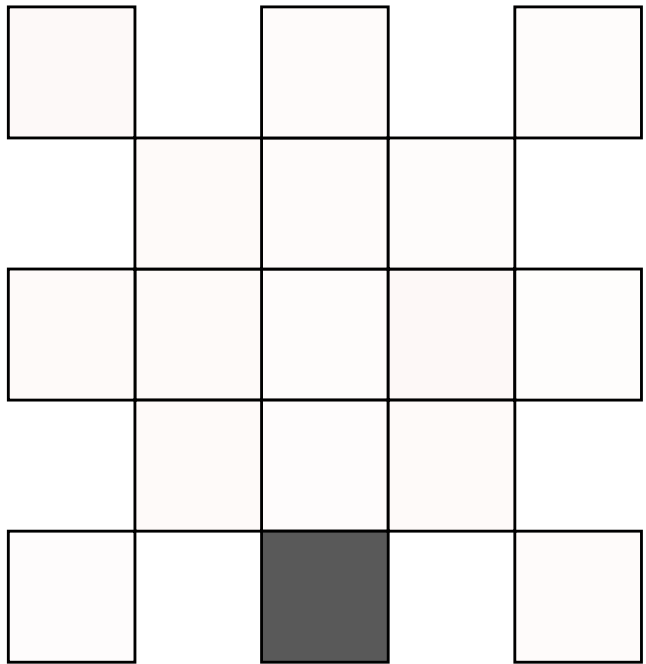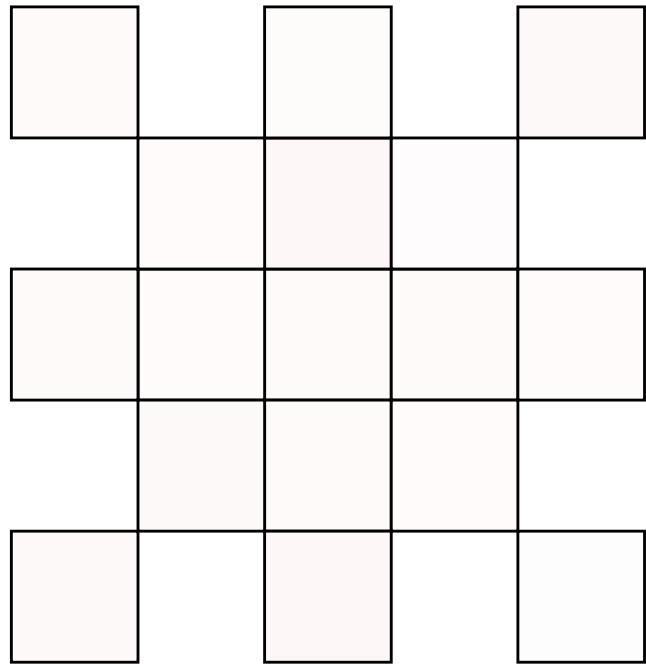

12-55677268-C-A

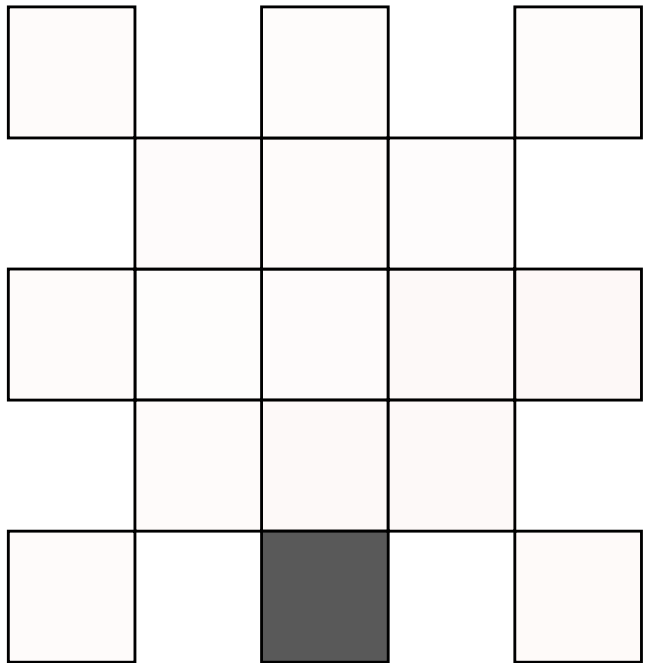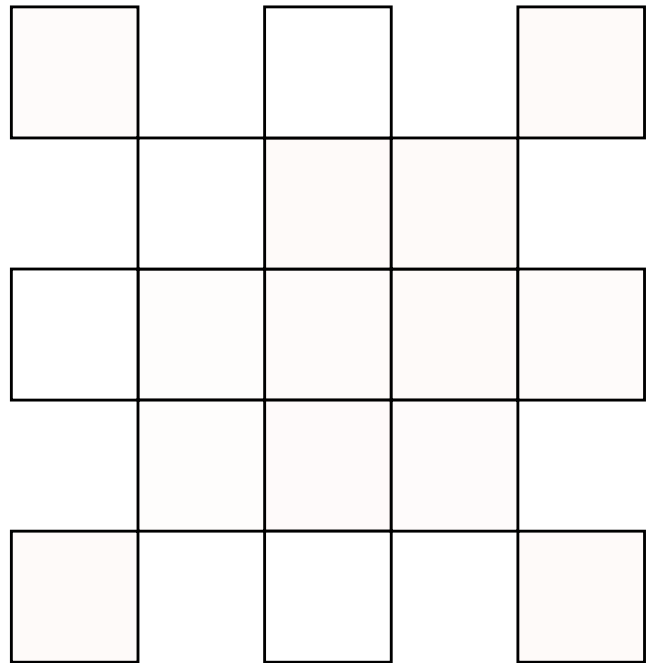



12-62486556-G-A

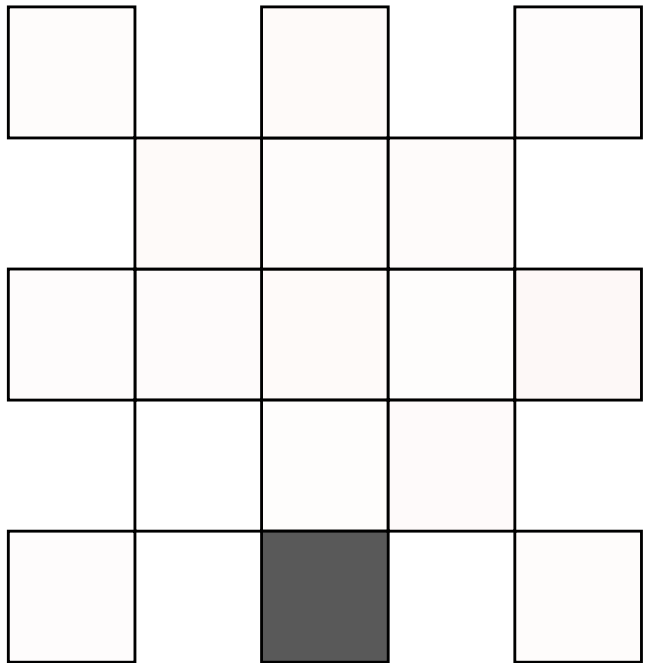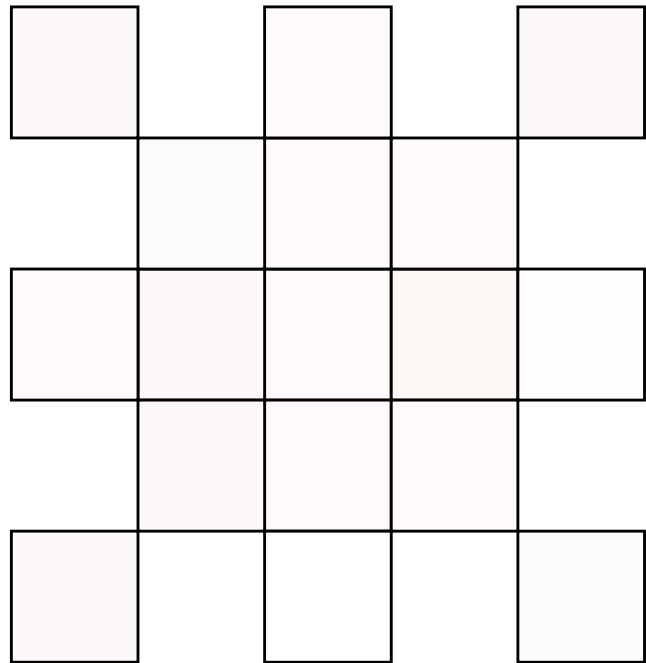

12-73783719-C-T

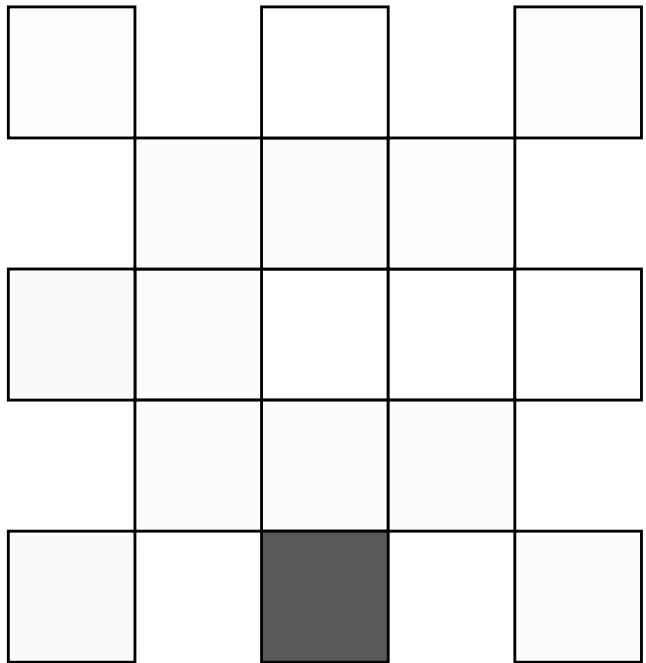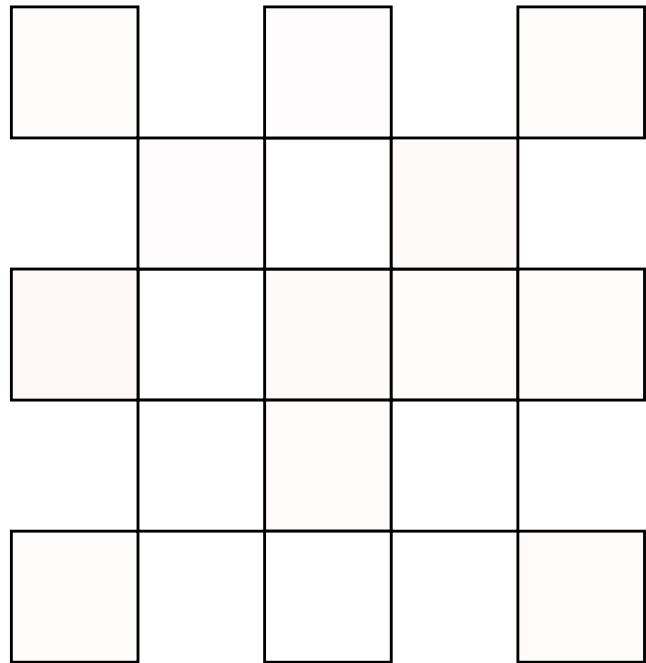

12-78761941-A-T

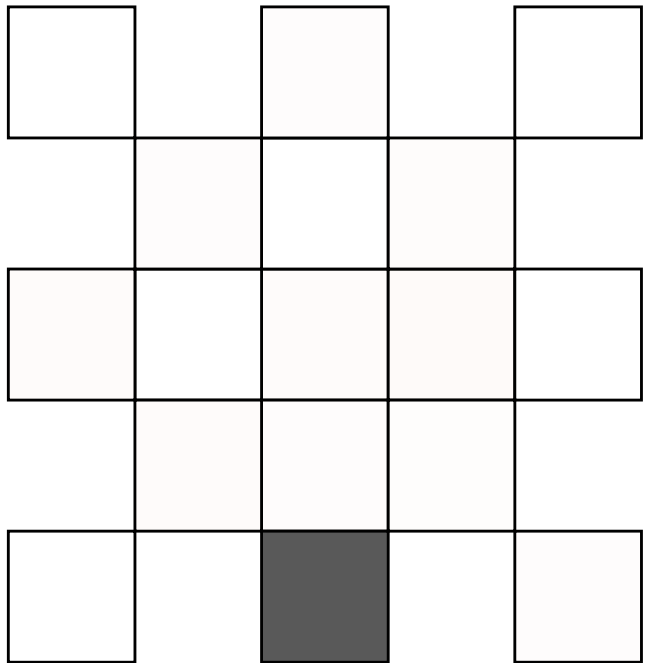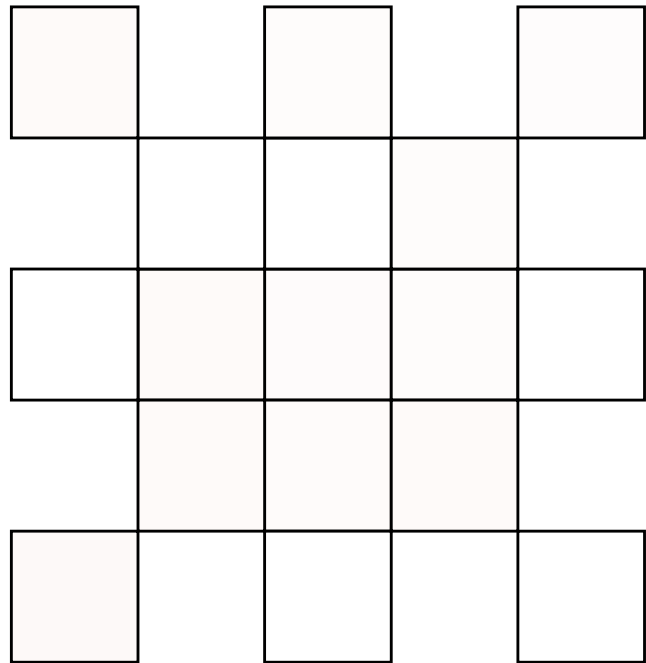

12-79536312-C-T

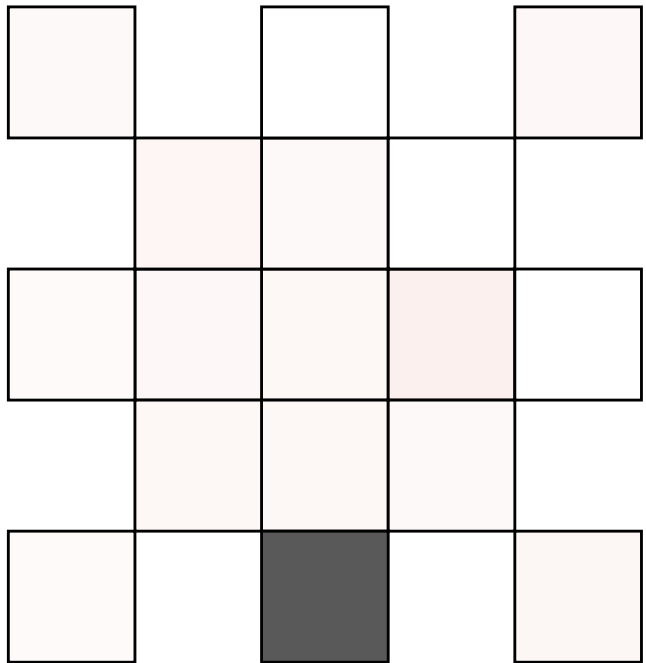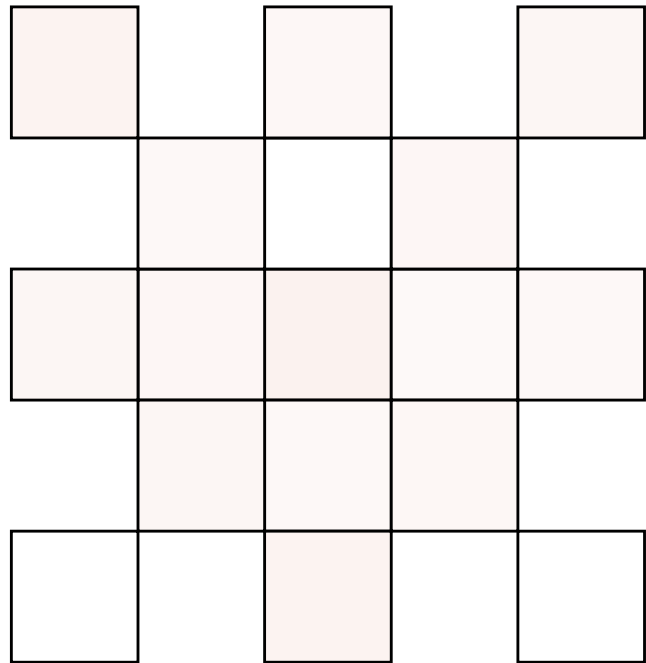

12-85014452-T-A

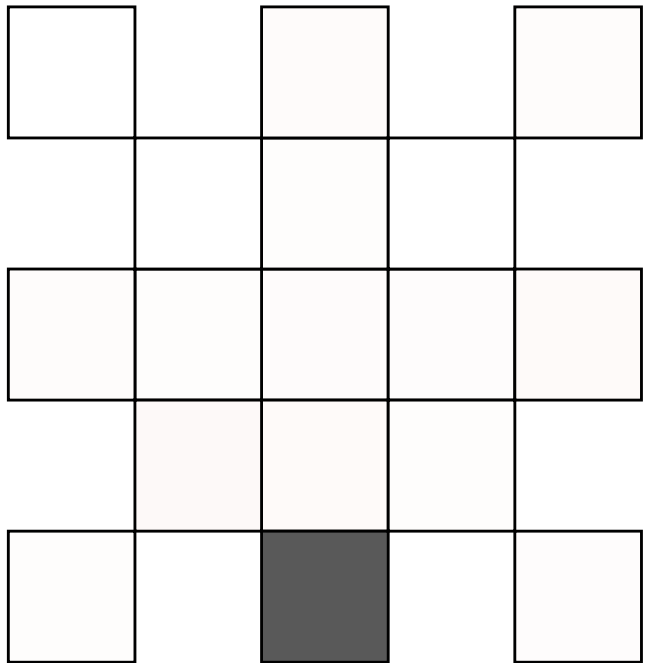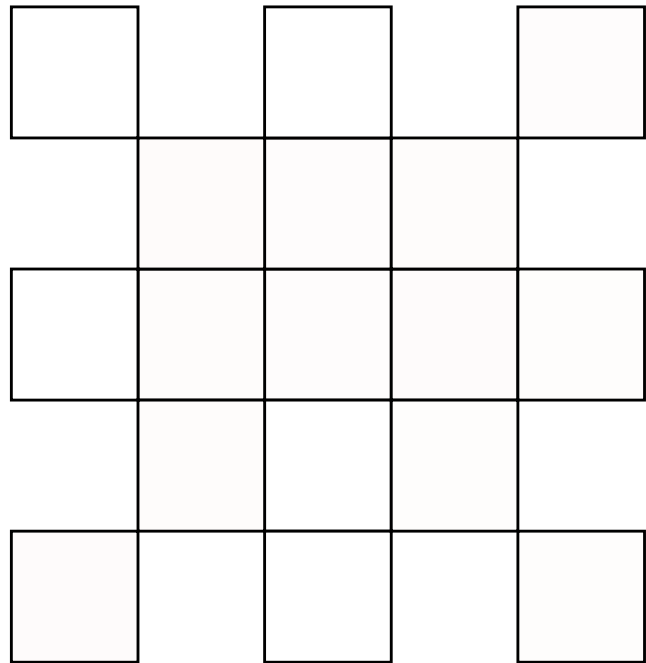

12-85787527-A-T

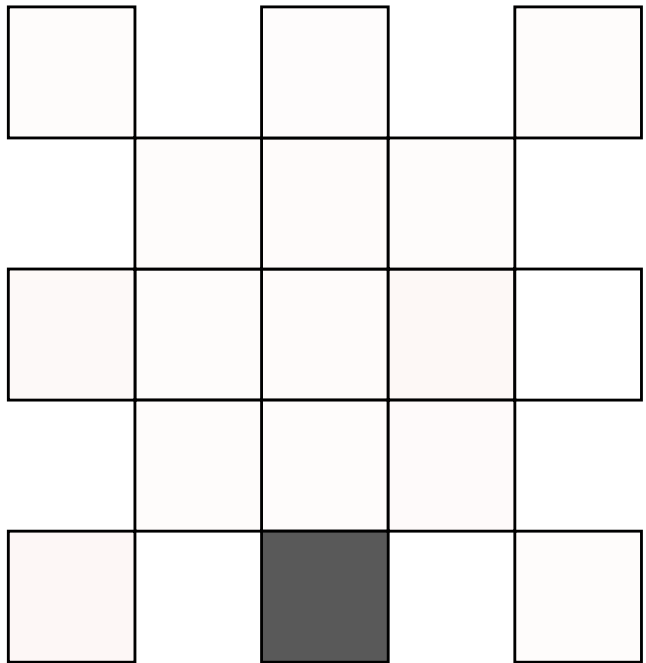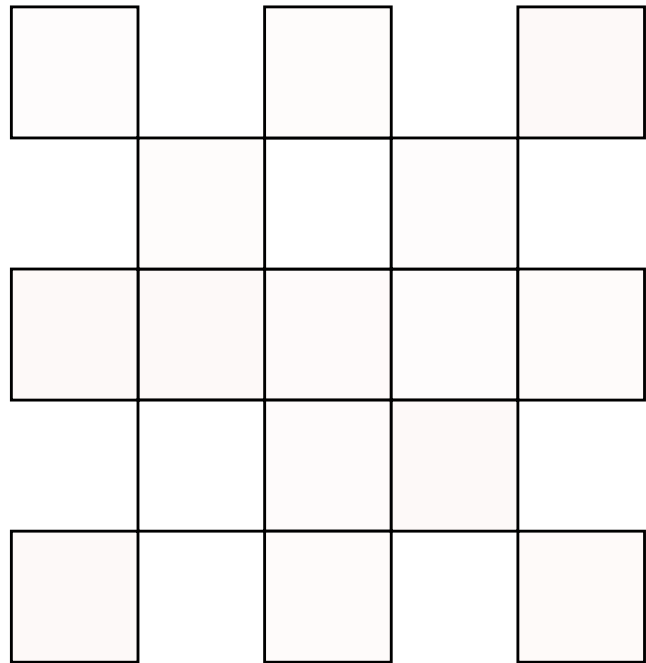

12-90774790-C-T

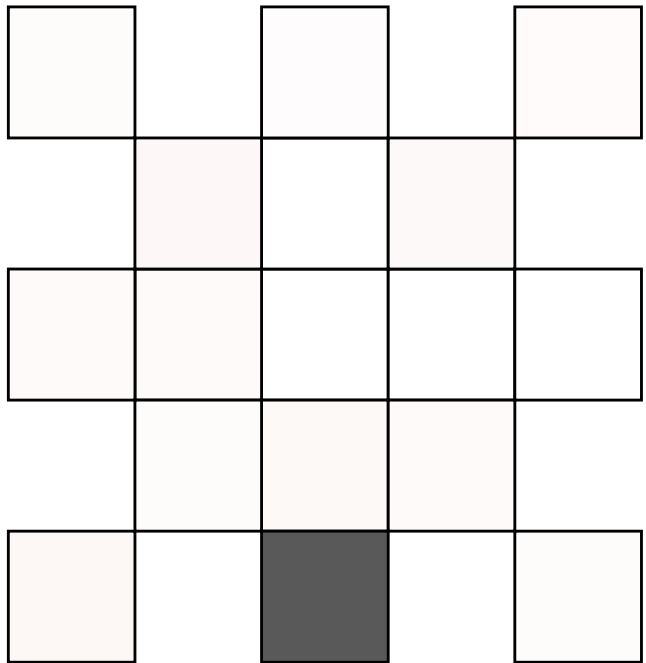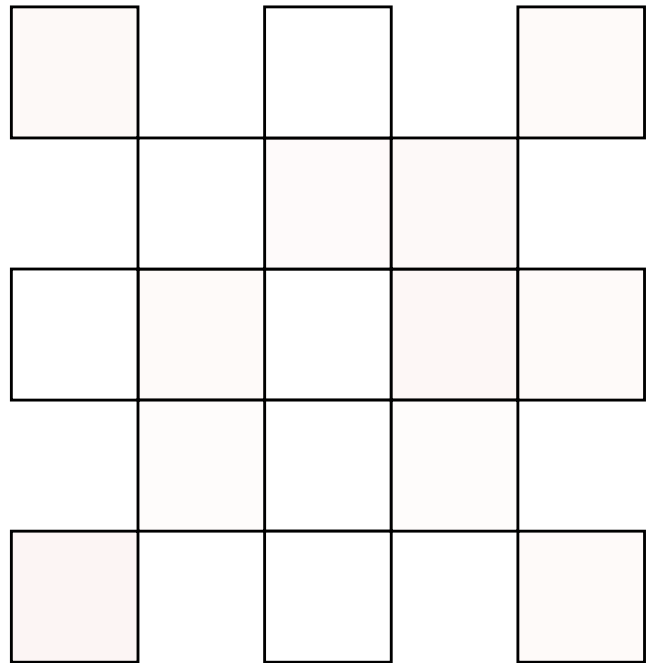

12-98567754-C-T

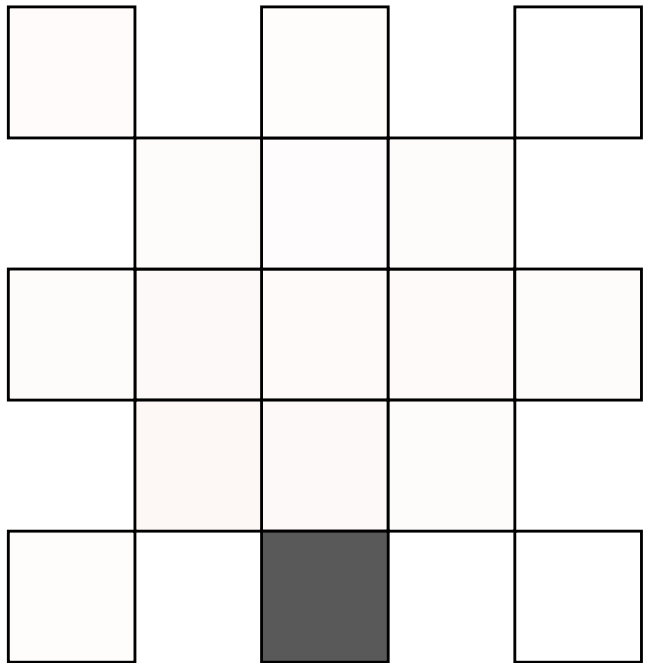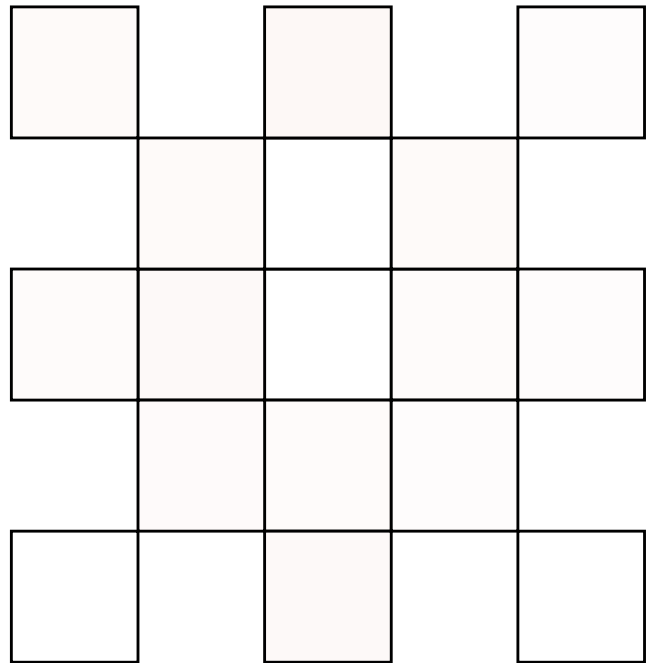



12-98674630-C-T

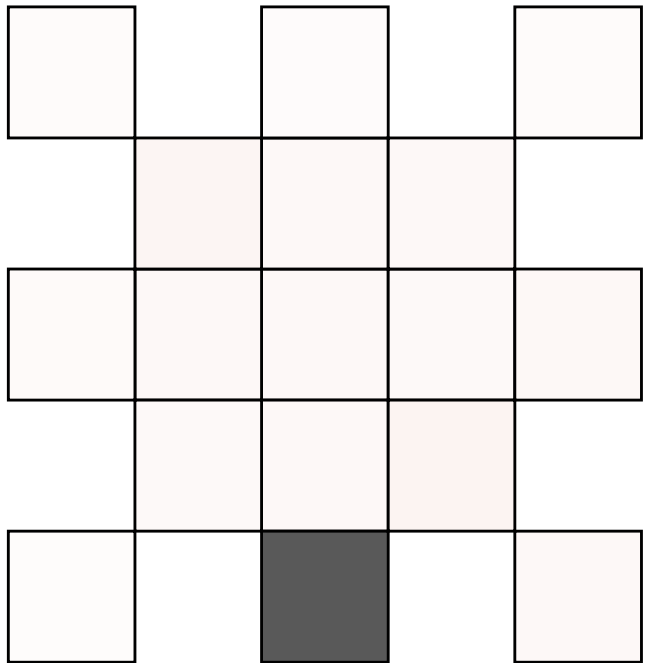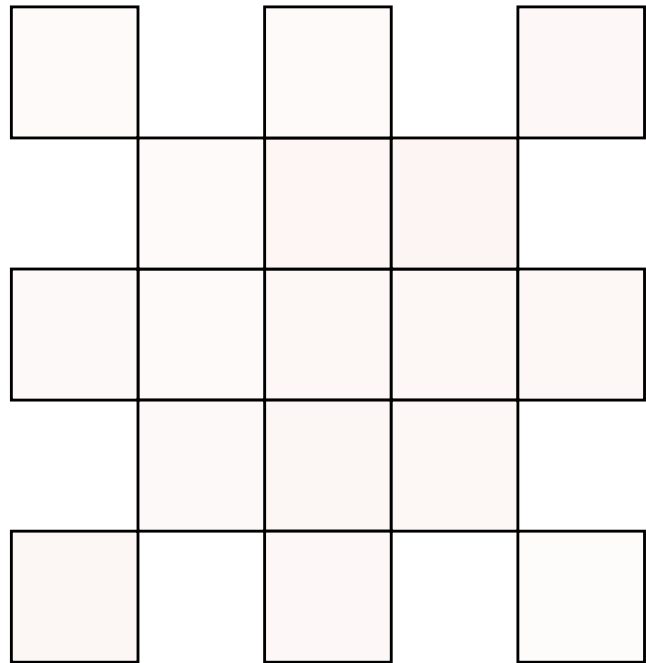

13-102240084-A-T

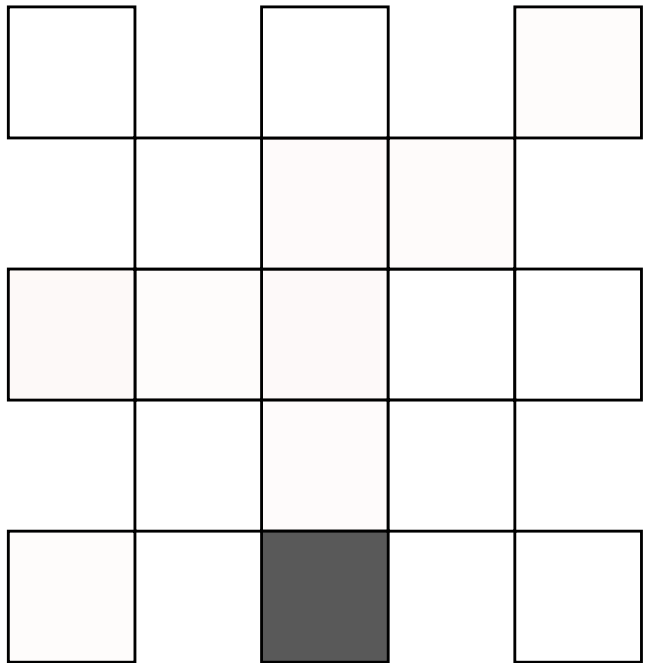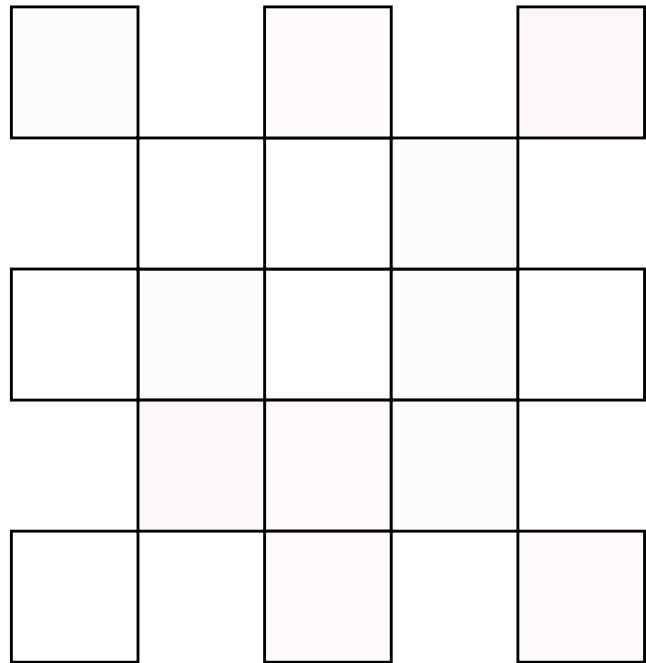

13-106141548-C-T

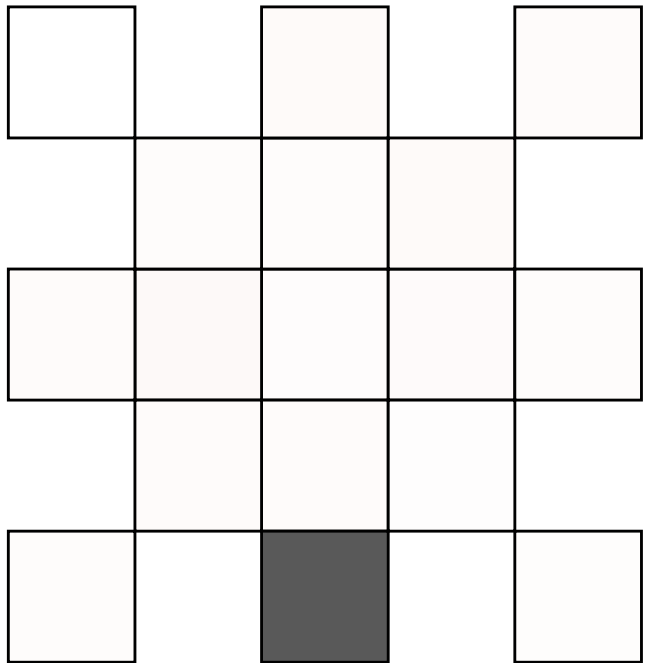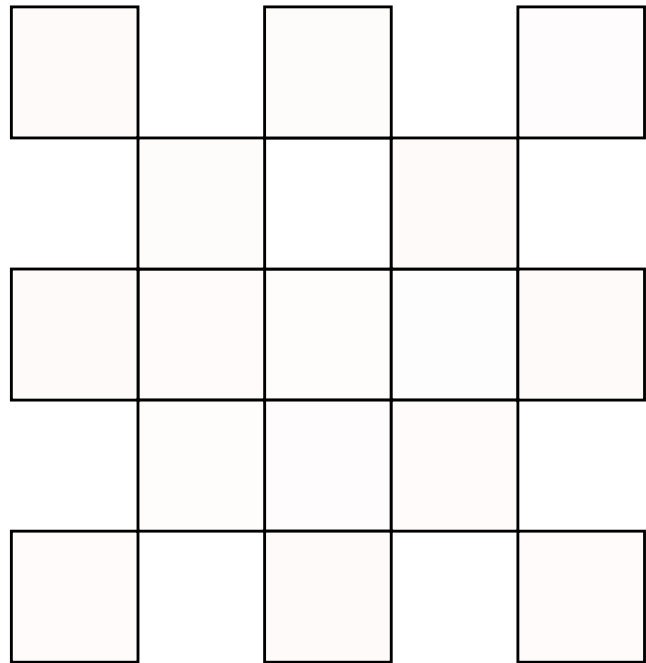

13-109148397-G-A

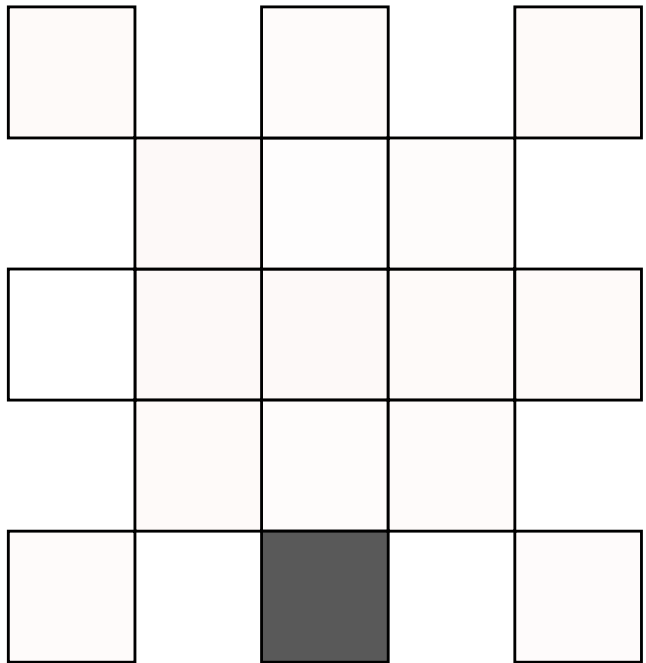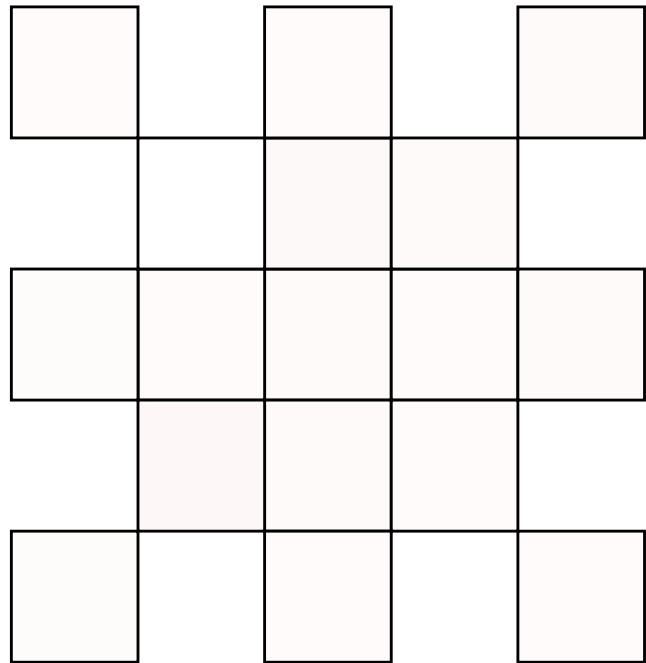

13-109292761-G-A

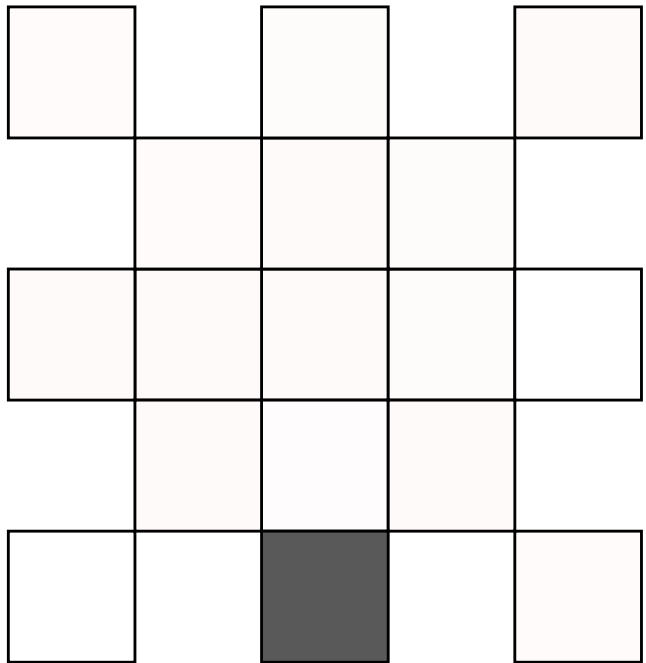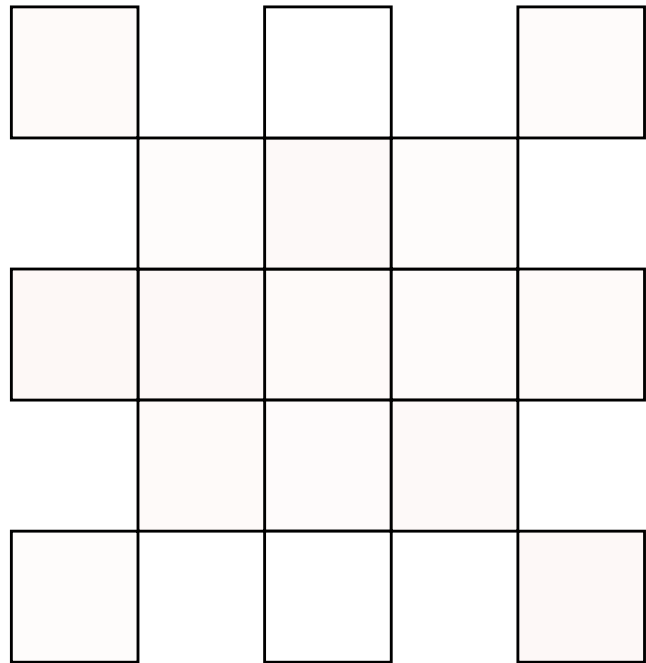

13-111450669-C-T

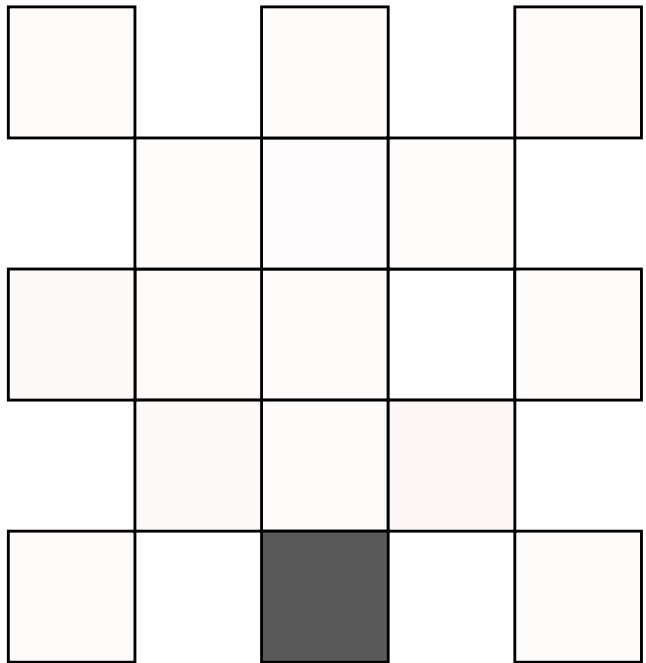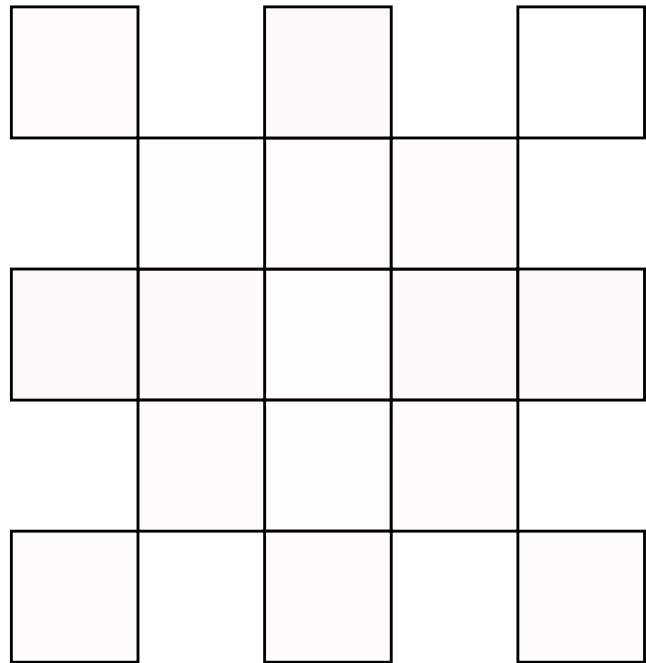

13-113879720-G-A

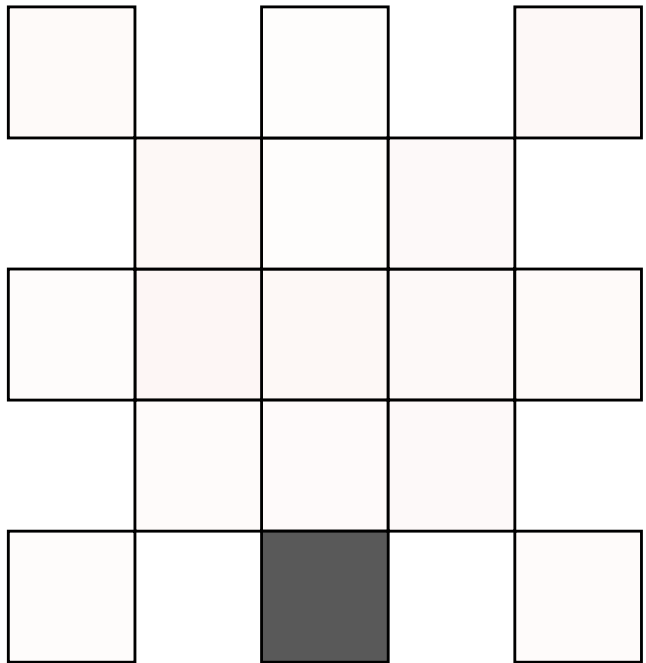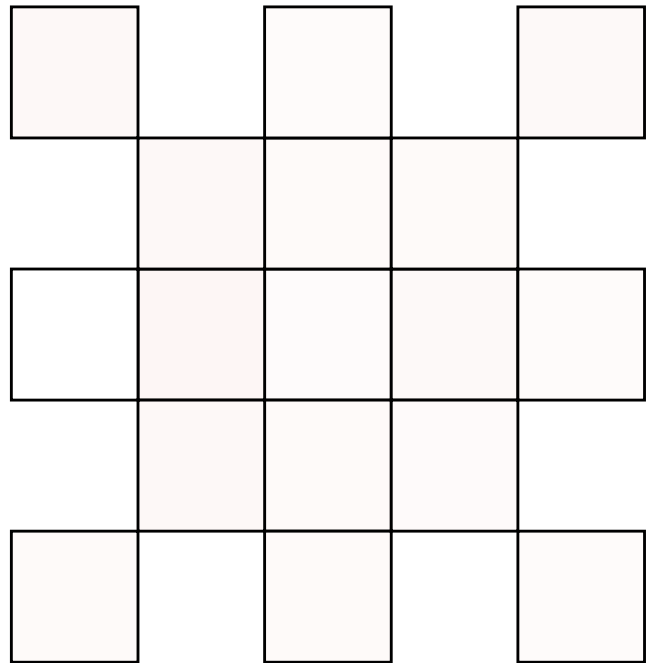

13-26972654-G-A

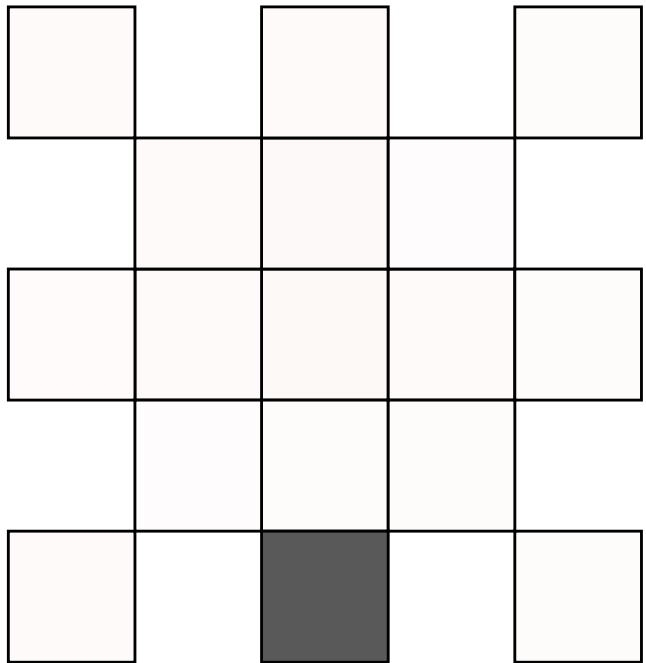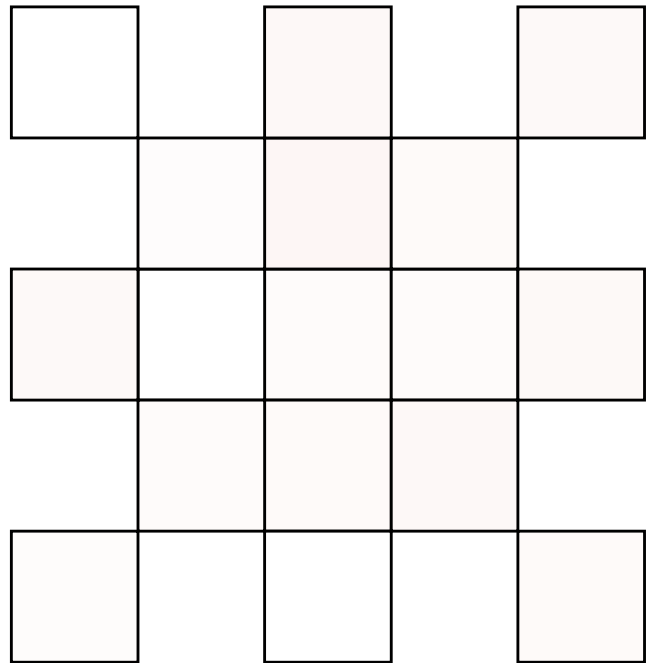



13-26972655-G-A

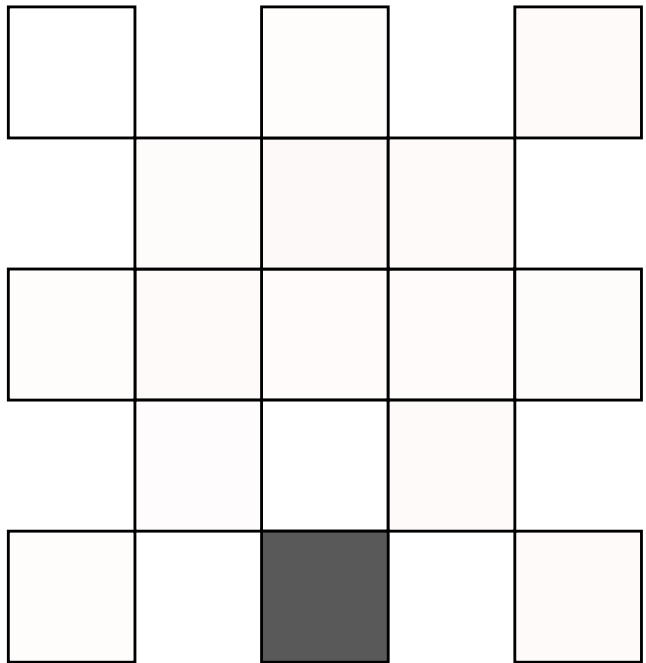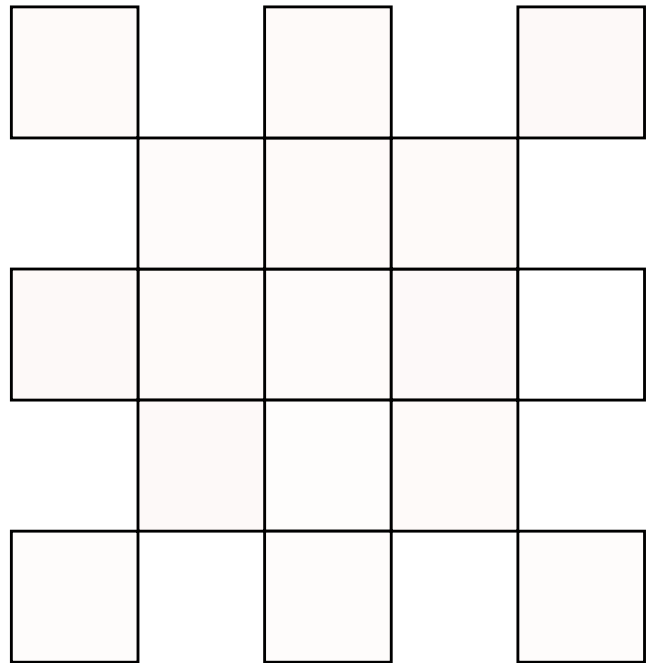

13-29040893-G-A

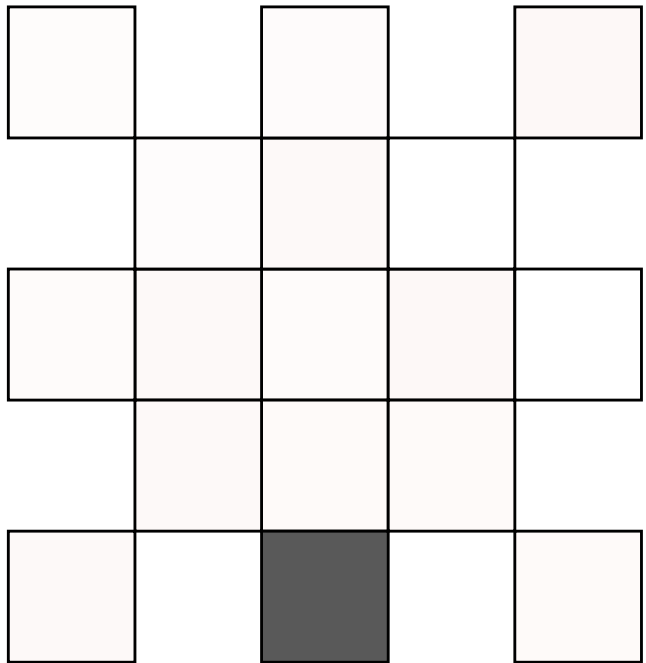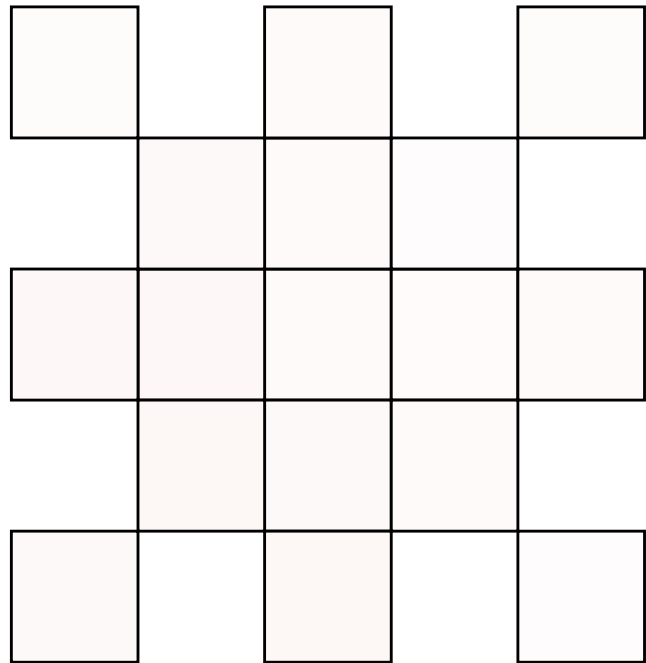

13-29577886-G-A

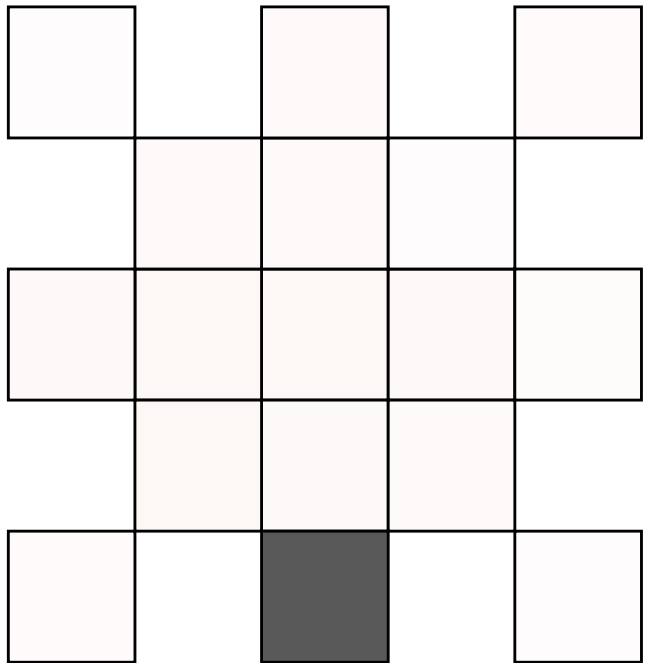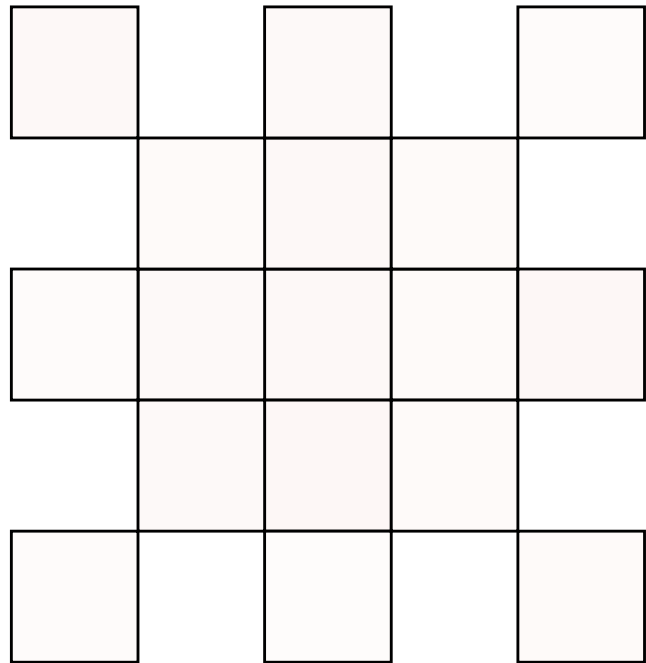

13-33420156-G-A

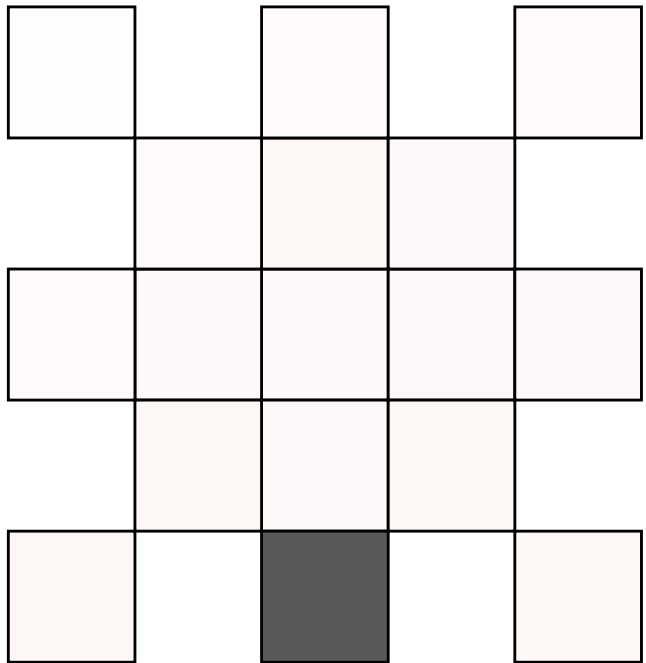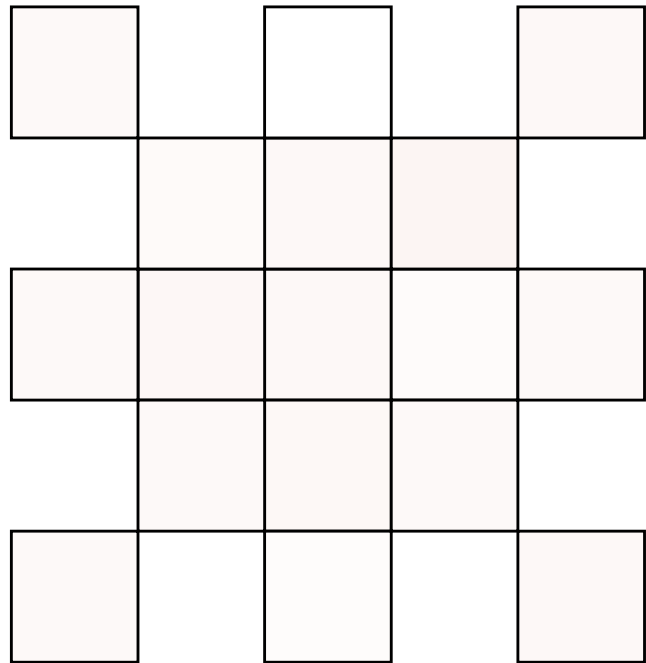

13-4156737-G-C

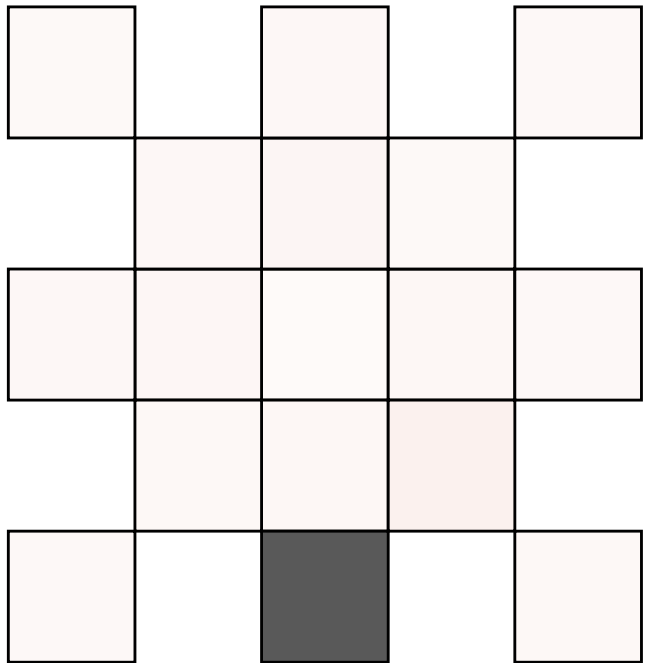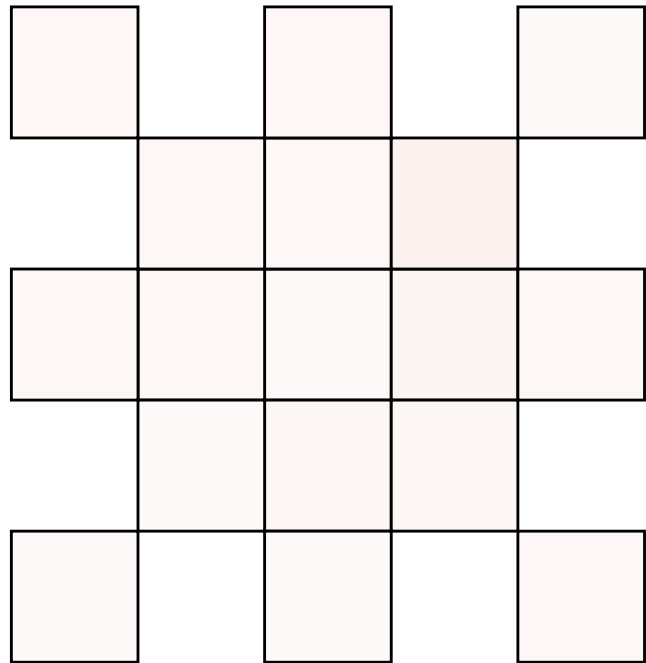

13-46288201-G-A

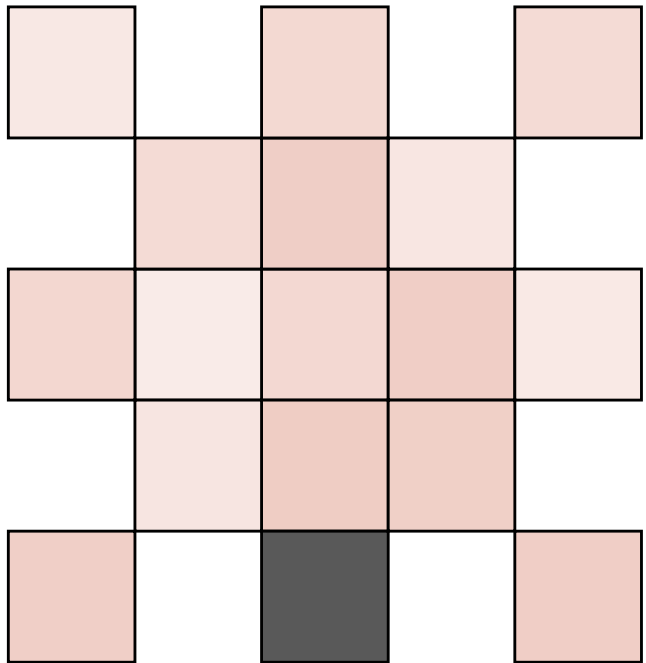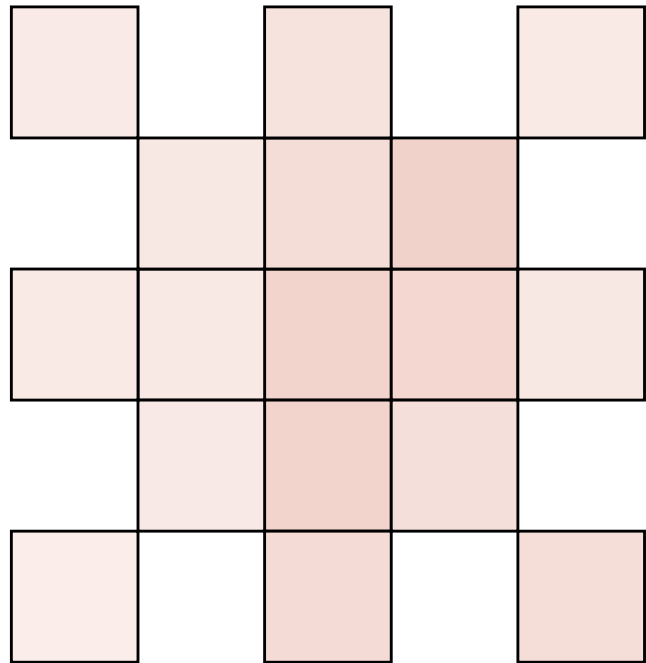

13-55140512-C-T

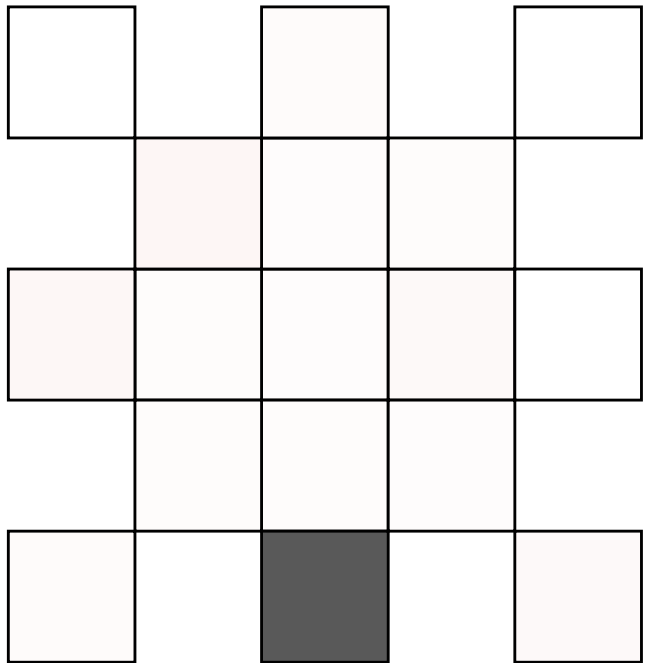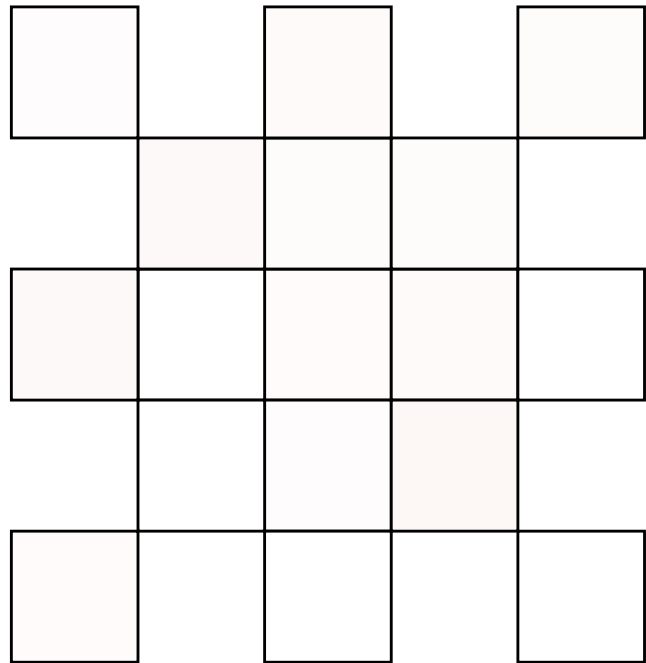

13-56431067-T-A

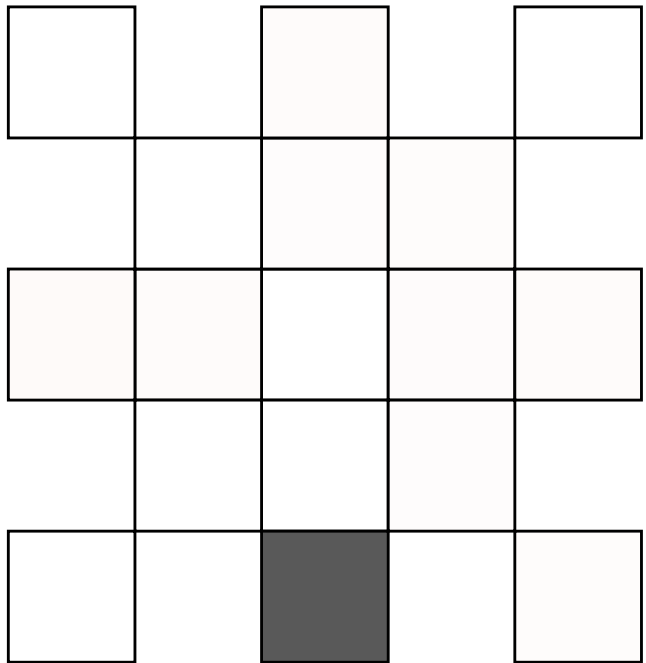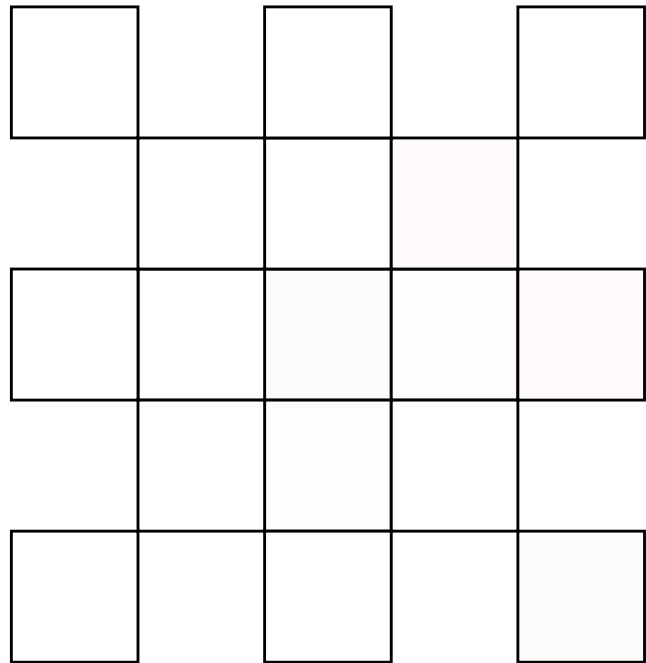



13-59159499-G-A

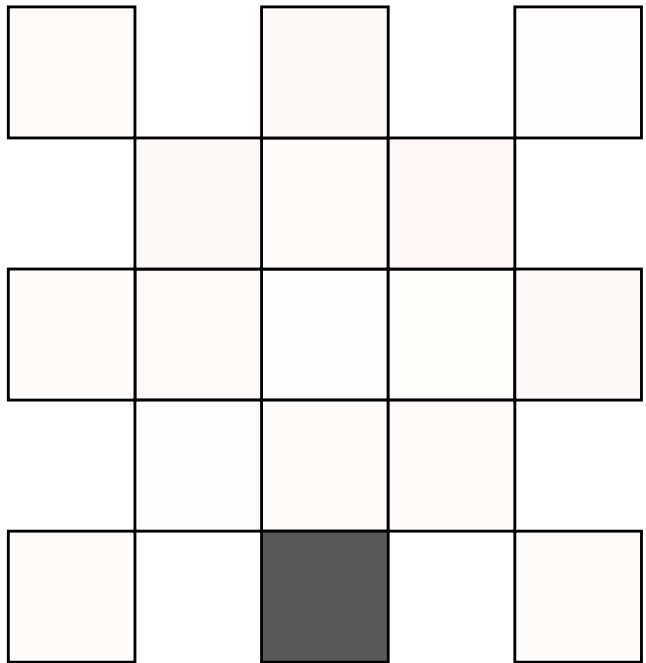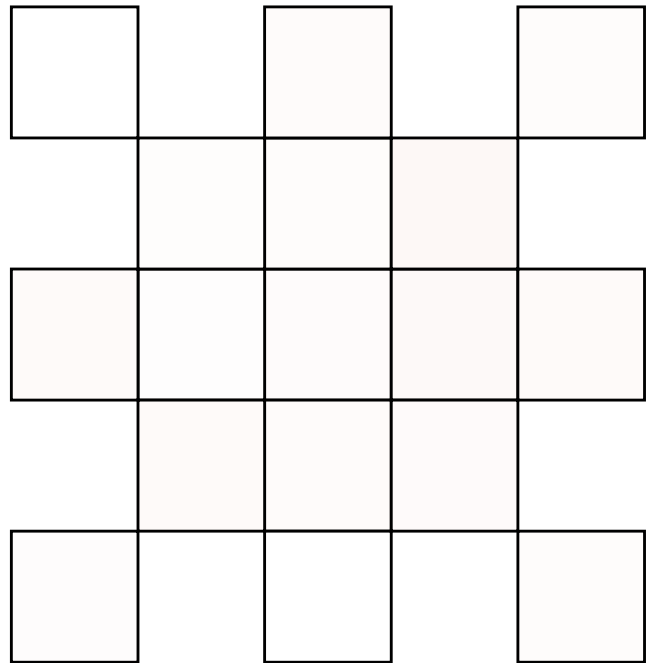

13-63432546-C-T

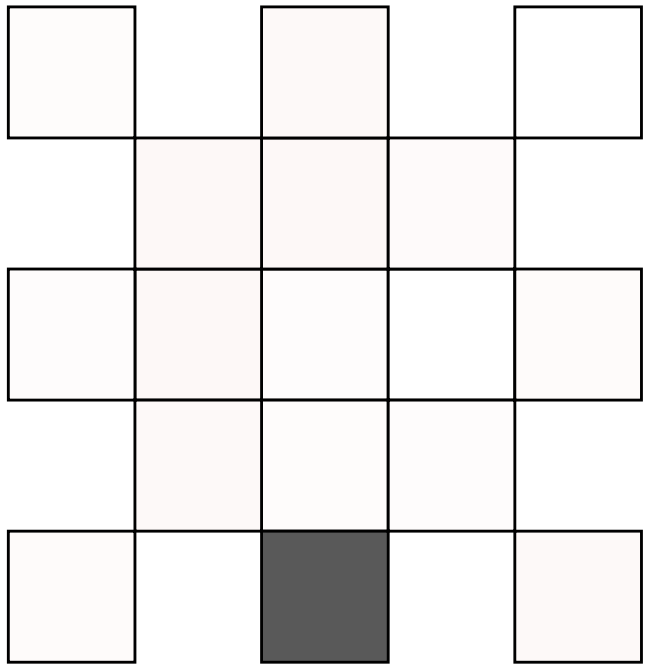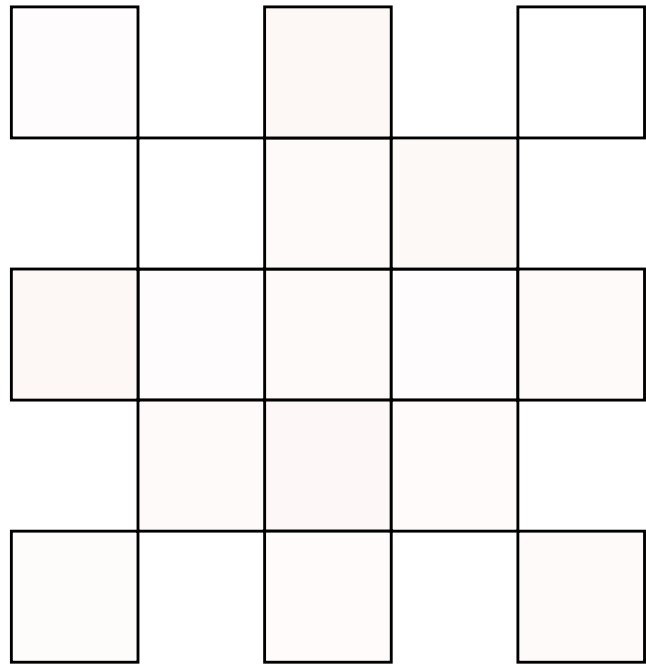

13-63856062-G-A

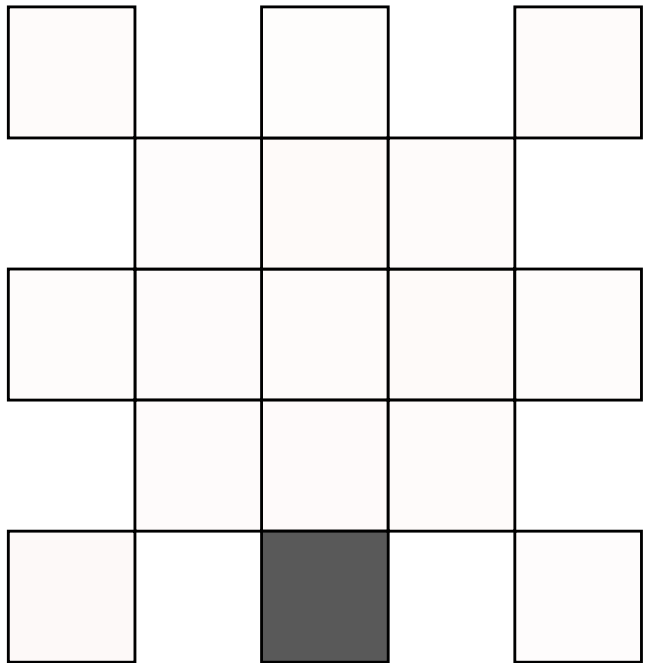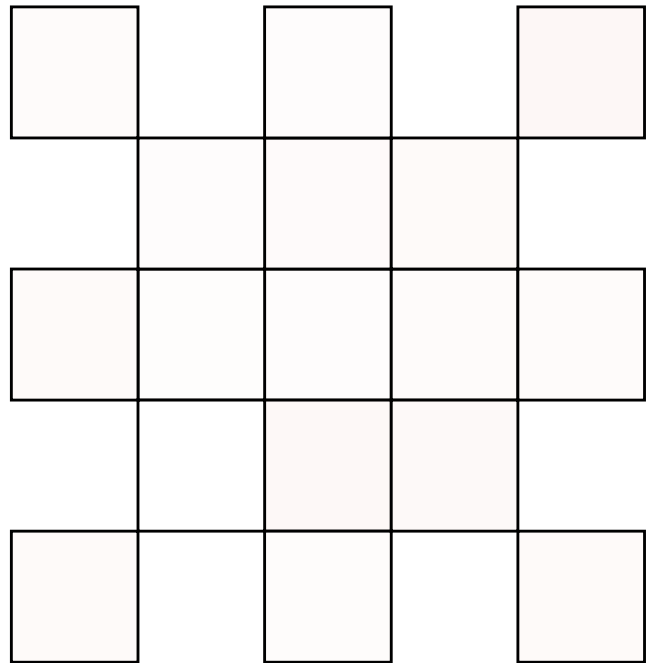

13-65586962-C-A

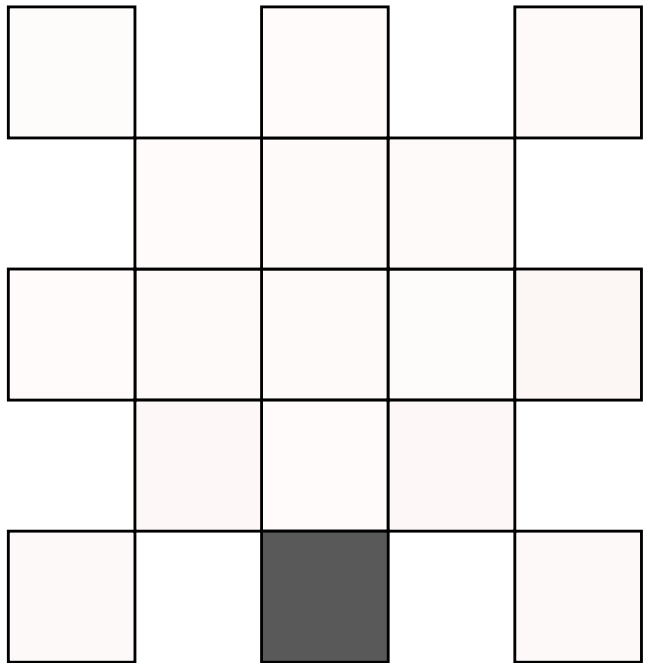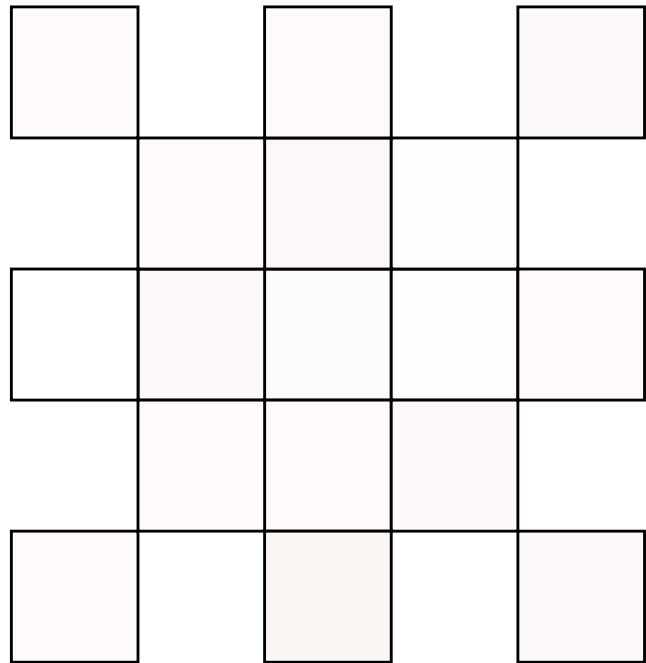

13-67322807-C-A

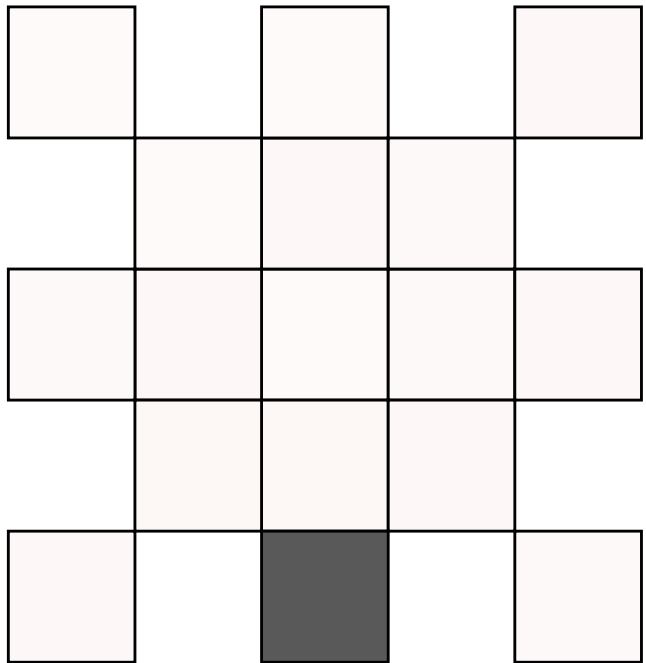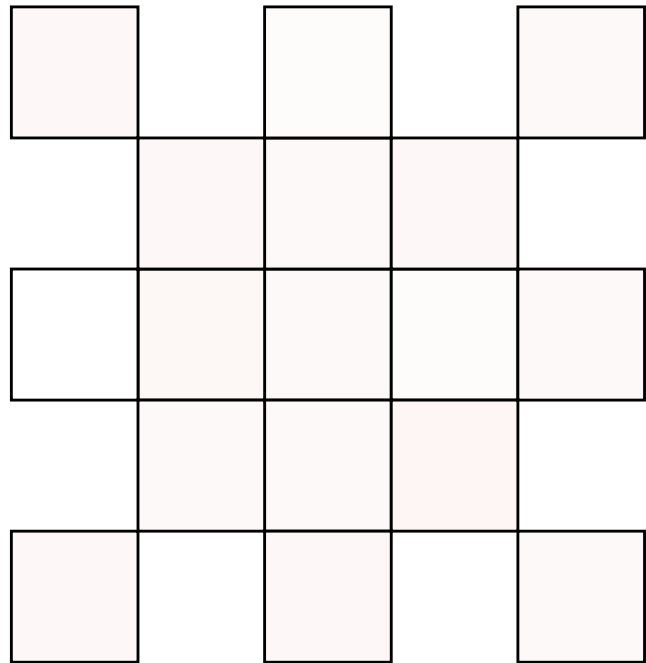

13-67852564-G-A

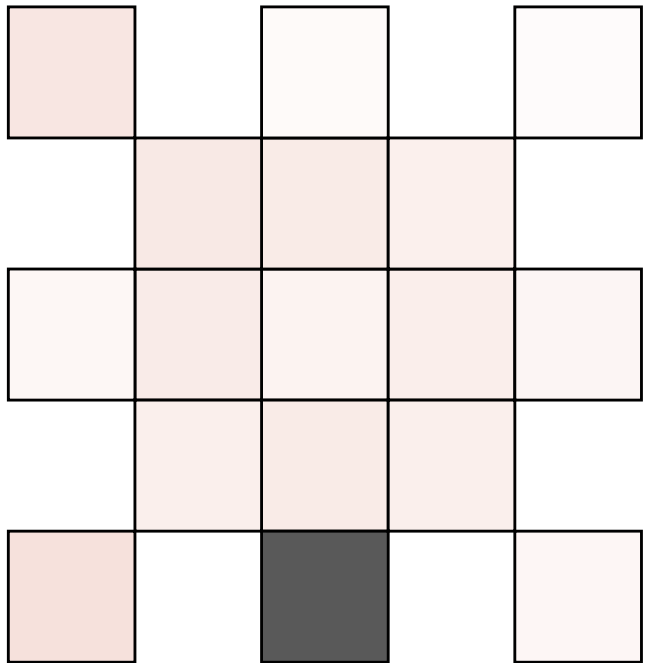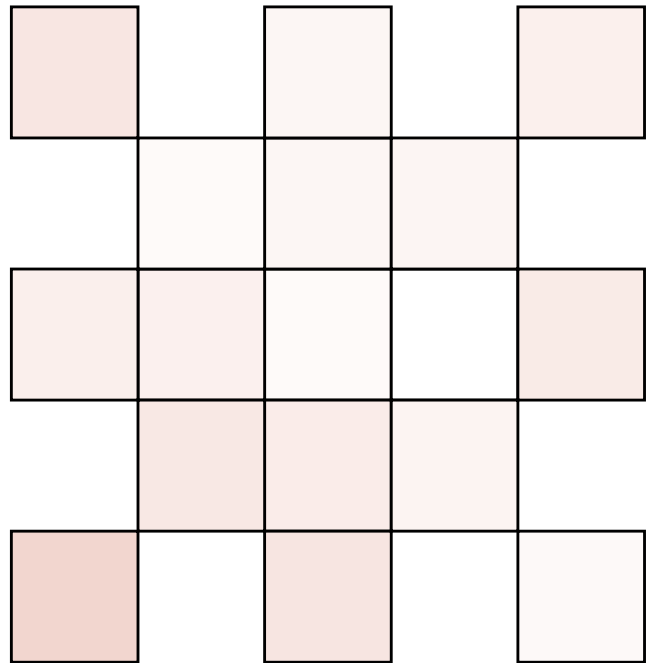

13-69093869-G-A

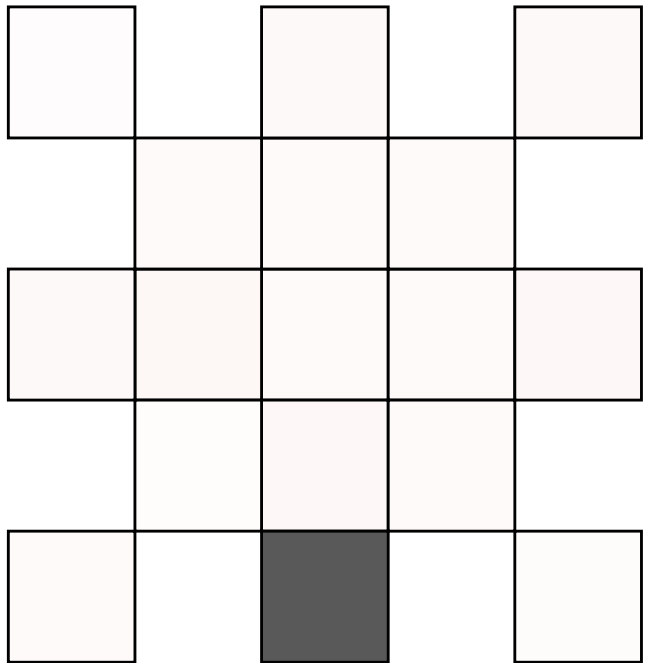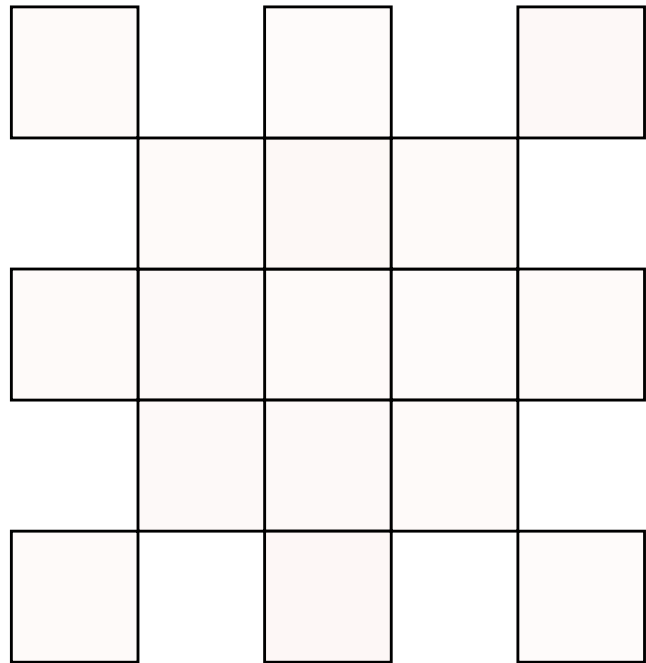

13-69308268-A-G

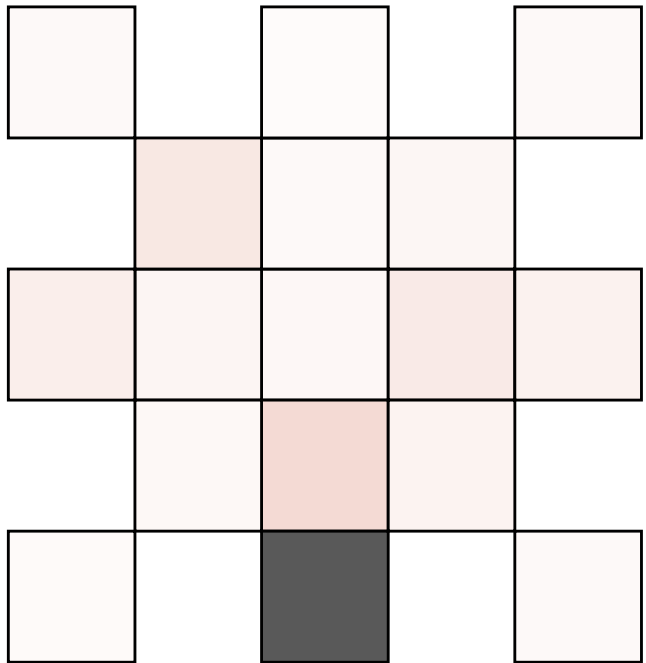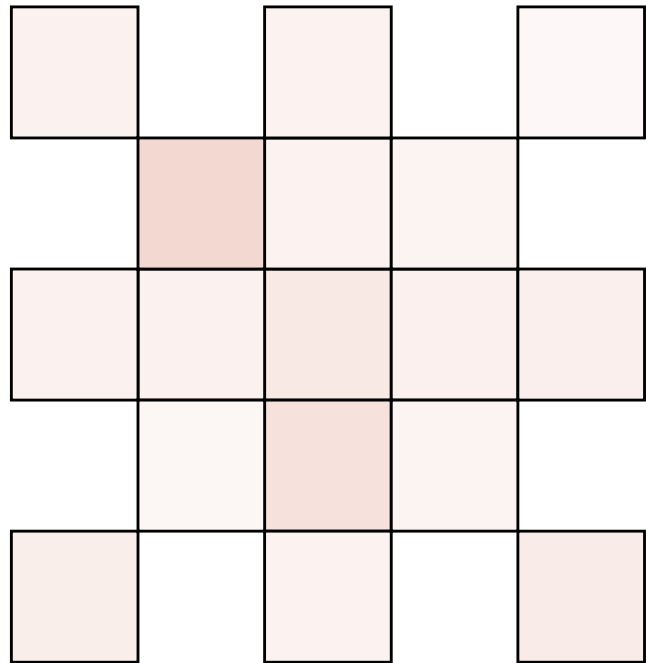



13-70279433-G-A

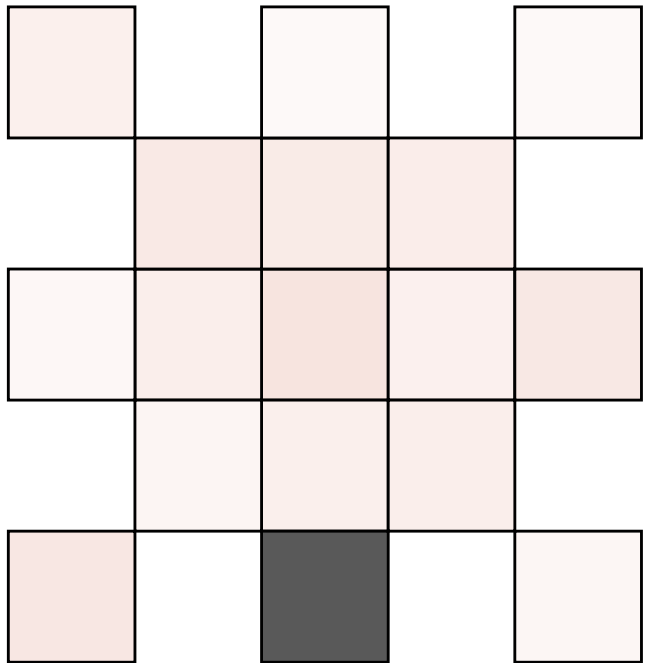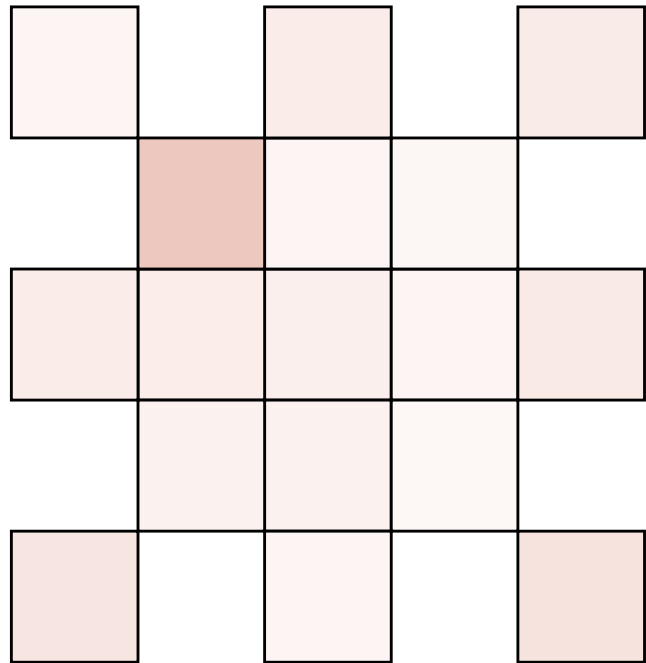

13-72218943-C-A

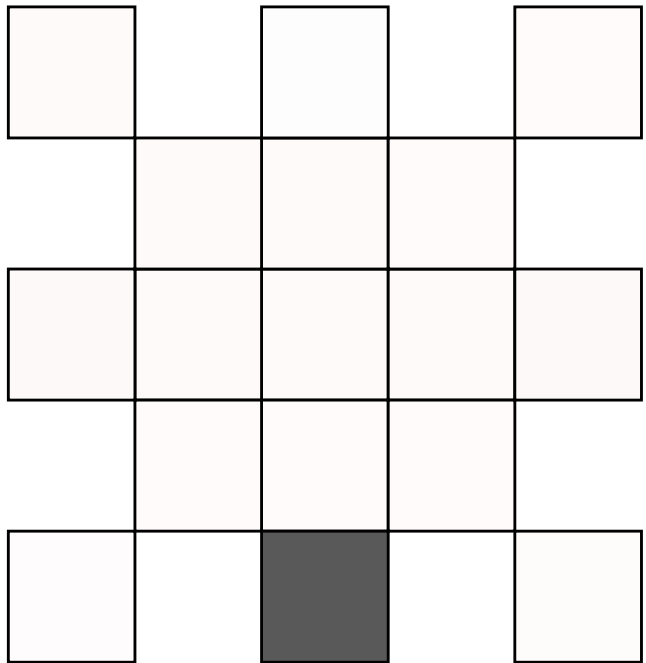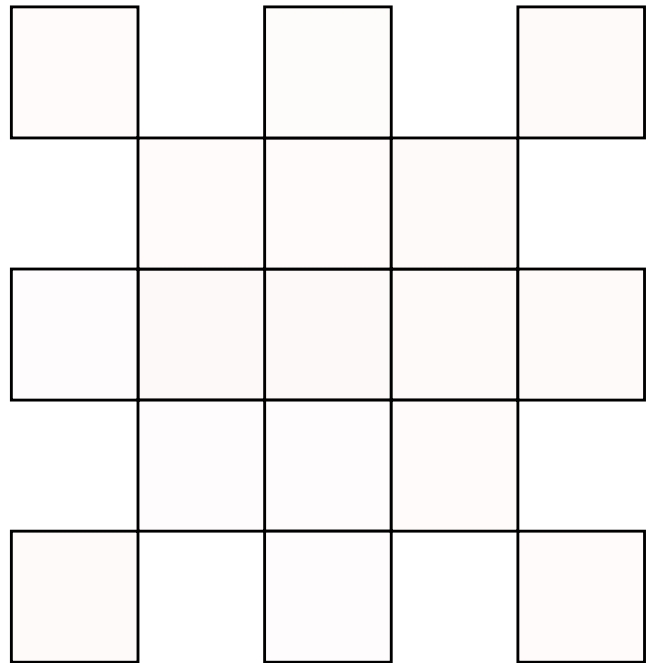

13-76279674-G-A

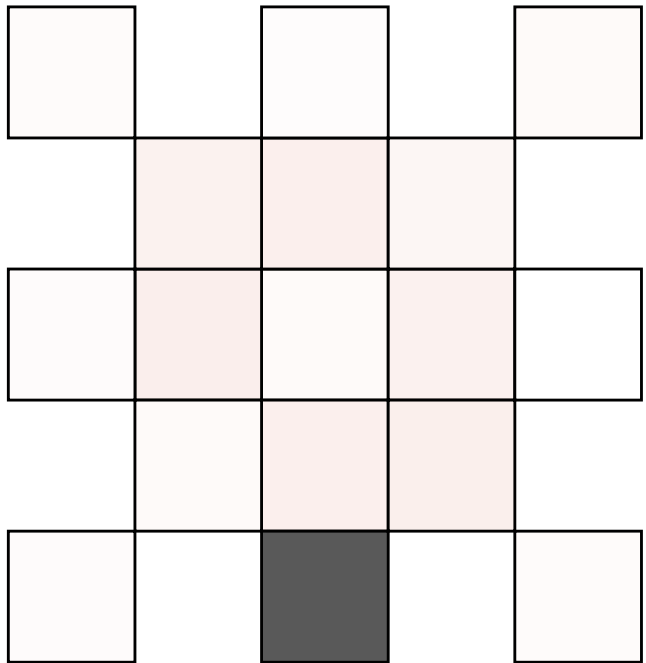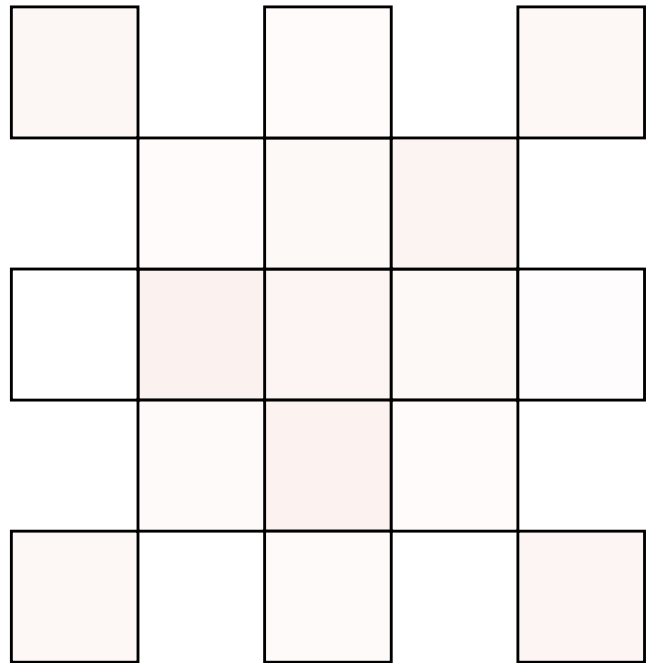

13-76874198-C-T

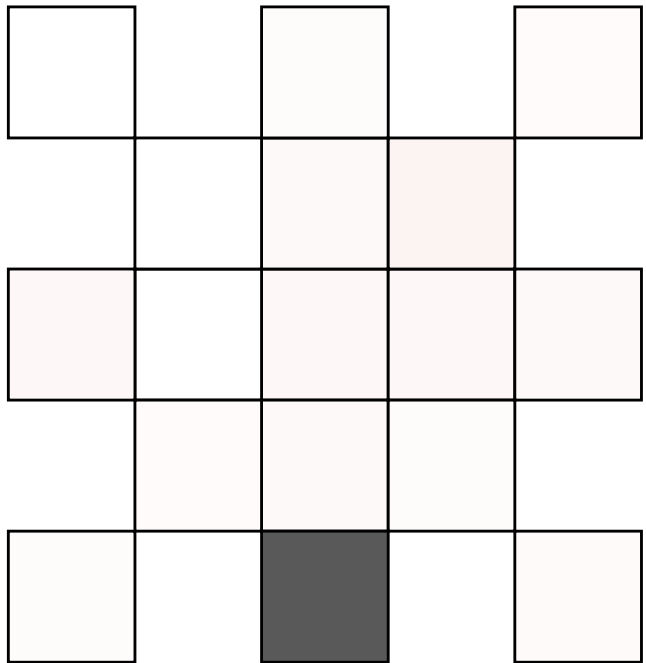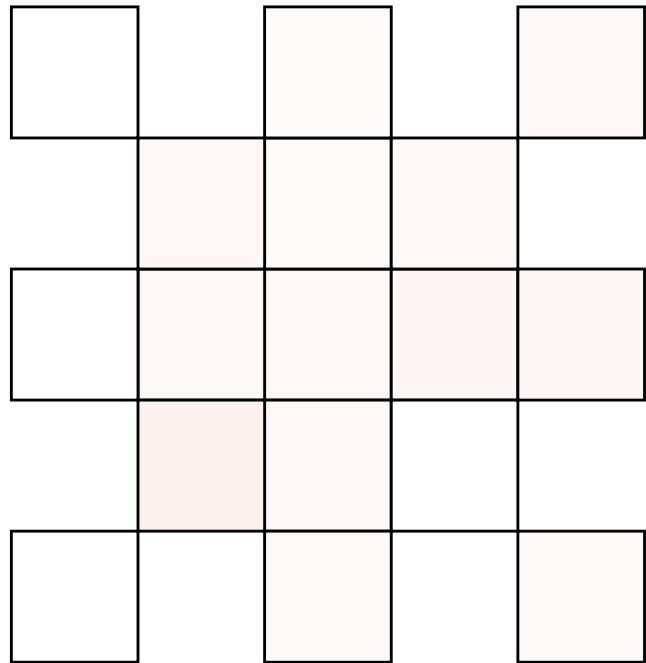

13-77509041-G-T

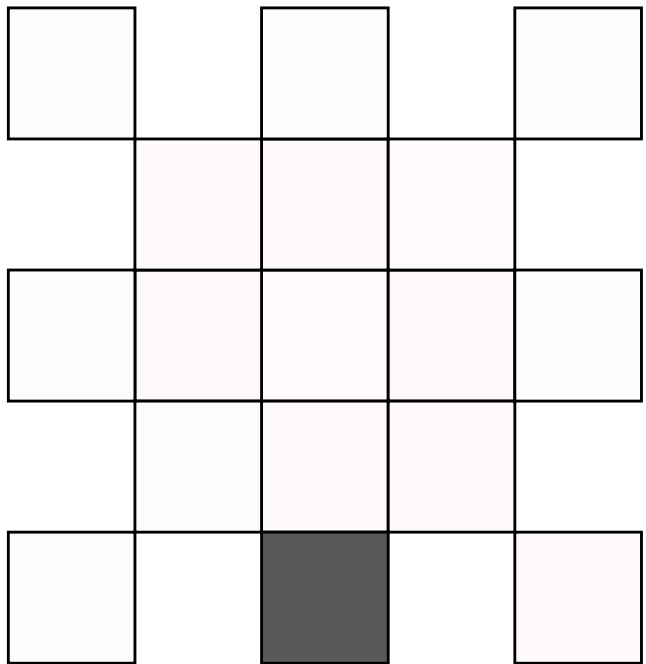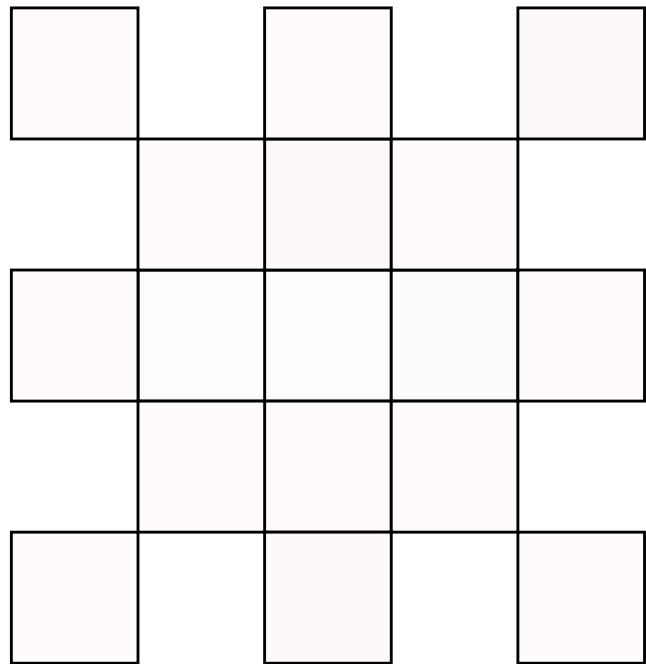

13-83875706-C-T

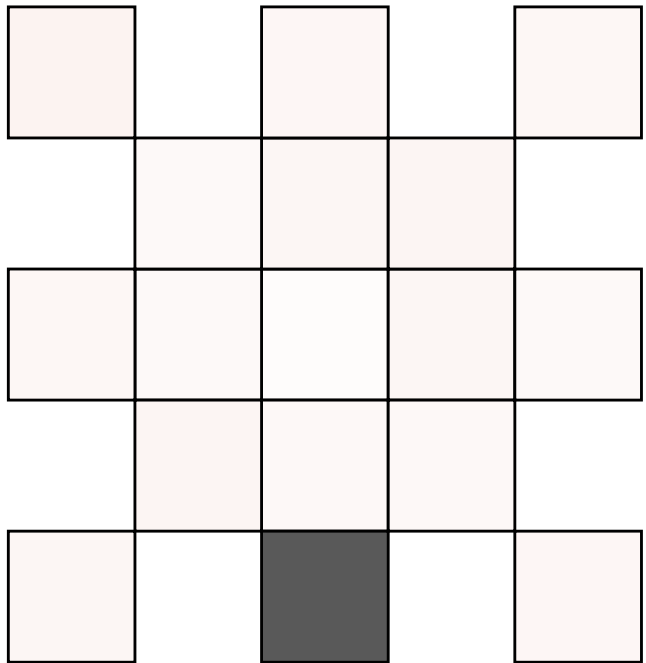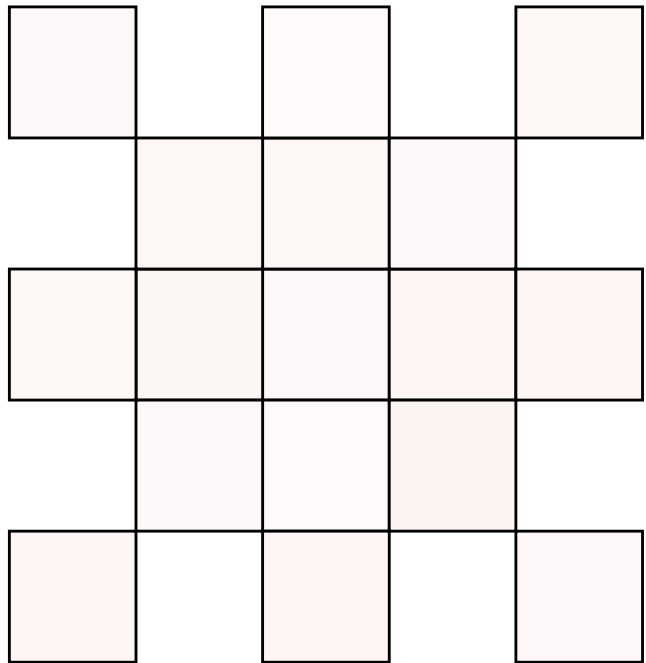

13-87055884-G-A

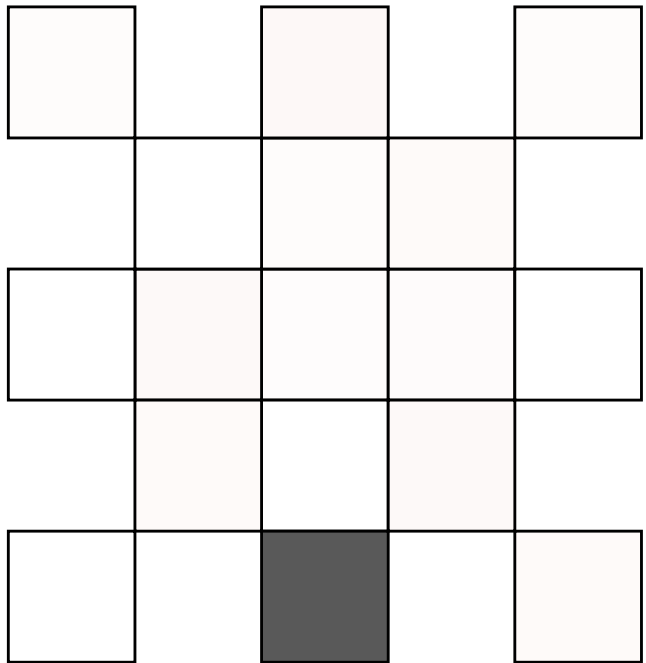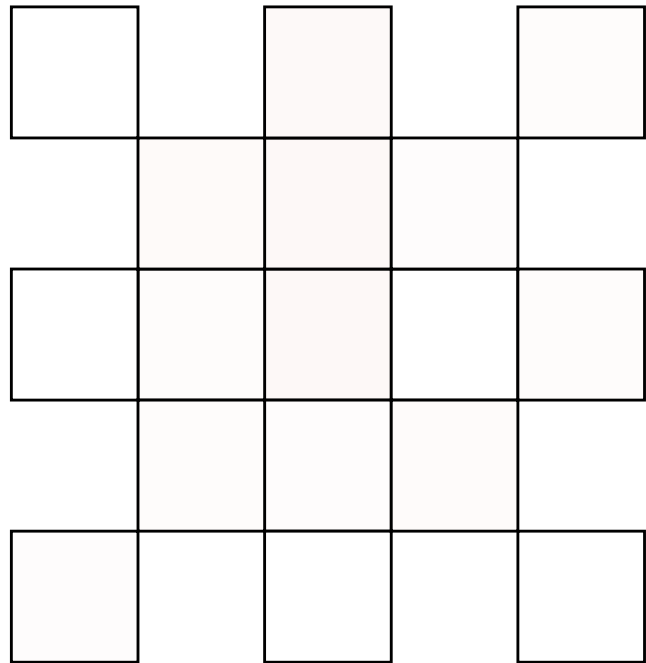

13-92867989-T-C

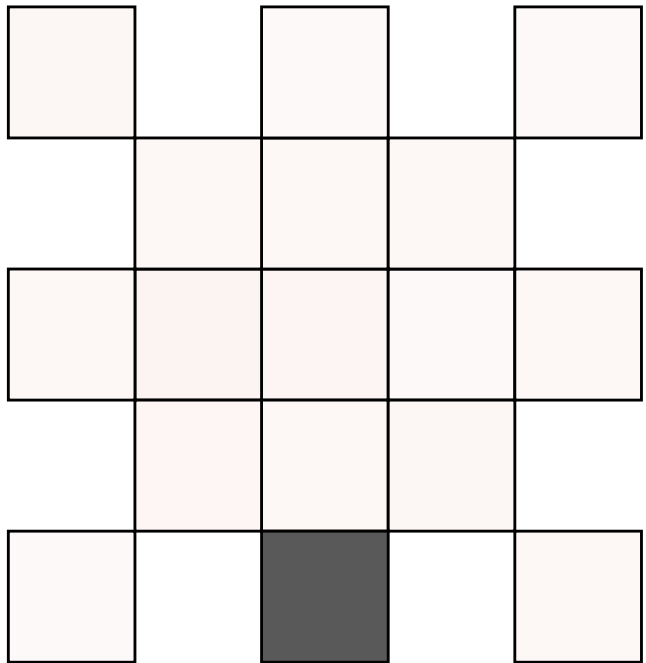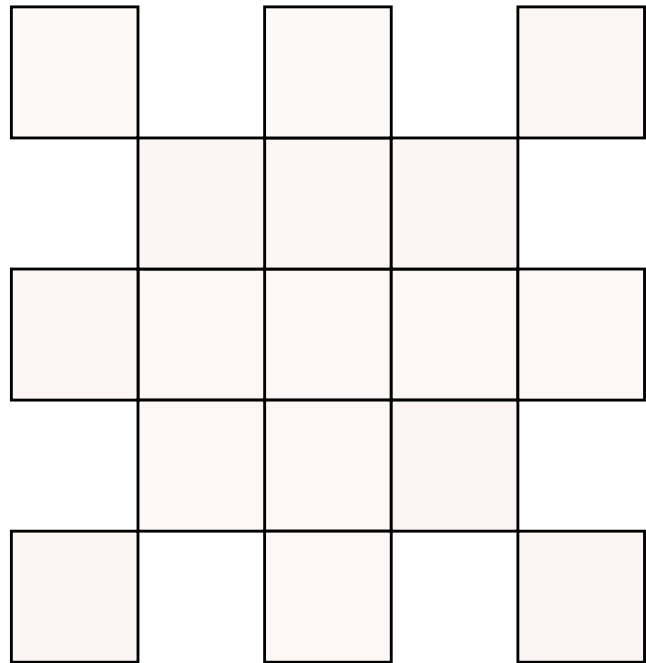



13-9695504-C-T

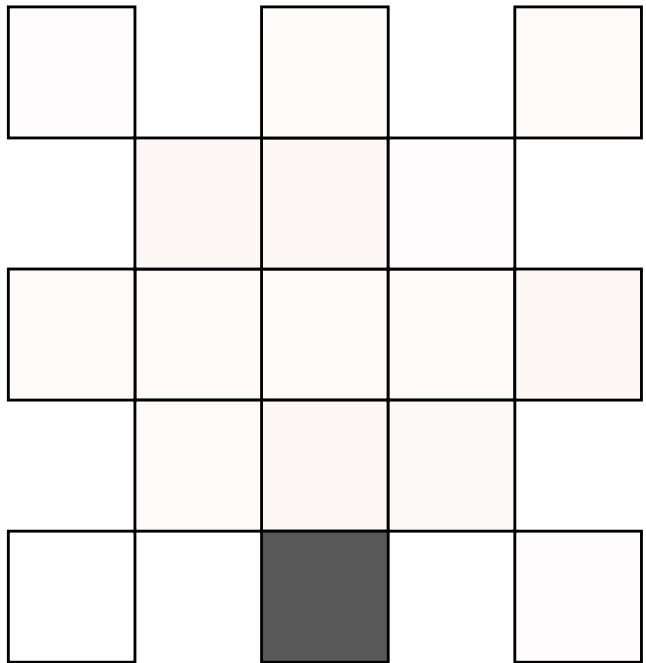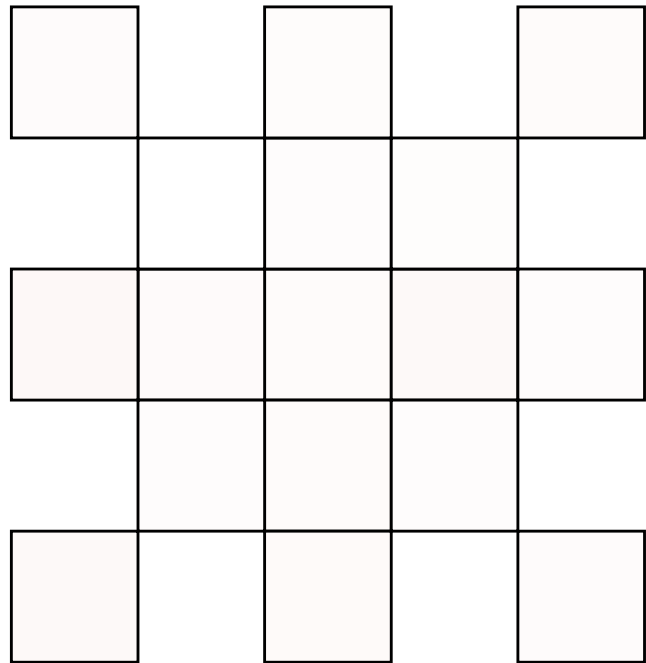

13-97072497-C-T

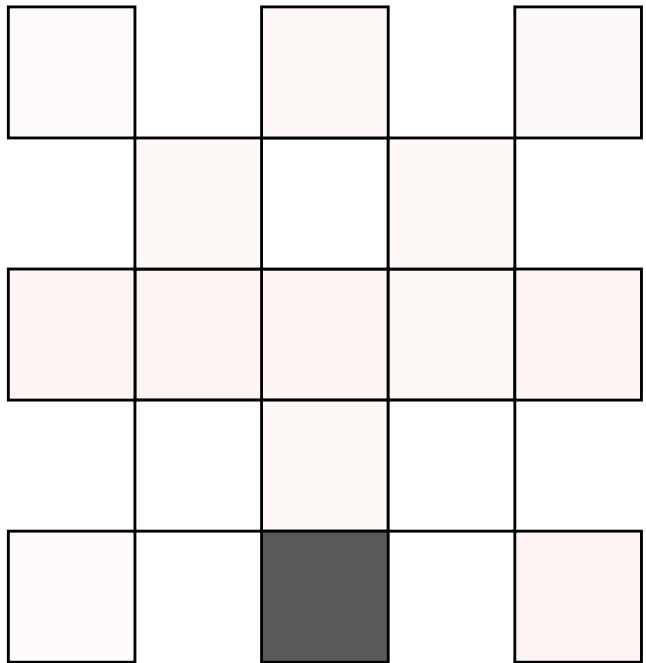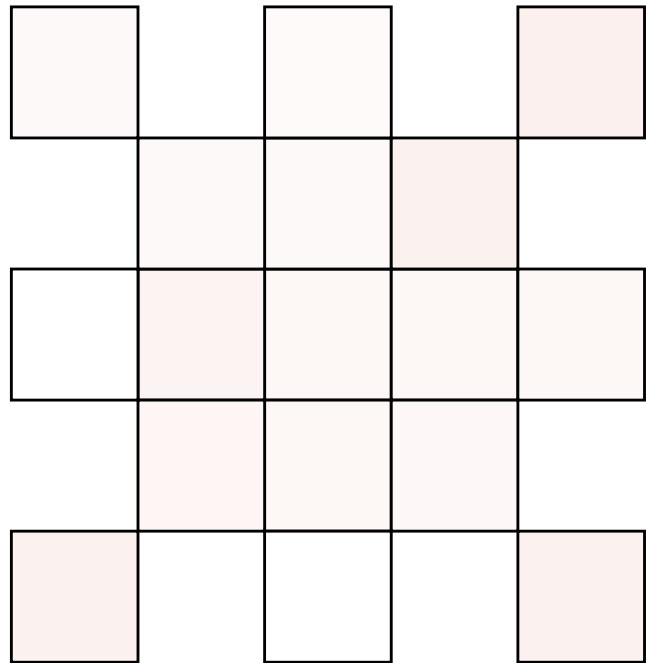

14-100590107-C-T

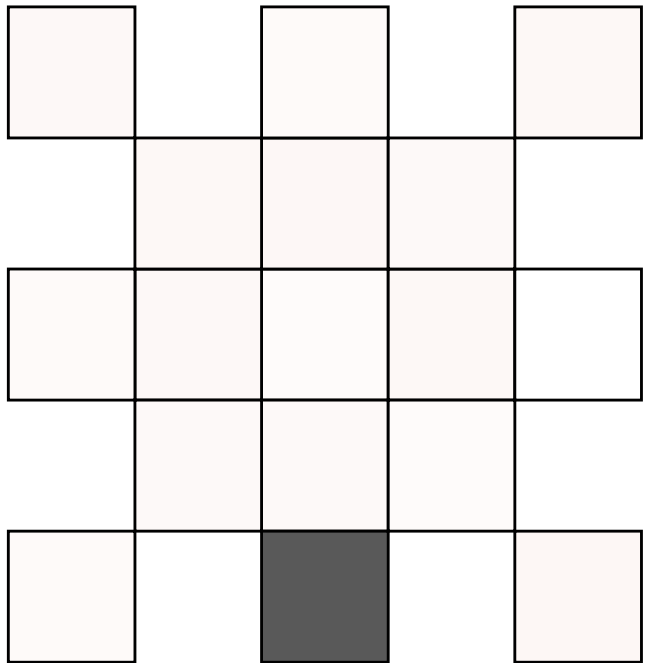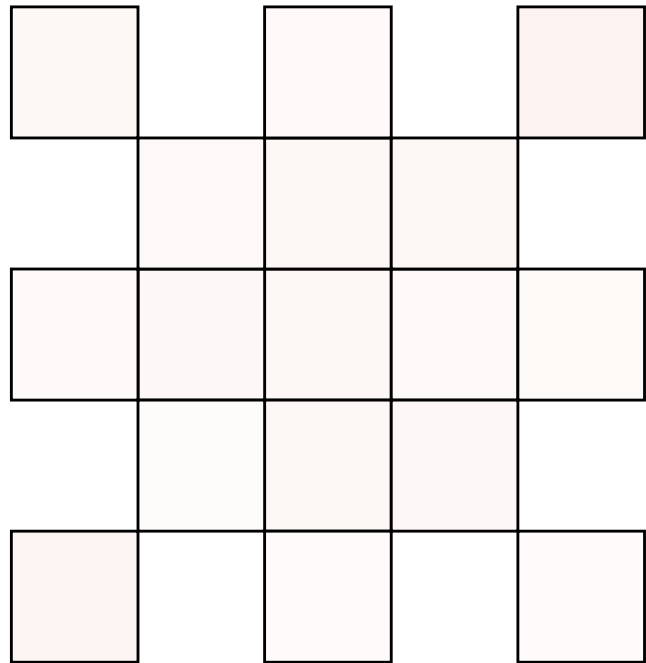

14-25316209-C-A

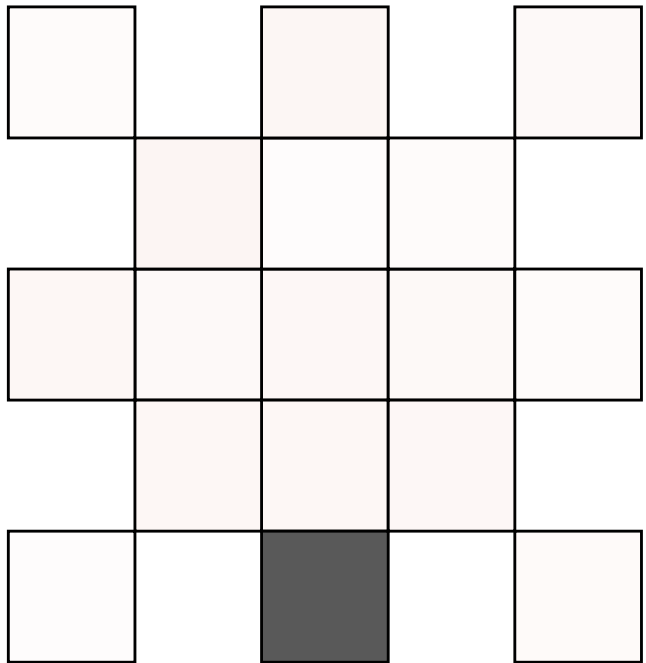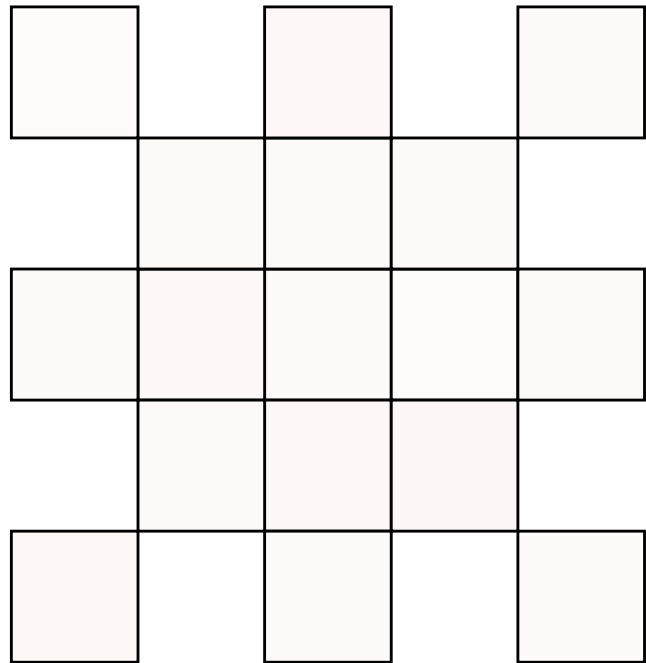

14-27412390-G-A

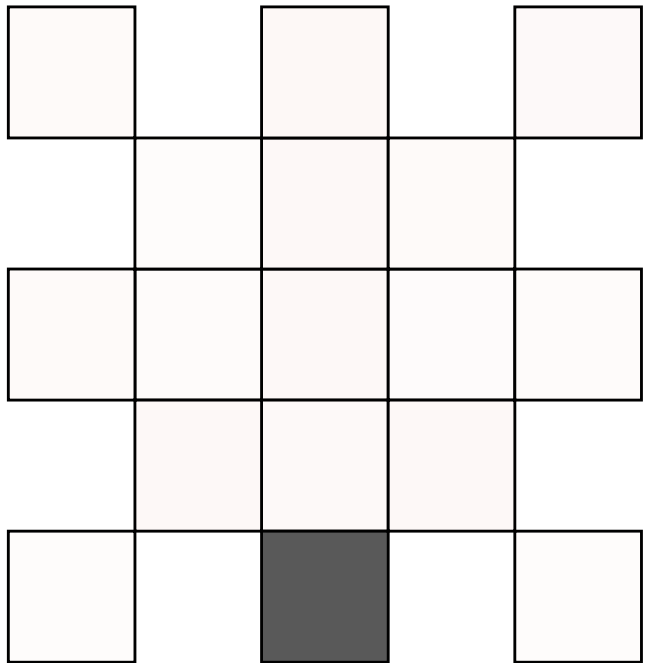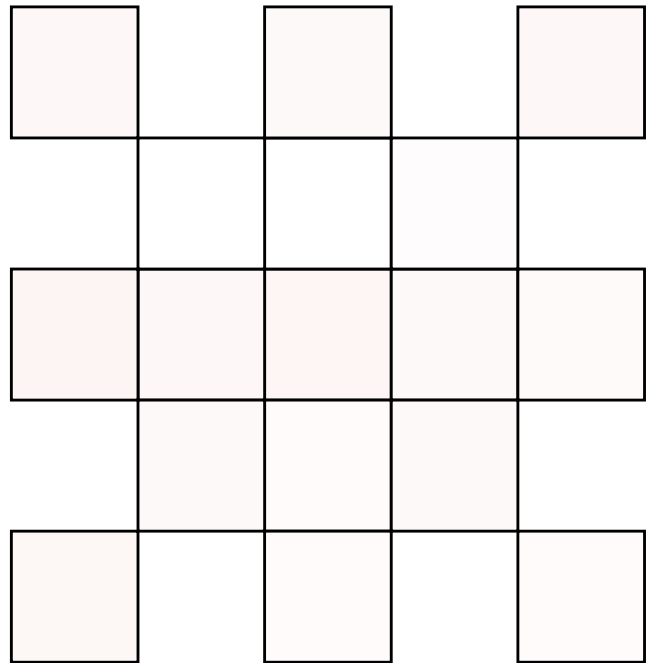

14-27649824-C-T

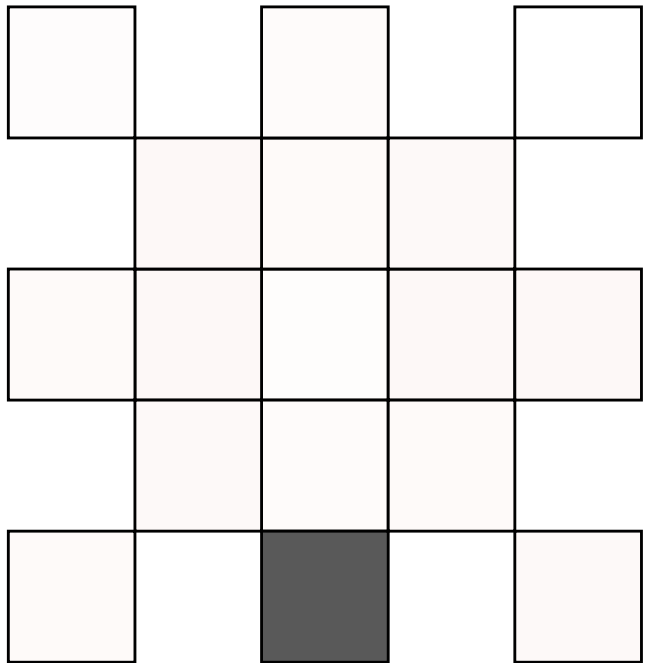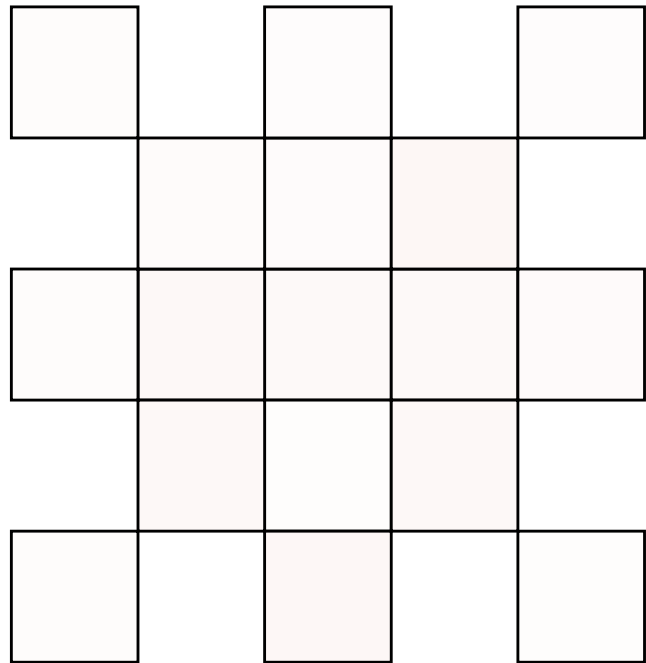

14-36924791-G-C

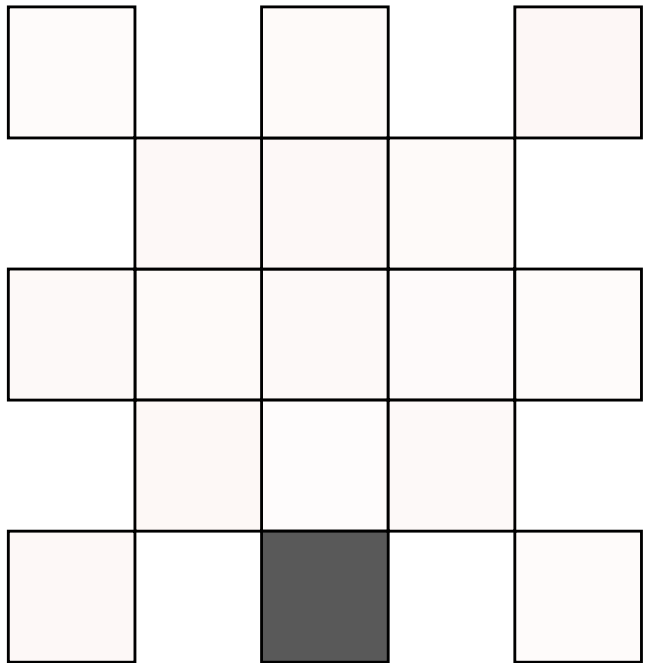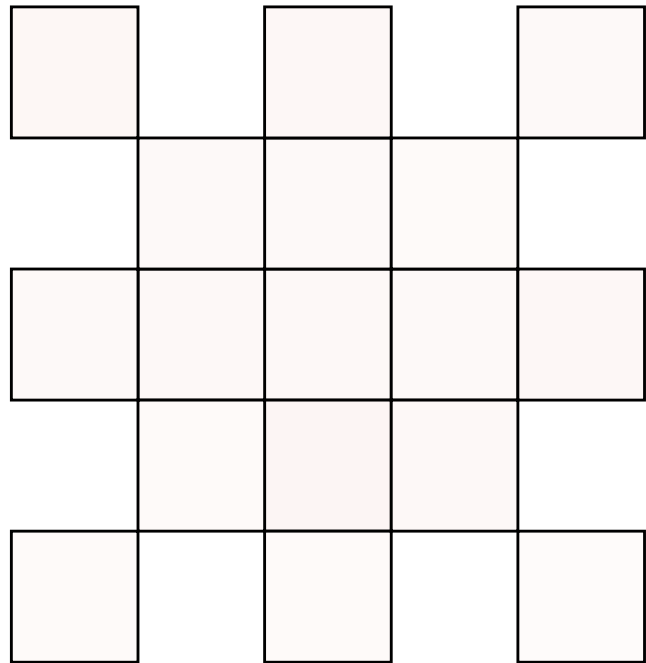

14-41027959-C-T

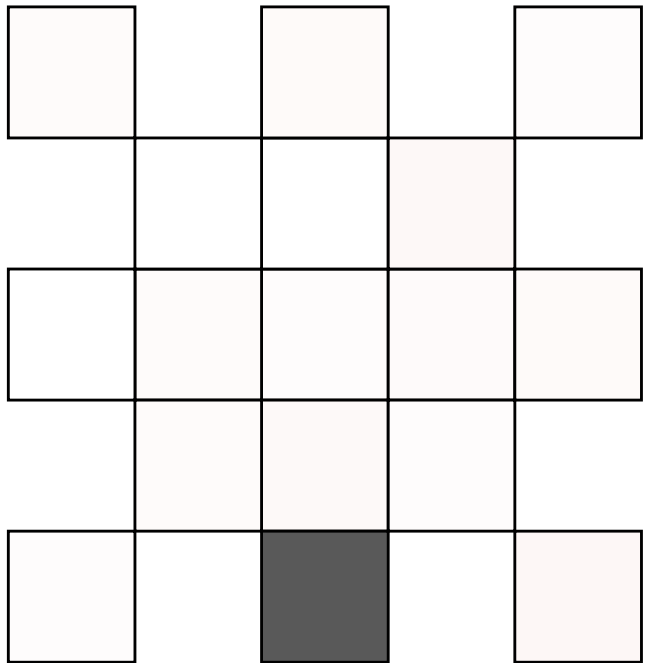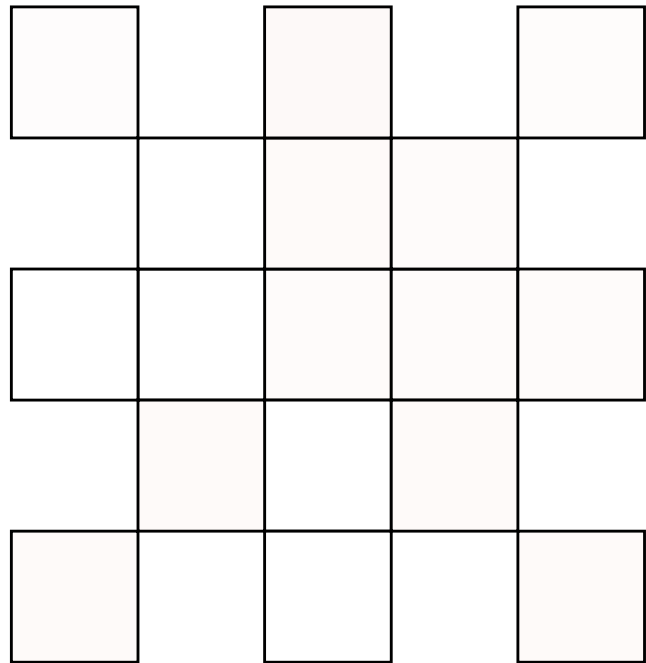



14-48152228-A-G

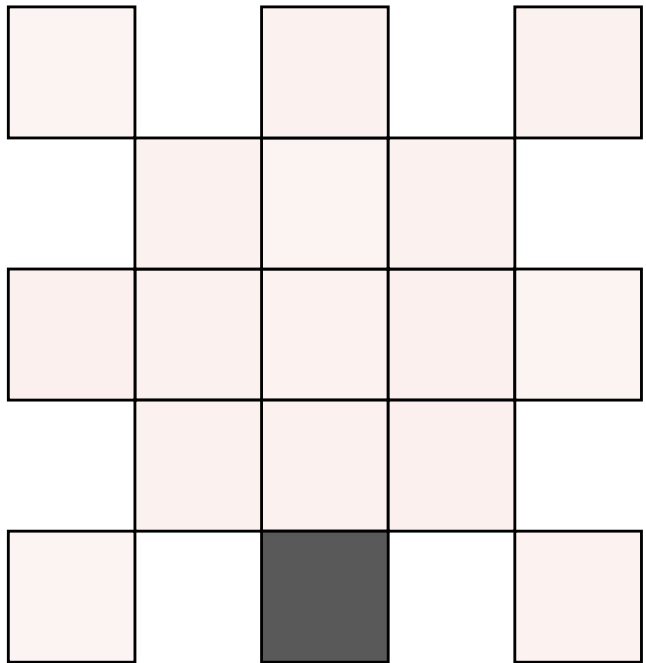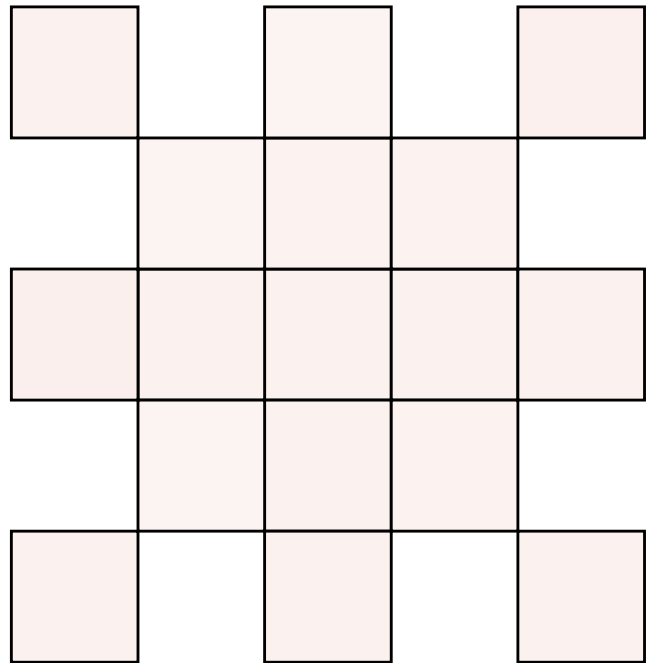

14-51478747-T-C

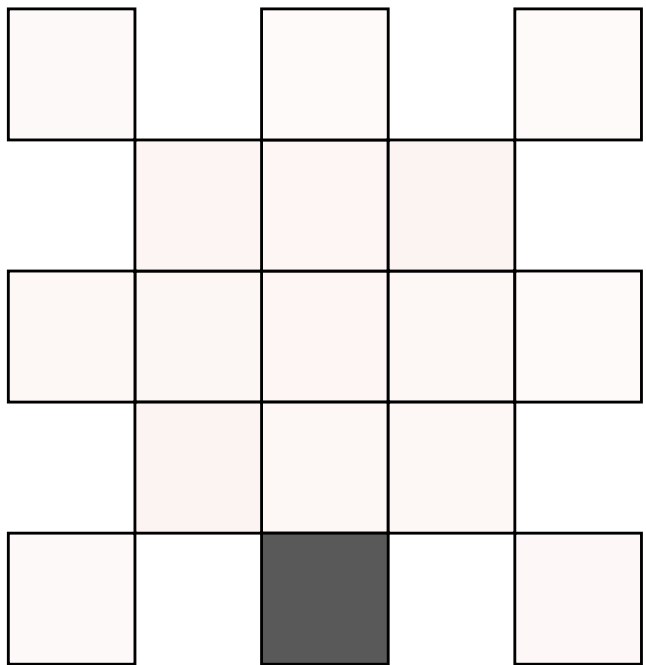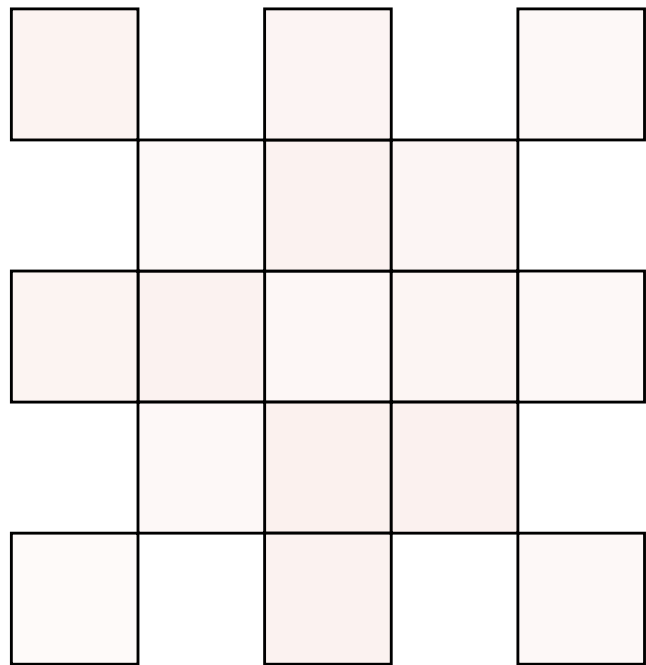

14-55887203-A-G

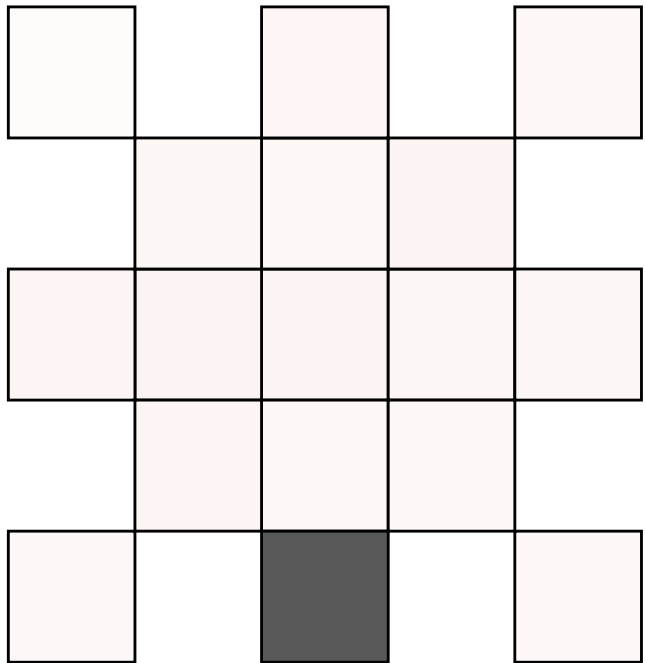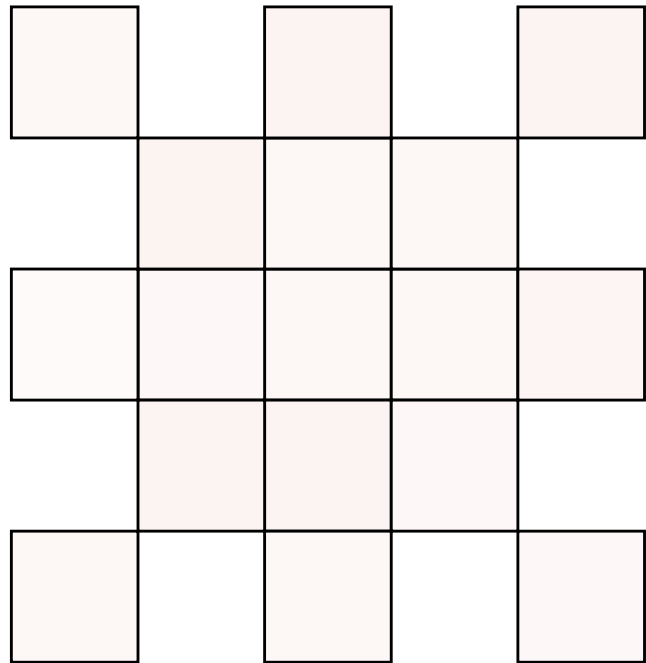

14-59827441-C-T

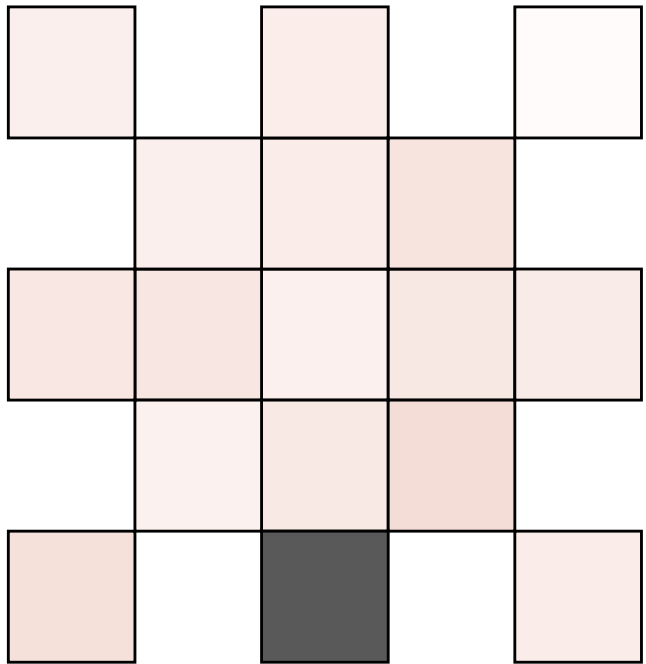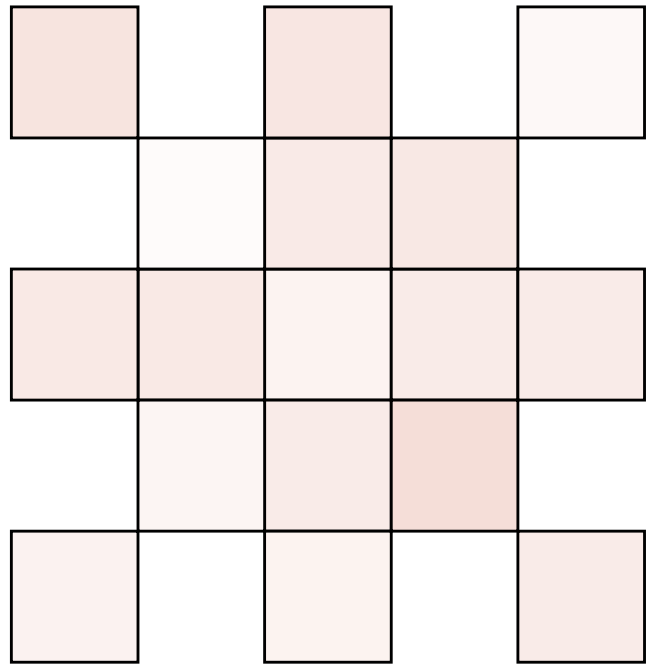

14-65264866-C-T

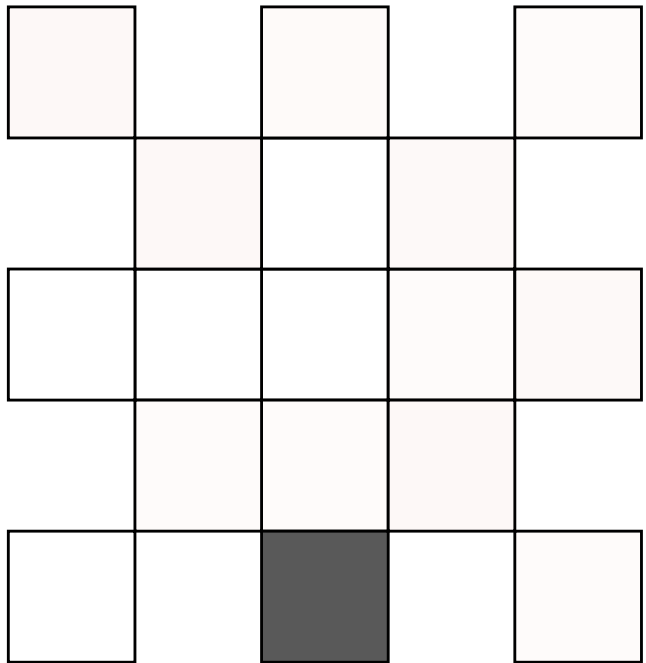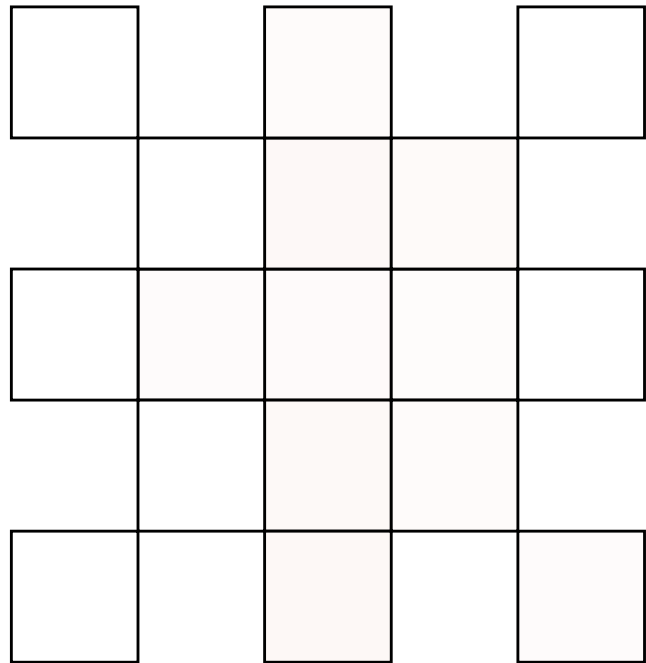

14-70538632-G-A

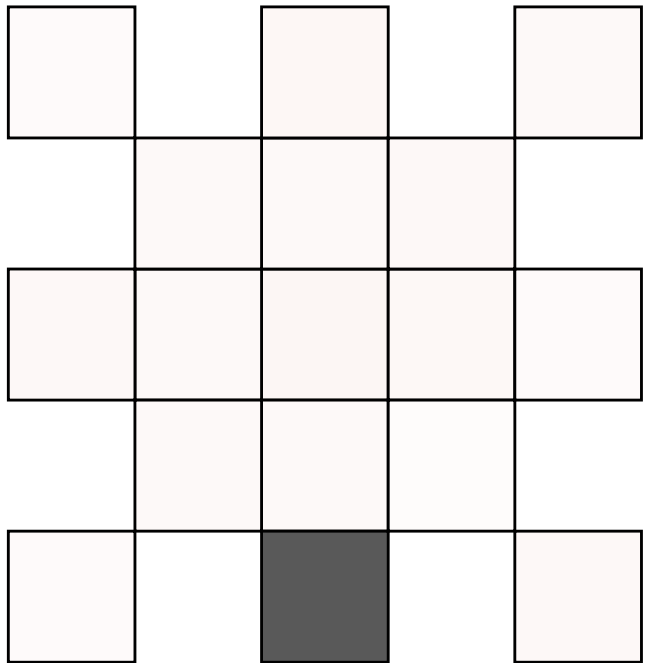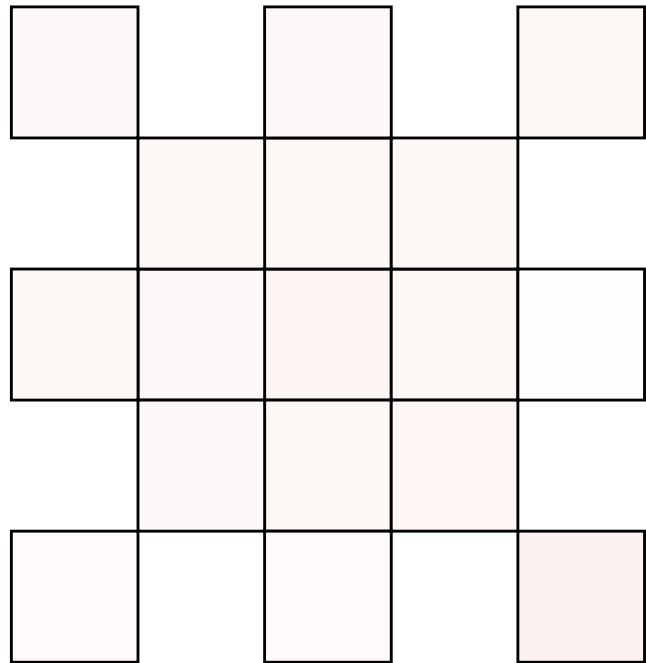

14-77126705-G-A

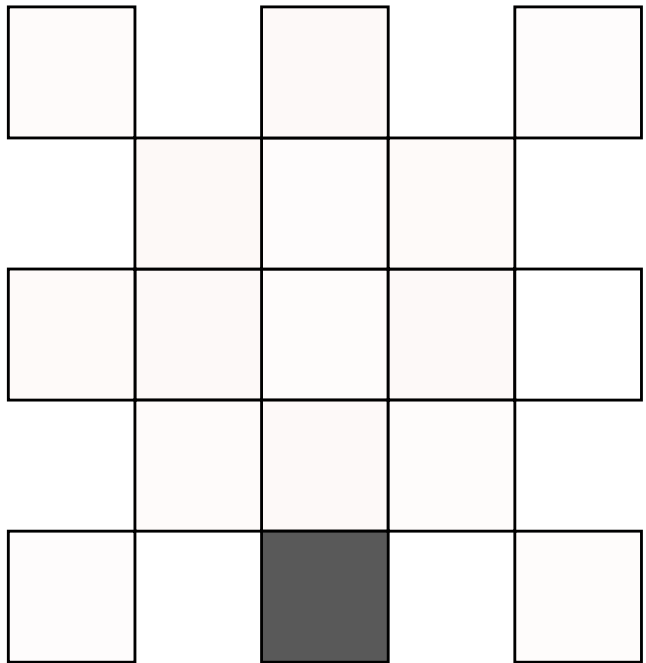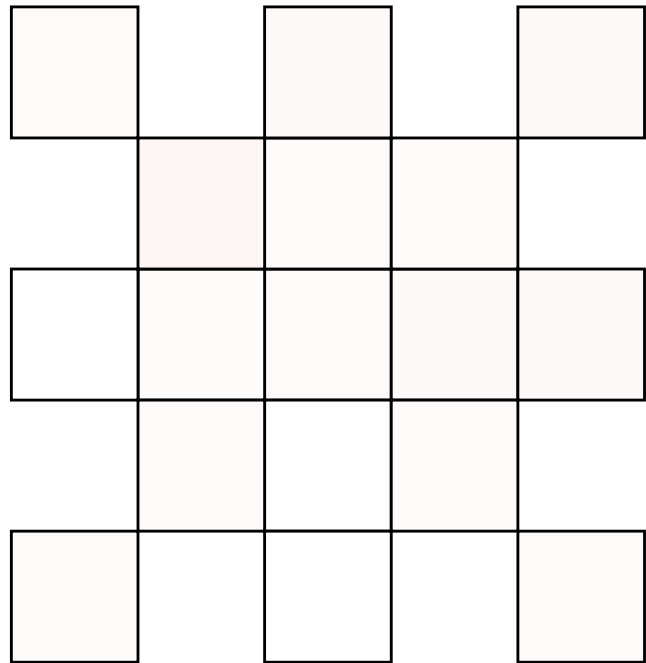

14-88471461-G-A

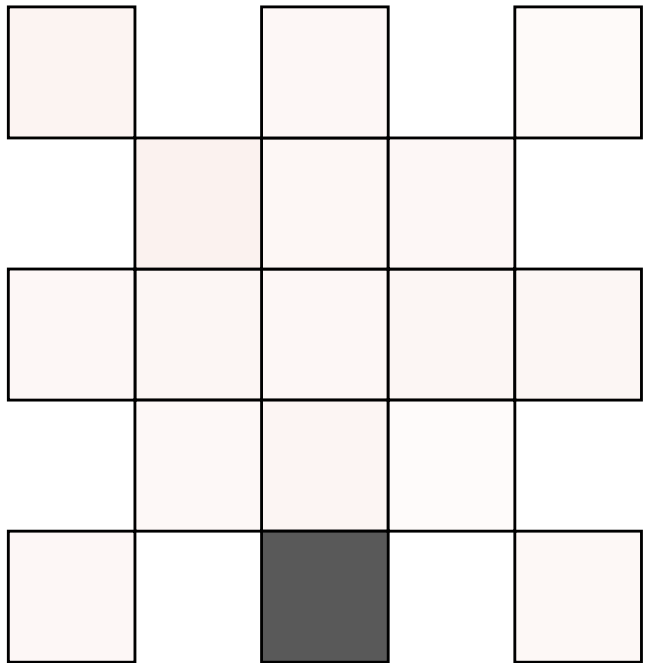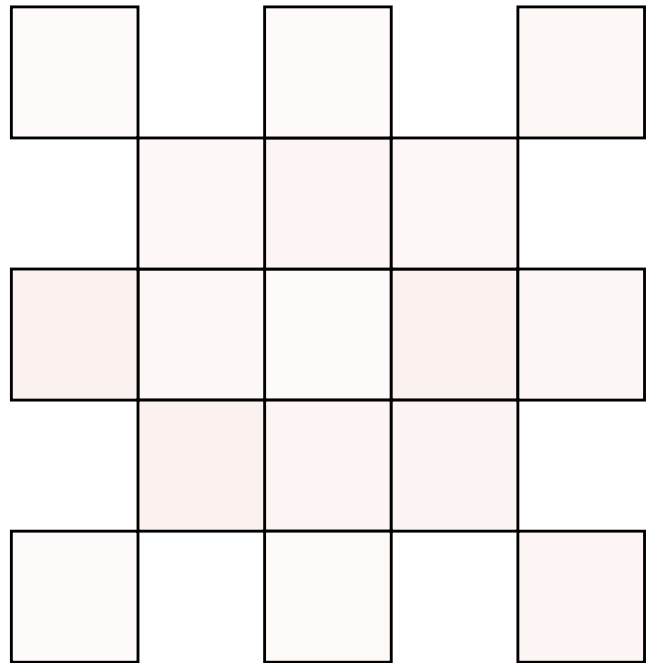



14-89375012-G-T

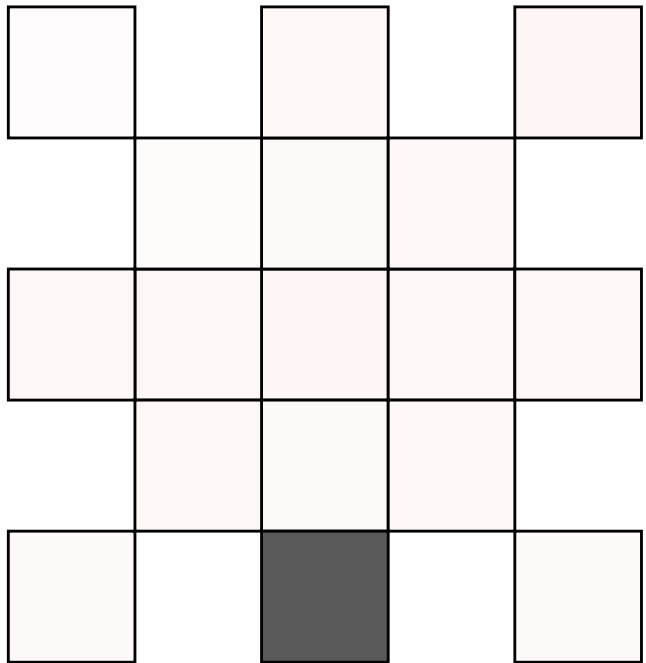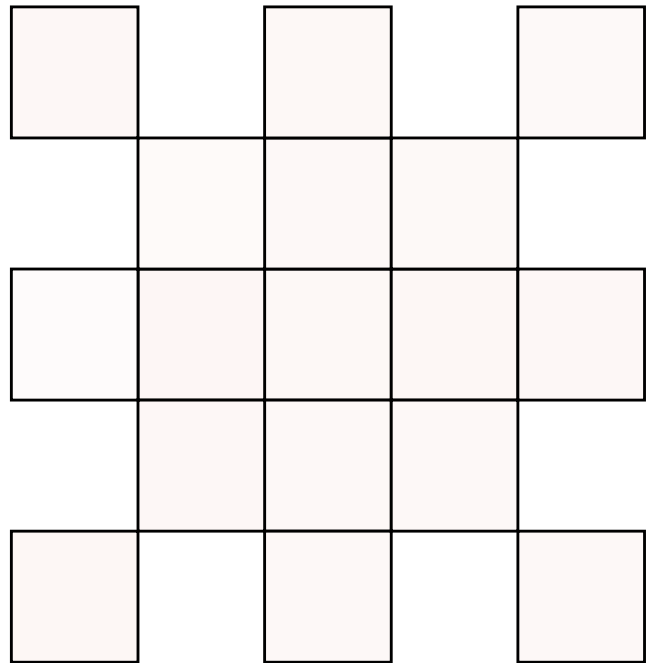

14-93813737-C-T

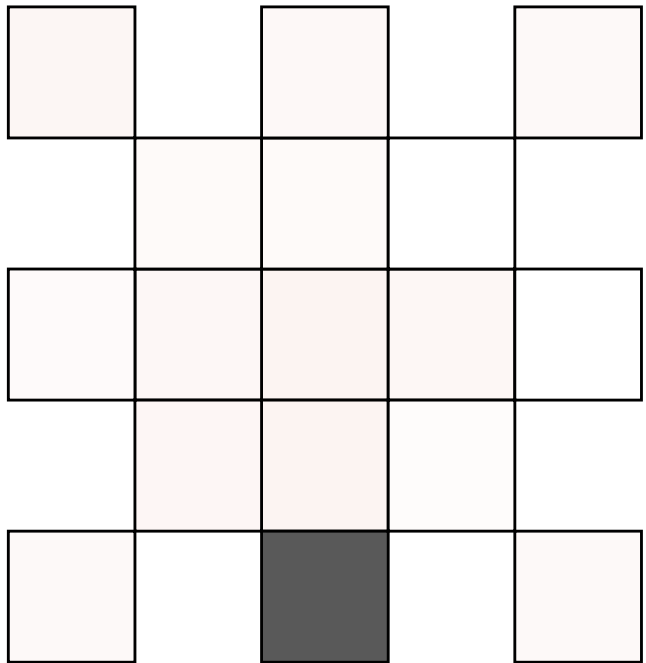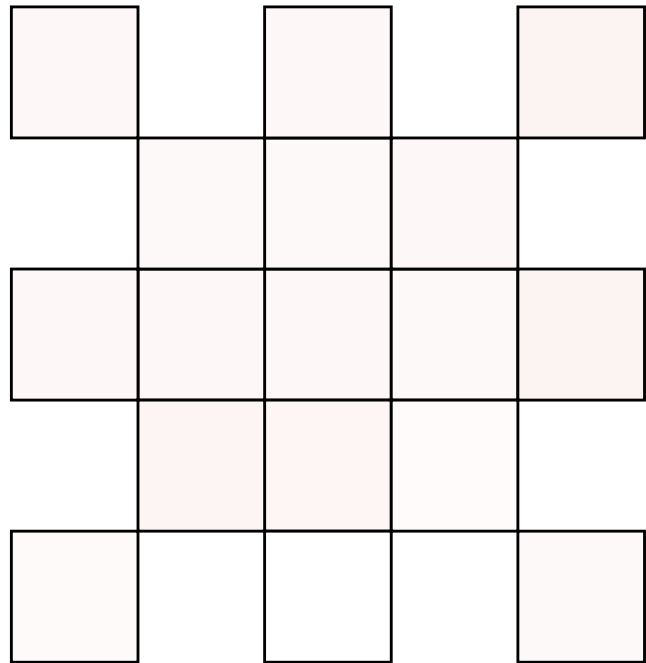

14-98759945-G-T

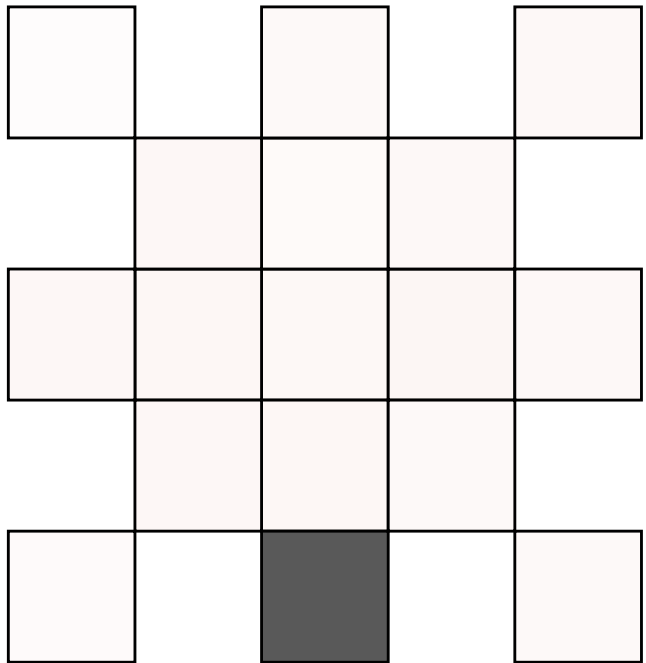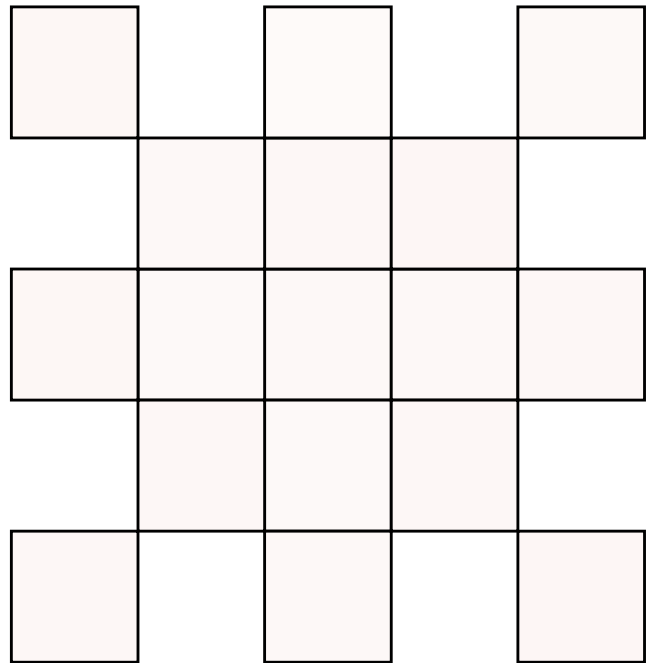

15-26356007-C-T

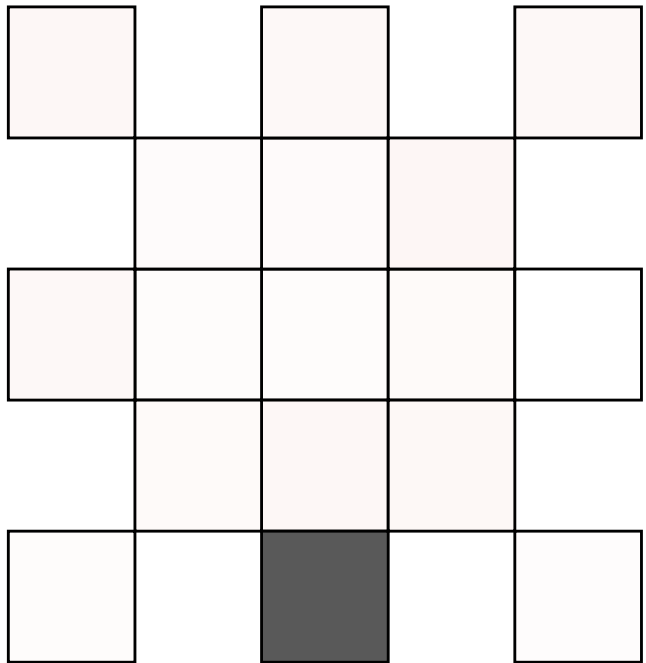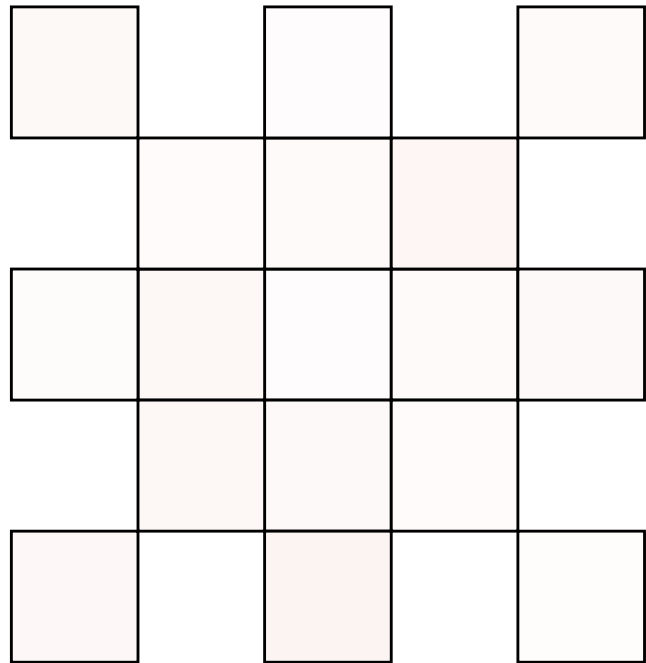

15-27301889-G-A

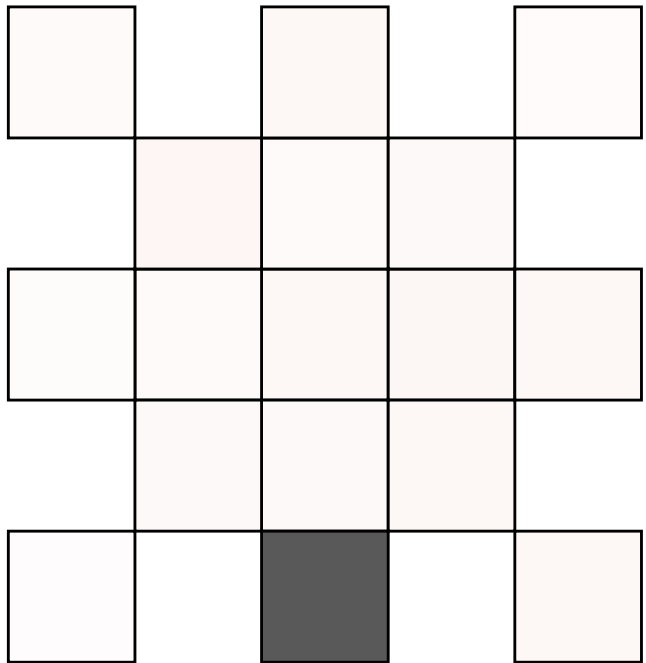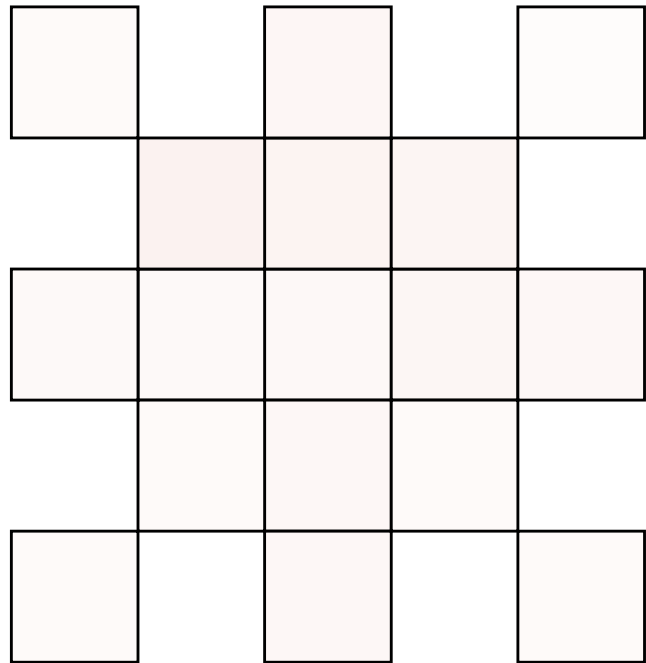

15-40429032-G-A

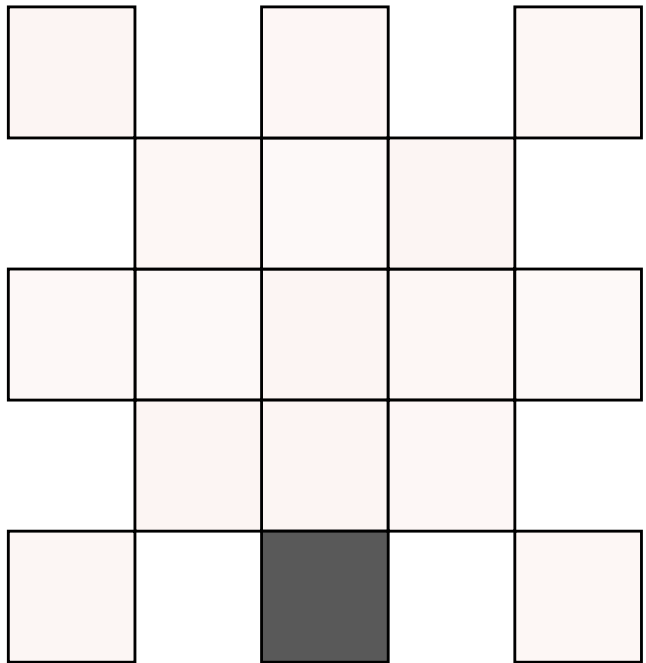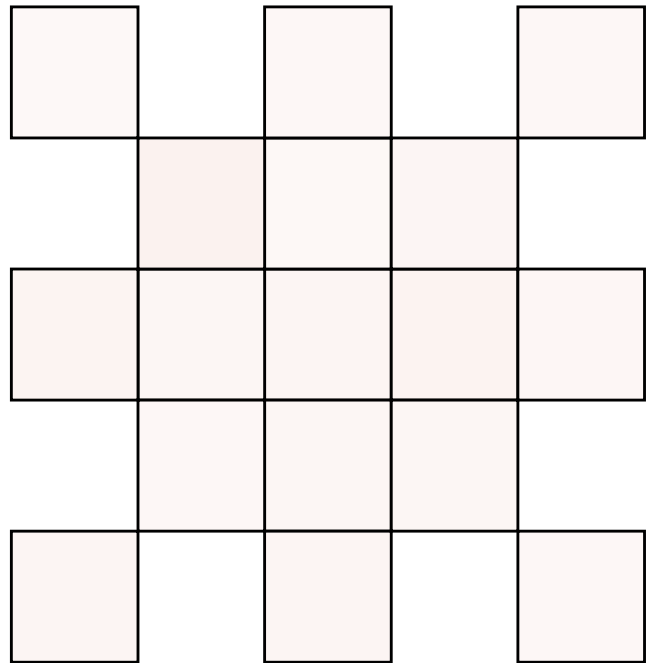

15-46932376-G-A

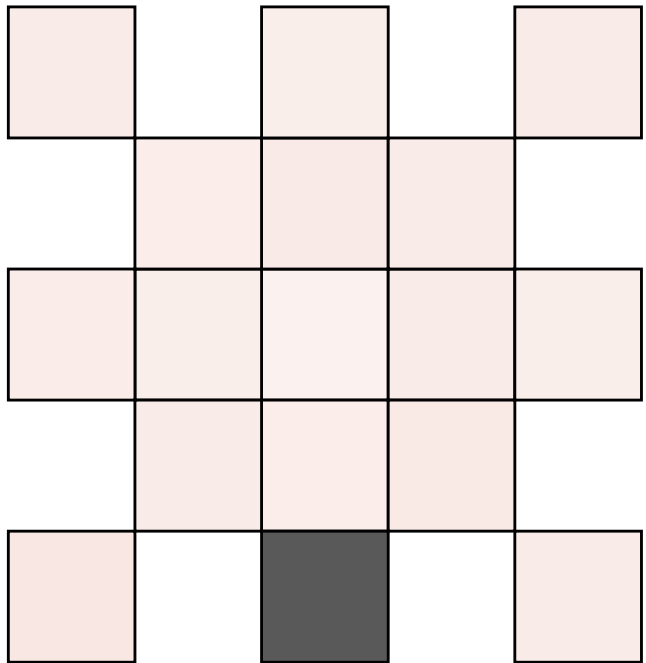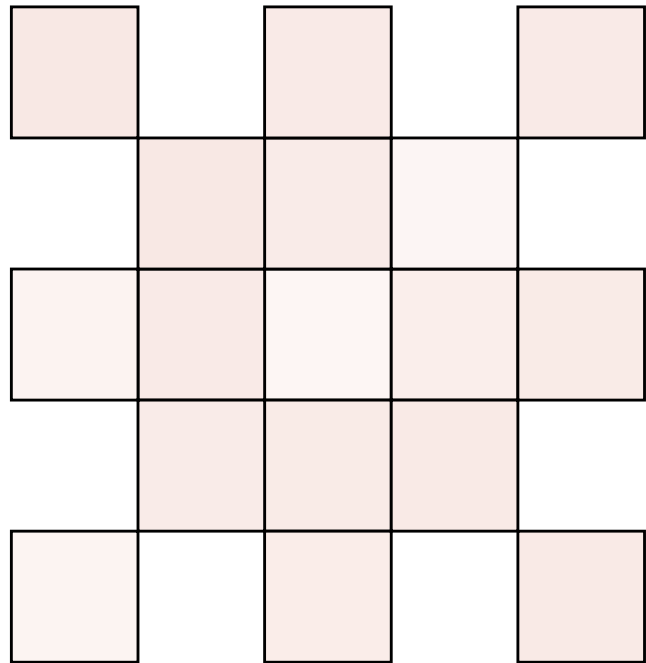

15-46962188-T-A

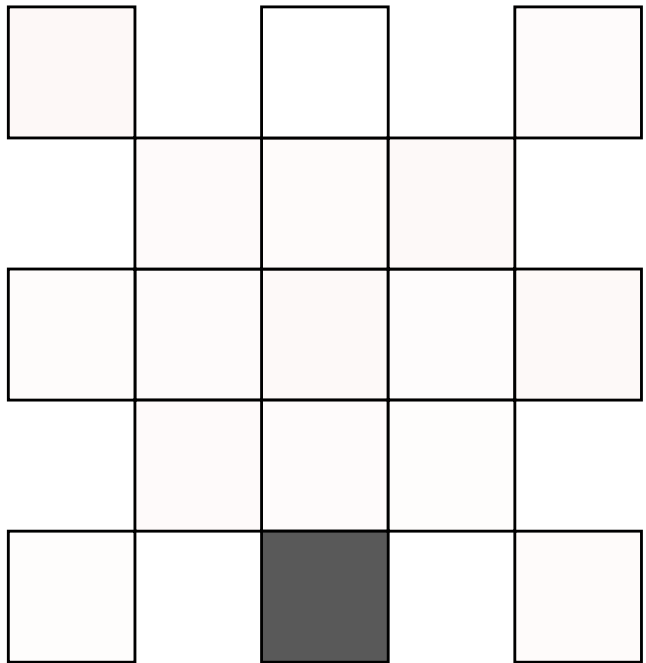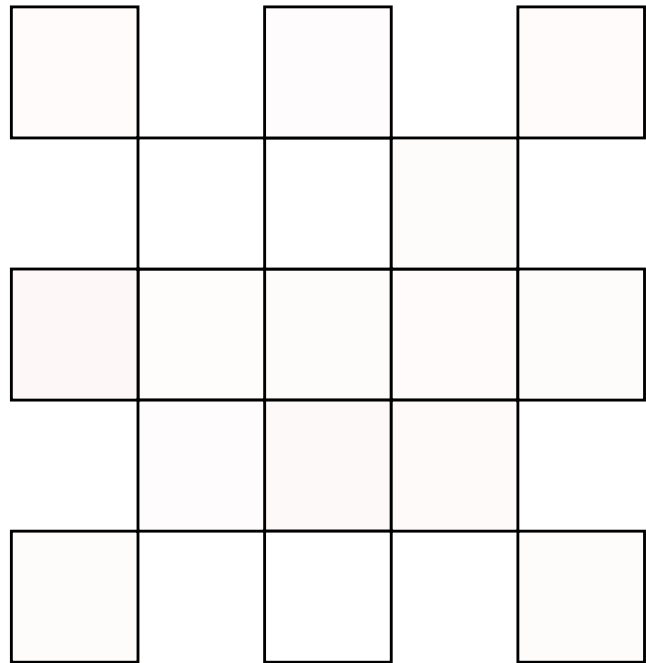



15-51489592-C-T

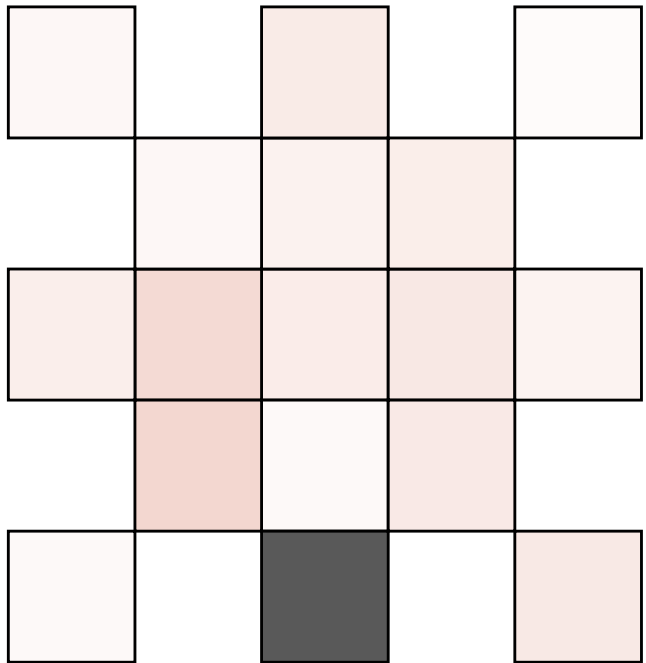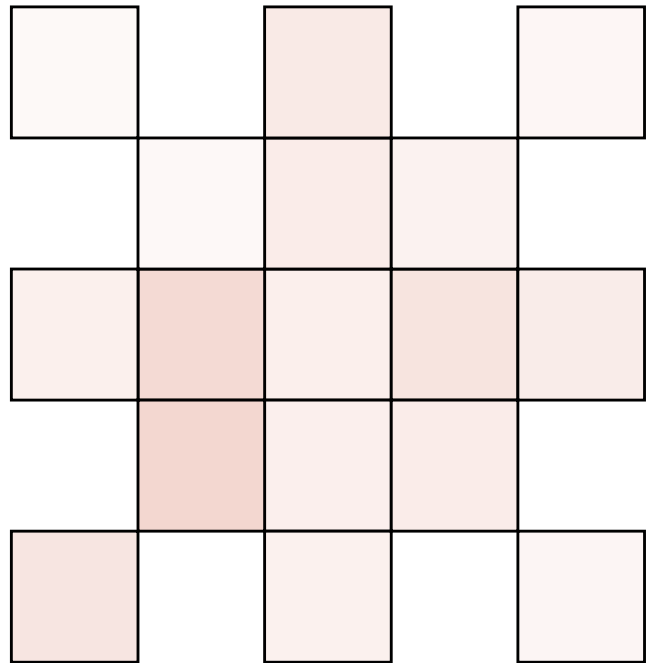

15-53985651-C-T

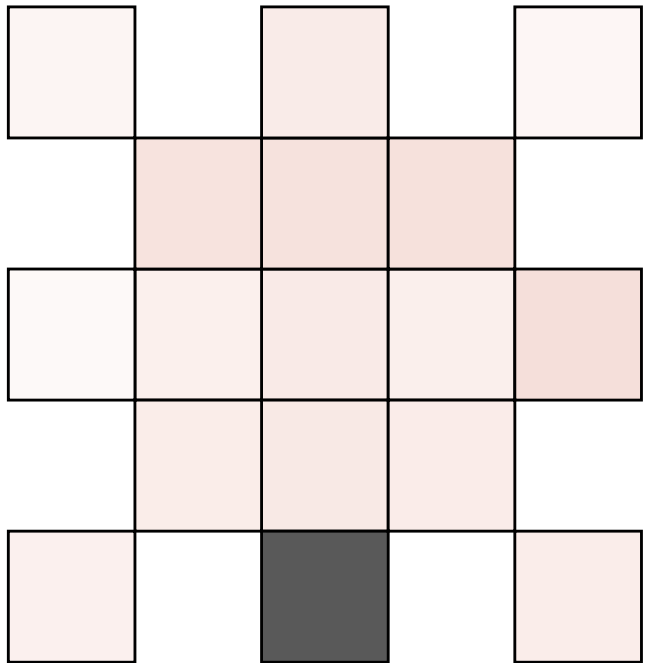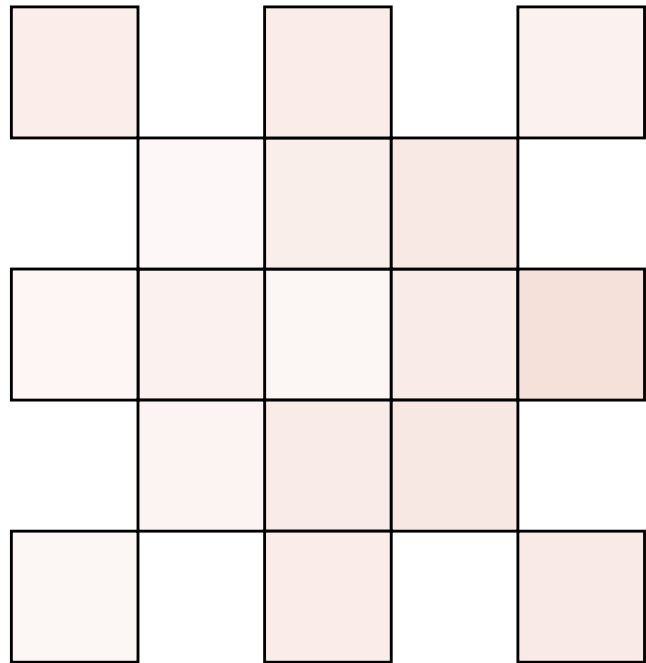

15-60164292-C-T

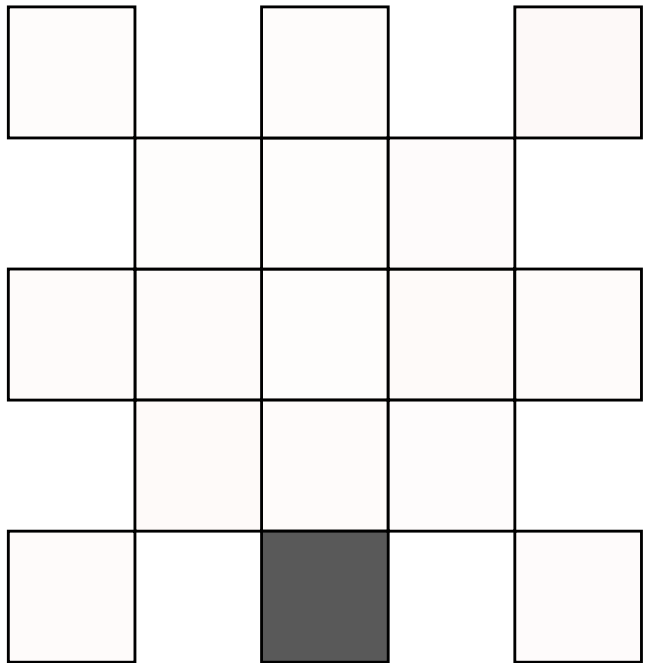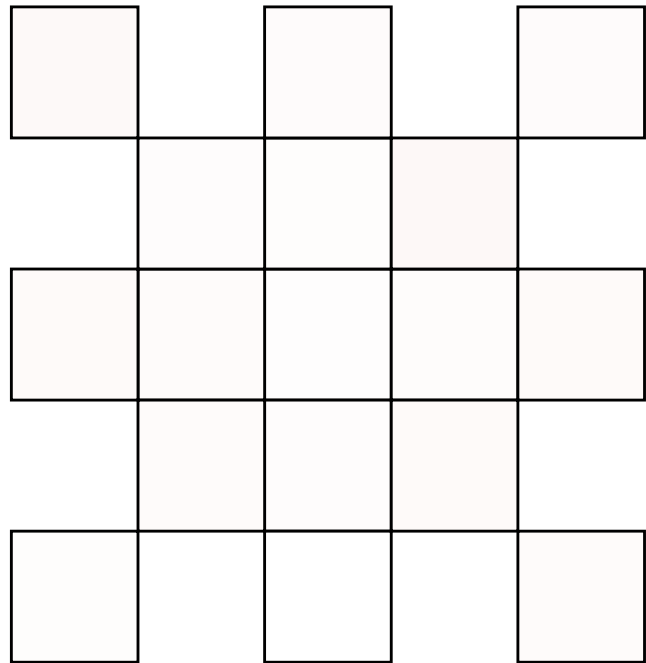

15-68132566-T-C

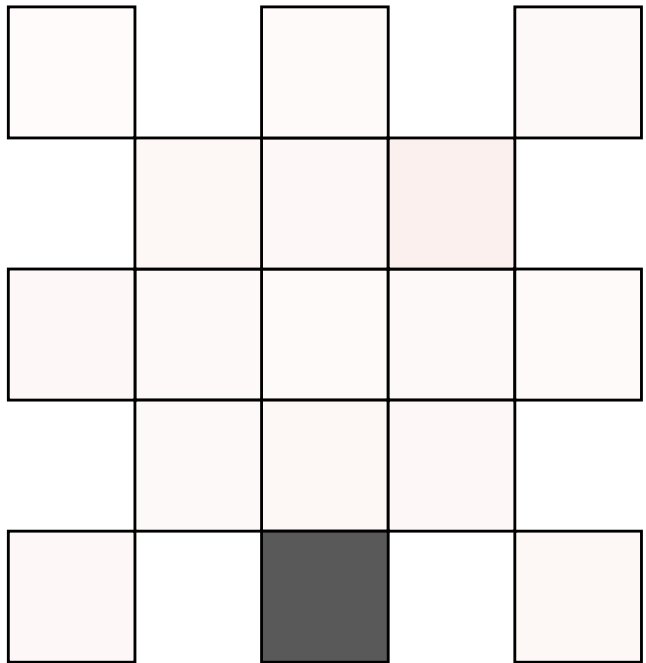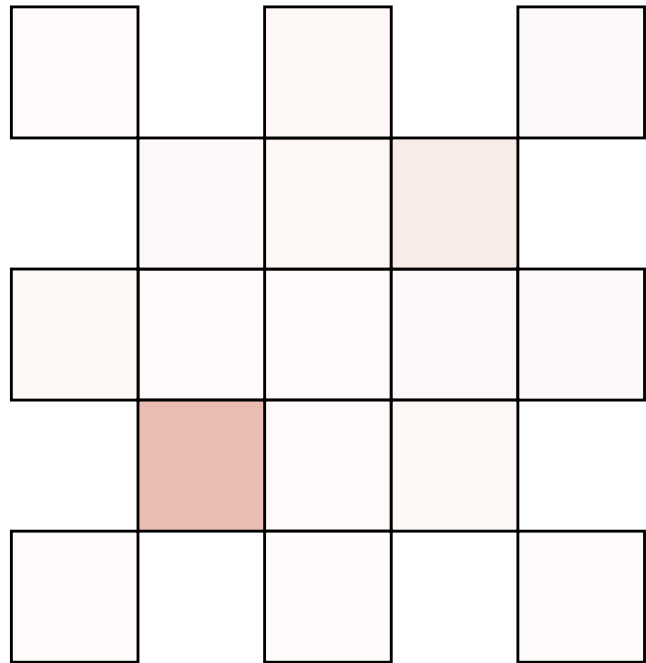

15-81097594-T-A

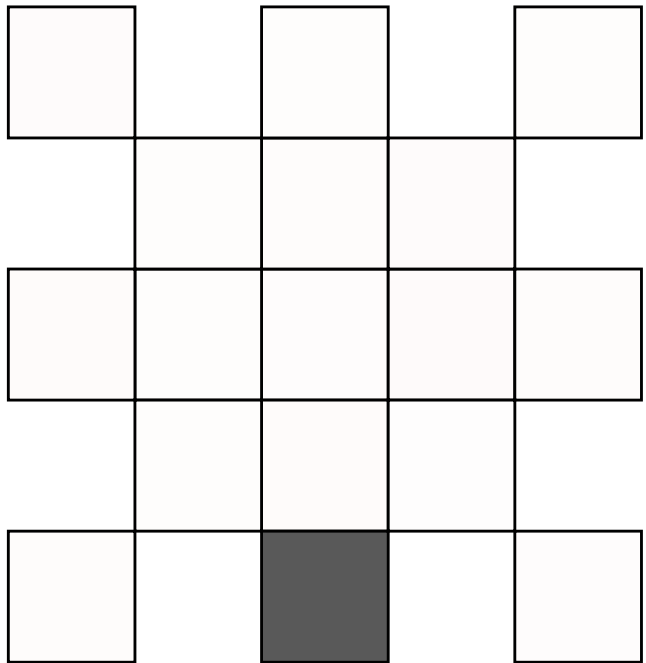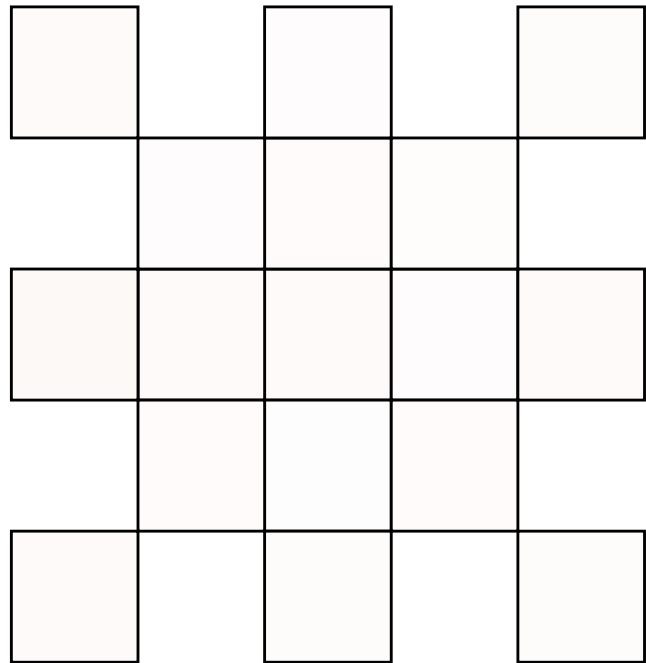

15-82103153-G-A

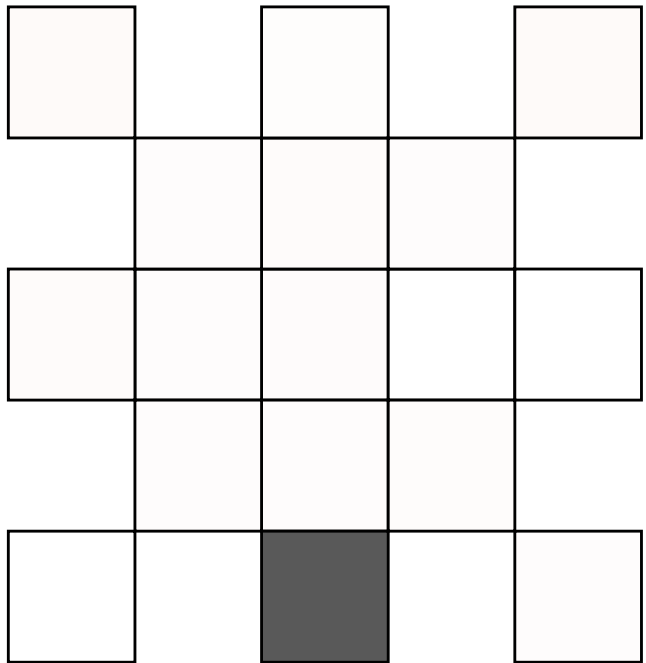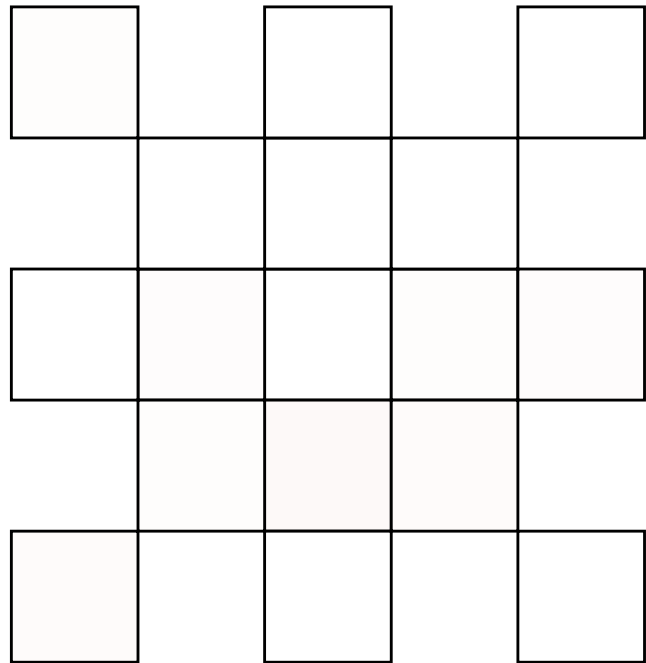

15-89449716-CT-C

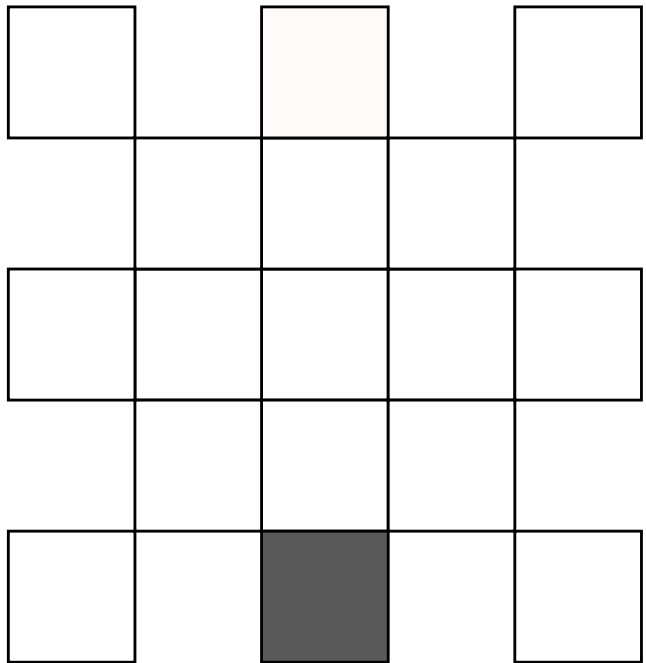

15-92865289-G-A

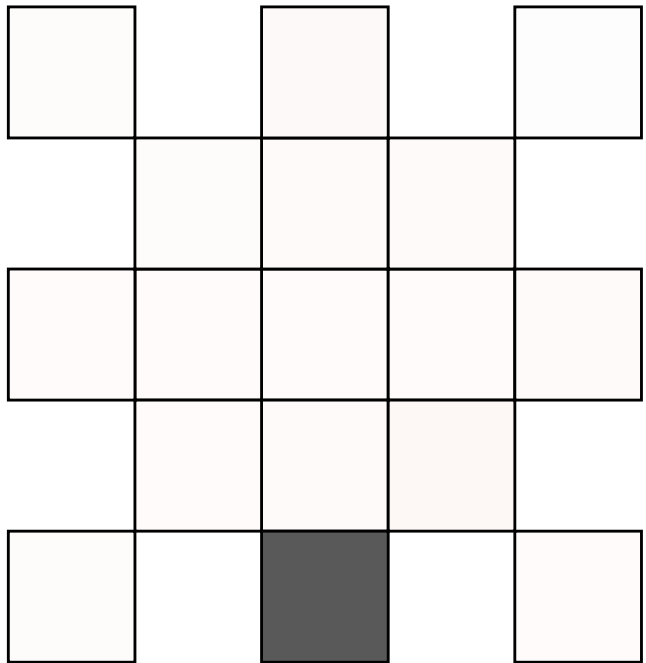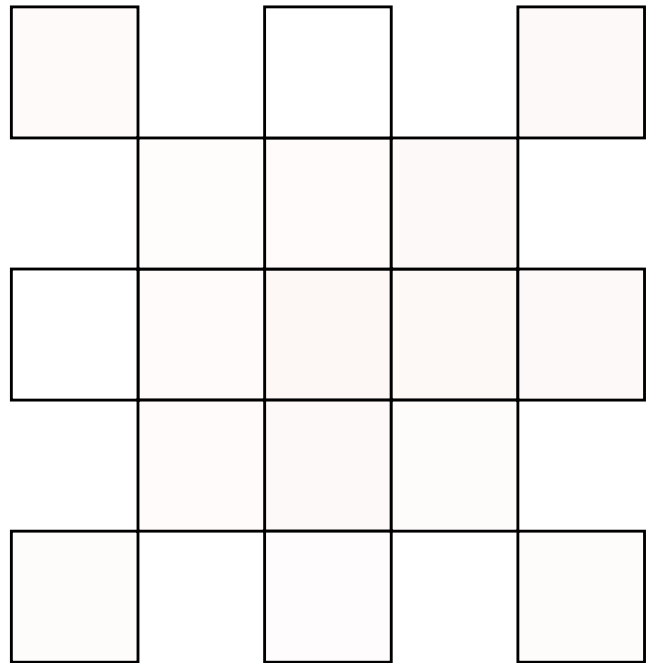



15-94903736-C-T

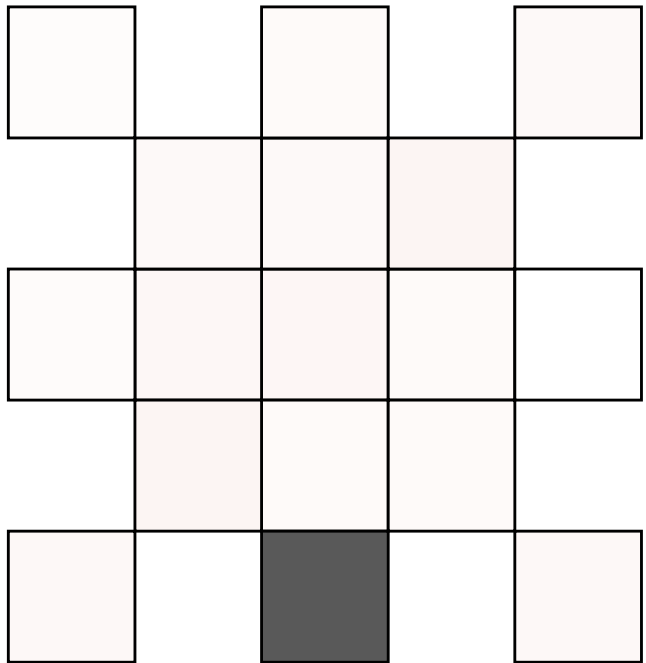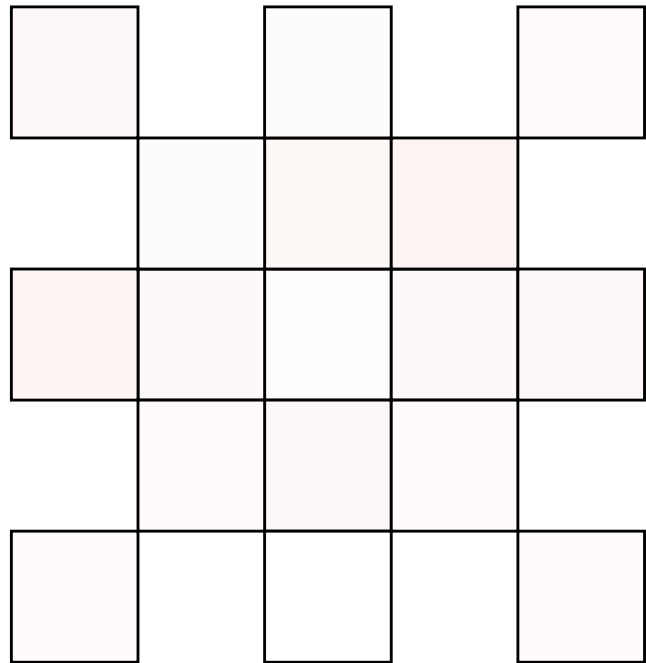

15-95374715-A-T

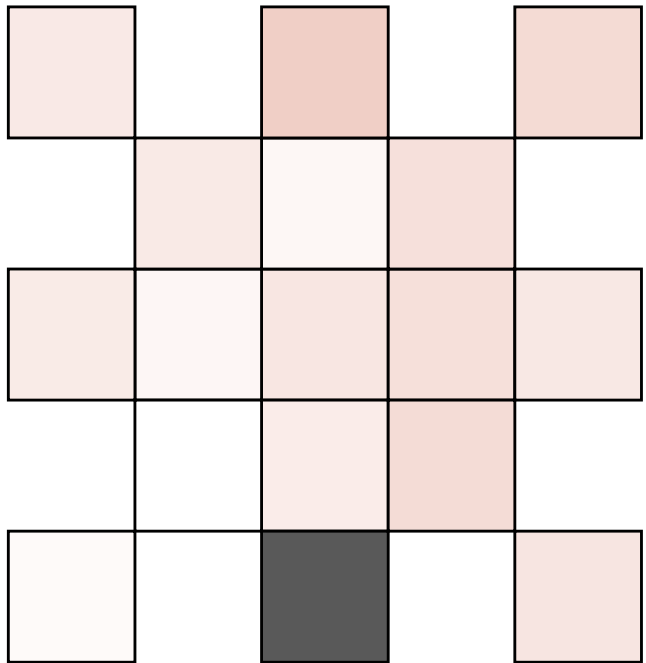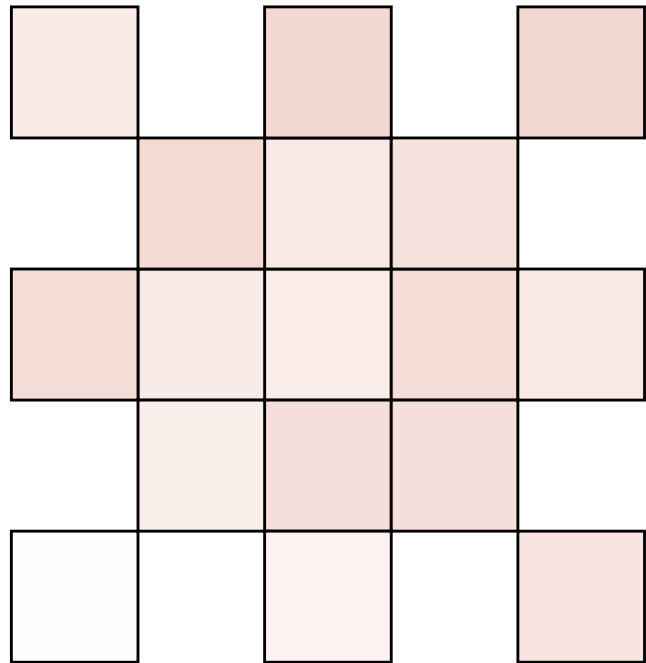

15-95789506-C-T

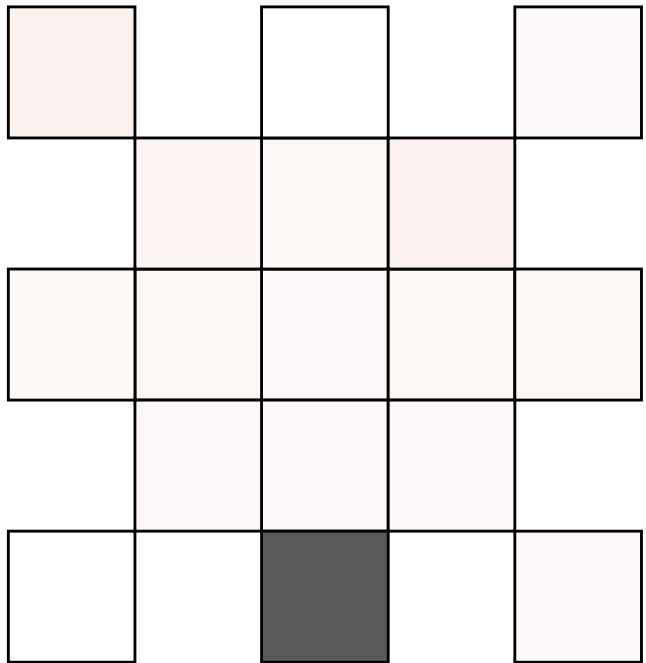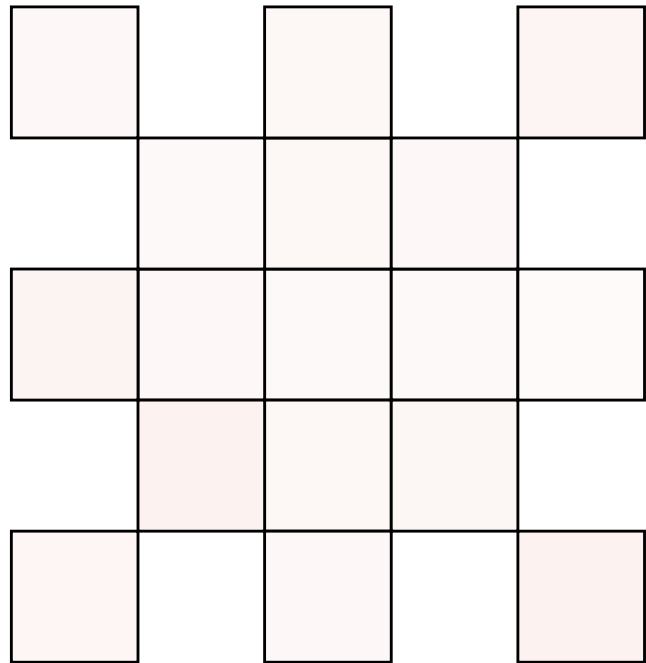

15-95947987-C-G

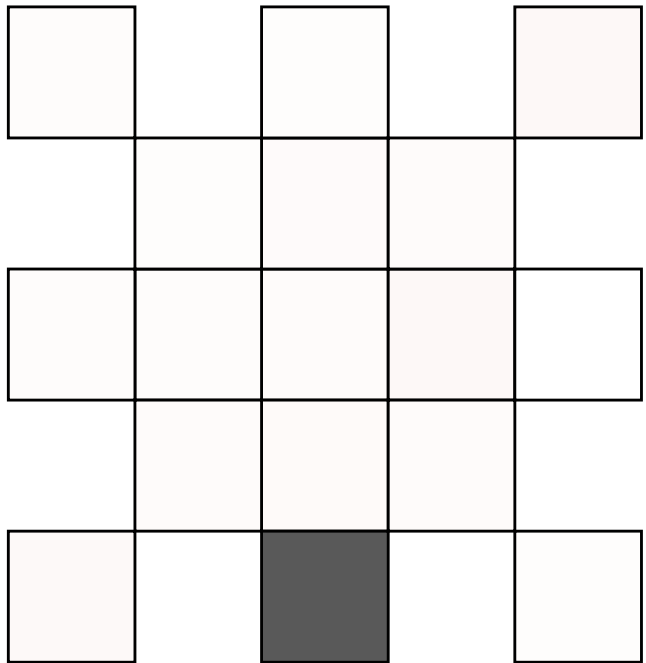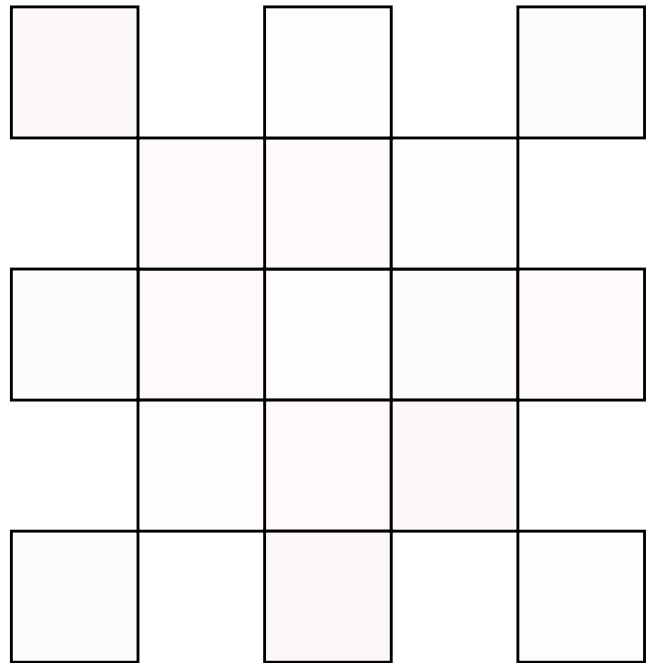

16-22921756-C-A

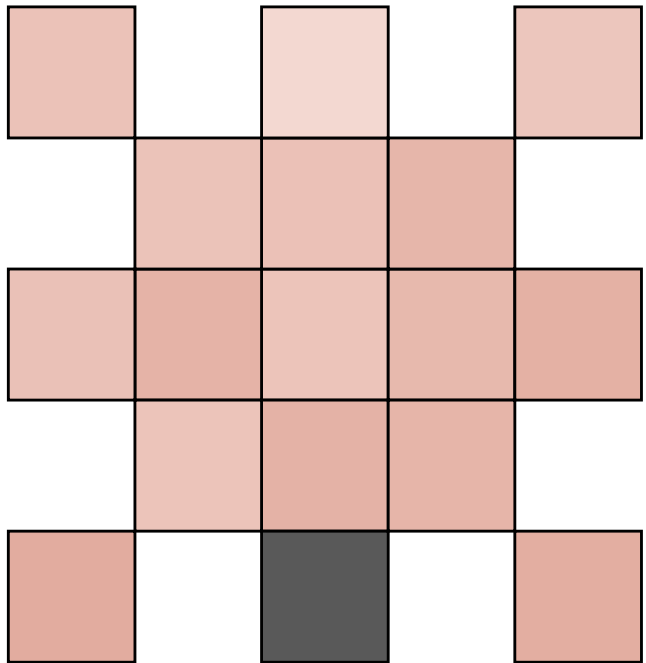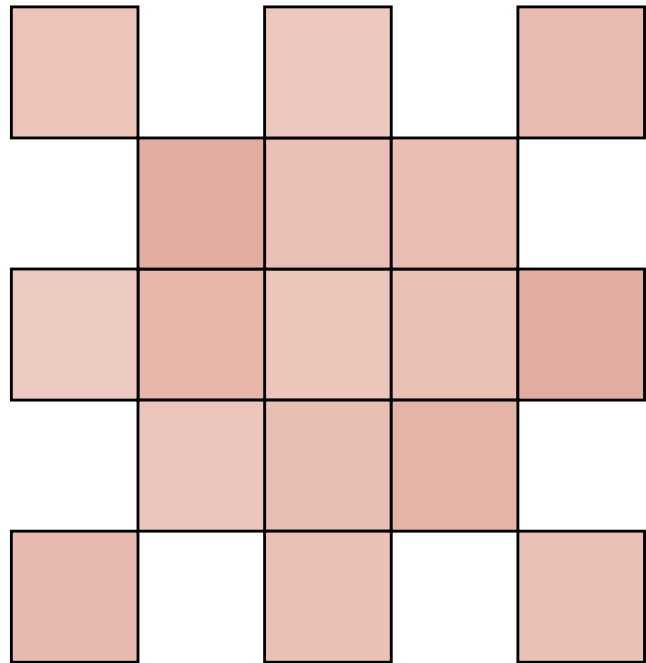

16-24164513-T-C

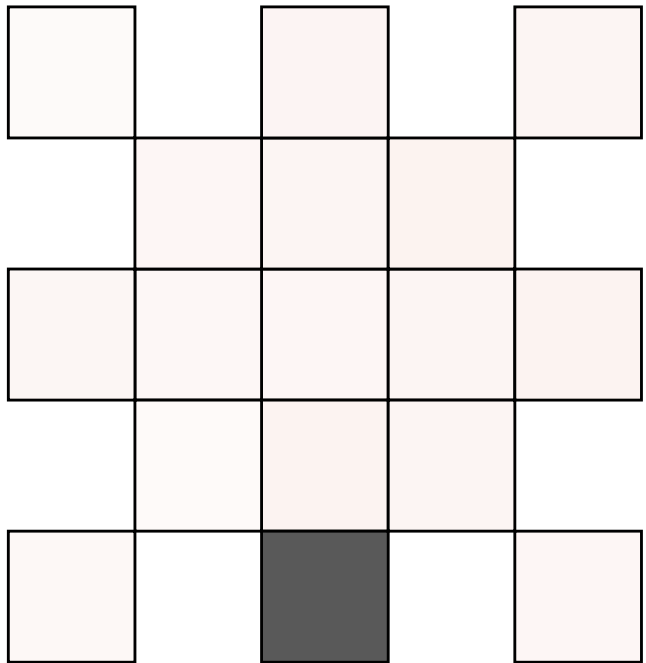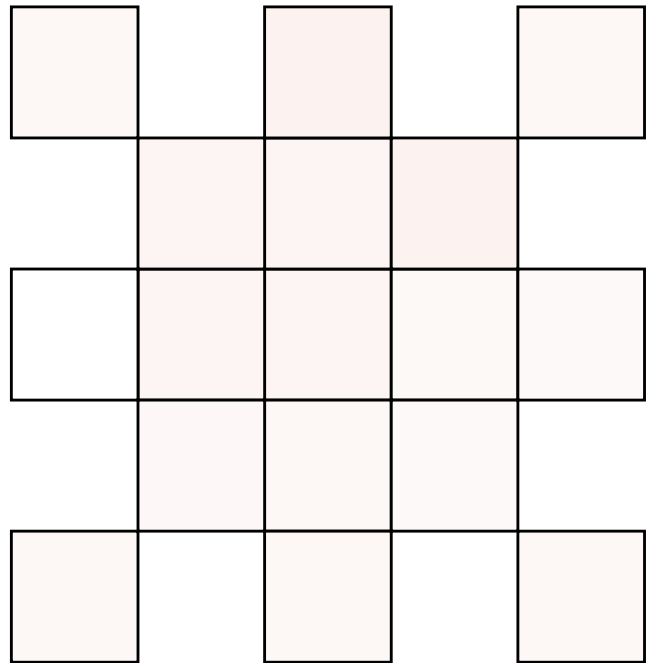

16-4649206-C-T

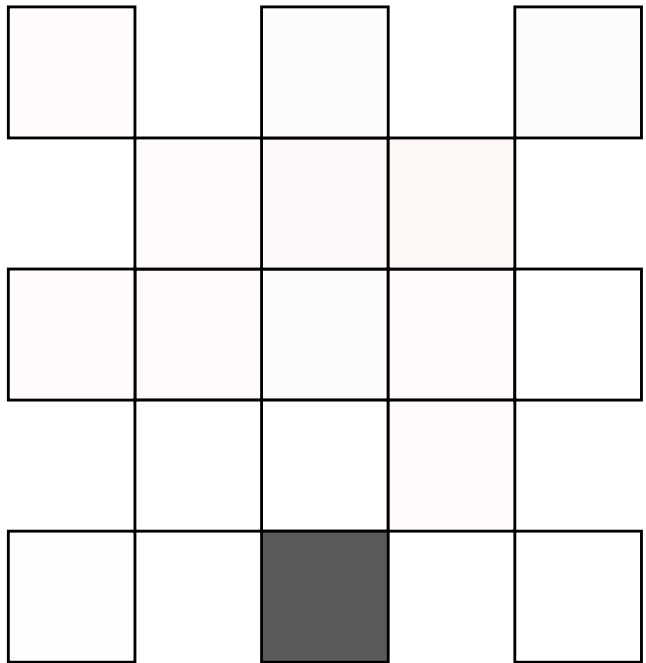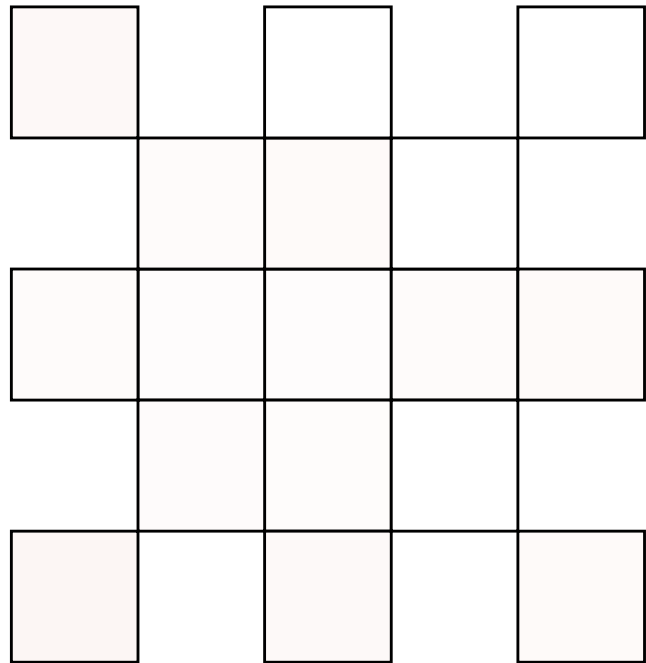

16-47975657-G-A

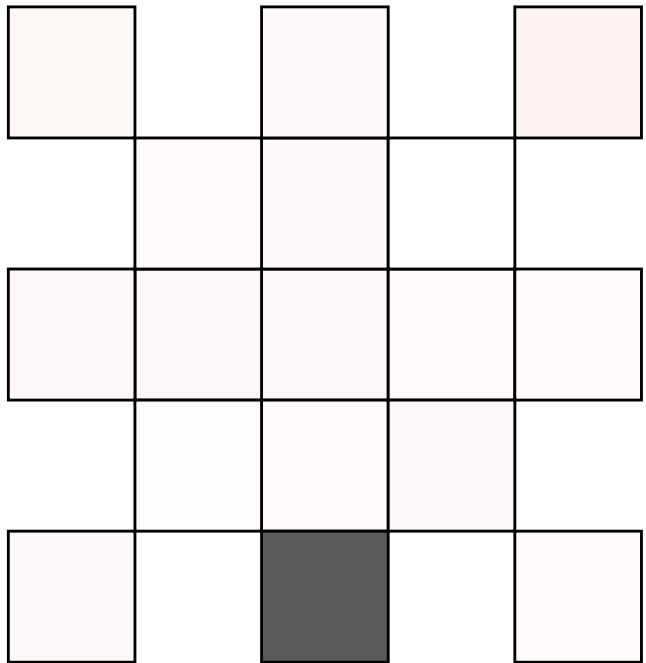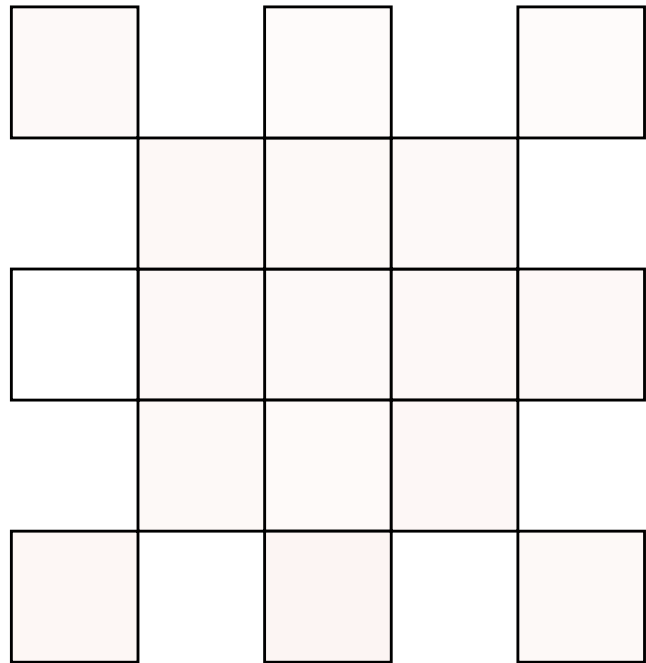



16-53451083-T-A

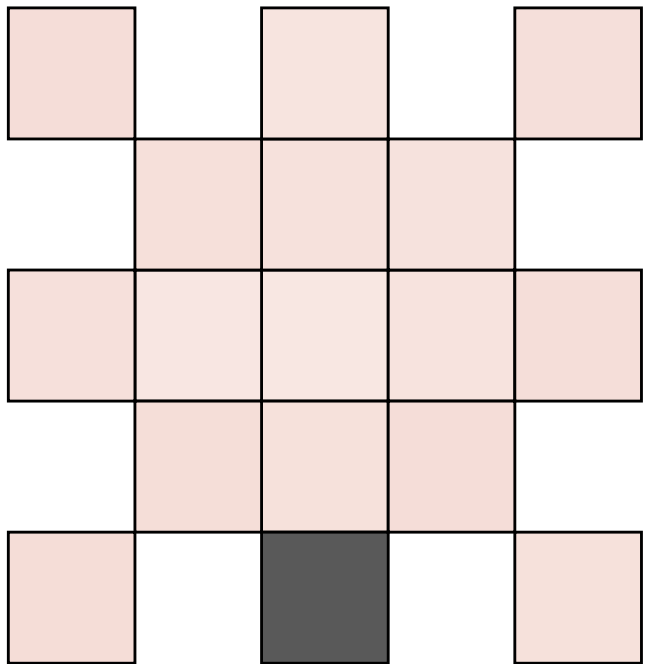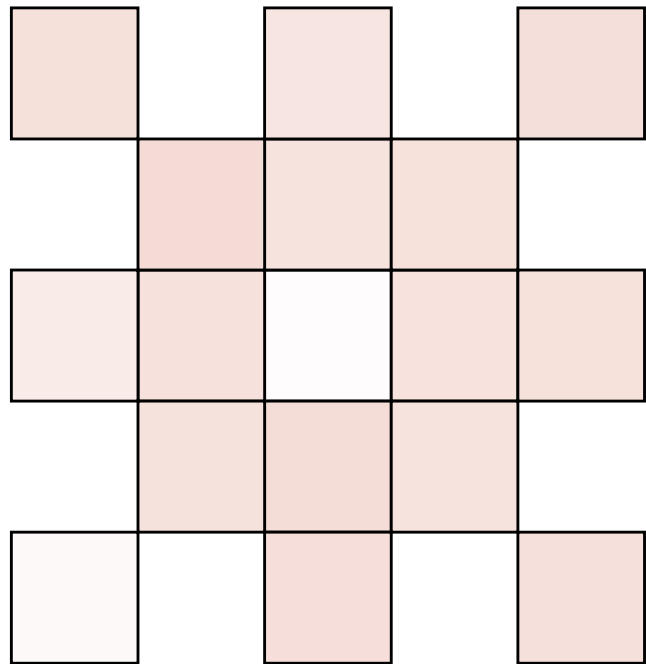

16-53451084-T-A

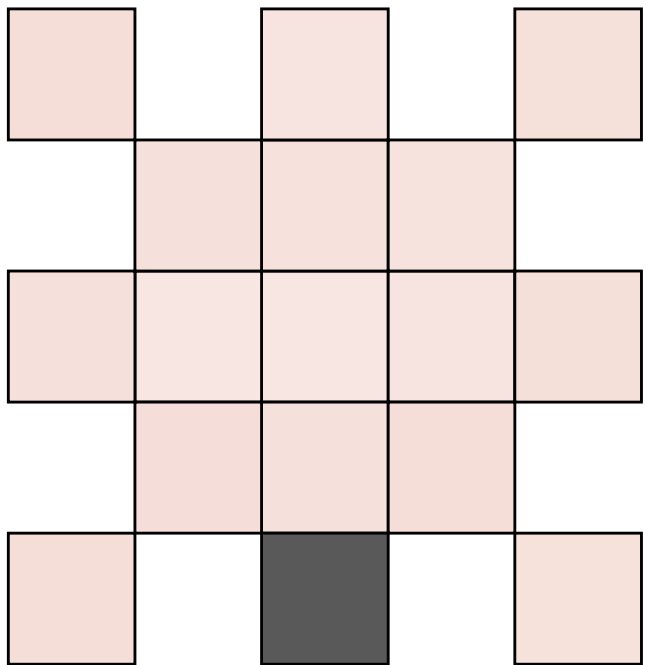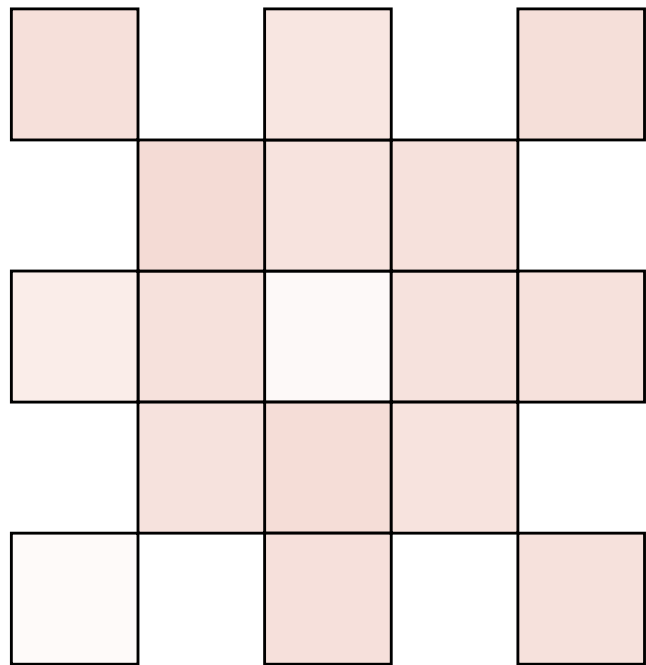

16-5864193-G-T

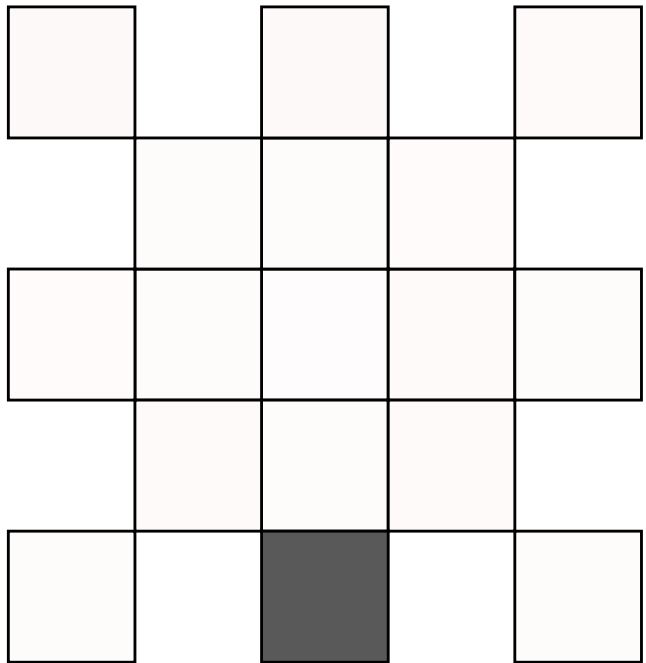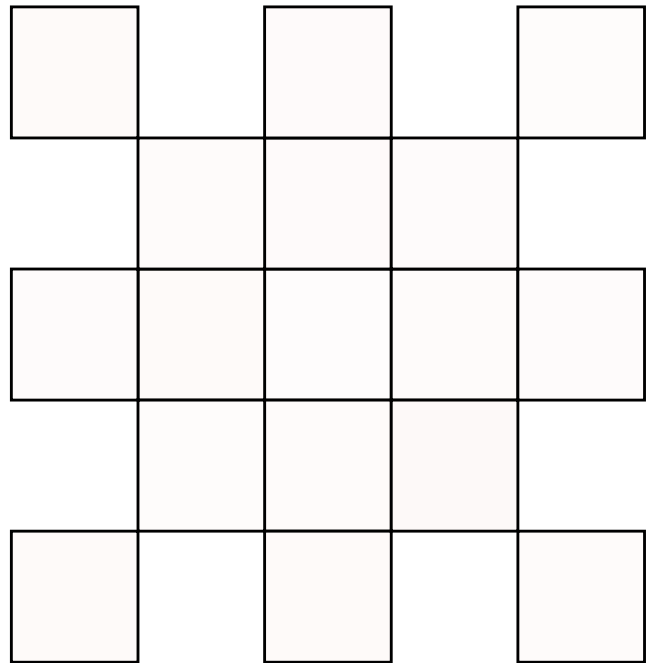

16-59987114-A-G

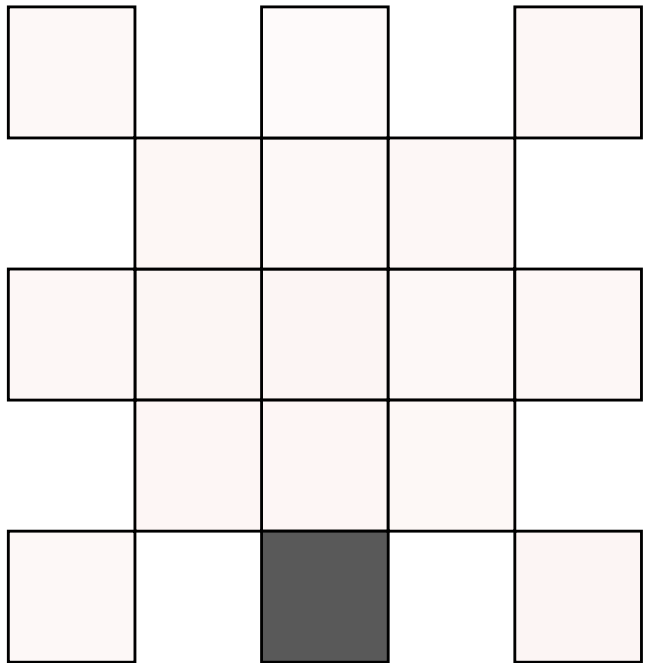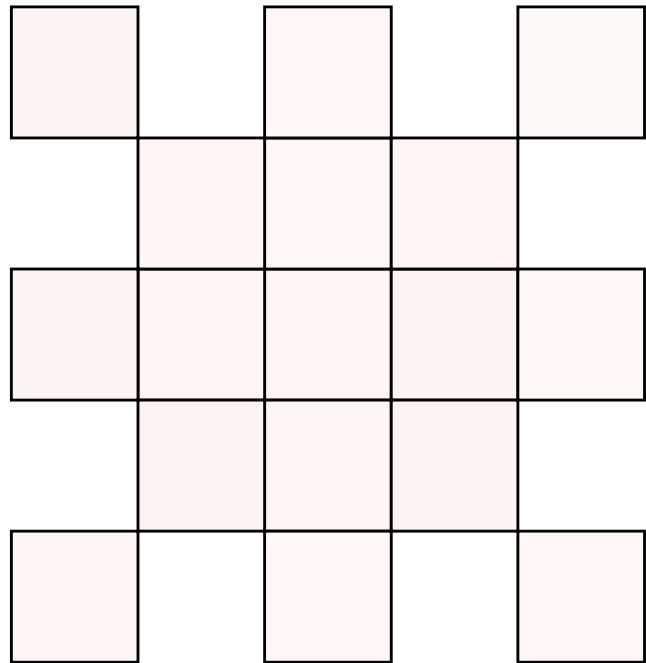

16-60721807-G-T

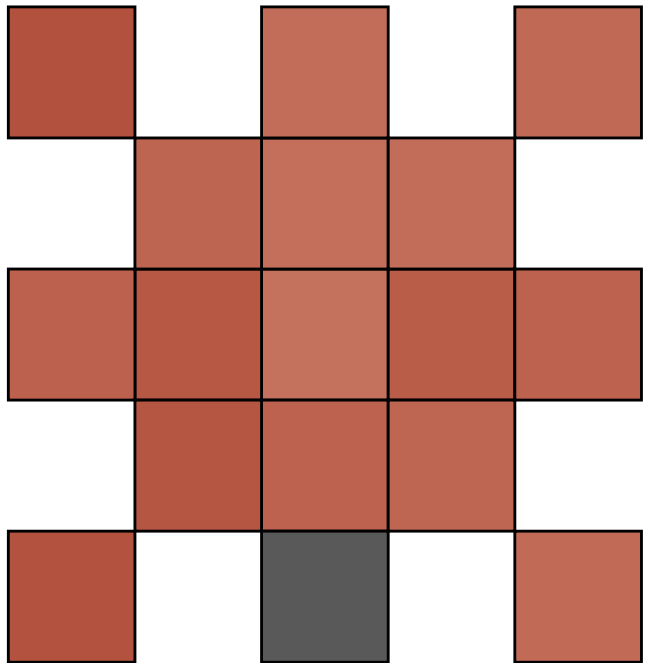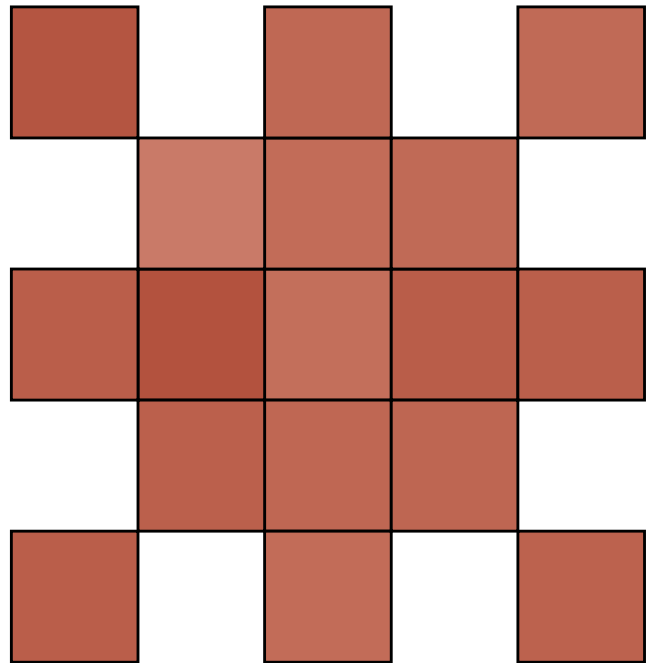

16-60833275-C-G

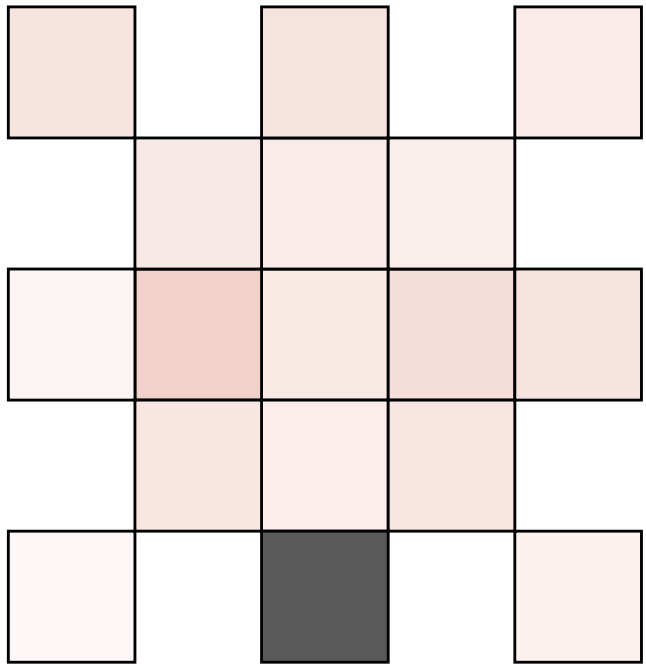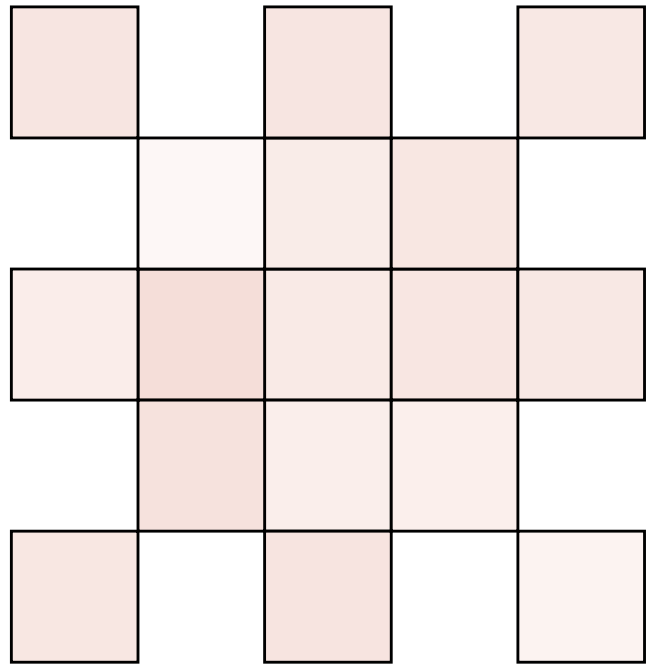

16-63481903-A-T

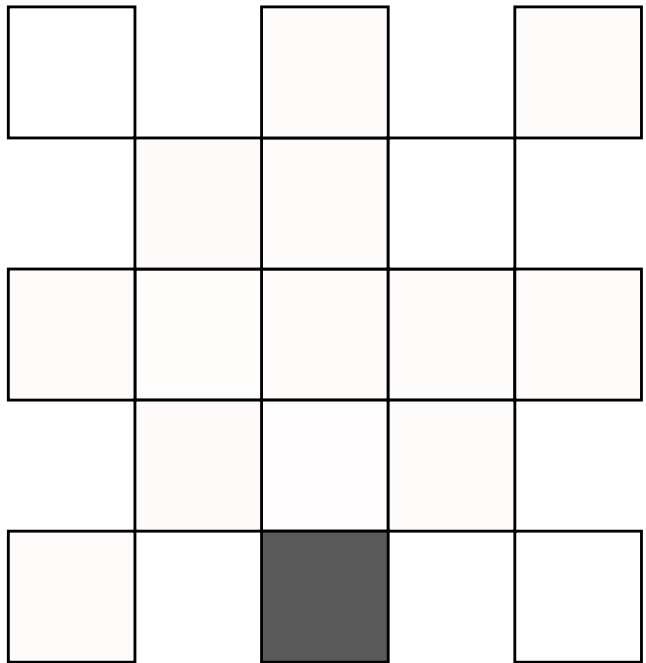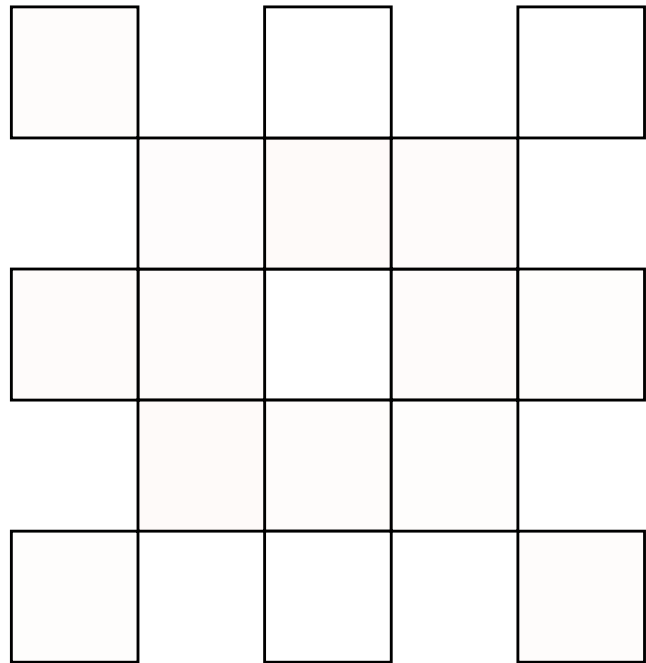

16-64667272-C-T

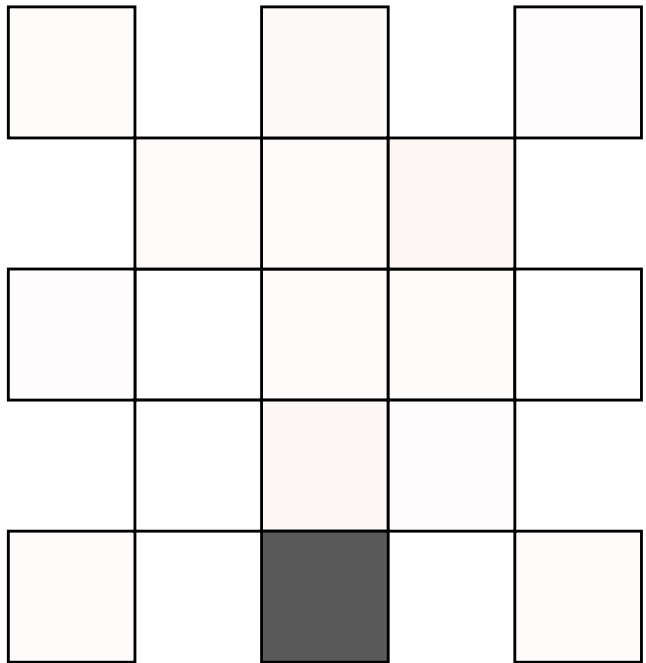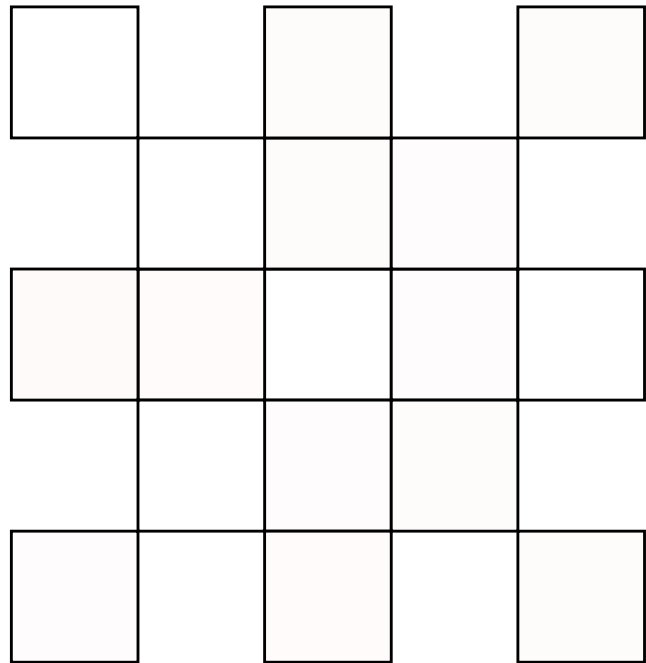



16-64780863-G-A

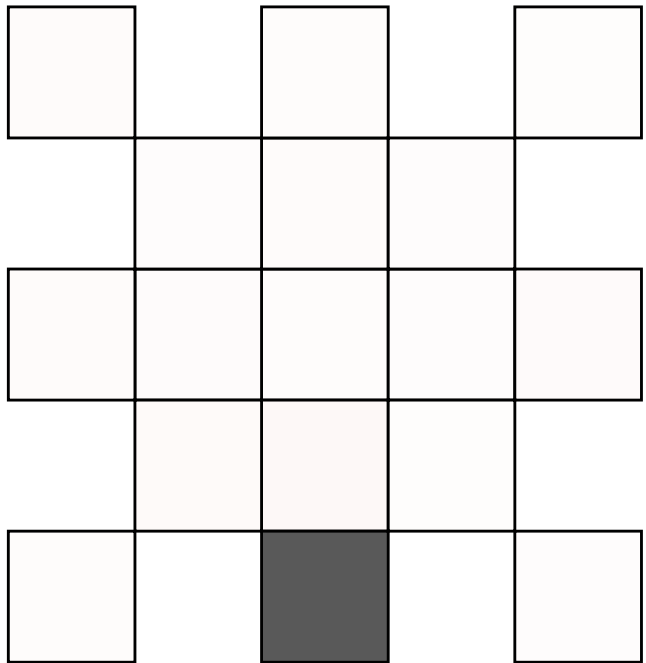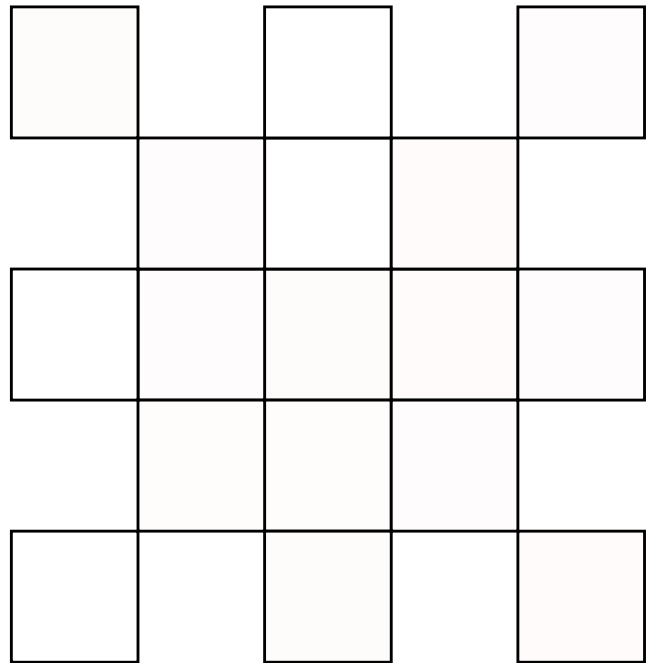

16-71798192-C-A

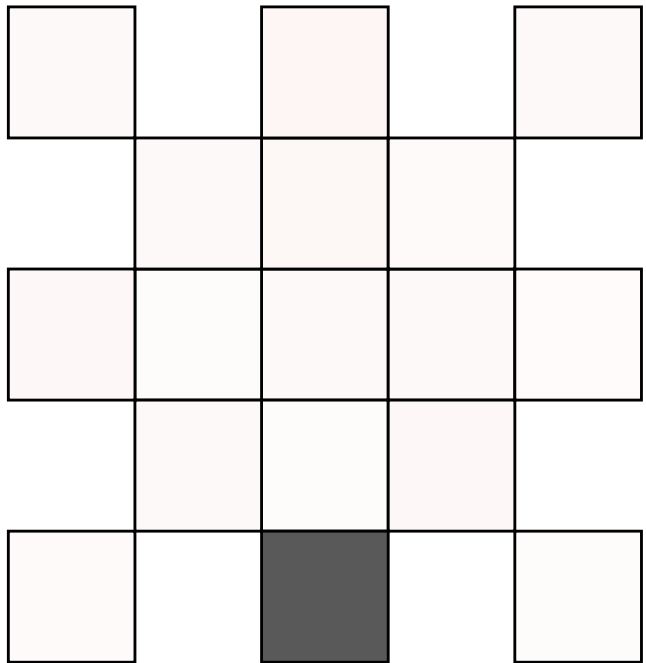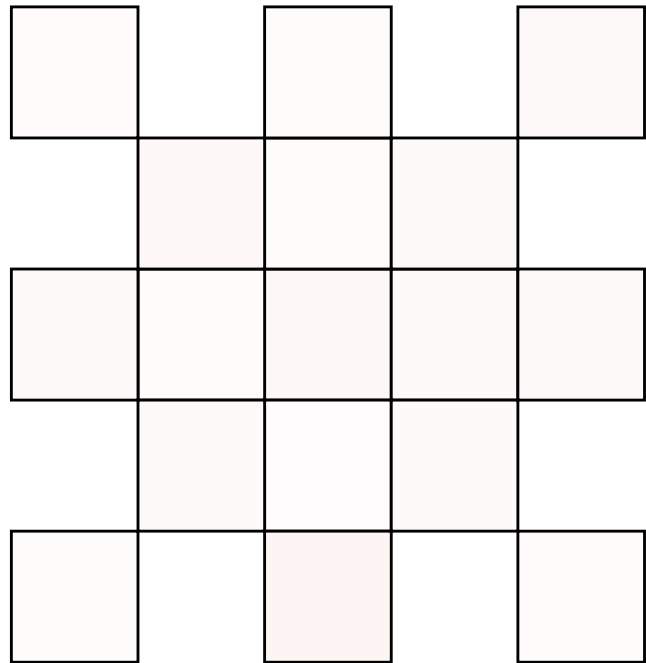

16-73492923-G-T

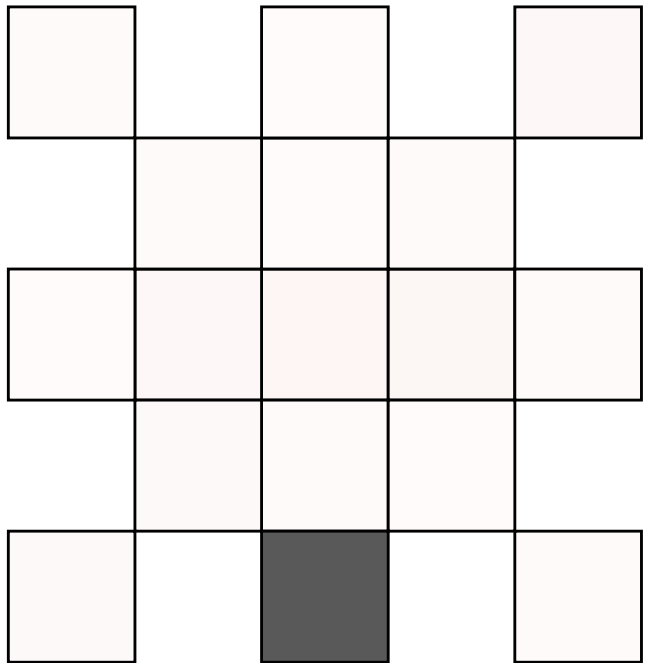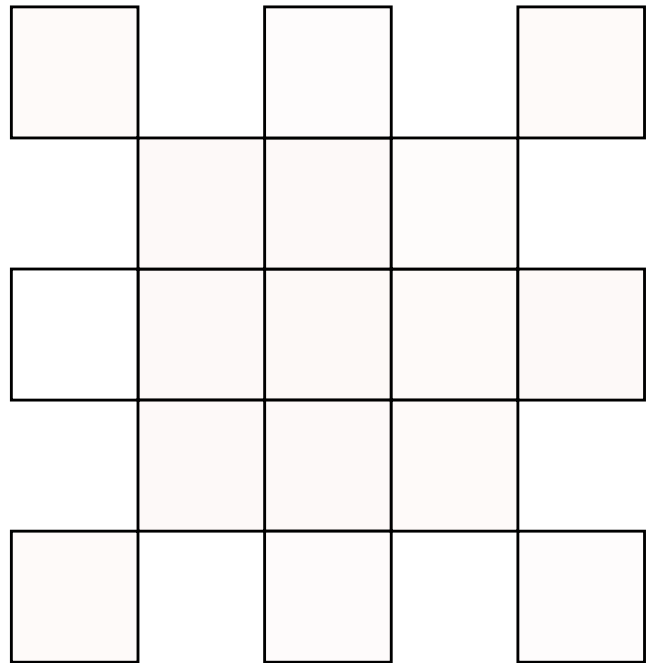

16-77437520-G-T

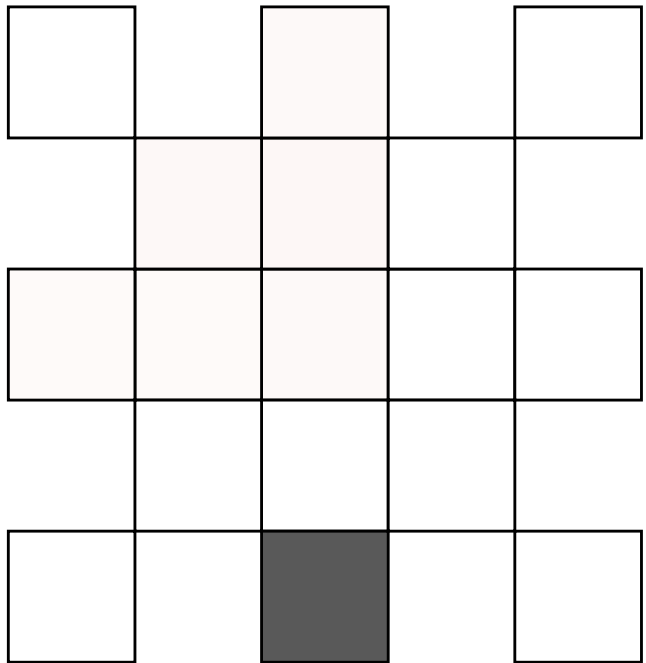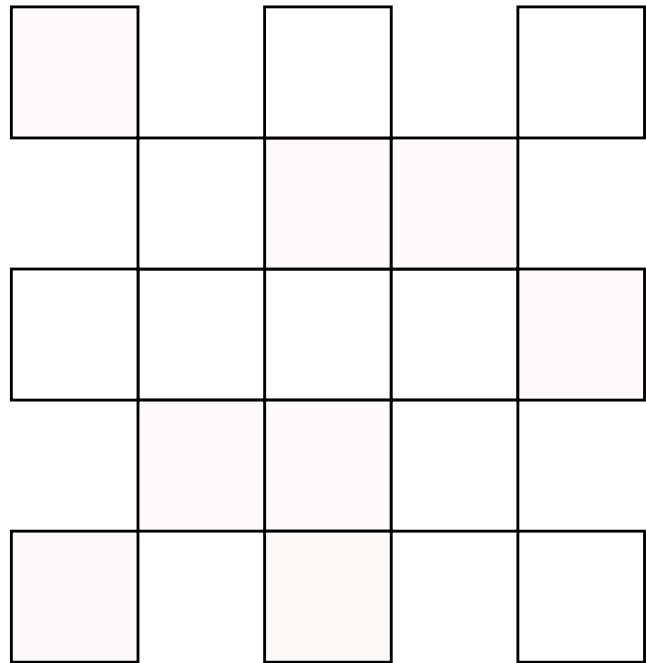

16-83153418-C-T

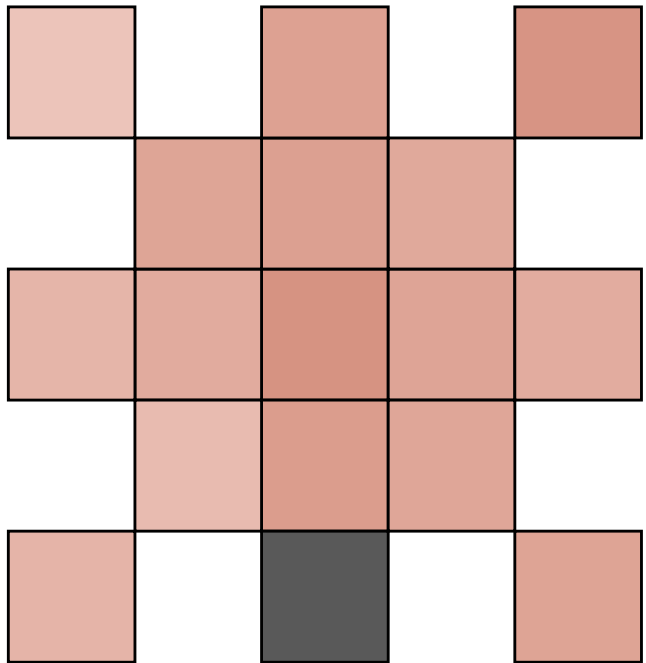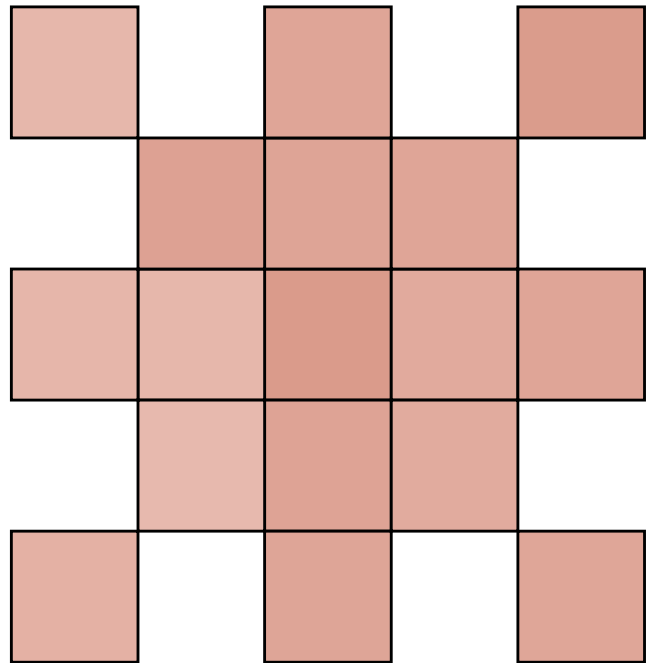

16-86500807-C-T

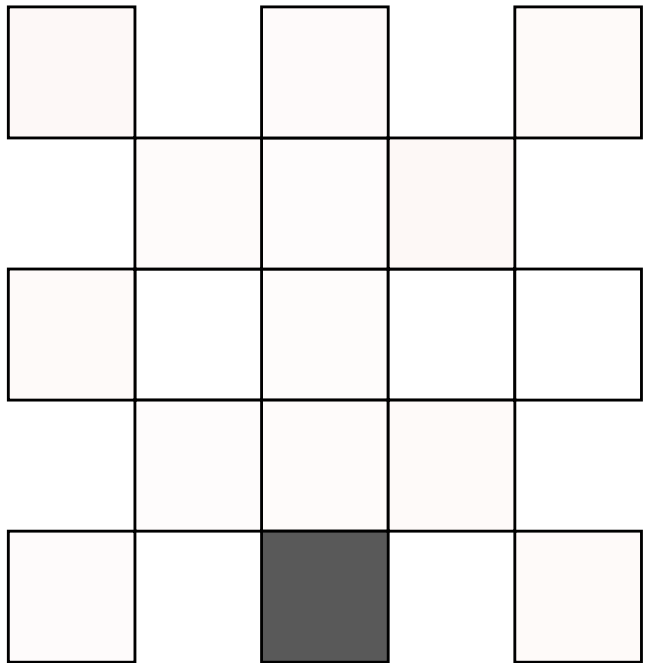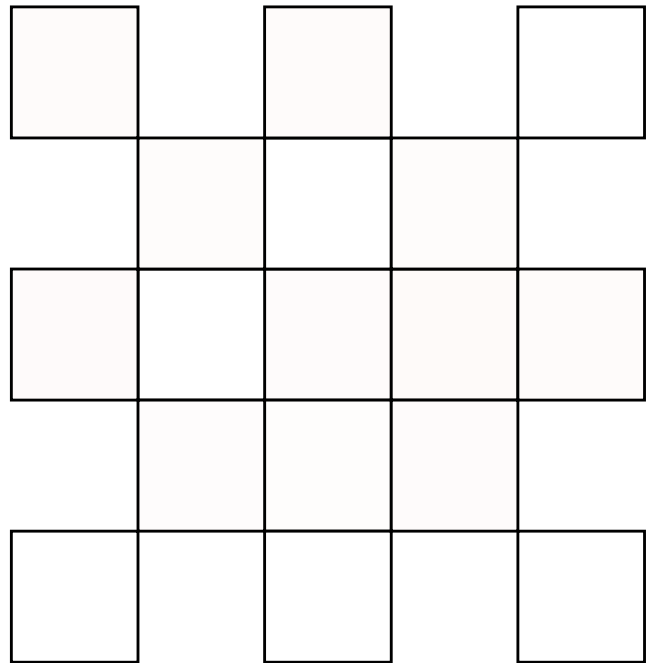

16-8802550-C-T

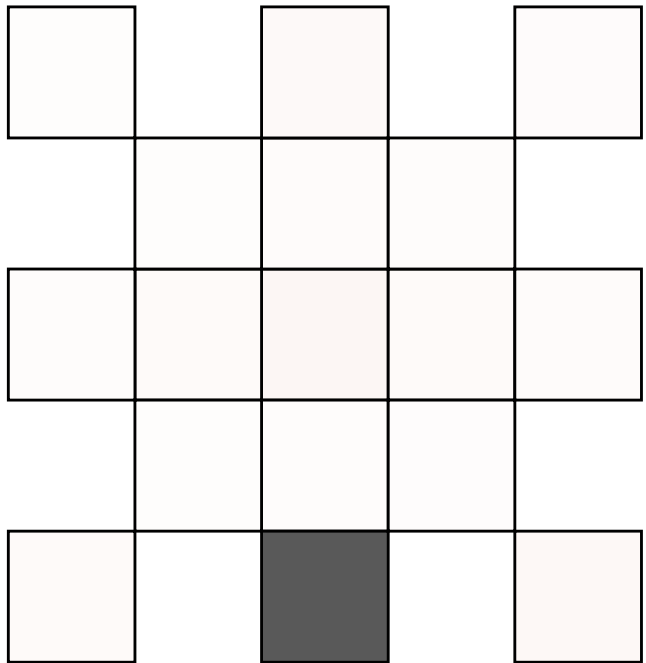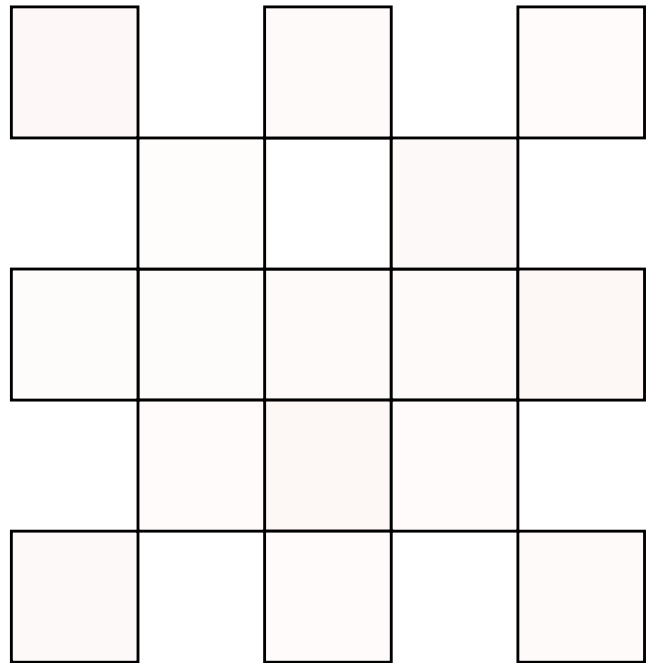

16-925921-C-T

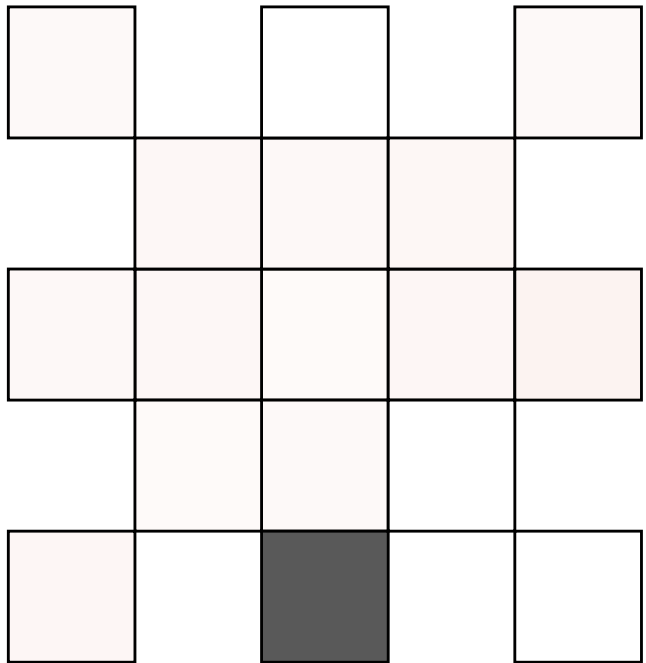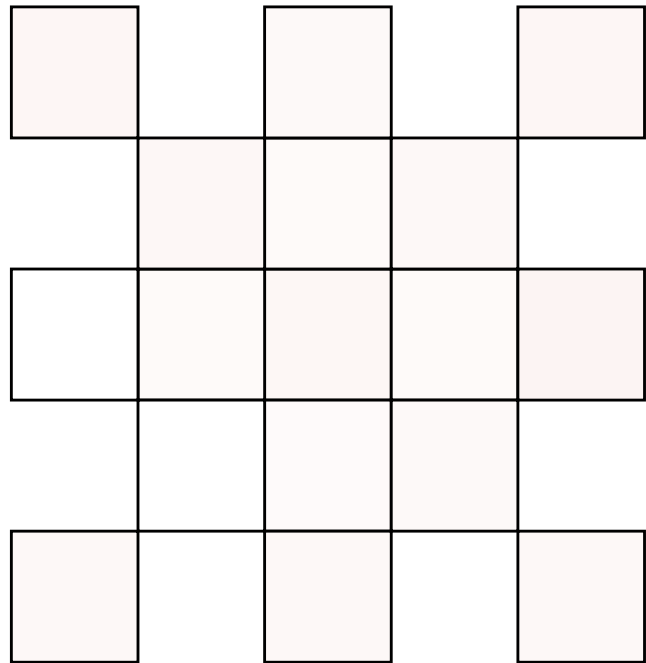



16-9382504-C-T

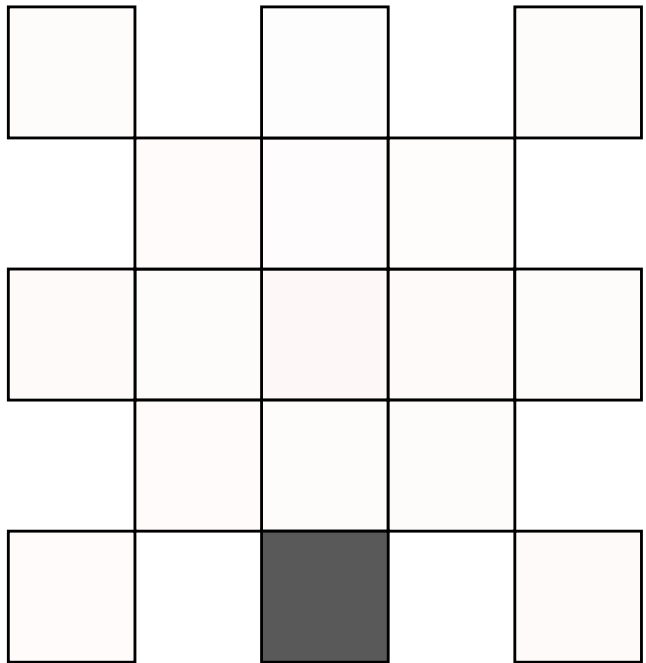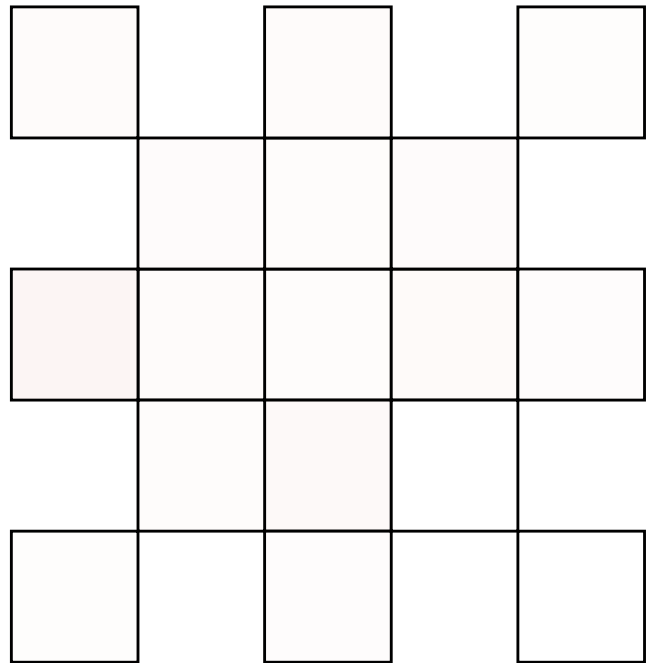

17-10283611-C-T

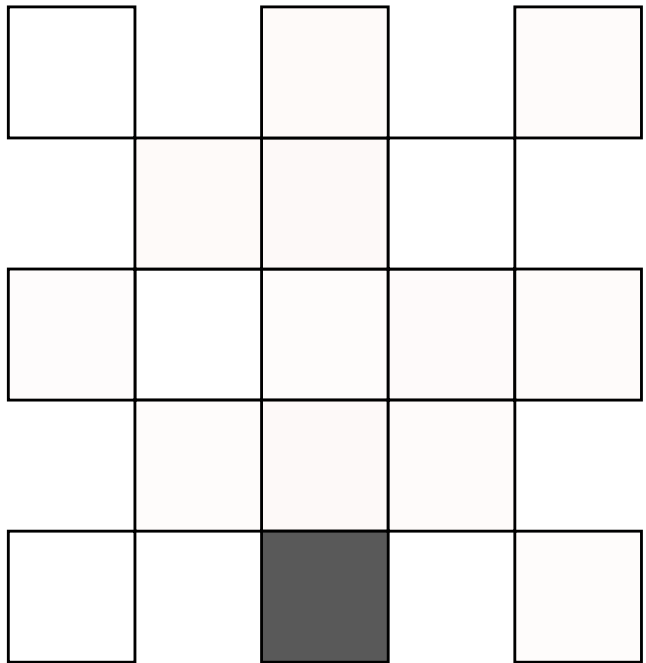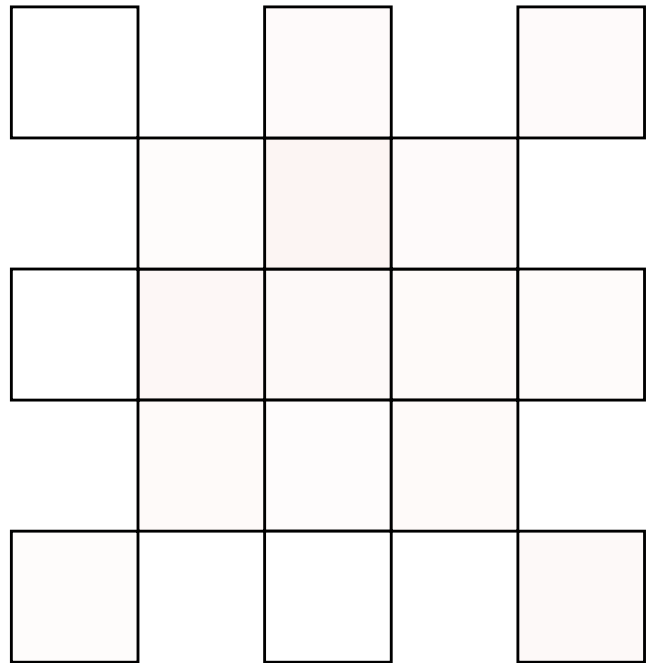

17-12534415-G-T

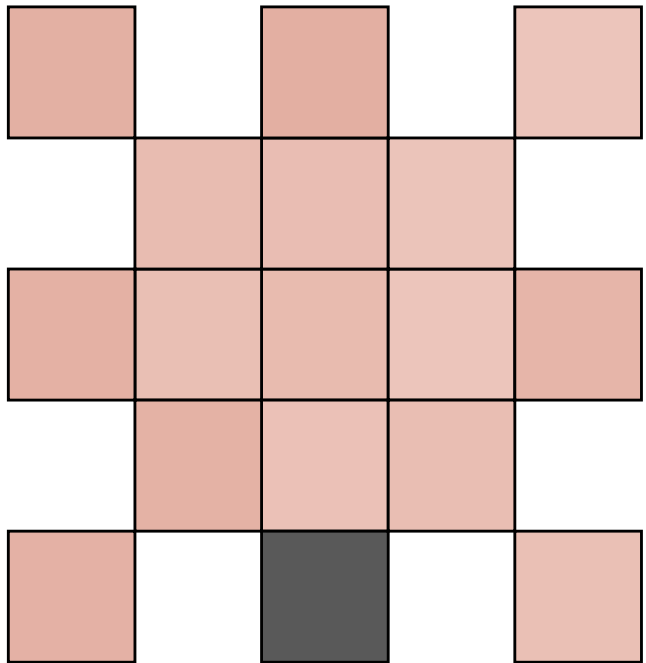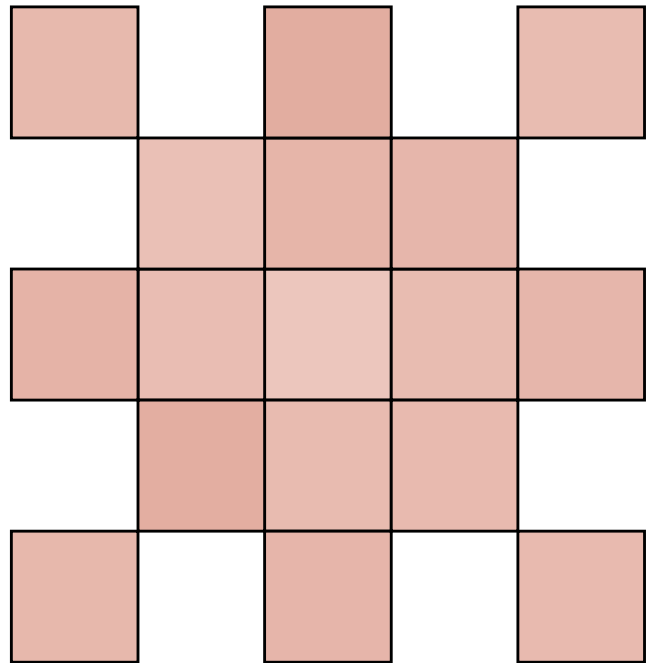

17-1478793-G-A

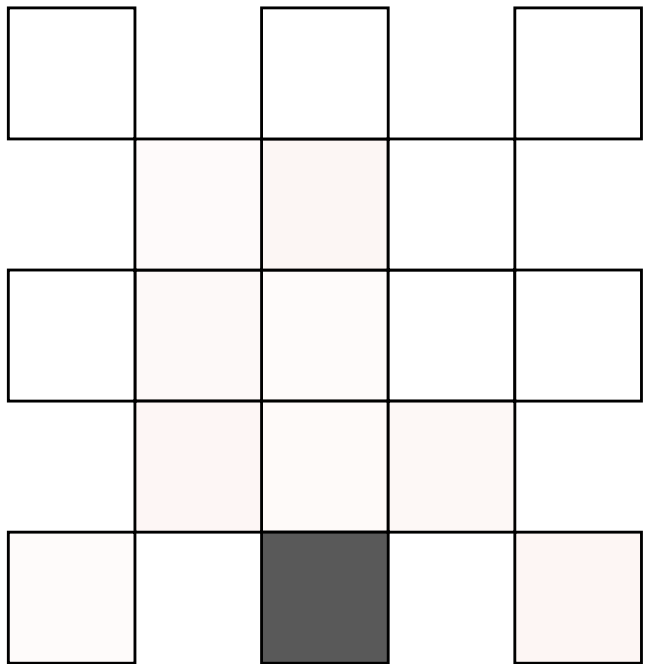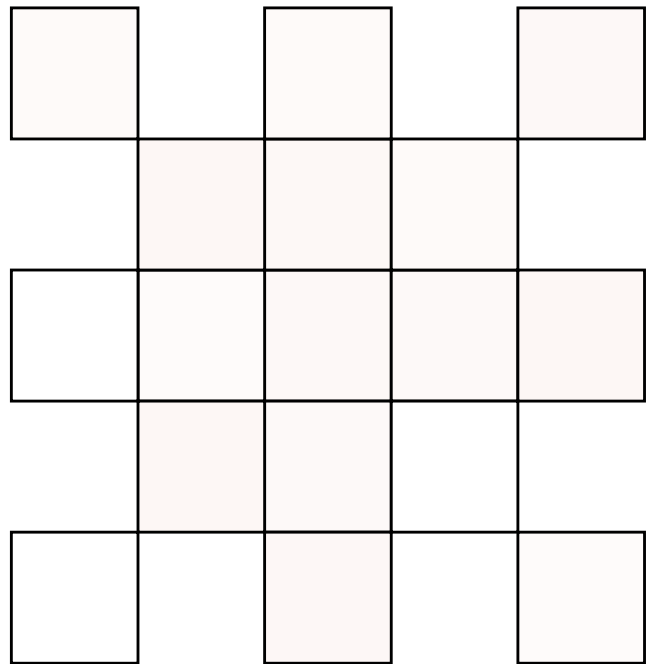

17-1620800-G-T

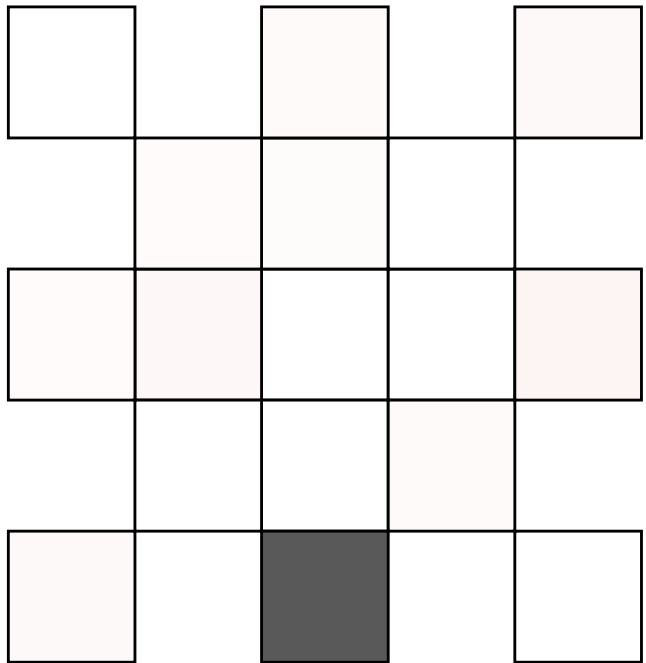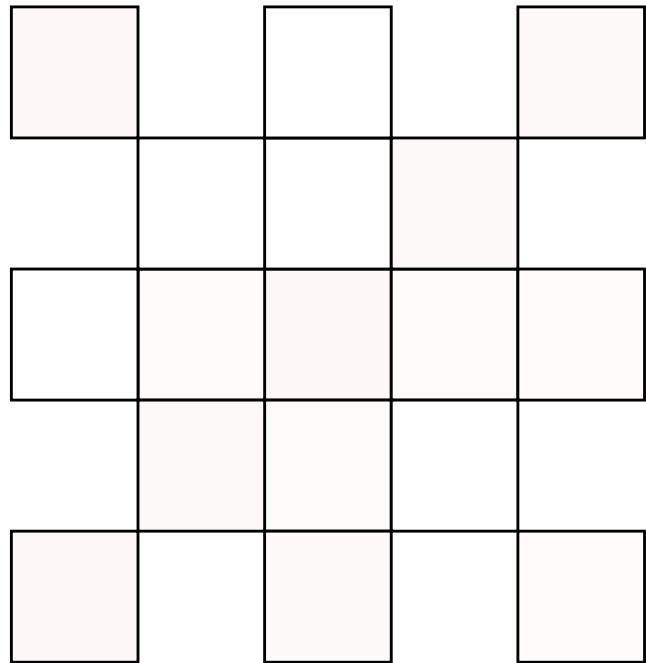

17-17411221-G-A

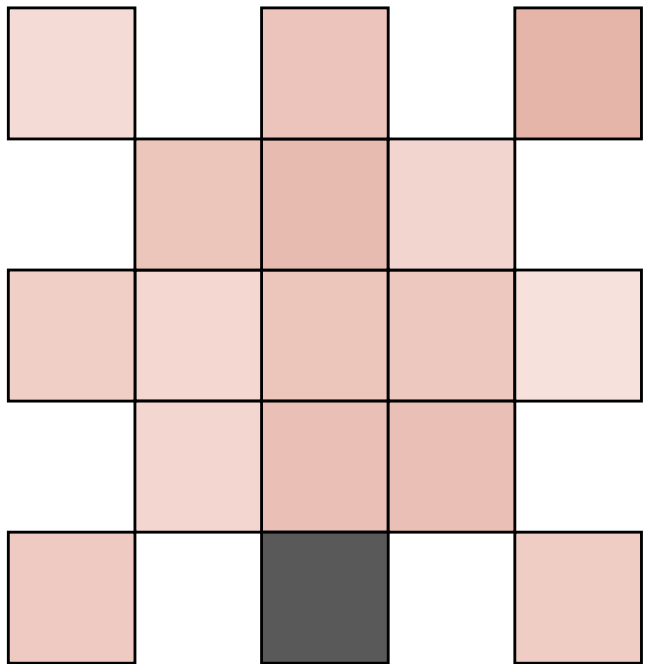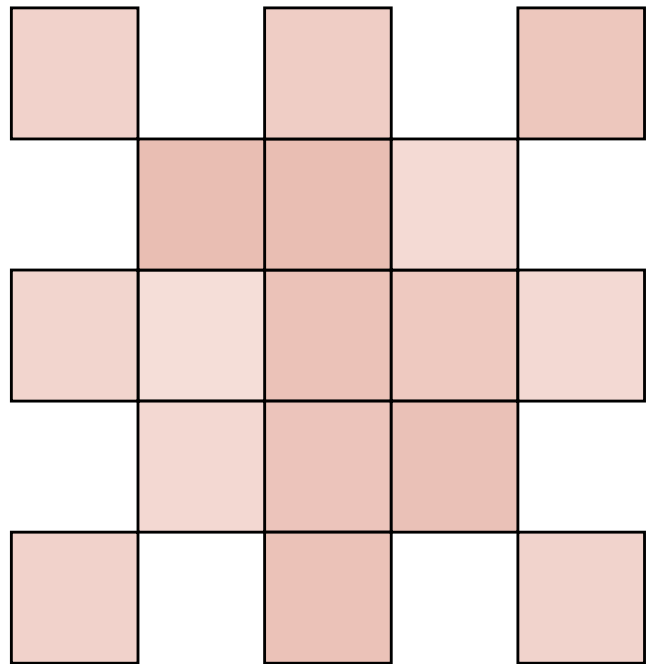

17-184881-G-A

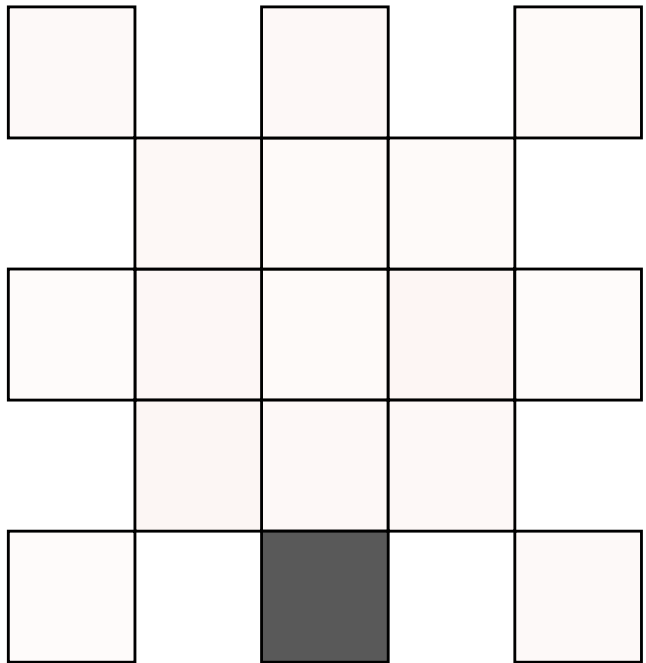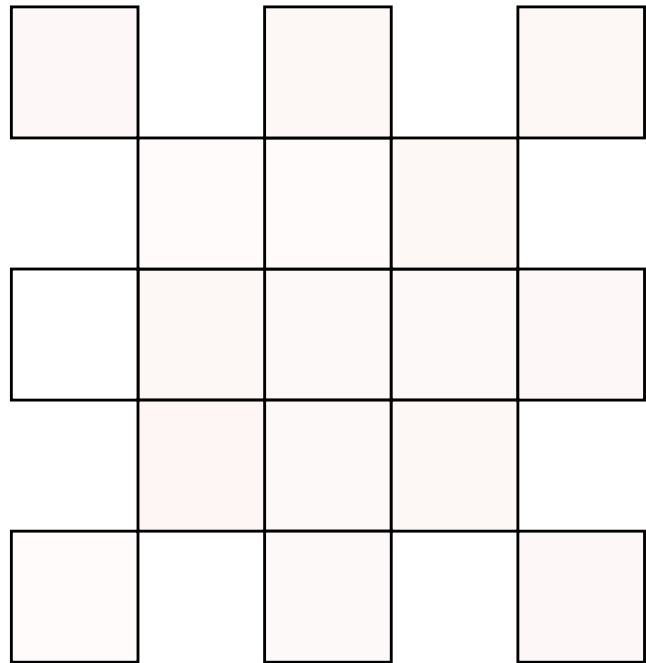

17-20005504-G-A

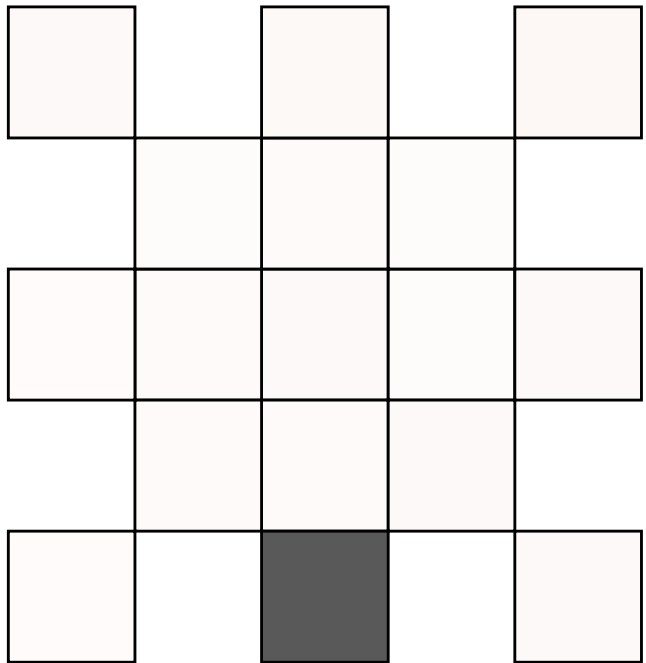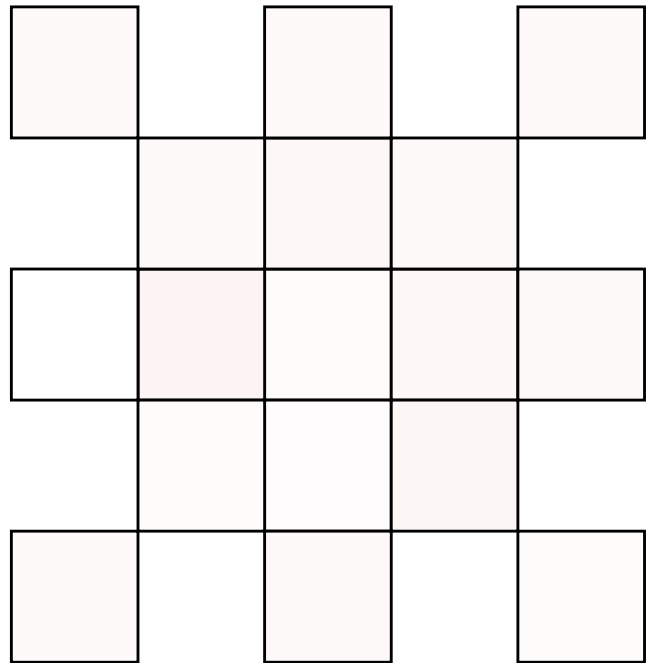



17-20005505-G-A

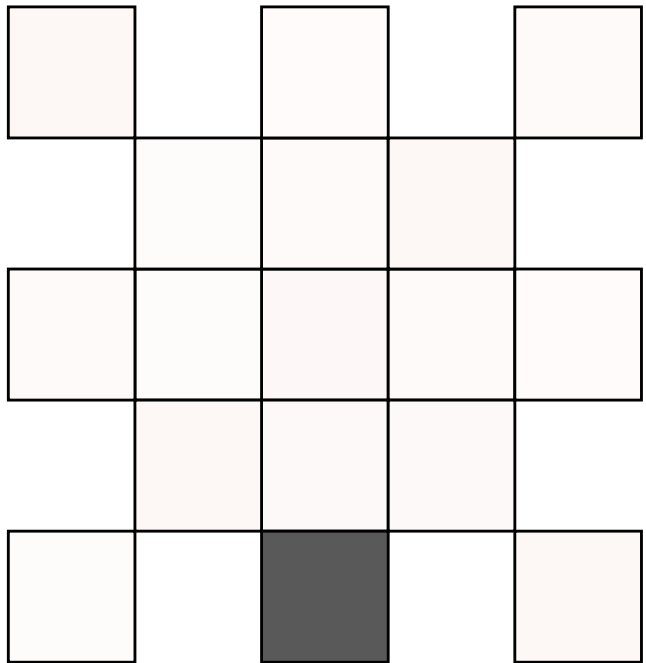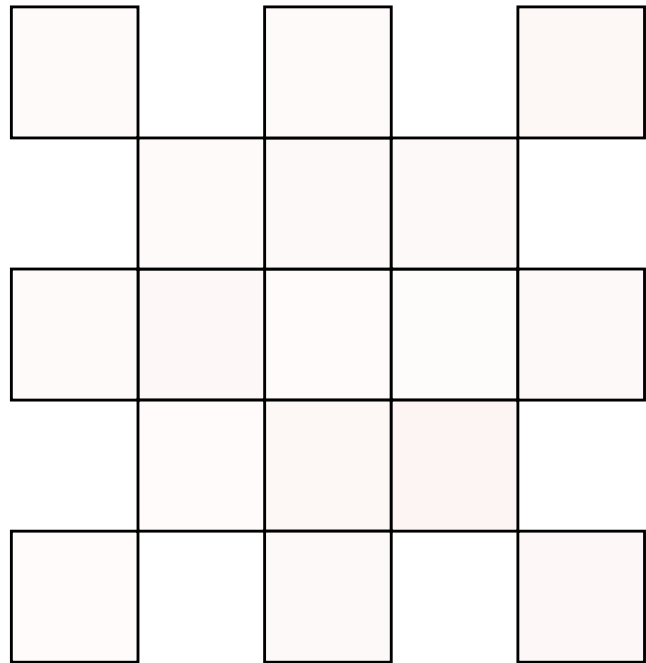

17-28171971-C-T

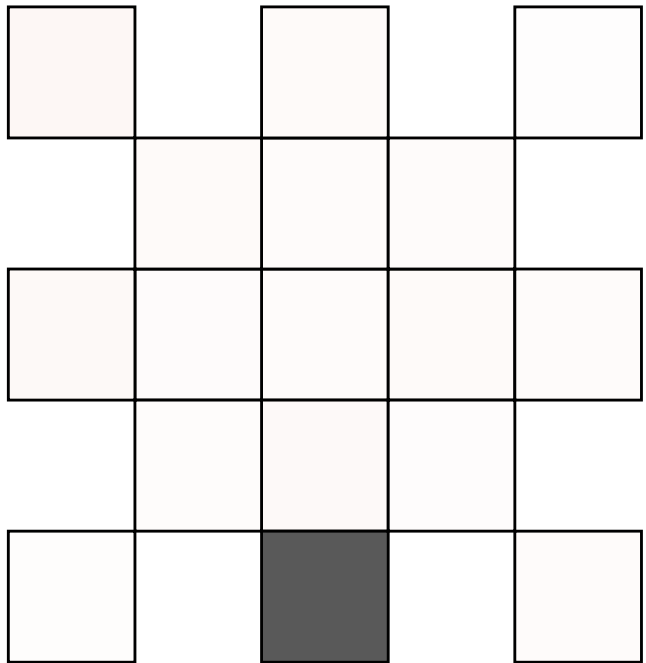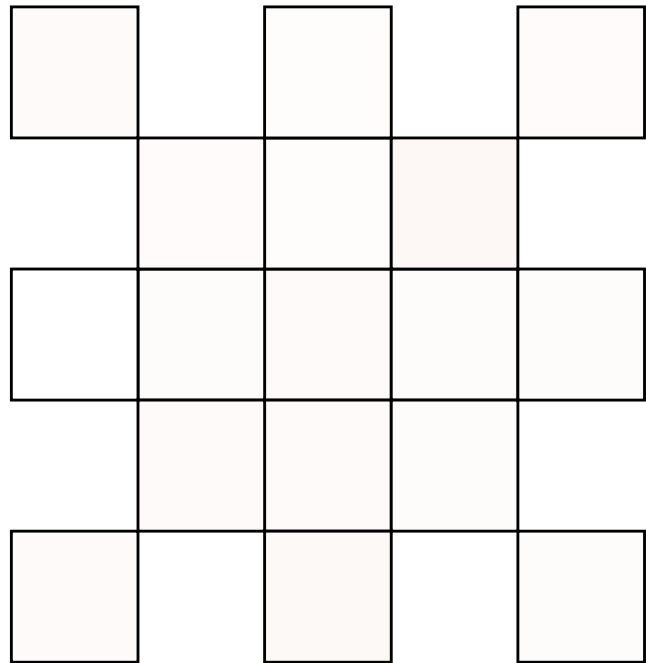

17-40192535-C-G

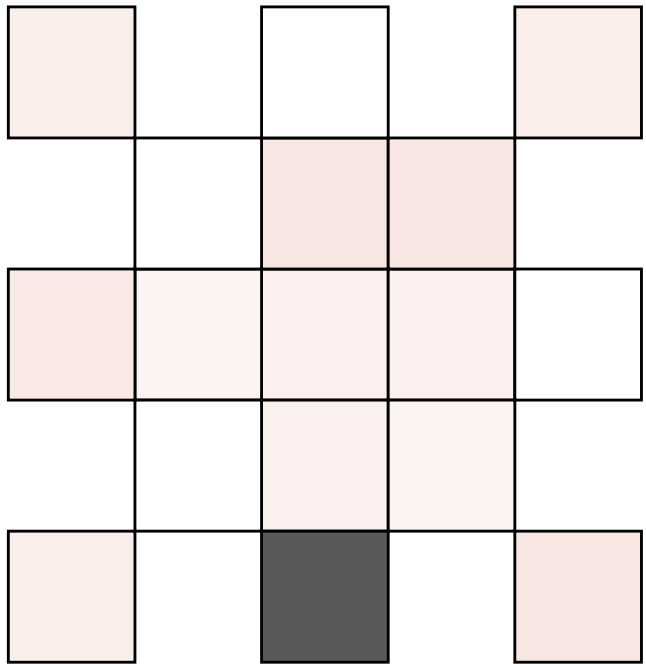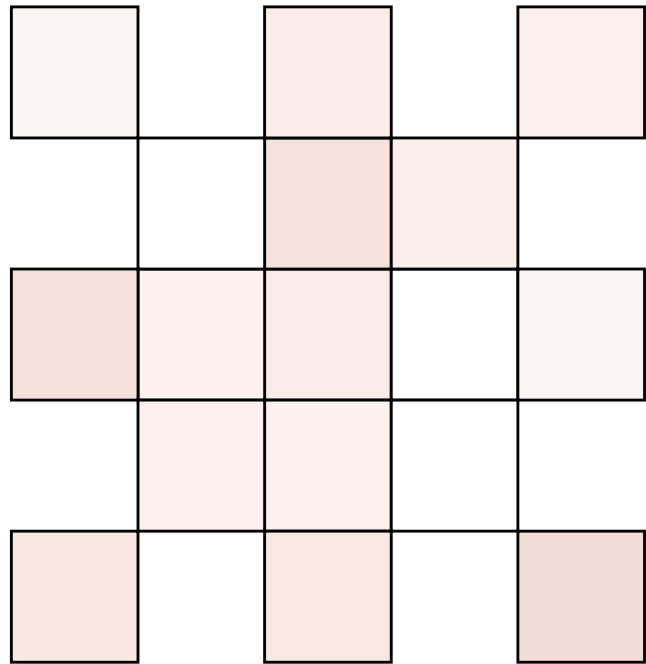

17-43076022-G-A

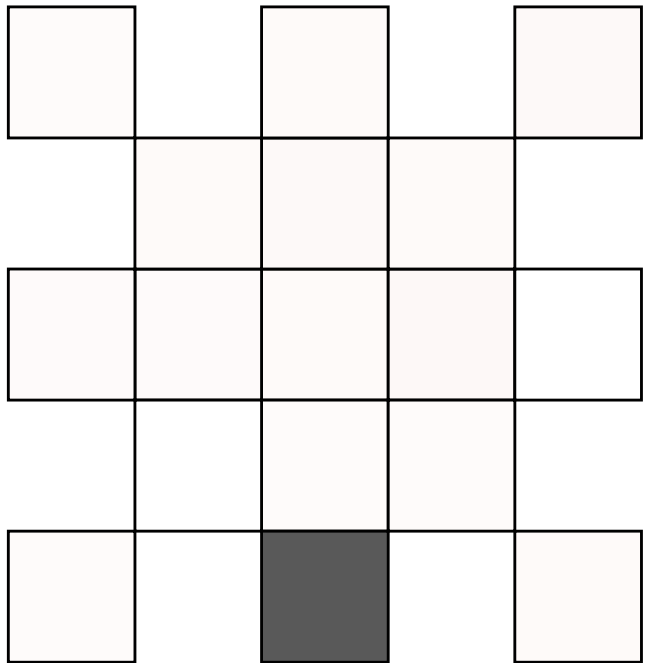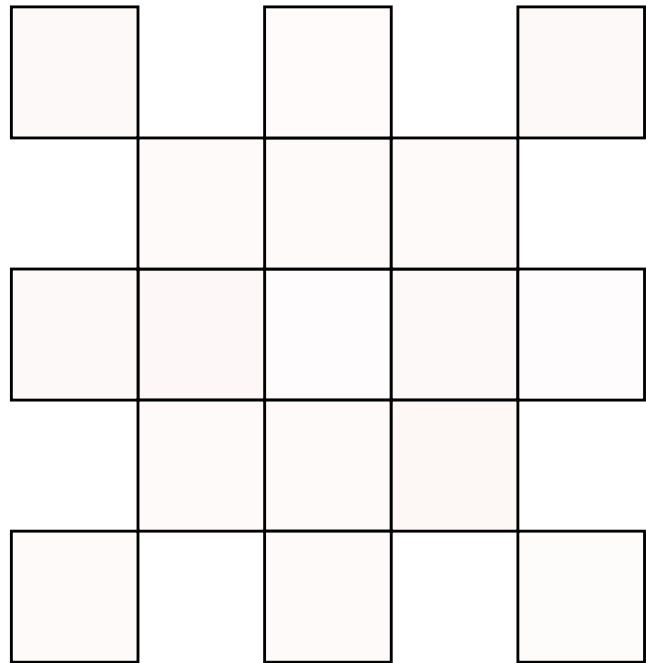

17-45401979-G-A

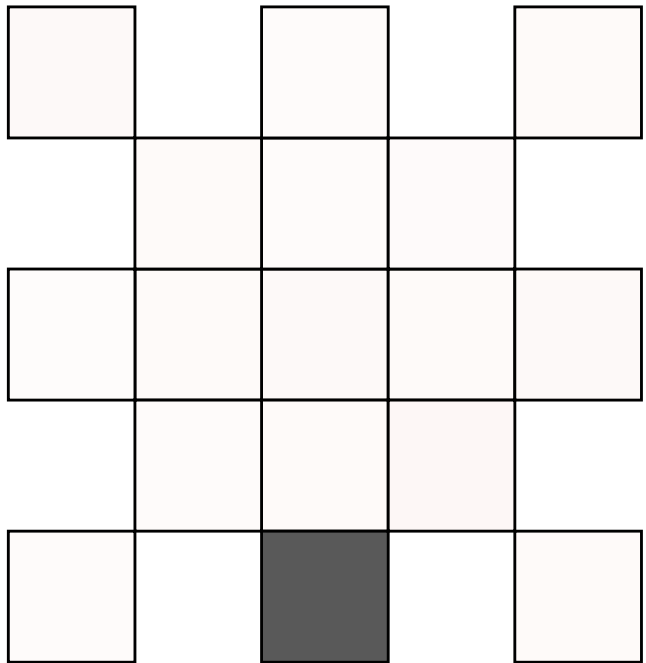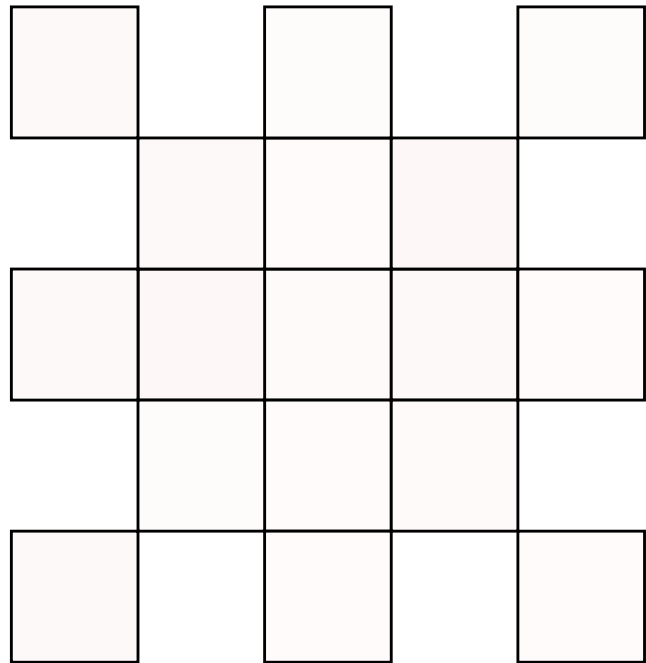

17-50011156-A-T

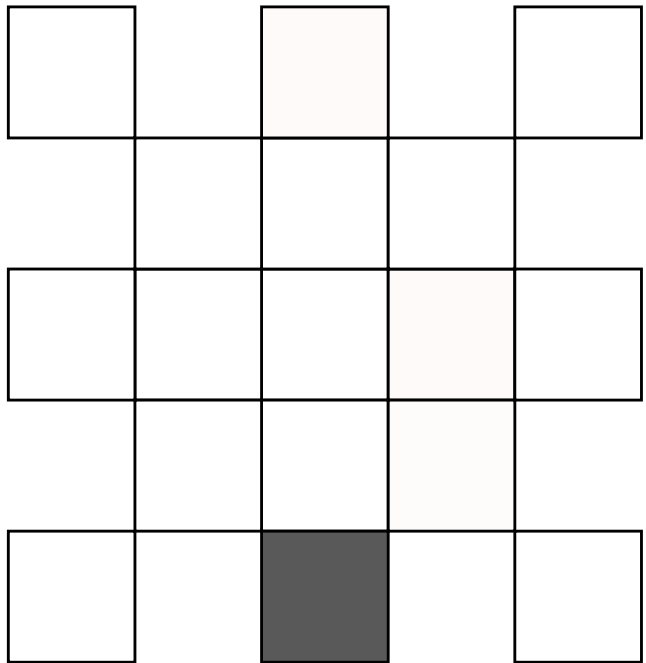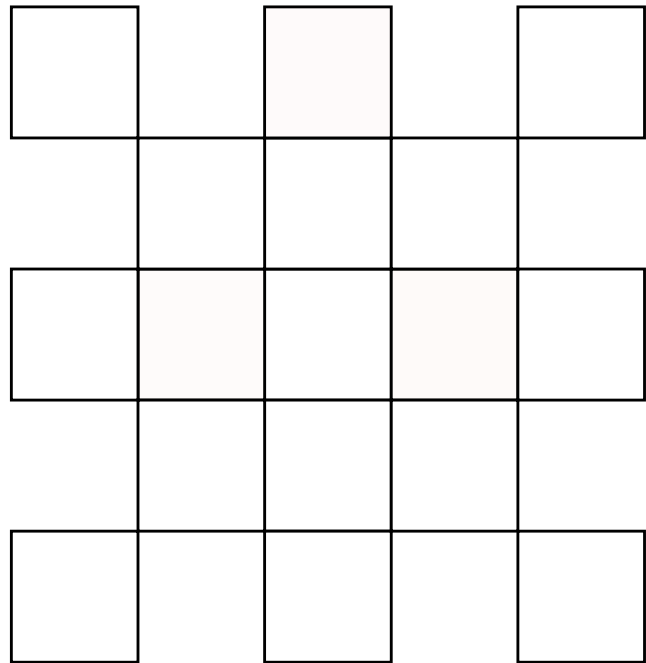

17-59031927-C-T

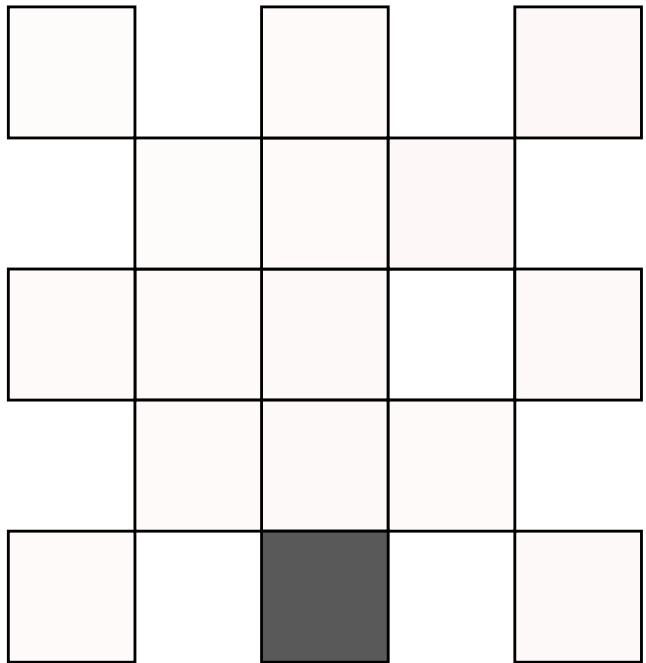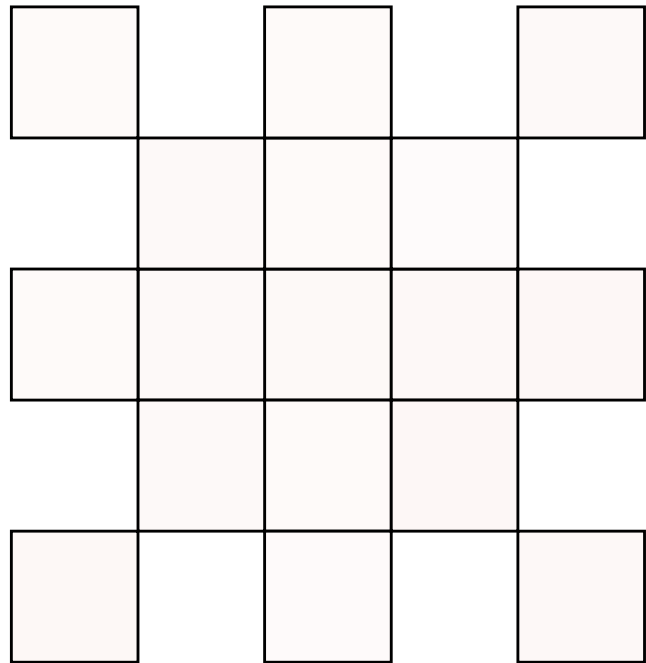

17-64301132-A-G

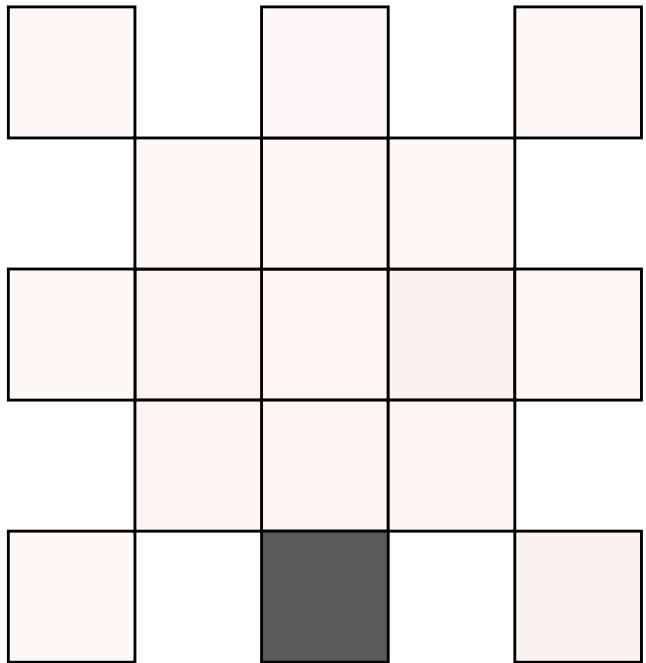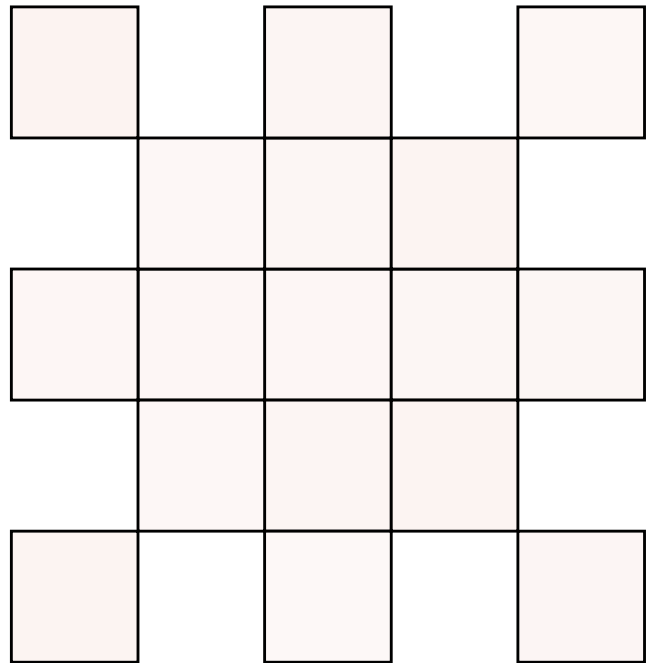



17-66742030-T-G

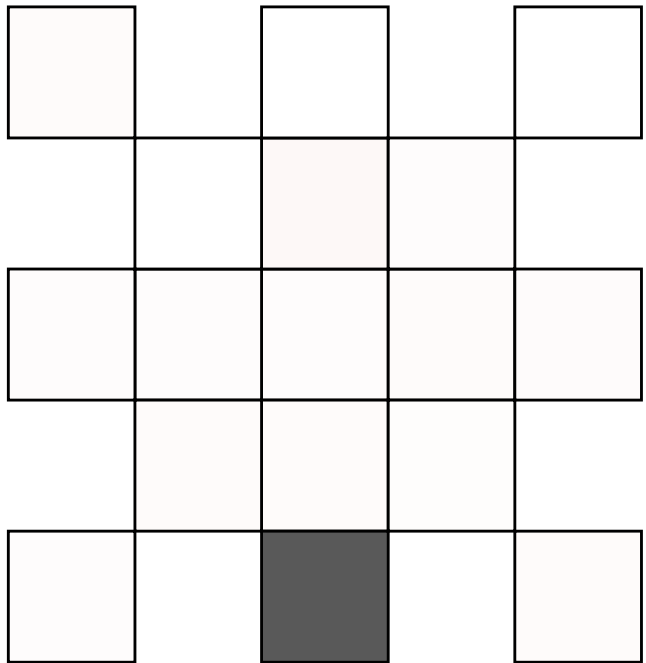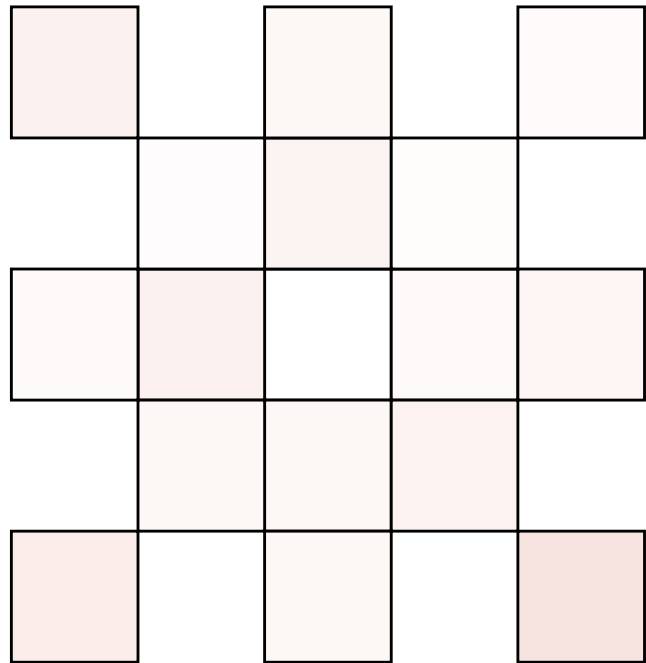

17-73327453-G-A

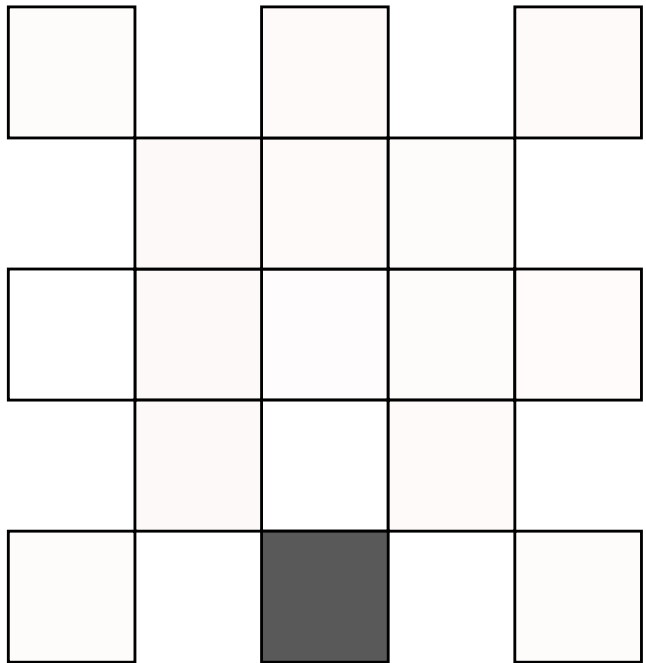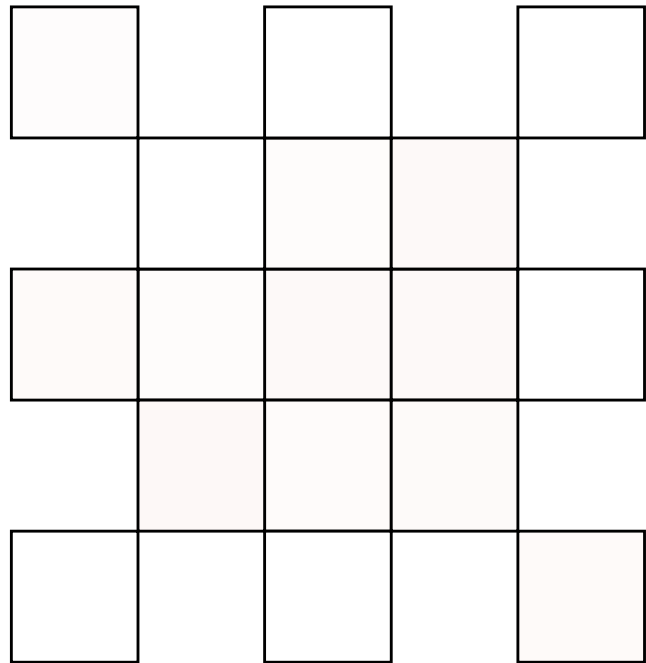

17-77323400-C-T

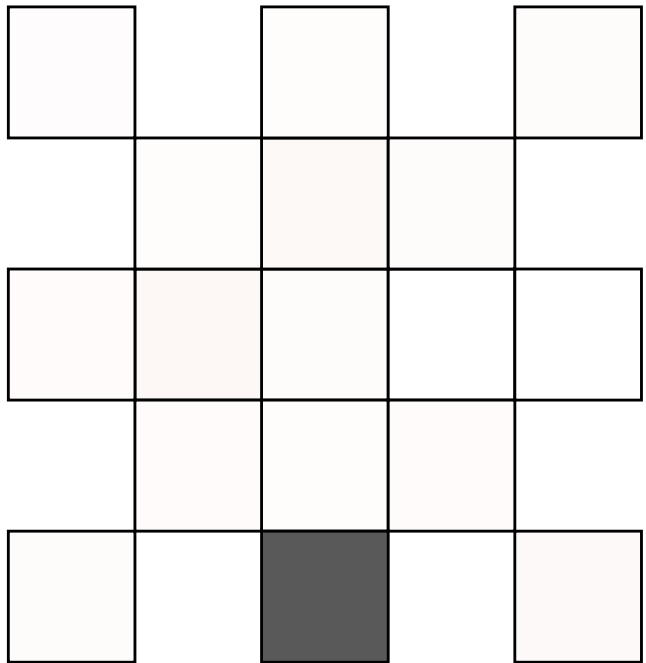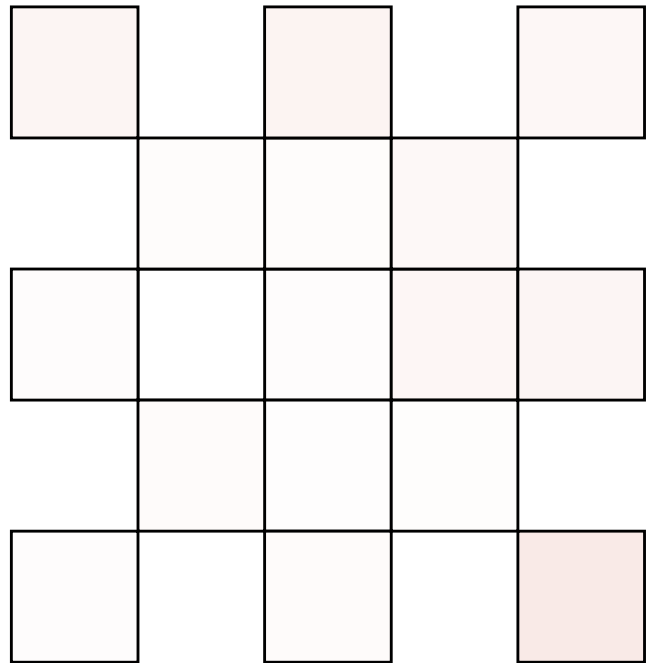

17-79305344-G-A

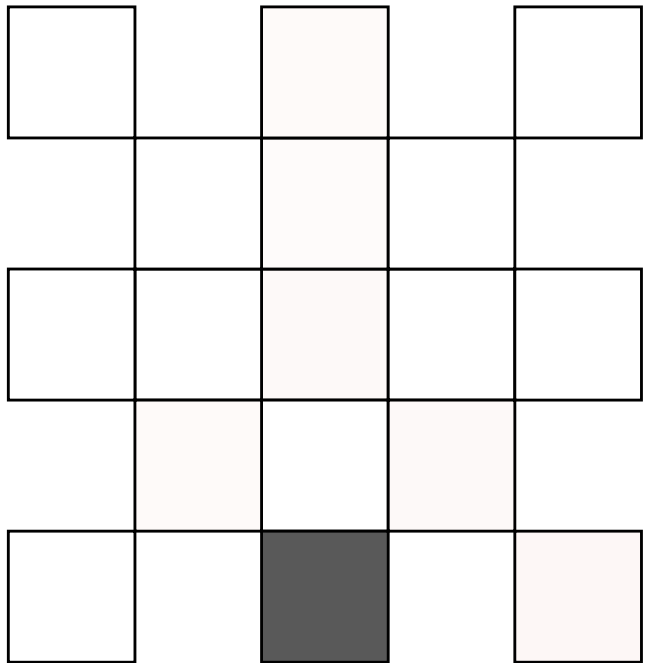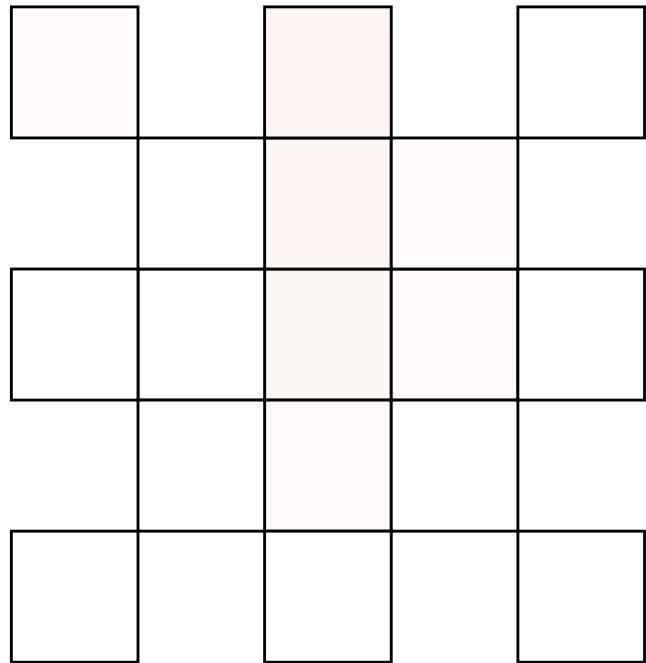

17-80207448-G-A

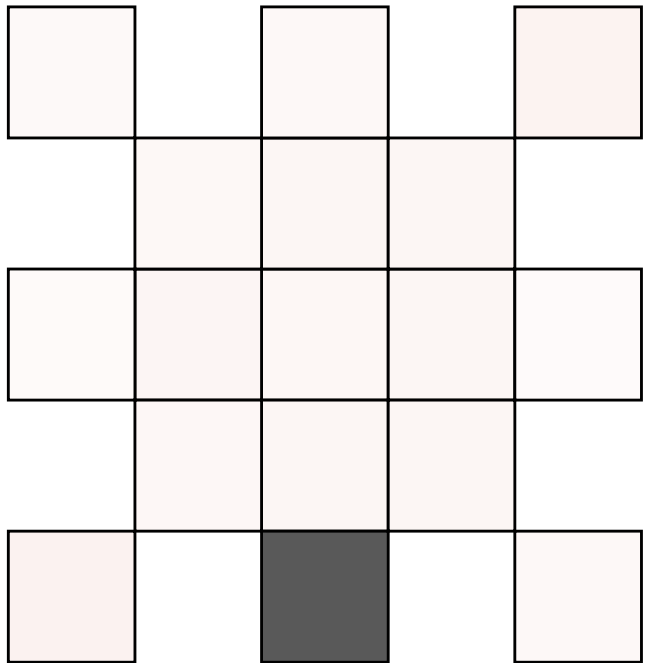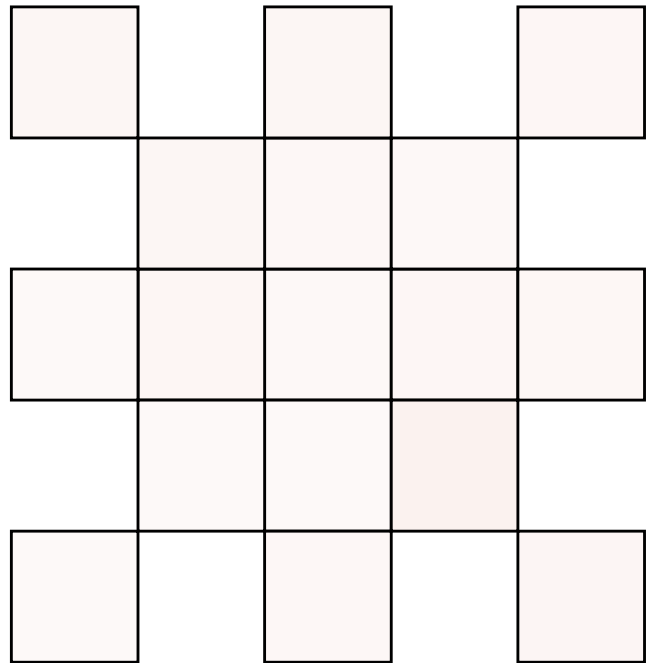

17-80643417-G-A

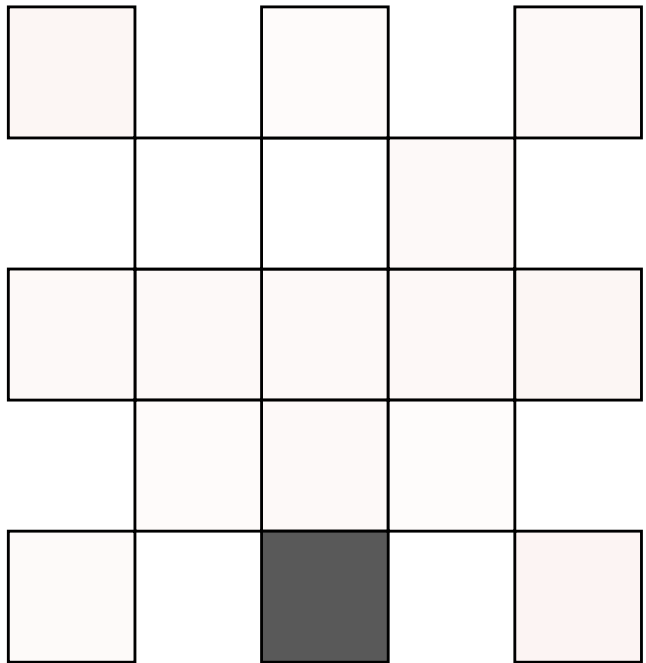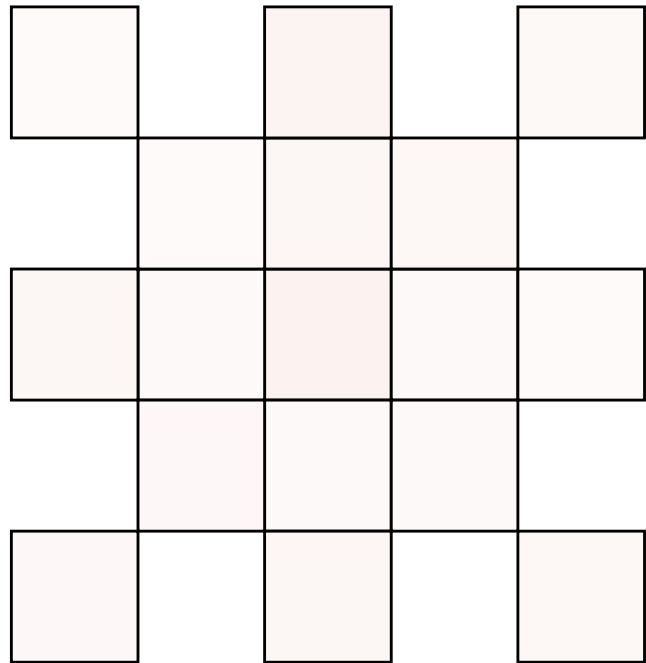

17-8815877-G-A

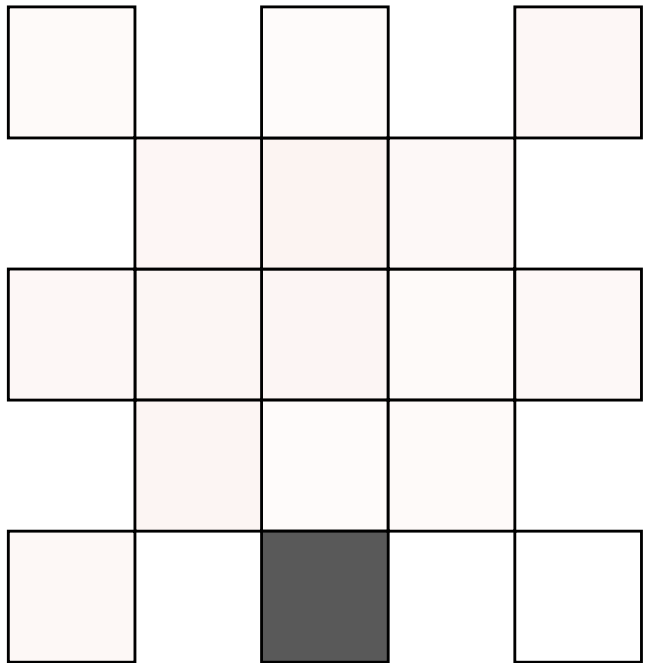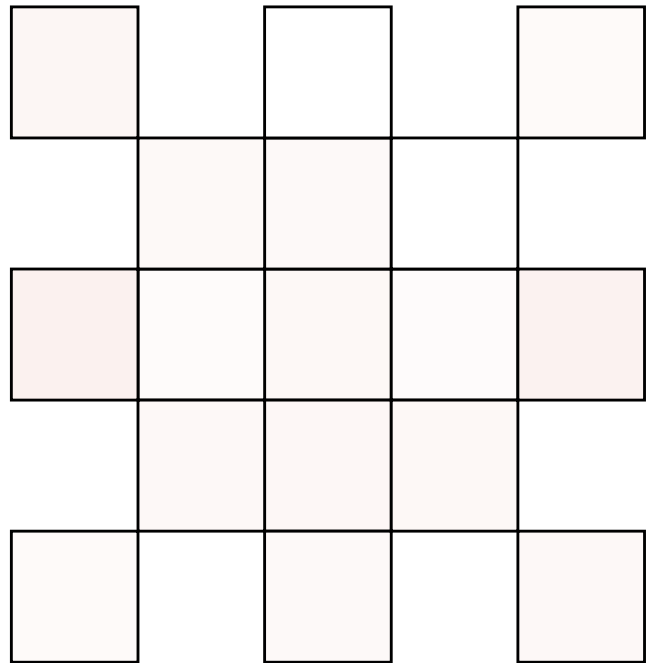

17-9084127-C-T

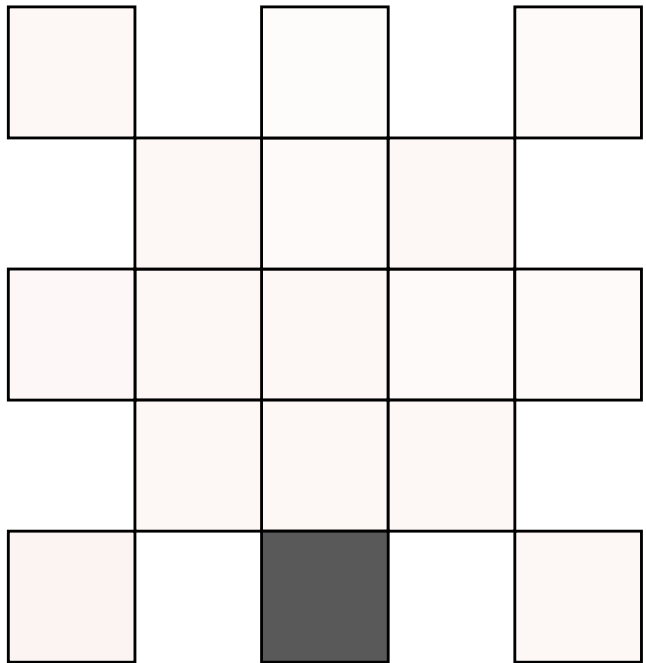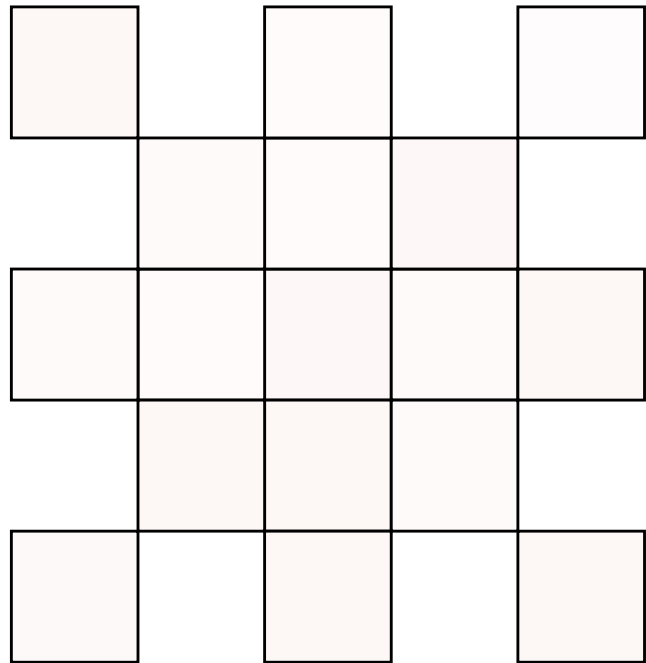



18-1735890-A-C

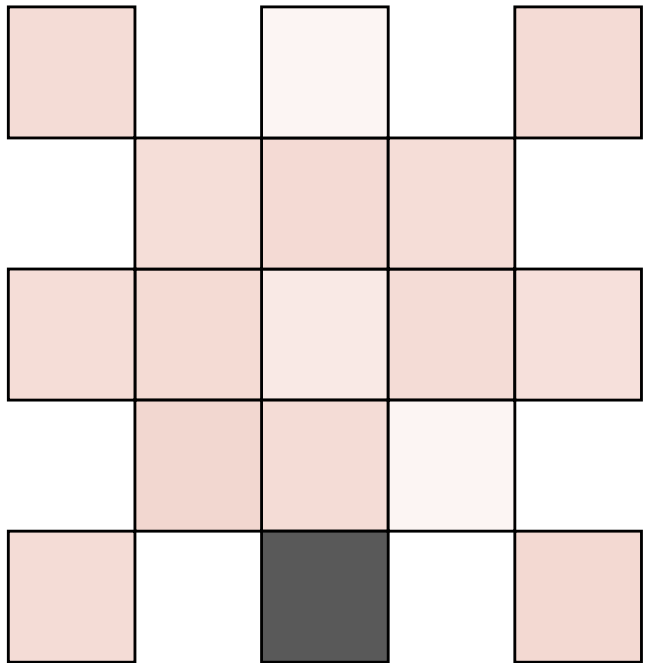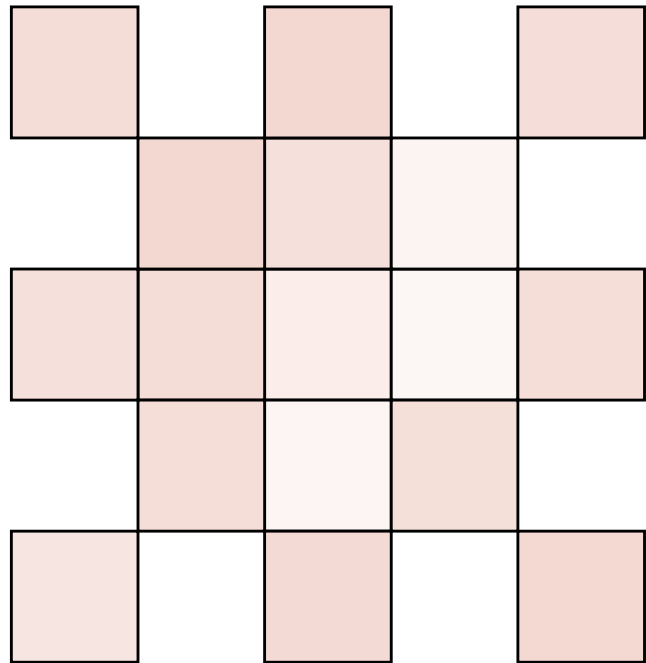

18-1735891-G-T

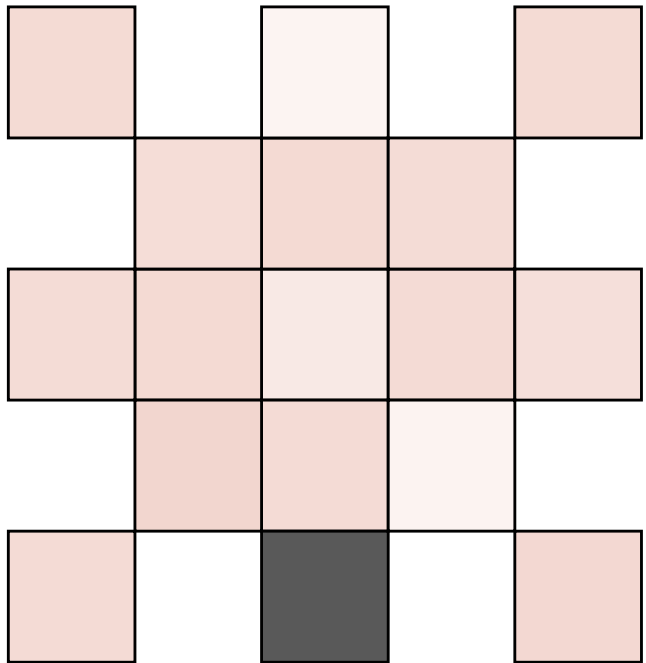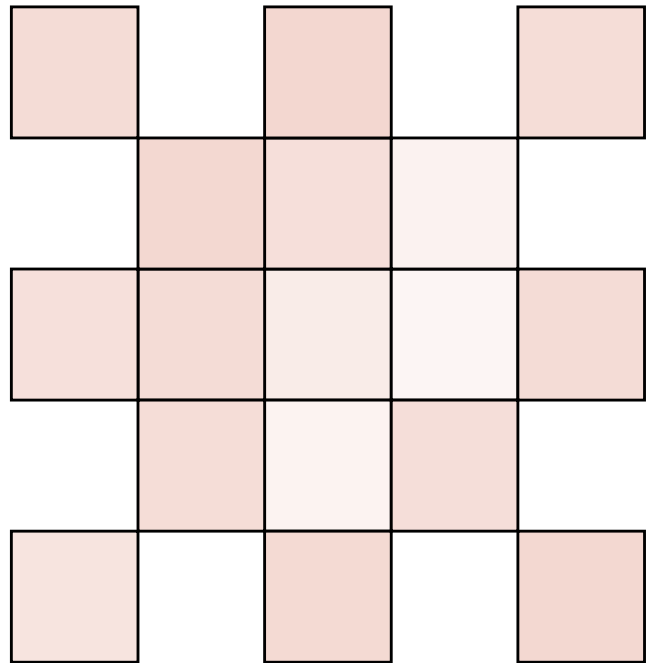

18-24782762-T-A

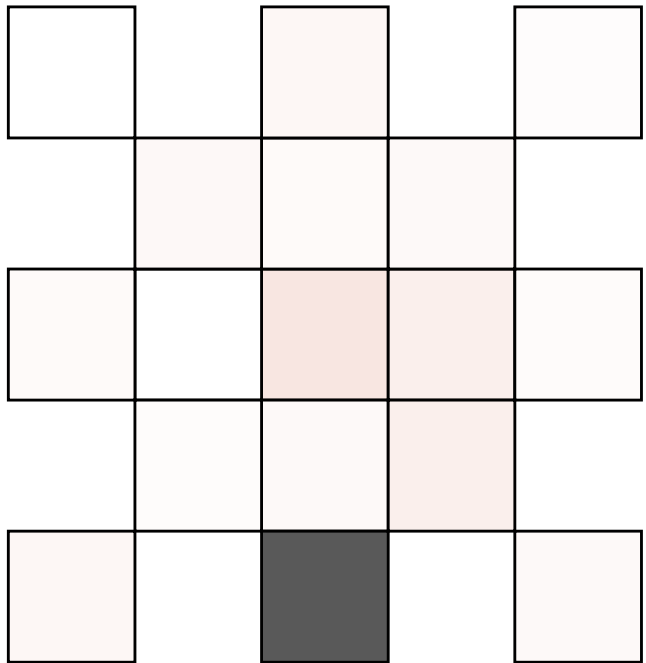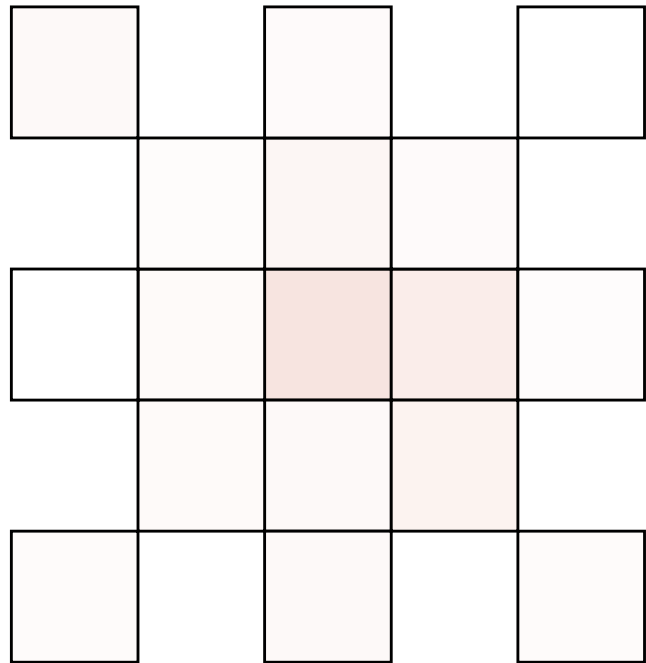

18-25171573-C-T

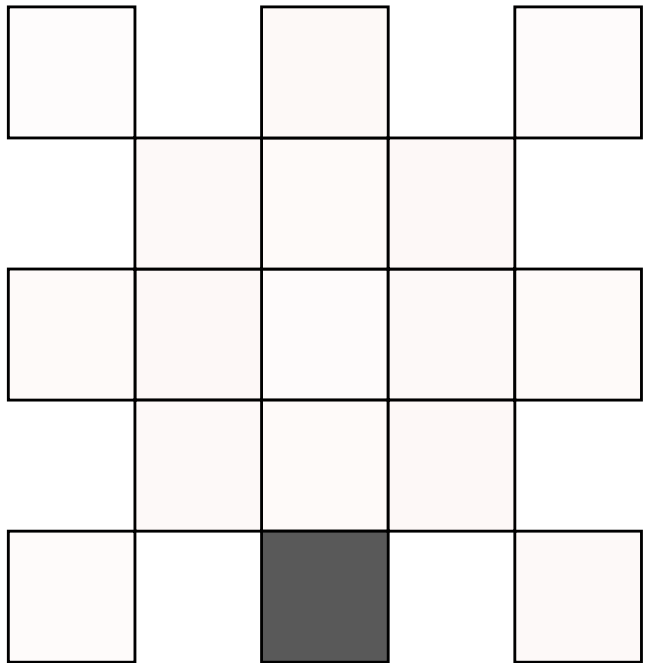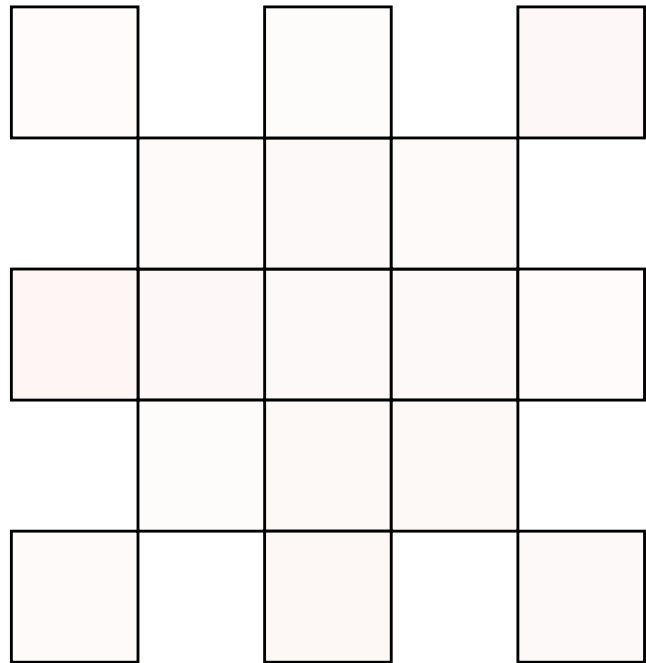

18-33999883-C-T

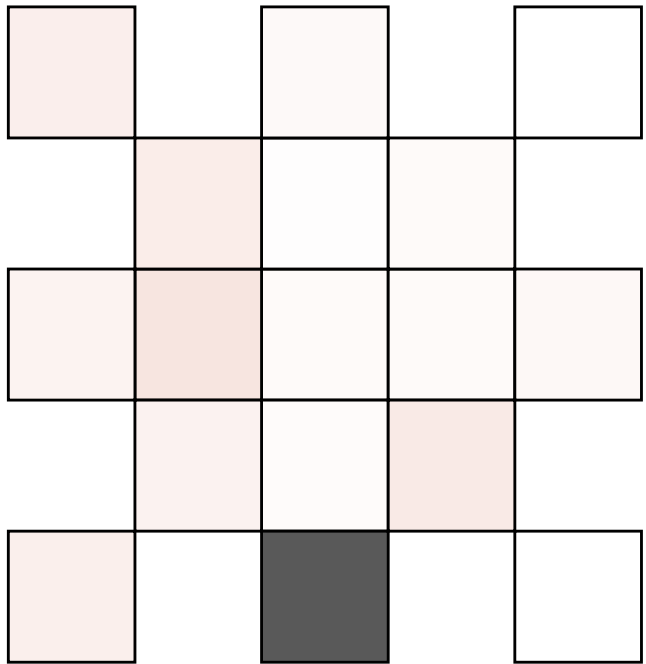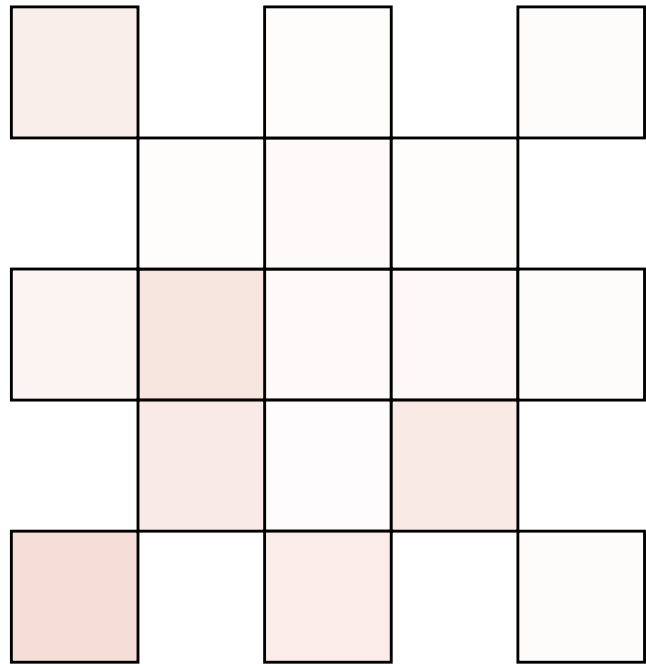

18-36090085-A-C

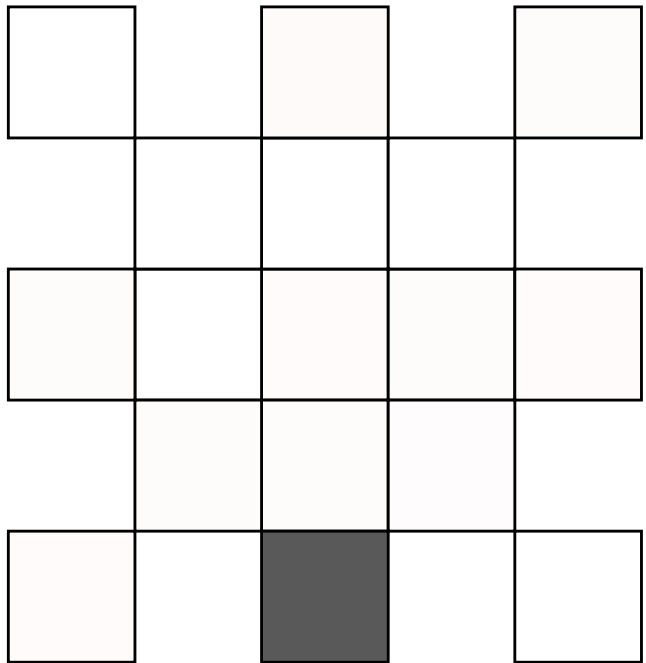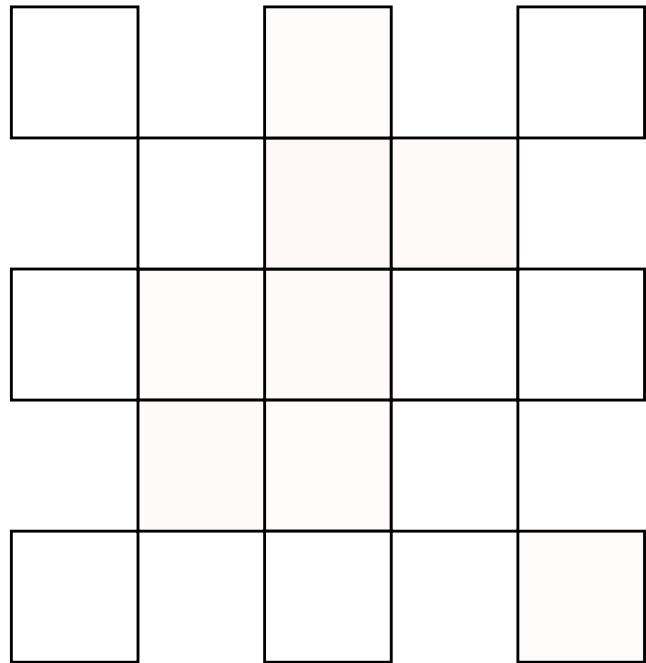

18-36334609-T-C

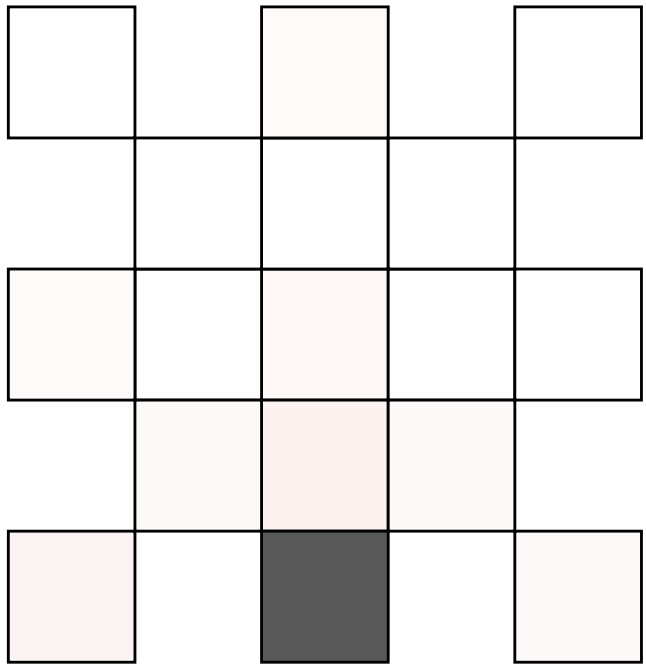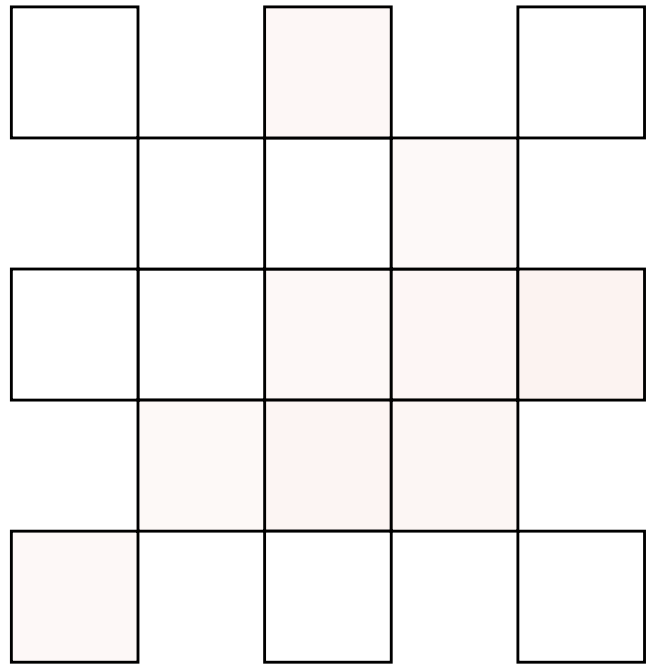

18-37021461-T-C

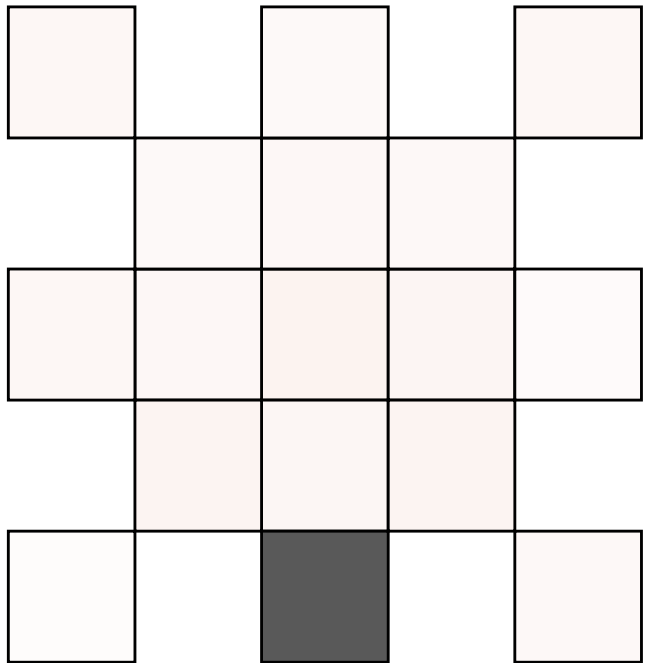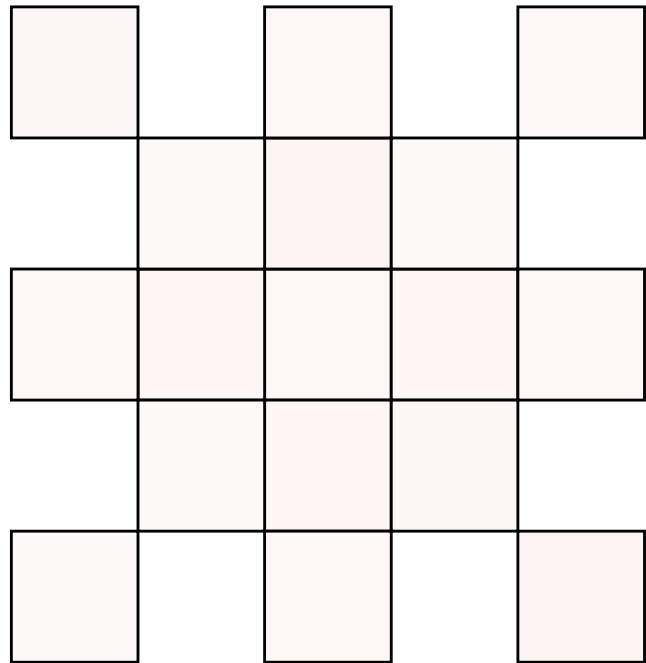



18-42932839-C-T

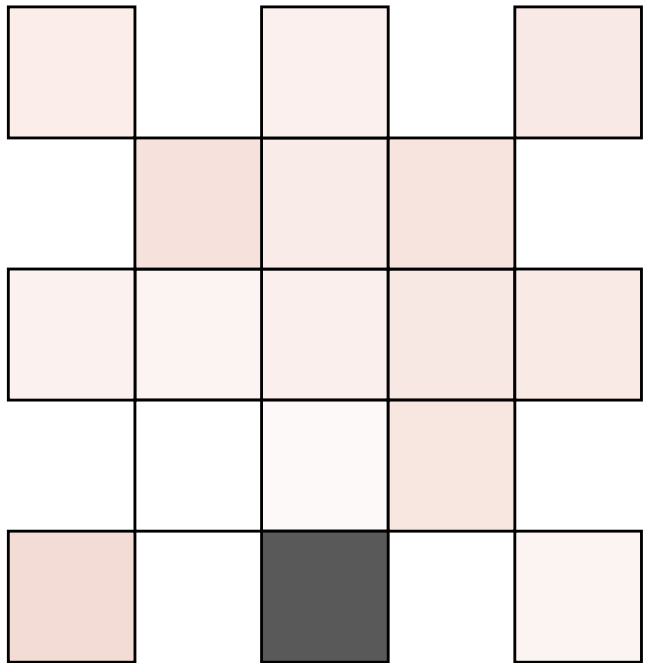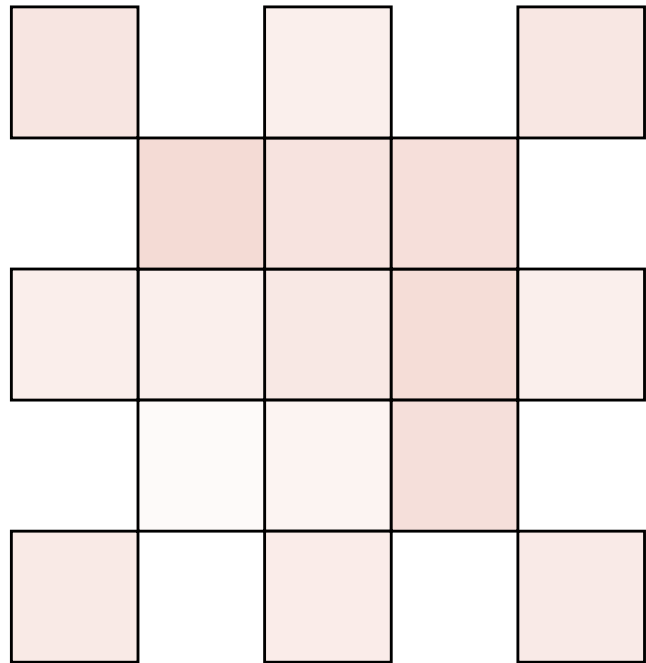

18-49194474-G-A

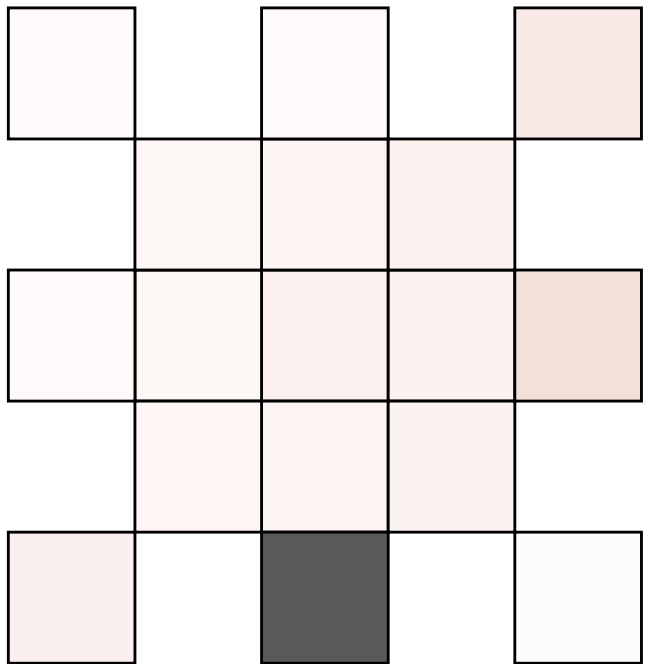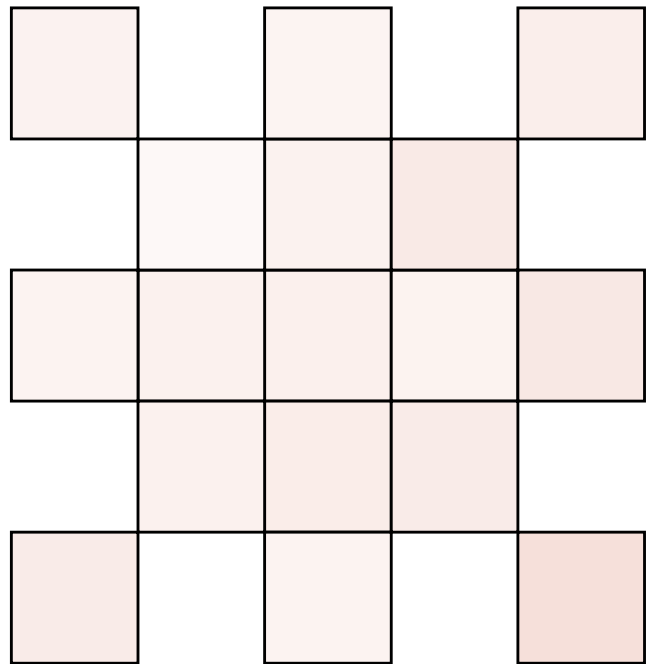

18-4957610-G-T

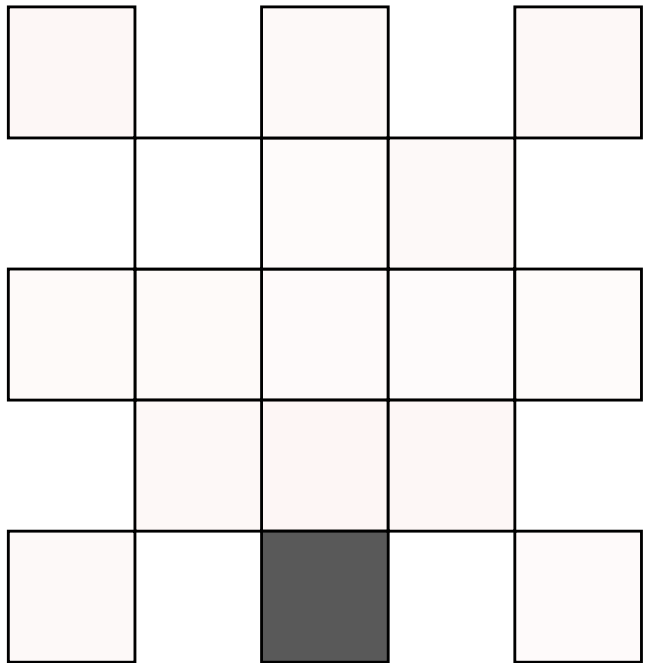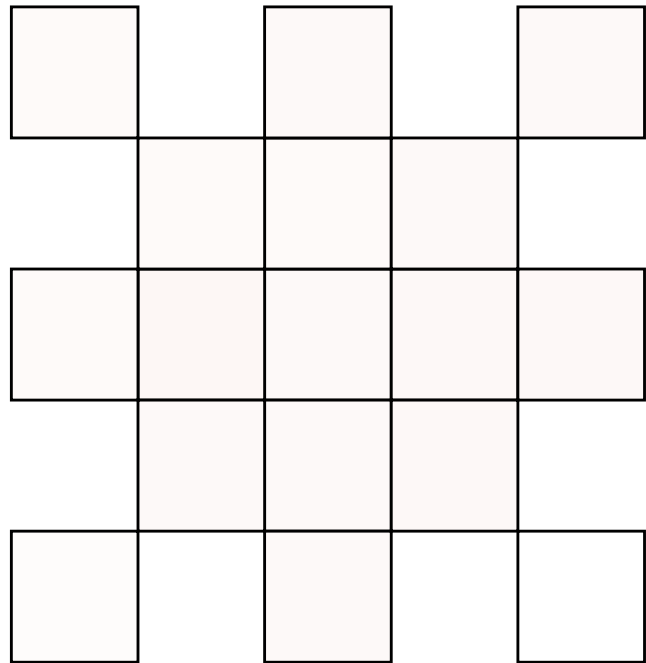

18-60849046-C-T

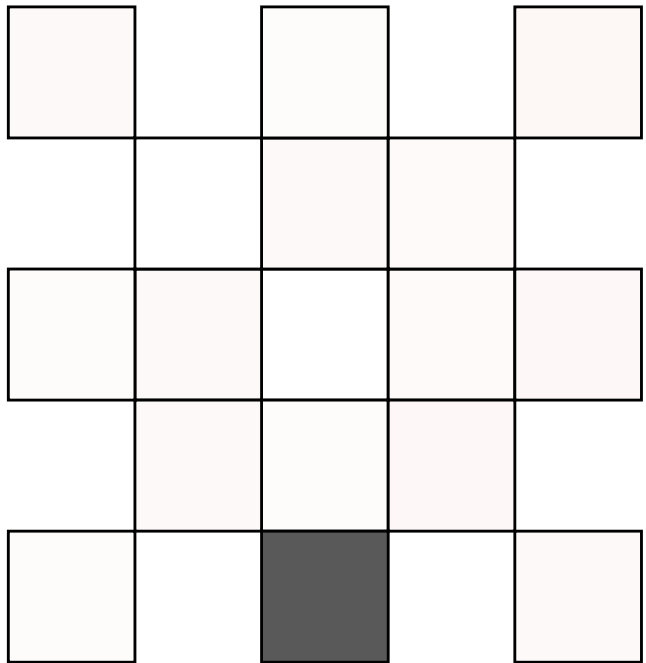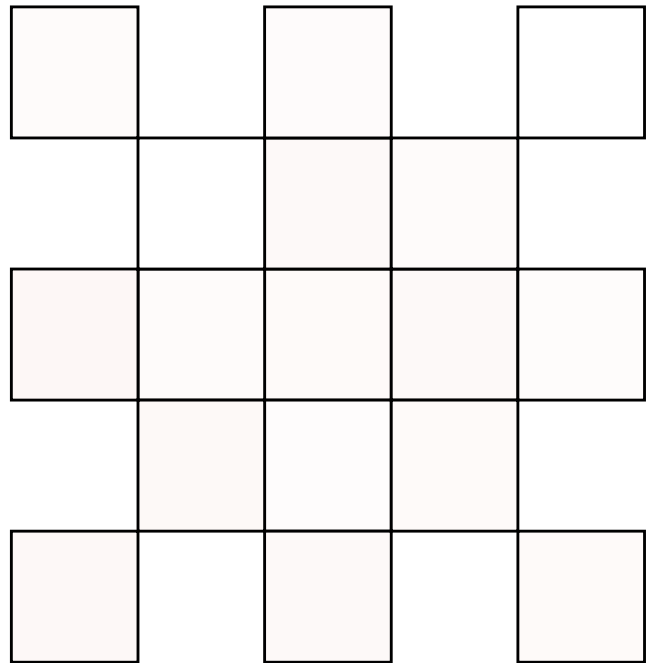

18-64016149-C-A

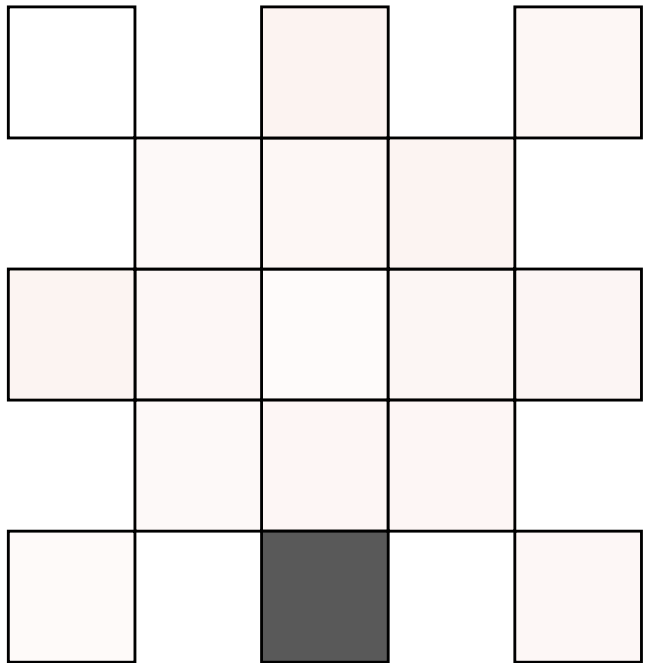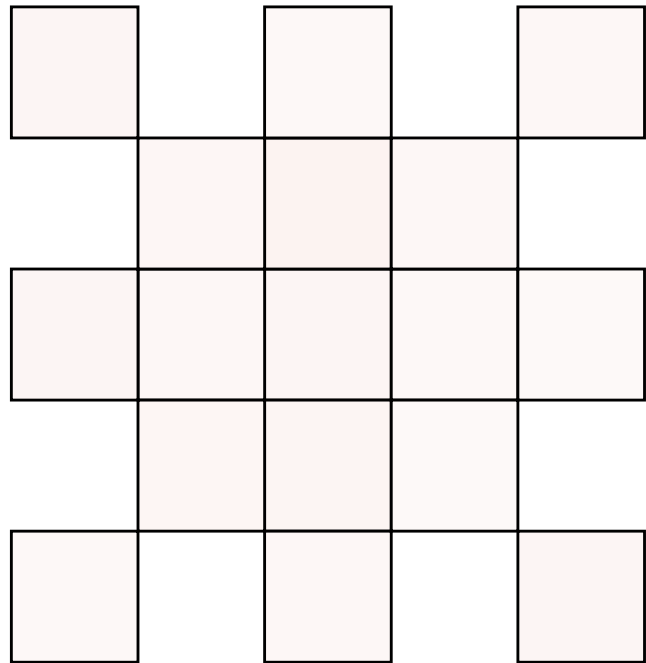

18-64125536-C-G

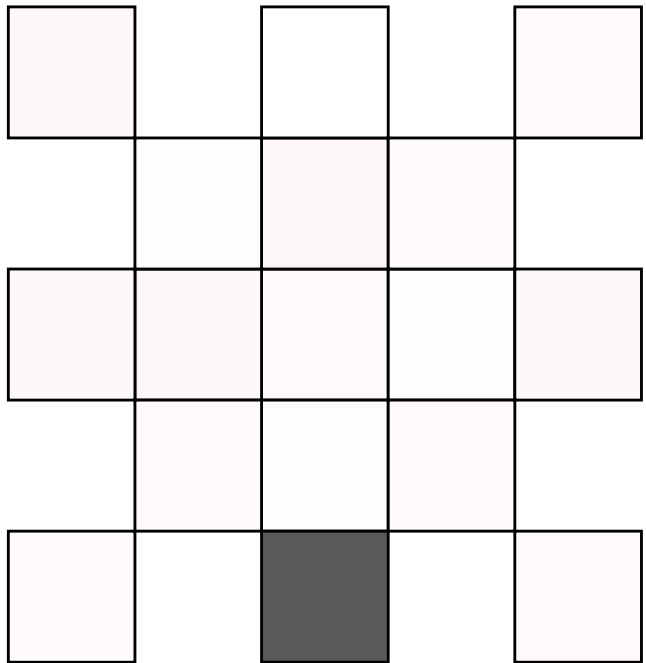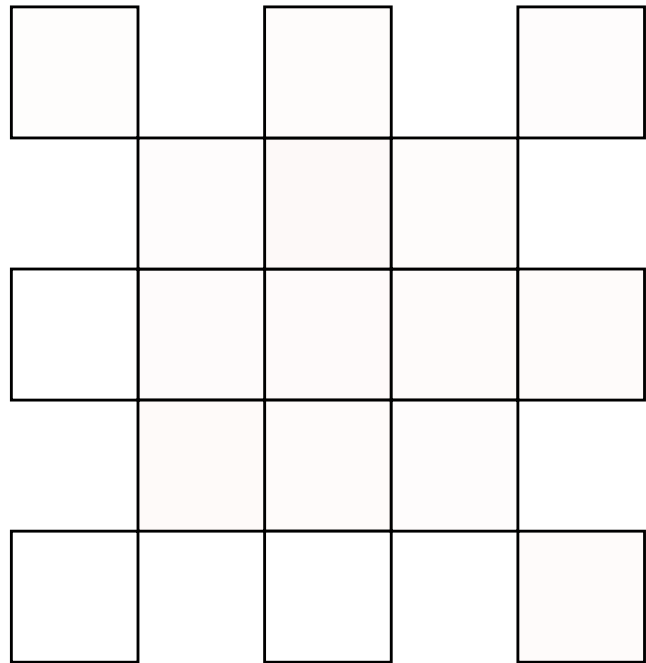

18-66103772-A-T

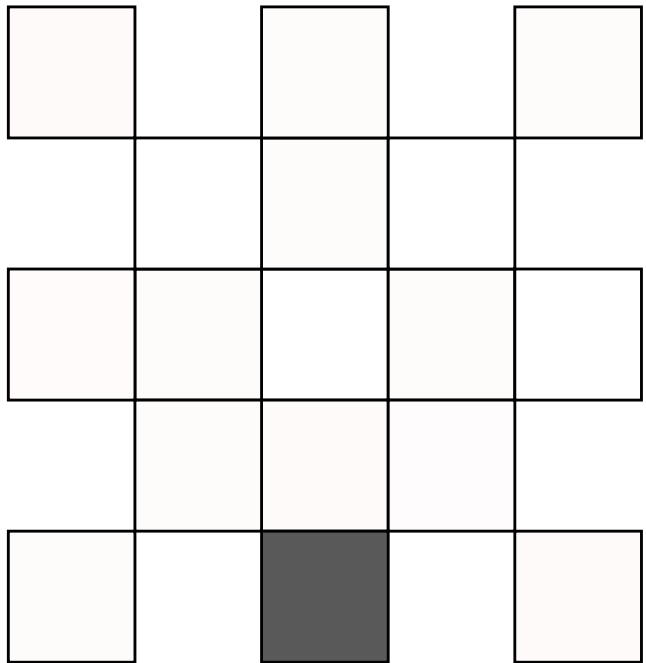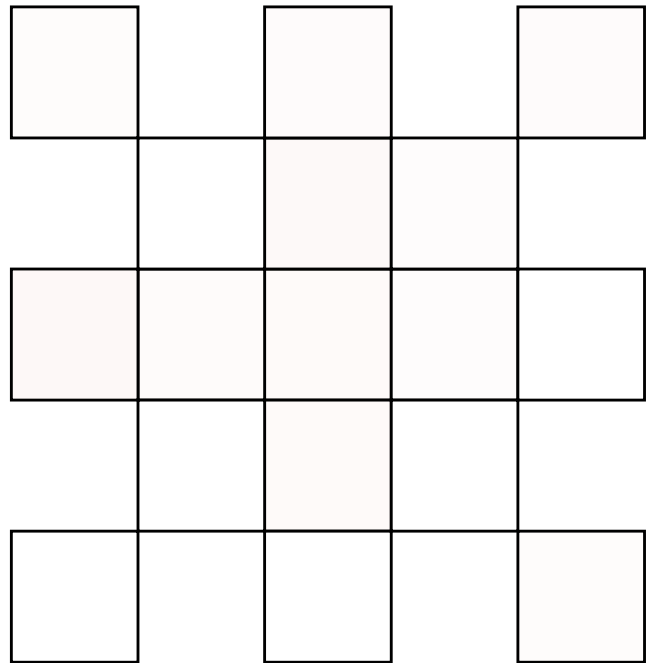

18-68768921-C-T

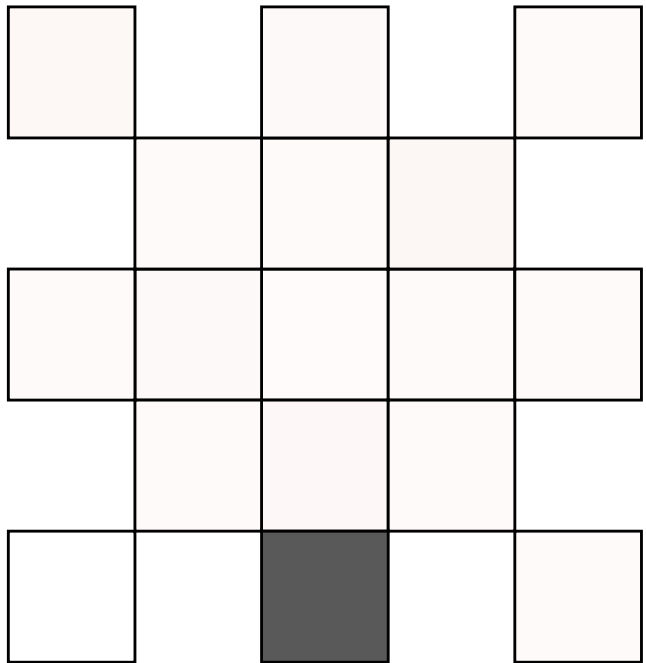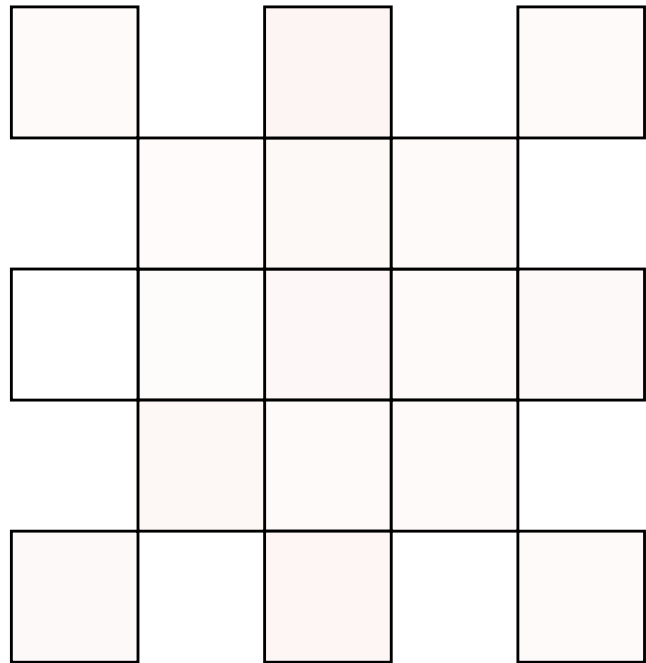



19-1124954-C-T

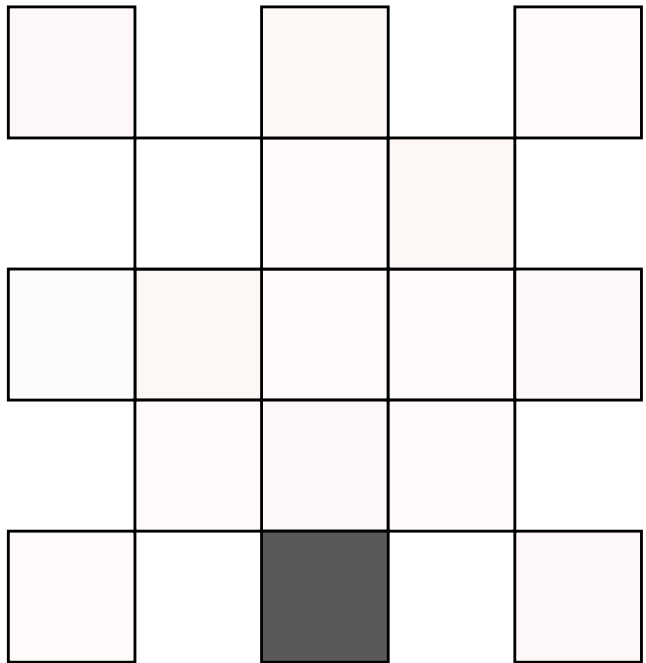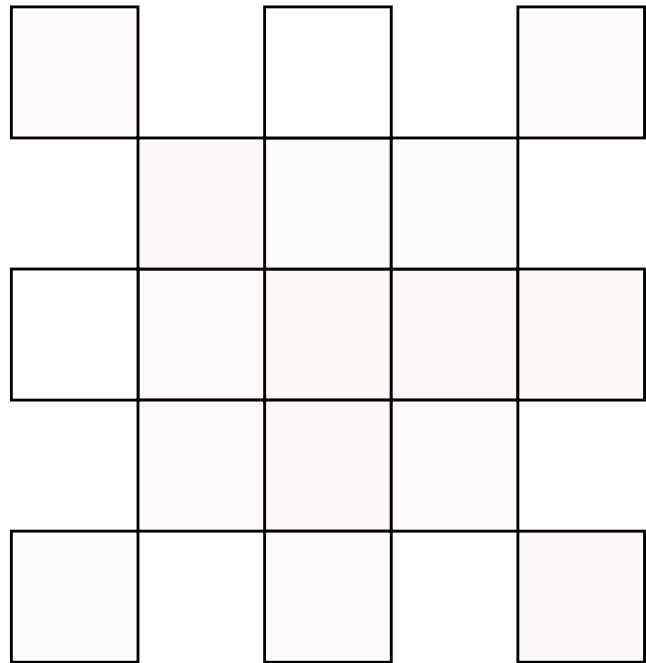

19-13941229-G-A

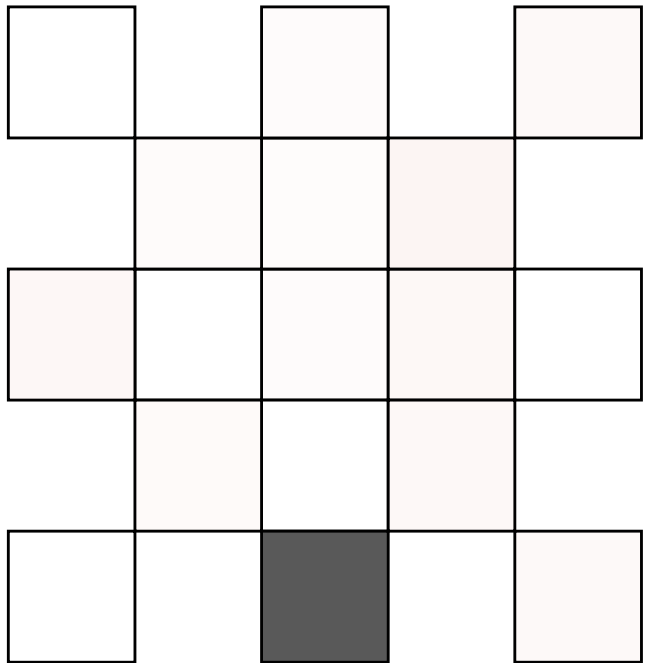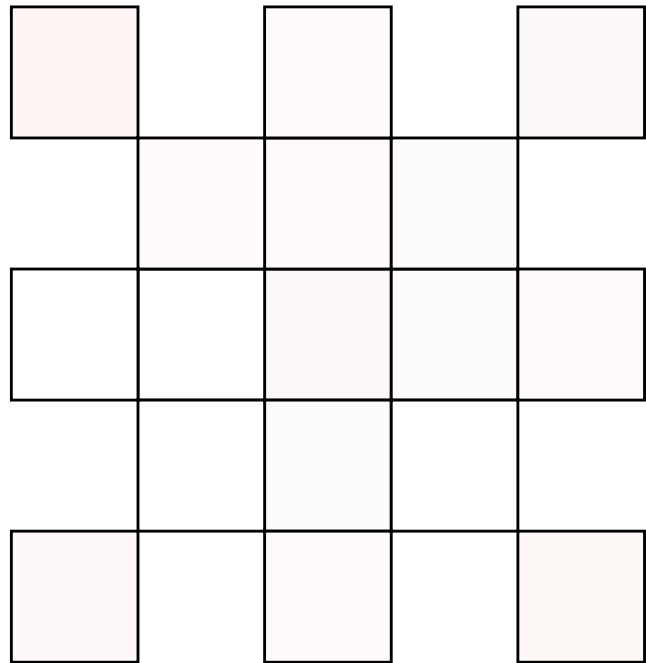

19-15010579-G-A

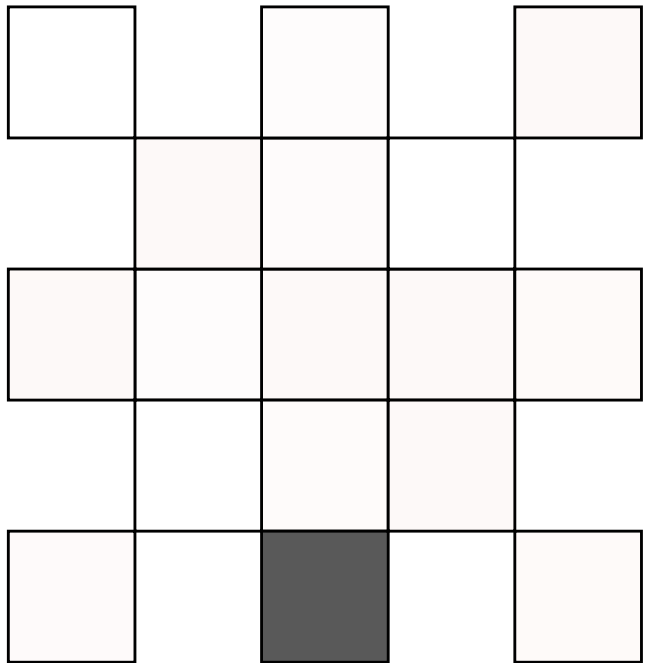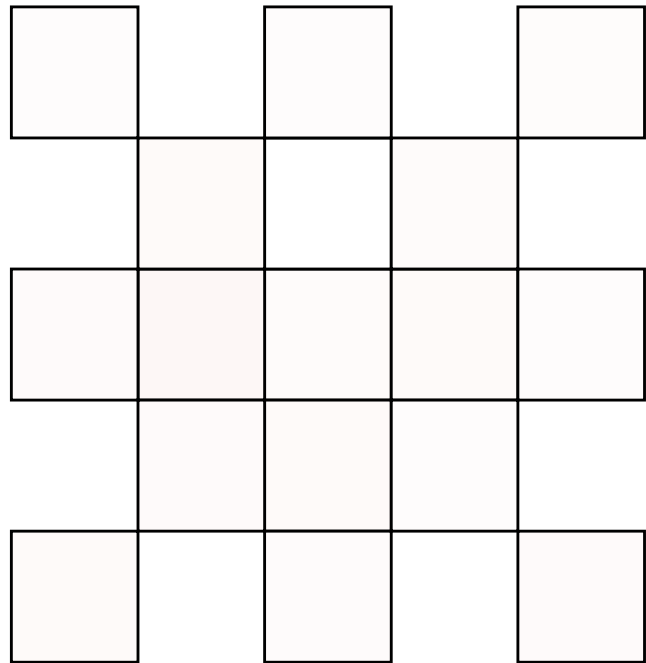

19-1621289-C-T

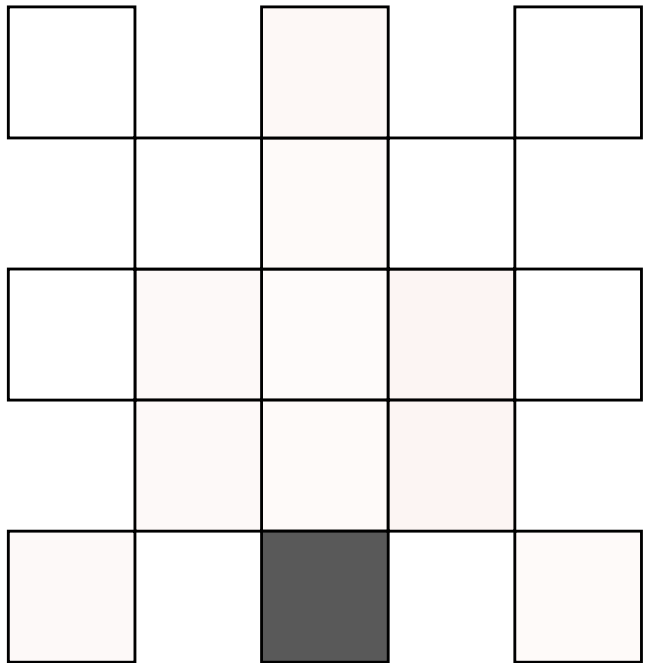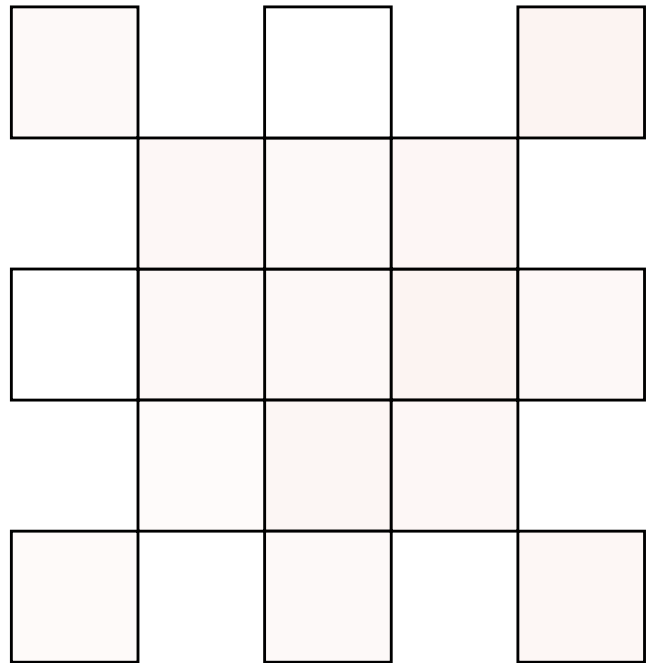

19-30808081-C-T

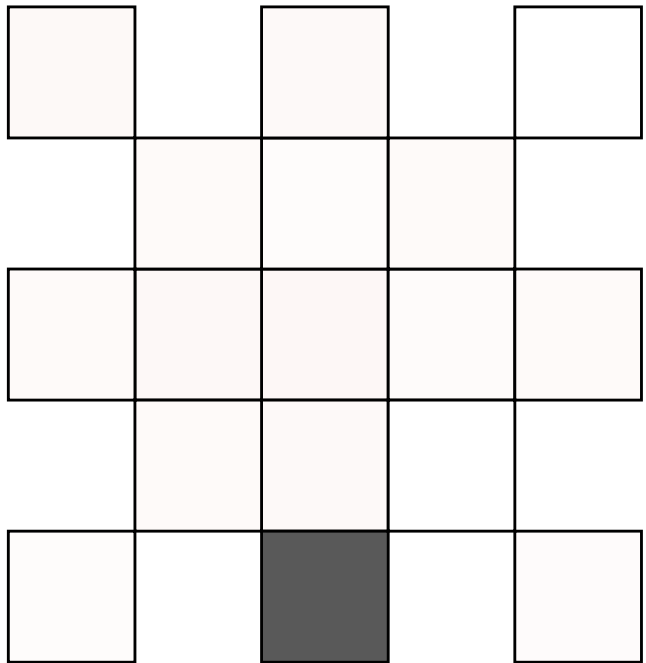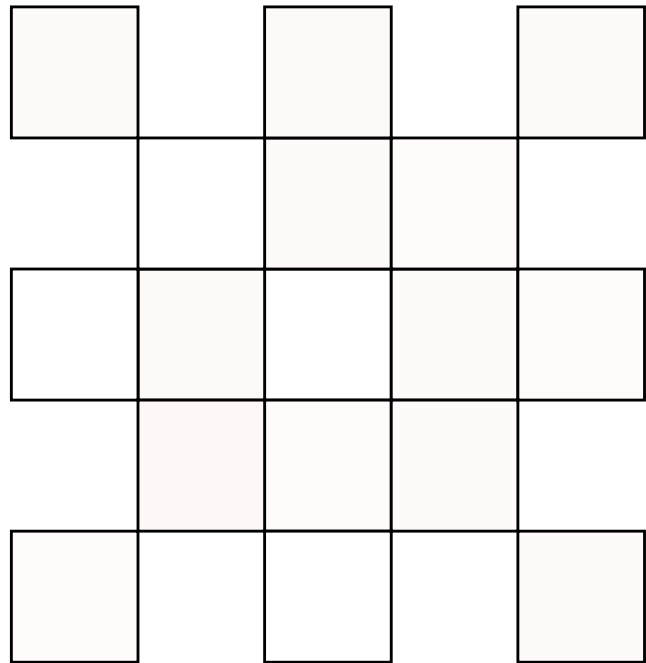

19-3551269-T-A

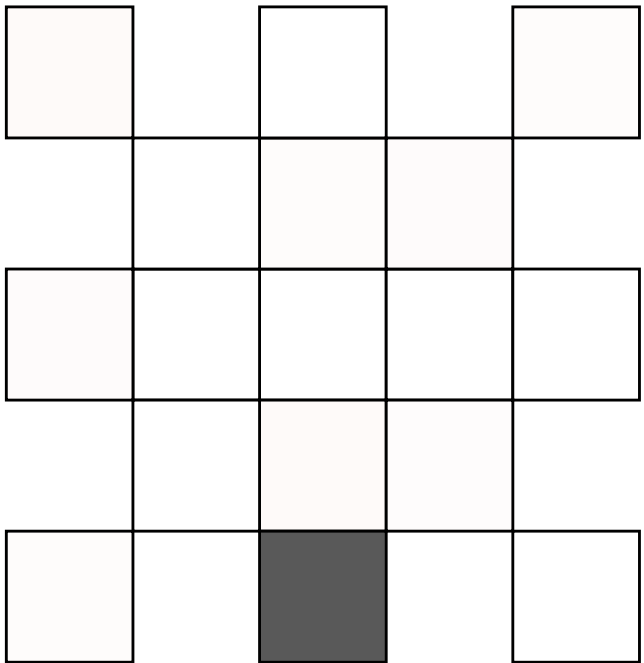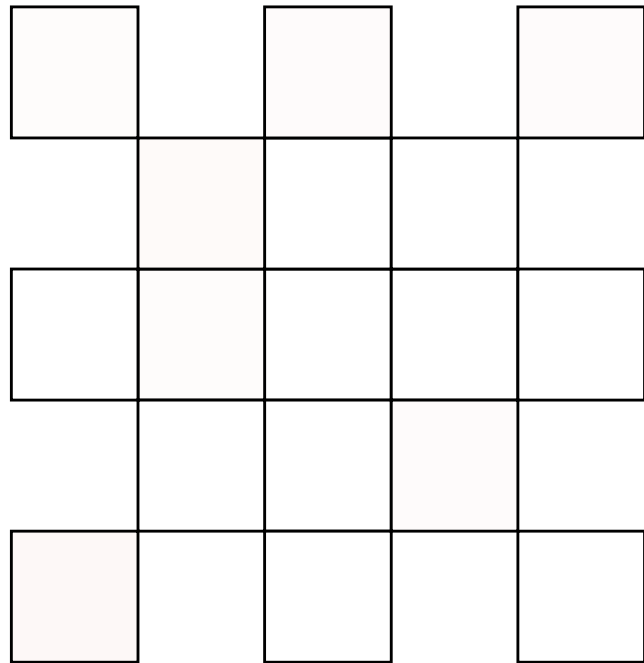

19-36516973-C-T

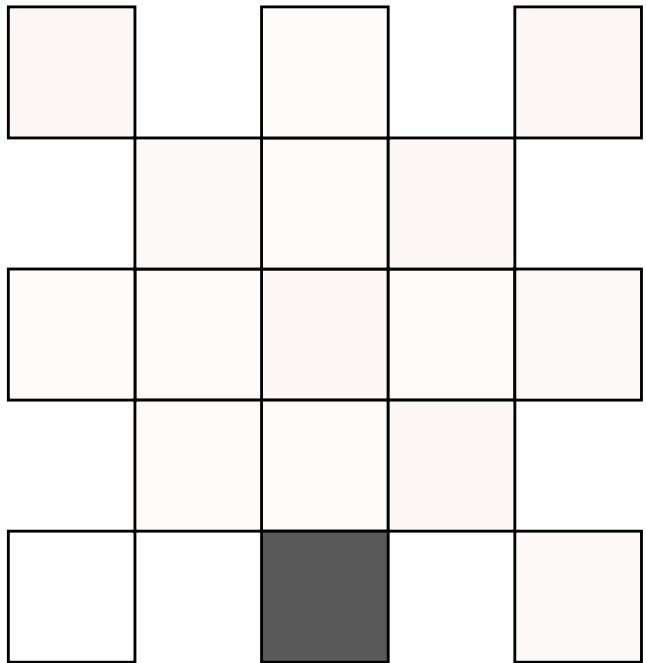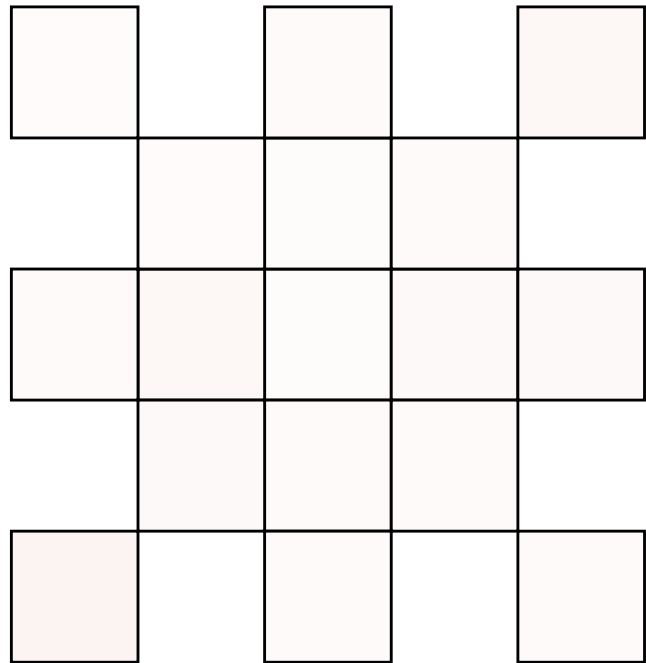

19-46596282-C-T

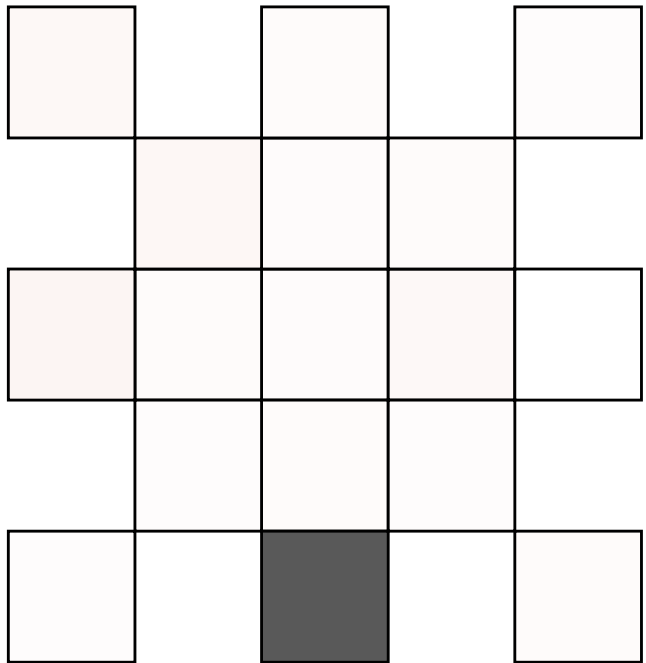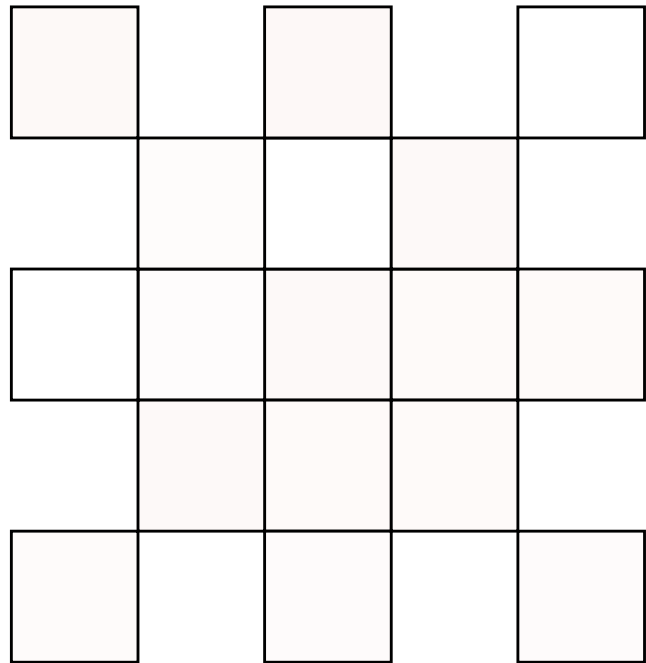



19-53880285-C-T

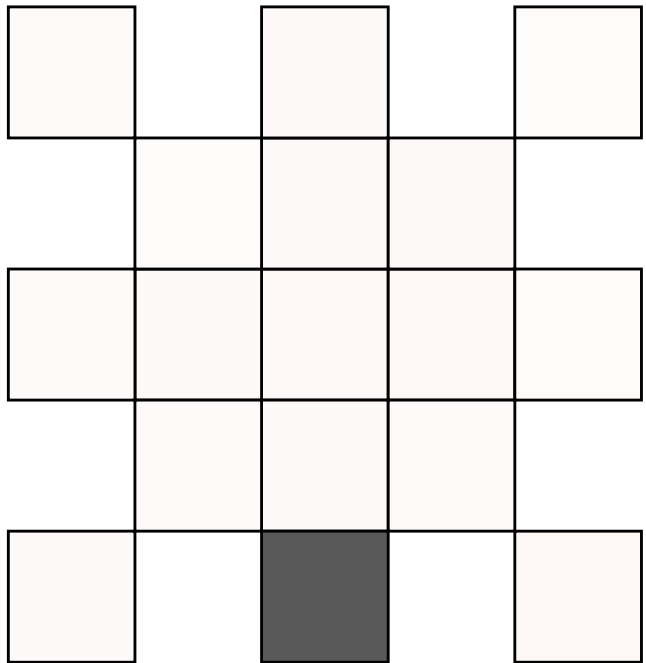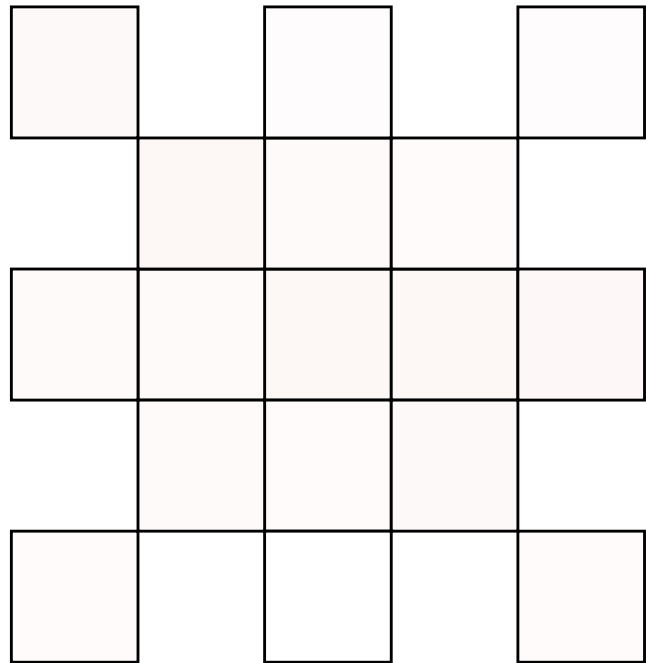

19-5499386-G-C

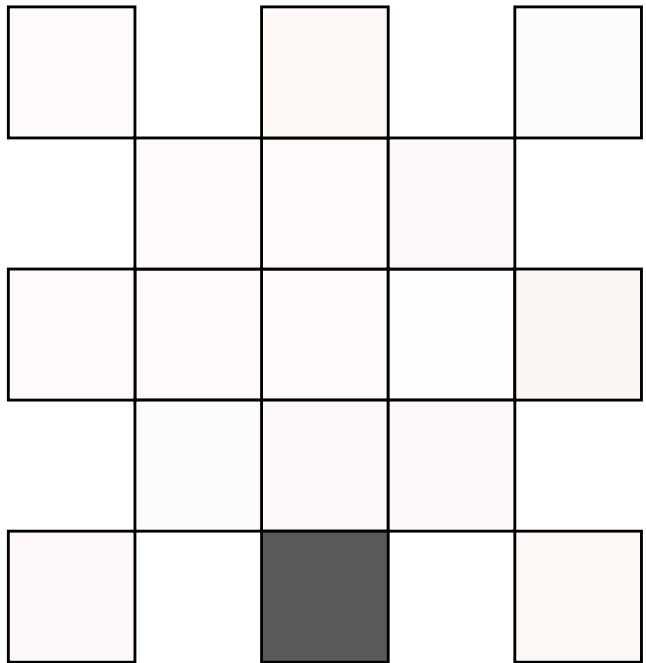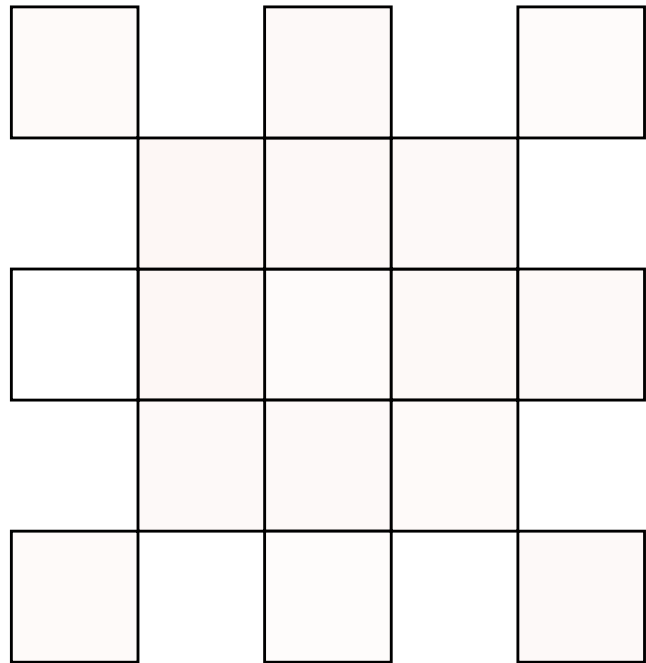

19-55665618-G-A

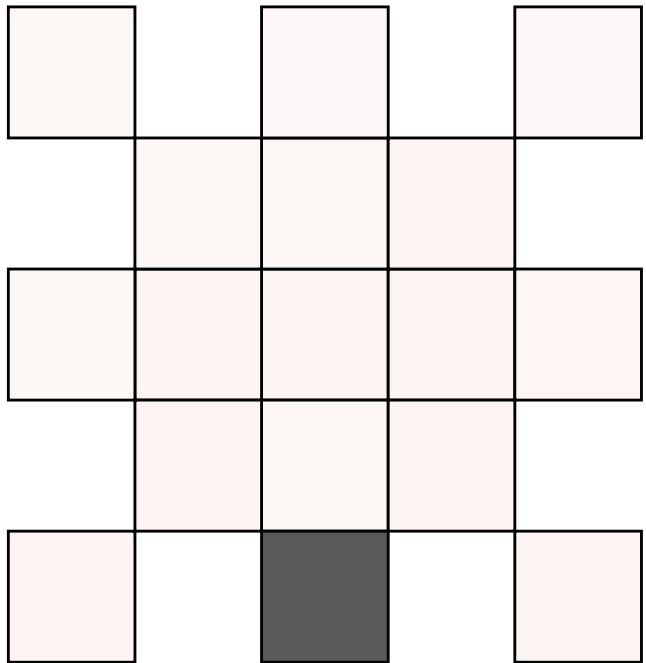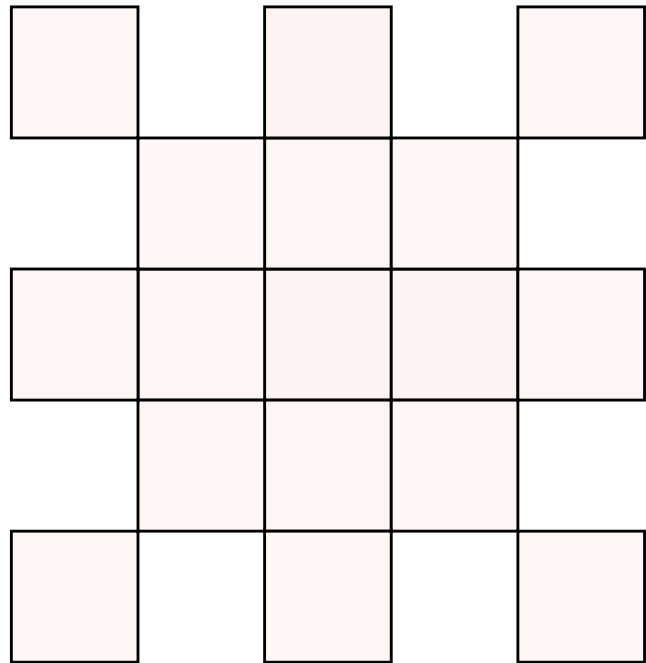

19-57342142-G-A

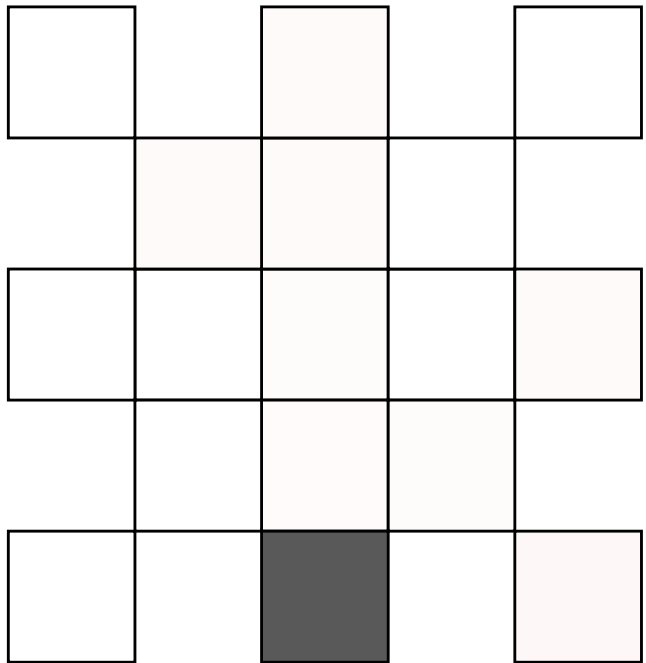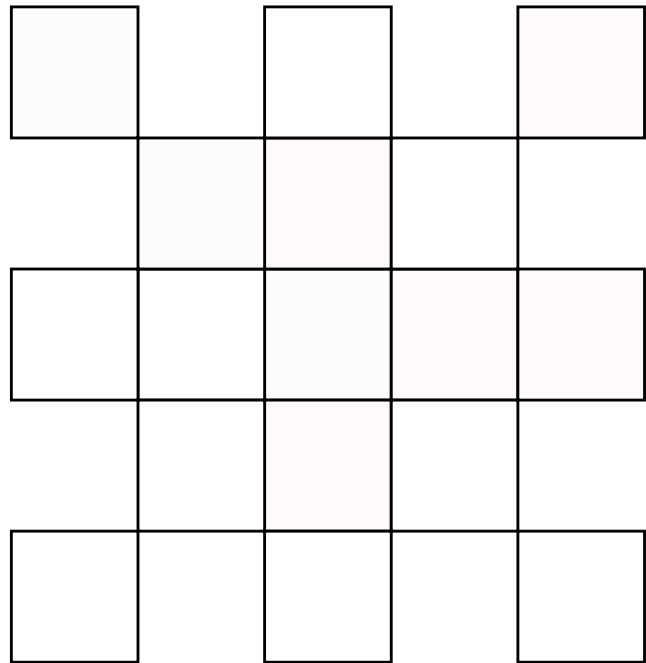

19-58610340-T-G

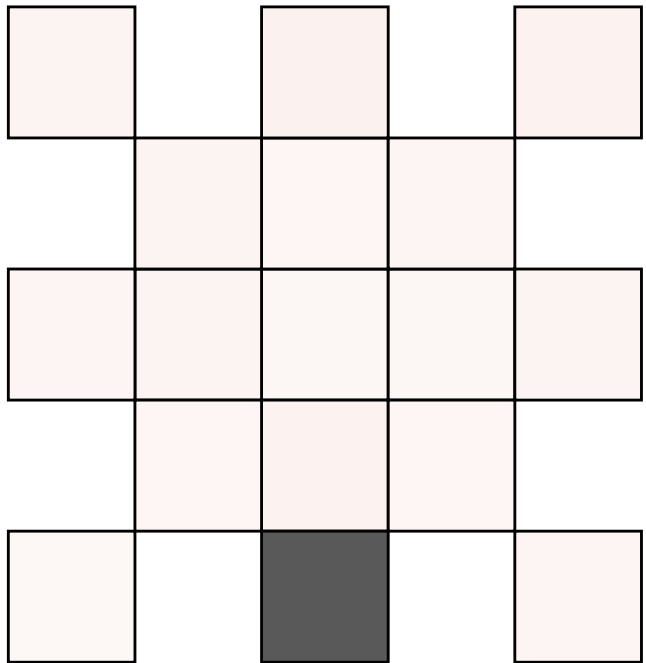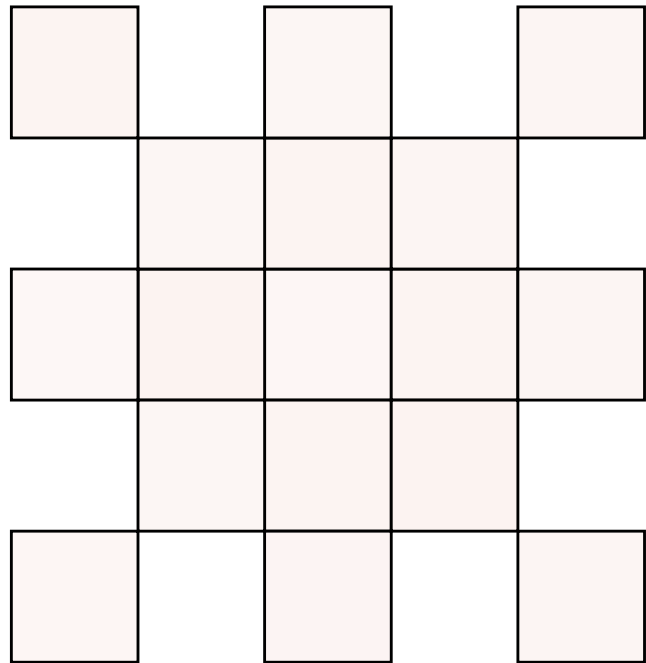

19-5879037-C-T

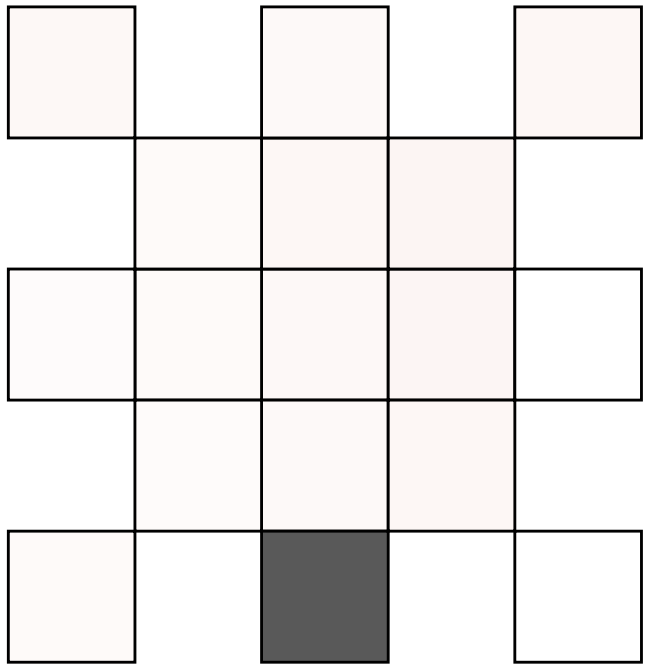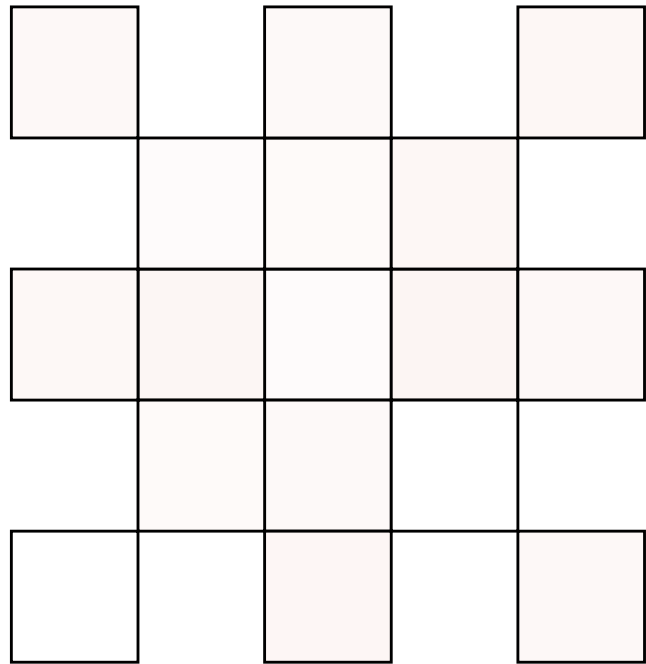

2-104851040-C-T

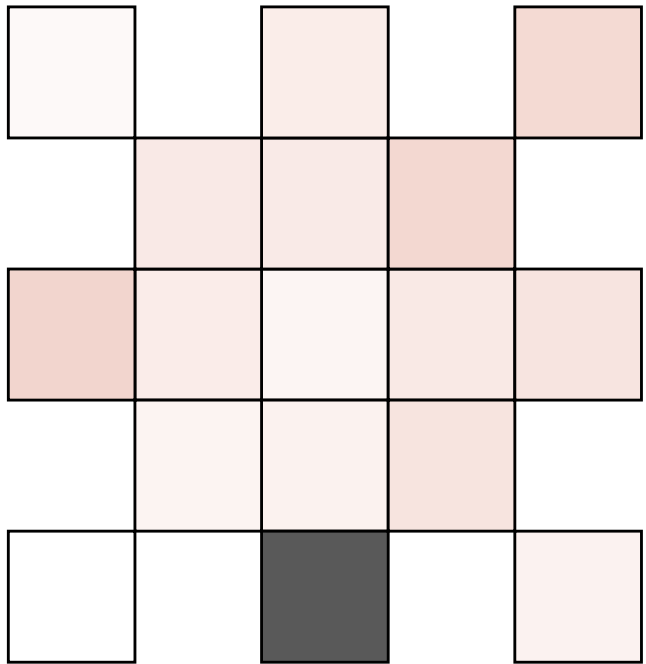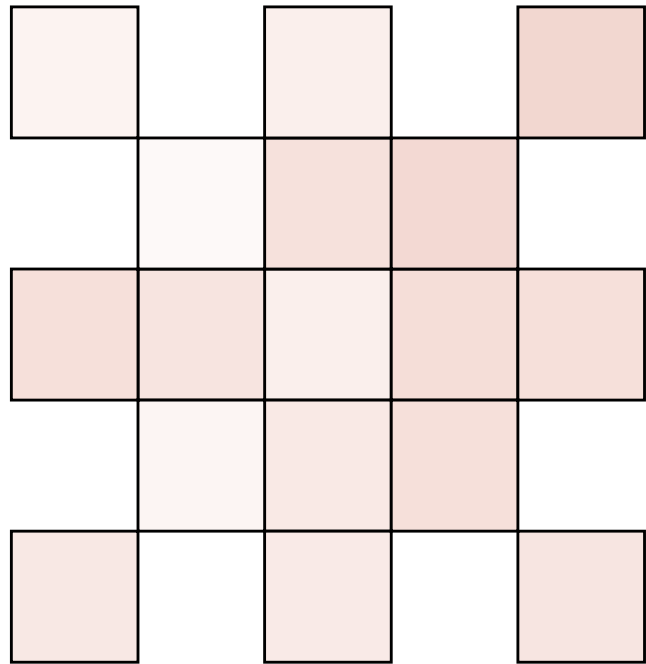

2-10485895-T-C

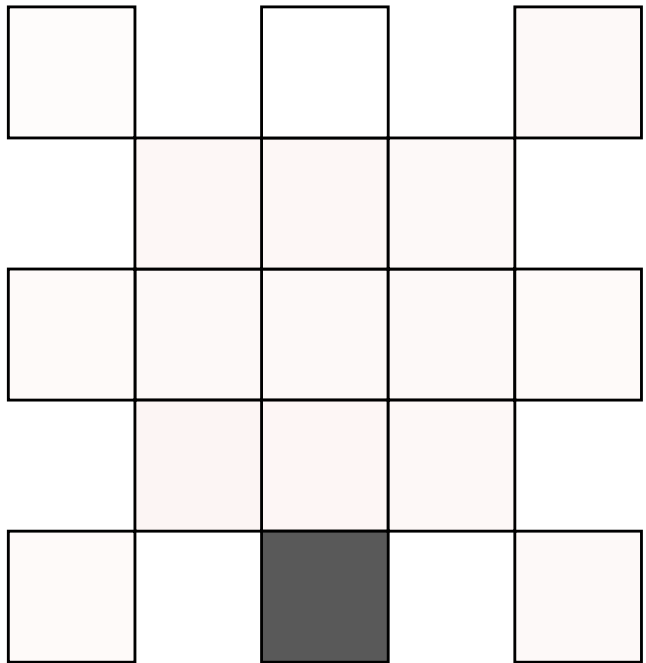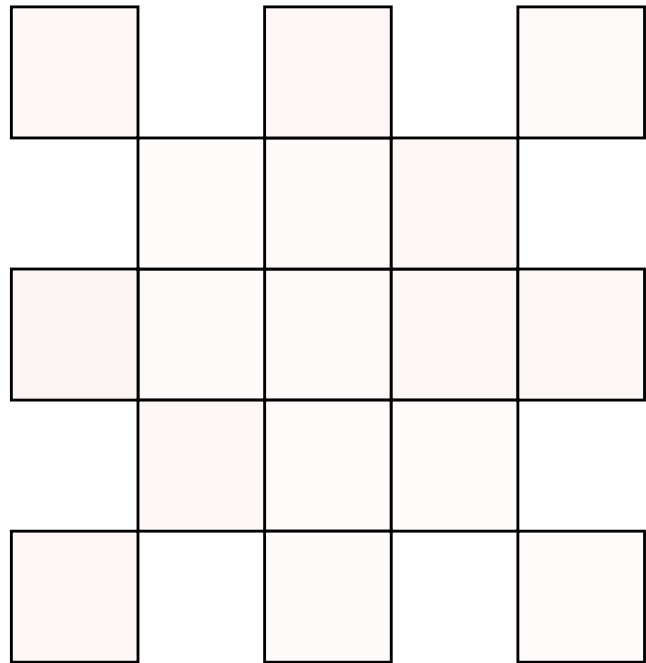



2-105083647-G-A

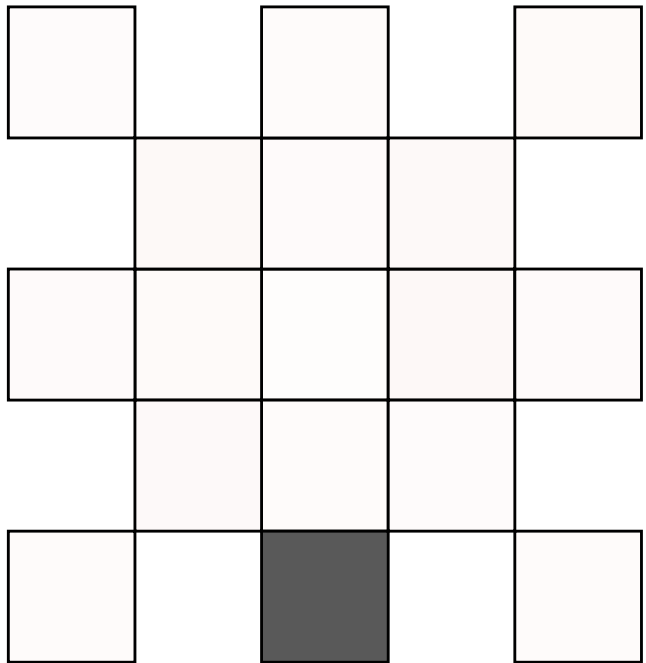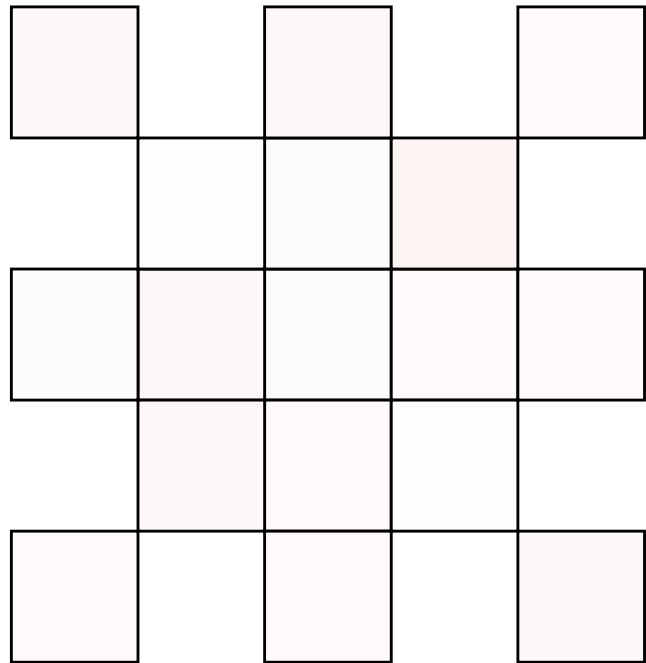

2-110272685-G-A

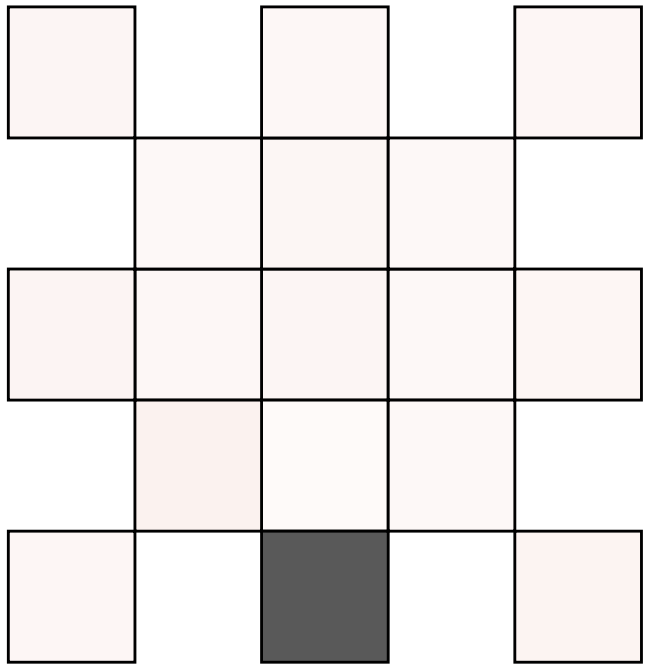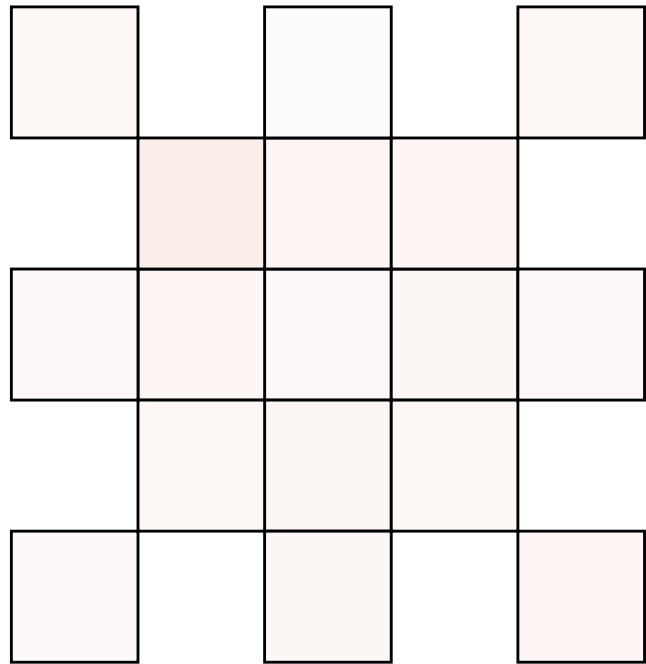

2-115000633-A-G

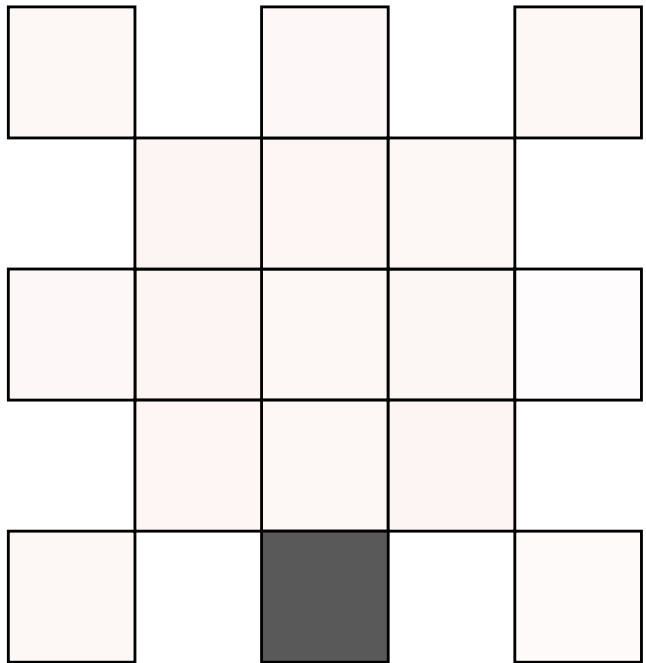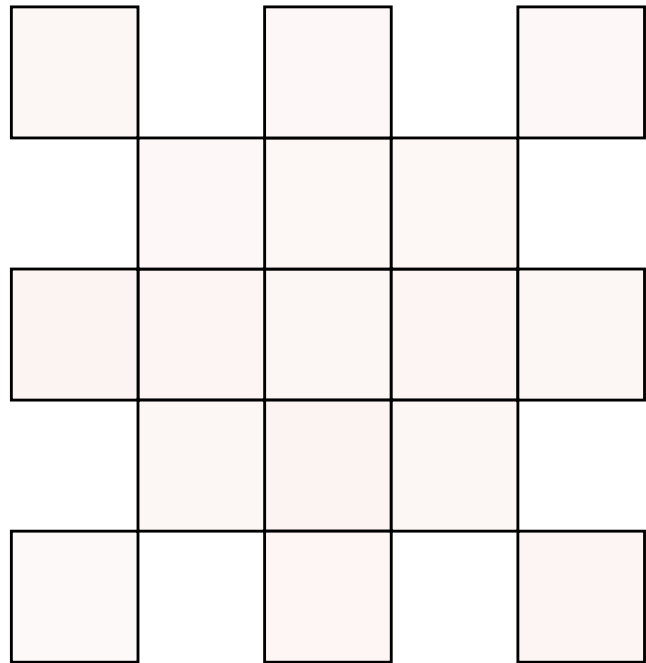

2-115027303-G-A

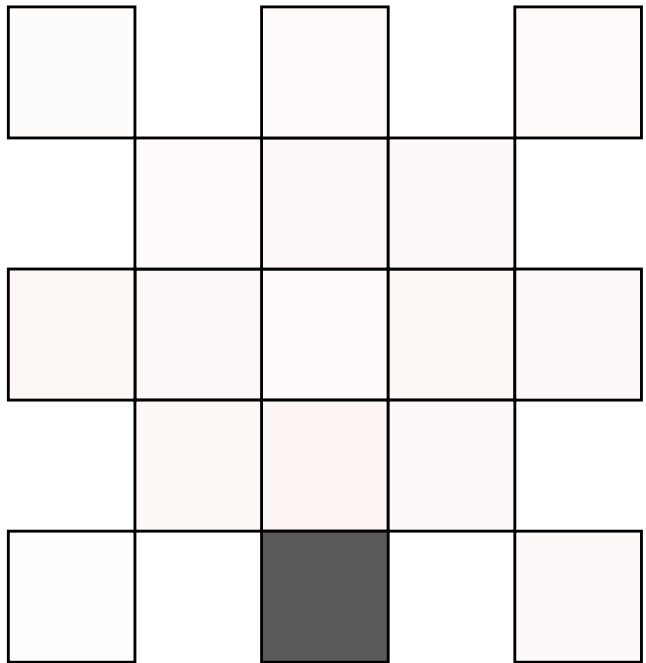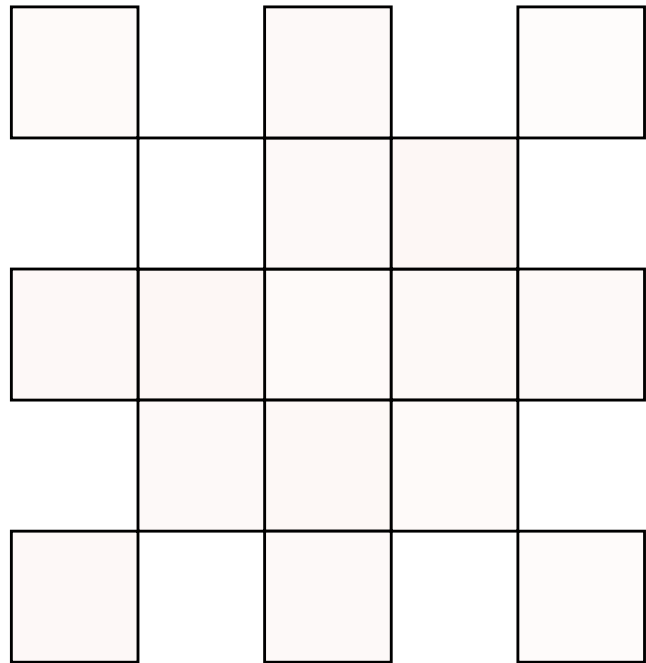

2-115601554-G-A

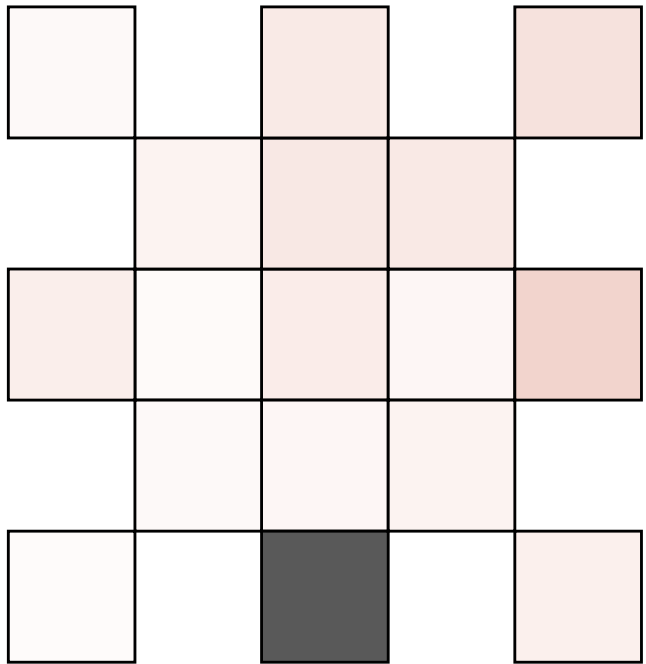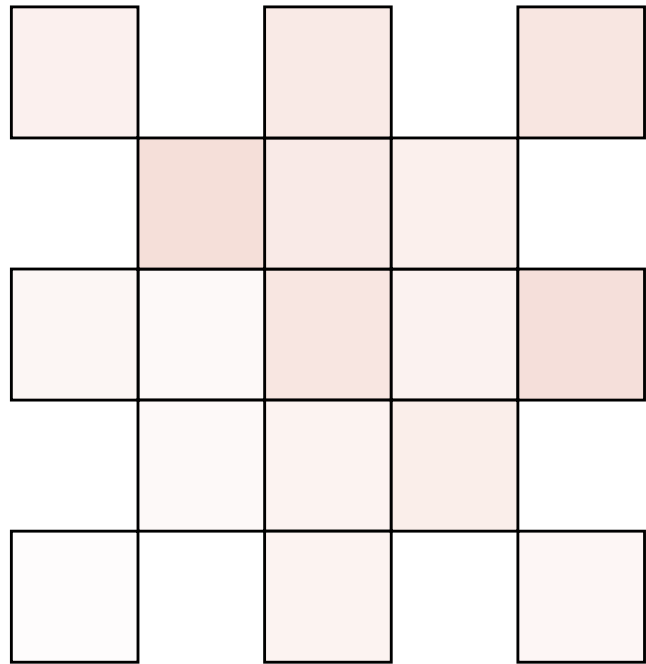

2-115708162-C-T

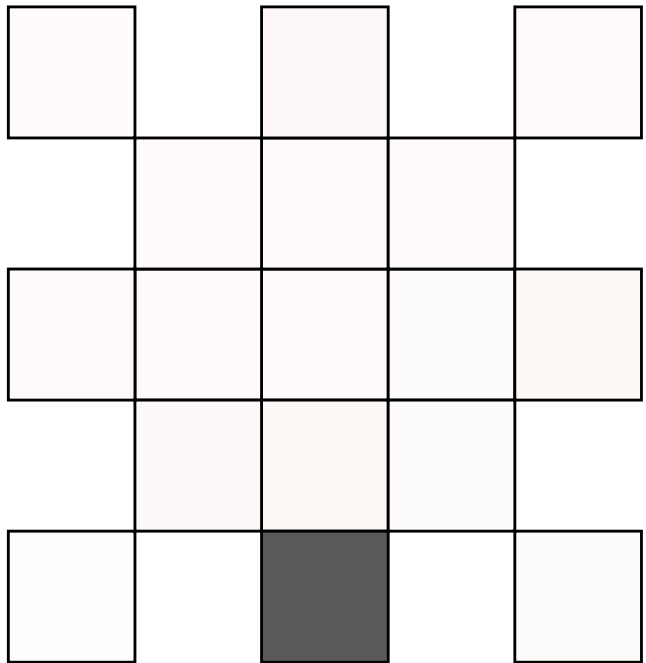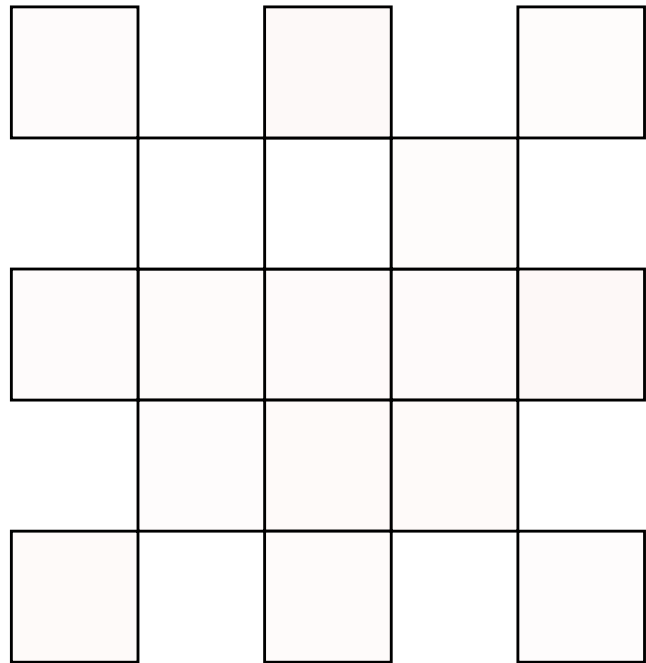

2-116395374-G-T

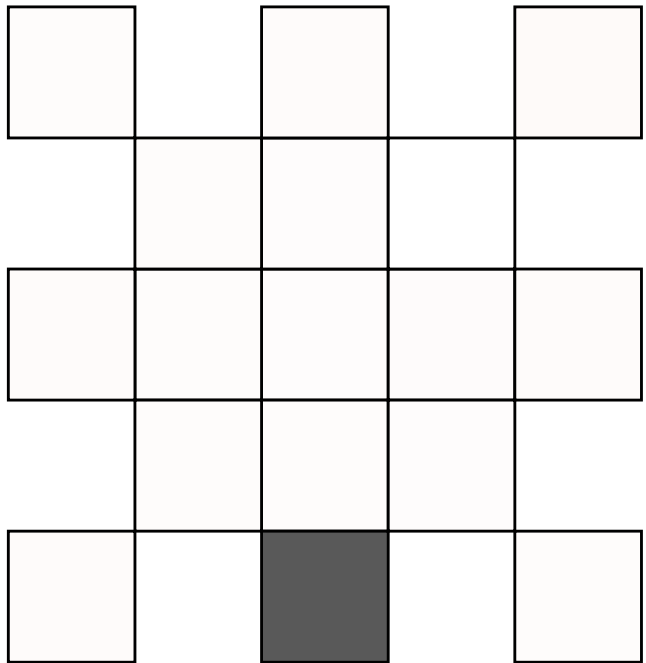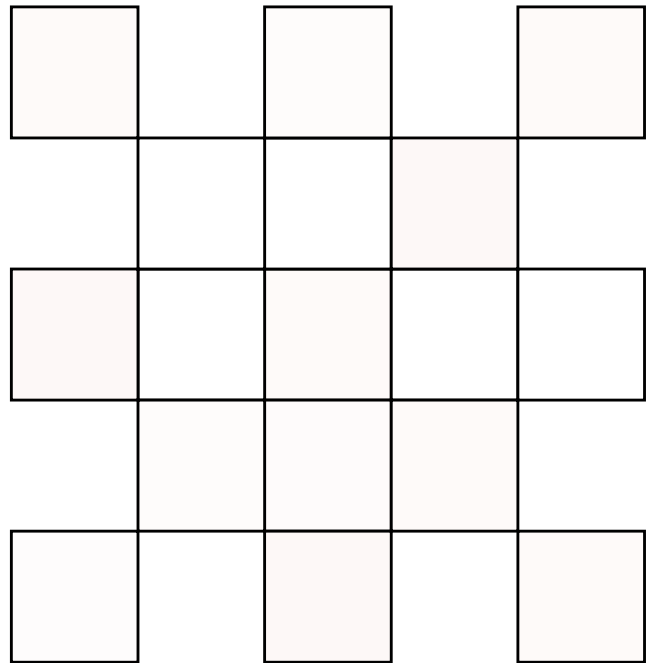

2-118425584-C-T

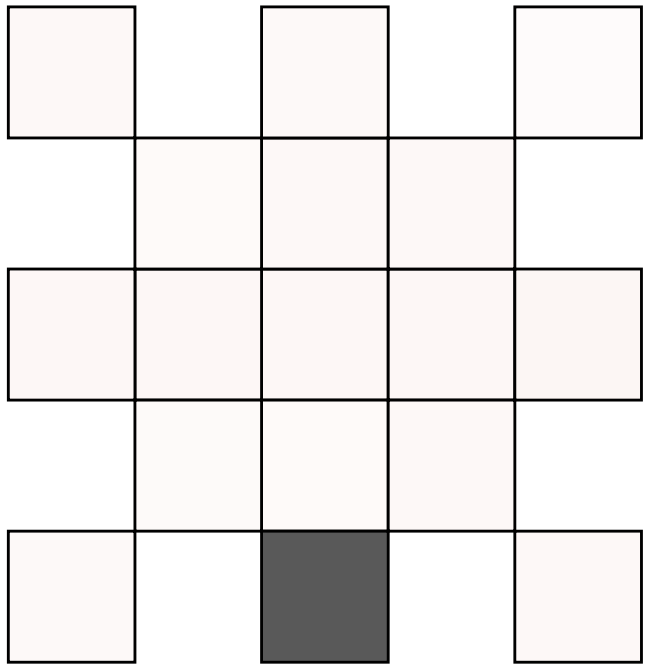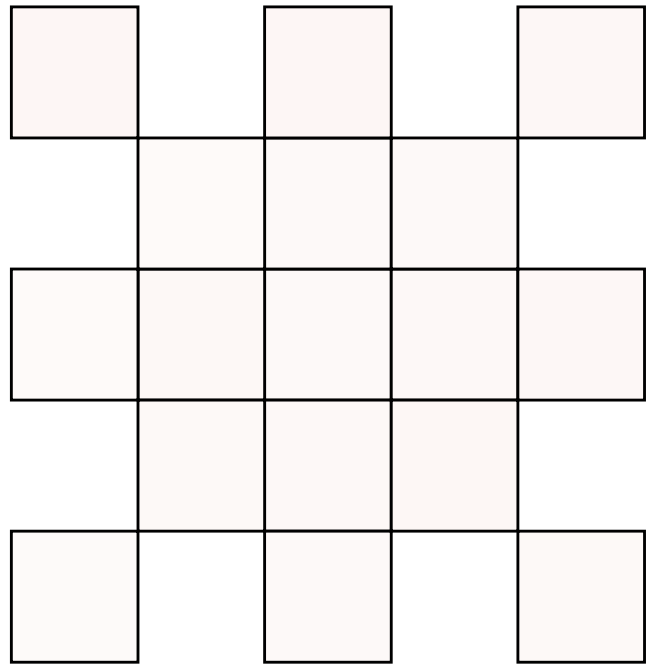



2-129713862-G-A

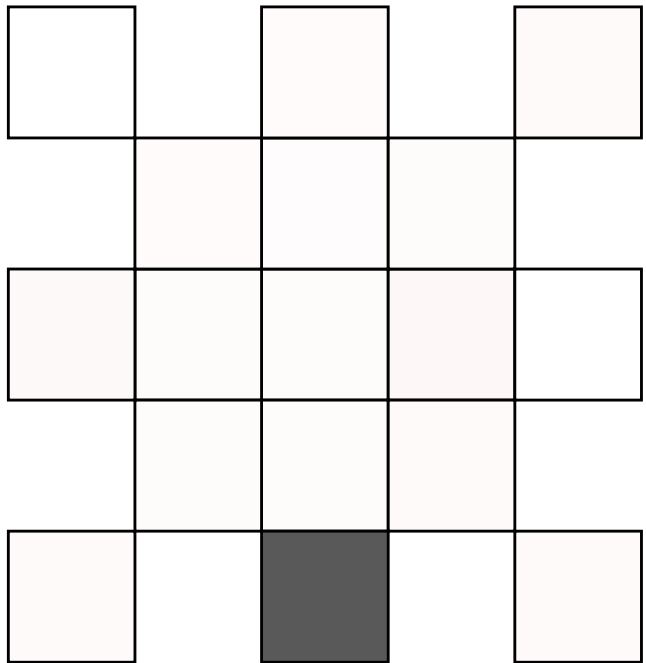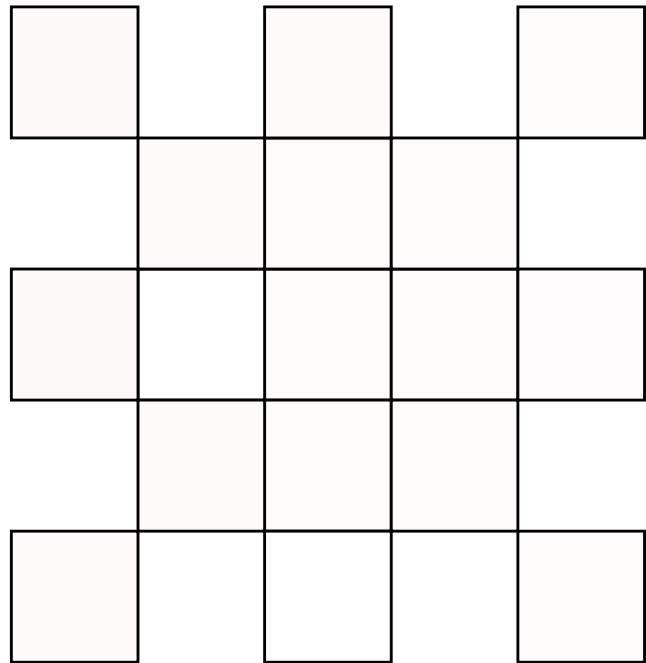

2-130483876-C-T

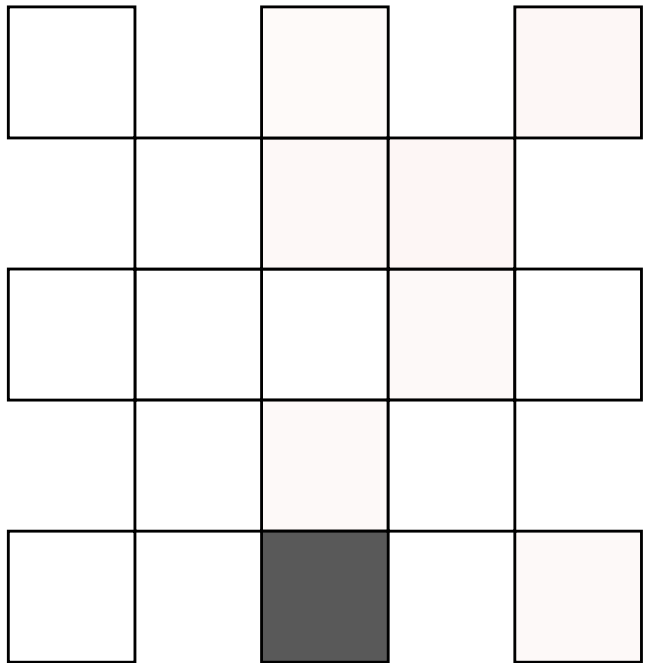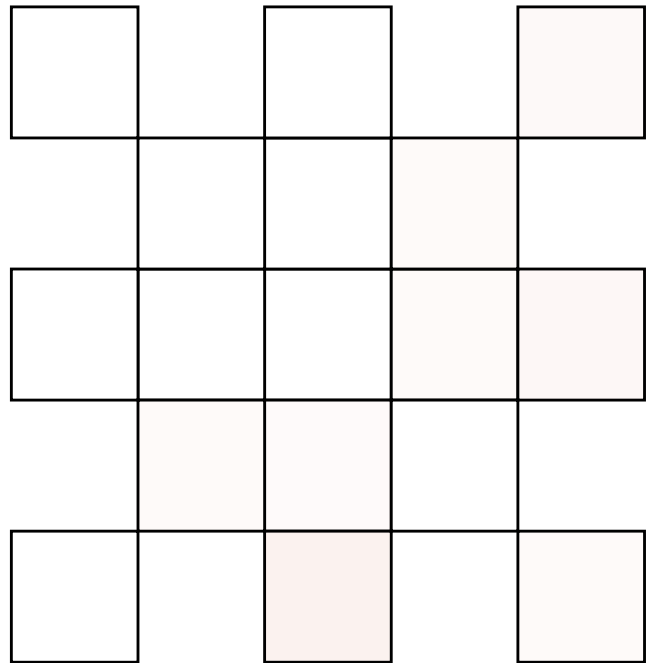

2-137813385-AT-A



2-139934078-G-A

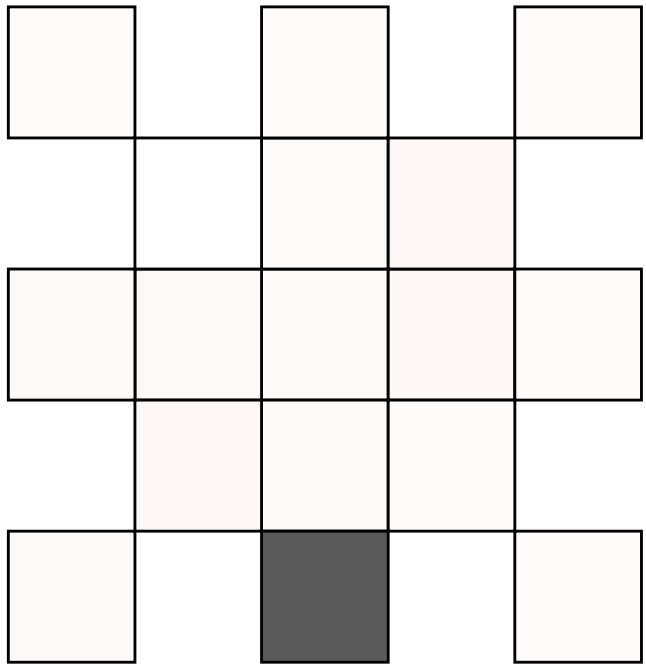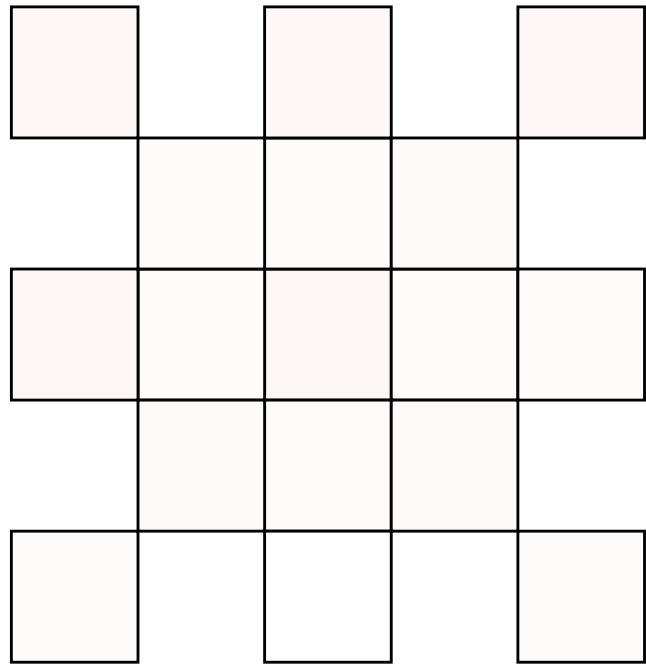

2-141914766-A-T

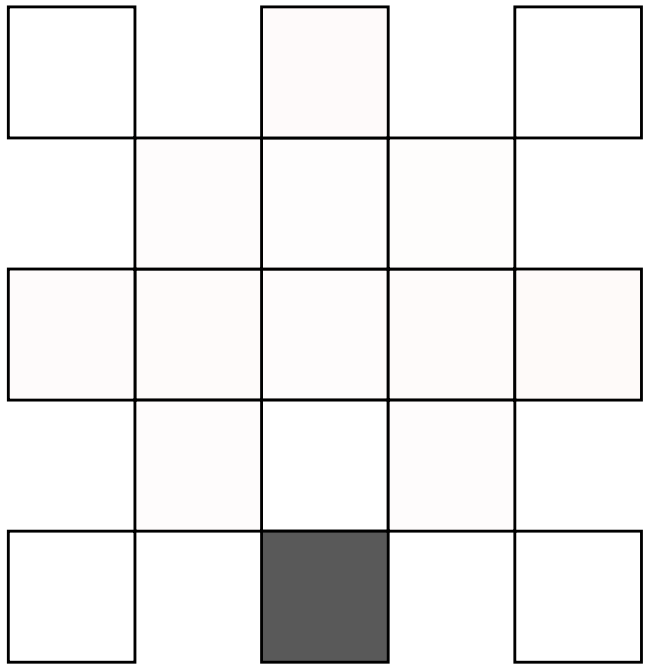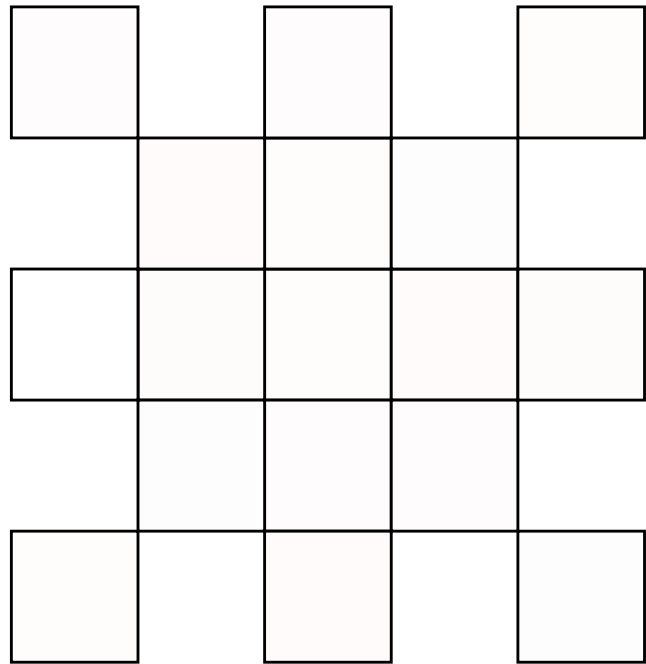

2-143167083-A-G

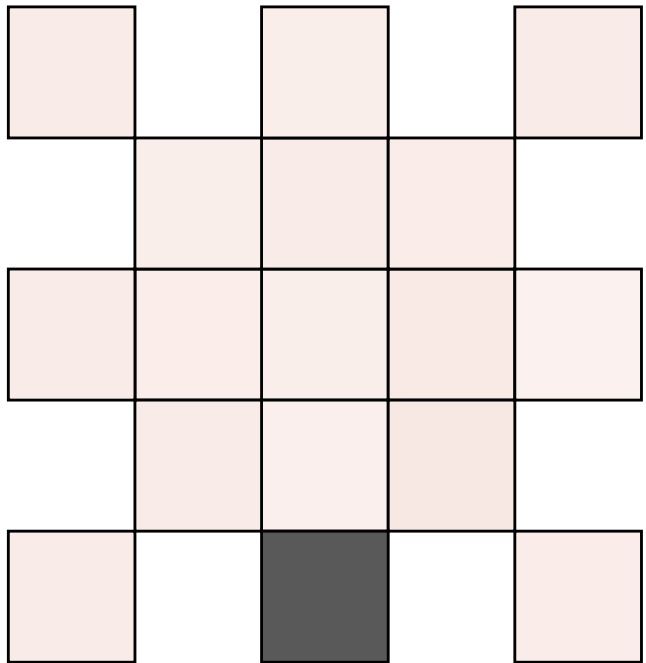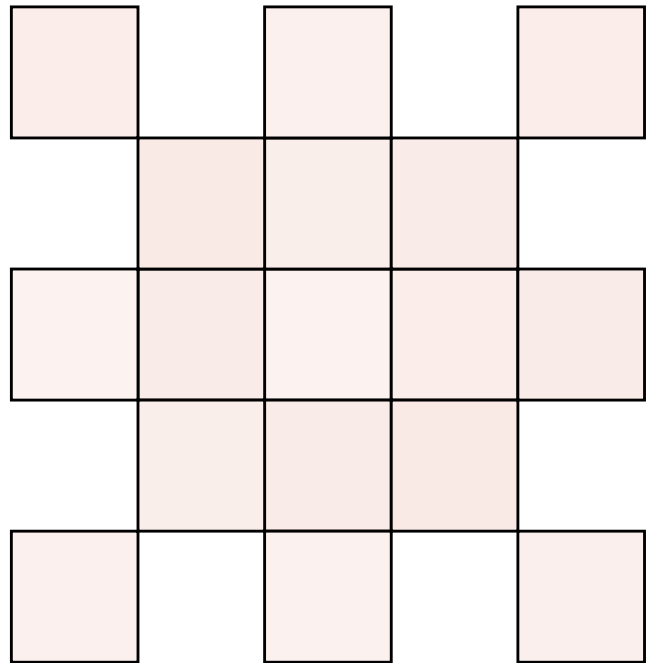

2-14466159-G-A

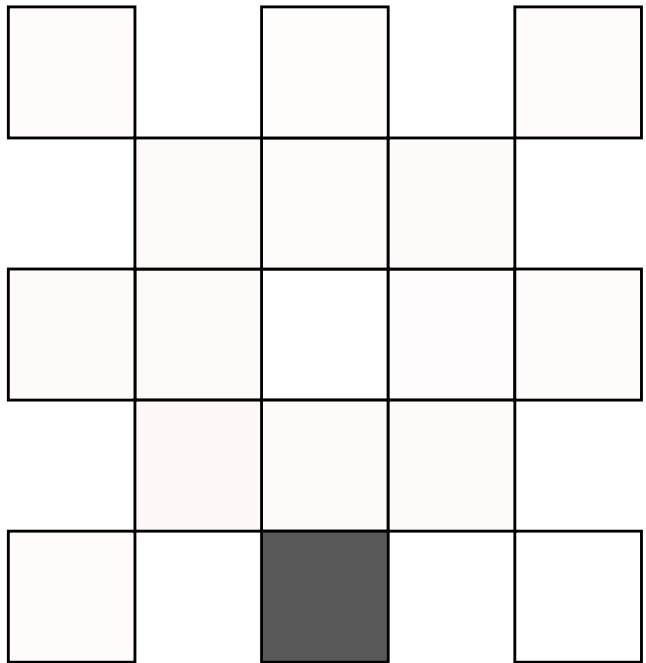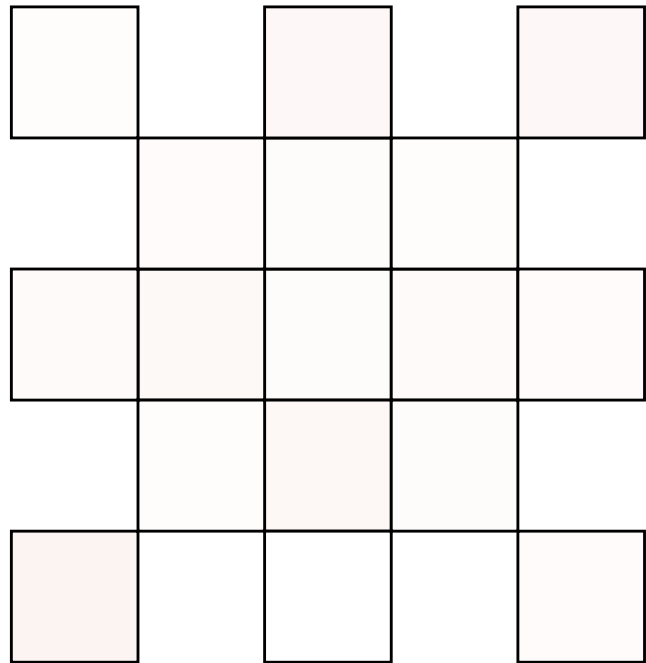

2-159760148-C-T

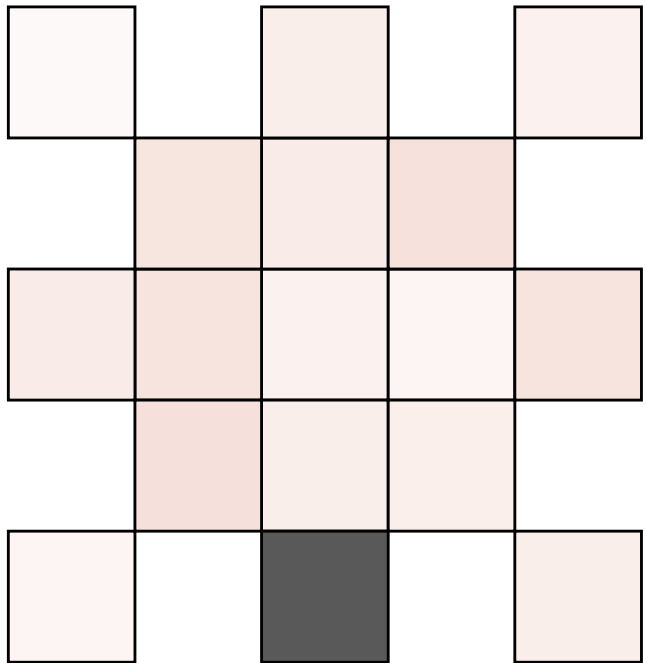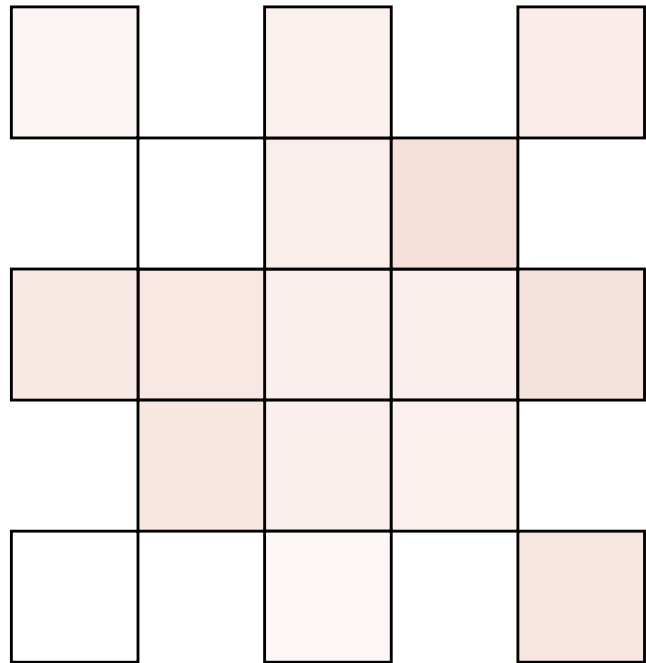



2-163073318-G-A

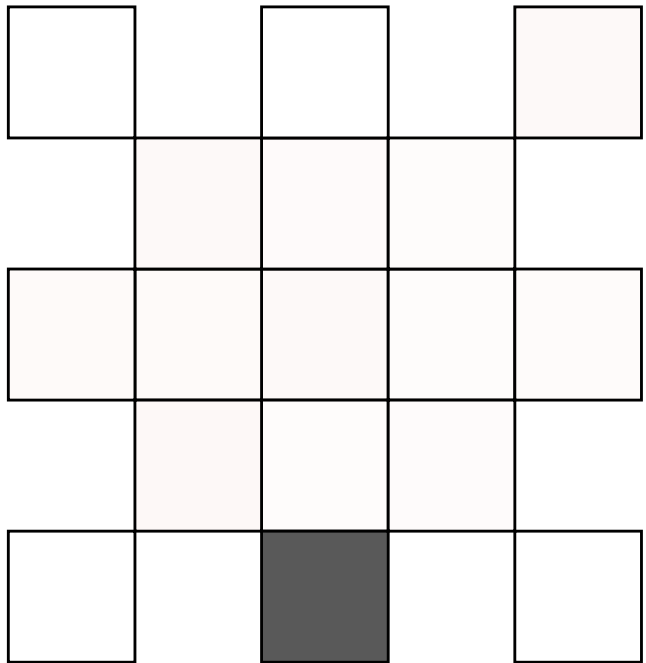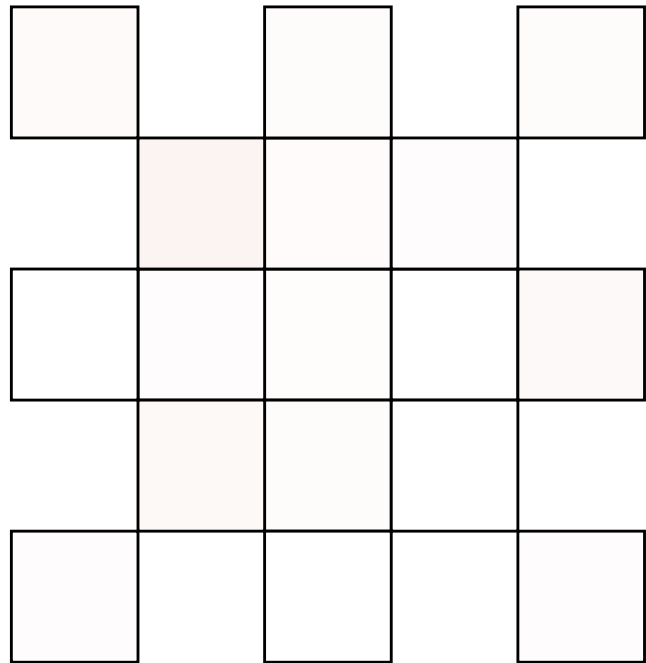

2-164210723-G-A

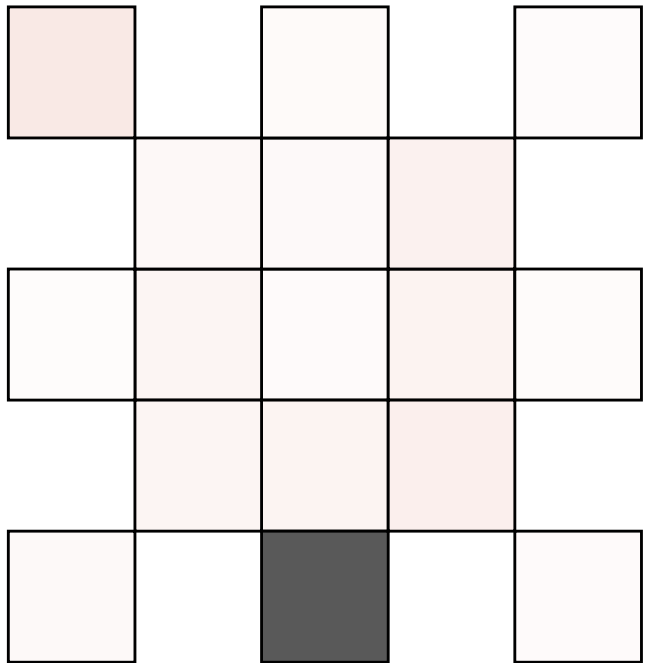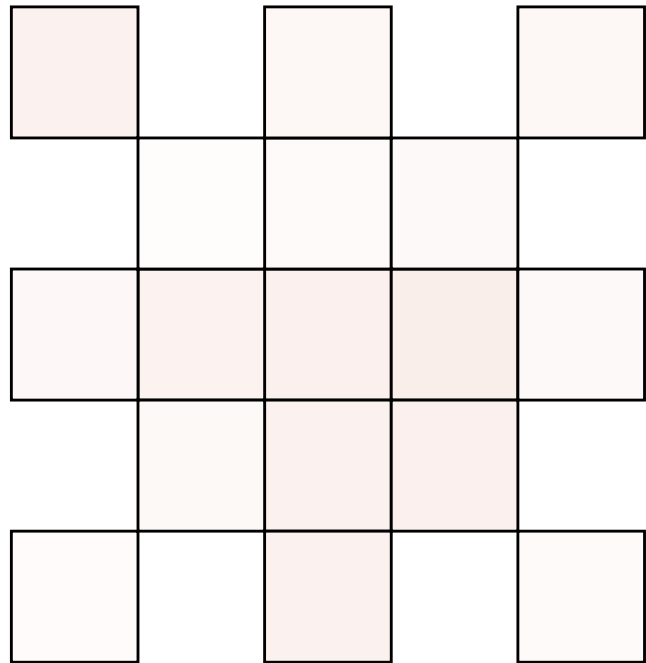

2-167087829-G-A

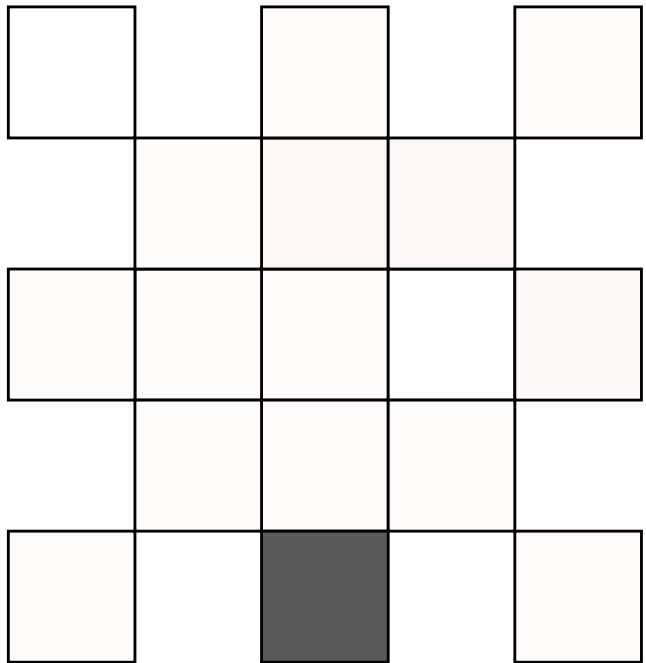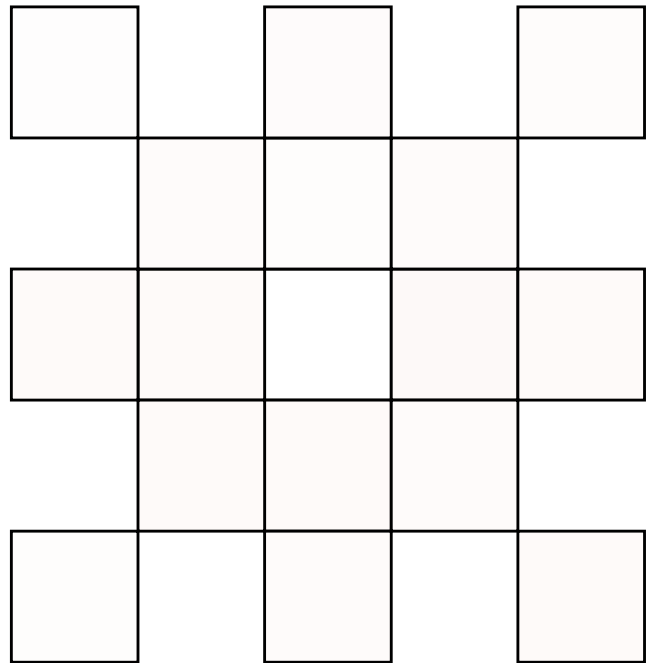

2-167342653-C-T

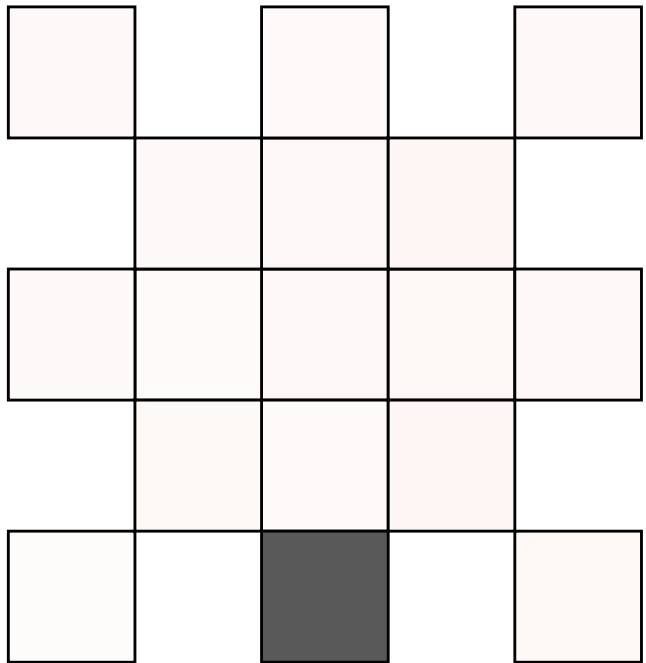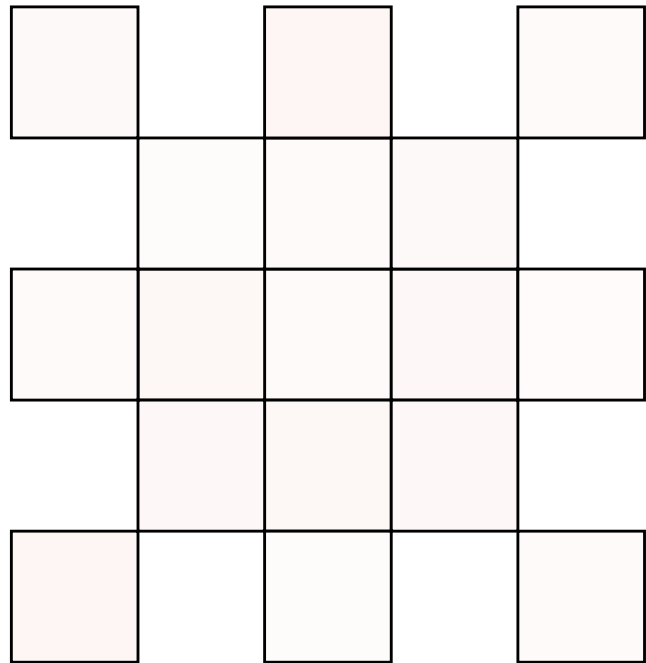

2-170101368-G-A

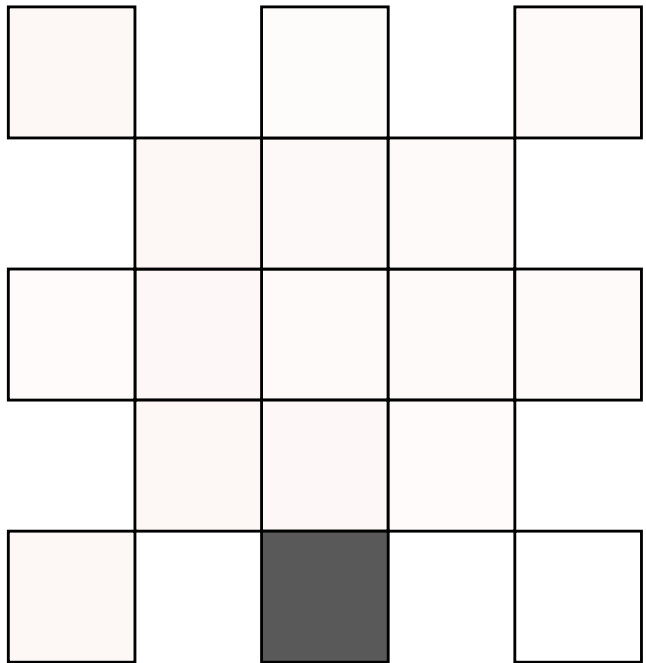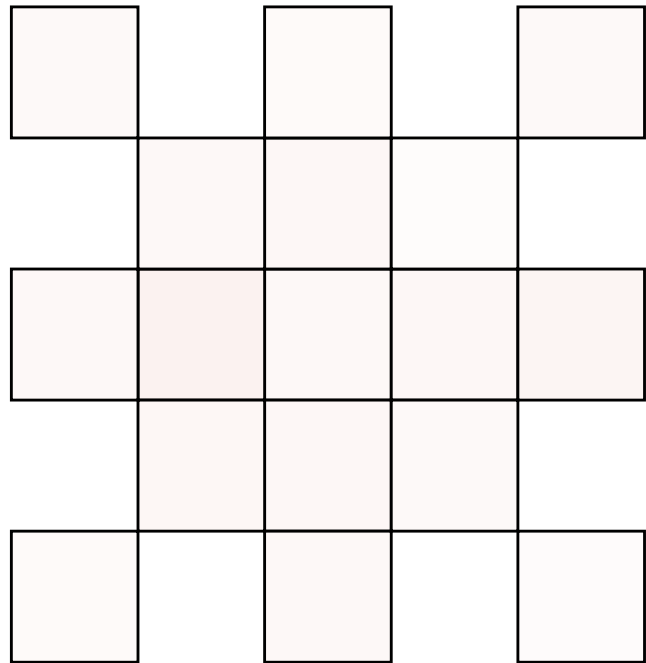

2-172334983-T-G

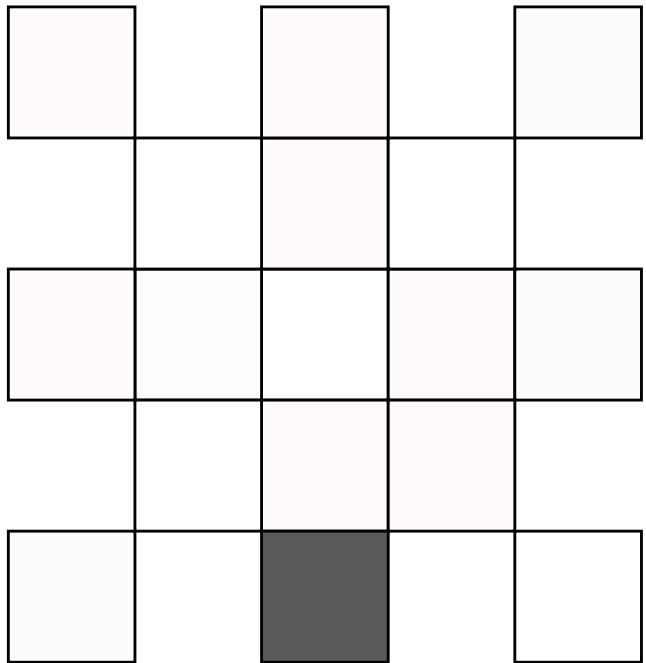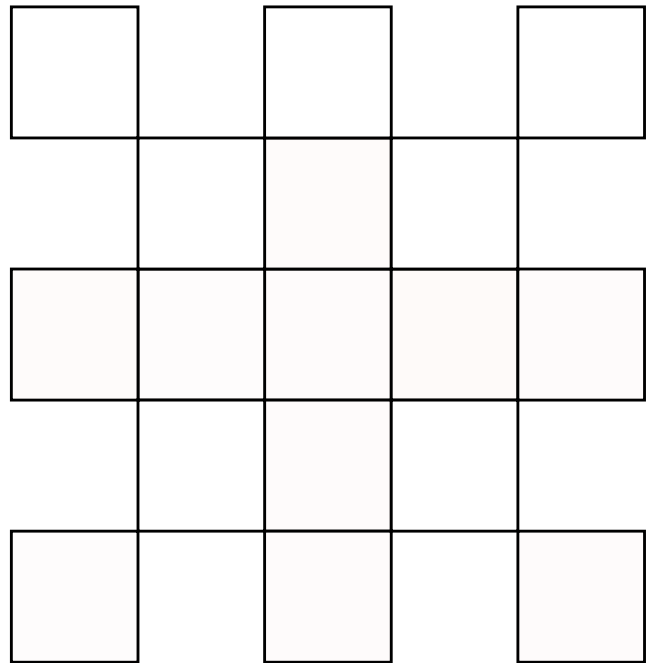

2-177408568-G-A

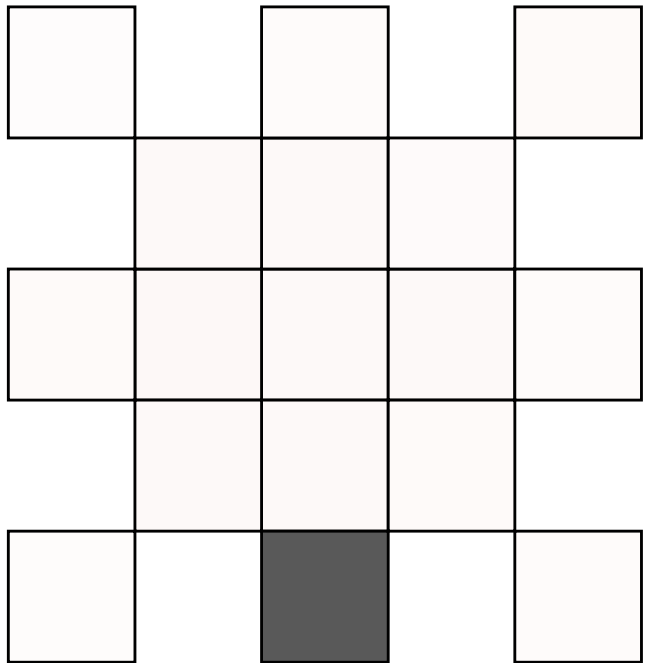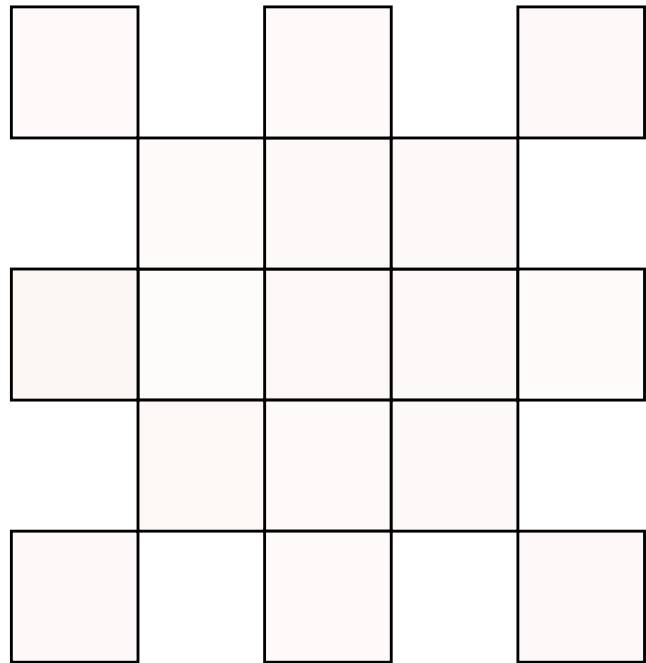

2-178026730-A-T

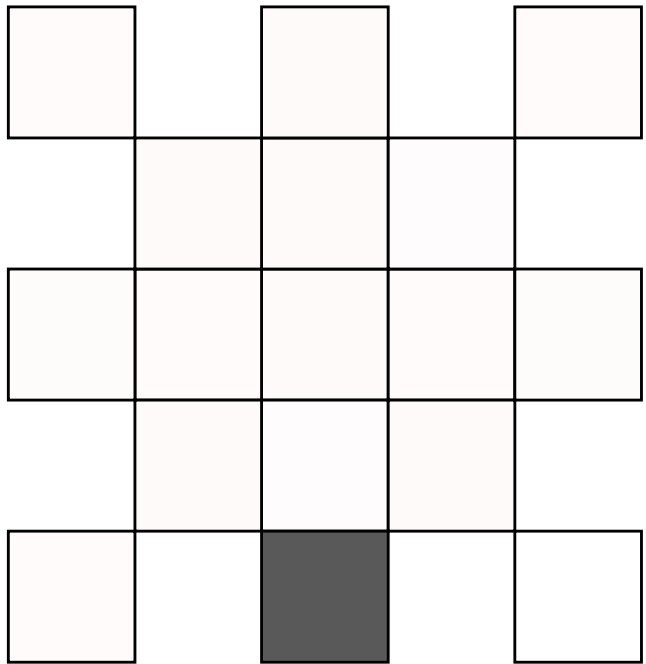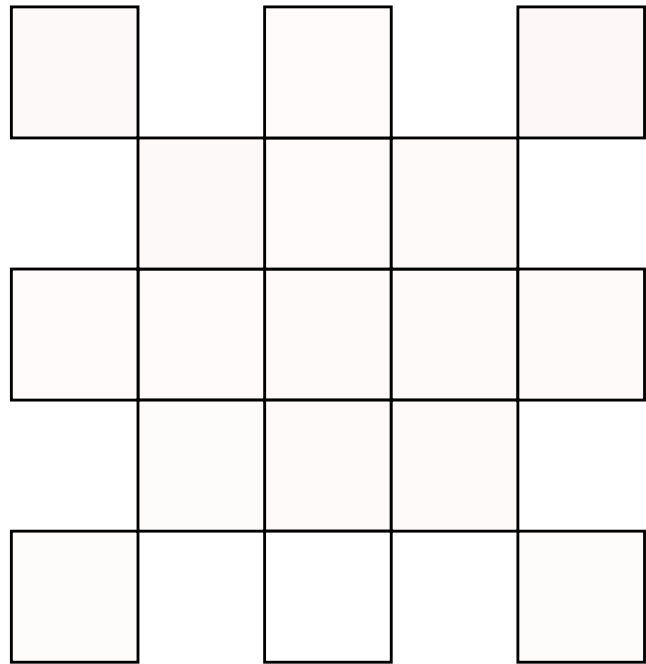



2-187776755-G-A

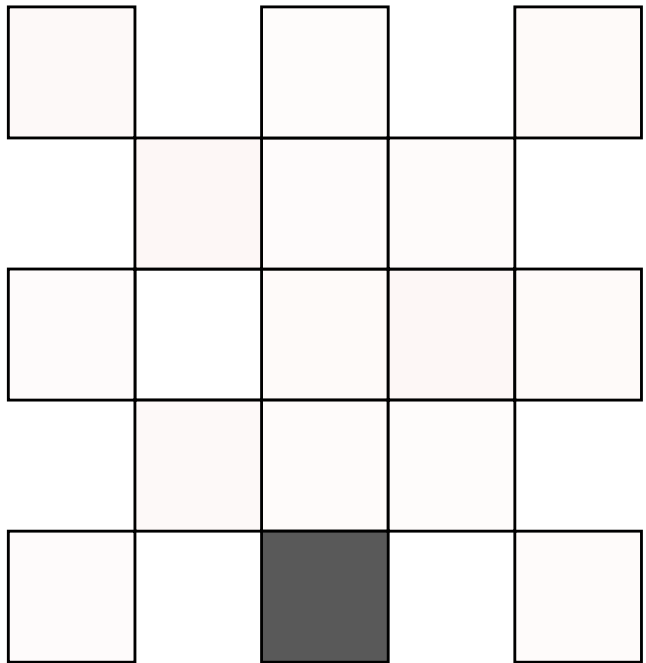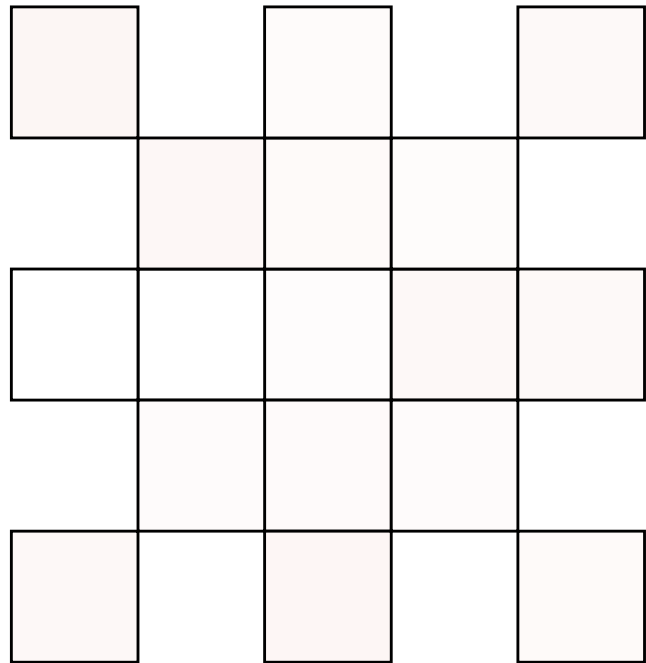

2-190501942-A-G

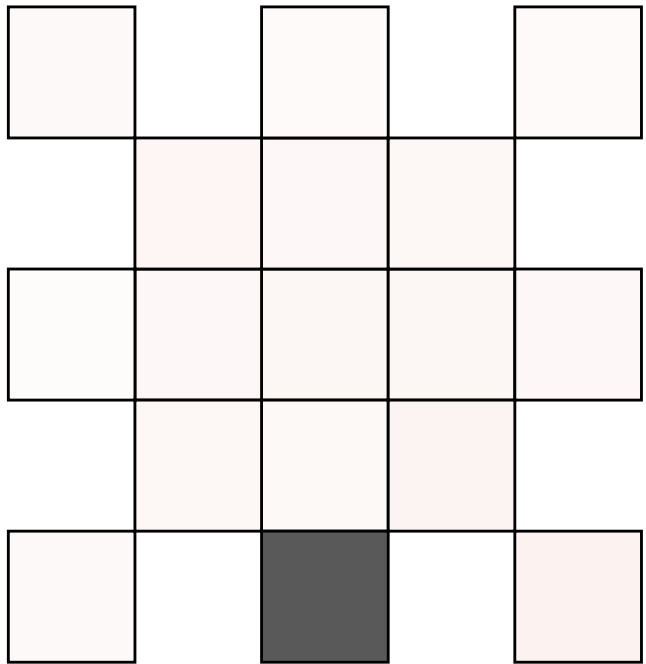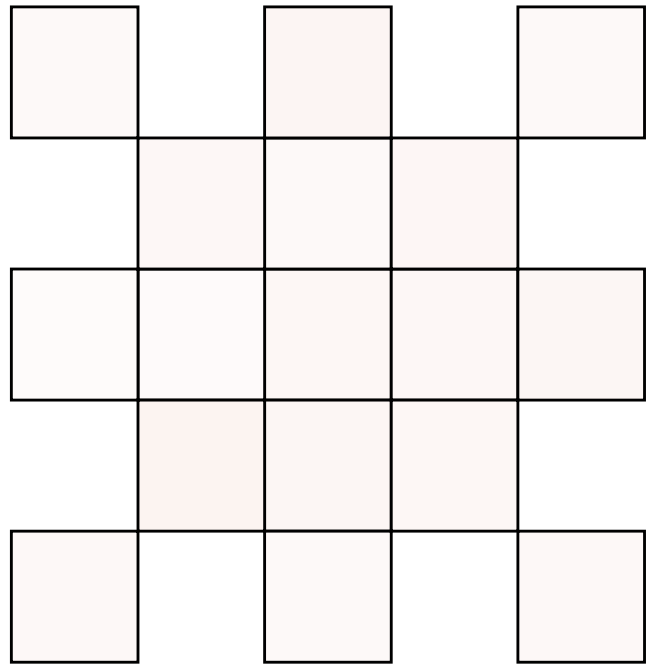

2-193626603-C-A

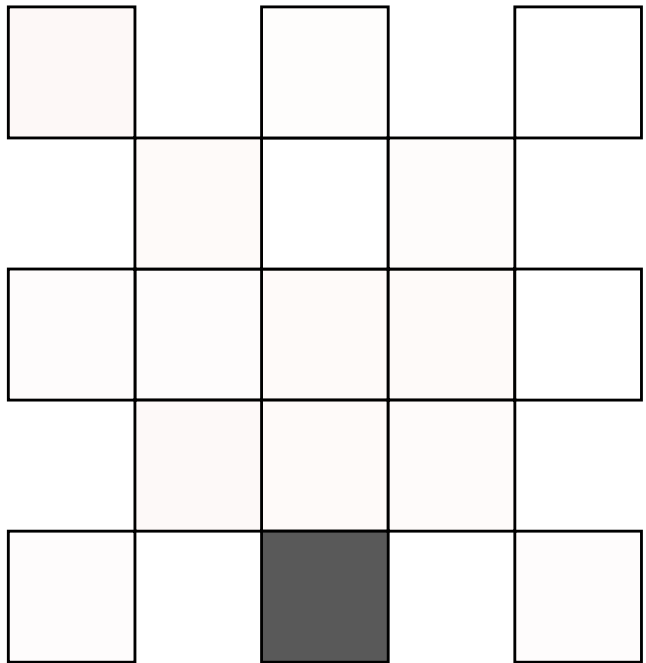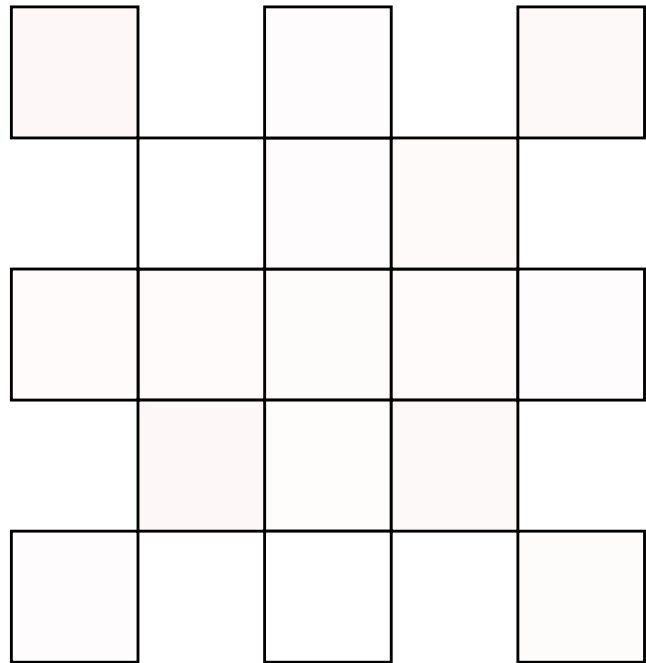

2-193831190-T-A

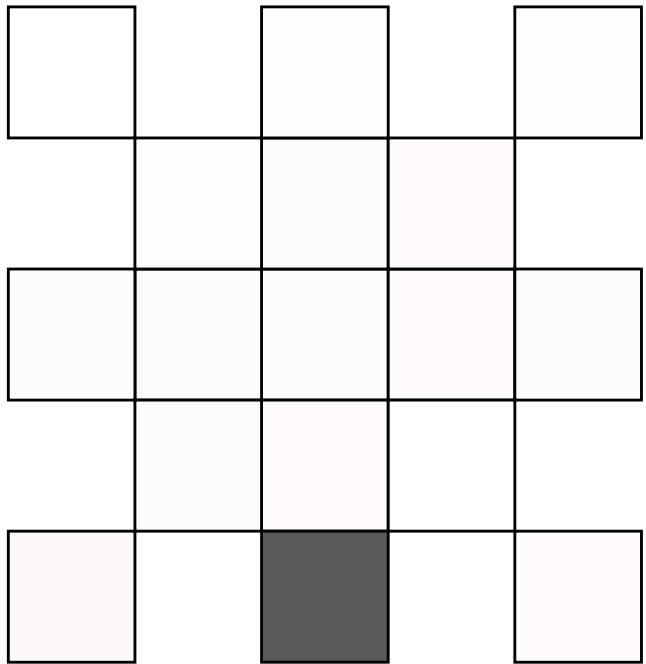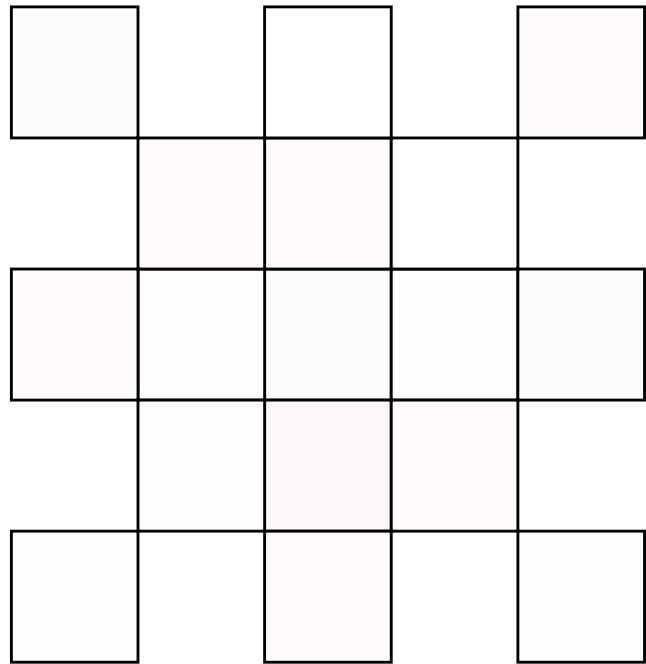

2-198773820-A-G

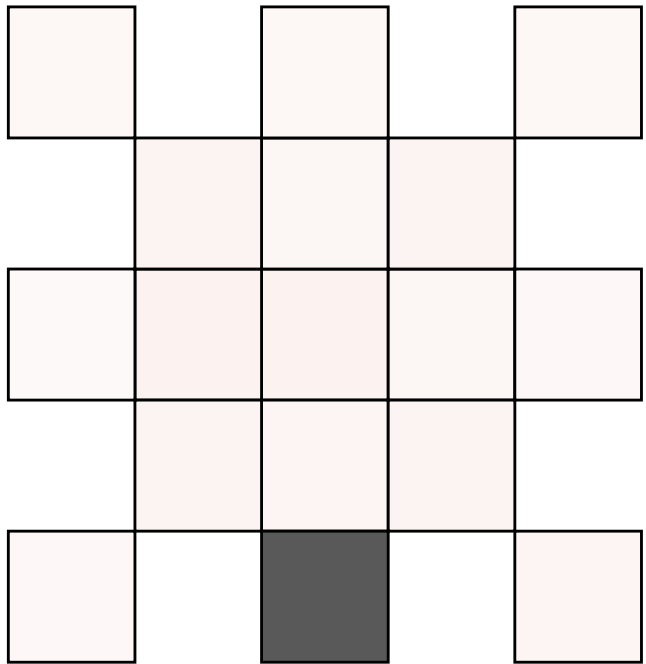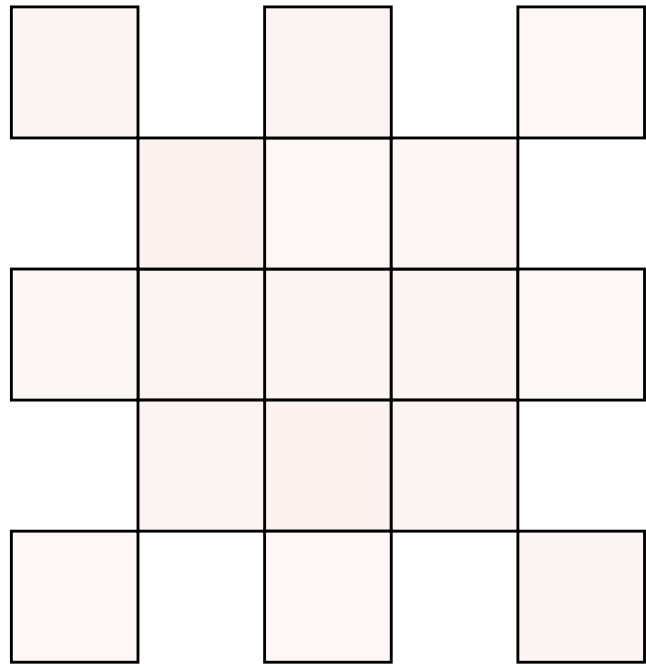

2-203467456-T-C

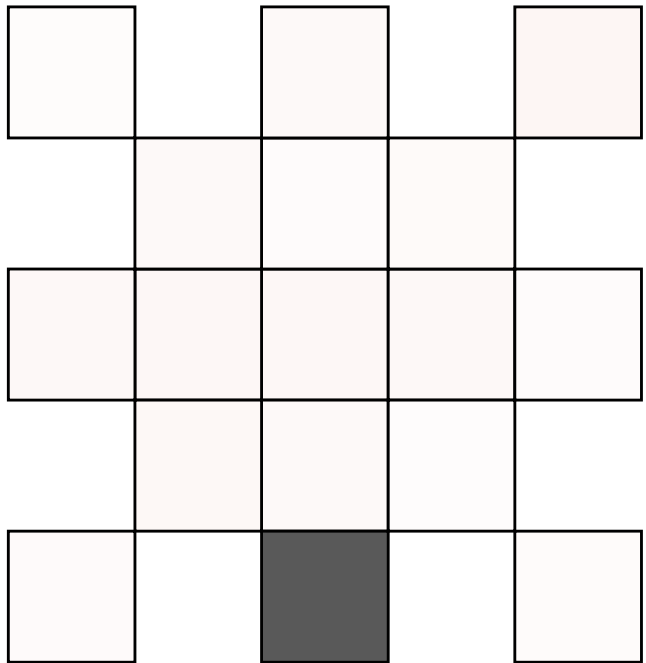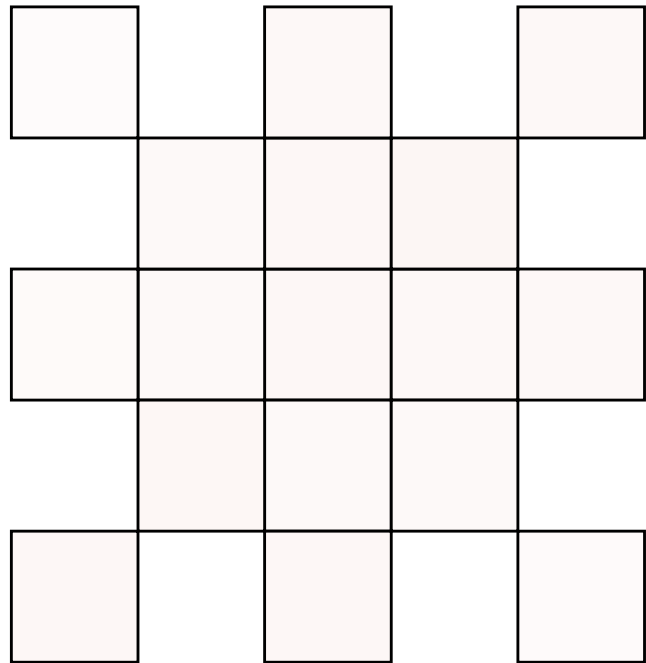

2-204722237-C-T

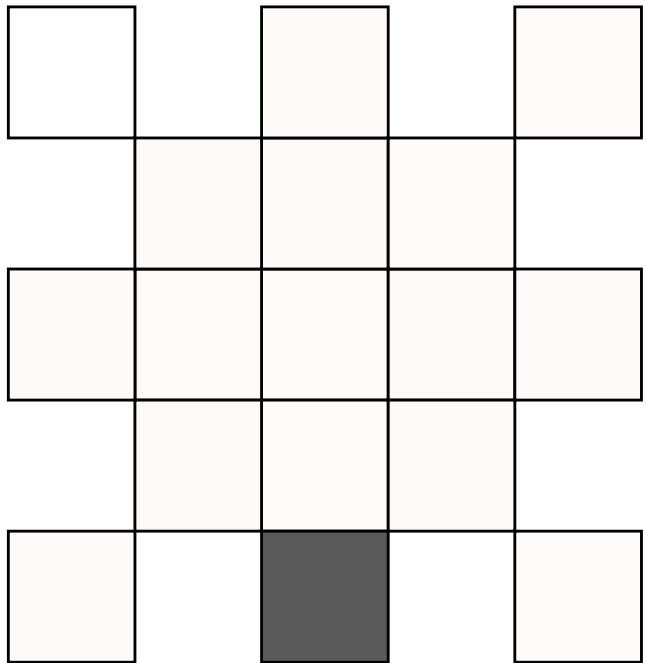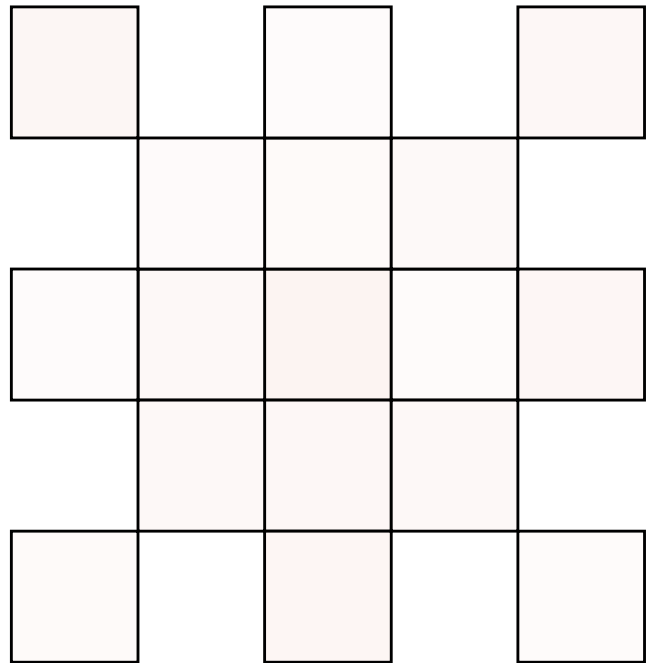

2-209569113-C-T

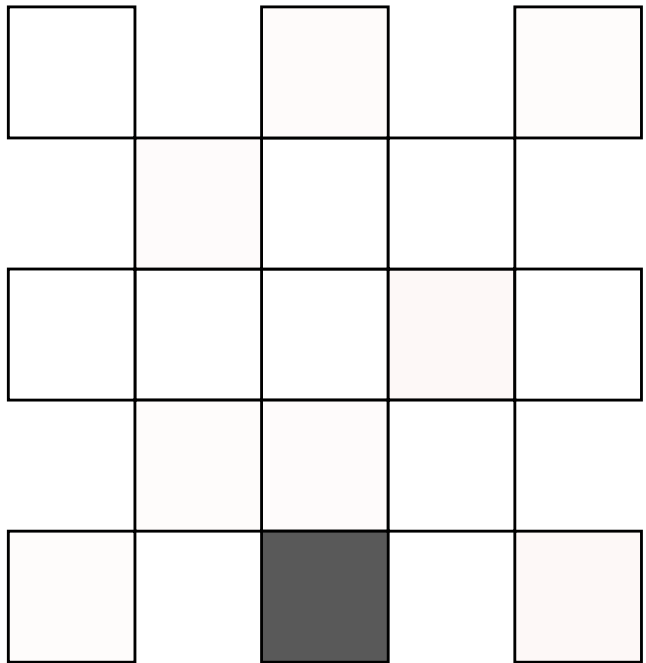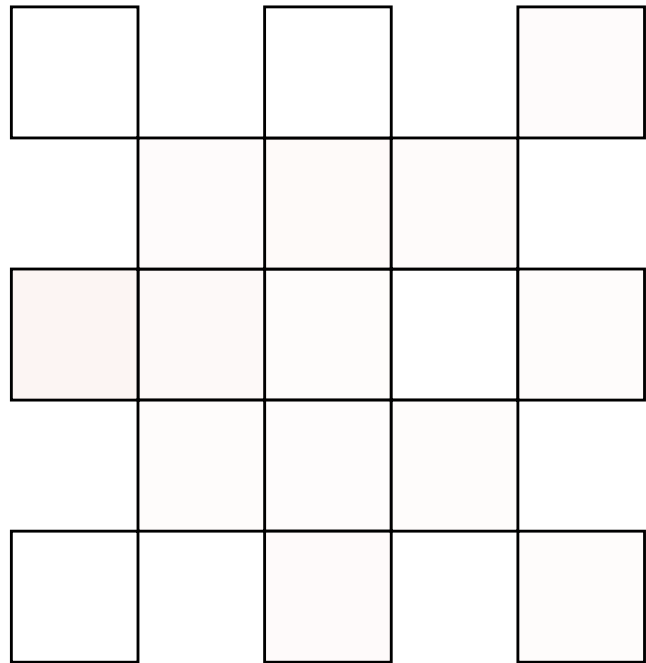



2-213063972-C-T

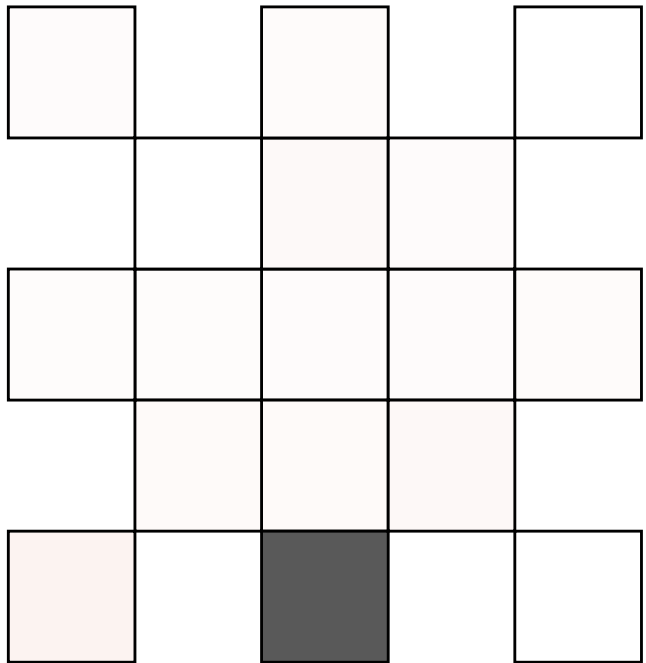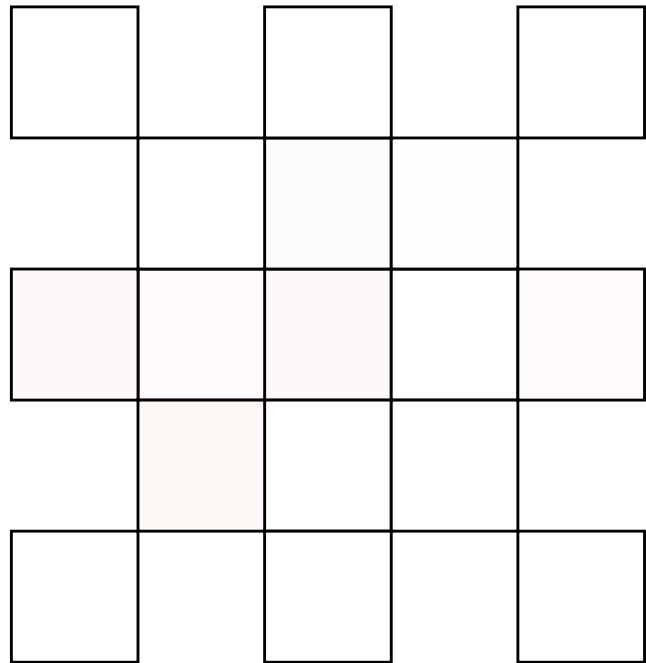

2-22209916-G-A

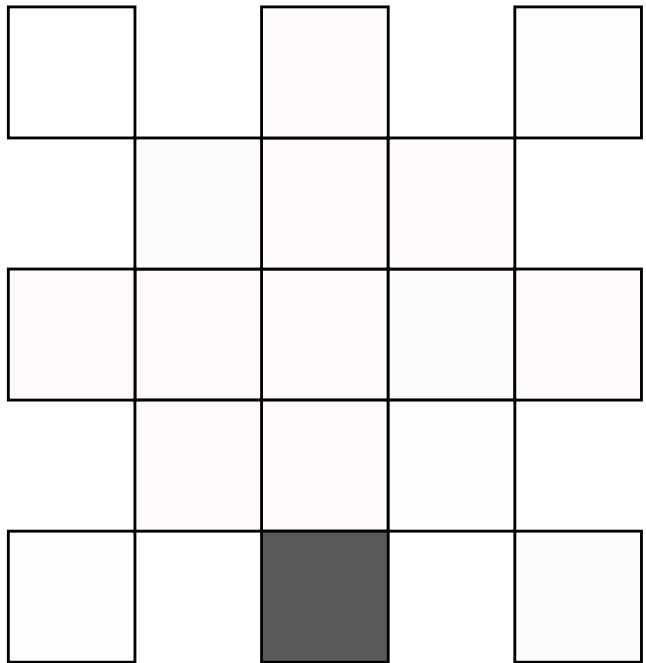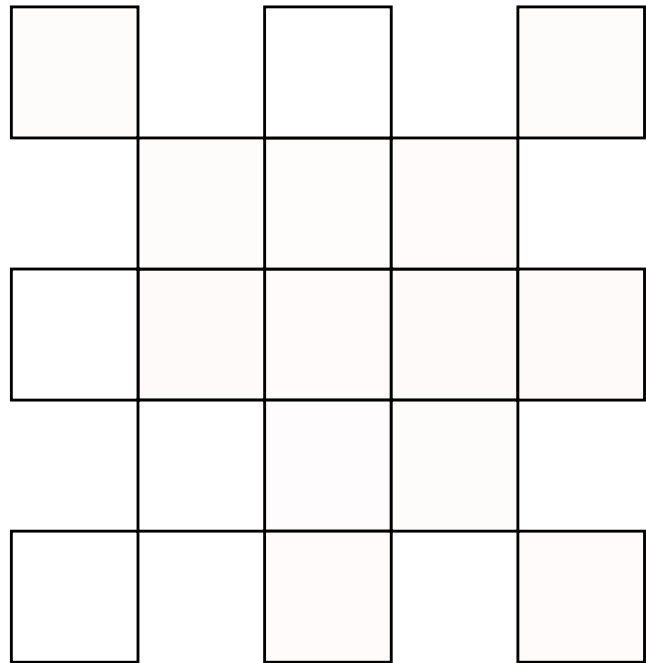

2-222480660-G-A

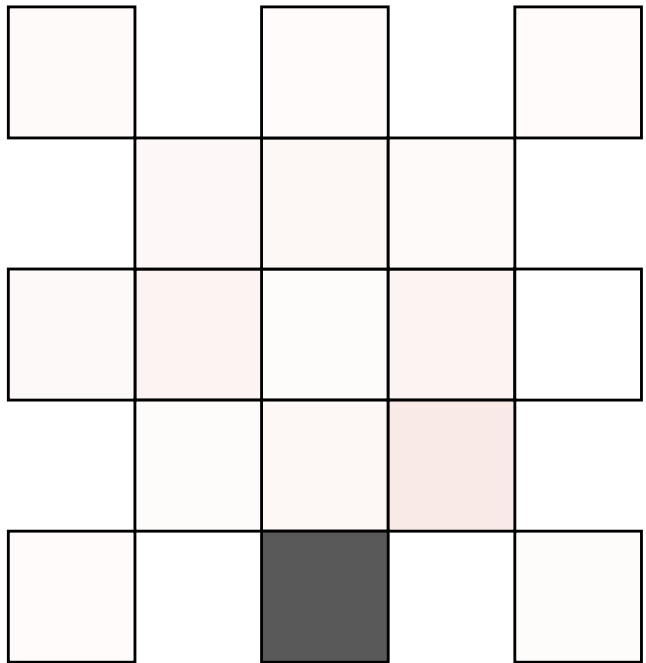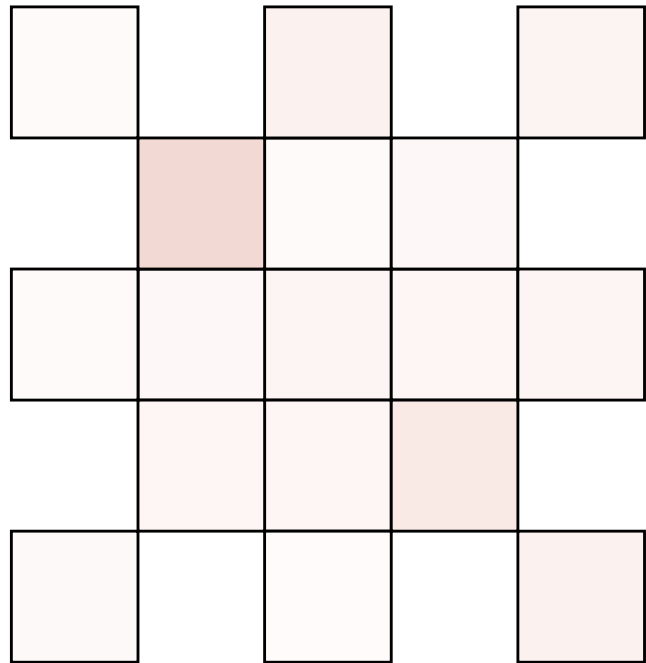

2-225875953-A-G

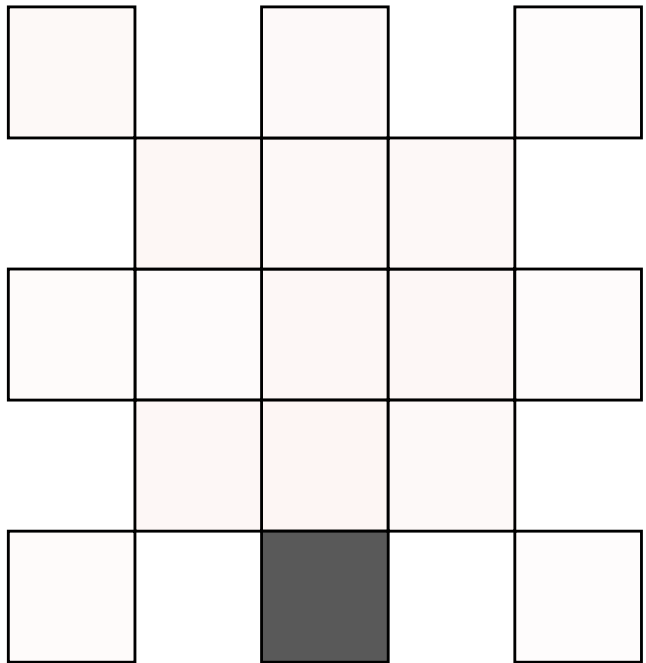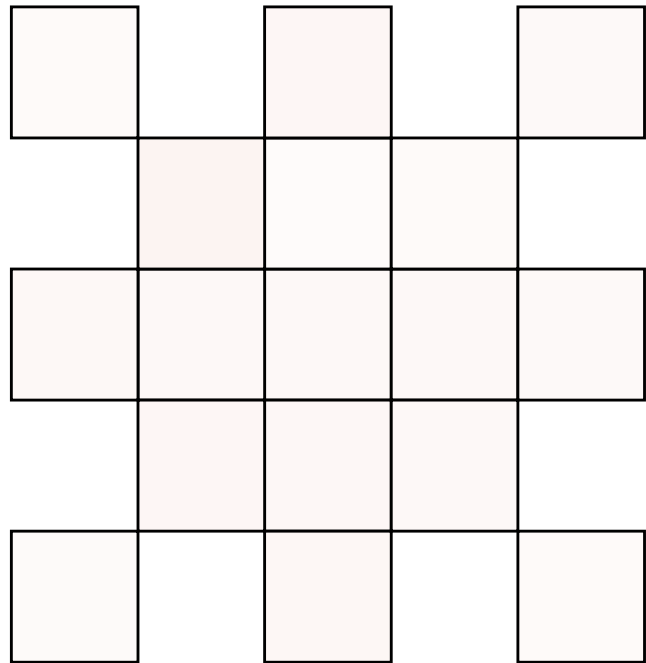

2-226074050-C-A

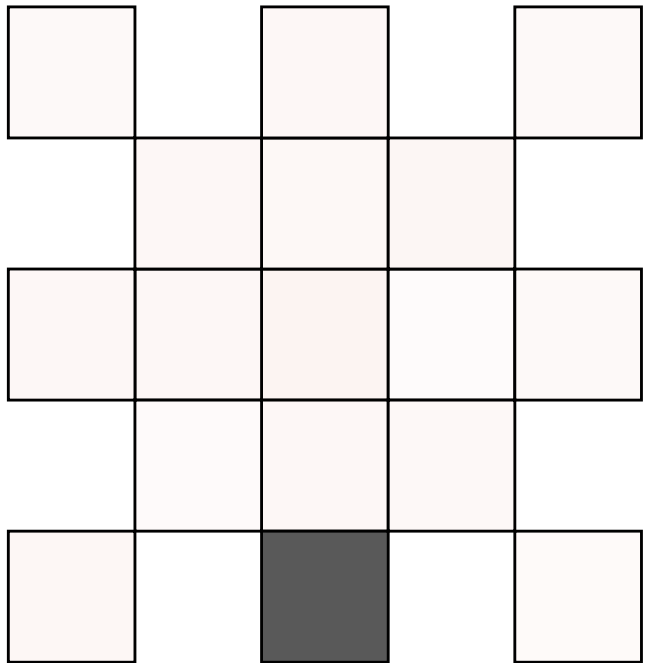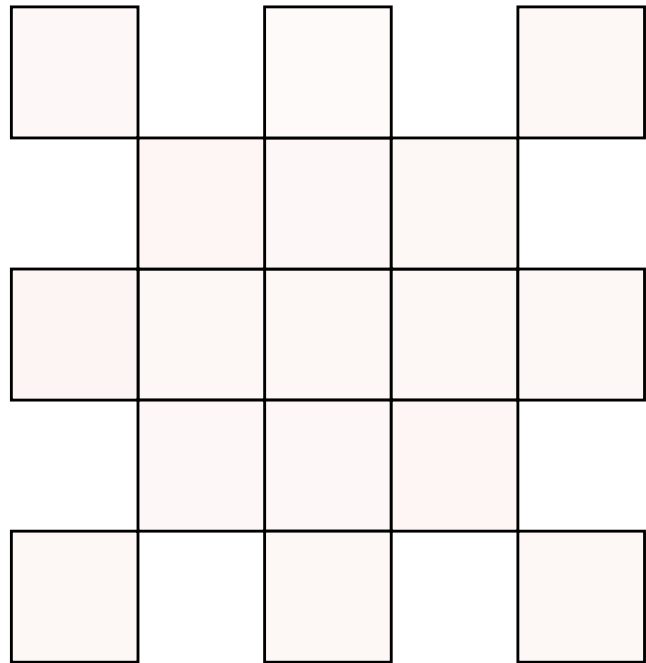

2-226299479-C-T

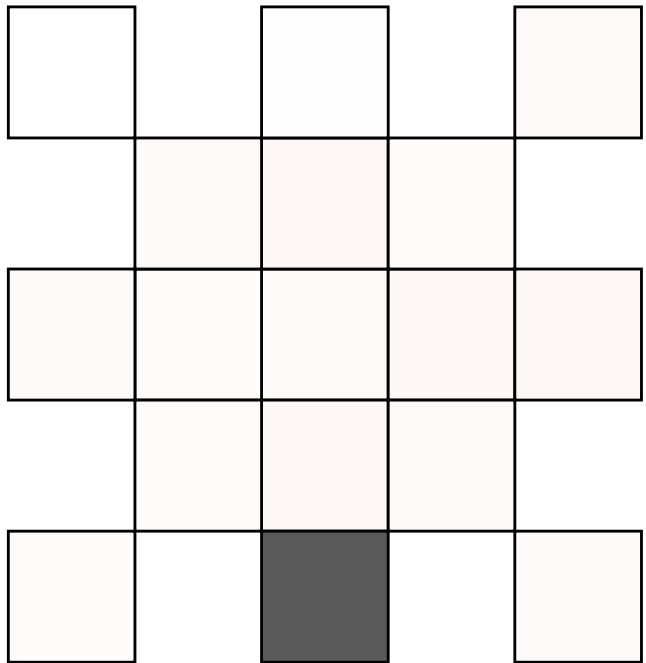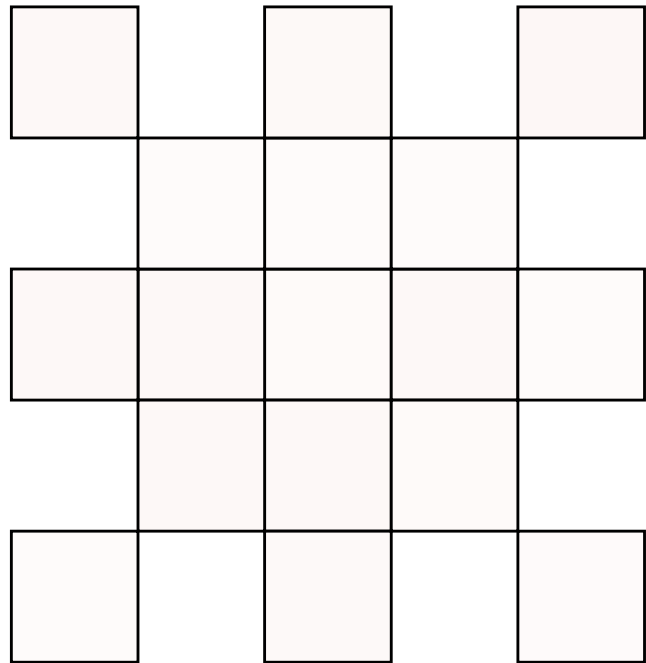

2-22992854-G-A

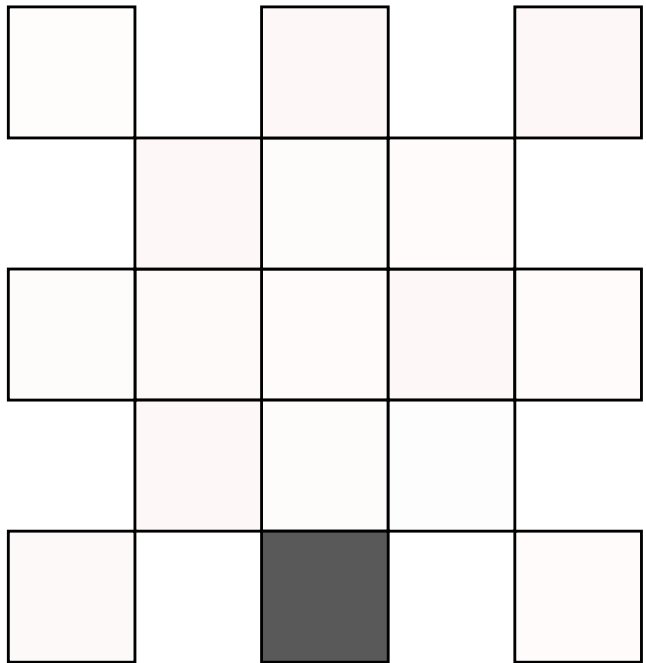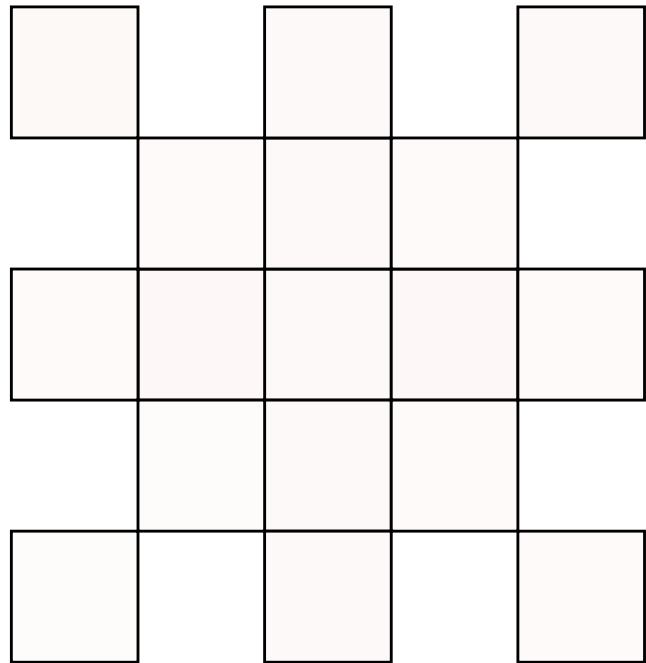

2-234349292-A-G

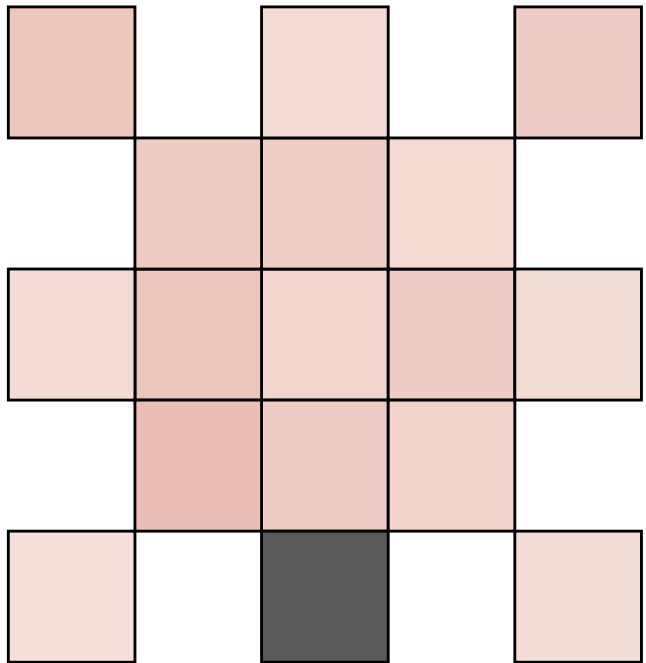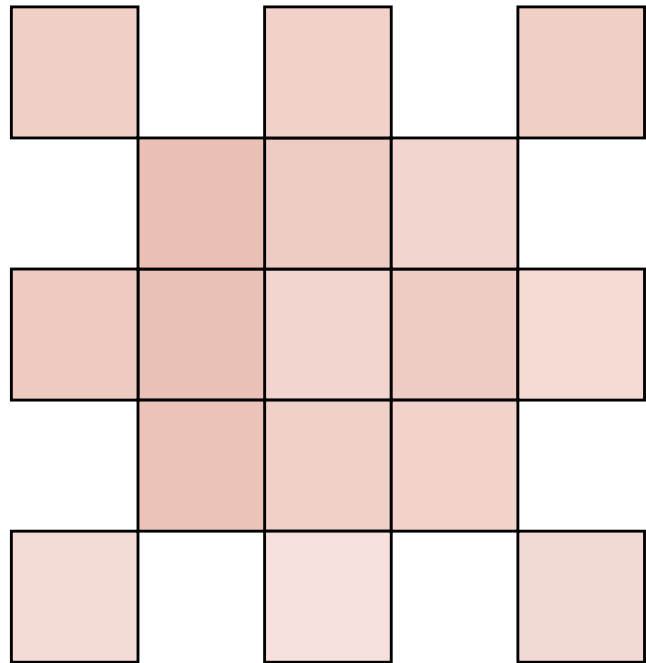



2-240582791-G-A

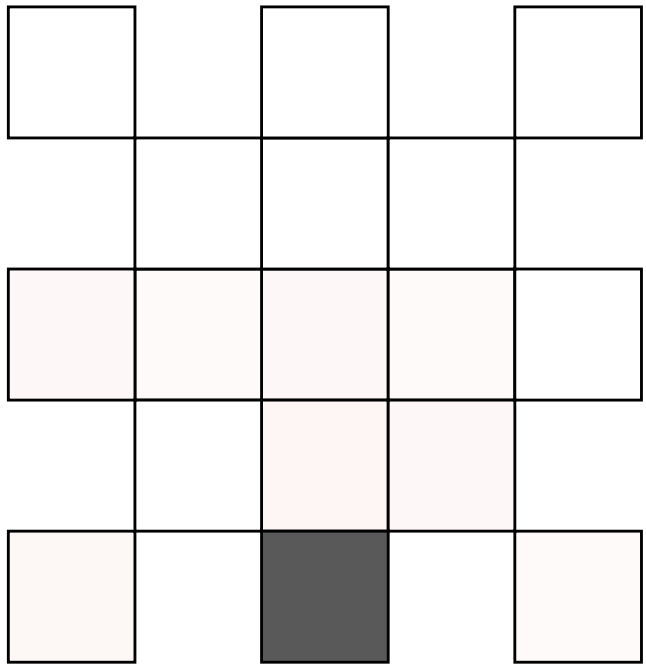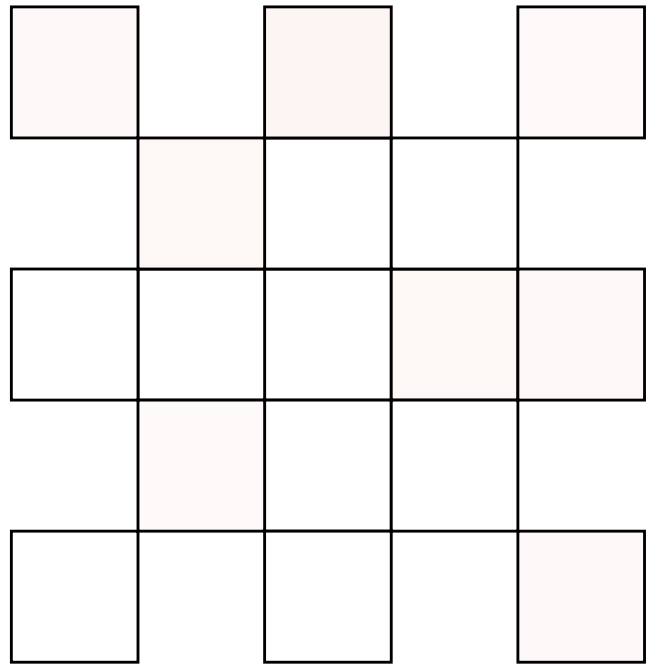

2-241015446-G-A

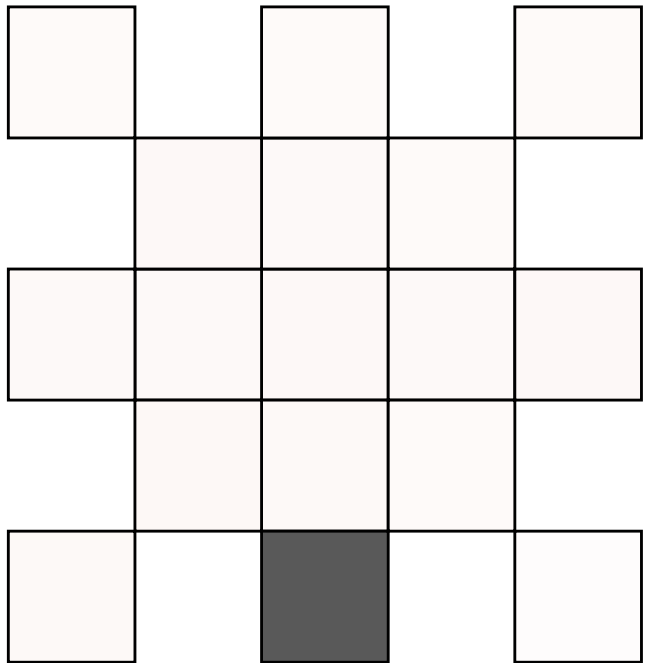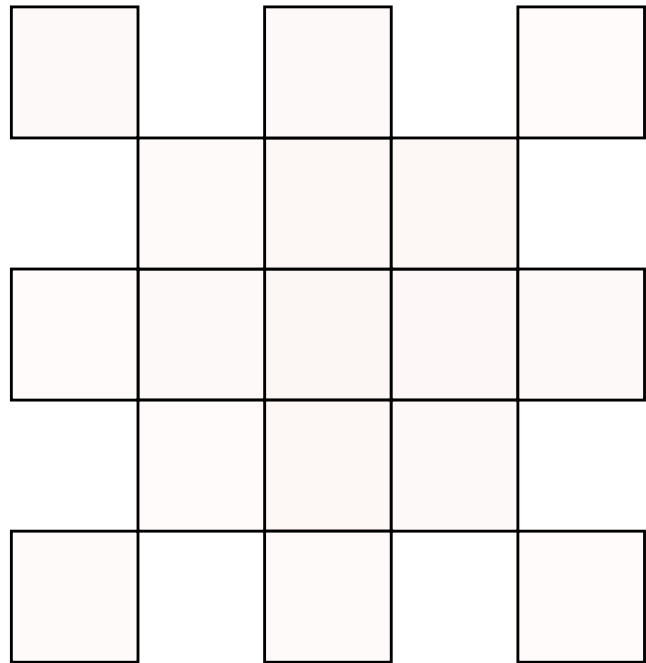

2-241258643-G-A

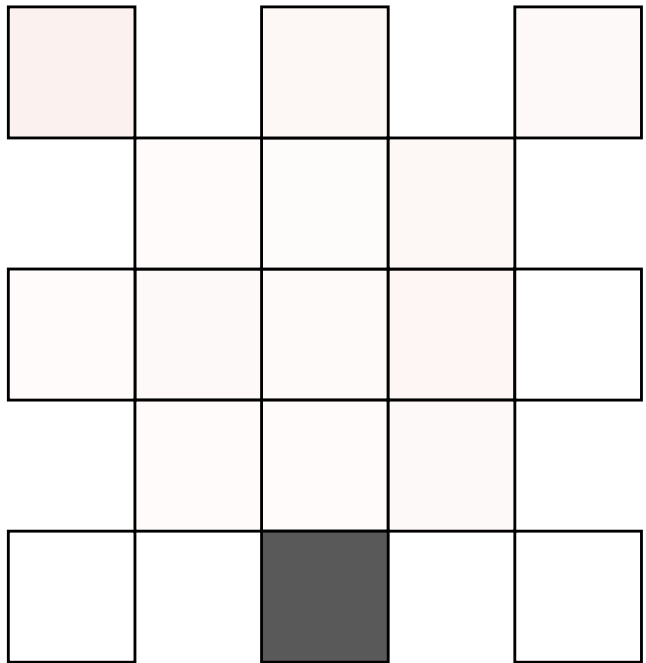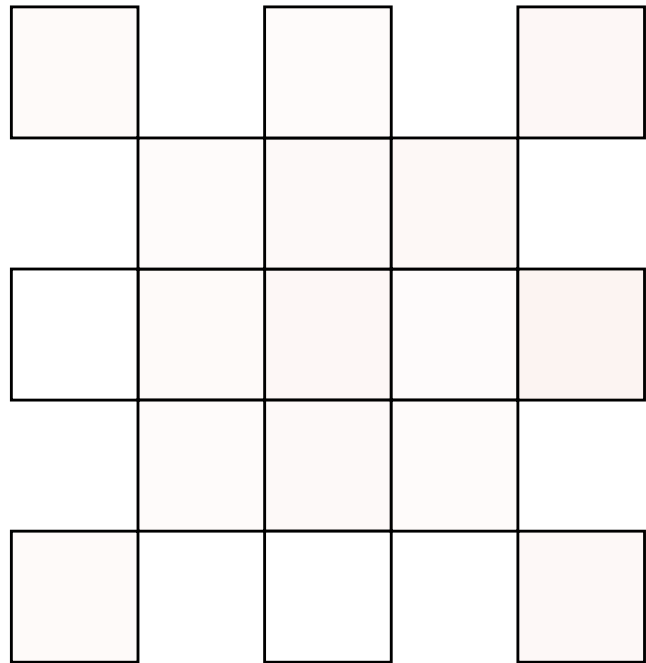

2-27102490-G-A

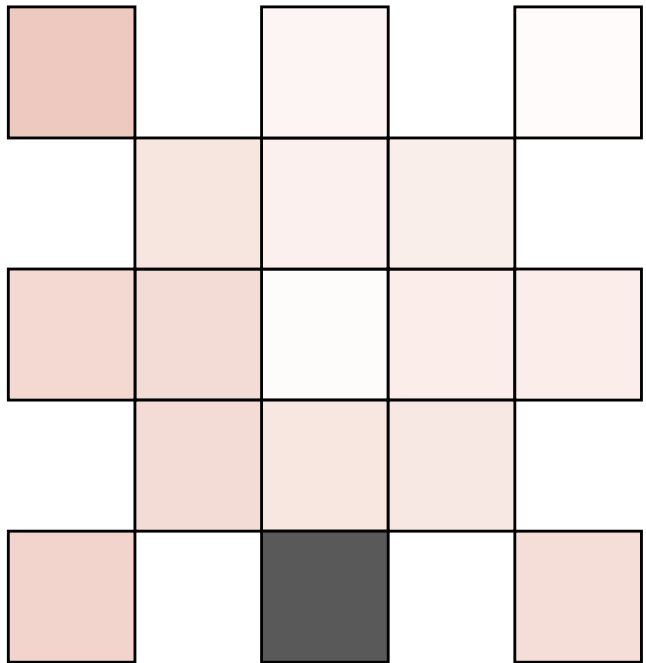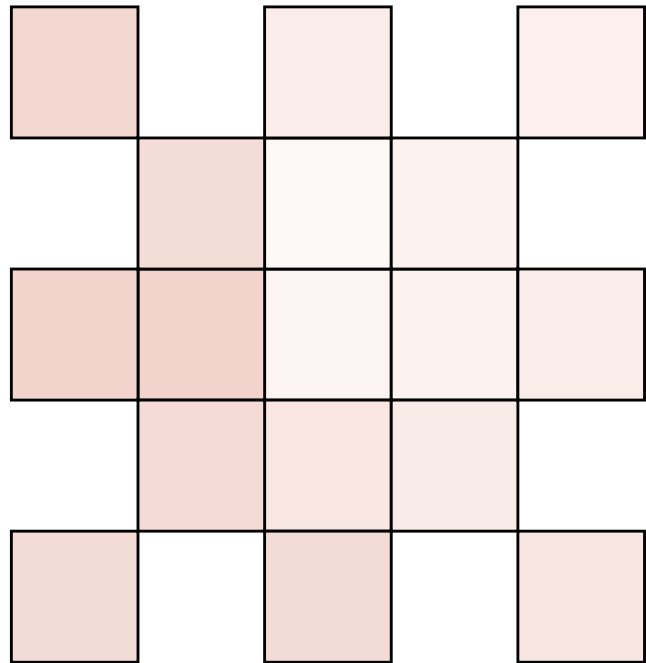

2-3282940-C-T

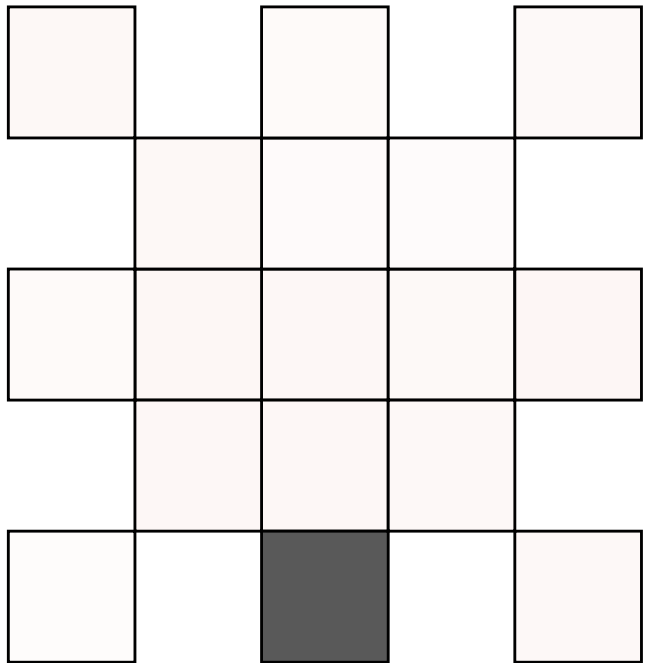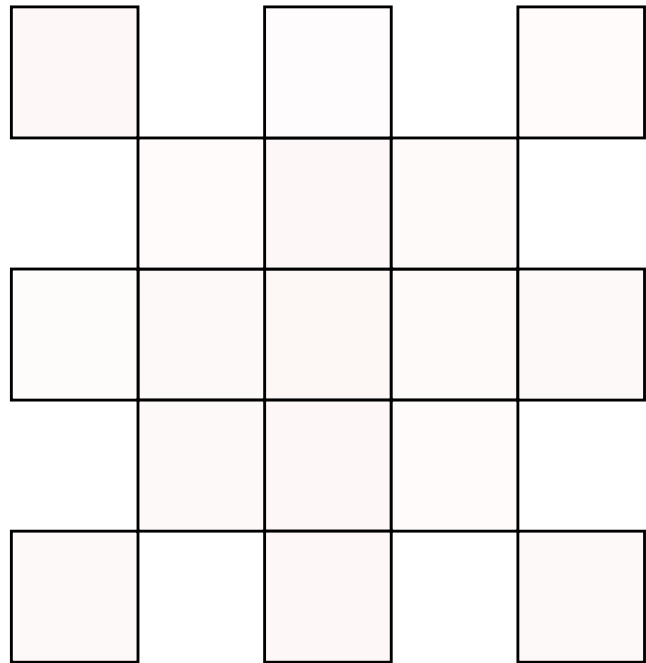

2-34945794-T-C

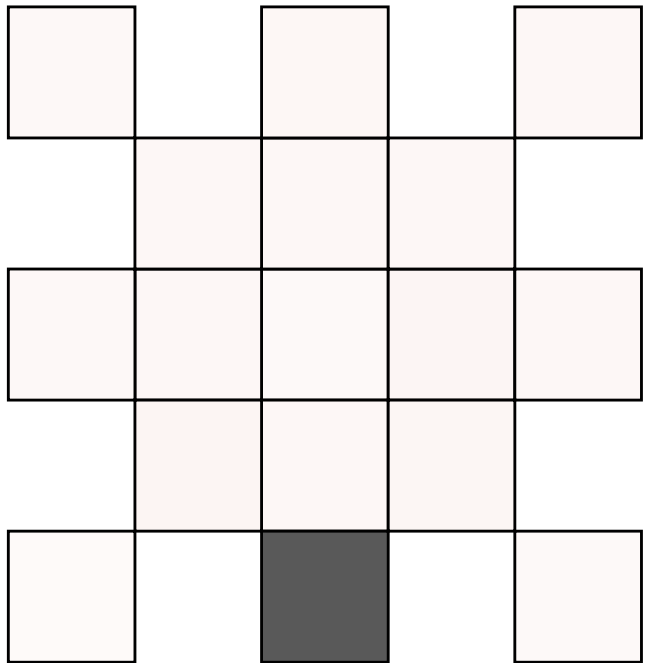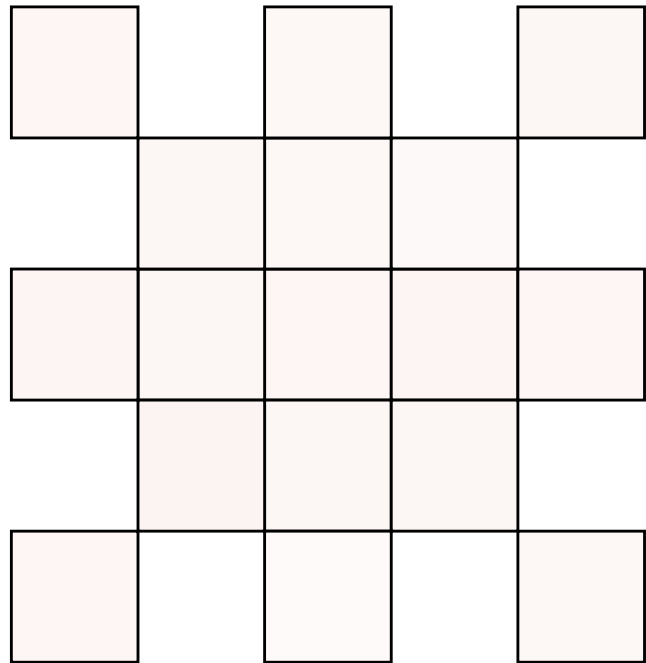

2-3565269-C-T

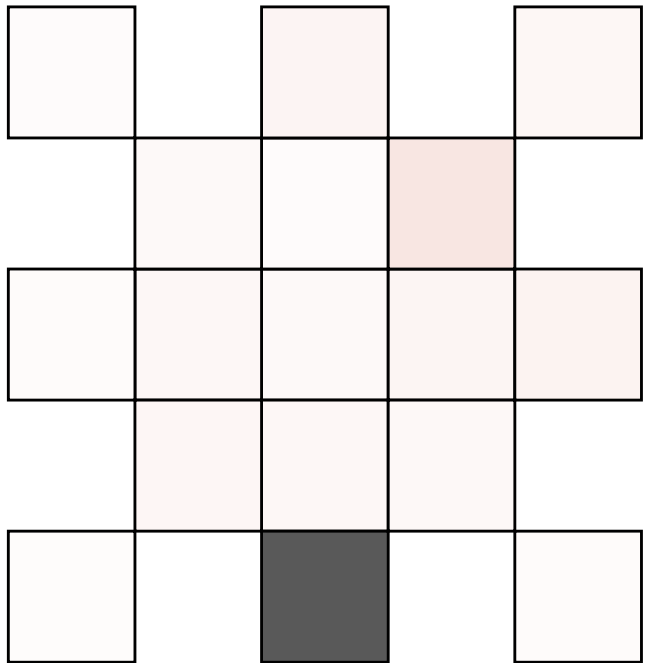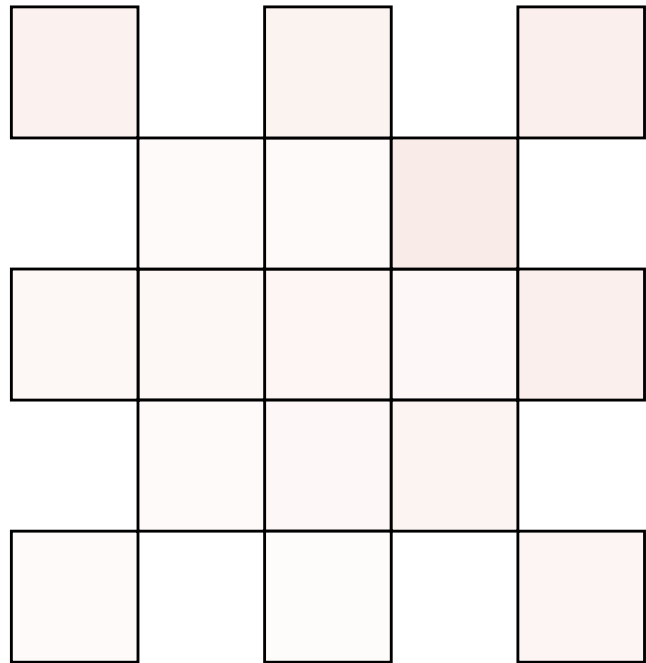

2-41714937-C-A

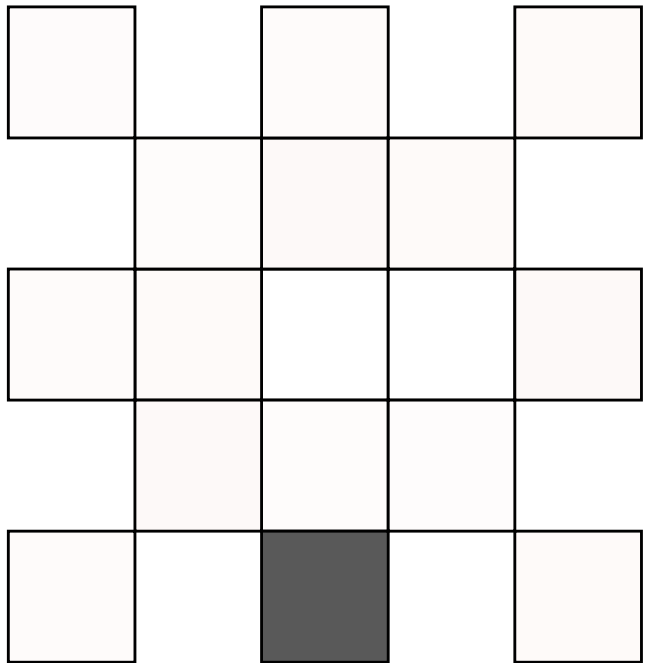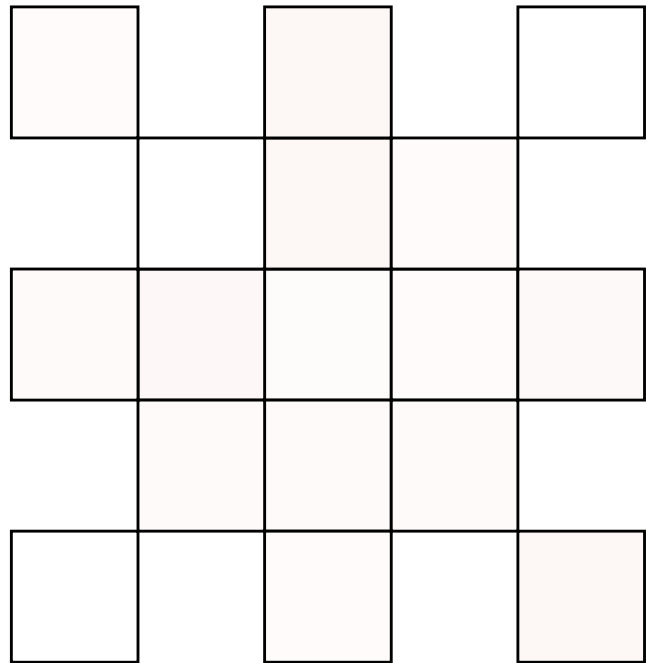



2-424135-C-T

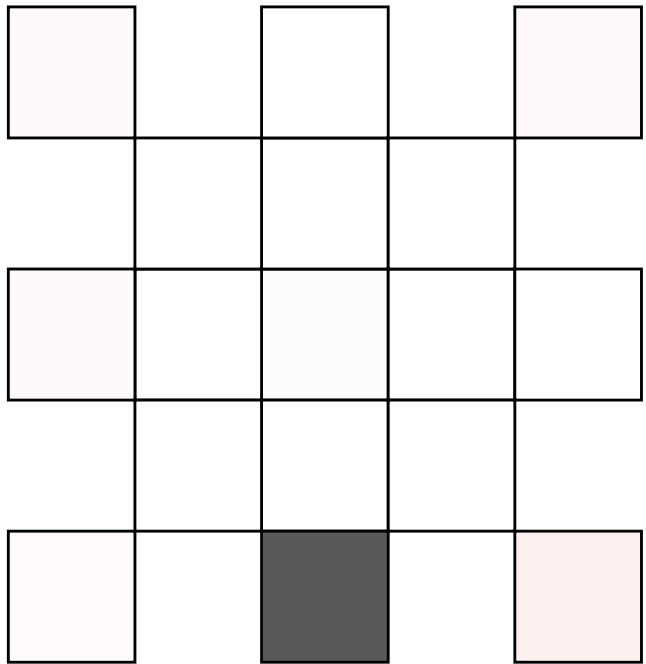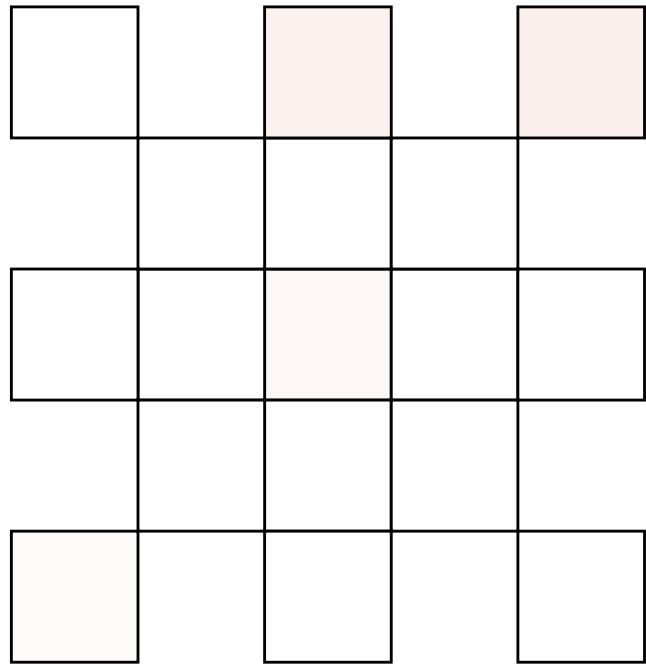

2-45142013-G-A

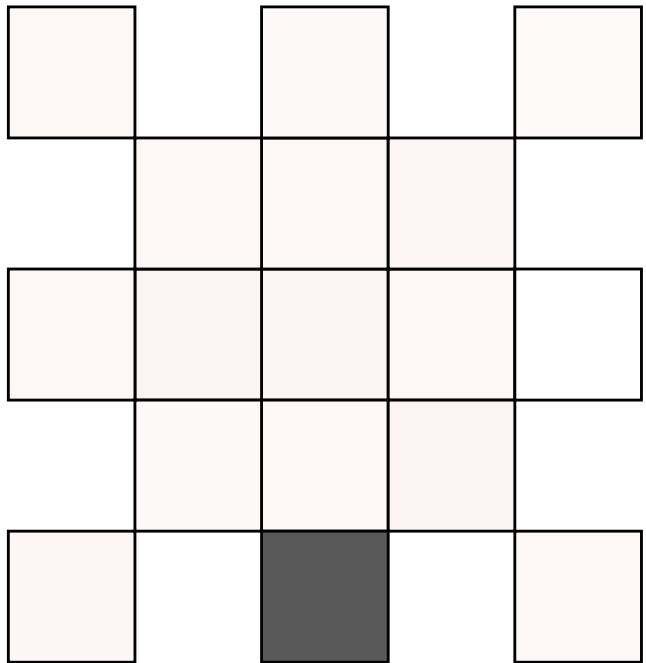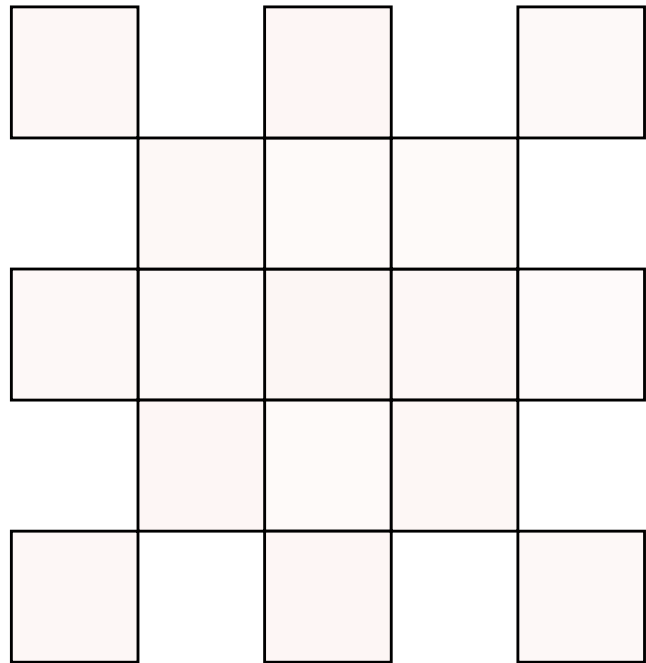

2-48643619-C-T

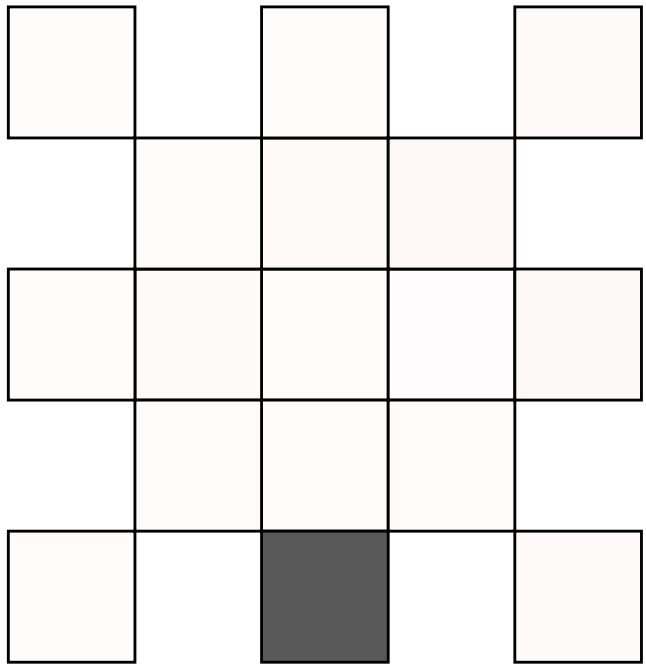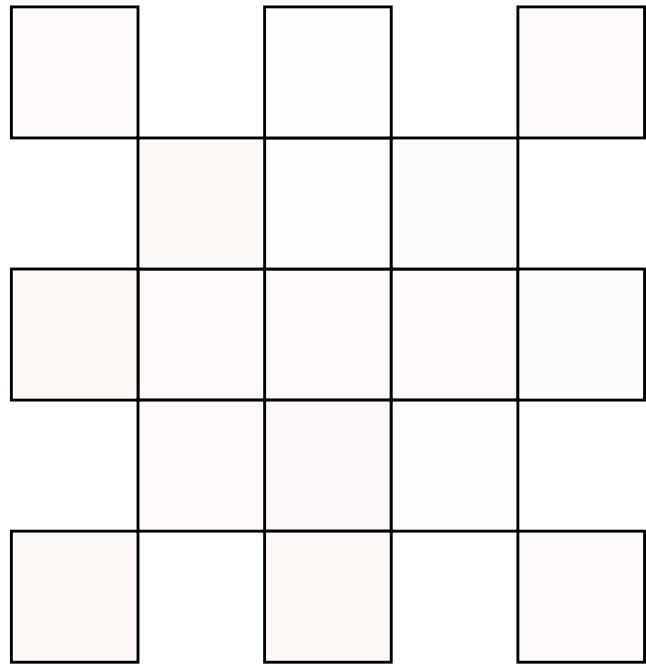

2-52452769-G-A

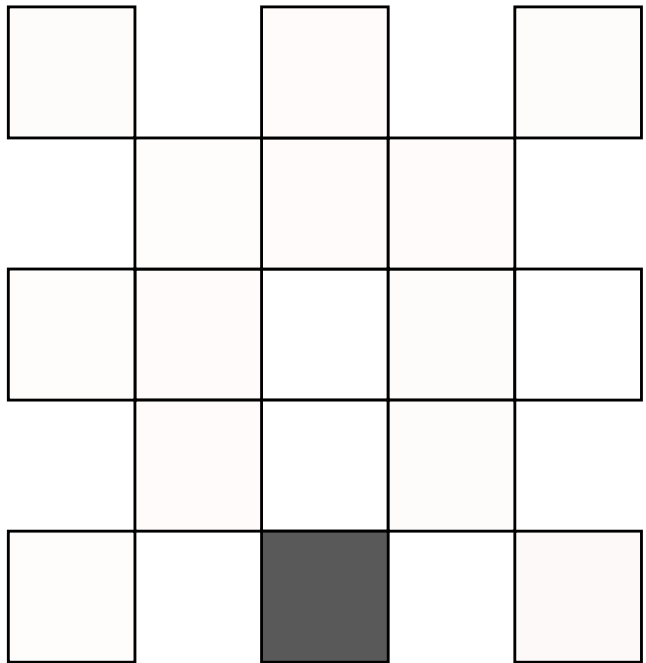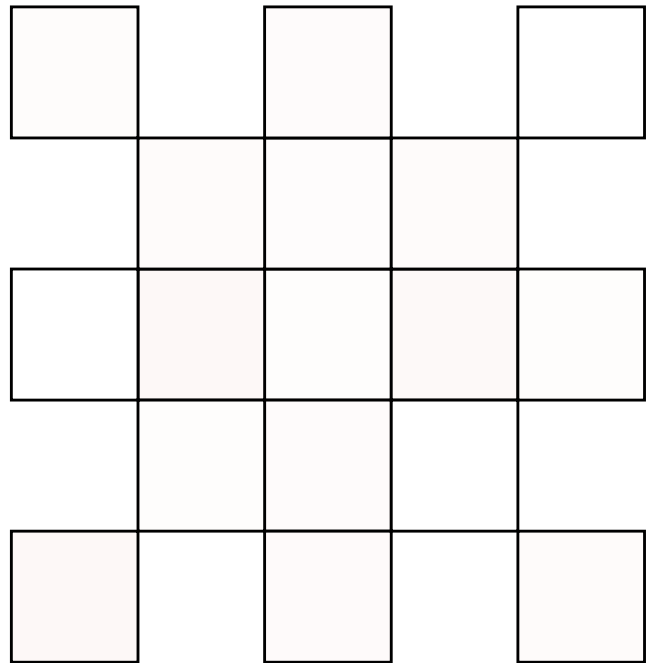

2-53839419-G-A

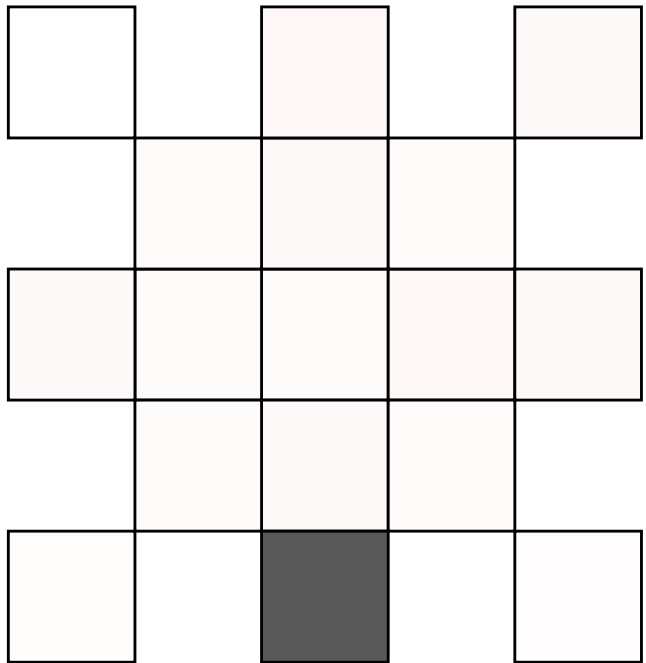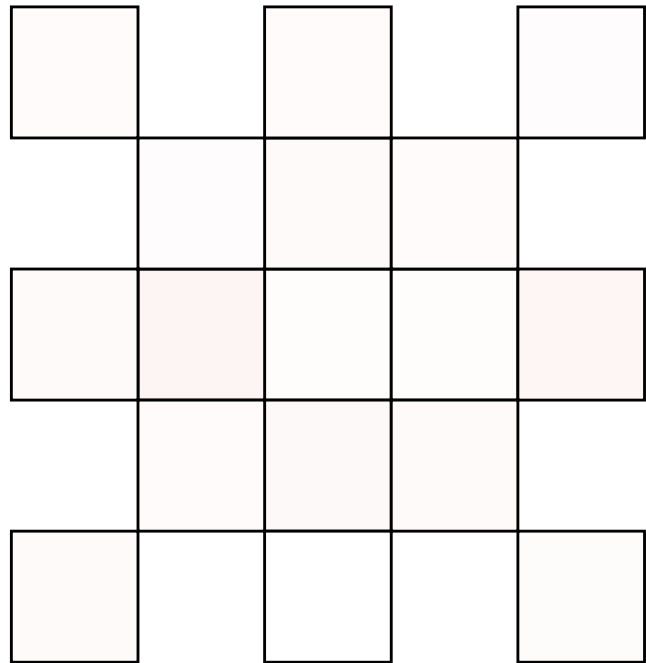

2-57021433-T-C

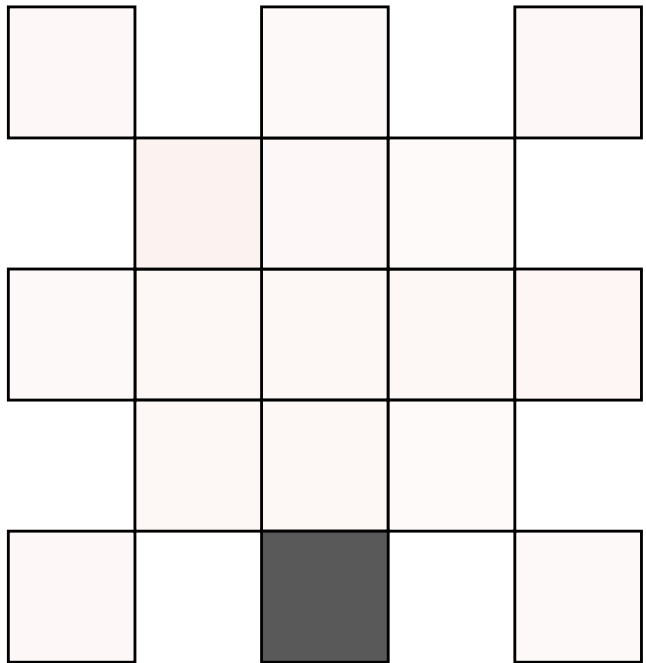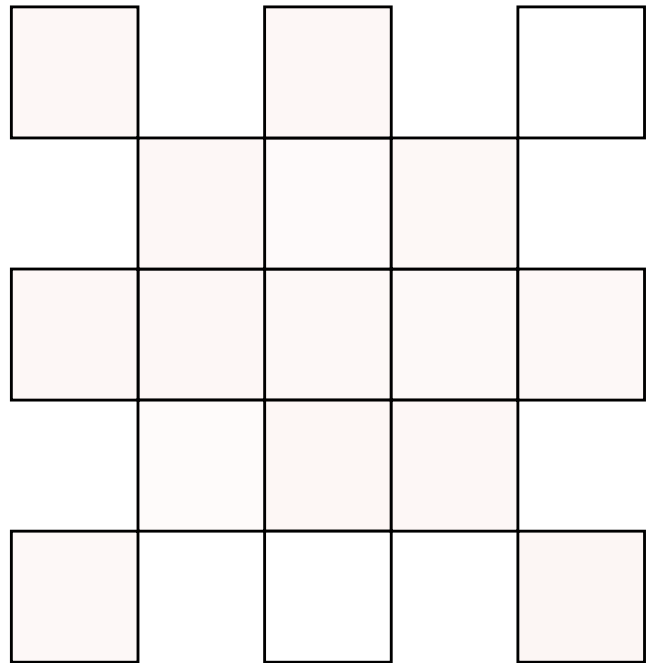

2-64648189-C-T

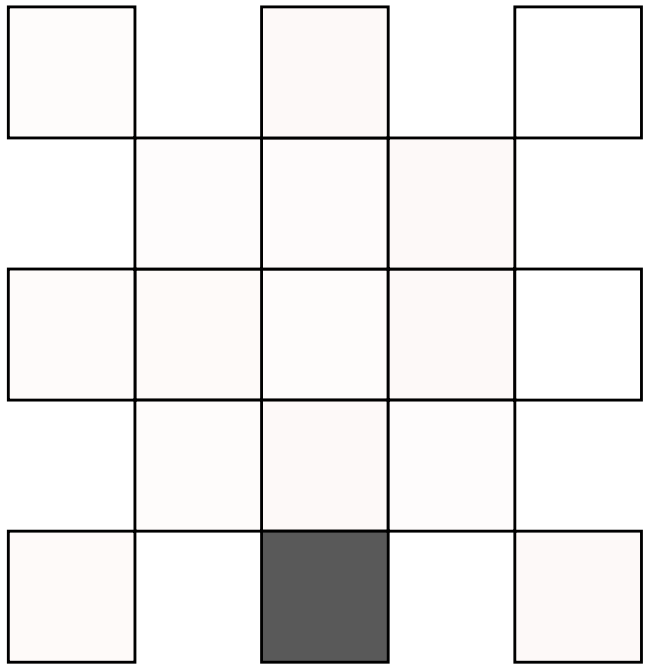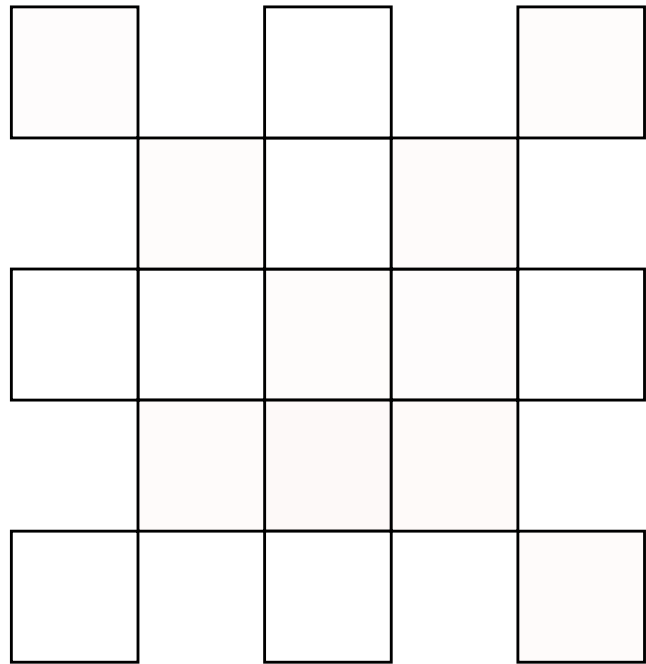

2-72858074-C-A

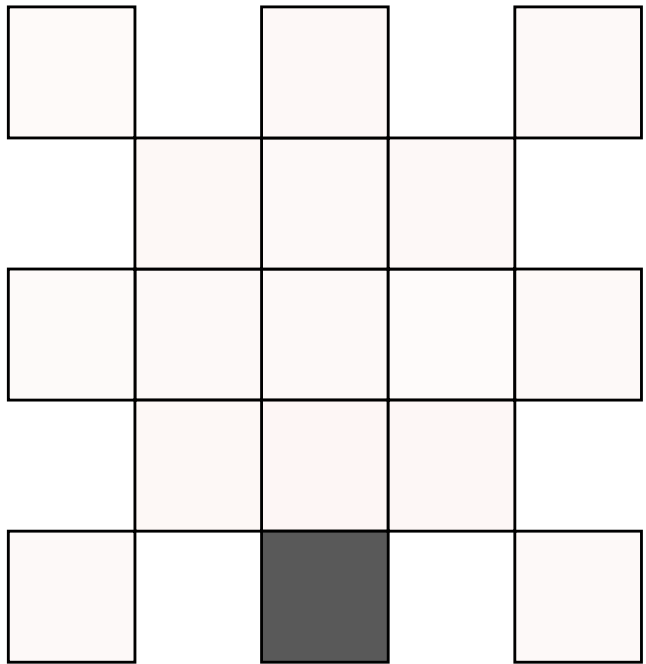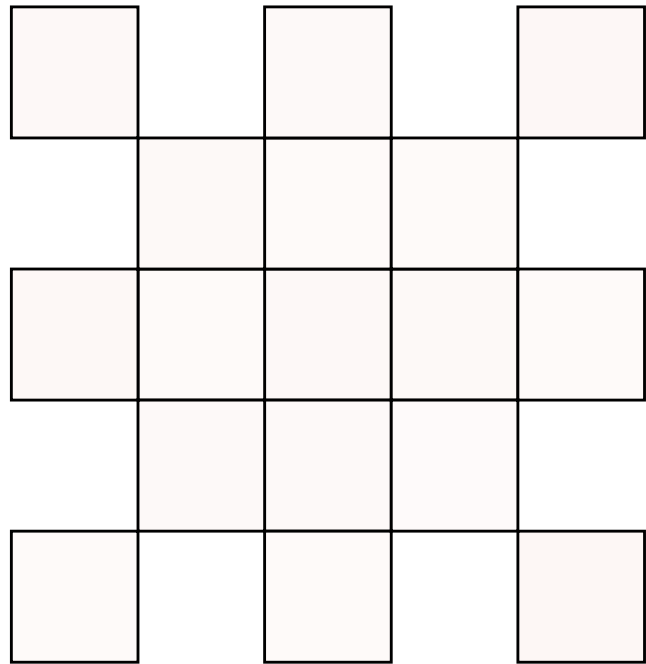



2-78747329-C-A

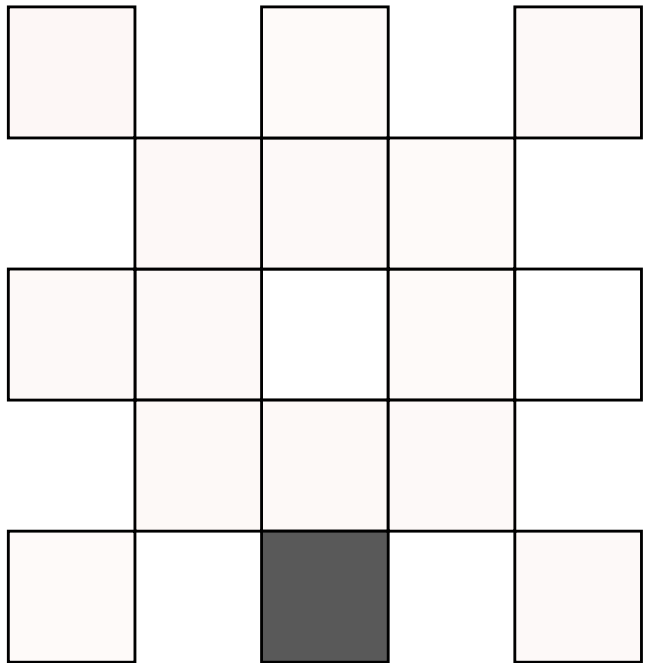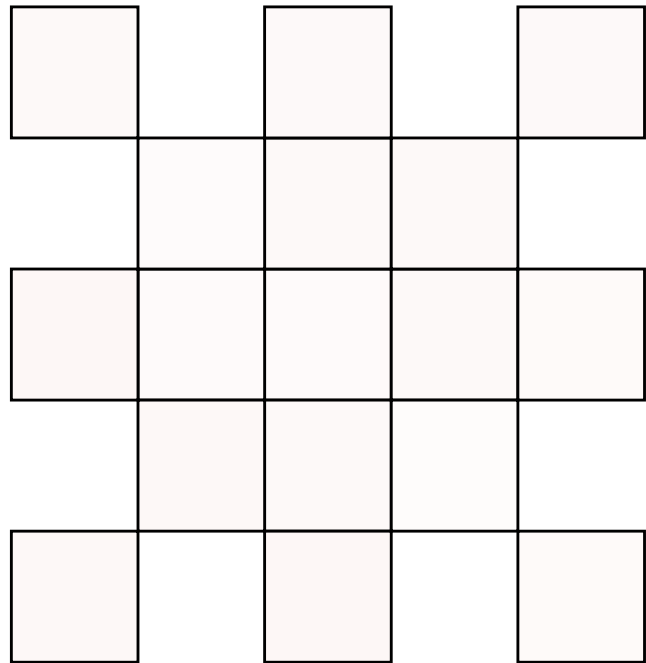

2-82189643-C-A

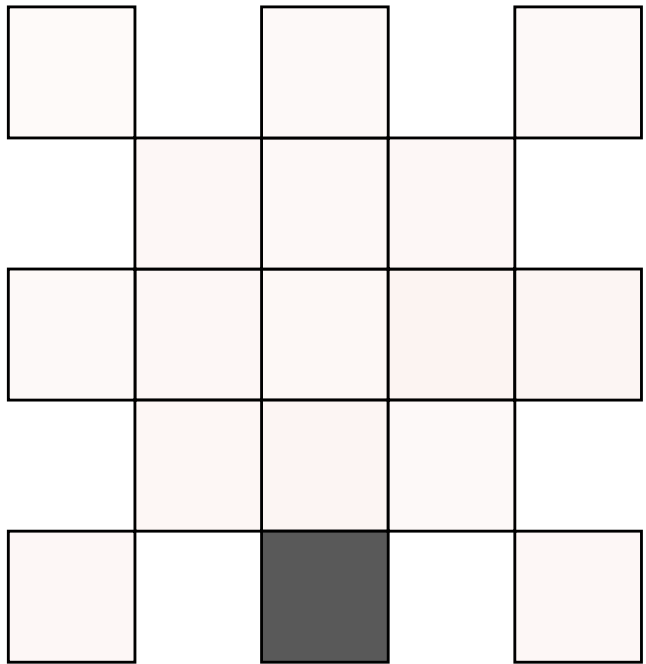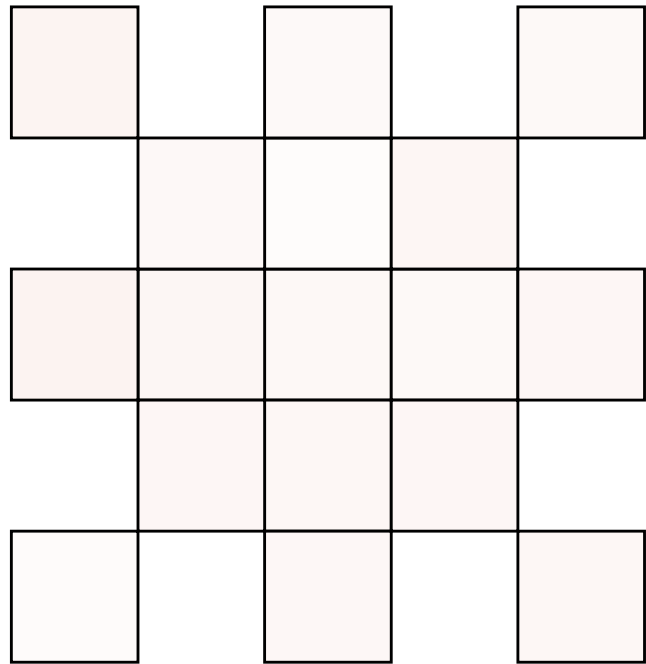

2-86260205-G-A

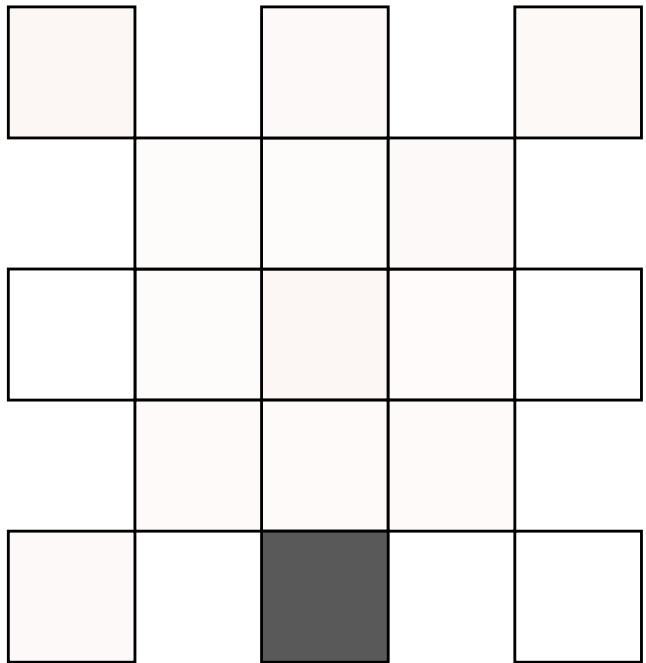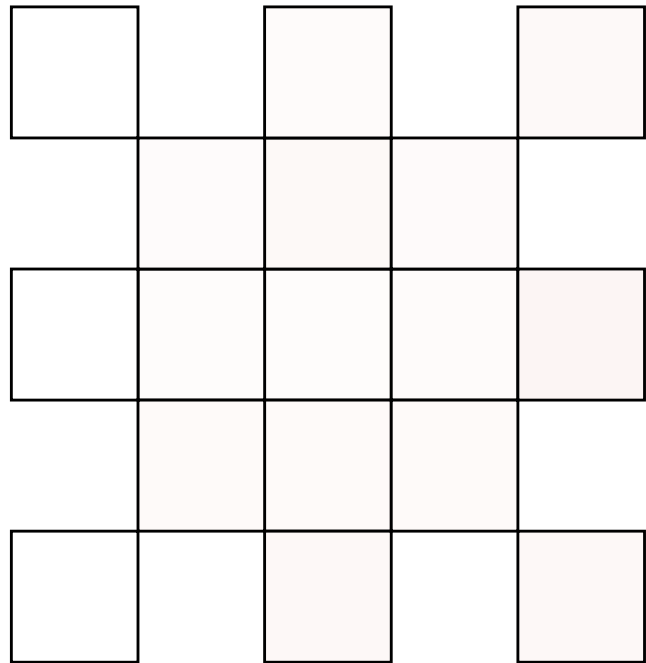

2-88993566-C-T

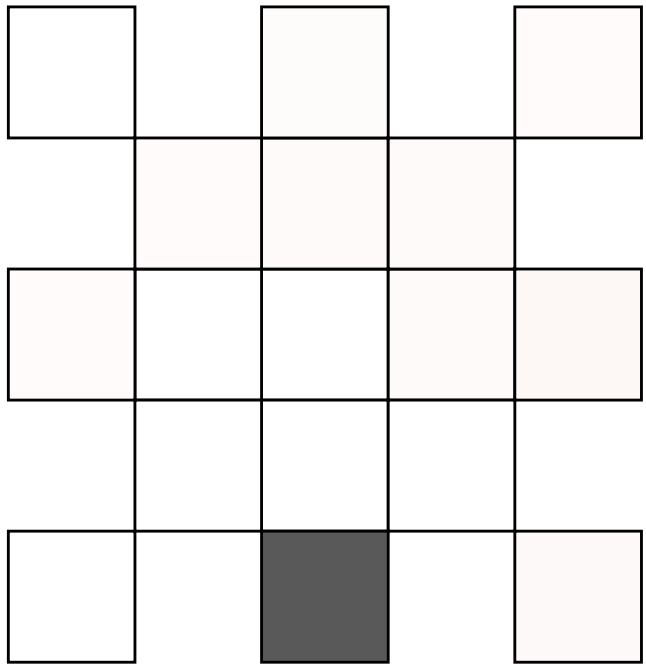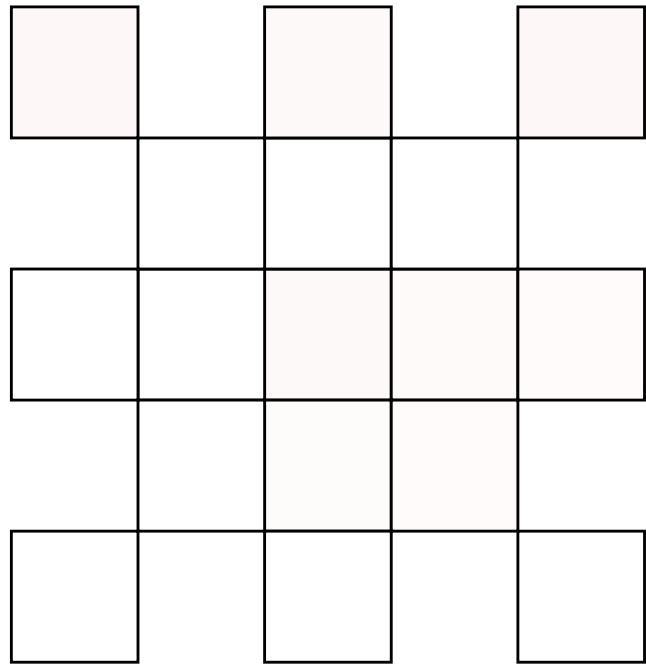

2-97528065-C-T

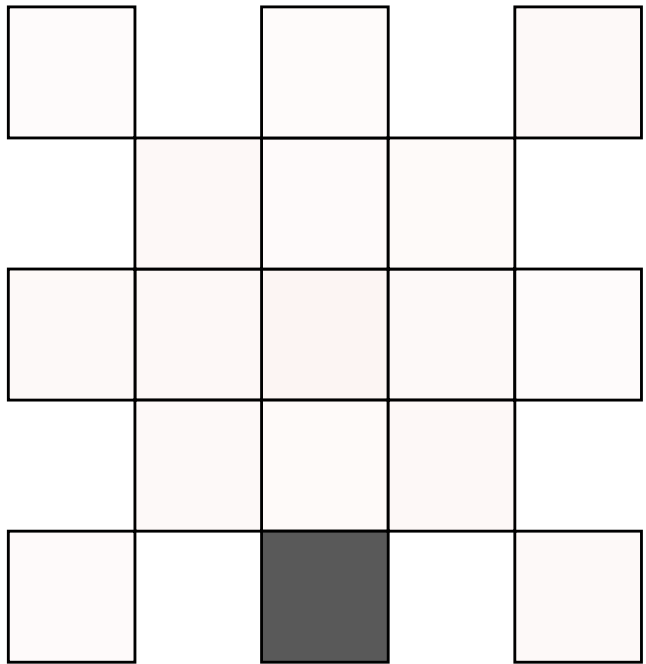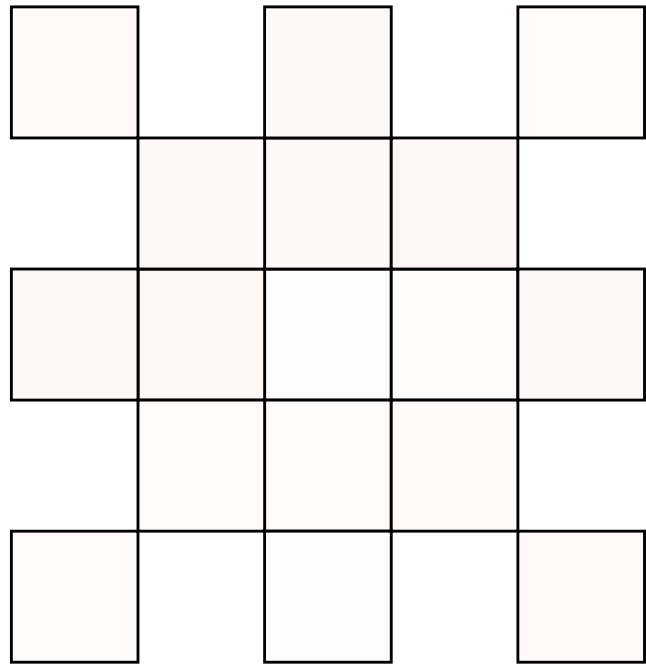

20-10701398-A-G

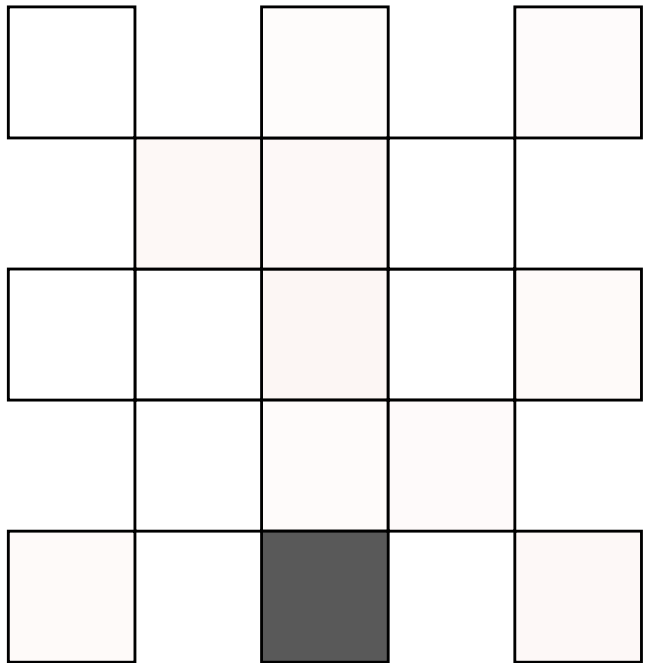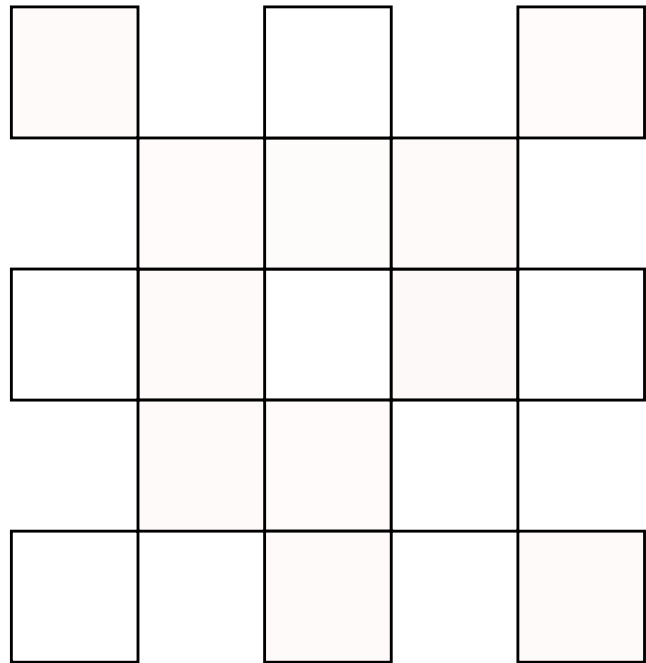

20-10742088-G-A

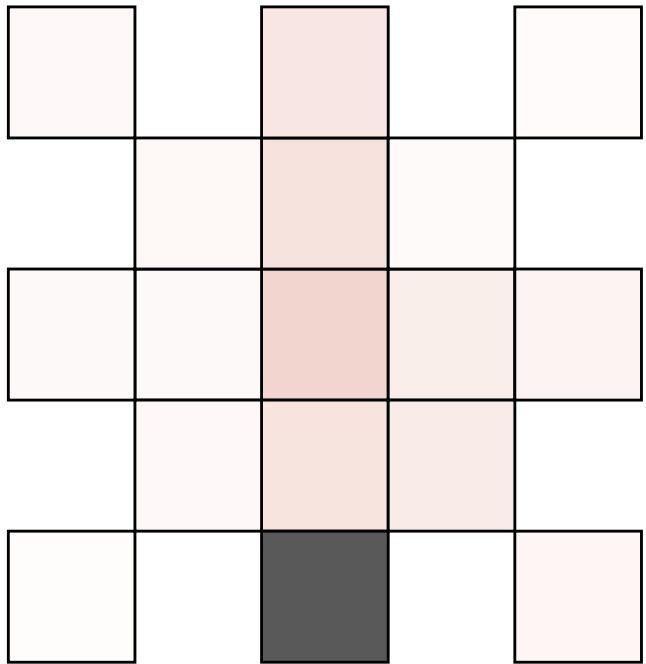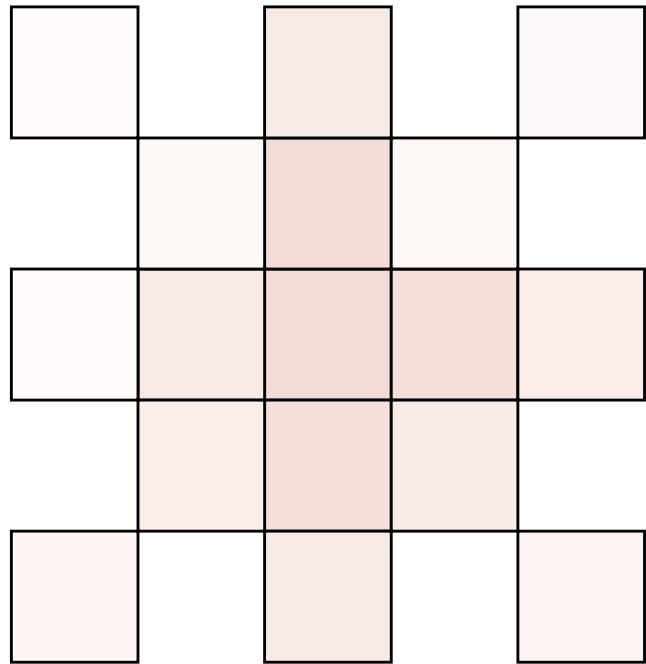

20-11798381-C-G

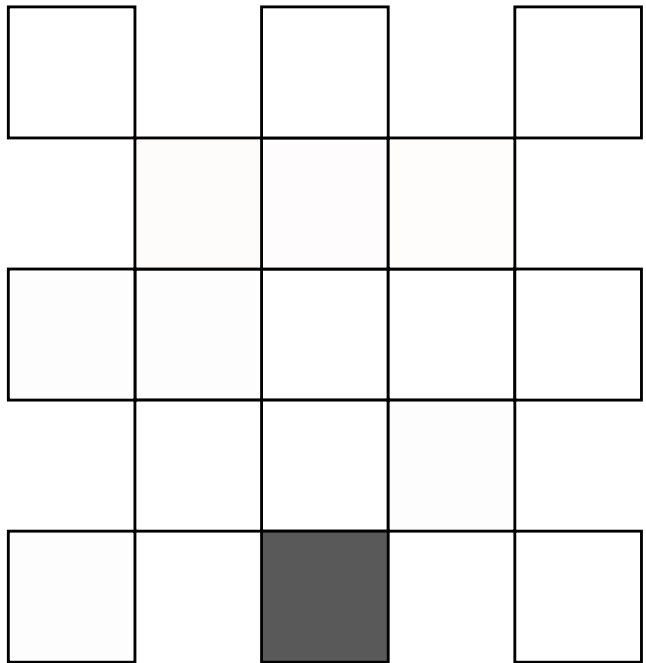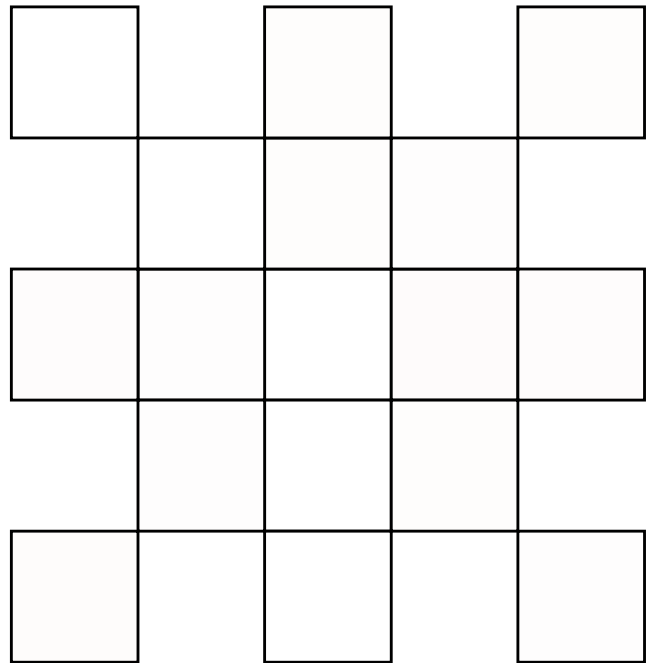



20-12514966-T-G

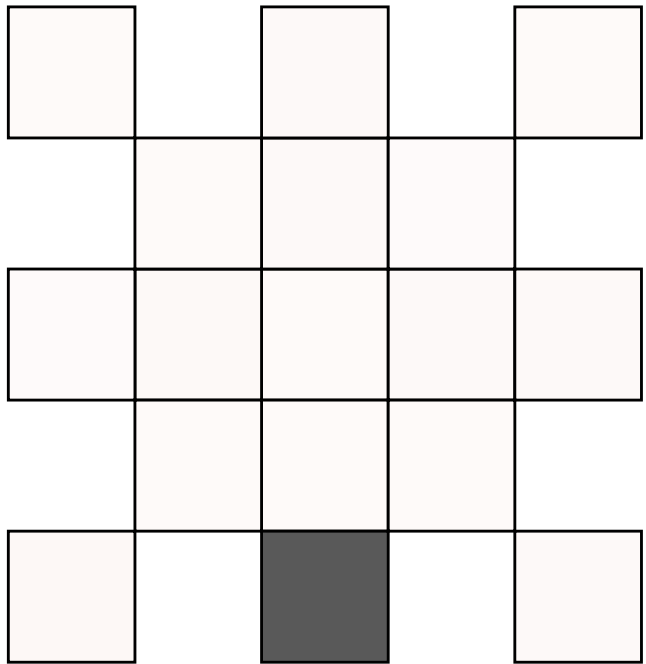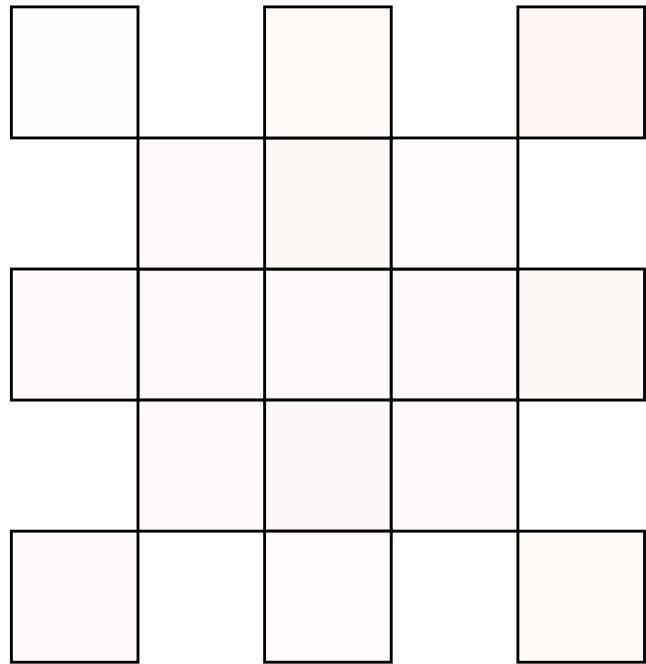

20-15344074-C-T

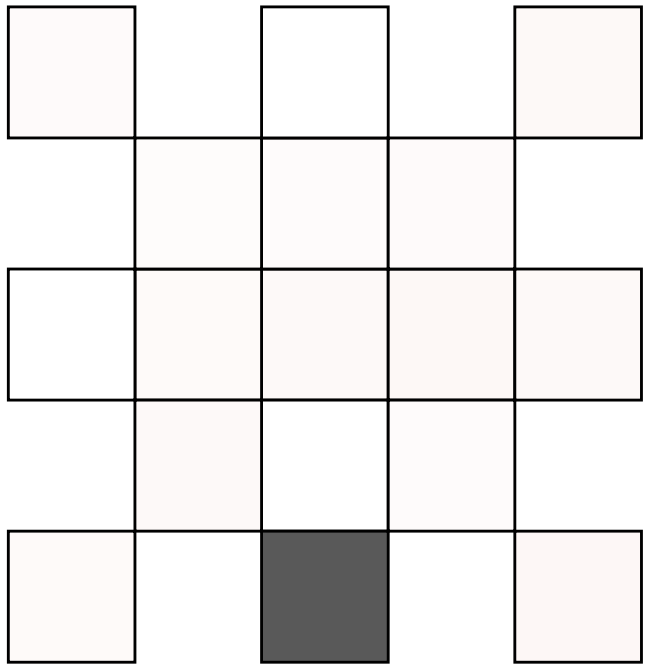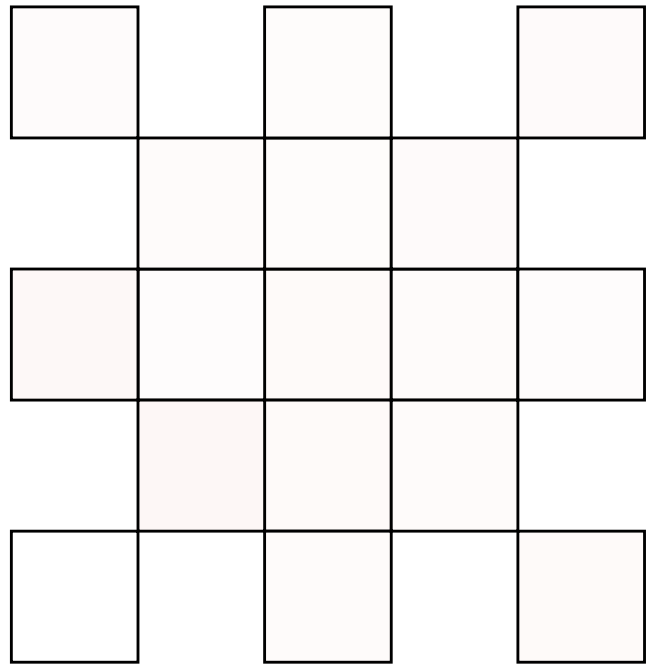

20-16783172-C-T

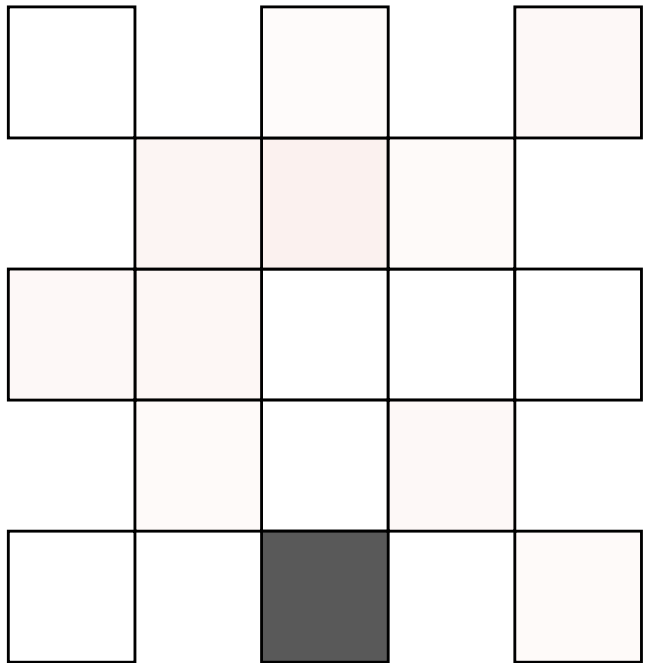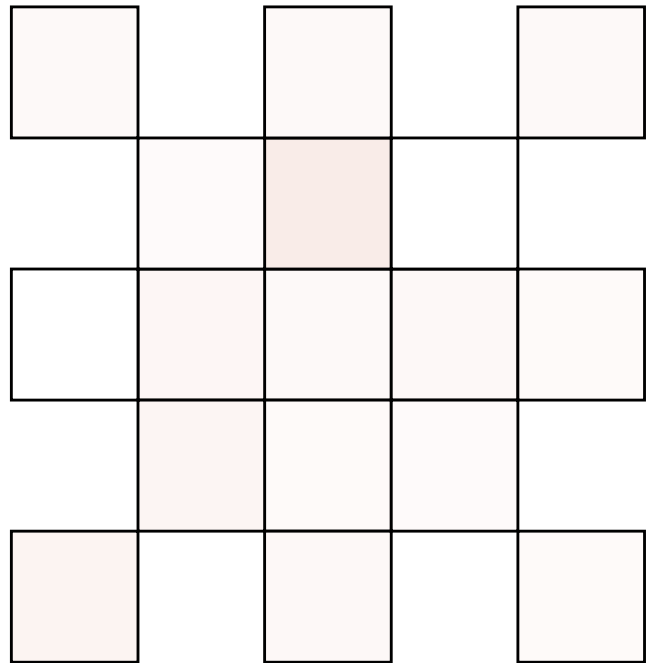

20-18482771-G-T

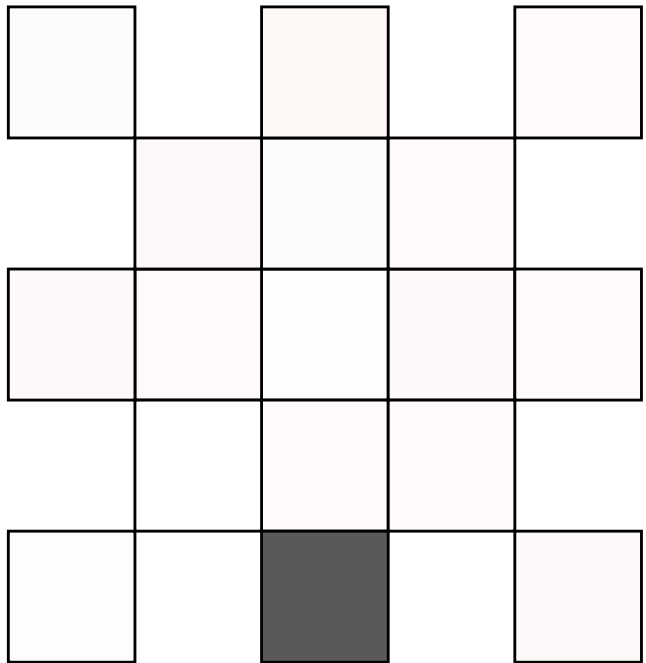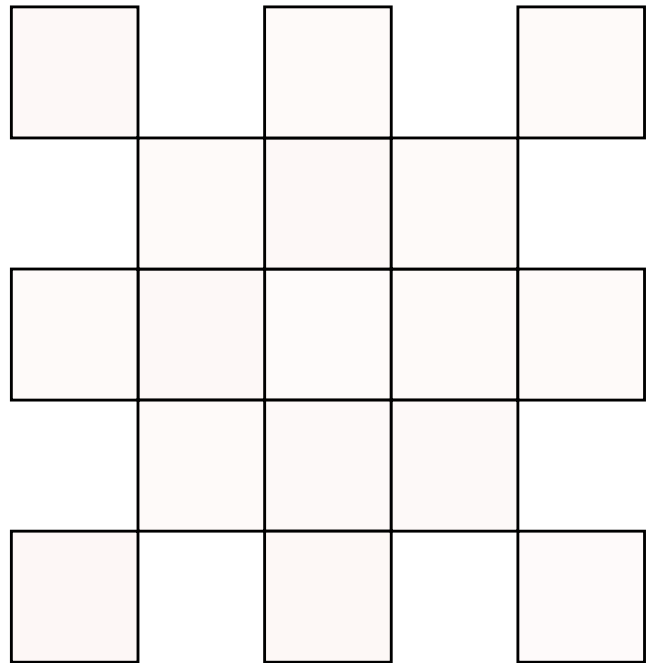

20-21698027-C-T

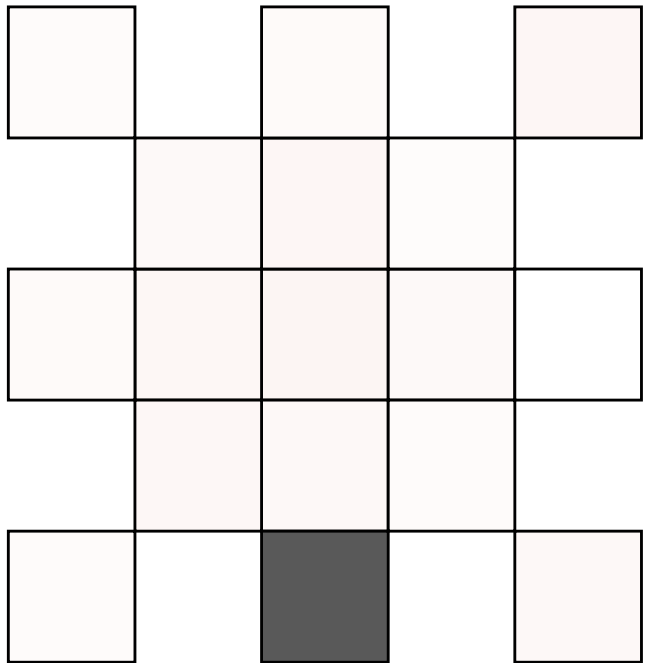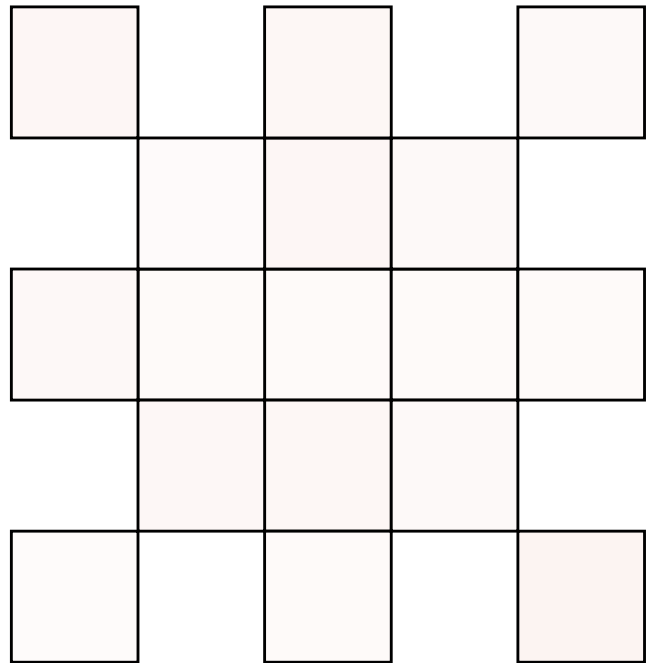

20-22087903-C-T

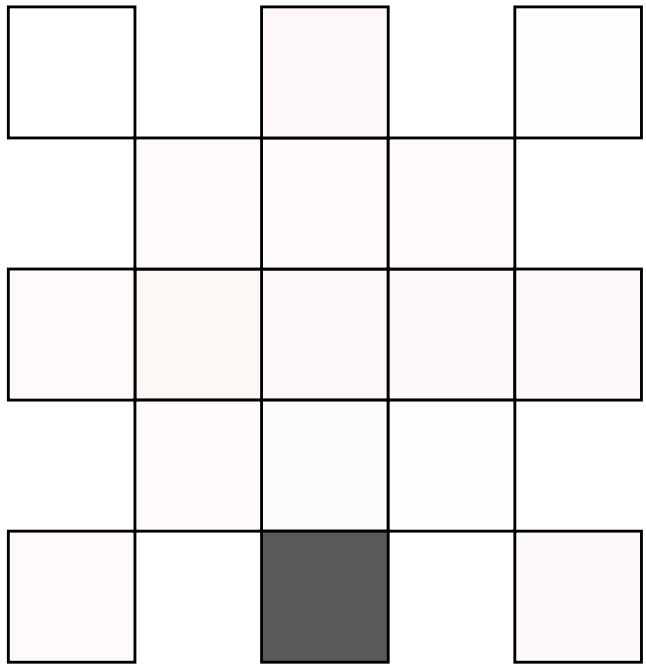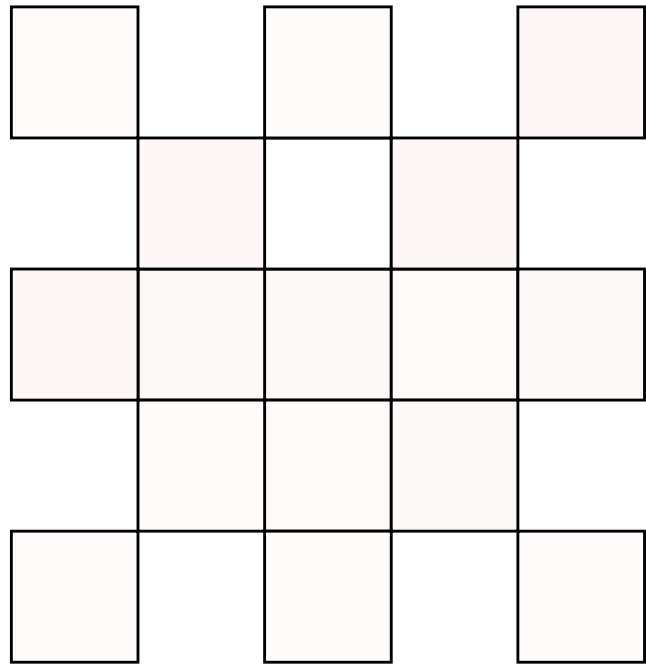

20-22280961-C-T

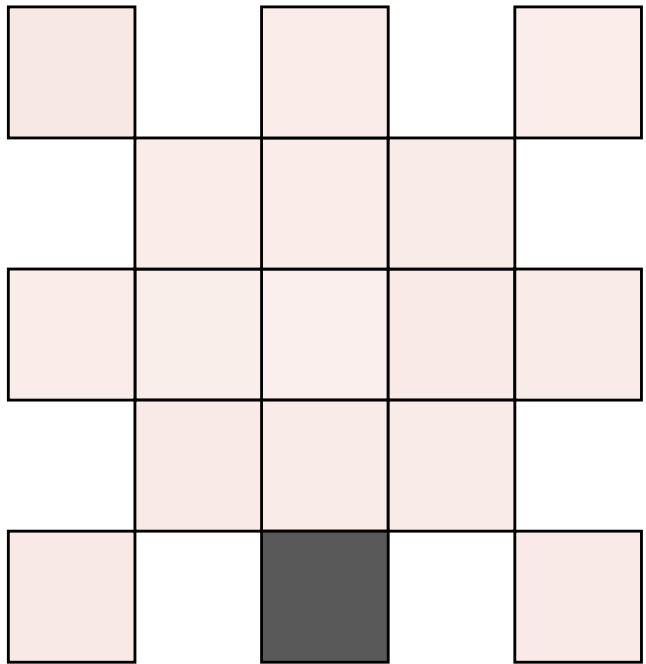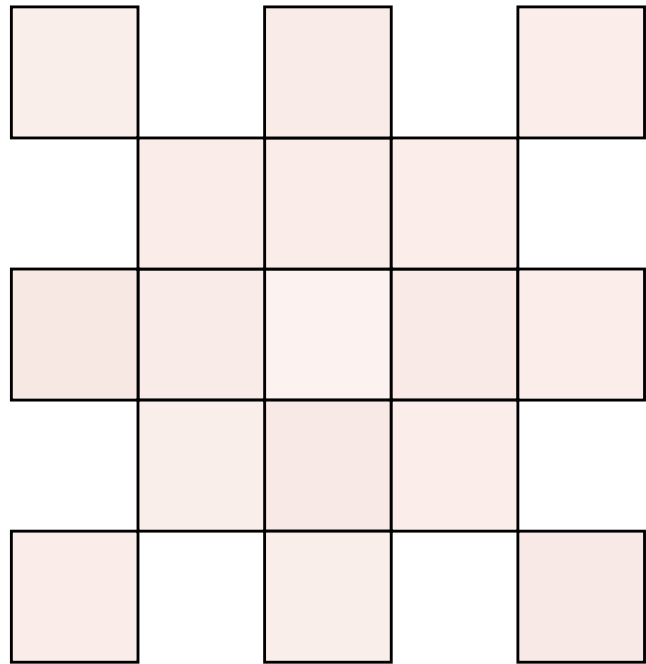

20-22383923-C-A

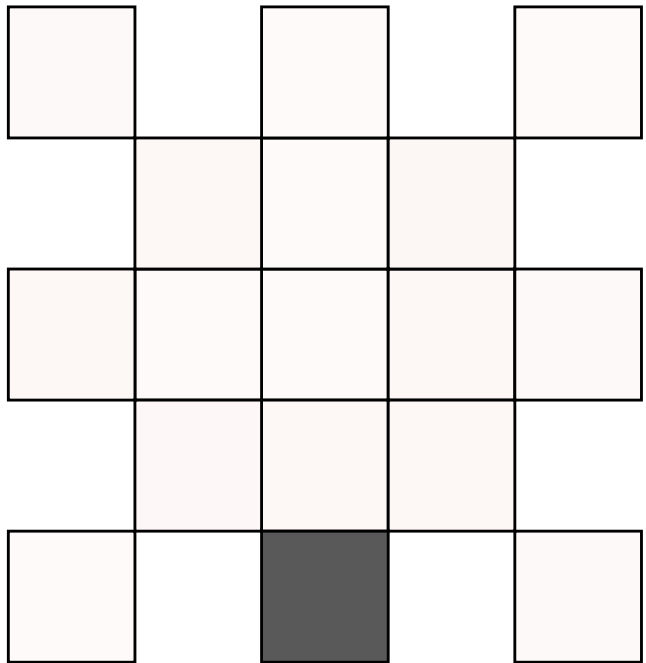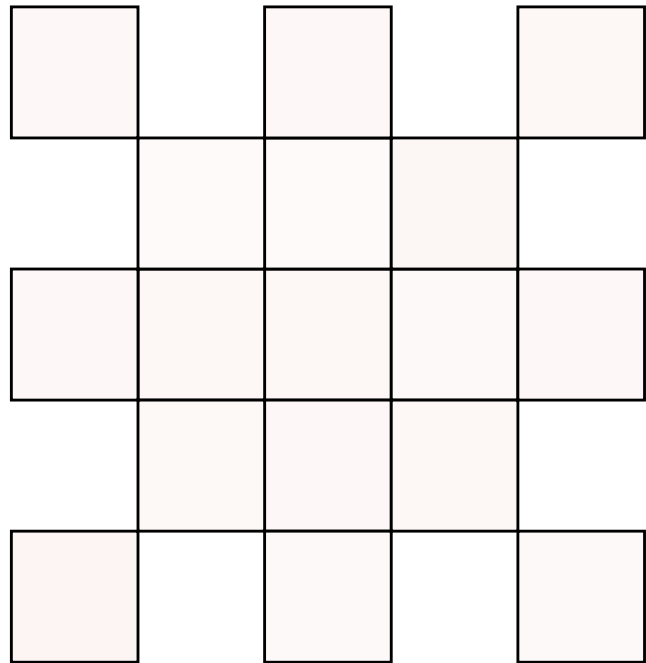



20-24978911-G-A

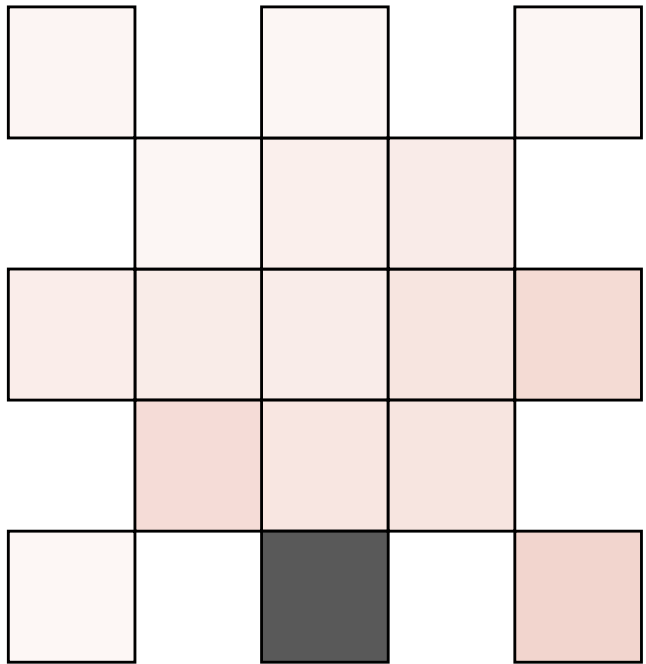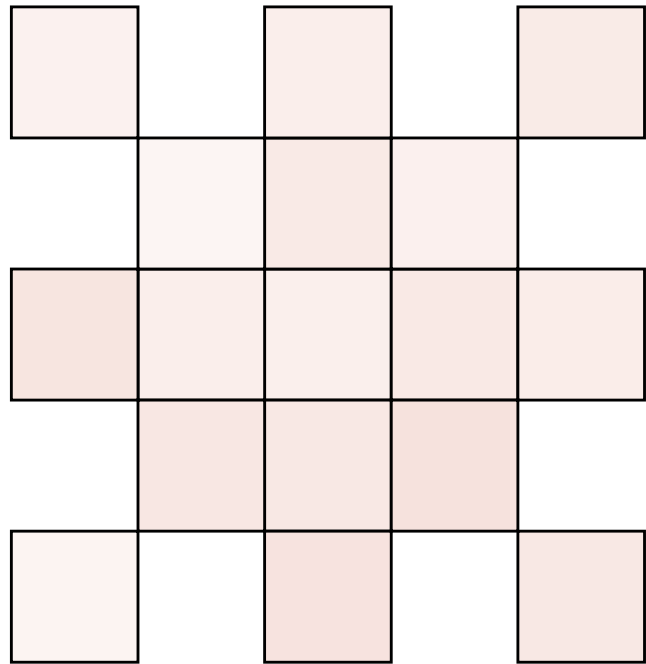

20-3202224-A-G

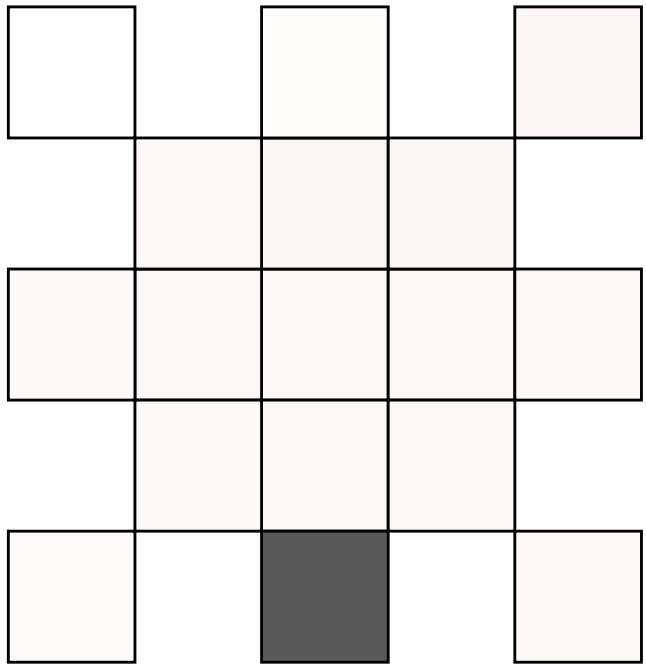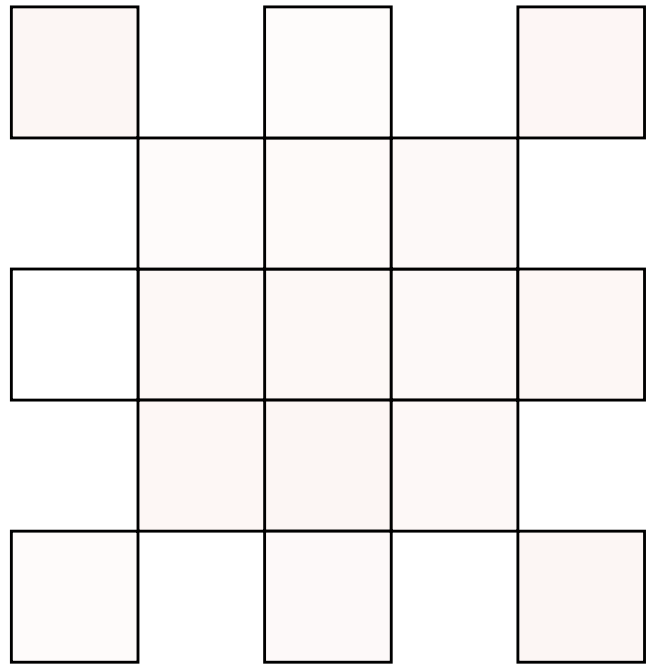

20-34064358-C-T

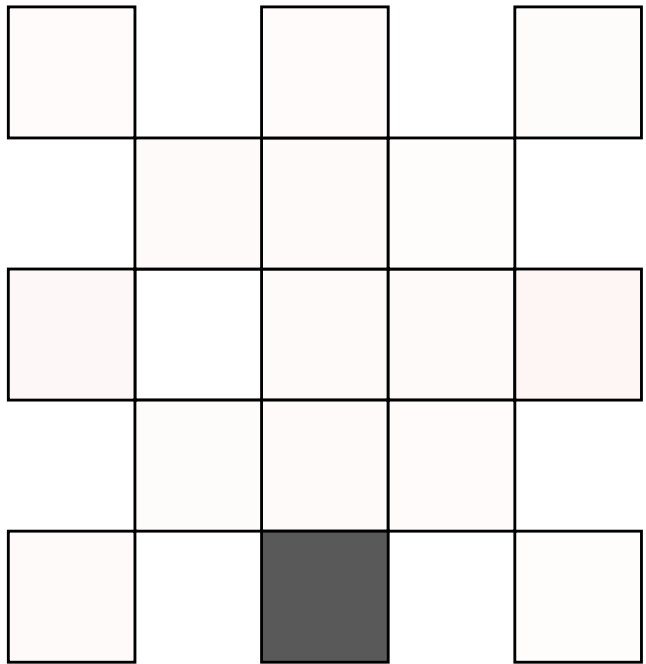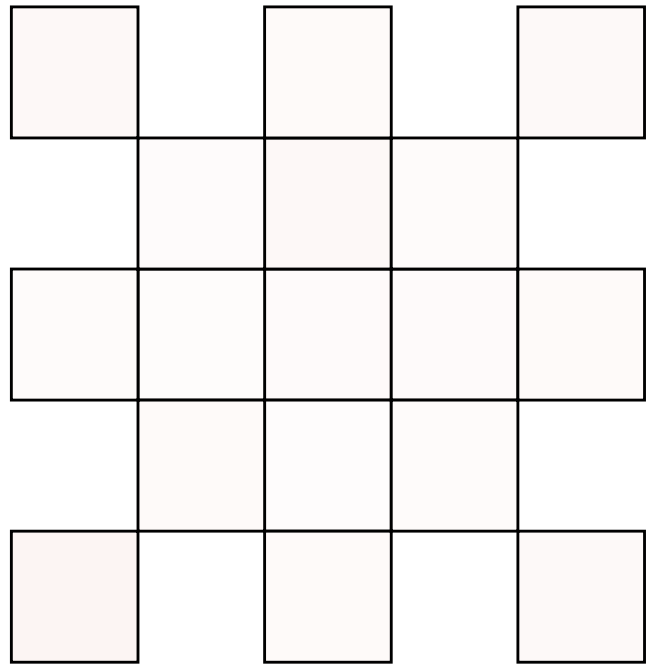

20-38271172-C-T

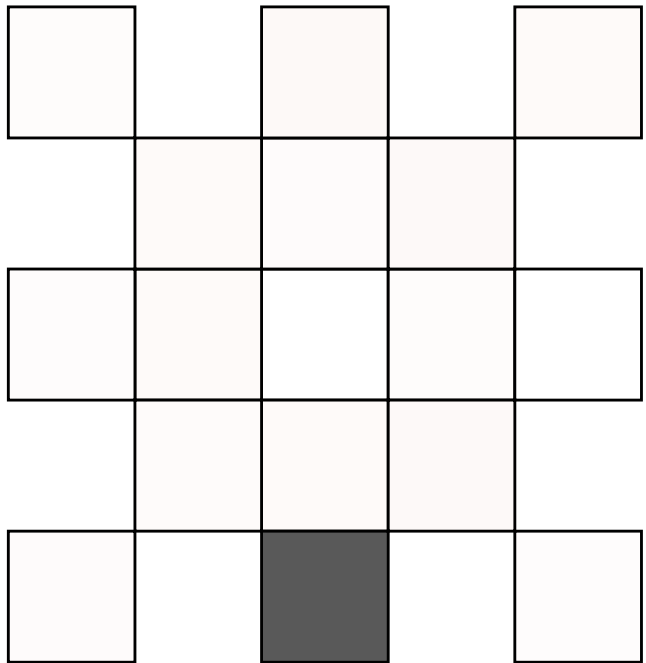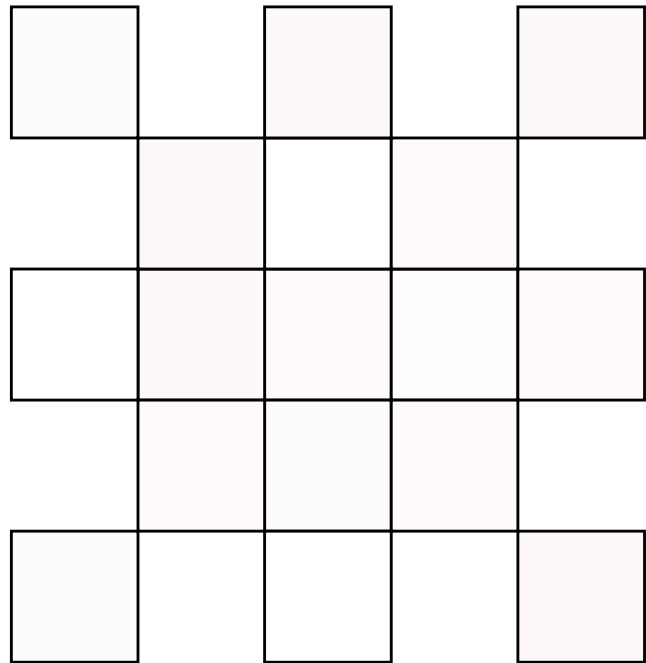

20-39222576-G-T

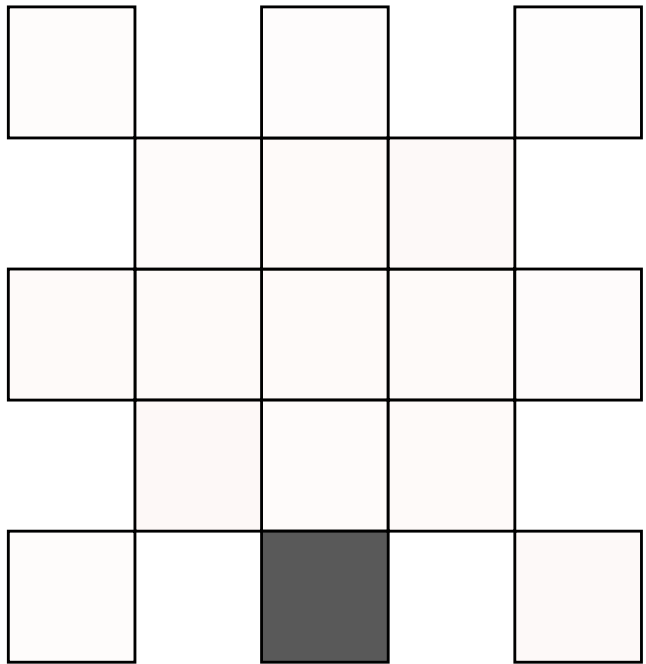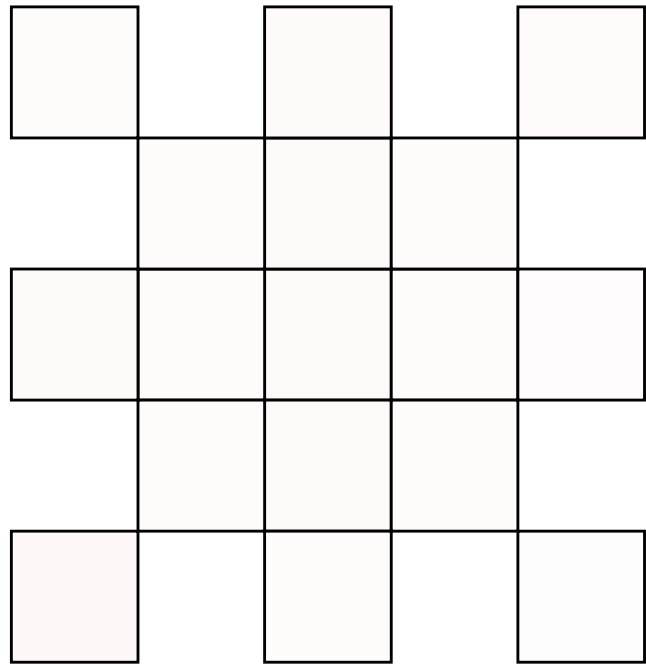

20-39714075-G-A

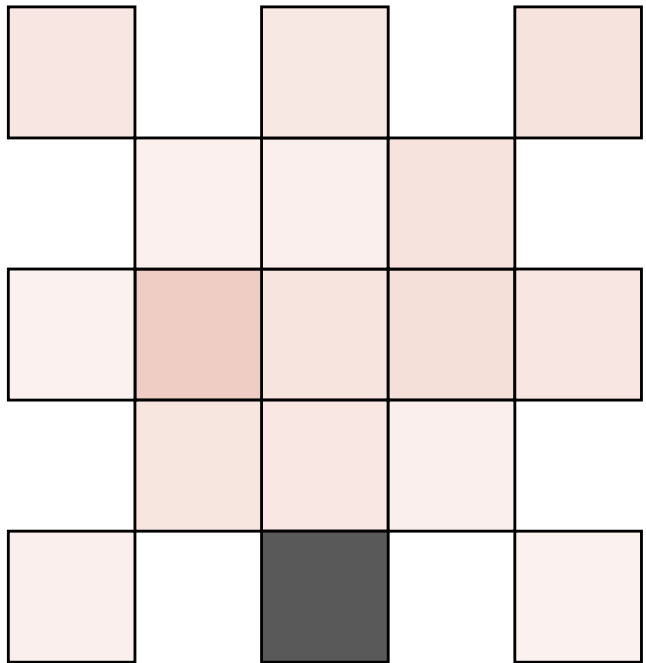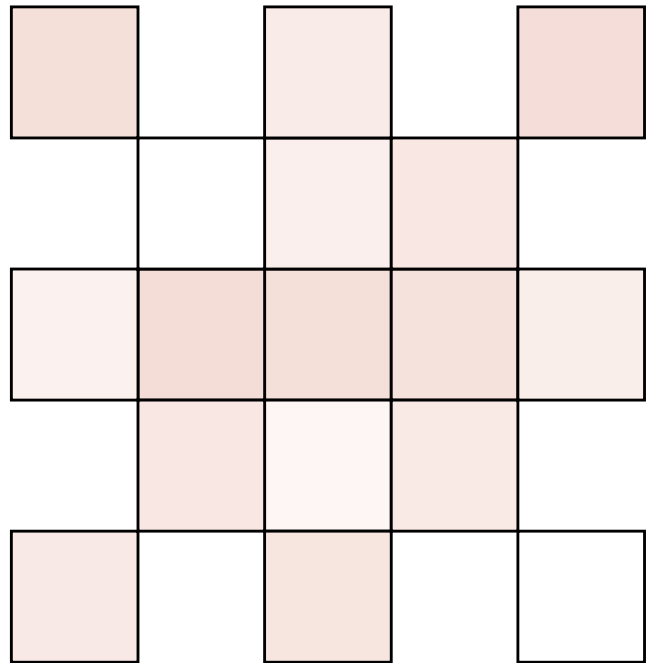

20-41427297-T-C

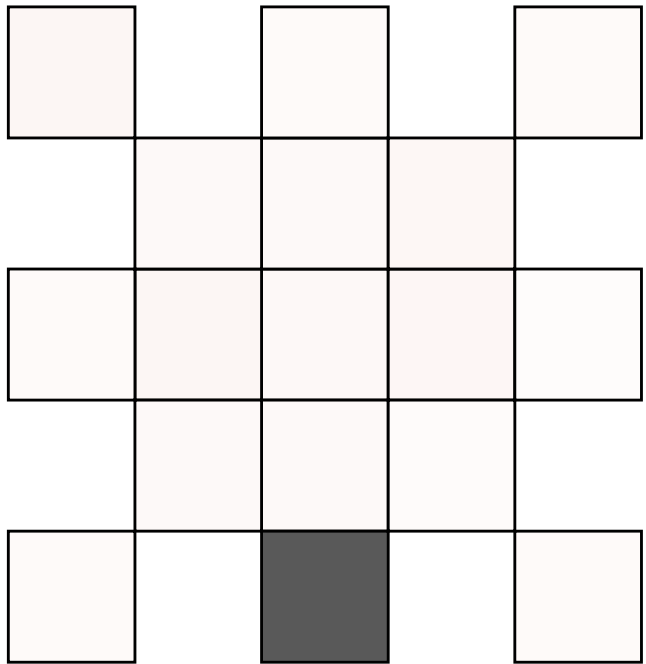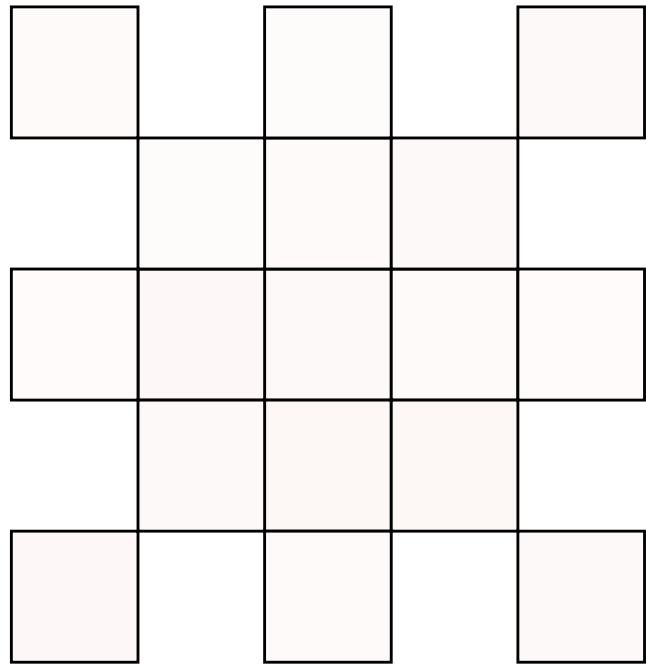

20-52196787-G-A

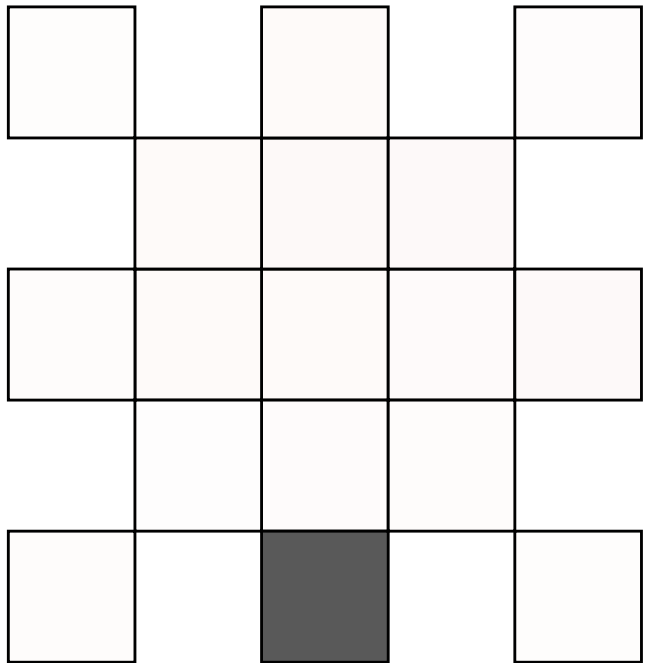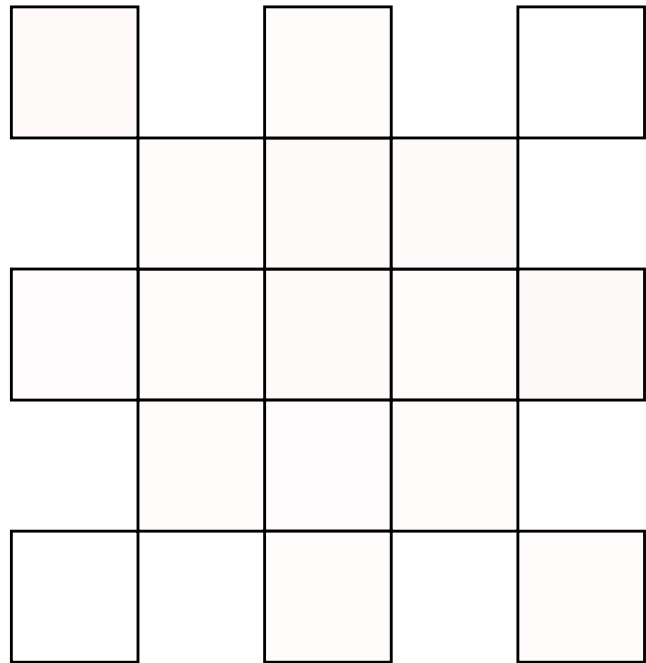



20-5456475-C-T

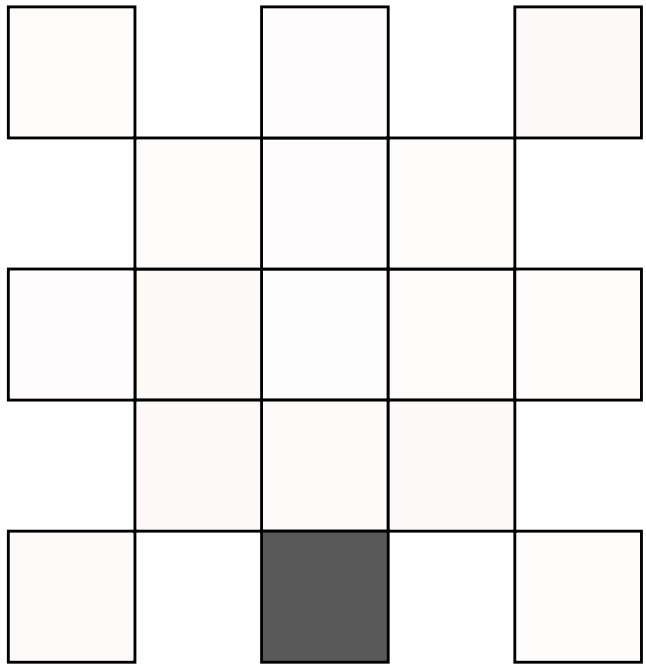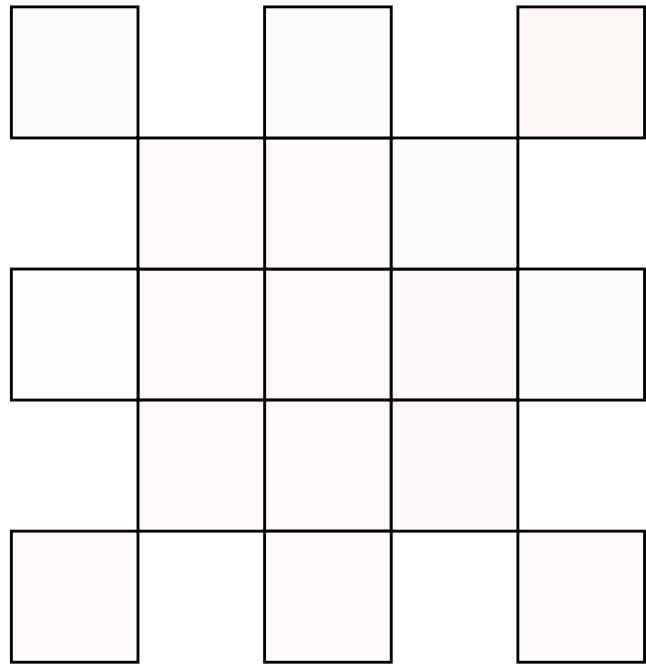

20-56452953-A-G

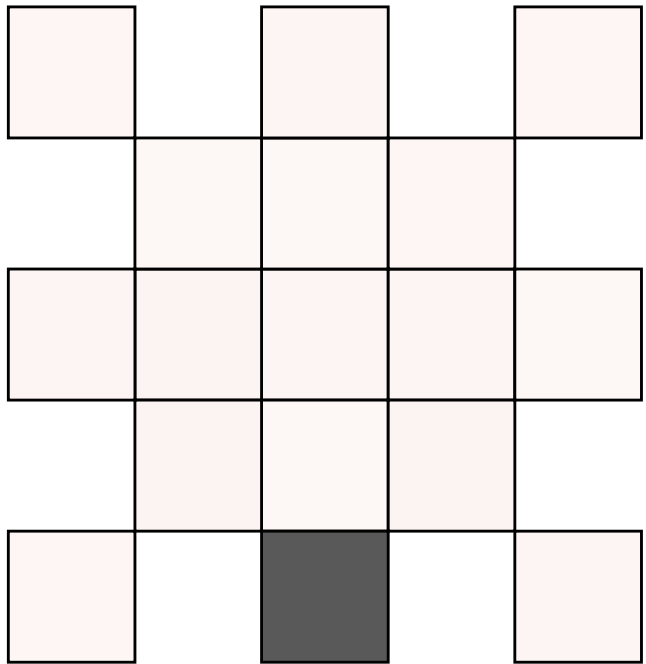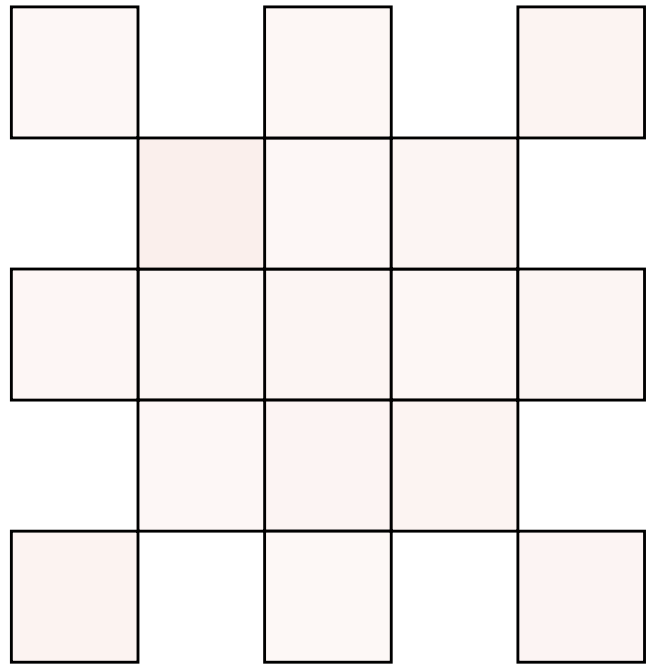

20-61014143-G-A

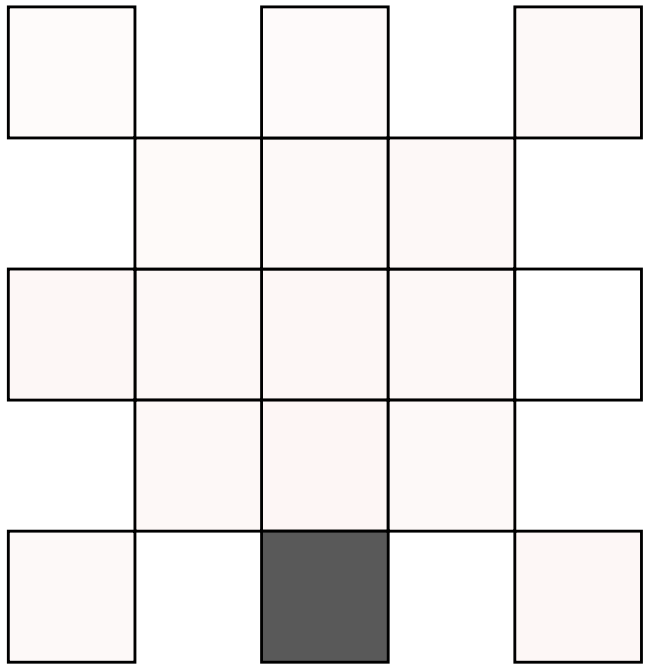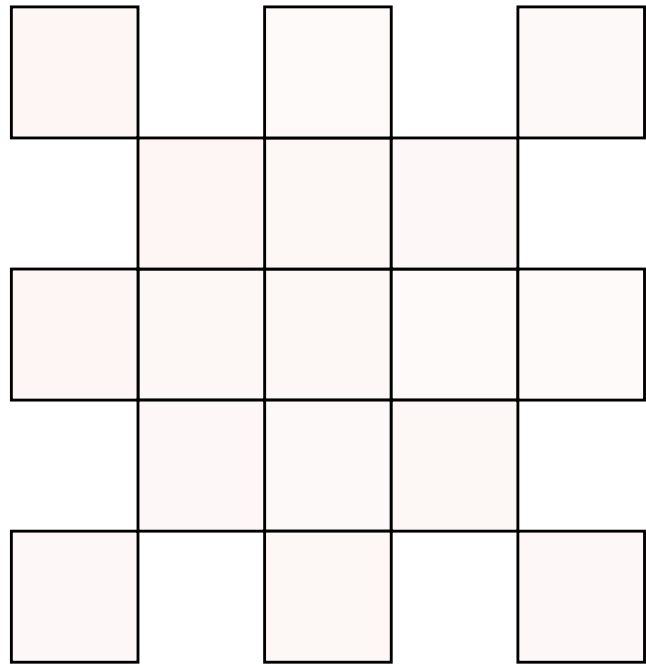

20-9698158-A-G

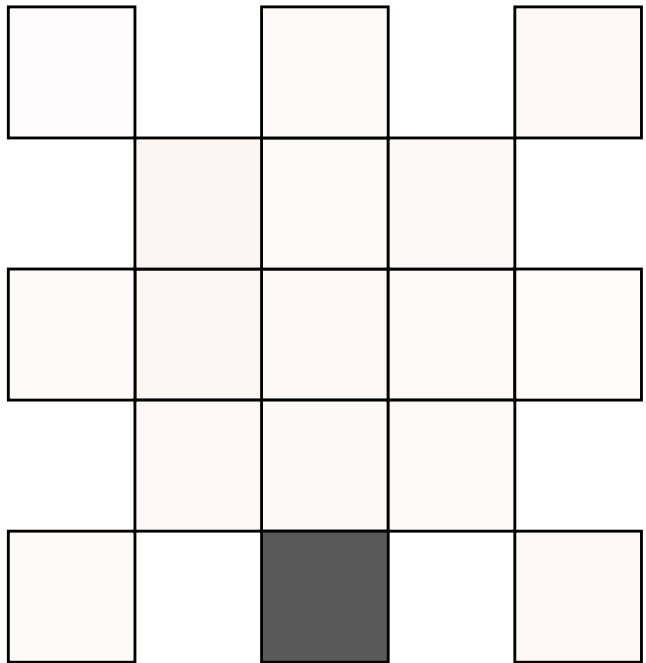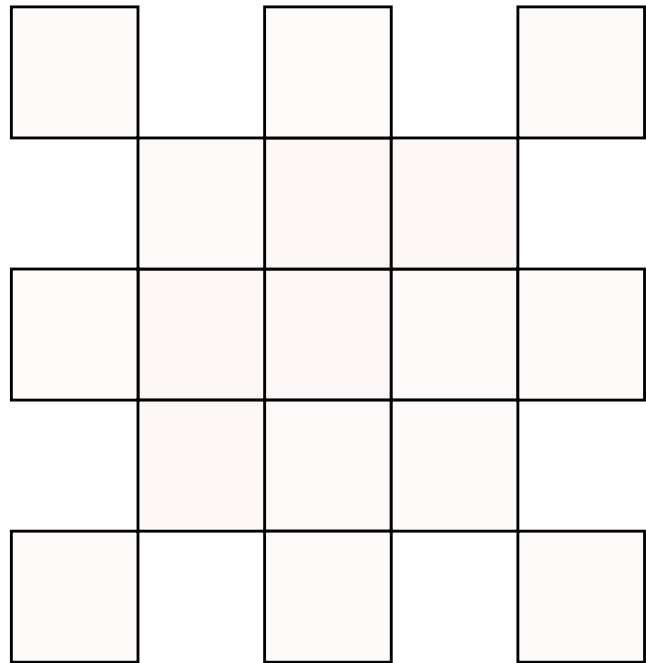

21-19919846-A-T

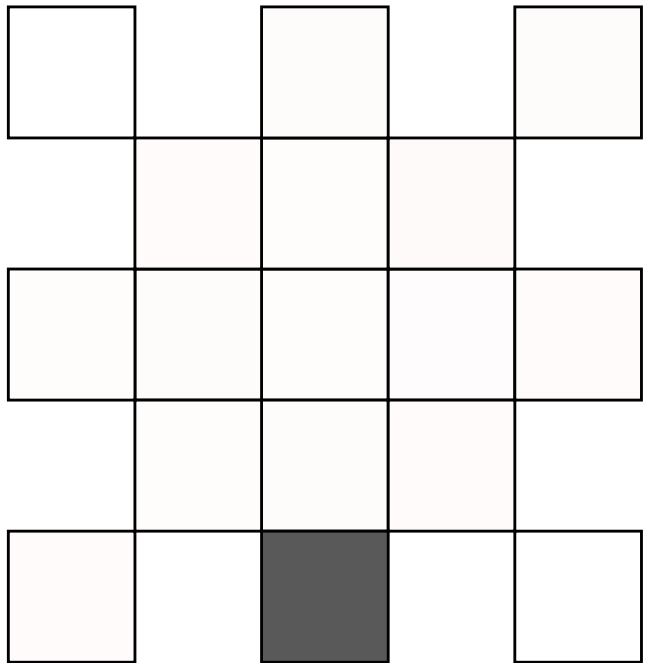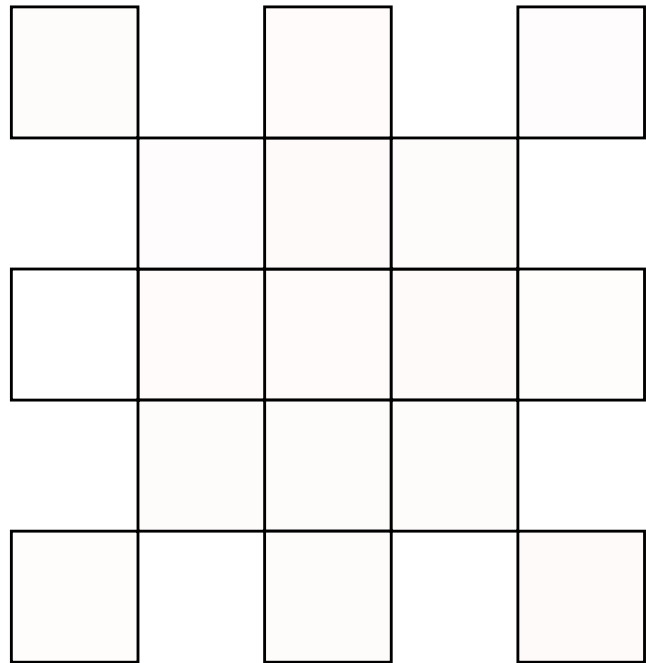

21-21779235-G-T

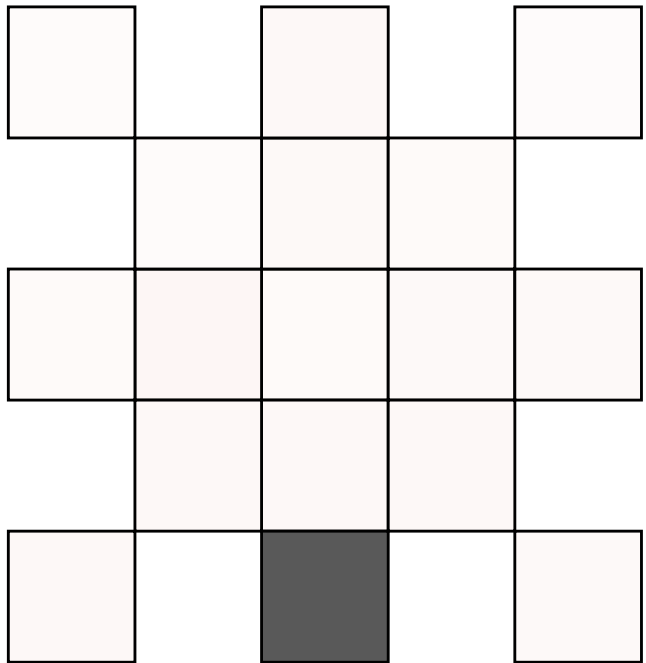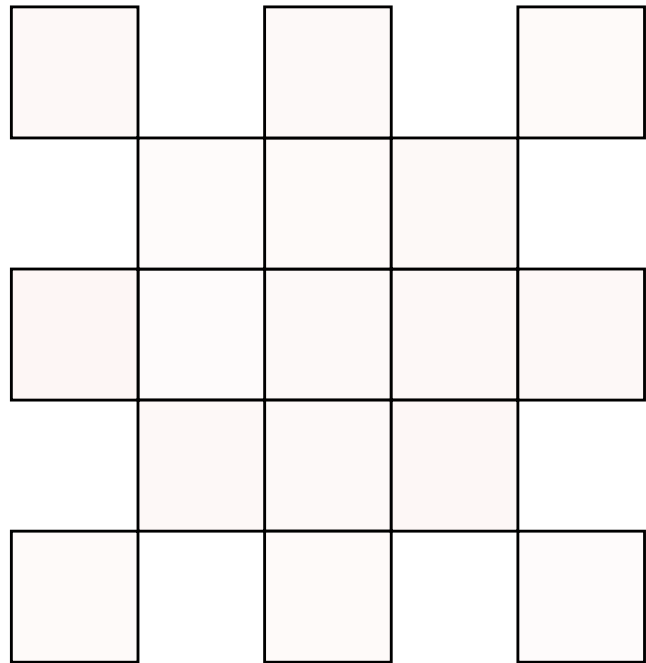

21-24508933-T-C

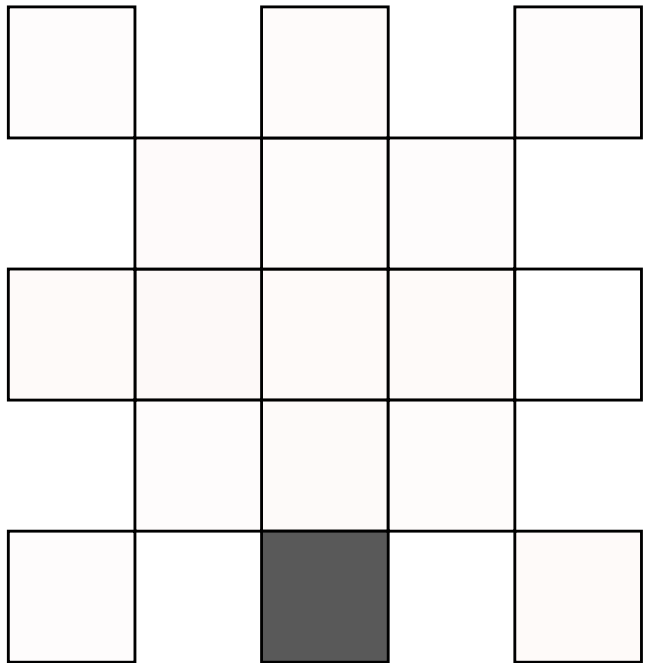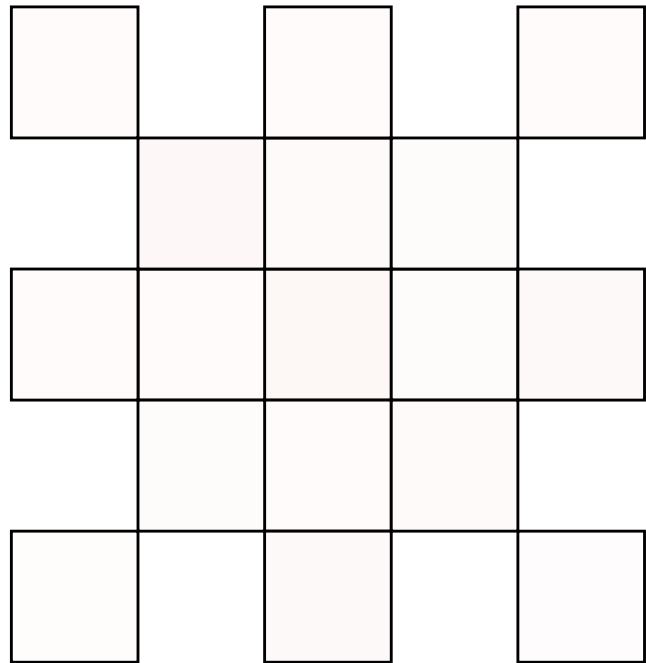

21-28769343-G-A

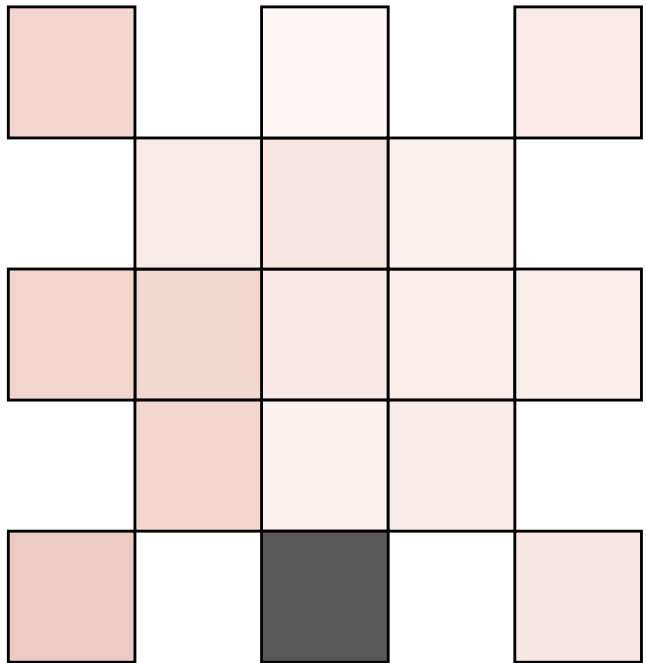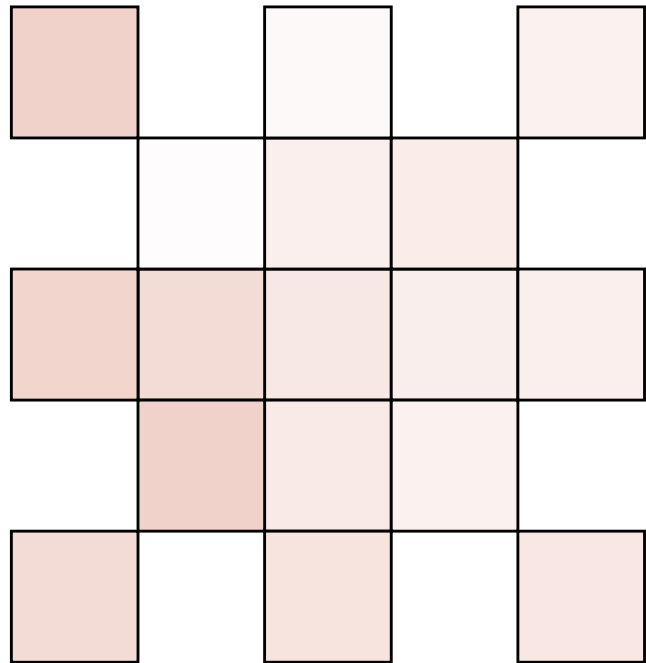



21-32316236-C-T

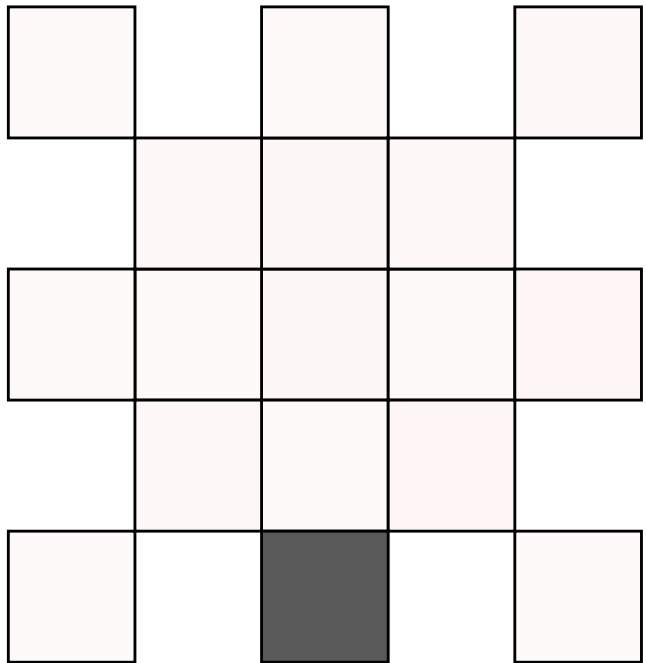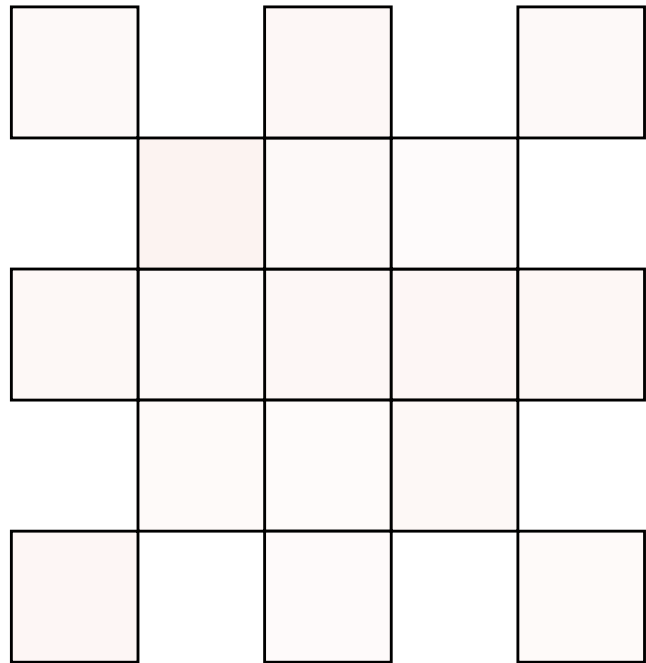

21-32682912-C-T

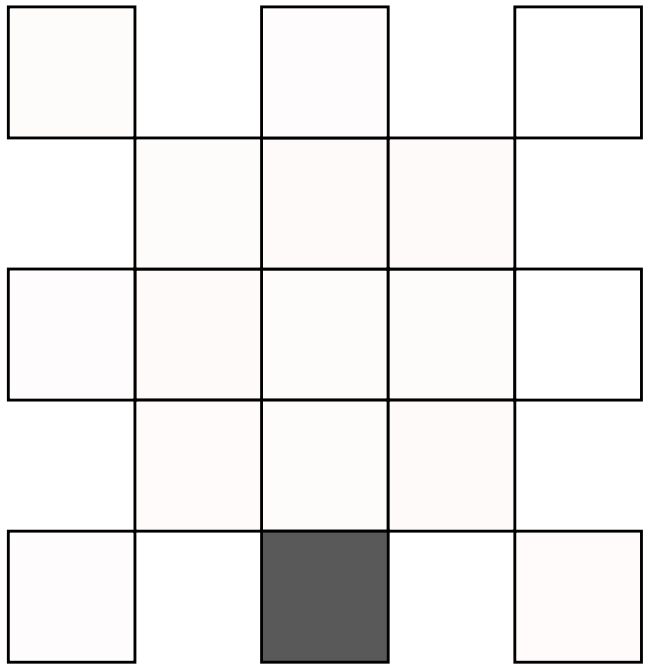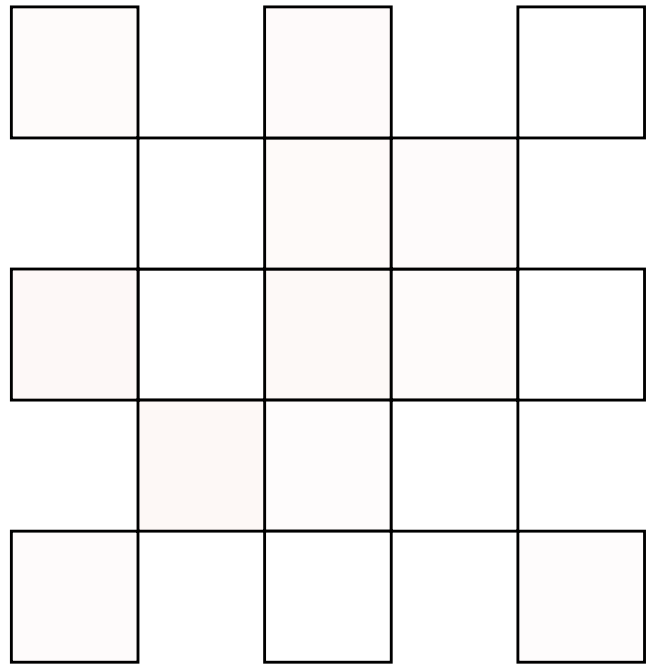

21-35772900-A-G

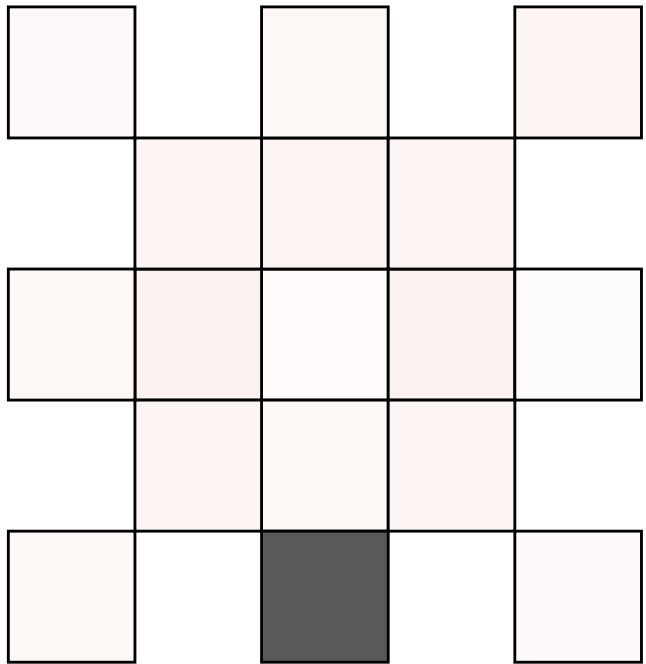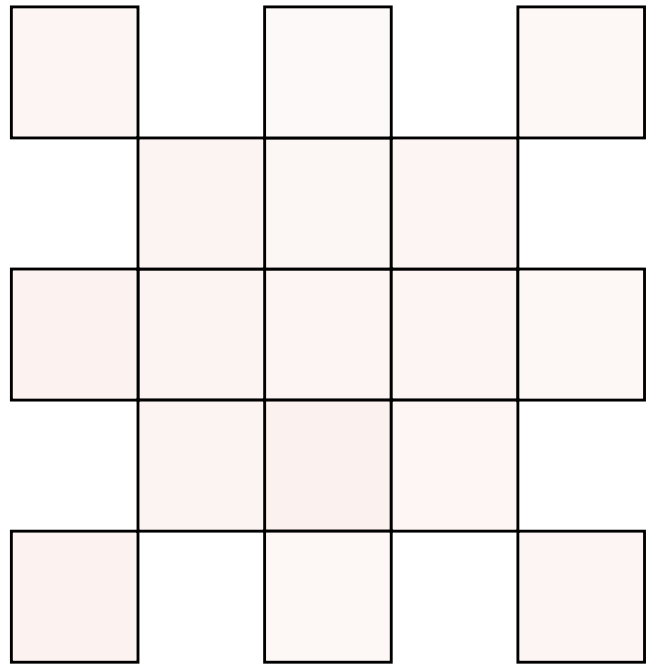

21-41023573-C-T

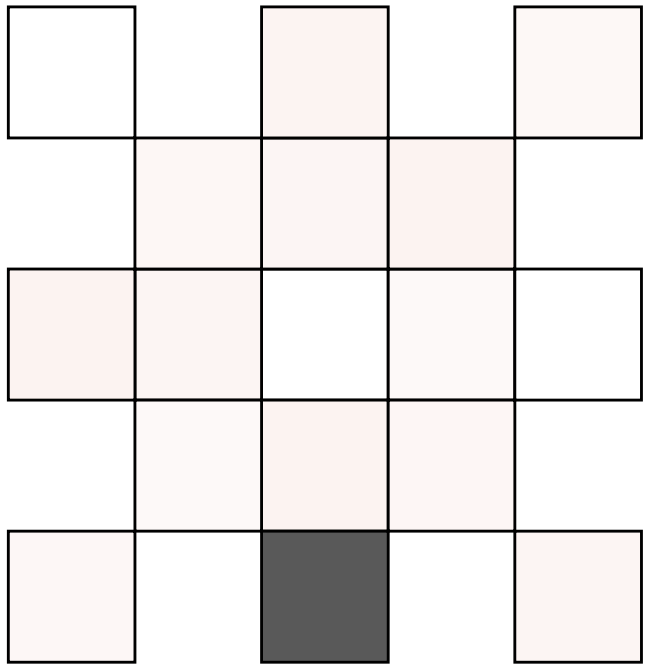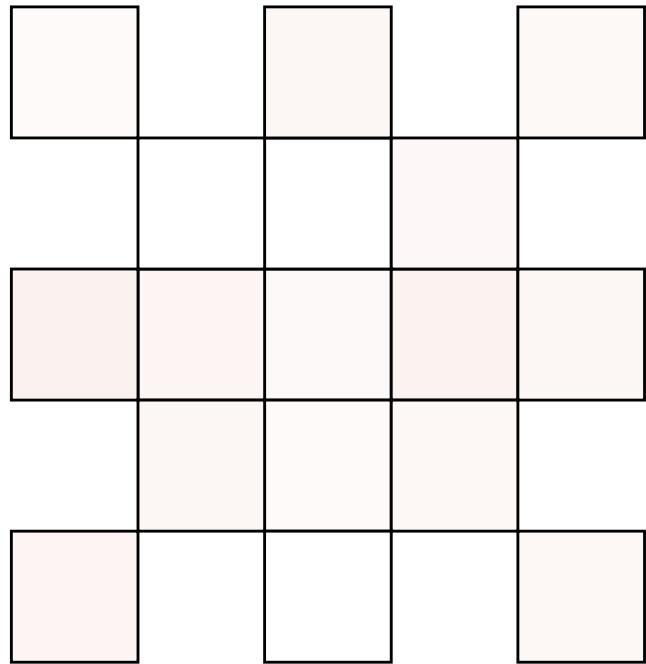

21-41236582-C-T

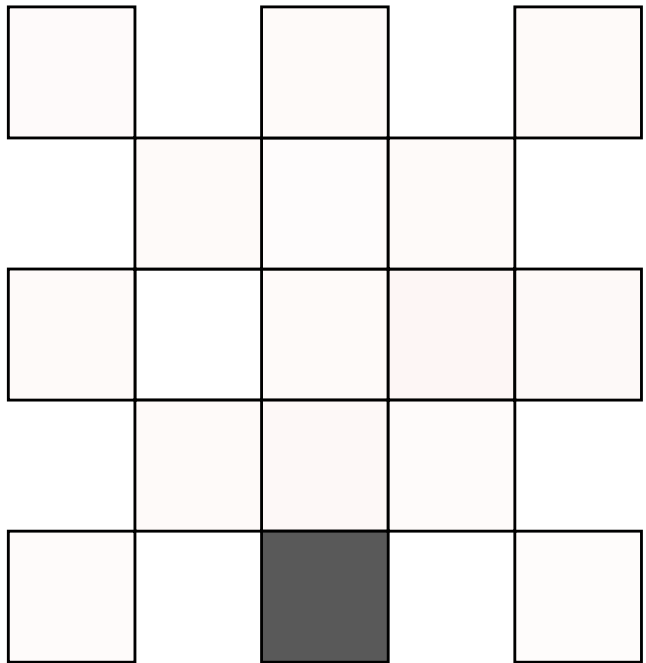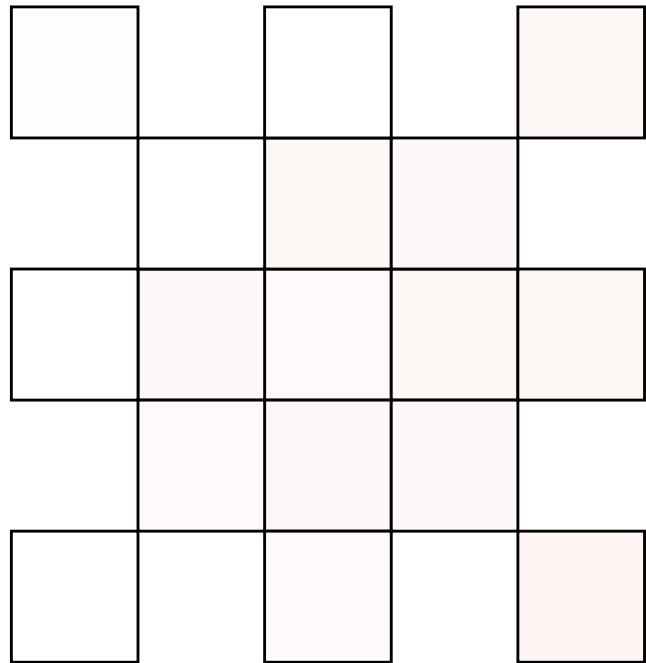

21-41370607-T-C

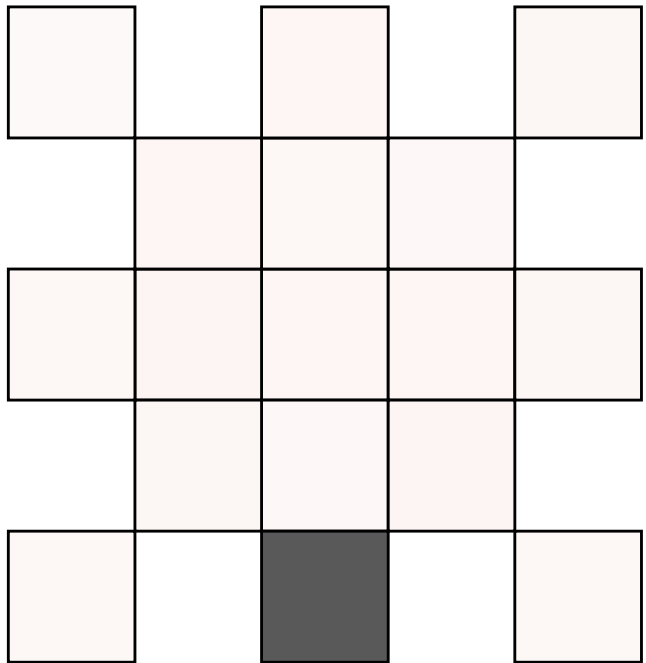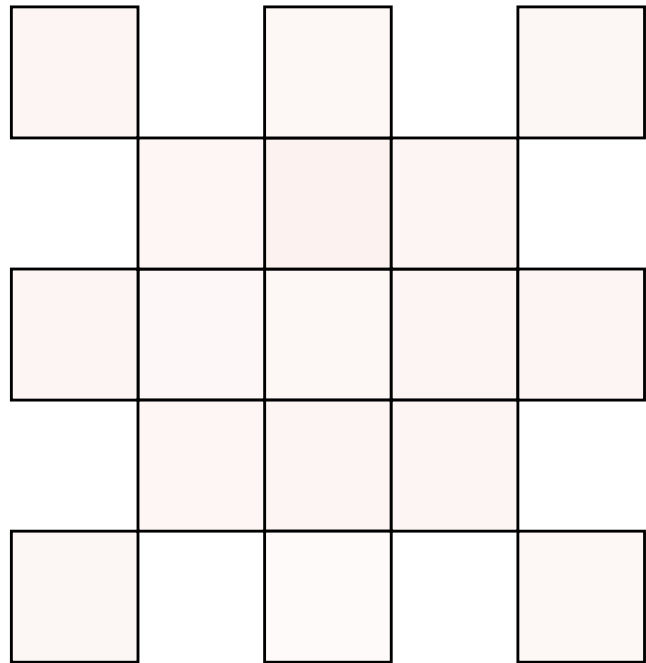

21-42343147-G-A

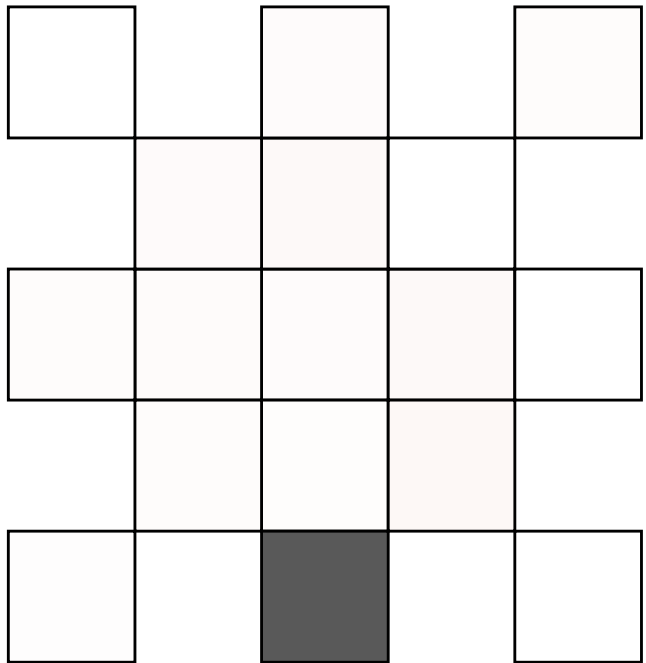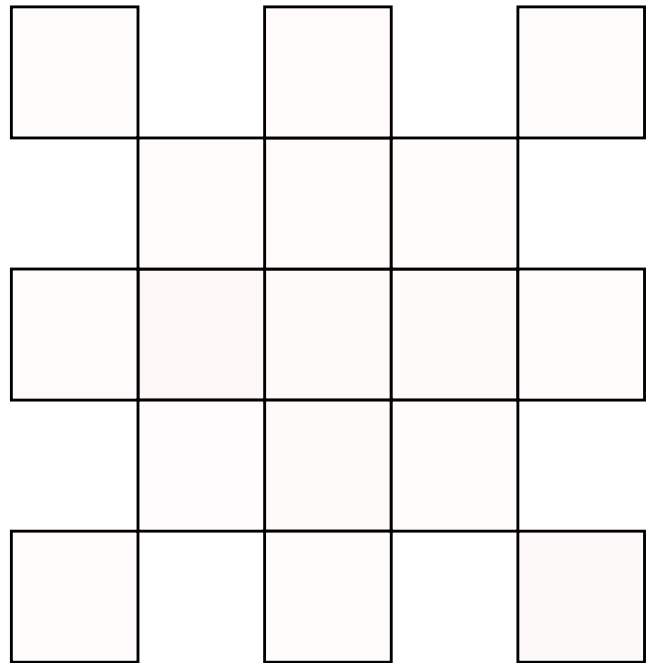

21-42676569-G-A

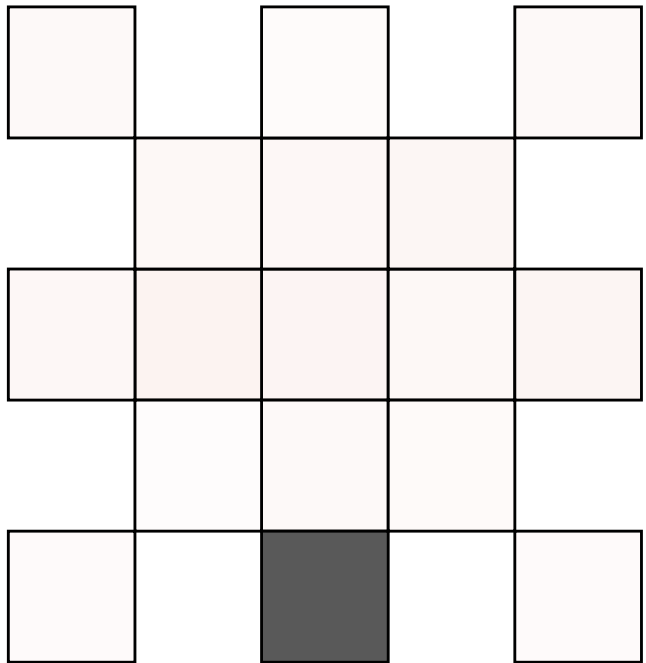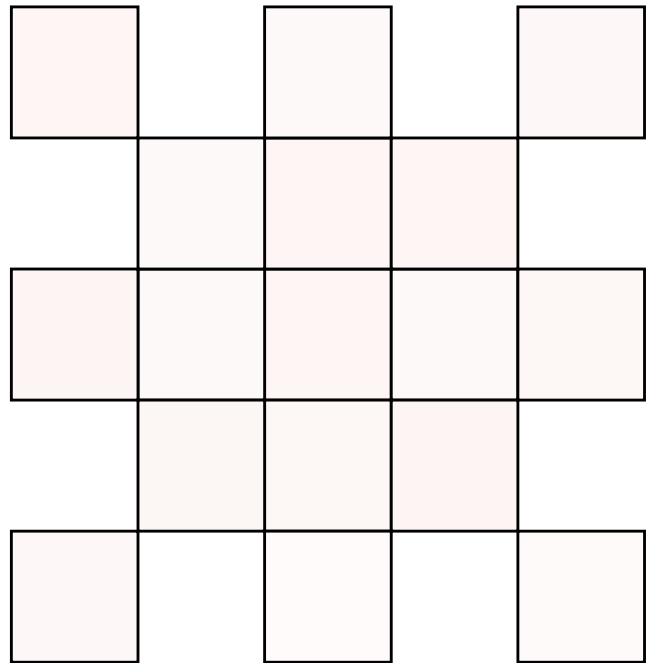



21-43768376-C-T

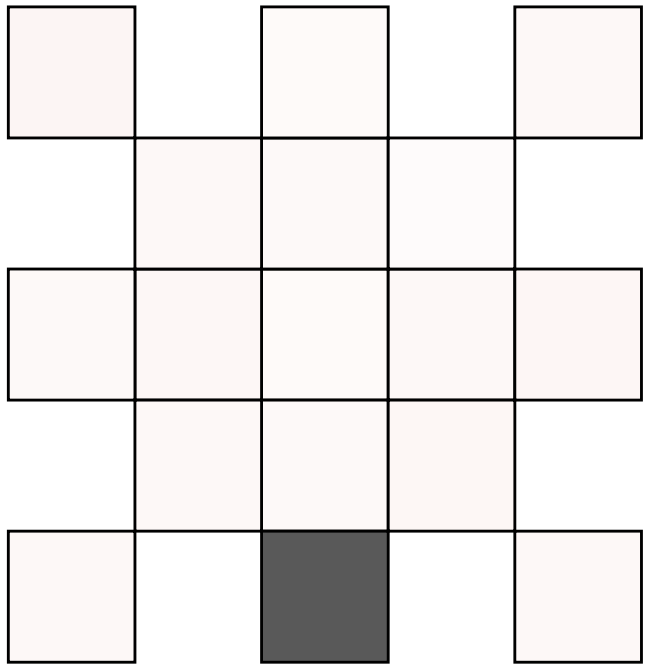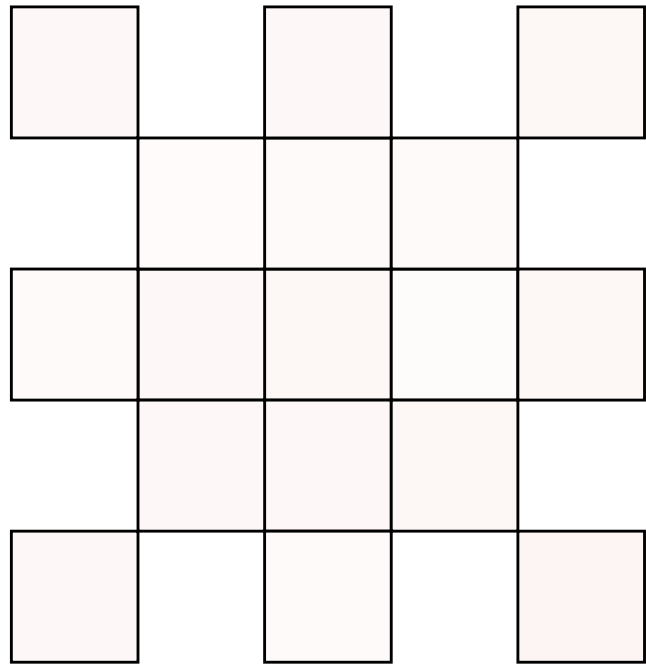

21-4753269-G-A

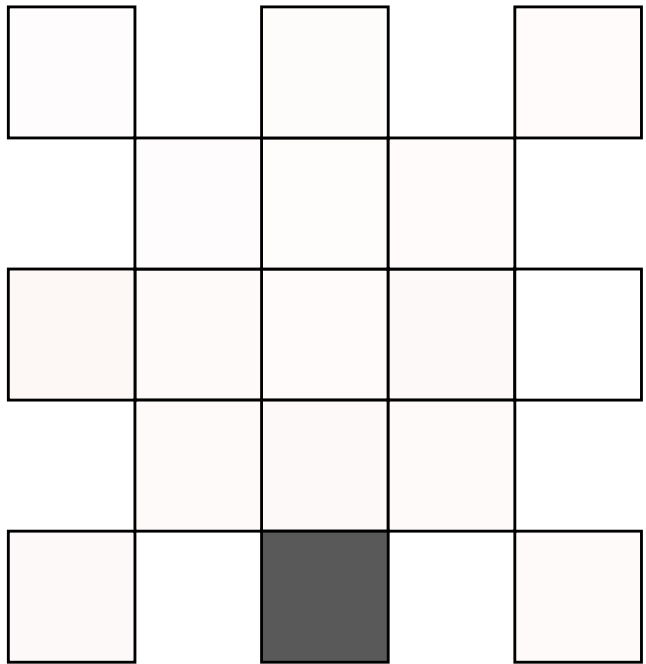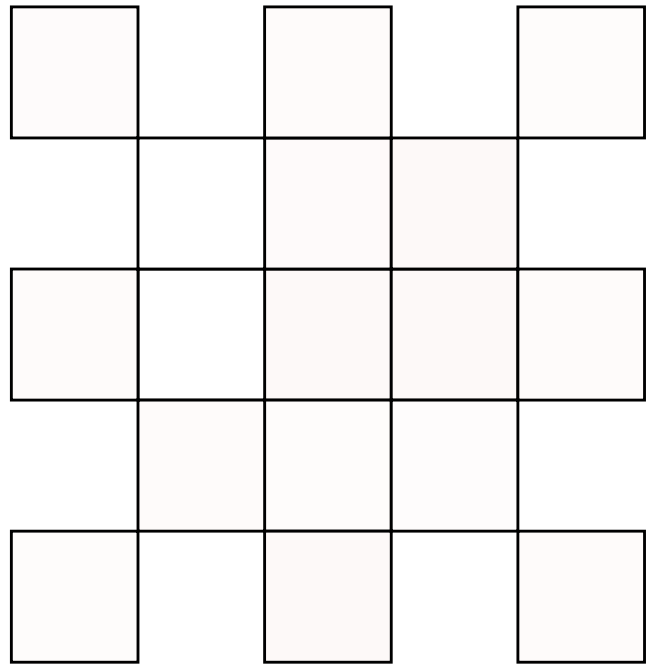

22-23315541-G-A

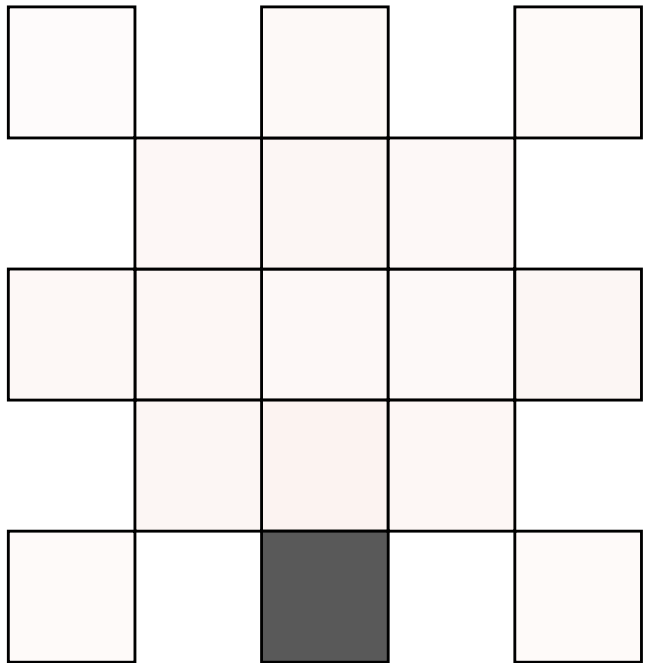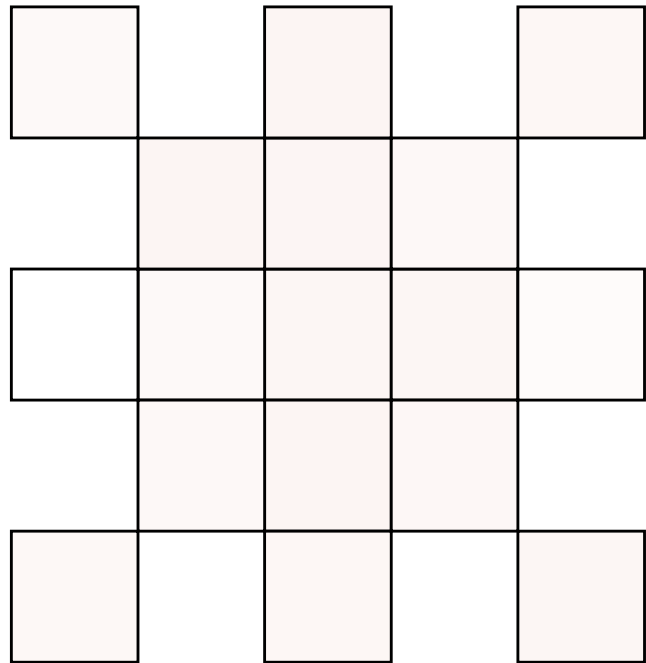

22-46301414-G-T

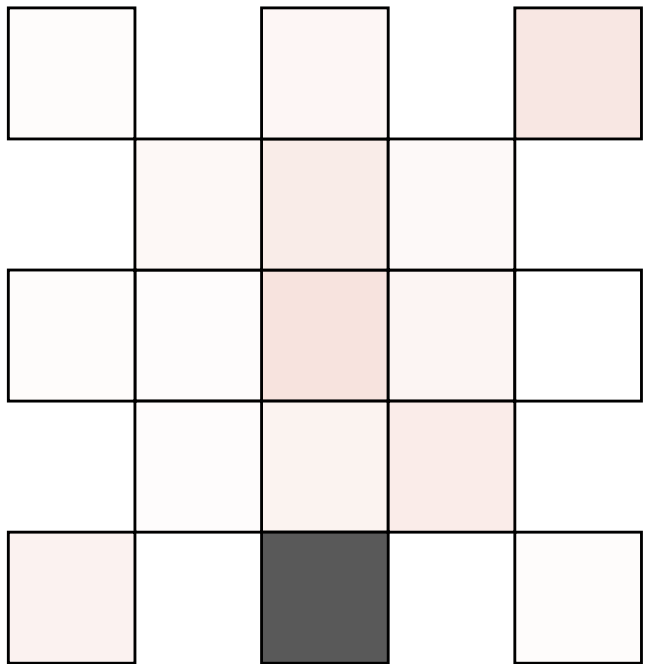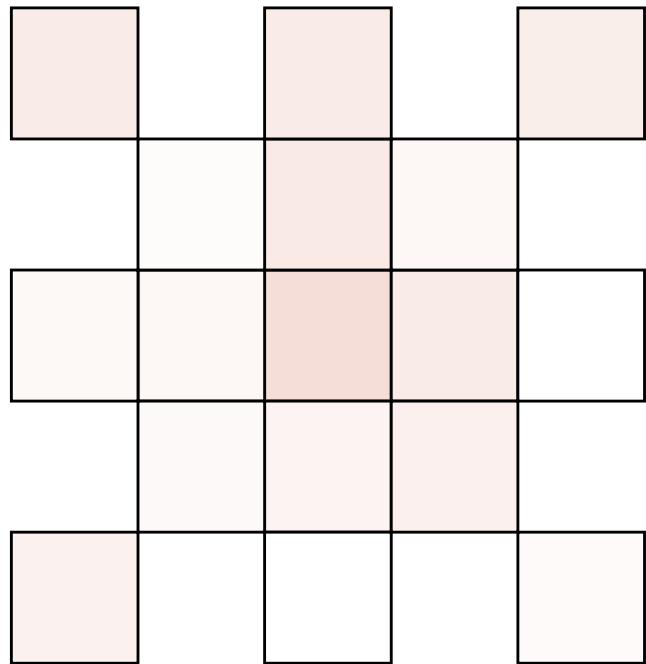

22-47149979-G-A

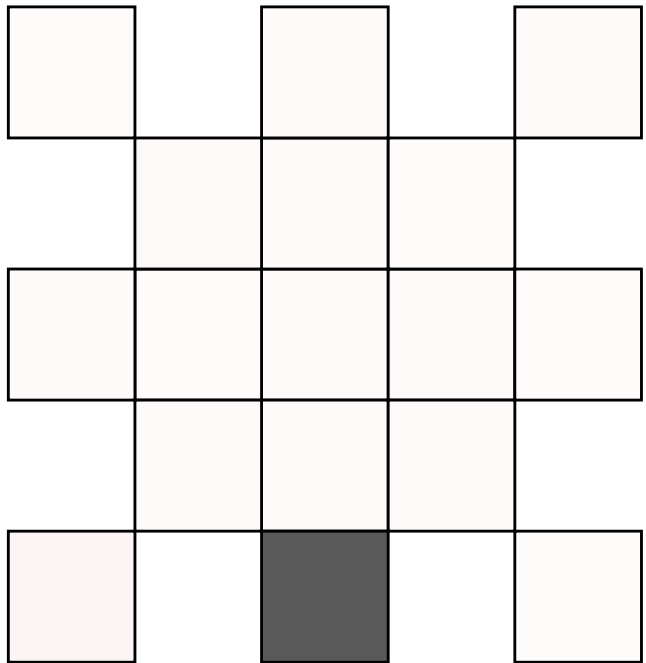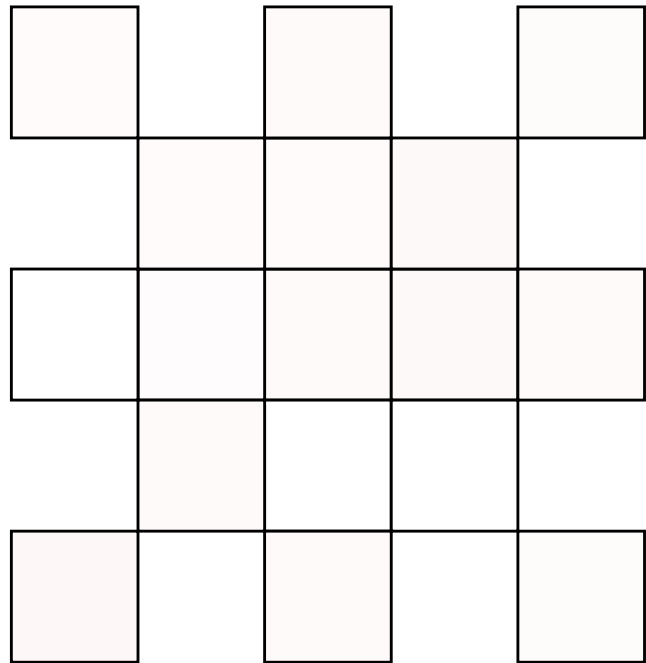

22-49202968-G-A

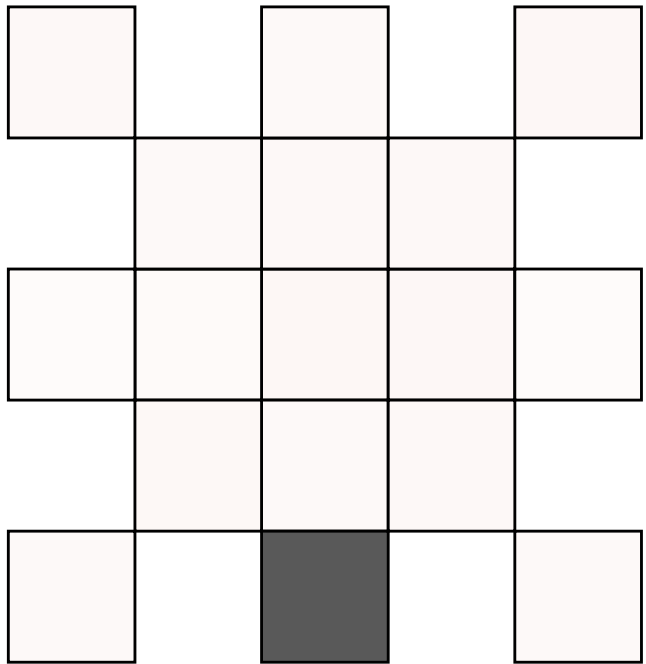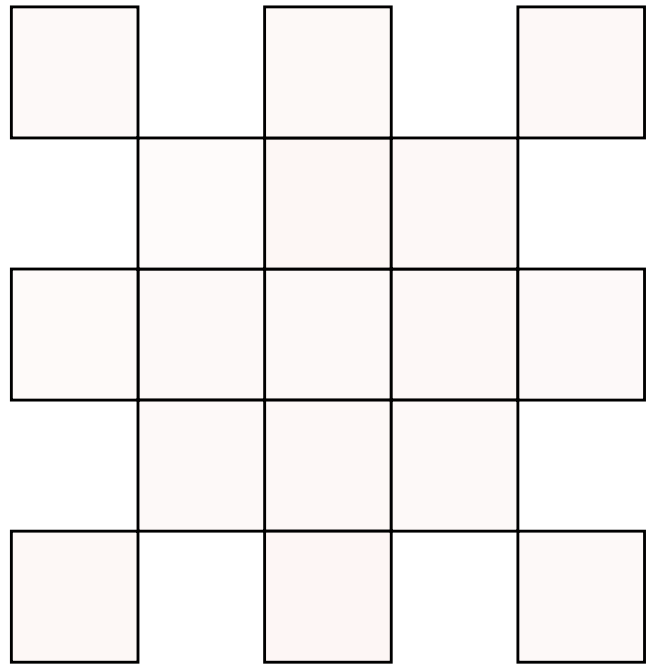

22-49376519-G-A

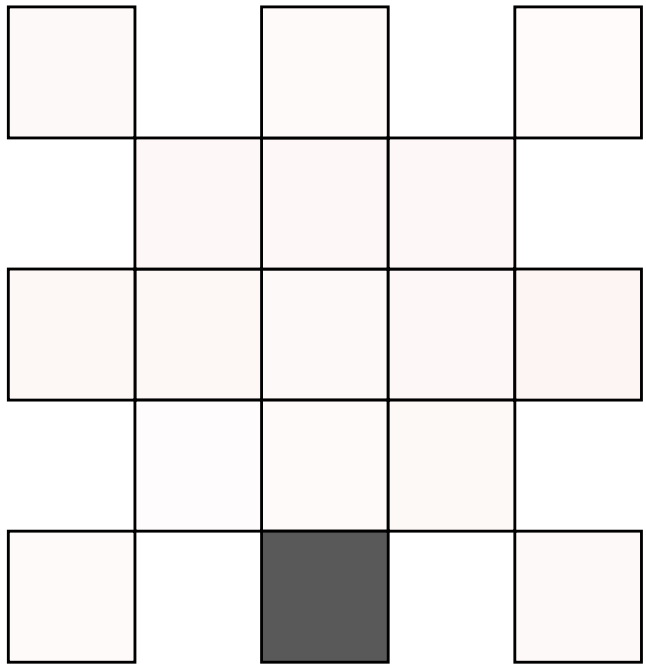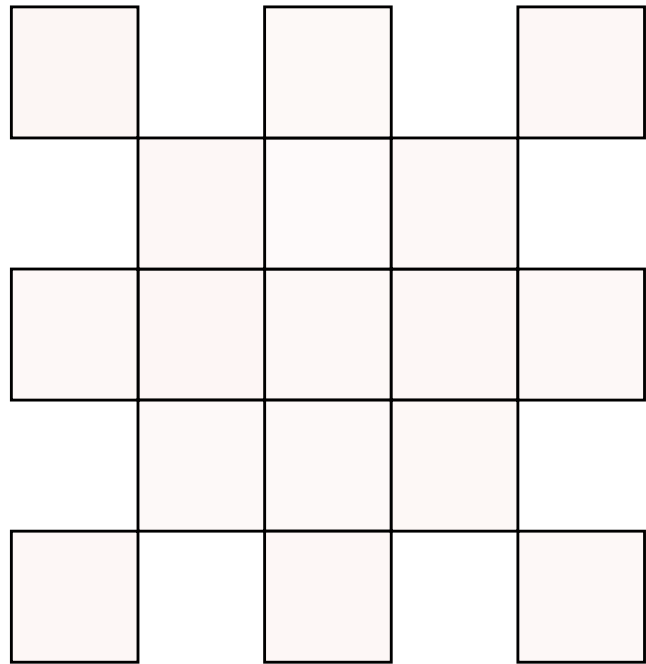

22-49717540-G-A

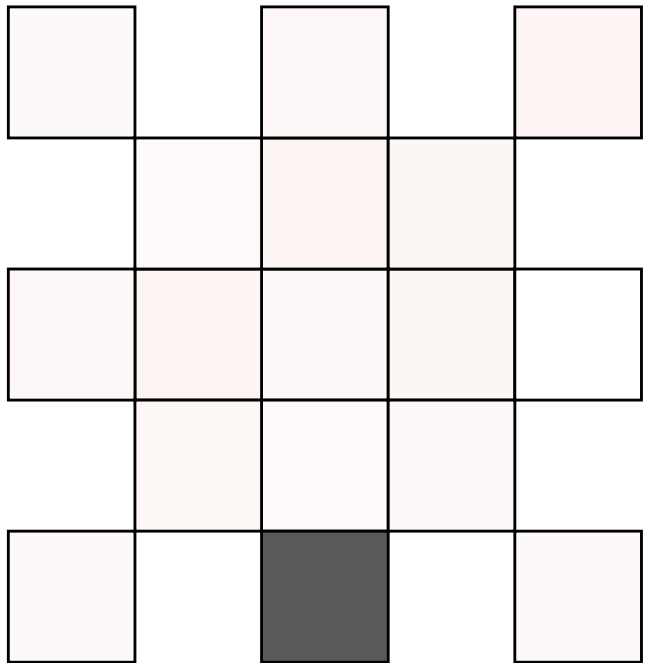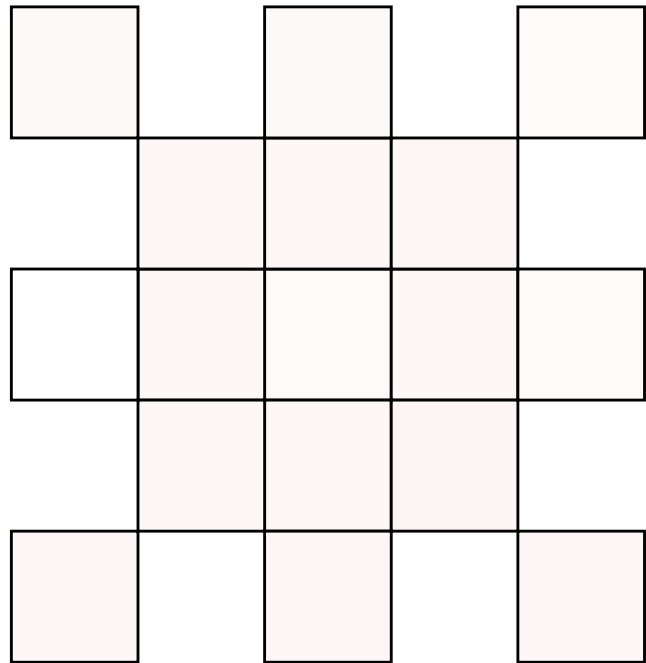



22-49847904-G-A

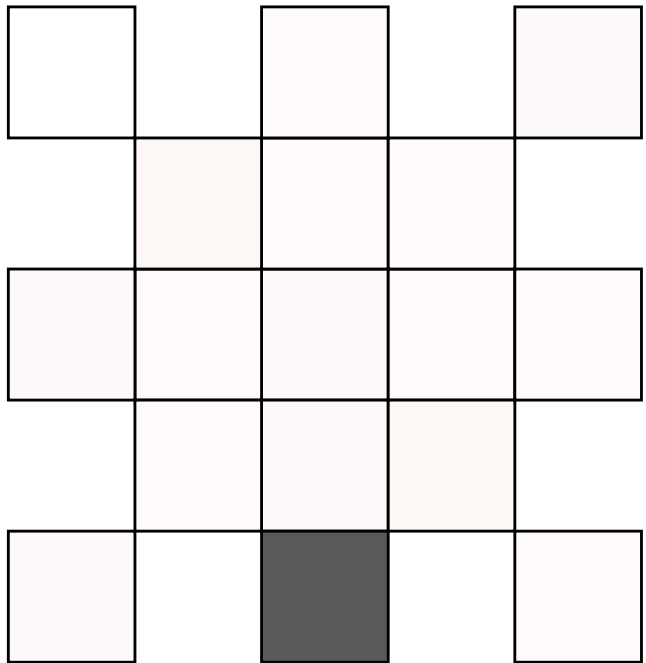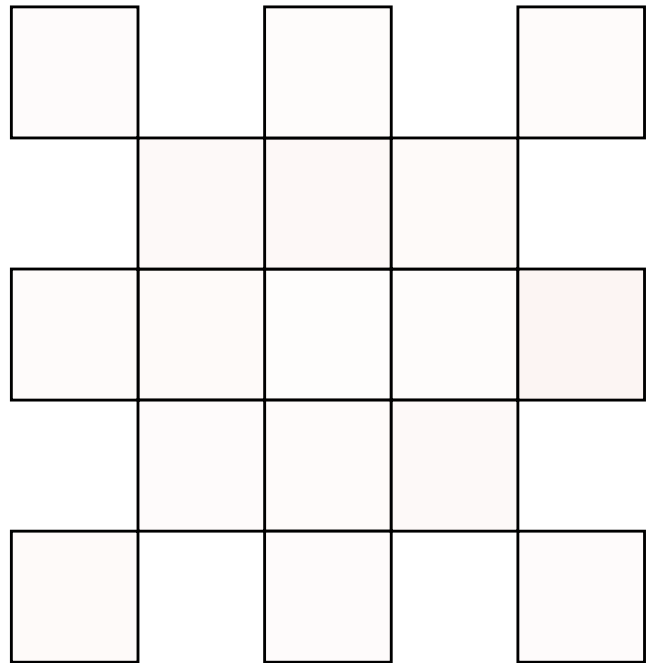

22-51170068-G-A

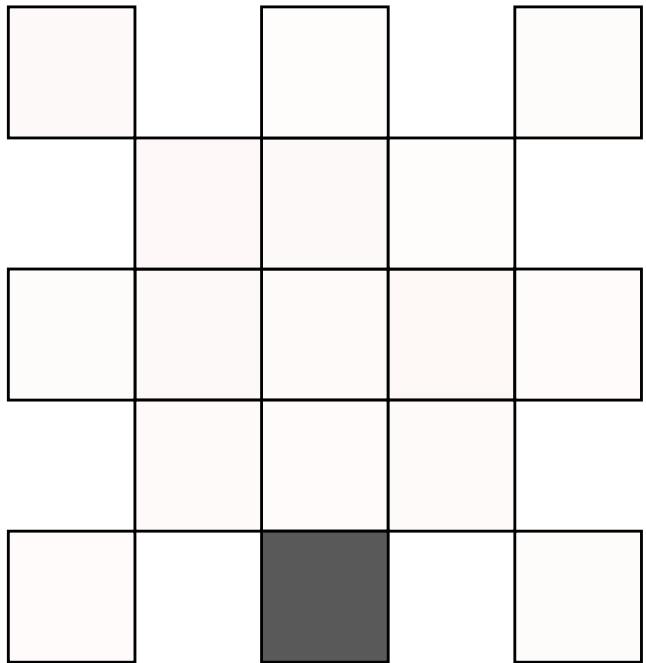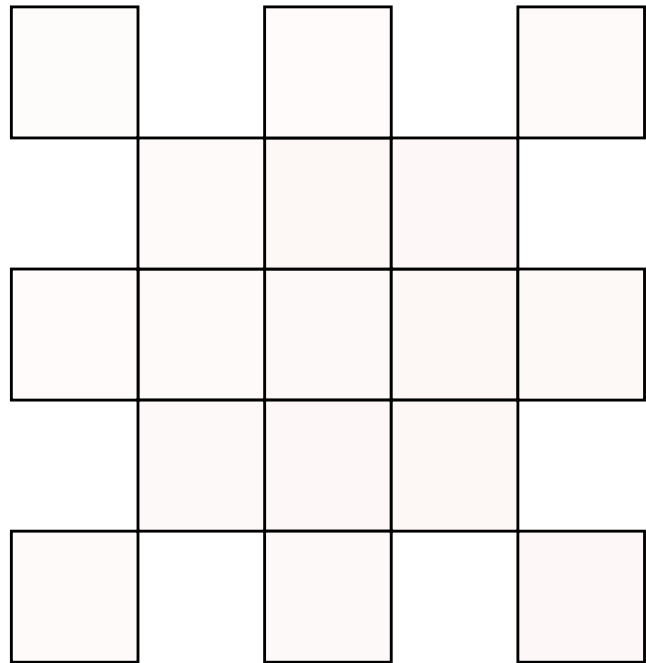

3-101156372-T-C

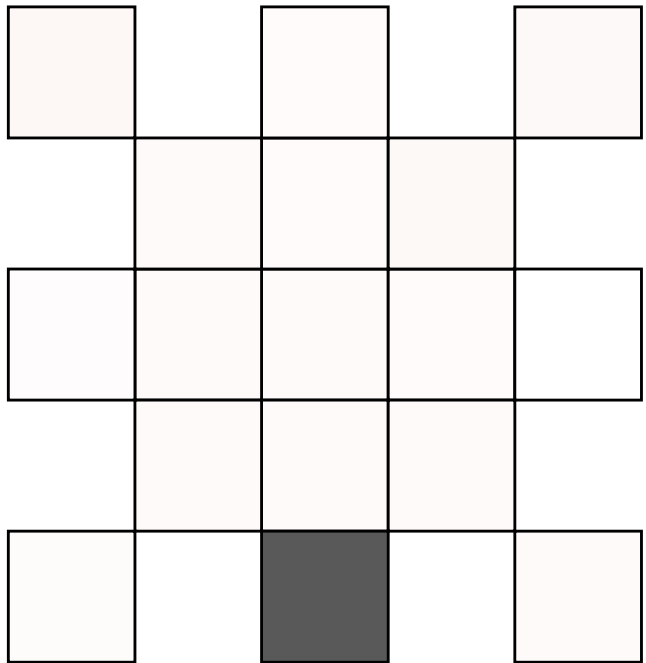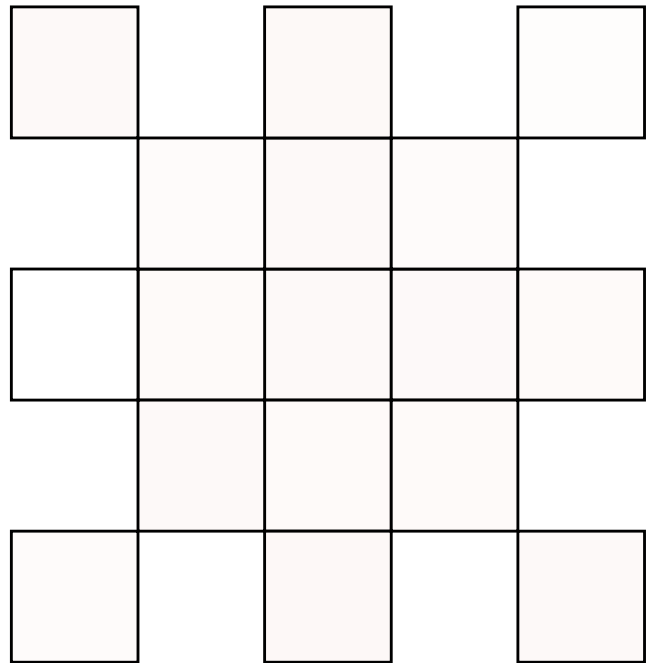

3-103294509-T-G

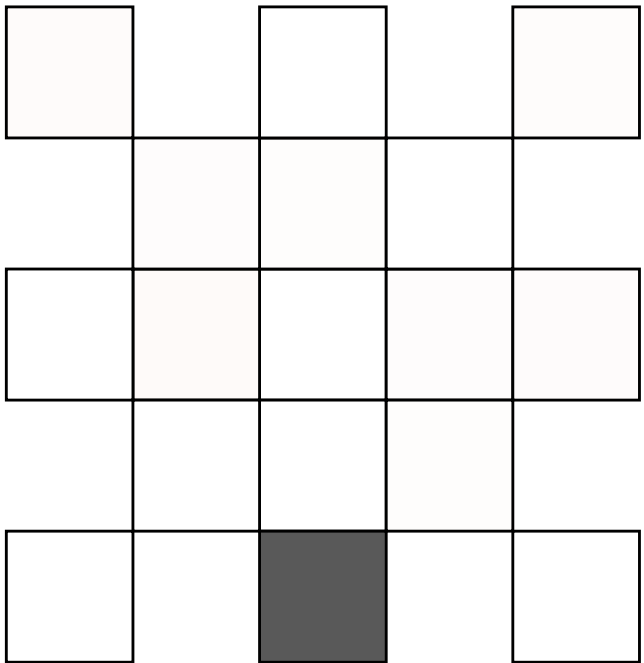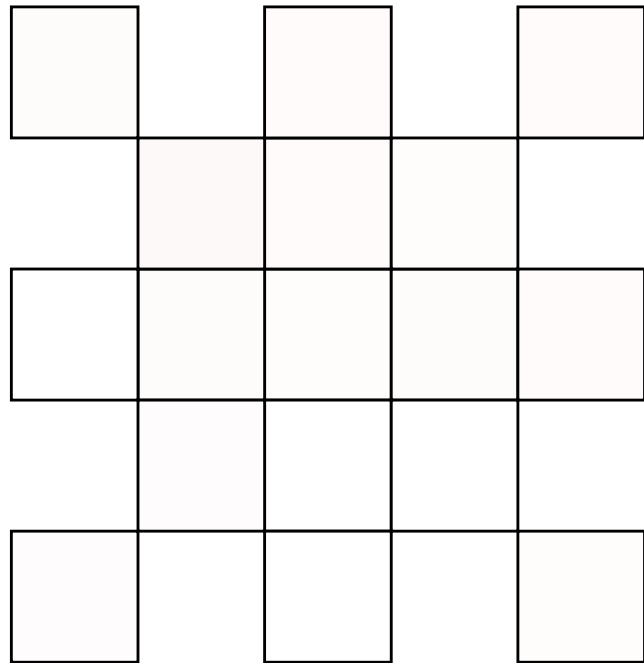

3-106102898-G-T

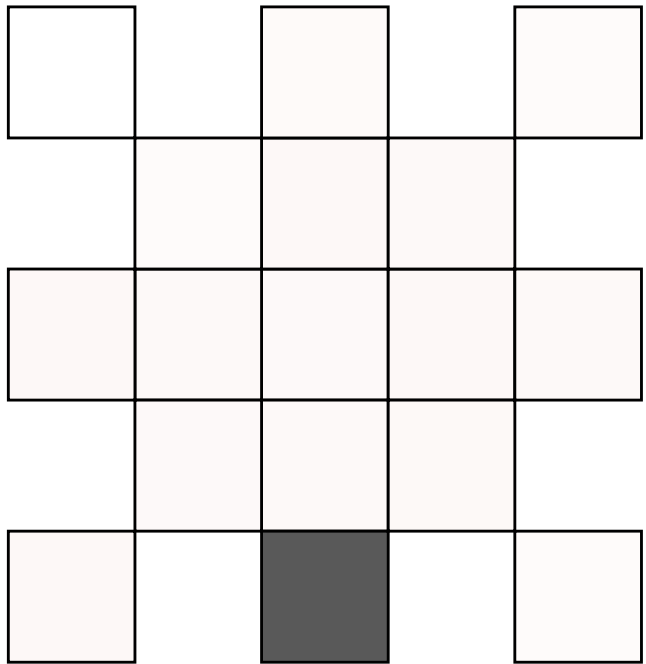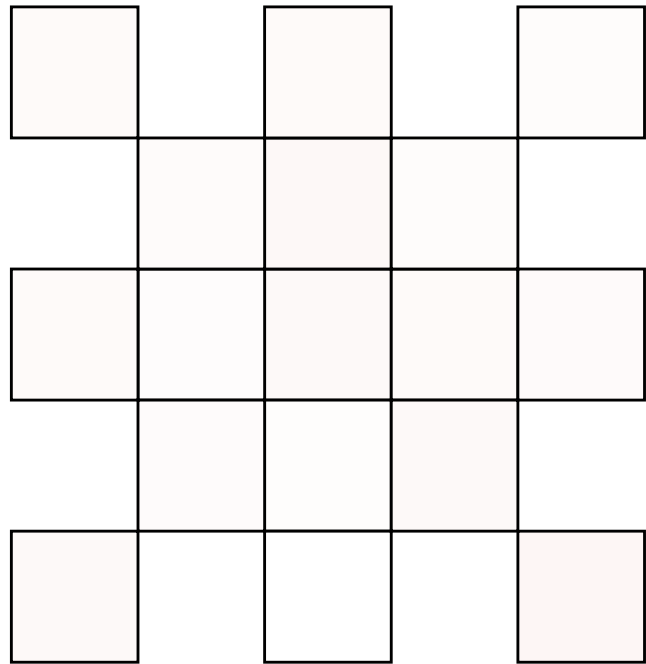

3-107821326-C-T

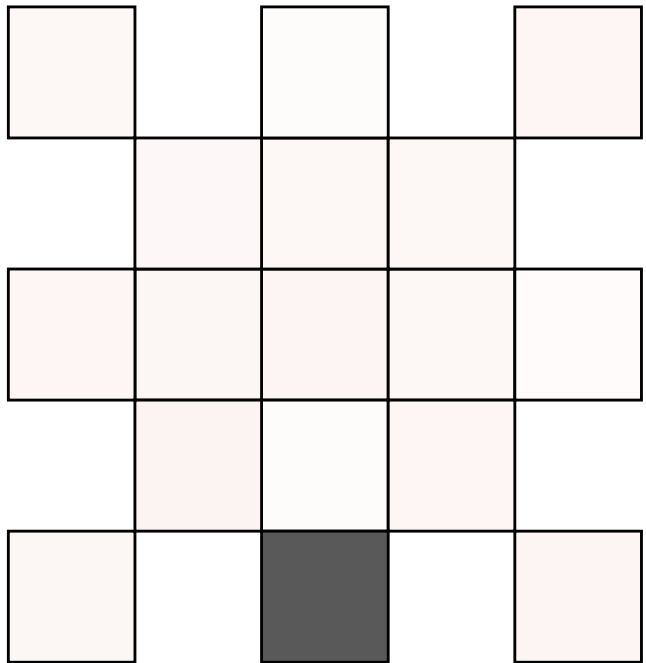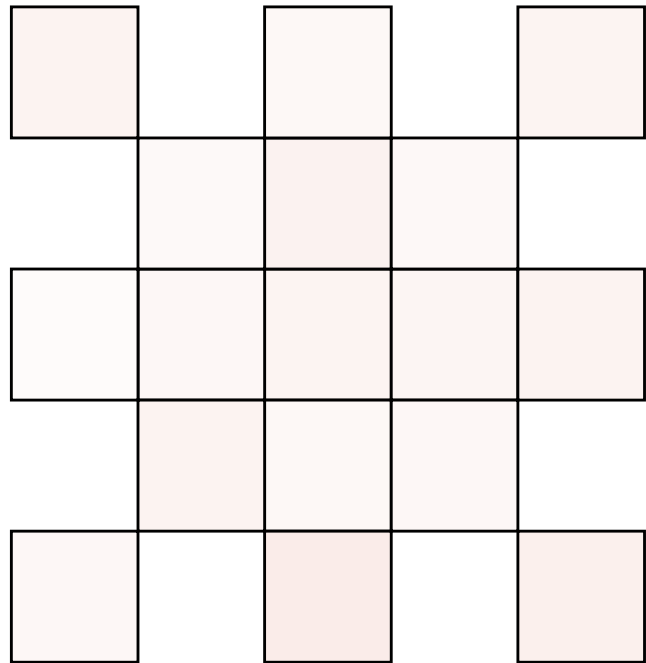

3-108008662-A-T

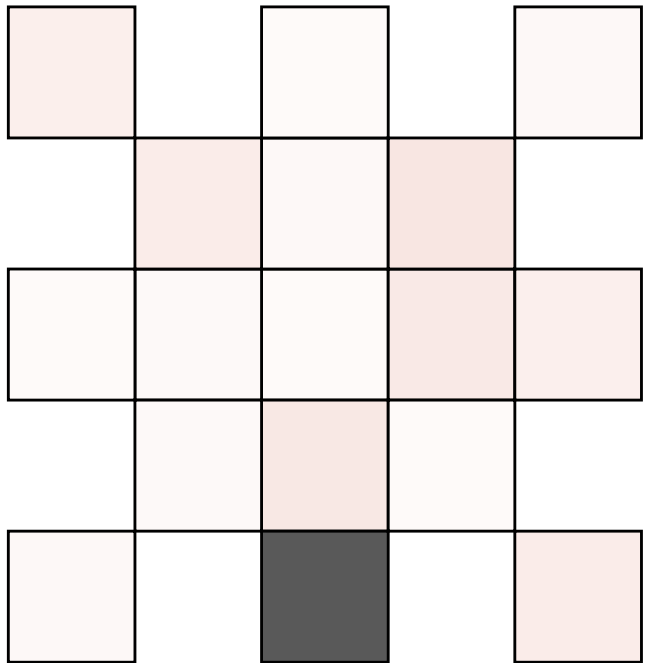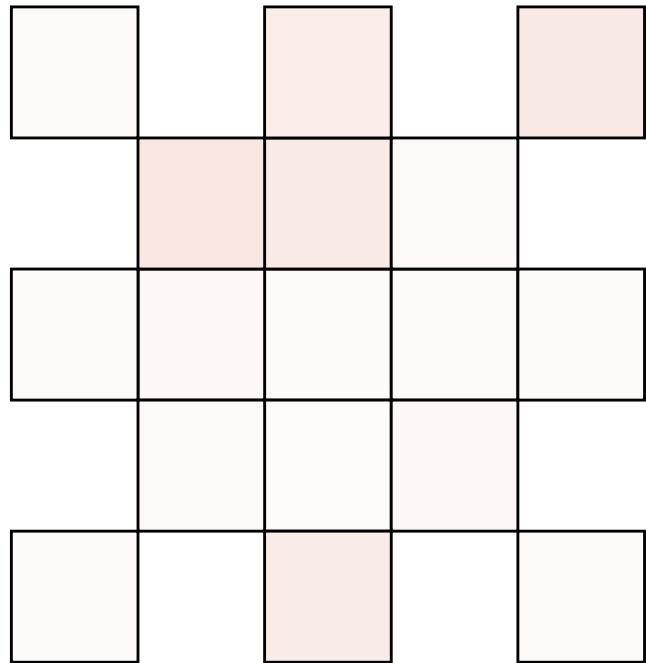

3-109900234-C-T

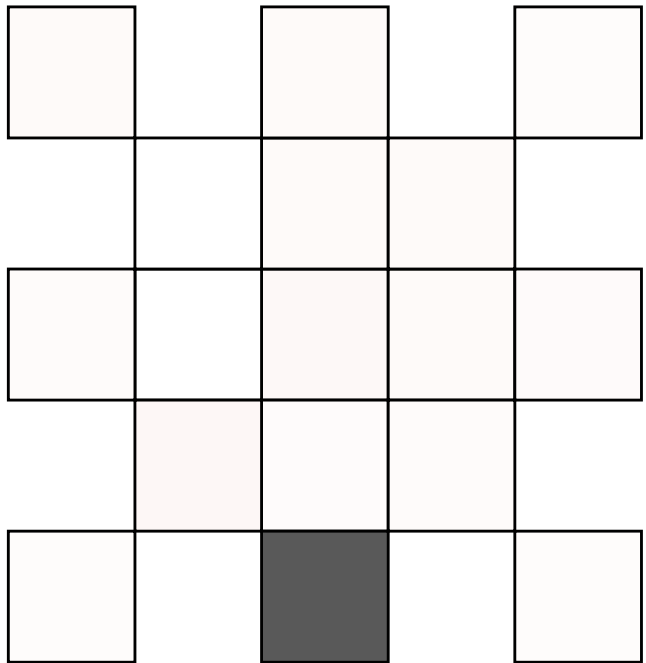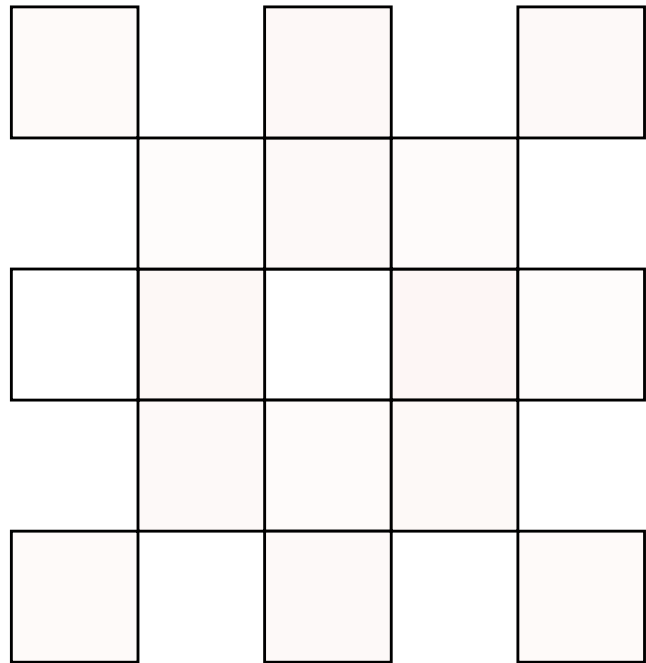



3-116101704-C-G

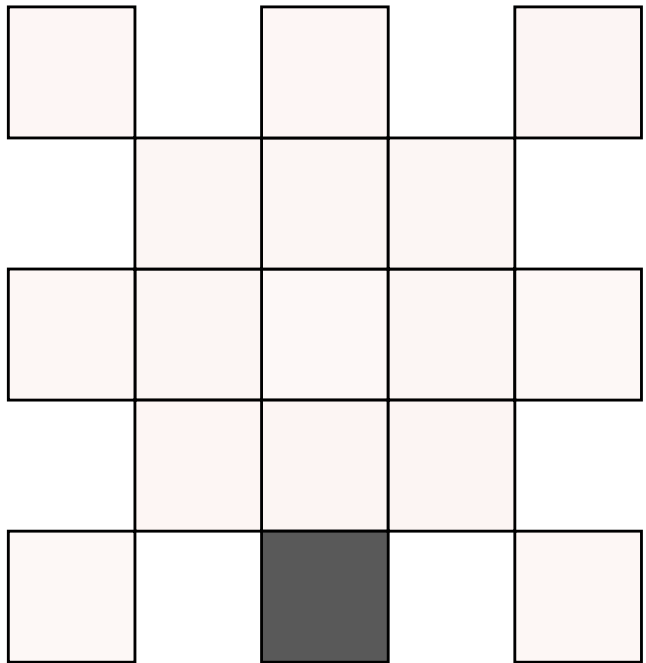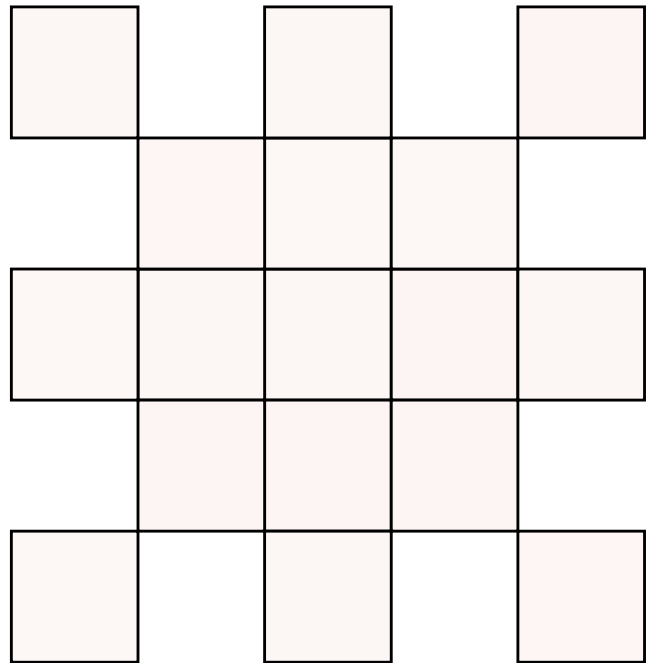

3-116224135-C-T

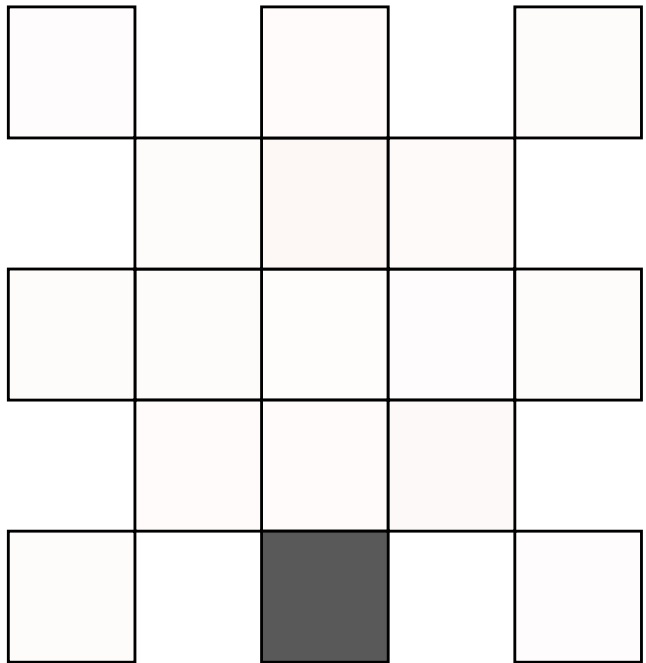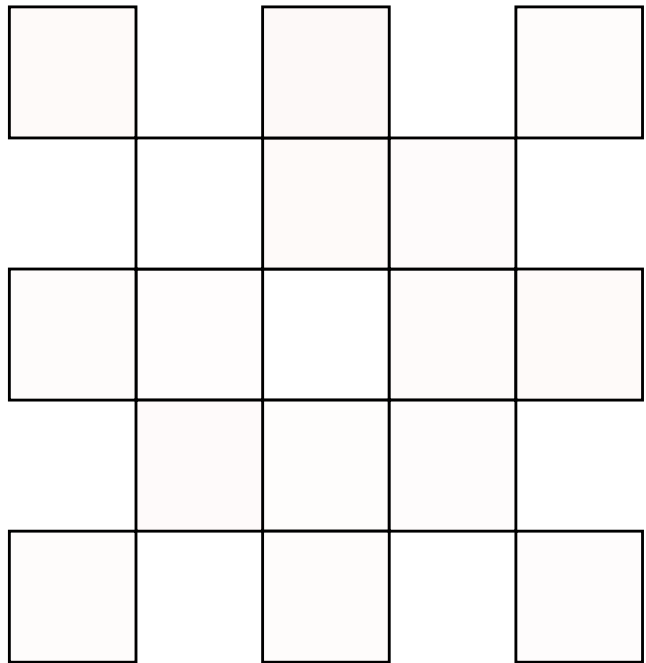

3-119866148-A-C

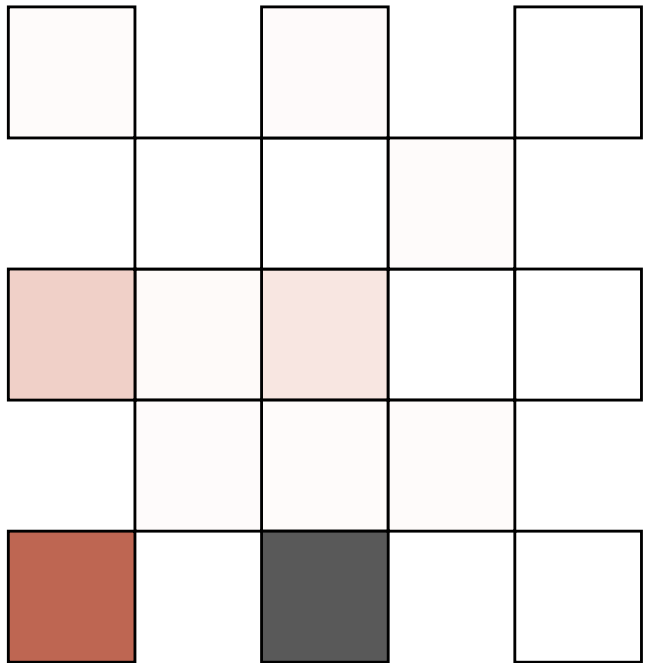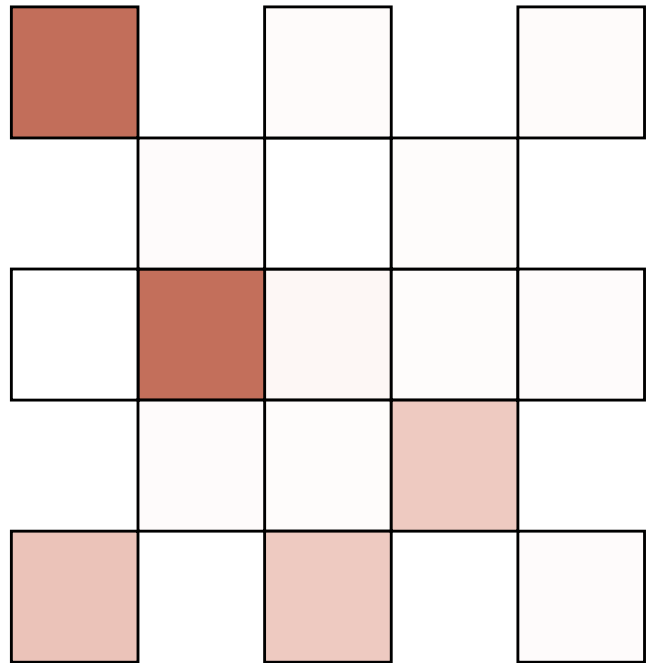

3-124402098-G-A

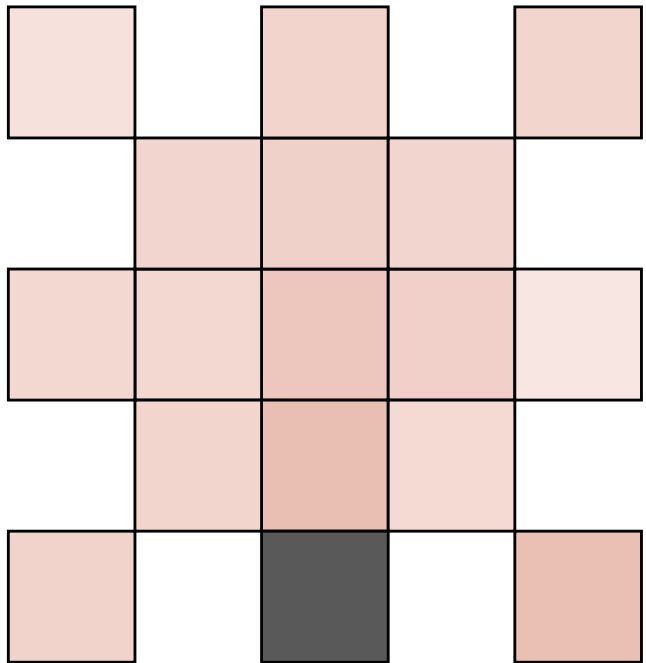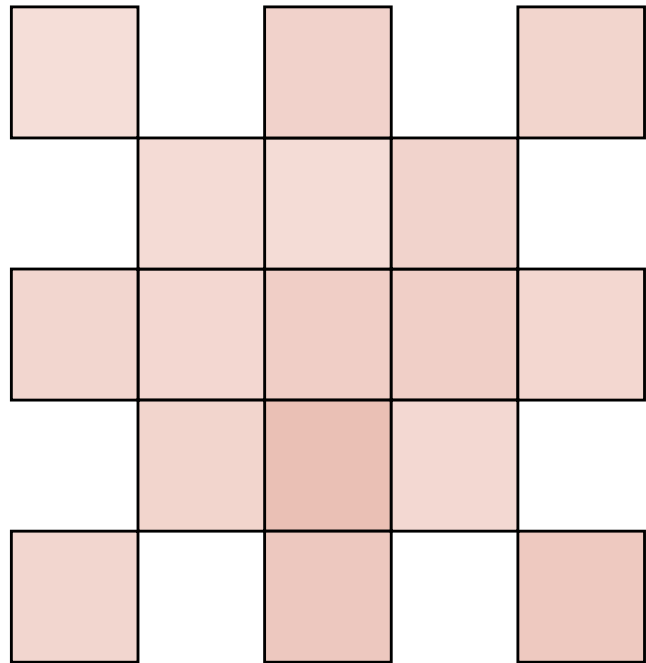

3-130175696-A-G

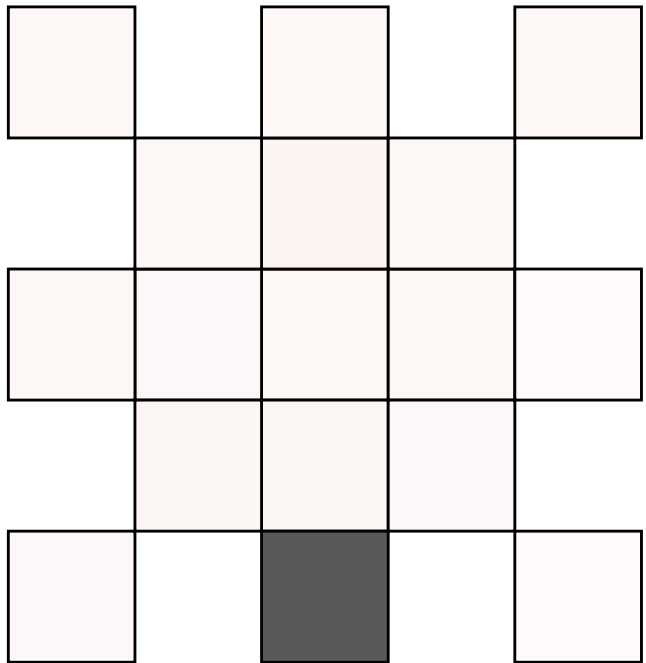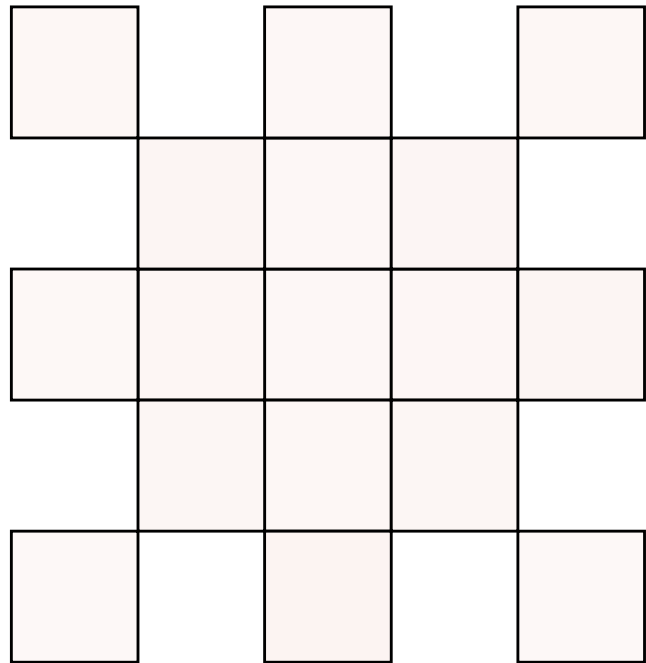

3-137569791-G-A

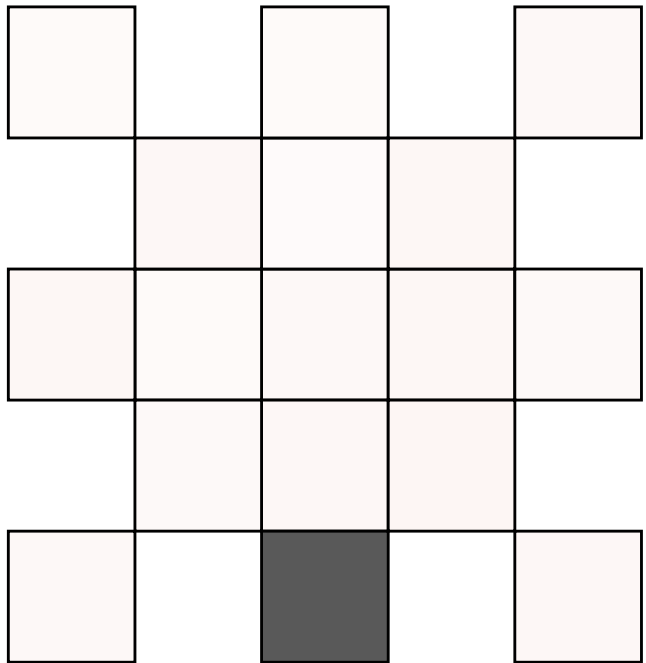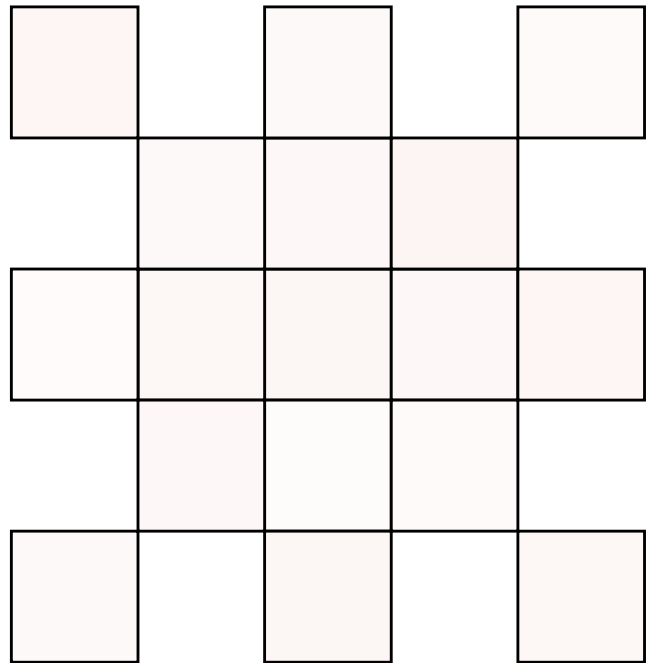

3-145391171-A-G

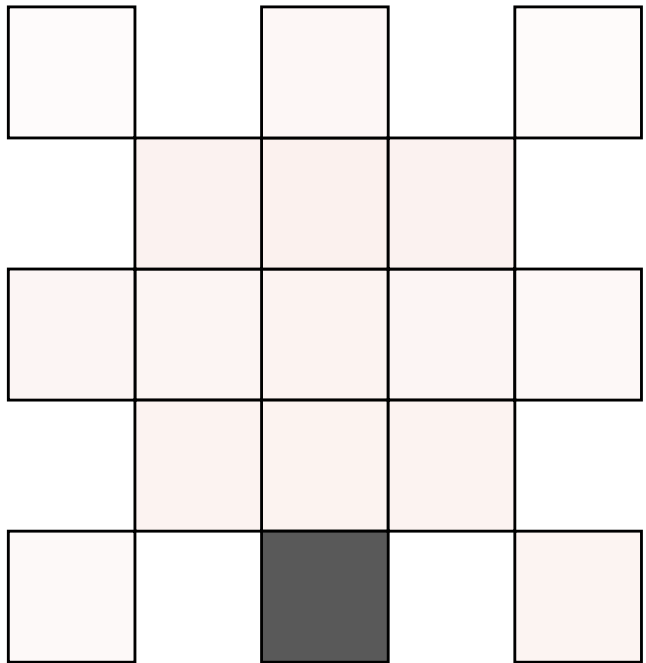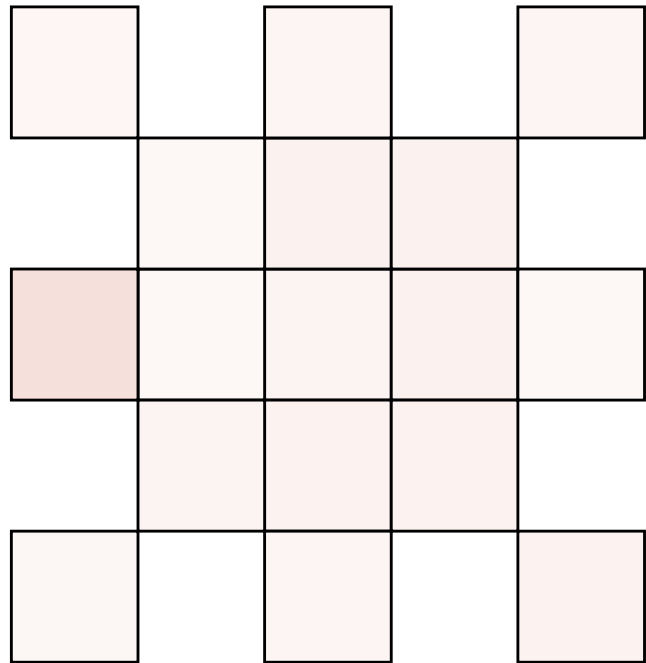

3-147144597-G-A

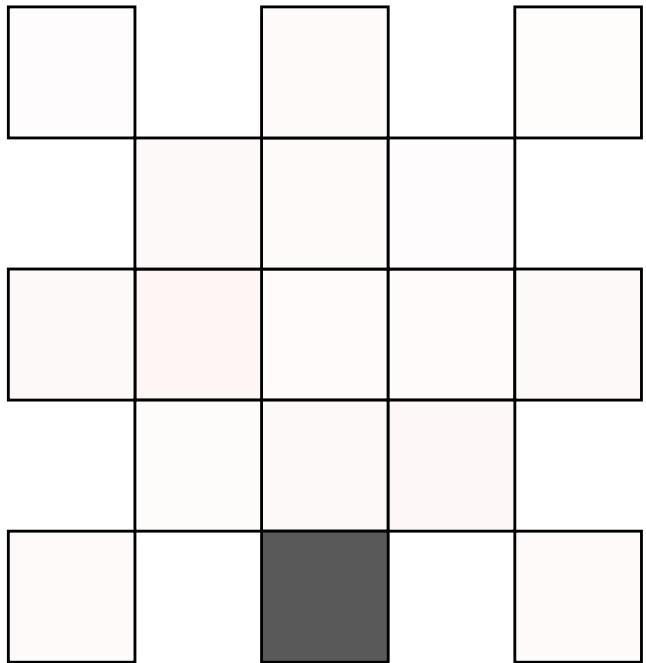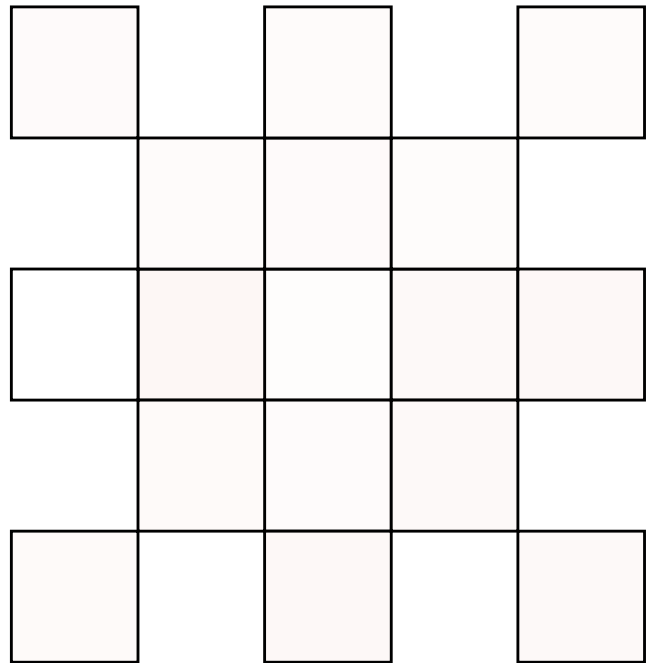



3-154786585-A-G

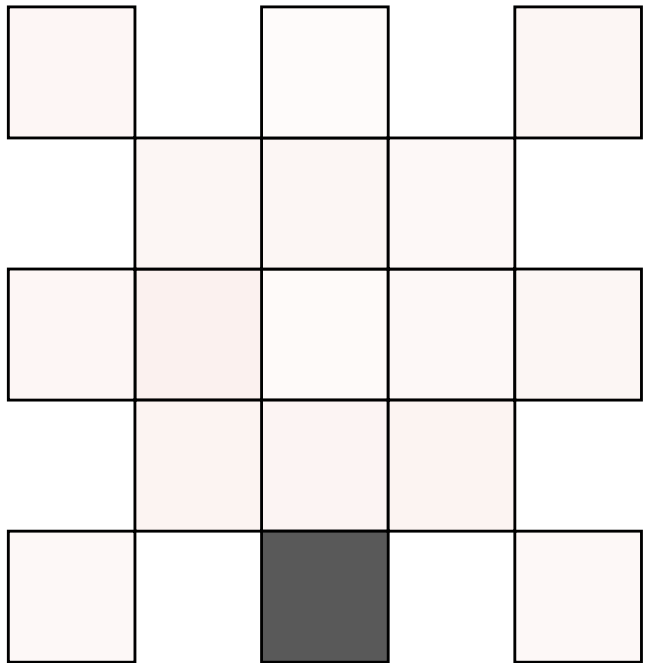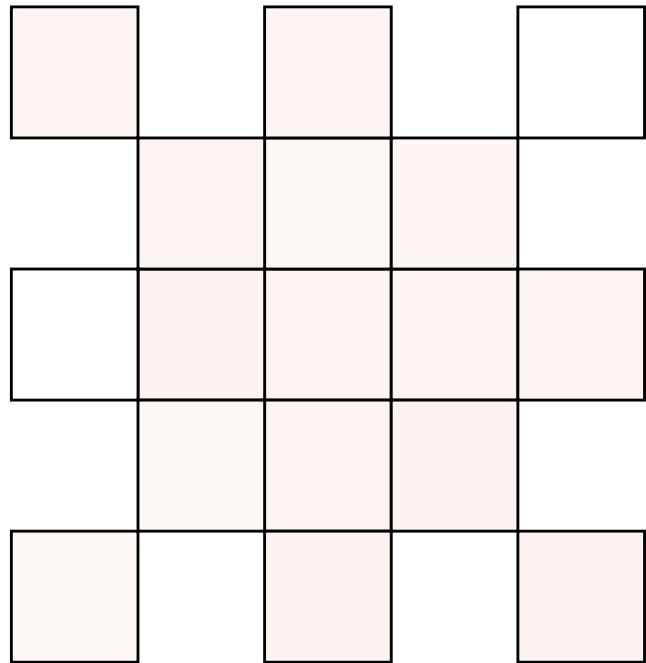

3-155866578-C-T

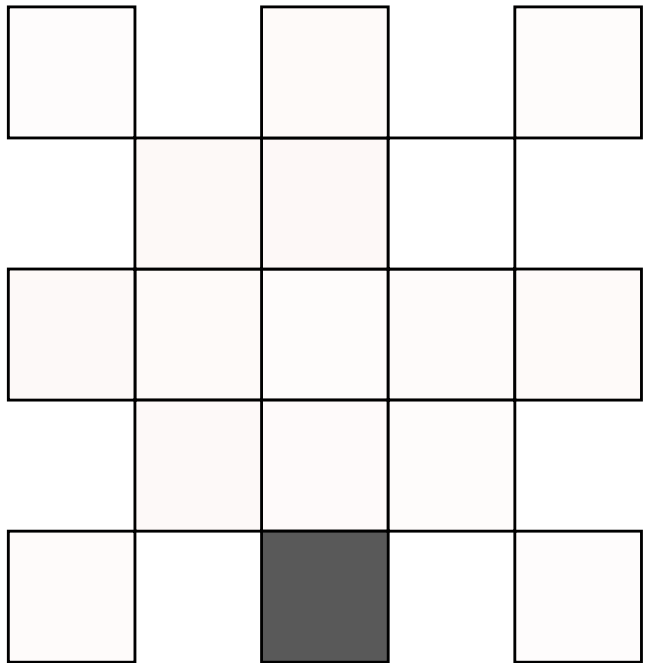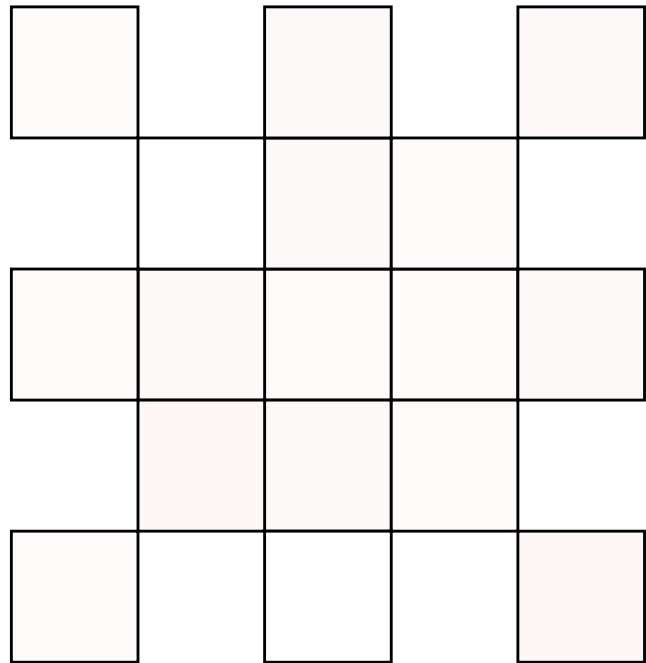

3-156768561-C-T

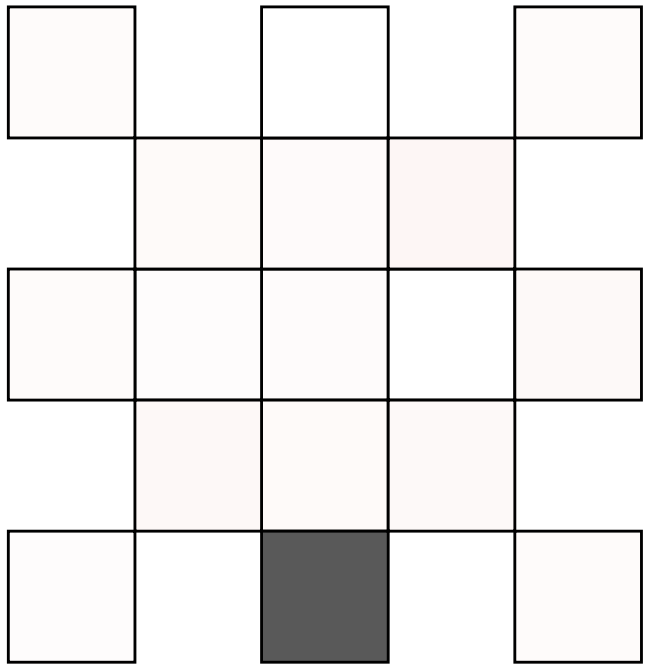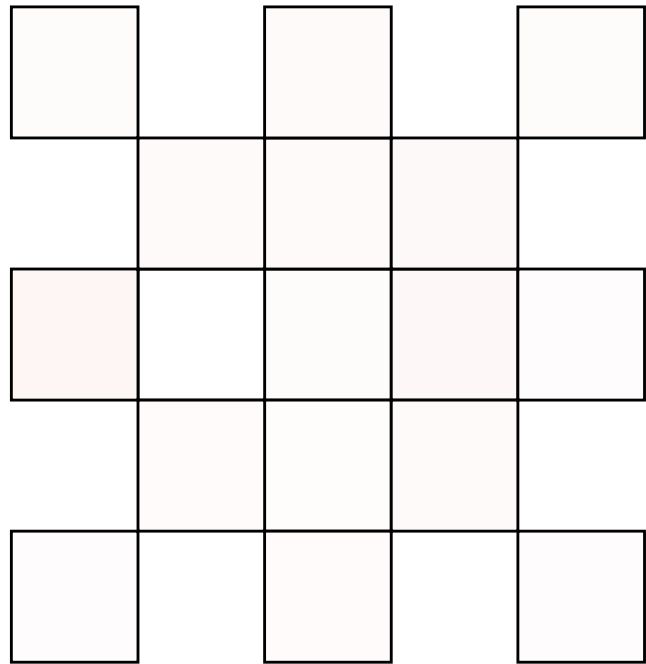

3-158256477-C-T

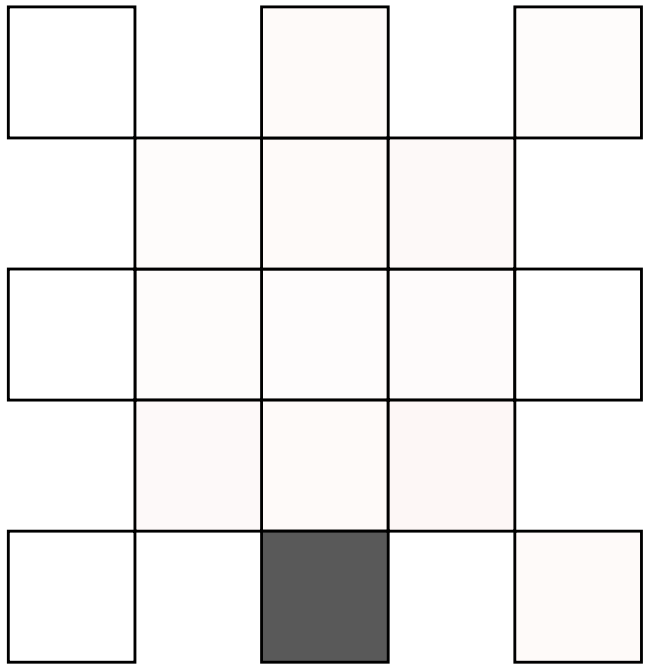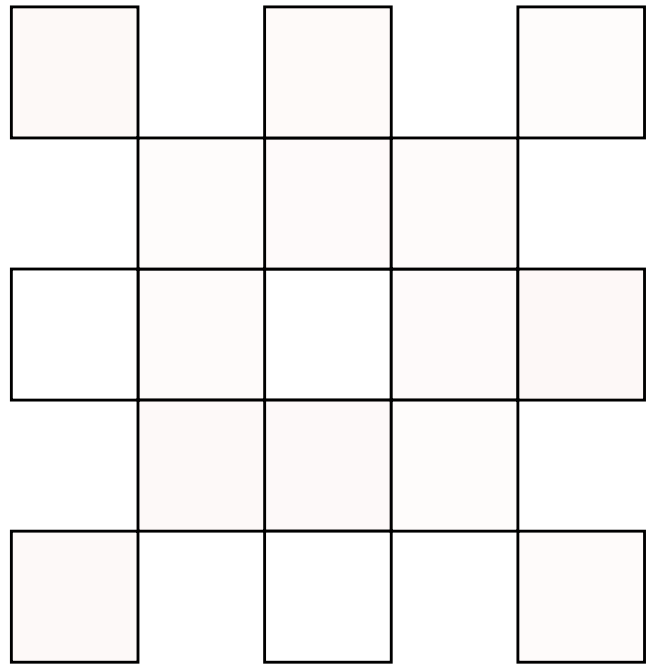

3-159483100-C-T

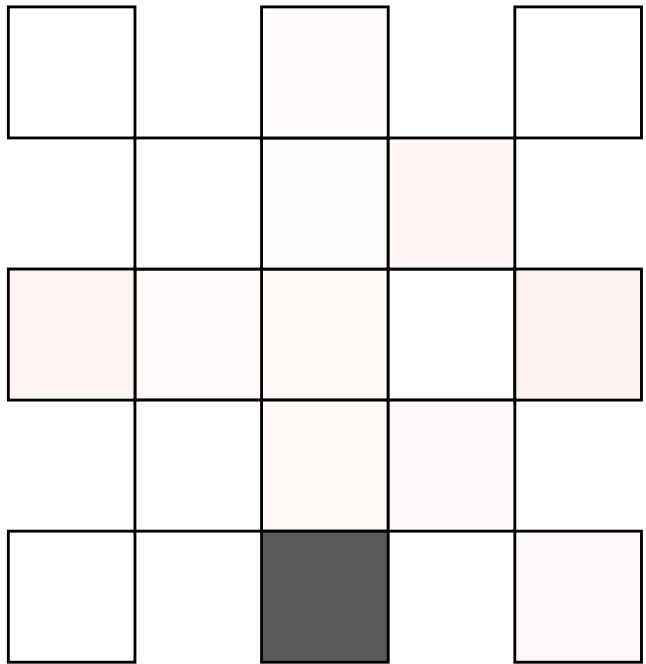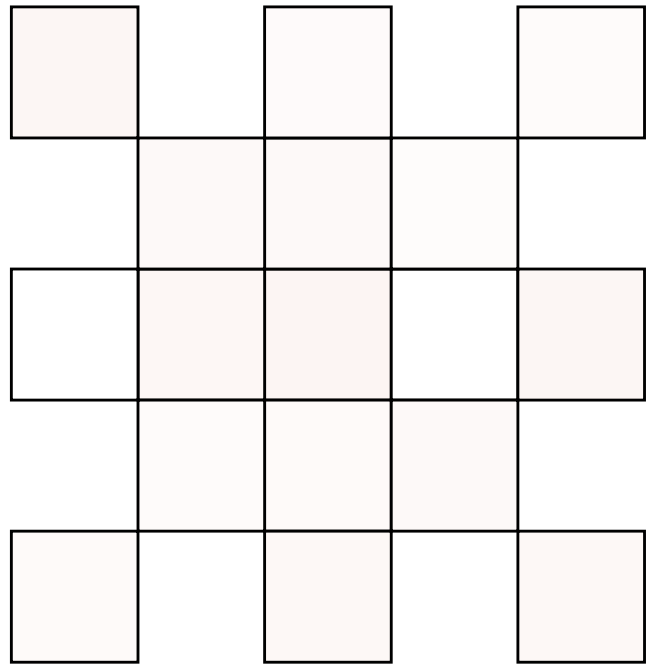

3-159569557-A-C

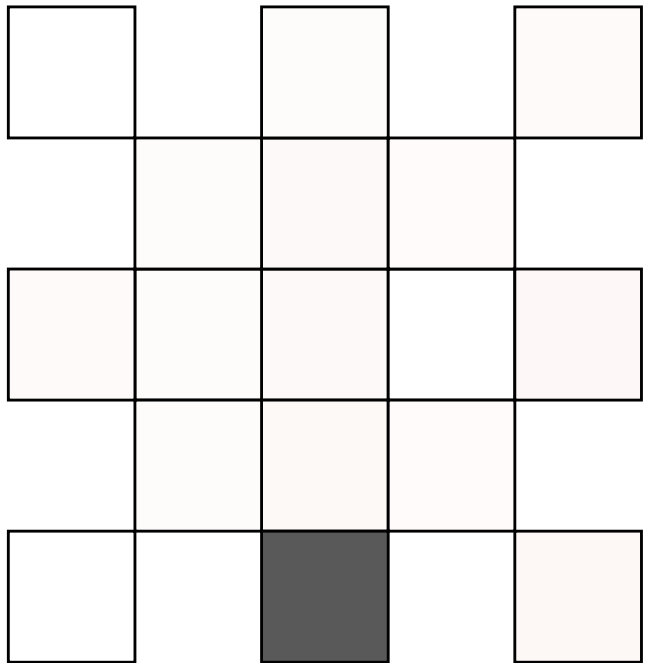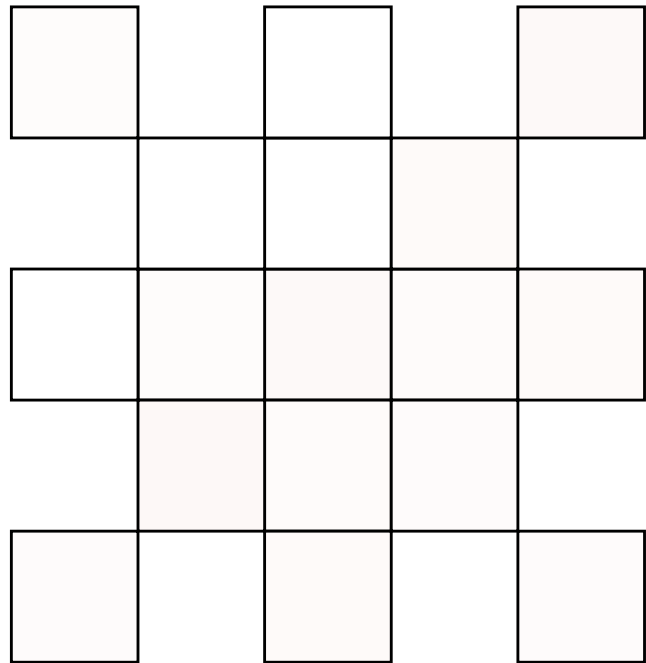

3-164879470-C-T

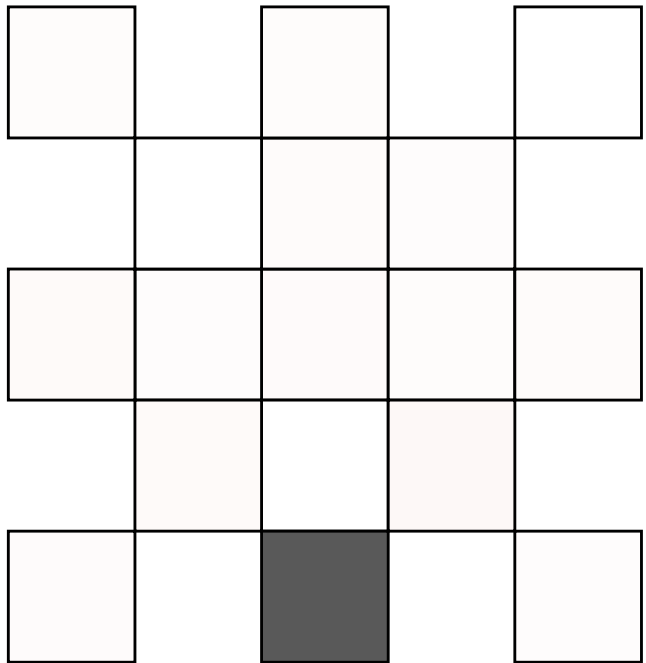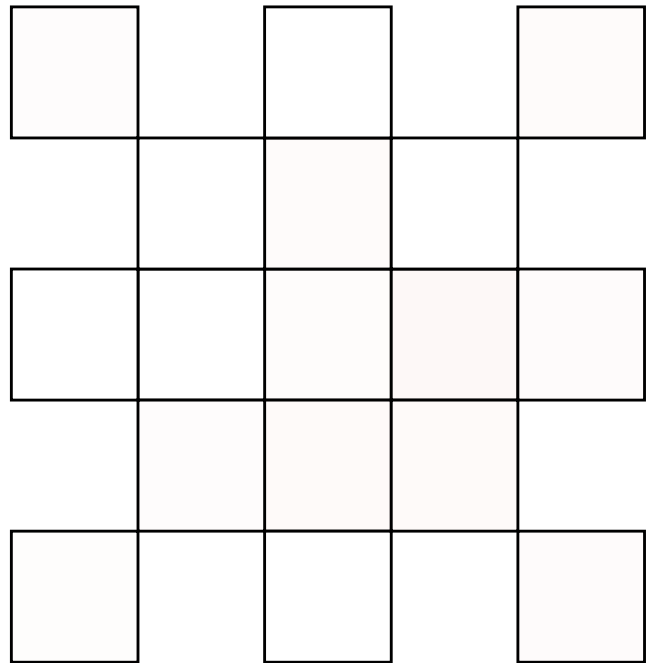

3-16511350-A-C

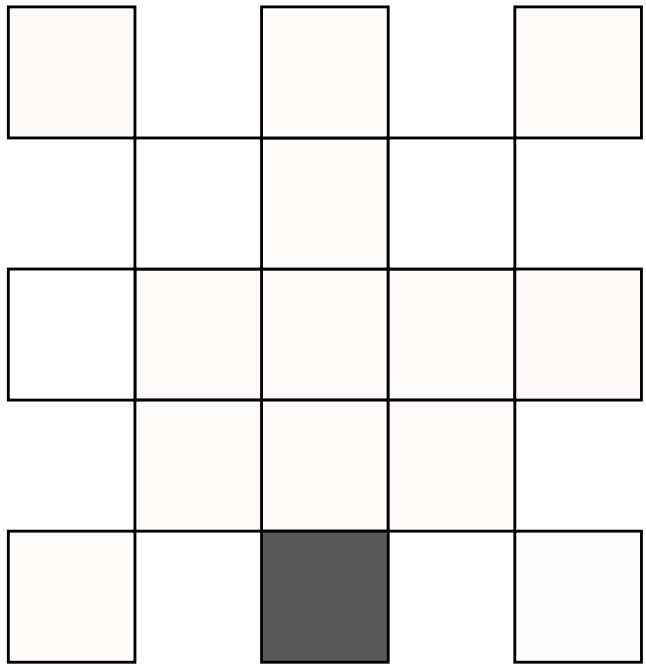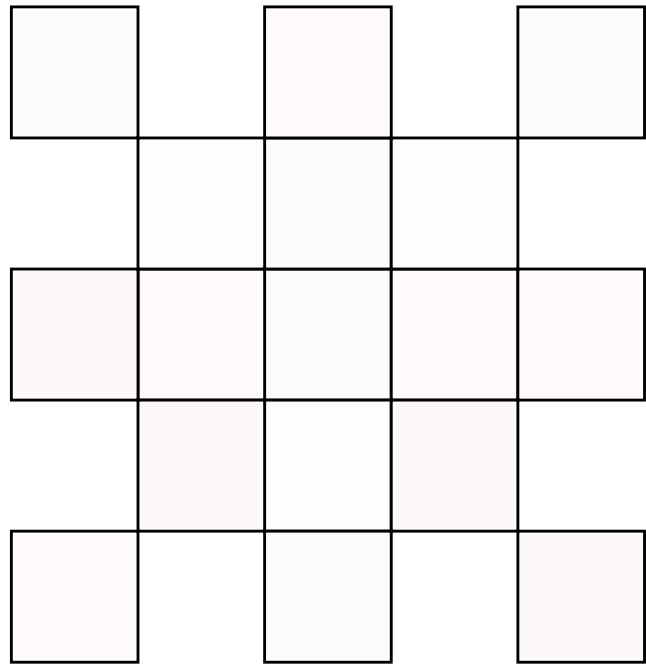



3-16568702-C-T

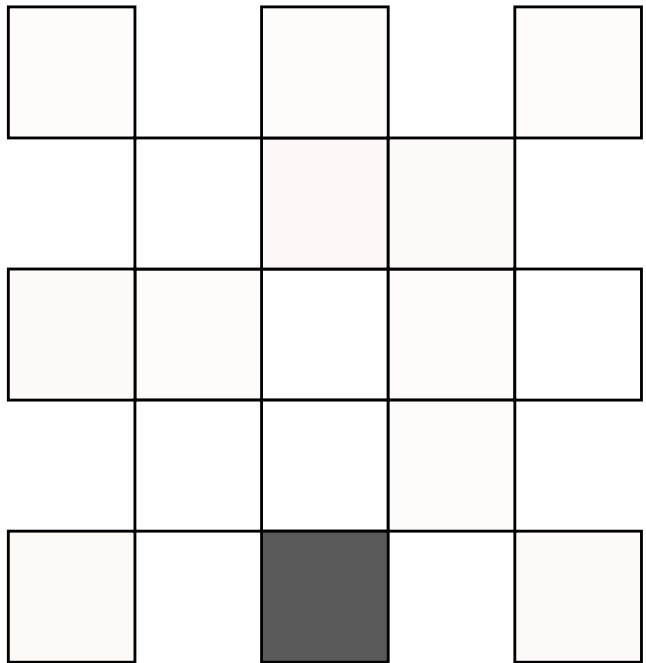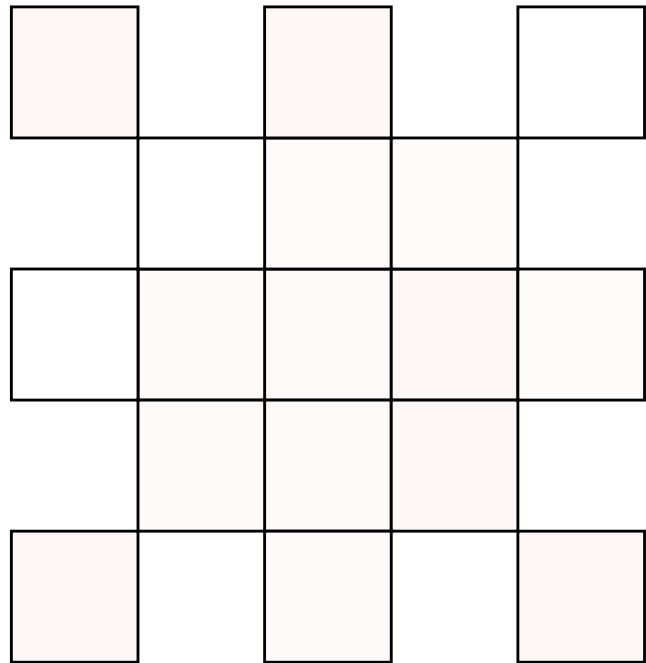

3-16983345-G-A

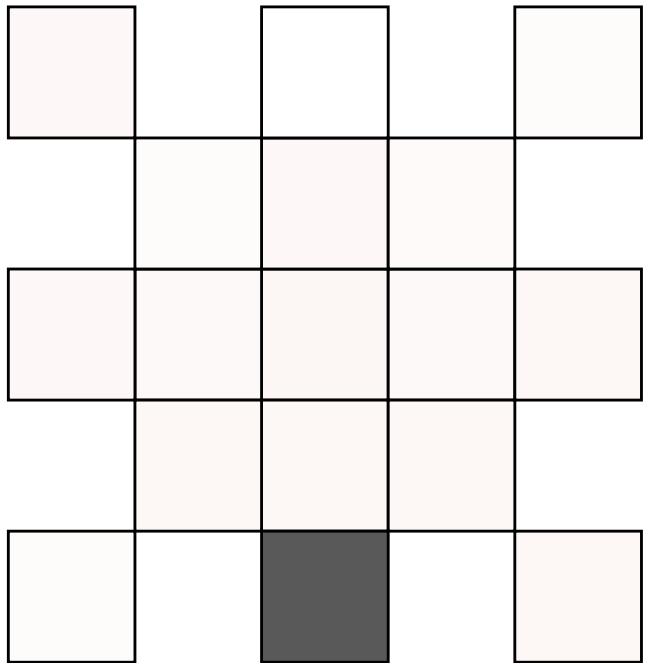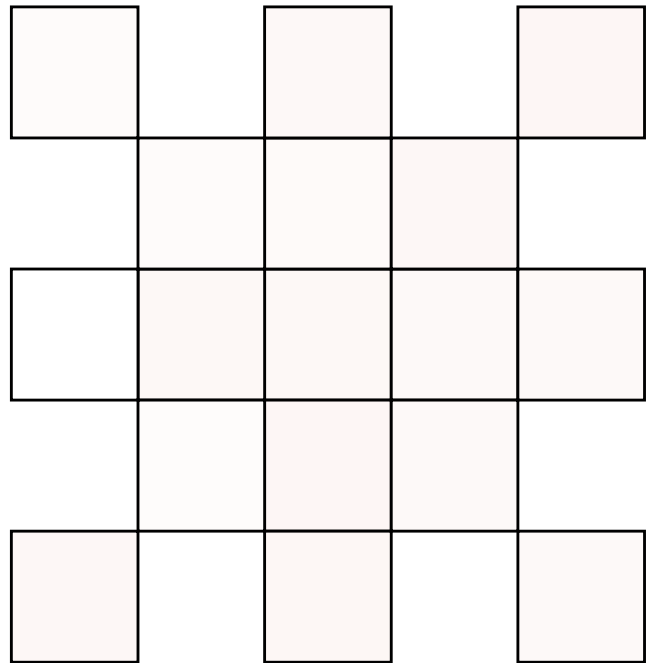

3-172635725-G-A

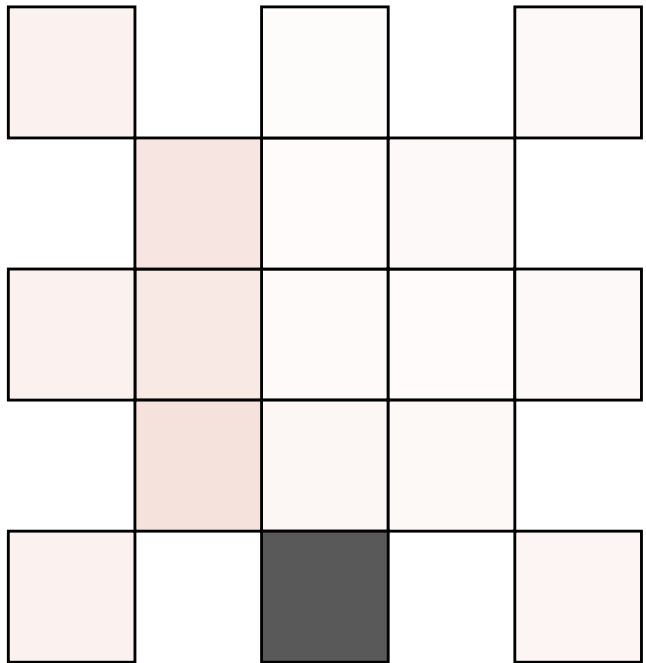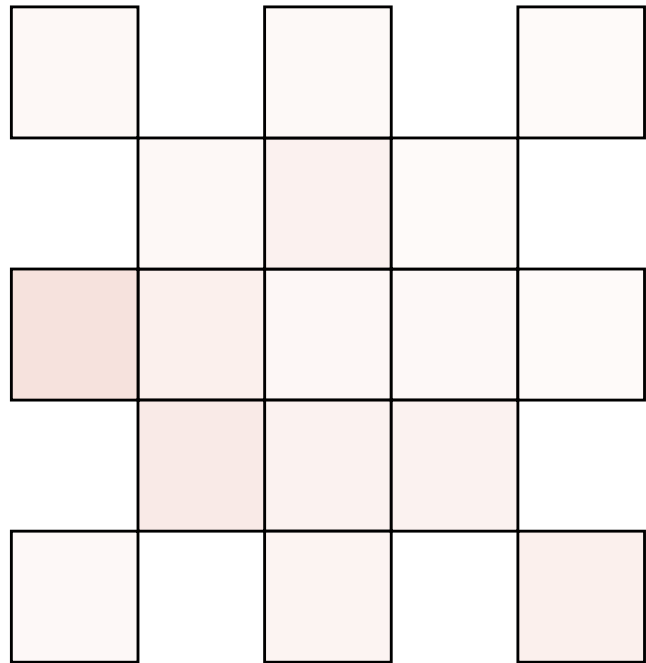

3-173423567-C-A

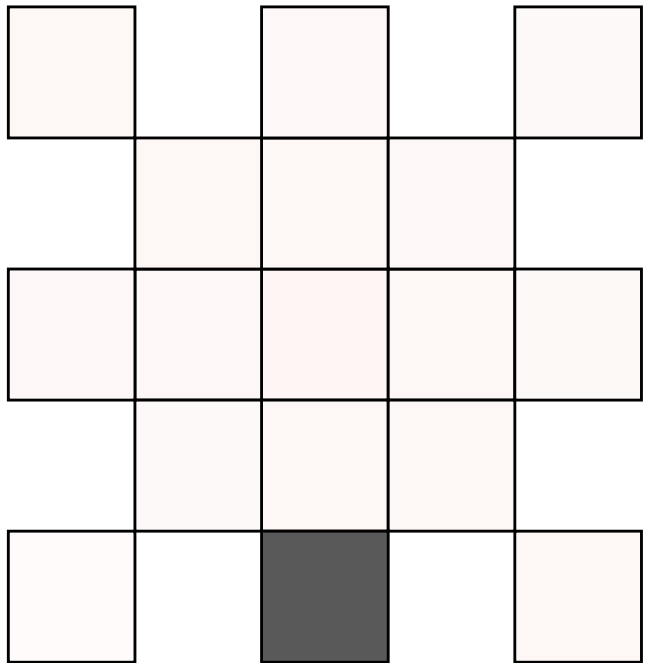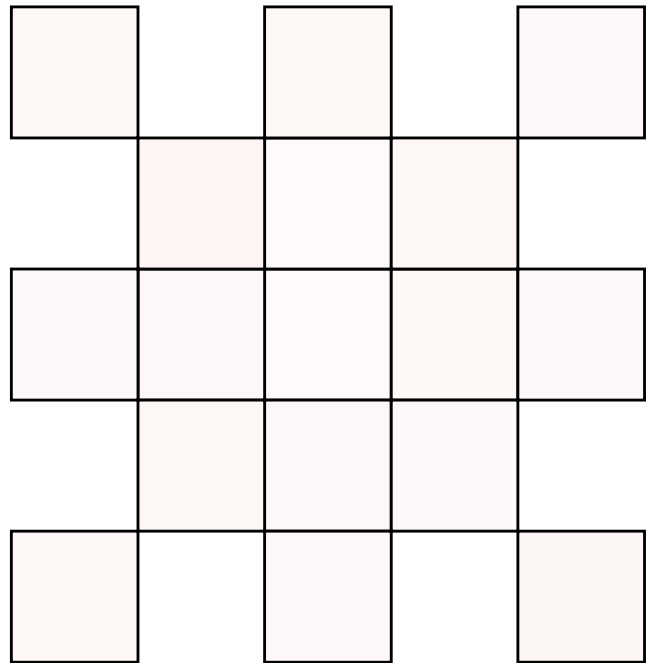

3-181259475-C-T

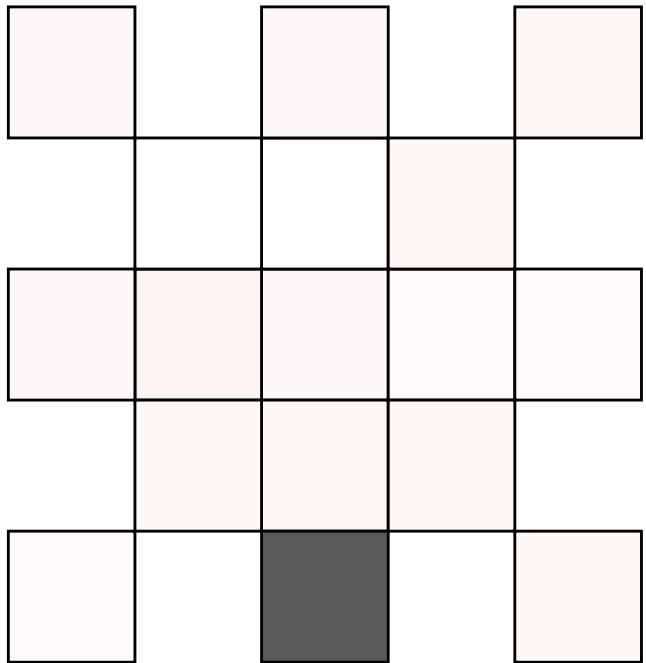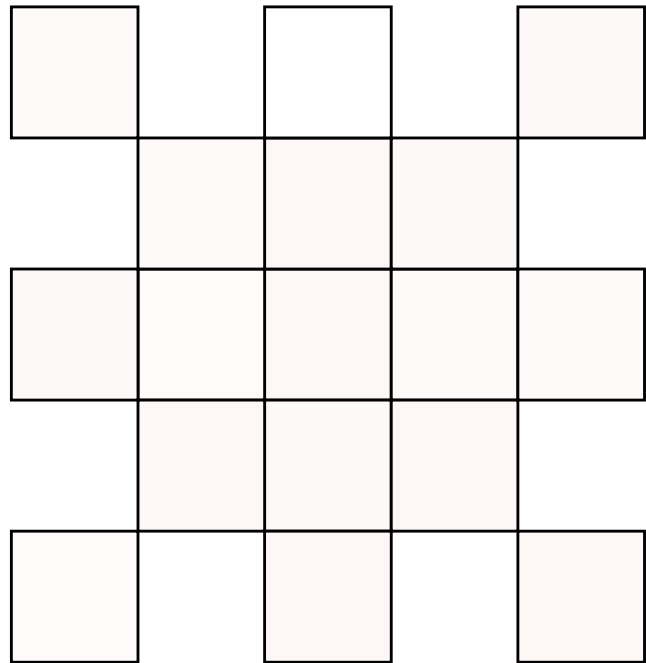

3-185077743-C-T

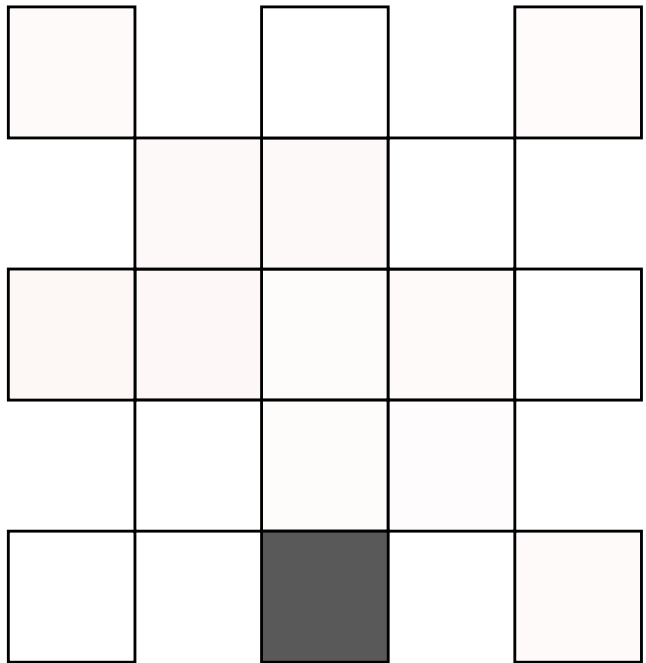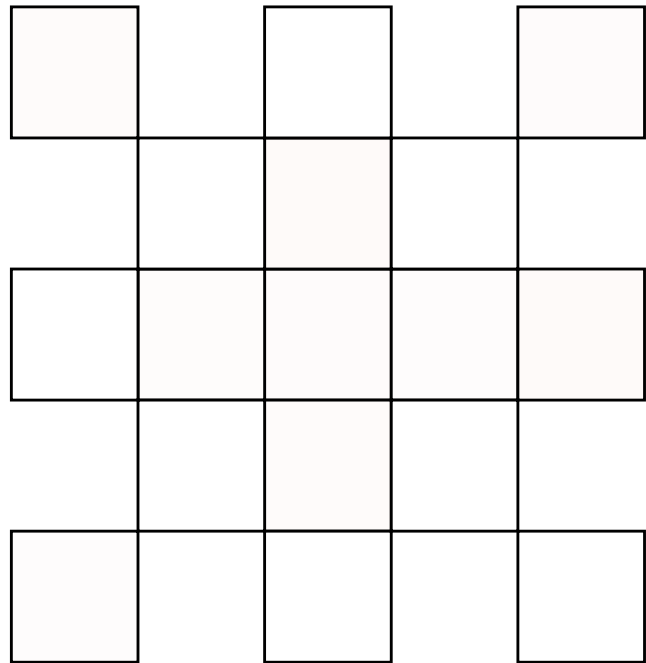

3-189834708-G-T

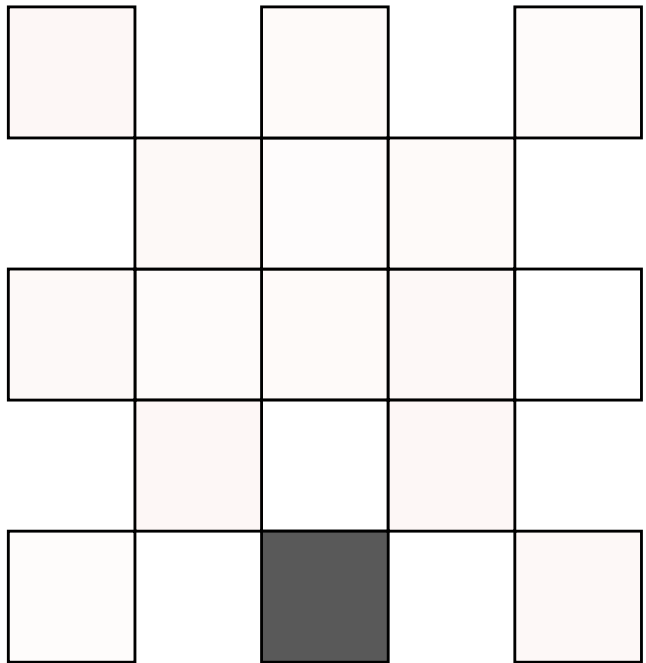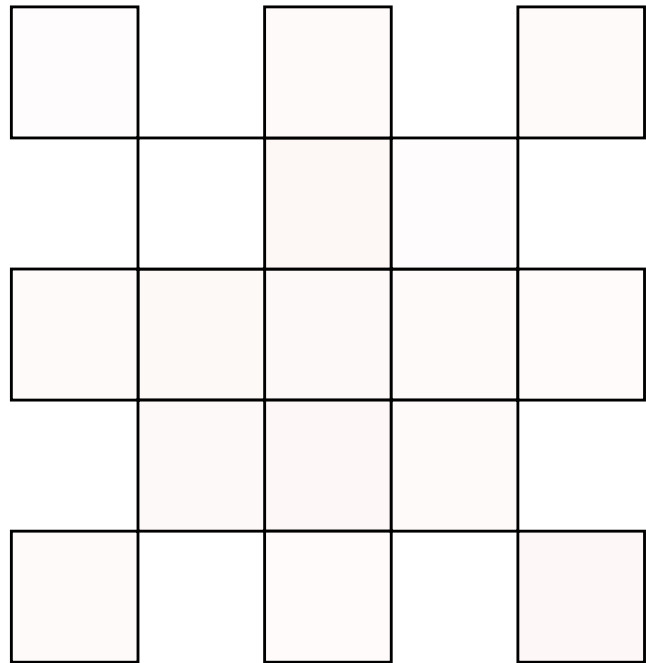

3-190125961-G-A

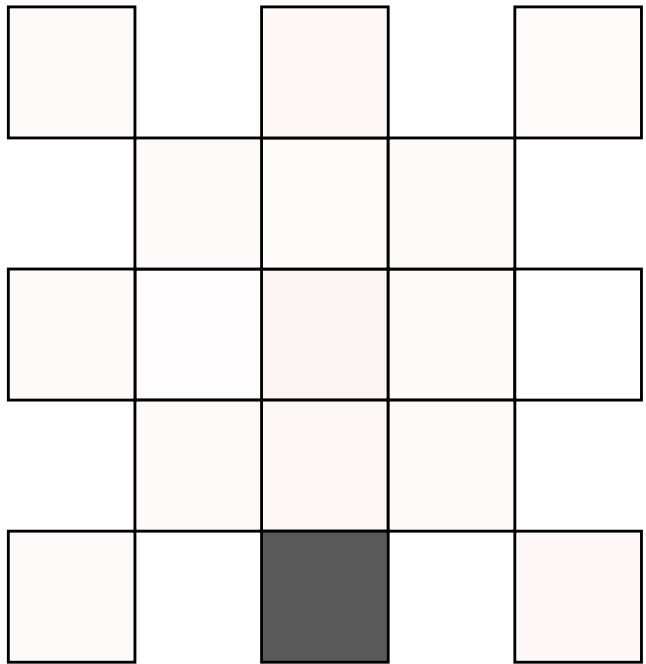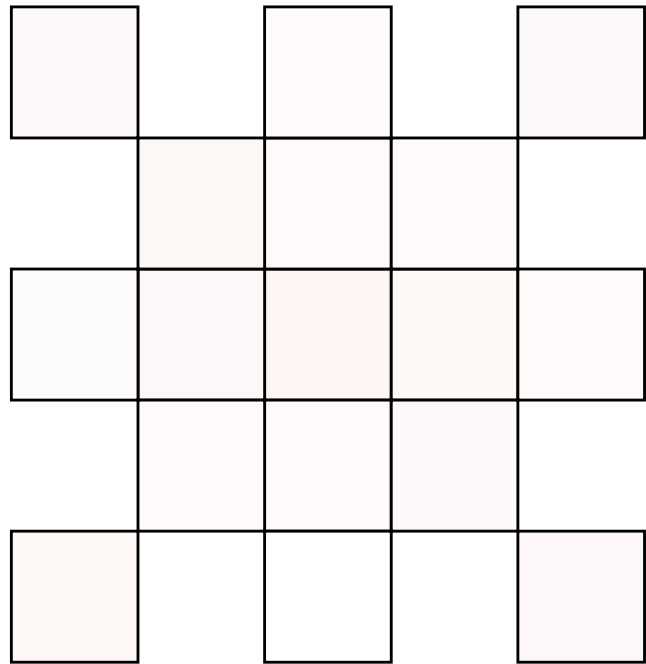



3-193720234-C-T

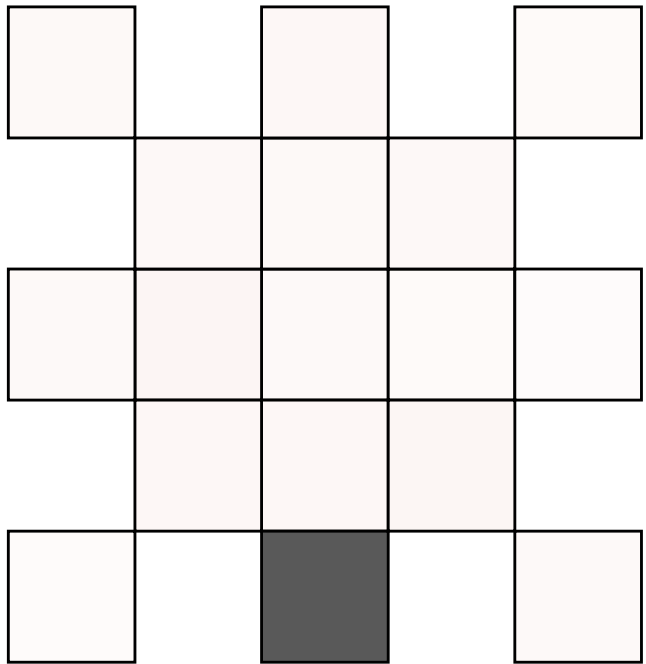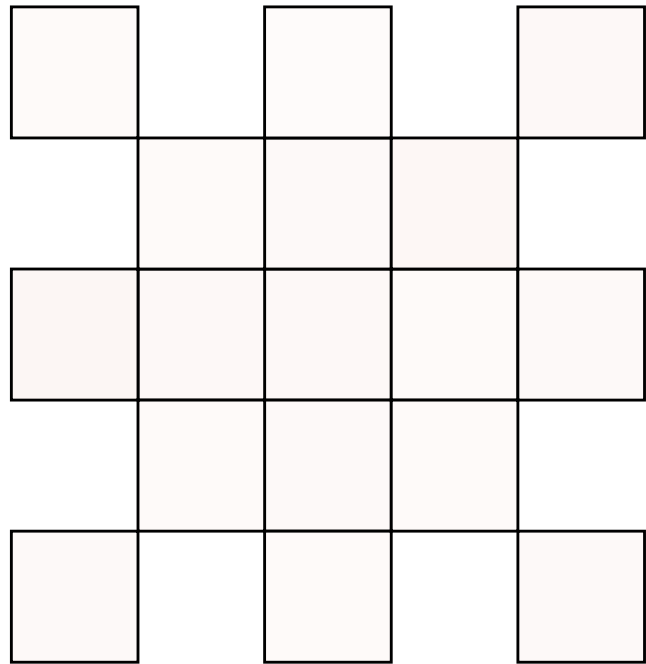

3-195270223-T-G

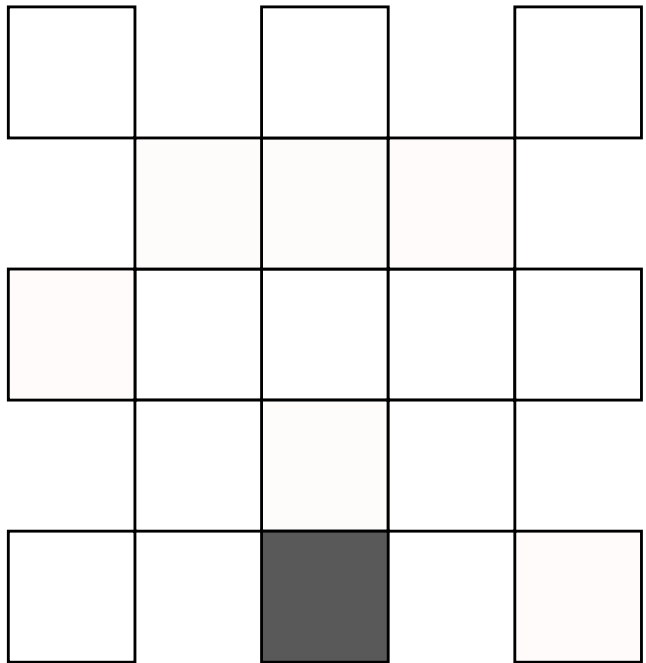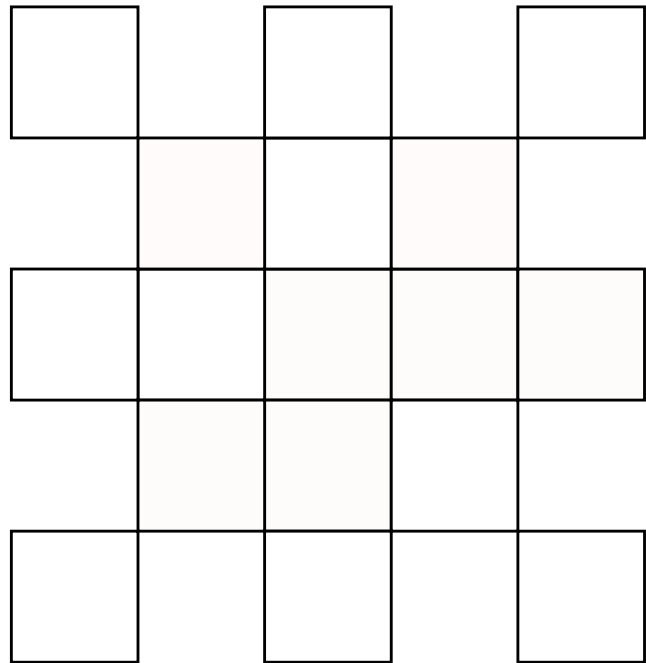

3-20053569-C-T

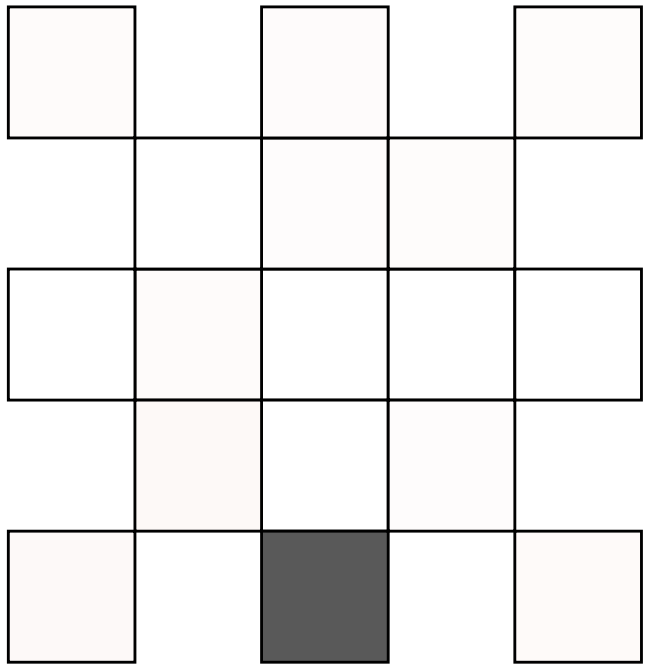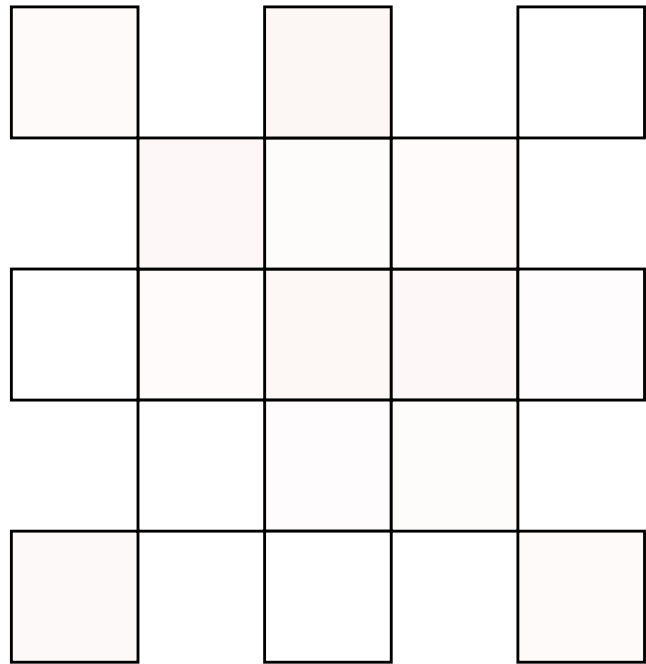

3-20145262-G-C

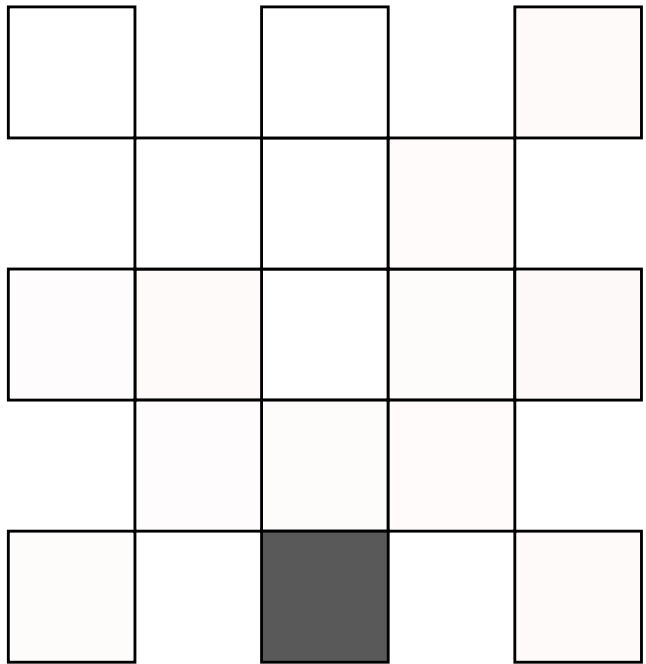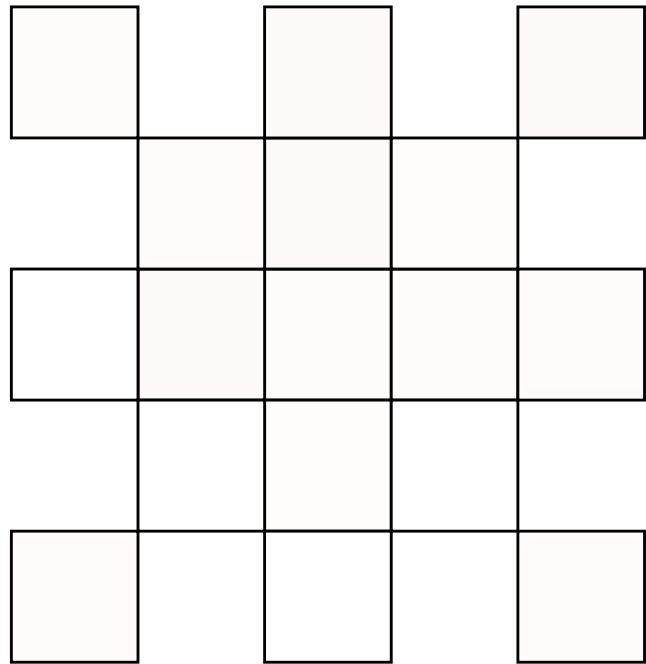

3-2022654-C-T

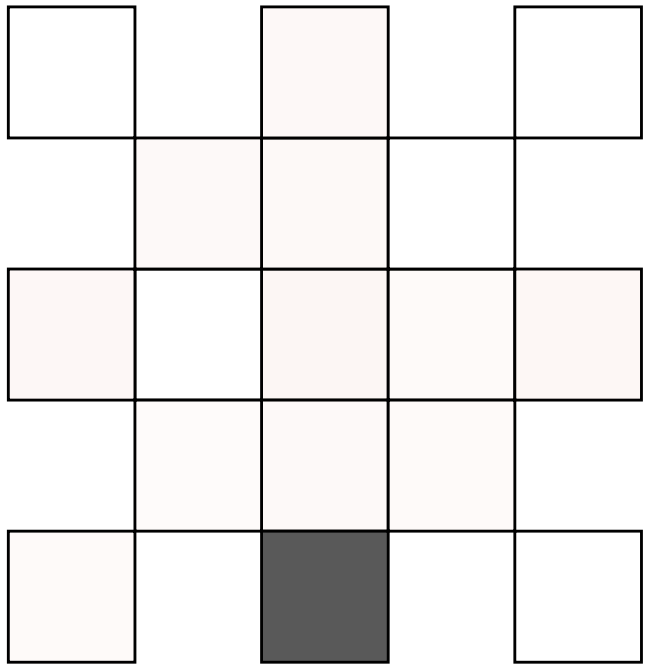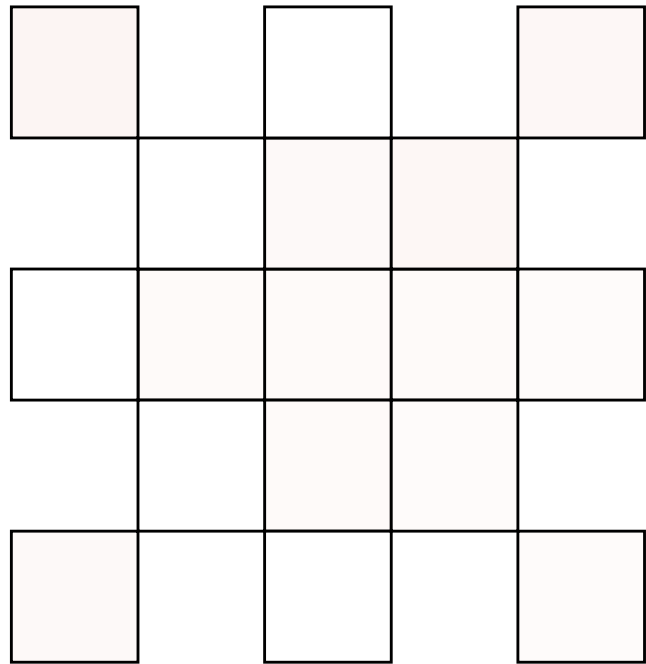

3-2448814-G-A

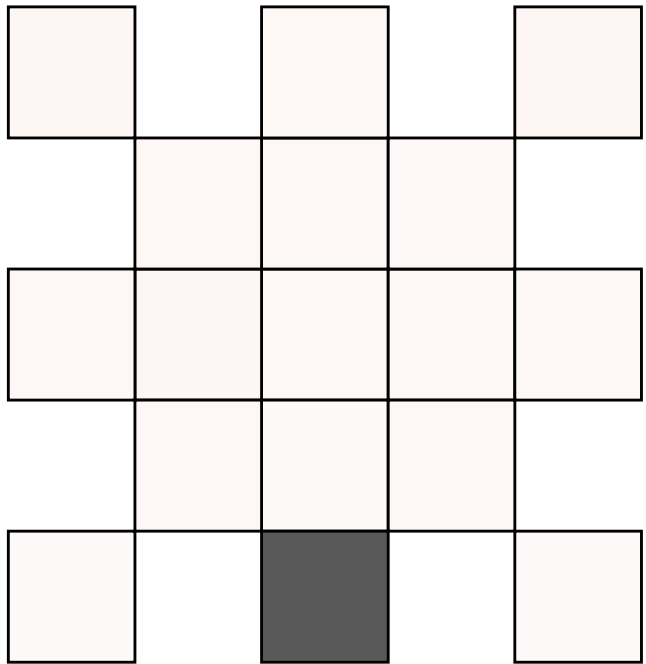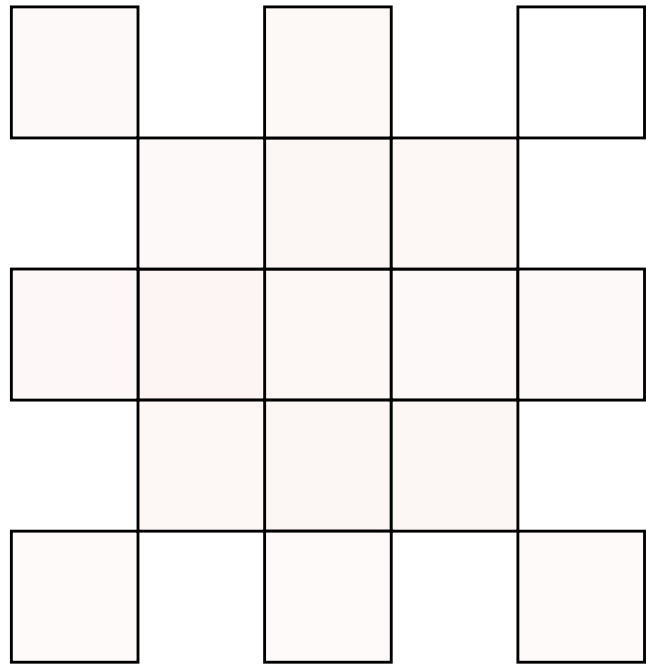

3-29362488-G-A

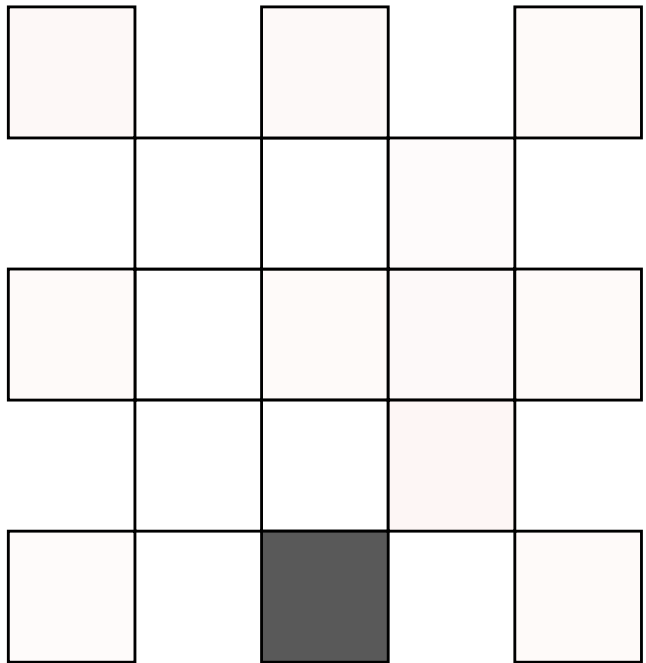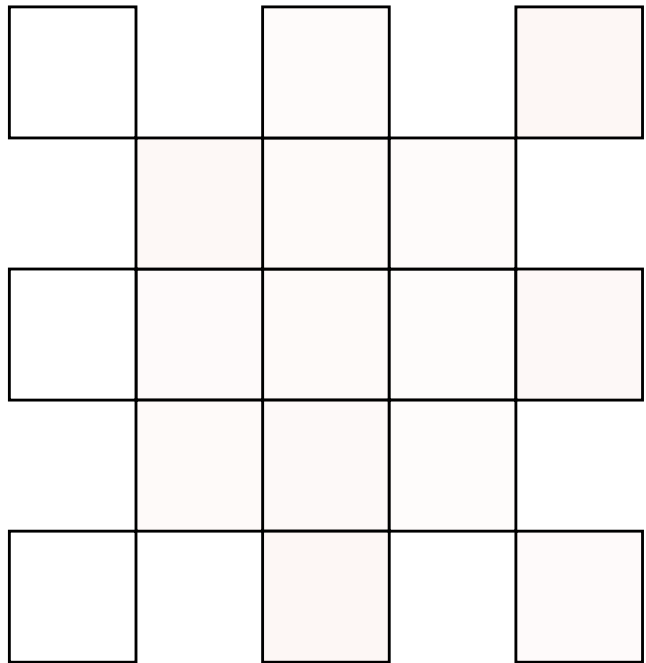

3-29763350-T-C

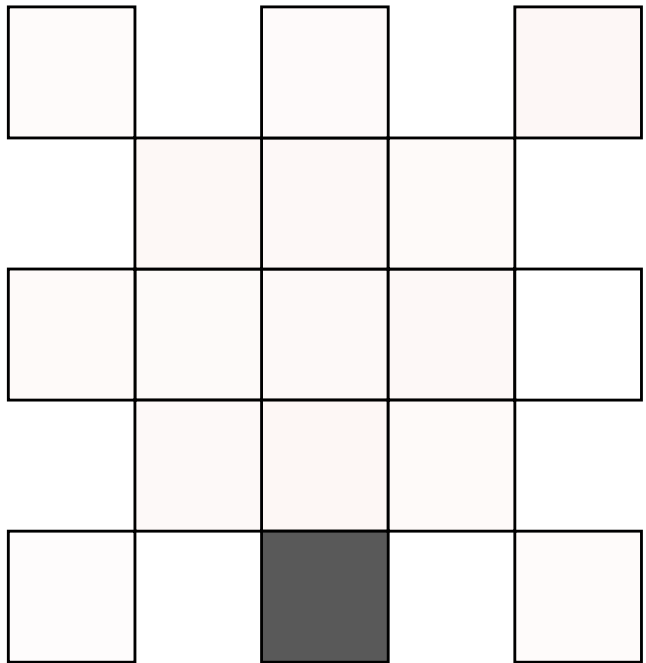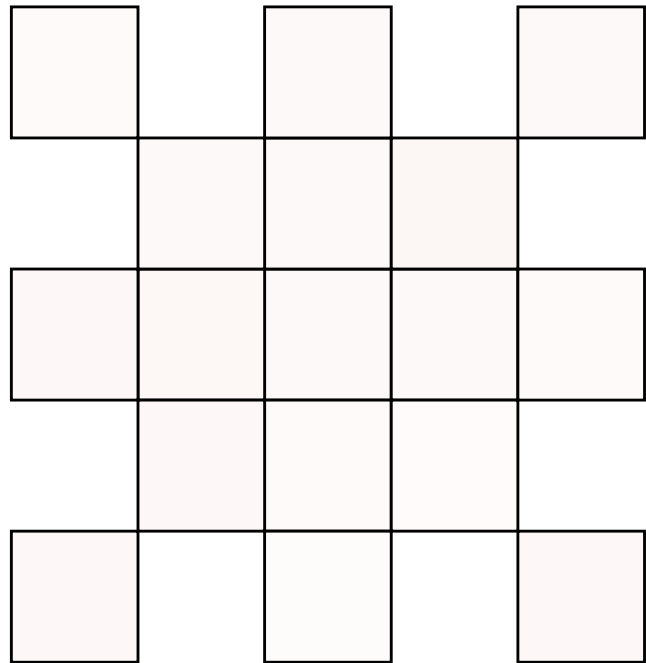



3-32863852-G-A

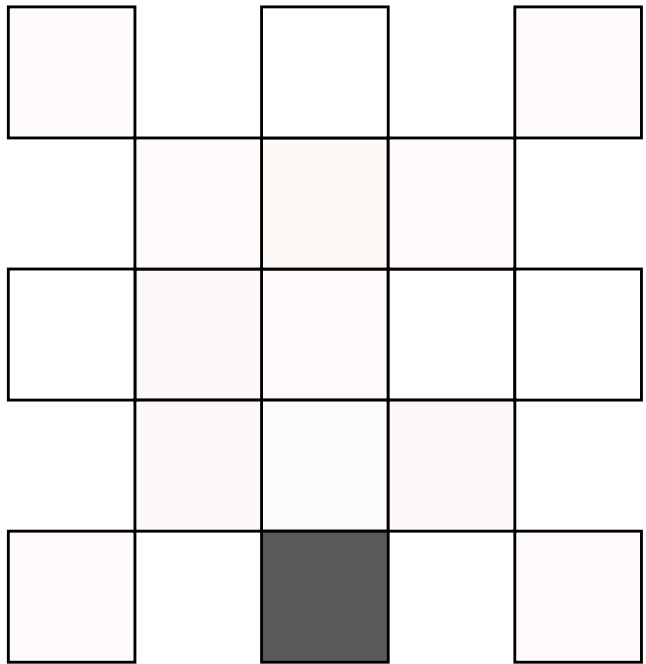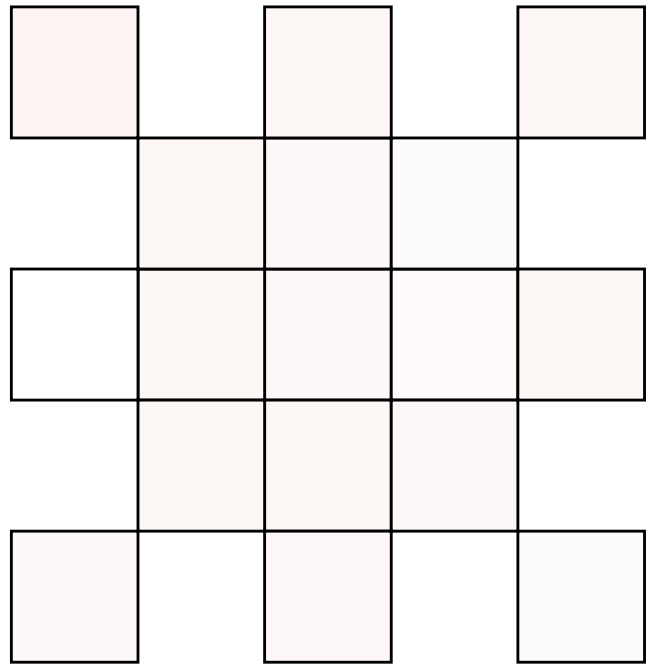

3-3458468-TG-T

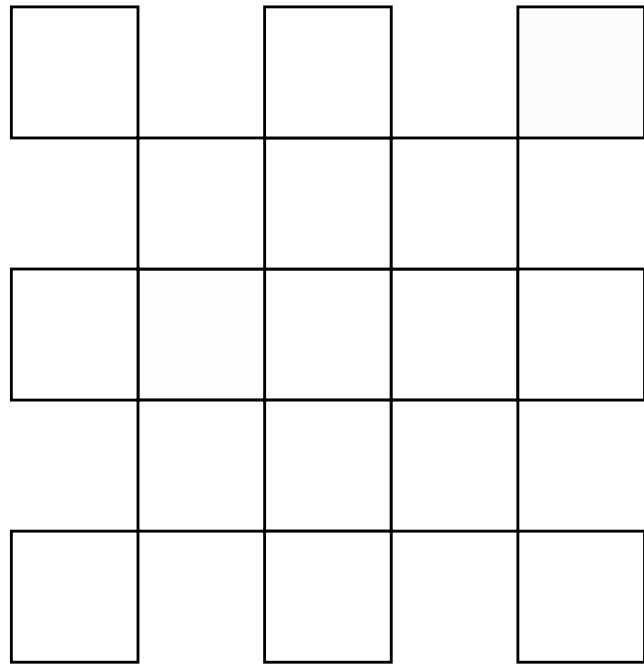

3-36389918-C-T

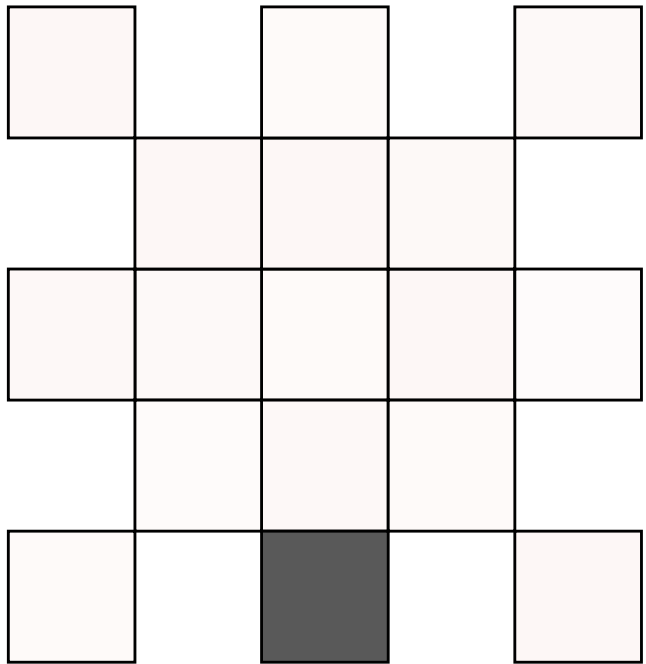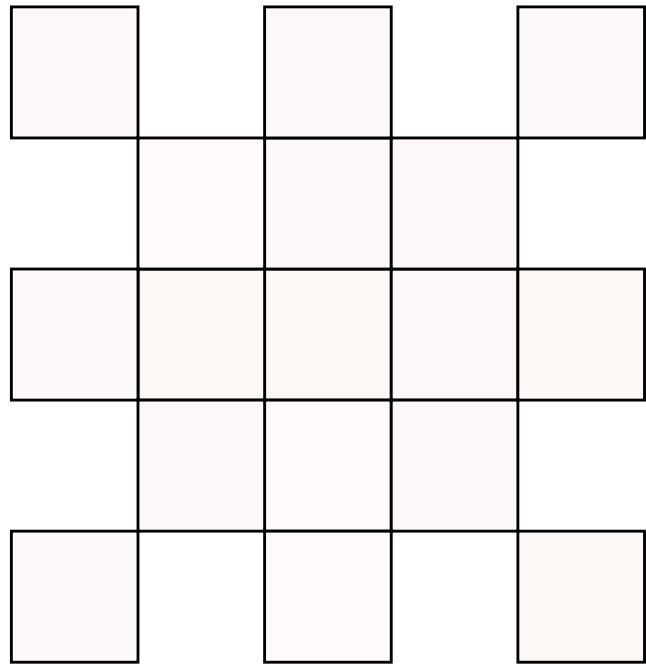

3-36414768-C-G

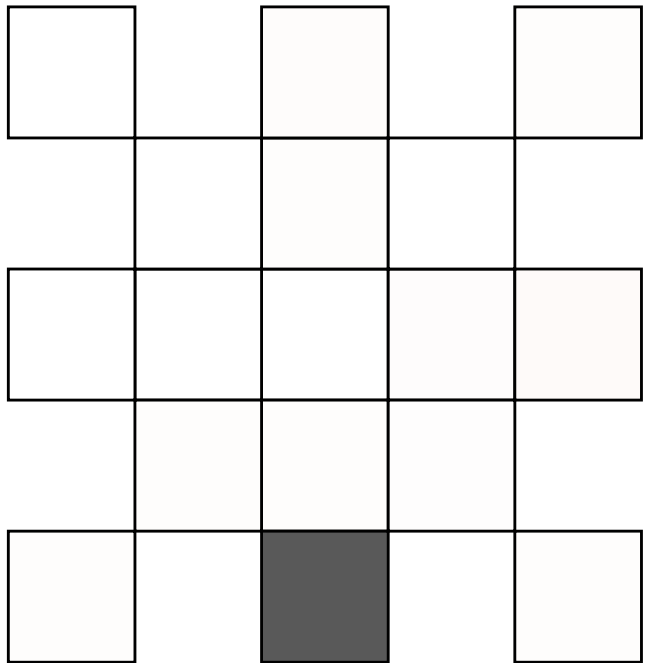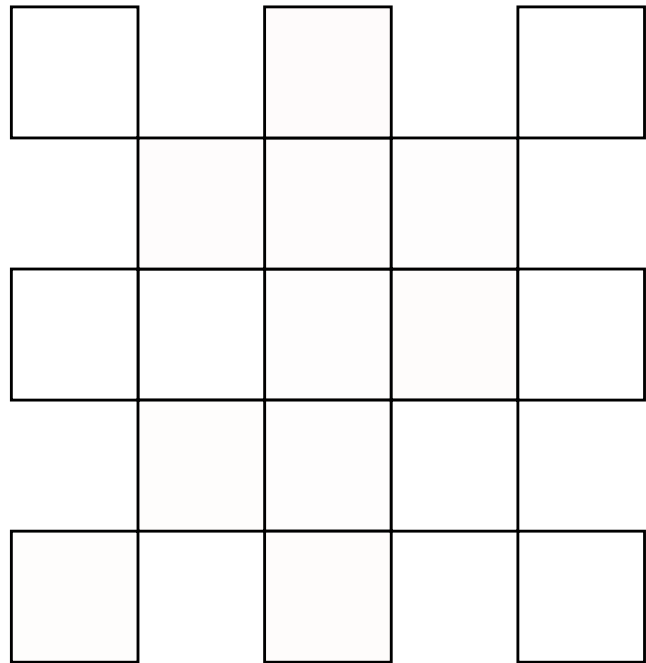

3-40086182-G-T

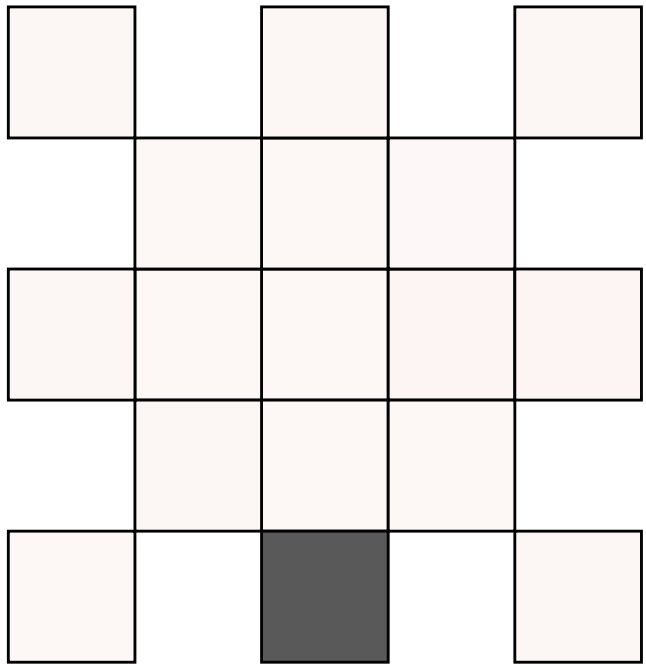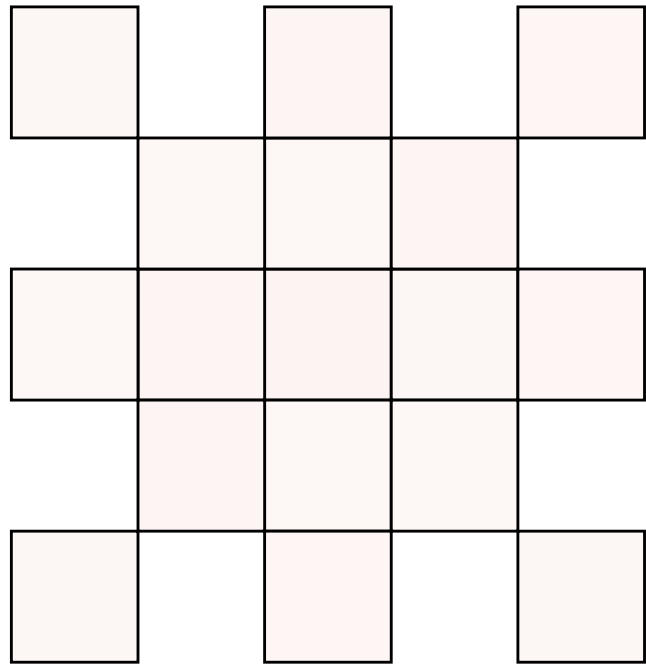

3-44078495-G-A

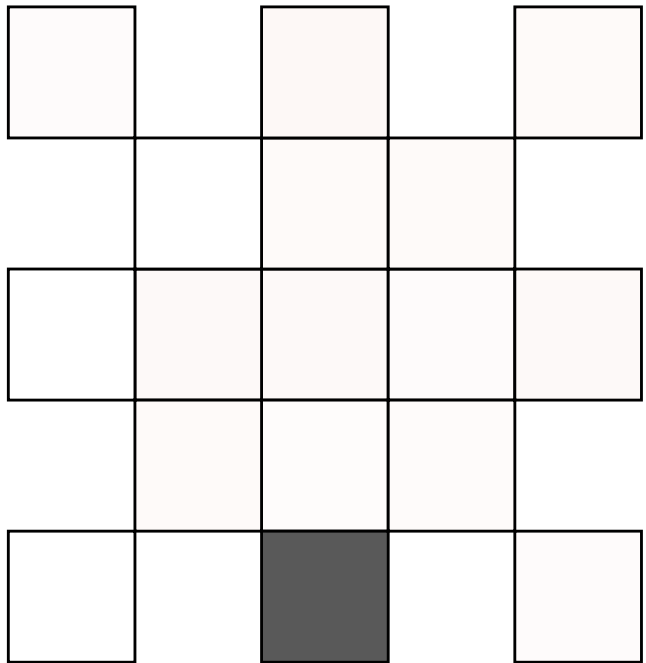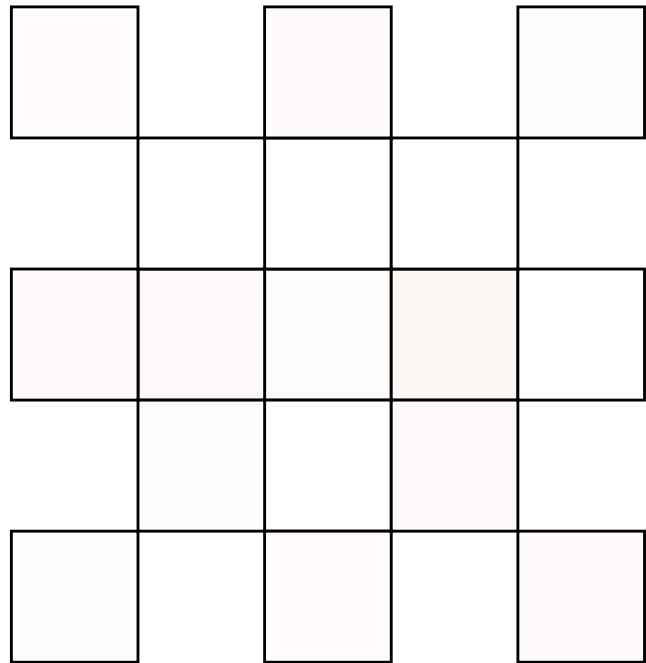

3-492626-A-T

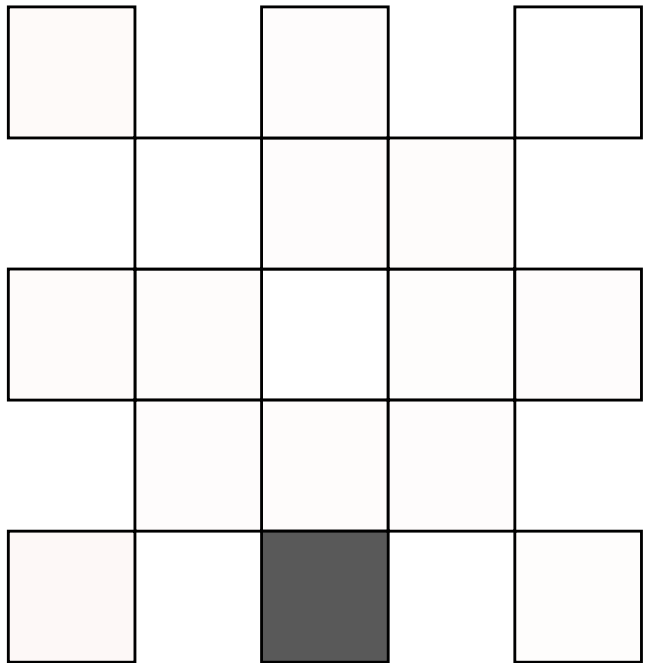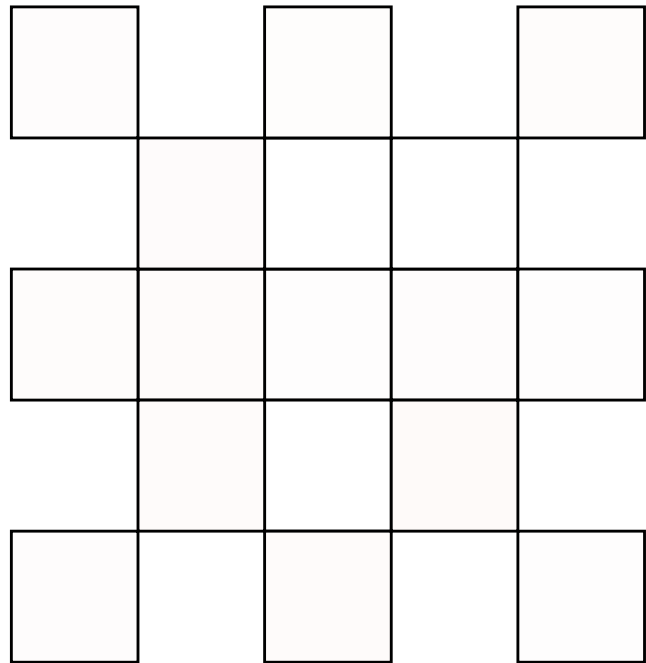

3-5254490-C-T

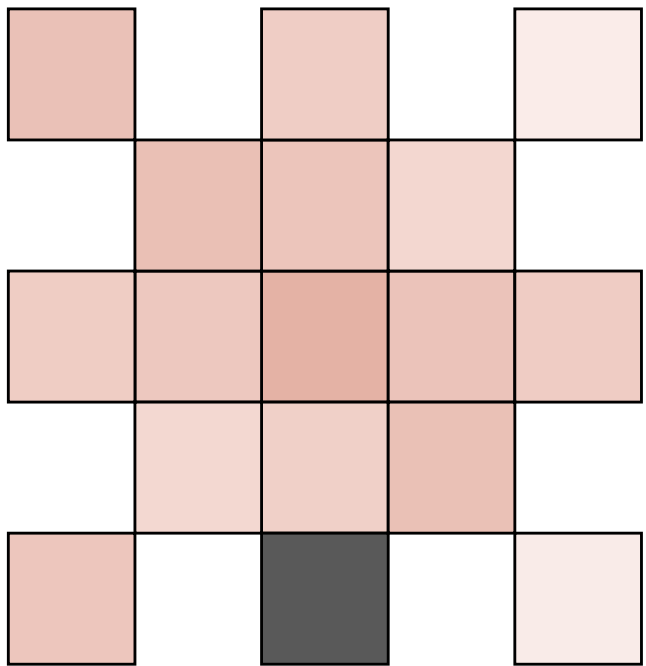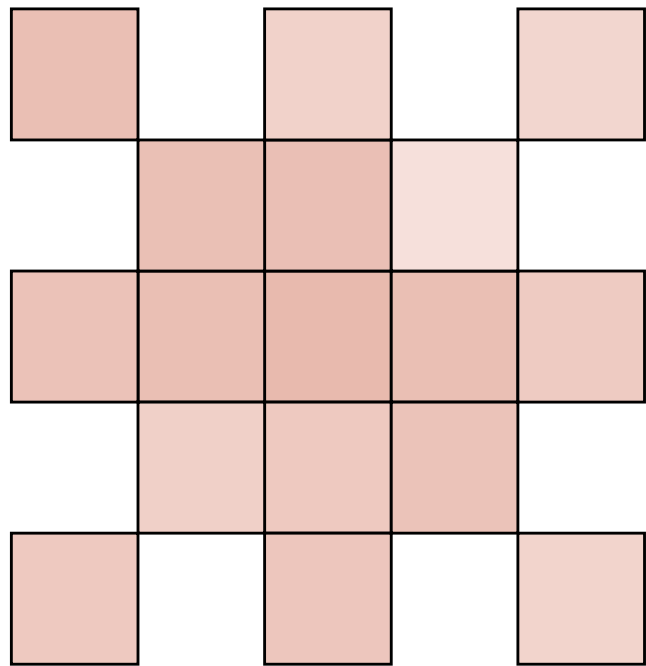



3-5352719-C-T

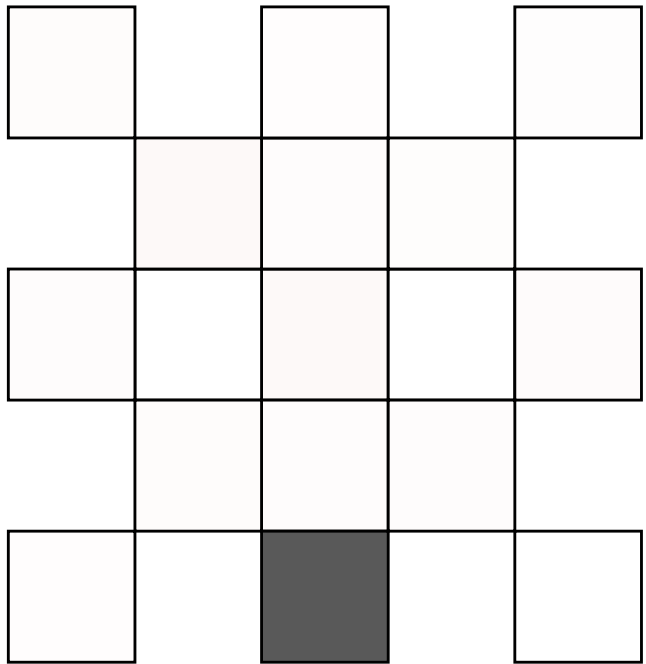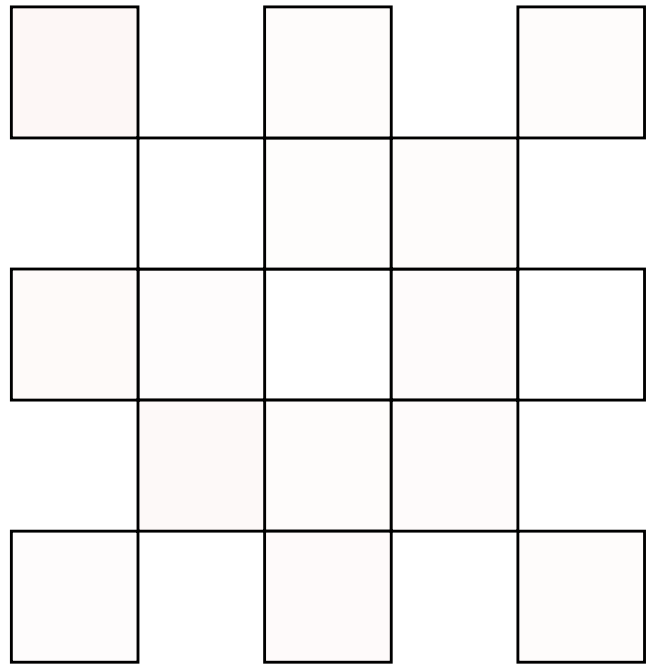

3-54233044-C-T

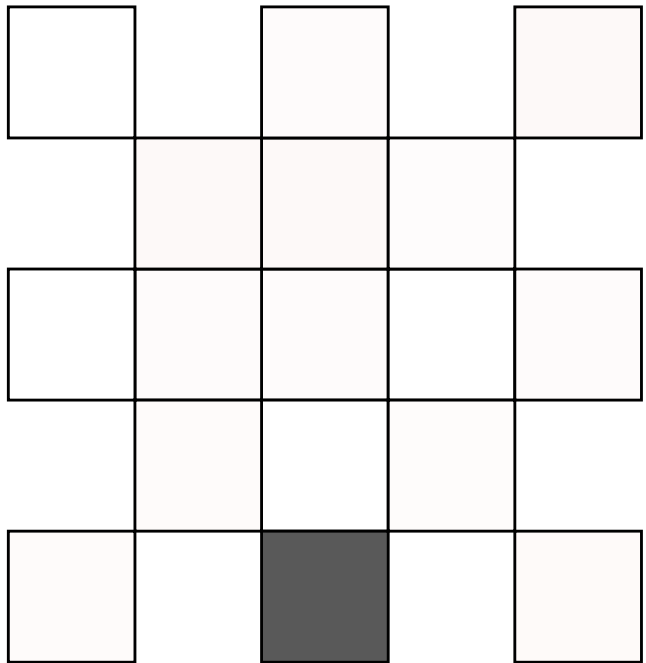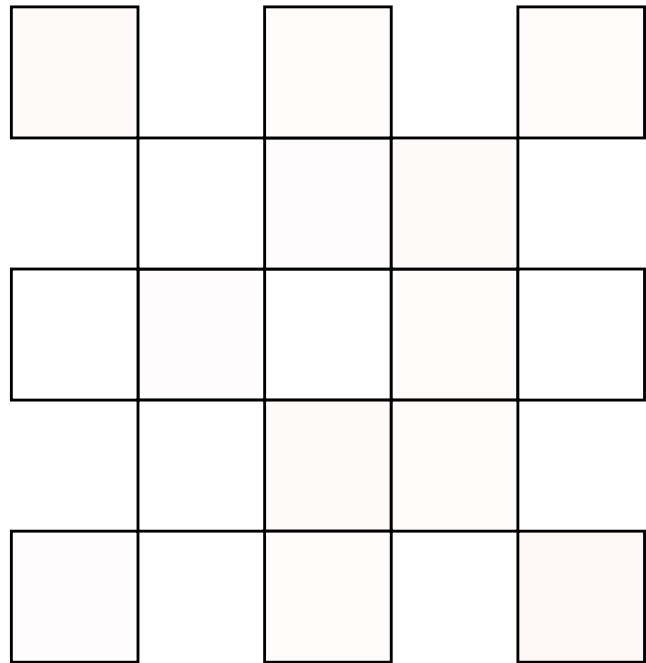

3-57851309-G-A

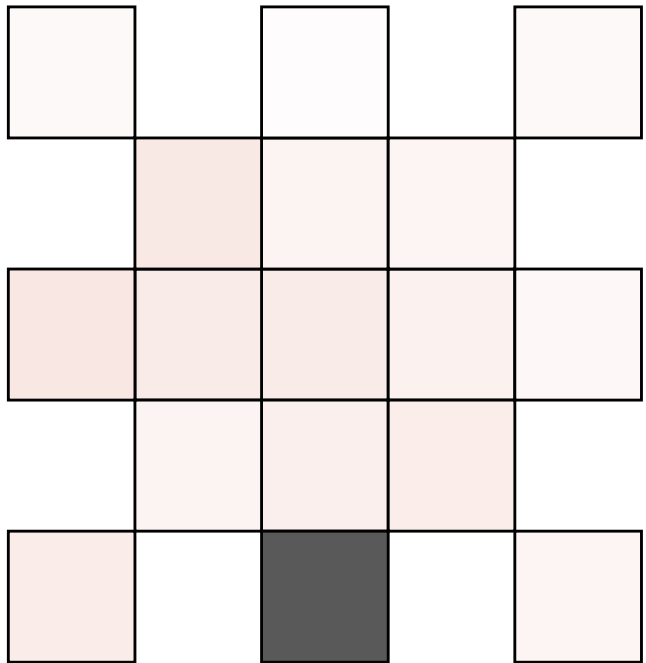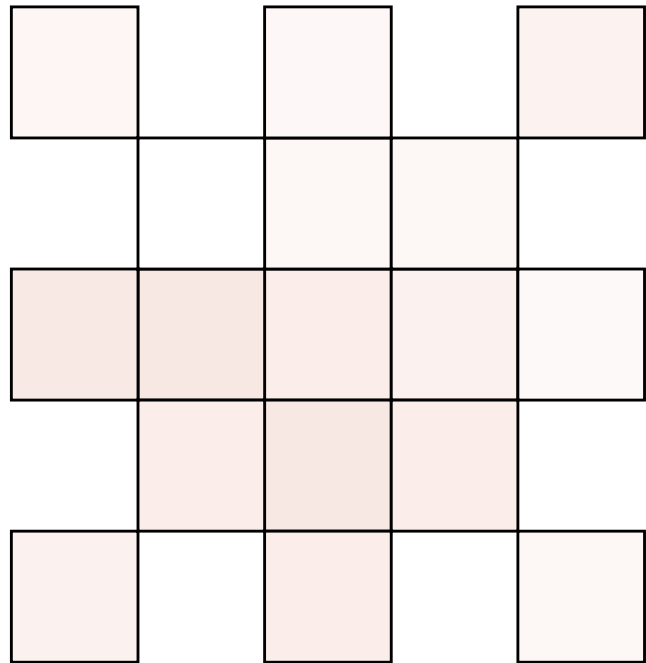

3-58915984-C-A

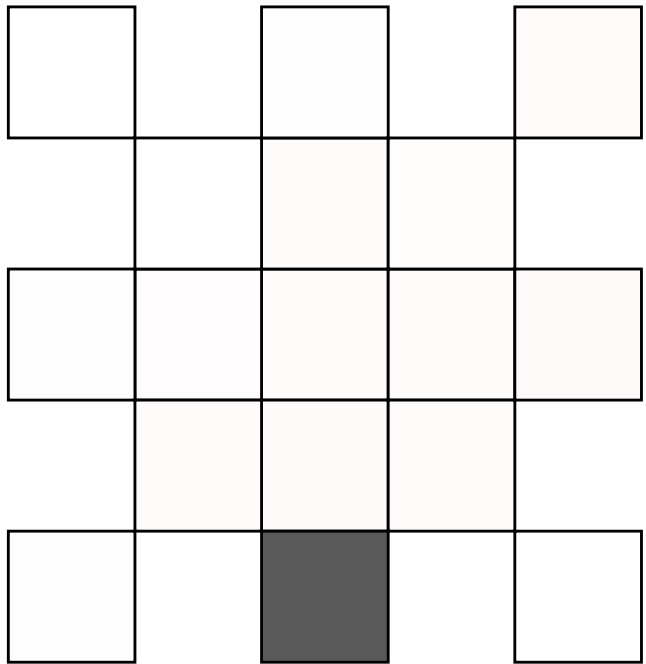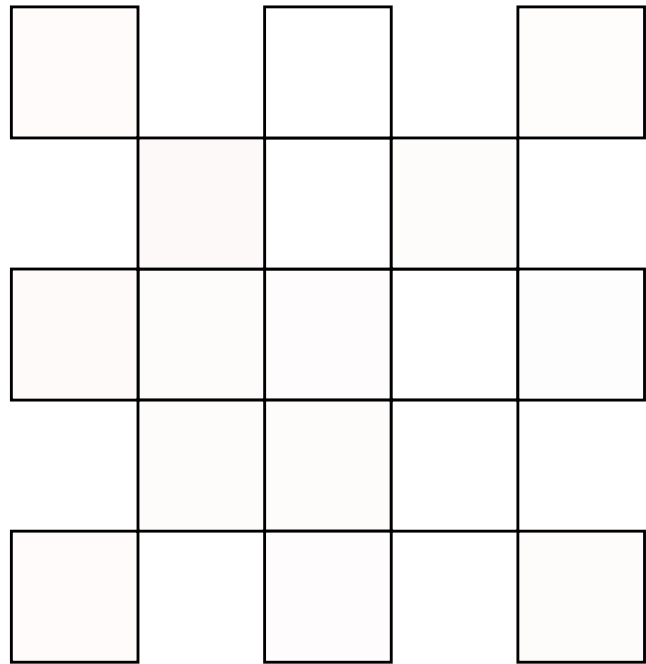

3-61853127-C-T

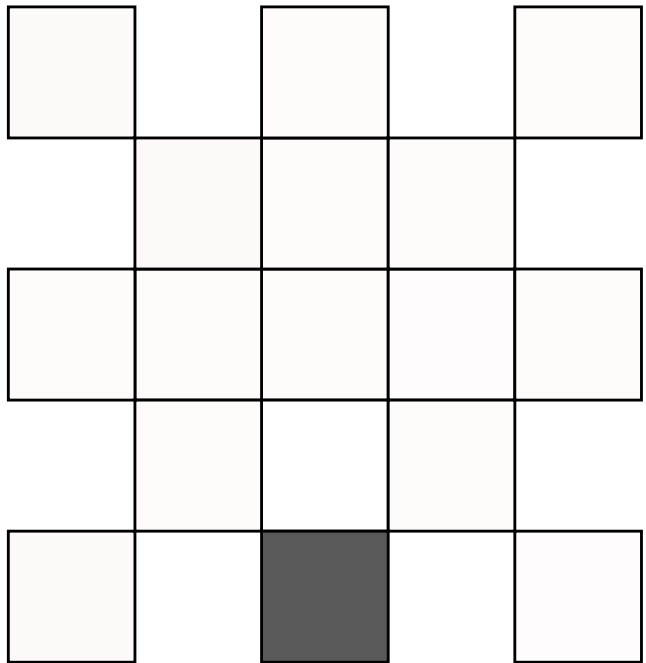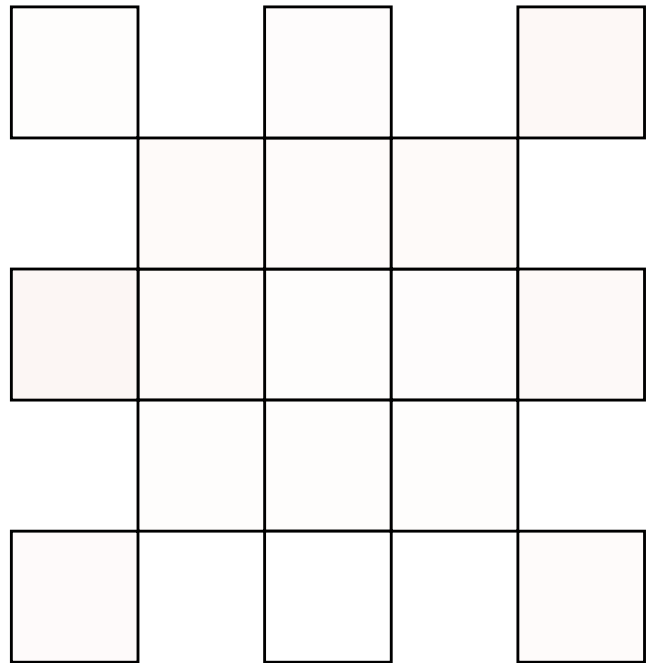

3-69001163-C-T

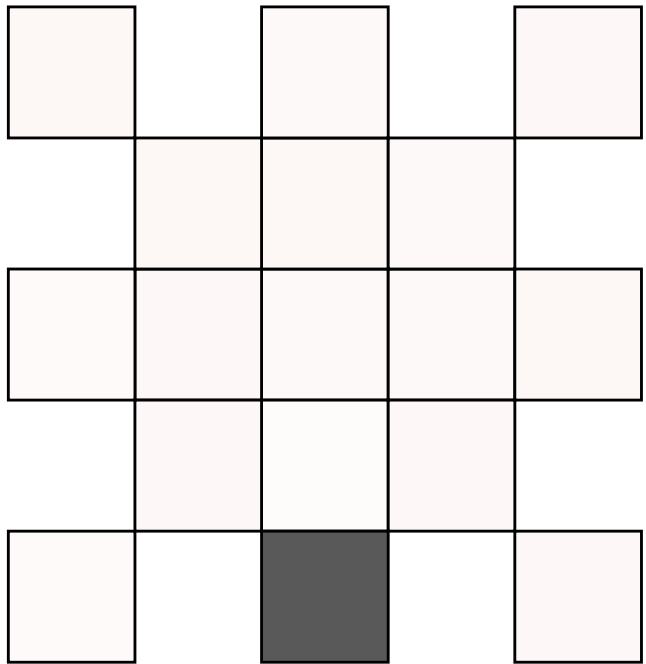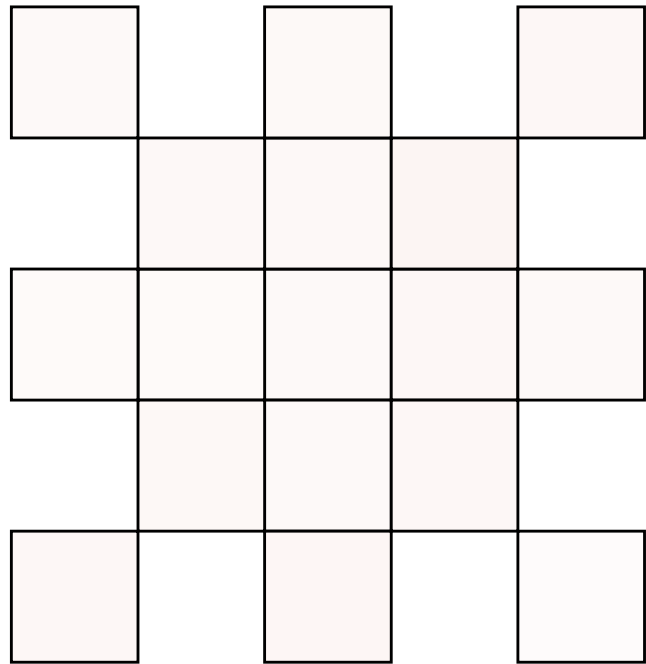

3-69456970-G-A

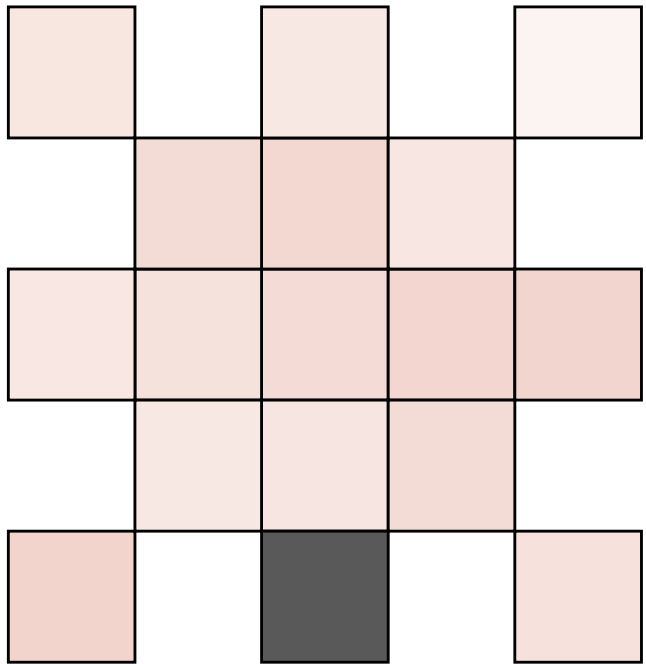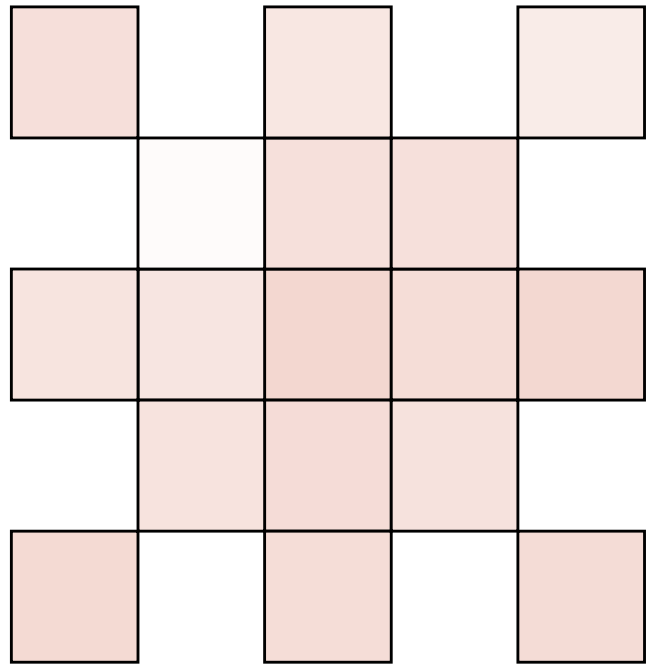

3-78738978-T-C

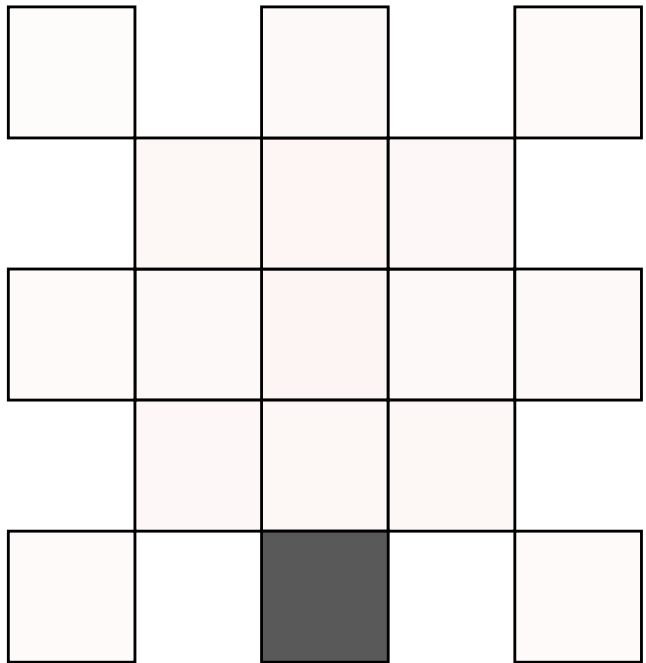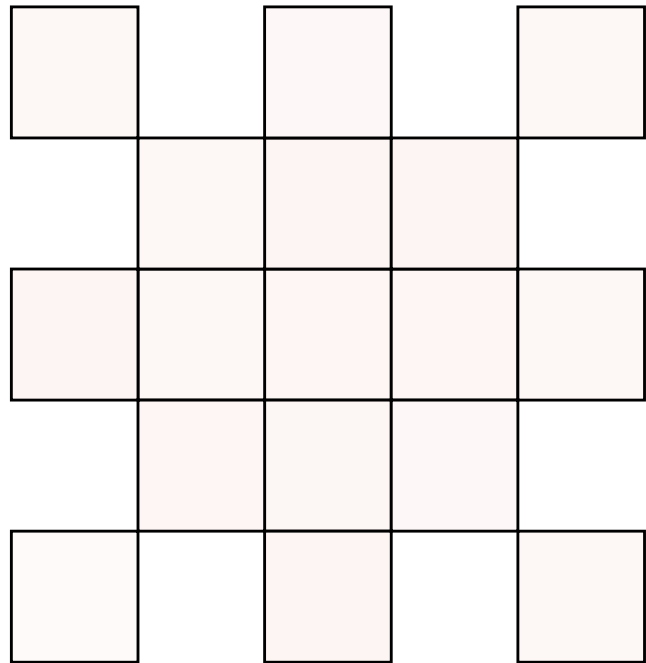



3-79357944-G-C

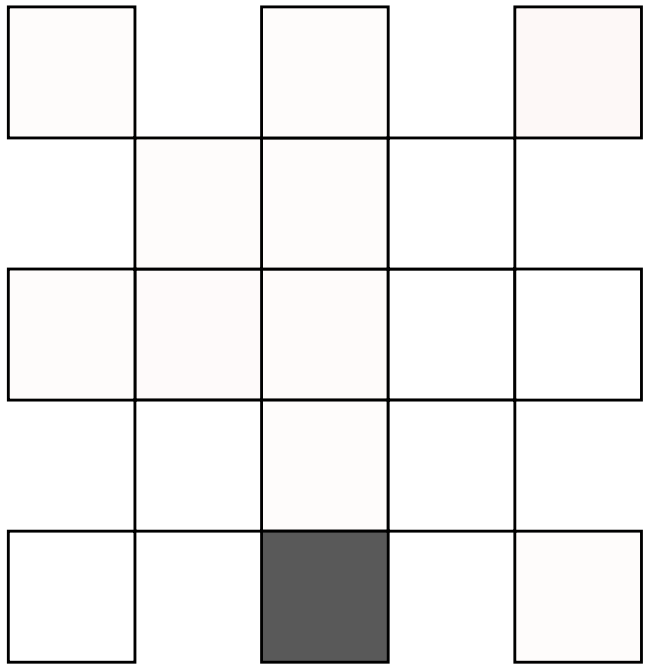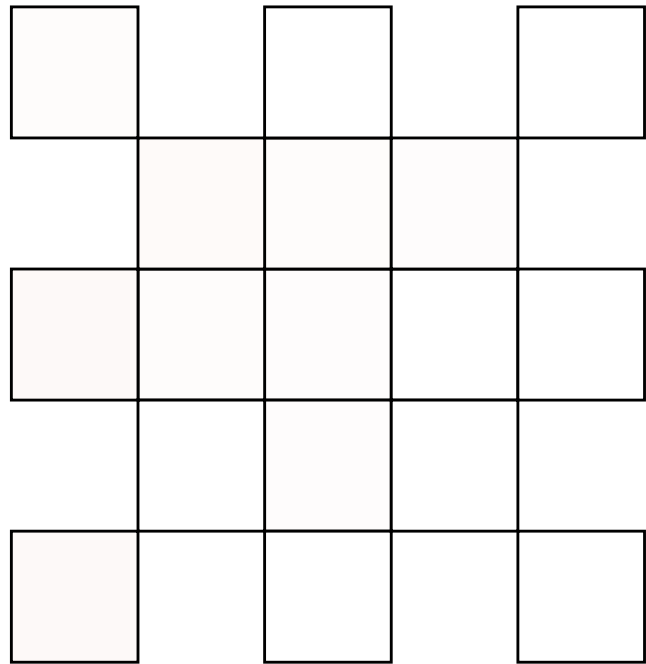

3-79921898-G-T

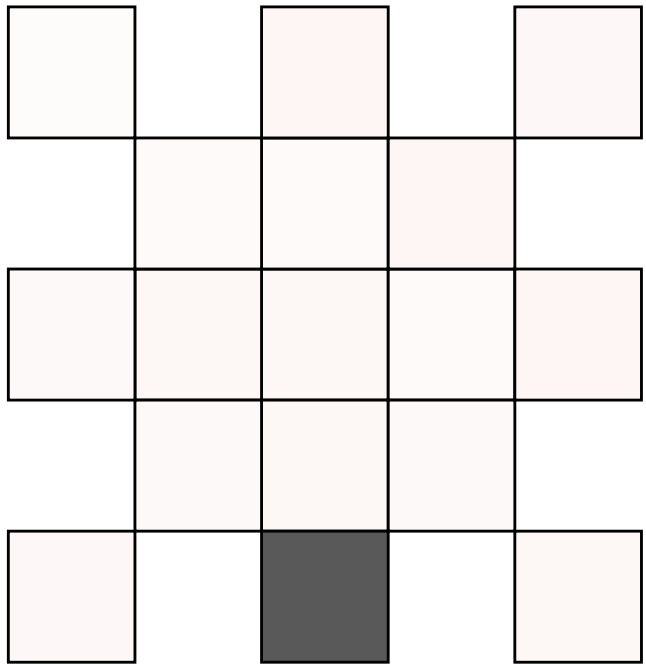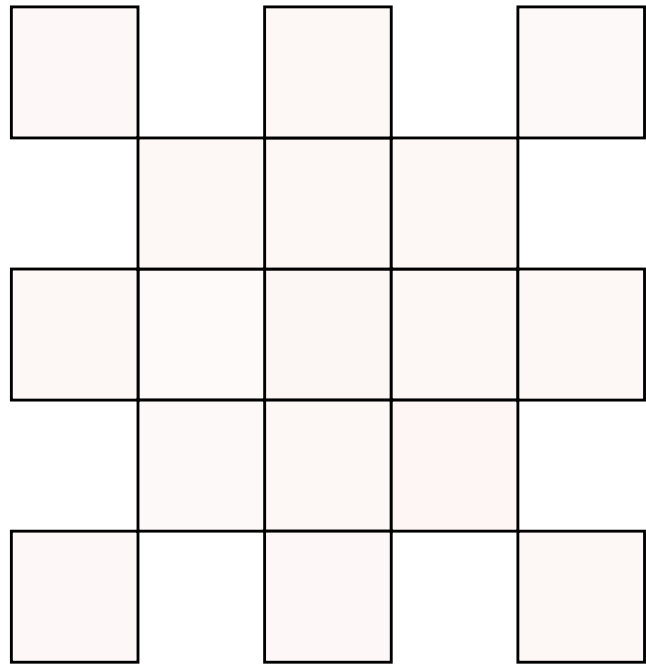

3-82072417-C-T

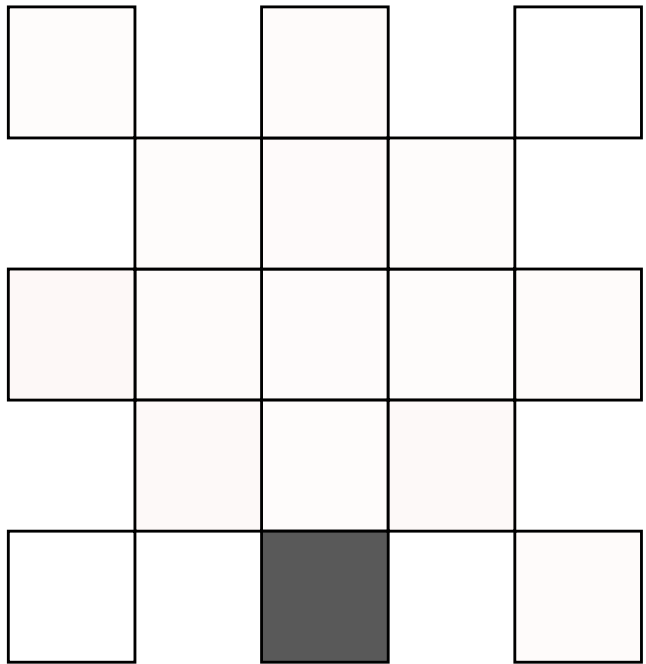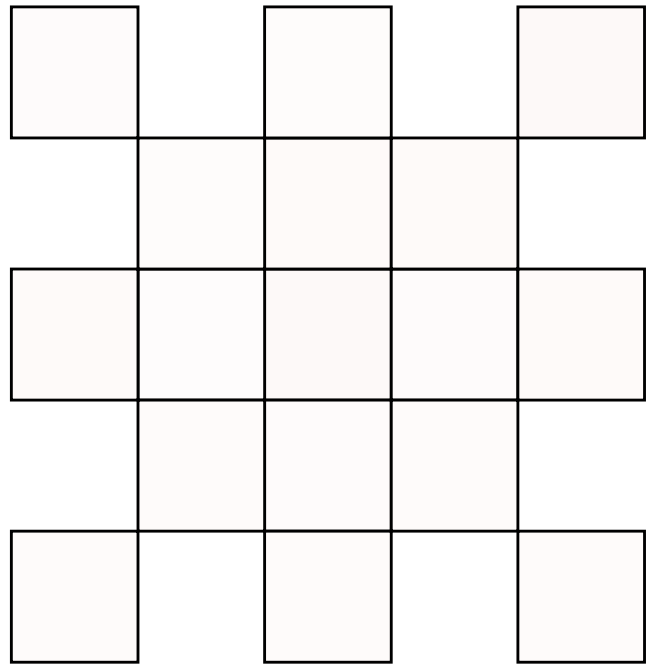

3-82901114-C-T

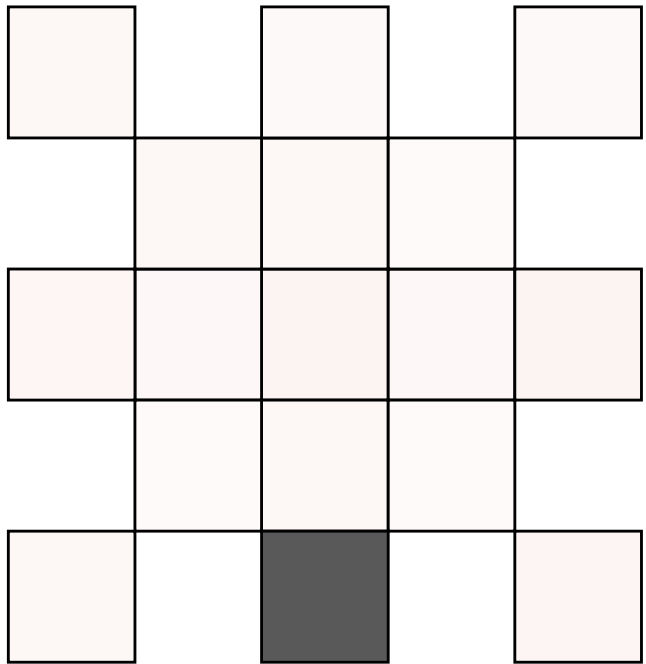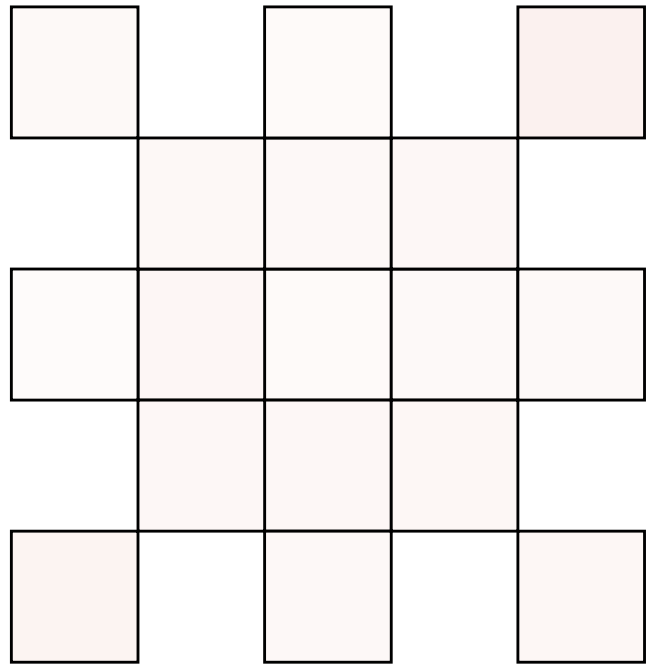

3-83516288-A-C

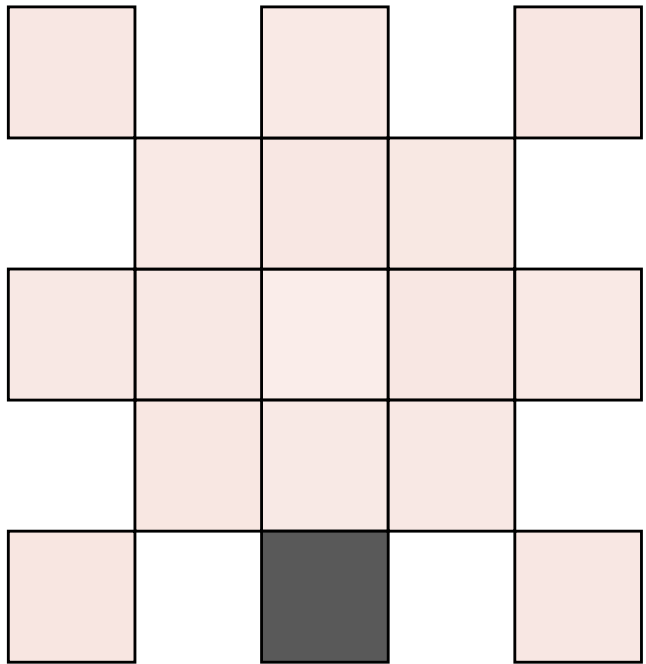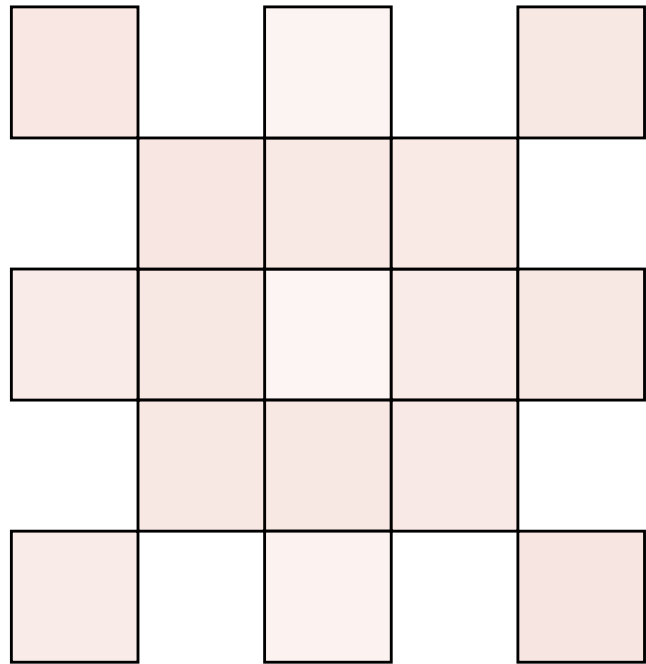

3-88303744-T-C

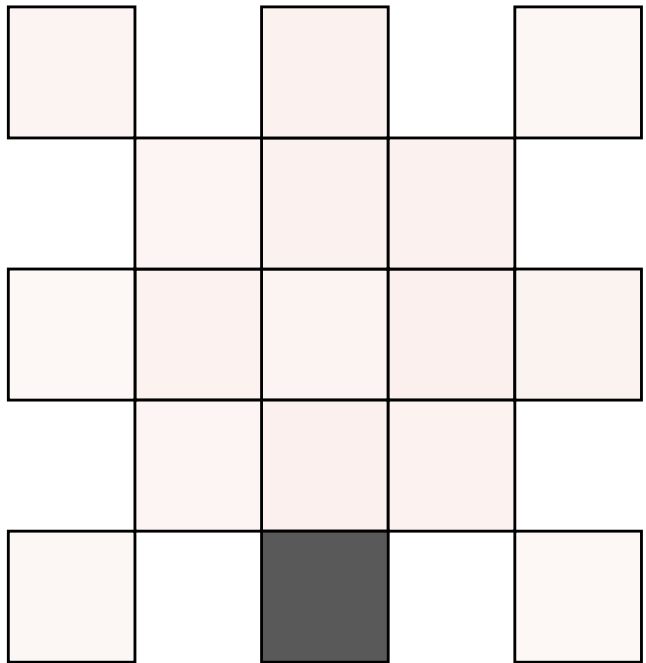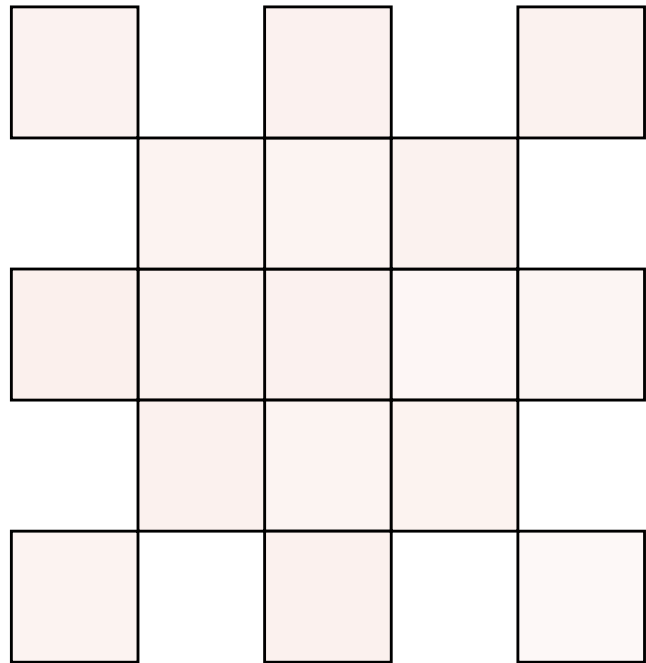

3-9195857-C-T

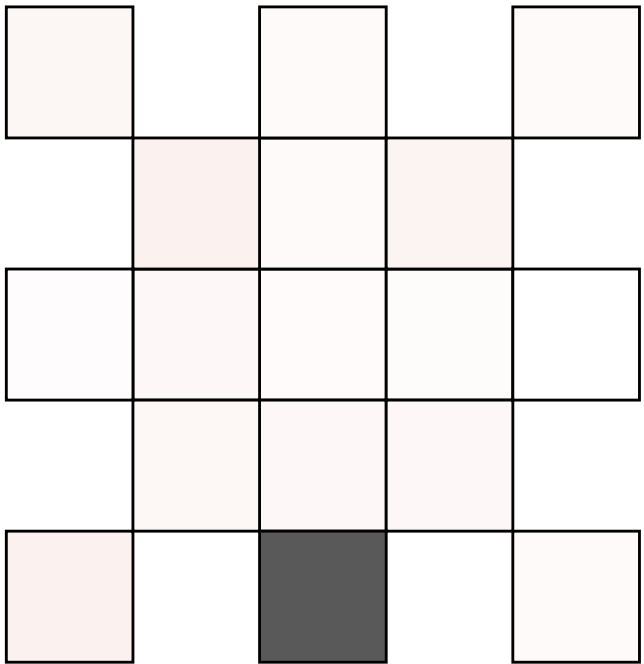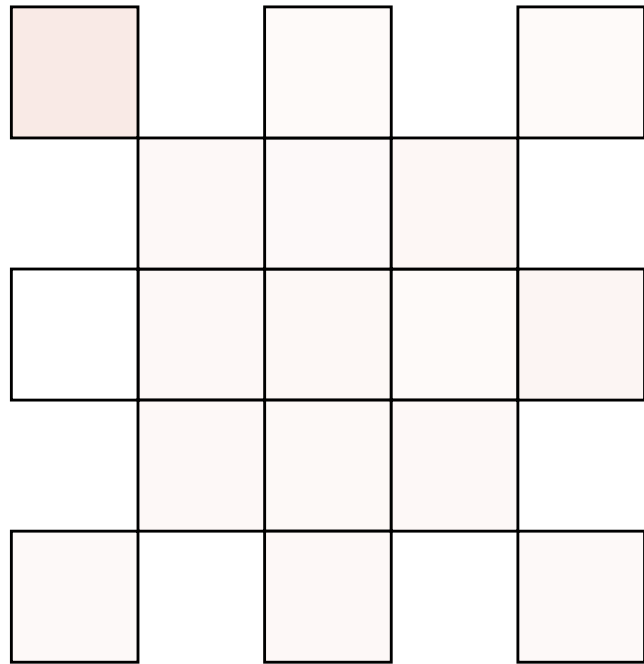

3-9291135-G-A

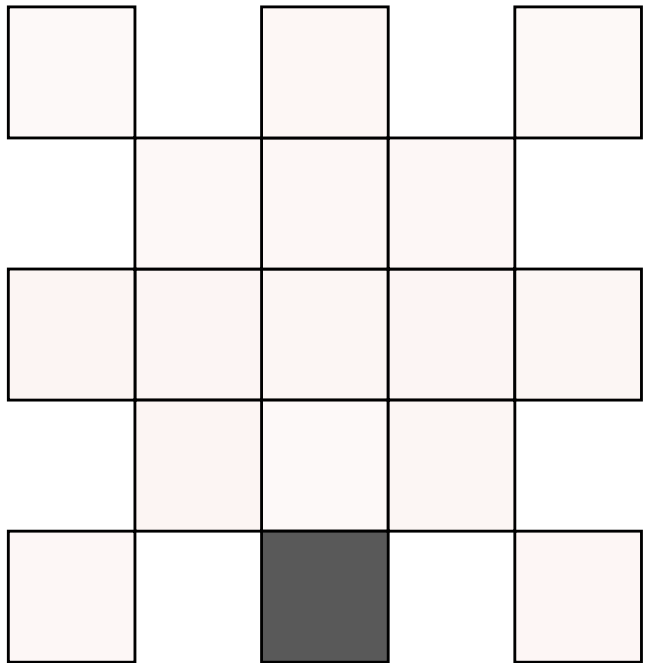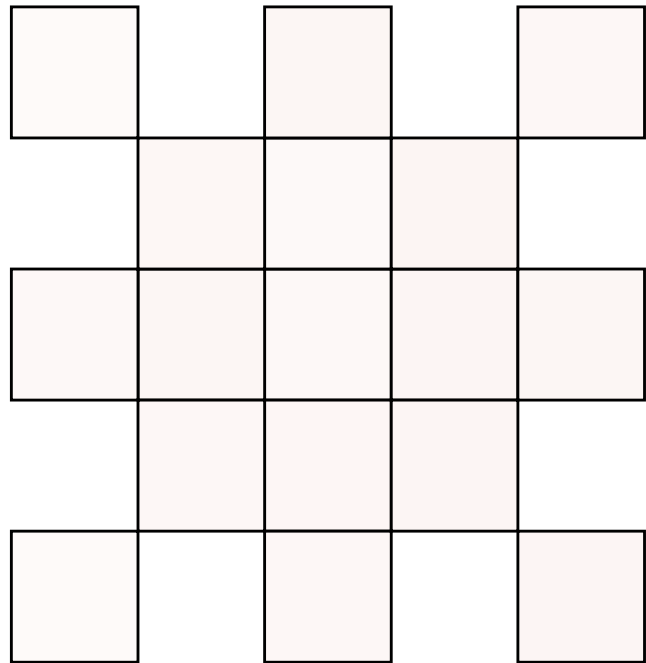



3-9859360-C-T

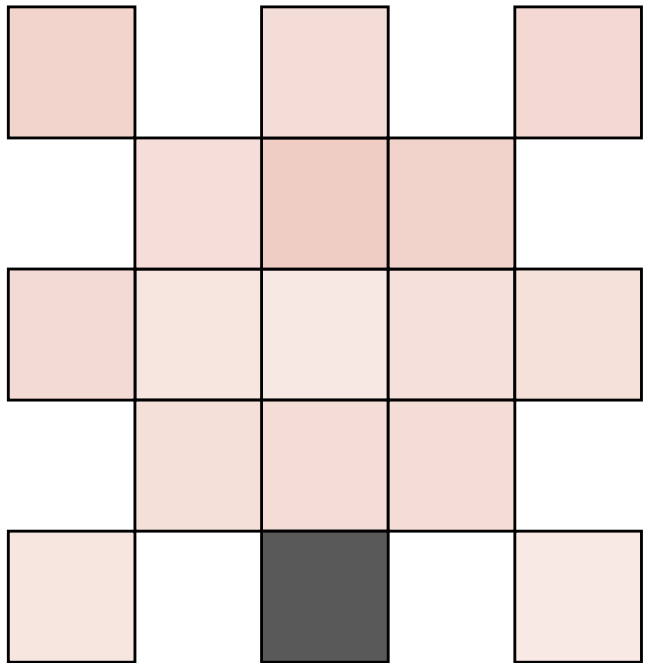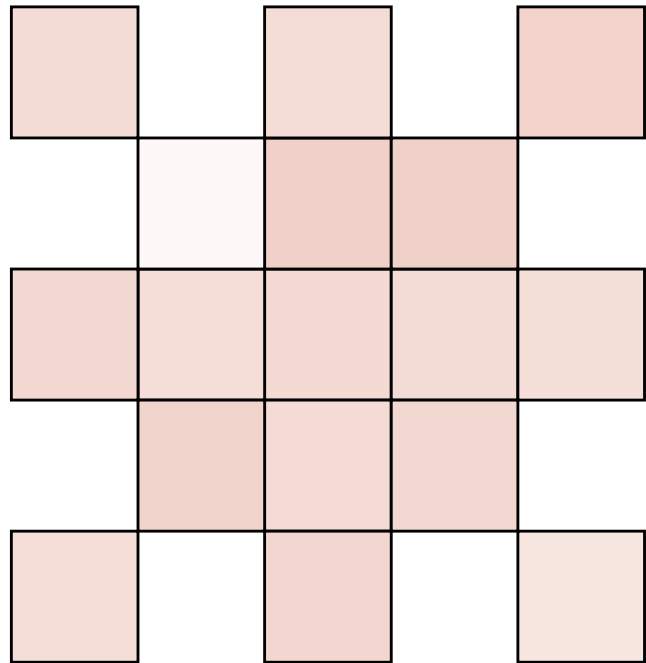

3-99869280-C-T

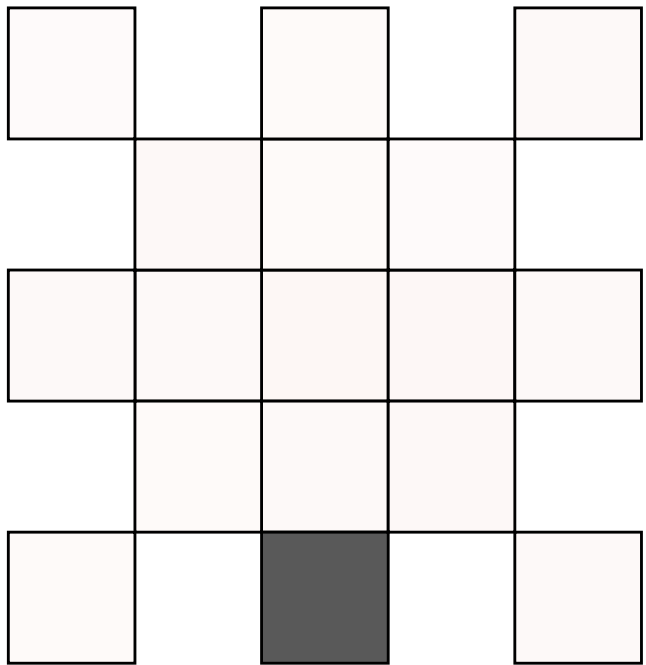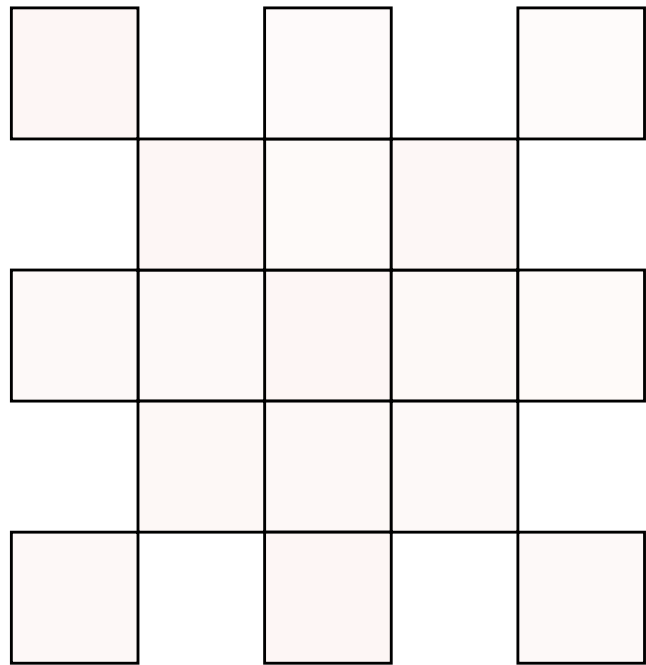

4-100236559-G-A

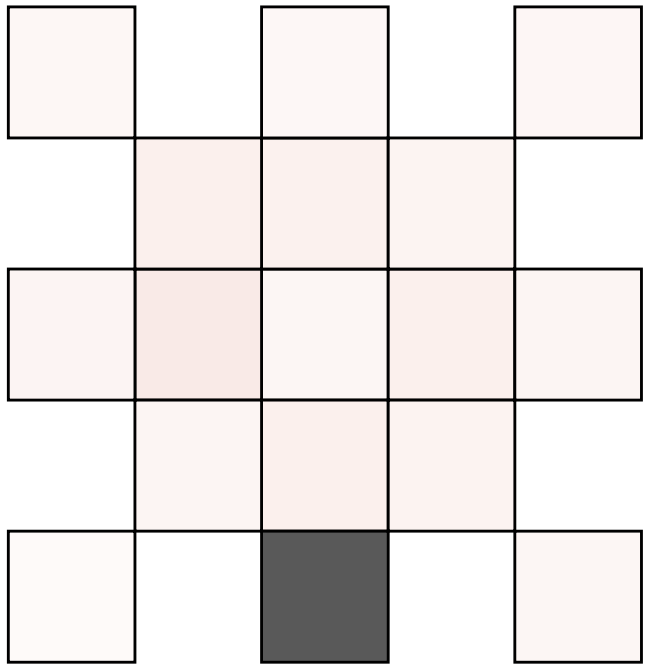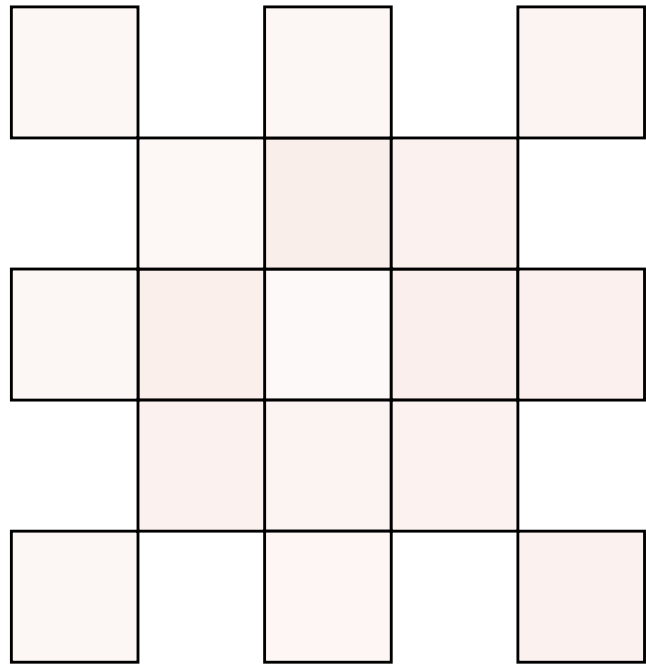

4-100484738-G-A

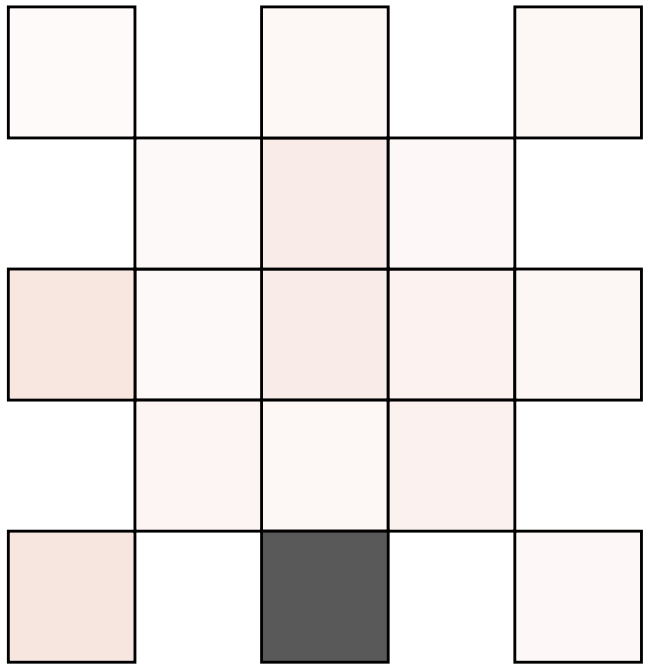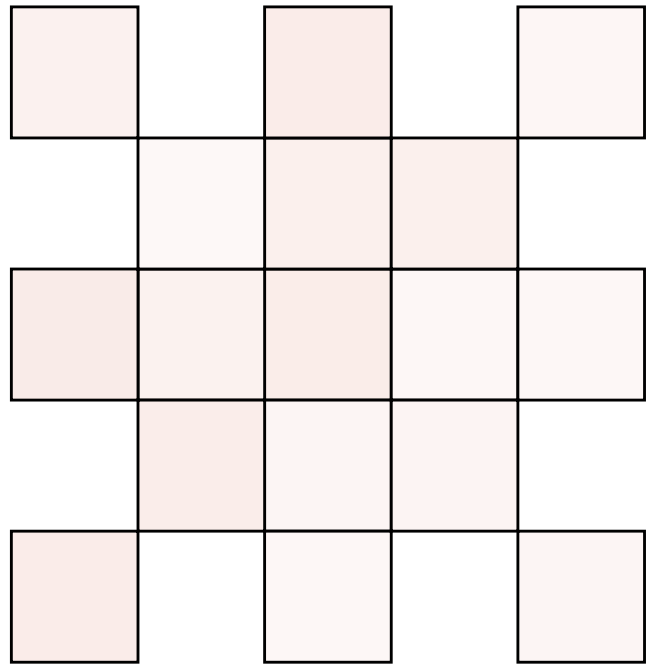

4-1028303-G-A

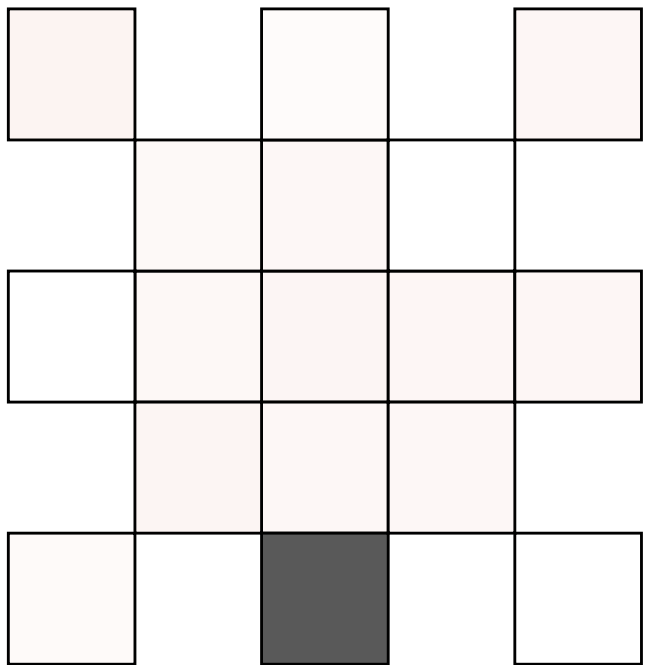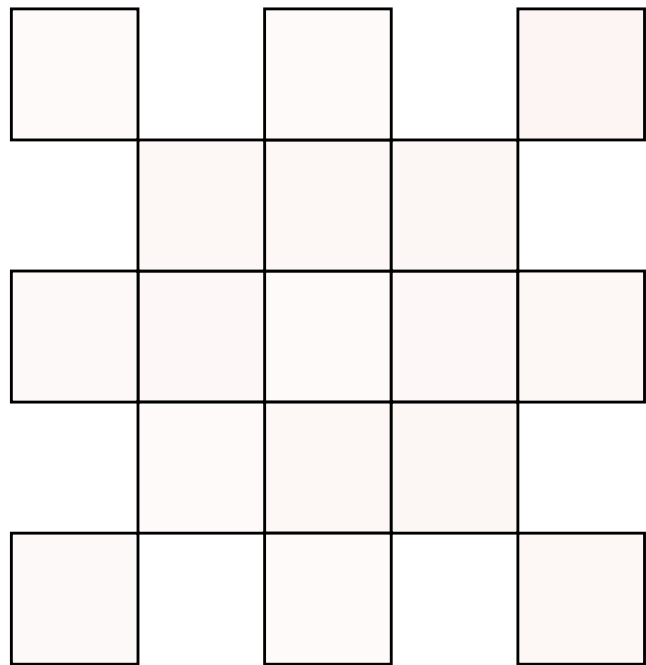

4-1028304-G-A

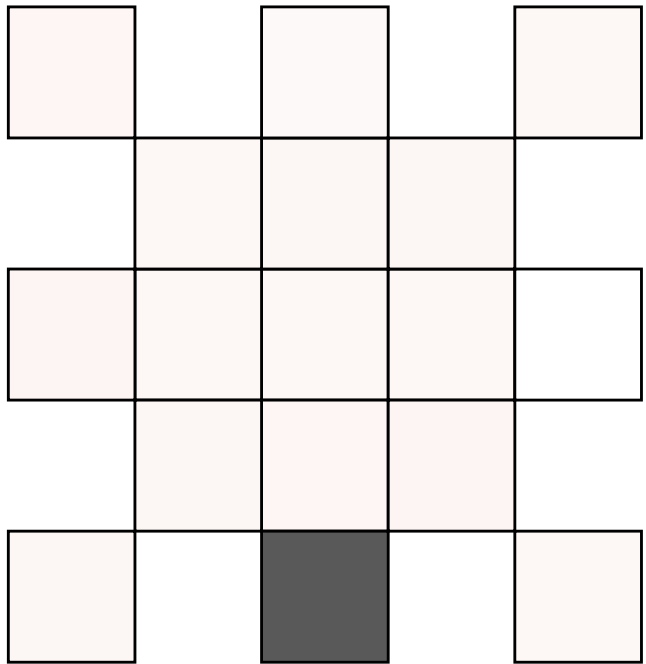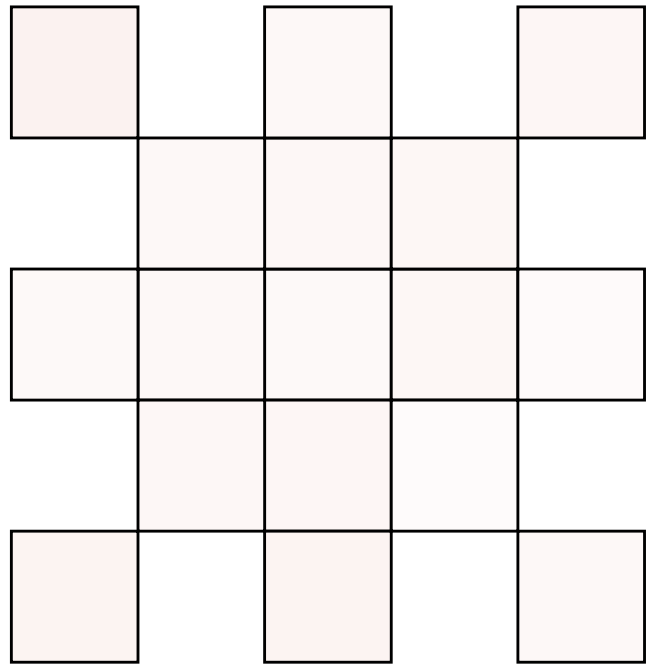

4-103751165-A-G

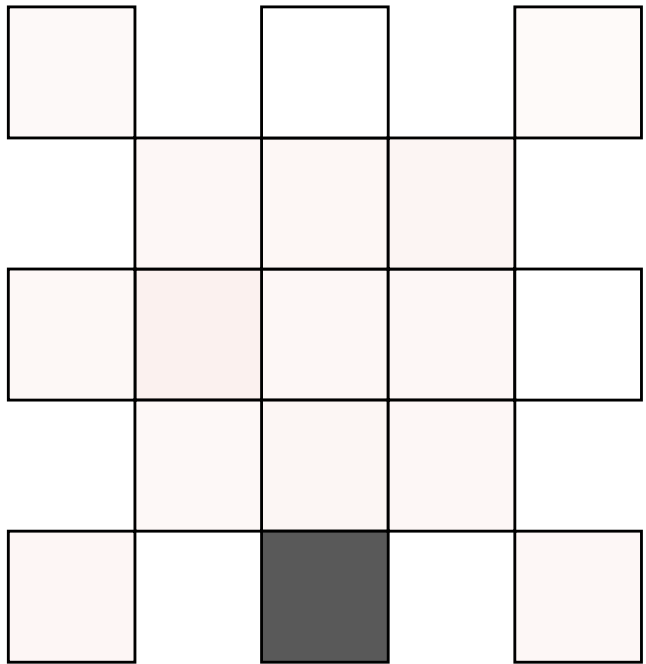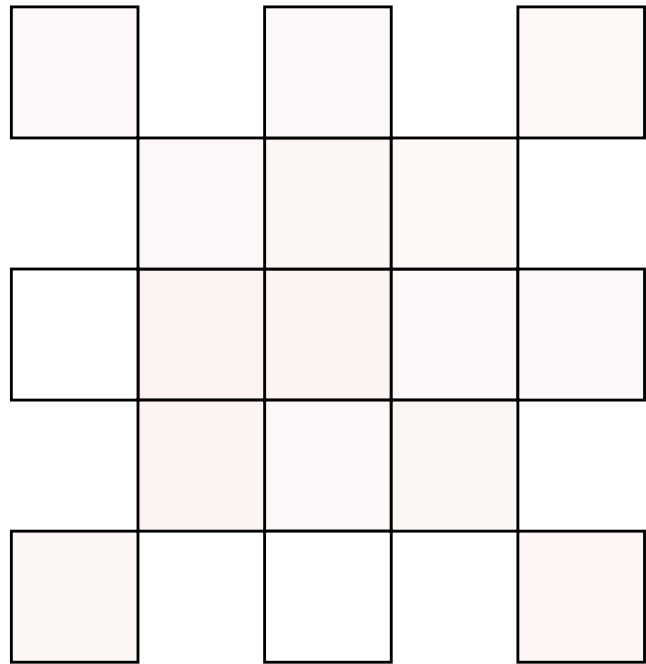

4-104214112-C-T

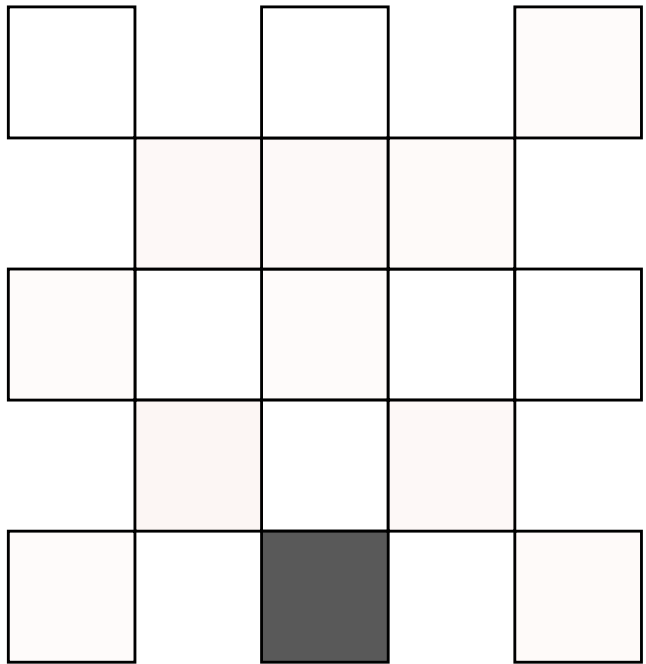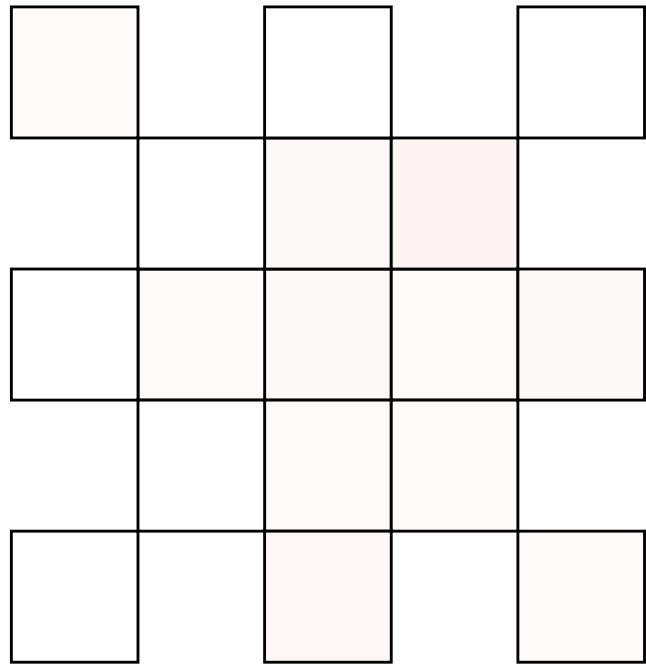



4-10646818-G-A

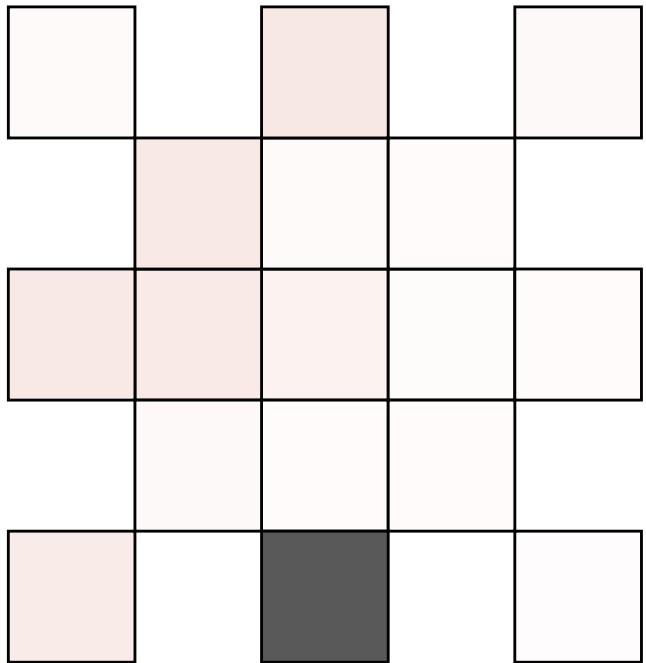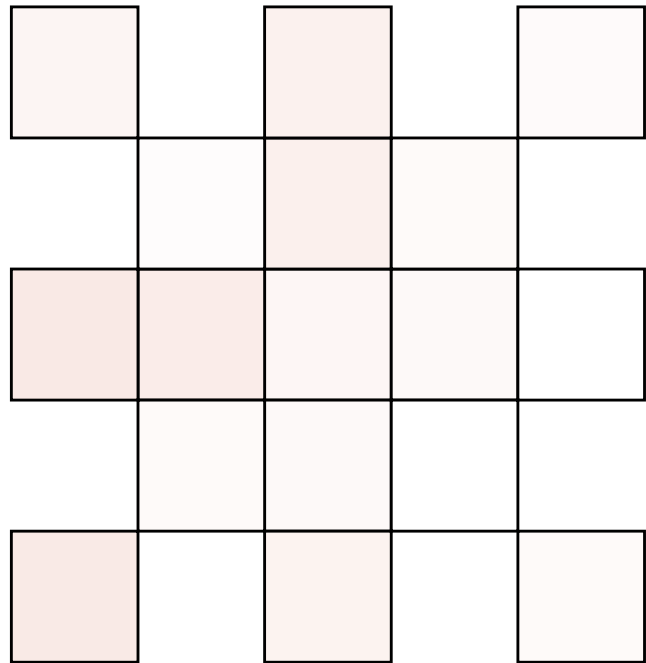

4-109178107-T-A

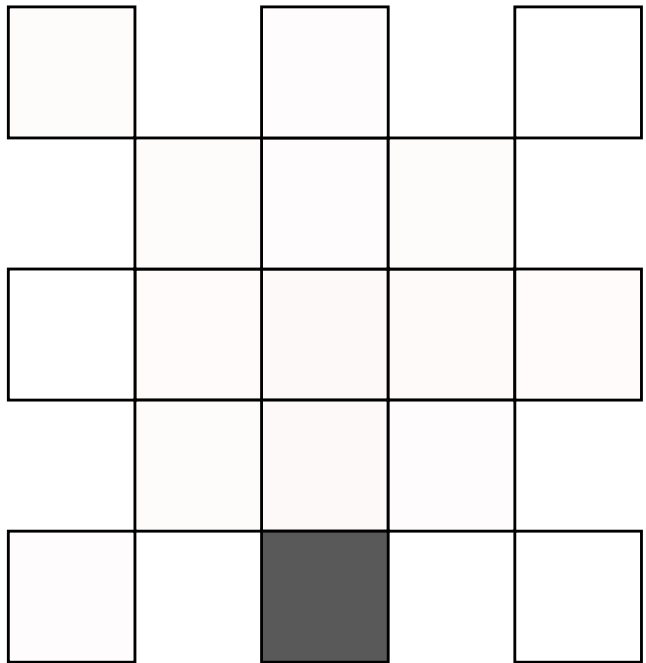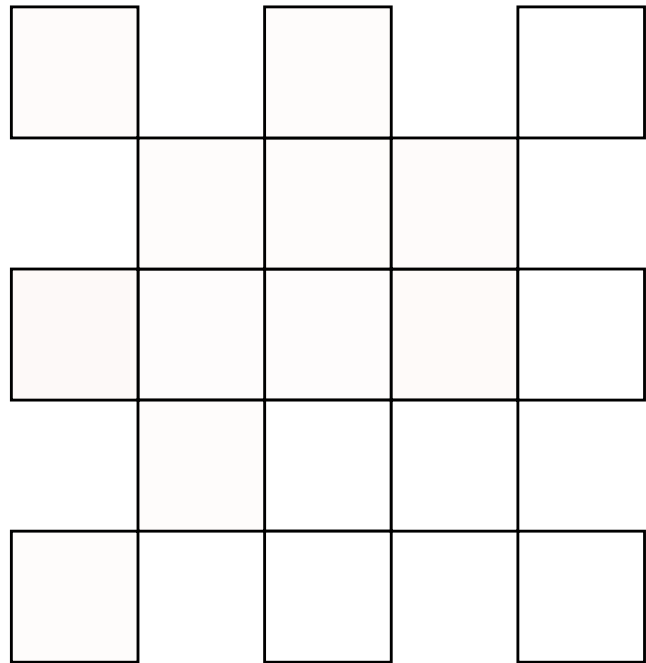

4-111676042-A-T

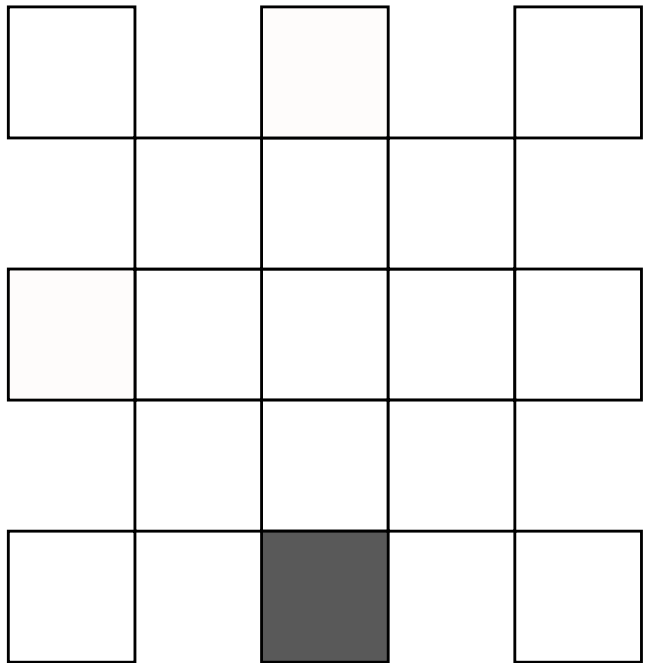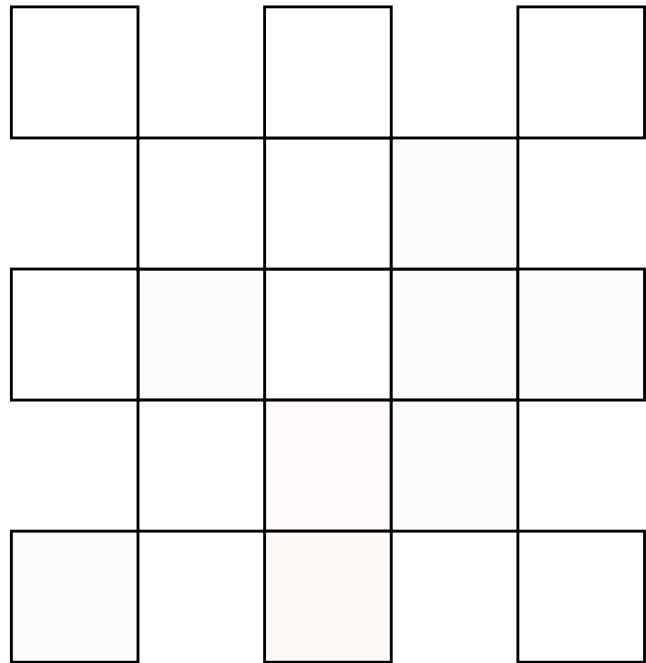

4-111915329-C-T

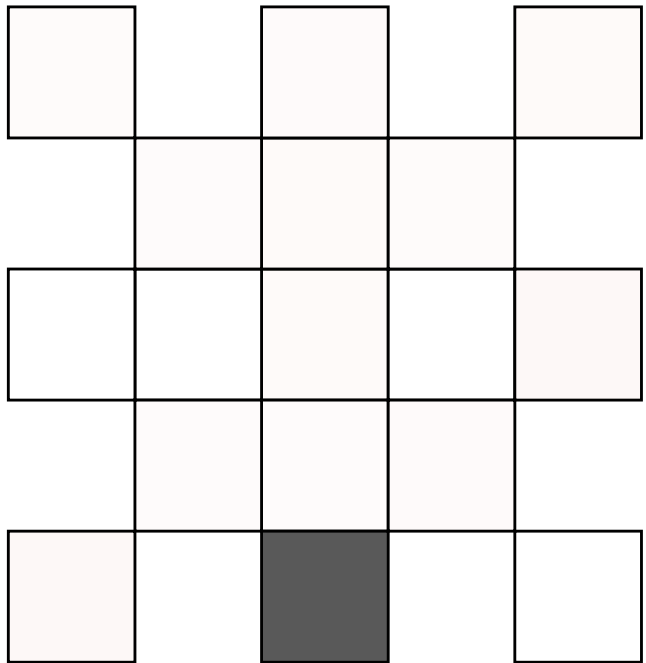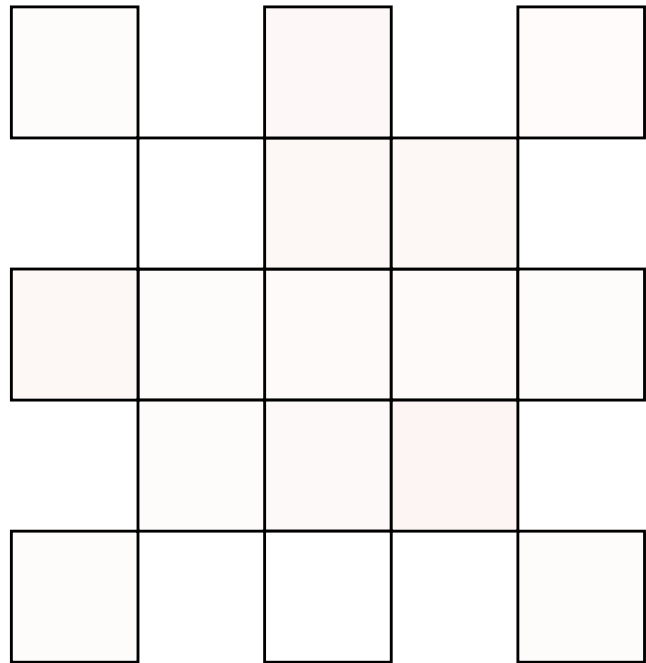

4-112309482-G-A

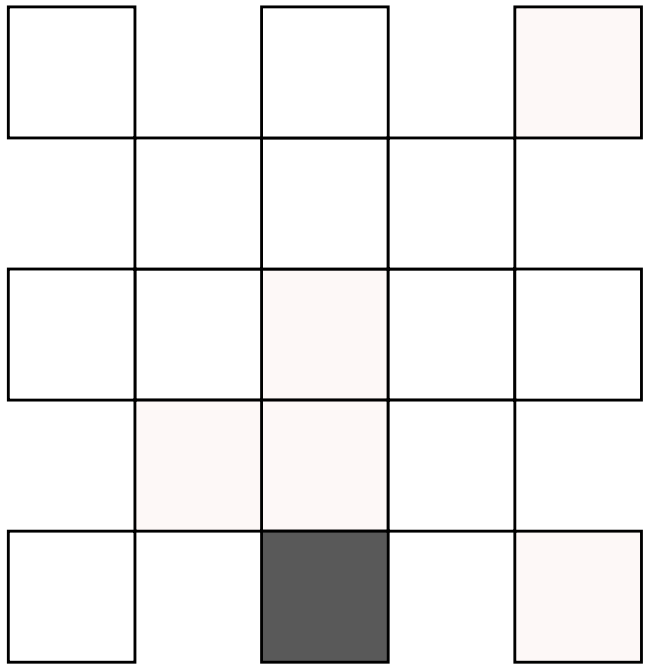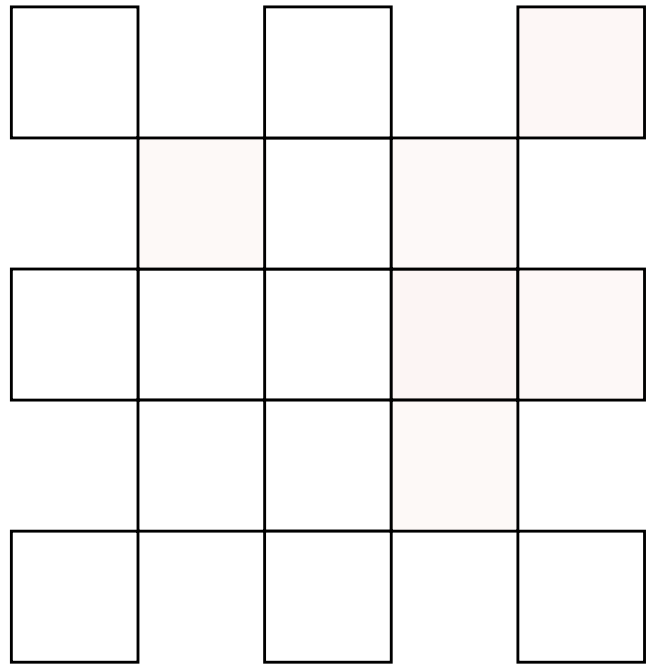

4-116228416-A-G

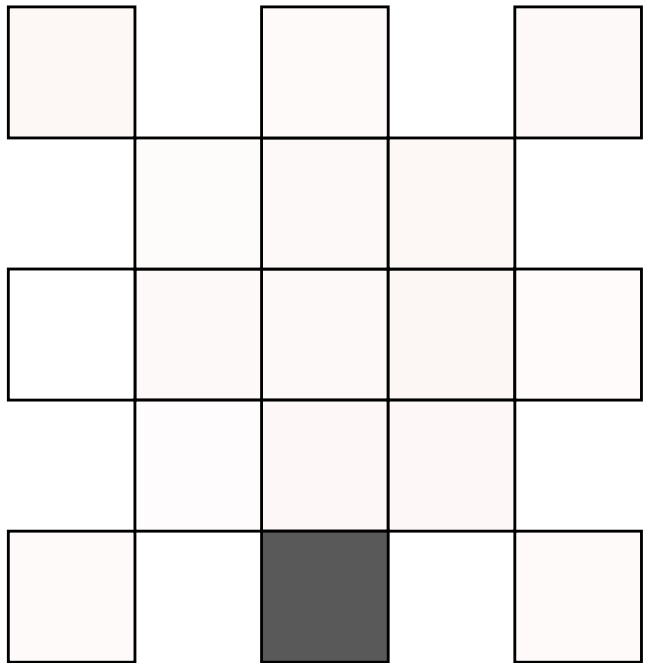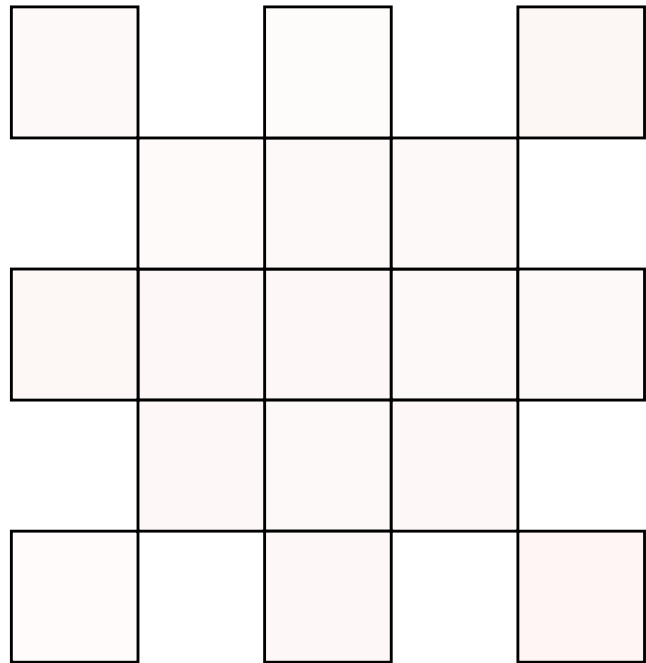

4-120426084-C-T

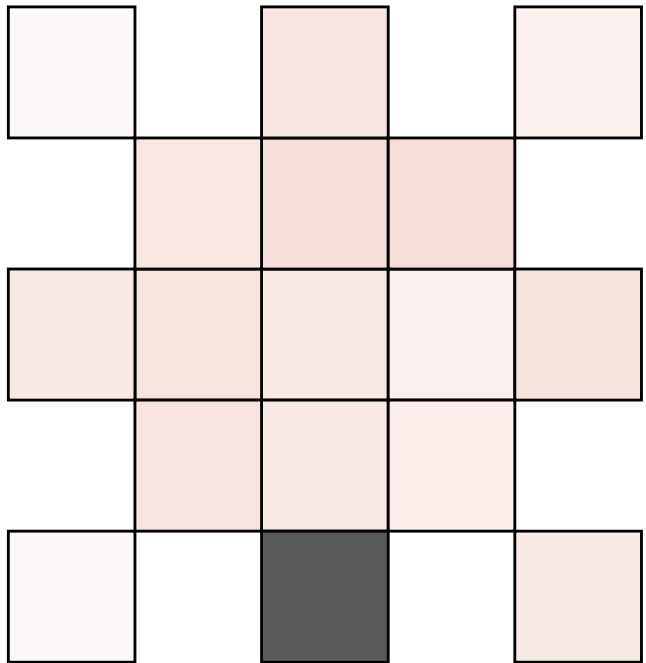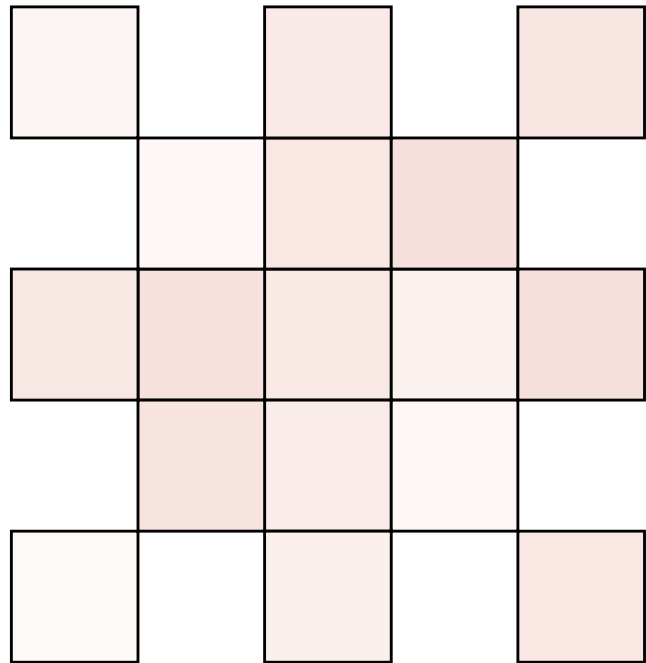

4-121359392-T-G

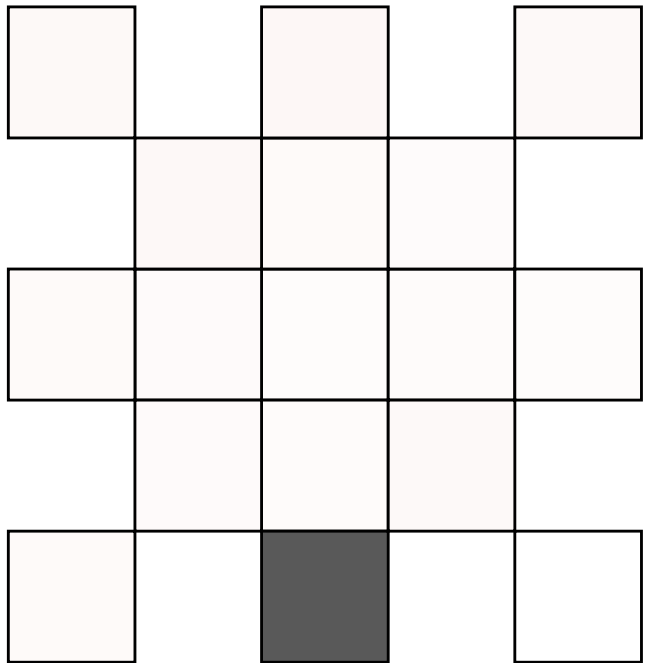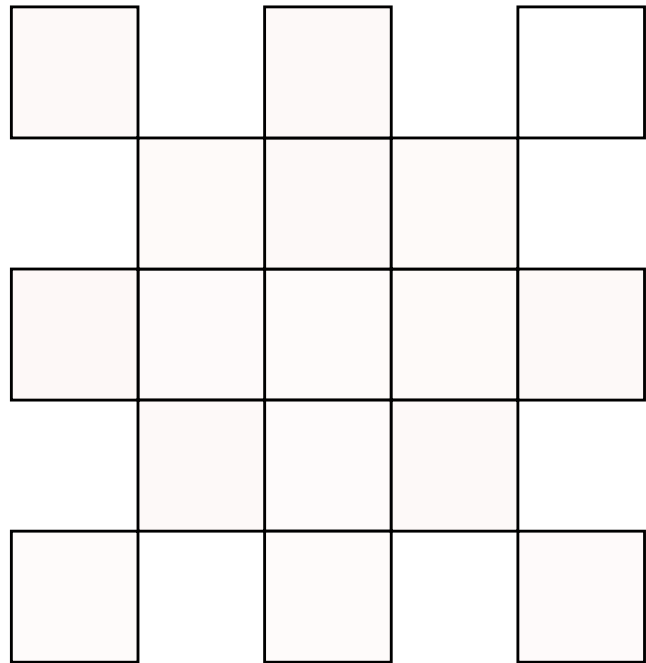



4-122936525-G-A

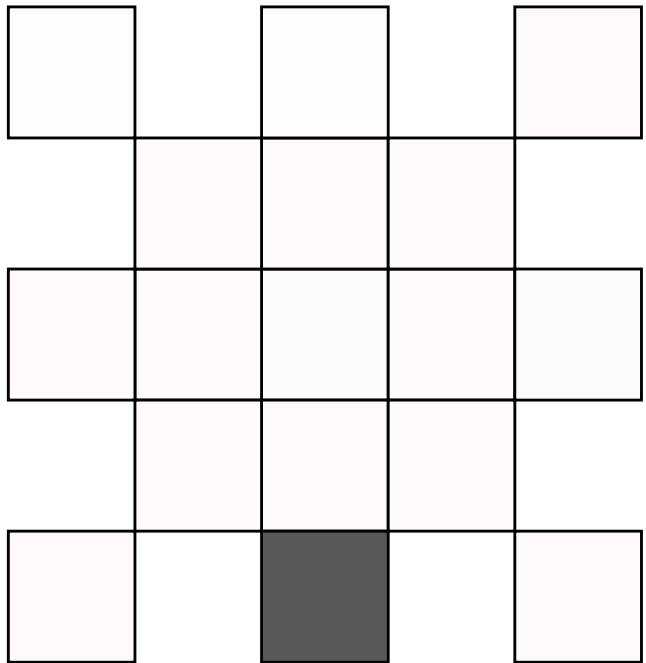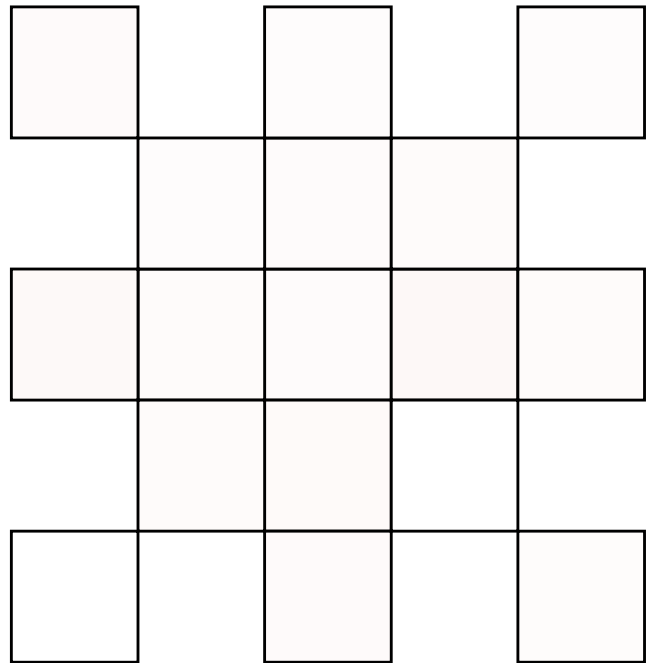

4-123000327-T-G

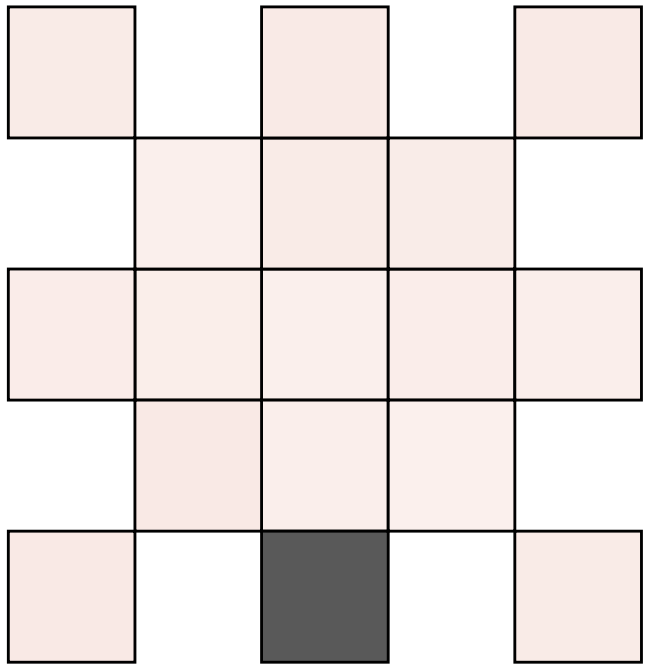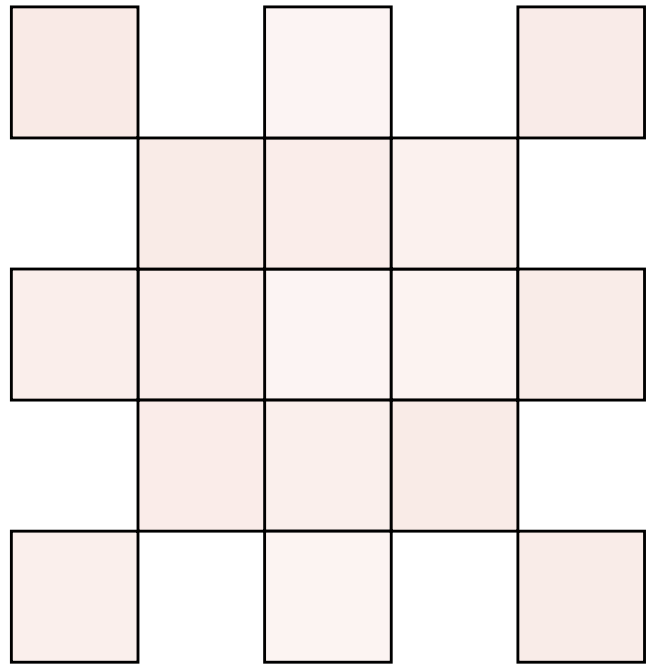

4-123000328-C-A

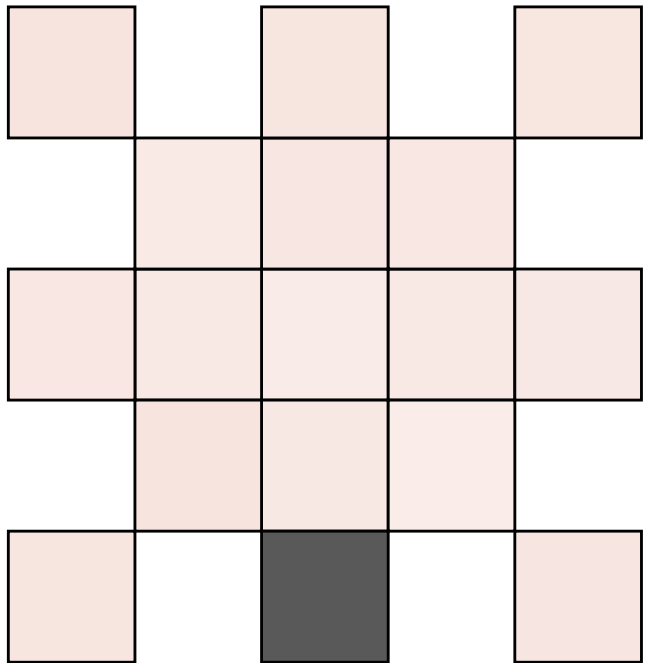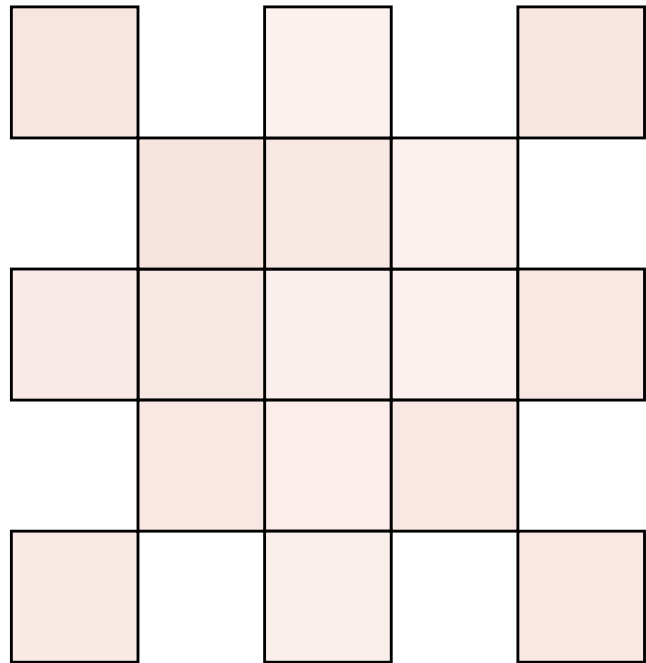

4-125806400-T-C

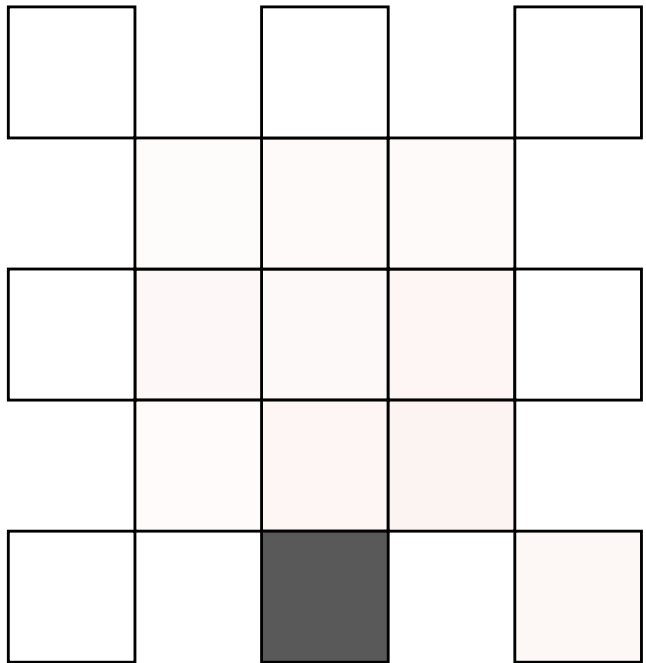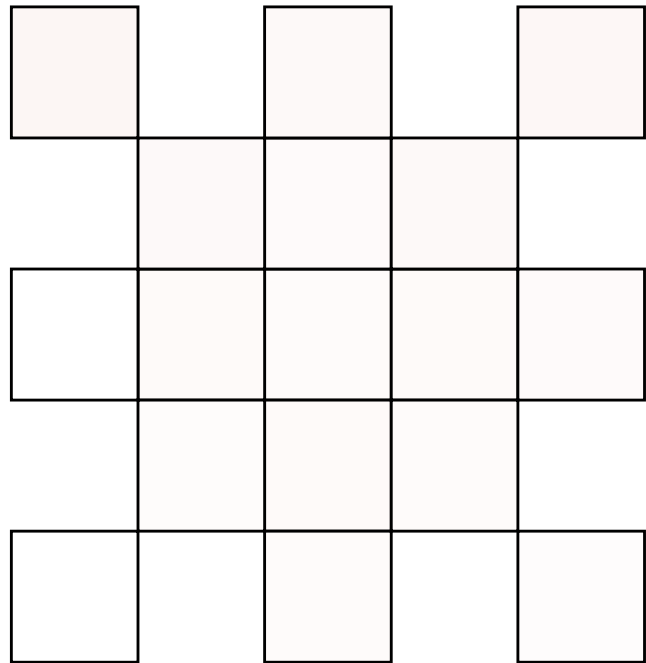

4-135038063-C-T

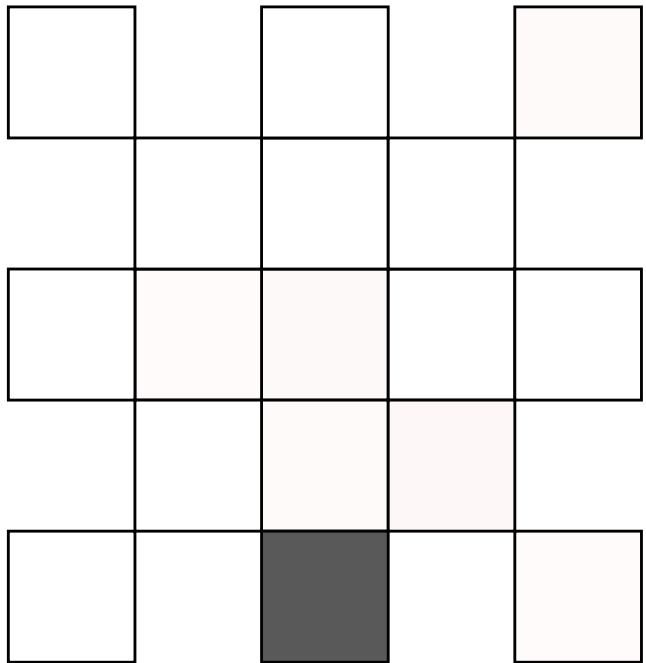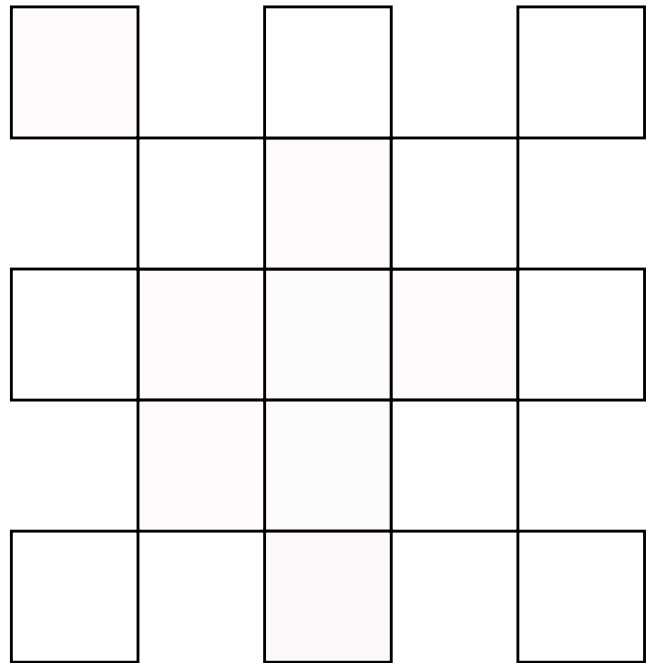

4-137937295-G-T

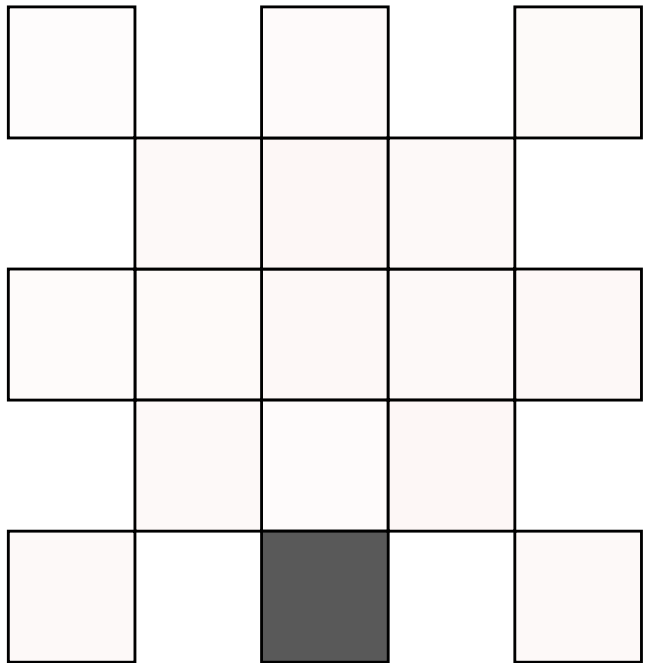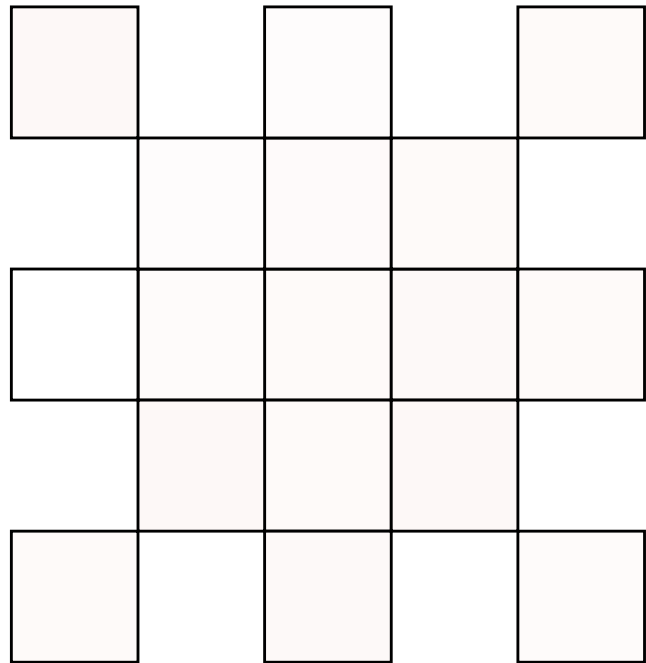

4-139482903-G-A

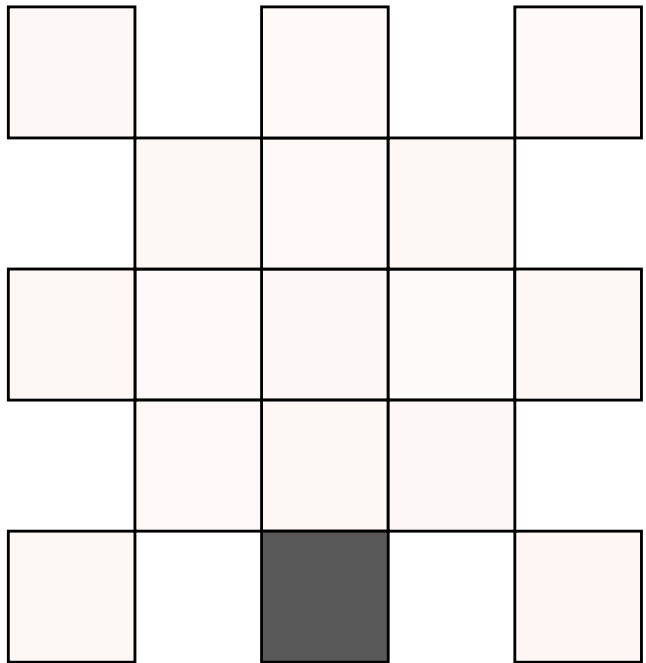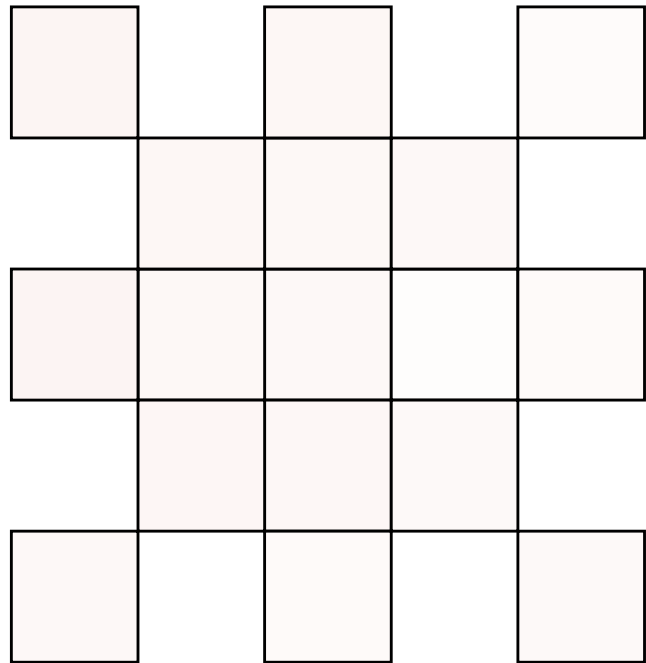

4-146067239-G-A

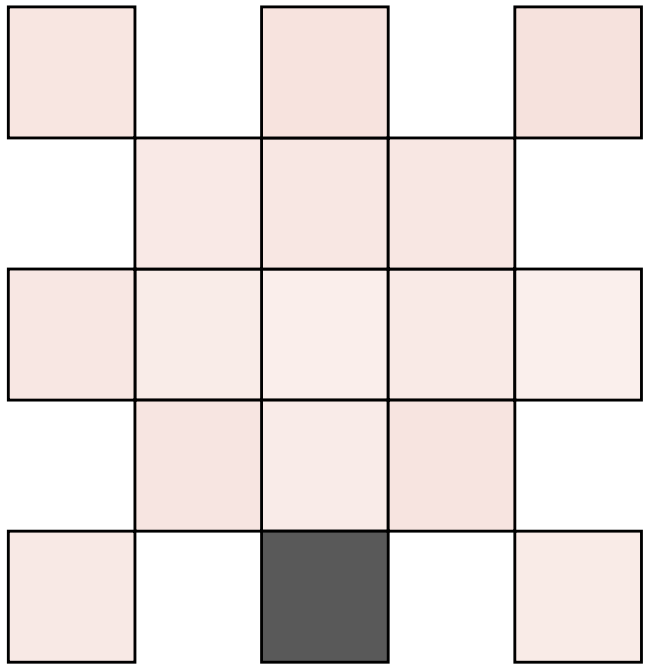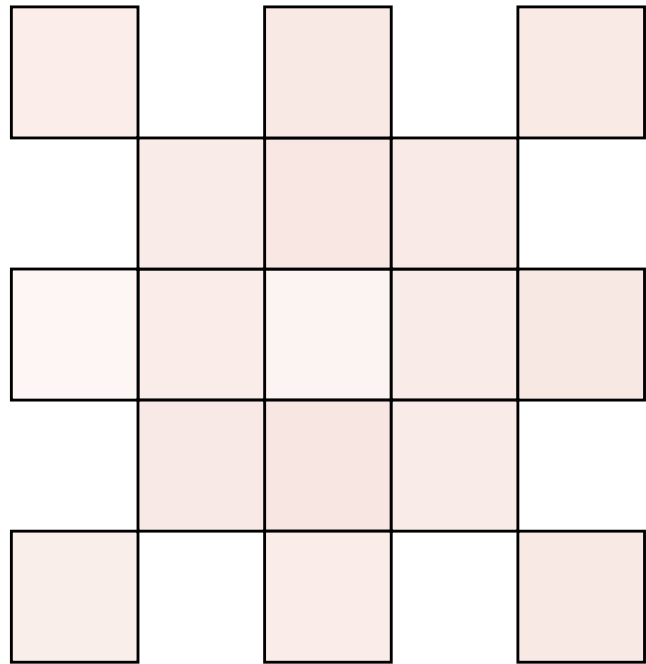



4-152509643-C-A

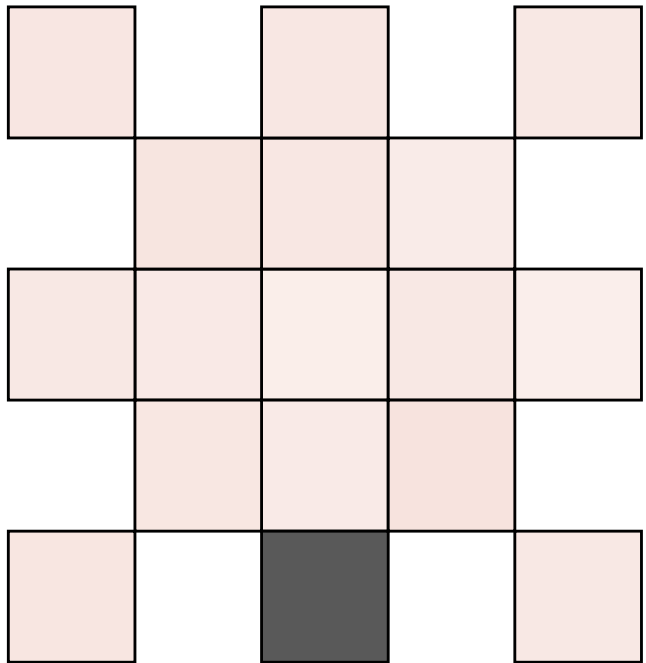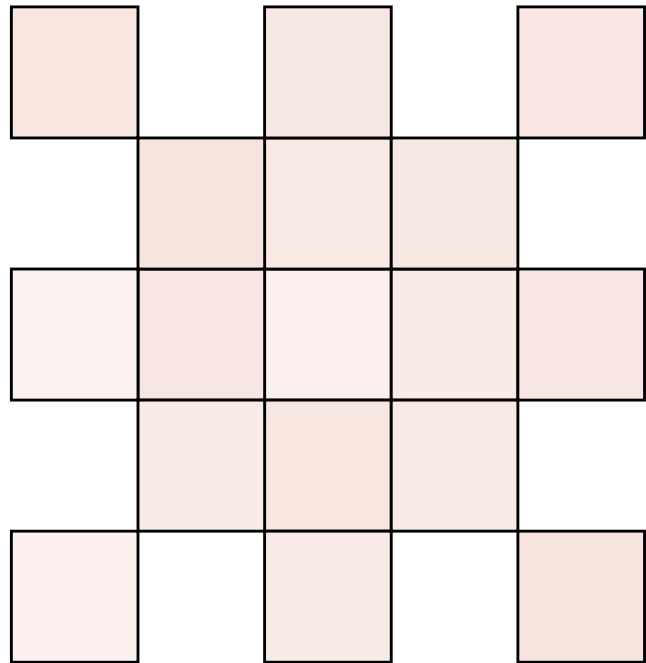

4-153029643-C-T

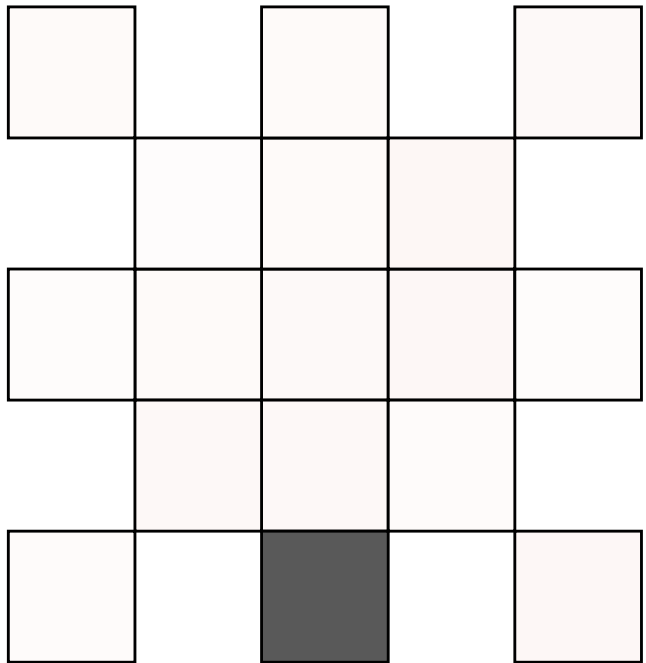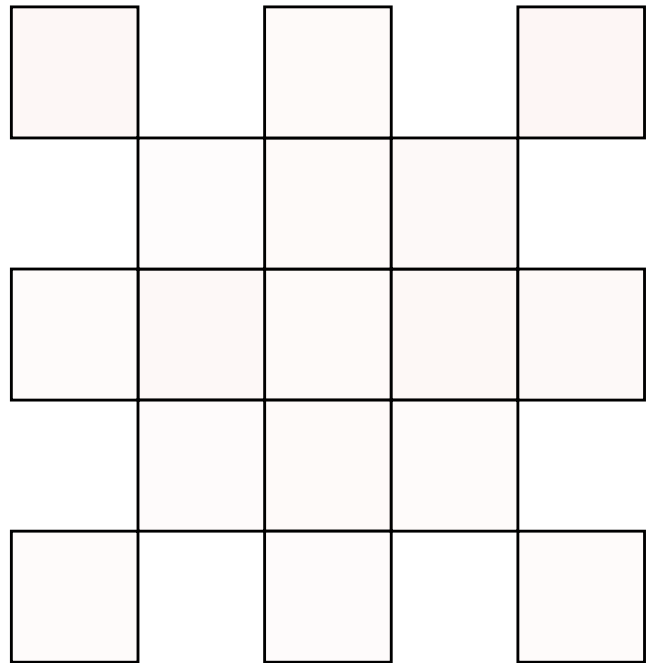

4-155190936-C-T

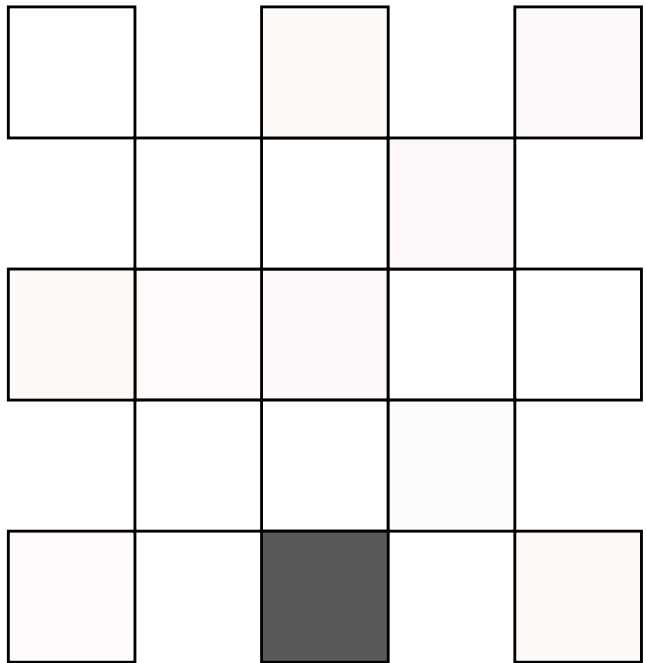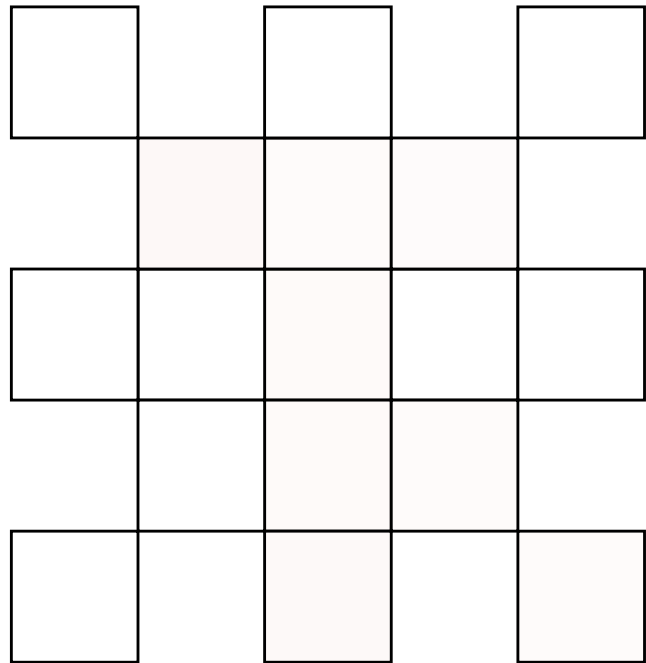

4-155889870-C-T

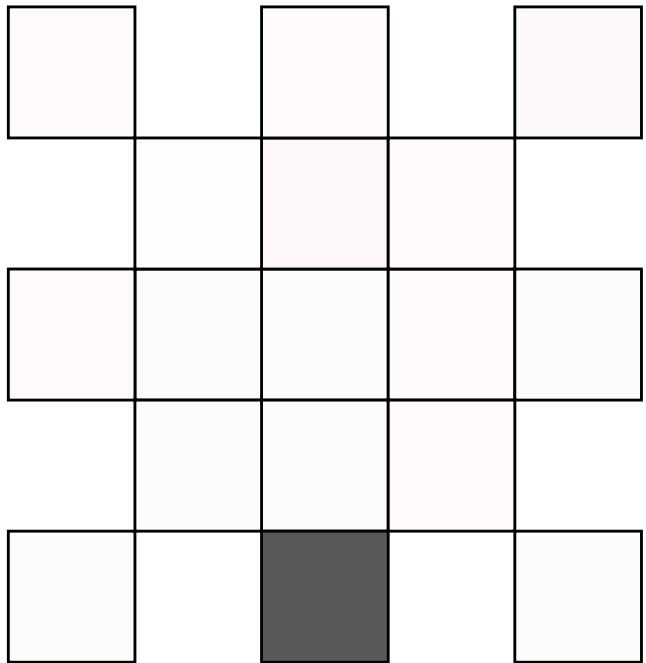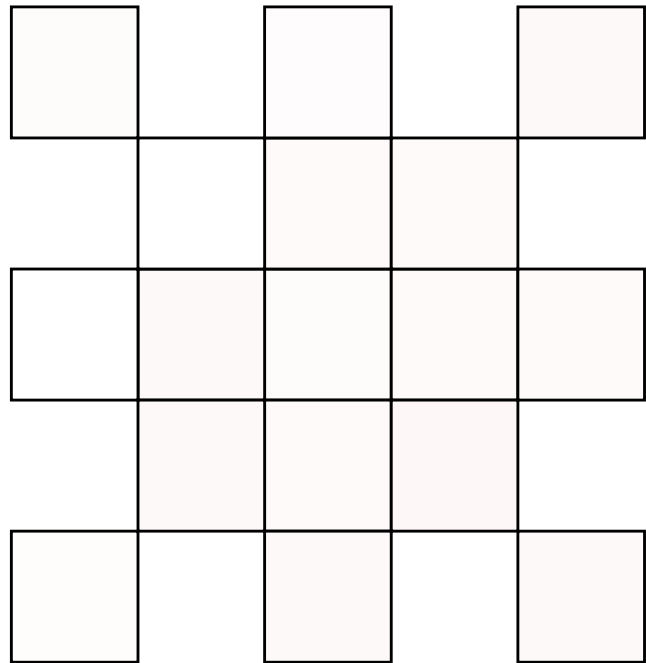

4-155904014-T-G

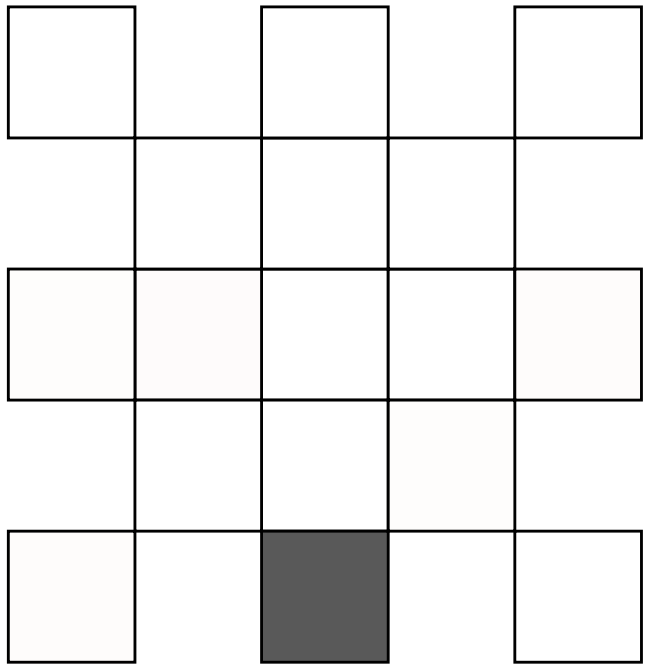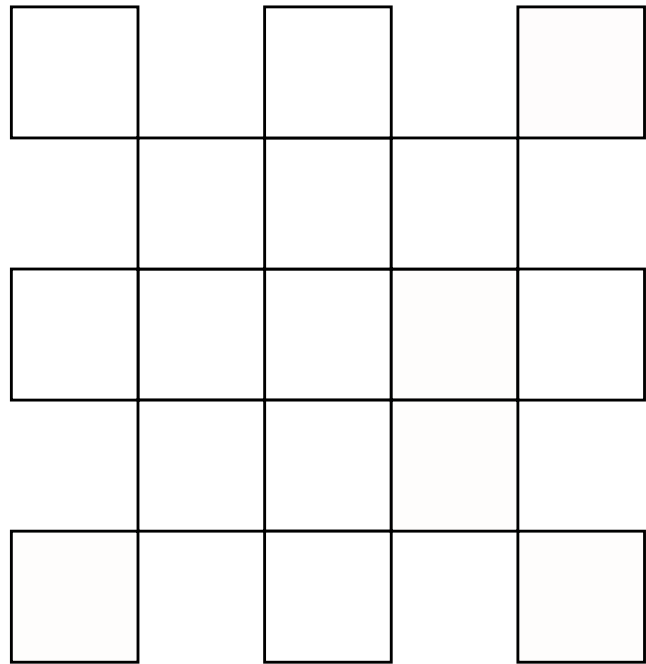

4-16592565-A-G

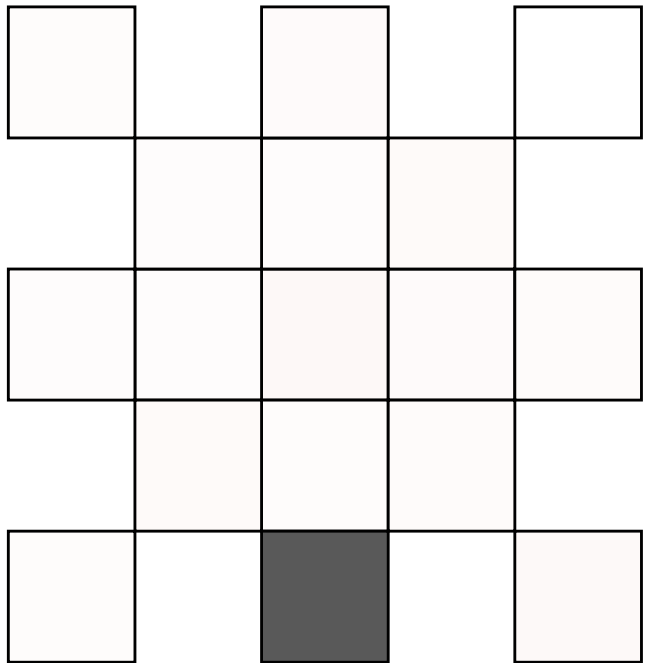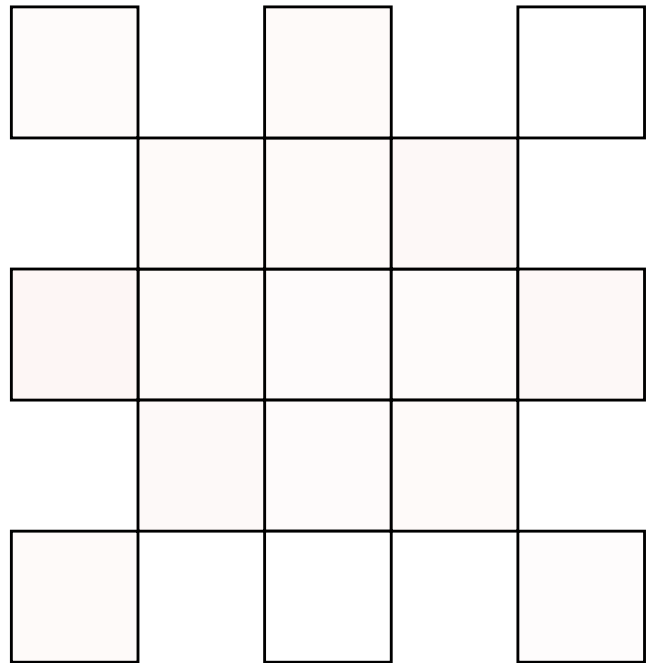

4-168050168-C-A

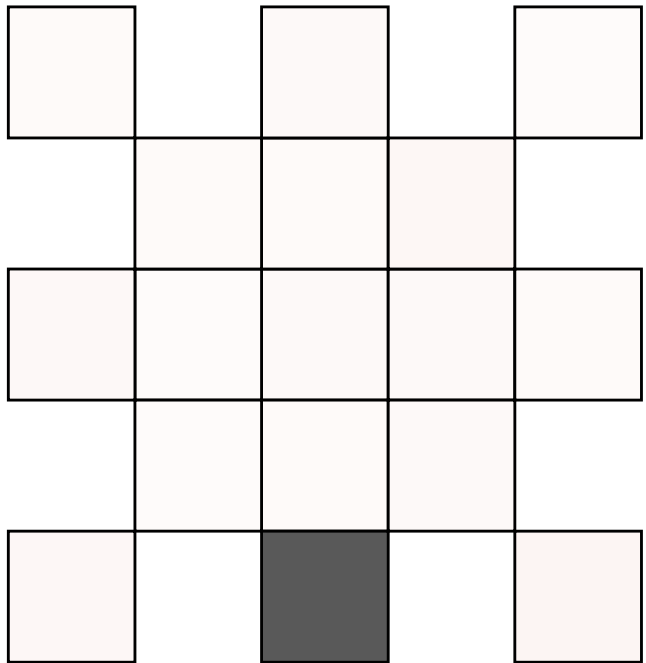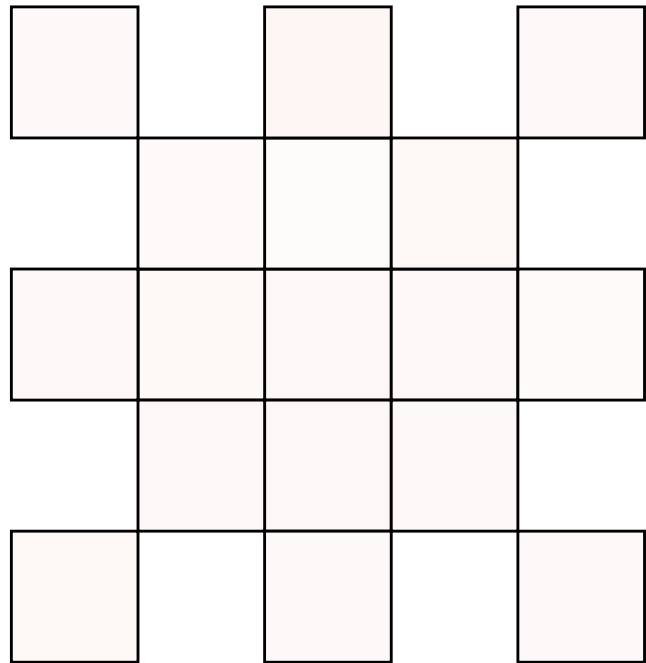

4-183244212-C-T

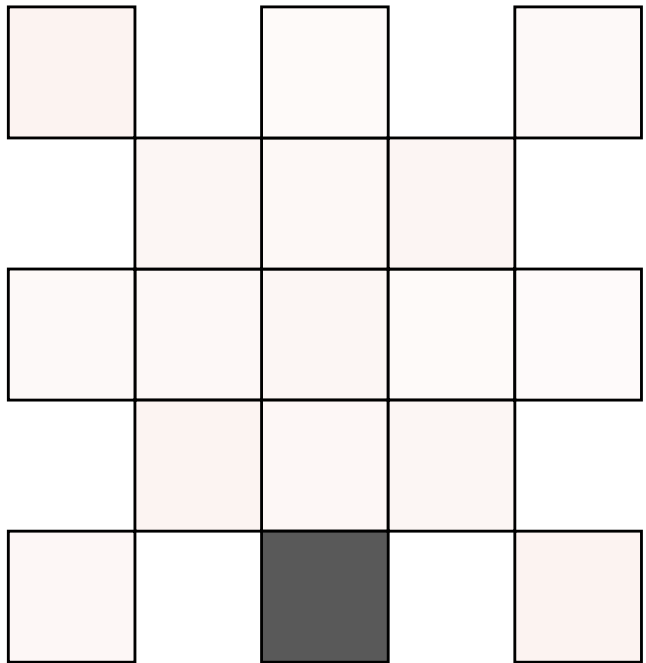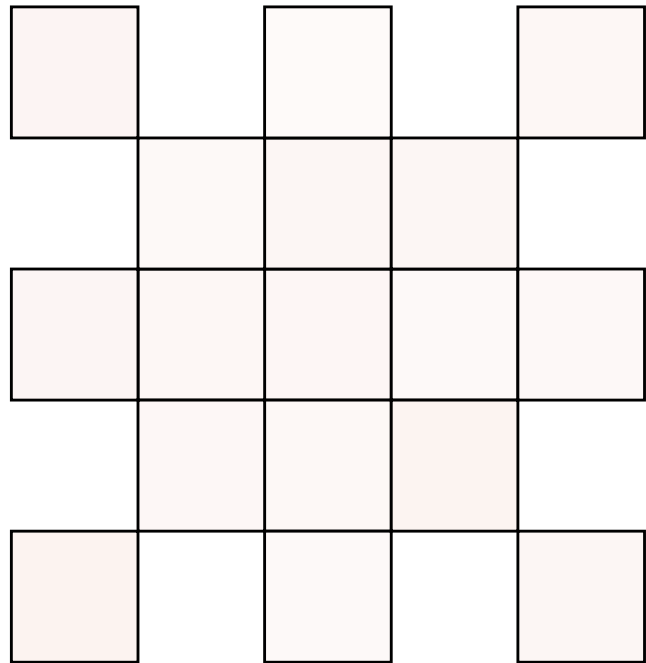



4-187491429-G-A

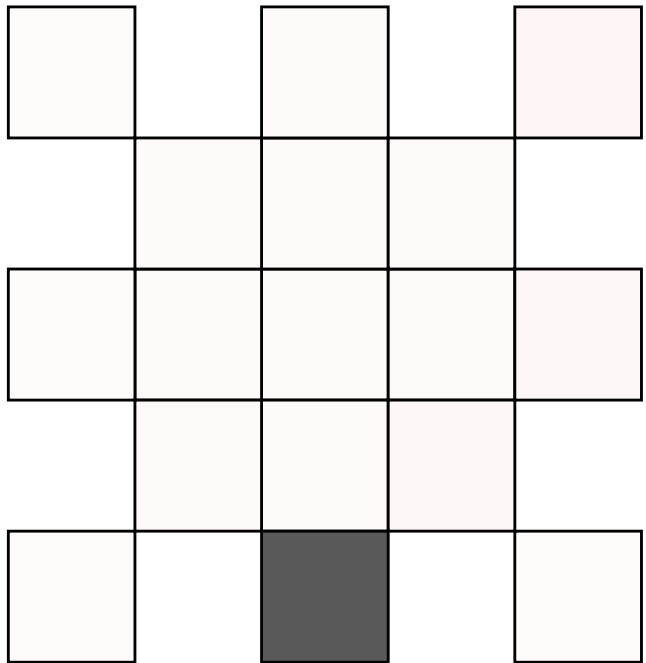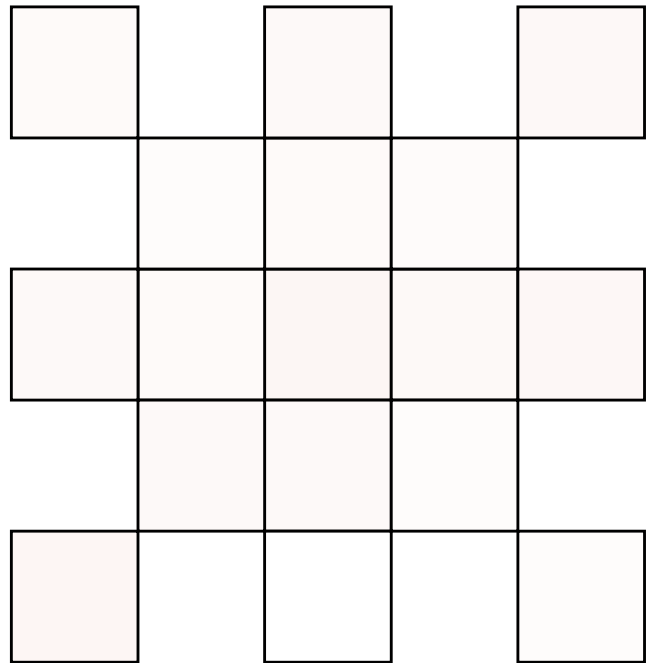

4-187539951-G-A

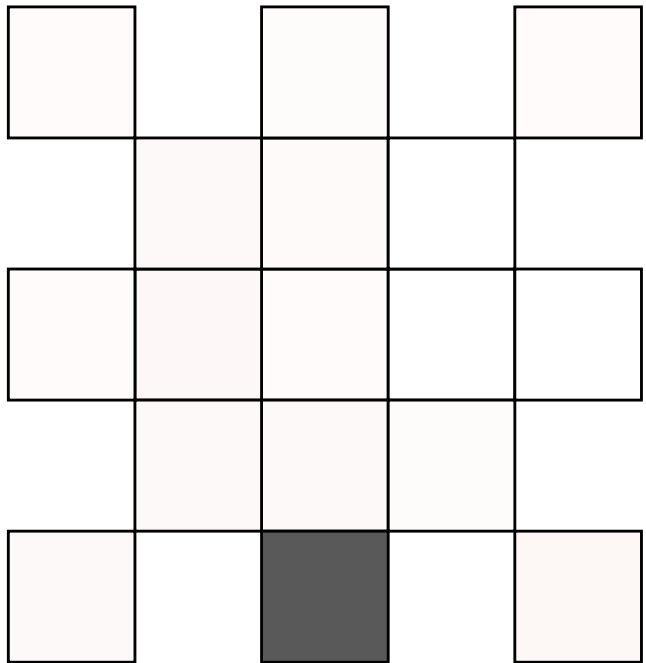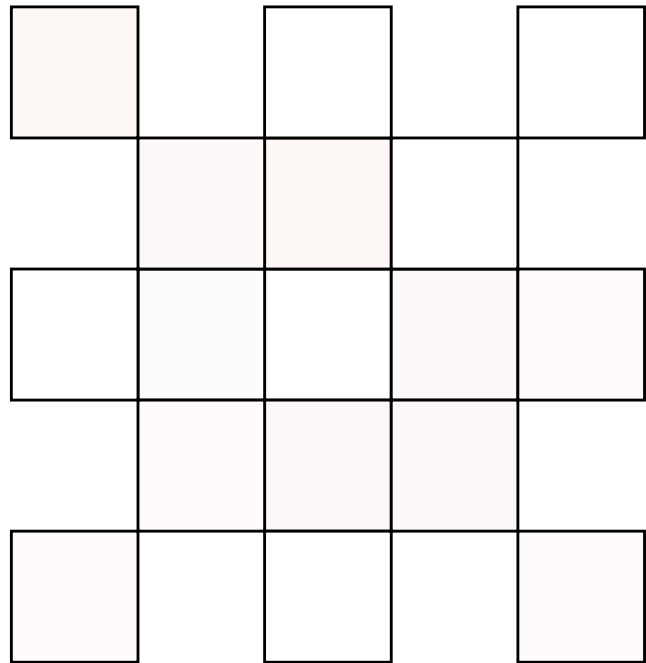

4-188115218-G-T

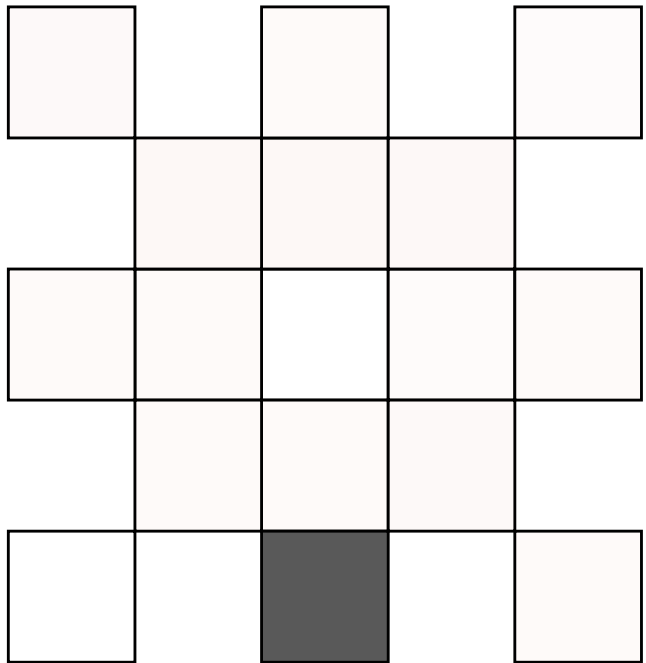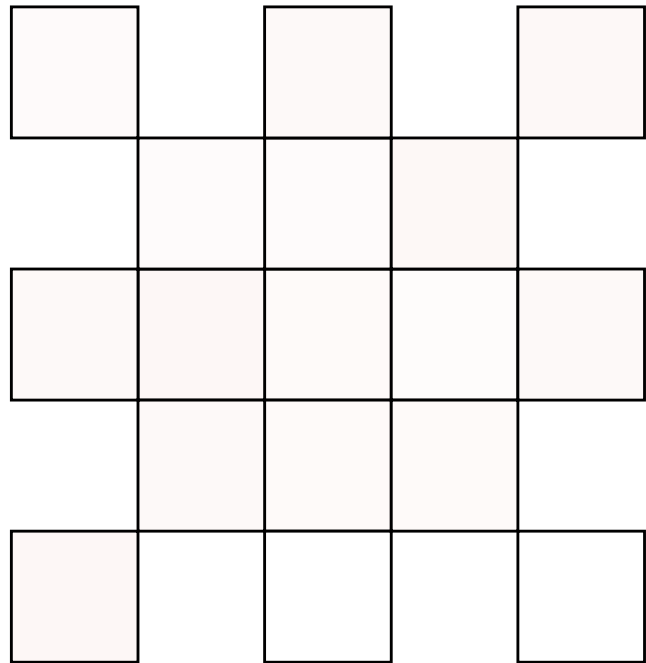

4-21301357-T-G

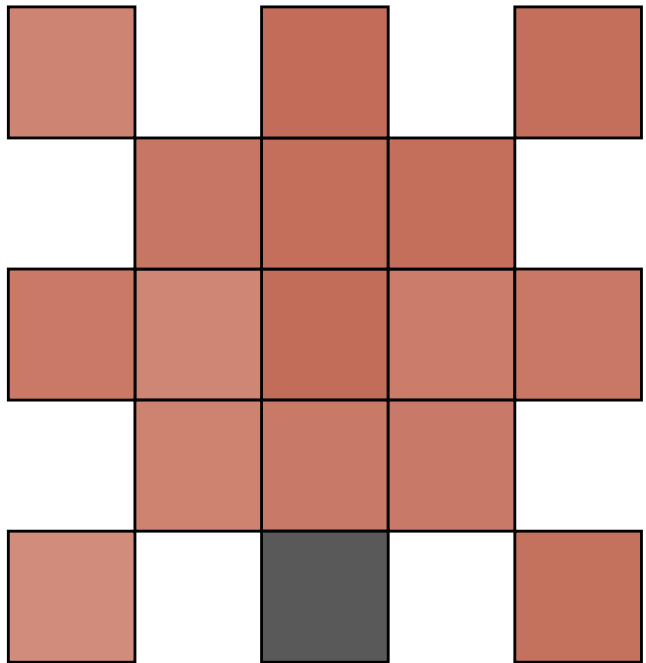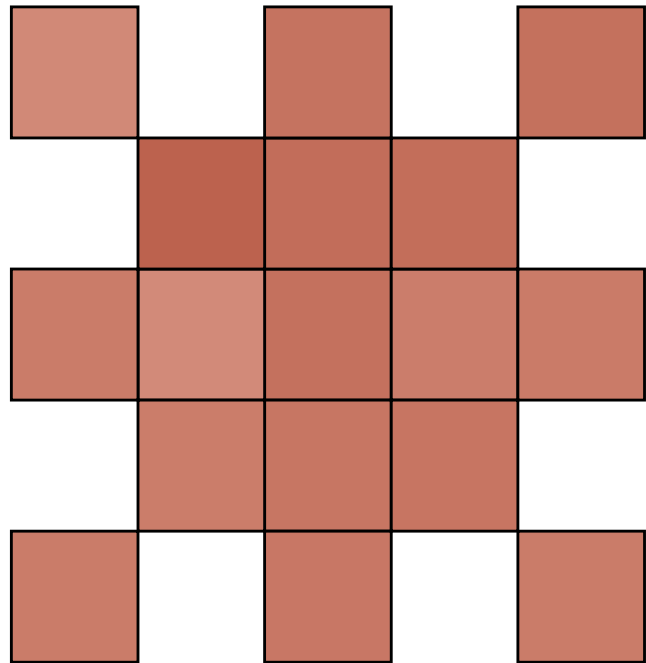

4-22428363-C-T

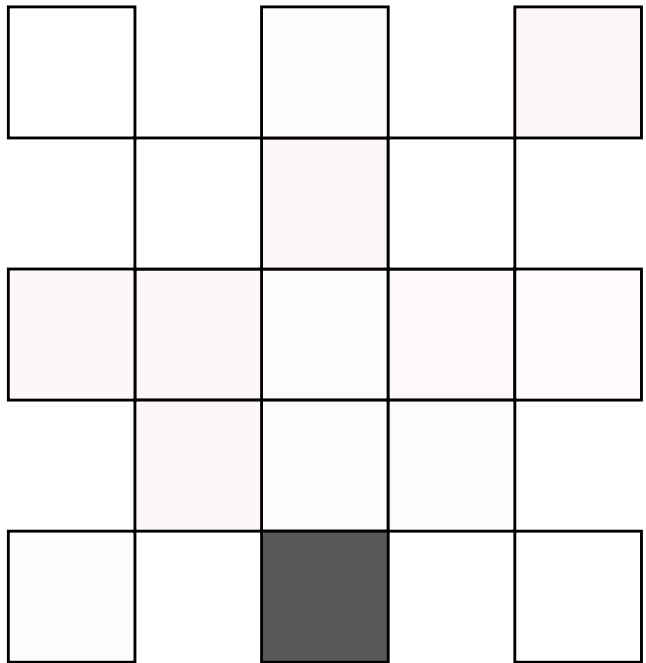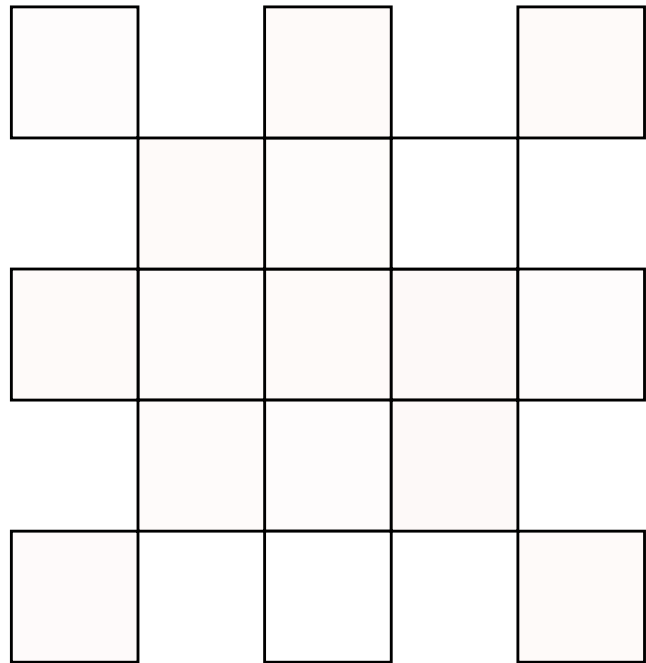

4-23552226-G-A

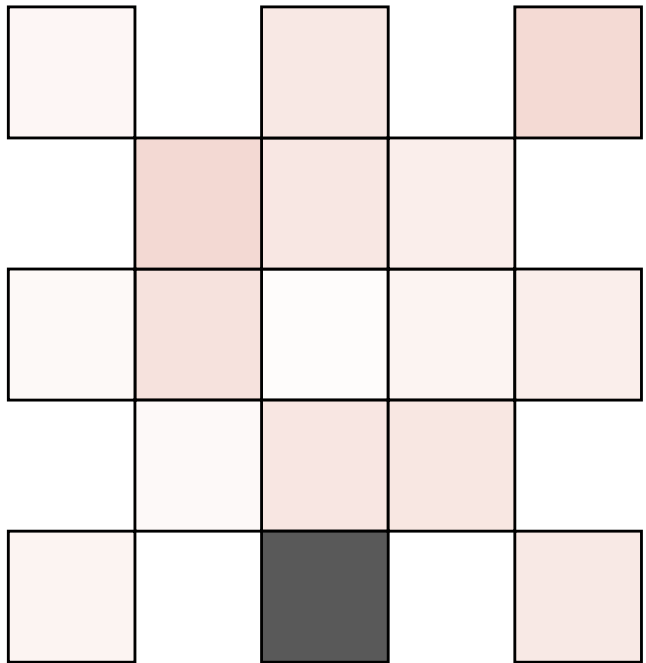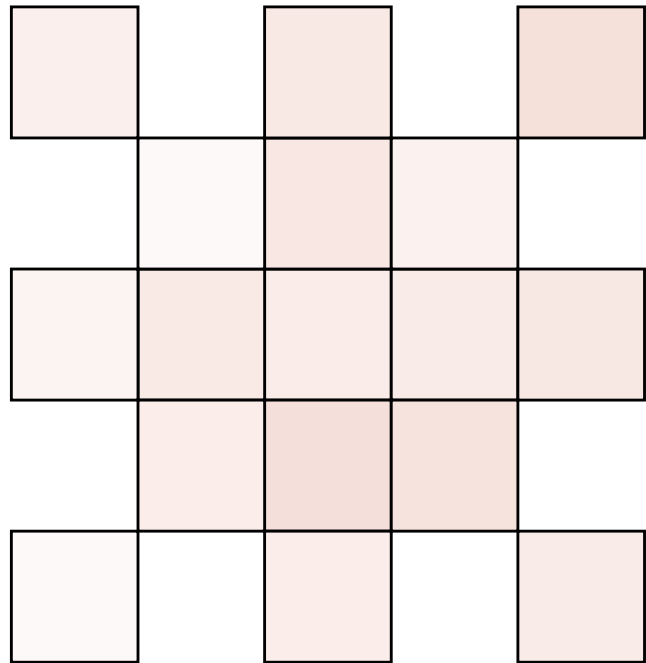

4-25107945-C-T

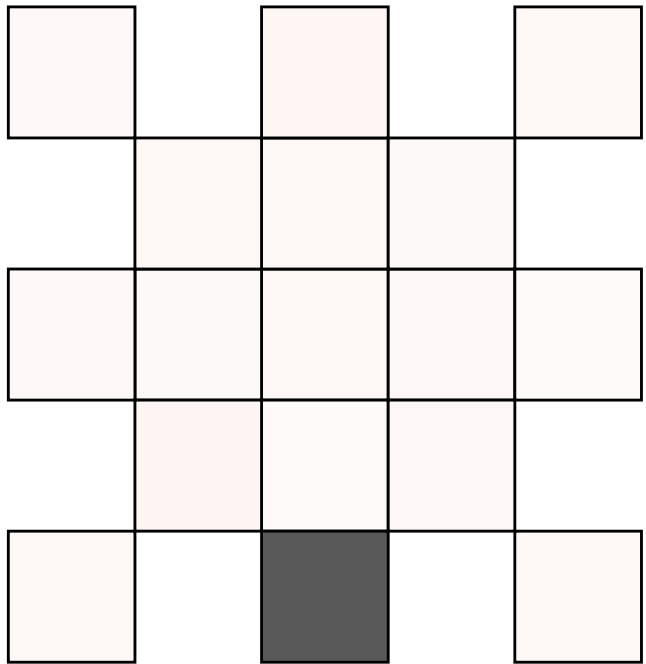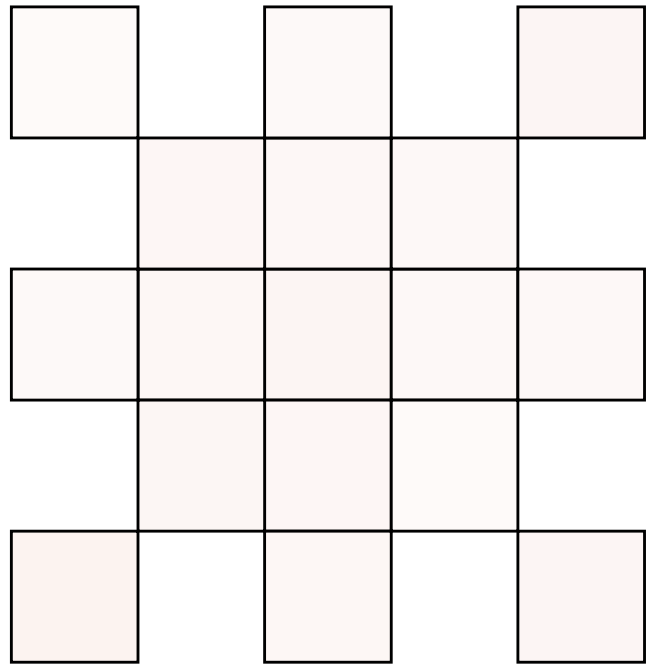

4-26808694-C-T

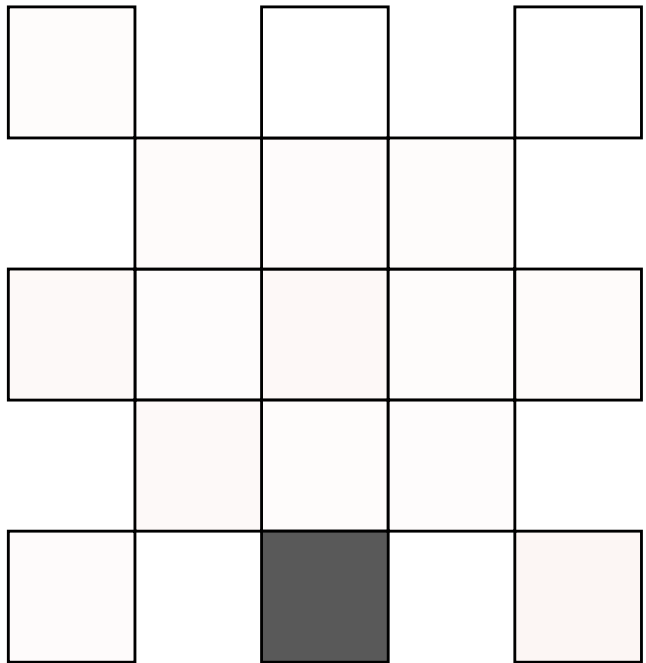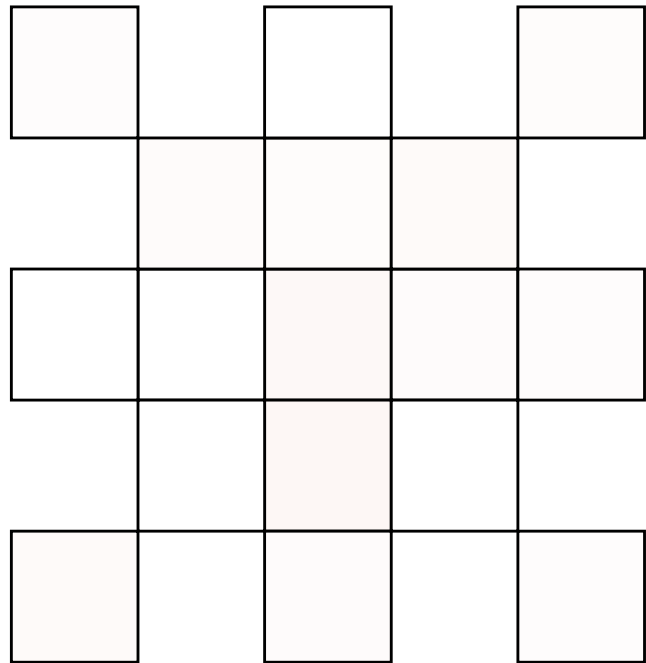



4-30123079-T-G

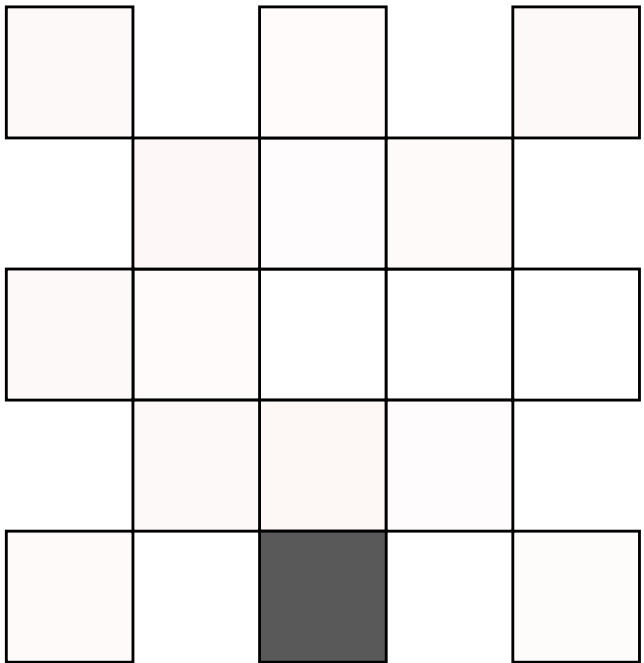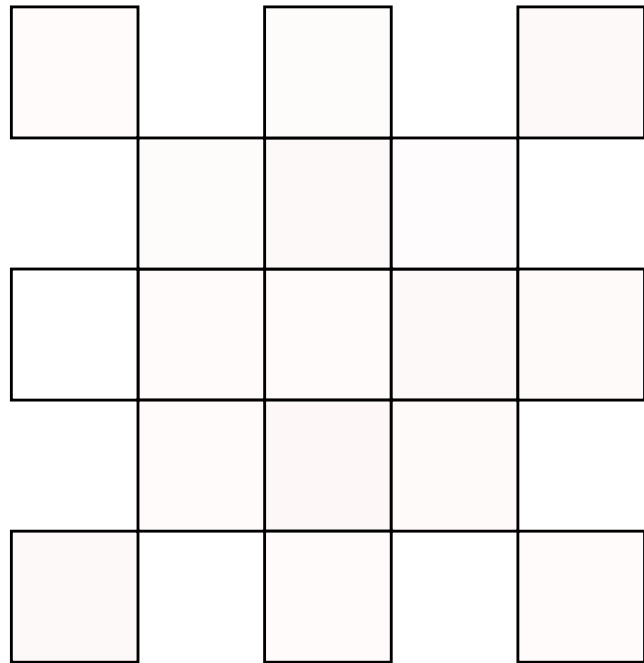

4-32745748-A-T

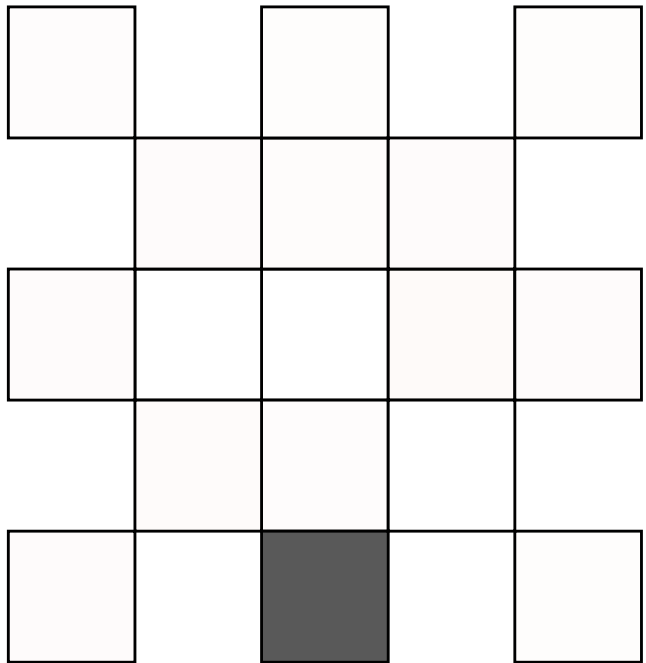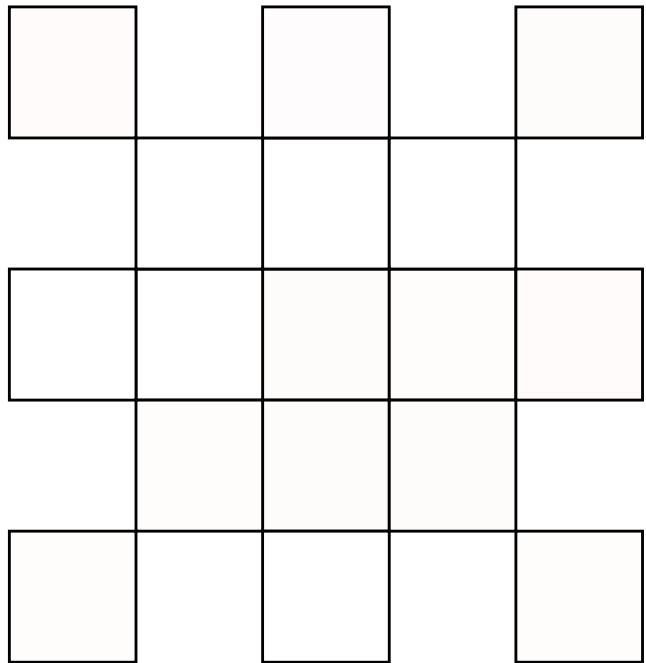

4-34386270-C-T

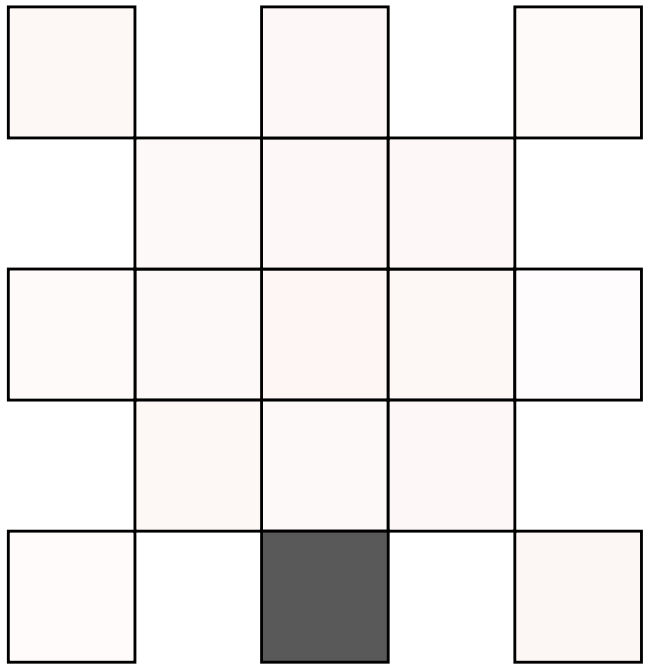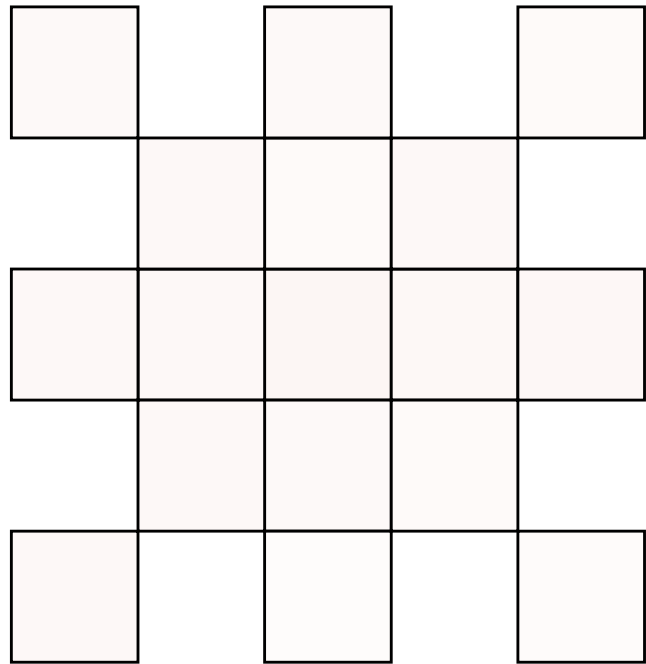

4-34586097-A-T

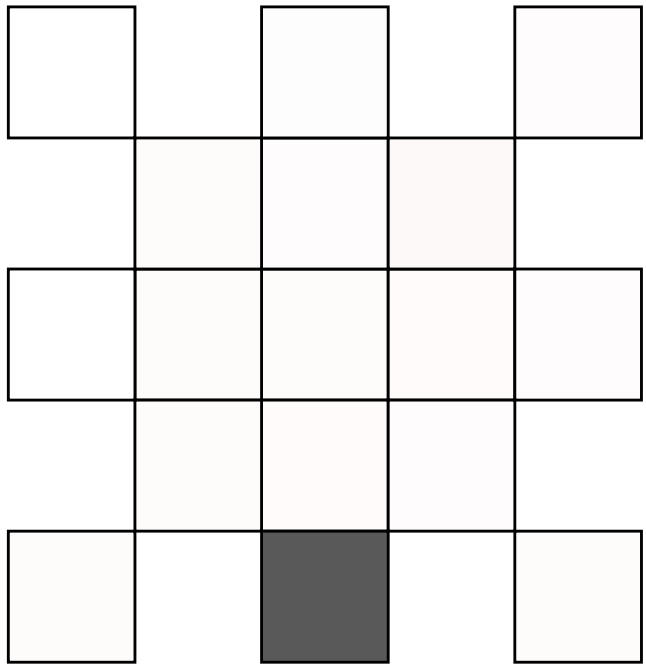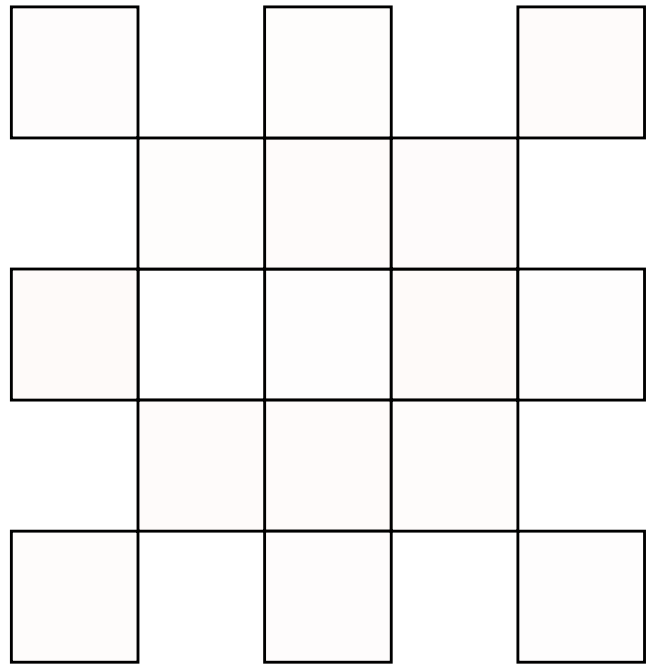

4-36163098-C-T

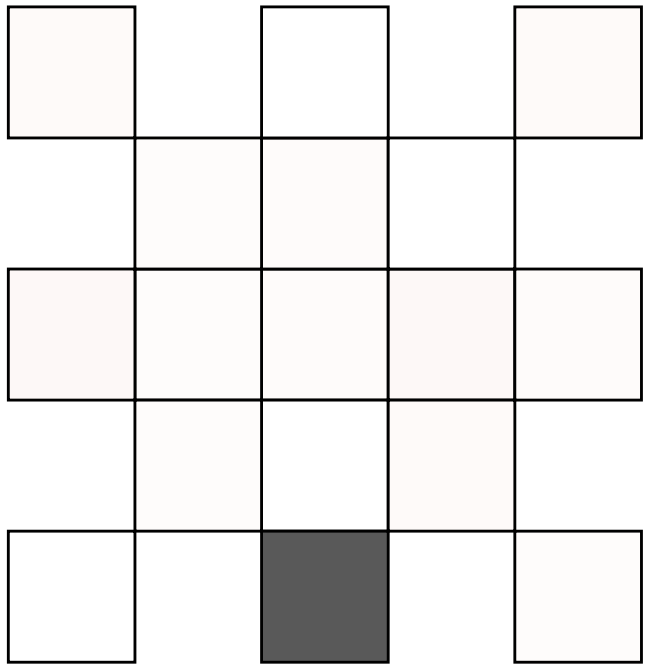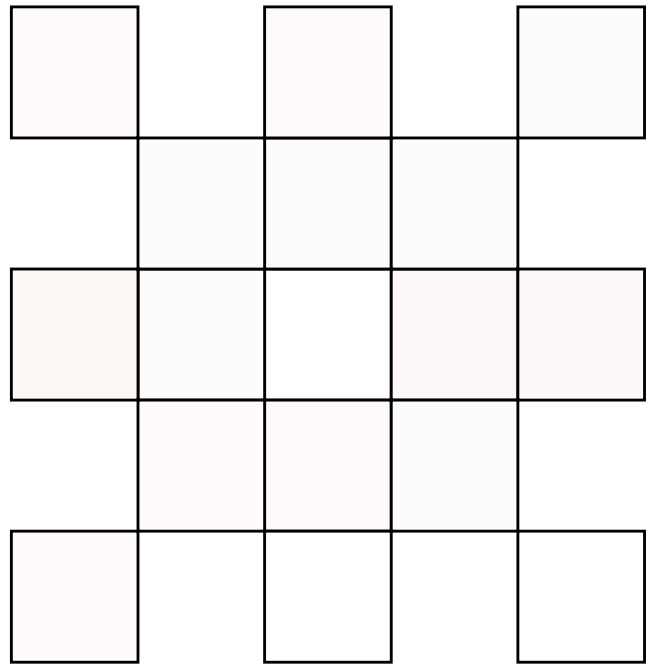

4-4290986-G-A

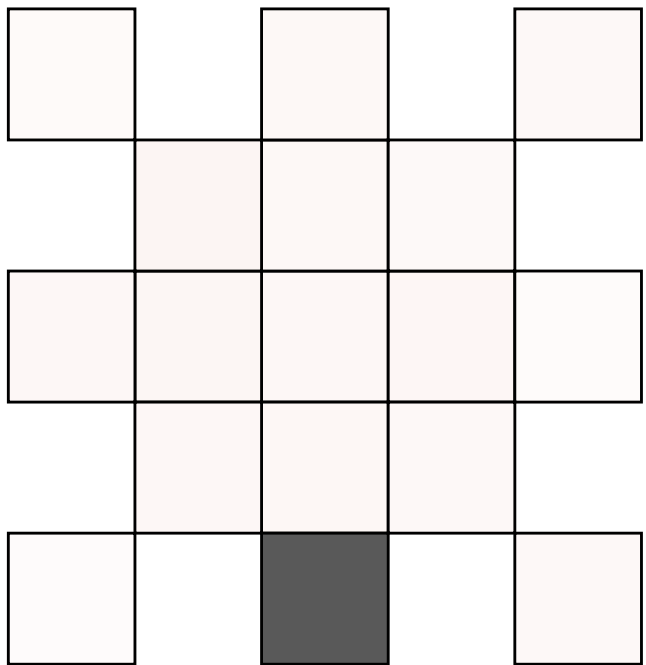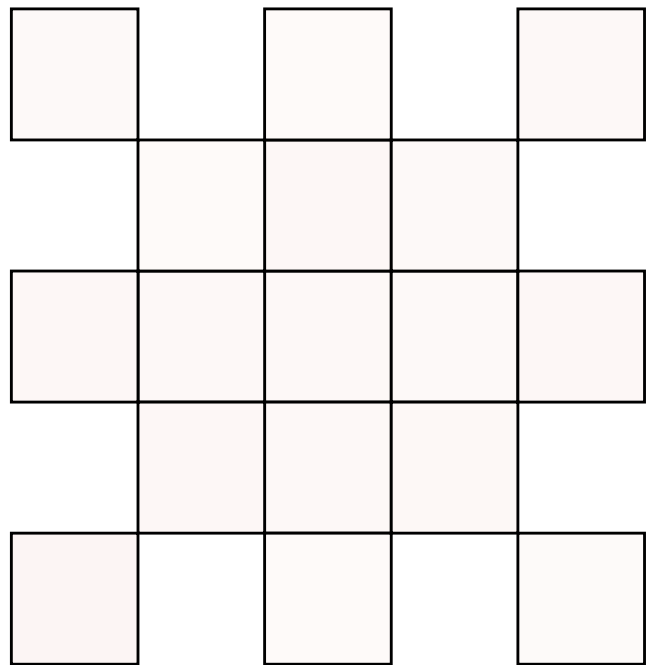

4-44006646-G-A

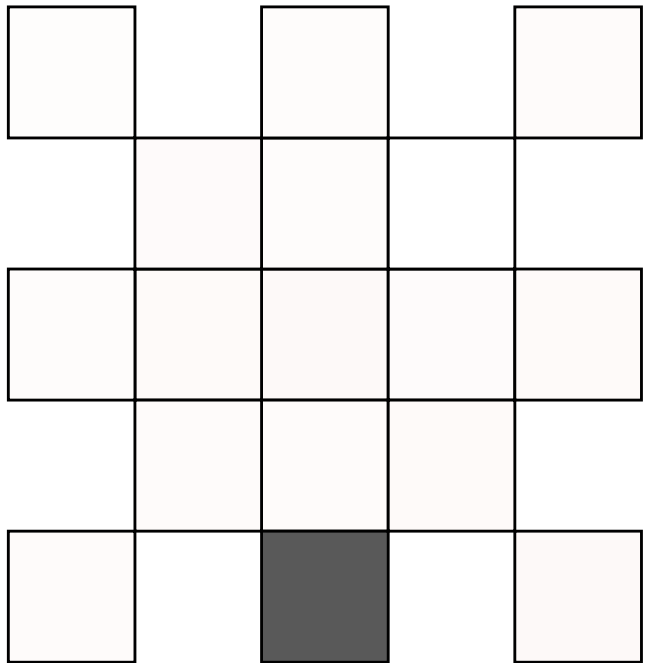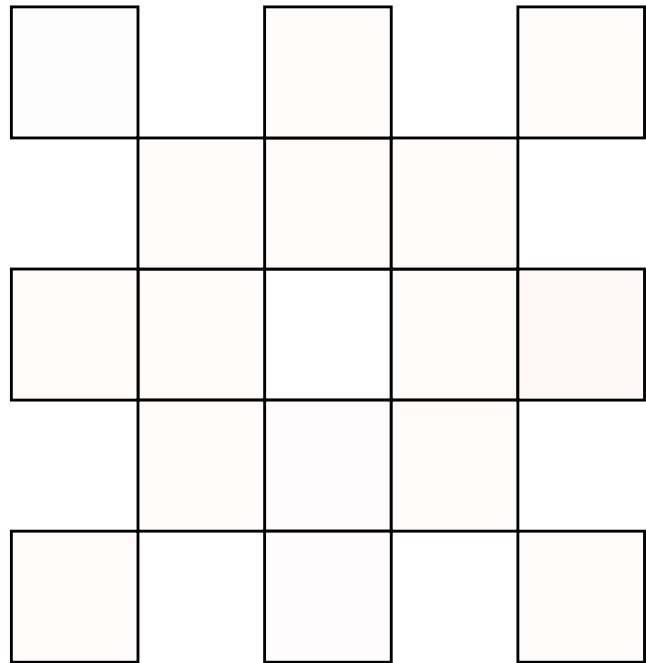

4-515885-G-A

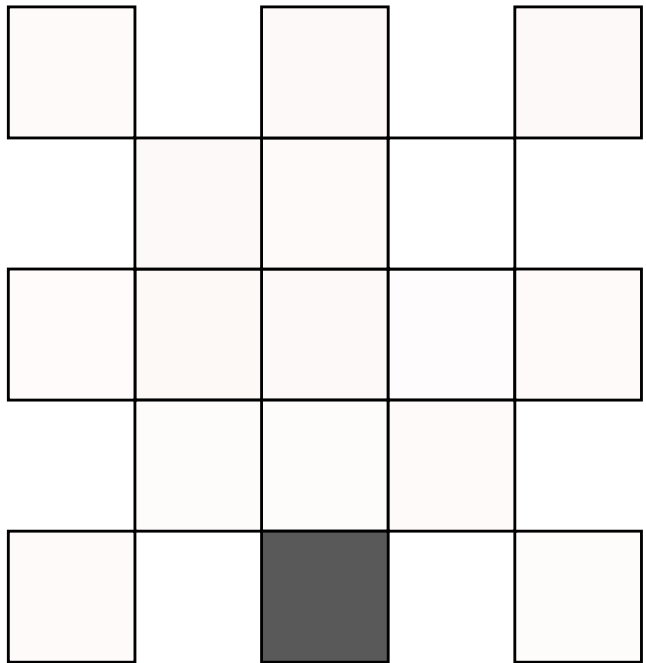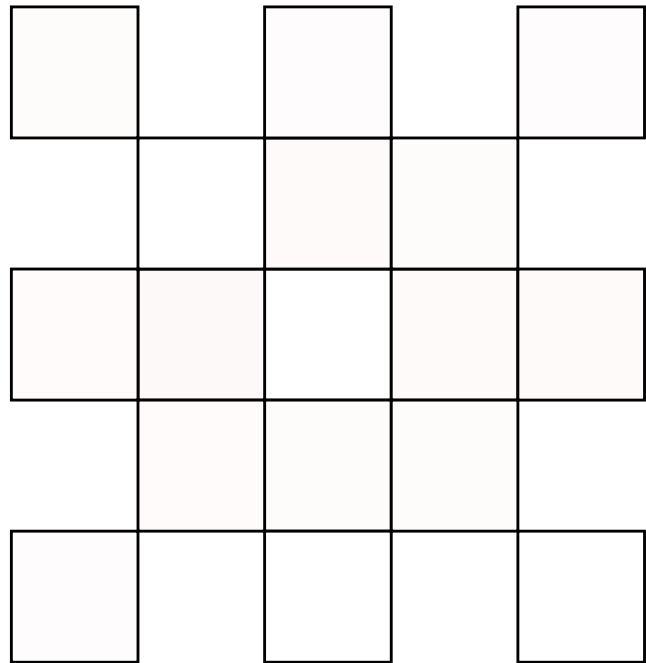



4-52773-C-T

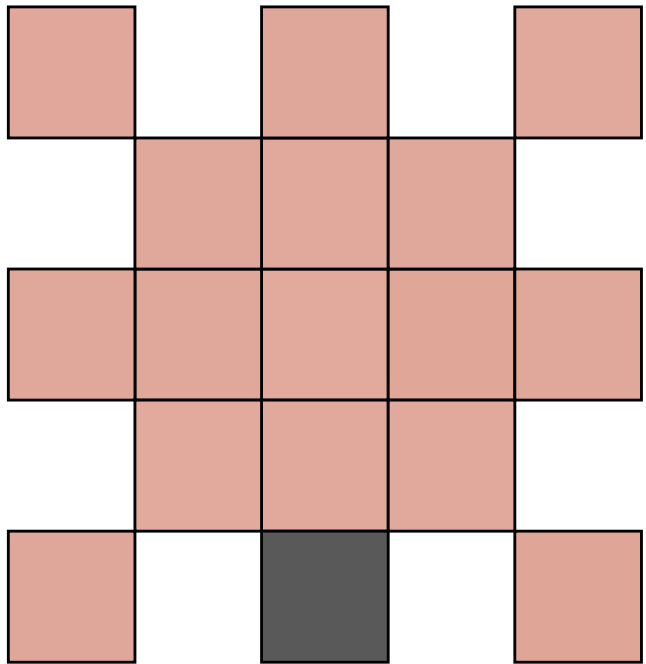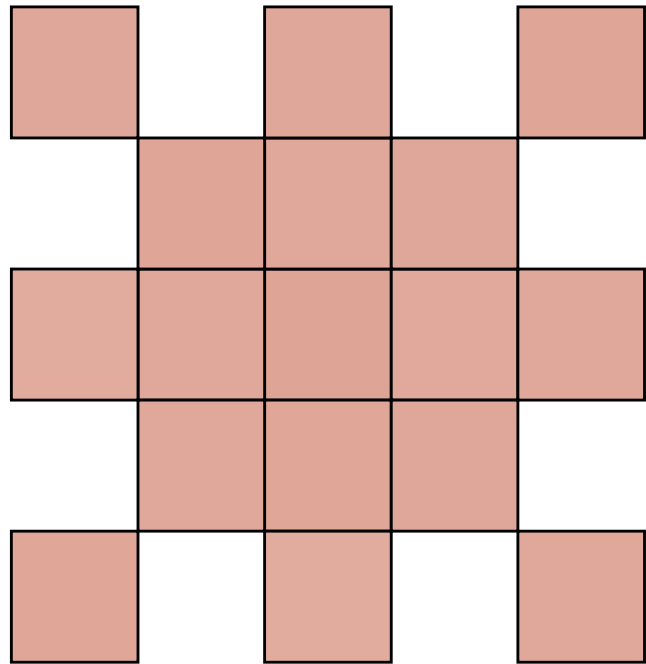

4-54628-G-T

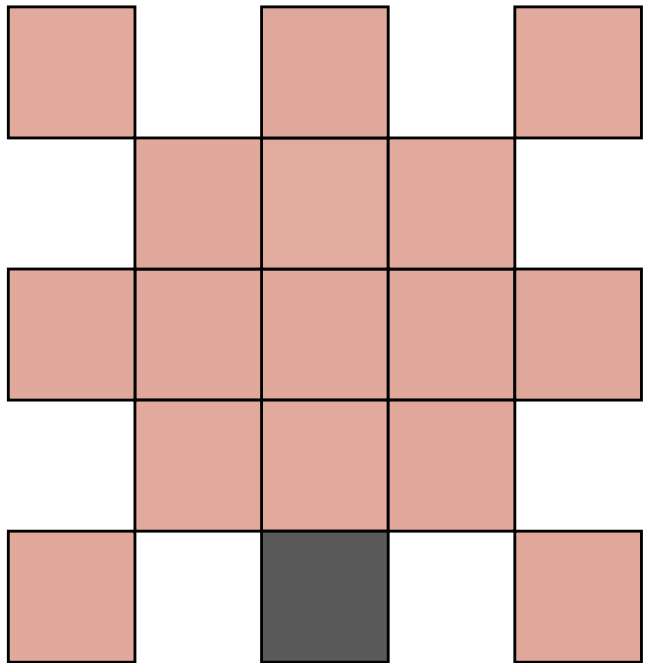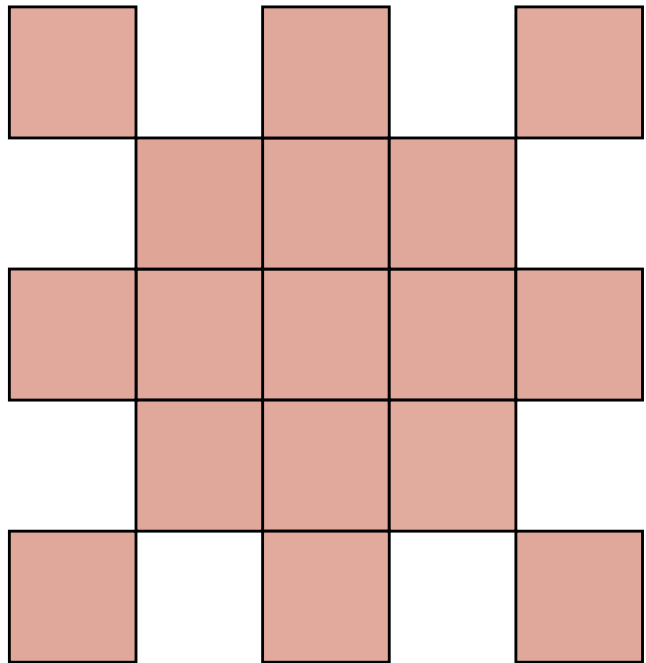

4-57773855-A-T

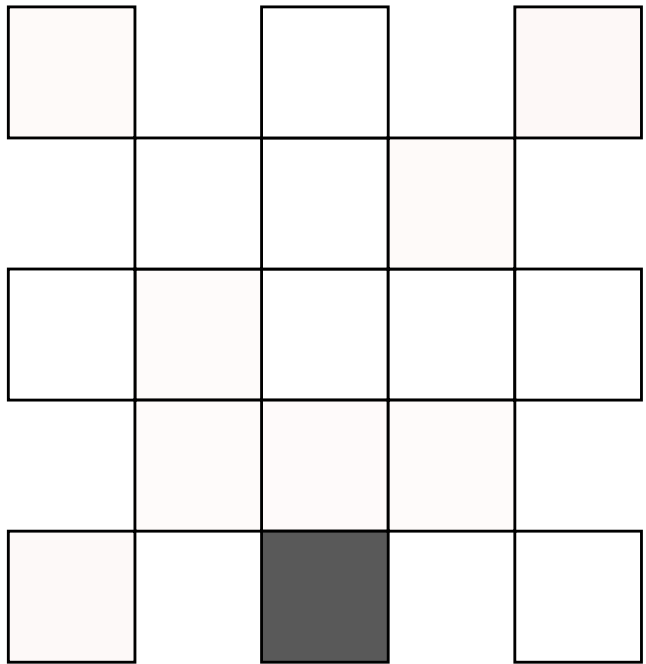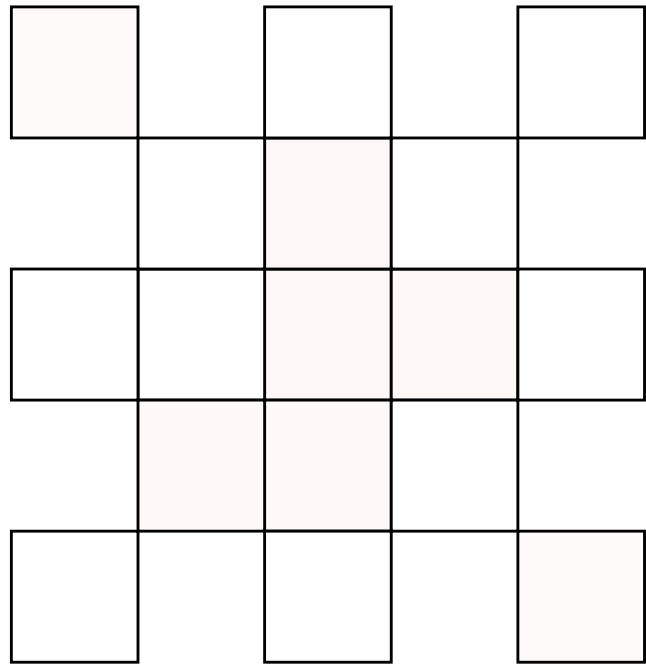

4-58638686-G-A

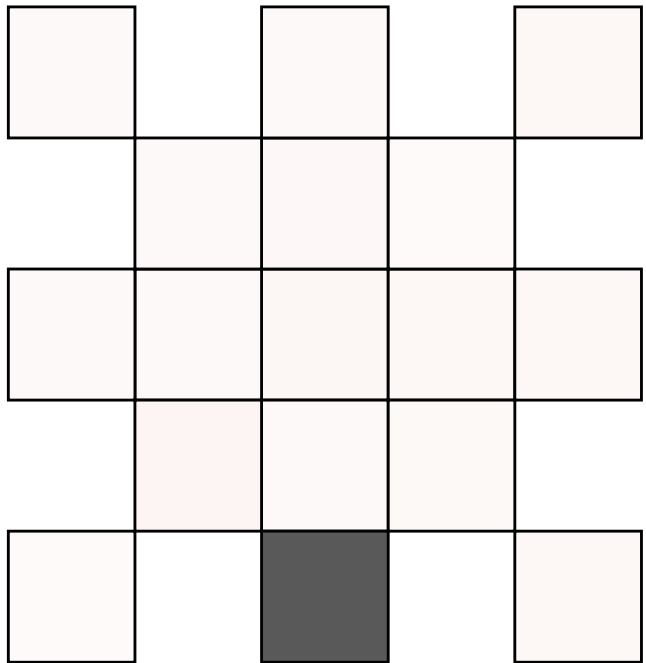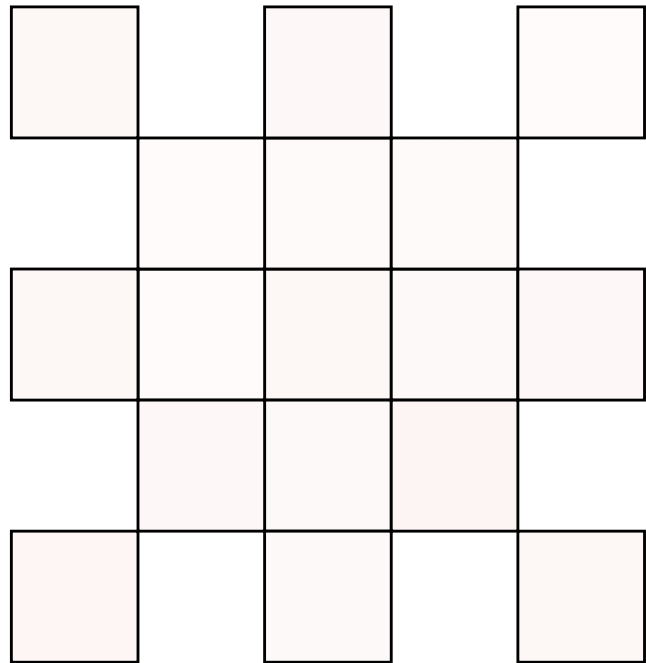

4-59641558-C-T

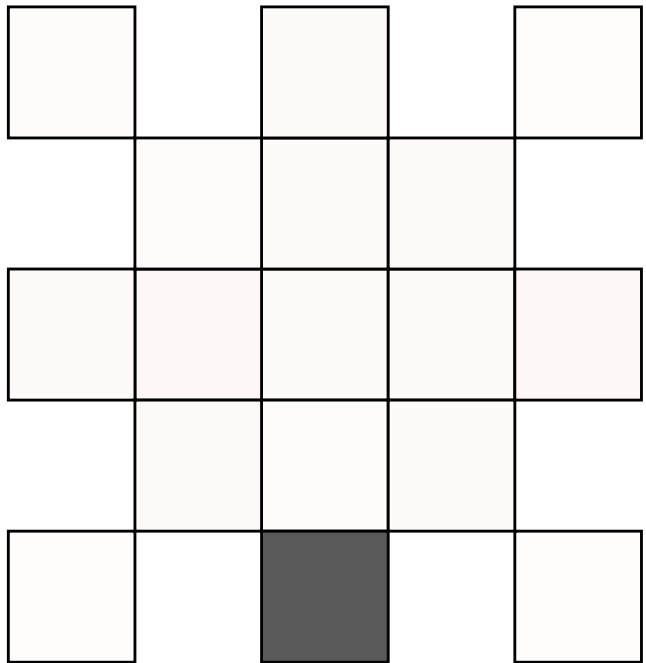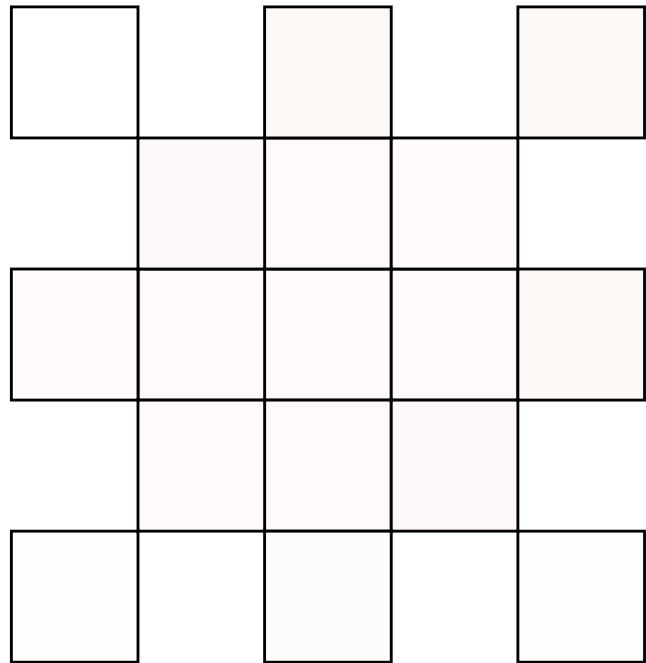

4-60968373-G-A

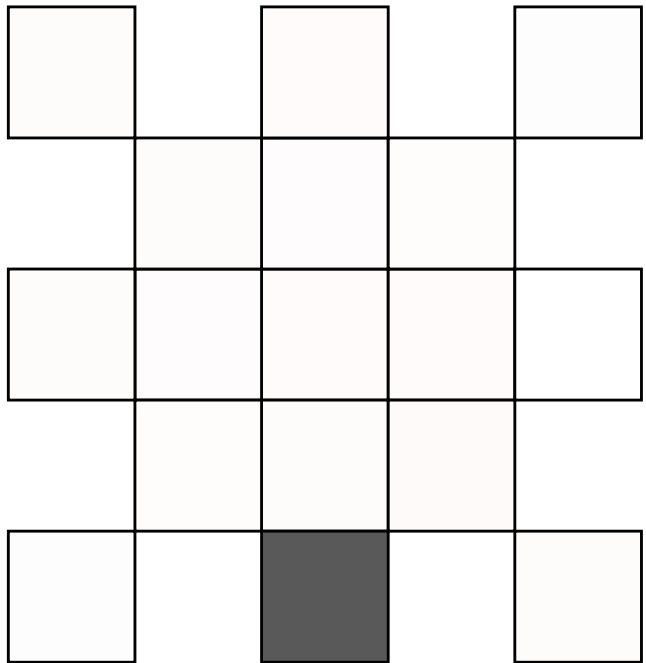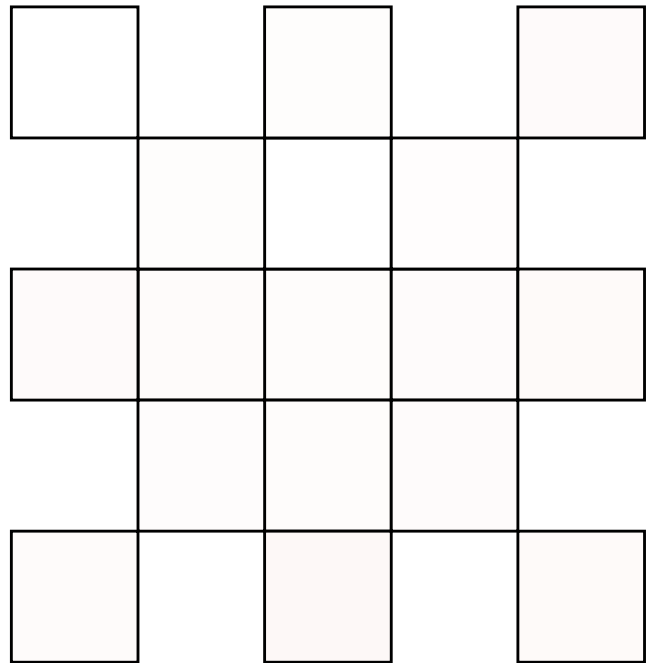

4-63640827-A-T

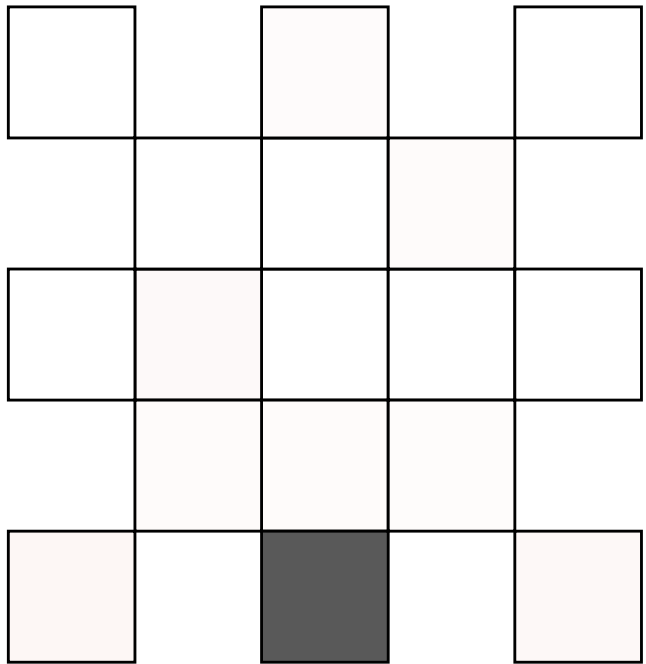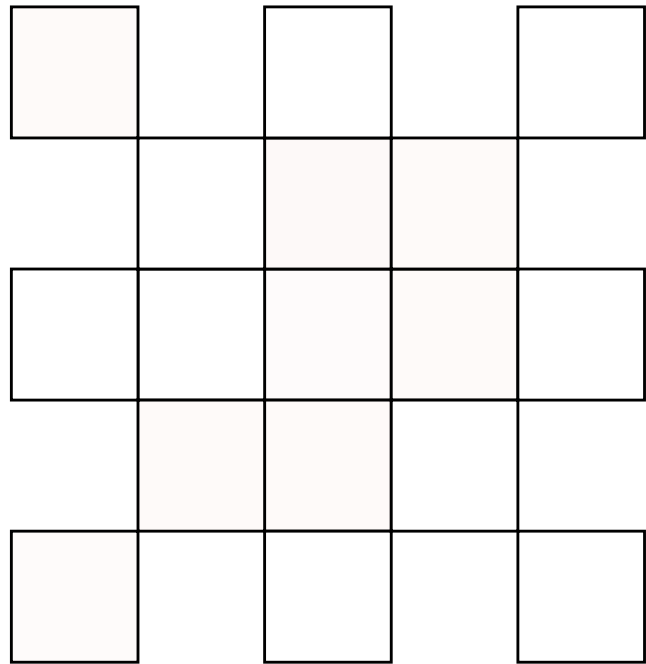

4-64742736-G-A

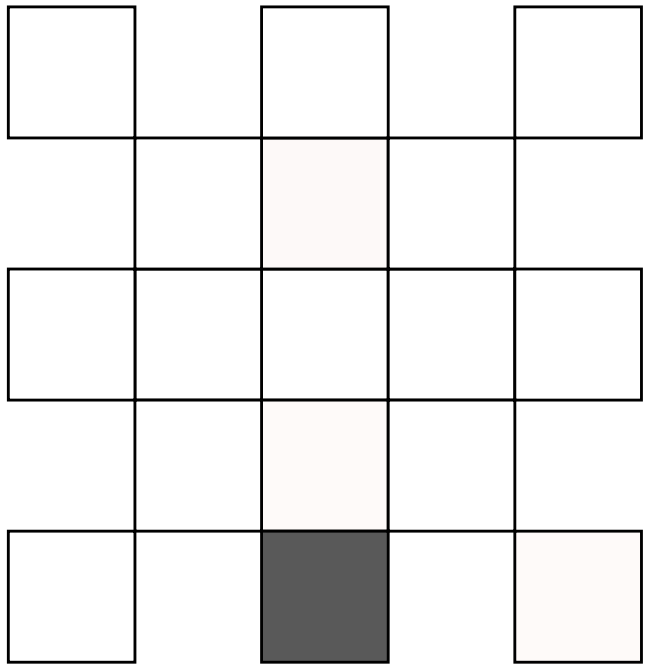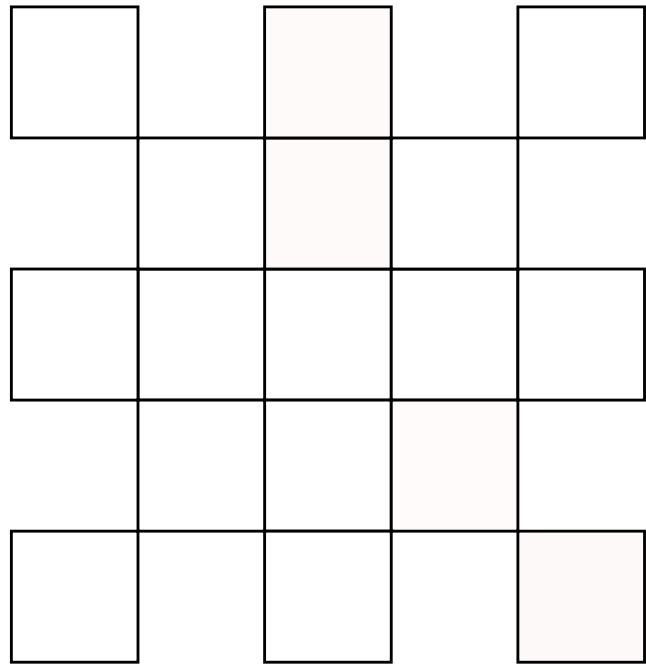



4-66798015-A-T

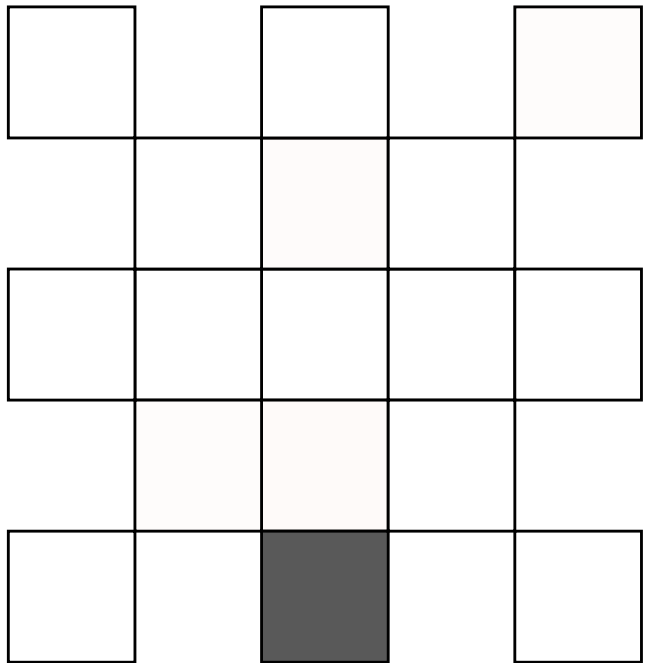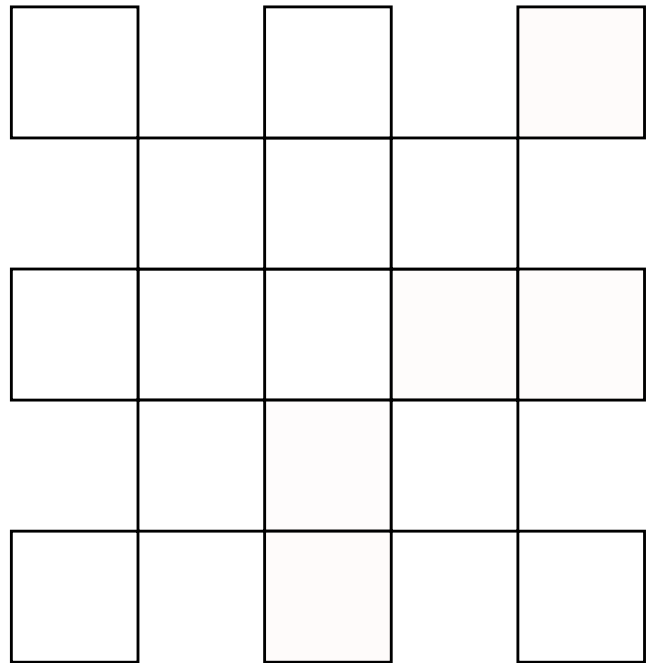

4-67957618-C-T

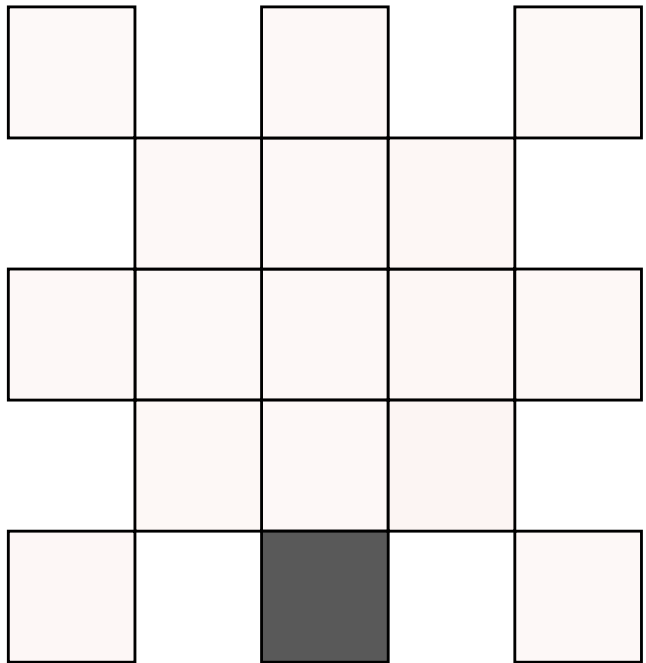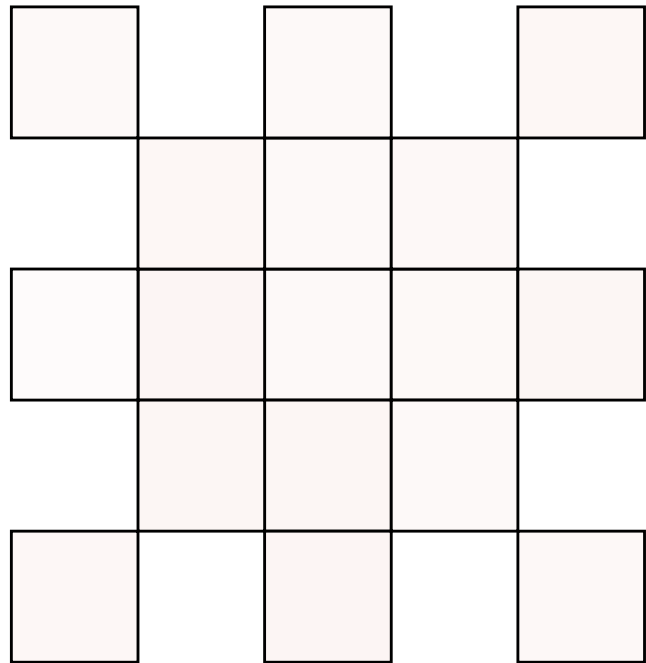

4-7232186-G-A

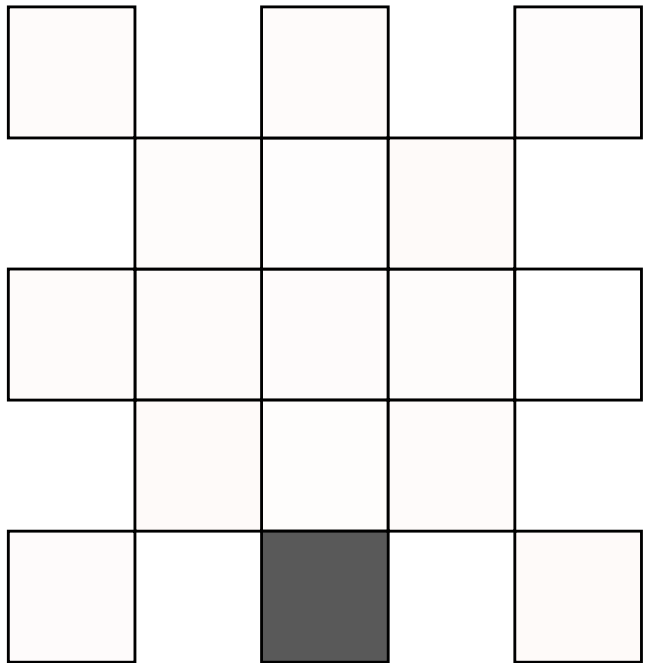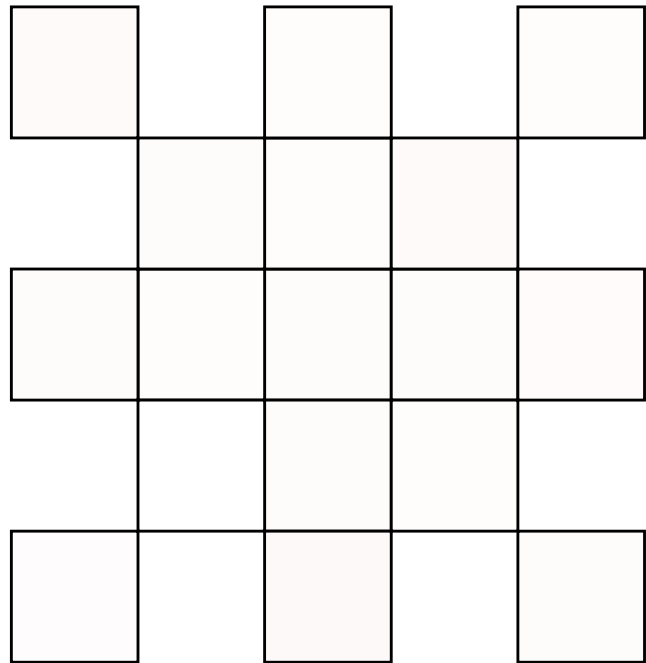

4-72321187-G-A

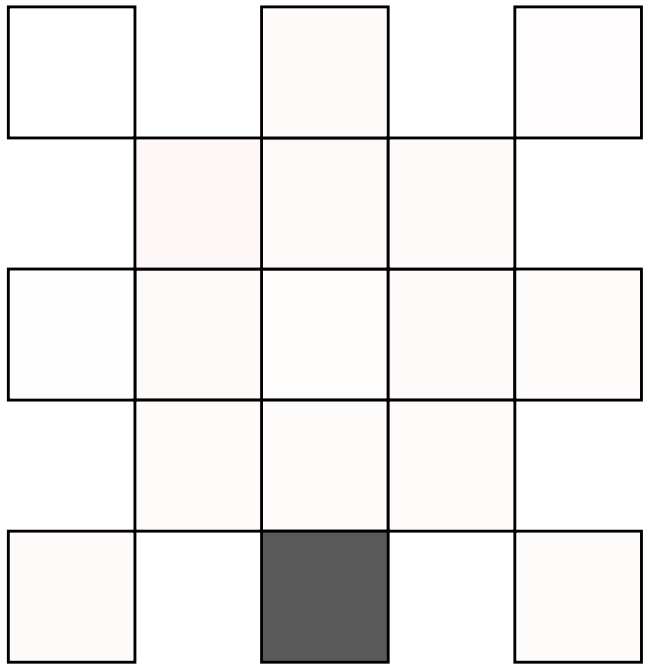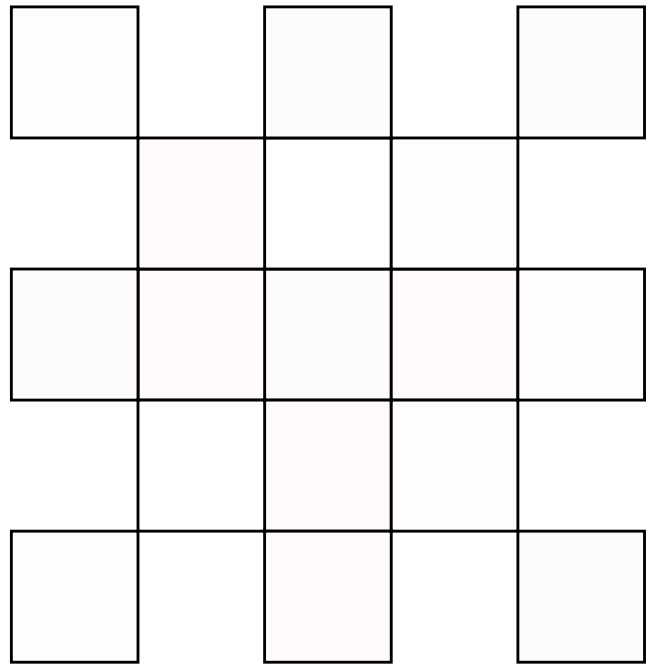

4-7370991-A-T

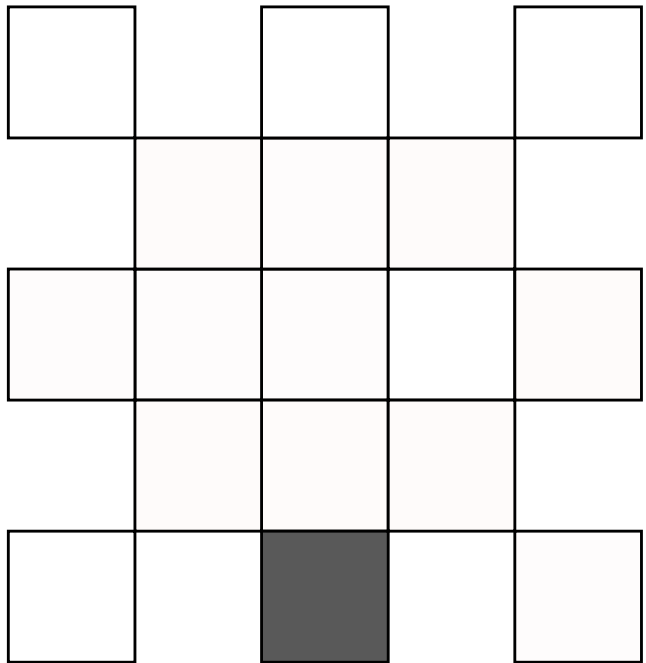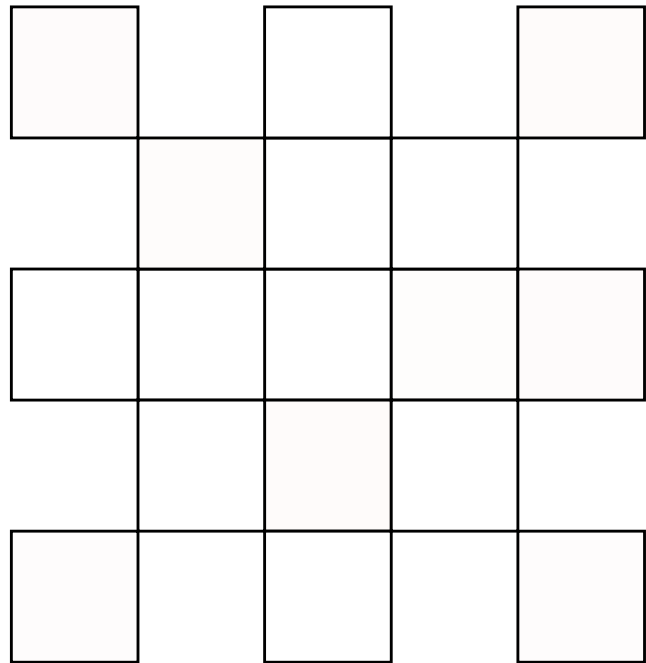

4-74784894-G-A

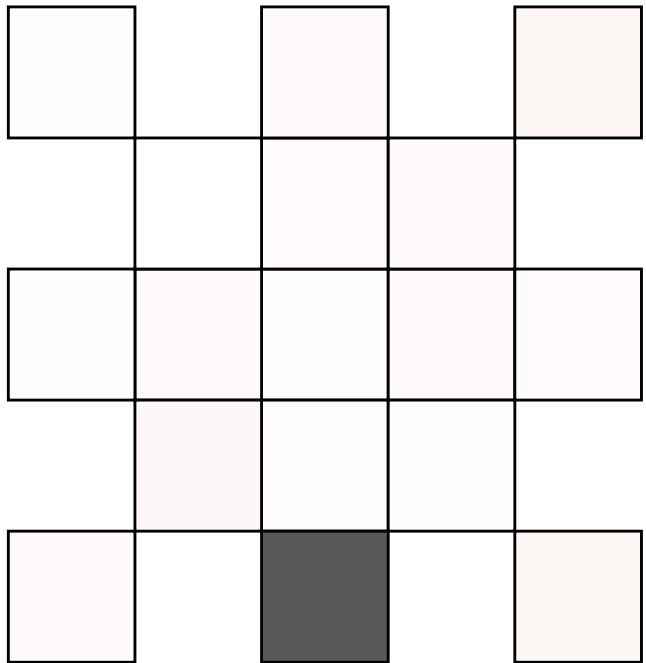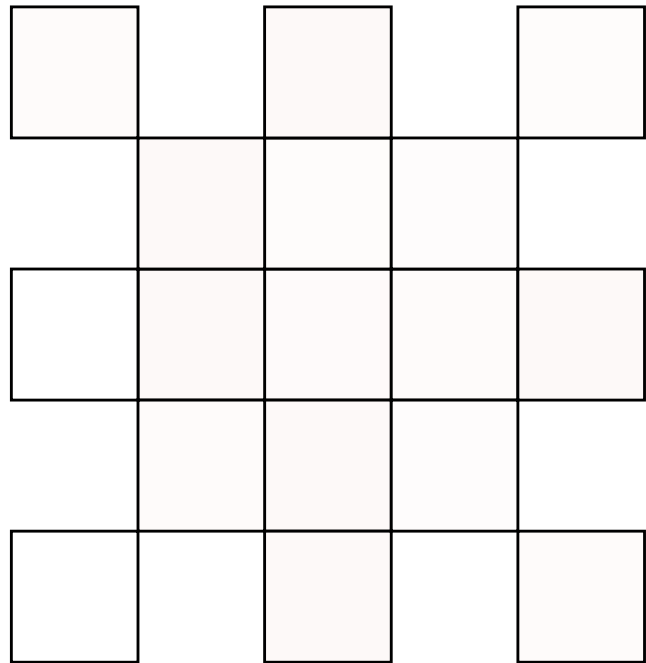

4-85164675-G-A

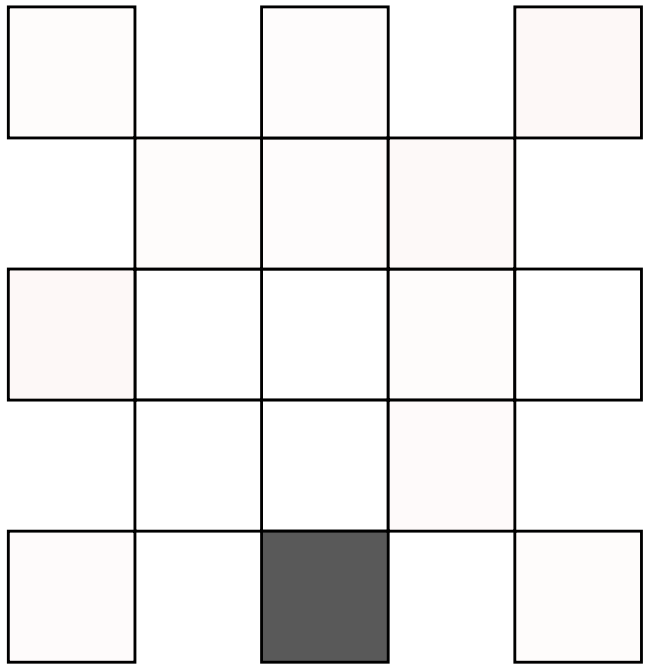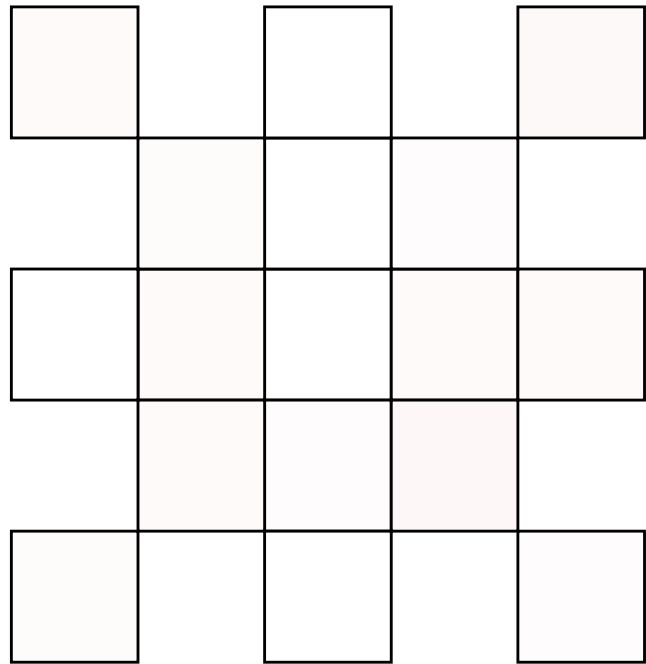

4-91993313-G-A

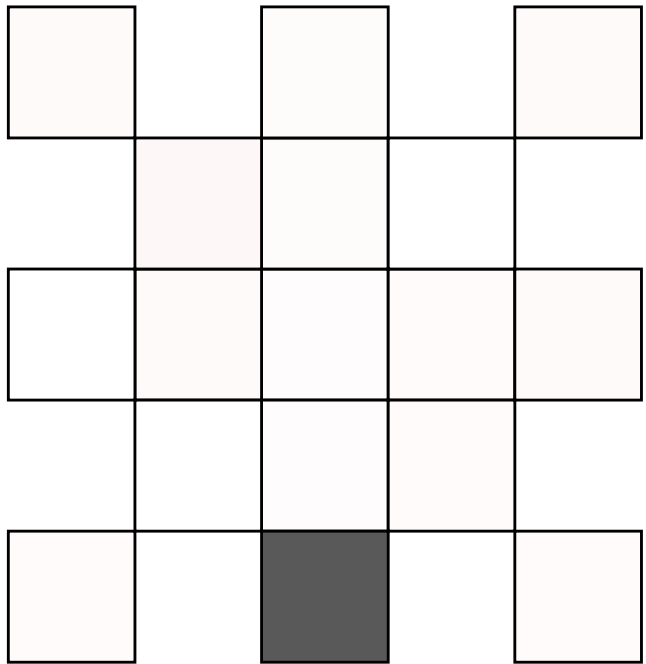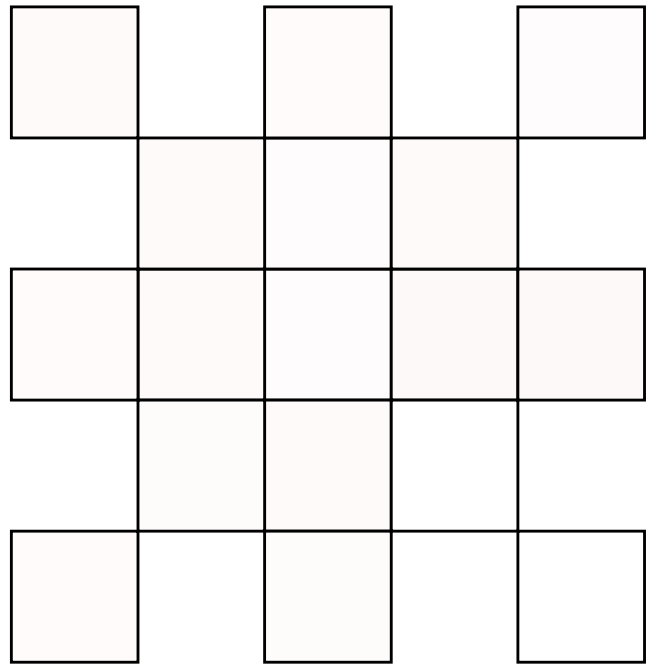



4-92330313-C-G

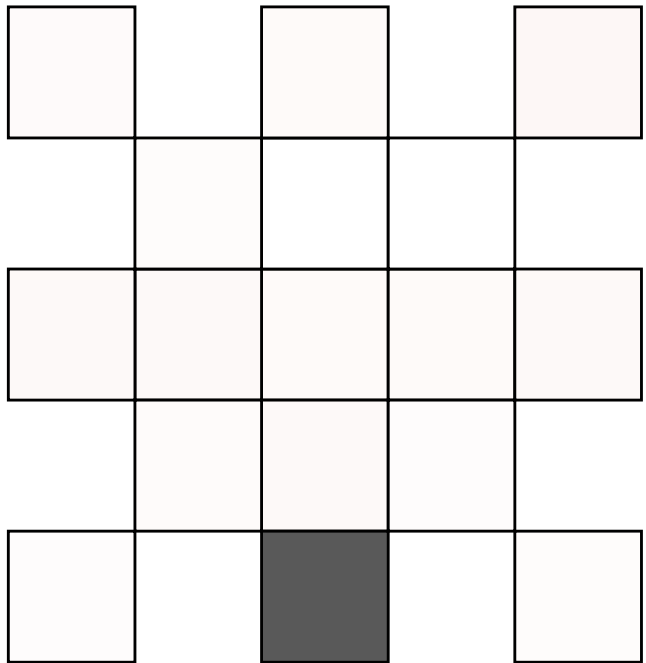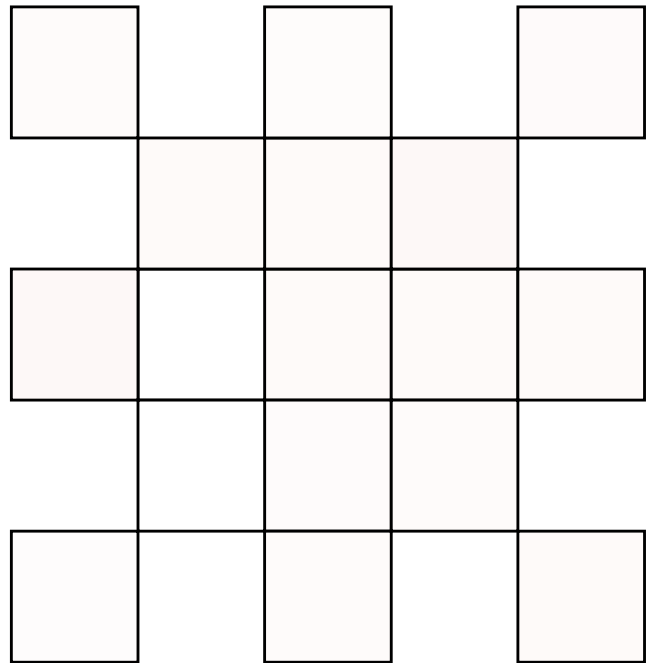

4-92660887-G-A

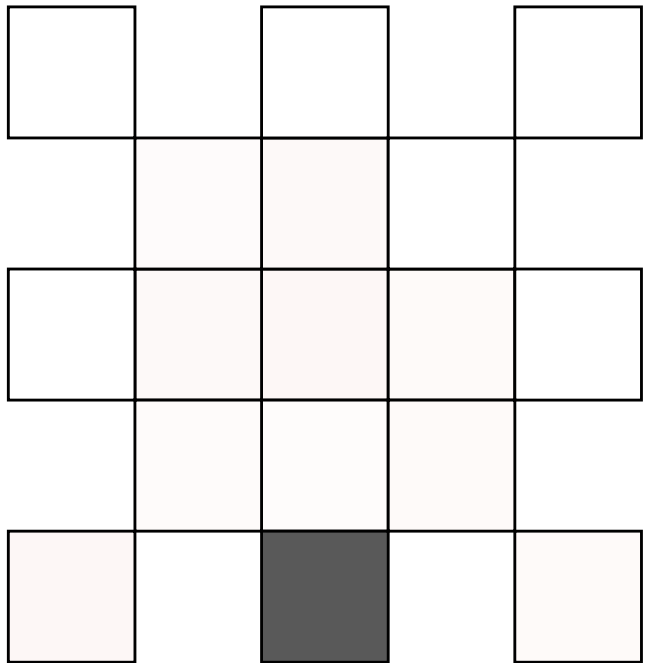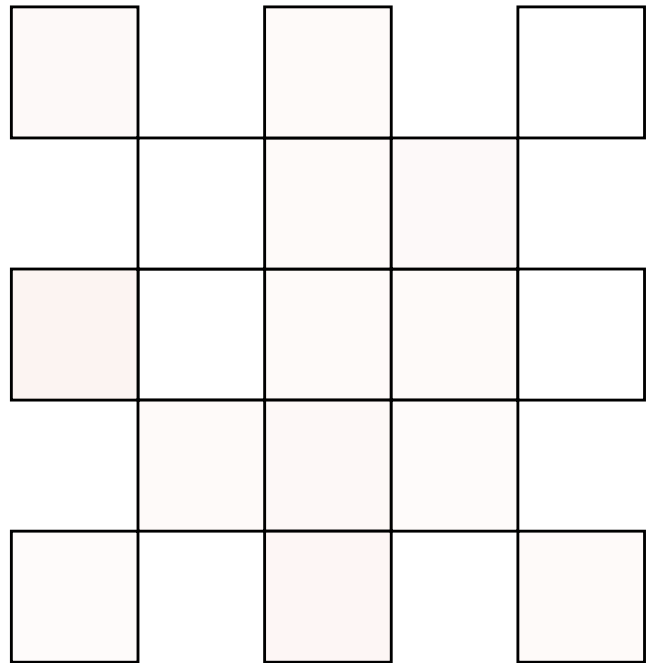

4-93137328-T-A

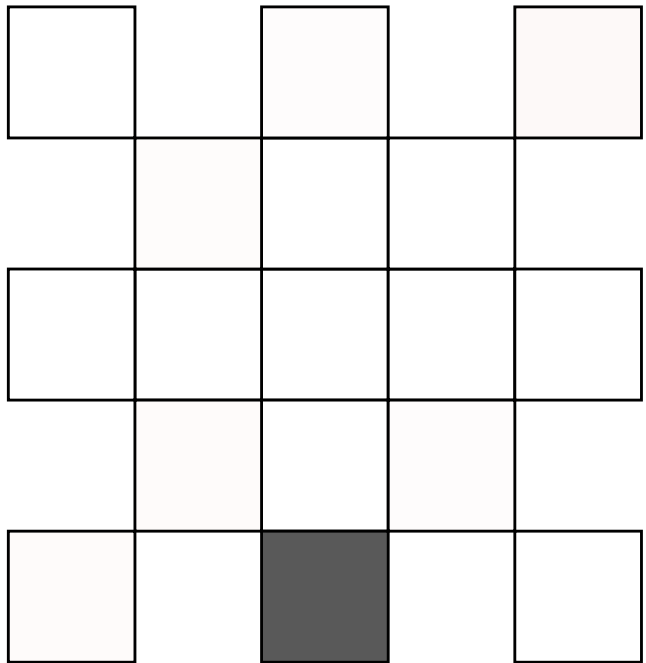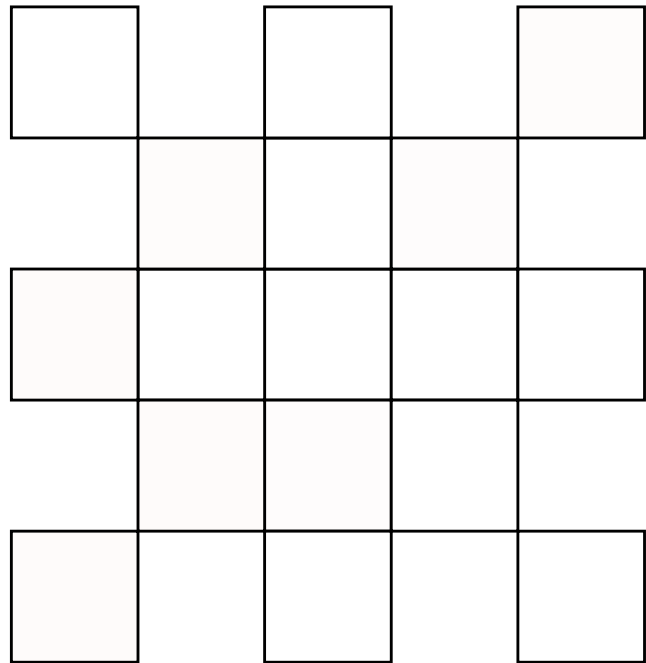

4-94277150-C-T

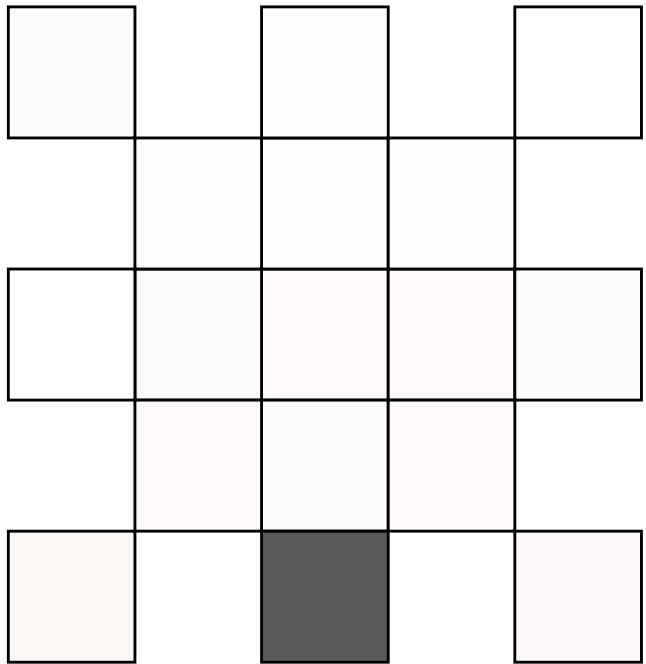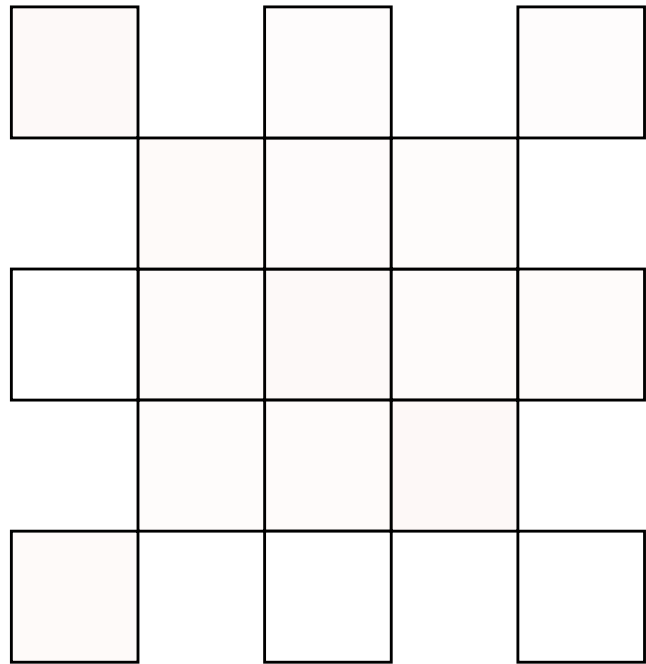

4-96601800-C-T

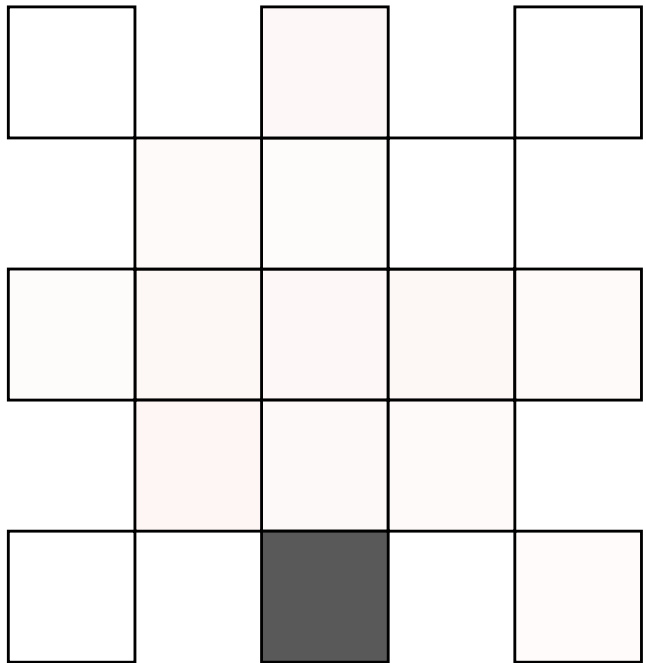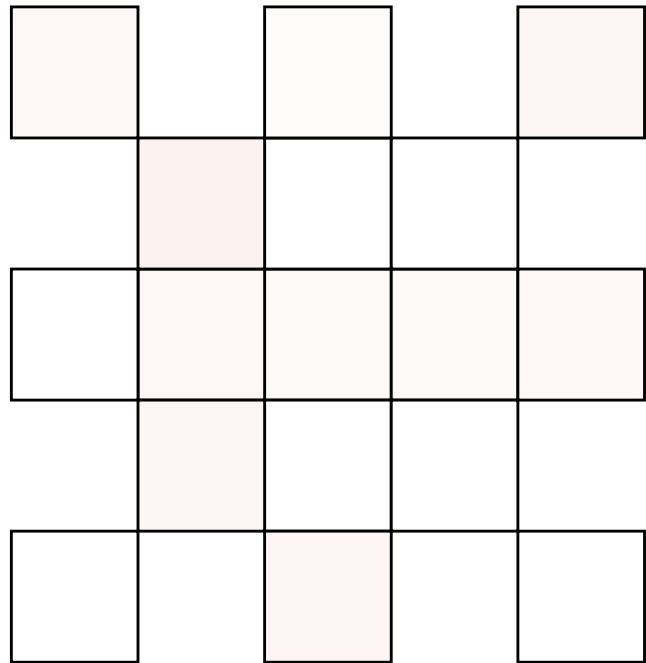

5-10808399-G-A

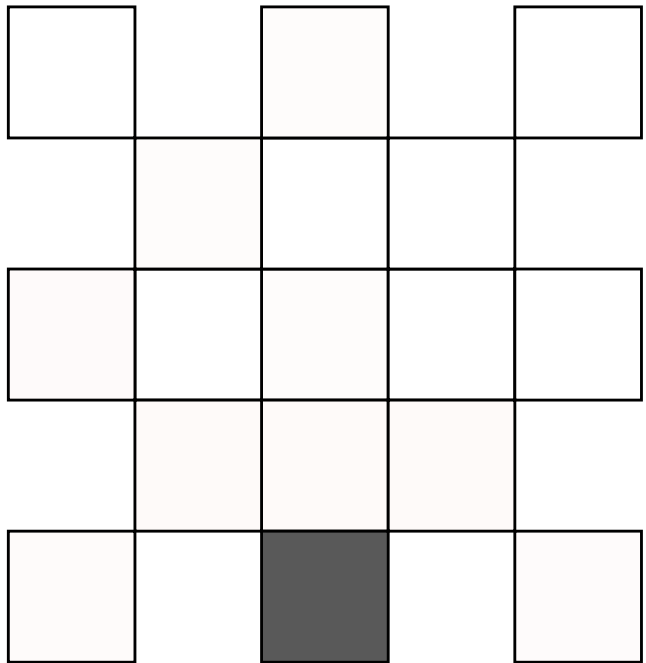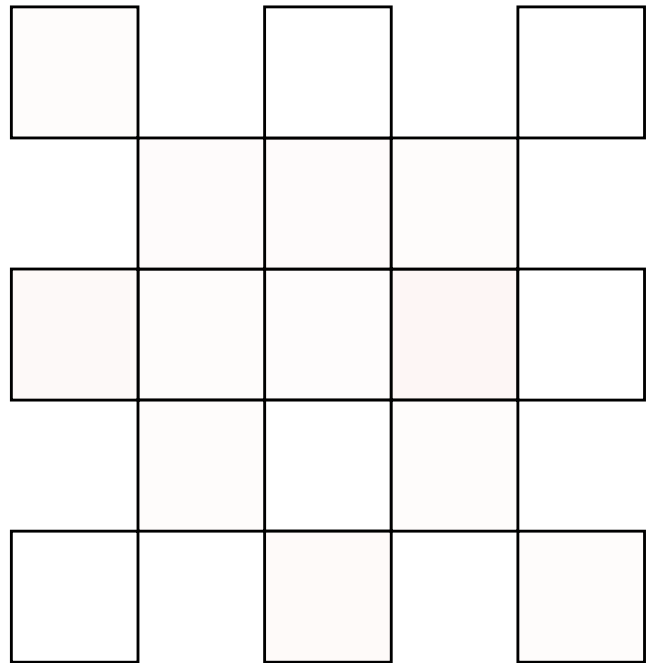

5-115045074-T-C

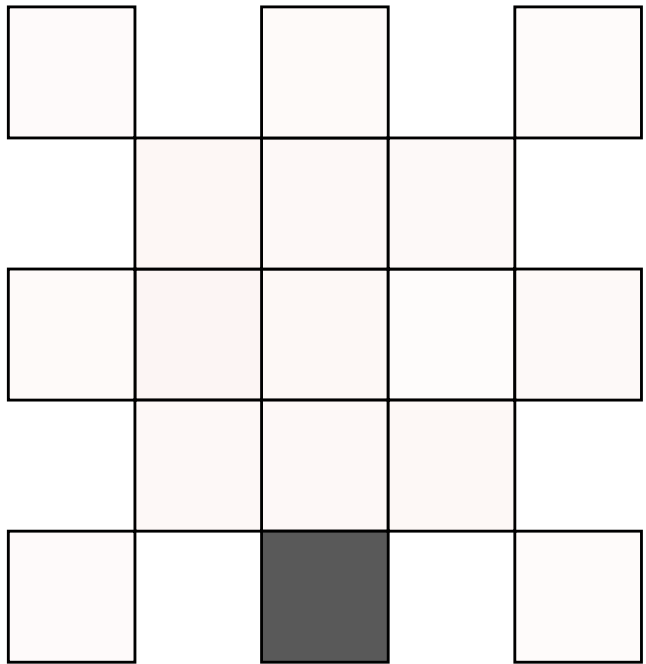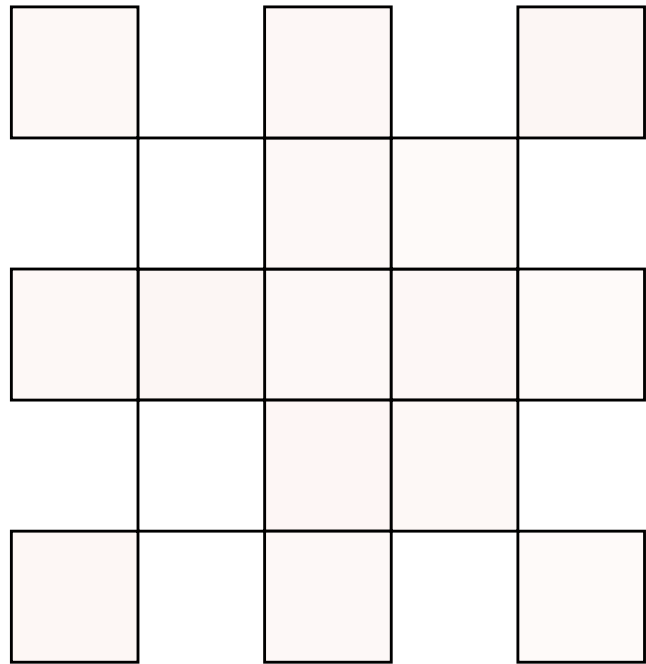

5-115316467-A-C

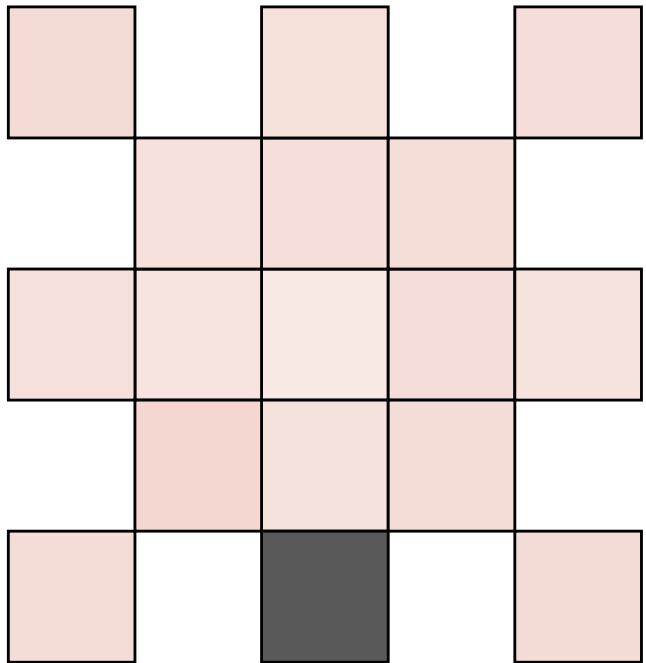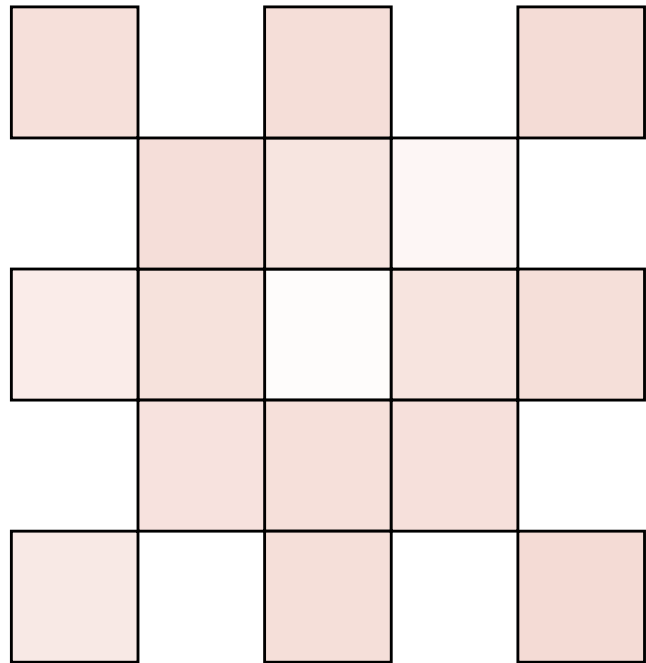



5-115316468-G-T

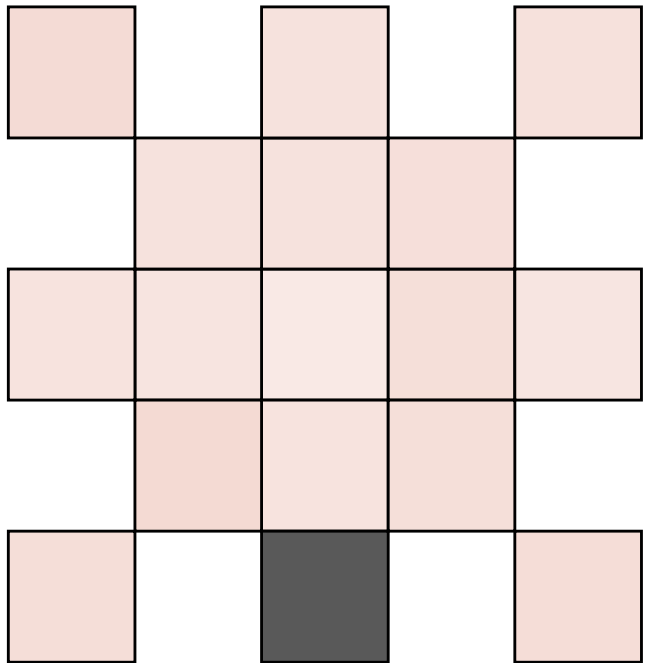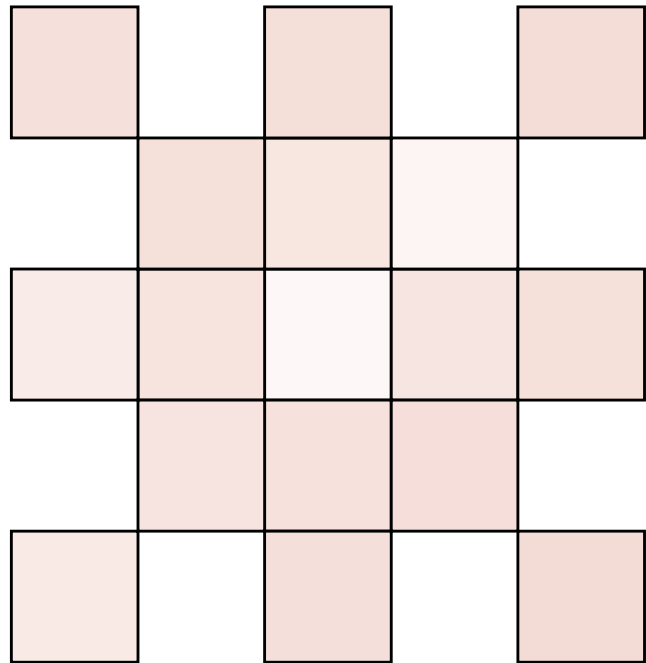

5-117219941-G-T

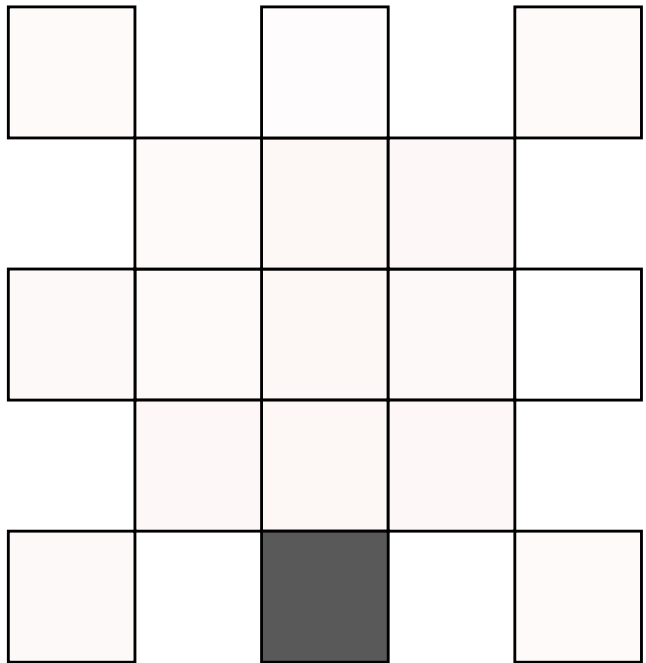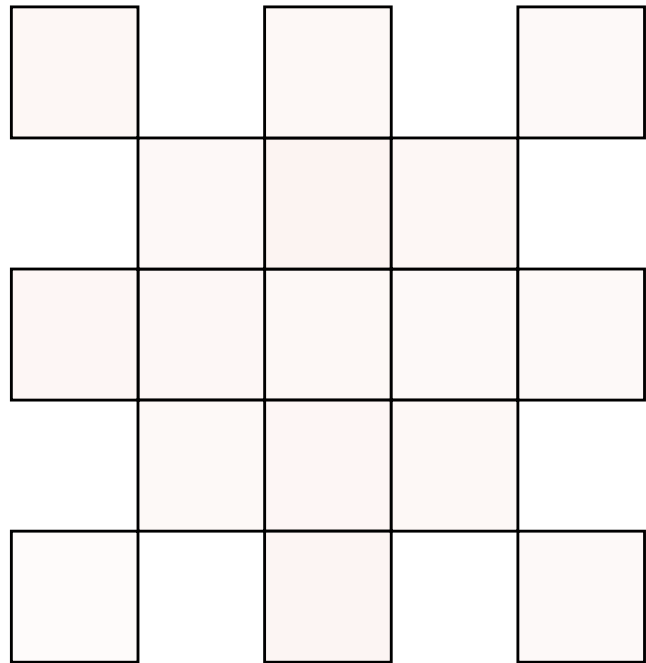

5-117725395-G-A

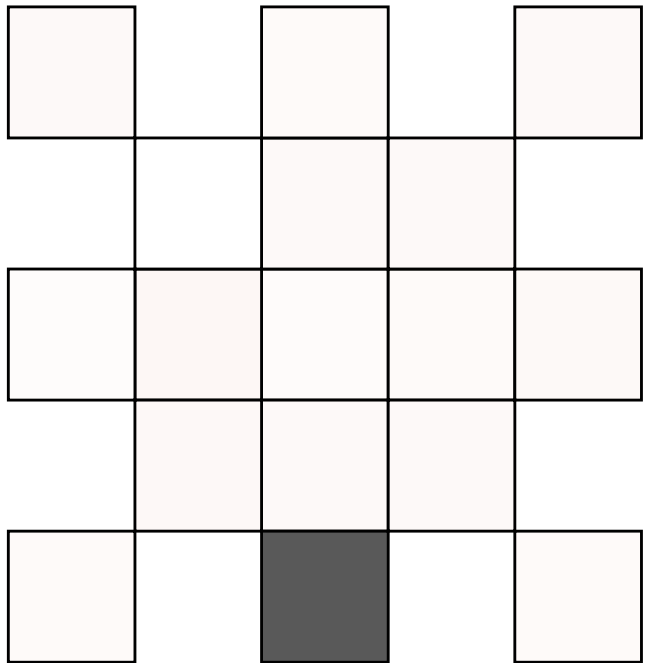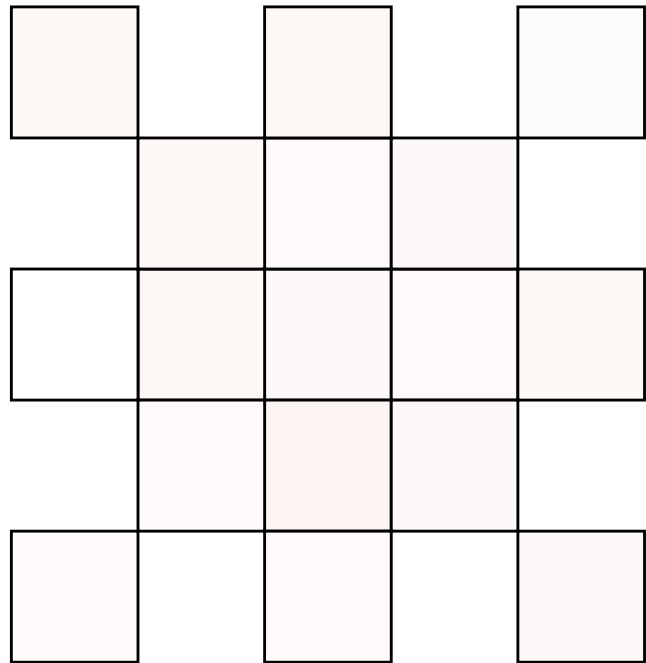

5-121446225-C-T

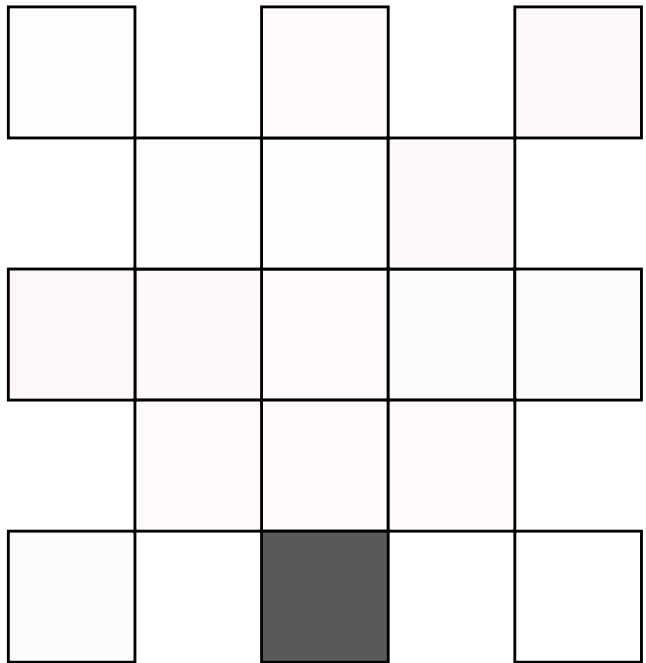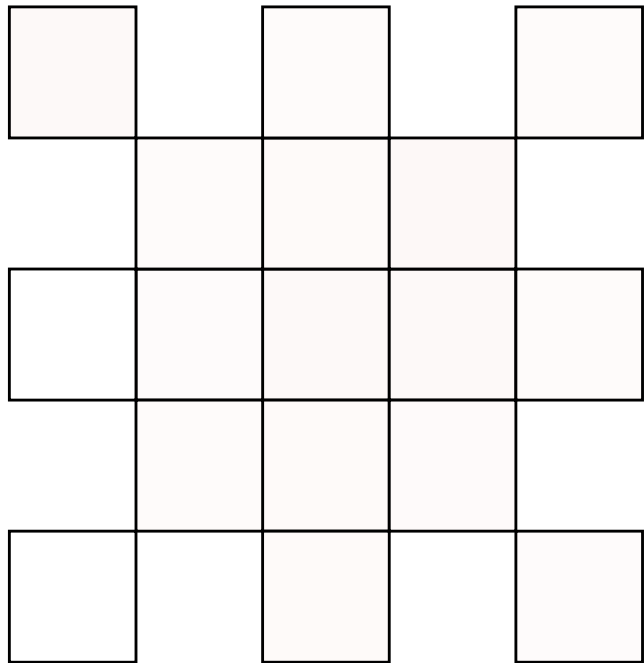

5-121518814-G-A

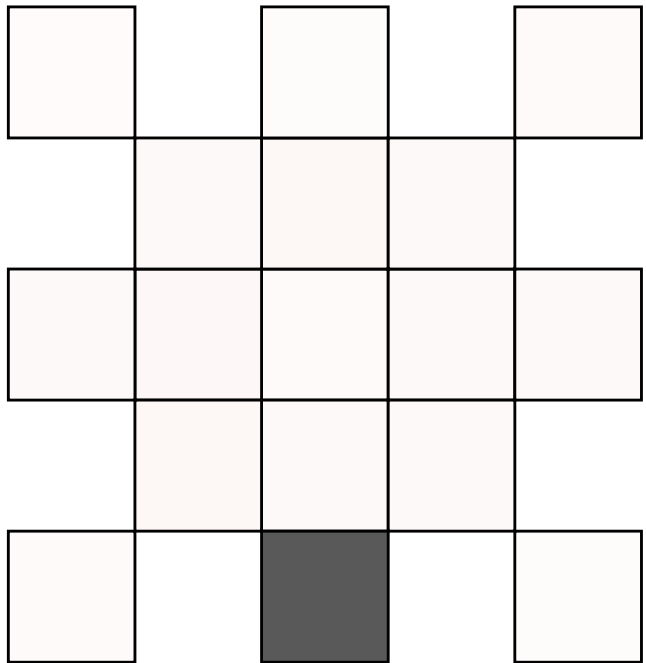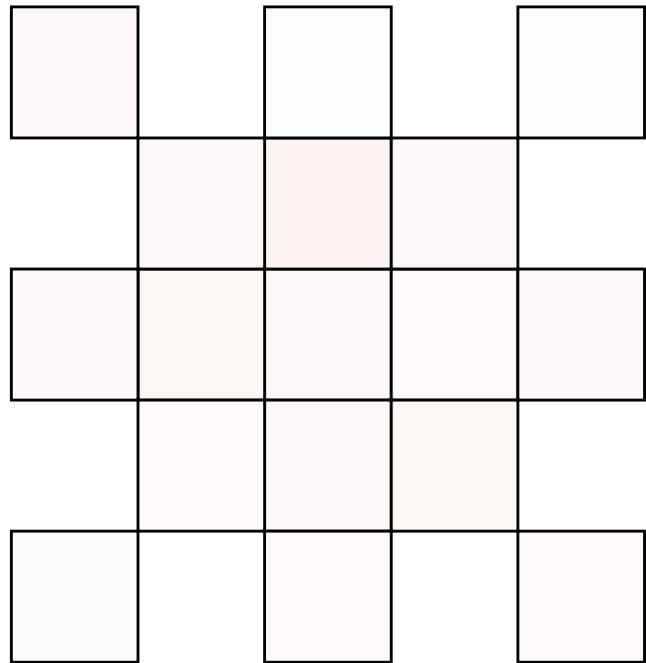

5-121862406-C-T

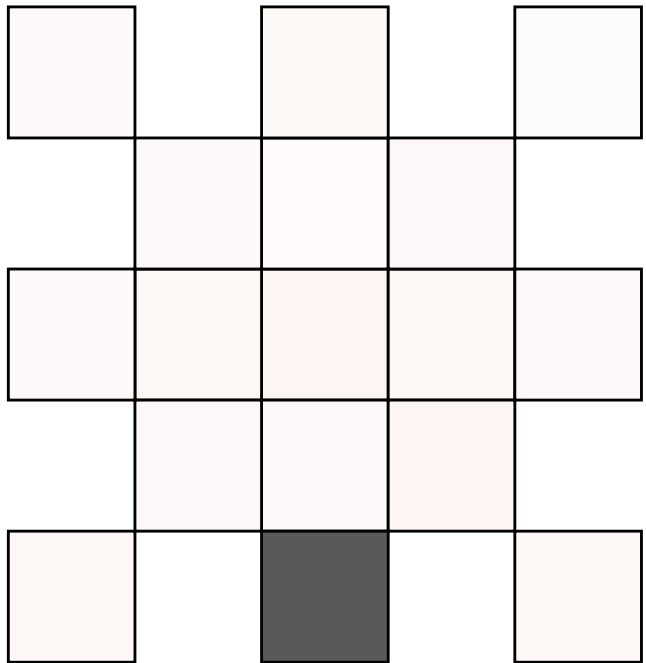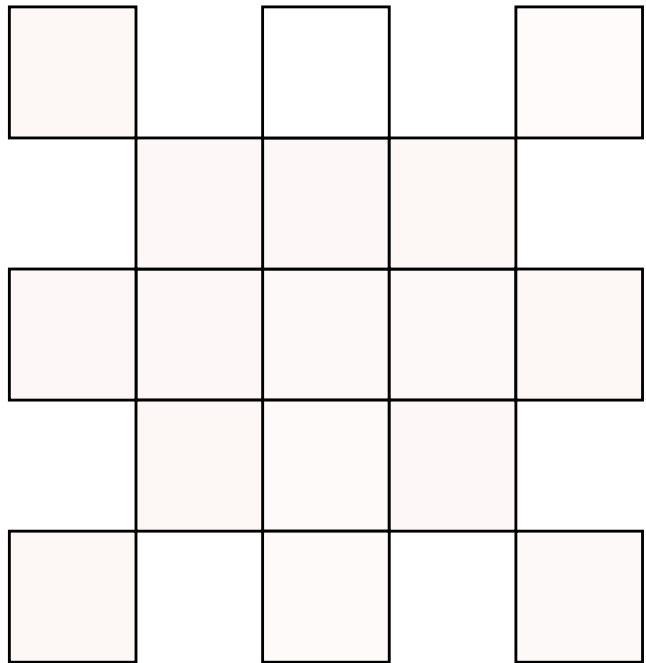

5-122337591-C-T

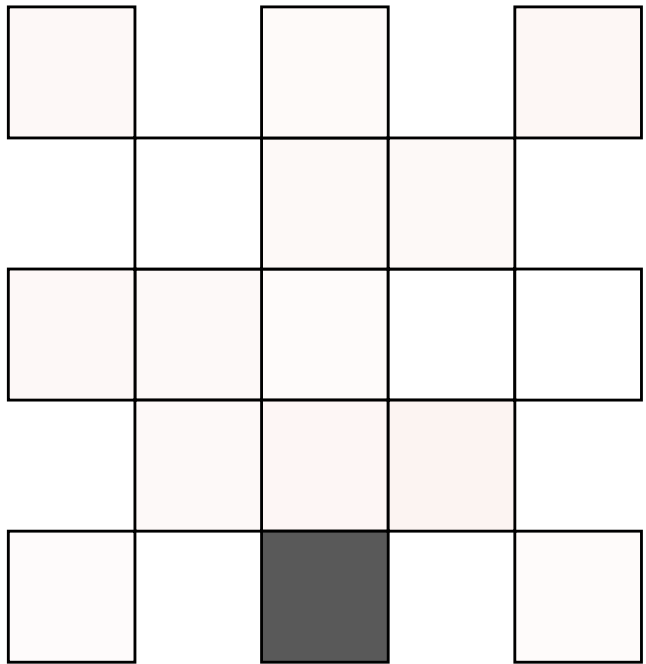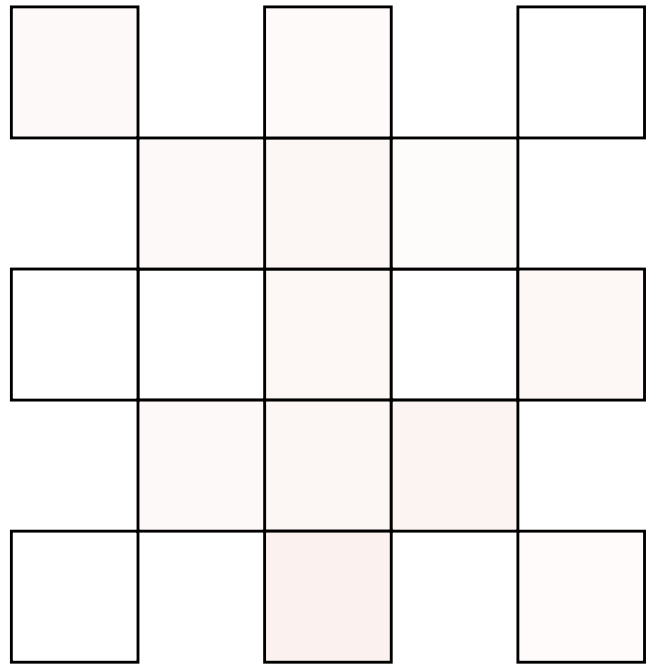

5-13021088-C-T

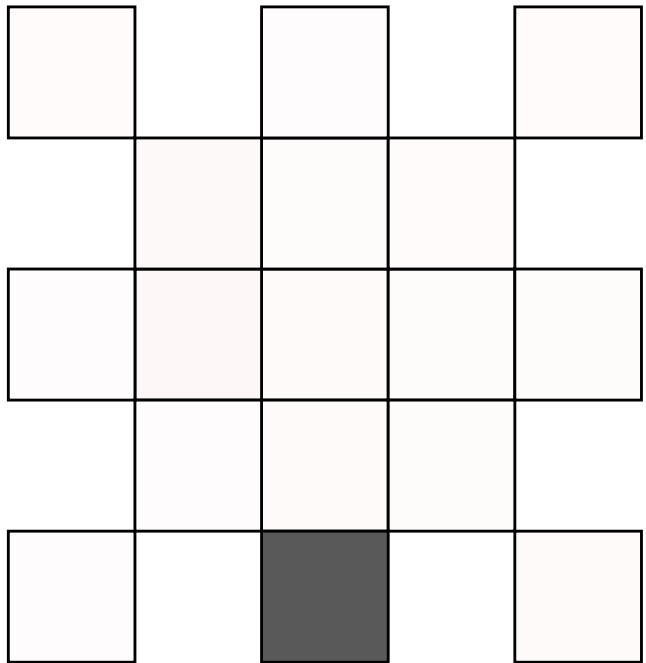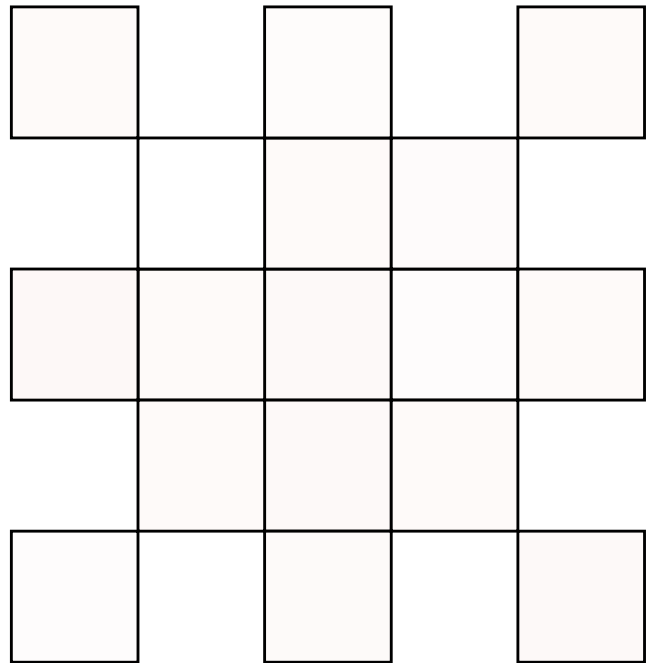



5-132489779-A-G

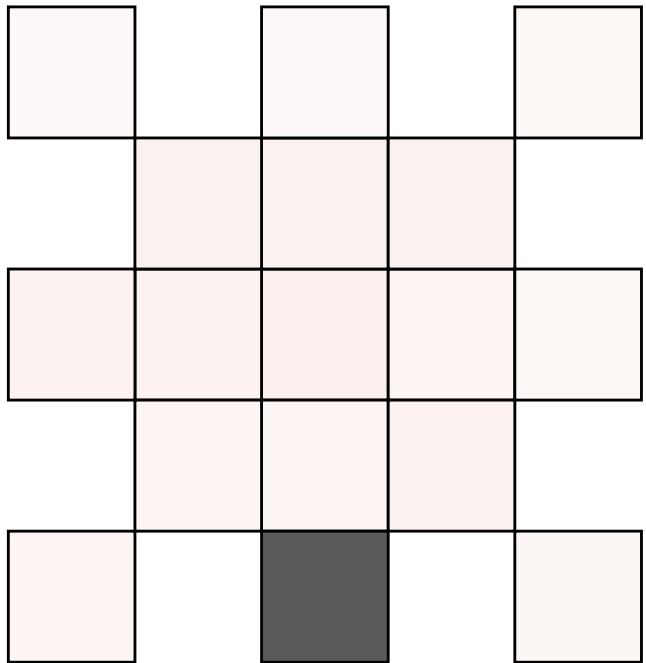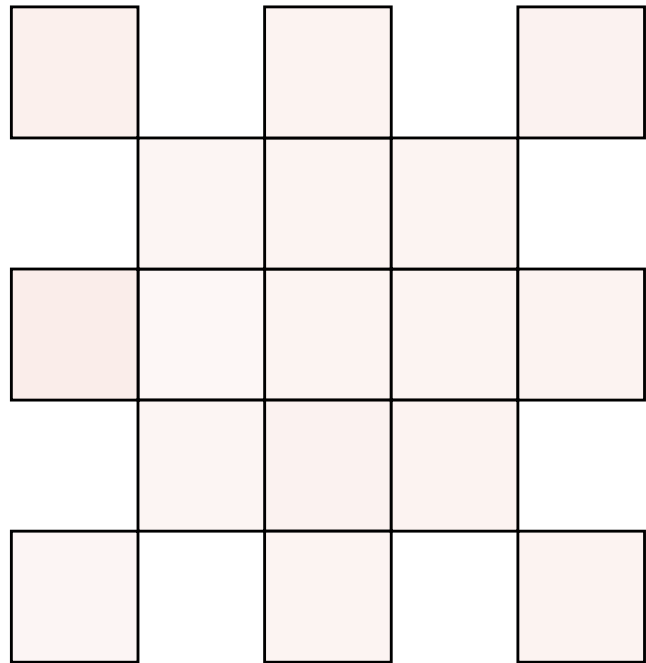

5-132635696-C-T

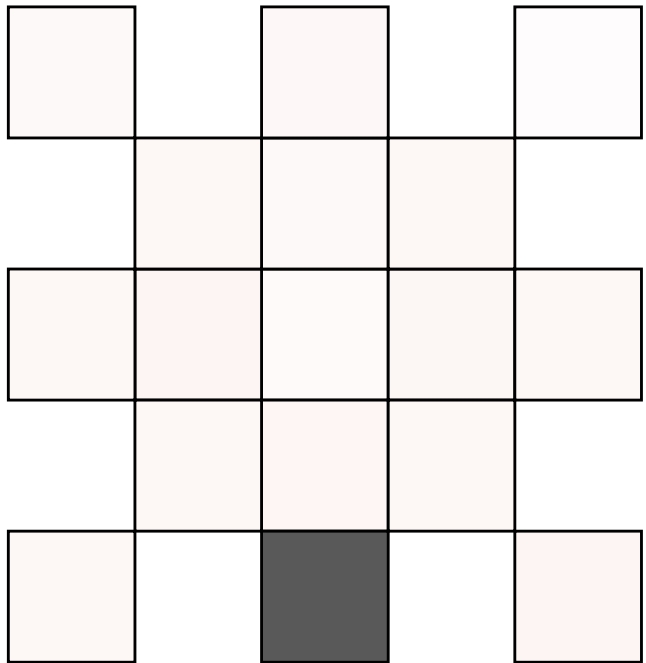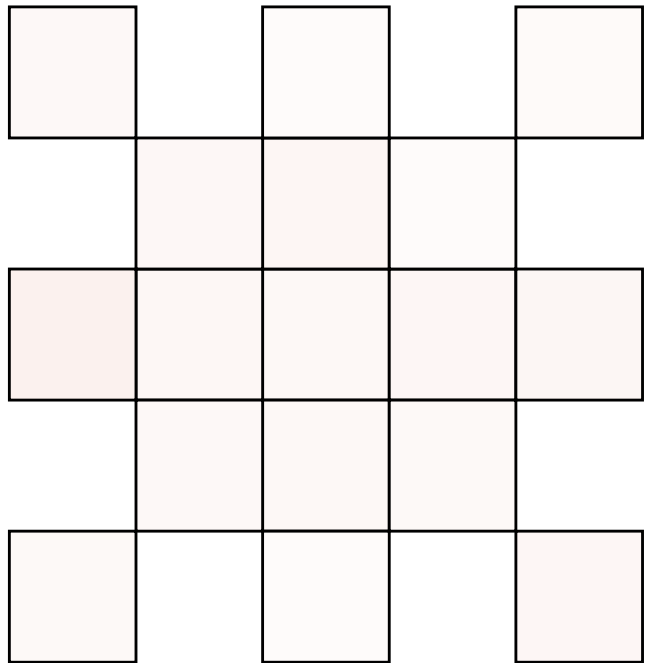

5-133636296-C-A

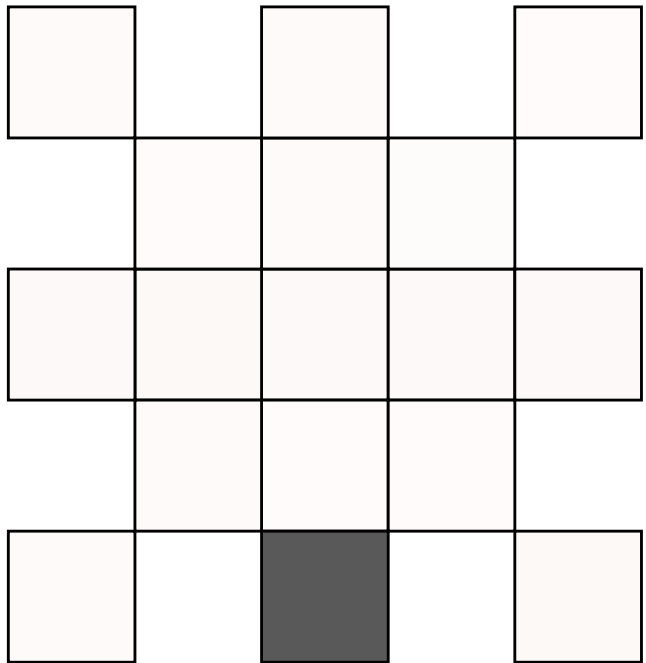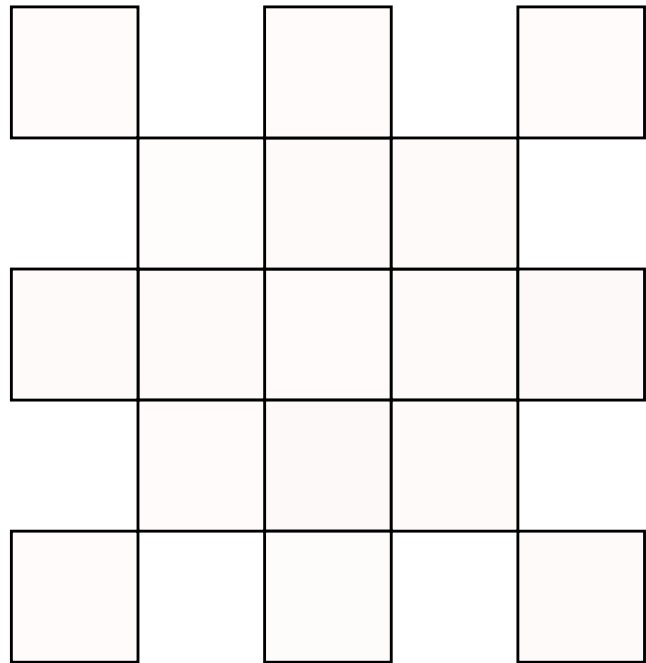

5-142247168-G-A

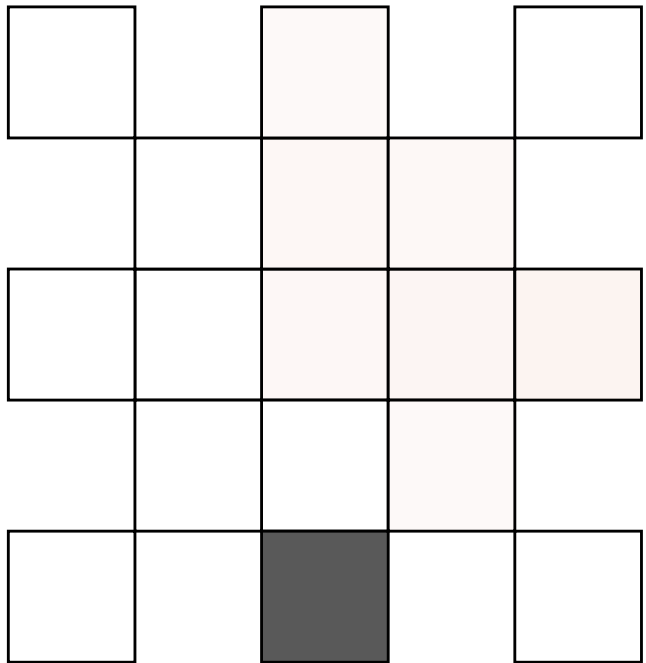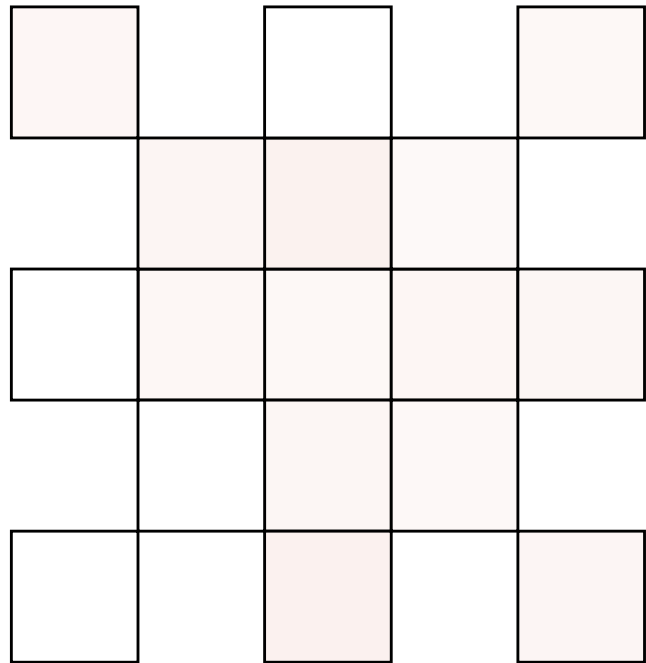

5-143984939-G-A

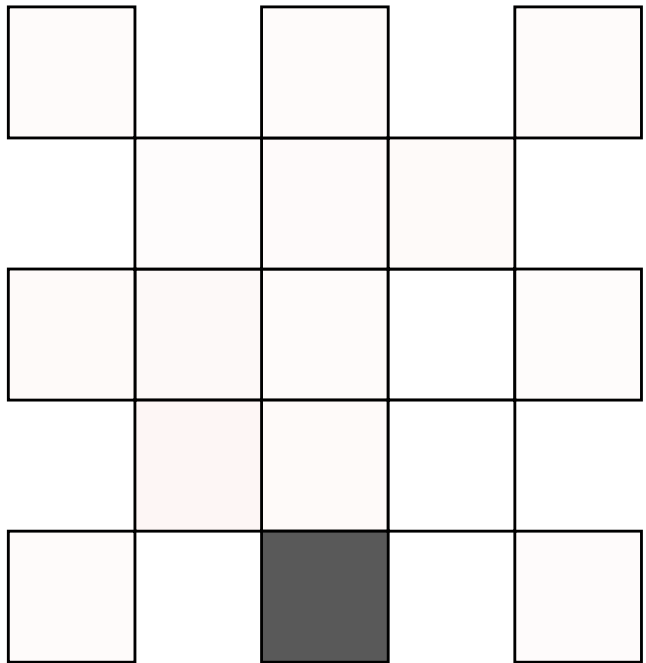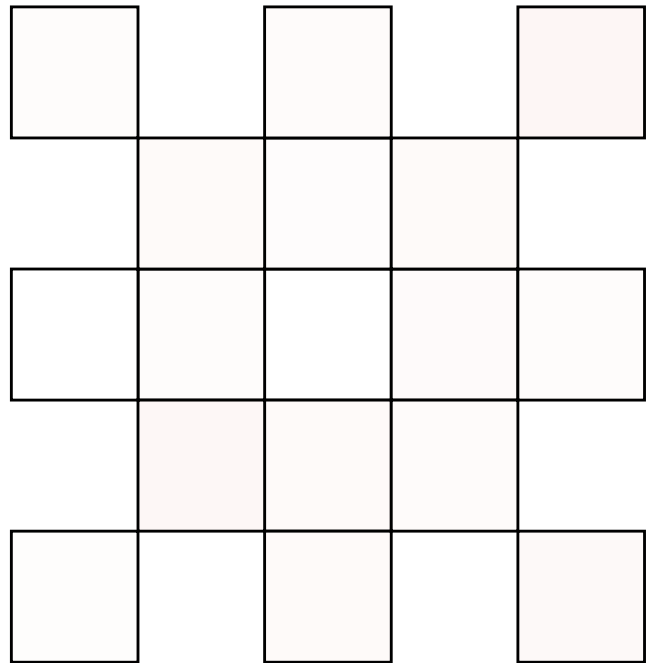

5-155350078-C-T

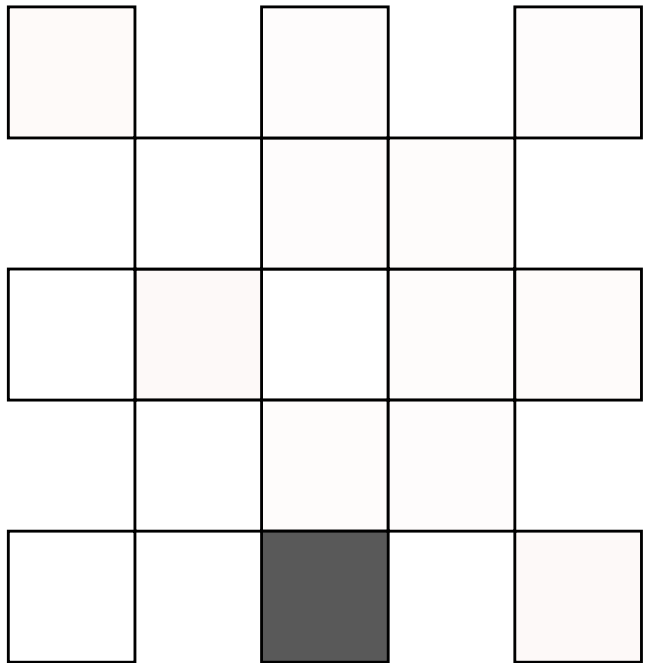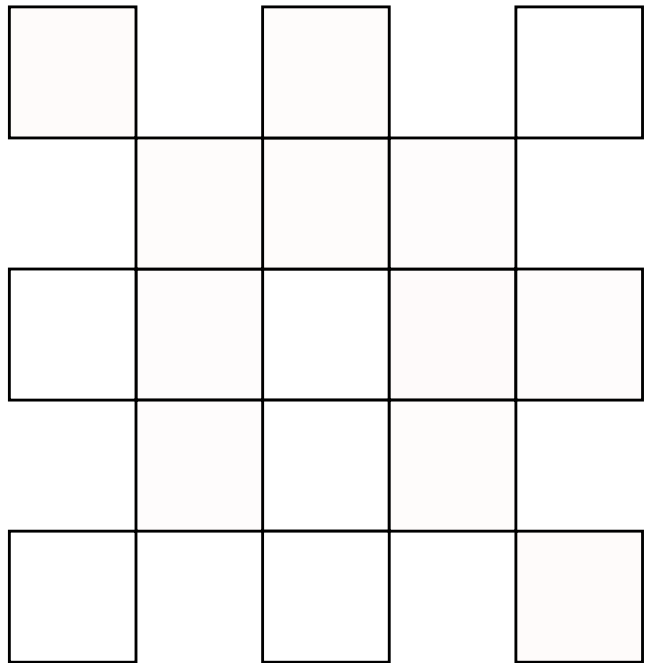

5-155351365-C-A

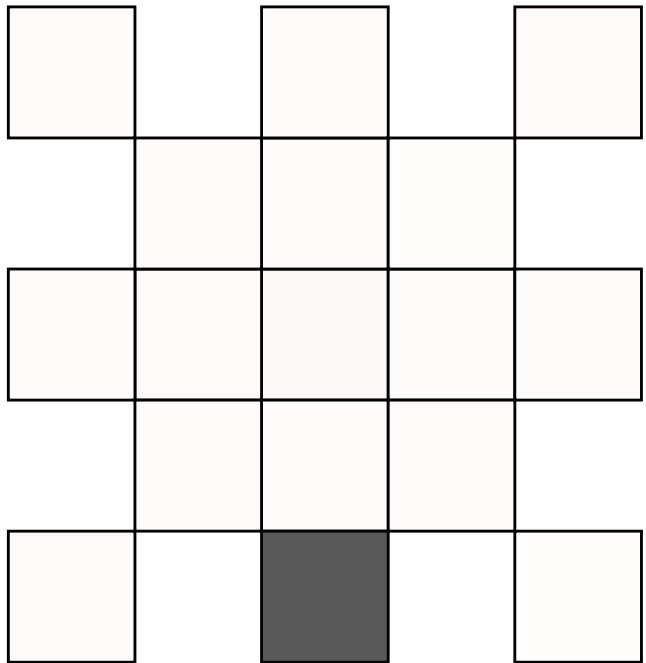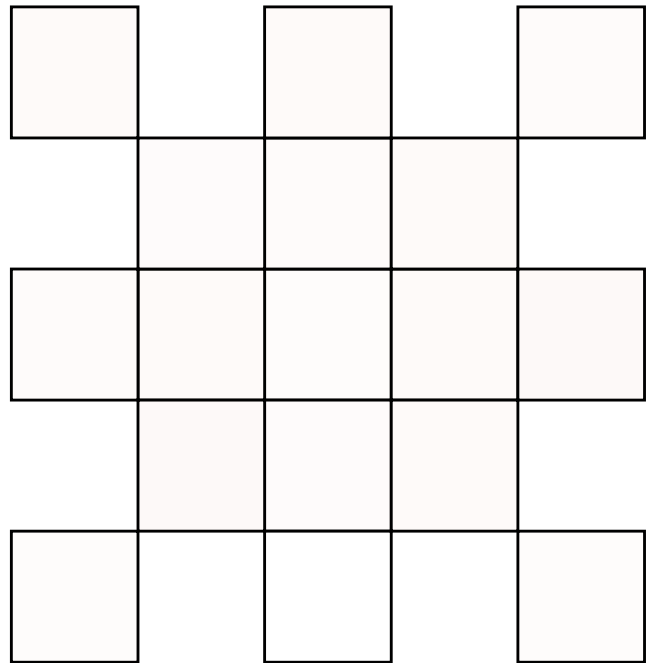

5-158180215-G-A

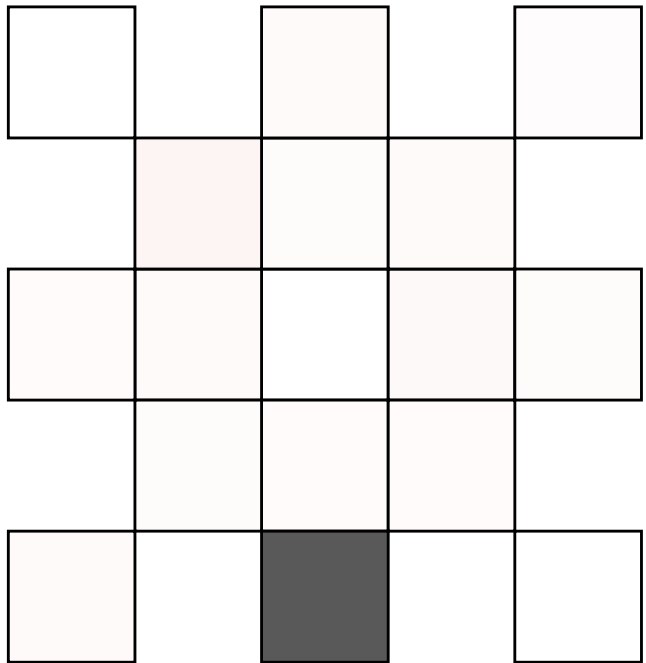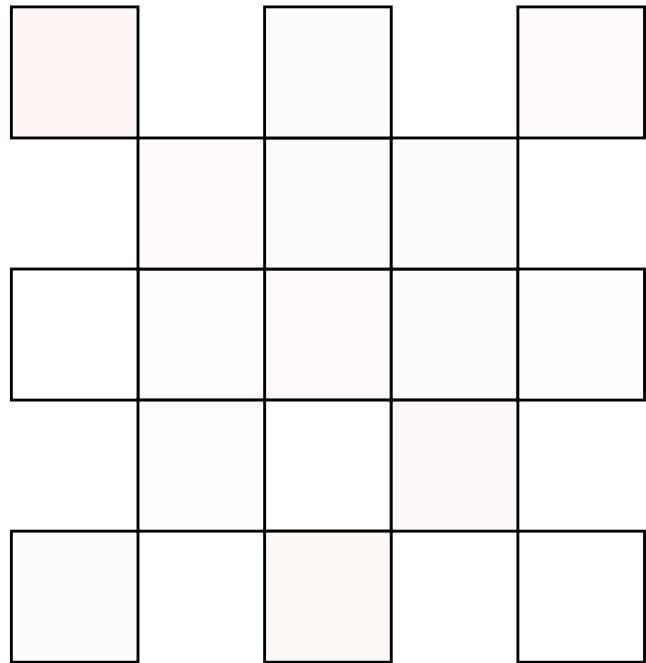



5-15936810-G-A

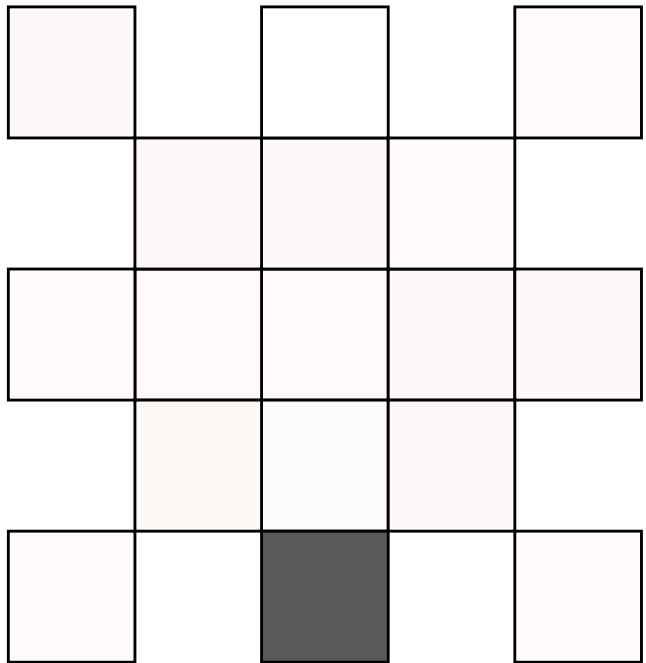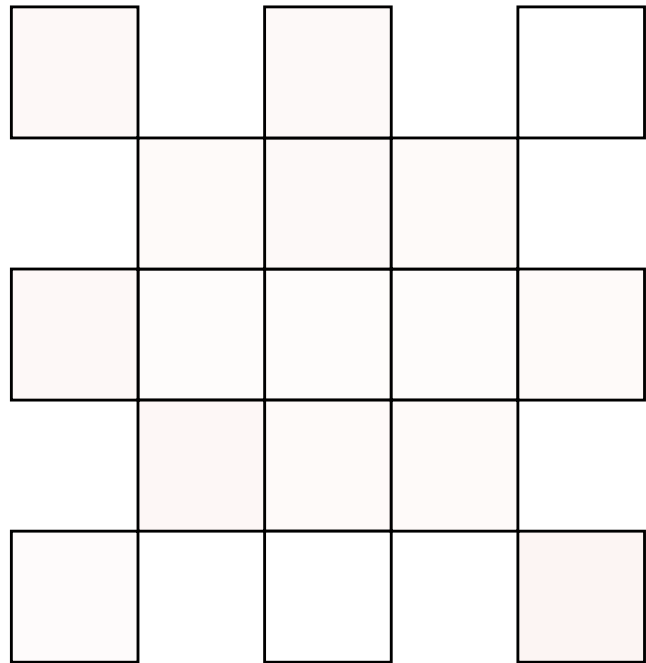

5-160583527-G-A

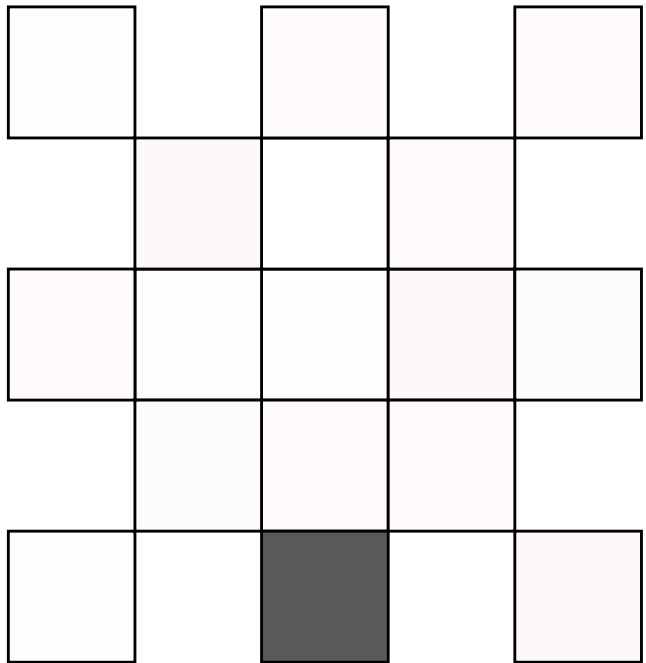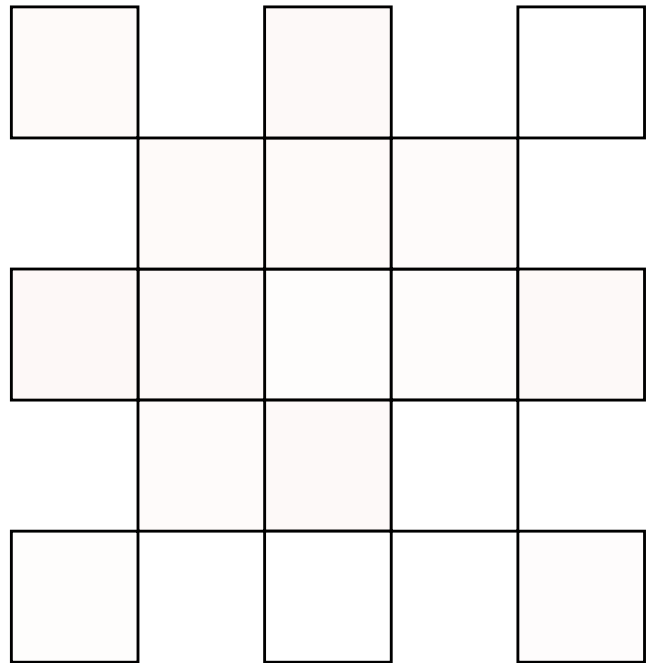

5-165691201-A-G

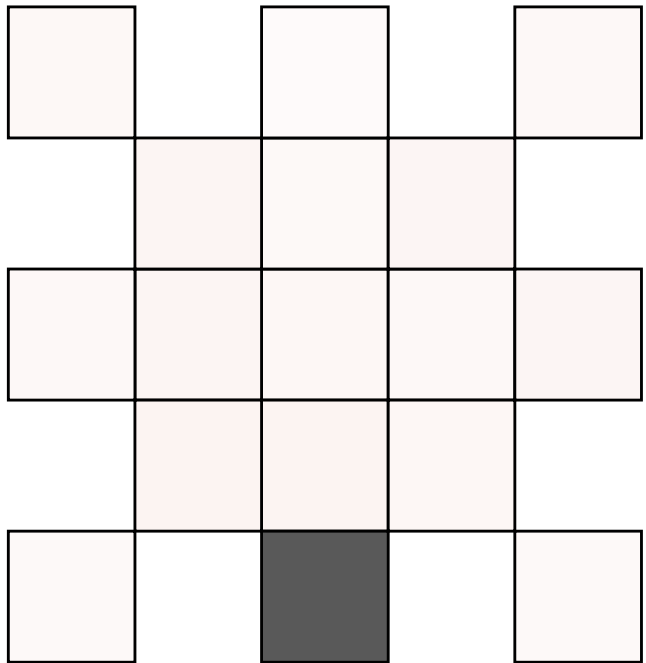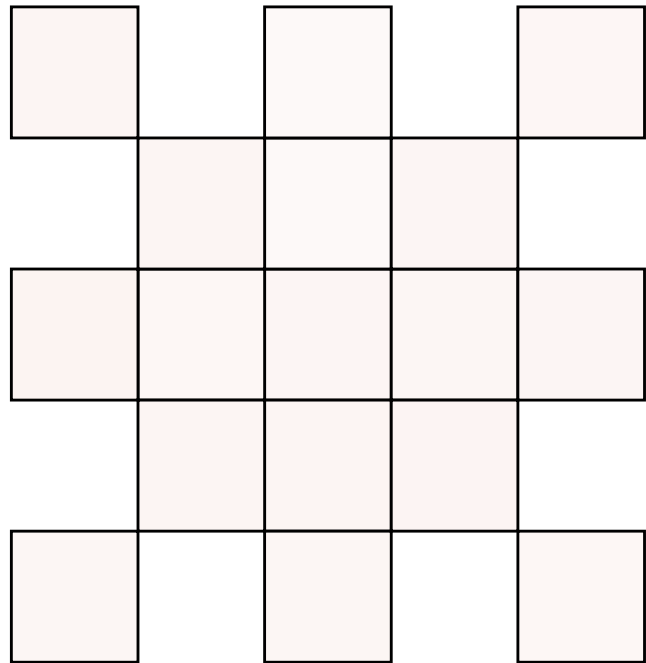

5-167949614-A-G

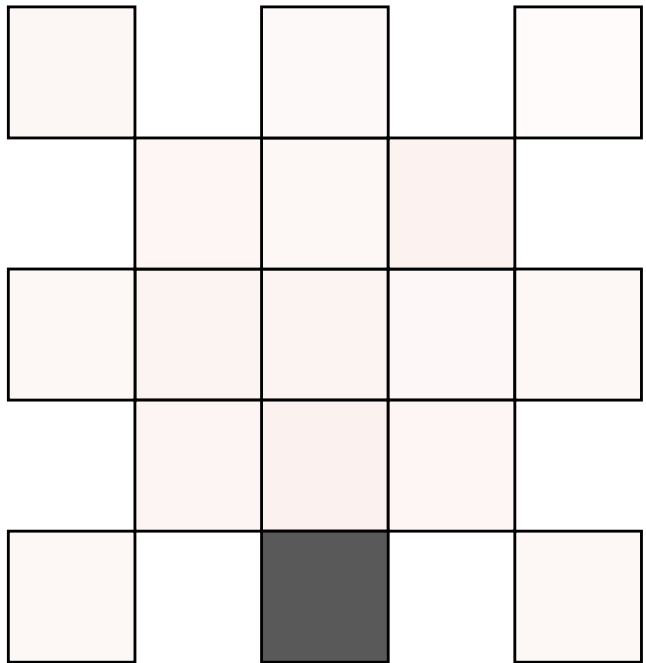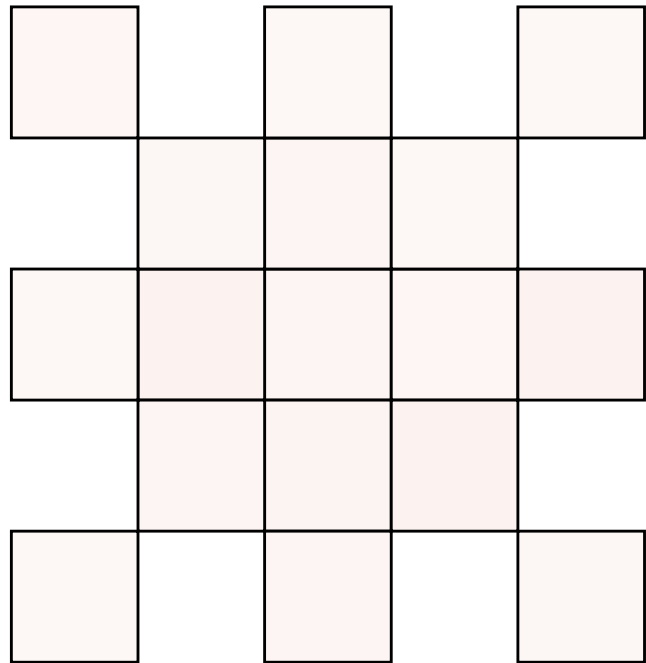

5-179554887-C-T

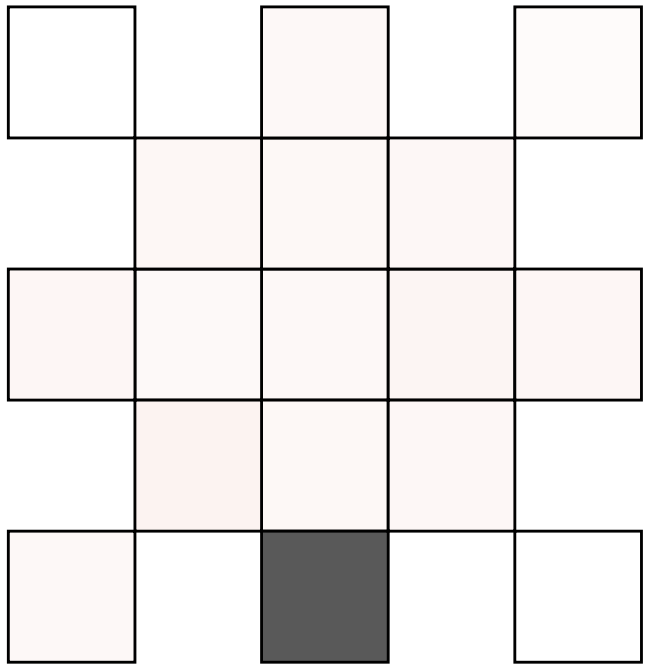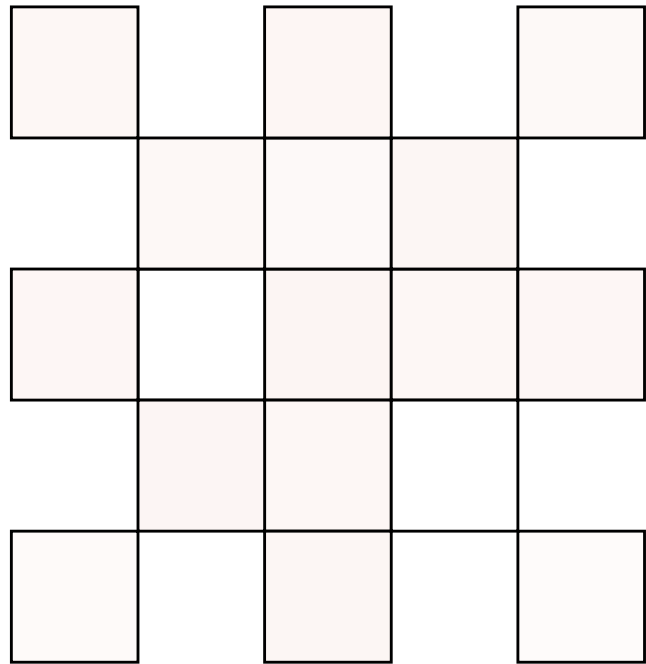

5-1949773-C-G

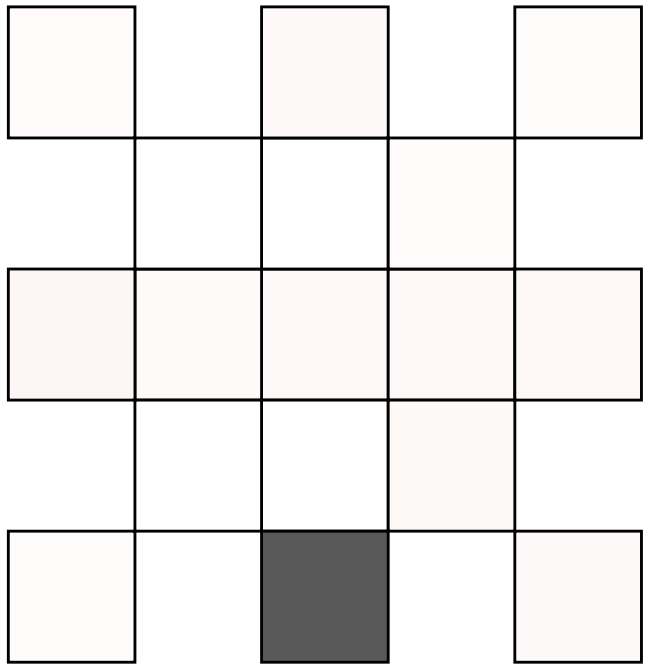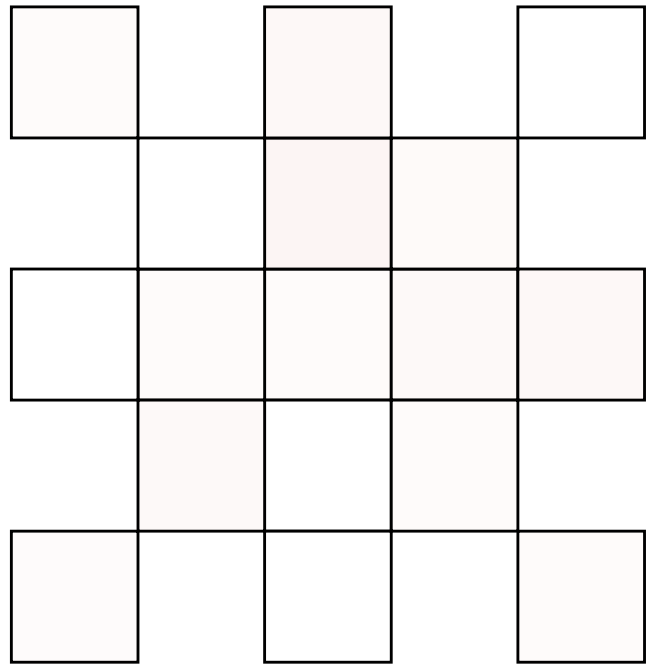

5-26502402-A-G

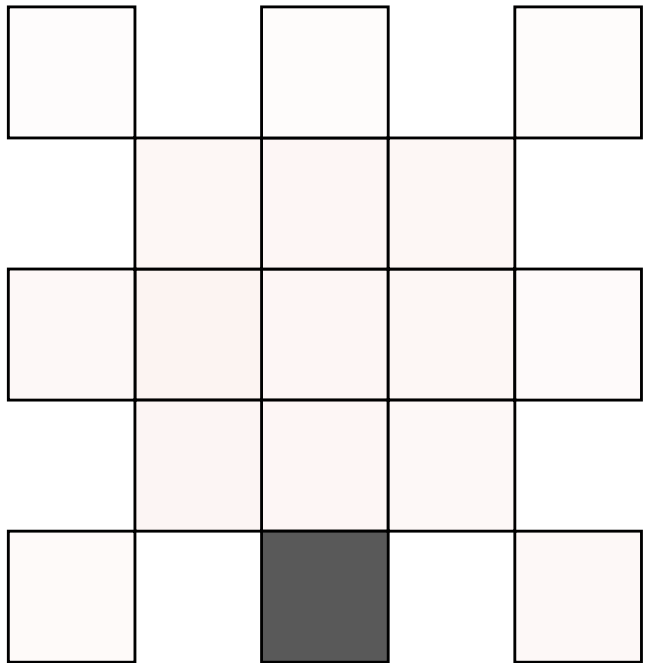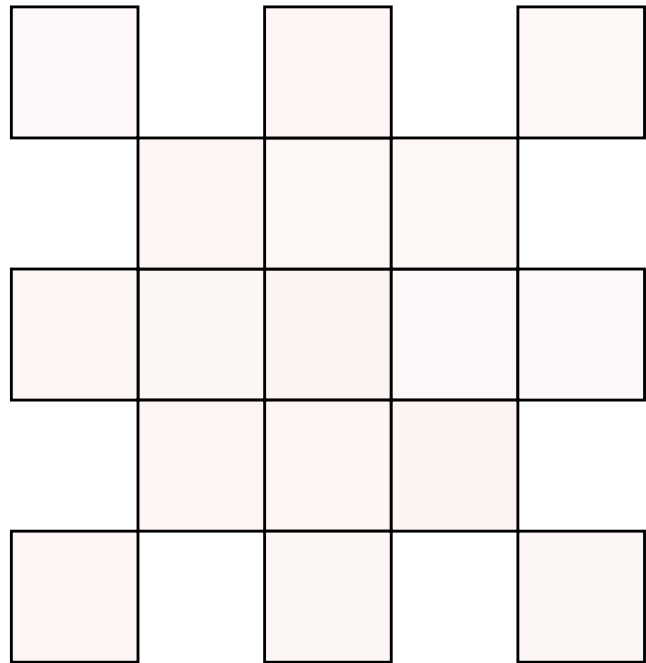

5-28689952-A-G

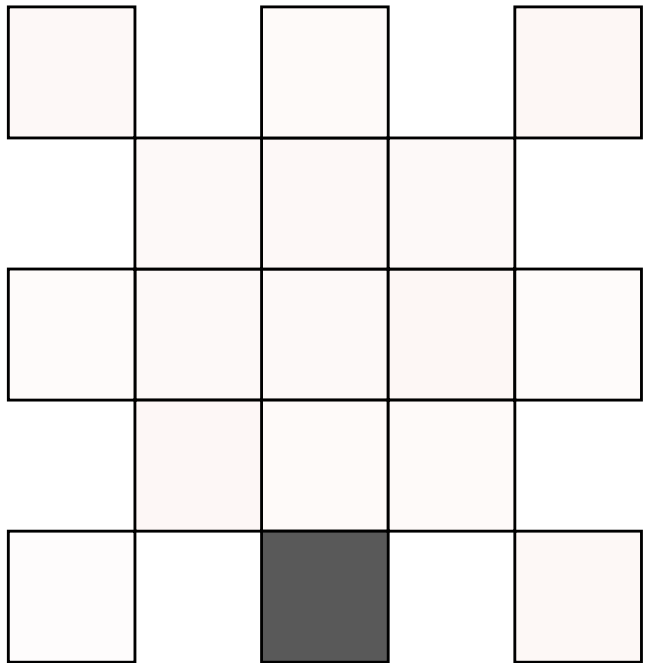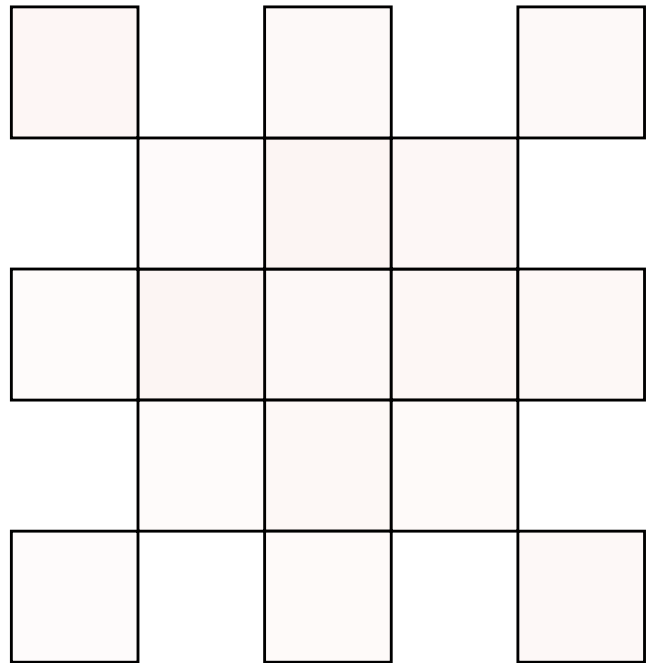



5-30650591-C-A

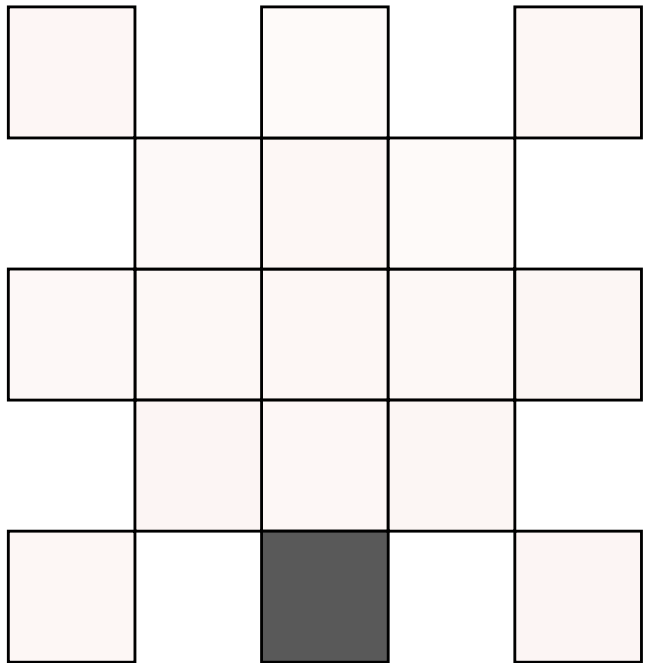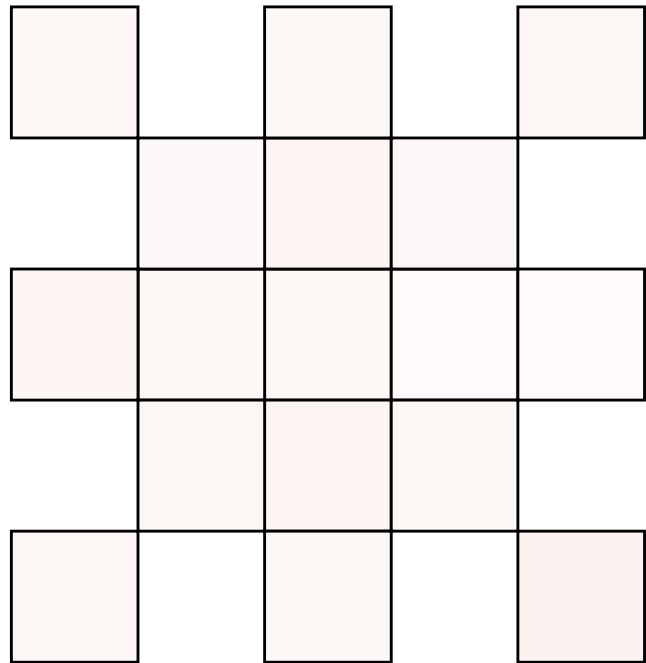

5-30923233-C-T

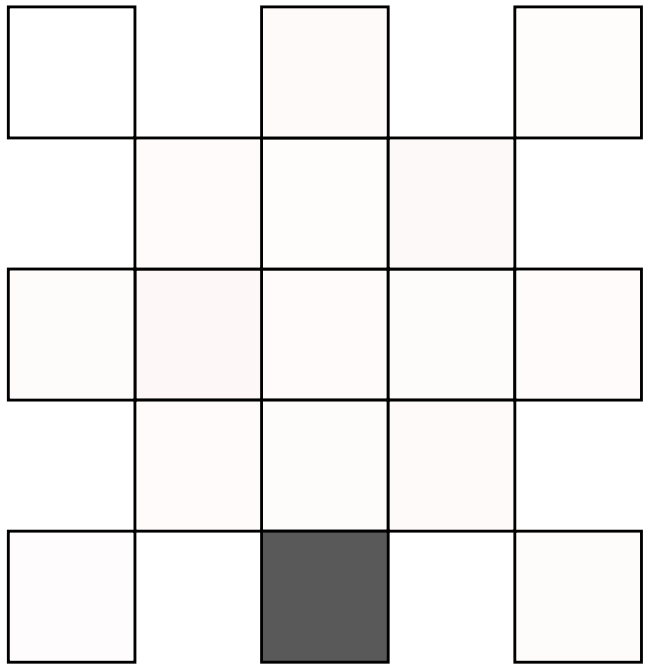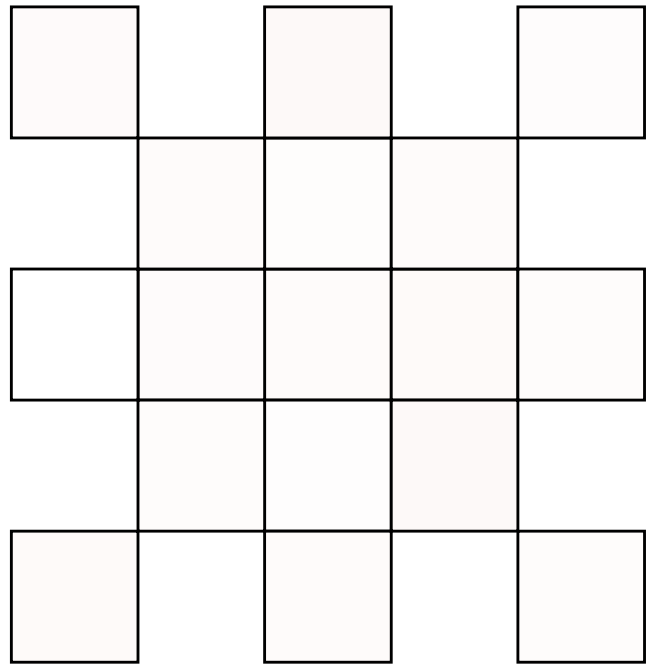

5-42394330-C-T

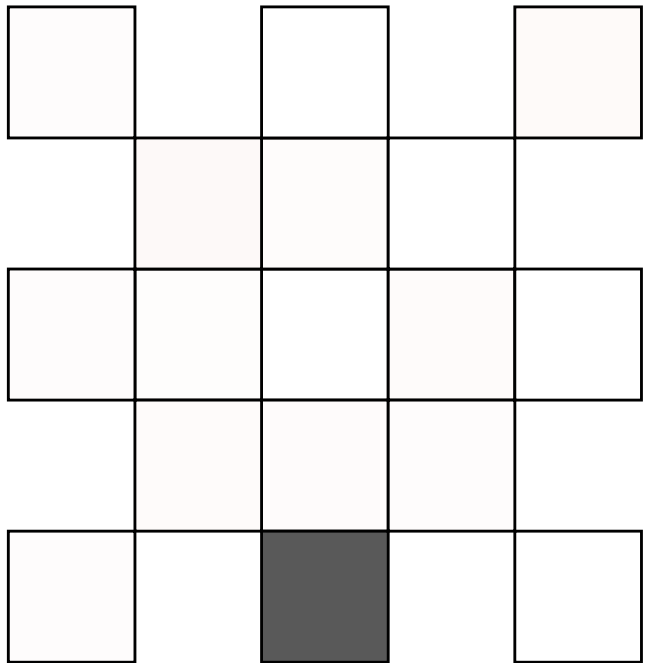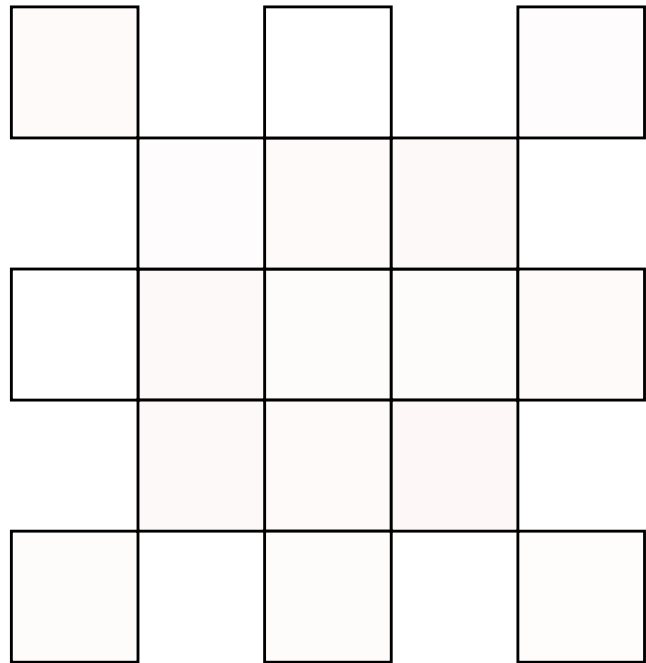

5-42474677-G-T

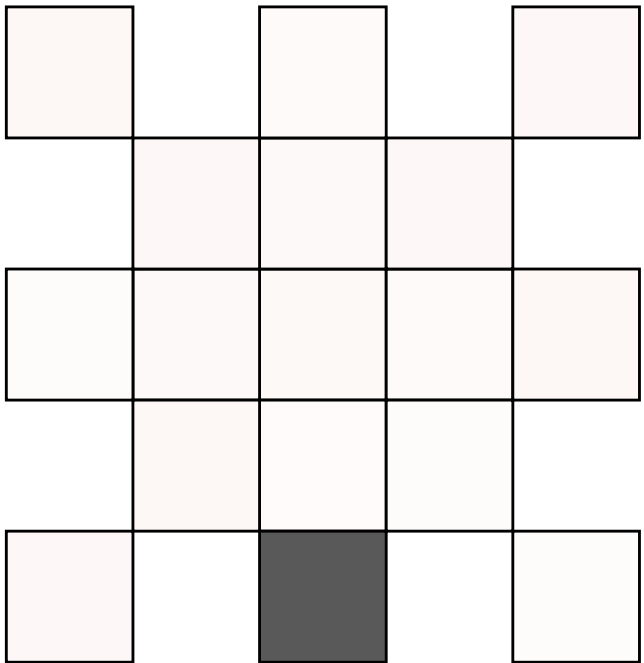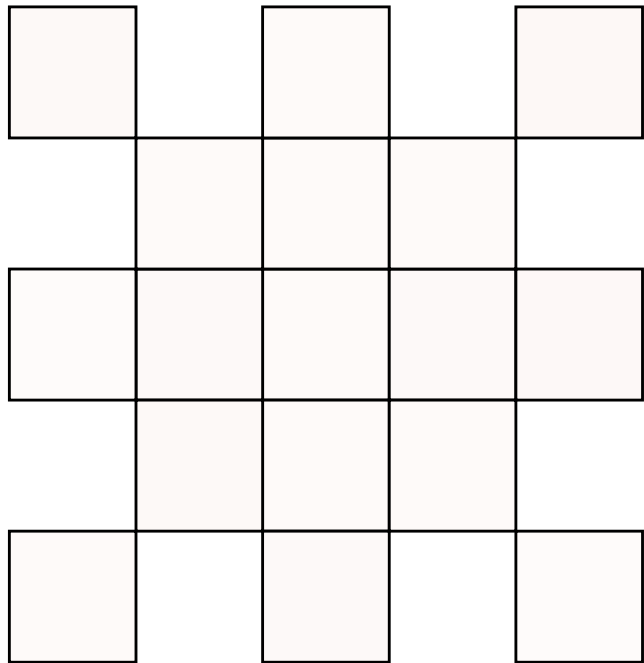

5-50102837-T-C

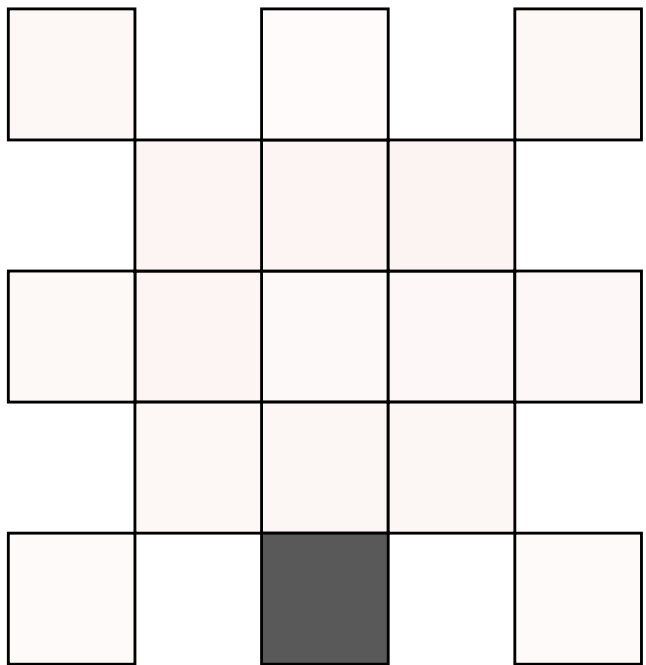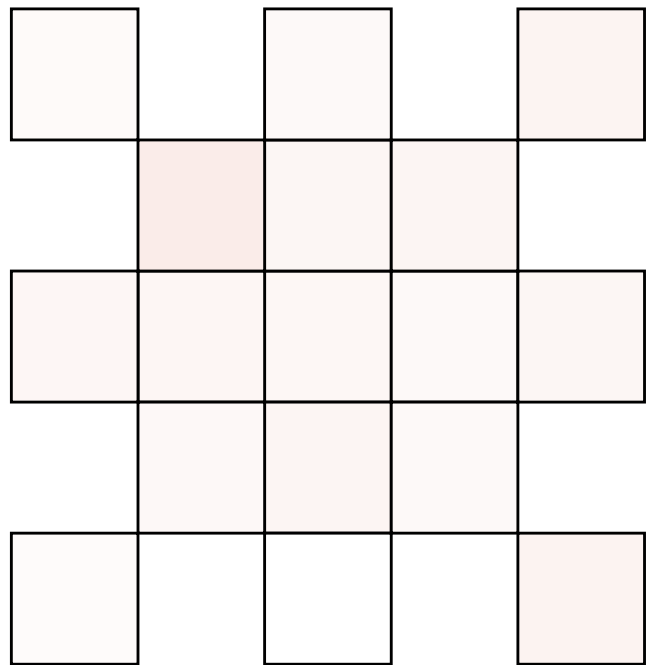

5-5353260-A-G

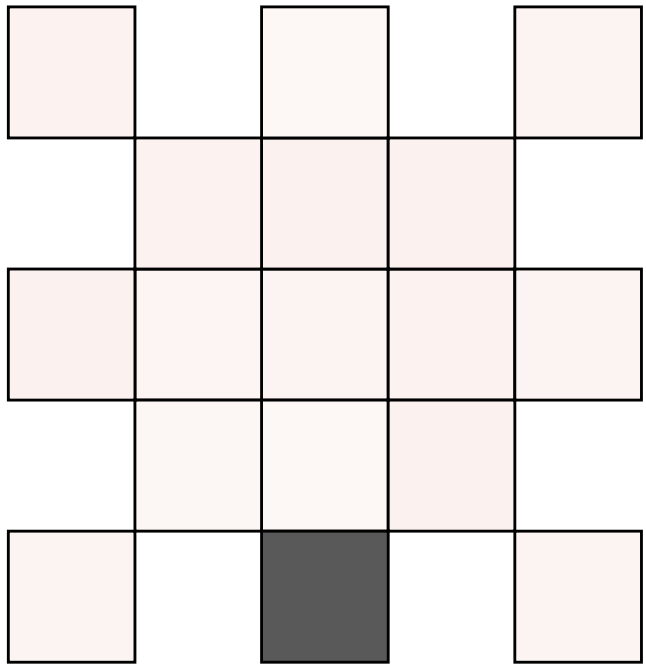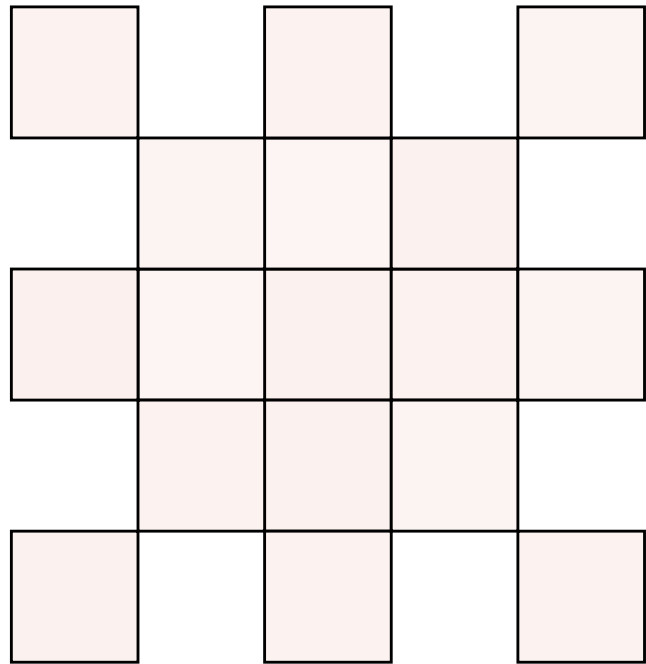

5-57965108-C-T

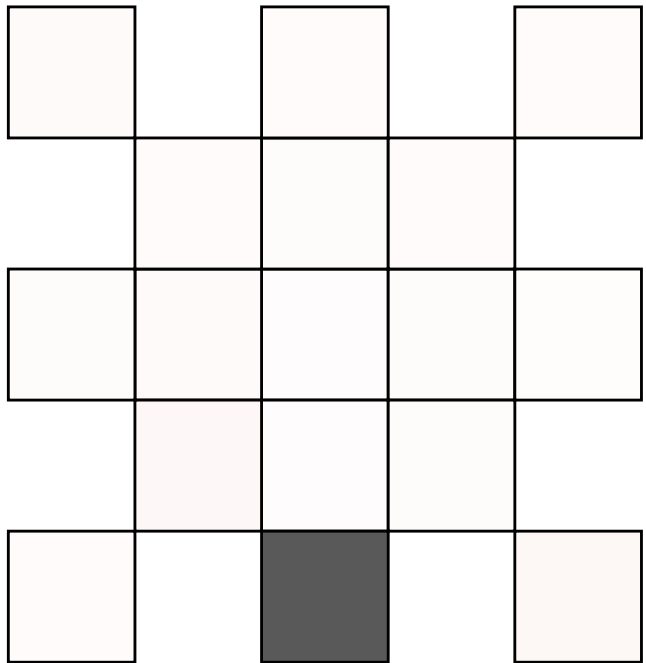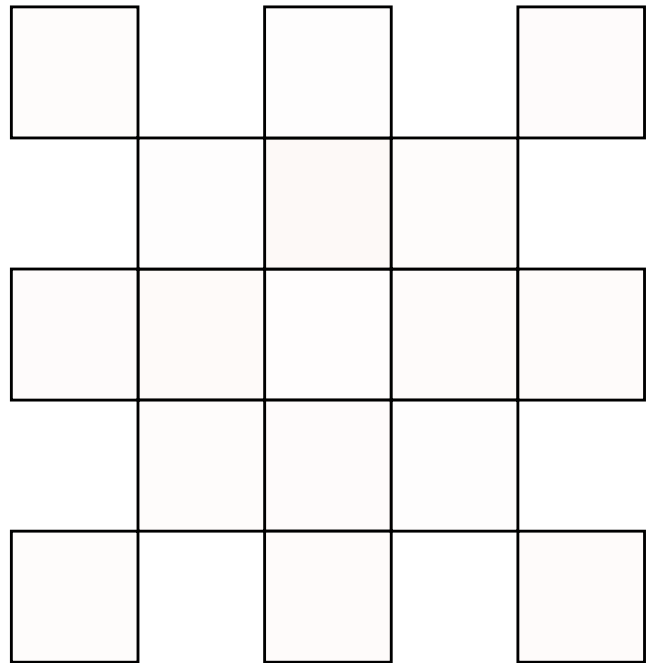

5-62110494-G-A

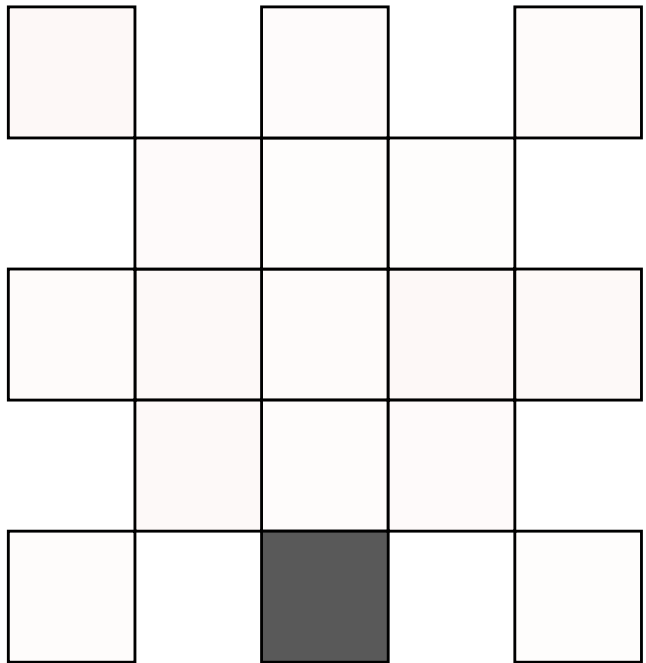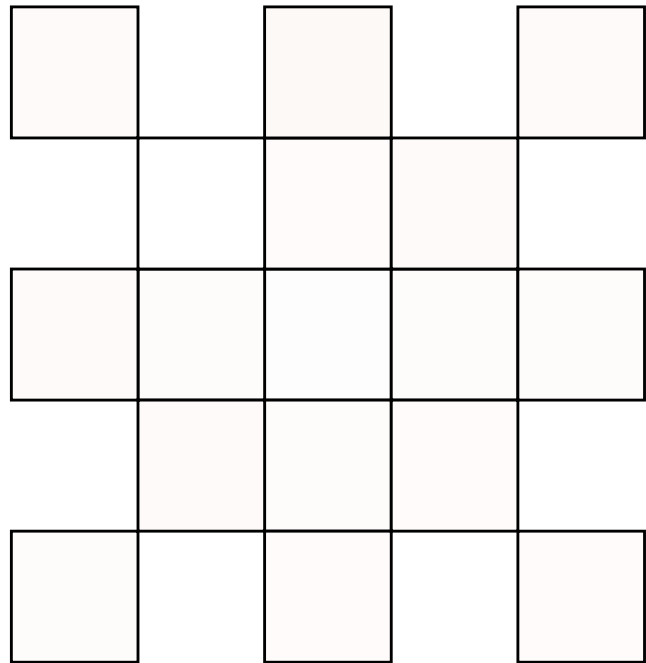



5-64328747-C-T

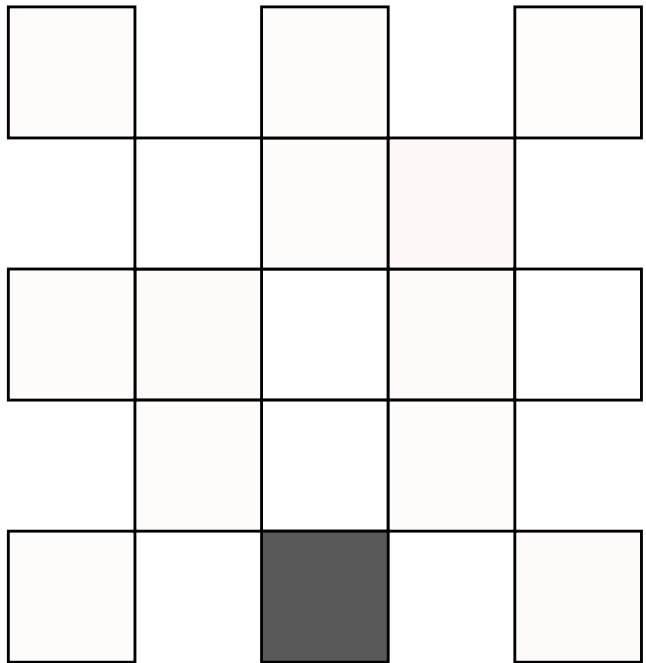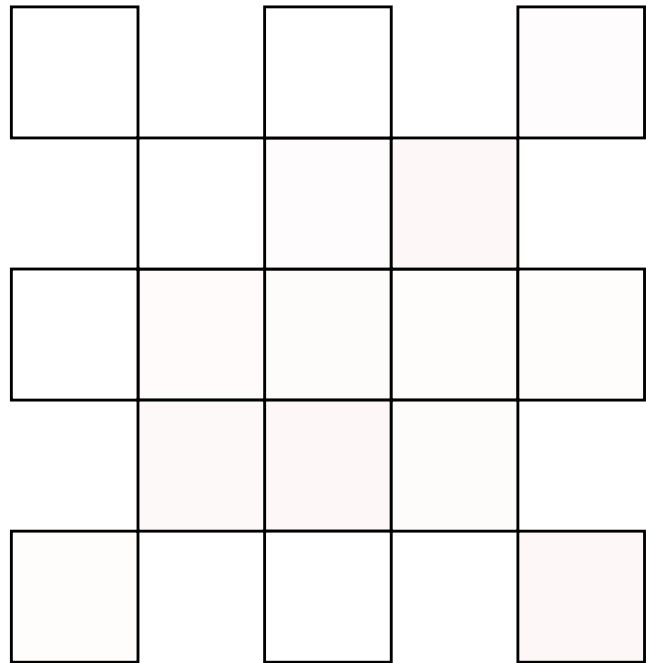

5-66922121-G-T

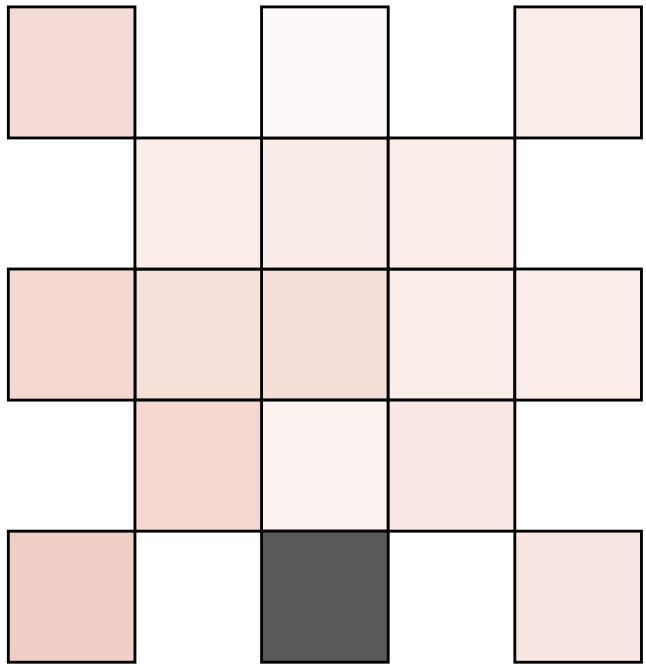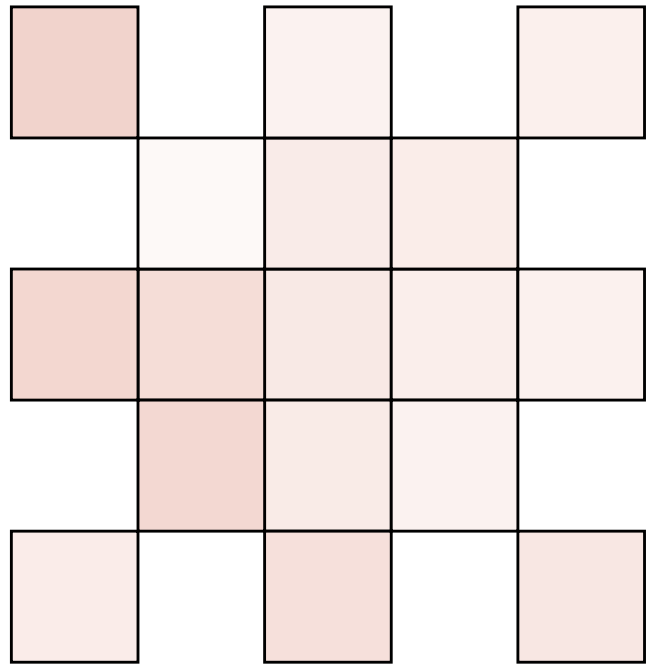

5-67667744-C-T

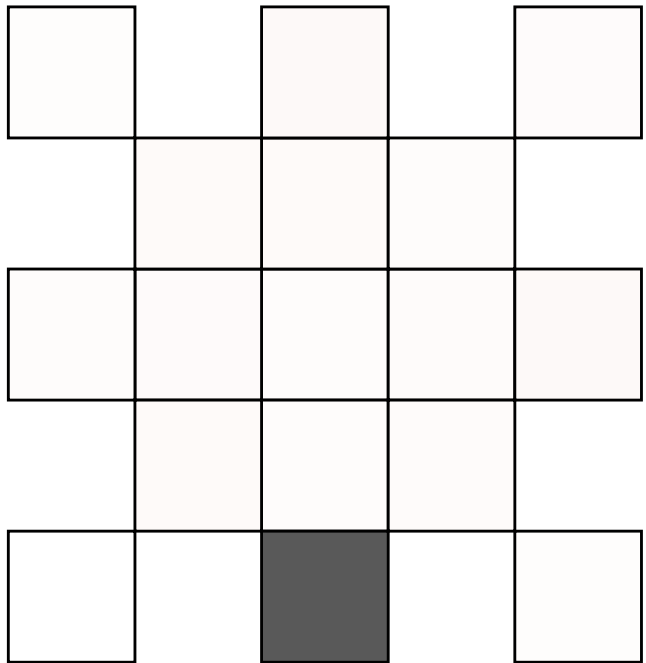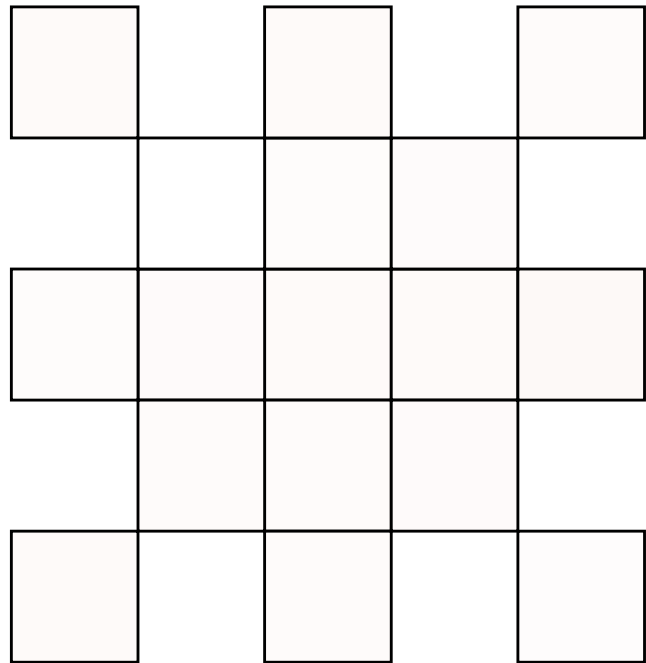

5-7018116-G-A

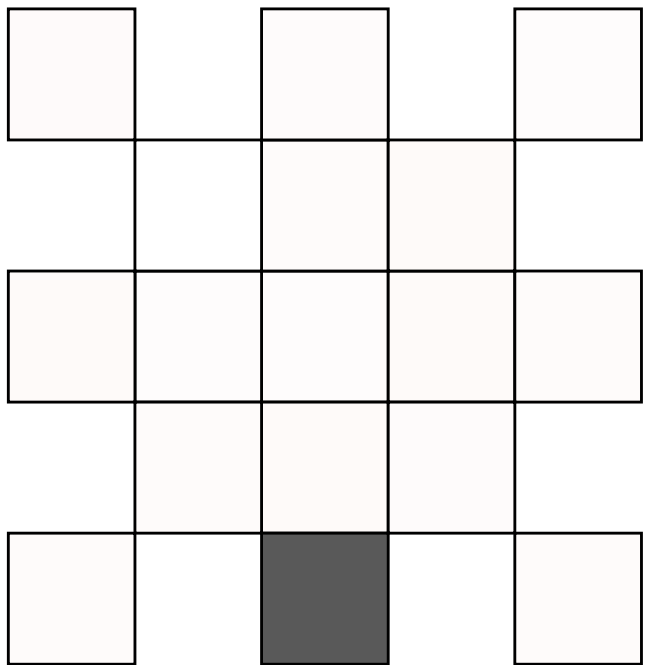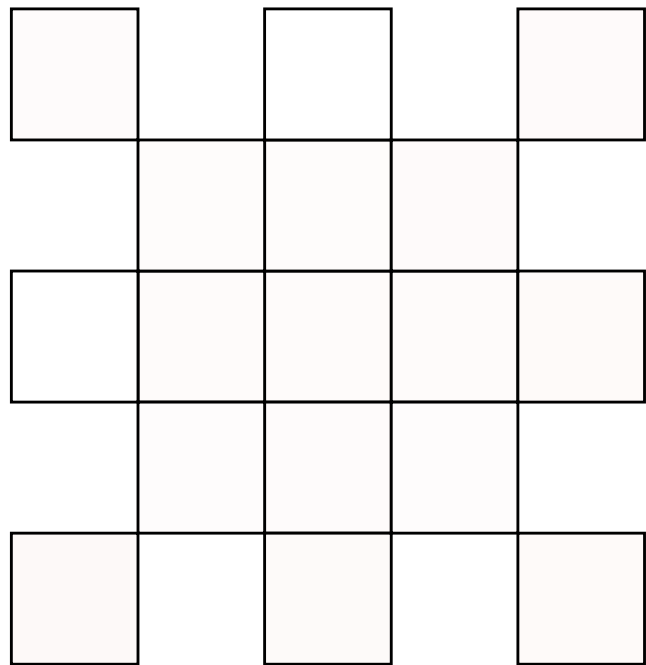

5-76511703-G-A

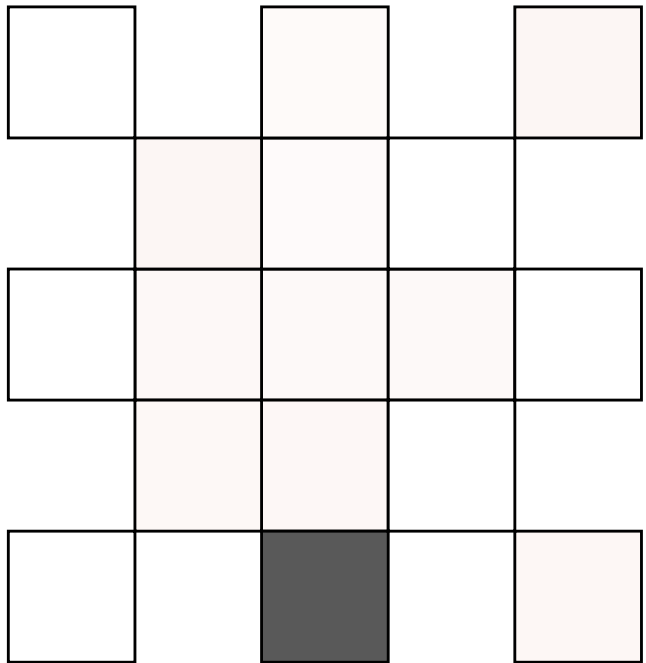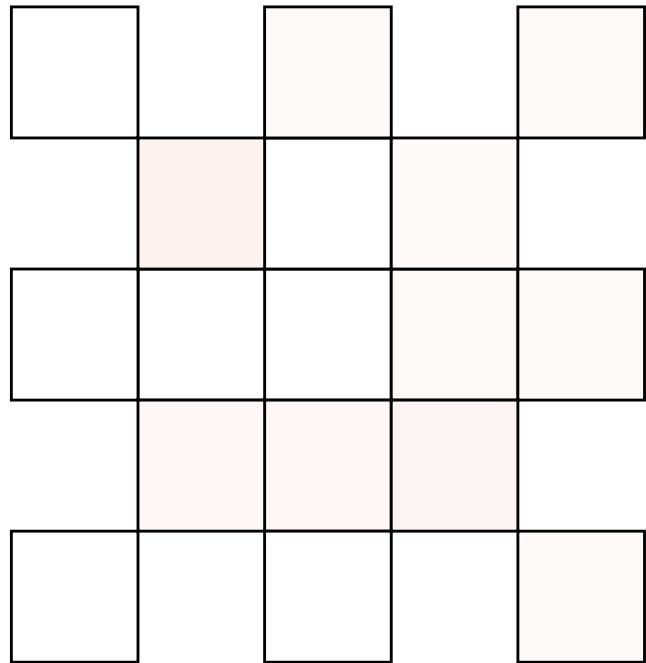

5-7667409-C-G

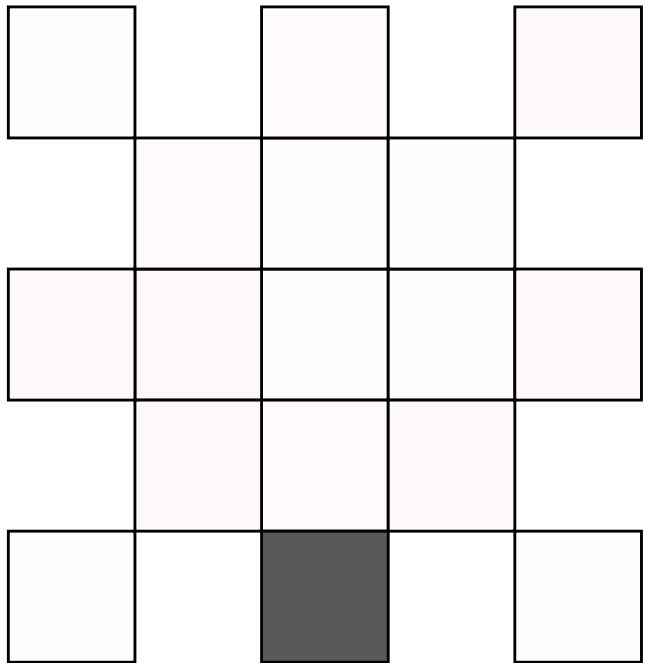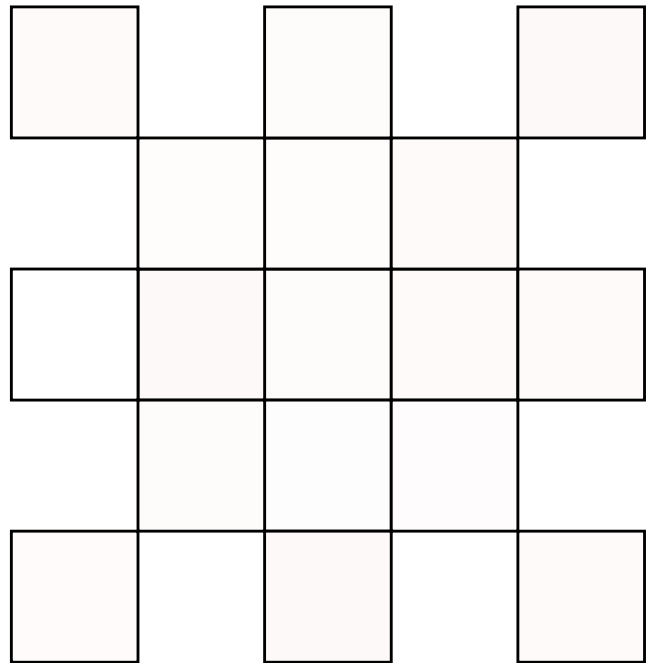

5-77299567-G-A

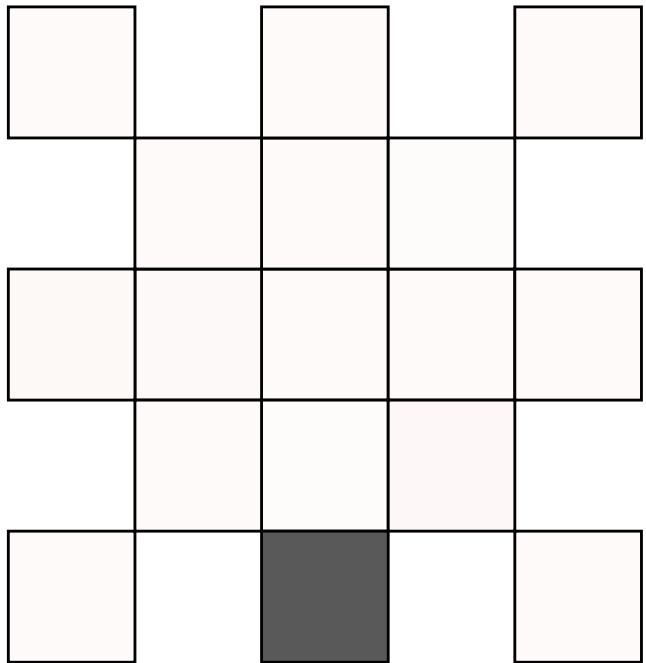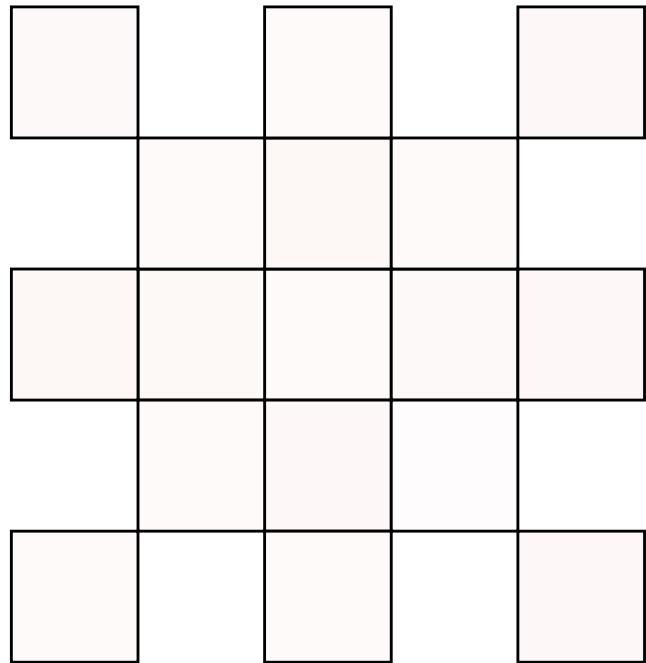

5-7771752-C-T

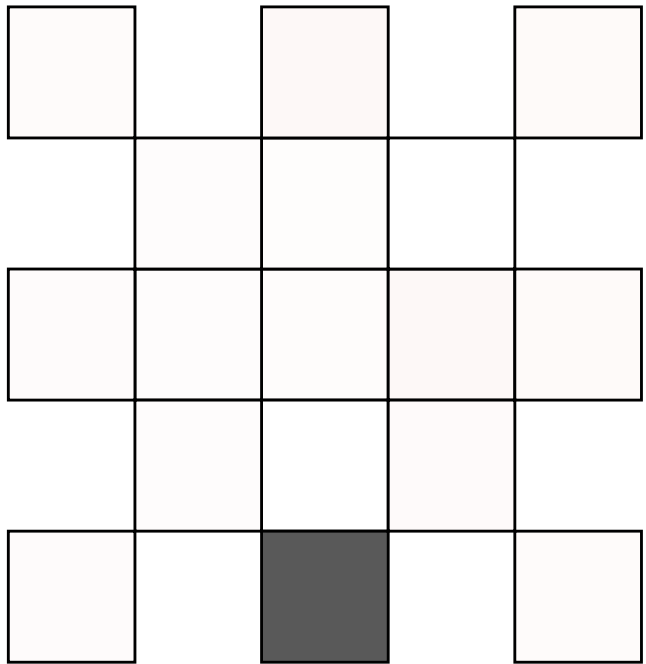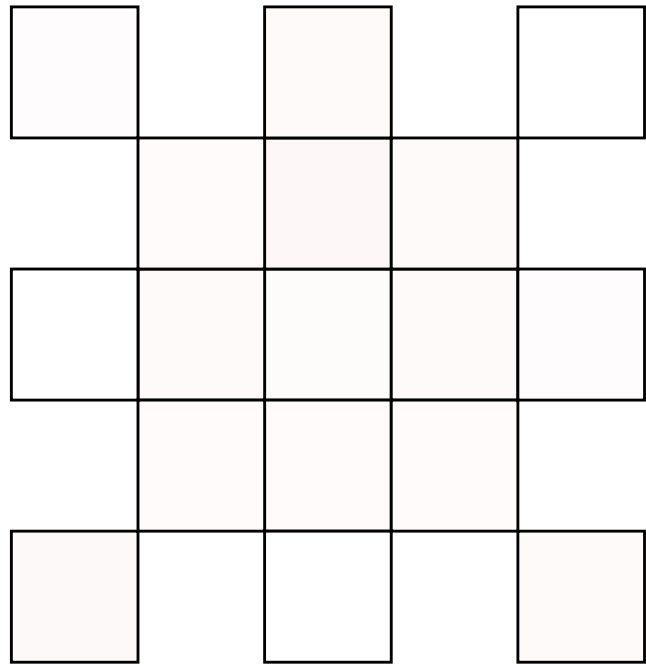



5-96456832-G-A

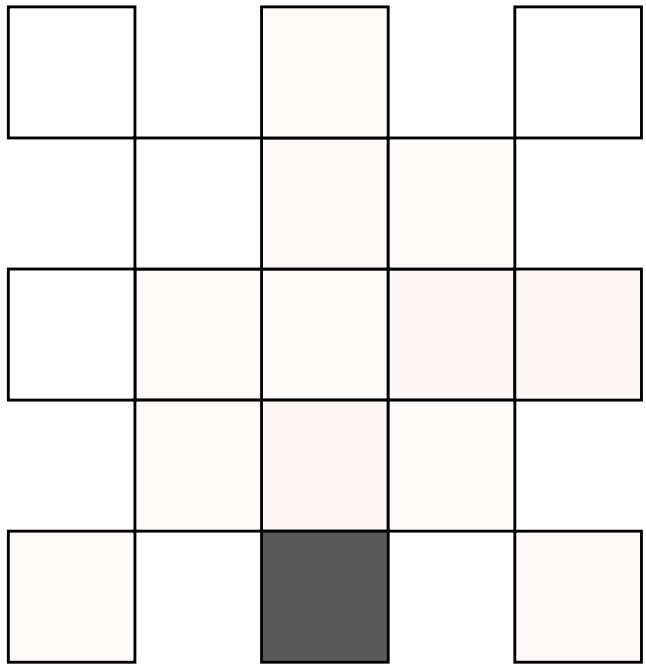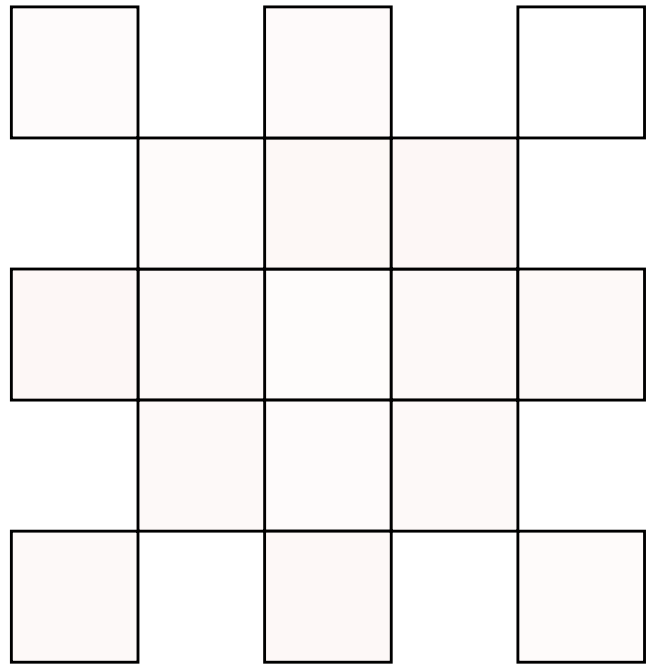

5-99372353-G-A

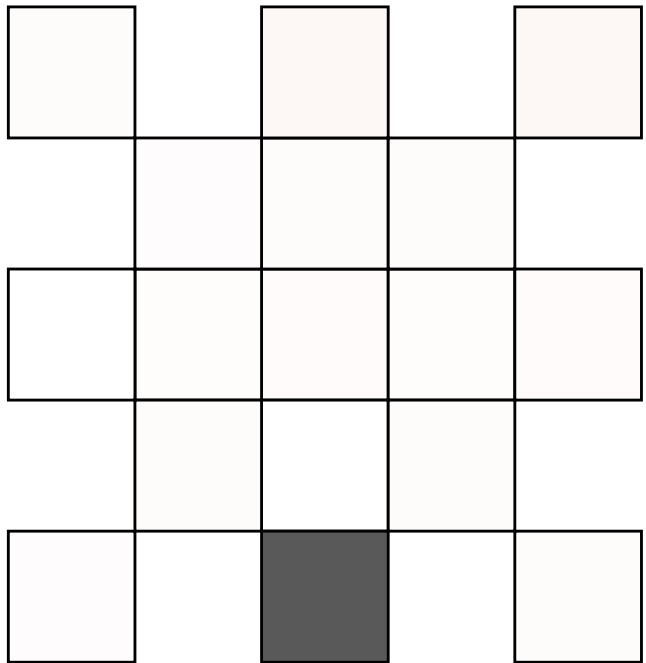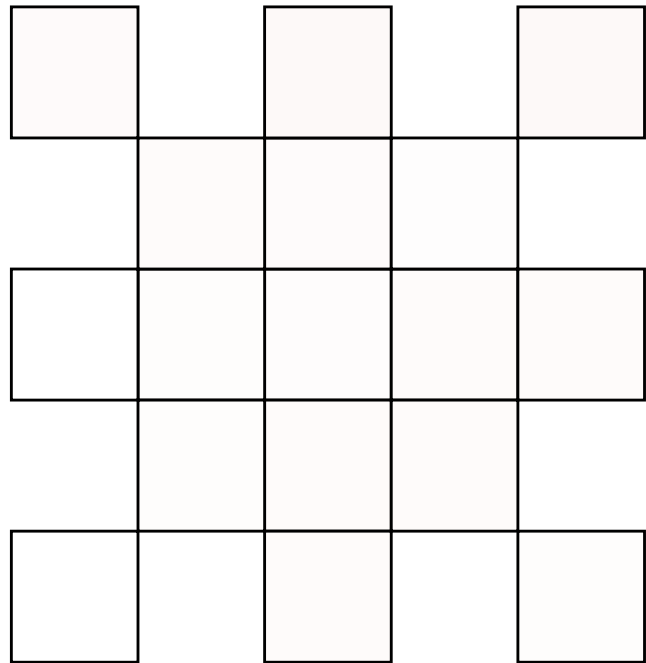

6-100351687-C-T

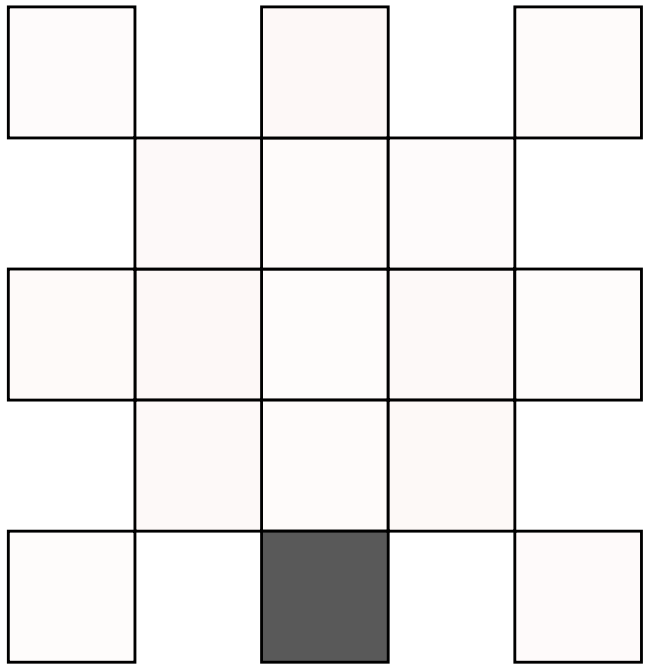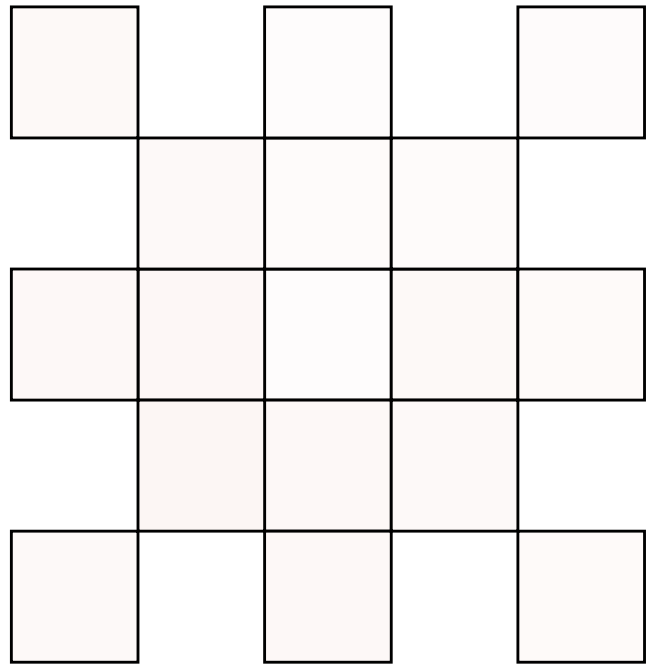

6-102878754-T-A

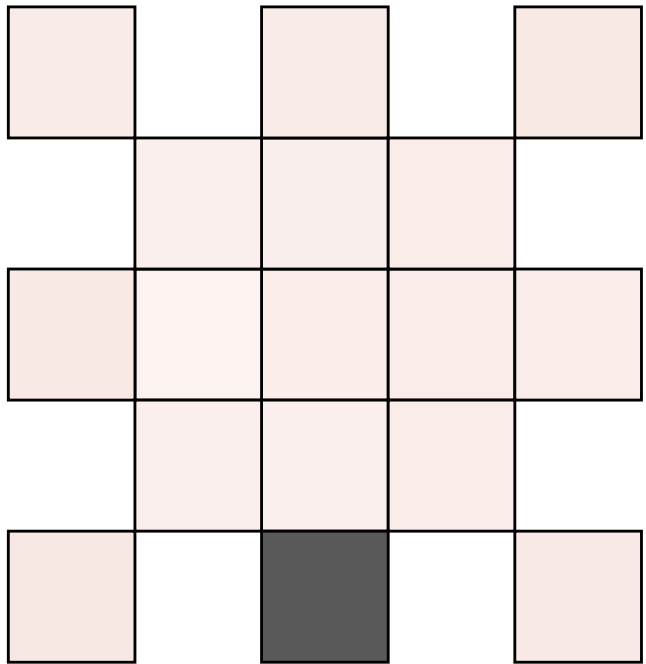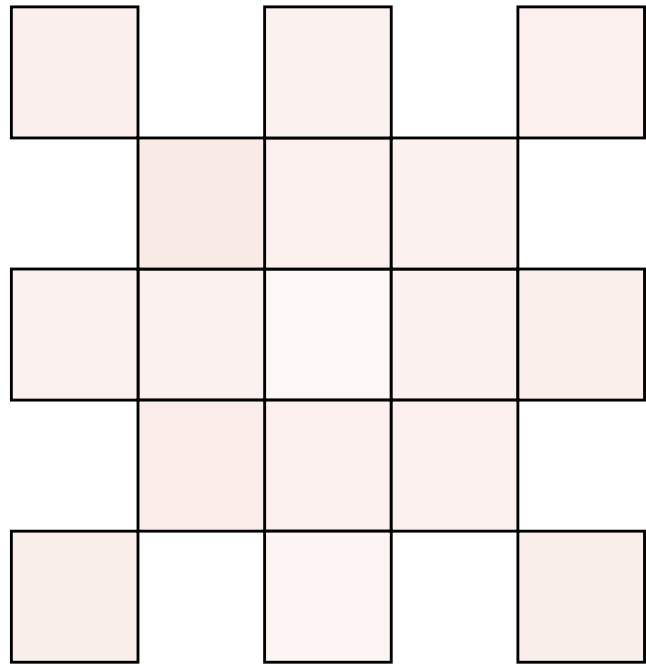

6-1039242-G-A

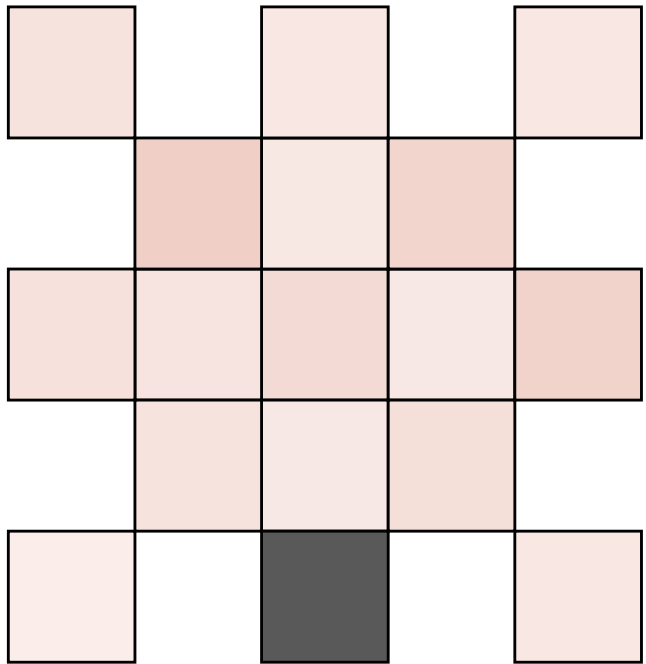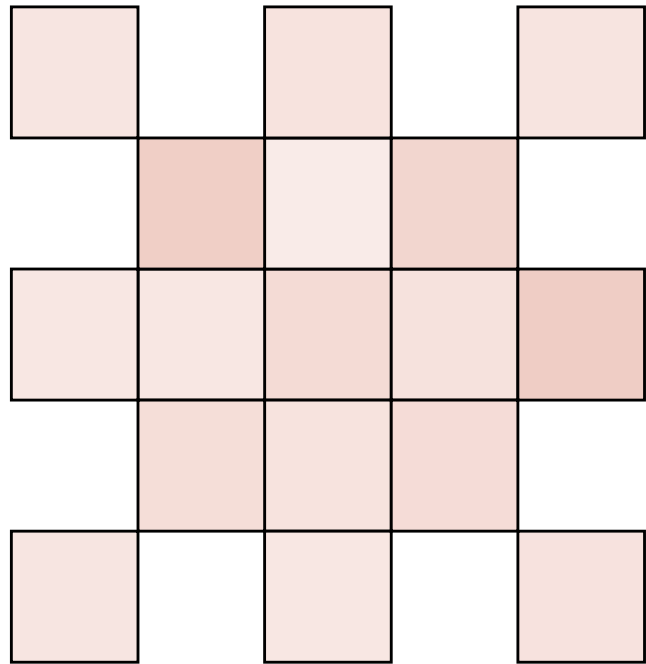

6-108325070-A-G

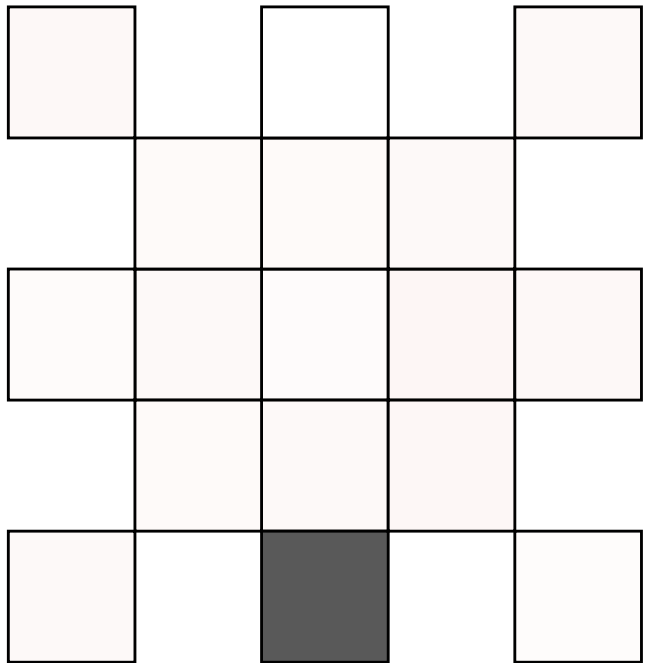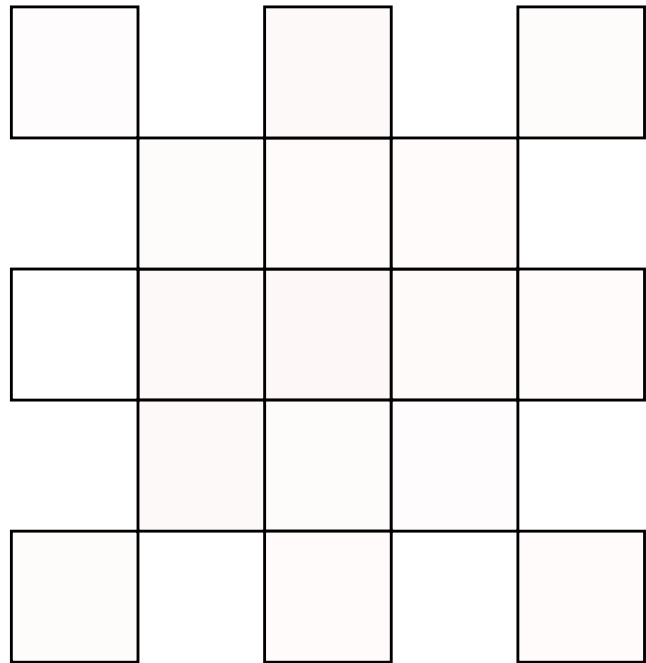

6-114240573-A-T

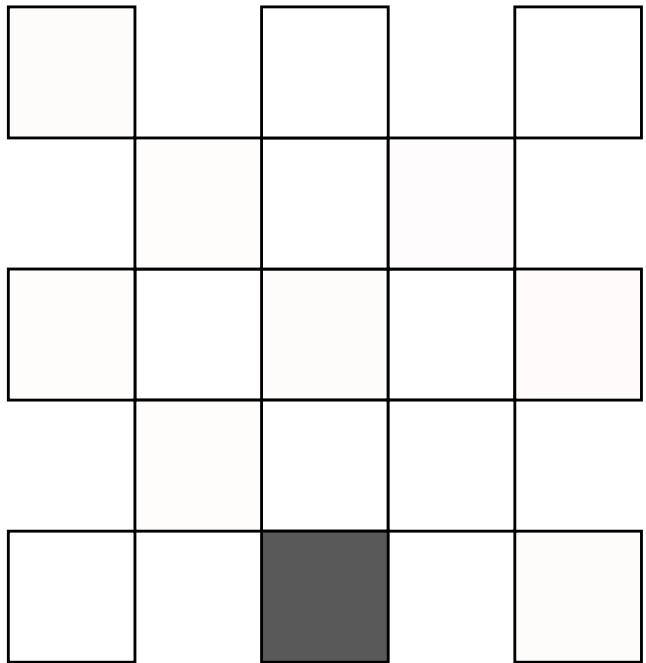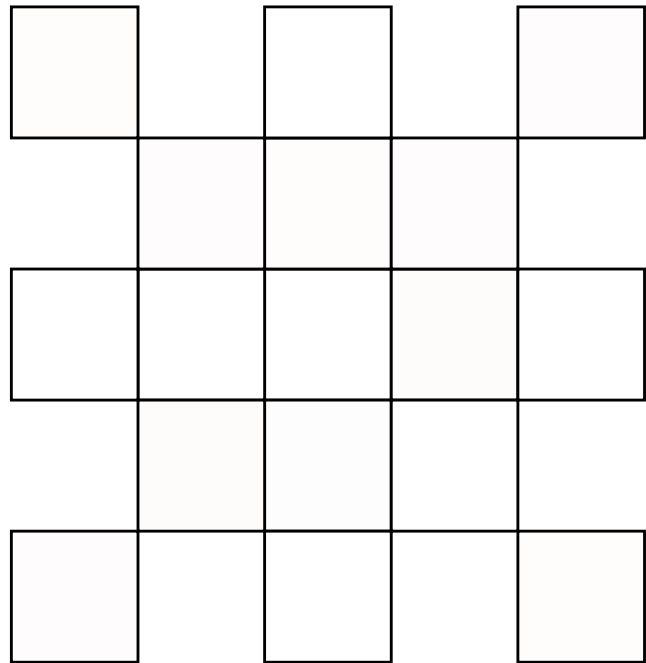

6-115212381-G-A

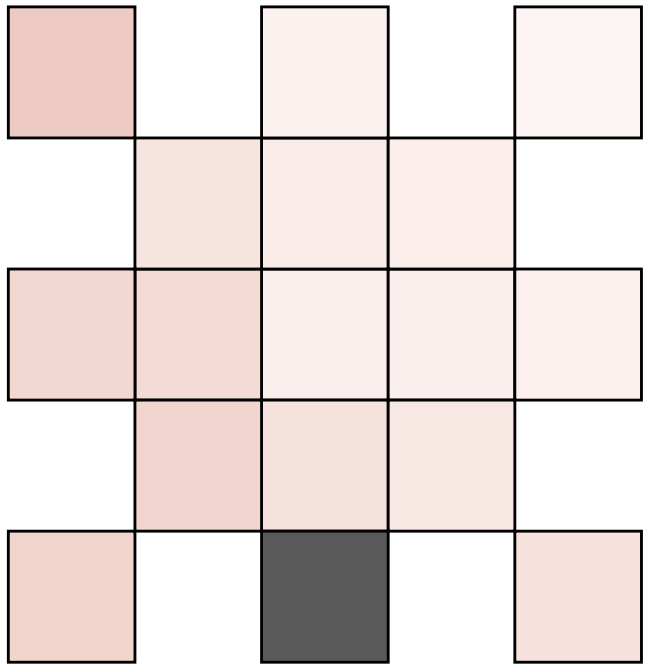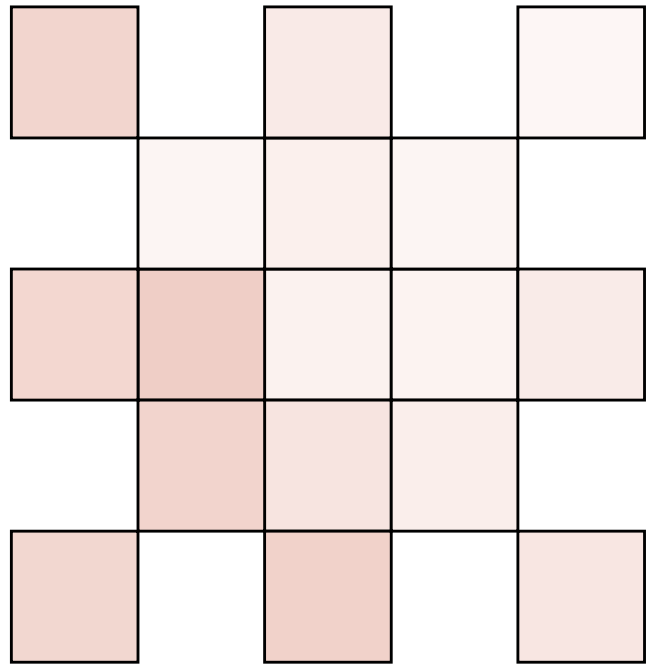



6-115259744-C-T

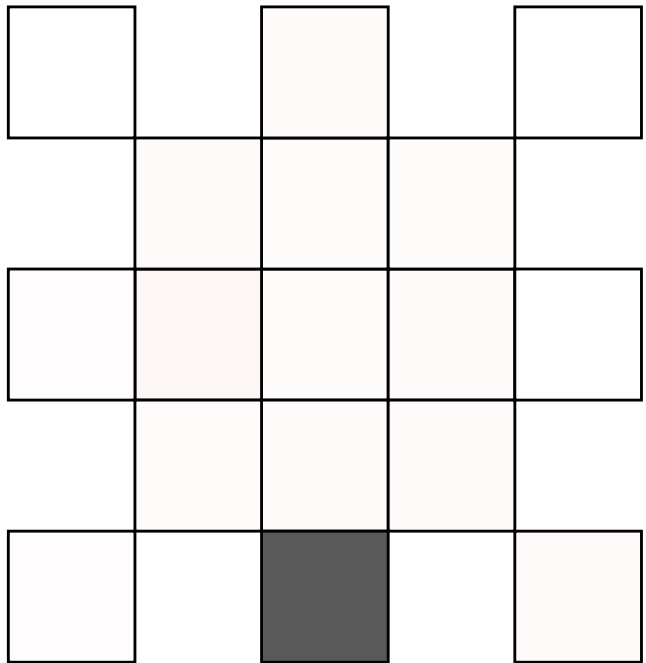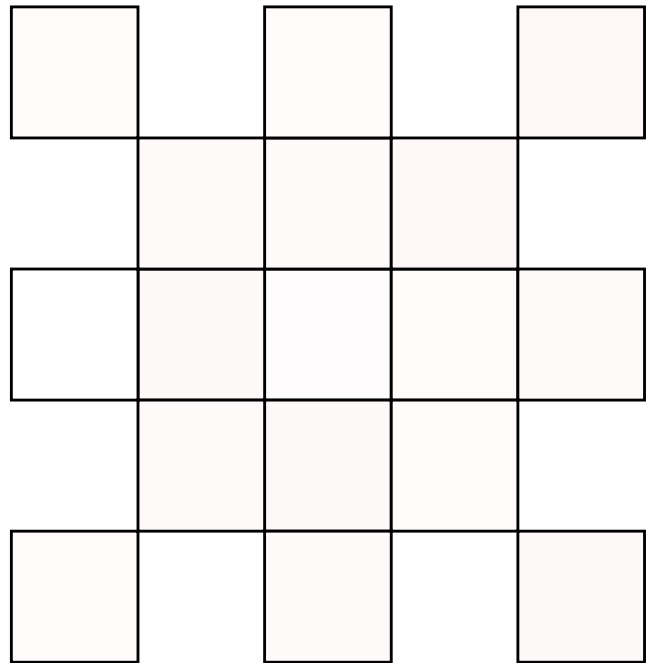

6-124787238-C-T

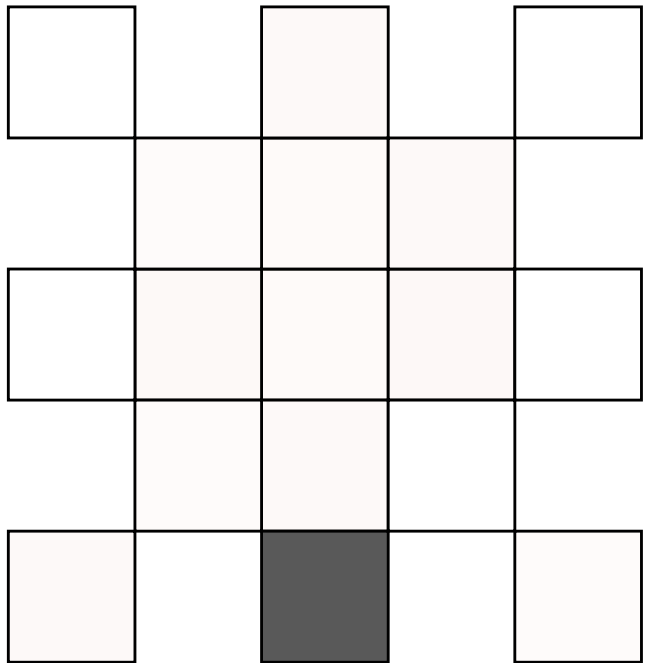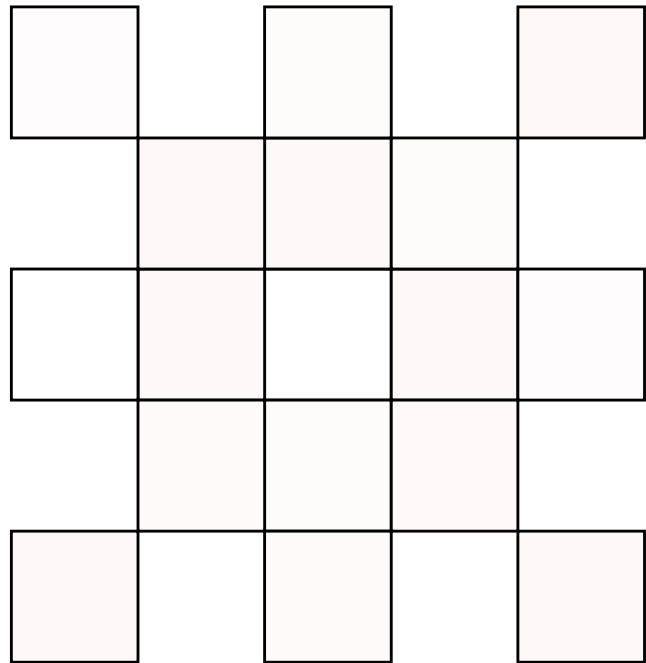

6-12613326-C-T

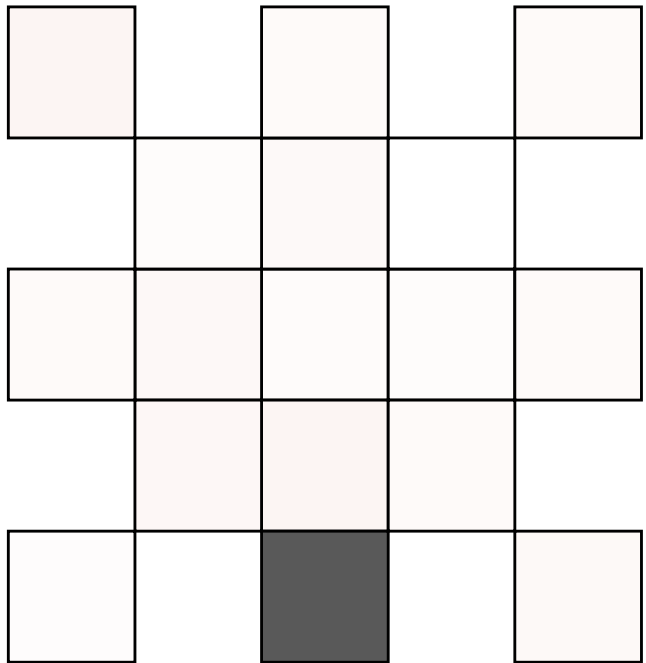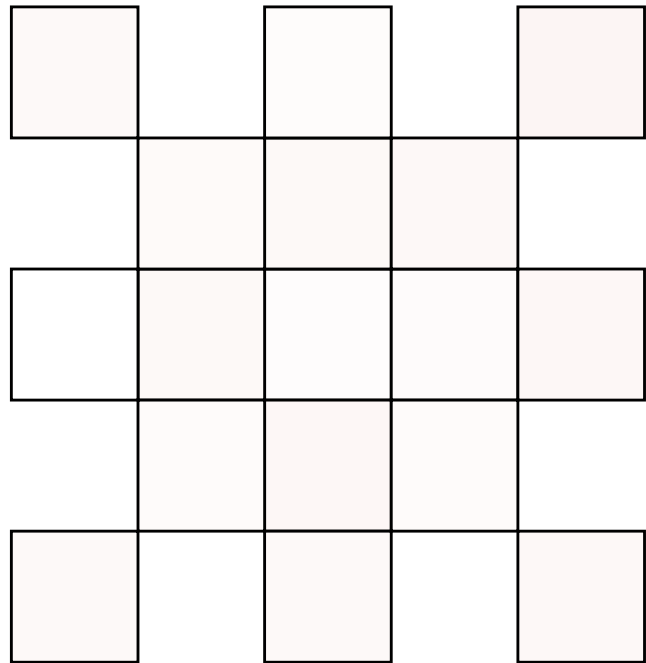

6-132170864-G-A

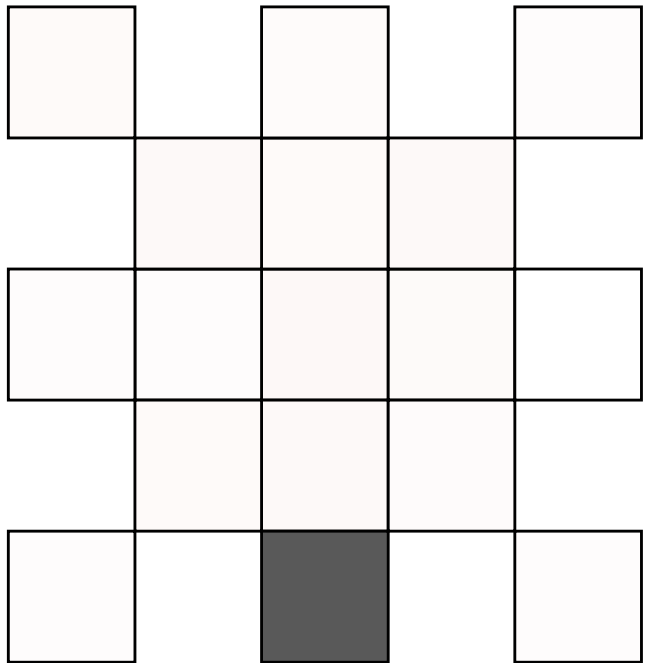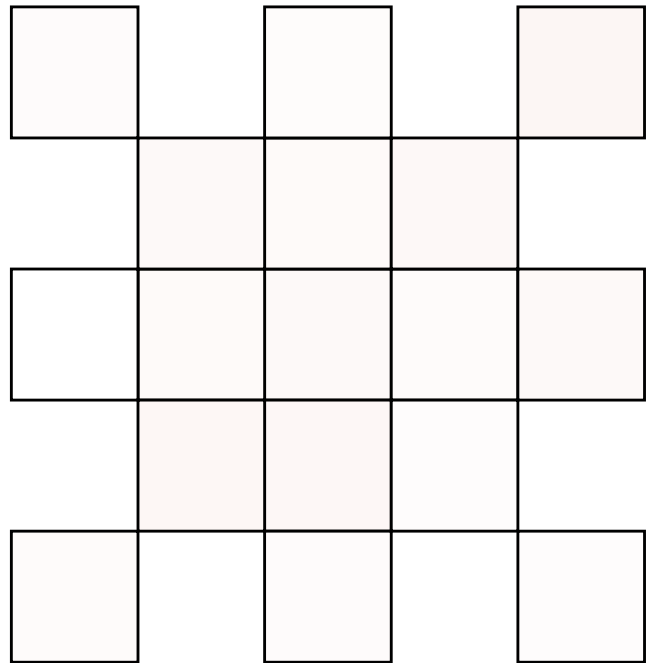

6-138352132-G-A

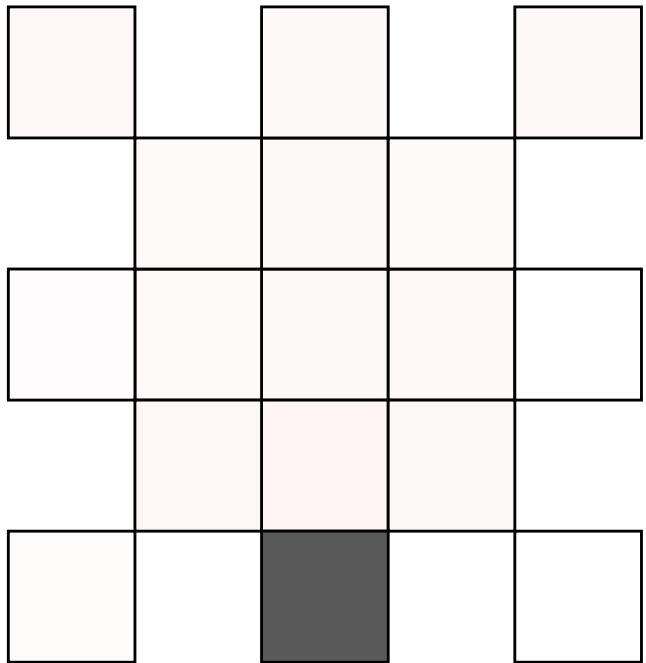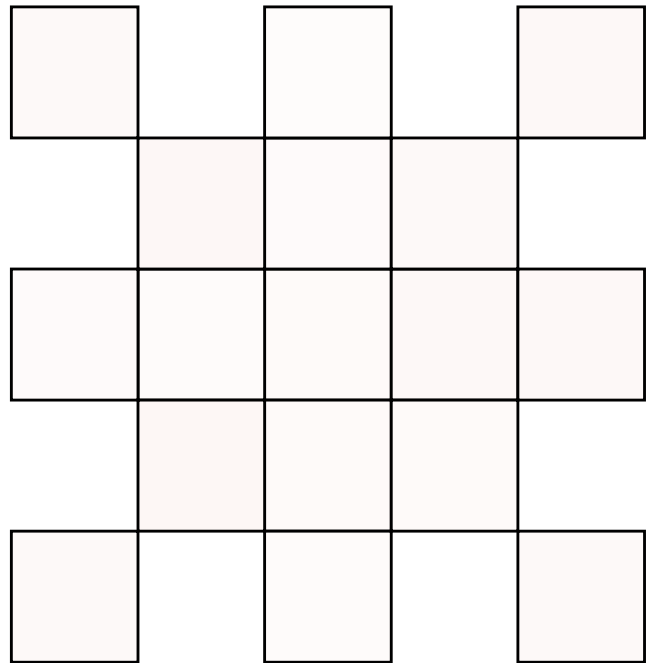

6-139194275-C-T

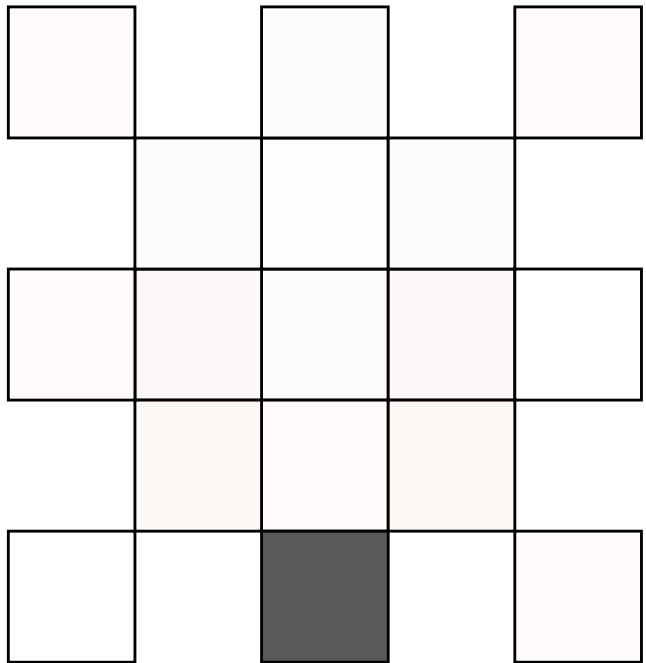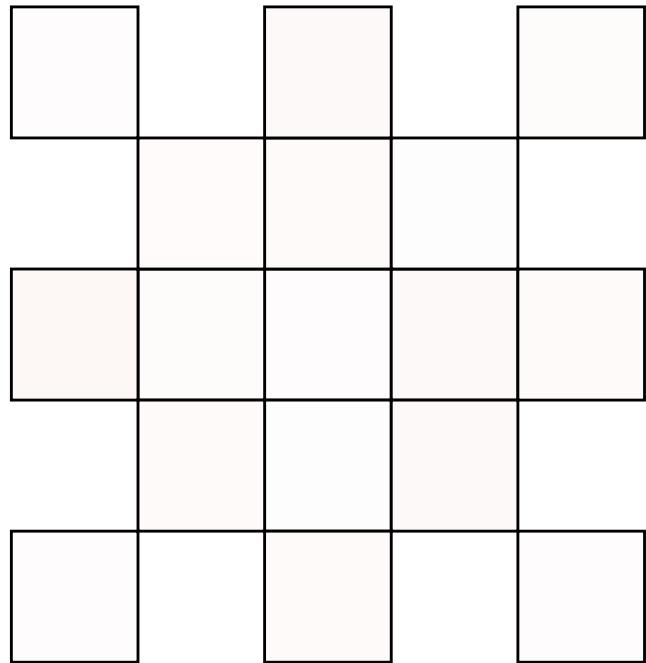

6-142200306-C-T

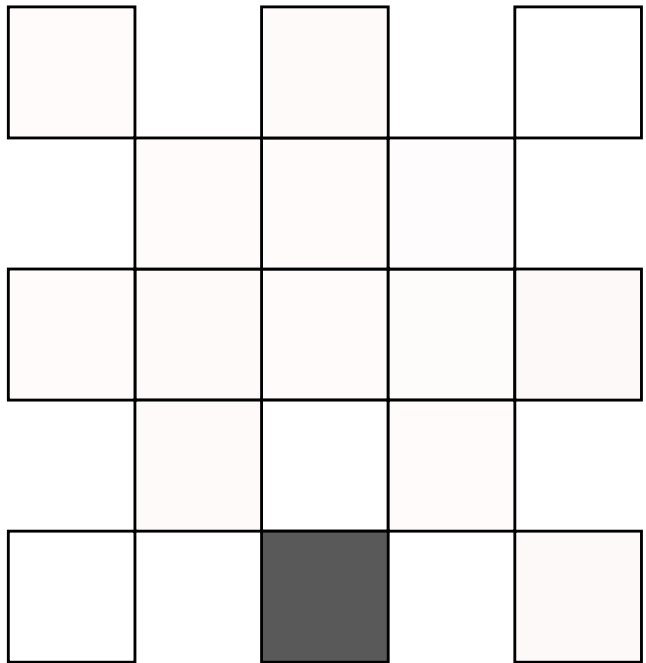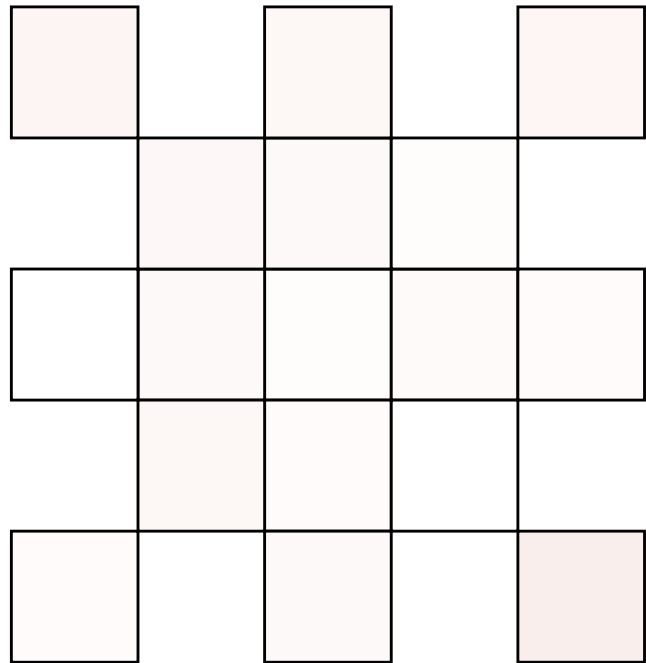

6-144775505-C-T

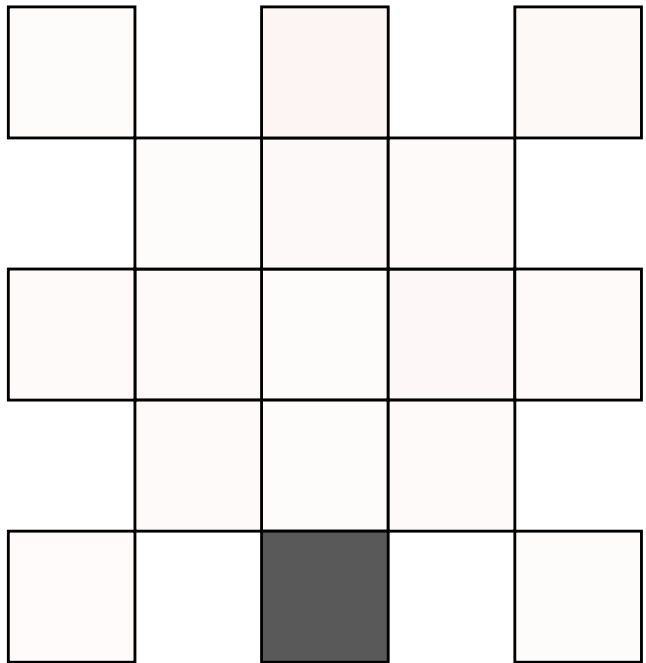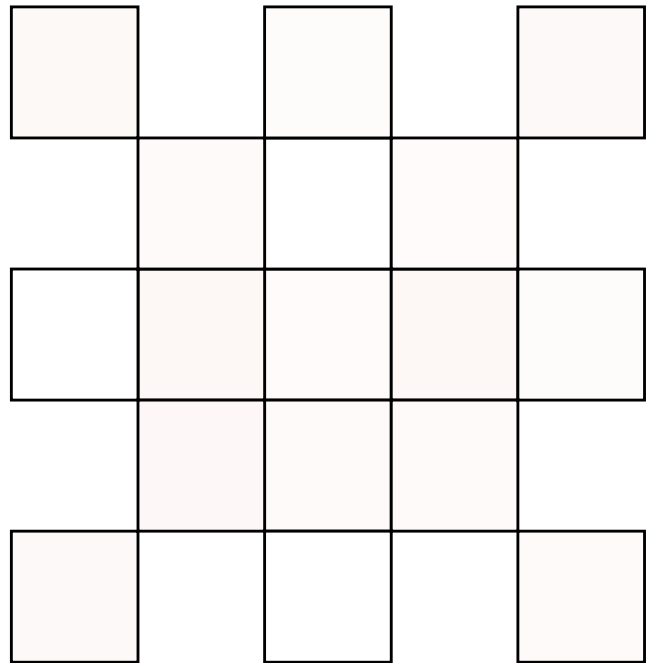



6-145560357-G-T

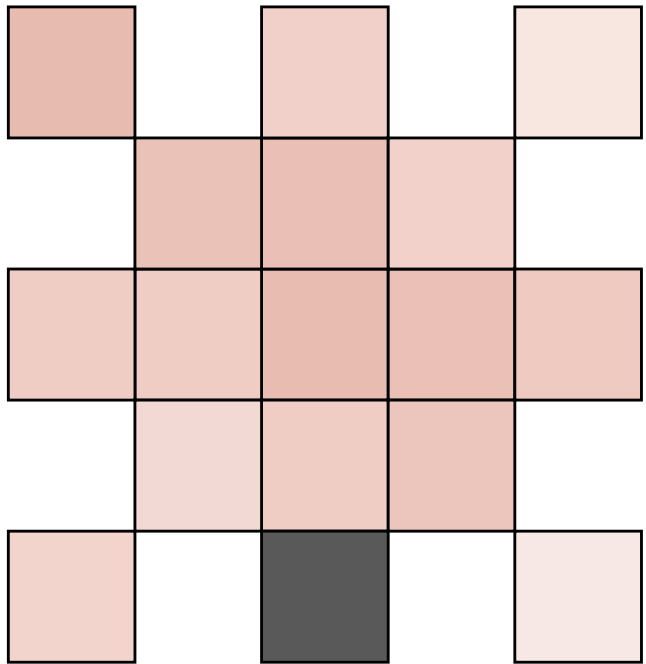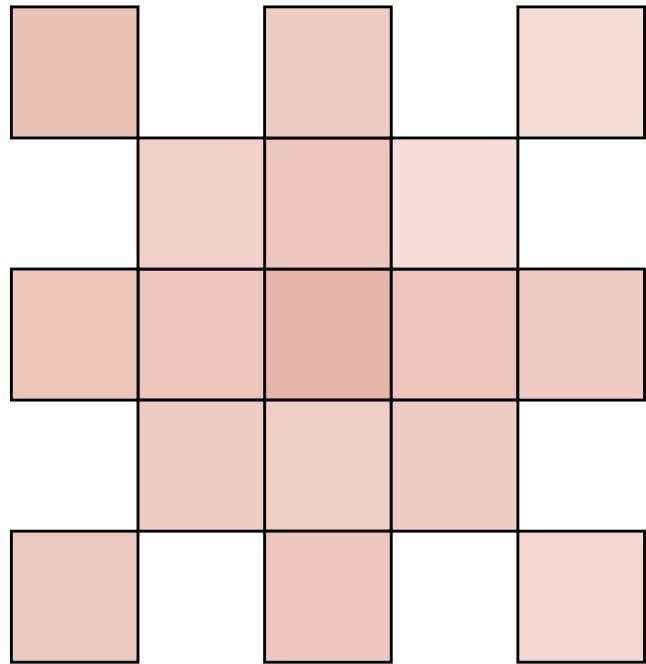

6-146019805-C-T

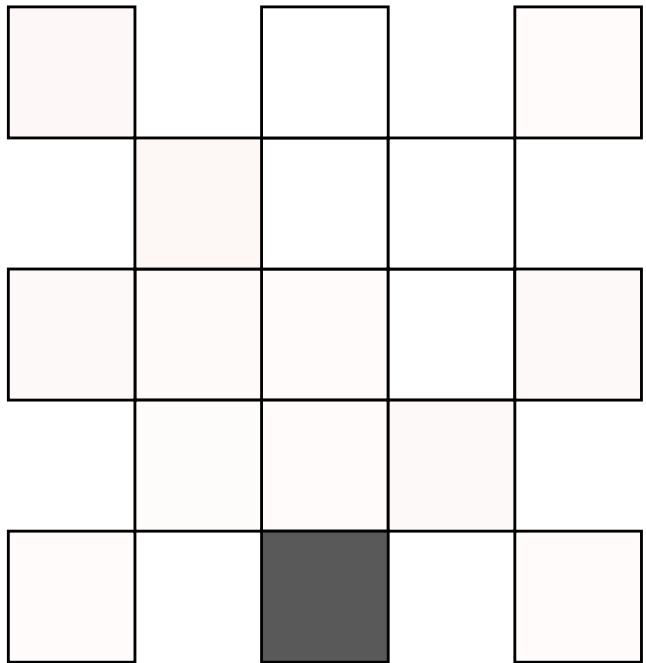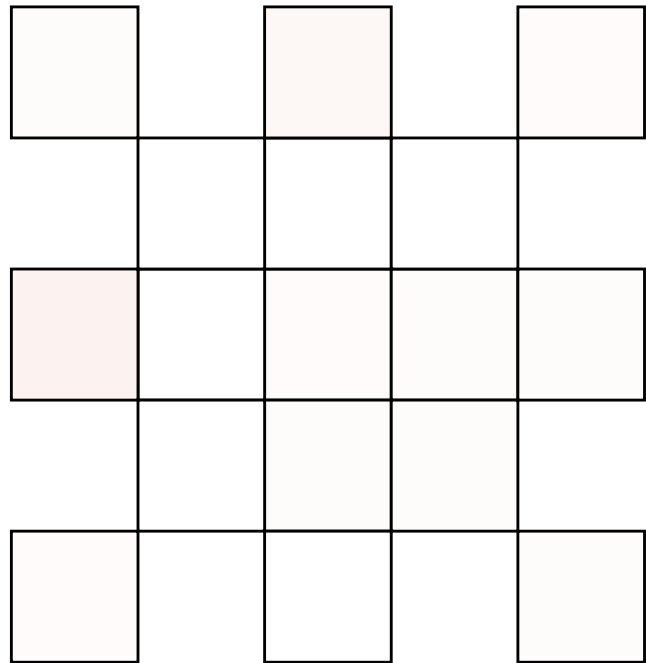

6-1519709-G-T

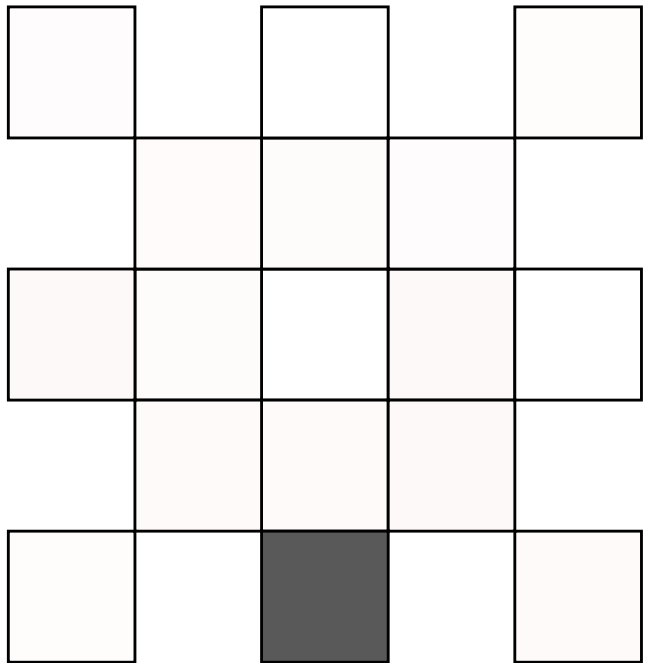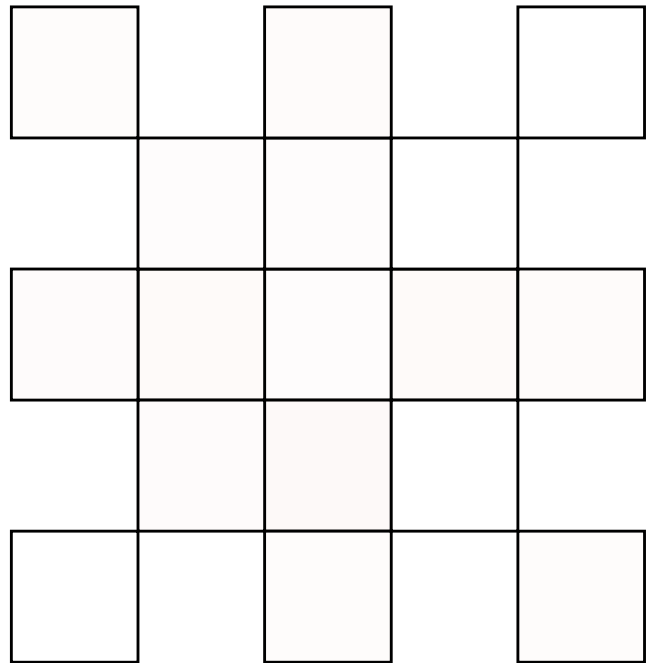

6-152939173-C-A

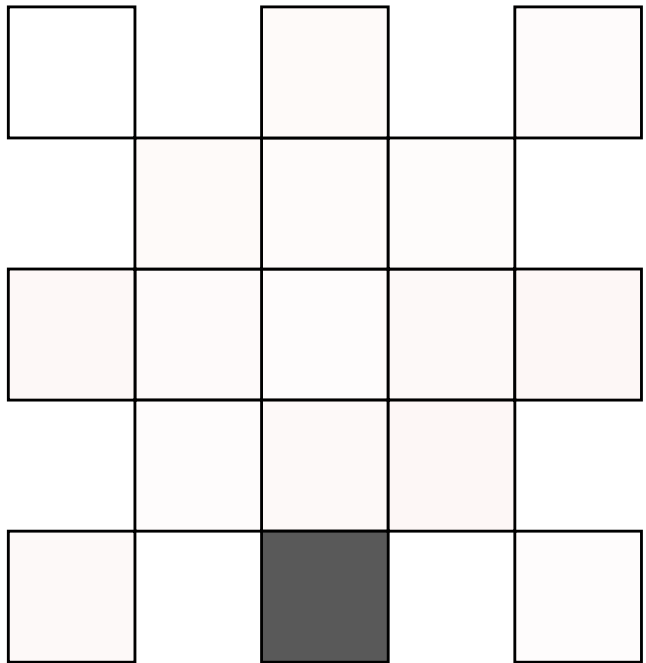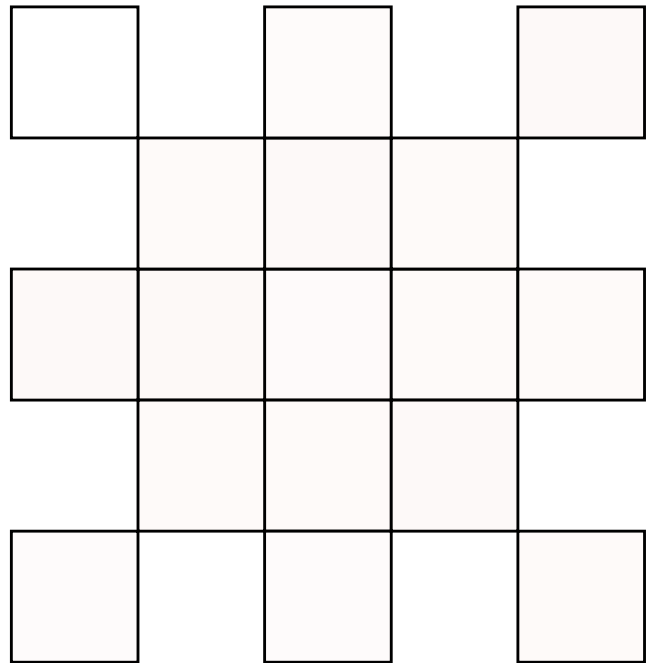

6-153112948-G-T

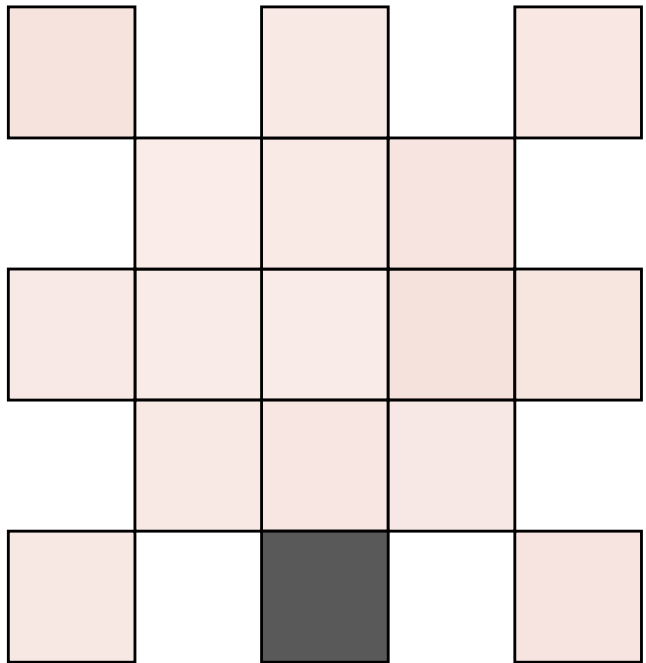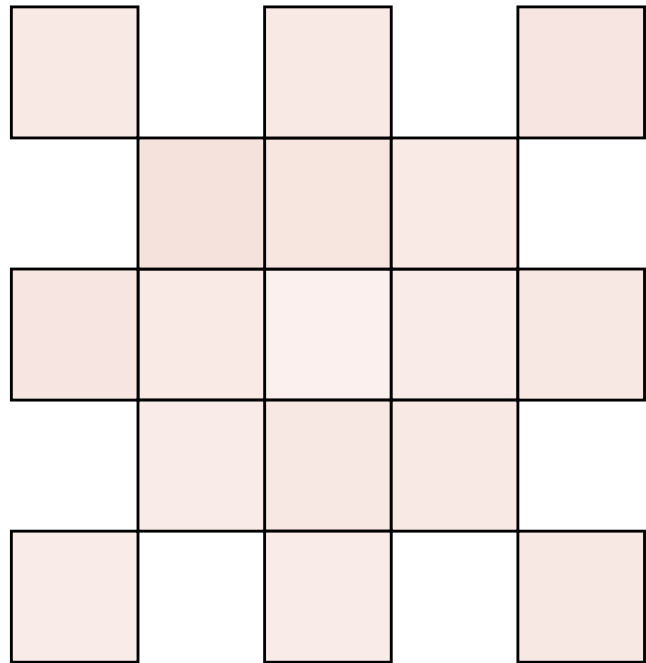

6-153564460-T-G

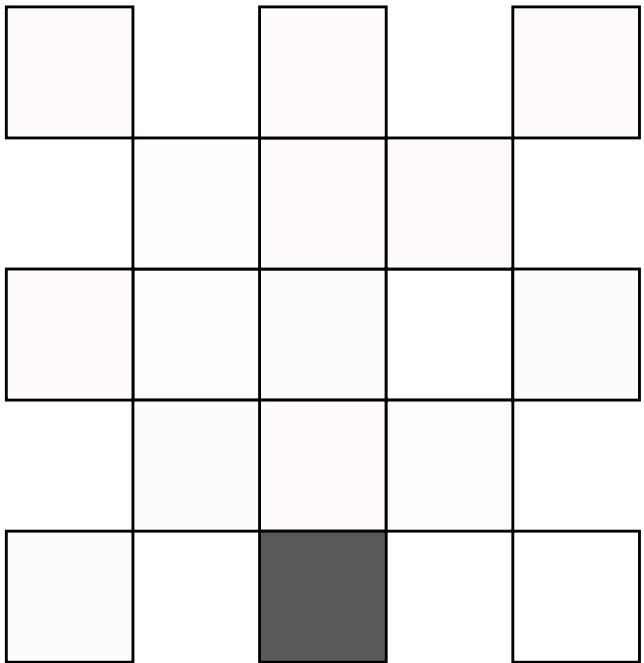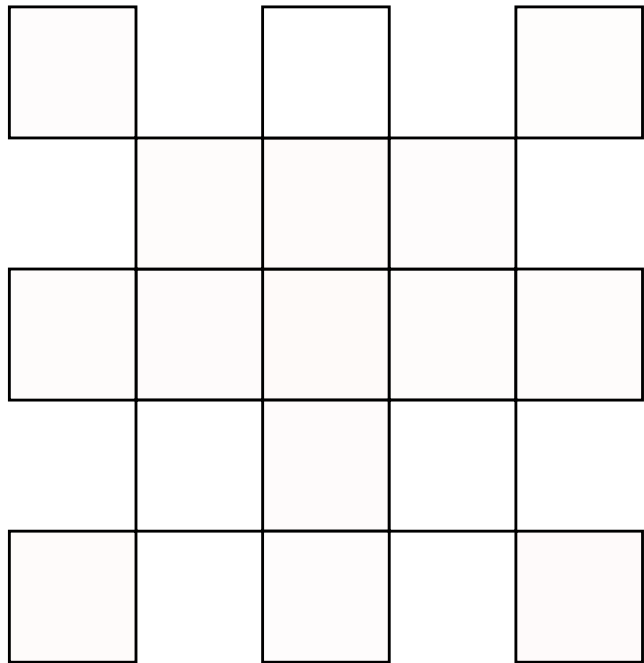

6-155986031-C-T

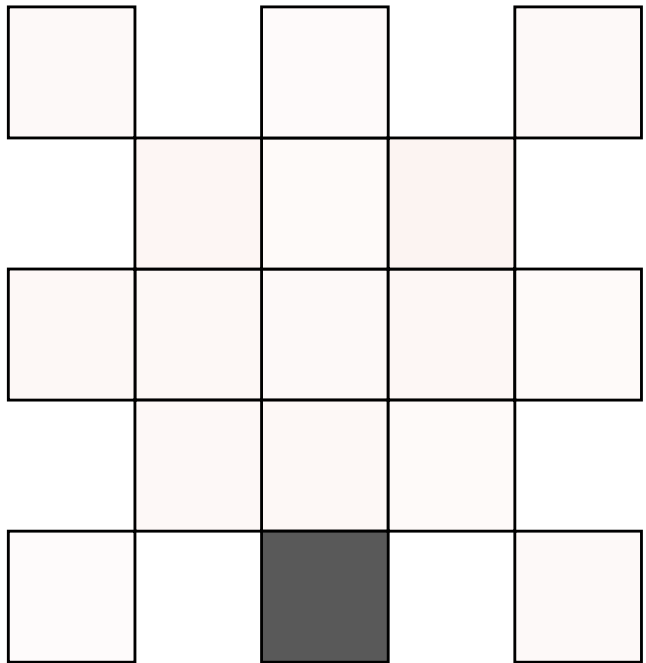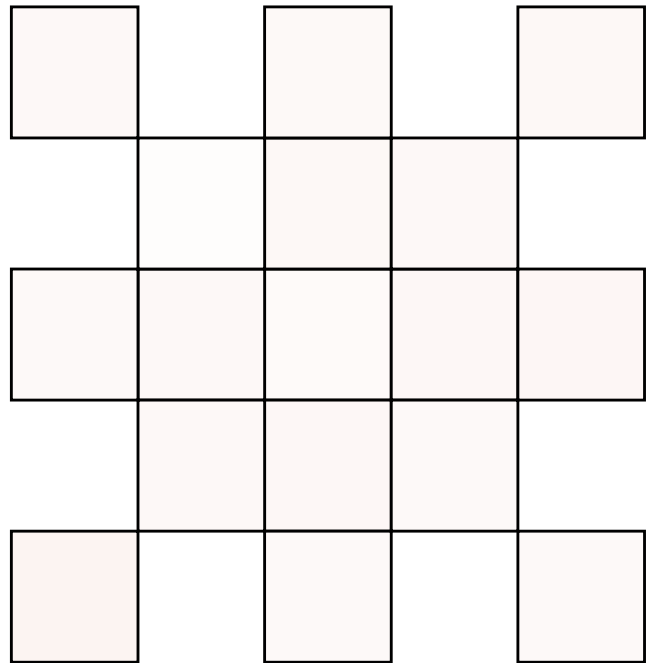

6-156635821-G-A

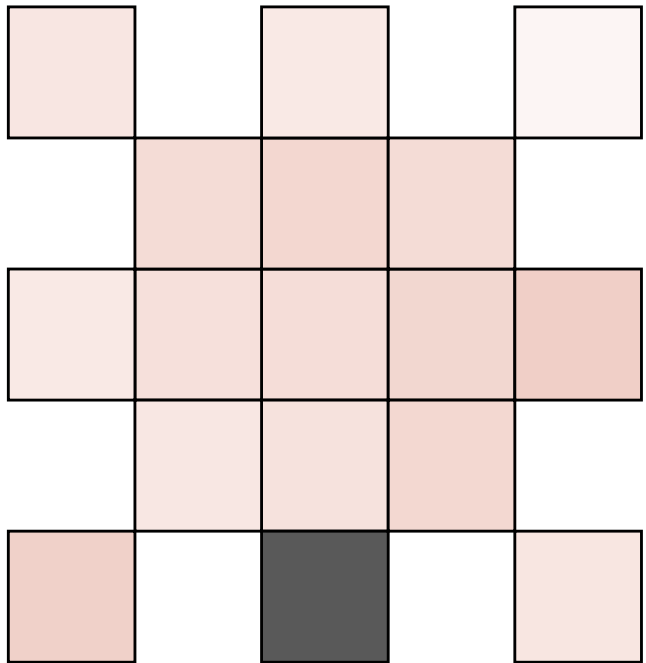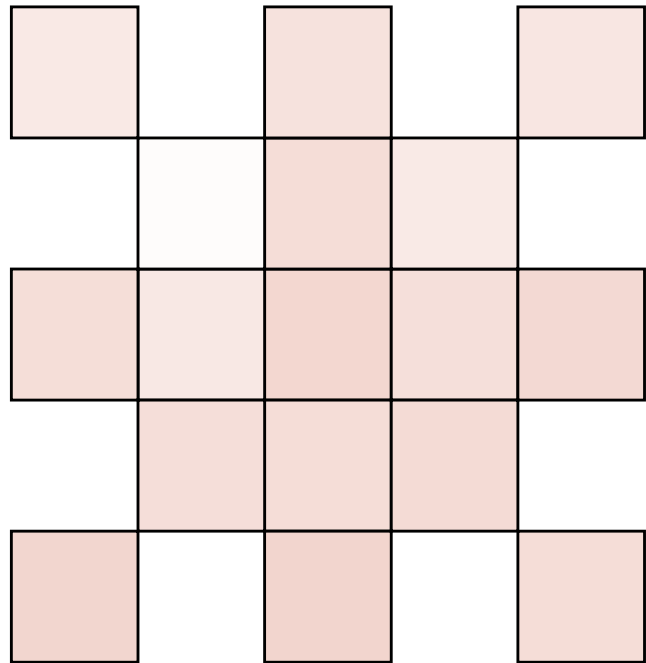



6-156792200-G-A

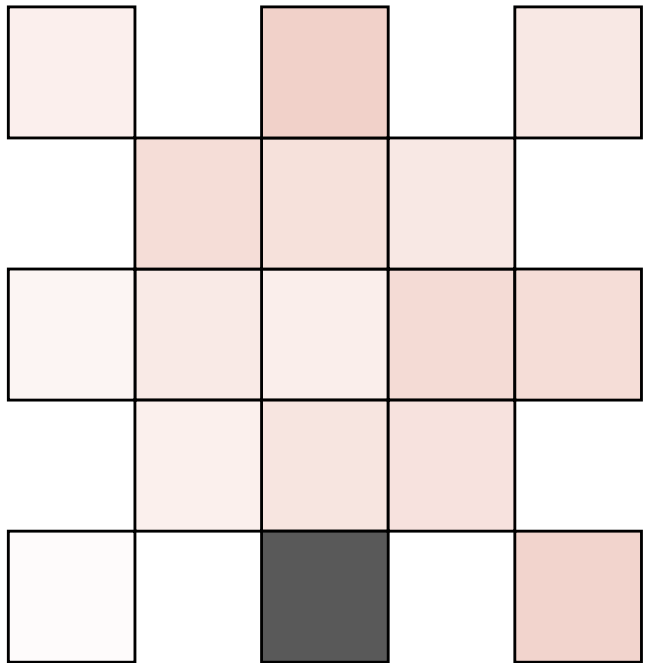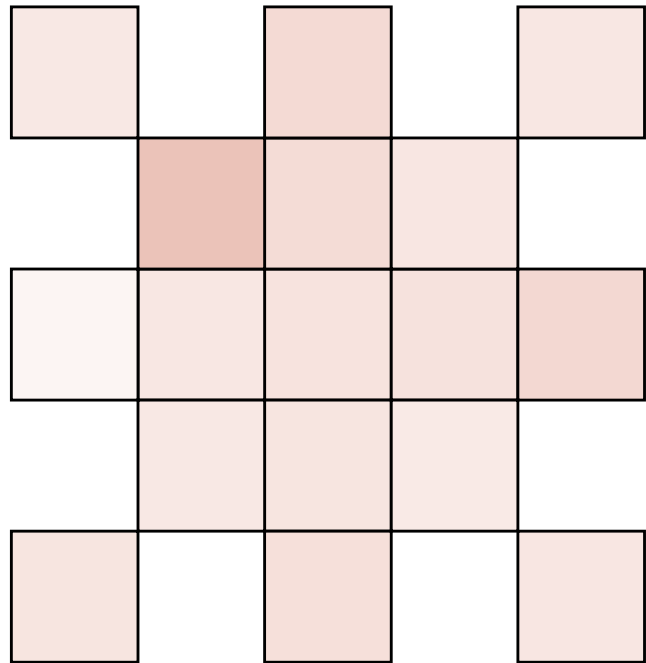

6-159935200-C-T

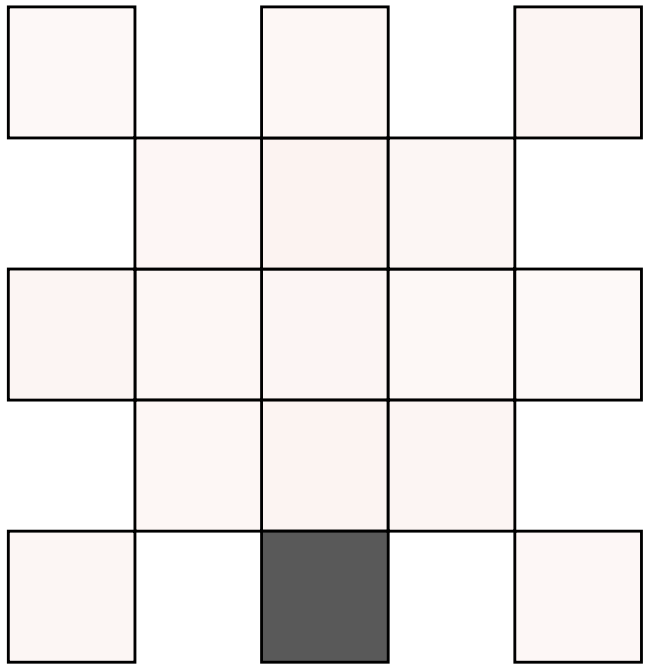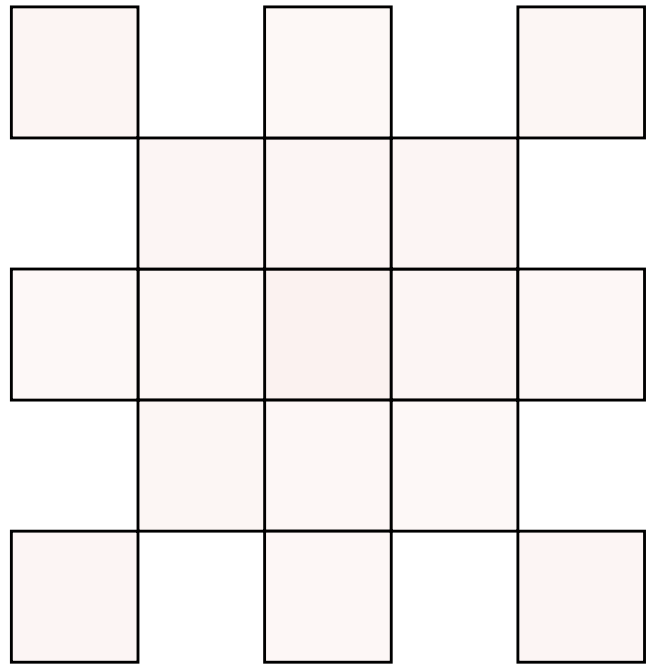

6-161158616-T-G

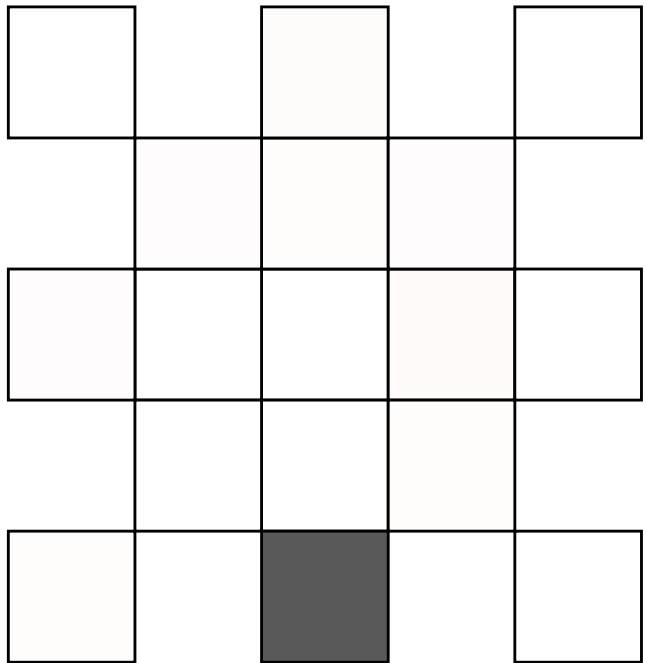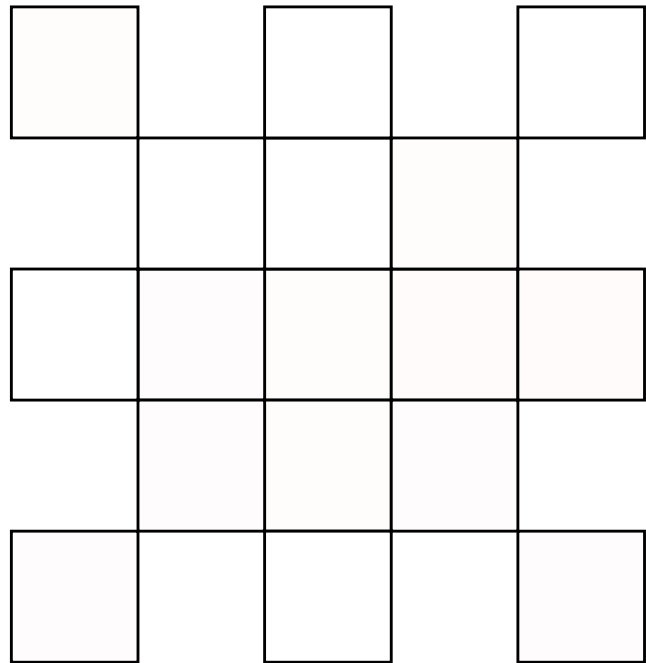

6-162806617-C-T

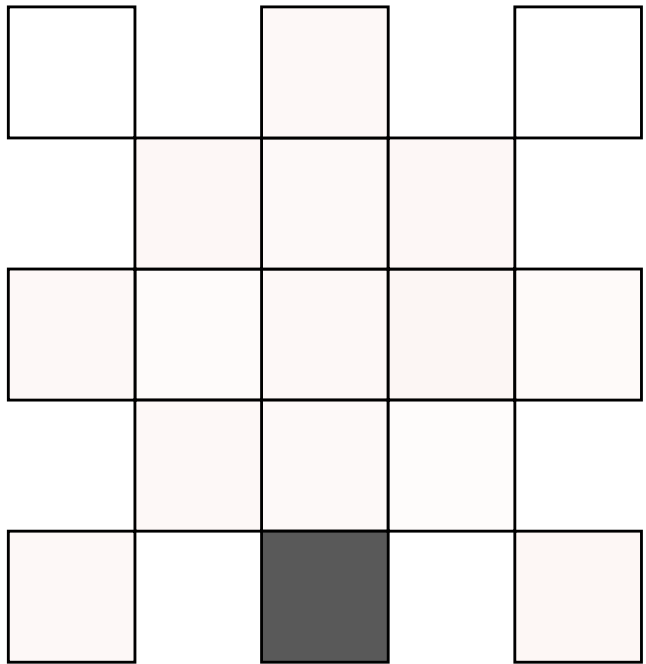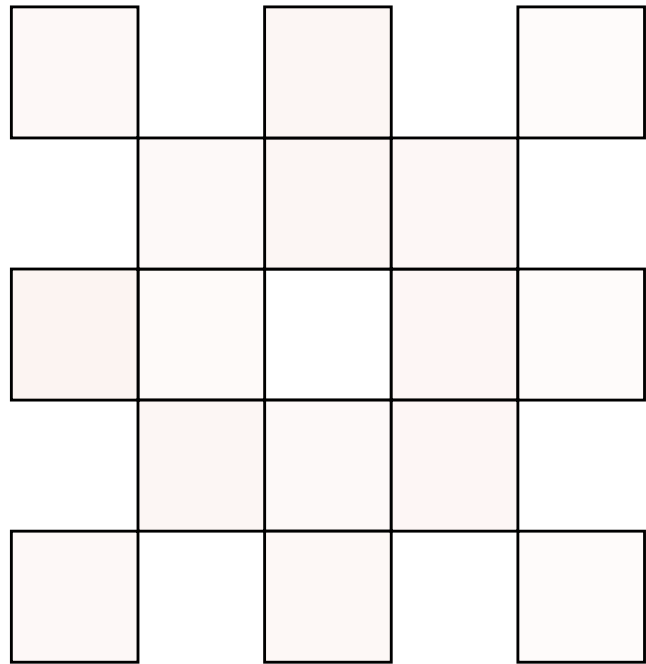

6-1661827-C-T

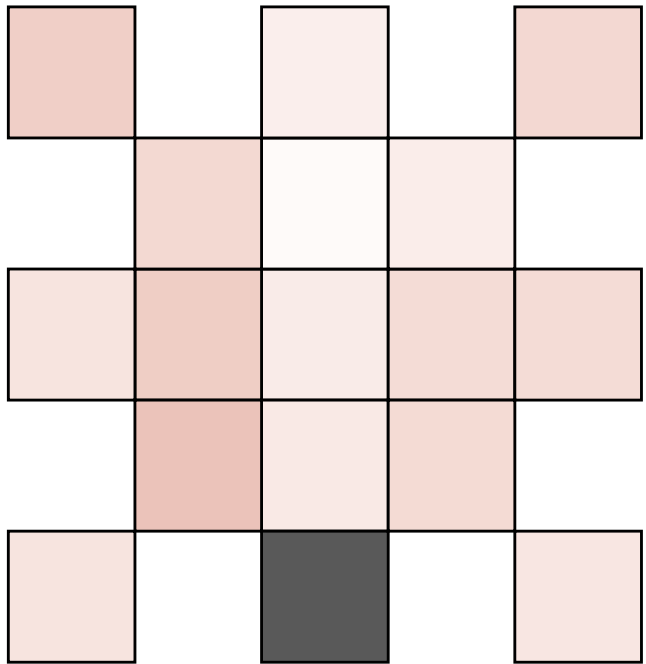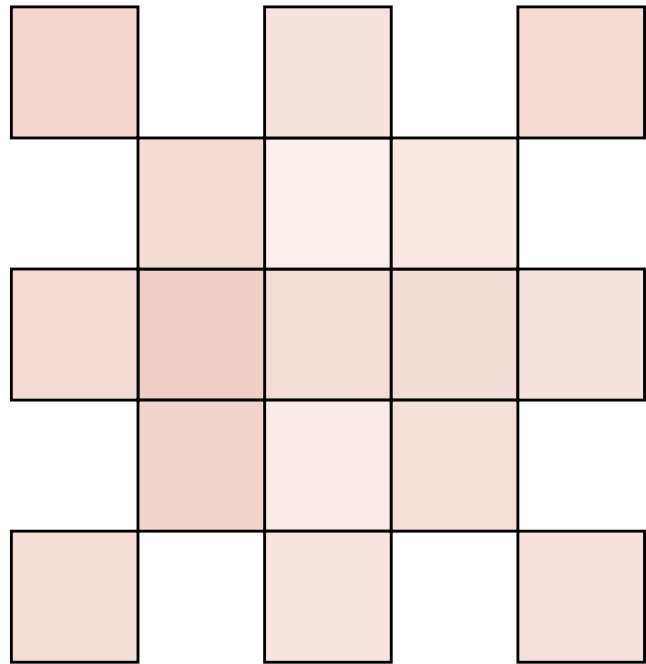

6-166482454-T-C

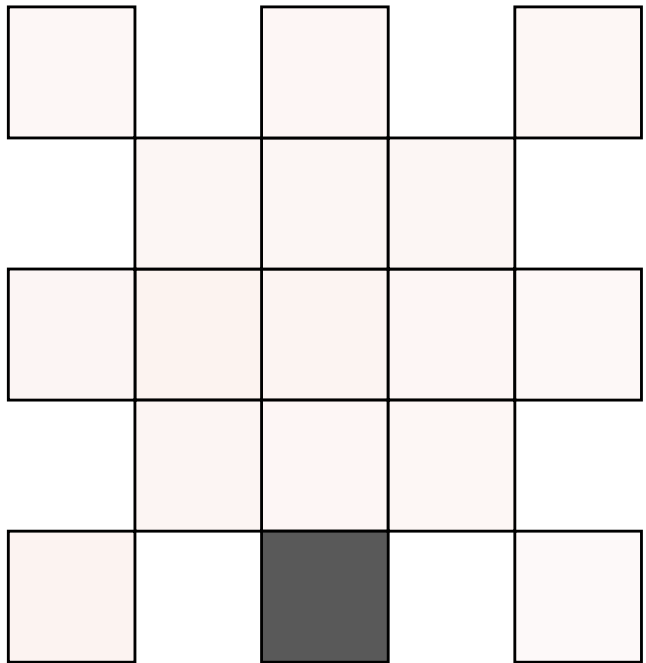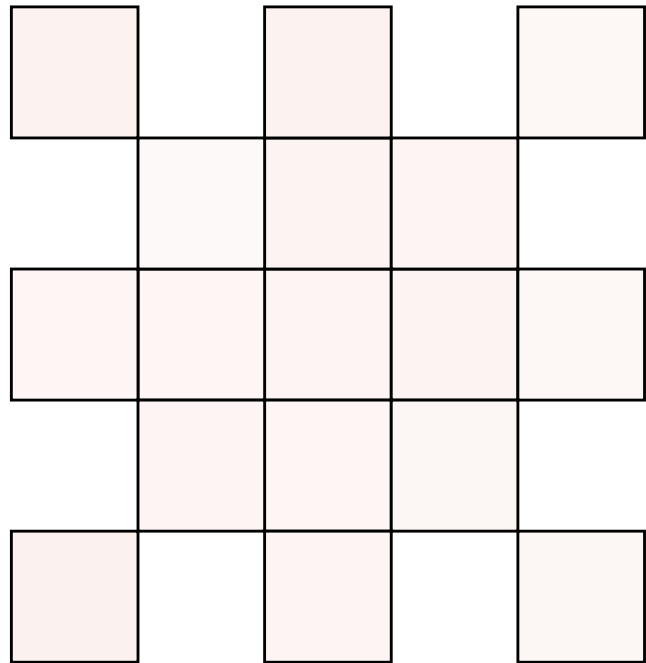

6-169577791-G-A

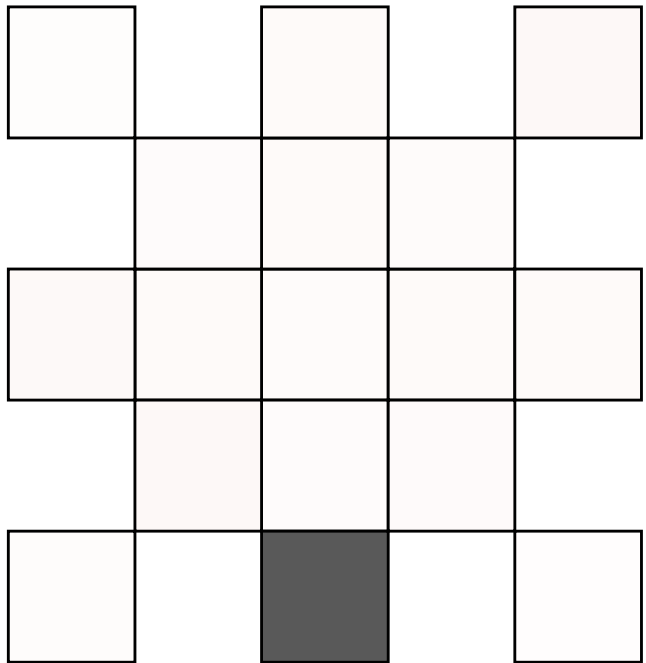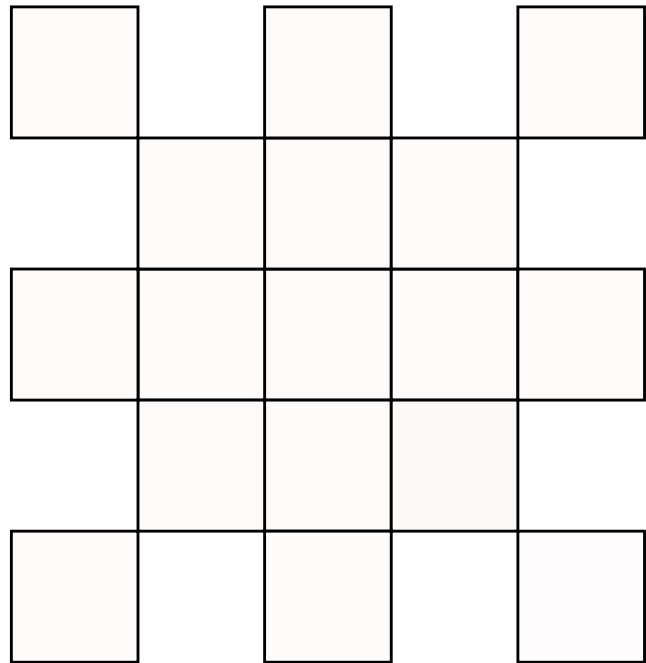

6-18819400-C-T

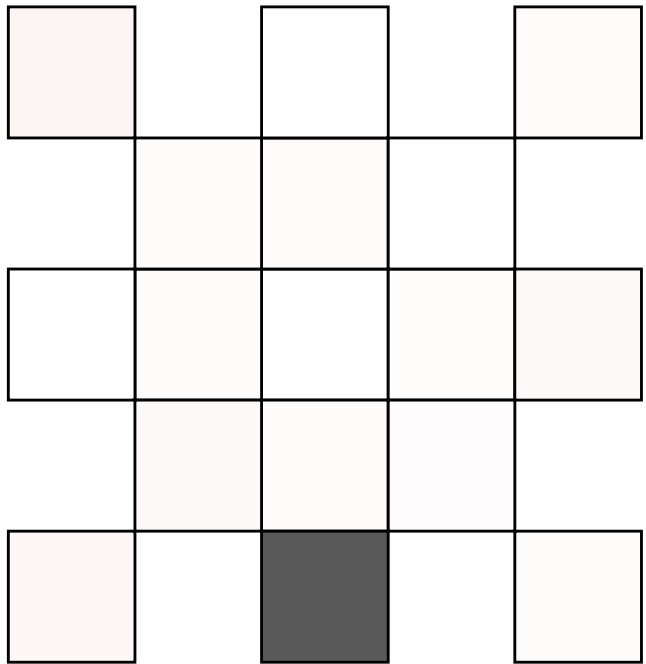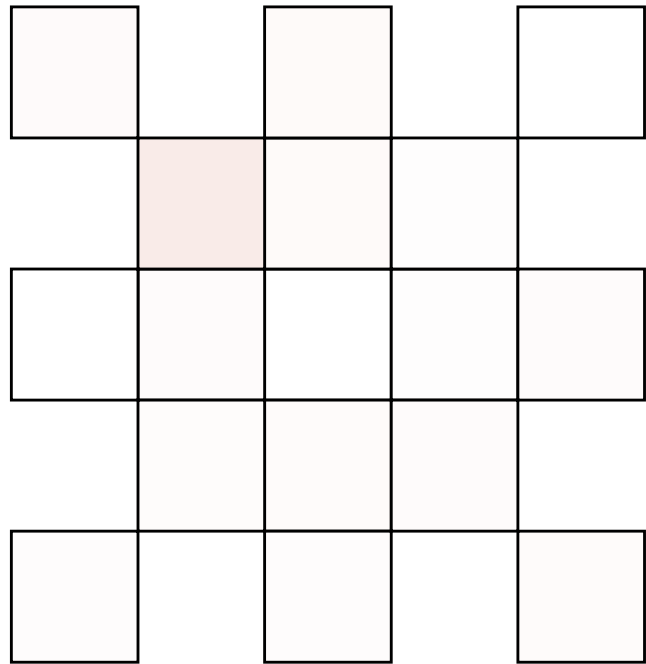



6-18903997-G-A

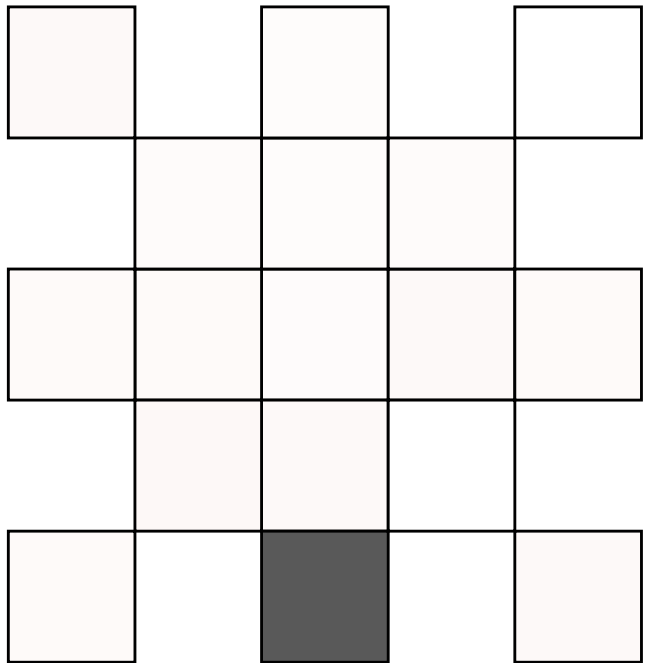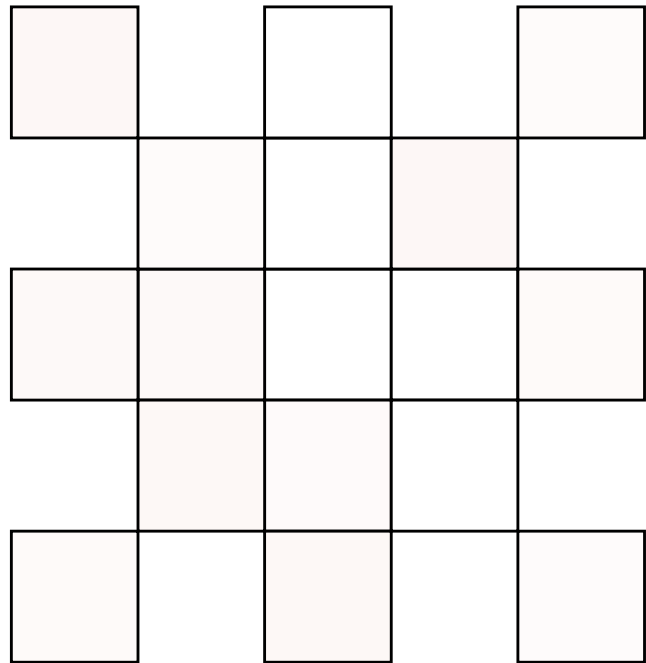

6-24537268-G-A

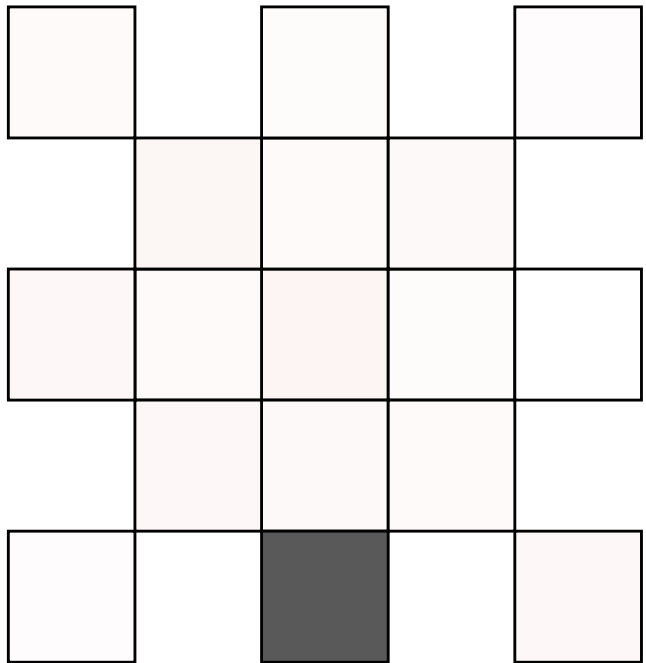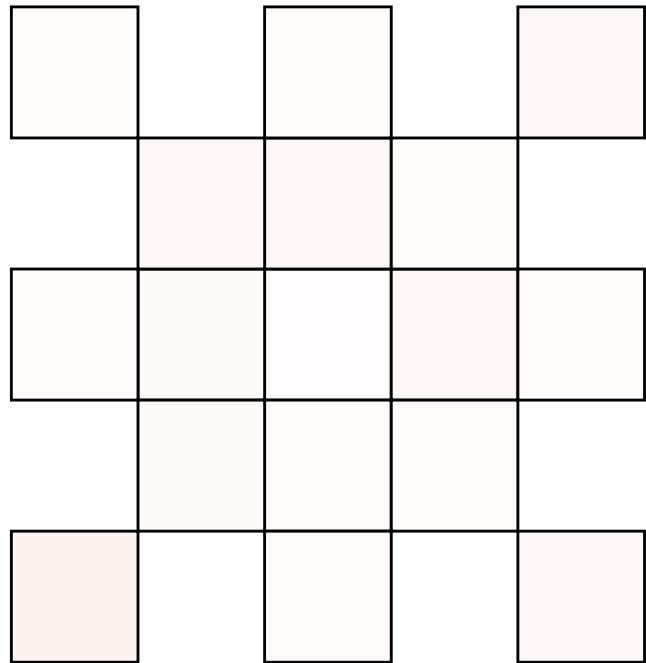

6-28244213-C-T

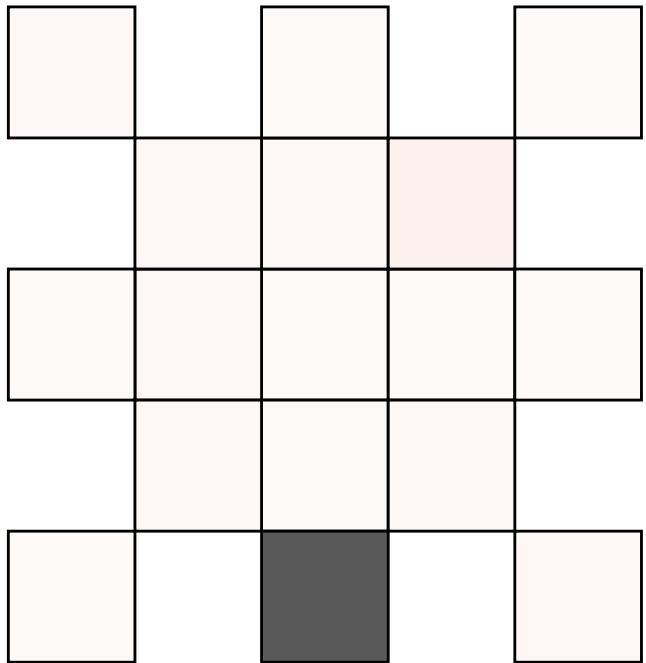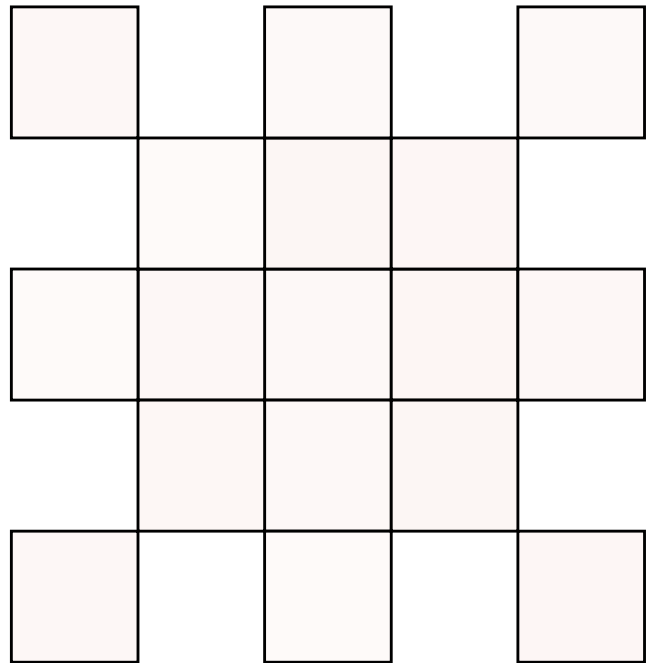

6-3287273-C-T

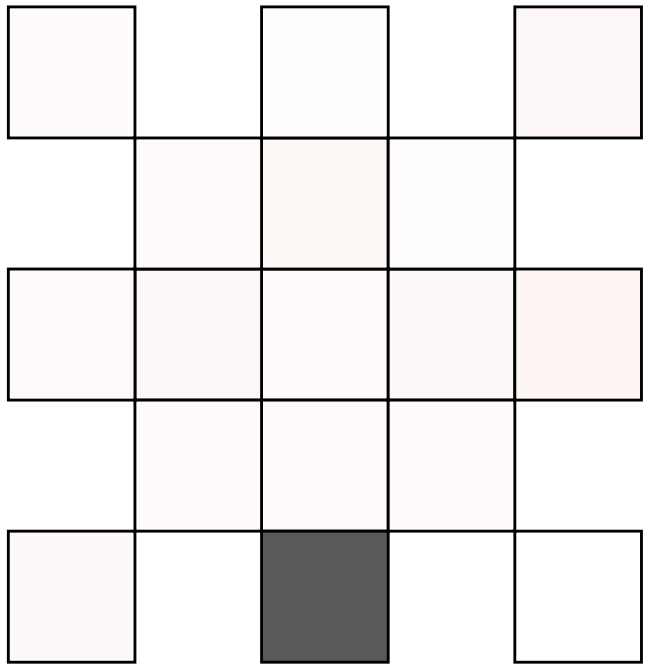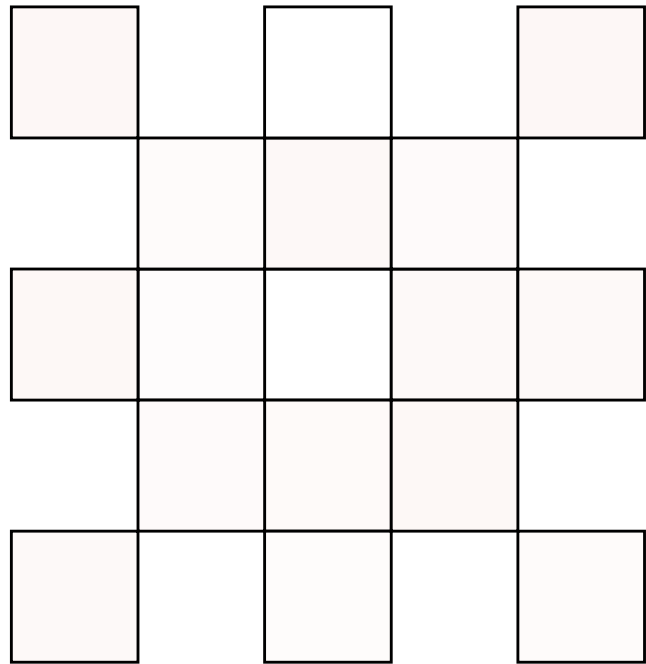

6-36931639-G-C

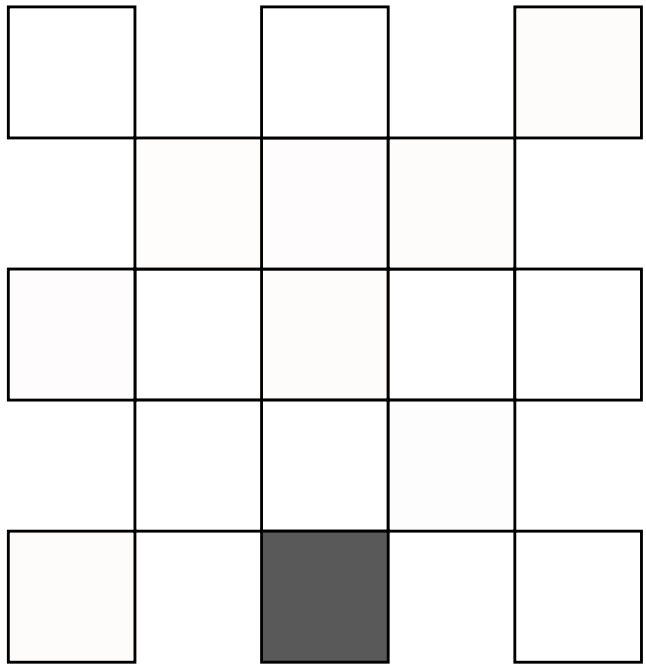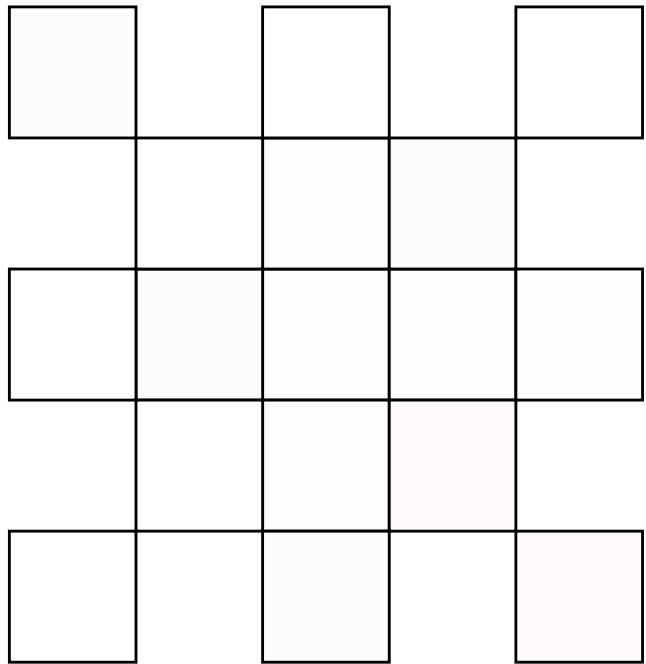

6-41864337-C-T

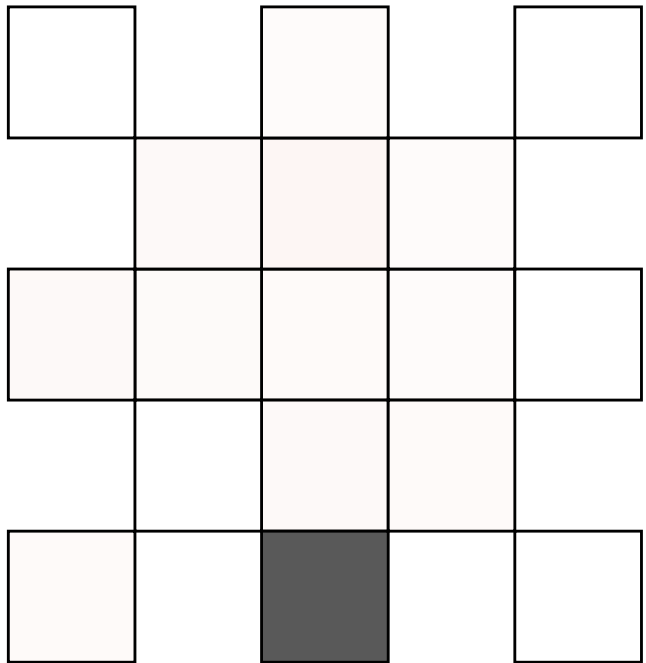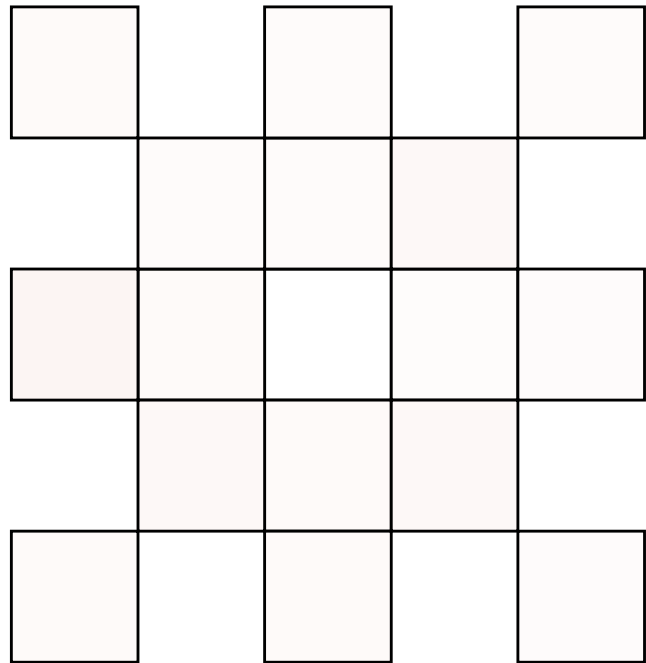

6-47367037-G-A

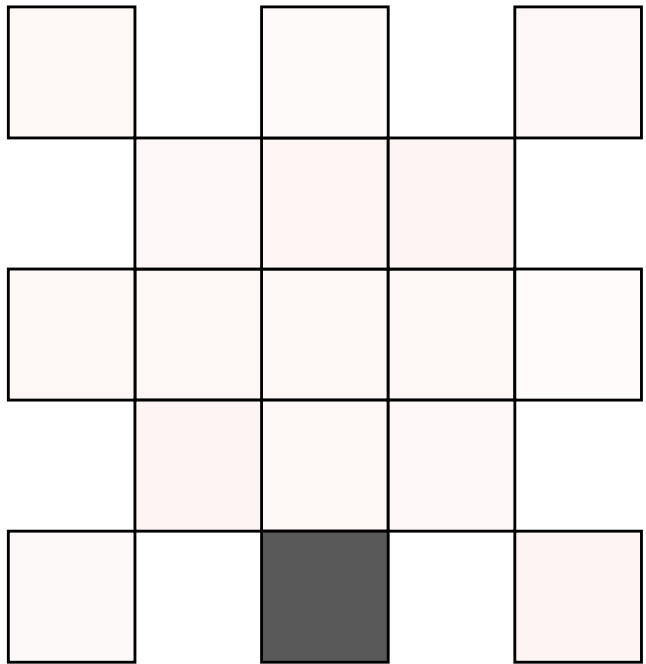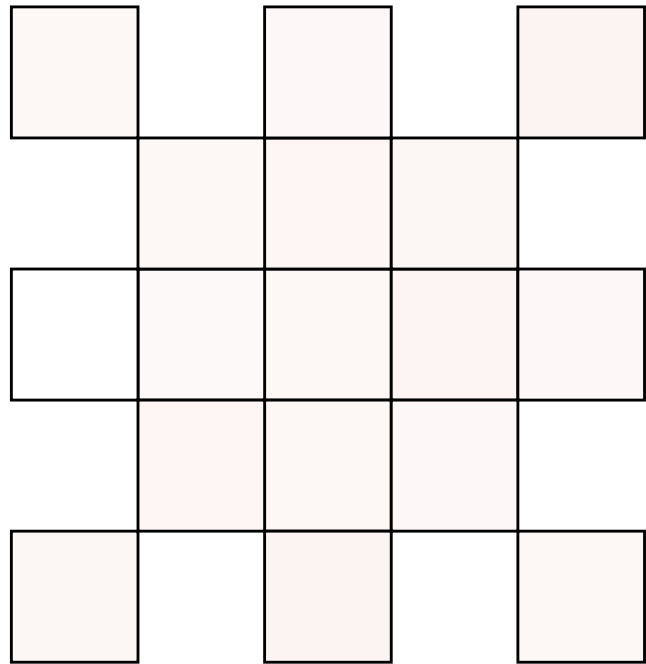

6-49937325-C-G

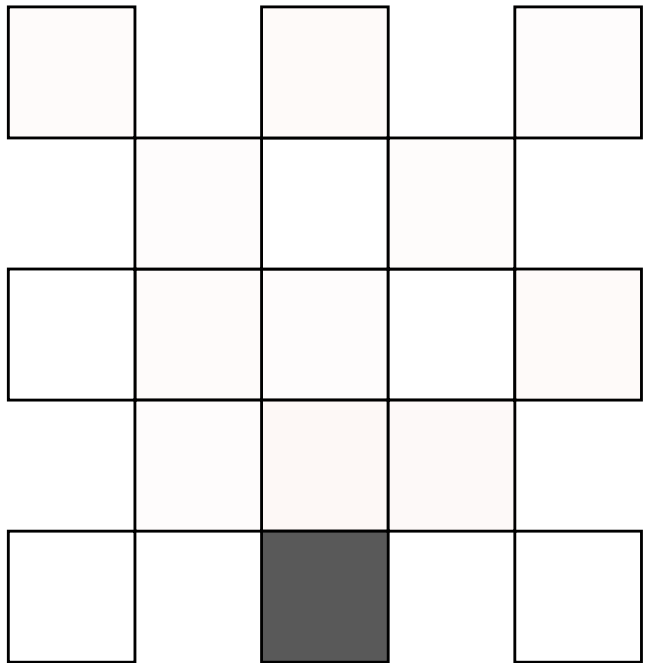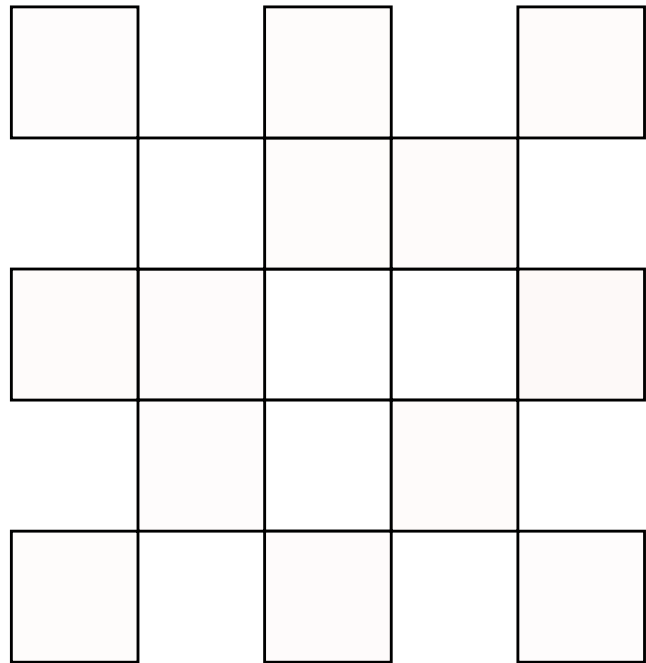



6-53413261-G-A

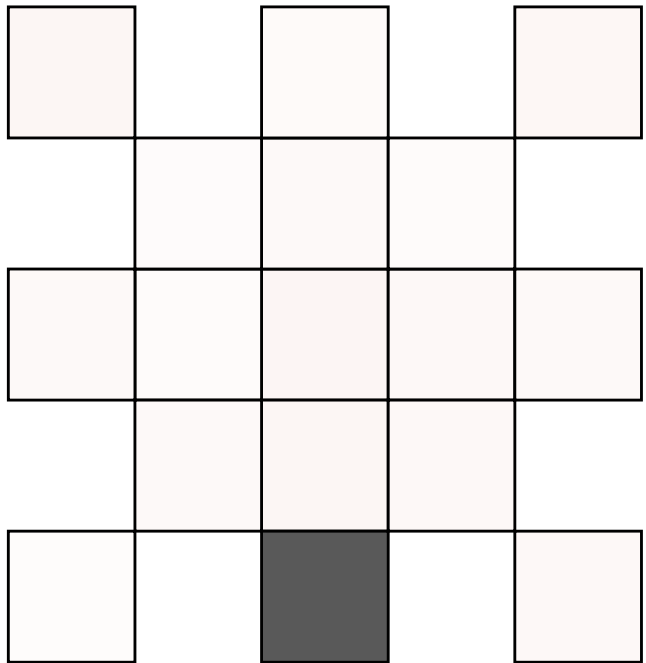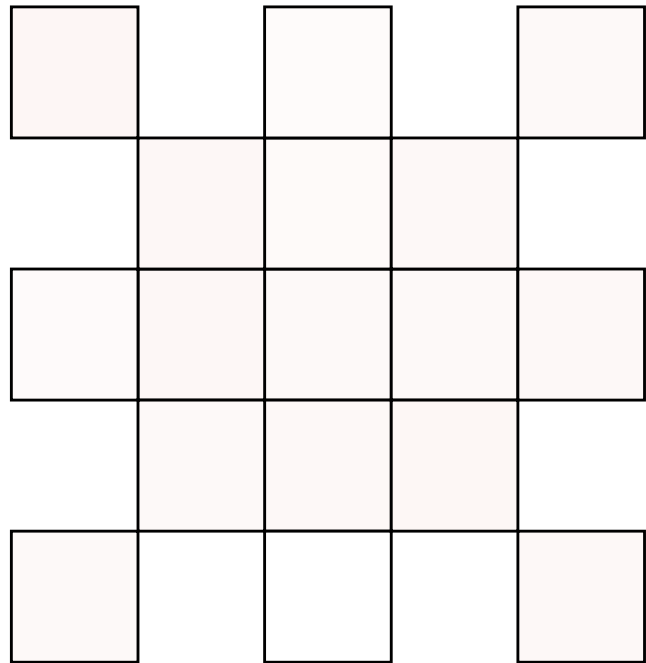

6-53918630-A-G

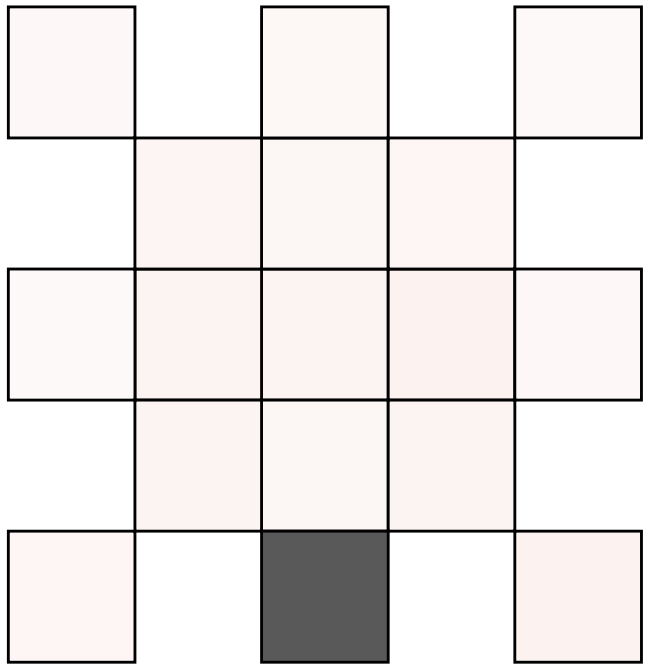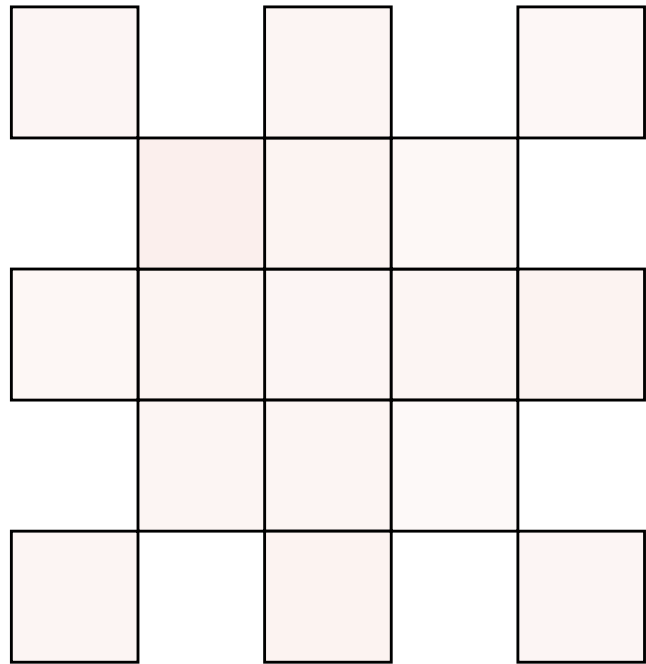

6-56684720-G-A

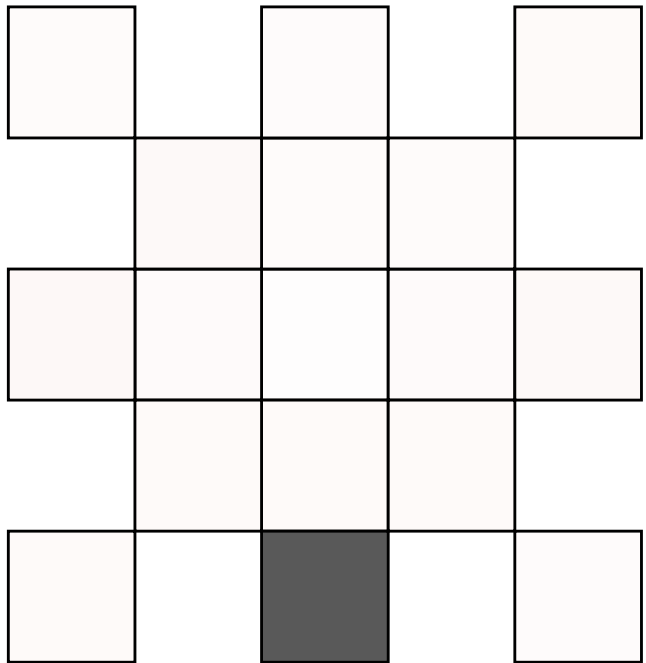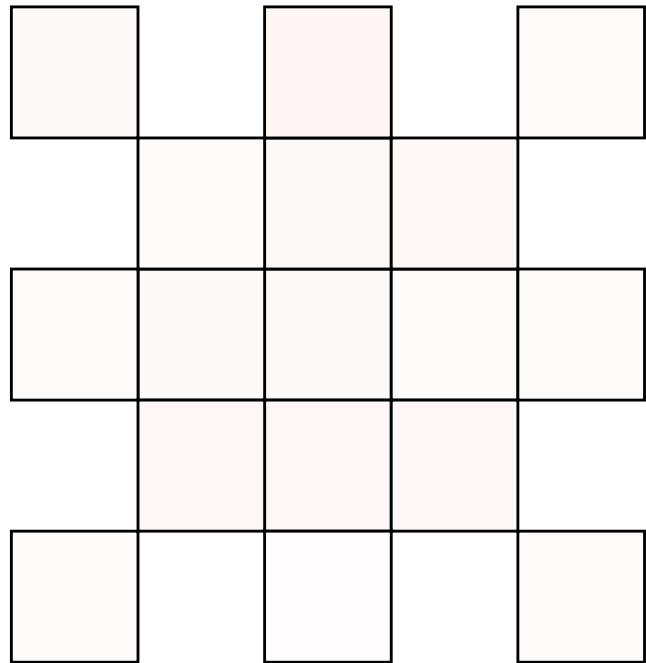

6-57165516-G-A

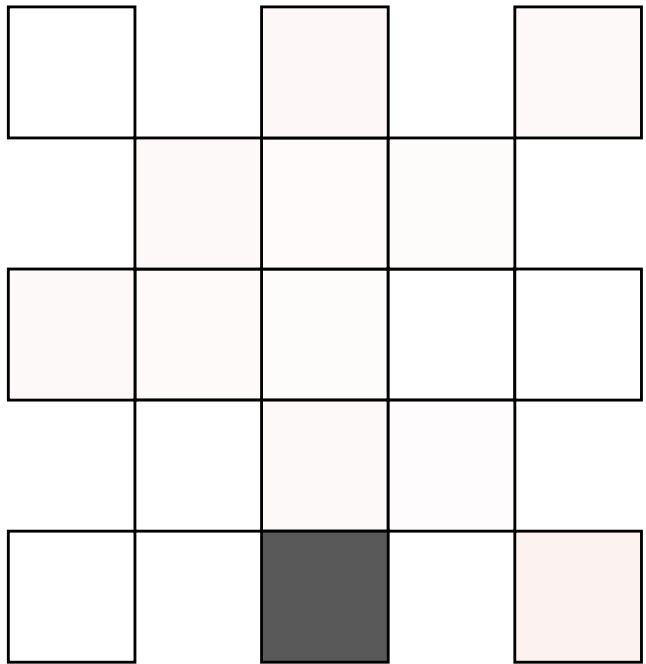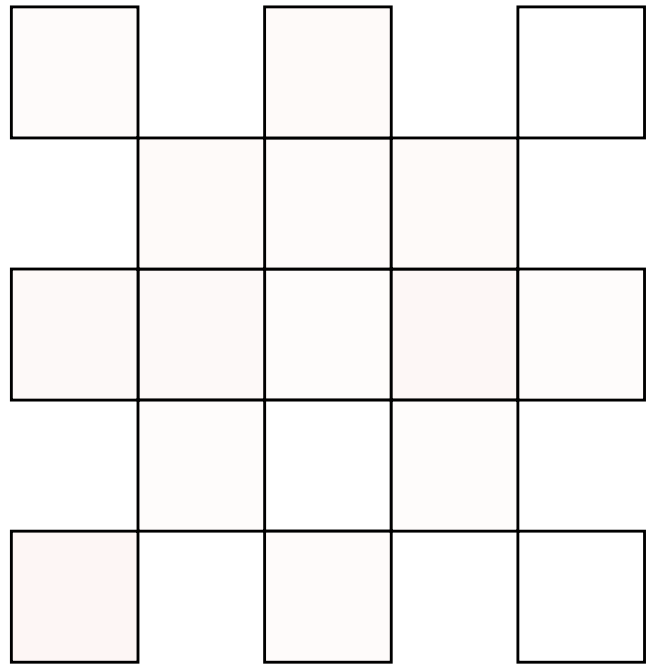

6-66934852-G-A

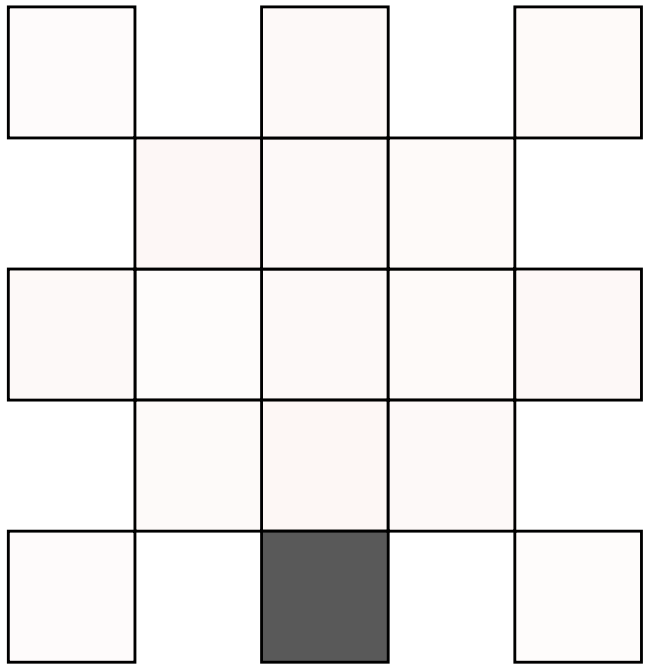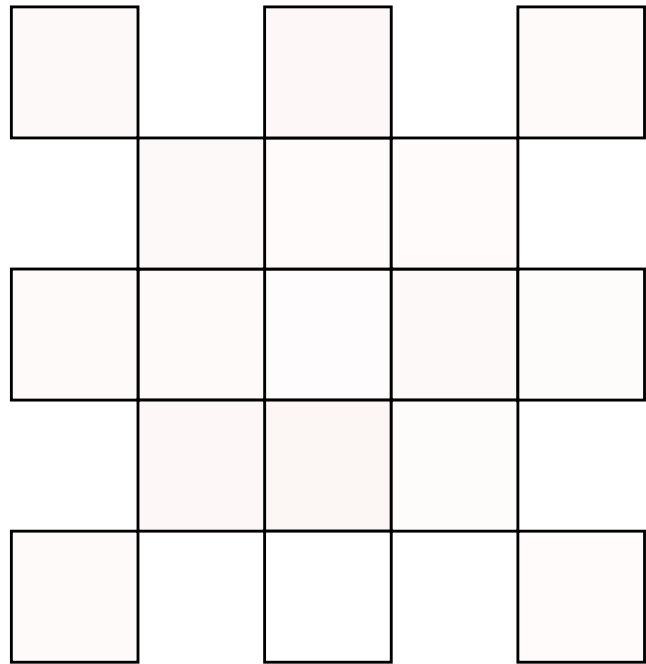

6-68312890-A-T

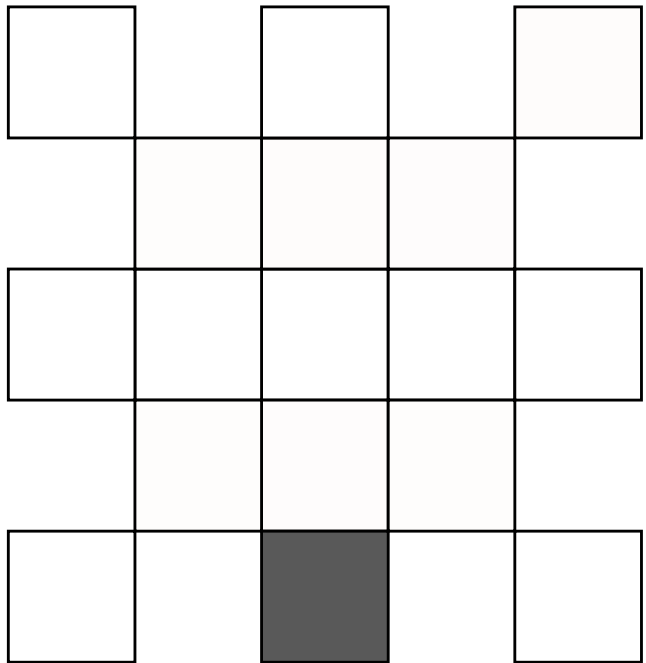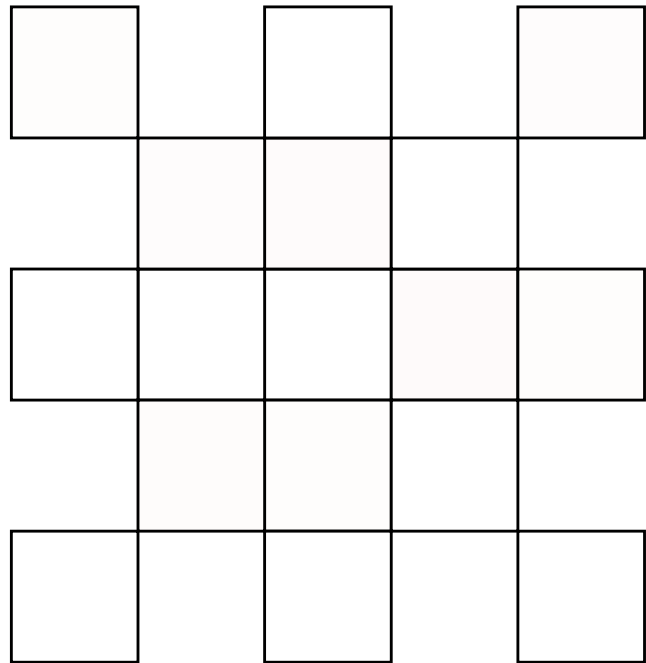

6-91839541-C-T

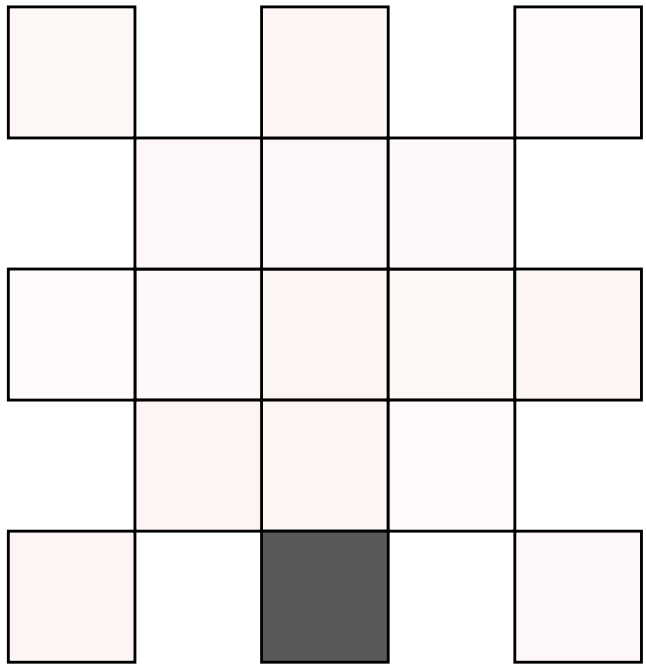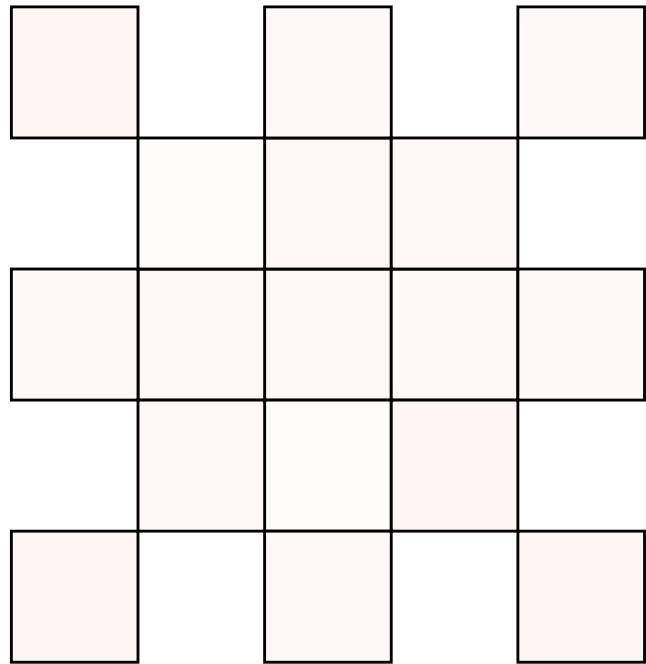

6-92211371-C-T

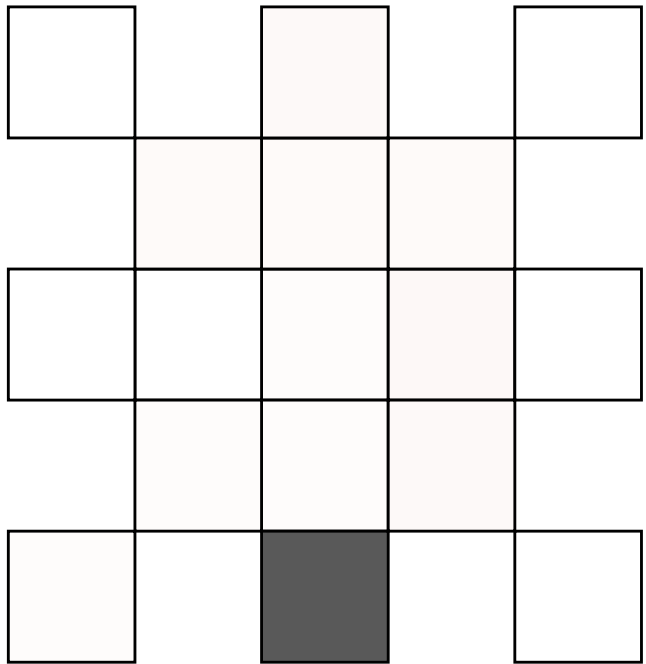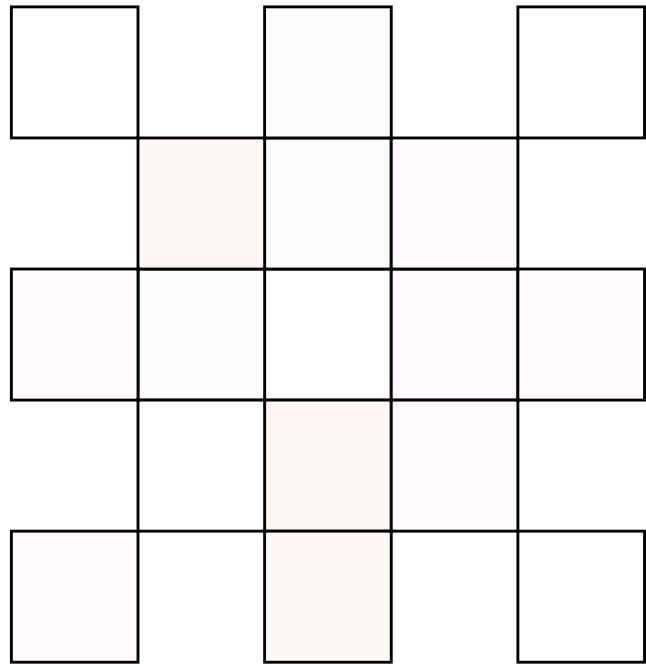



6-9485972-G-A

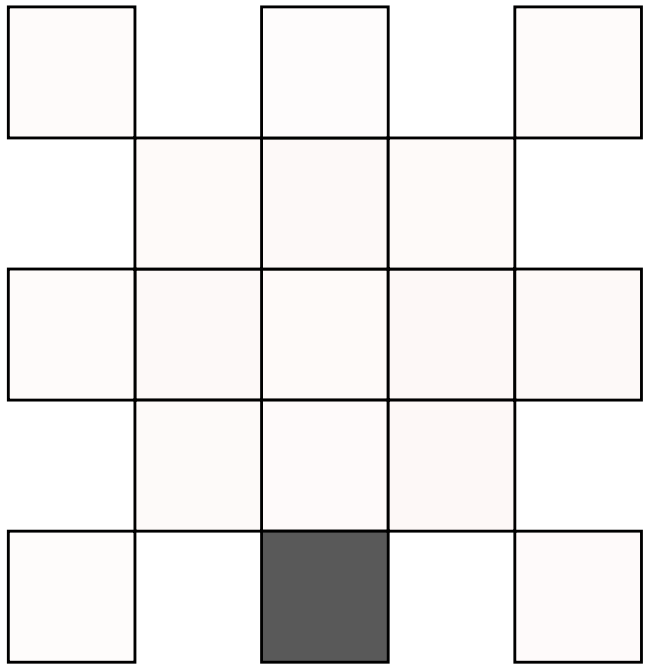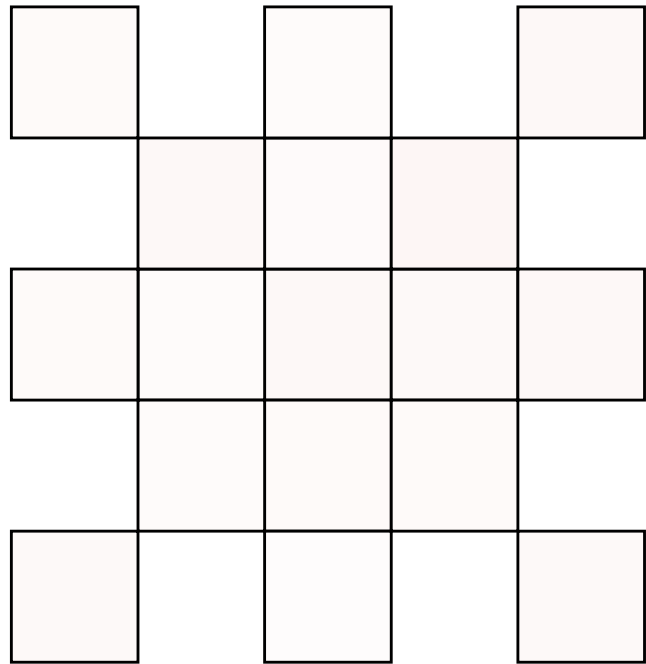

6-96176402-T-C

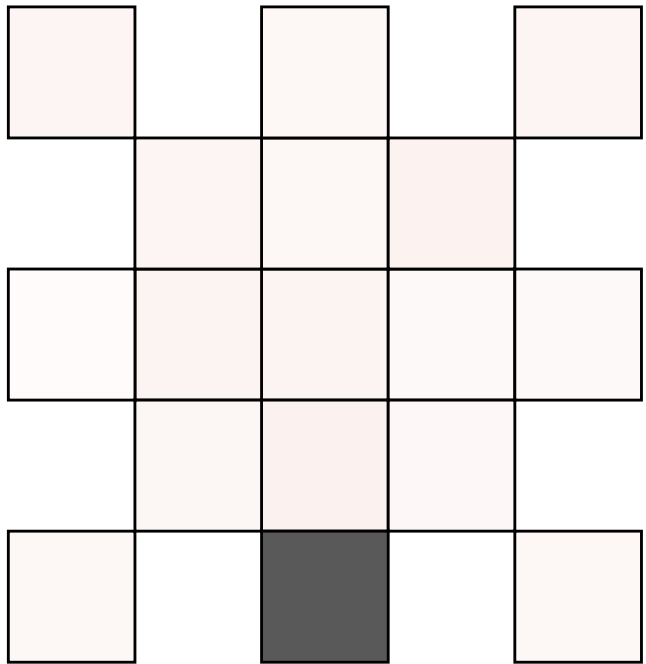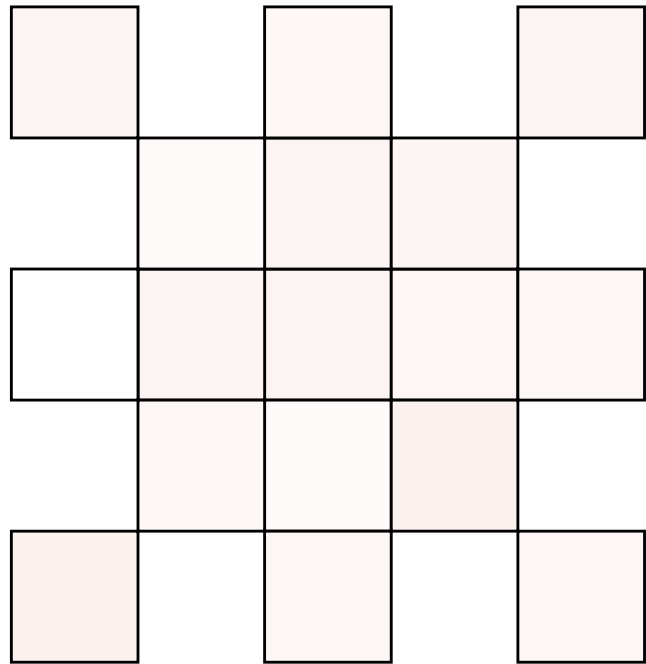

6-98372583-C-T

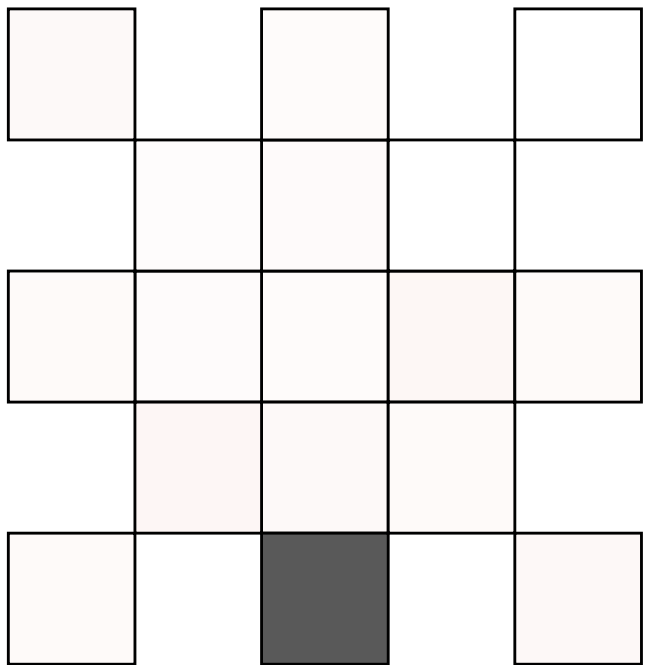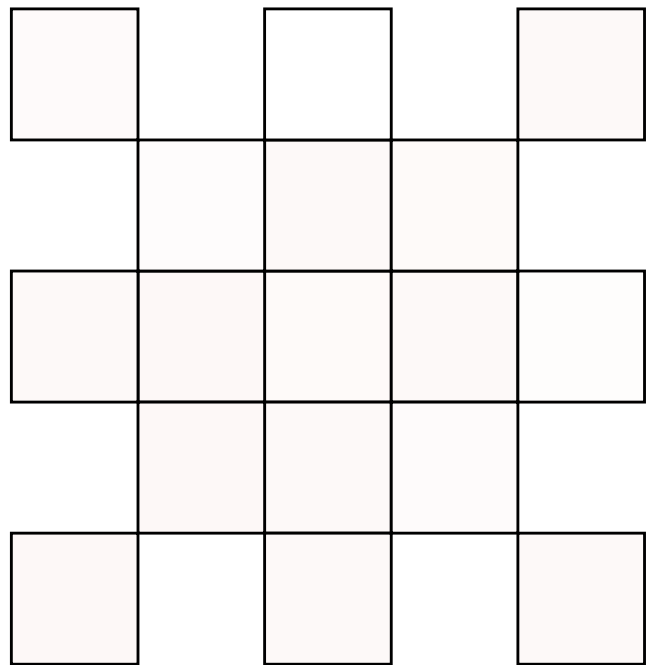

6-99090478-G-T

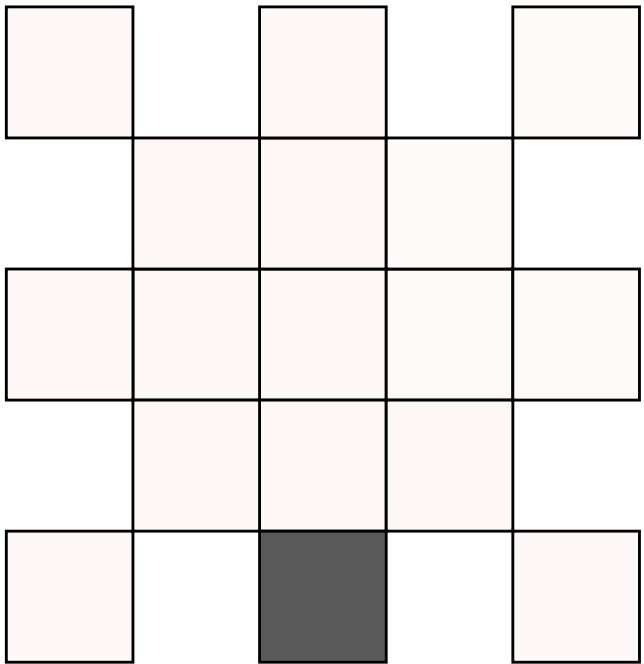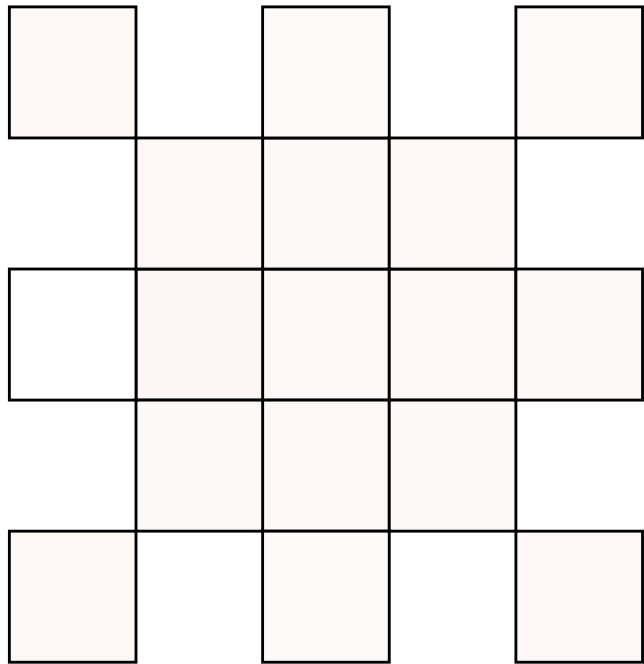

6-99303058-CCT-C

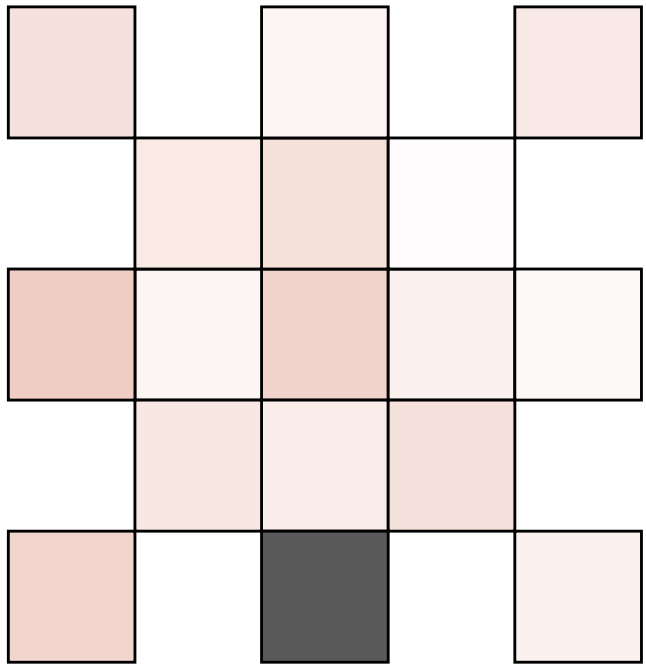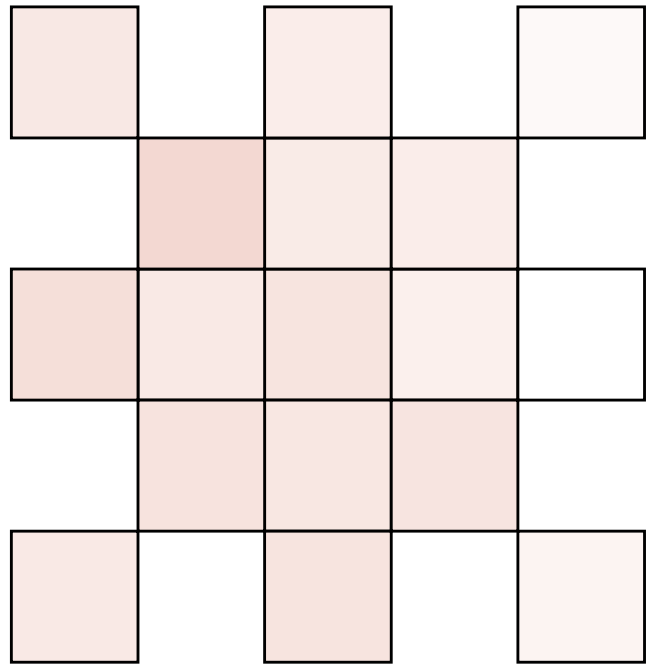

7-10285800-T-C

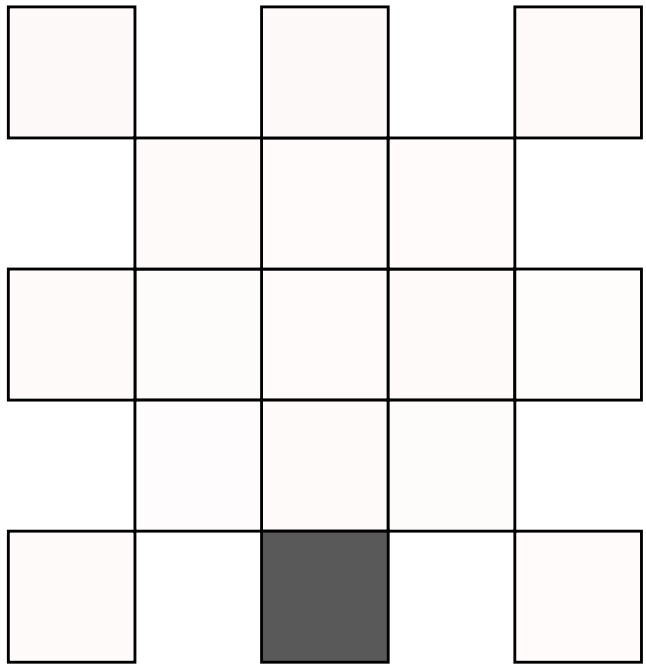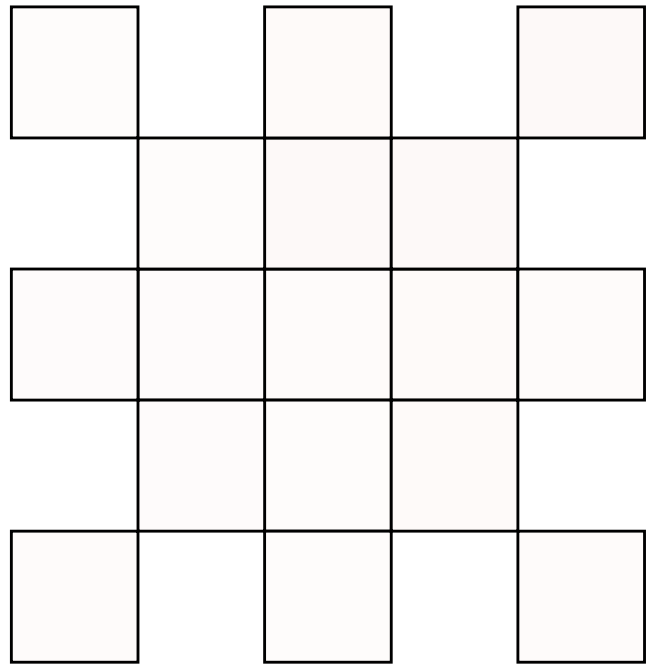

7-109736410-A-T

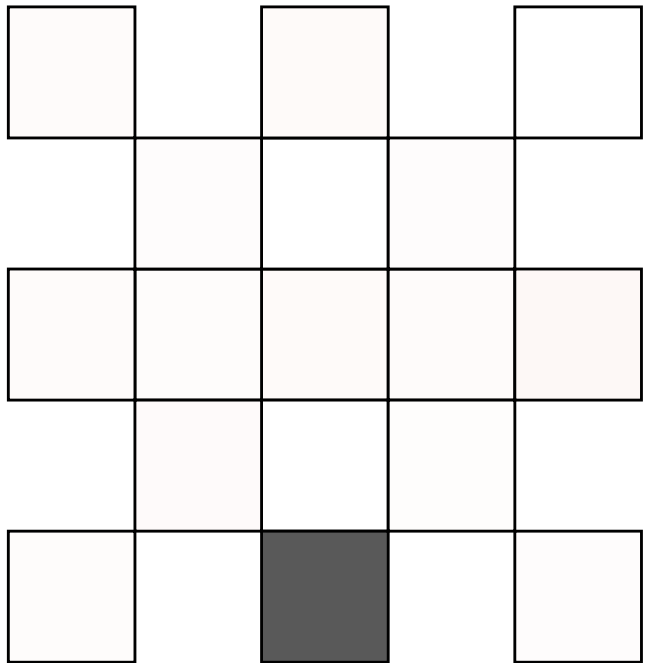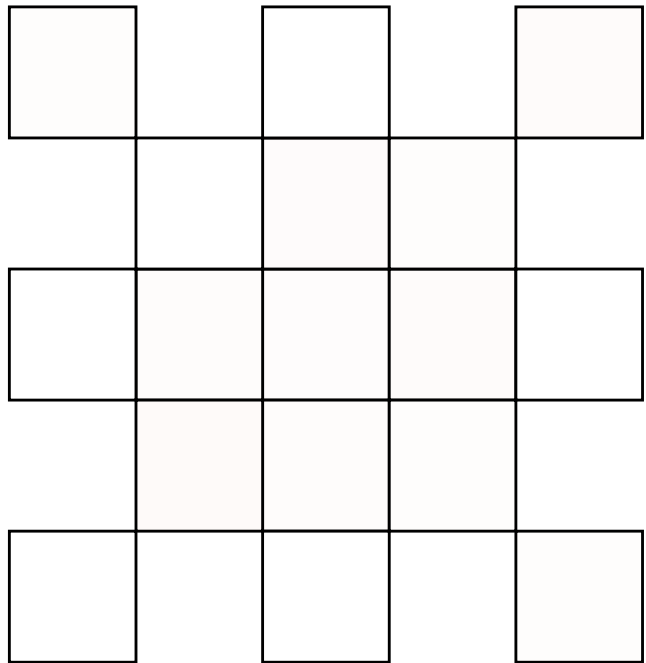

7-114017234-C-T

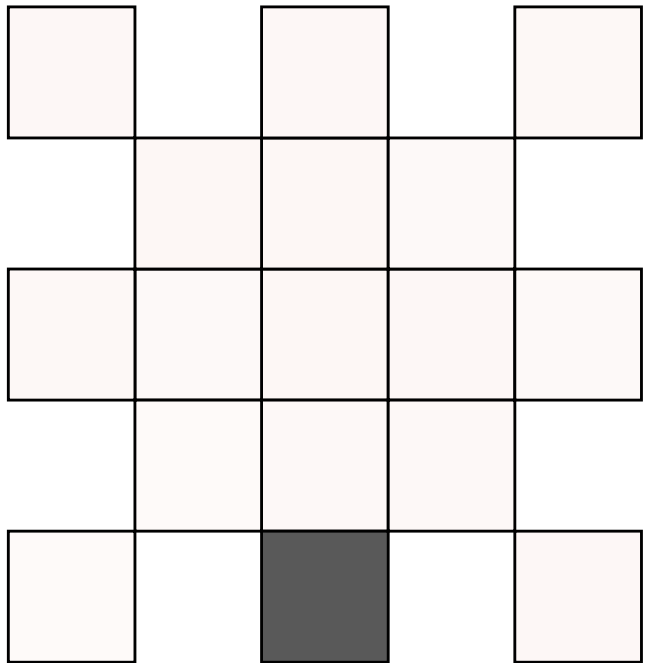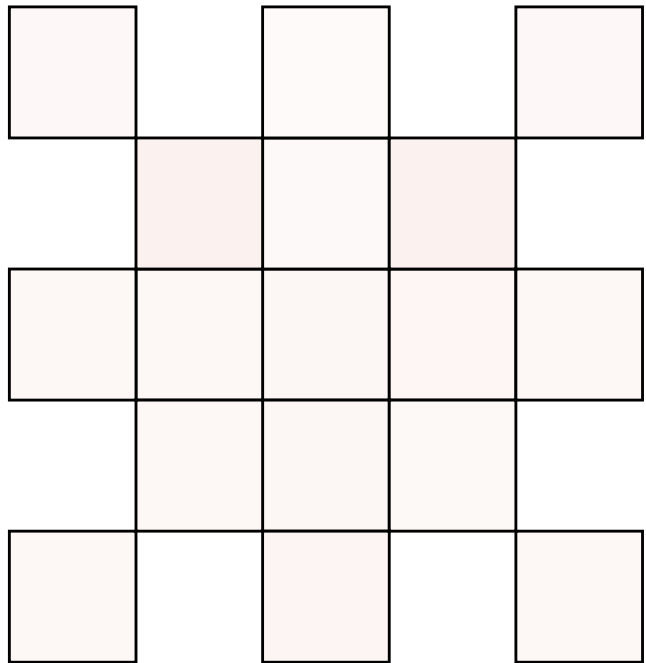



7-114658860-A-G

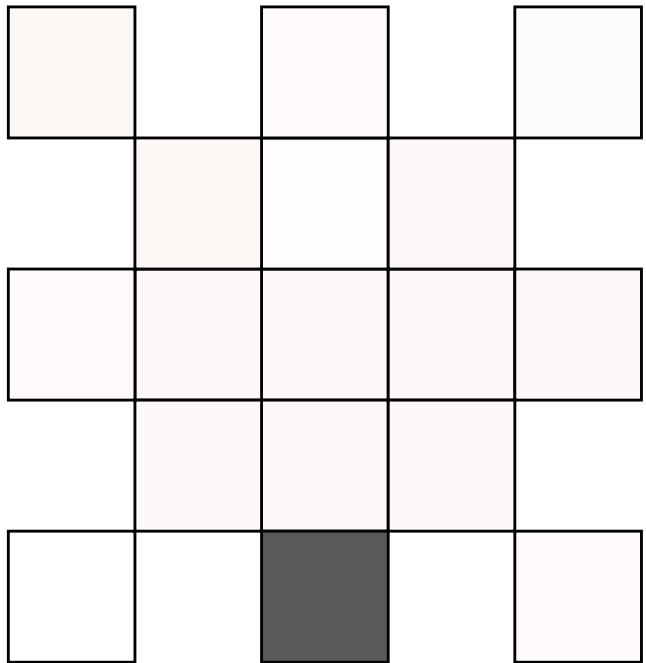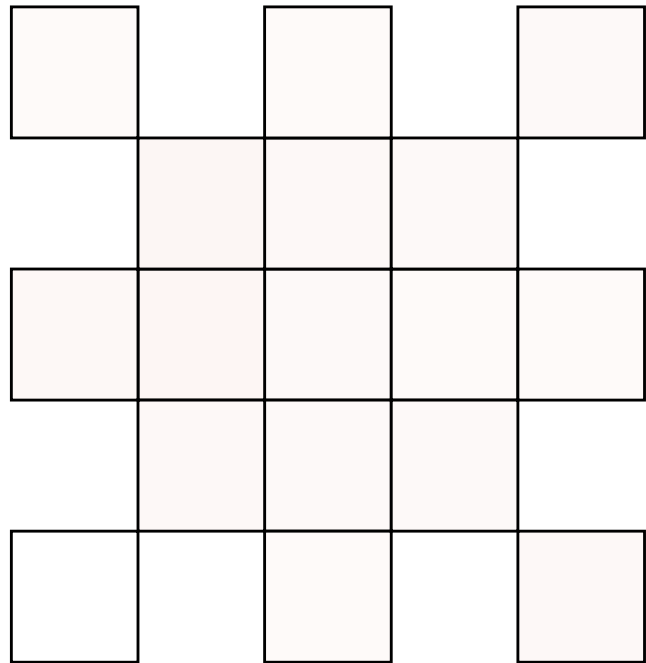

7-134512508-G-T

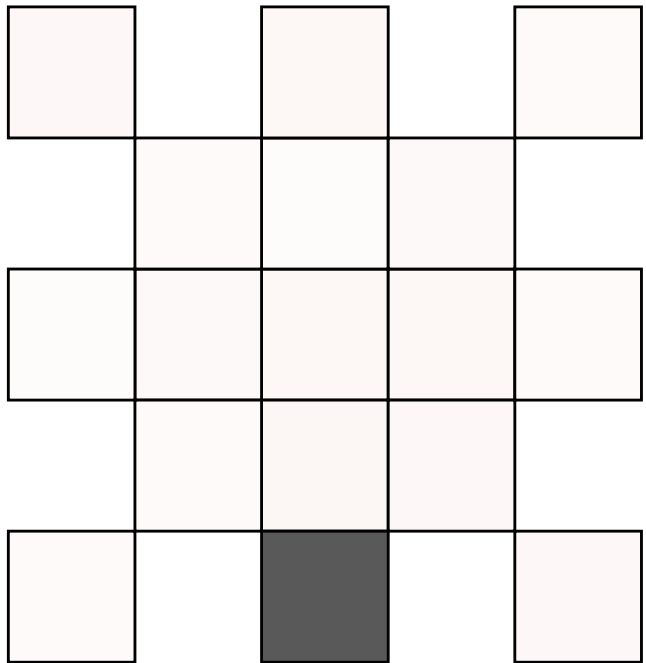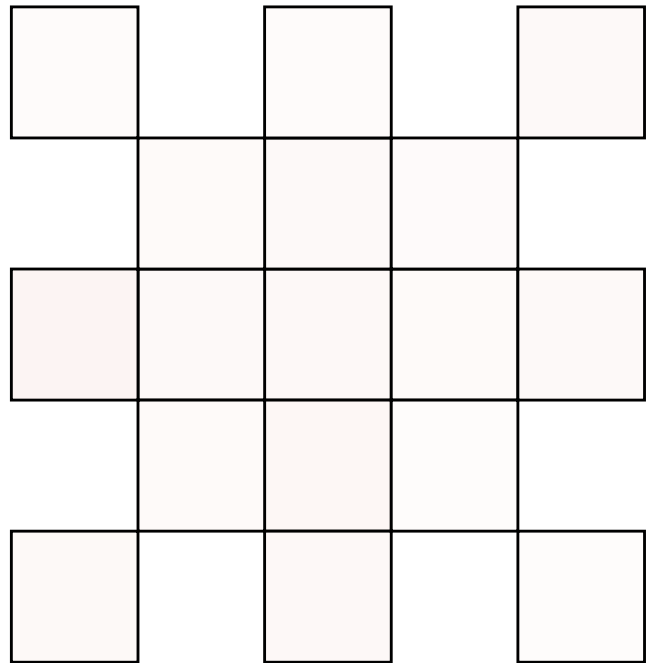

7-137220703-G-A

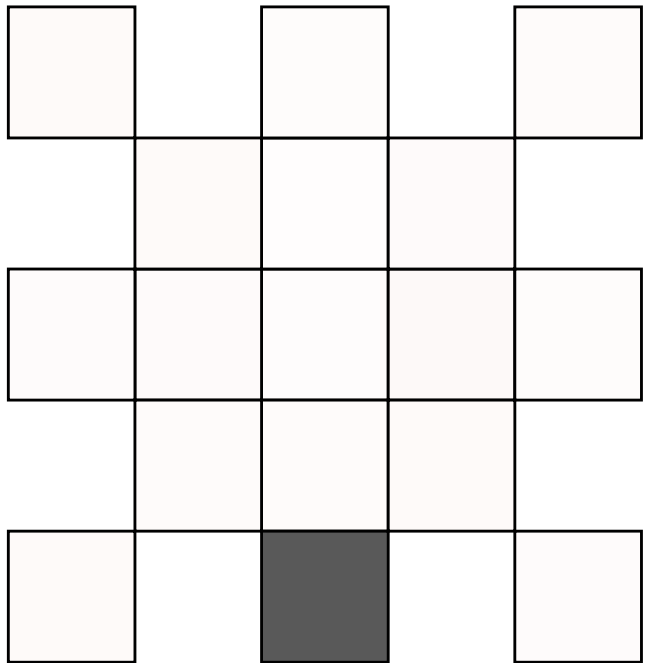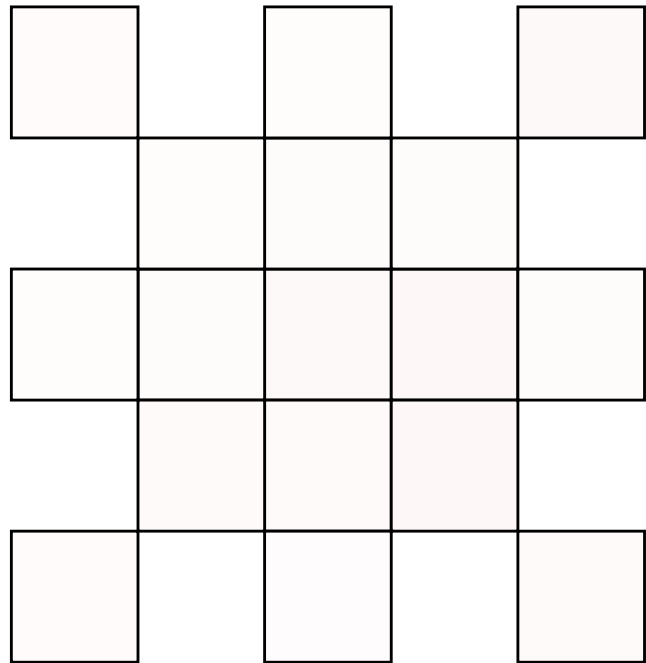

7-139192862-C-T

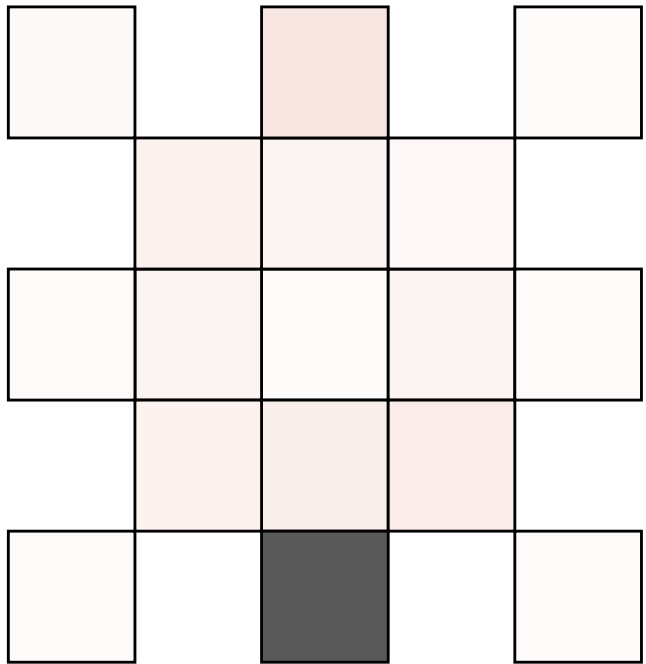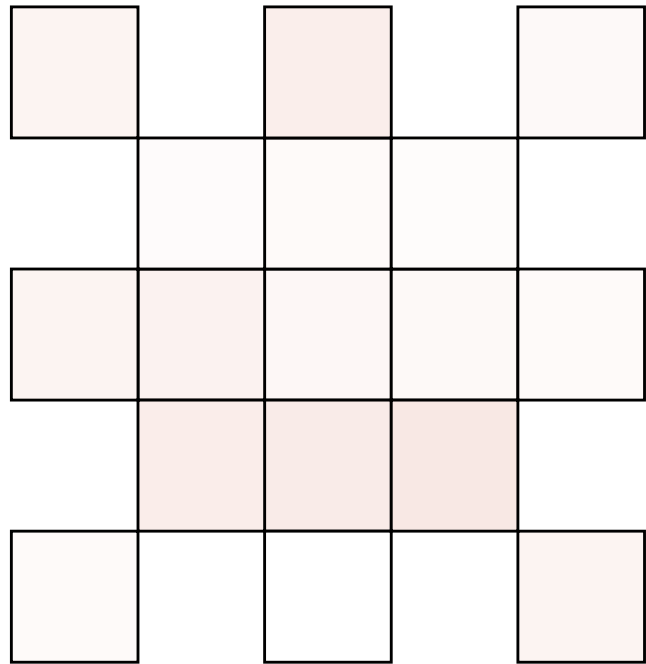

7-144944639-C-T

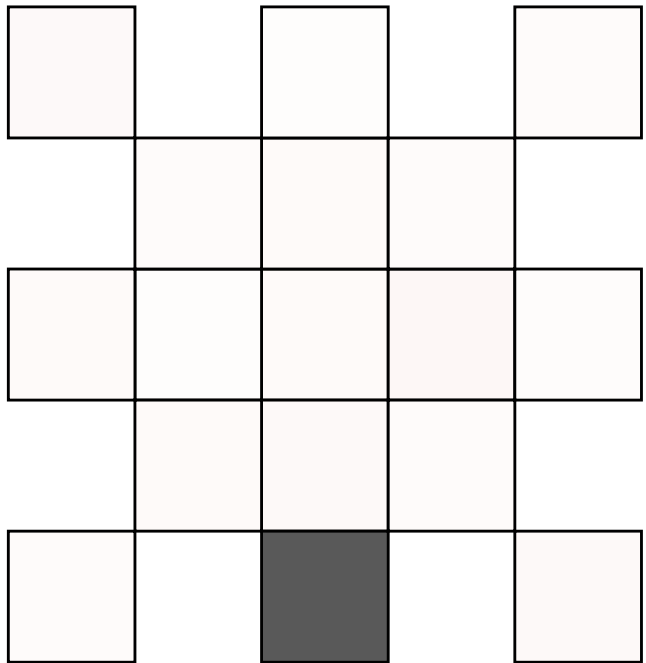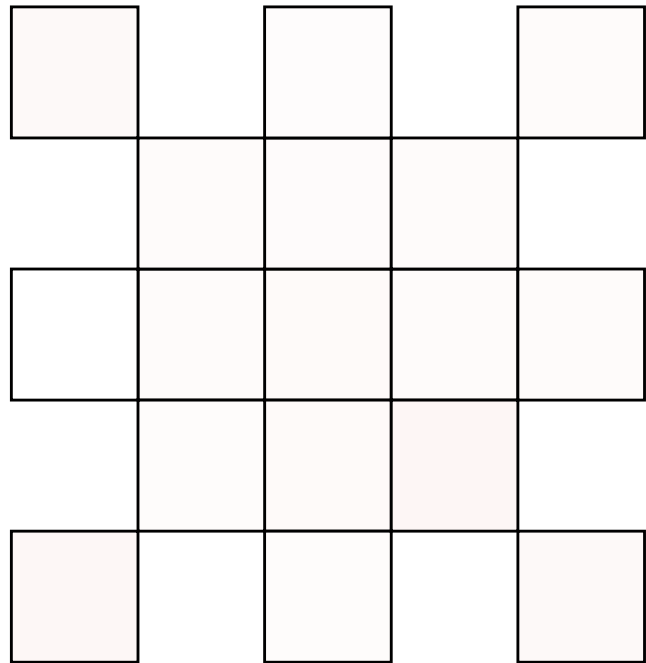

7-146307789-T-A

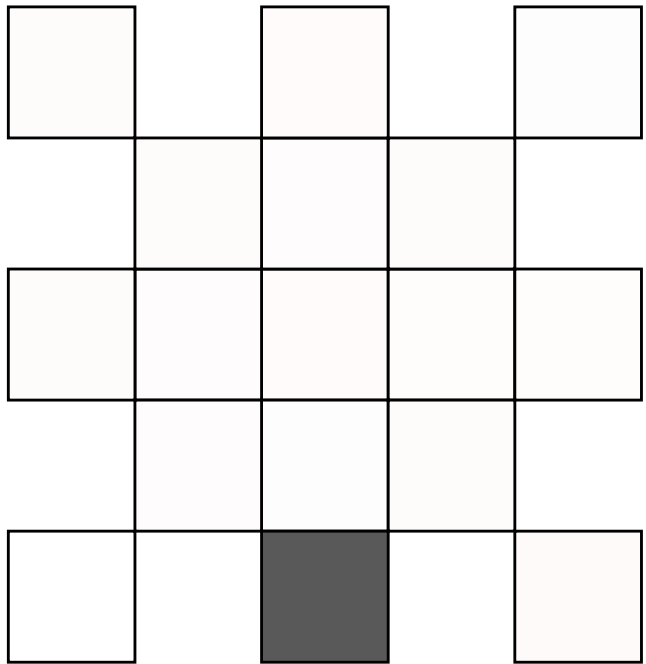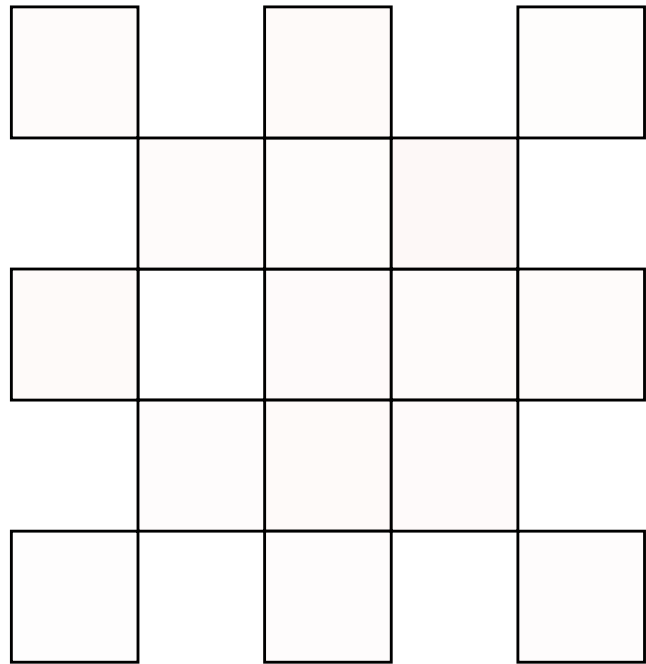

7-147380993-G-A

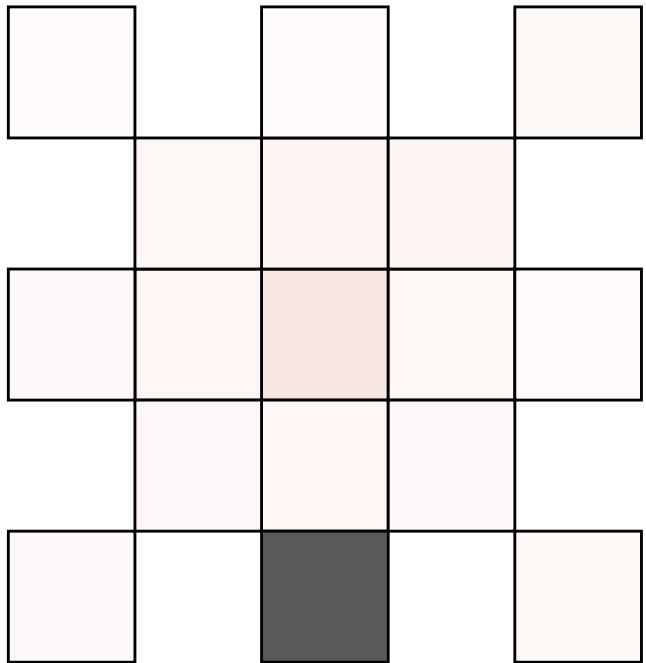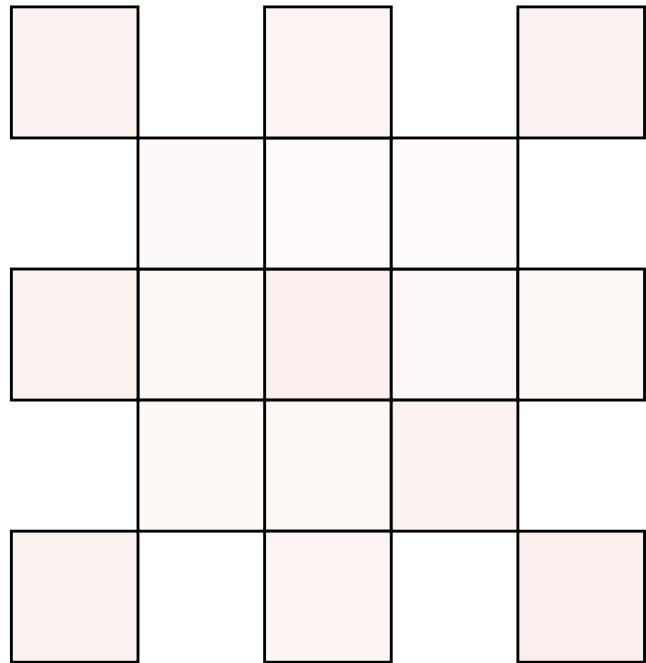

7-151491278-C-T

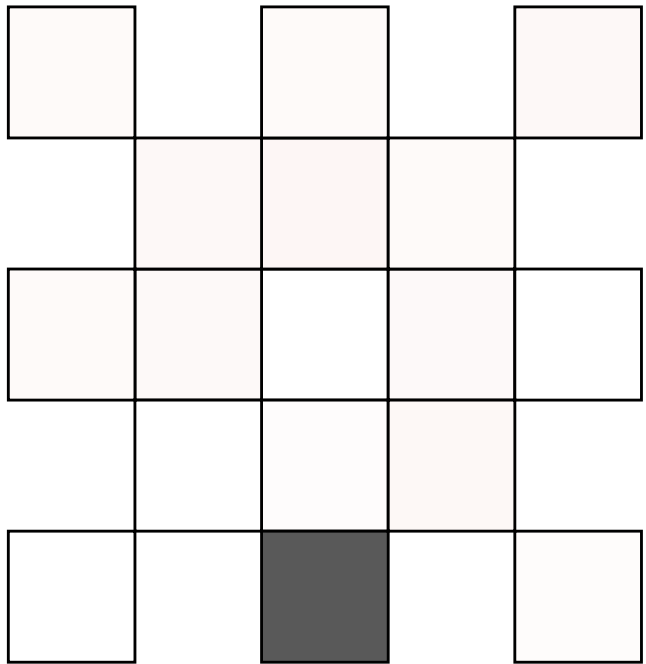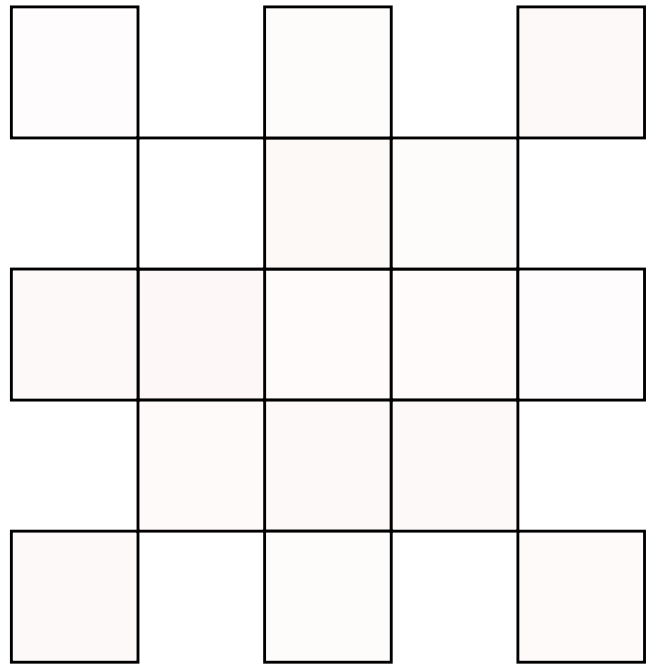



7-15451172-G-A

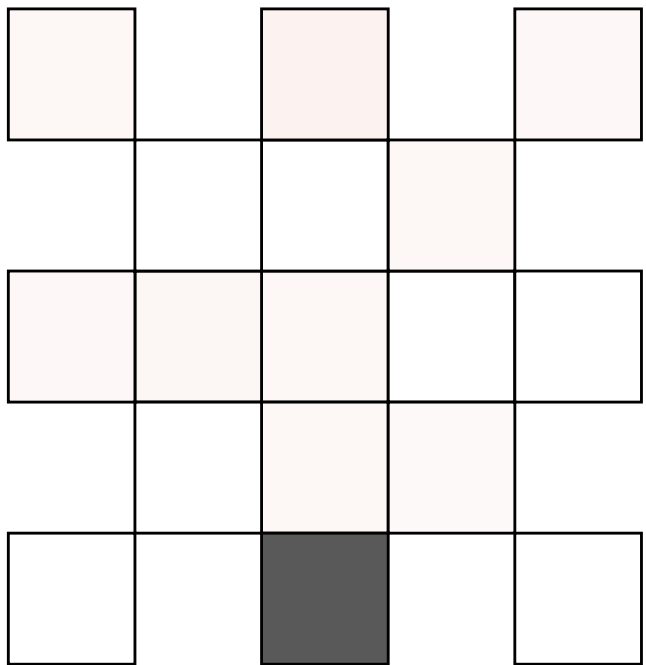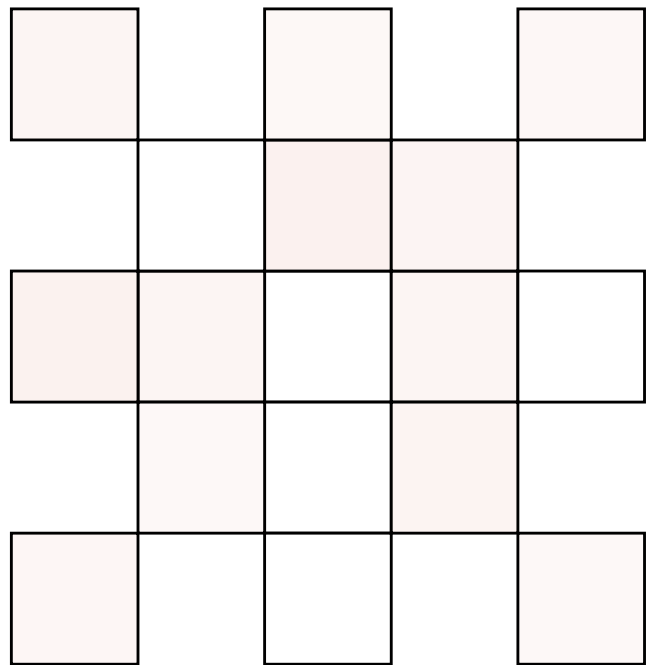

7-155855403-T-C

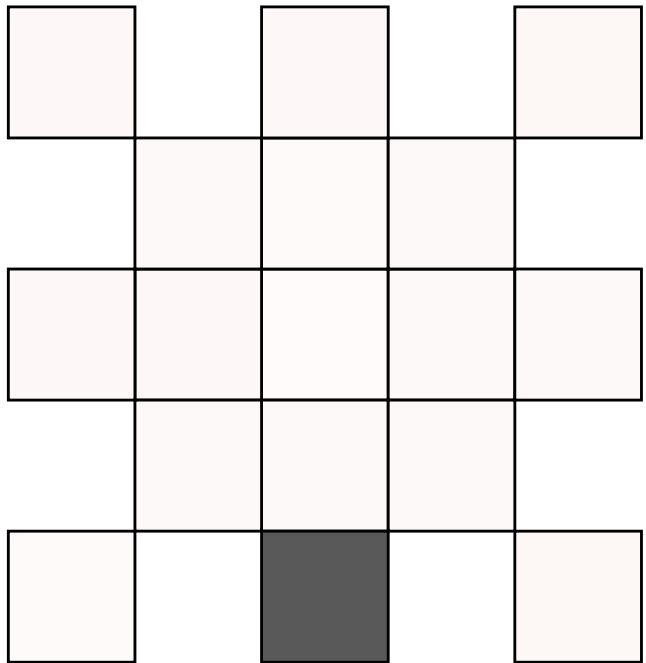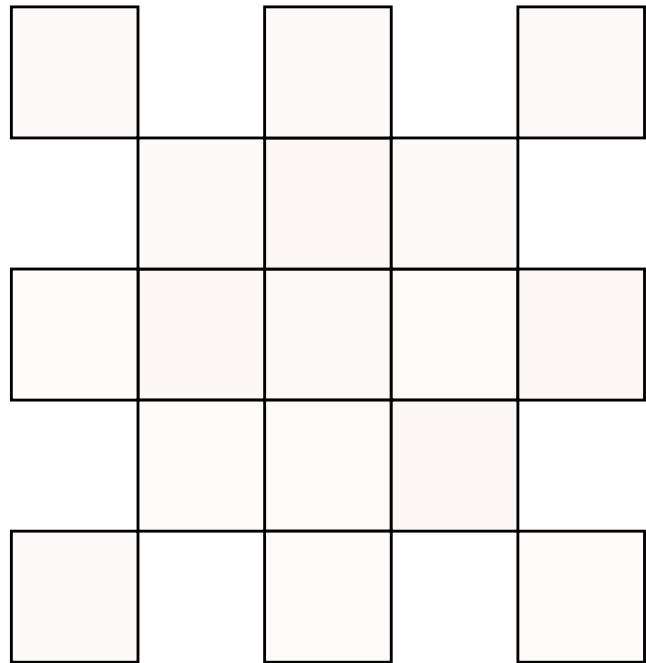

7-16742061-C-T

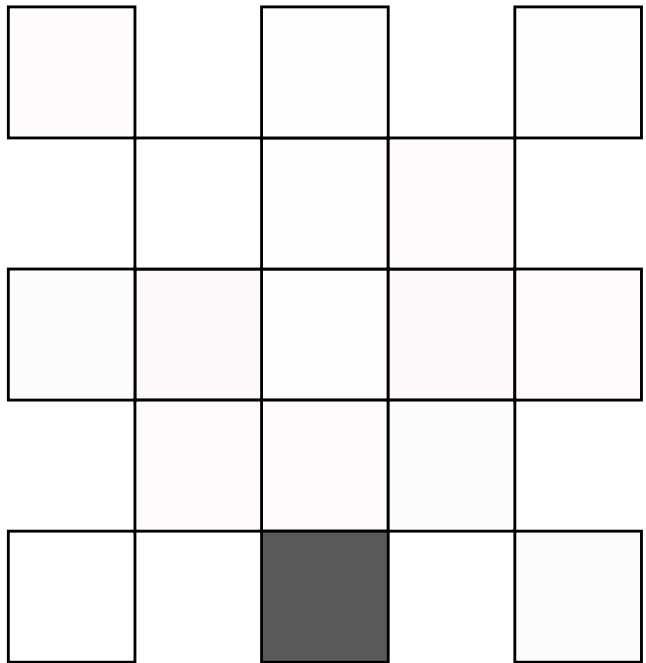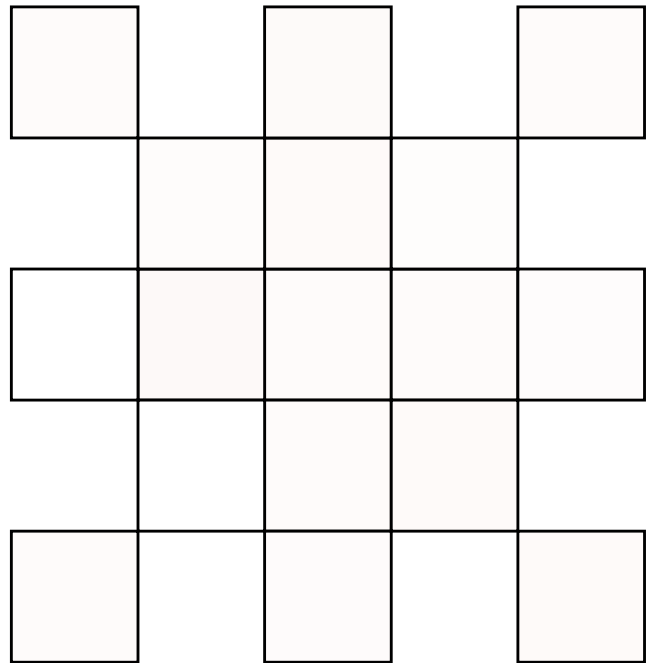

7-19648848-A-G

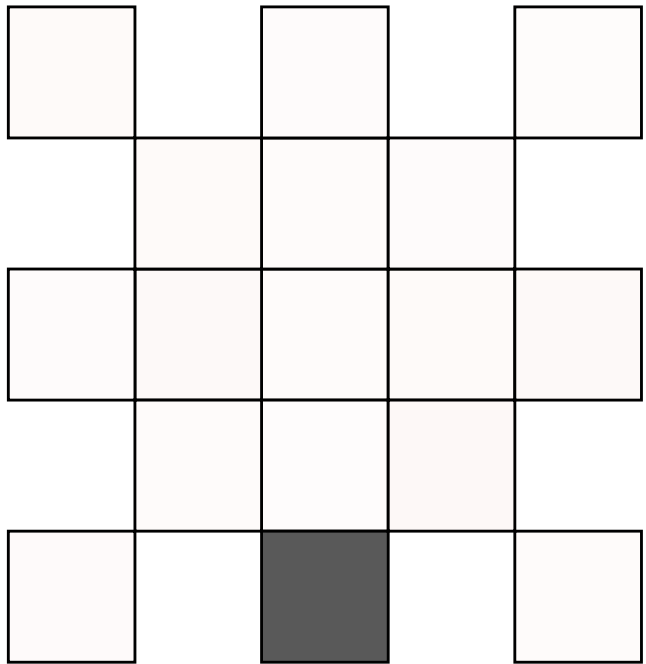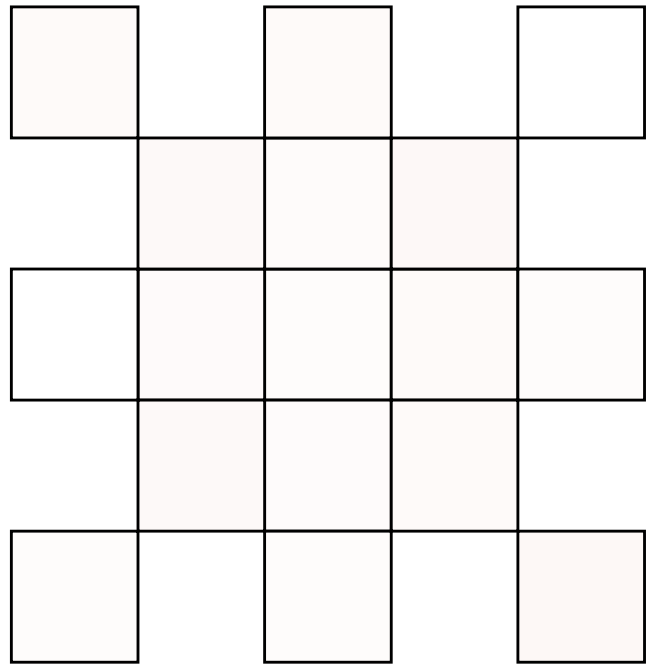

7-20852978-C-A

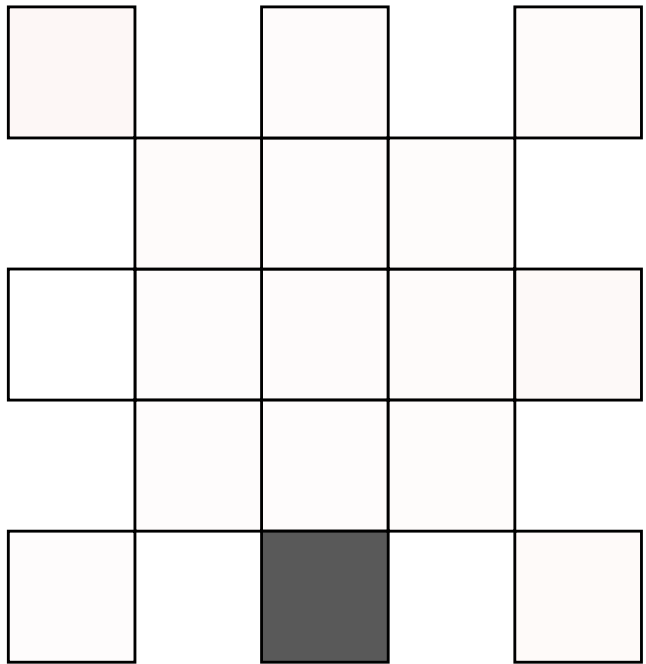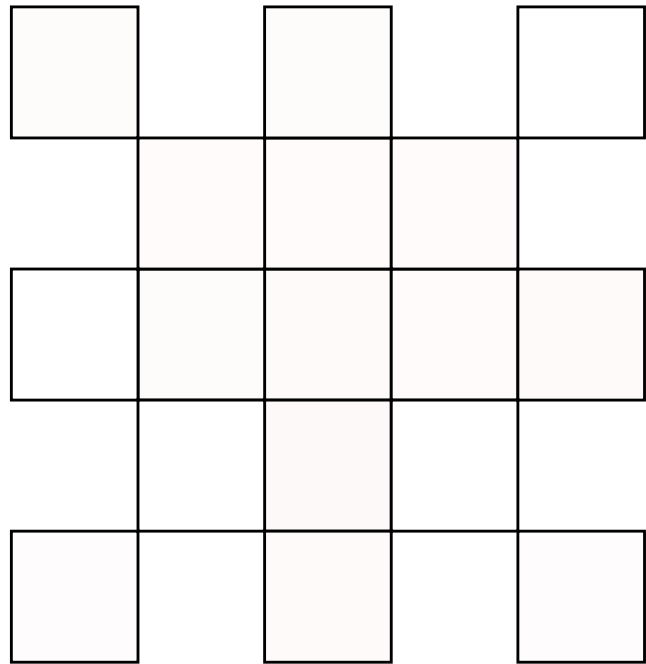

7-226651-G-A

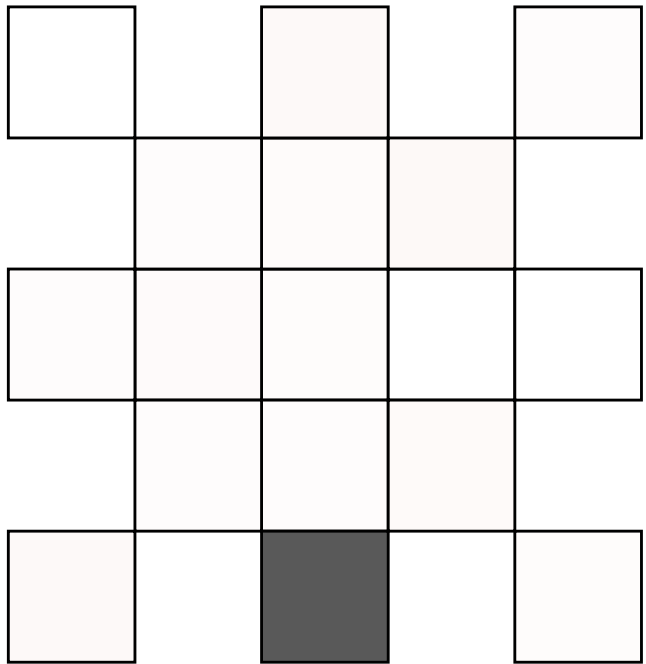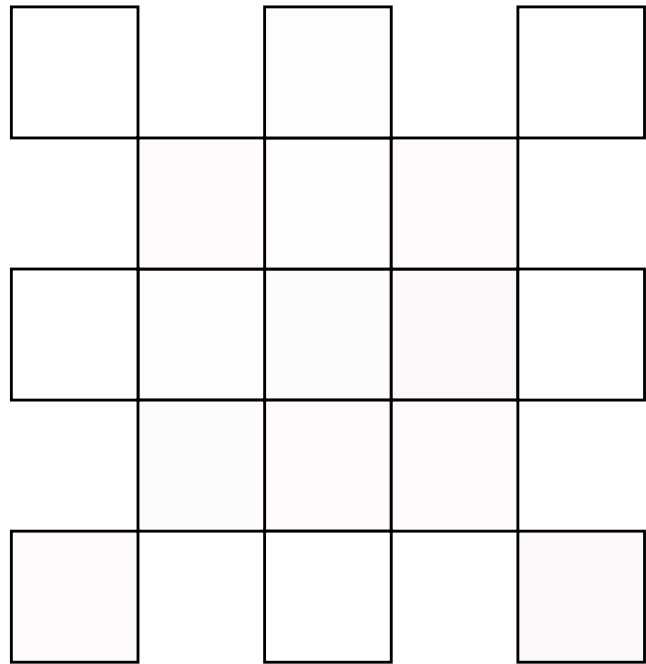

7-24504428-A-G

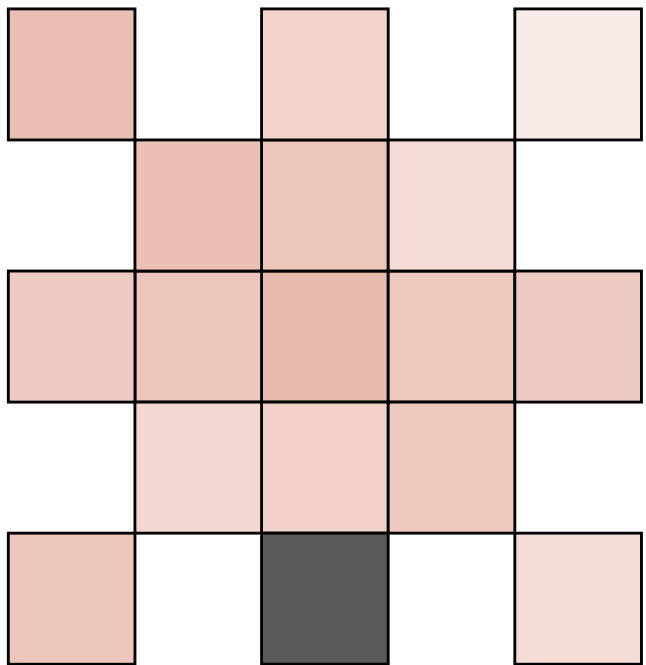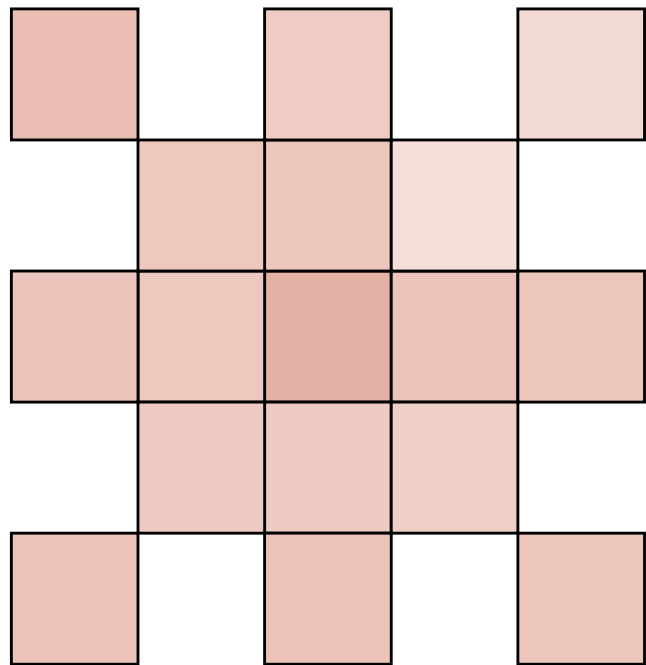

7-26490020-G-A

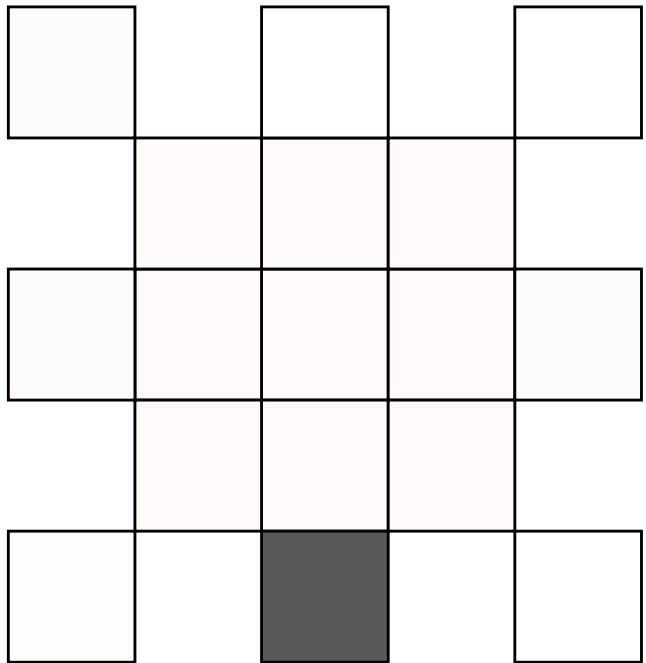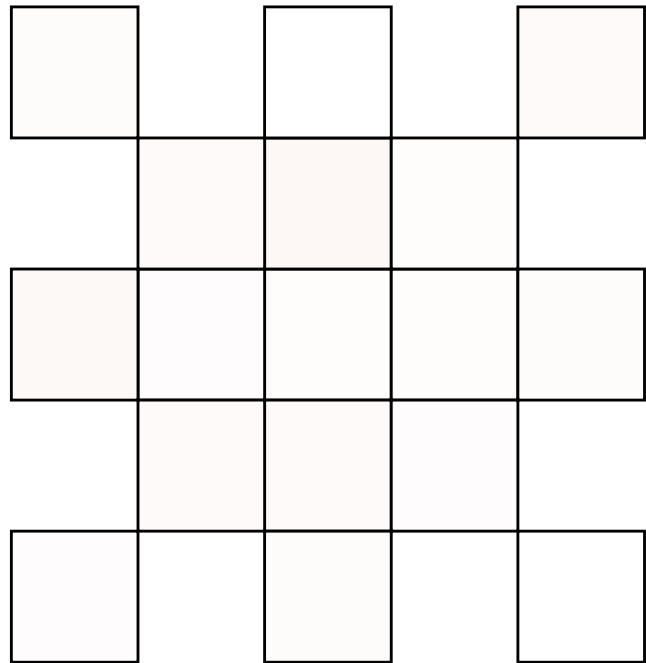



7-30962886-G-A

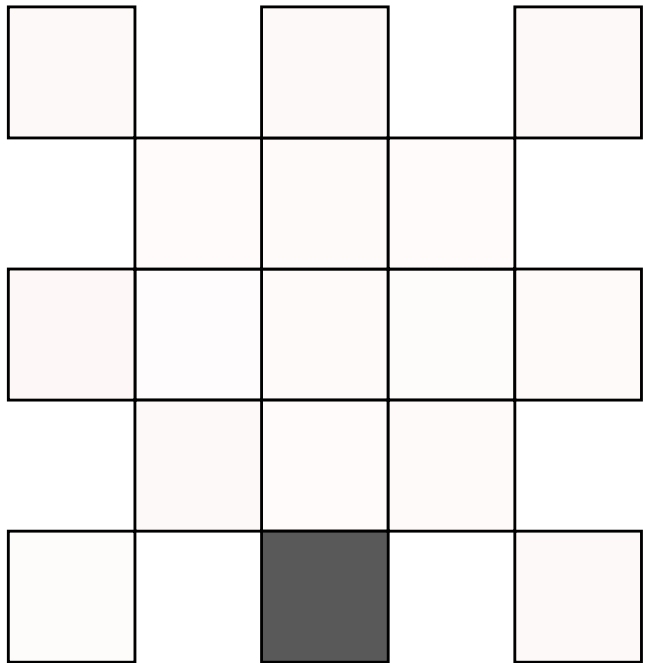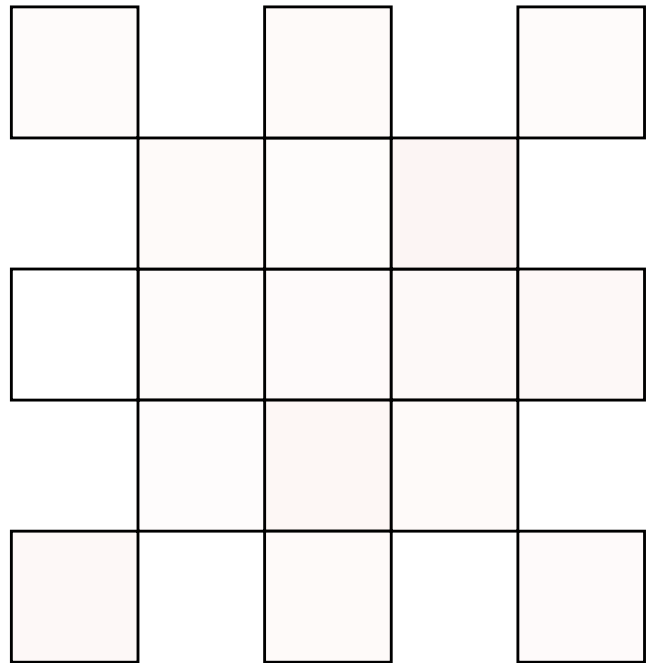

7-31462228-G-A

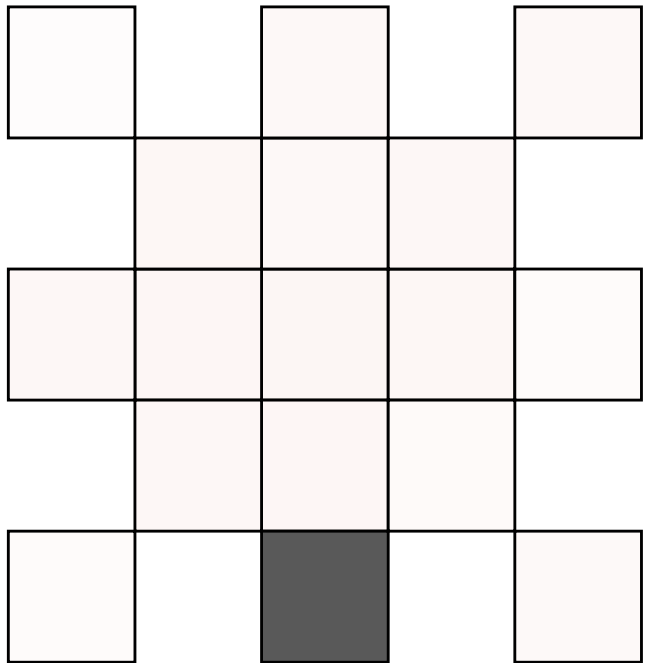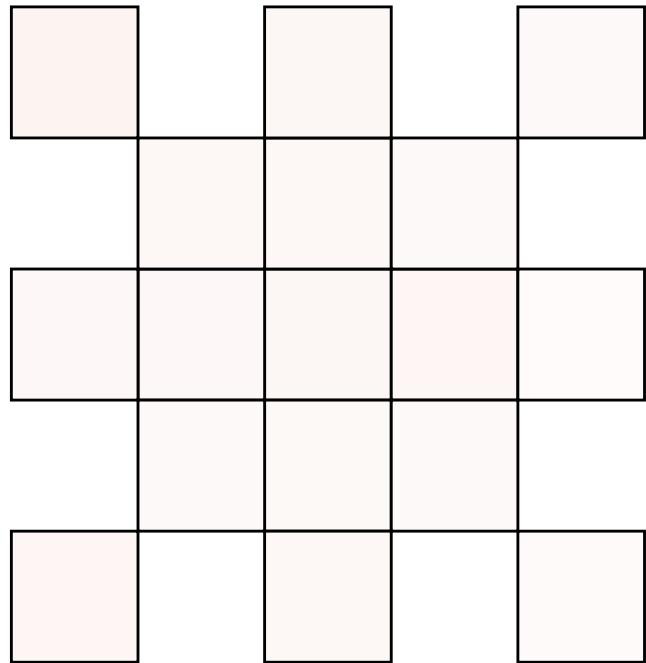

7-35583026-G-C

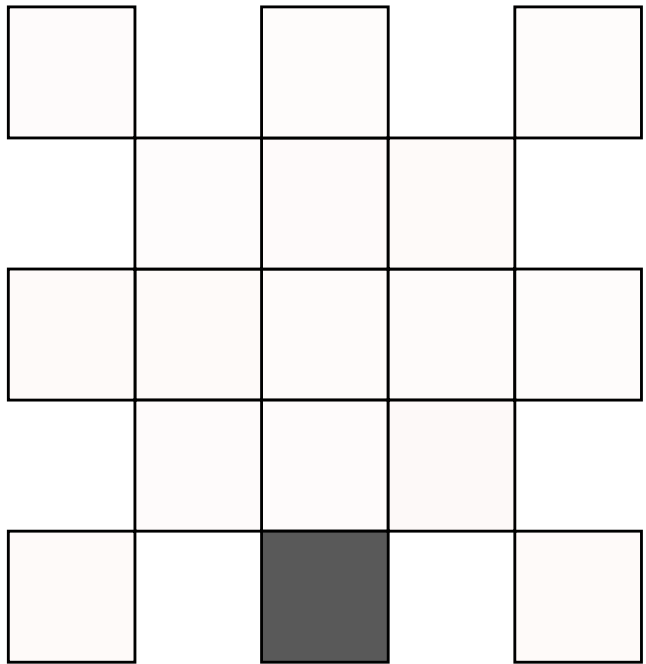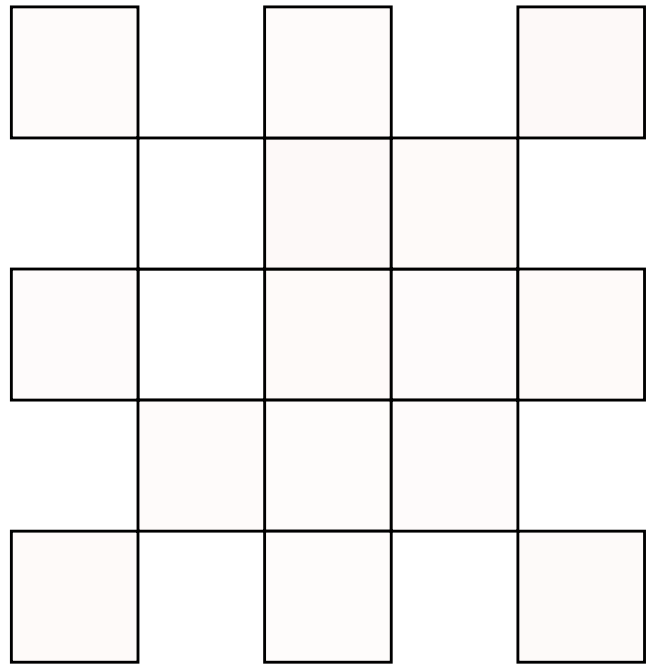

7-41735414-A-G

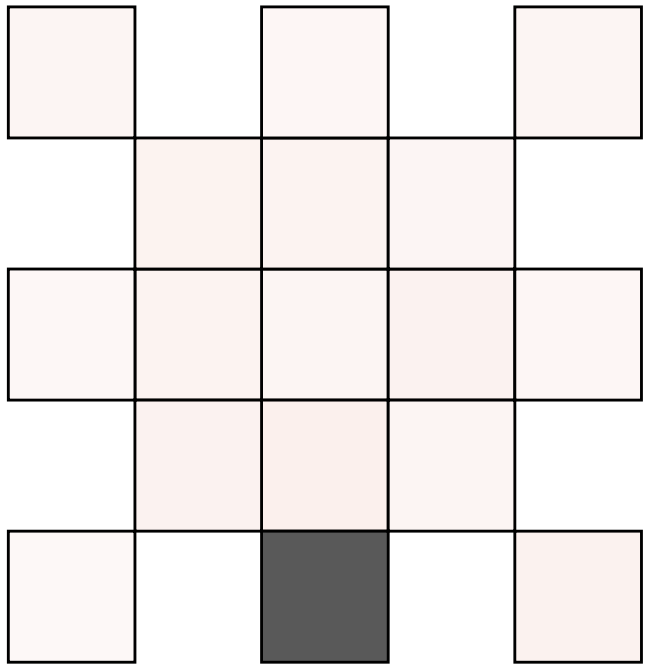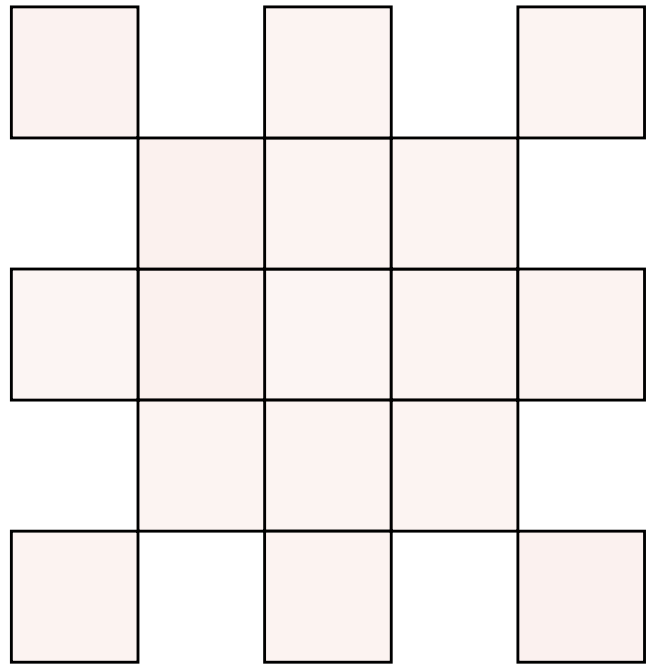

7-46623362-G-C

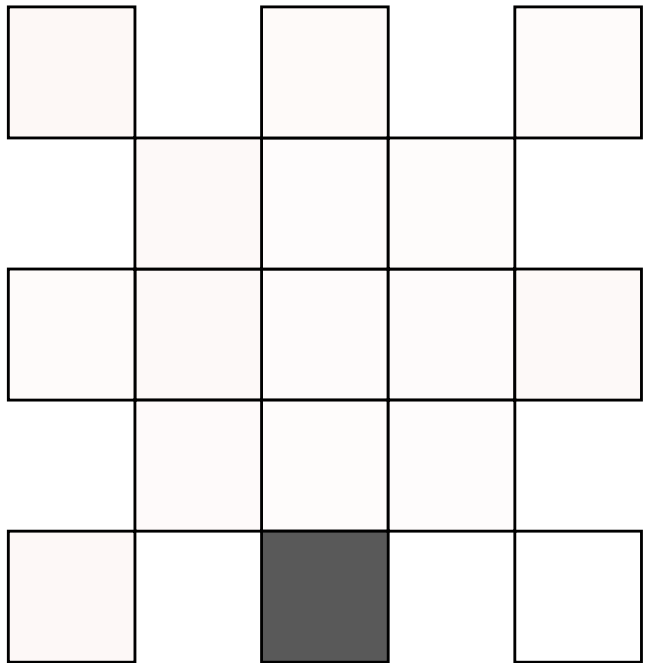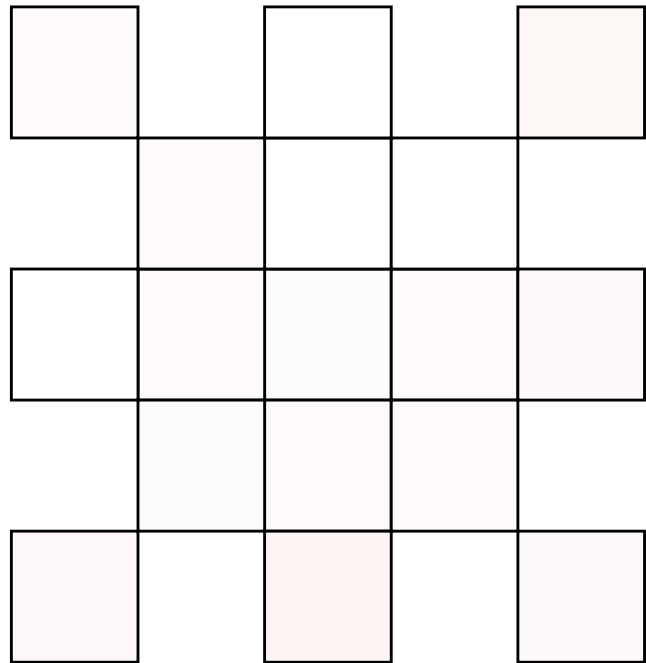

7-54130903-T-G

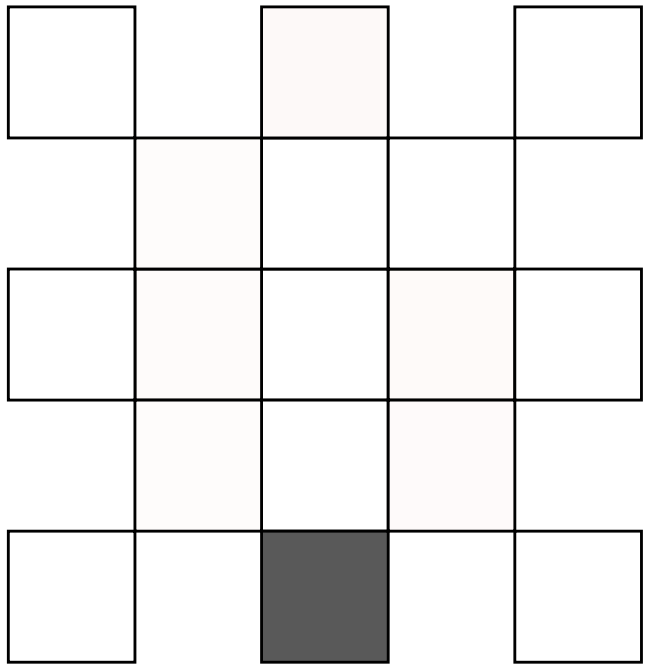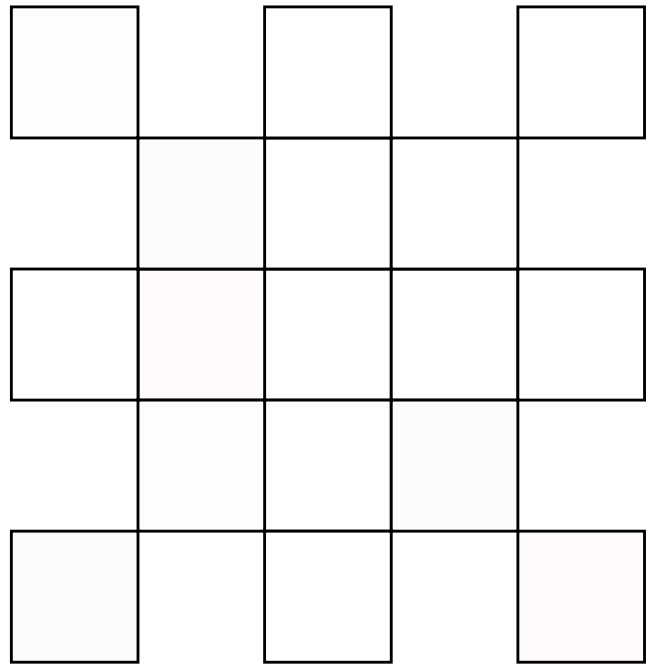

7-75695715-A-G

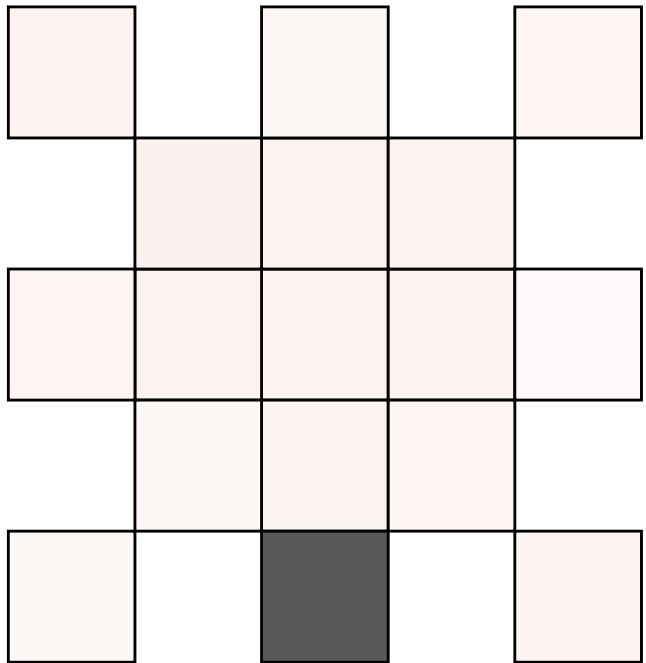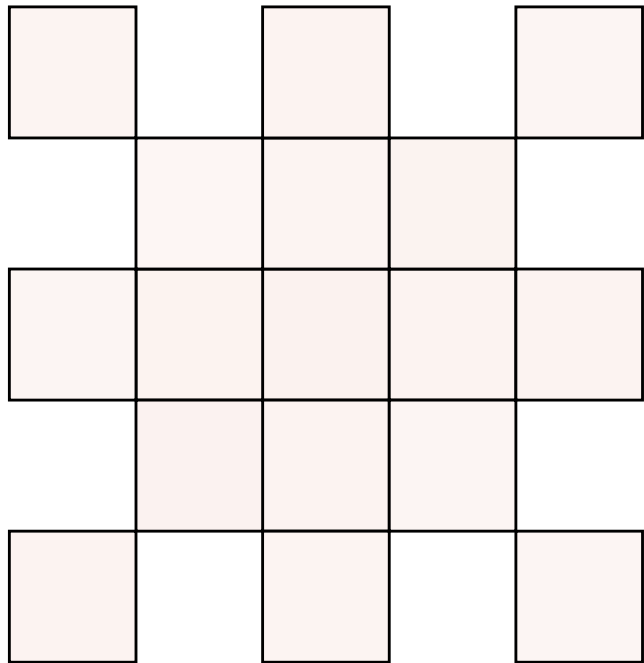

7-78830807-C-T

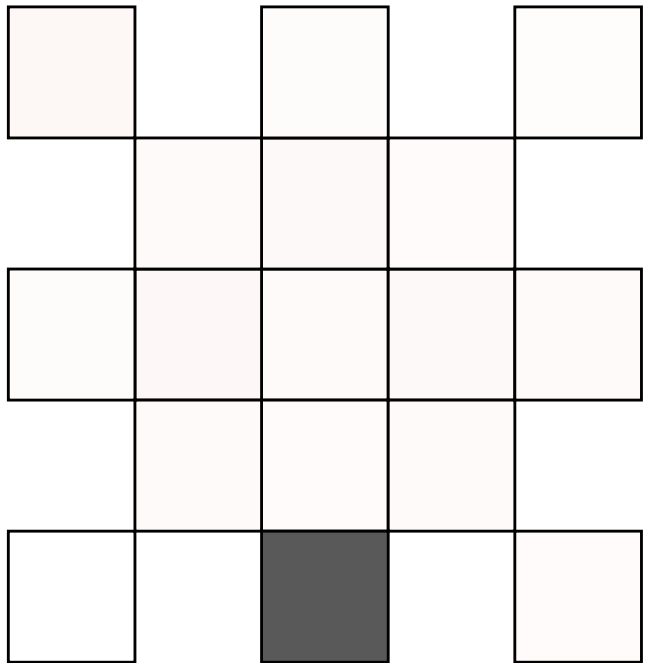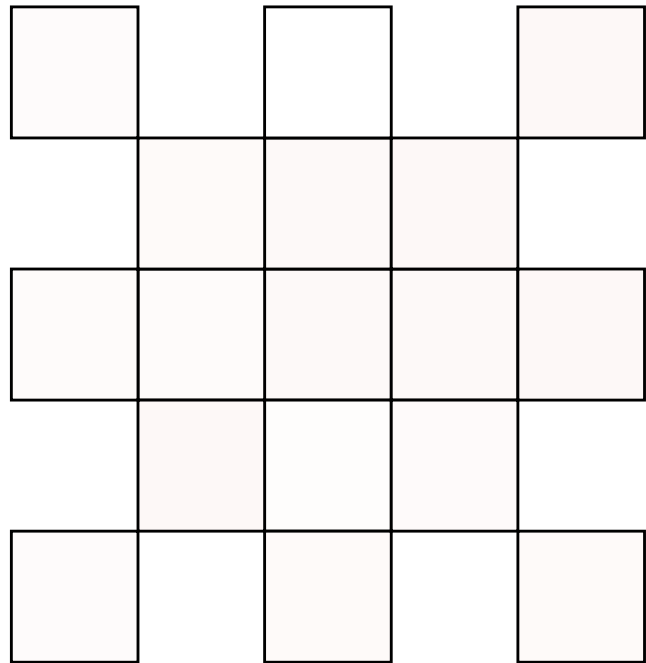



7-87643499-T-A

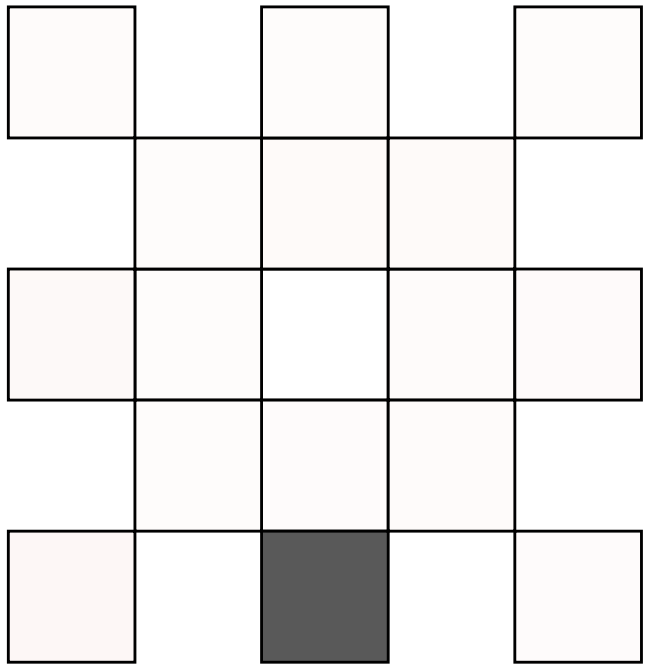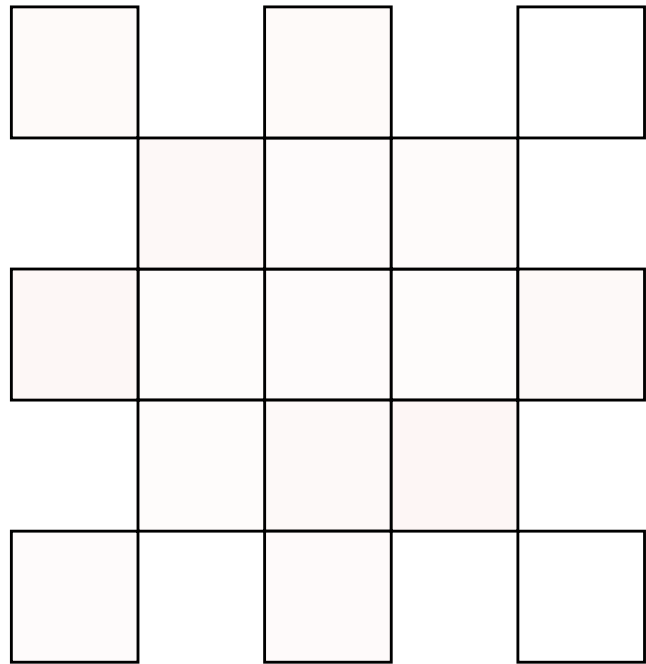

7-89347679-A-T

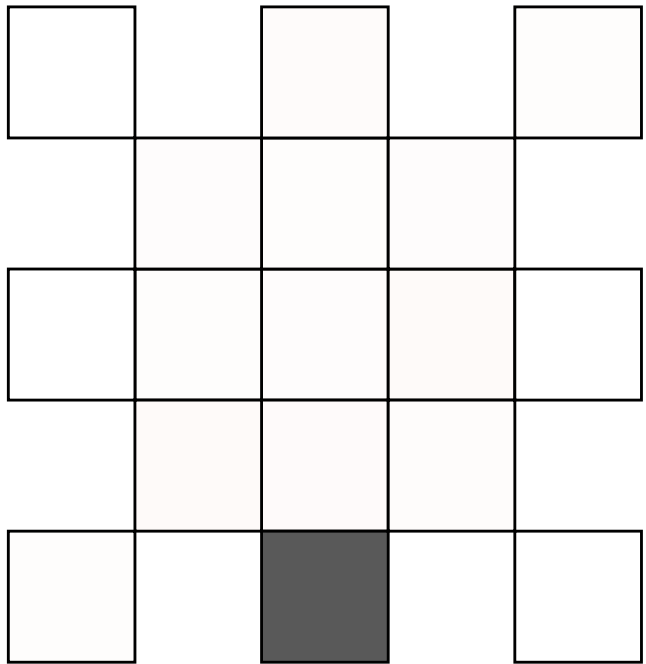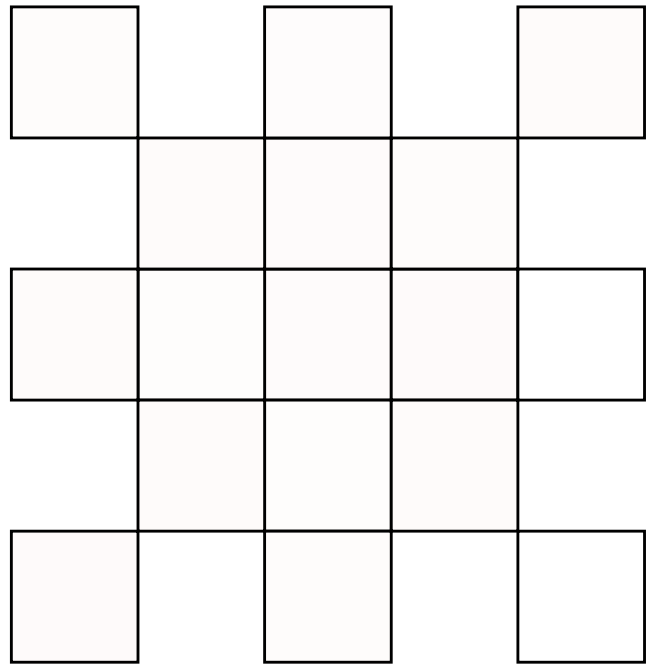

7-9192631-C-T

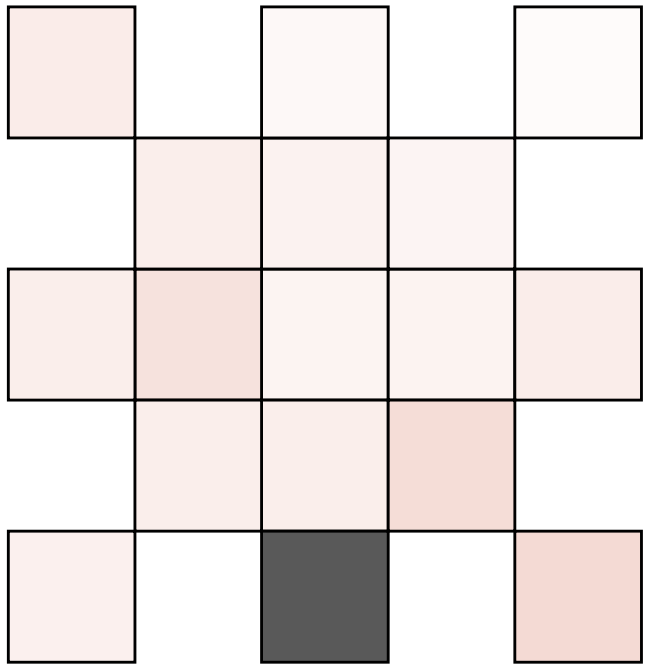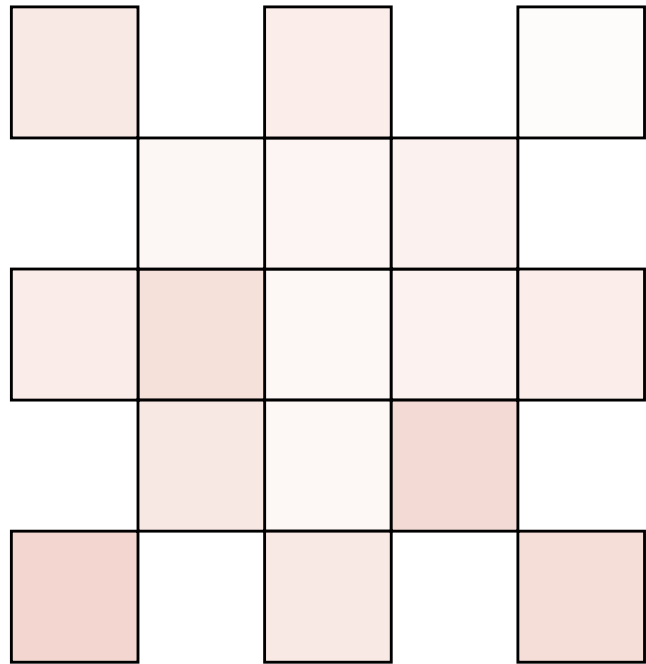

7-94919994-G-C

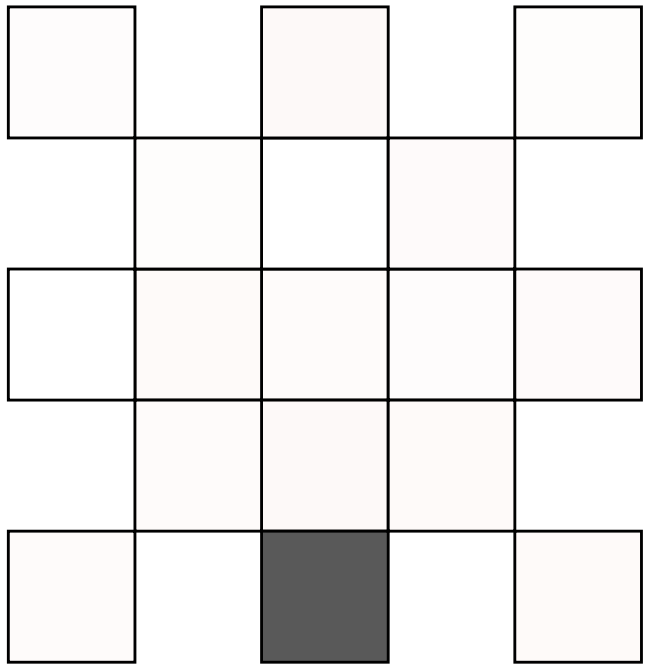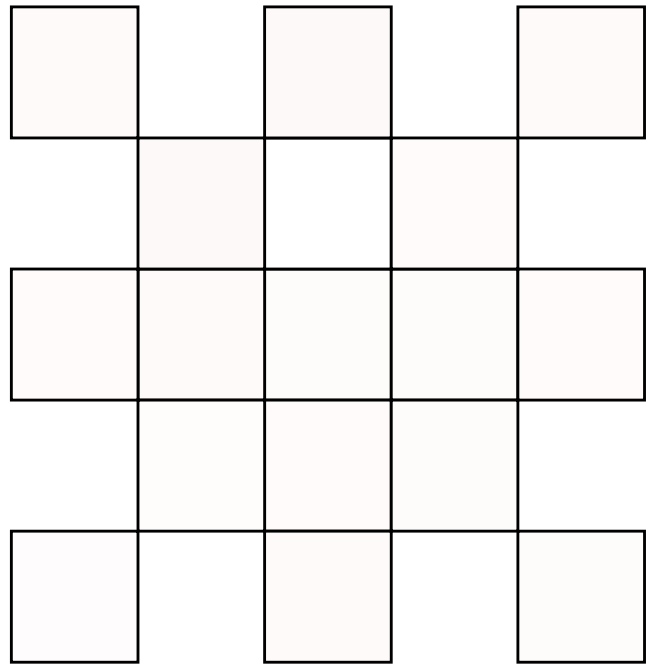

7-98311420-C-T

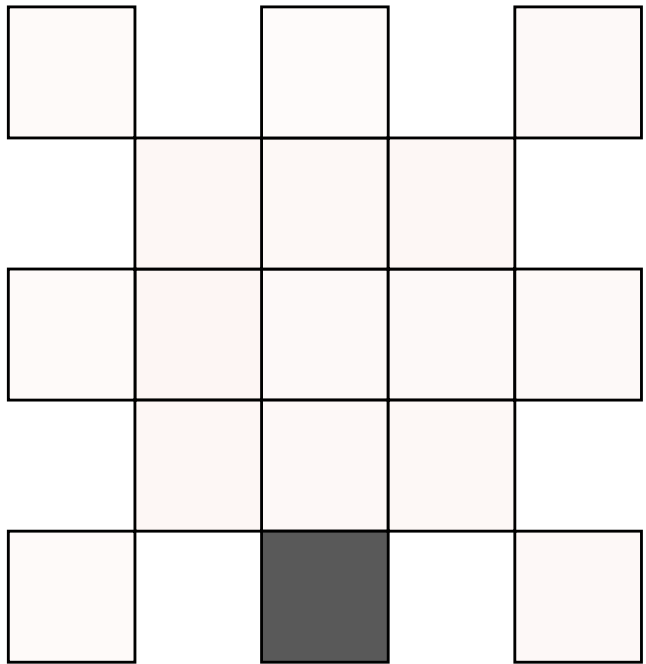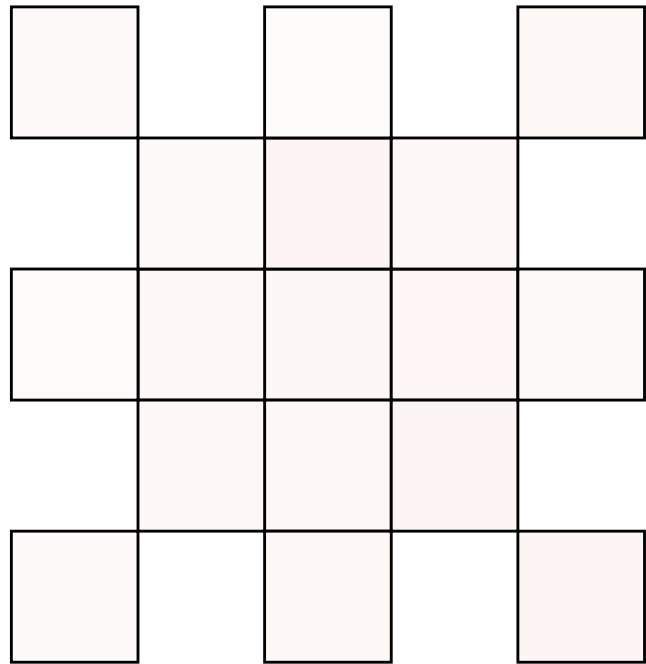

8-101369438-G-A

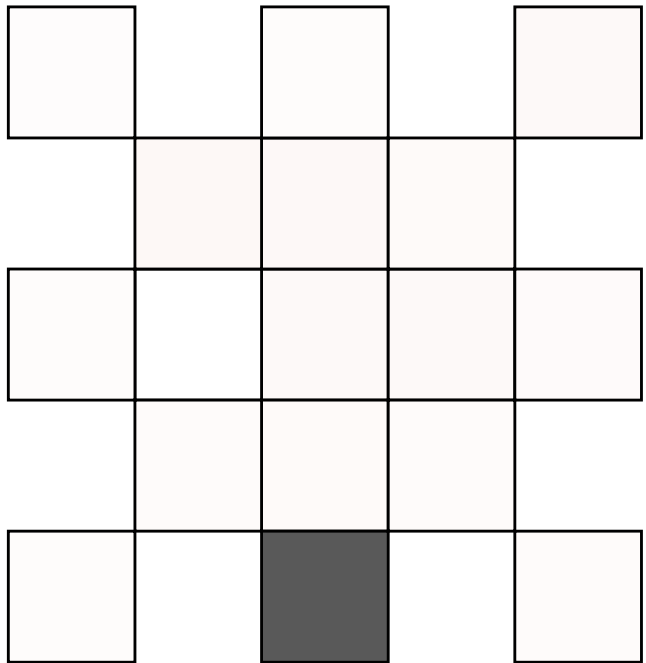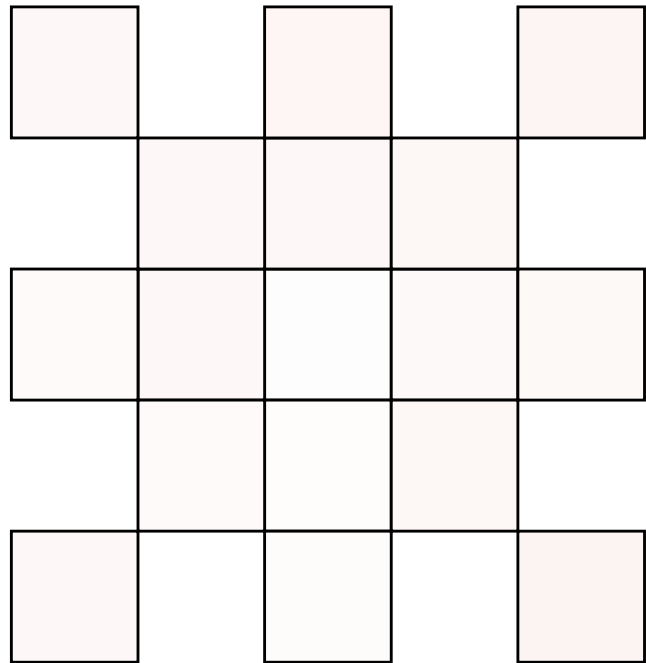

8-101774660-C-A

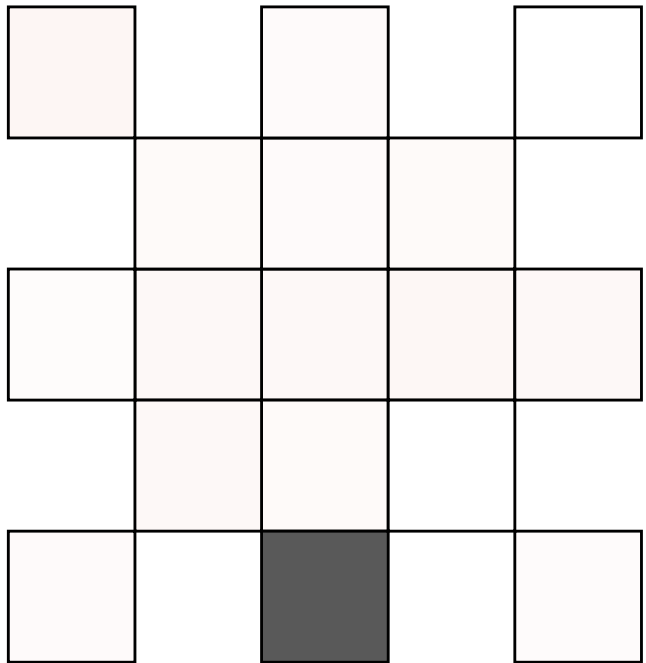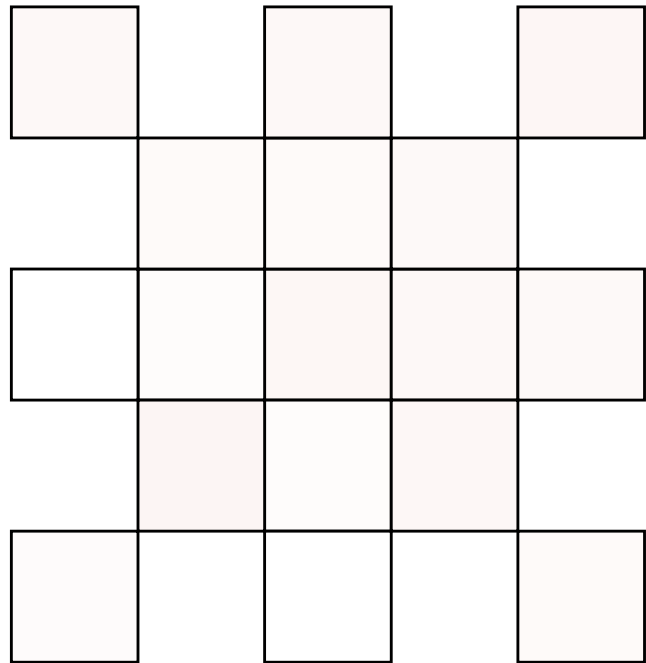

8-110907861-T-A

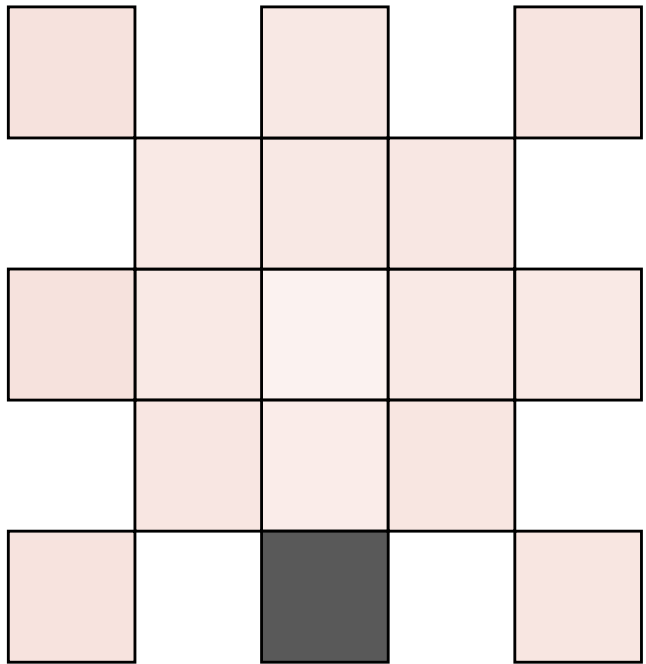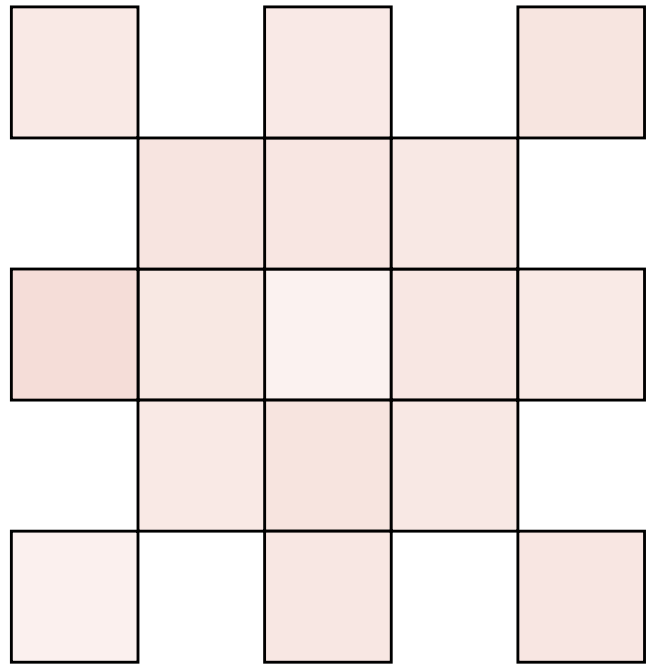



8-117647581-C-T

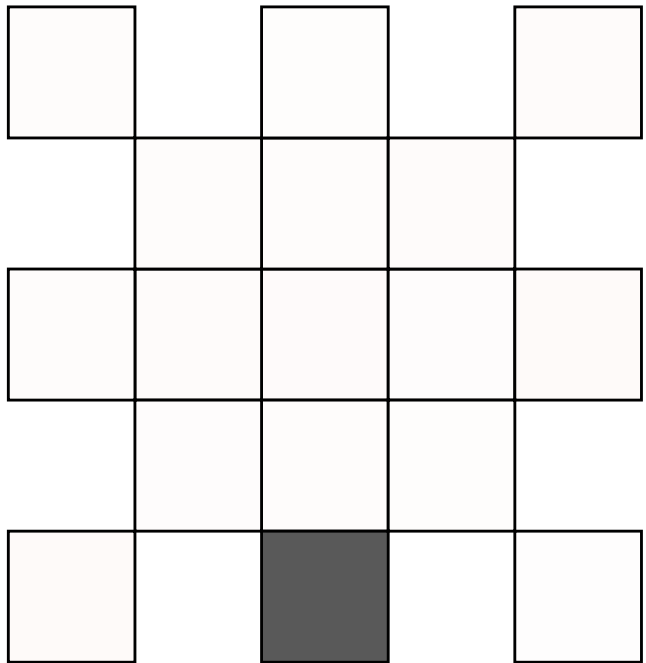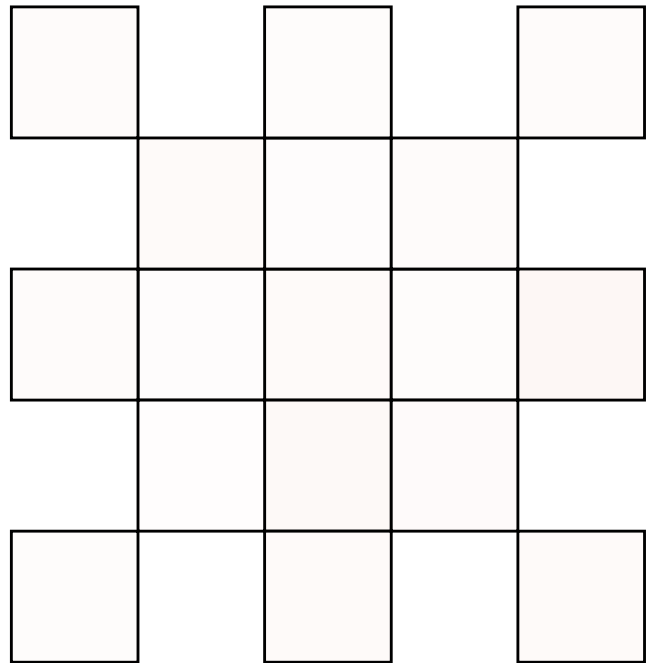

8-122970954-A-T

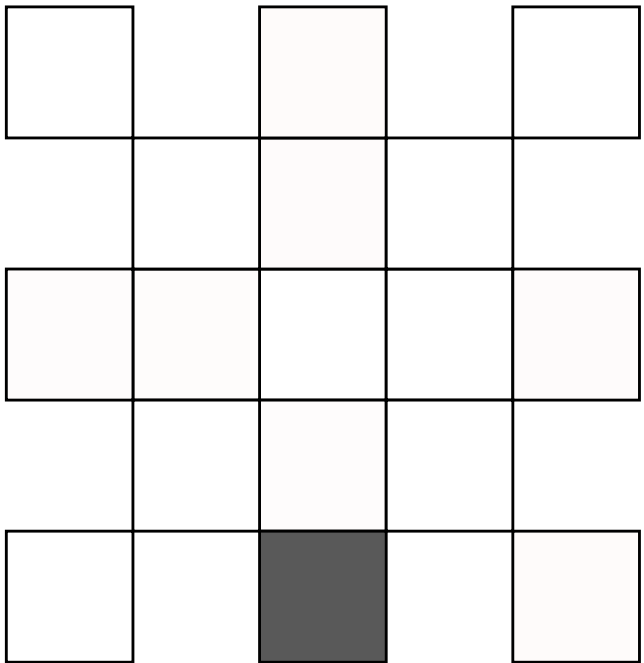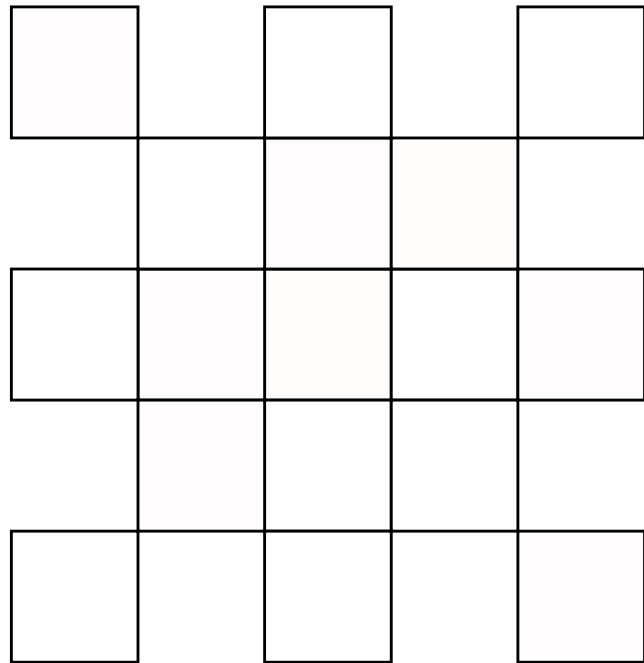

8-125891540-G-A

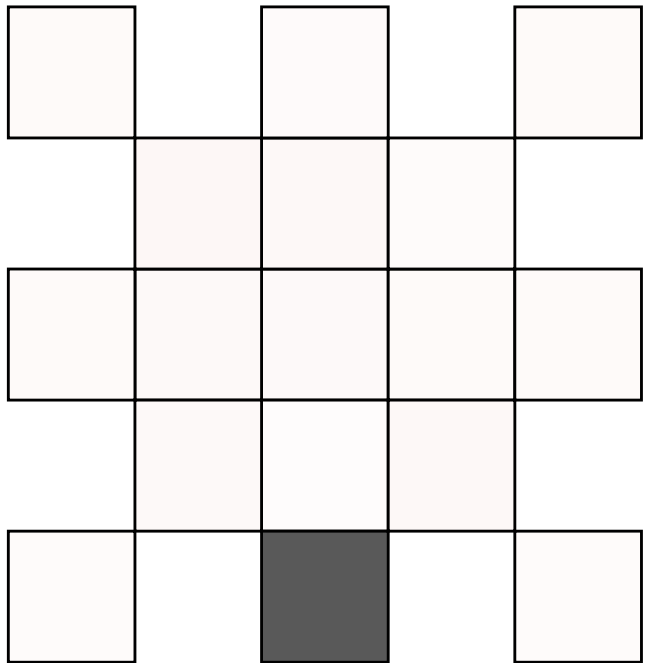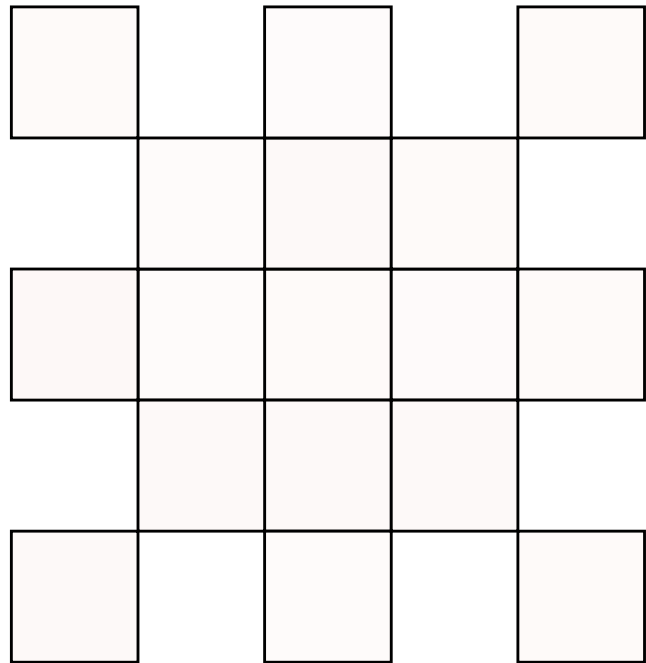

8-135596207-G-A

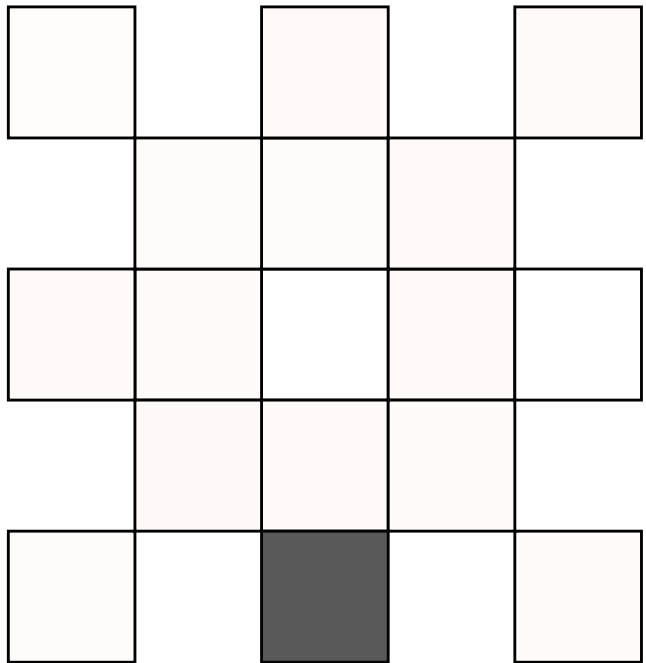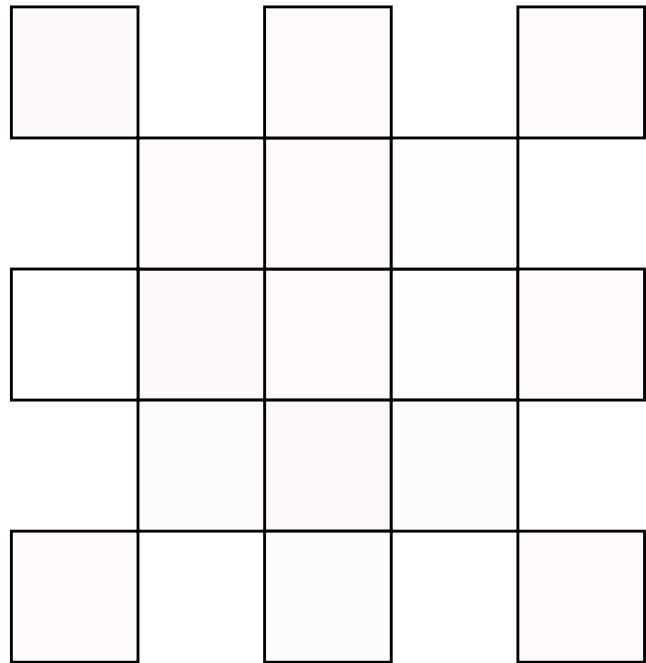

8-140637848-C-A

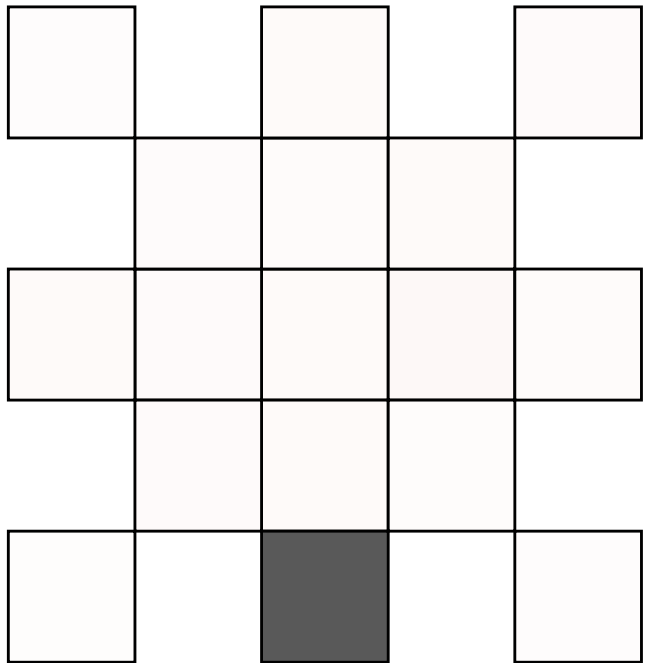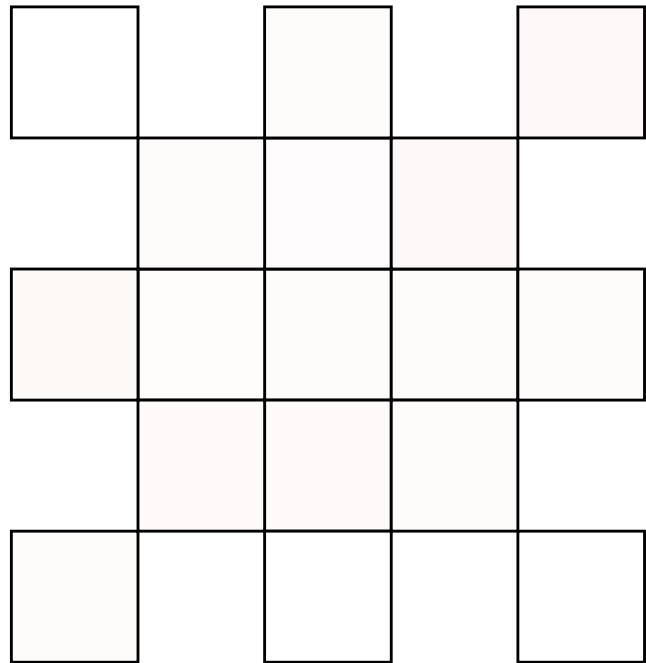

8-20681102-G-A

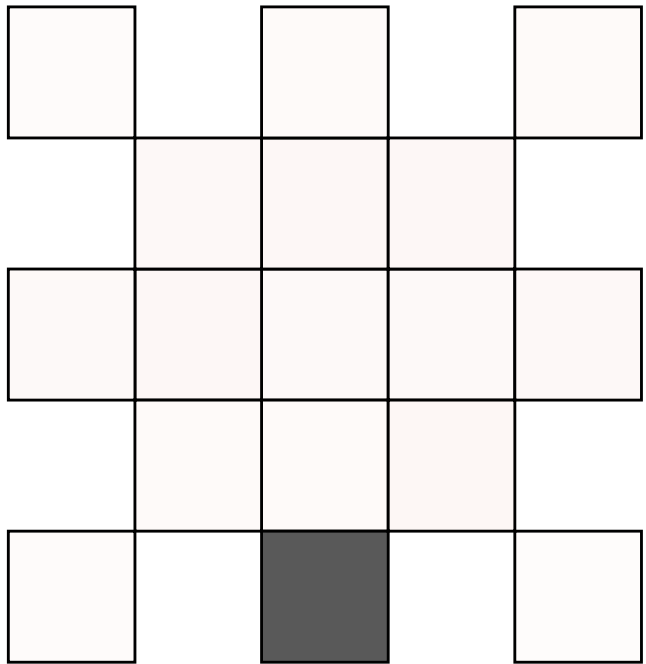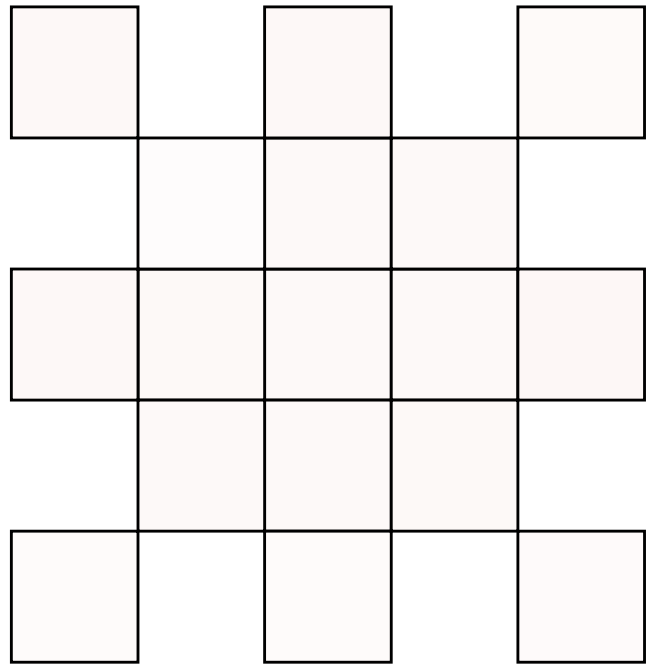

8-20774226-G-A

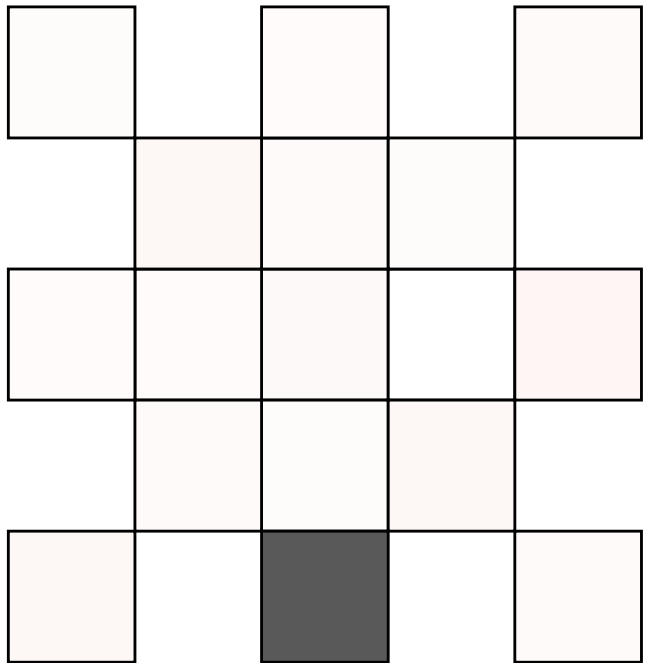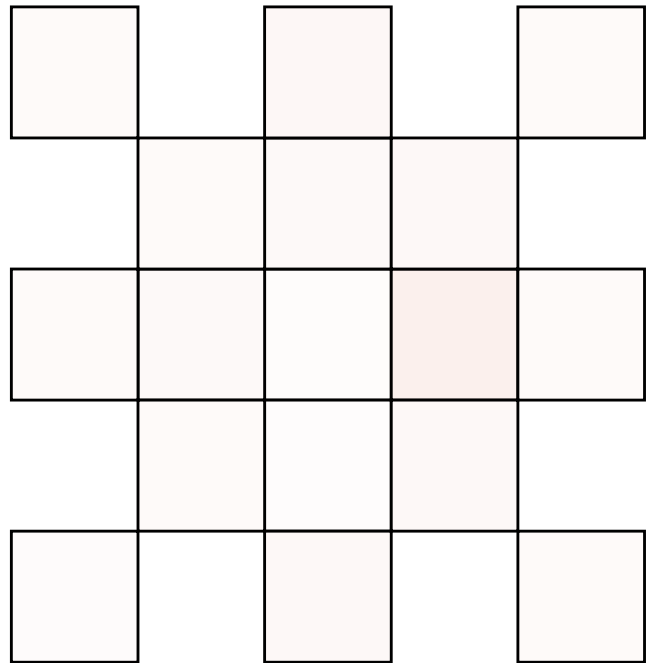

8-24188792-G-A

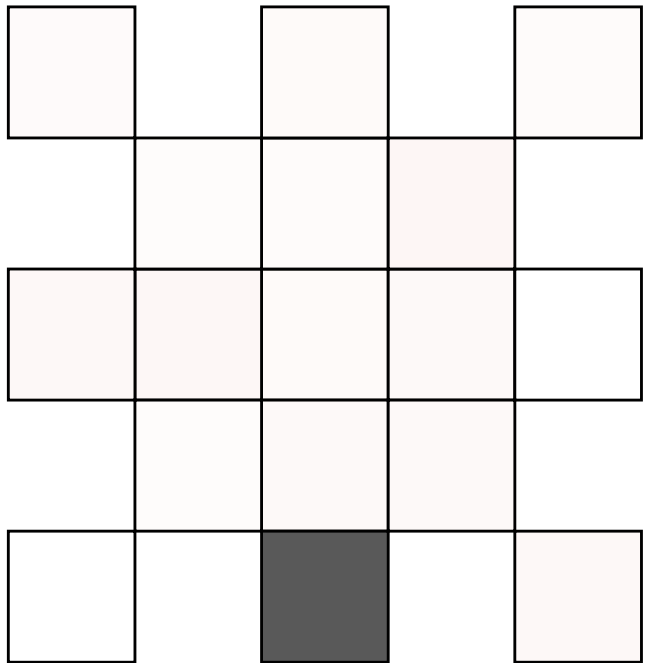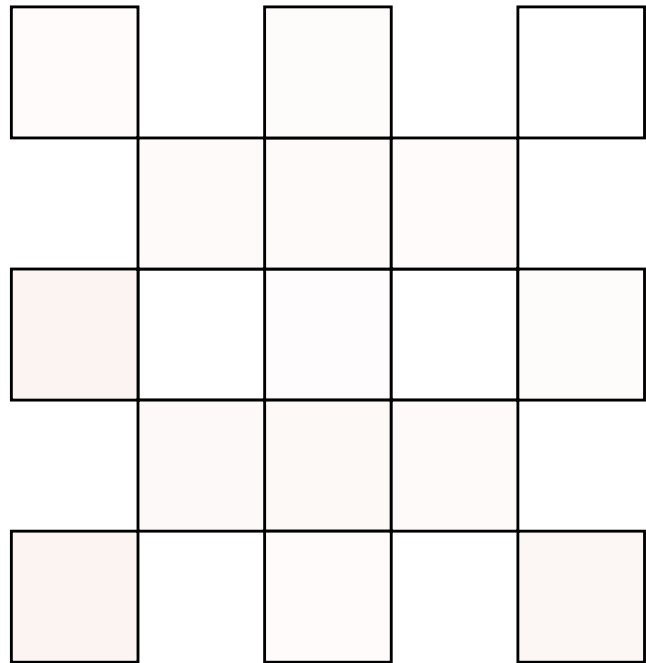



8-2986666-C-T

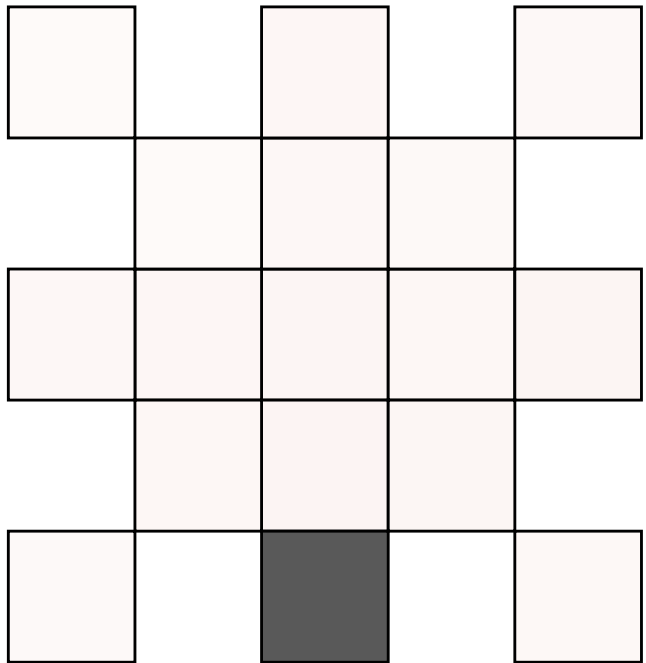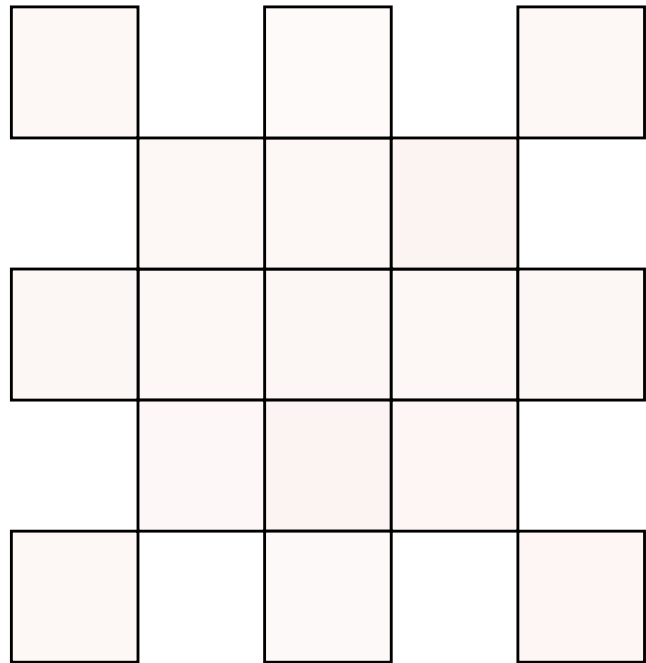

8-32152493-G-T

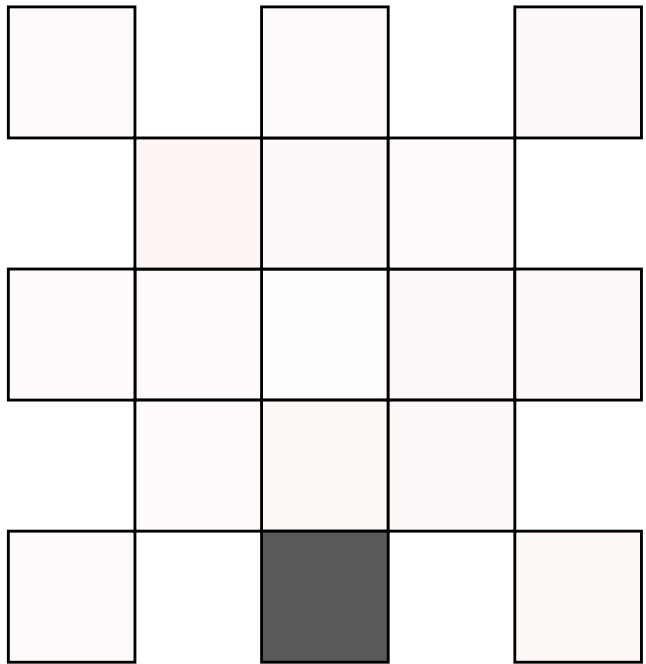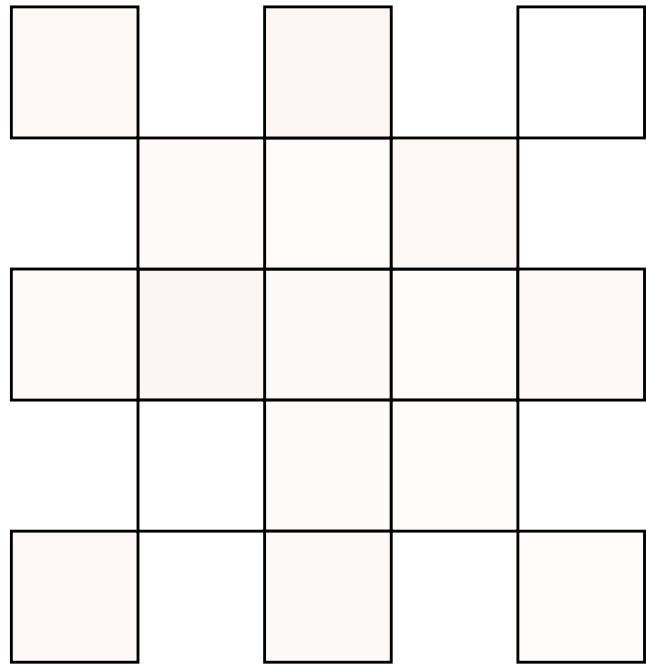

8-3439977-G-A

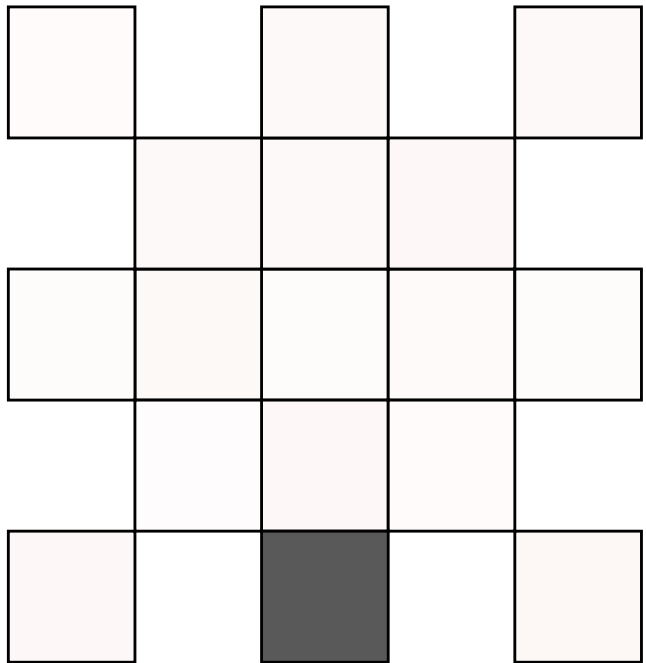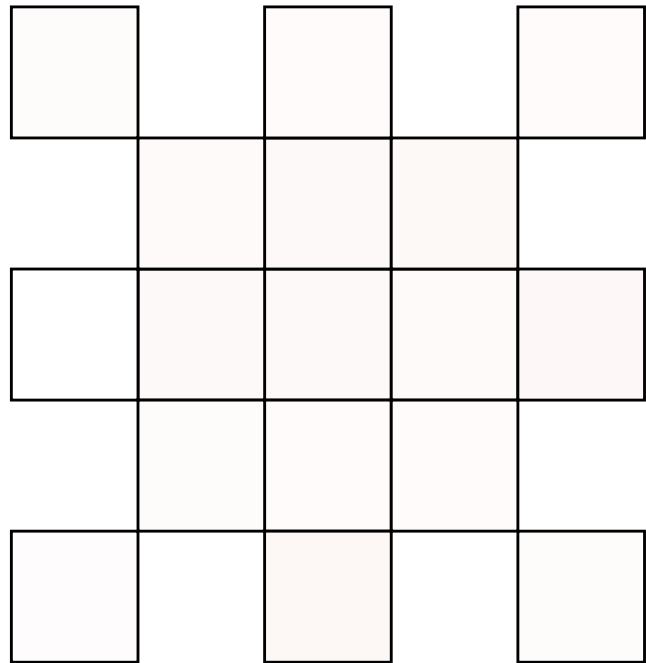

8-35923762-C-T

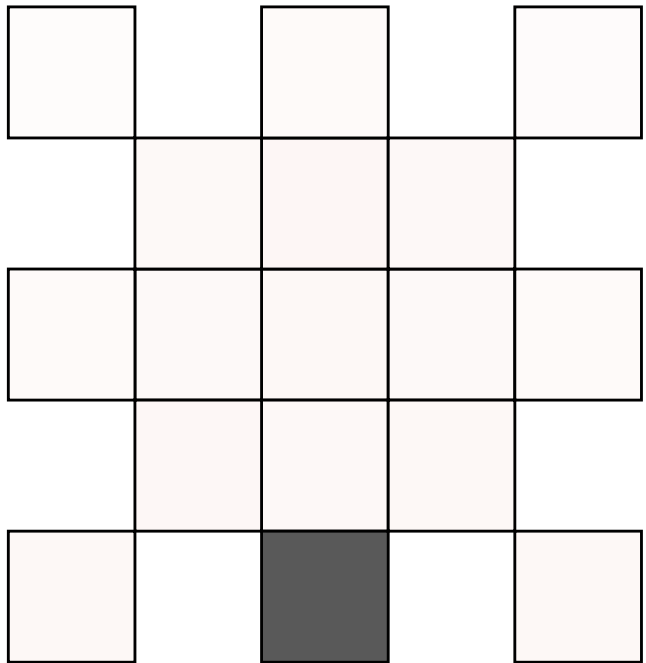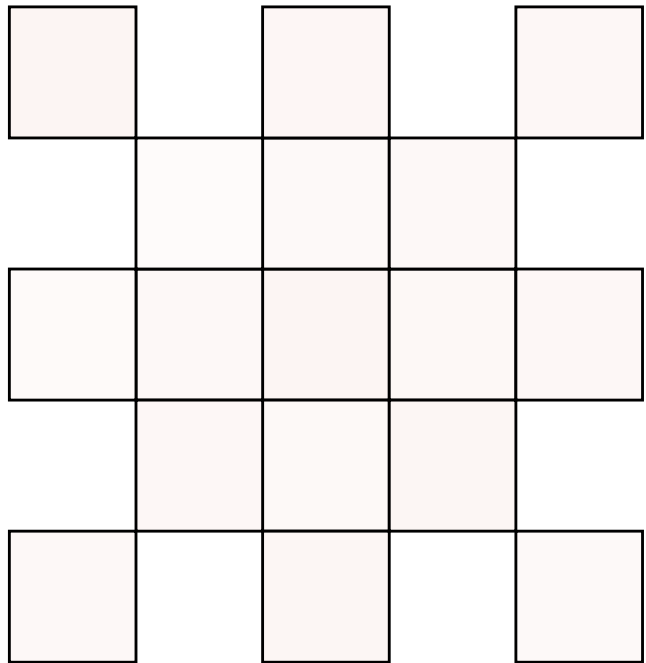

8-36571735-C-T

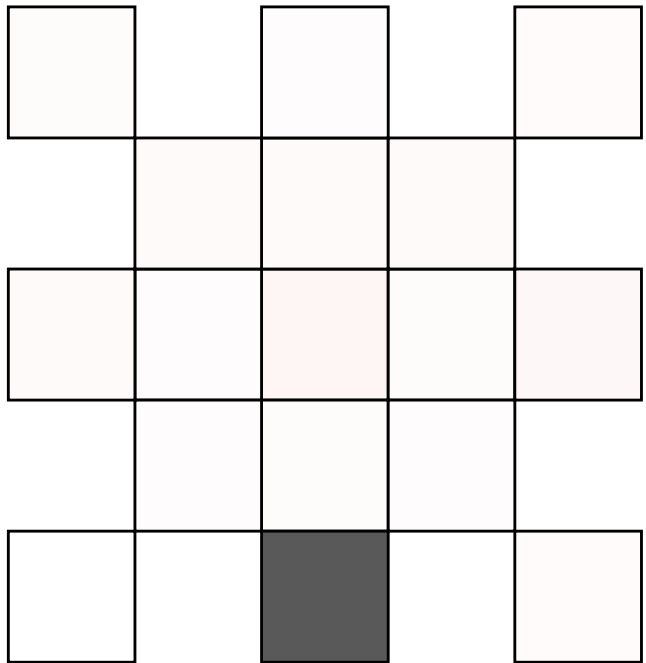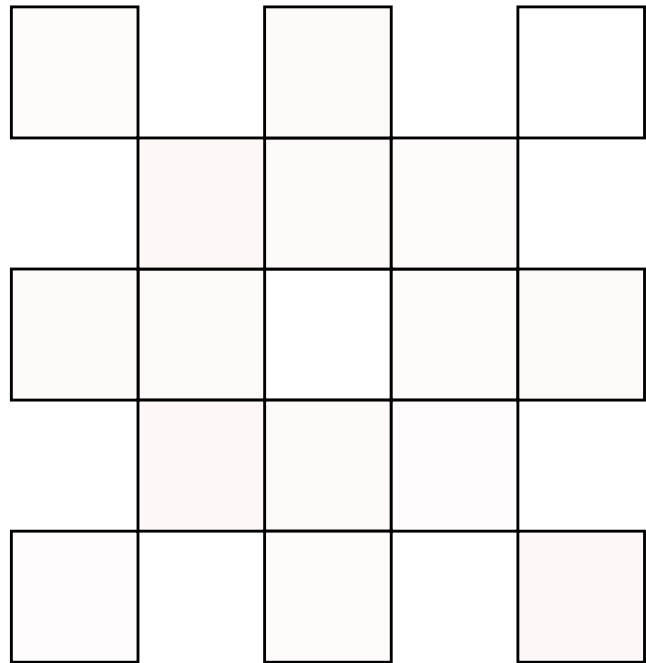

8-41303253-C-T

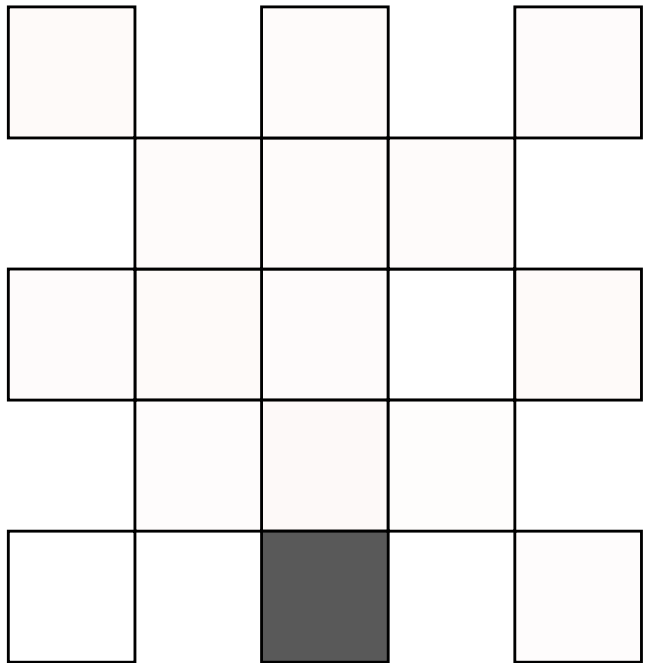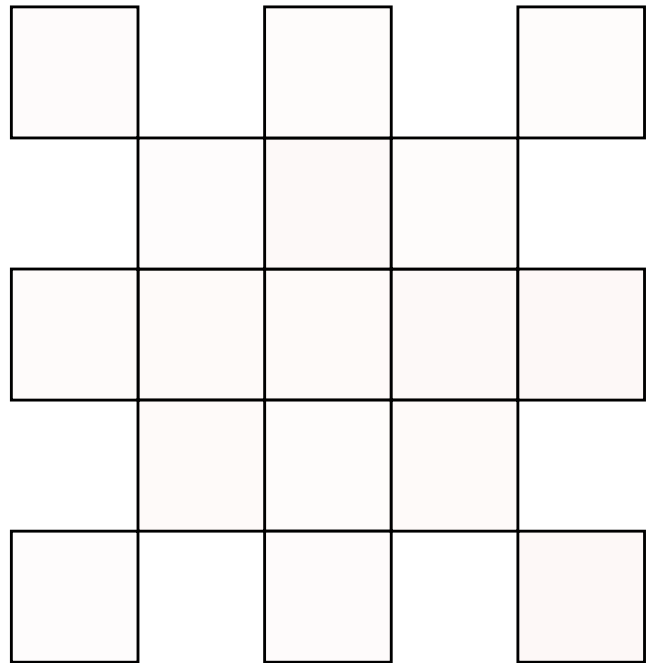

8-4601722-C-G

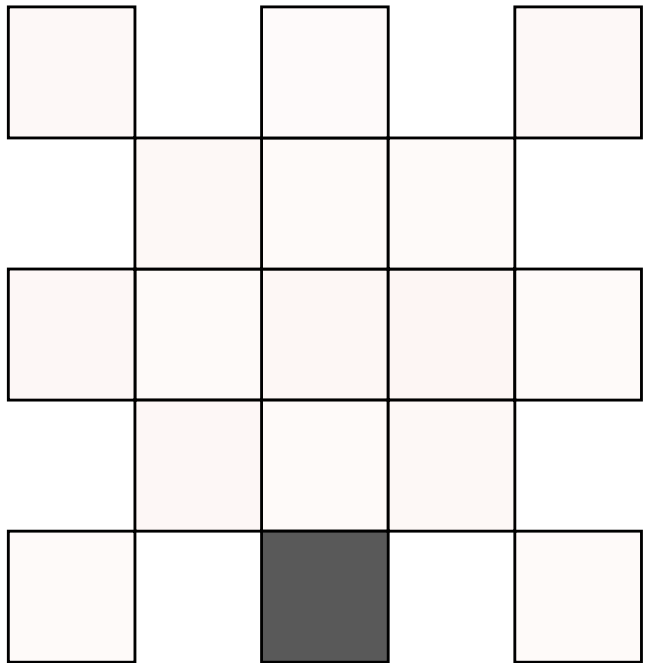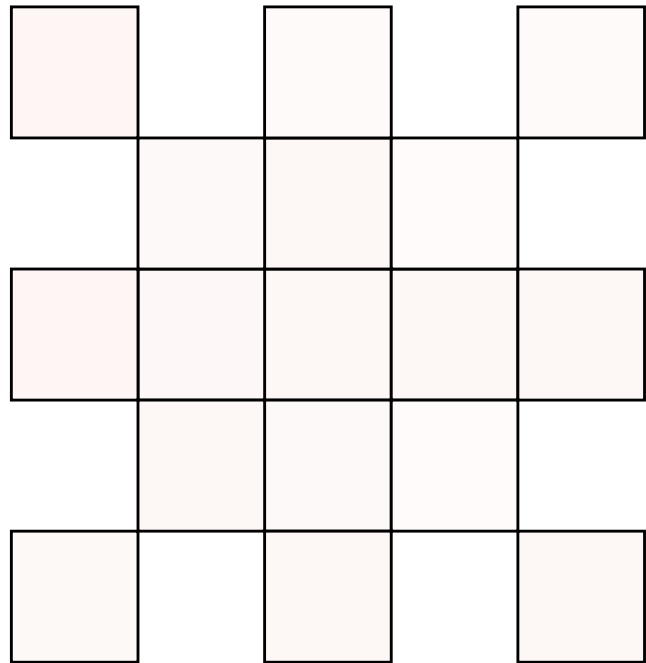

8-49587201-C-T

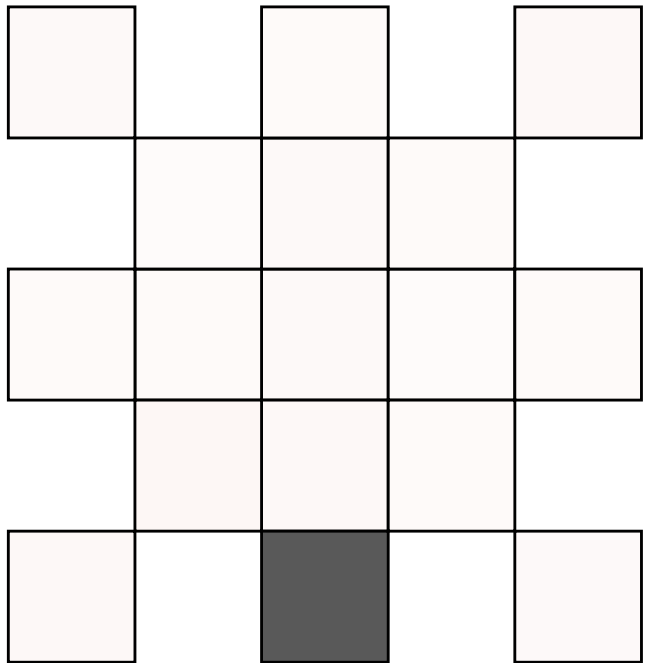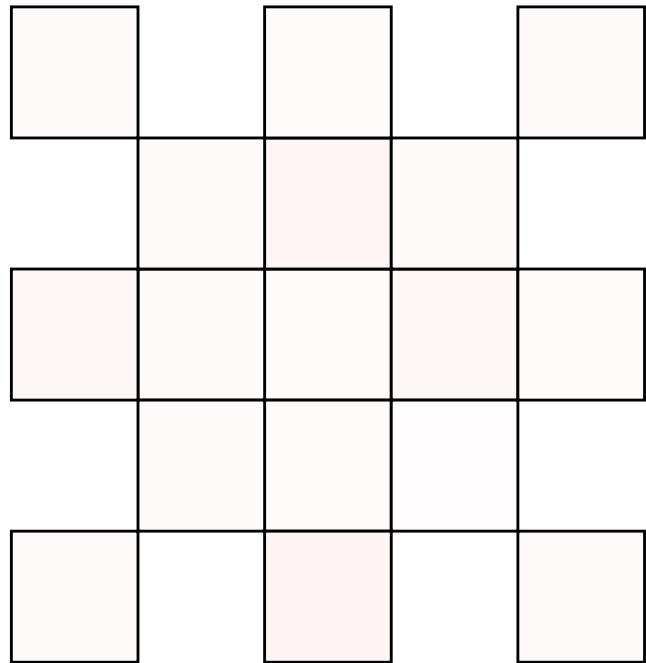



8-49636775-C-A

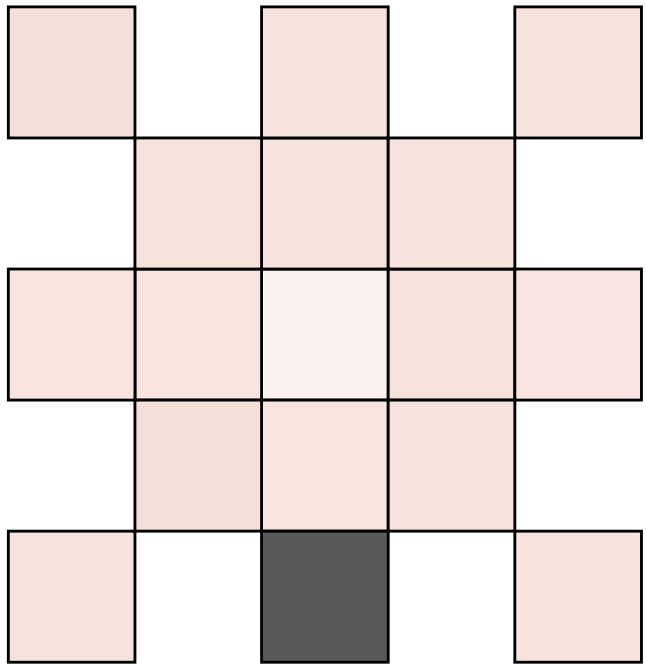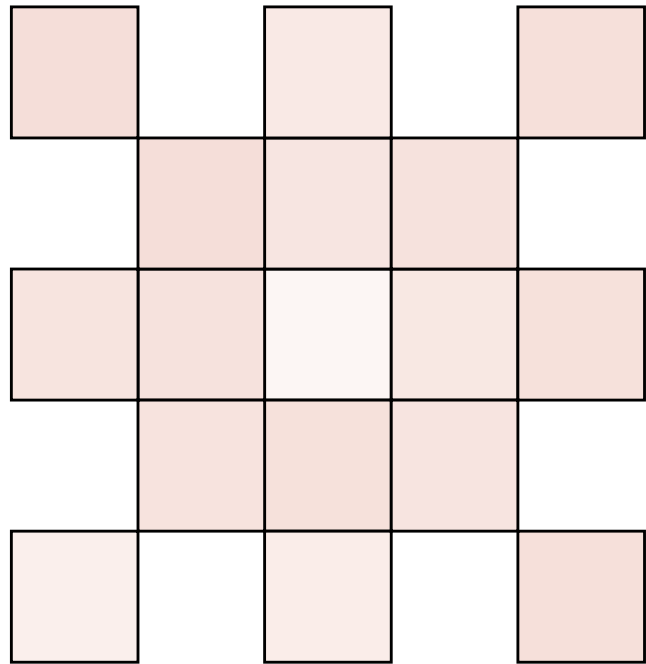

8-50752909-G-C

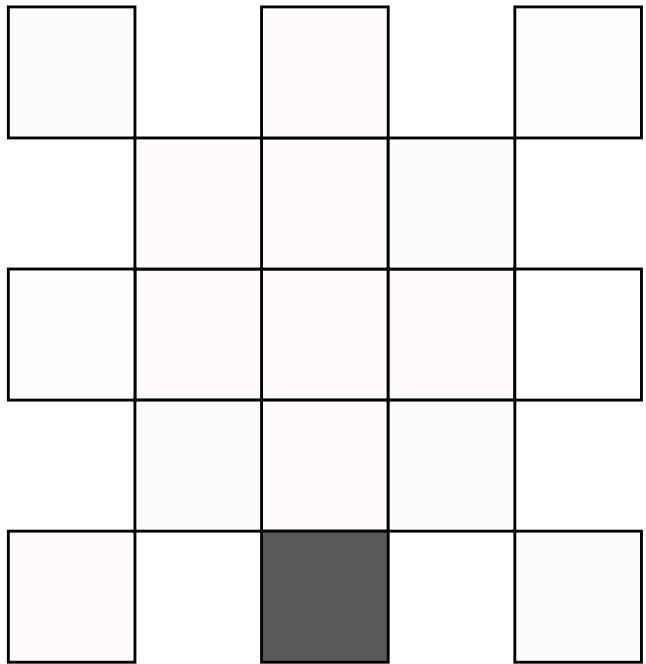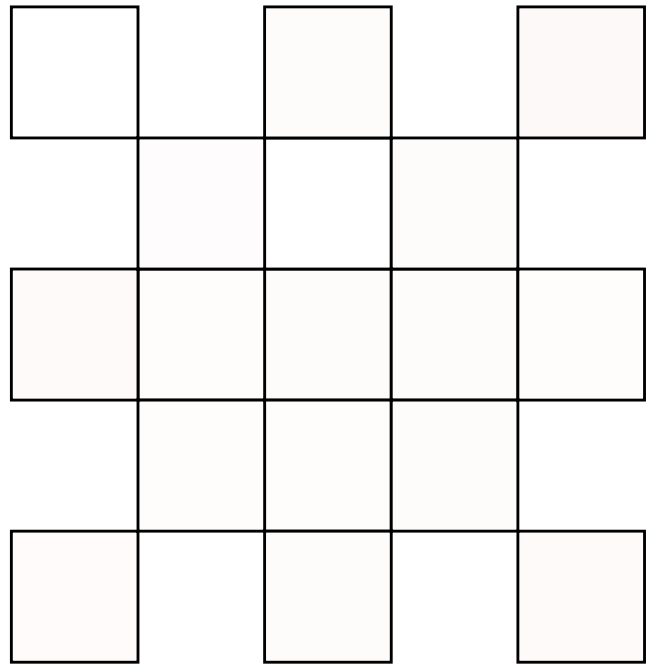

8-56154213-C-T

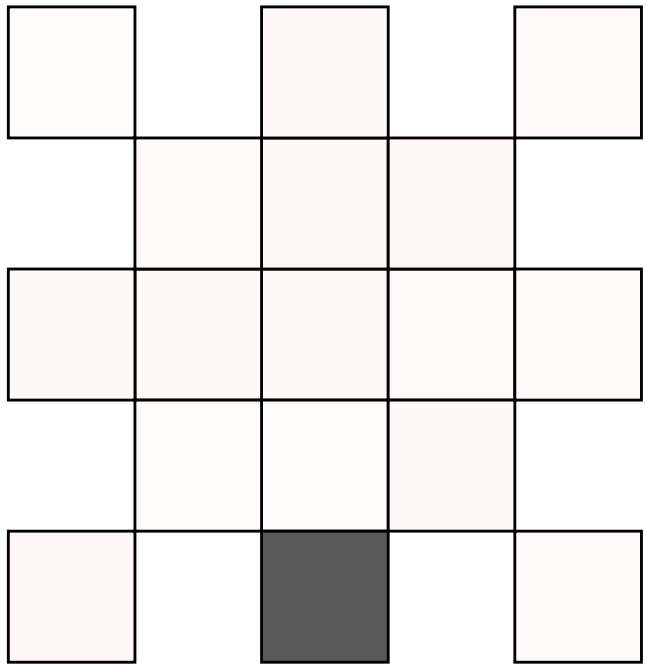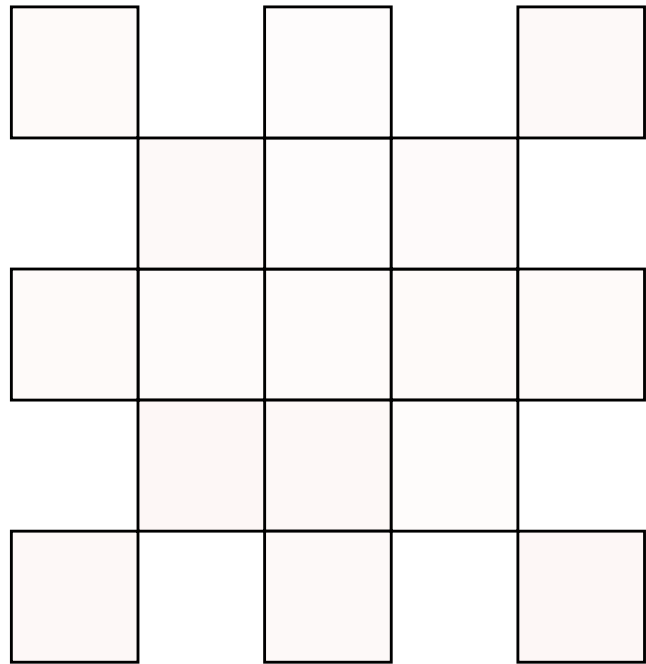

8-57499201-TG-T

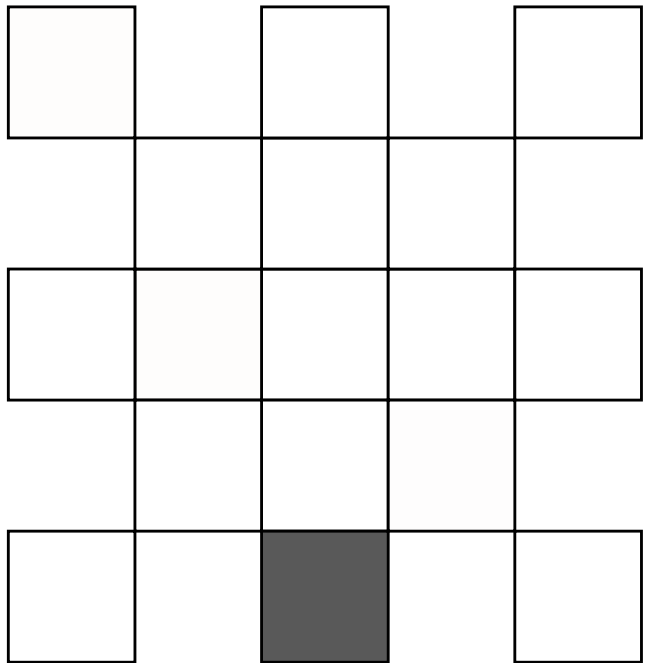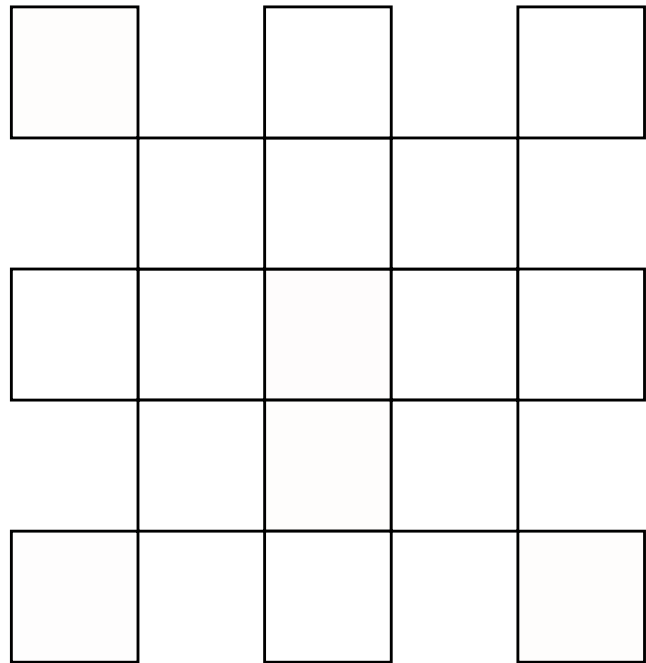

8-58808555-G-A

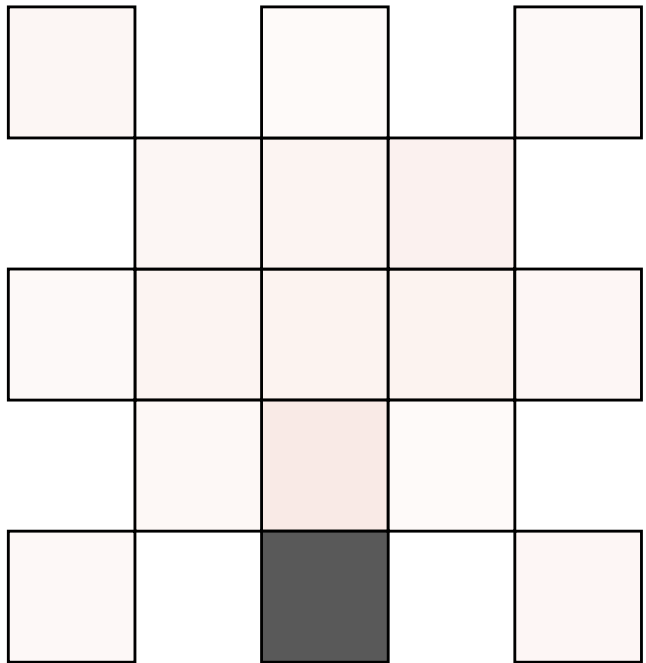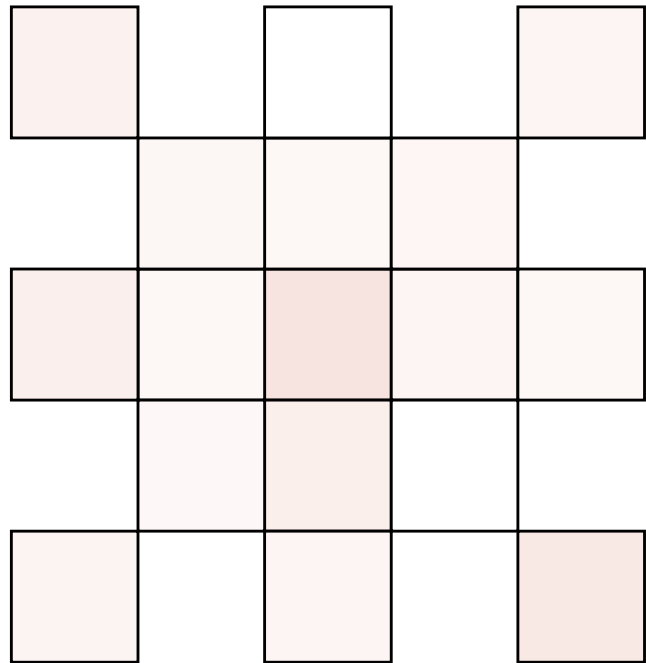

8-62438170-G-A

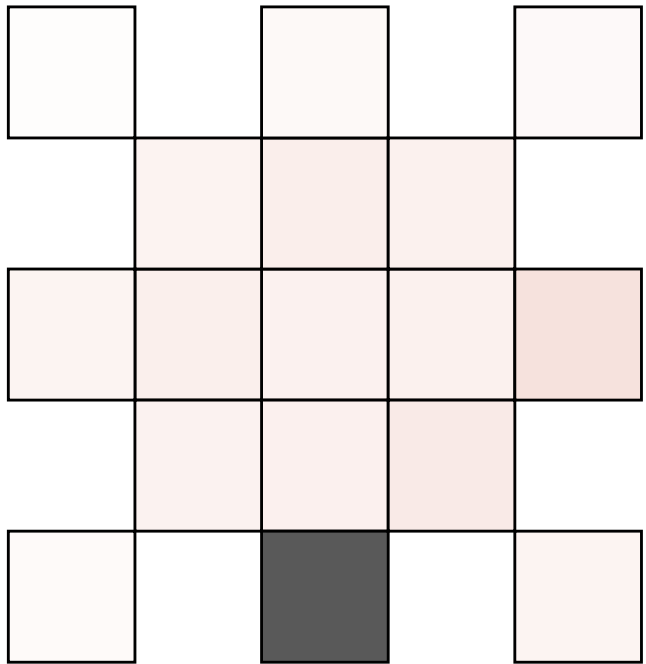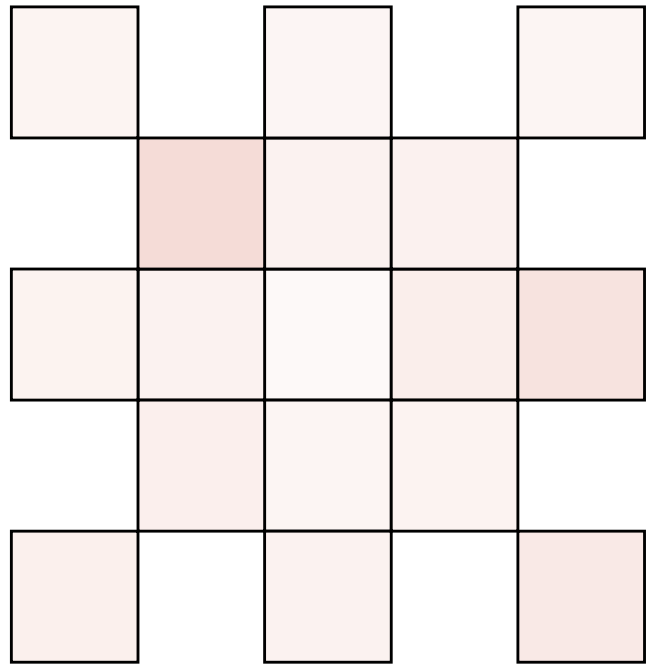

8-65149924-C-T

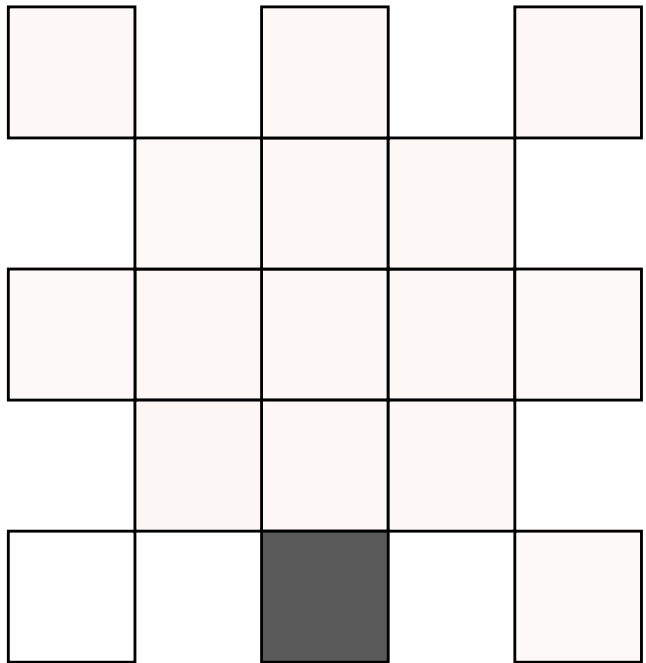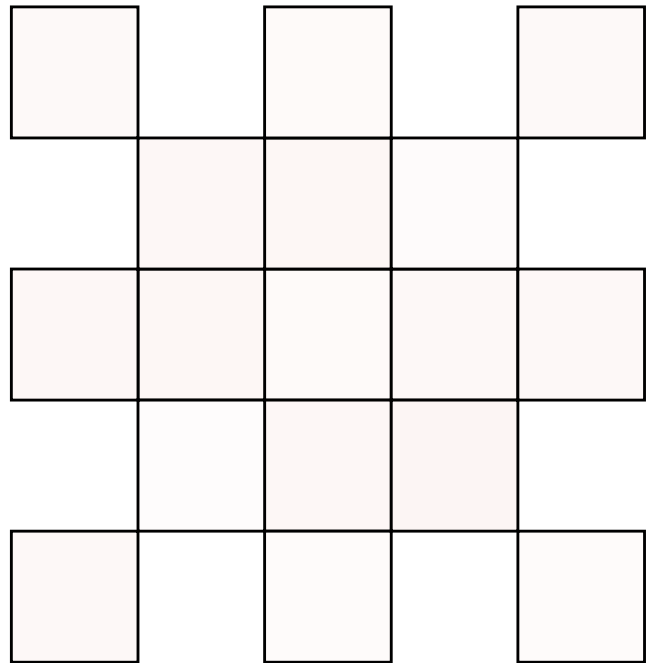

8-66303042-C-T

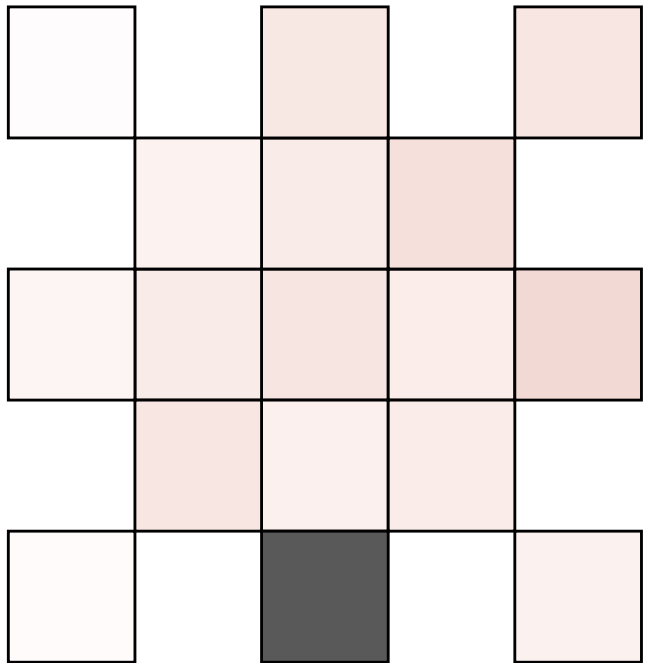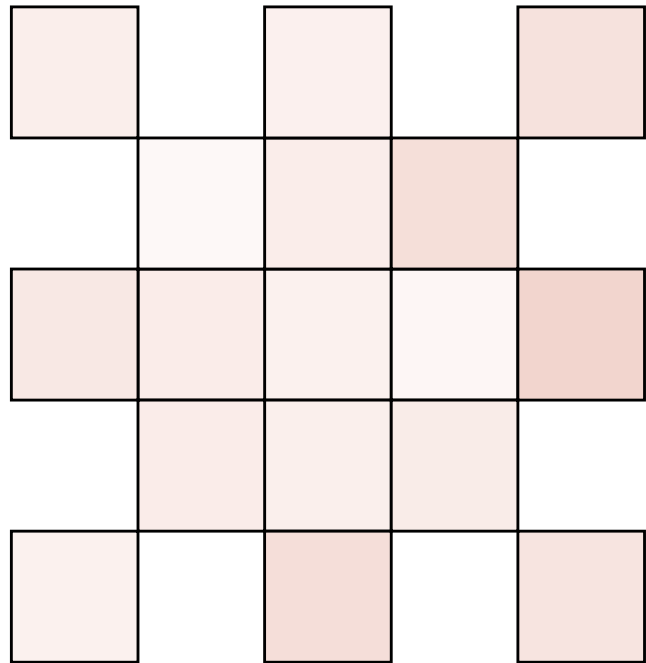



8-68843802-G-A

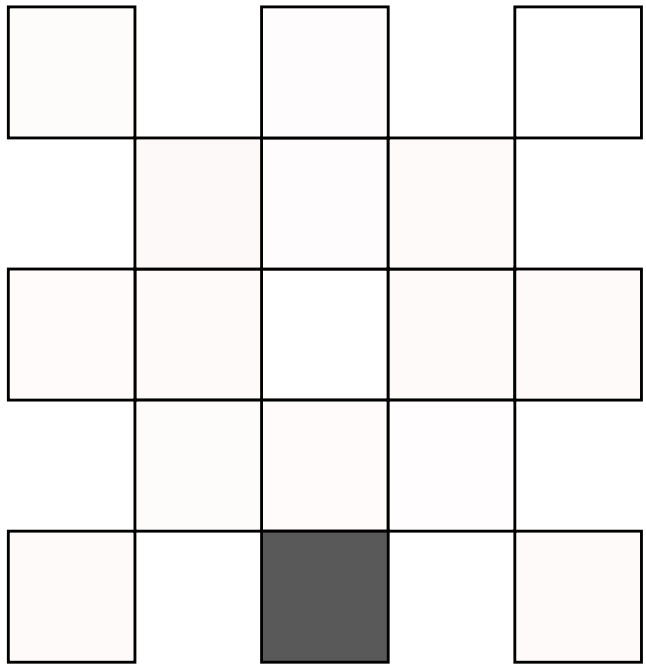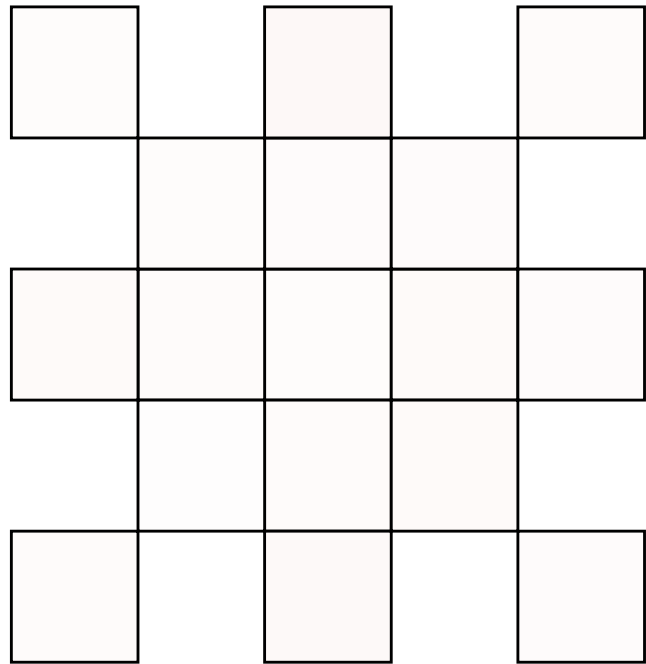

8-72347819-C-T

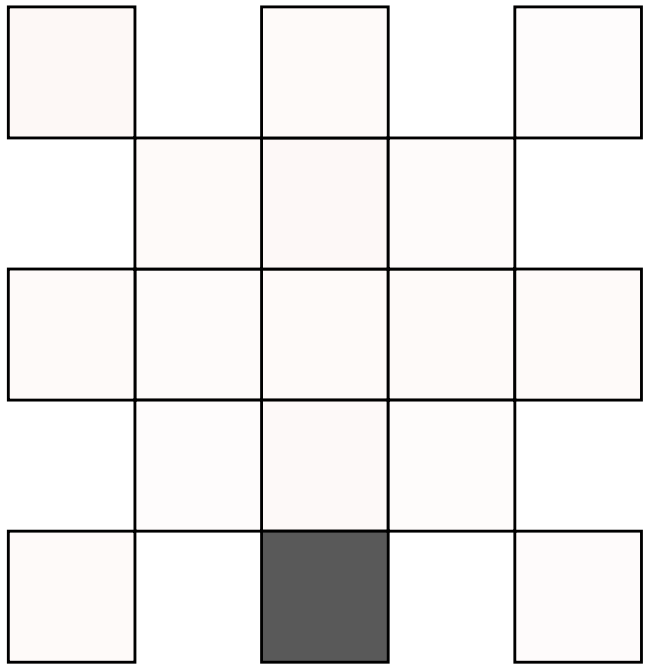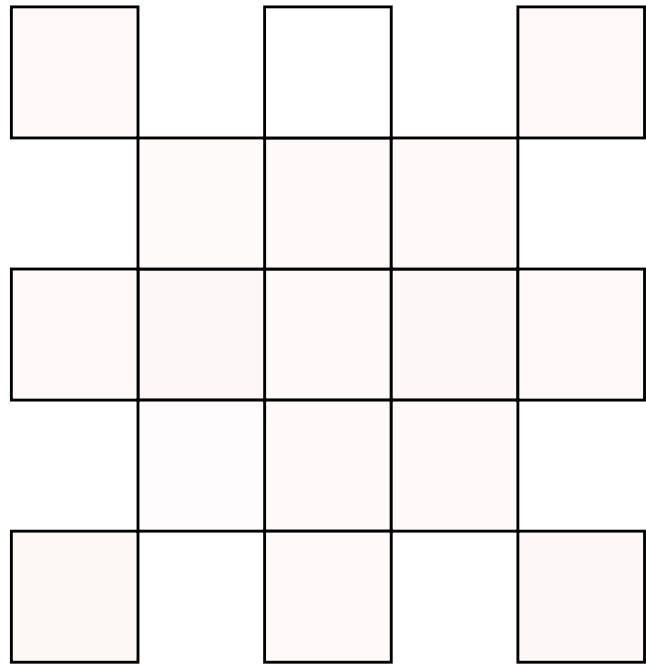

8-73048428-C-T

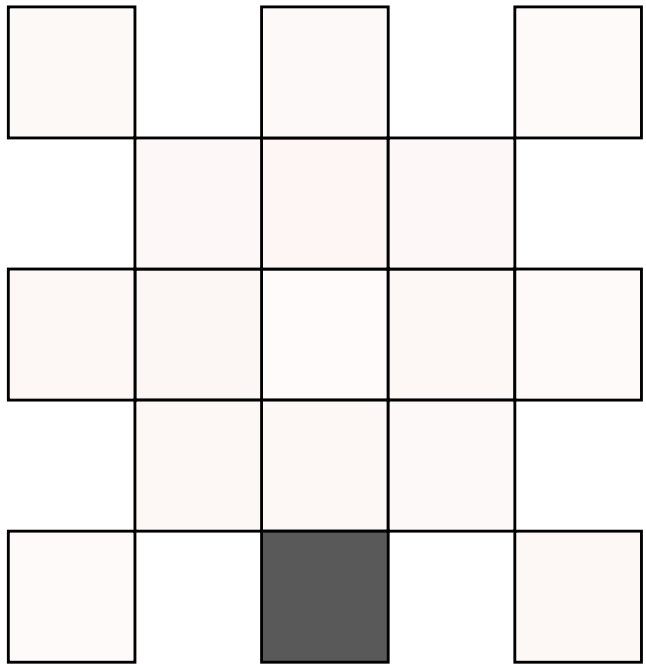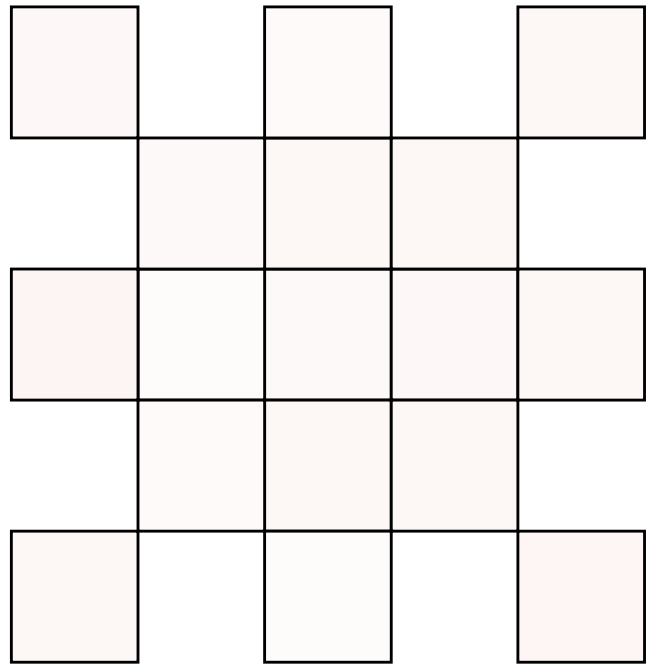

8-77652300-G-A

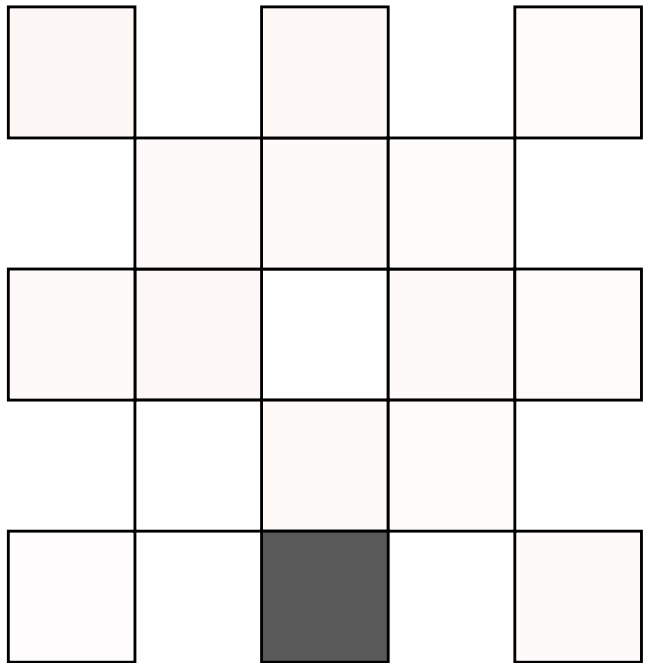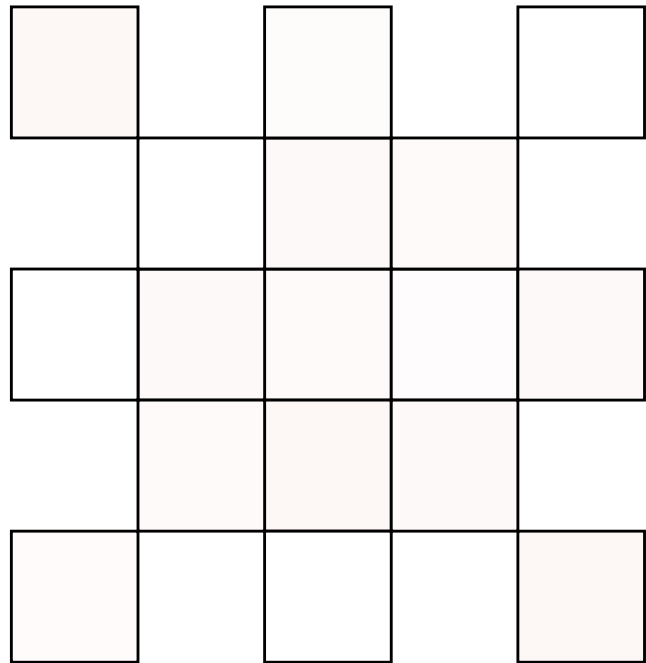

8-786897-C-G

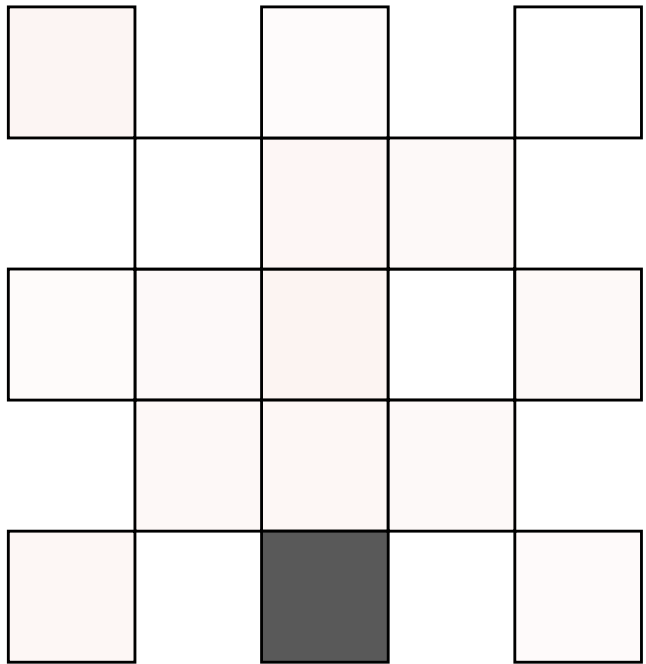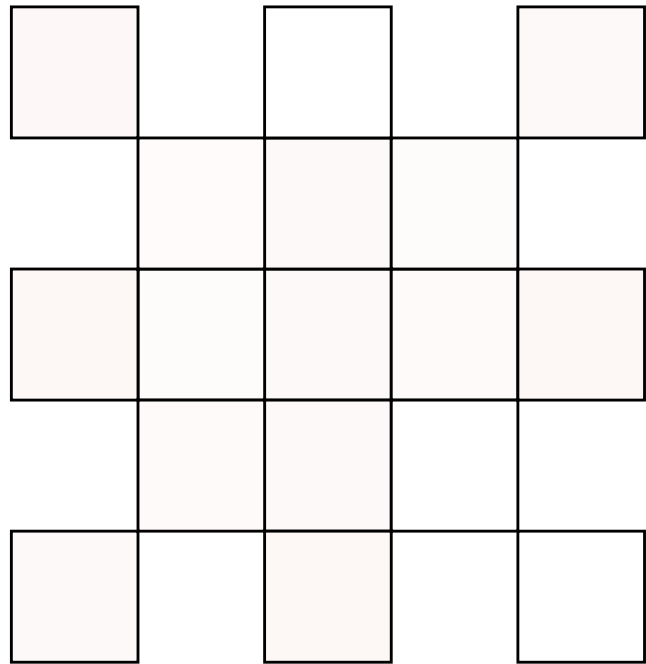

8-80121537-G-A

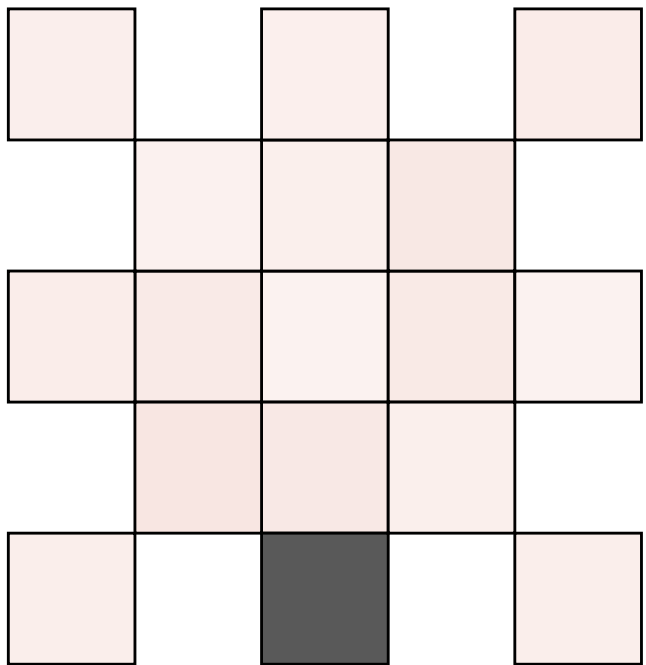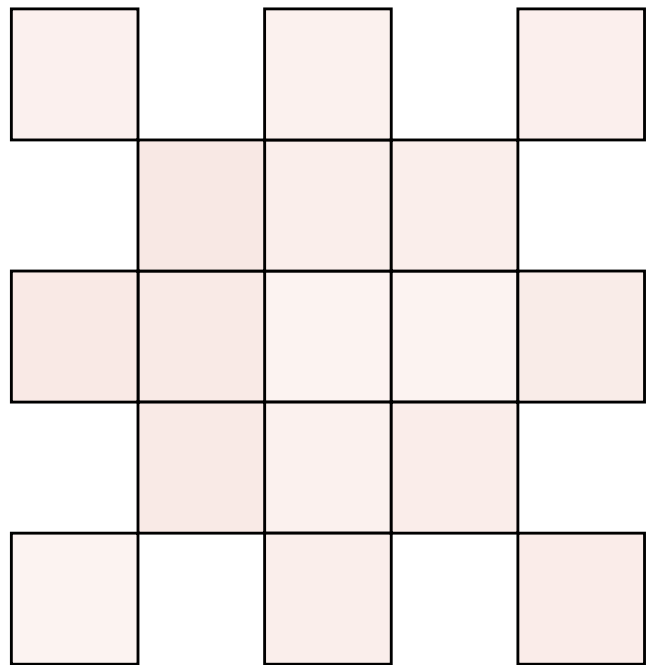

8-80121538-T-C

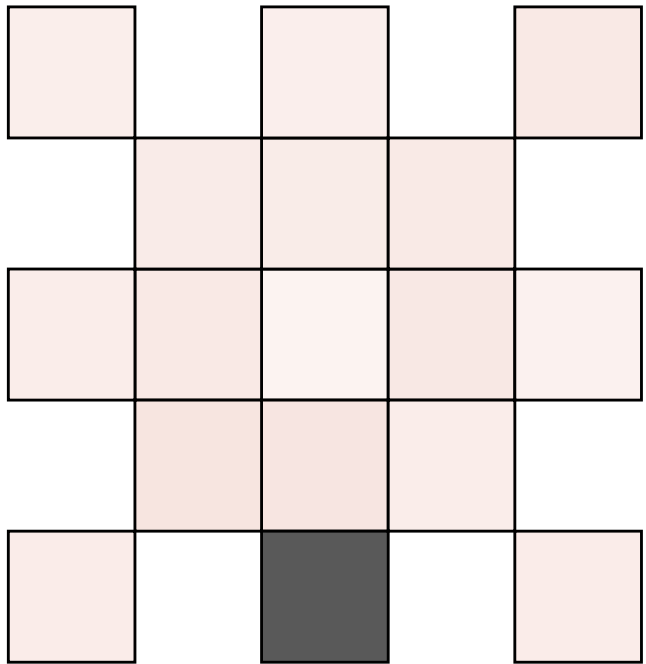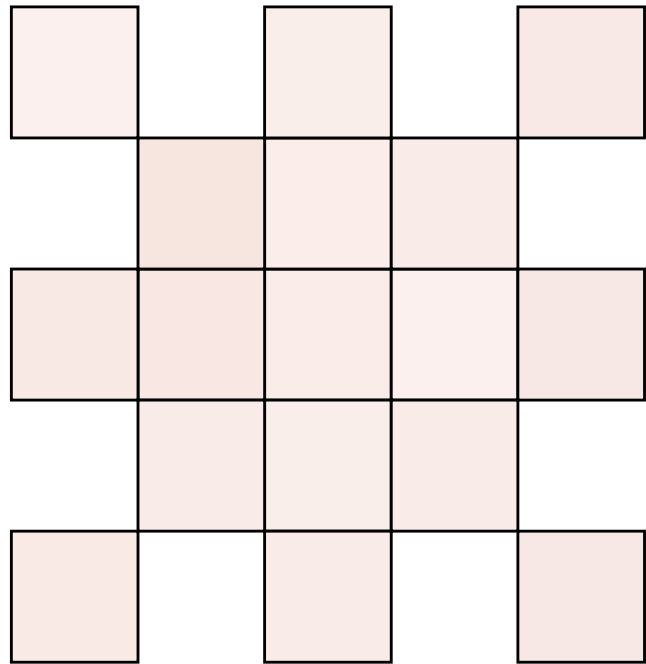

8-83768131-G-A

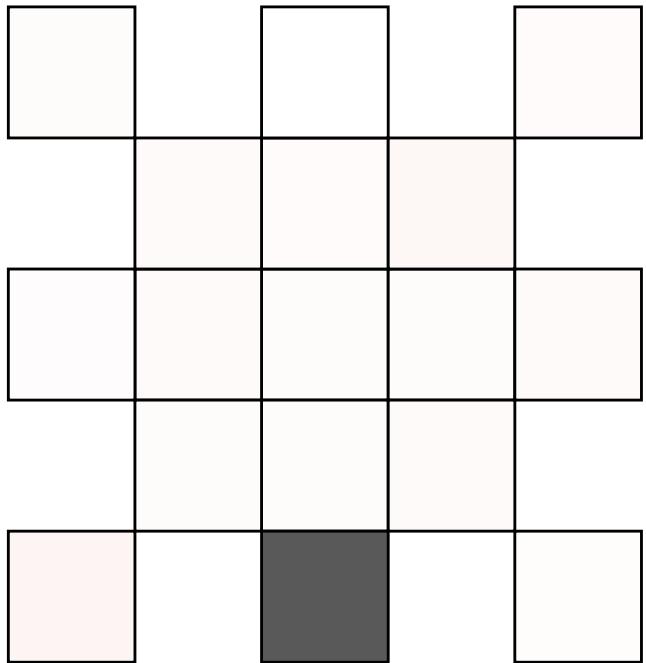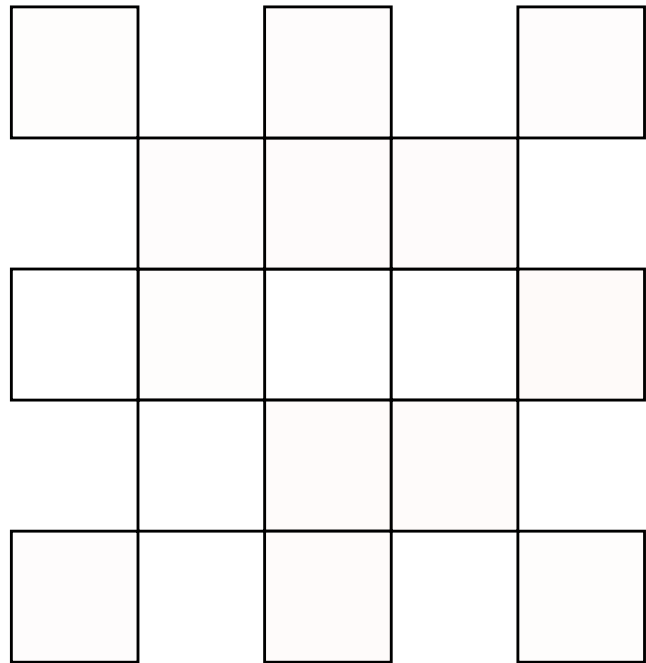



8-89142864-G-A

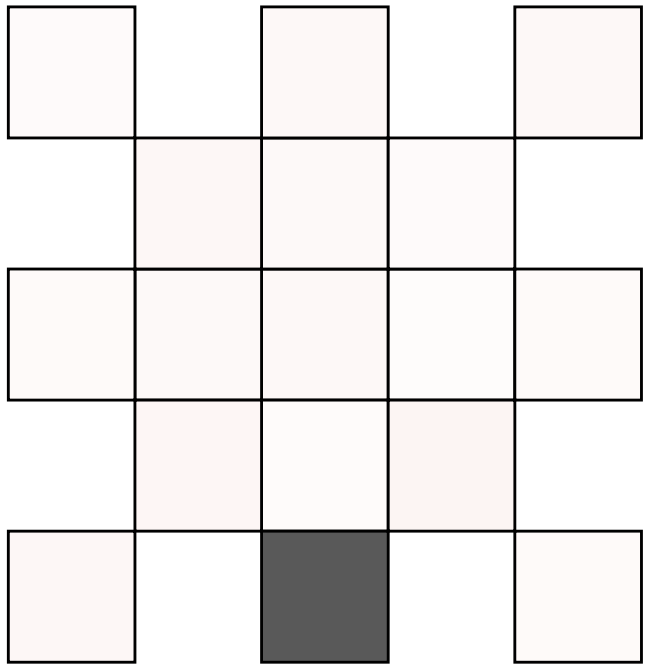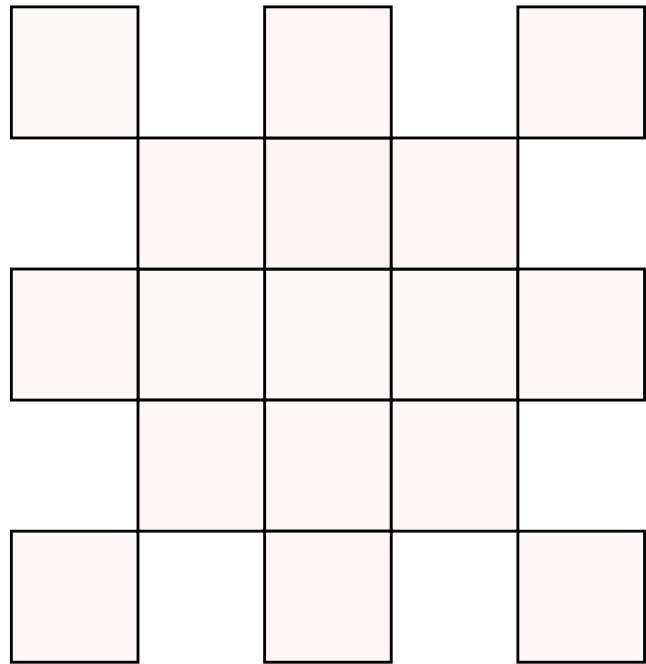

8-89612305-G-A

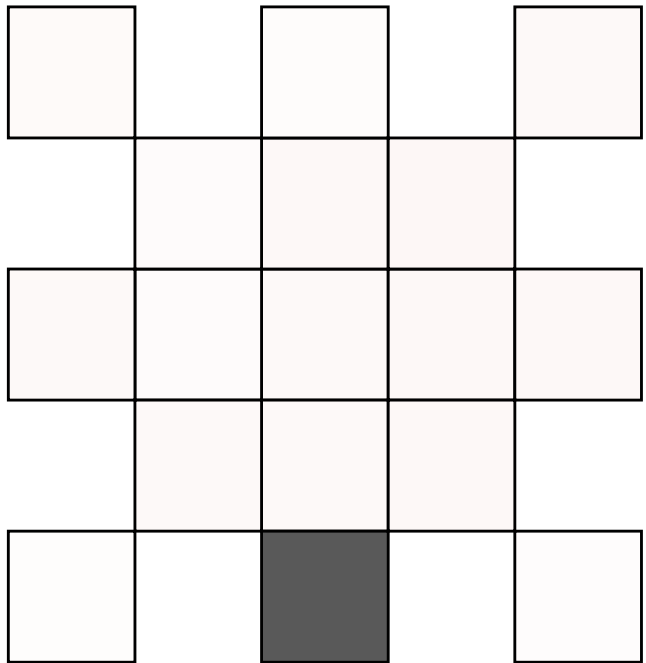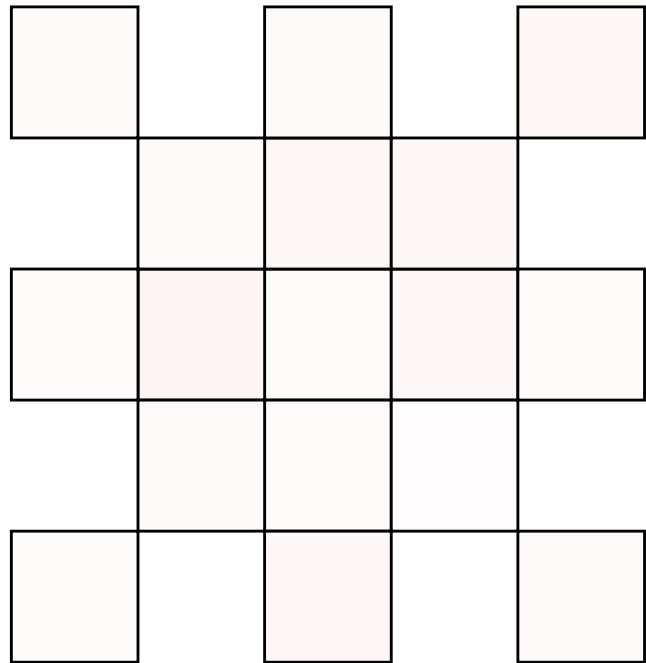

8-91951808-C-T

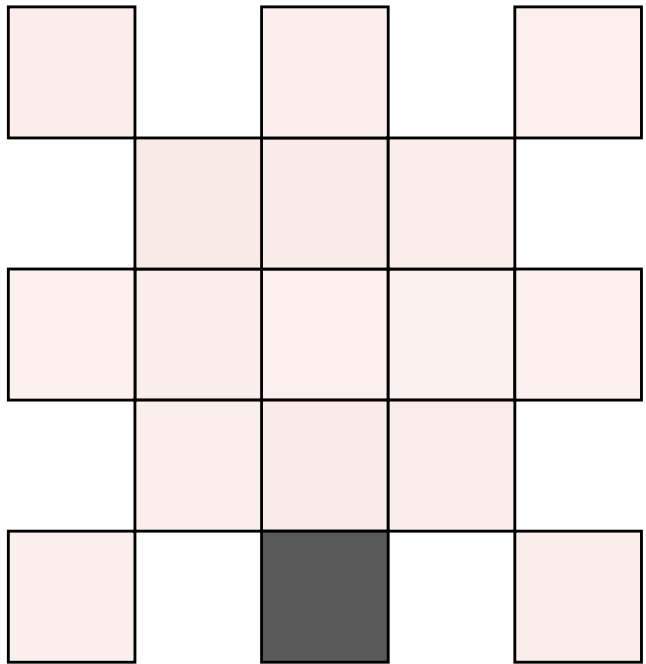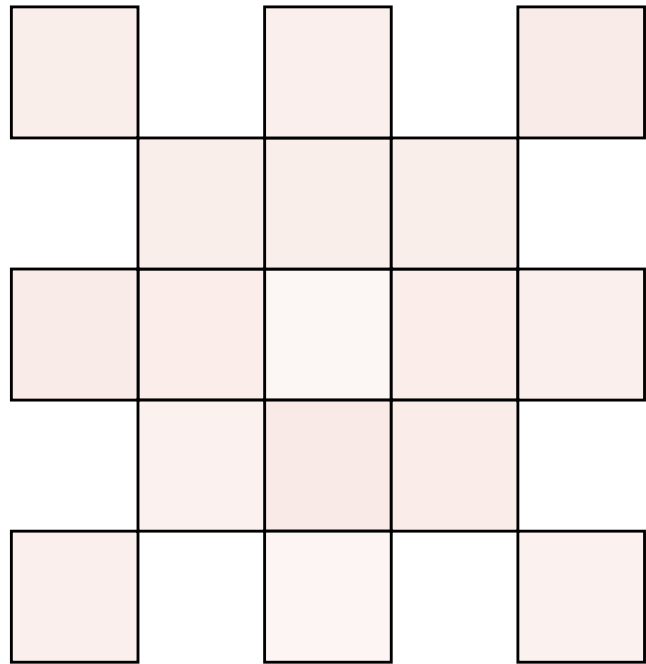

9-103766822-C-T

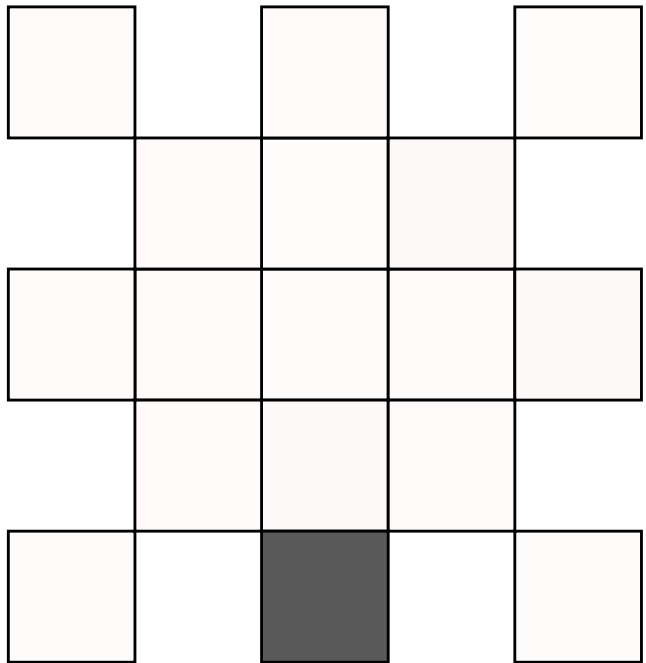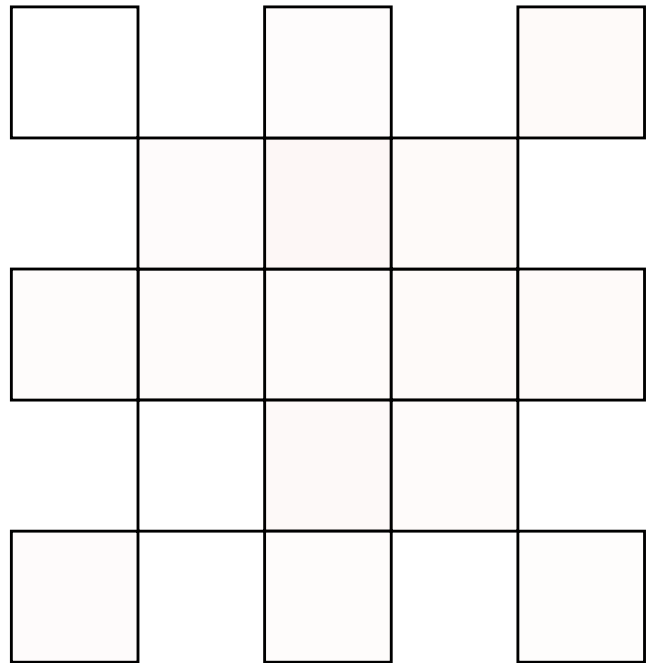

9-10473452-T-A

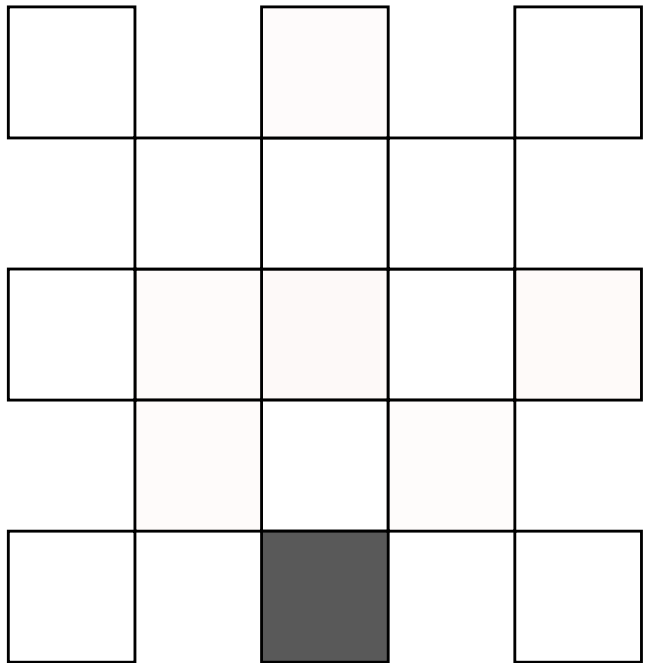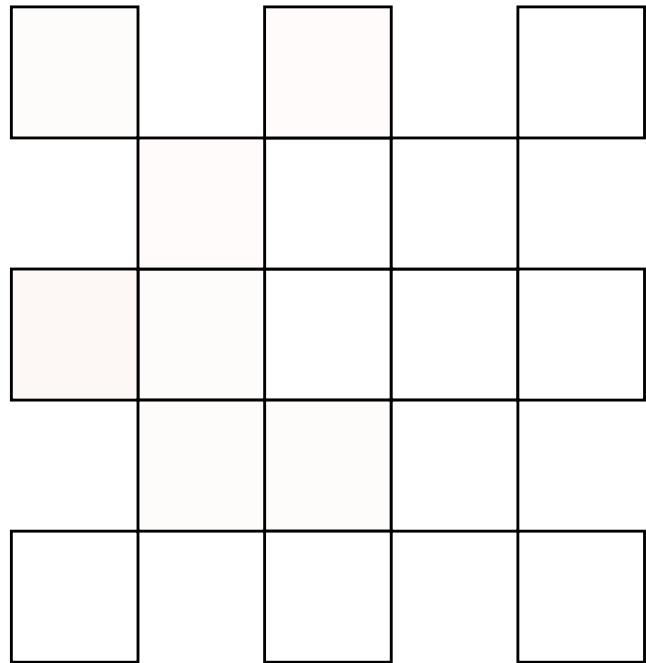

9-105015839-T-C

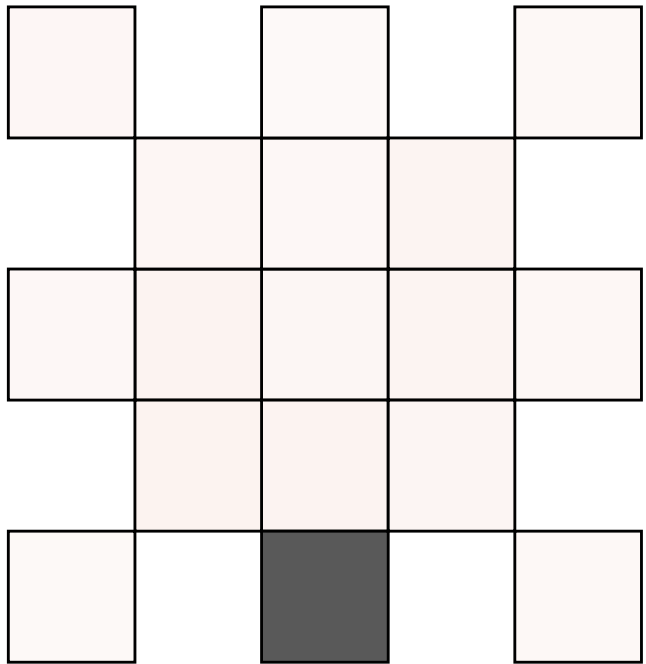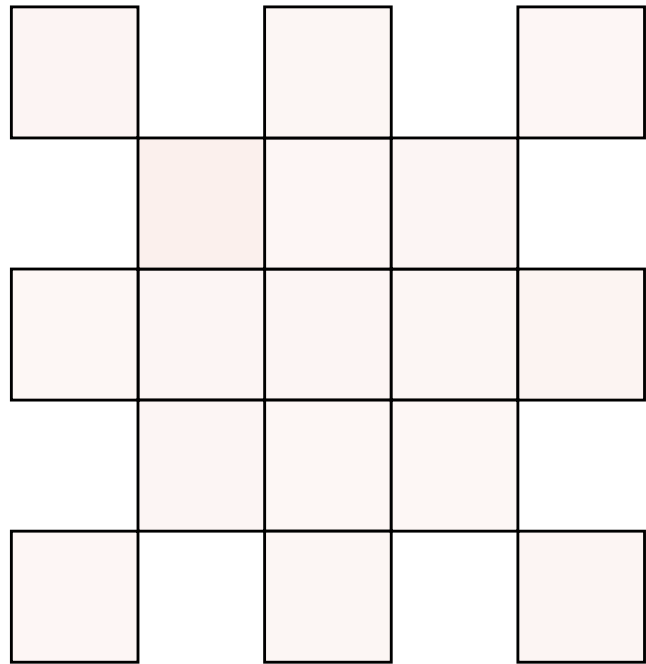

9-107723679-T-A

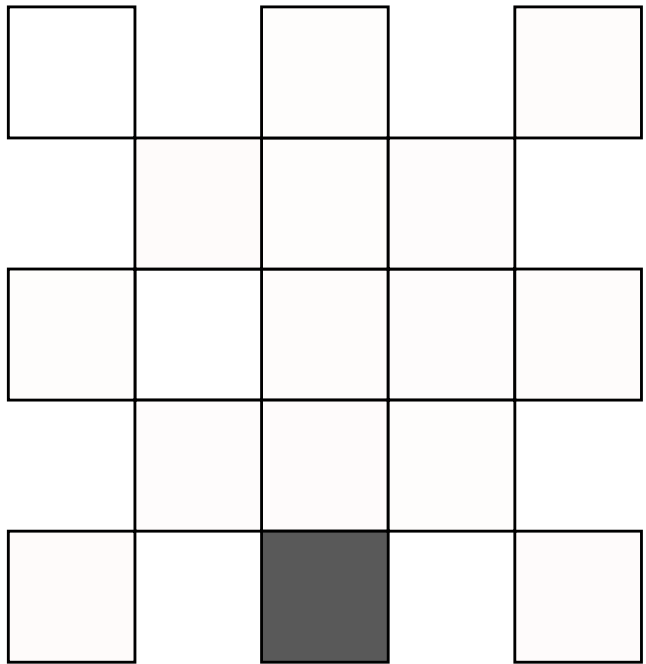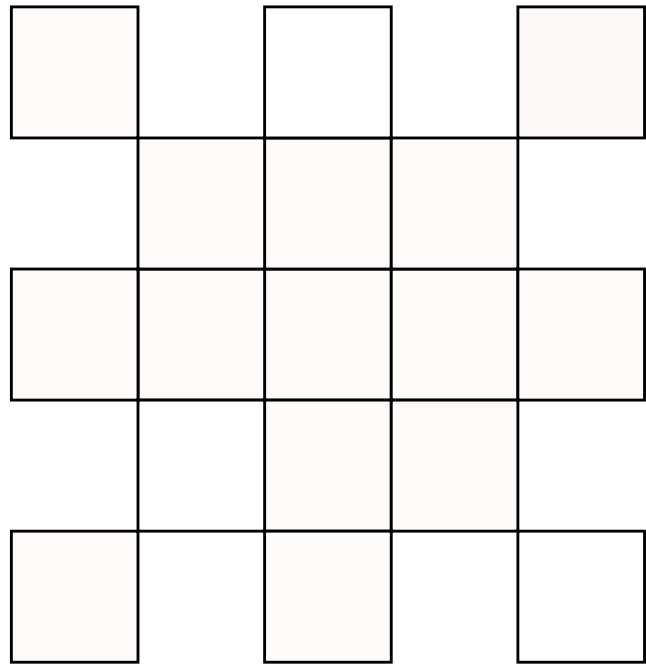

9-10773884-G-A

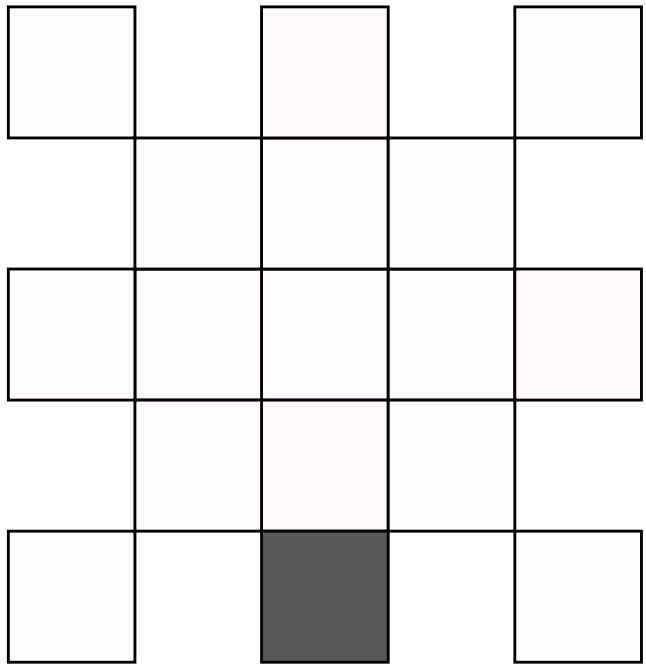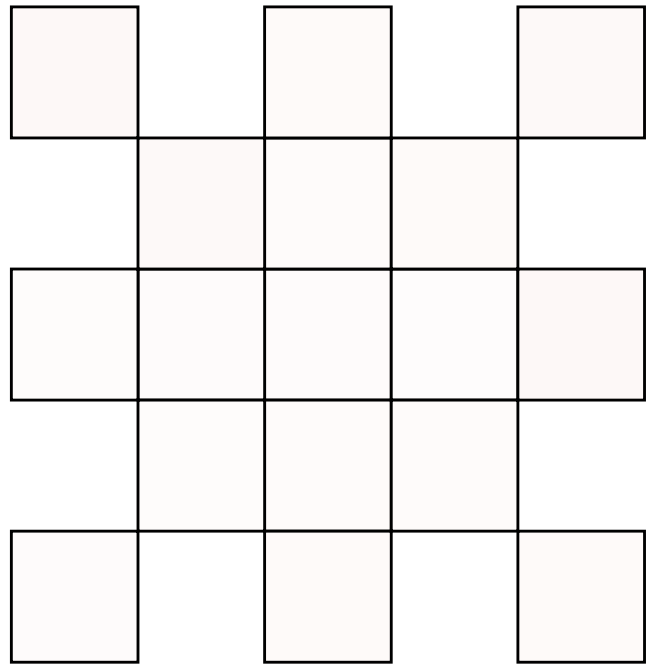



9-119721731-C-T

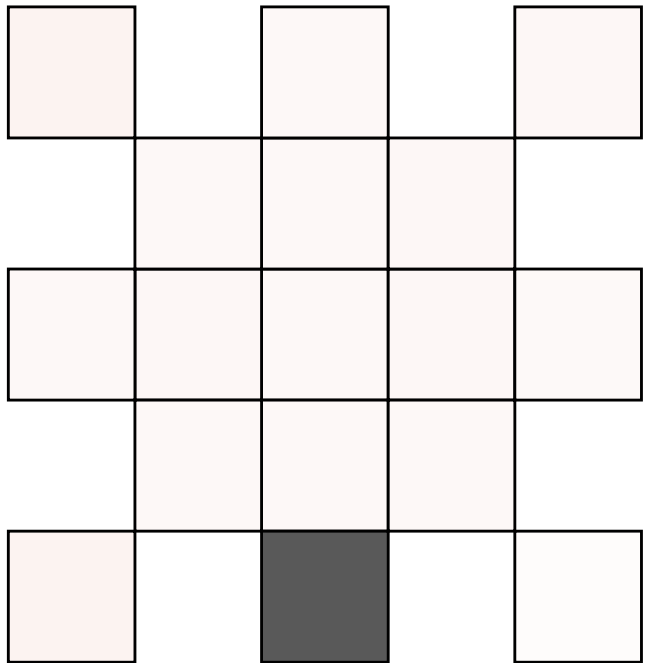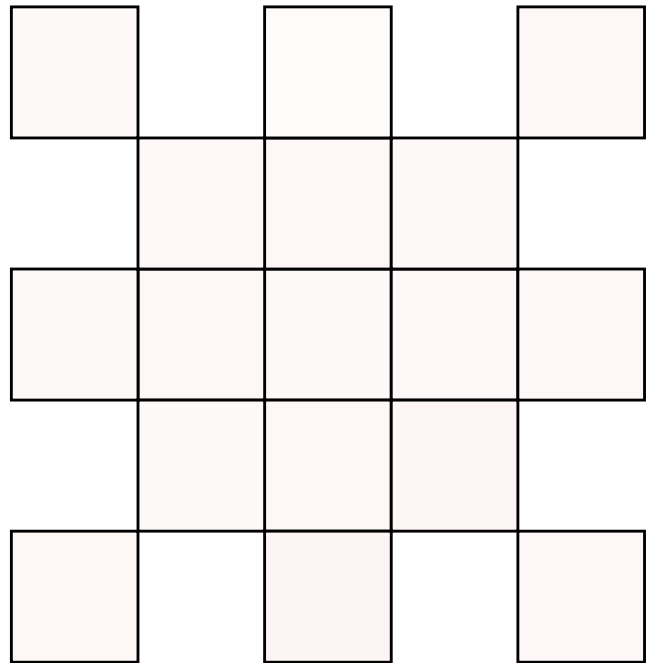

9-121141606-T-C

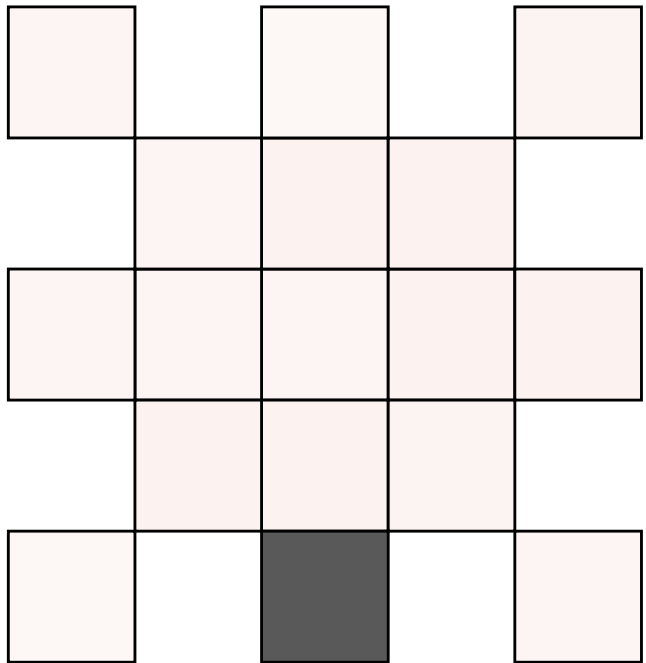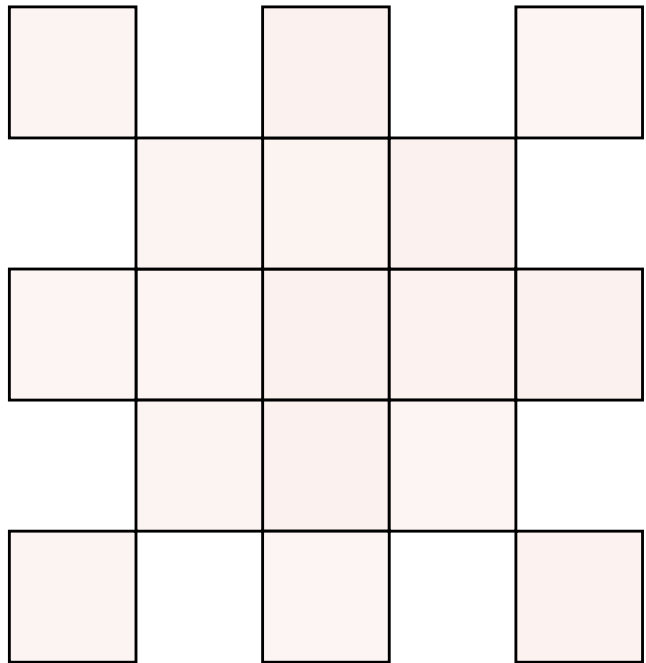

9-121997207-C-T

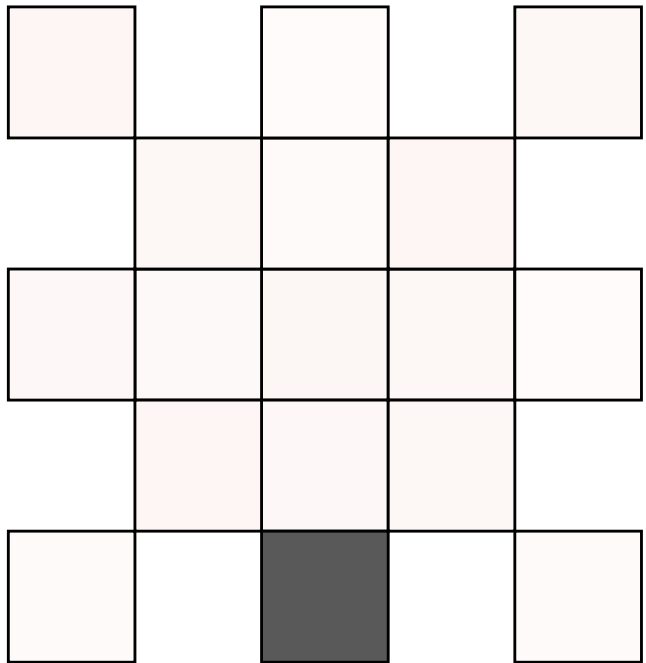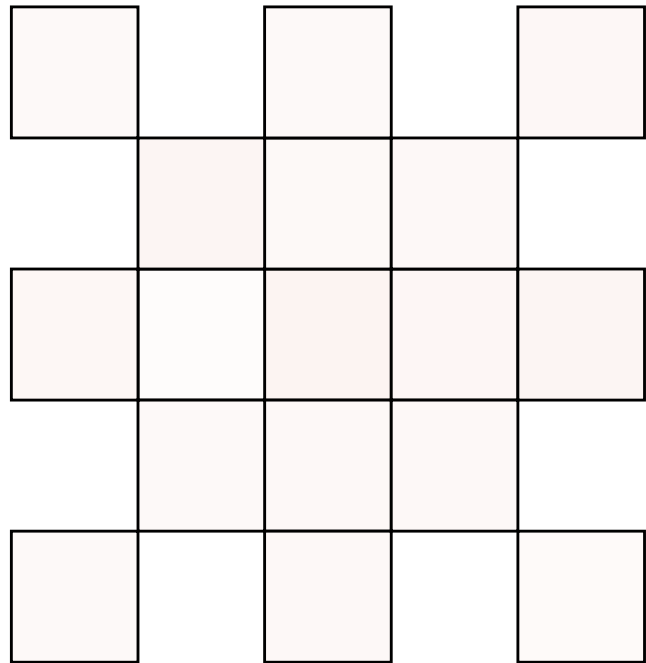

9-12287979-T-C

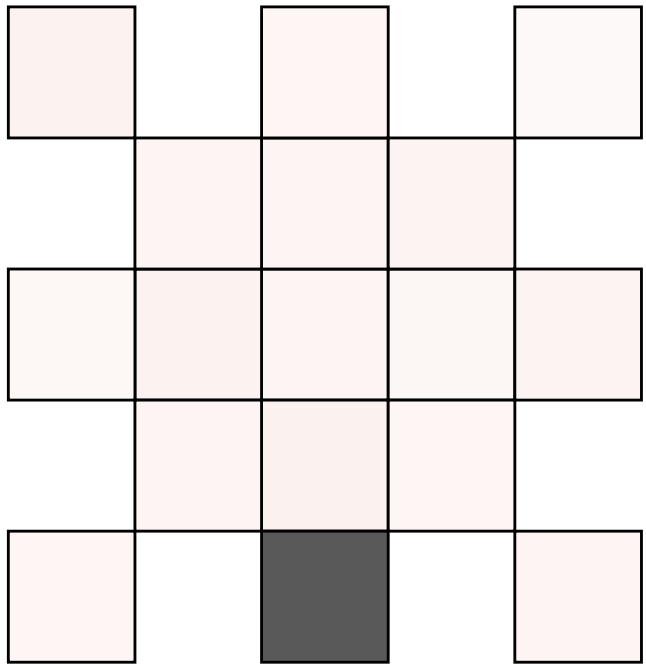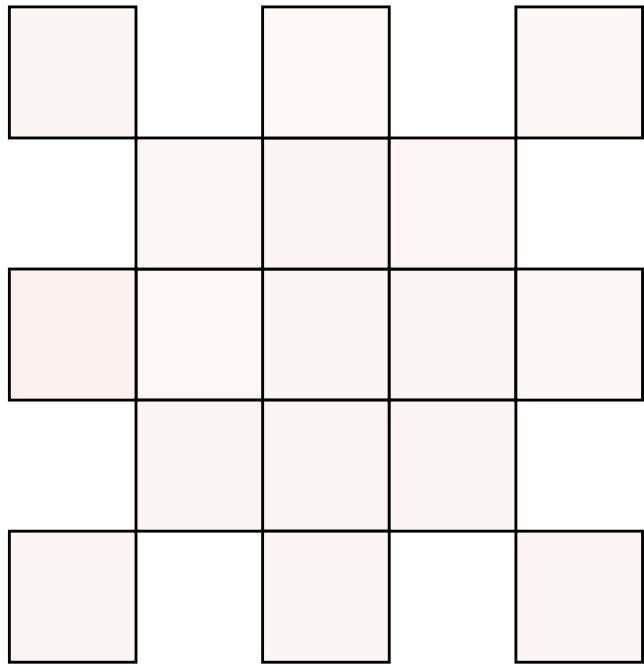

9-126795616-G-A

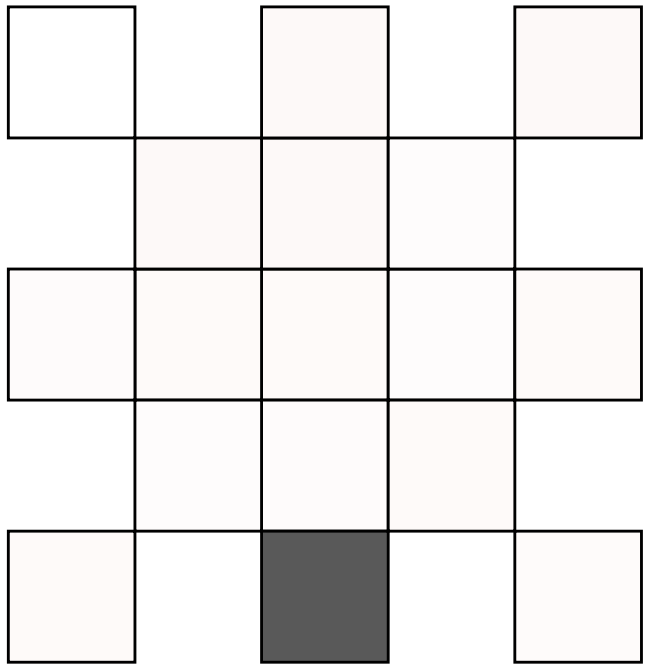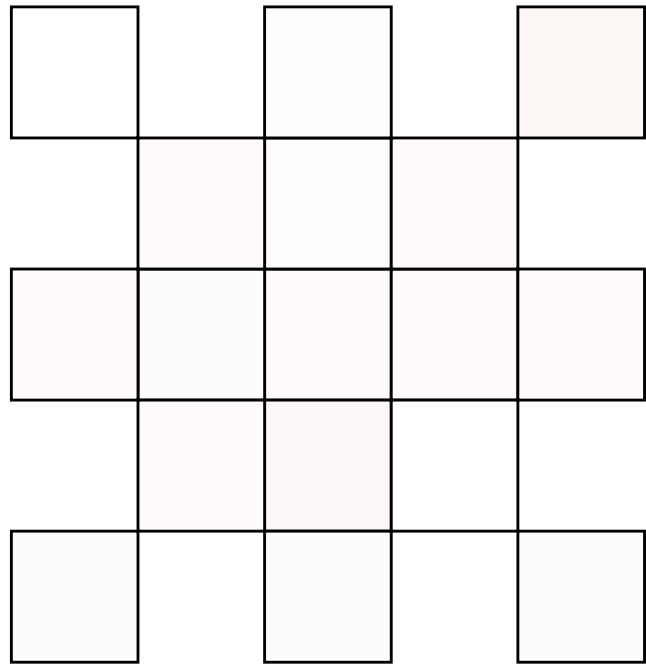

9-134621051-C-T

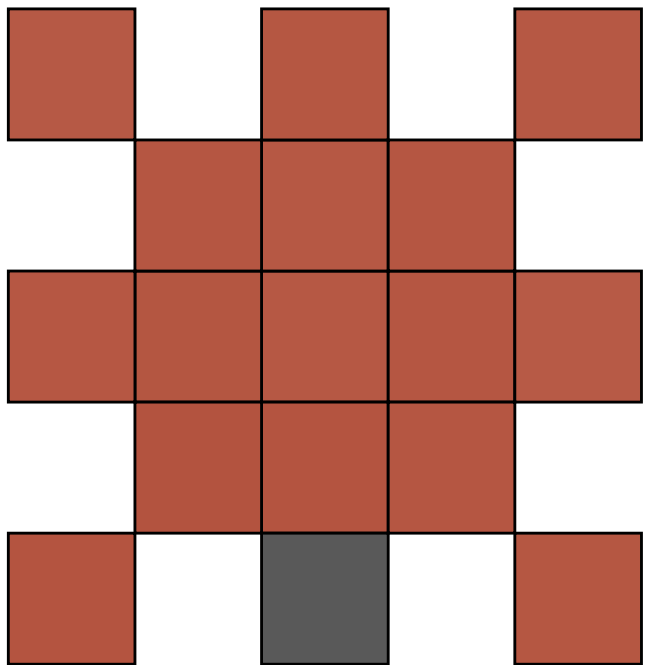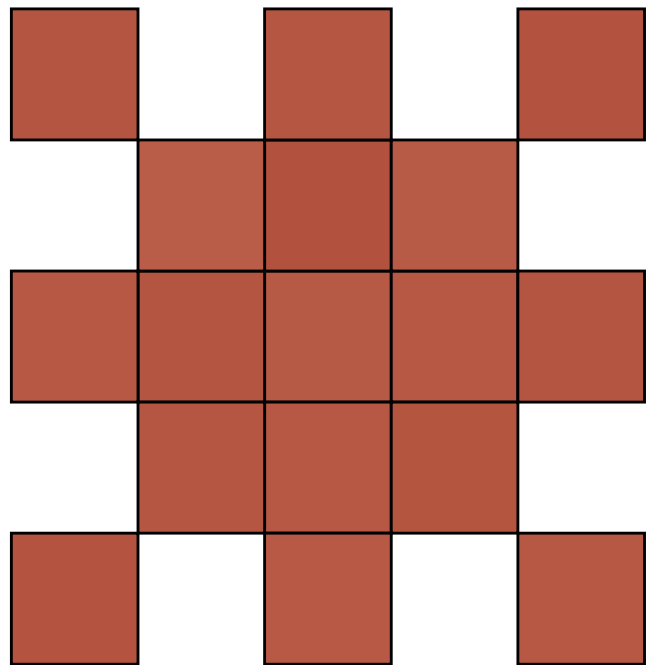

9-13509007-G-A

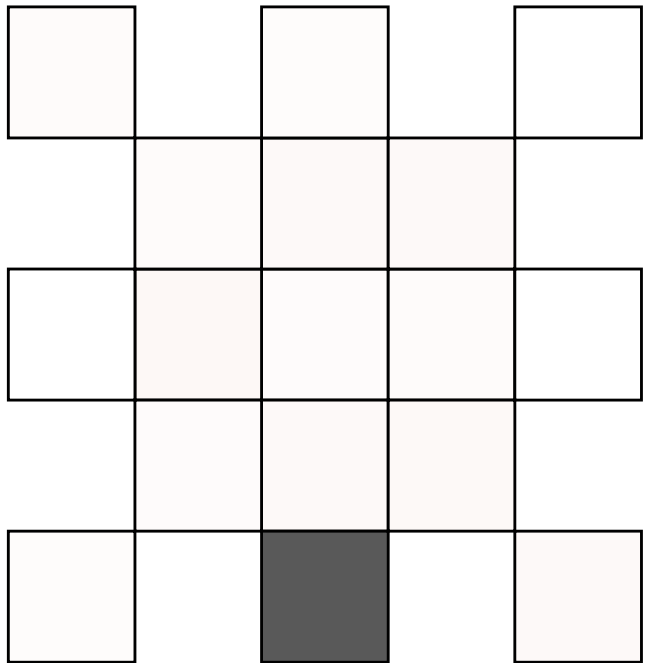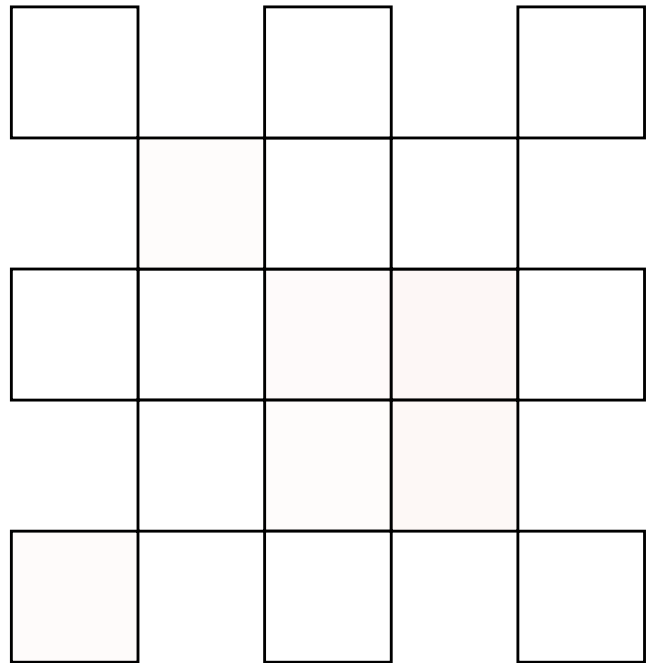

9-138162523-G-A

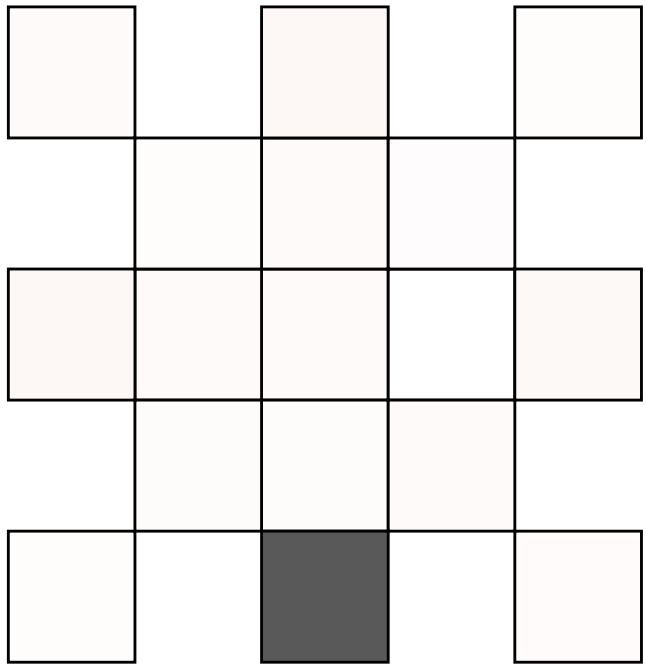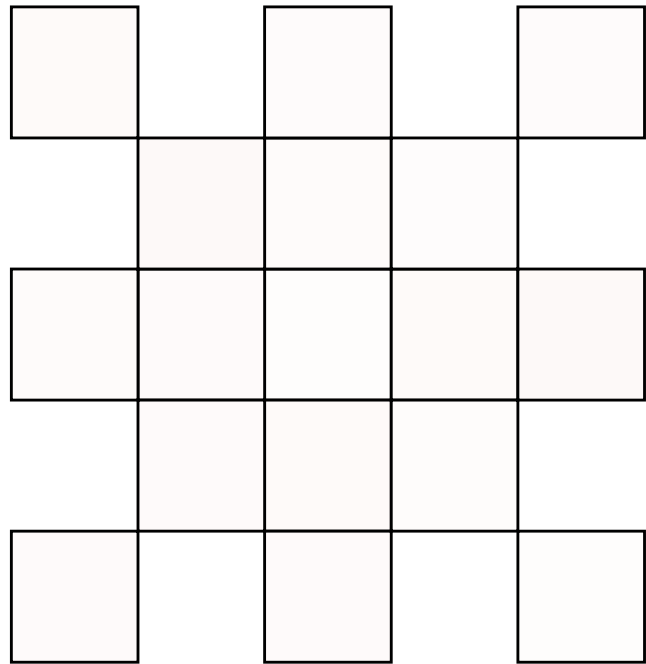



9-14510306-G-A

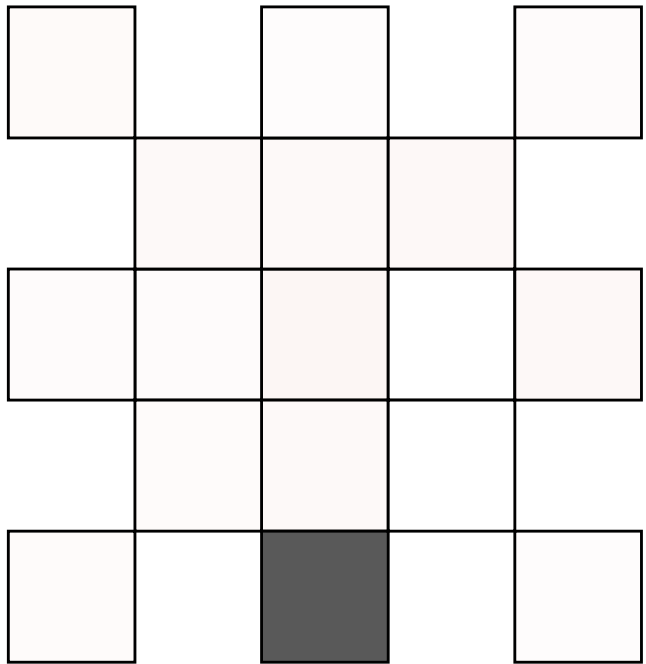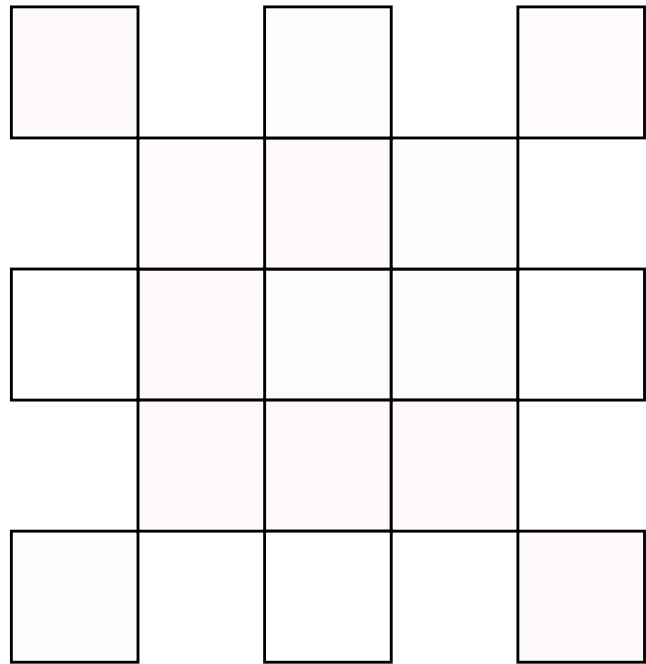

9-19957121-C-T

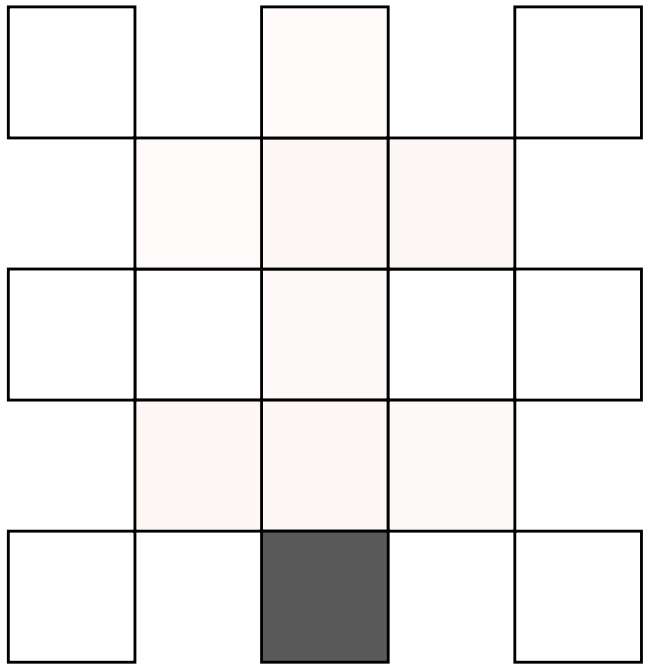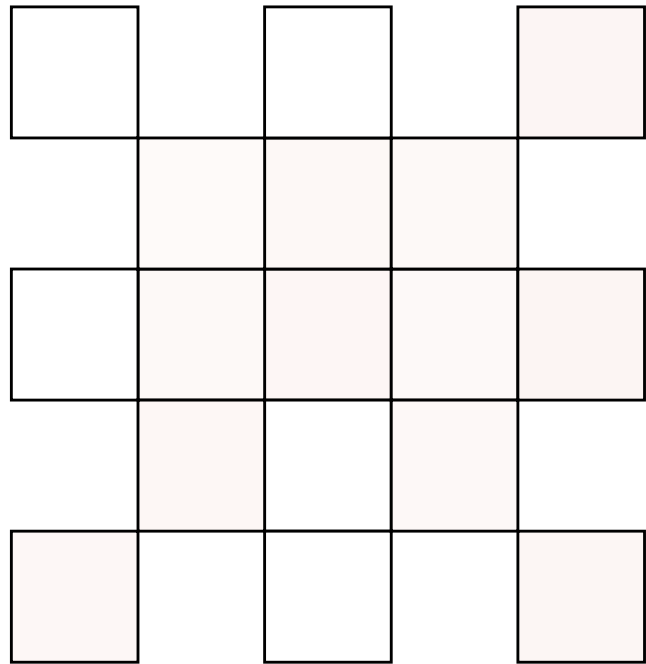

9-21154273-T-C

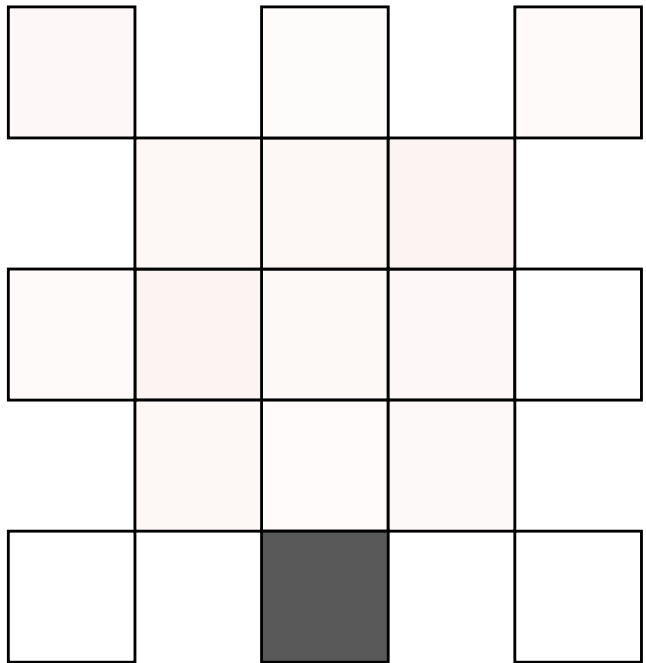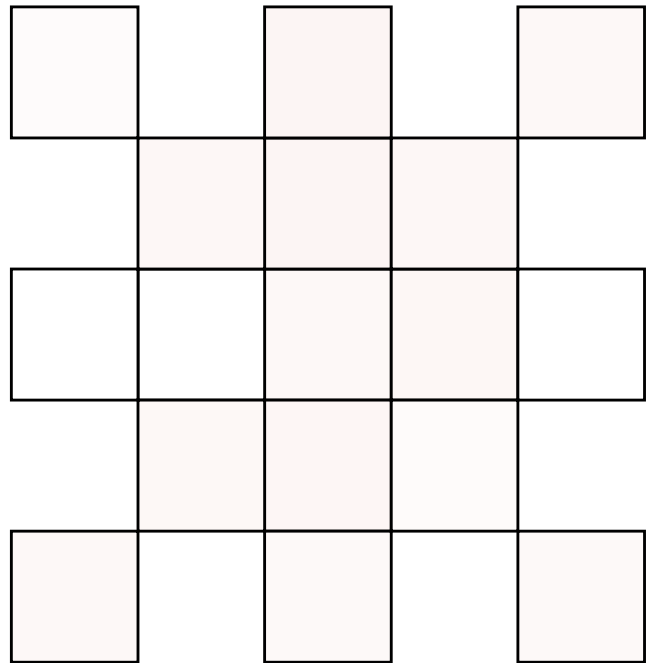

9-21506598-C-A

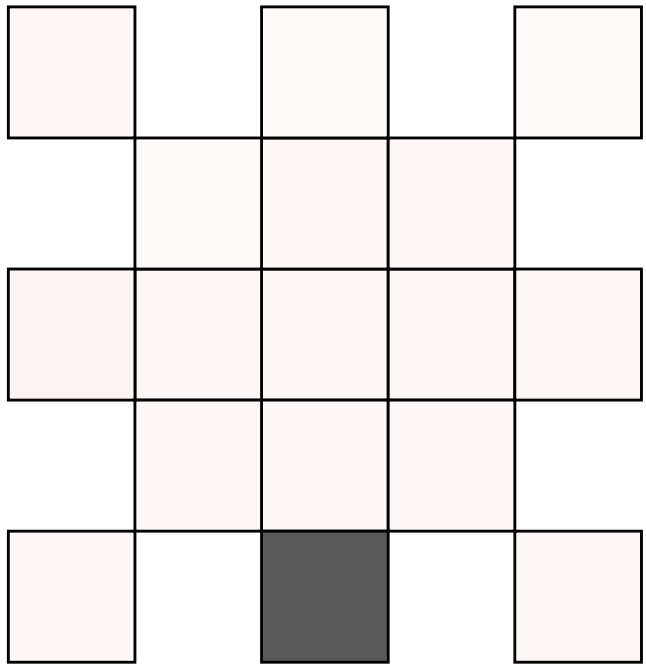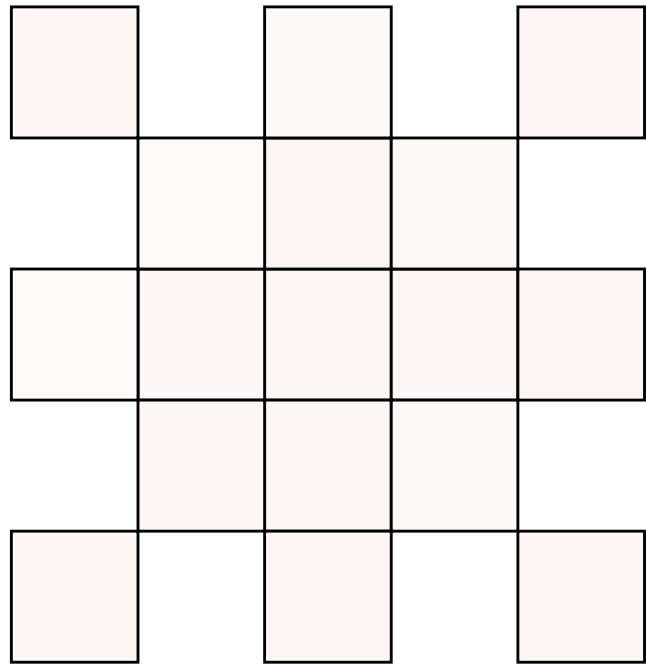

9-23041281-C-T

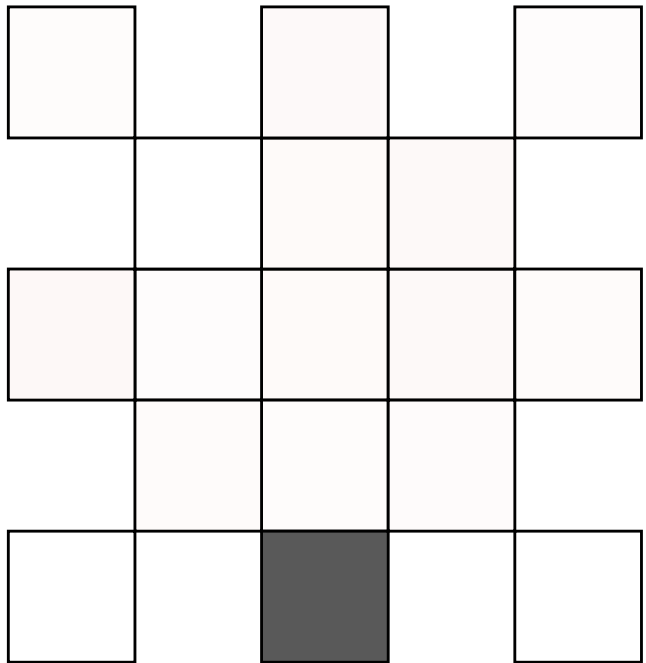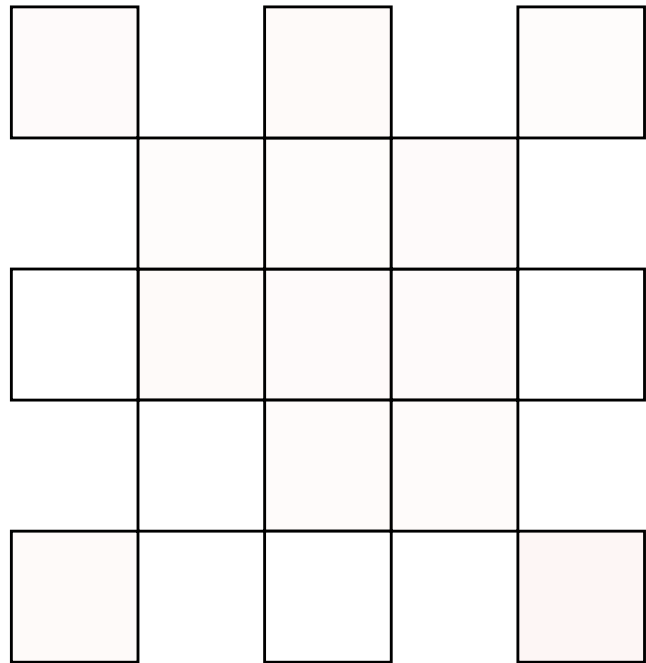

9-28561999-C-T

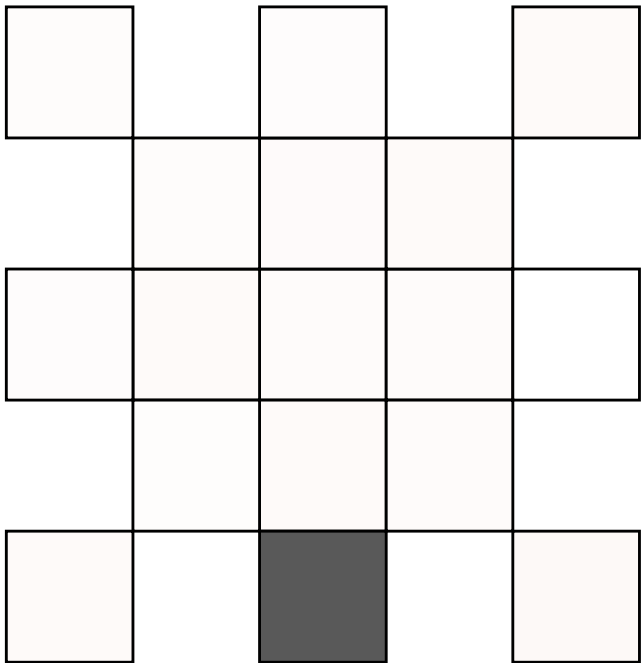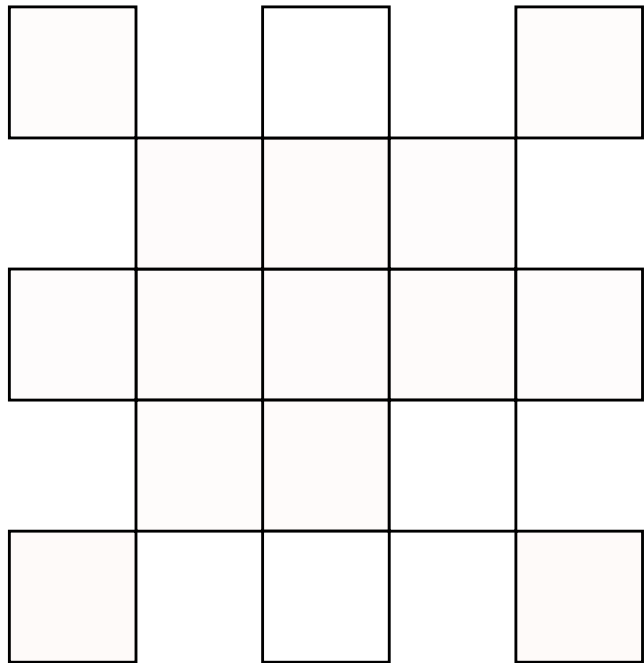

9-31039053-G-T

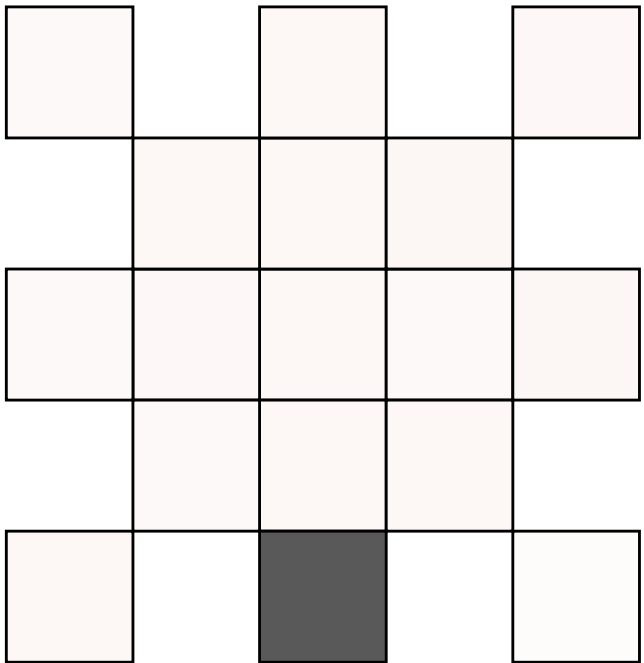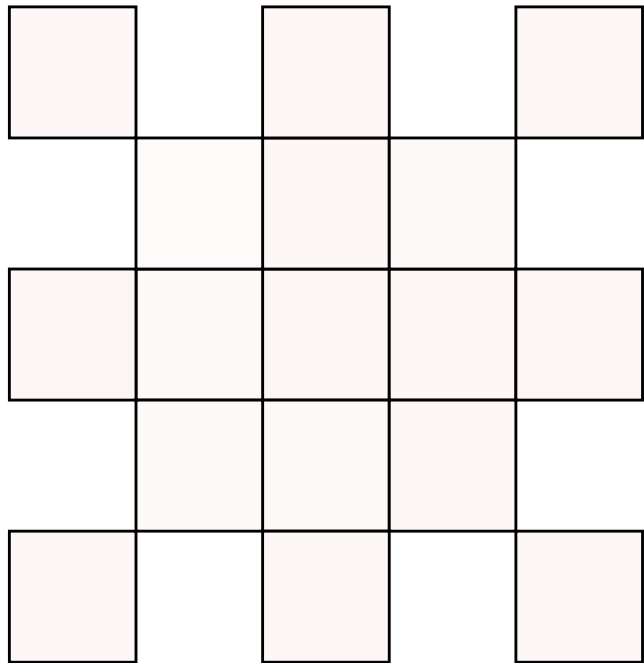

9-36967923-G-A

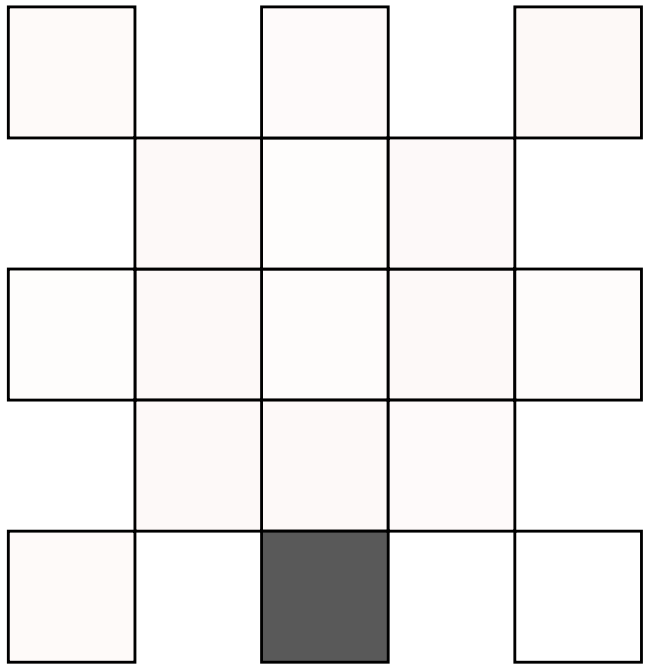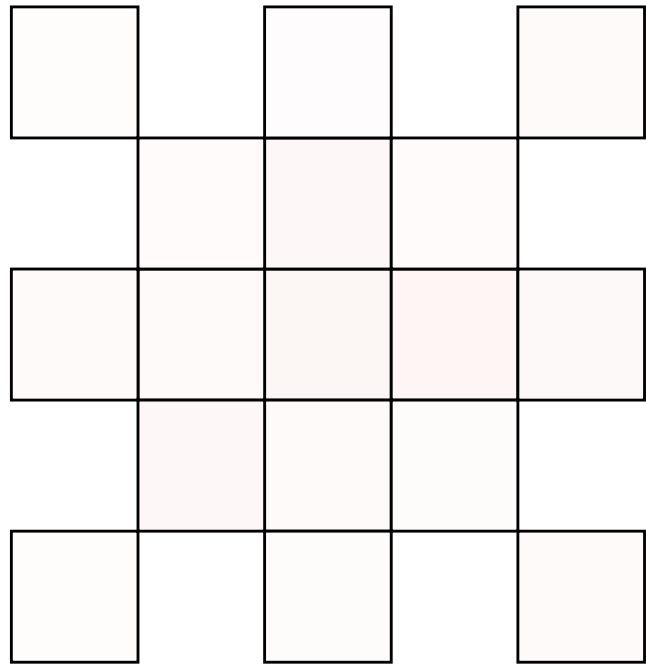



9-559661-C-T

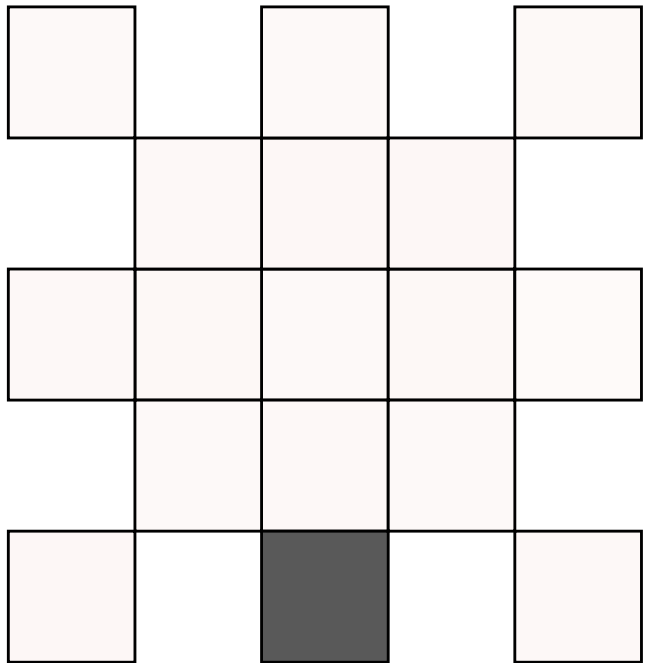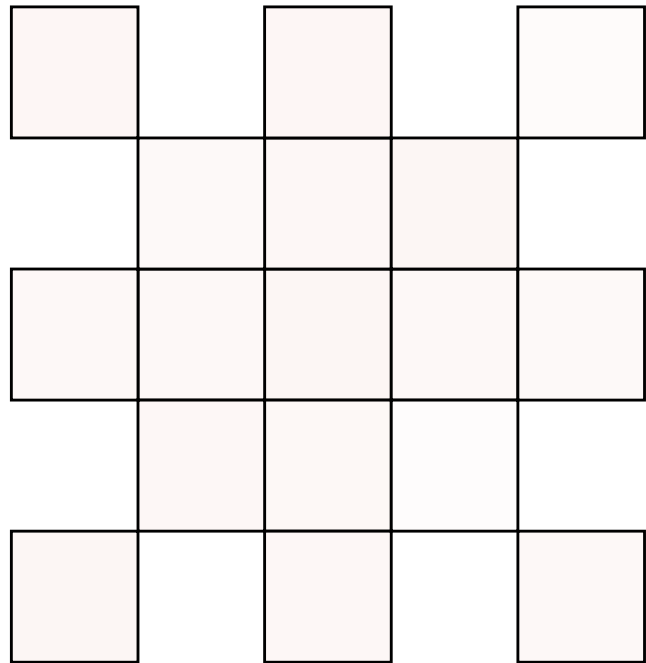

9-74407663-G-A

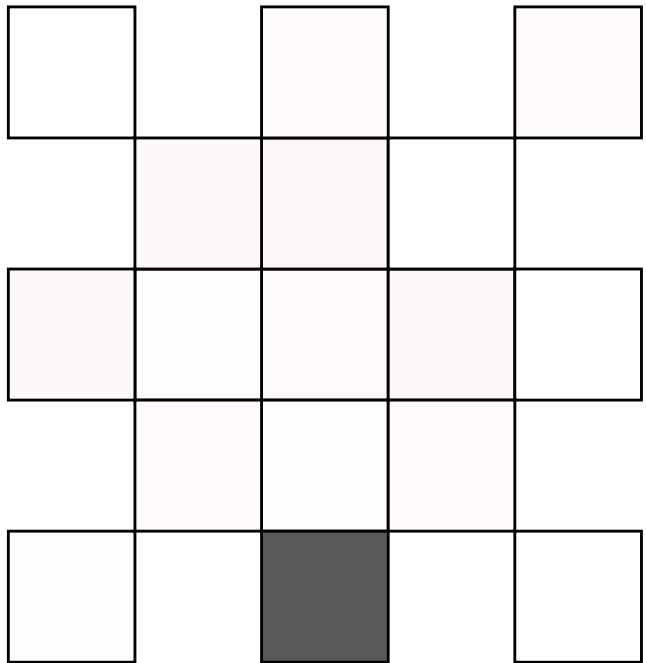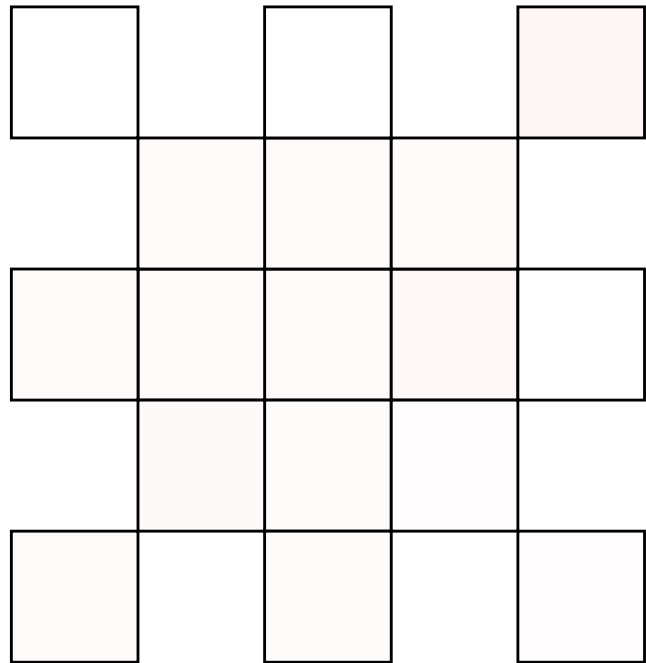

9-76169299-T-C

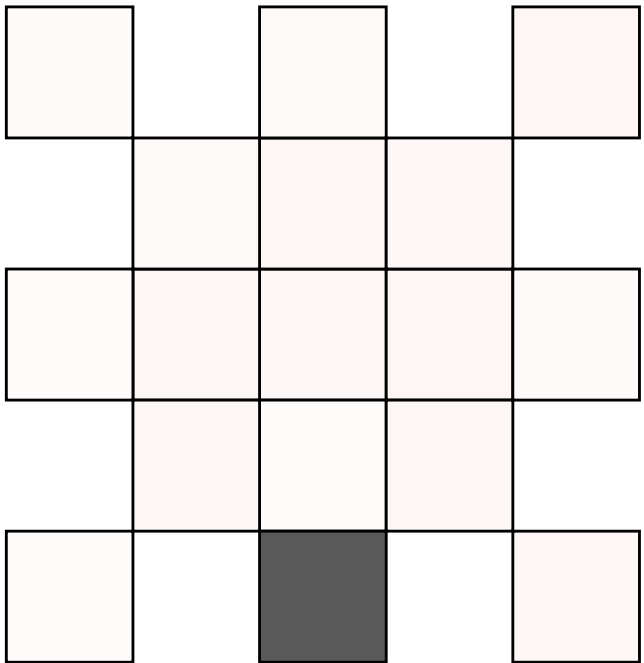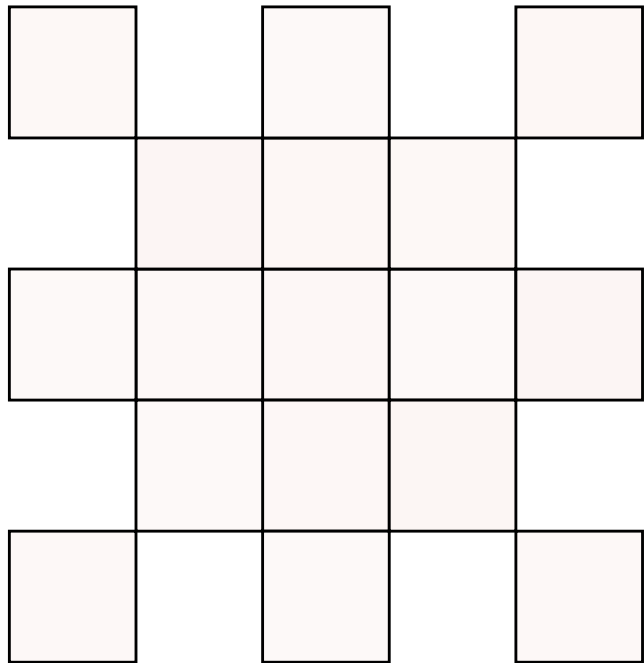

9-77140705-C-T

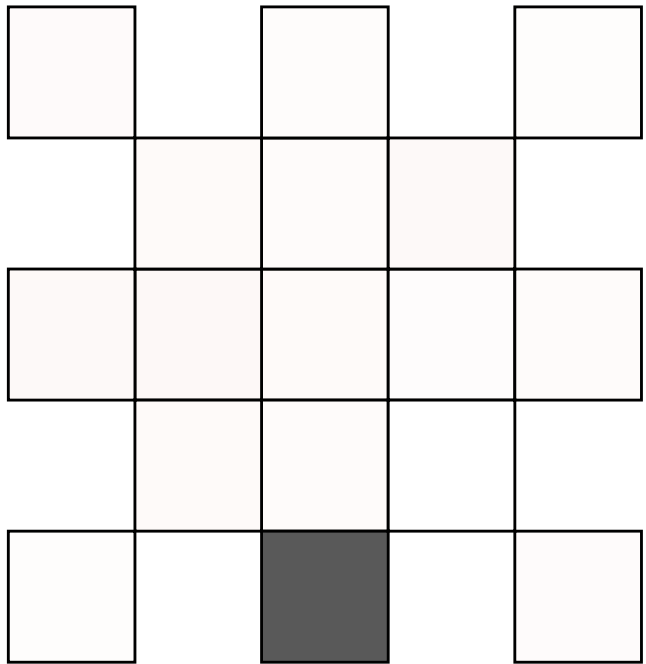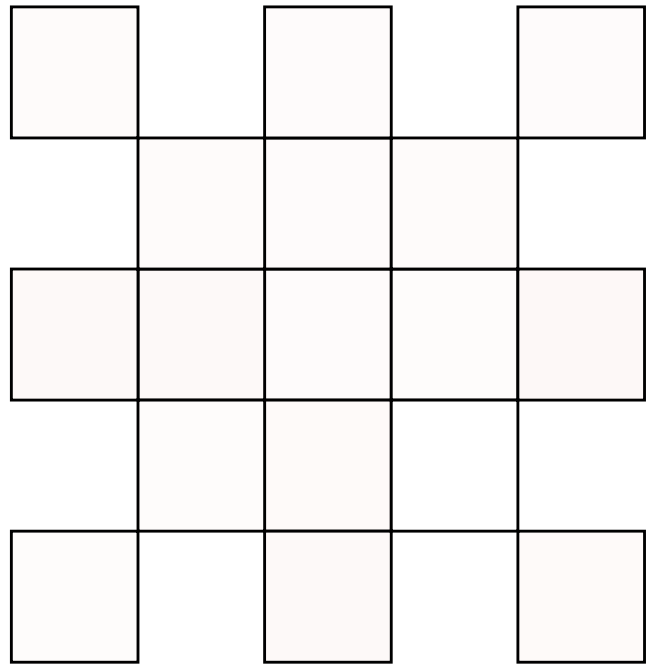

9-81603782-C-T

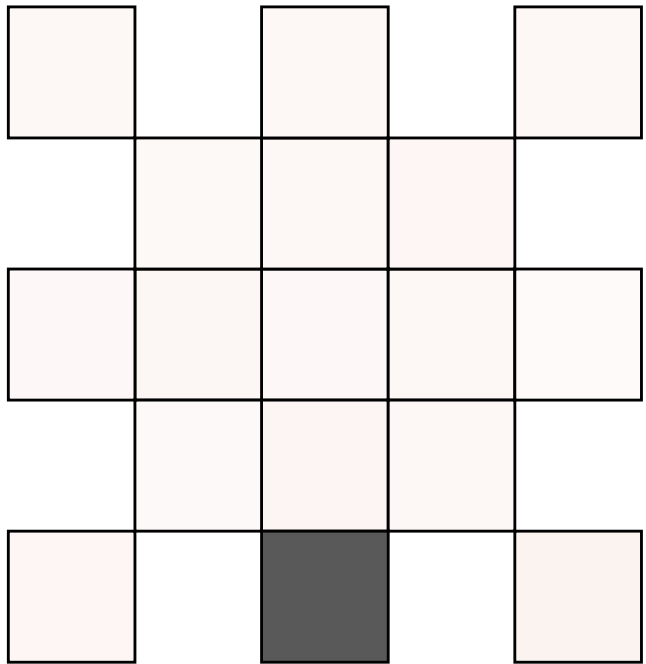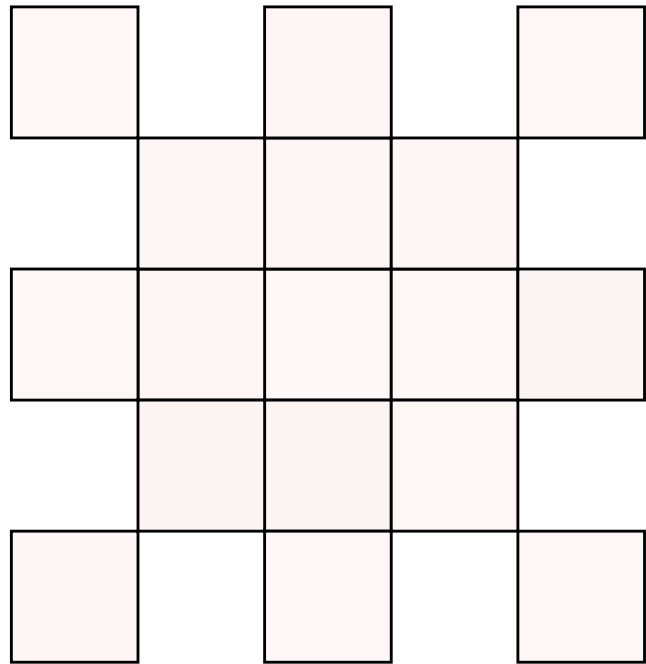

9-82881649-G-T

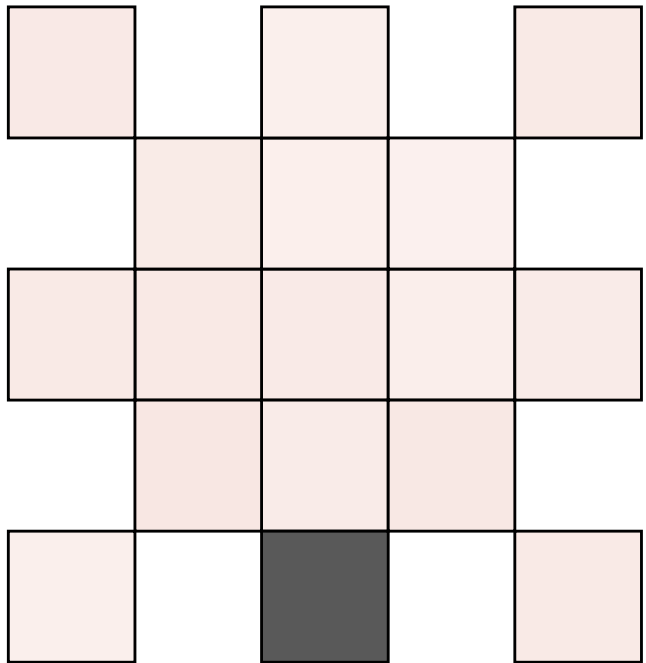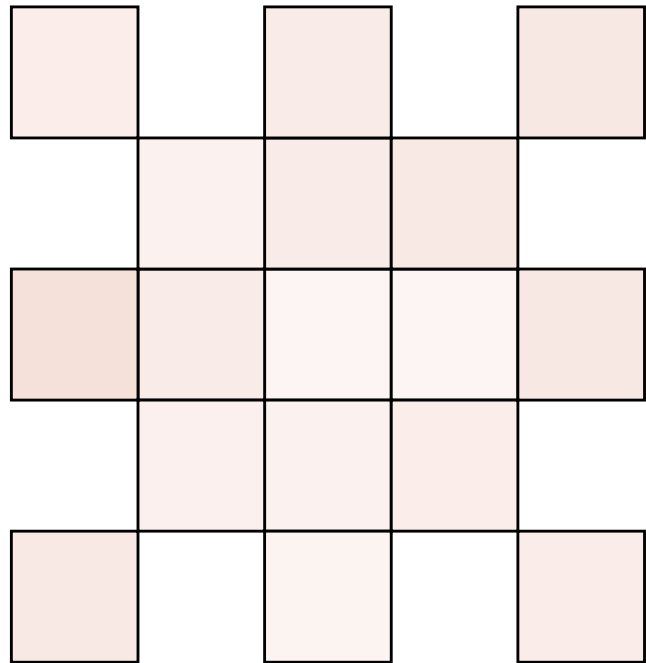

9-82881654-A-C

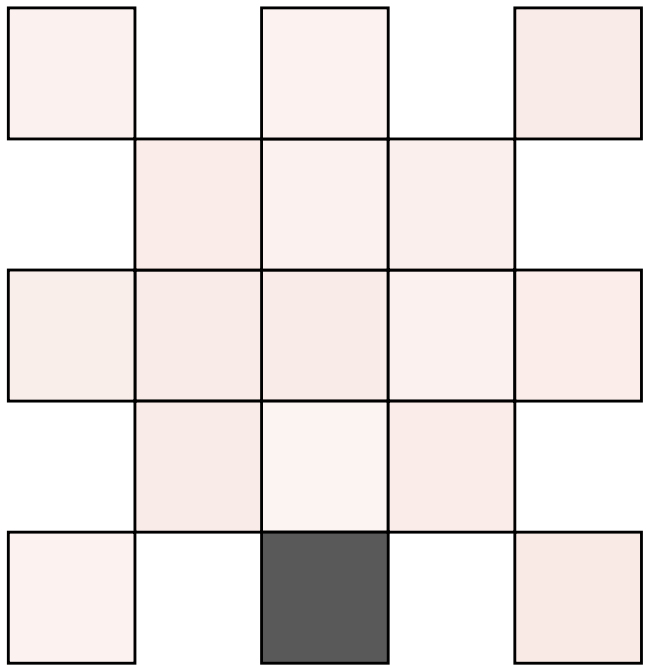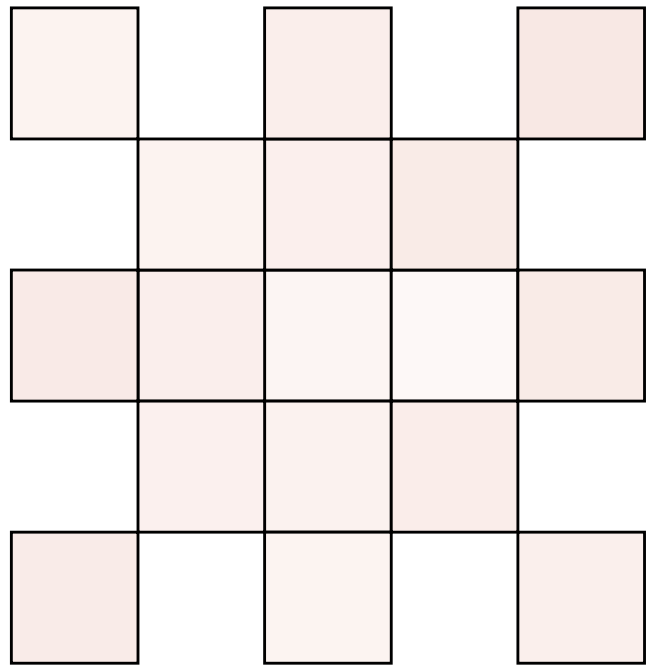

9-83044793-C-A

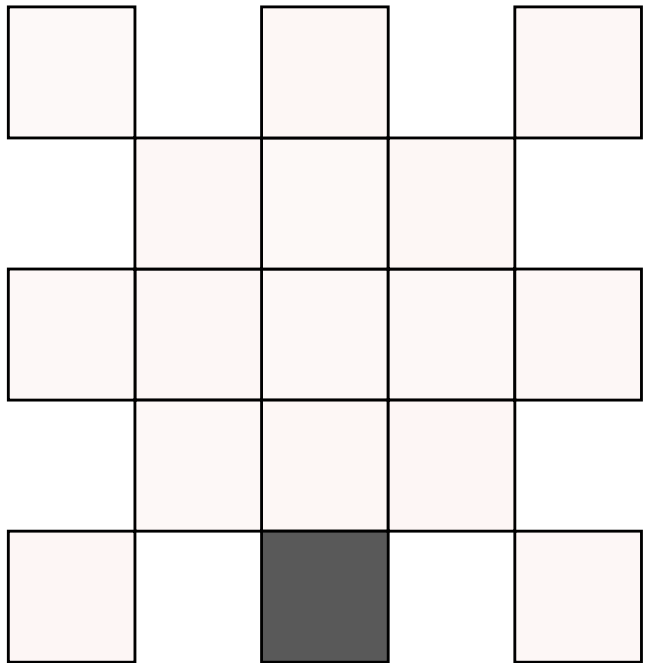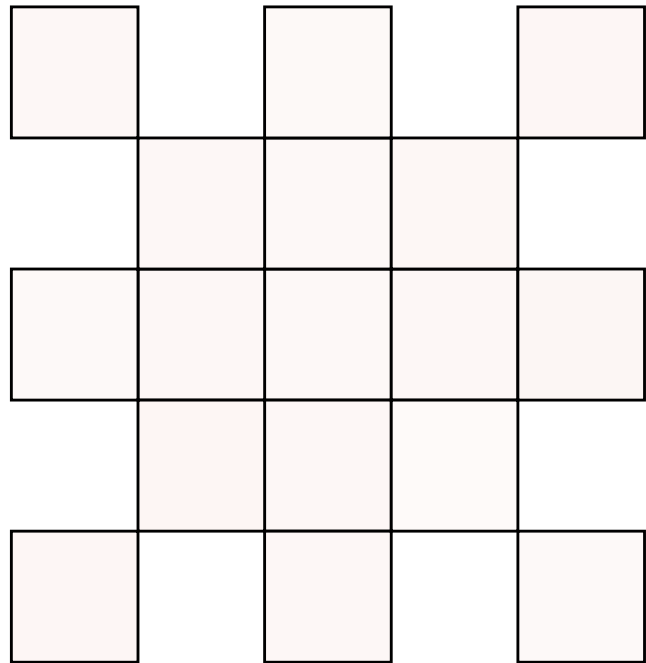



9-83538985-A-G

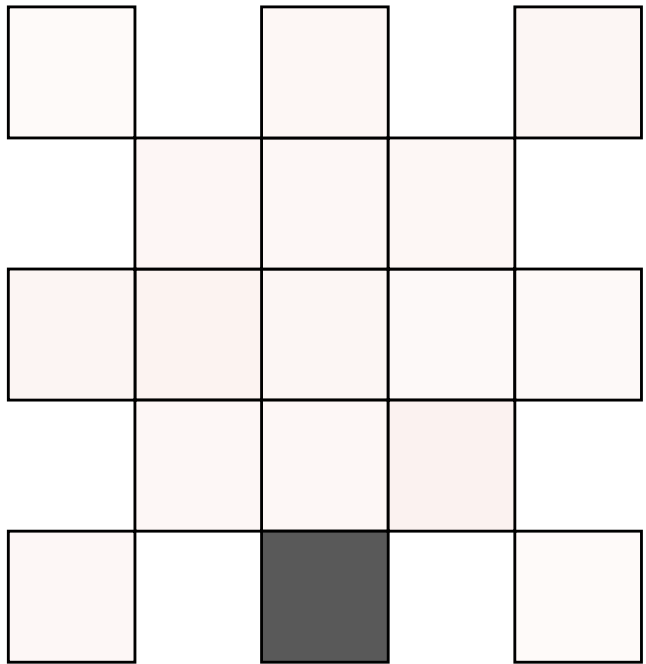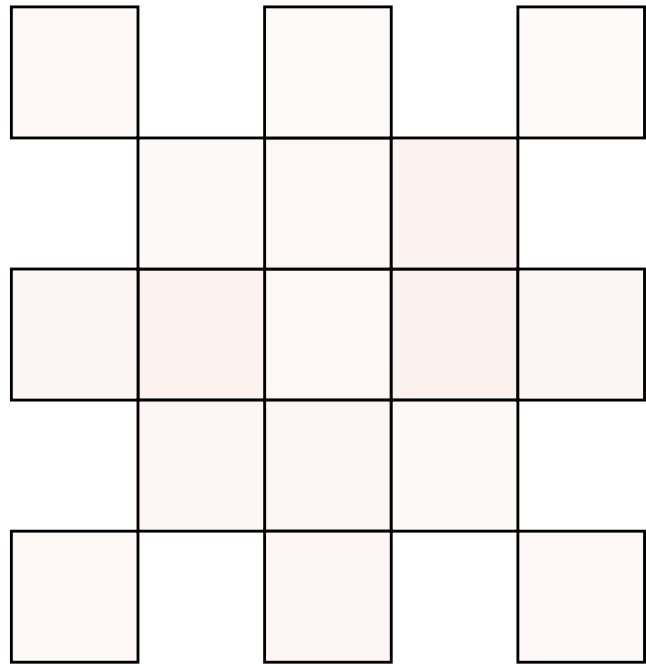

9-96677164-G-A

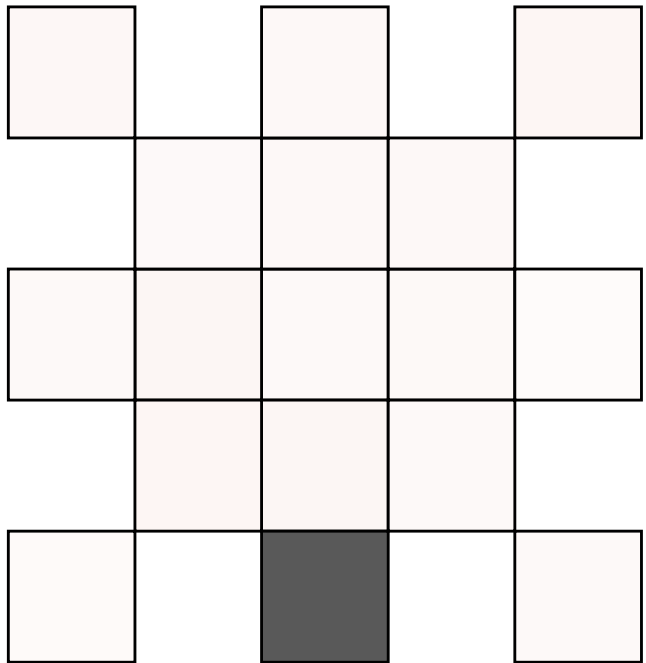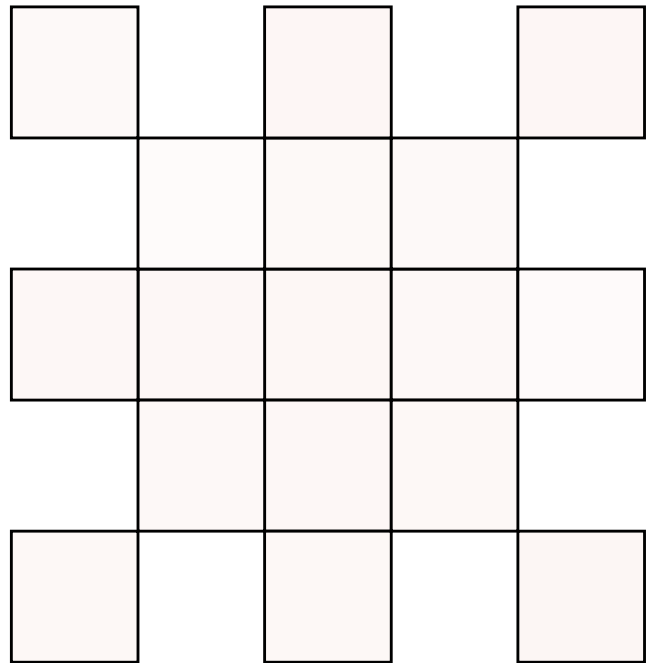

9-9971800-C-T

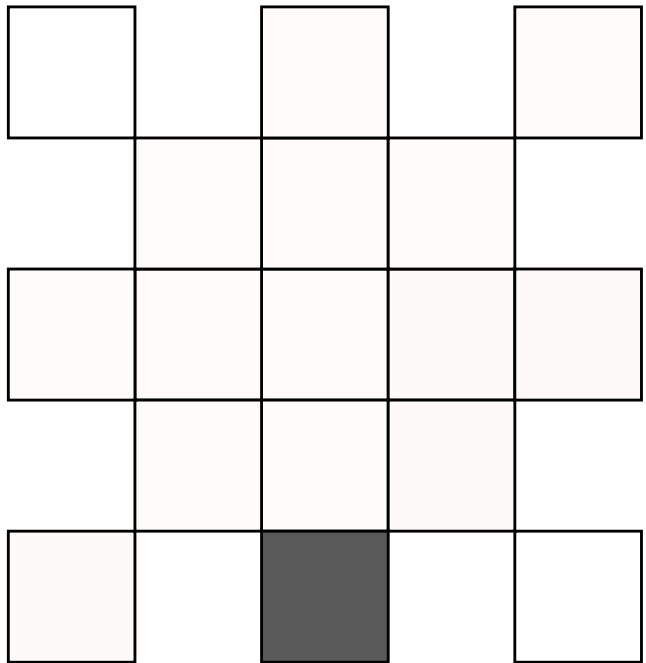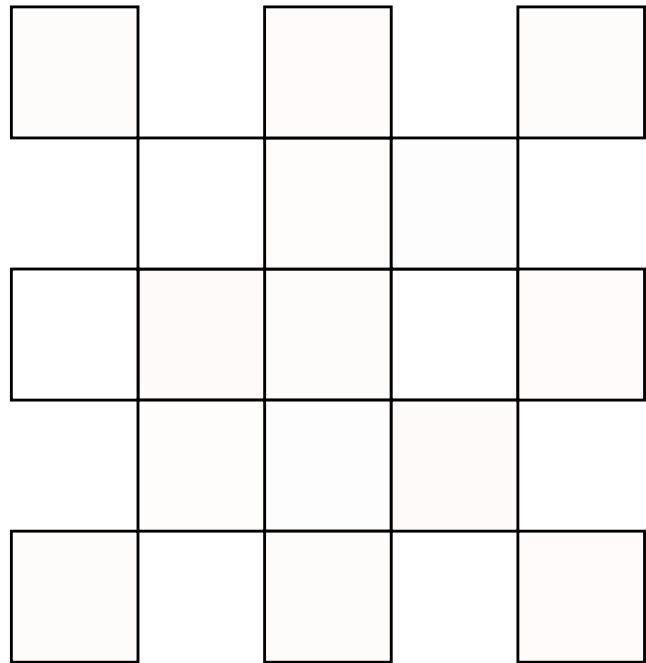

X-107301303-G-T

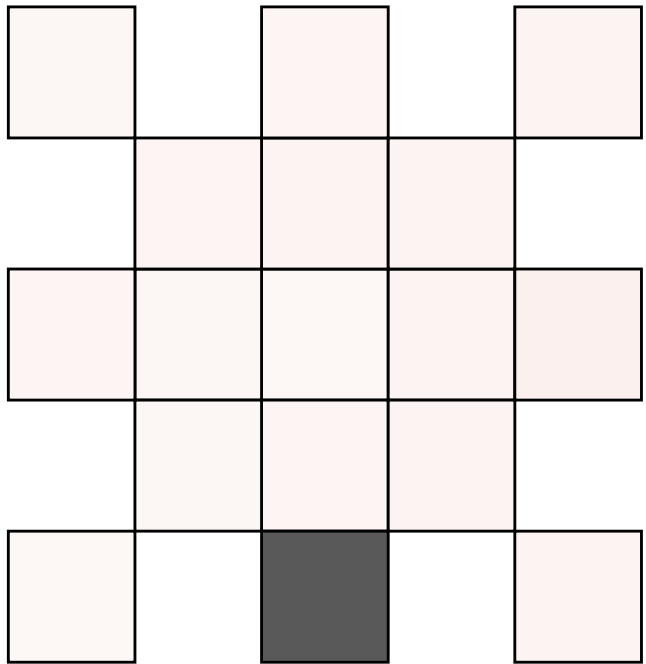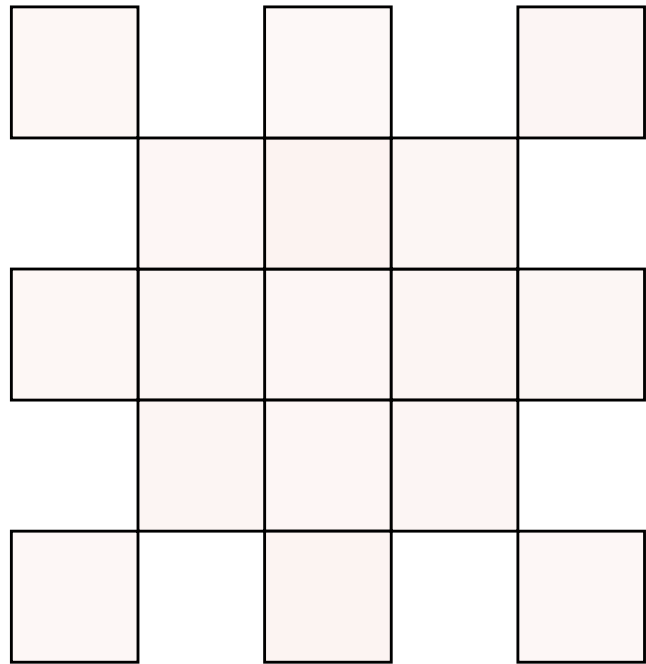

X-109753054-C-T

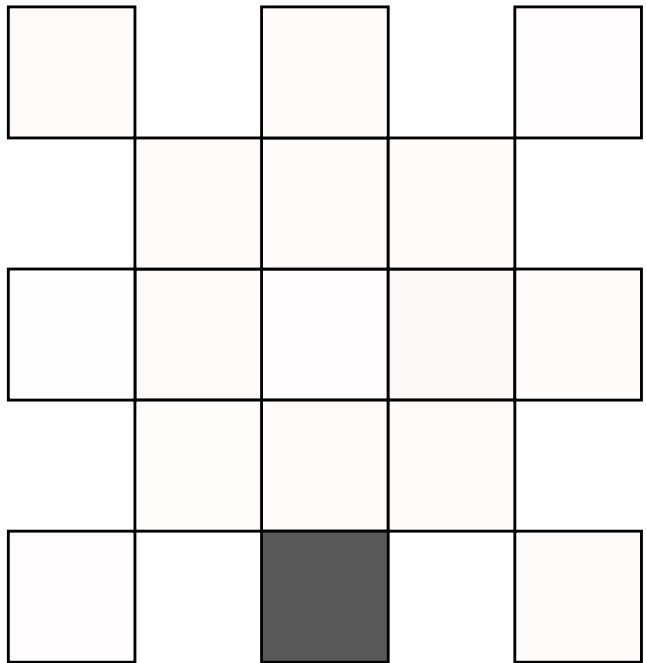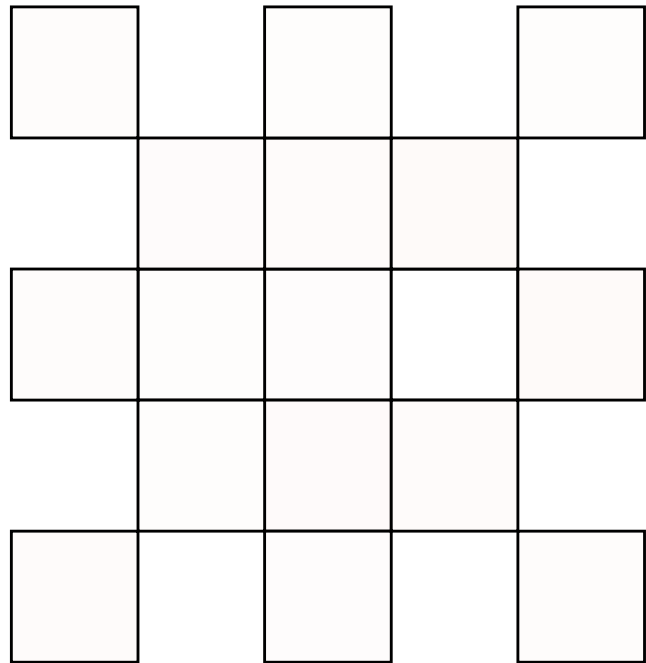

X-109939493-G-A

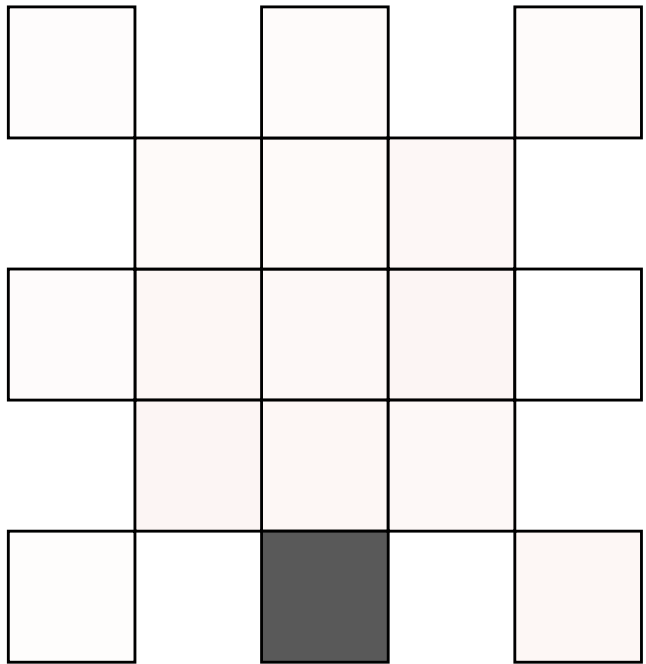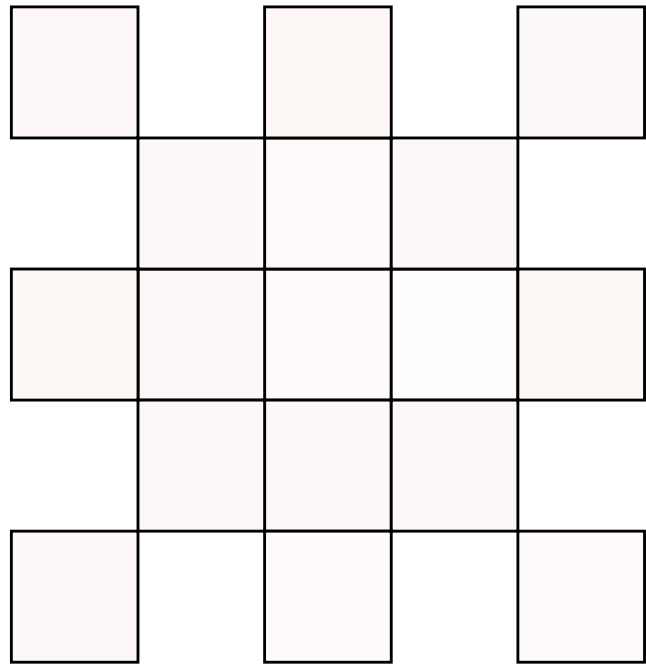

X-117240525-A-C

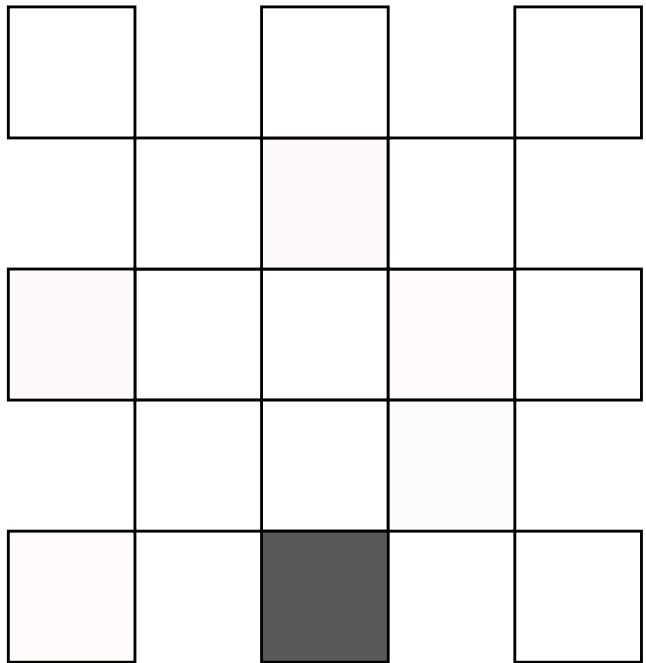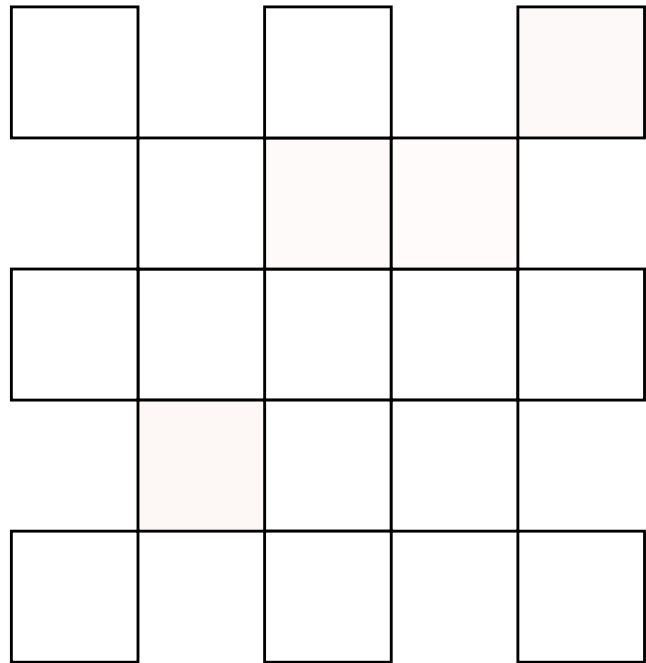

X-122220079-G-A

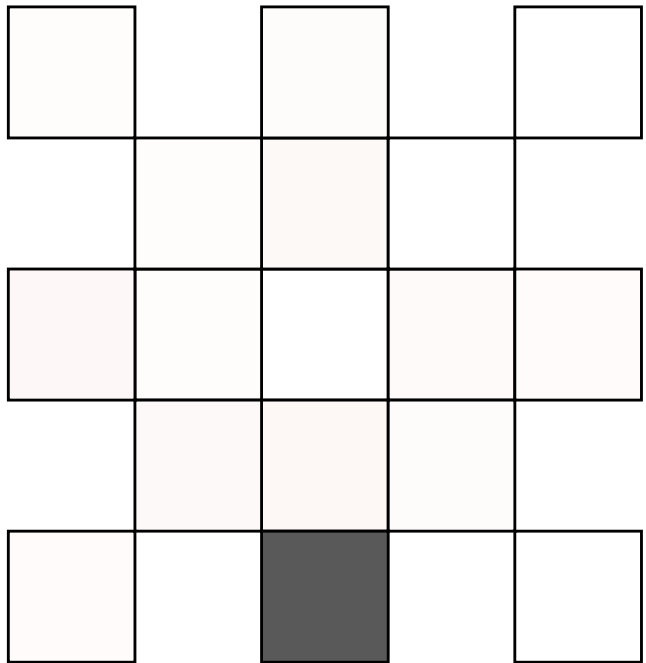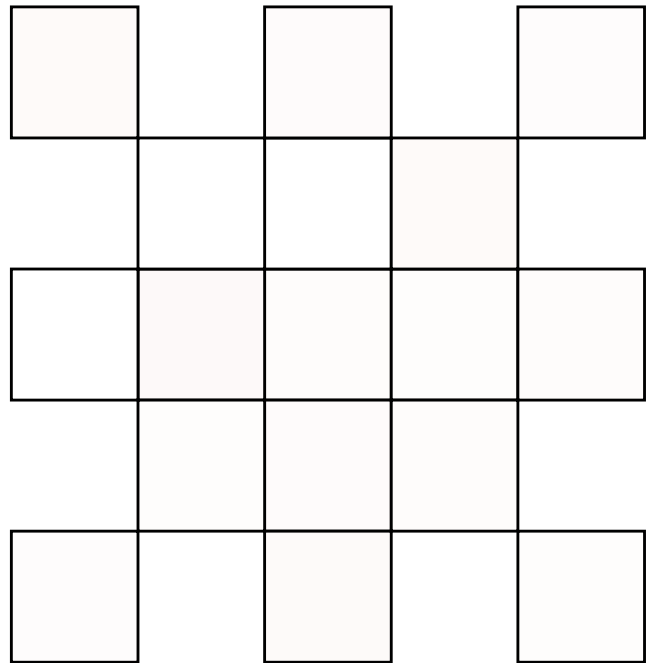



X-125464024-G-A

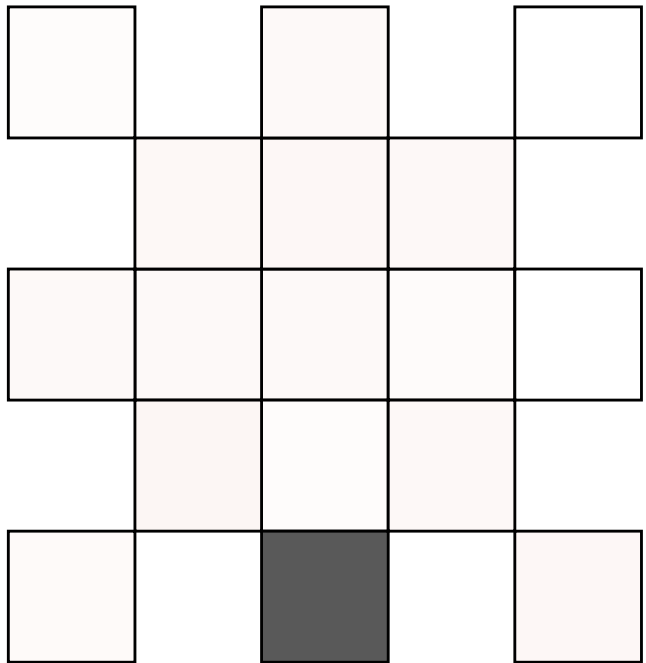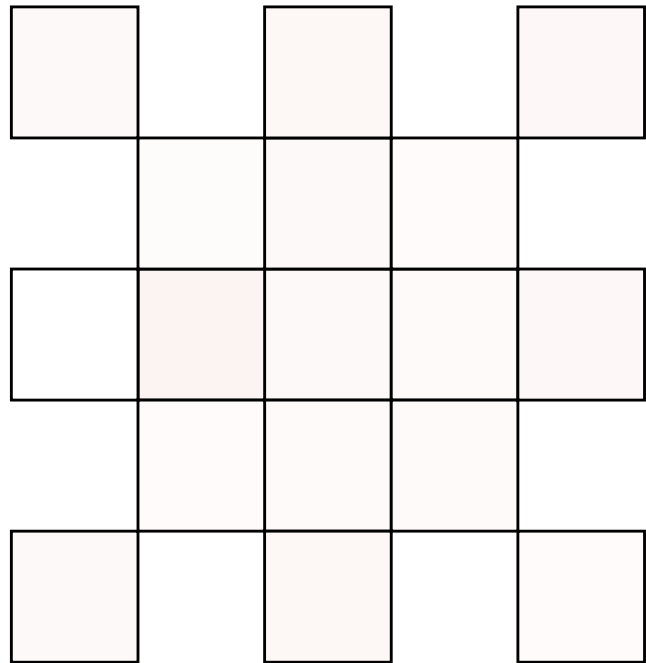

X-129536409-G-A

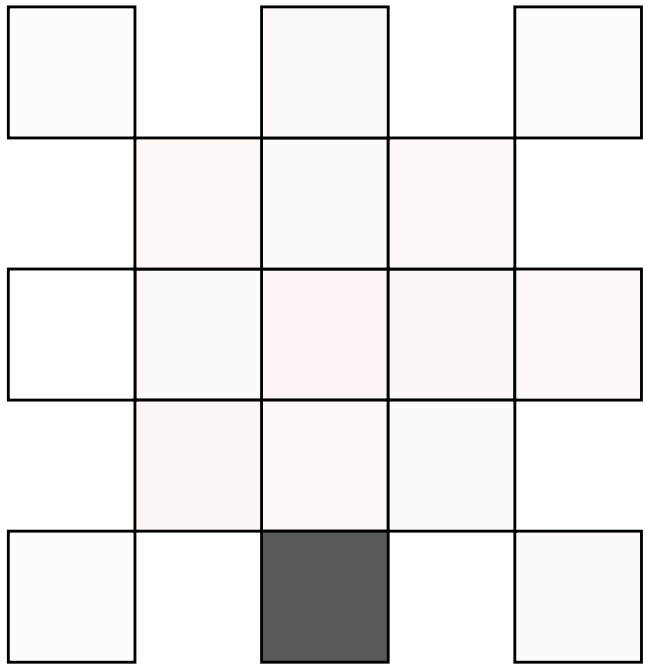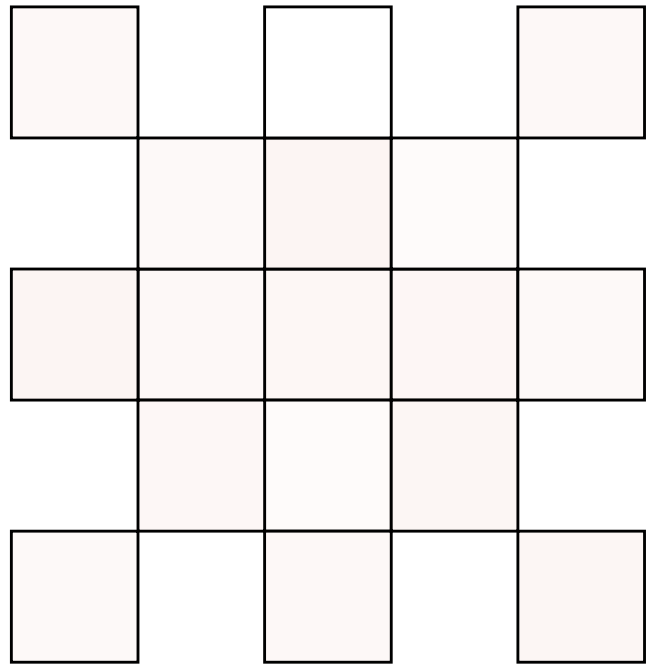

X-131850019-A-T

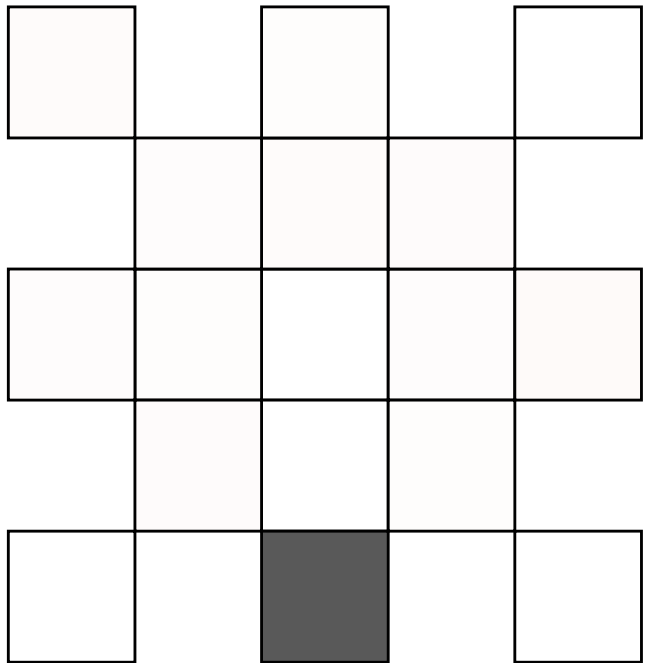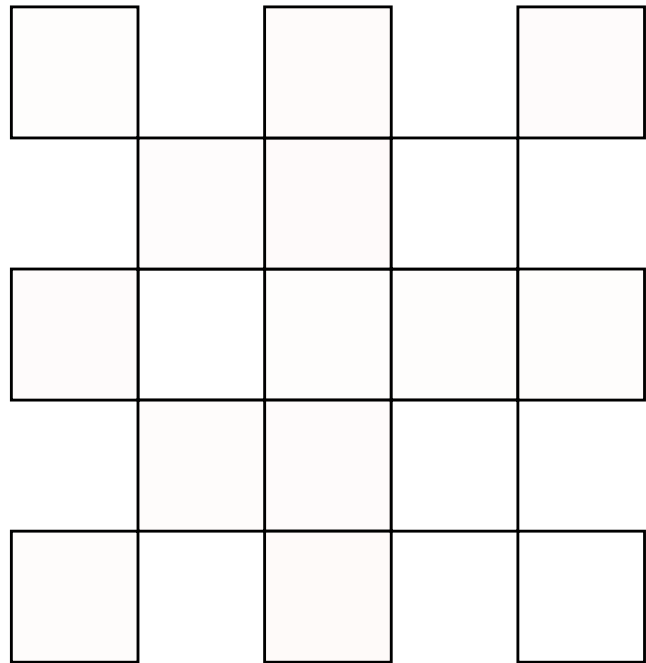

X-138211912-G-A

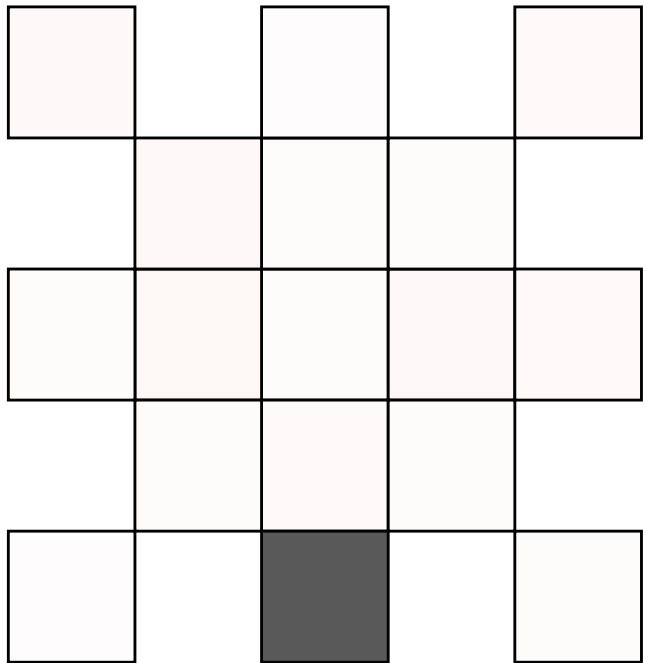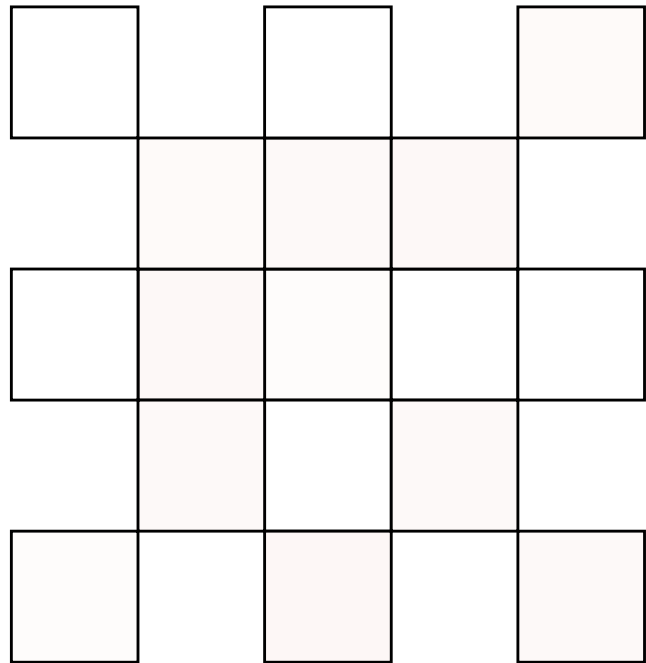

X-139604228-A-G

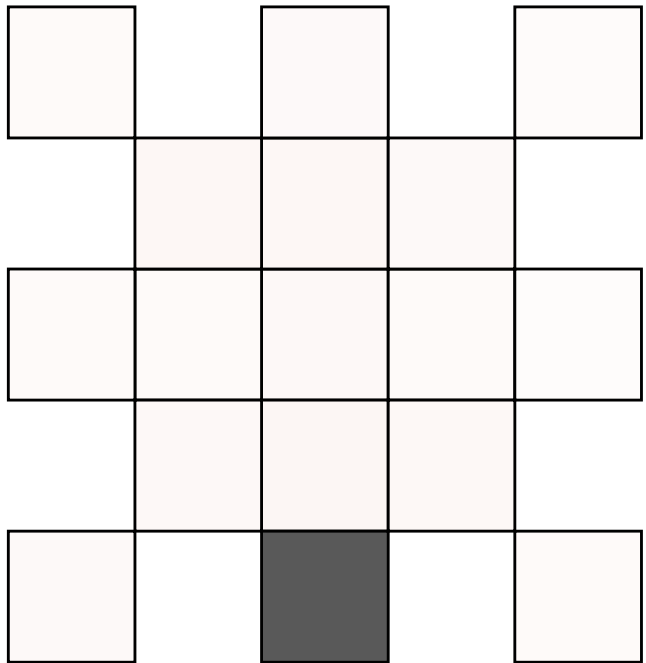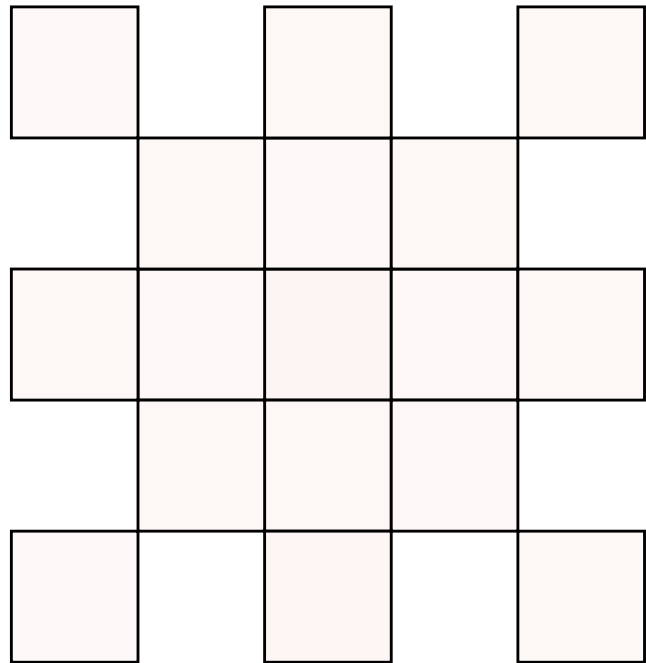

X-140066644-G-T

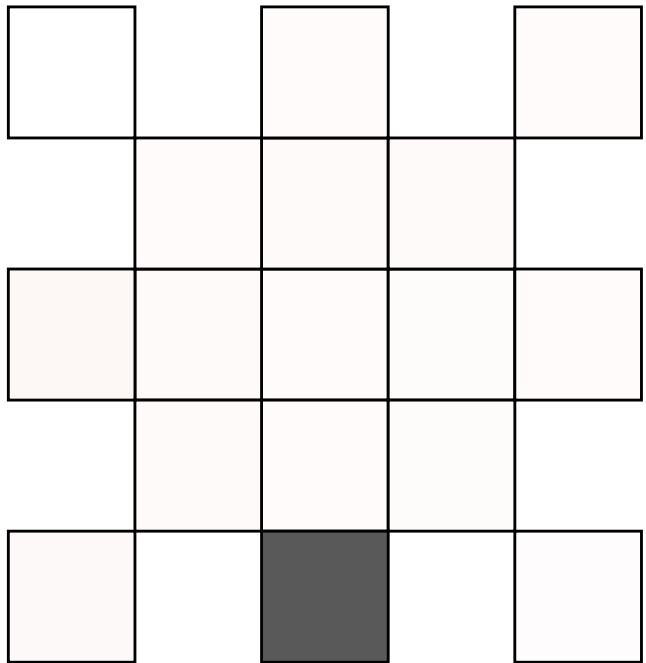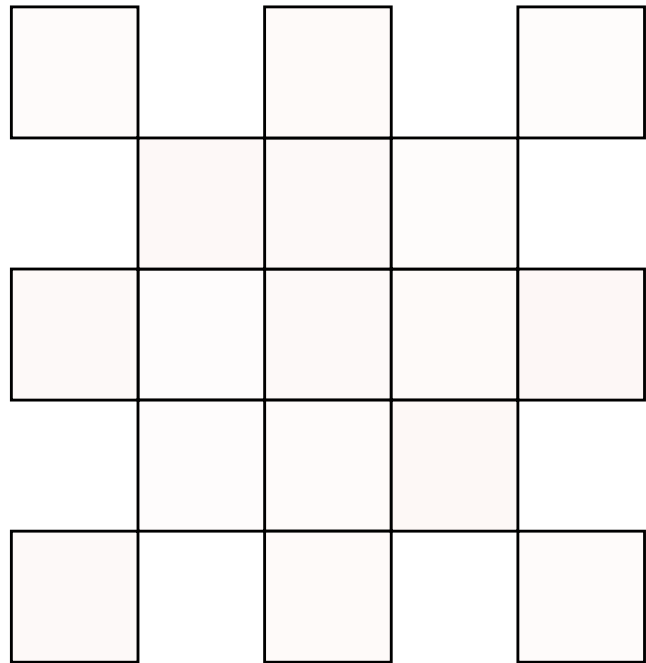

X-141738997-A-G

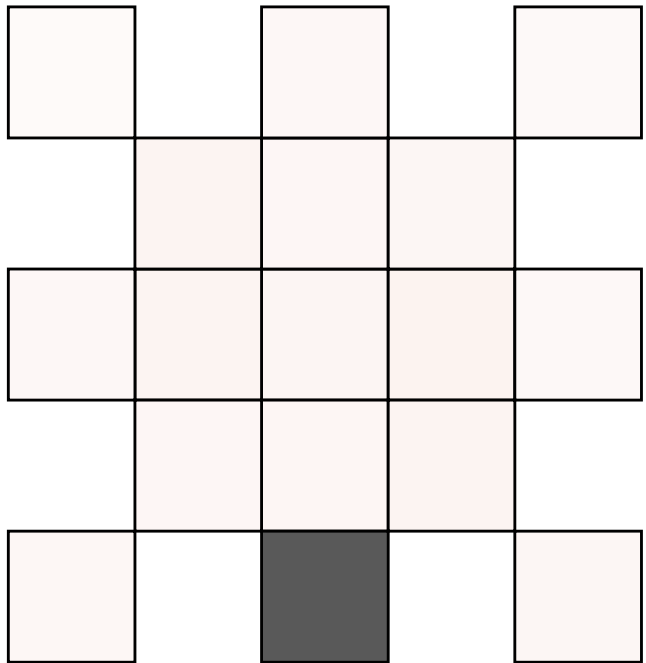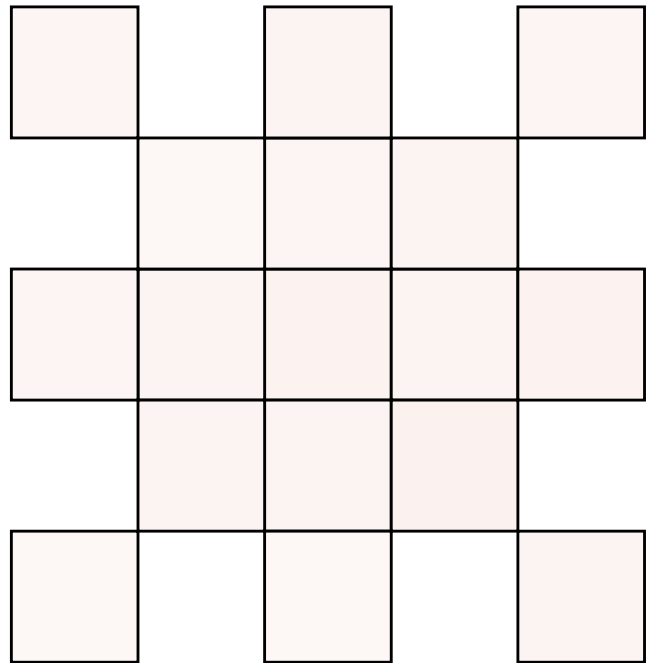

X-143150040-A-T

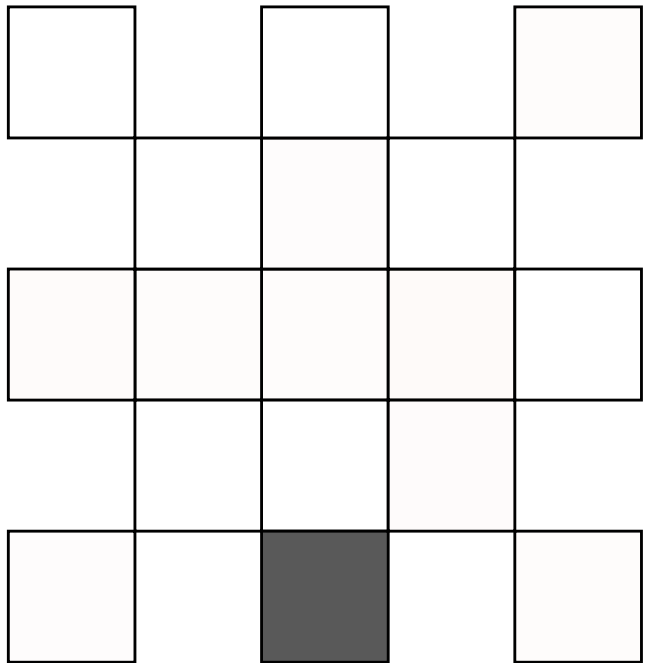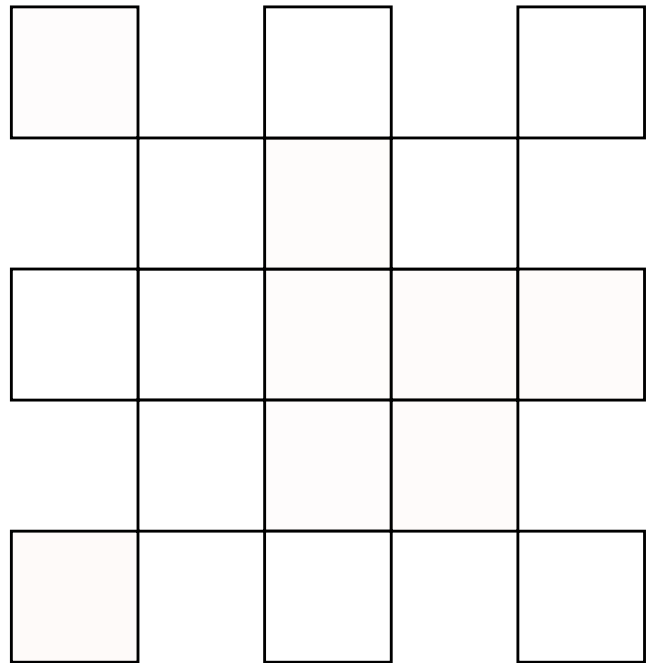



X-146647450-C-T

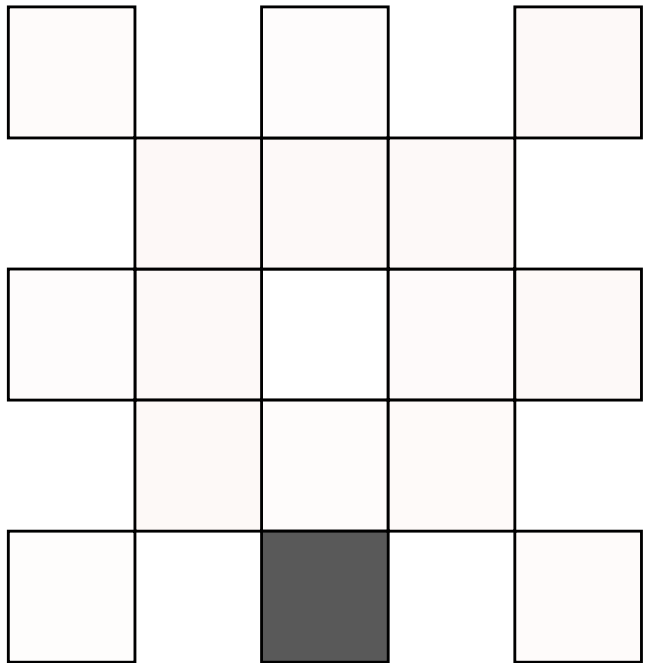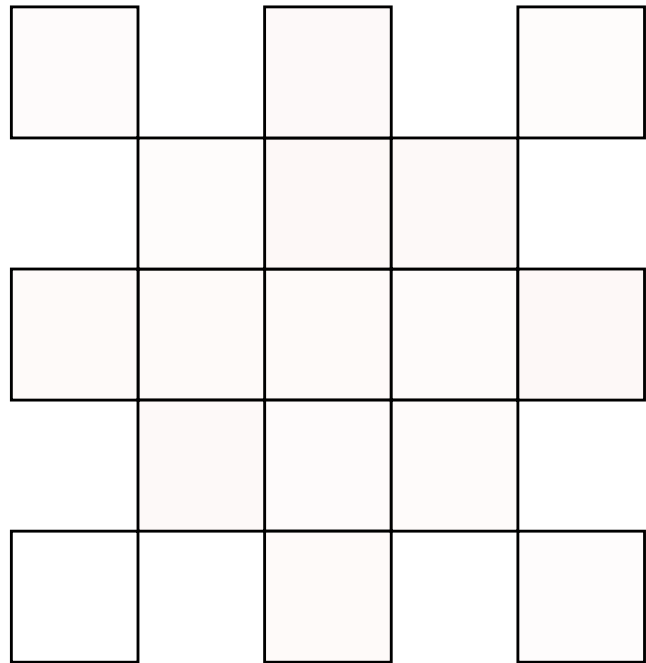

X-150945179-C-A

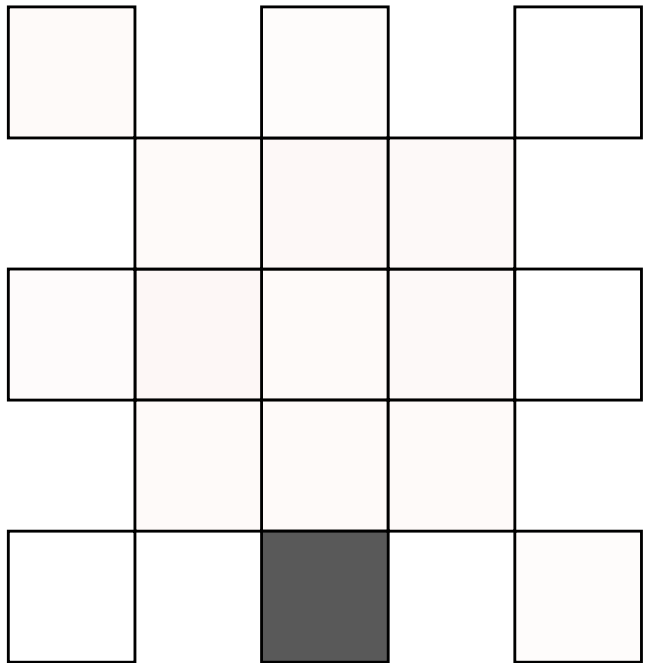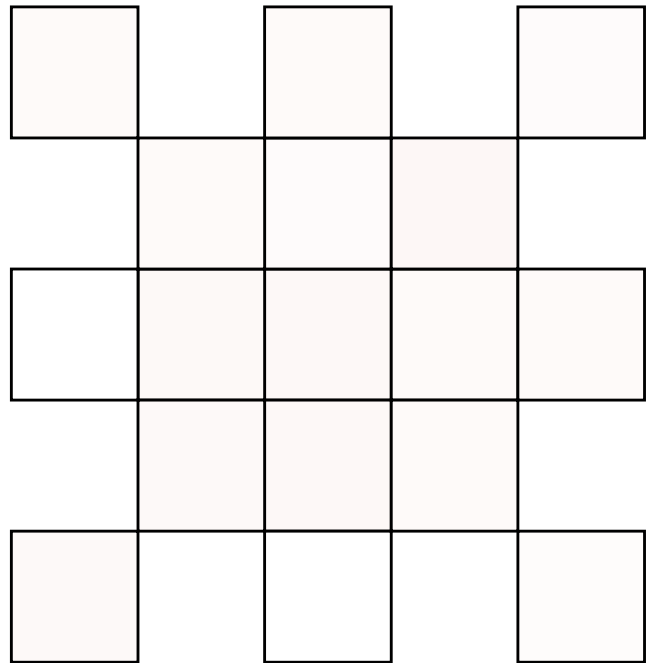

X-151132909-G-A

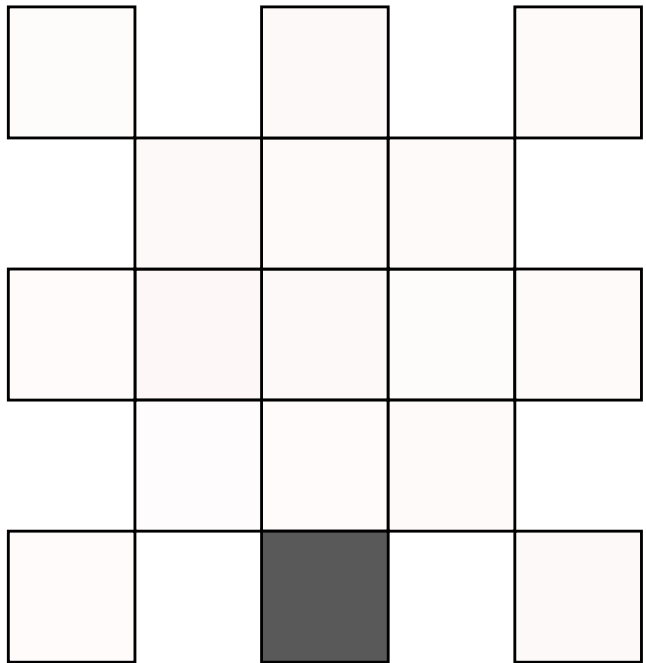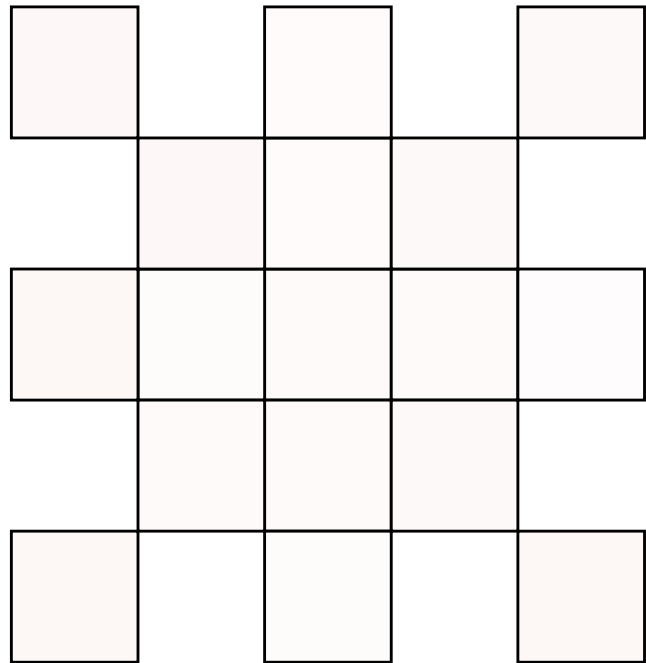

X-16444039-G-A

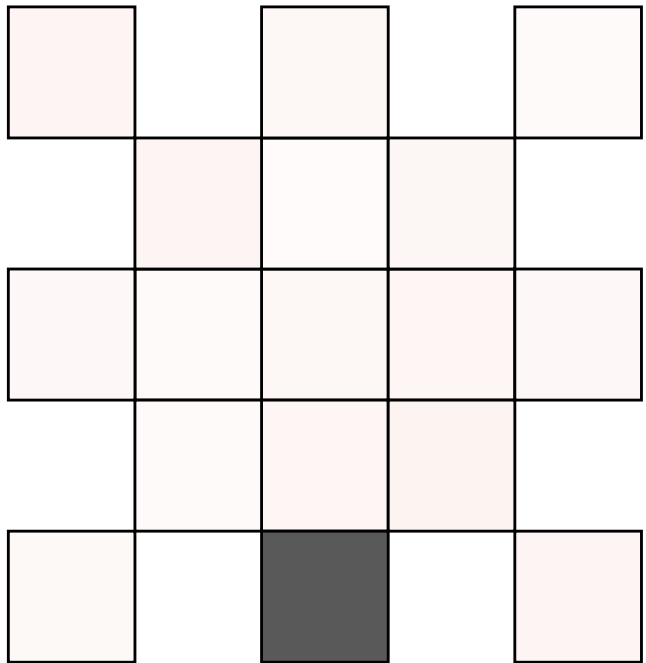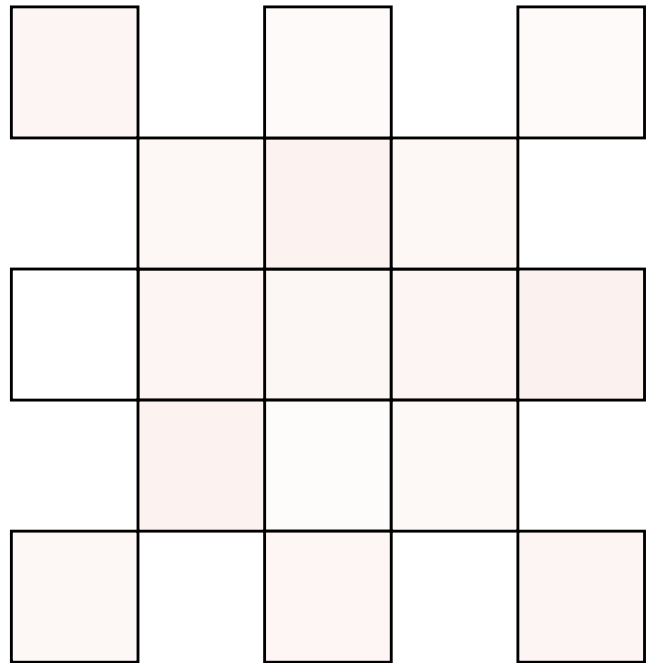

X-17021591-G-A

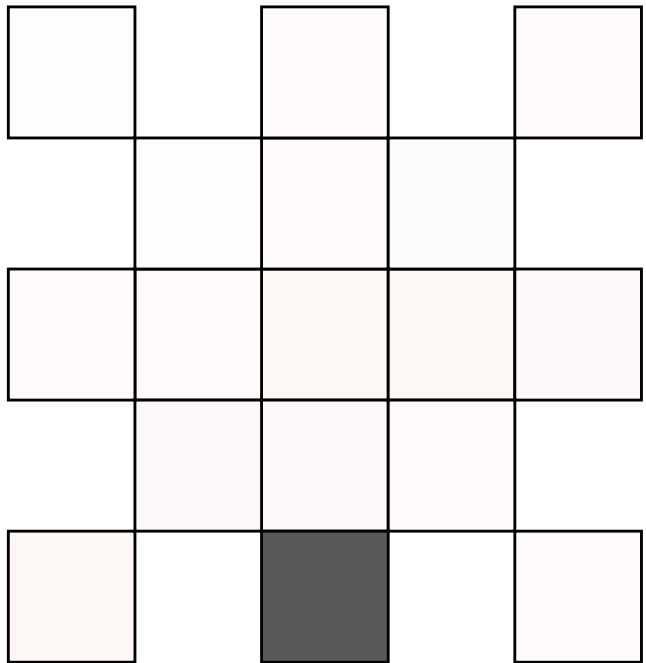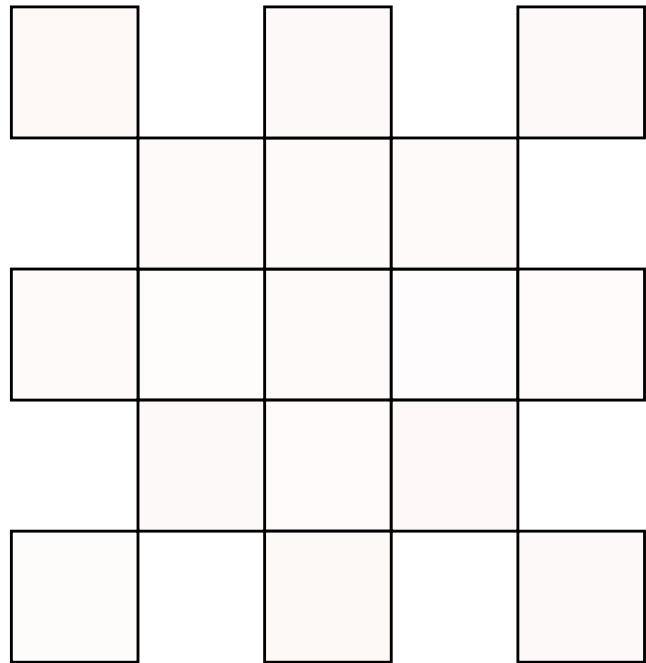

X-17091941-T-G

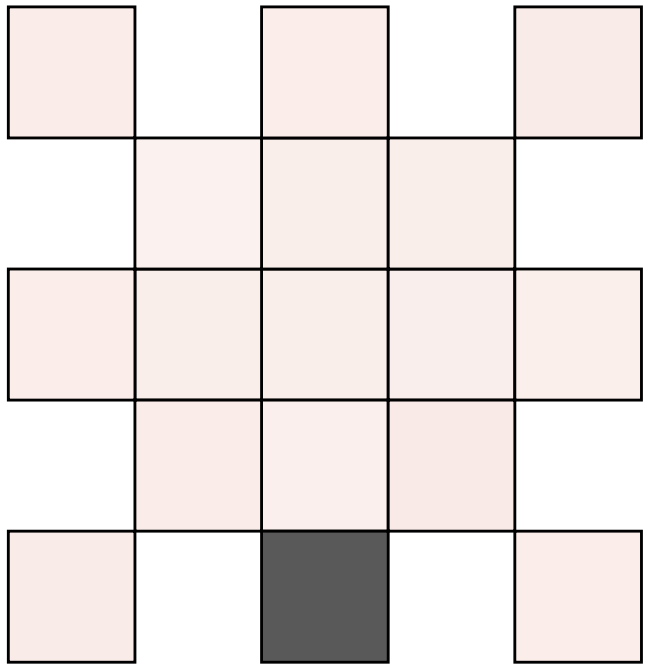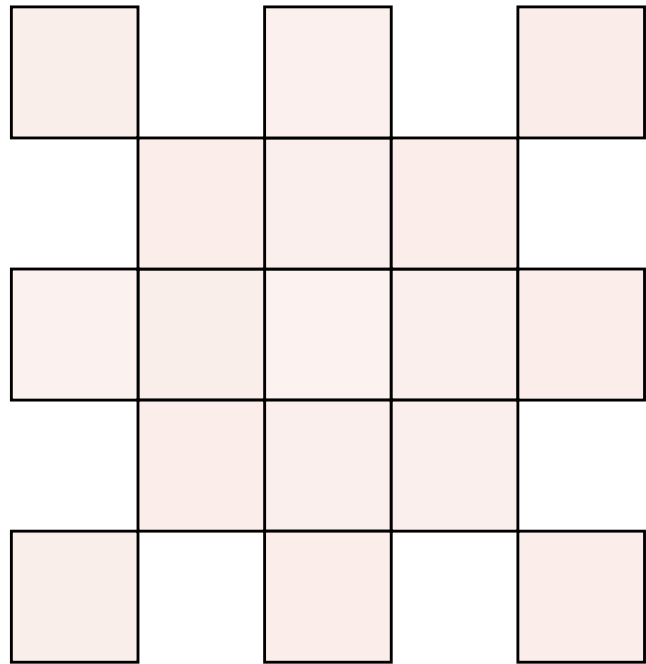

X-17091942-C-A

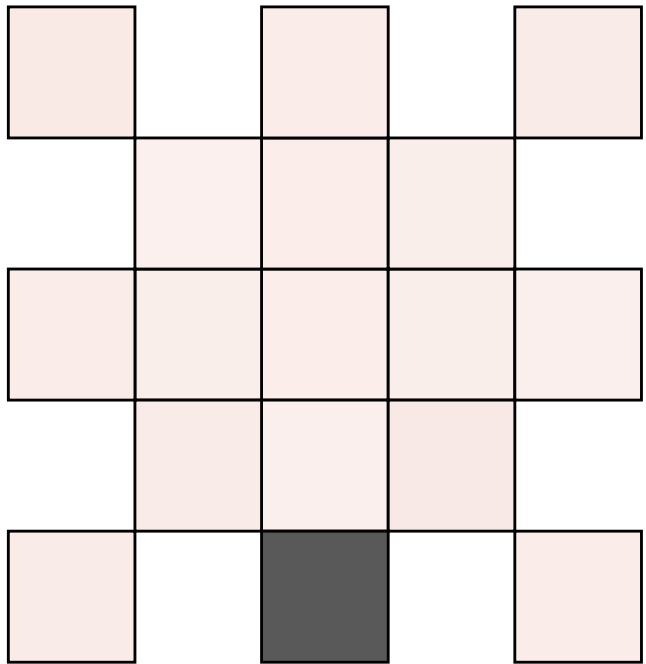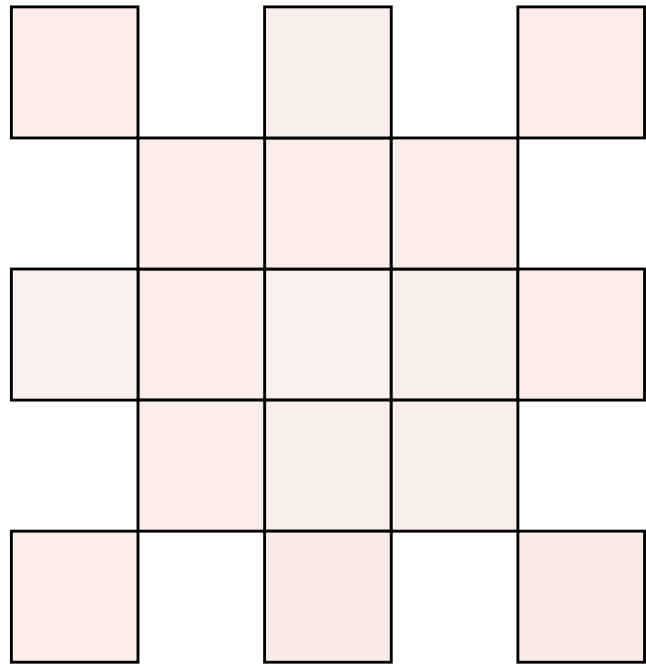

X-21528963-A-C

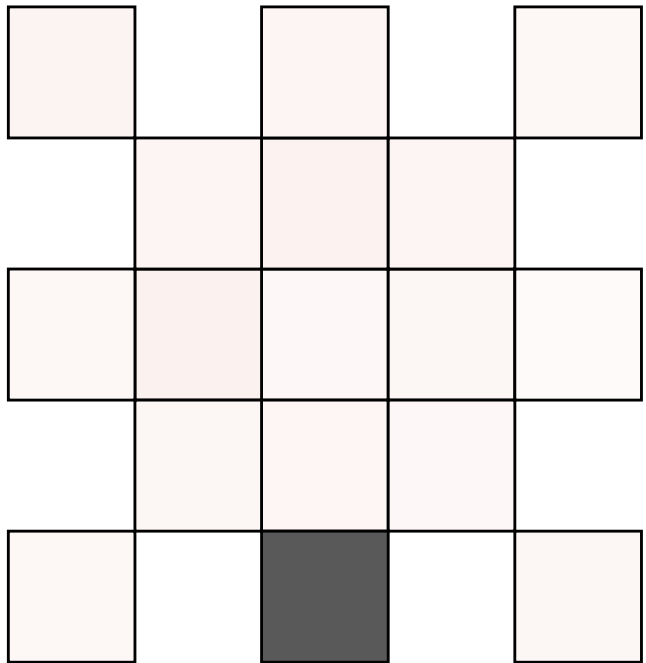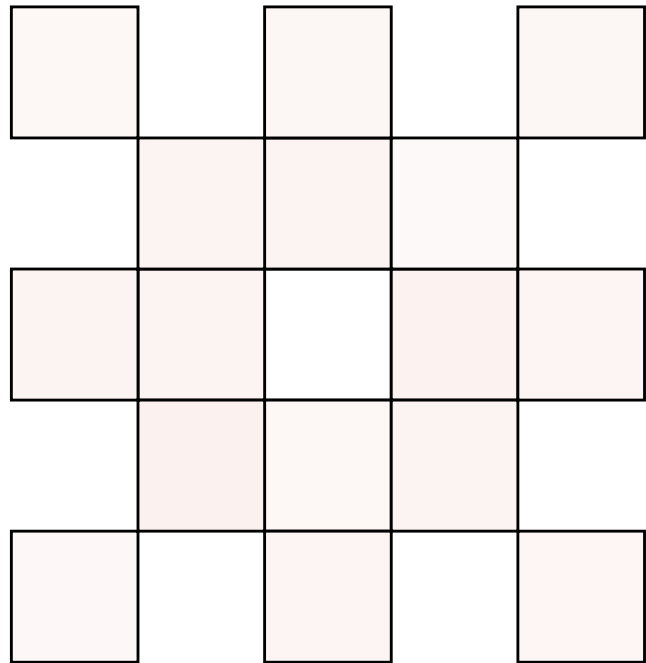



X-24541835-C-A

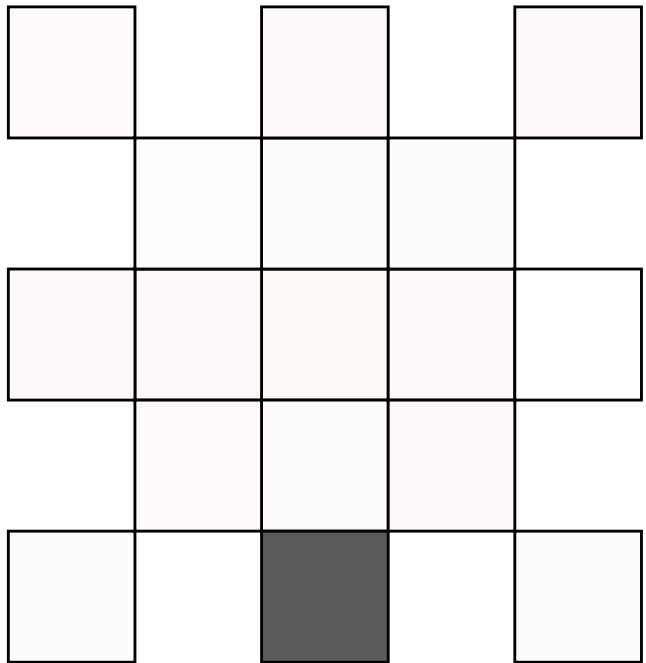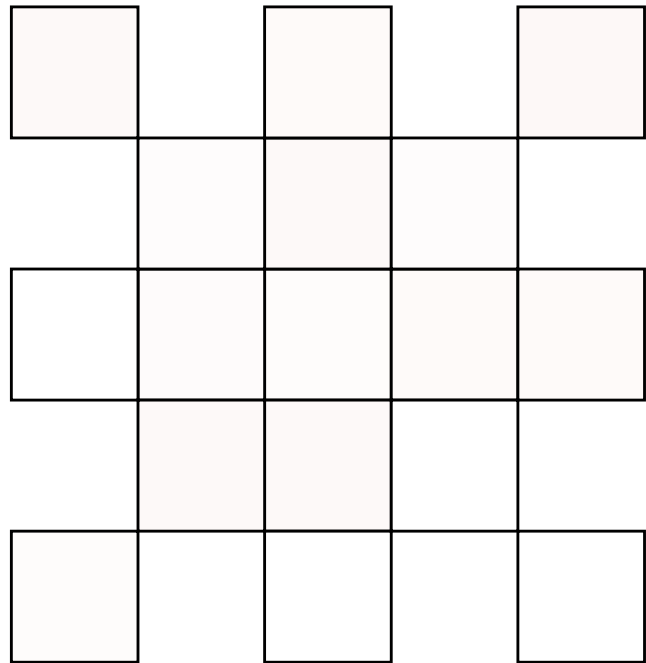

X-27063252-A-G

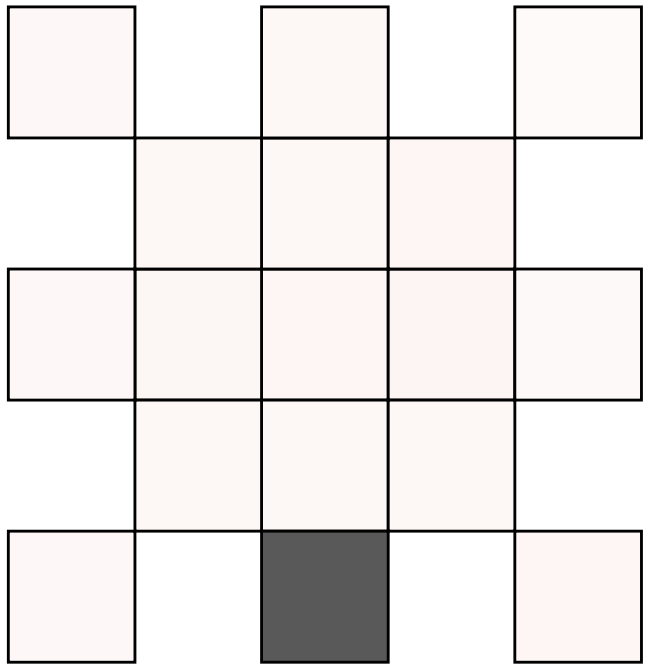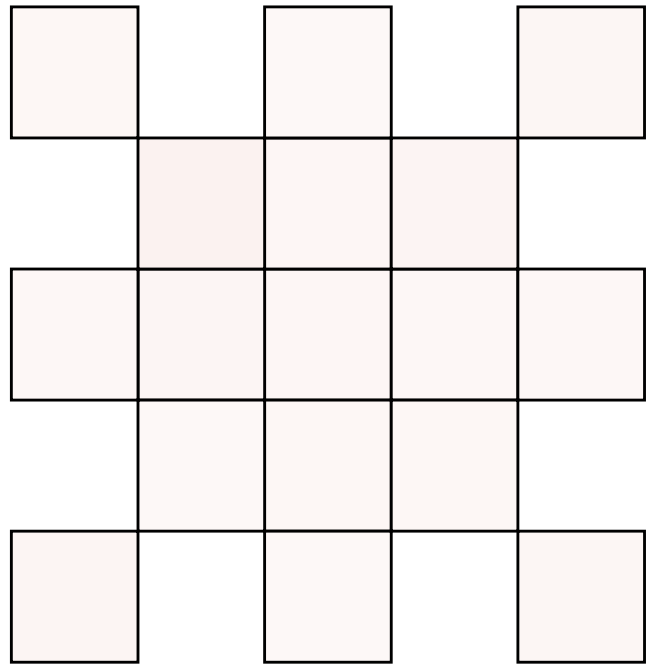

X-28357791-T-A

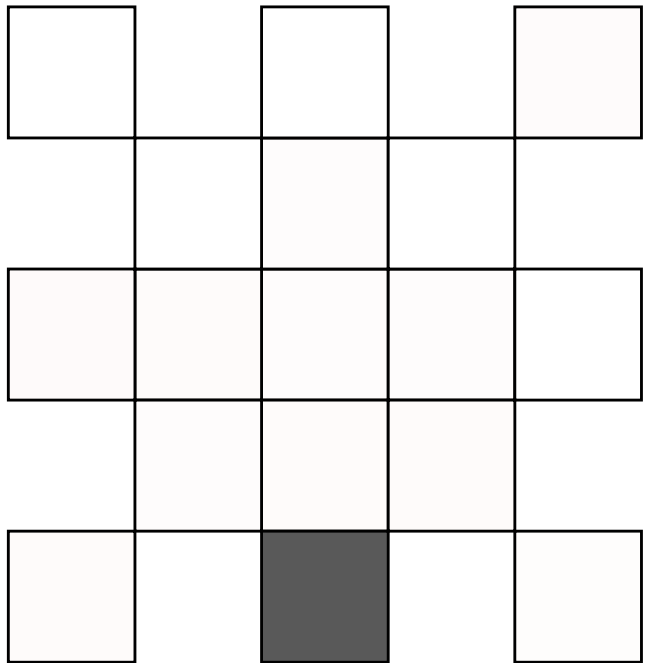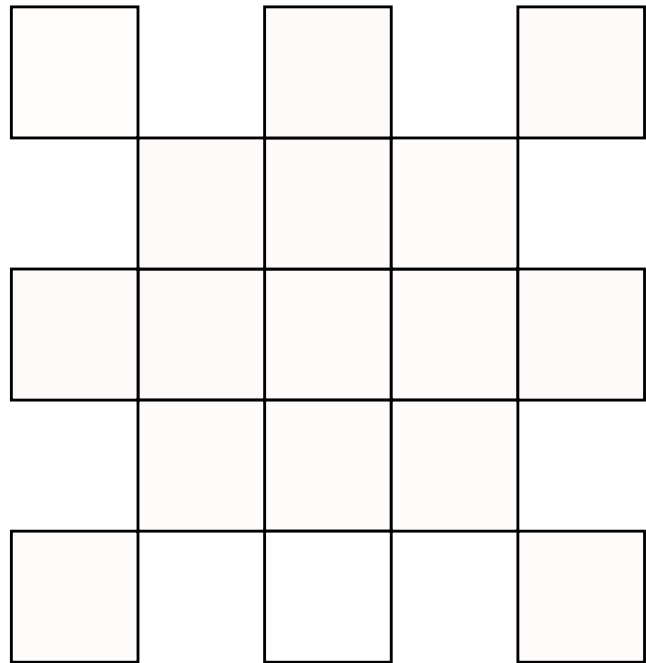

X-32465017-G-A

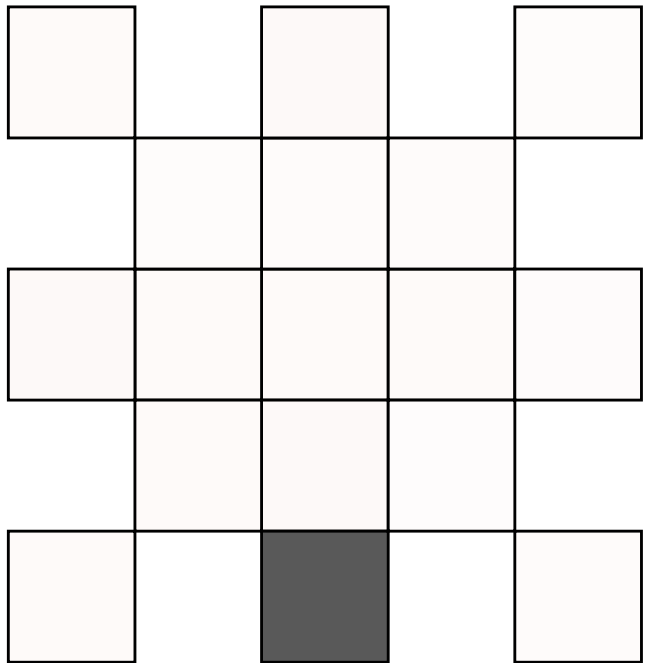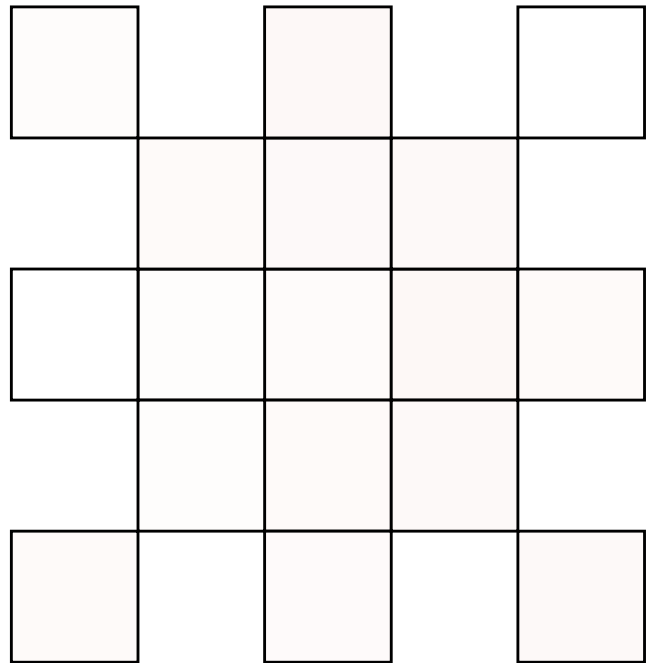

X-33444958-G-A

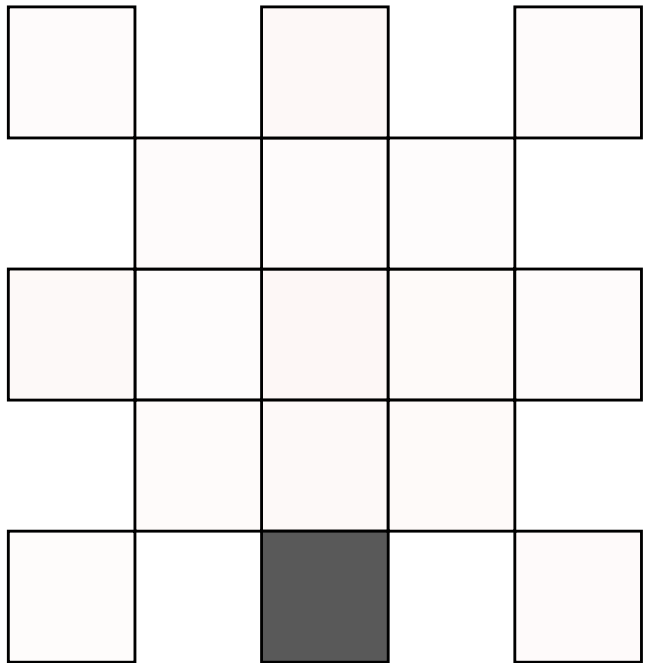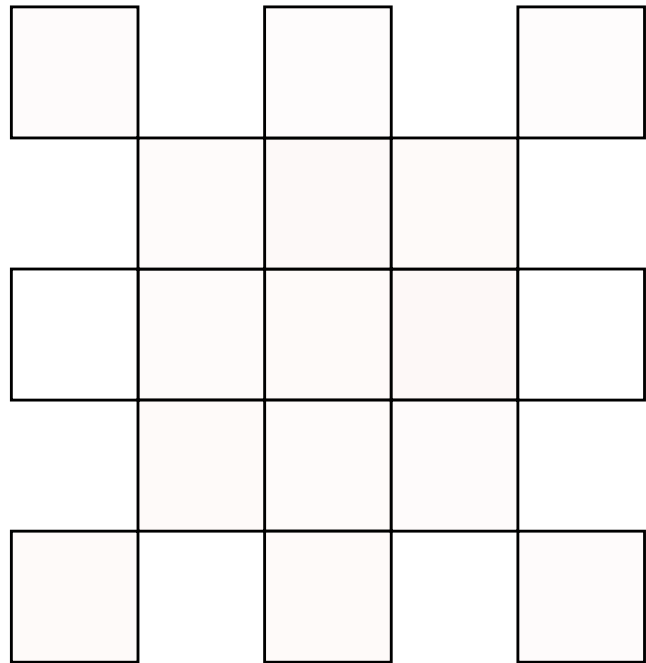

X-34424349-A-T

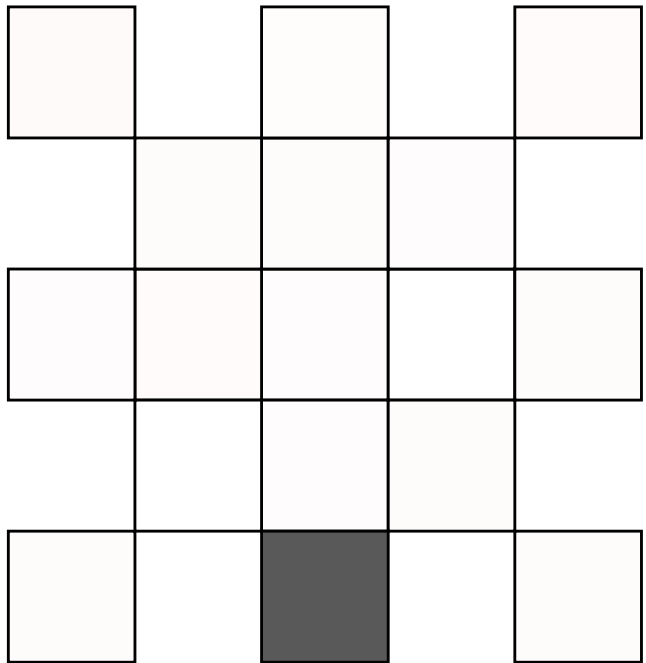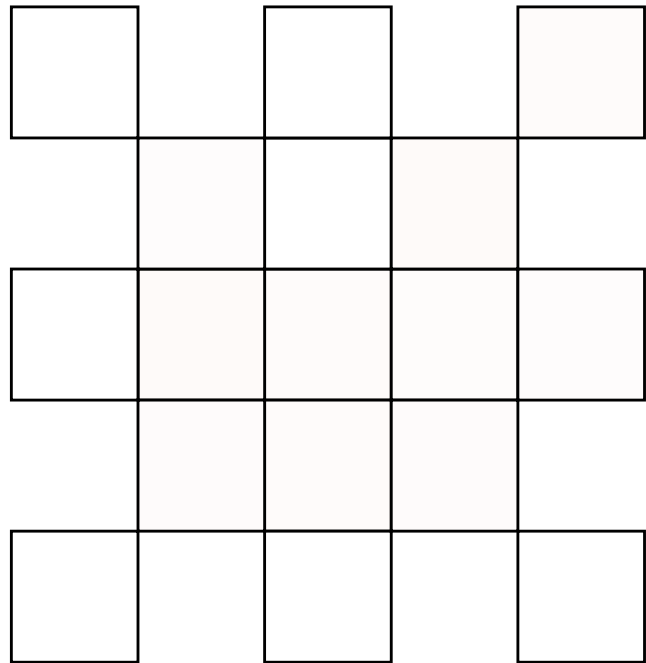

X-34664512-A-G

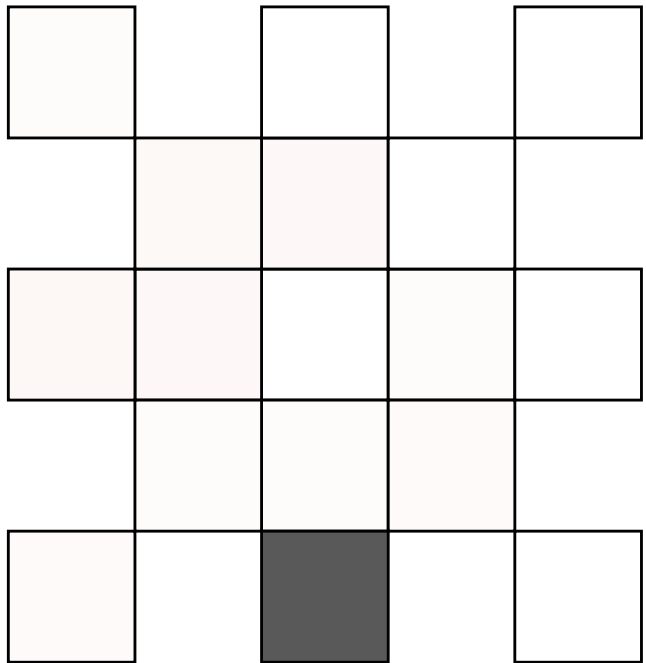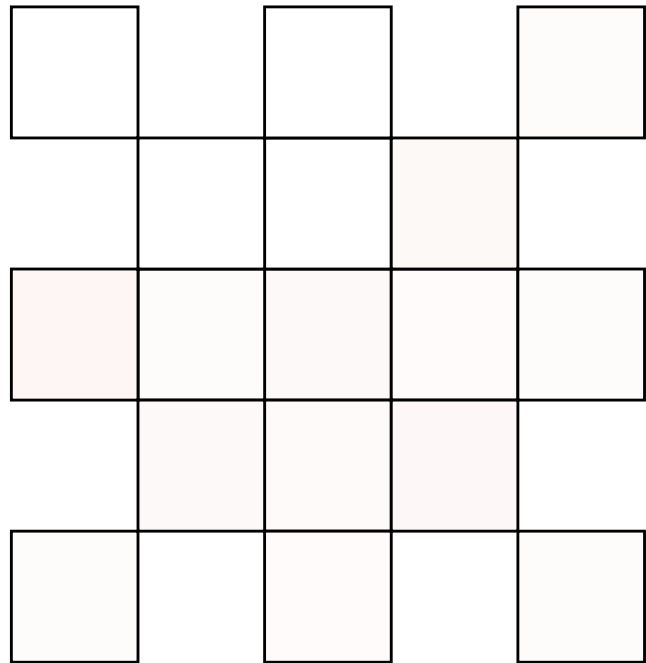

X-34801213-T-C

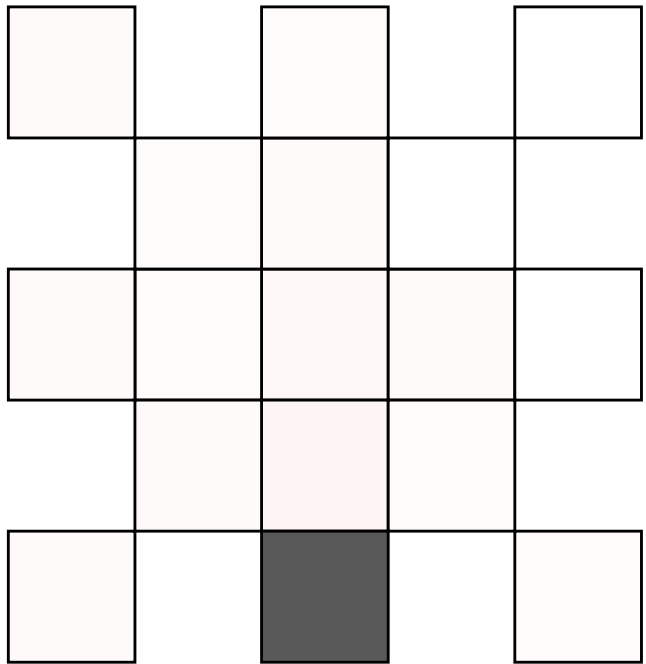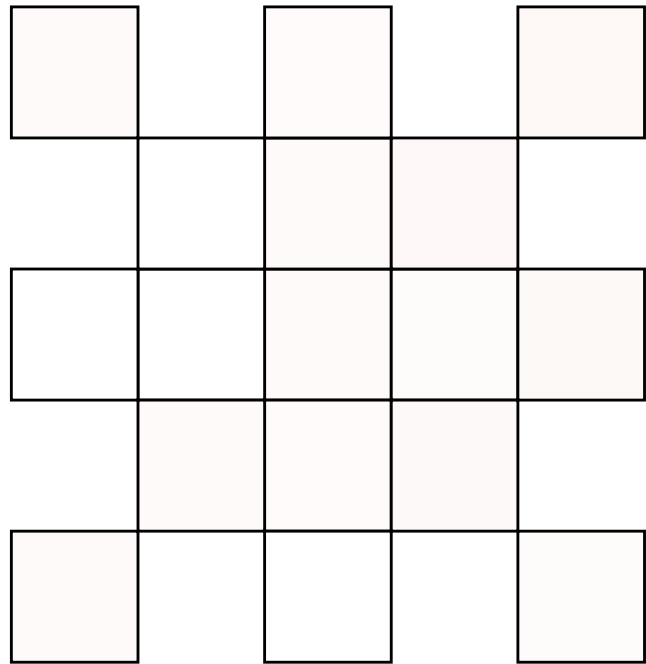



X-35362338-C-T

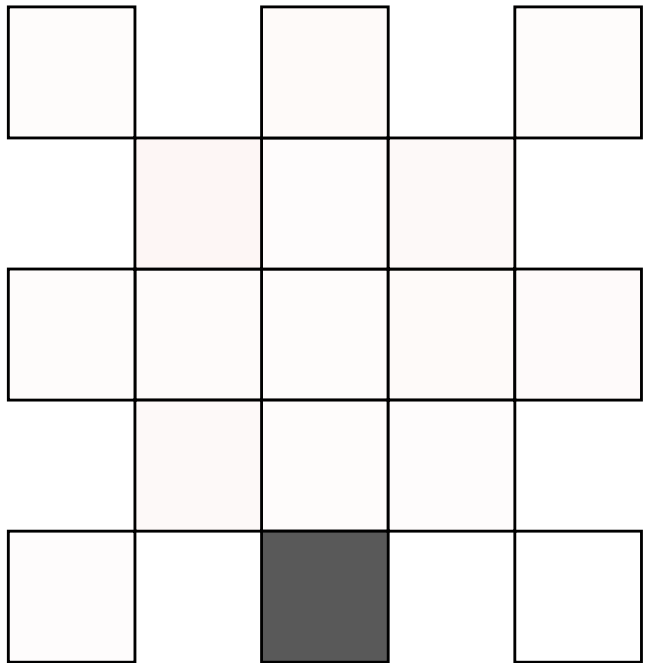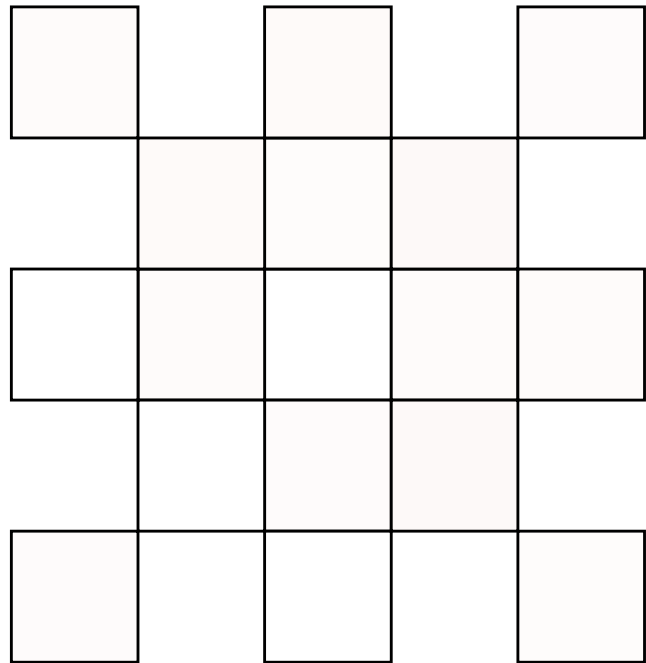

X-35471077-C-T

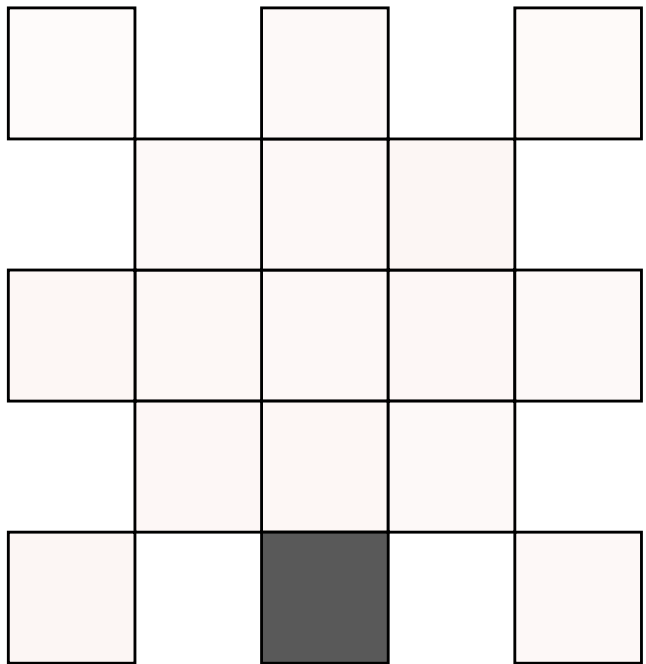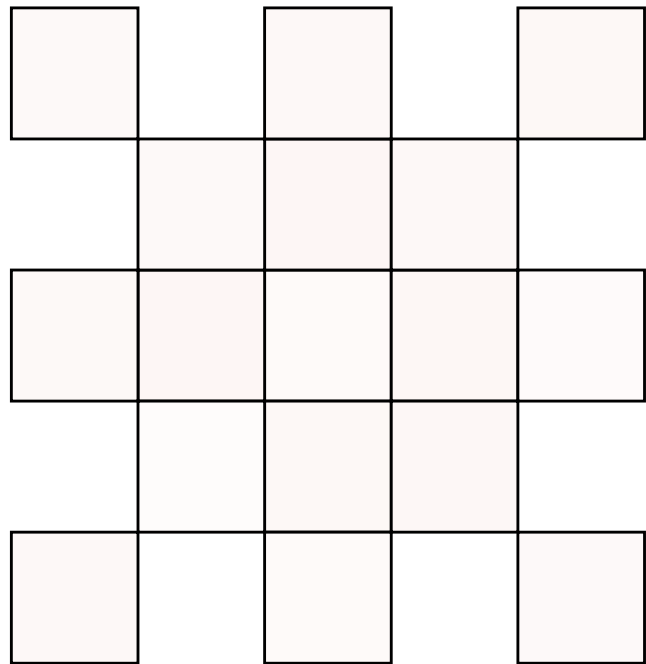

X-36528250-G-T

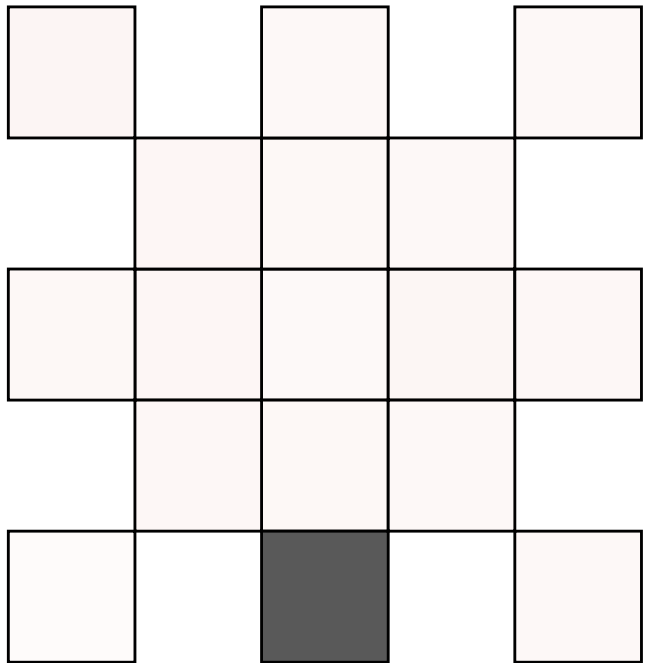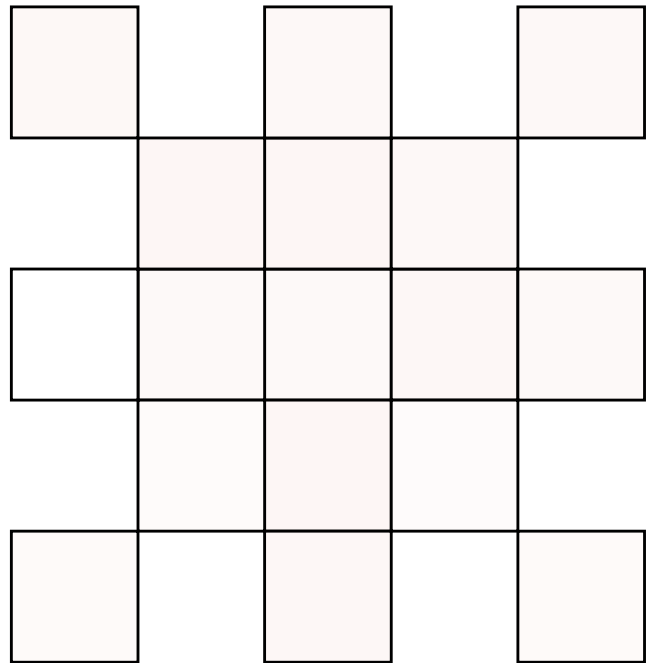

X-39832087-T-A

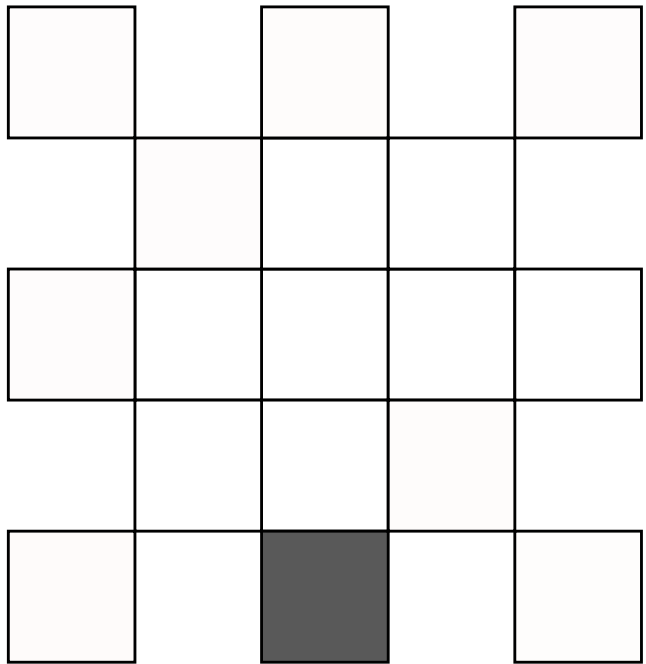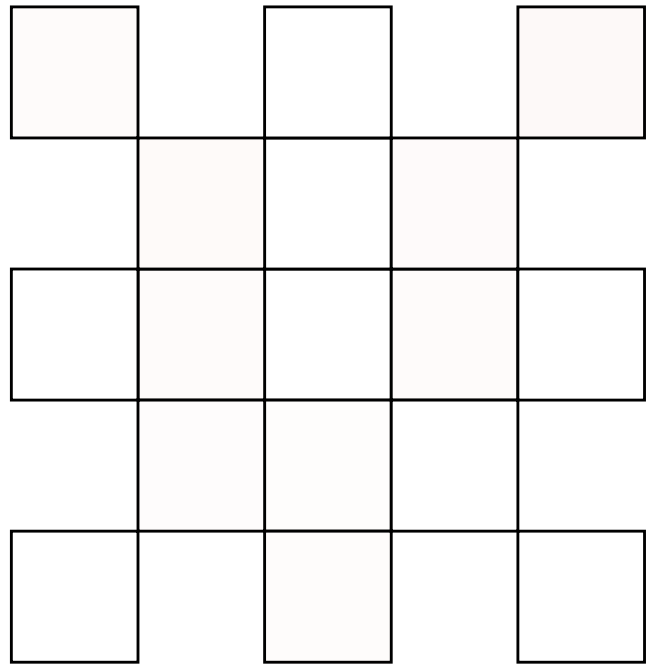

X-40030465-C-A

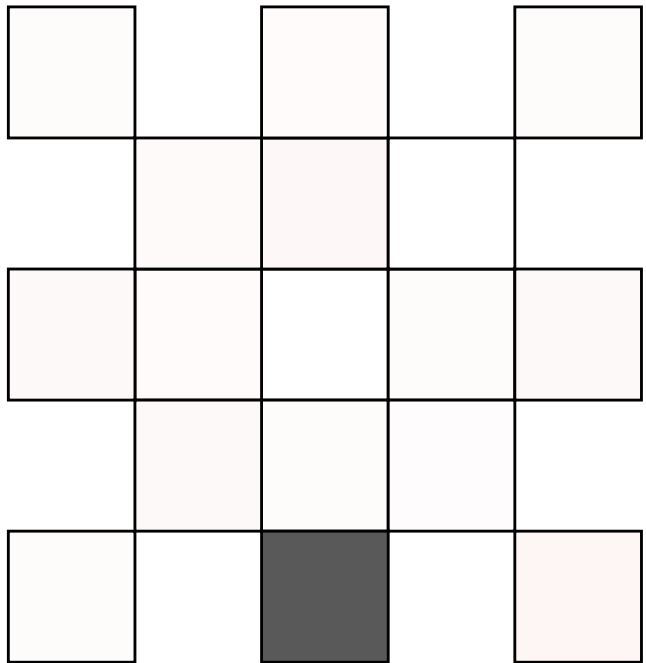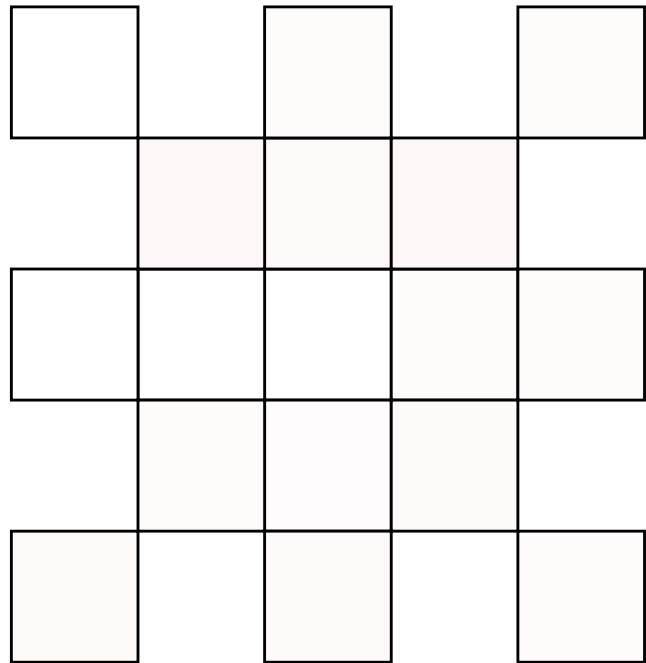

X-40790933-G-A

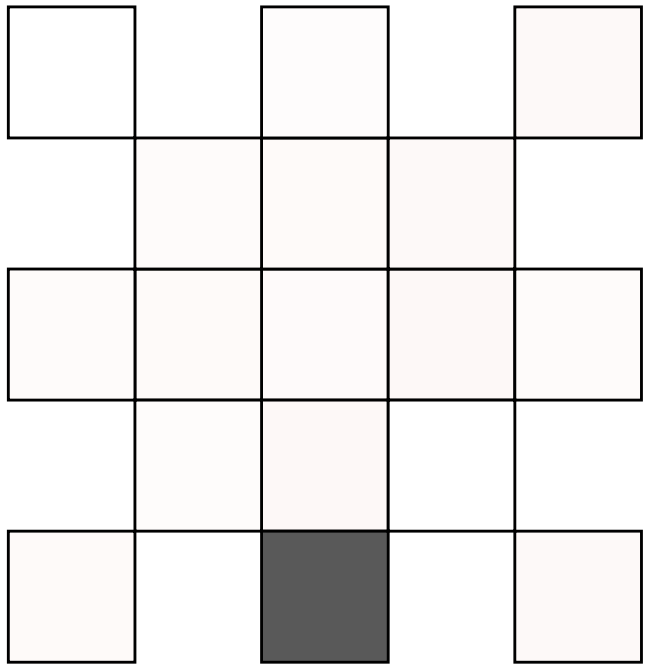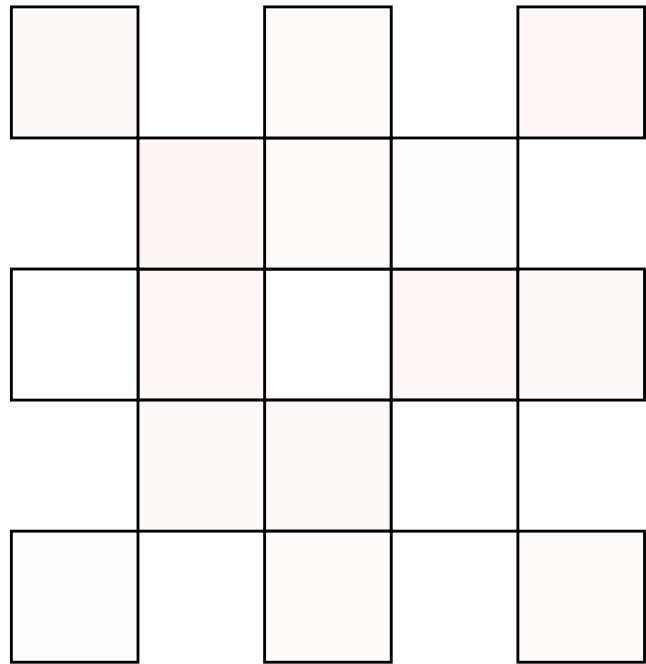

X-41029320-G-A

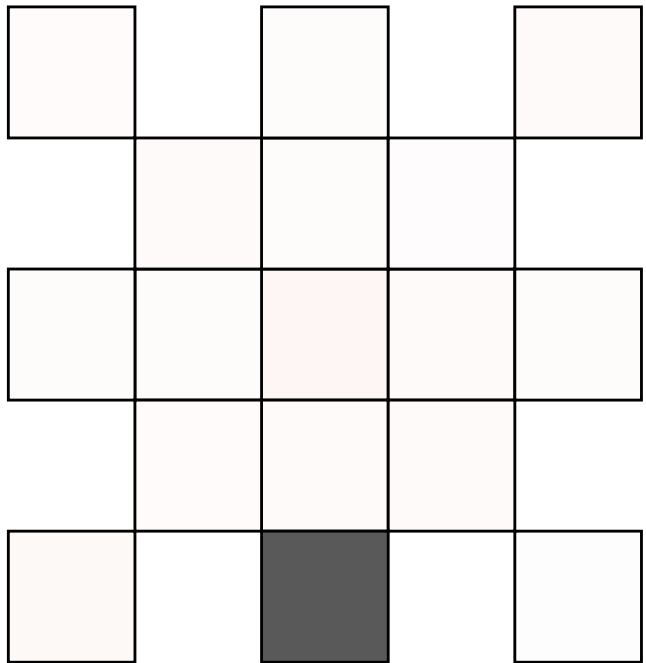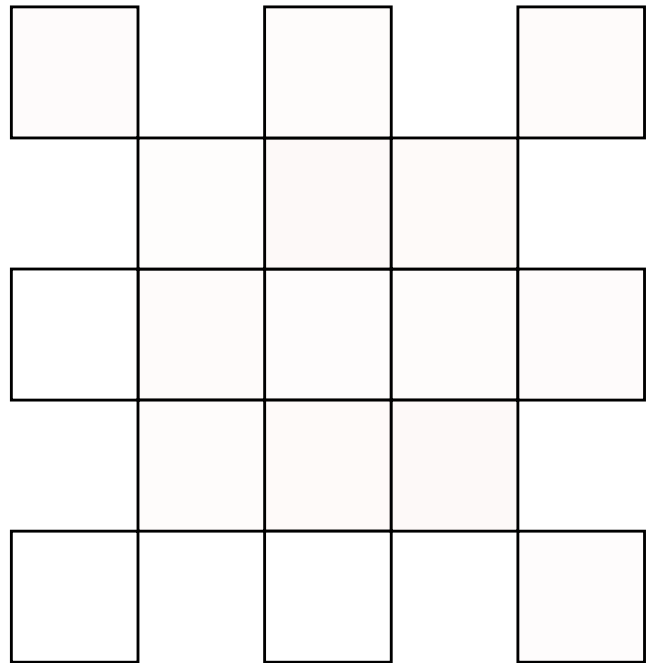

X-4557817-T-C

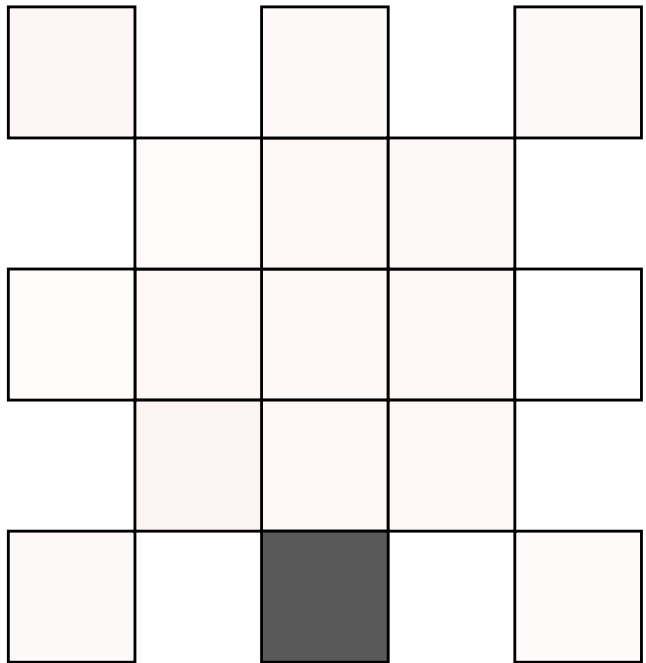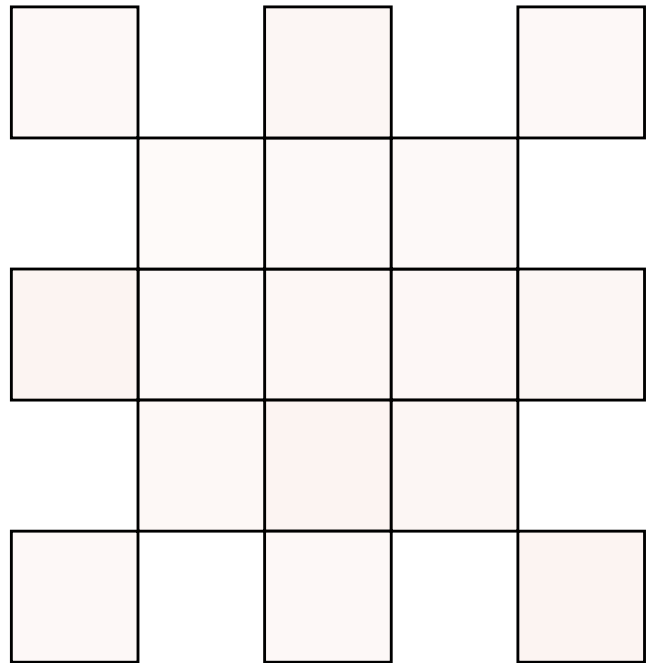



X-49135150-G-T

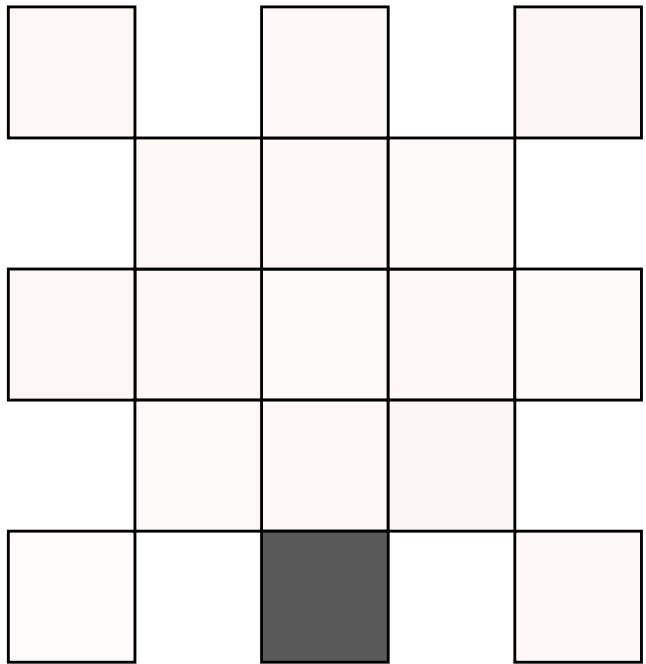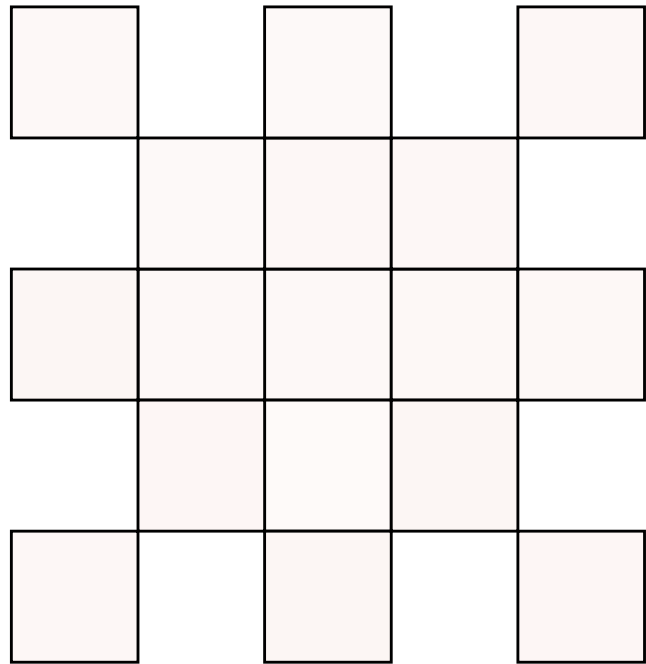

X-53927483-G-A

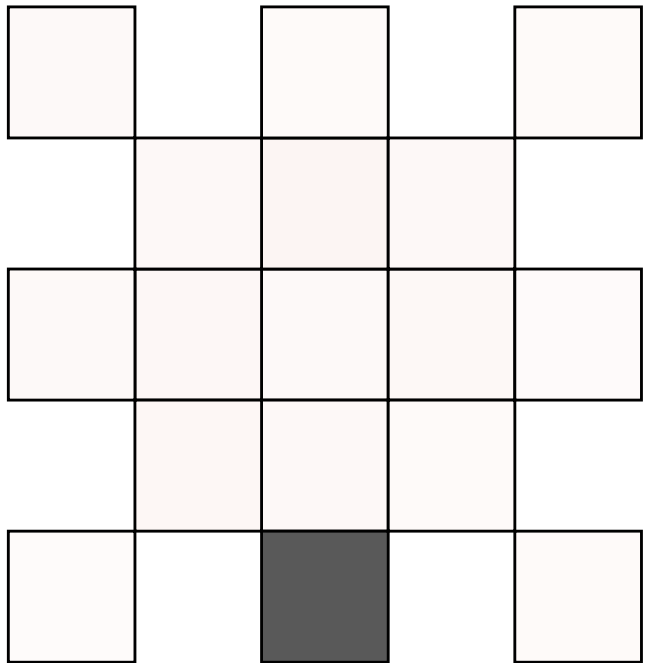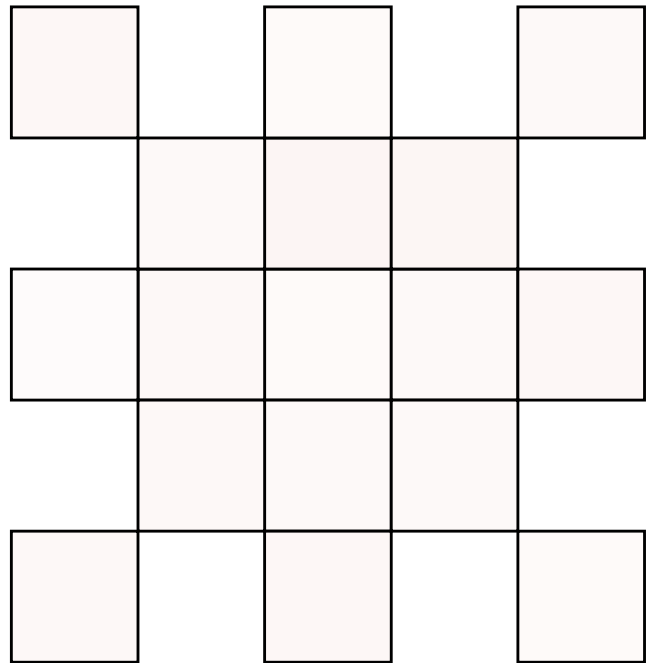

X-5452716-T-A

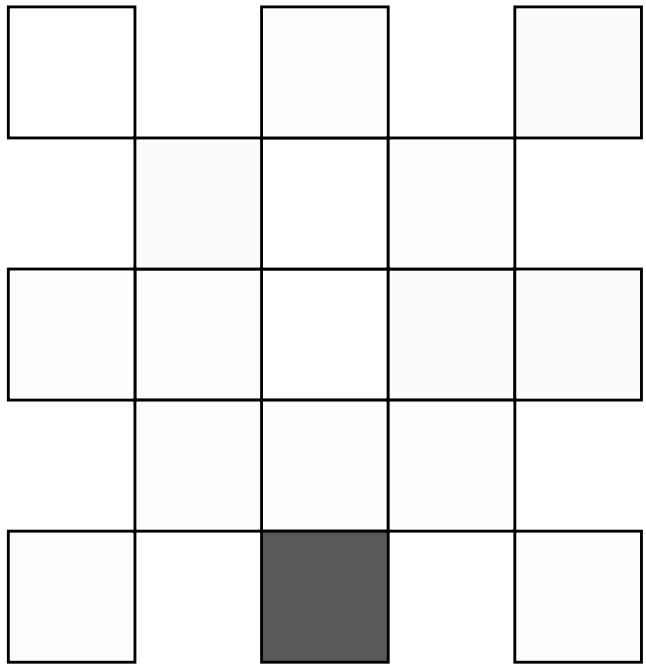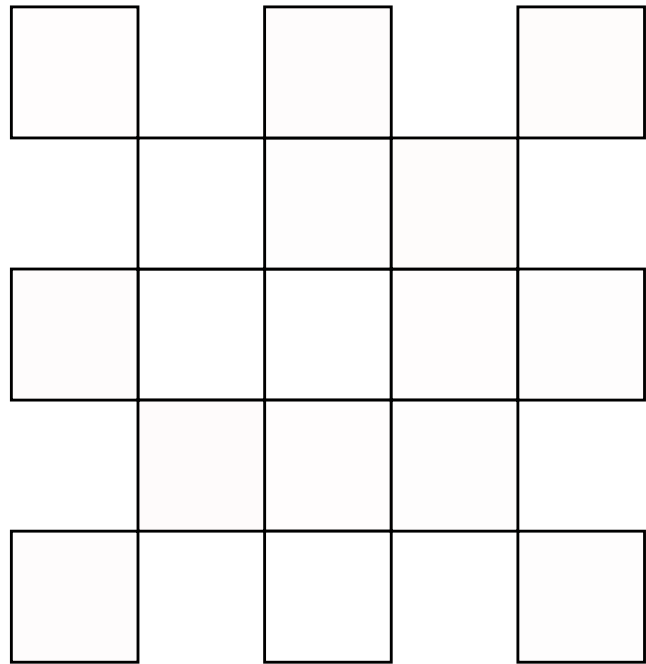

X-6657783-T-A

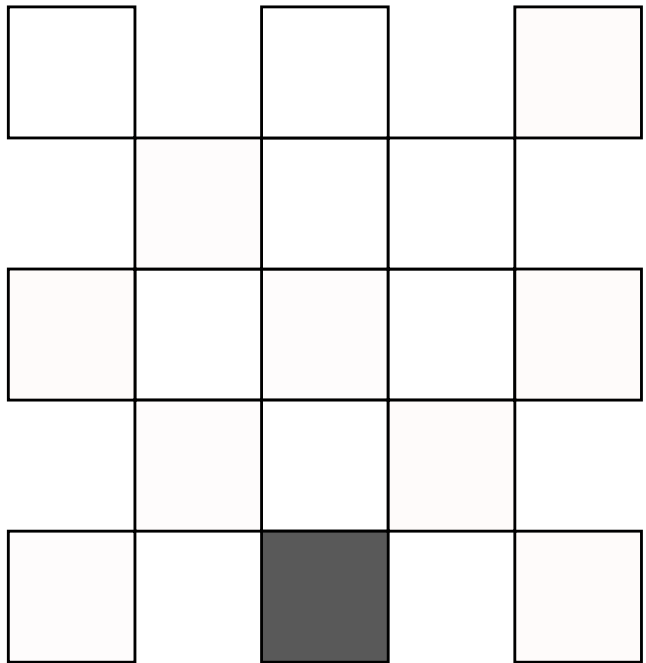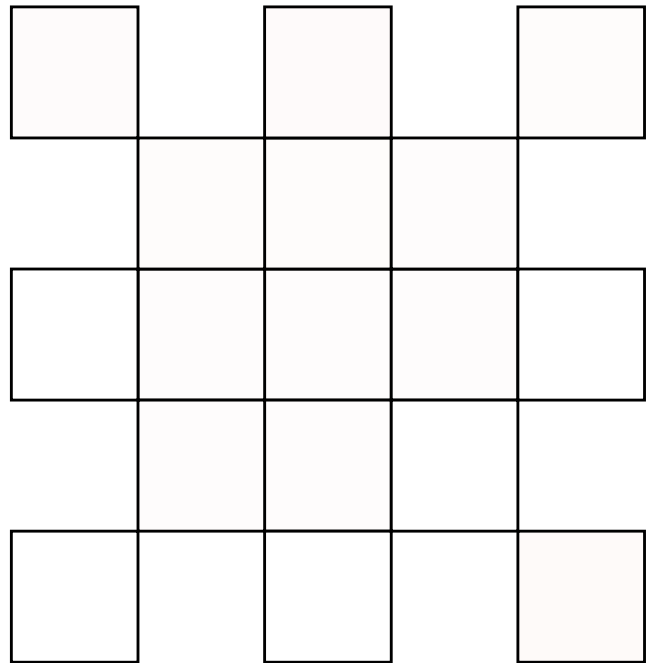

X-6657784-C-A

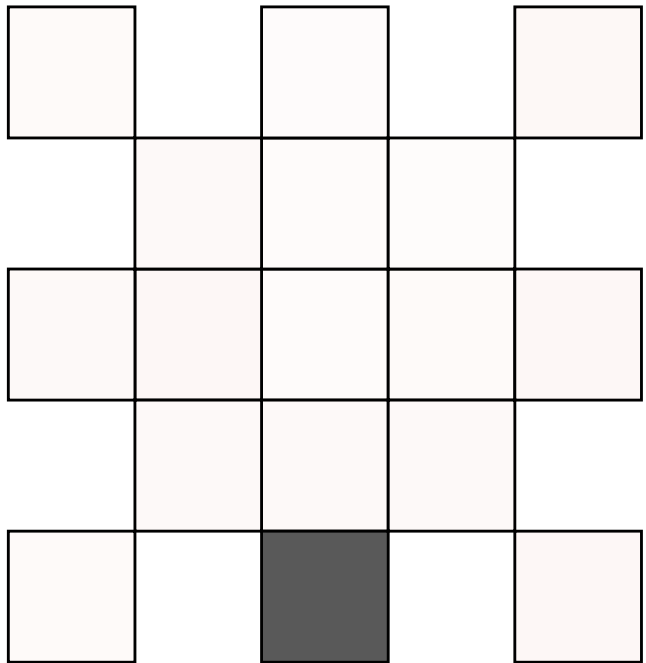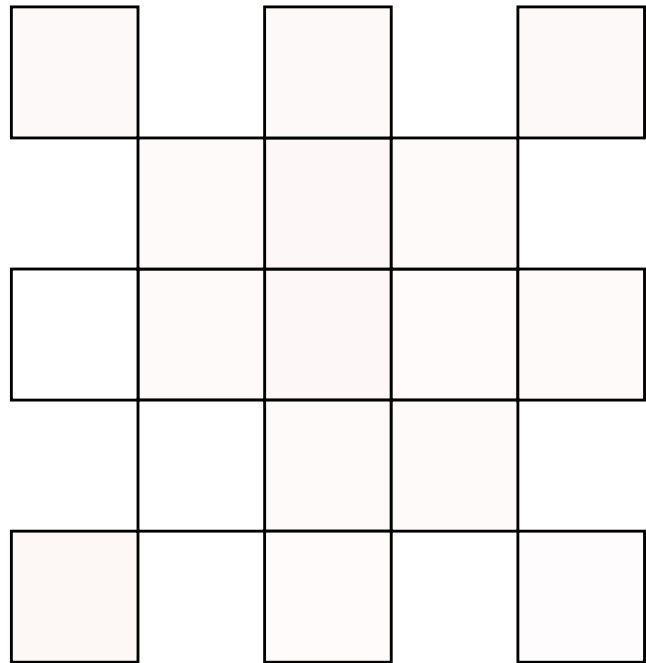

X-69258884-G-A

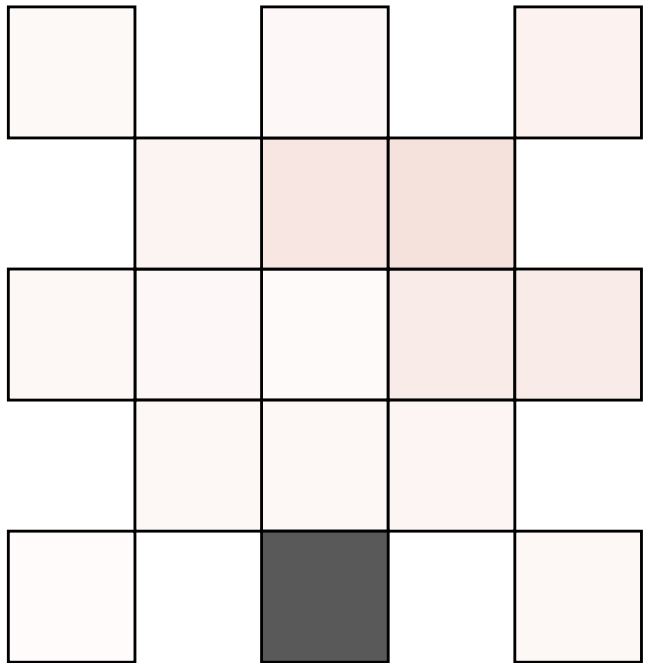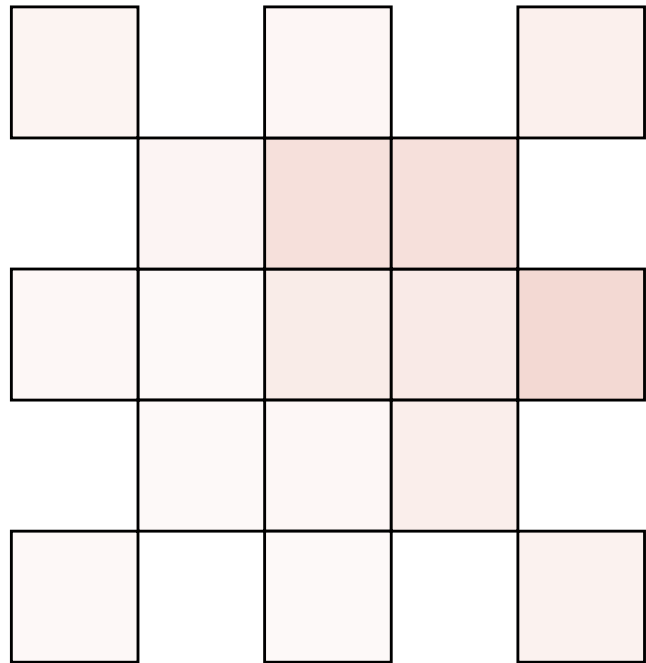

X-69794428-G-A

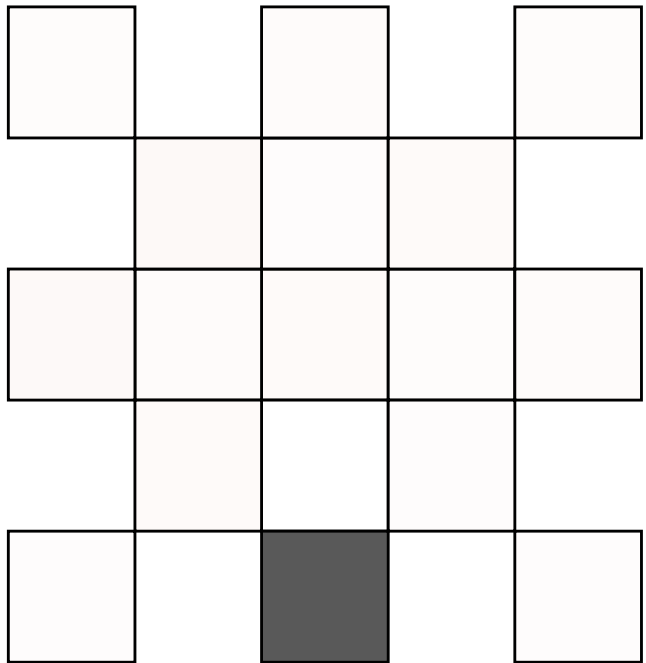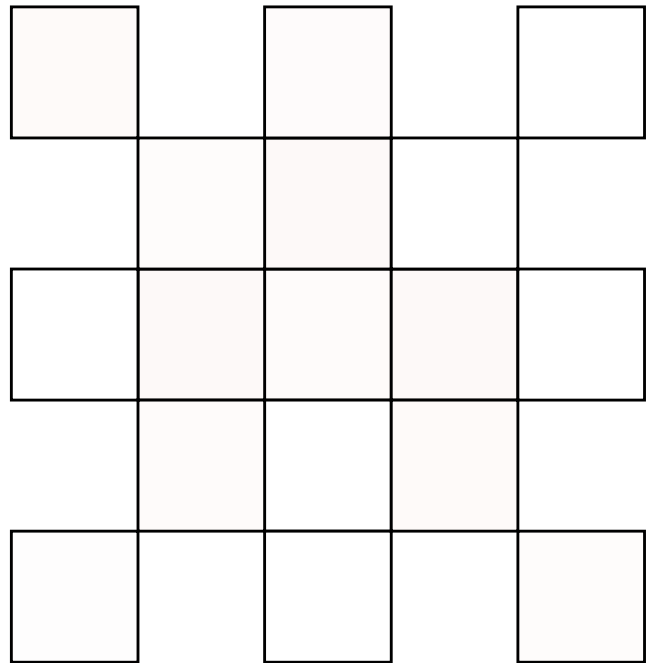

X-70346122-G-A

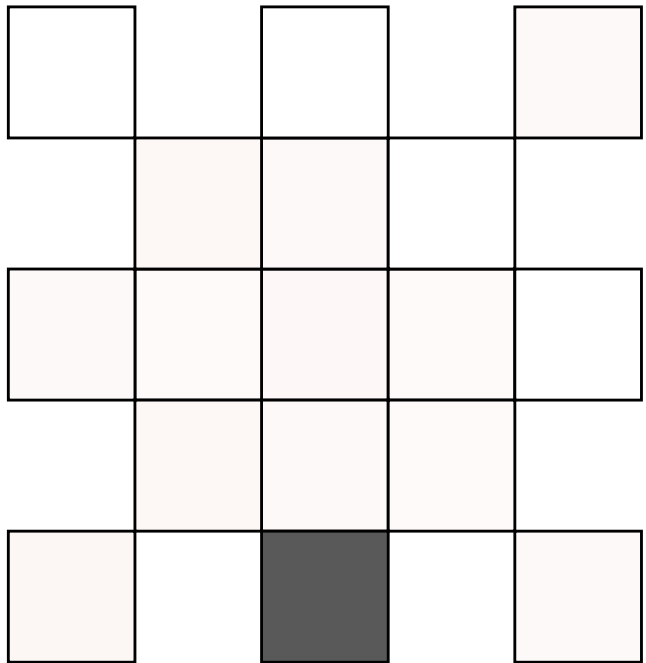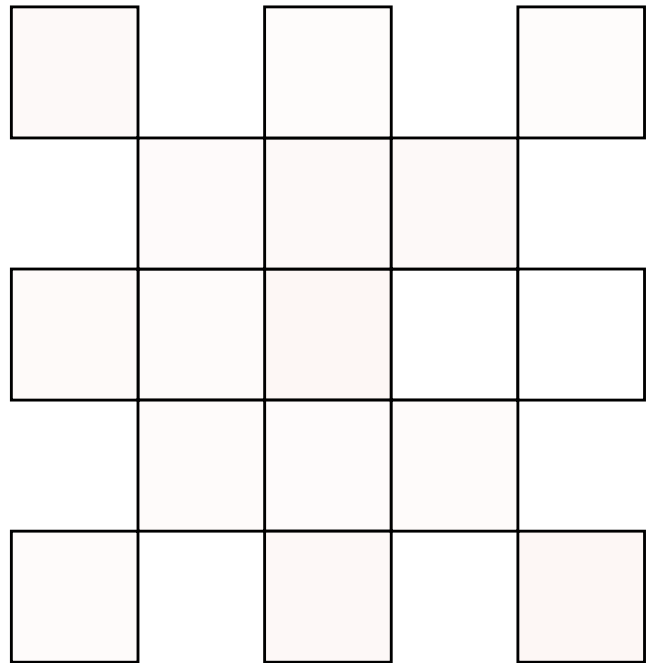



X-72495149-C-A

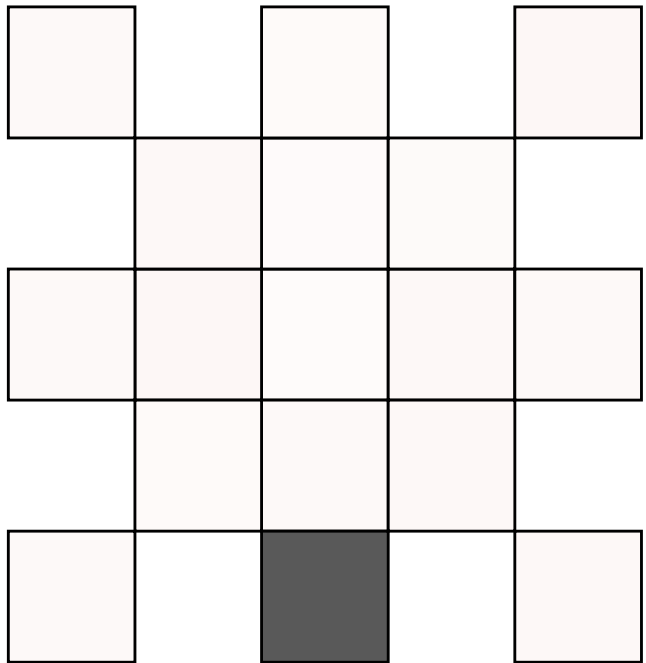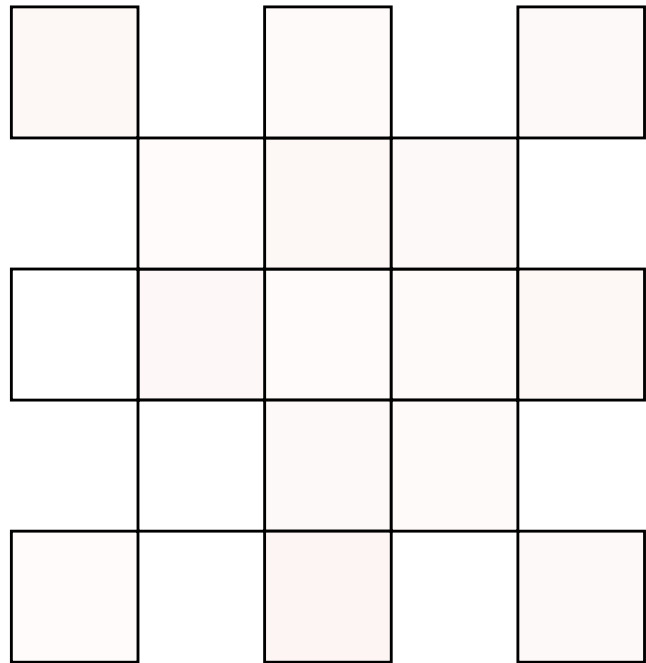

X-7883974-C-T

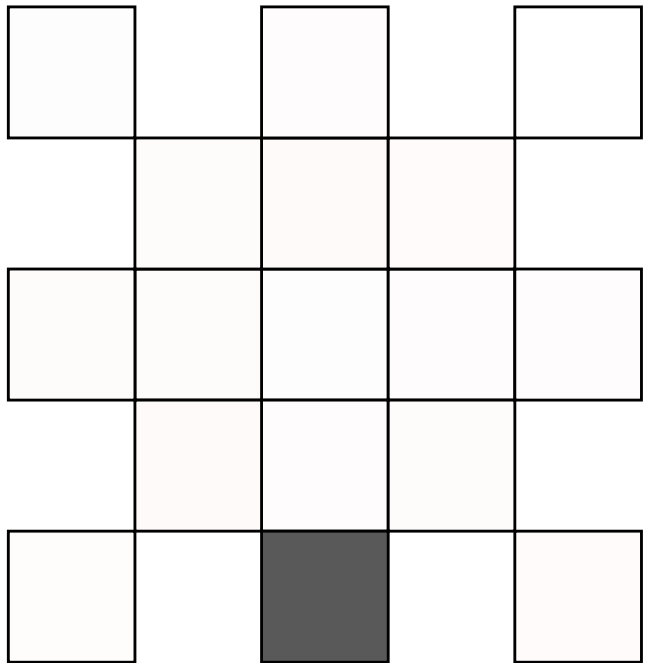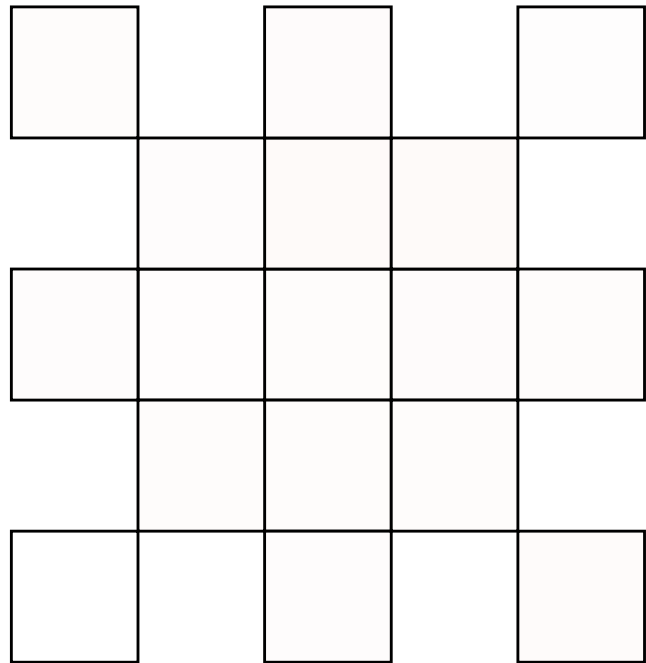

X-79691731-A-T

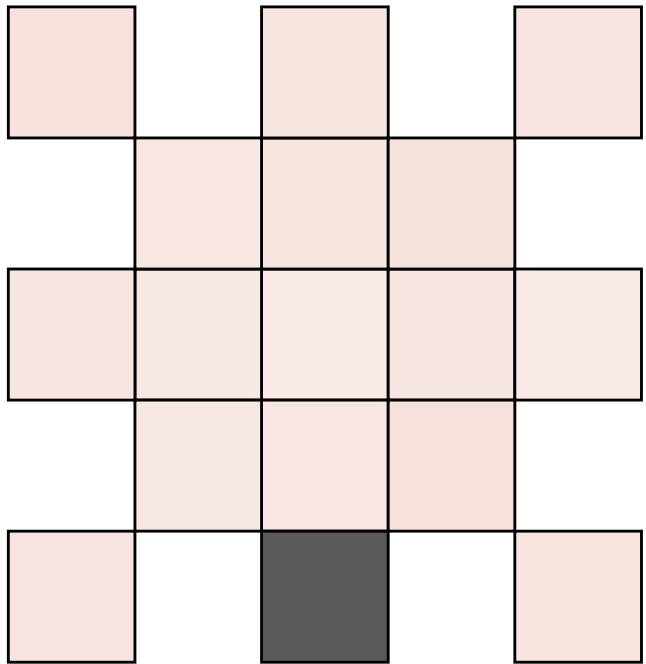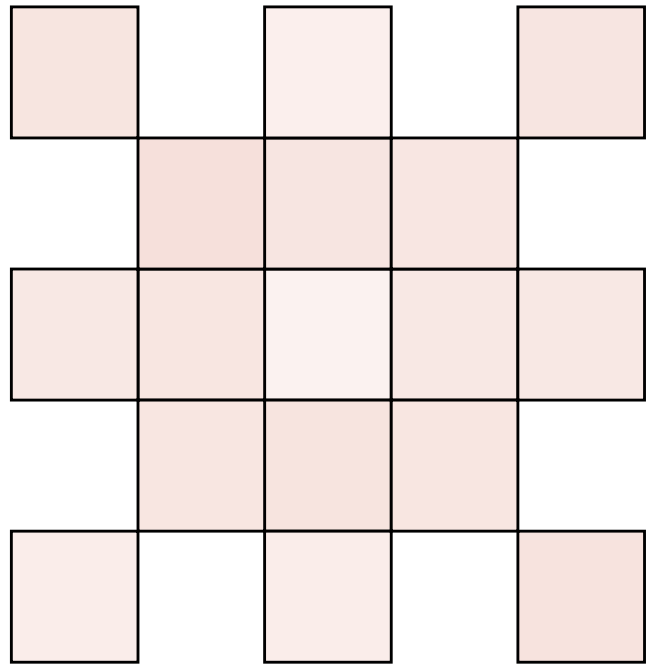

X-79691734-A-T

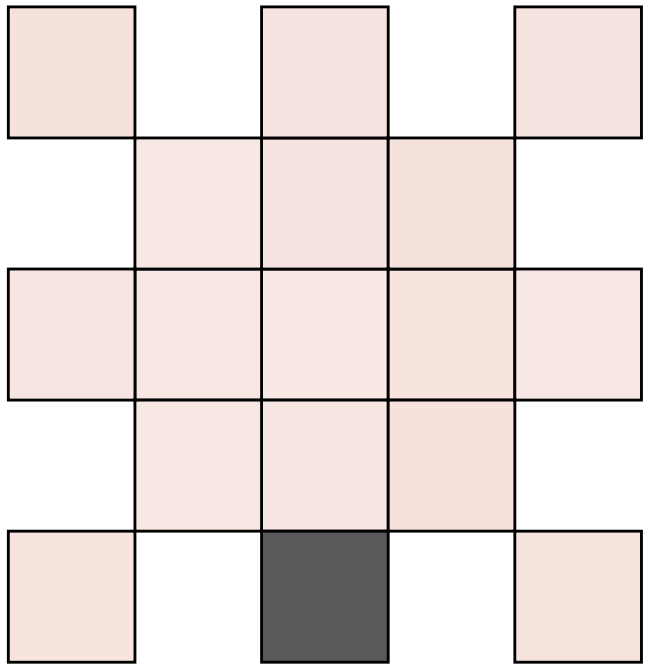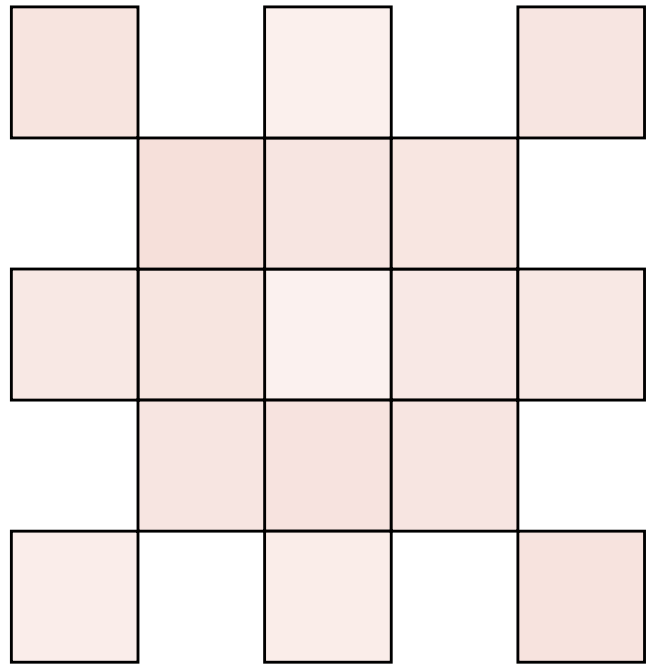

X-83599149-G-A

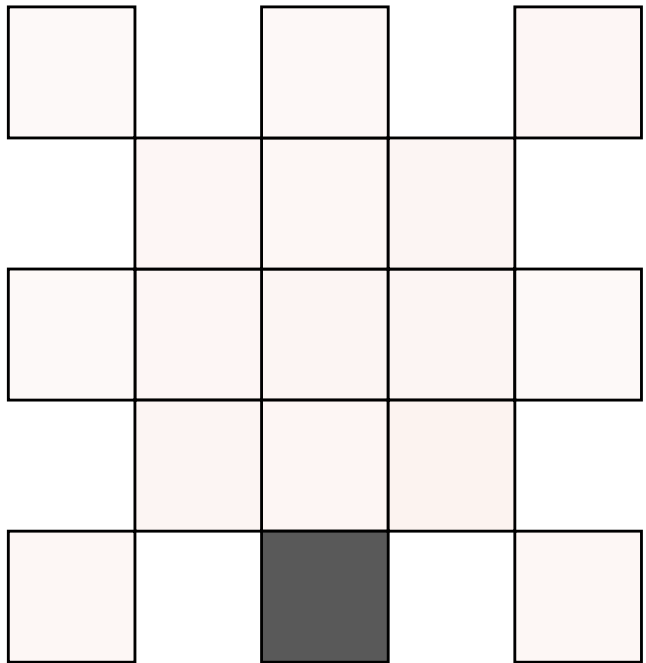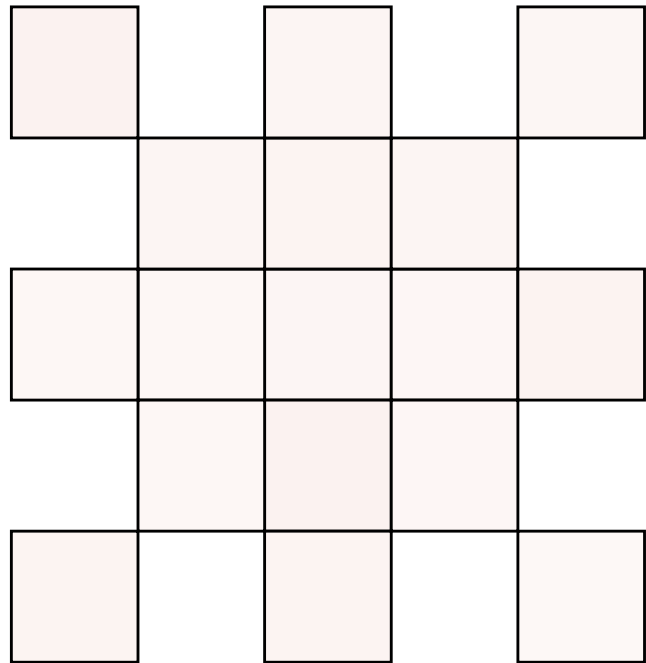

X-88323908-T-G

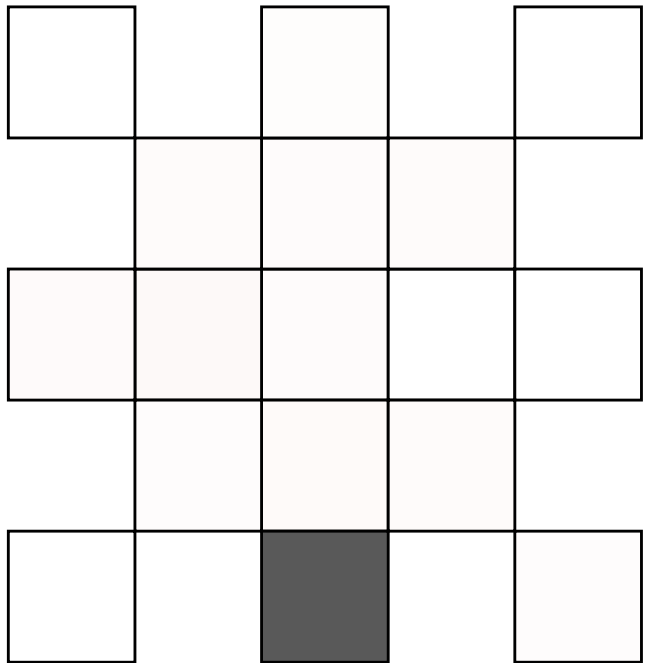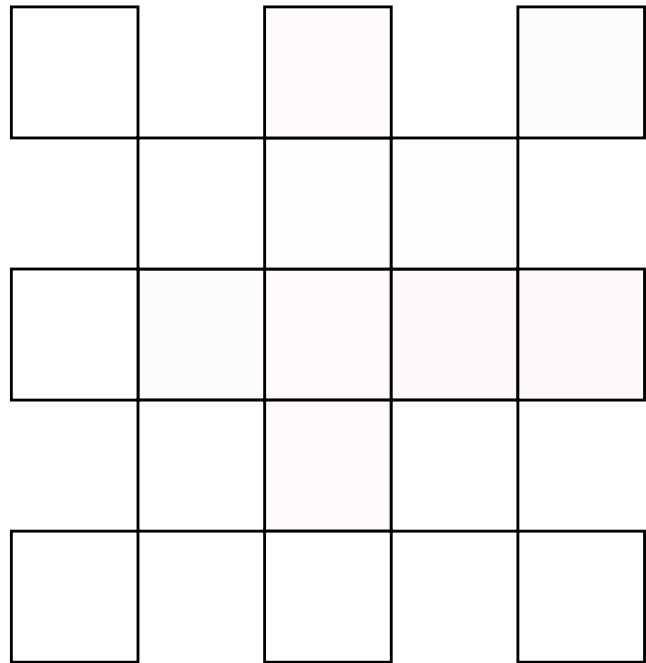

X-95198288-C-T

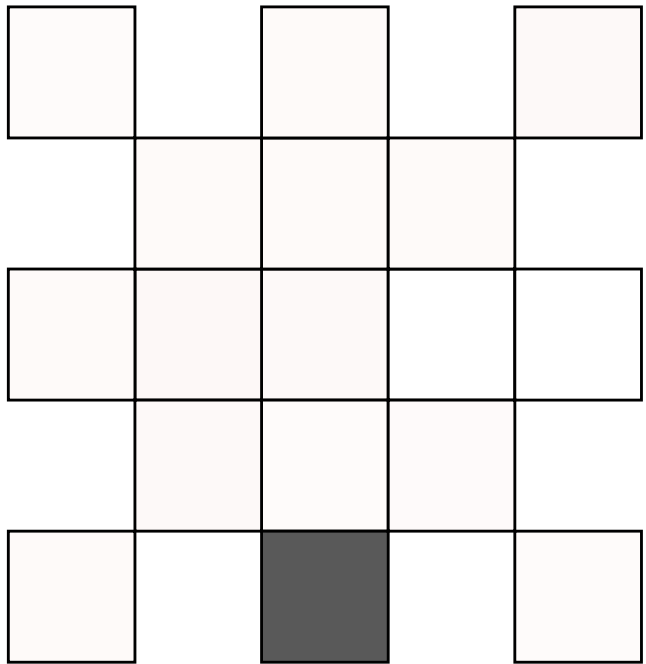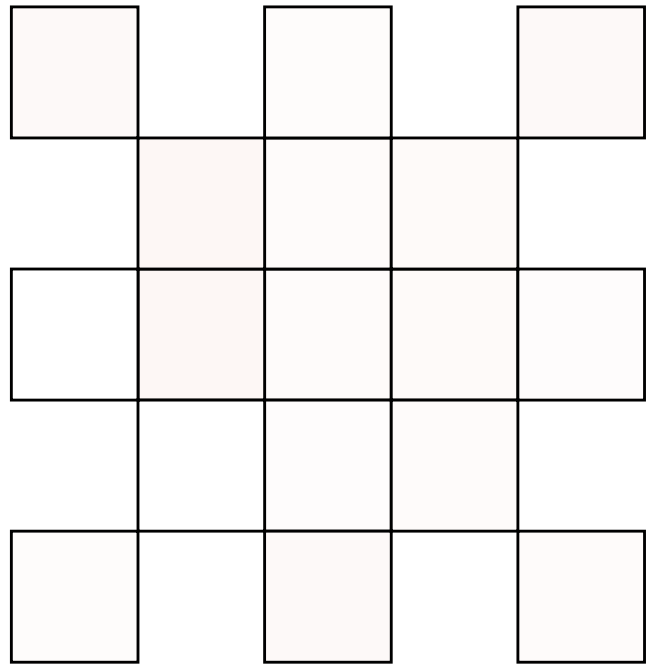

X-96237346-G-A

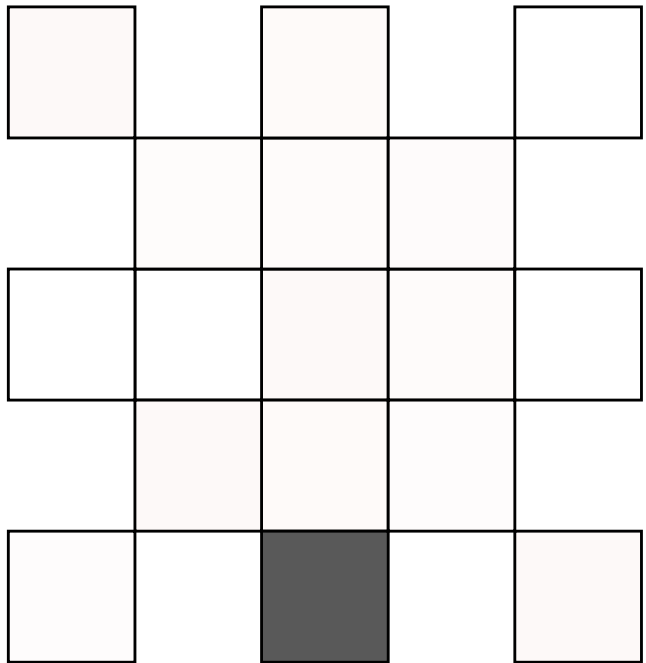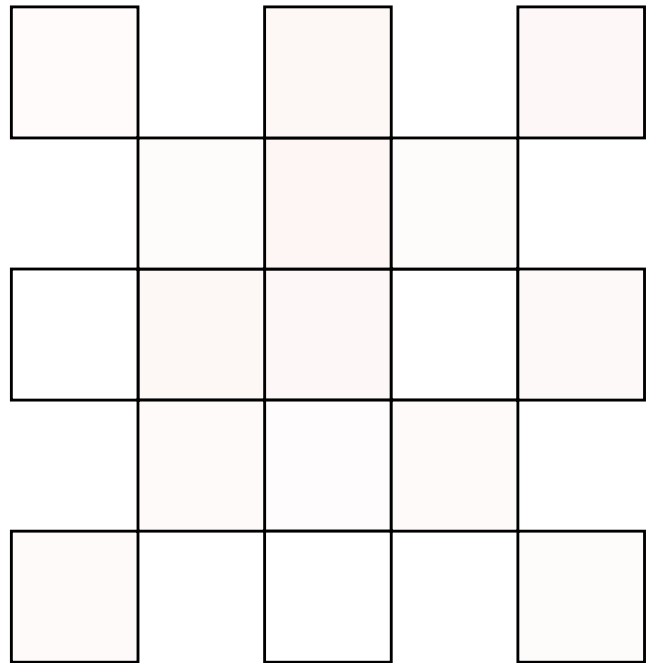



X-98261573-C-T

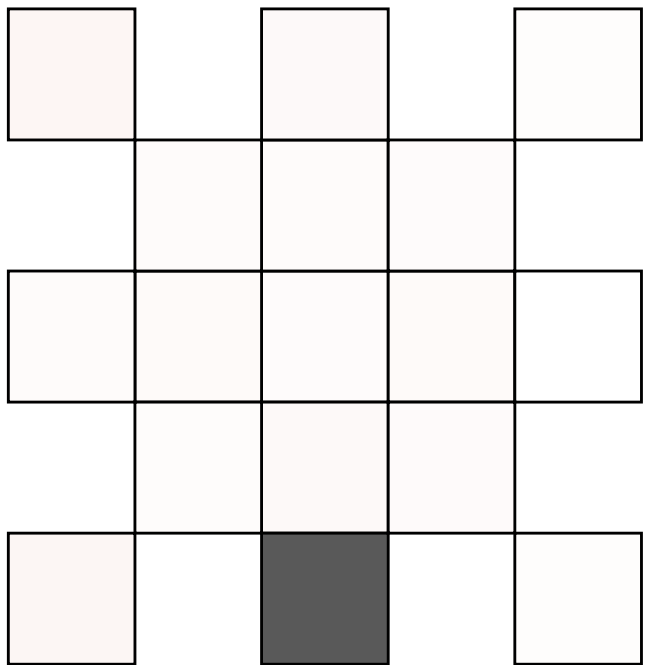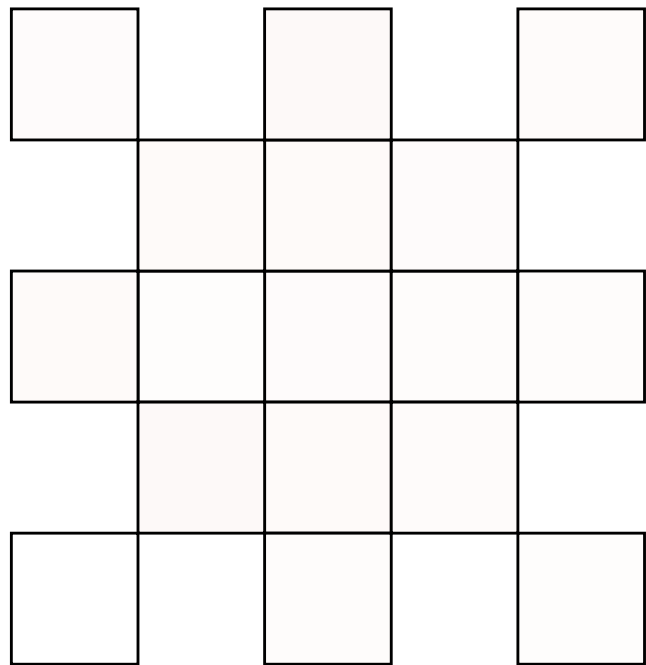

X-98520292-C-A

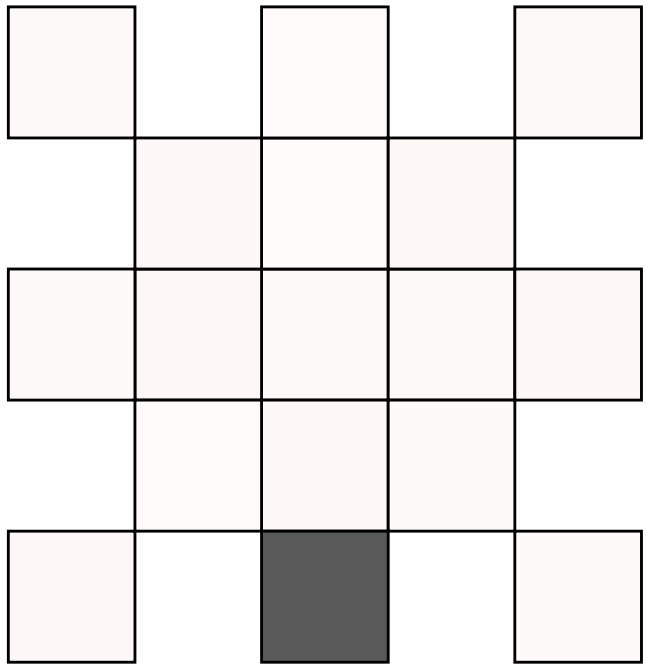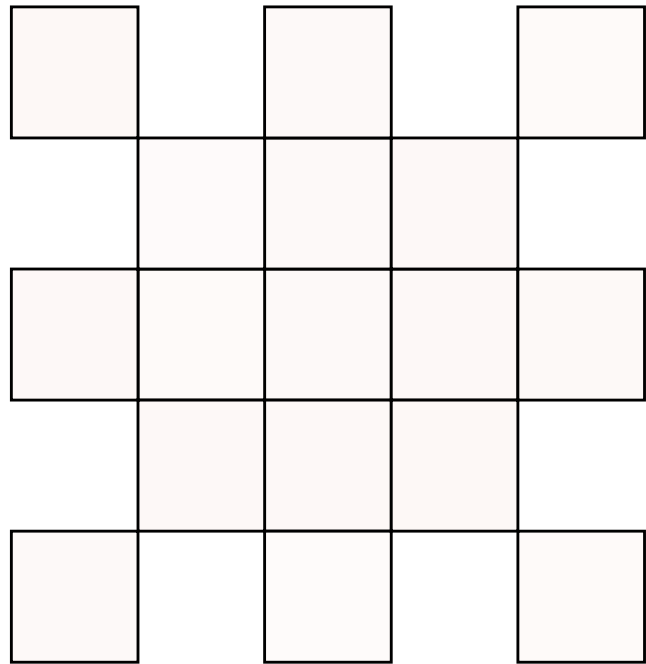

X-98527468-AC-A

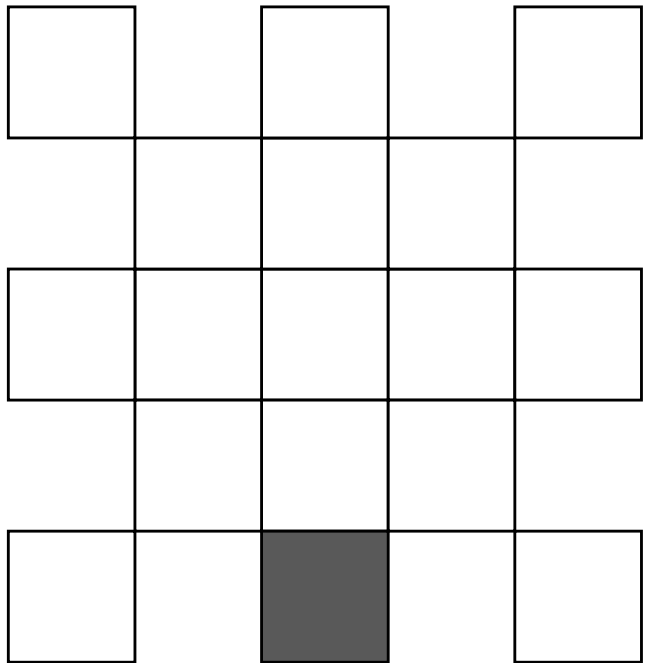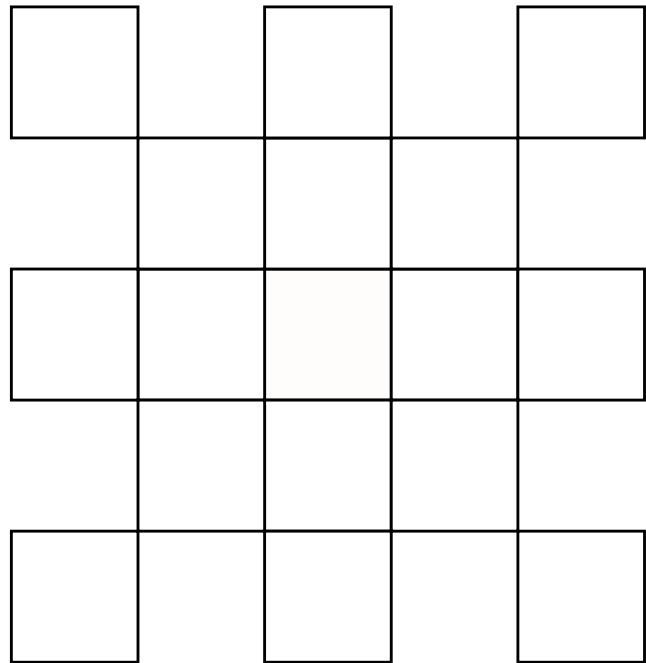

X-99571049-A-C

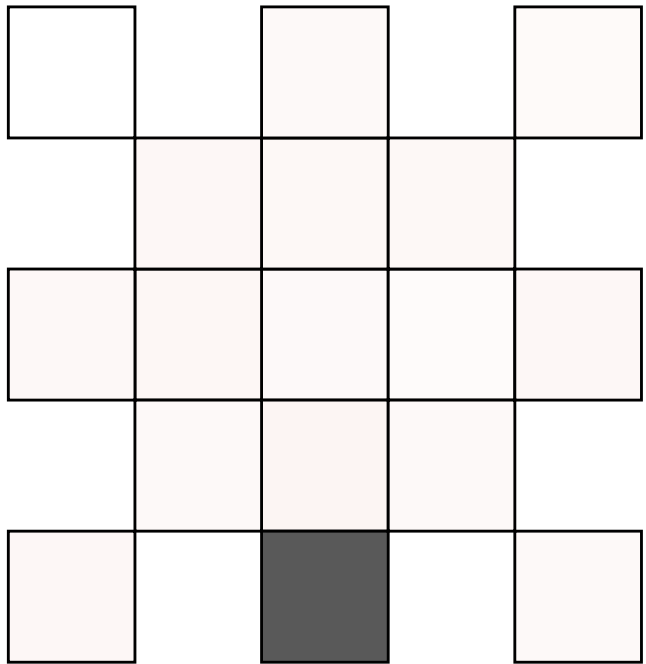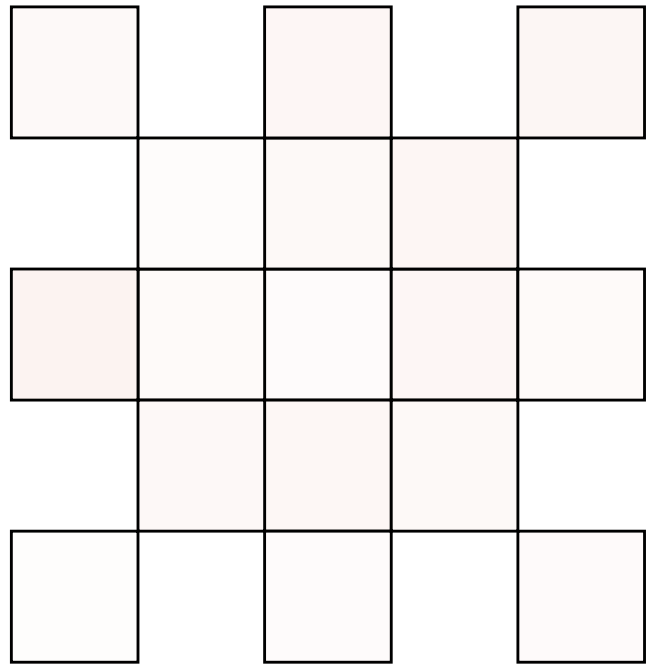

X-99890064-T-C

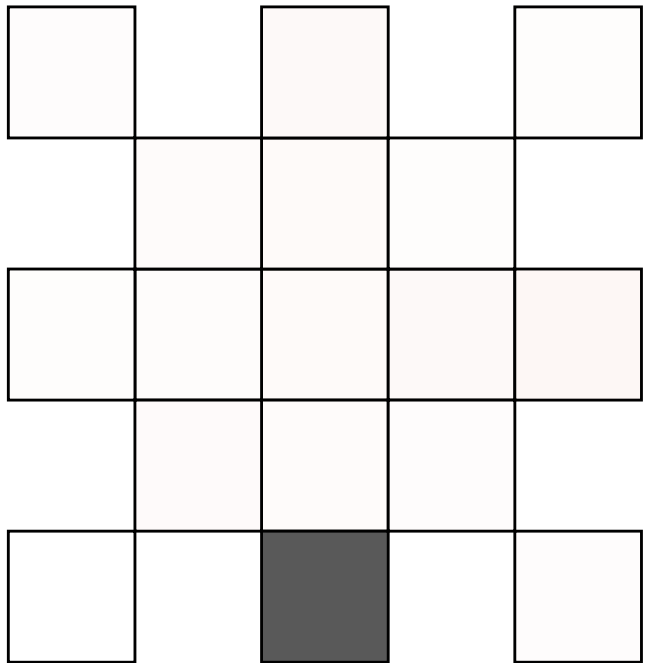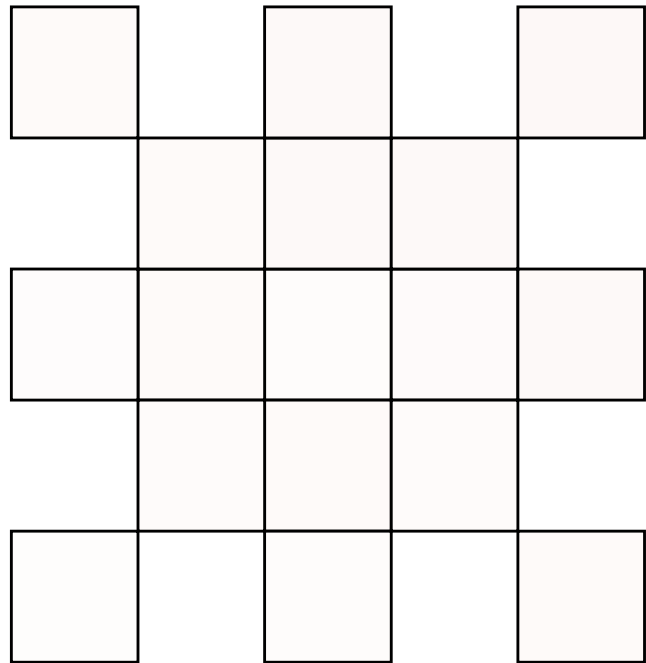

Supplement: media-3.pdf [file media-3.pdf]
