# Supplementary material for: Cell-type-resolved somatic mosaicism reveals clonal dynamics of the human forebrain
Source: PubMed Central journal article supplement — bioRxiv. 2023 Oct 26:2023.10.24.563814. Preprint. [Version 2] doi: 10.1101/2023.10.24.563814 (PMC10634852; doi:10.1101/2023.10.24.563814), 2023-10-26

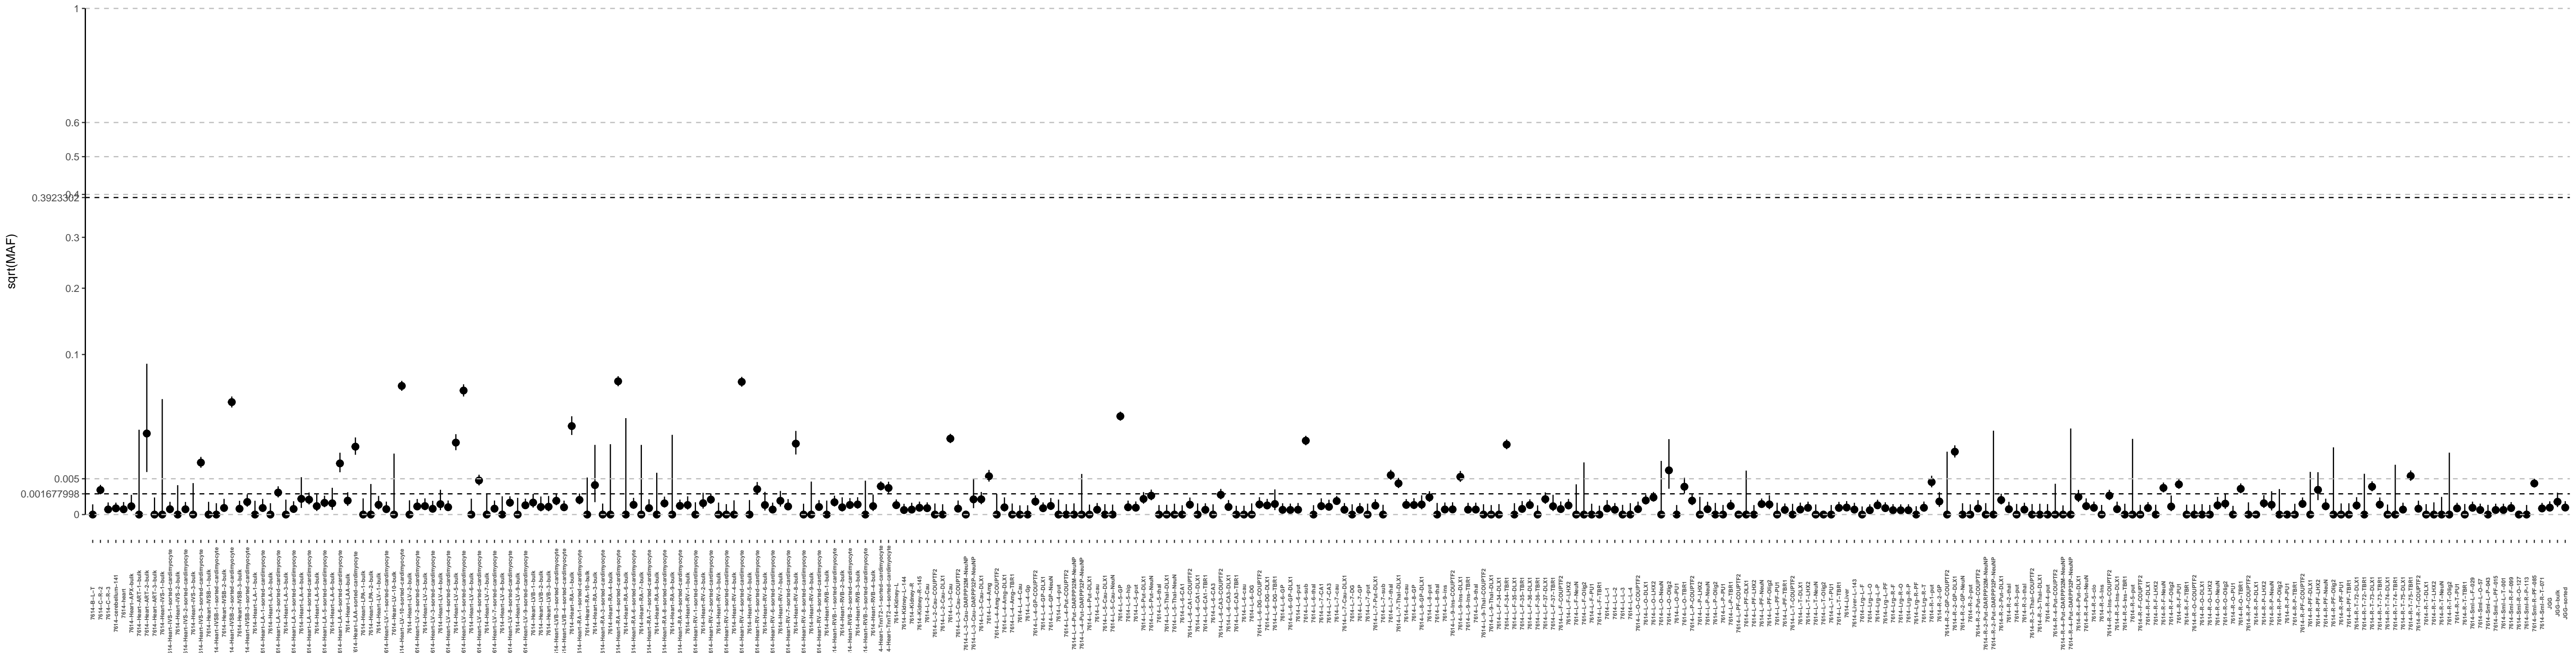



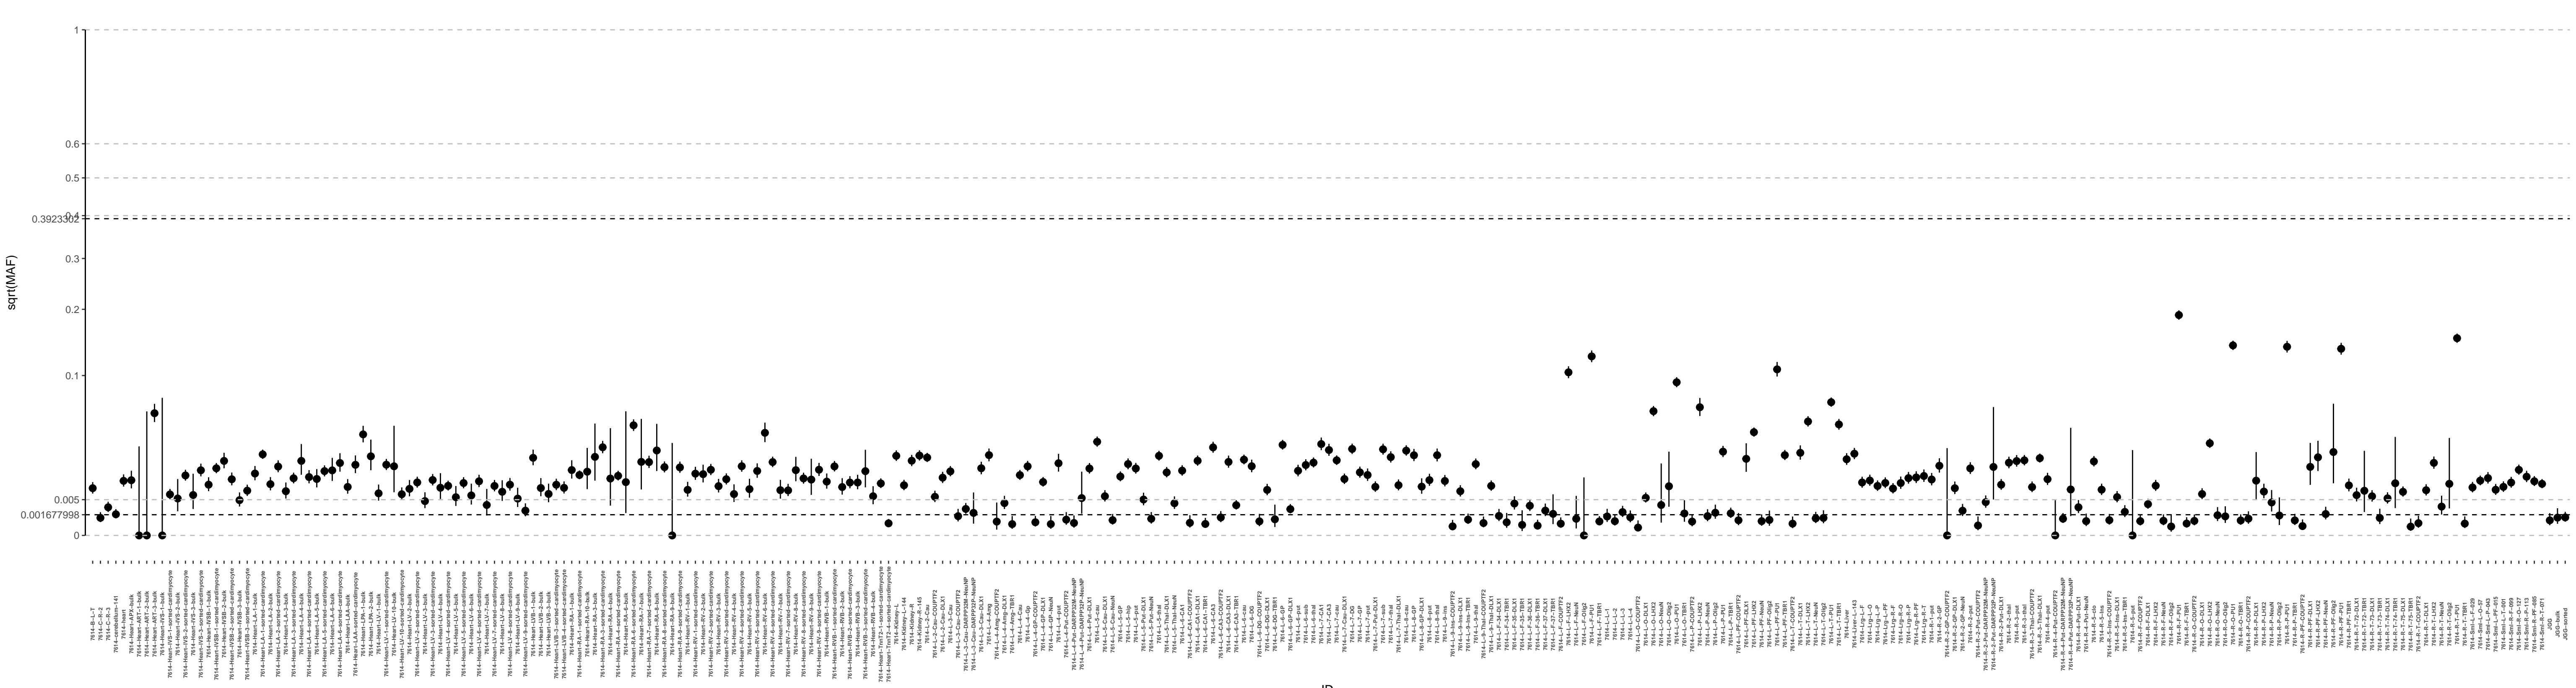

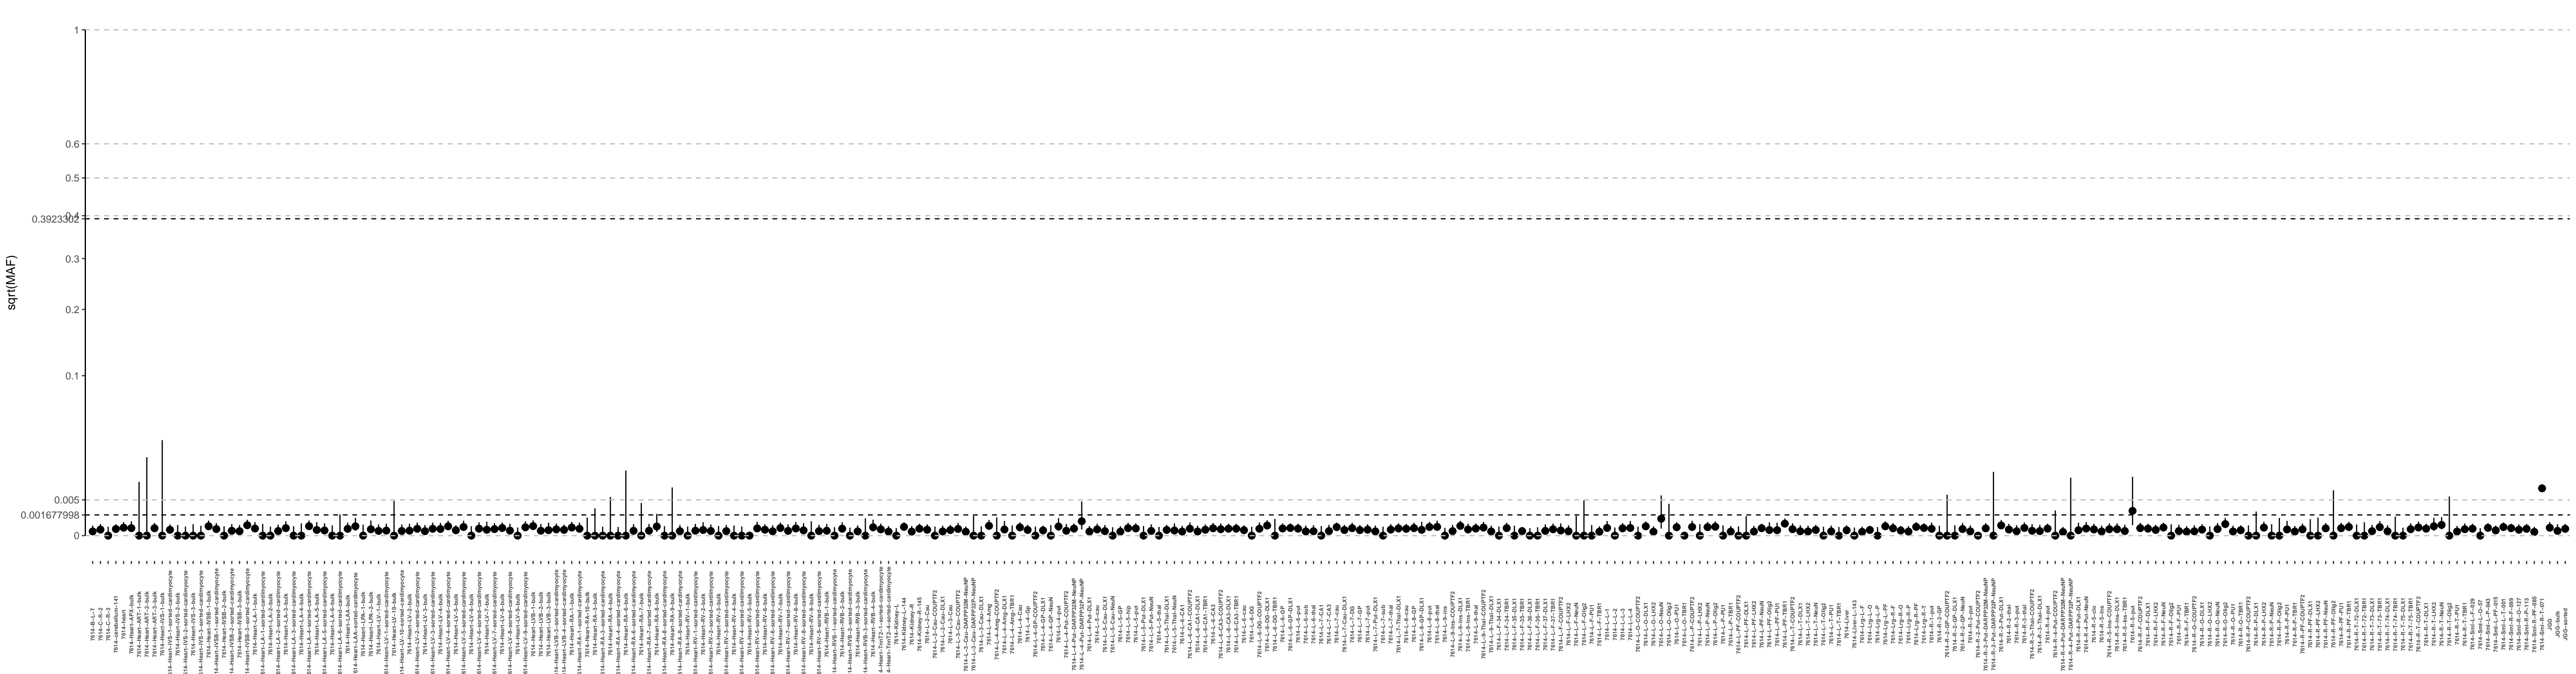

JGQ-sorted

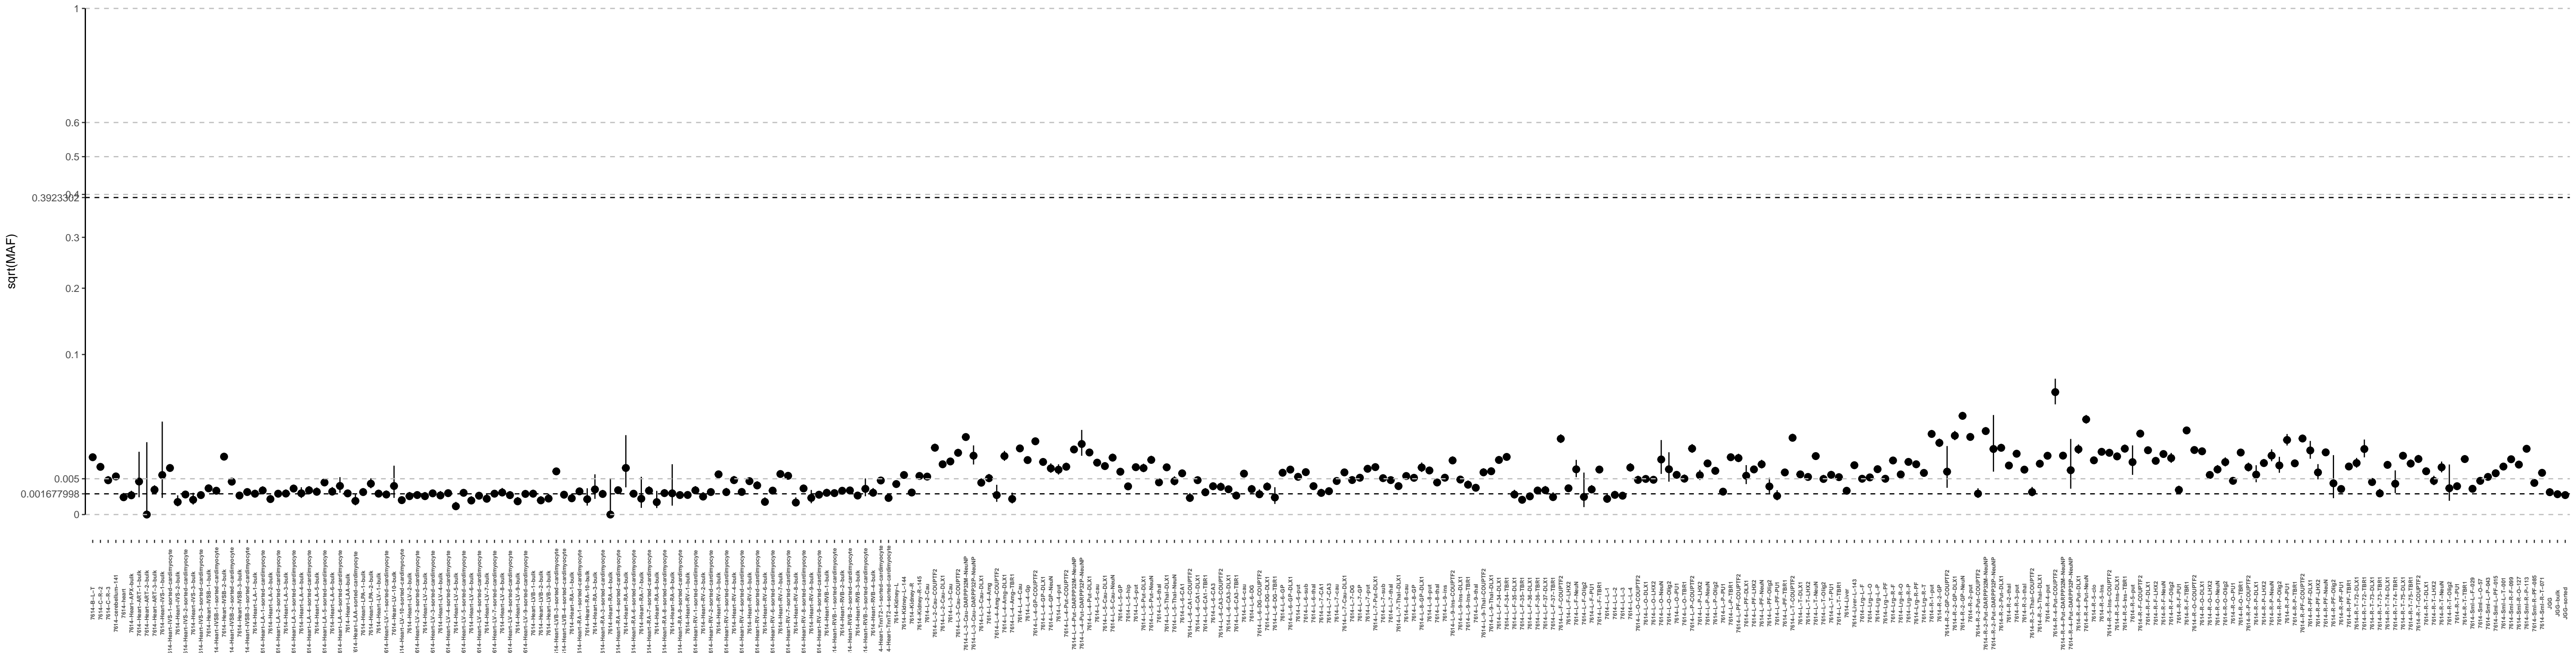



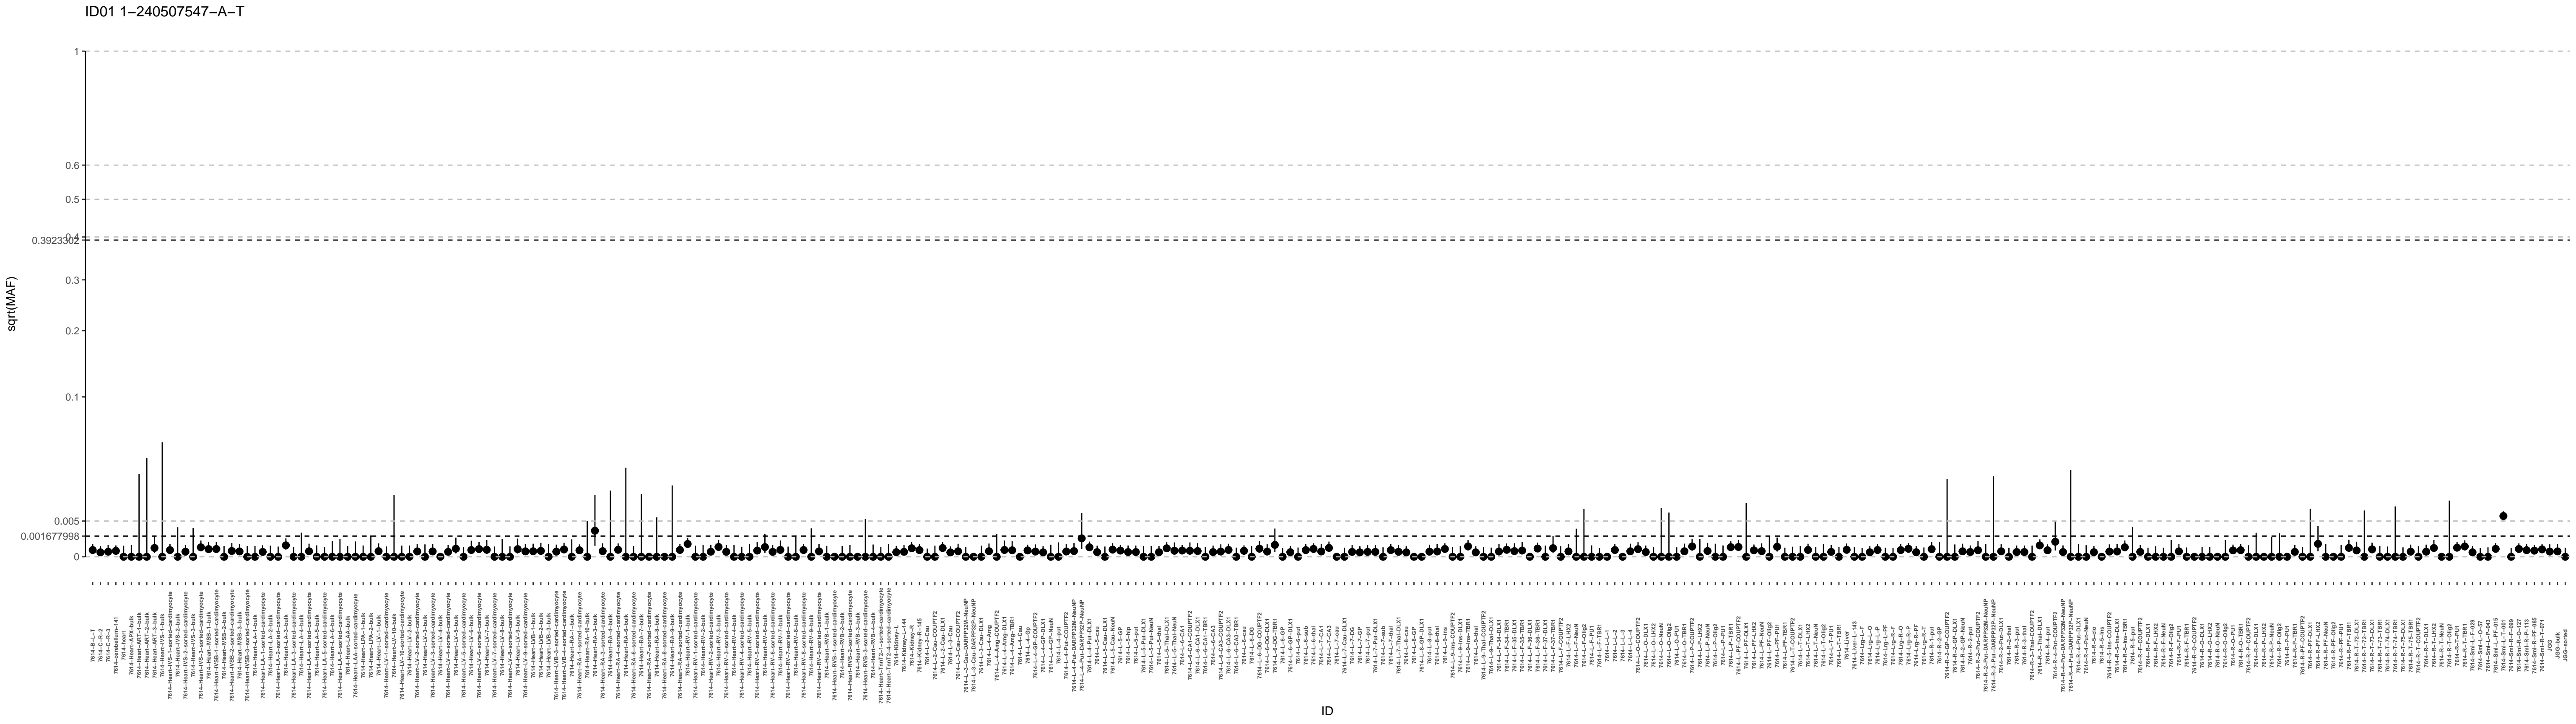

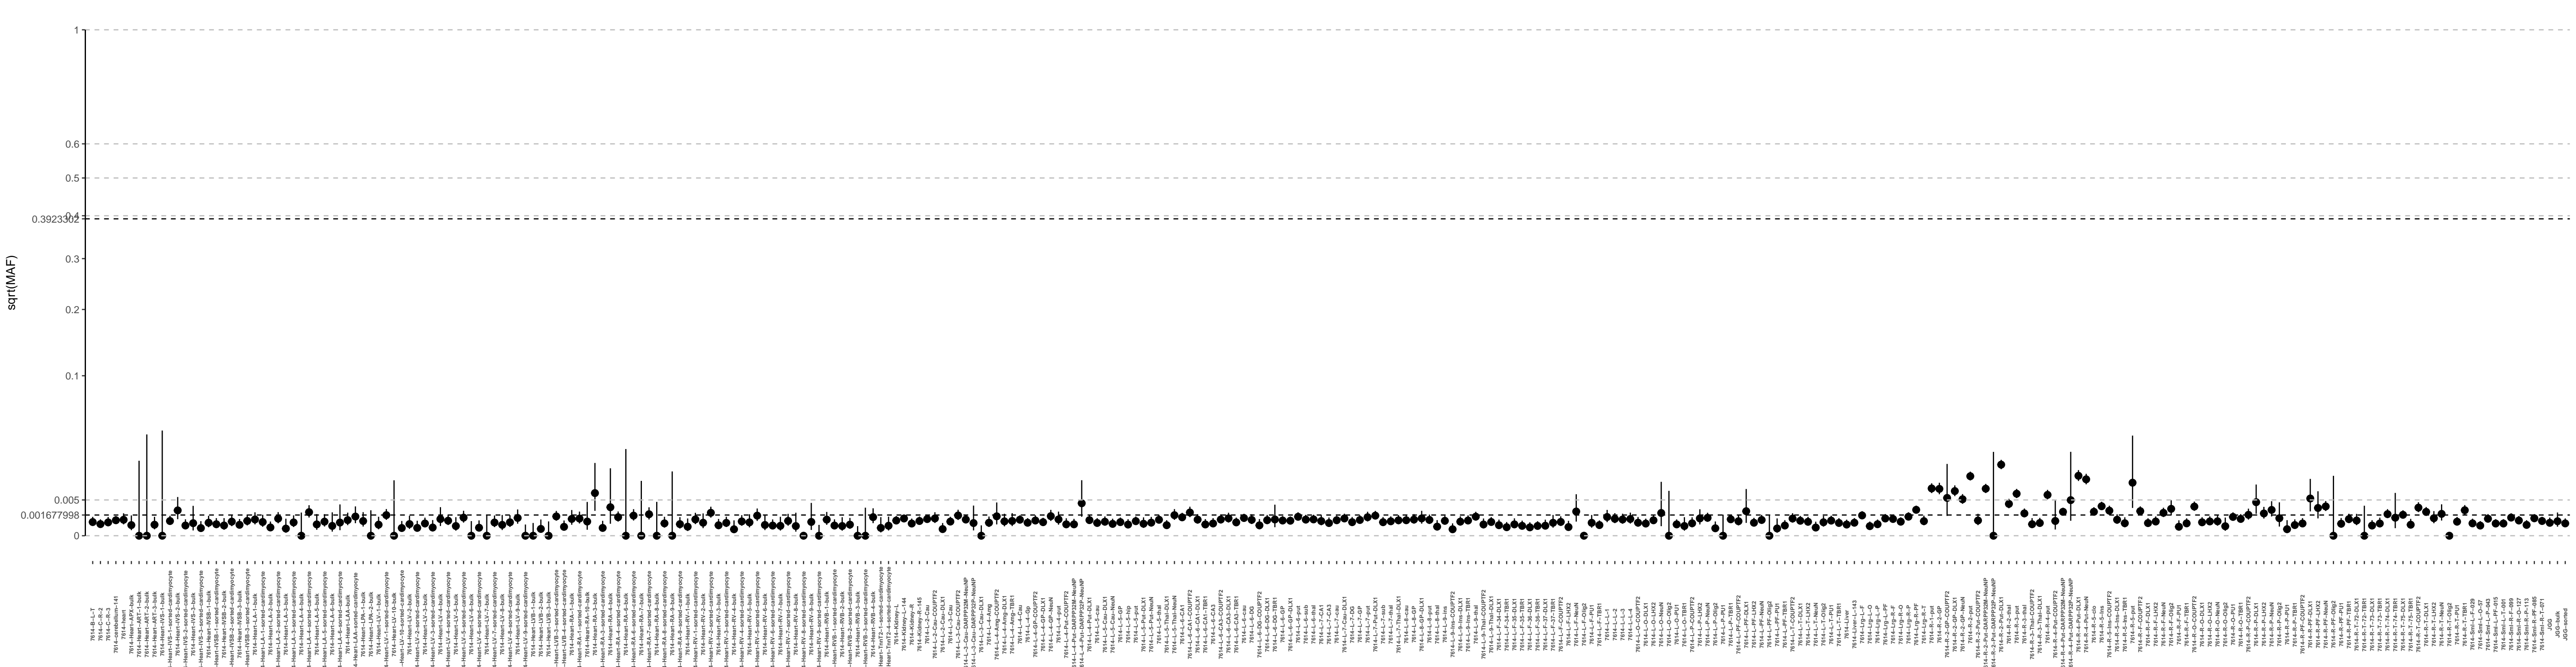









sqrt(MAF)

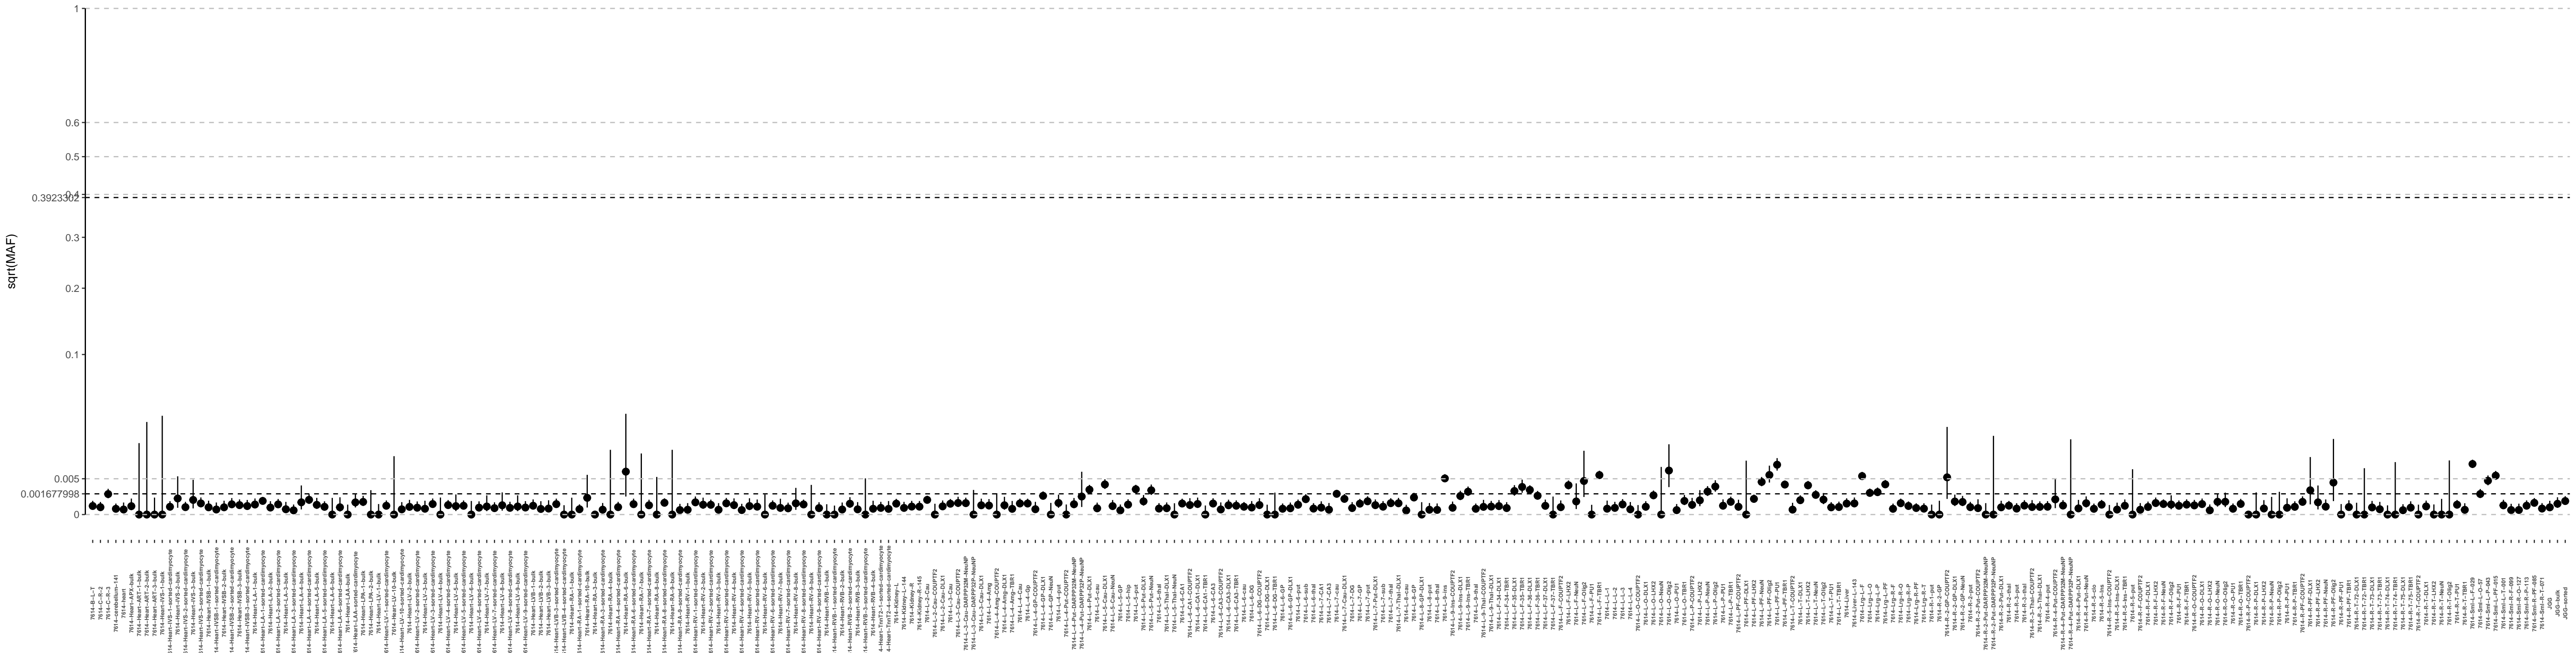

ID





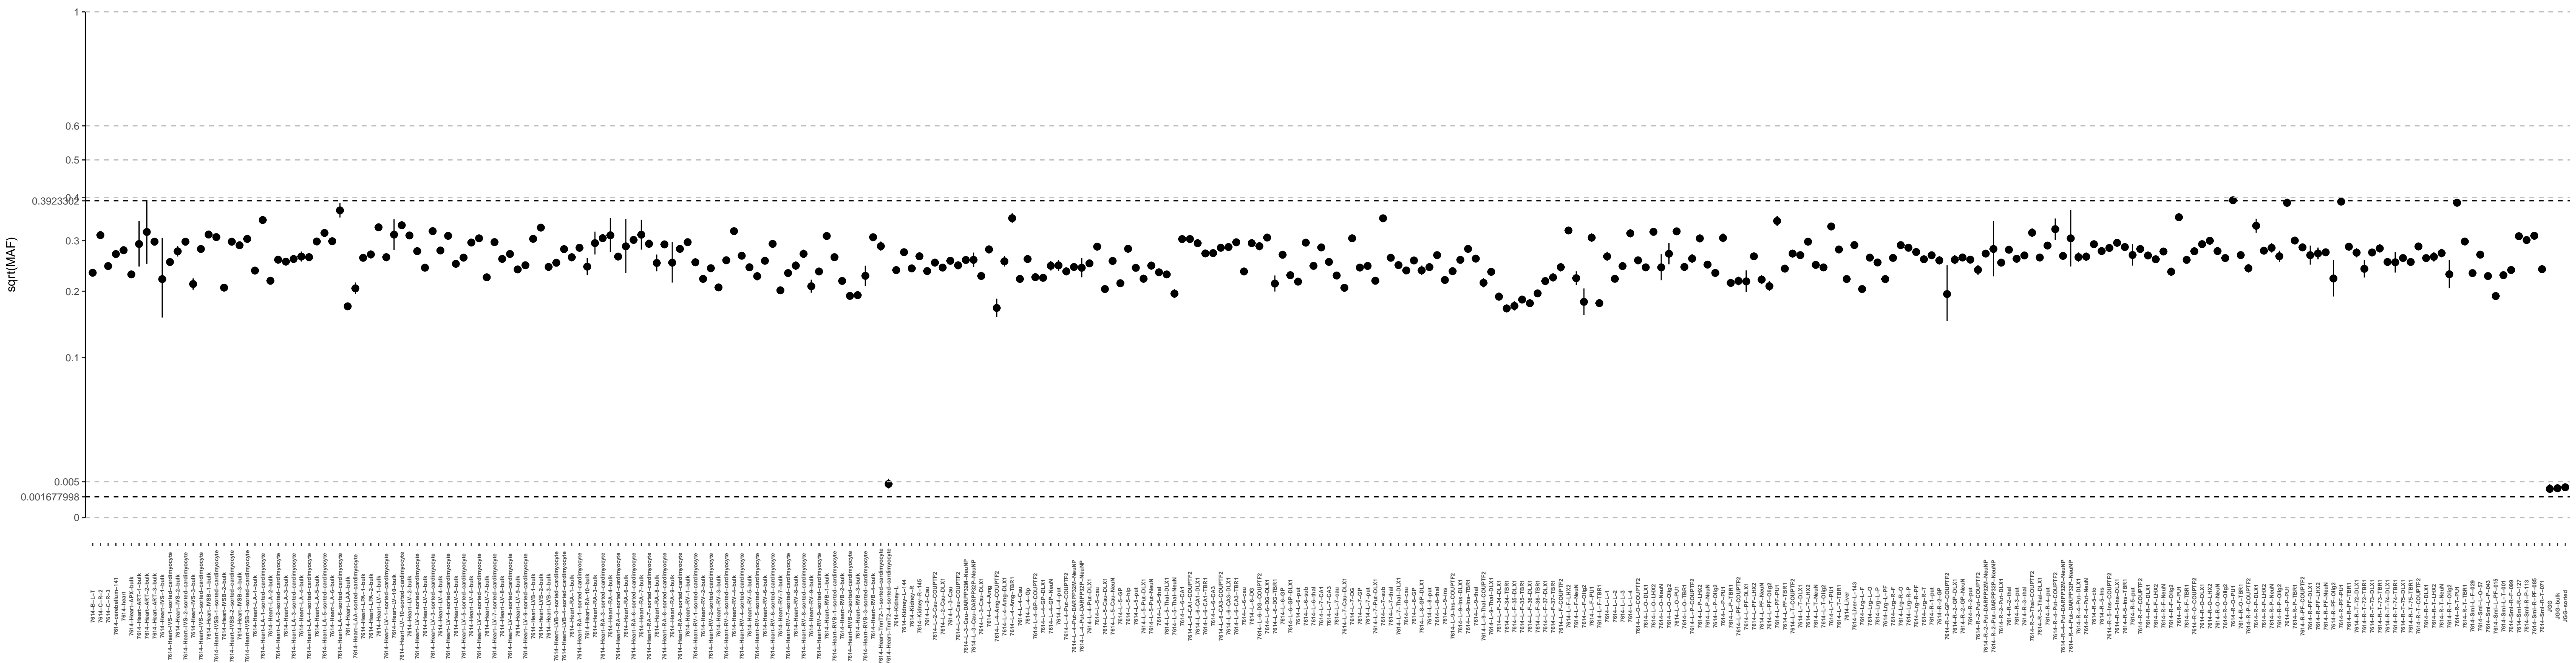

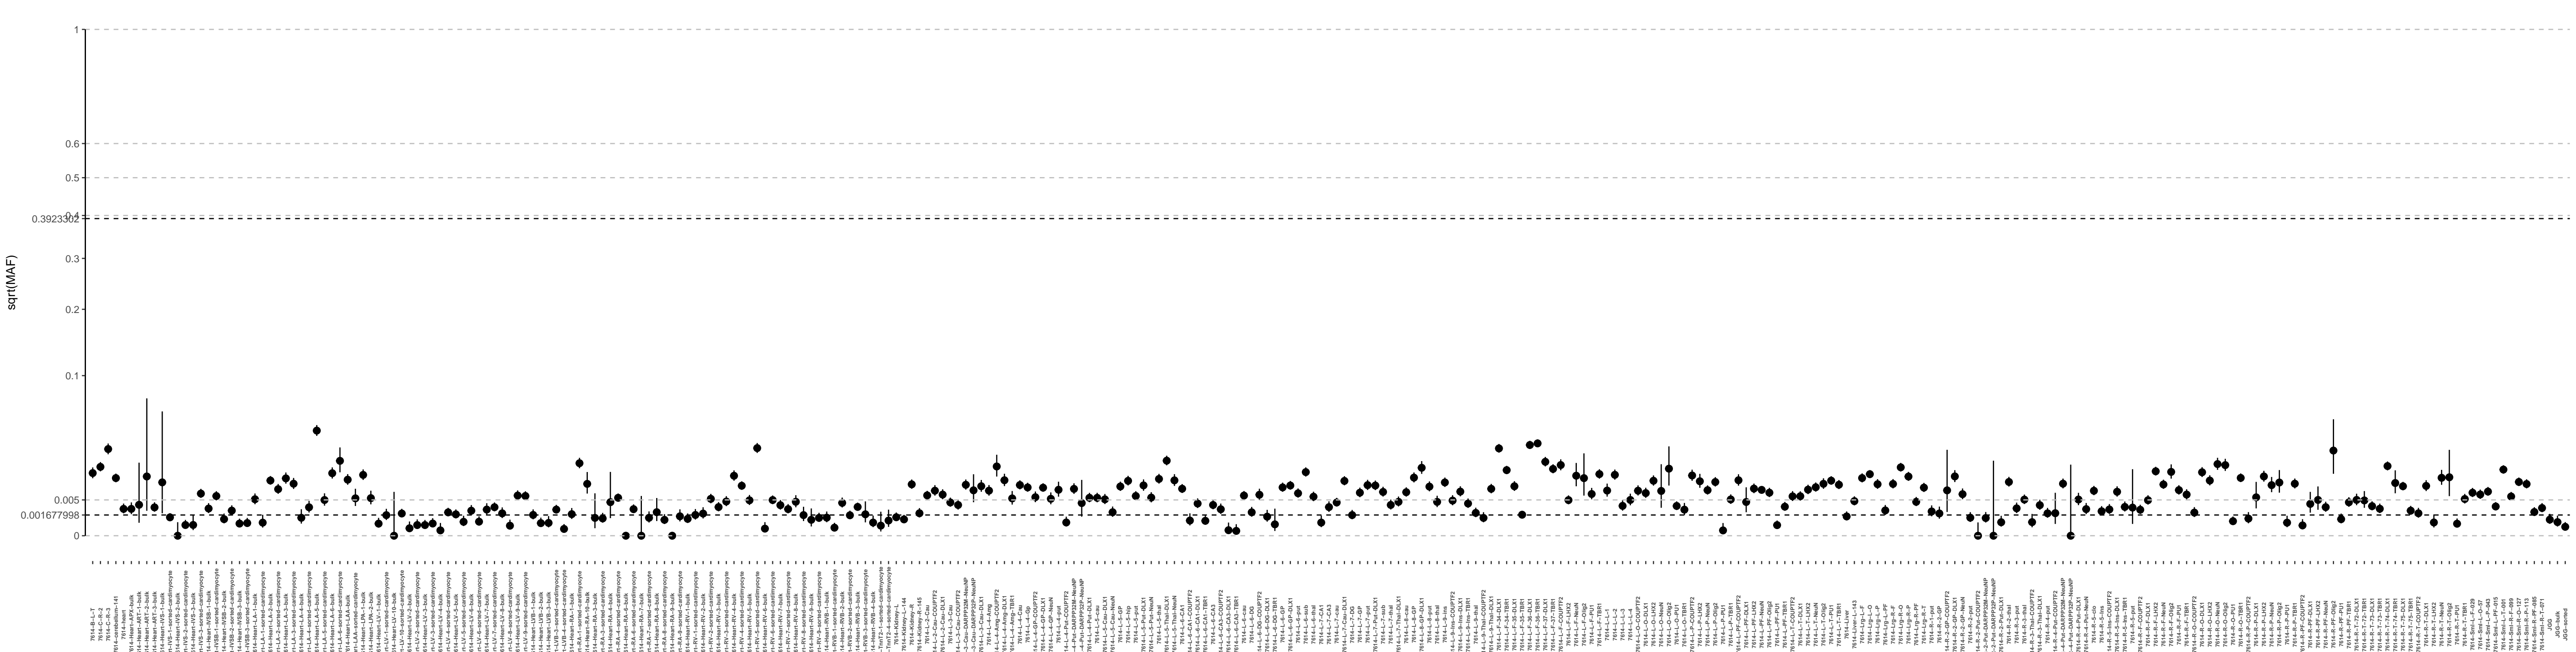

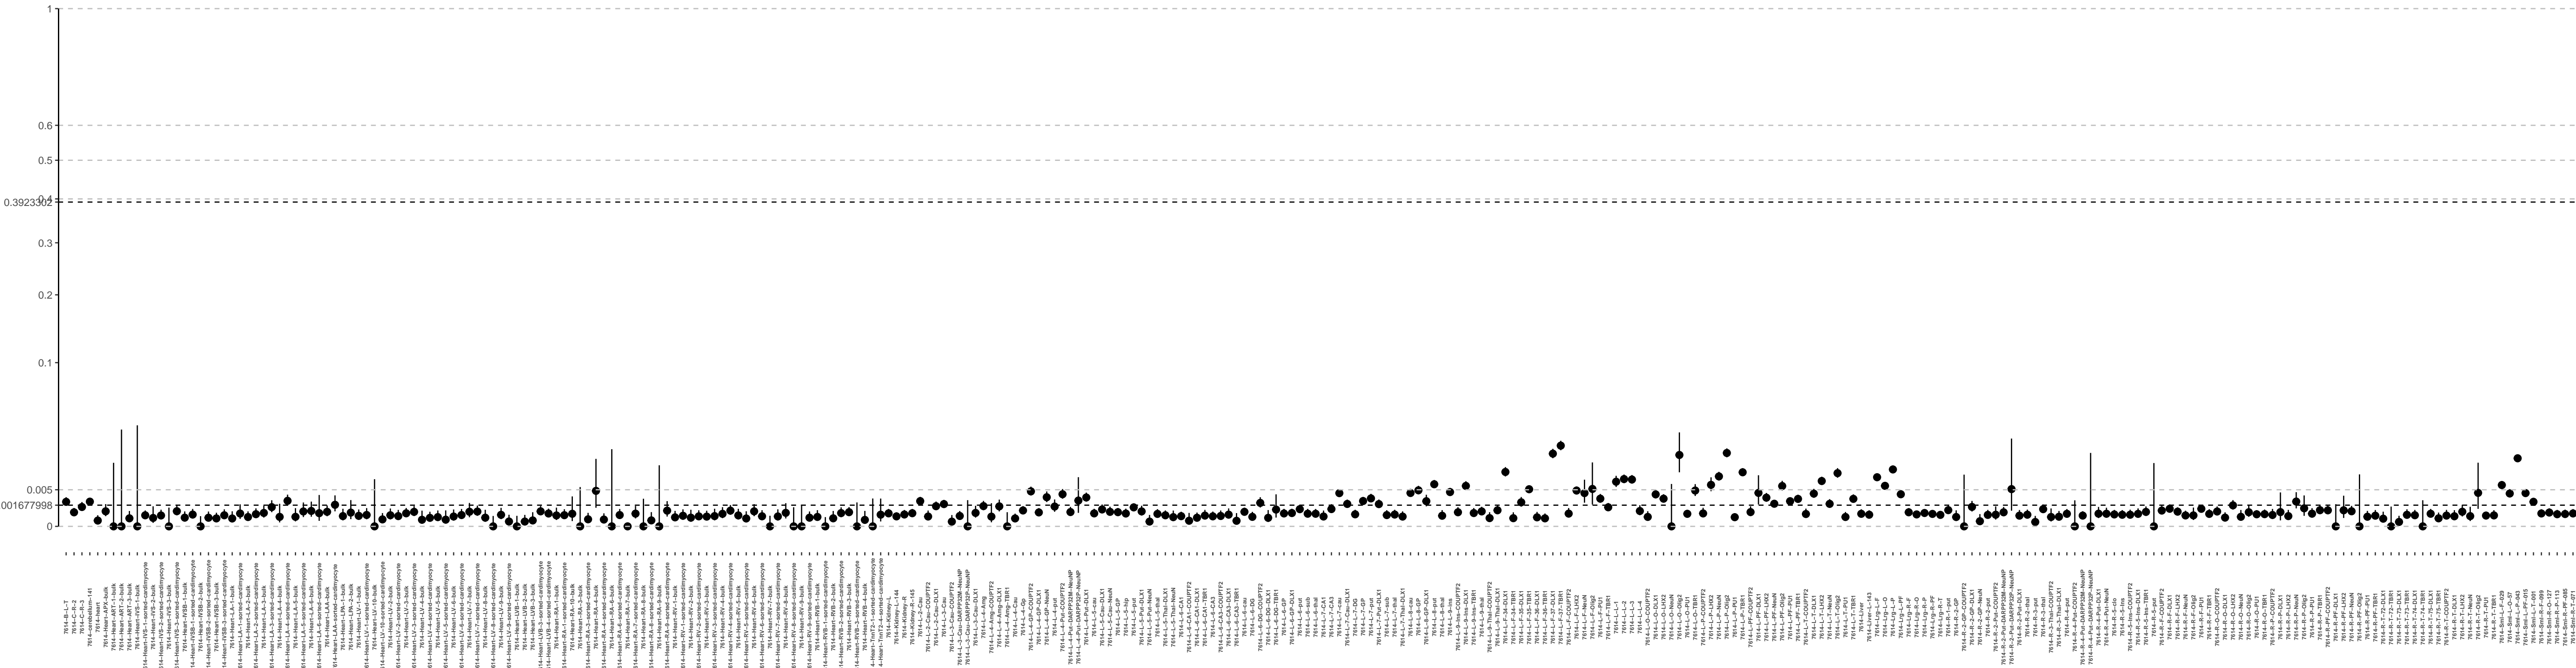

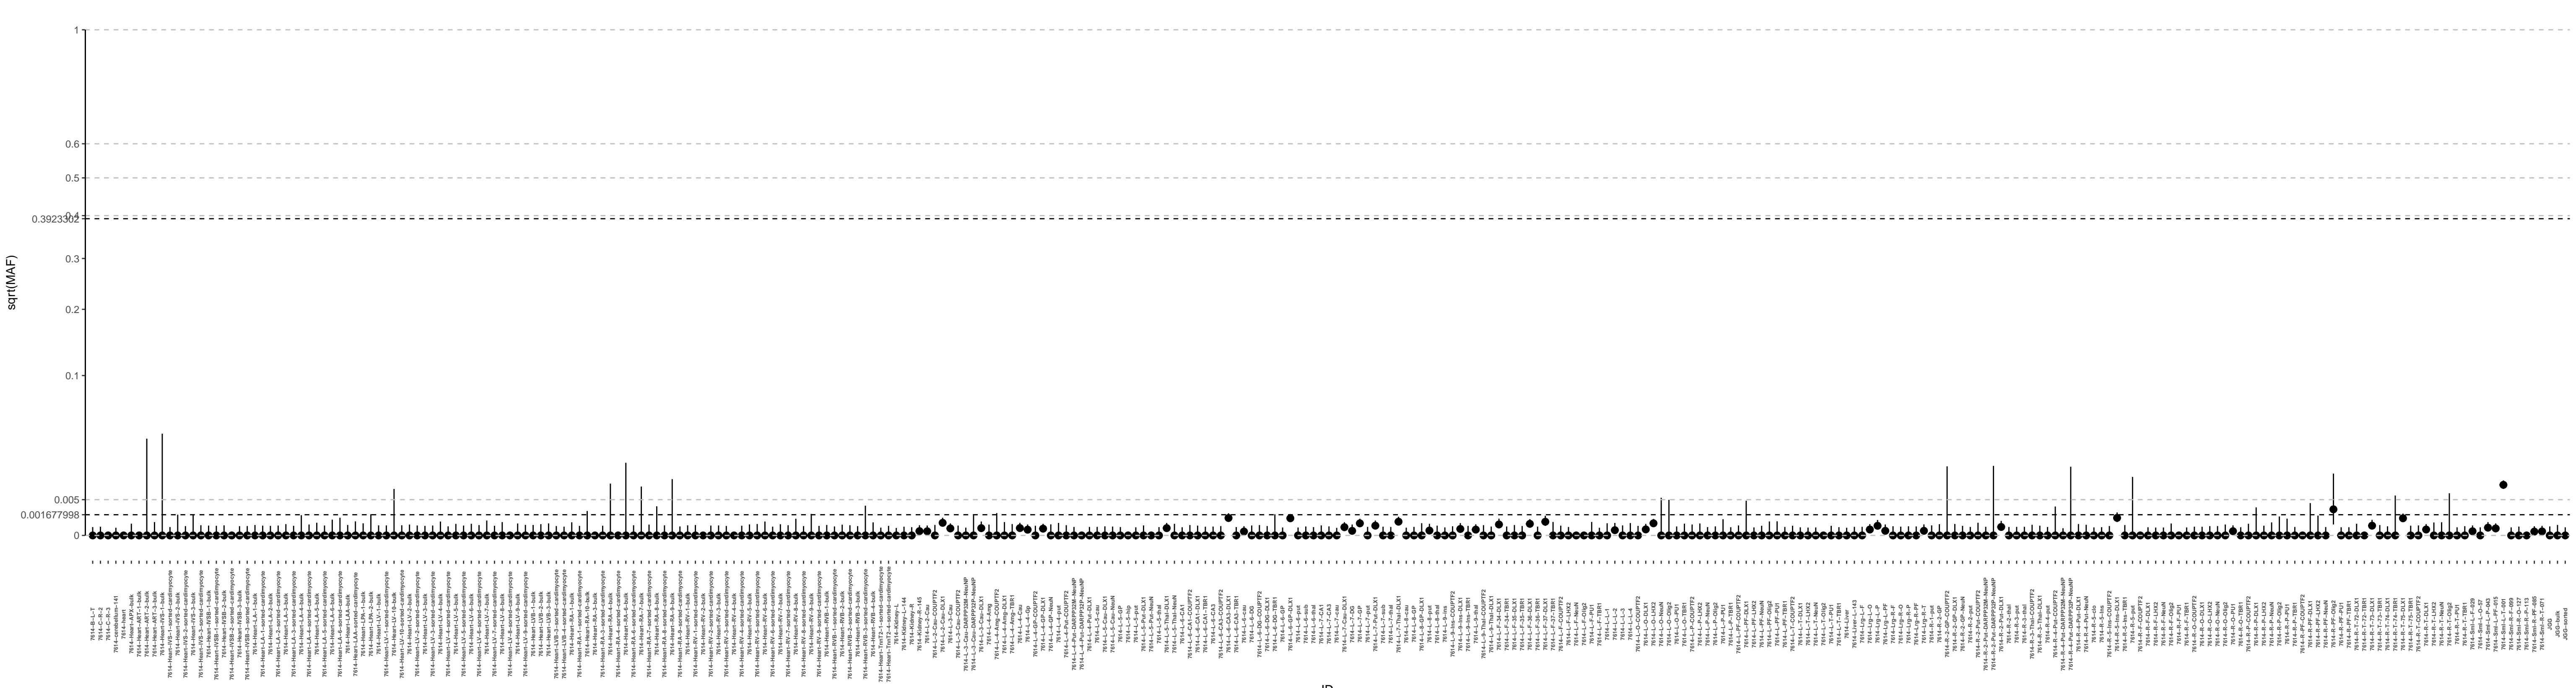

ID



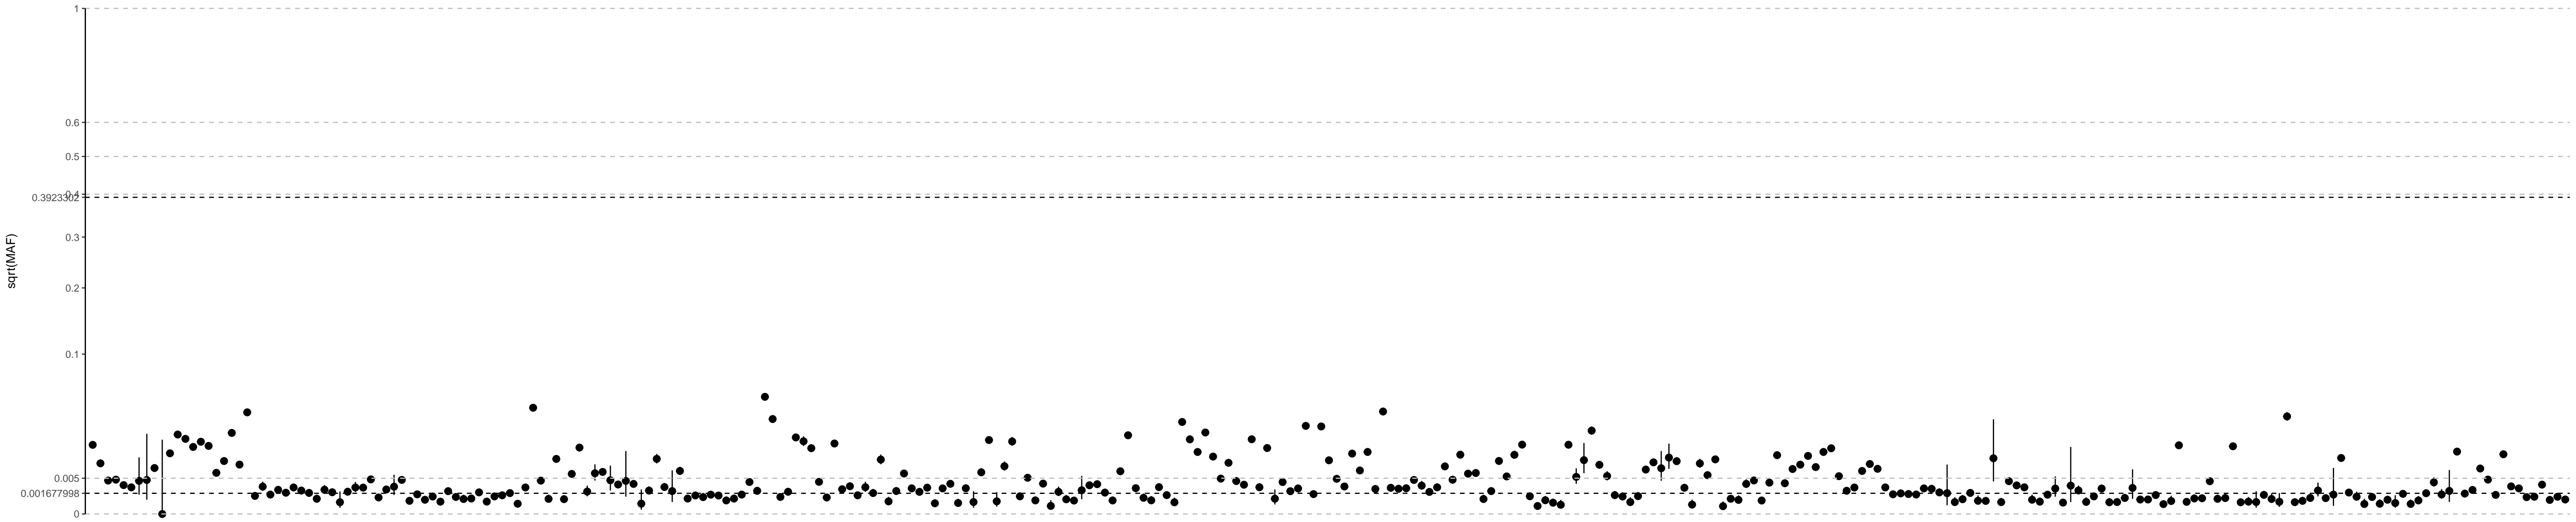

0.3923302

0.00167798

ID













sqrt(MAF)

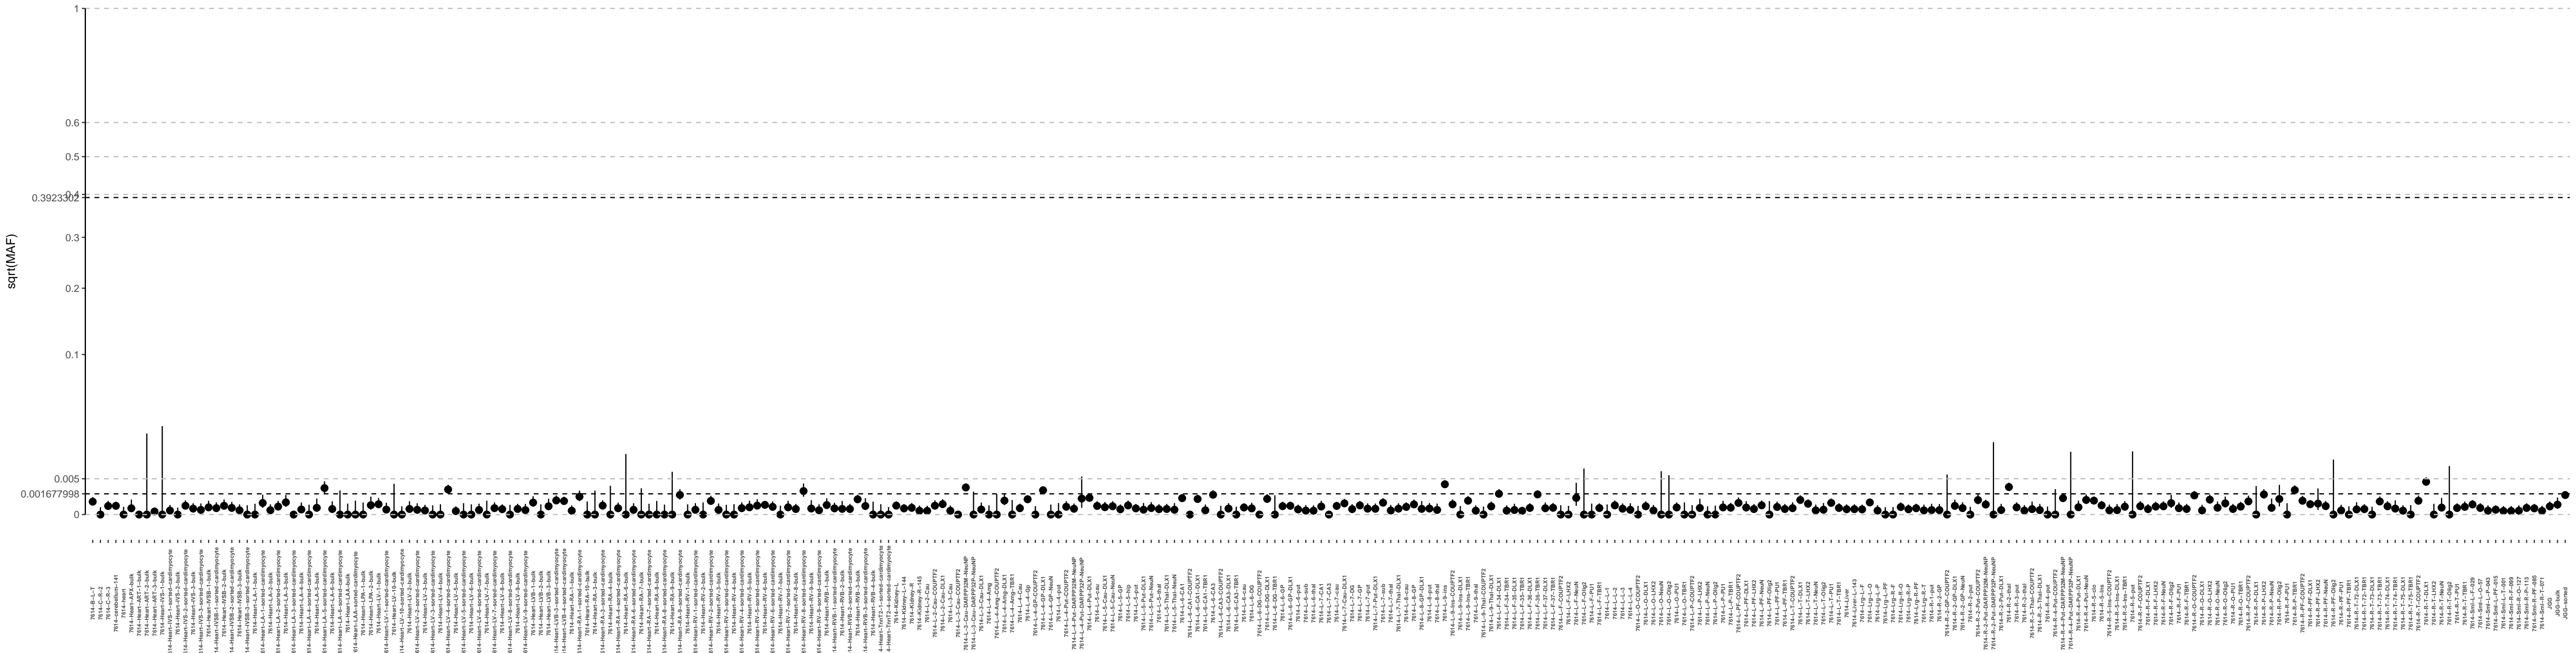

ID





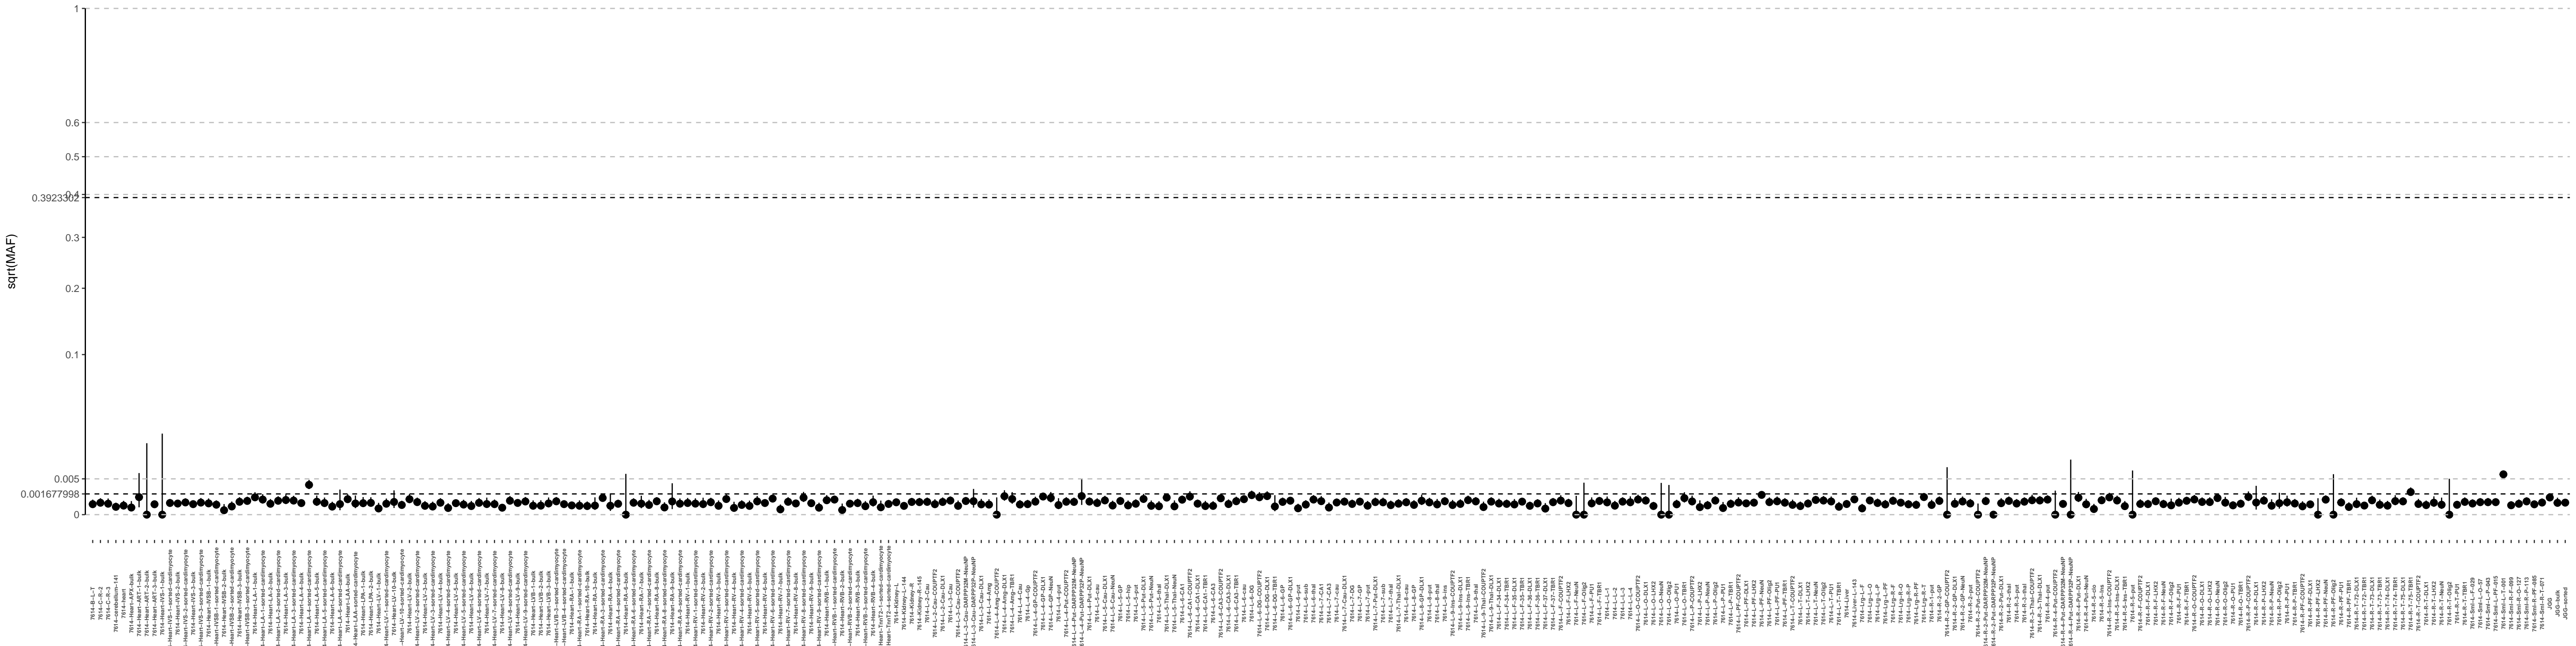

sqrt(MAF)

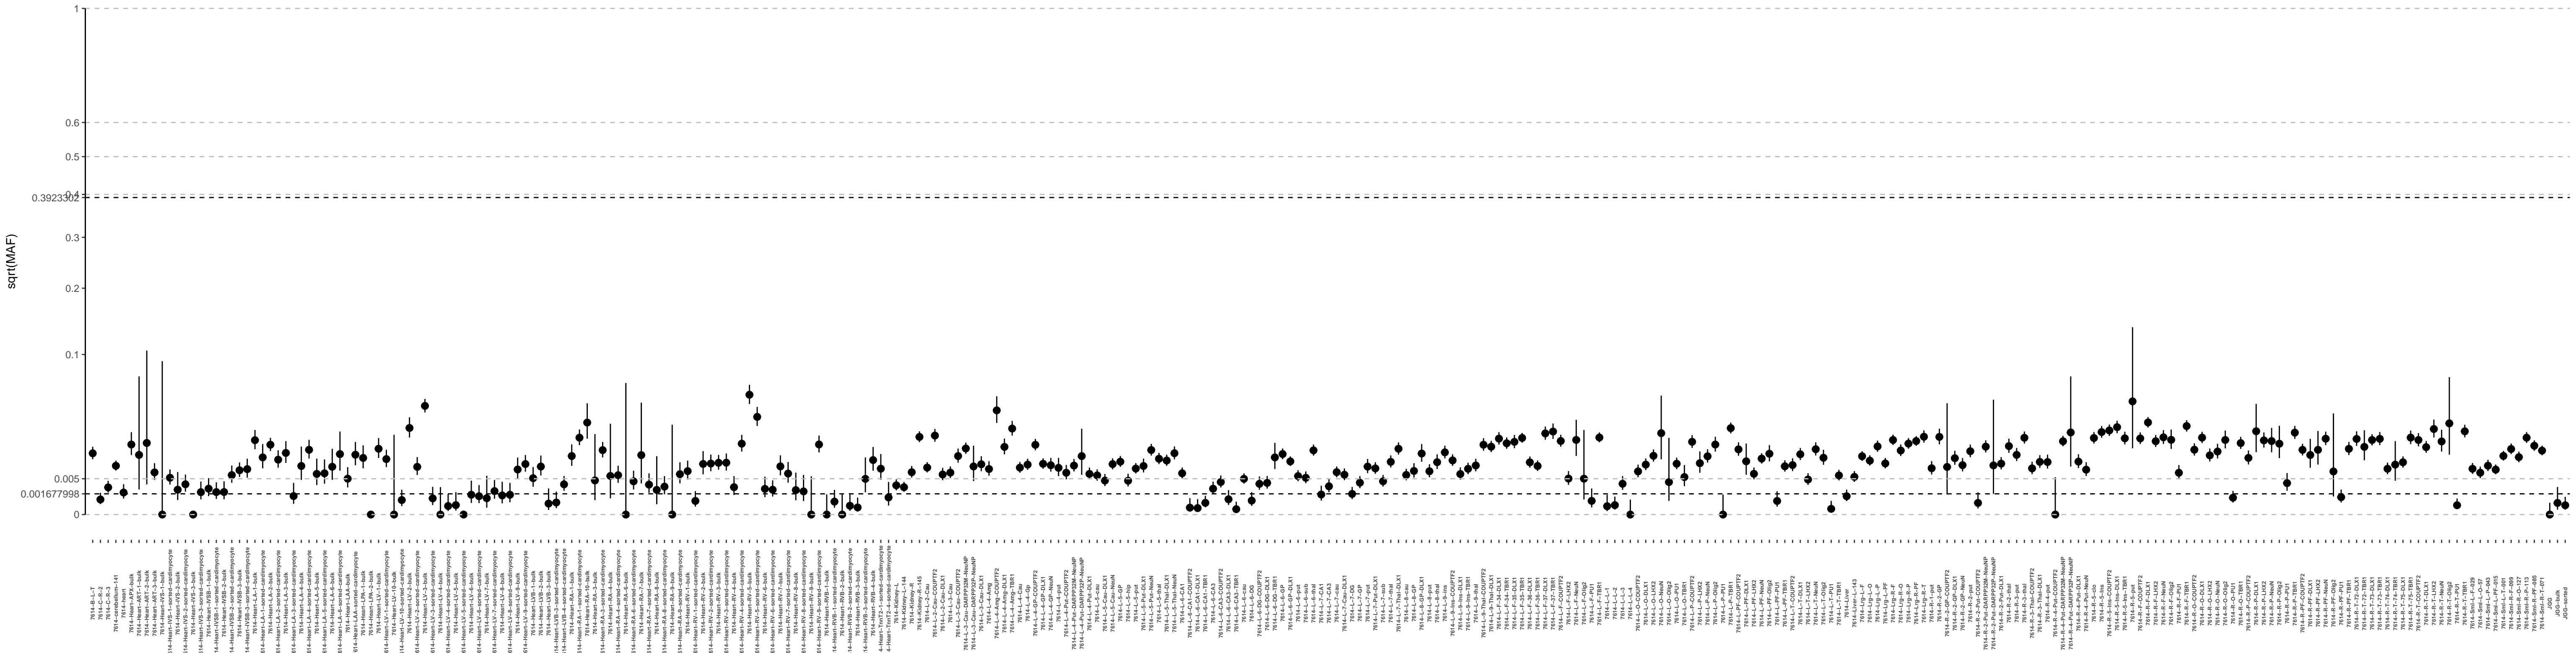

ID

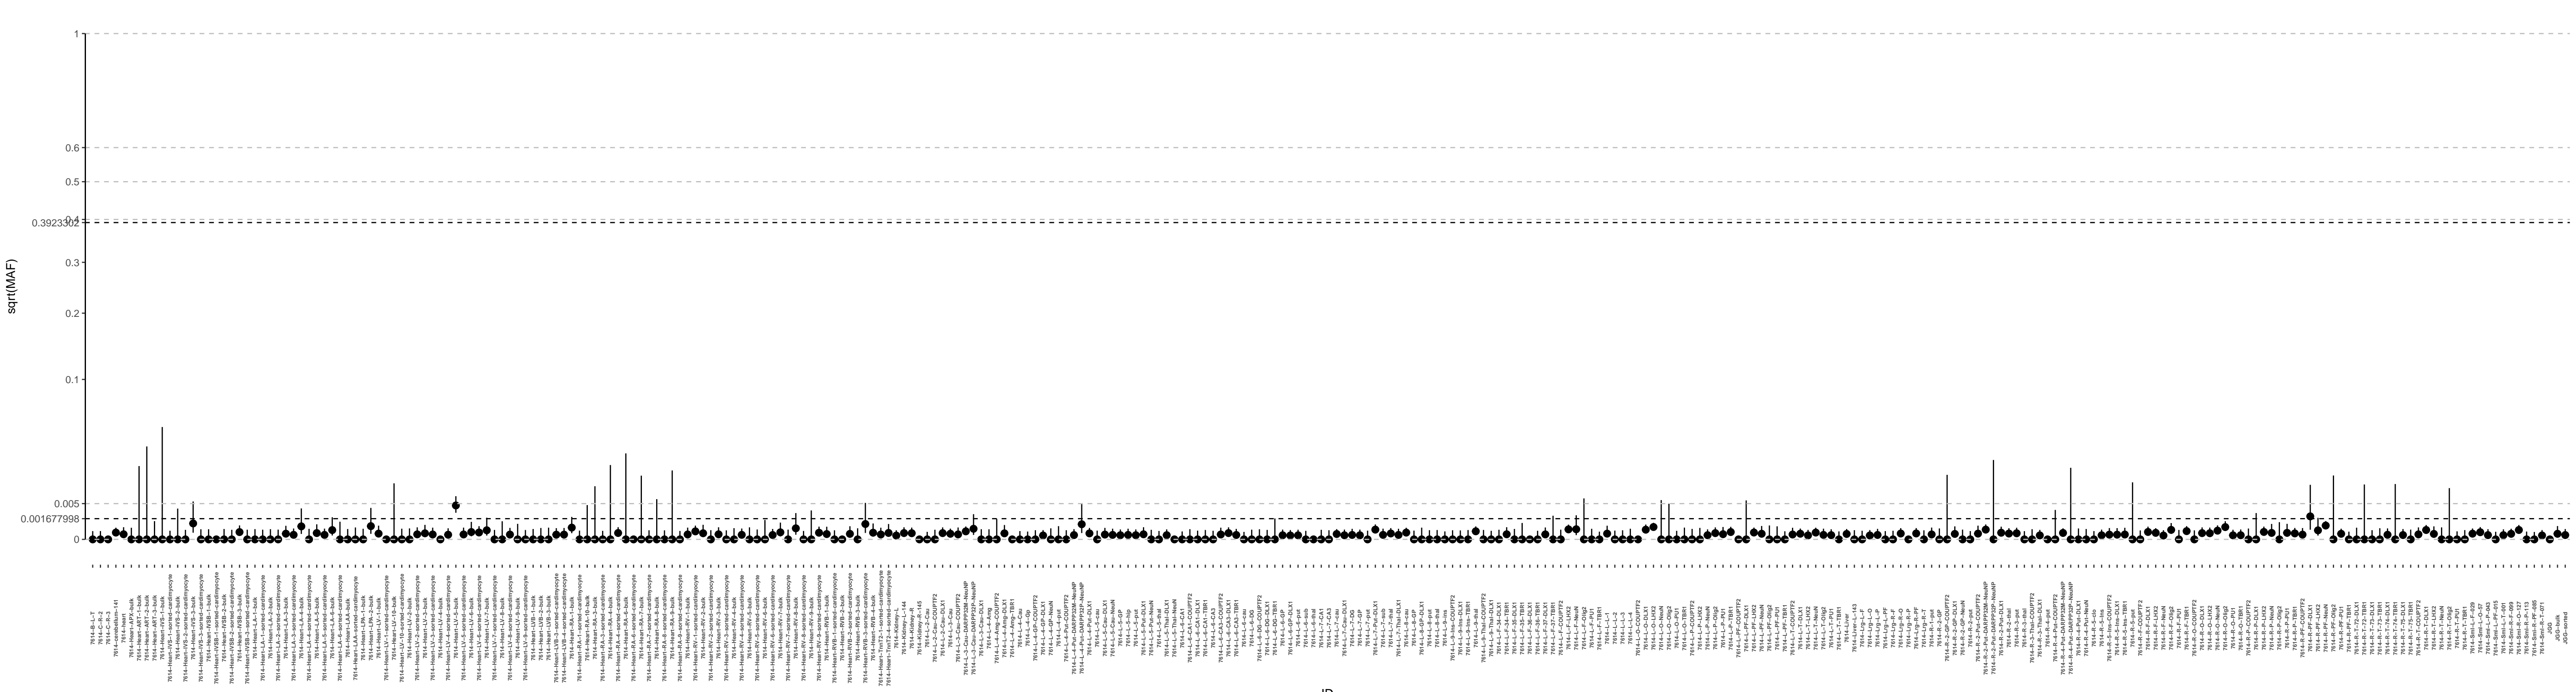

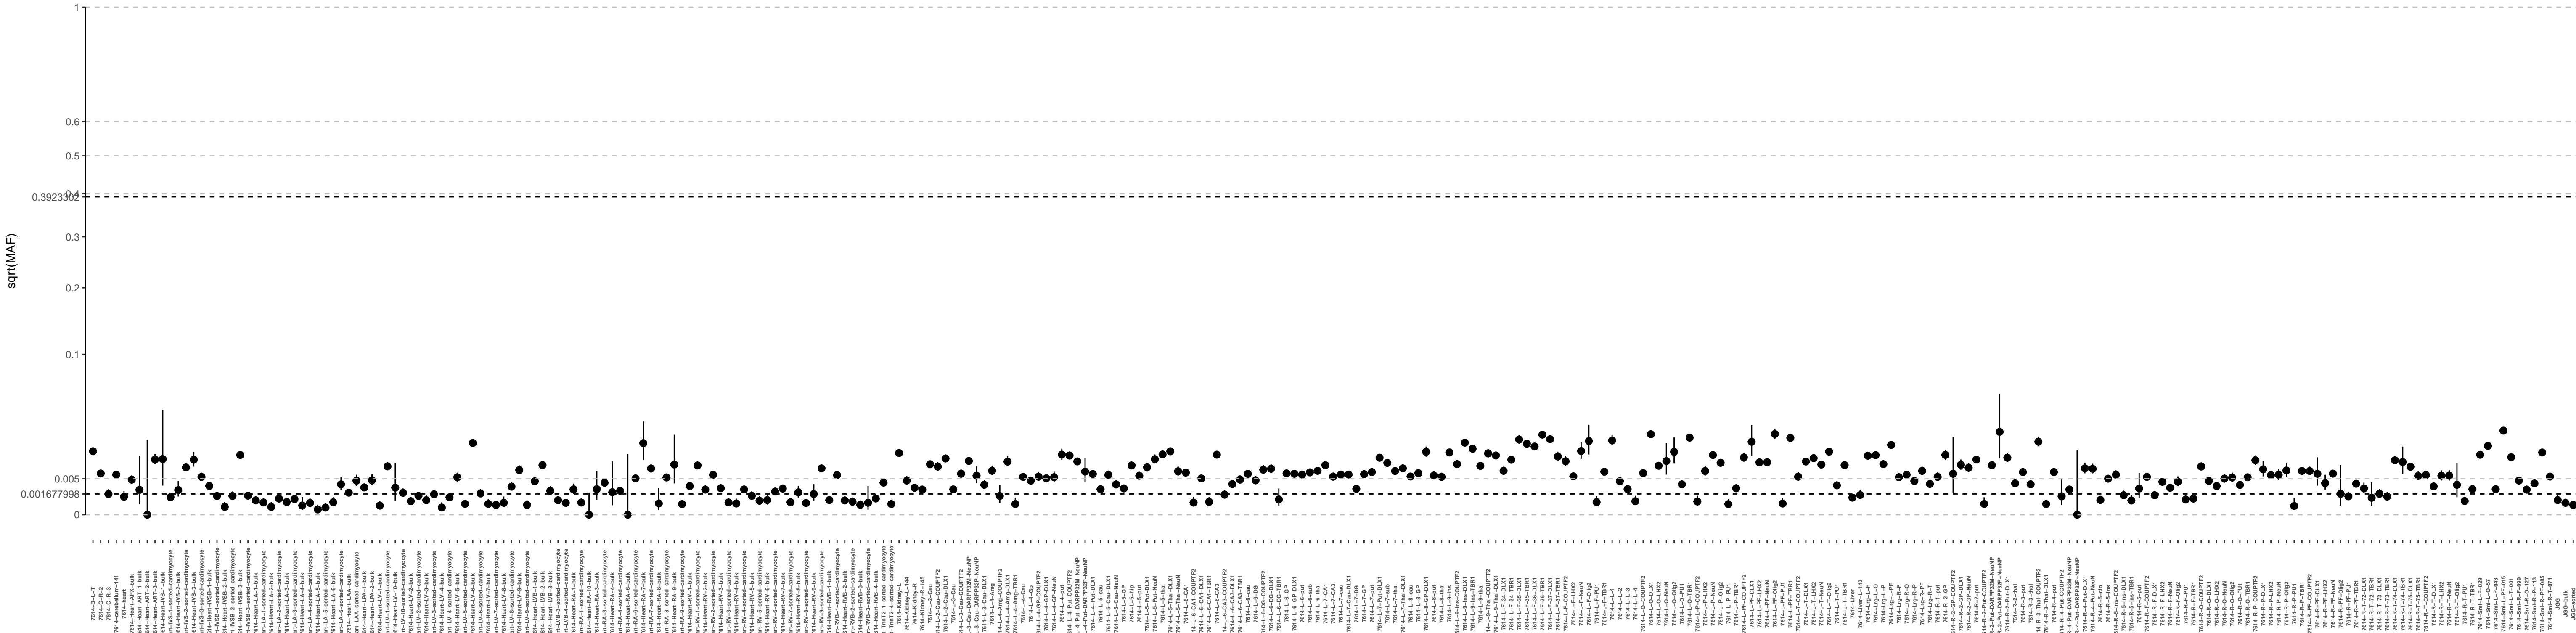



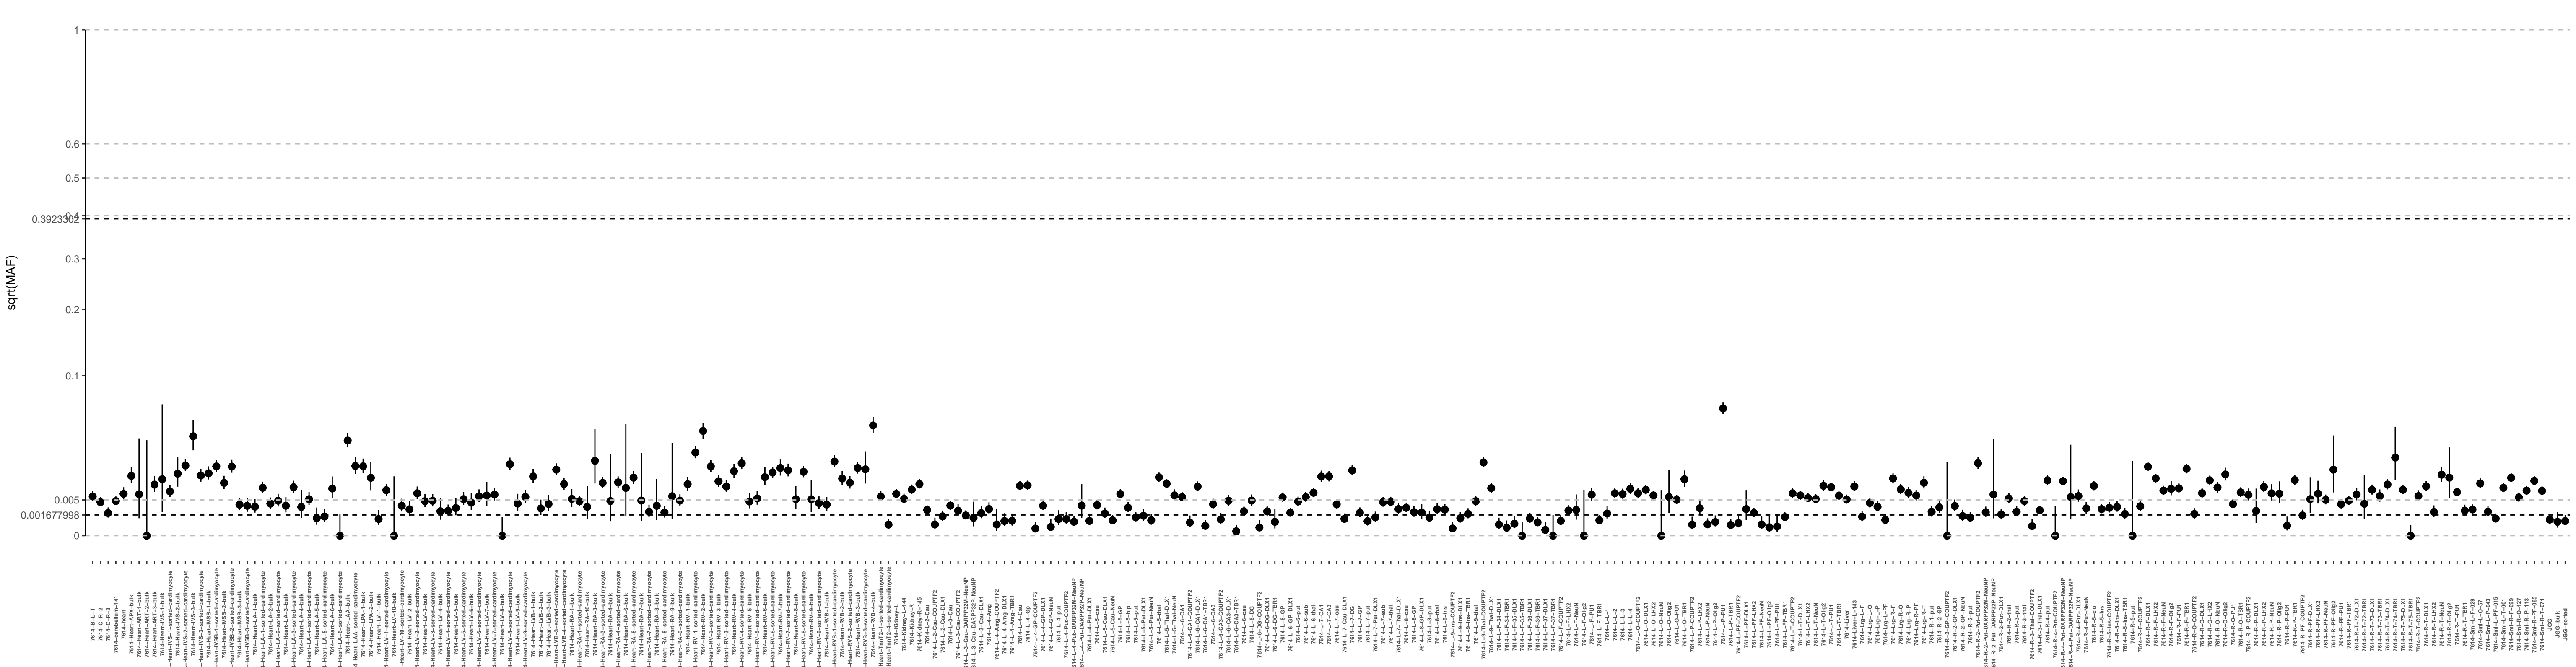





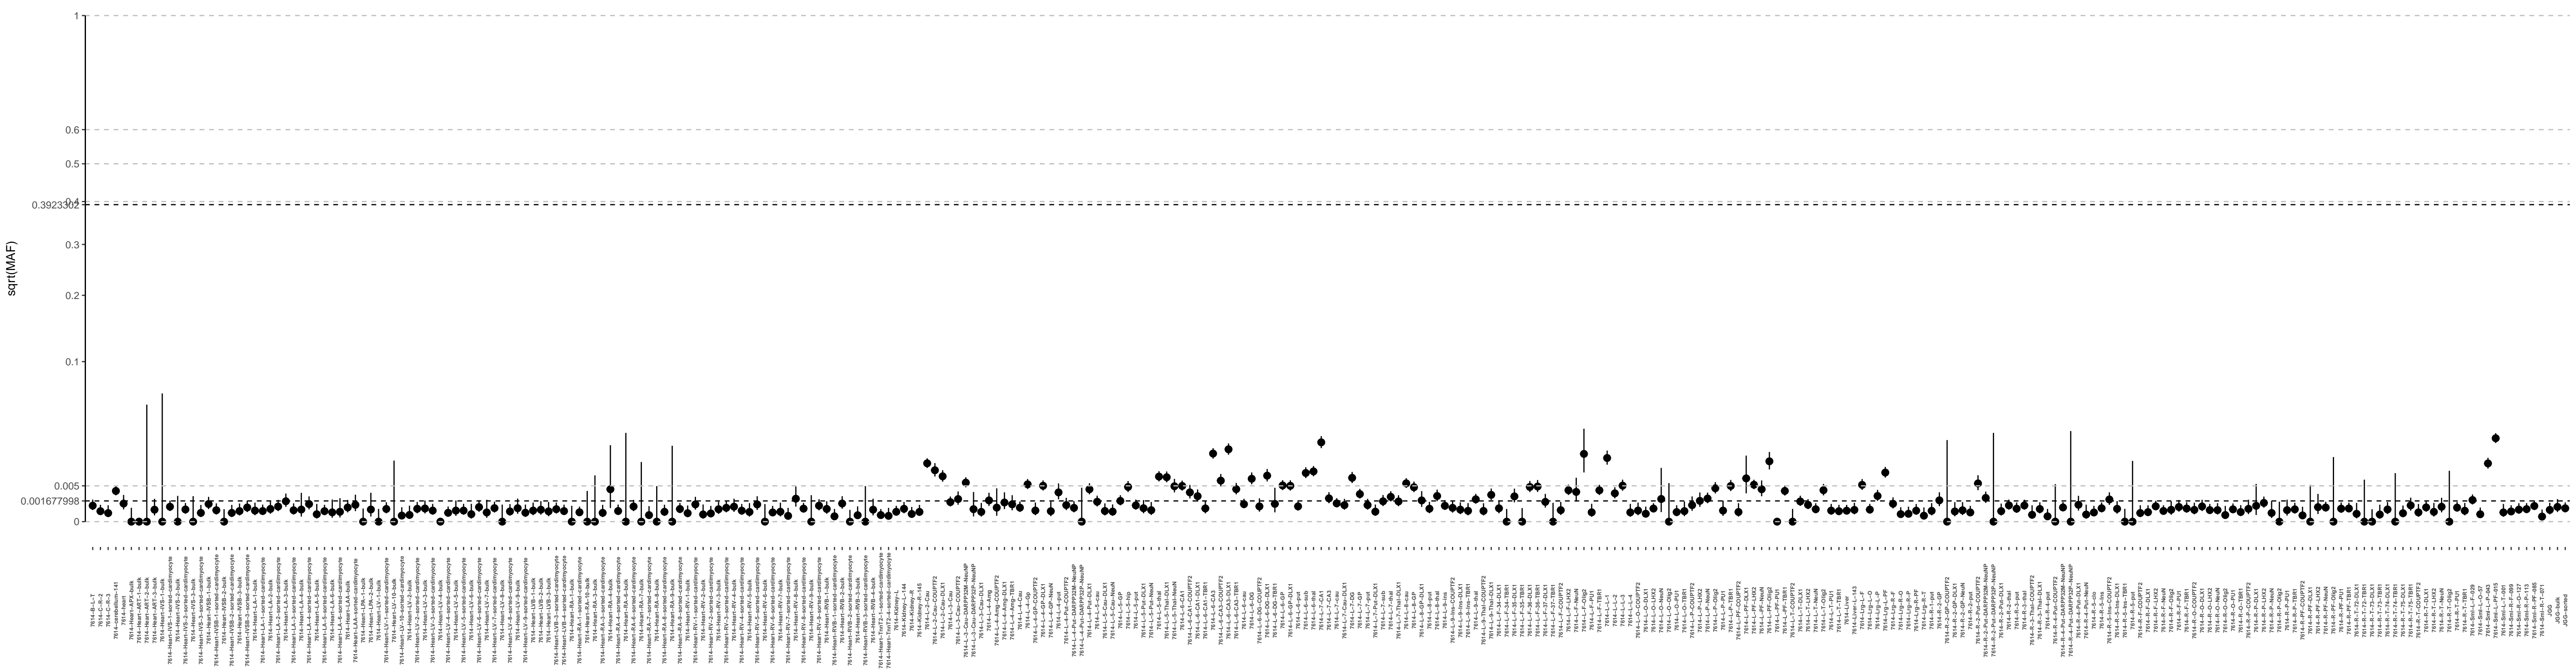

ID

JGG-bulk  
JGG-sorted



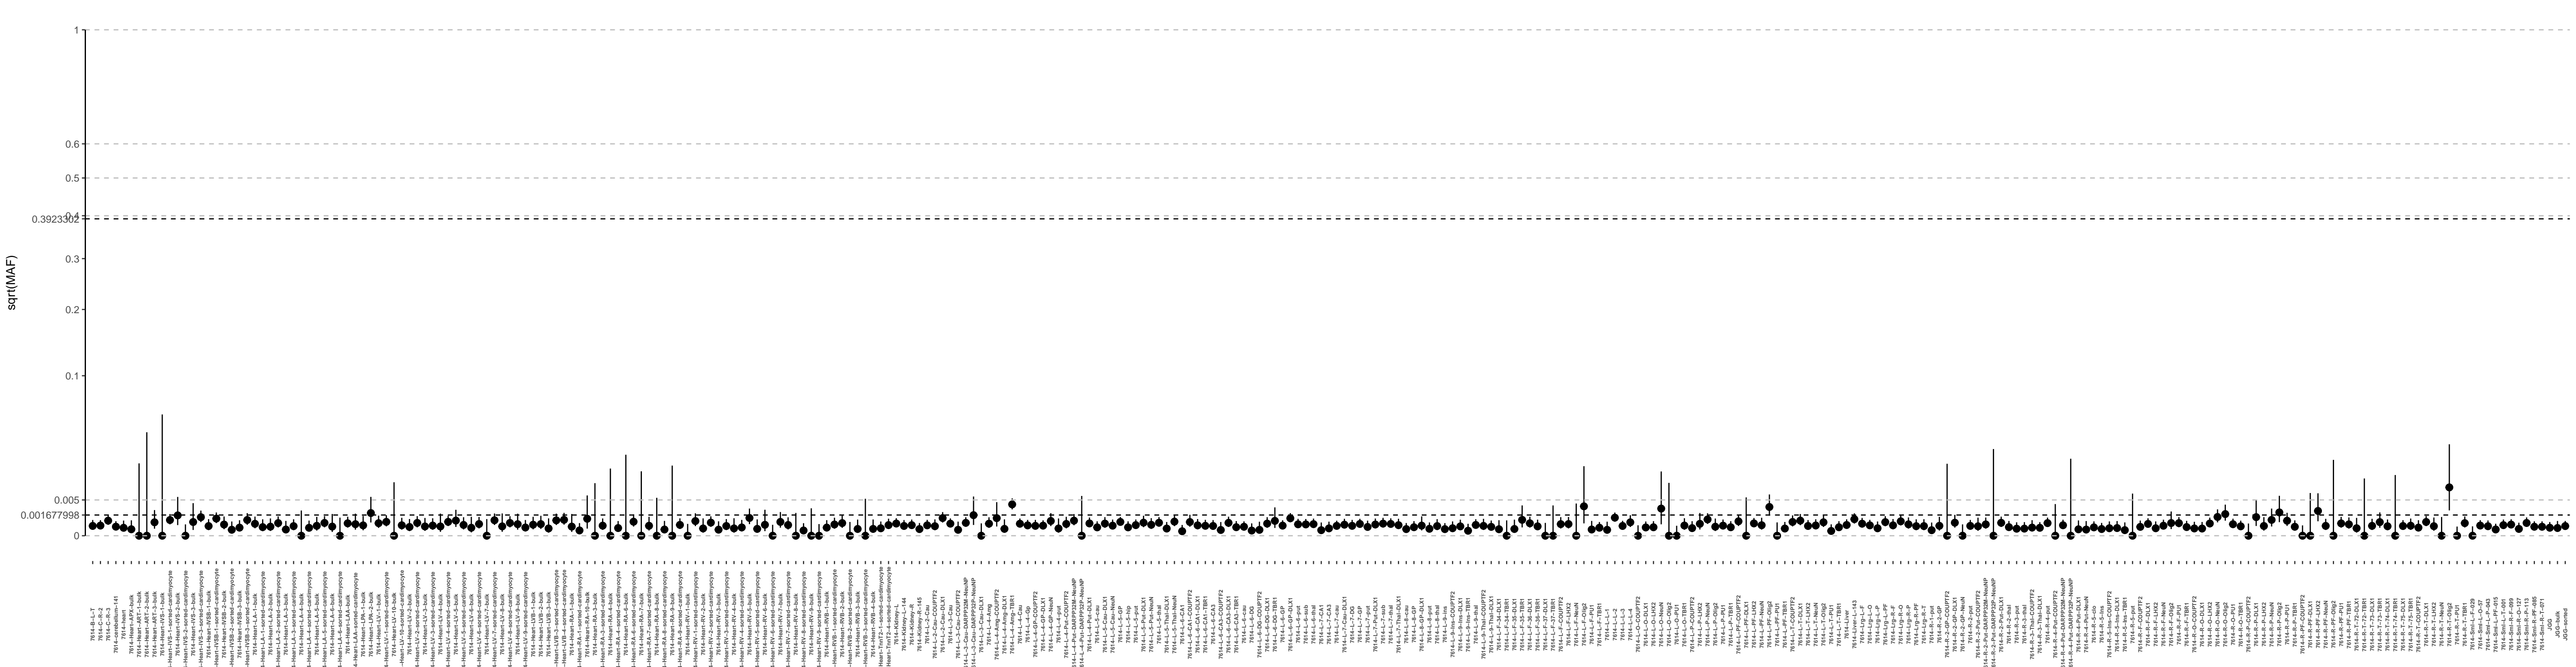



sqrt(MAF)

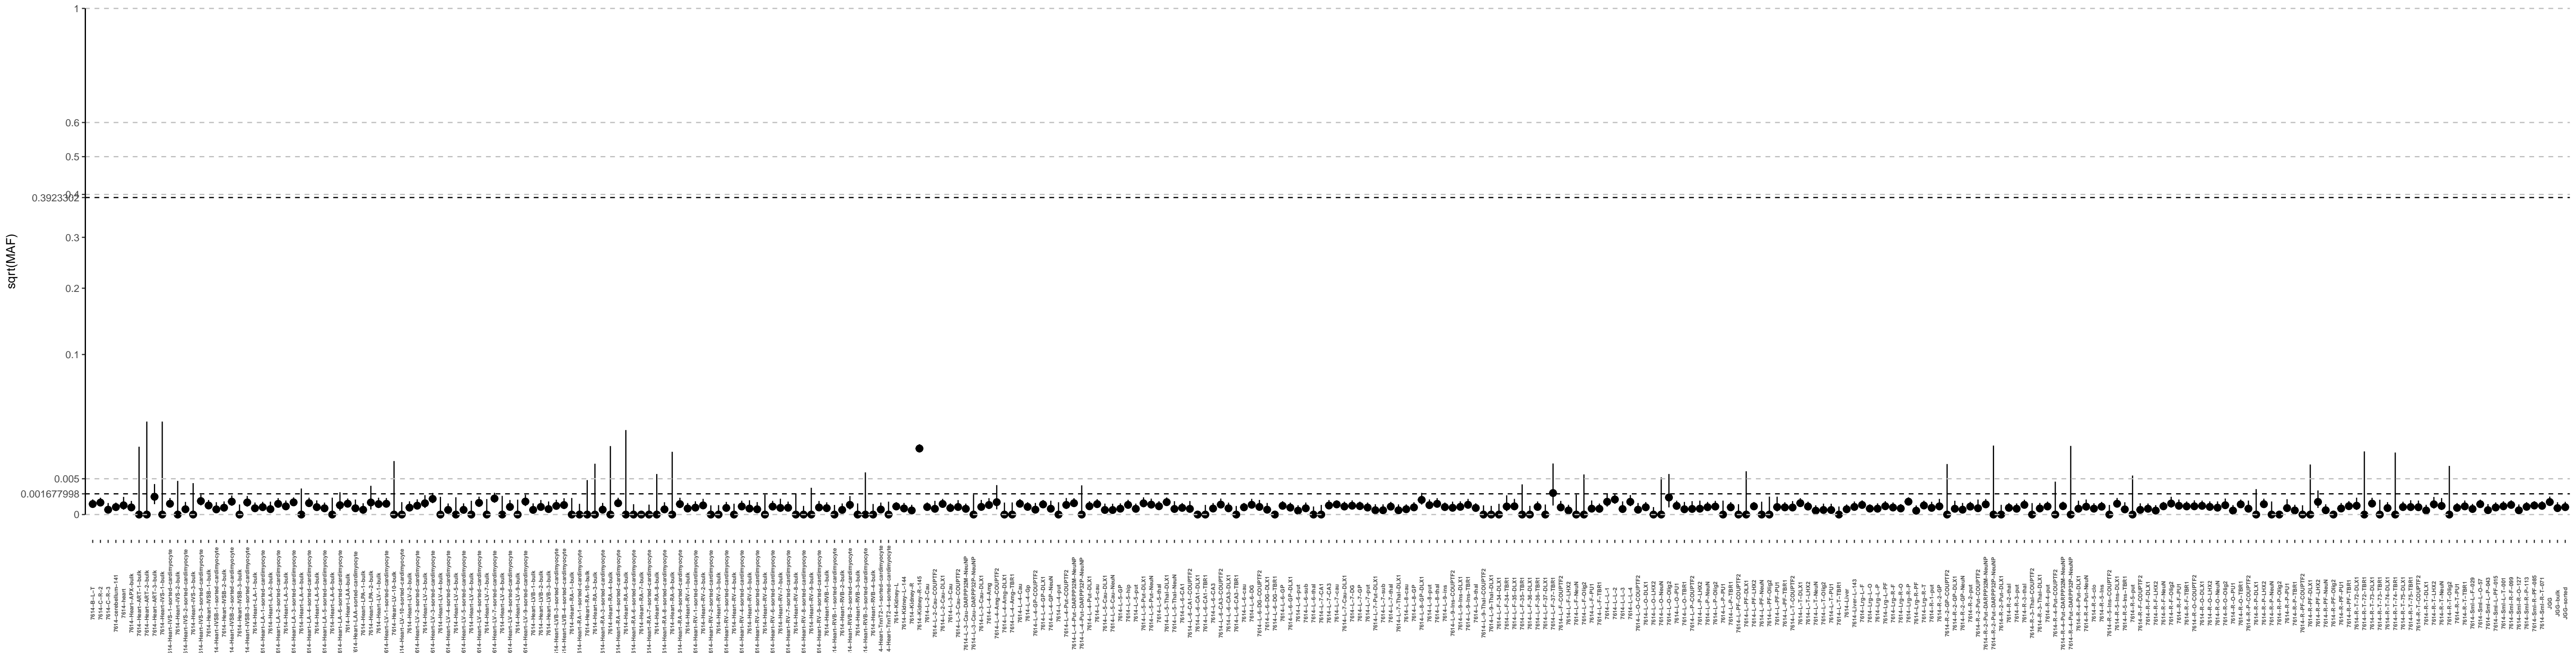

ID

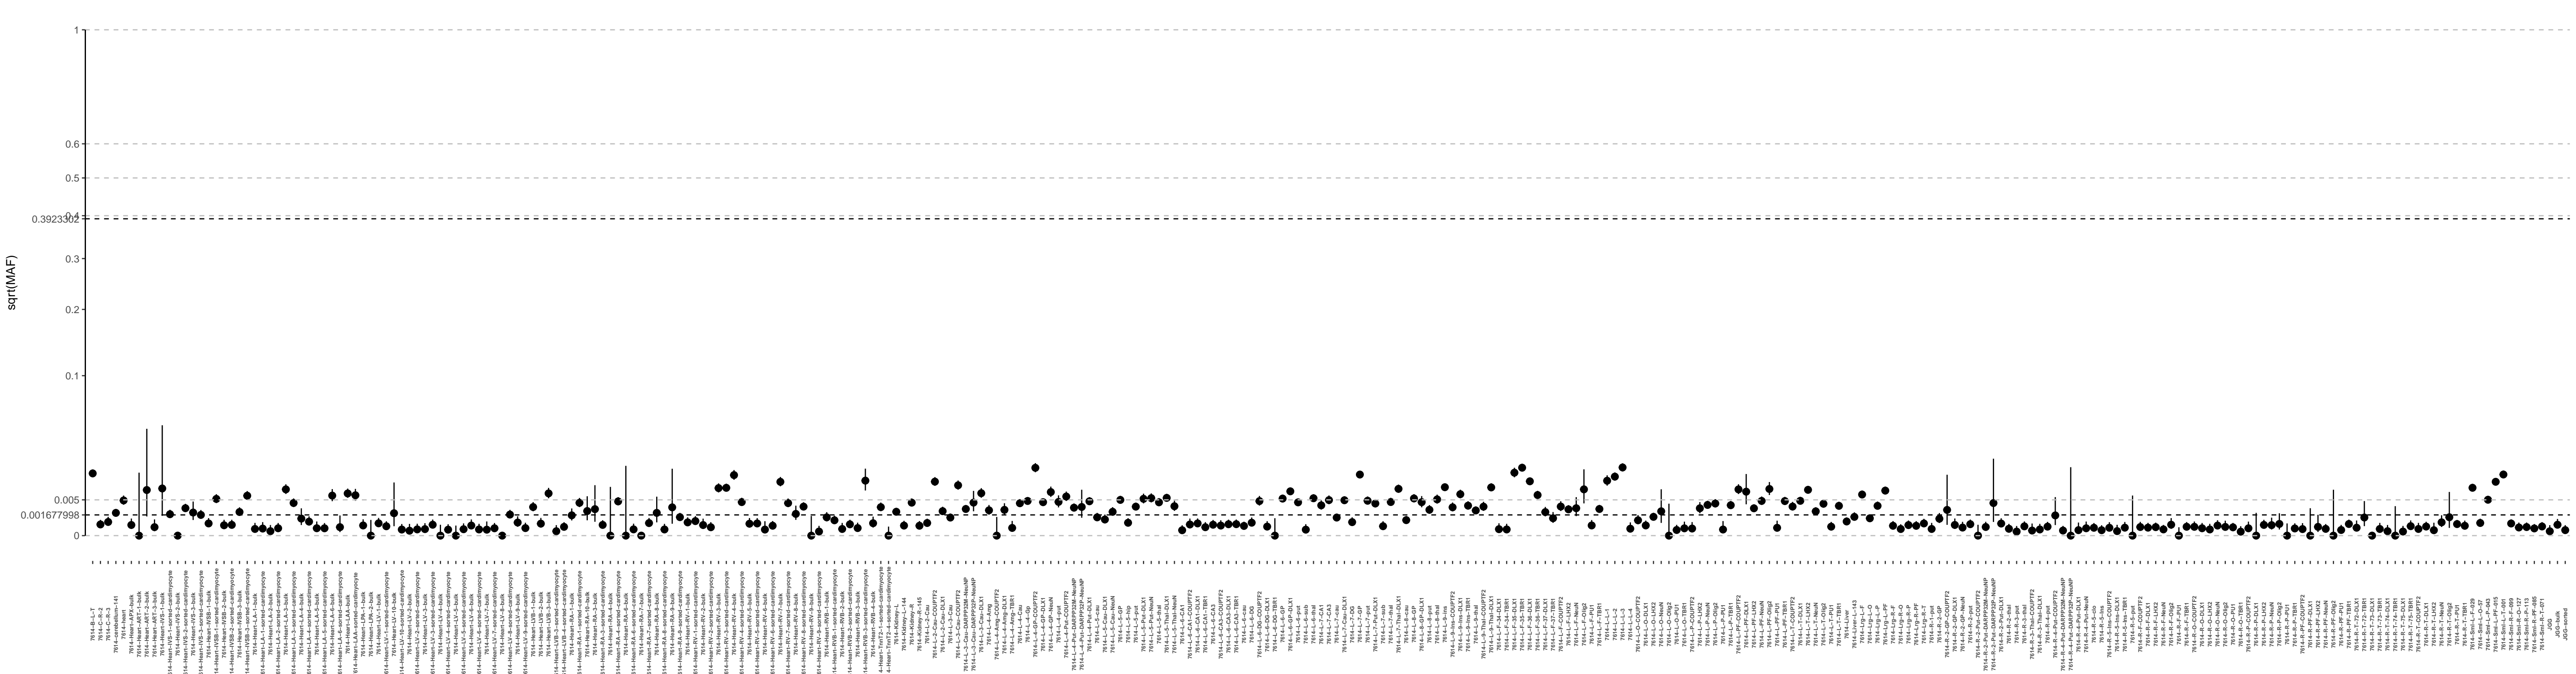

ID

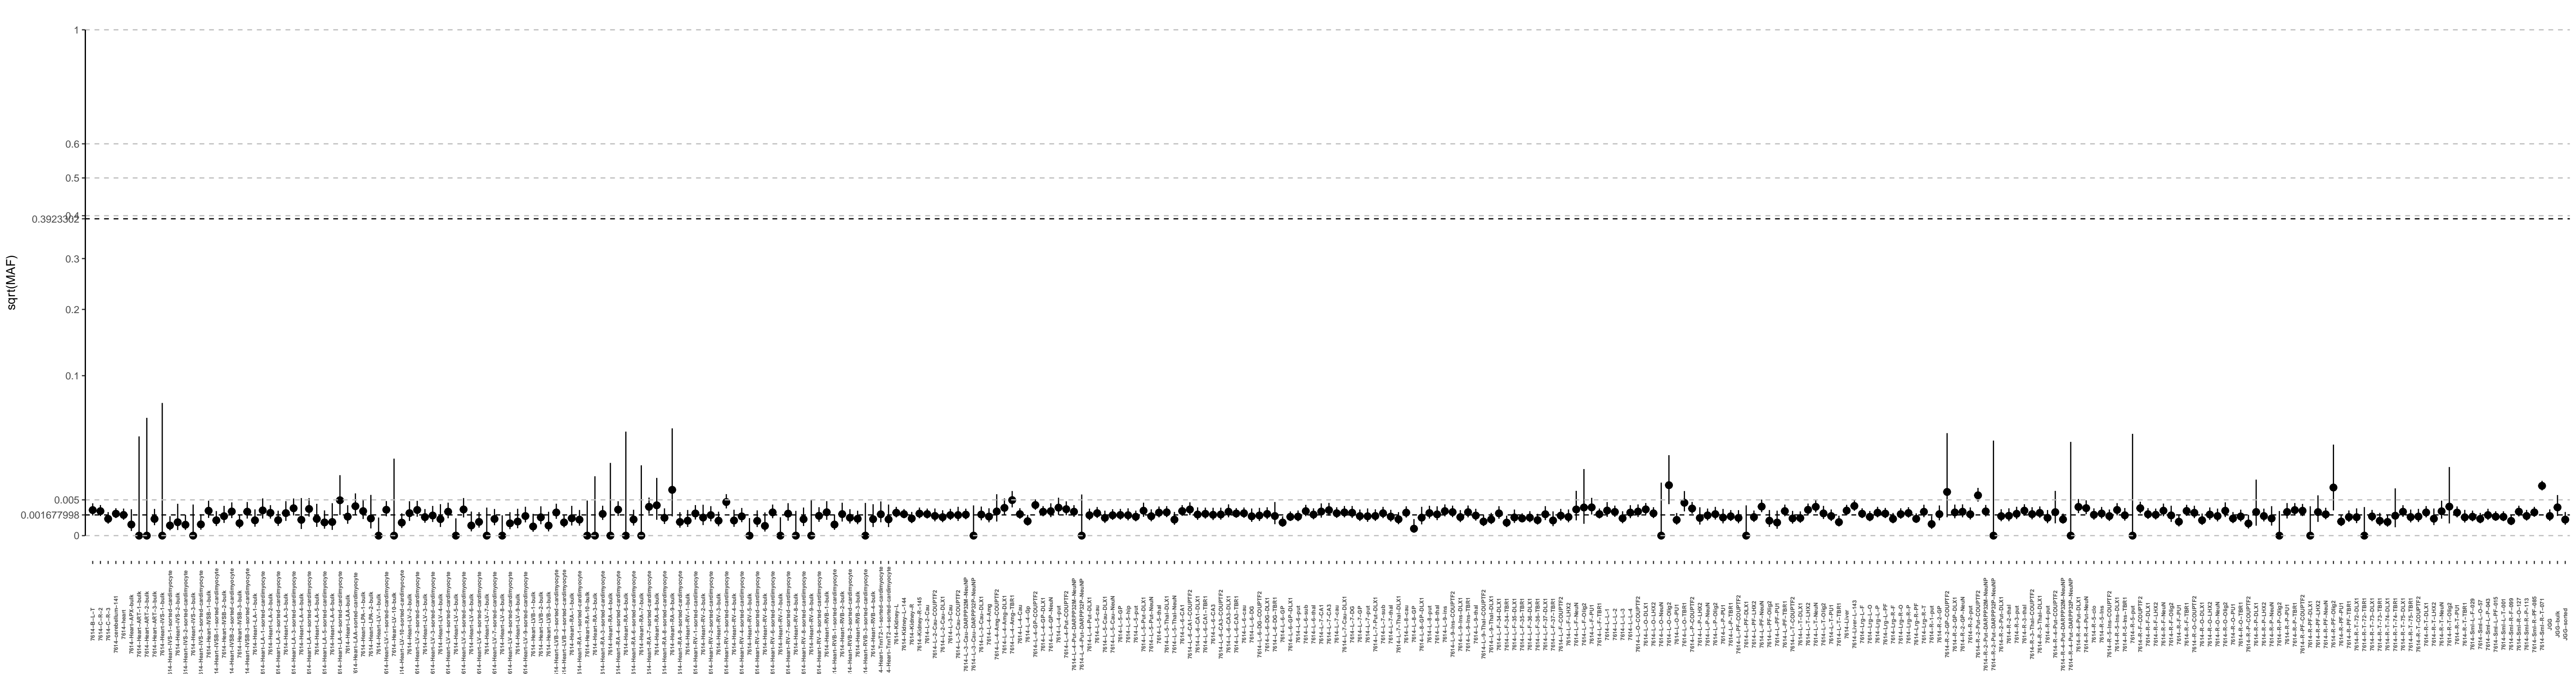

sqrt(MAF)

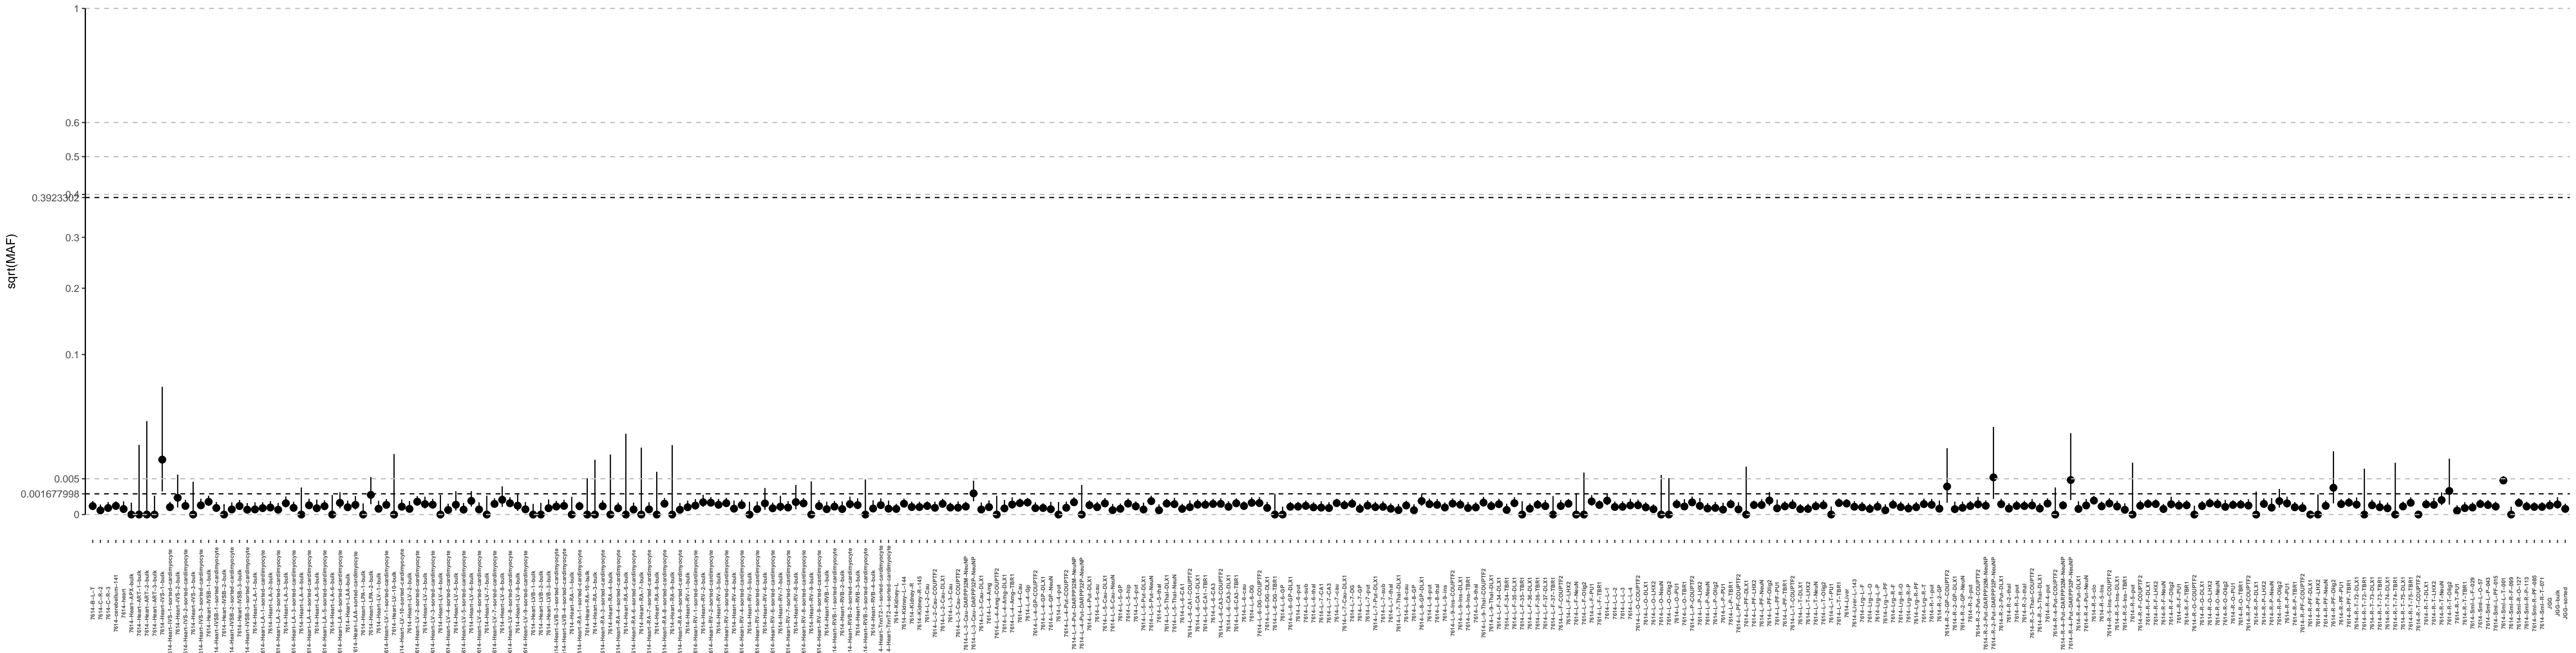

ID



sqrt(MAF)

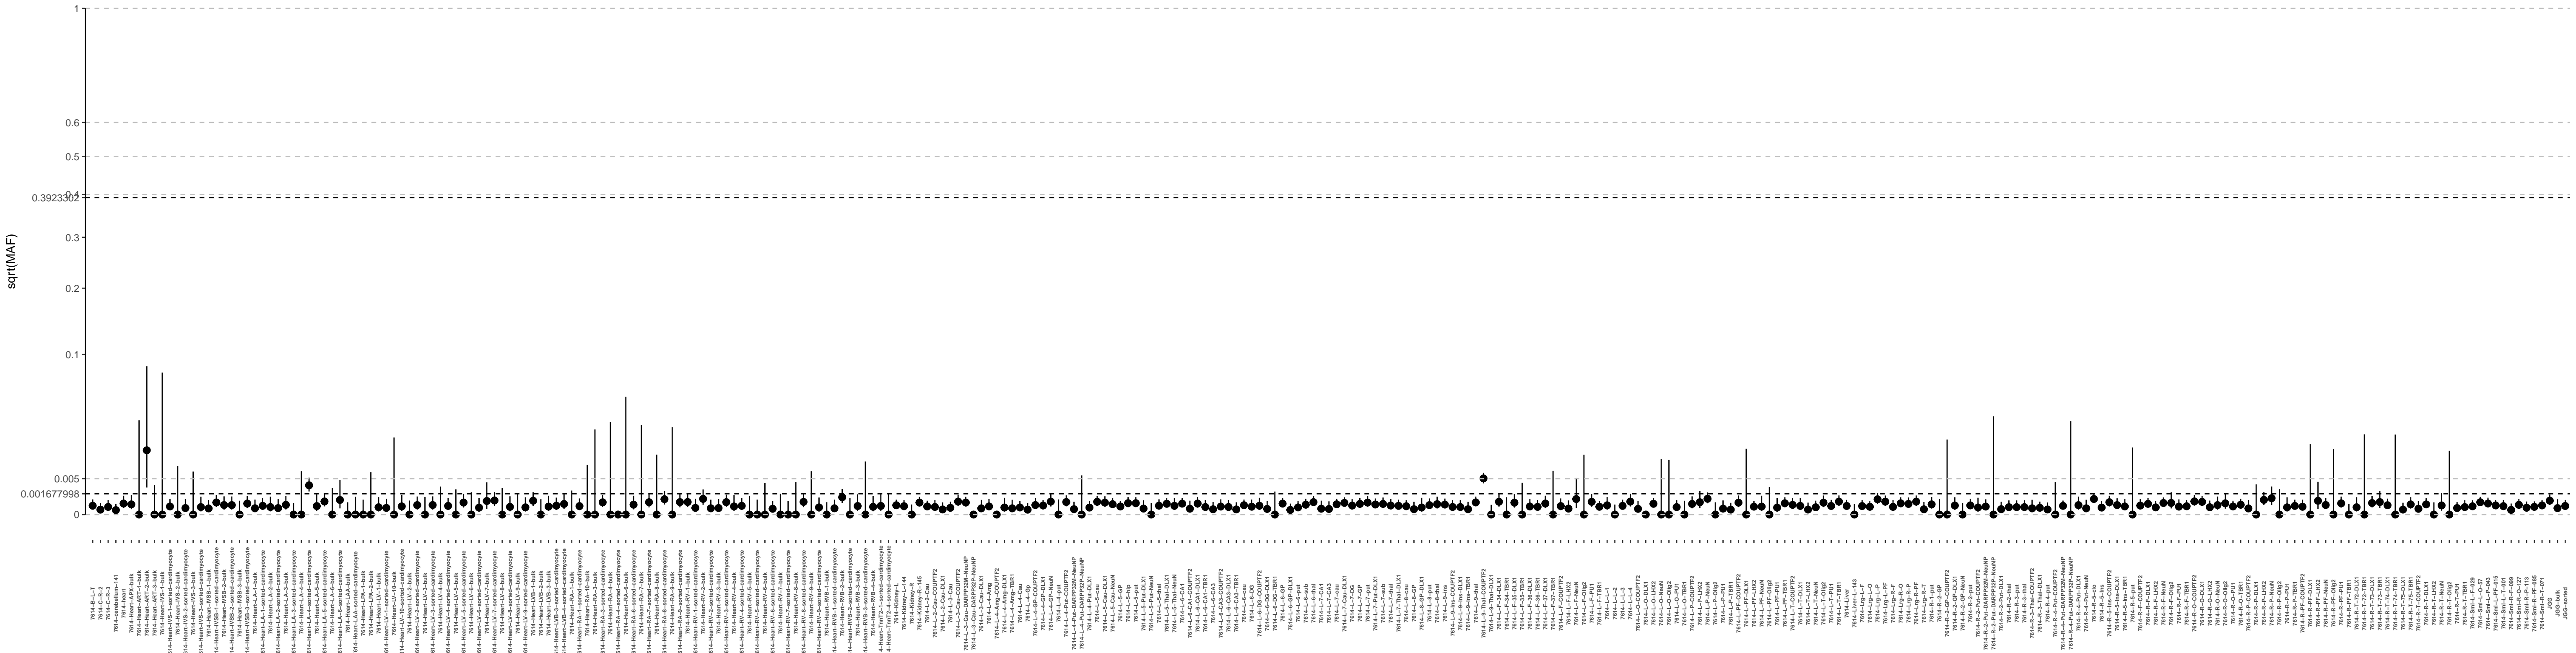

ID

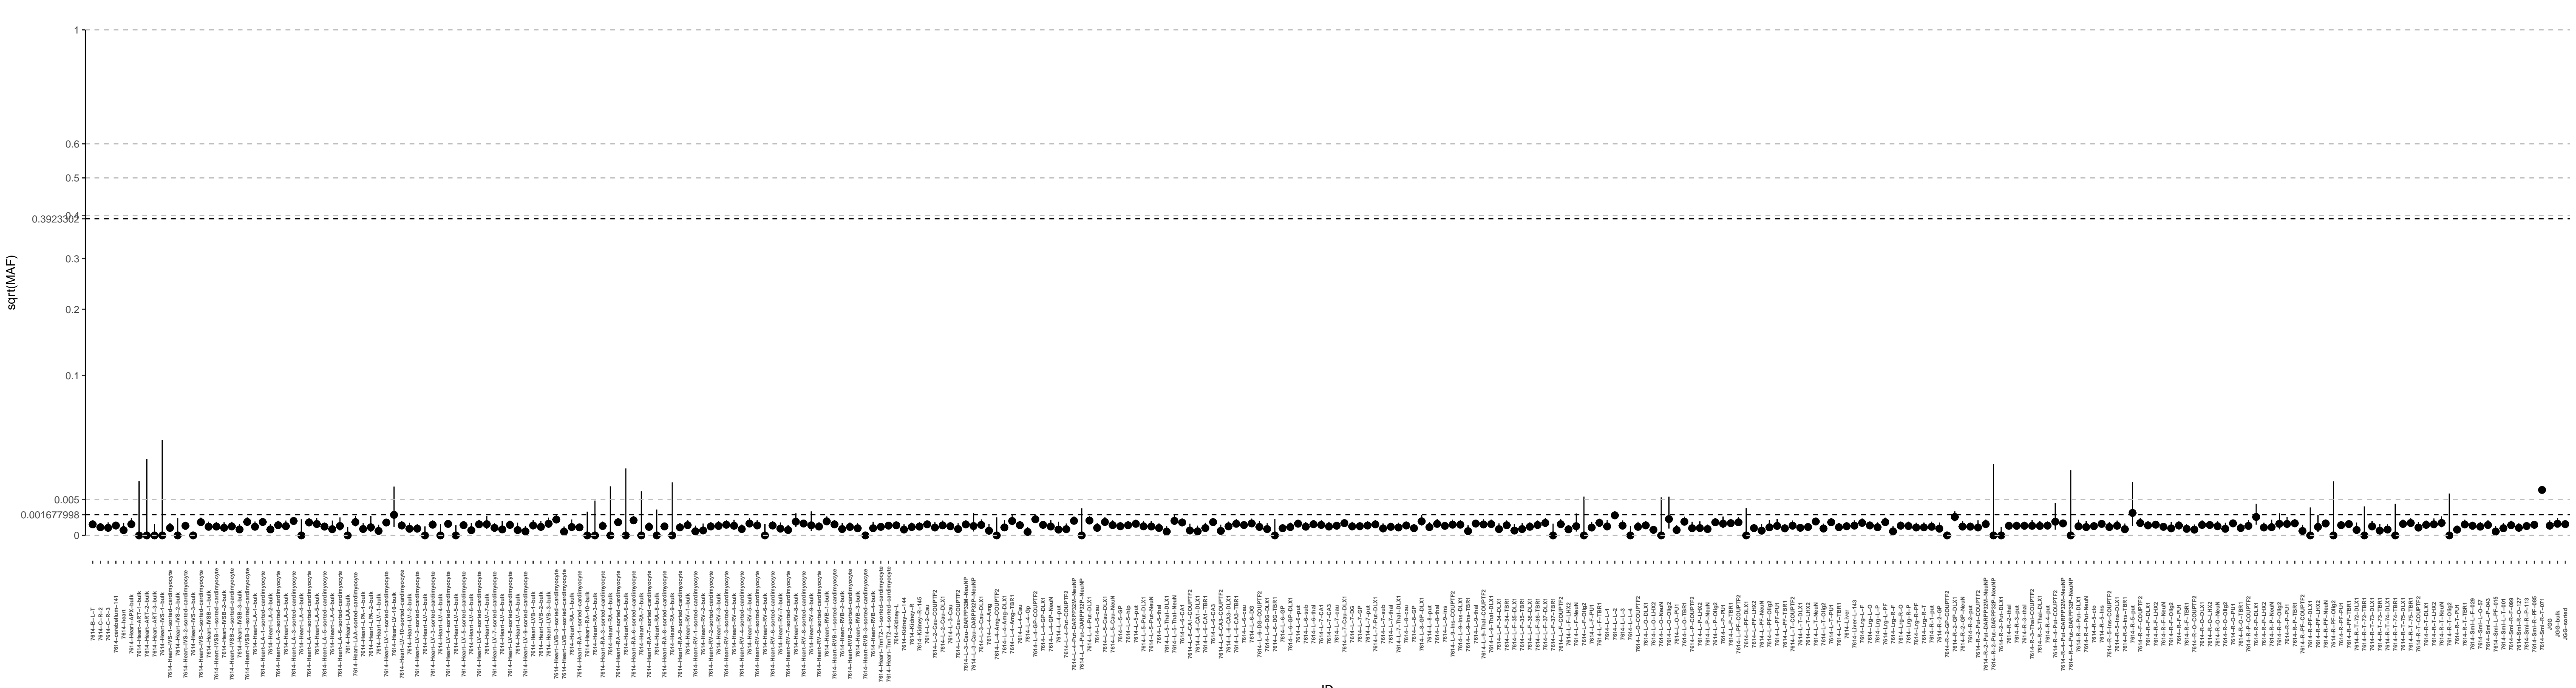



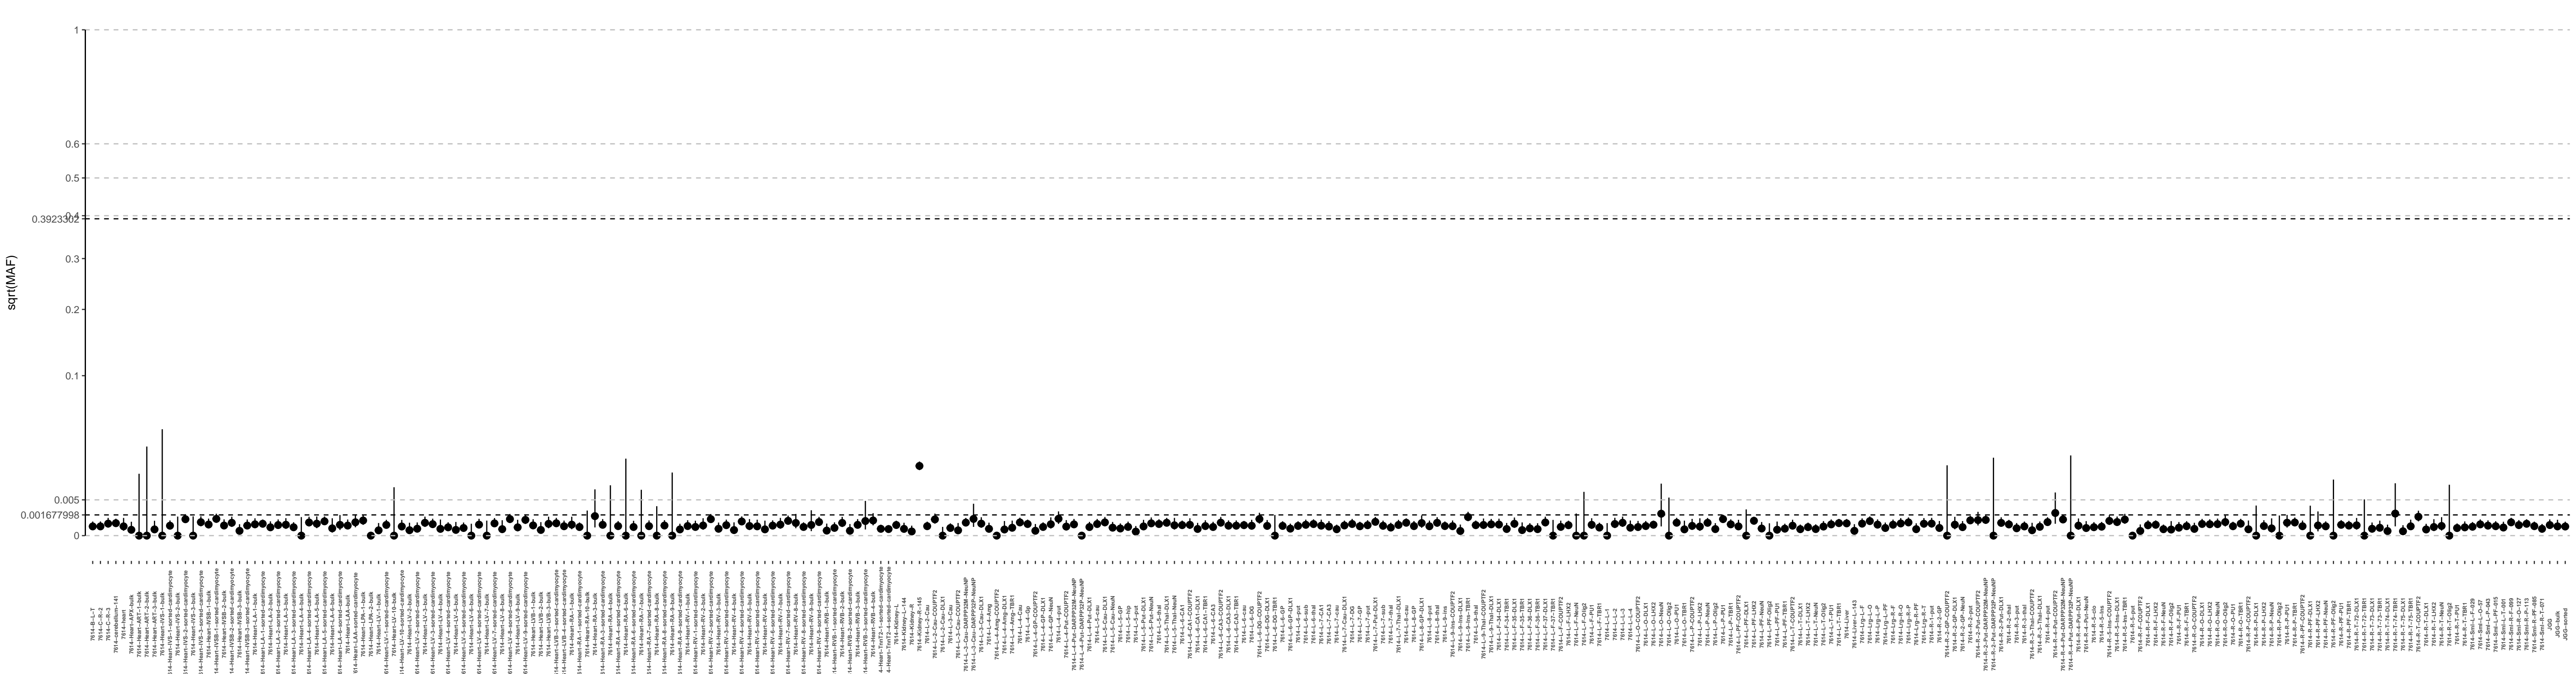

sqrt(MAF)

1  
0.6  
0.5  
0.4  
0.3  
0.2  
0.1  
0.05  
0.01677998  
0

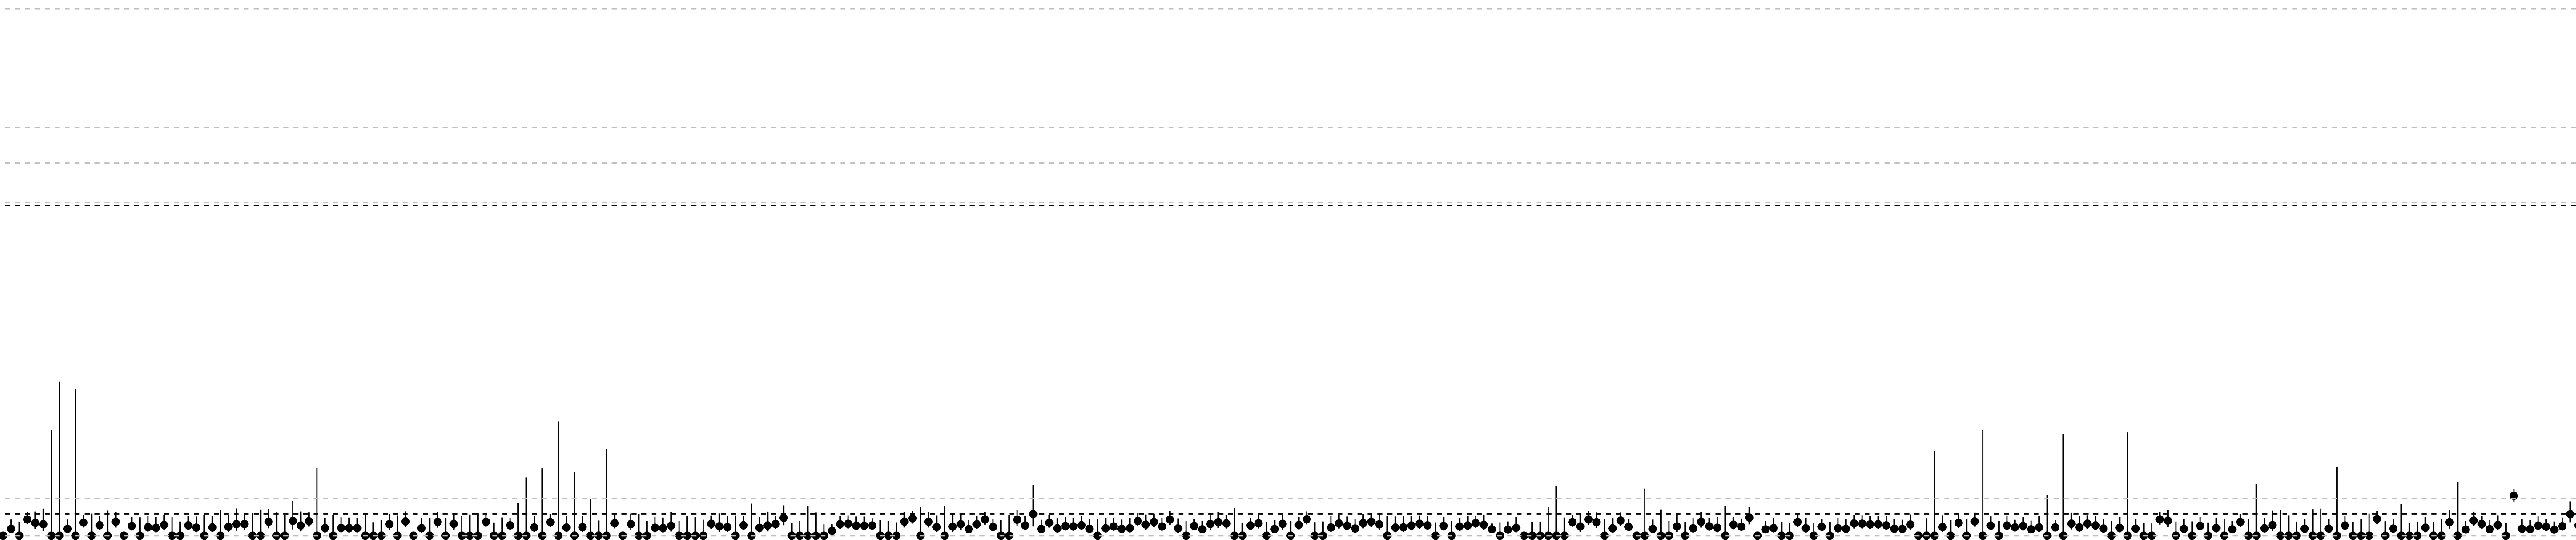

7614-B-L-T  
7614-C-R-2  
7614-erebellum-141  
7614-Heart-VS-1  
7614-Heart-VS-2  
7614-Heart-VS-3  
7614-Heart-VS-4  
7614-Heart-VS-5  
7614-Heart-VS-6  
7614-Heart-VS-7  
7614-Heart-VS-8  
7614-Heart-VS-9  
7614-Heart-VS-10  
7614-Heart-VS-11  
7614-Heart-VS-12  
7614-Heart-VS-13  
7614-Heart-VS-14  
7614-Heart-VS-15  
7614-Heart-VS-16  
7614-Heart-VS-17  
7614-Heart-VS-18  
7614-Heart-VS-19  
7614-Heart-VS-20  
7614-Heart-VS-21  
7614-Heart-VS-22  
7614-Heart-VS-23  
7614-Heart-VS-24  
7614-Heart-VS-25  
7614-Heart-VS-26  
7614-Heart-VS-27  
7614-Heart-VS-28  
7614-Heart-VS-29  
7614-Heart-VS-30  
7614-Heart-VS-31  
7614-Heart-VS-32  
7614-Heart-VS-33  
7614-Heart-VS-34  
7614-Heart-VS-35  
7614-Heart-VS-36  
7614-Heart-VS-37  
7614-Heart-VS-38  
7614-Heart-VS-39  
7614-Heart-VS-40  
7614-Heart-VS-41  
7614-Heart-VS-42  
7614-Heart-VS-43  
7614-Heart-VS-44  
7614-Heart-VS-45  
7614-Heart-VS-46  
7614-Heart-VS-47  
7614-Heart-VS-48  
7614-Heart-VS-49  
7614-Heart-VS-50  
7614-Heart-VS-51  
7614-Heart-VS-52  
7614-Heart-VS-53  
7614-Heart-VS-54  
7614-Heart-VS-55  
7614-Heart-VS-56  
7614-Heart-VS-57  
7614-Heart-VS-58  
7614-Heart-VS-59  
7614-Heart-VS-60  
7614-Heart-VS-61  
7614-Heart-VS-62  
7614-Heart-VS-63  
7614-Heart-VS-64  
7614-Heart-VS-65  
7614-Heart-VS-66  
7614-Heart-VS-67  
7614-Heart-VS-68  
7614-Heart-VS-69  
7614-Heart-VS-70  
7614-Heart-VS-71  
7614-Heart-VS-72  
7614-Heart-VS-73  
7614-Heart-VS-74  
7614-Heart-VS-75  
7614-Heart-VS-76  
7614-Heart-VS-77  
7614-Heart-VS-78  
7614-Heart-VS-79  
7614-Heart-VS-80  
7614-Heart-VS-81  
7614-Heart-VS-82  
7614-Heart-VS-83  
7614-Heart-VS-84  
7614-Heart-VS-85  
7614-Heart-VS-86  
7614-Heart-VS-87  
7614-Heart-VS-88  
7614-Heart-VS-89  
7614-Heart-VS-90  
7614-Heart-VS-91  
7614-Heart-VS-92  
7614-Heart-VS-93  
7614-Heart-VS-94  
7614-Heart-VS-95  
7614-Heart-VS-96  
7614-Heart-VS-97  
7614-Heart-VS-98  
7614-Heart-VS-99  
7614-Heart-VS-100

ID



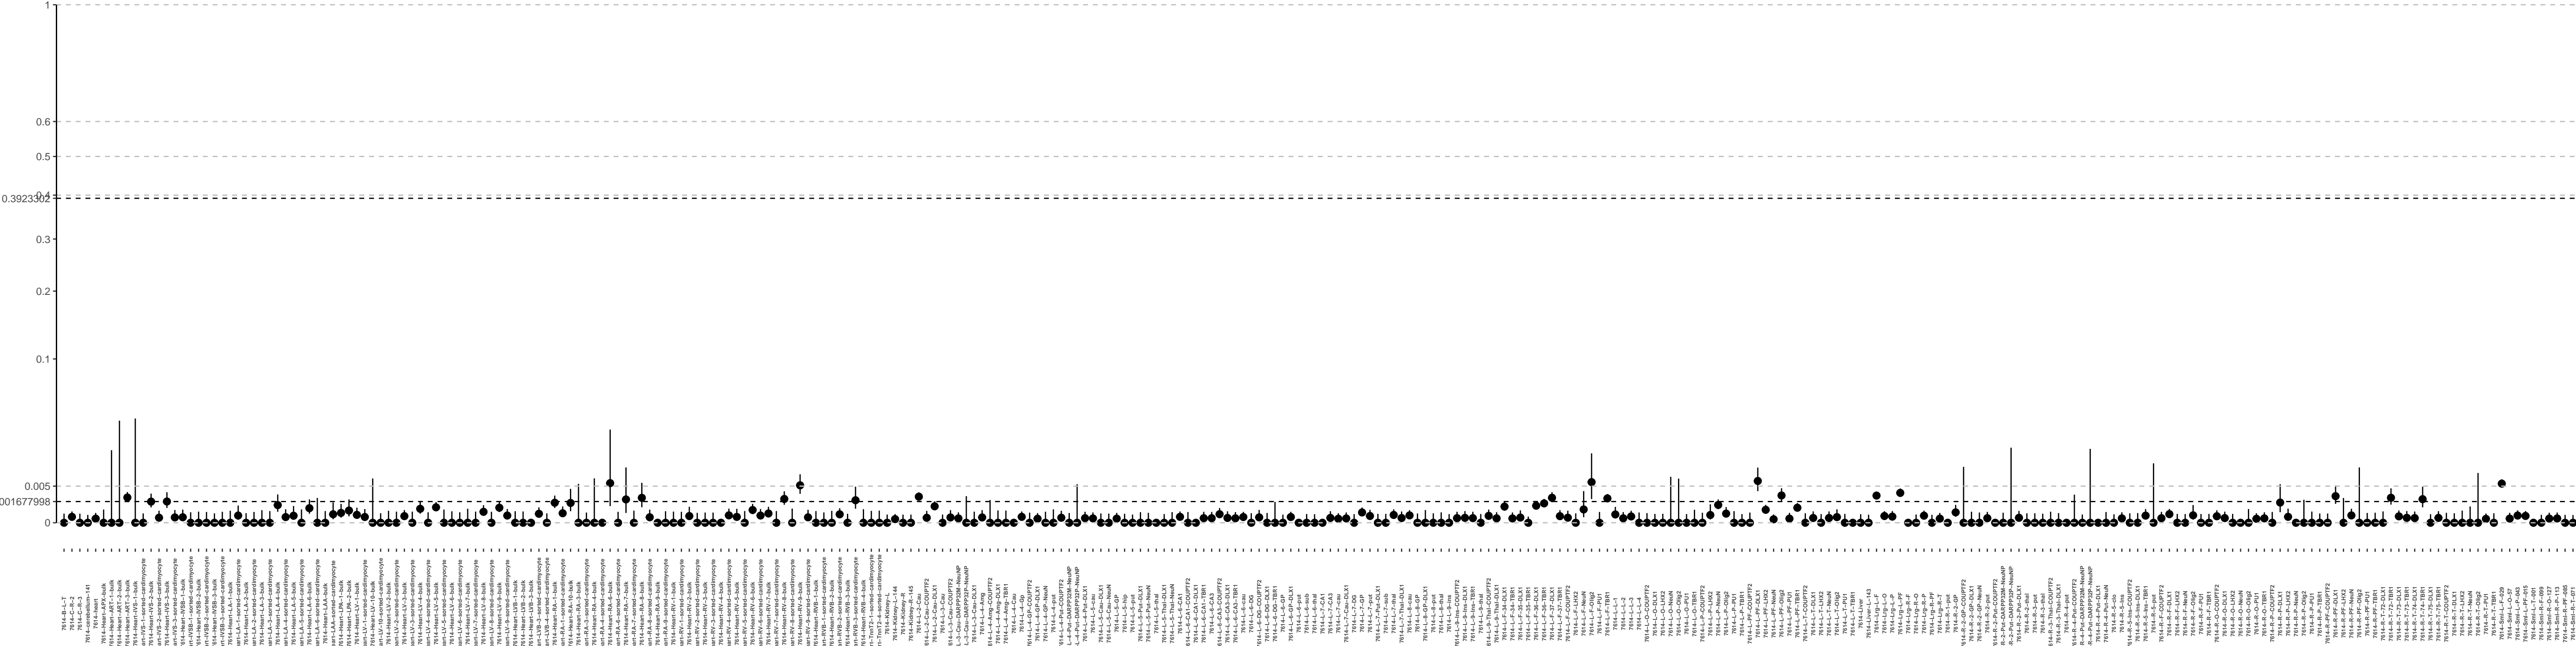

ID

JG5-bulk  
JG6-sorted

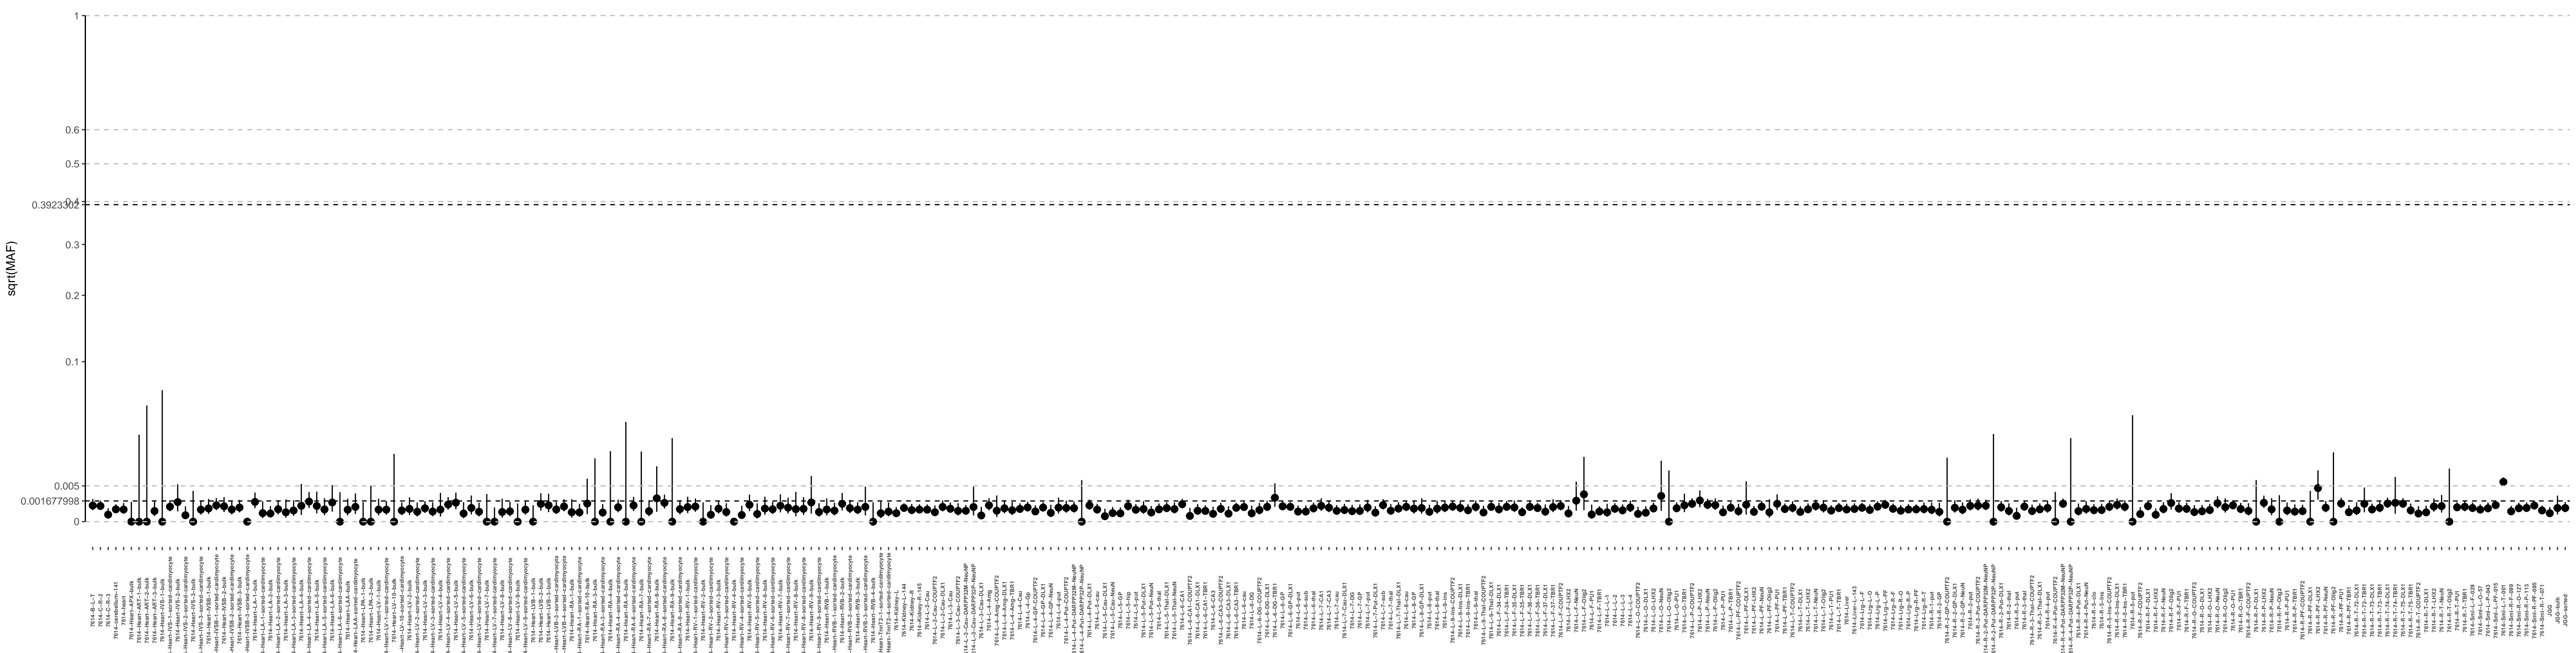



sqrt(MAF)

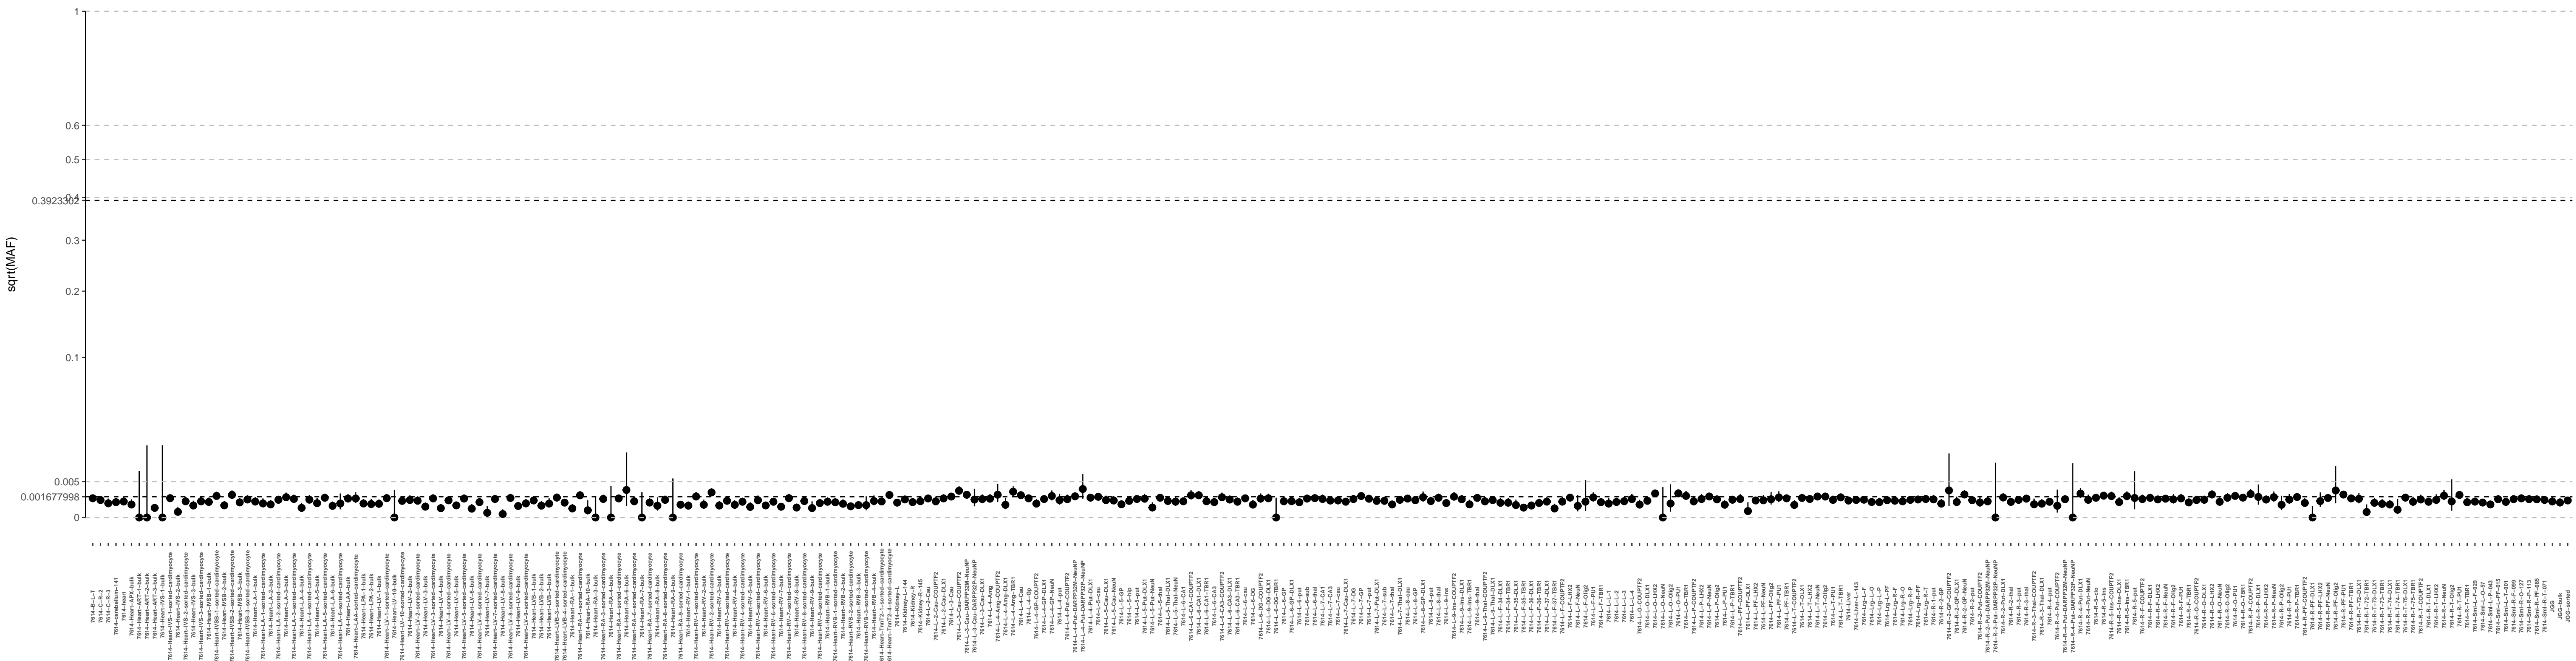

ID

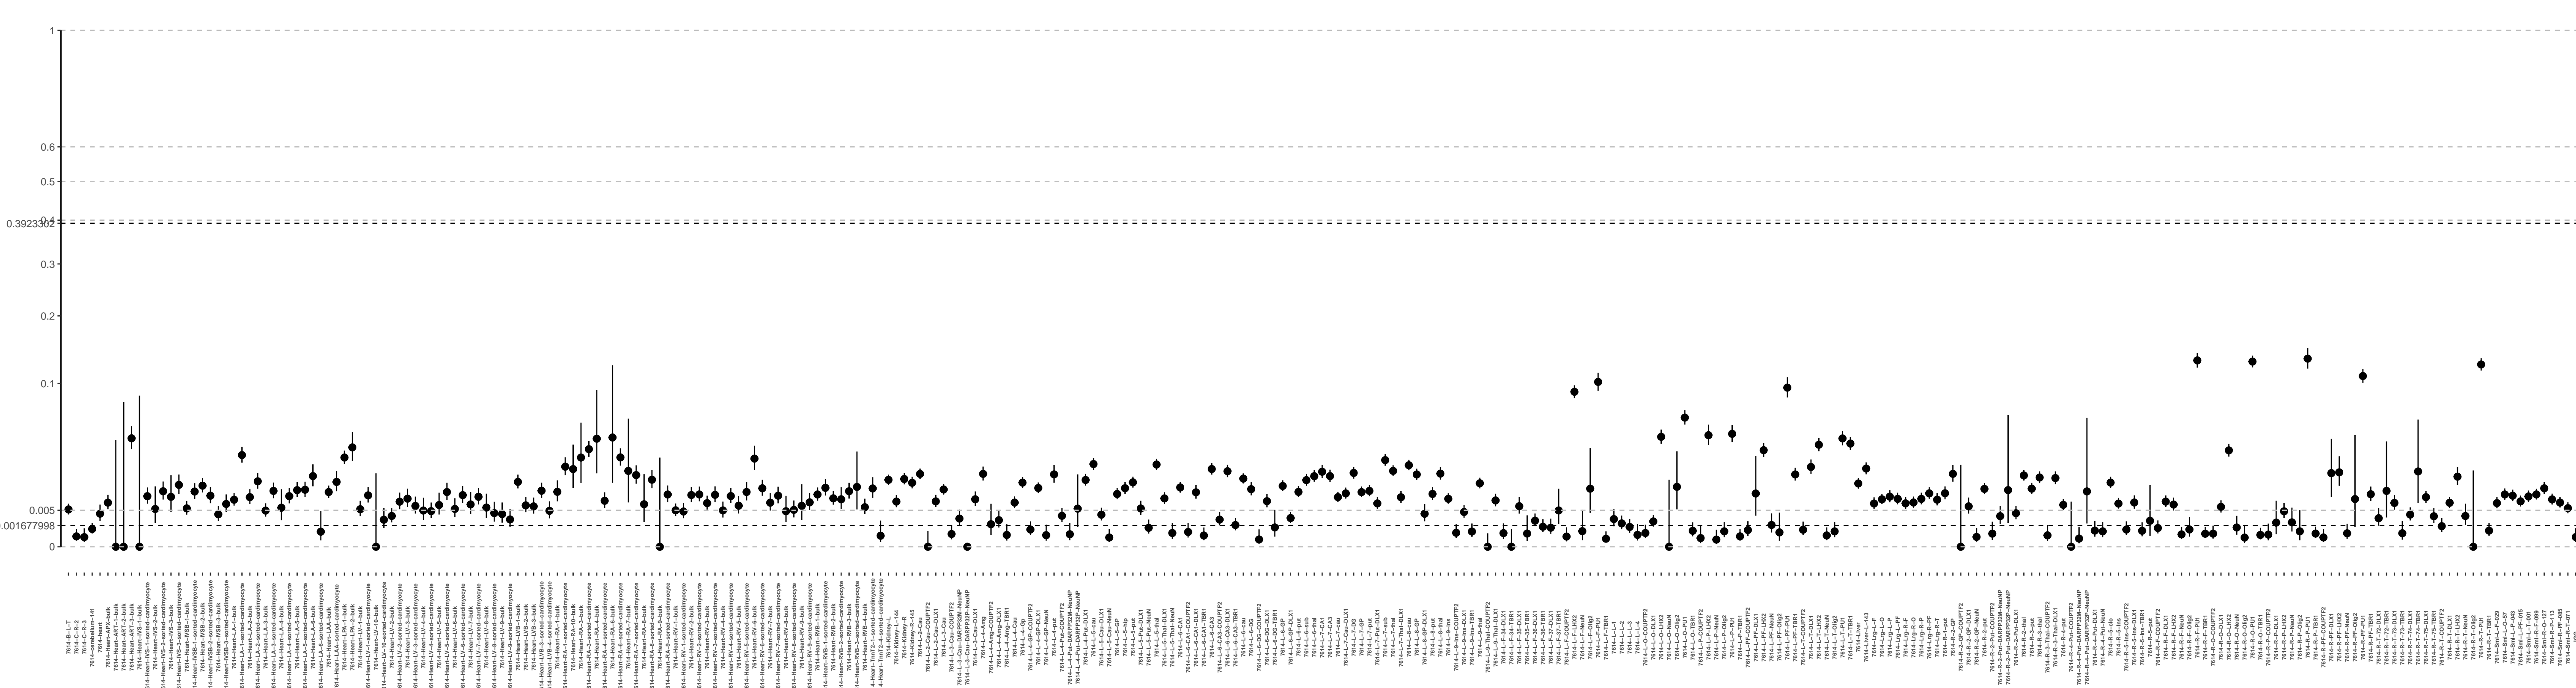



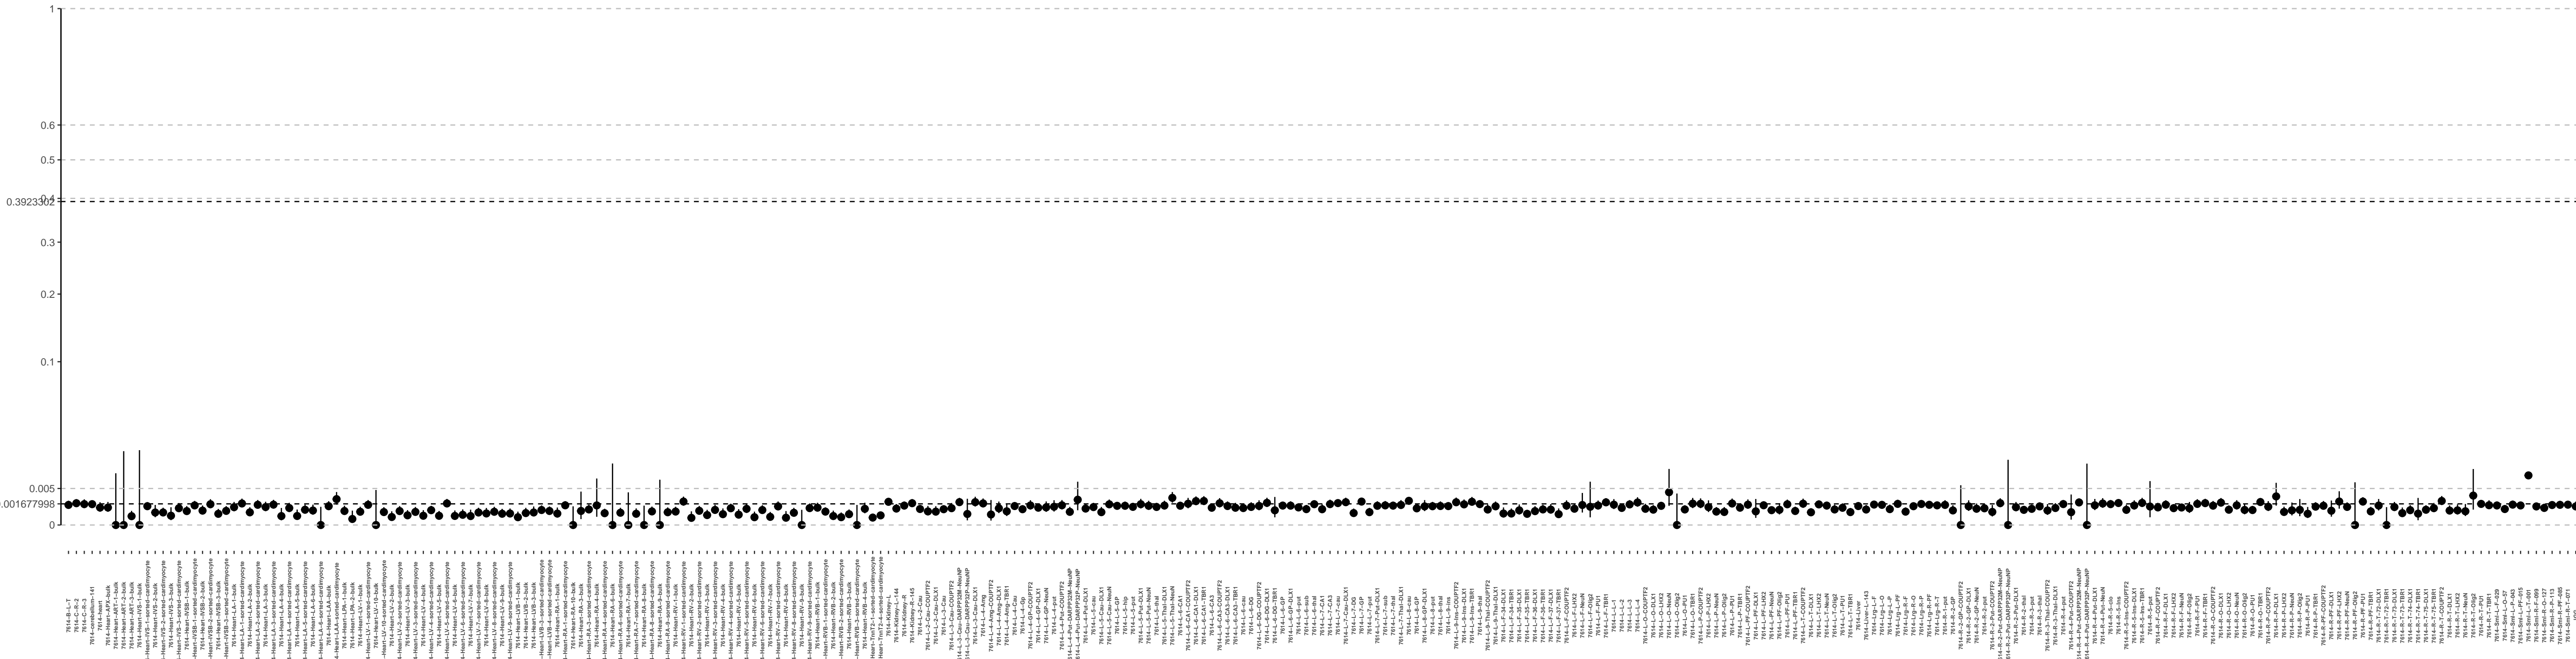



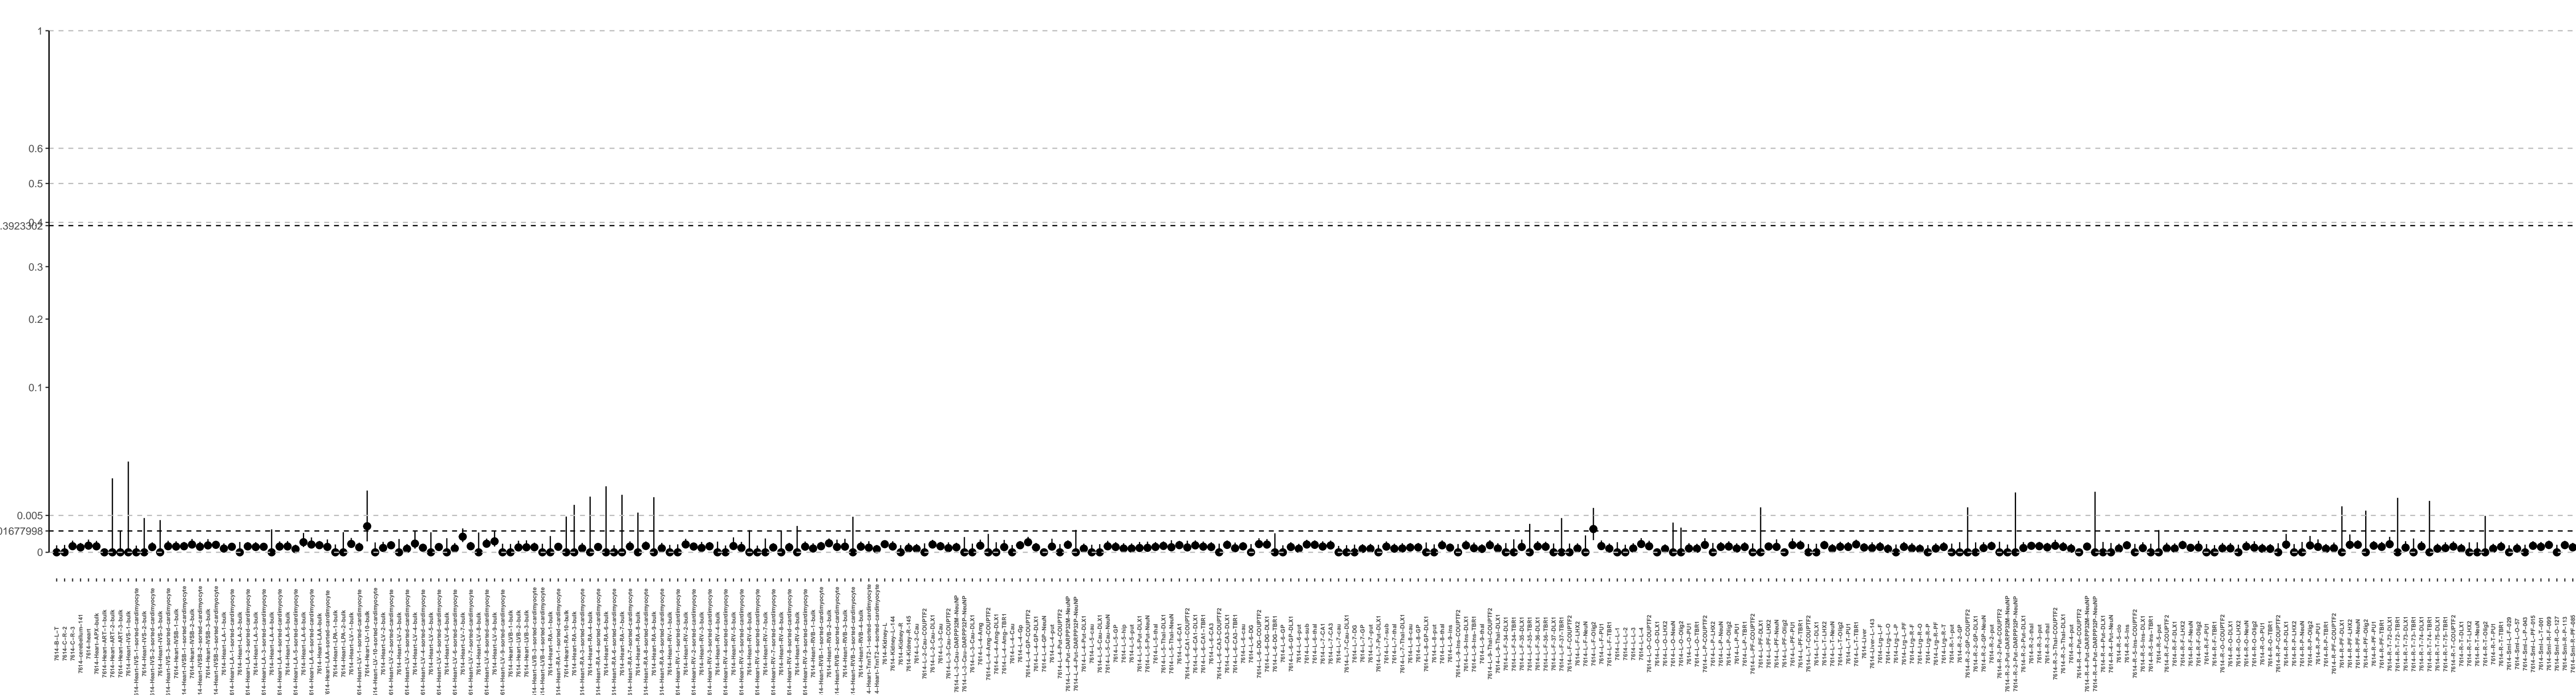

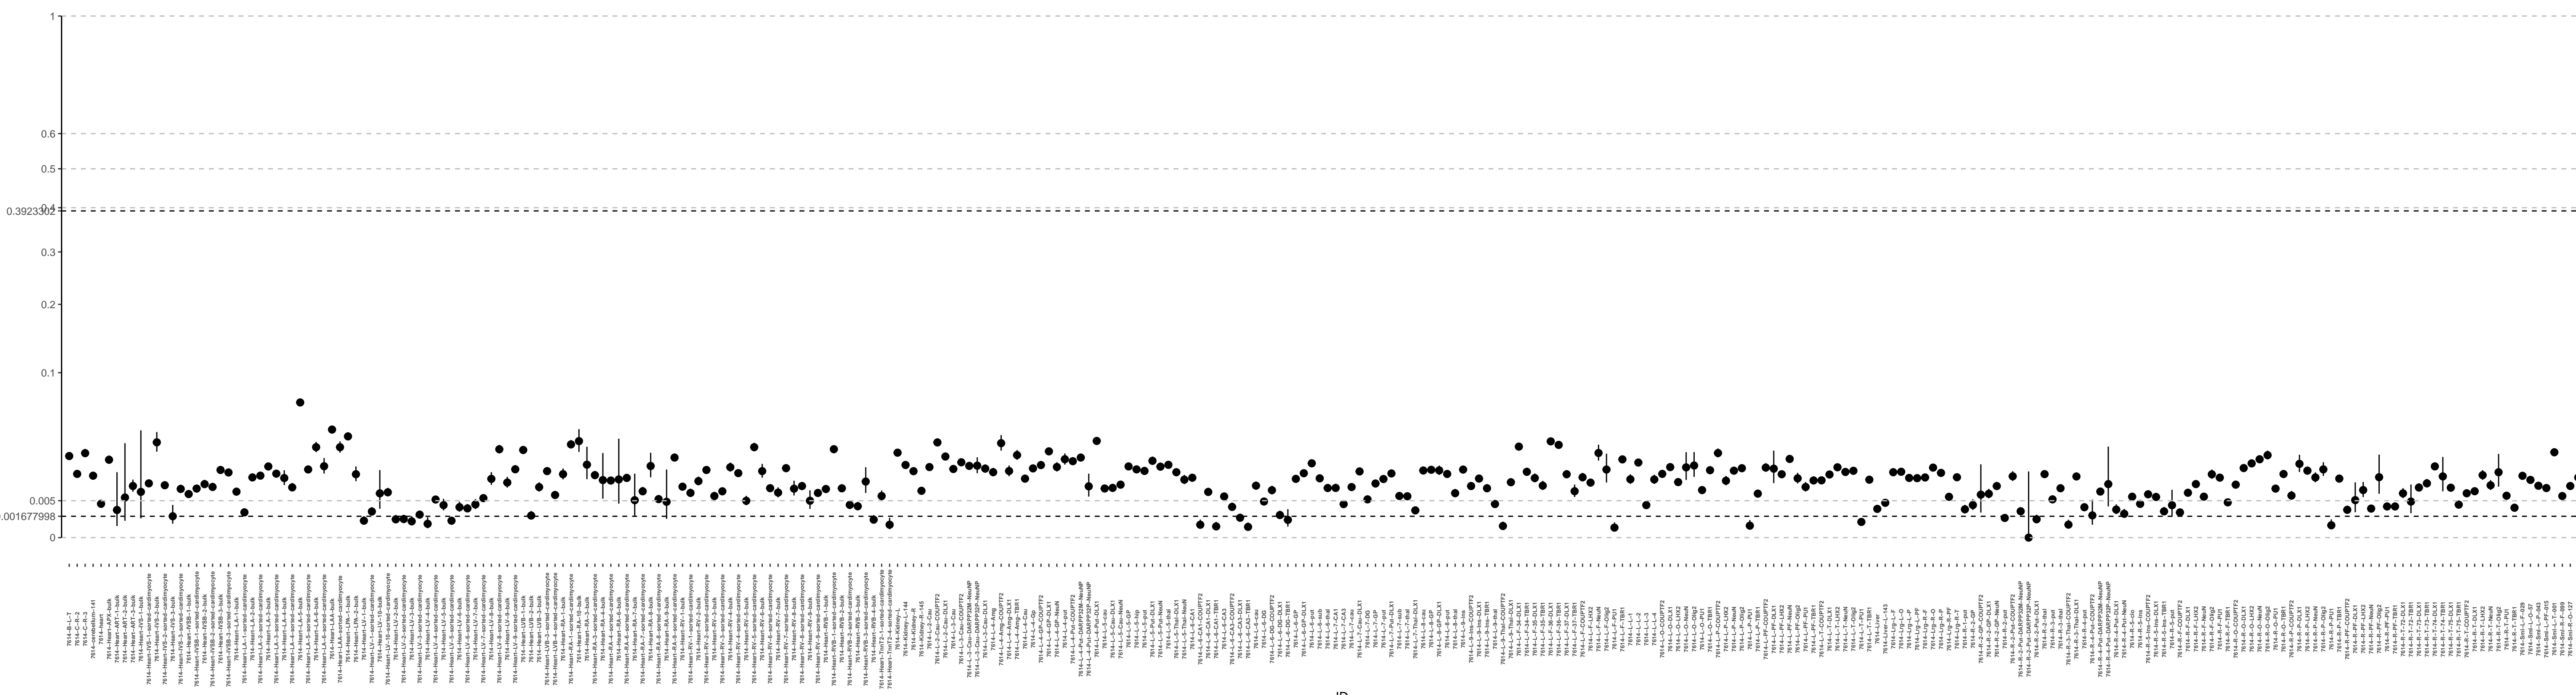

ID







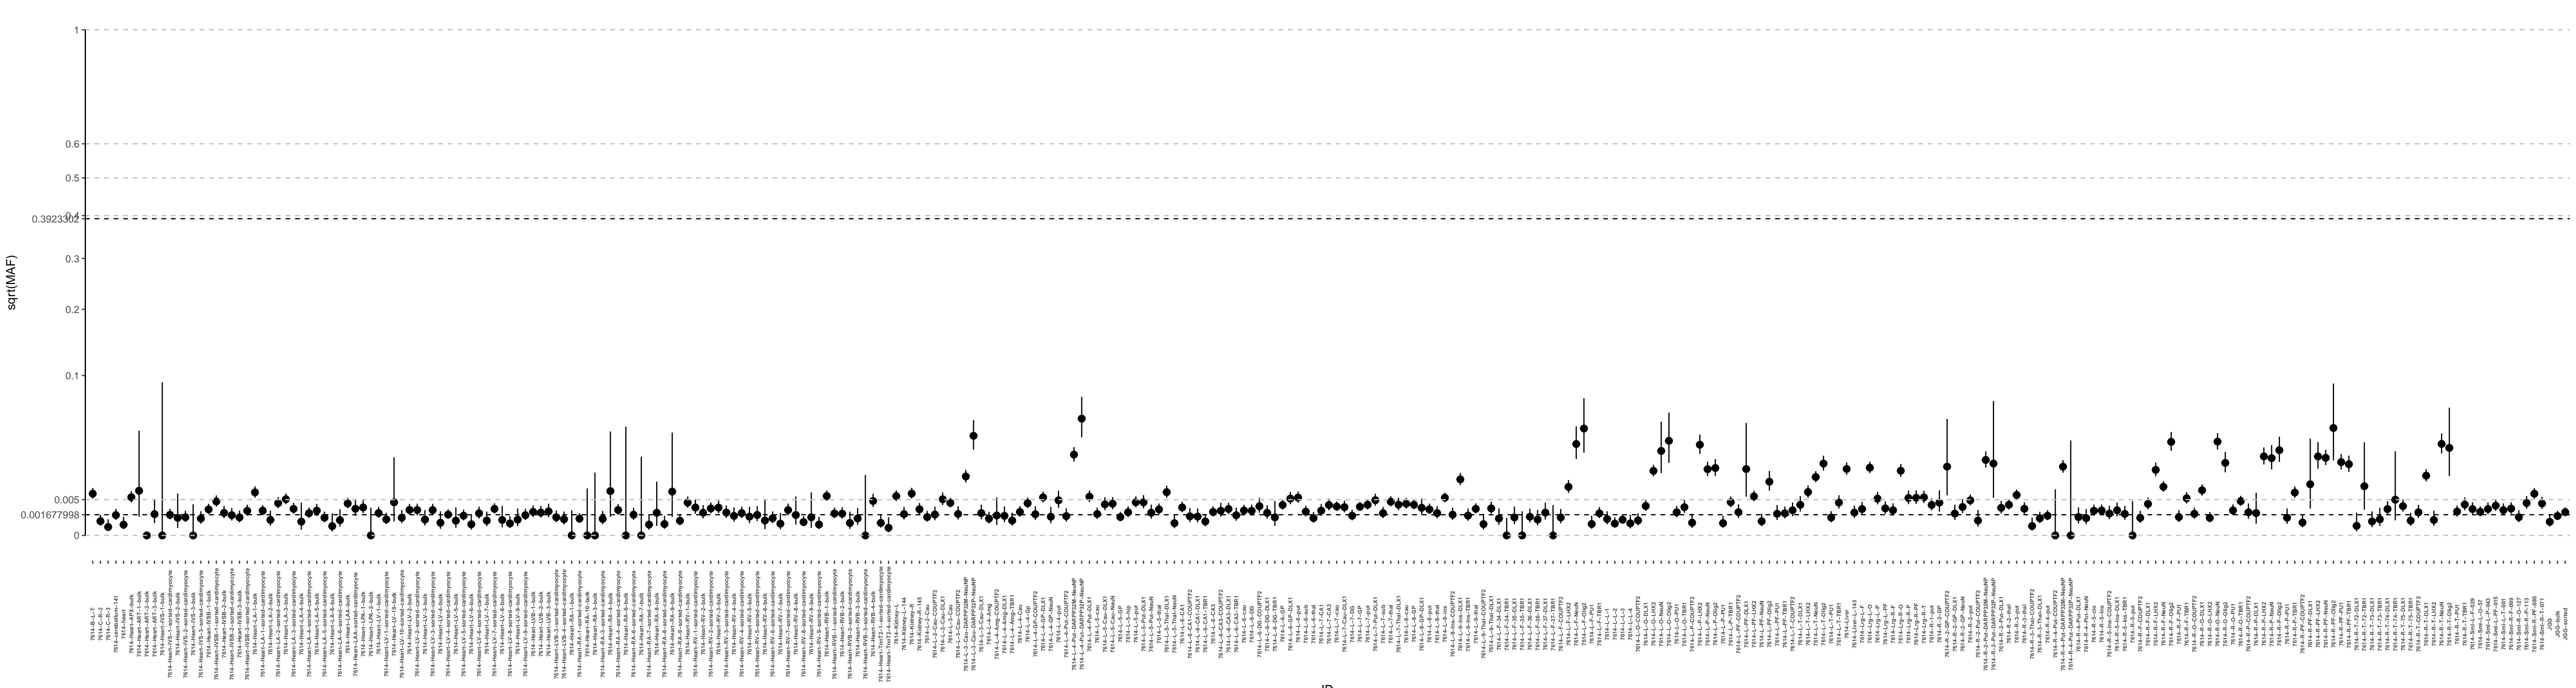

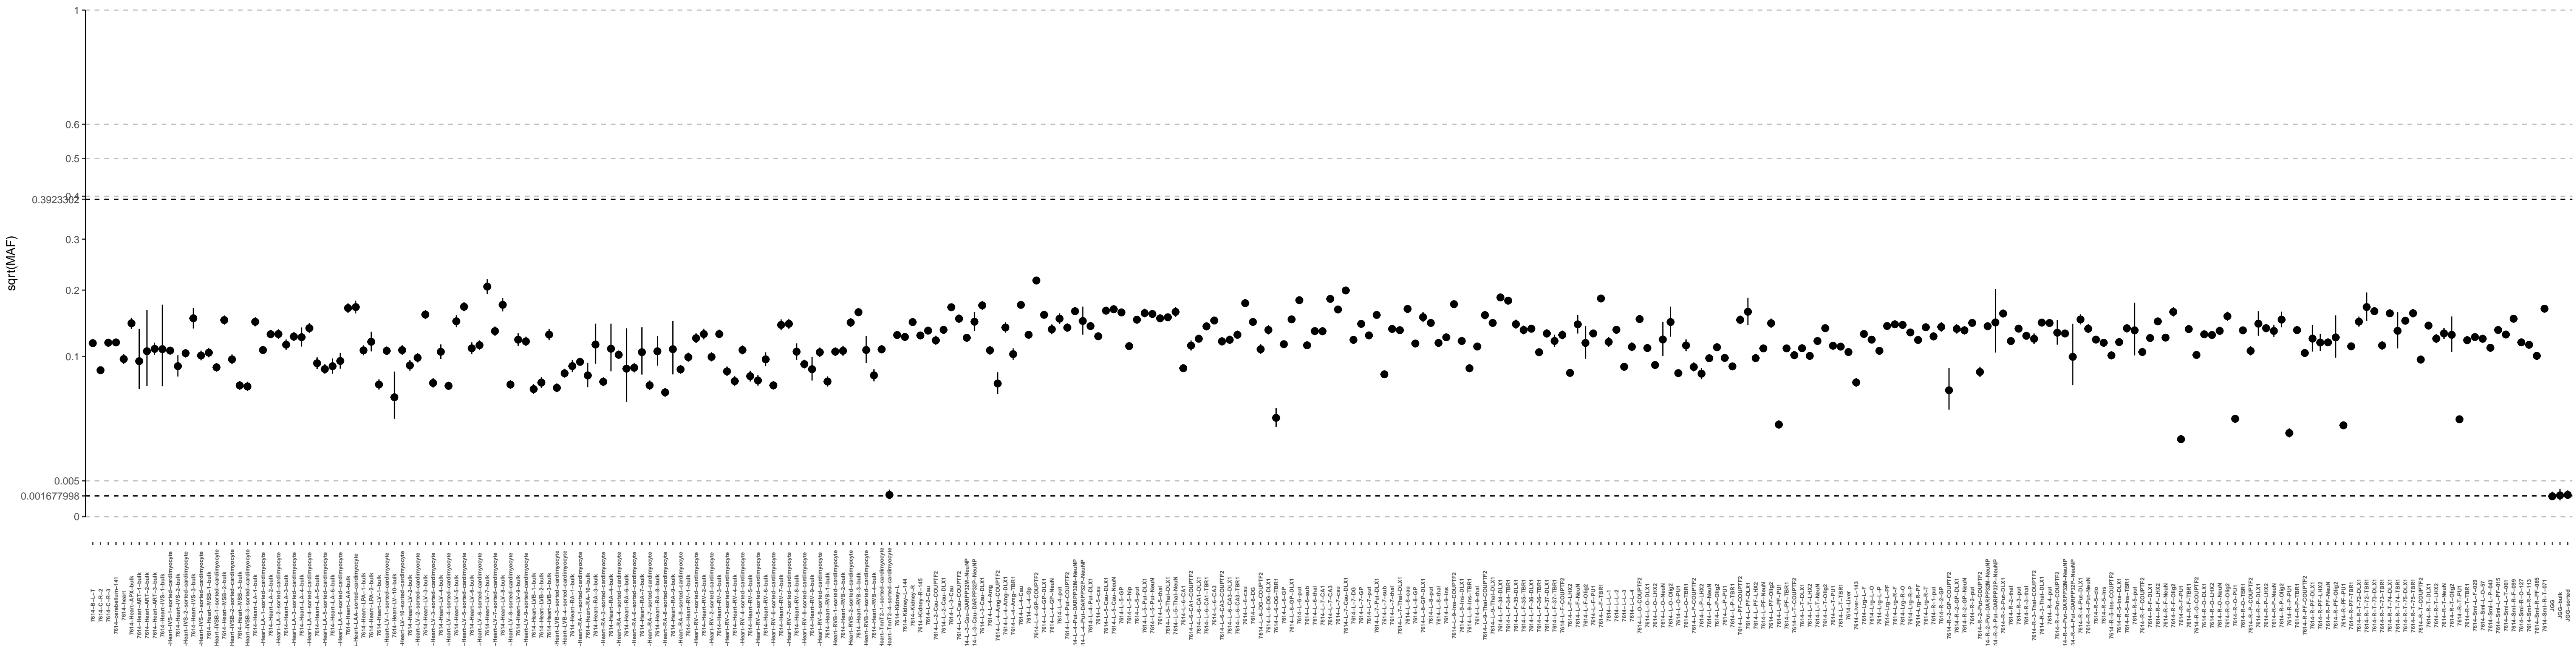







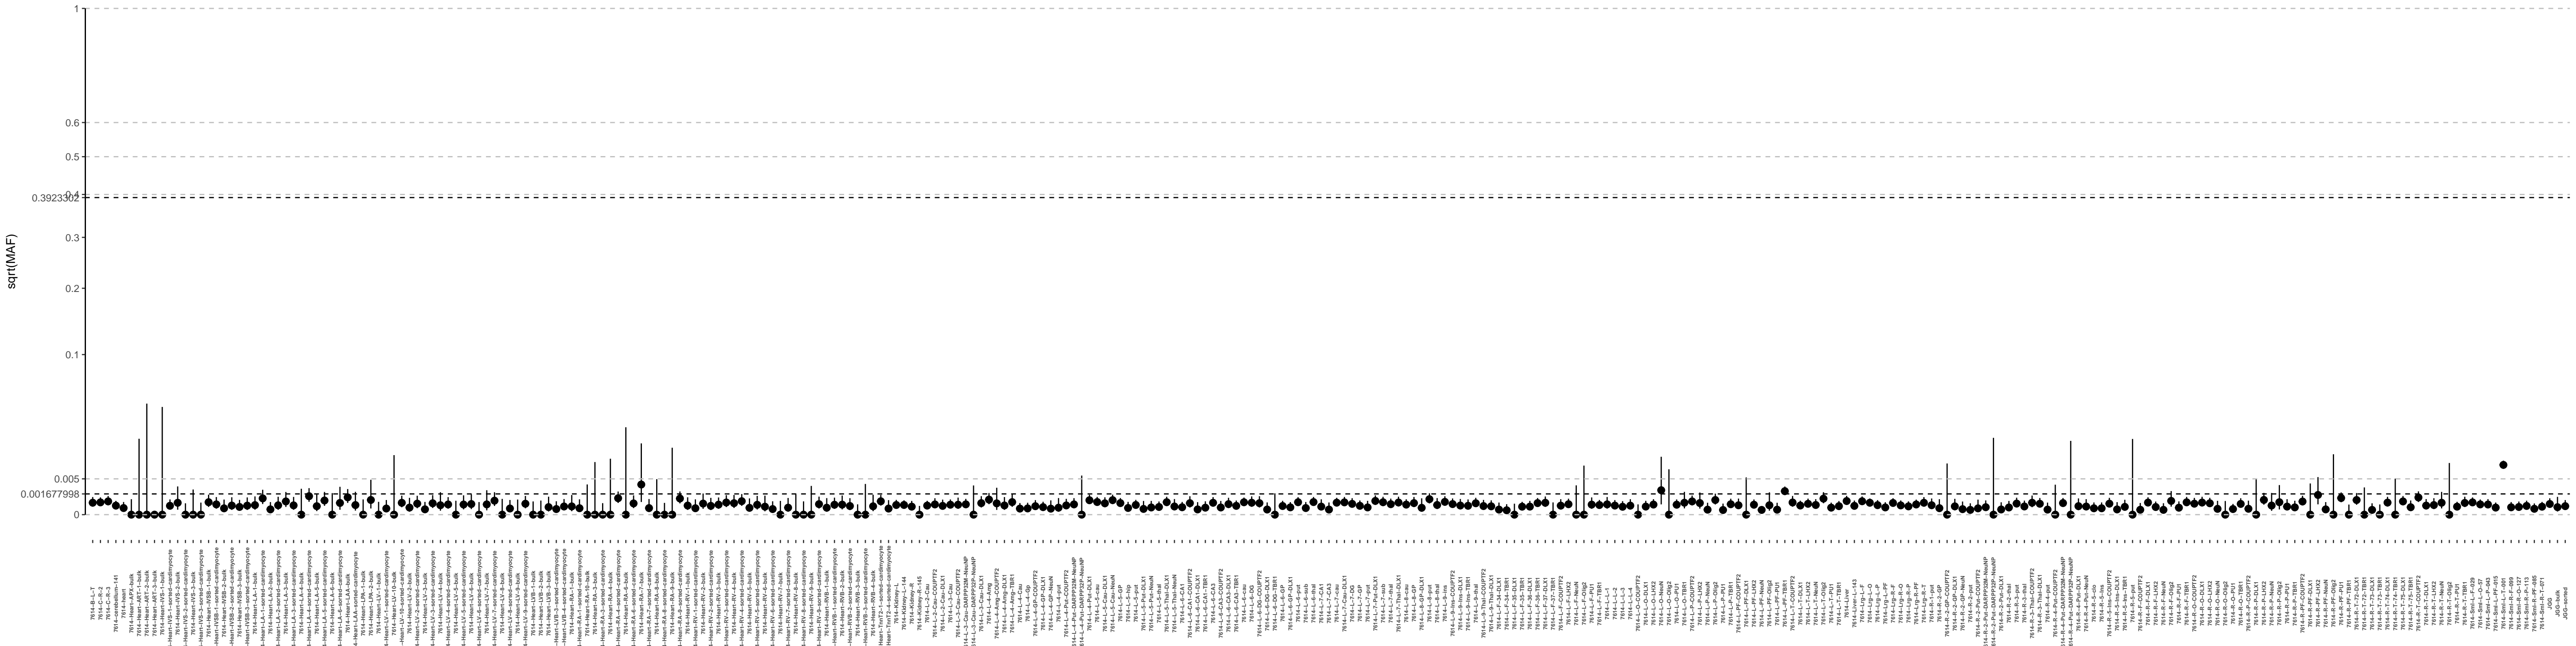





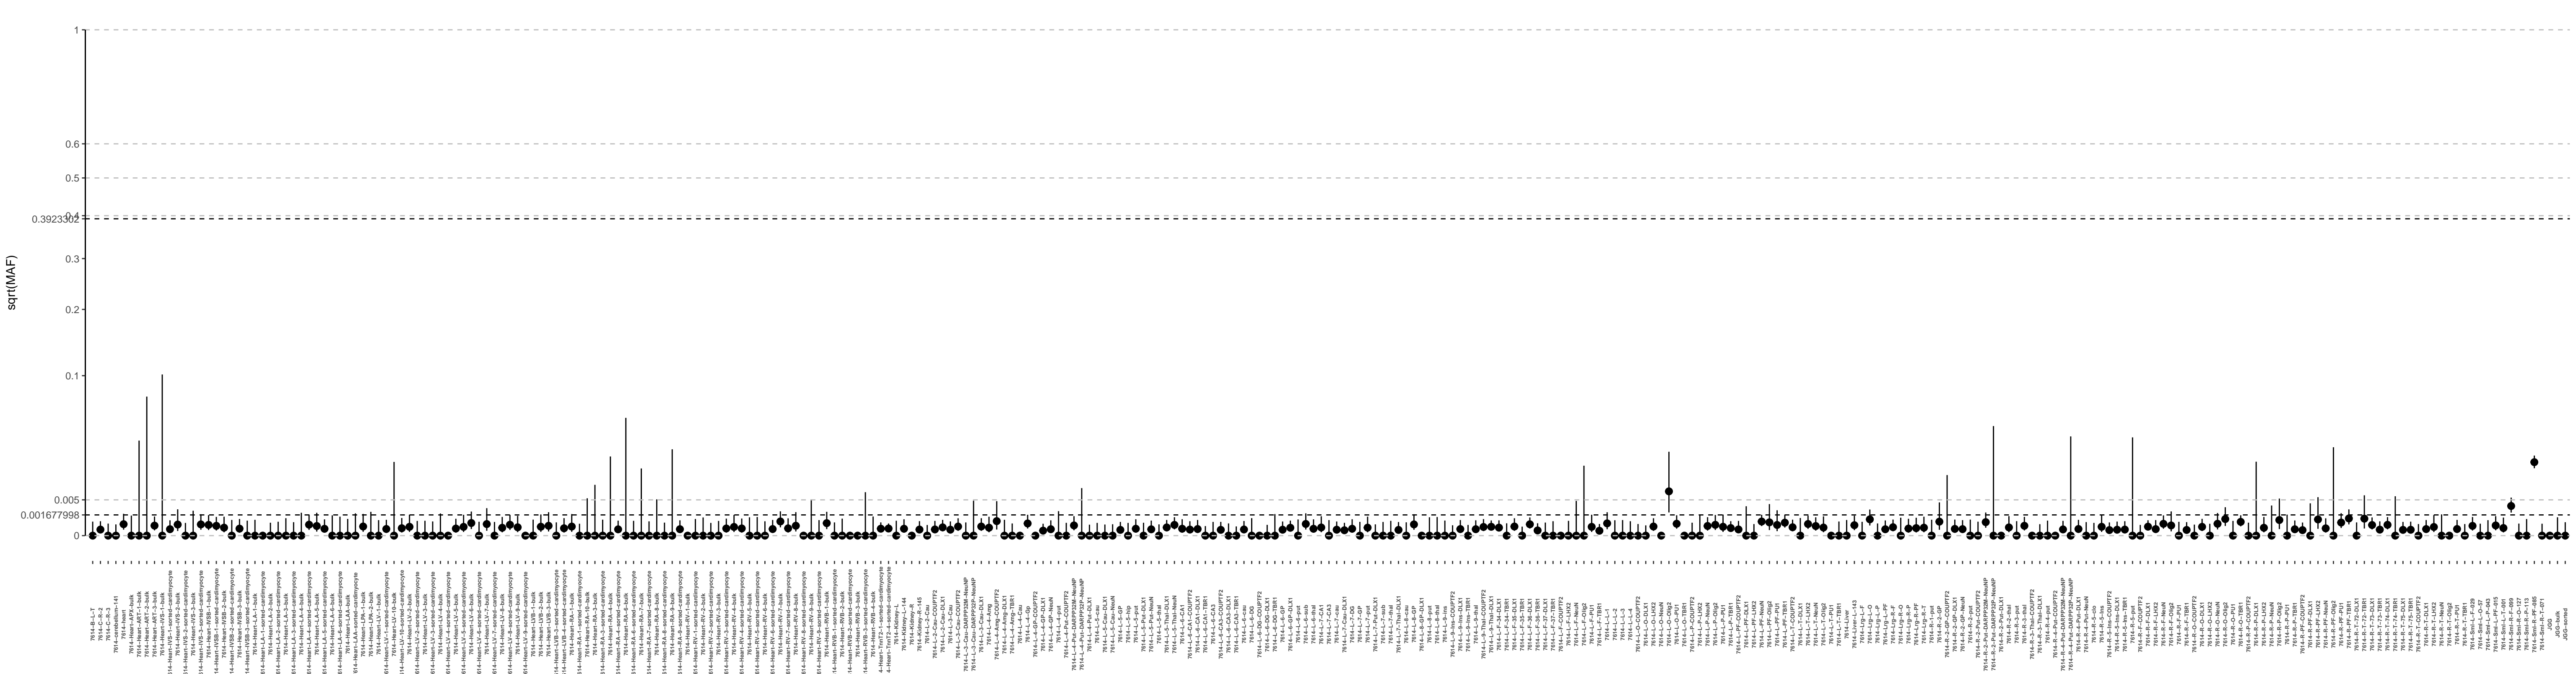

JGQ-bulk  
JGQ-sorted

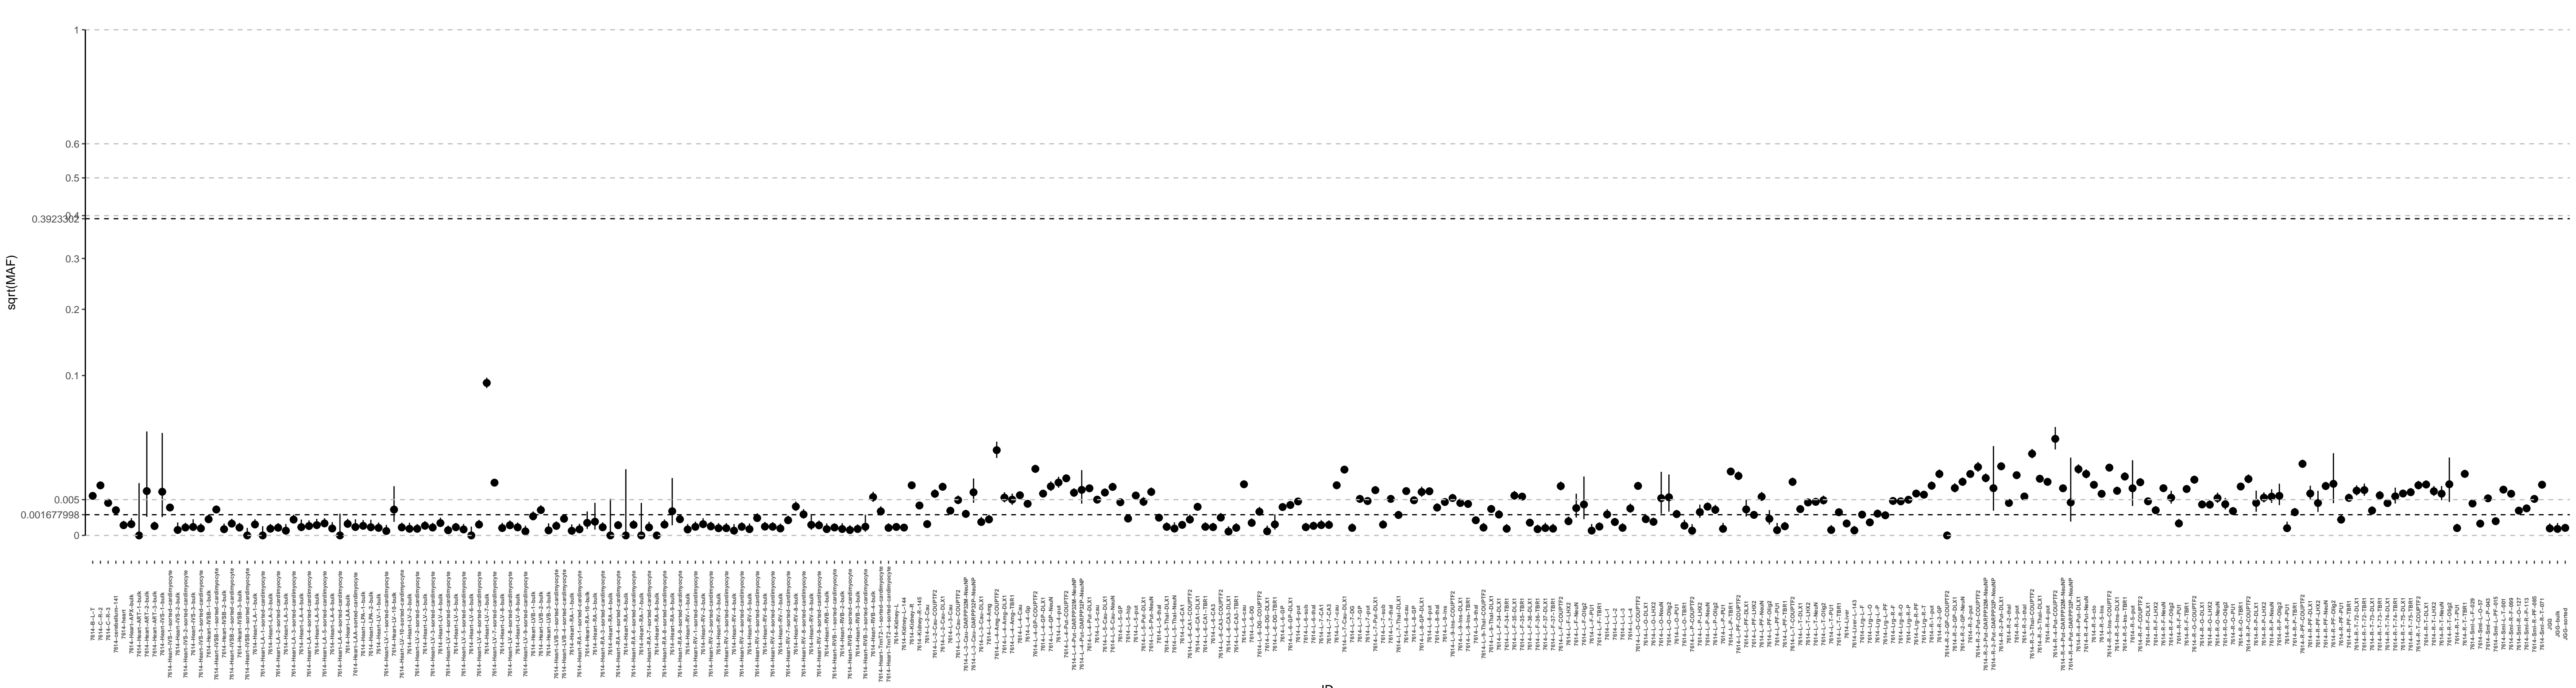

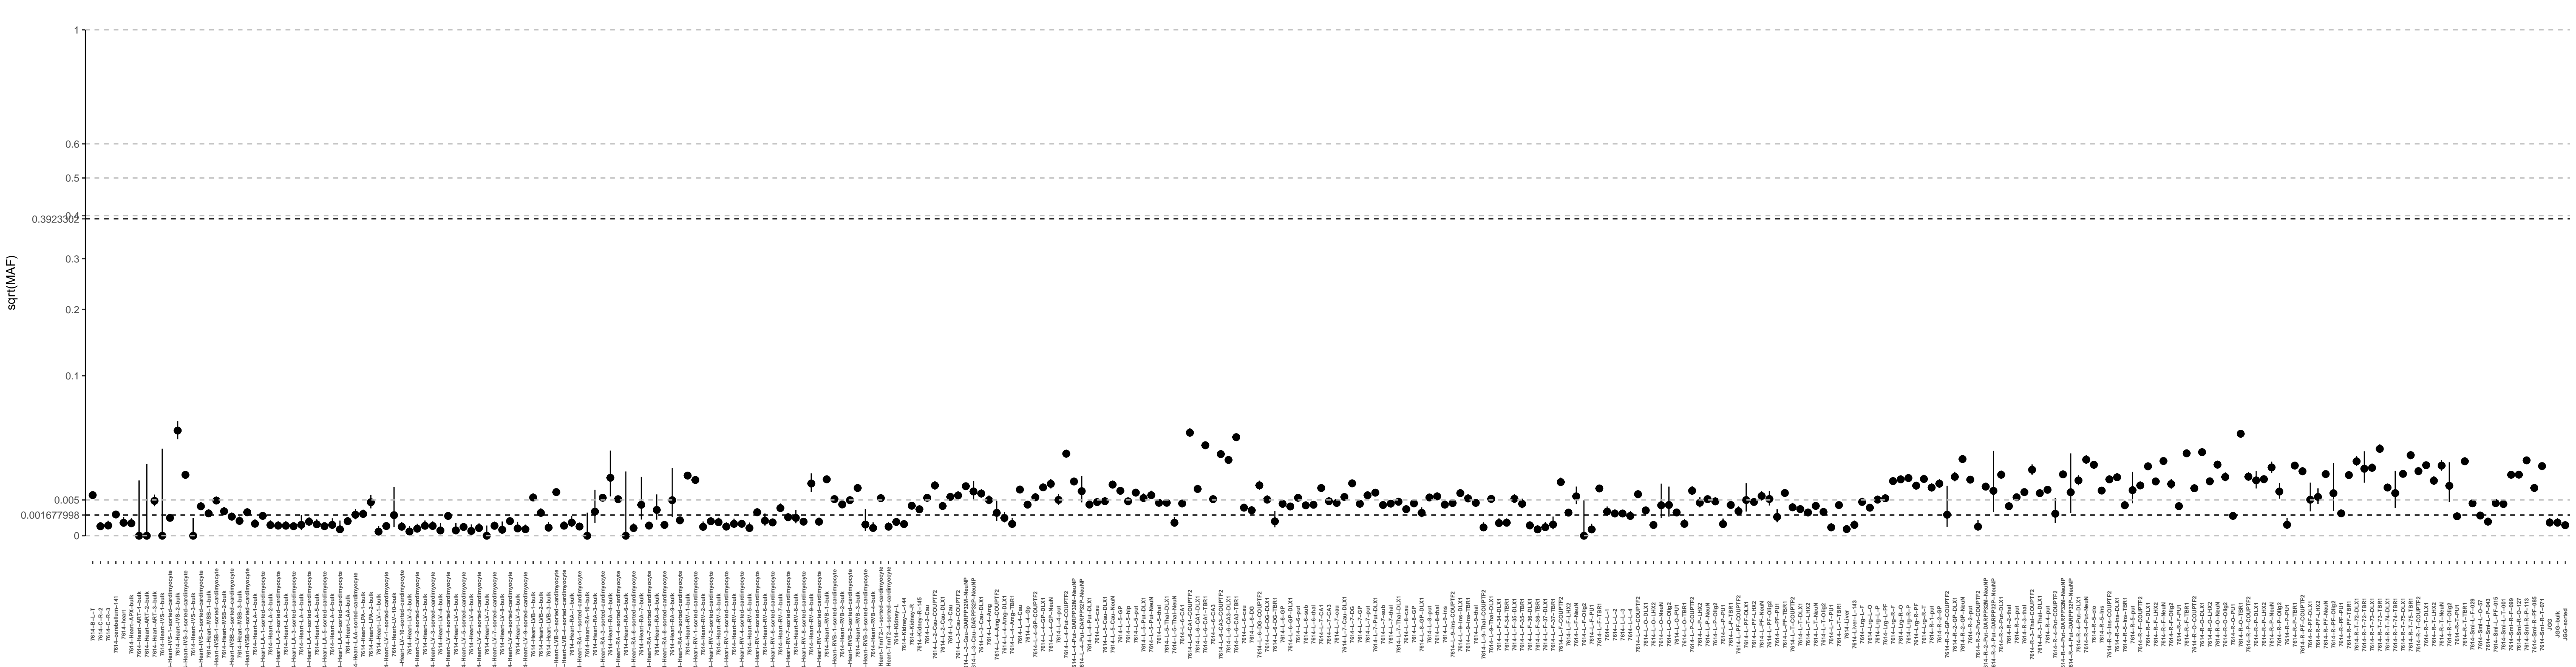



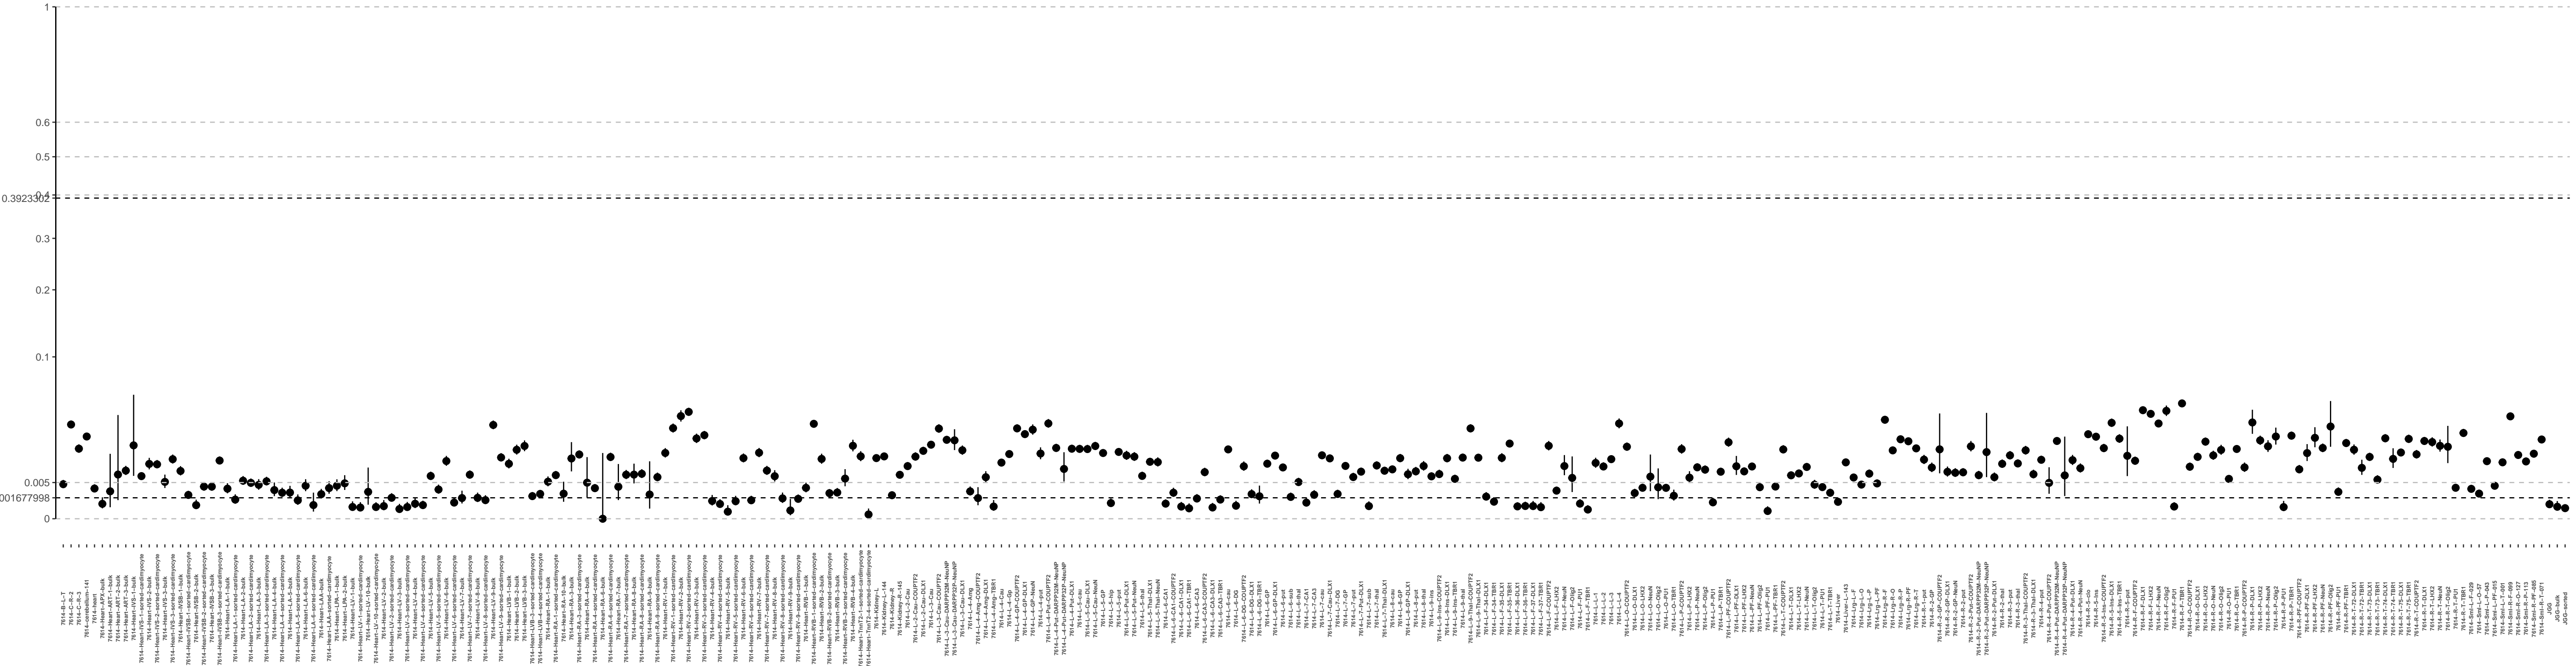

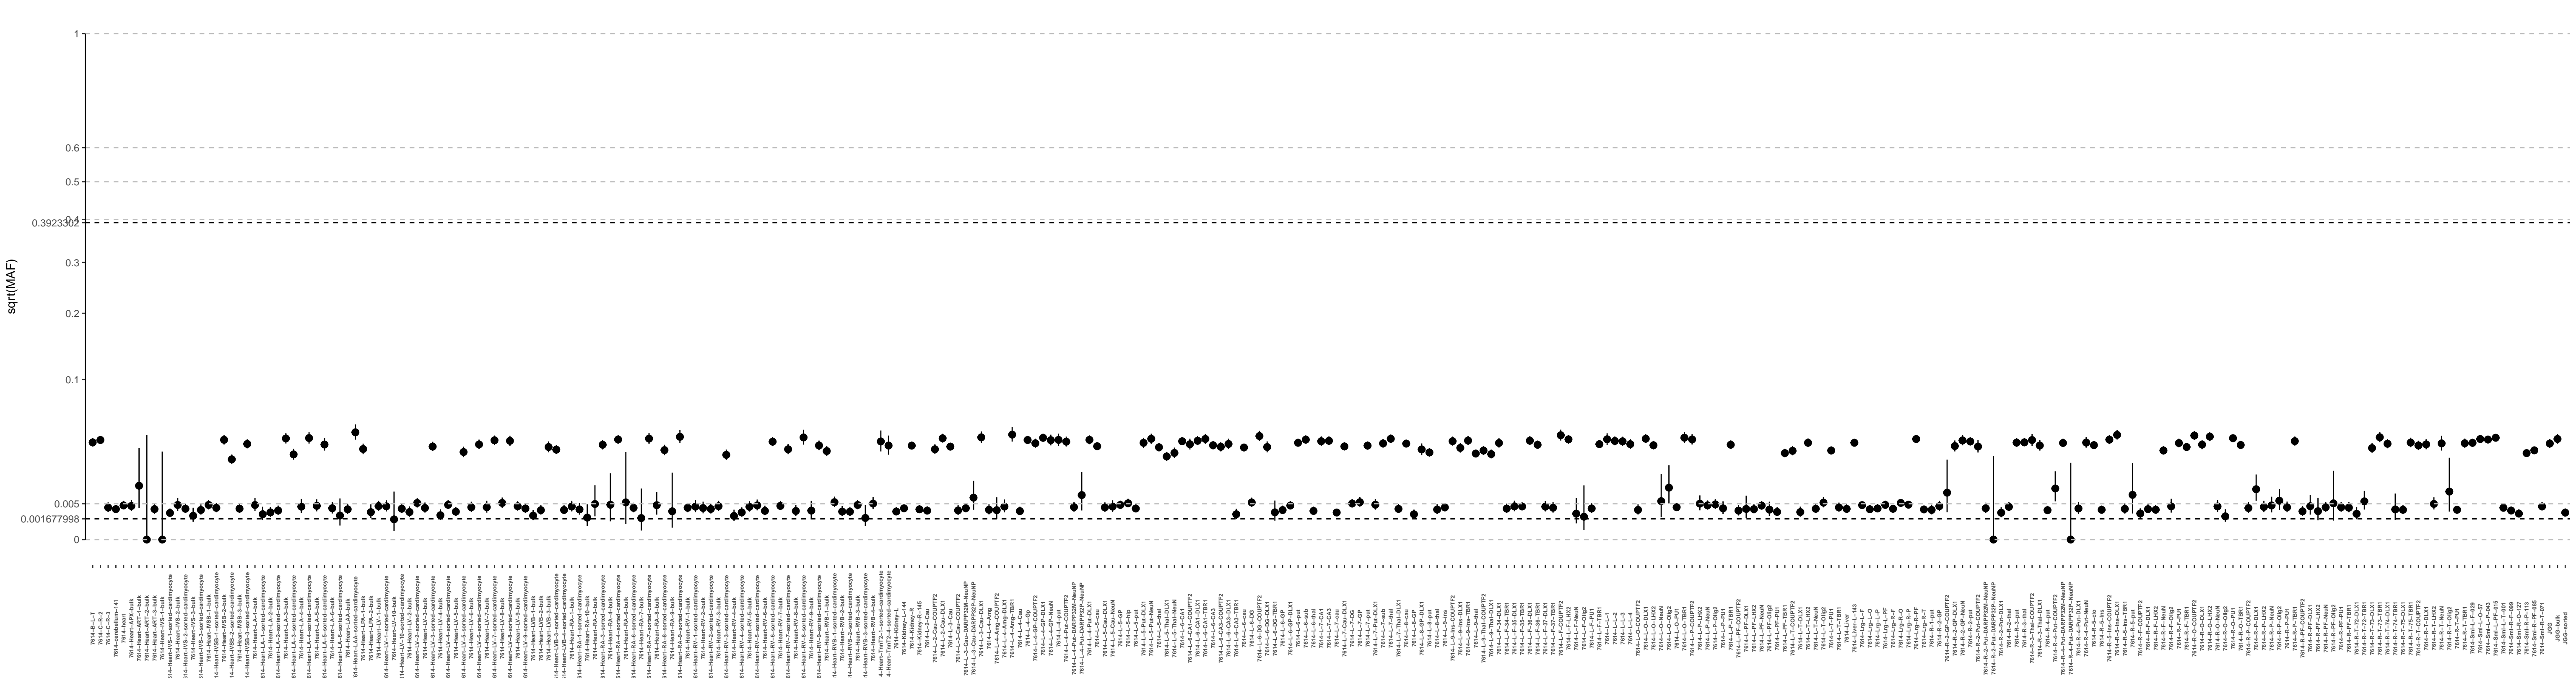

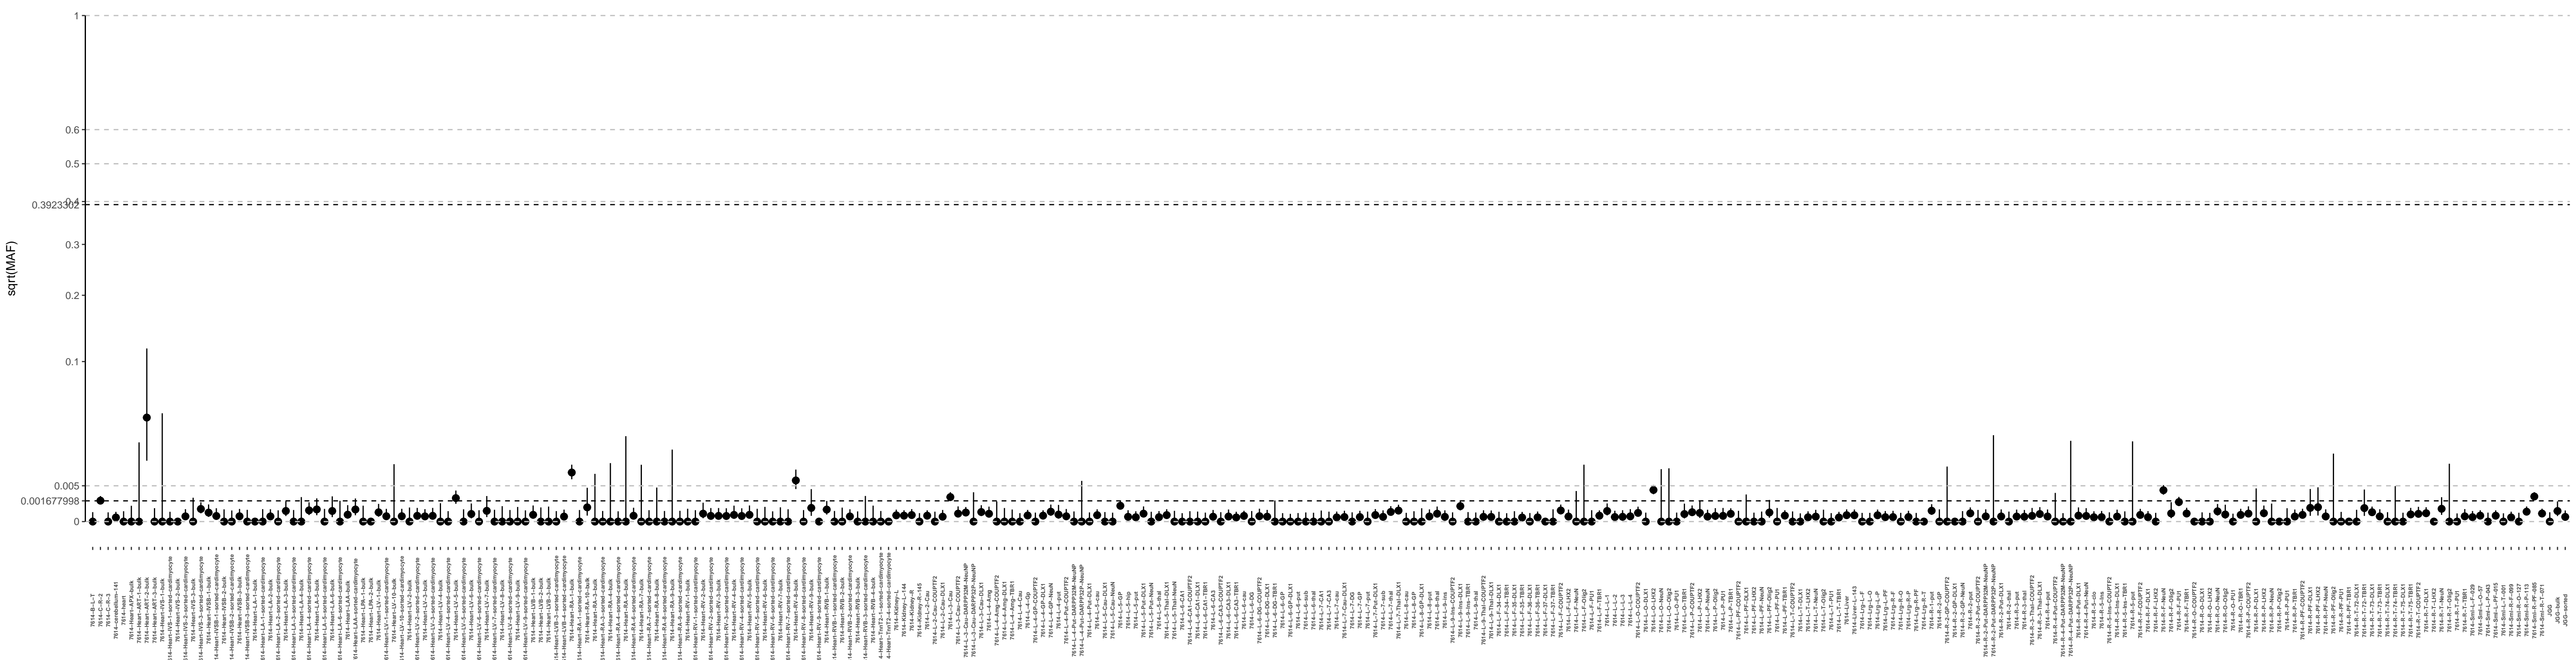

ID

JGQ-sorted

sqrt(MAF)

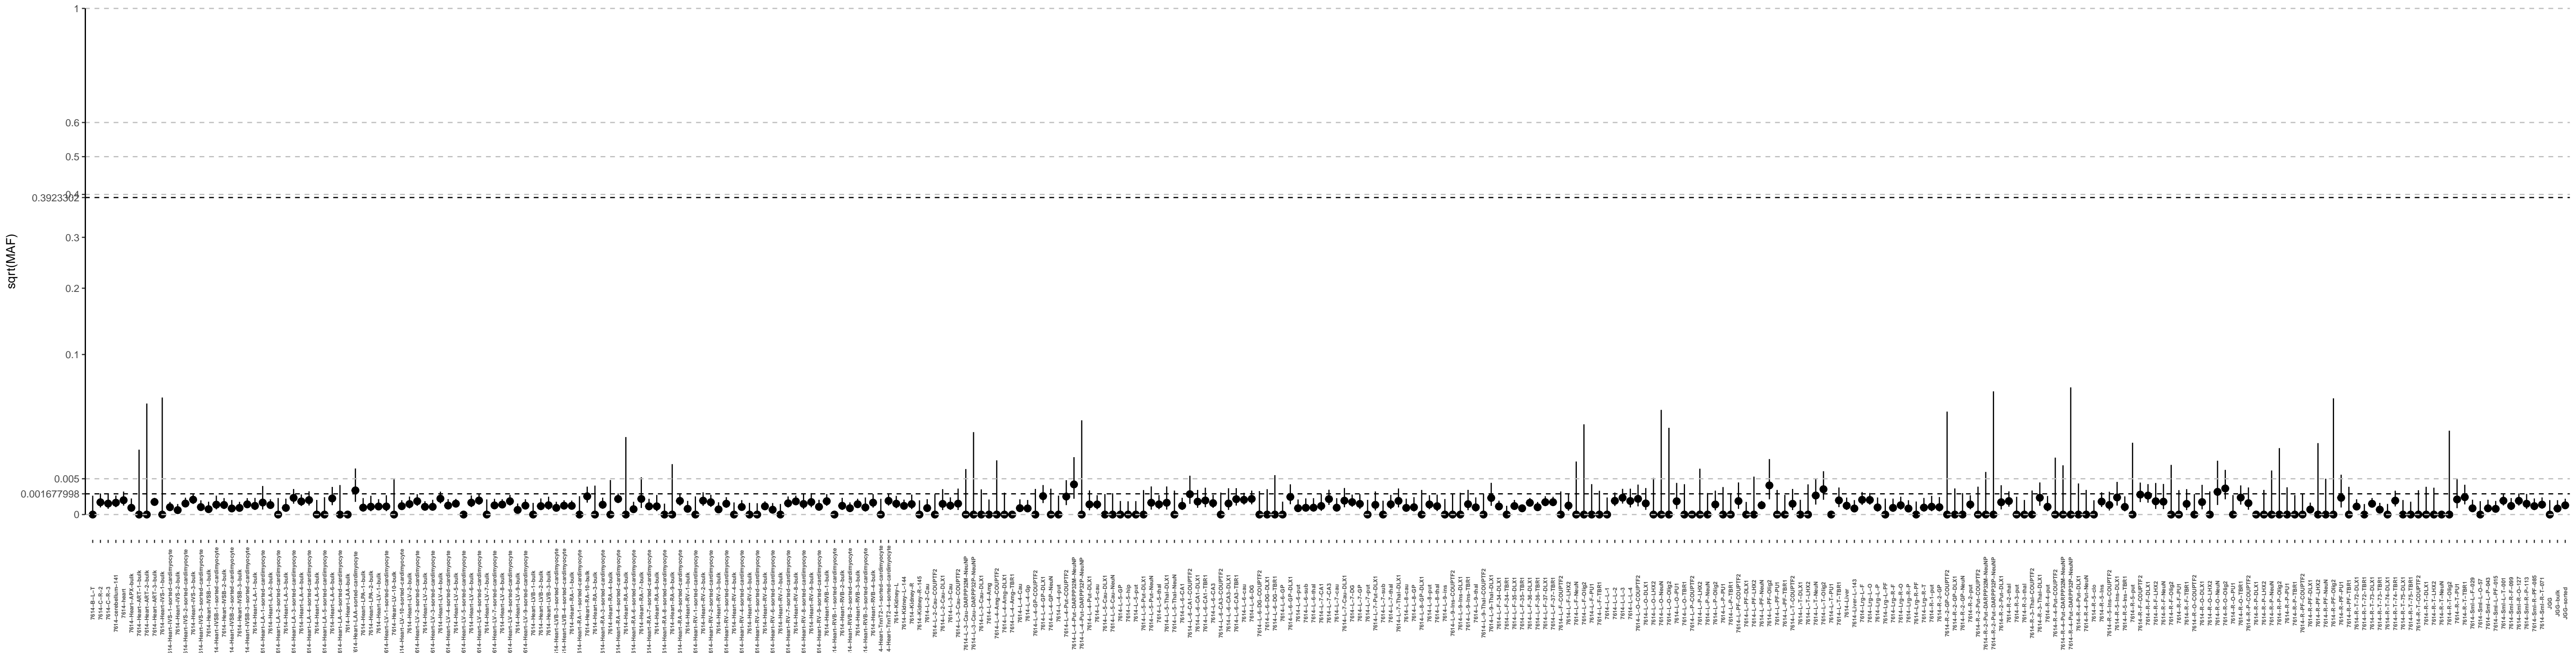

ID







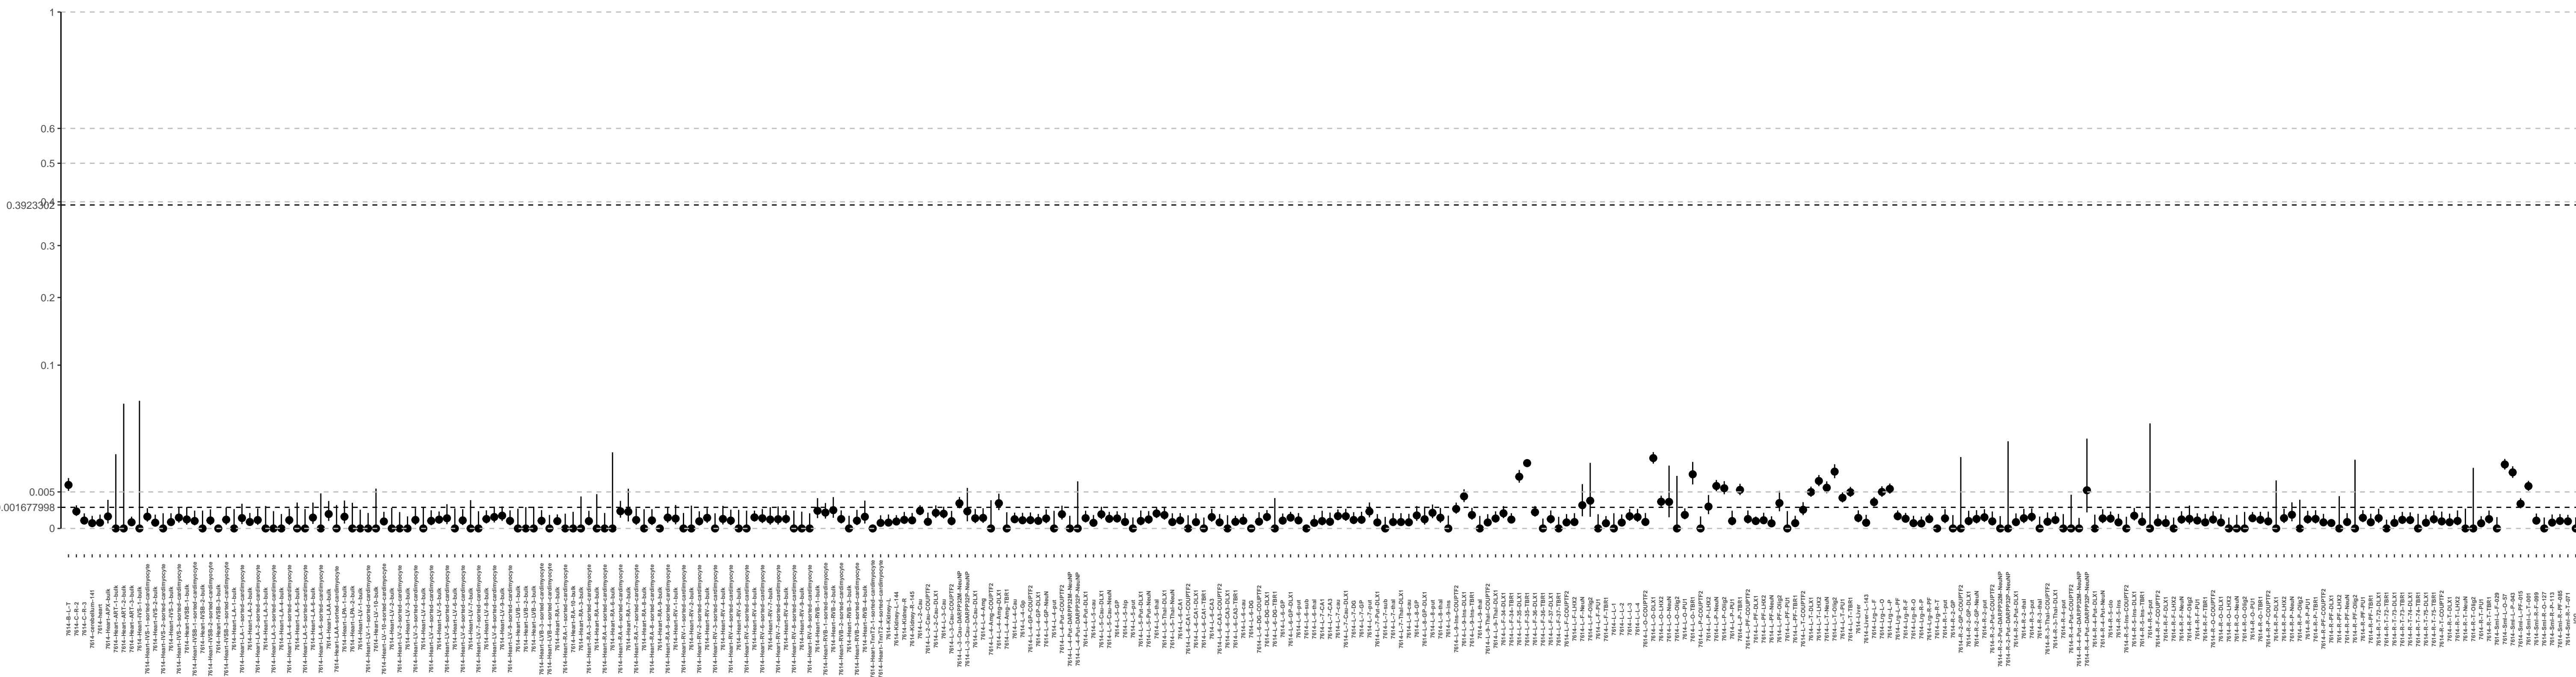

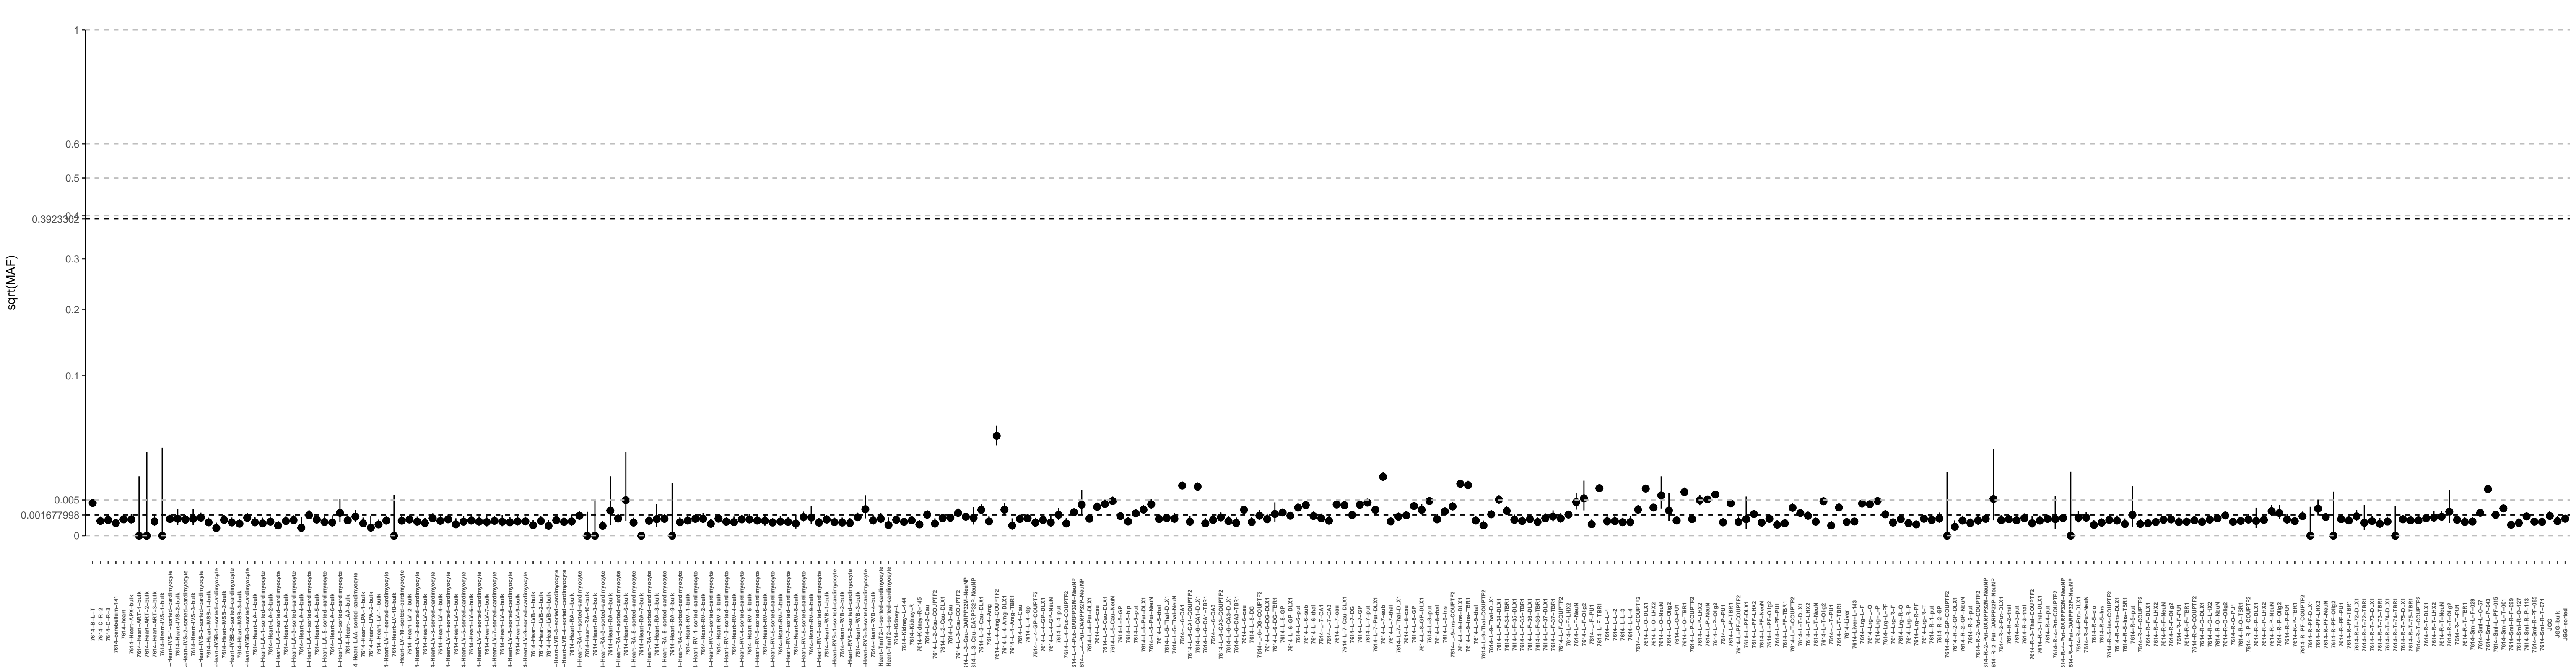



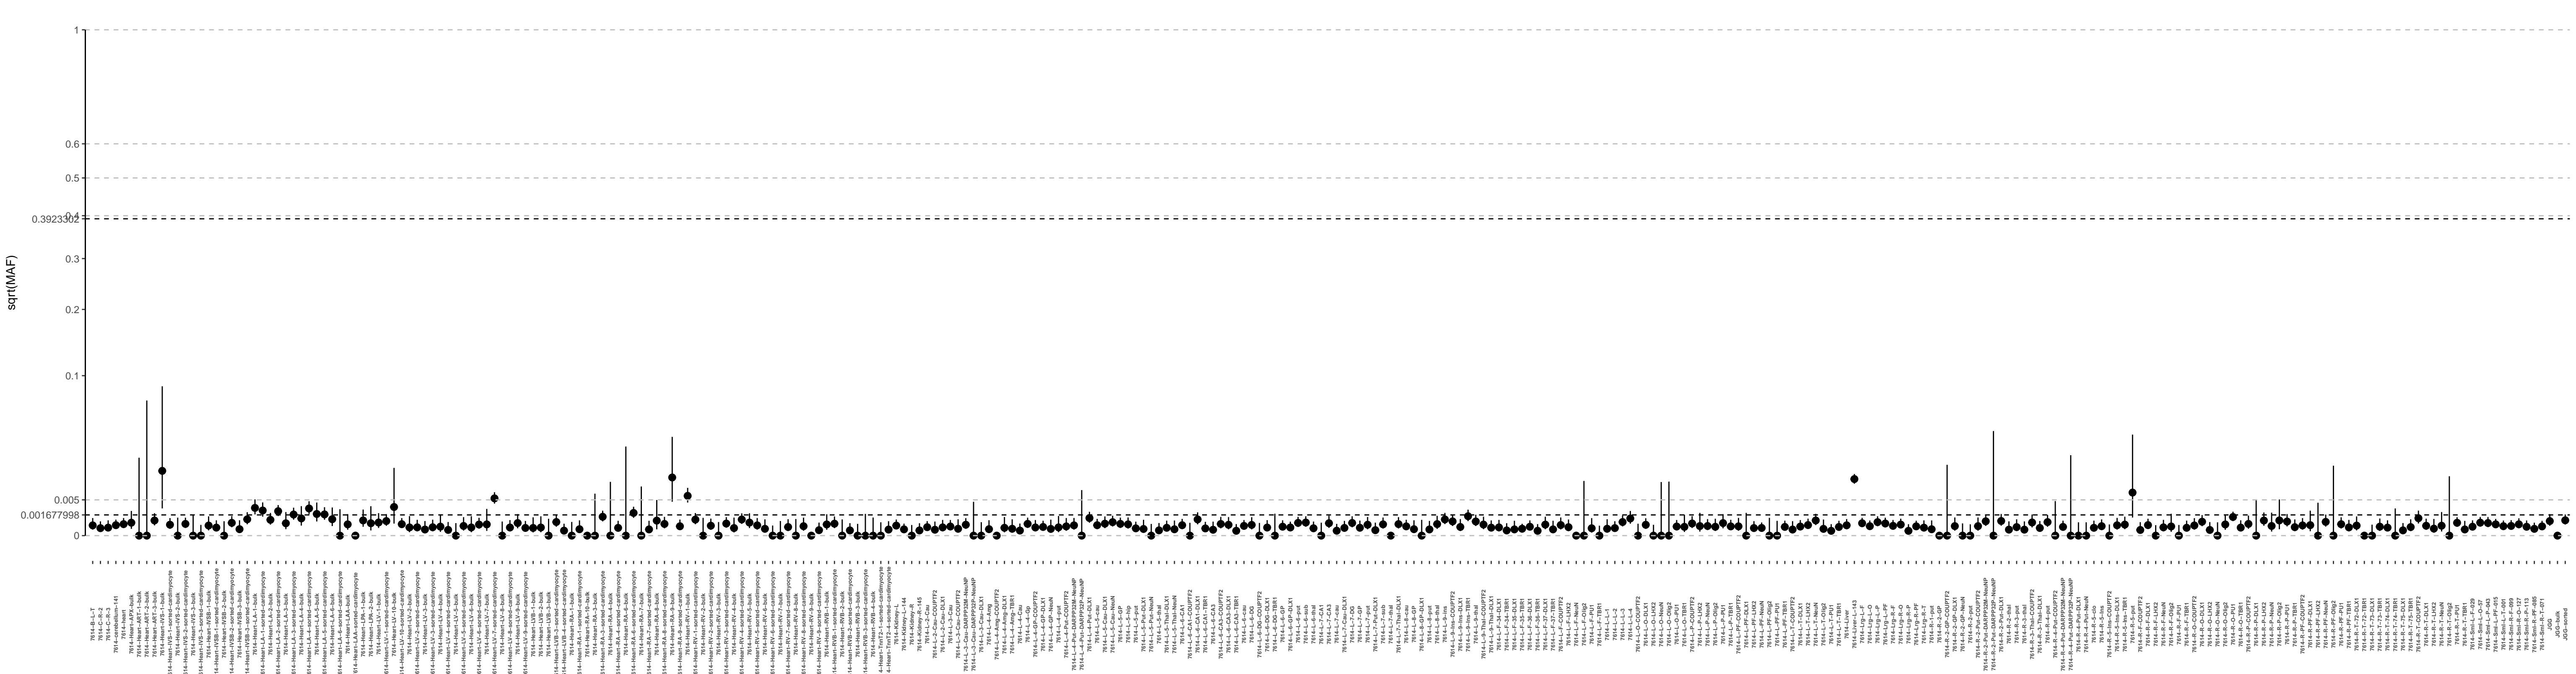

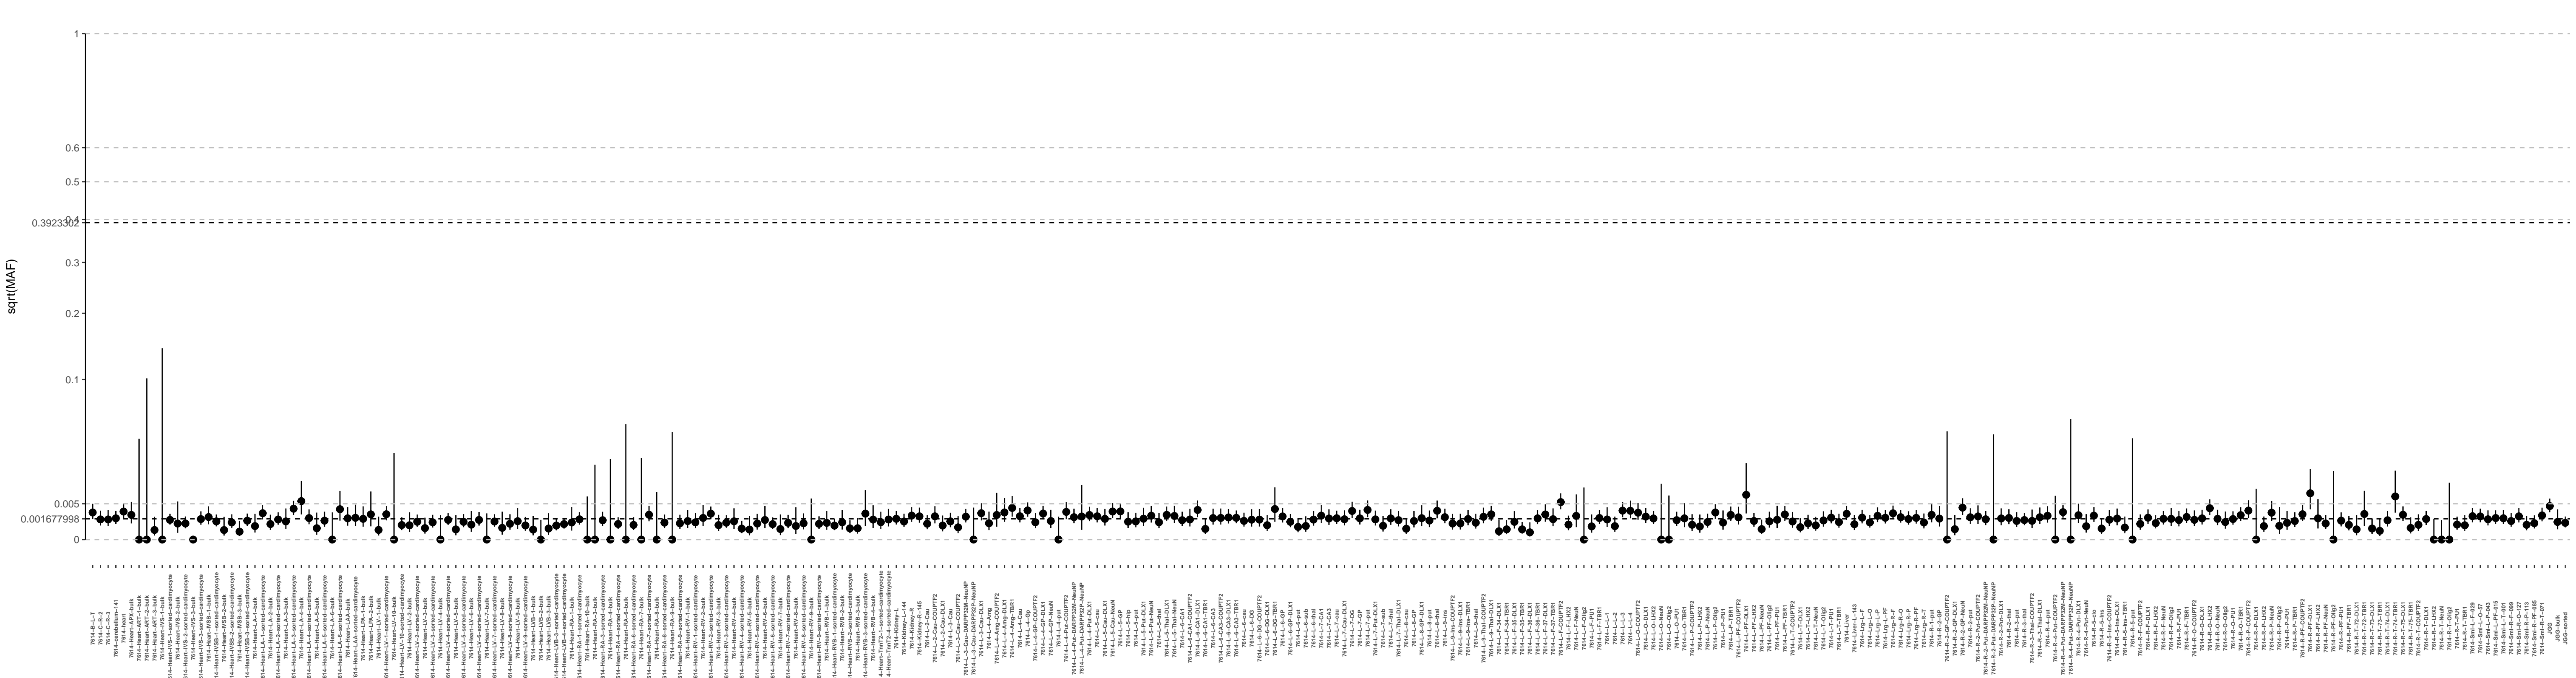

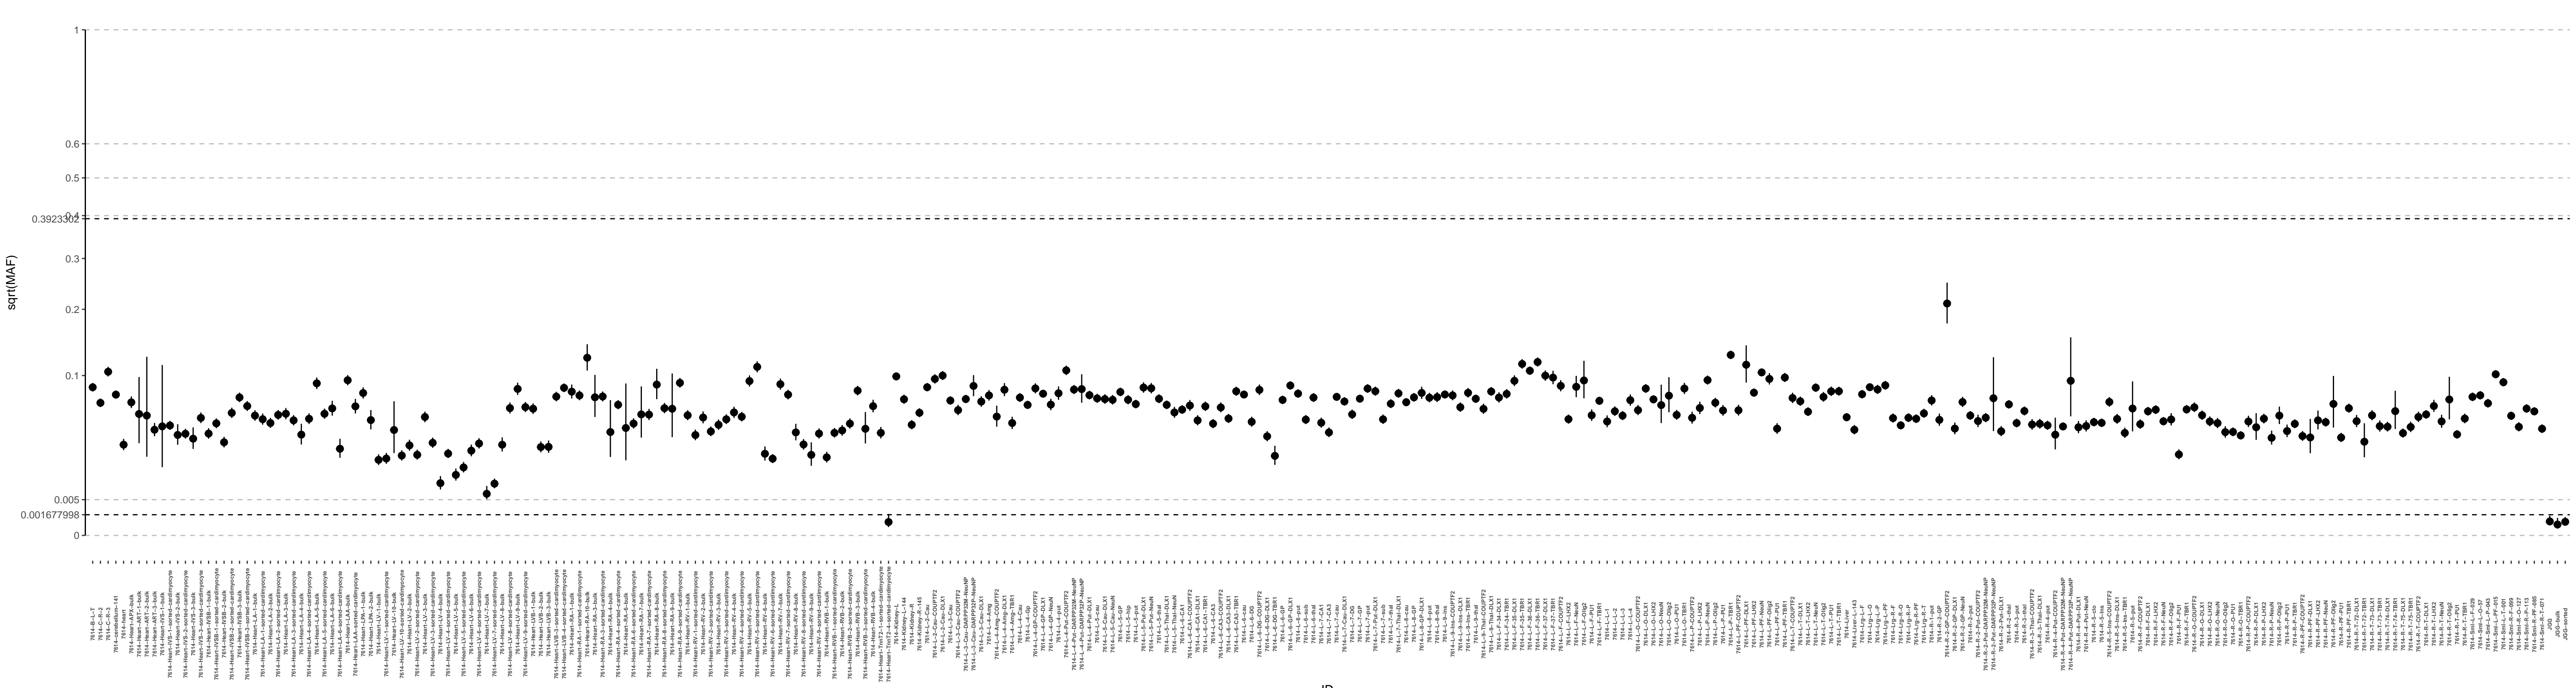



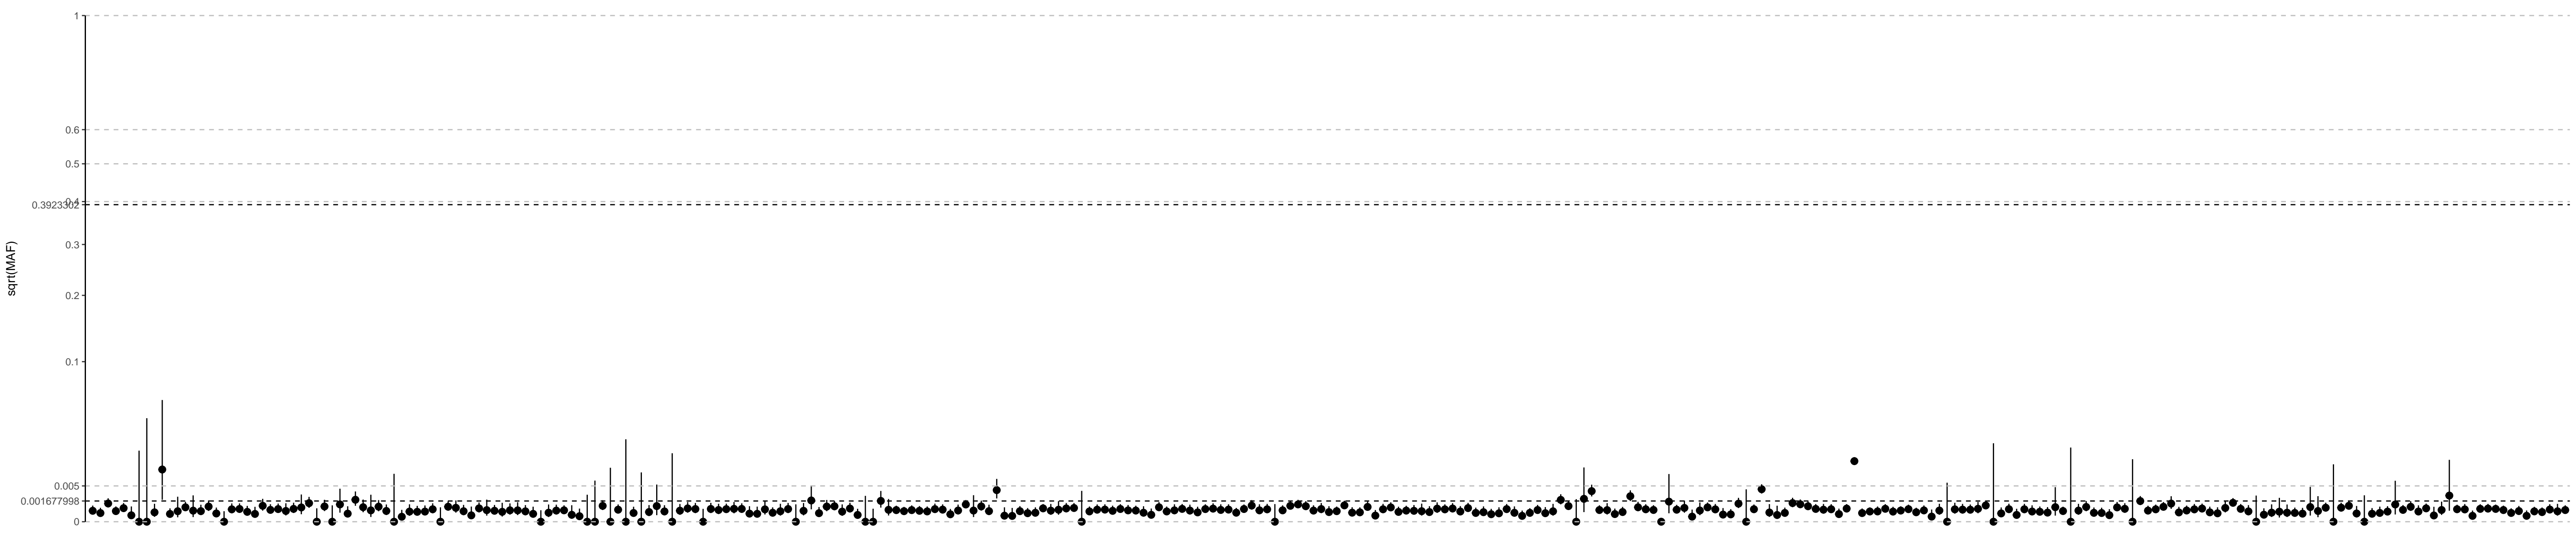



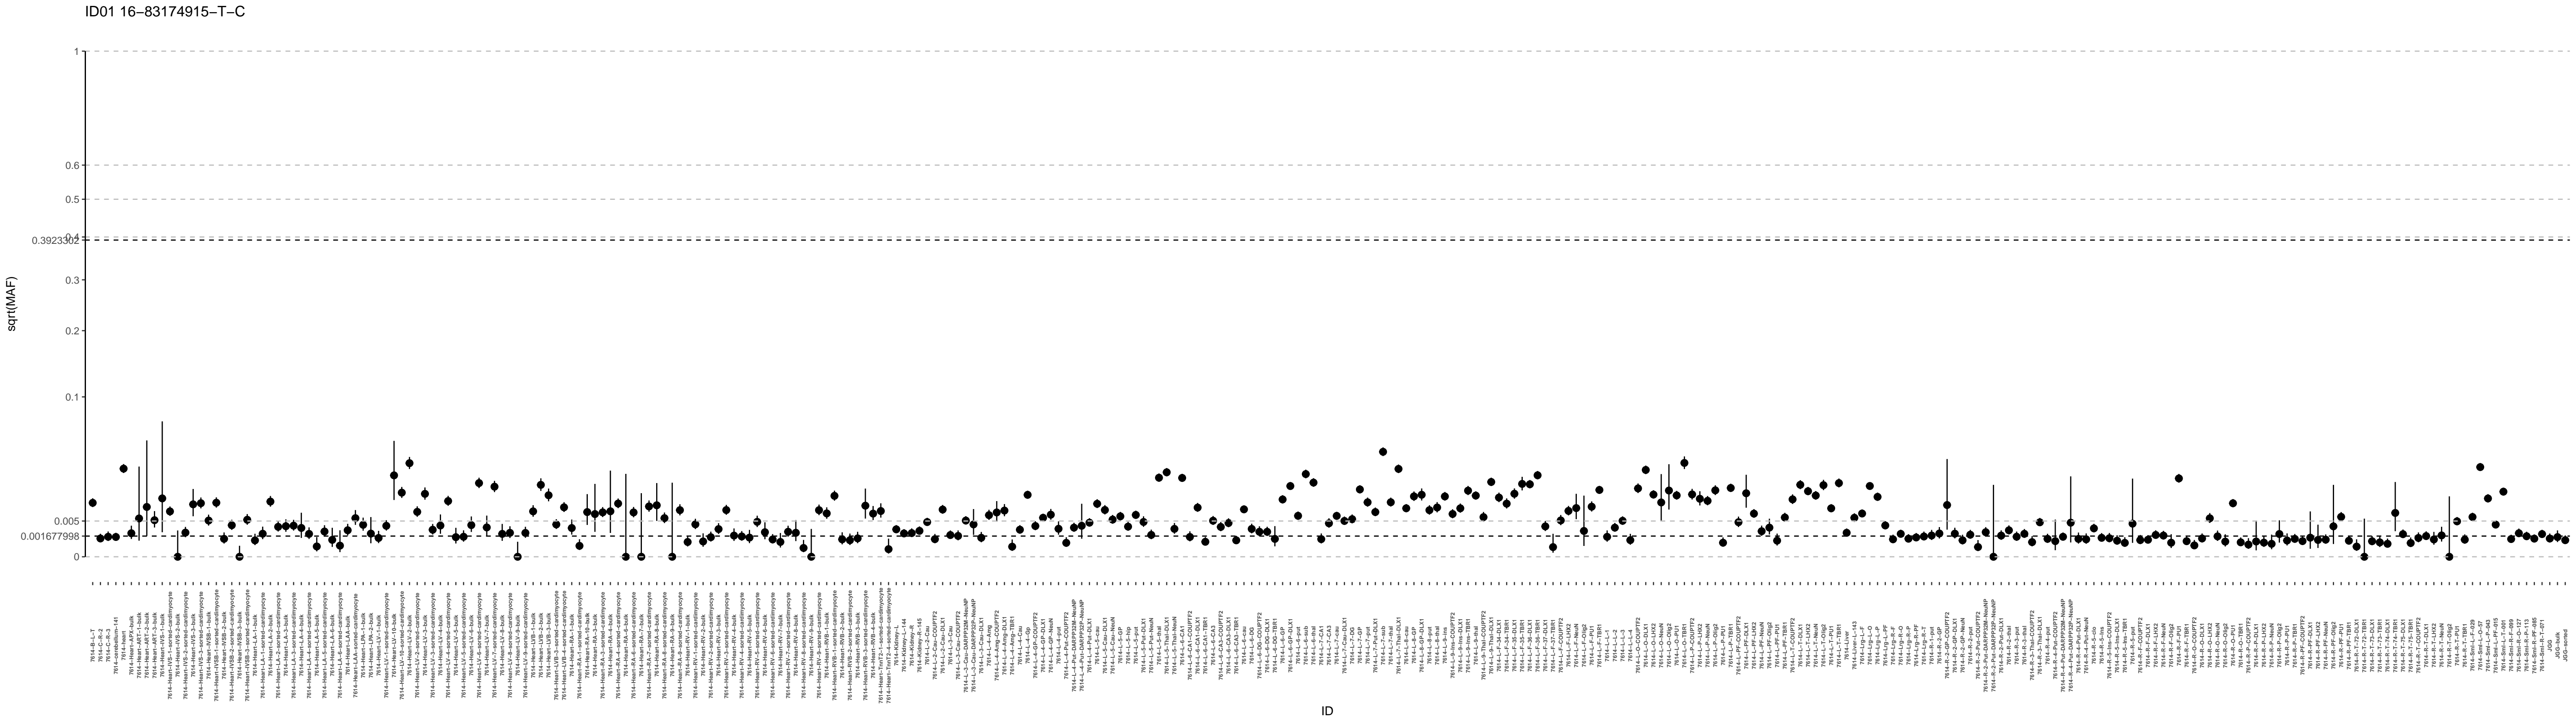

ID

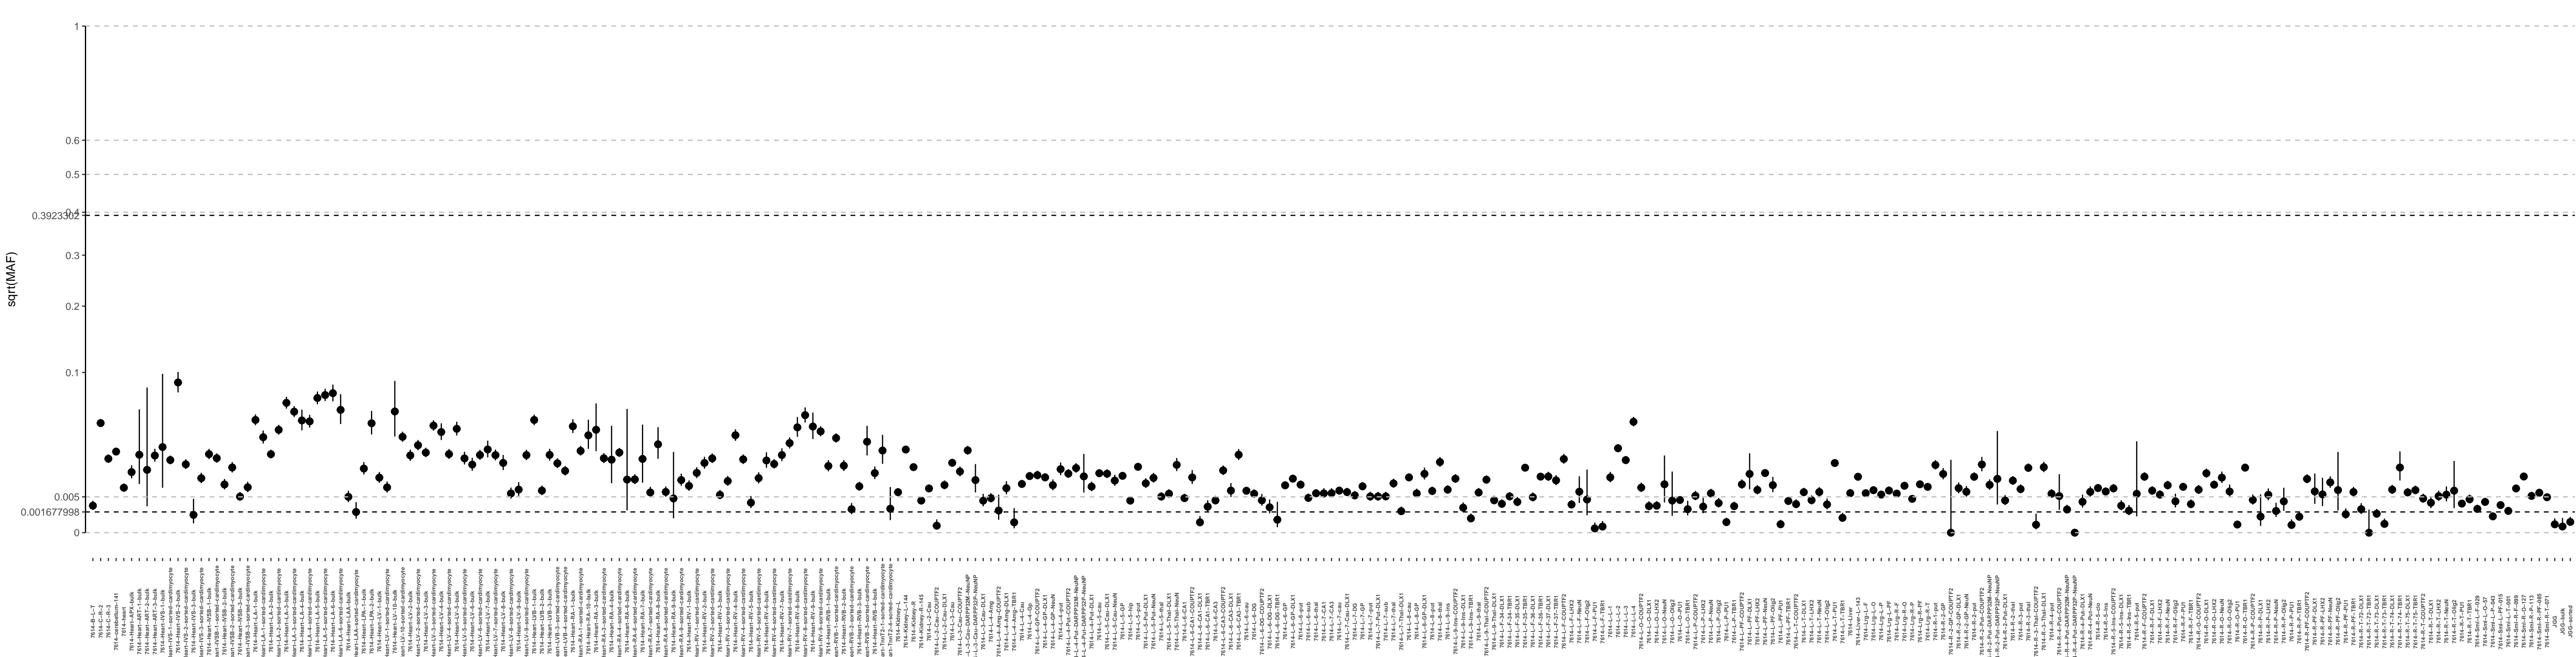

sqrt(MAF)

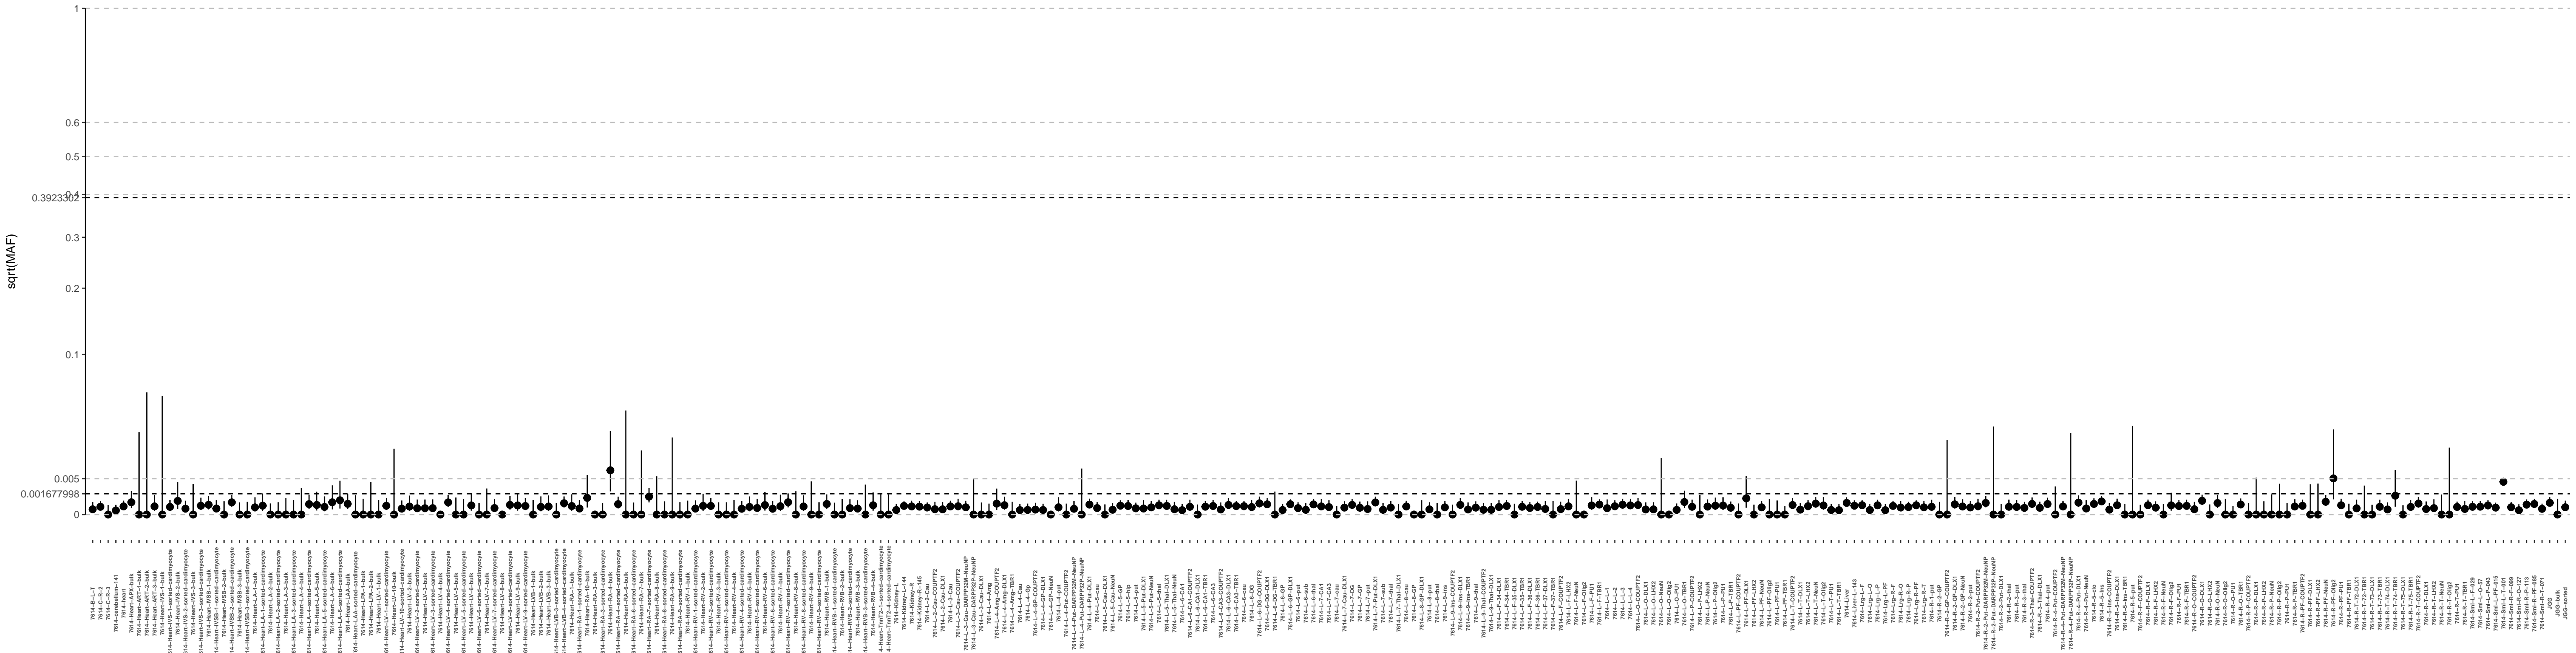

ID

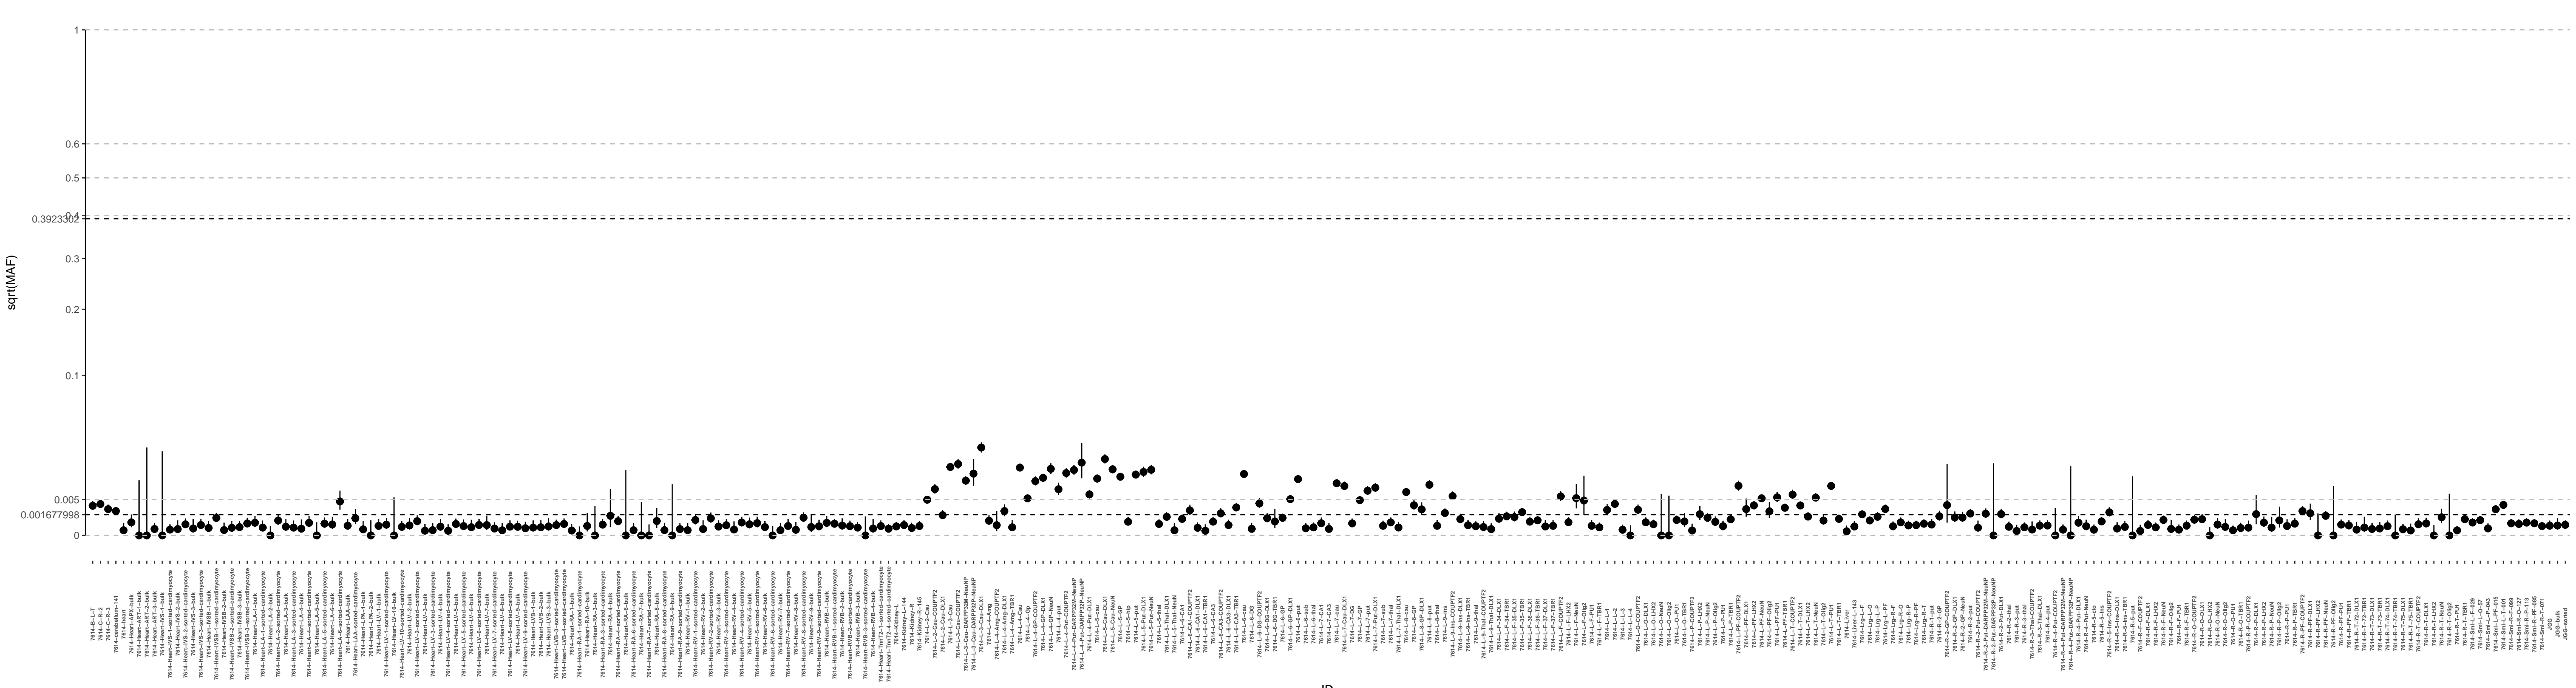

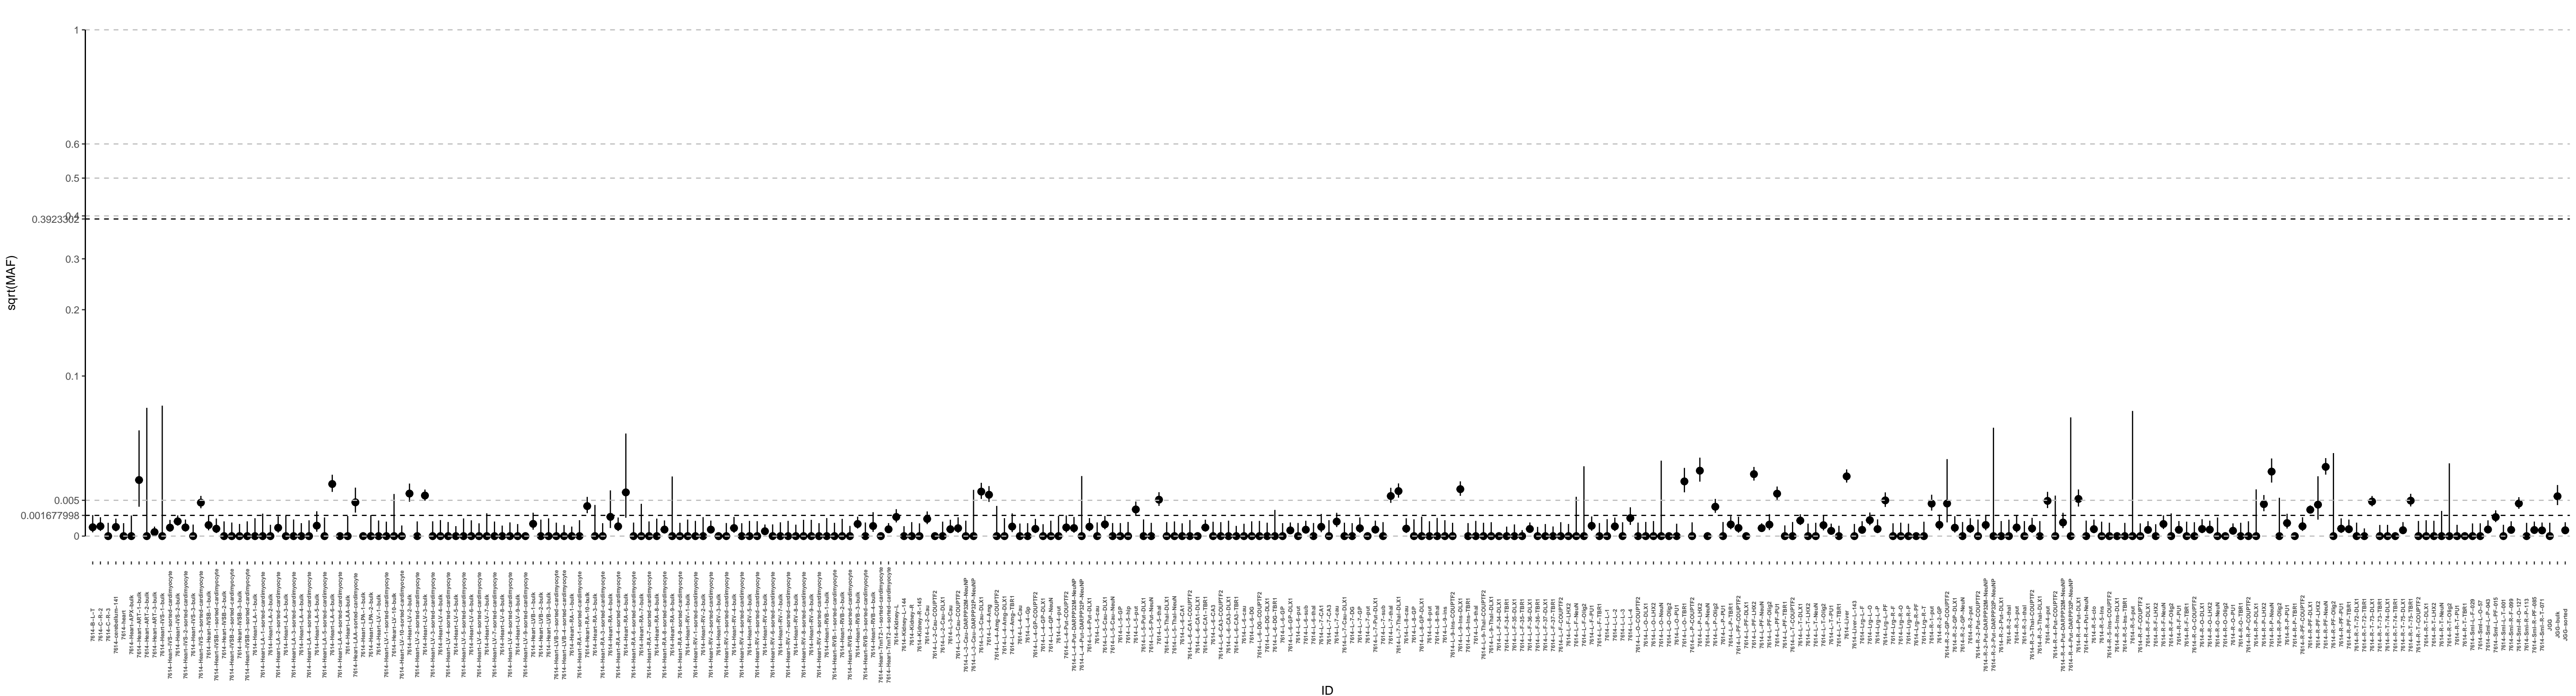

ID













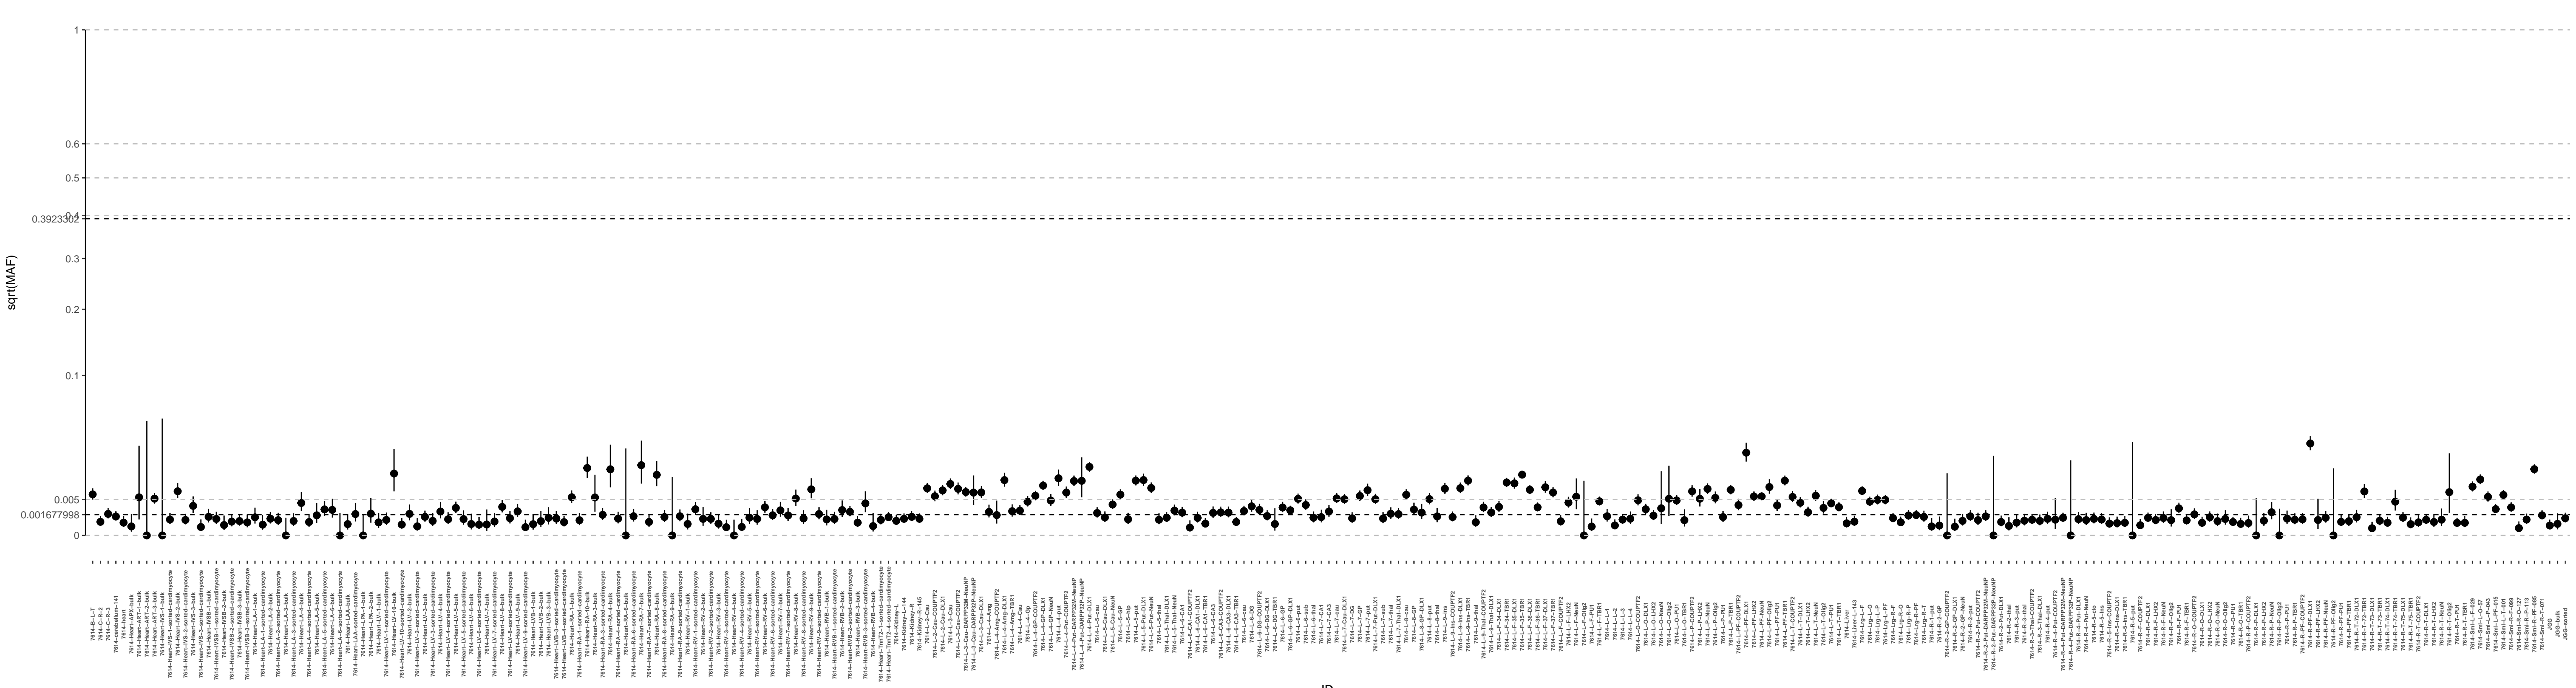



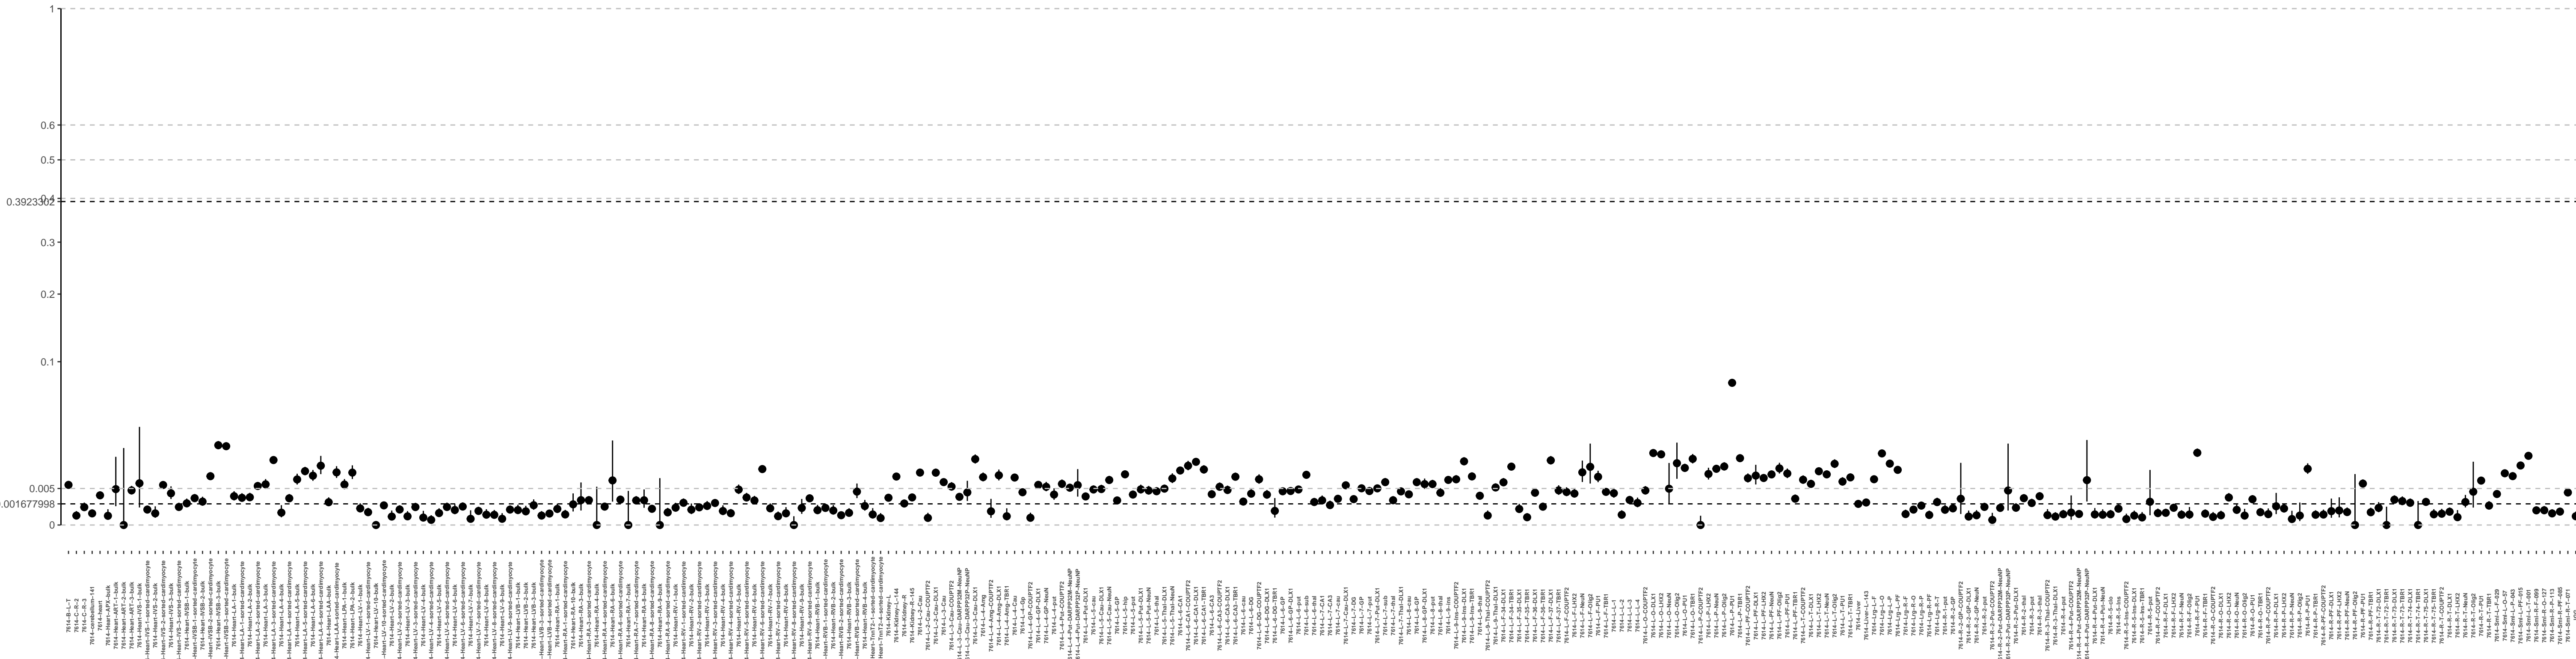

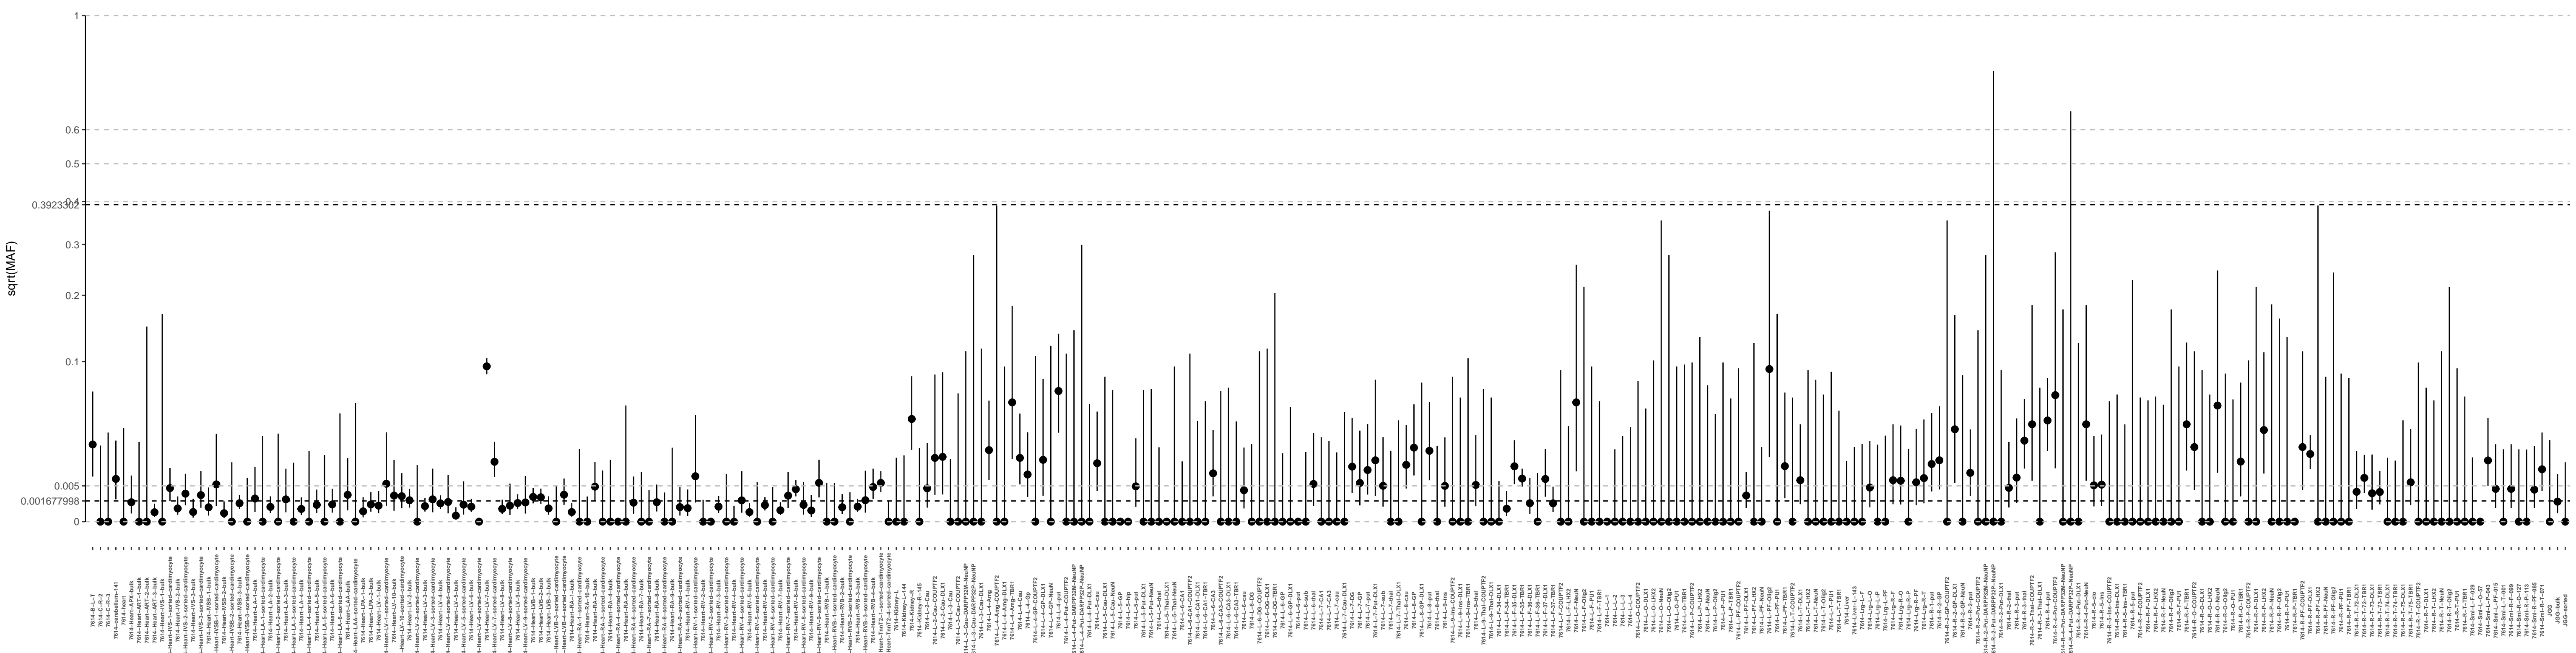







sqrt(MAF)

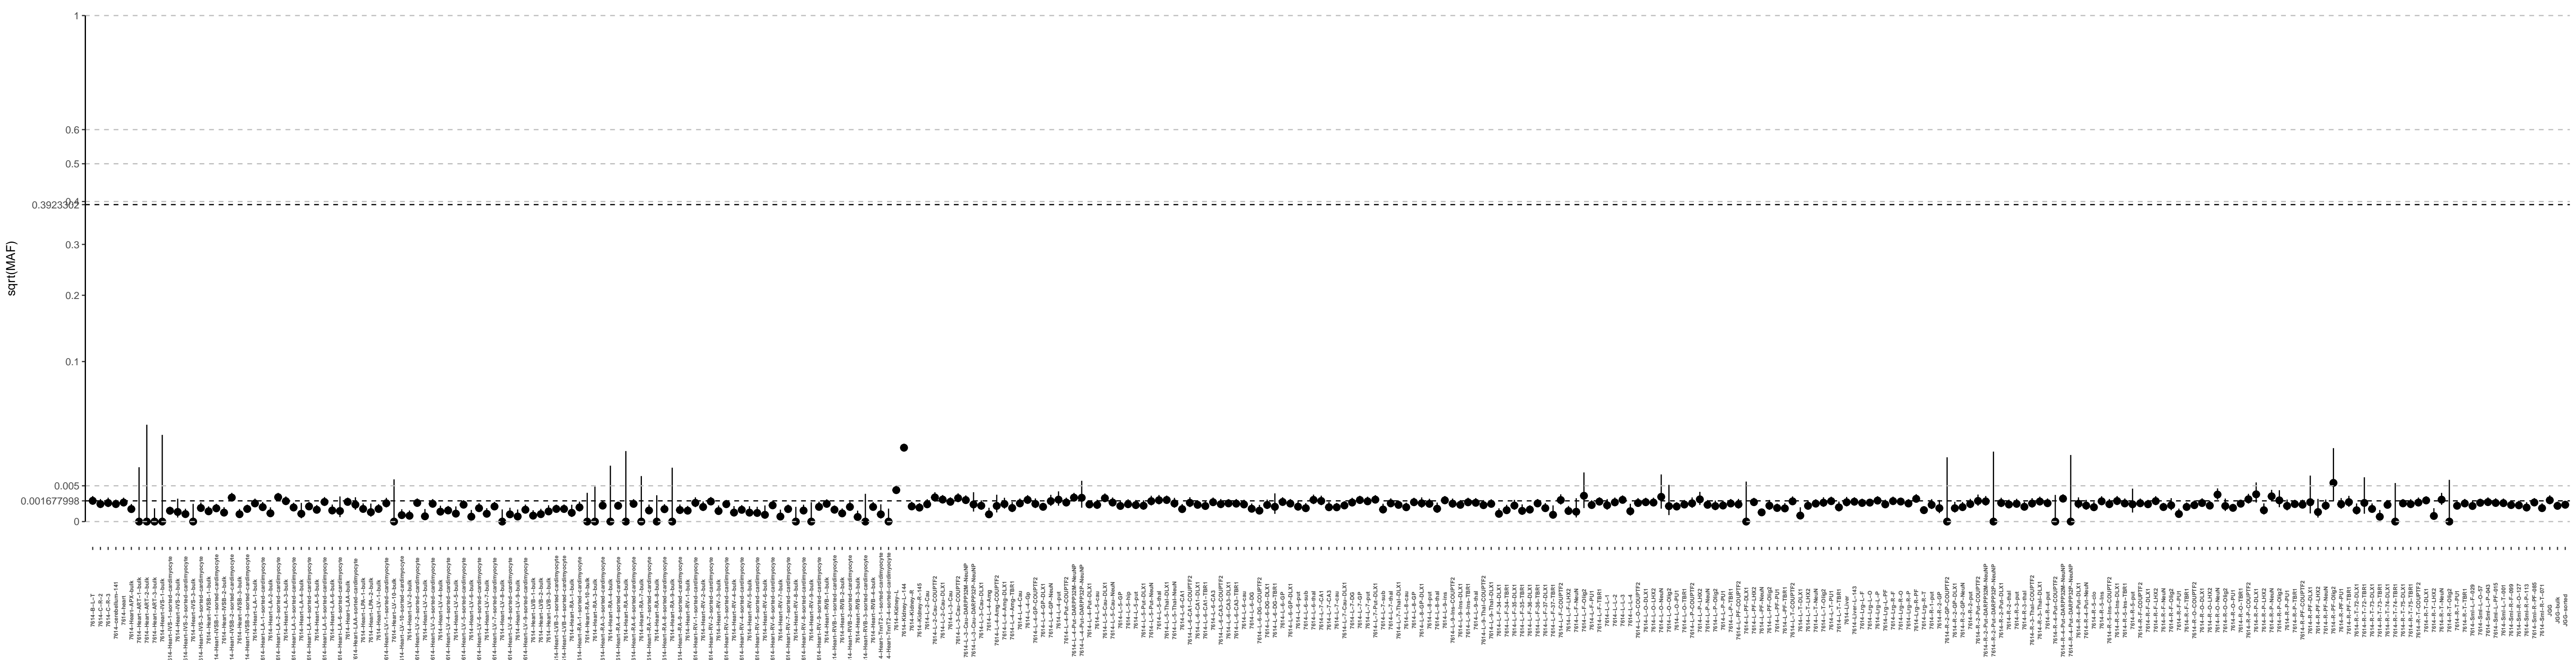

ID

sqrt(MAF)

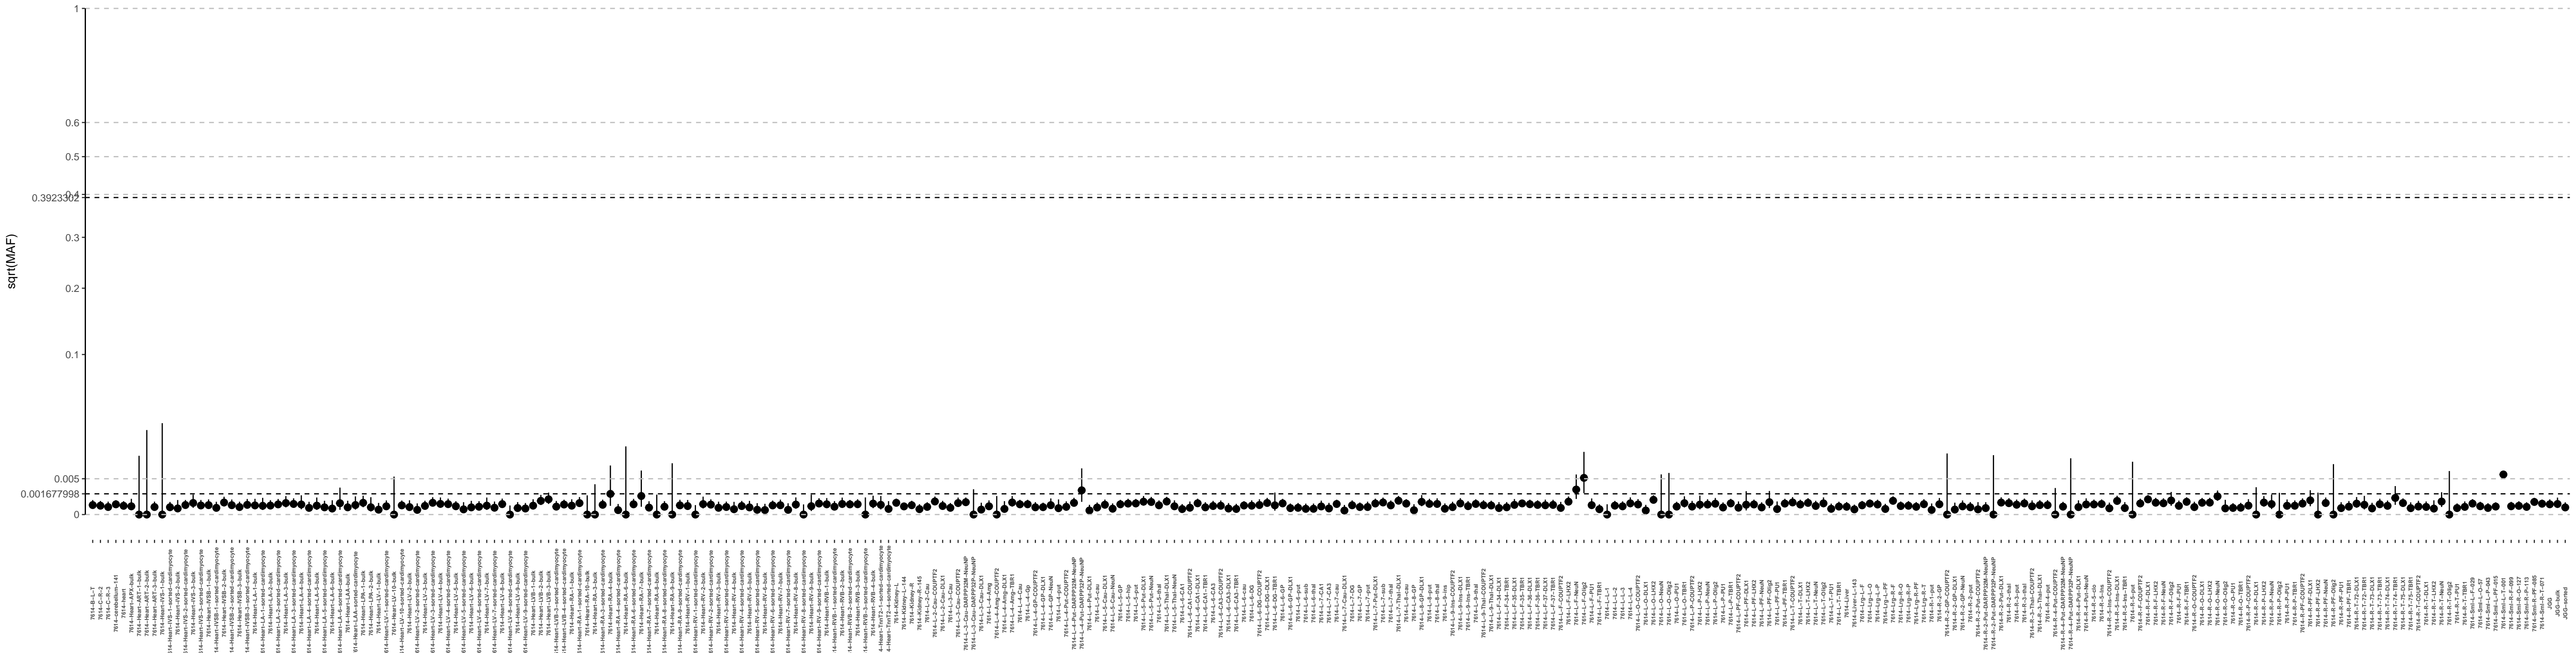

ID

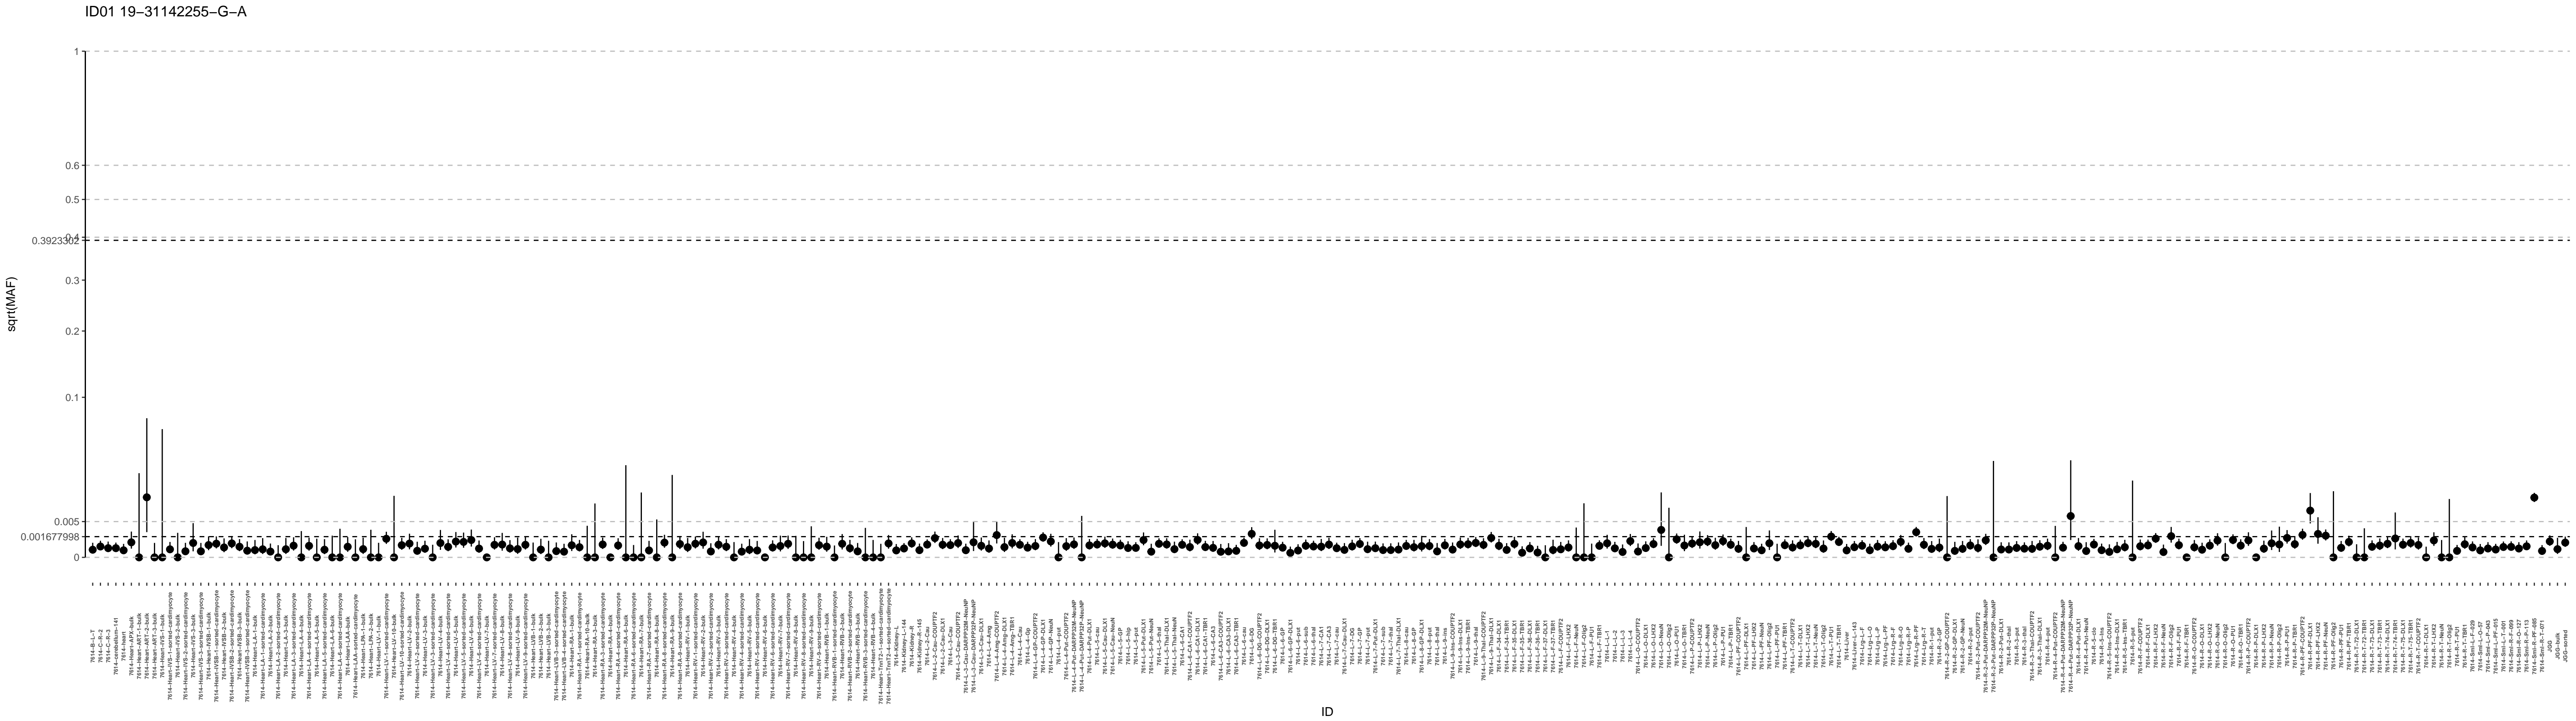

ID

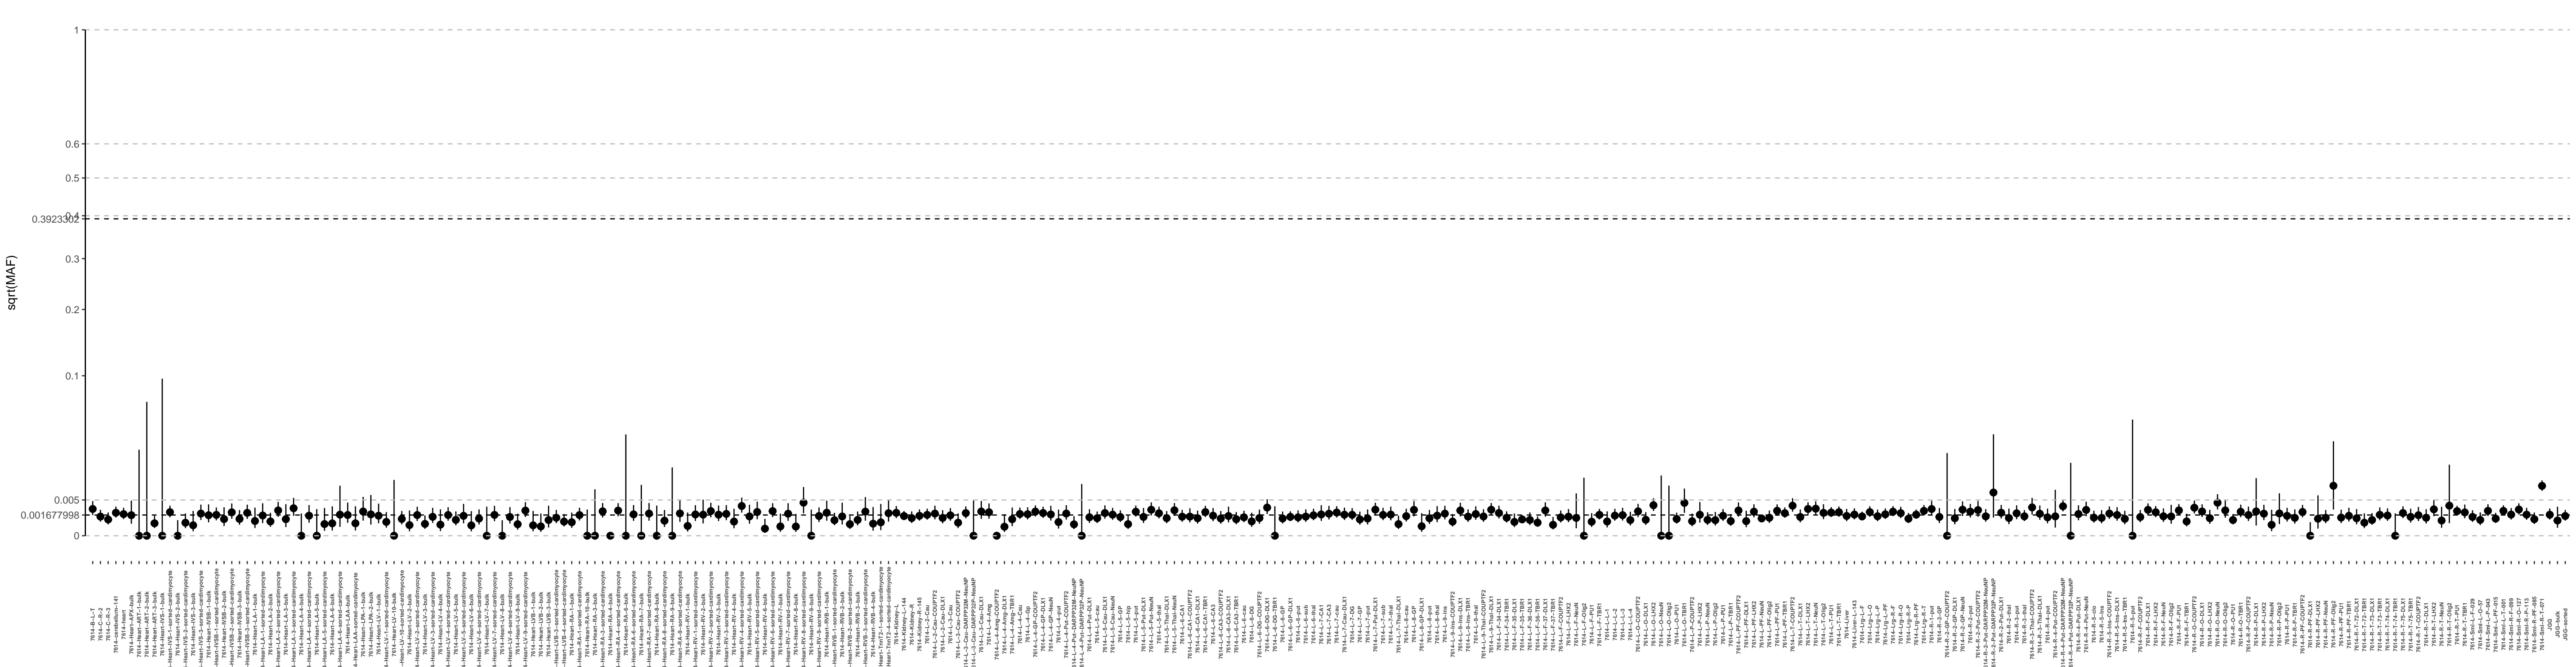

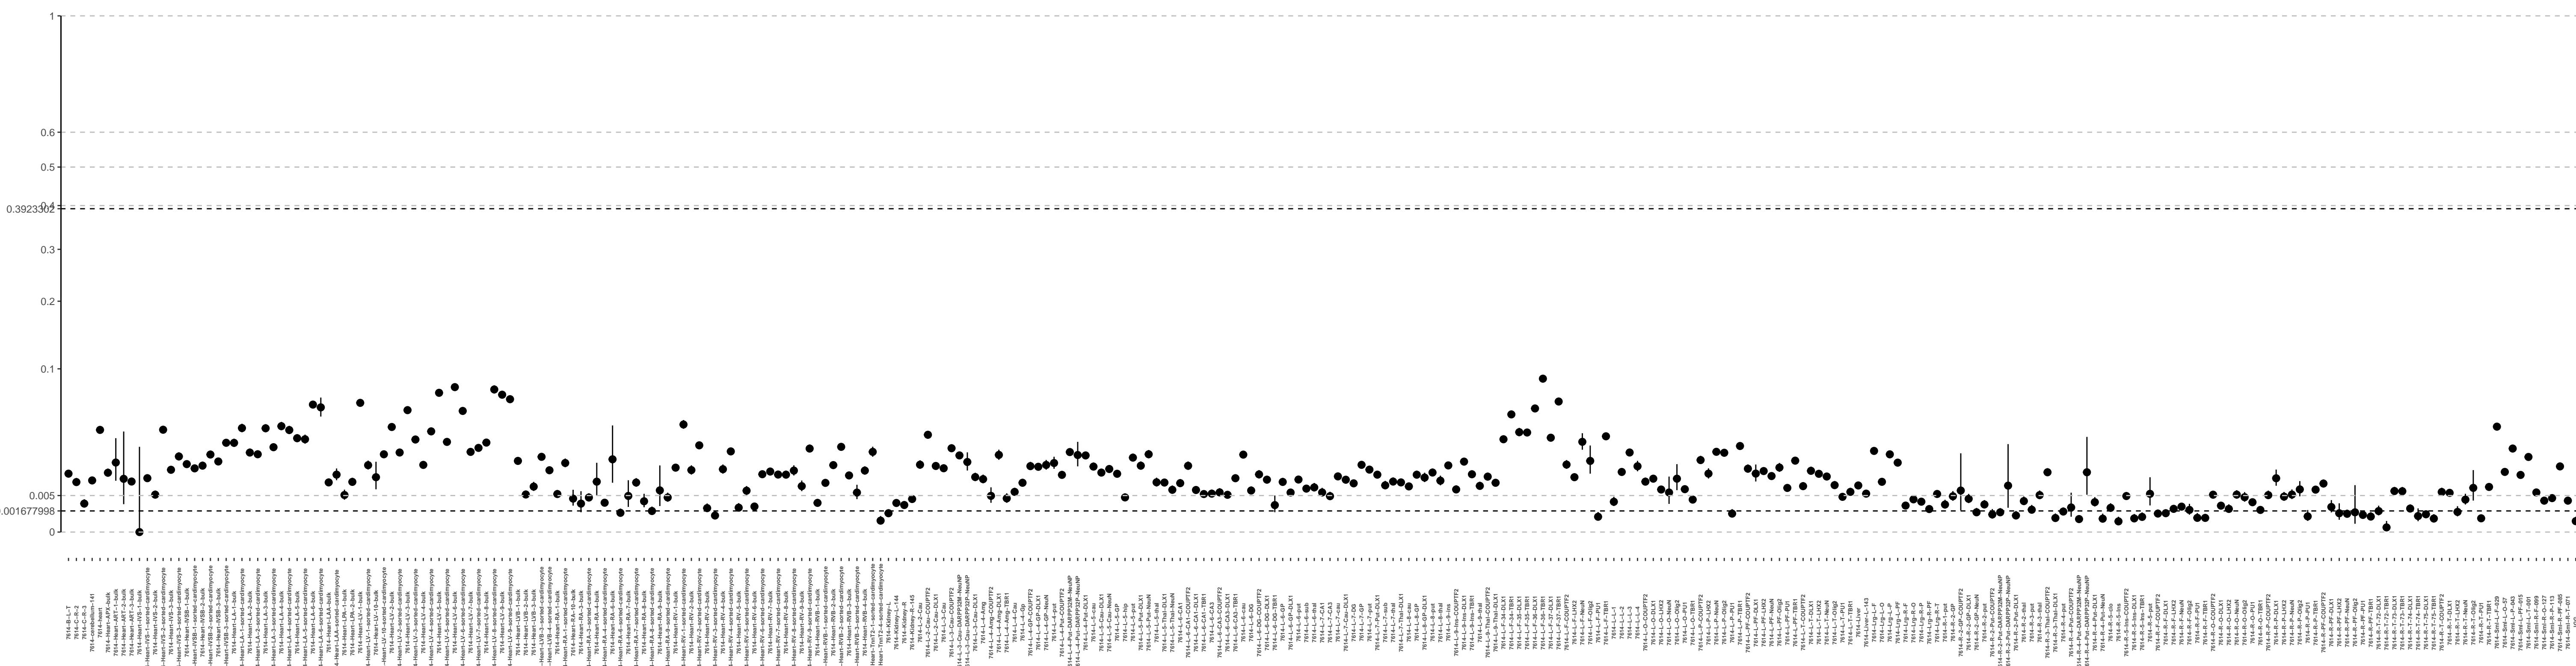







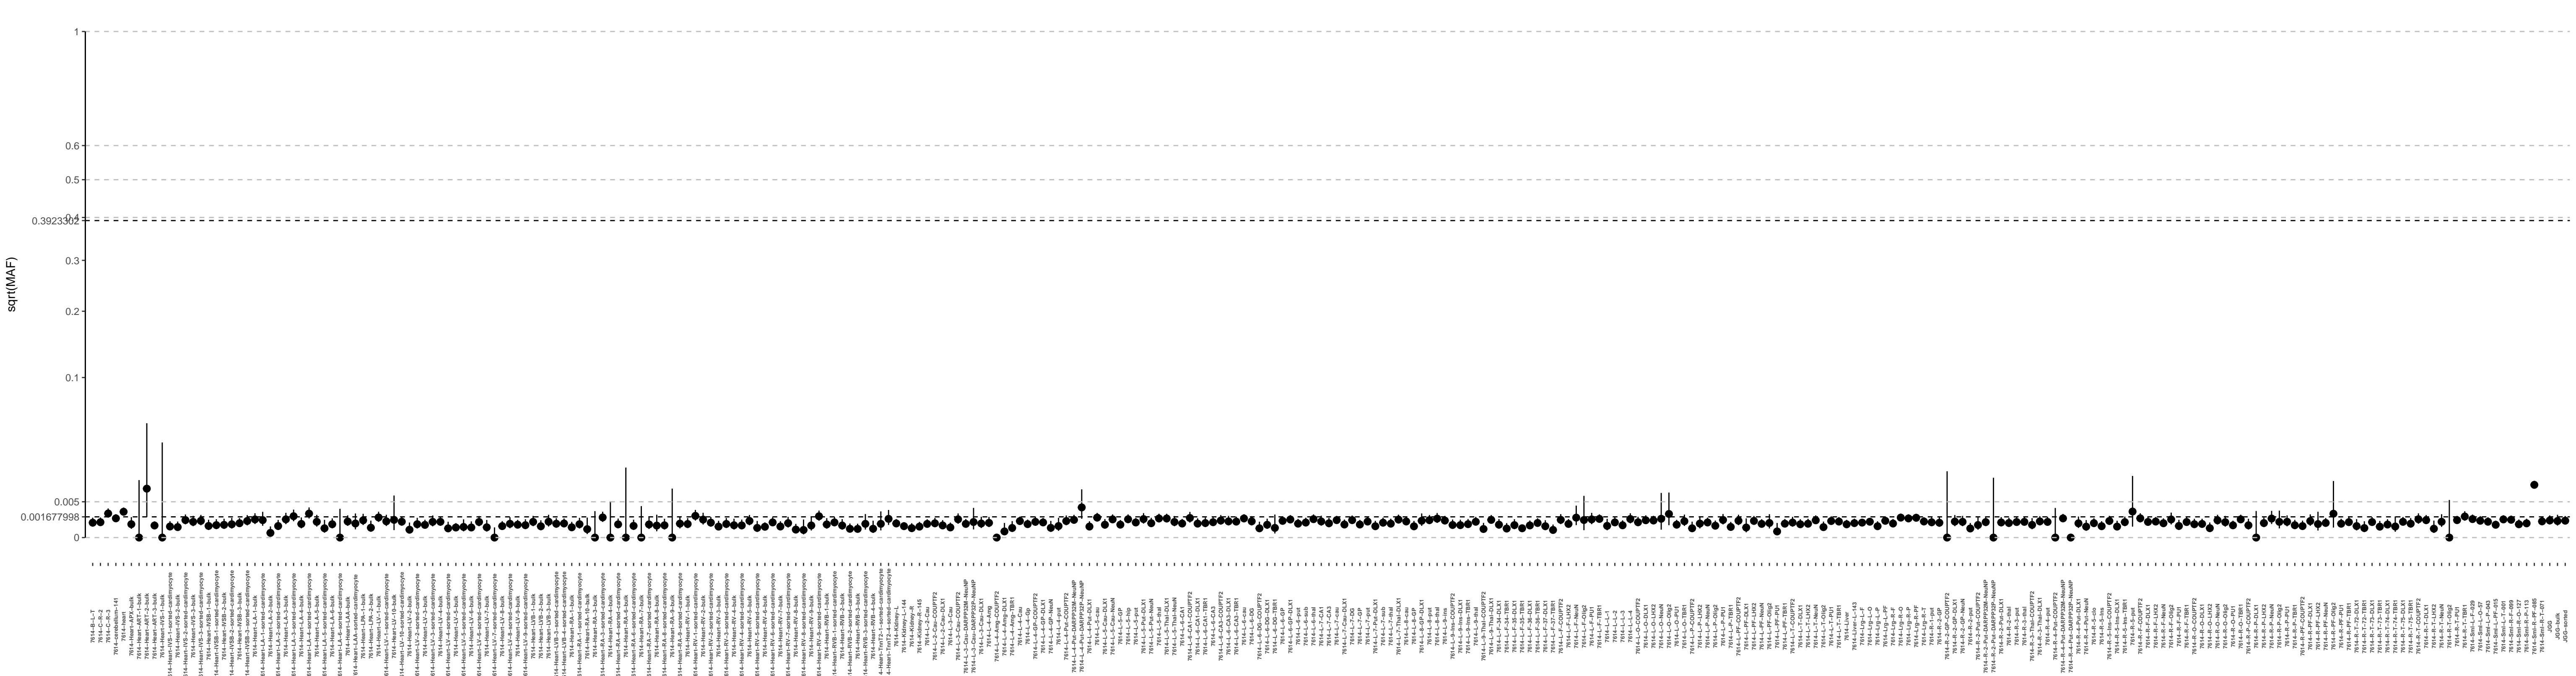

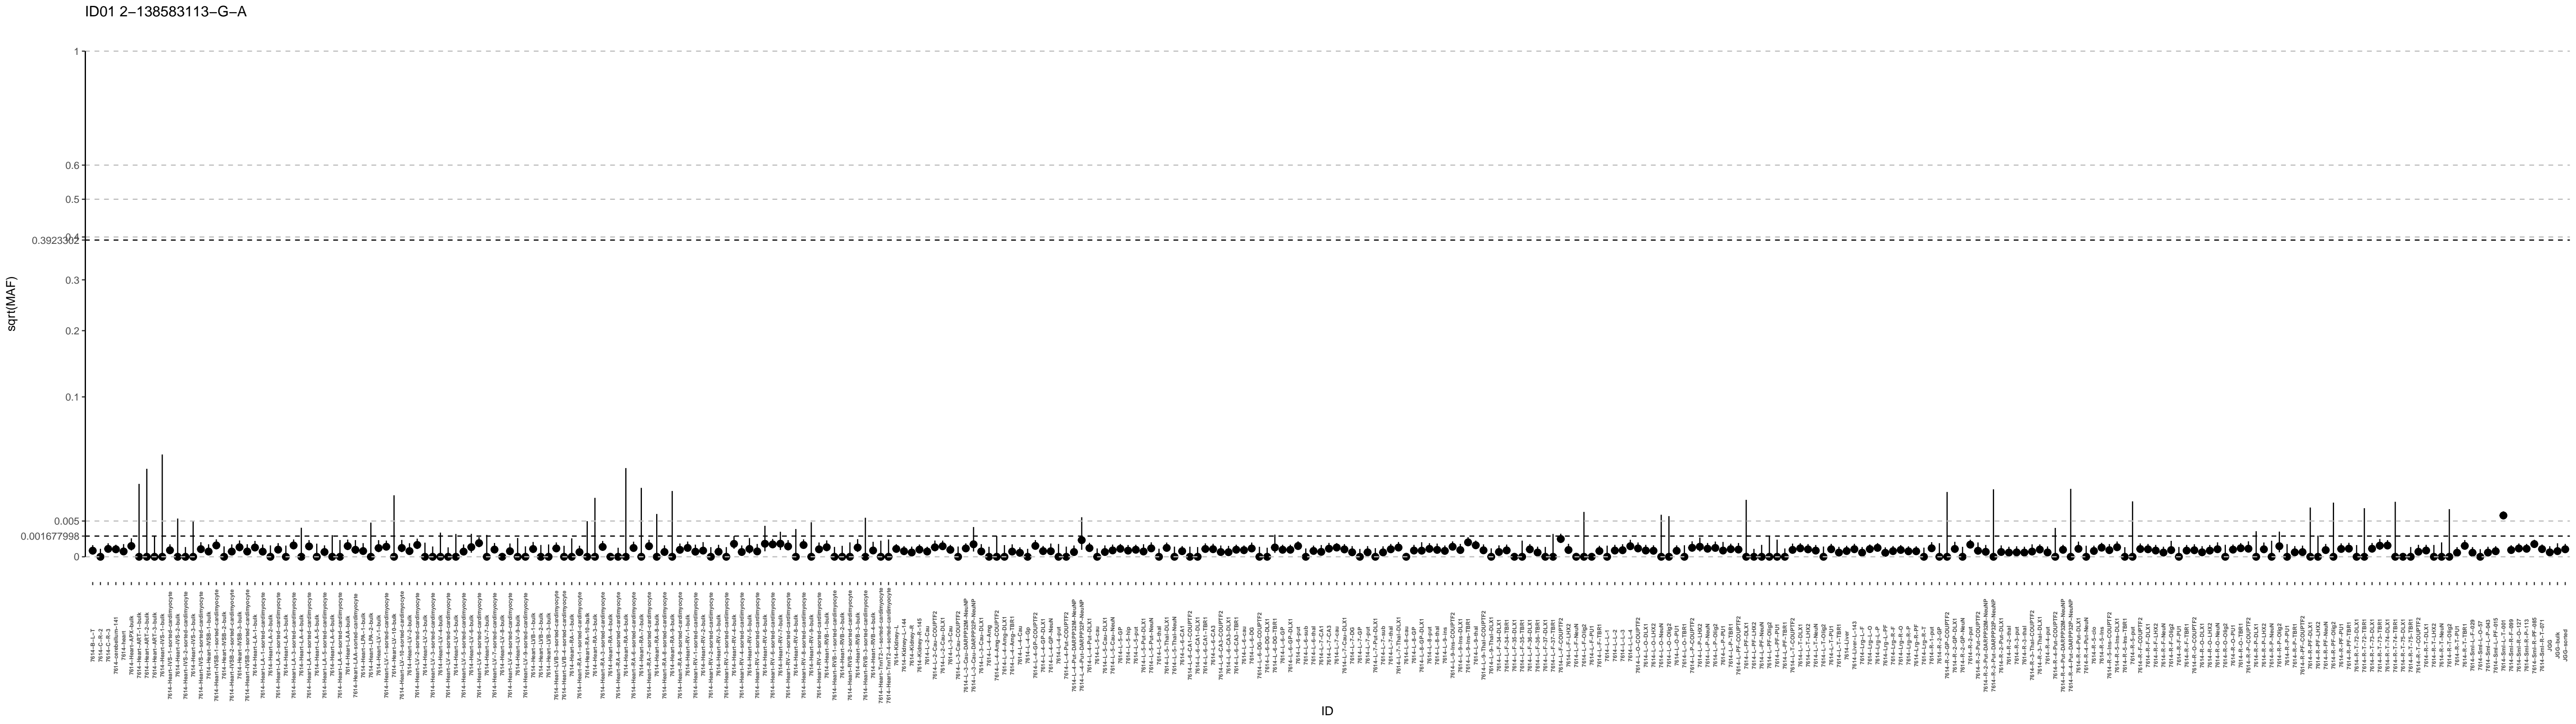

ID



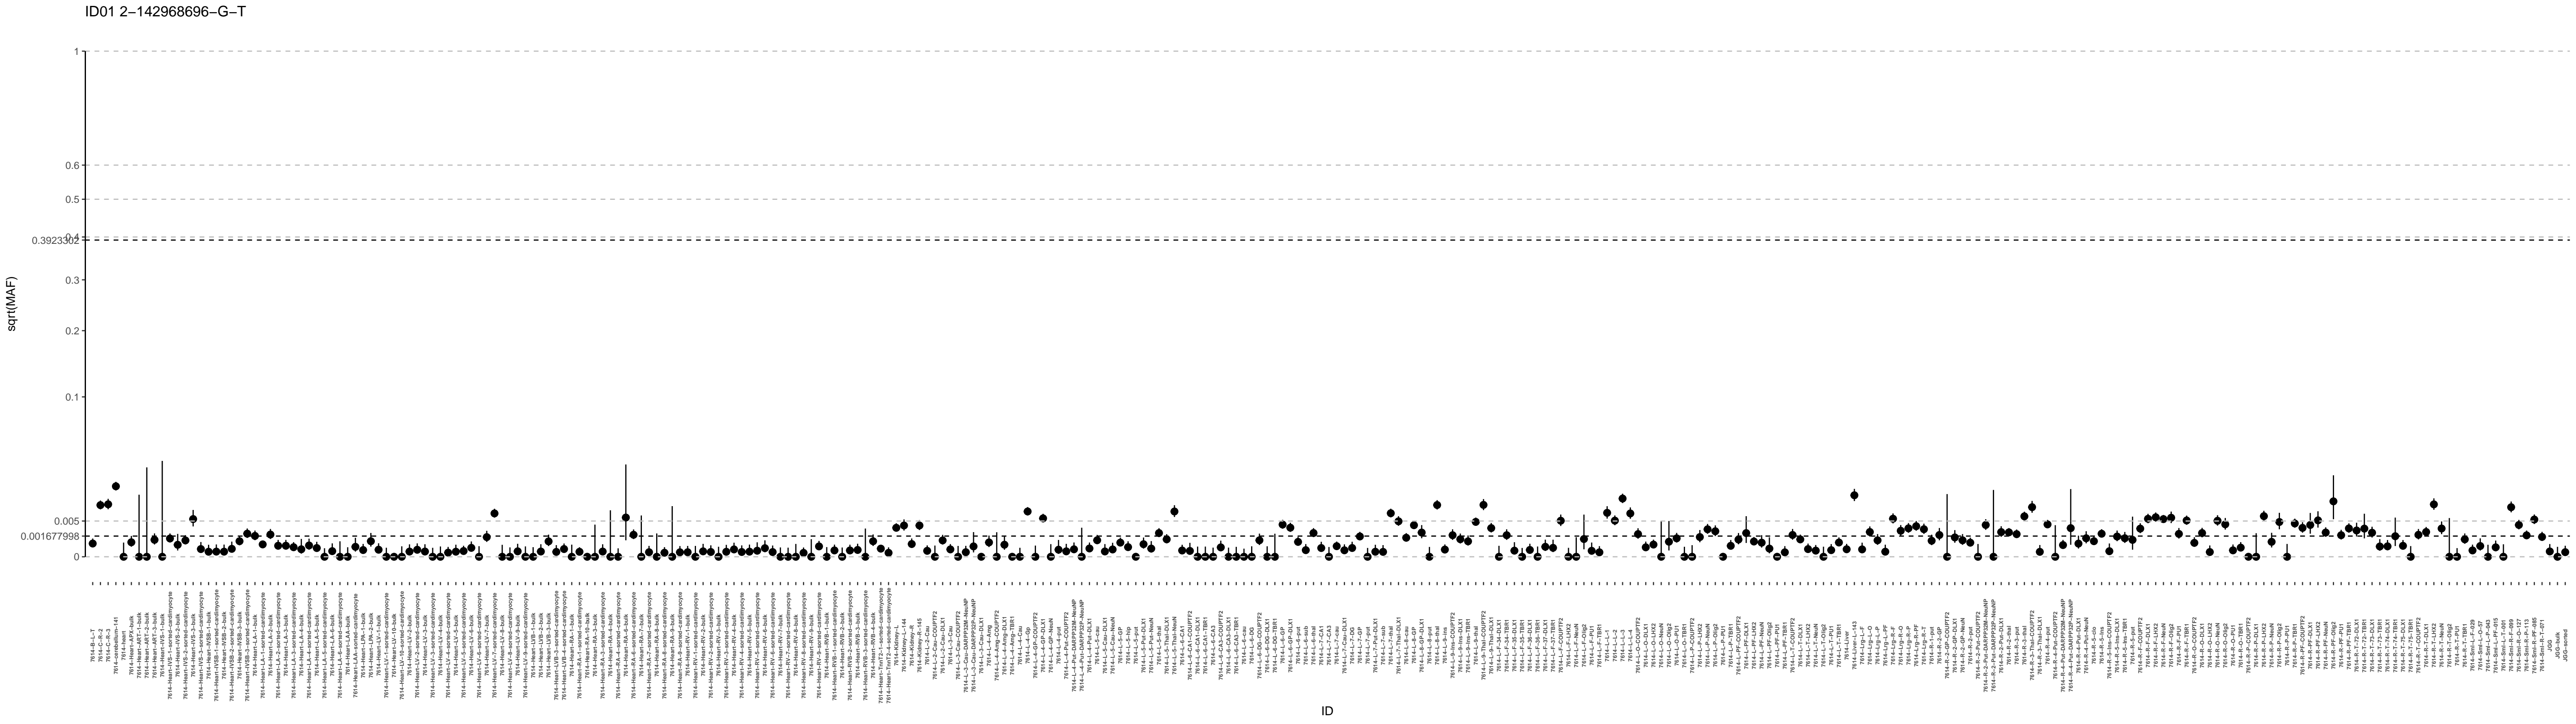

ID

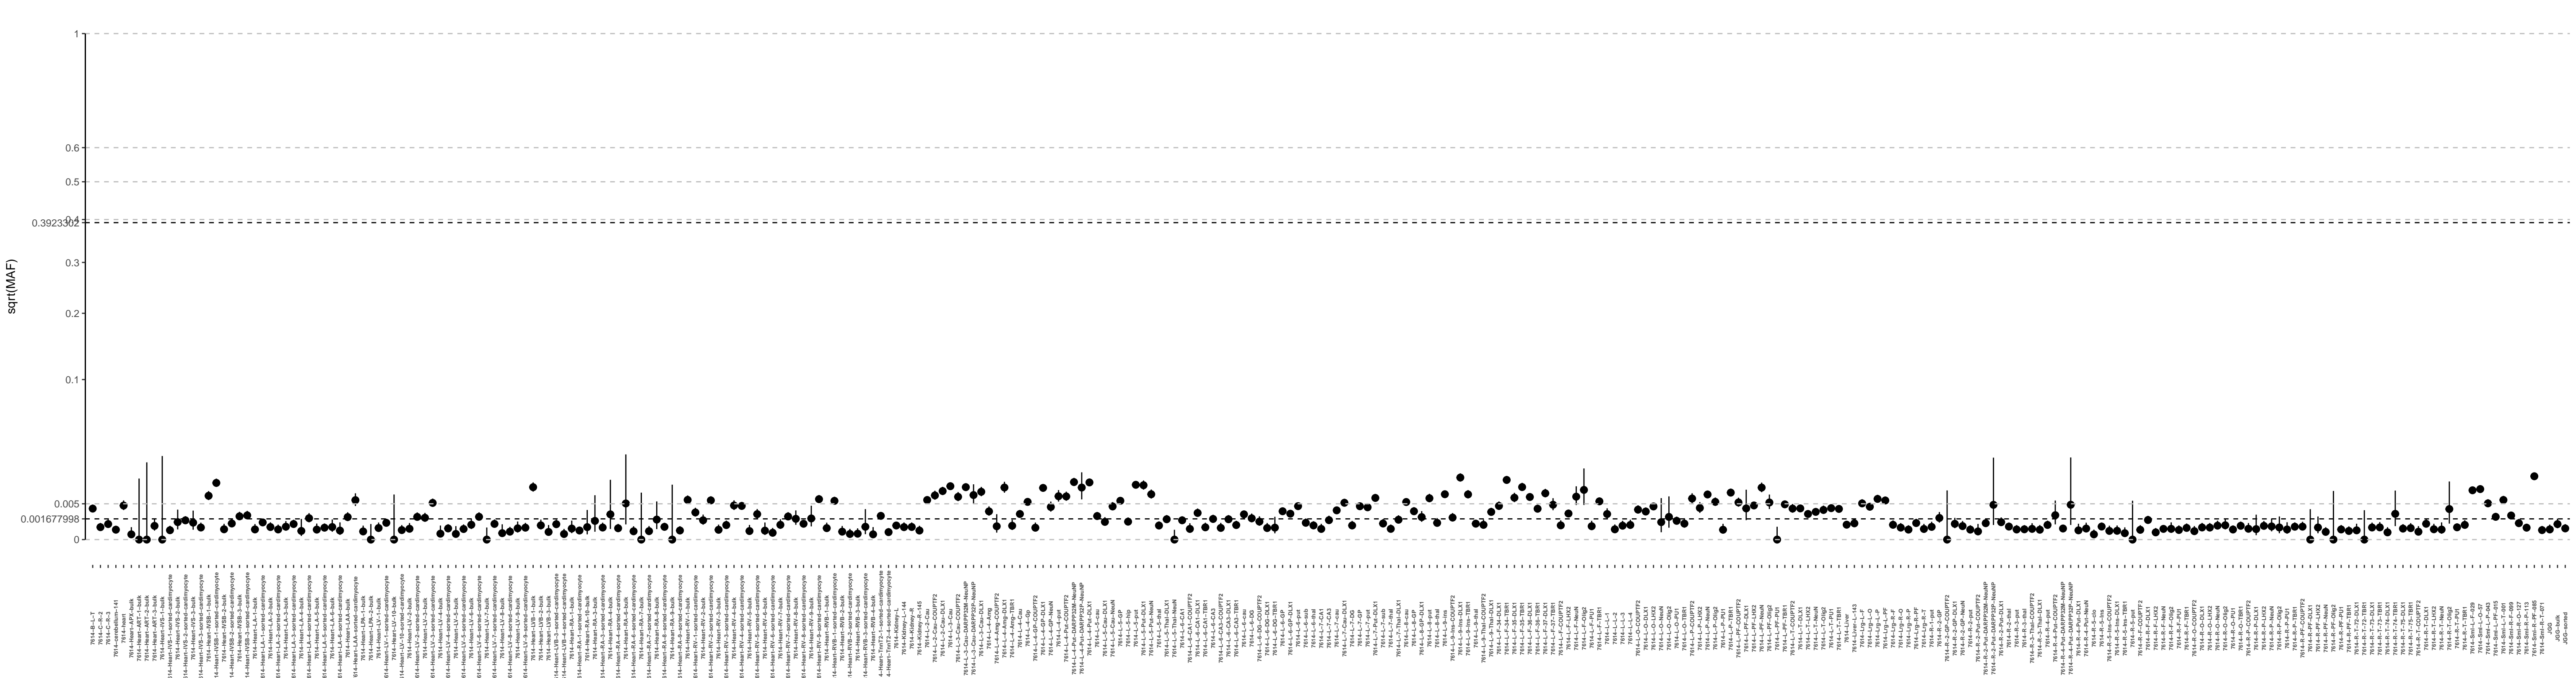

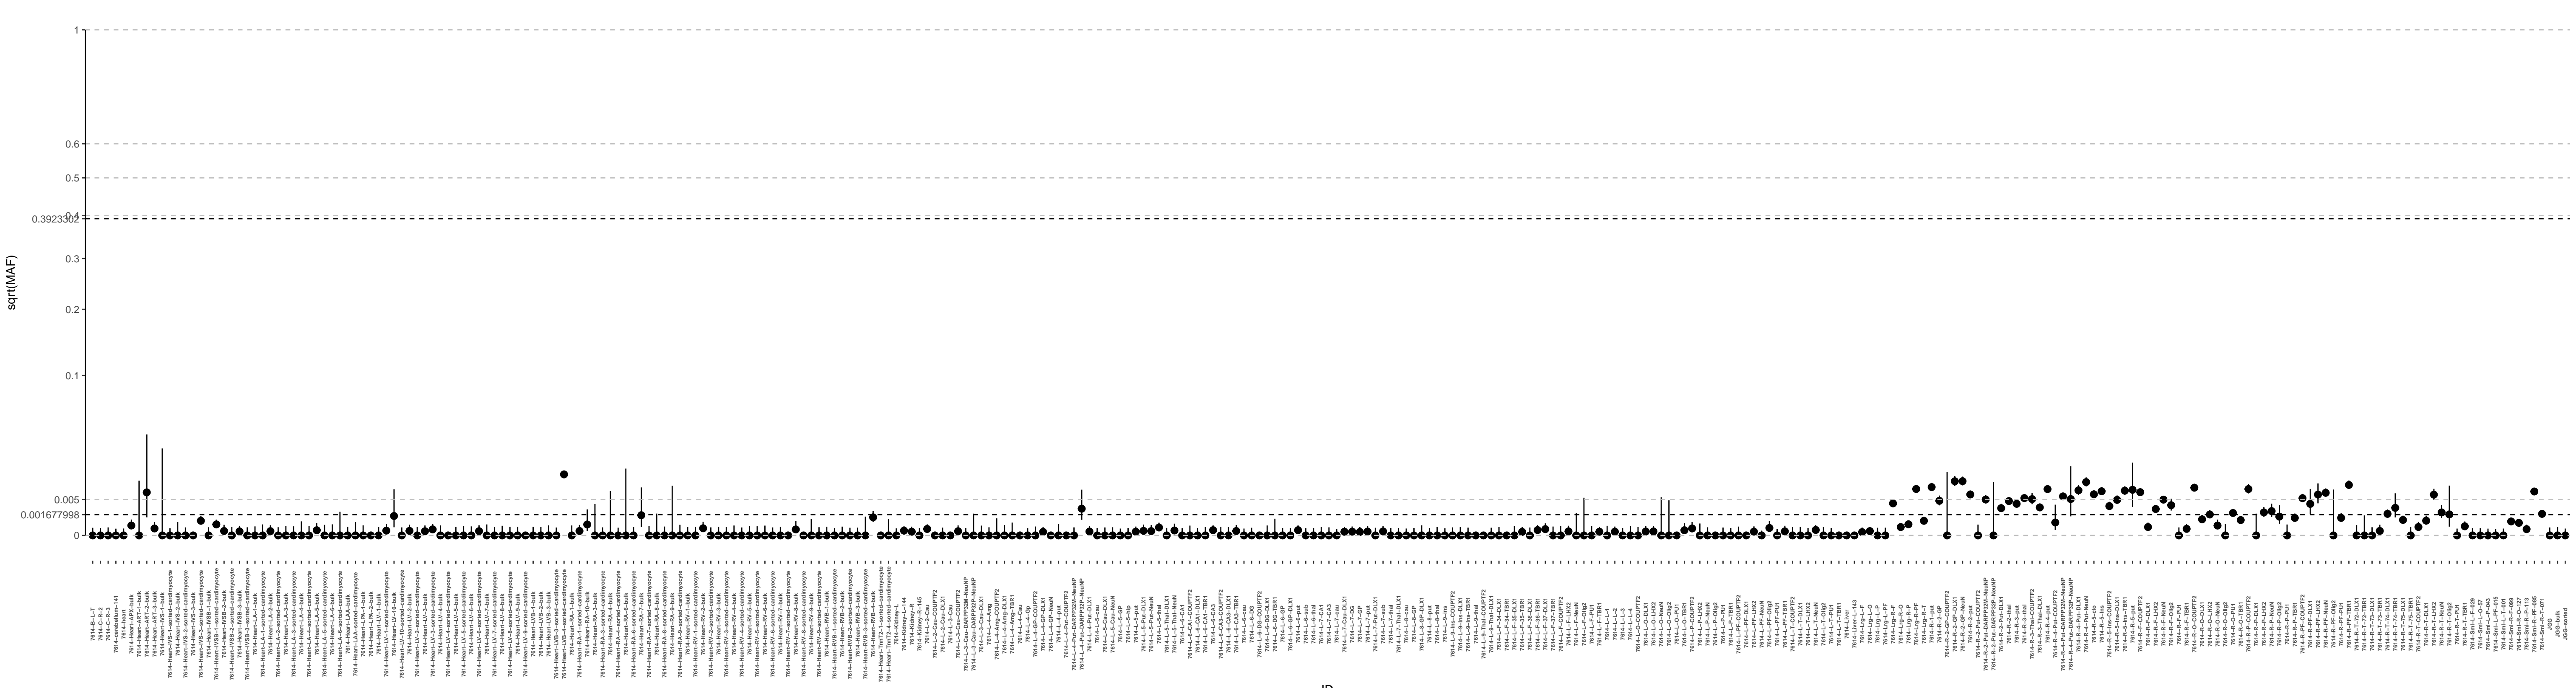







sqrt(MAF)

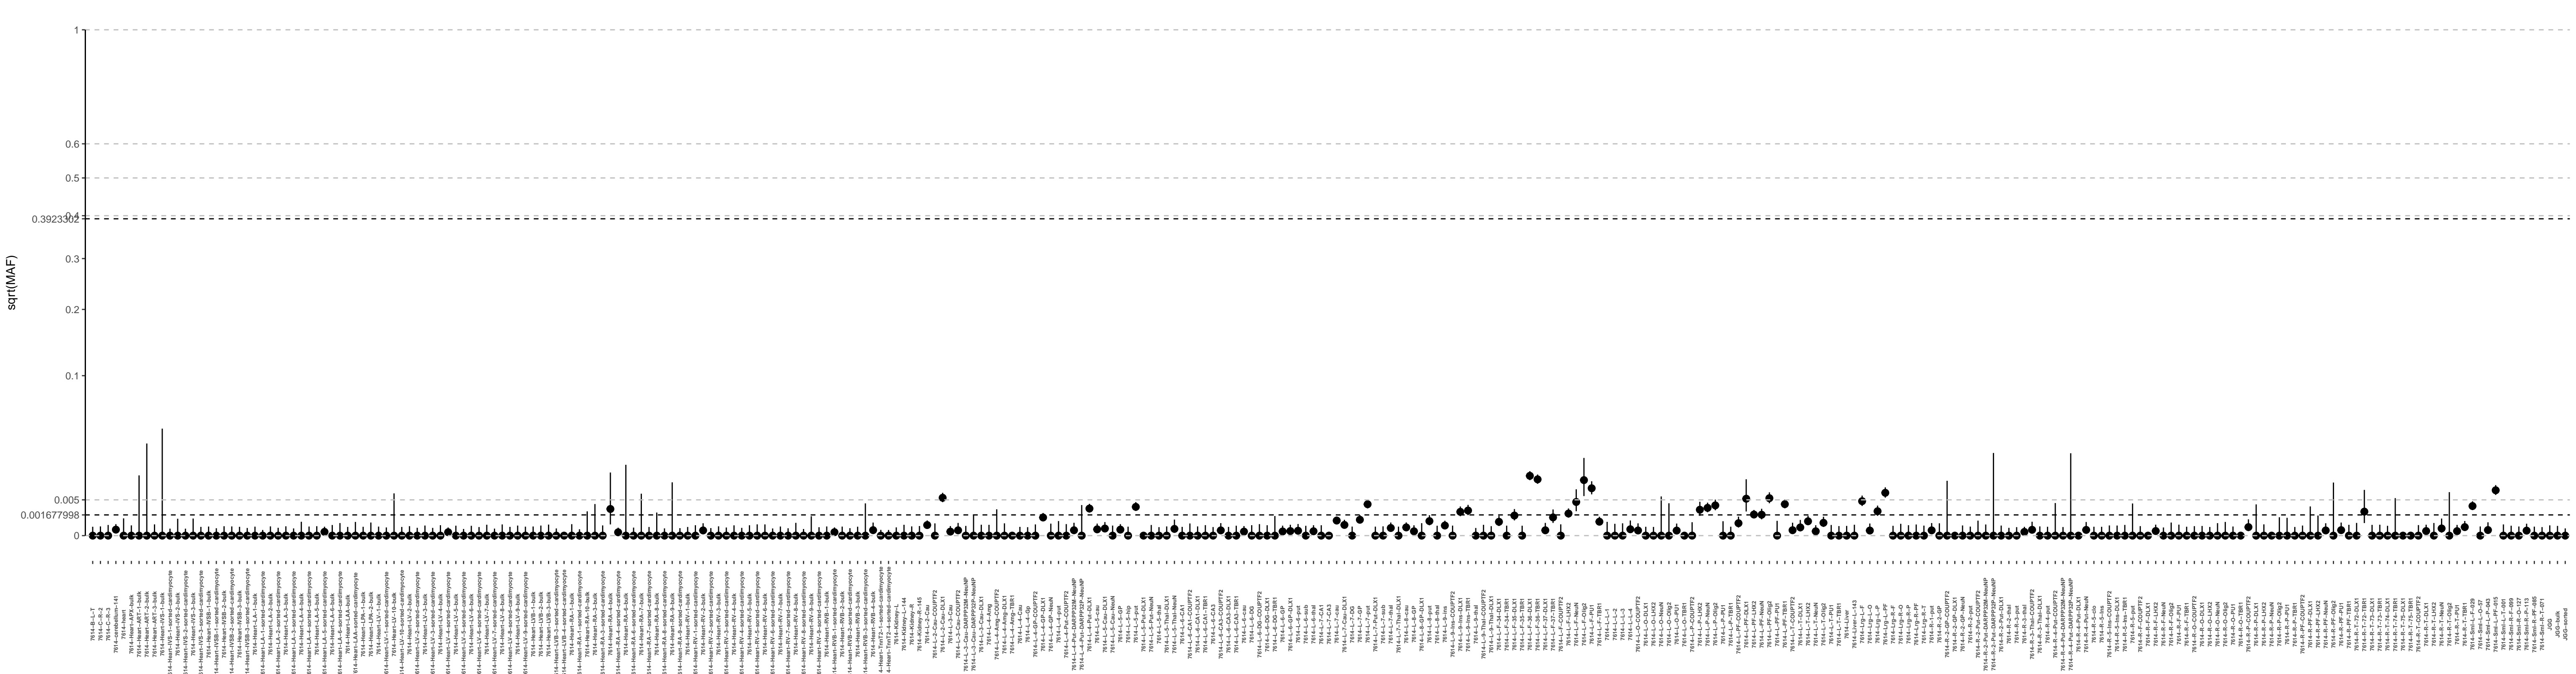

ID





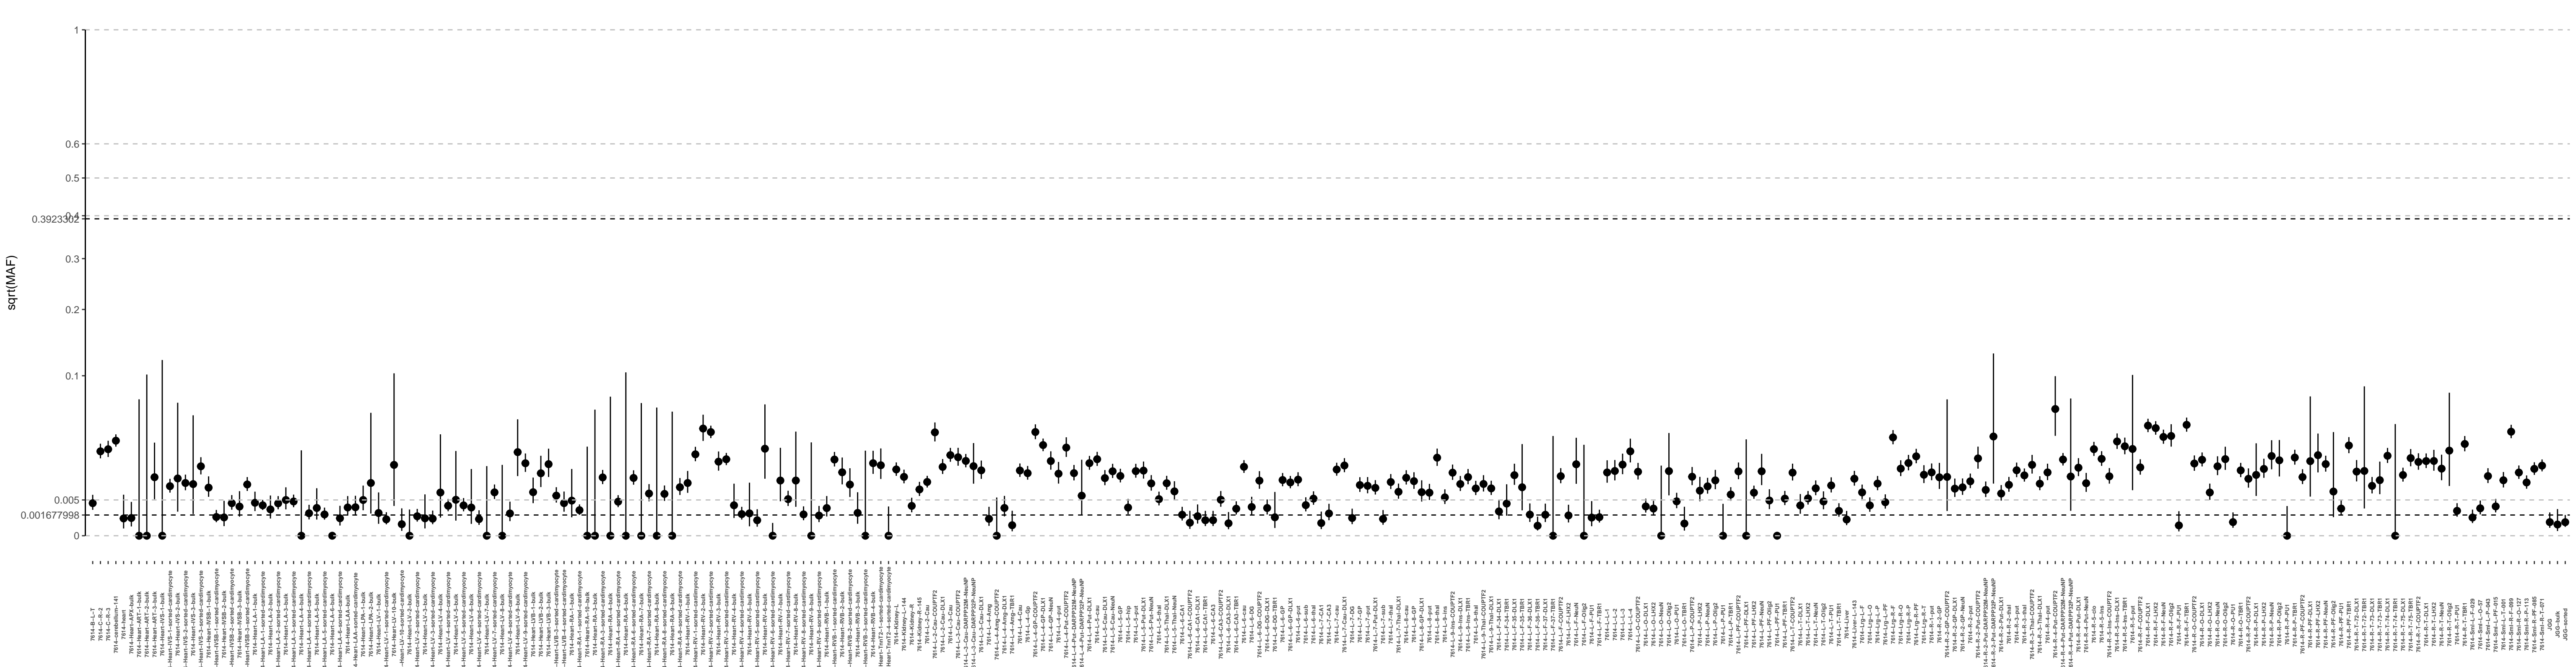





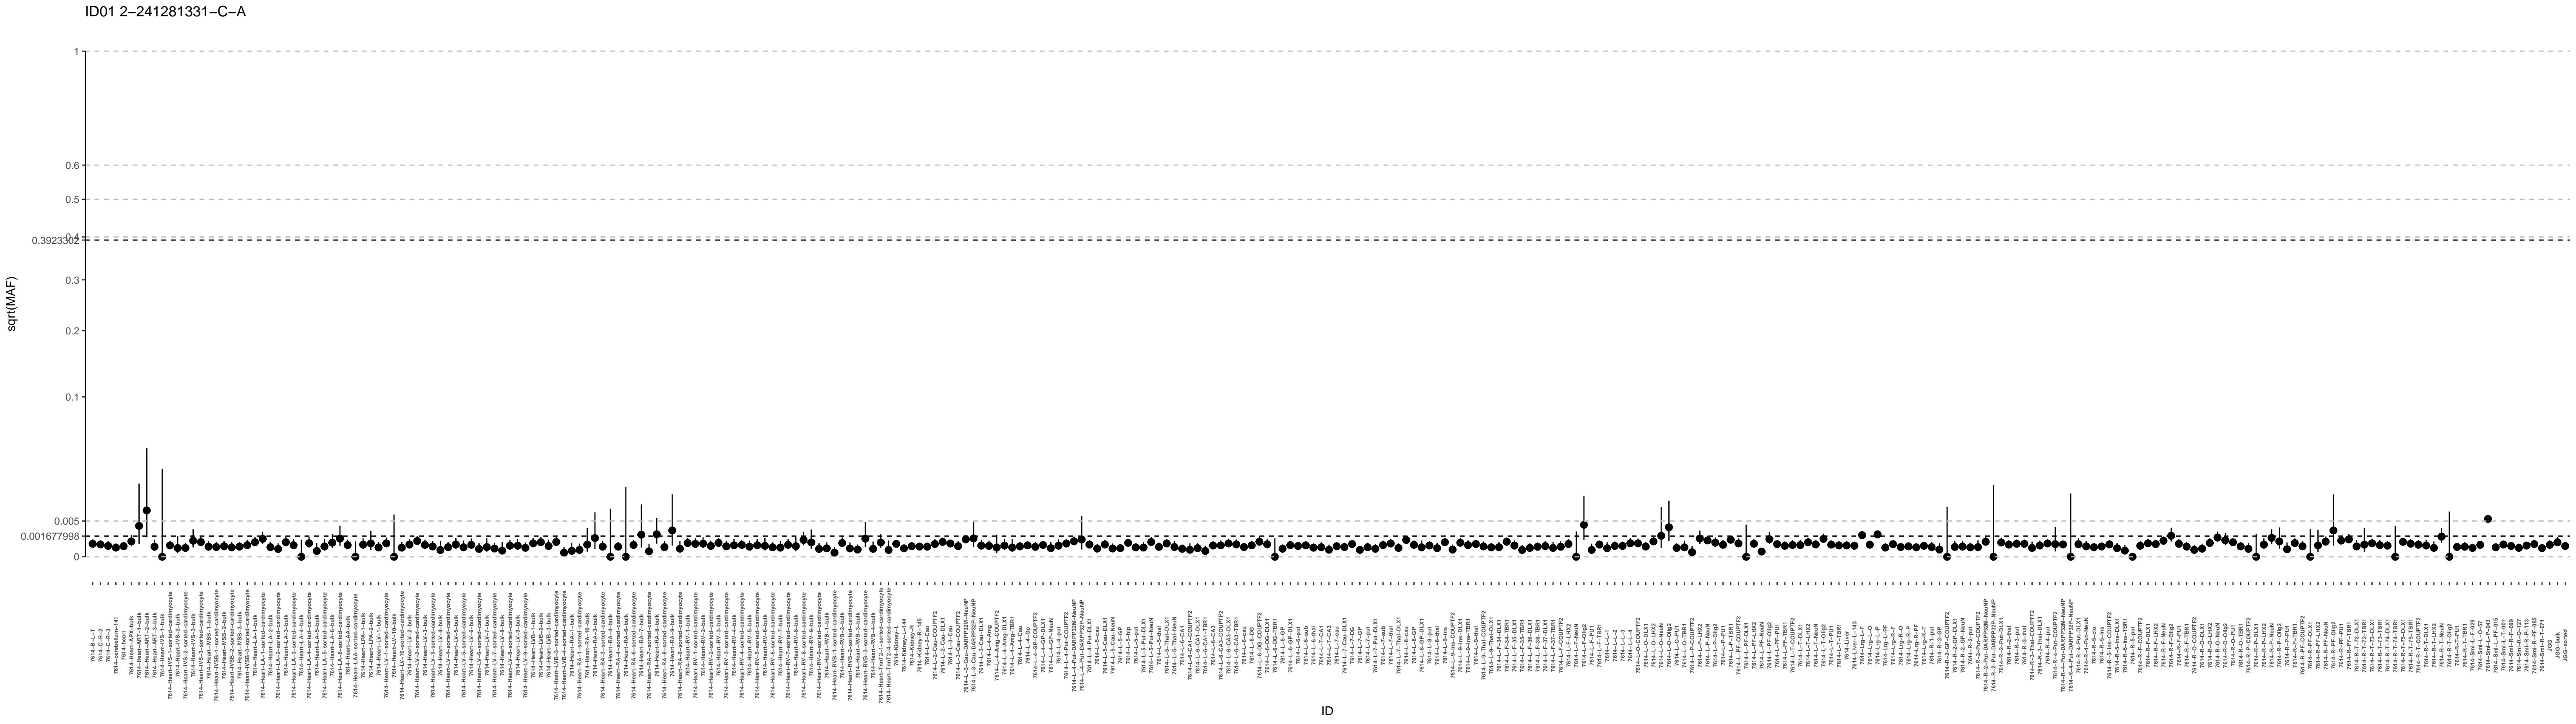

ID







sqrt(MAF)

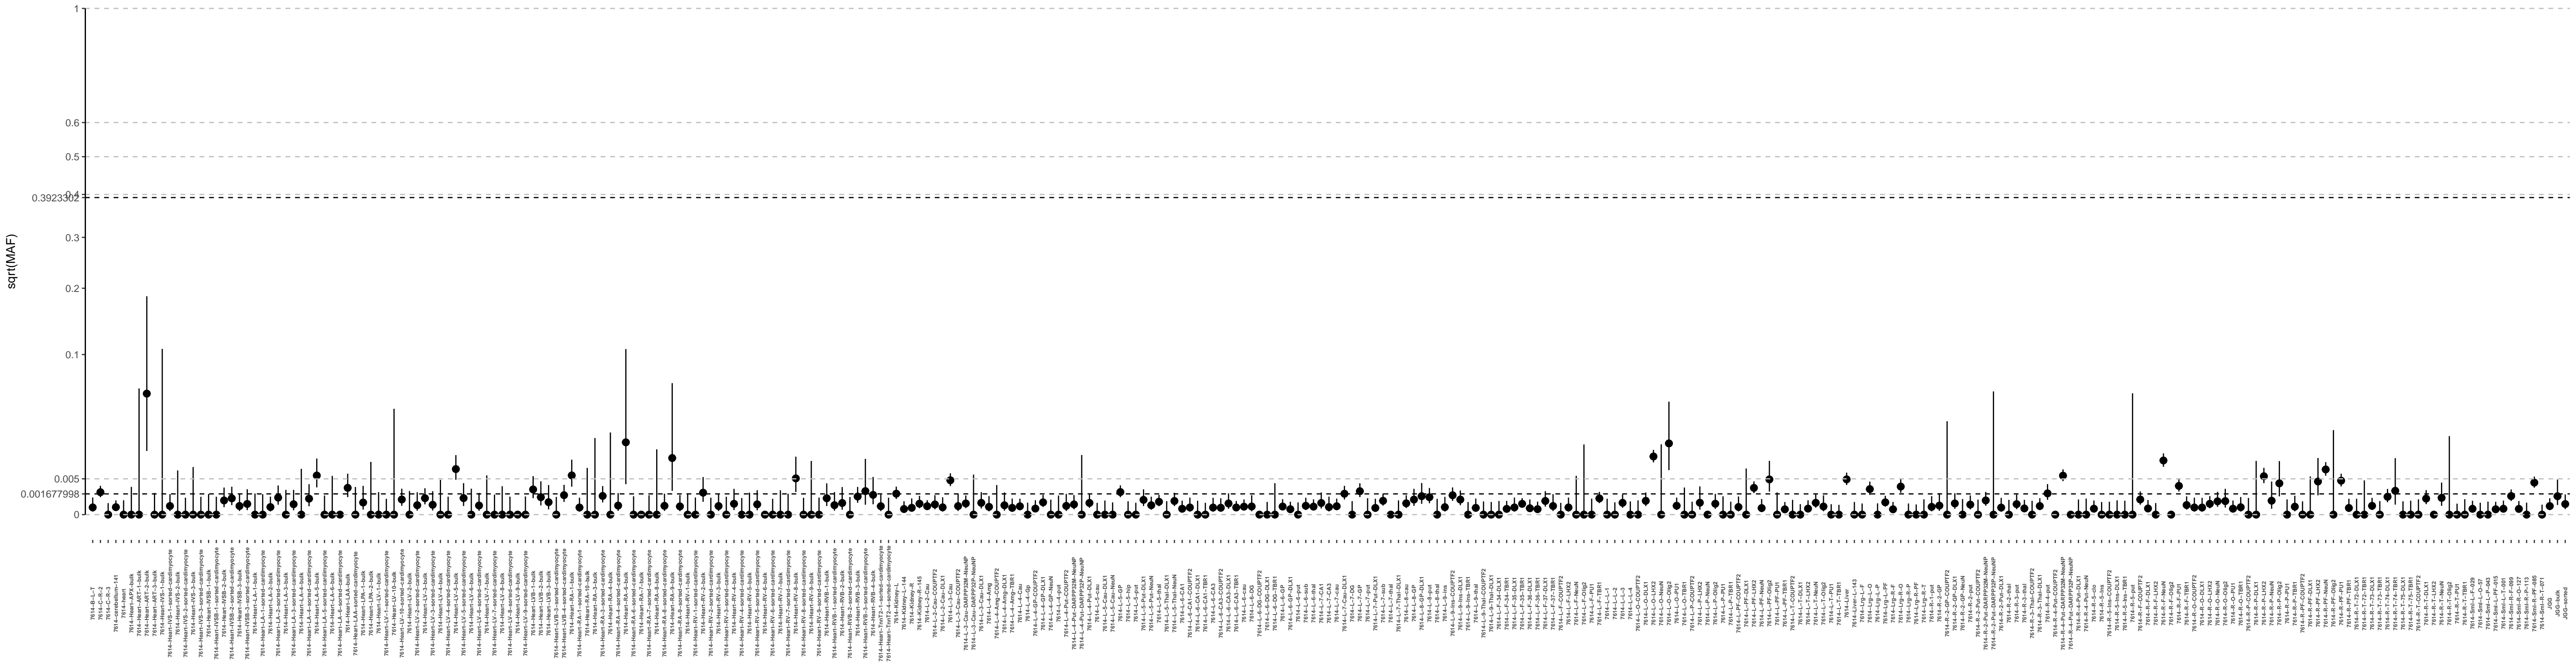

ID





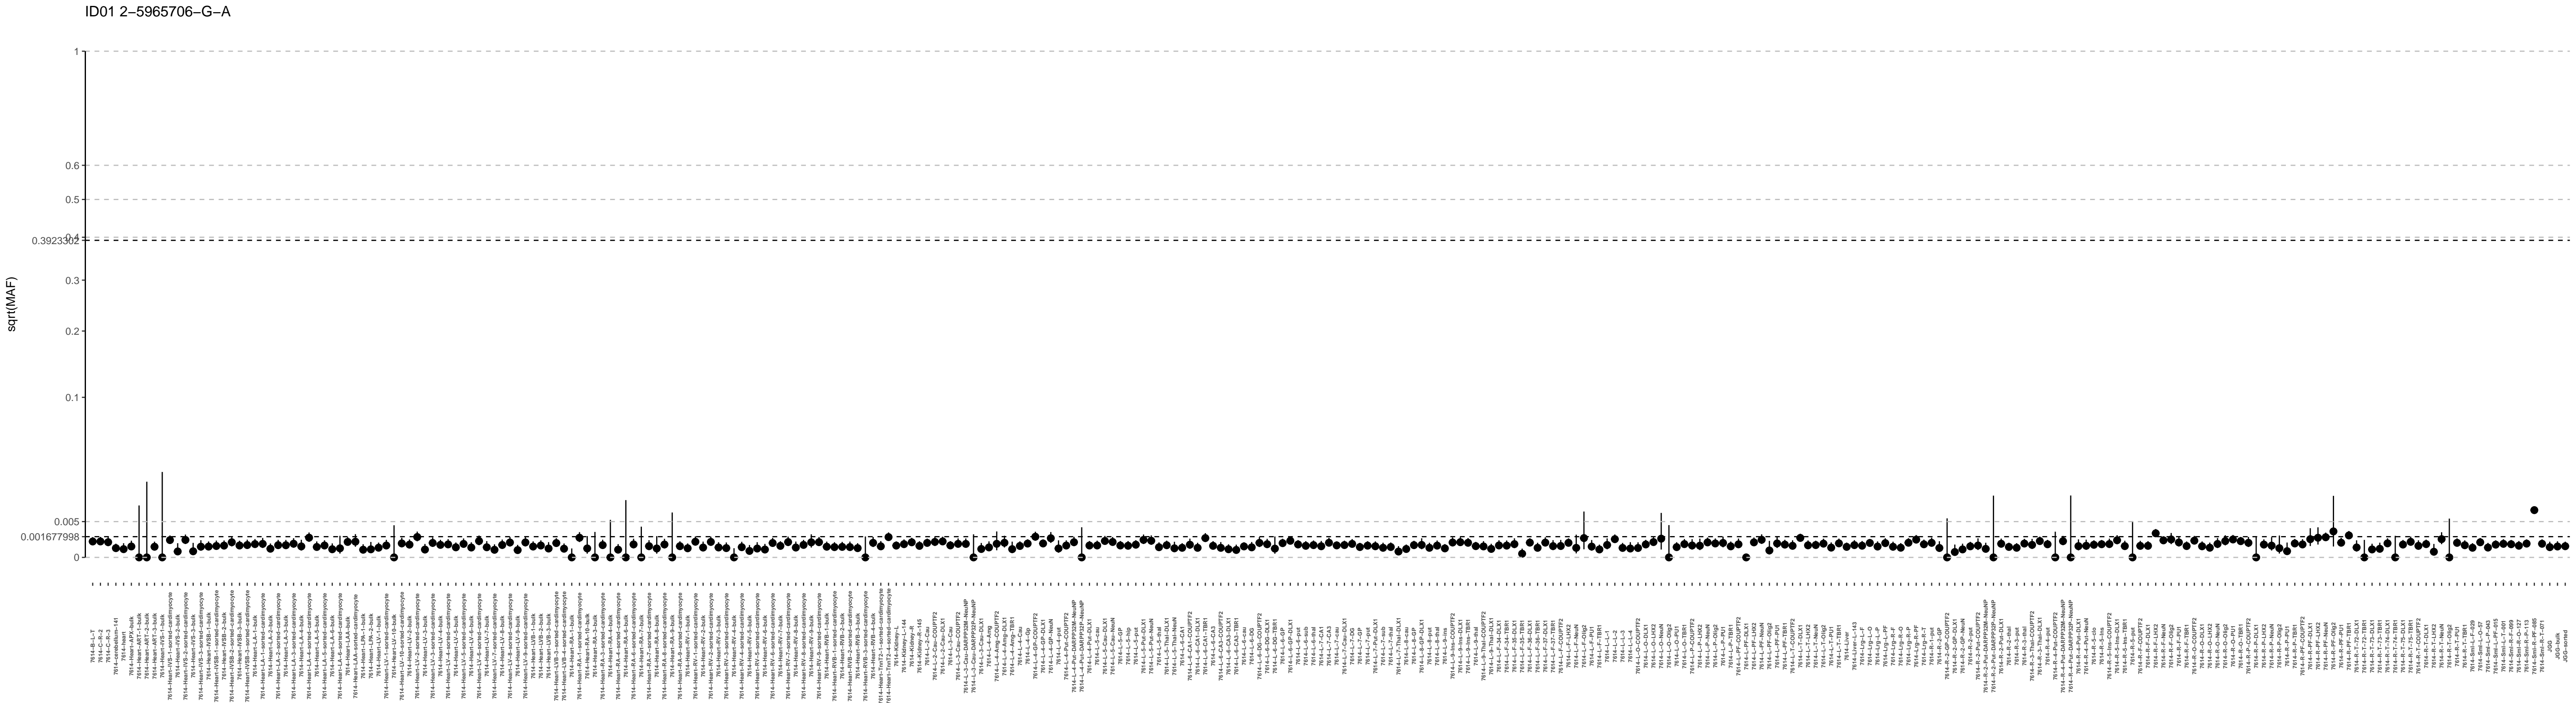

ID



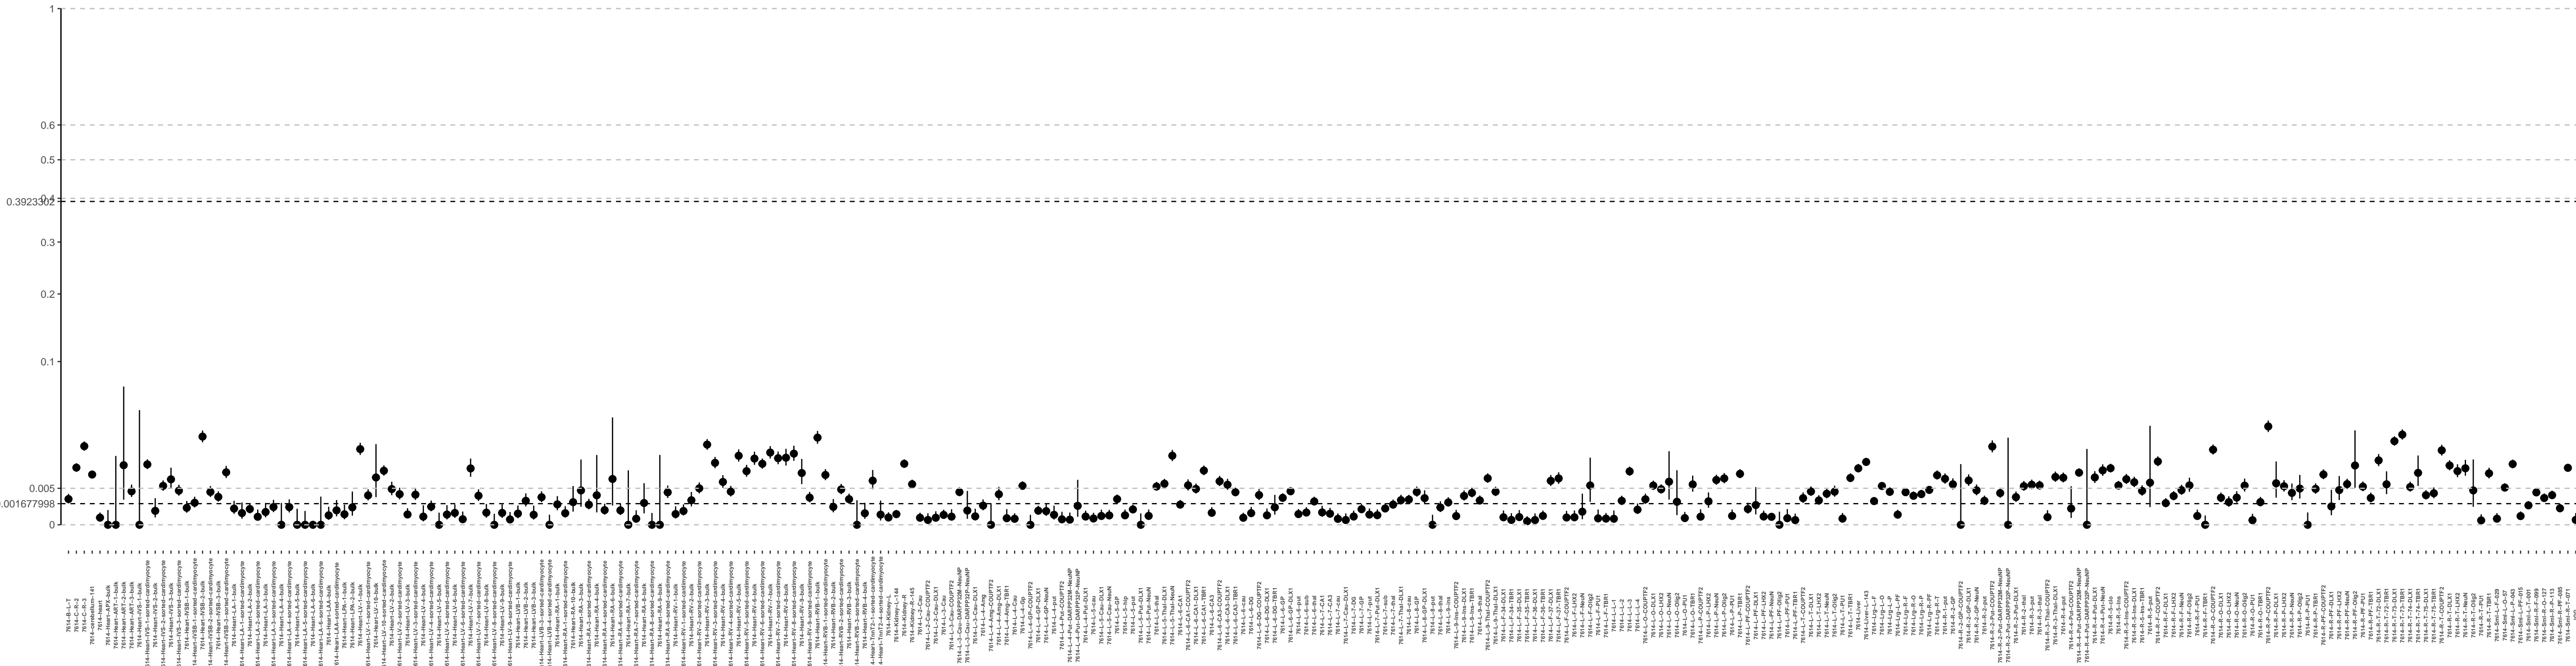



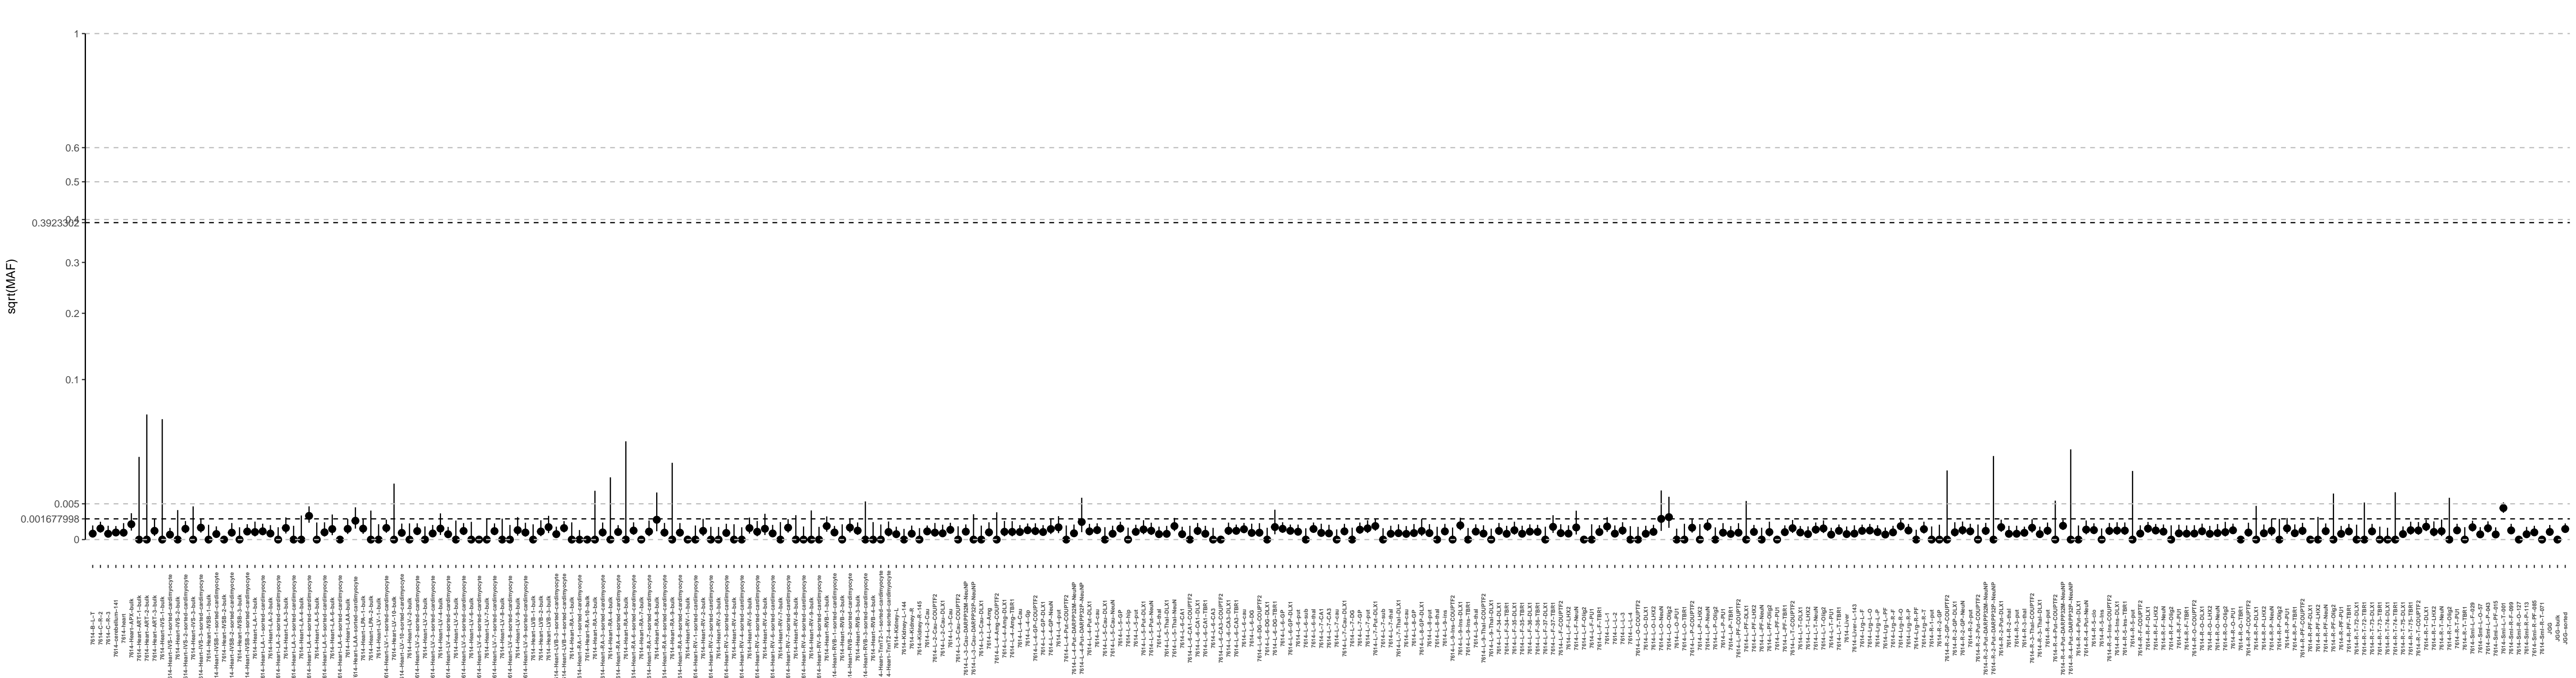



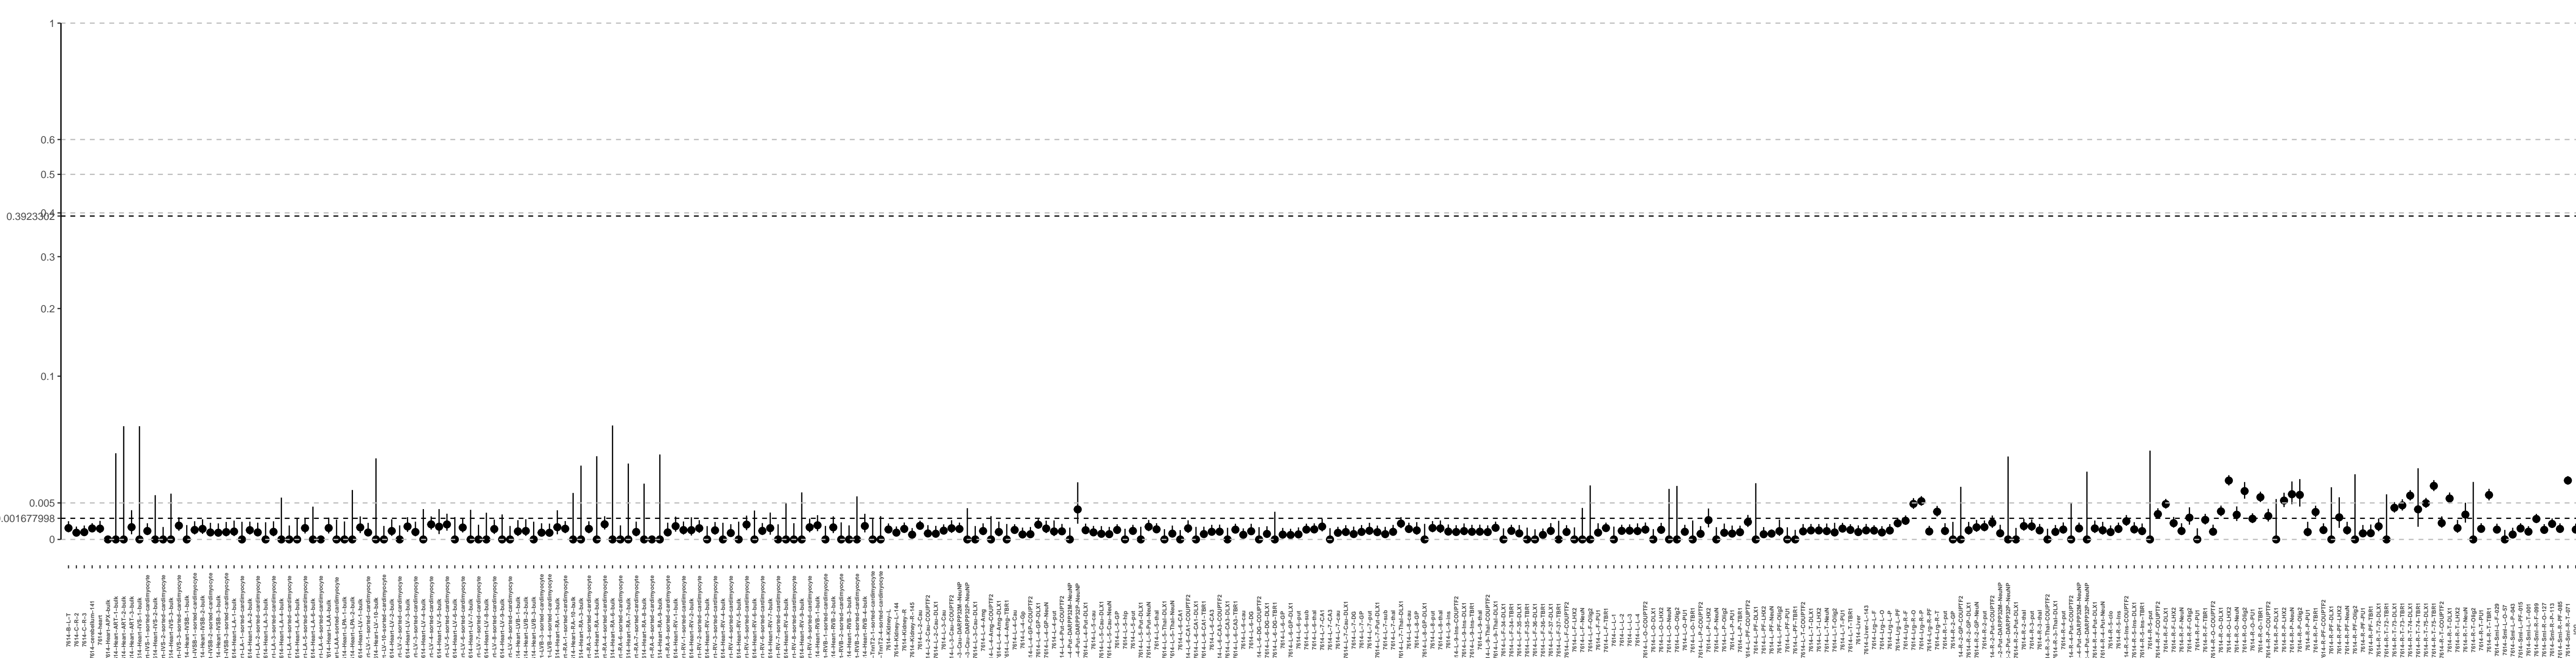

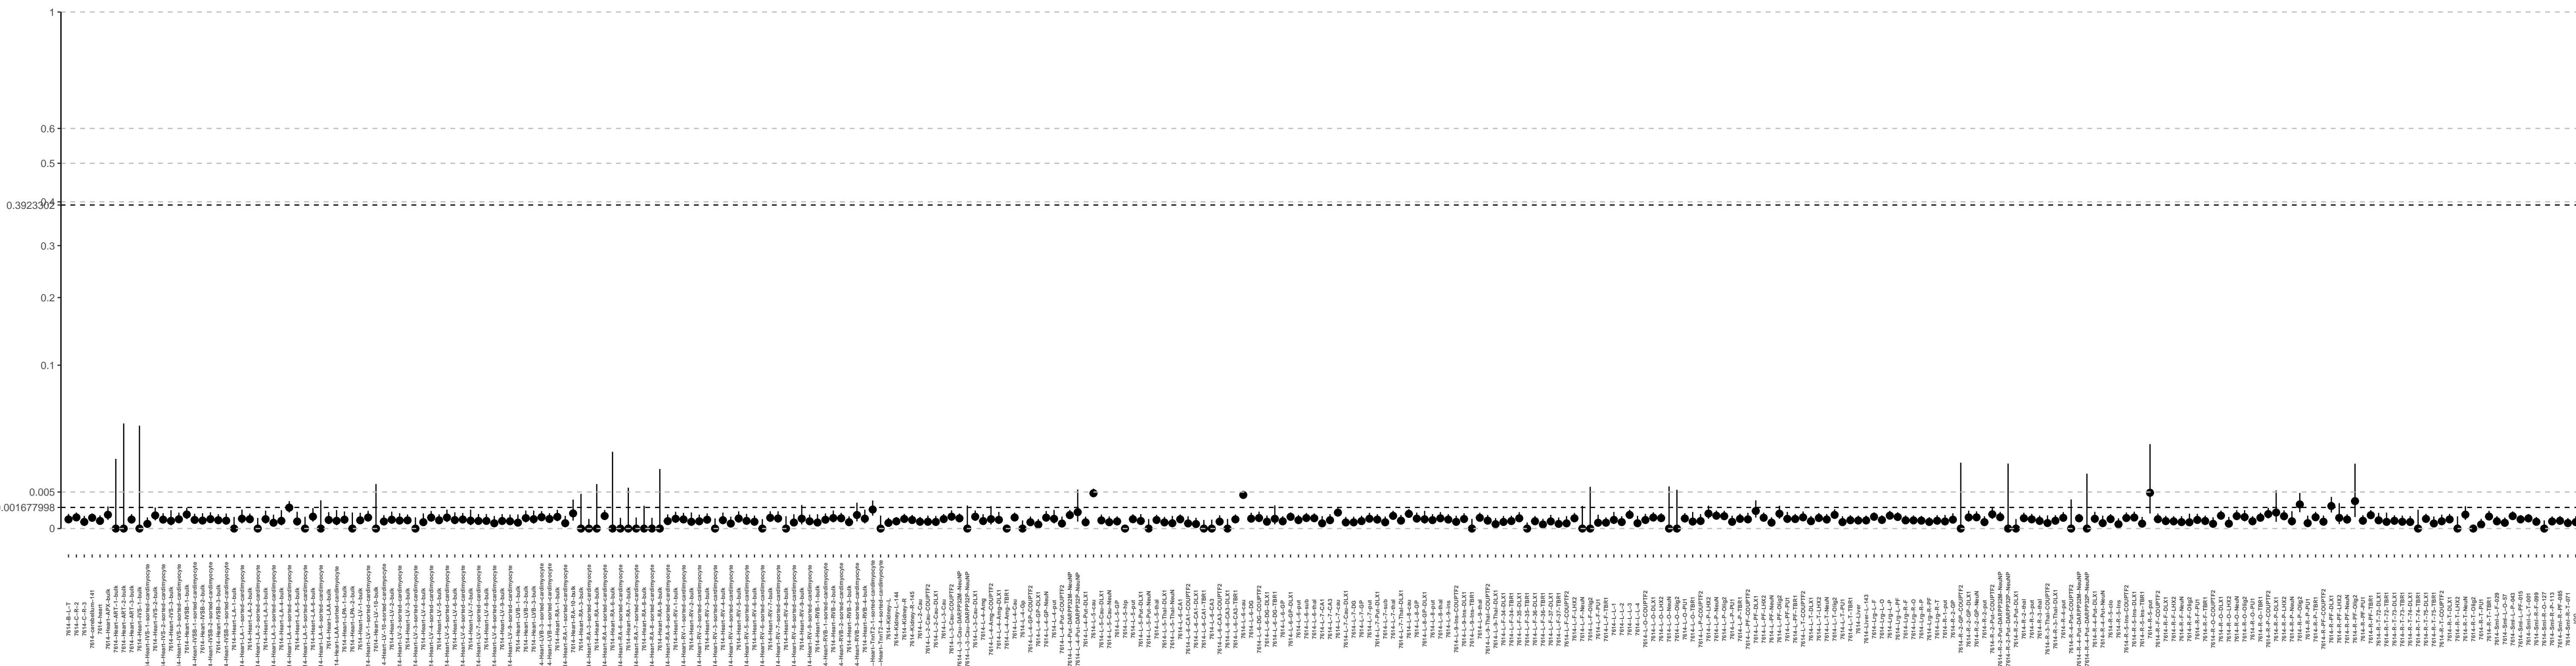







sqrt(MAF)

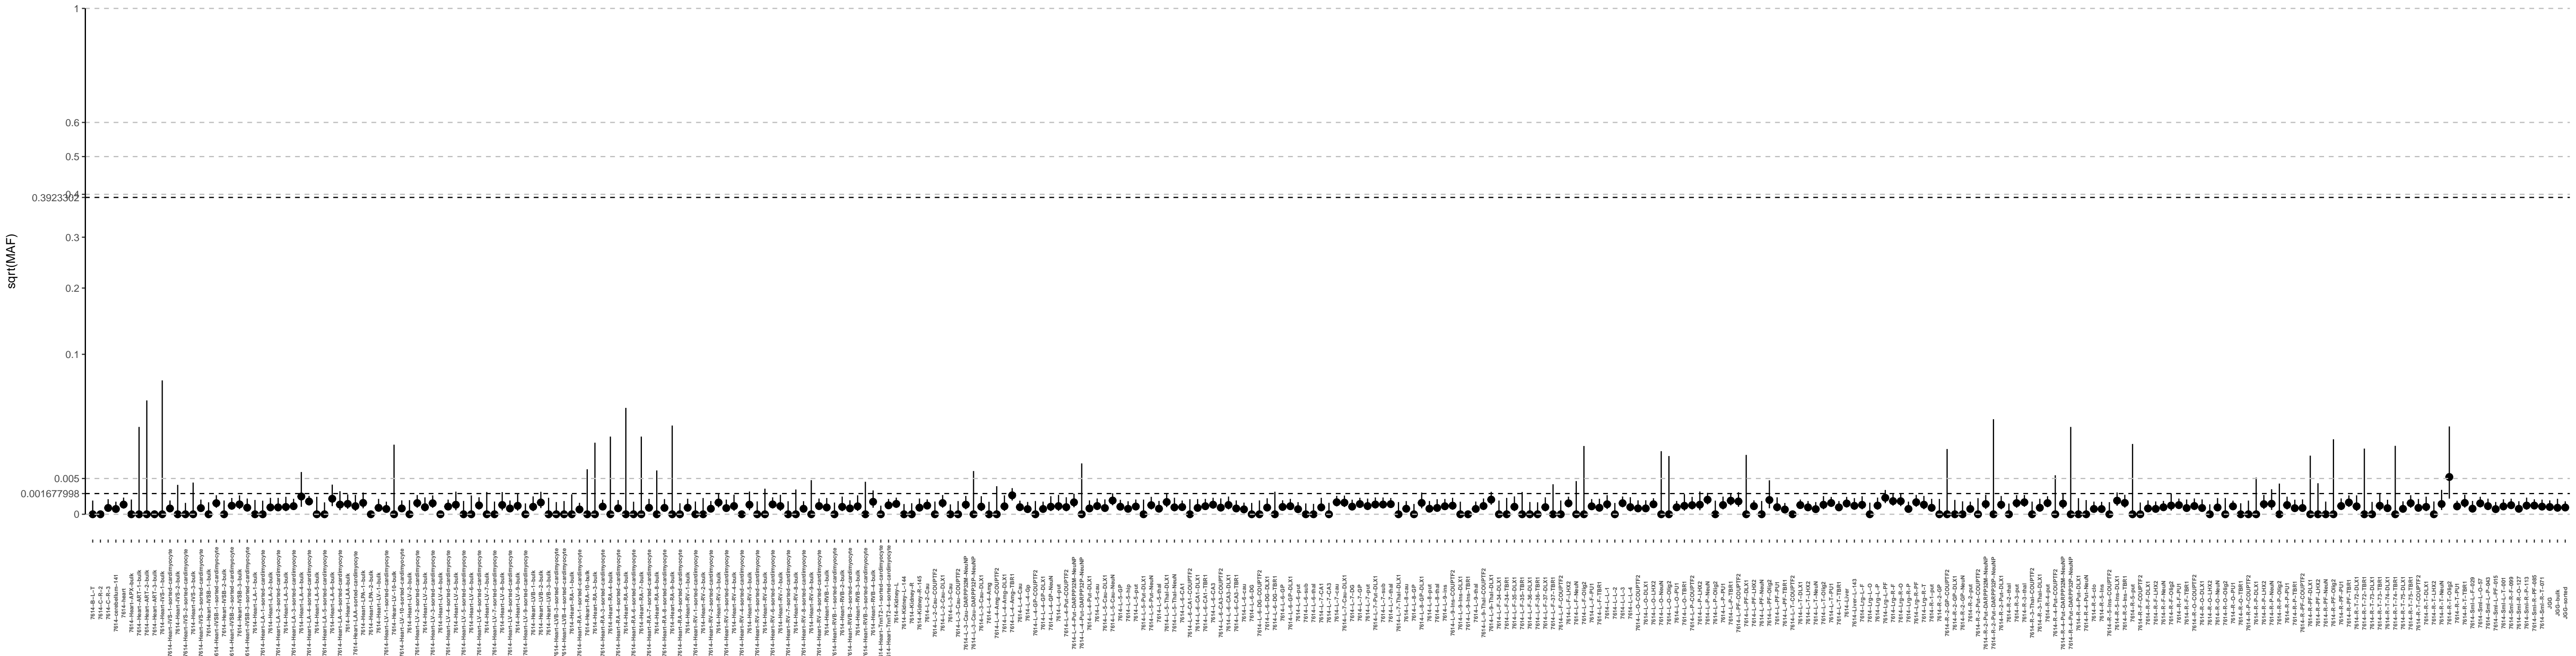

ID



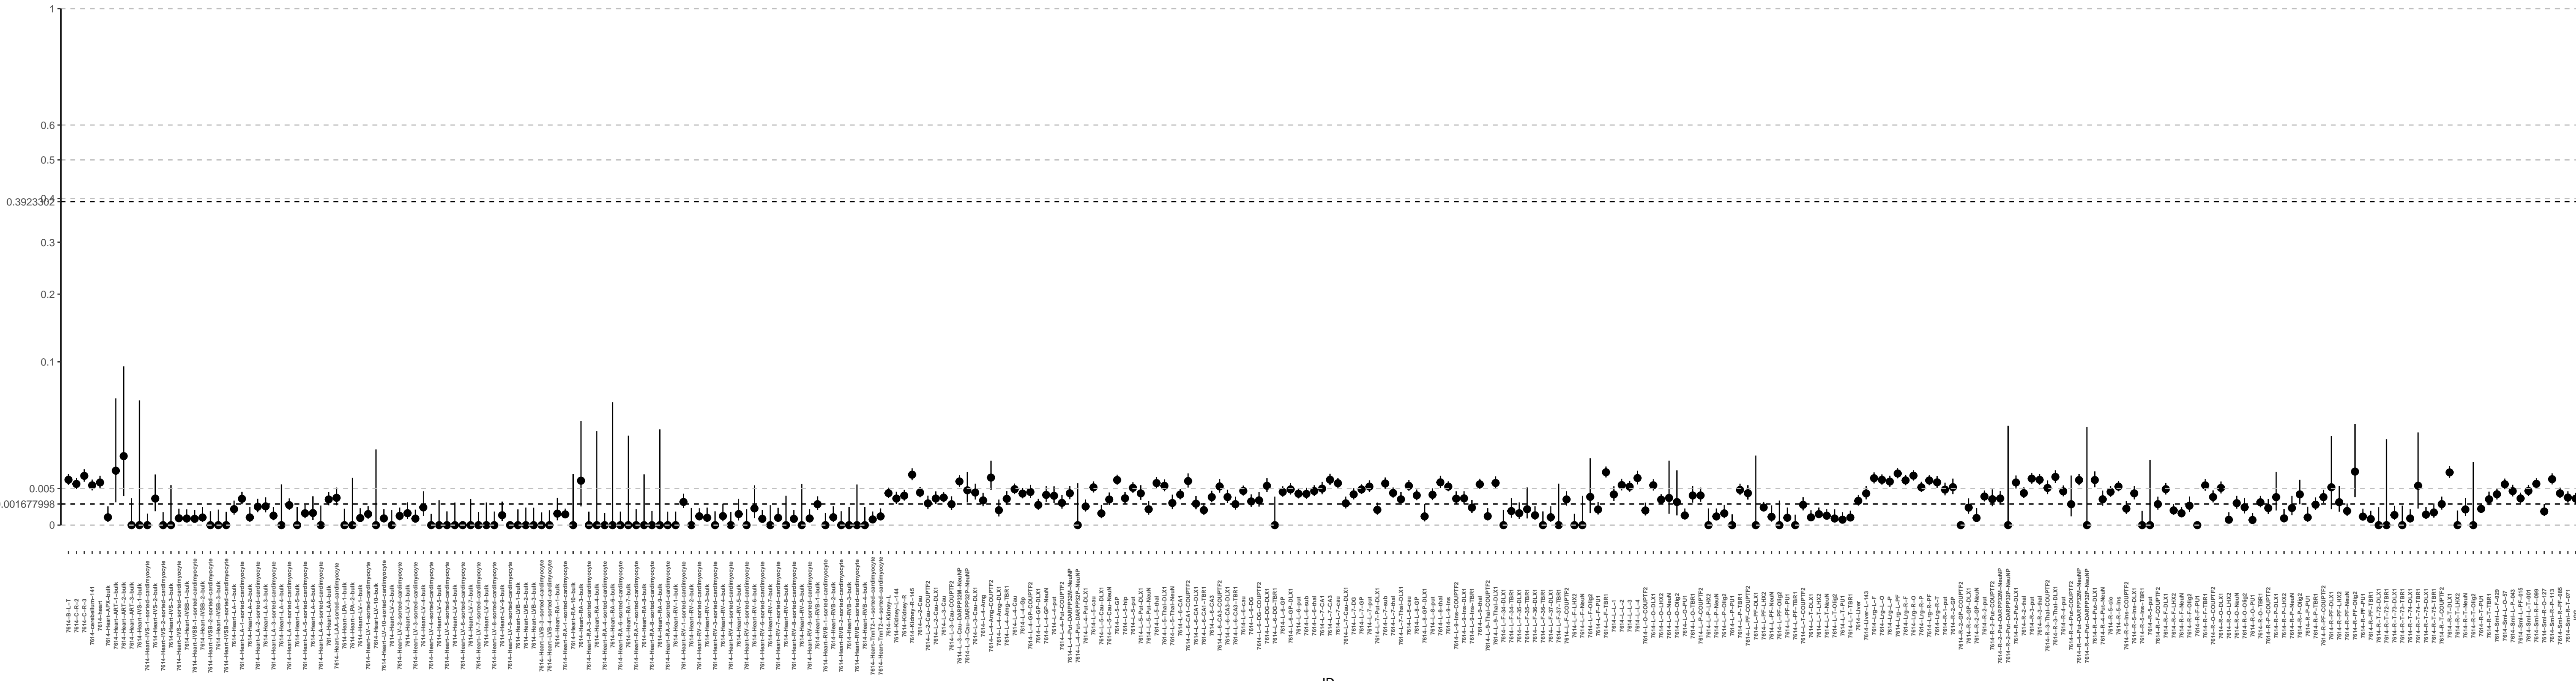

sqrt(MAF)

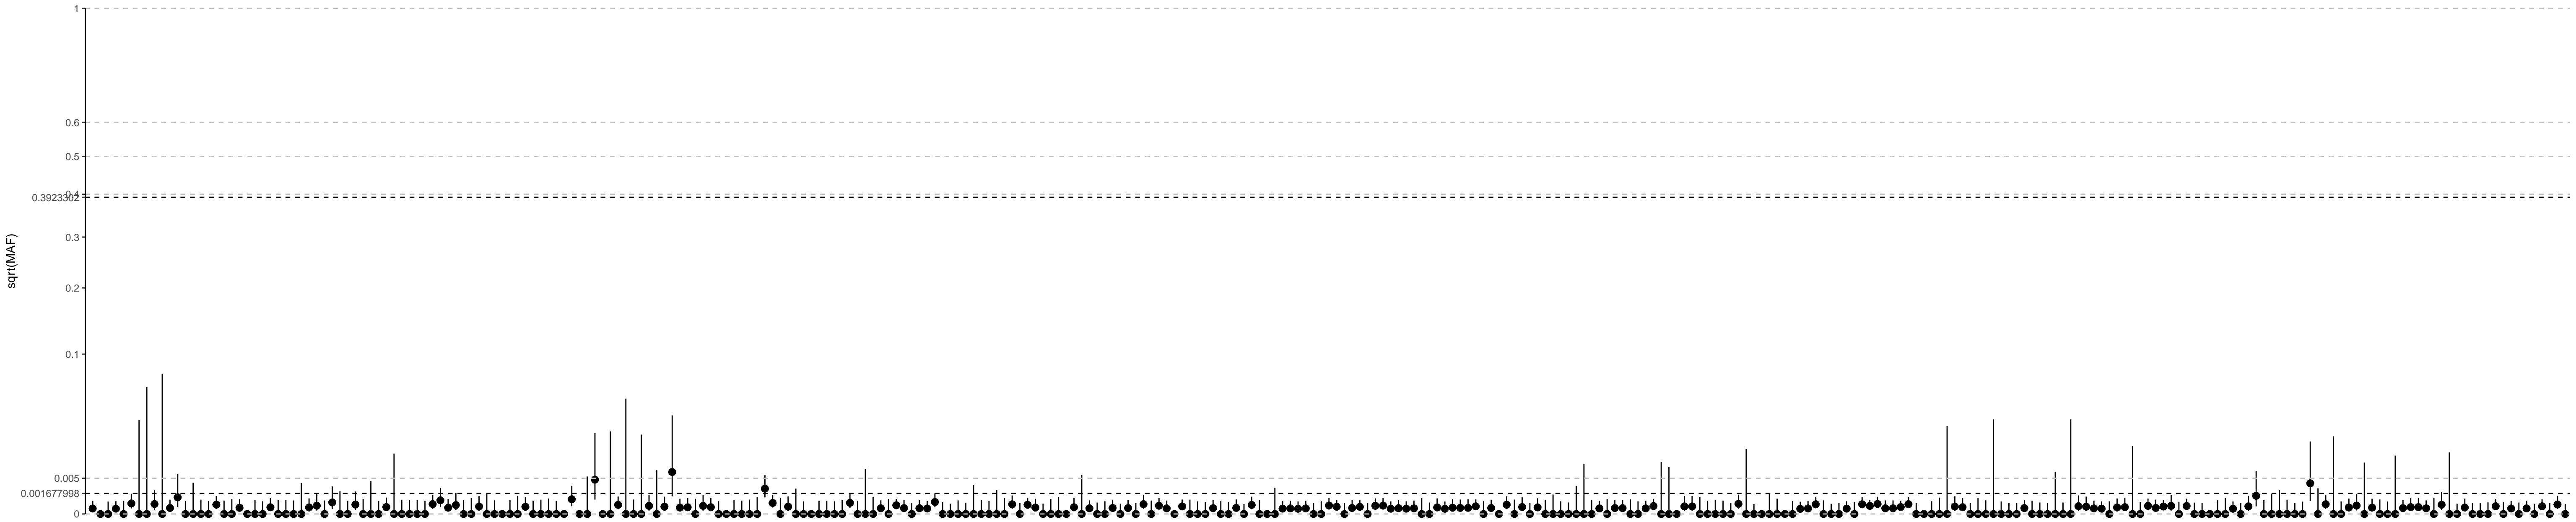

- 7614-B-L-T
- 7614-C-R-2
- 7614-C-R-3
- 7614-Heart-VS-1
- 7614-Heart-VS-2
- 7614-Heart-VS-3
- 7614-Heart-VS-4
- 7614-Heart-VS-5
- 7614-Heart-VS-6
- 7614-Heart-VS-7
- 7614-Heart-VS-8
- 7614-Heart-VS-9
- 7614-Heart-VS-10
- 7614-Heart-VS-11
- 7614-Heart-VS-12
- 7614-Heart-VS-13
- 7614-Heart-VS-14
- 7614-Heart-VS-15
- 7614-Heart-VS-16
- 7614-Heart-VS-17
- 7614-Heart-VS-18
- 7614-Heart-VS-19
- 7614-Heart-VS-20
- 7614-Heart-VS-21
- 7614-Heart-VS-22
- 7614-Heart-VS-23
- 7614-Heart-VS-24
- 7614-Heart-VS-25
- 7614-Heart-VS-26
- 7614-Heart-VS-27
- 7614-Heart-VS-28
- 7614-Heart-VS-29
- 7614-Heart-VS-30
- 7614-Heart-VS-31
- 7614-Heart-VS-32
- 7614-Heart-VS-33
- 7614-Heart-VS-34
- 7614-Heart-VS-35
- 7614-Heart-VS-36
- 7614-Heart-VS-37
- 7614-Heart-VS-38
- 7614-Heart-VS-39
- 7614-Heart-VS-40
- 7614-Heart-VS-41
- 7614-Heart-VS-42
- 7614-Heart-VS-43
- 7614-Heart-VS-44
- 7614-Heart-VS-45
- 7614-Heart-VS-46
- 7614-Heart-VS-47
- 7614-Heart-VS-48
- 7614-Heart-VS-49
- 7614-Heart-VS-50
- 7614-Heart-VS-51
- 7614-Heart-VS-52
- 7614-Heart-VS-53
- 7614-Heart-VS-54
- 7614-Heart-VS-55
- 7614-Heart-VS-56
- 7614-Heart-VS-57
- 7614-Heart-VS-58
- 7614-Heart-VS-59
- 7614-Heart-VS-60
- 7614-Heart-VS-61
- 7614-Heart-VS-62
- 7614-Heart-VS-63
- 7614-Heart-VS-64
- 7614-Heart-VS-65
- 7614-Heart-VS-66
- 7614-Heart-VS-67
- 7614-Heart-VS-68
- 7614-Heart-VS-69
- 7614-Heart-VS-70
- 7614-Heart-VS-71
- 7614-Heart-VS-72
- 7614-Heart-VS-73
- 7614-Heart-VS-74
- 7614-Heart-VS-75
- 7614-Heart-VS-76
- 7614-Heart-VS-77
- 7614-Heart-VS-78
- 7614-Heart-VS-79
- 7614-Heart-VS-80
- 7614-Heart-VS-81
- 7614-Heart-VS-82
- 7614-Heart-VS-83
- 7614-Heart-VS-84
- 7614-Heart-VS-85
- 7614-Heart-VS-86
- 7614-Heart-VS-87
- 7614-Heart-VS-88
- 7614-Heart-VS-89
- 7614-Heart-VS-90
- 7614-Heart-VS-91
- 7614-Heart-VS-92
- 7614-Heart-VS-93
- 7614-Heart-VS-94
- 7614-Heart-VS-95
- 7614-Heart-VS-96
- 7614-Heart-VS-97
- 7614-Heart-VS-98
- 7614-Heart-VS-99
- 7614-Heart-VS-100

ID

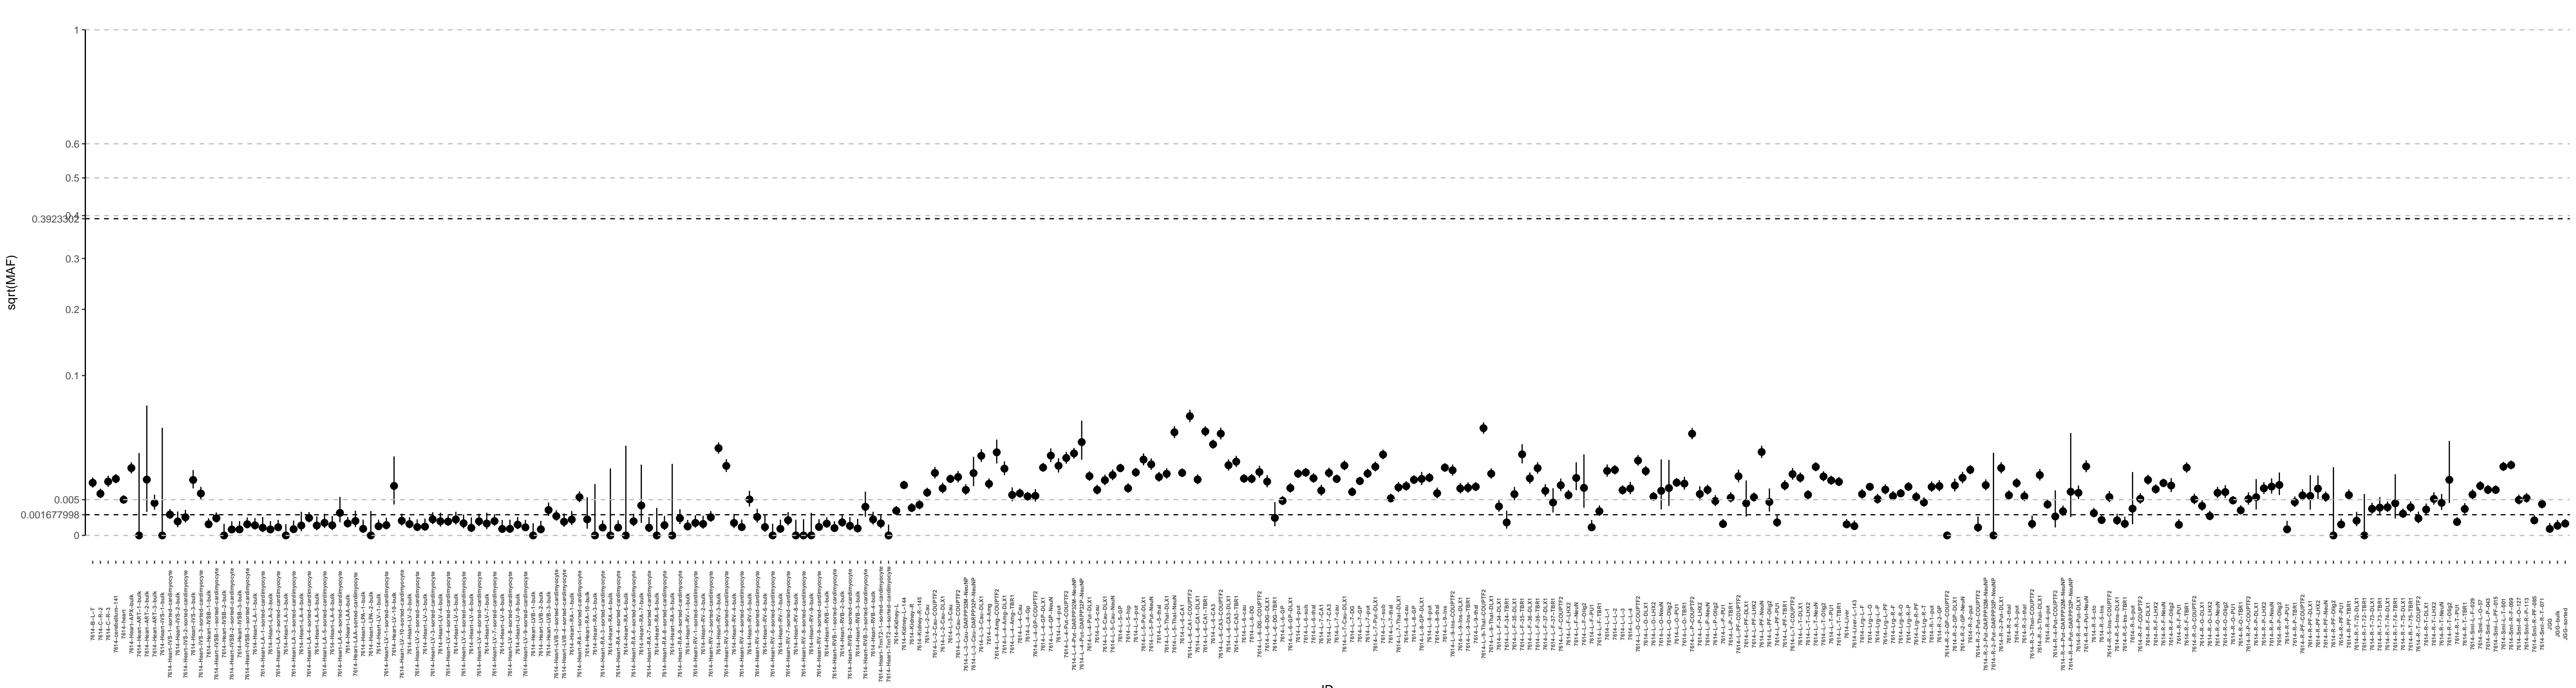



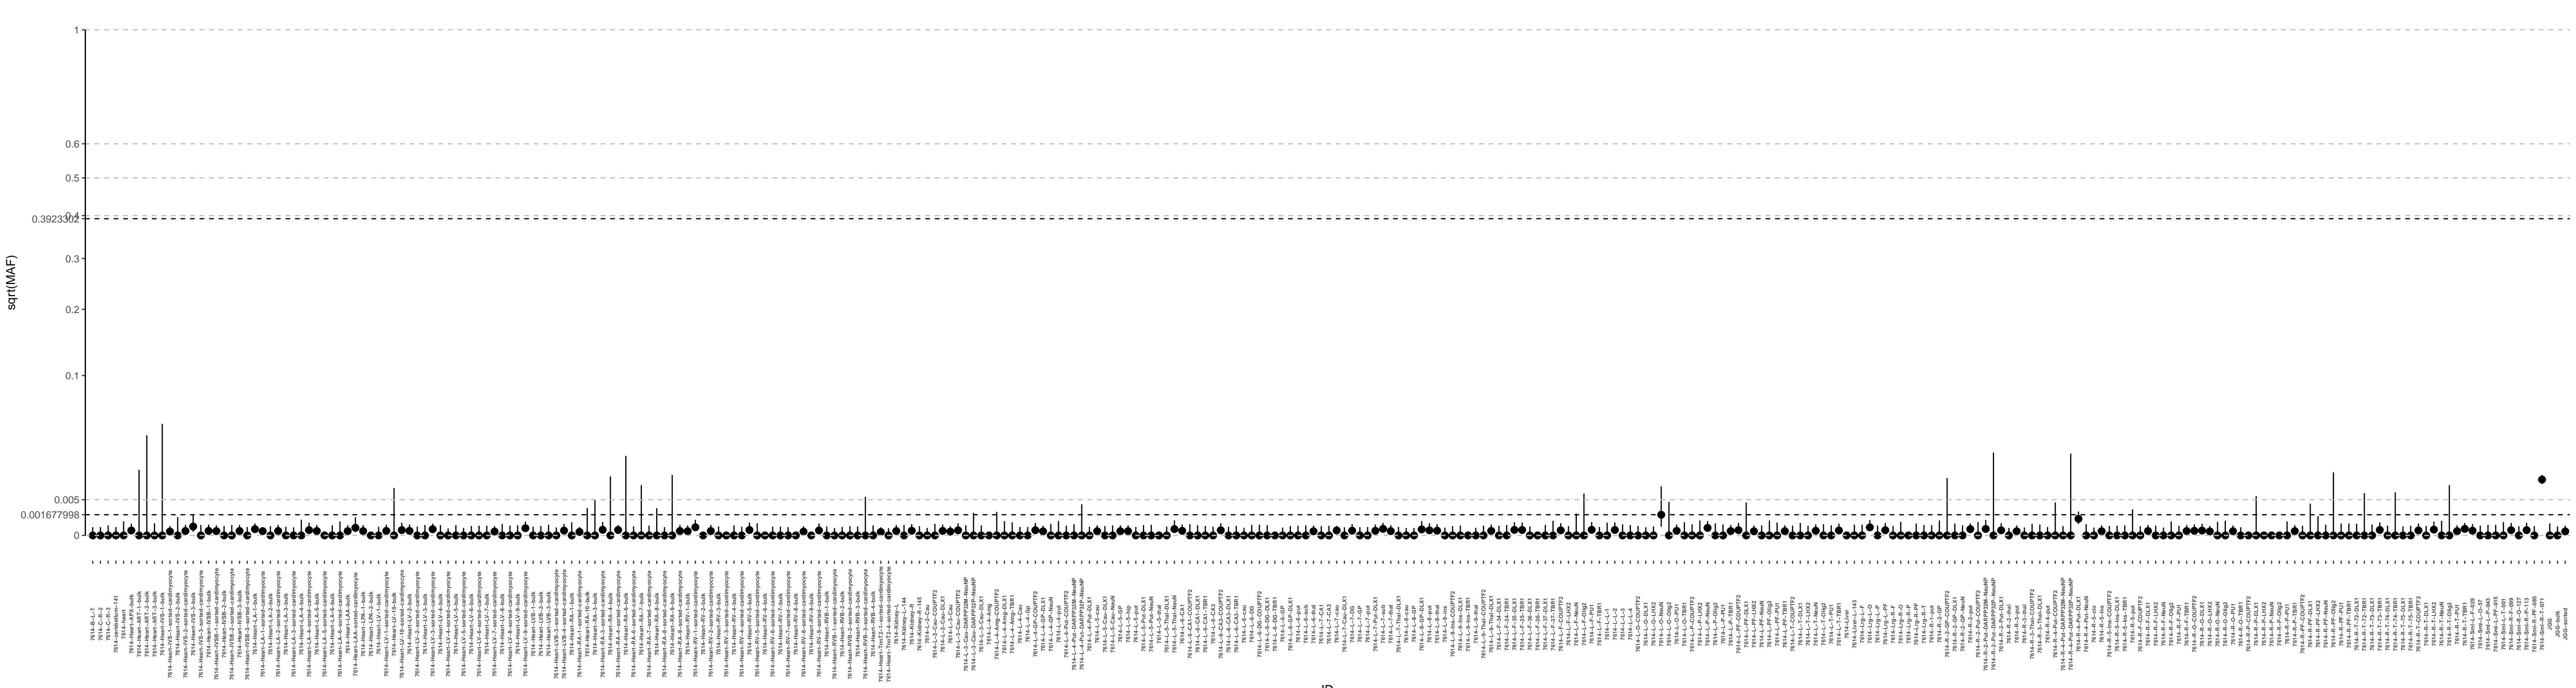





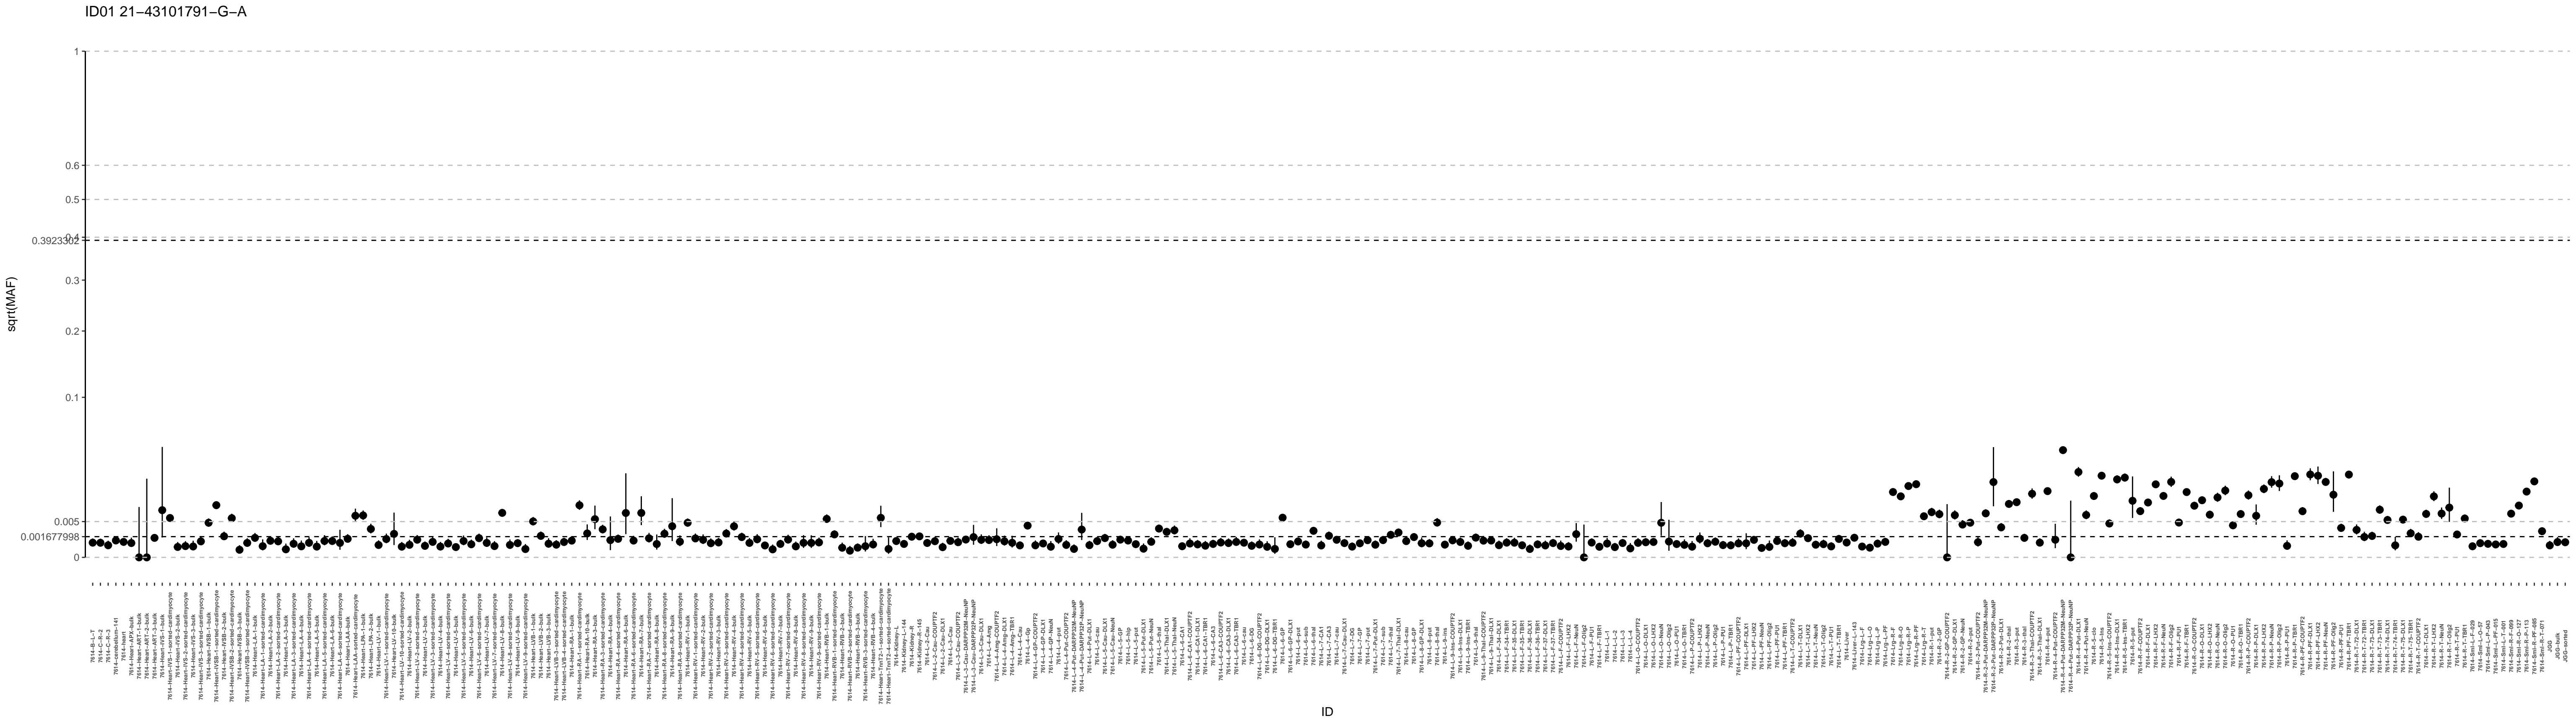







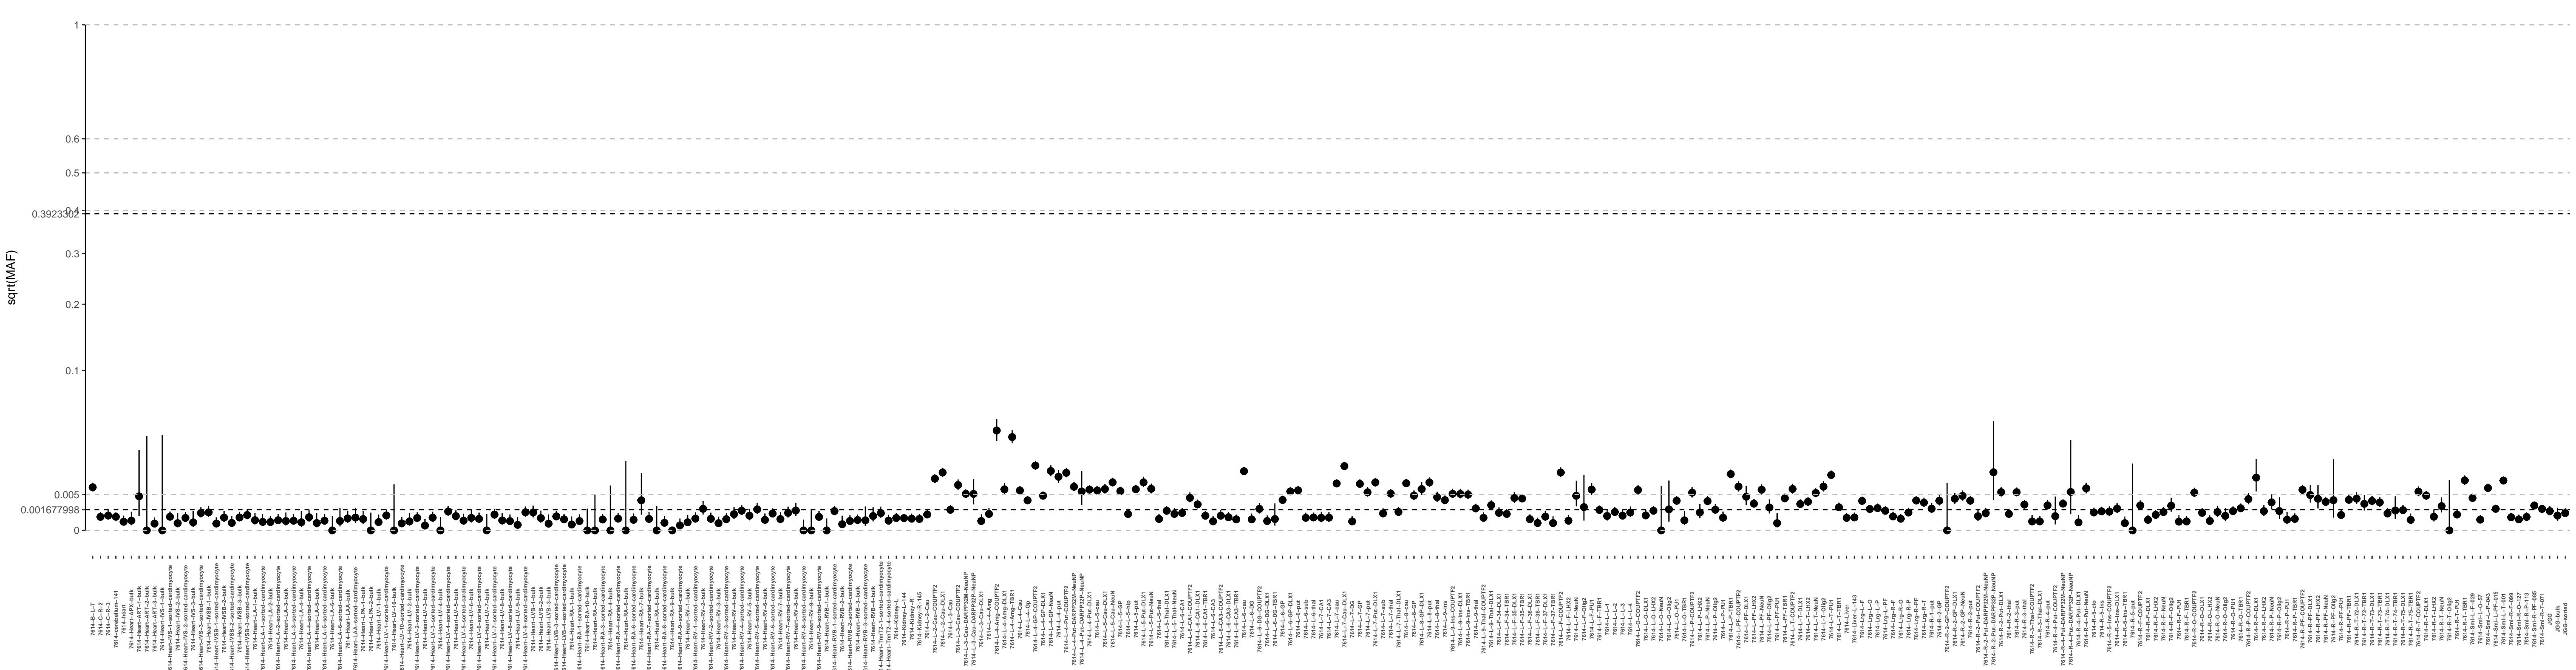

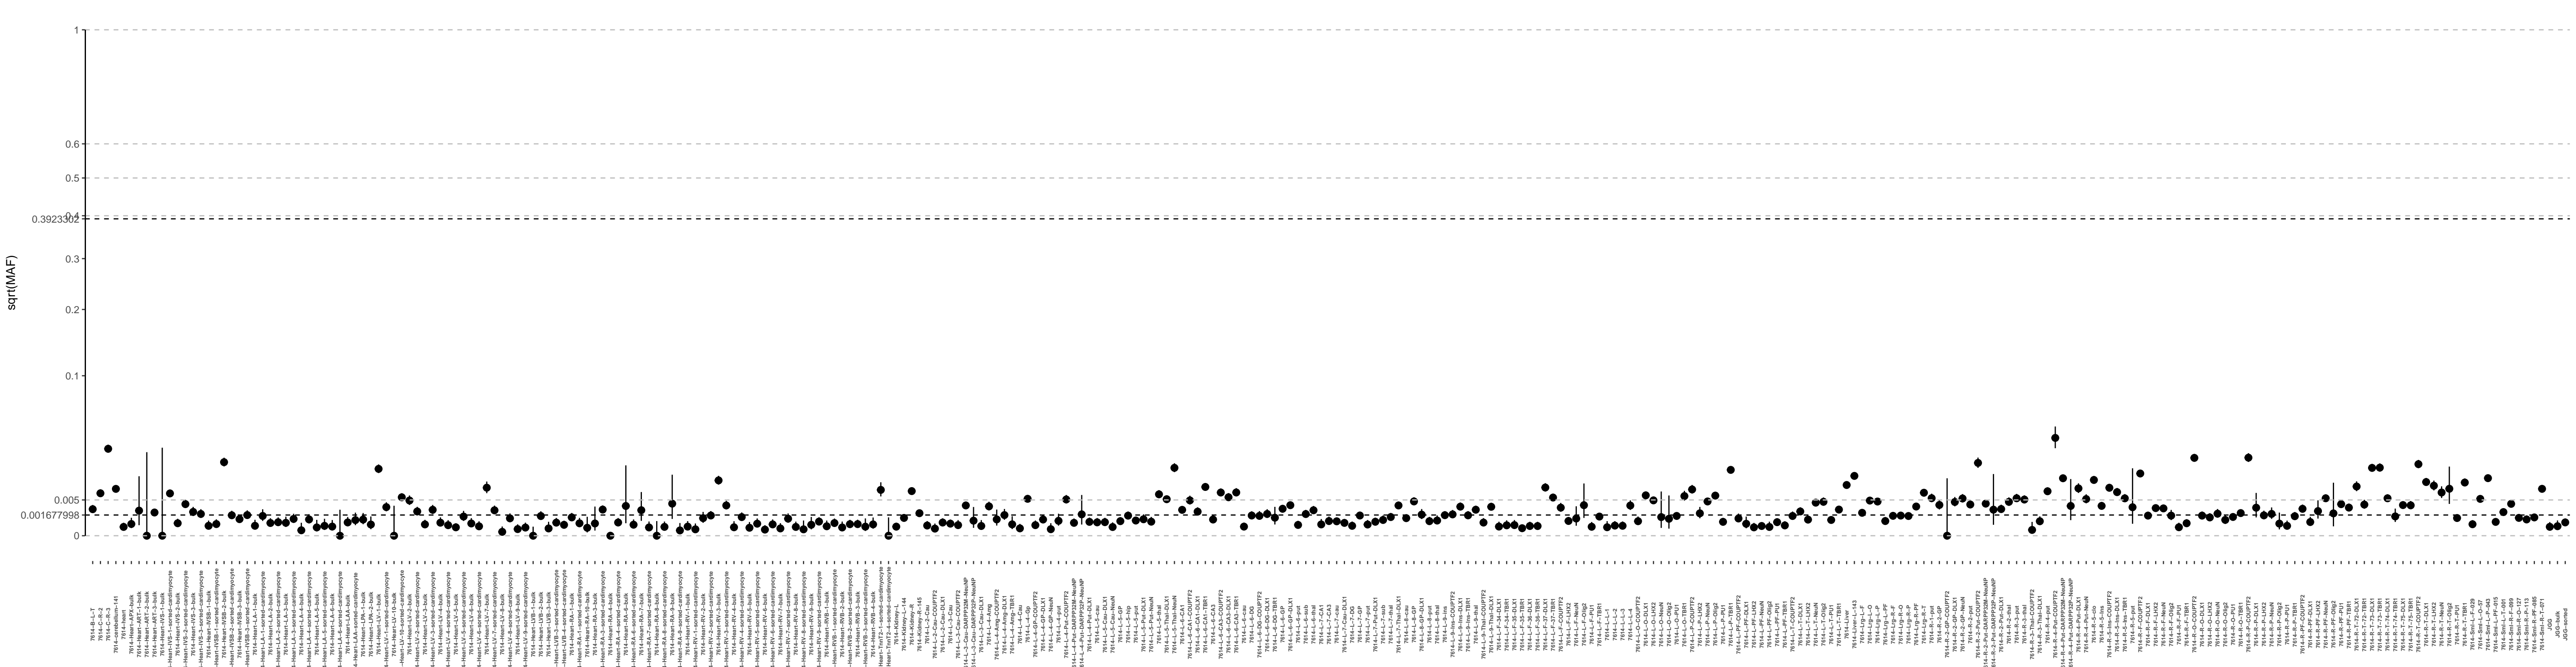







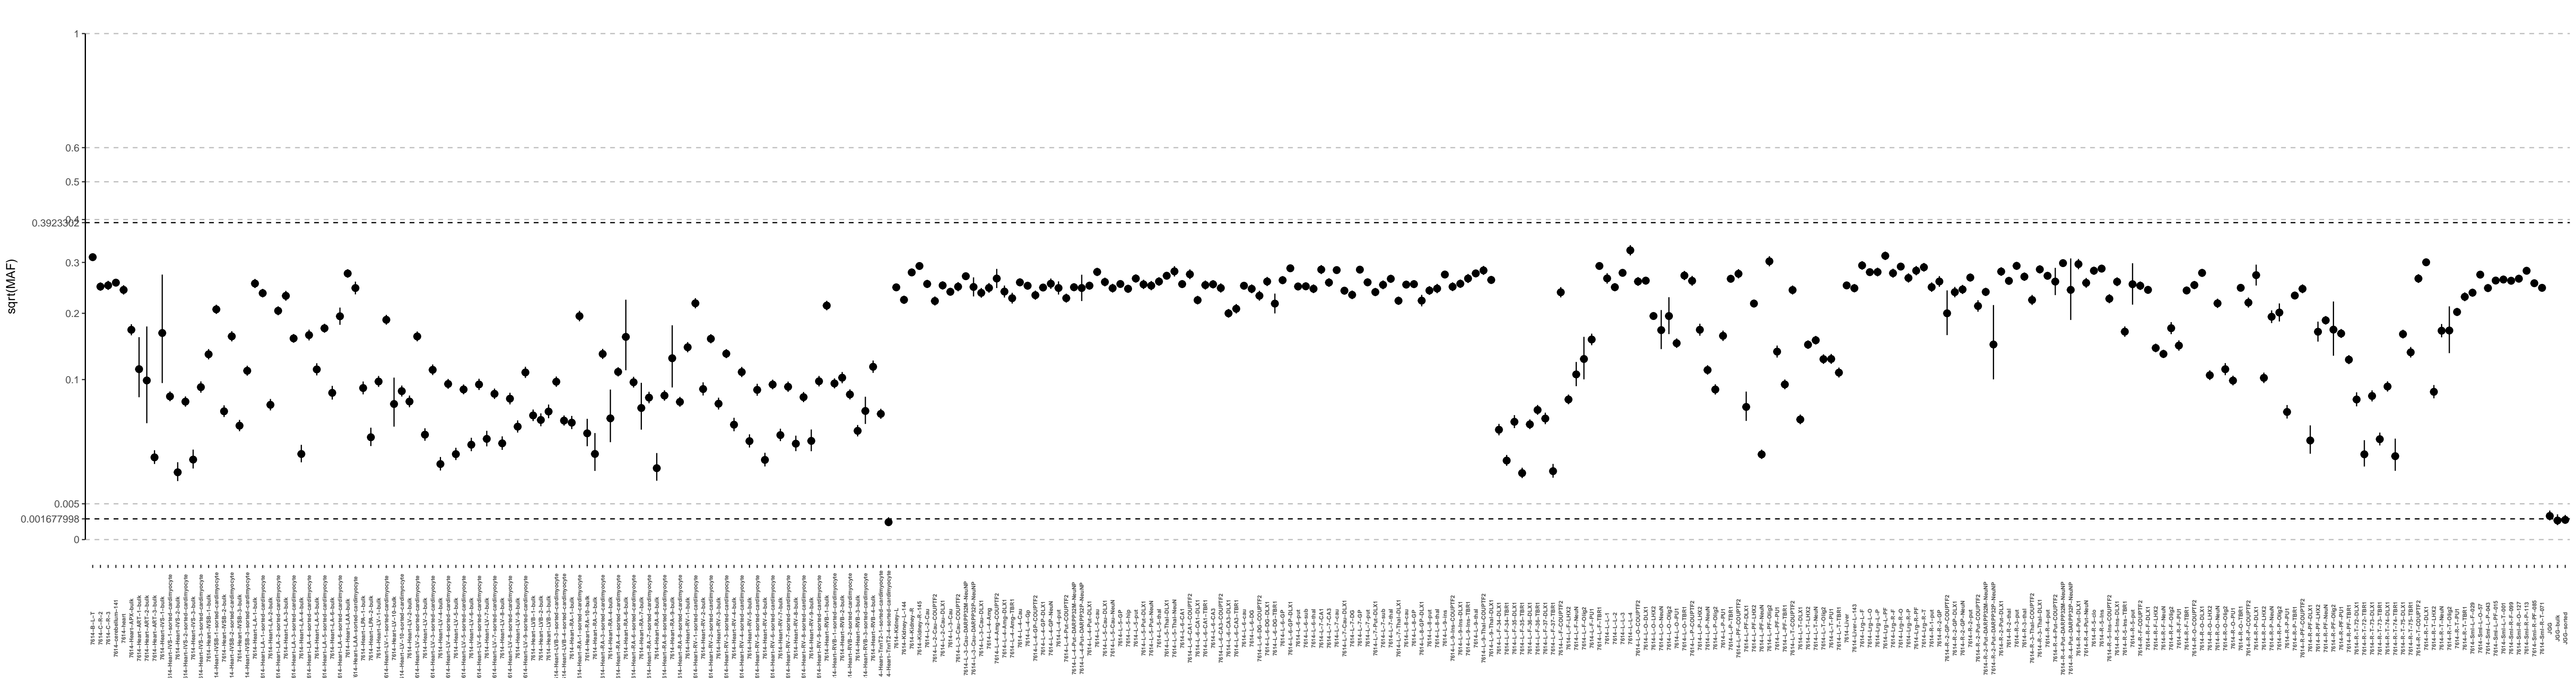





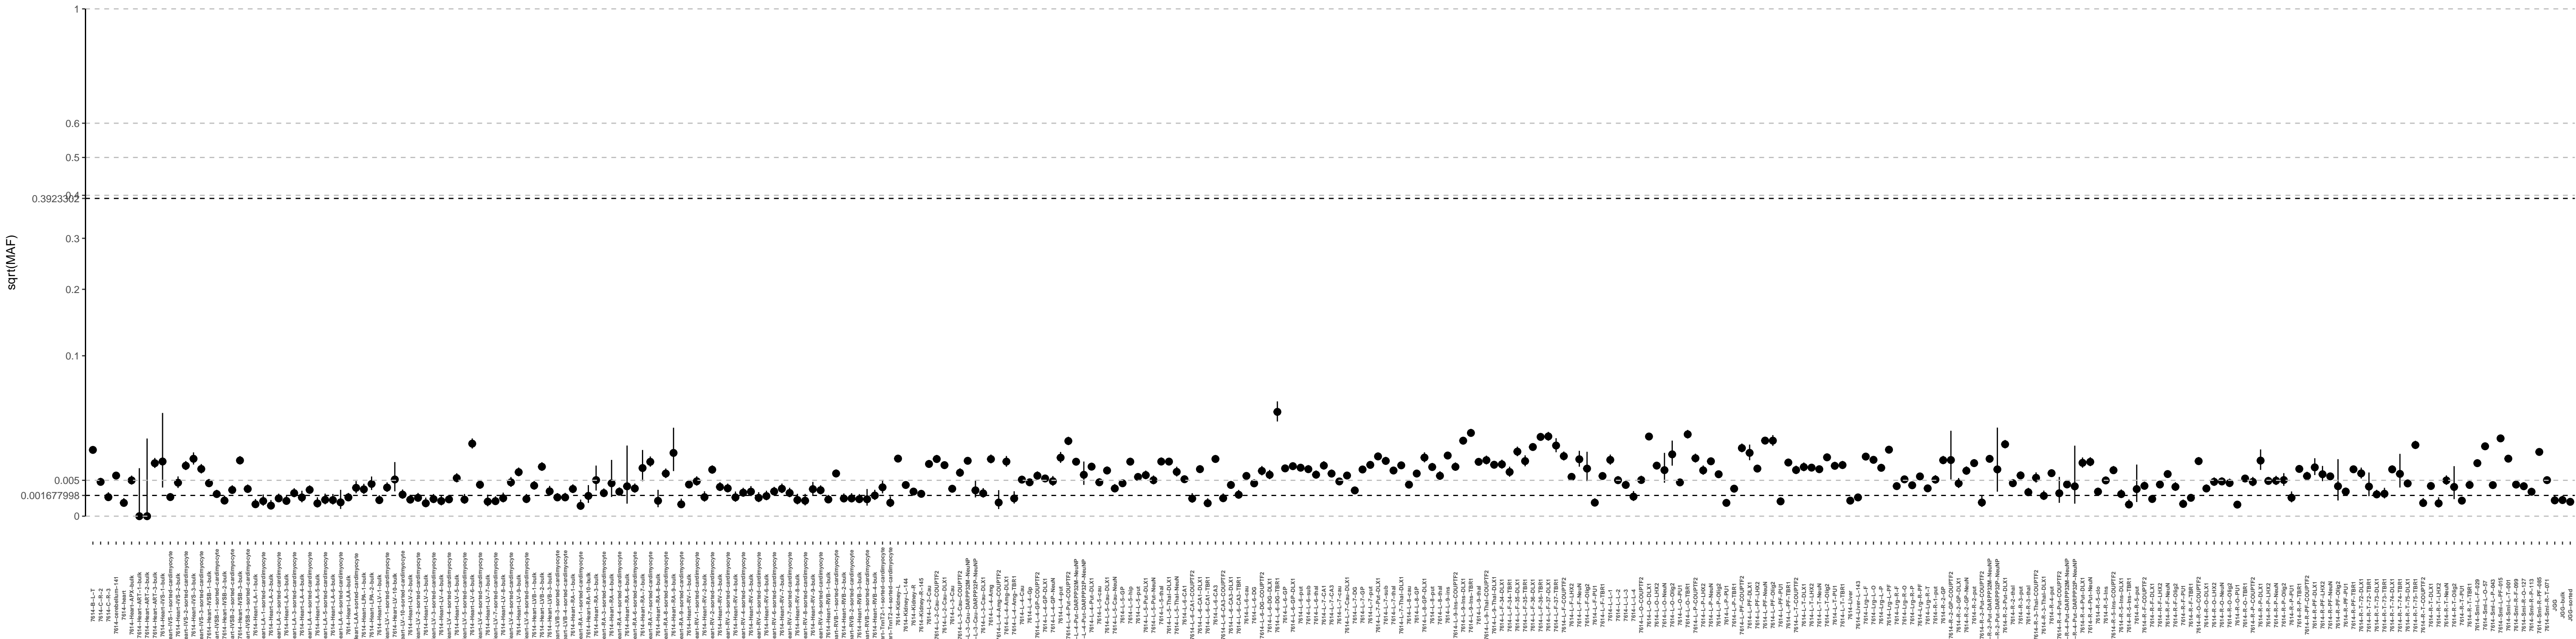

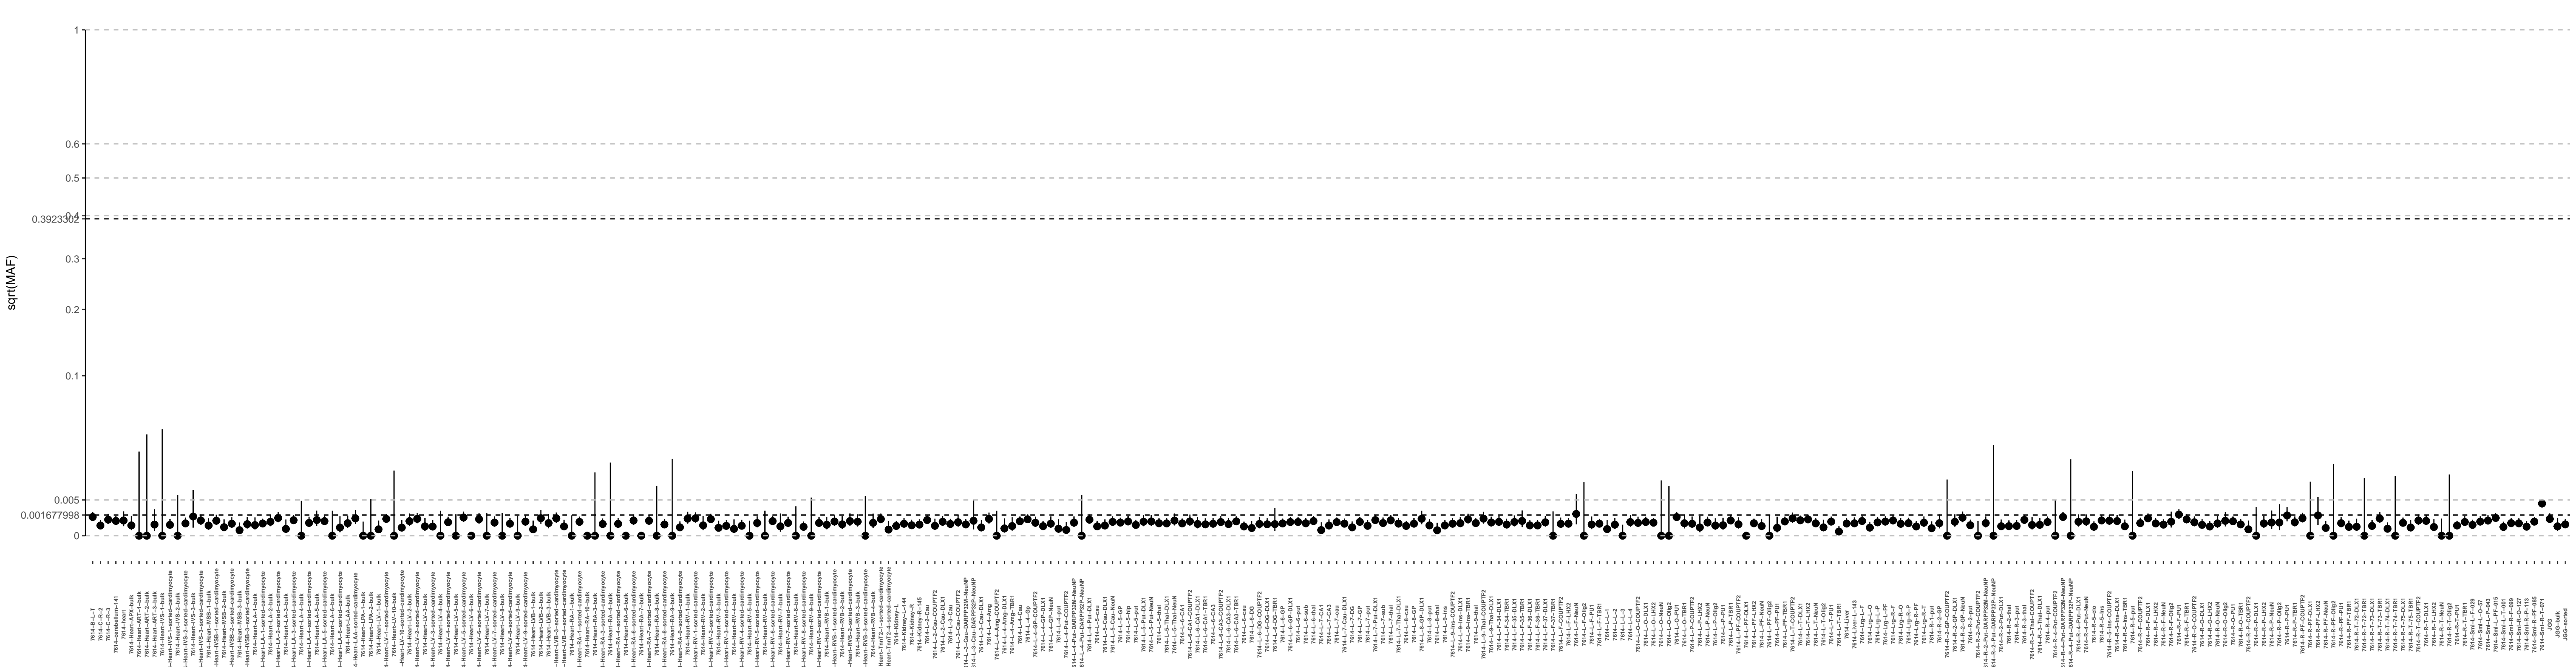

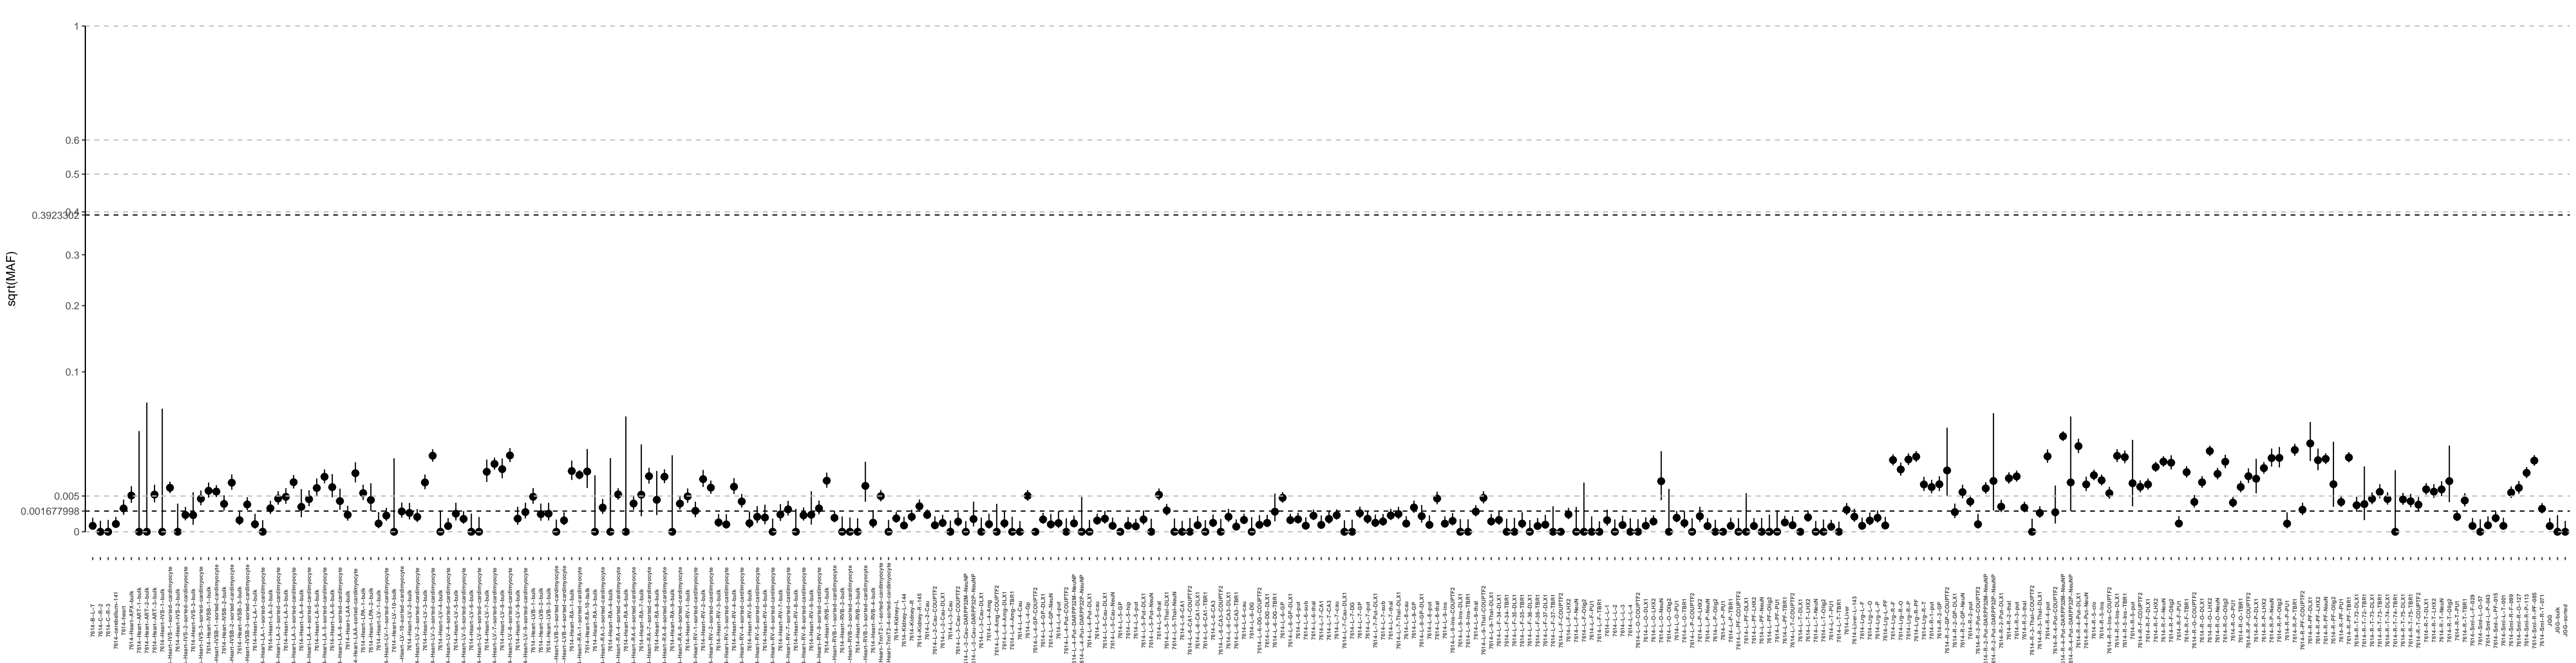



sqrt(MAF)

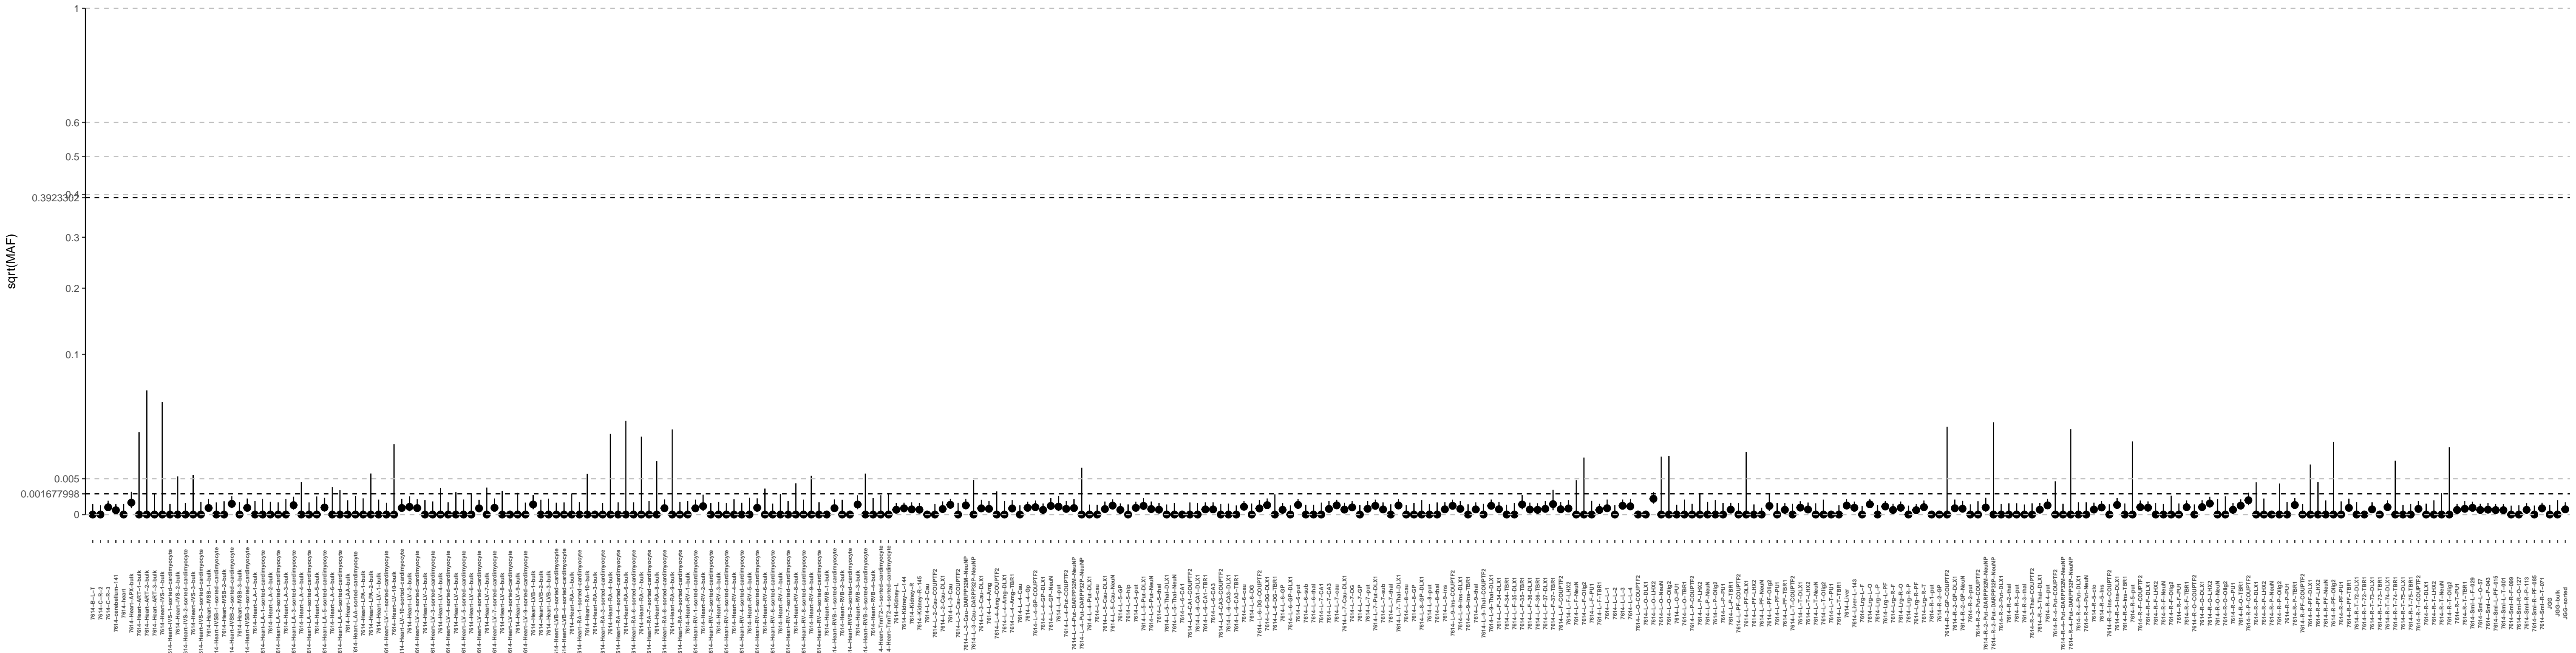

ID

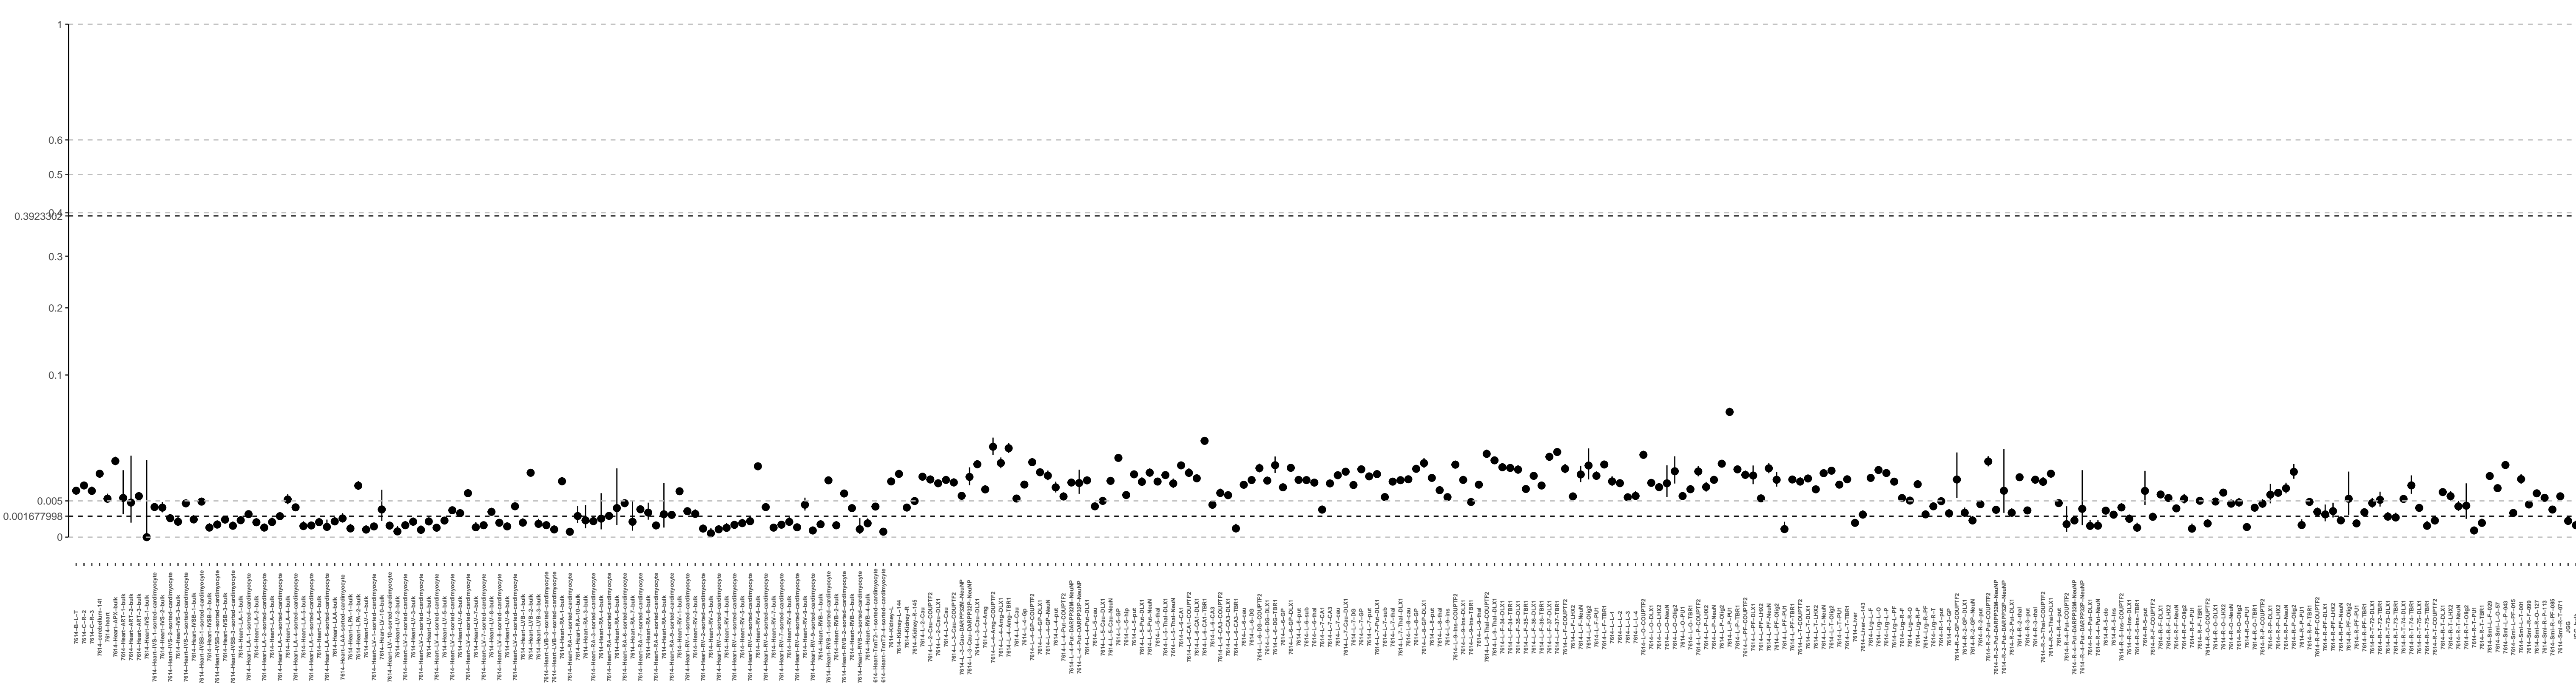







sqrt(MAF)

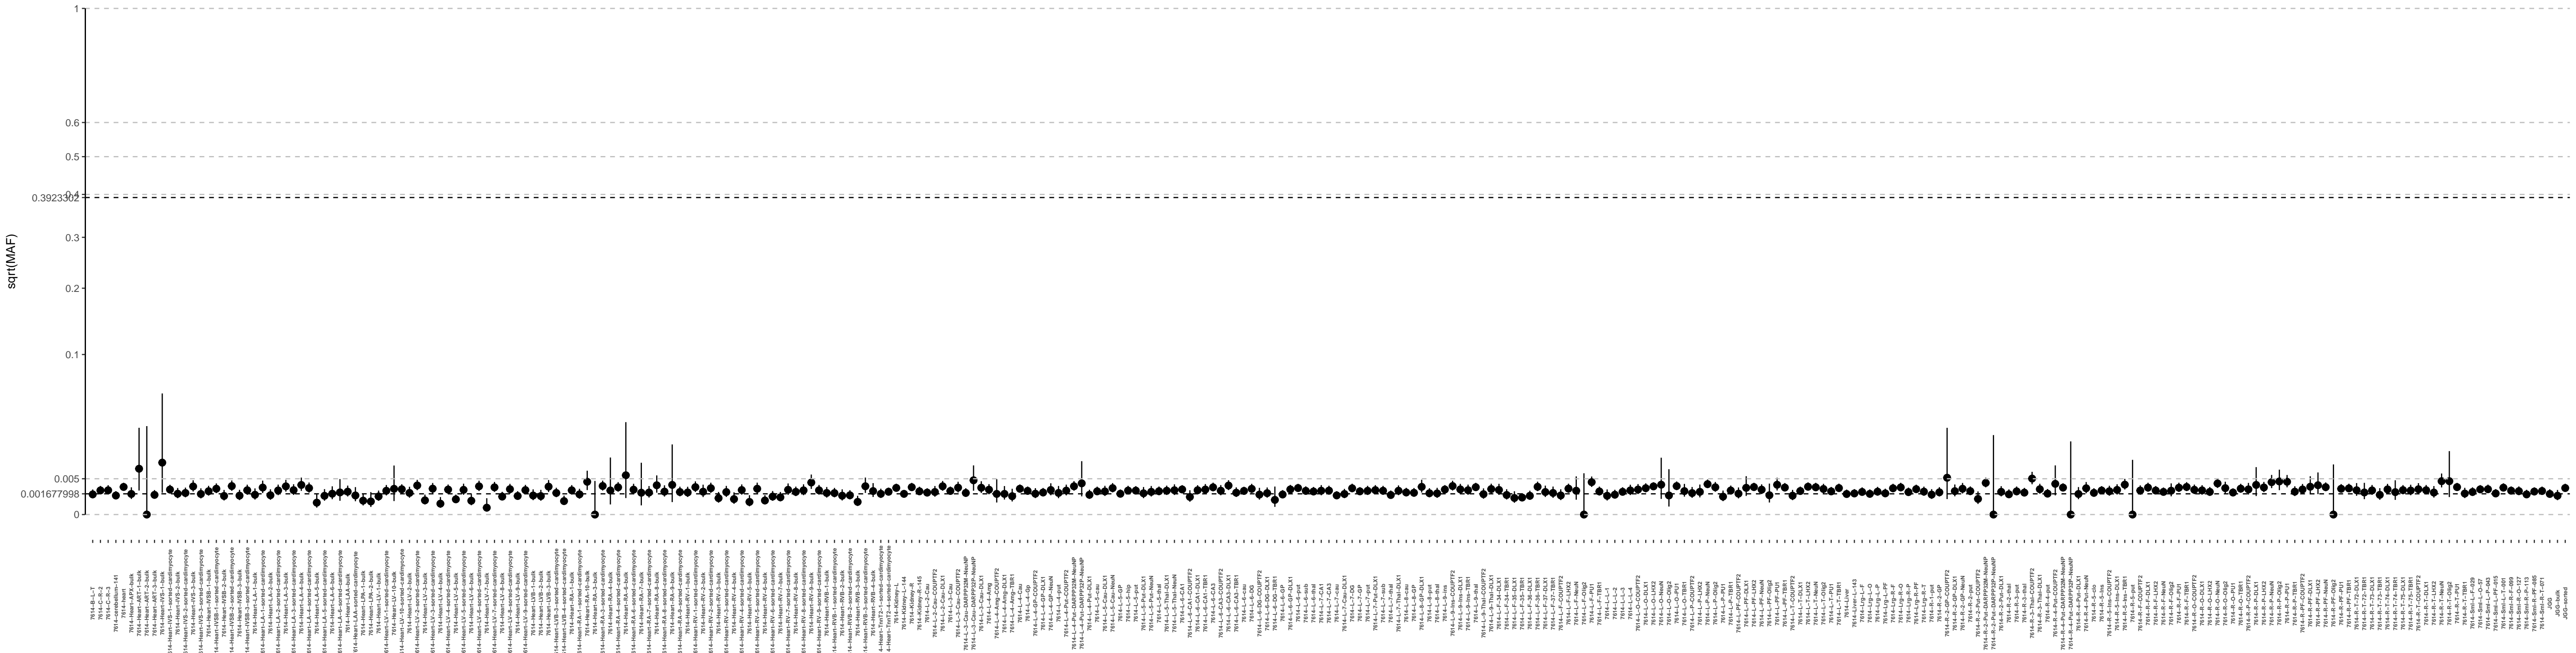

ID

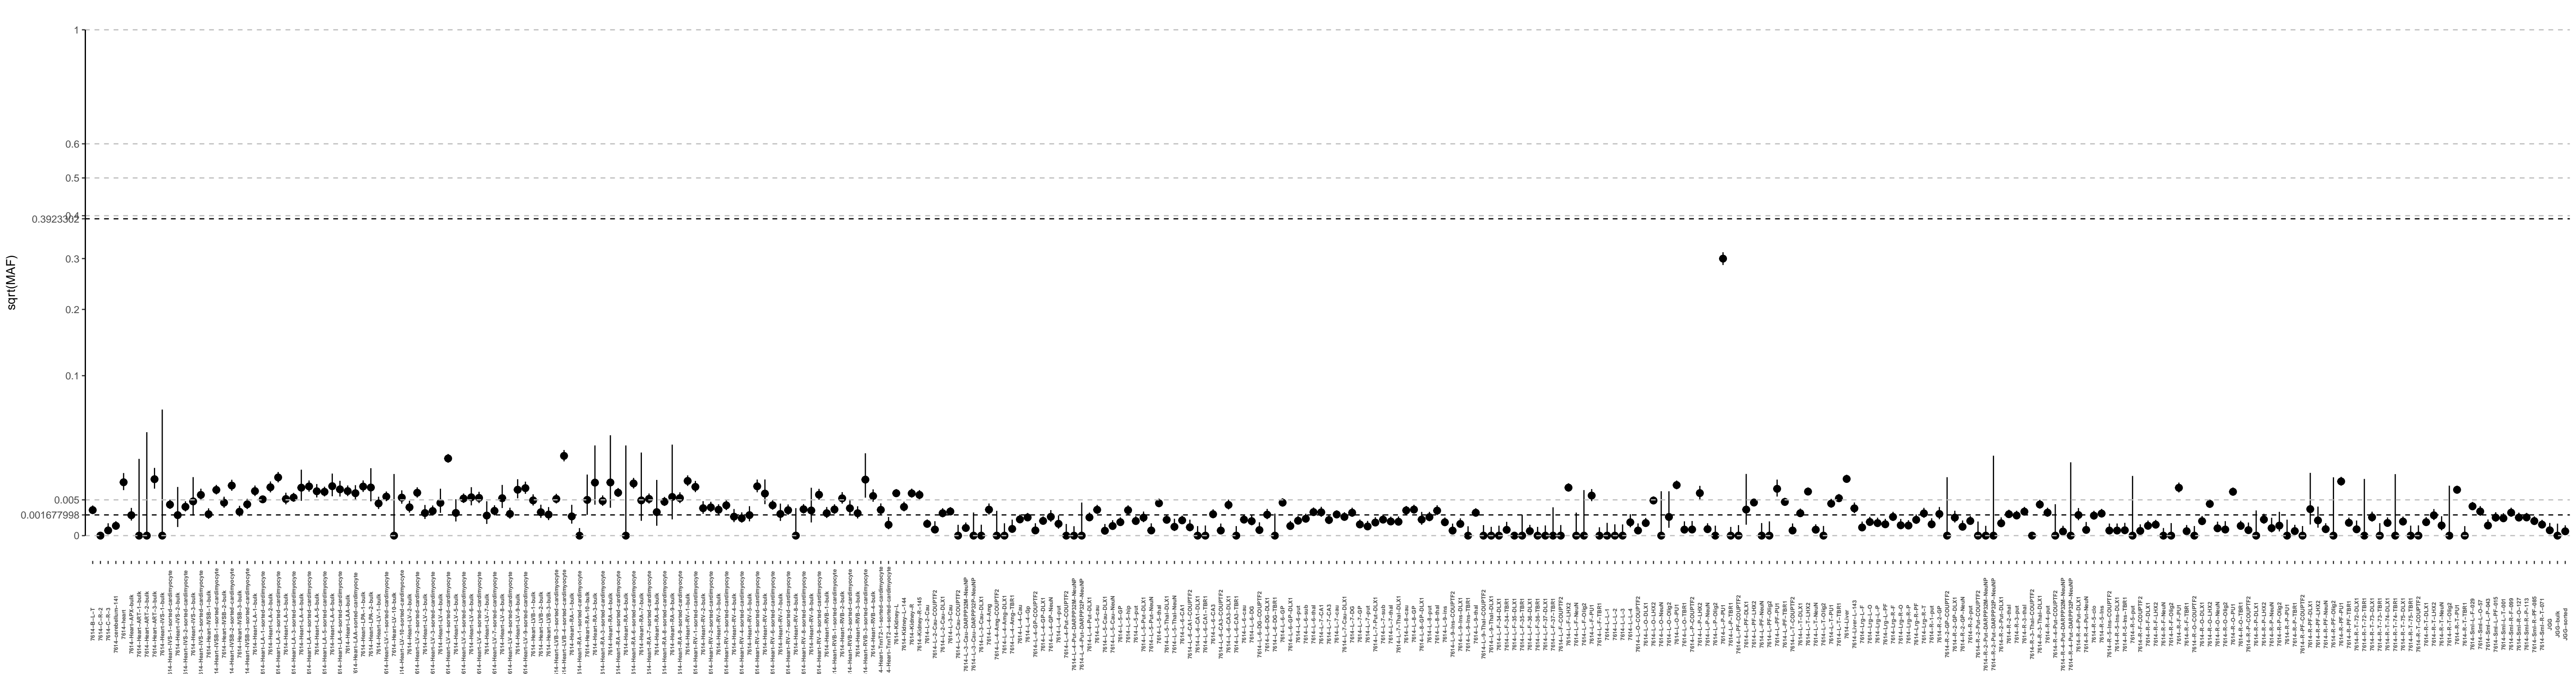

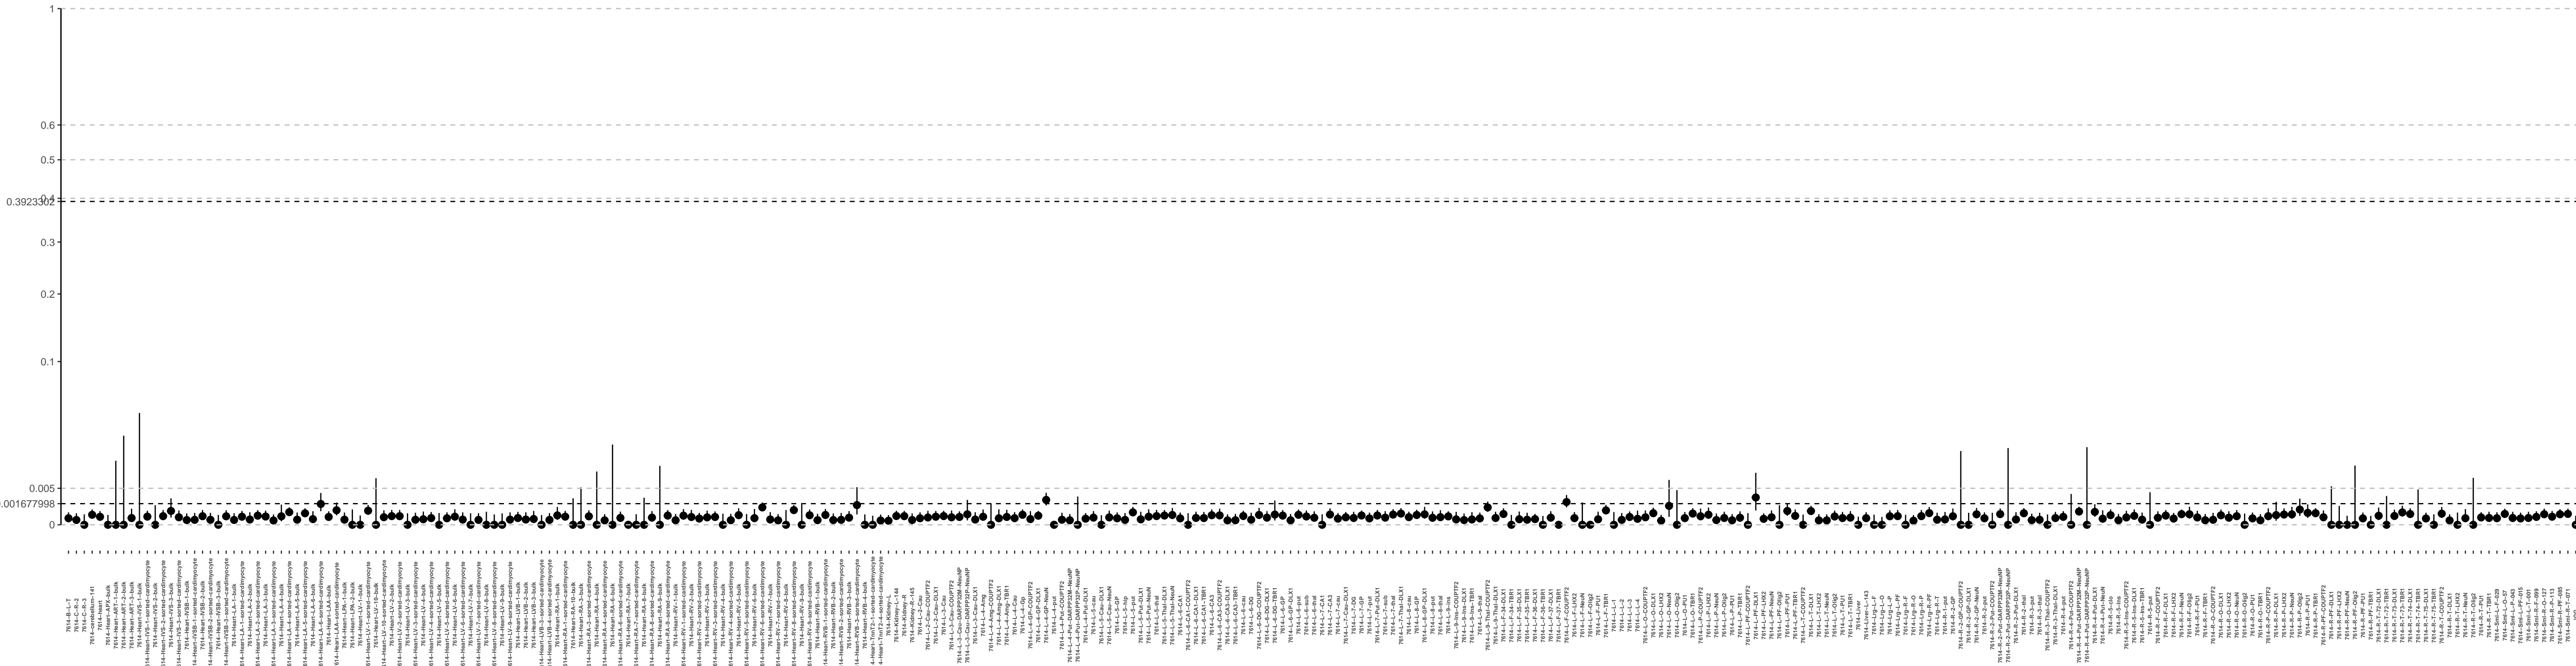

ID



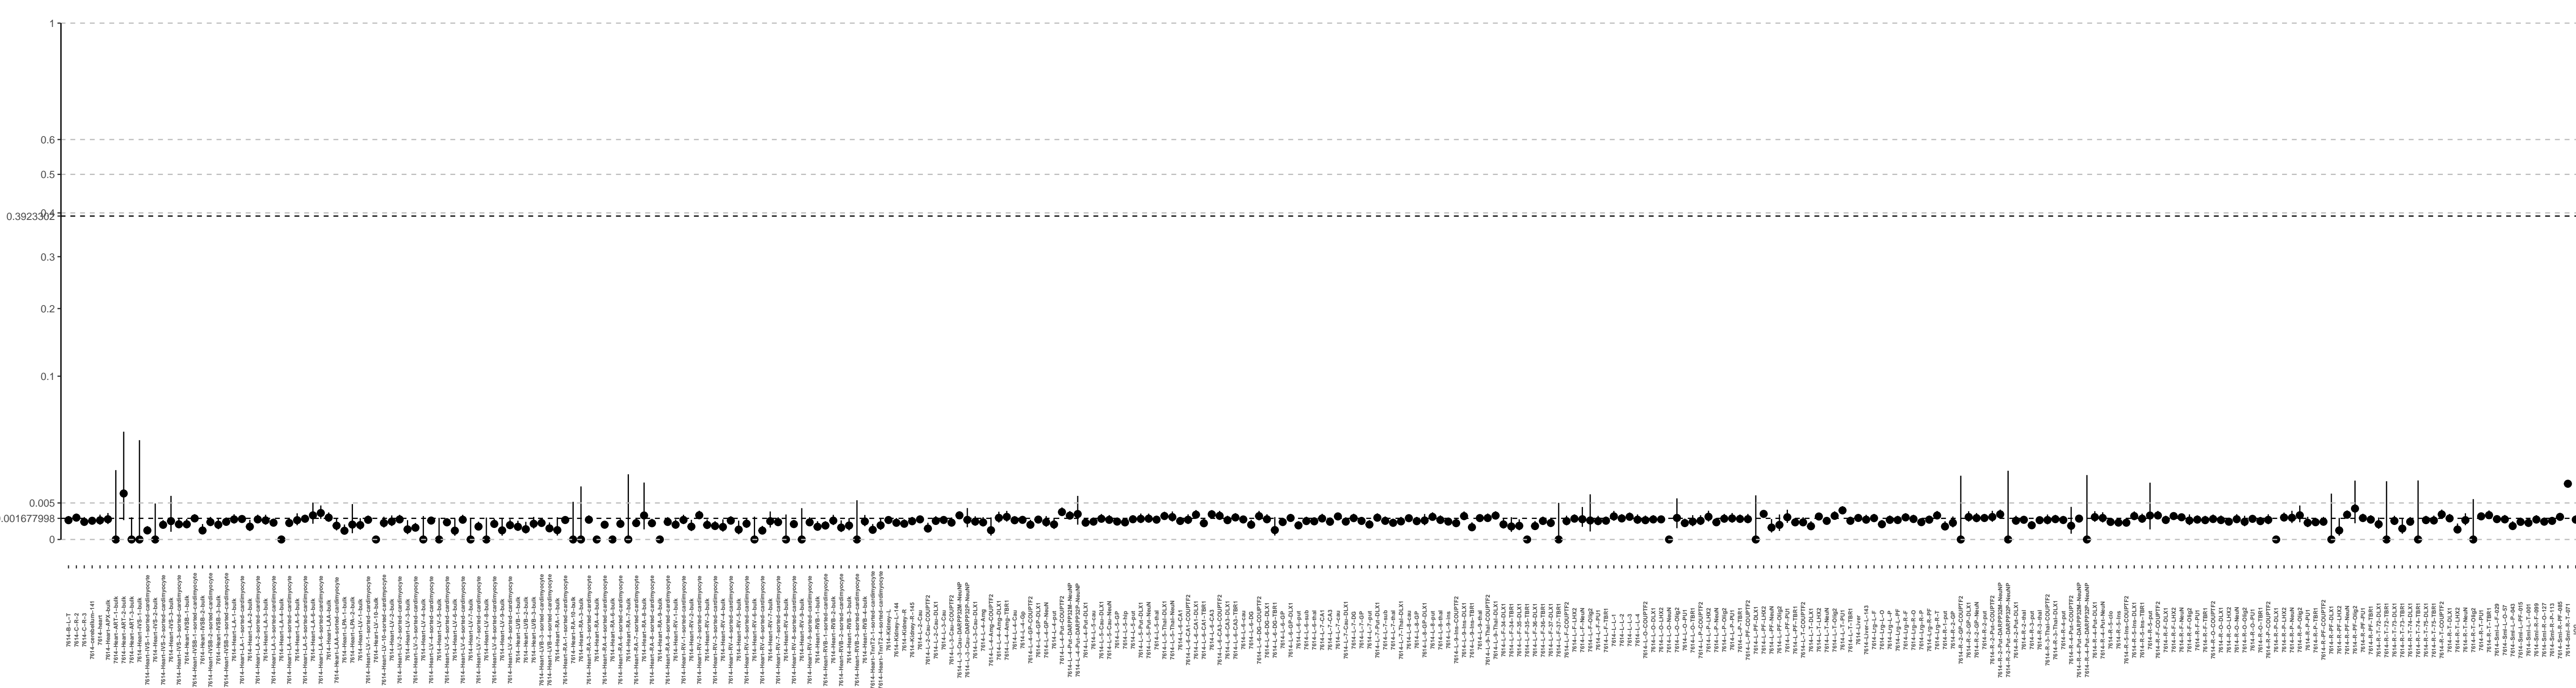







sqrt(MAF)

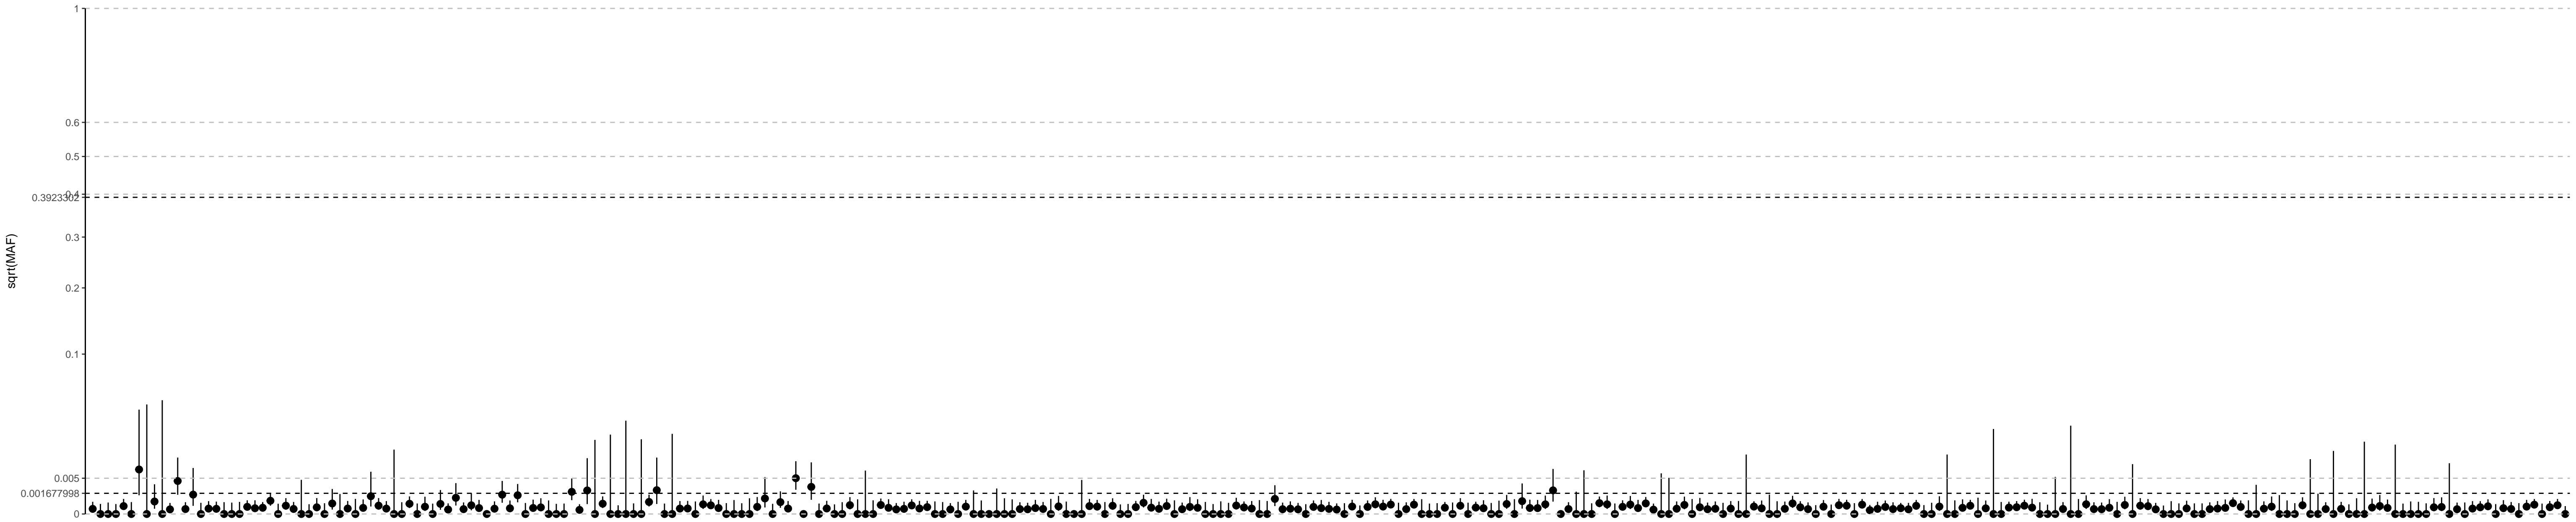

- 7614-B-L-T
- 7614-C-R-2
- 7614-erebellum-141
- 7614-Heart-VS-1
- 7614-Heart-VS-2
- 7614-Heart-VS-3
- 7614-Heart-VS-4
- 7614-Heart-VS-5
- 7614-Heart-VS-6
- 7614-Heart-VS-7
- 7614-Heart-VS-8
- 7614-Heart-VS-9
- 7614-Heart-VS-10
- 7614-Heart-VS-11
- 7614-Heart-VS-12
- 7614-Heart-VS-13
- 7614-Heart-VS-14
- 7614-Heart-VS-15
- 7614-Heart-VS-16
- 7614-Heart-VS-17
- 7614-Heart-VS-18
- 7614-Heart-VS-19
- 7614-Heart-VS-20
- 7614-Heart-VS-21
- 7614-Heart-VS-22
- 7614-Heart-VS-23
- 7614-Heart-VS-24
- 7614-Heart-VS-25
- 7614-Heart-VS-26
- 7614-Heart-VS-27
- 7614-Heart-VS-28
- 7614-Heart-VS-29
- 7614-Heart-VS-30
- 7614-Heart-VS-31
- 7614-Heart-VS-32
- 7614-Heart-VS-33
- 7614-Heart-VS-34
- 7614-Heart-VS-35
- 7614-Heart-VS-36
- 7614-Heart-VS-37
- 7614-Heart-VS-38
- 7614-Heart-VS-39
- 7614-Heart-VS-40
- 7614-Heart-VS-41
- 7614-Heart-VS-42
- 7614-Heart-VS-43
- 7614-Heart-VS-44
- 7614-Heart-VS-45
- 7614-Heart-VS-46
- 7614-Heart-VS-47
- 7614-Heart-VS-48
- 7614-Heart-VS-49
- 7614-Heart-VS-50
- 7614-Heart-VS-51
- 7614-Heart-VS-52
- 7614-Heart-VS-53
- 7614-Heart-VS-54
- 7614-Heart-VS-55
- 7614-Heart-VS-56
- 7614-Heart-VS-57
- 7614-Heart-VS-58
- 7614-Heart-VS-59
- 7614-Heart-VS-60
- 7614-Heart-VS-61
- 7614-Heart-VS-62
- 7614-Heart-VS-63
- 7614-Heart-VS-64
- 7614-Heart-VS-65
- 7614-Heart-VS-66
- 7614-Heart-VS-67
- 7614-Heart-VS-68
- 7614-Heart-VS-69
- 7614-Heart-VS-70
- 7614-Heart-VS-71
- 7614-Heart-VS-72
- 7614-Heart-VS-73
- 7614-Heart-VS-74
- 7614-Heart-VS-75
- 7614-Heart-VS-76
- 7614-Heart-VS-77
- 7614-Heart-VS-78
- 7614-Heart-VS-79
- 7614-Heart-VS-80
- 7614-Heart-VS-81
- 7614-Heart-VS-82
- 7614-Heart-VS-83
- 7614-Heart-VS-84
- 7614-Heart-VS-85
- 7614-Heart-VS-86
- 7614-Heart-VS-87
- 7614-Heart-VS-88
- 7614-Heart-VS-89
- 7614-Heart-VS-90
- 7614-Heart-VS-91
- 7614-Heart-VS-92
- 7614-Heart-VS-93
- 7614-Heart-VS-94
- 7614-Heart-VS-95
- 7614-Heart-VS-96
- 7614-Heart-VS-97
- 7614-Heart-VS-98
- 7614-Heart-VS-99
- 7614-Heart-VS-100







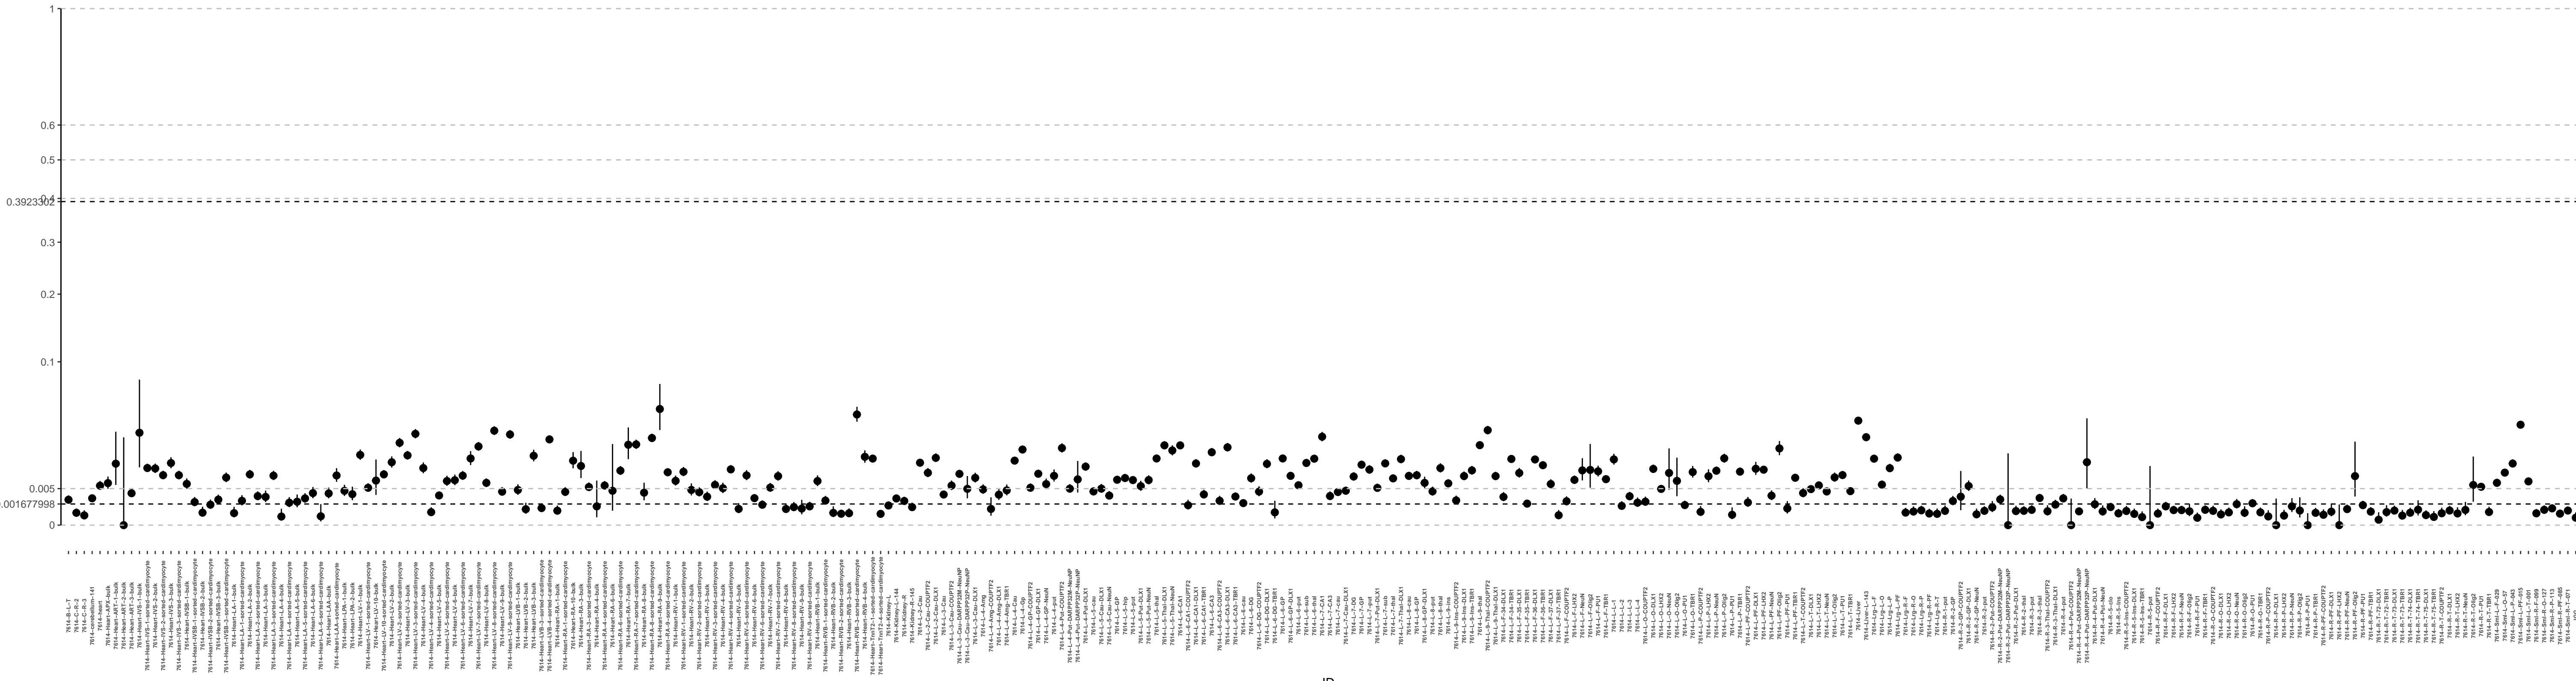

ID

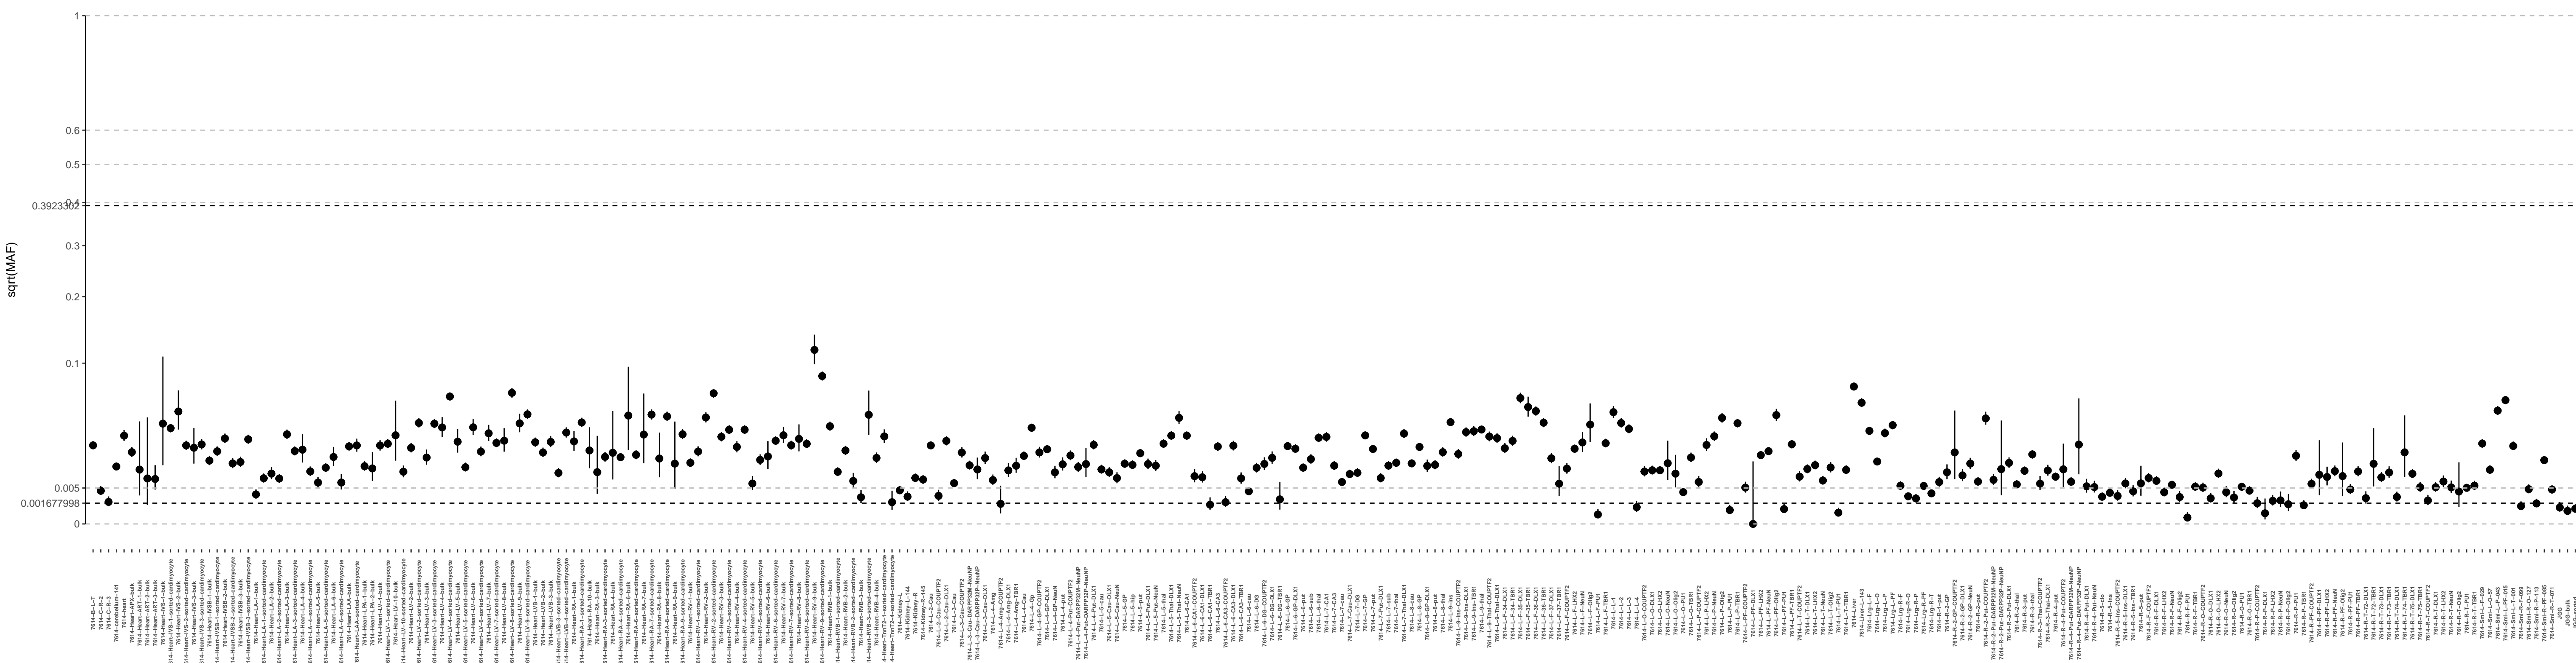



sqrt(MAF)

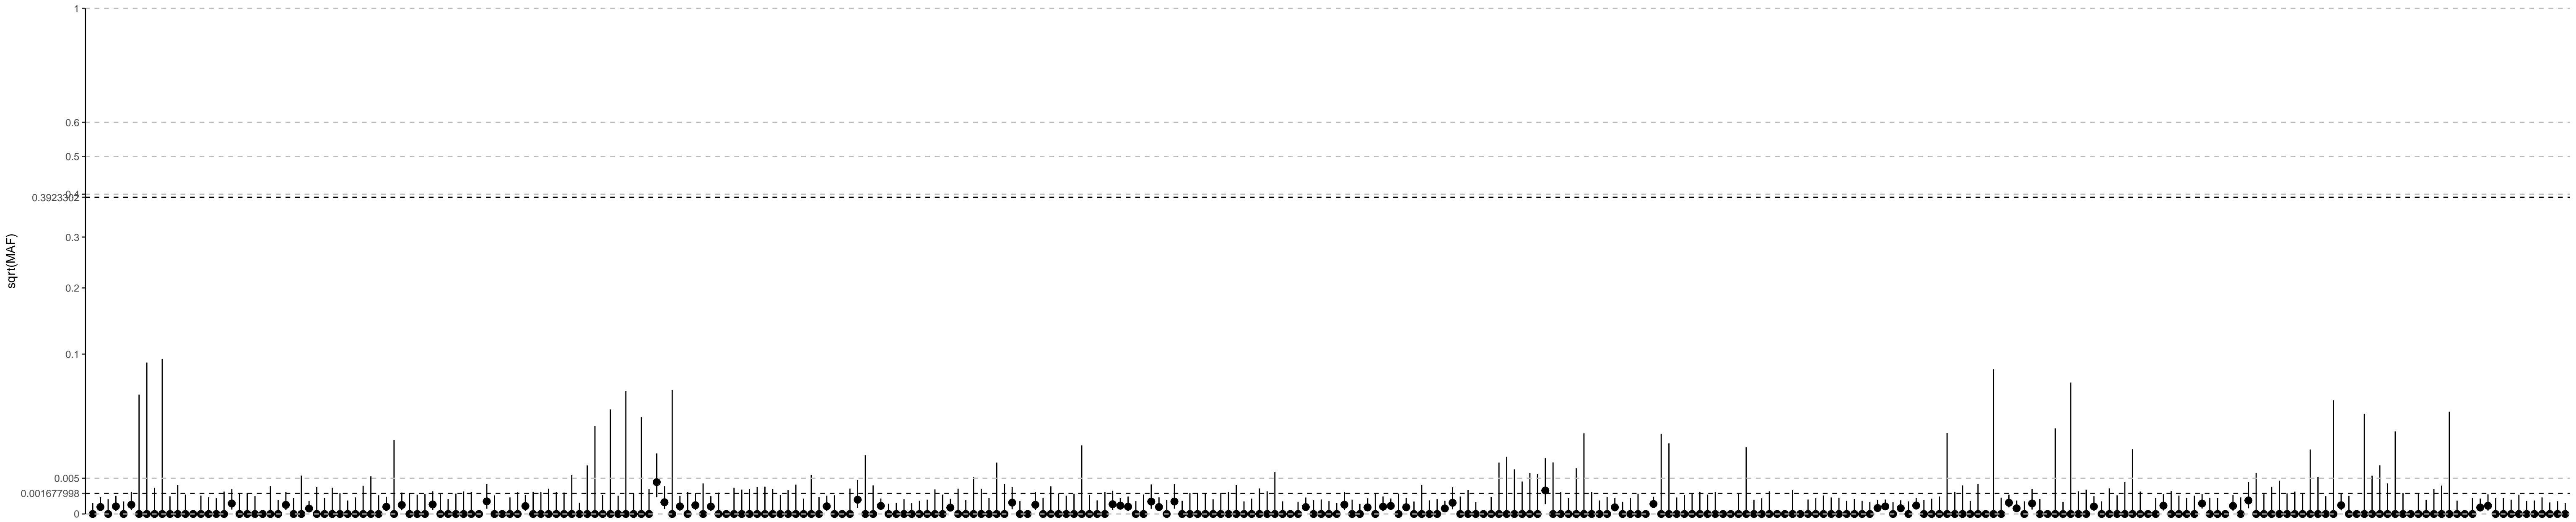

ID

- 7614-B-L-T
- 7614-C-R-2
- 7614-Cerebellum-141
- 7614-Heart-VS-1
- 7614-Heart-VS-2
- 7614-Heart-VS-3
- 7614-Heart-VS-4
- 7614-Heart-VS-5
- 7614-Heart-VS-6
- 7614-Heart-VS-7
- 7614-Heart-VS-8
- 7614-Heart-VS-9
- 7614-Heart-VS-10
- 7614-Heart-VS-11
- 7614-Heart-VS-12
- 7614-Heart-VS-13
- 7614-Heart-VS-14
- 7614-Heart-VS-15
- 7614-Heart-VS-16
- 7614-Heart-VS-17
- 7614-Heart-VS-18
- 7614-Heart-VS-19
- 7614-Heart-VS-20
- 7614-Heart-VS-21
- 7614-Heart-VS-22
- 7614-Heart-VS-23
- 7614-Heart-VS-24
- 7614-Heart-VS-25
- 7614-Heart-VS-26
- 7614-Heart-VS-27
- 7614-Heart-VS-28
- 7614-Heart-VS-29
- 7614-Heart-VS-30
- 7614-Heart-VS-31
- 7614-Heart-VS-32
- 7614-Heart-VS-33
- 7614-Heart-VS-34
- 7614-Heart-VS-35
- 7614-Heart-VS-36
- 7614-Heart-VS-37
- 7614-Heart-VS-38
- 7614-Heart-VS-39
- 7614-Heart-VS-40
- 7614-Heart-VS-41
- 7614-Heart-VS-42
- 7614-Heart-VS-43
- 7614-Heart-VS-44
- 7614-Heart-VS-45
- 7614-Heart-VS-46
- 7614-Heart-VS-47
- 7614-Heart-VS-48
- 7614-Heart-VS-49
- 7614-Heart-VS-50
- 7614-Heart-VS-51
- 7614-Heart-VS-52
- 7614-Heart-VS-53
- 7614-Heart-VS-54
- 7614-Heart-VS-55
- 7614-Heart-VS-56
- 7614-Heart-VS-57
- 7614-Heart-VS-58
- 7614-Heart-VS-59
- 7614-Heart-VS-60
- 7614-Heart-VS-61
- 7614-Heart-VS-62
- 7614-Heart-VS-63
- 7614-Heart-VS-64
- 7614-Heart-VS-65
- 7614-Heart-VS-66
- 7614-Heart-VS-67
- 7614-Heart-VS-68
- 7614-Heart-VS-69
- 7614-Heart-VS-70
- 7614-Heart-VS-71
- 7614-Heart-VS-72
- 7614-Heart-VS-73
- 7614-Heart-VS-74
- 7614-Heart-VS-75
- 7614-Heart-VS-76
- 7614-Heart-VS-77
- 7614-Heart-VS-78
- 7614-Heart-VS-79
- 7614-Heart-VS-80
- 7614-Heart-VS-81
- 7614-Heart-VS-82
- 7614-Heart-VS-83
- 7614-Heart-VS-84
- 7614-Heart-VS-85
- 7614-Heart-VS-86
- 7614-Heart-VS-87
- 7614-Heart-VS-88
- 7614-Heart-VS-89
- 7614-Heart-VS-90
- 7614-Heart-VS-91
- 7614-Heart-VS-92
- 7614-Heart-VS-93
- 7614-Heart-VS-94
- 7614-Heart-VS-95
- 7614-Heart-VS-96
- 7614-Heart-VS-97
- 7614-Heart-VS-98
- 7614-Heart-VS-99
- 7614-Heart-VS-100



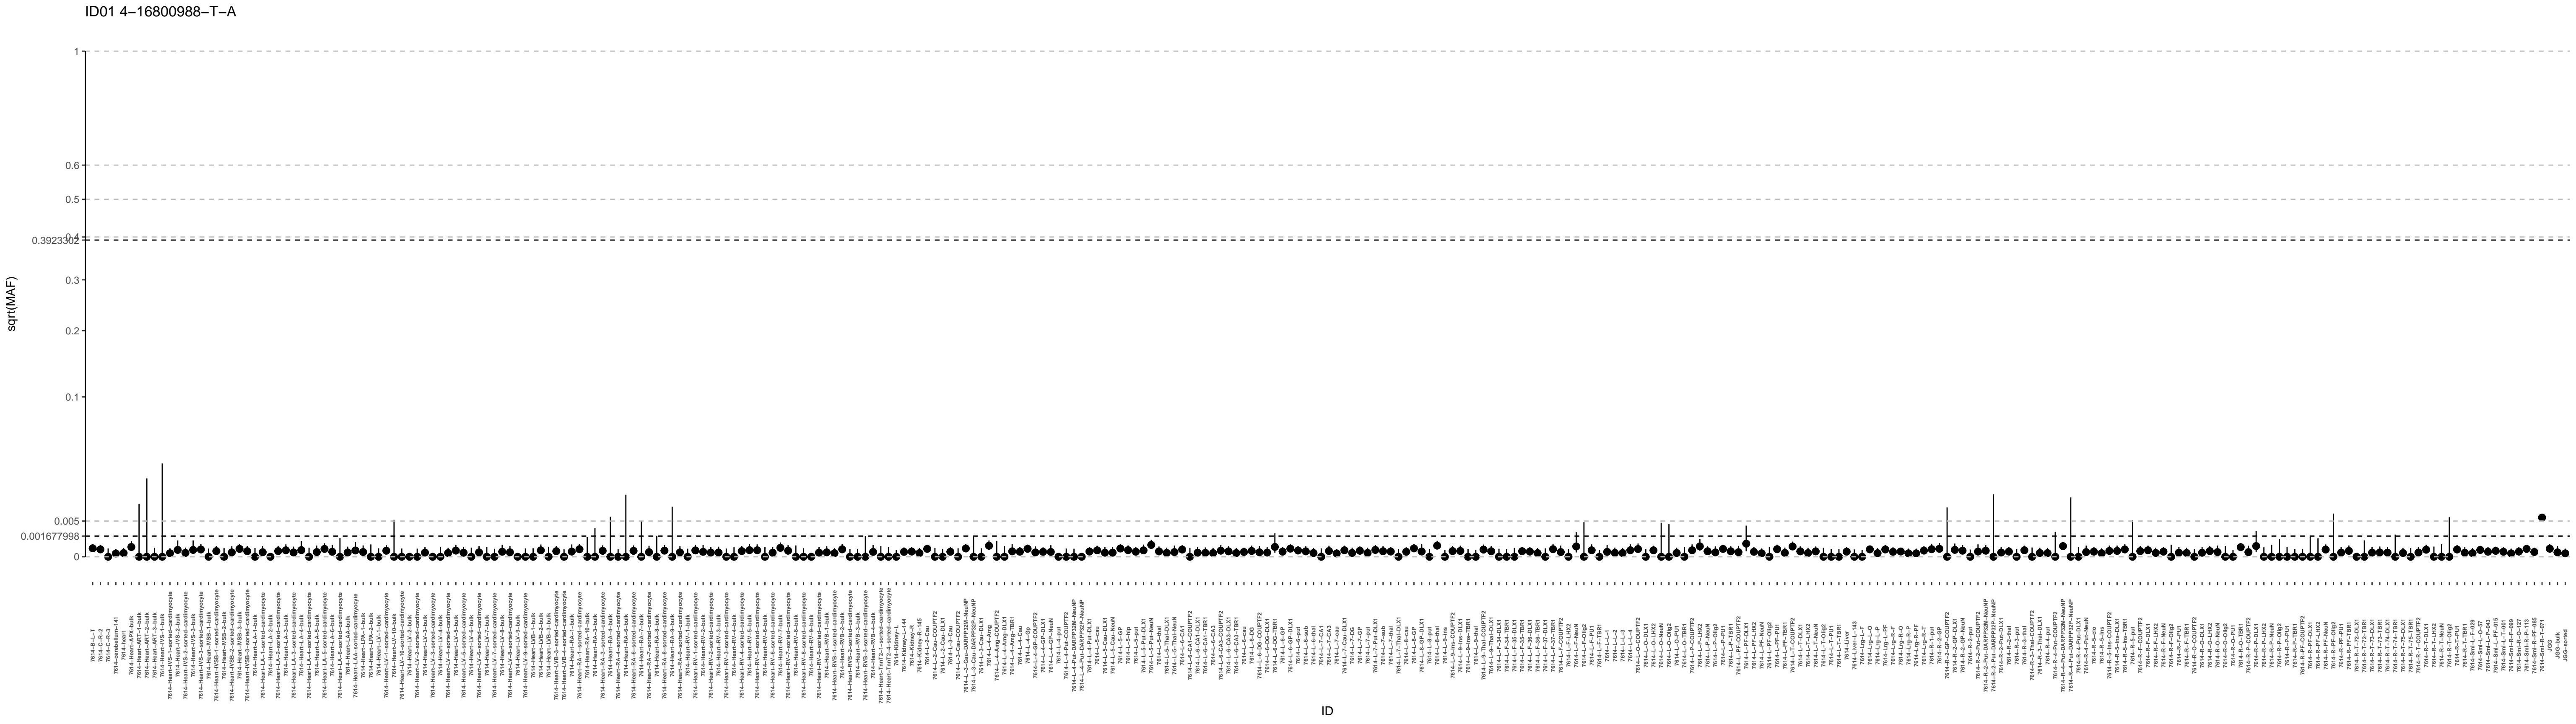



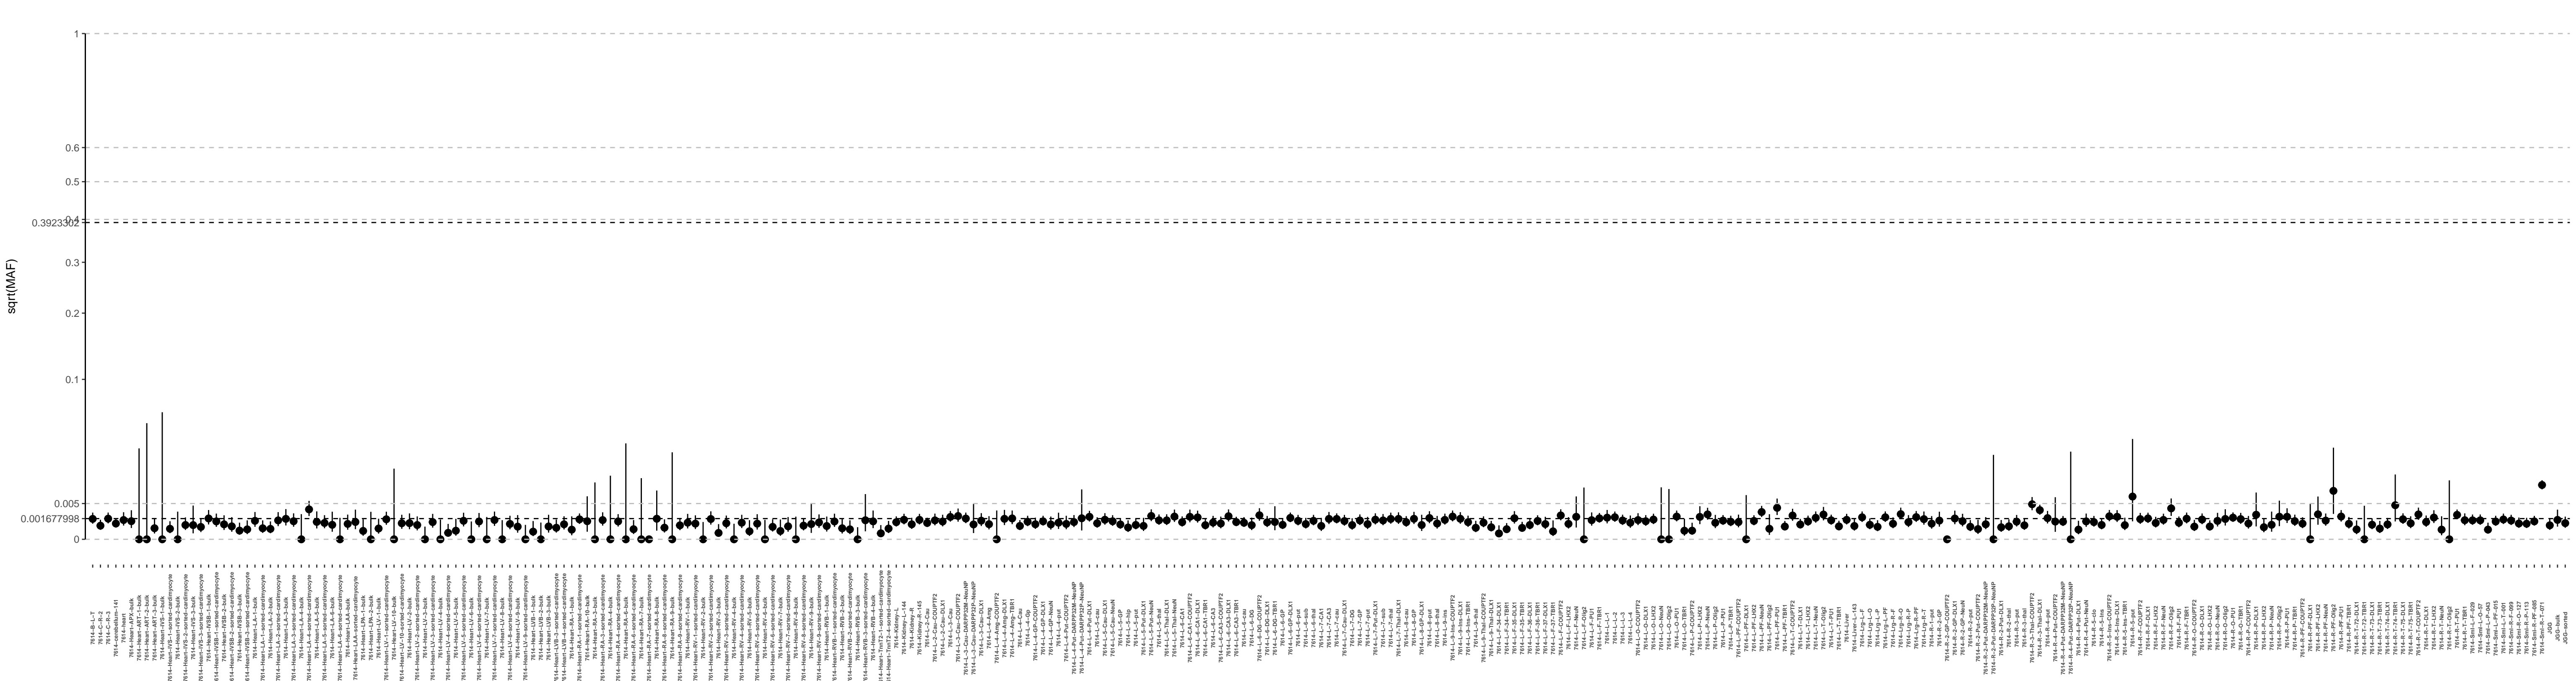

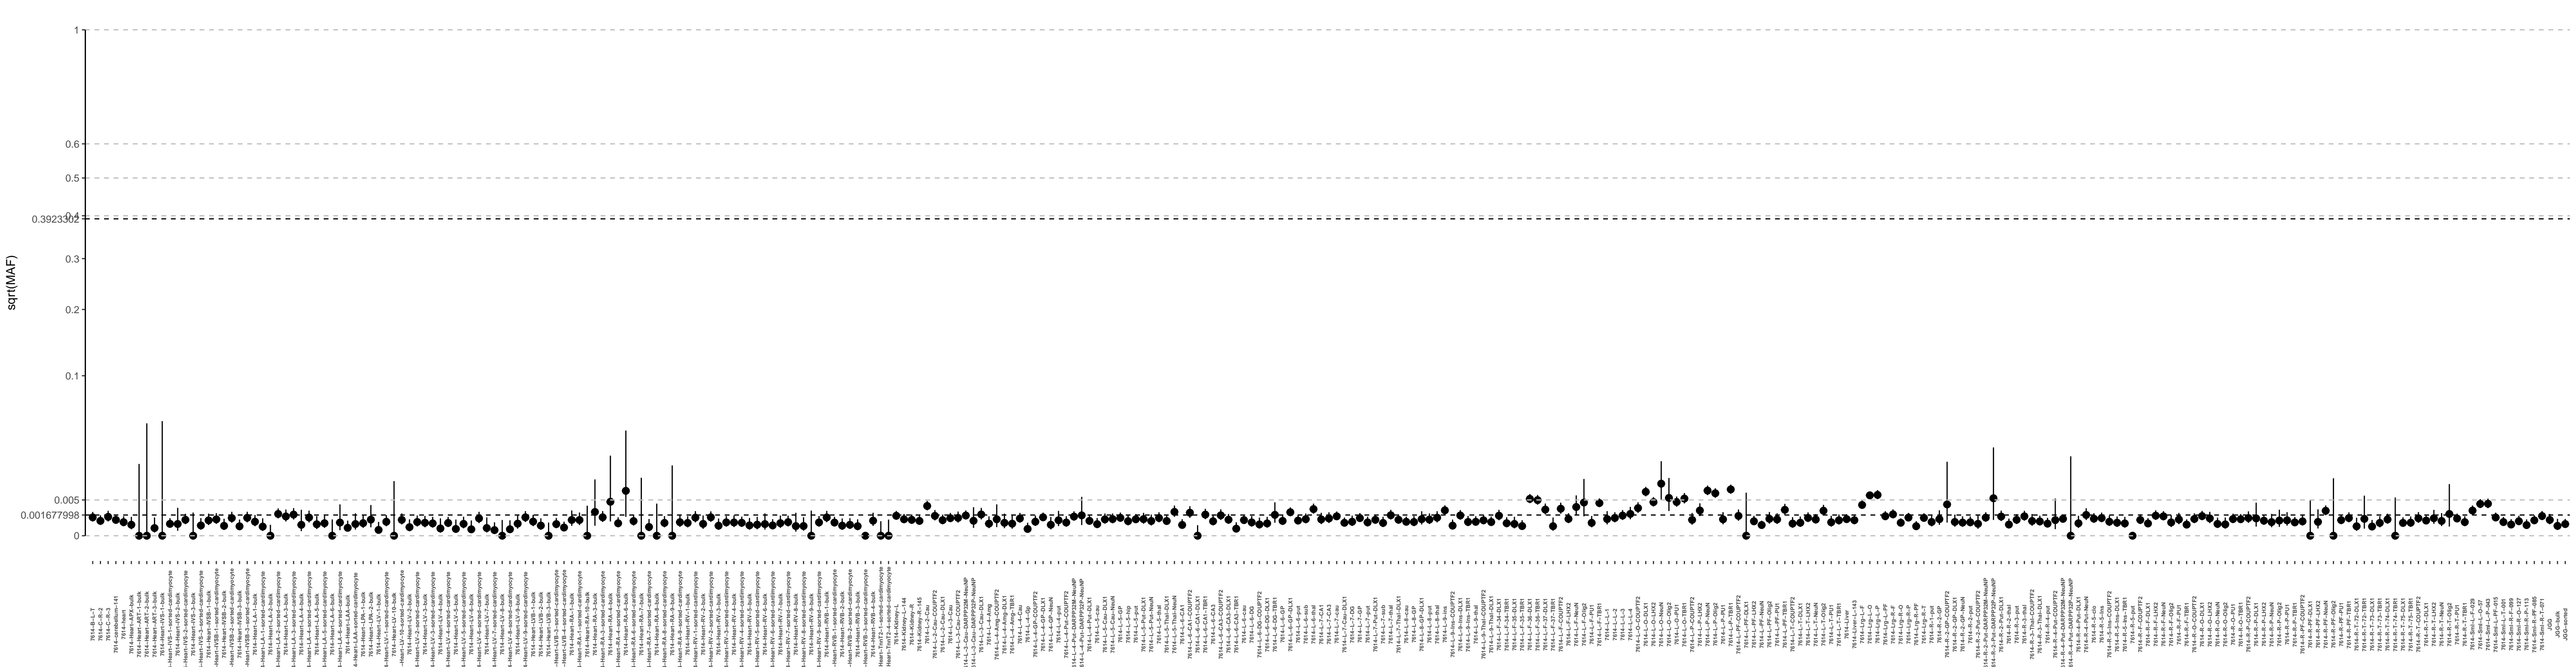



sqrt(MAF)

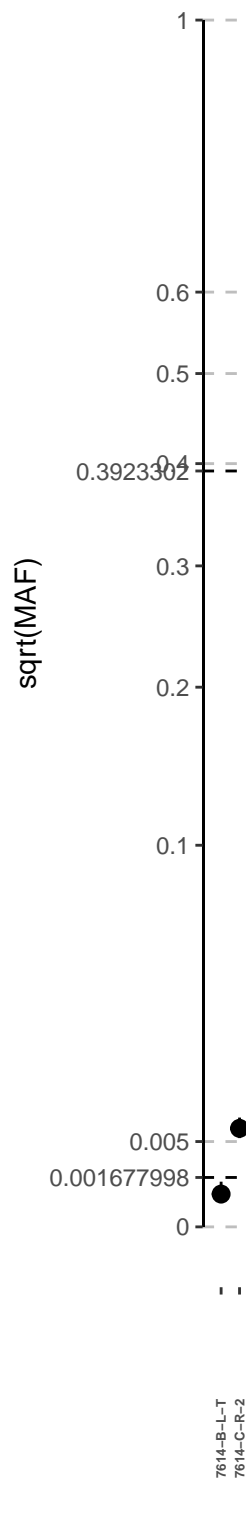

ID

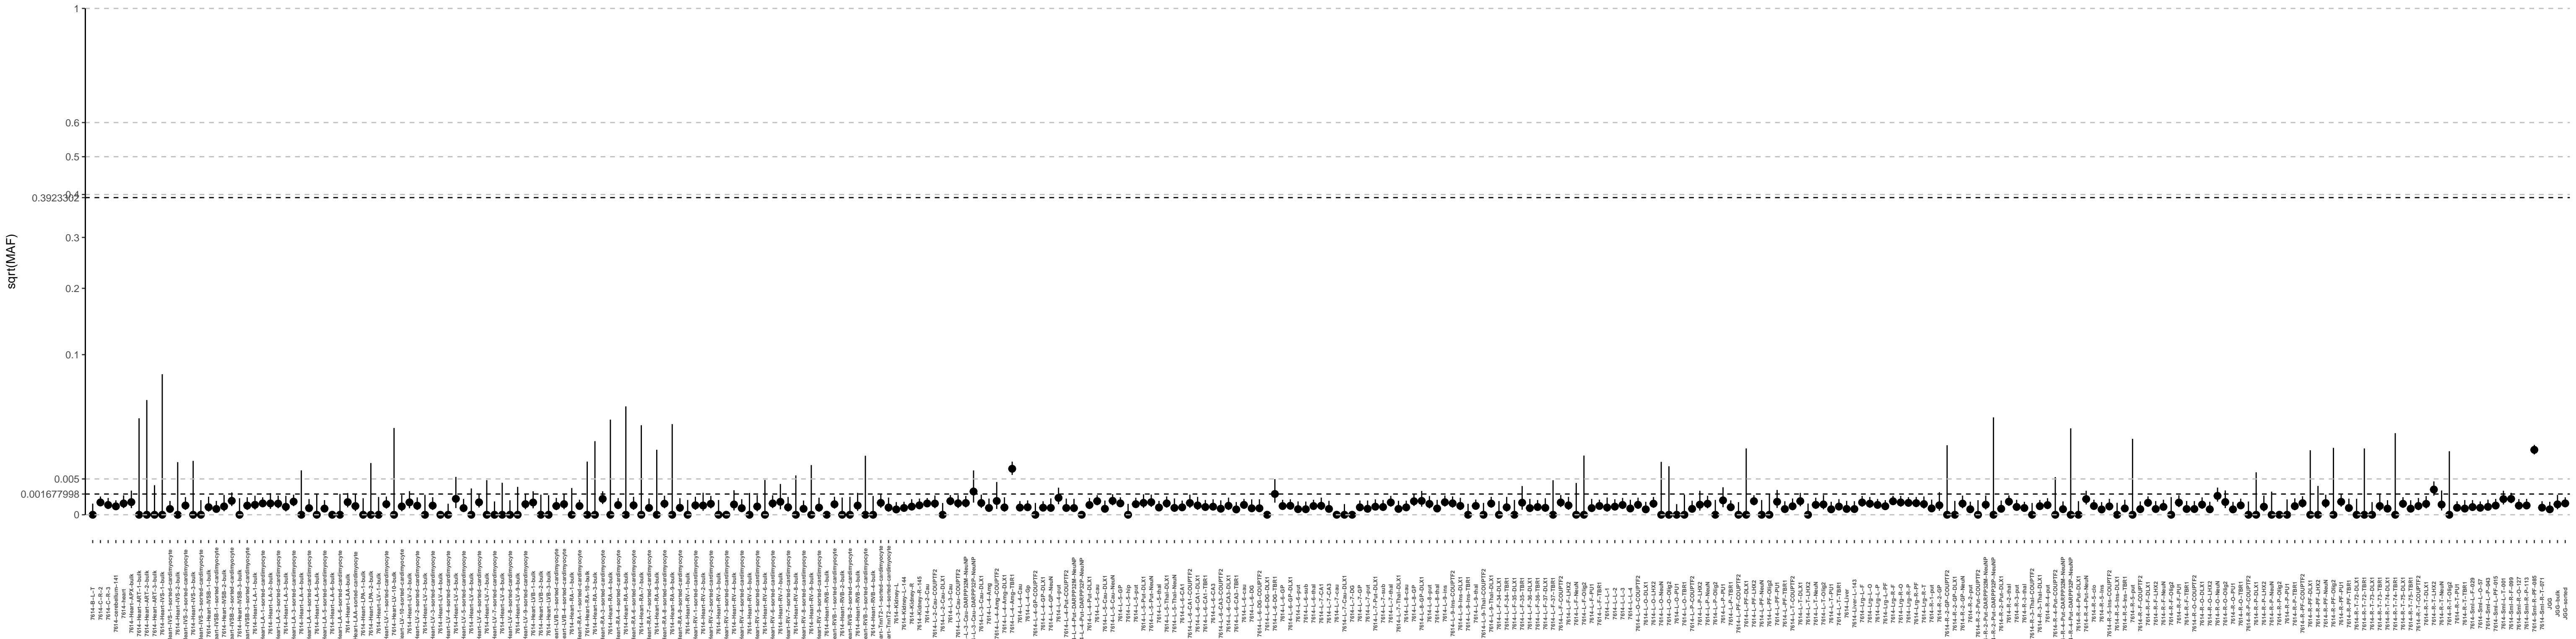





sqrt(MAF)

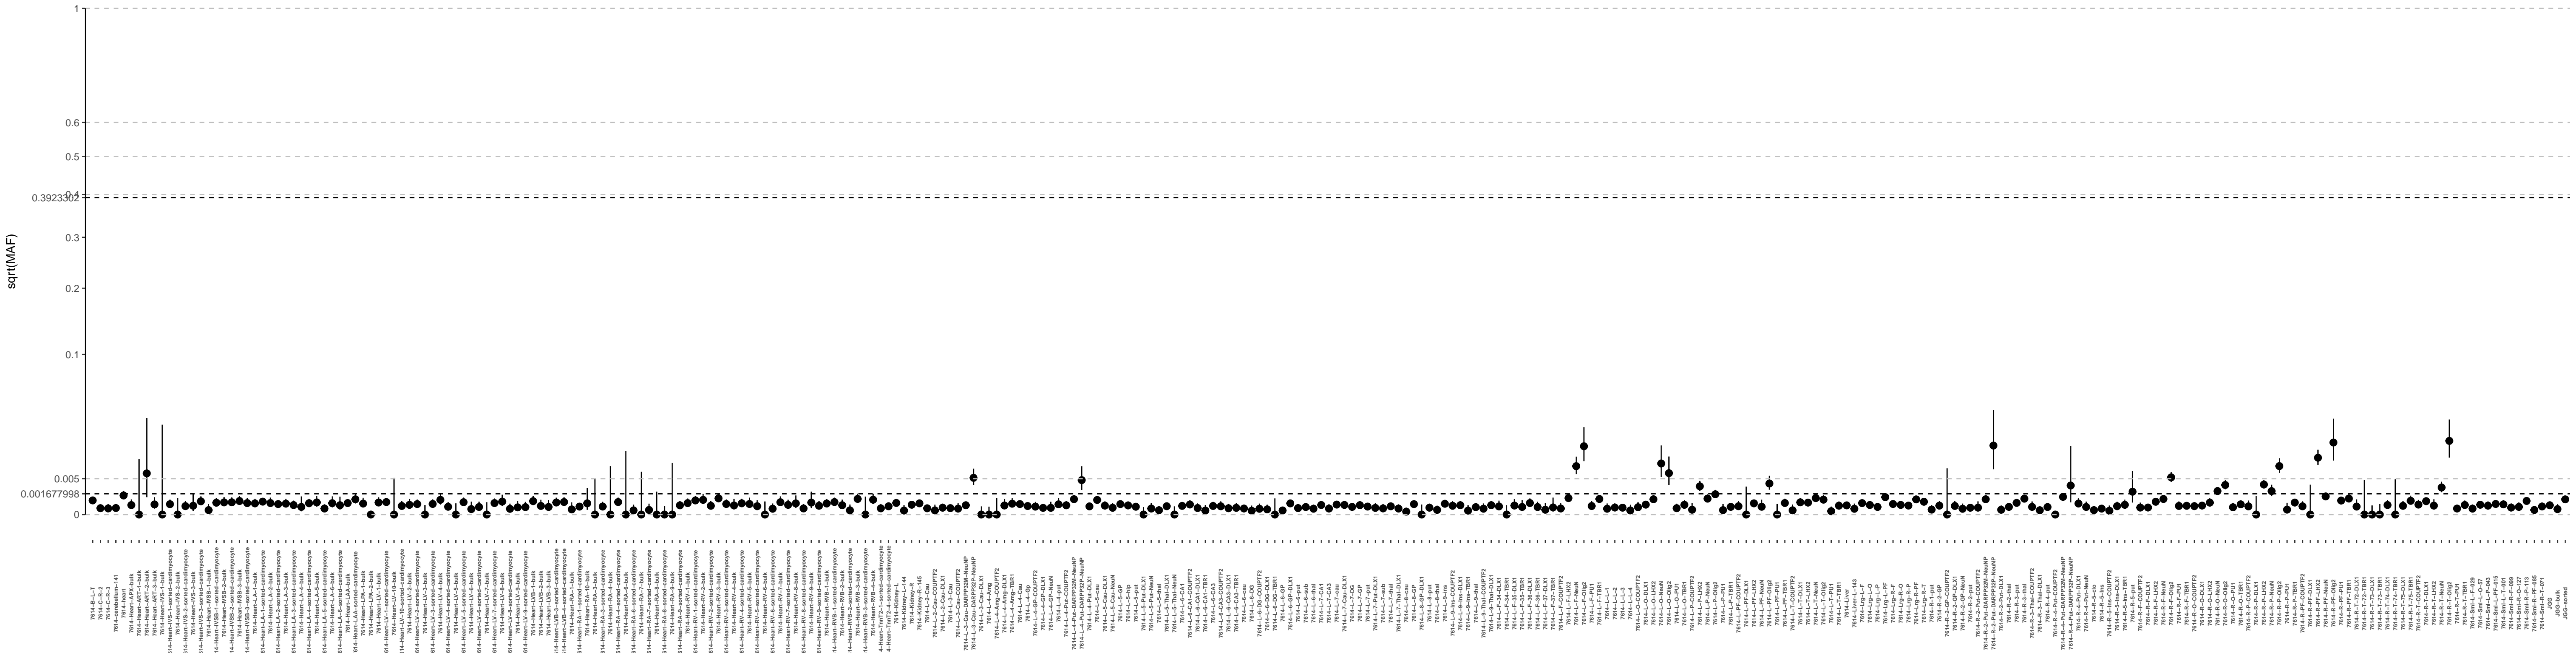

ID

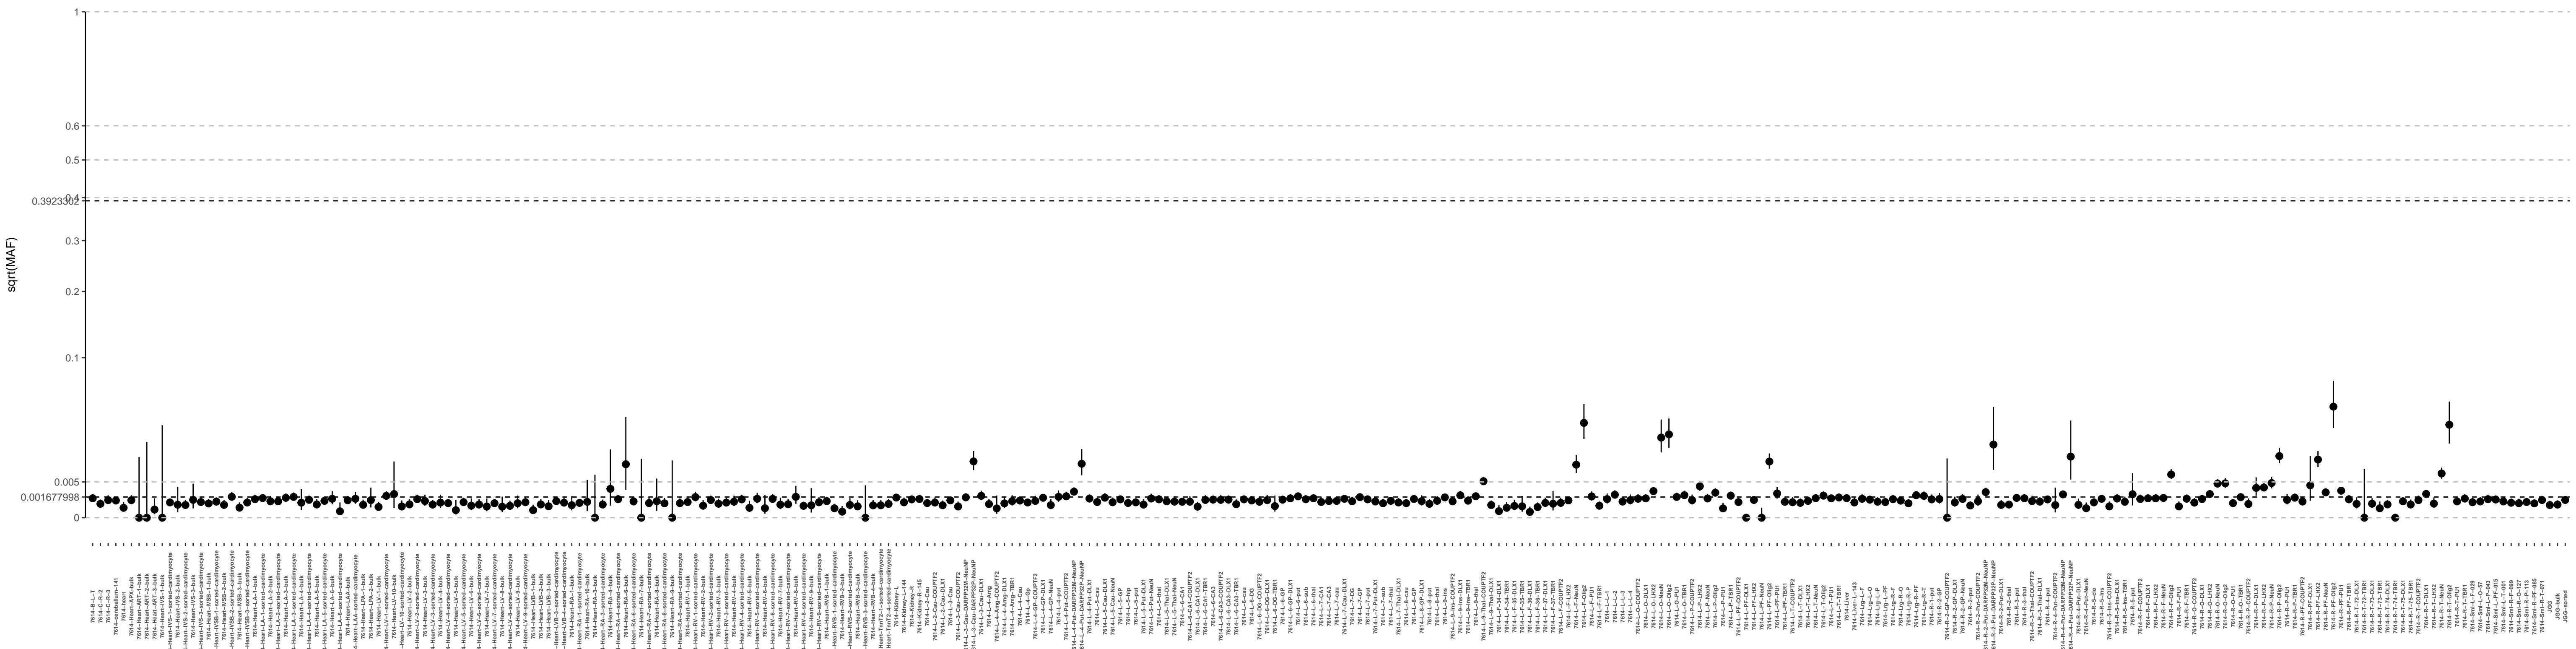

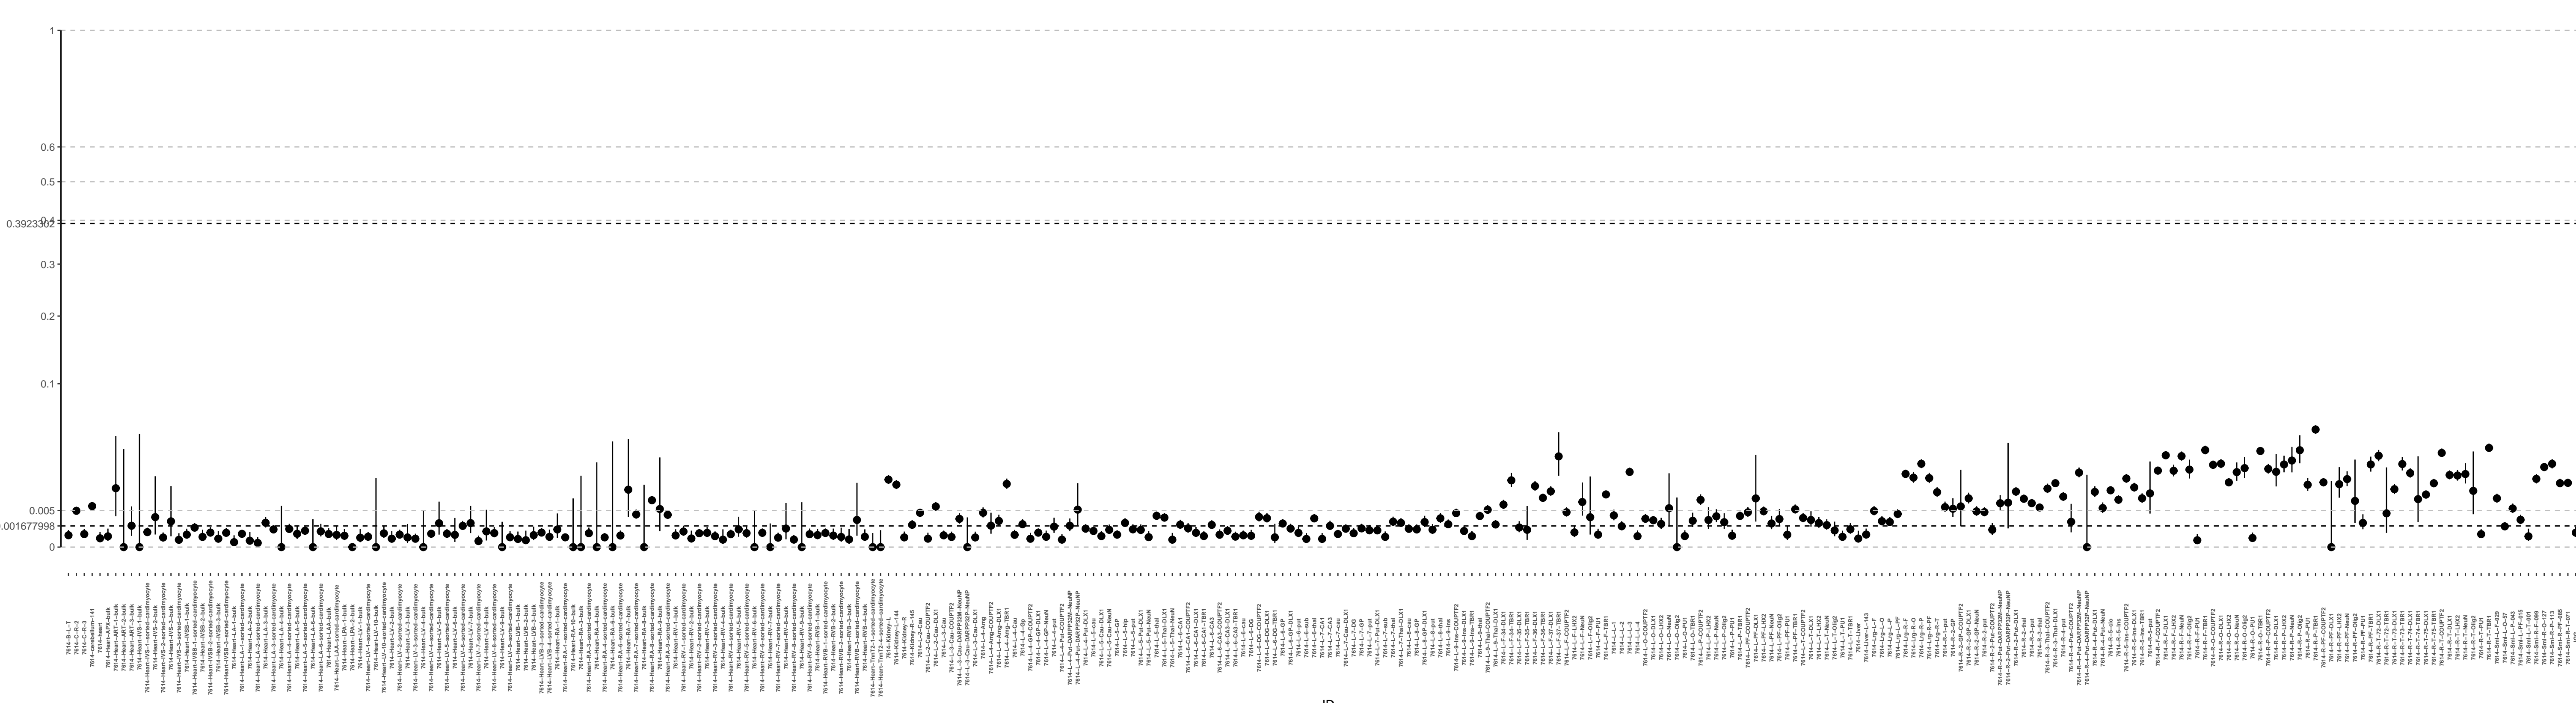



sqrt(MAF)

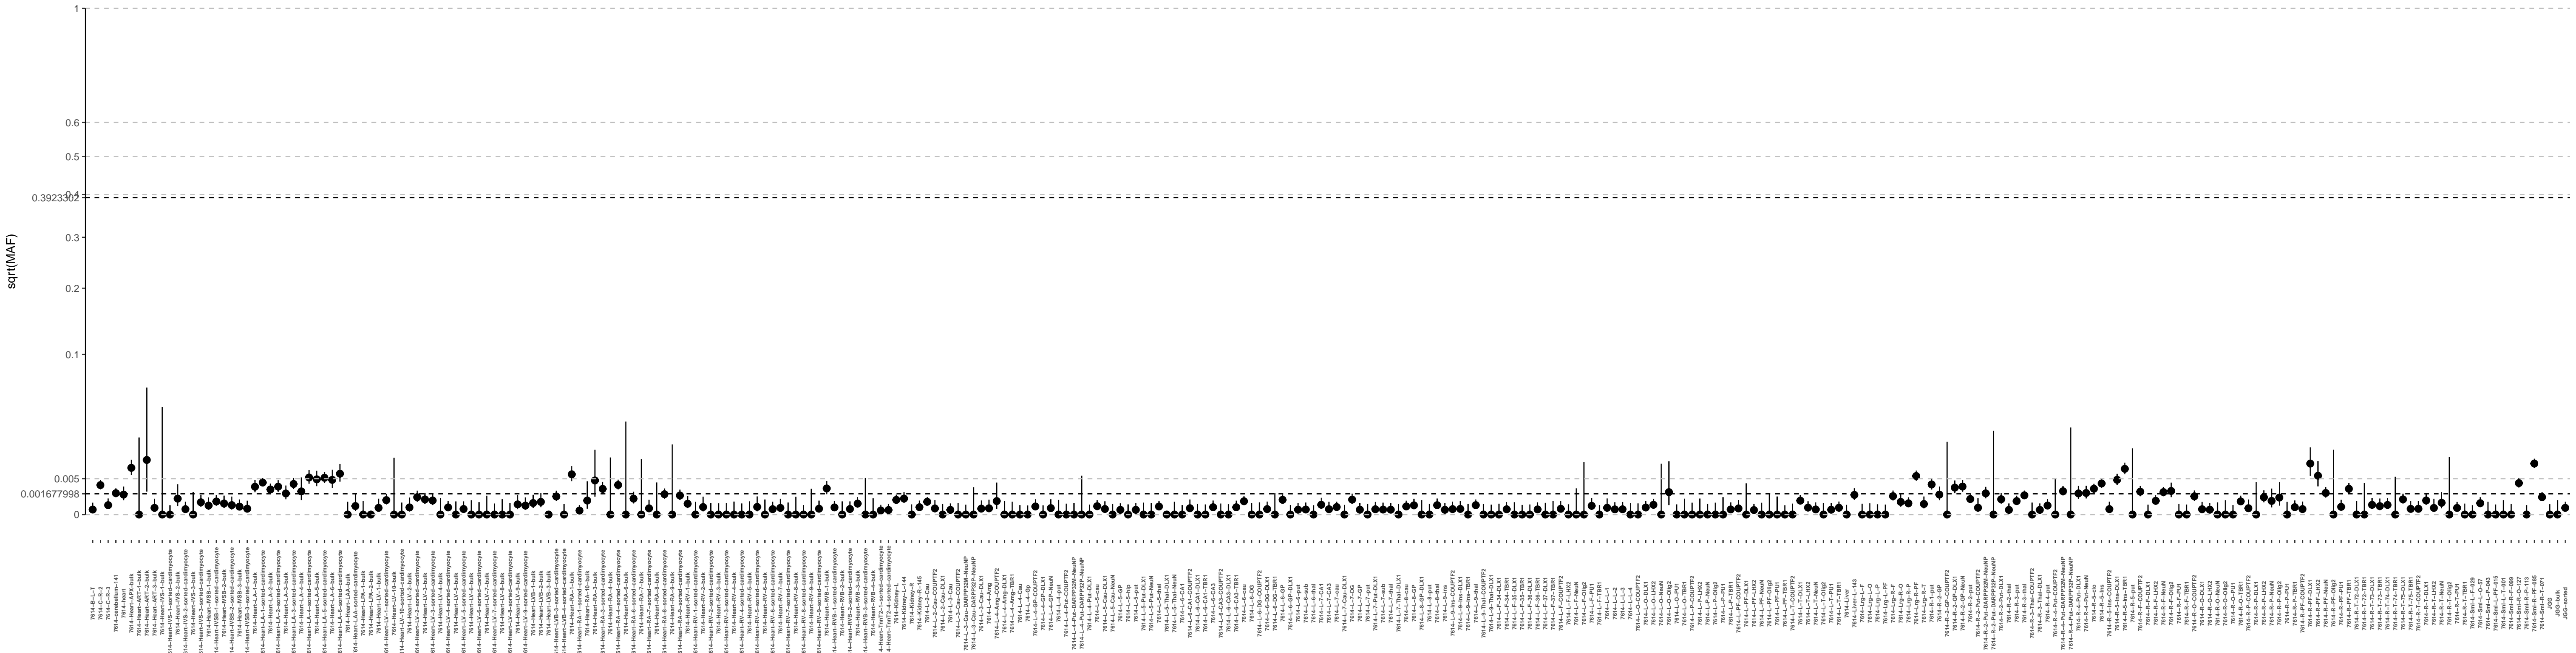

ID

sqrt(MAF)

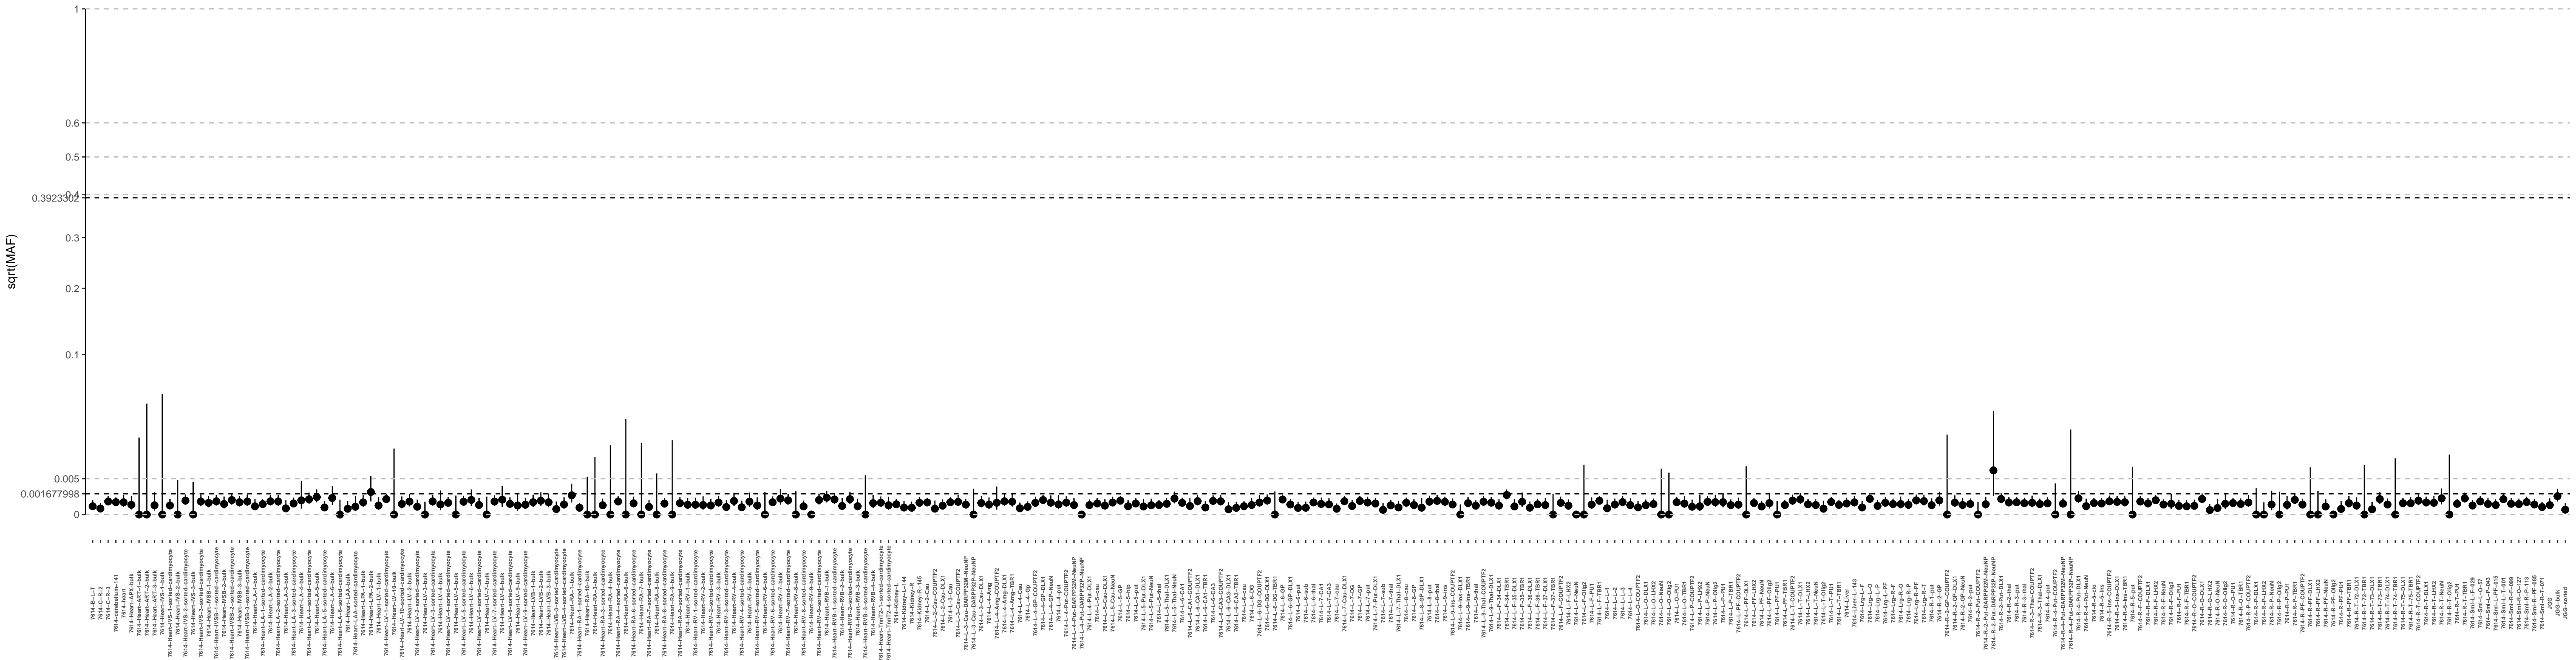

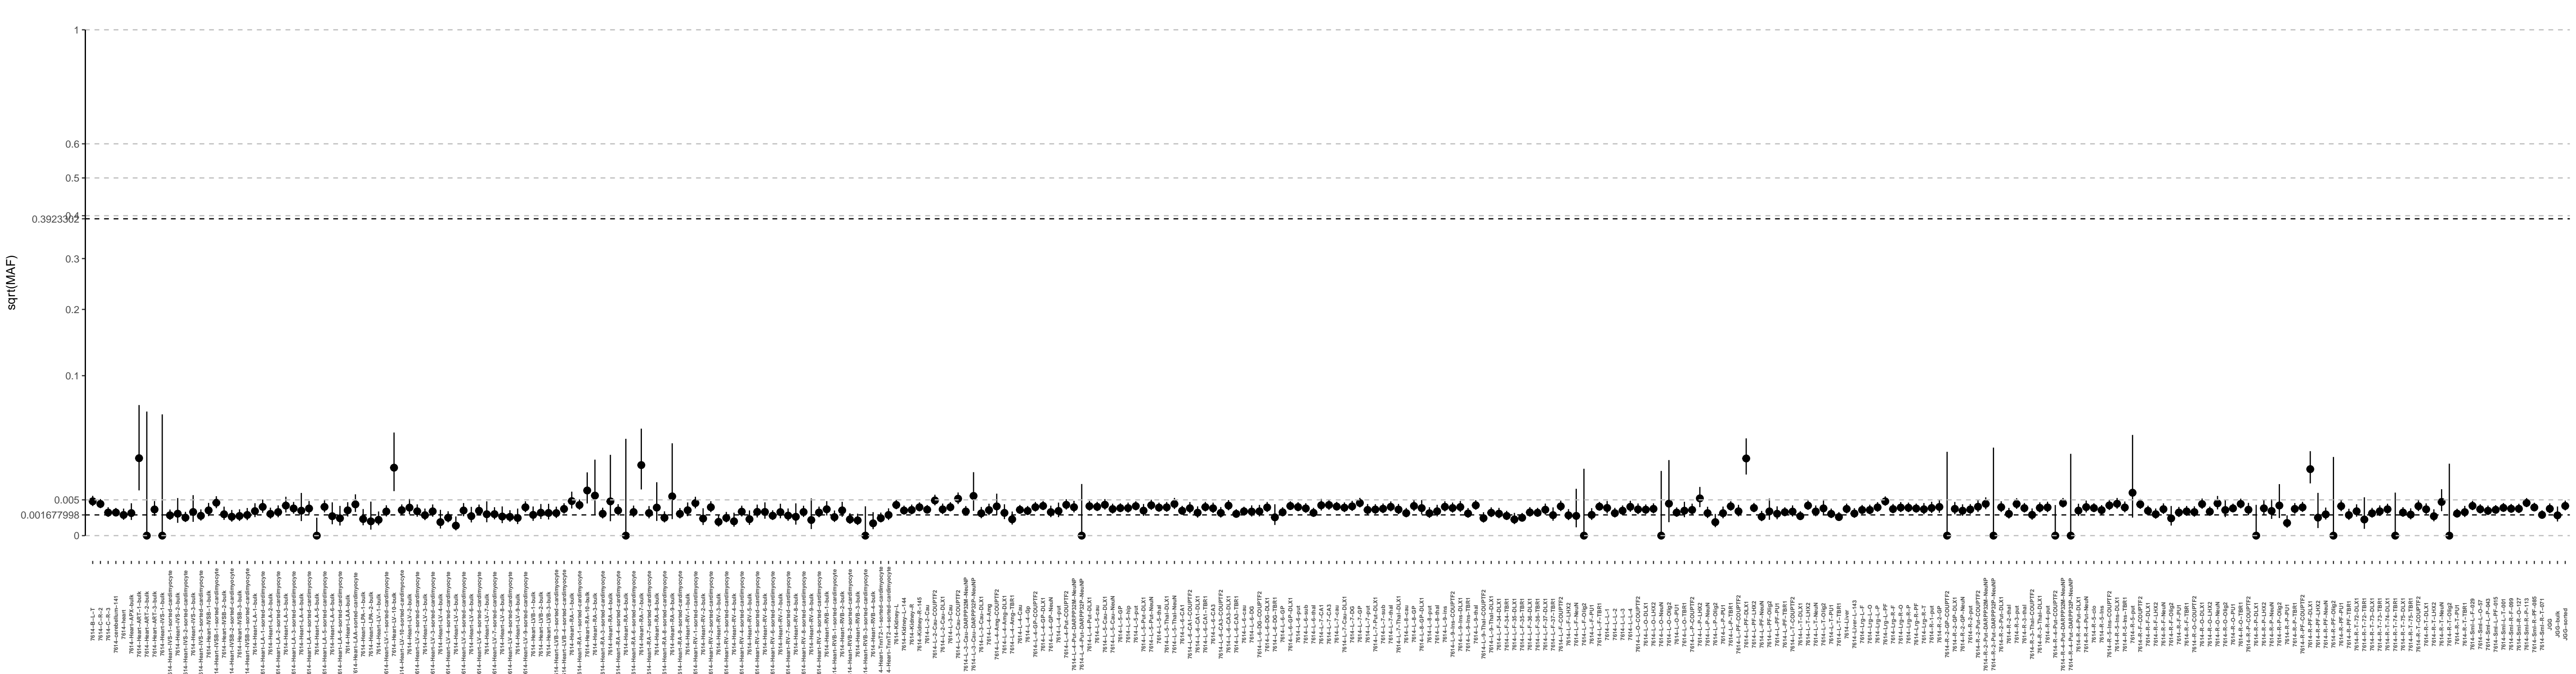

ID

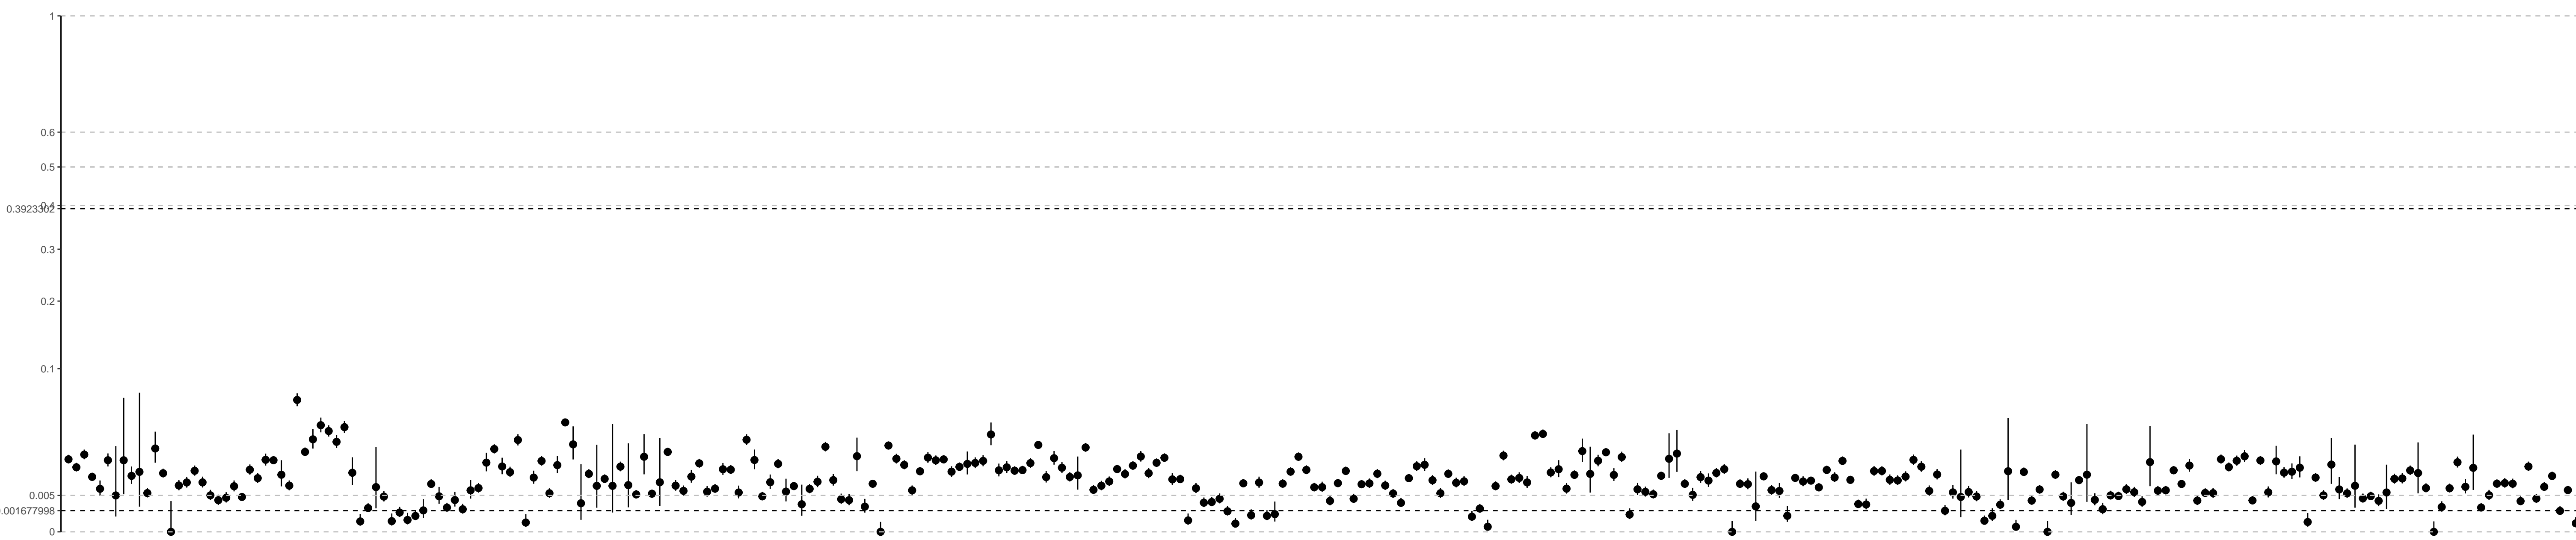

ID



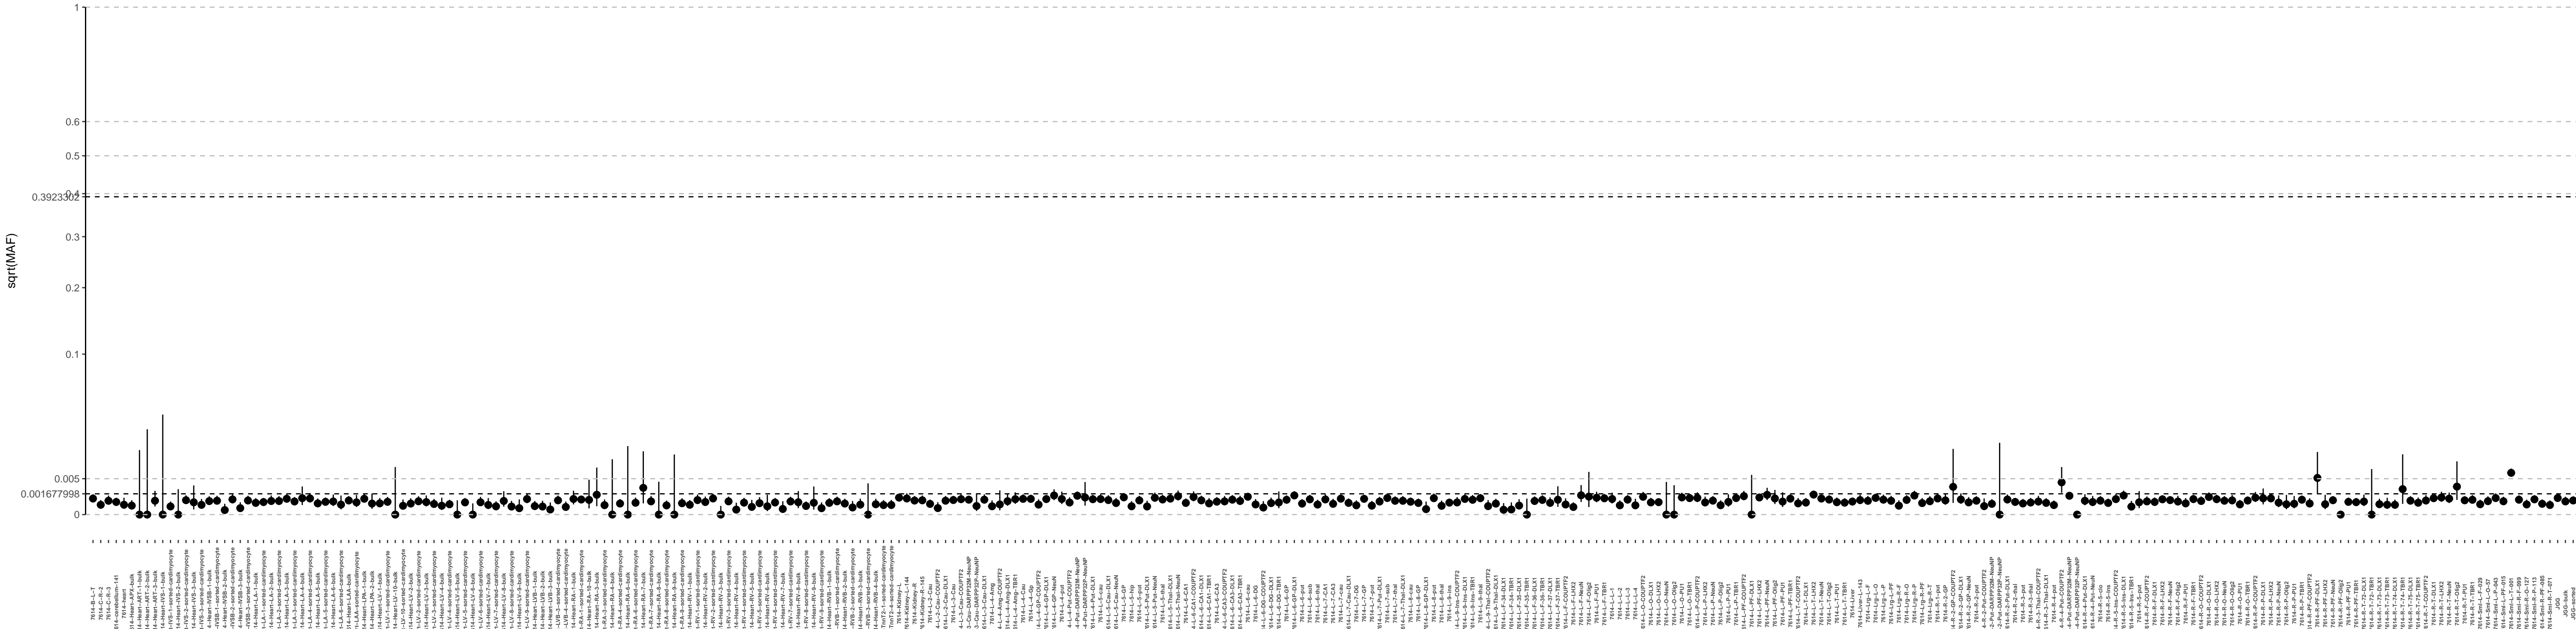

sqrt(MAF)

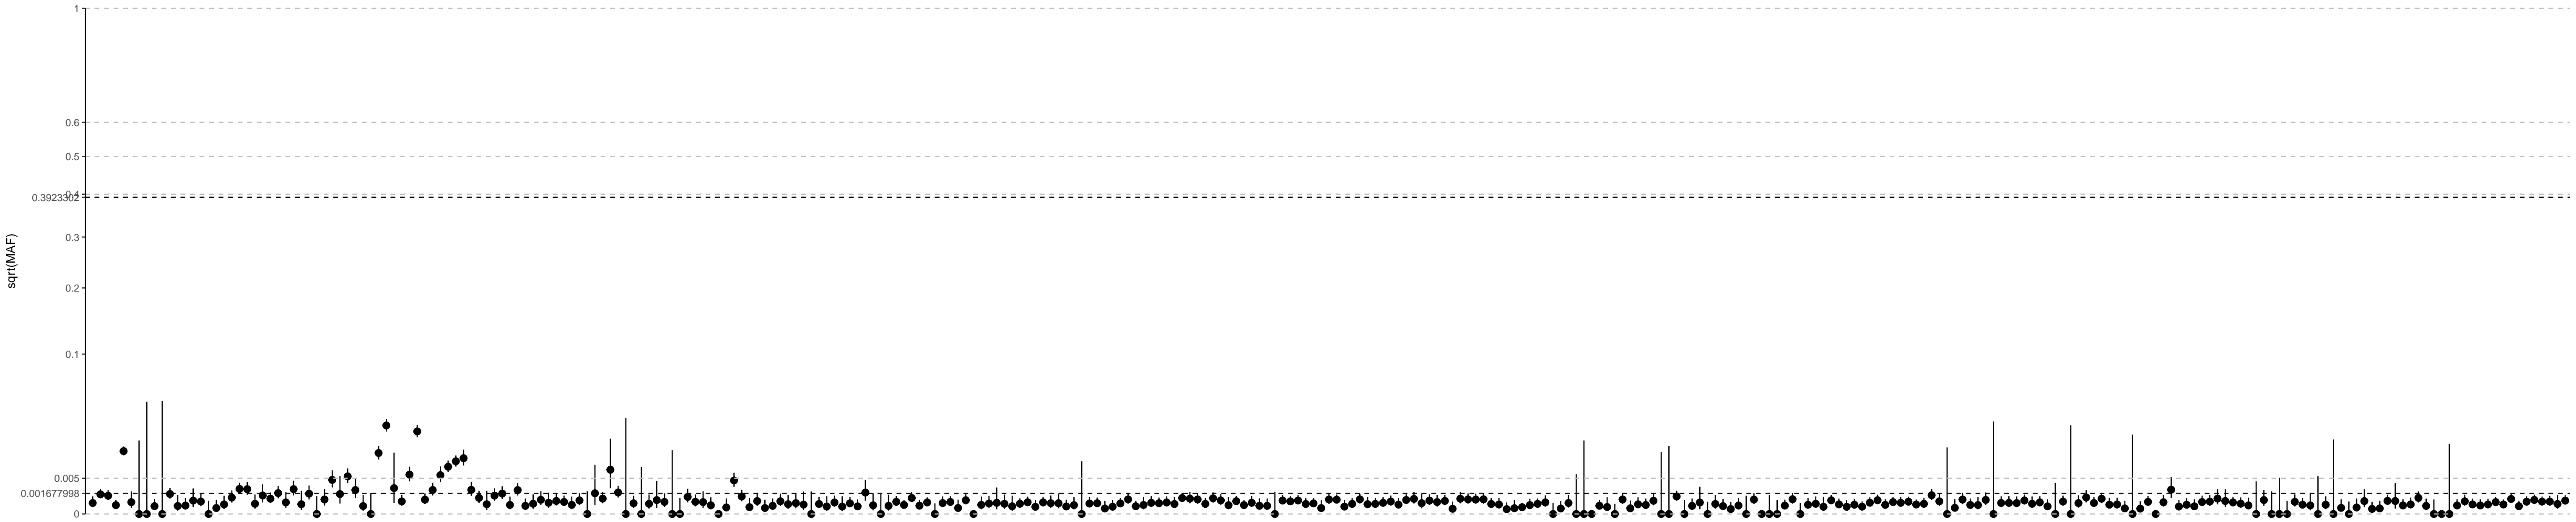

- 7614-B-L-T
- 7614-C-R-2
- 7614-Heart-VS-1
- 7614-Heart-VS-2
- 7614-Heart-VS-3
- 7614-Heart-VS-4
- 7614-Heart-VS-5
- 7614-Heart-VS-6
- 7614-Heart-VS-7
- 7614-Heart-VS-8
- 7614-Heart-VS-9
- 7614-Heart-VS-10
- 7614-Heart-VS-11
- 7614-Heart-VS-12
- 7614-Heart-VS-13
- 7614-Heart-VS-14
- 7614-Heart-VS-15
- 7614-Heart-VS-16
- 7614-Heart-VS-17
- 7614-Heart-VS-18
- 7614-Heart-VS-19
- 7614-Heart-VS-20
- 7614-Heart-VS-21
- 7614-Heart-VS-22
- 7614-Heart-VS-23
- 7614-Heart-VS-24
- 7614-Heart-VS-25
- 7614-Heart-VS-26
- 7614-Heart-VS-27
- 7614-Heart-VS-28
- 7614-Heart-VS-29
- 7614-Heart-VS-30
- 7614-Heart-VS-31
- 7614-Heart-VS-32
- 7614-Heart-VS-33
- 7614-Heart-VS-34
- 7614-Heart-VS-35
- 7614-Heart-VS-36
- 7614-Heart-VS-37
- 7614-Heart-VS-38
- 7614-Heart-VS-39
- 7614-Heart-VS-40
- 7614-Heart-VS-41
- 7614-Heart-VS-42
- 7614-Heart-VS-43
- 7614-Heart-VS-44
- 7614-Heart-VS-45
- 7614-Heart-VS-46
- 7614-Heart-VS-47
- 7614-Heart-VS-48
- 7614-Heart-VS-49
- 7614-Heart-VS-50
- 7614-Heart-VS-51
- 7614-Heart-VS-52
- 7614-Heart-VS-53
- 7614-Heart-VS-54
- 7614-Heart-VS-55
- 7614-Heart-VS-56
- 7614-Heart-VS-57
- 7614-Heart-VS-58
- 7614-Heart-VS-59
- 7614-Heart-VS-60
- 7614-Heart-VS-61
- 7614-Heart-VS-62
- 7614-Heart-VS-63
- 7614-Heart-VS-64
- 7614-Heart-VS-65
- 7614-Heart-VS-66
- 7614-Heart-VS-67
- 7614-Heart-VS-68
- 7614-Heart-VS-69
- 7614-Heart-VS-70
- 7614-Heart-VS-71
- 7614-Heart-VS-72
- 7614-Heart-VS-73
- 7614-Heart-VS-74
- 7614-Heart-VS-75
- 7614-Heart-VS-76
- 7614-Heart-VS-77
- 7614-Heart-VS-78
- 7614-Heart-VS-79
- 7614-Heart-VS-80
- 7614-Heart-VS-81
- 7614-Heart-VS-82
- 7614-Heart-VS-83
- 7614-Heart-VS-84
- 7614-Heart-VS-85
- 7614-Heart-VS-86
- 7614-Heart-VS-87
- 7614-Heart-VS-88
- 7614-Heart-VS-89
- 7614-Heart-VS-90
- 7614-Heart-VS-91
- 7614-Heart-VS-92
- 7614-Heart-VS-93
- 7614-Heart-VS-94
- 7614-Heart-VS-95
- 7614-Heart-VS-96
- 7614-Heart-VS-97
- 7614-Heart-VS-98
- 7614-Heart-VS-99
- 7614-Heart-VS-100

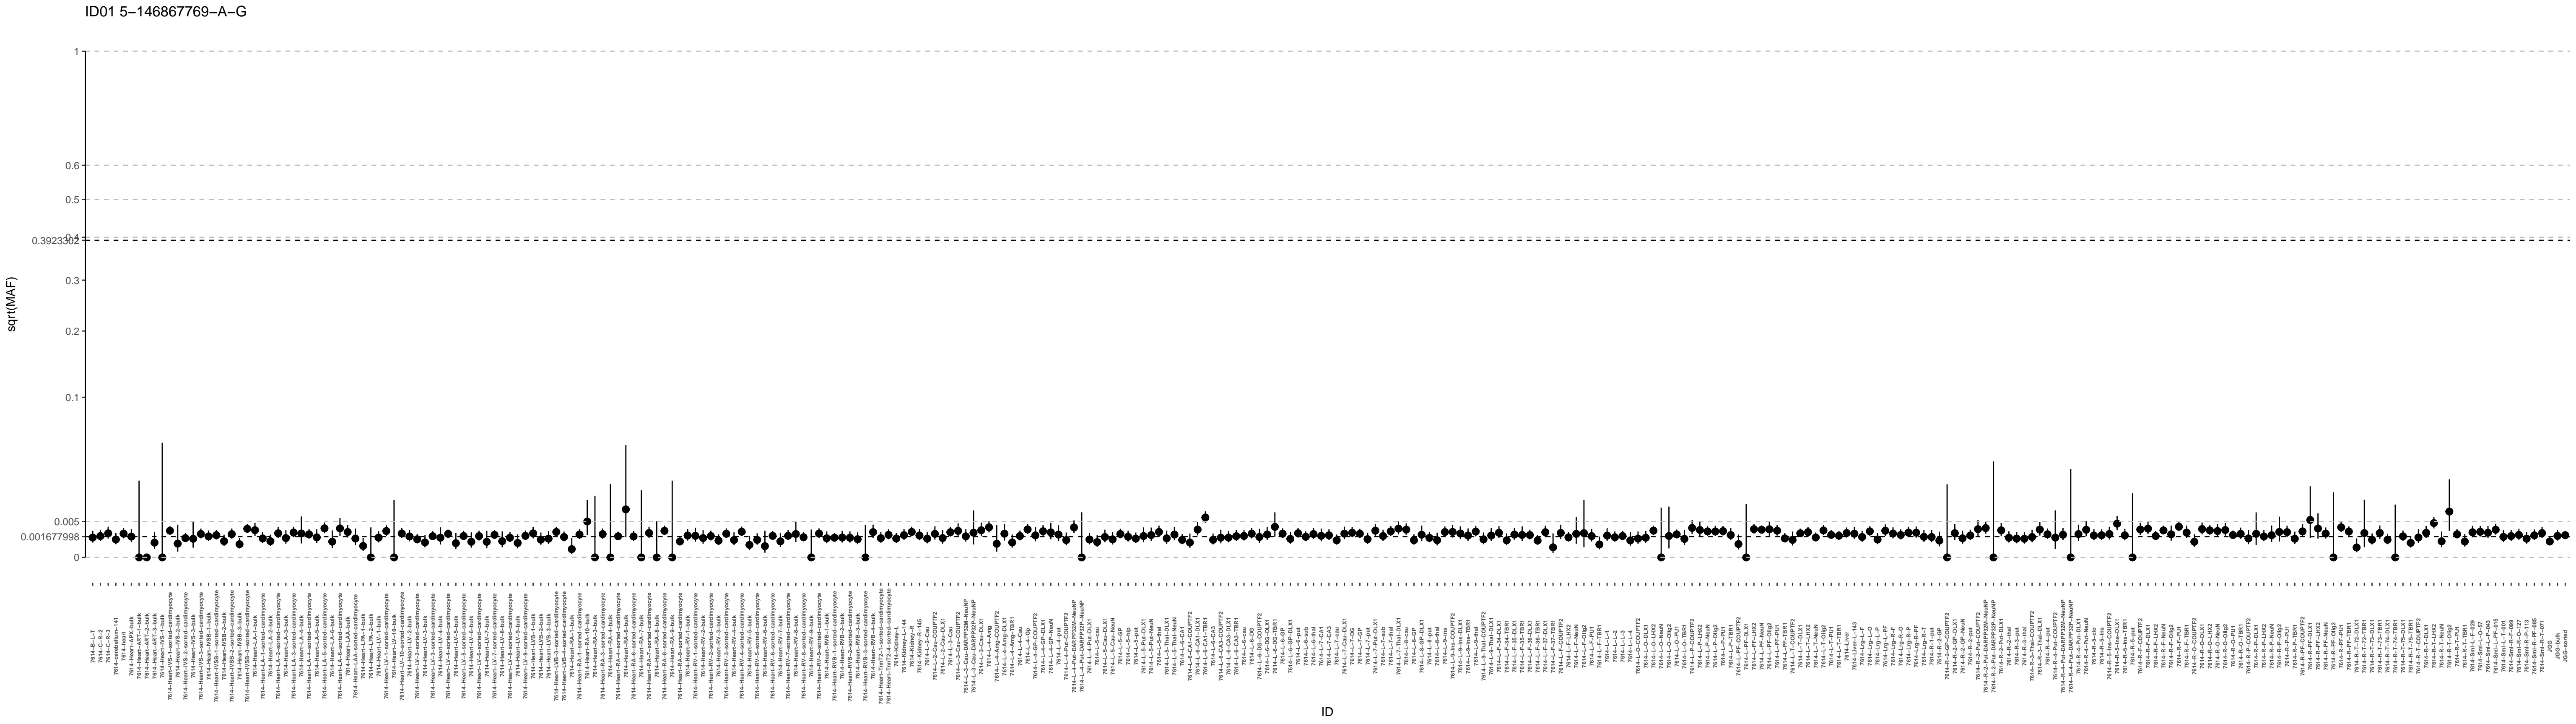

ID

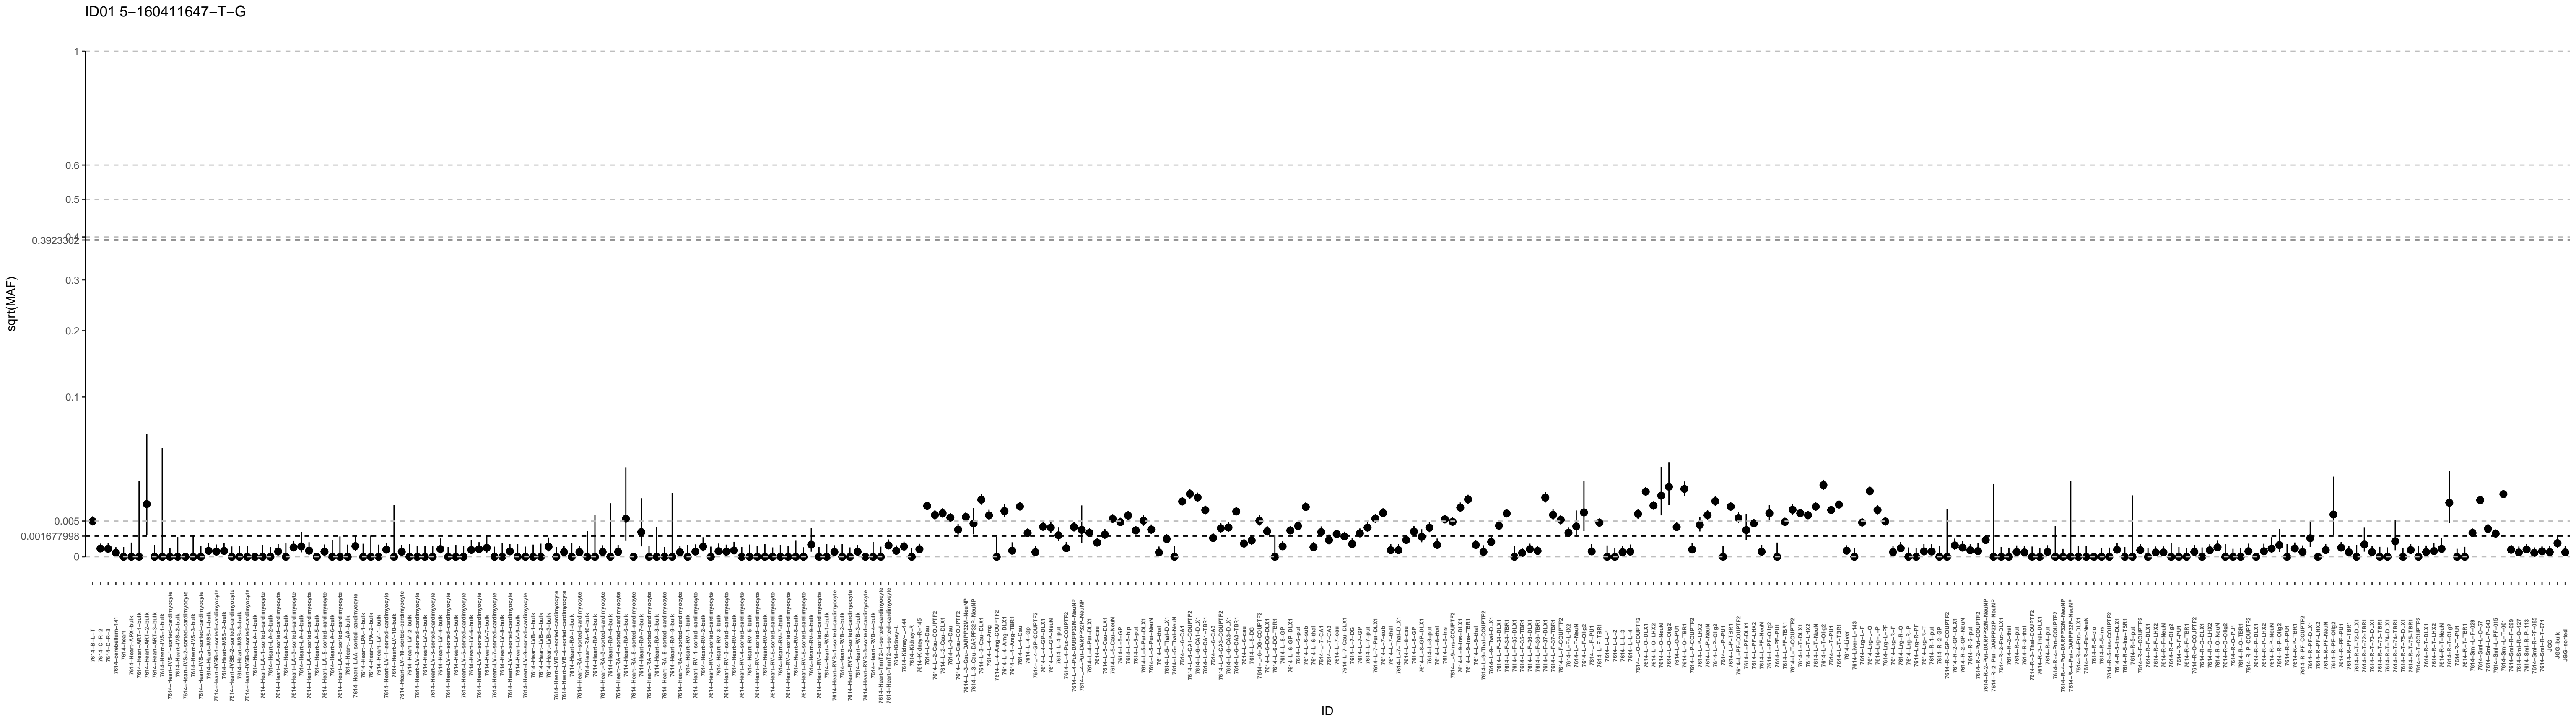

ID



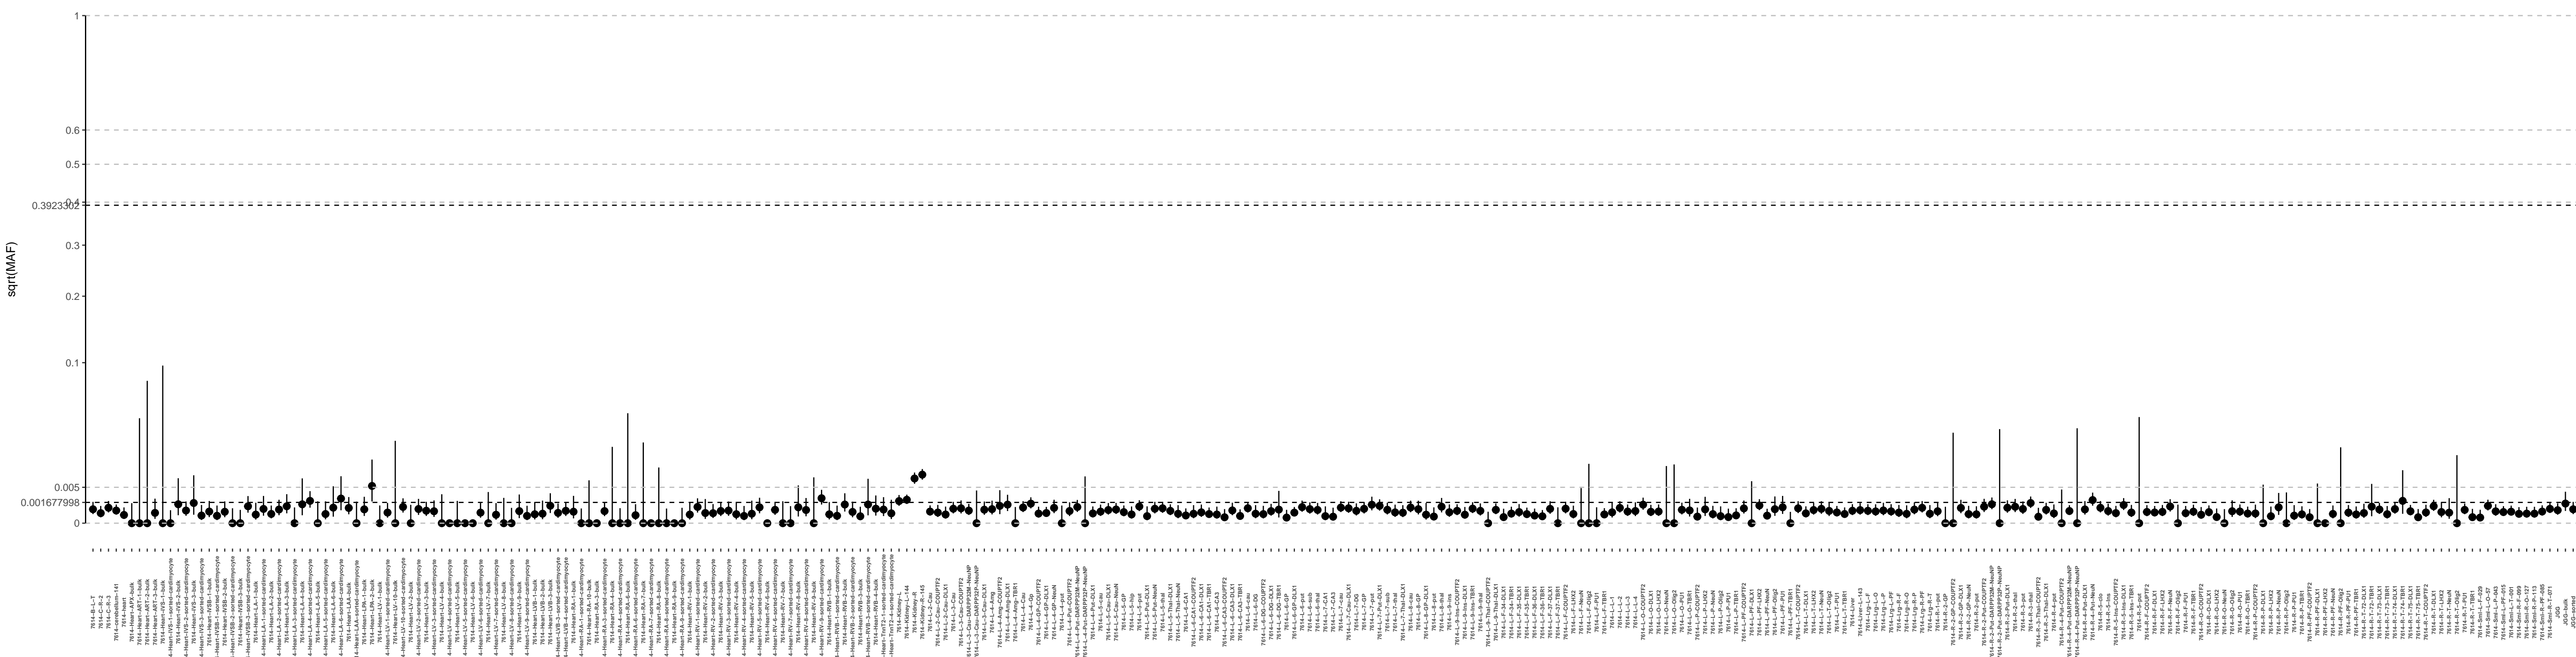

sqrt(MAF)

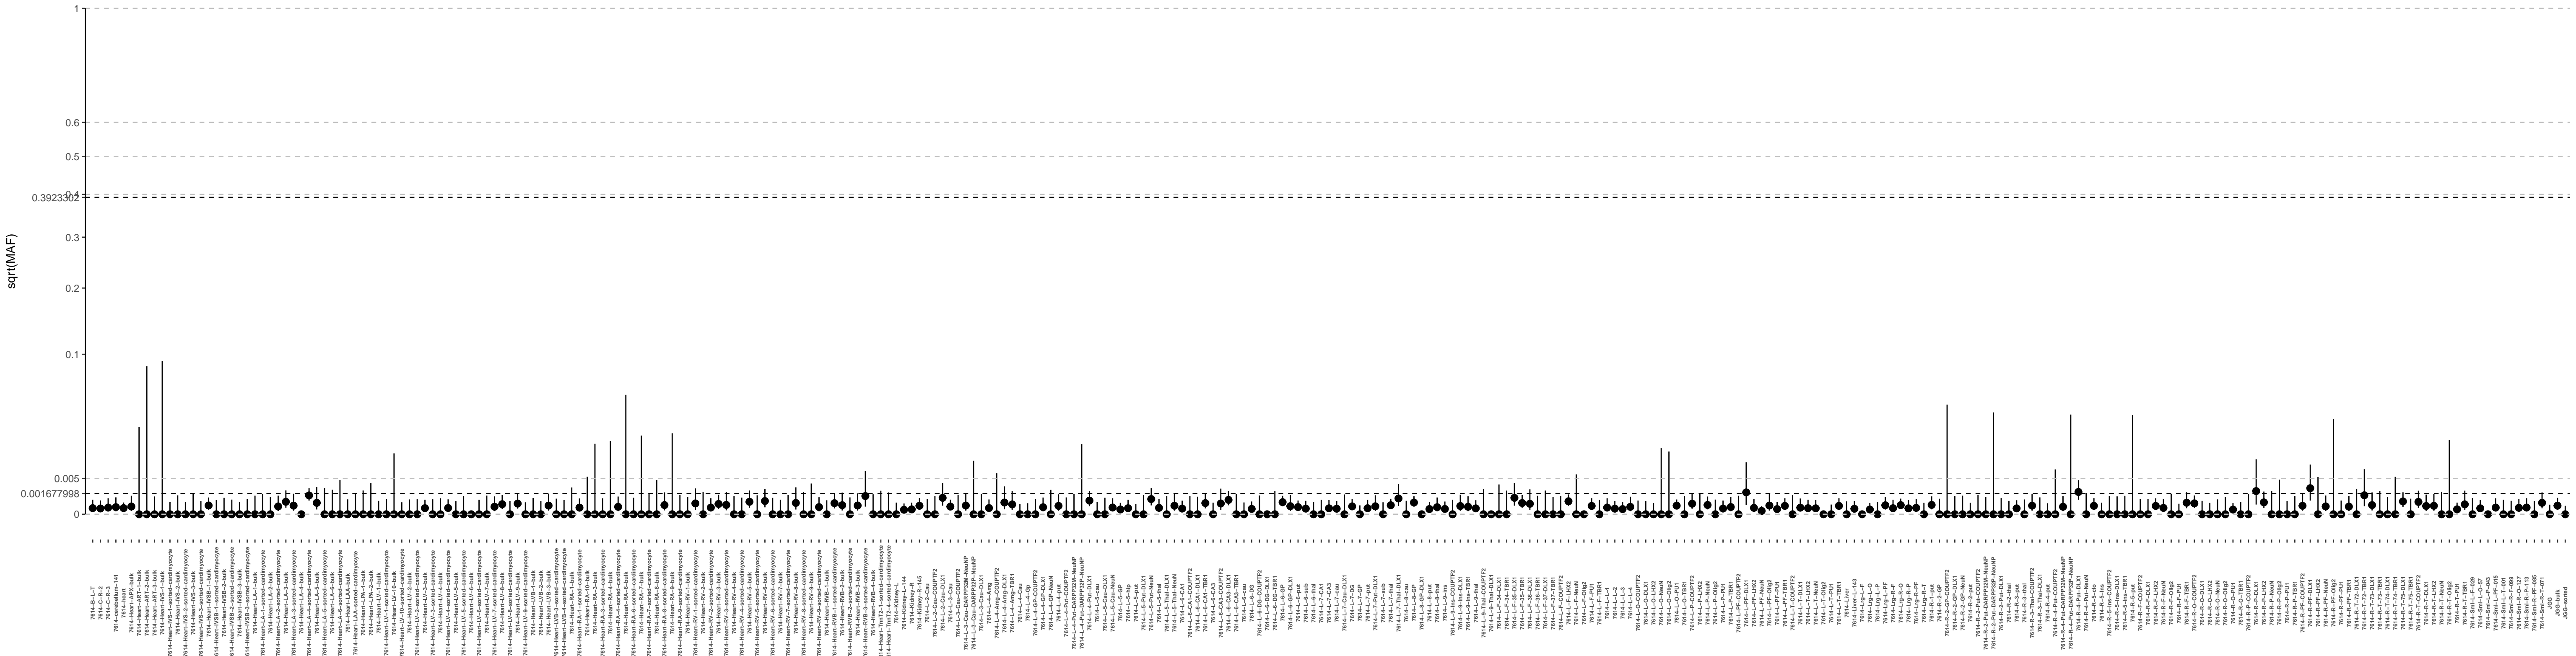

ID





sqrt(MAF)

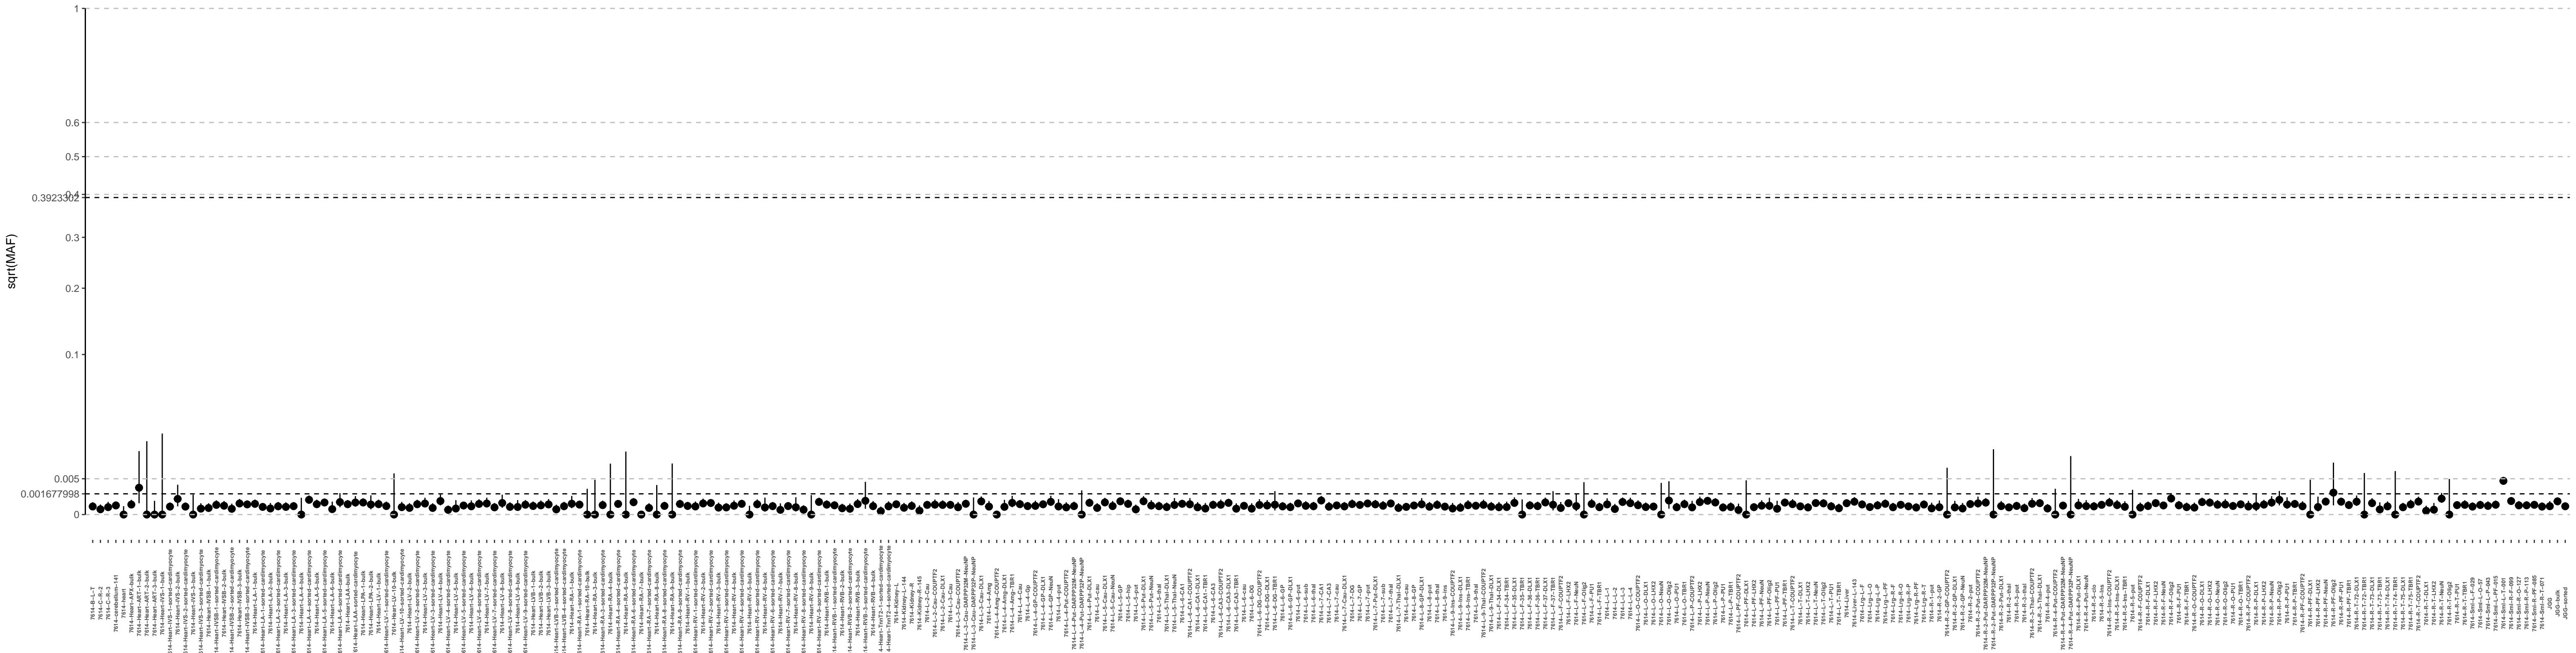

ID



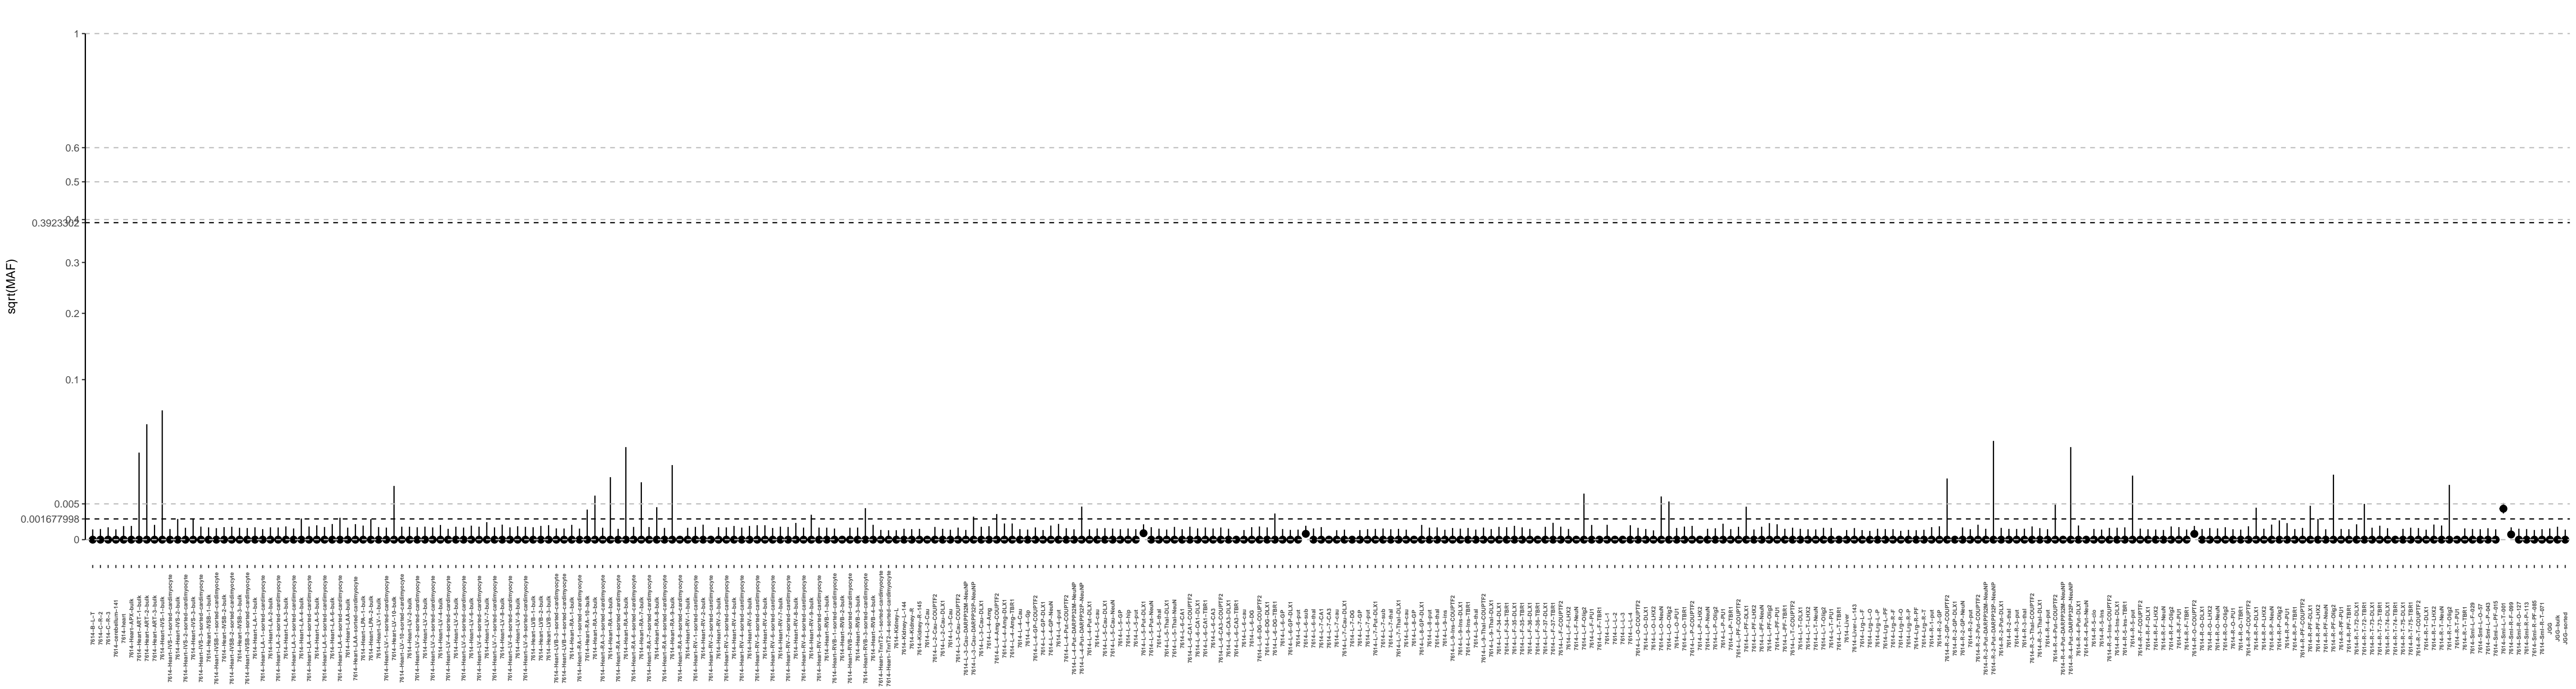

sqrt(MAF)

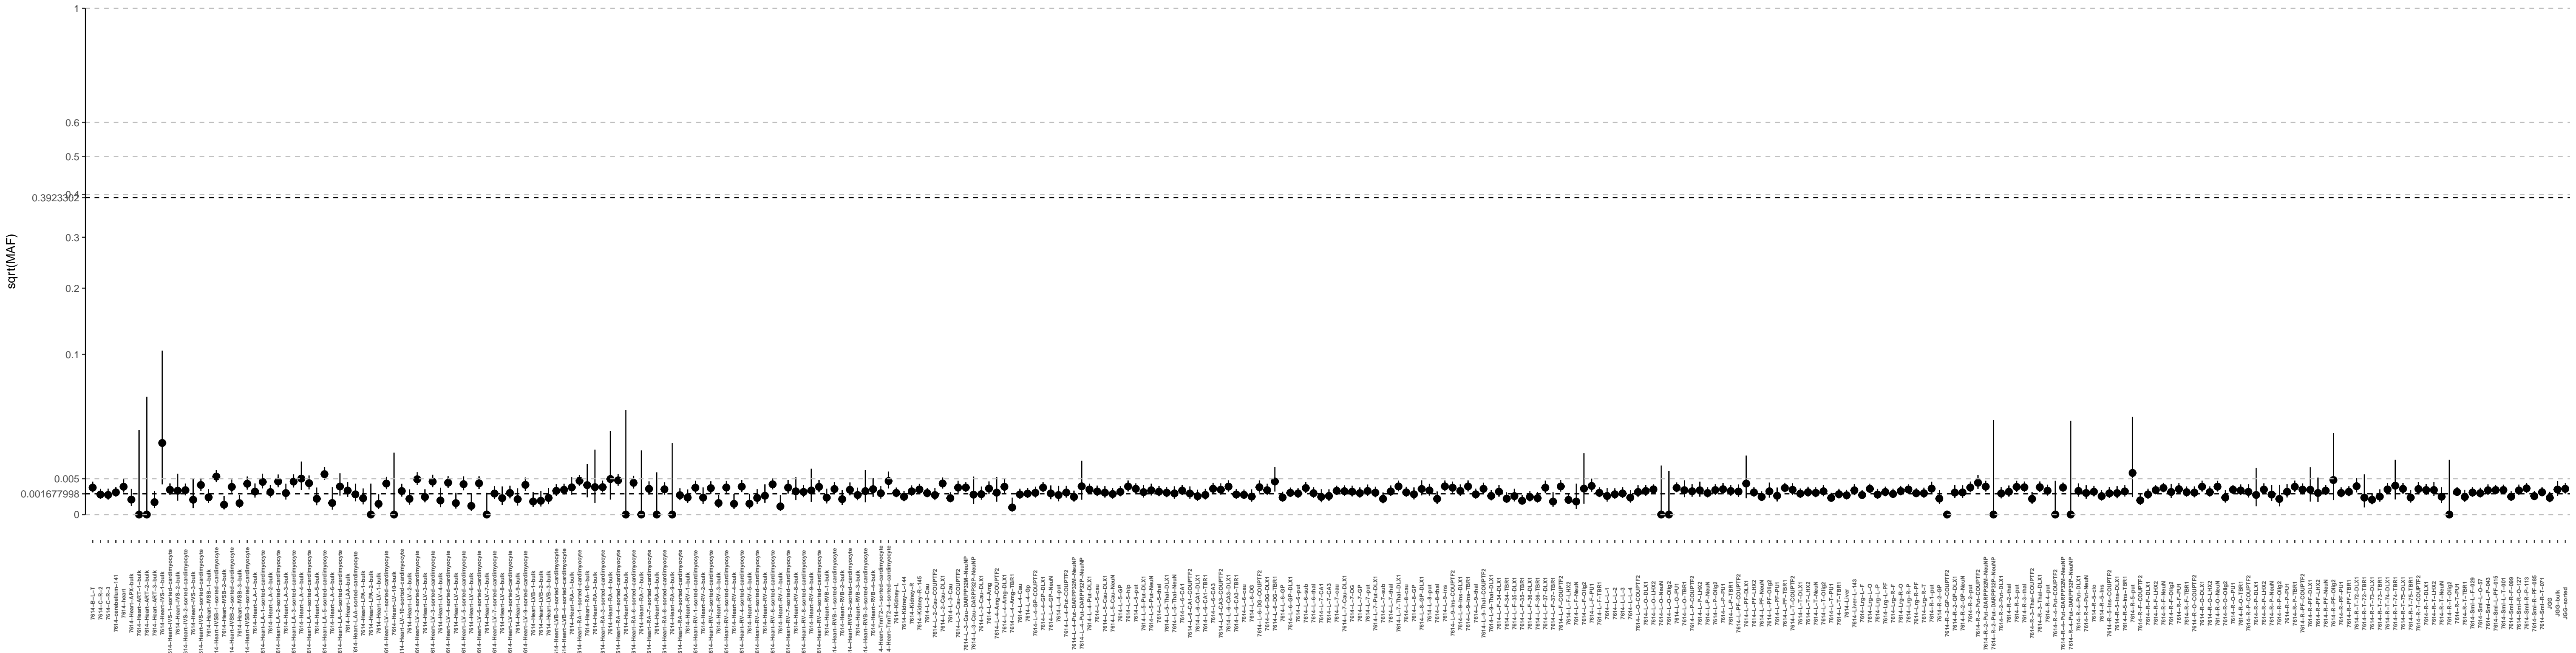

ID

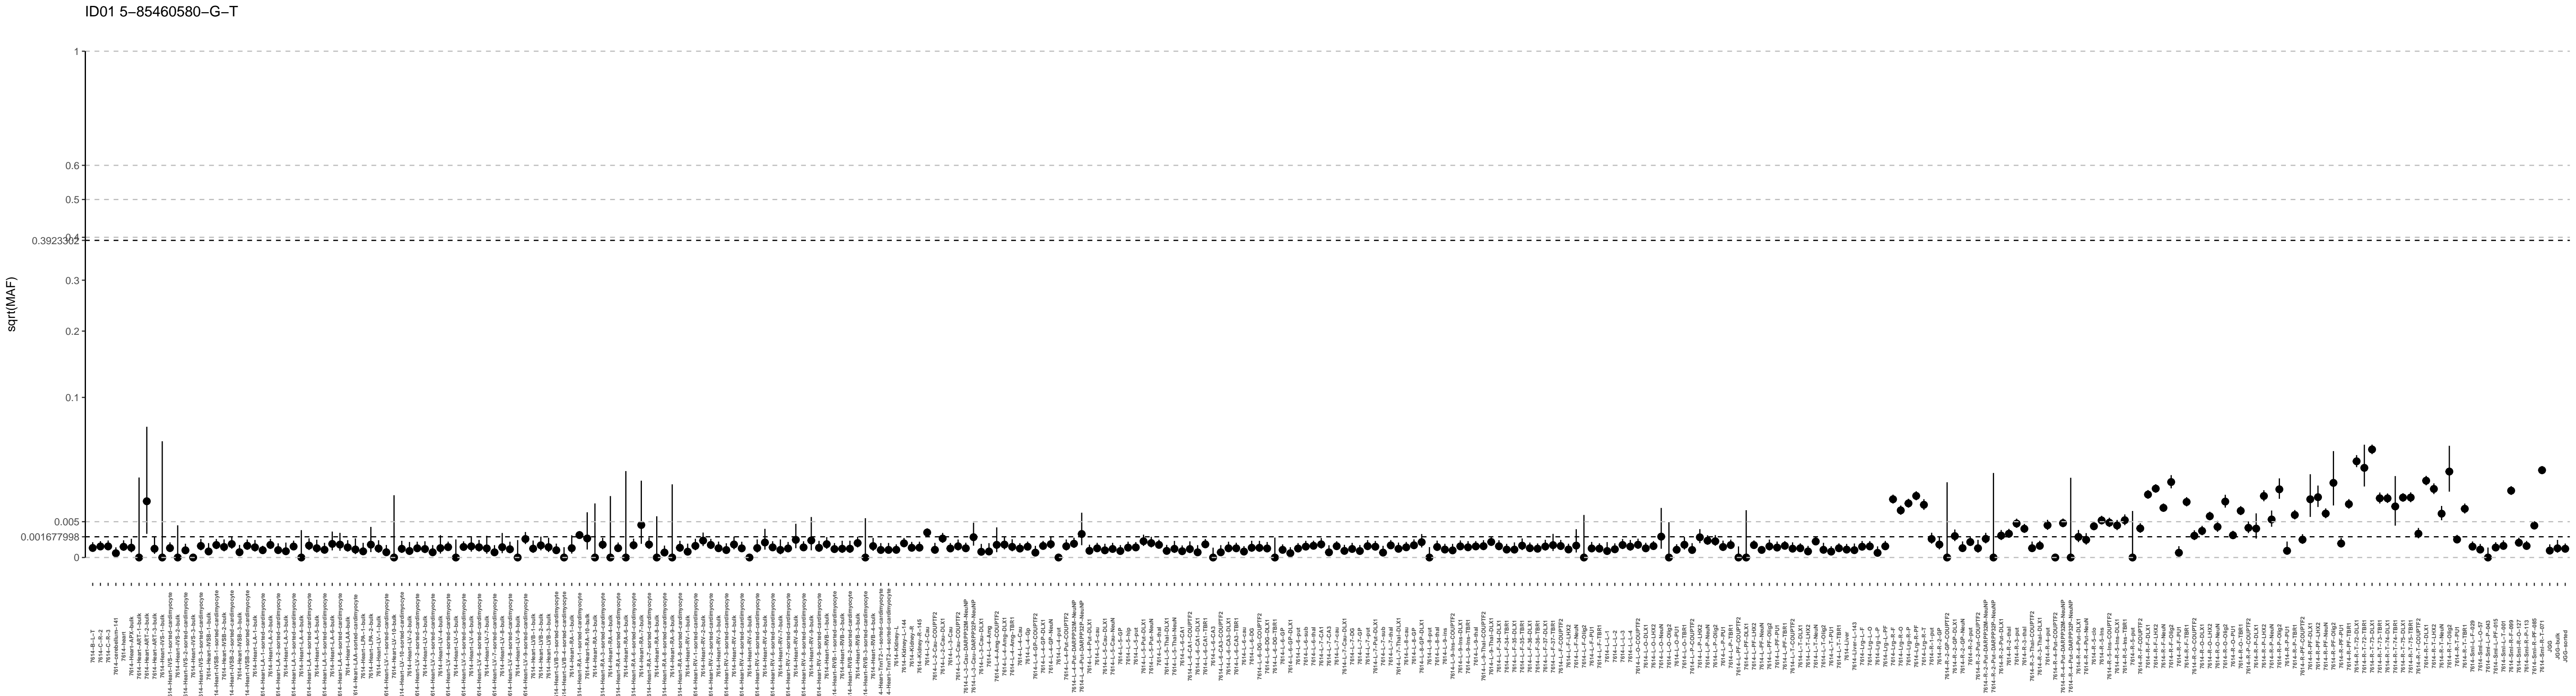

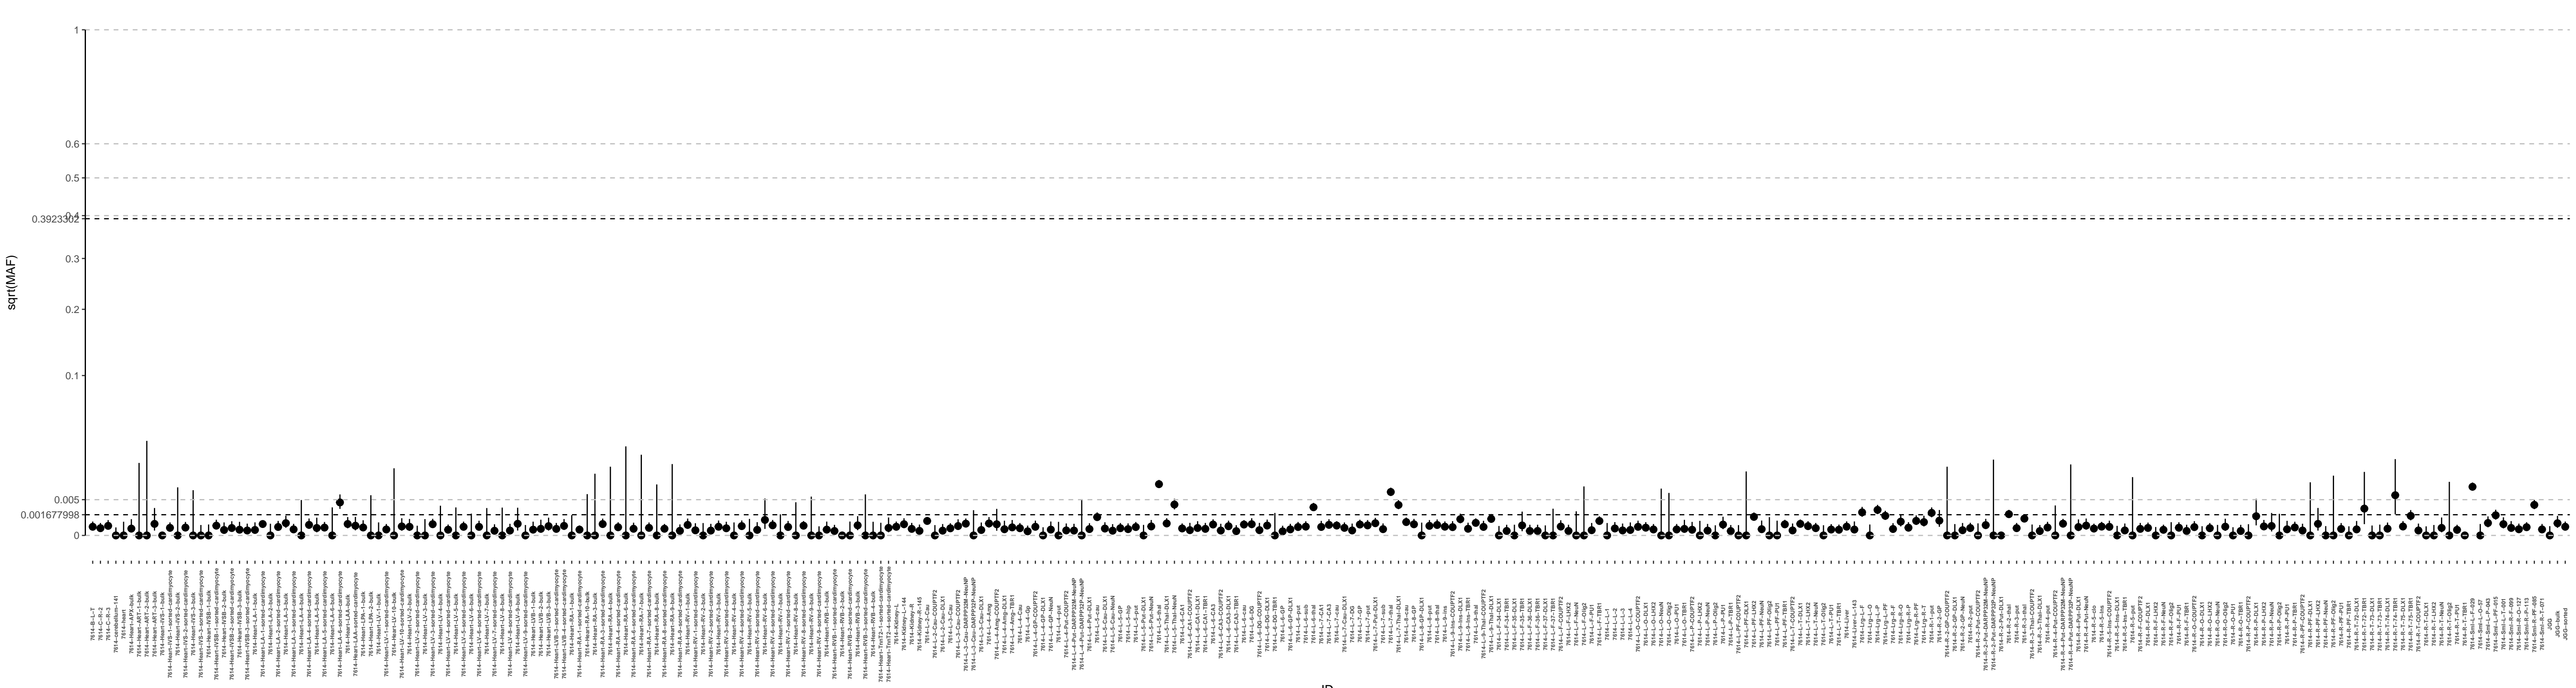

sqrt(MAF)

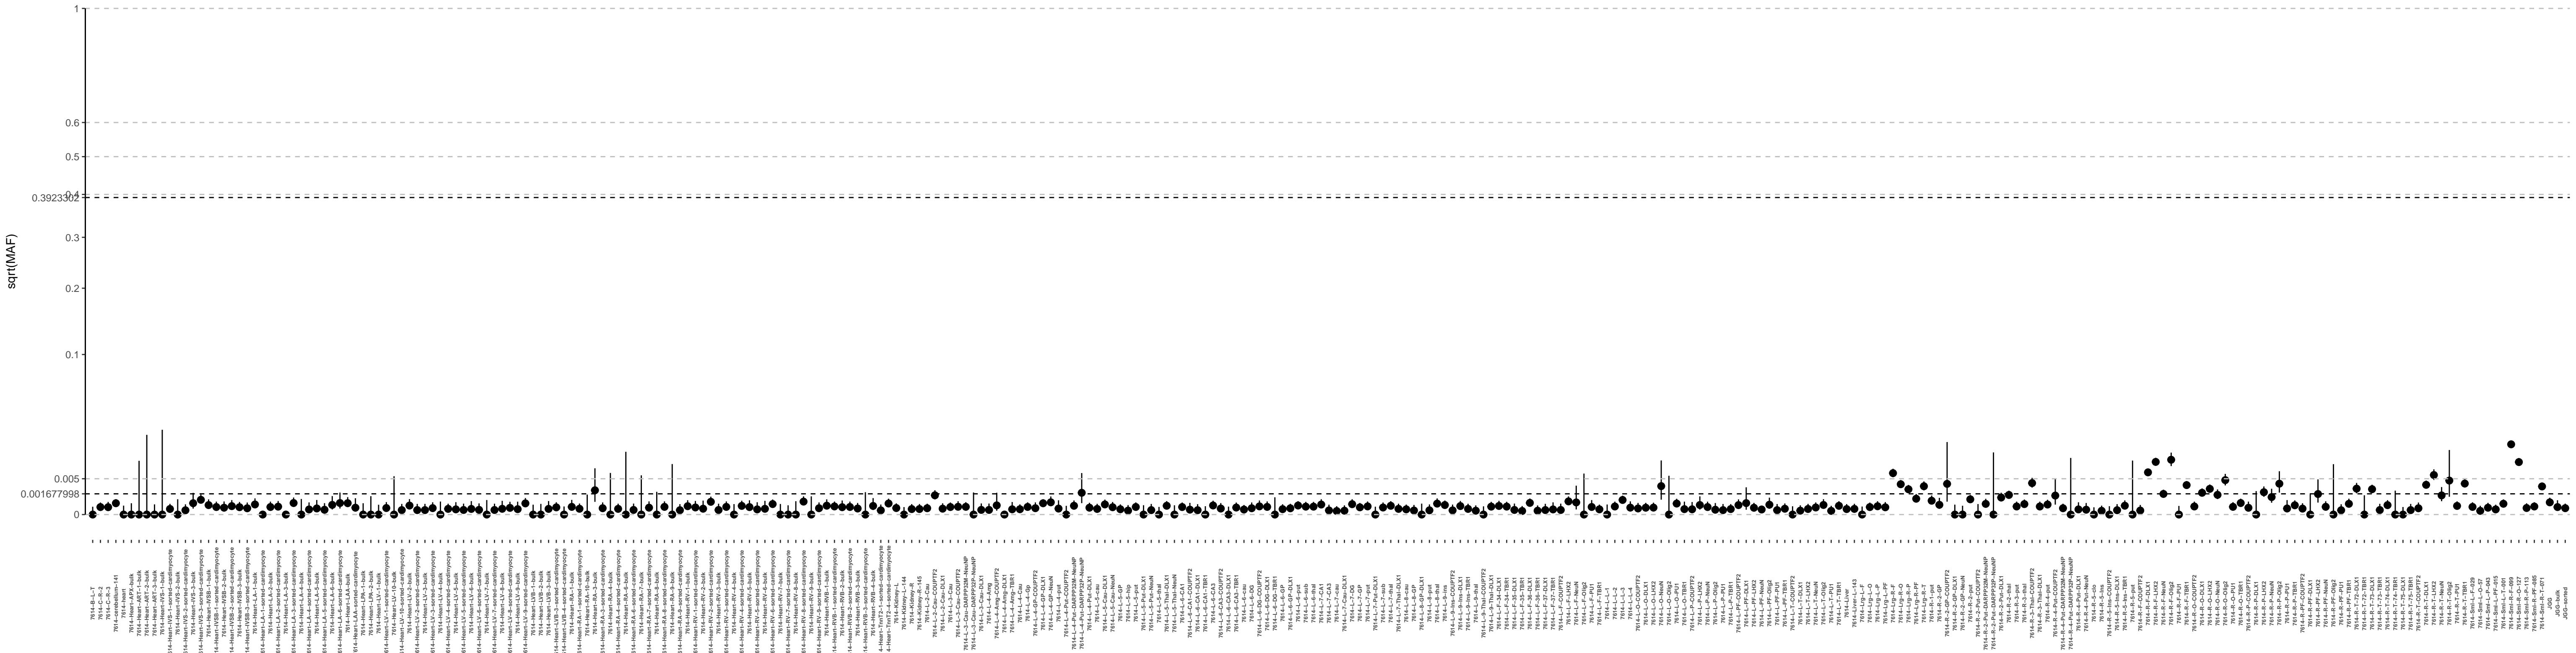

ID

sqrt(MAF)

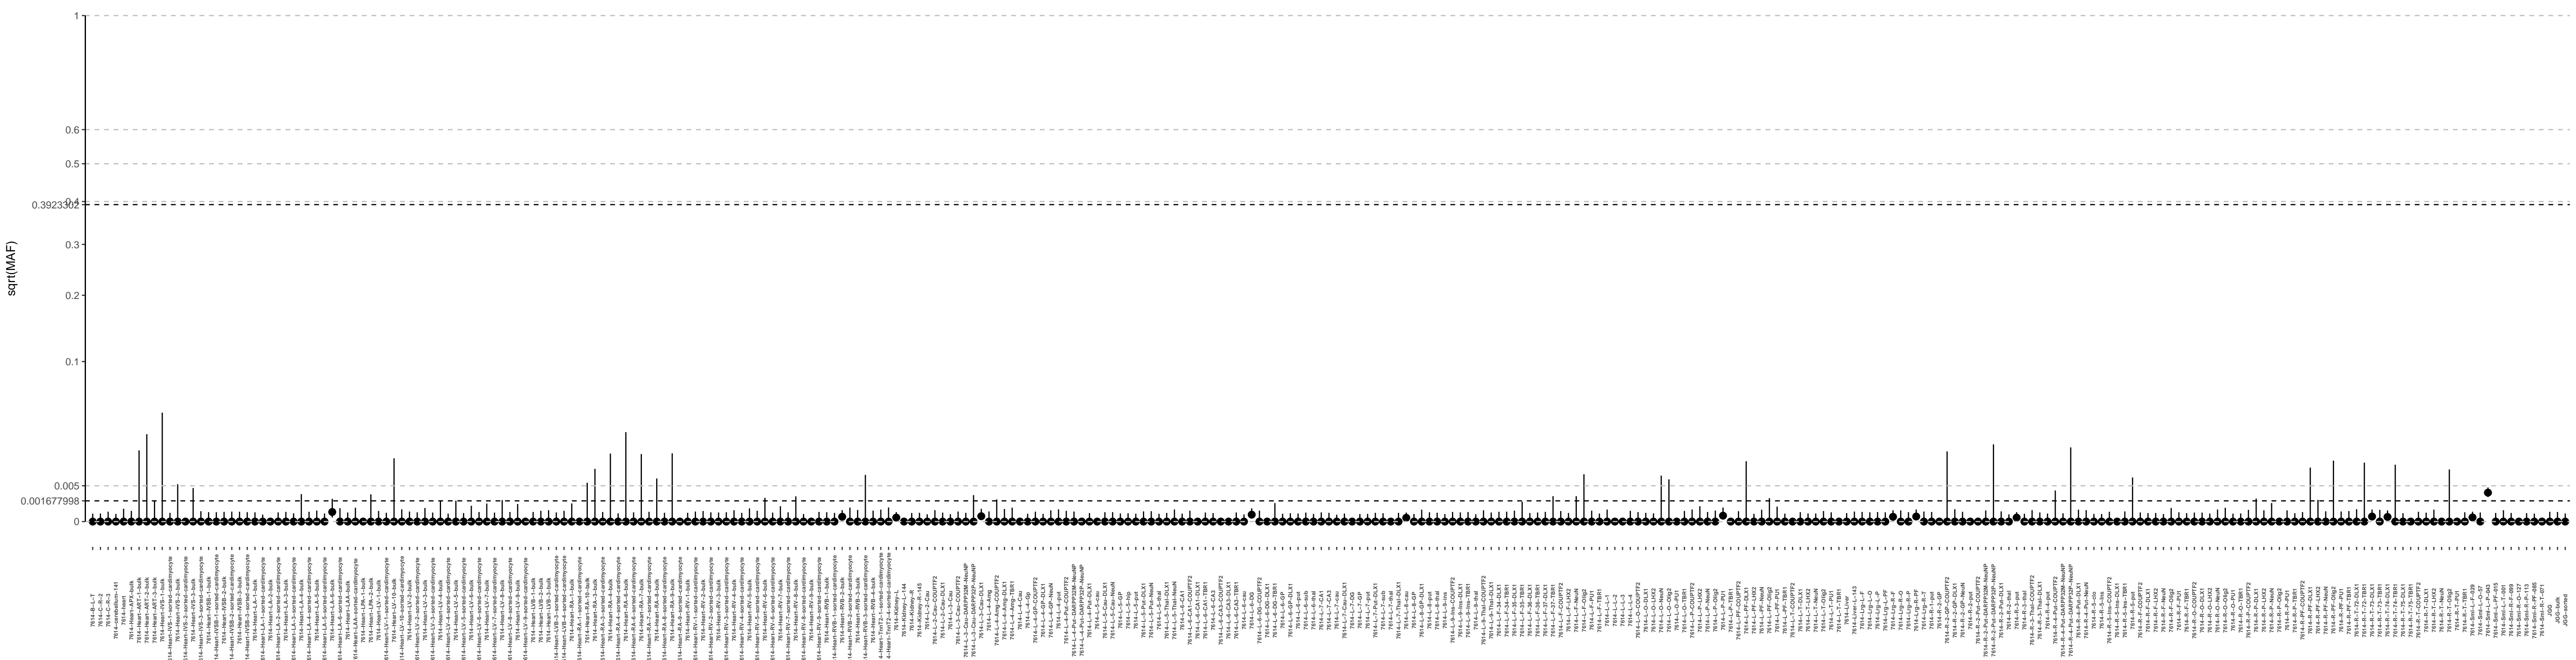

ID



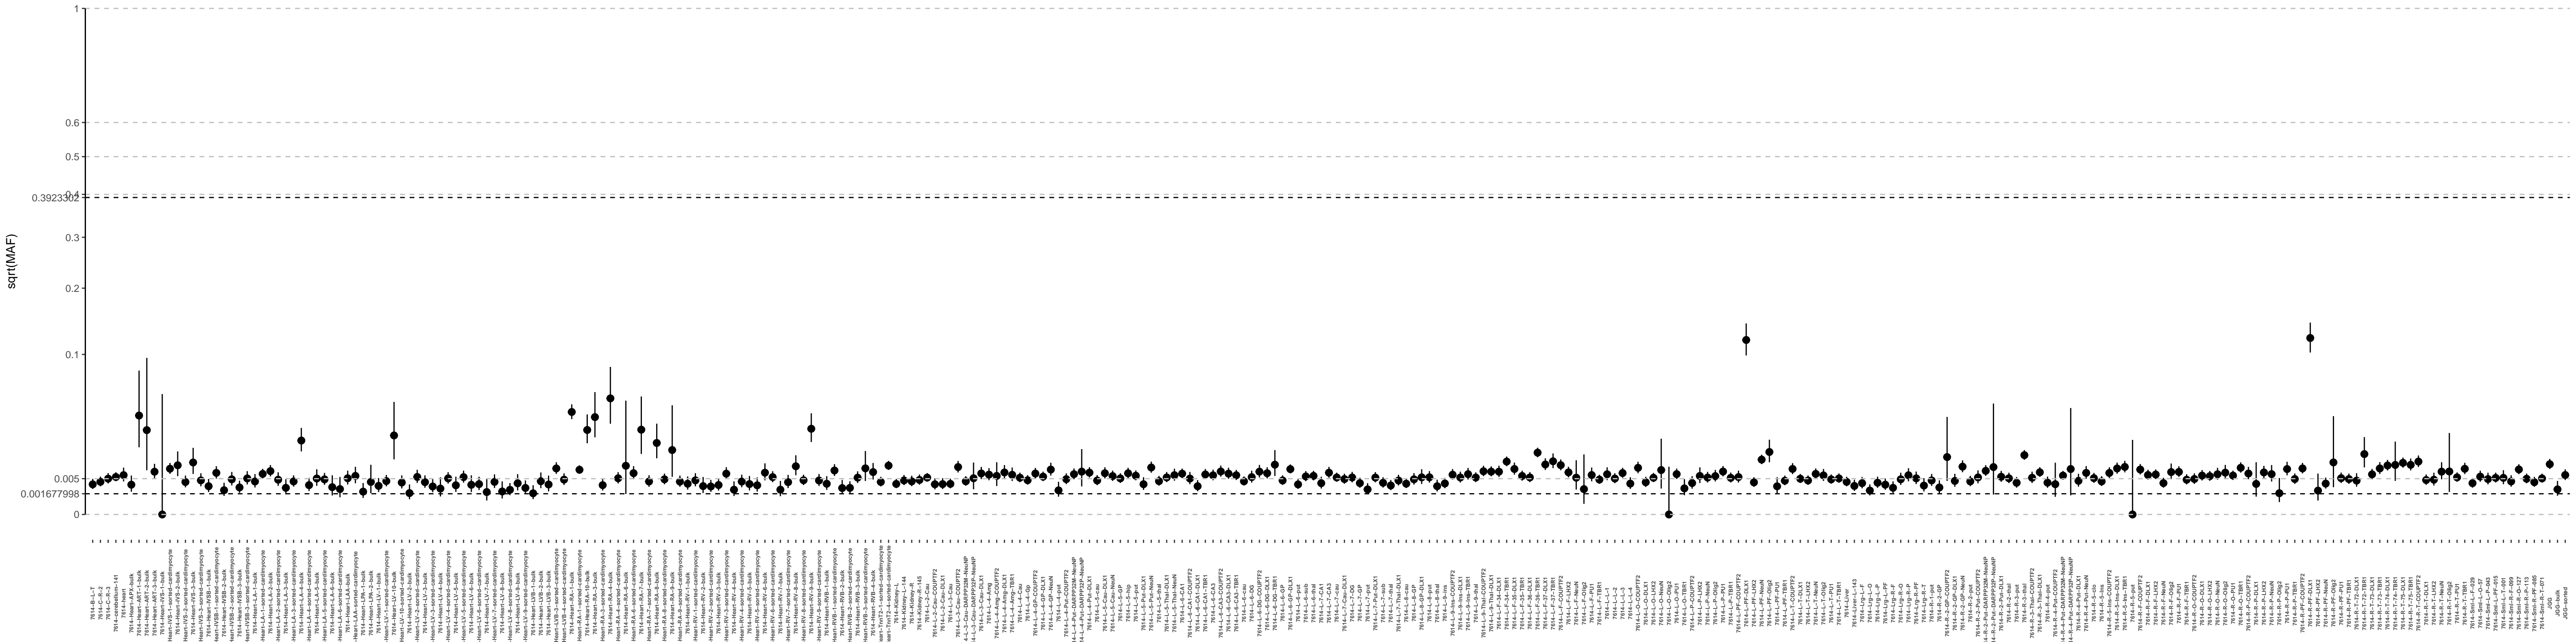

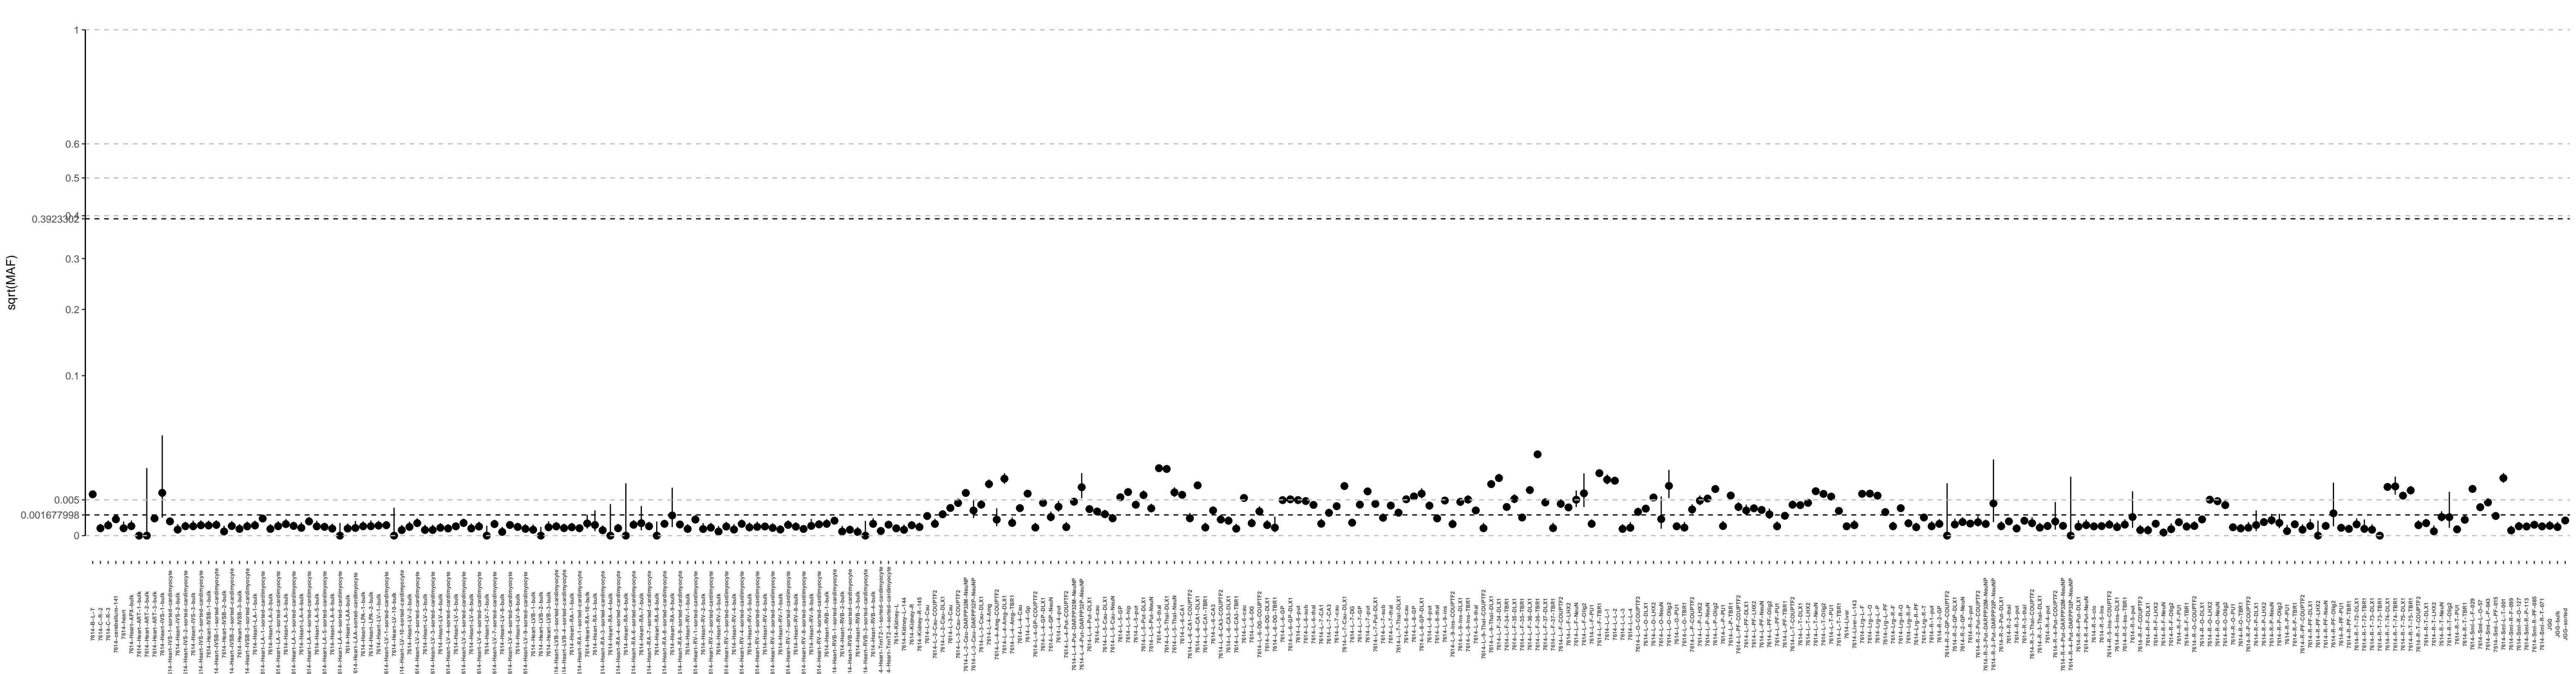

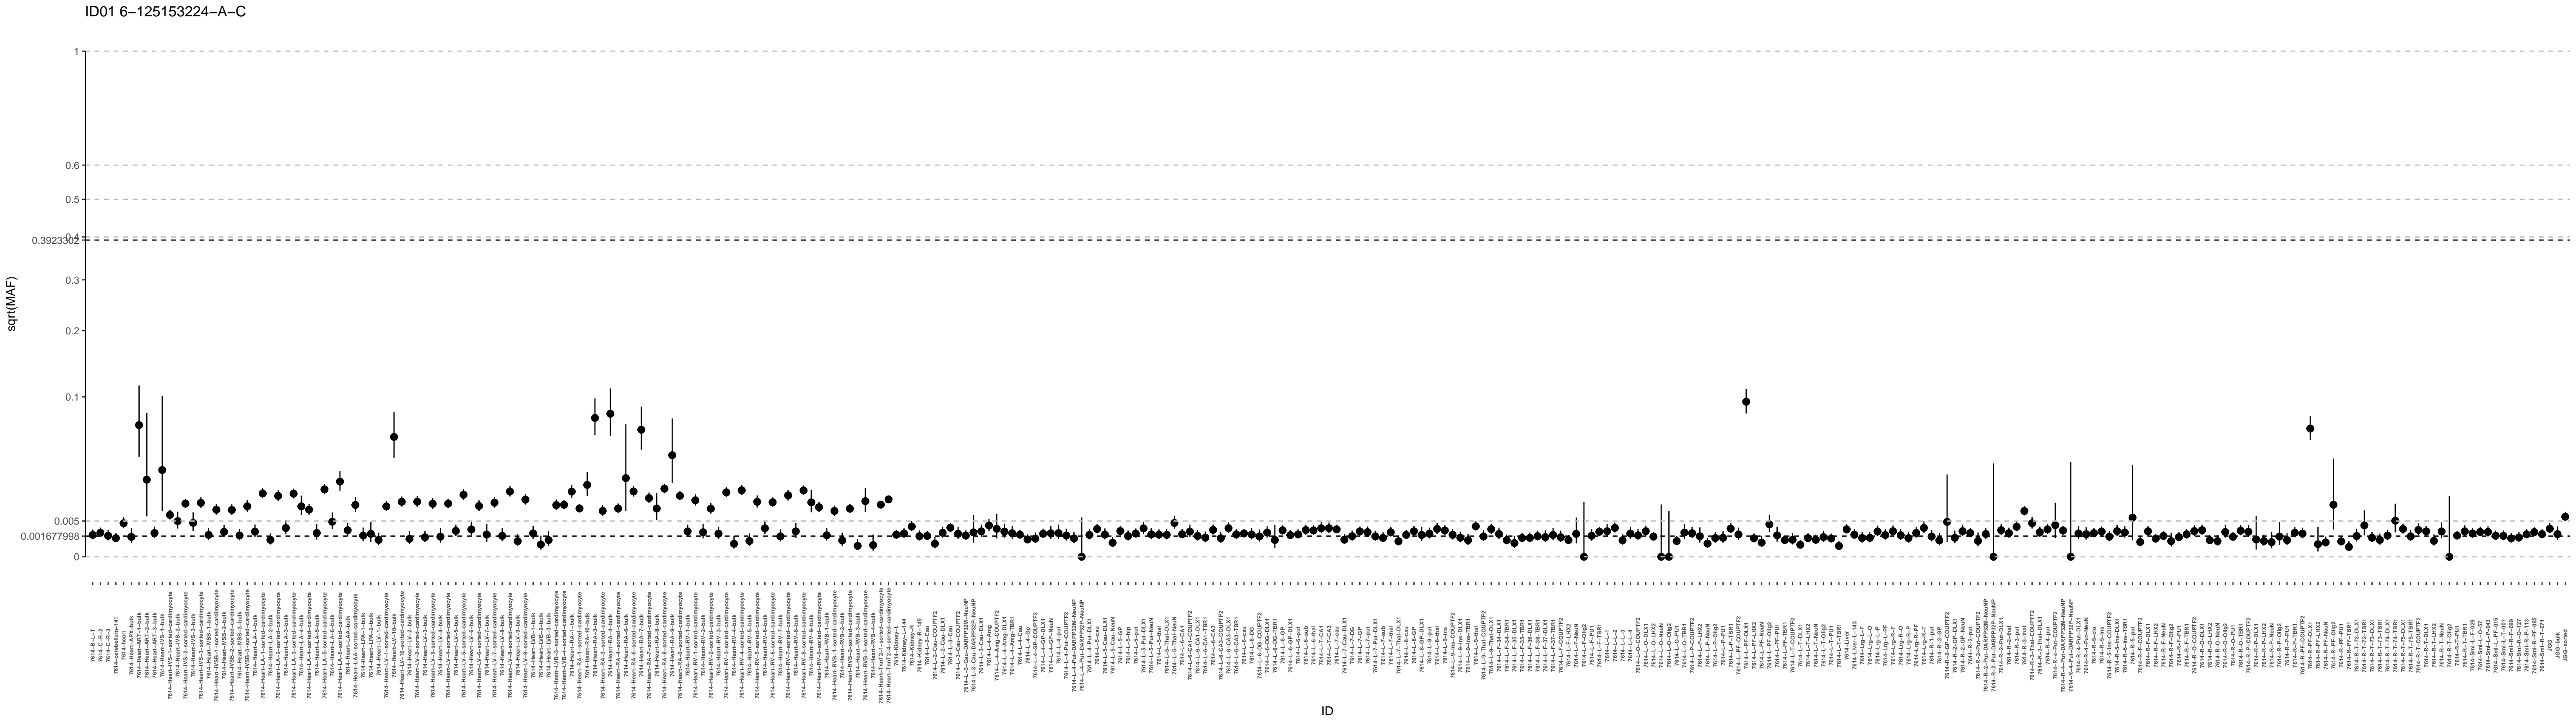

ID



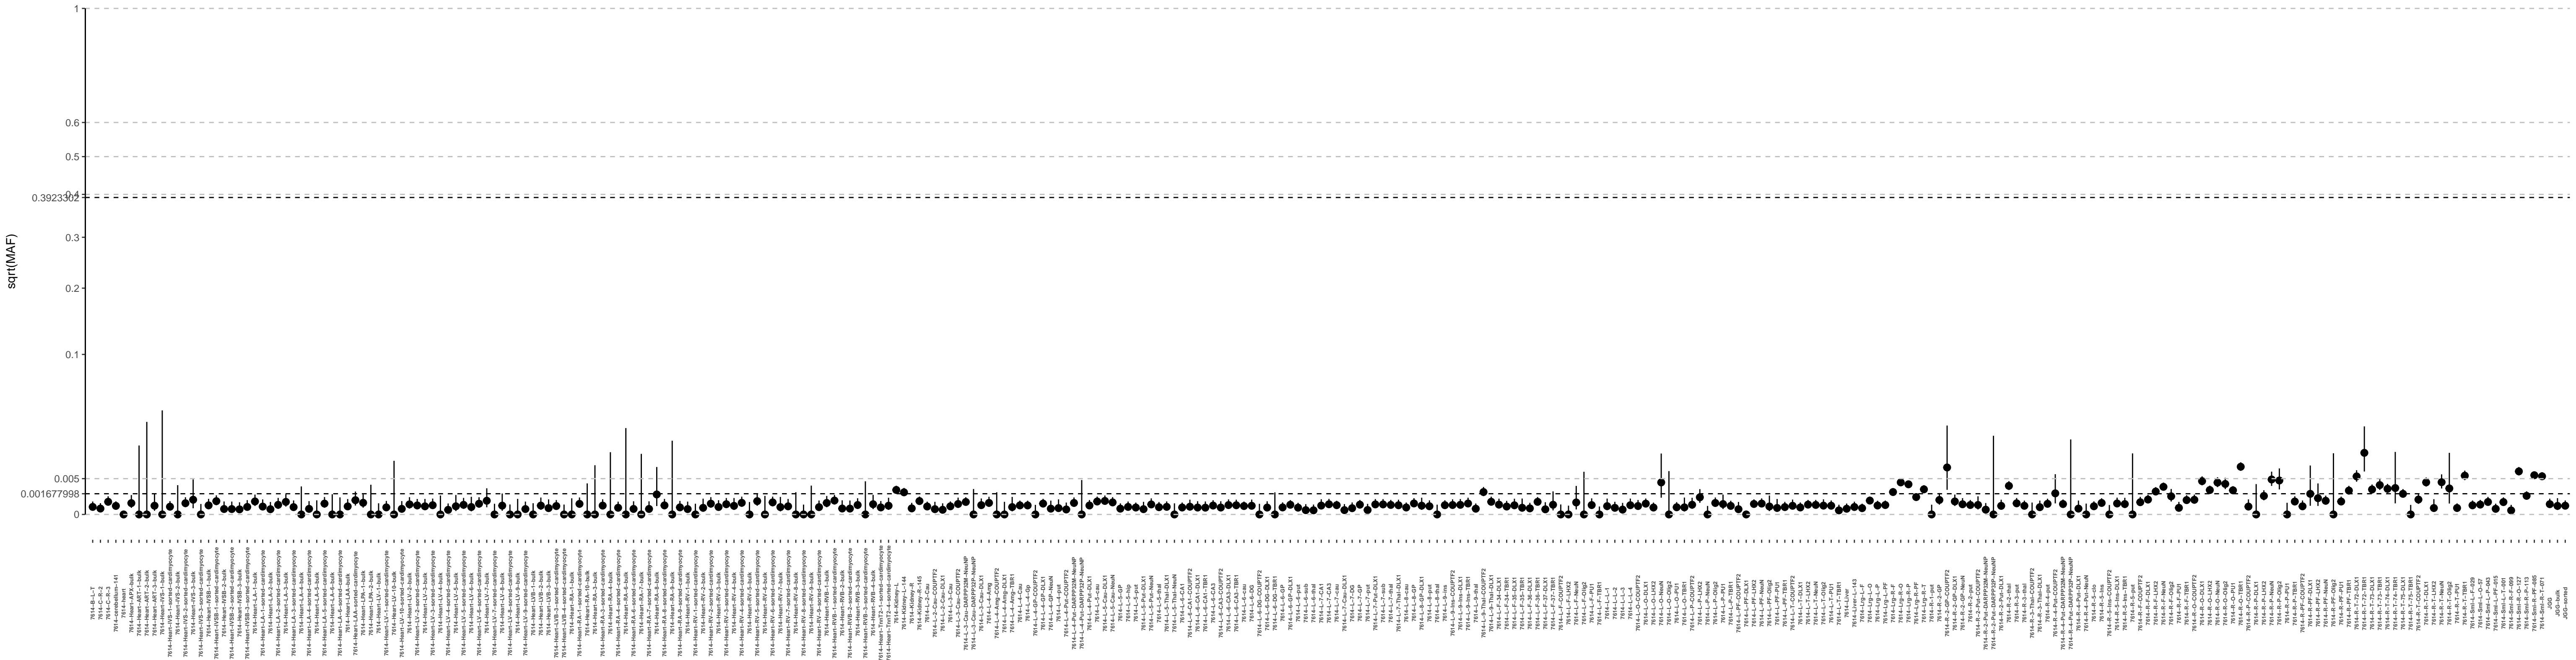



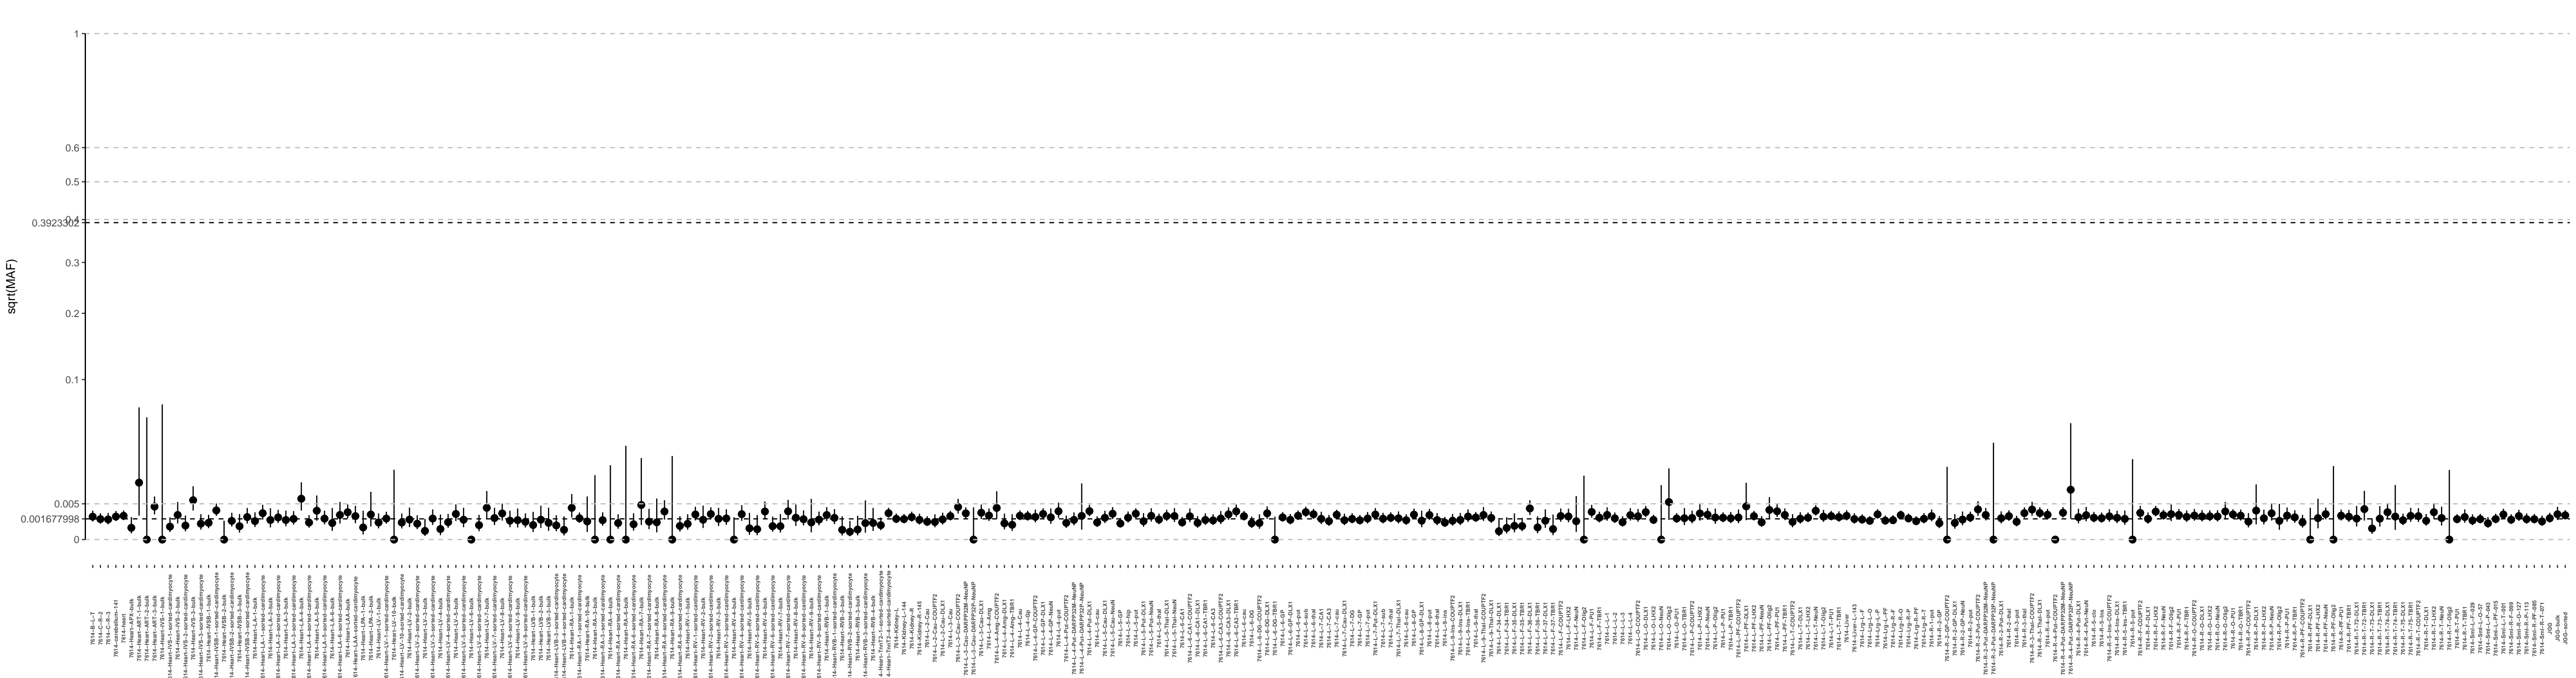

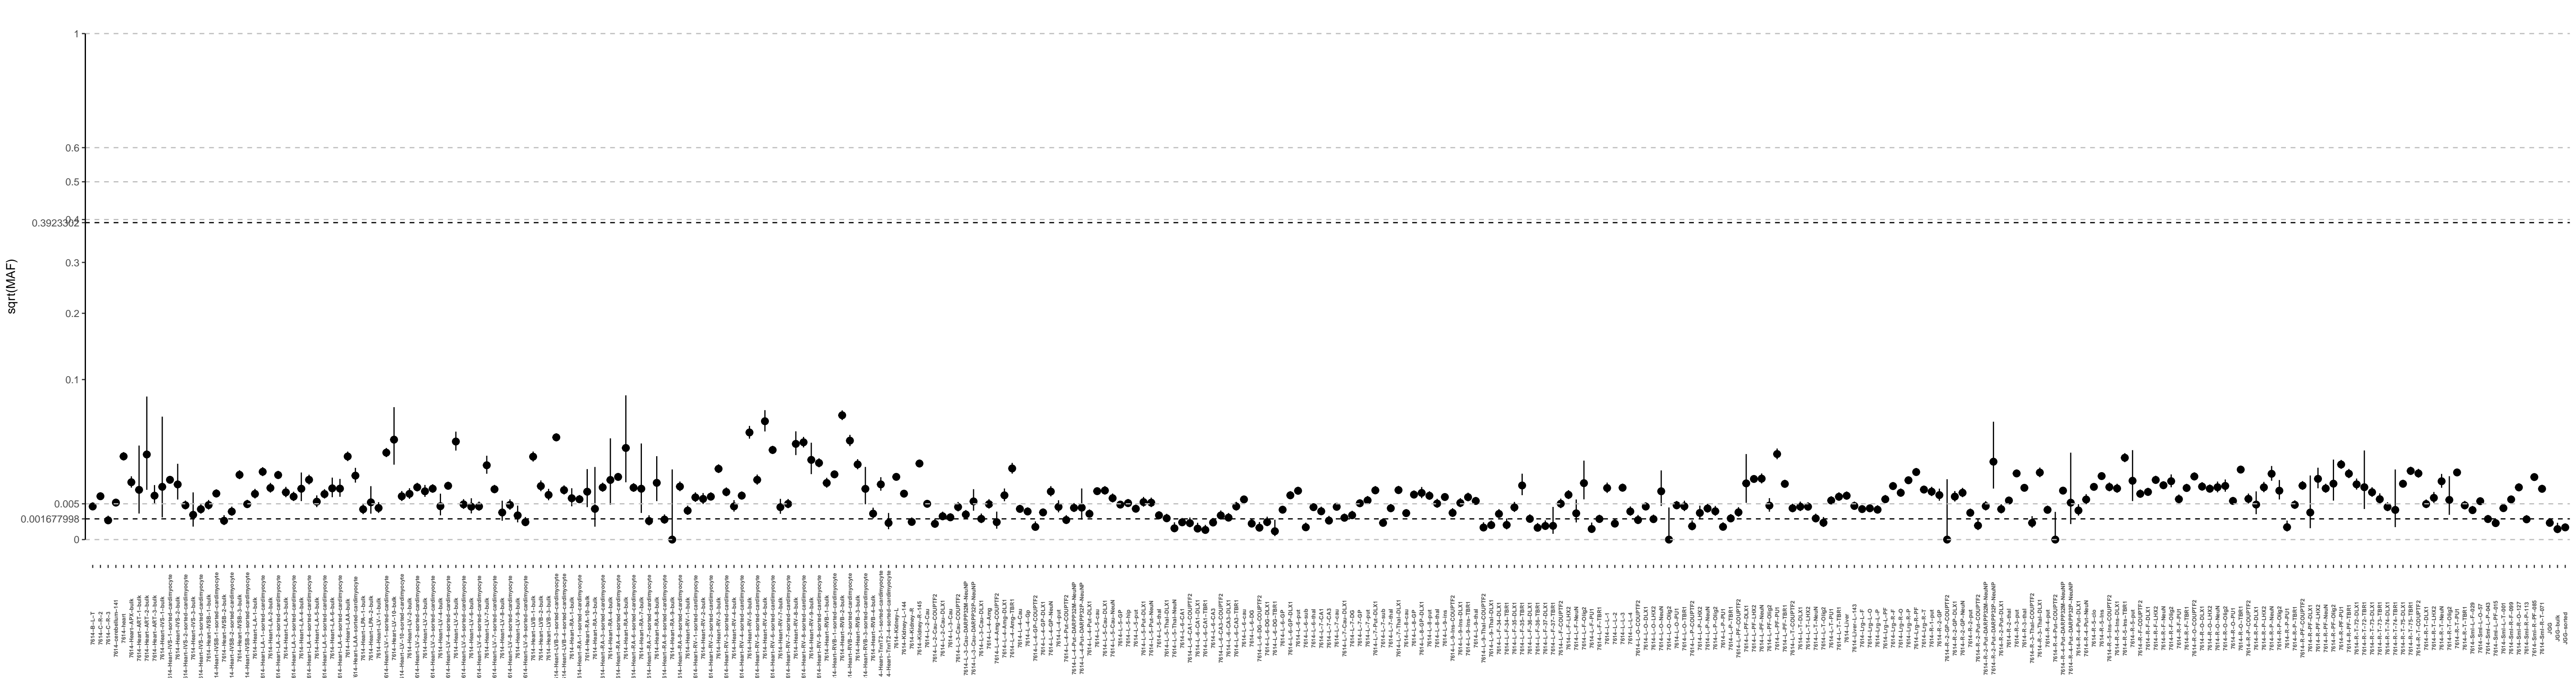



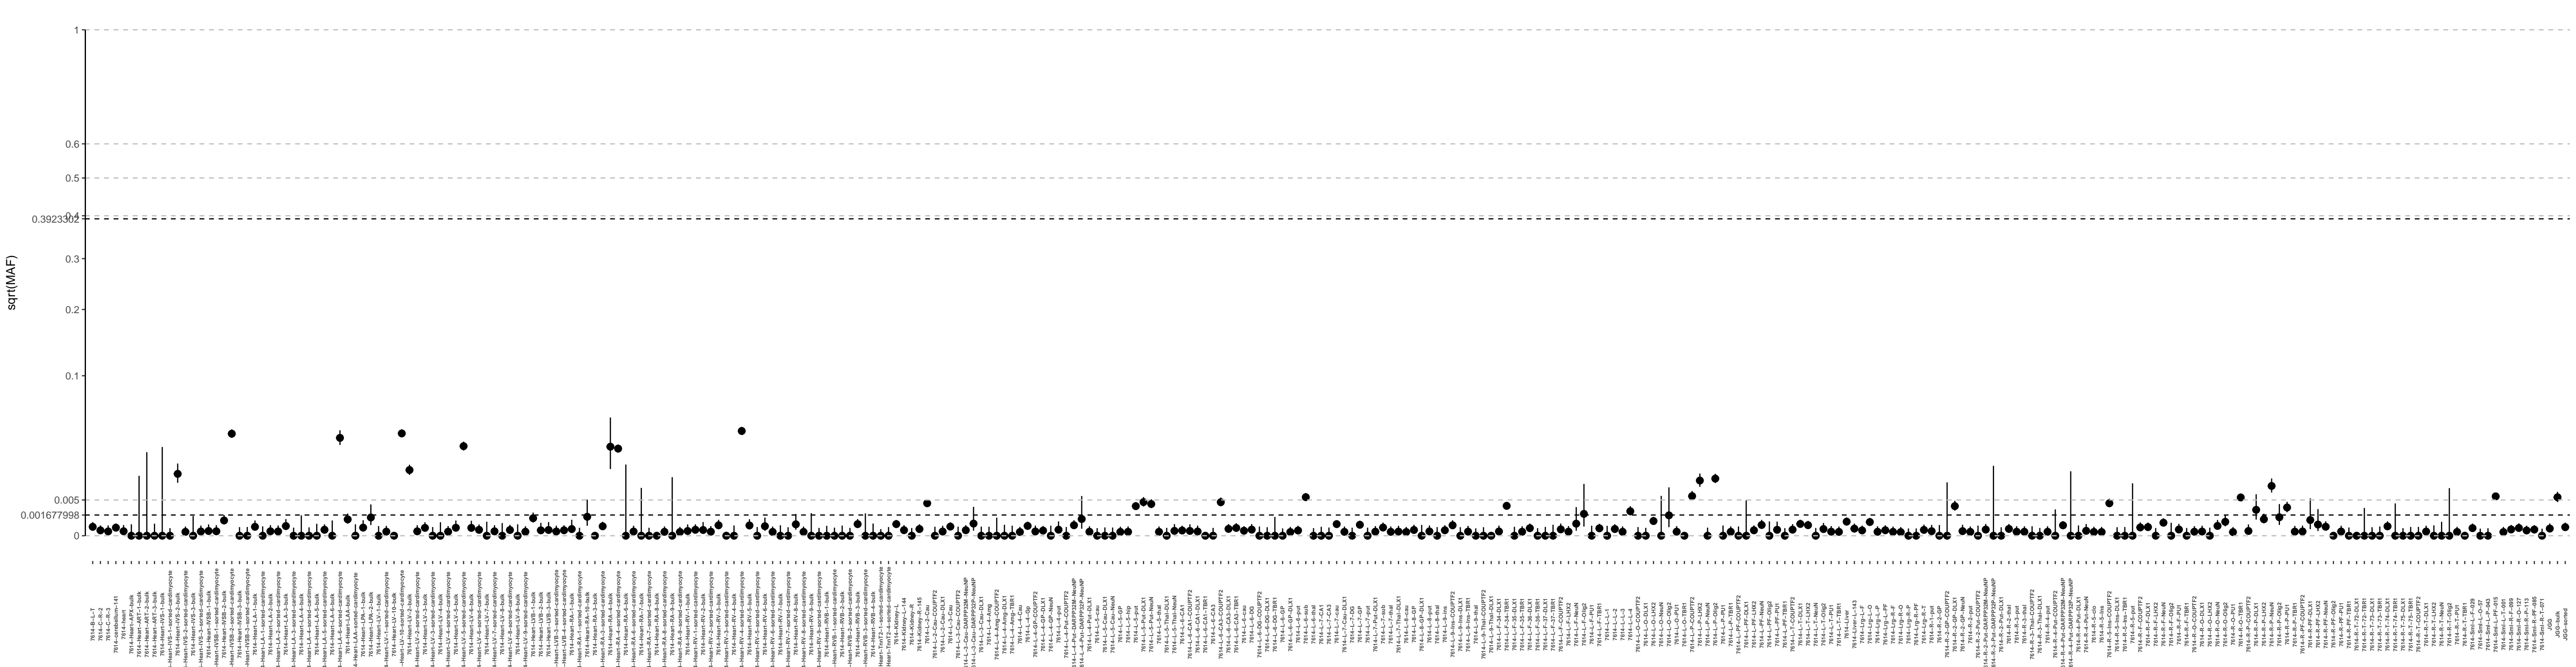



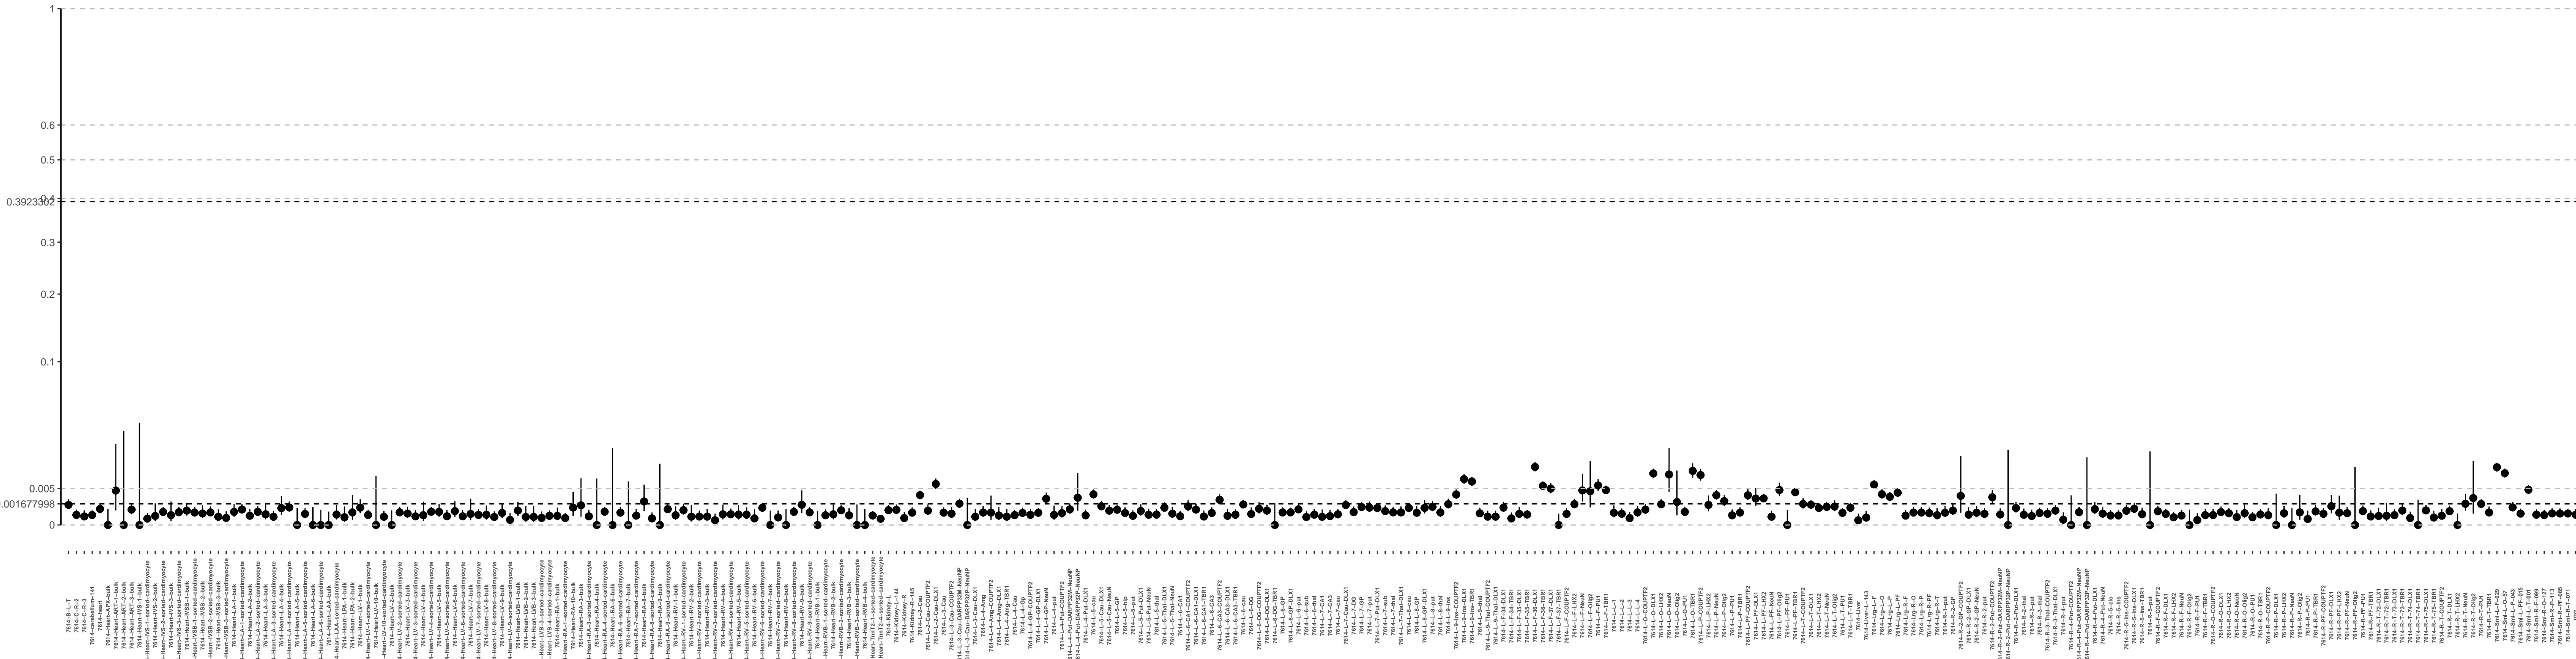





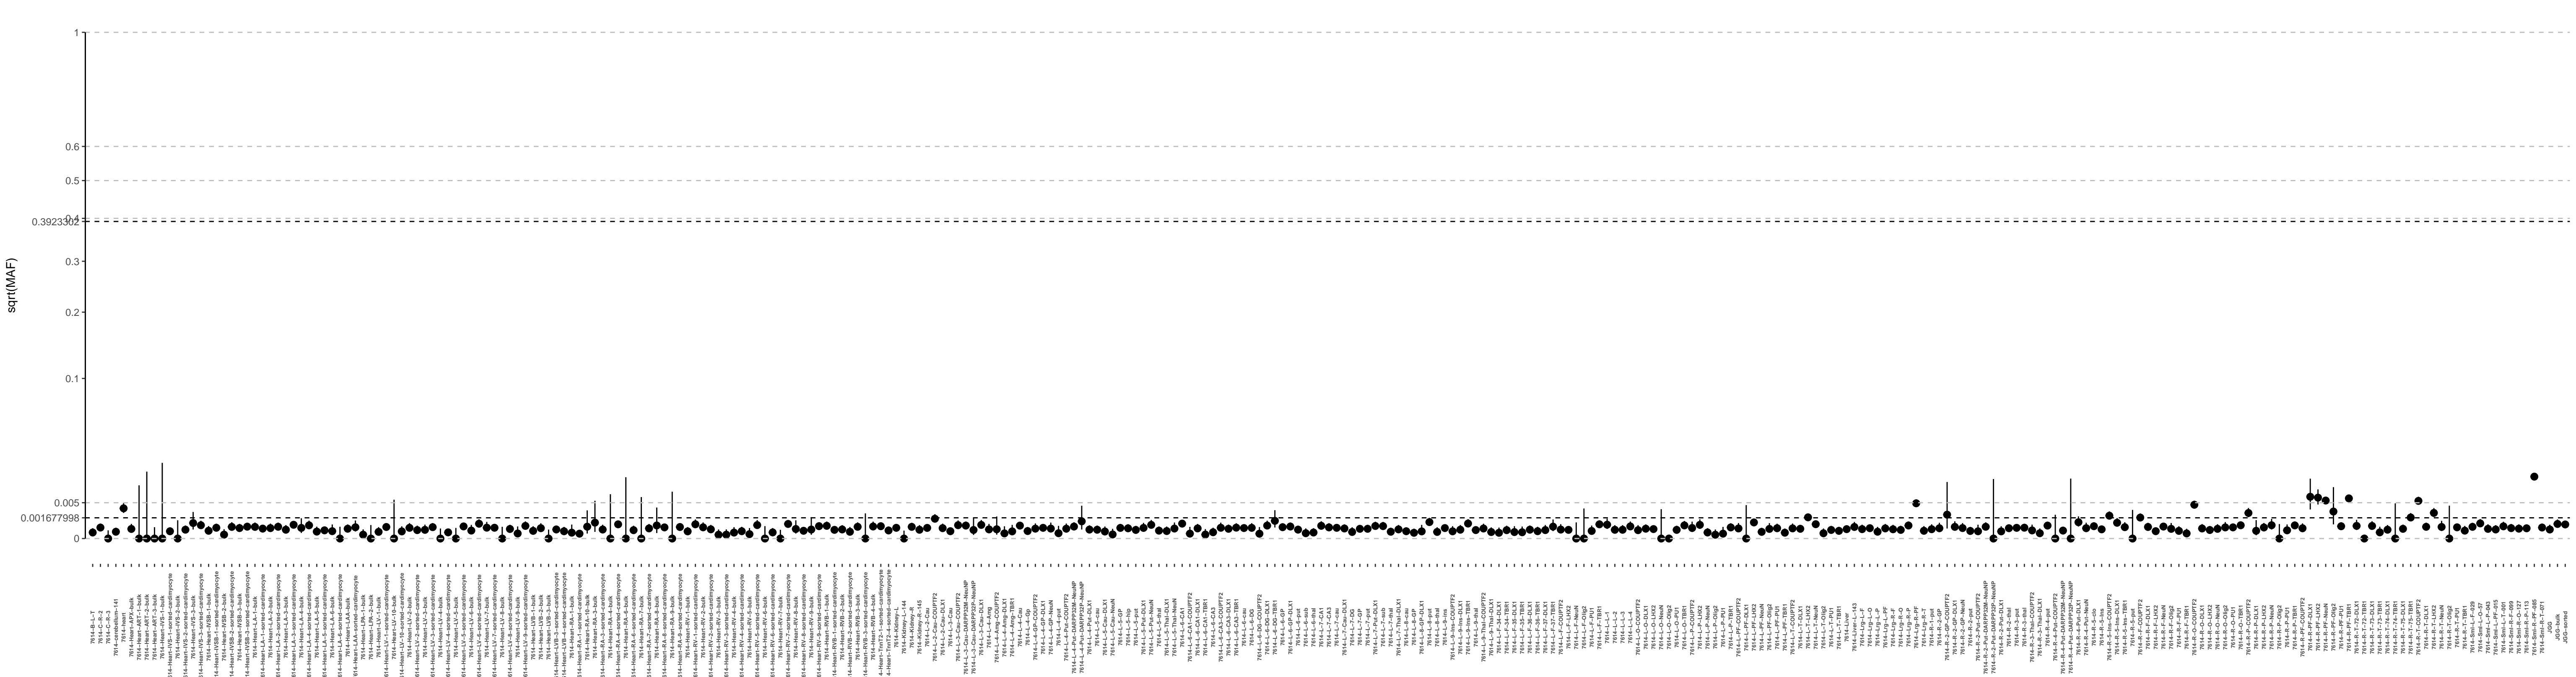



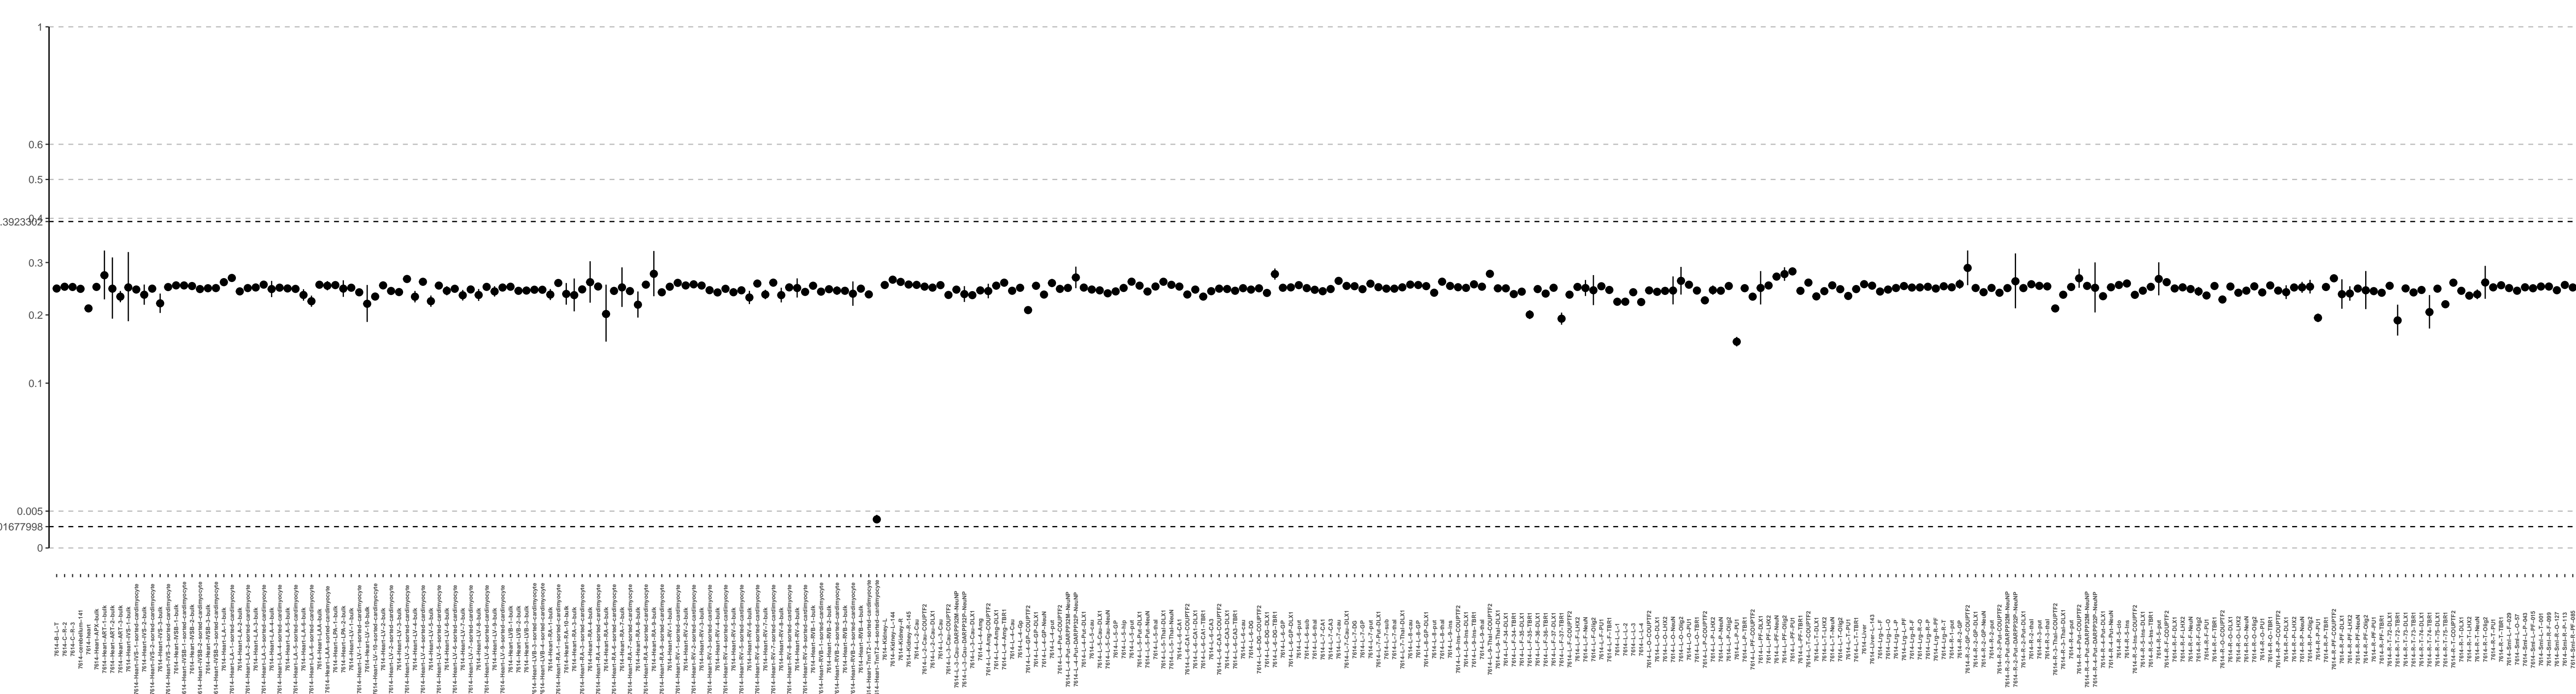

ID







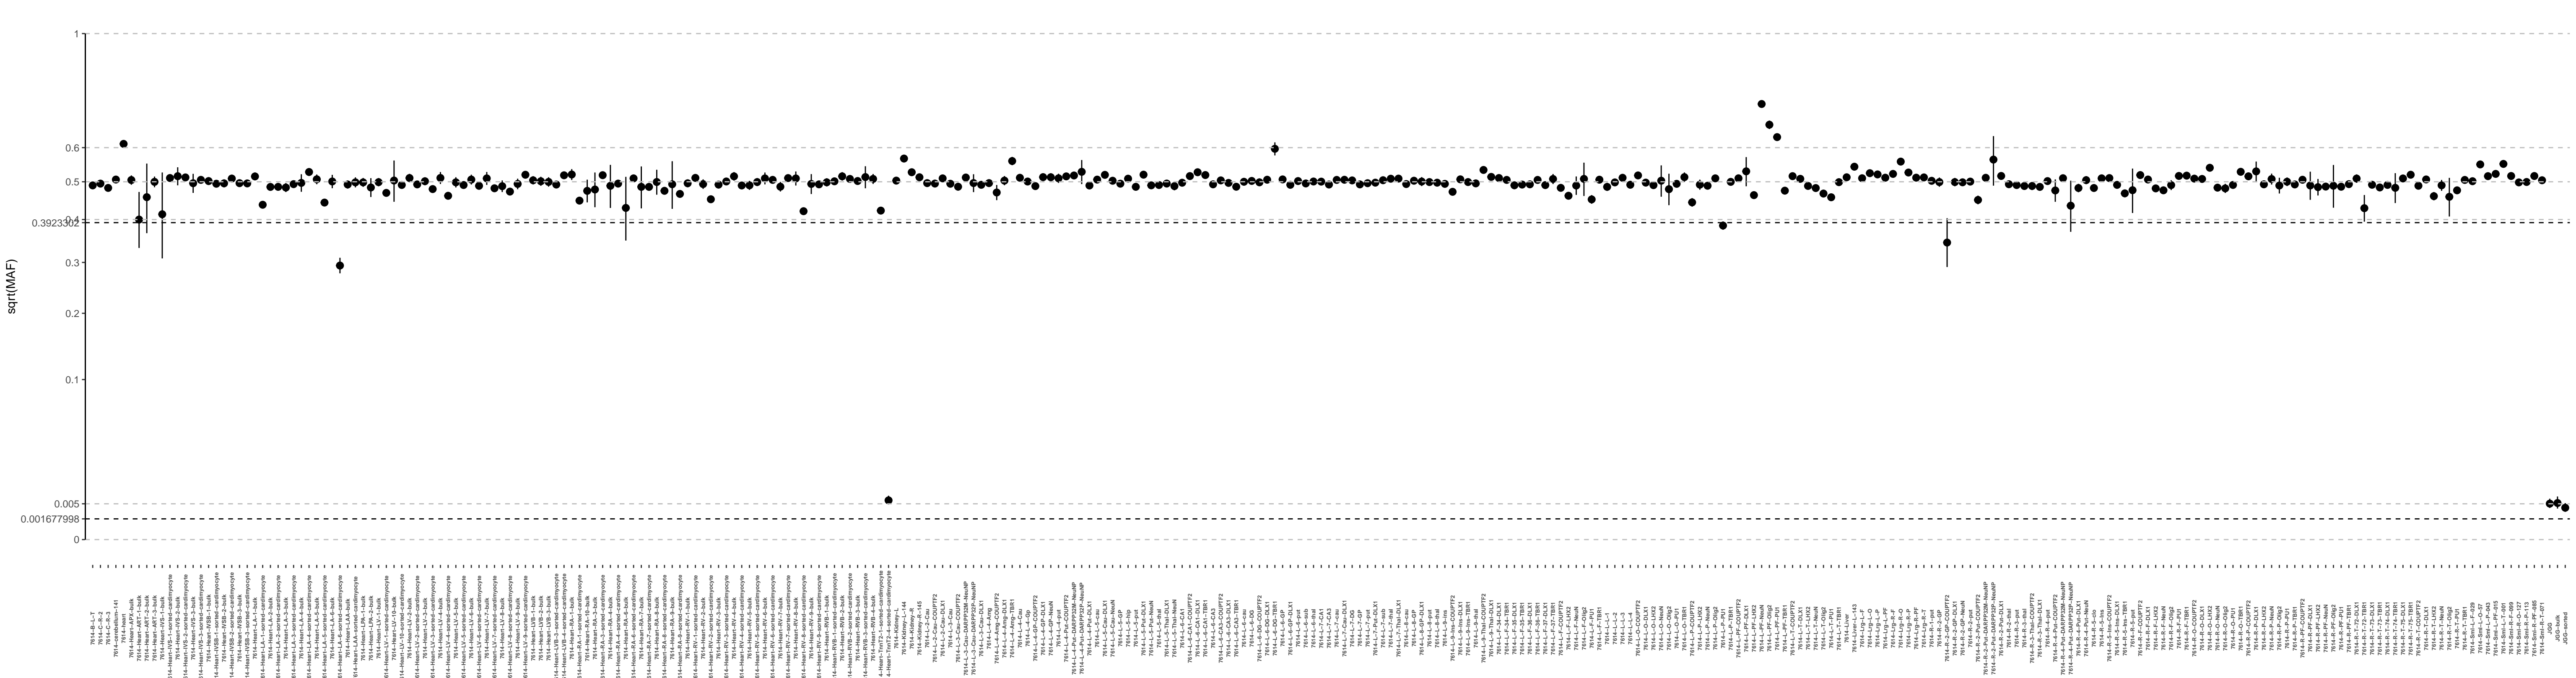



sqrt(MAF)

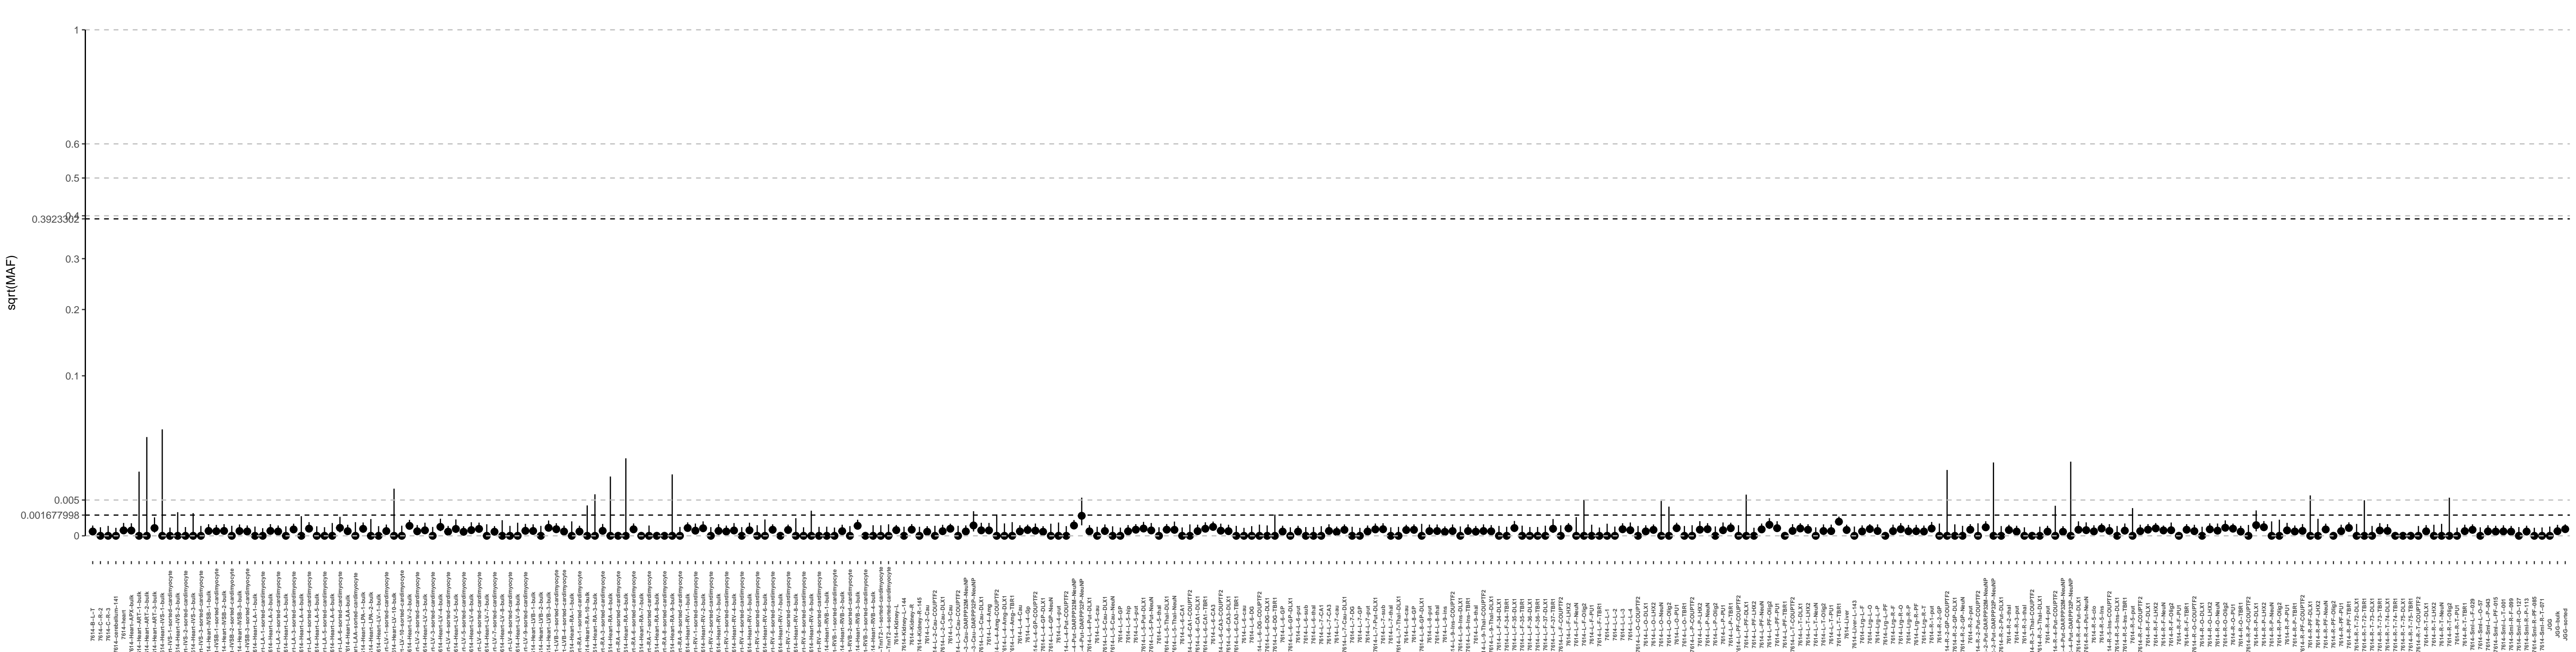

ID

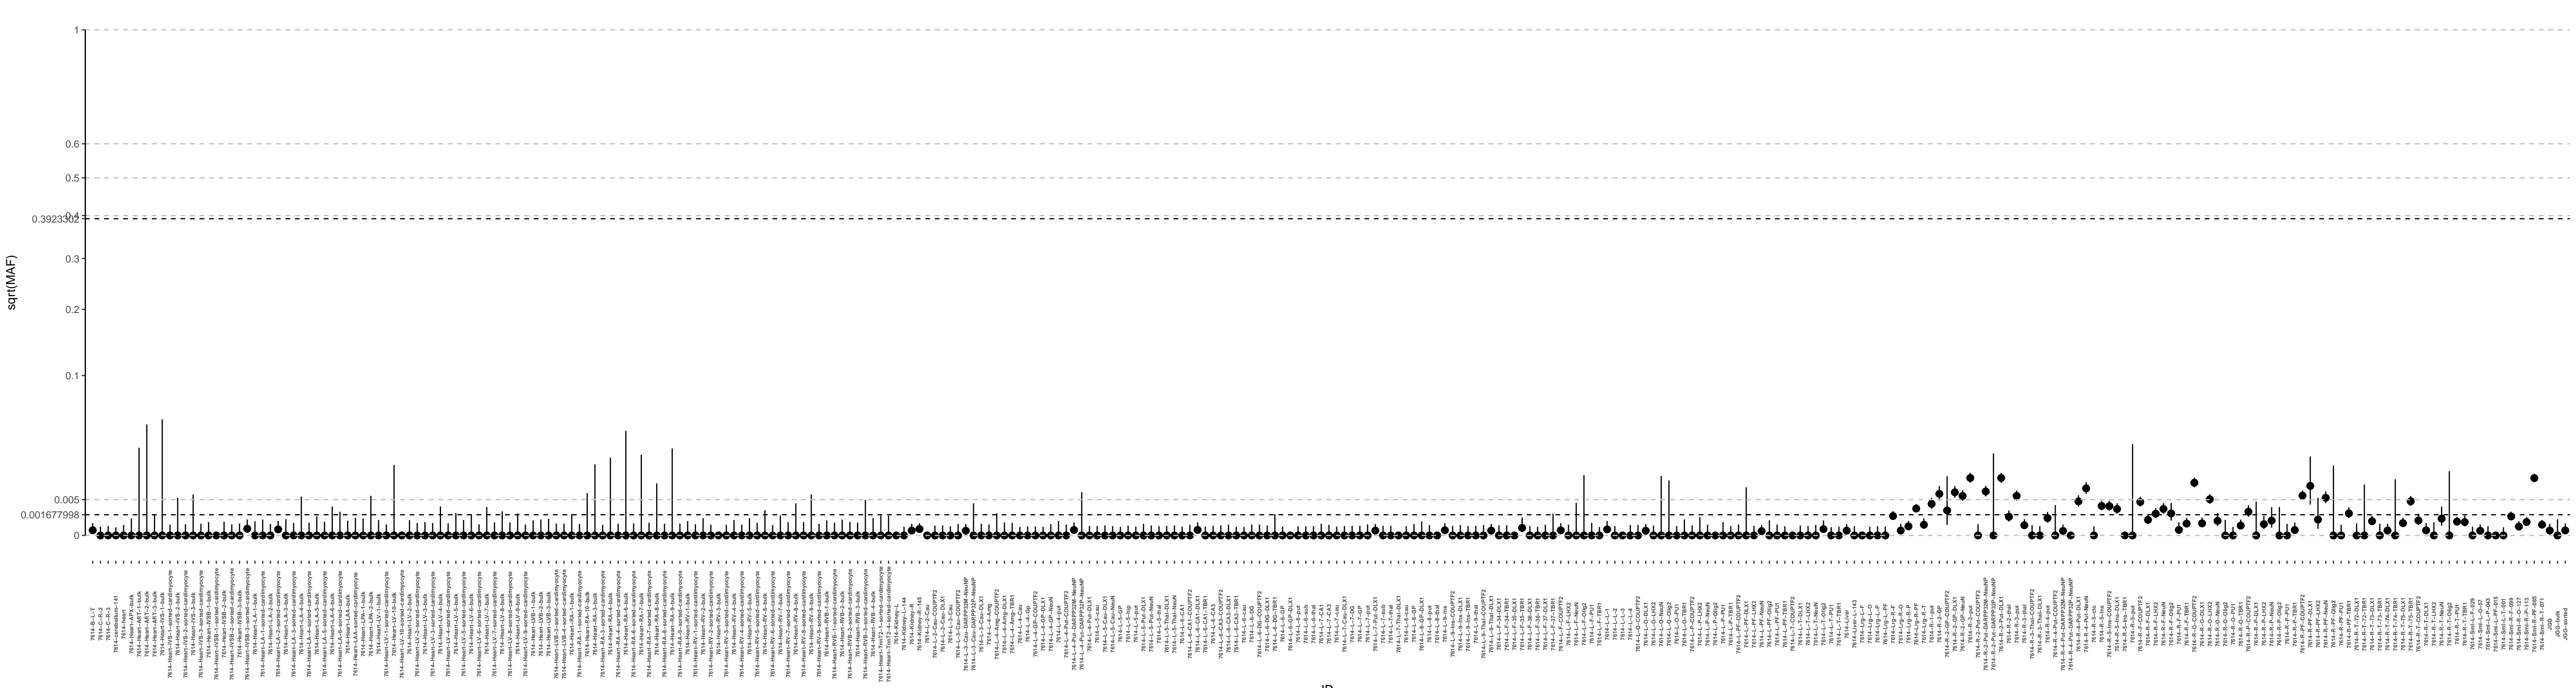



sqrt(MAF)

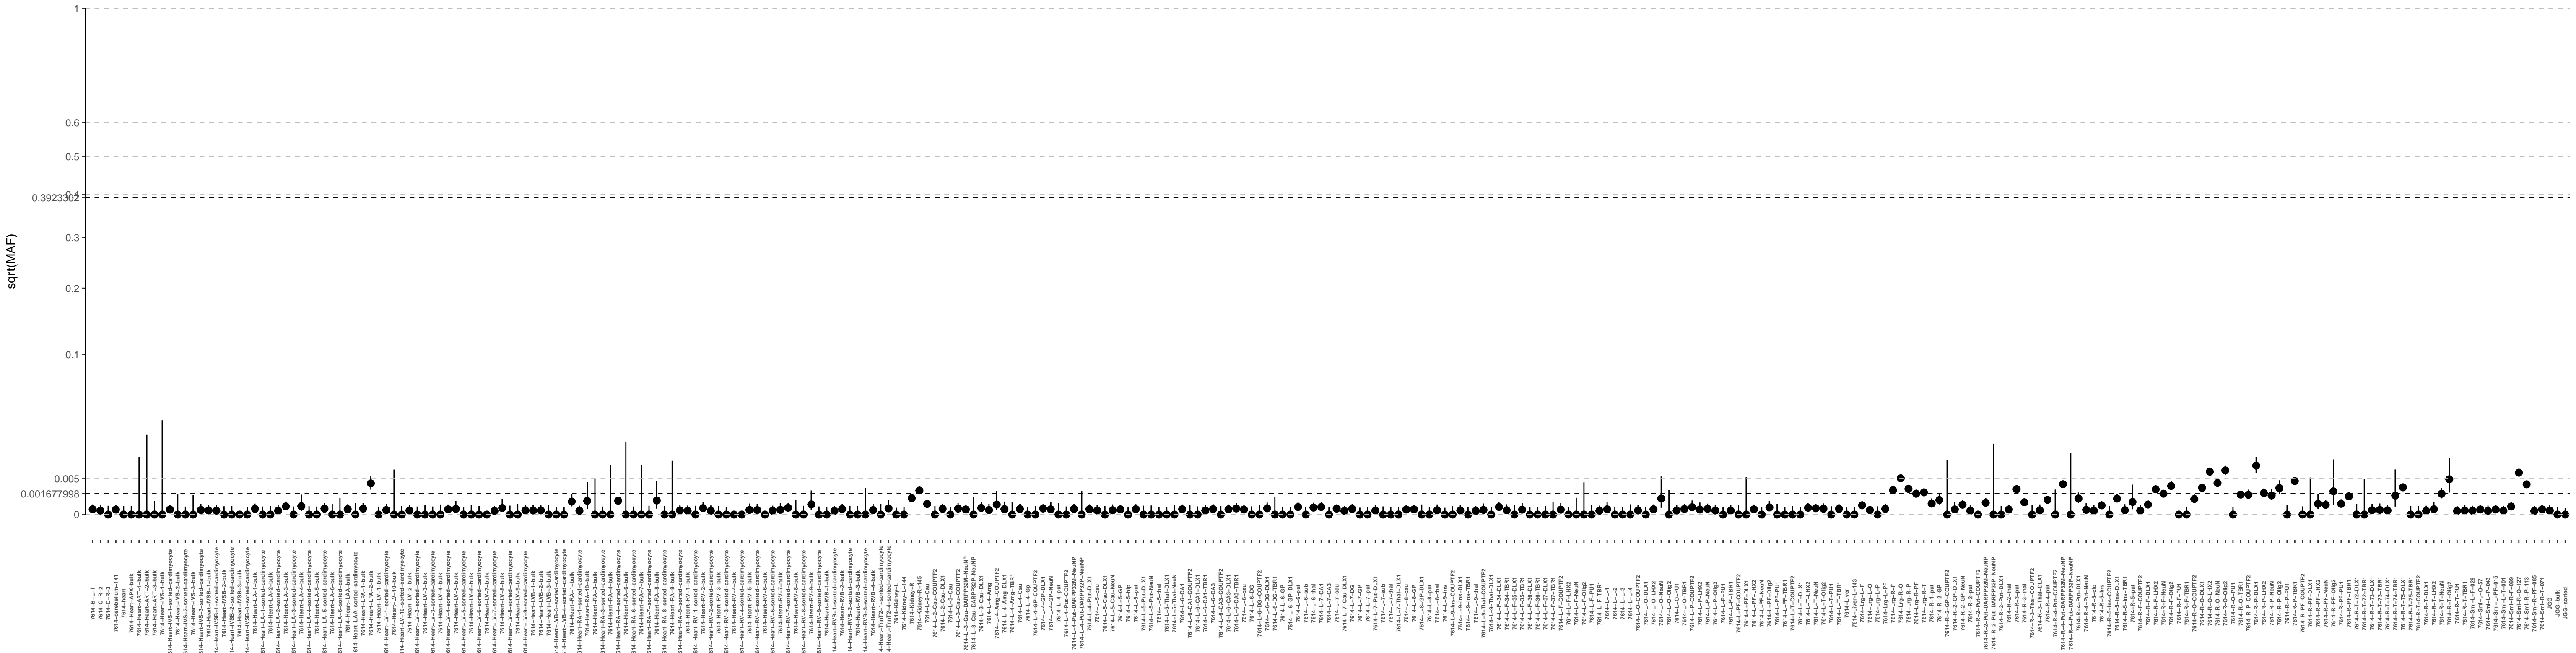

ID



sqrt(MAF)

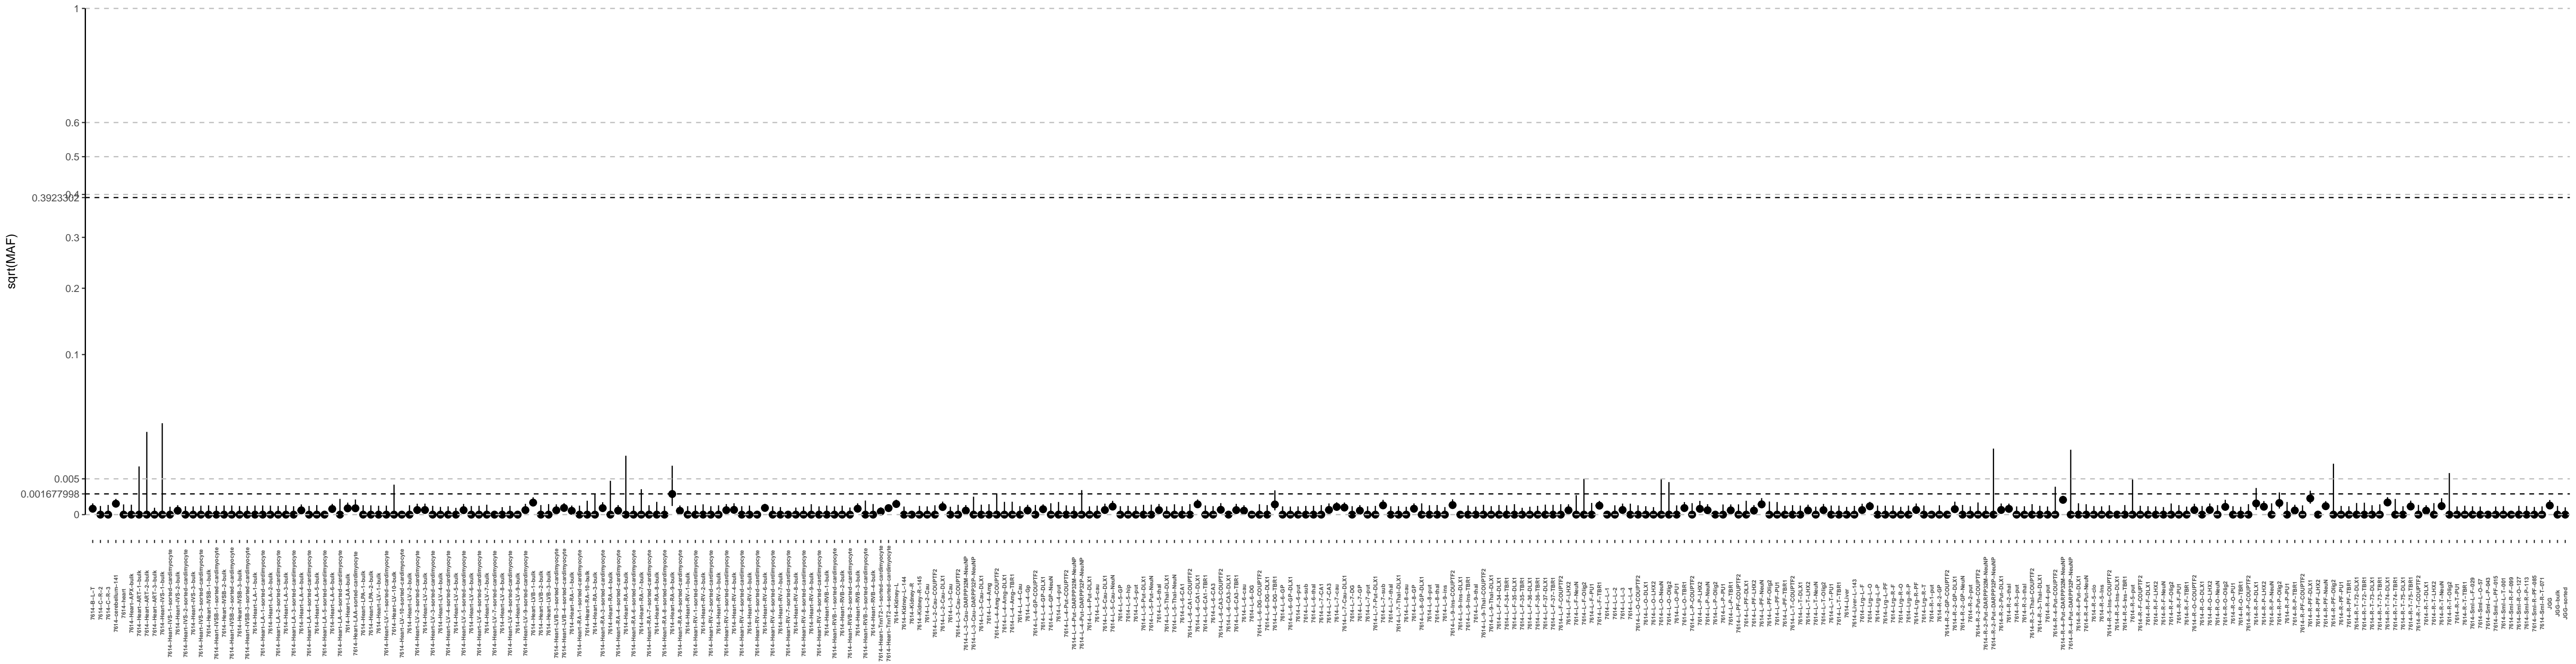

ID

sqrt(MAF)

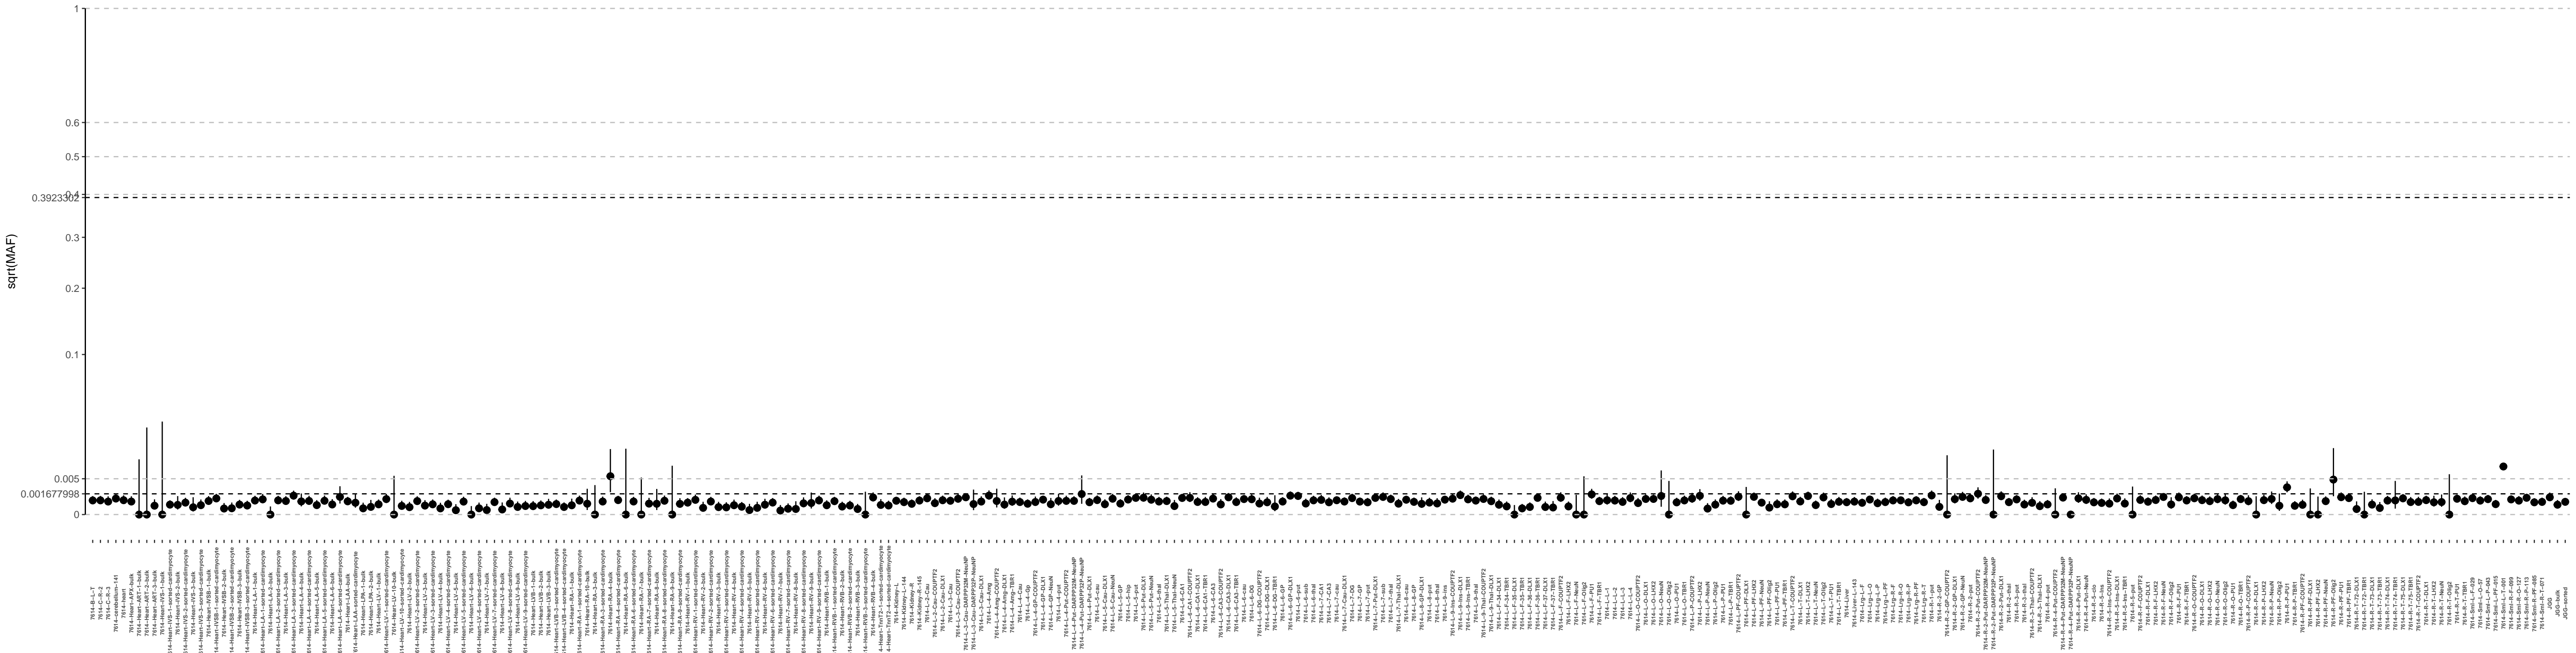

ID



sqrt(MAF)

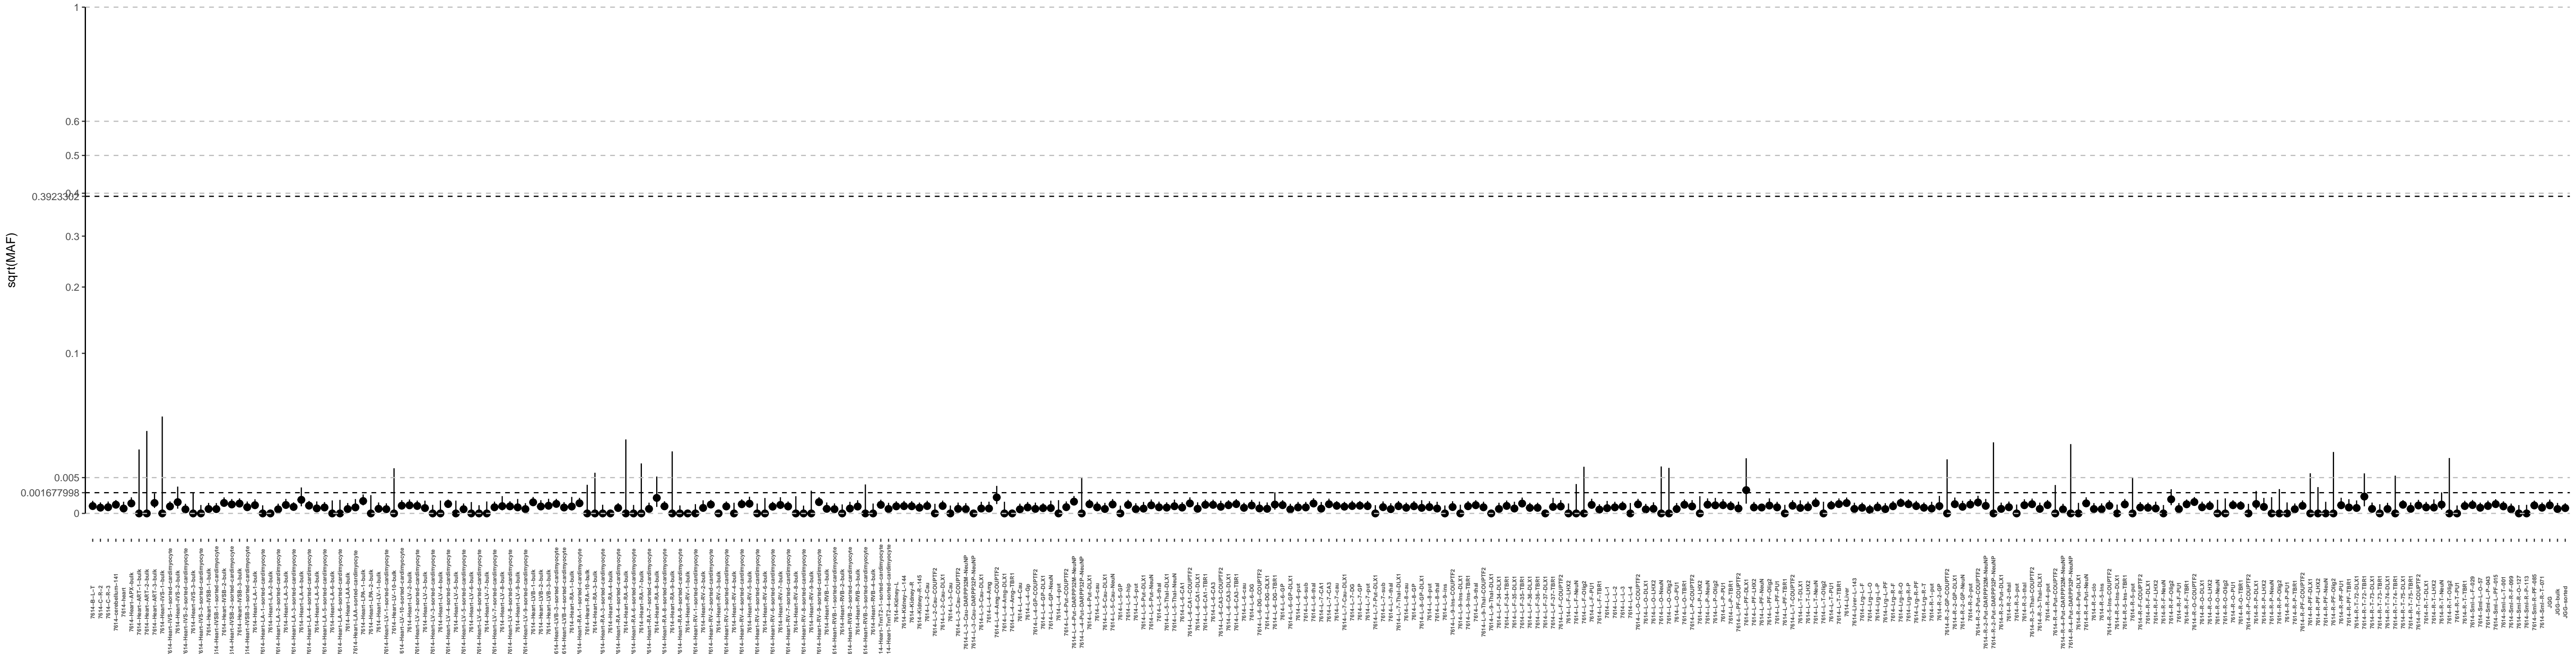

ID

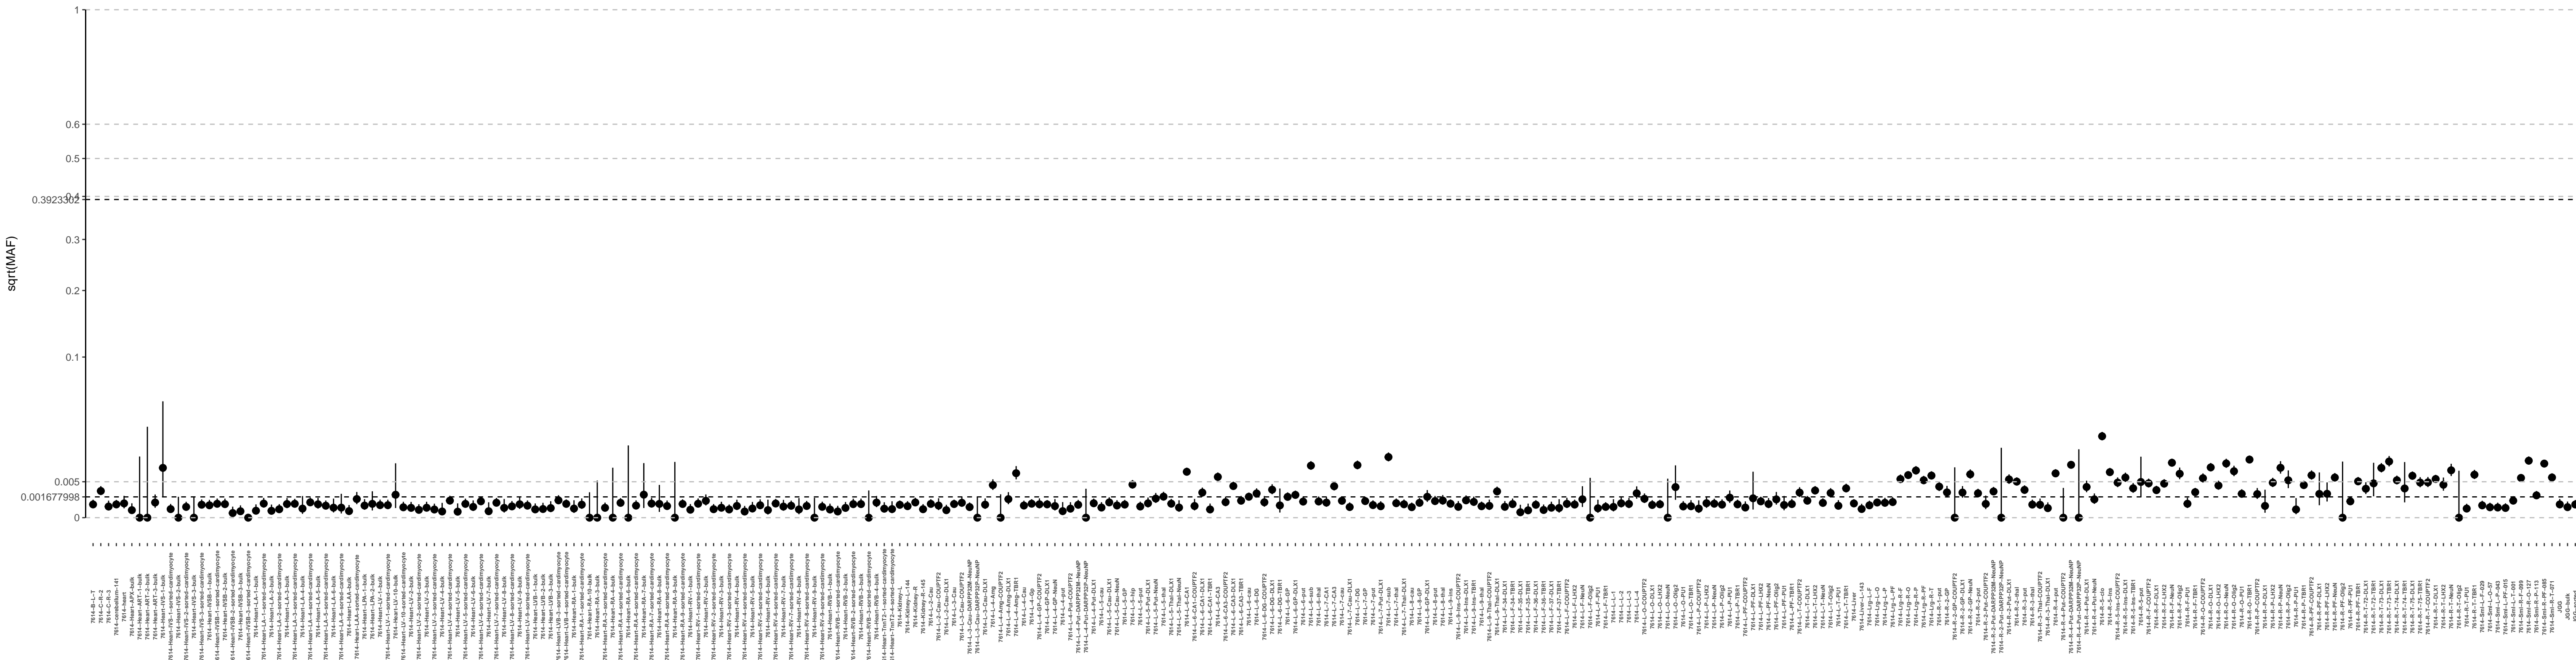

sqrt(MAF)

1  
0.6  
0.5  
0.4  
0.3  
0.2  
0.1  
0.05  
0.01677998  
0

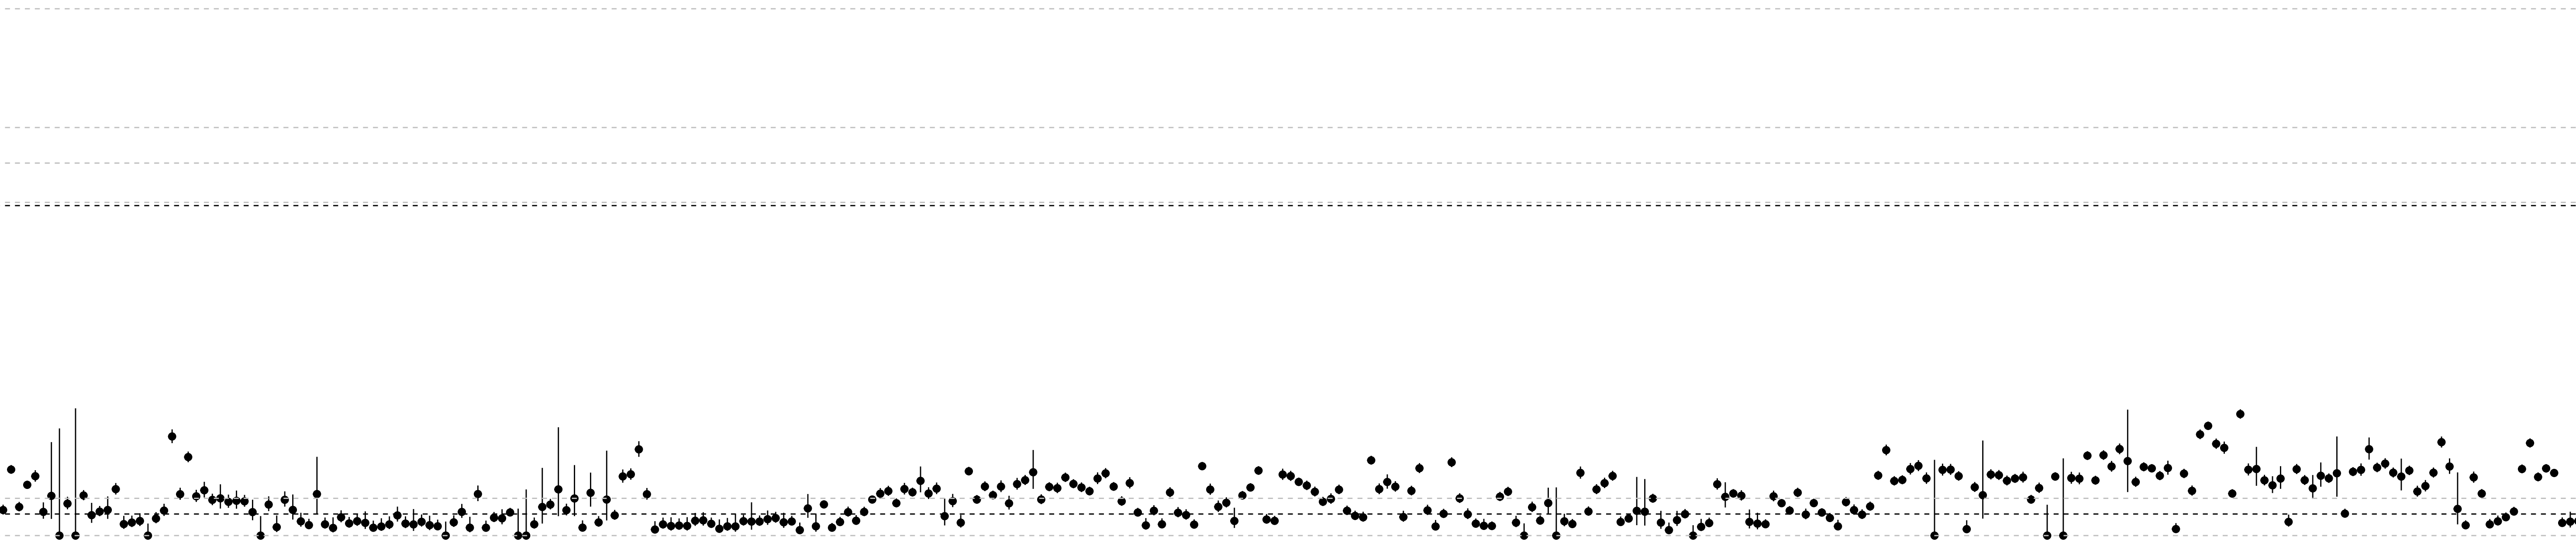

7814-B-L-T  
7814-C-R-2  
7814-Cerebellum-141  
7814-Heart-VS-1  
7814-Heart-VS-2  
7814-Heart-VS-3  
7814-Heart-VS-4  
7814-Heart-VS-5  
7814-Heart-VS-6  
7814-Heart-VS-7  
7814-Heart-VS-8  
7814-Heart-VS-9  
7814-Heart-VS-10  
7814-Heart-VS-11  
7814-Heart-VS-12  
7814-Heart-VS-13  
7814-Heart-VS-14  
7814-Heart-VS-15  
7814-Heart-VS-16  
7814-Heart-VS-17  
7814-Heart-VS-18  
7814-Heart-VS-19  
7814-Heart-VS-20  
7814-Heart-VS-21  
7814-Heart-VS-22  
7814-Heart-VS-23  
7814-Heart-VS-24  
7814-Heart-VS-25  
7814-Heart-VS-26  
7814-Heart-VS-27  
7814-Heart-VS-28  
7814-Heart-VS-29  
7814-Heart-VS-30  
7814-Heart-VS-31  
7814-Heart-VS-32  
7814-Heart-VS-33  
7814-Heart-VS-34  
7814-Heart-VS-35  
7814-Heart-VS-36  
7814-Heart-VS-37  
7814-Heart-VS-38  
7814-Heart-VS-39  
7814-Heart-VS-40  
7814-Heart-VS-41  
7814-Heart-VS-42  
7814-Heart-VS-43  
7814-Heart-VS-44  
7814-Heart-VS-45  
7814-Heart-VS-46  
7814-Heart-VS-47  
7814-Heart-VS-48  
7814-Heart-VS-49  
7814-Heart-VS-50  
7814-Heart-VS-51  
7814-Heart-VS-52  
7814-Heart-VS-53  
7814-Heart-VS-54  
7814-Heart-VS-55  
7814-Heart-VS-56  
7814-Heart-VS-57  
7814-Heart-VS-58  
7814-Heart-VS-59  
7814-Heart-VS-60  
7814-Heart-VS-61  
7814-Heart-VS-62  
7814-Heart-VS-63  
7814-Heart-VS-64  
7814-Heart-VS-65  
7814-Heart-VS-66  
7814-Heart-VS-67  
7814-Heart-VS-68  
7814-Heart-VS-69  
7814-Heart-VS-70  
7814-Heart-VS-71  
7814-Heart-VS-72  
7814-Heart-VS-73  
7814-Heart-VS-74  
7814-Heart-VS-75  
7814-Heart-VS-76  
7814-Heart-VS-77  
7814-Heart-VS-78  
7814-Heart-VS-79  
7814-Heart-VS-80  
7814-Heart-VS-81  
7814-Heart-VS-82  
7814-Heart-VS-83  
7814-Heart-VS-84  
7814-Heart-VS-85  
7814-Heart-VS-86  
7814-Heart-VS-87  
7814-Heart-VS-88  
7814-Heart-VS-89  
7814-Heart-VS-90  
7814-Heart-VS-91  
7814-Heart-VS-92  
7814-Heart-VS-93  
7814-Heart-VS-94  
7814-Heart-VS-95  
7814-Heart-VS-96  
7814-Heart-VS-97  
7814-Heart-VS-98  
7814-Heart-VS-99  
7814-Heart-VS-100

ID







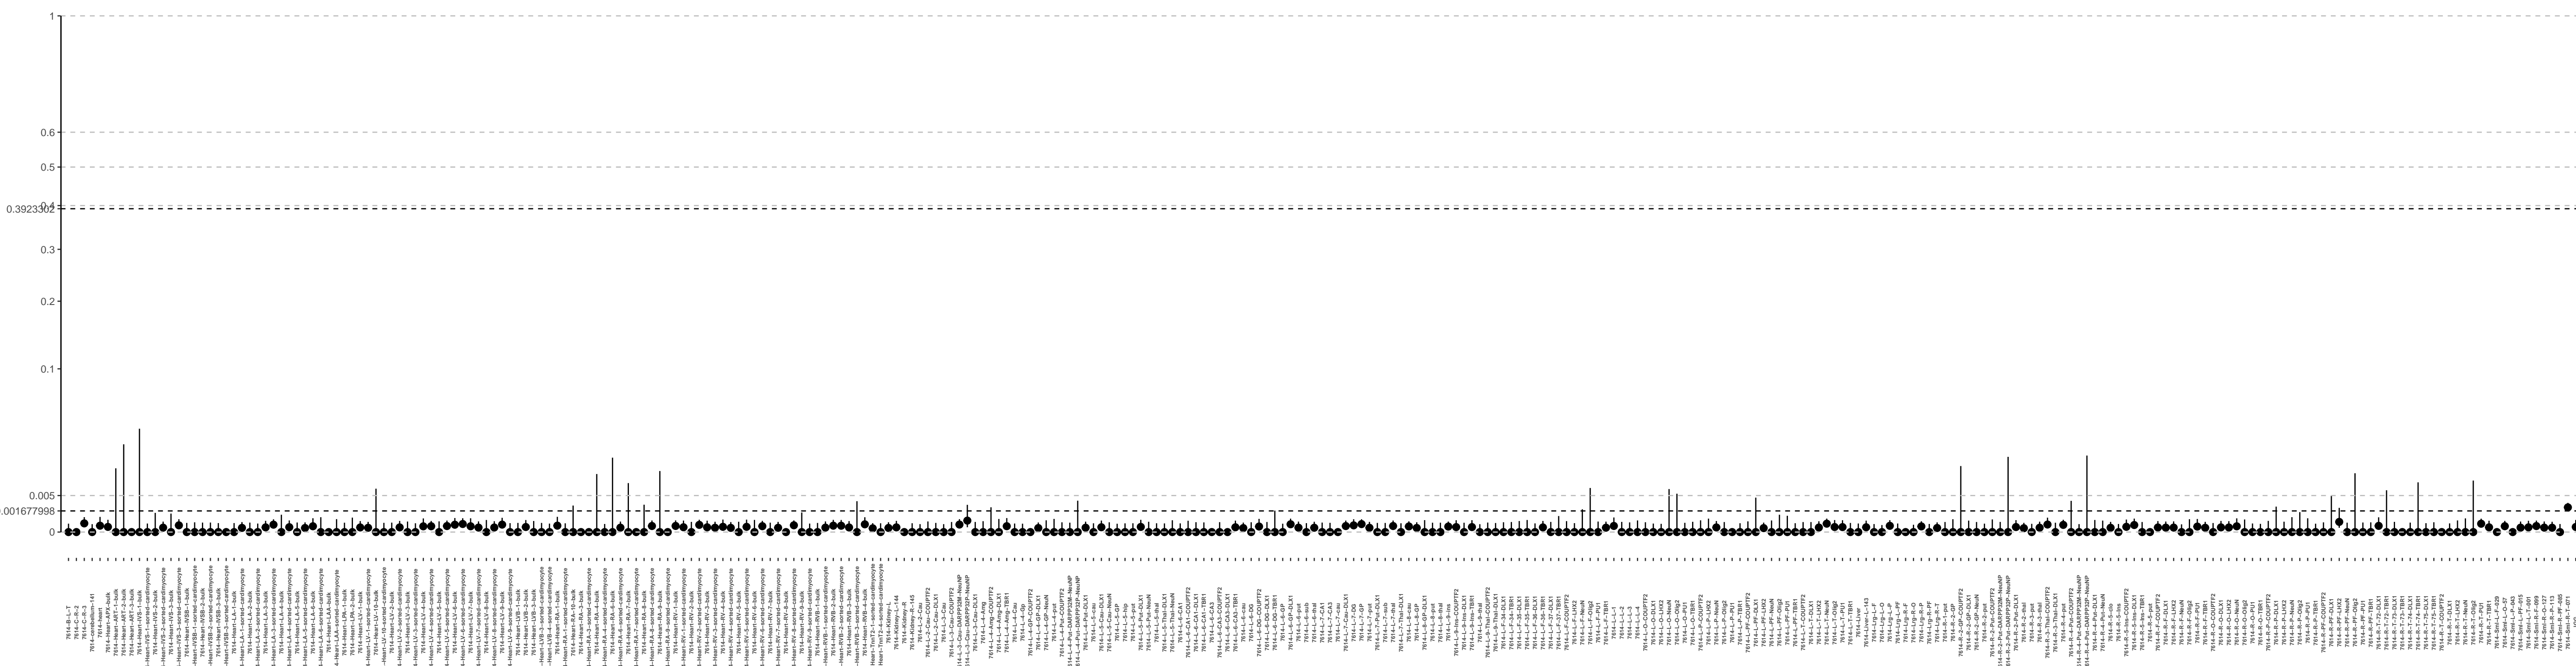

ID

- JGG-bulk
- JGG-sorted





sqrt(MAF)

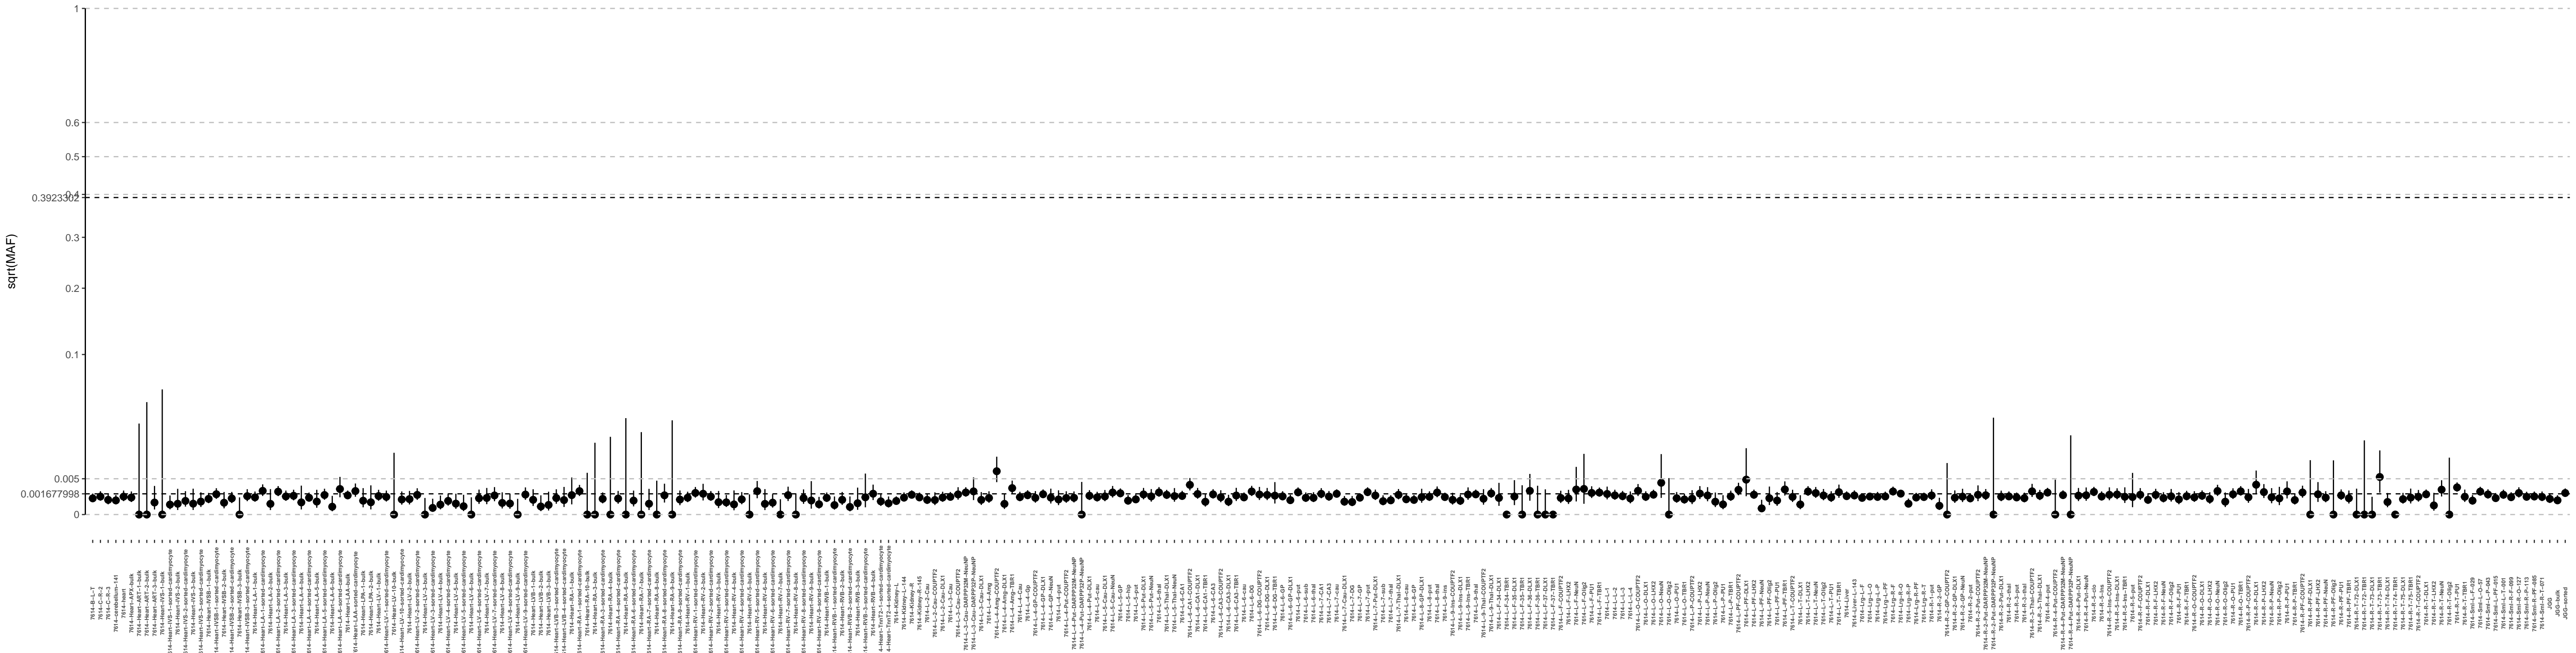

ID

ID01 8-138116363-A-G

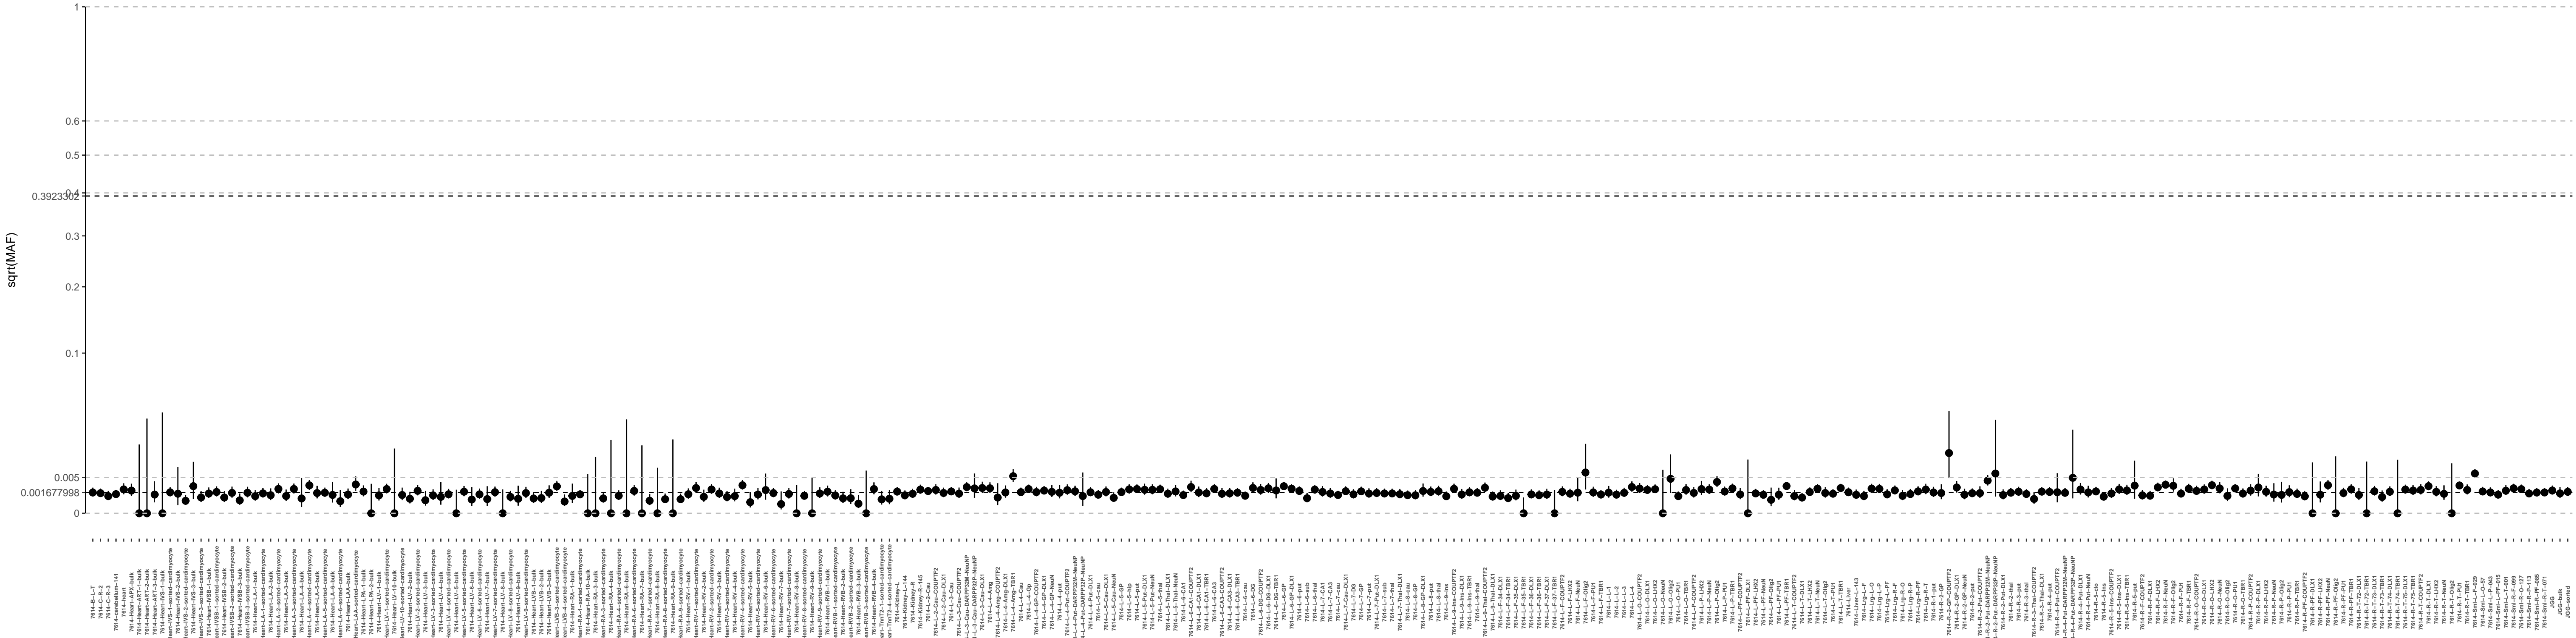

ID



sqrt(MAF)

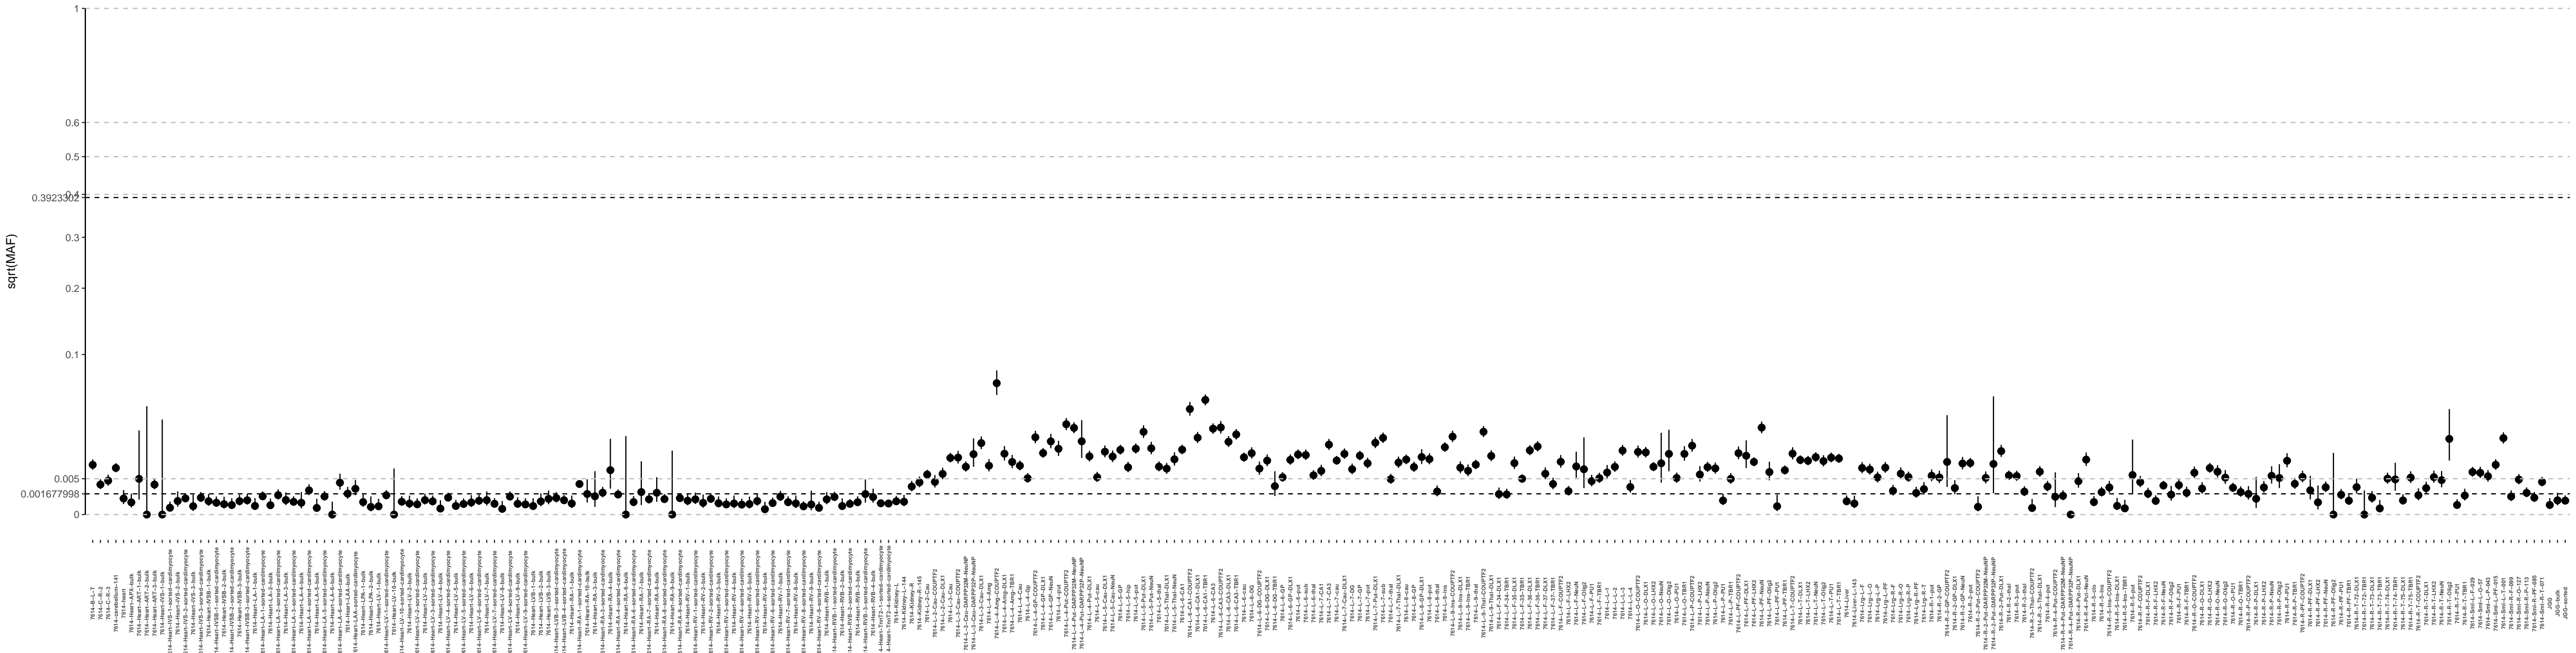

ID









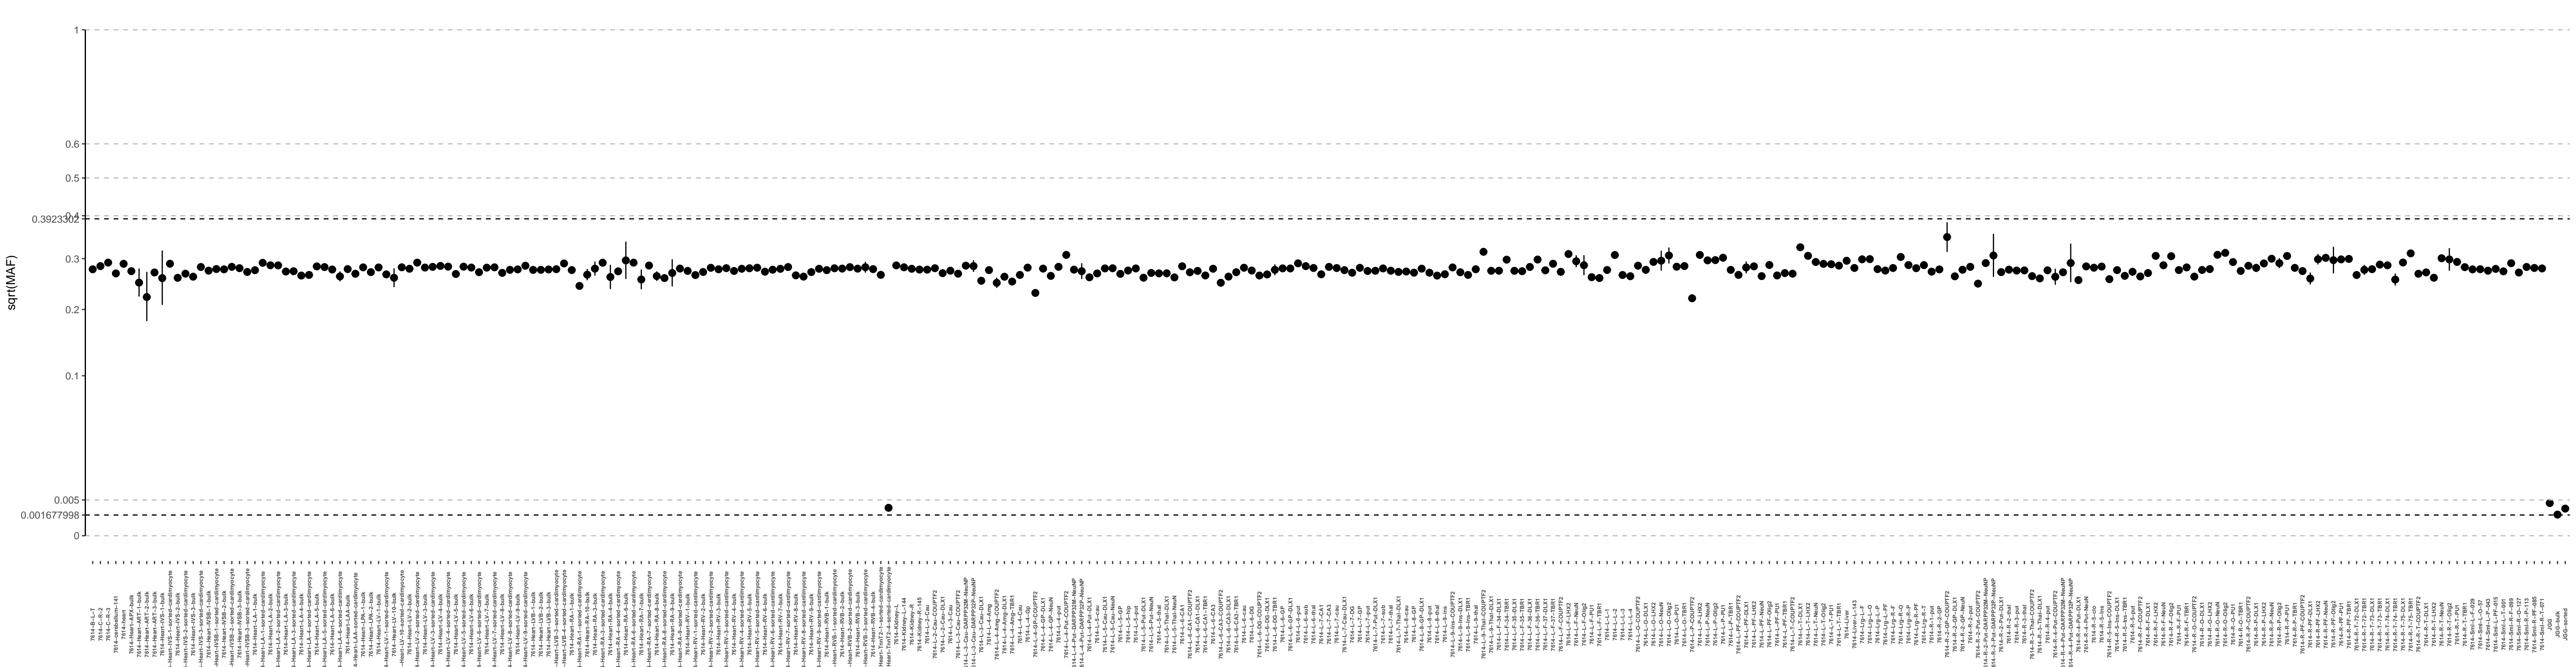





sqrt(MAF)

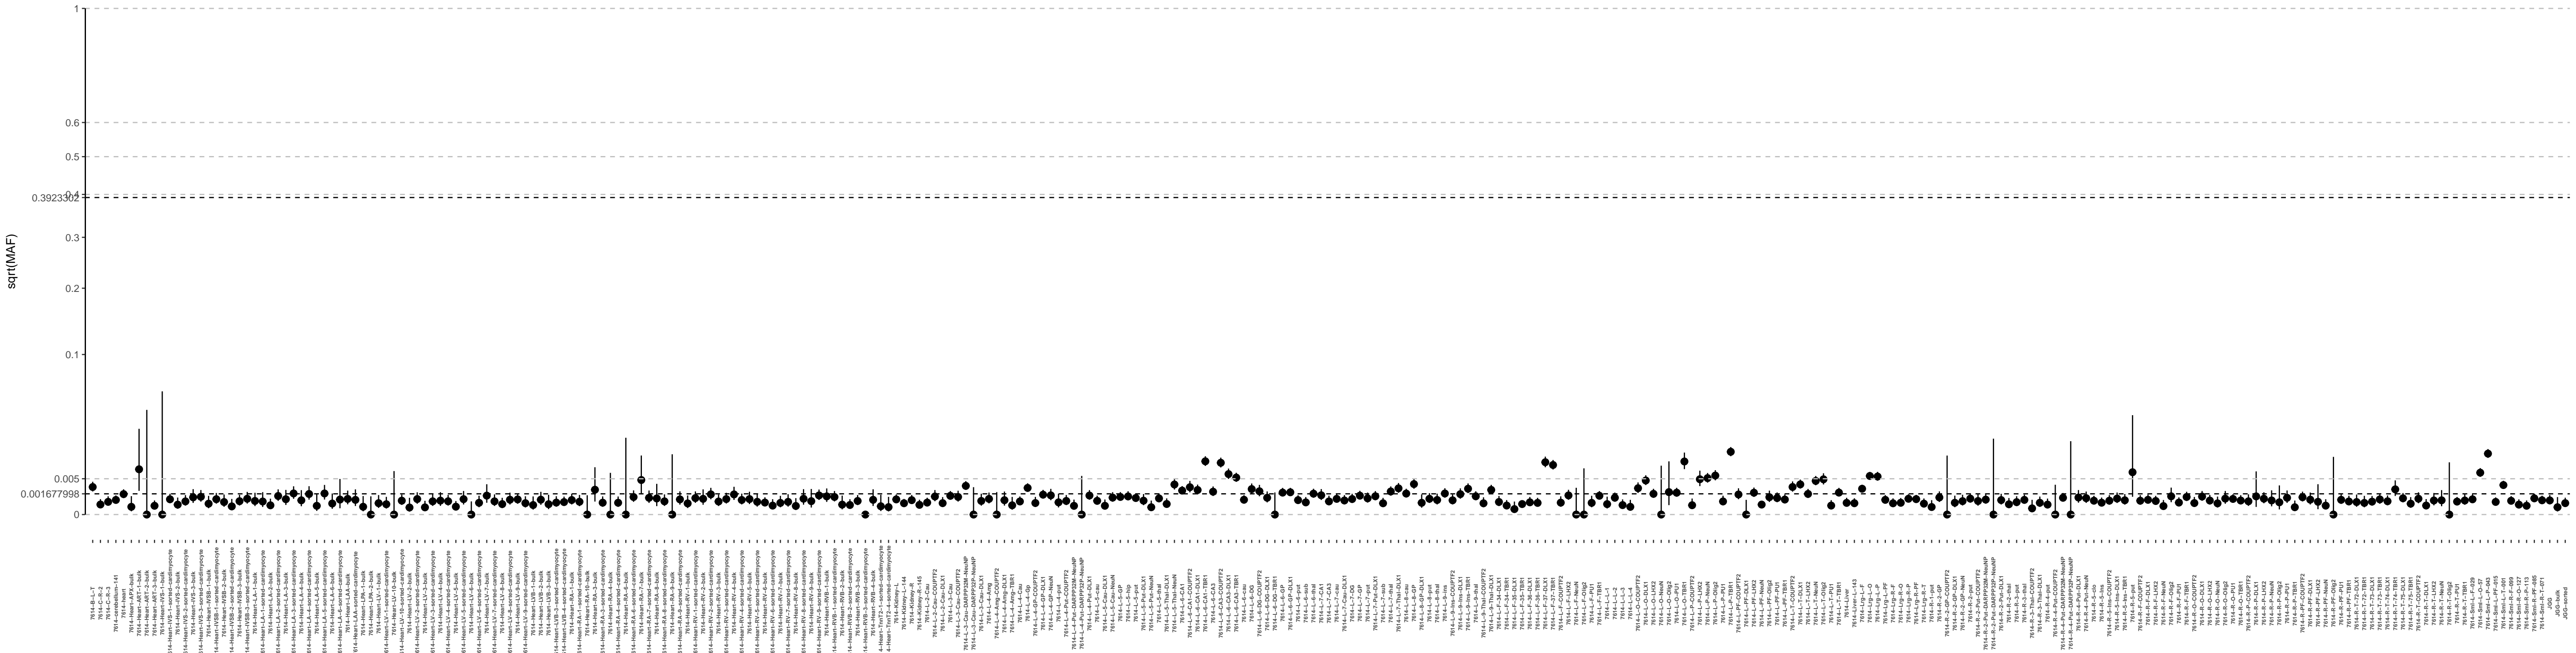

ID



sqrt(MAF)

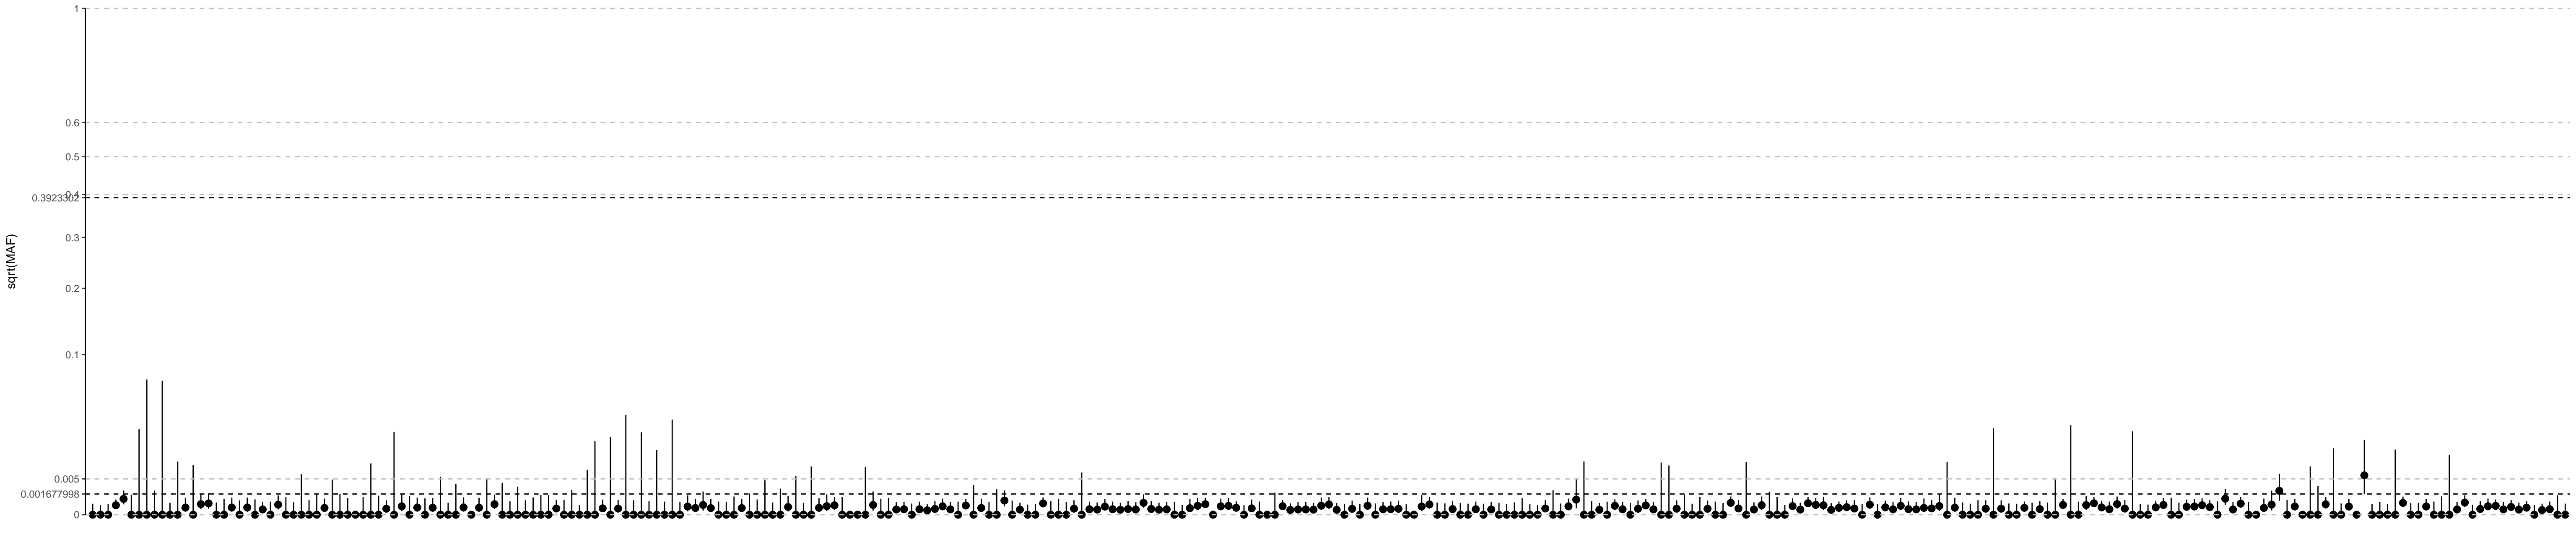

ID





sqrt(MAF)

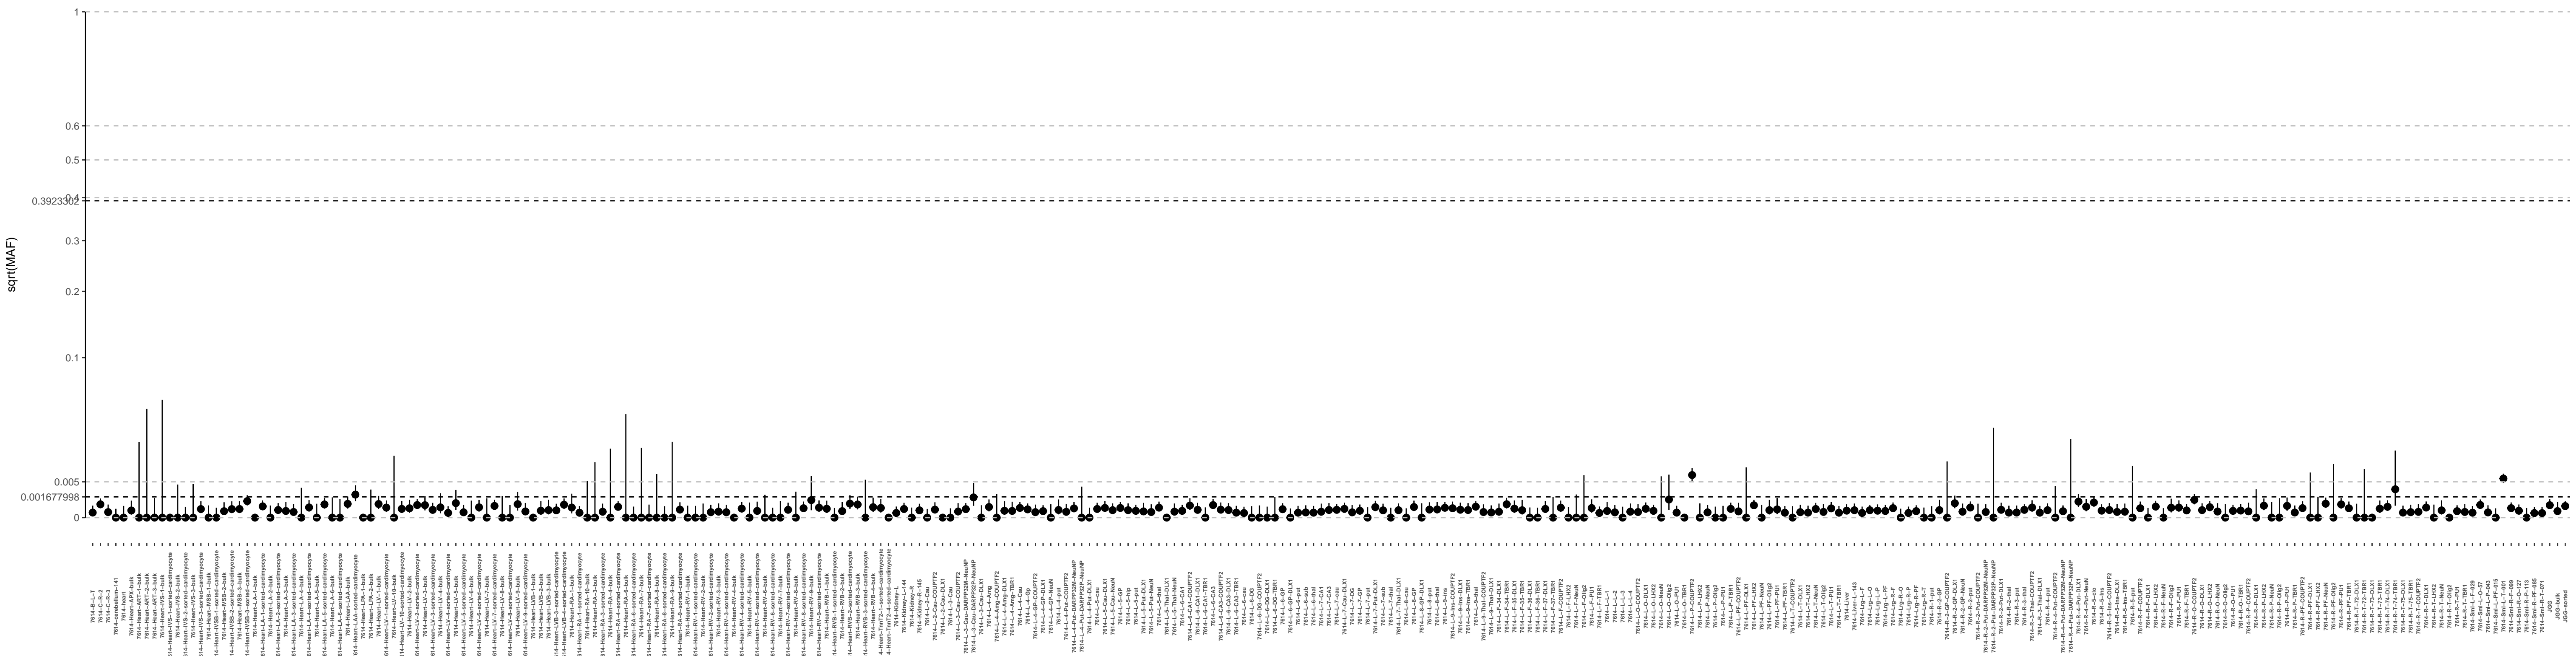

ID





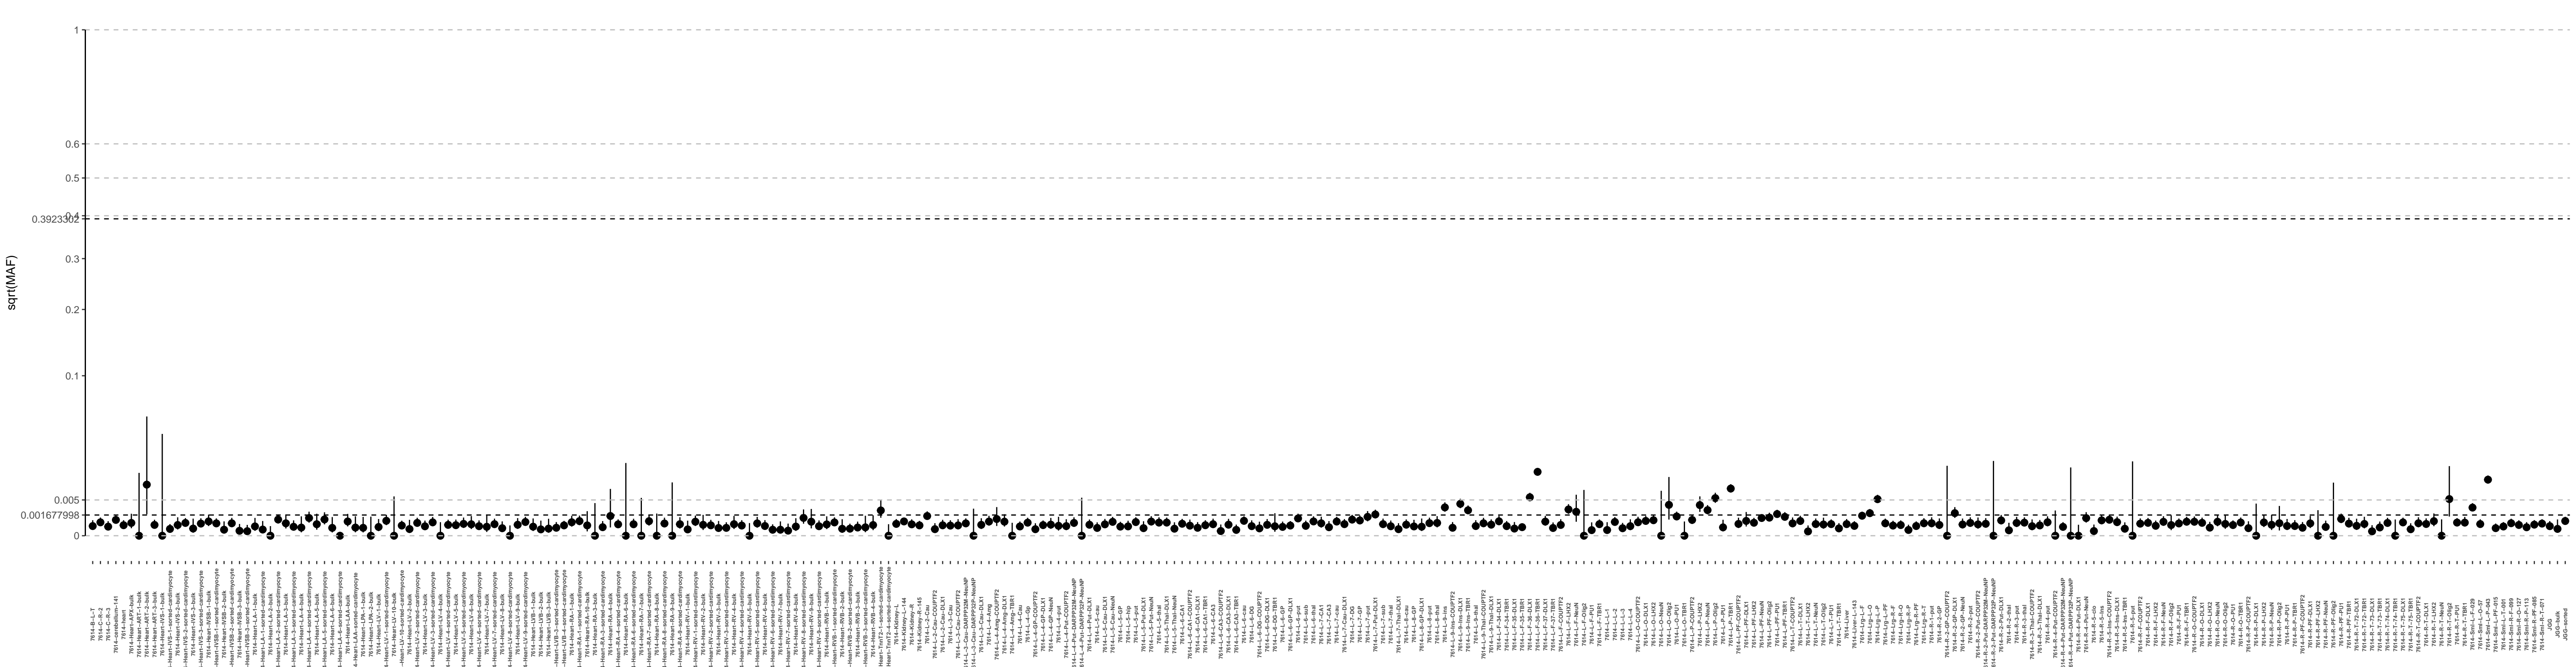

sqrt(MAF)

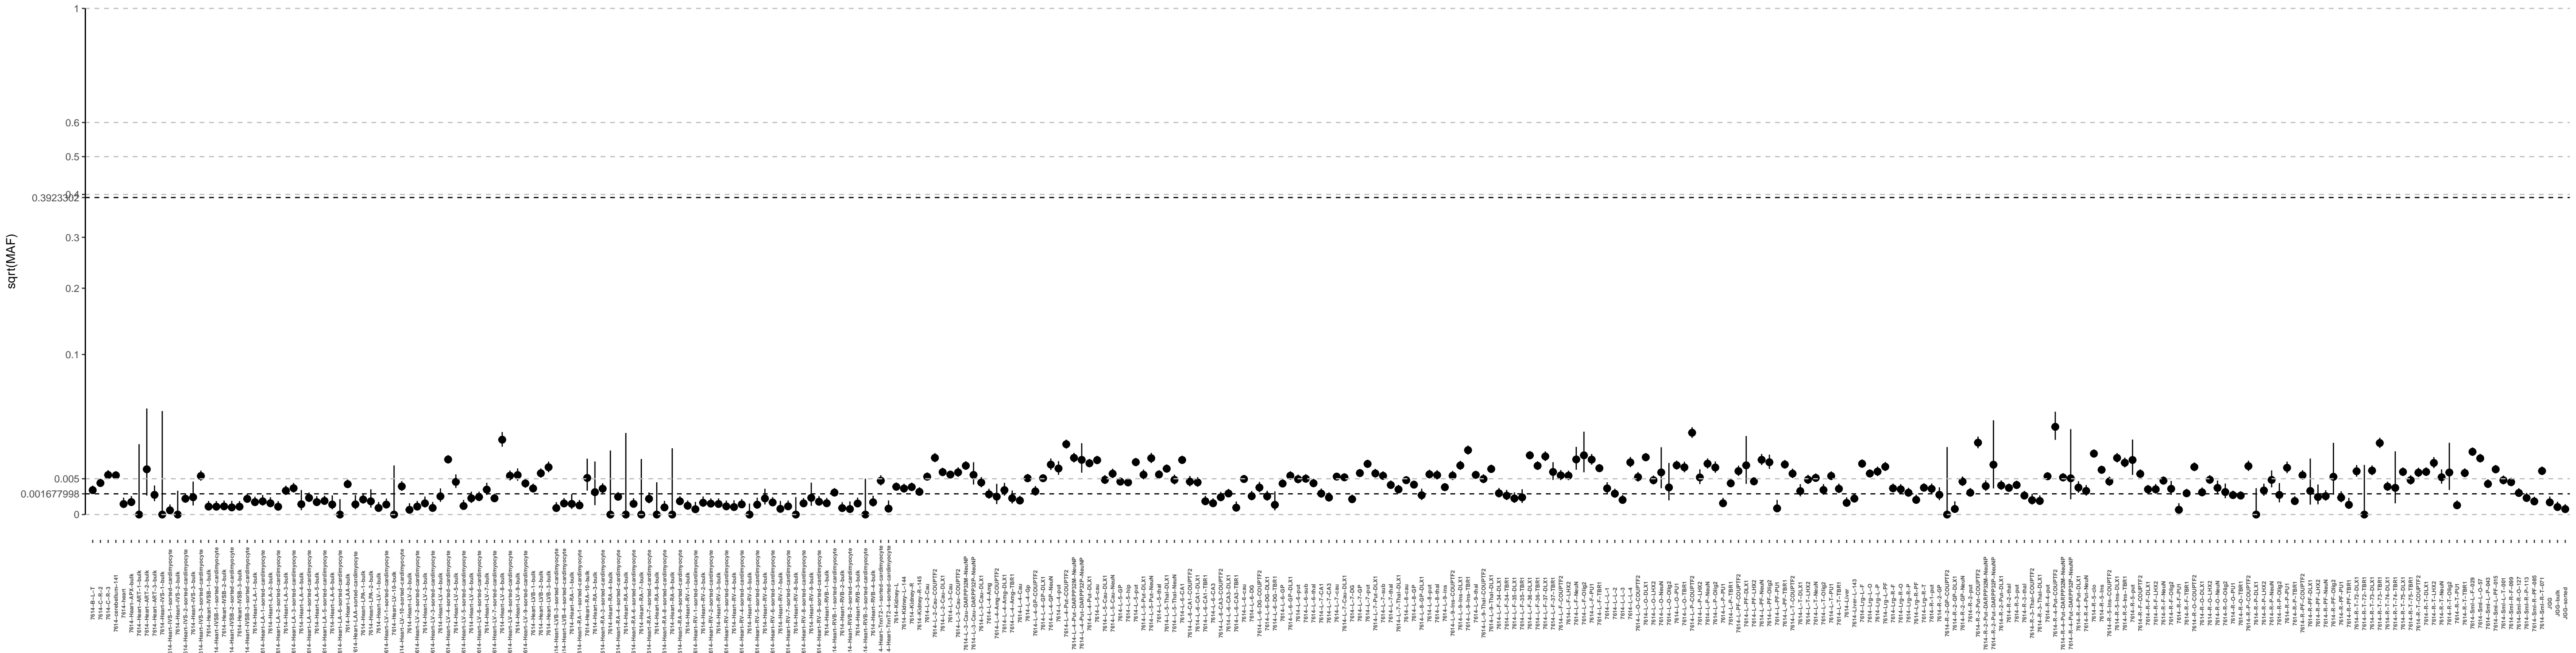

ID

JGQ-bulk  
JGQ-sorted



sqrt(MAF)

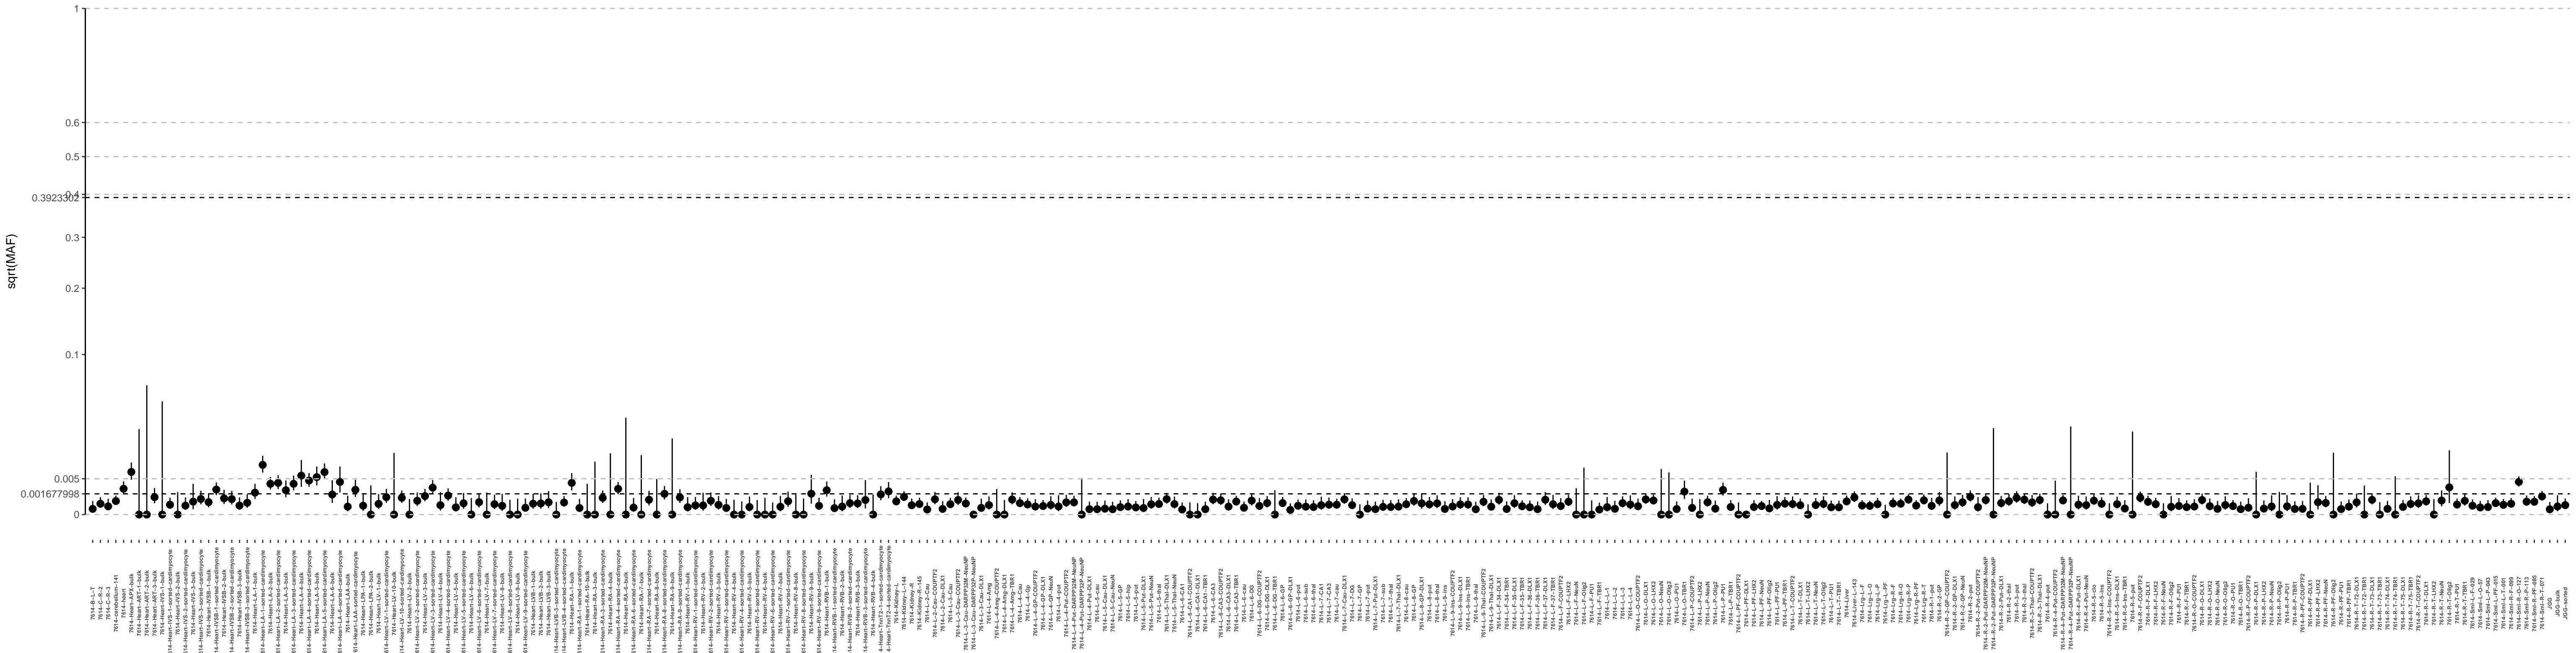

ID



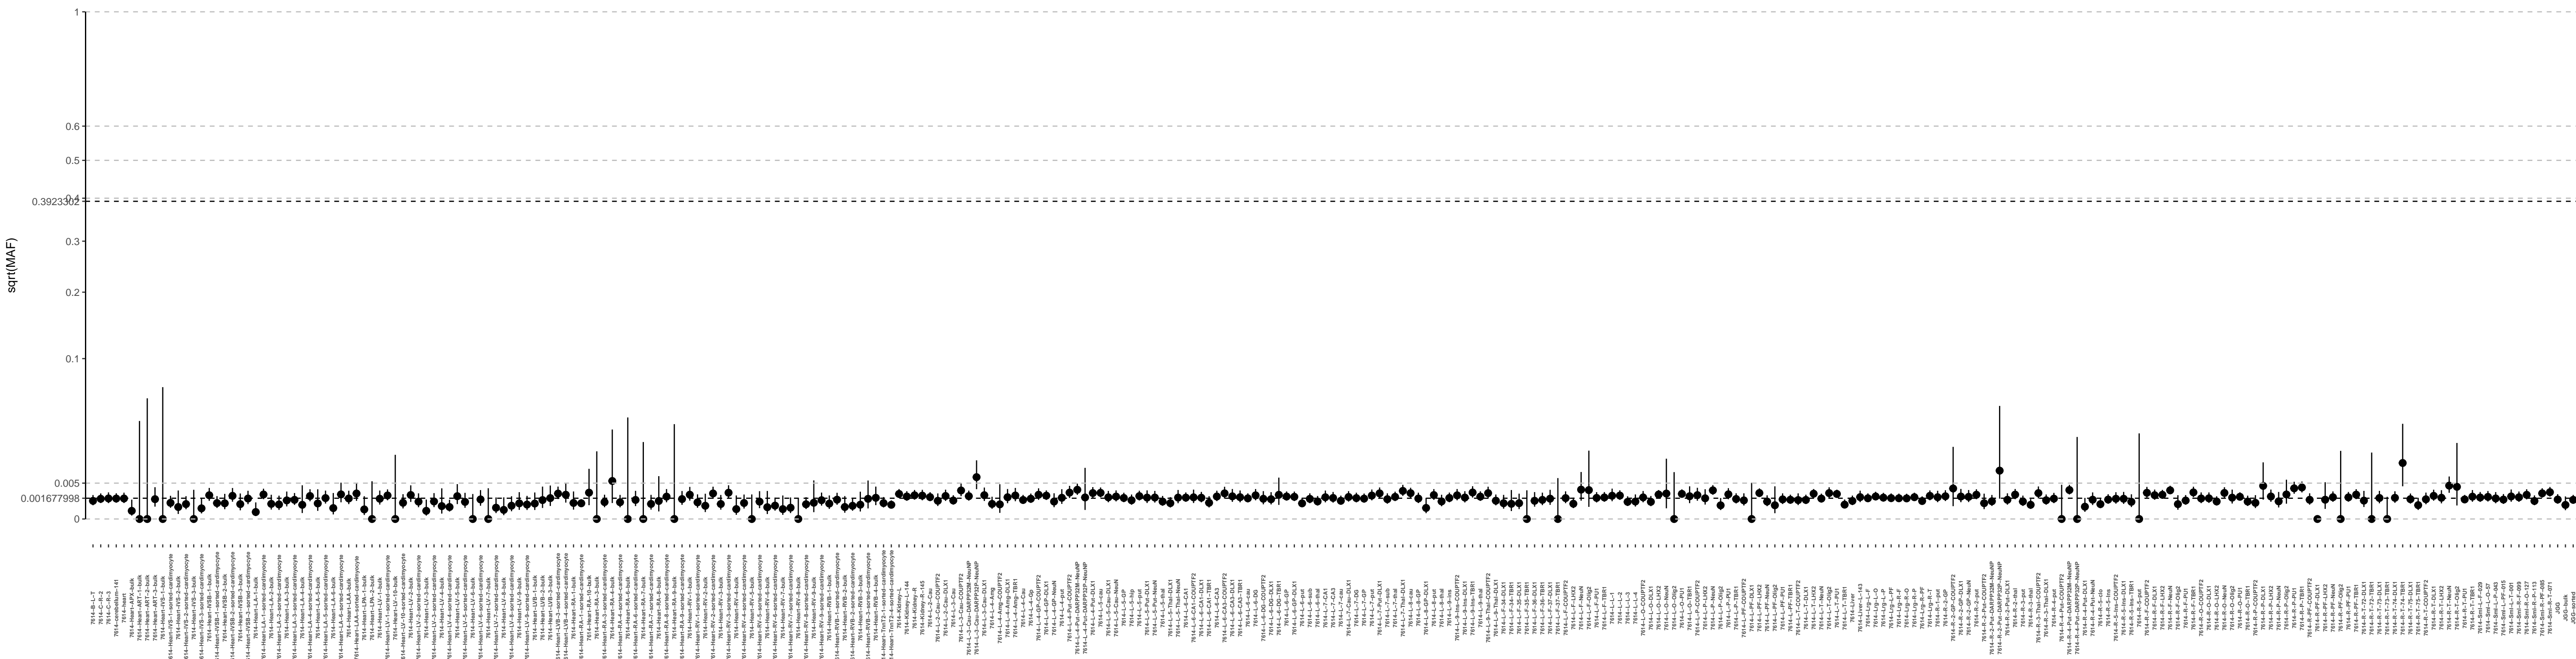

sqrt(MAF)

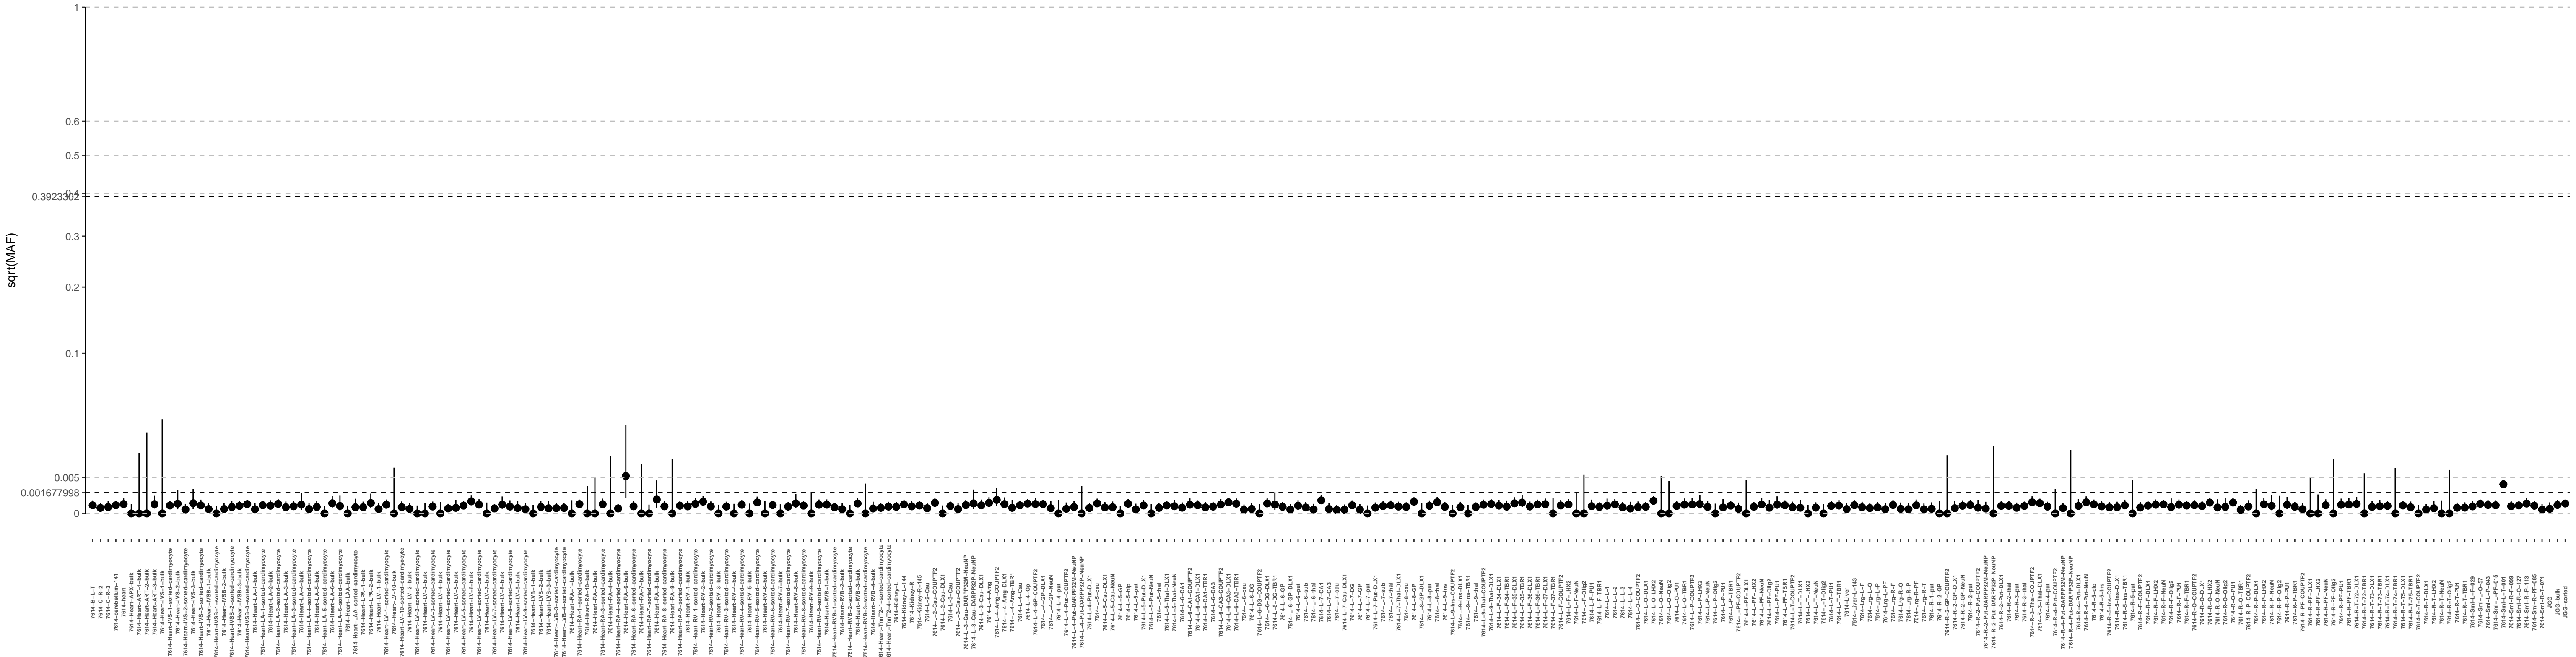

ID

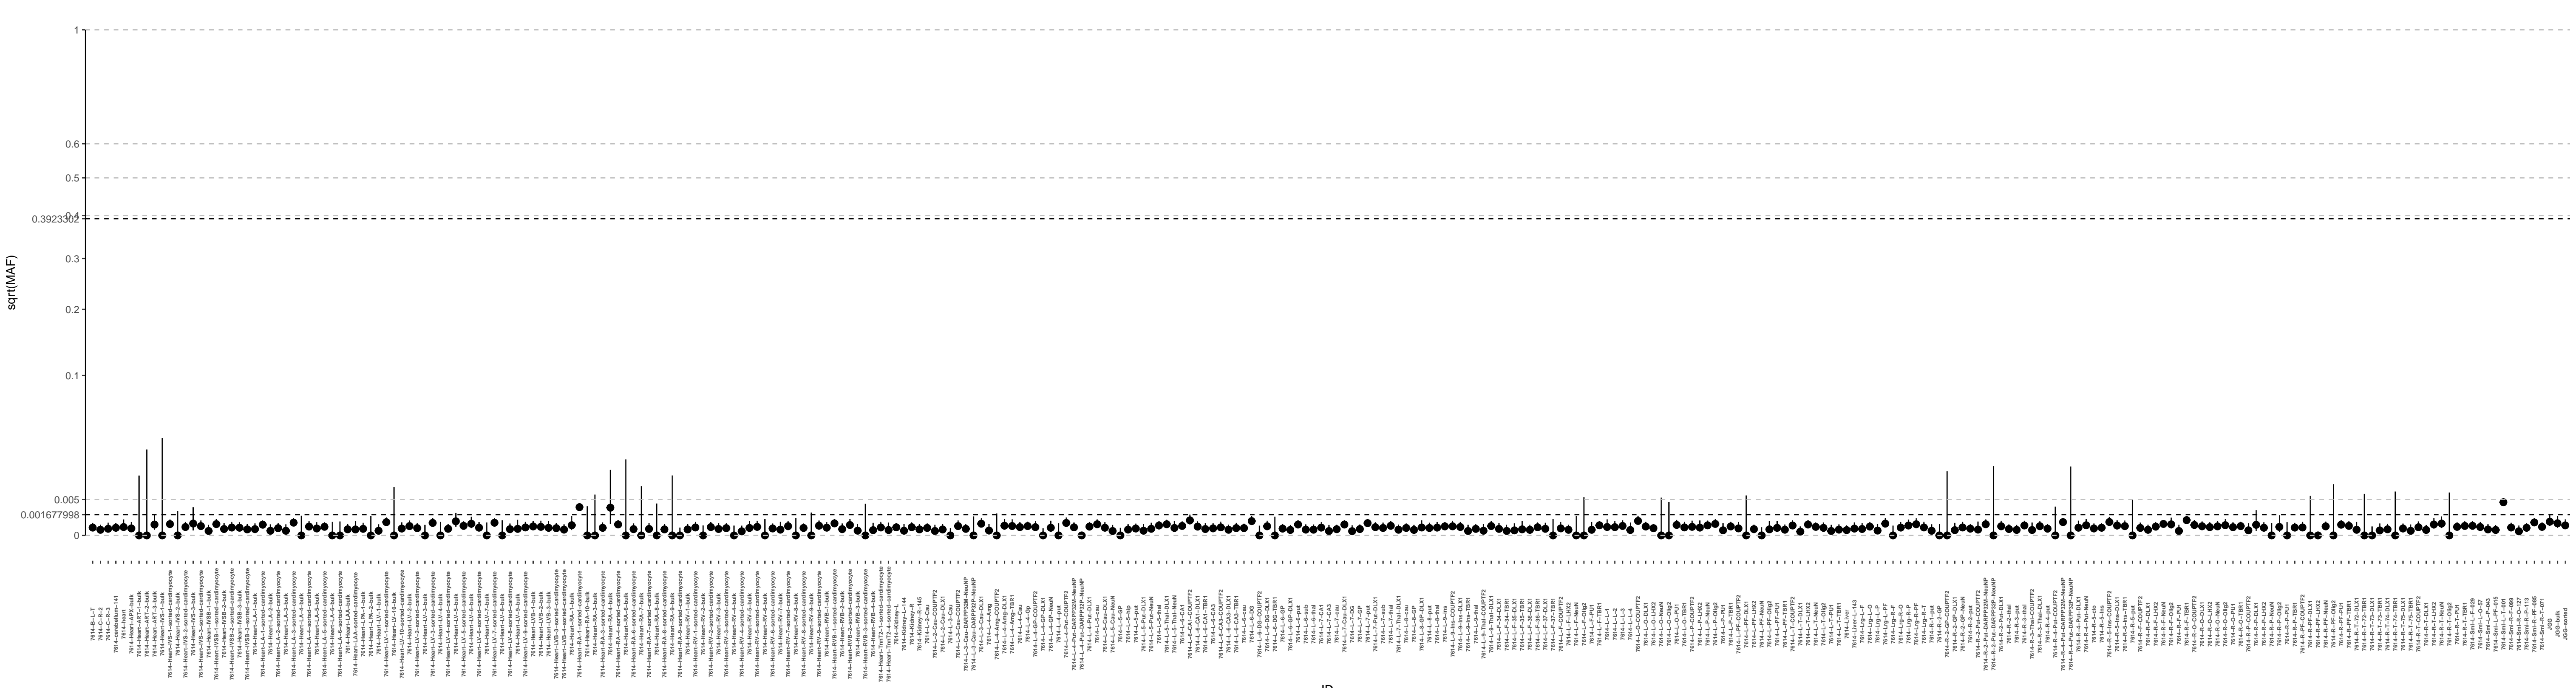



sqrt(MAF)

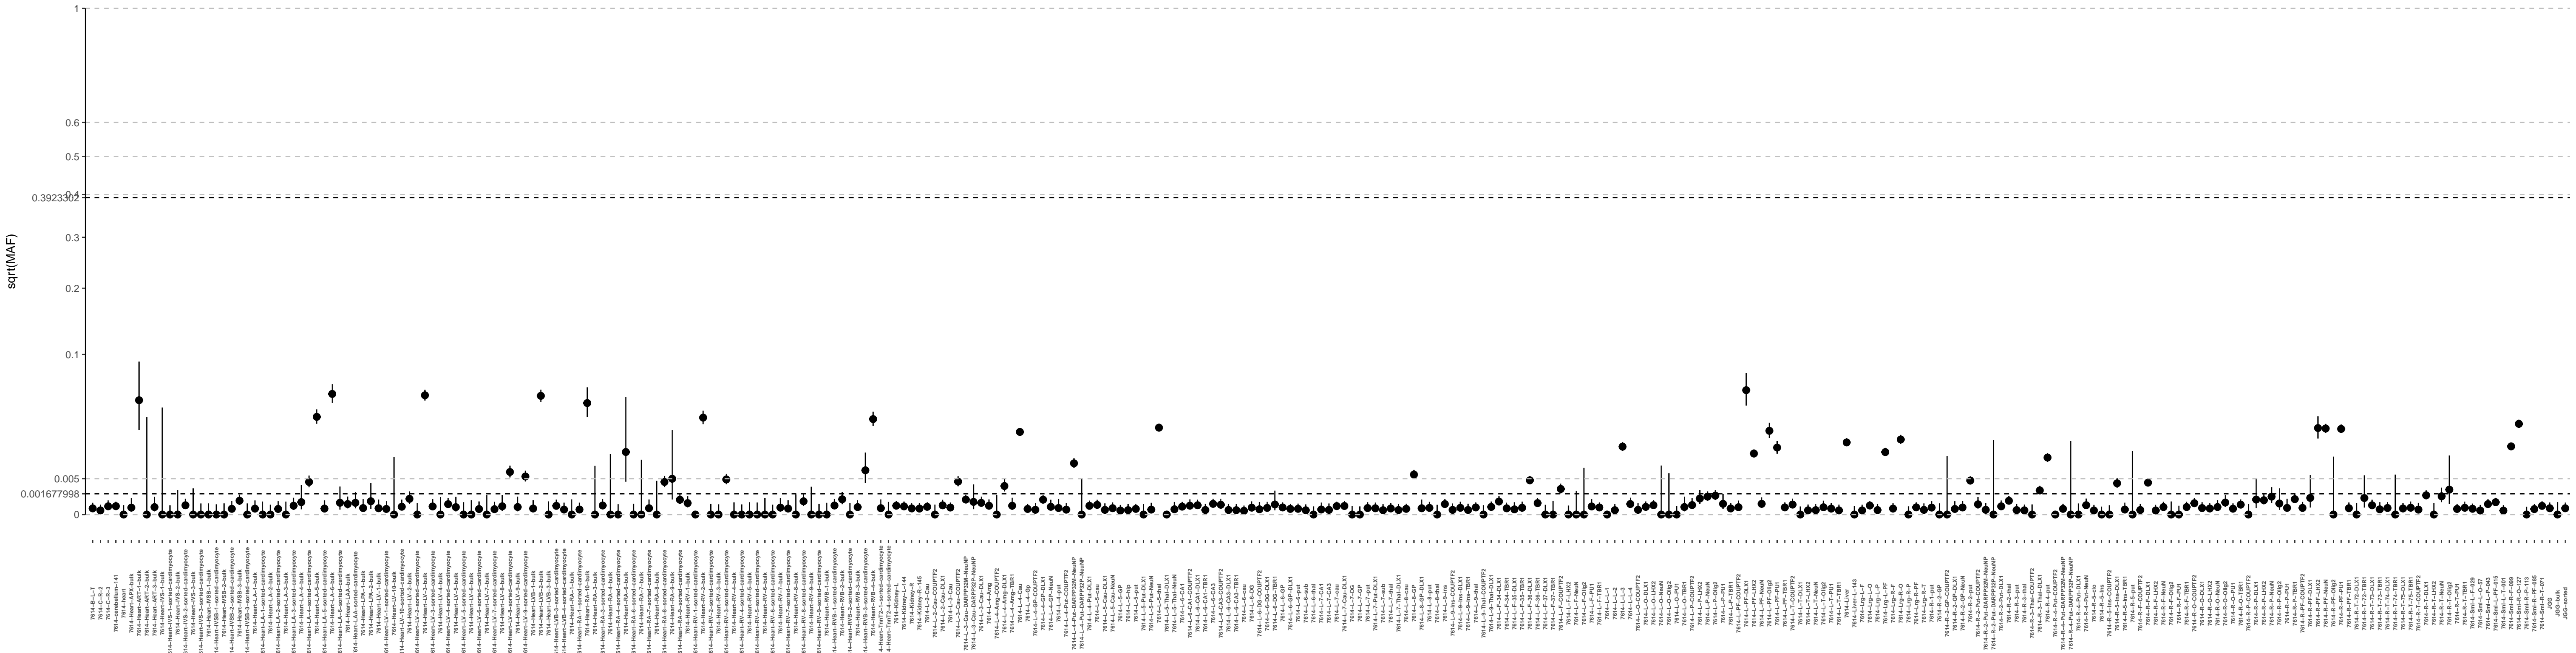

ID

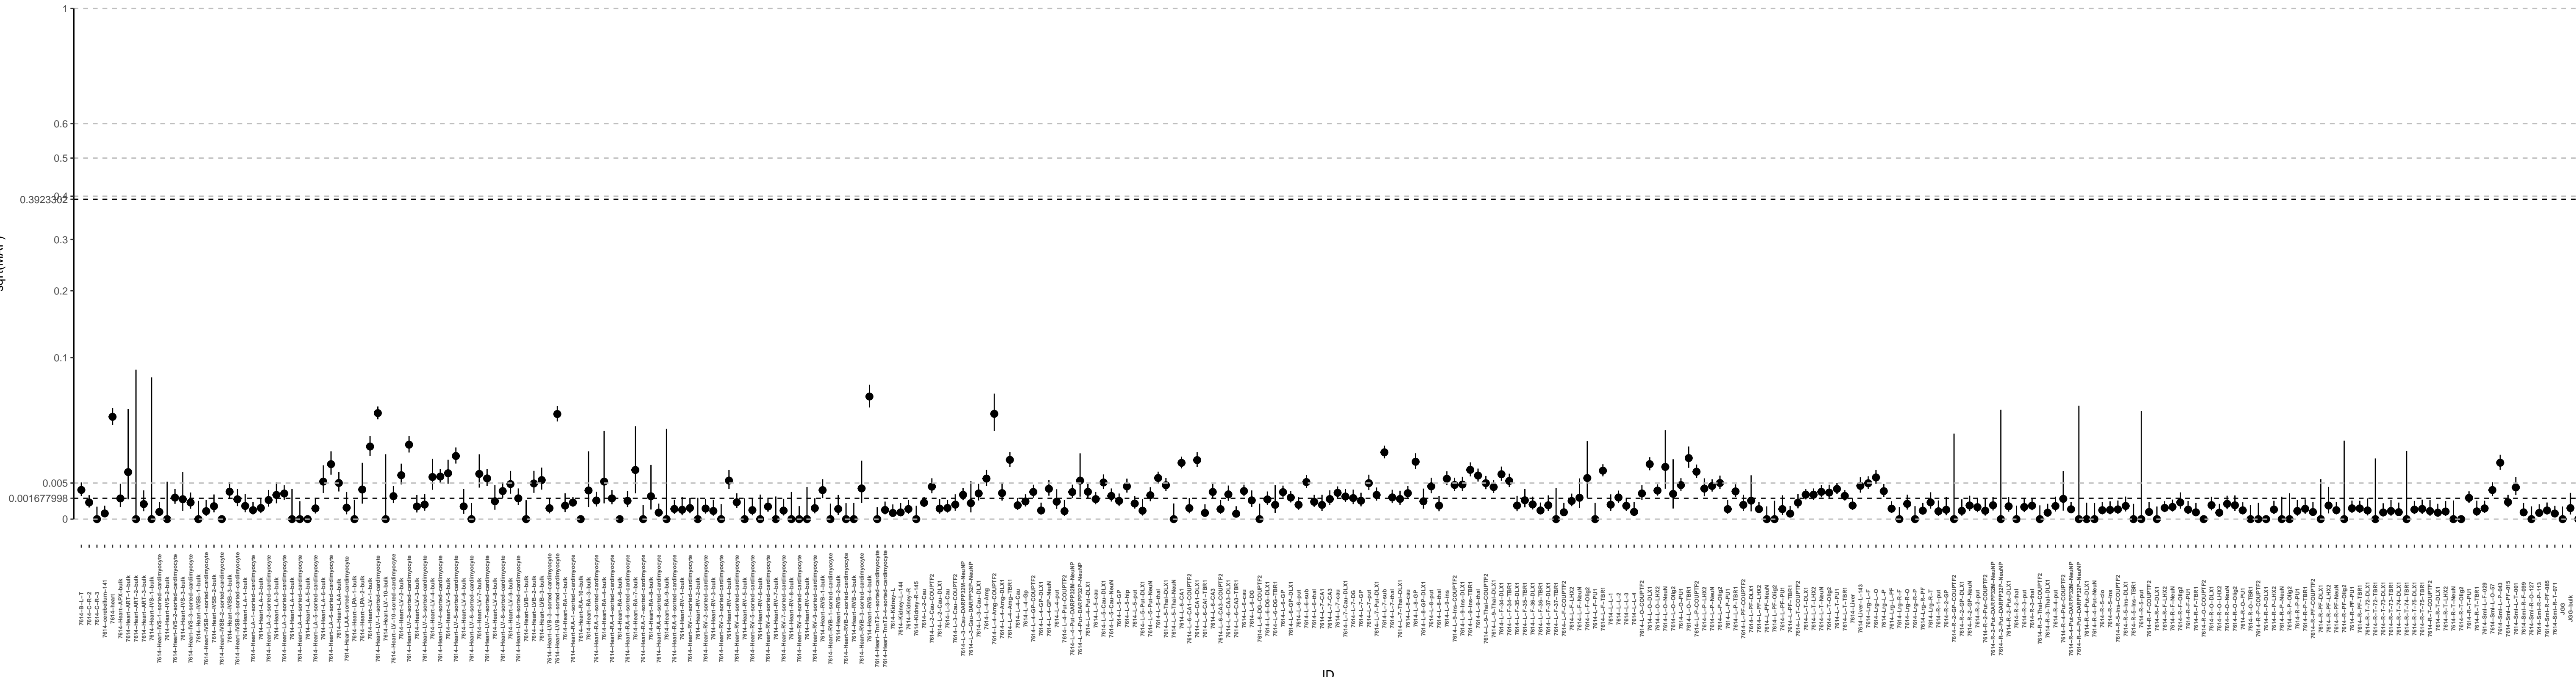

ID

sqrt(MAF)

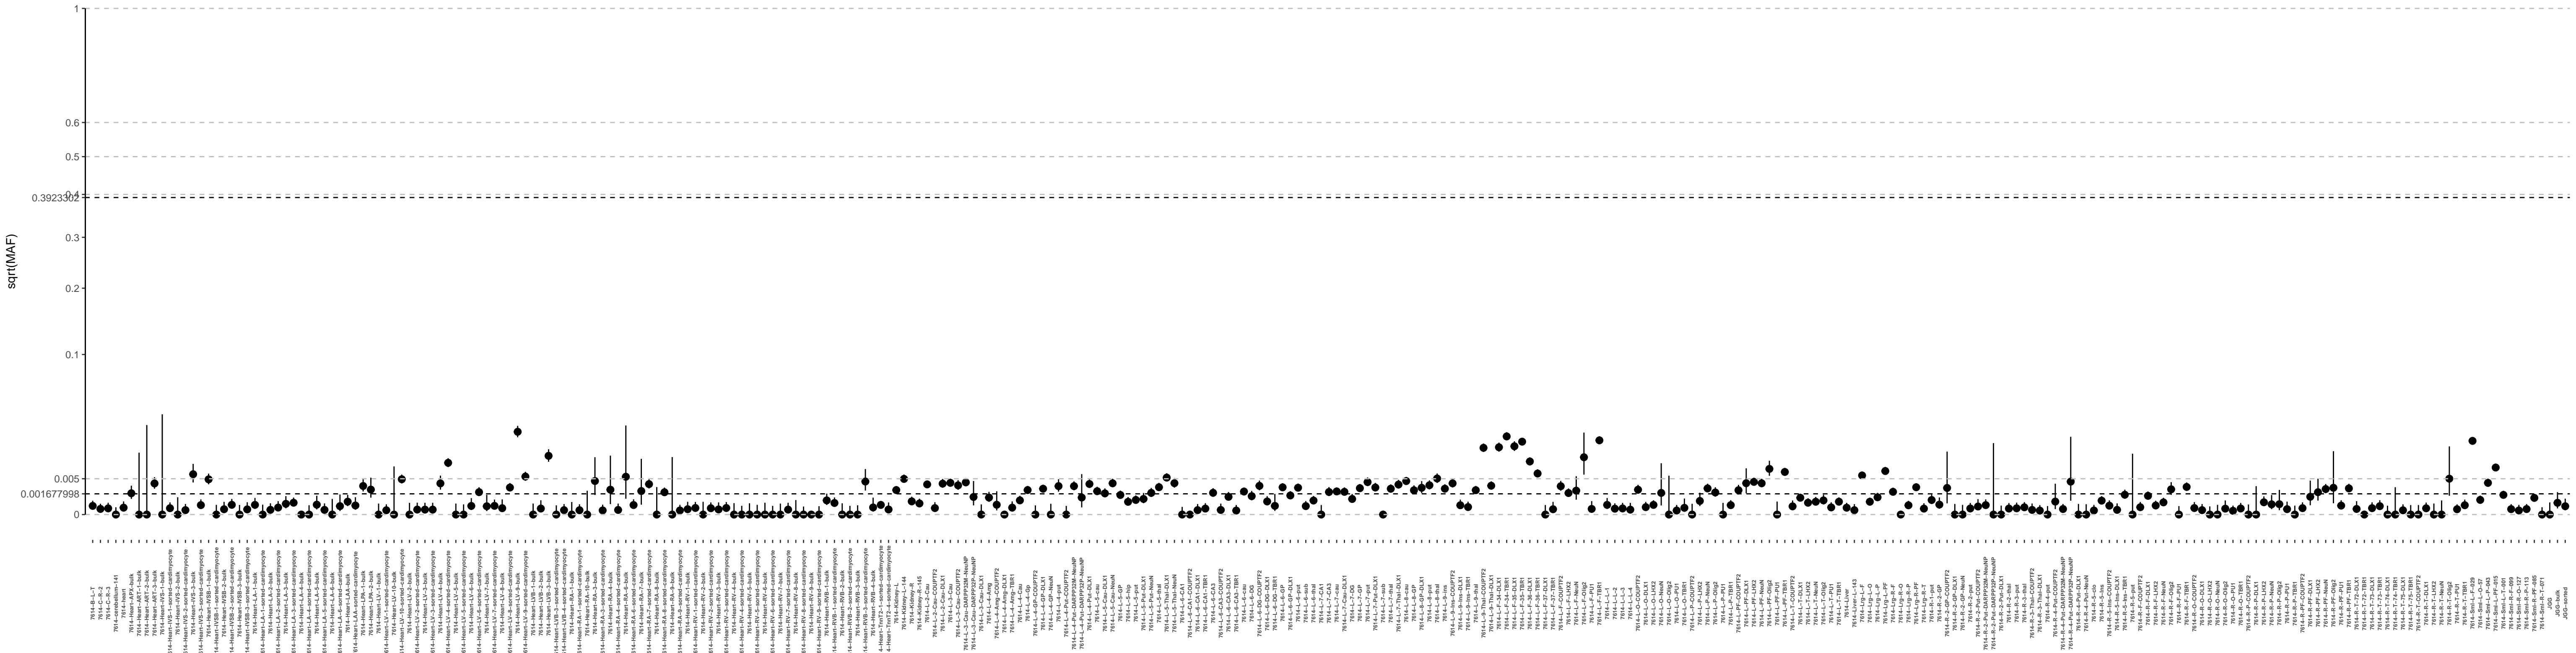

ID

sqrt(MAF)

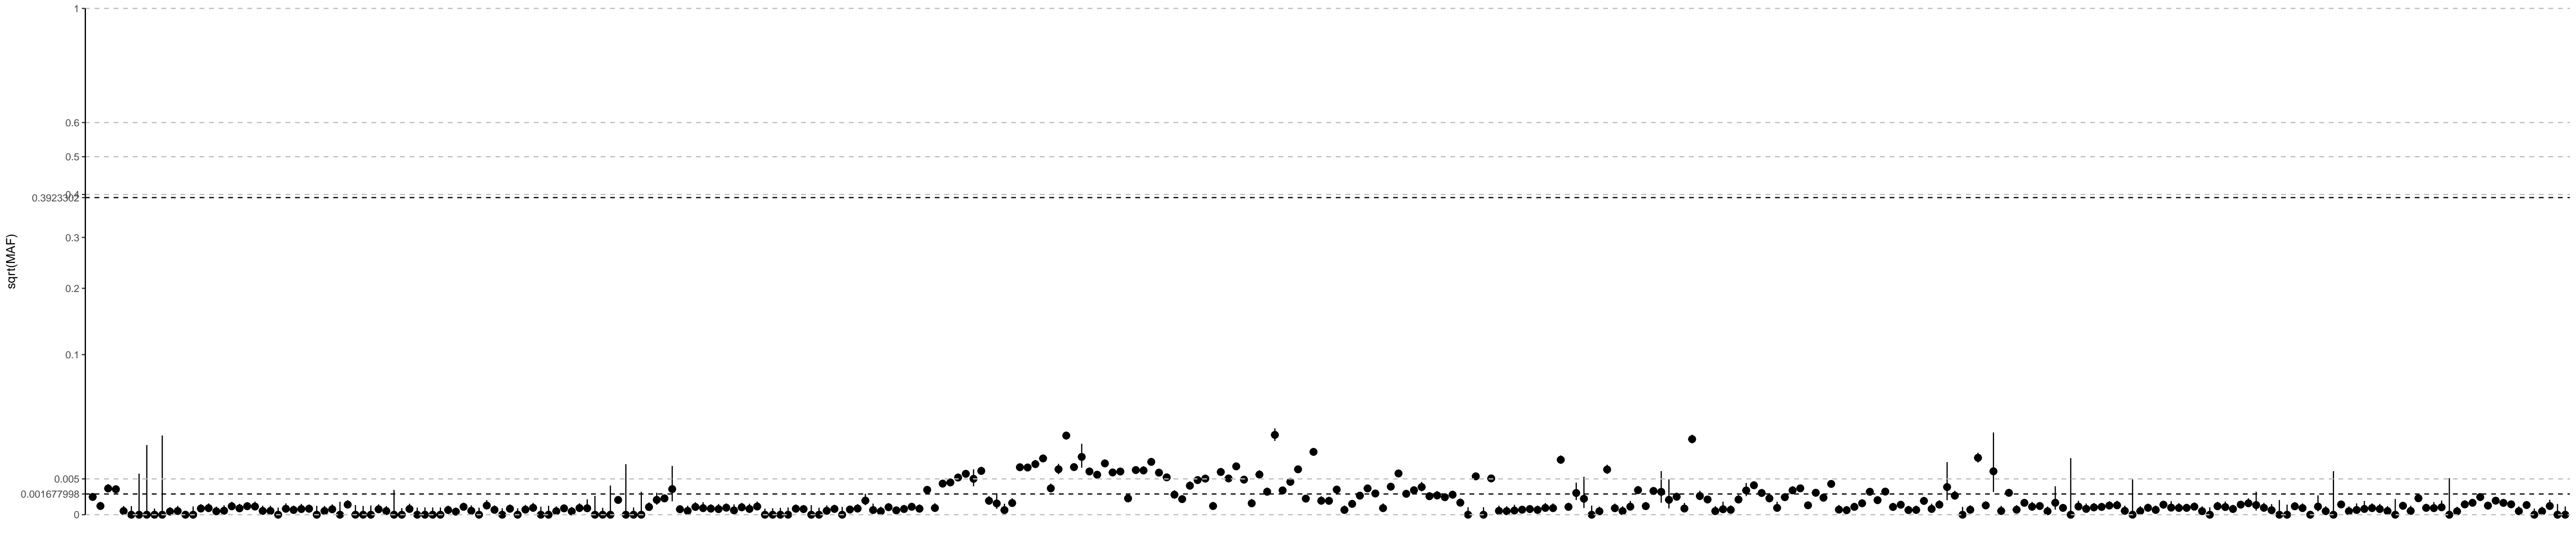

ID



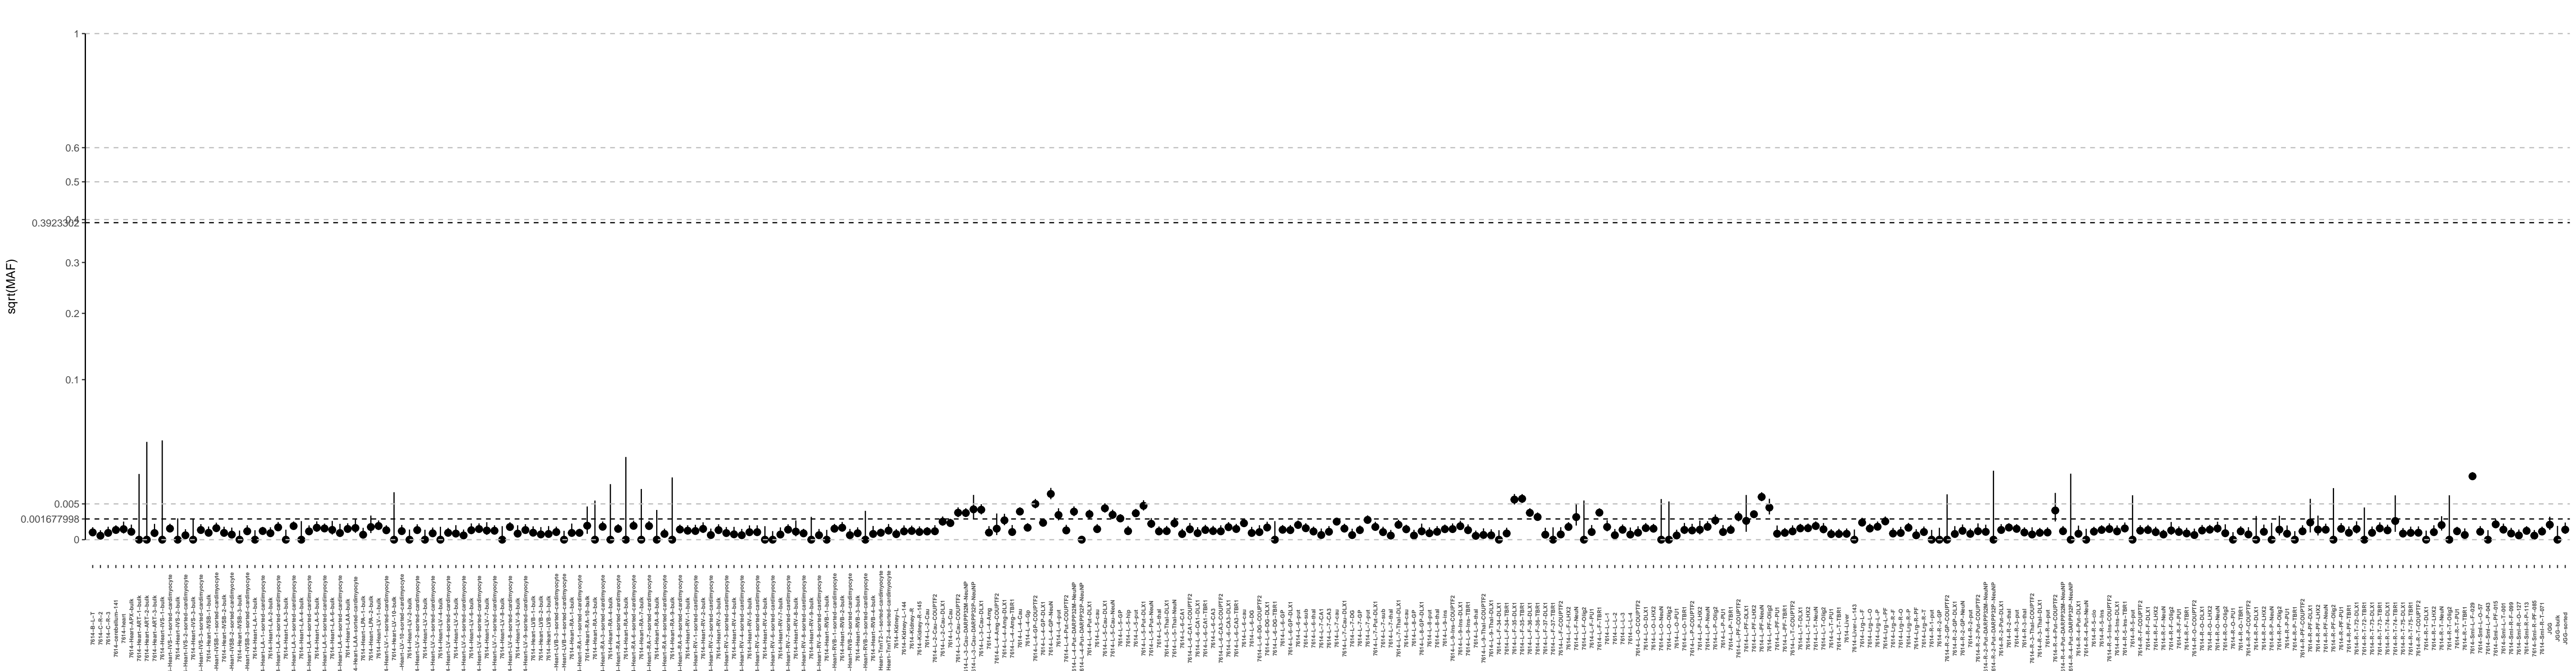



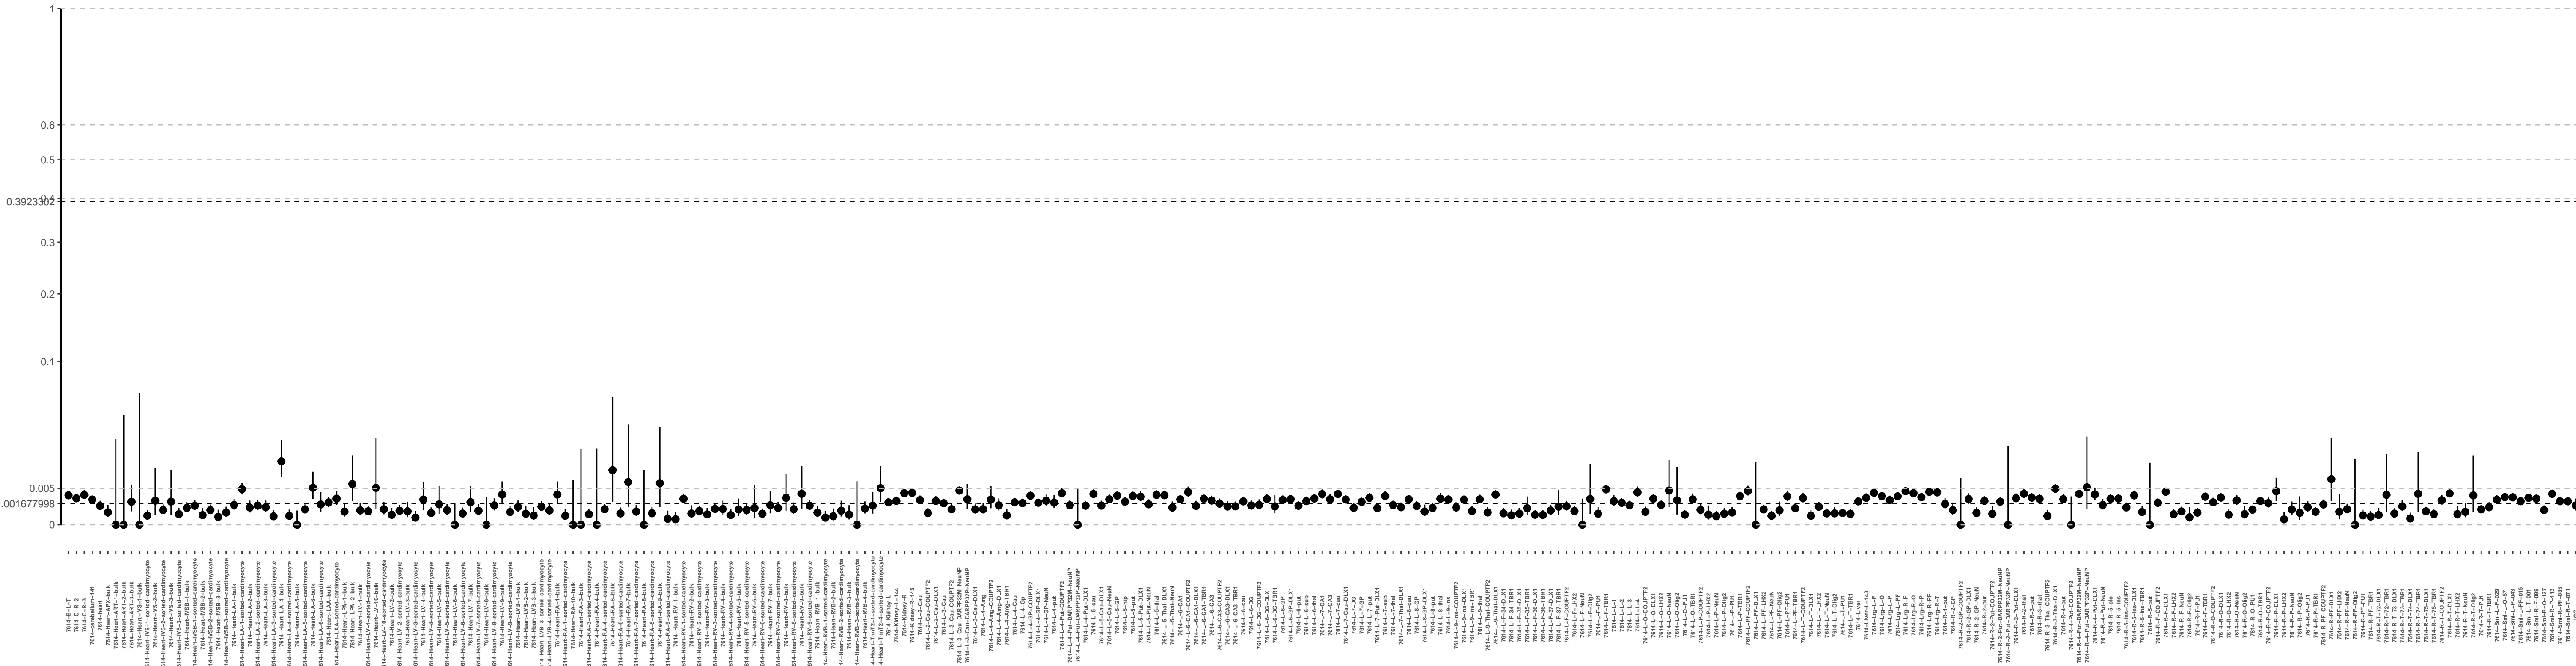

ID

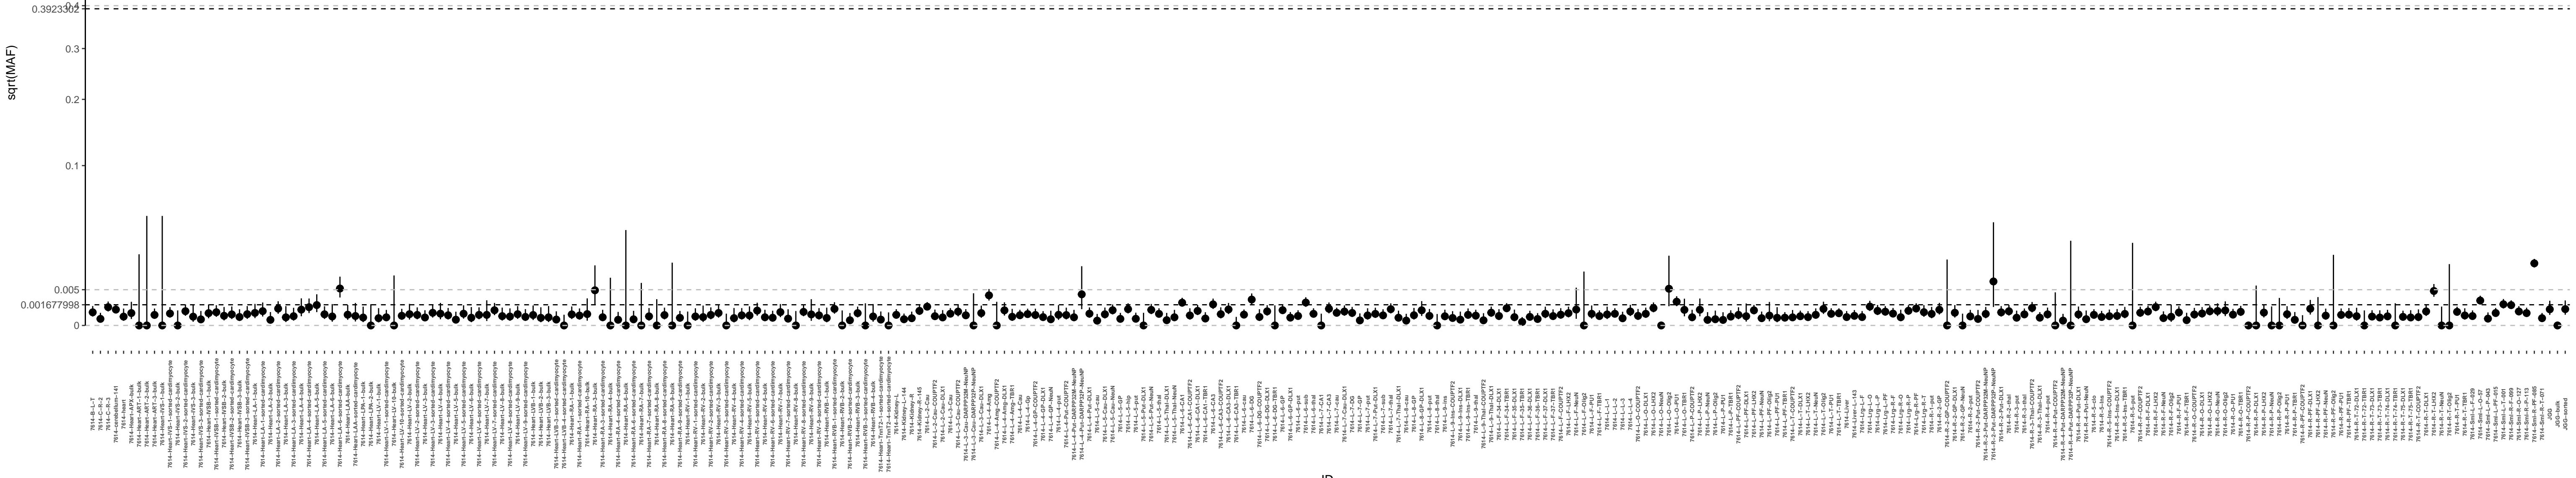

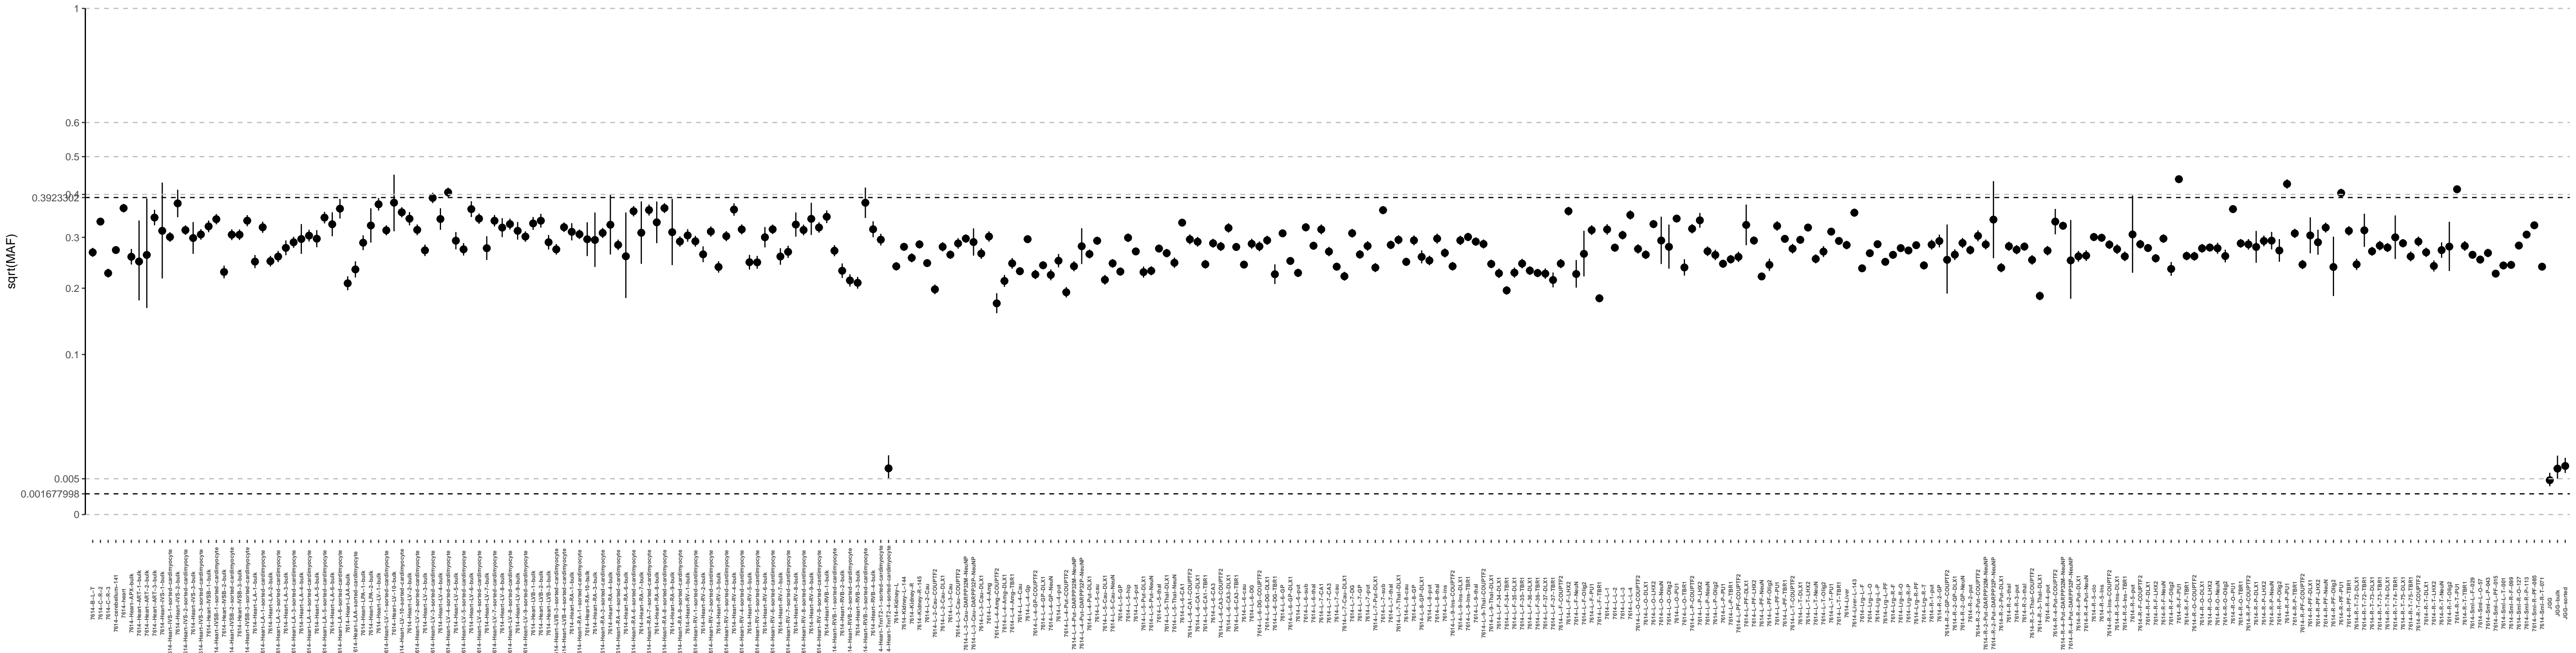

ID





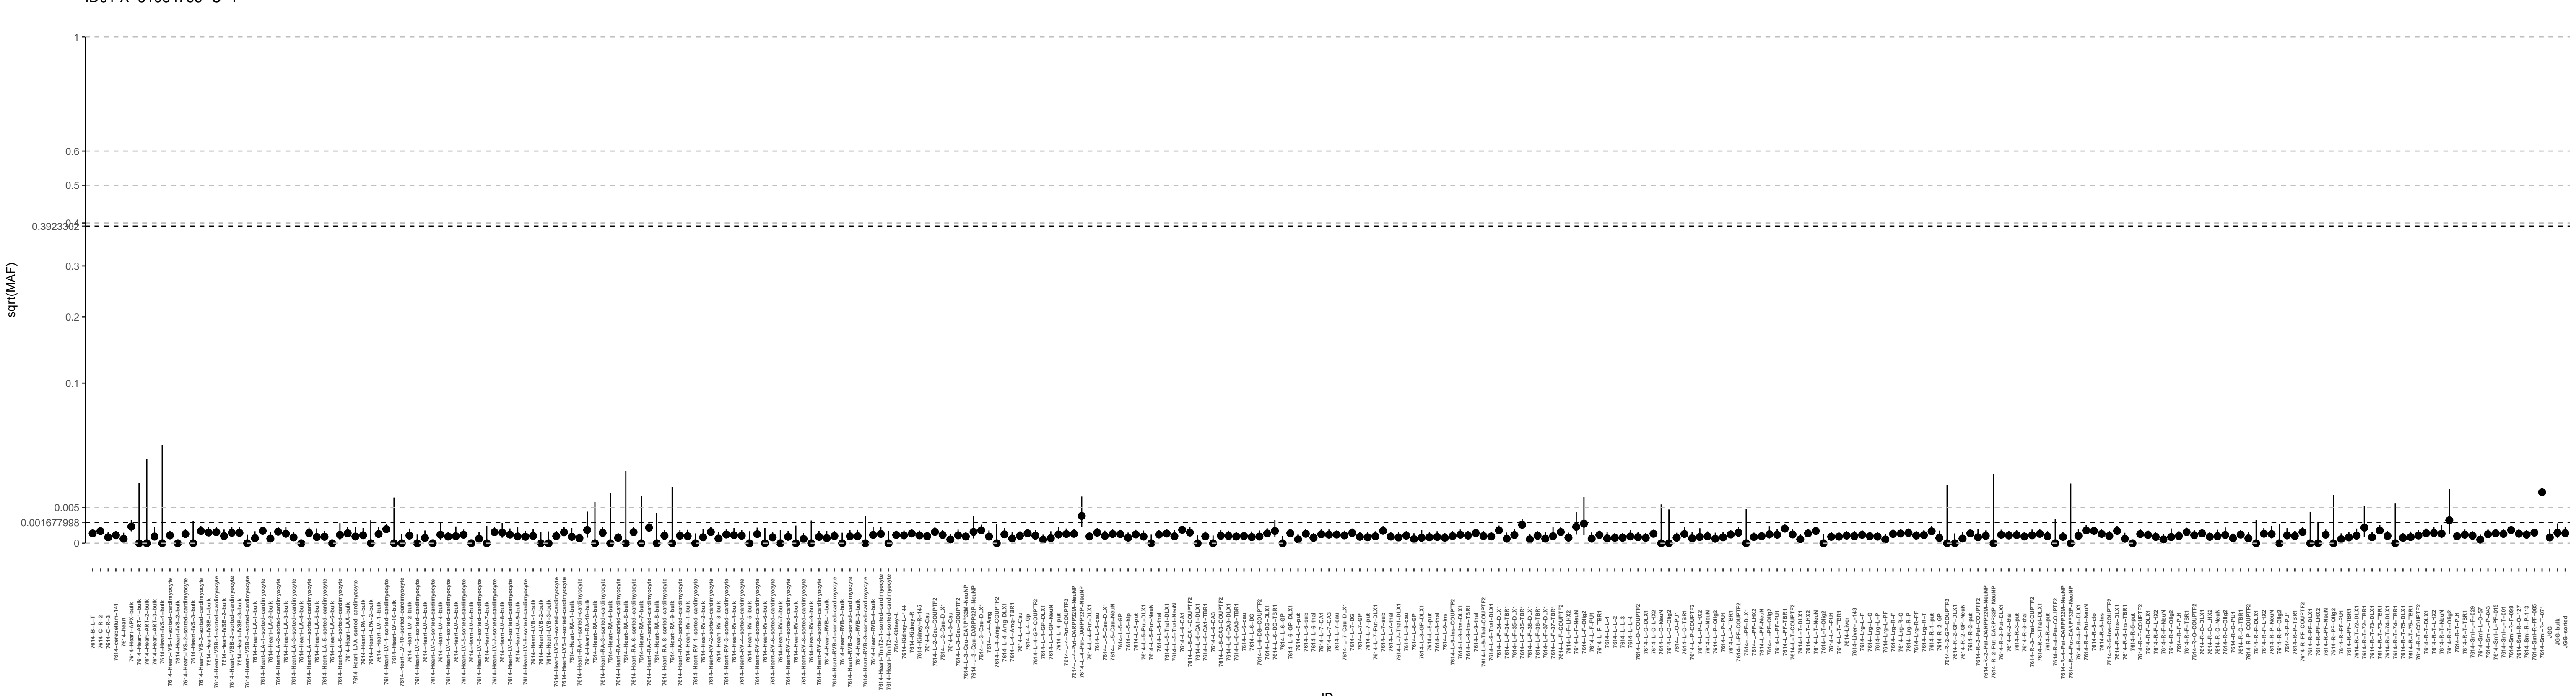

ID



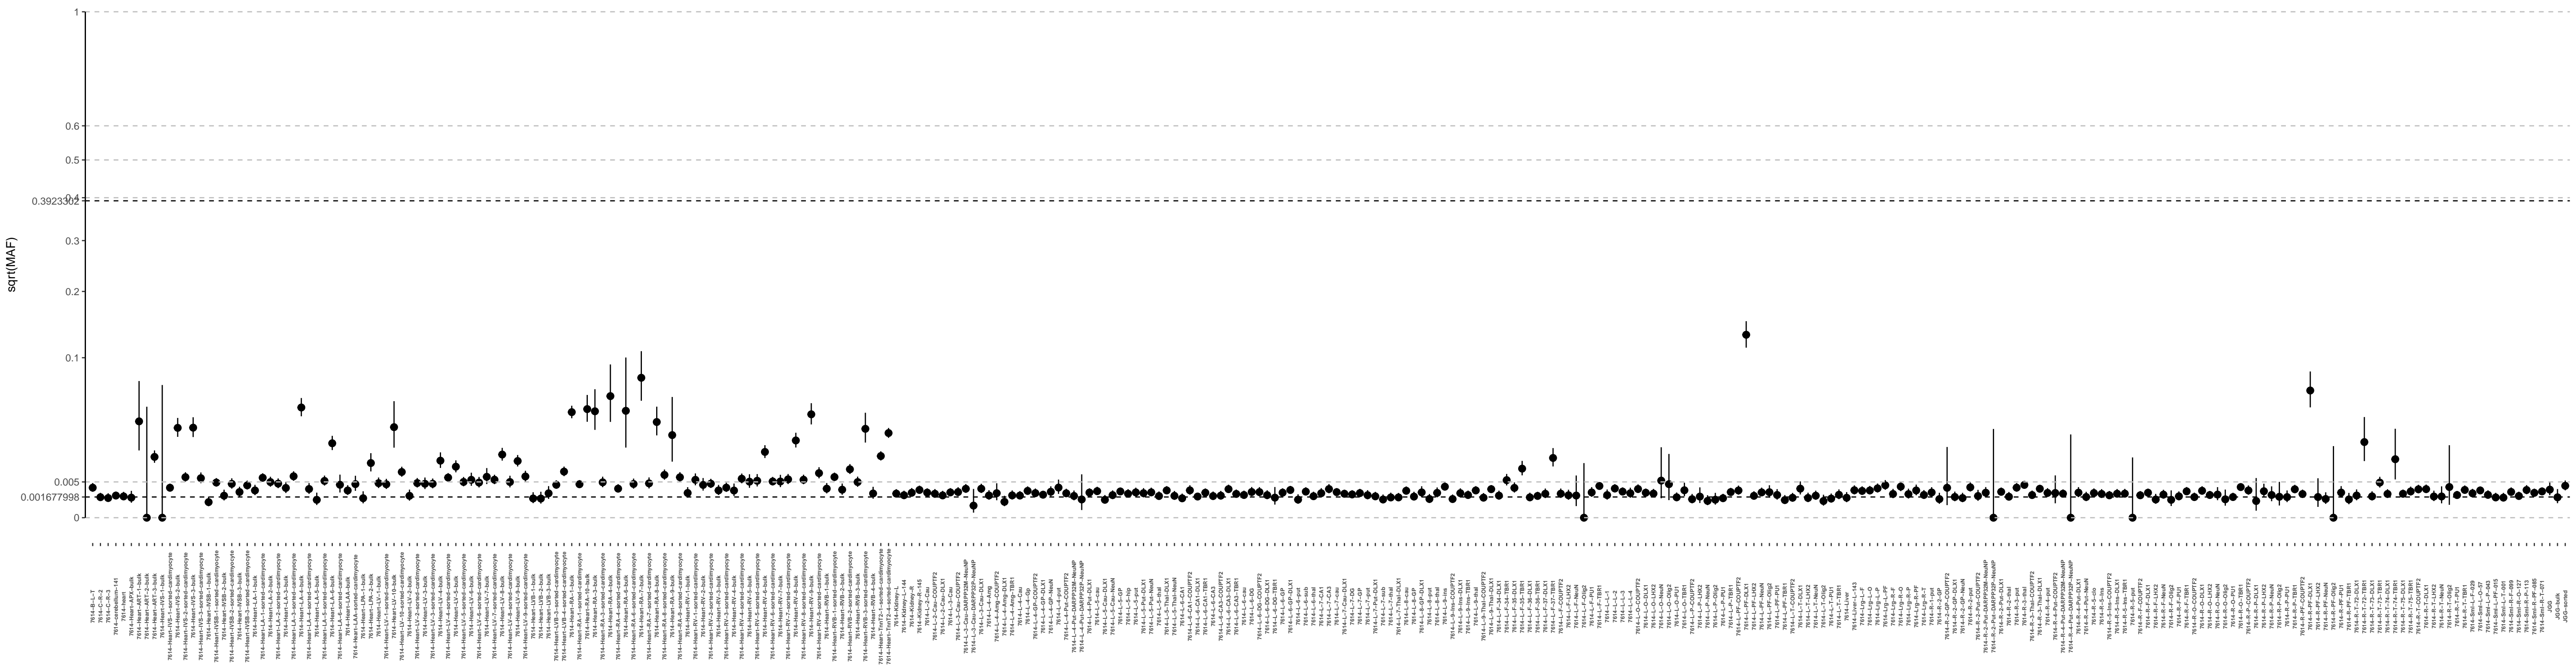

ID

JGG-bulk  
JGG-sorted

sqrt(MAF)

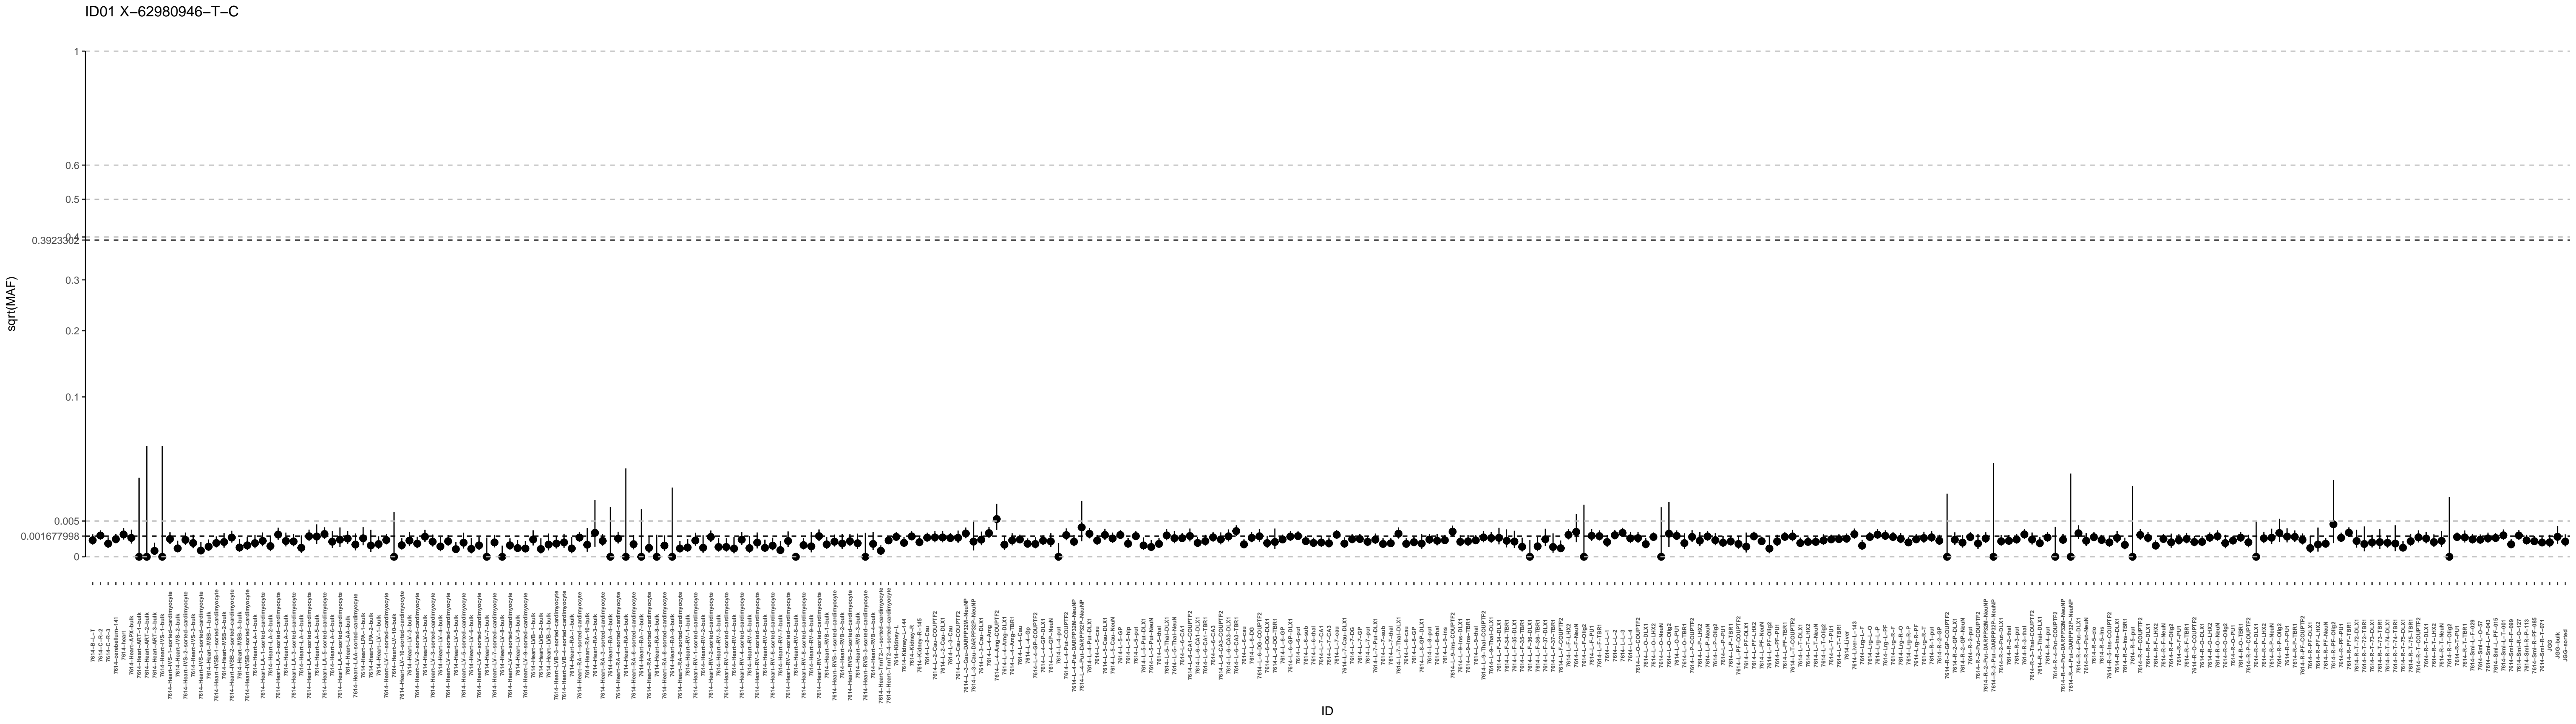

ID



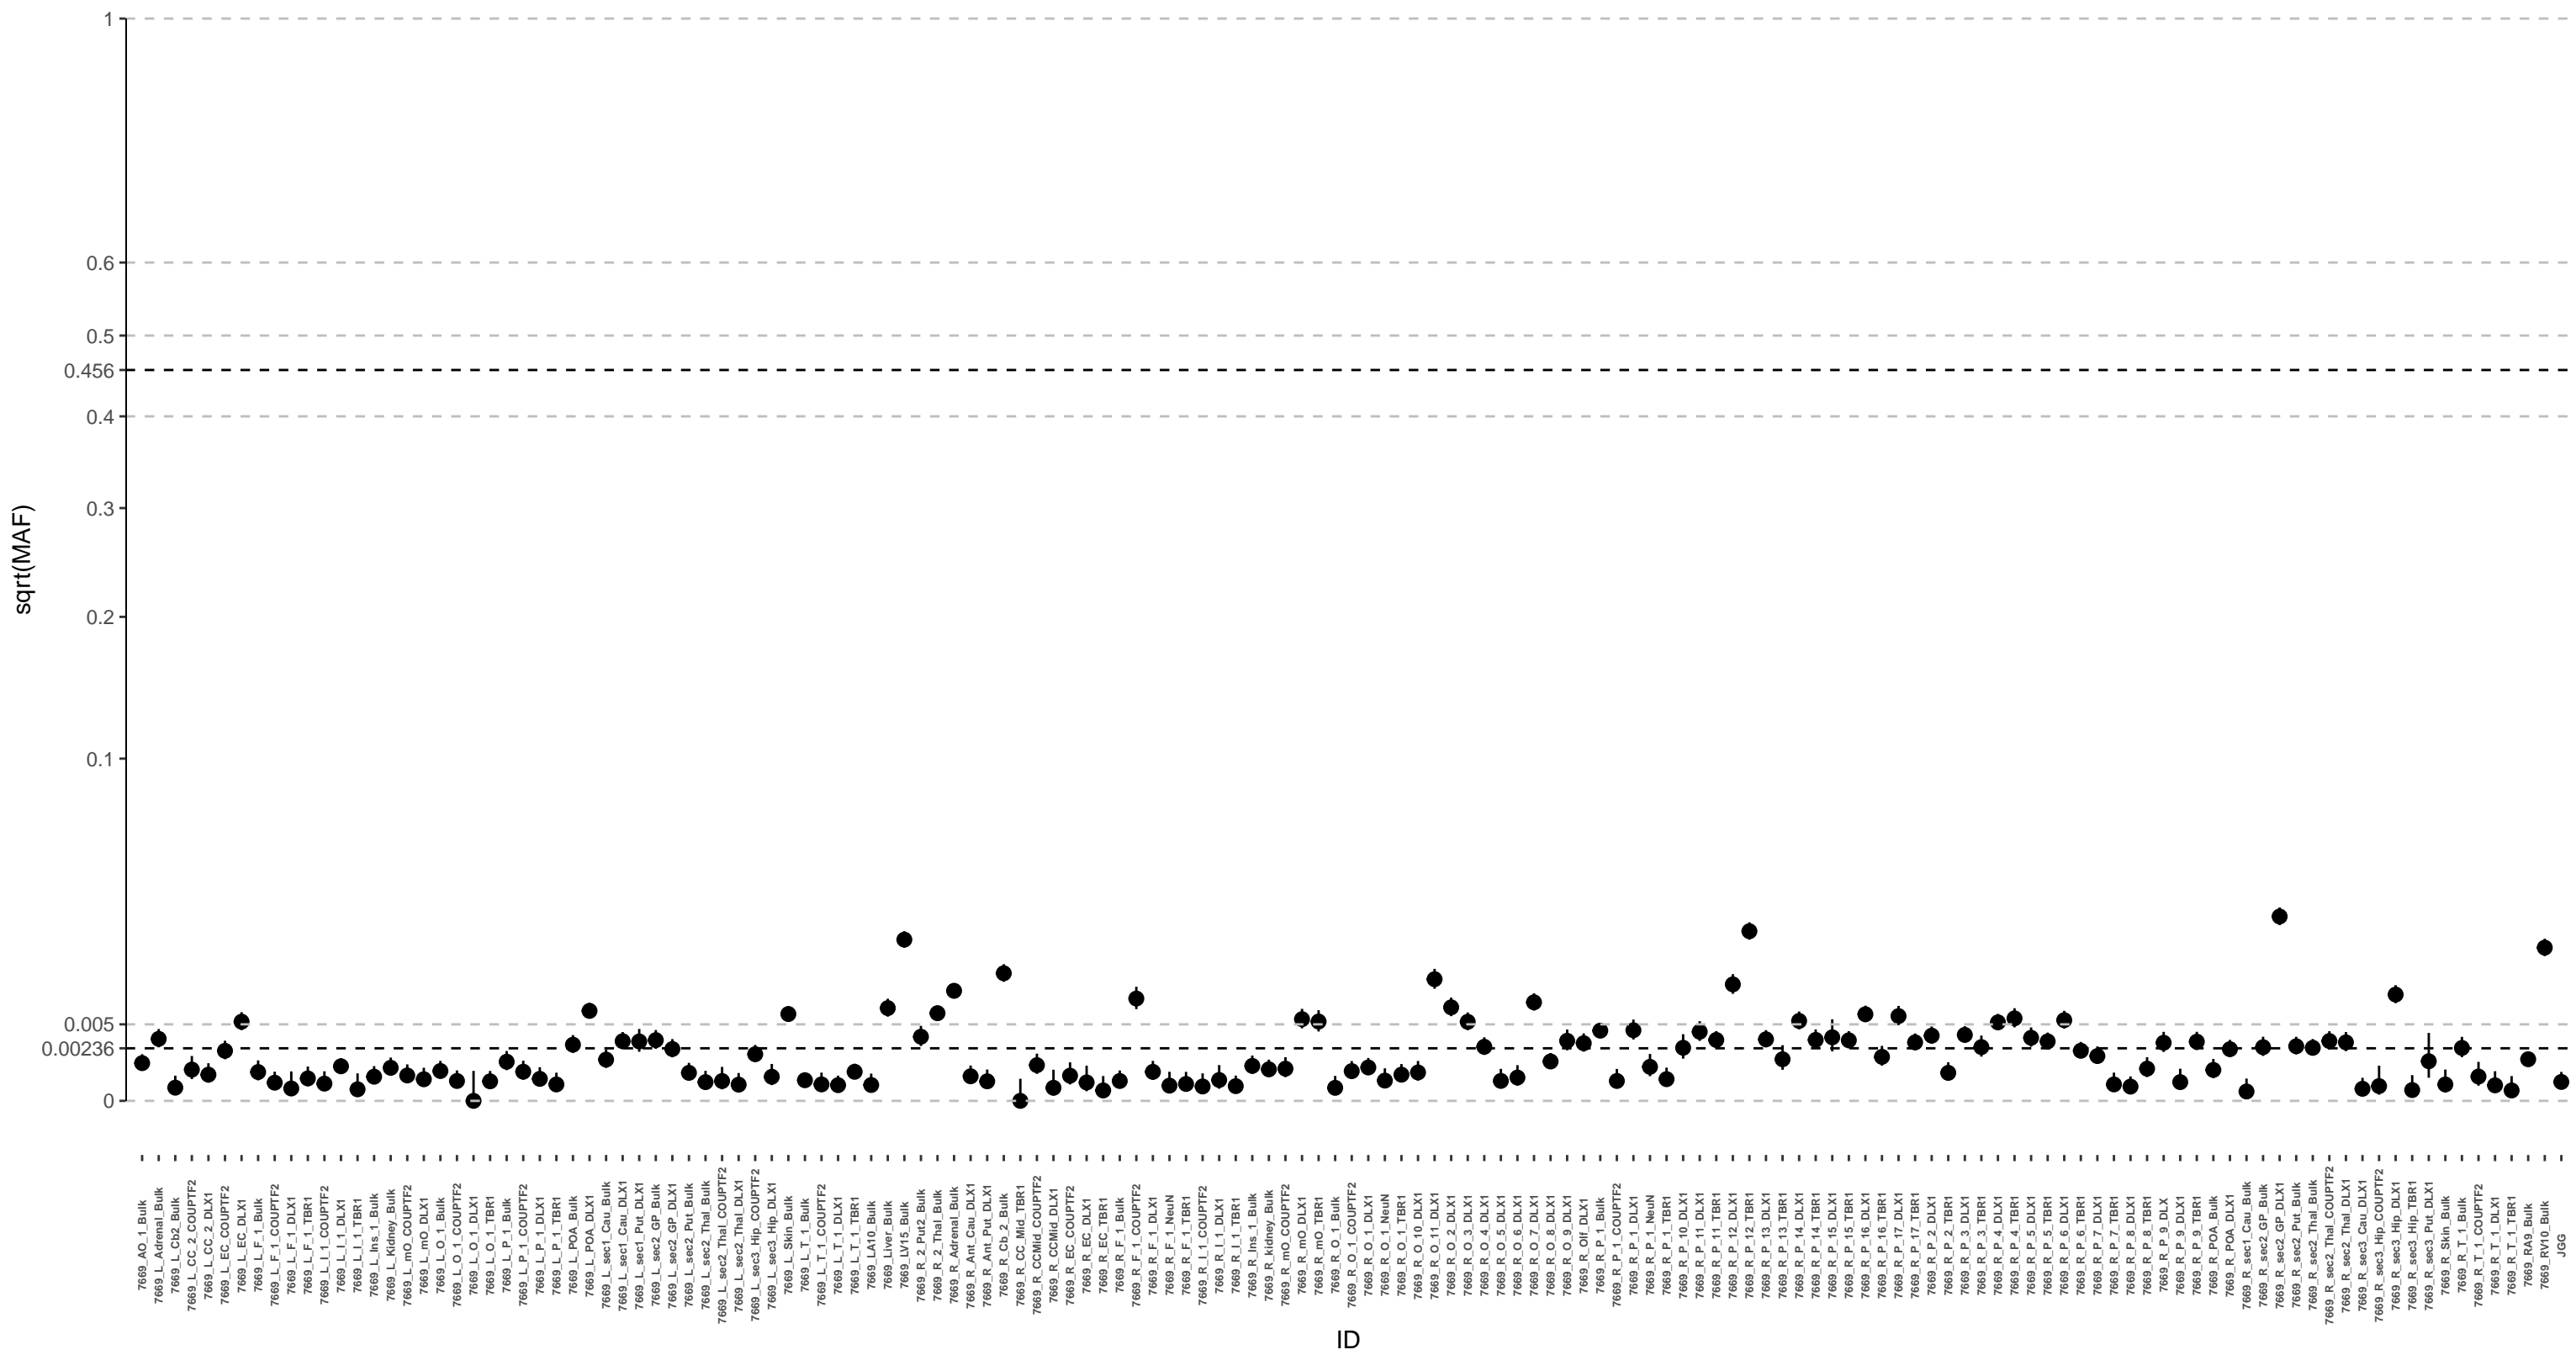

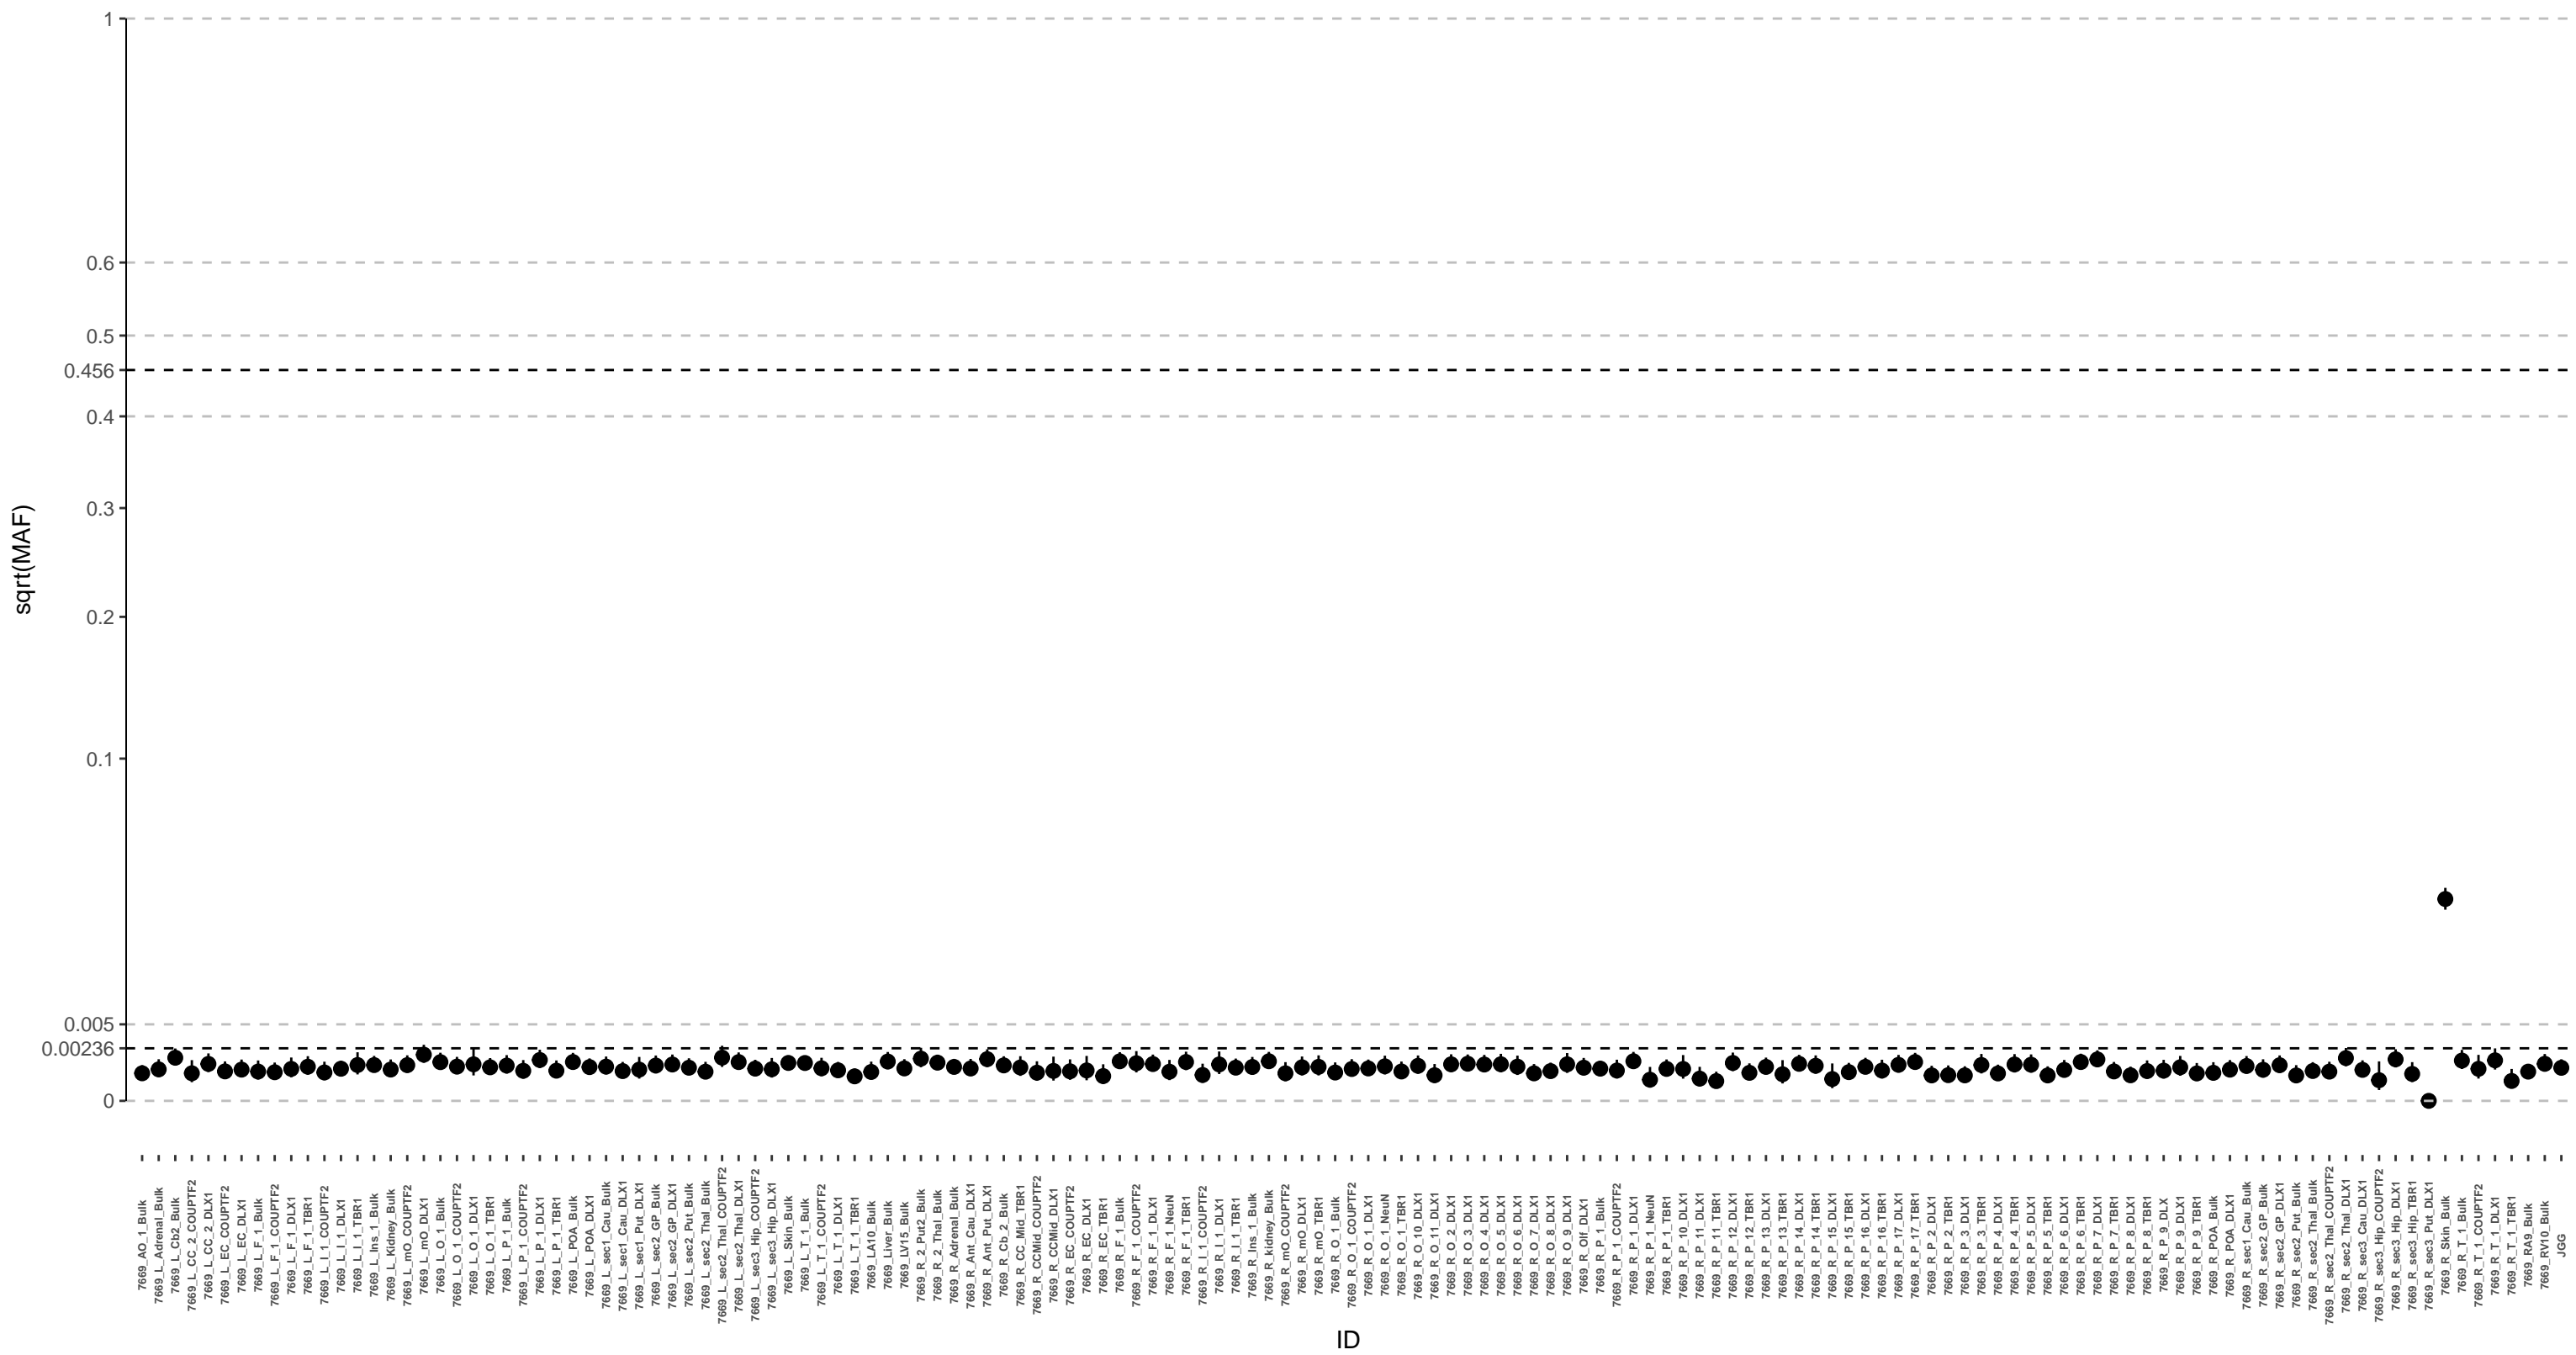

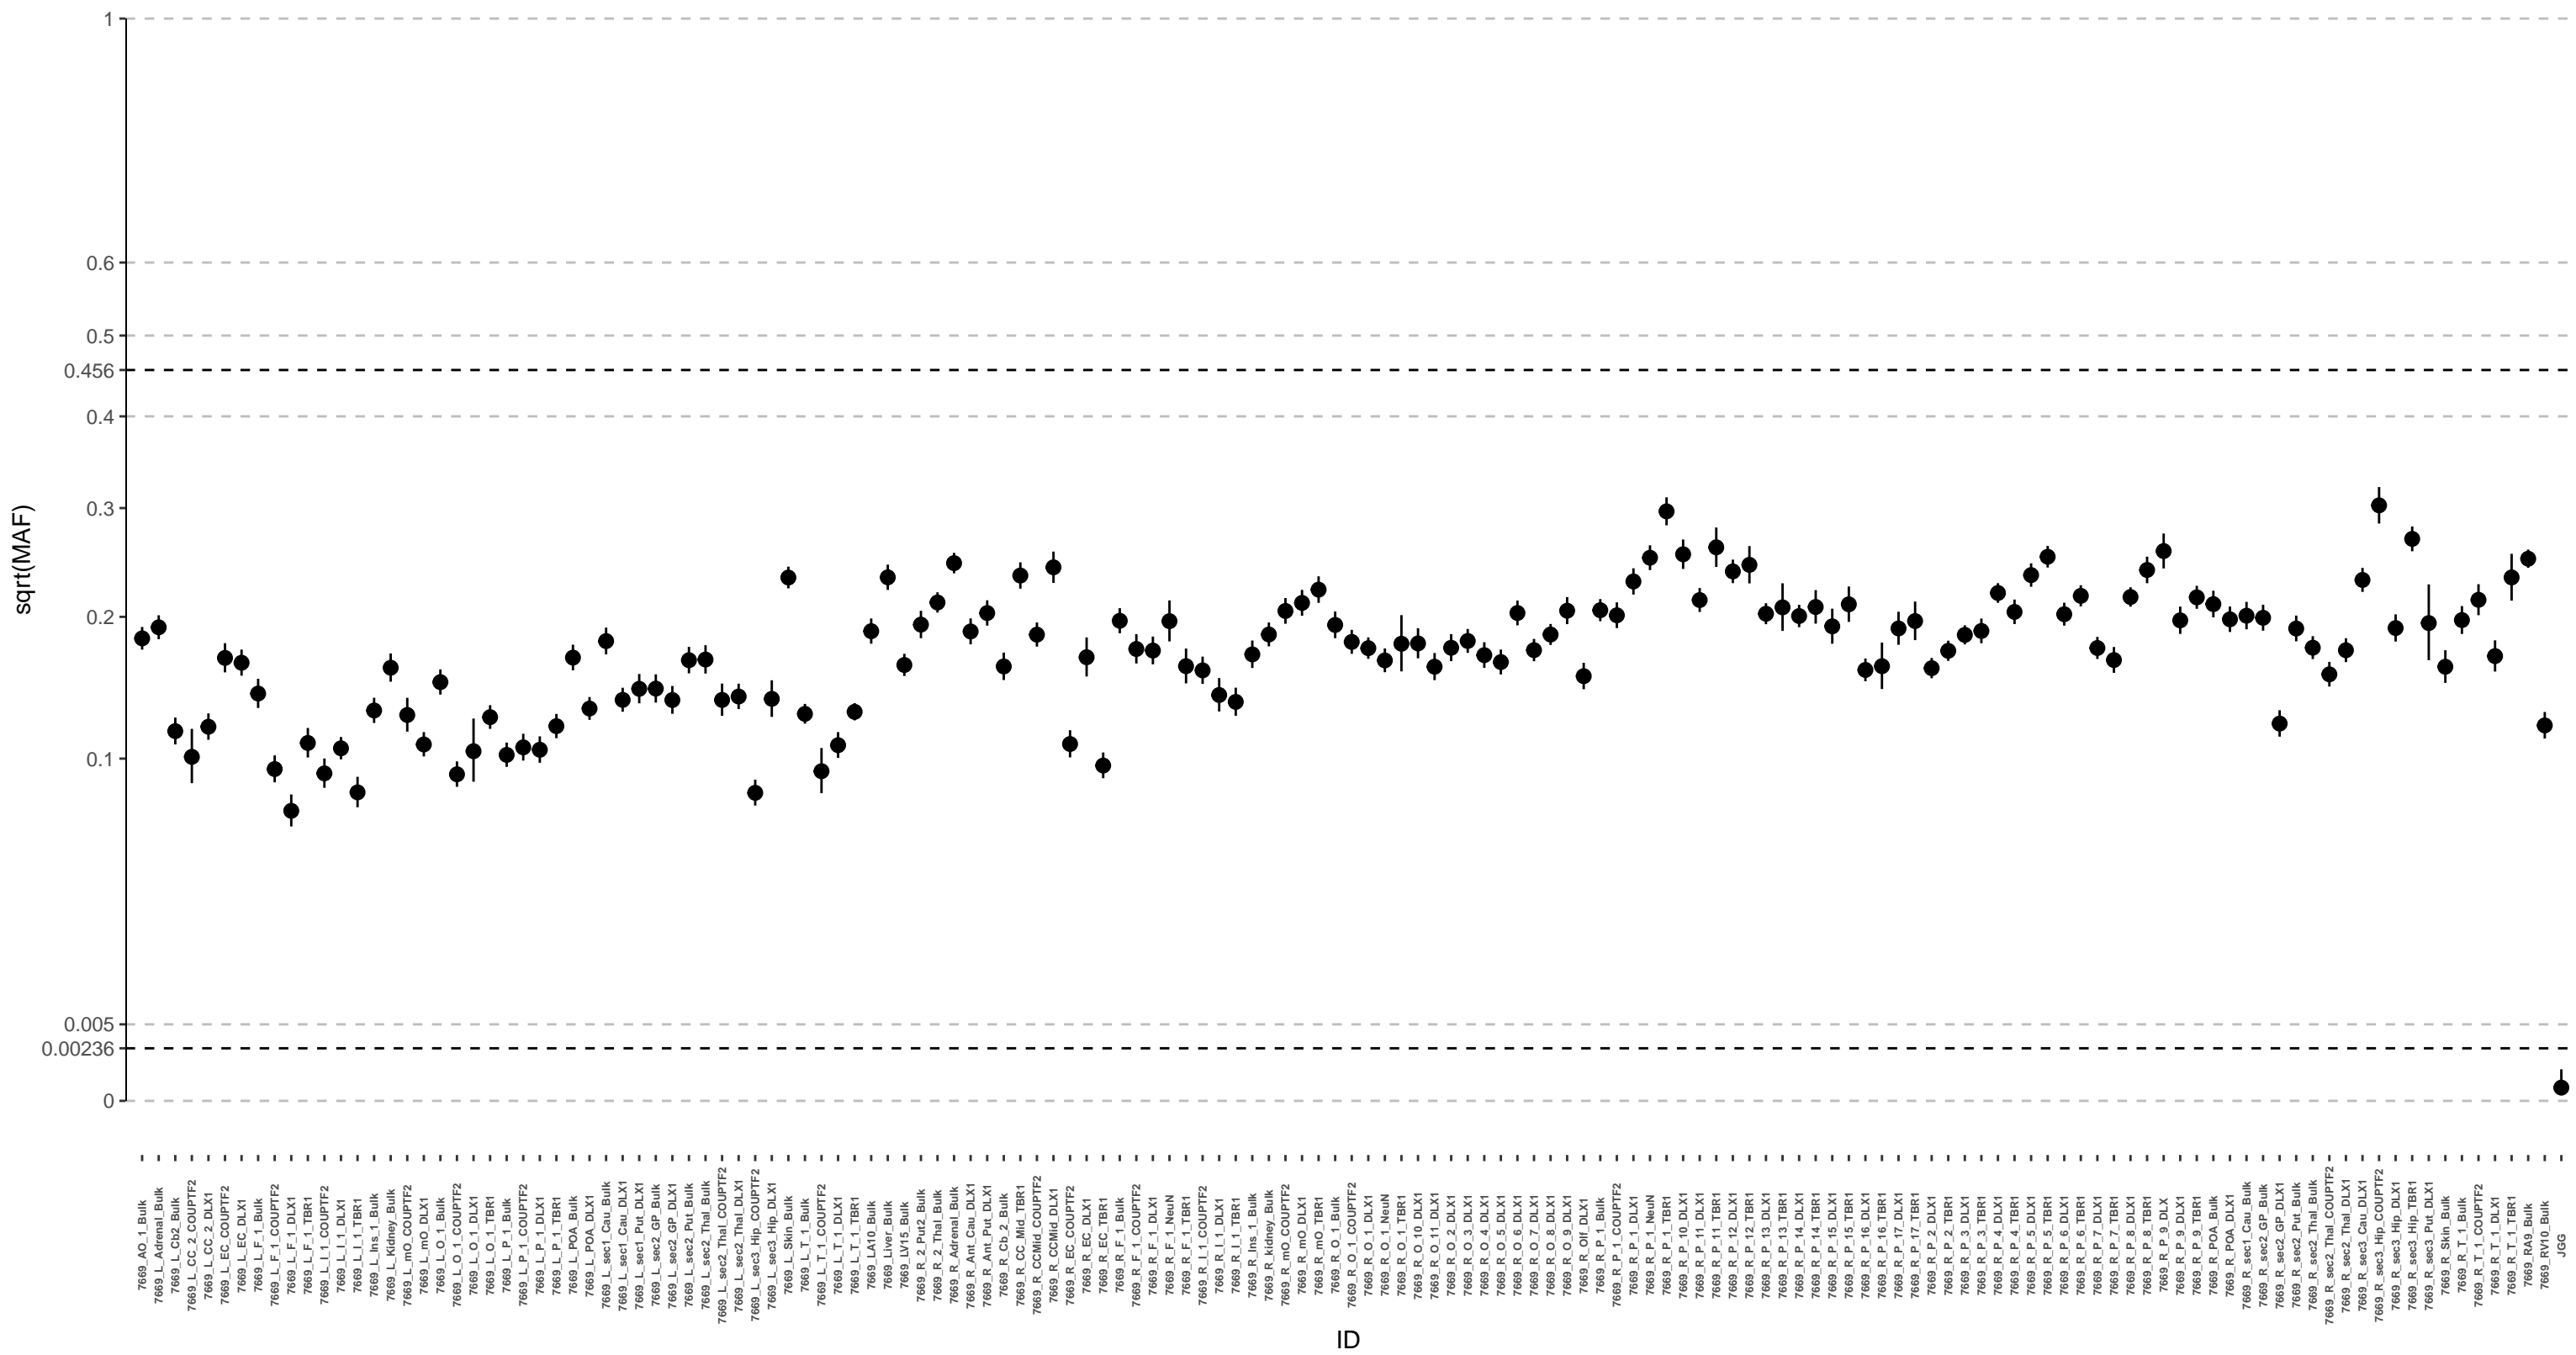

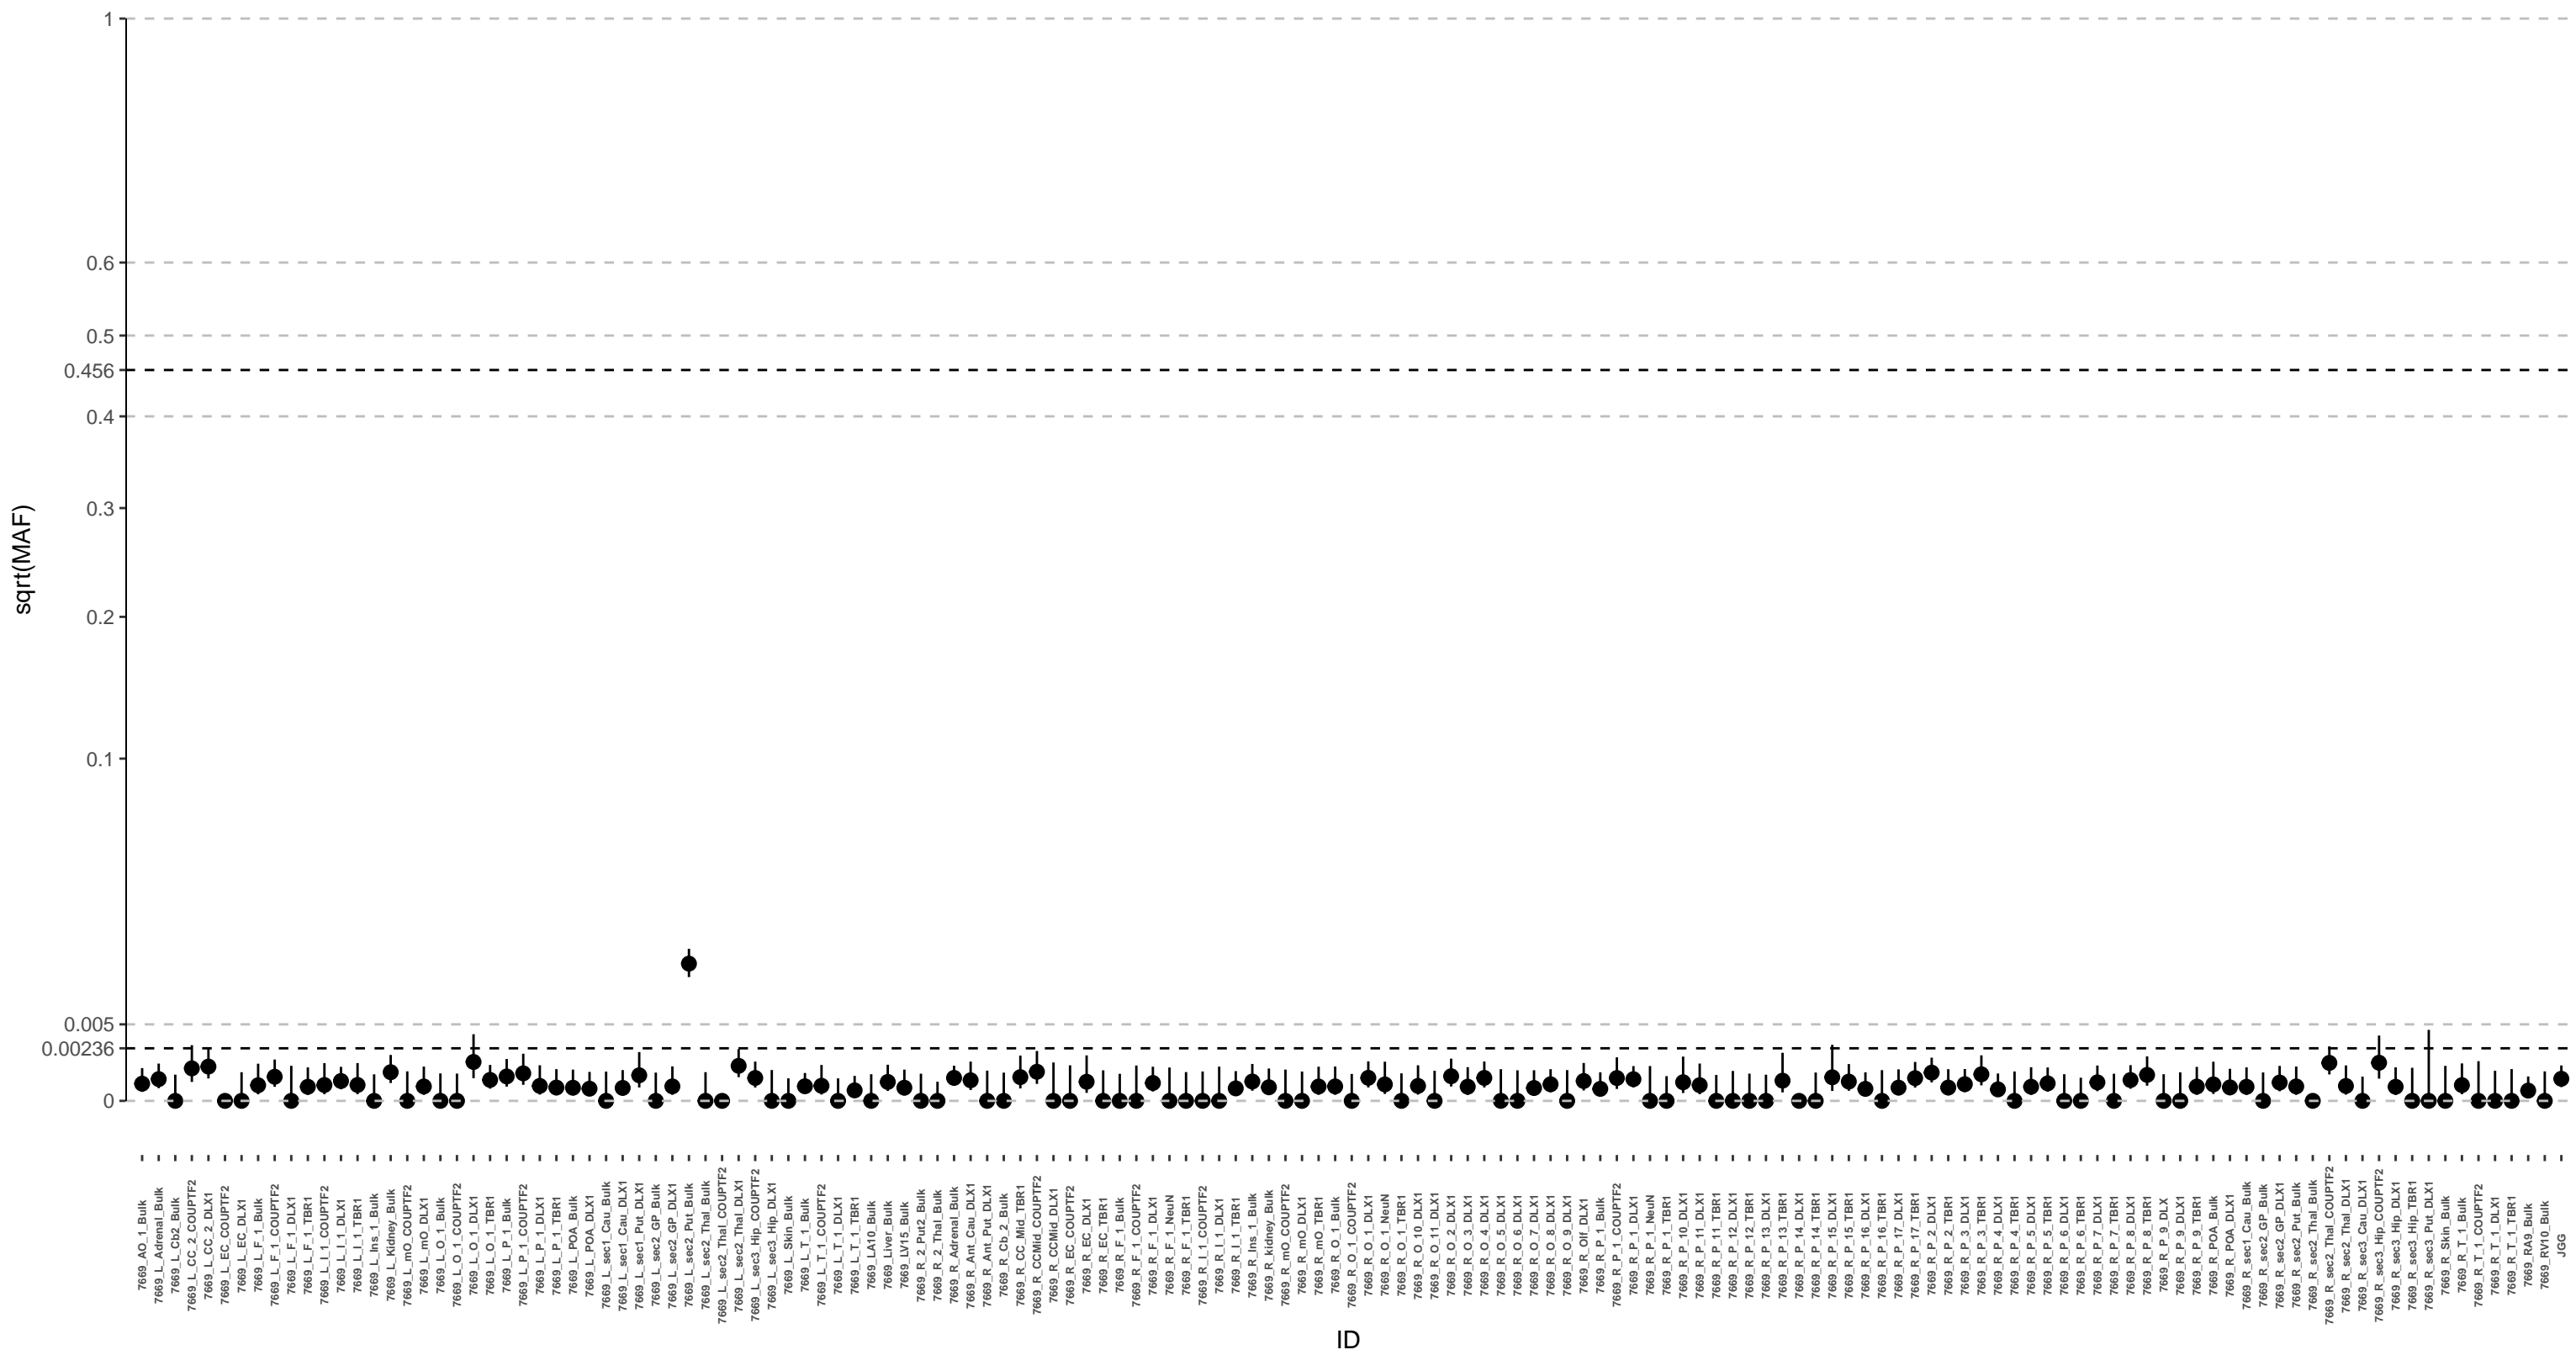

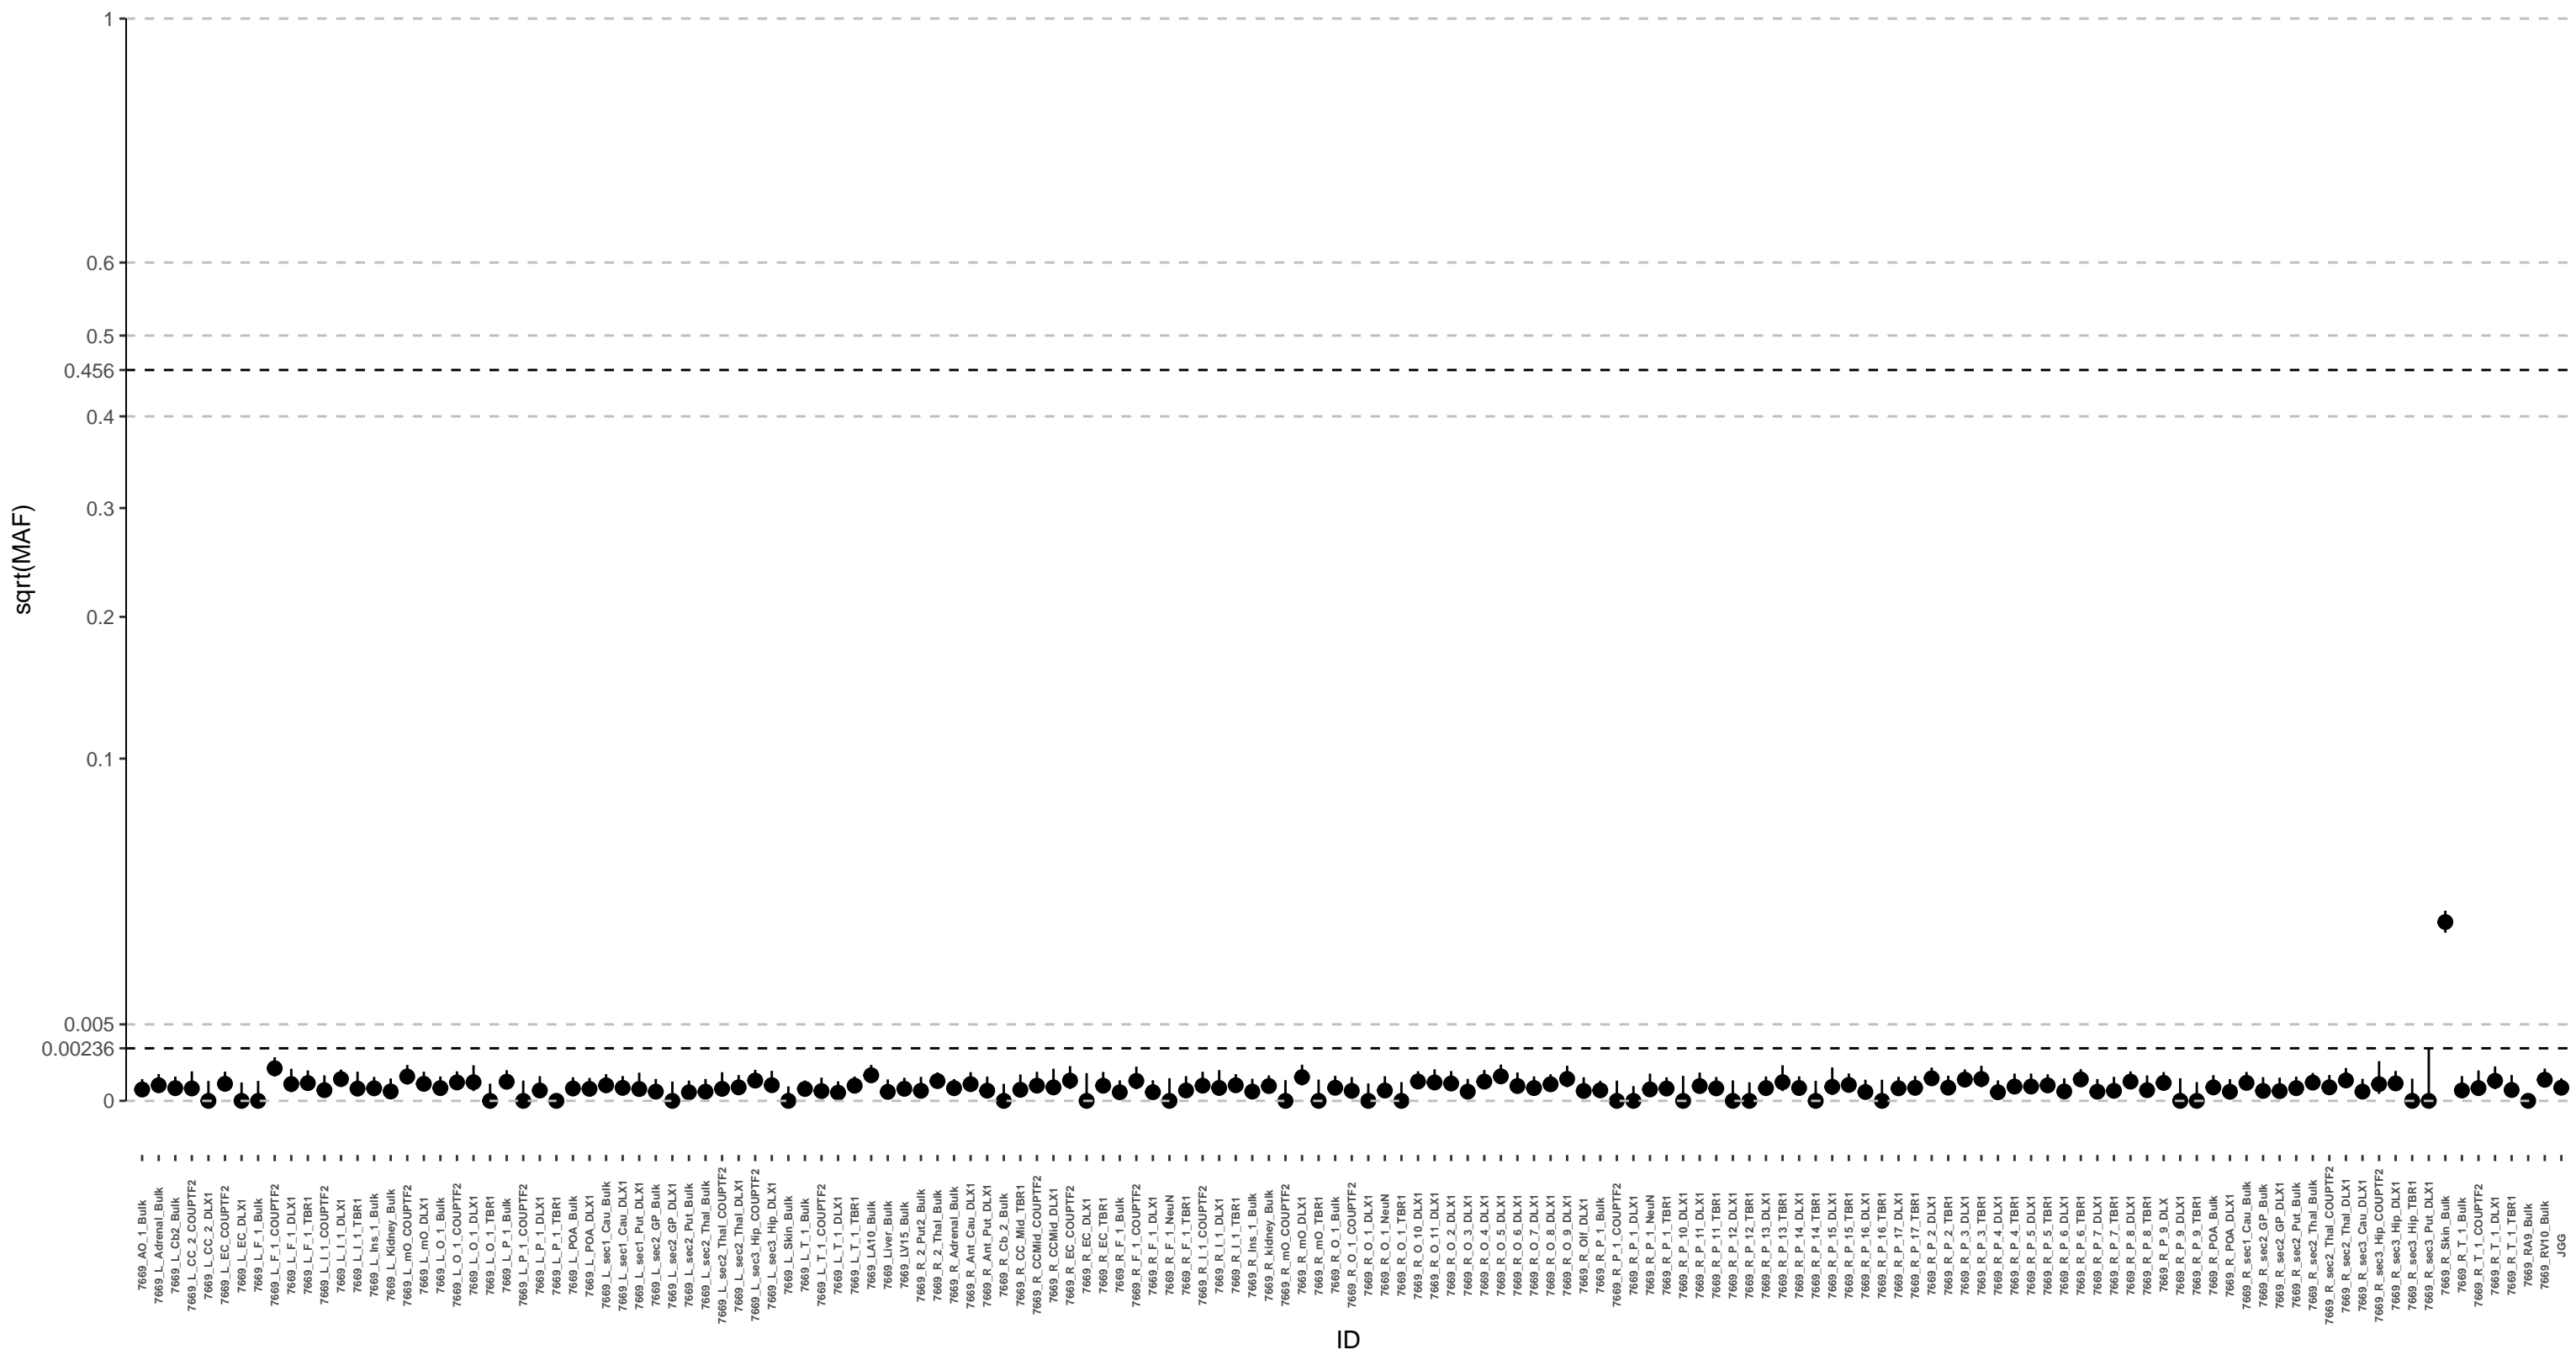



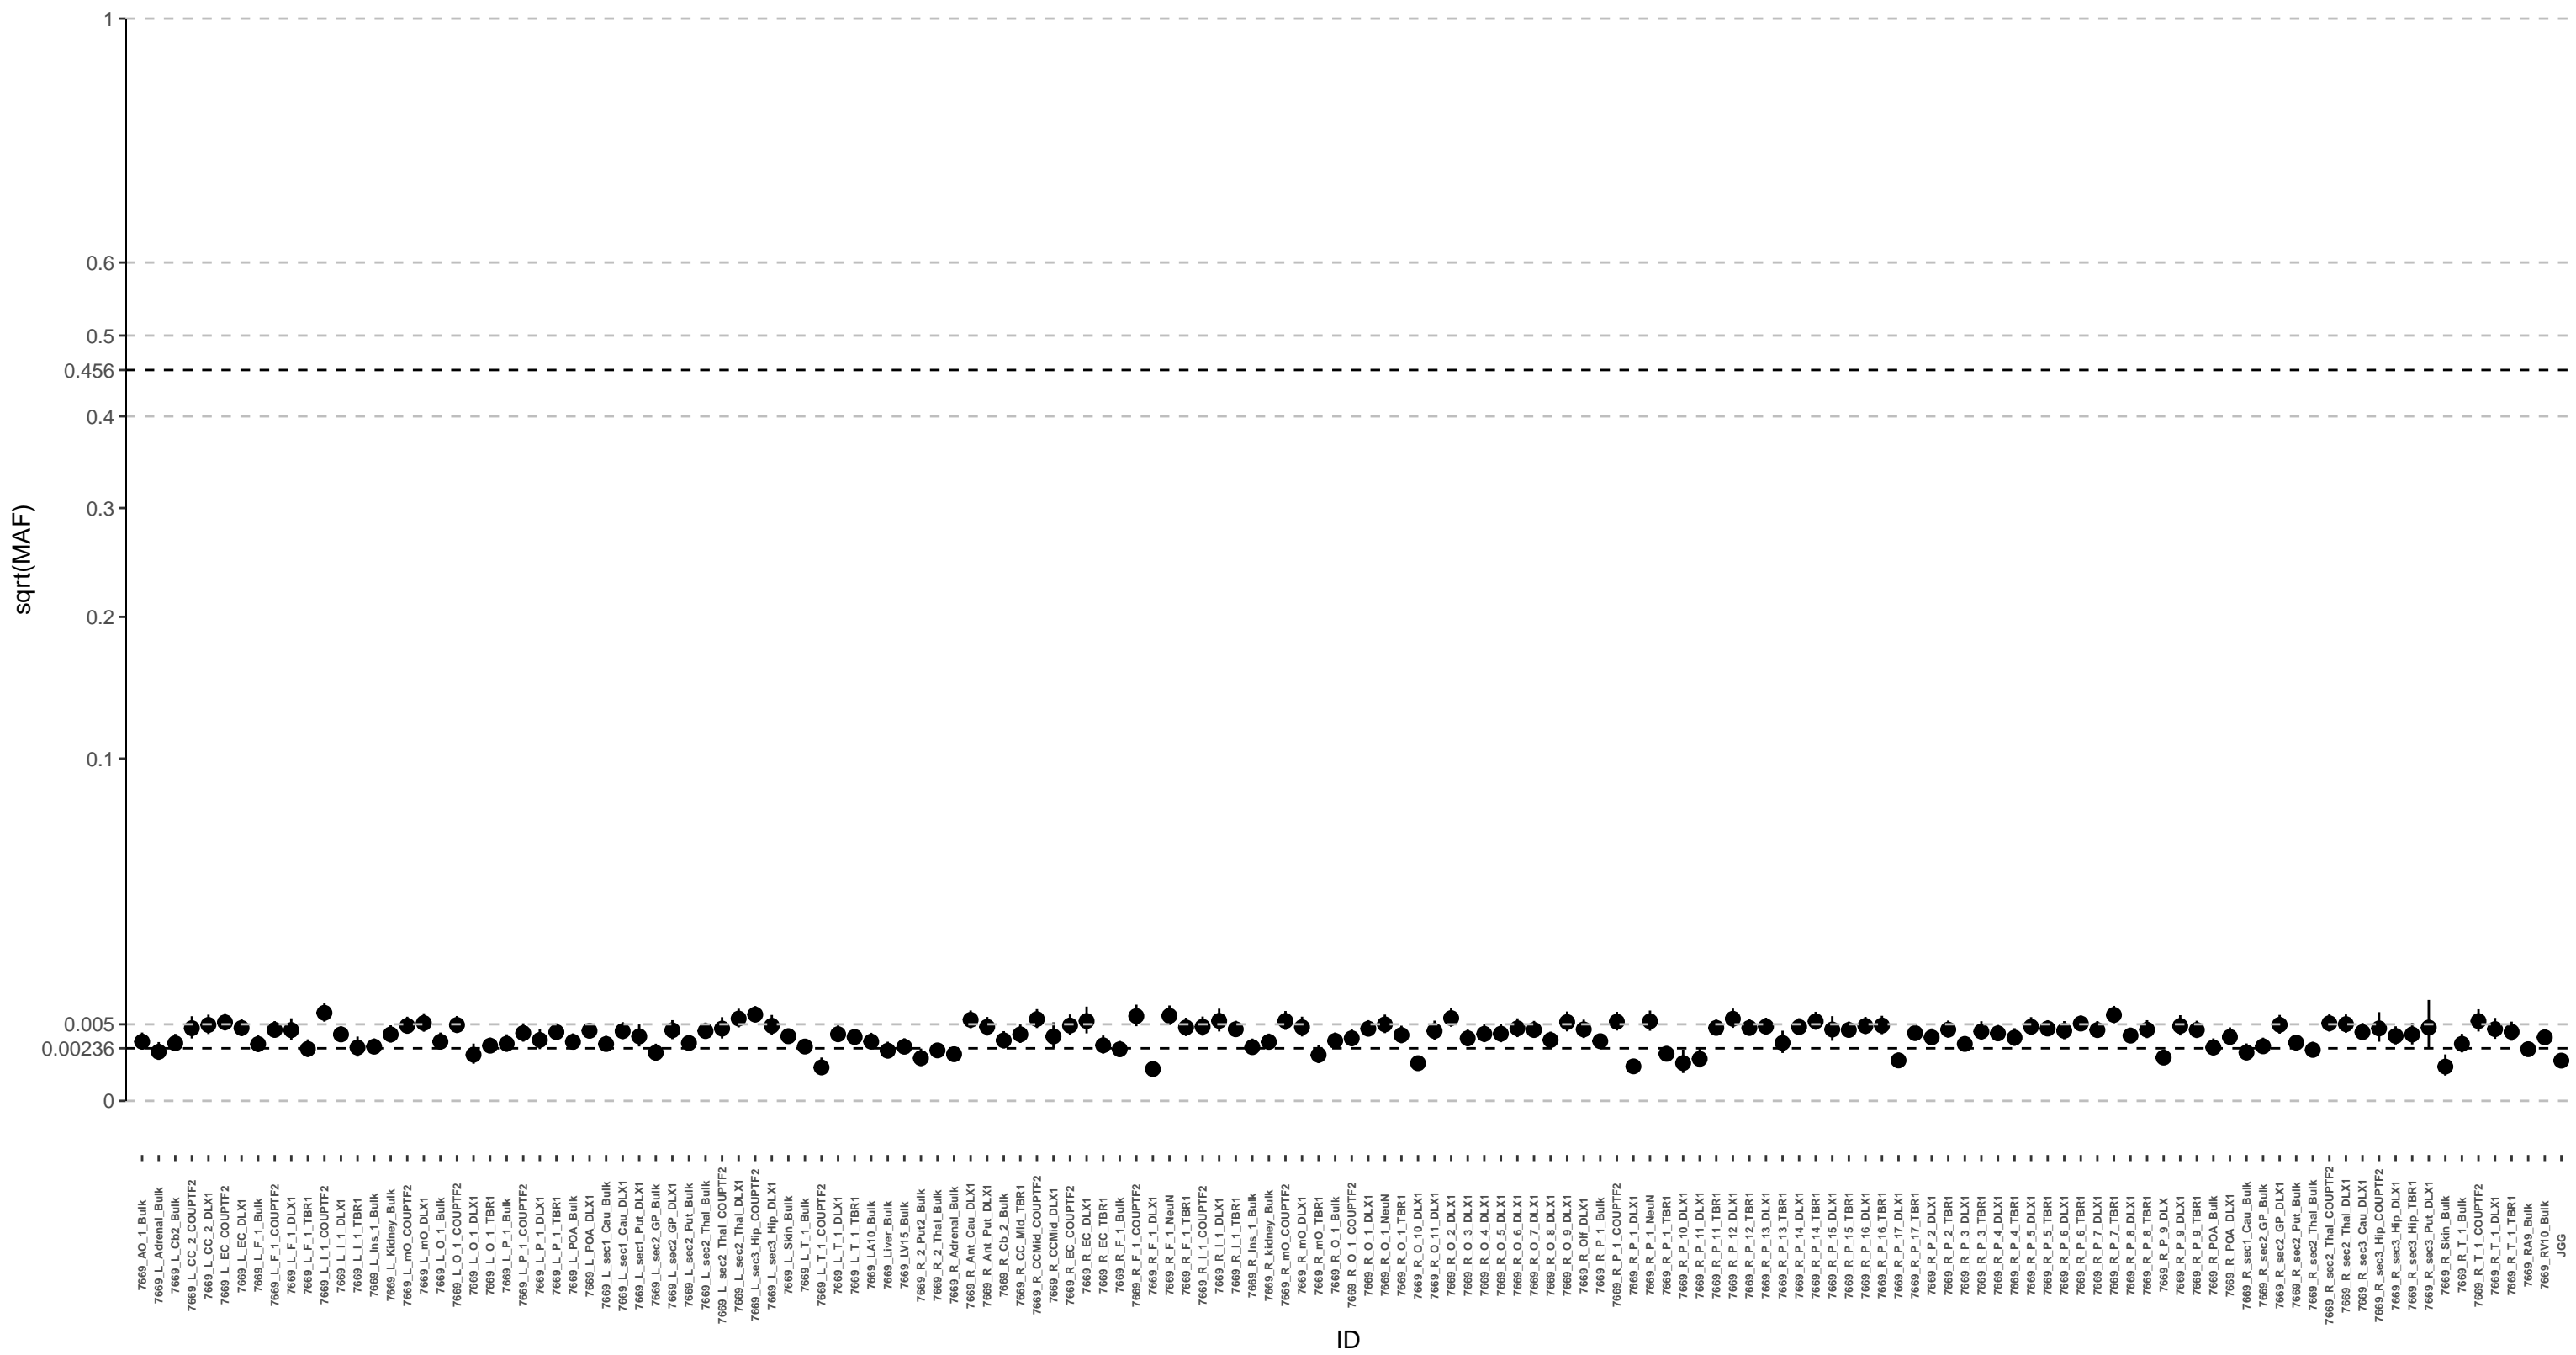

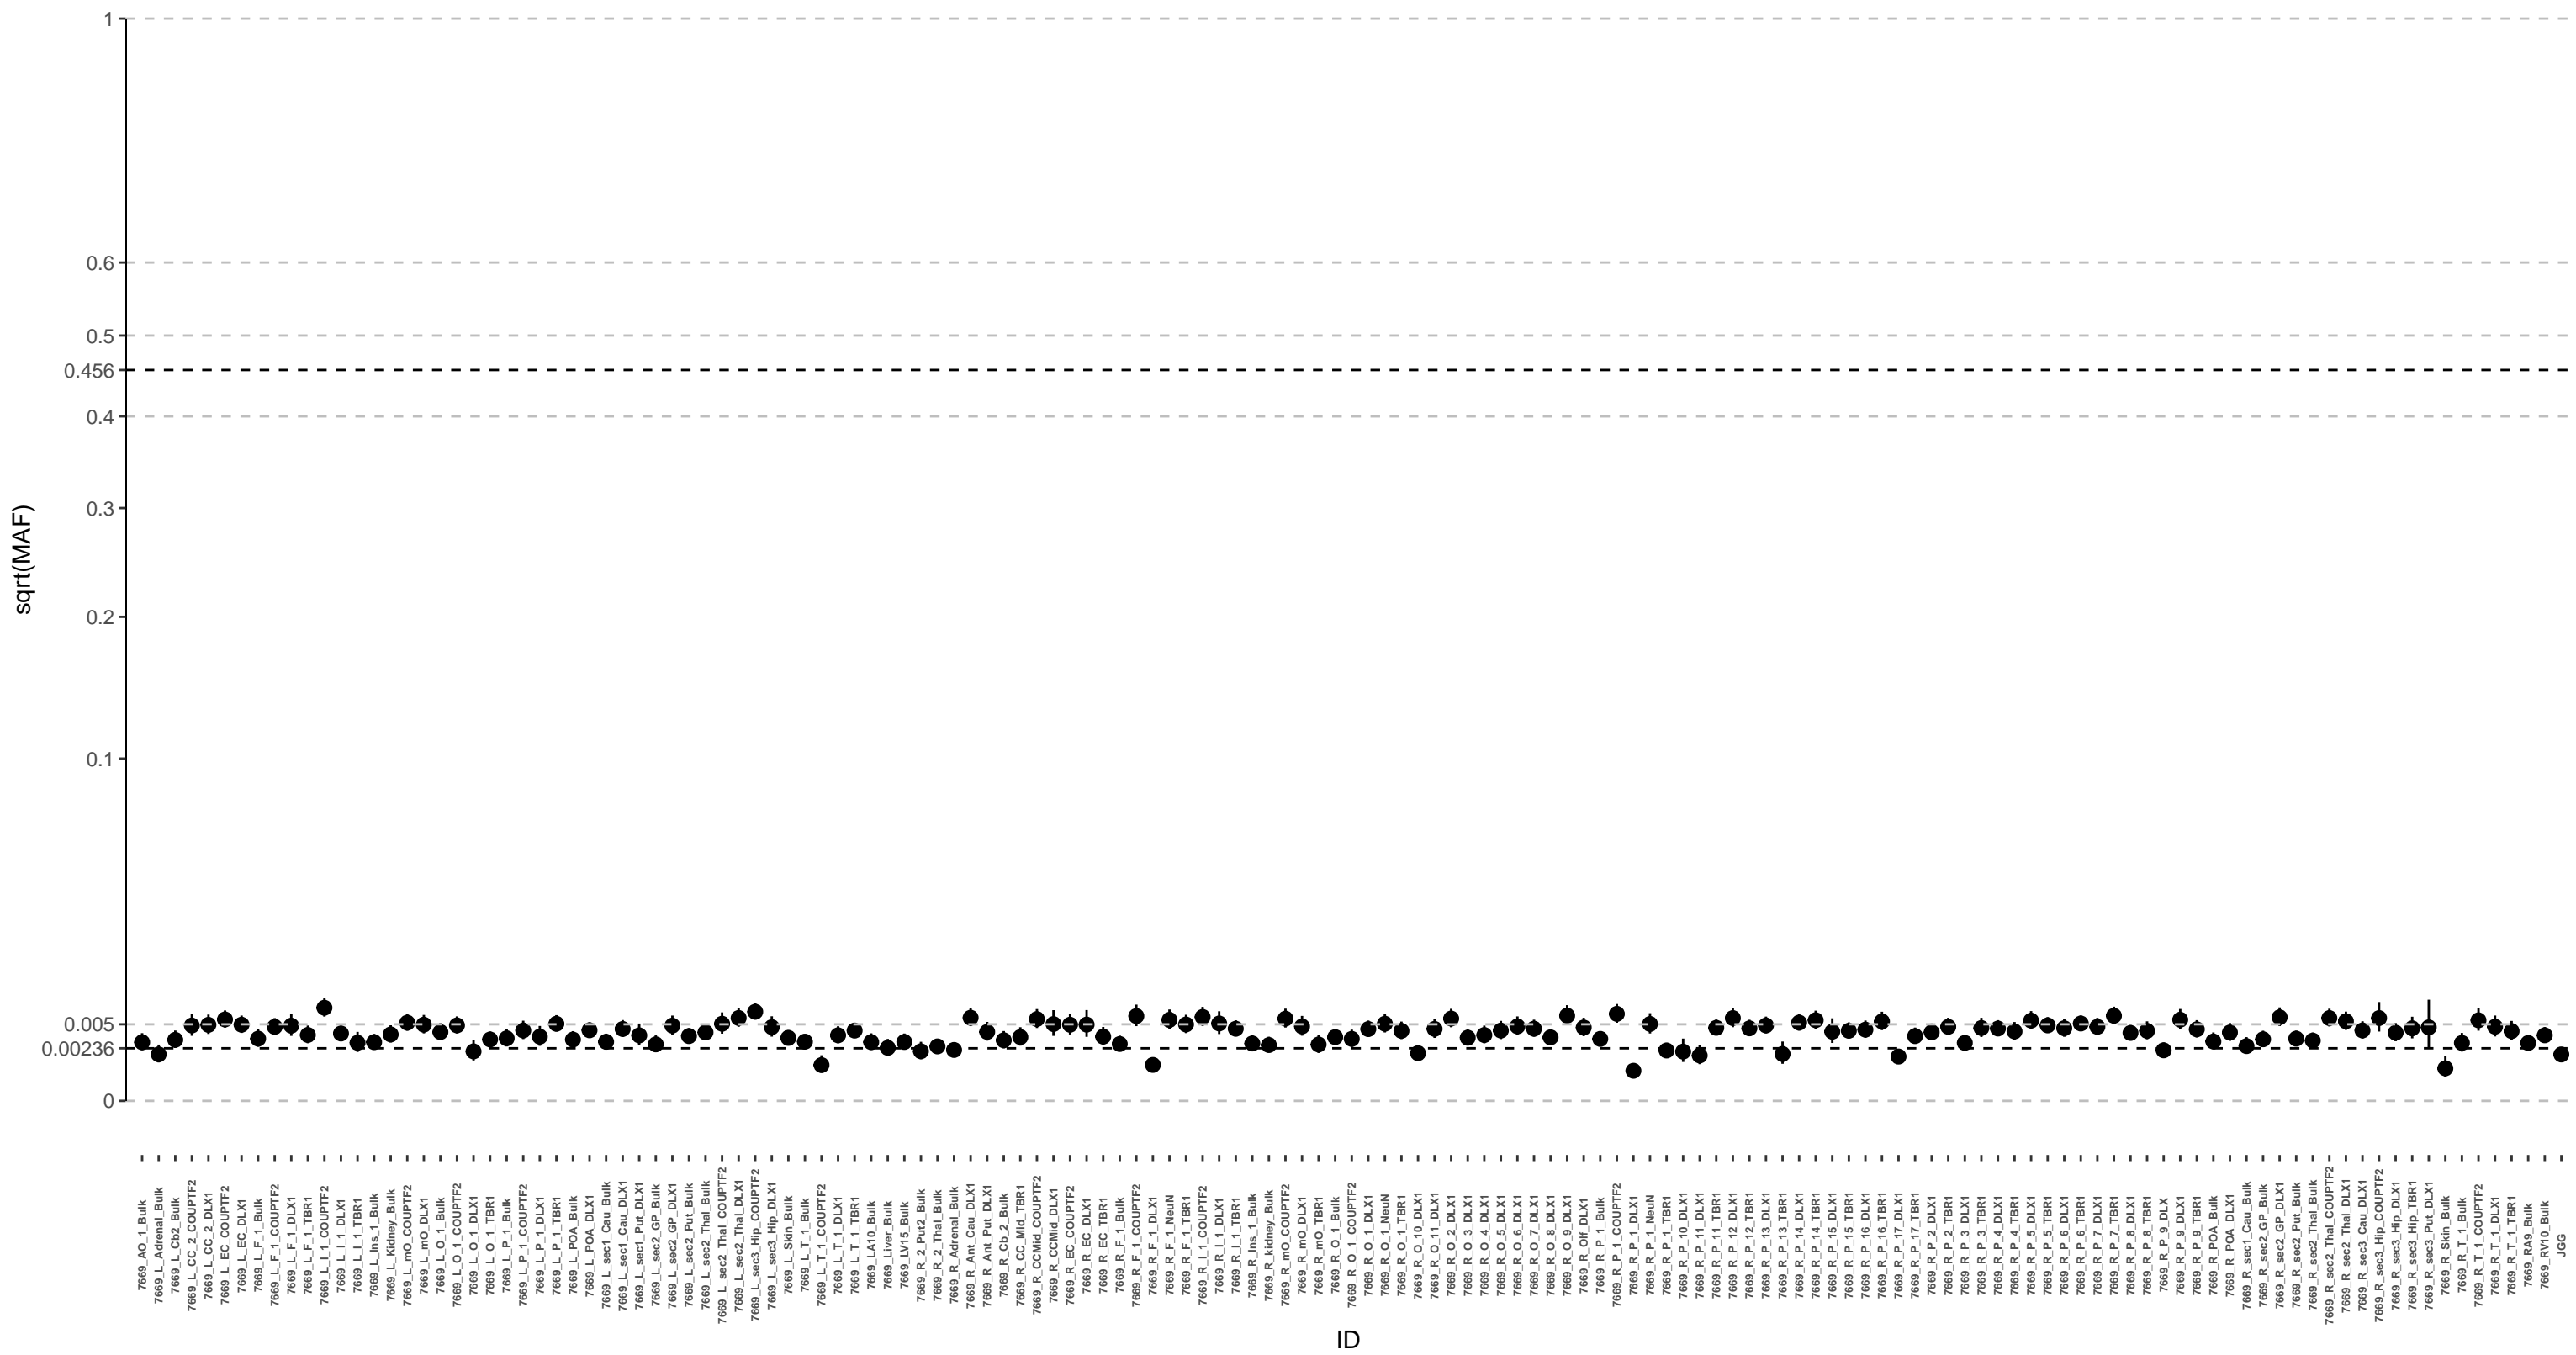

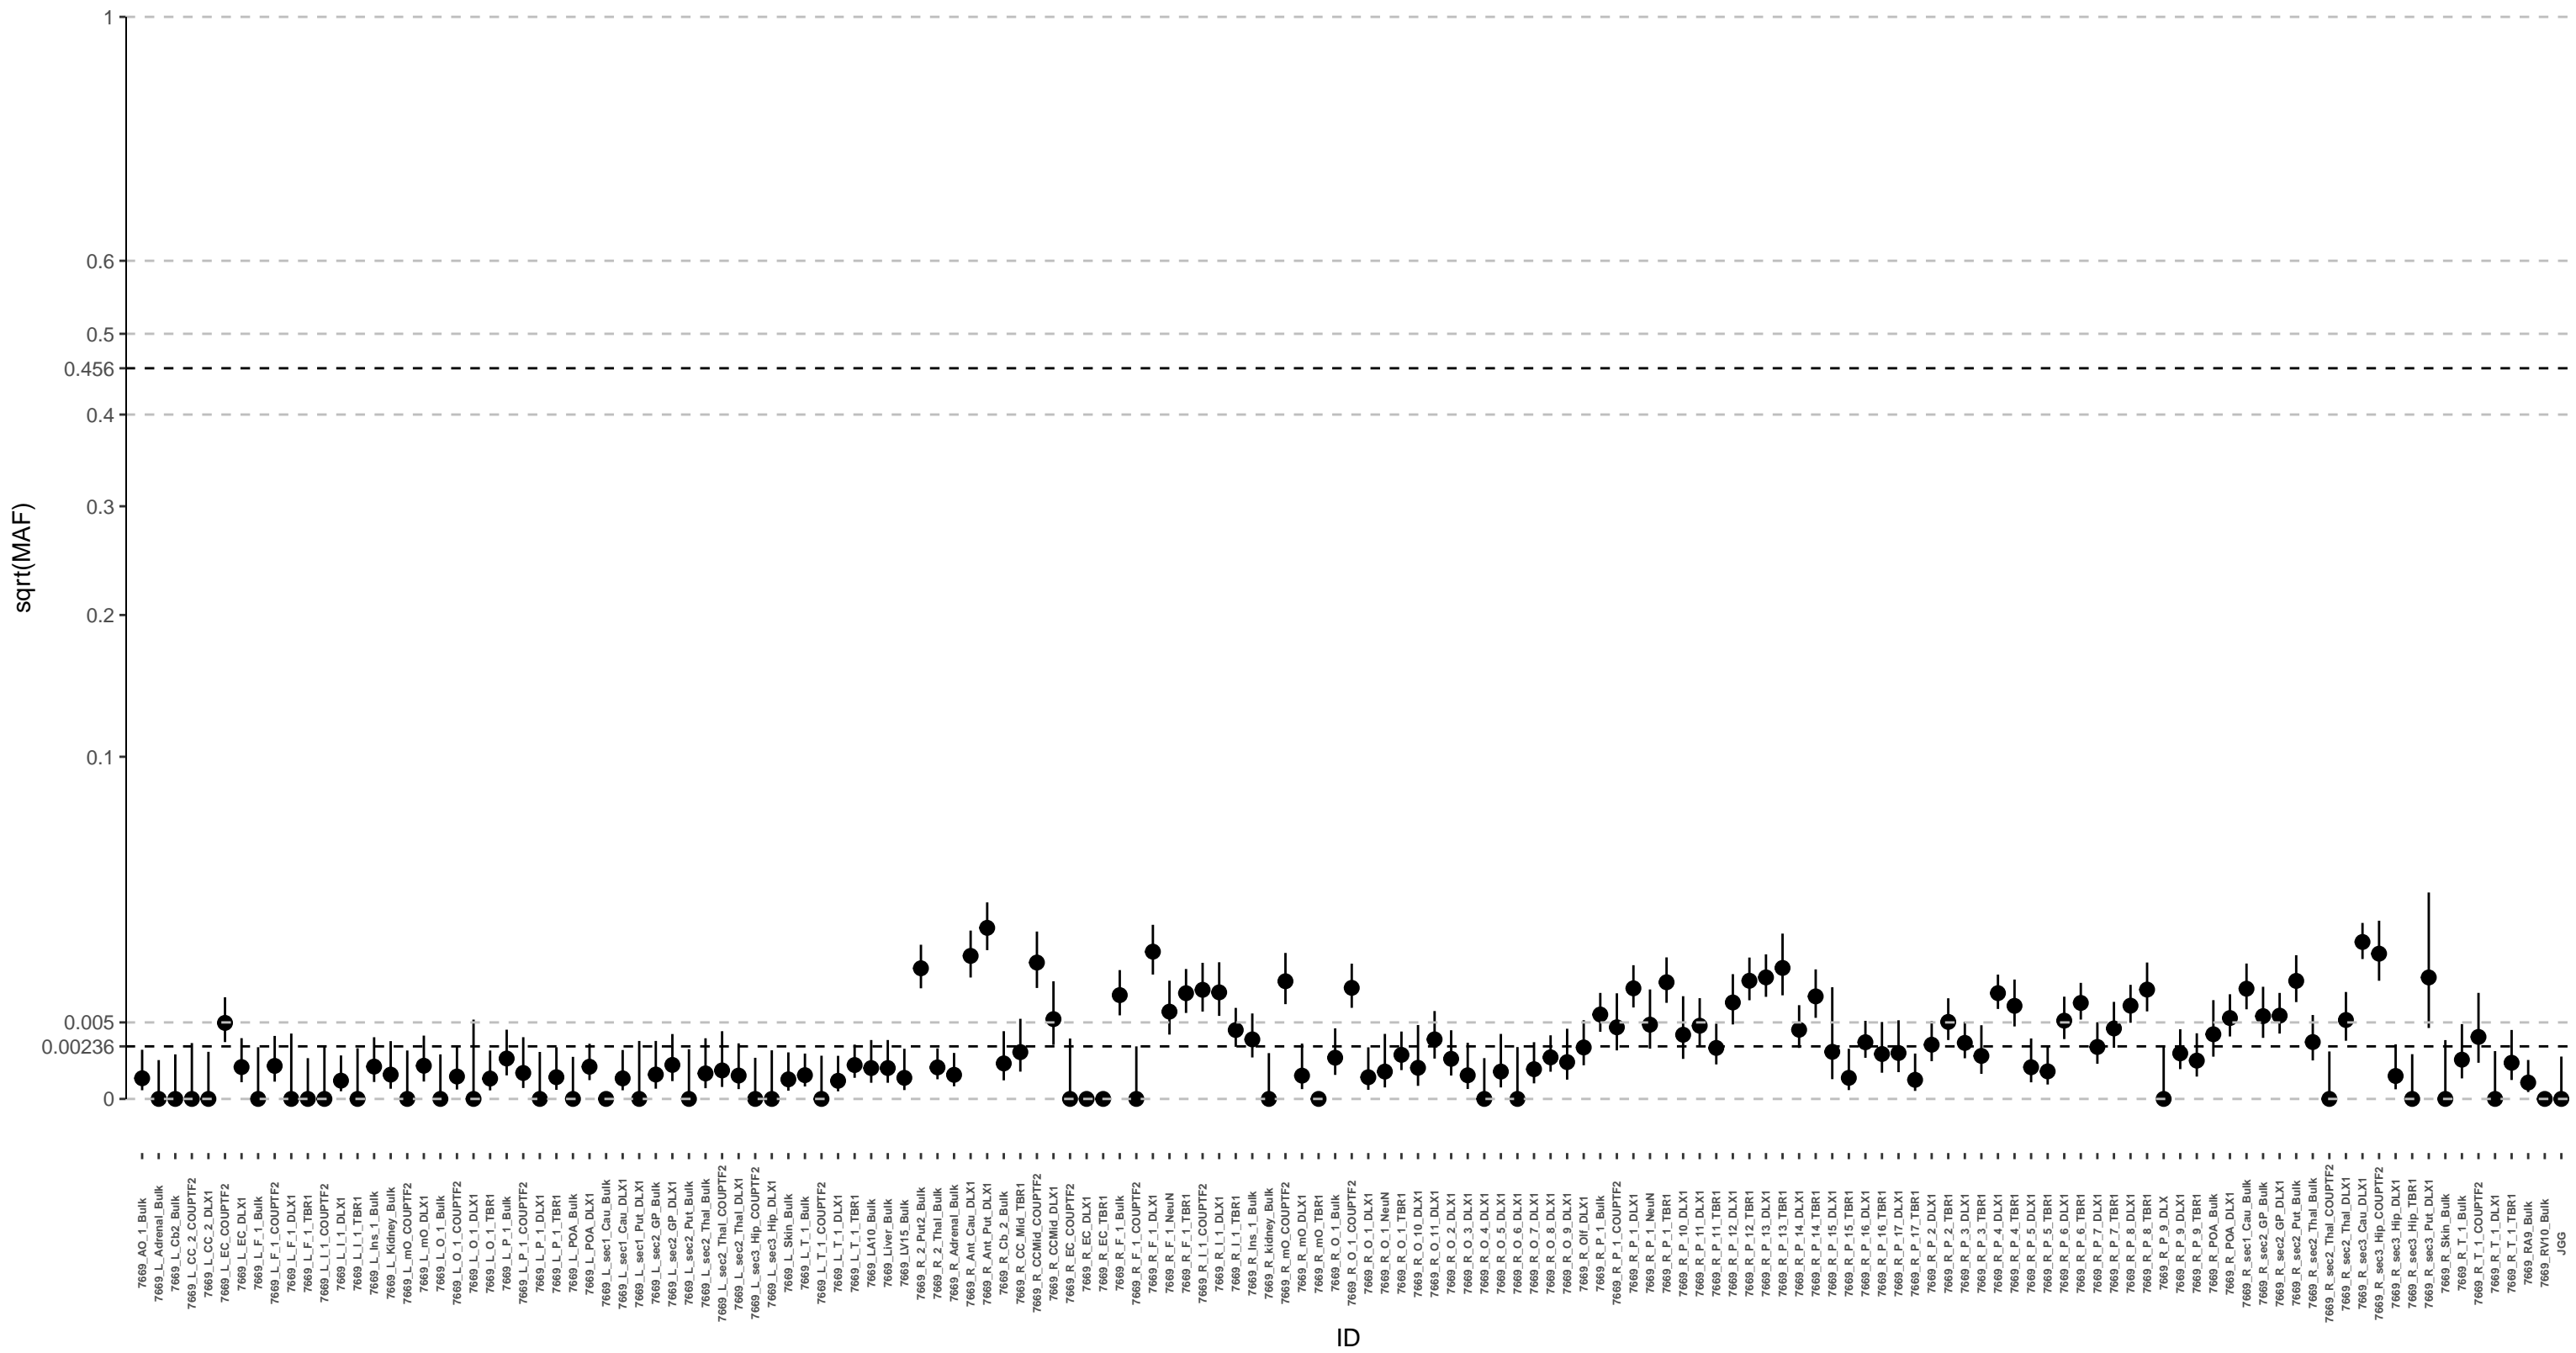

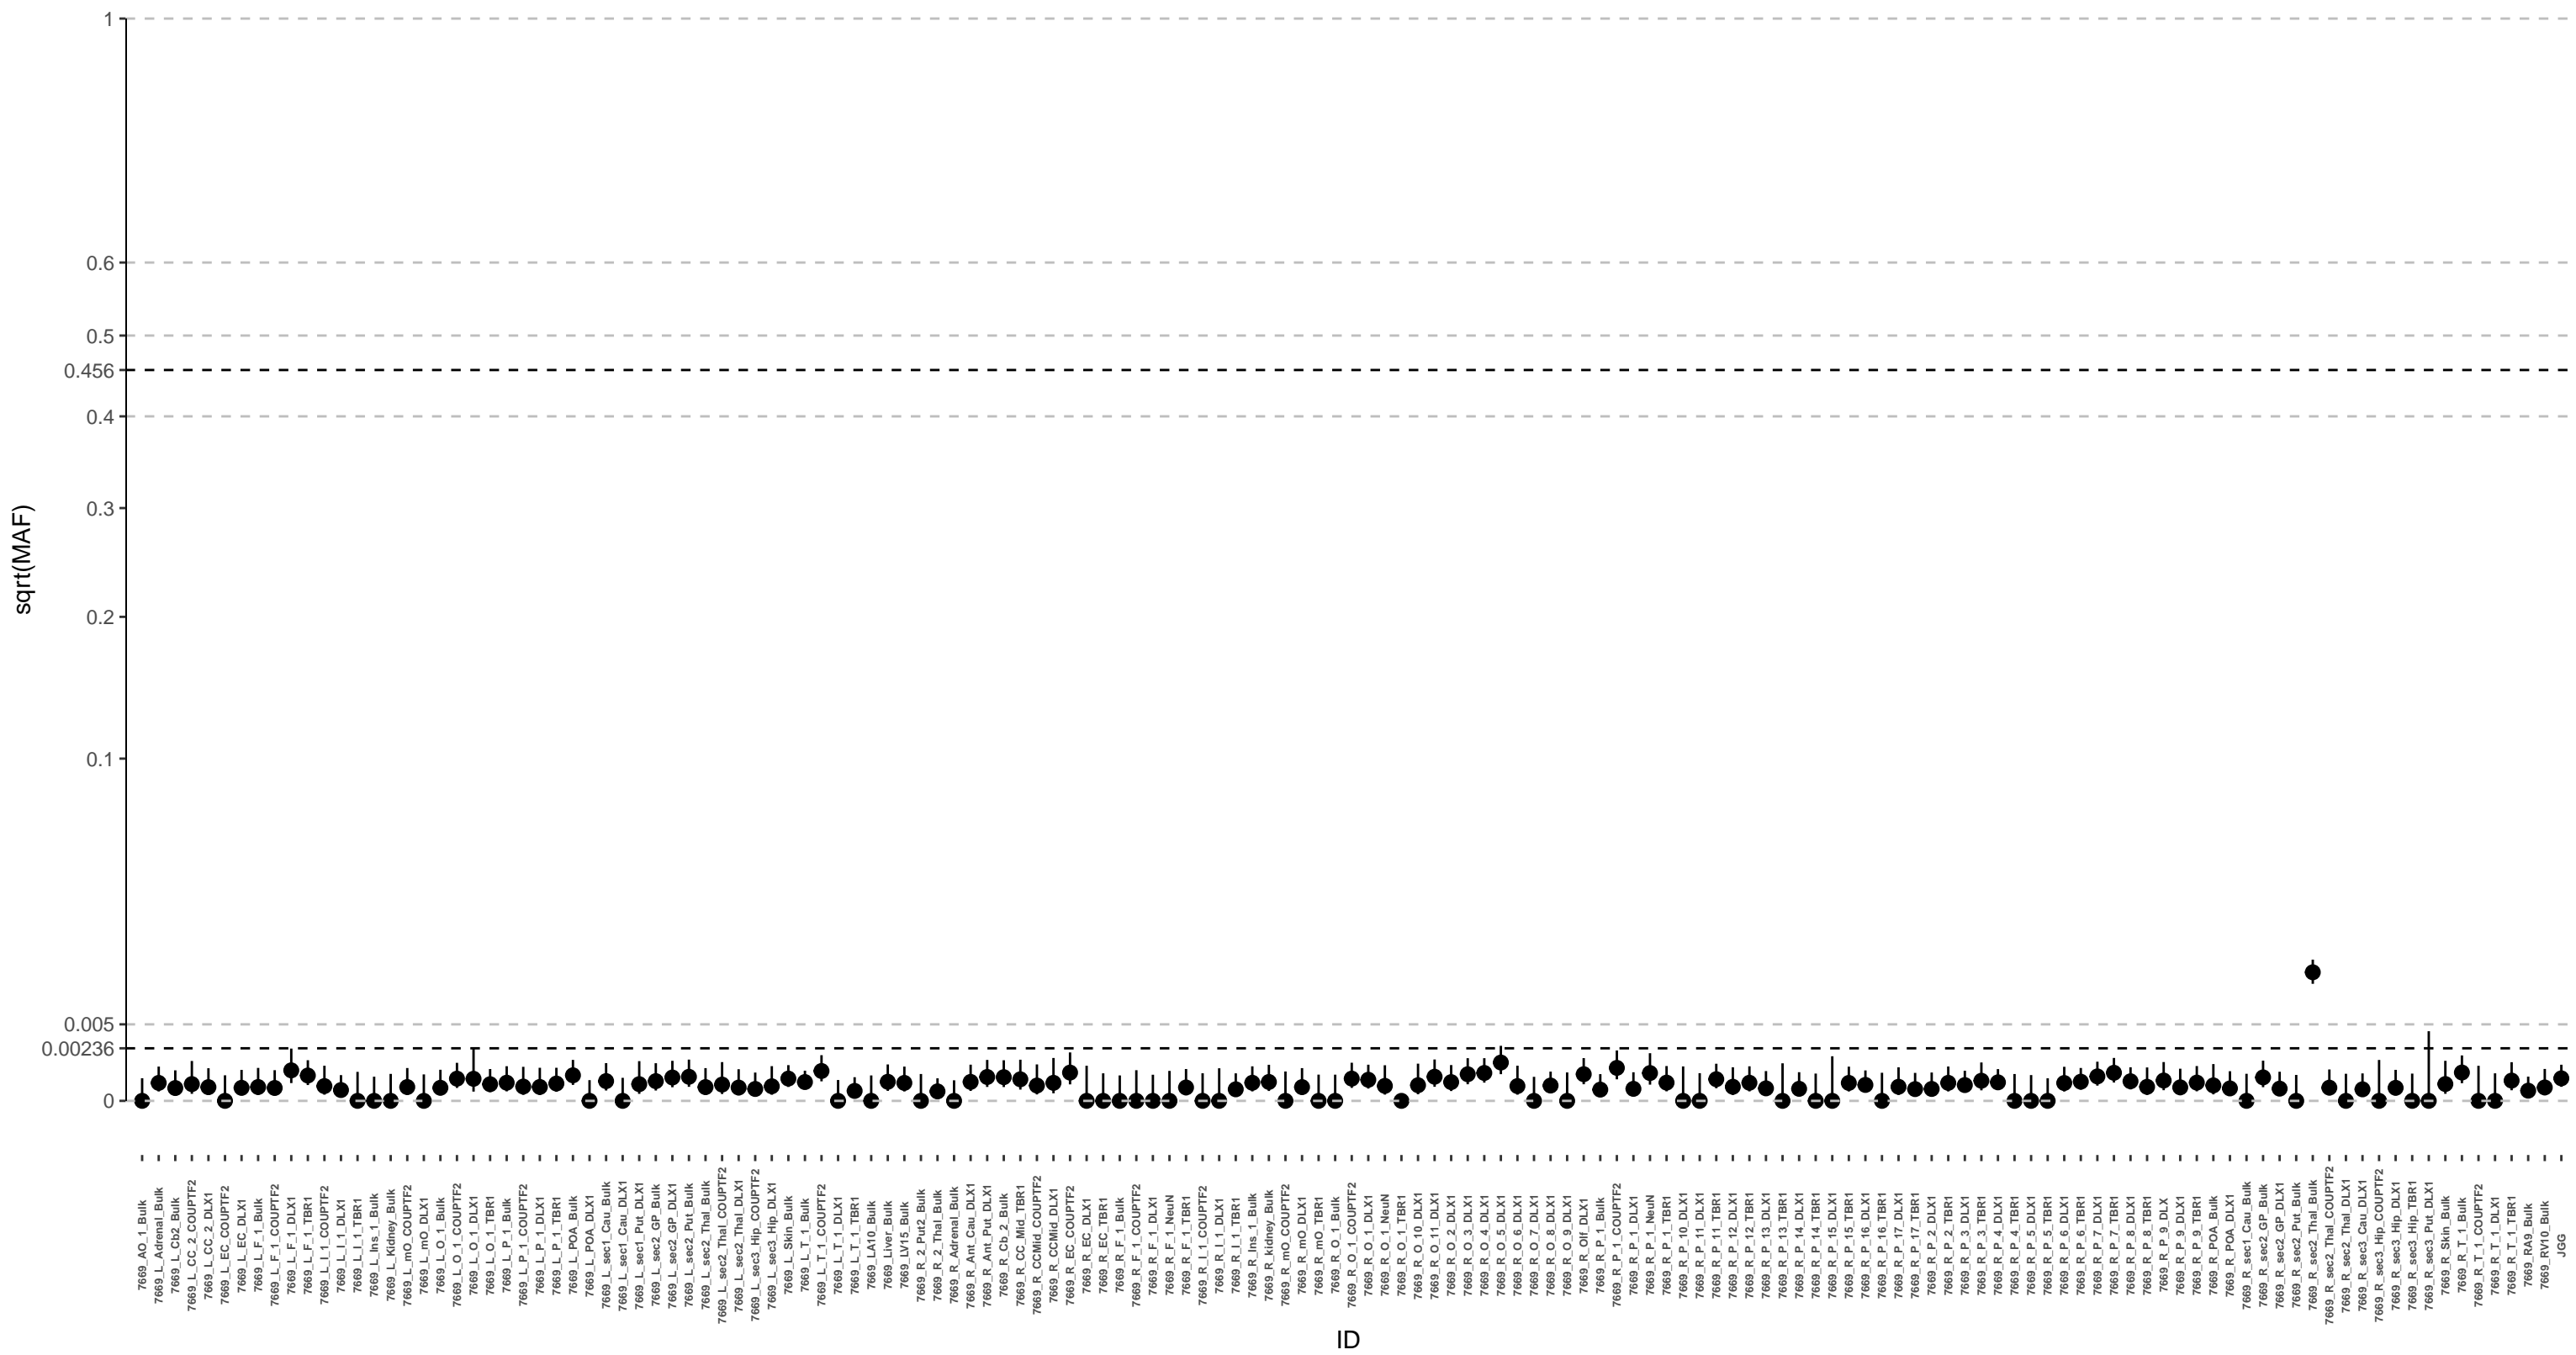

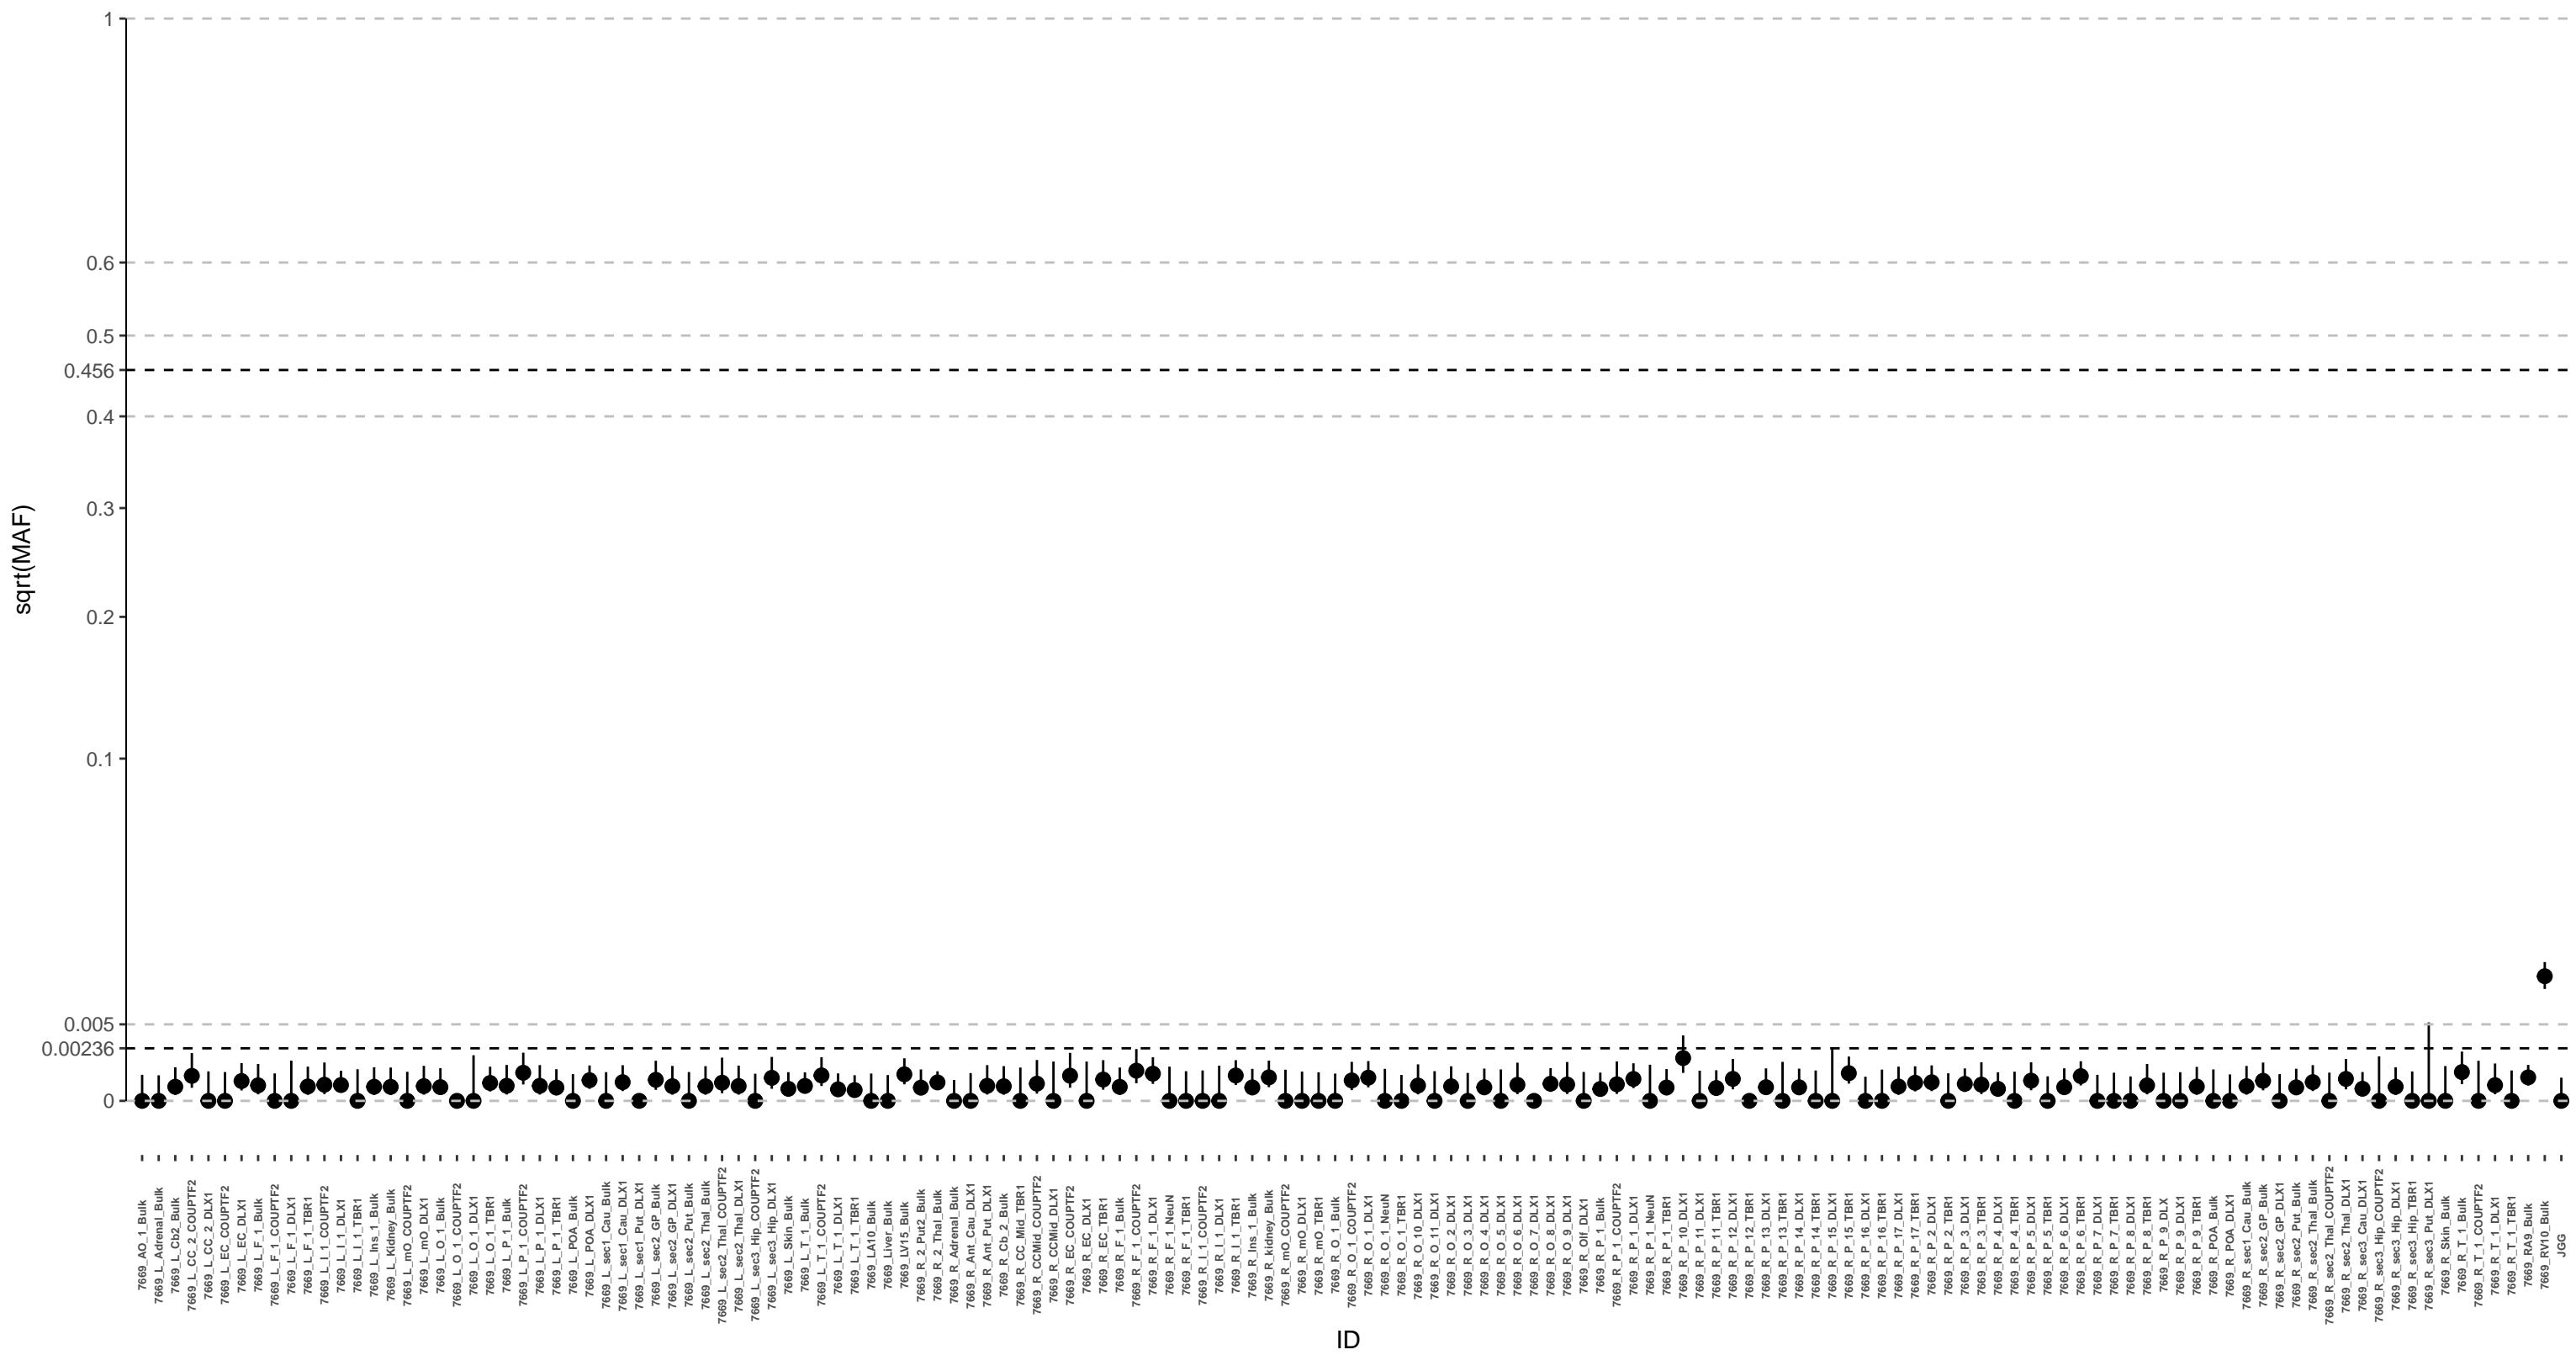

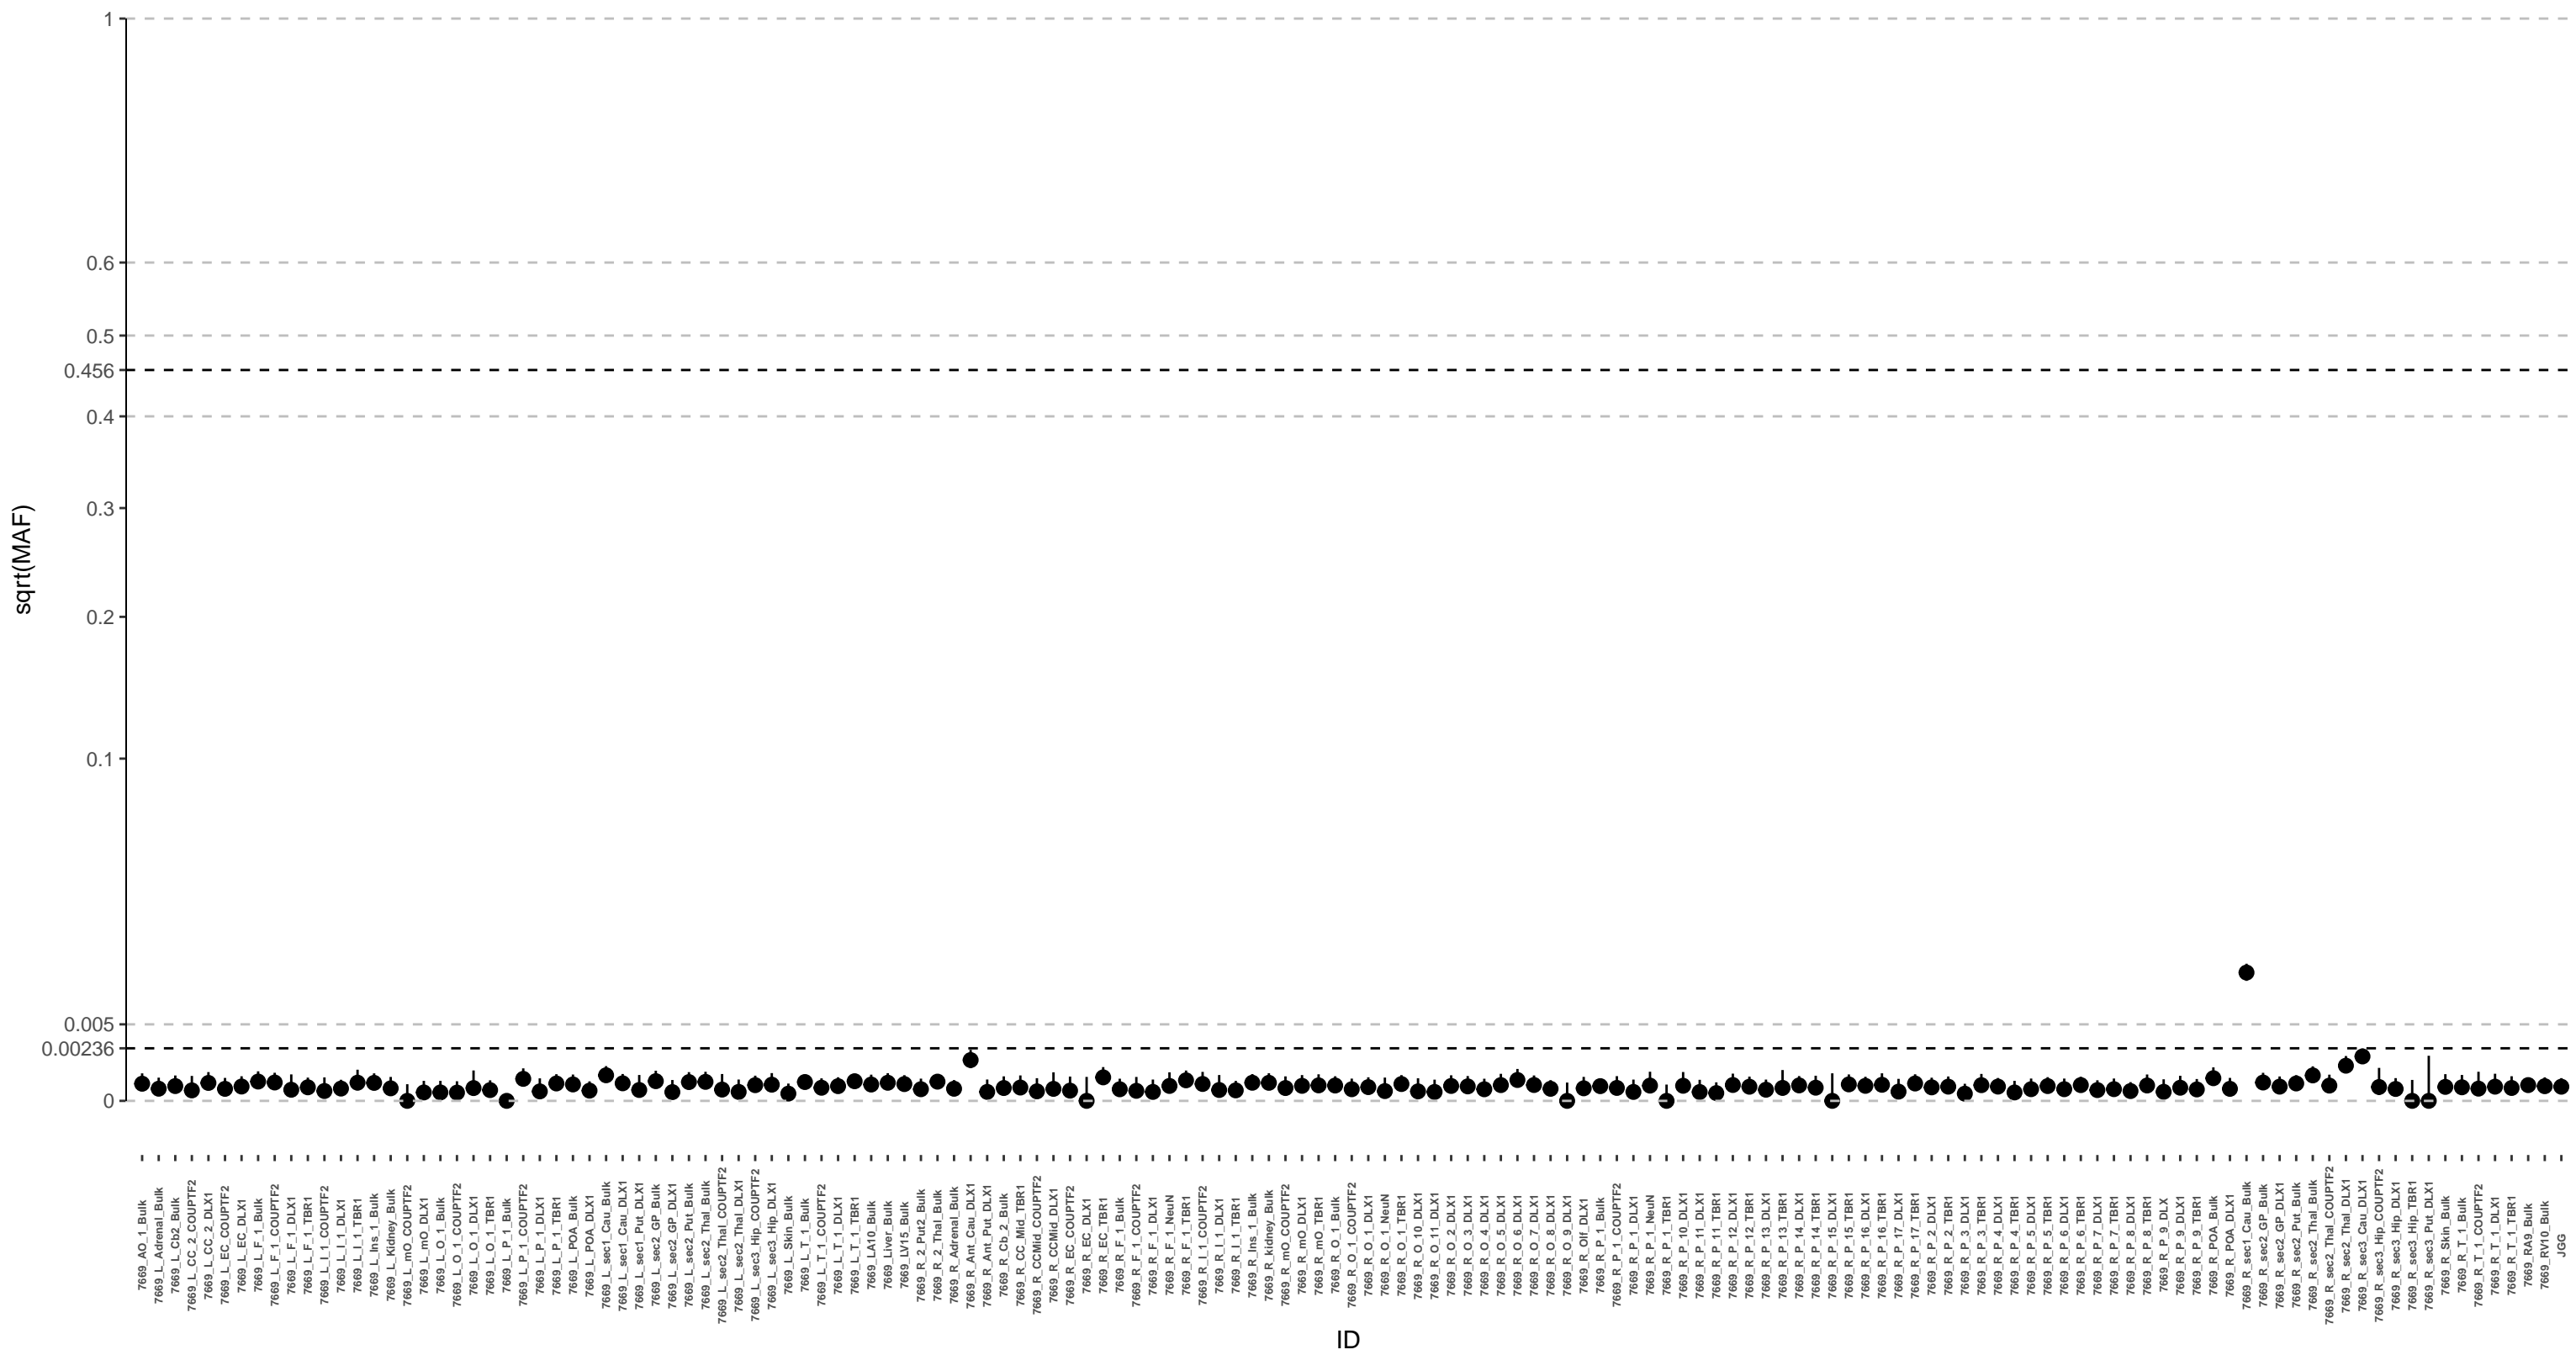

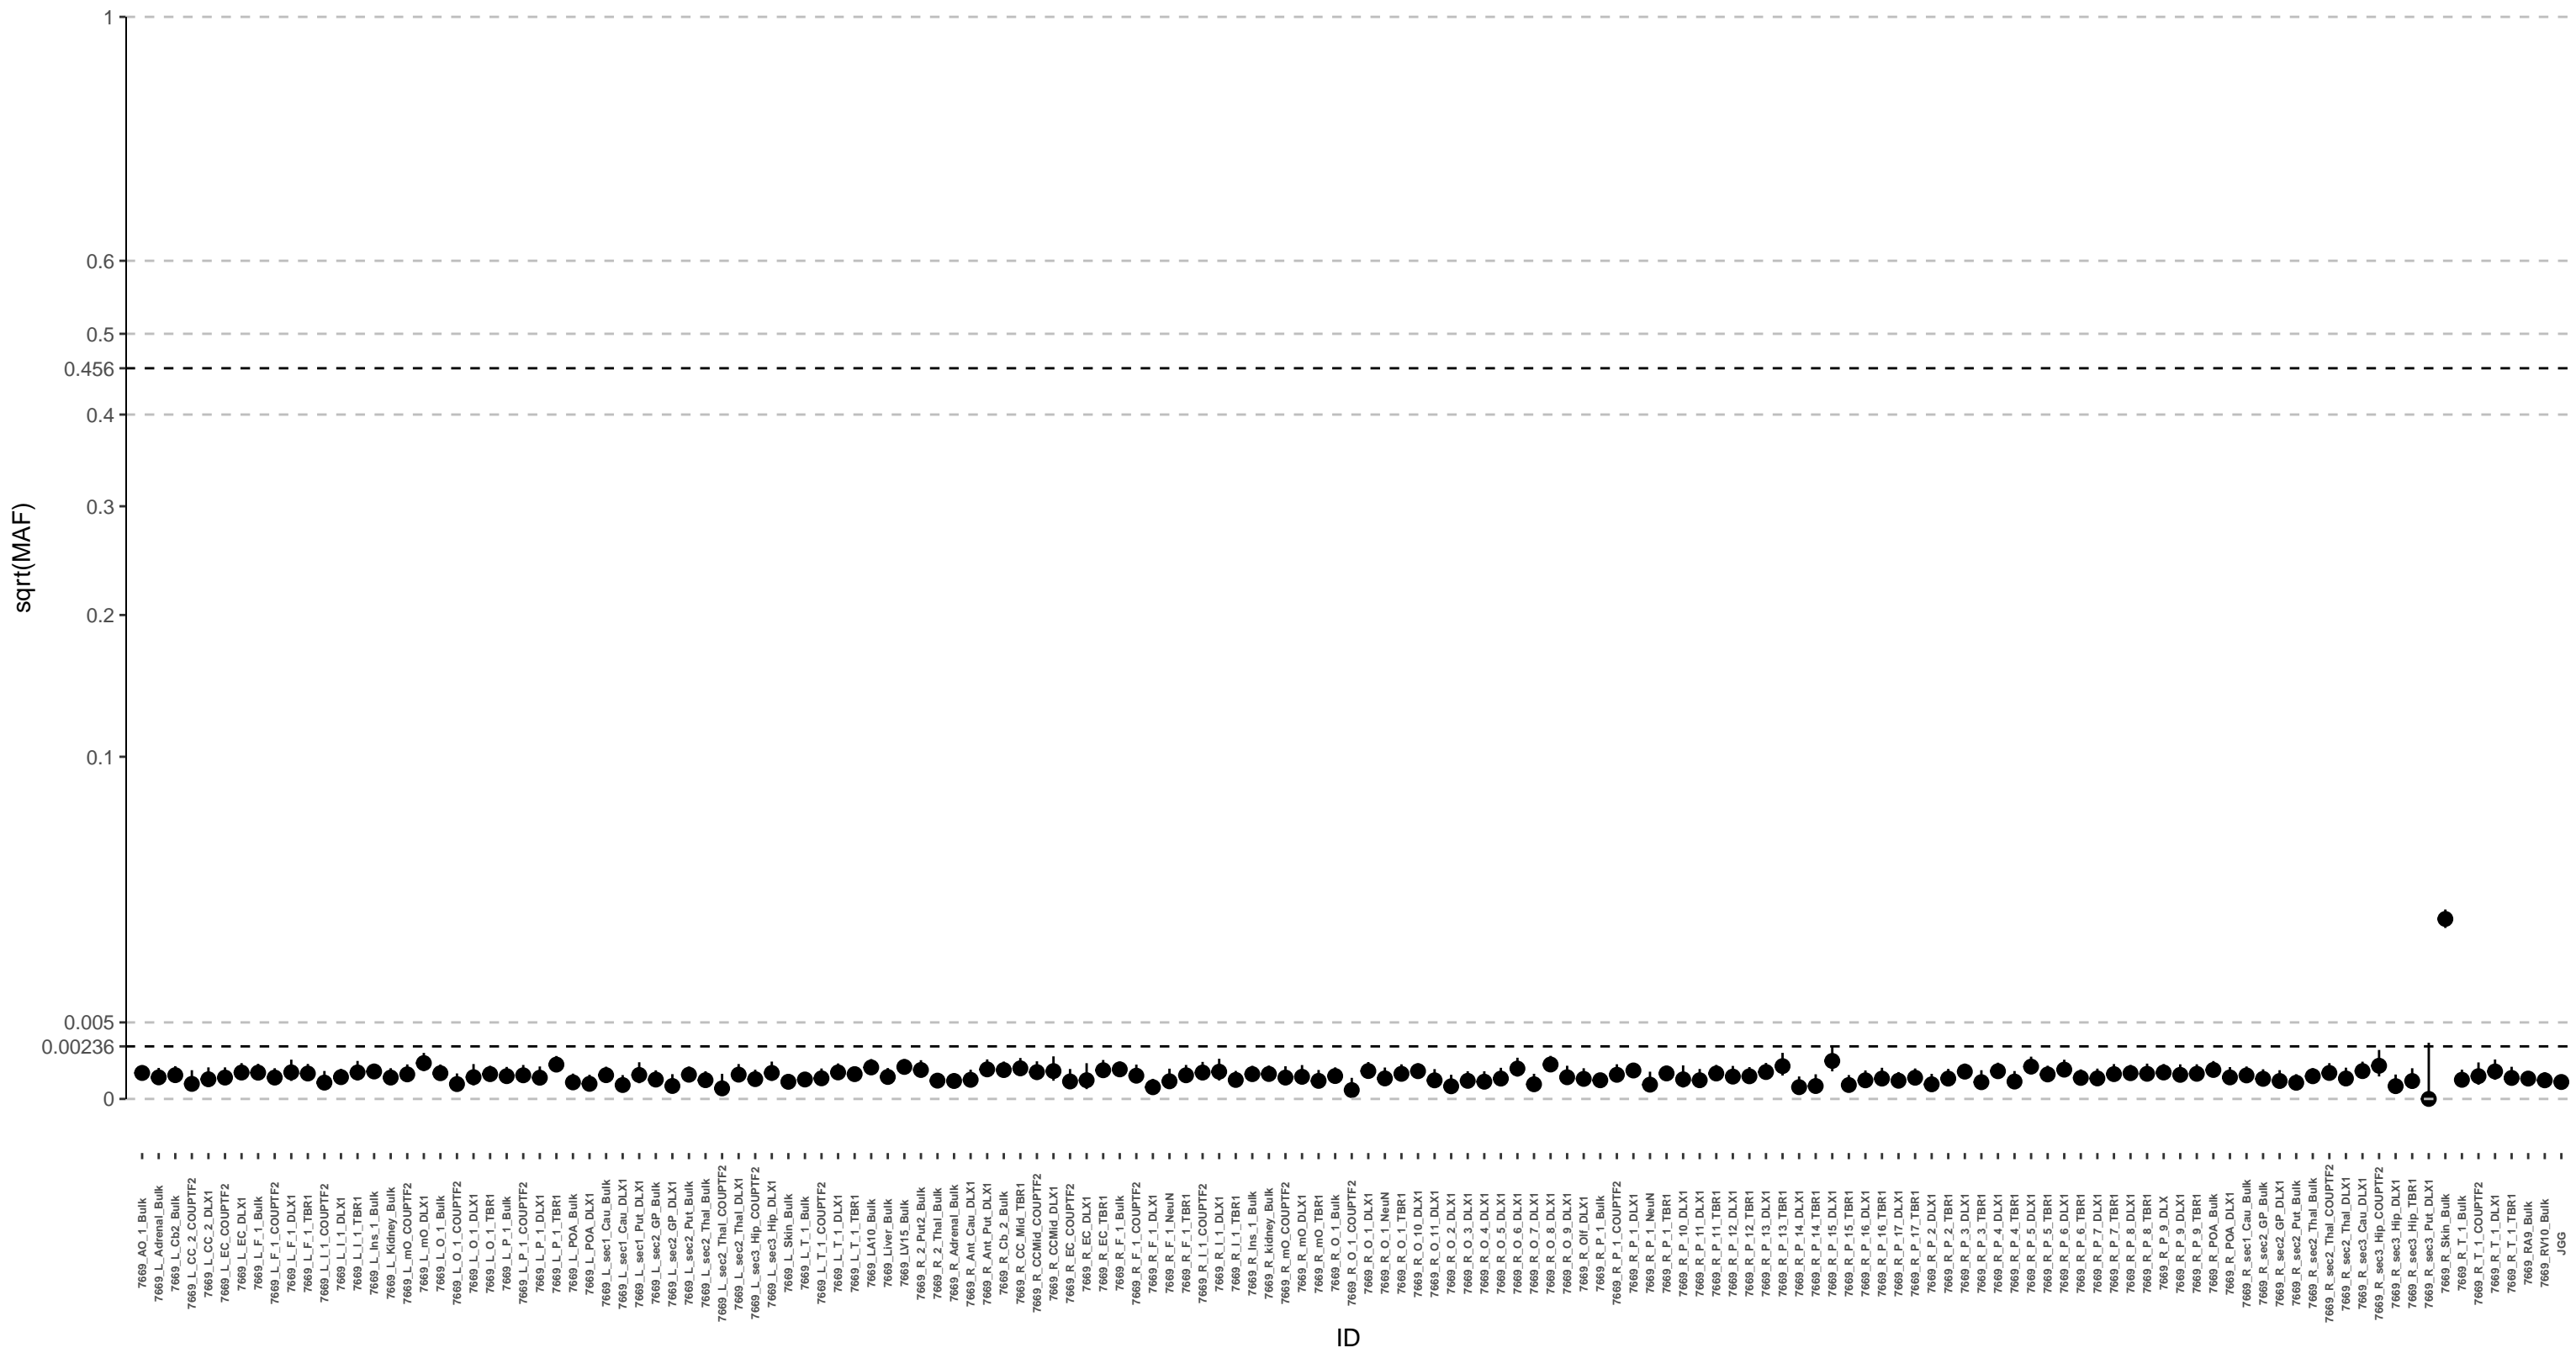

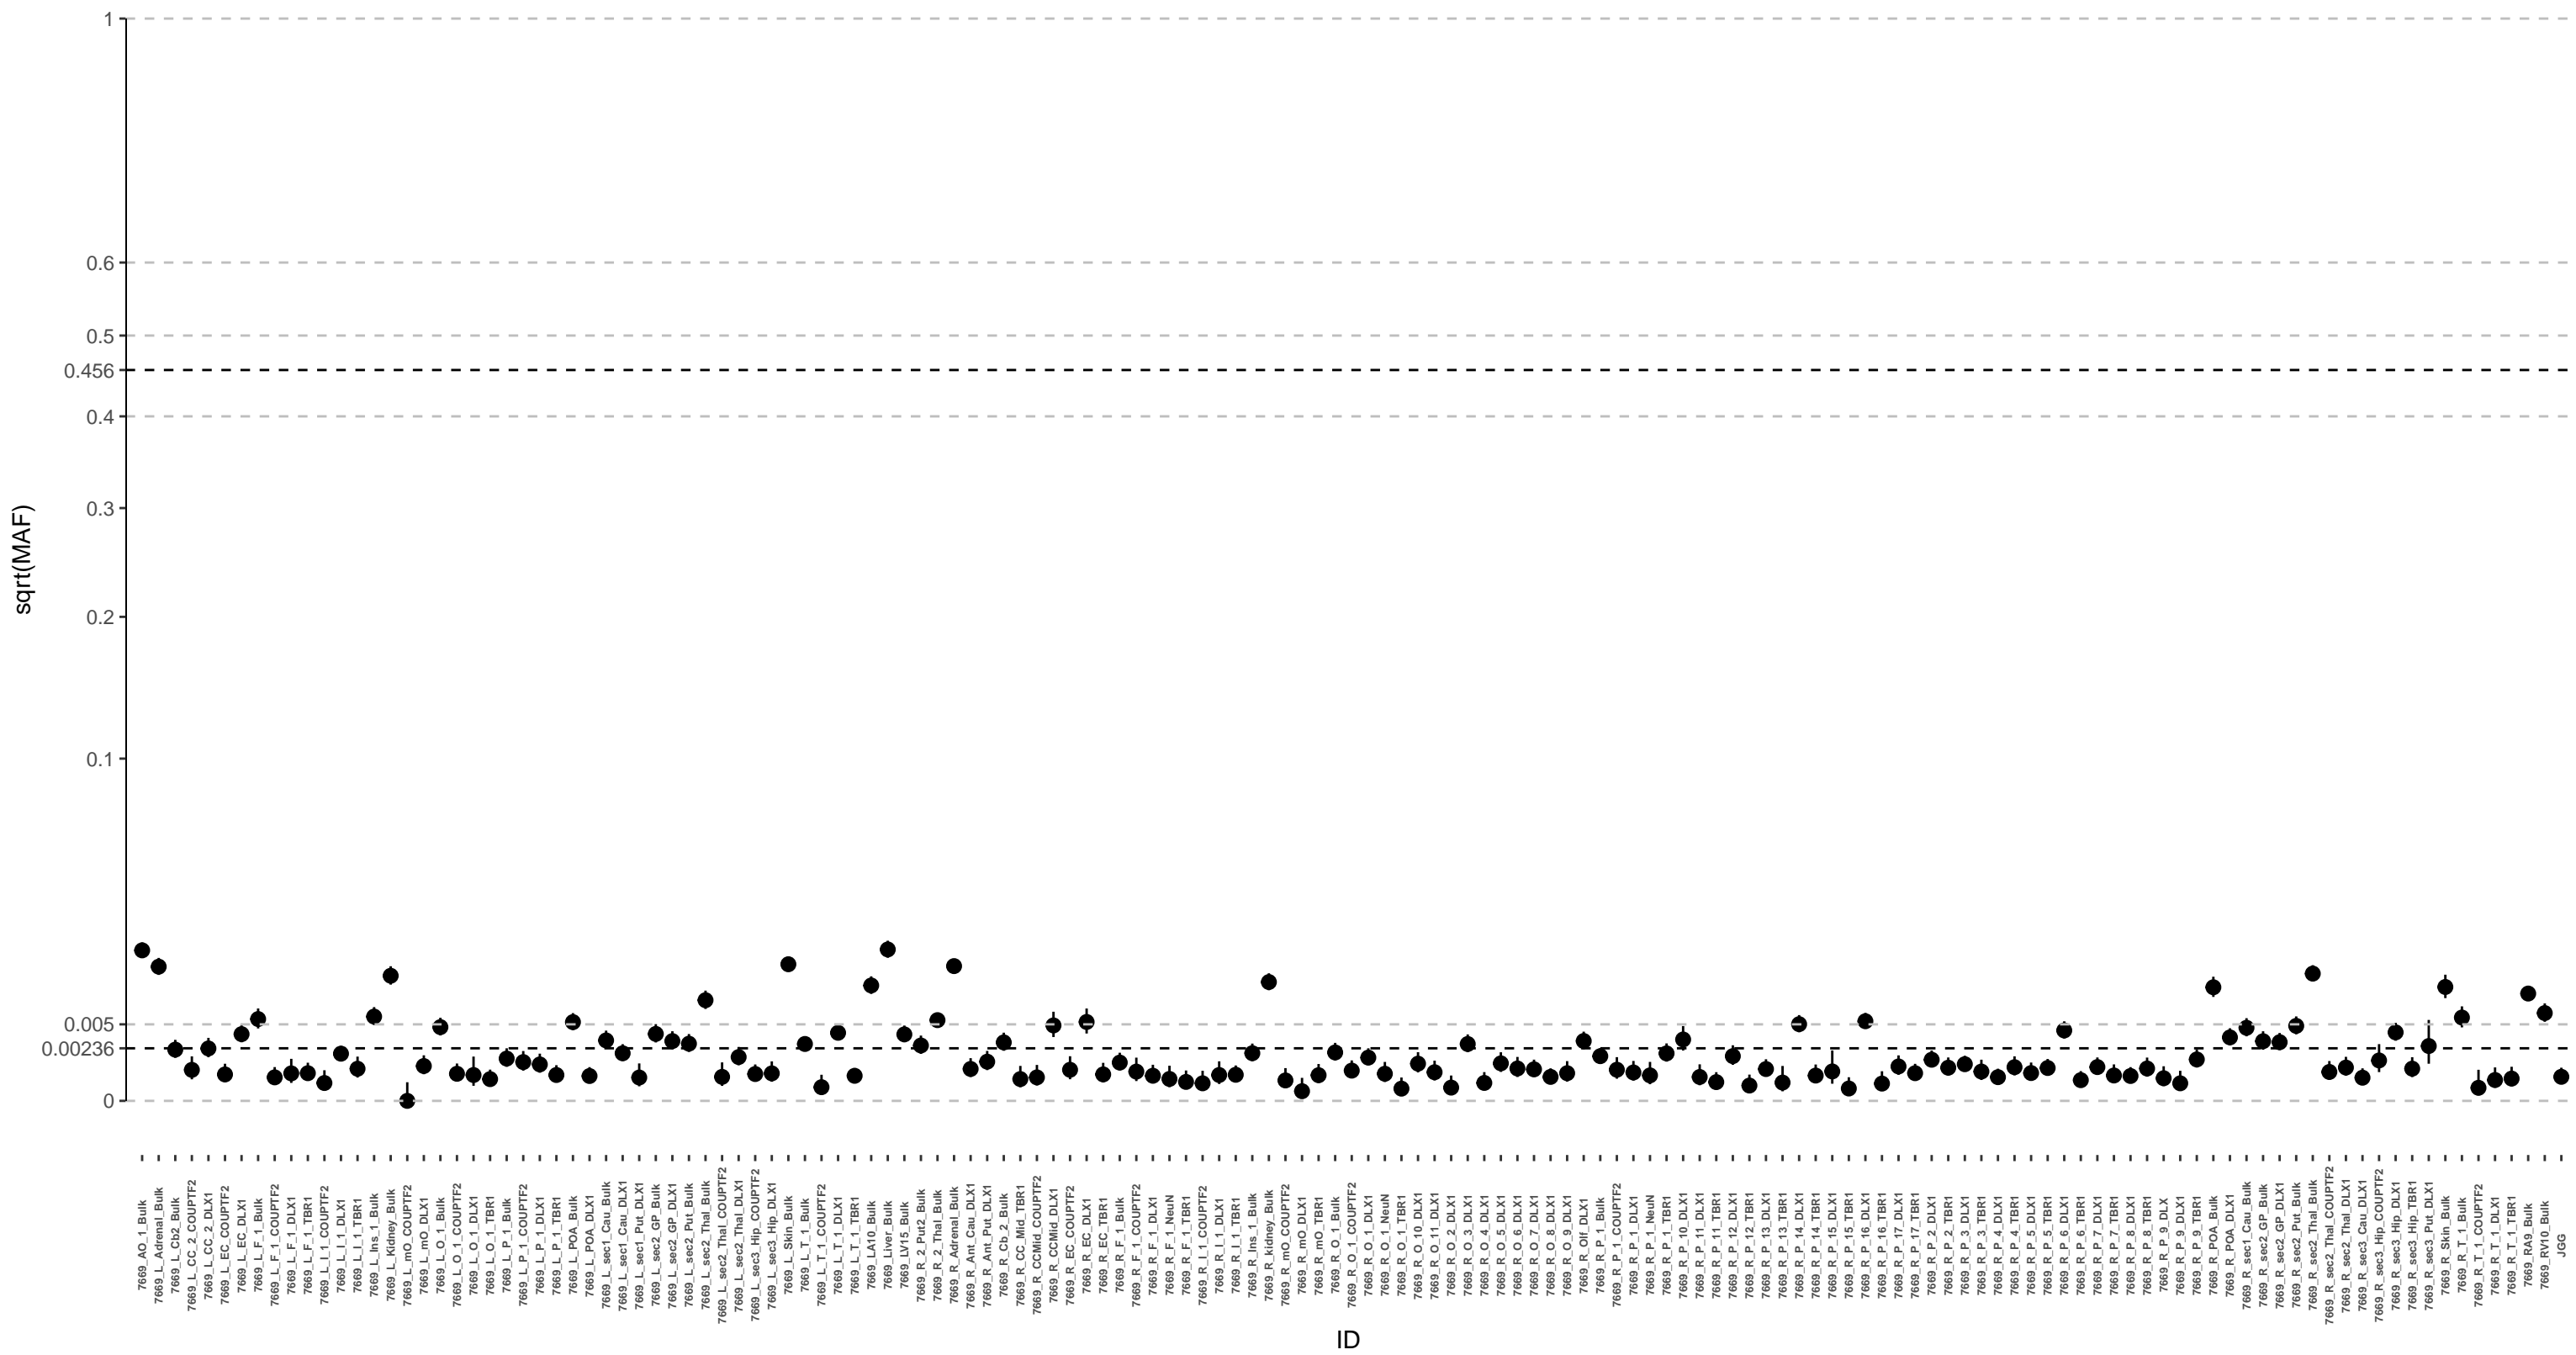



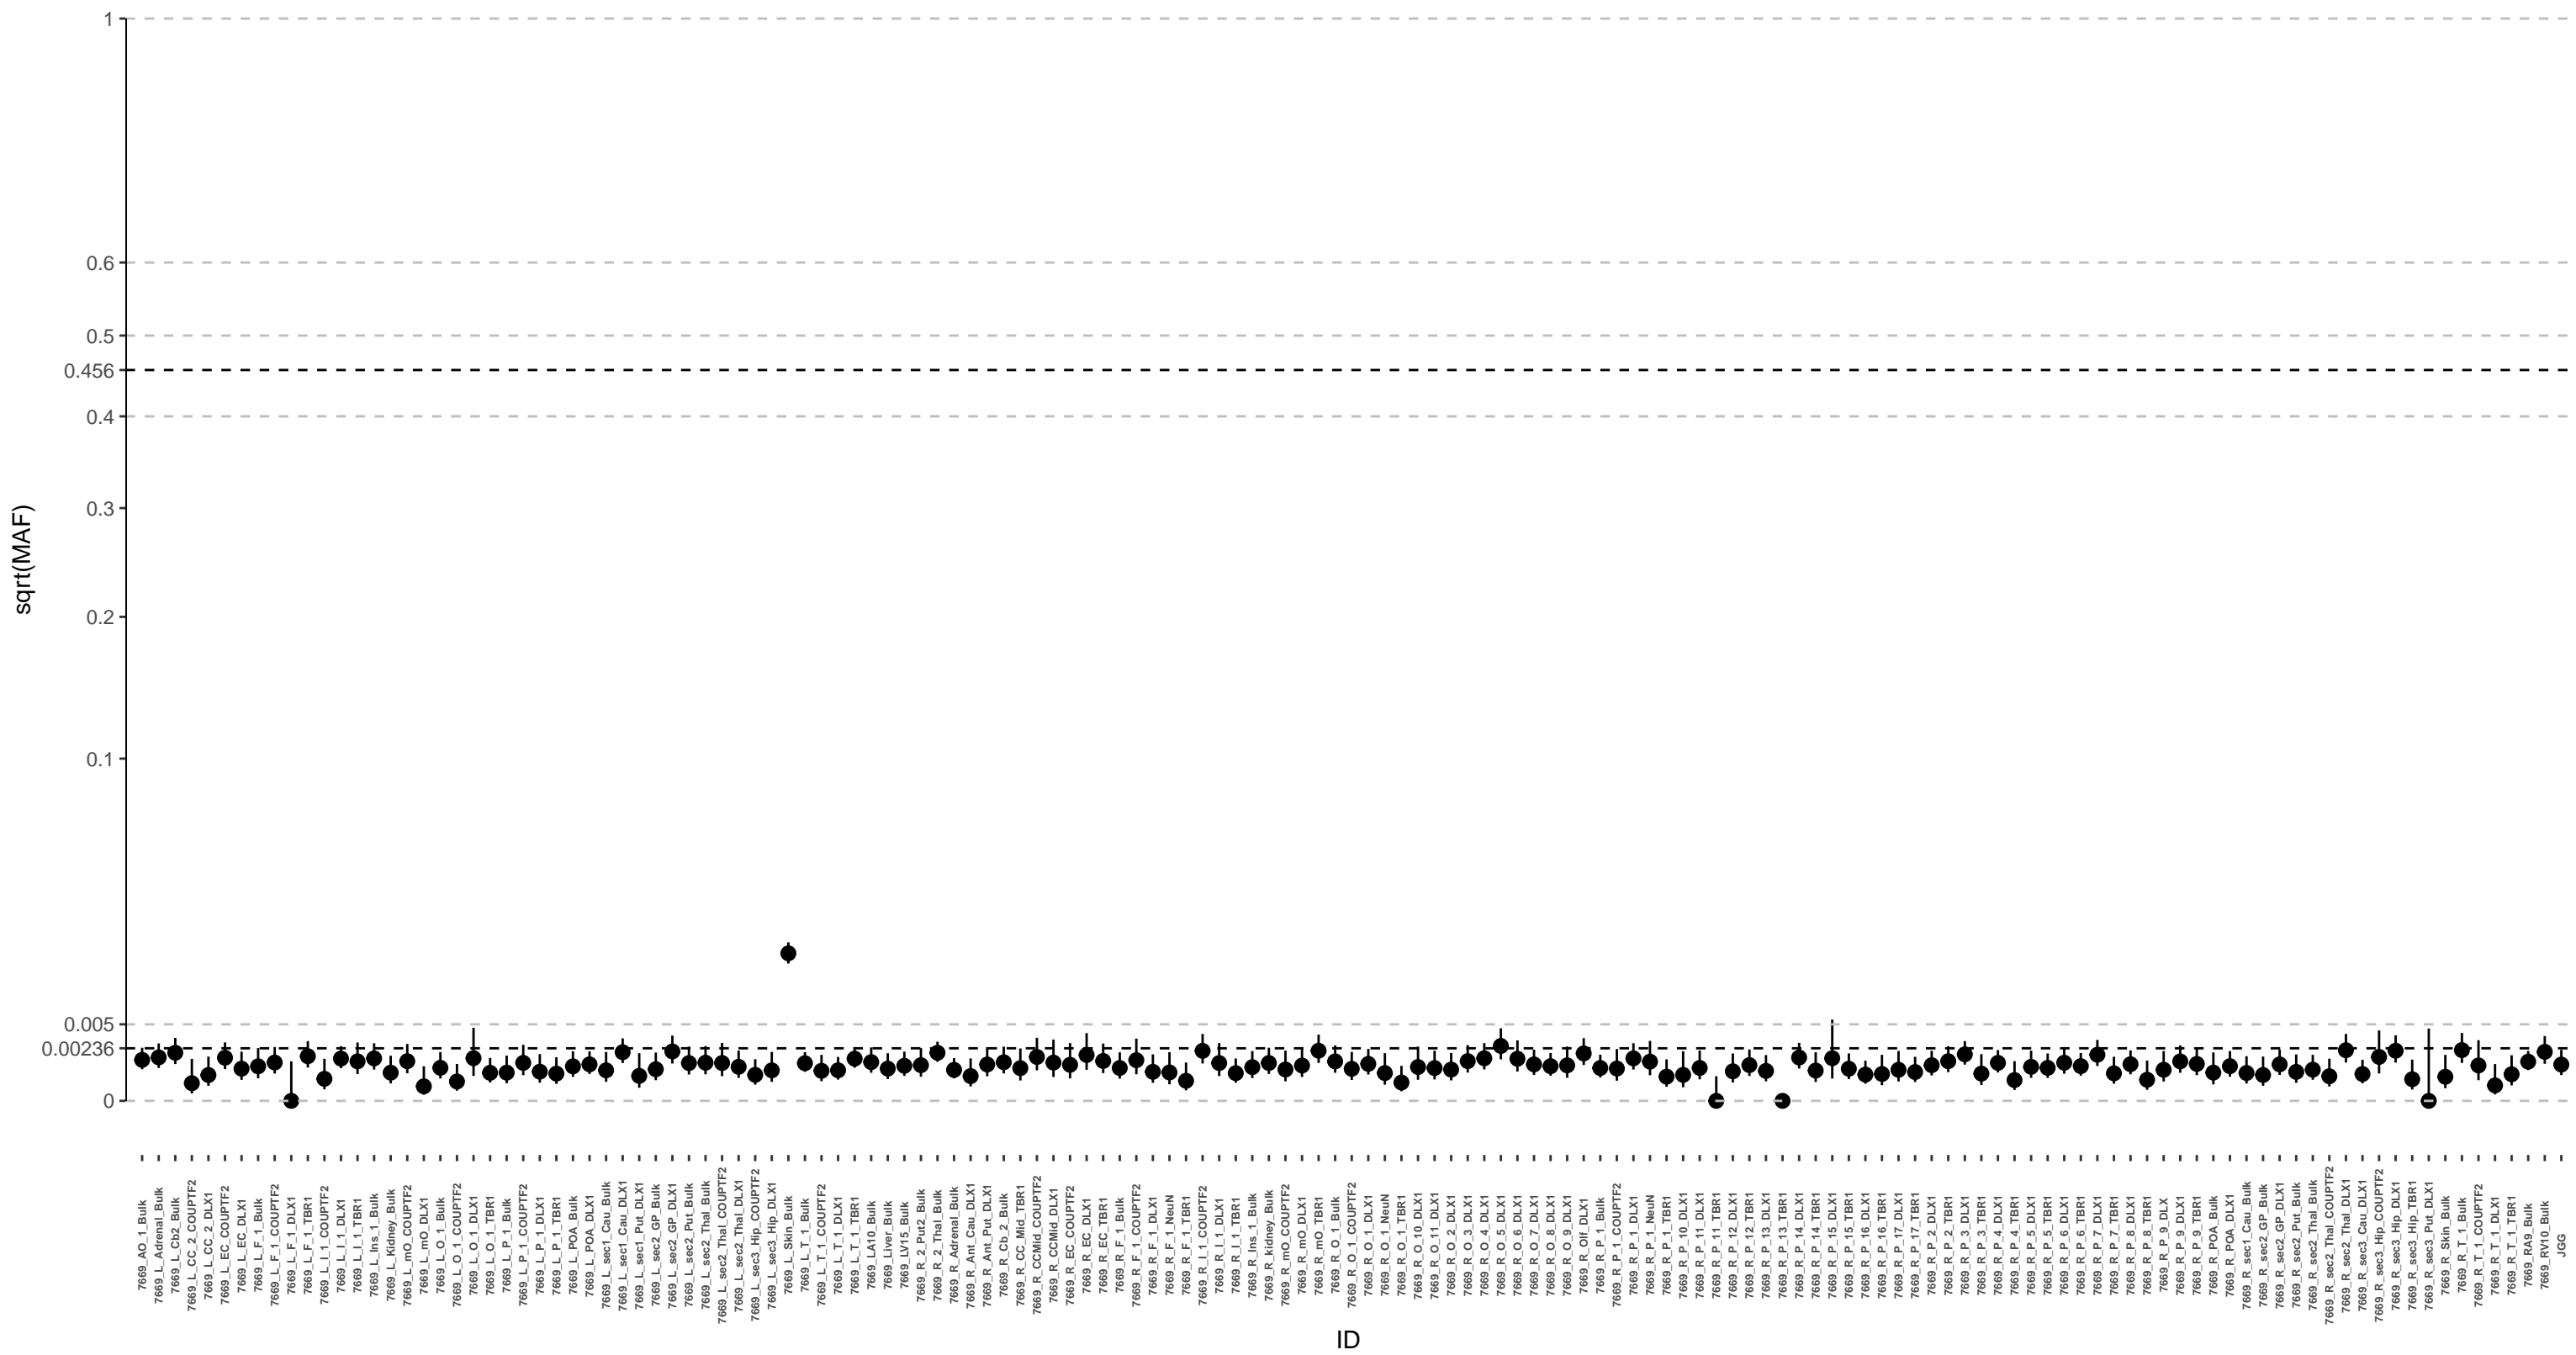

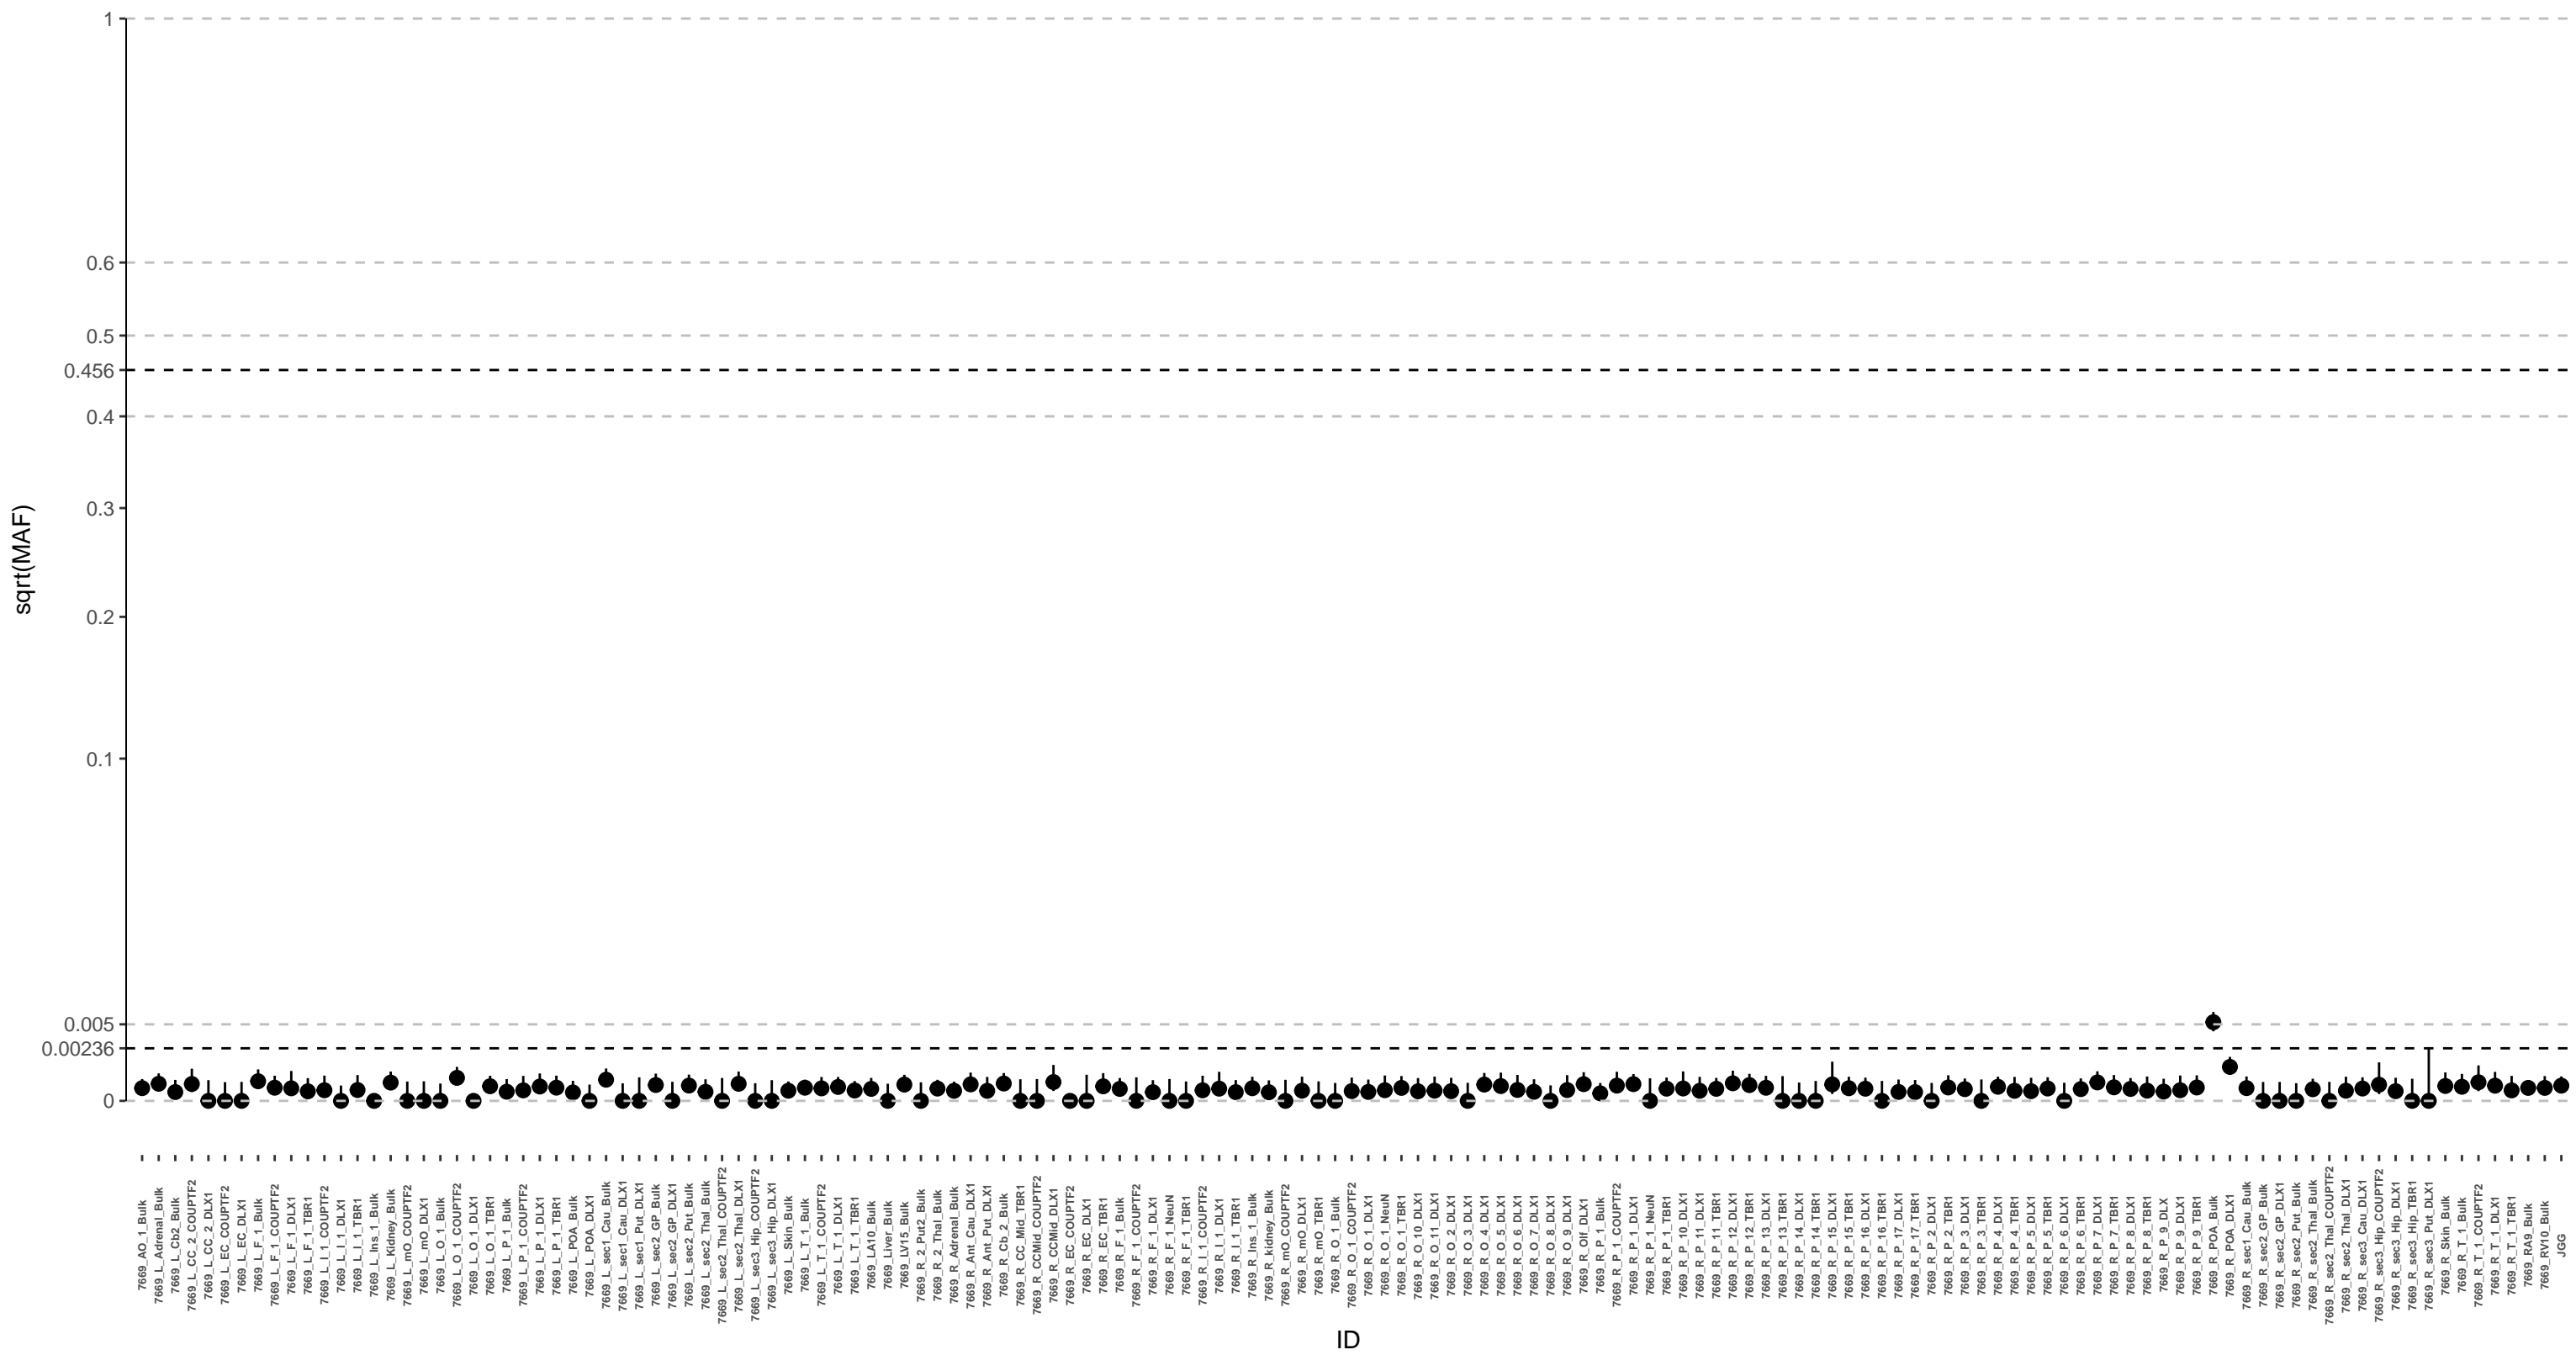

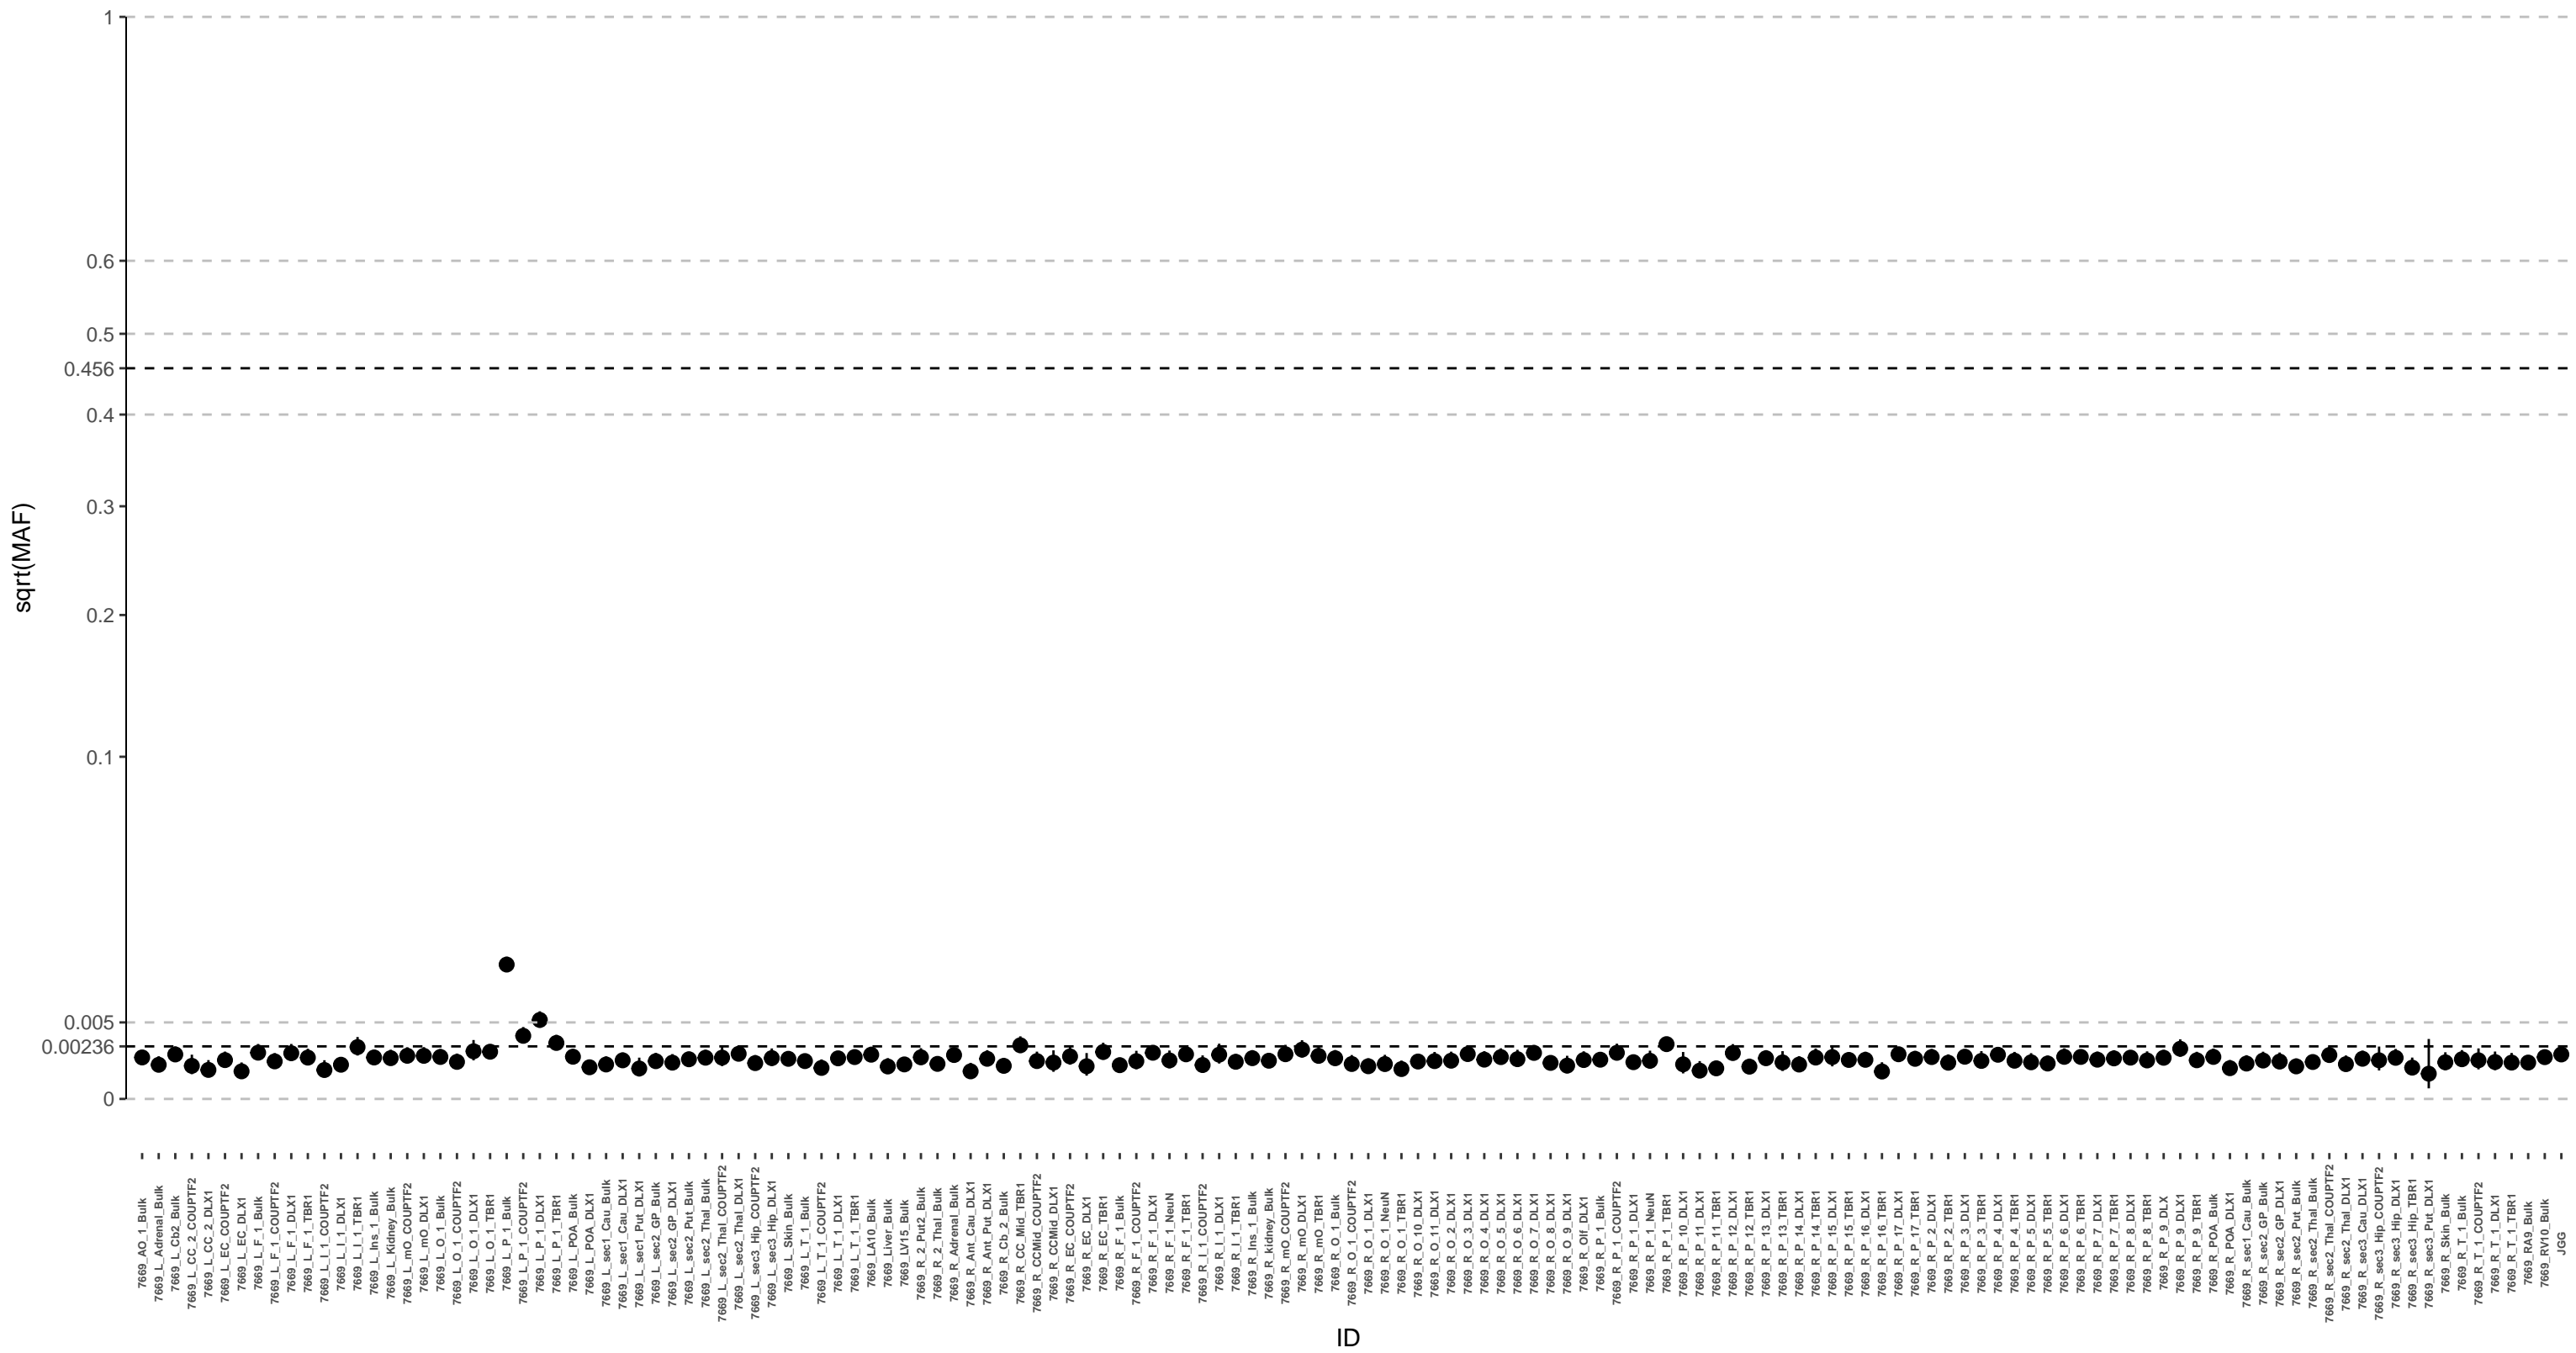

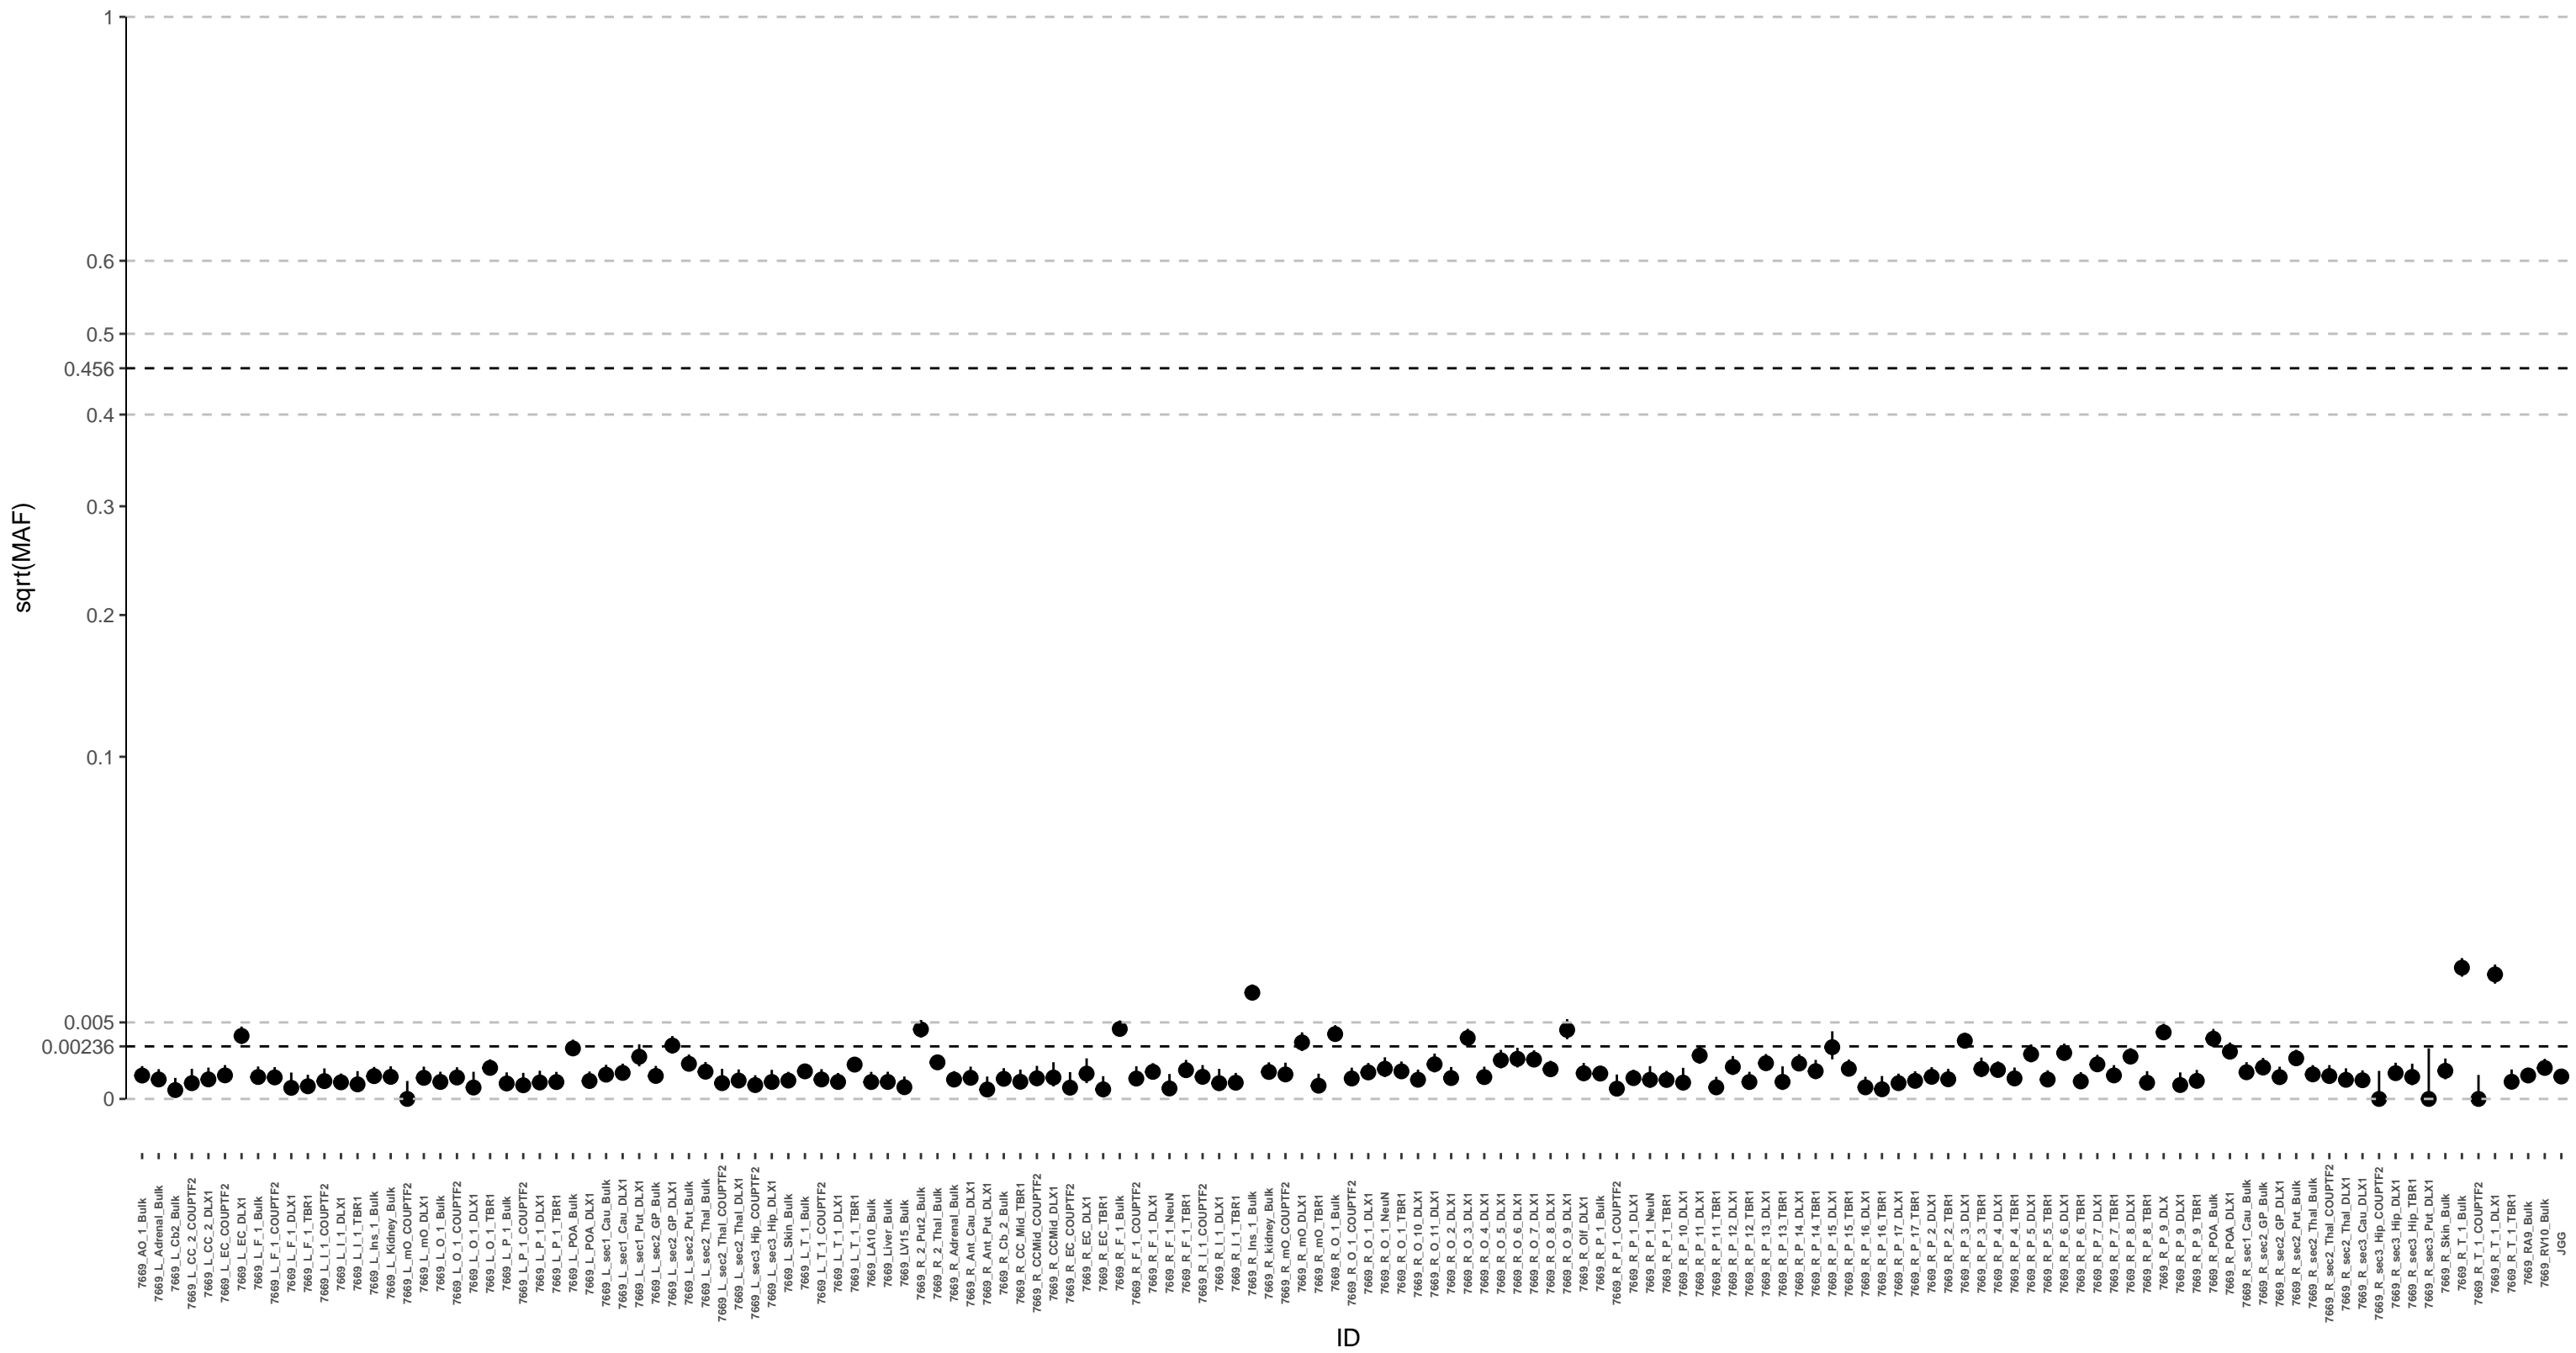

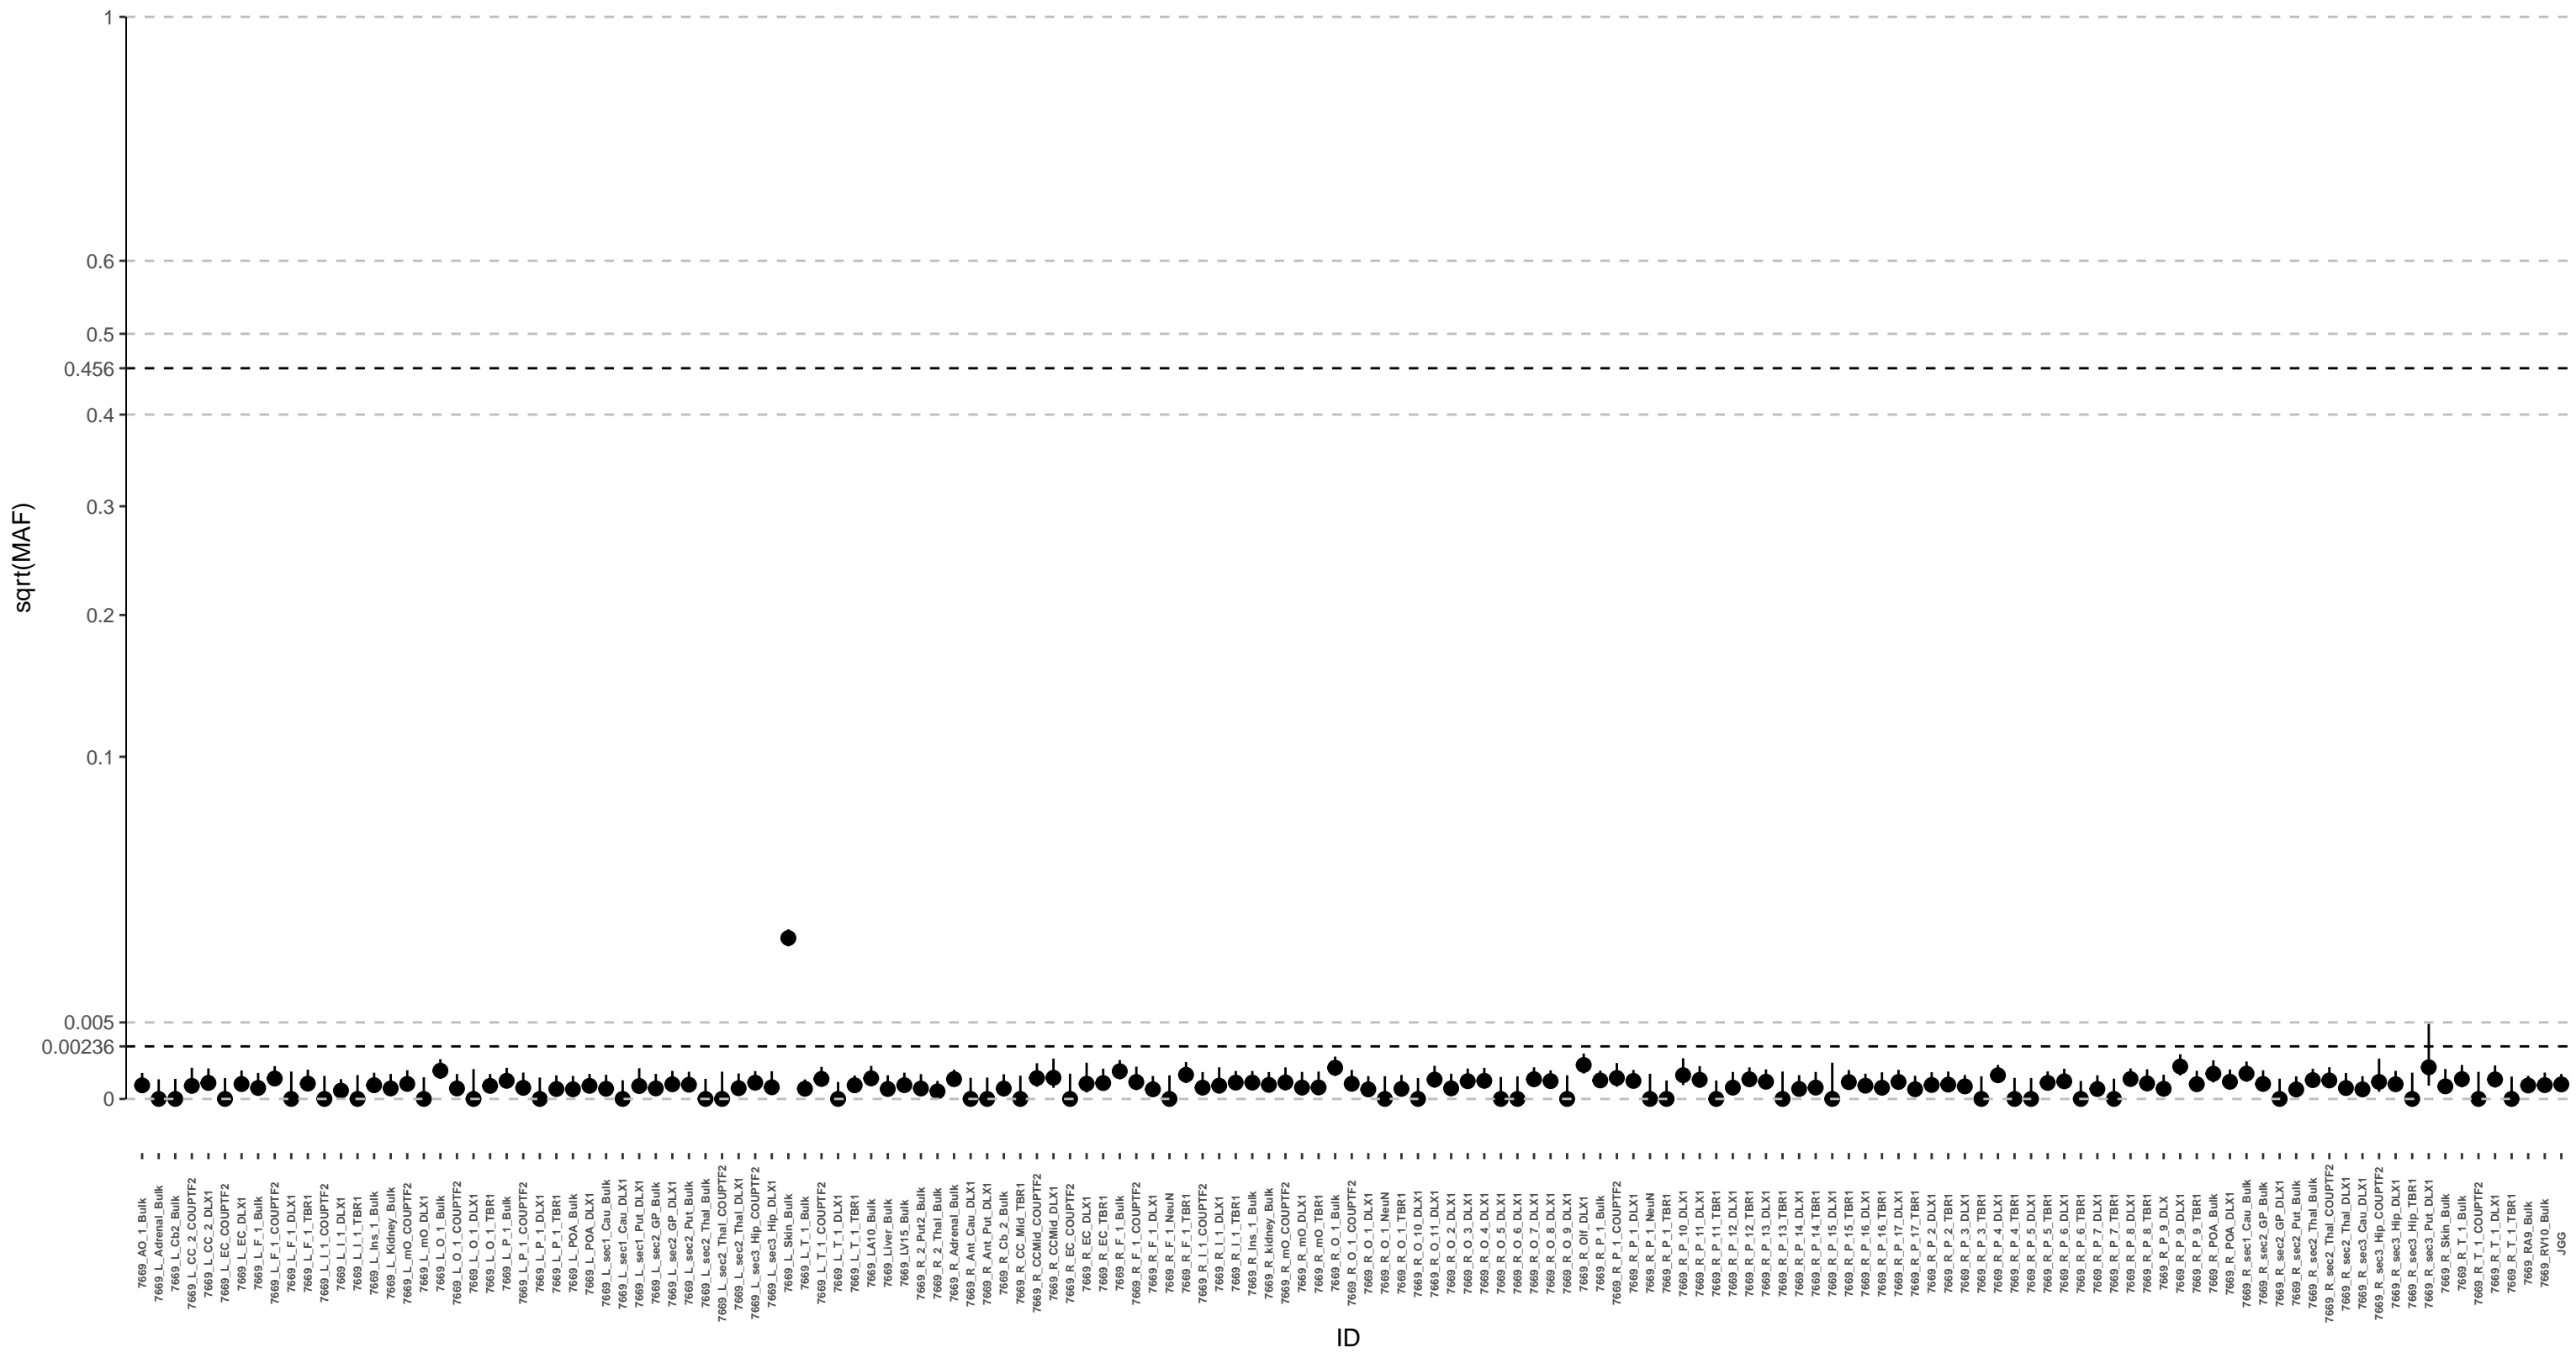

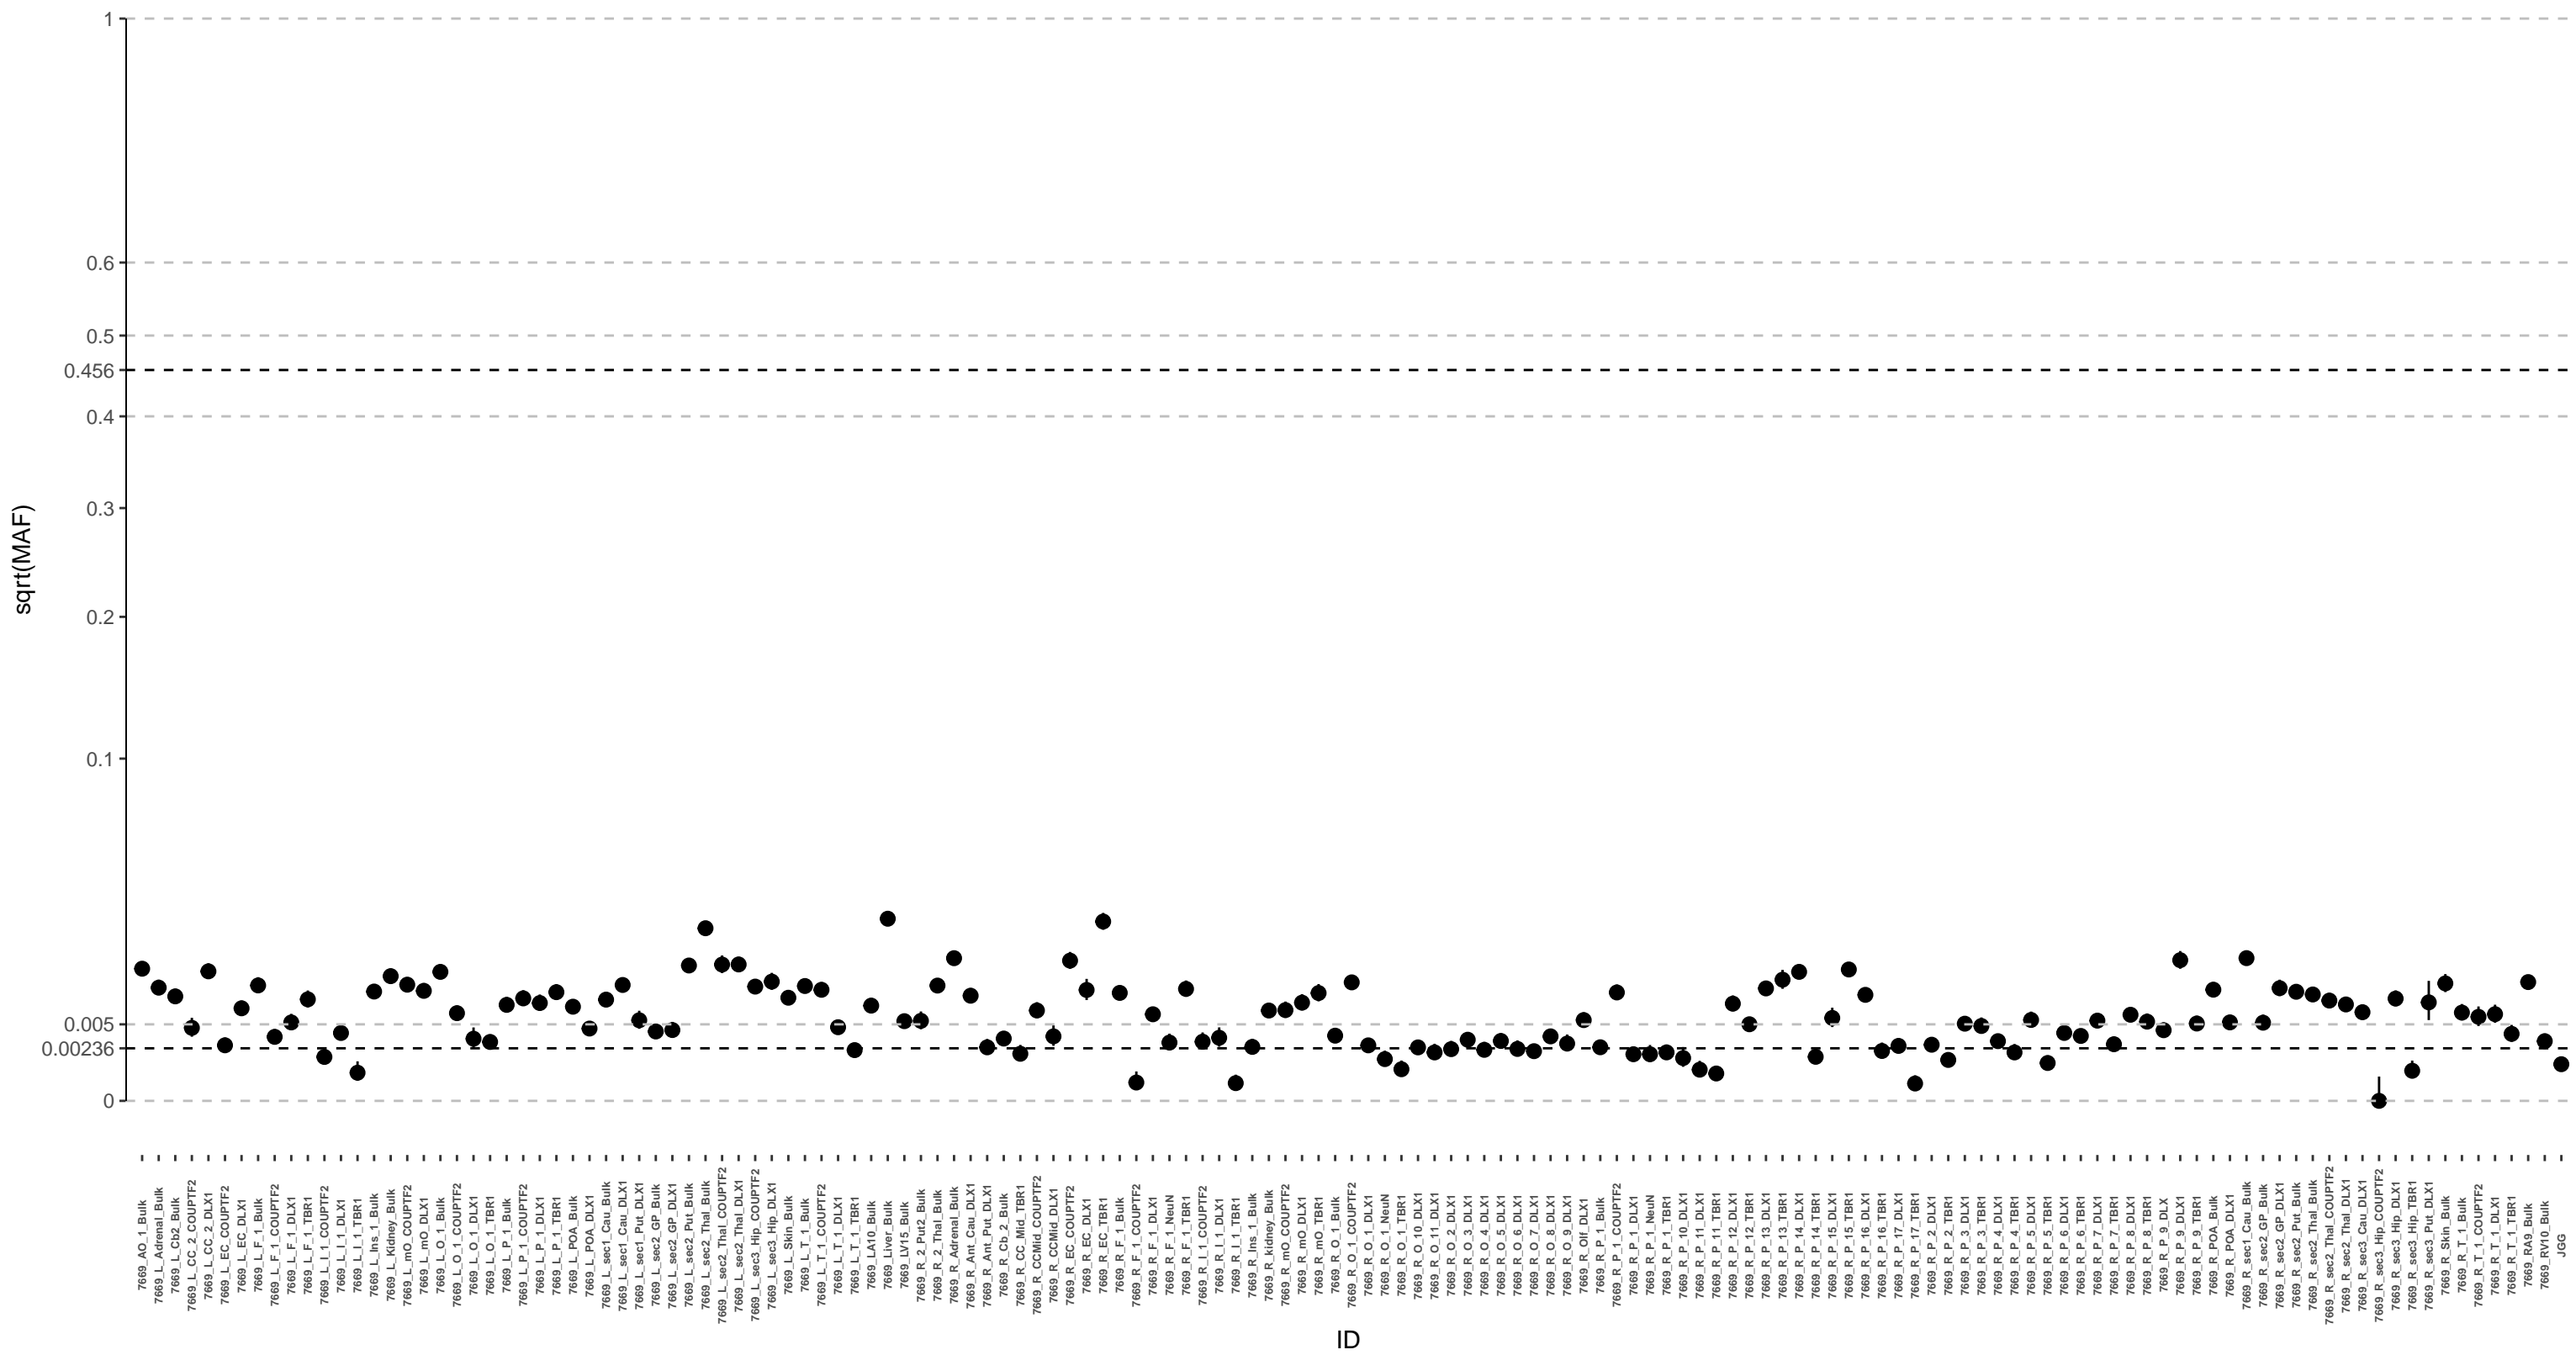

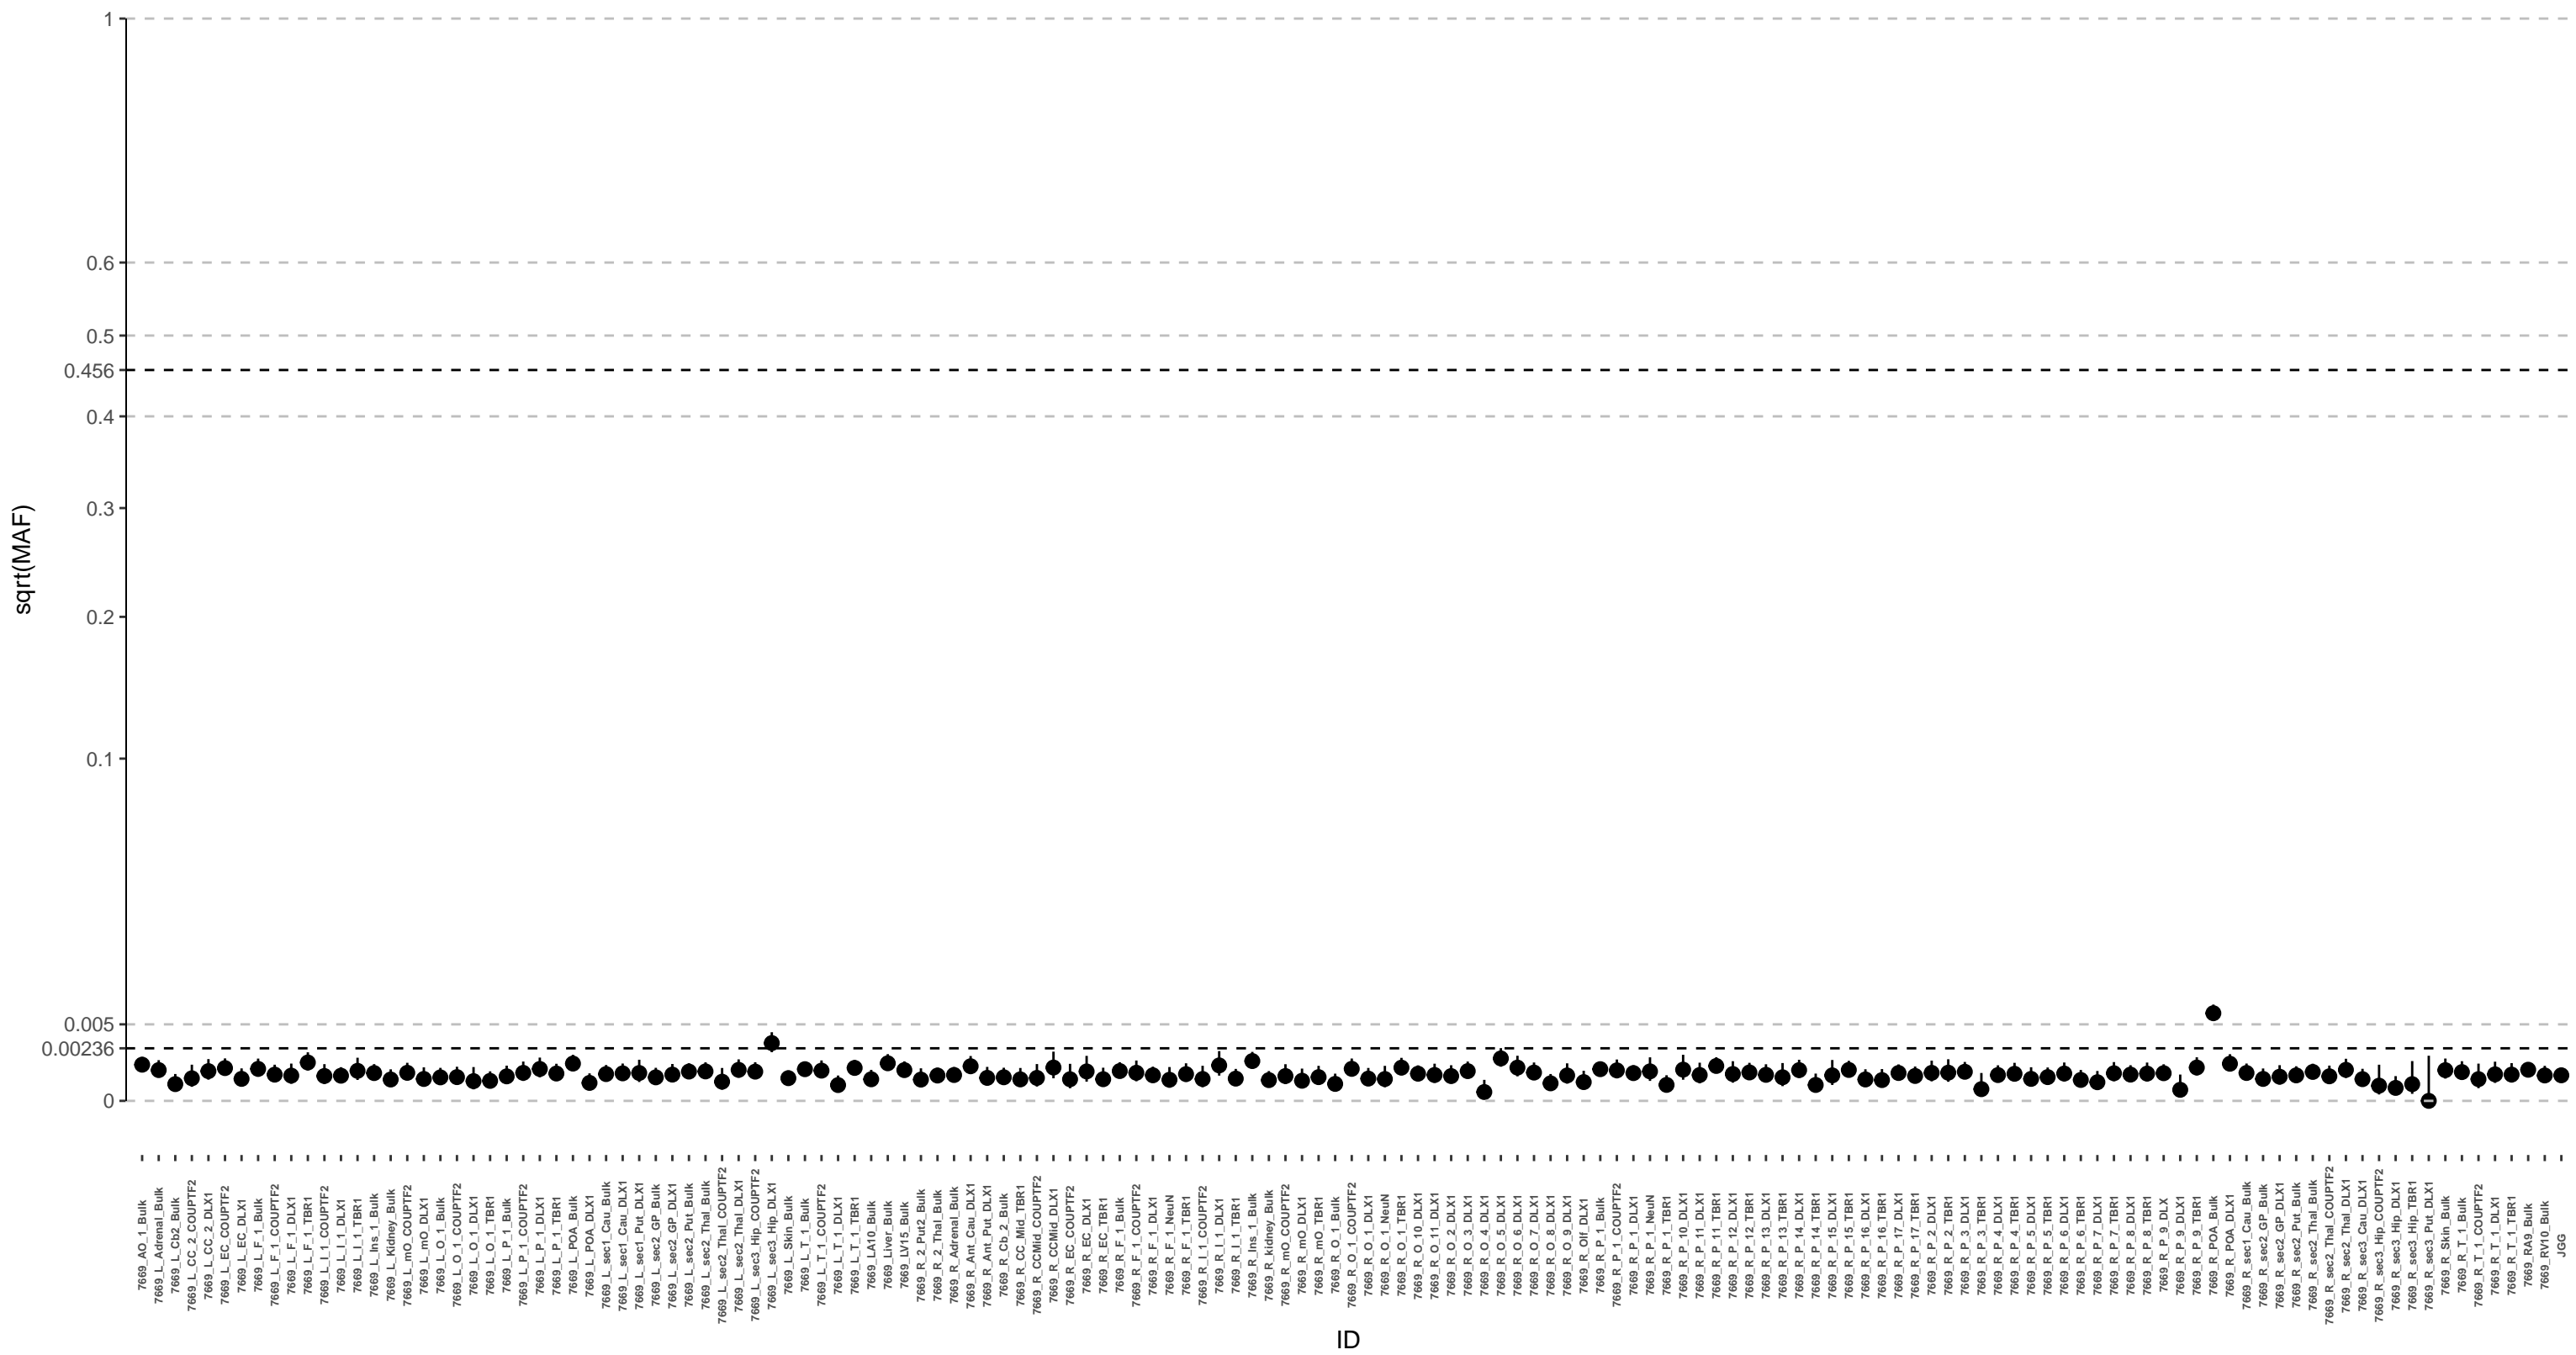

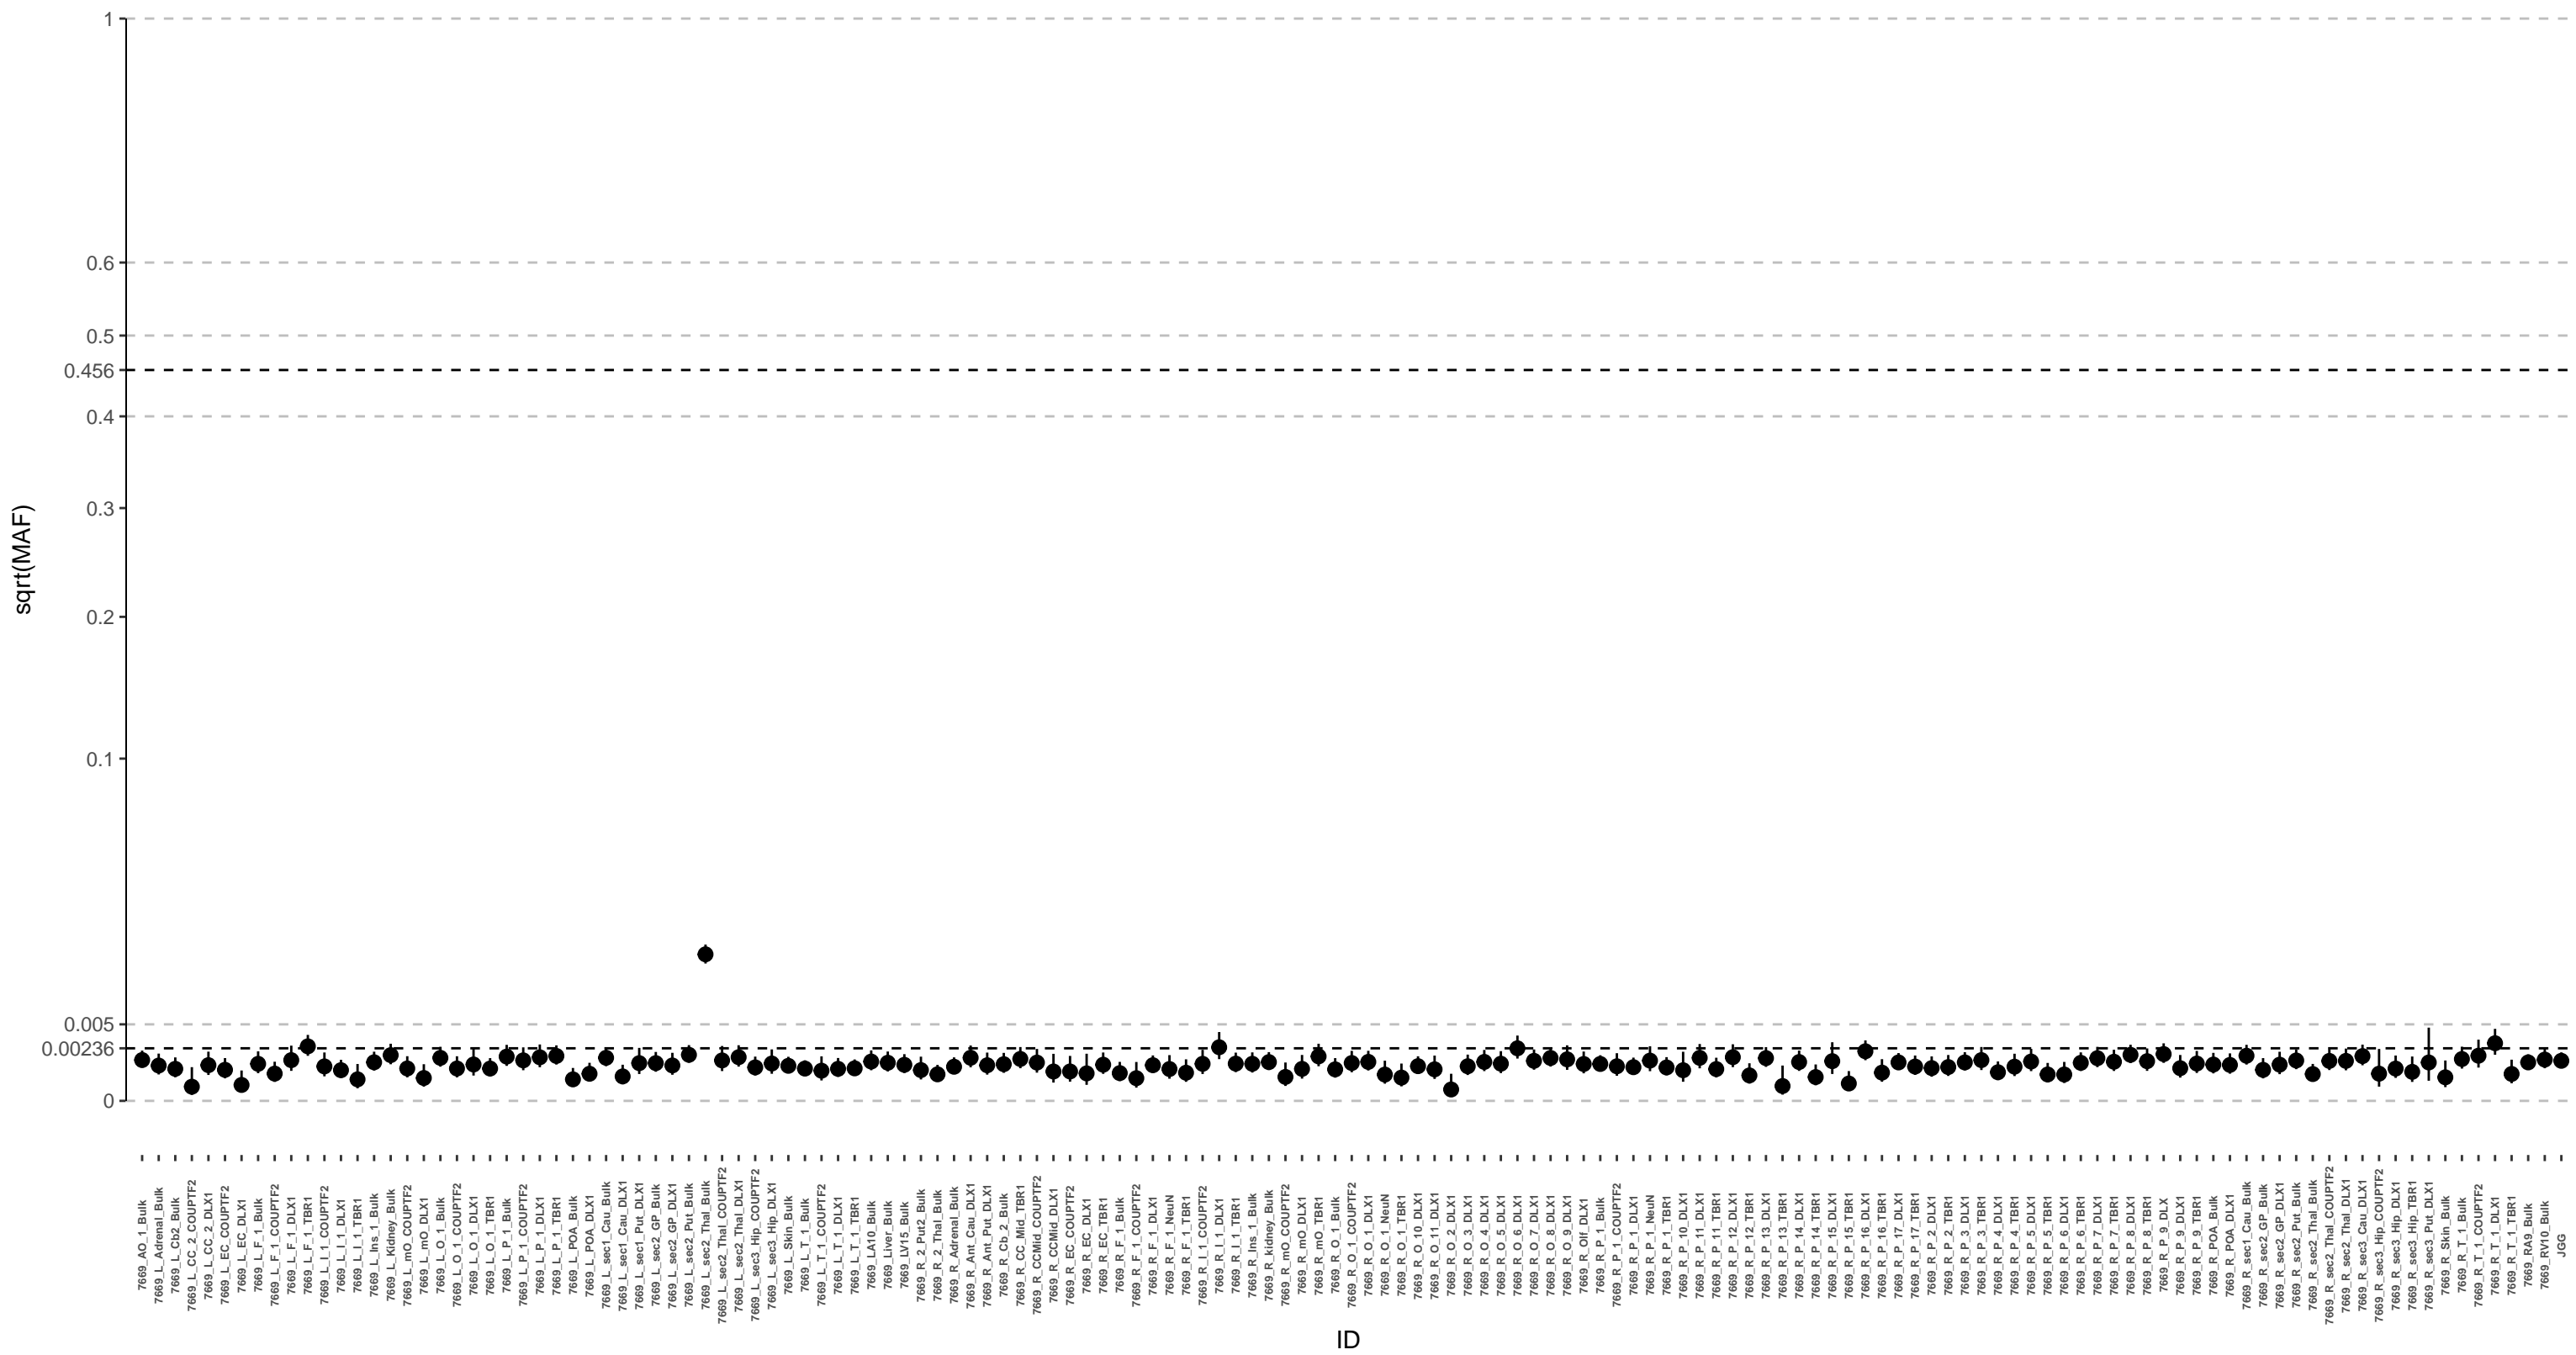



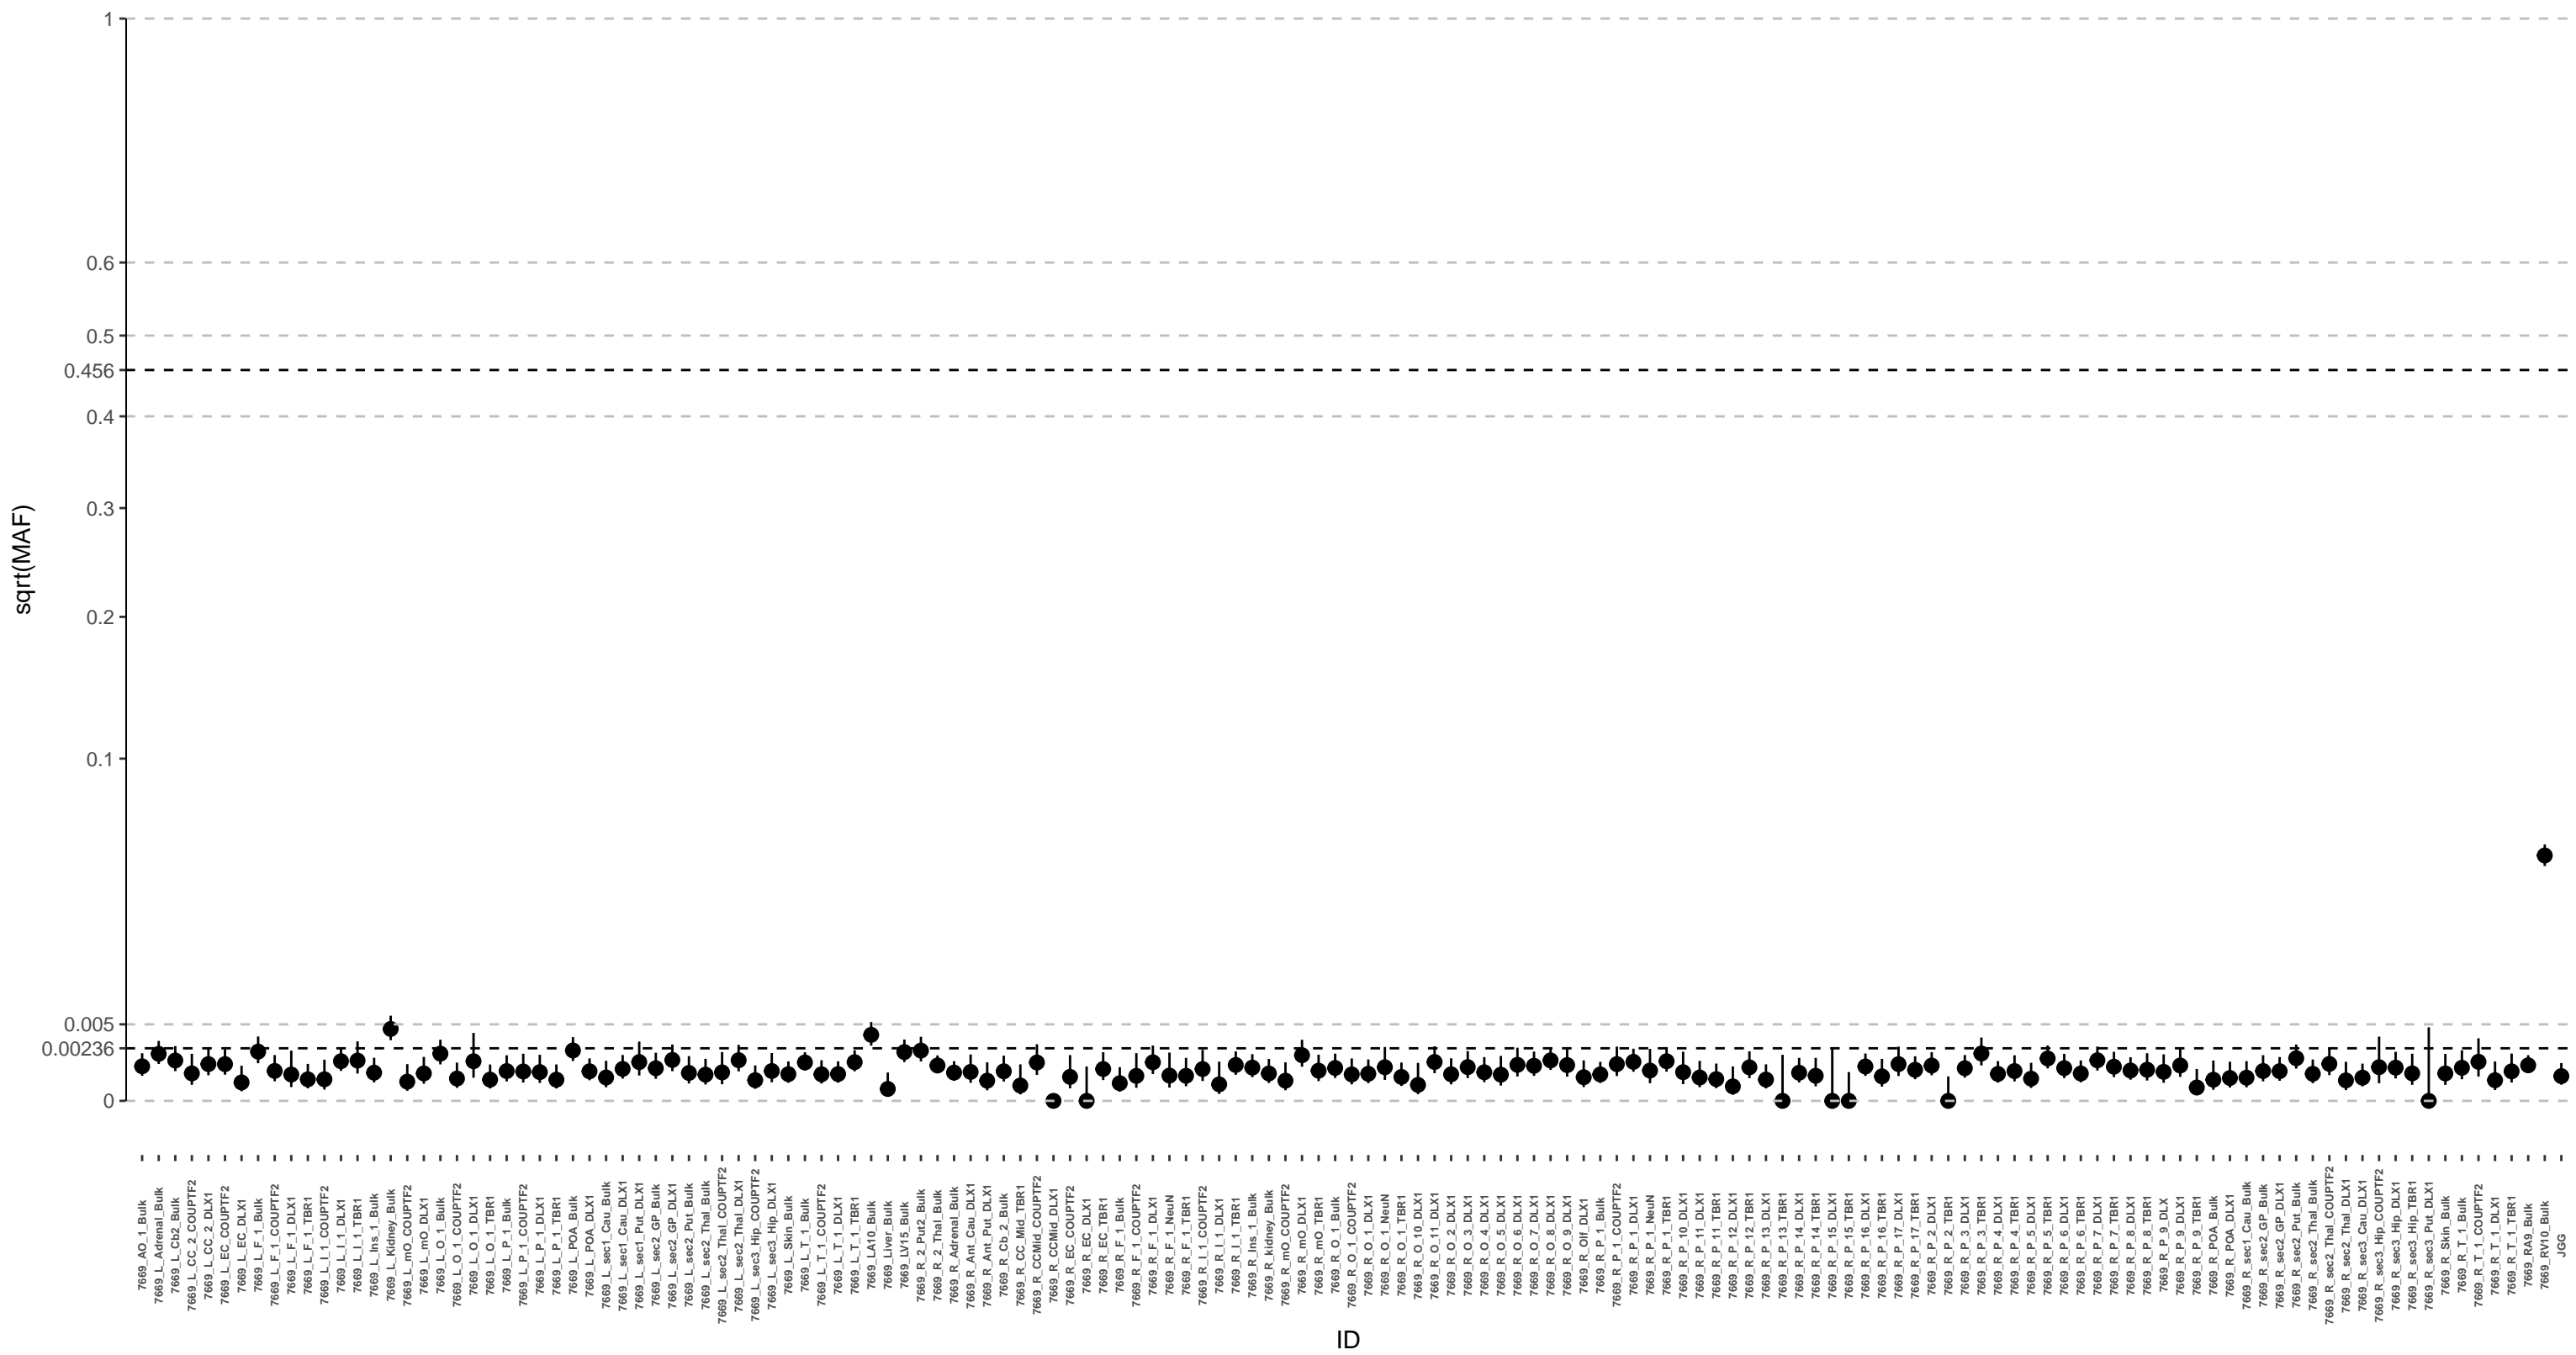

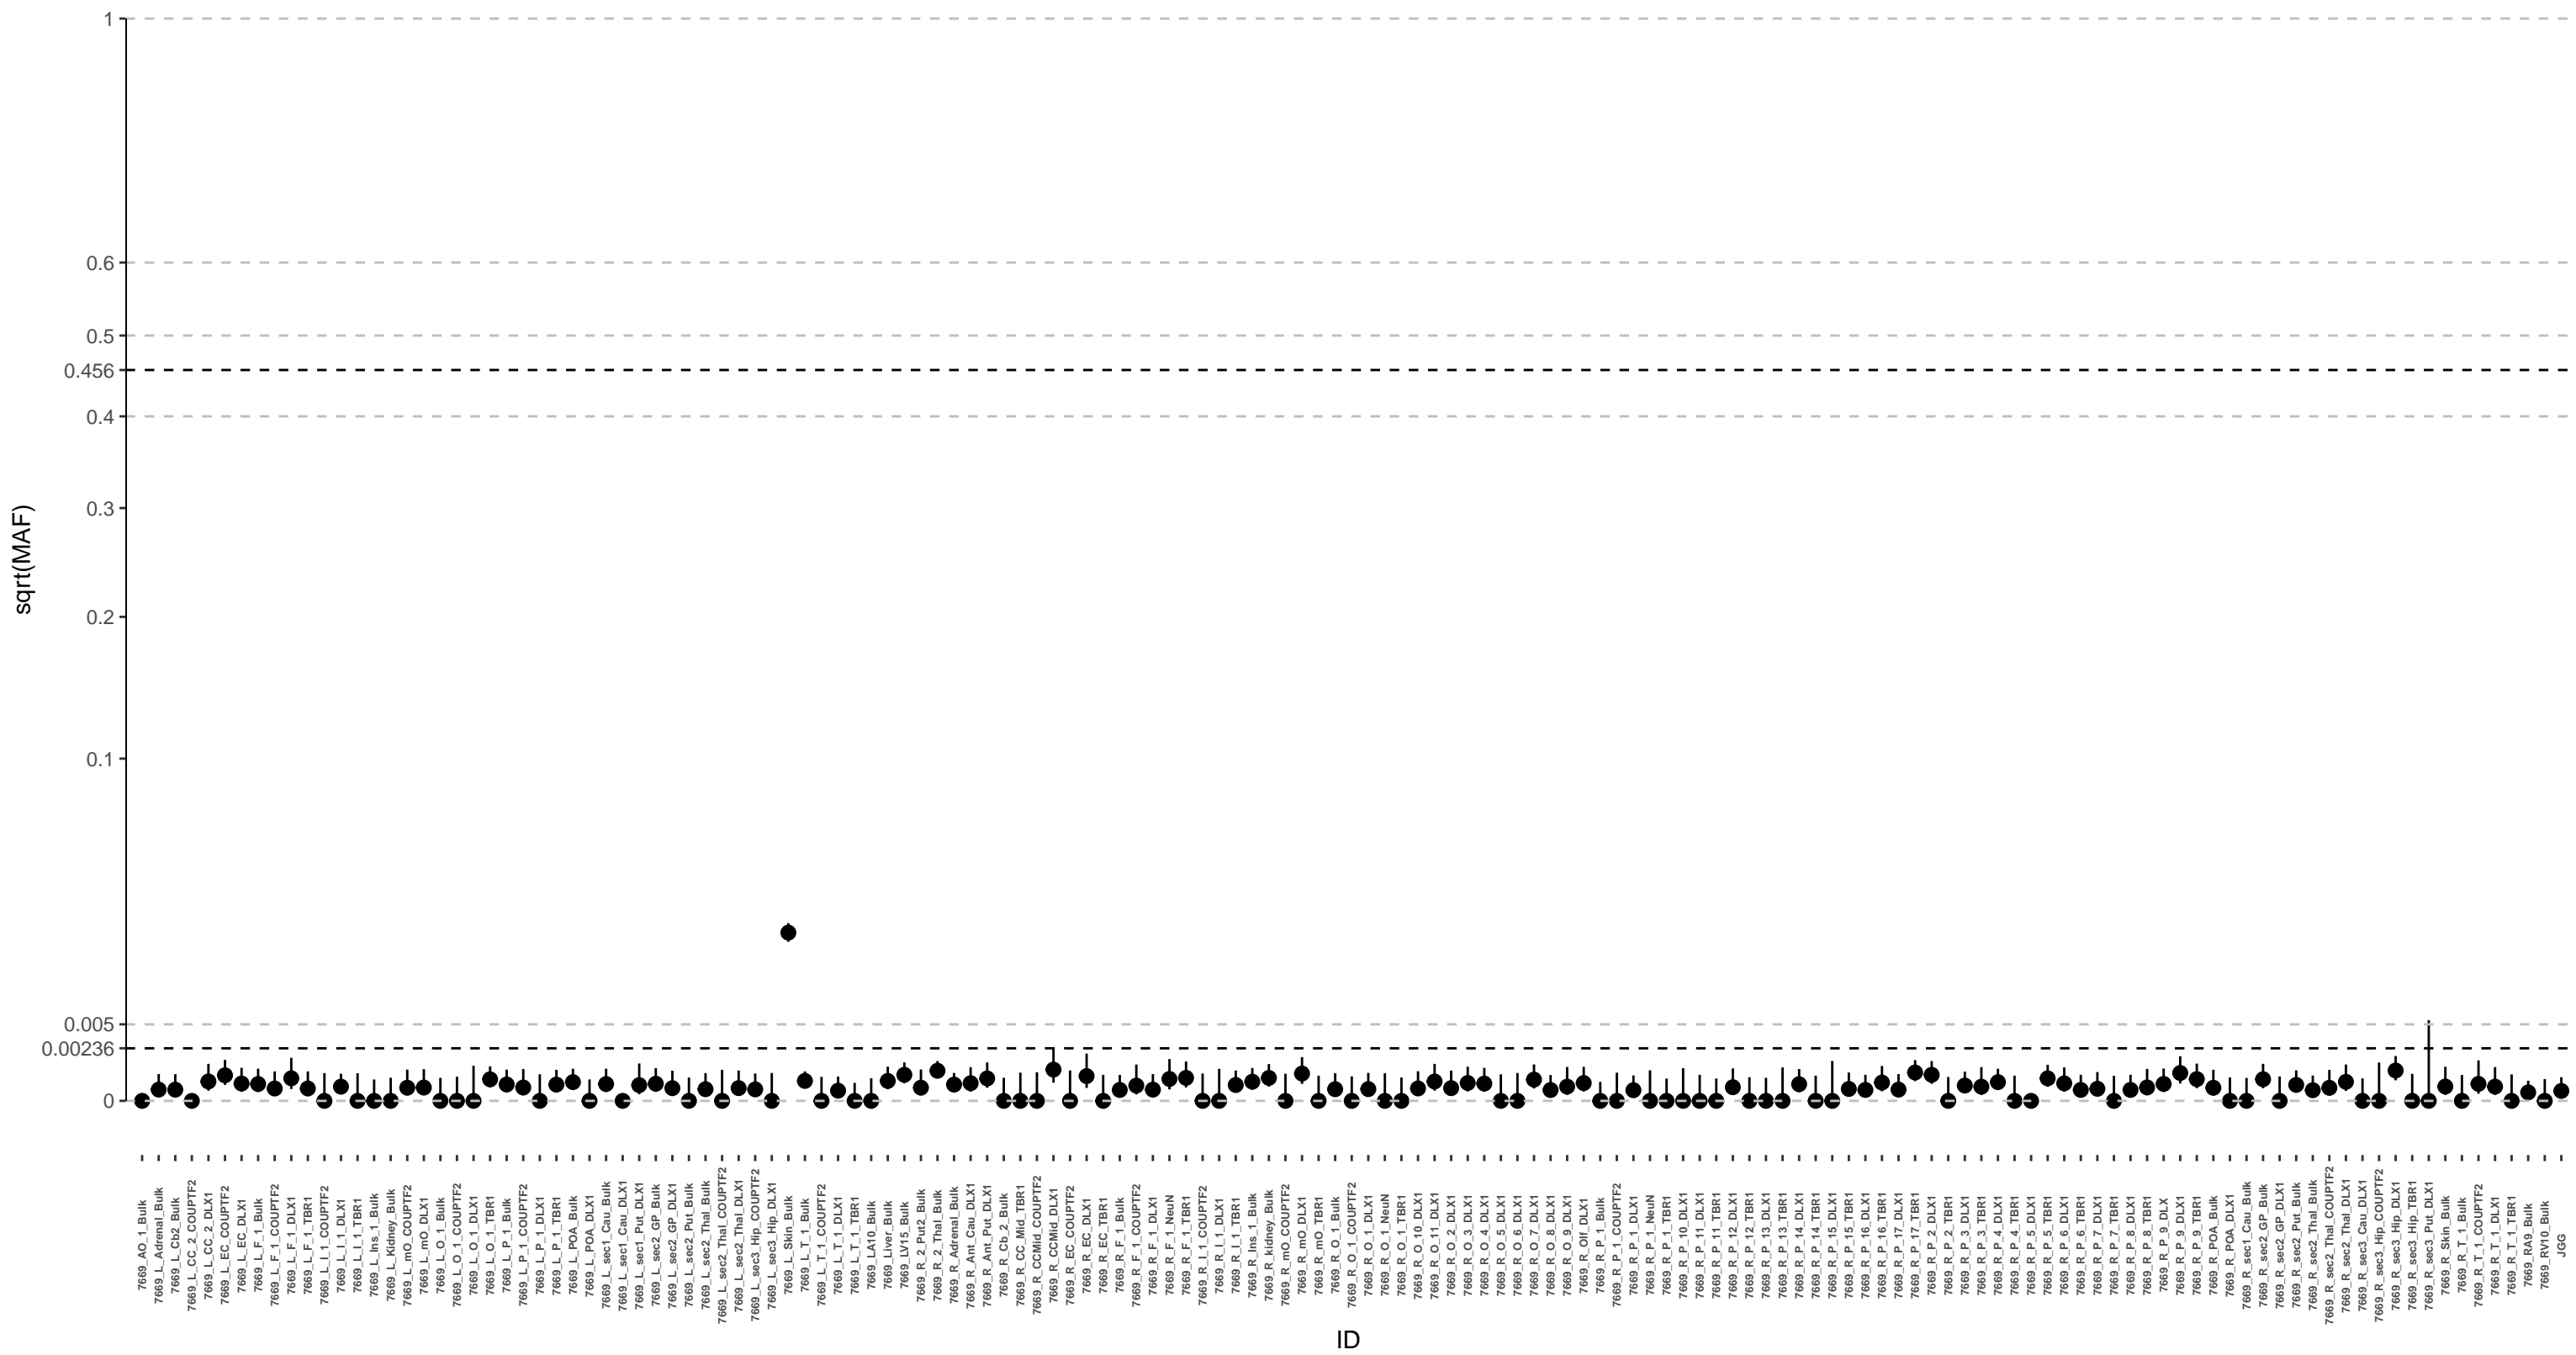

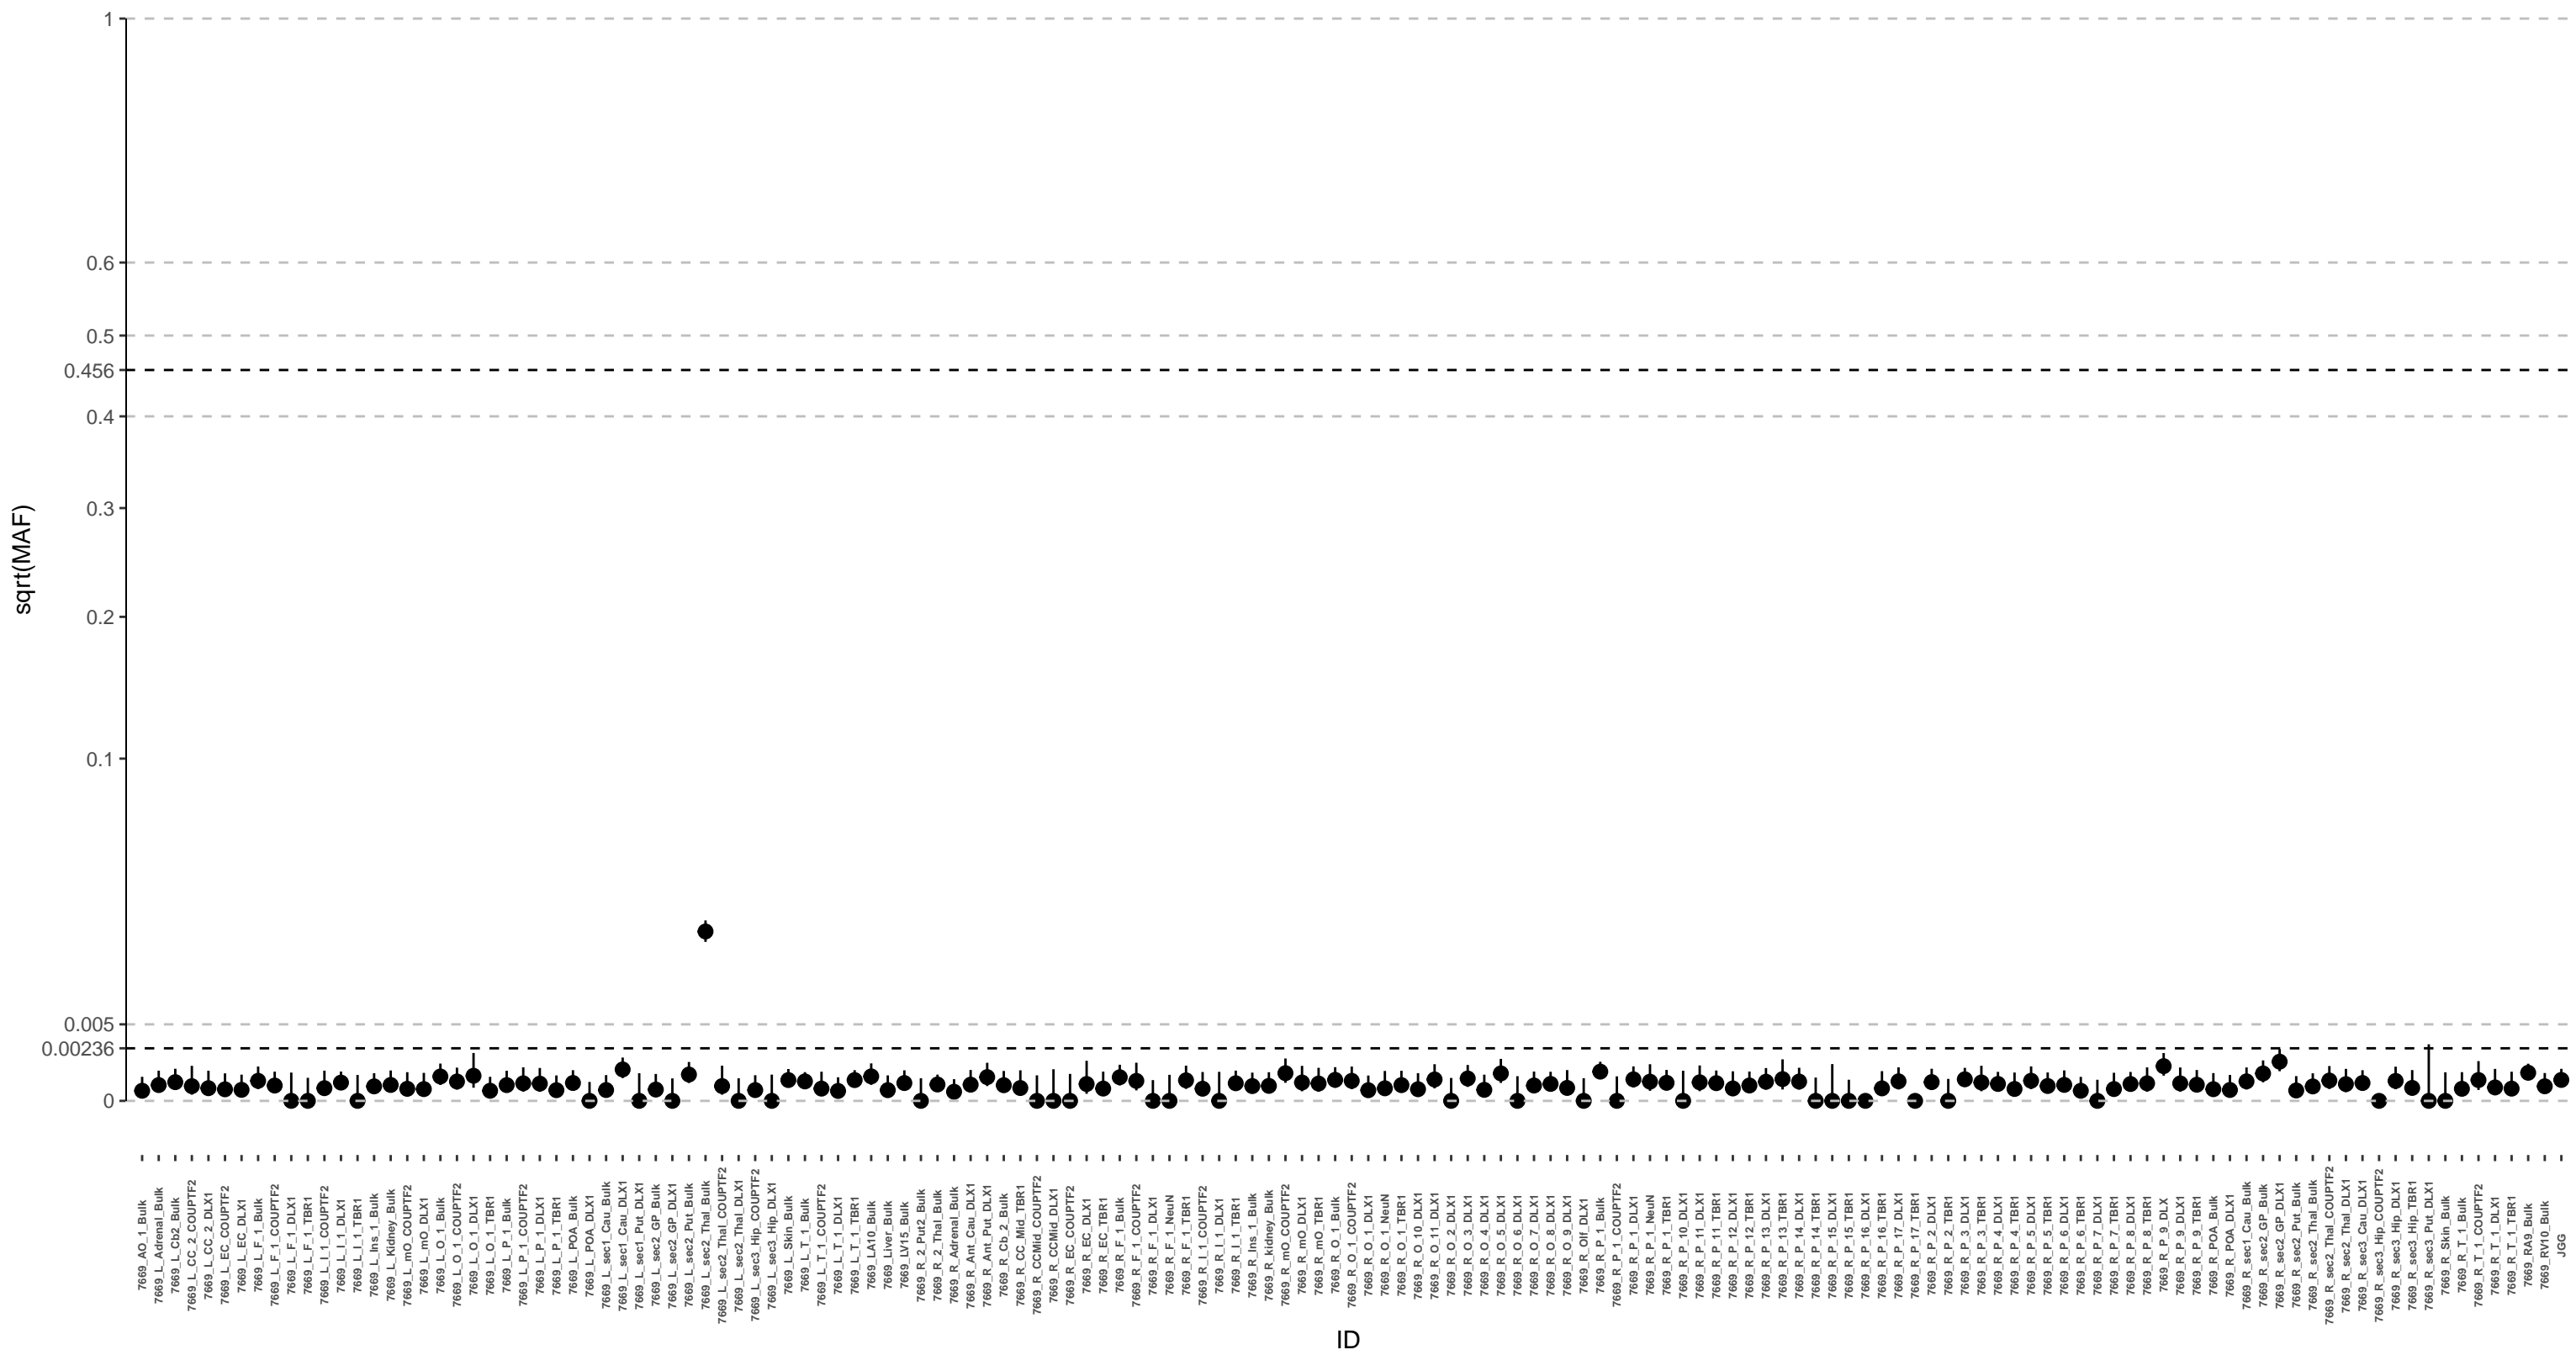

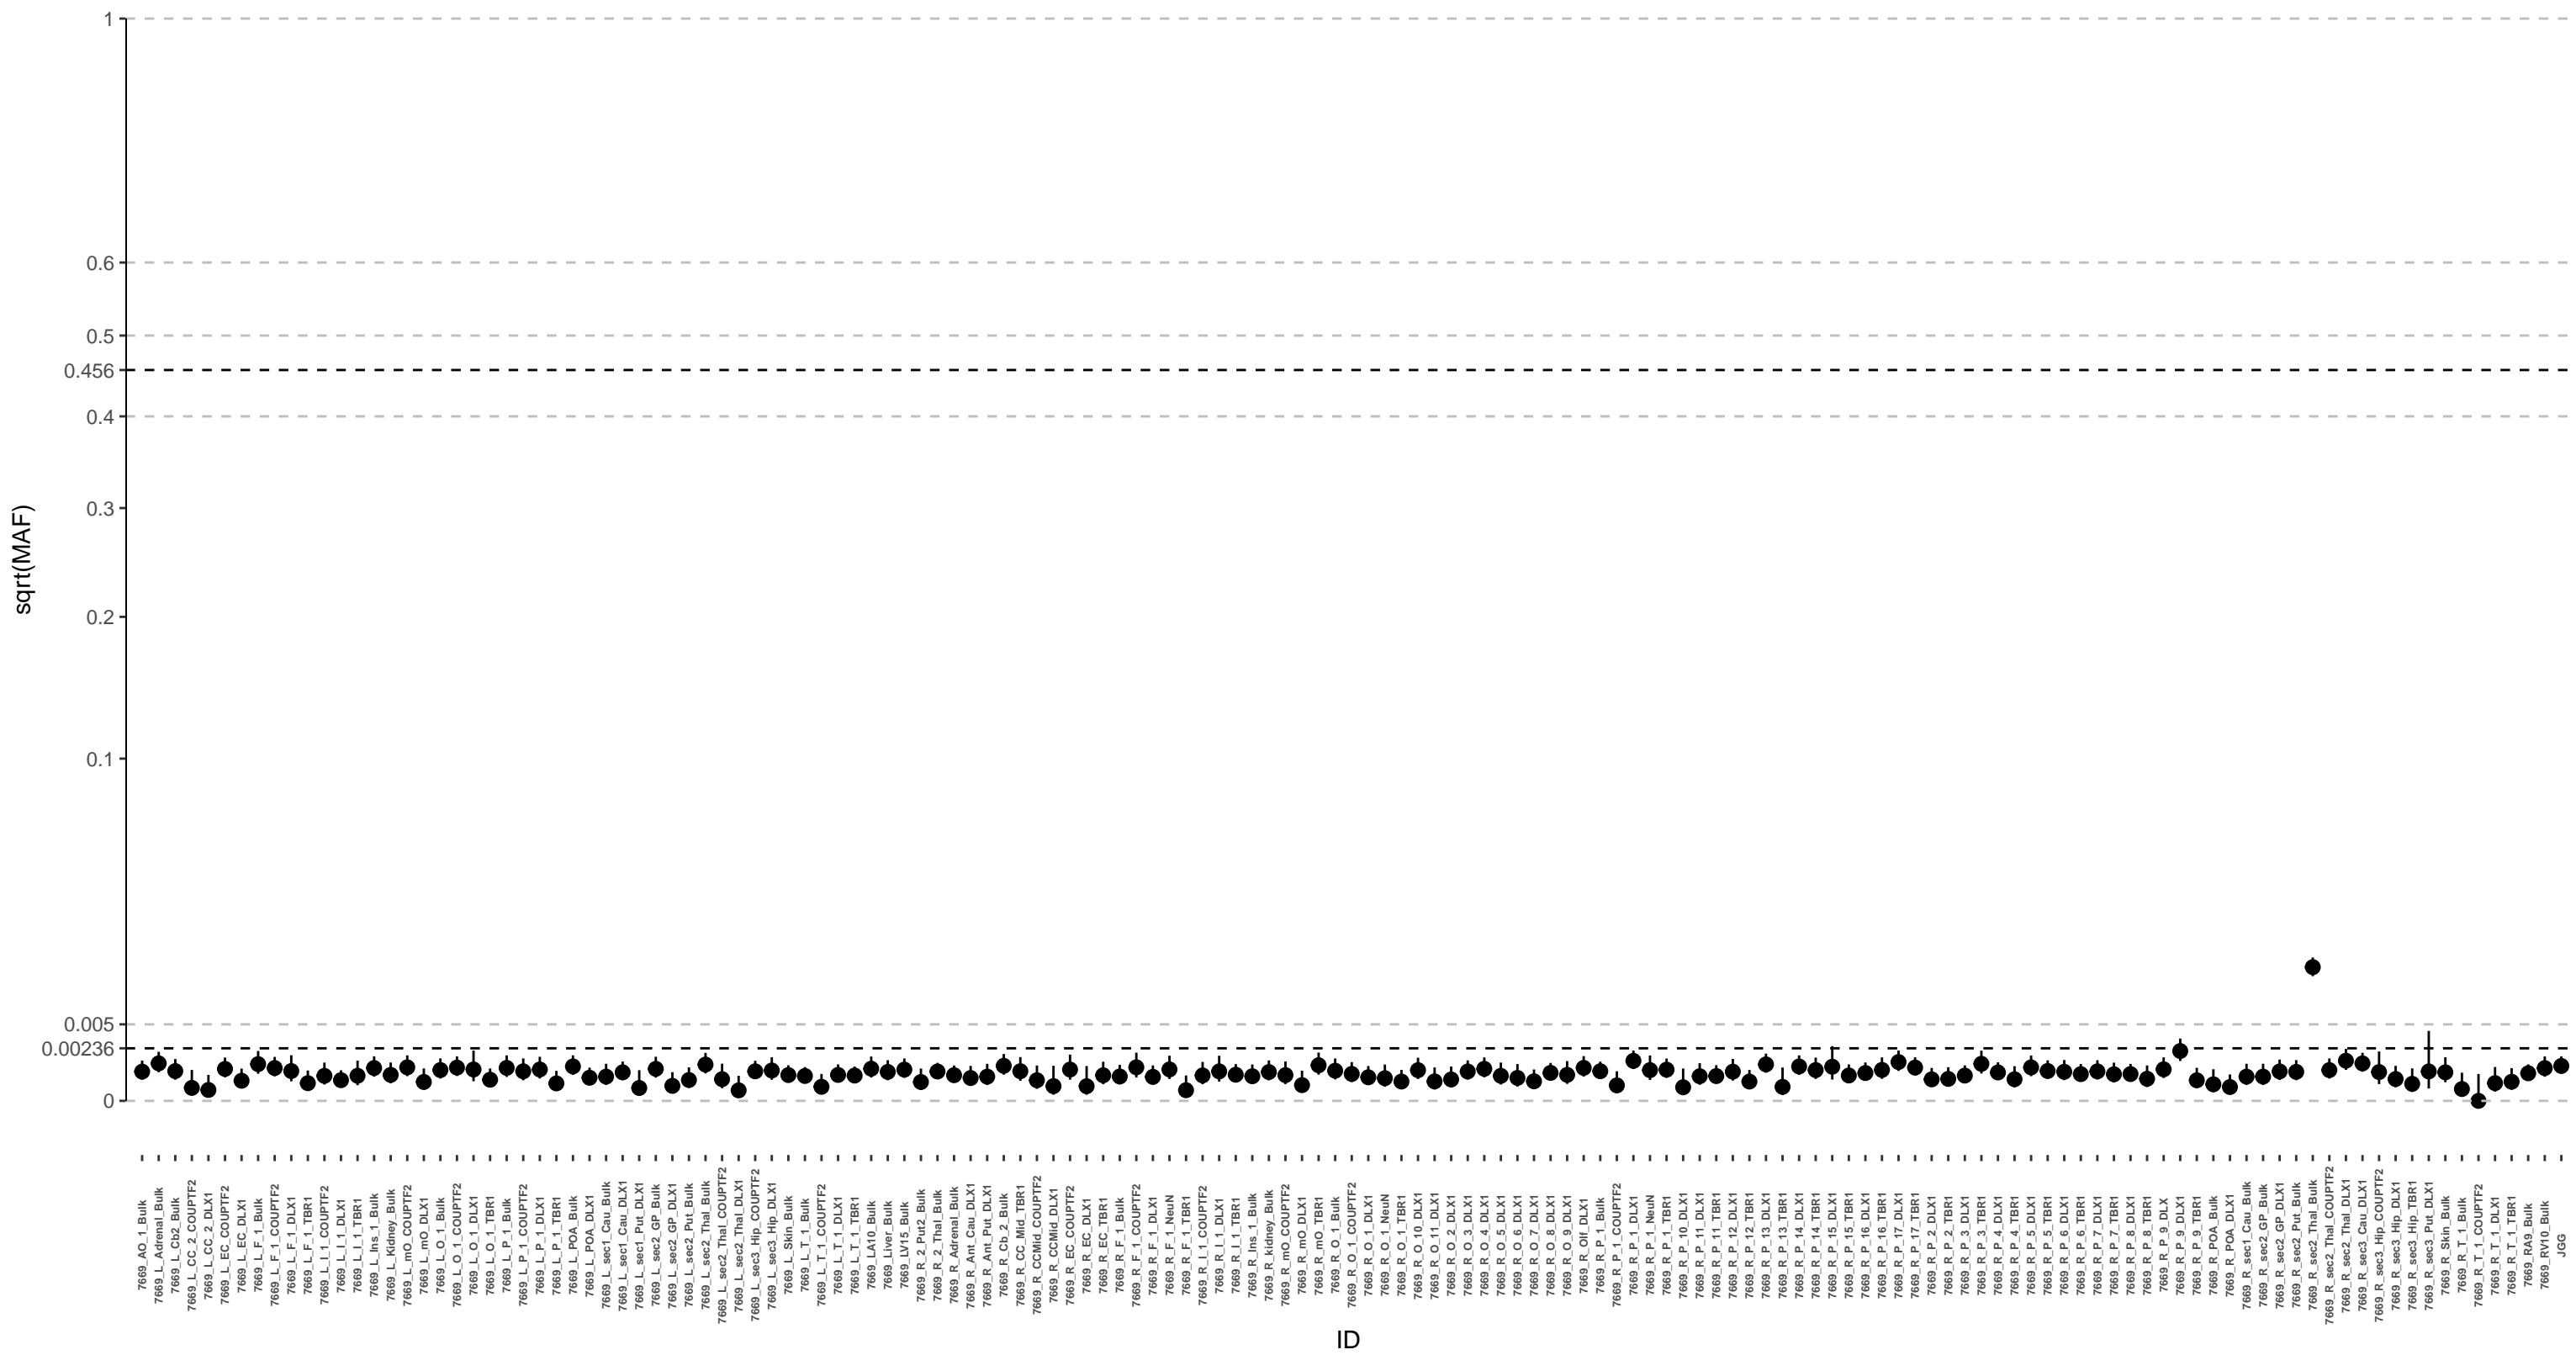

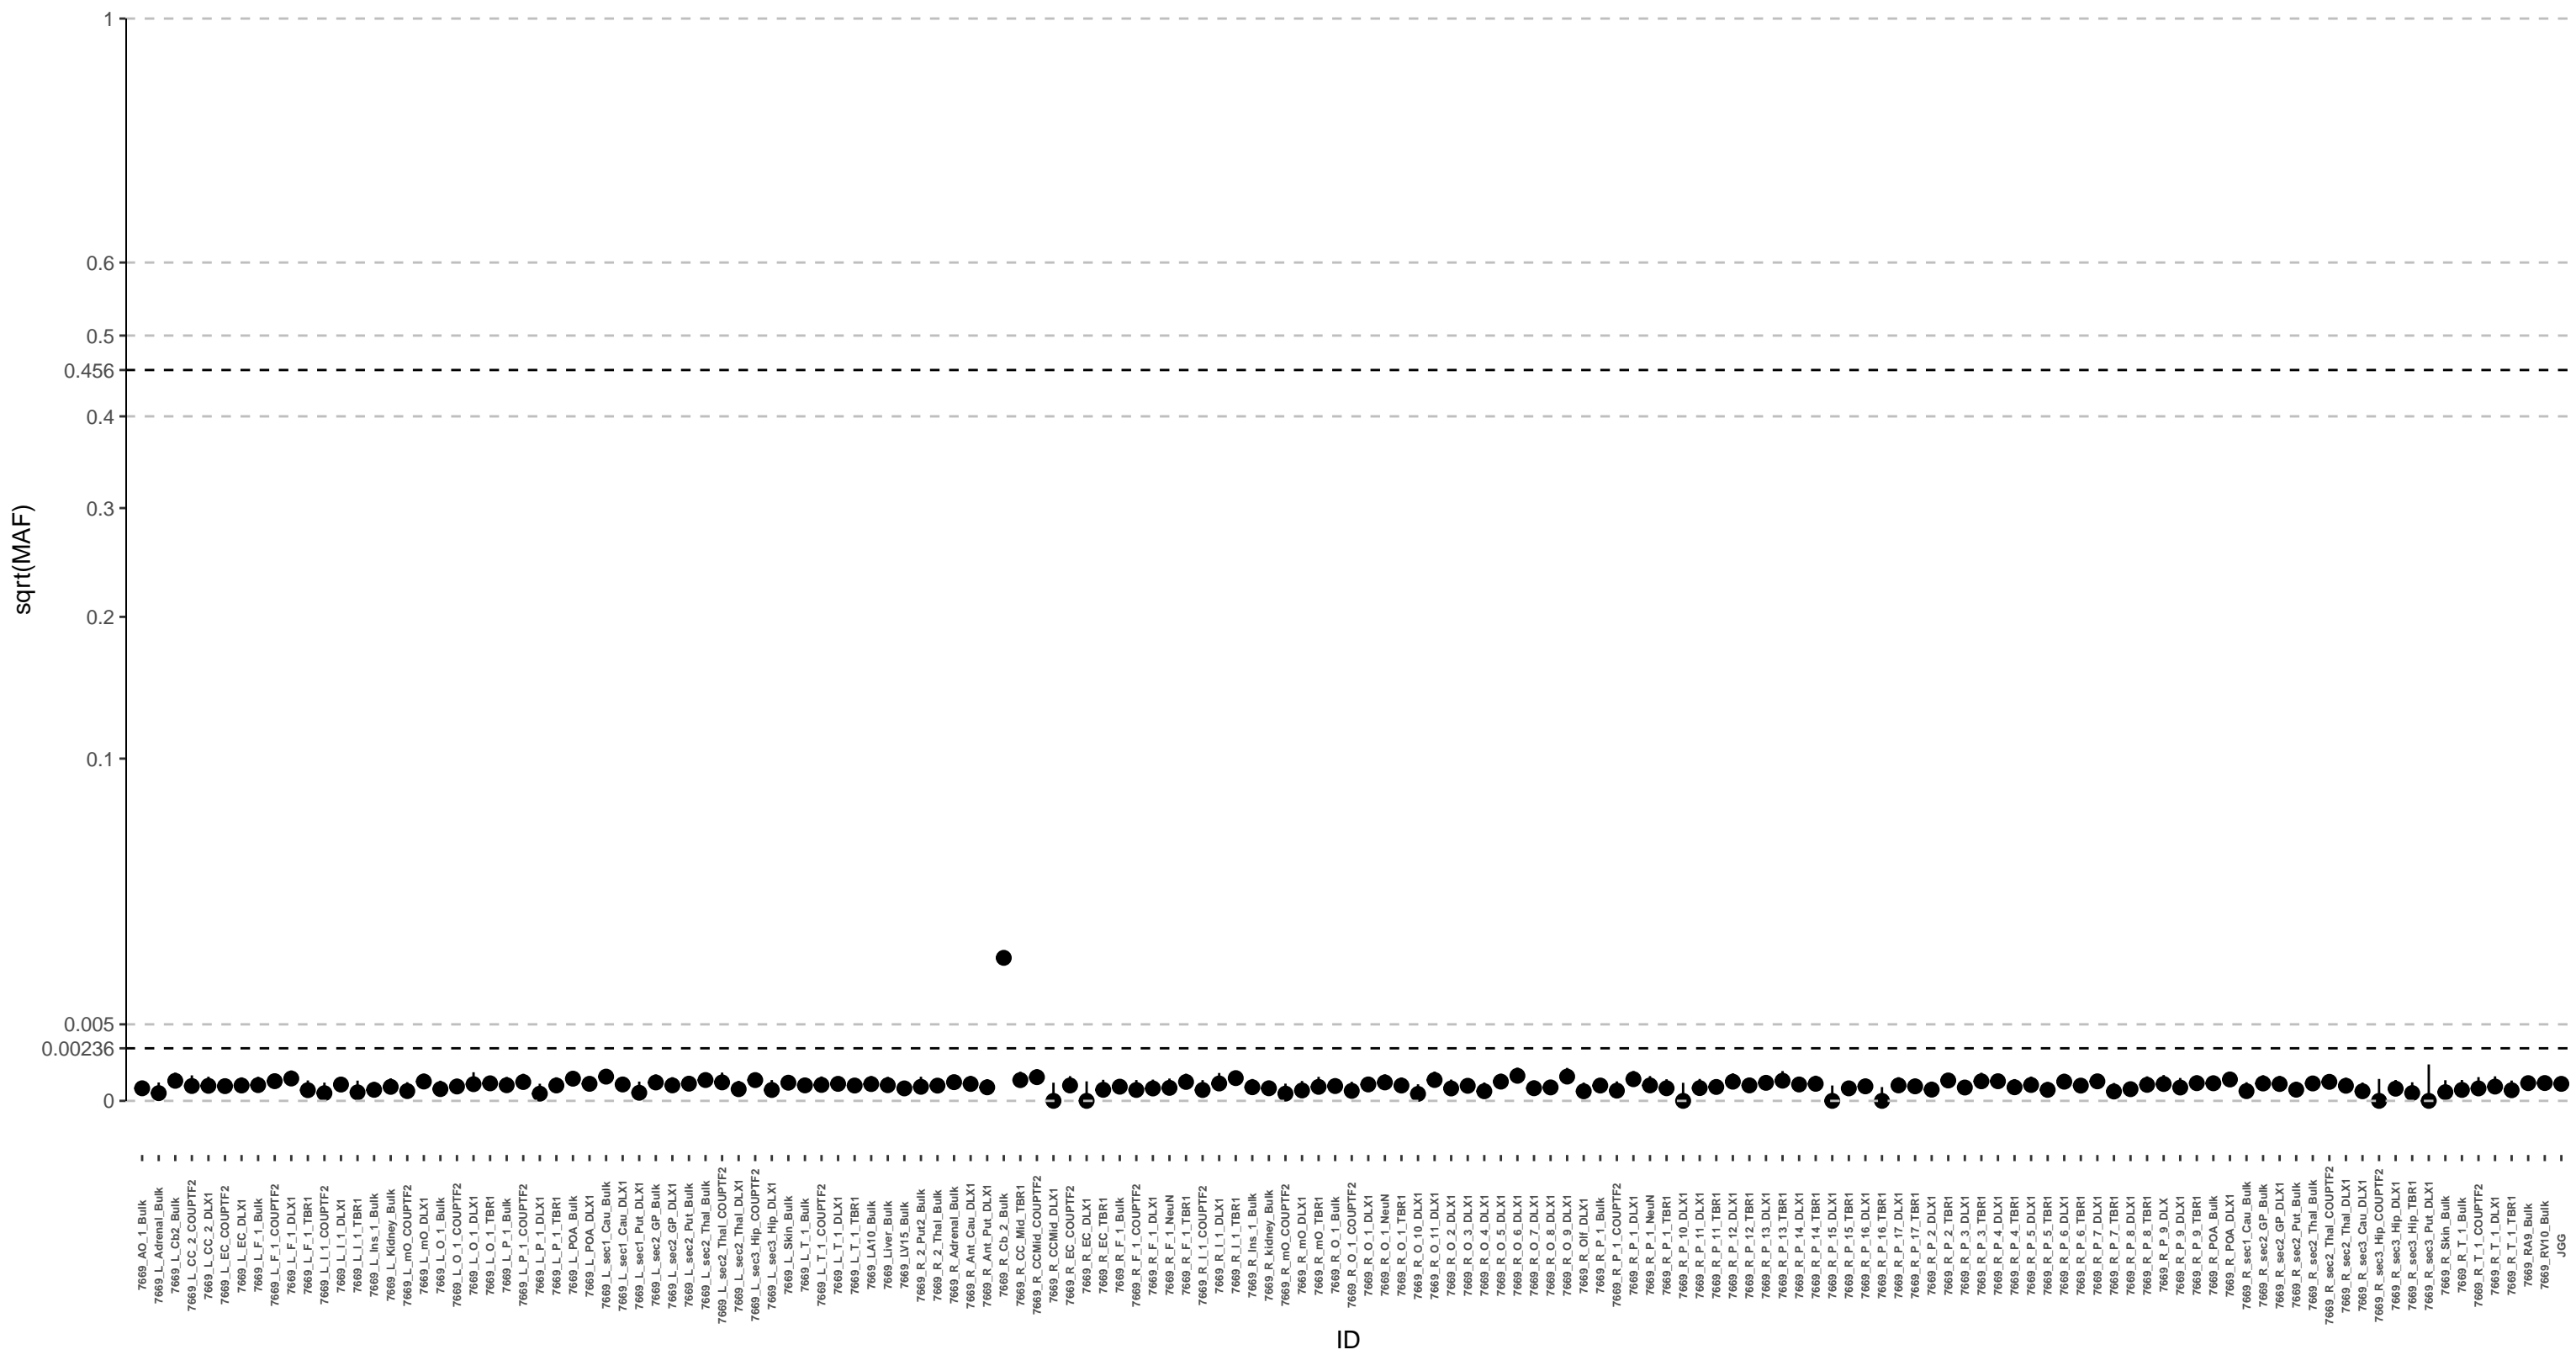

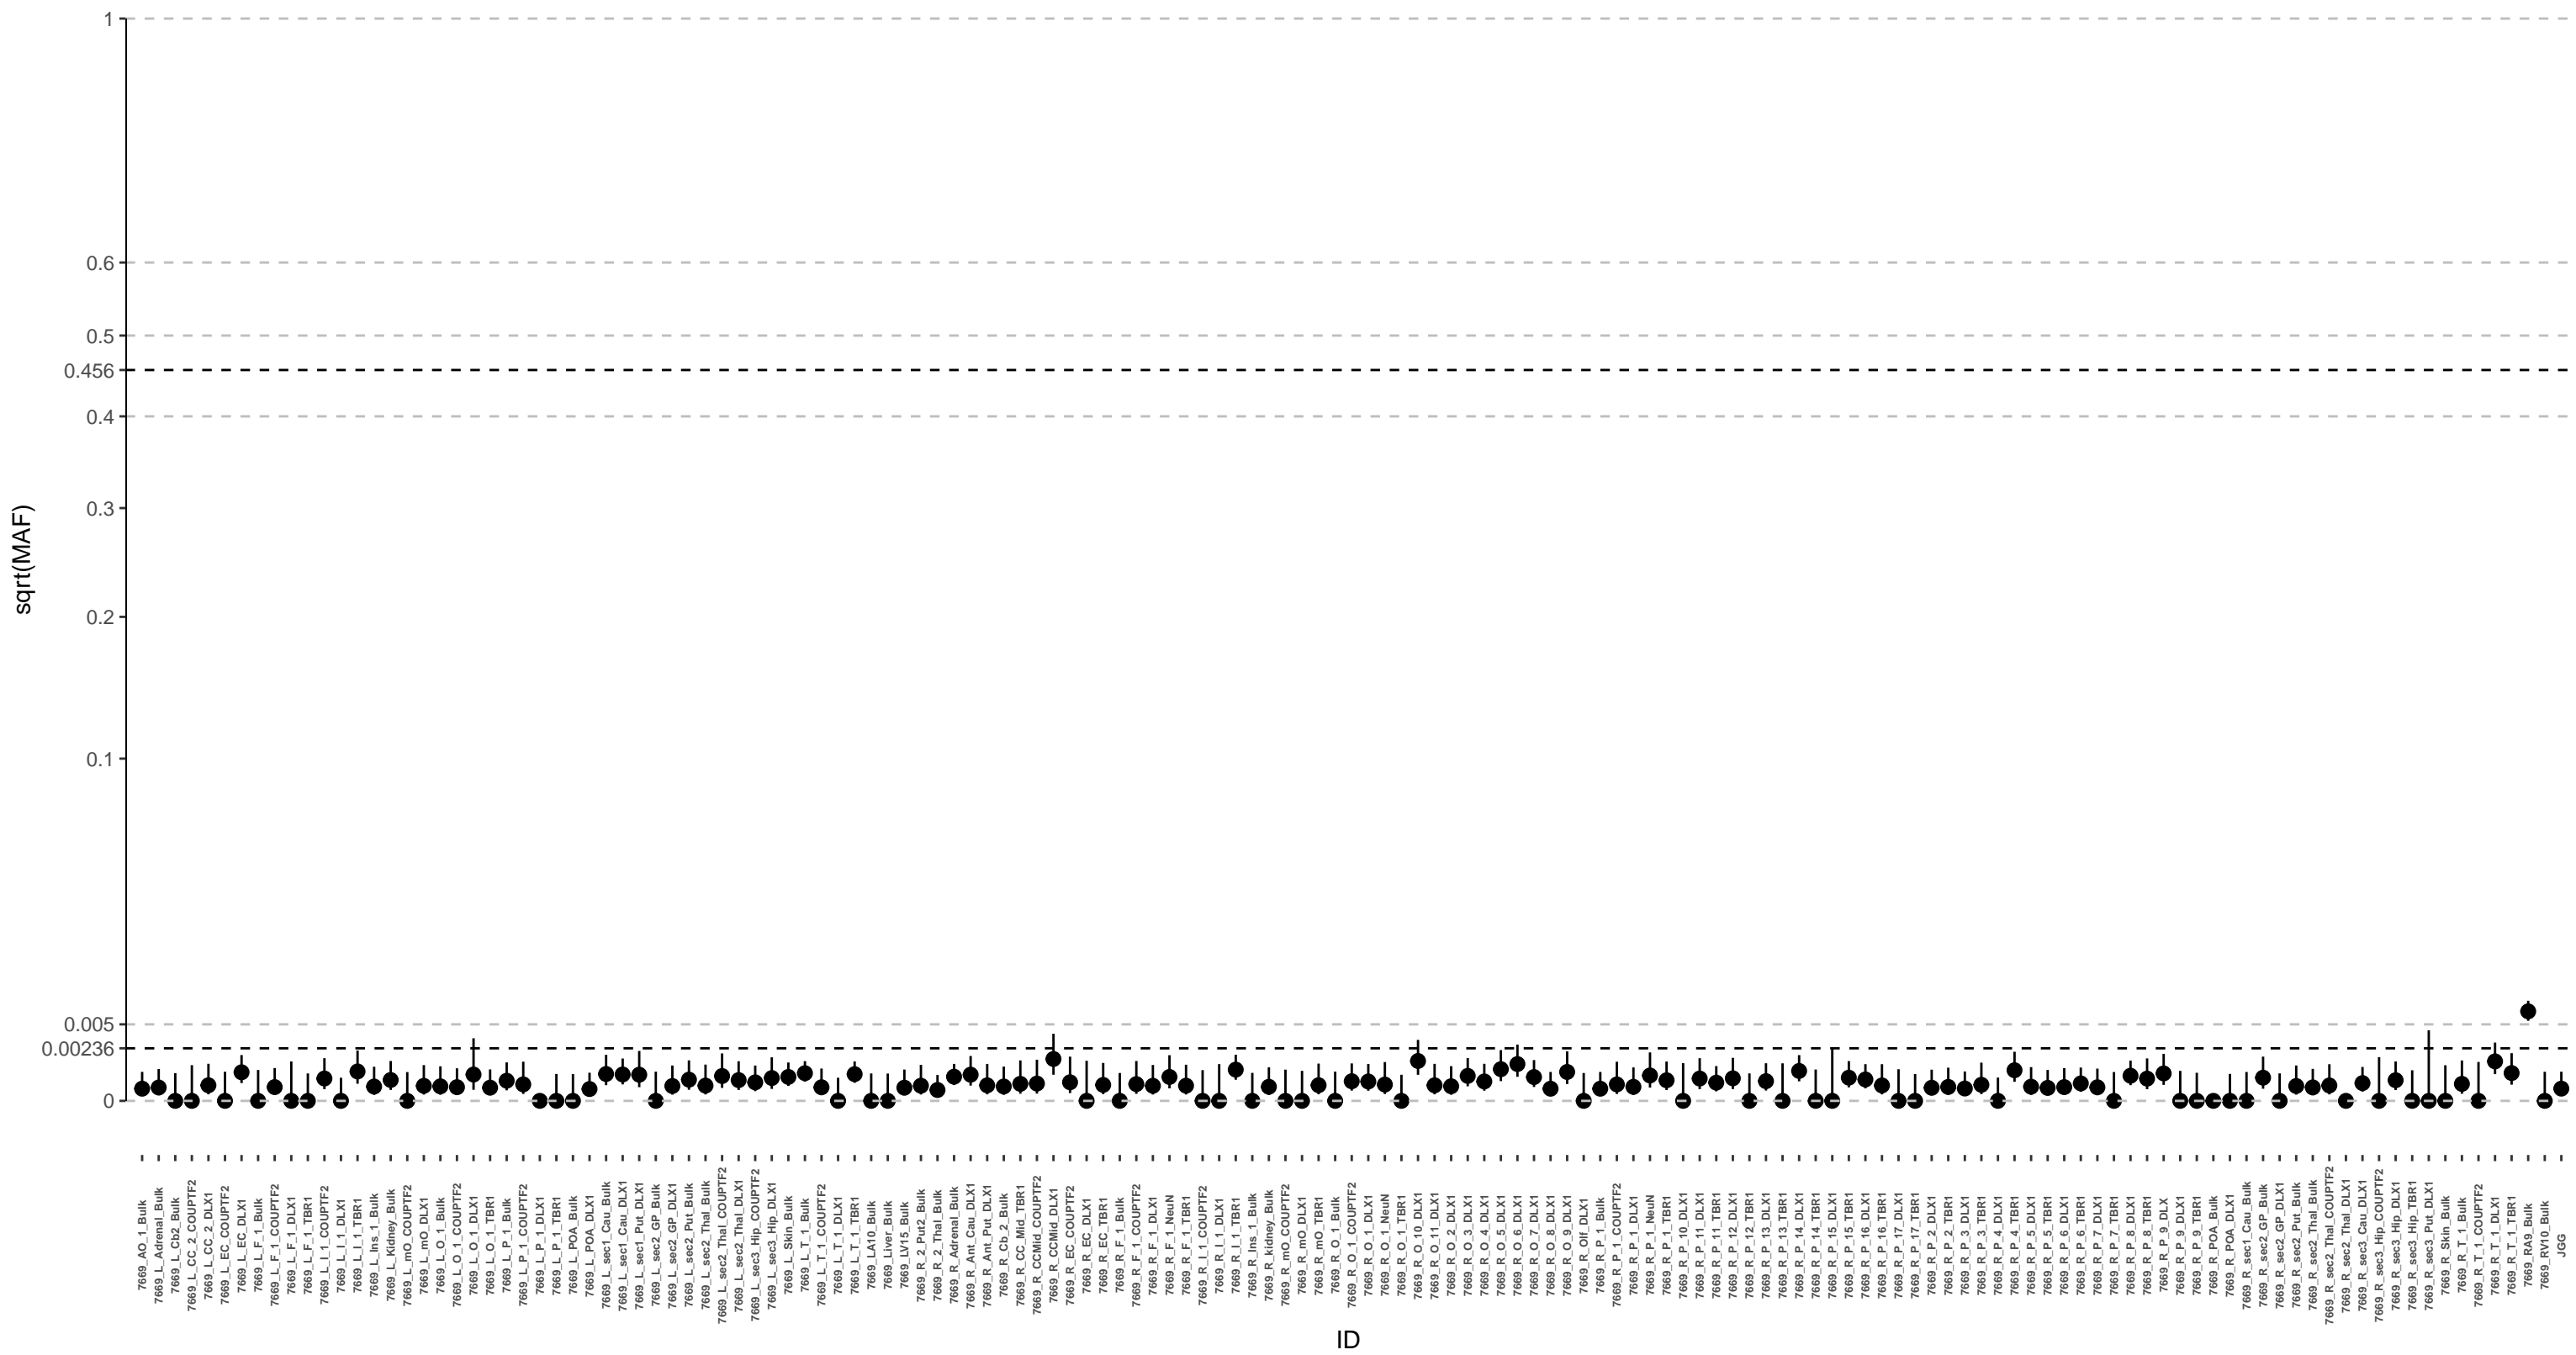

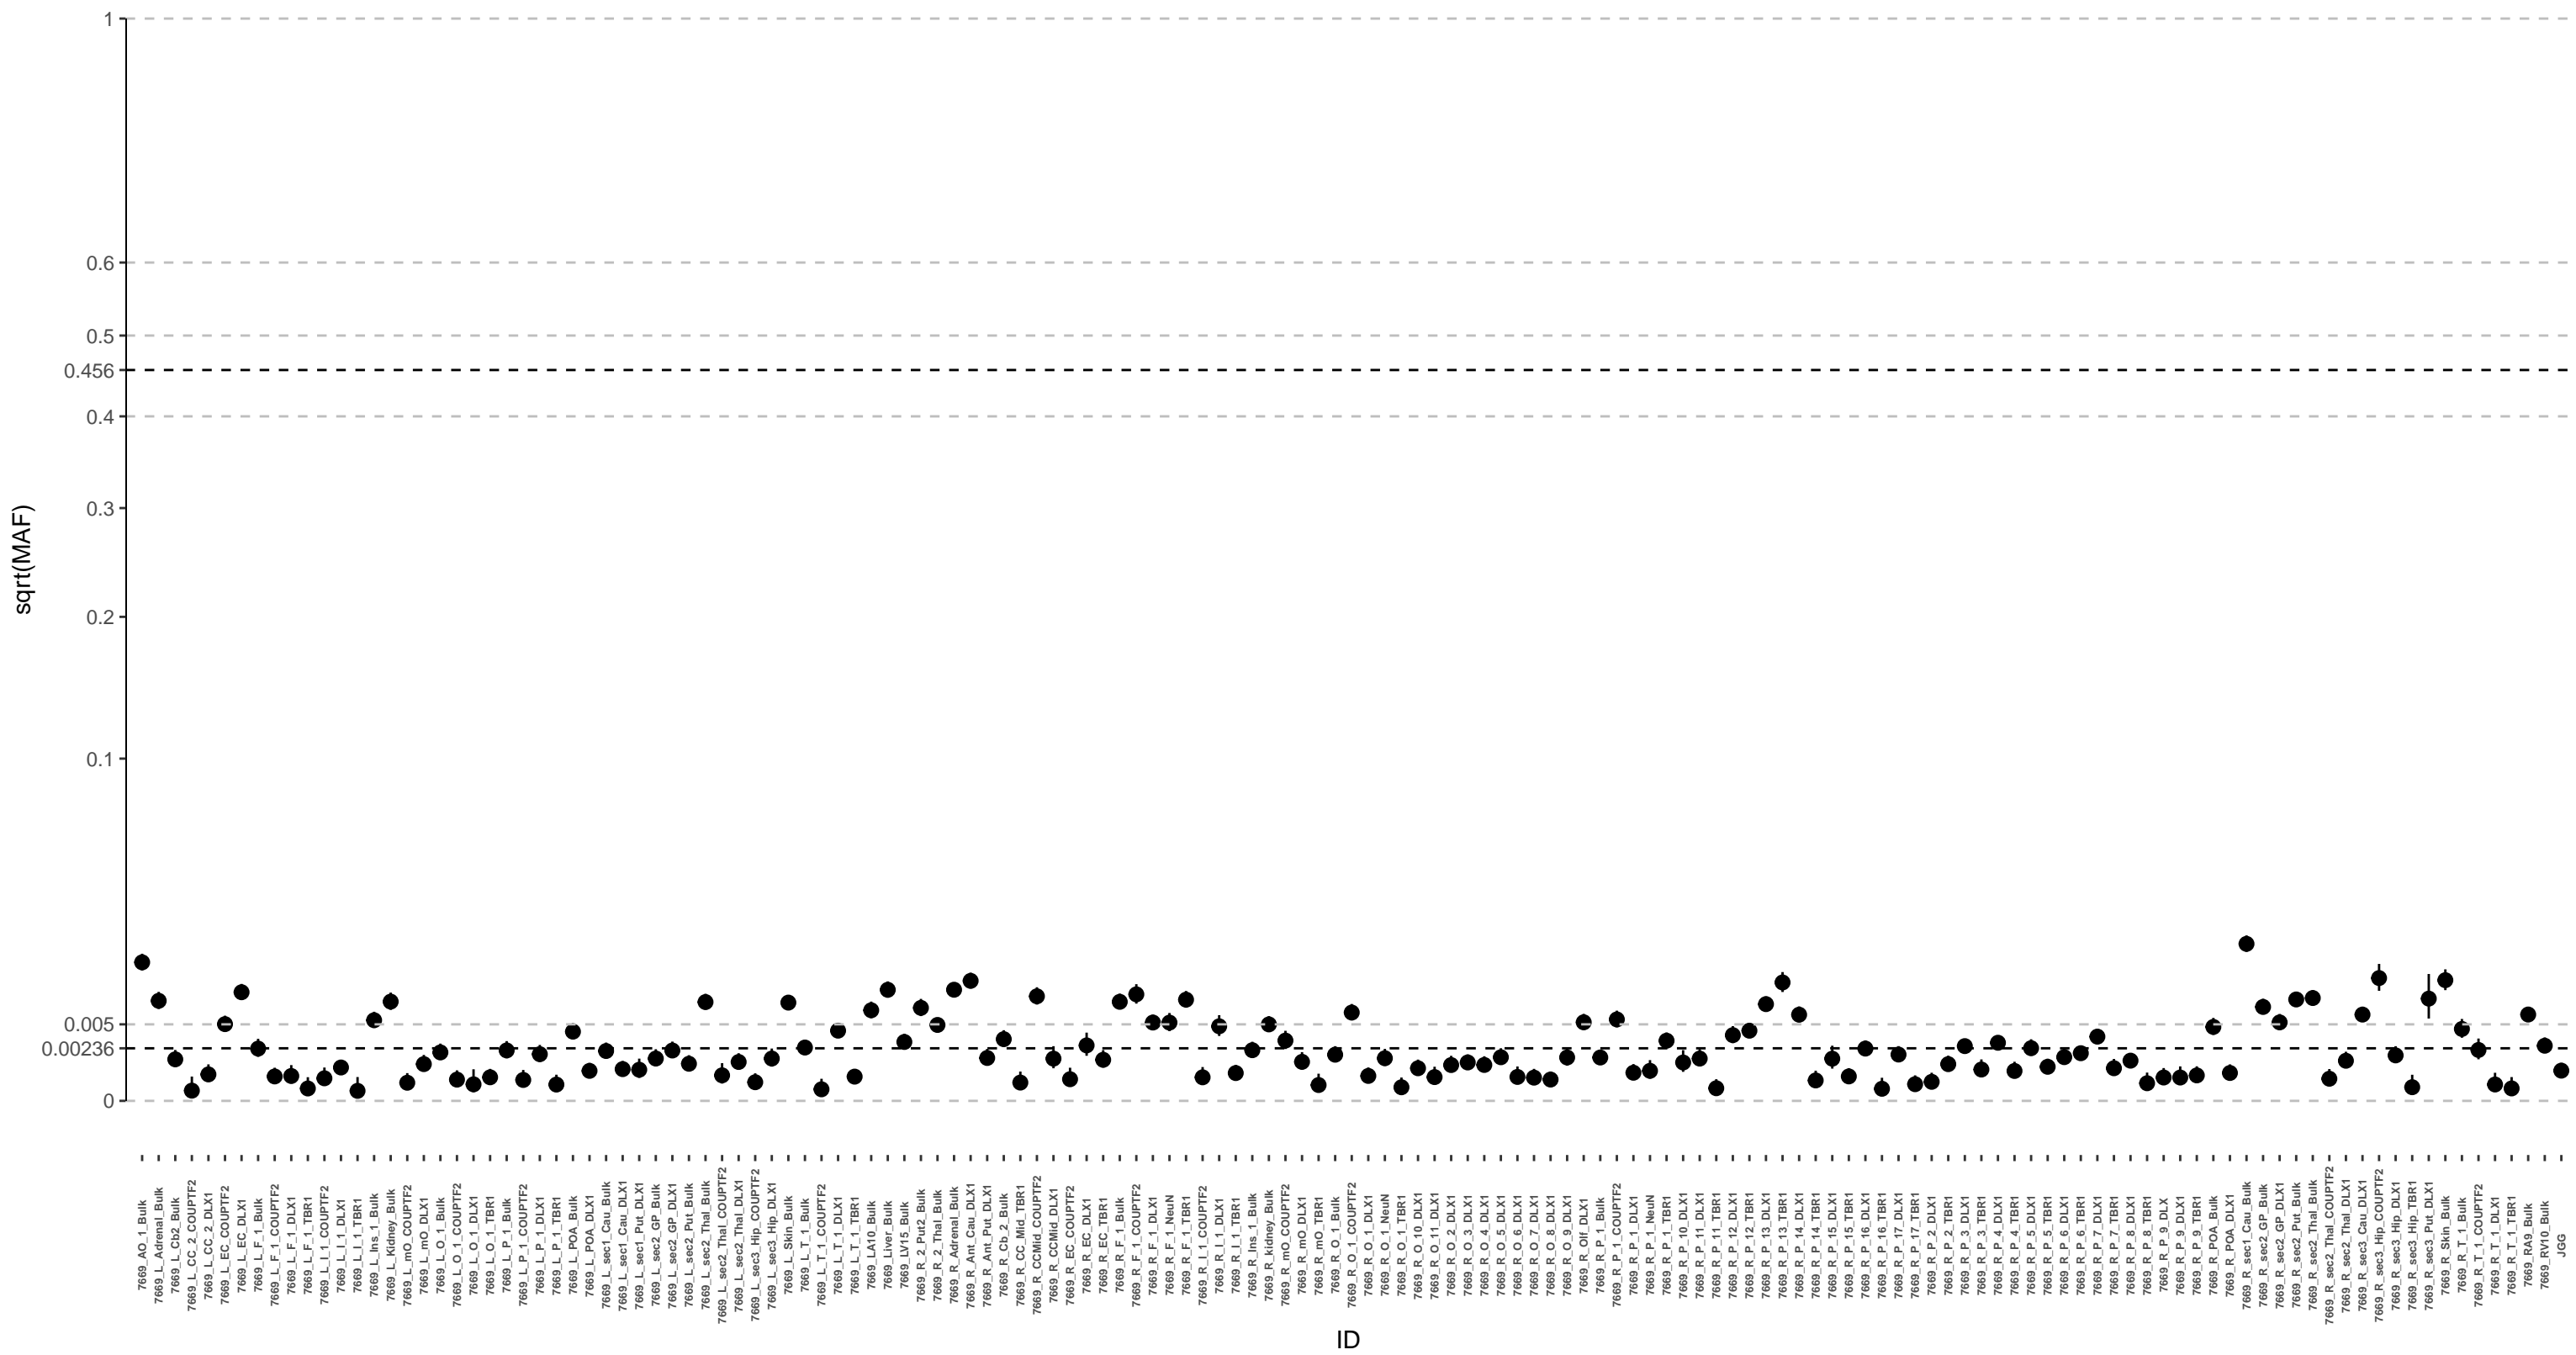

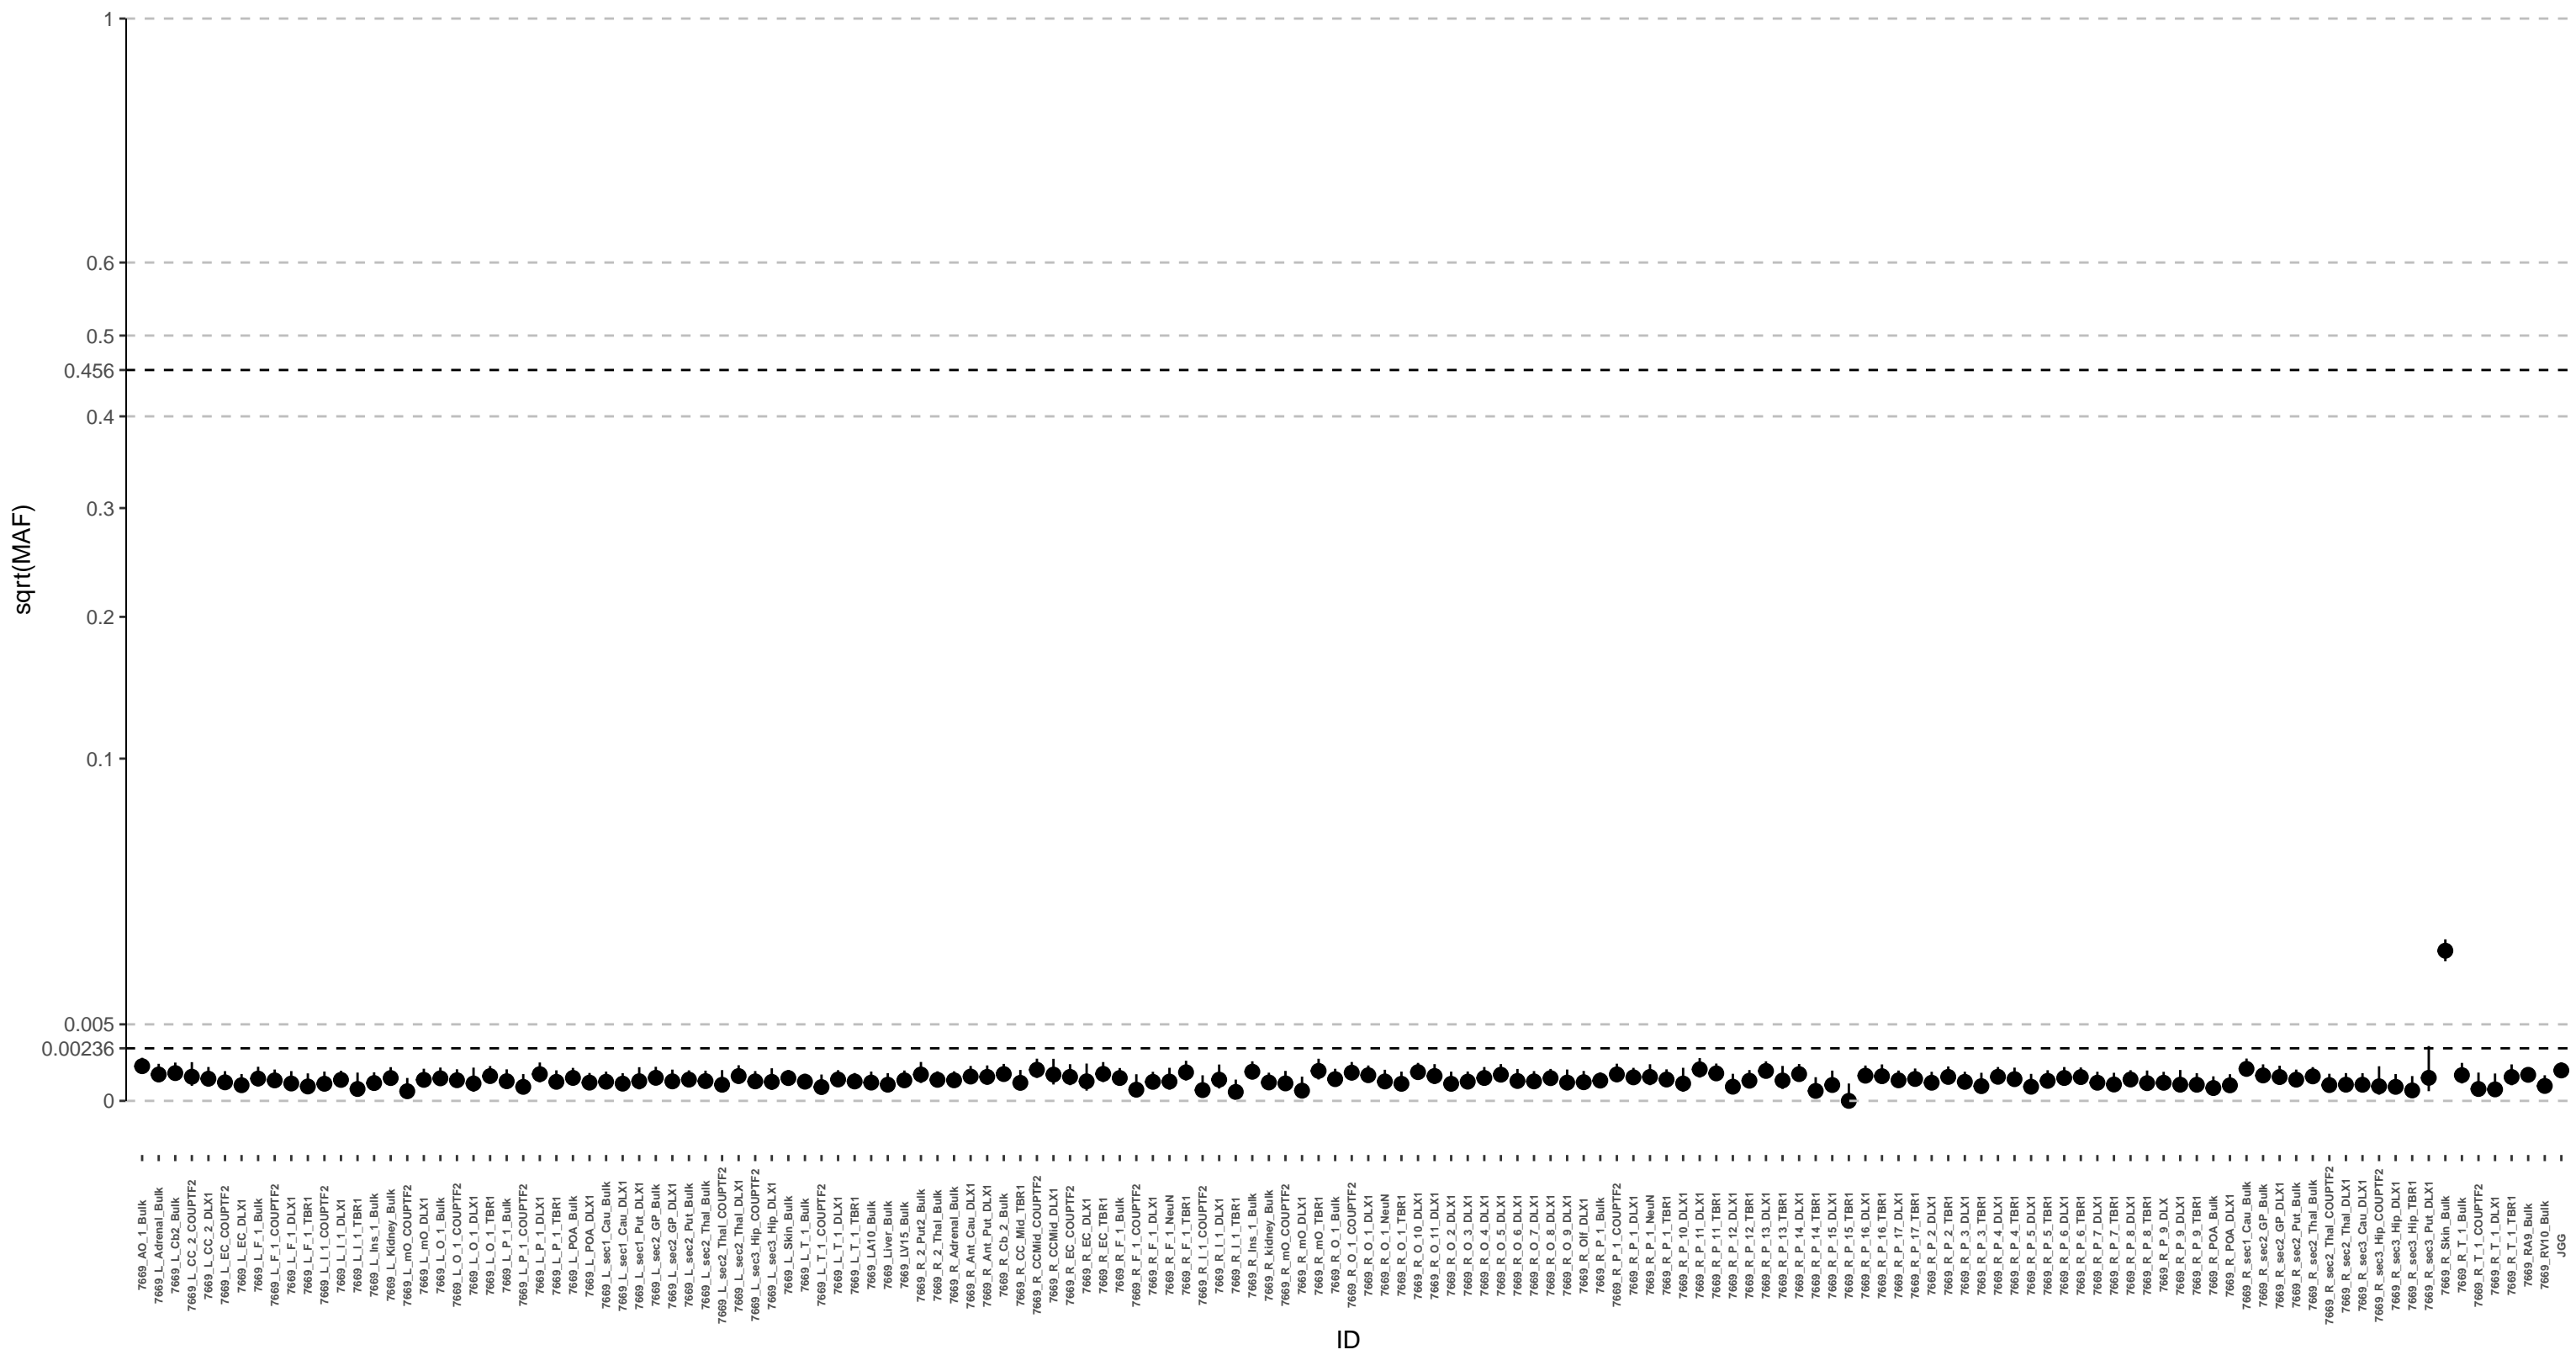



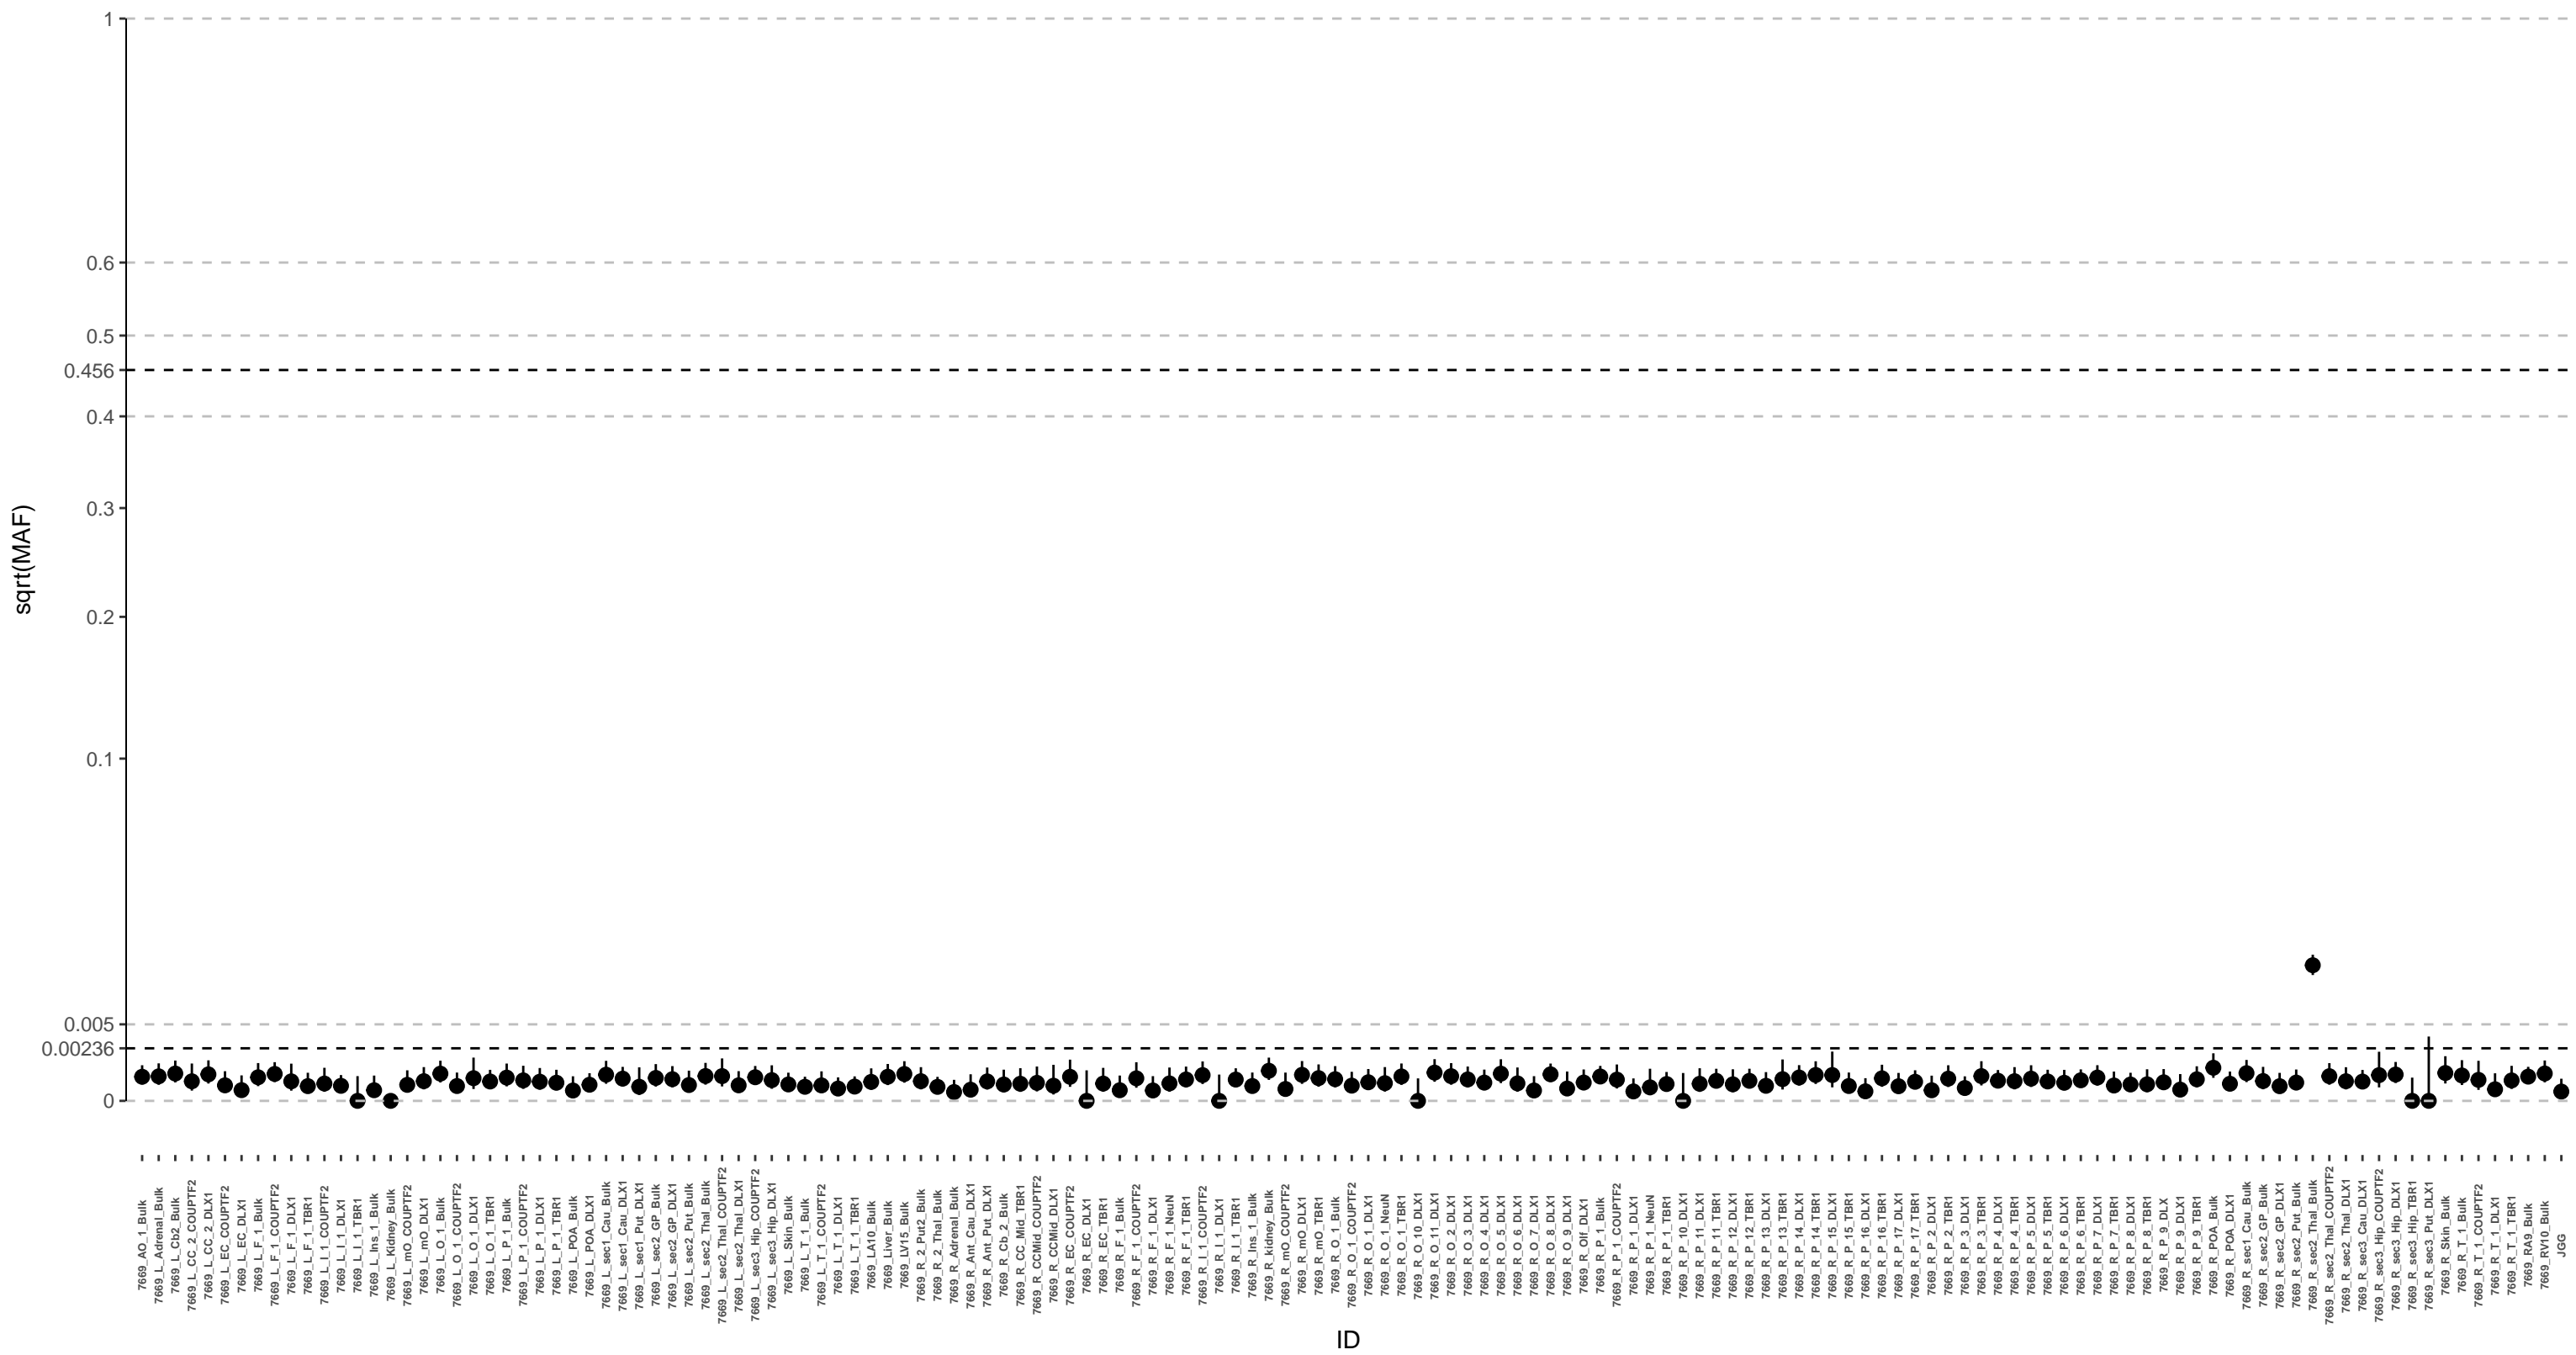

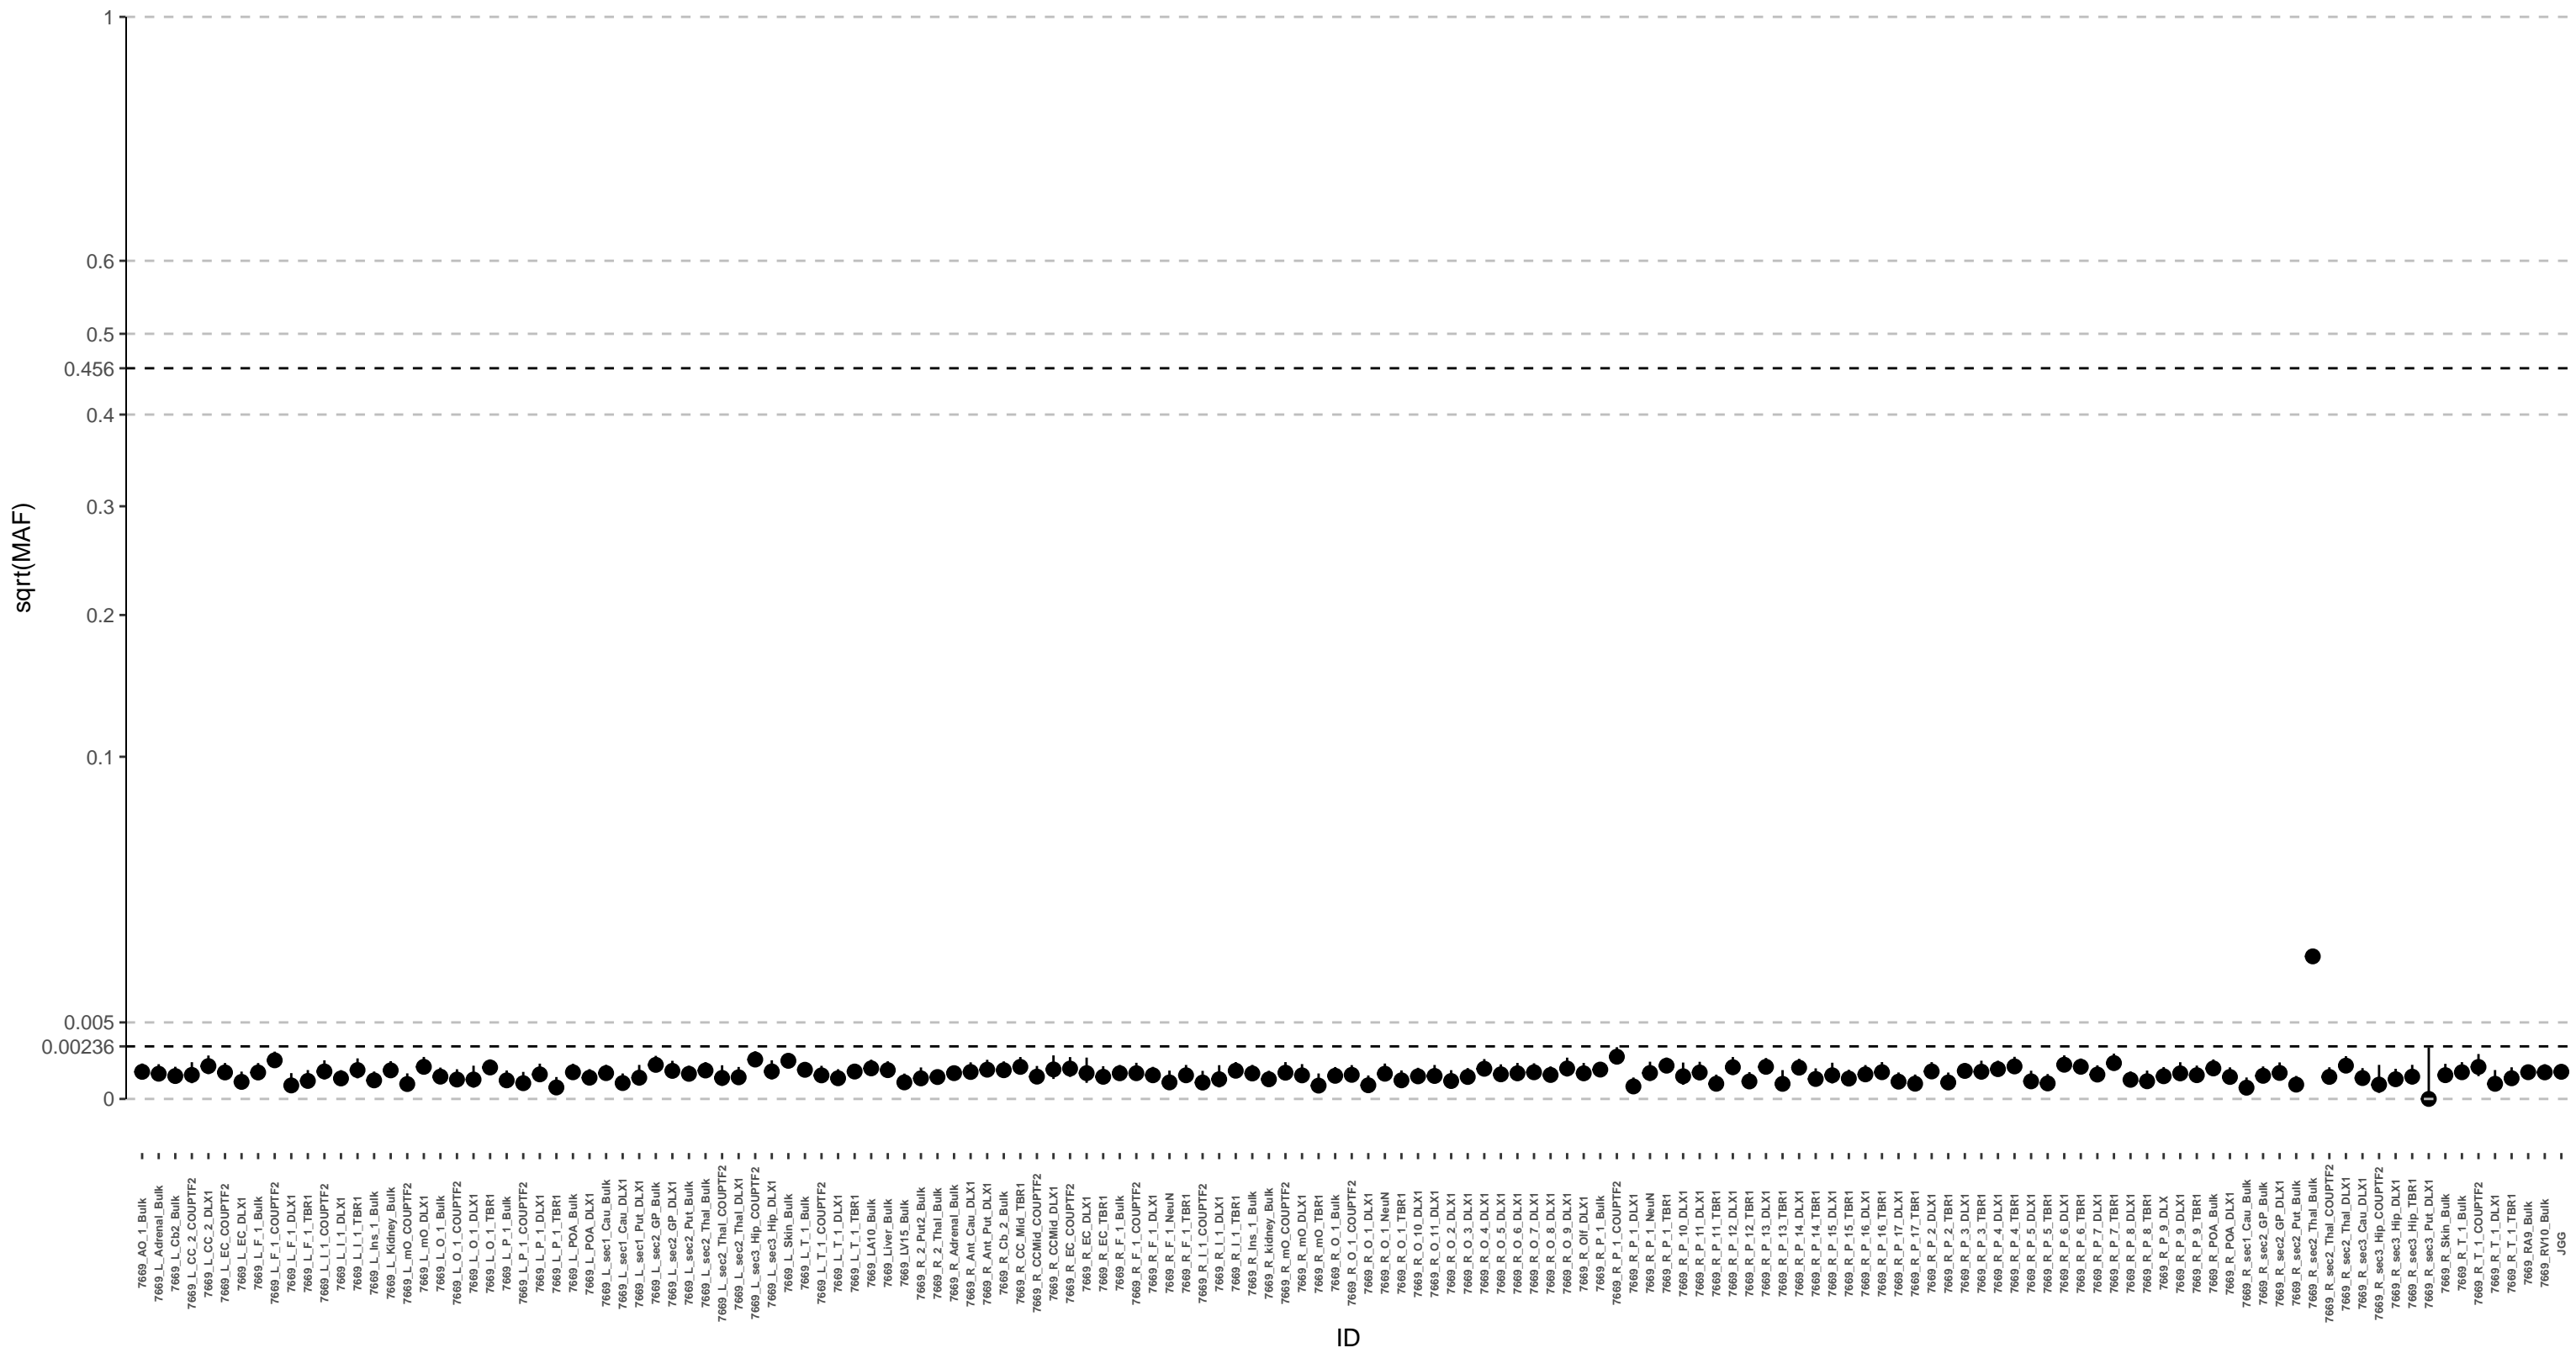

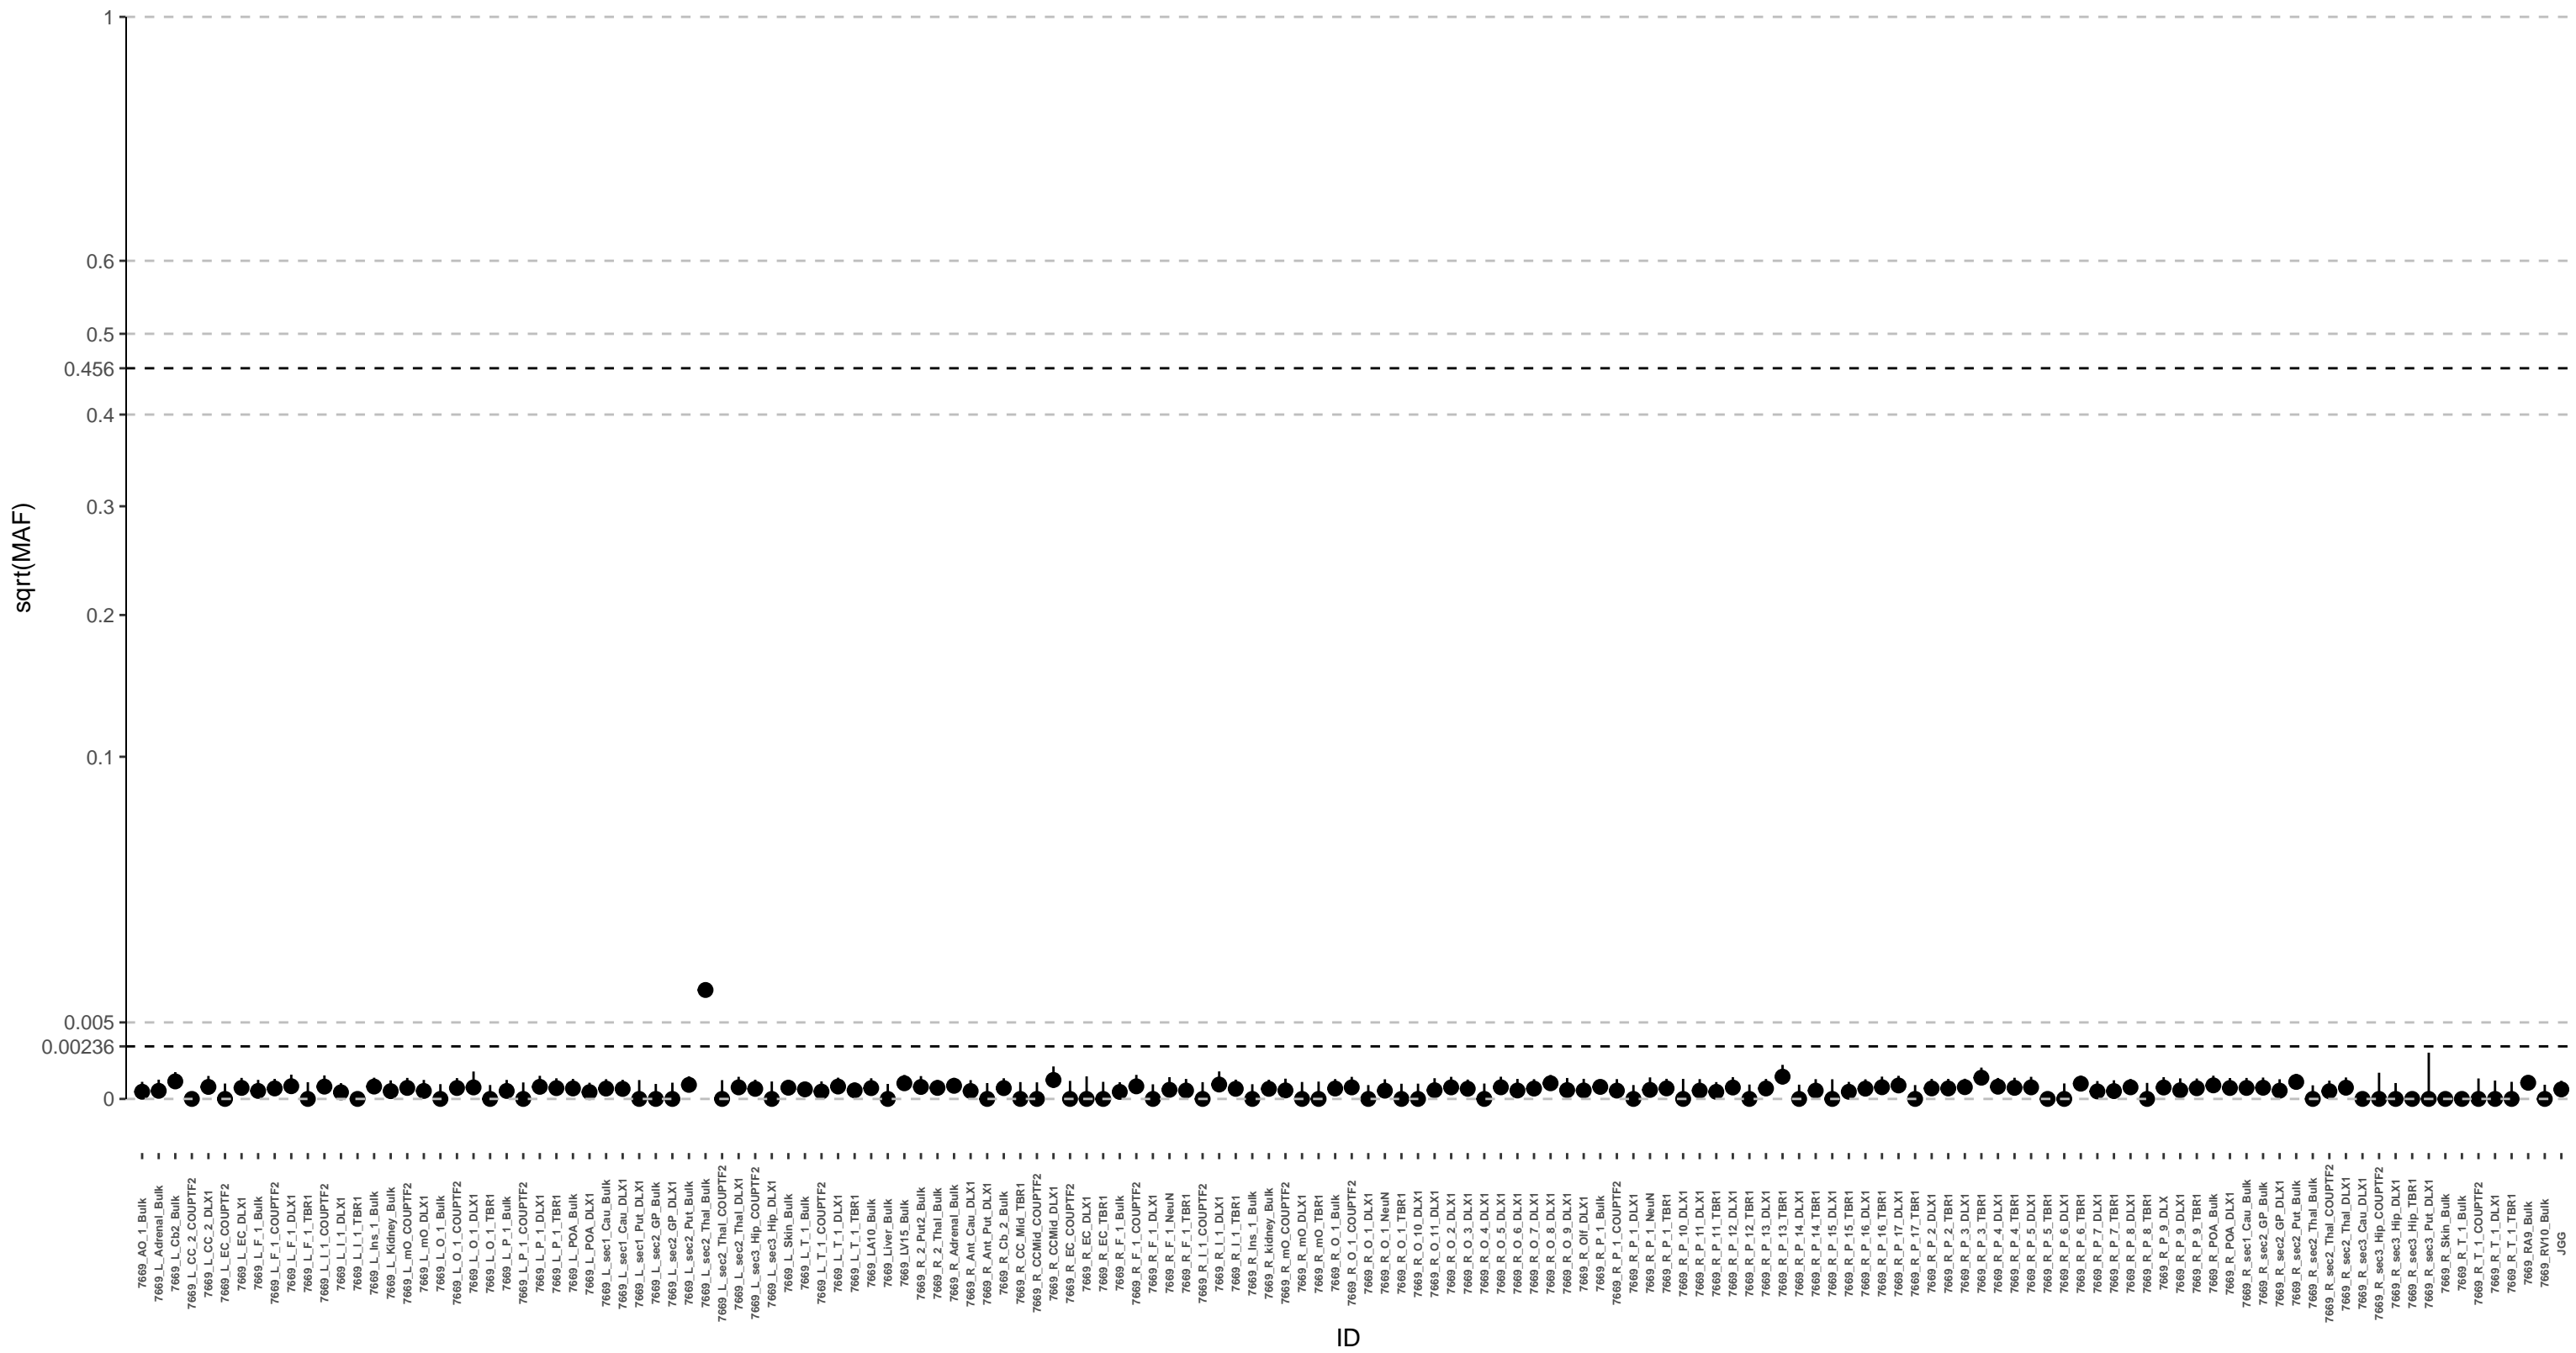

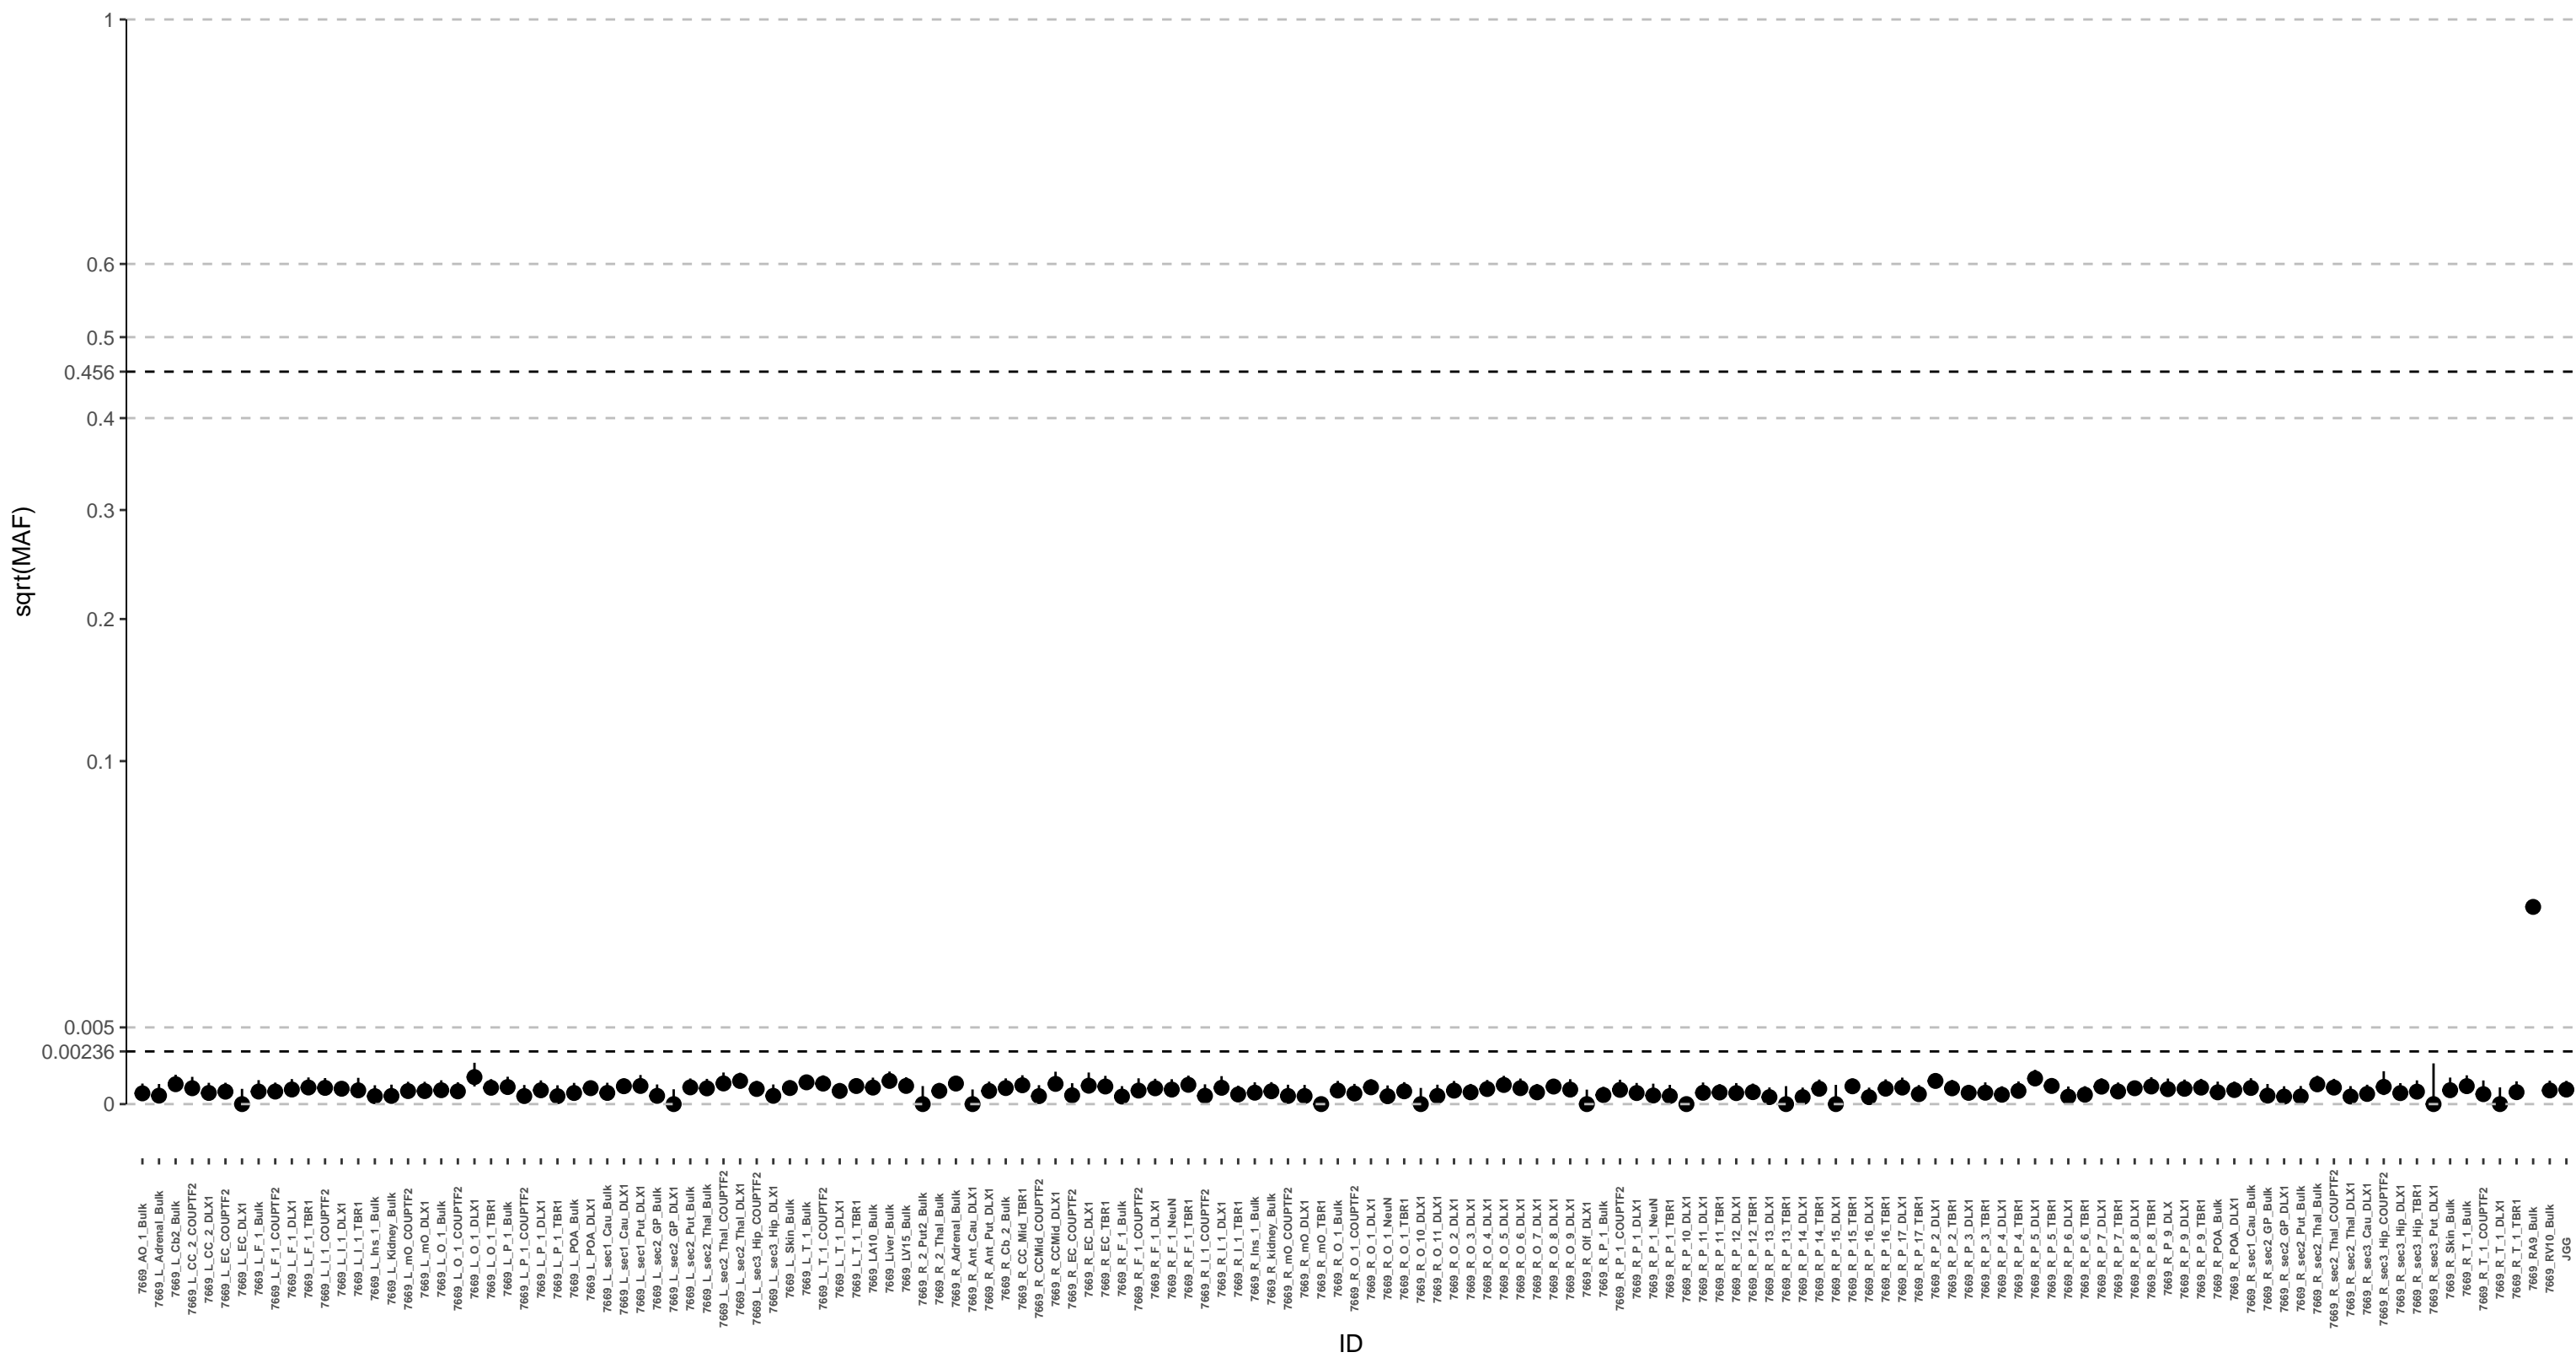

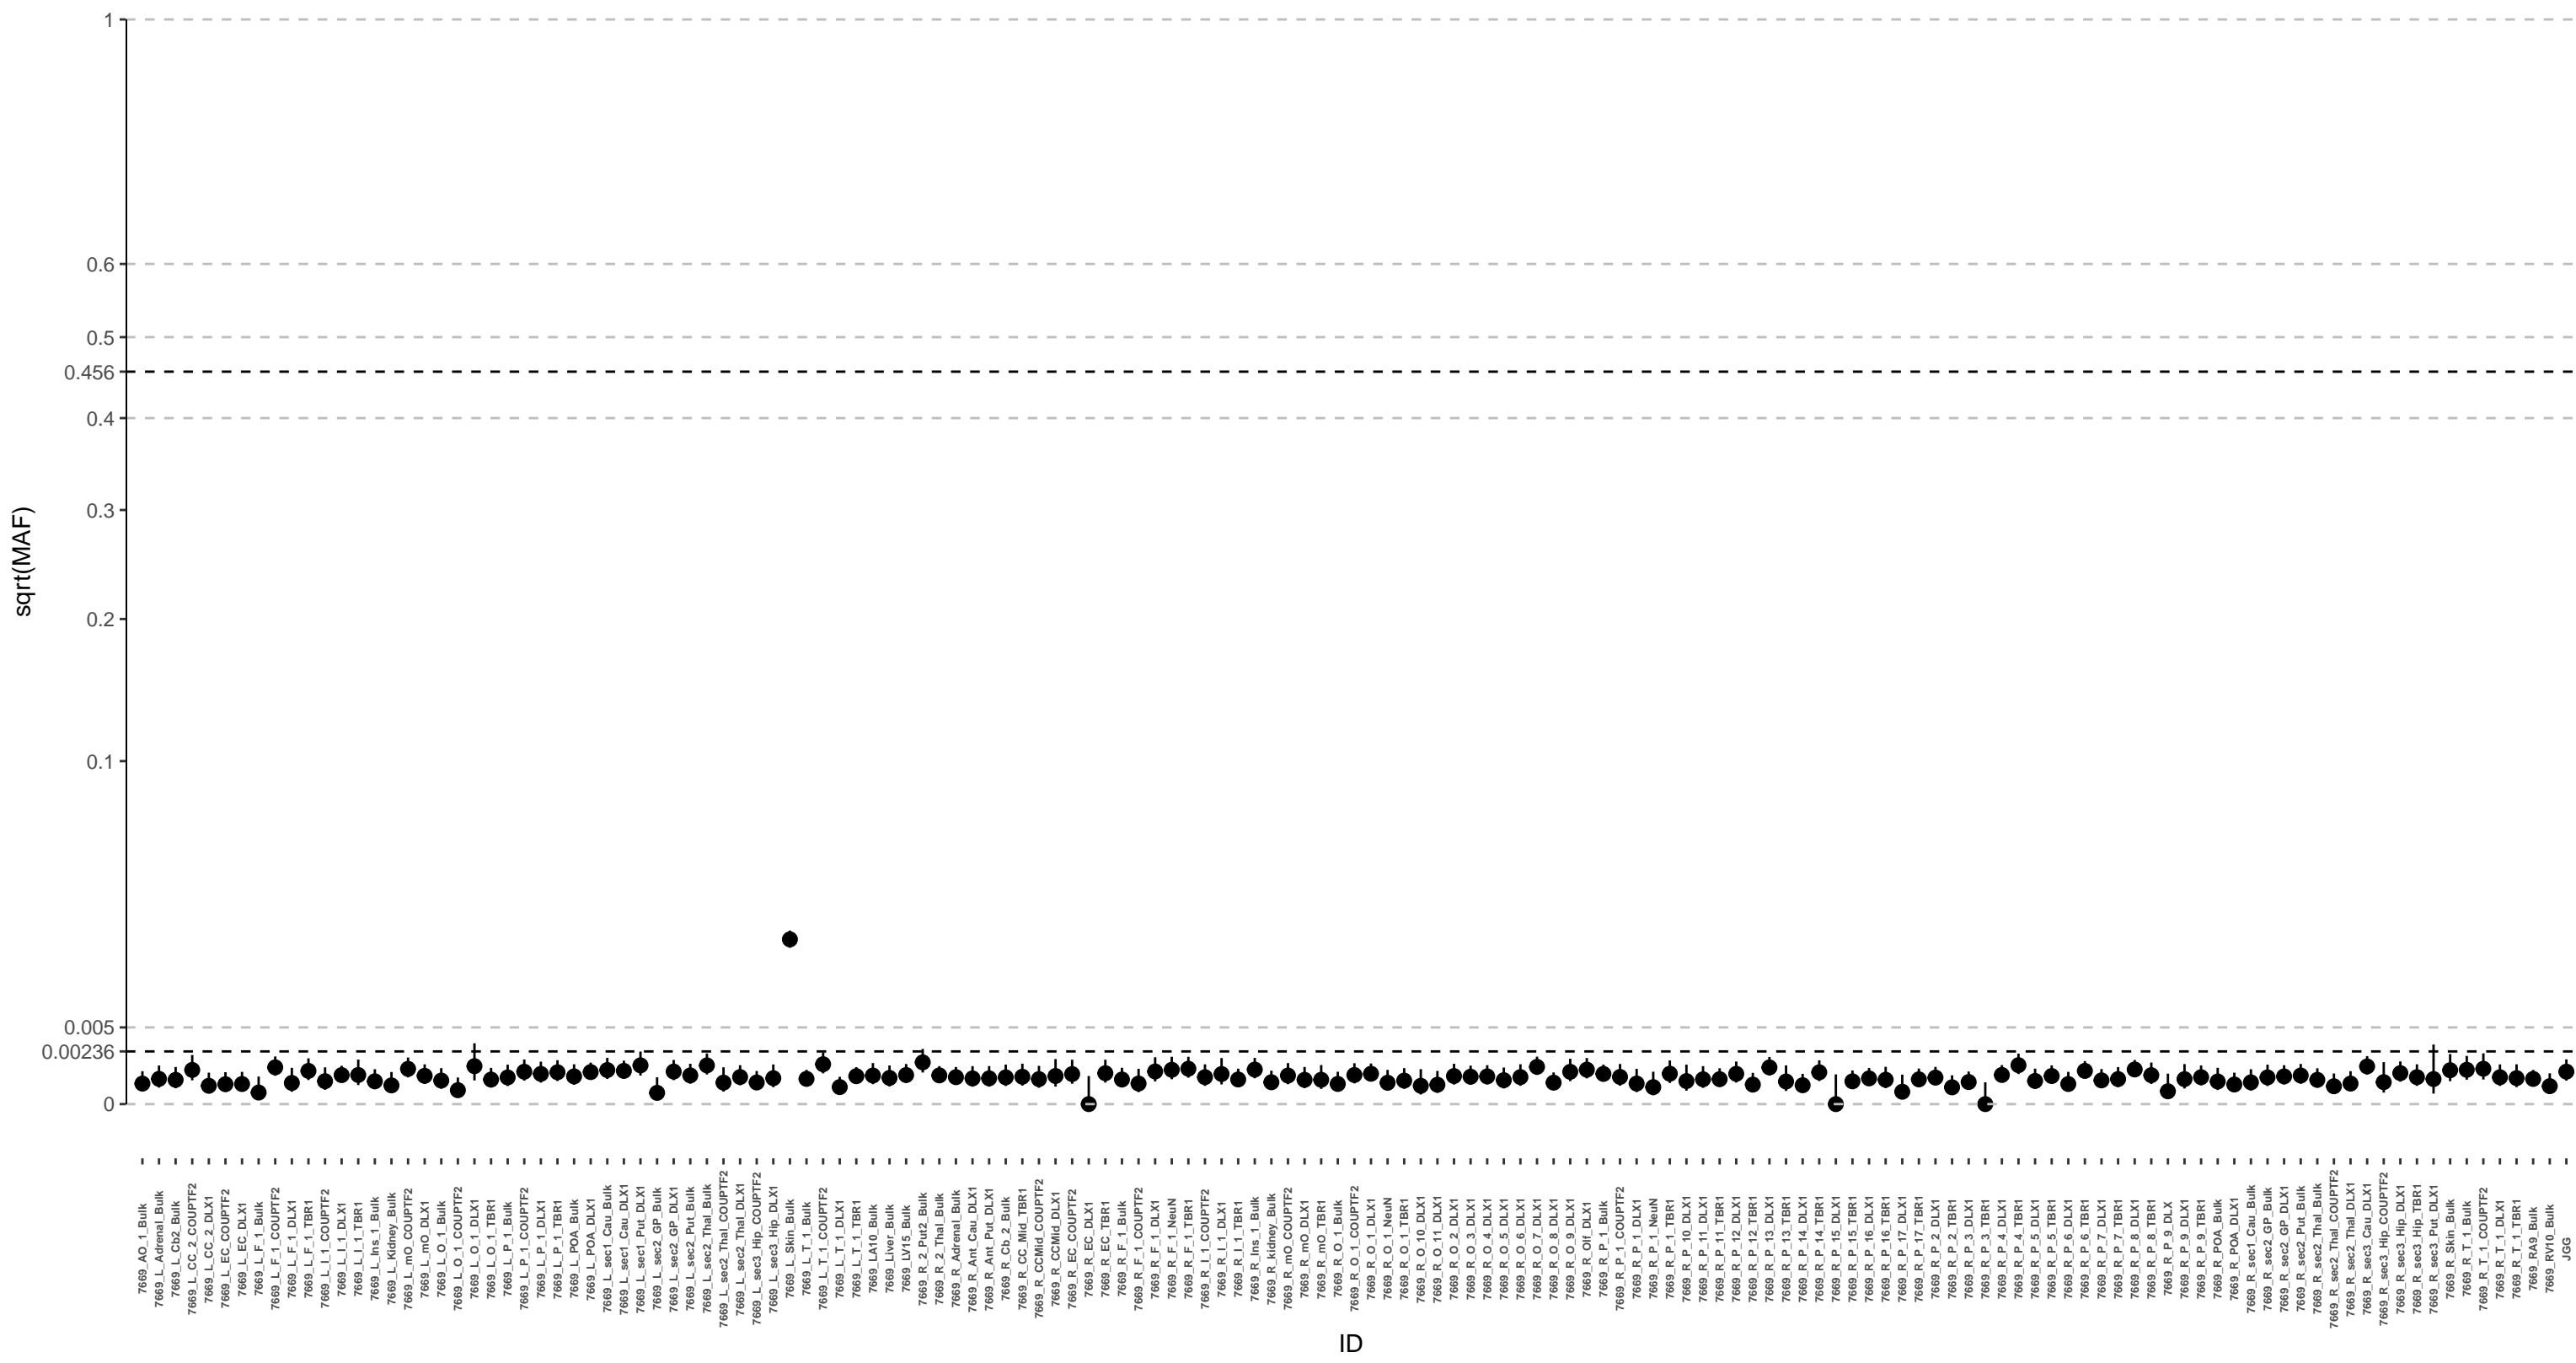

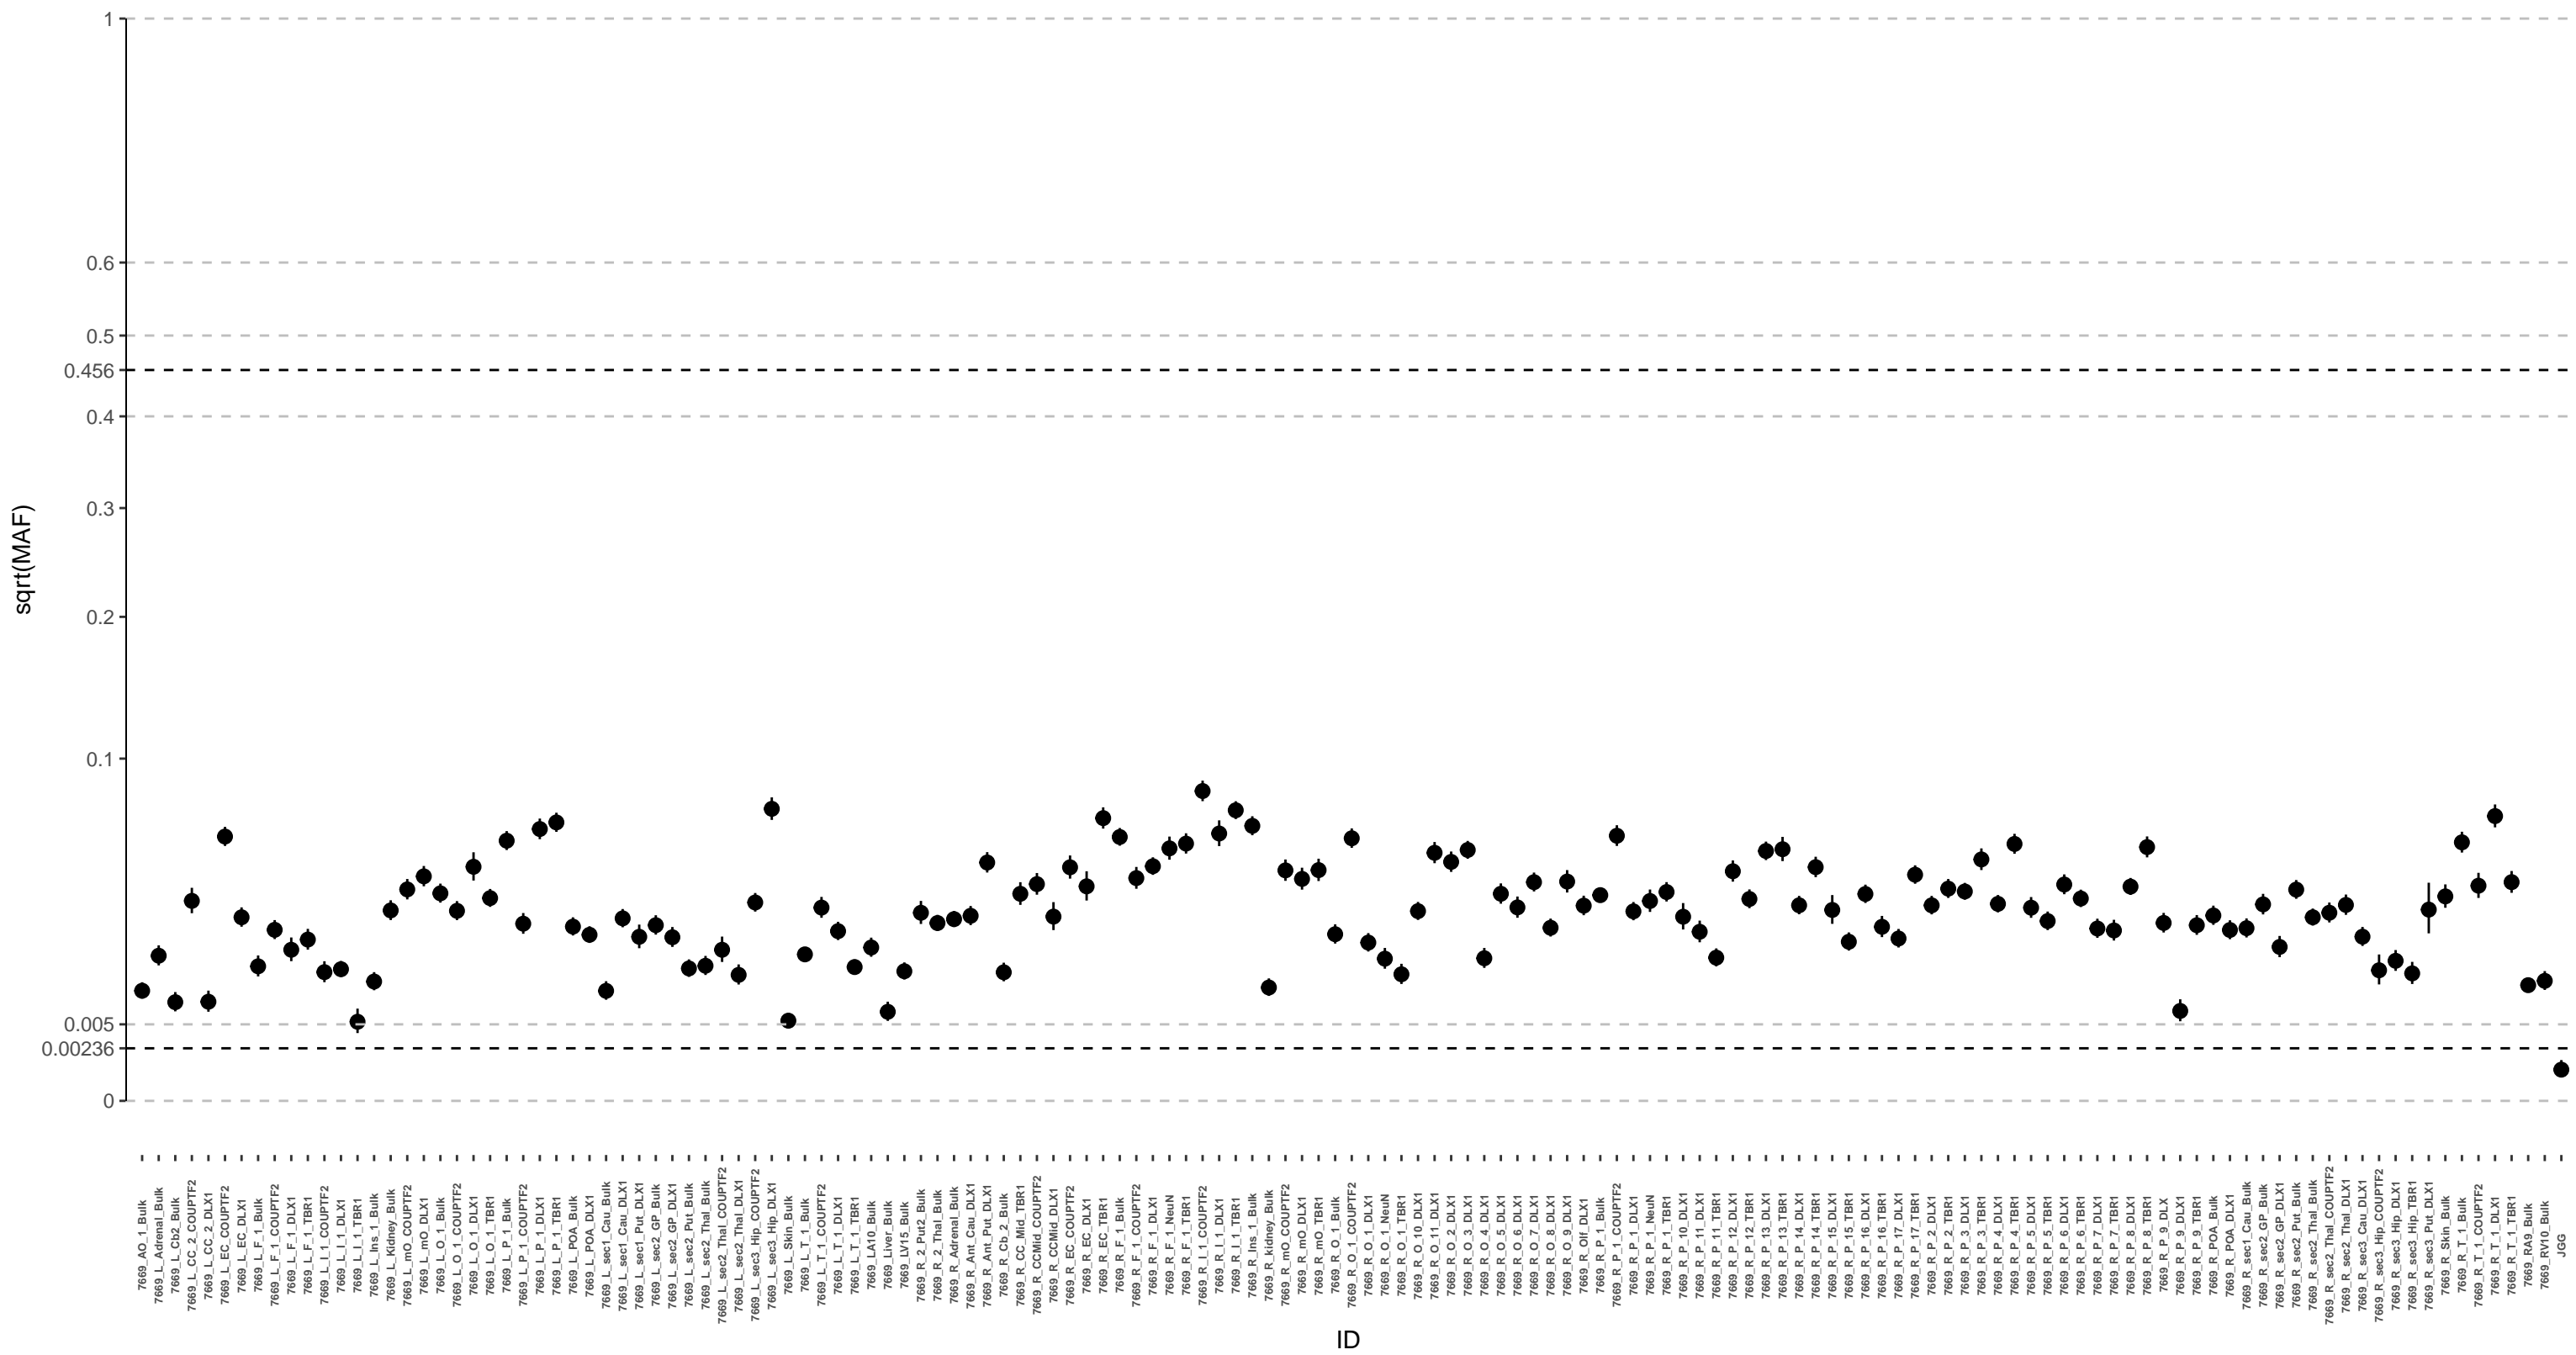

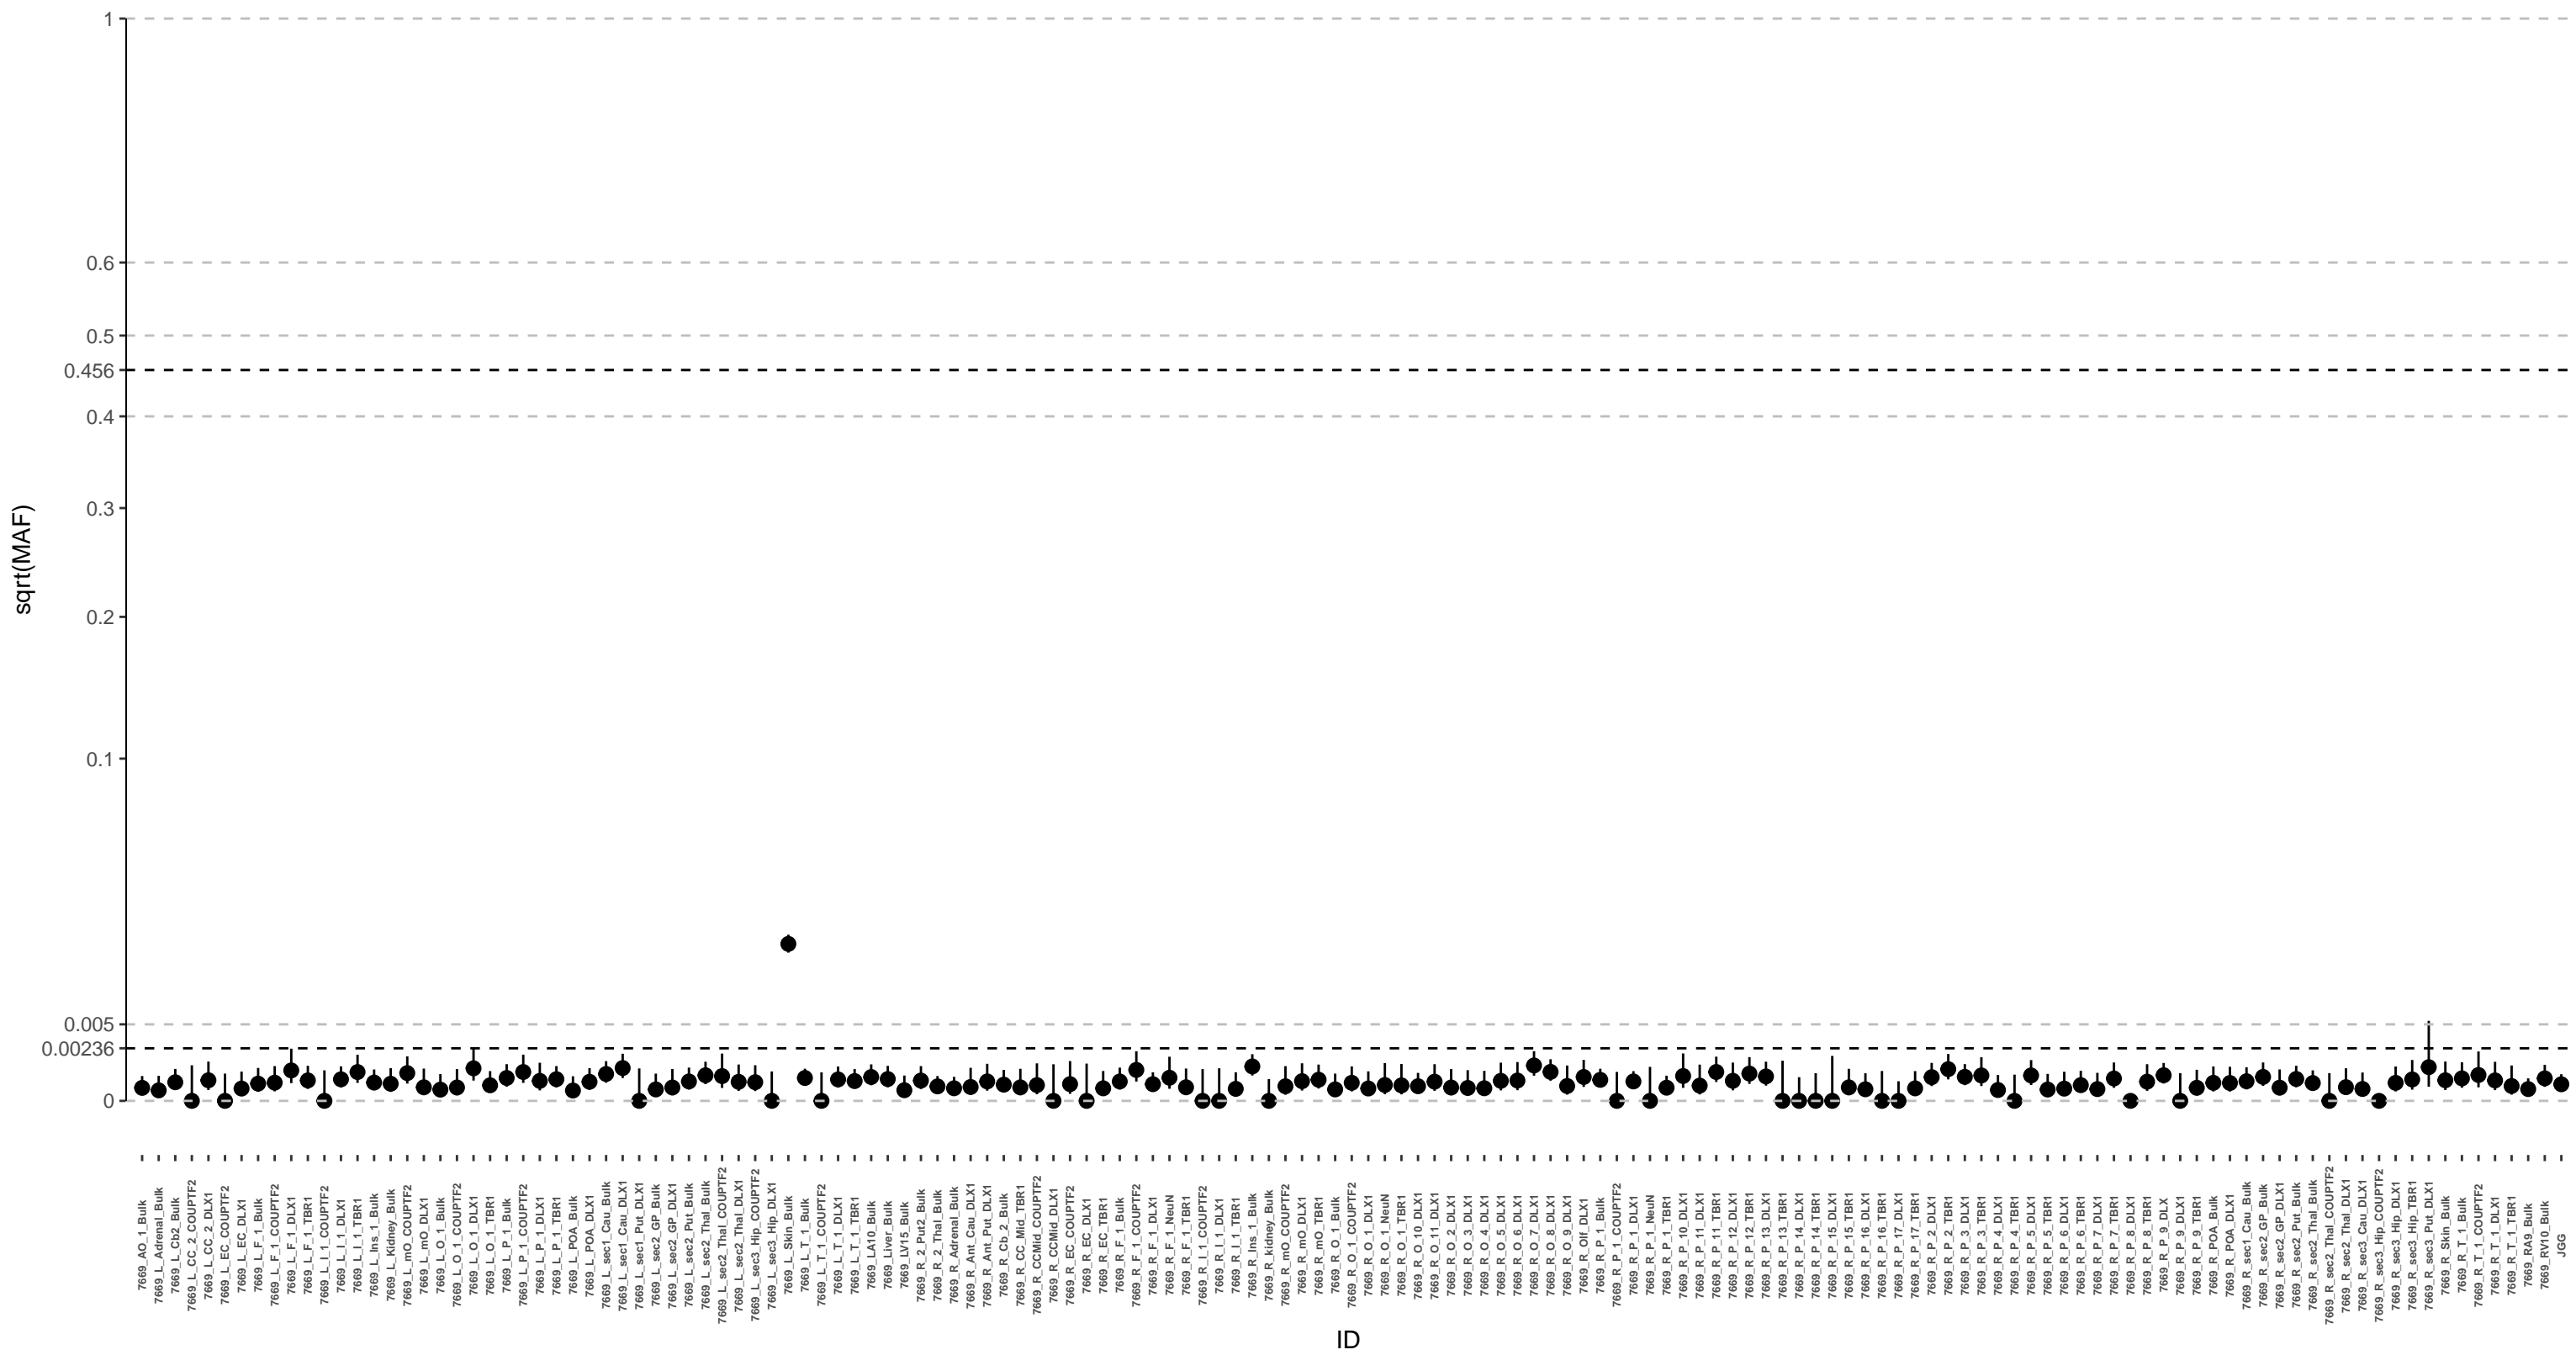

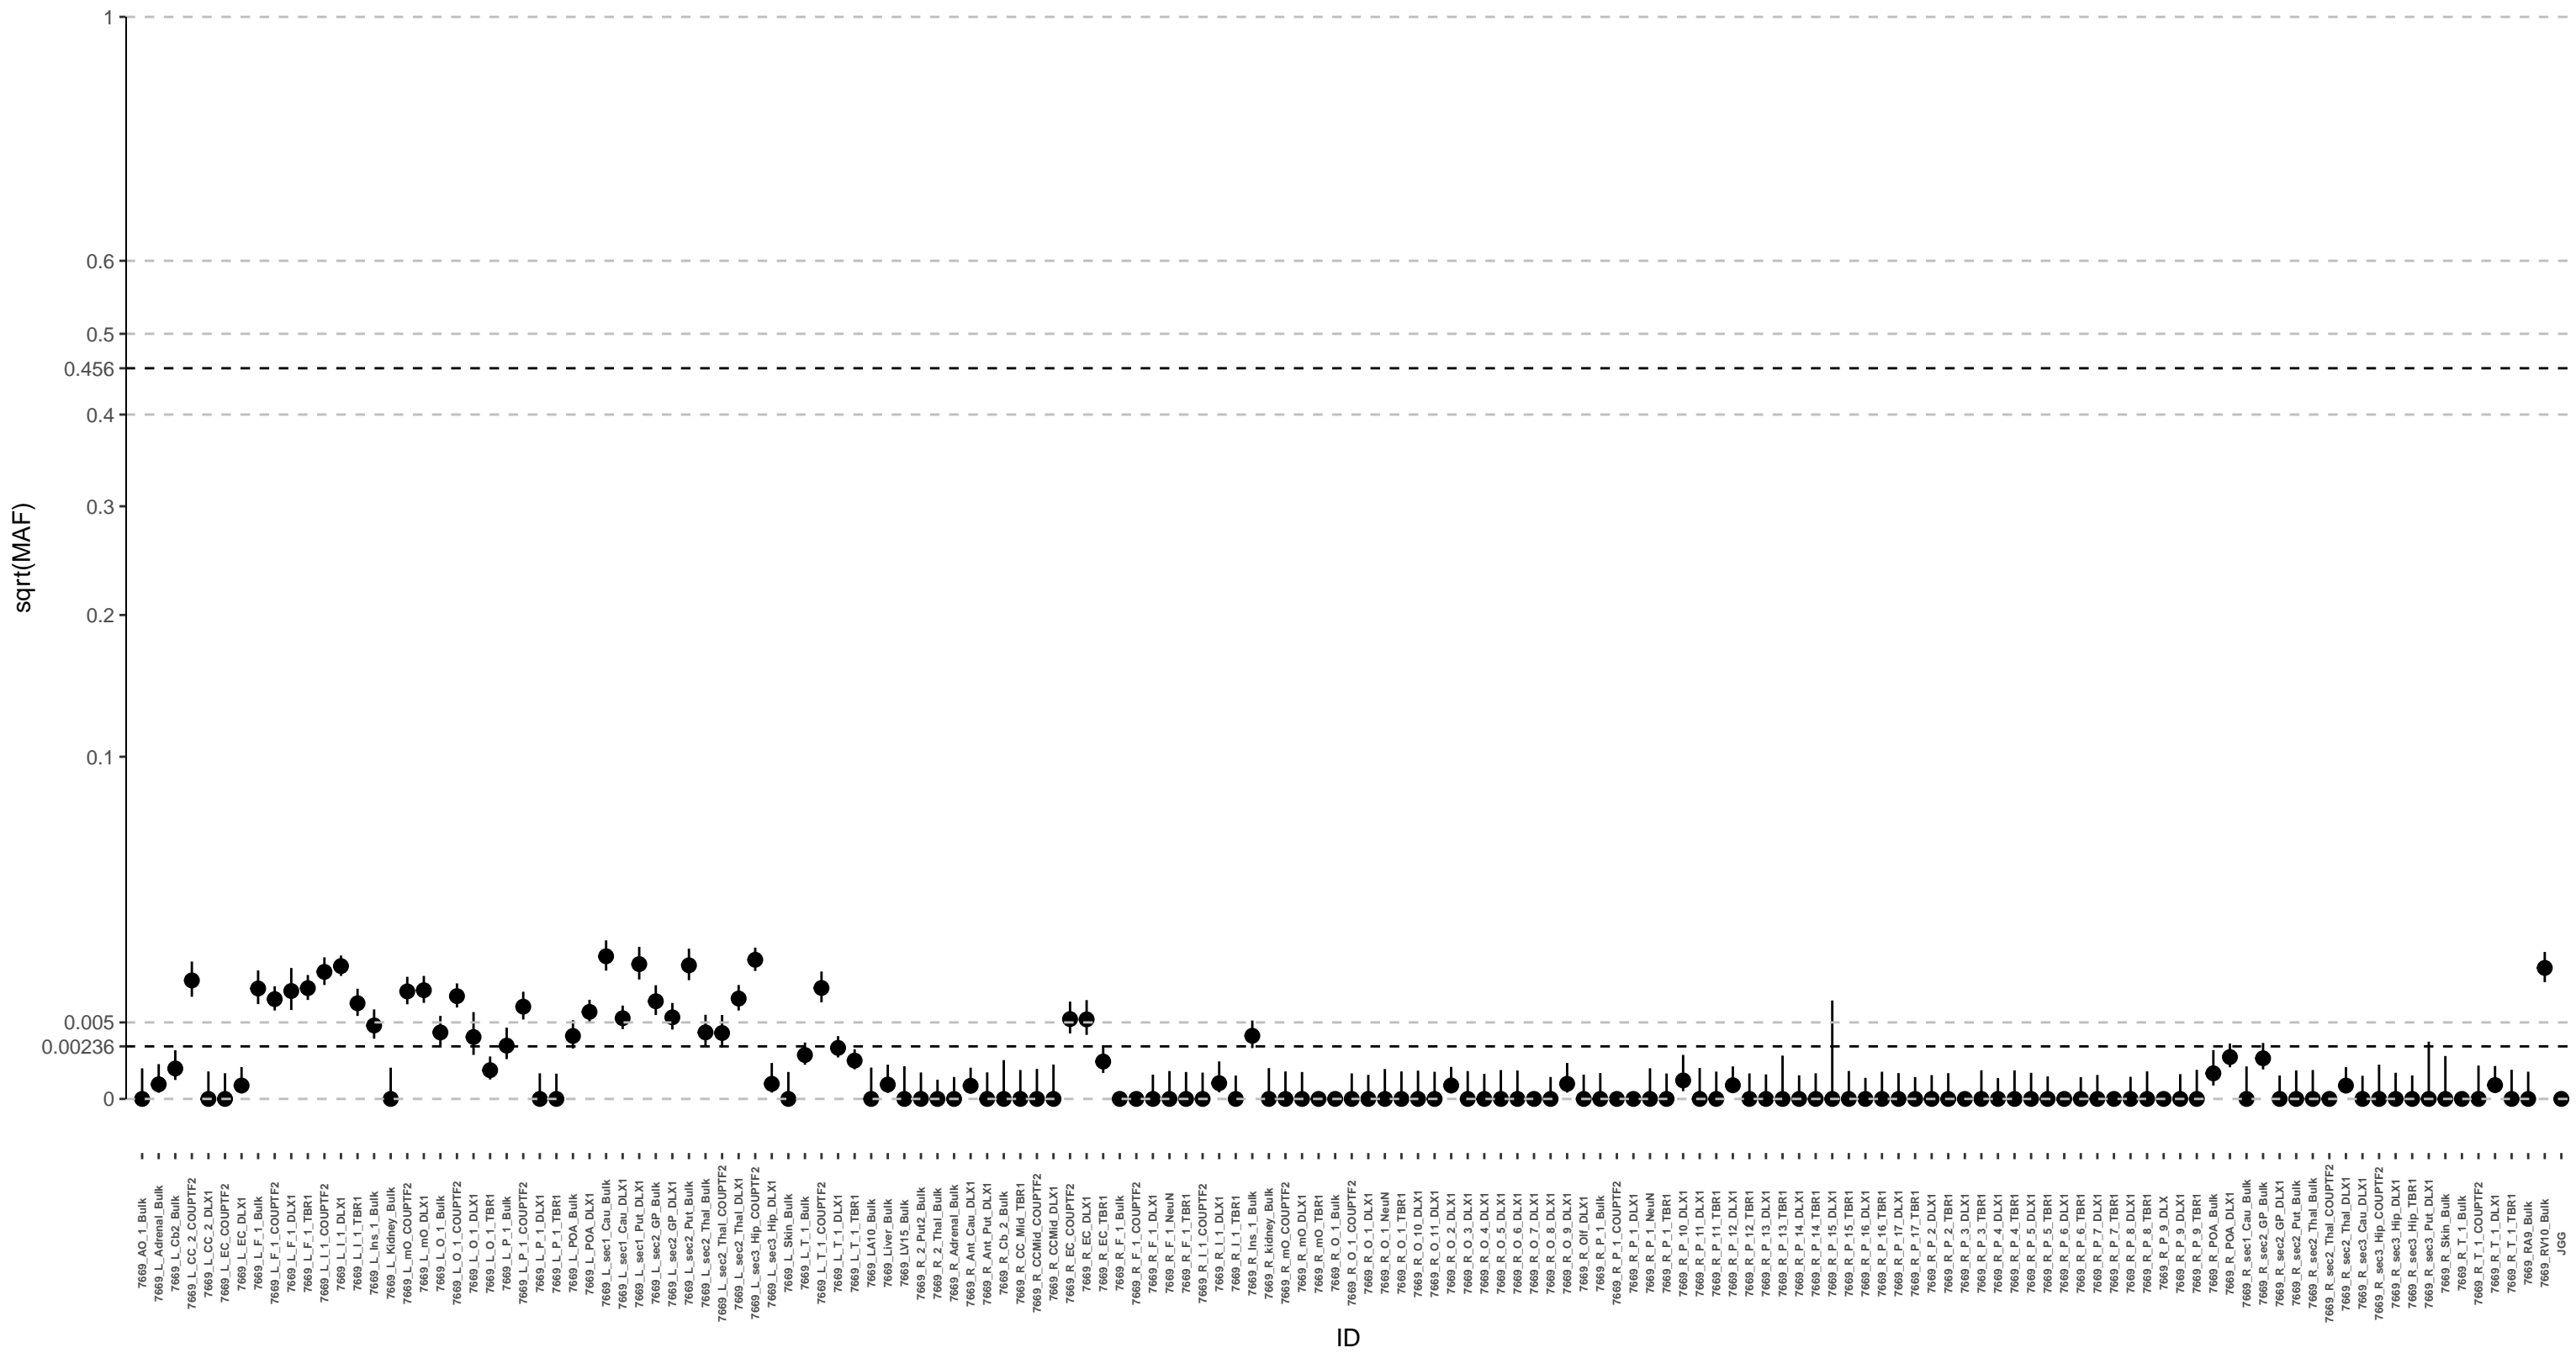



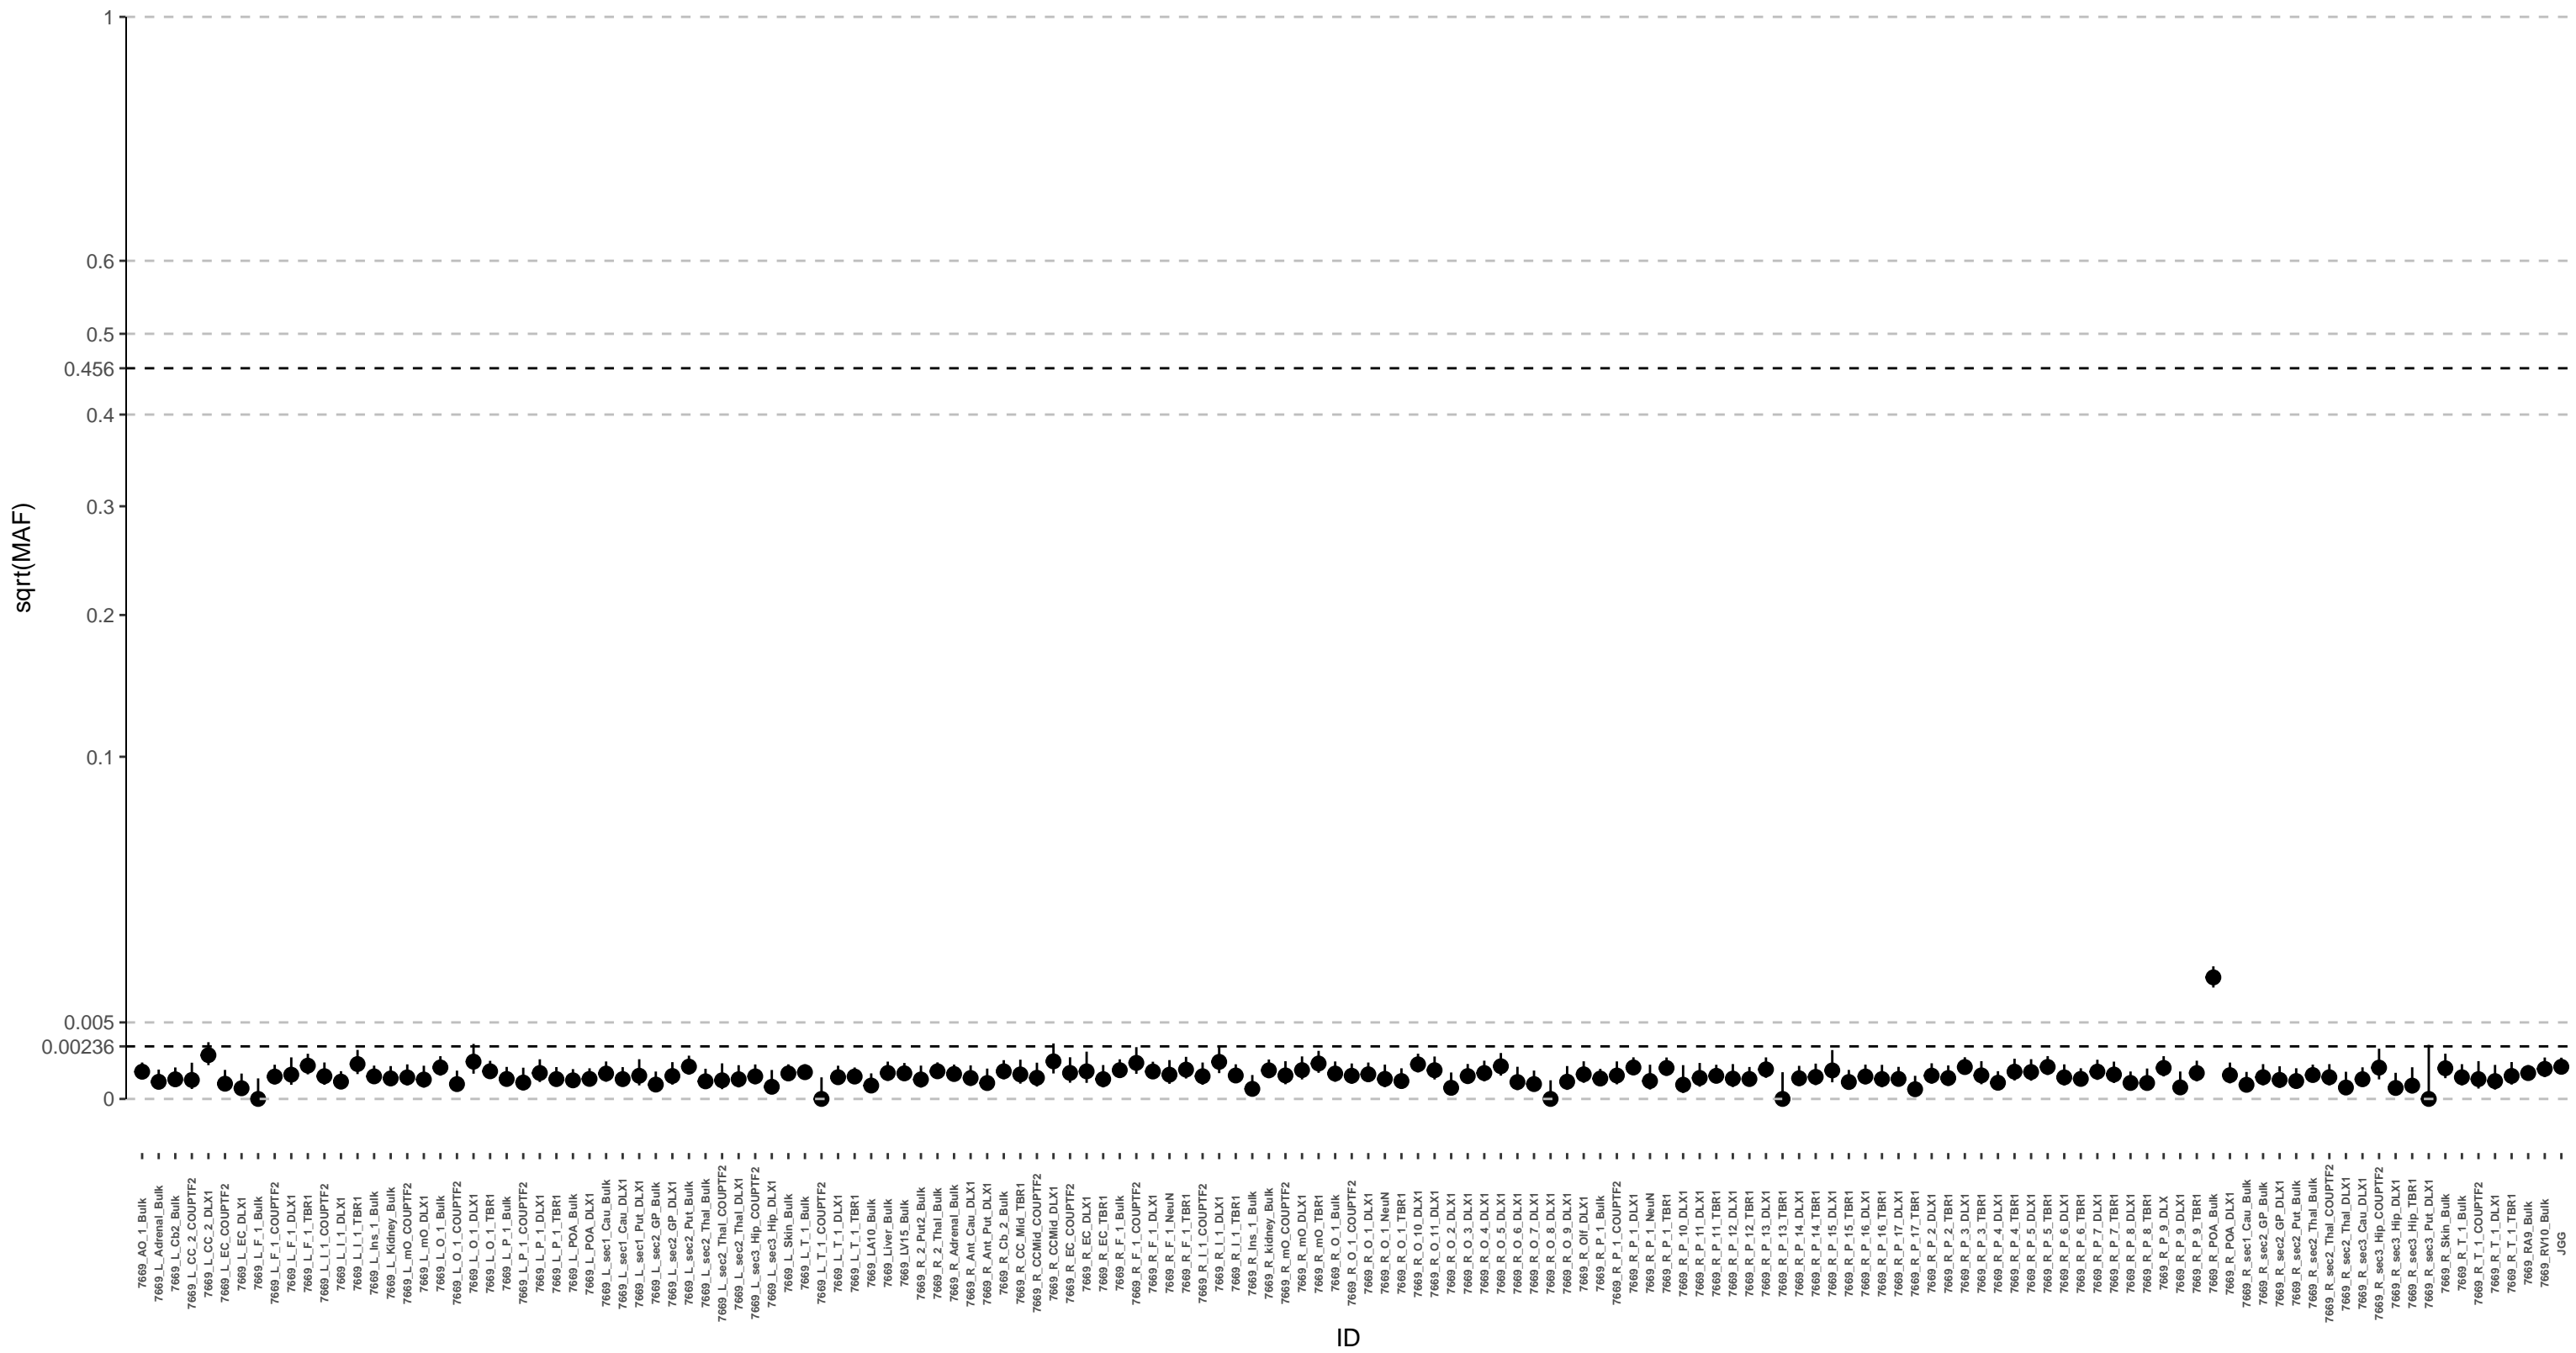

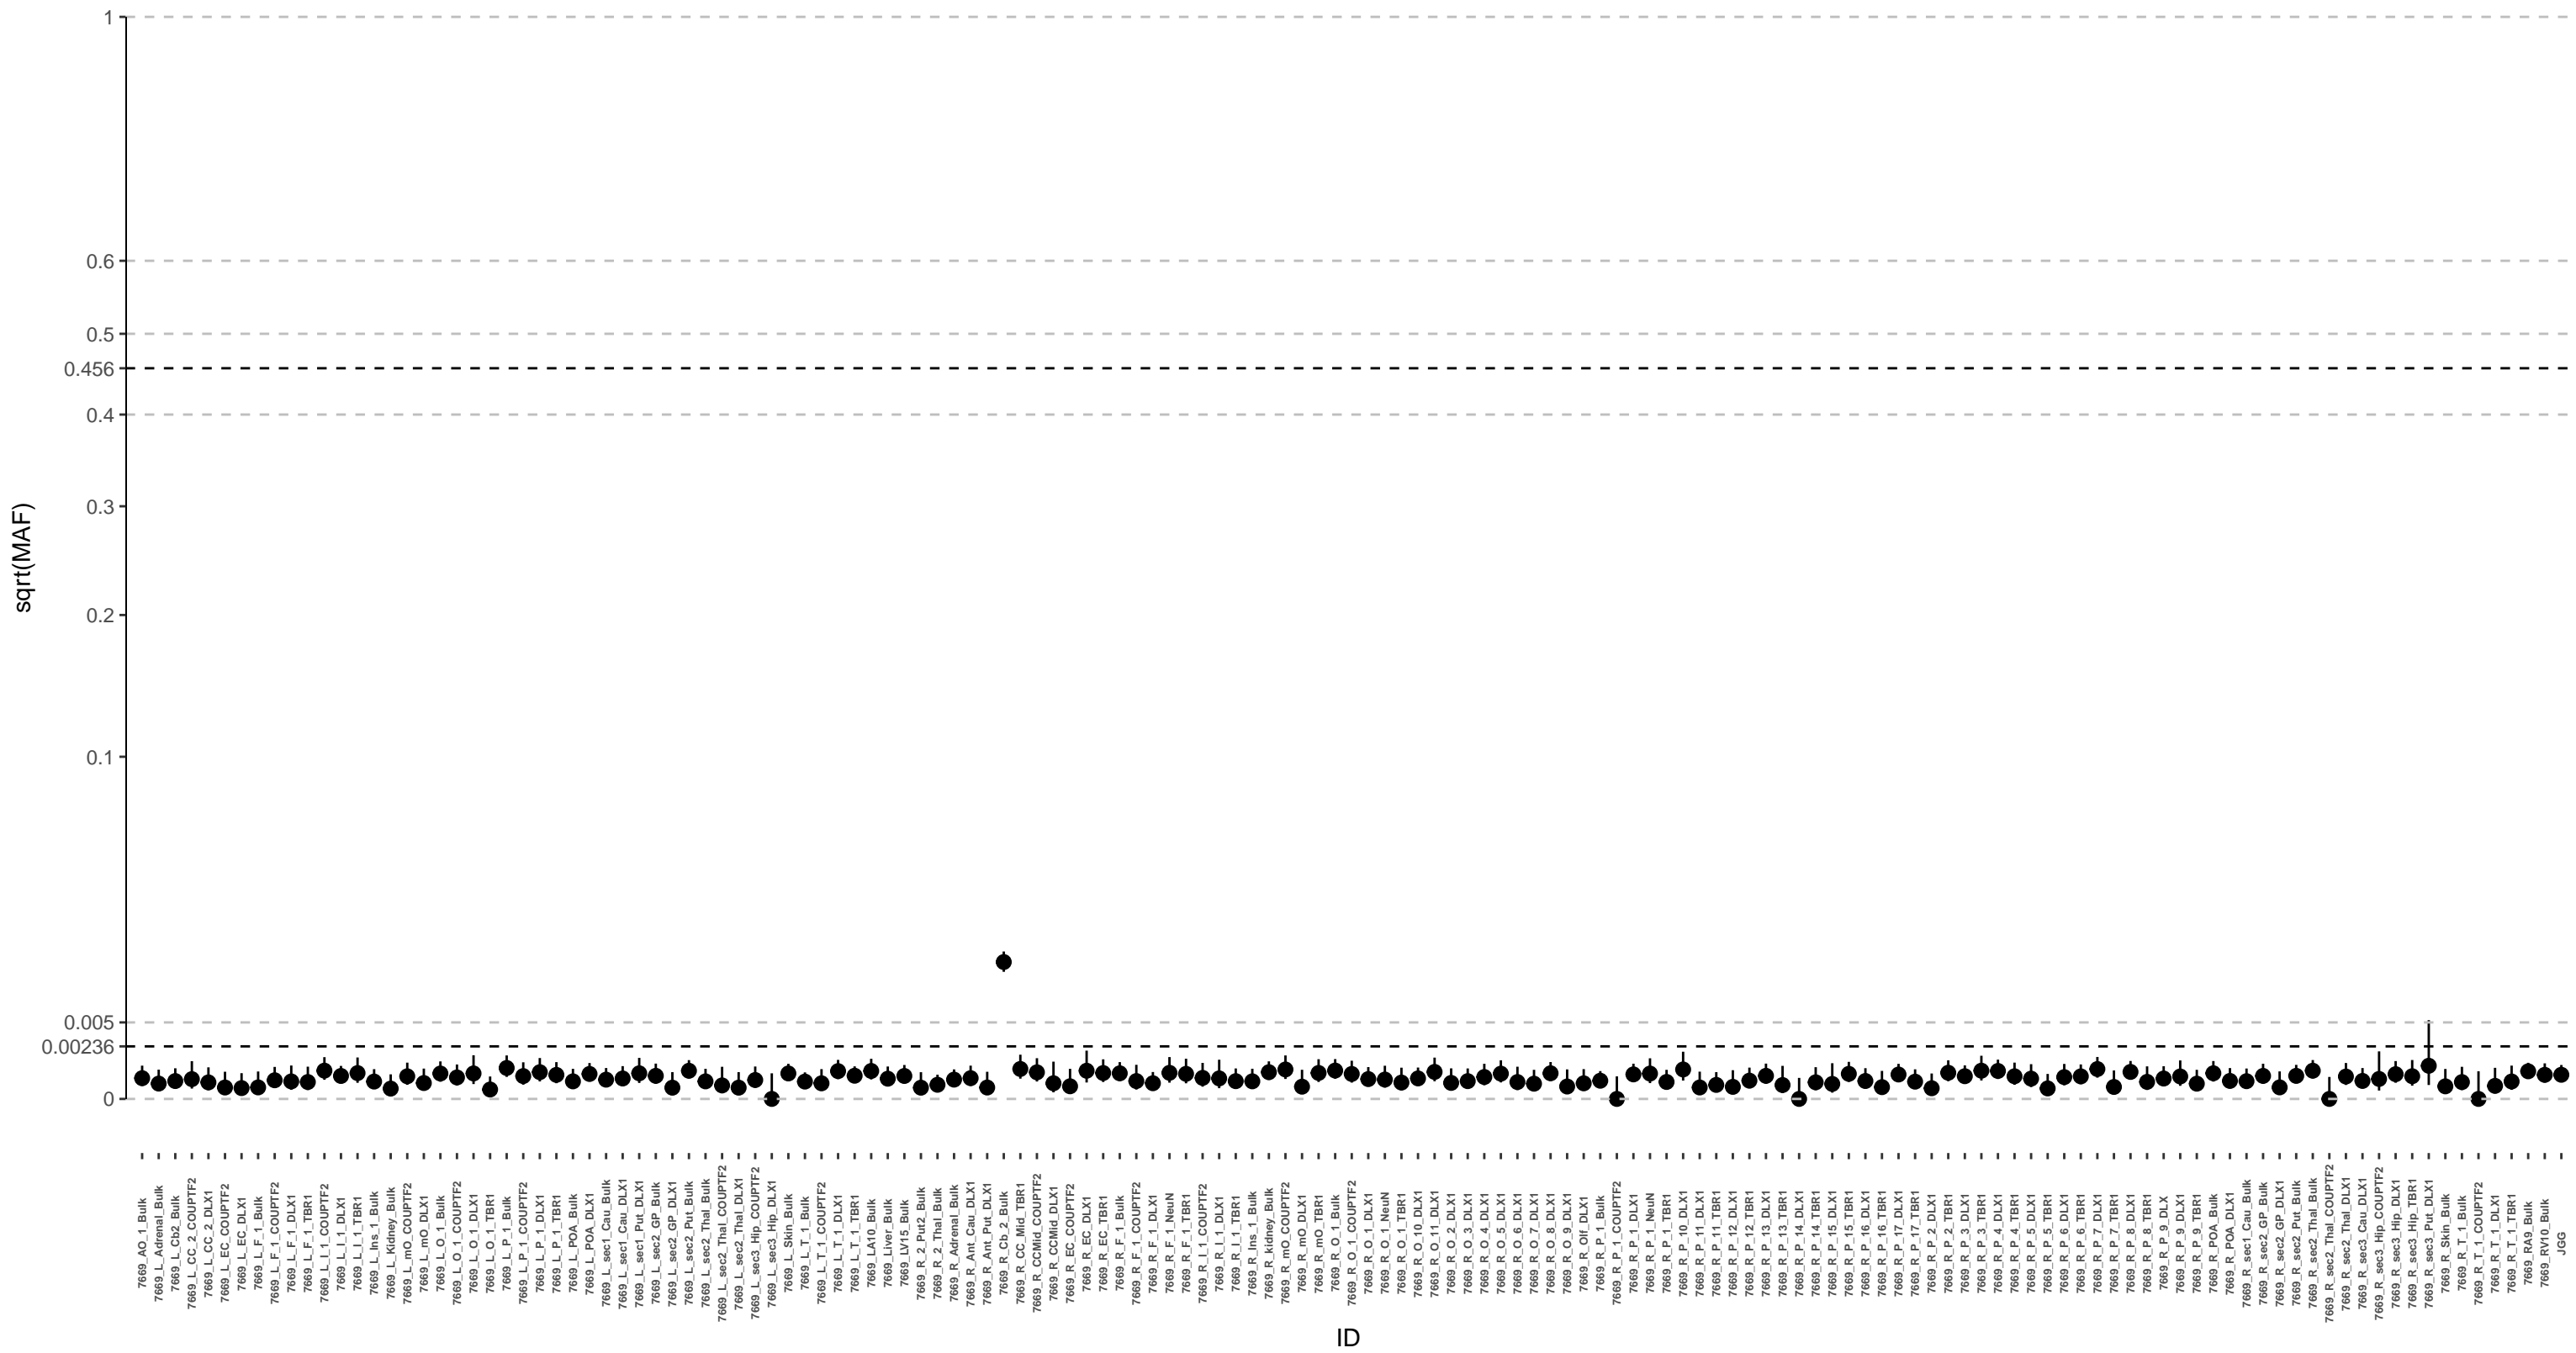

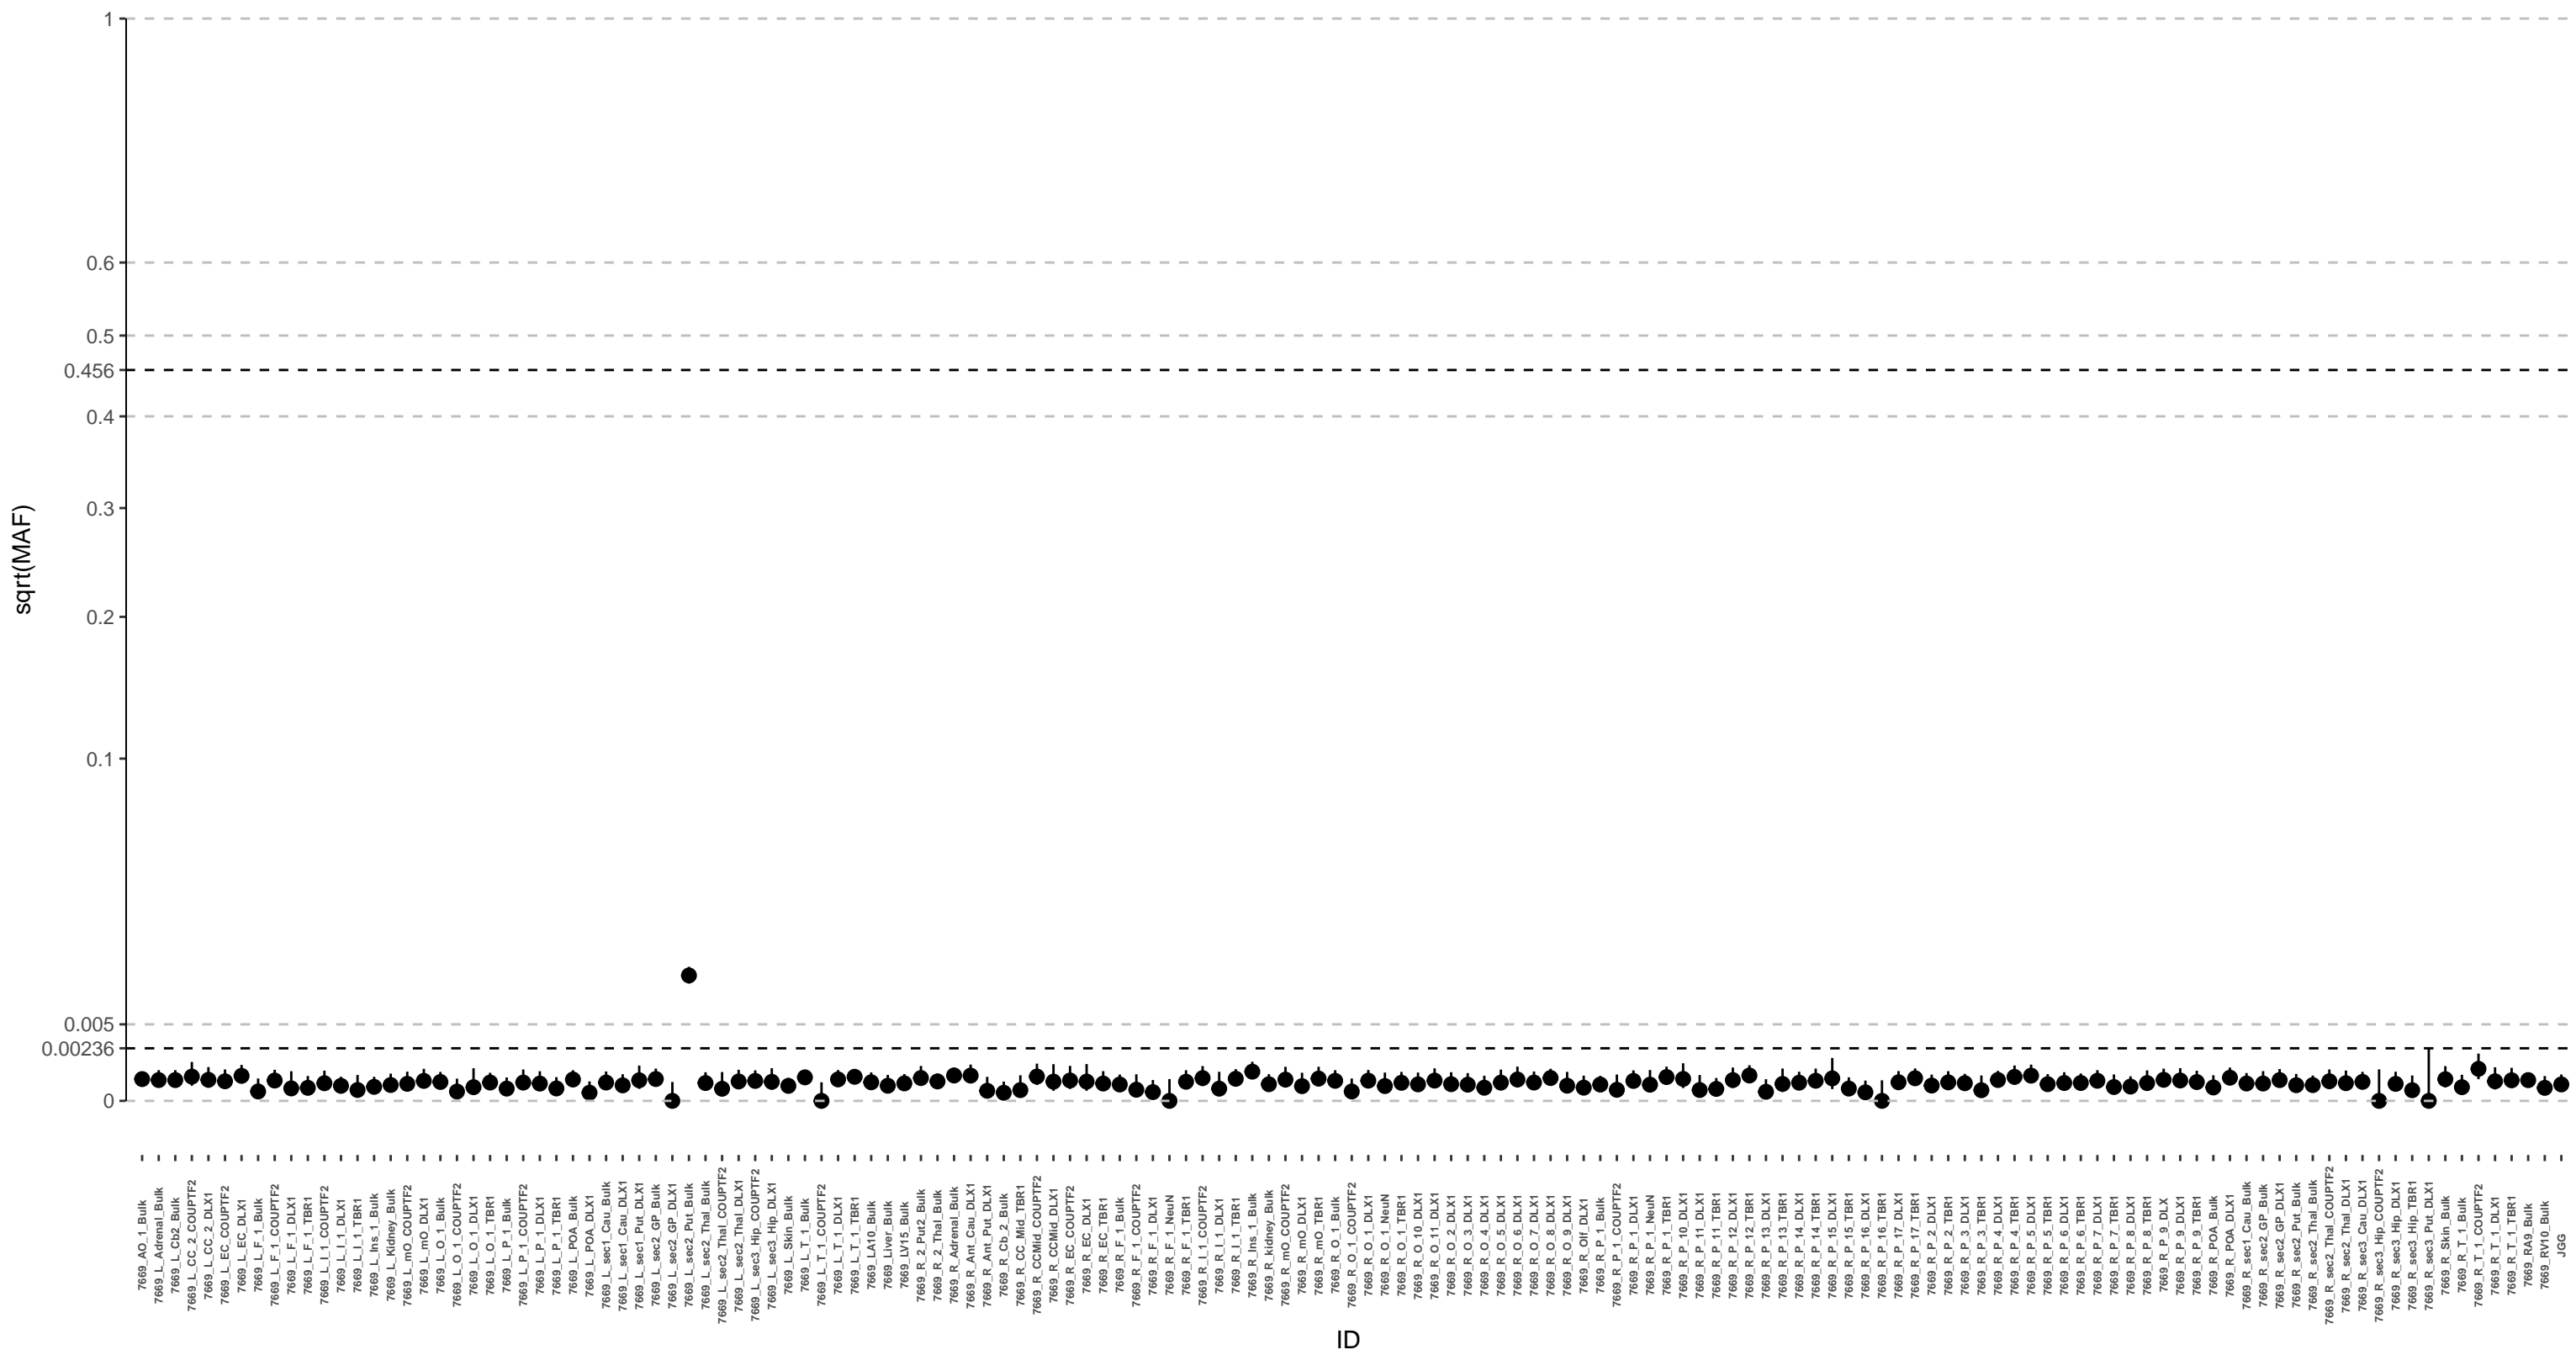

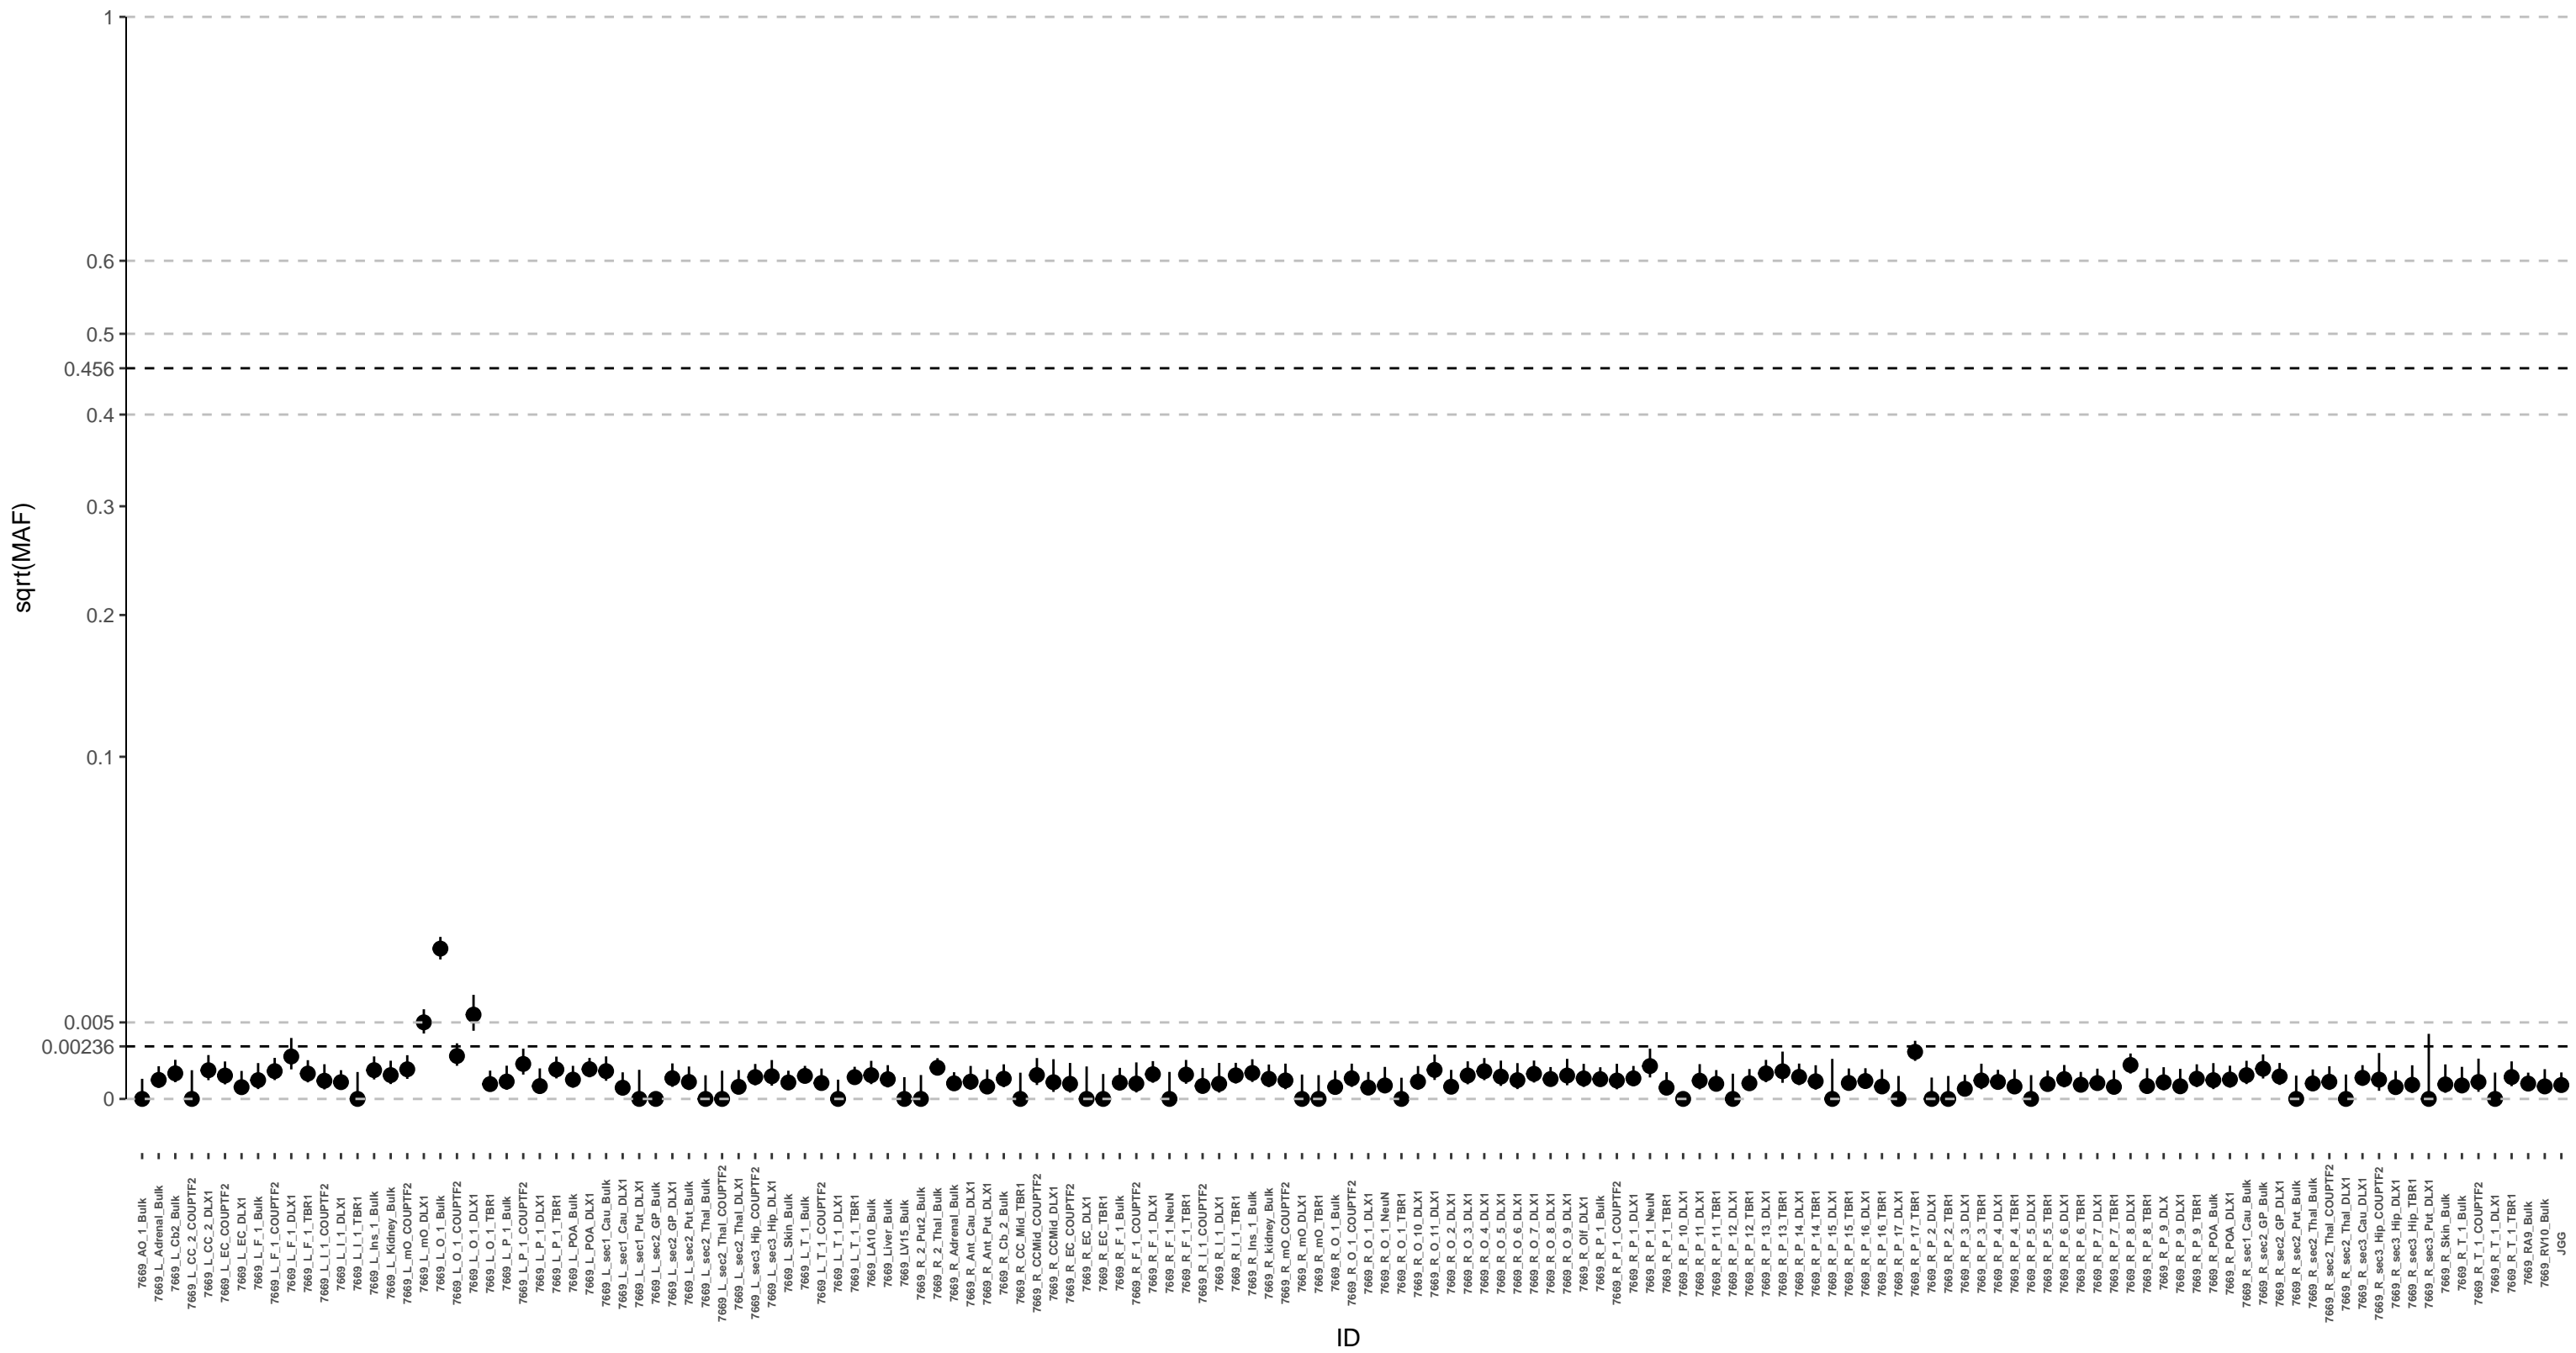

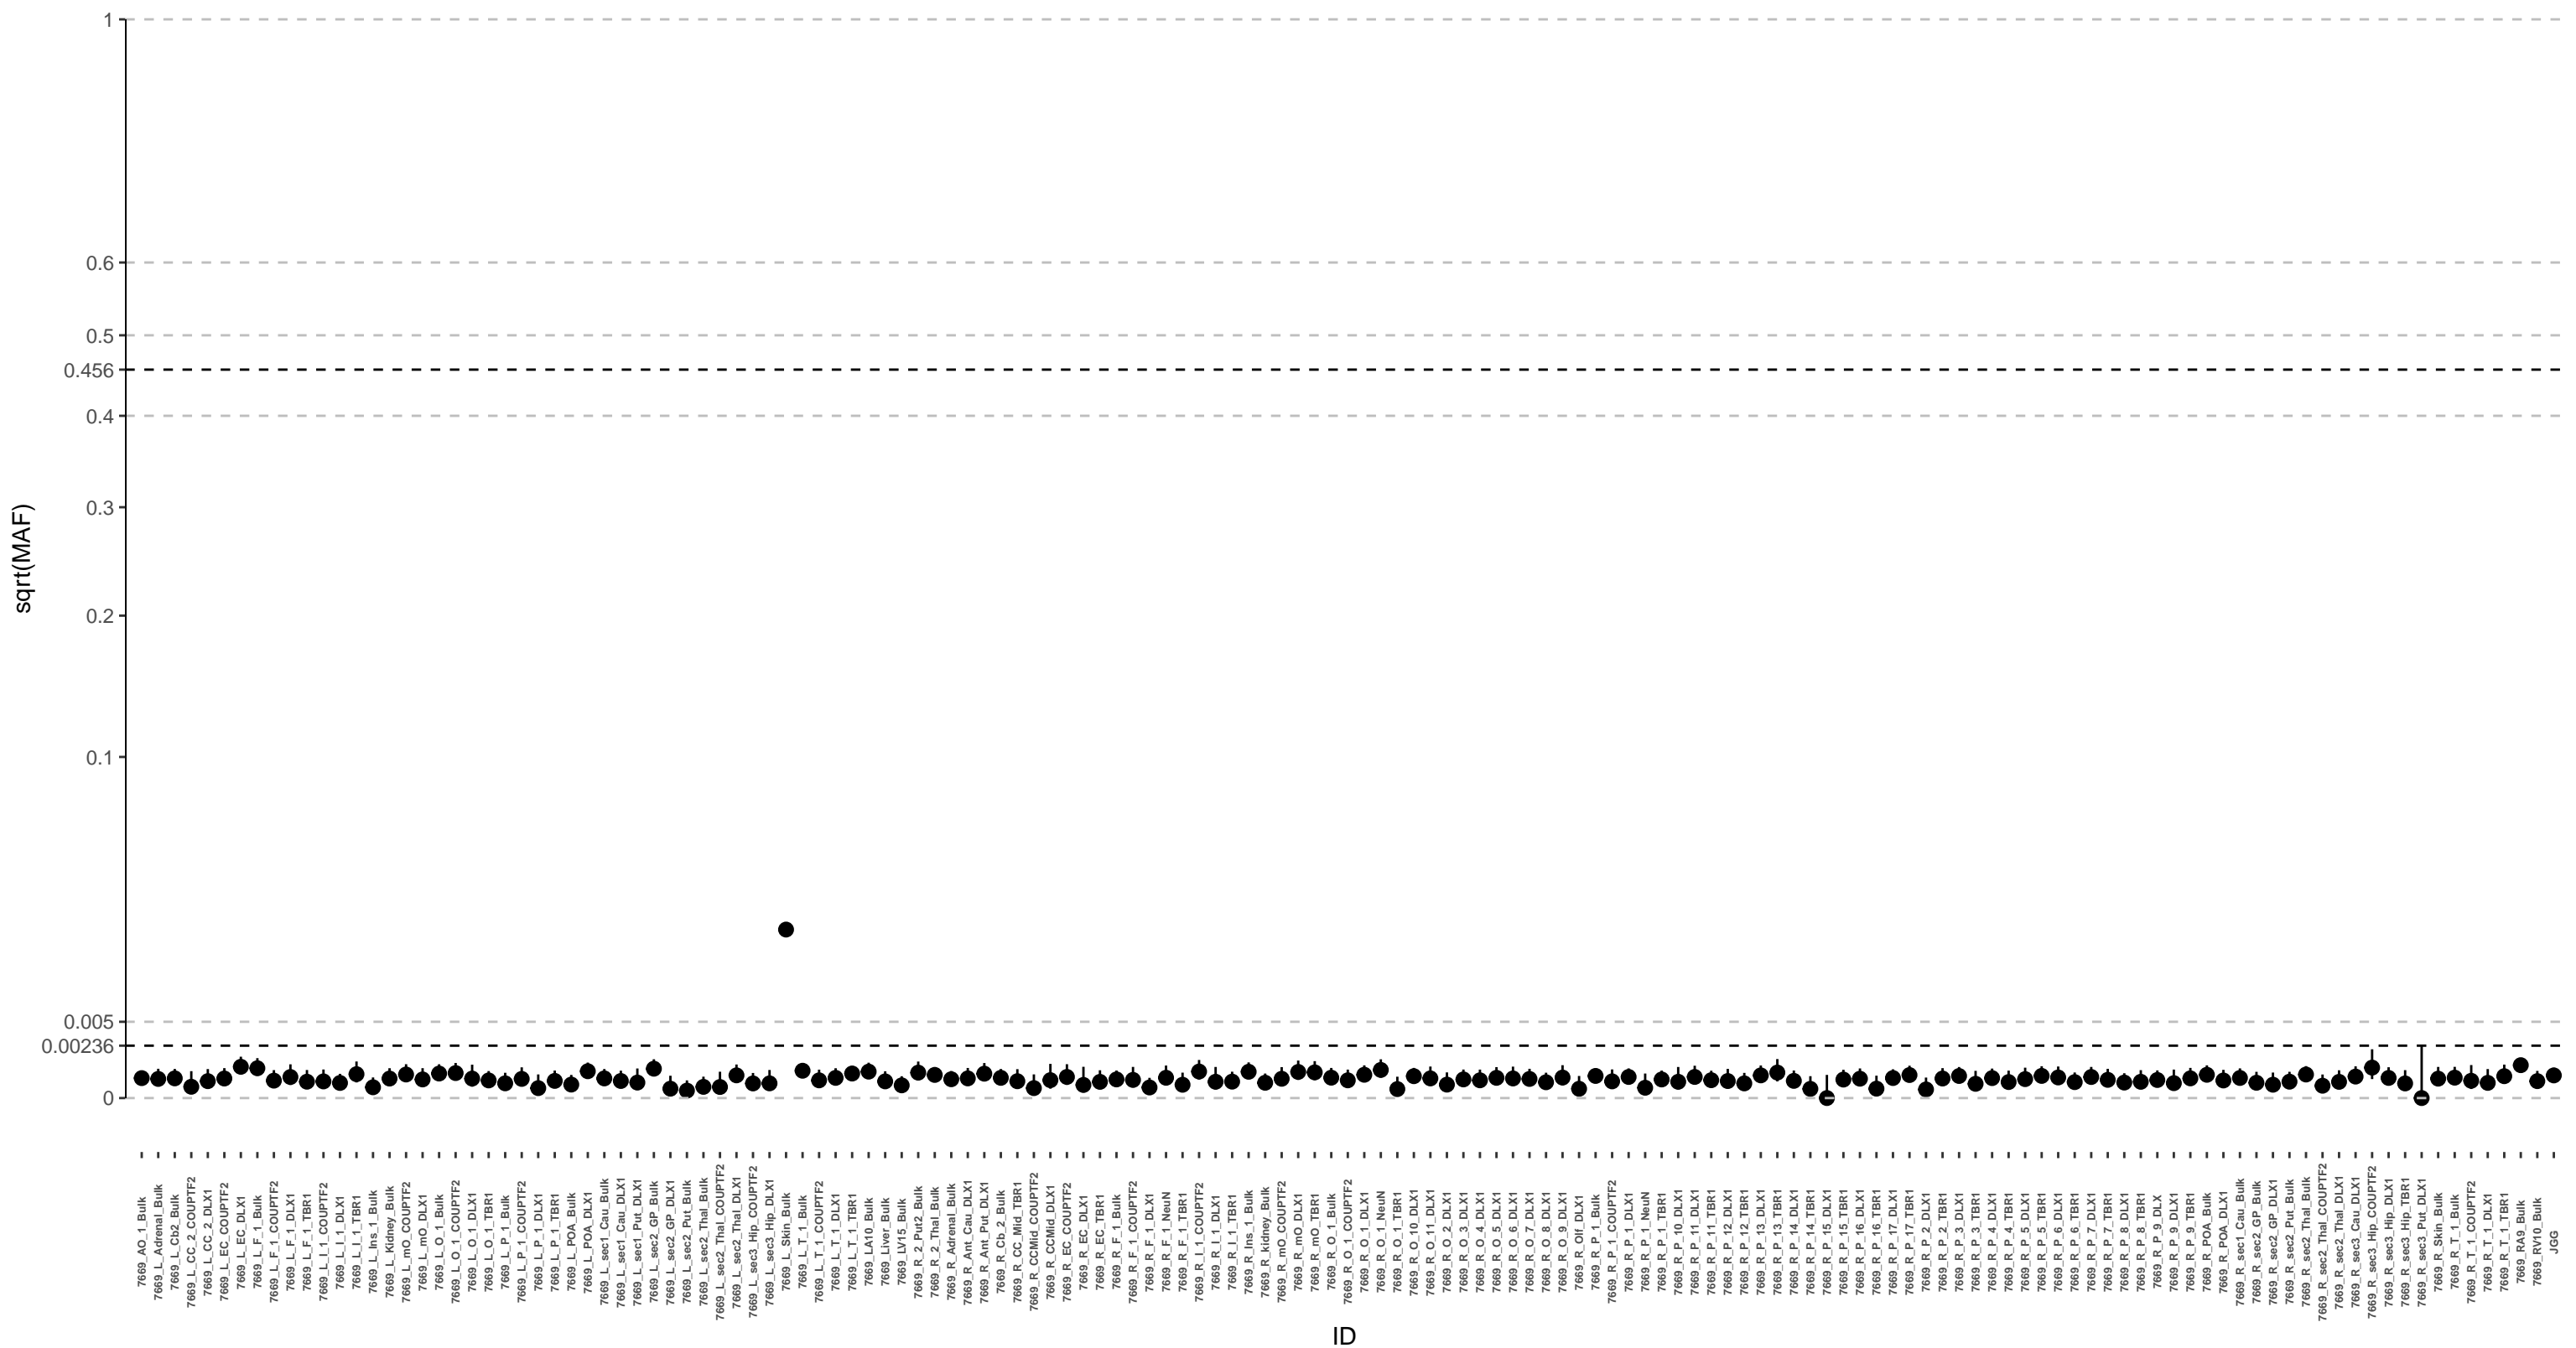

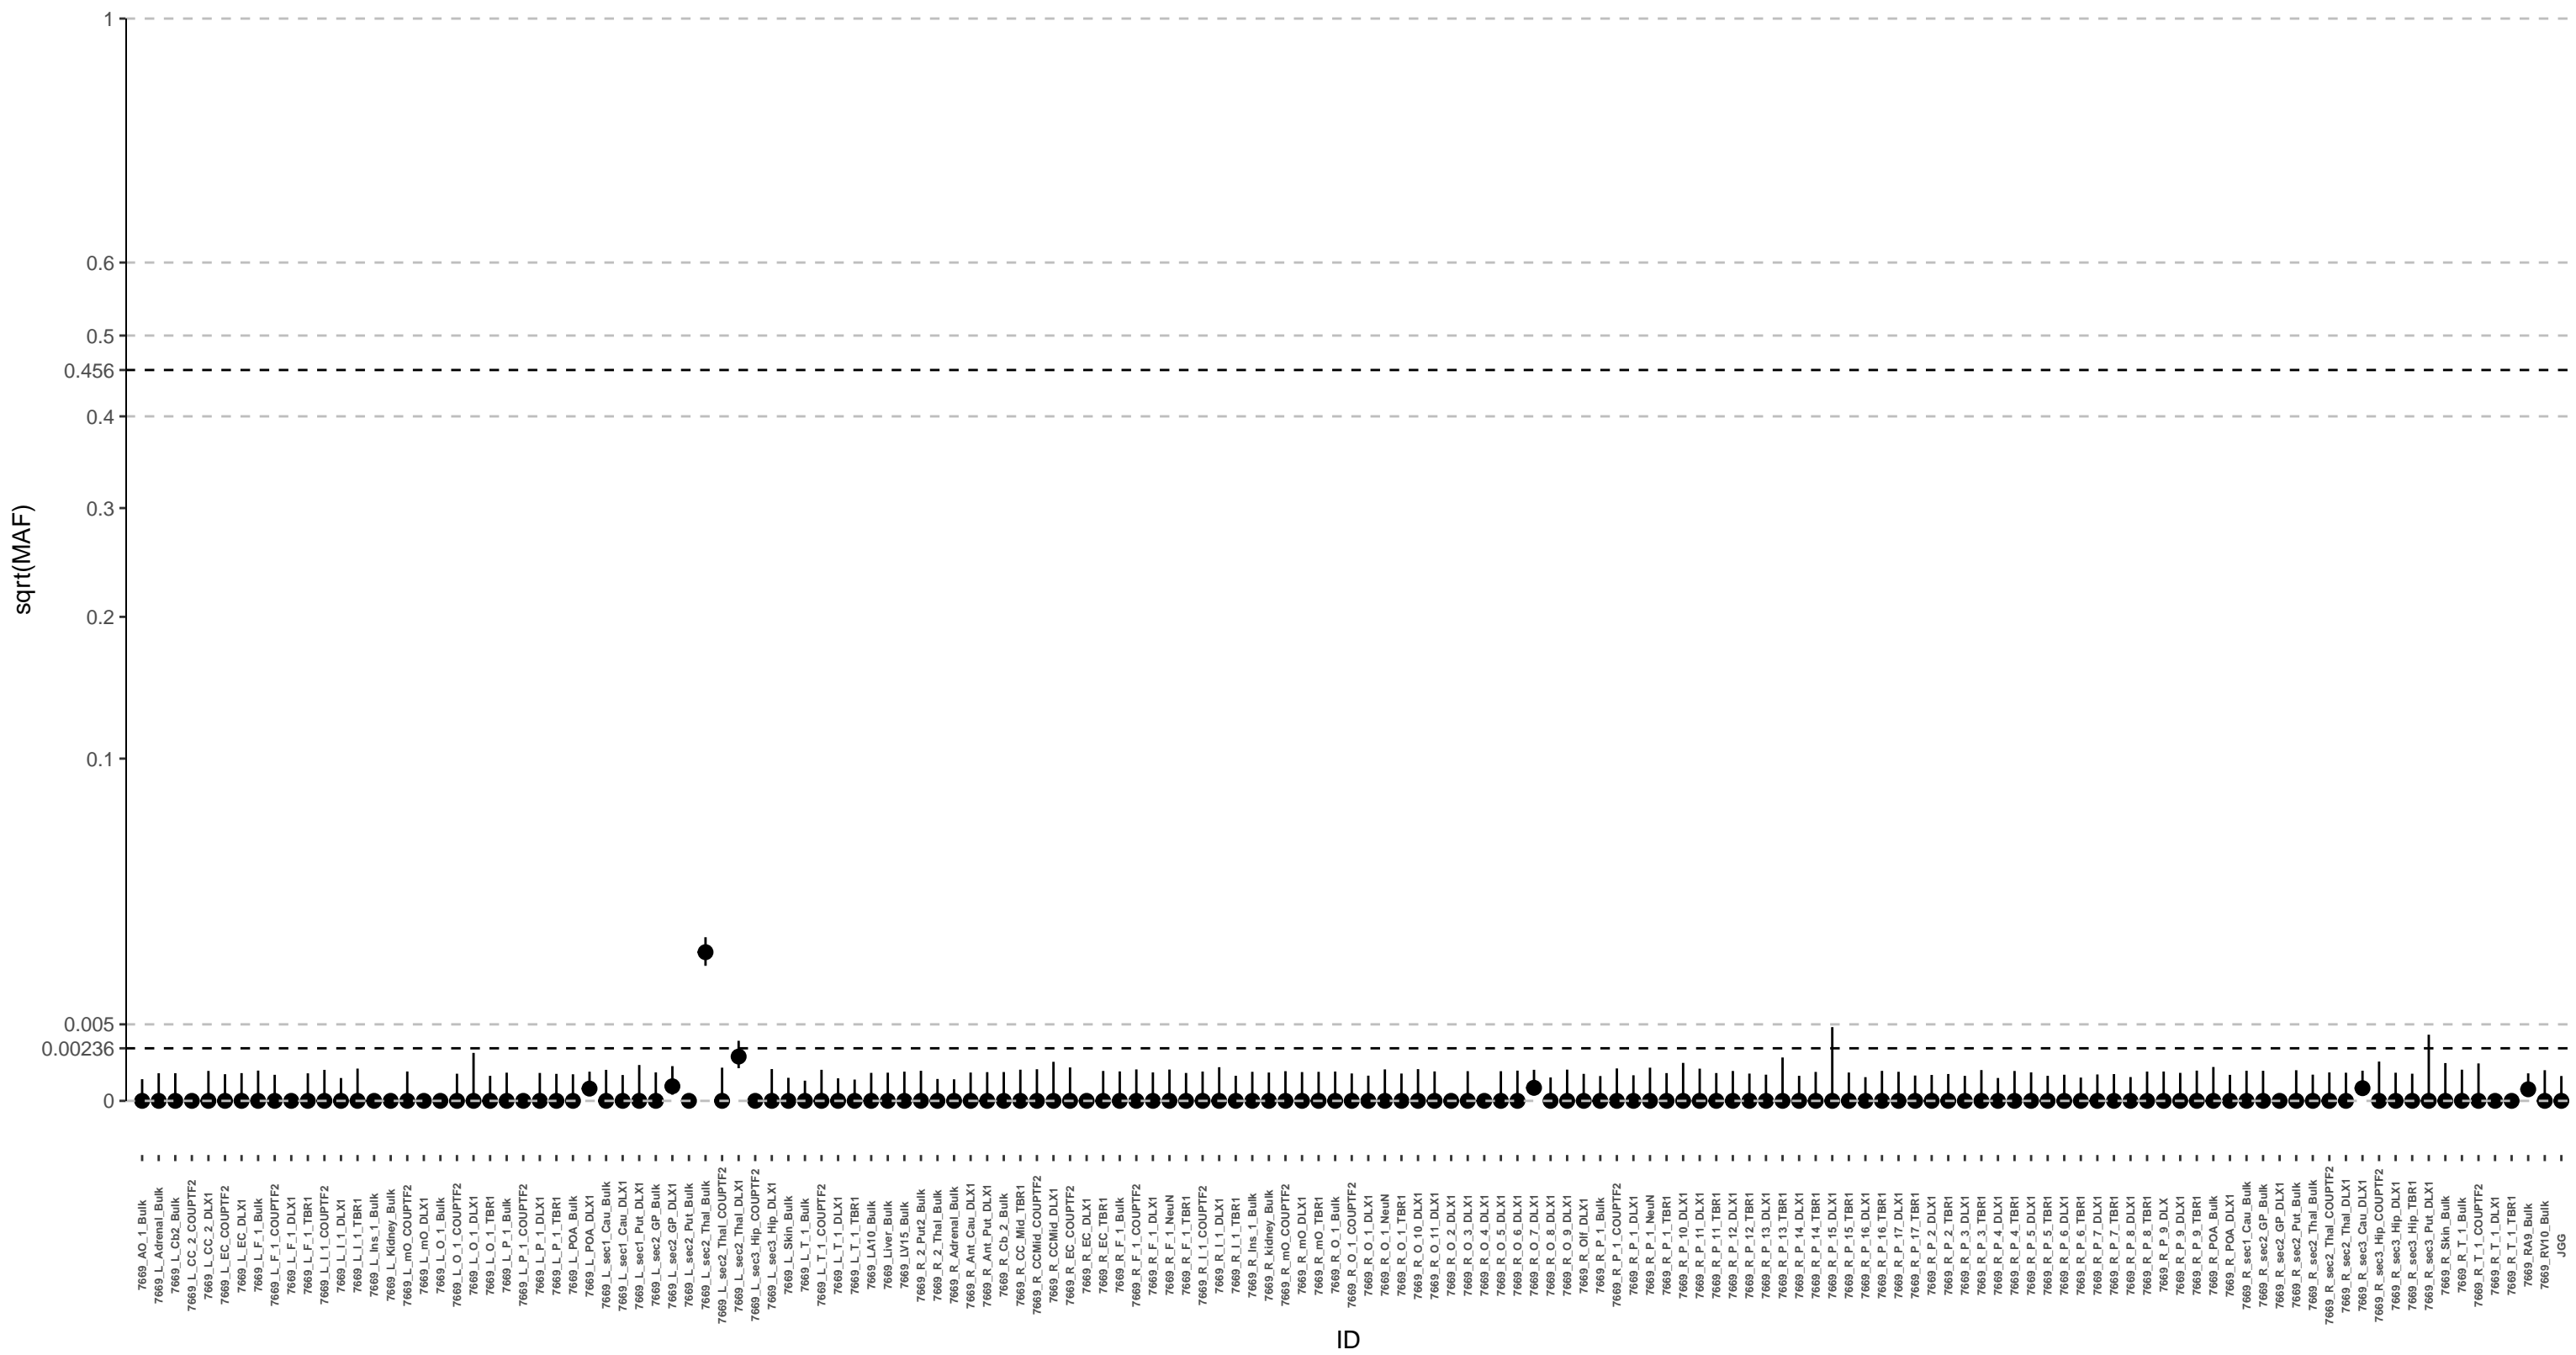

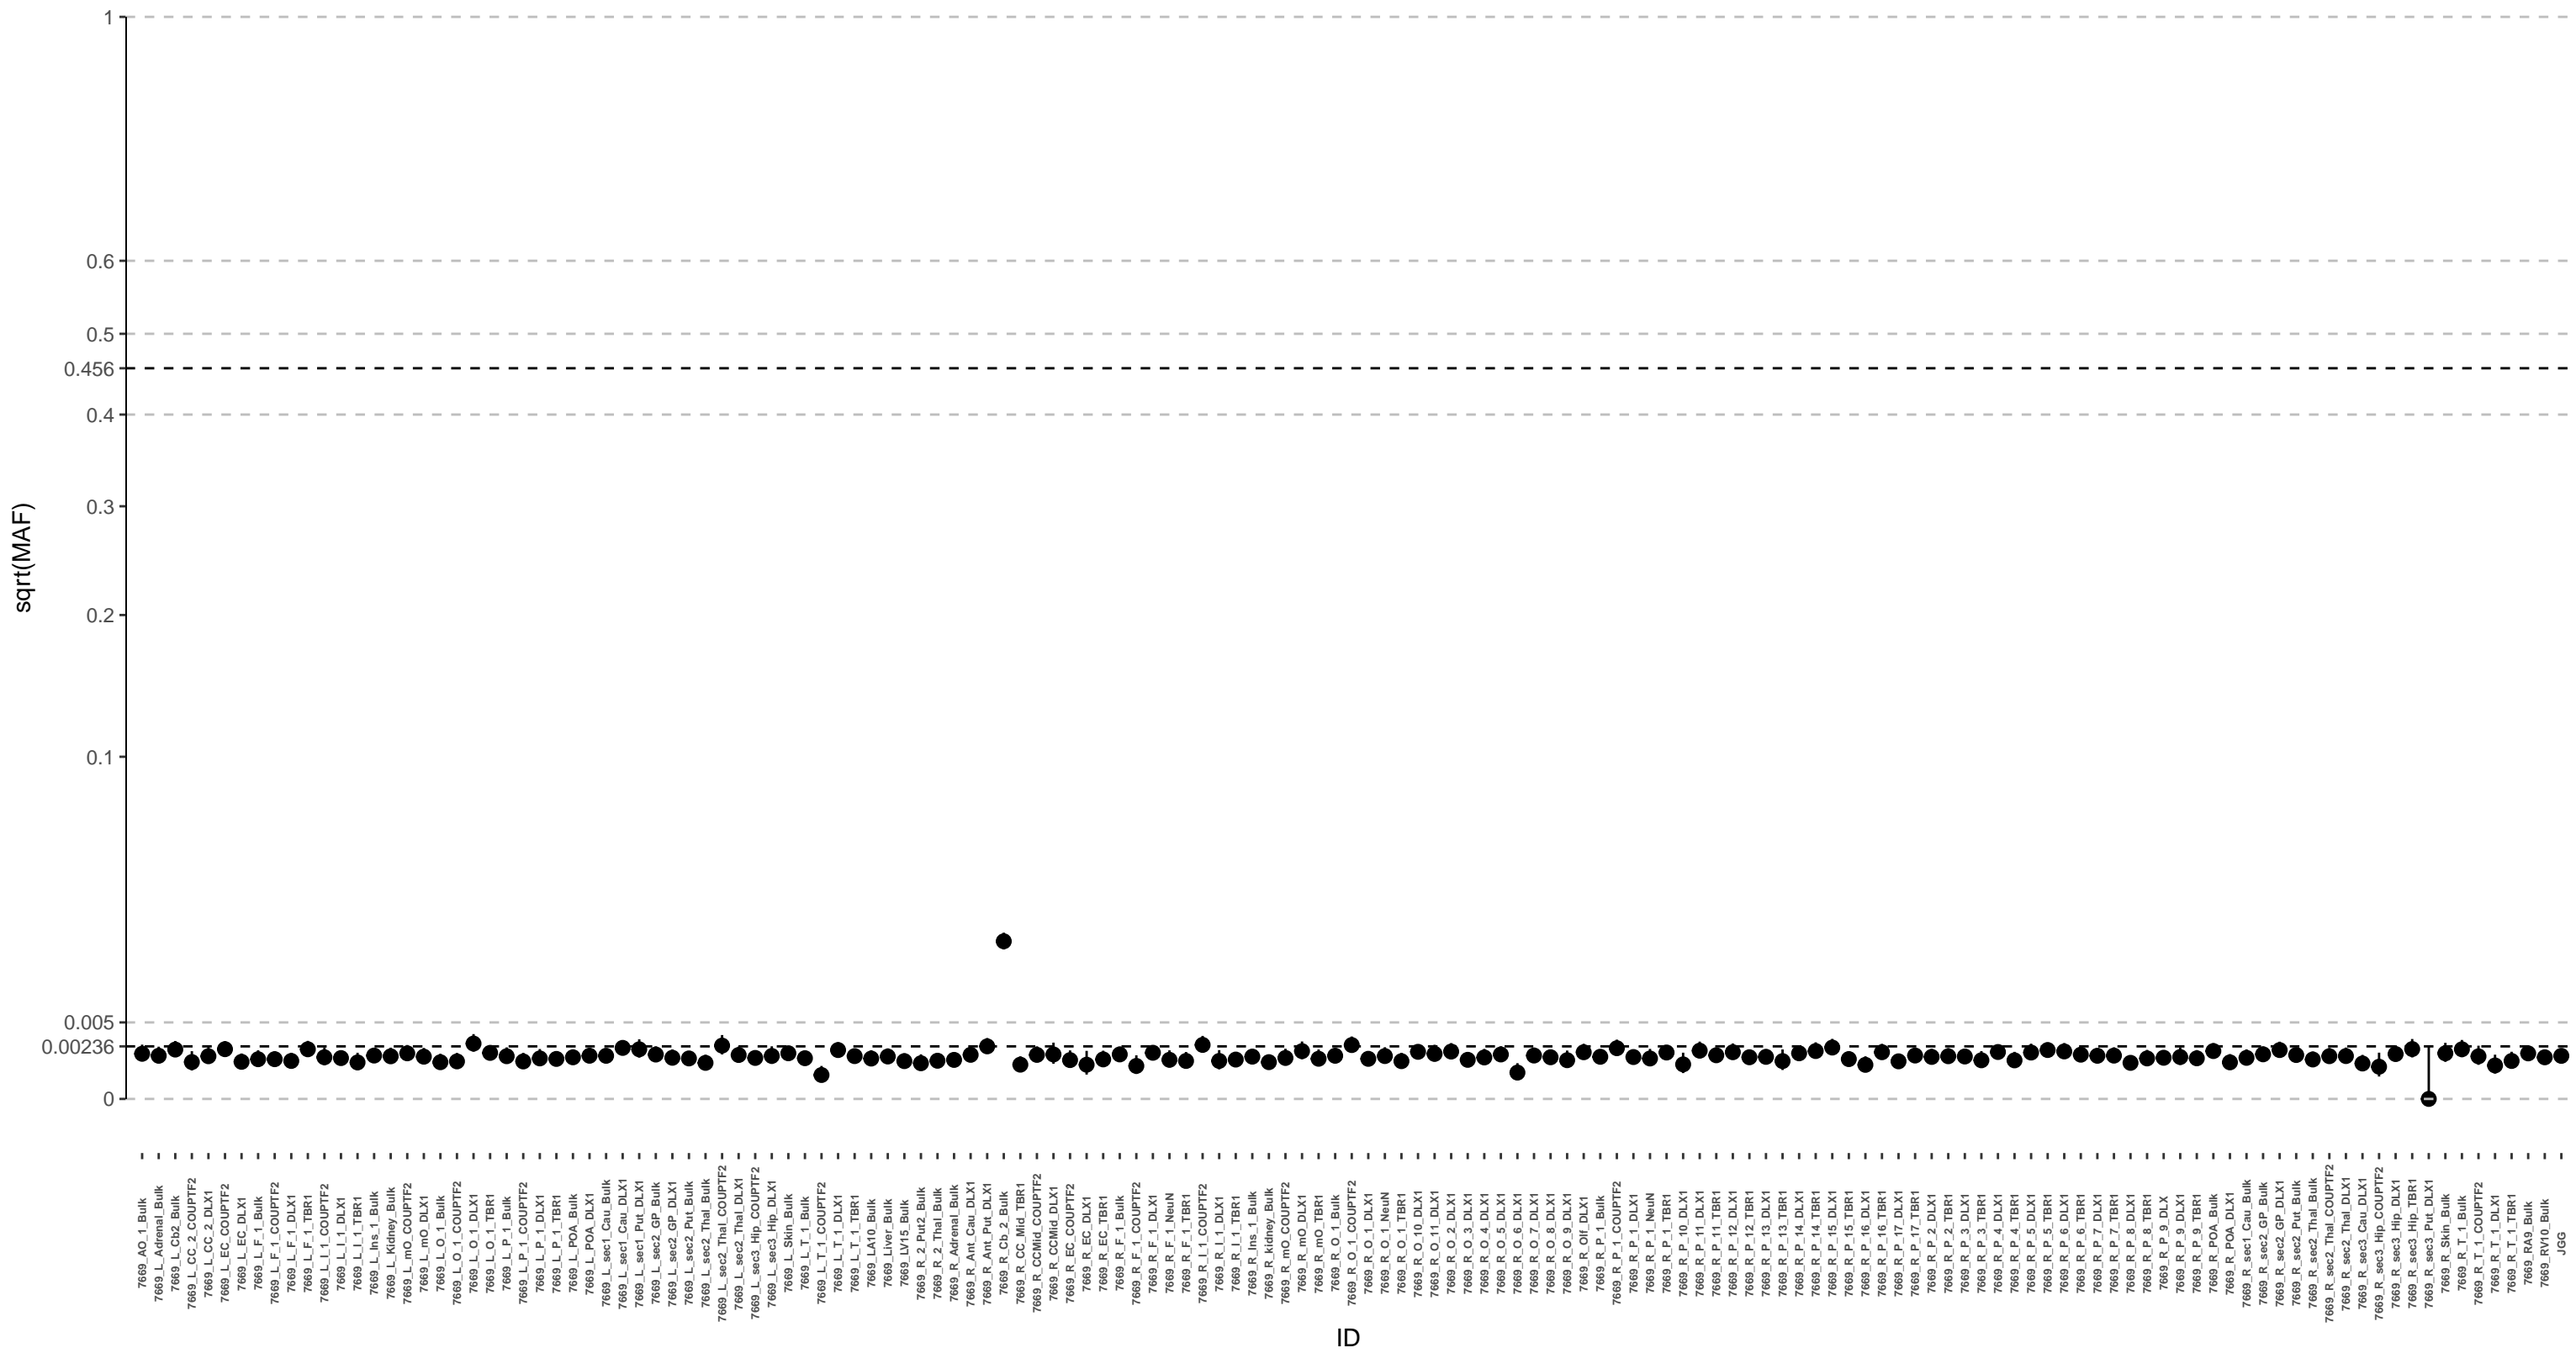

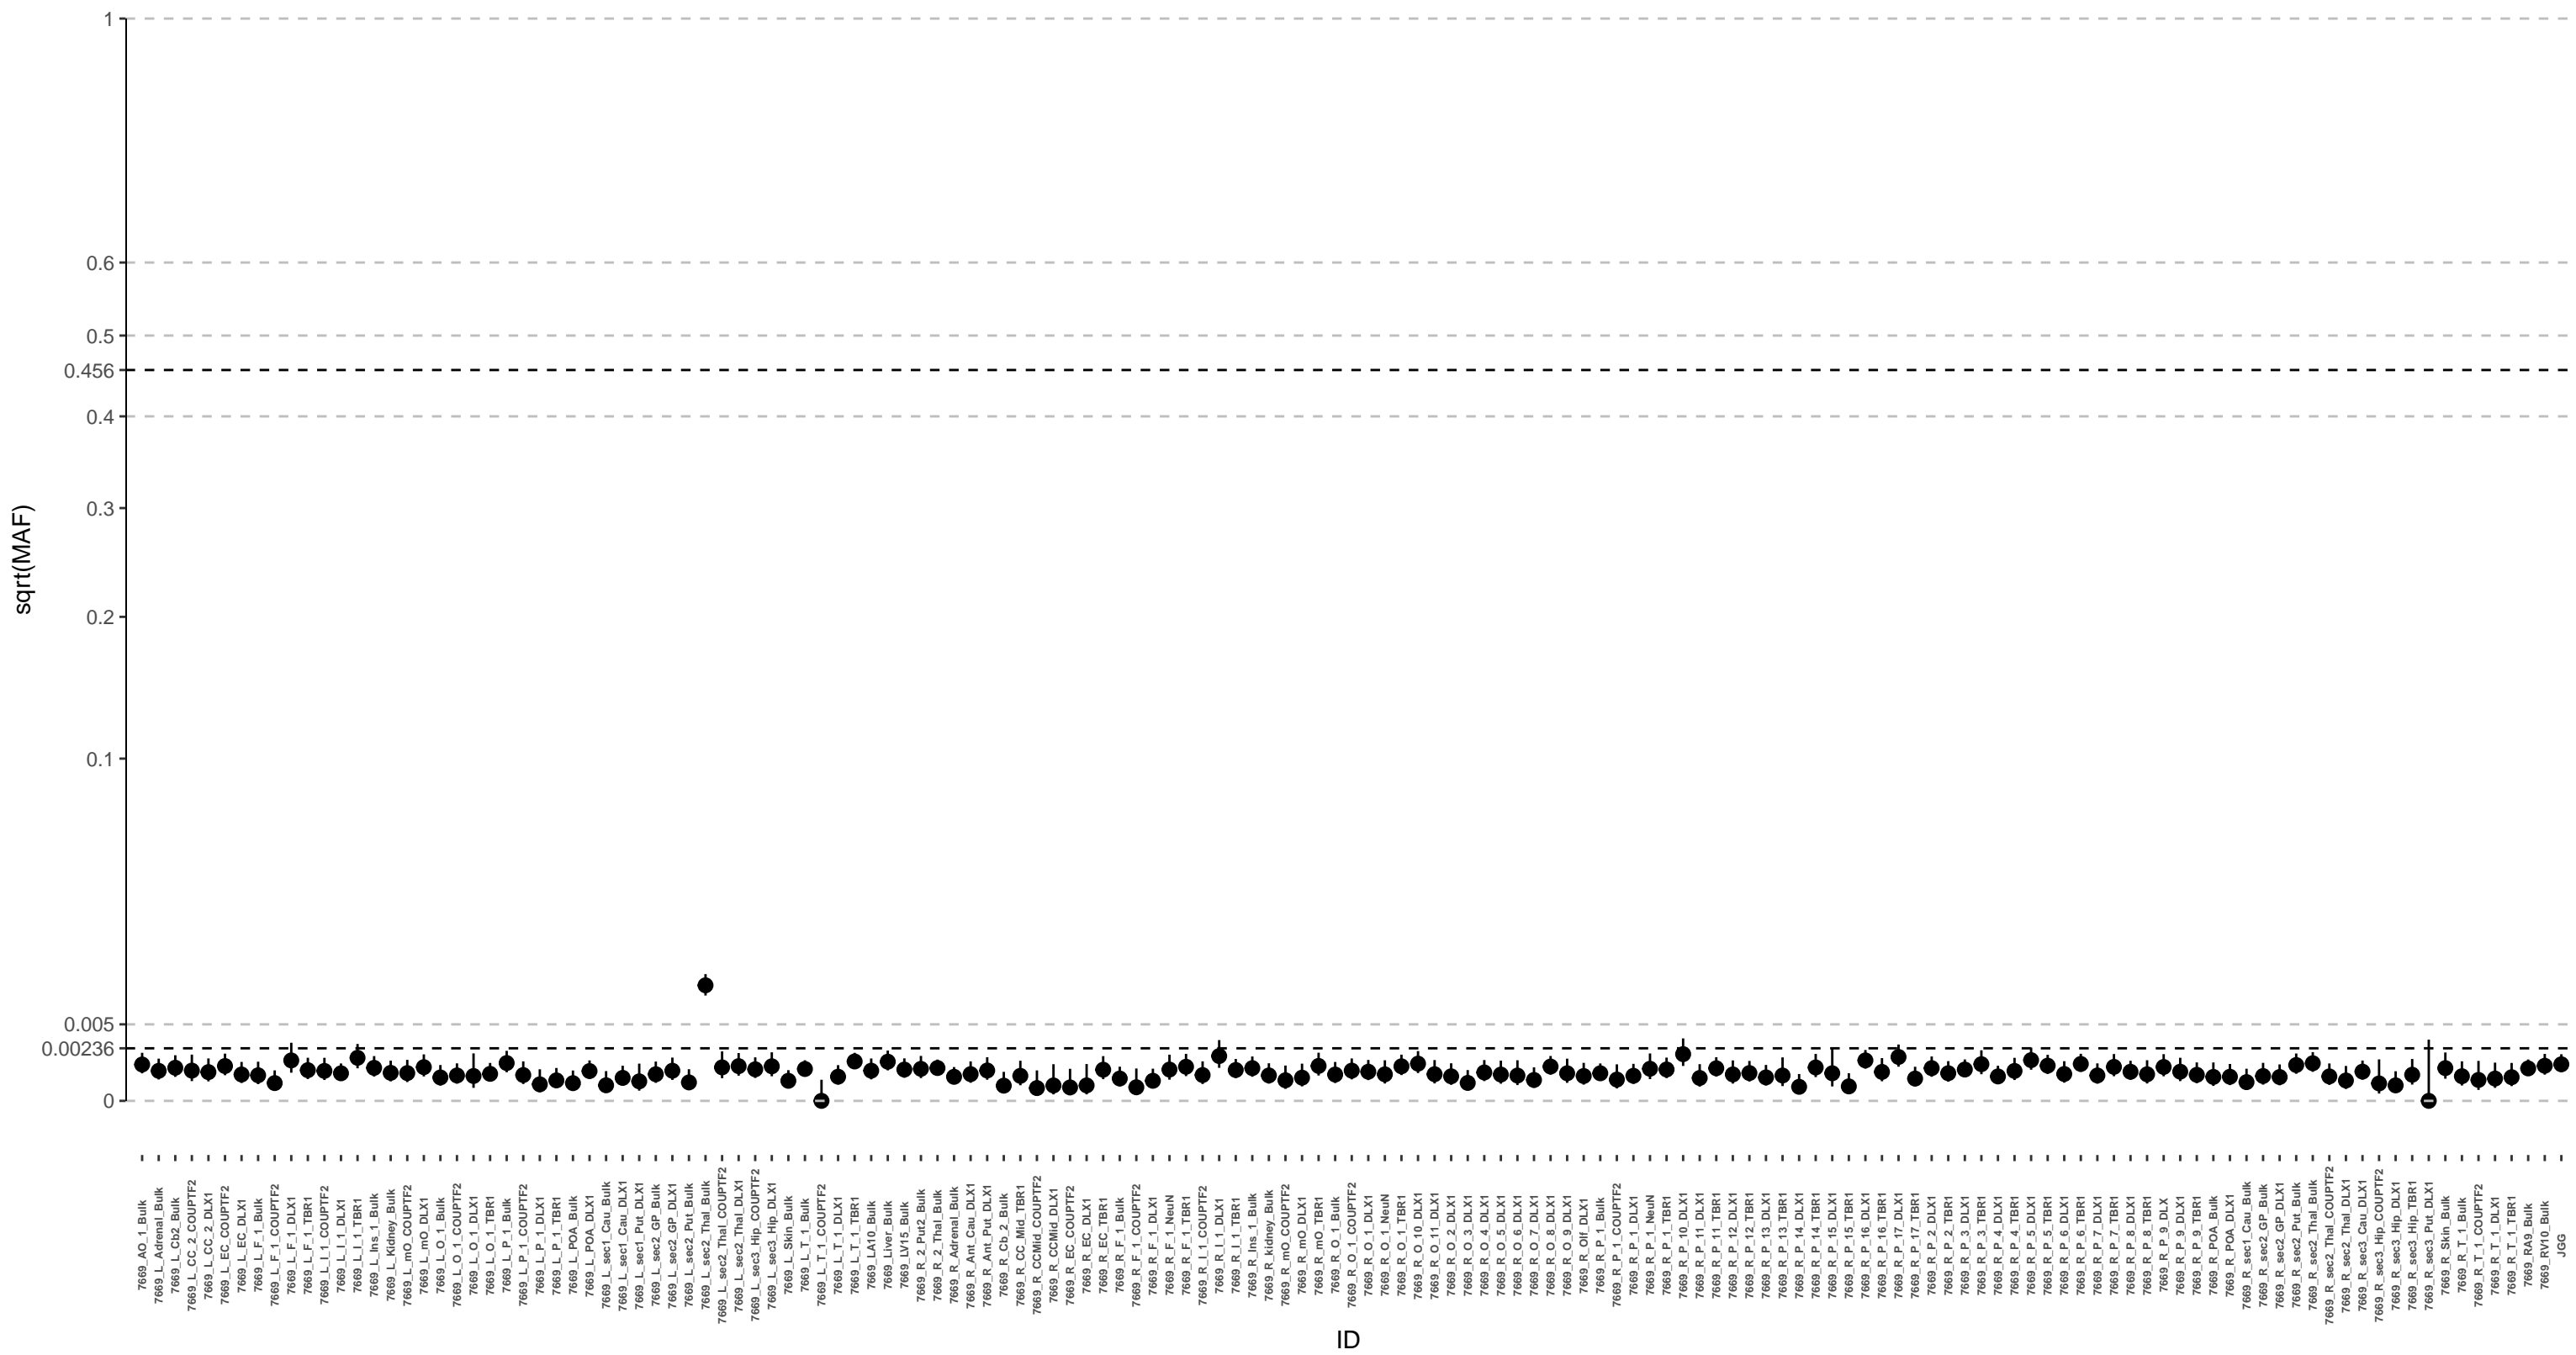



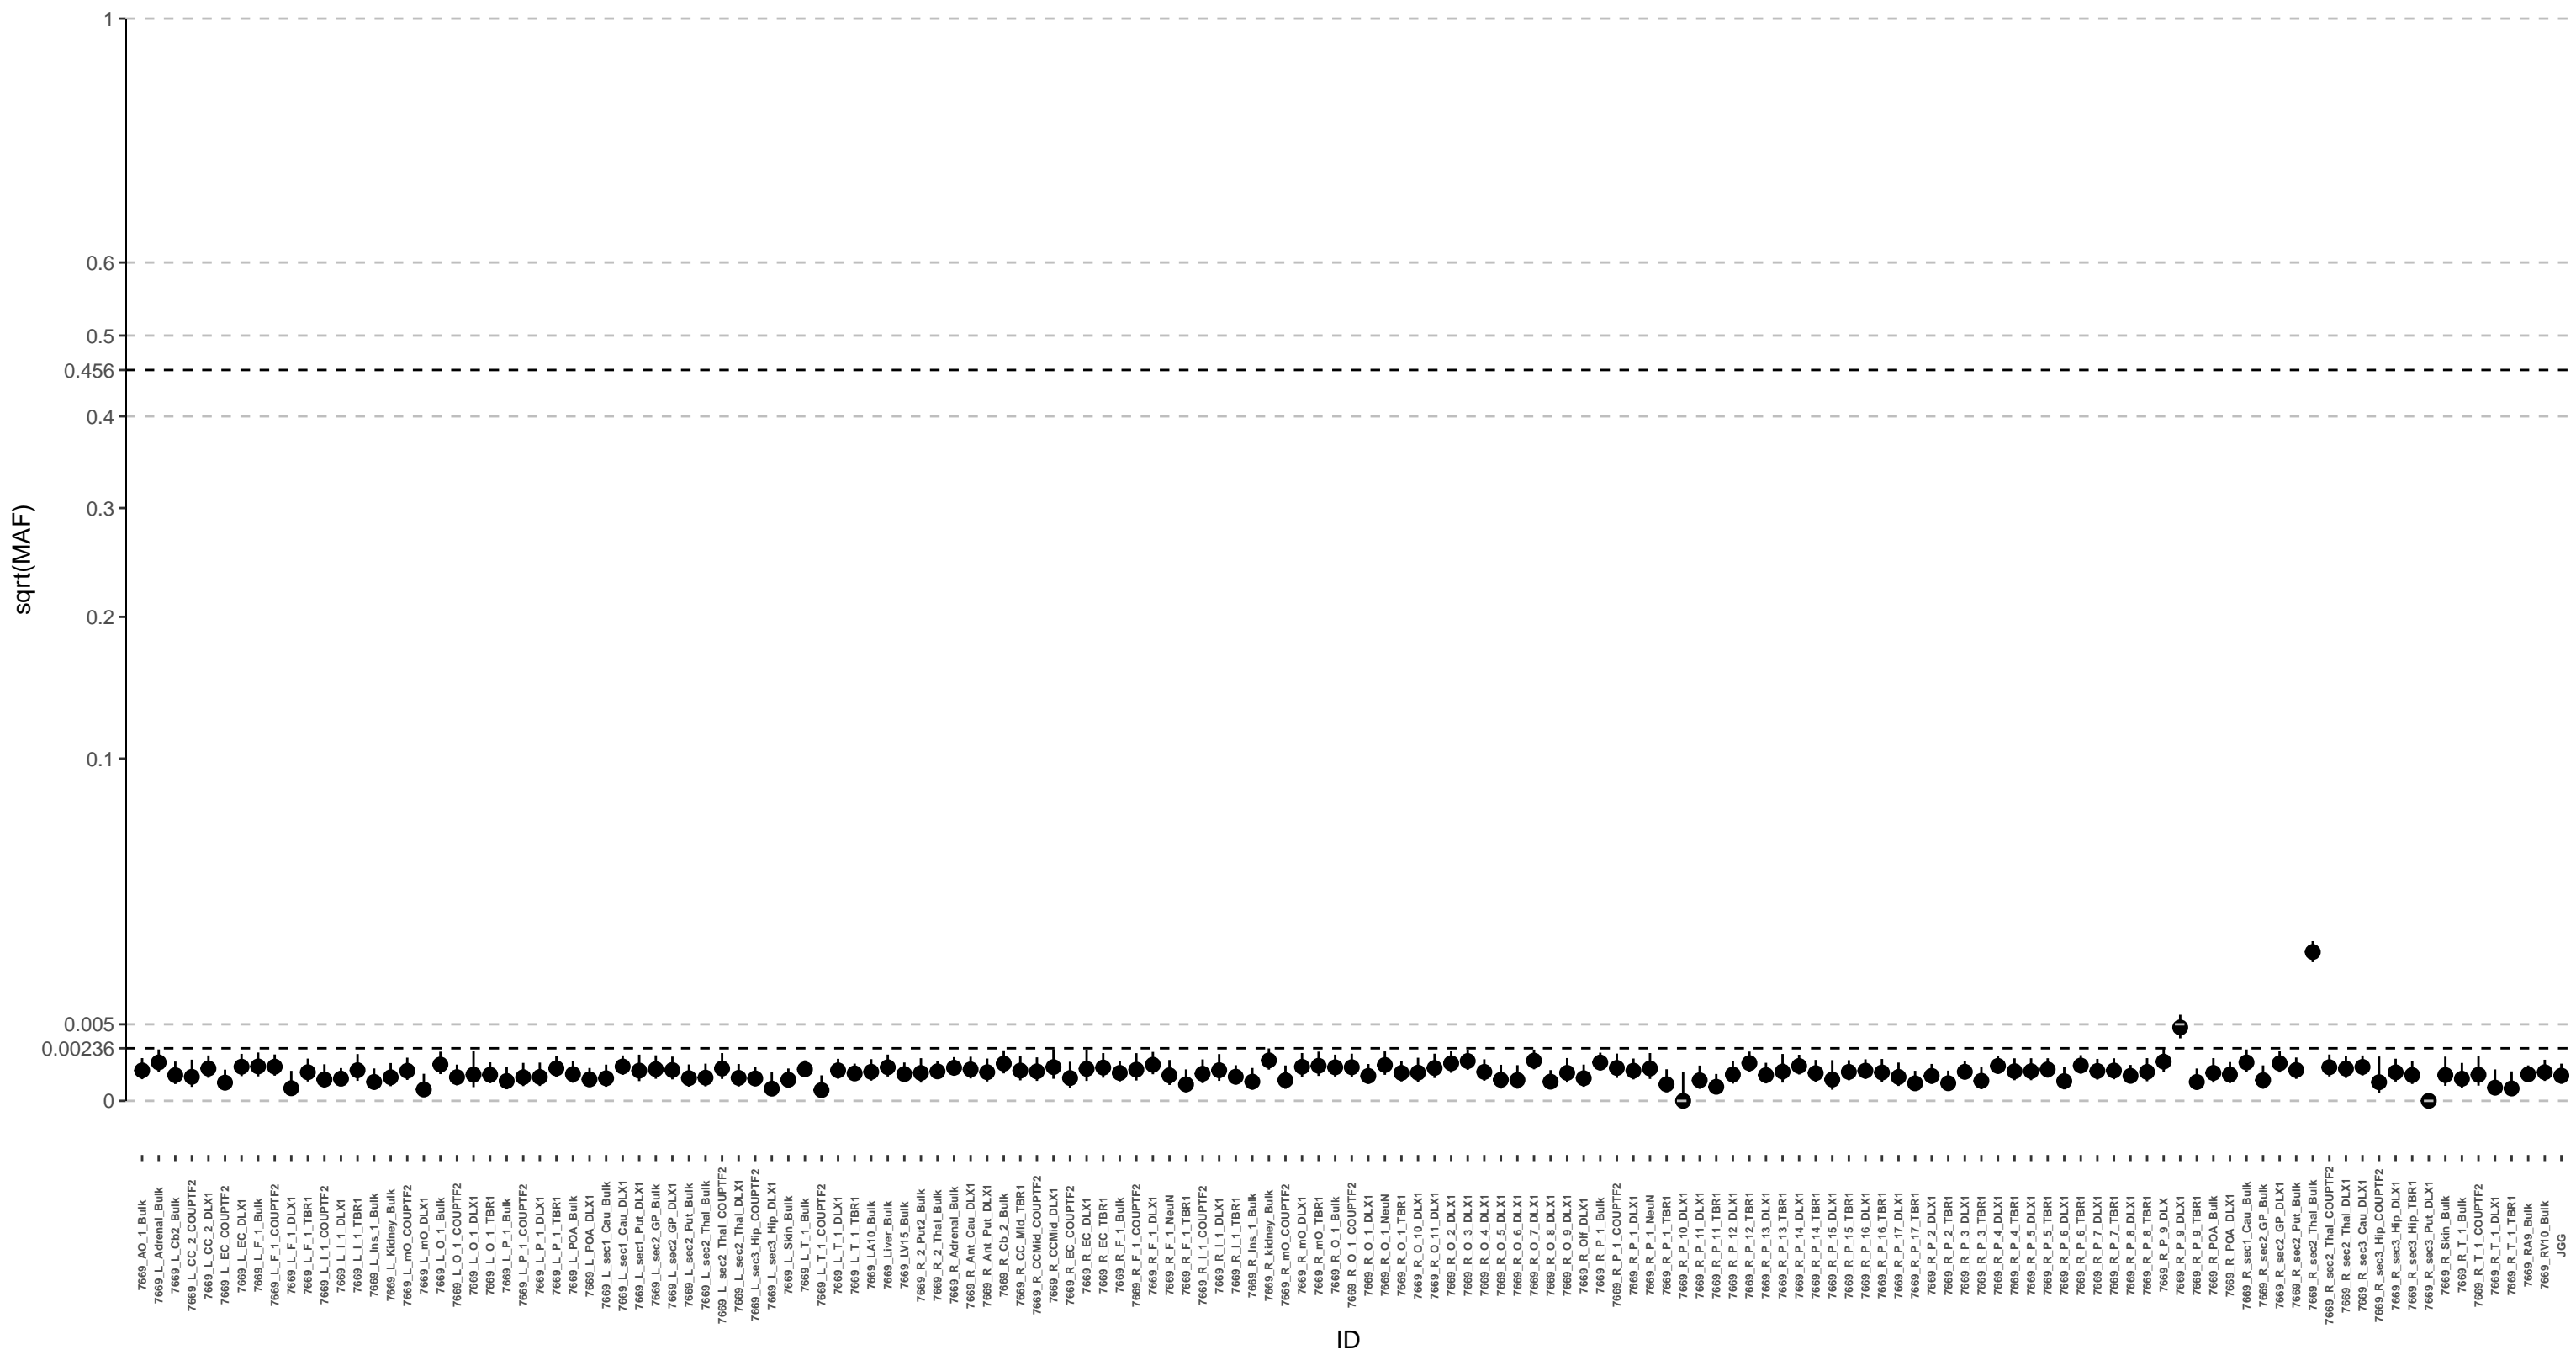

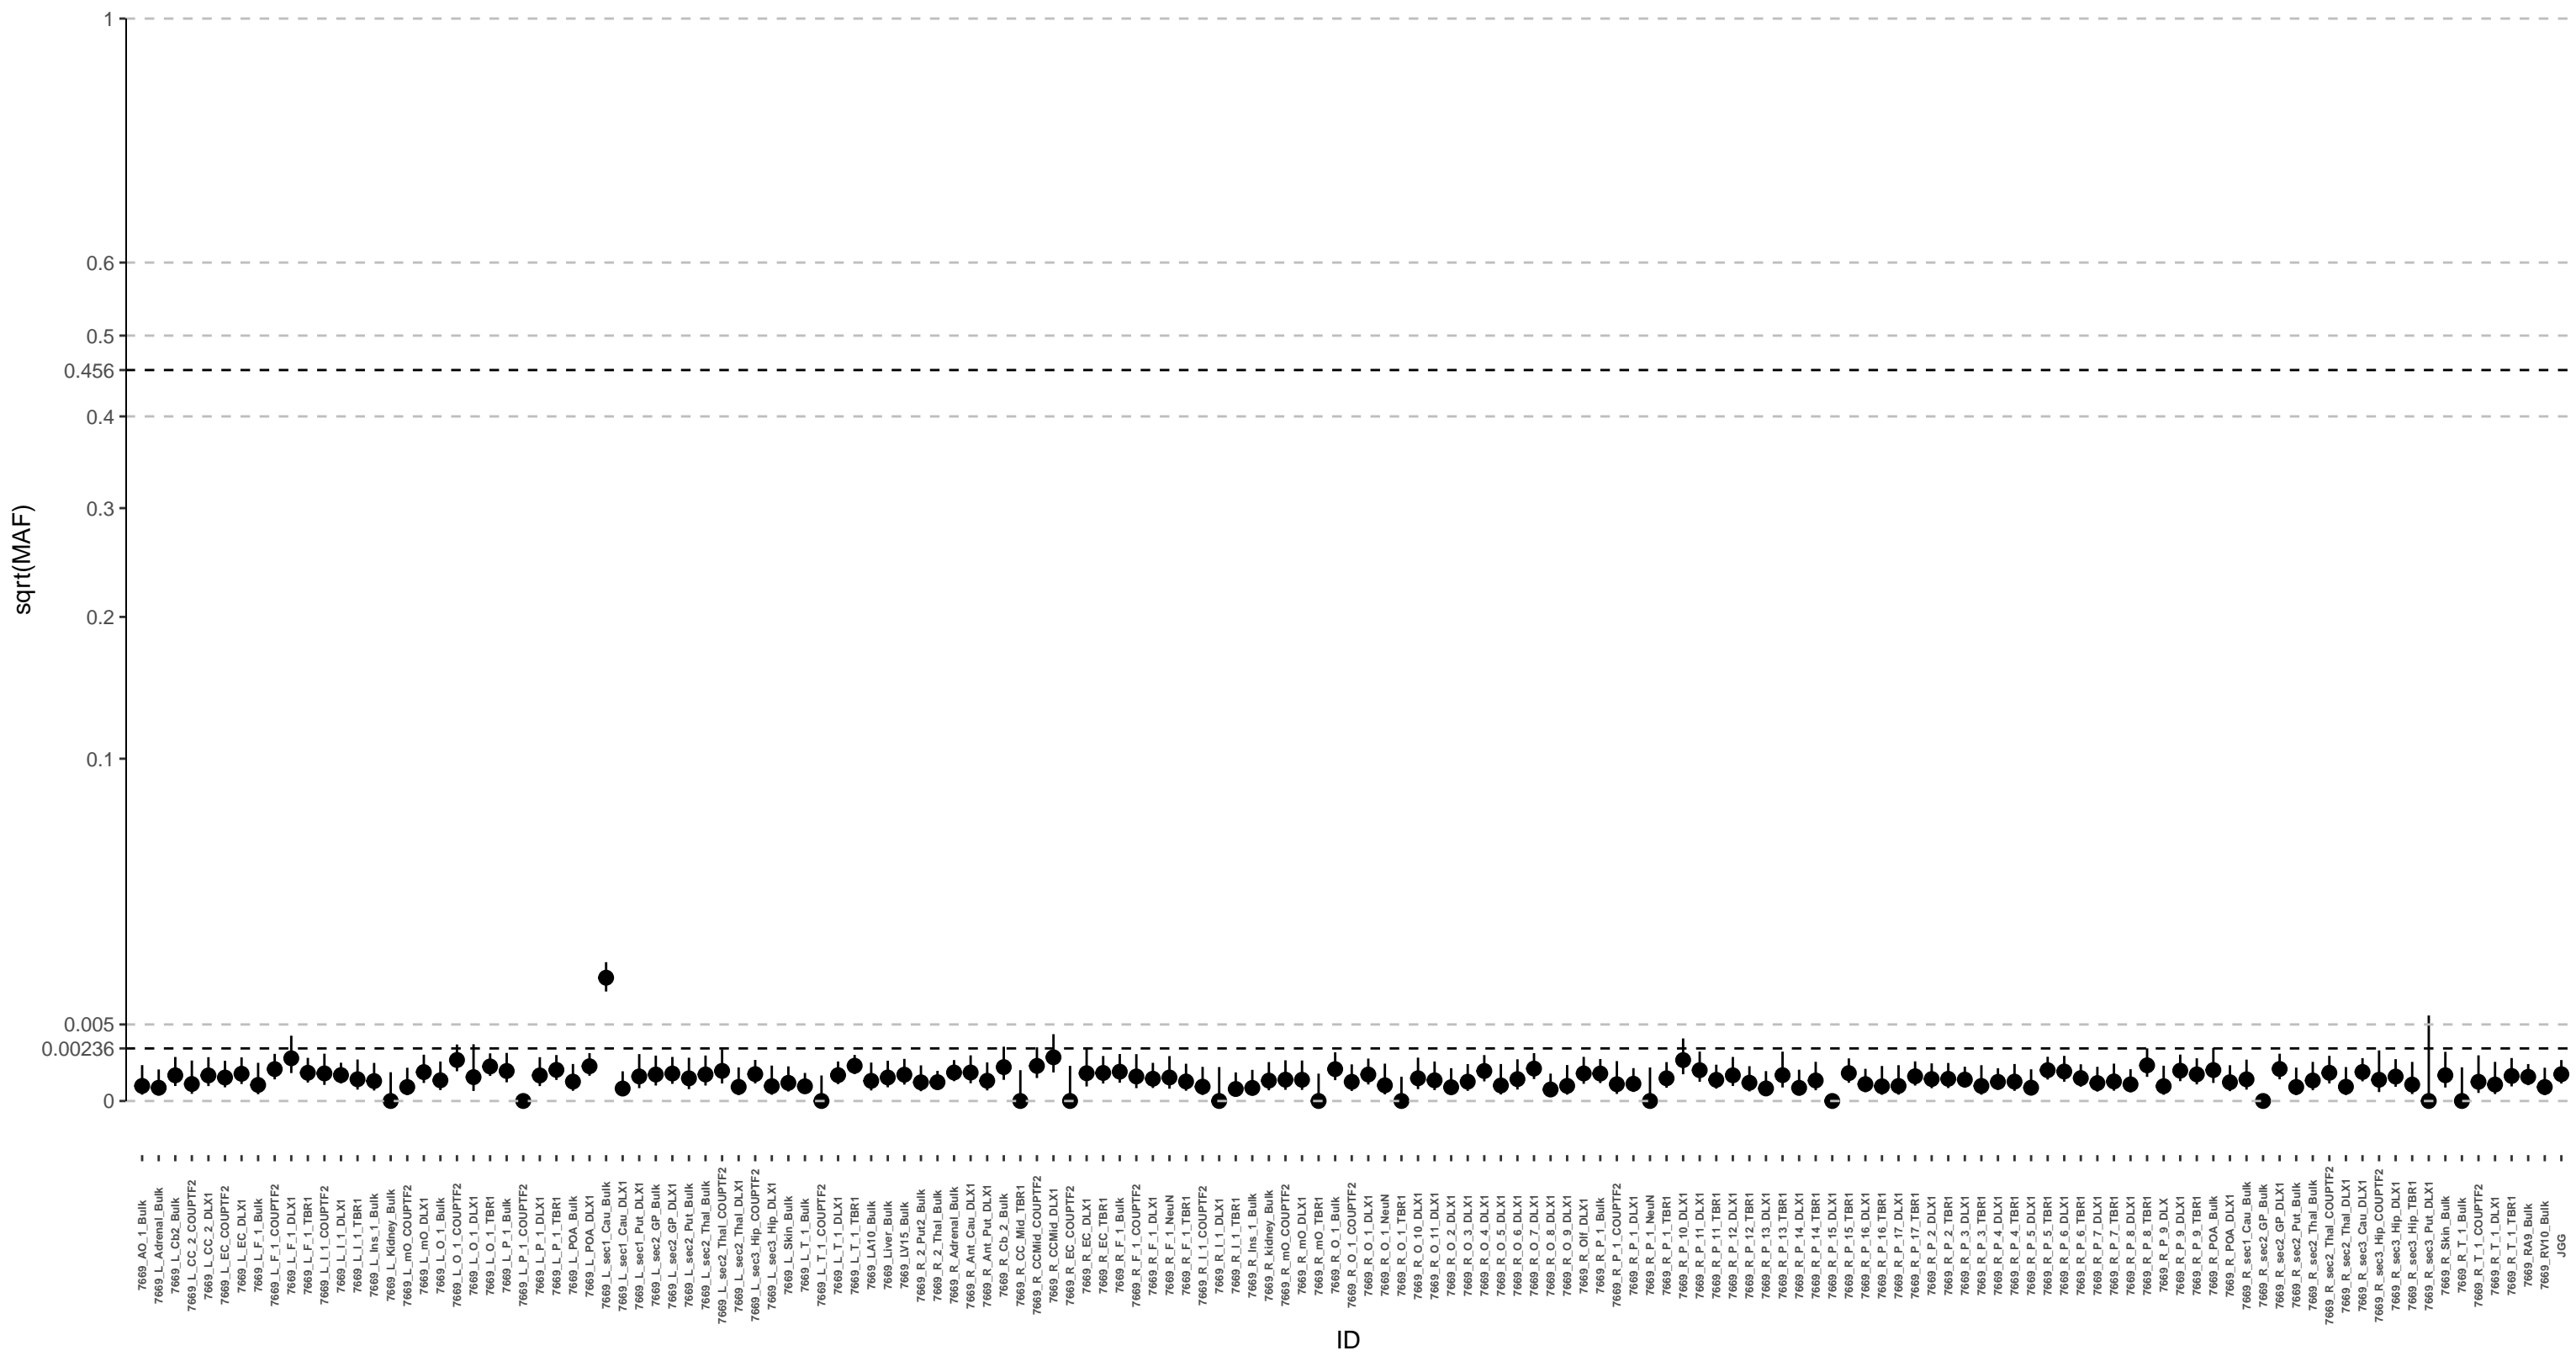

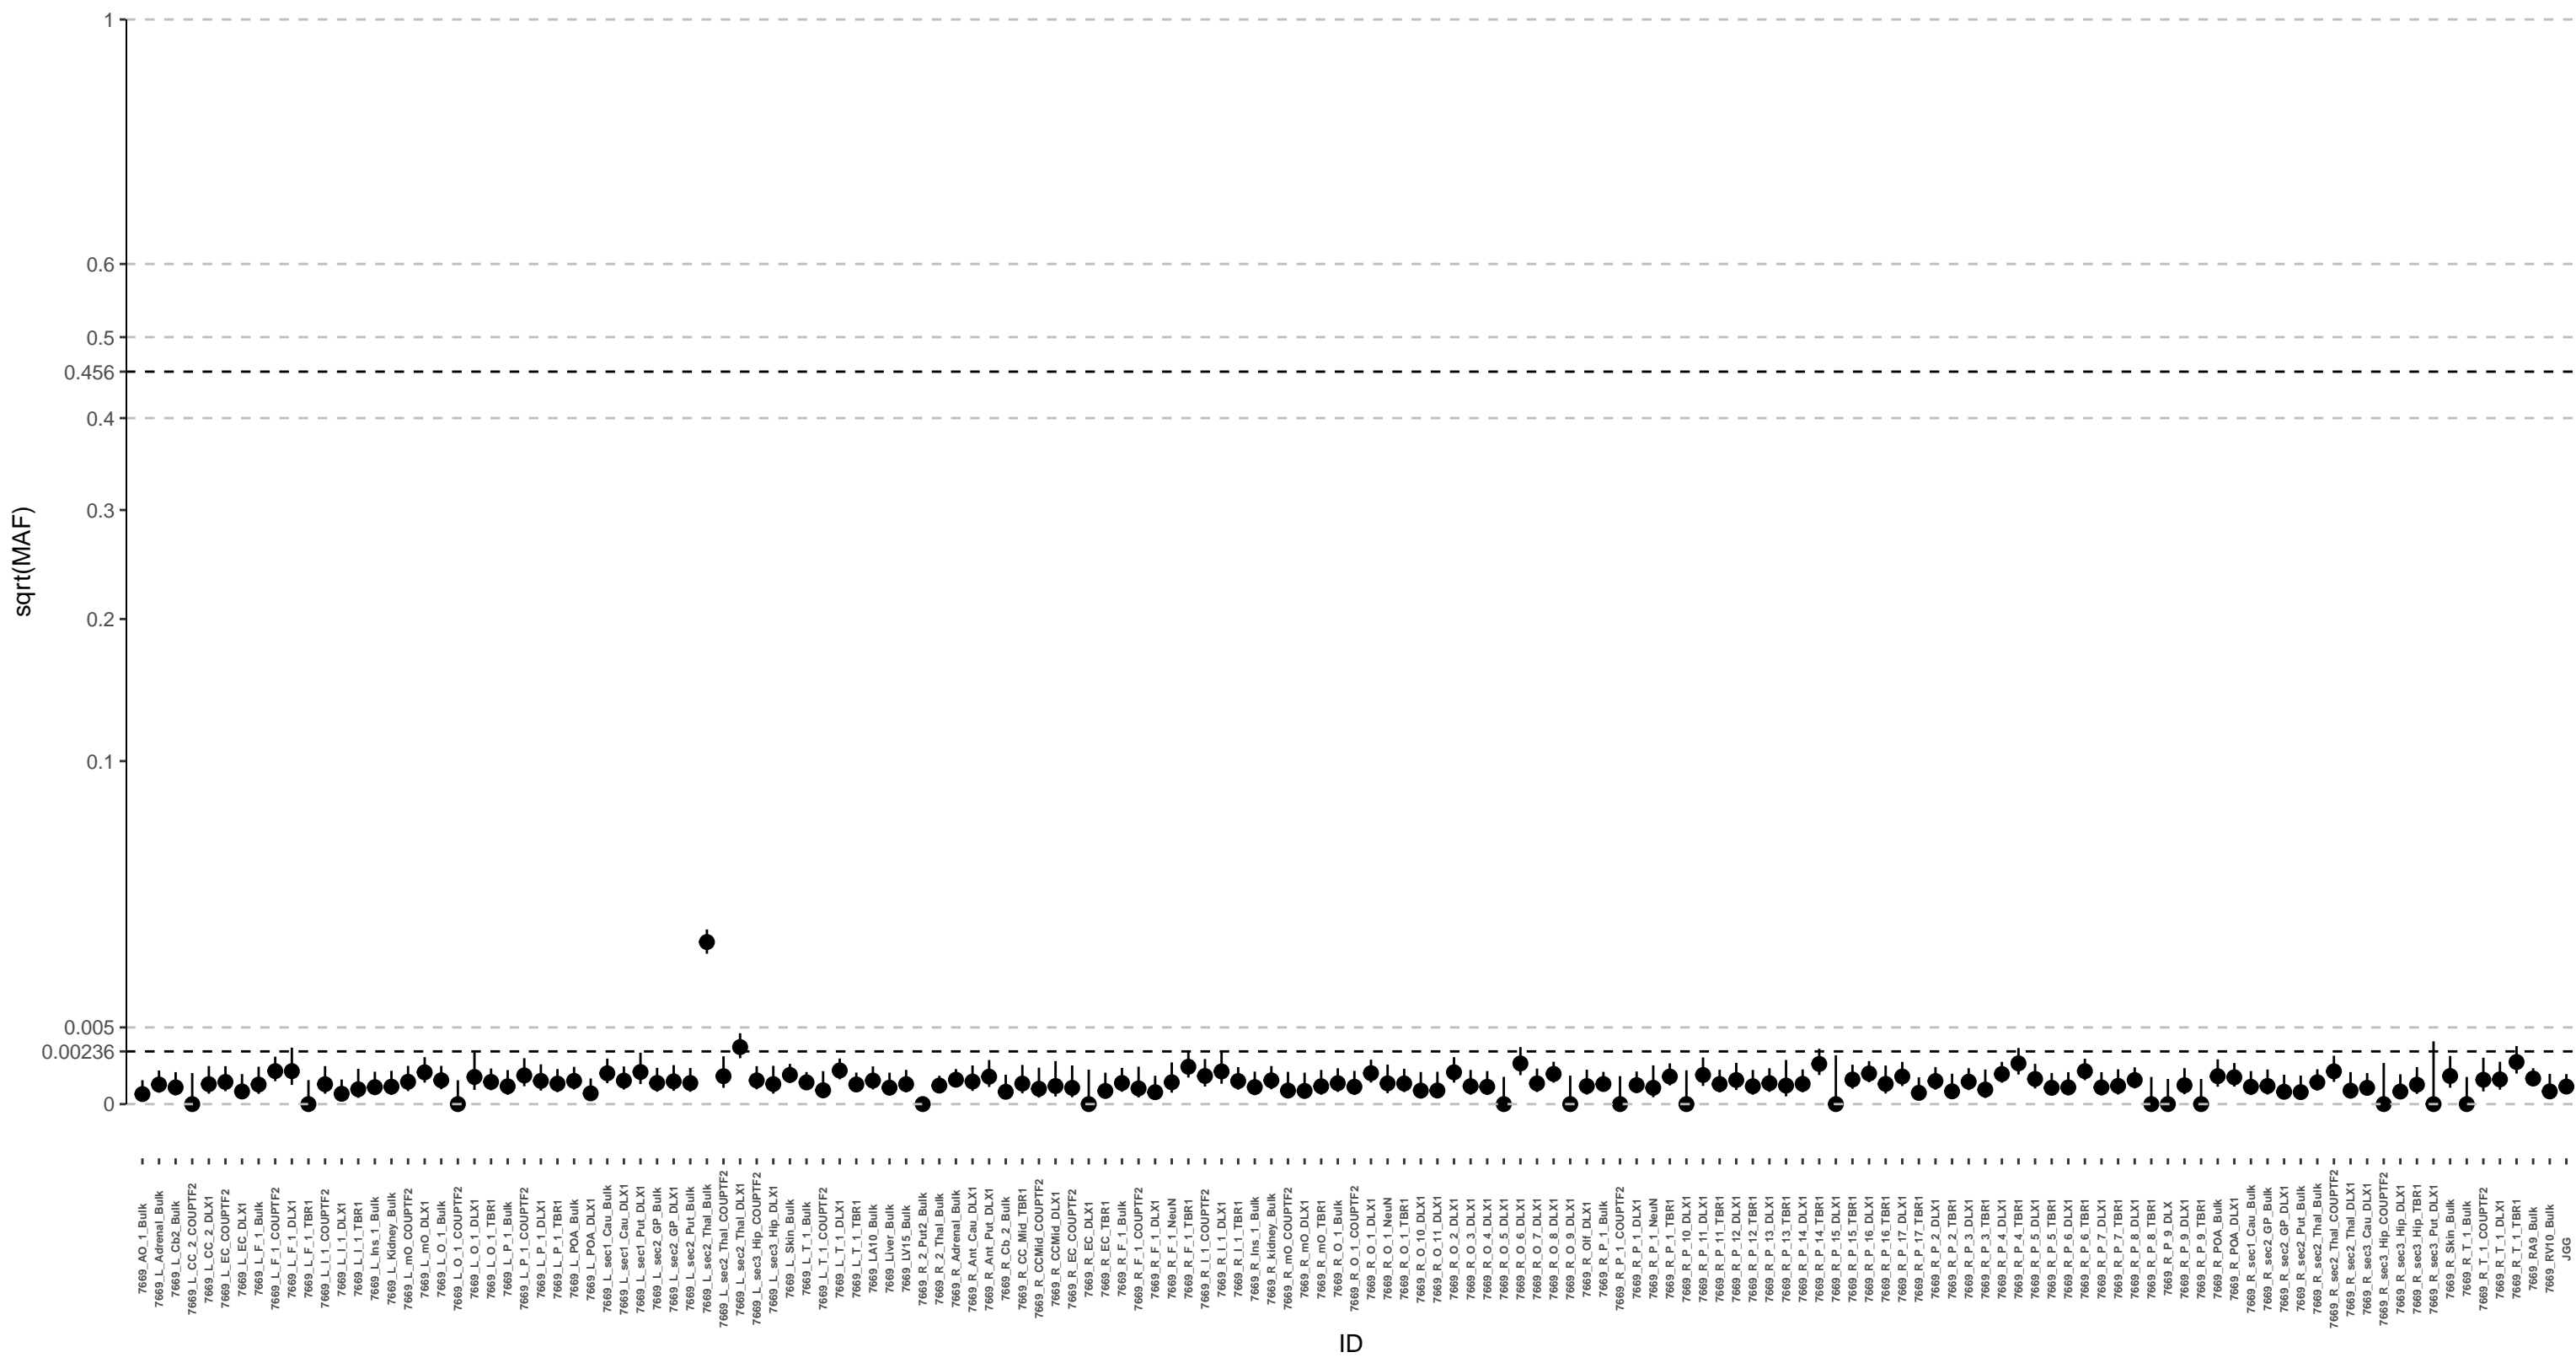

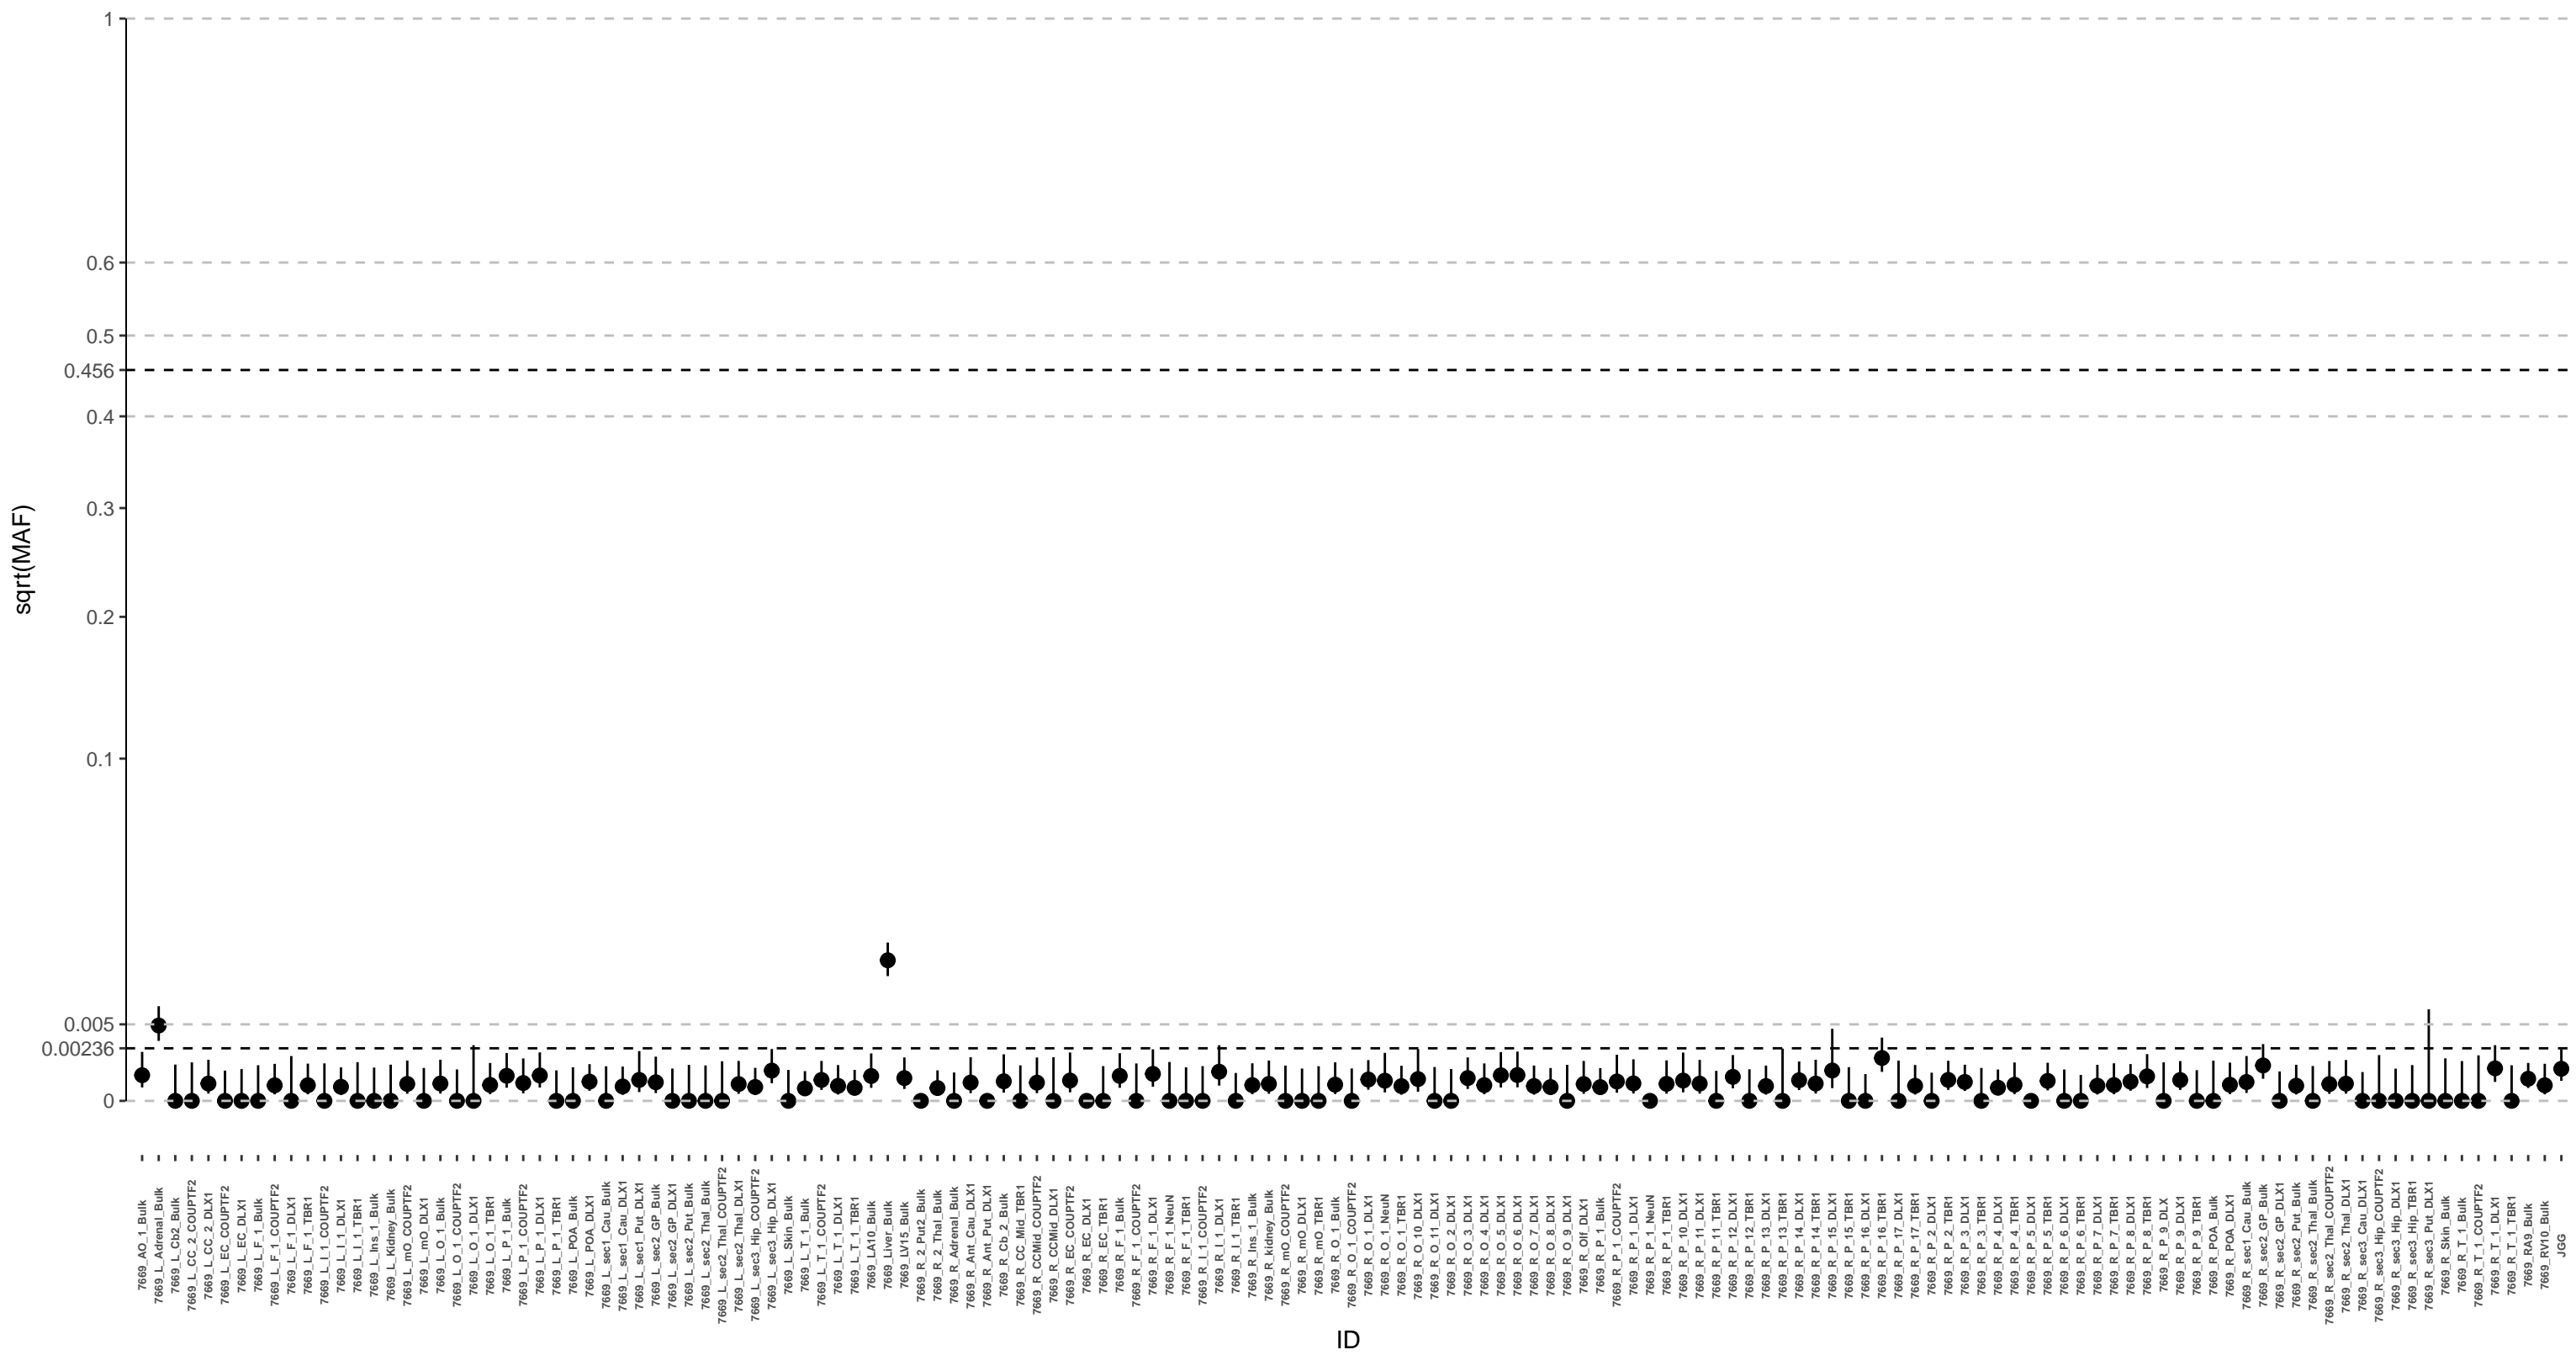

ID05 1-98301896-T-C

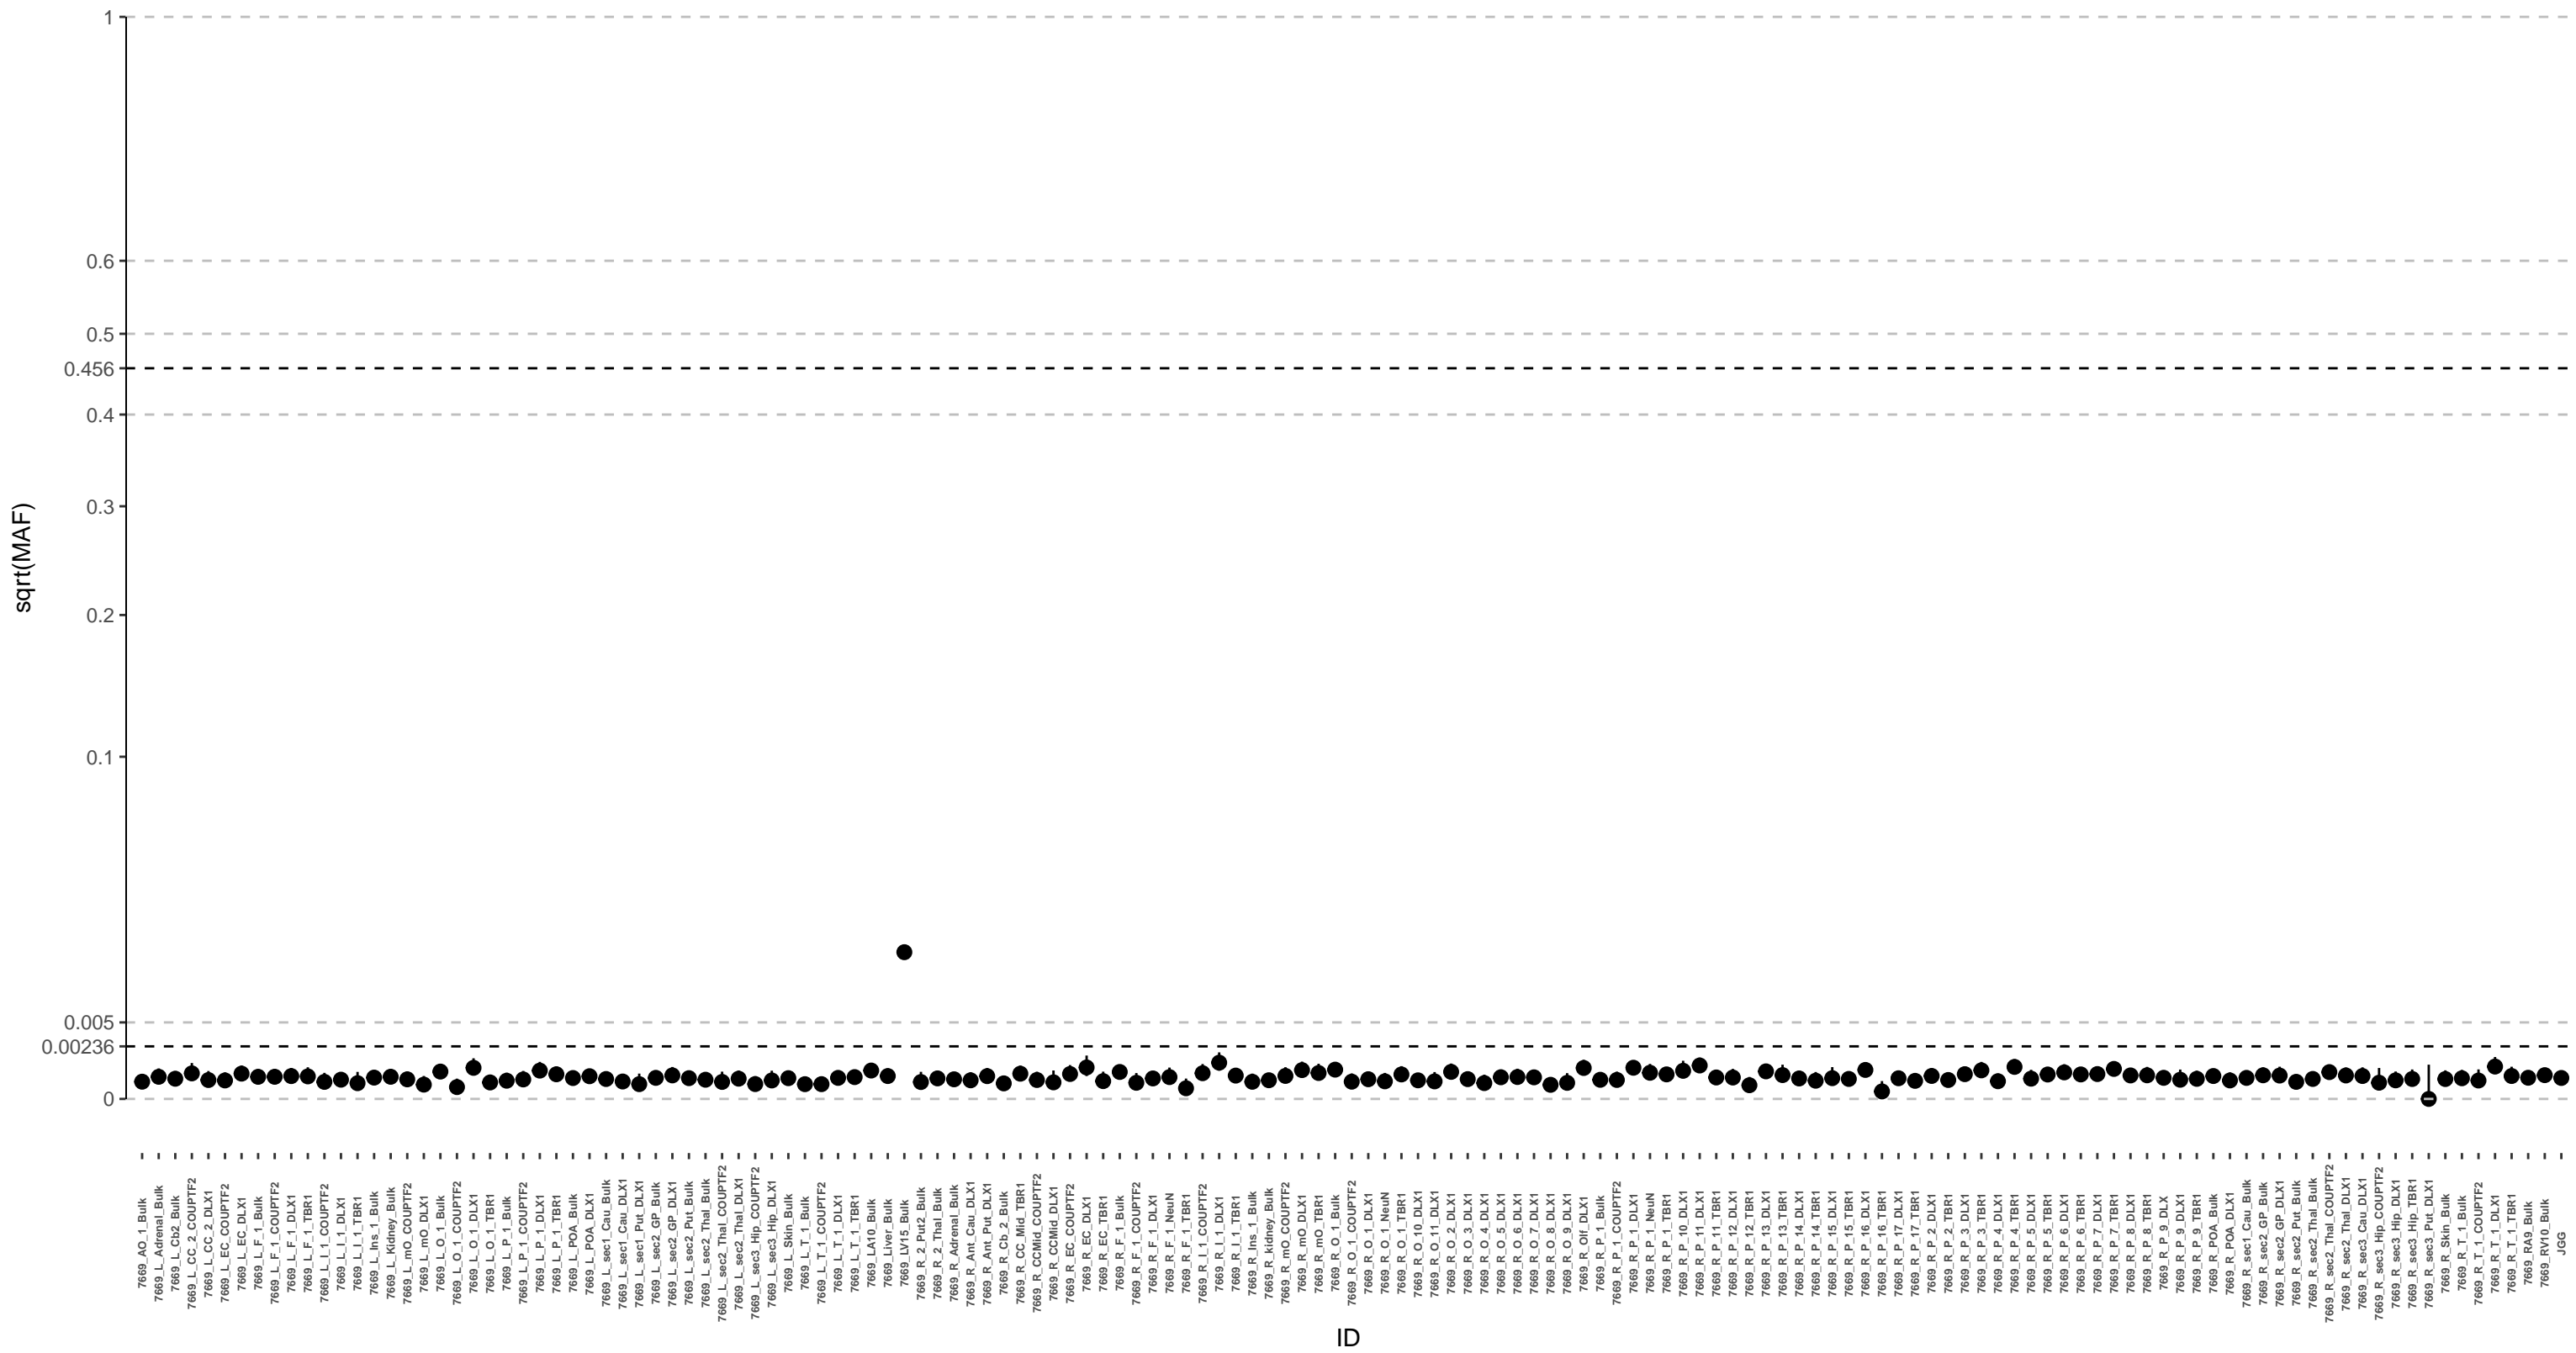

ID05 10-105764174-A-G

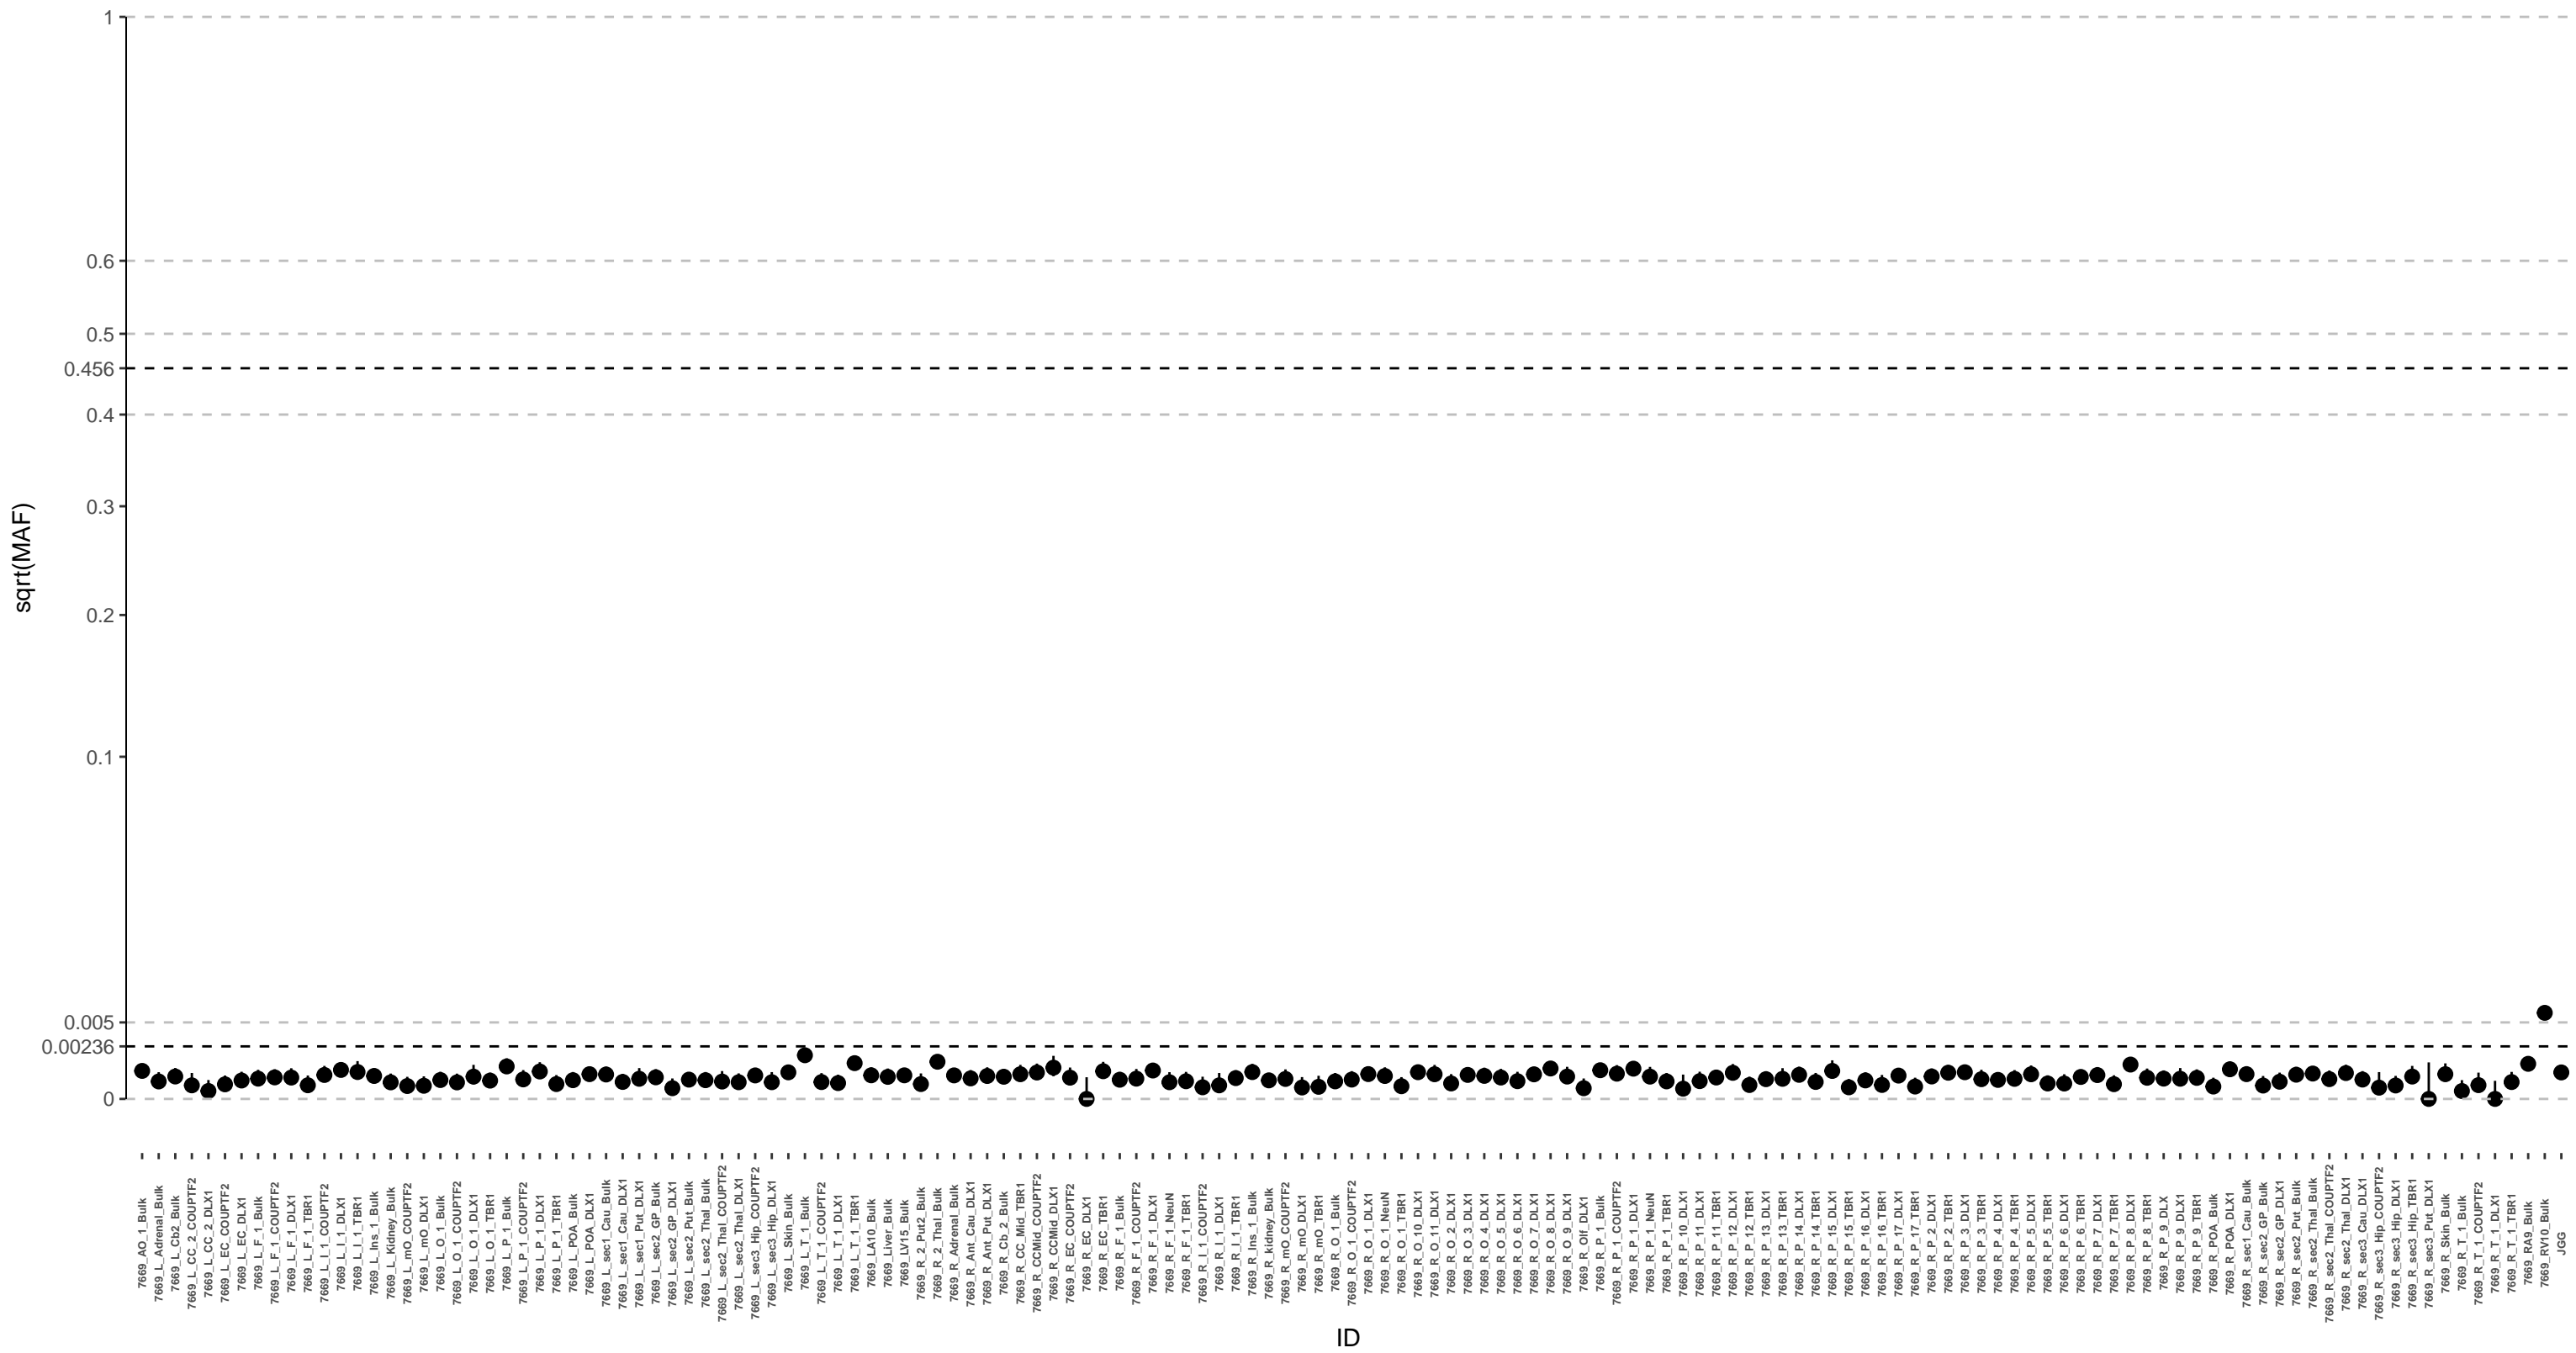

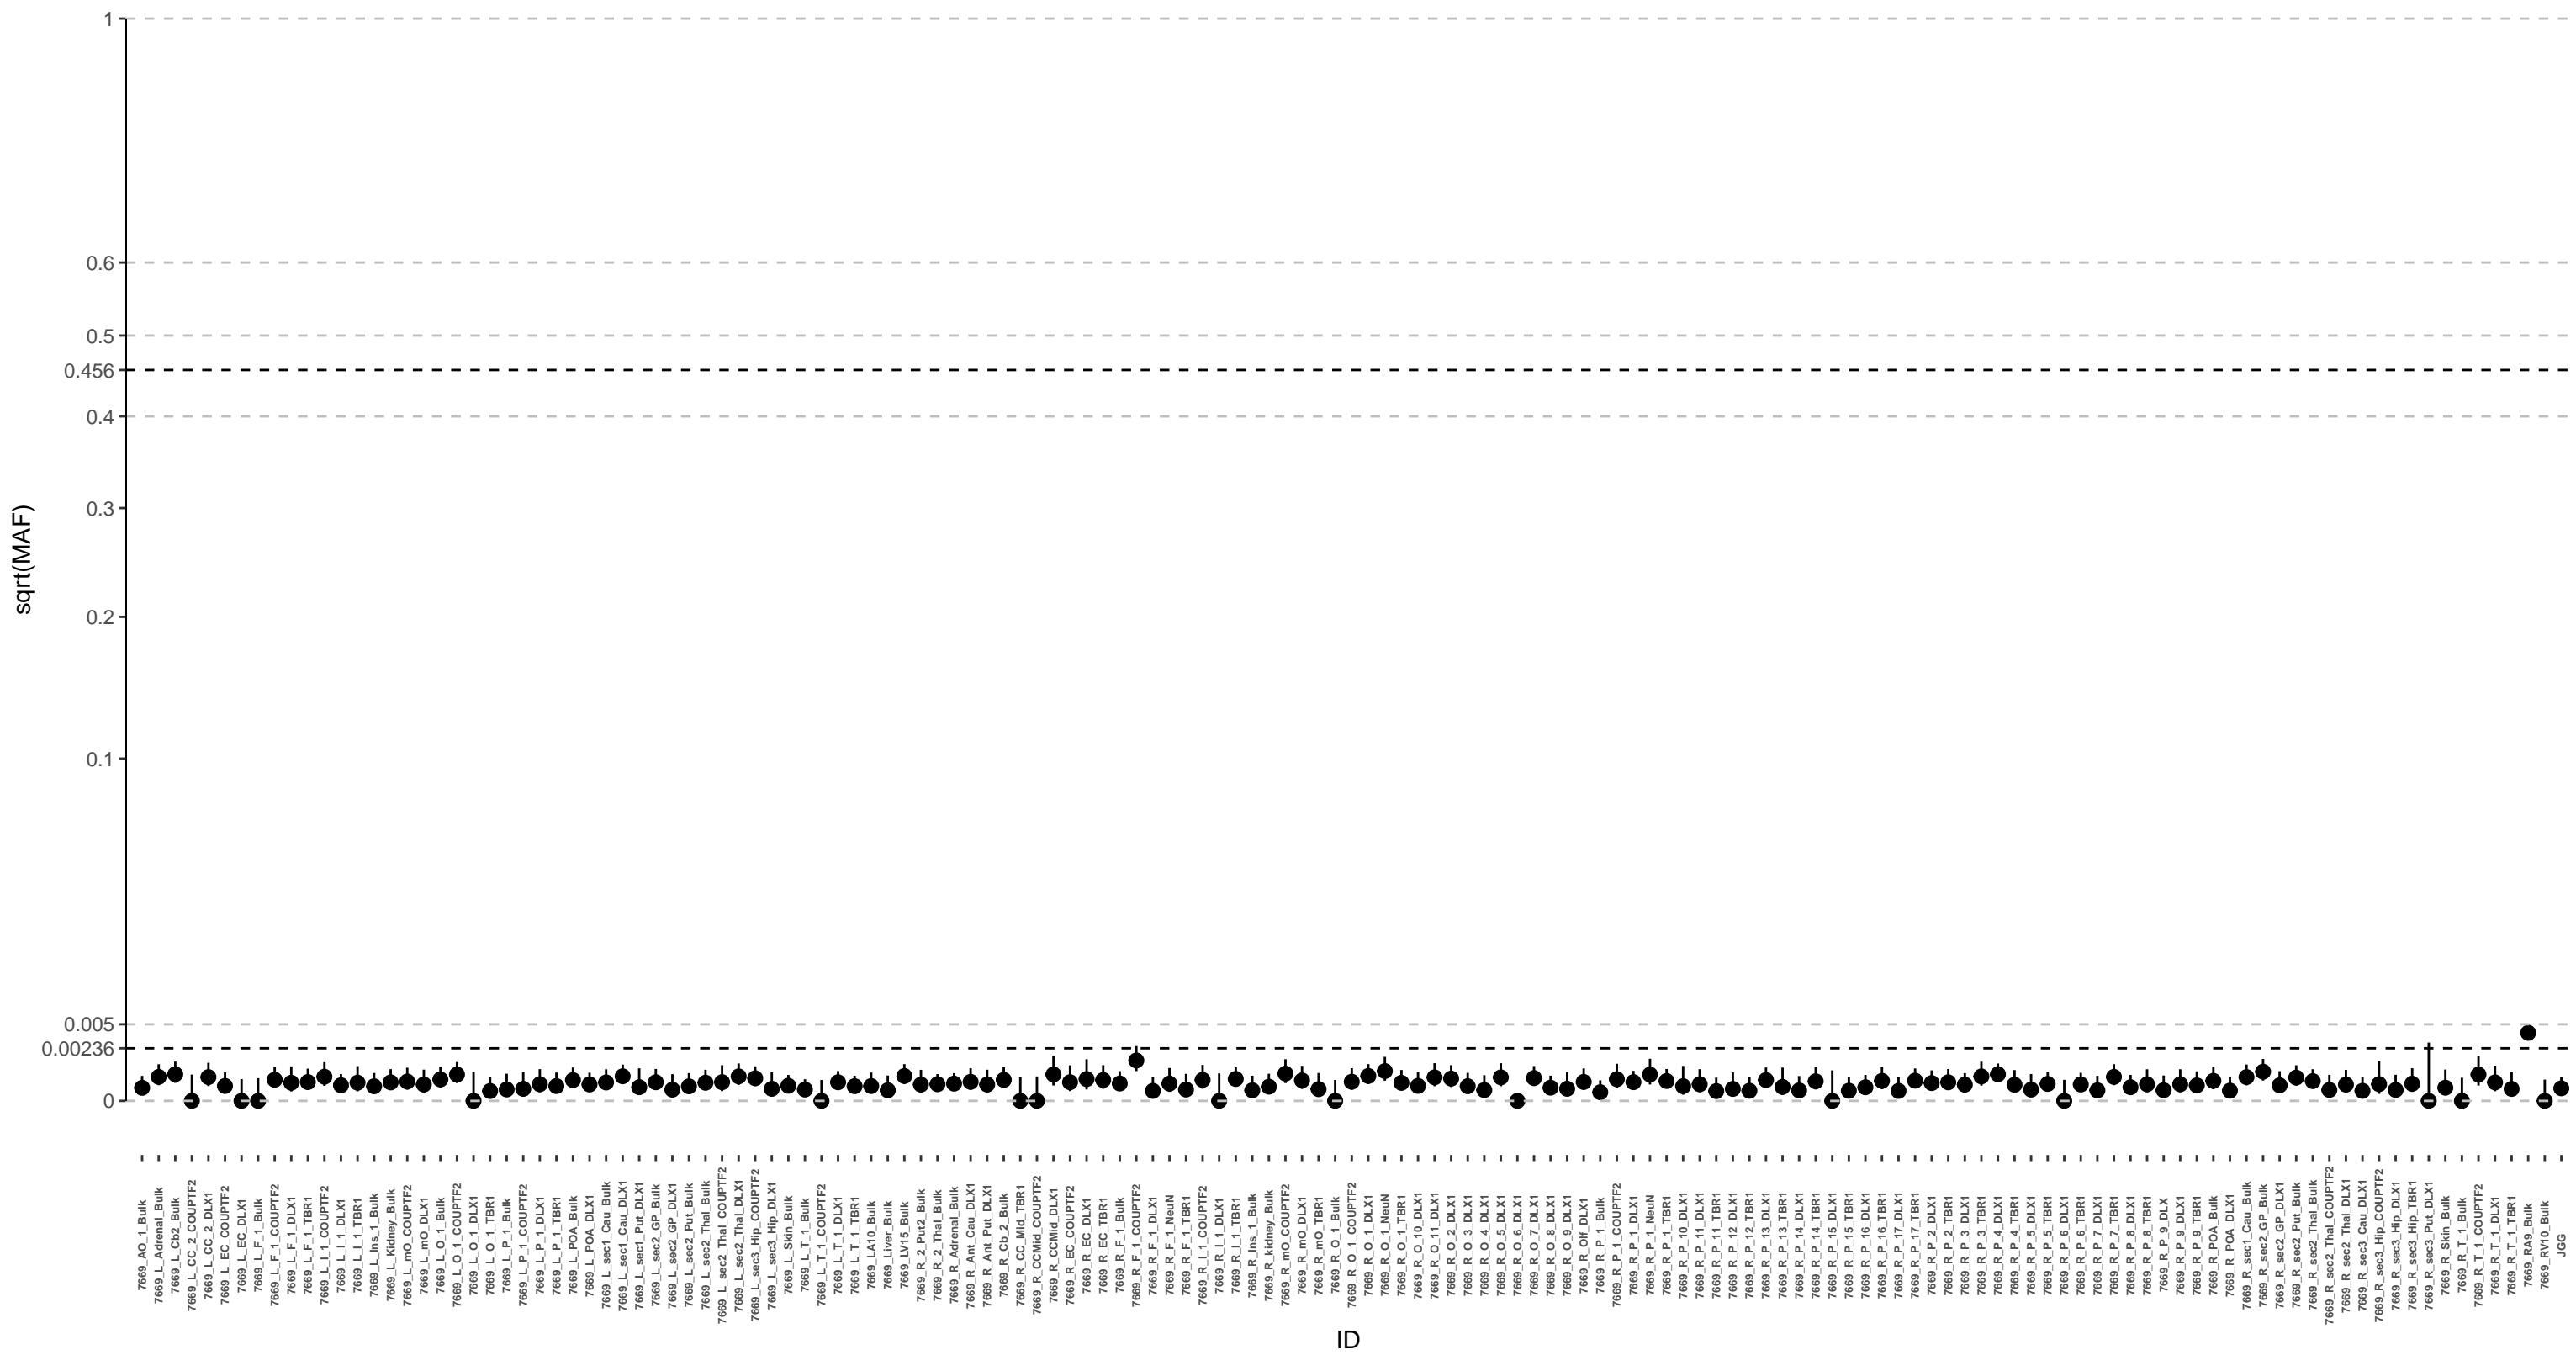

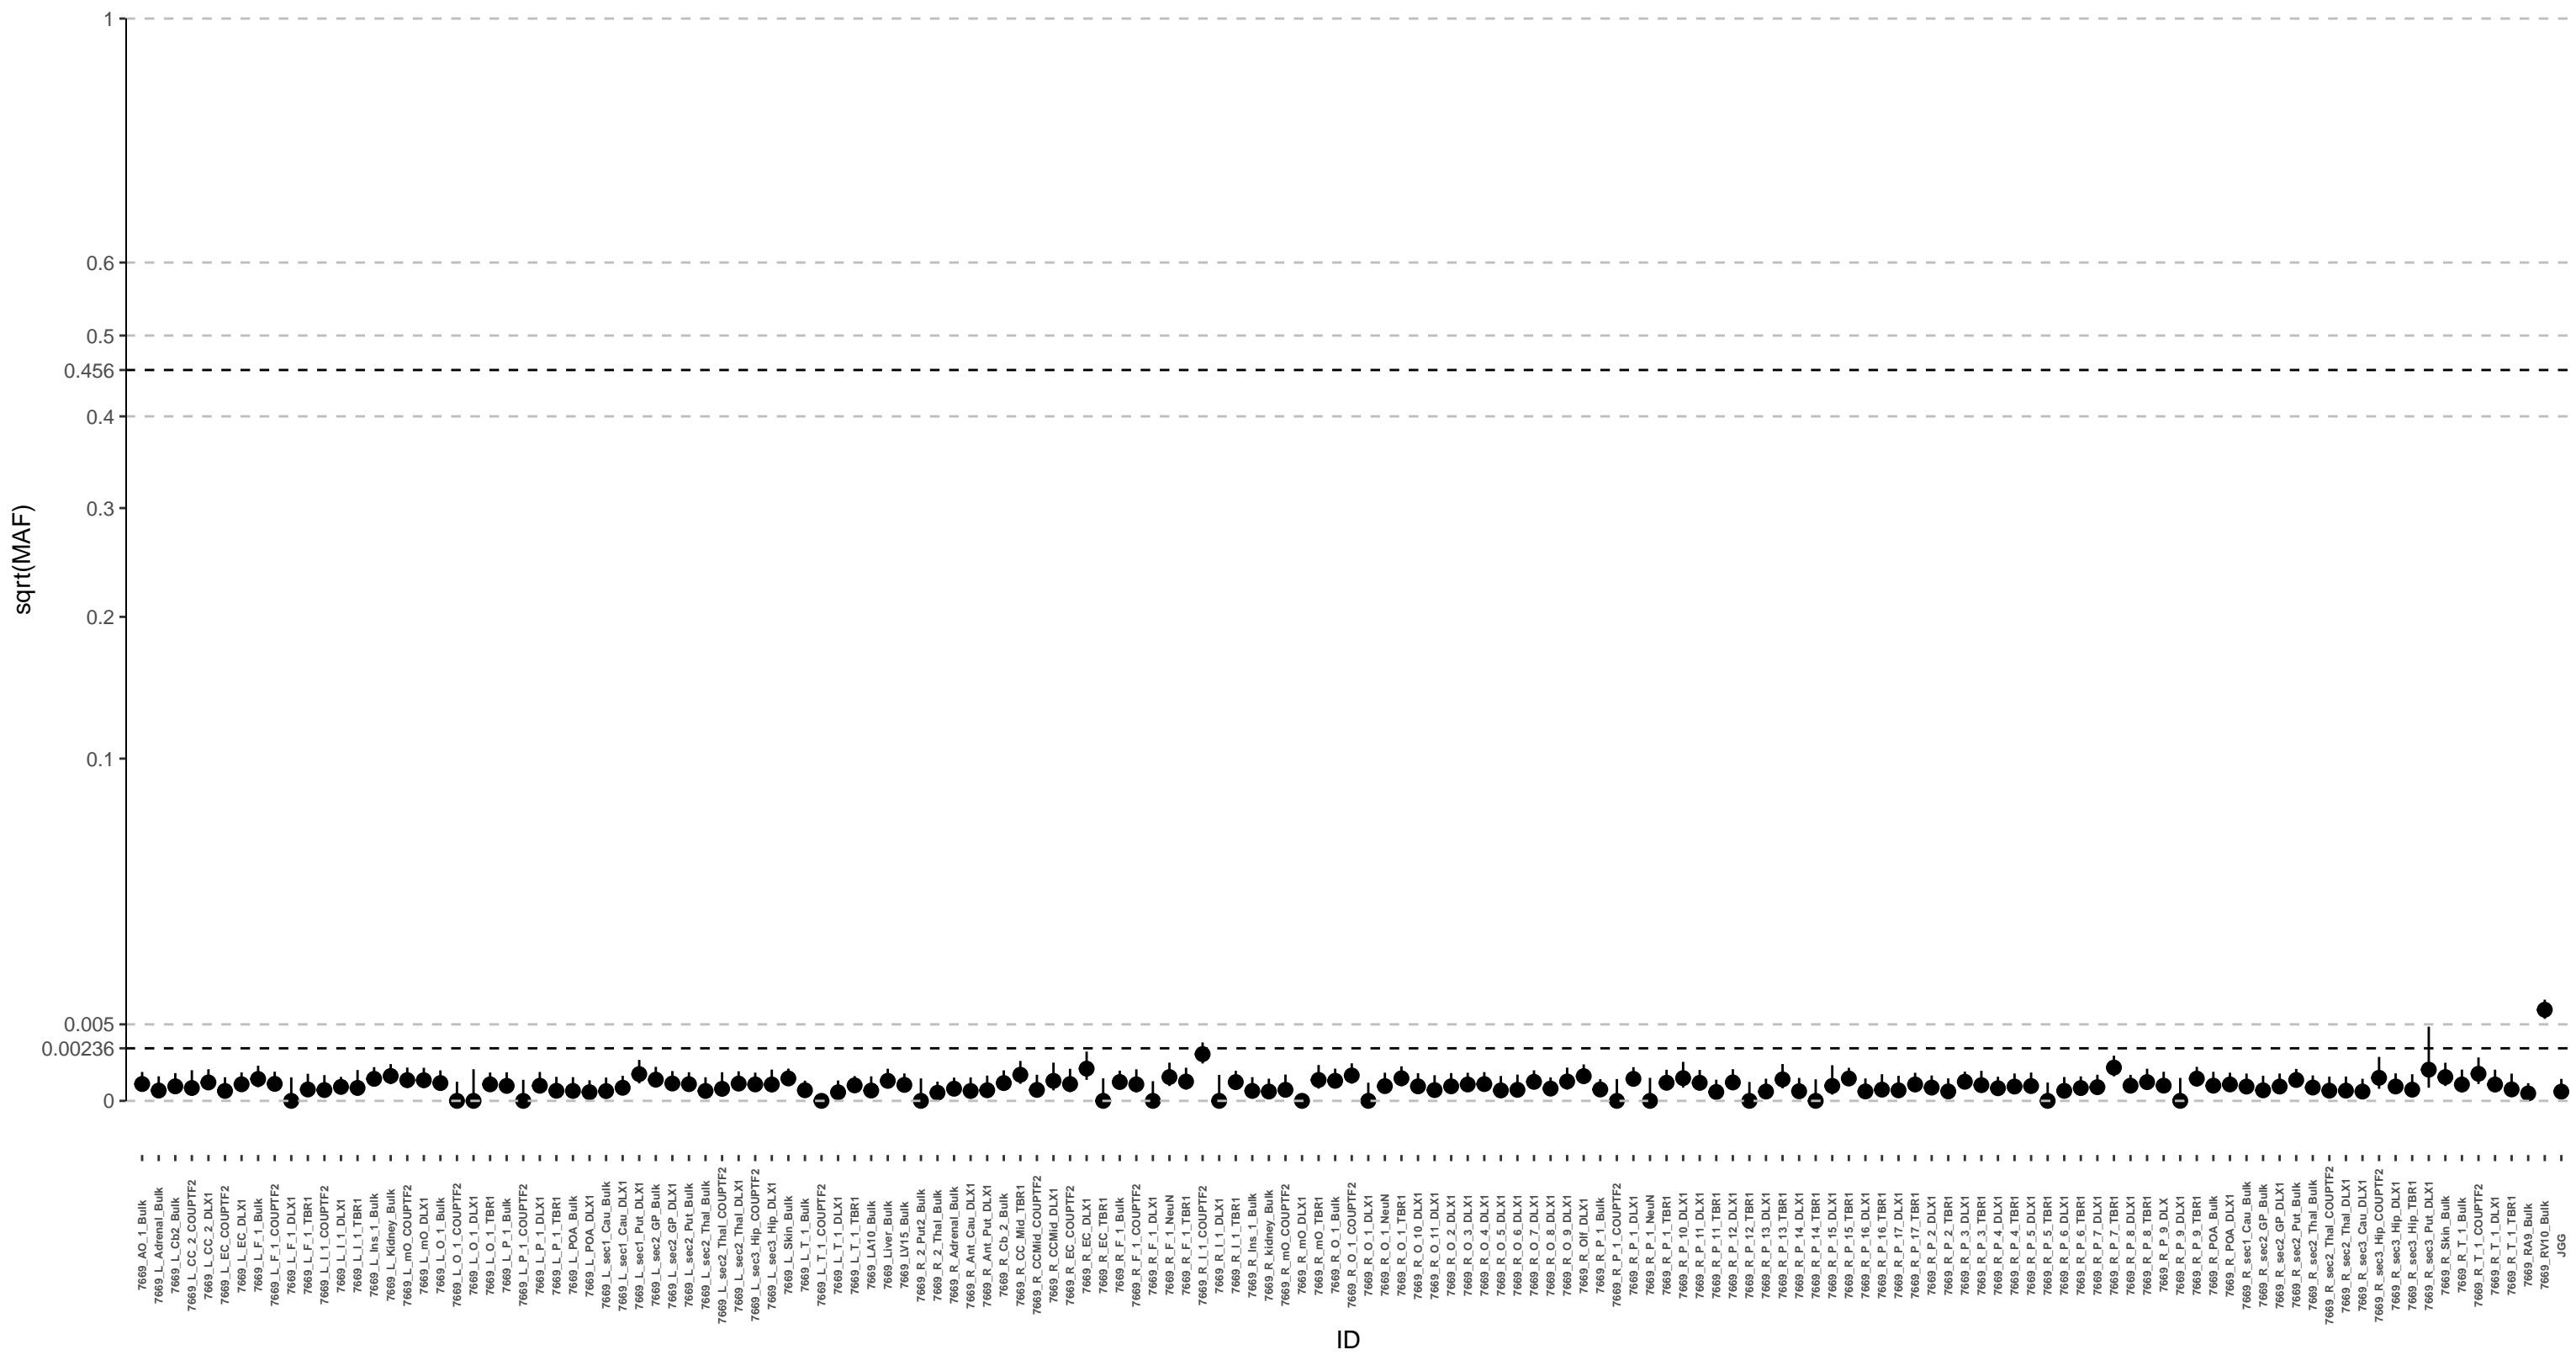



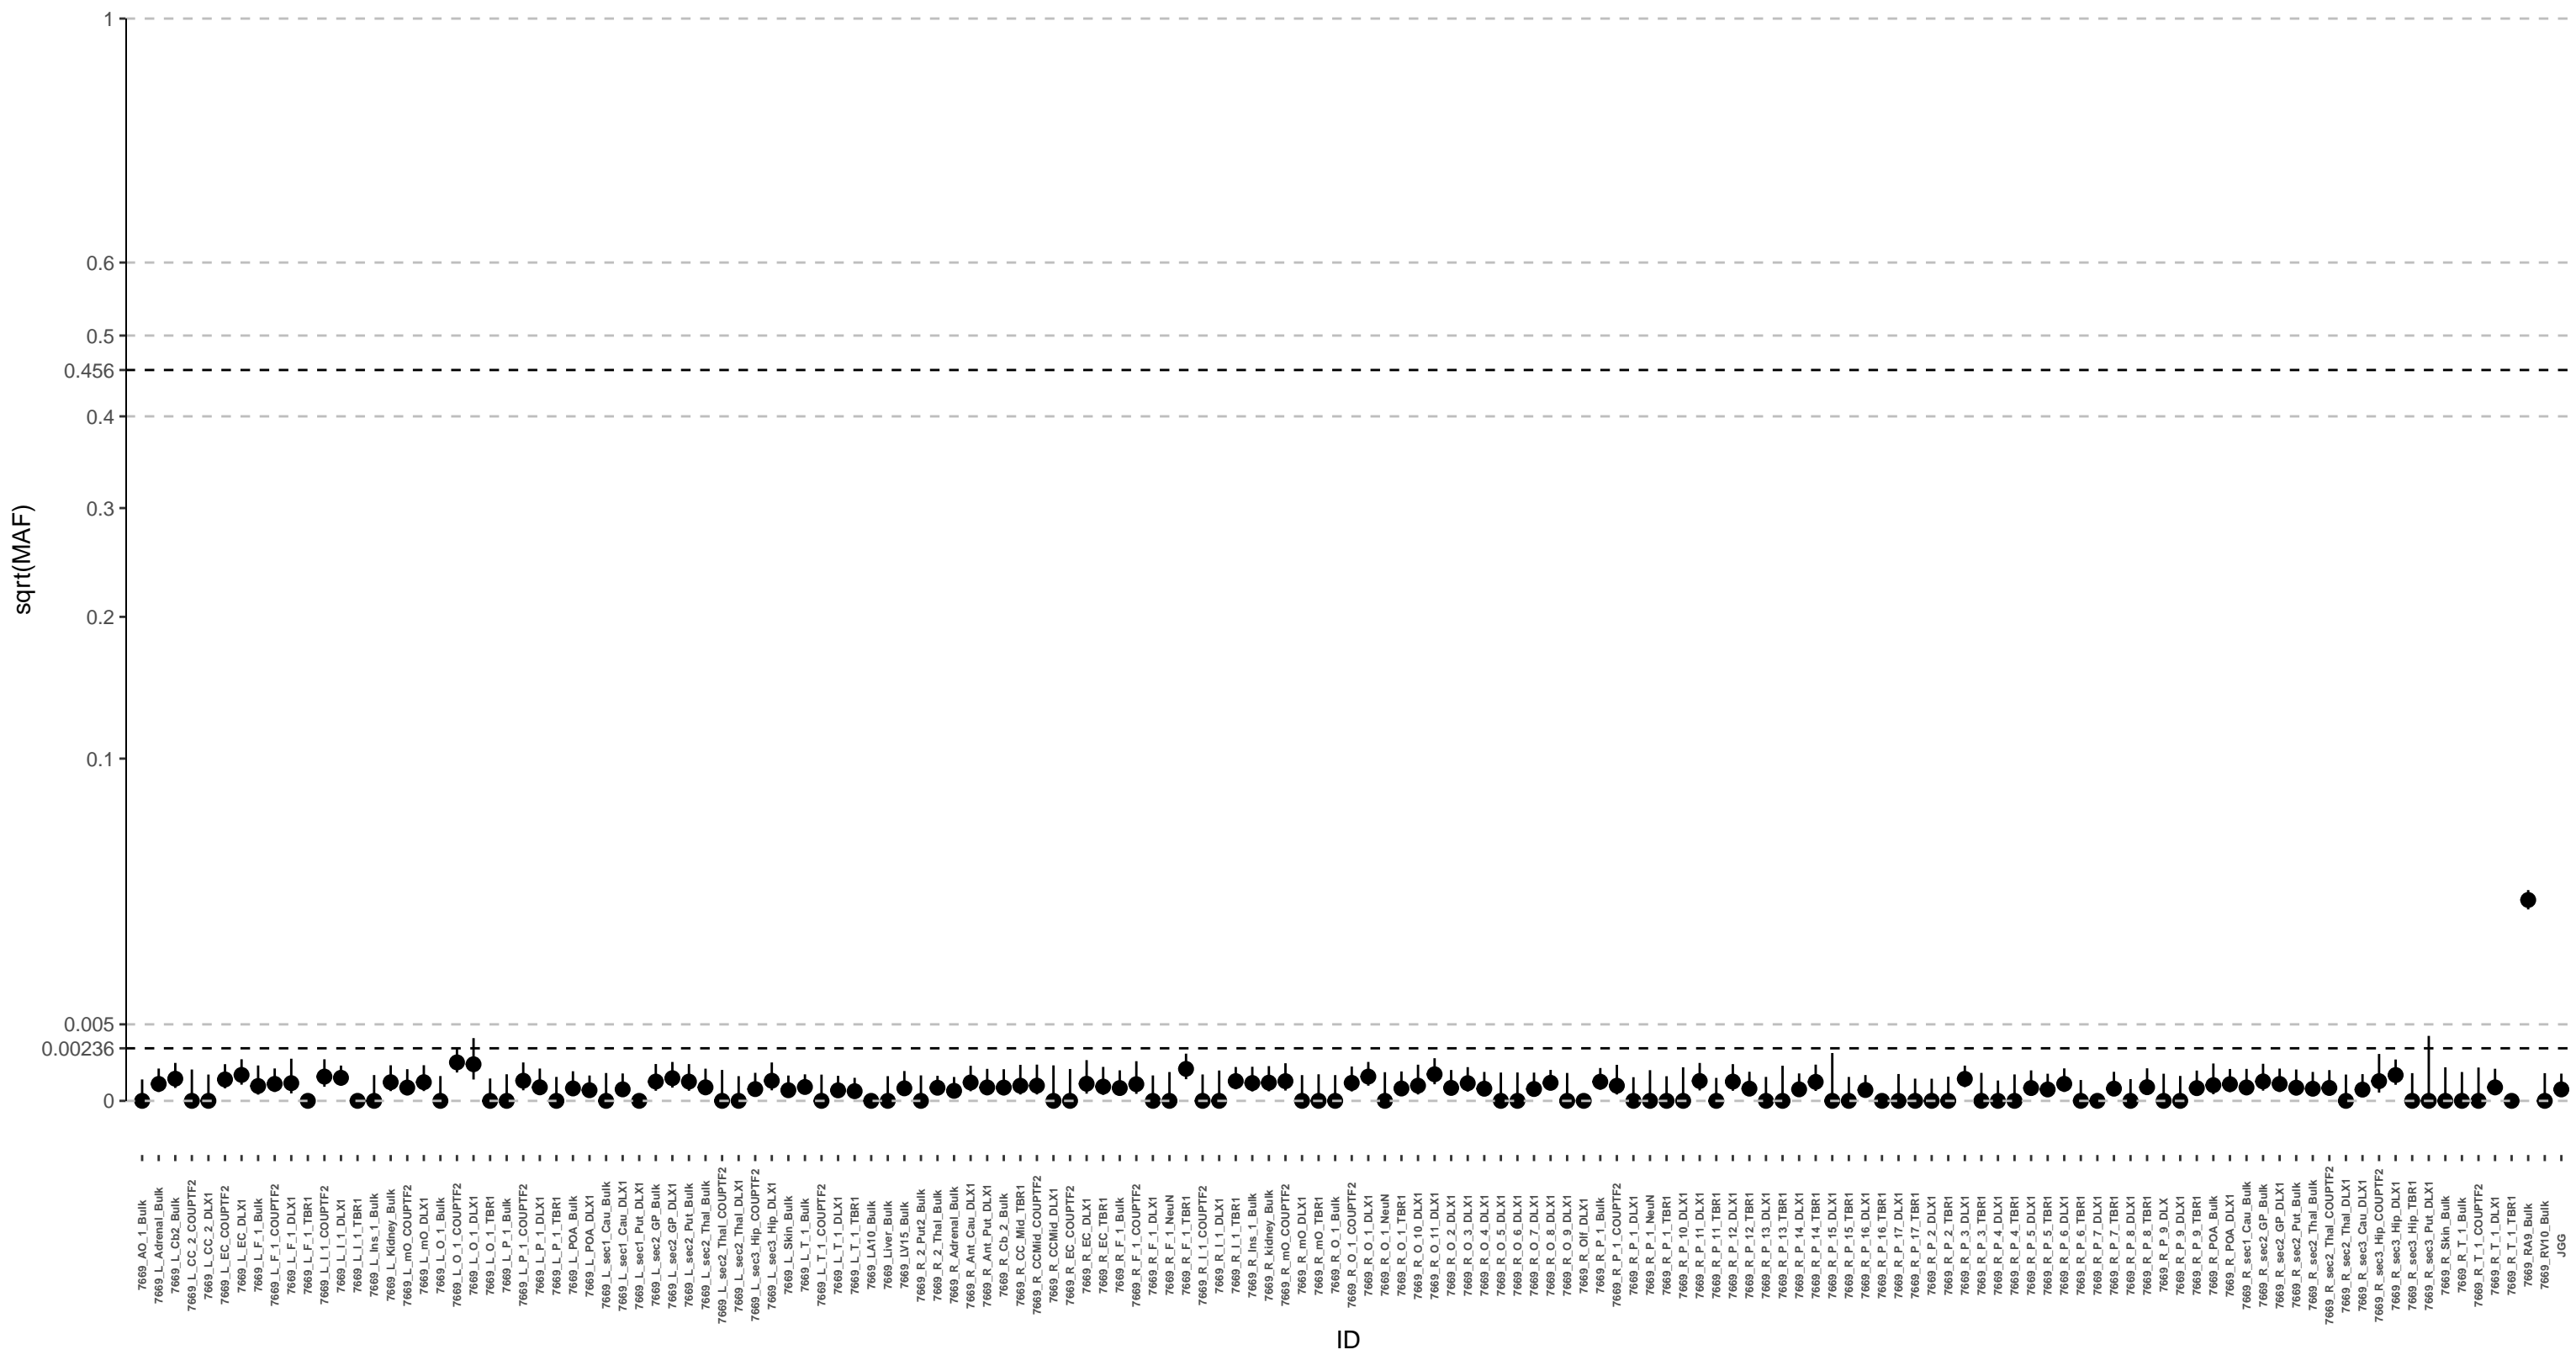

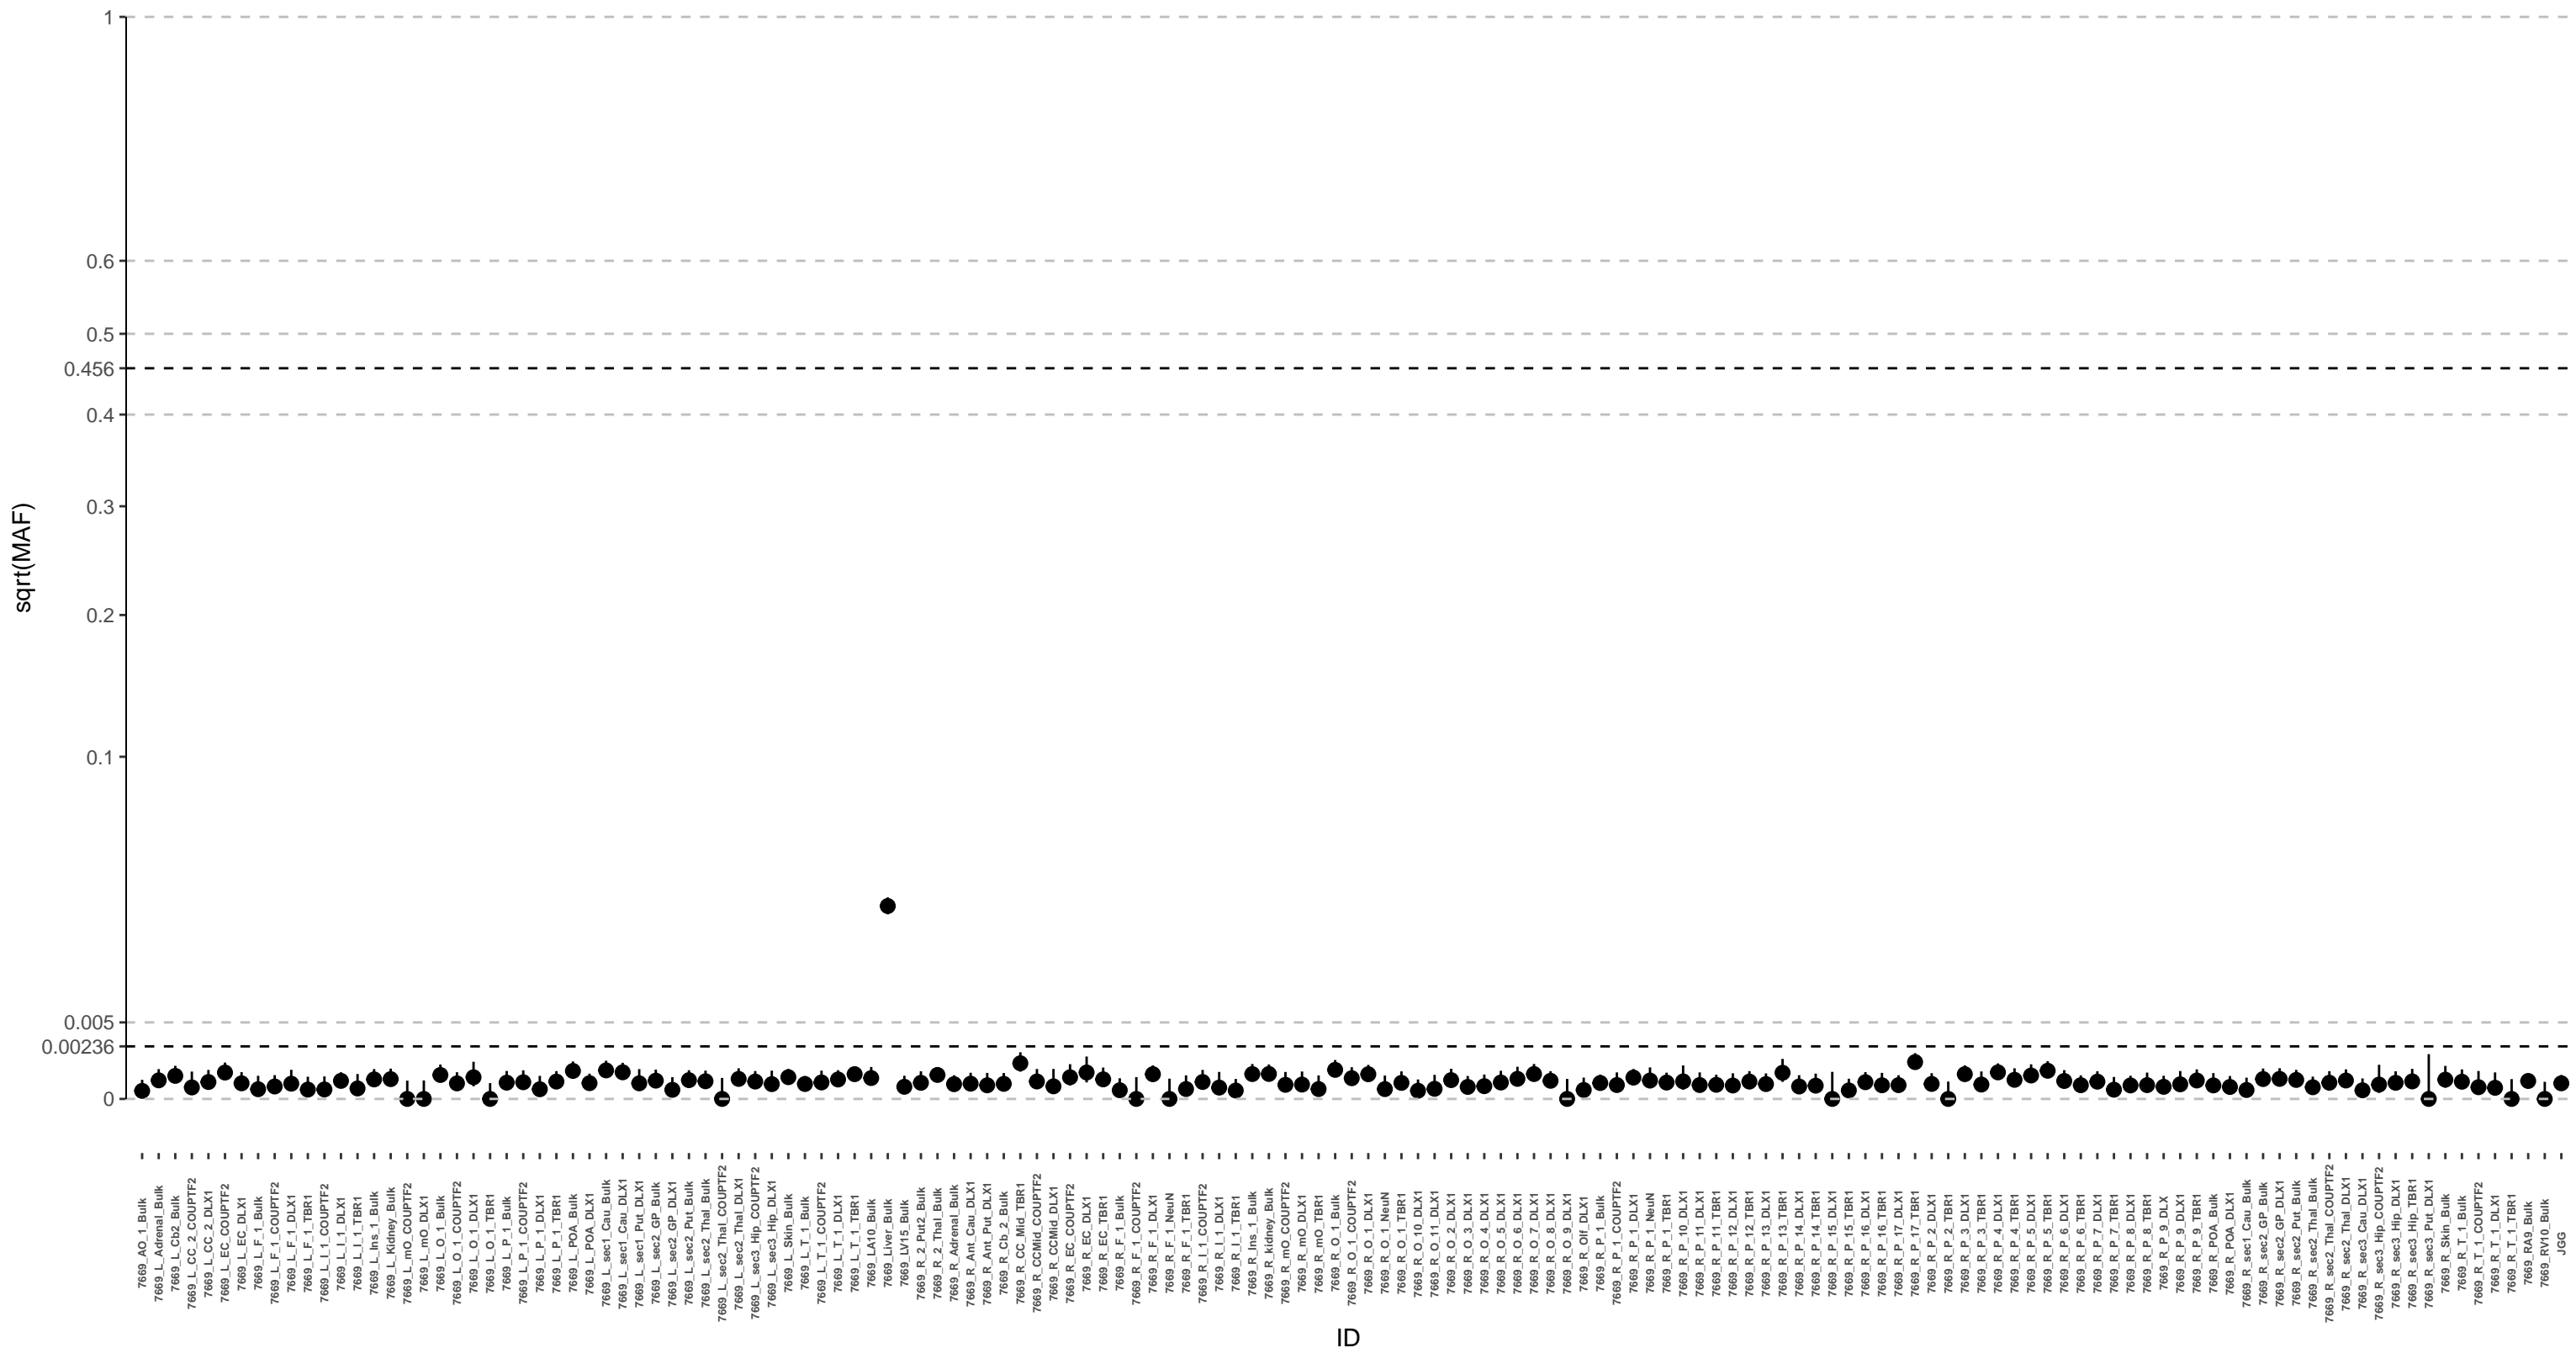

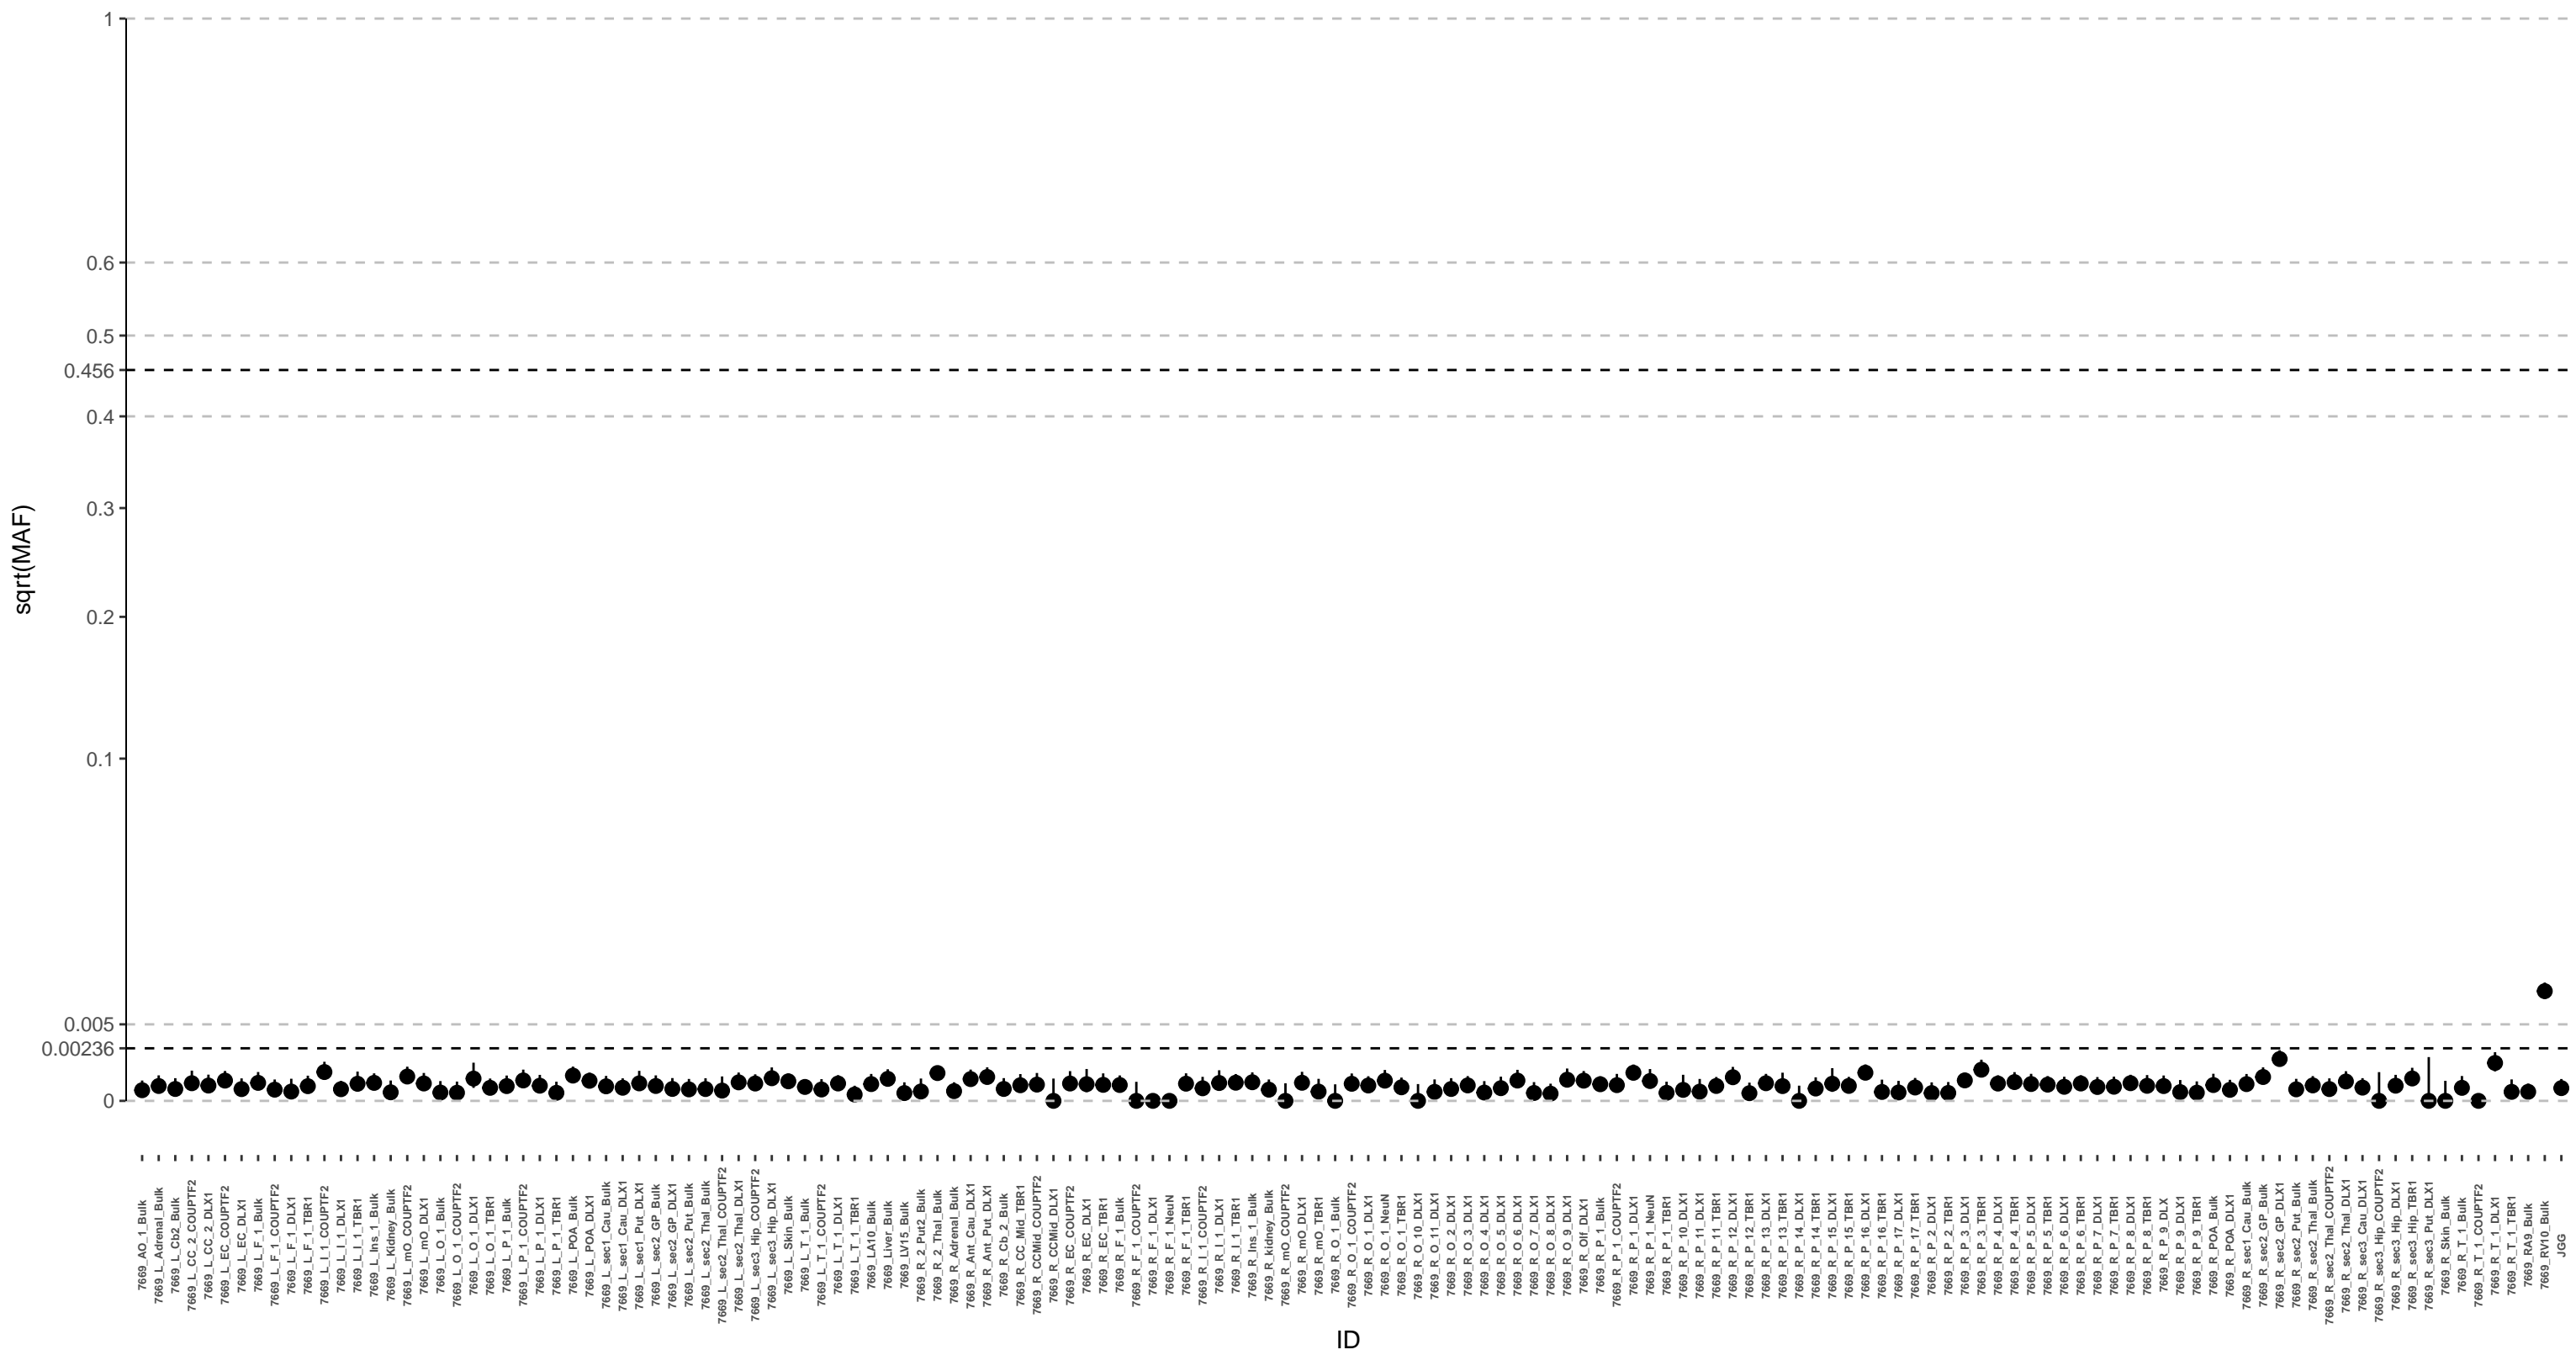

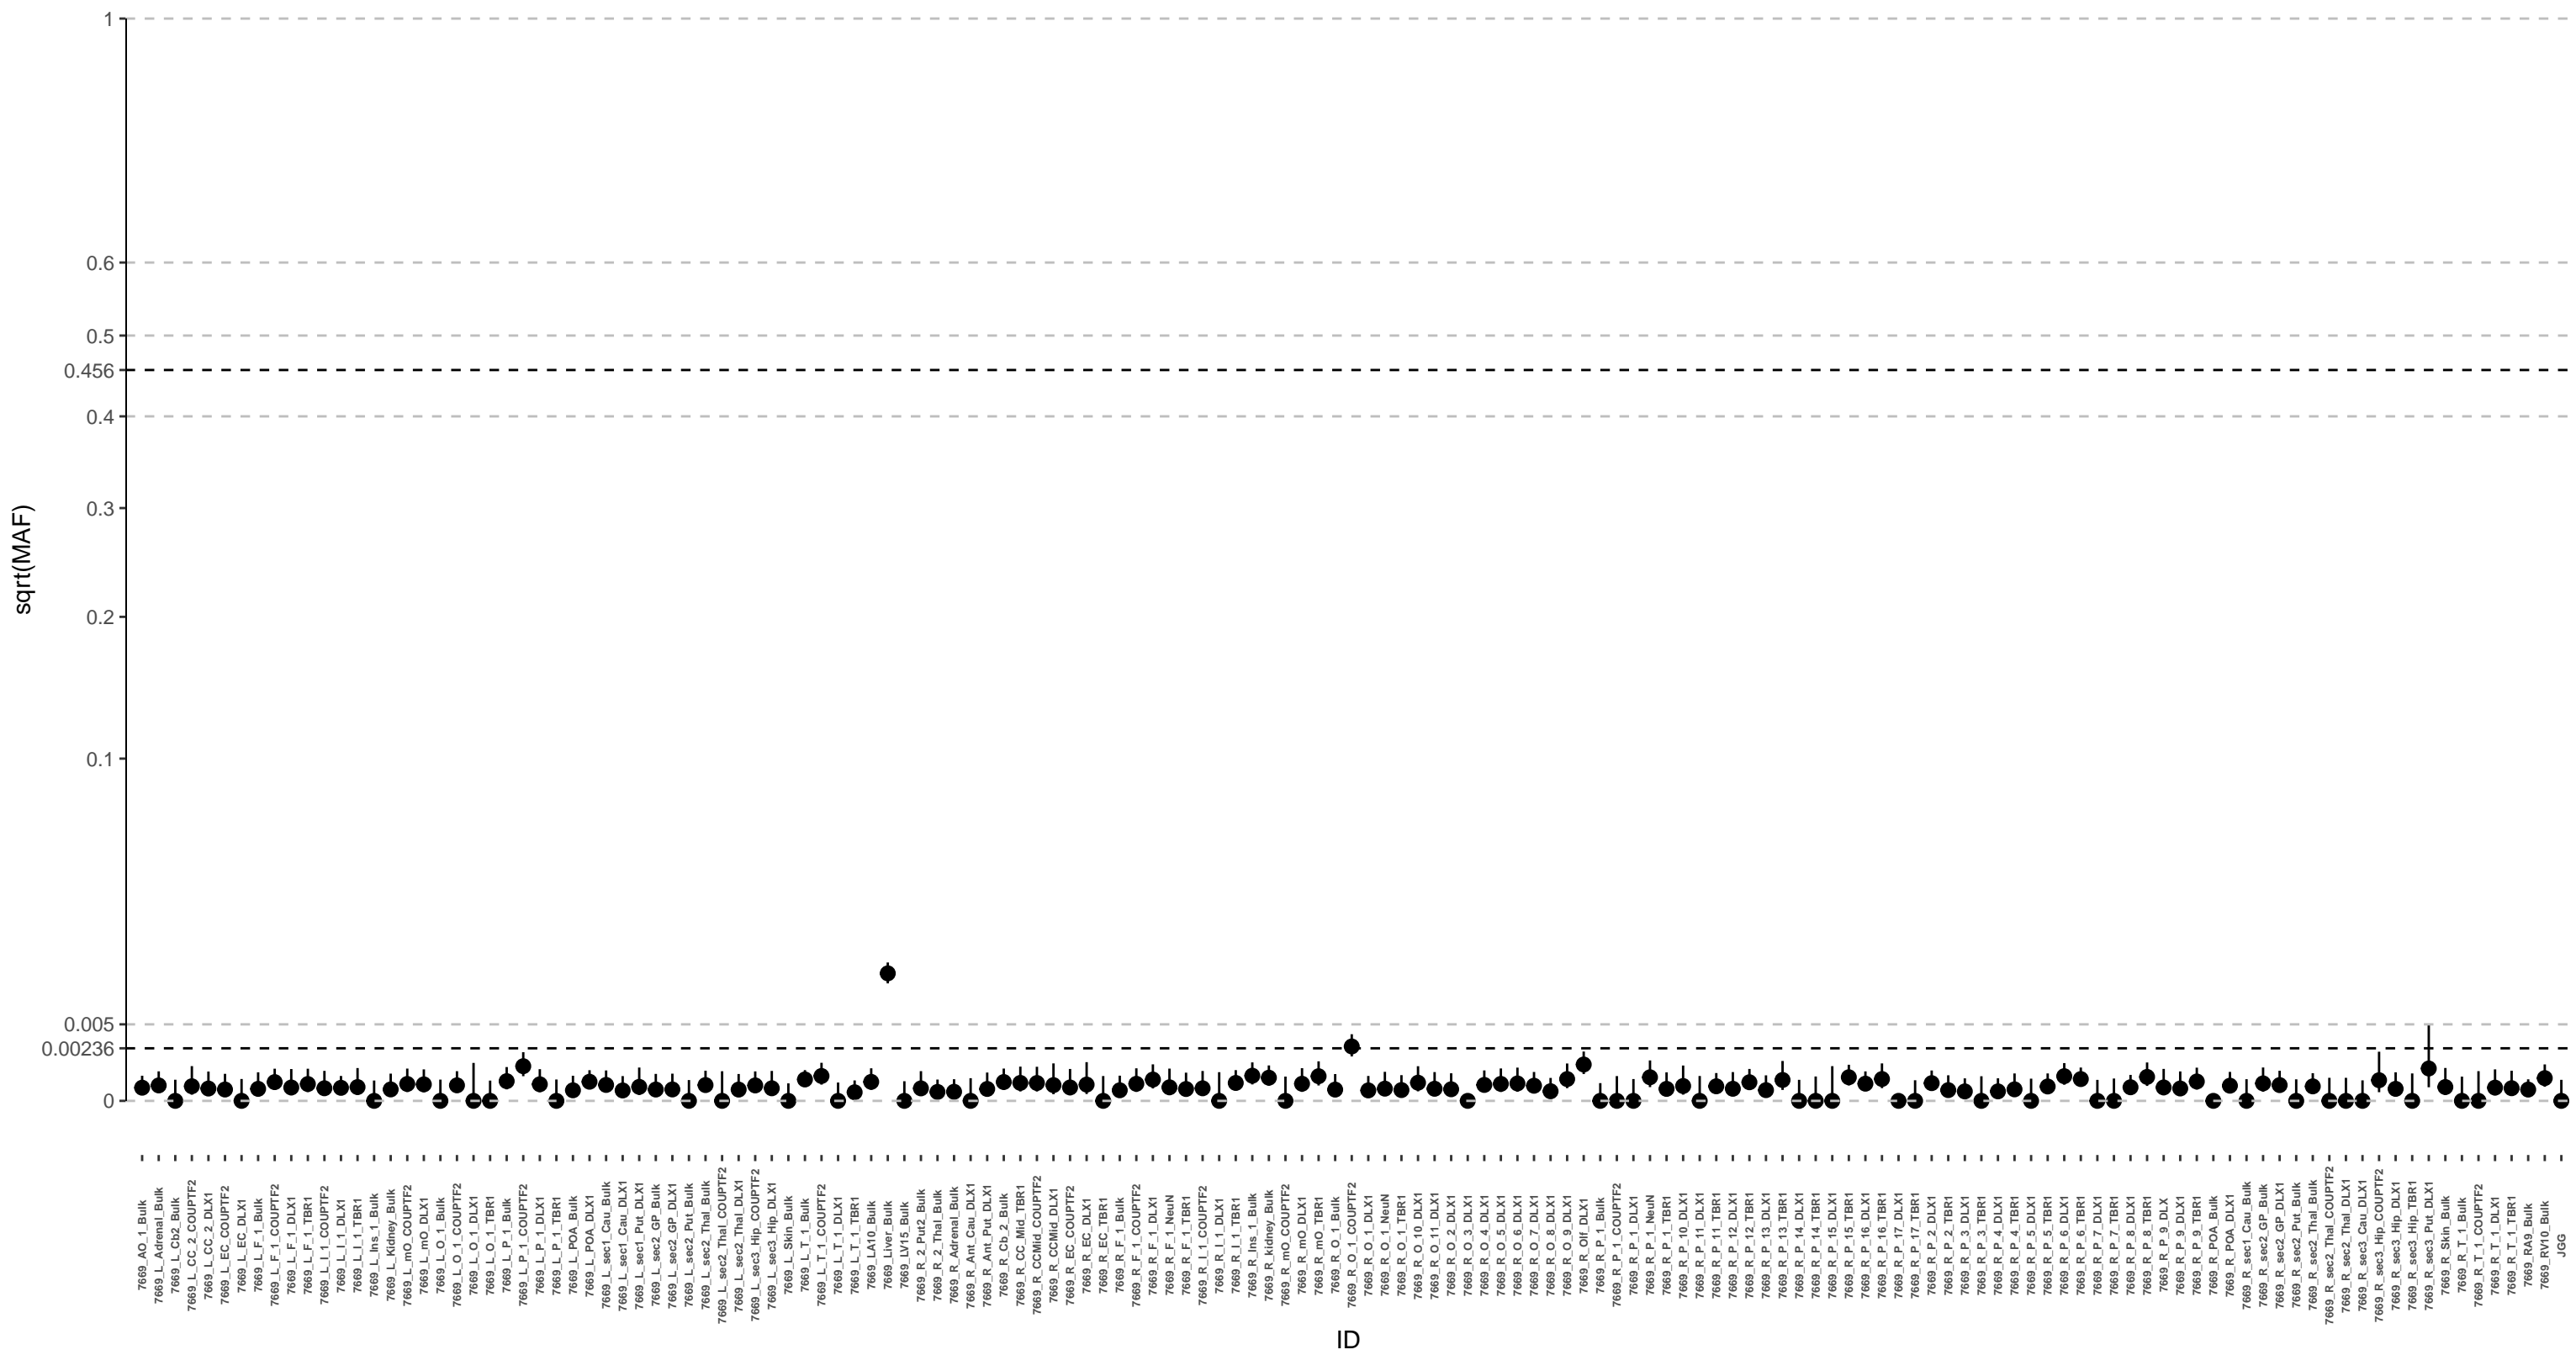

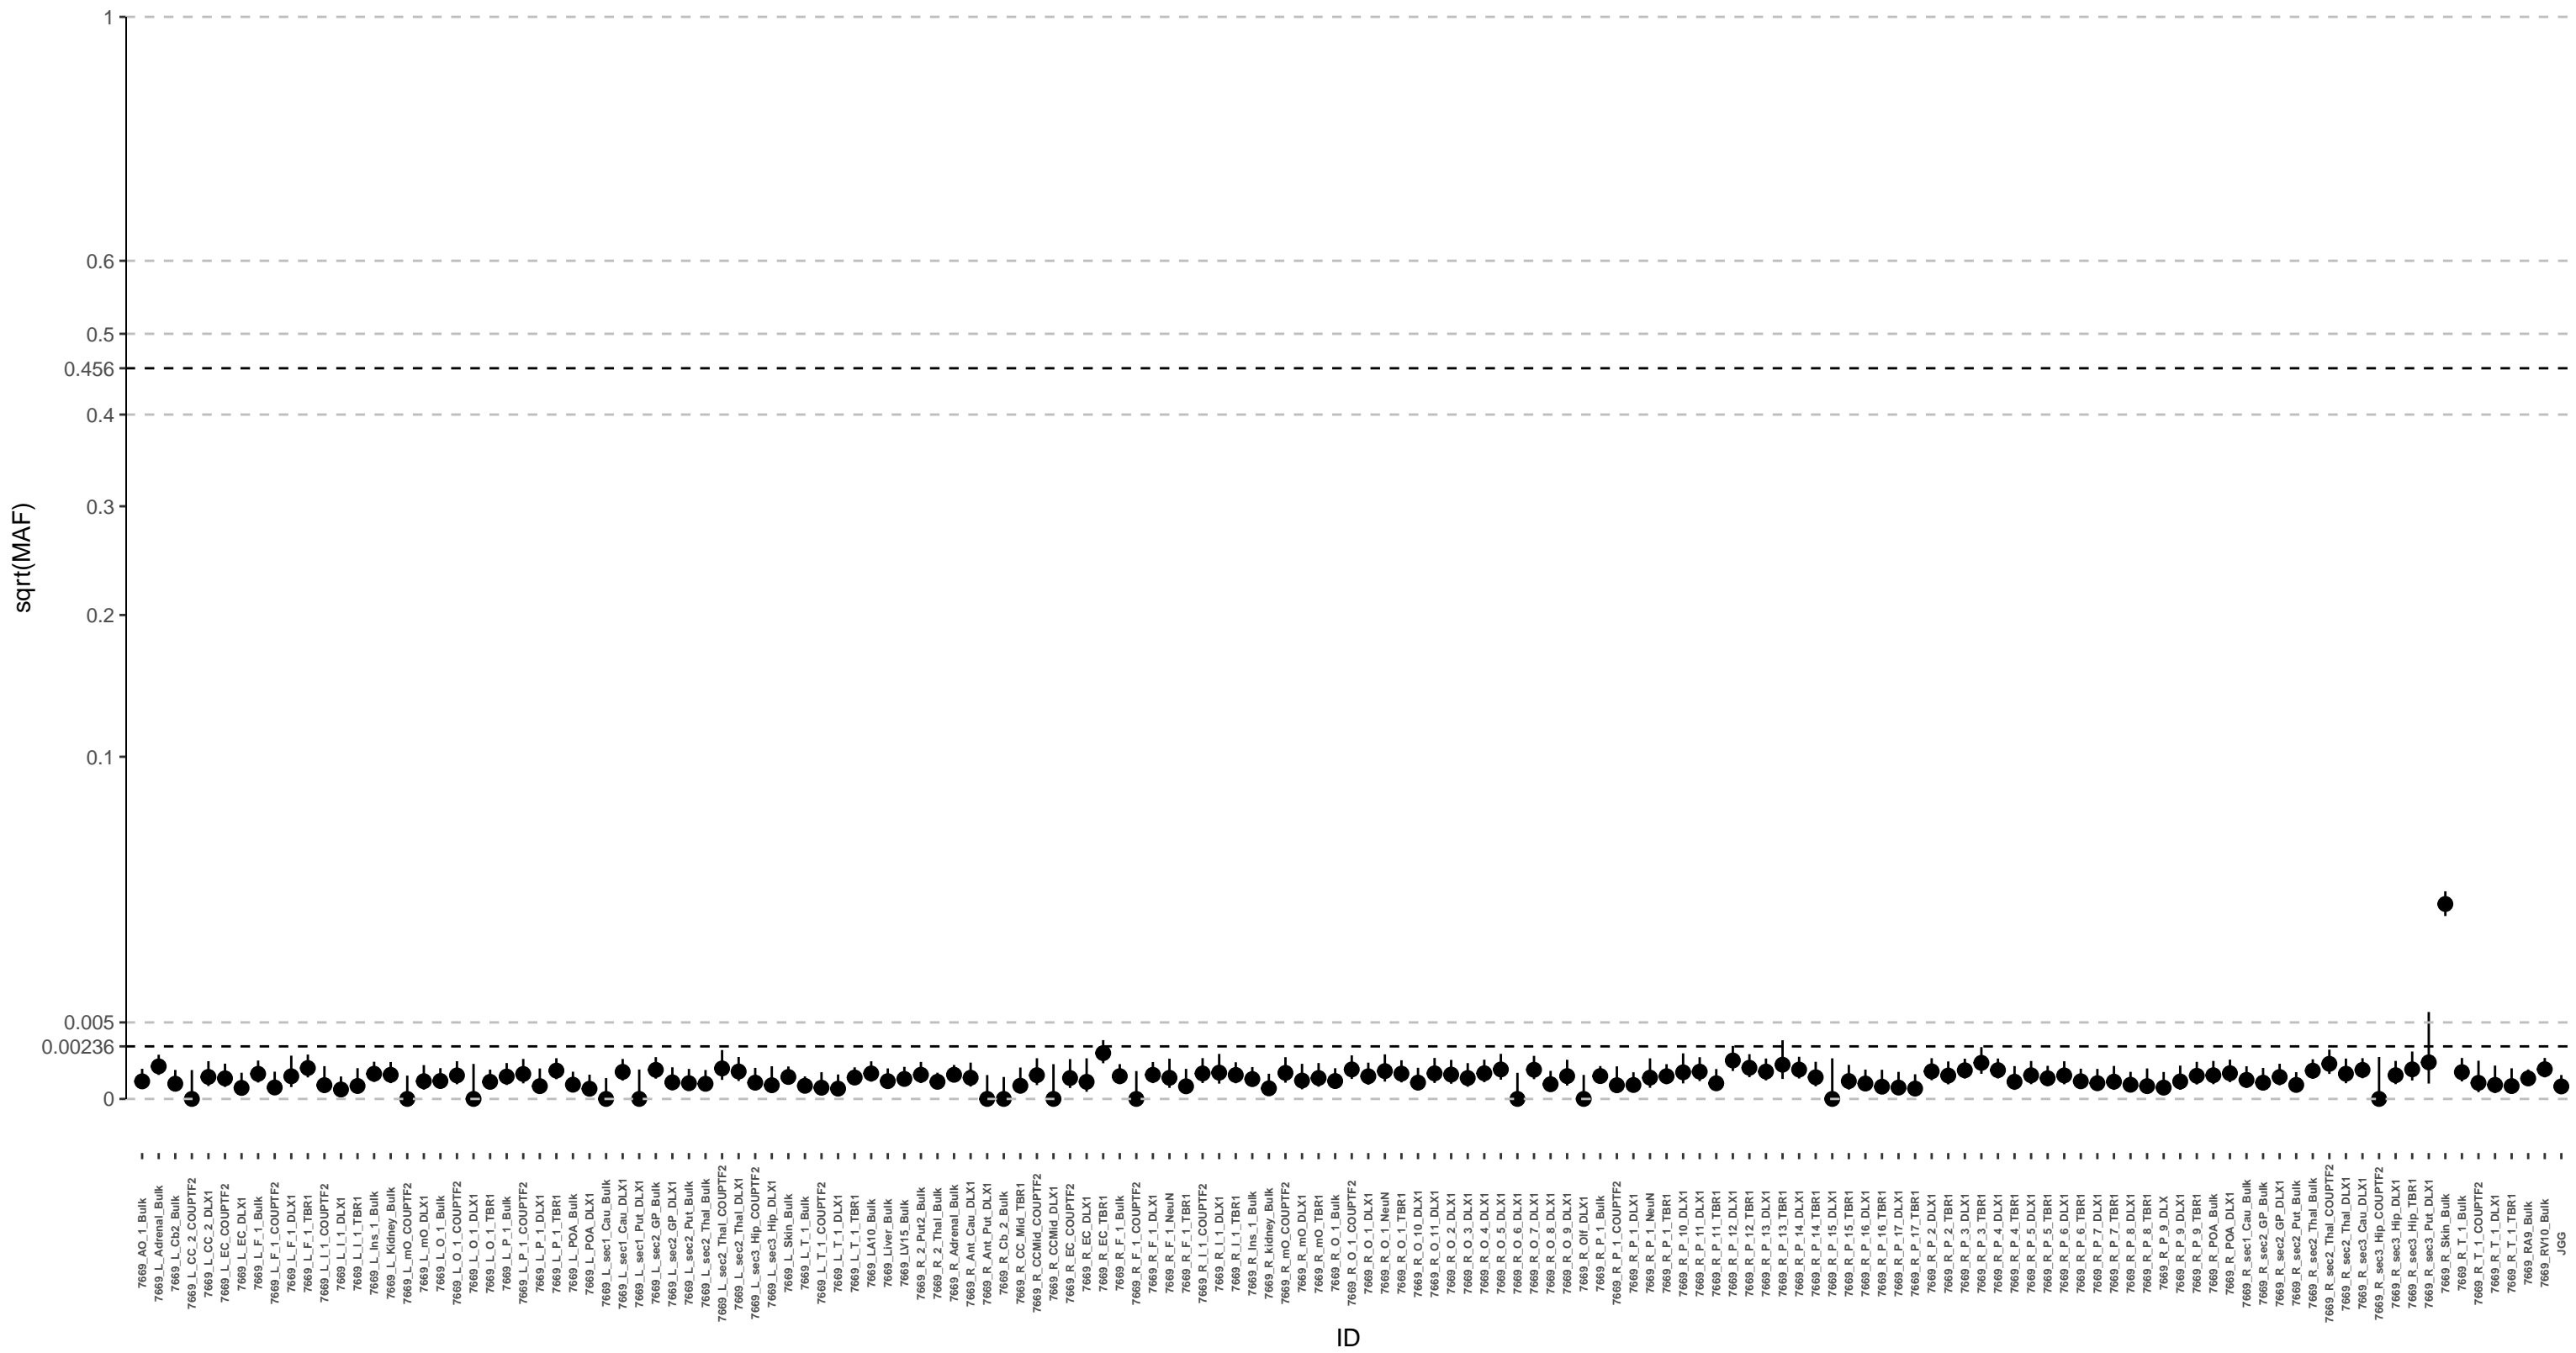

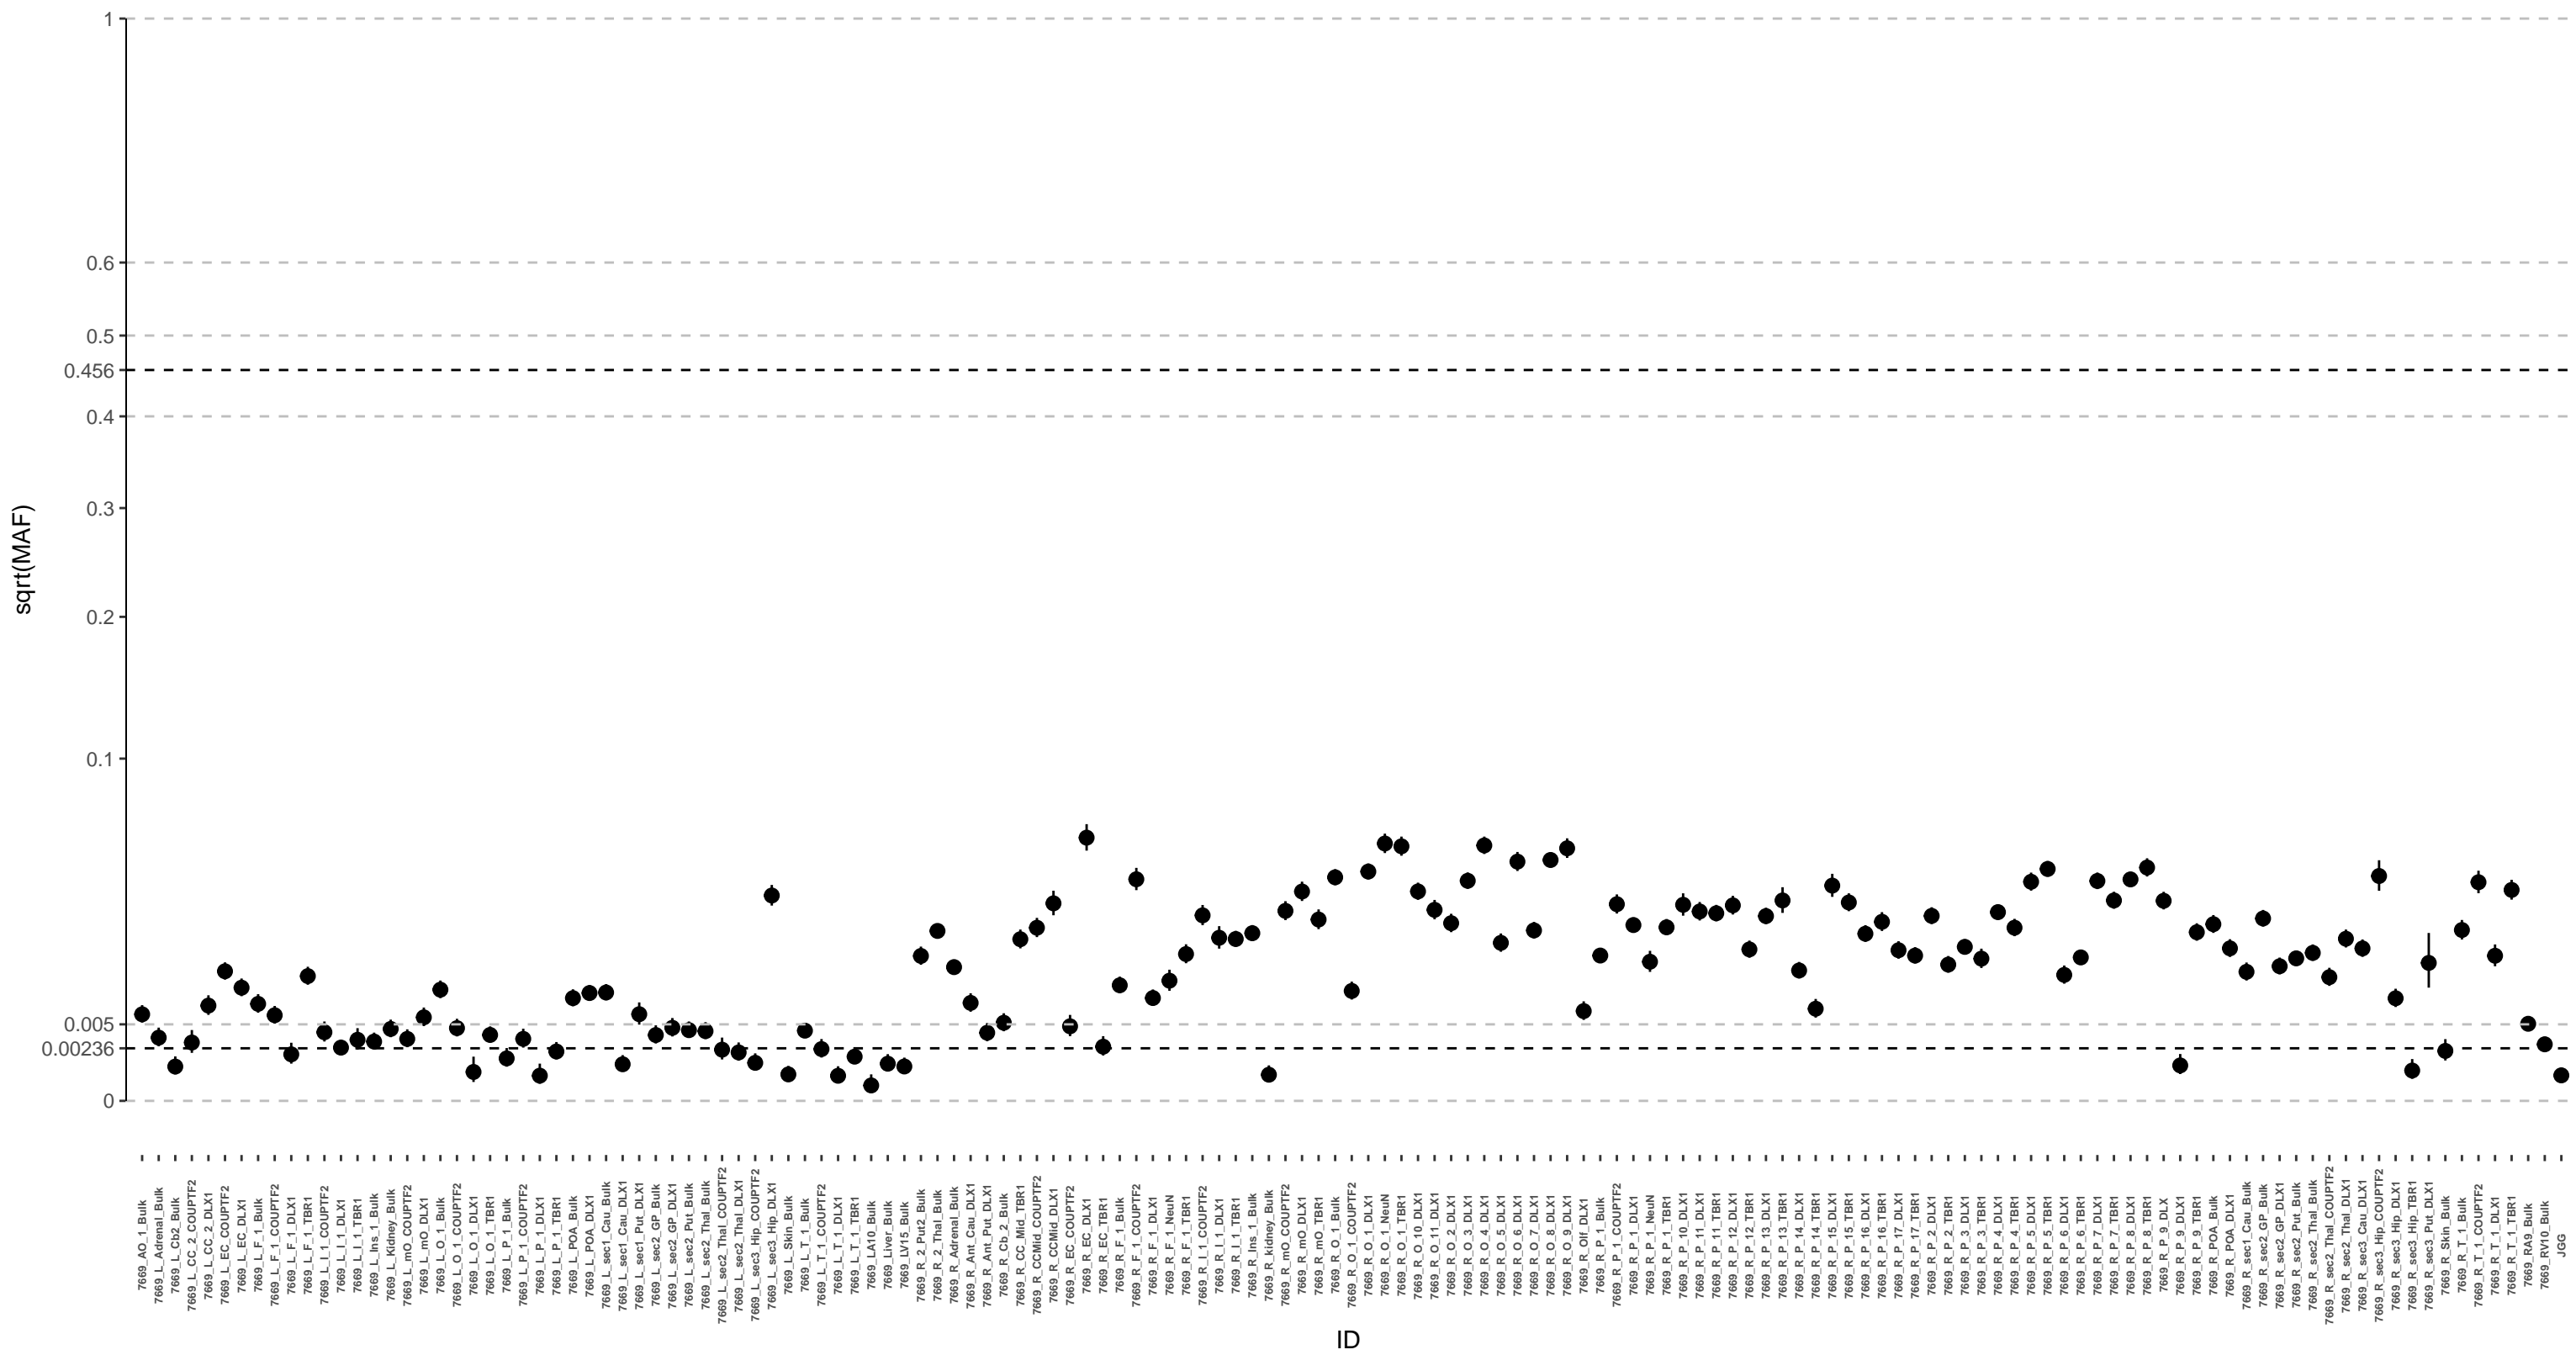

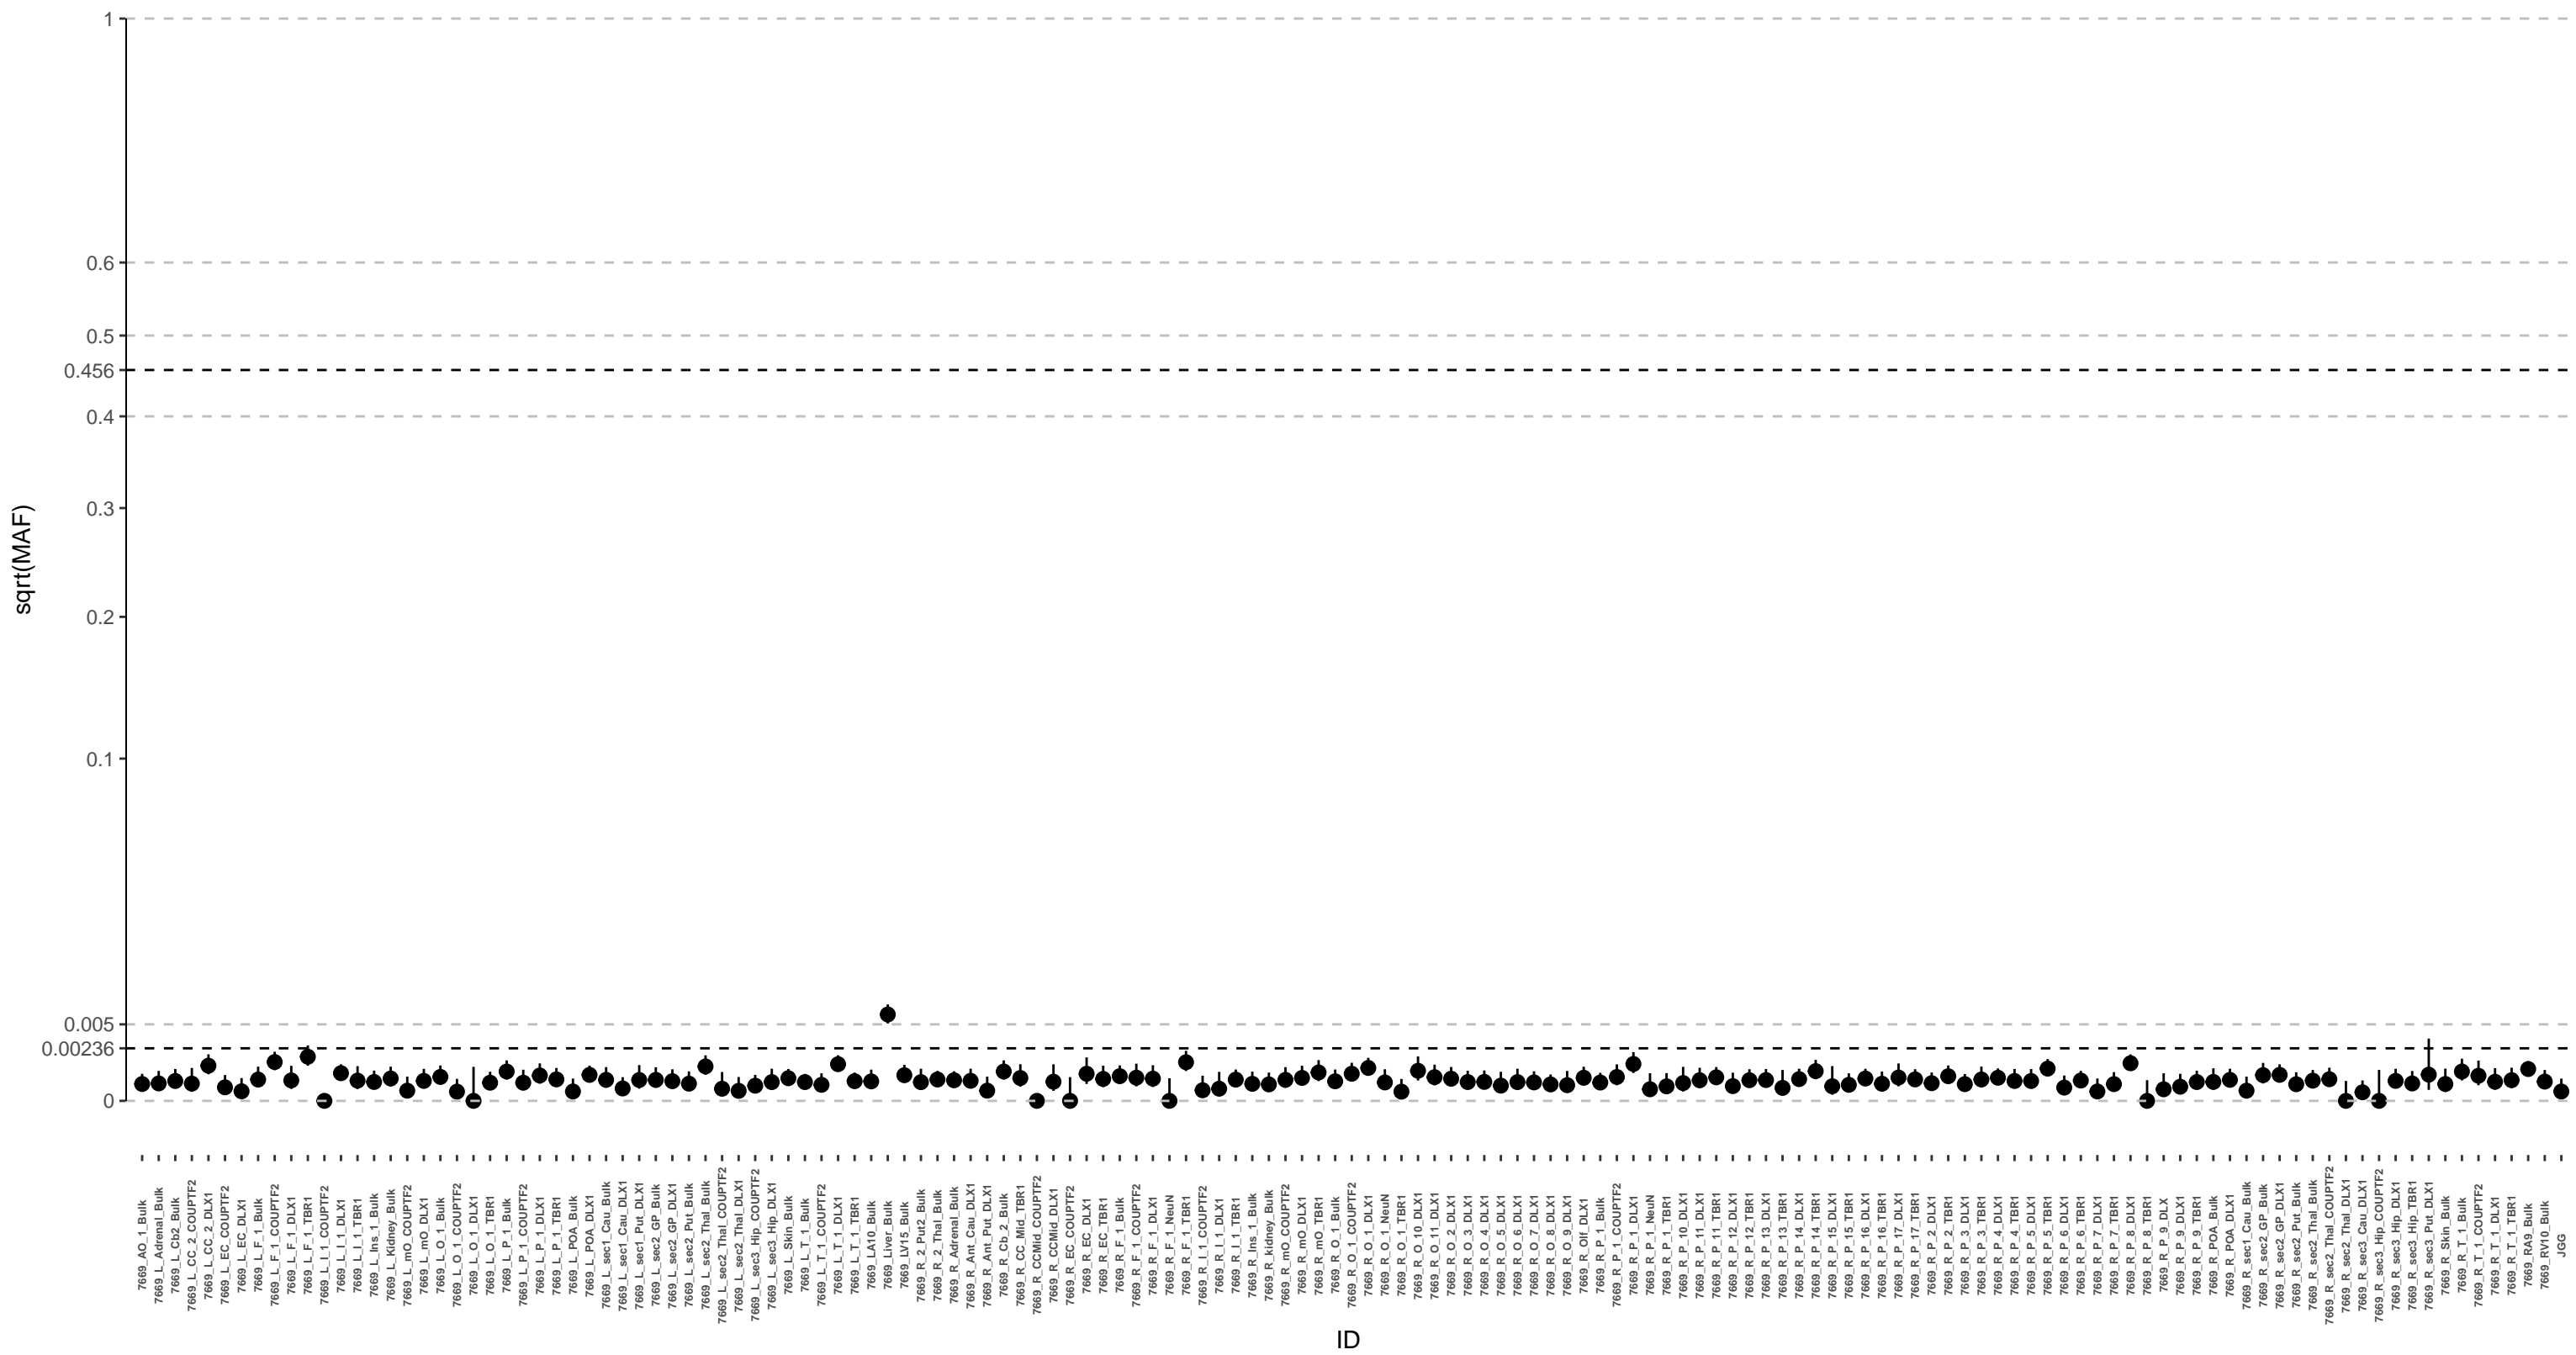

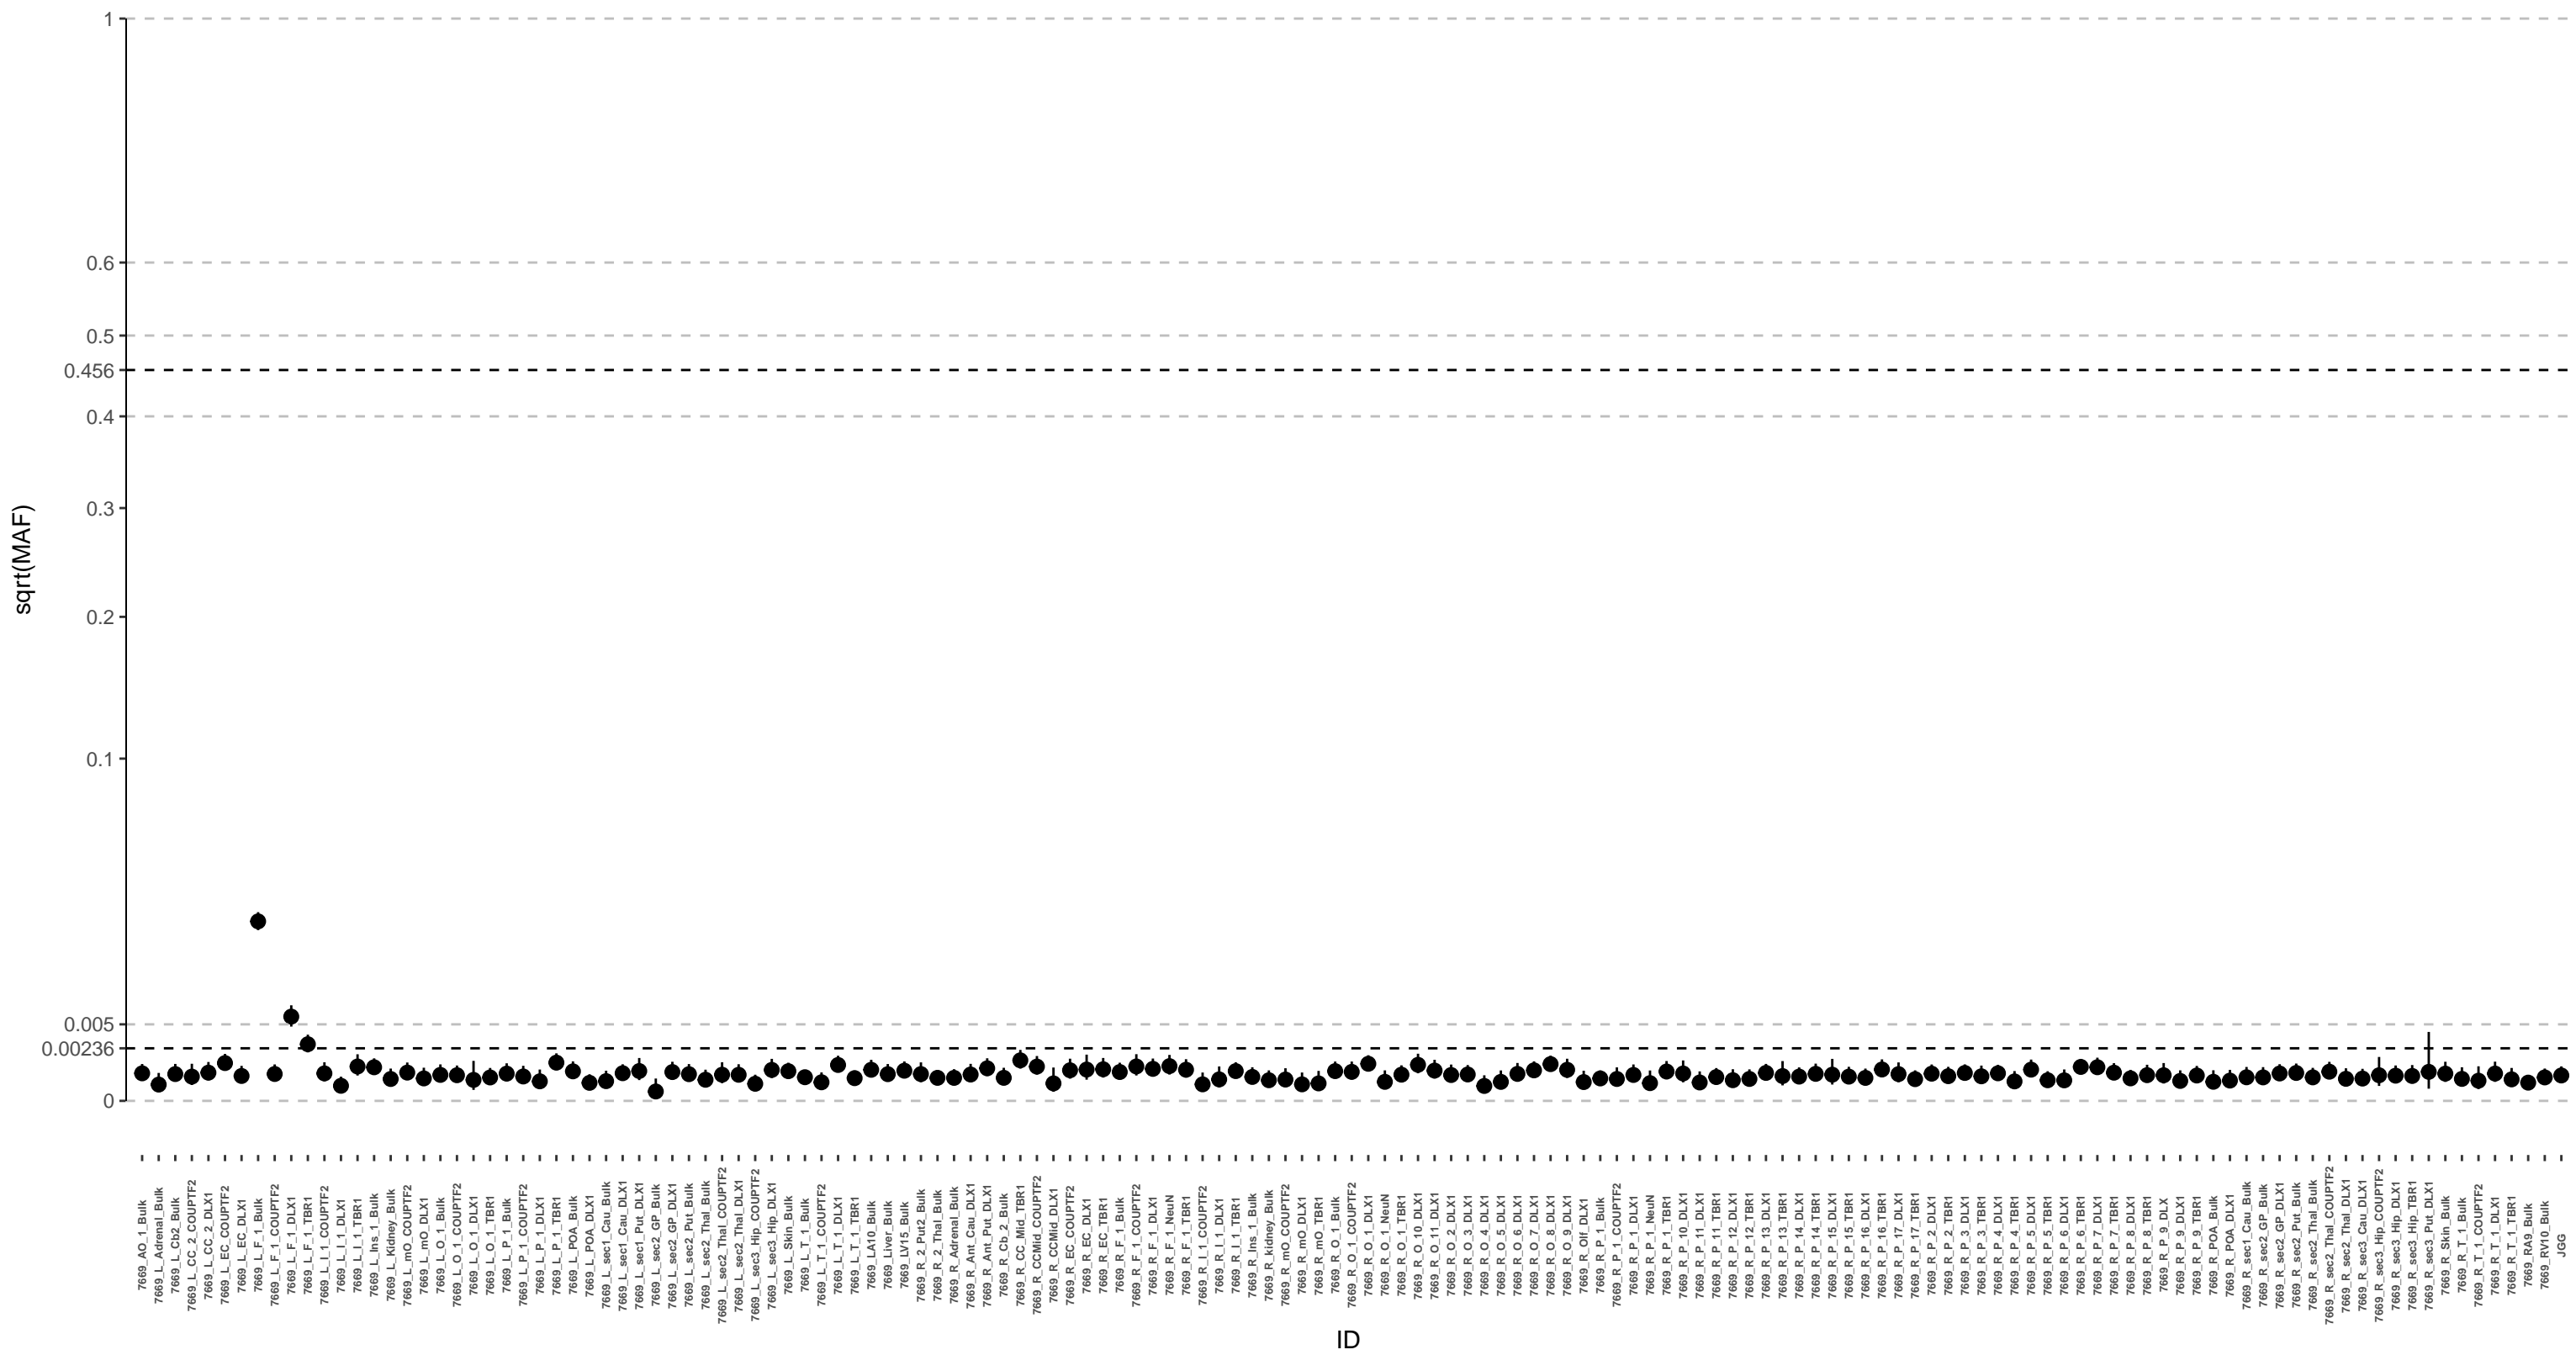



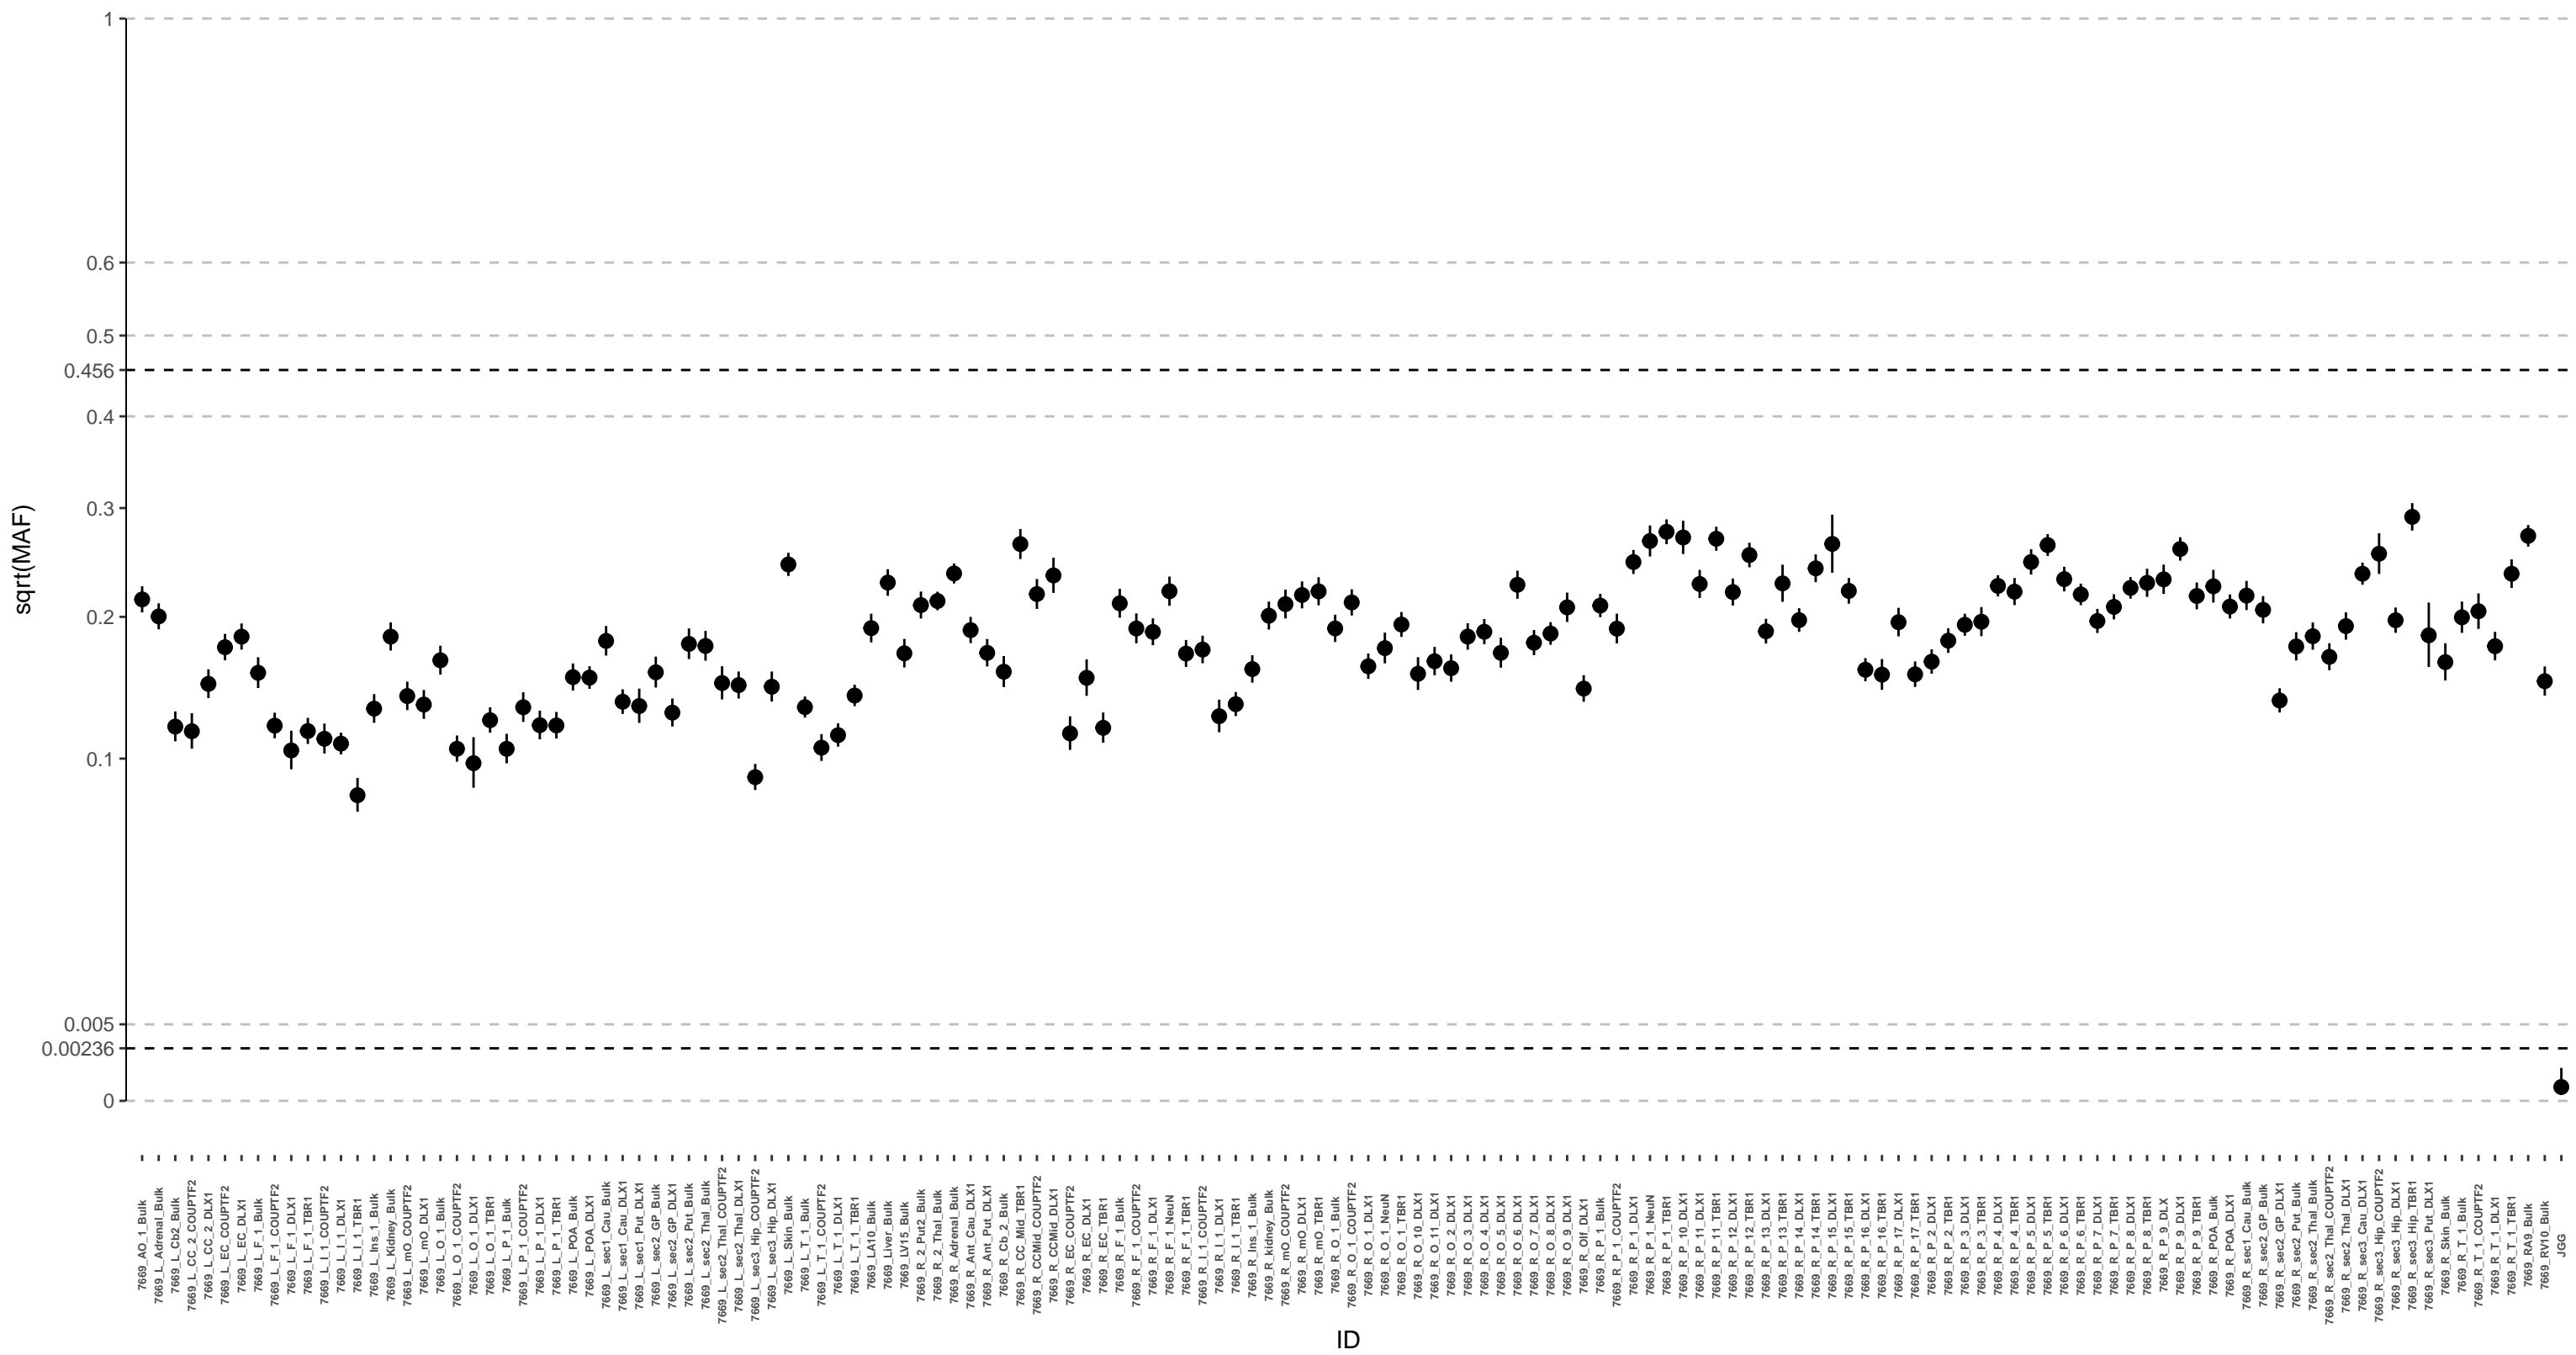

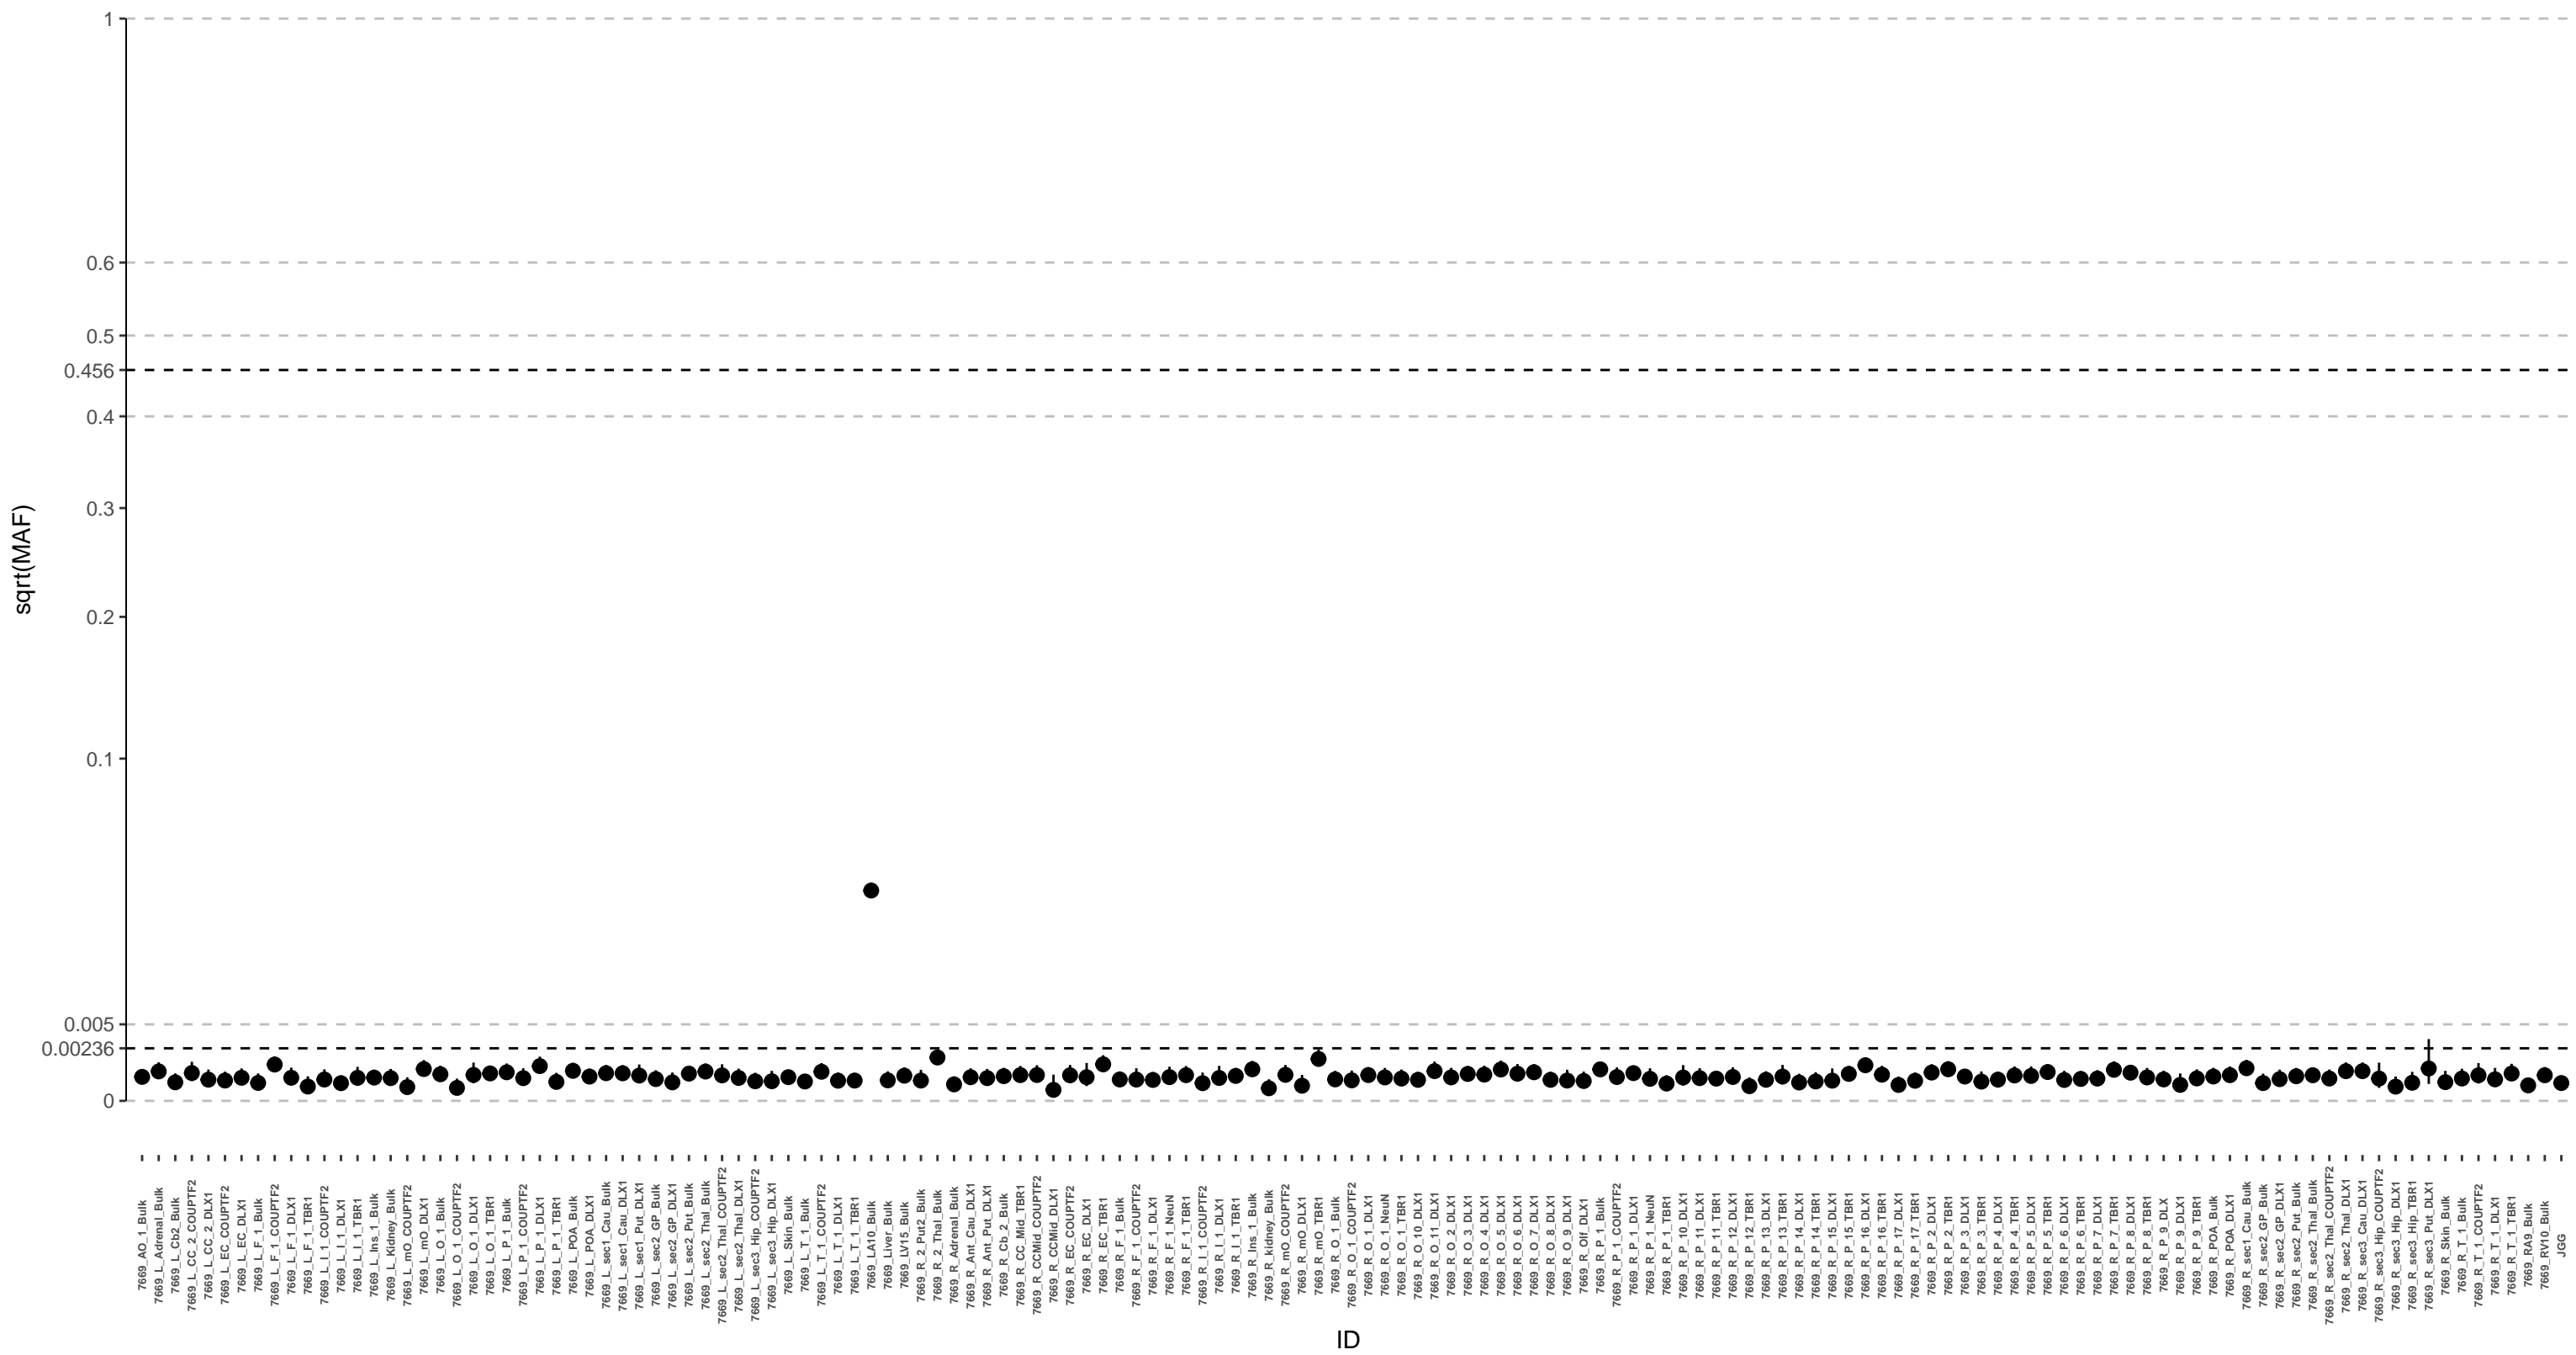

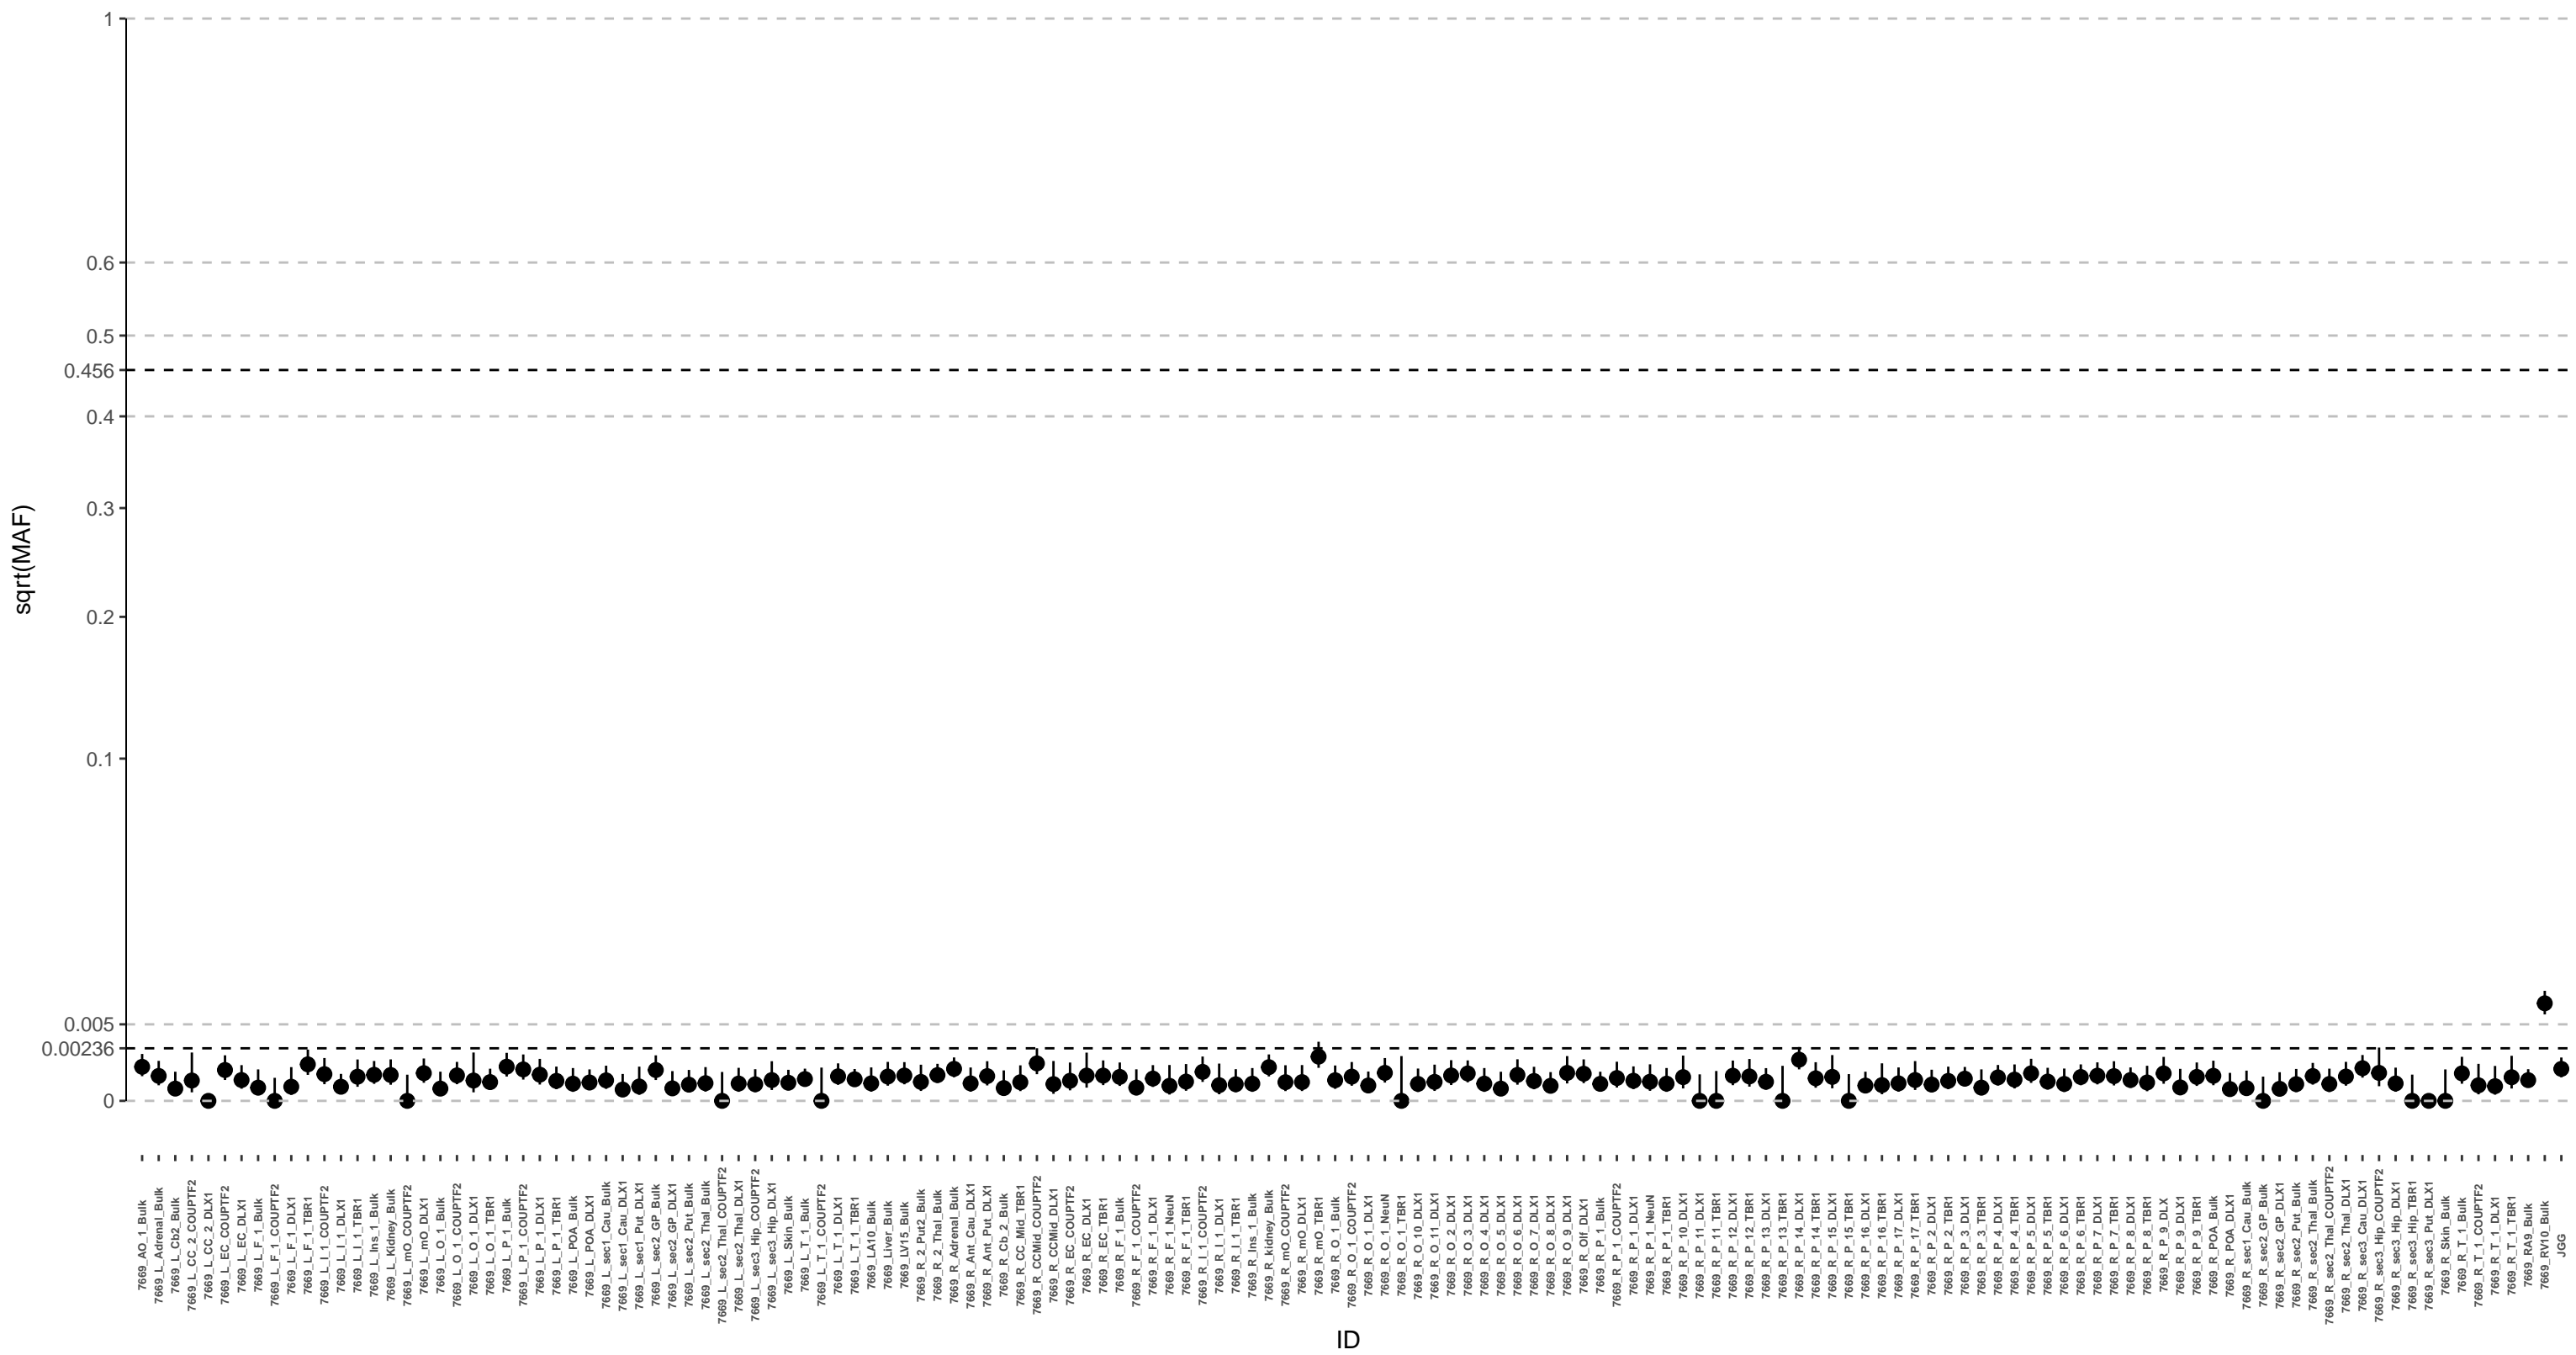

ID05 10-129376060-T-G

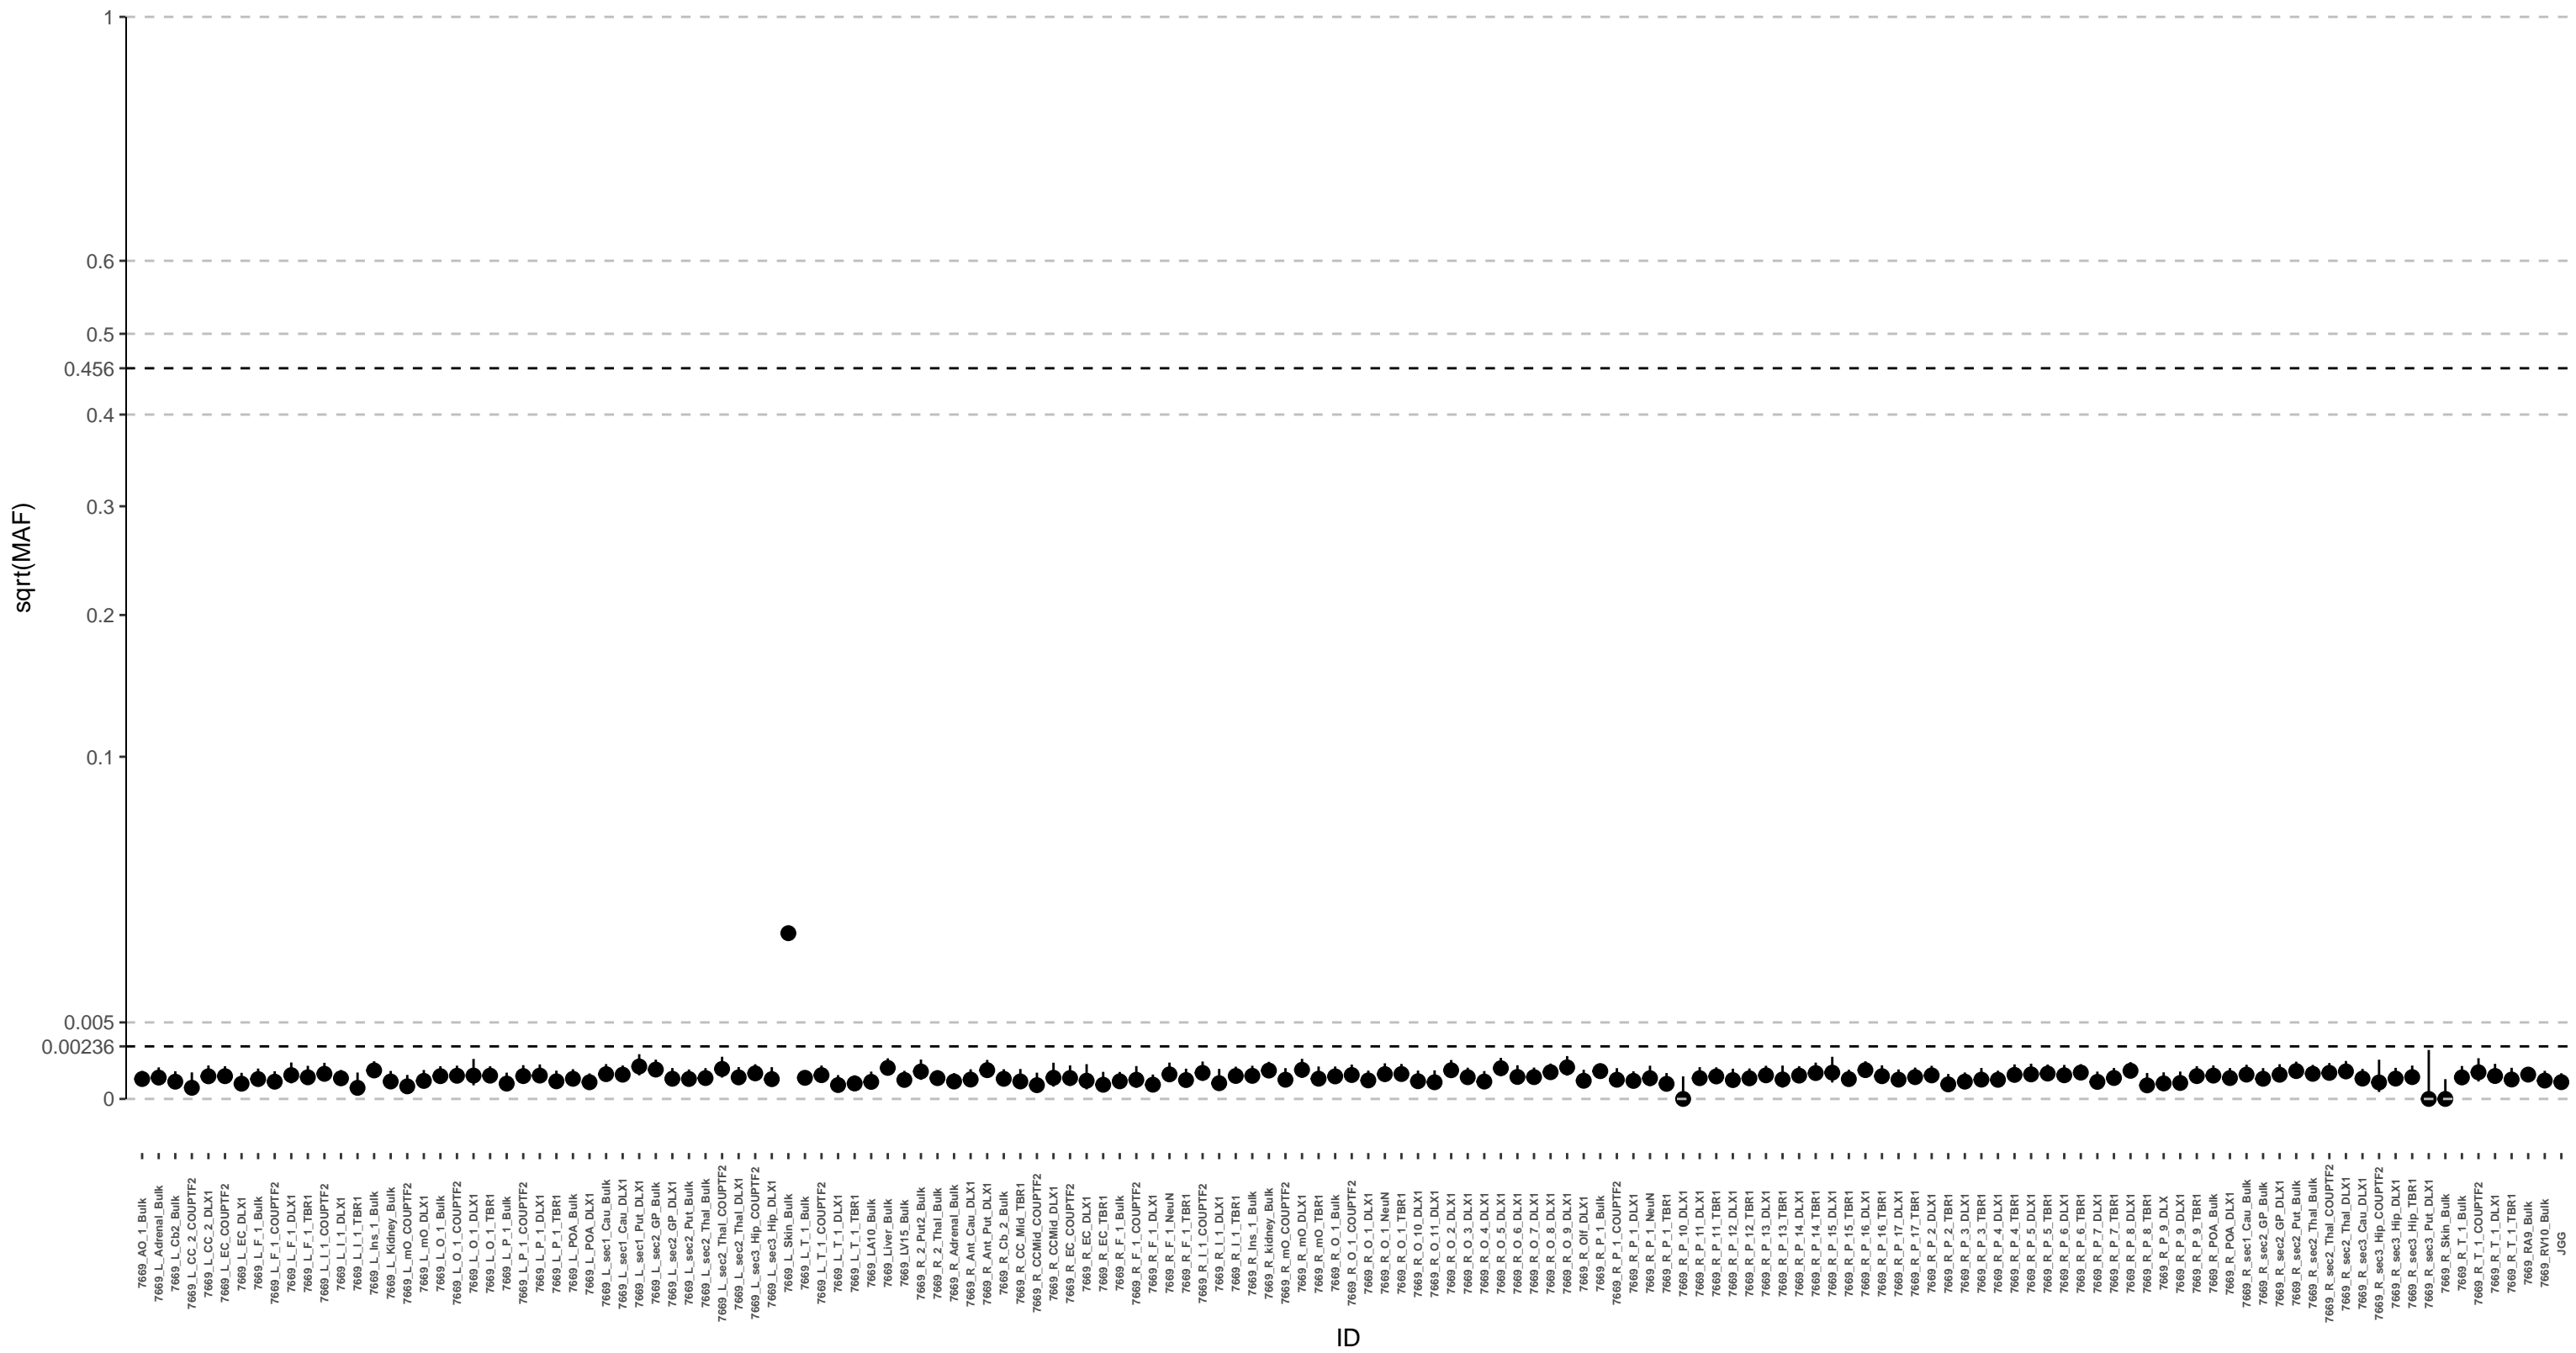

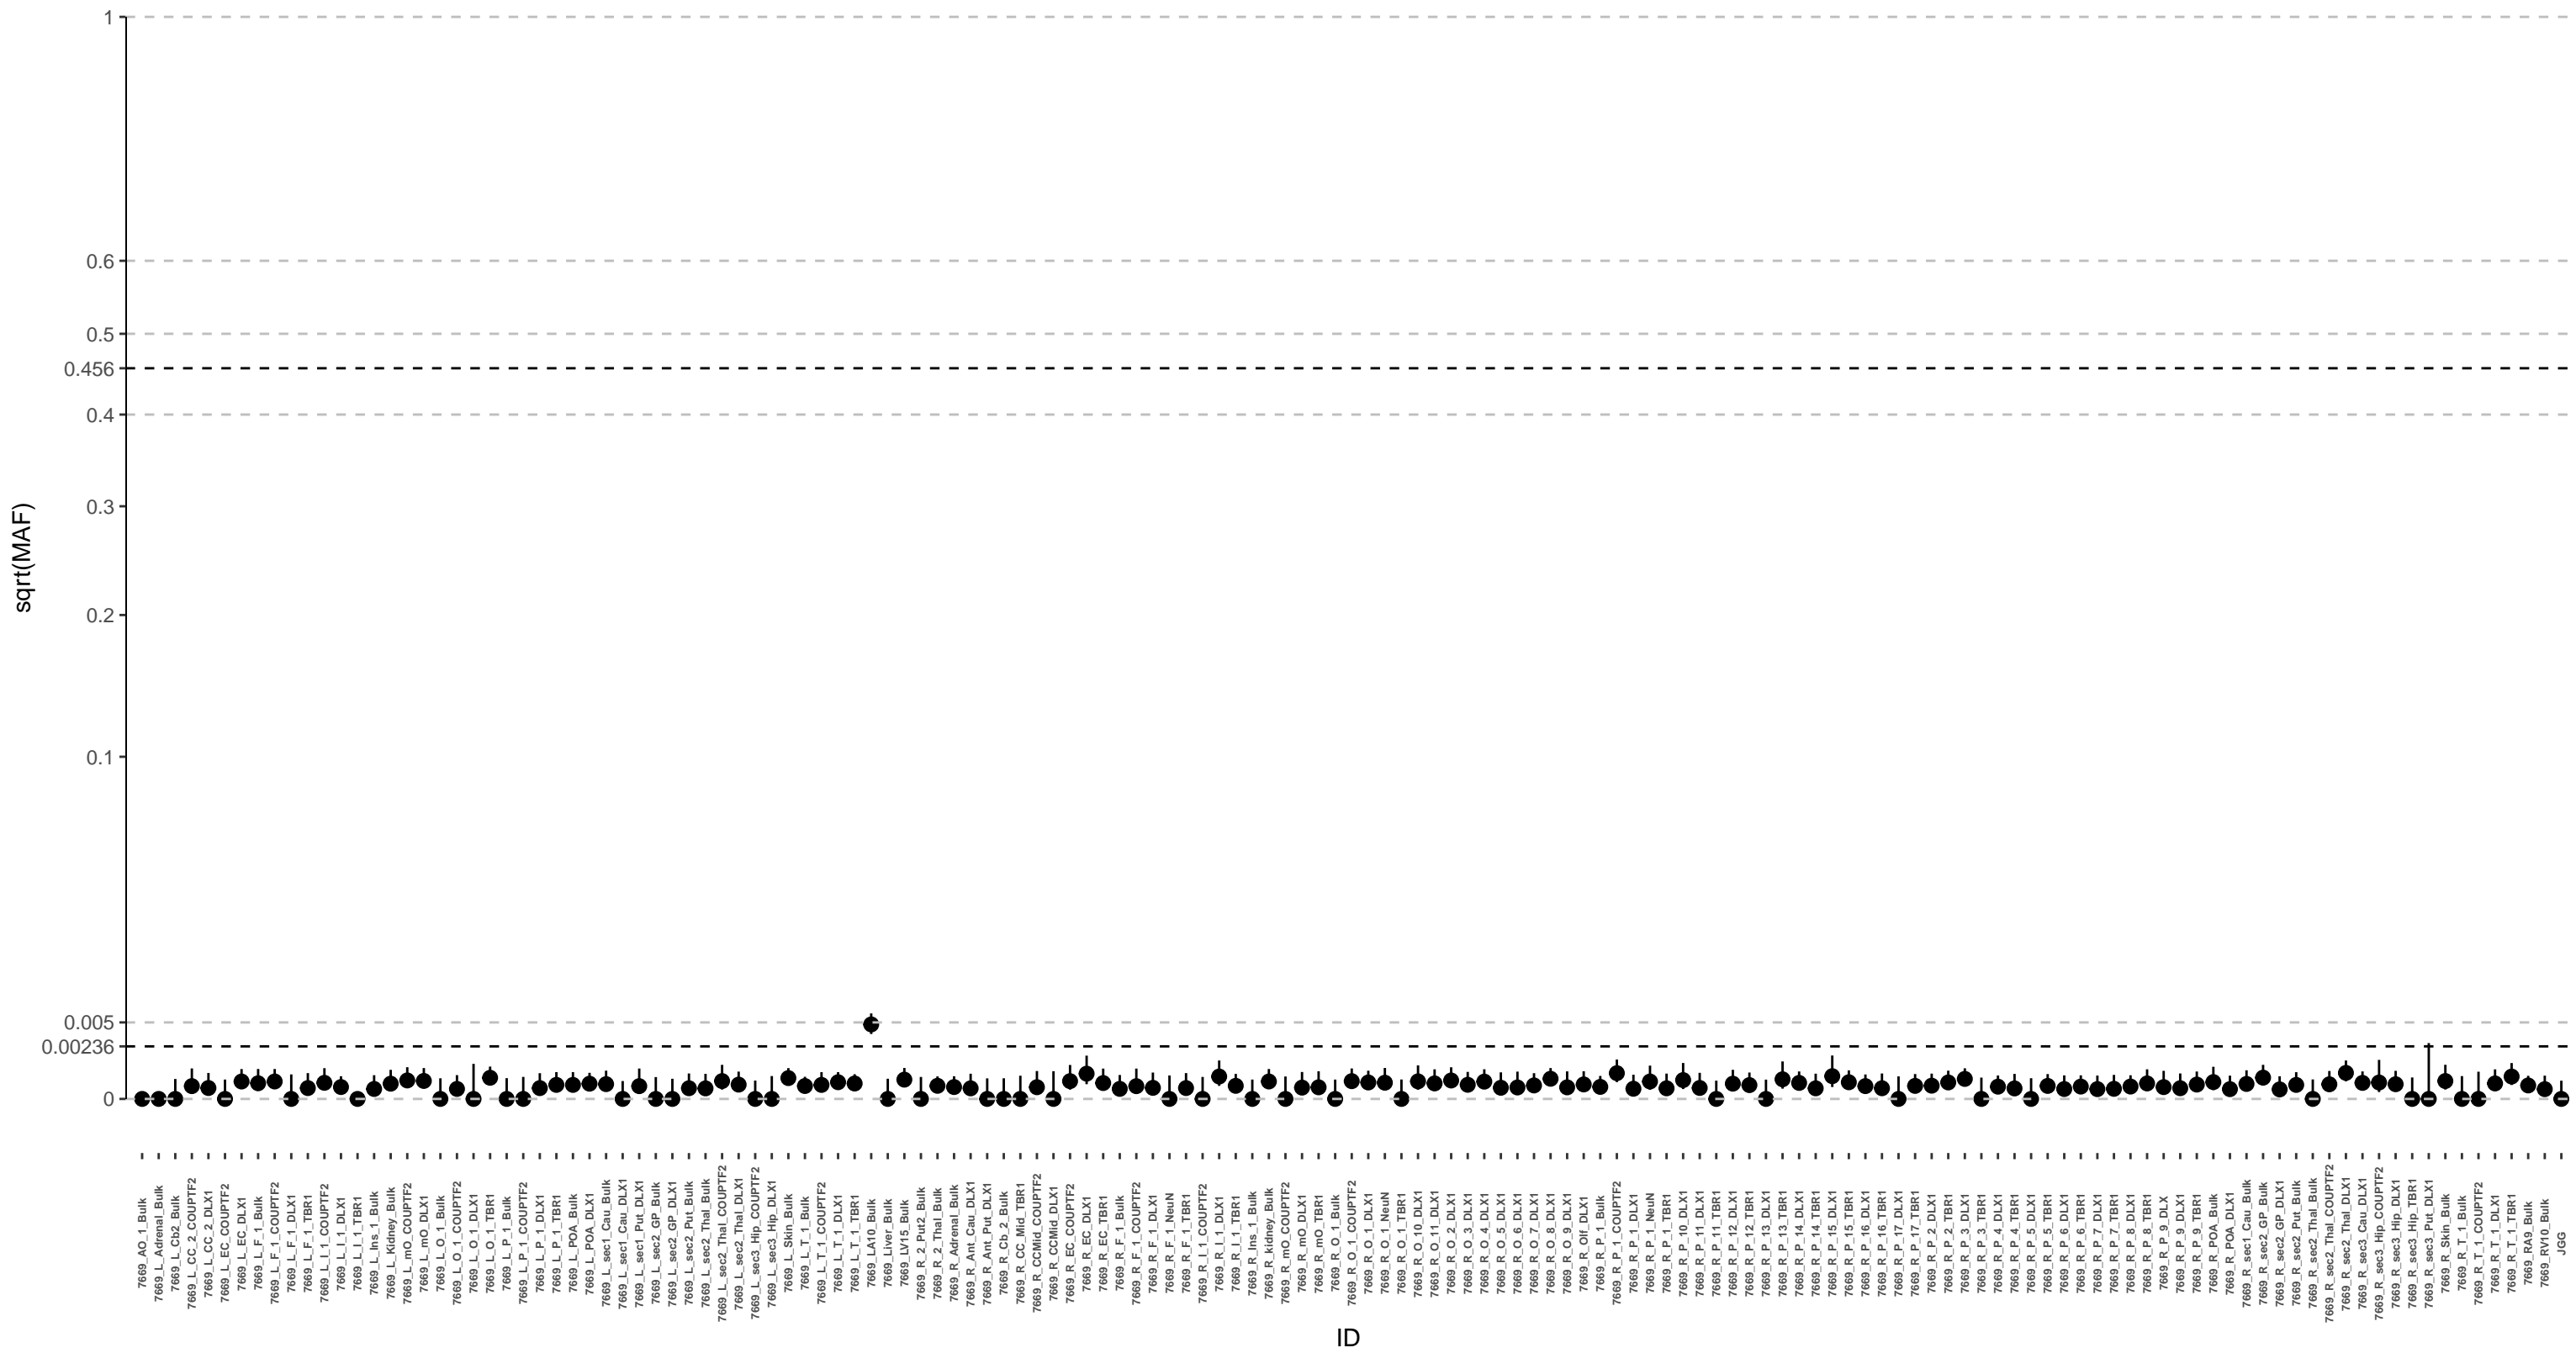

ID05 10-134211625-C-T

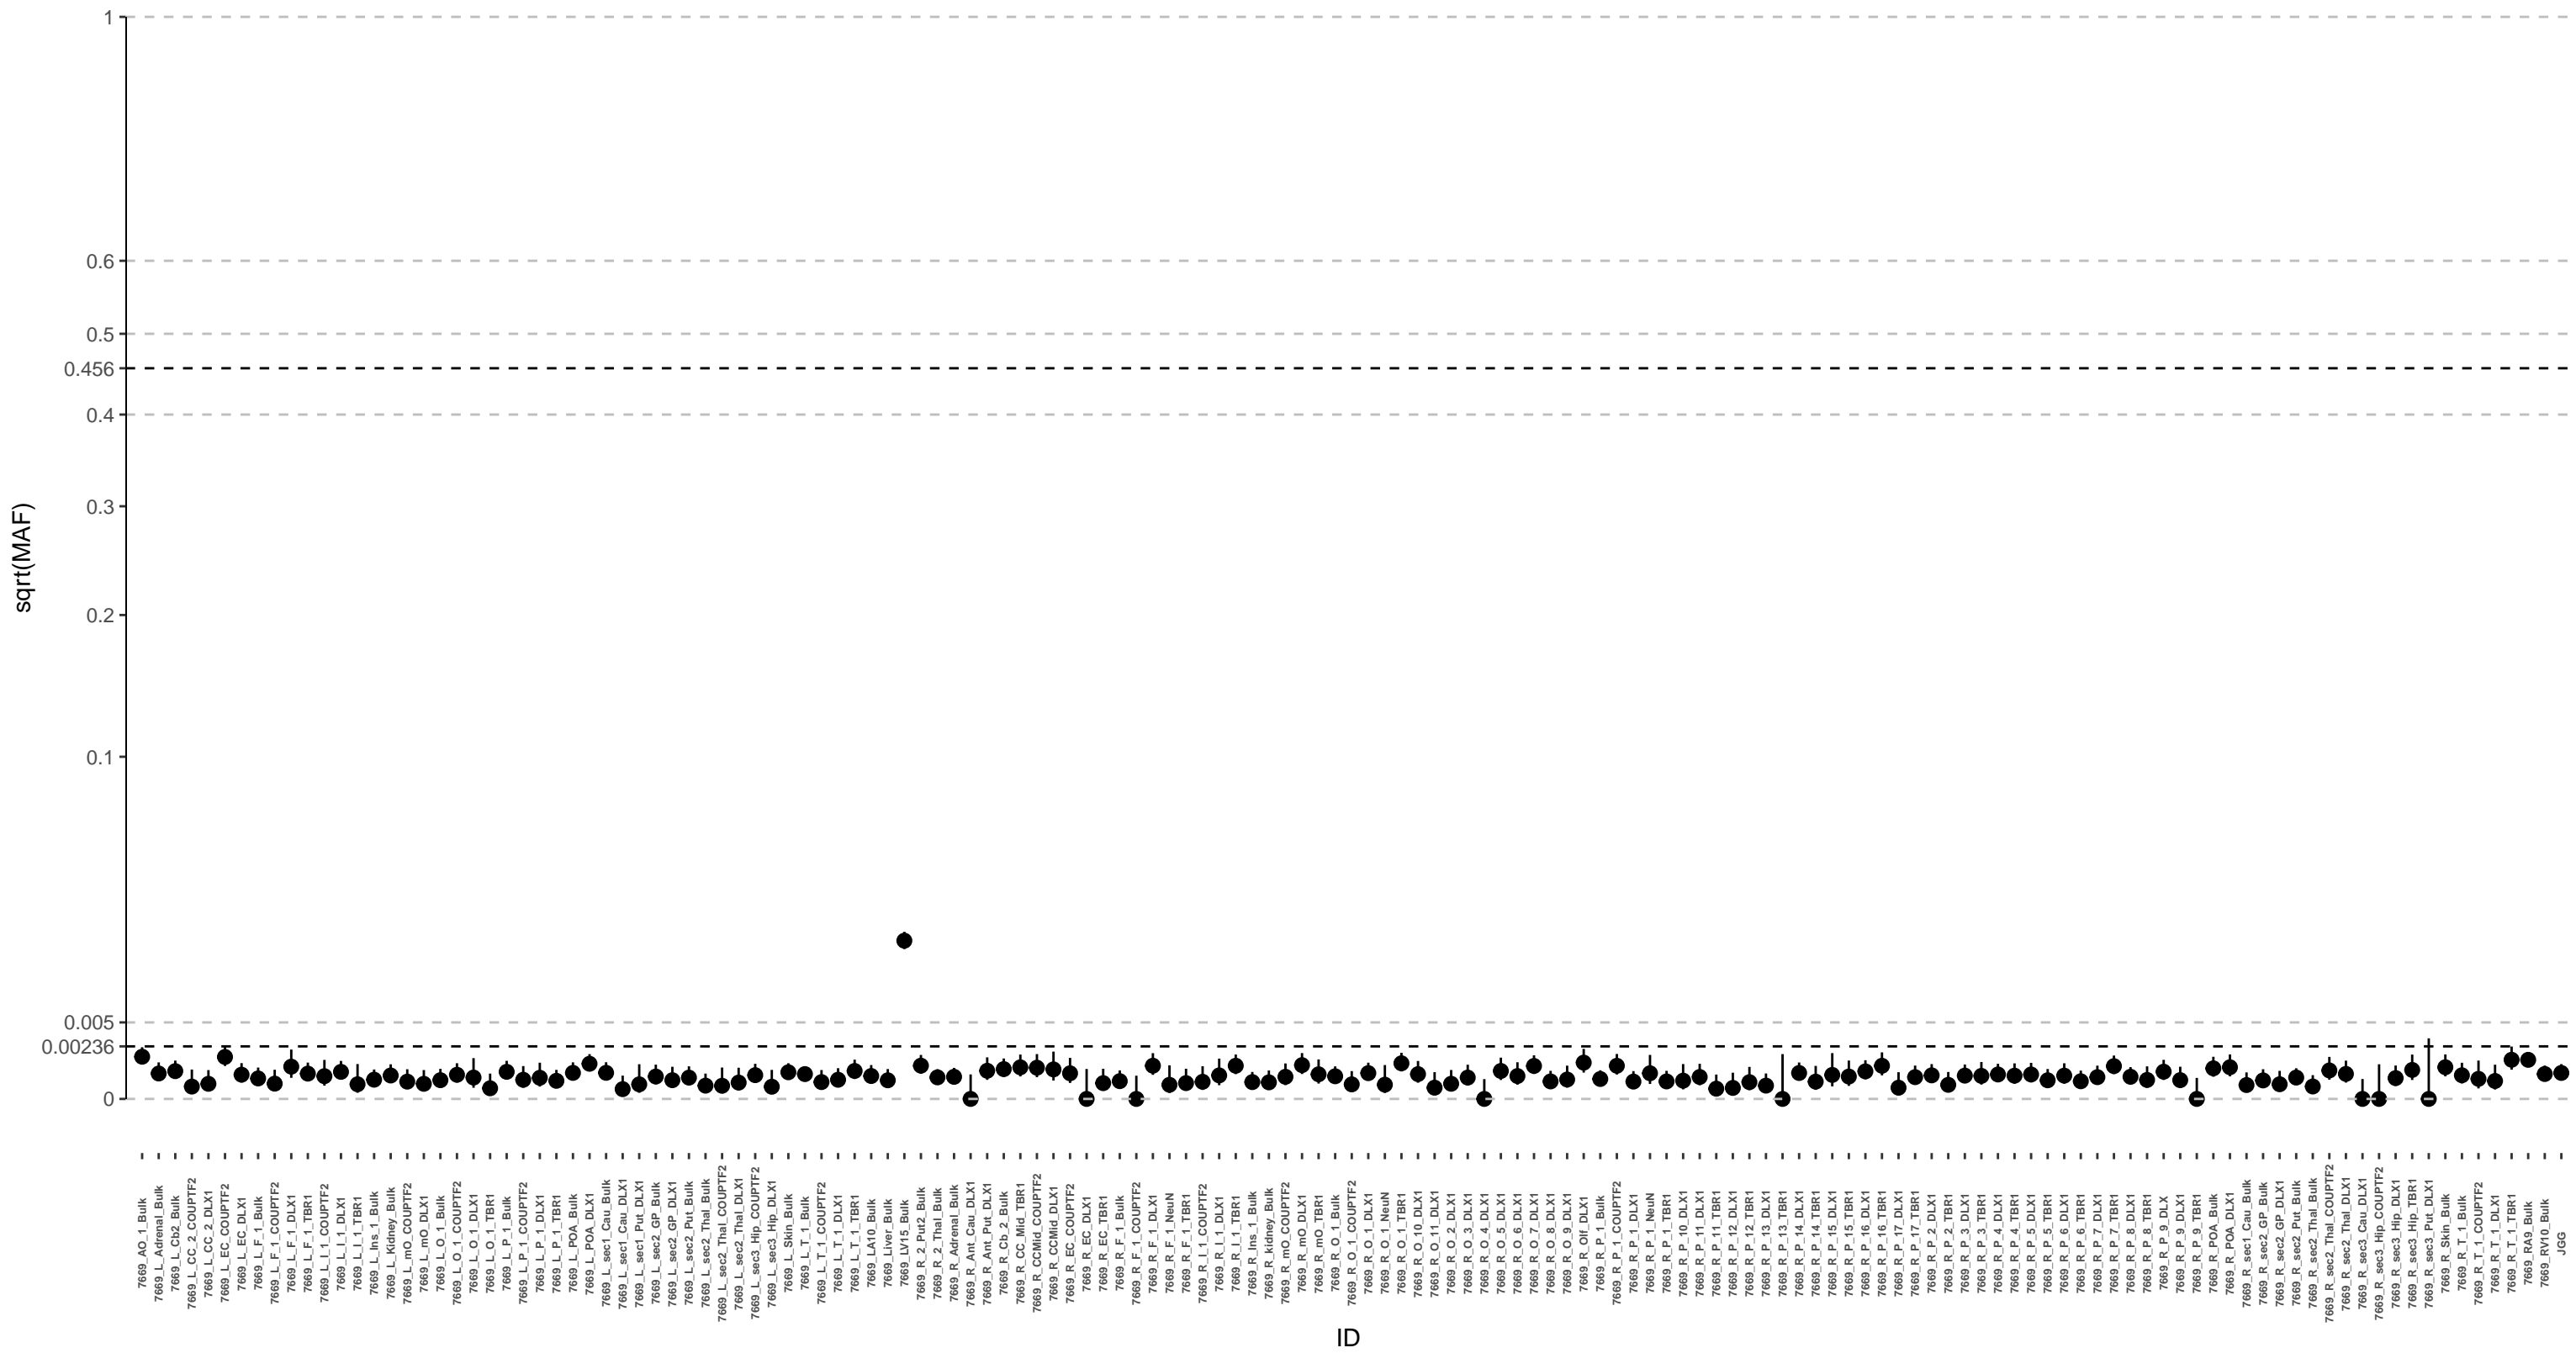

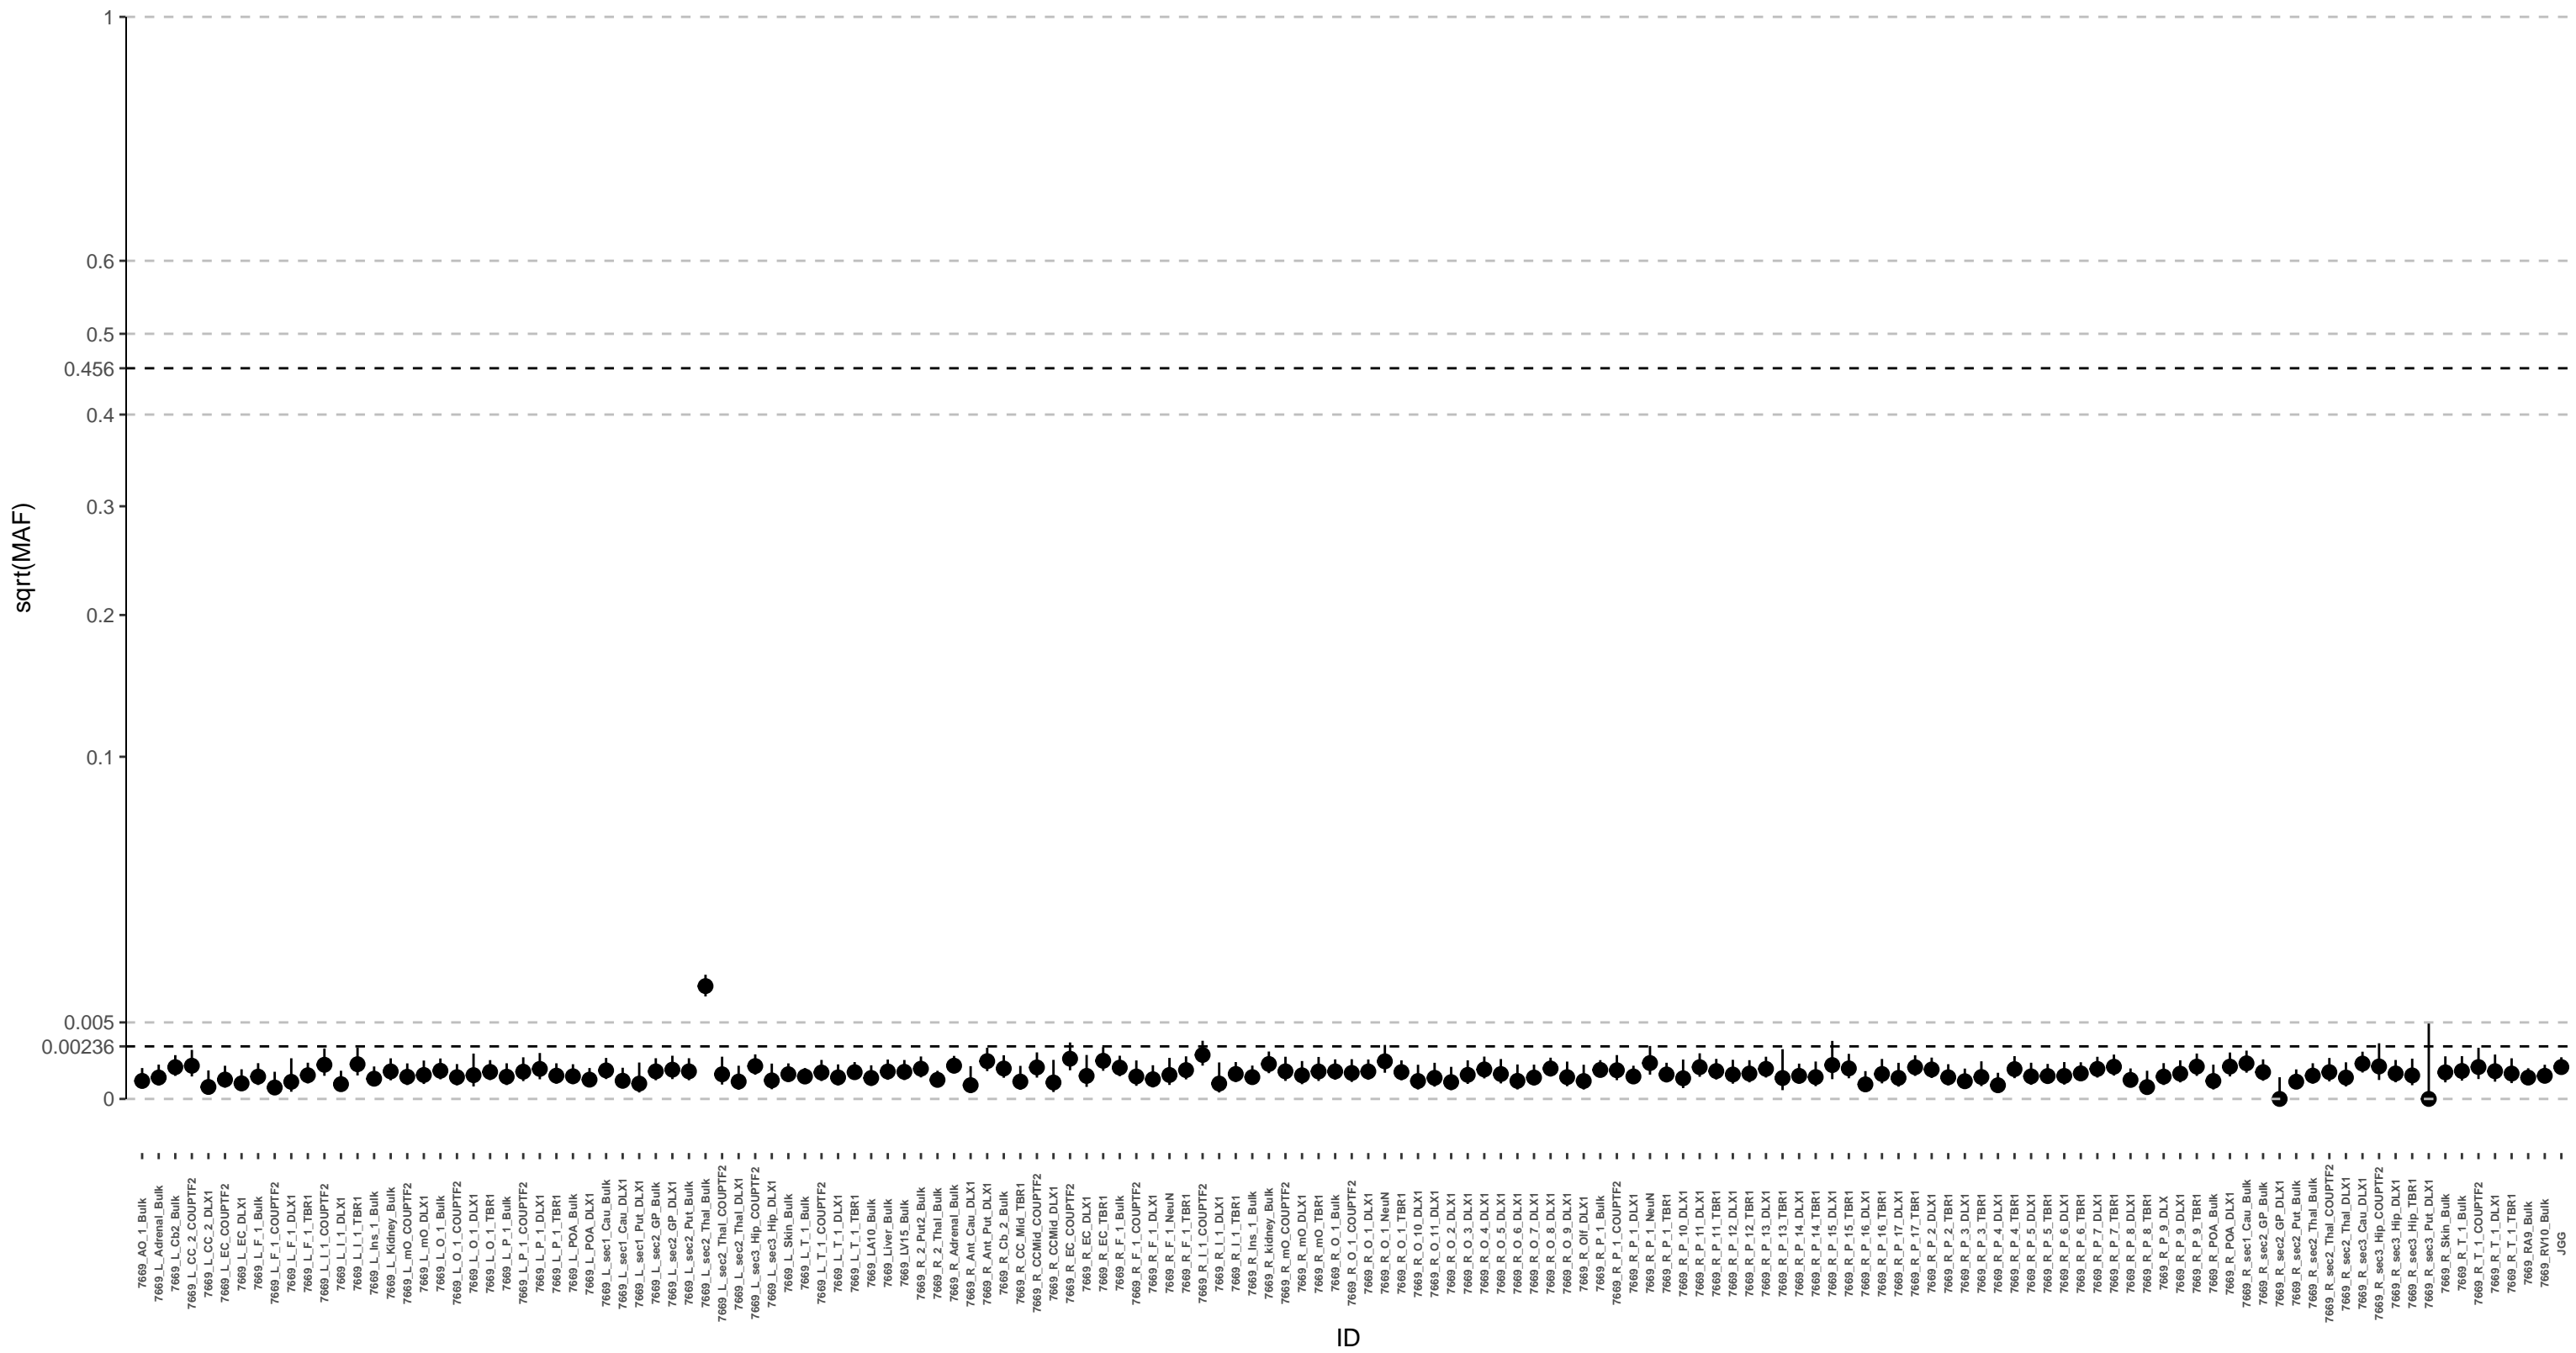

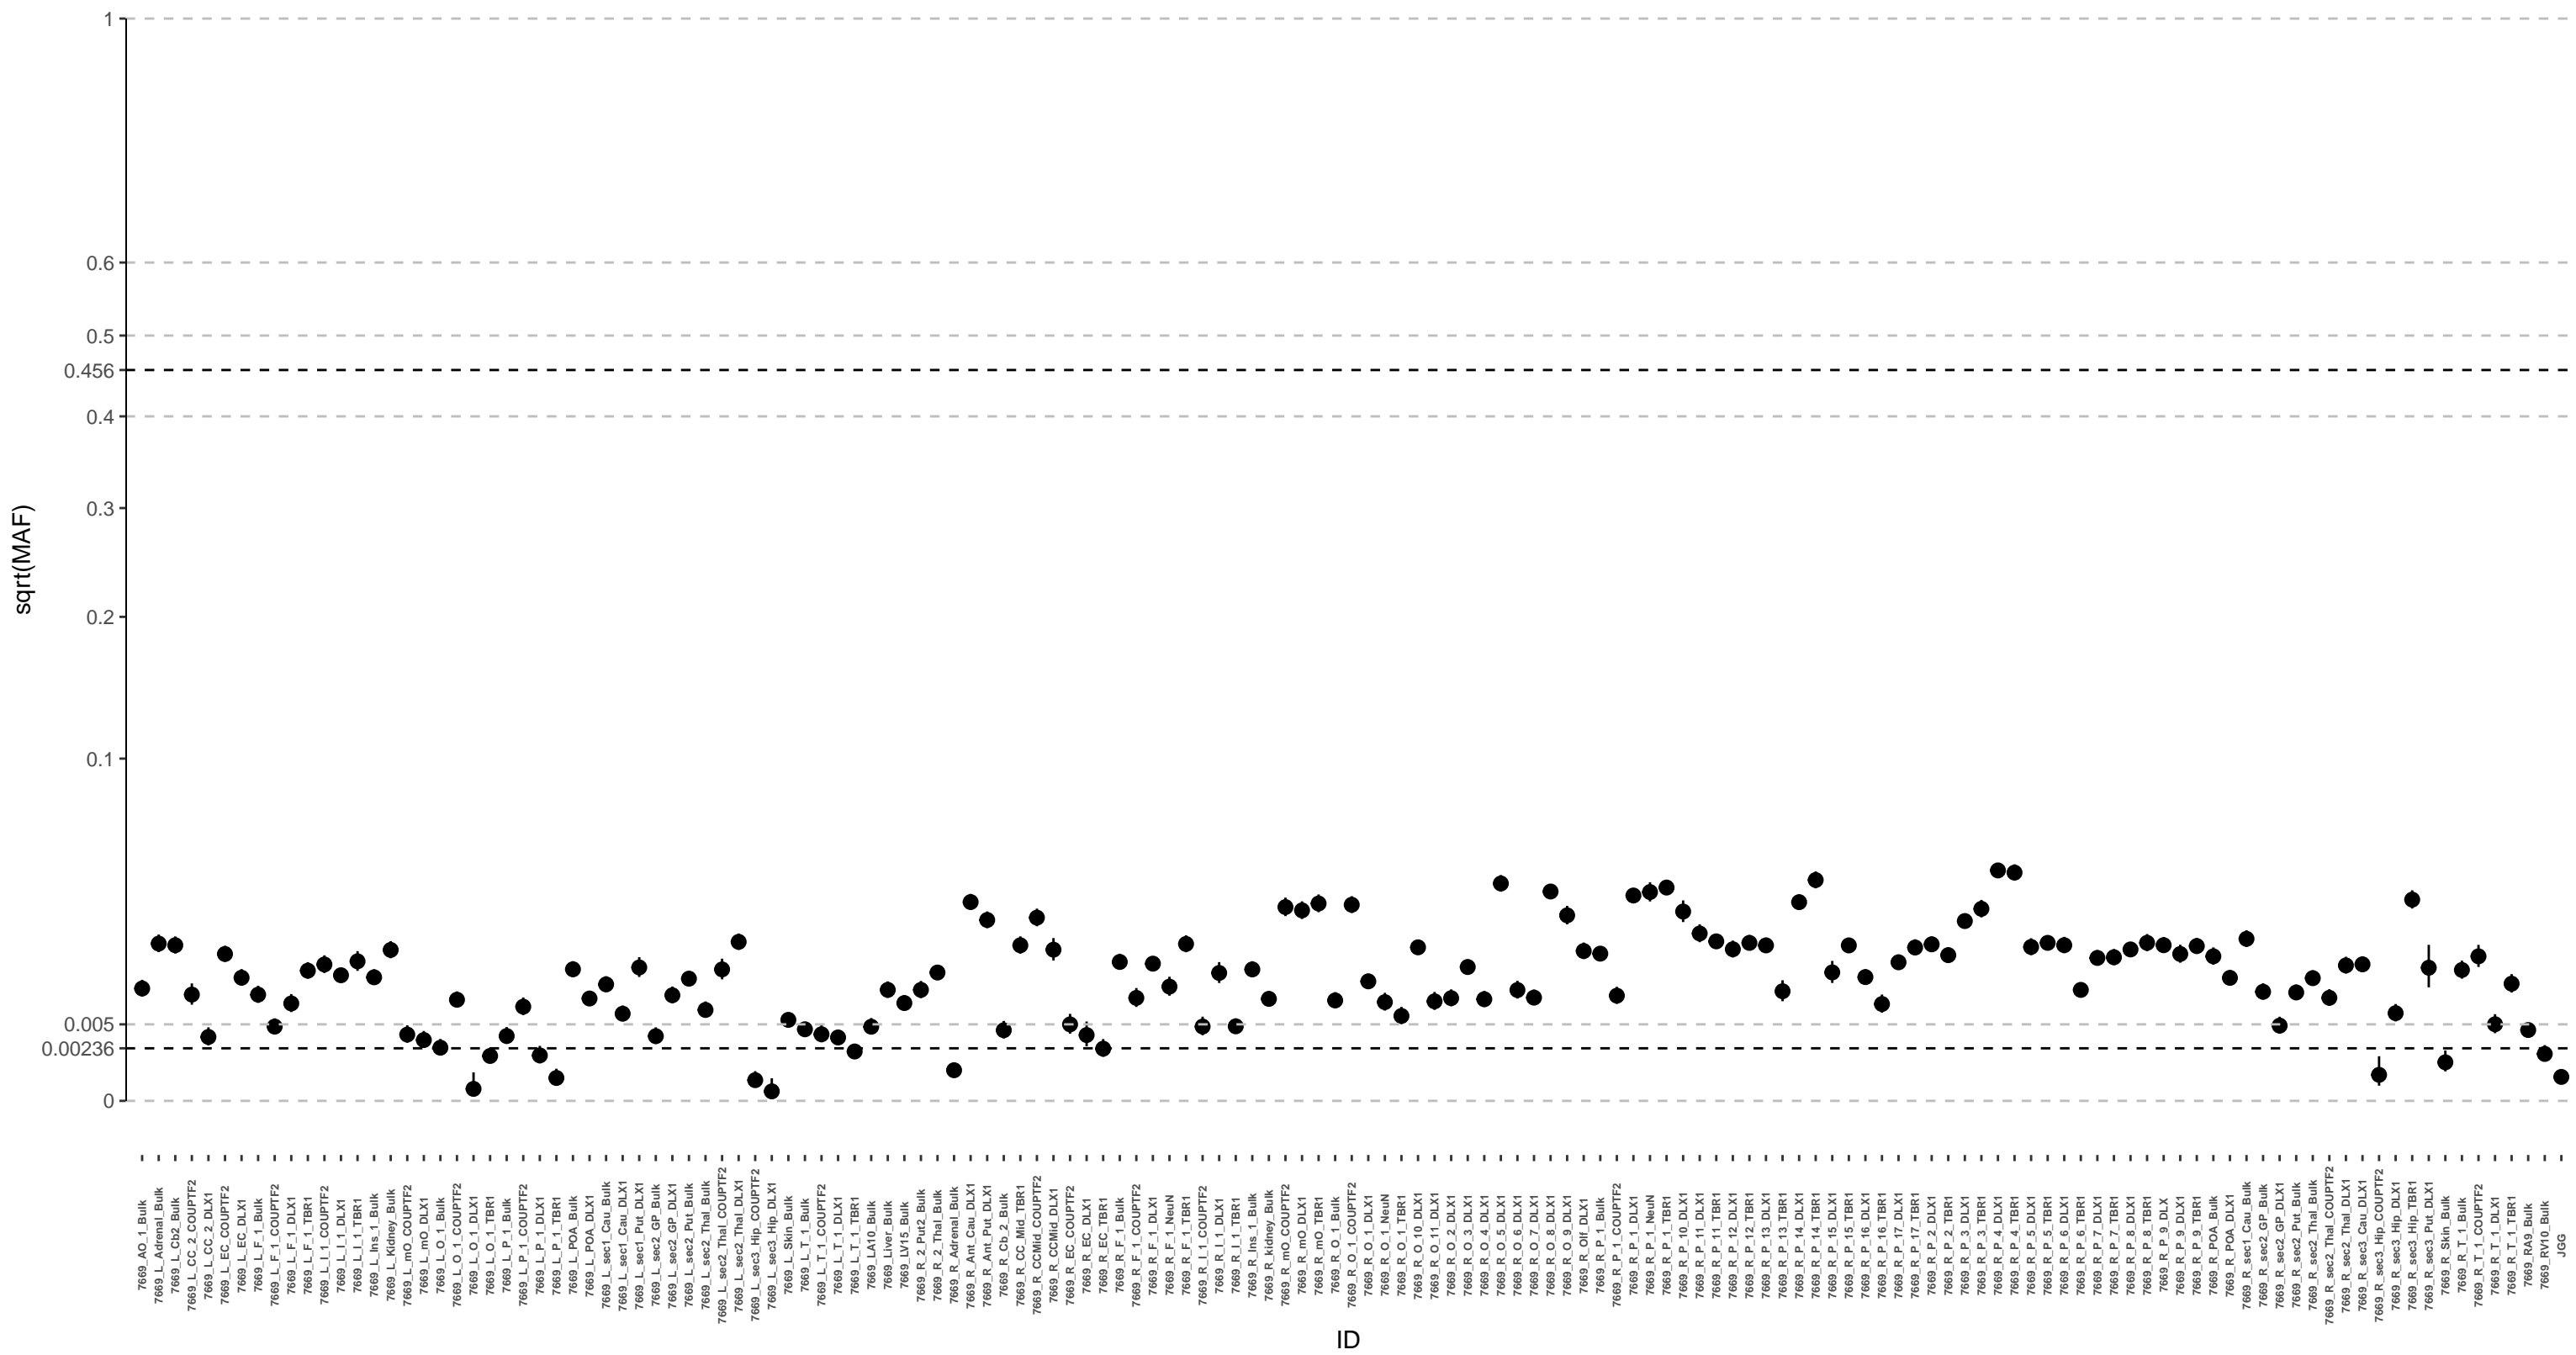



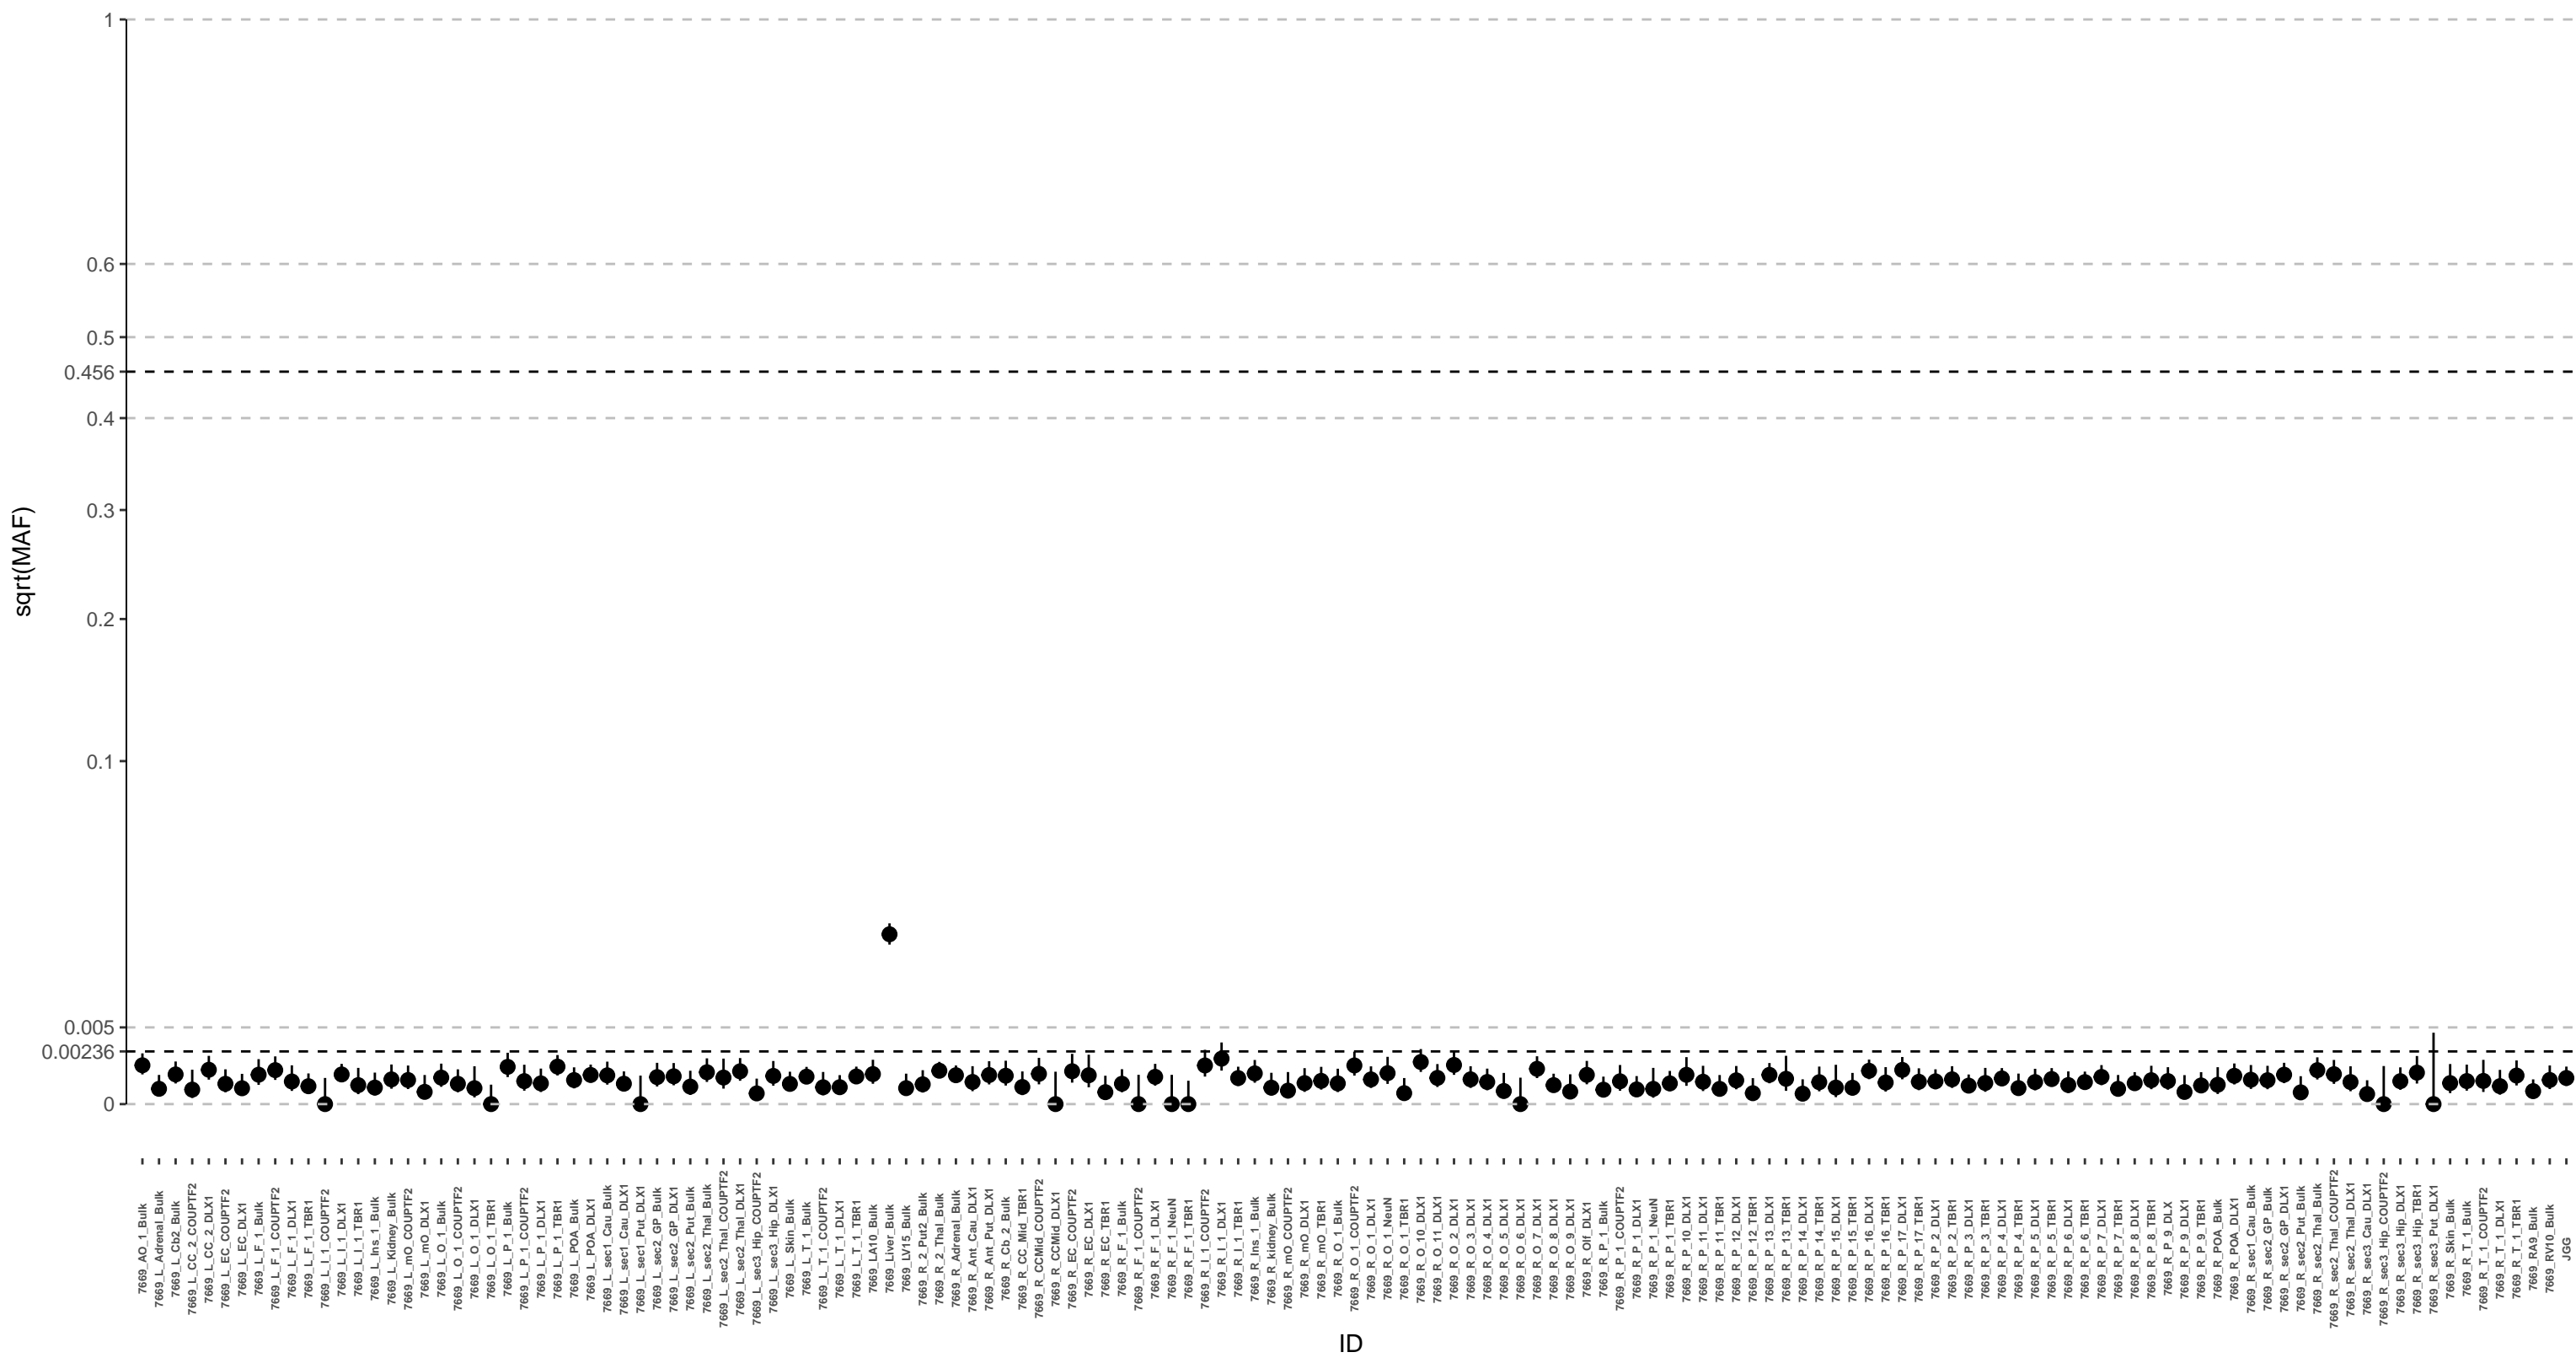

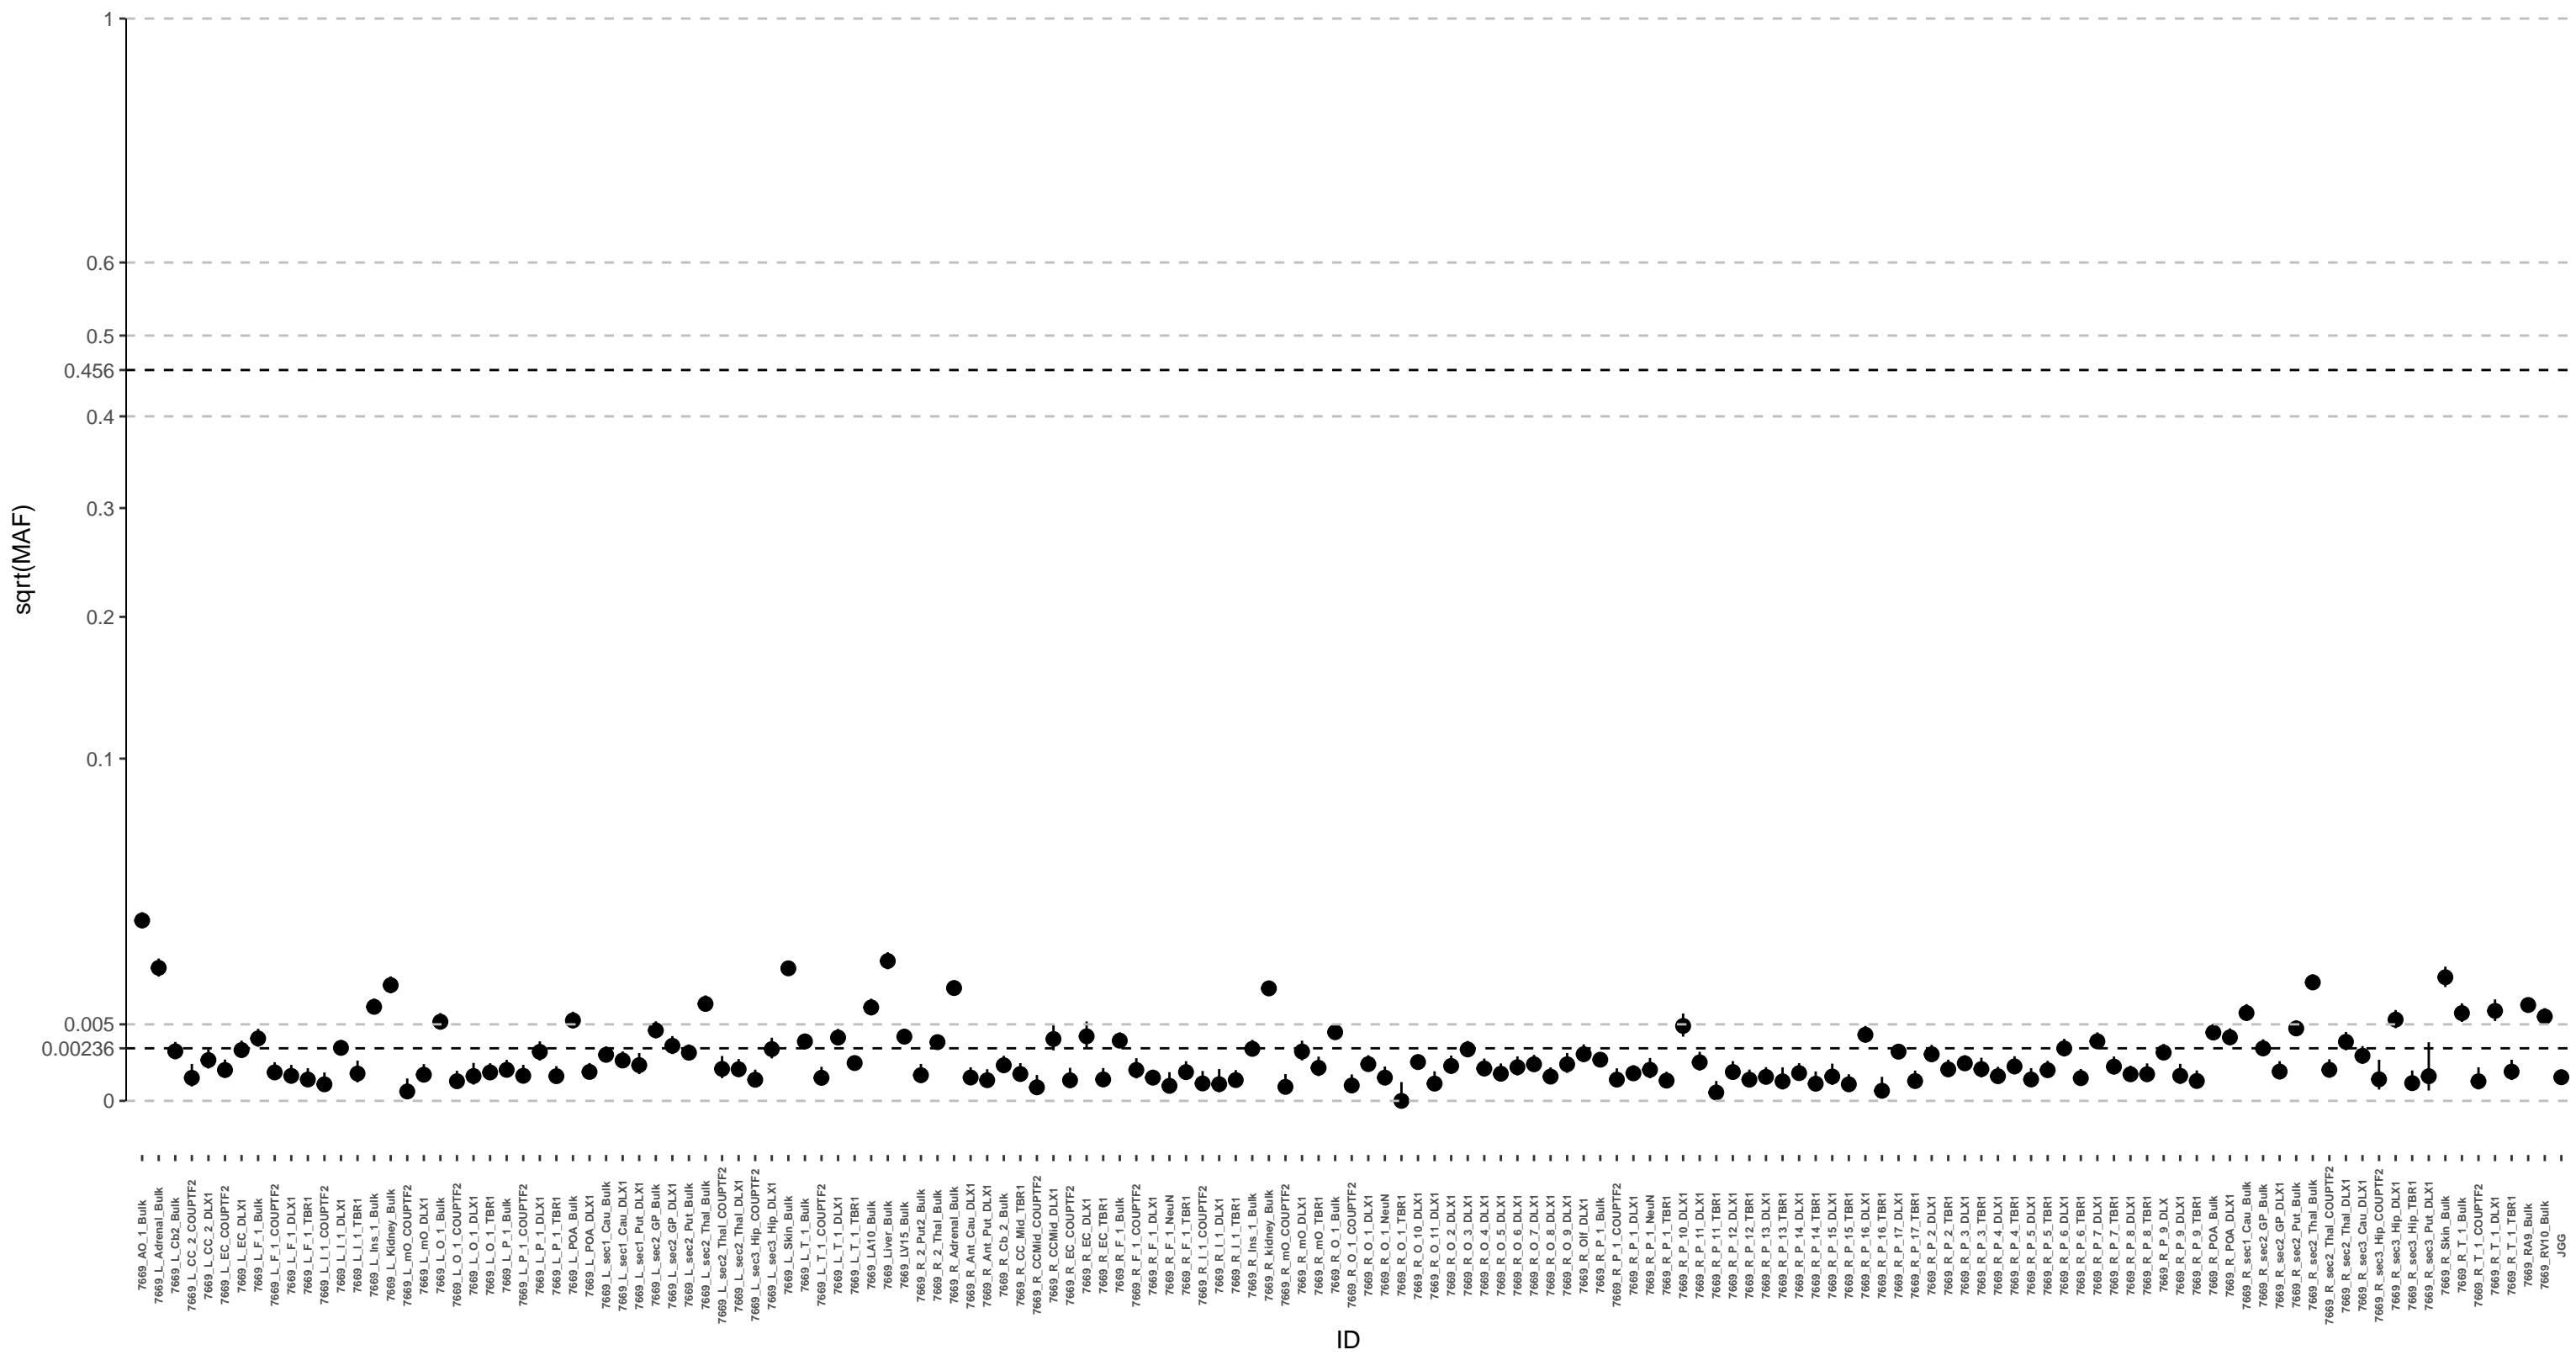

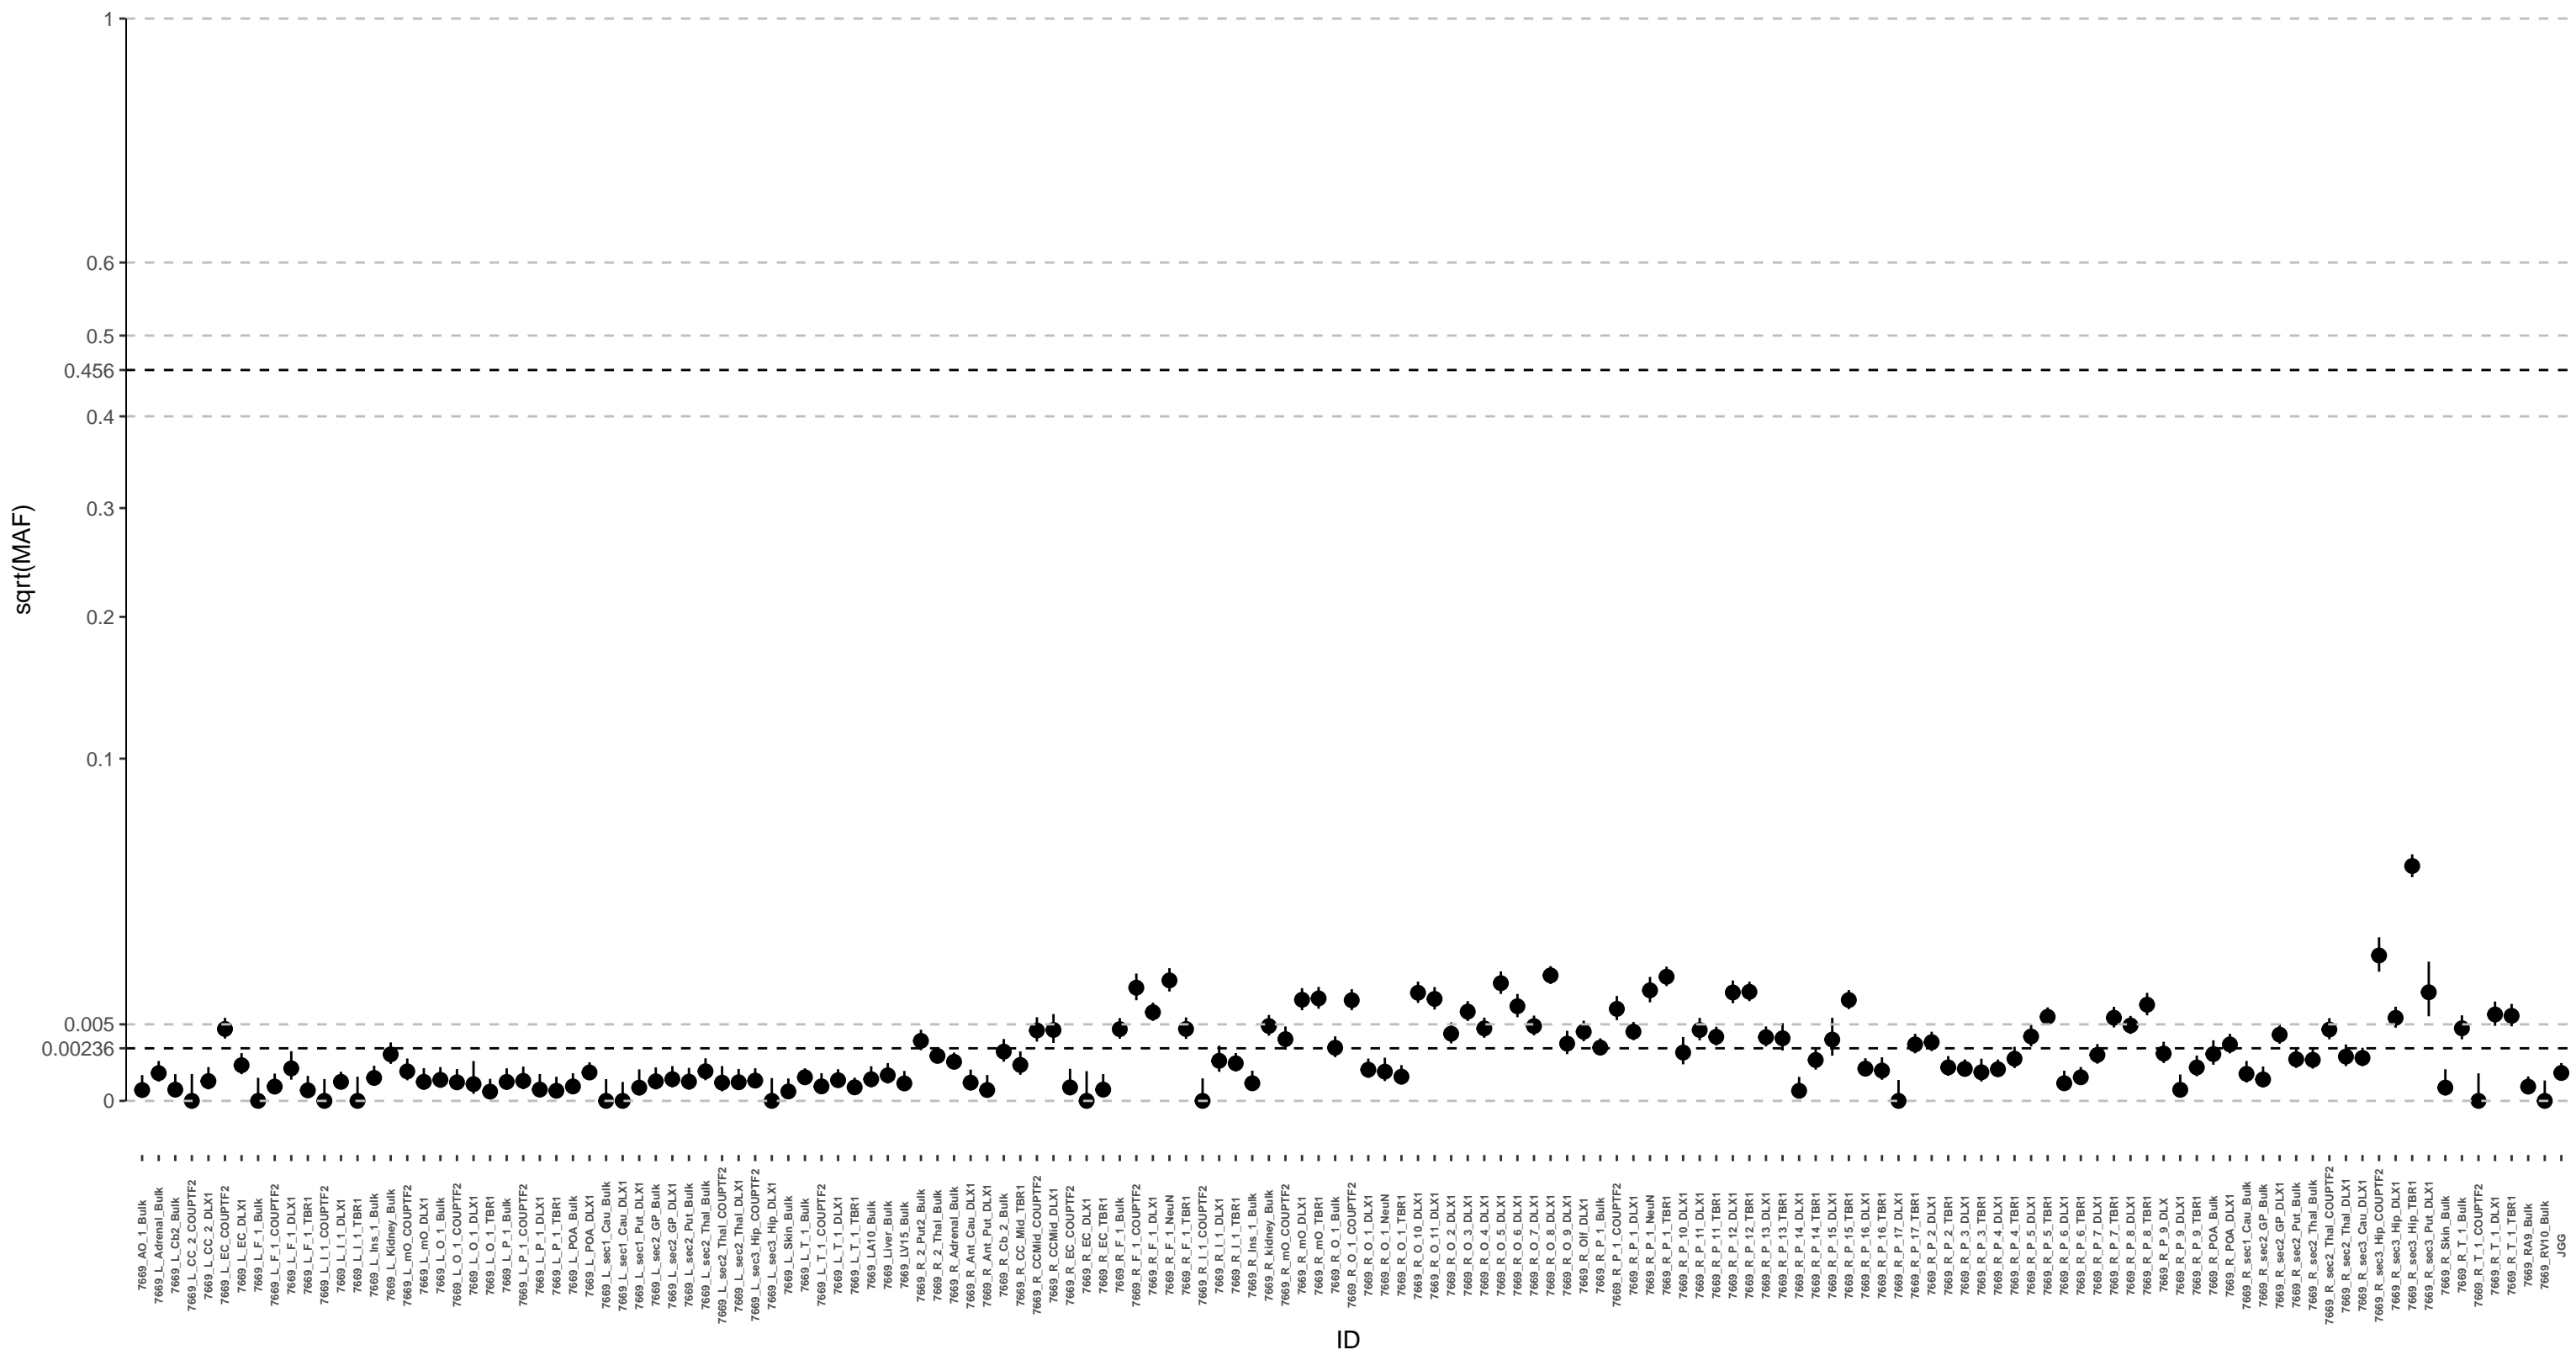

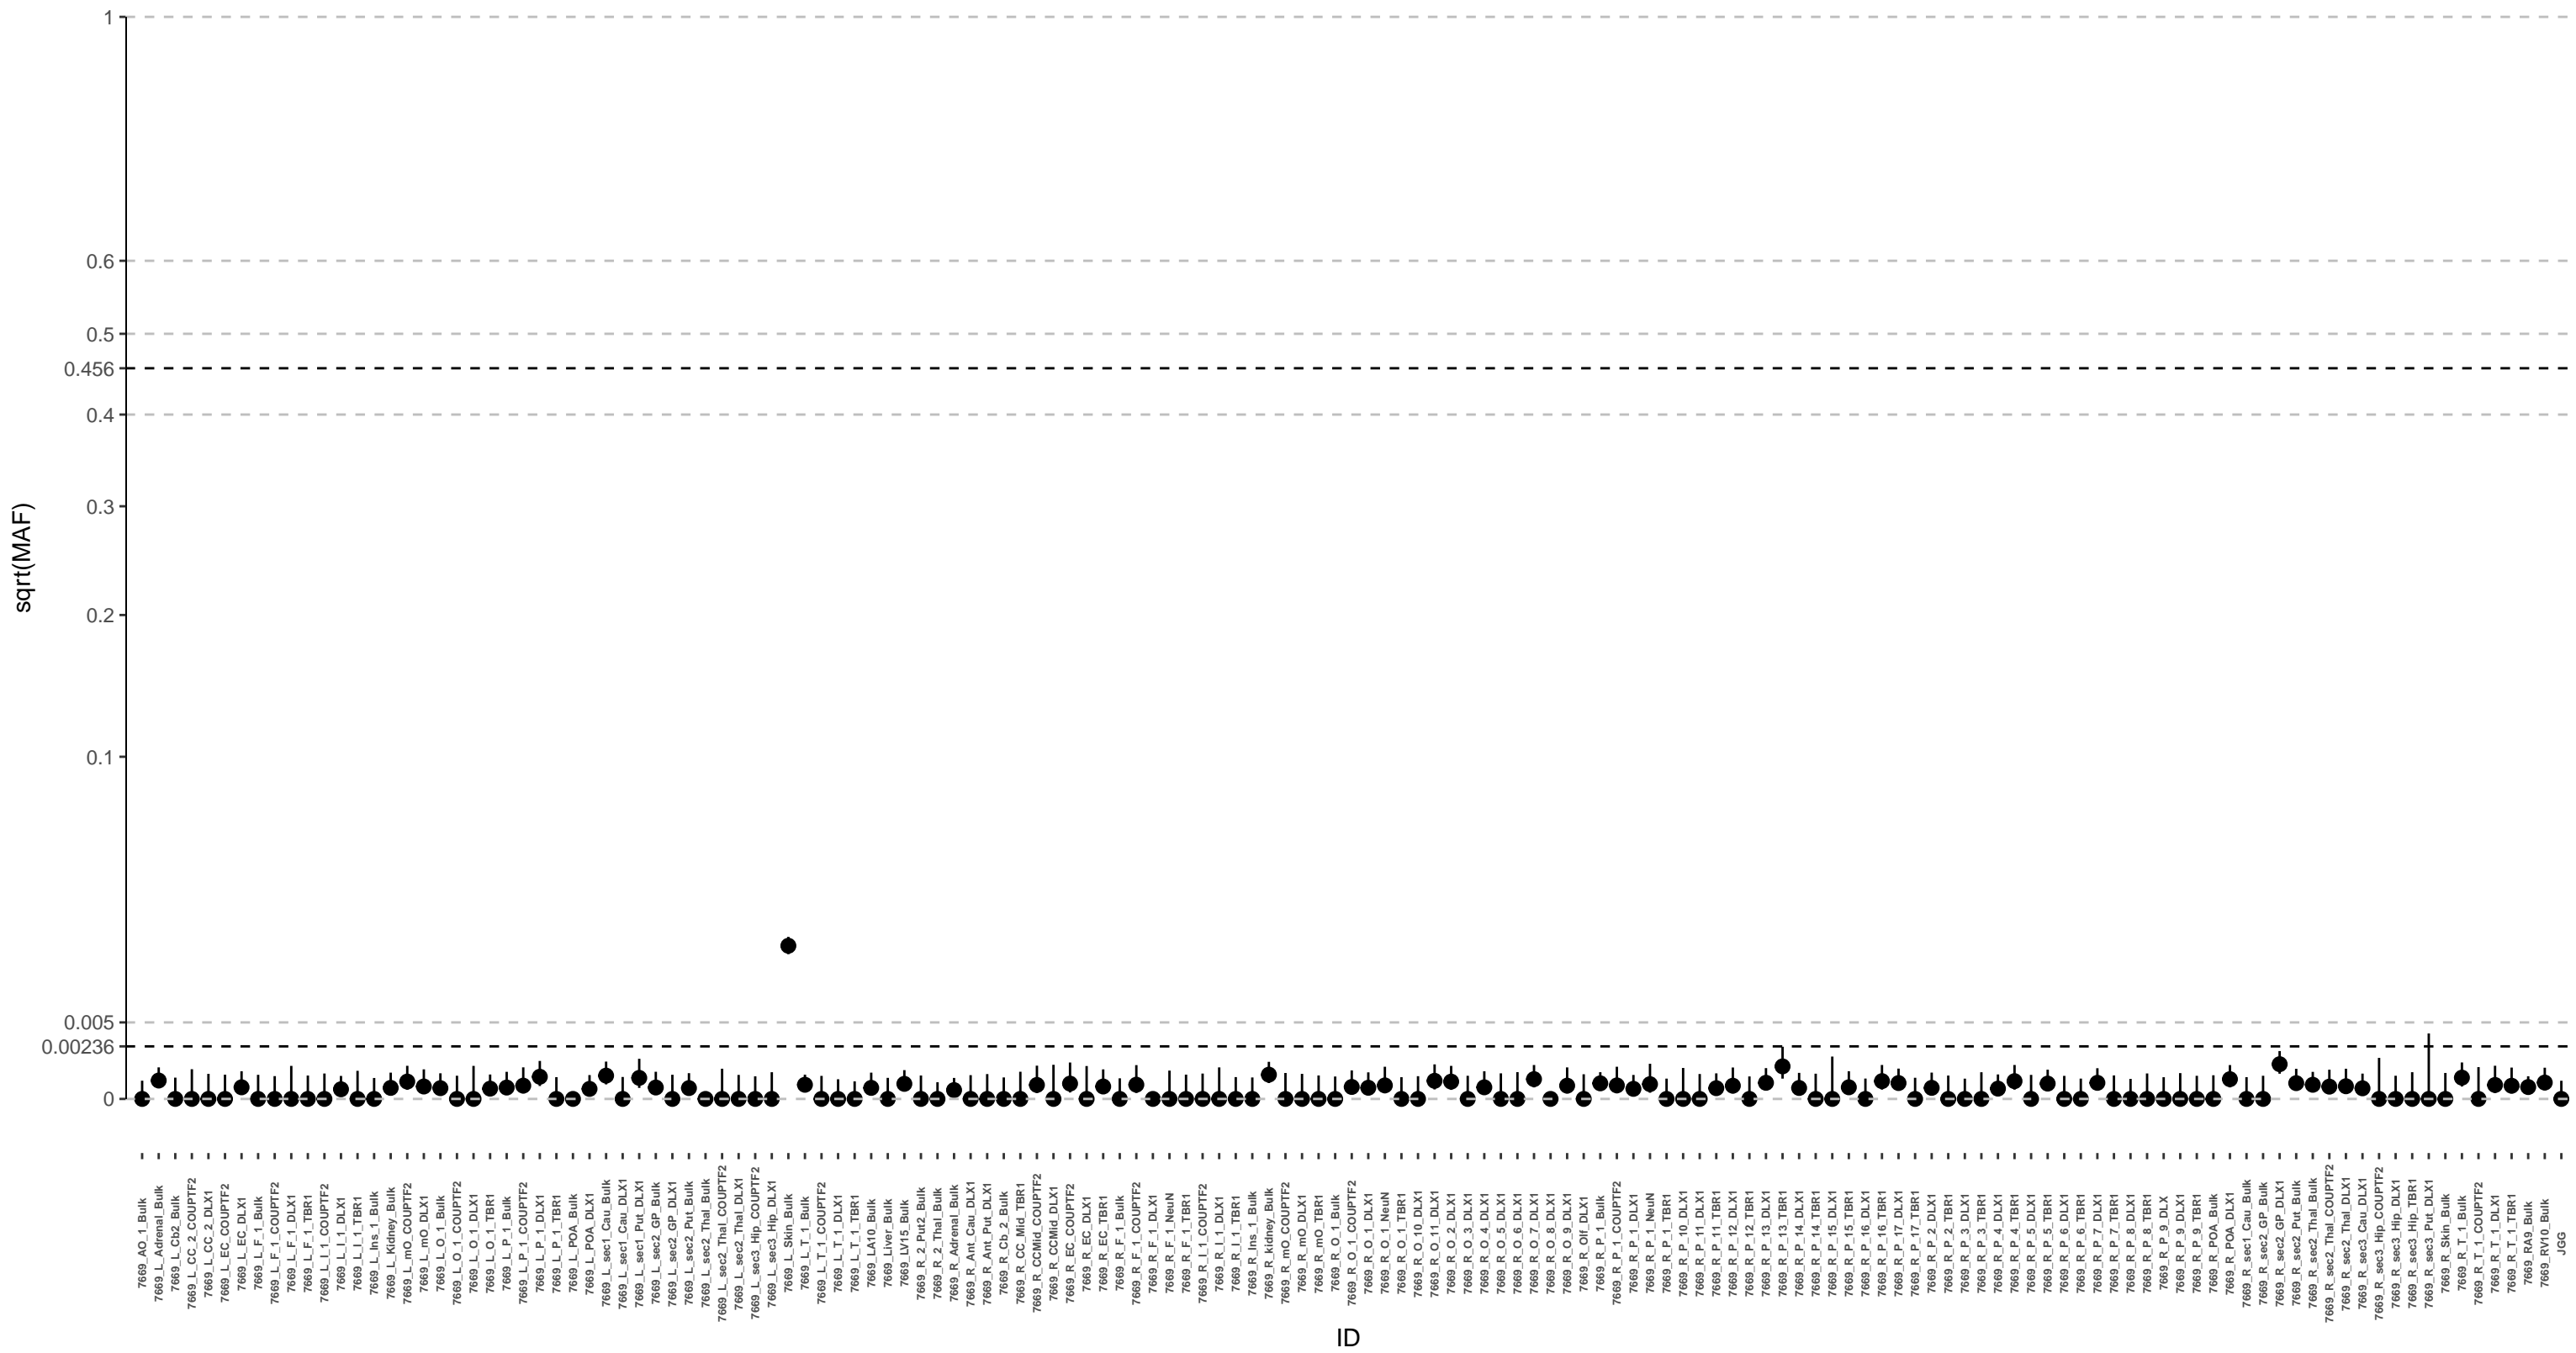

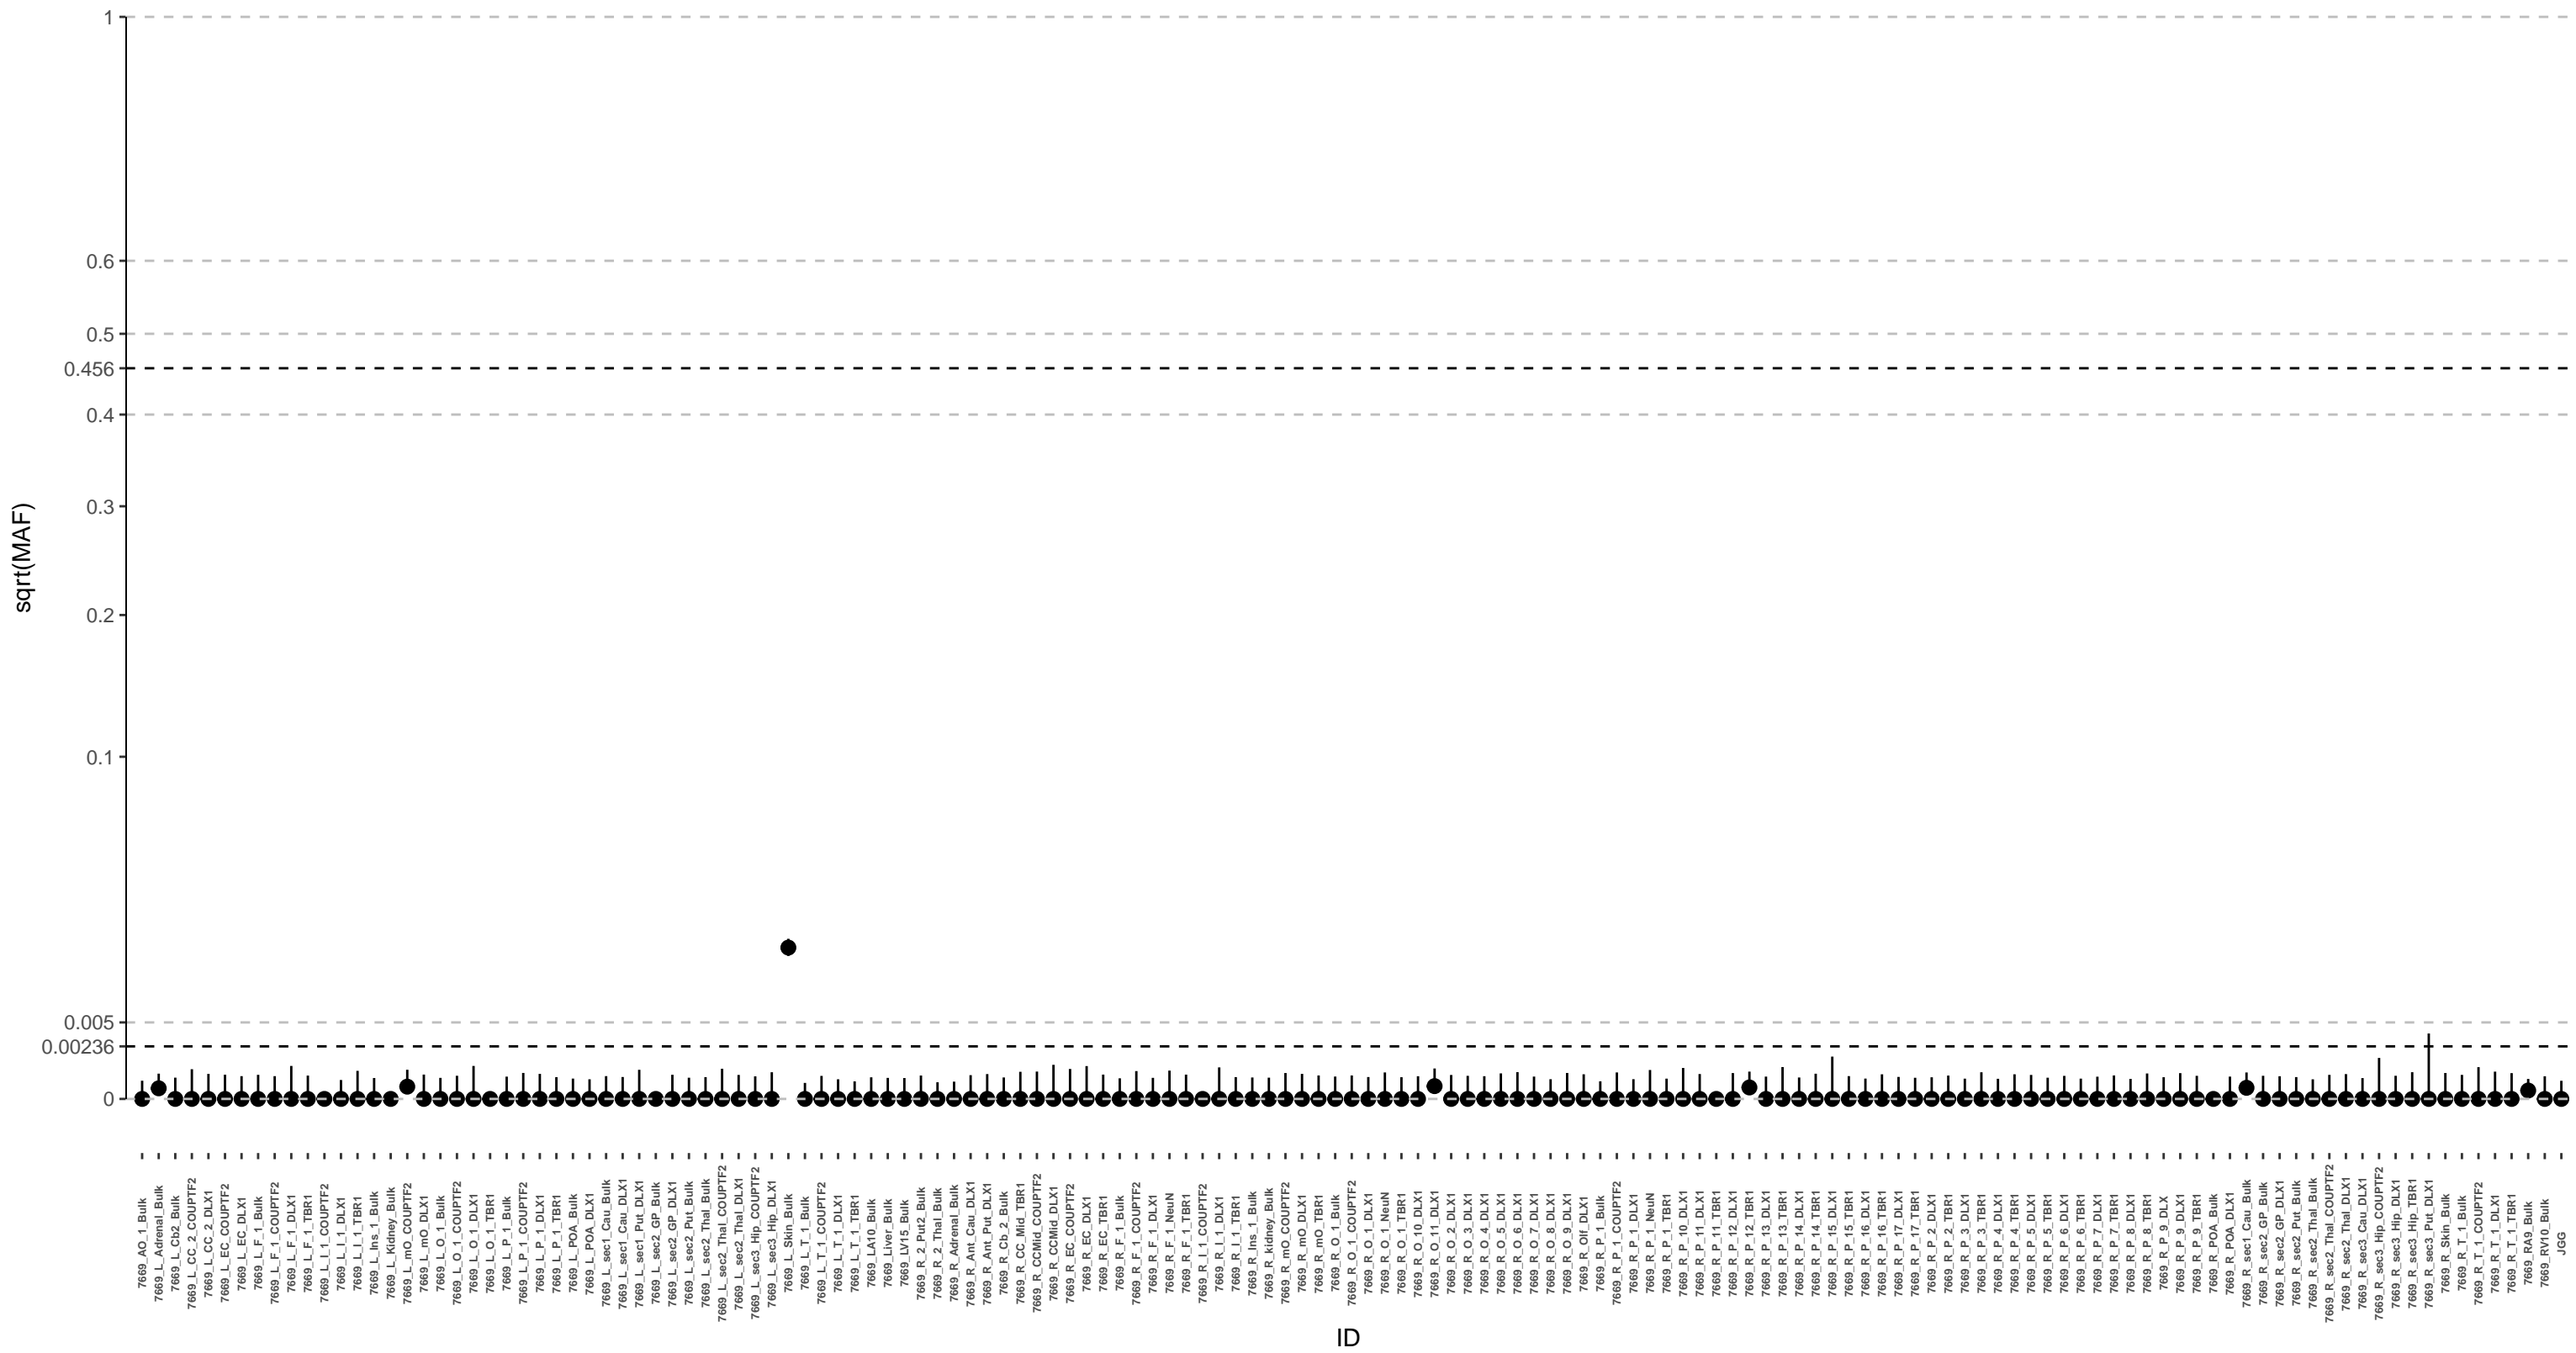

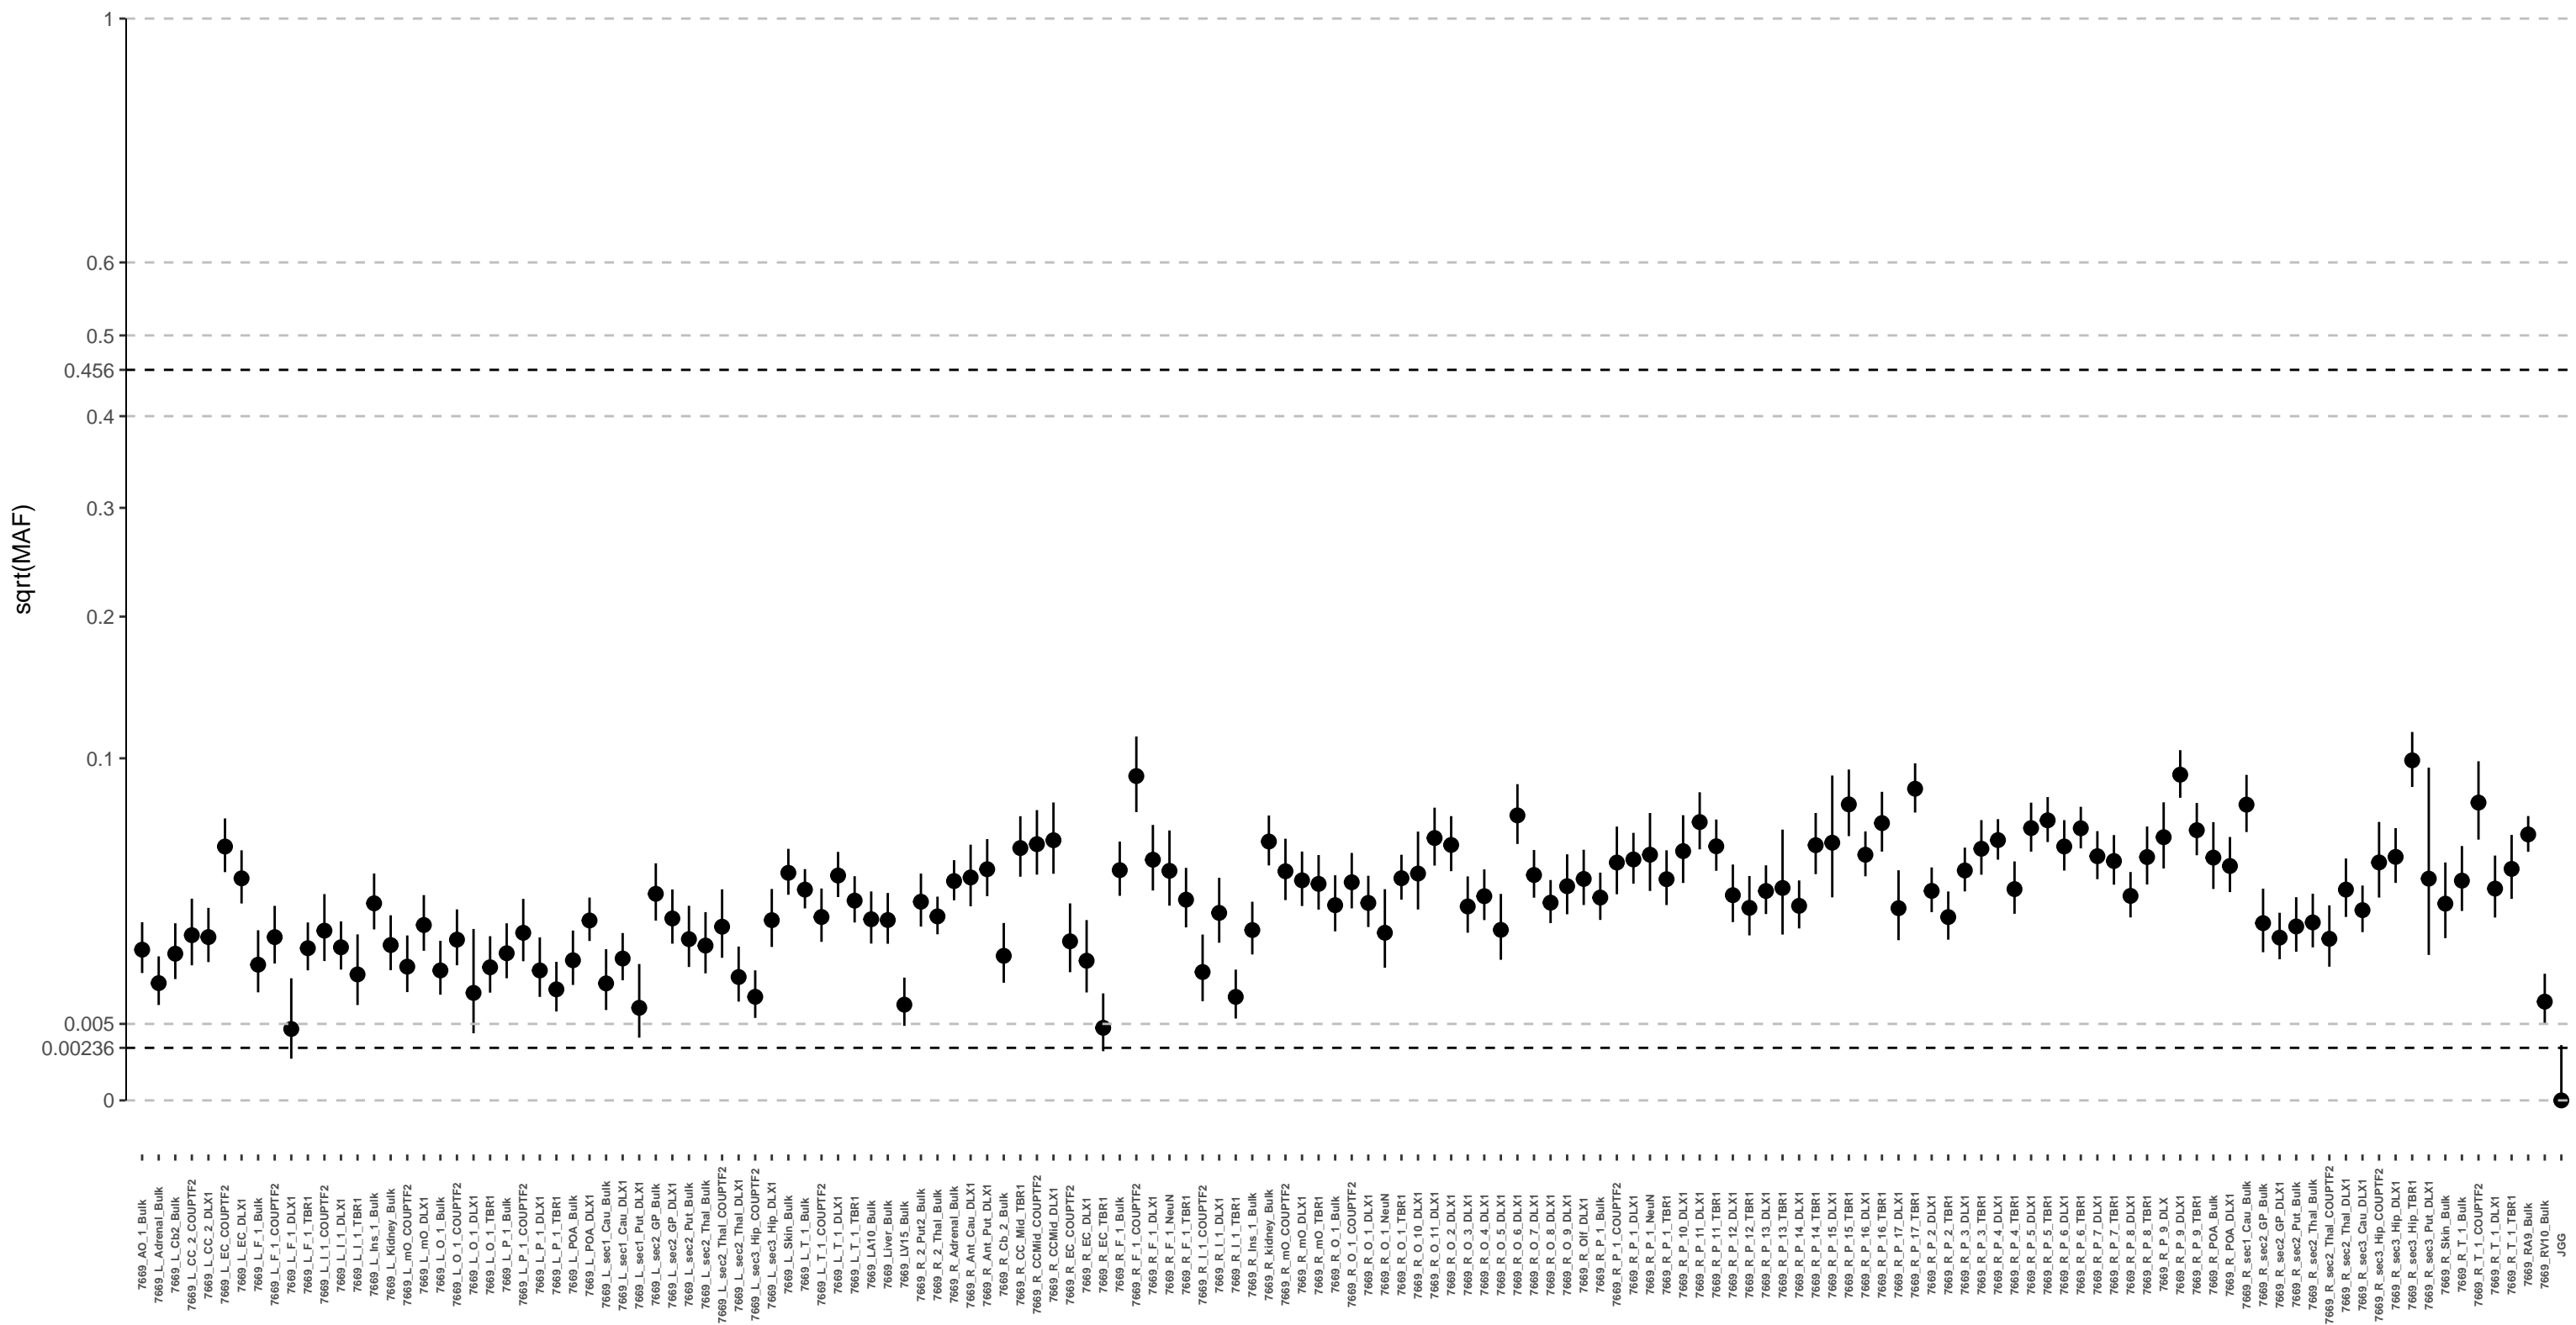

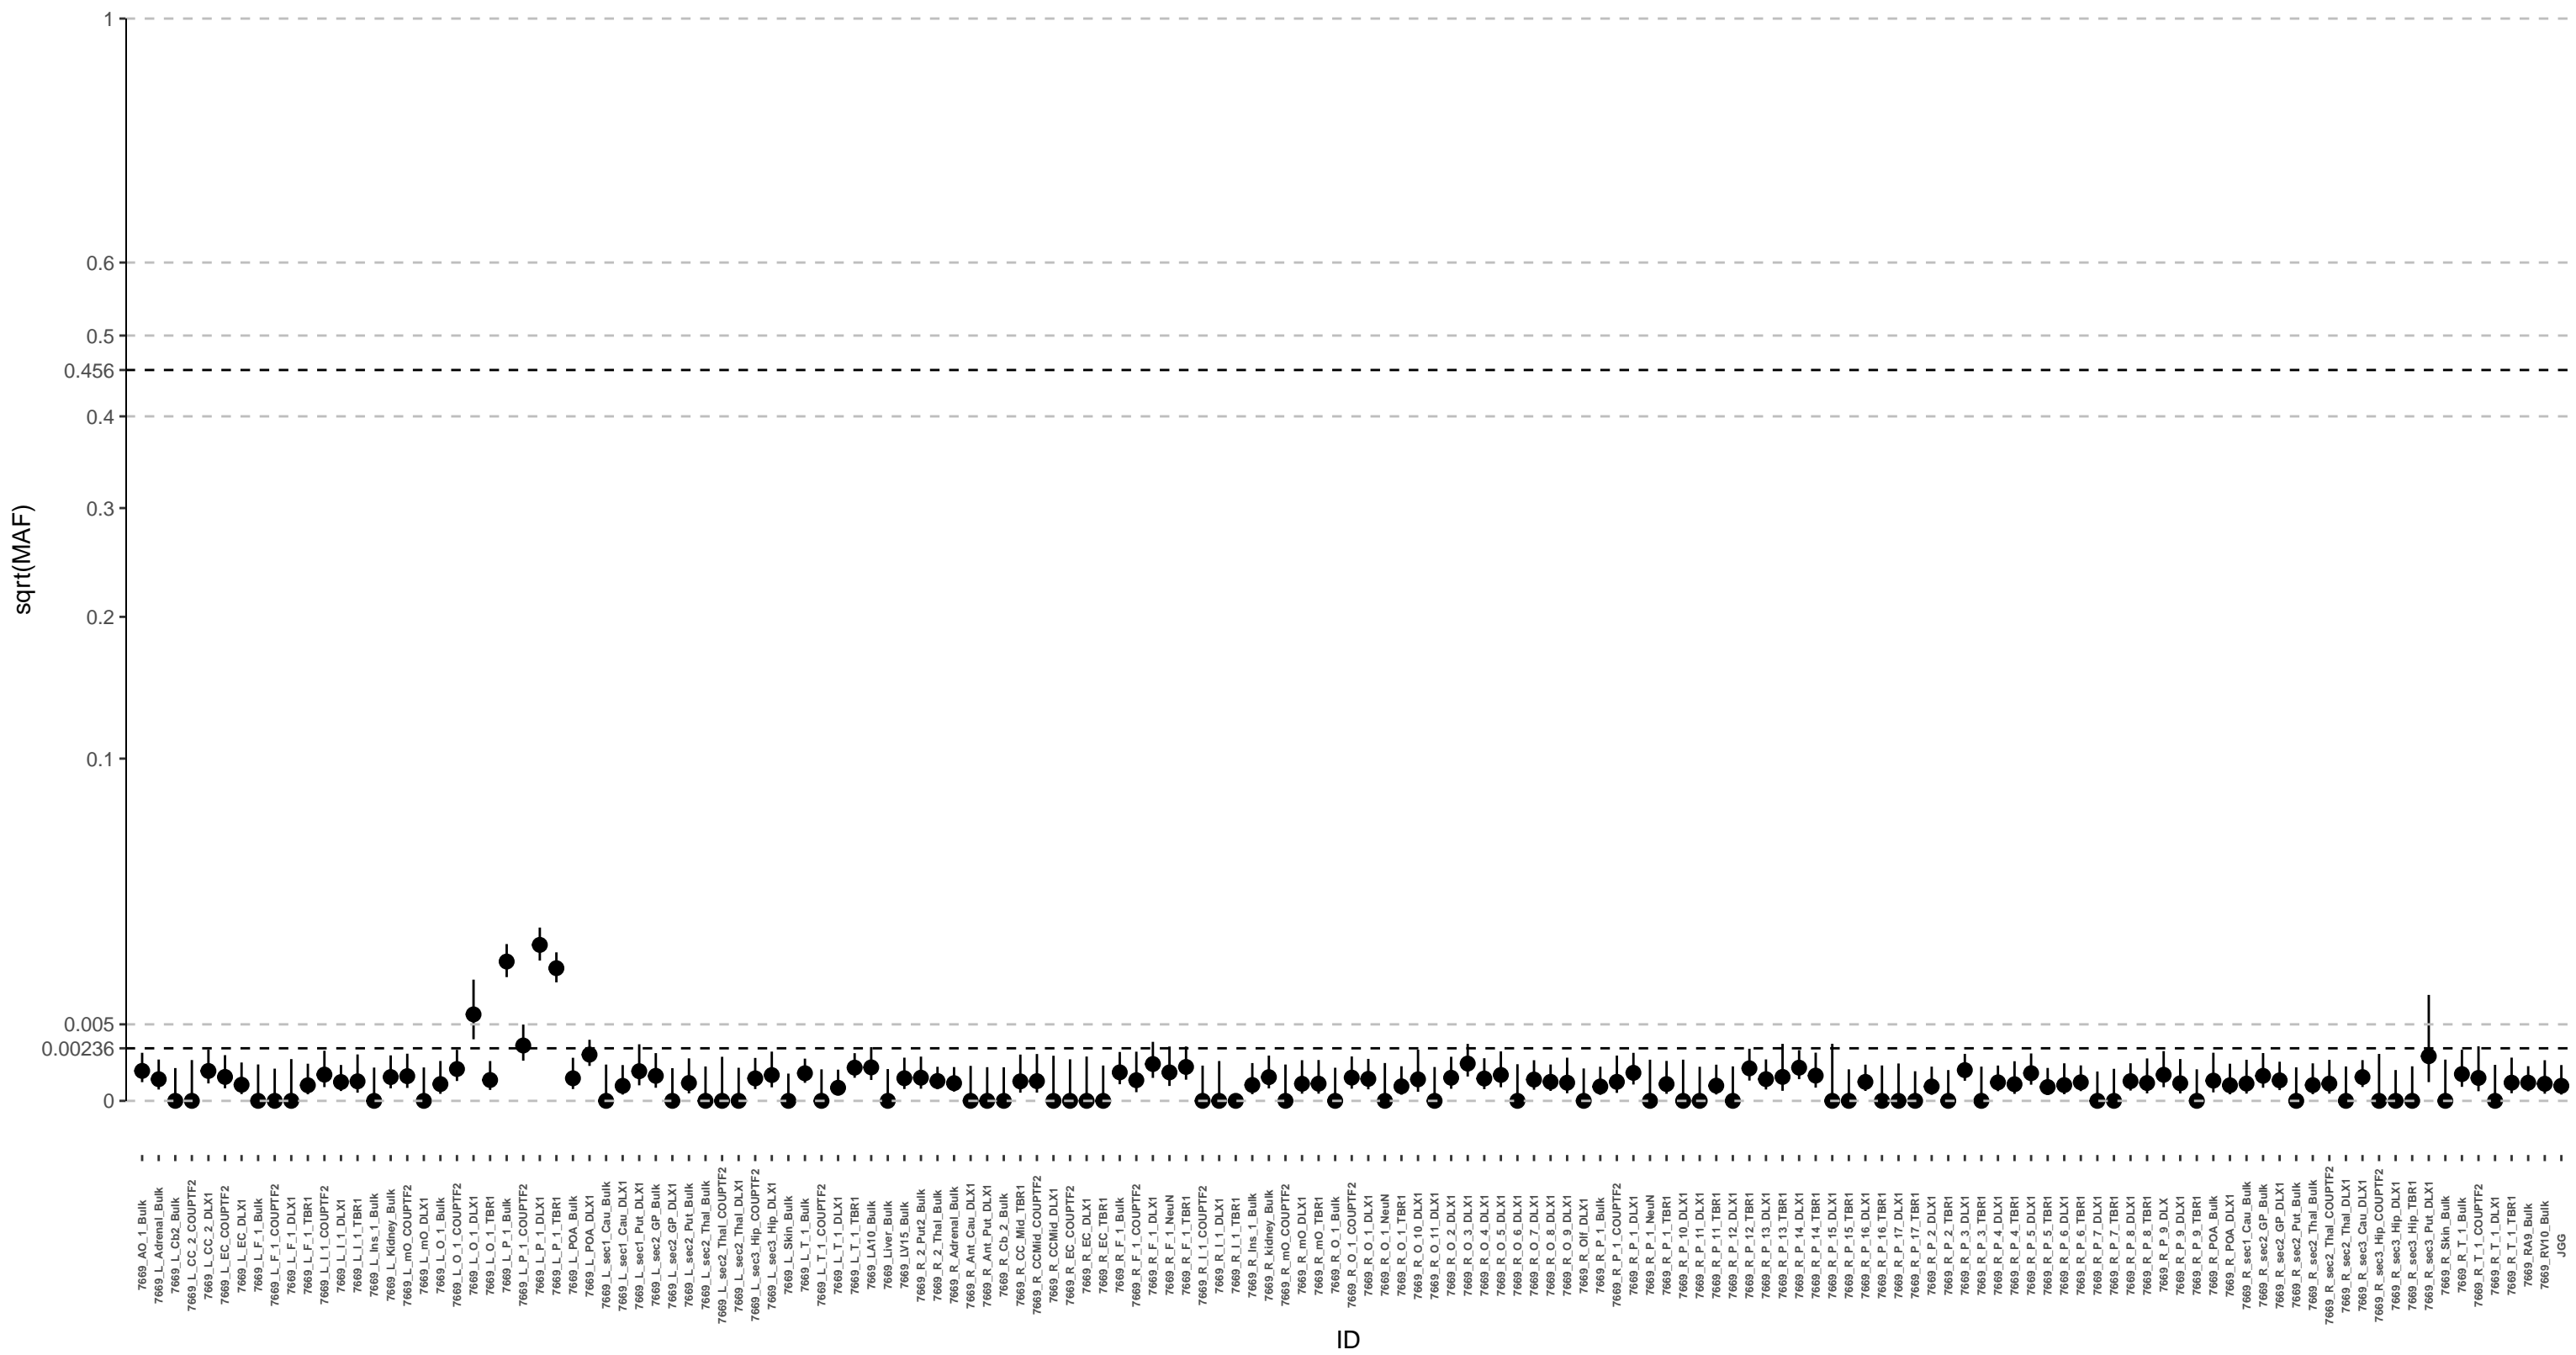

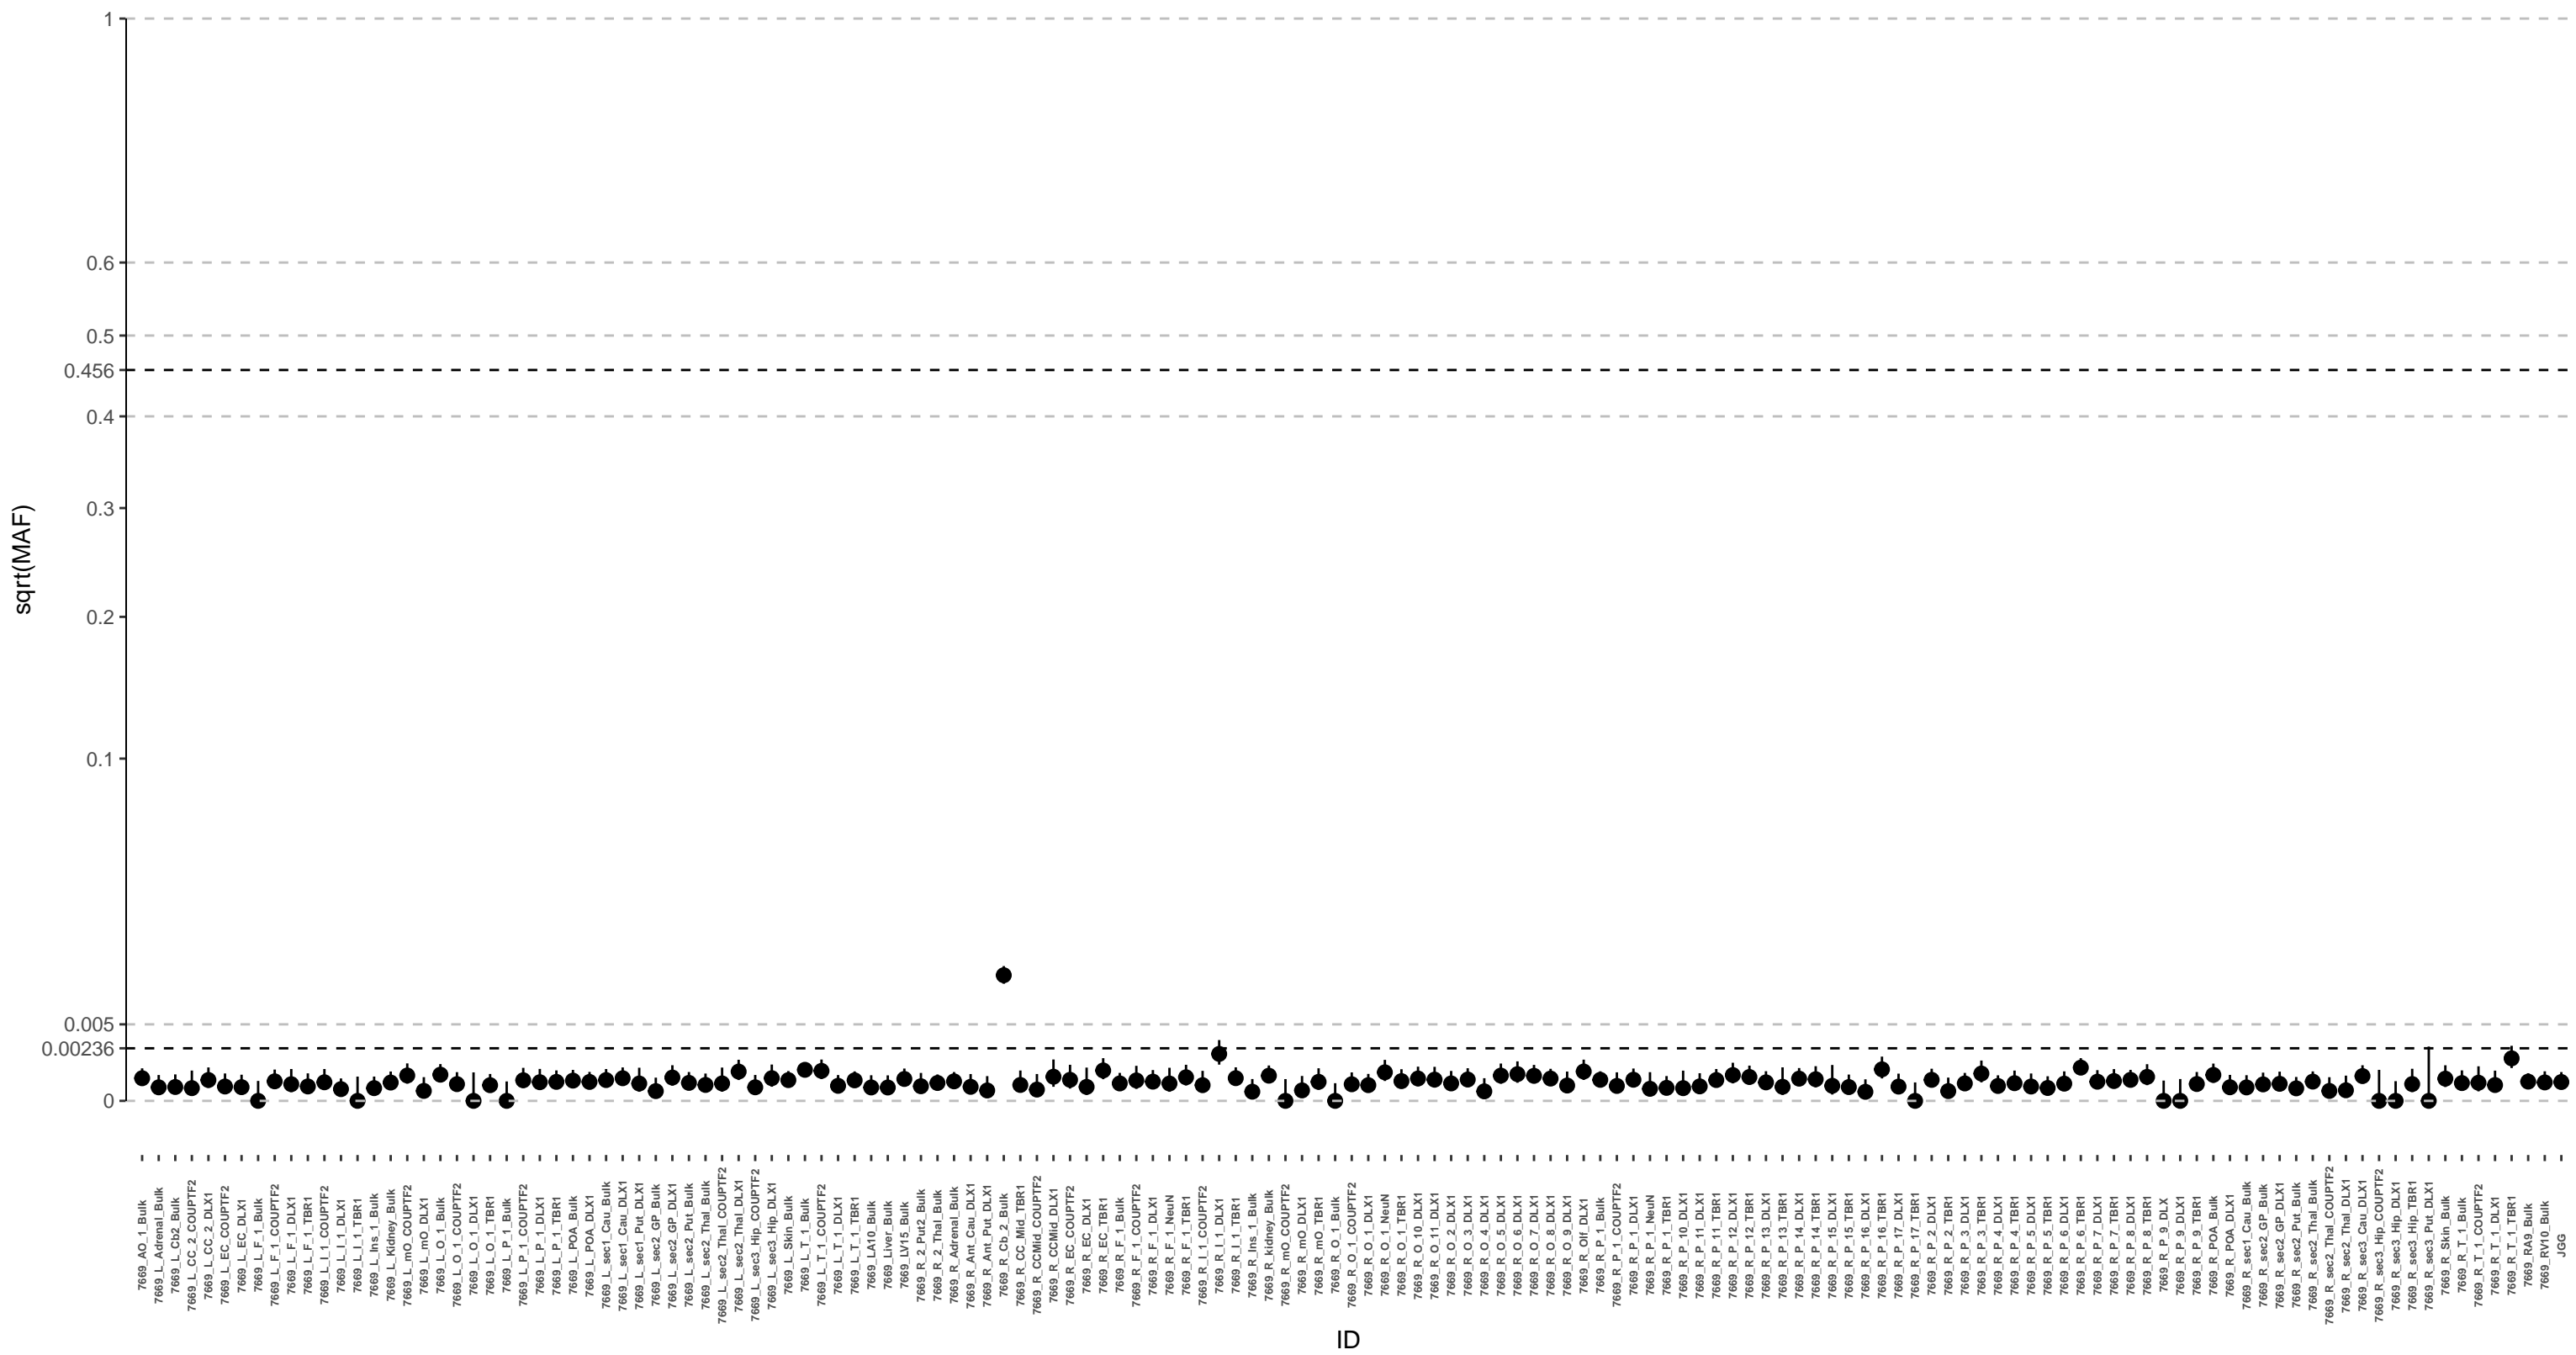



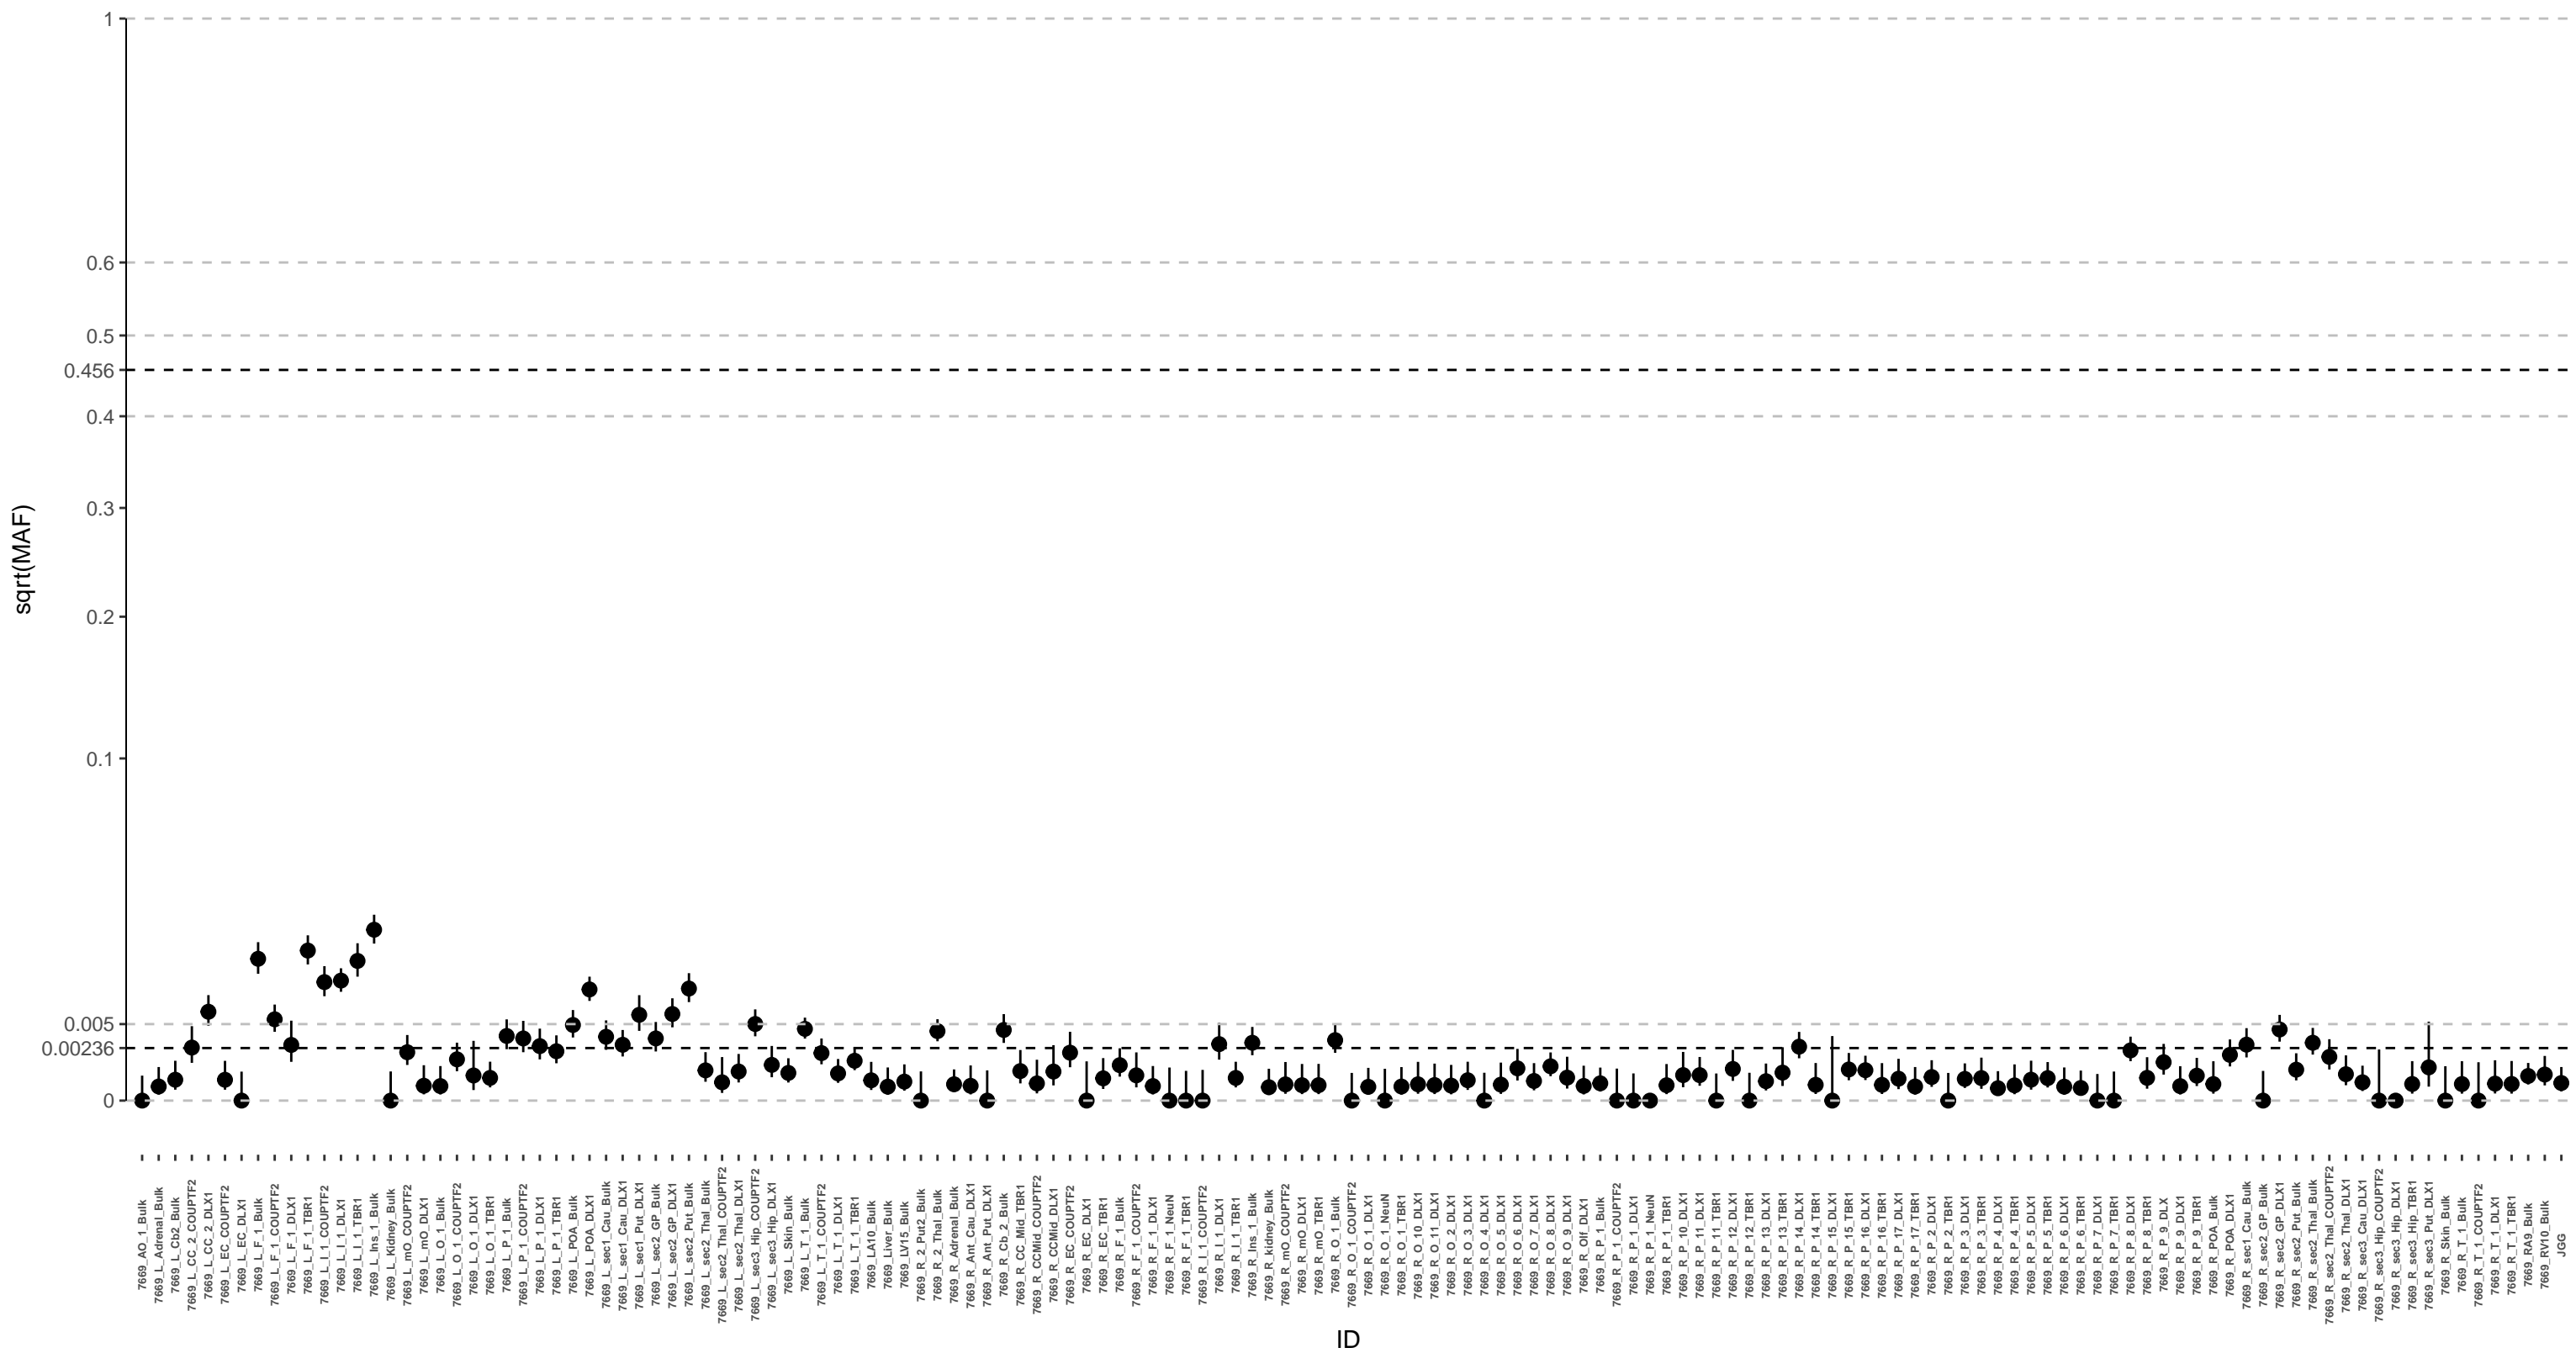

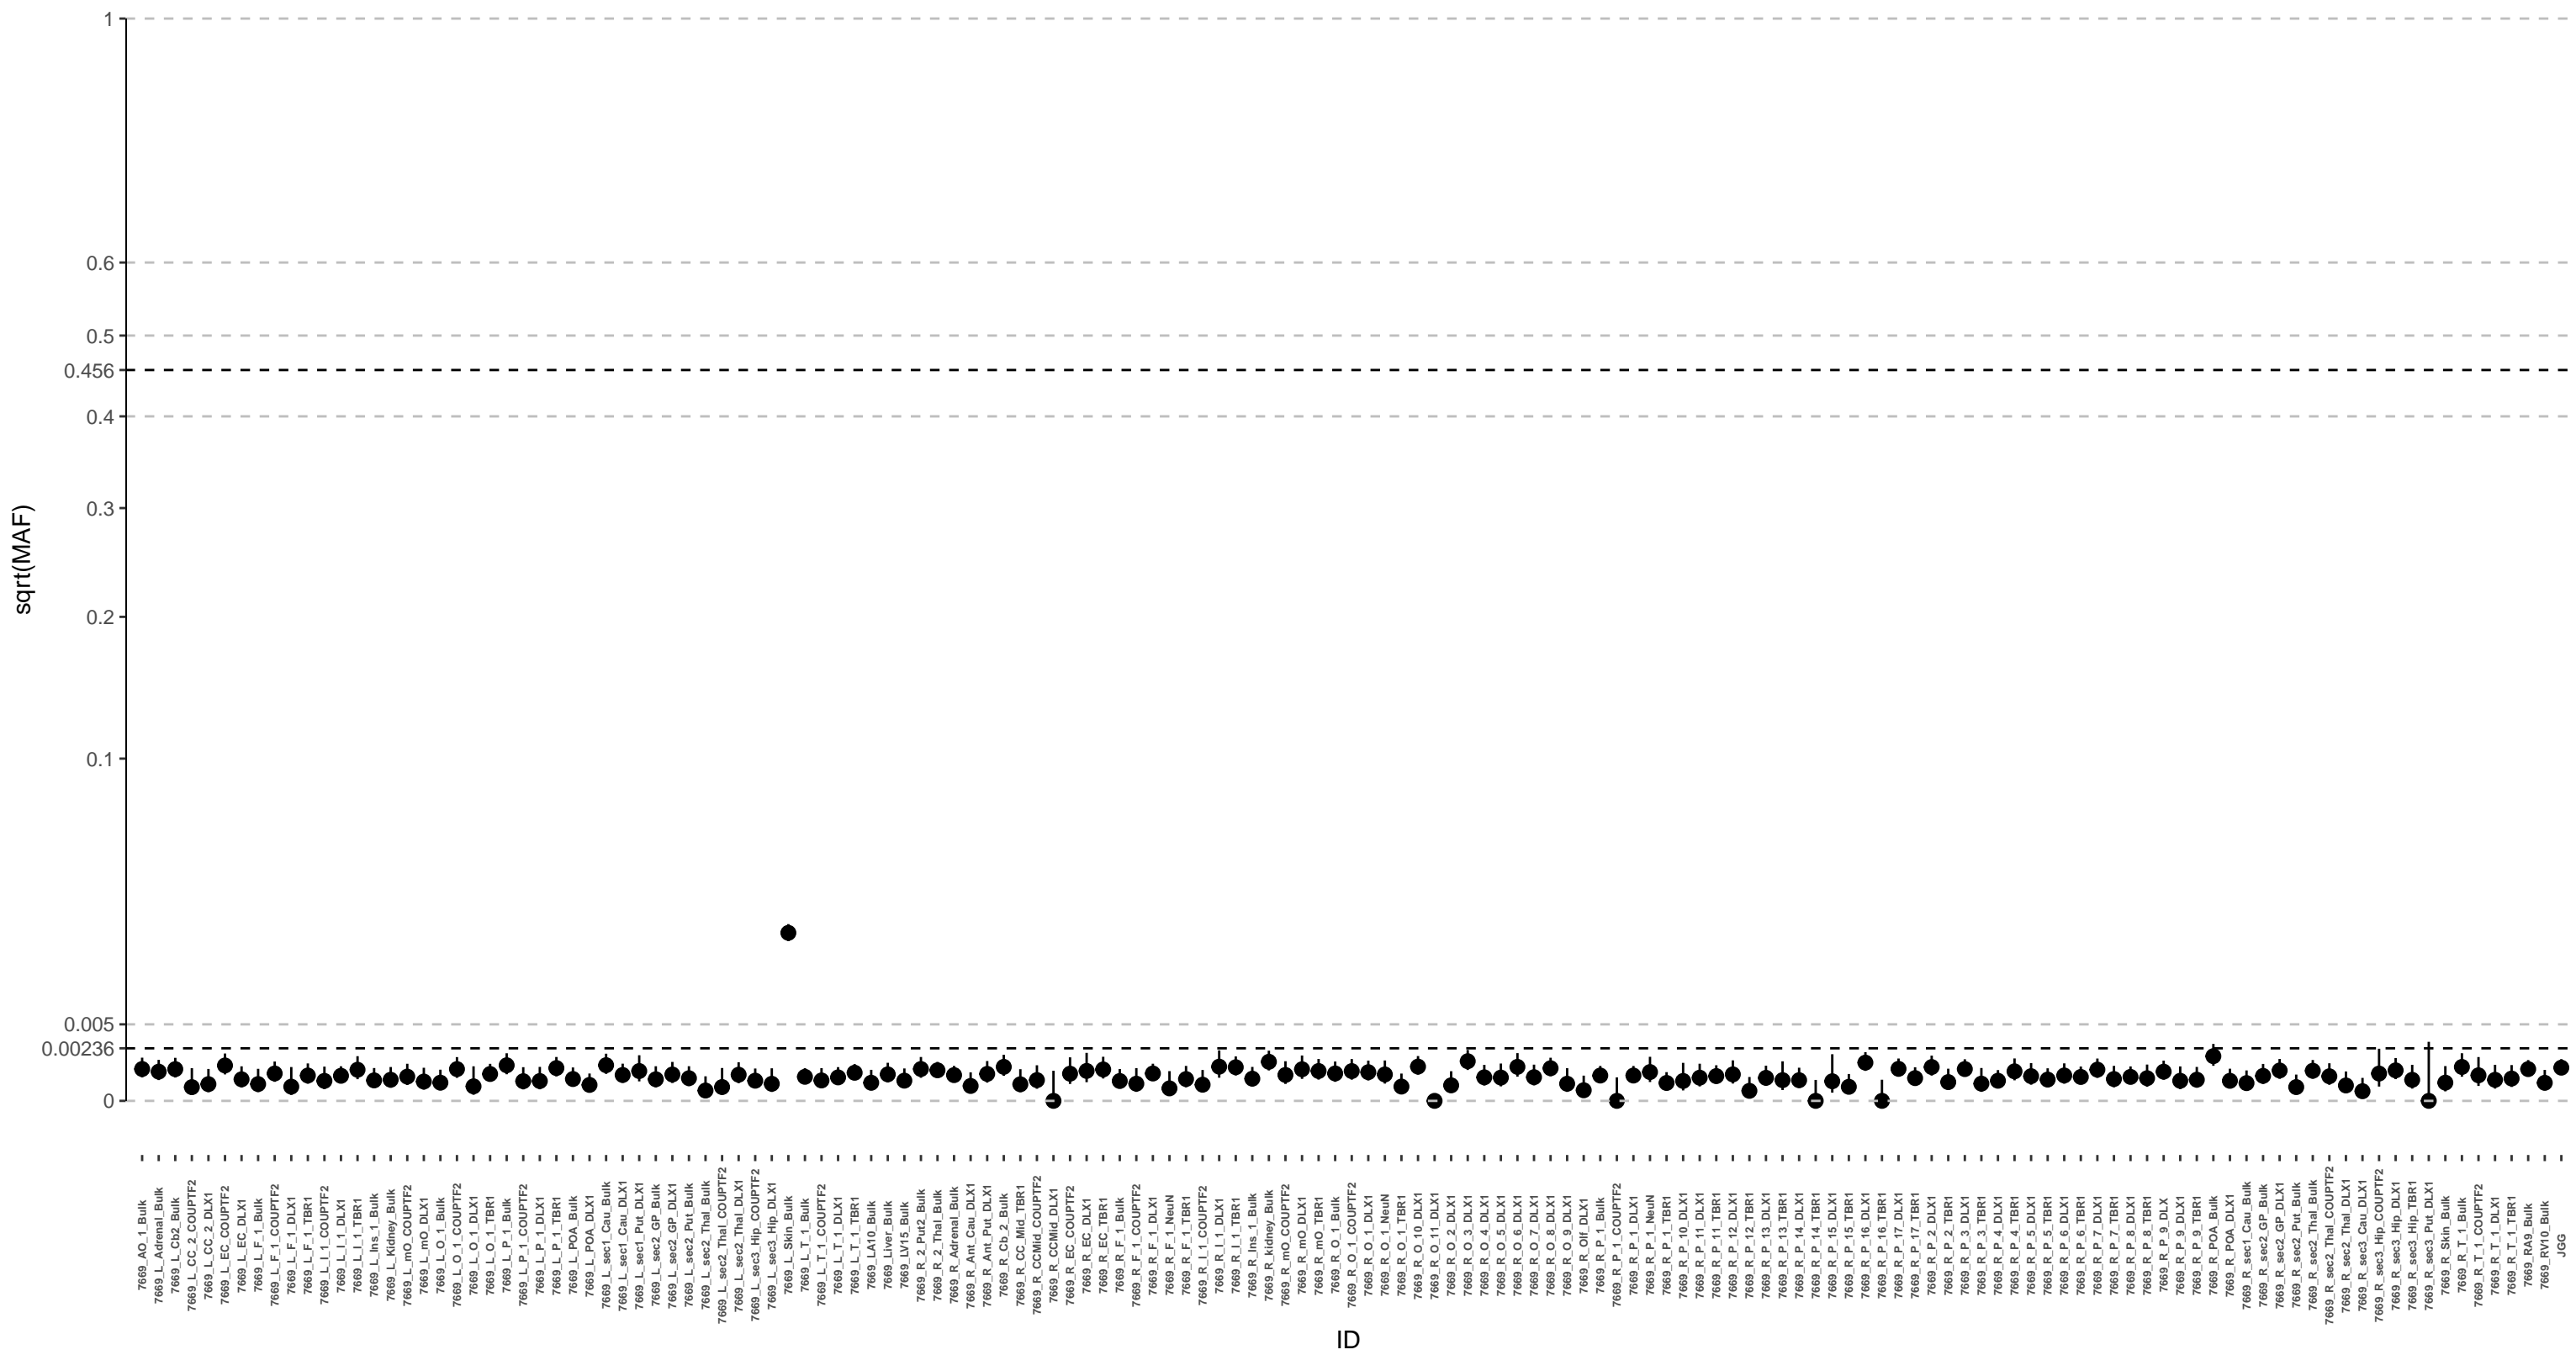

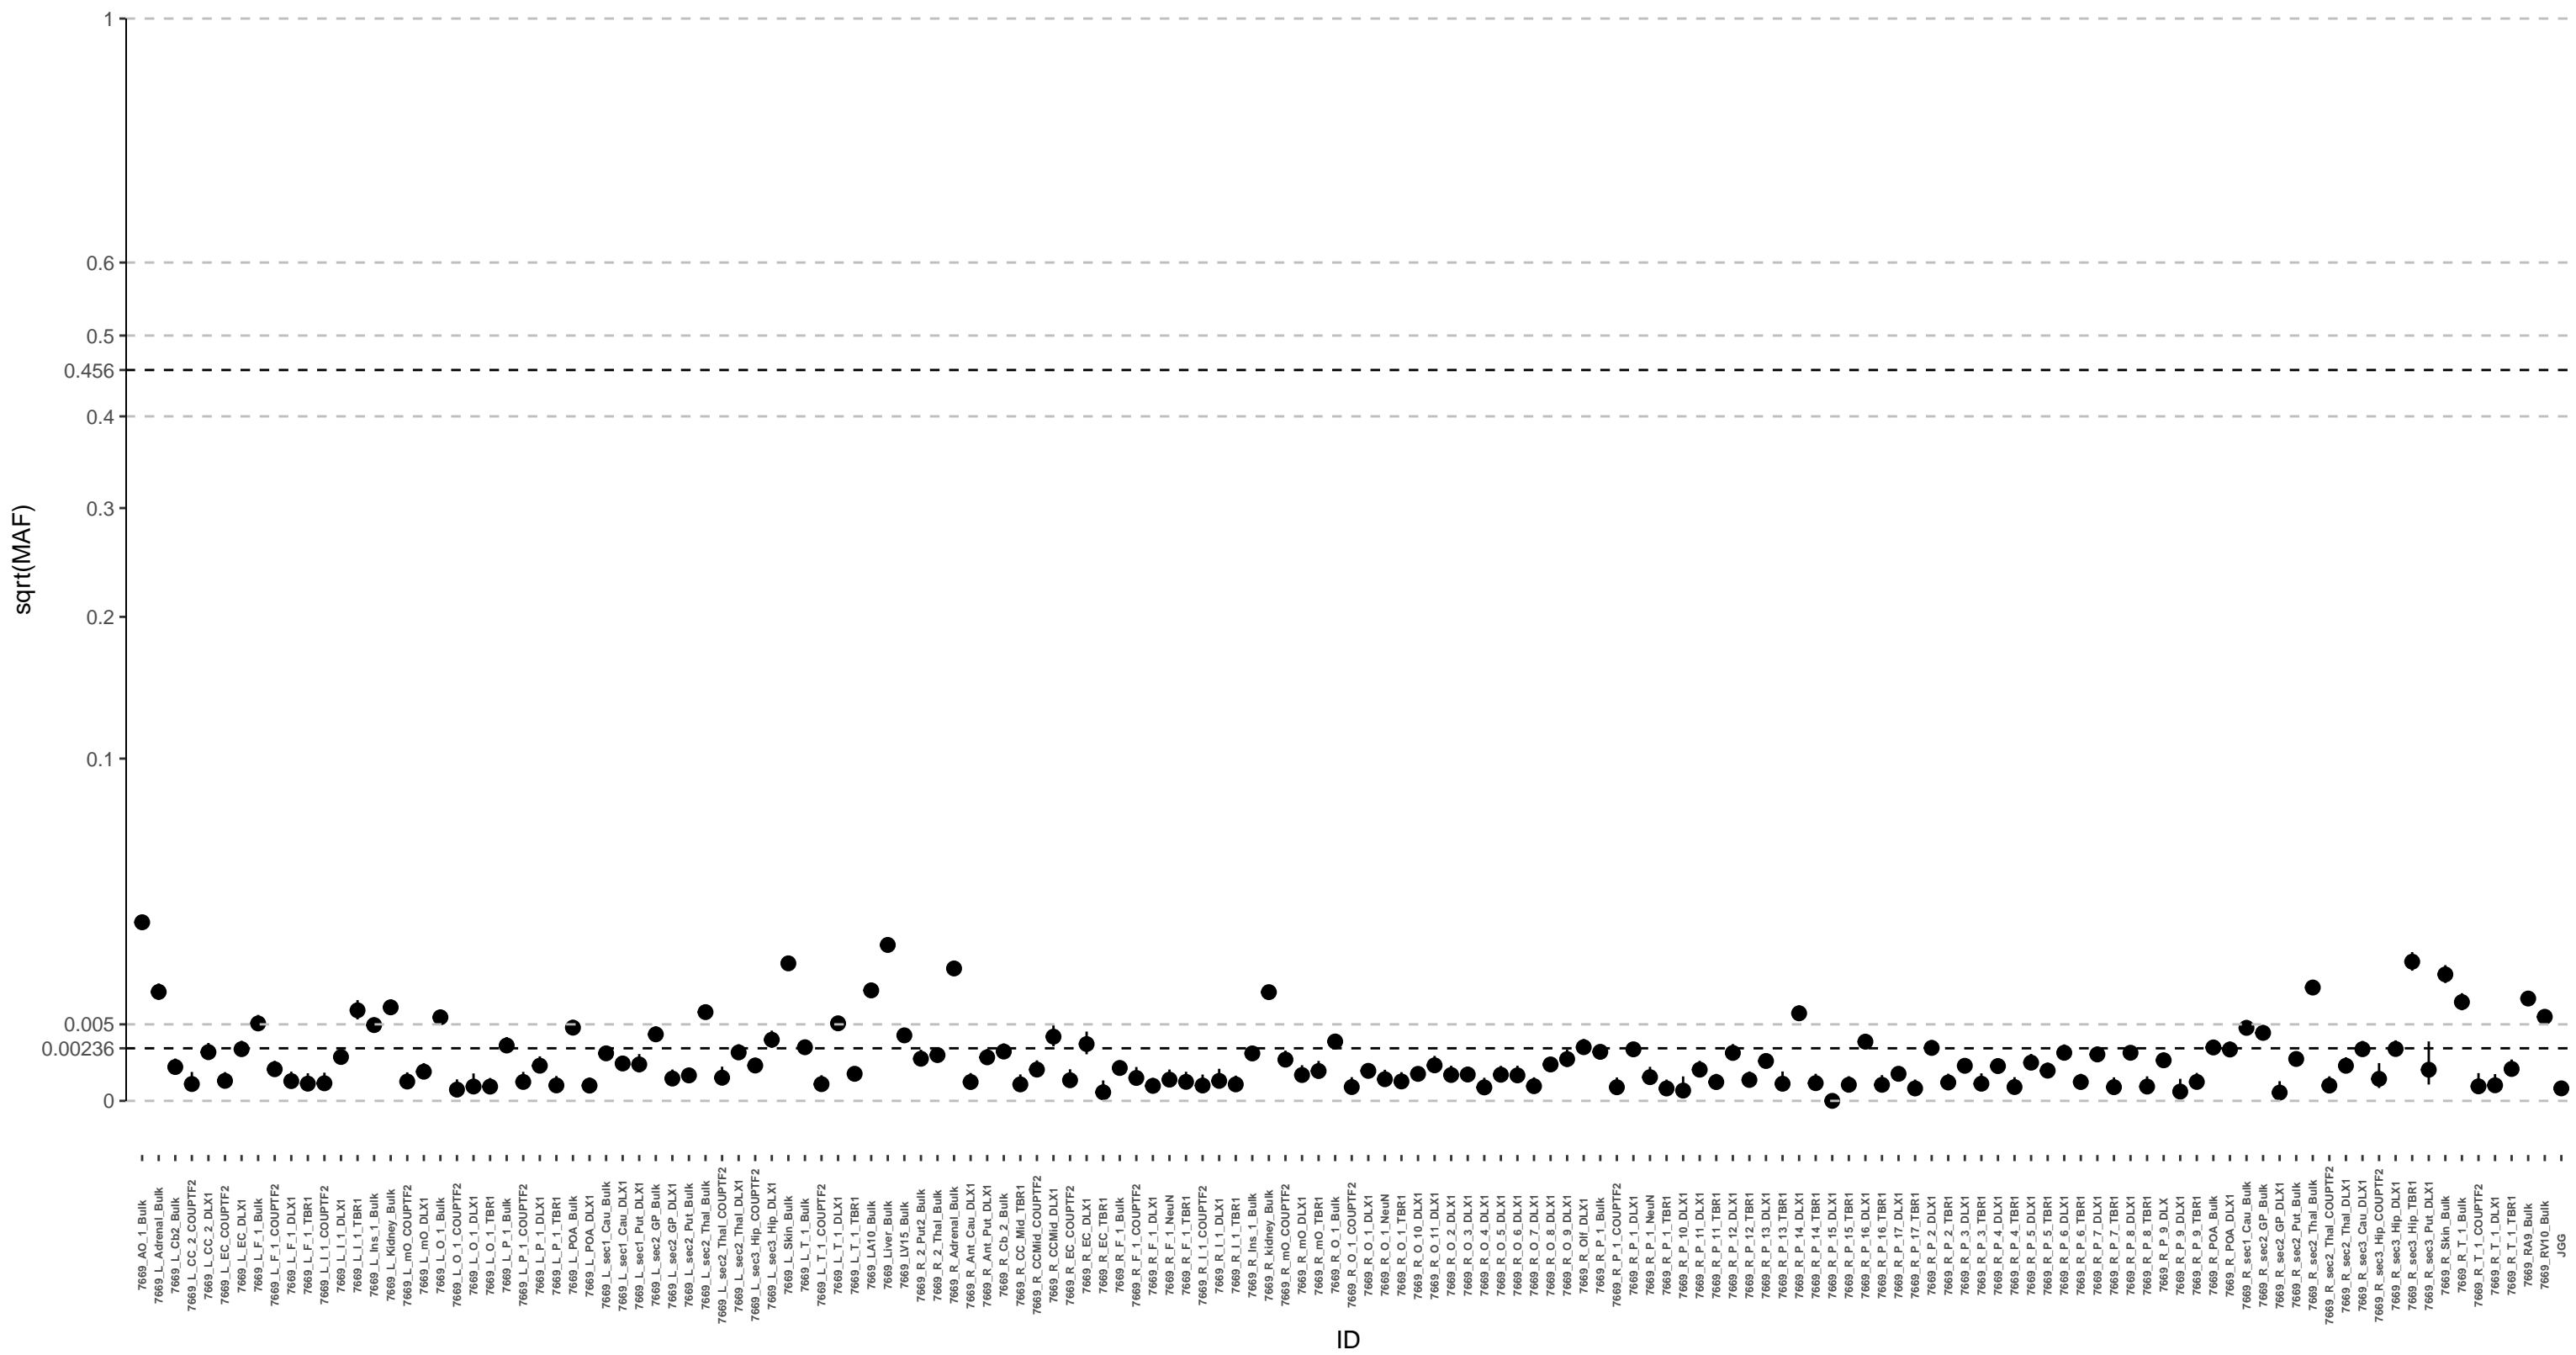

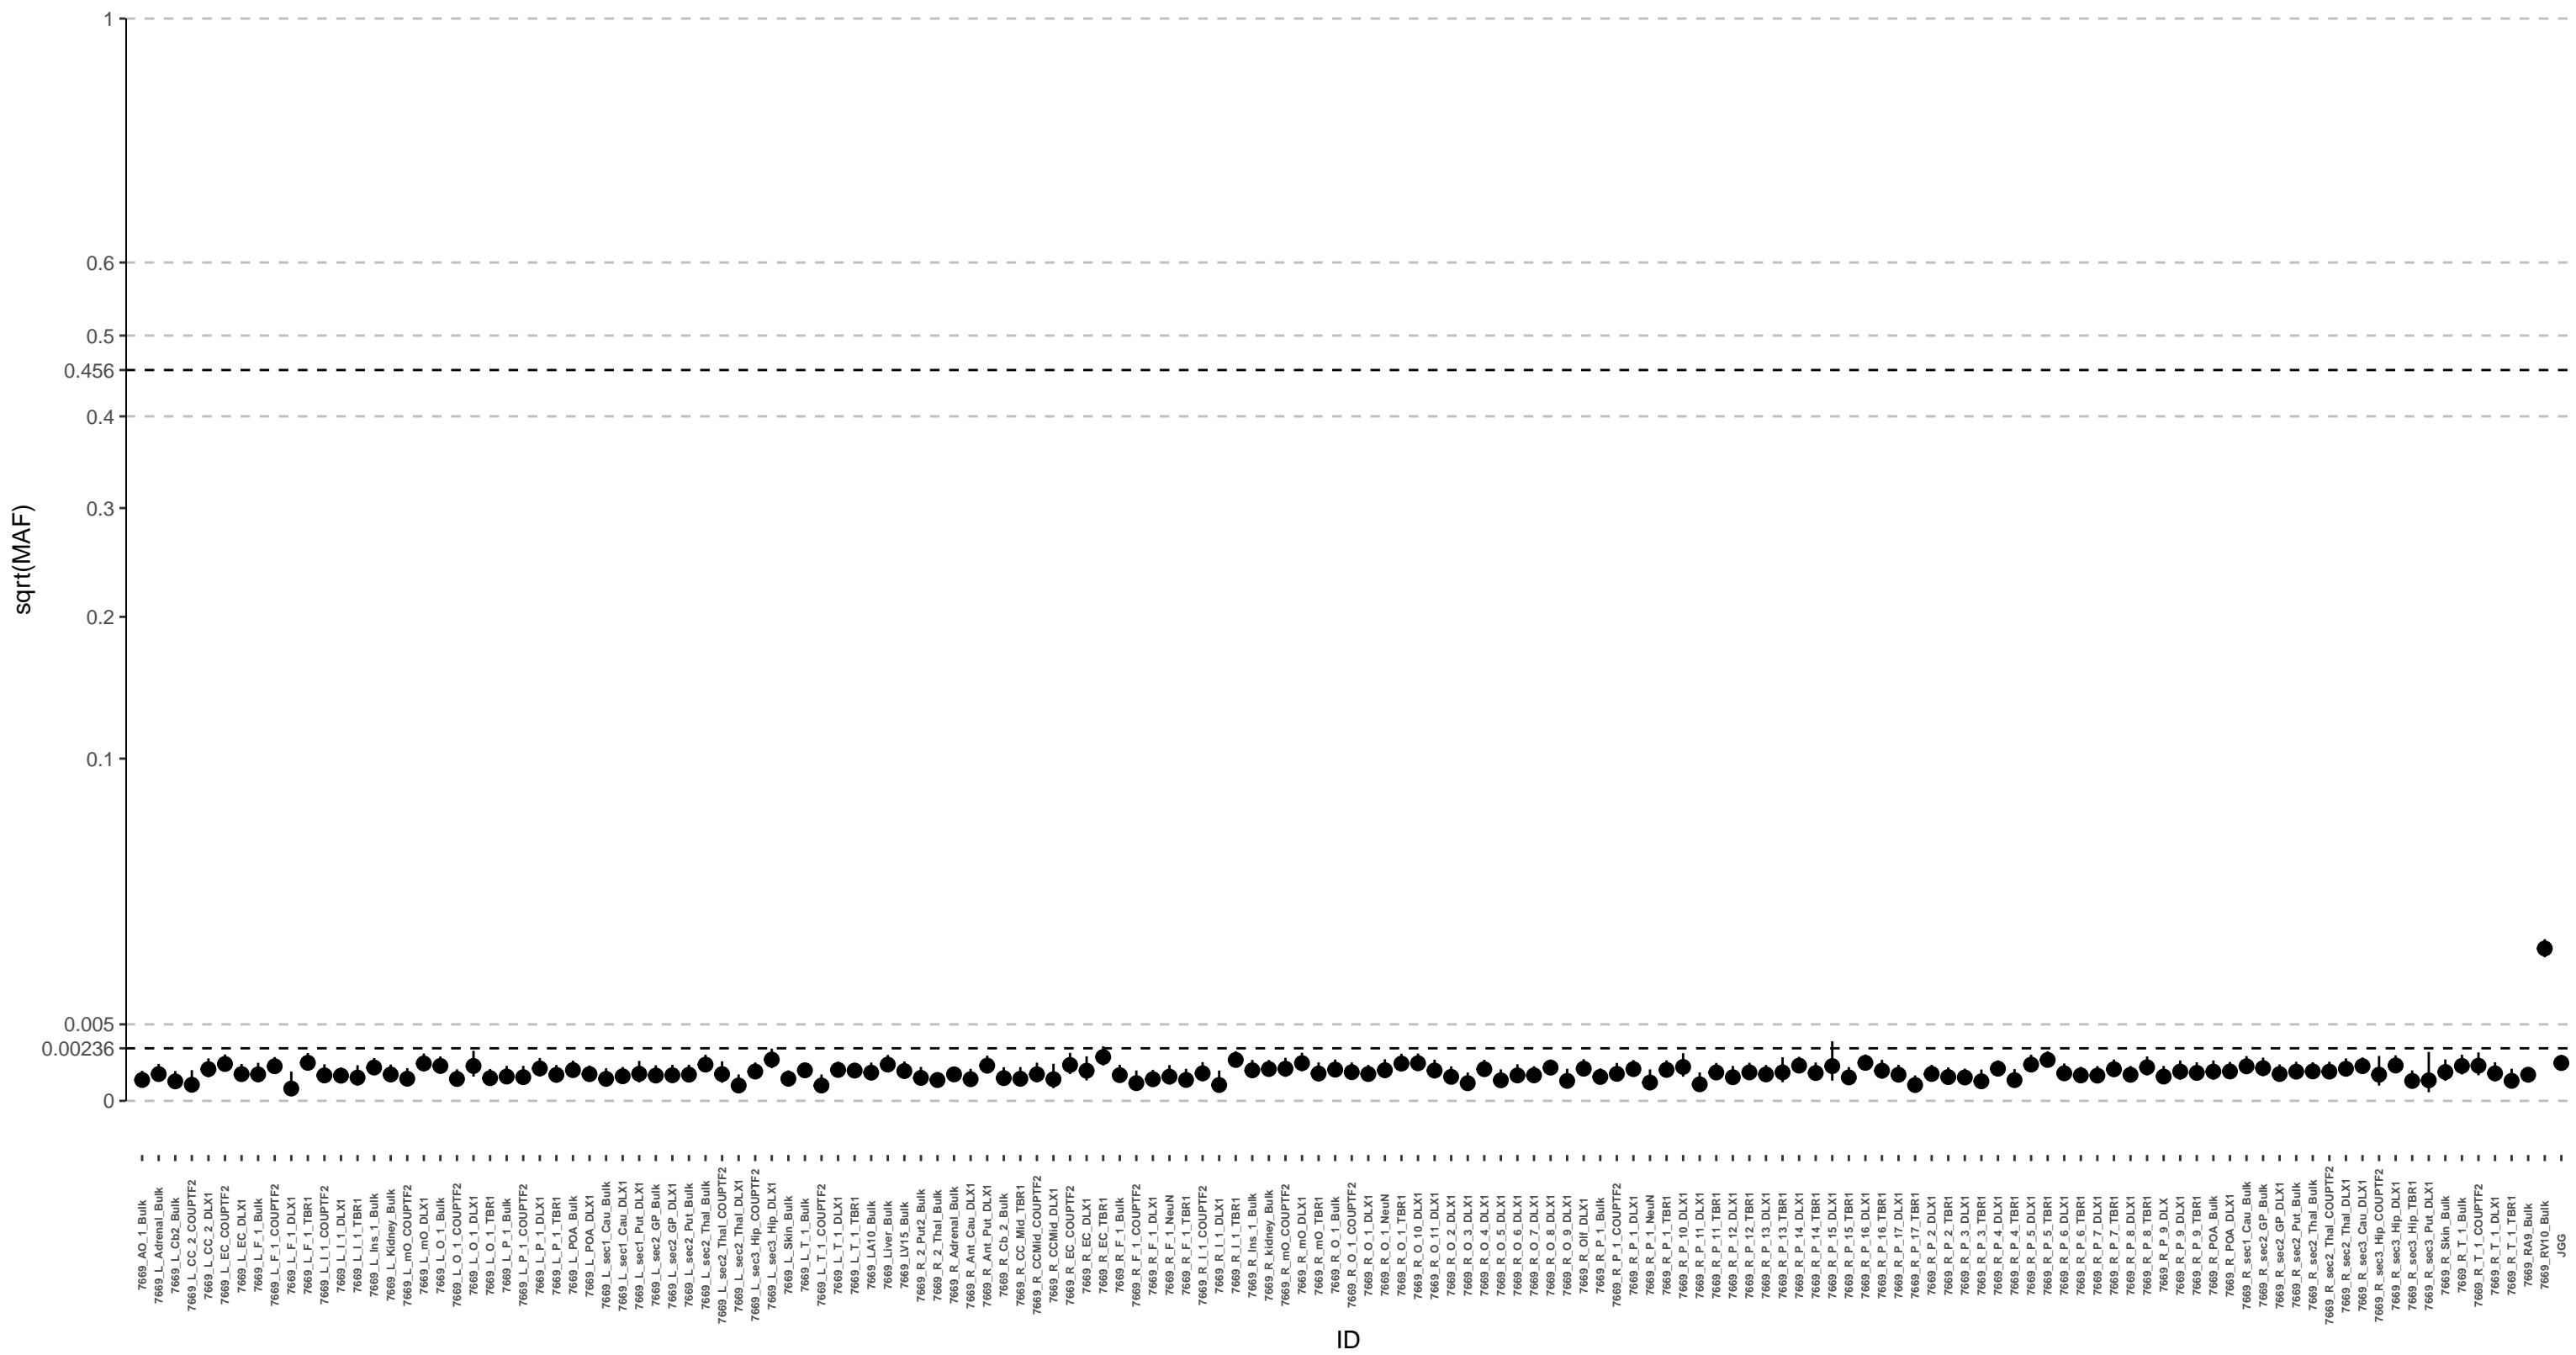

ID05 10-58457040-T-G

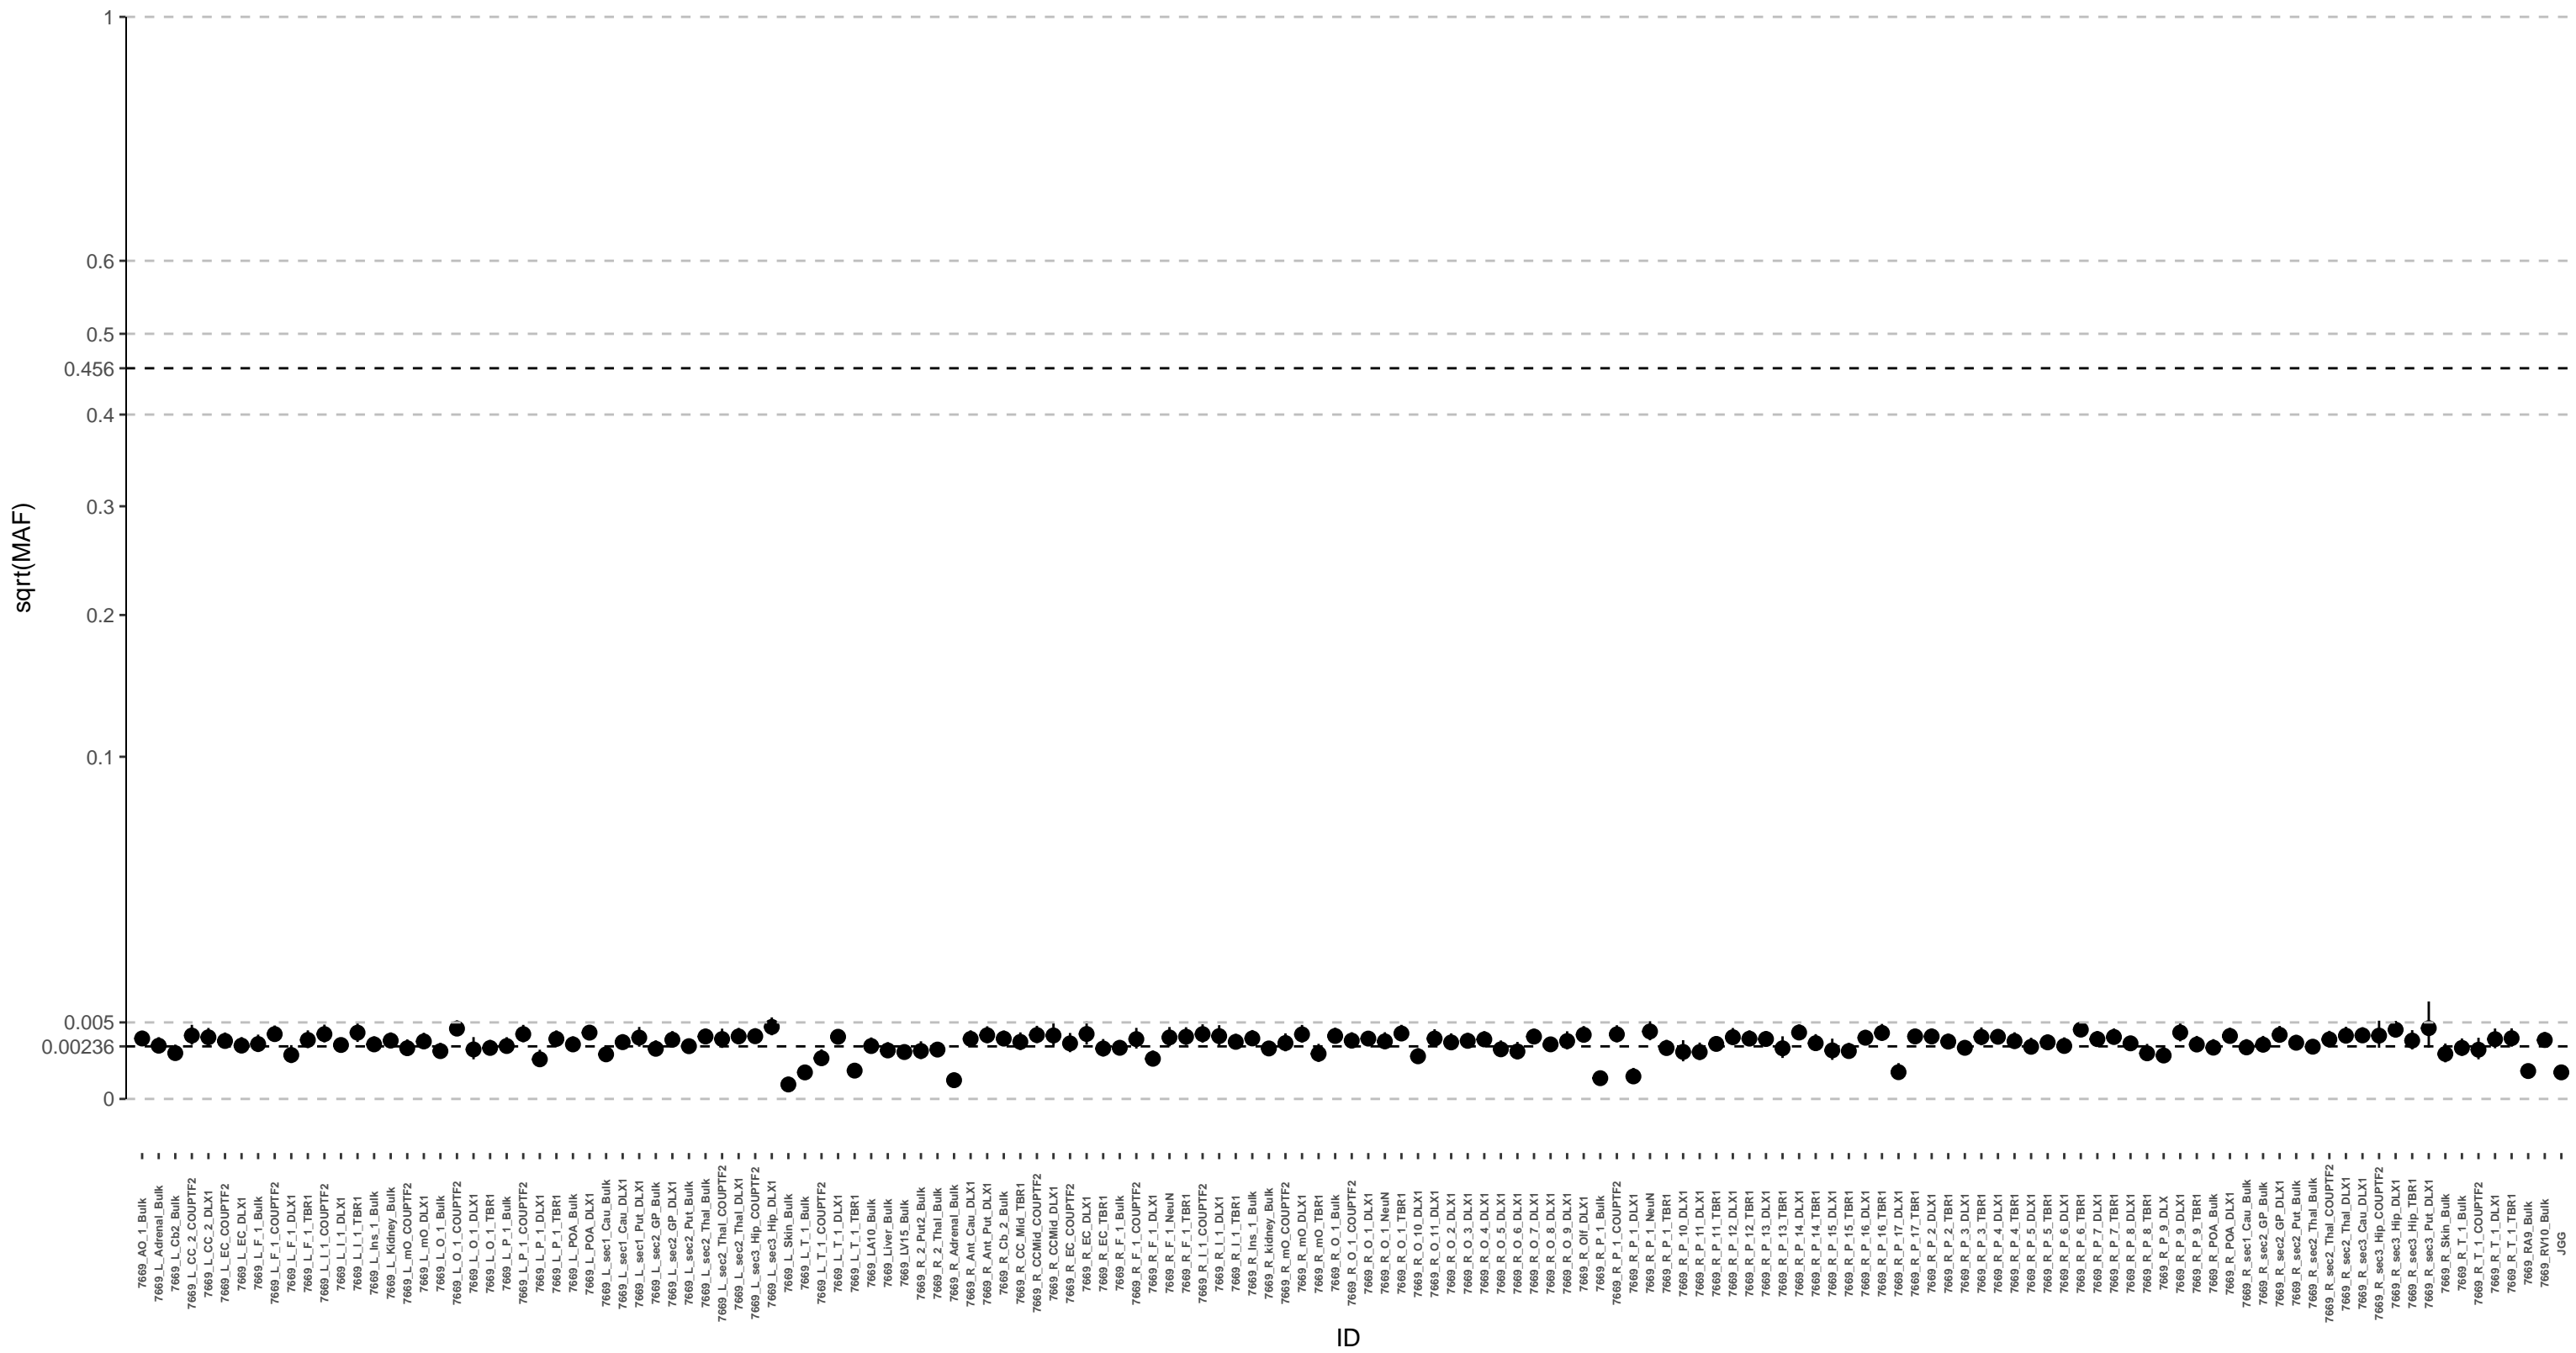

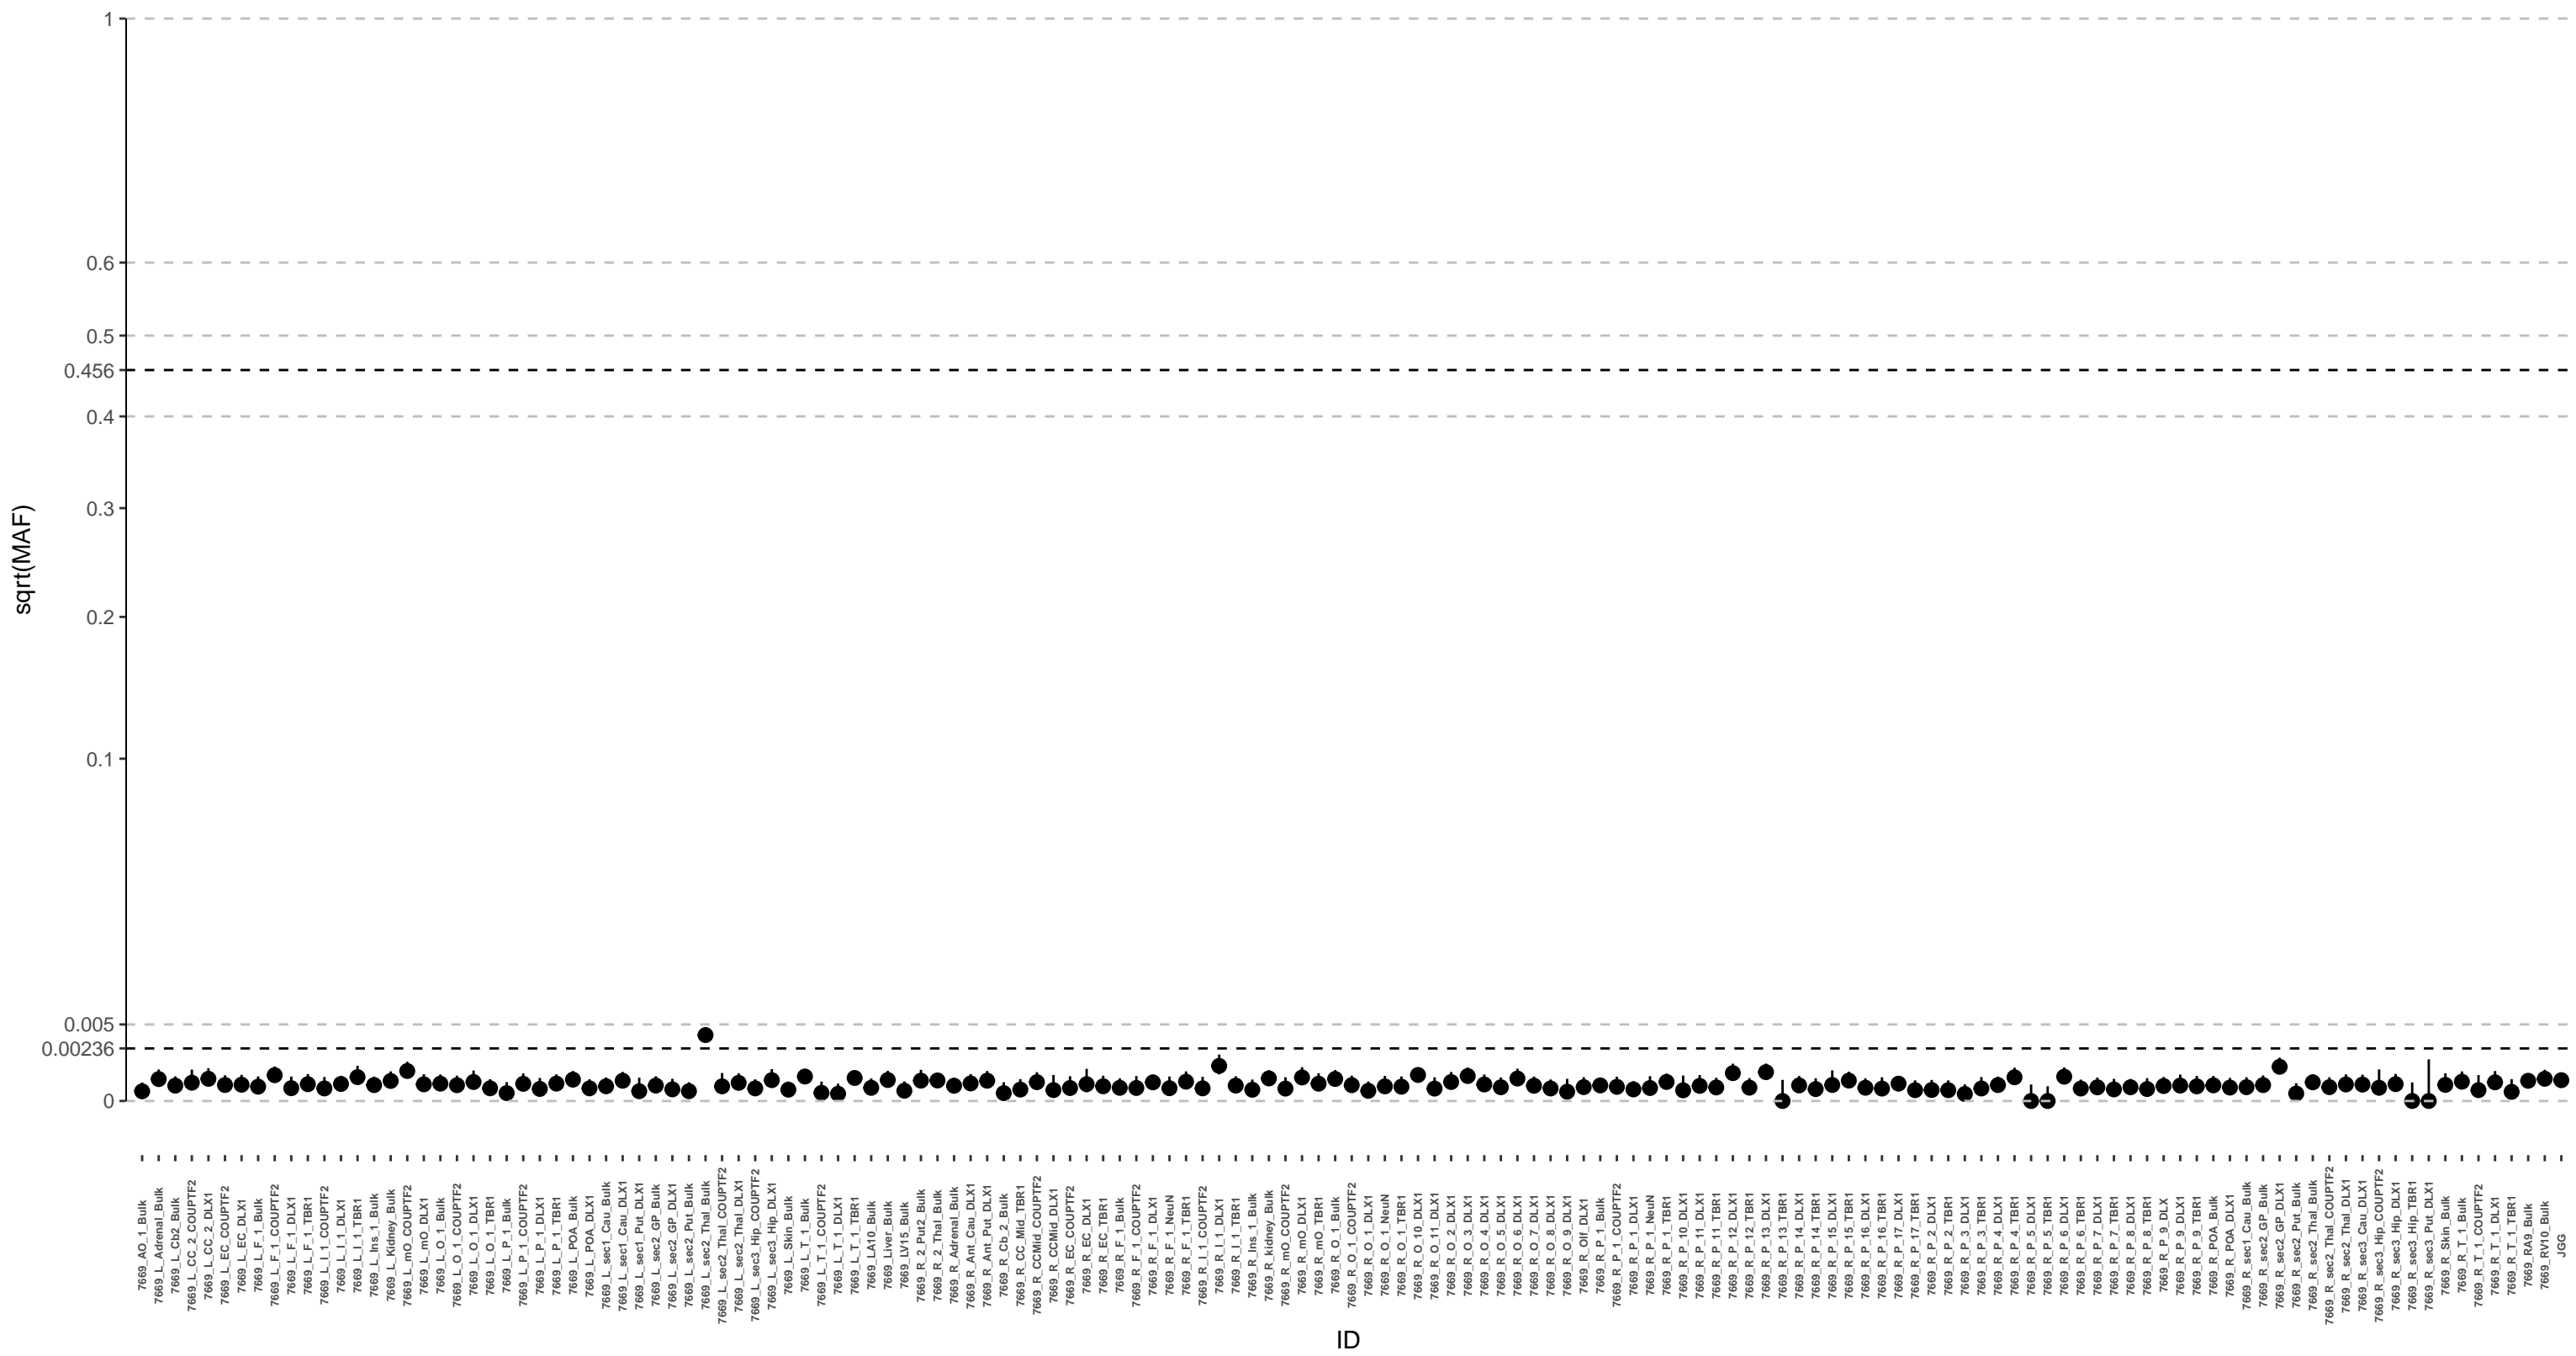

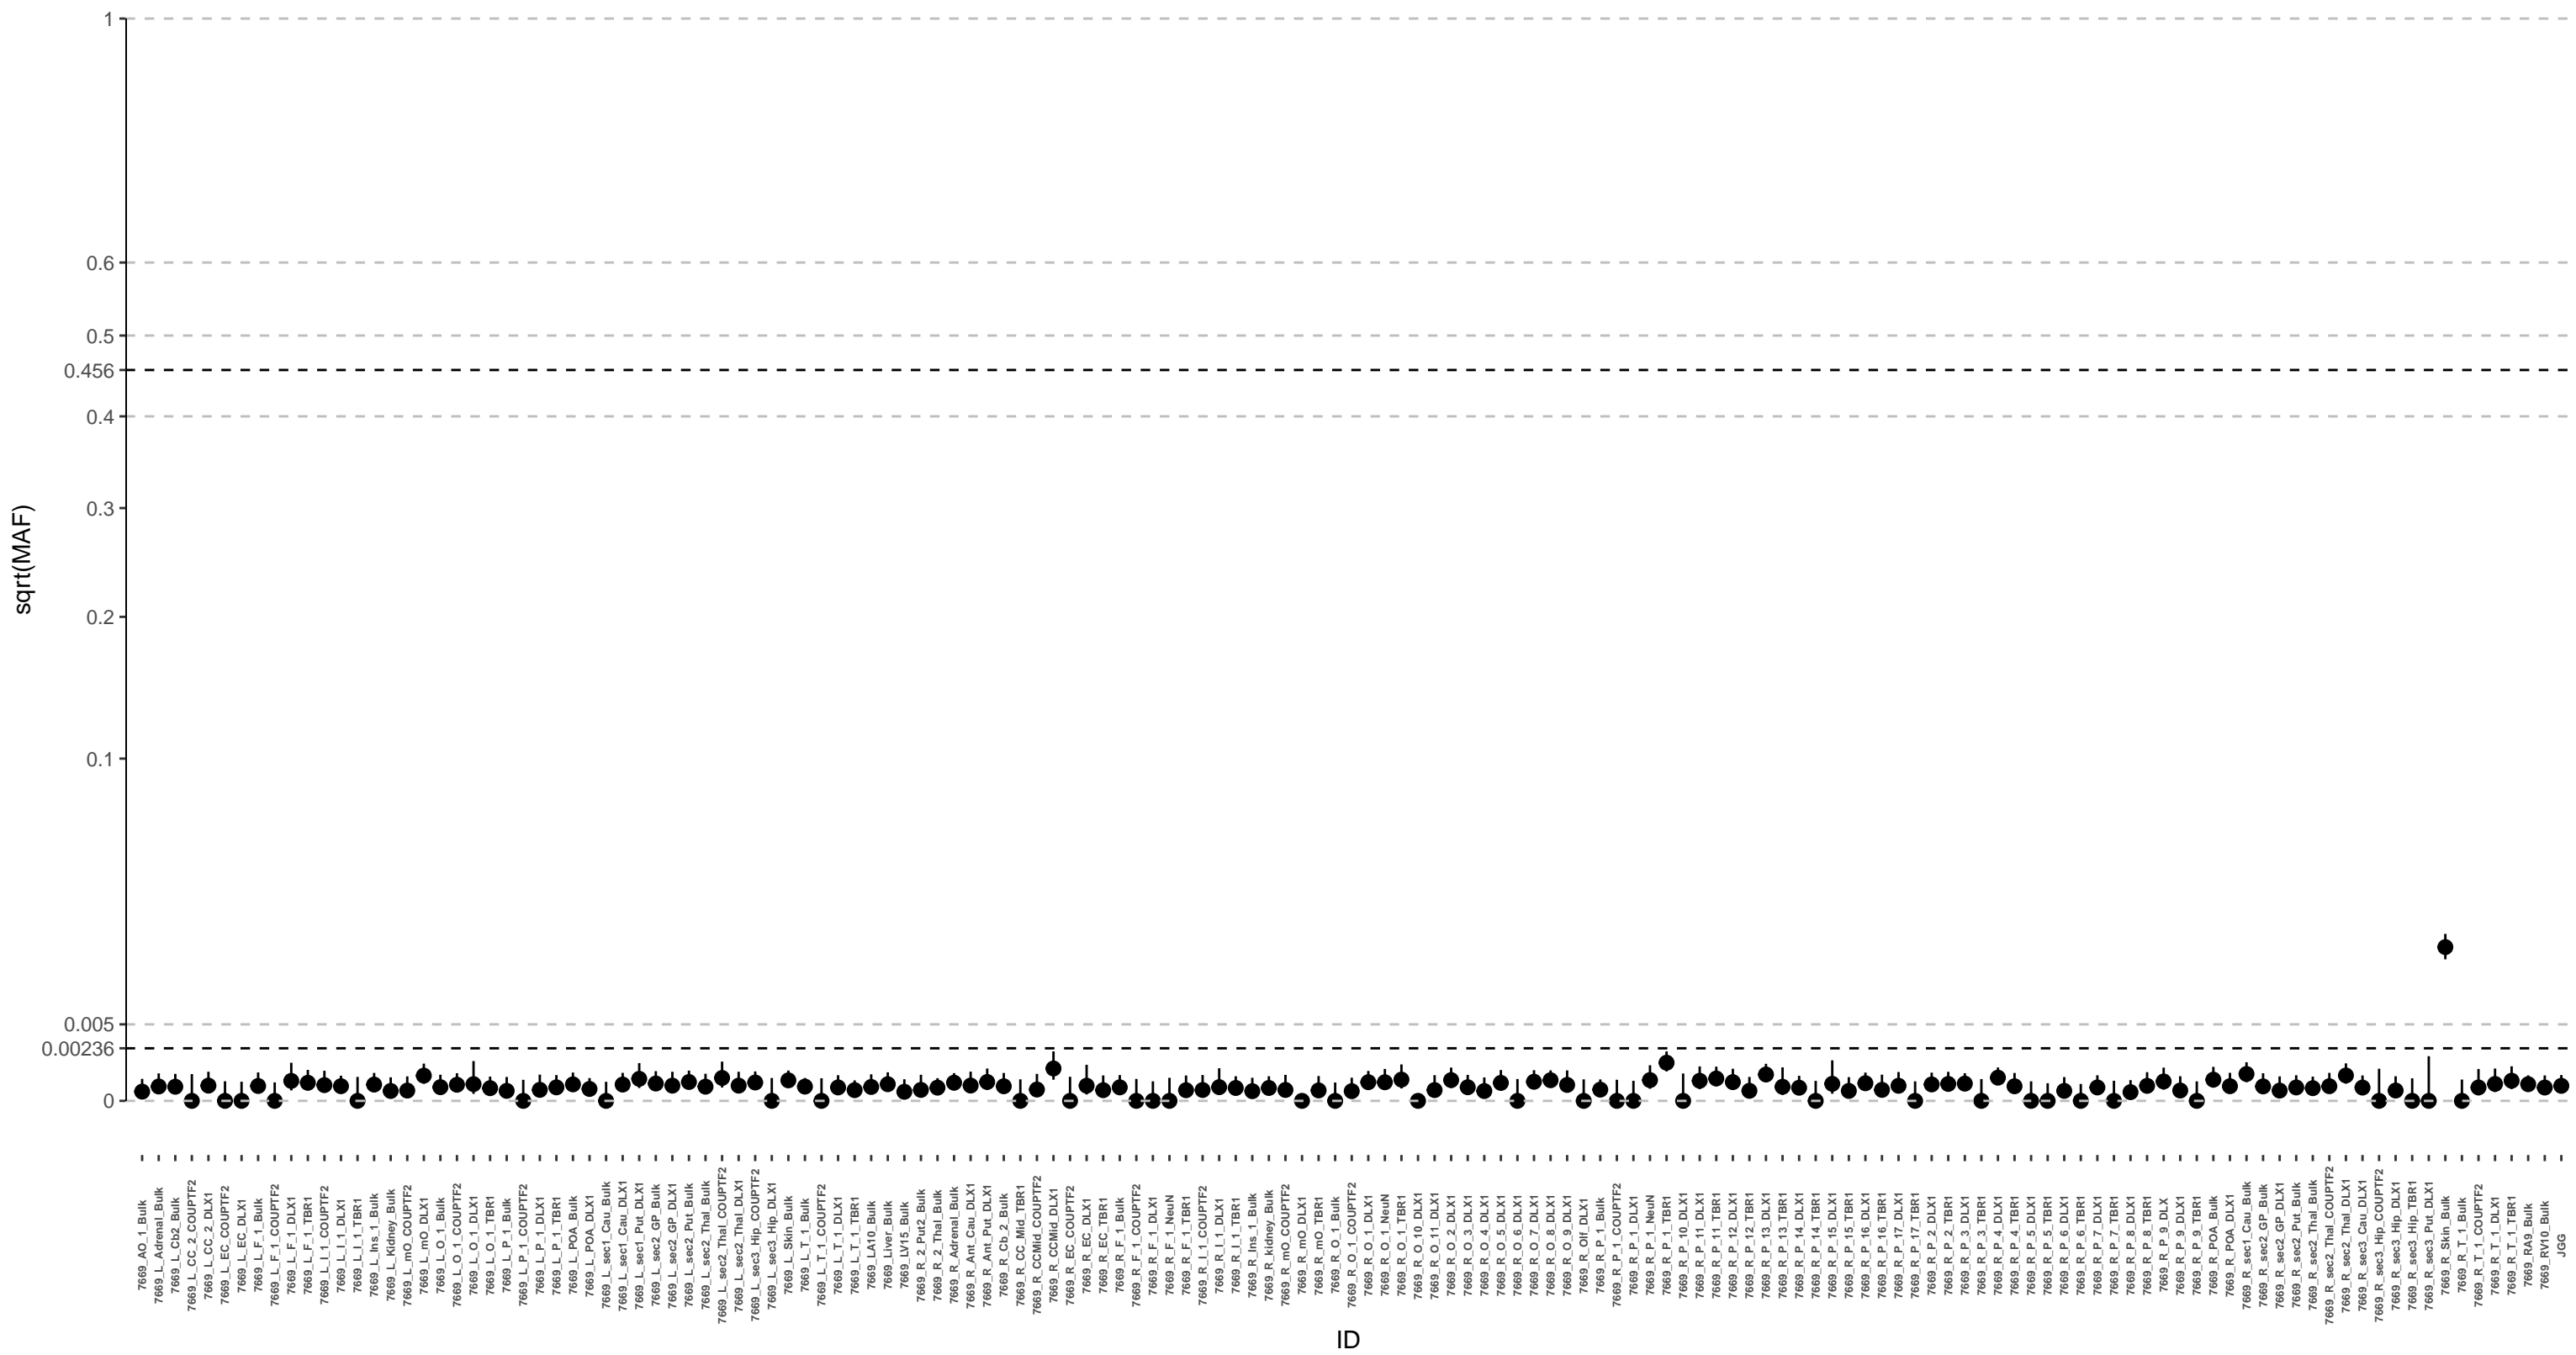

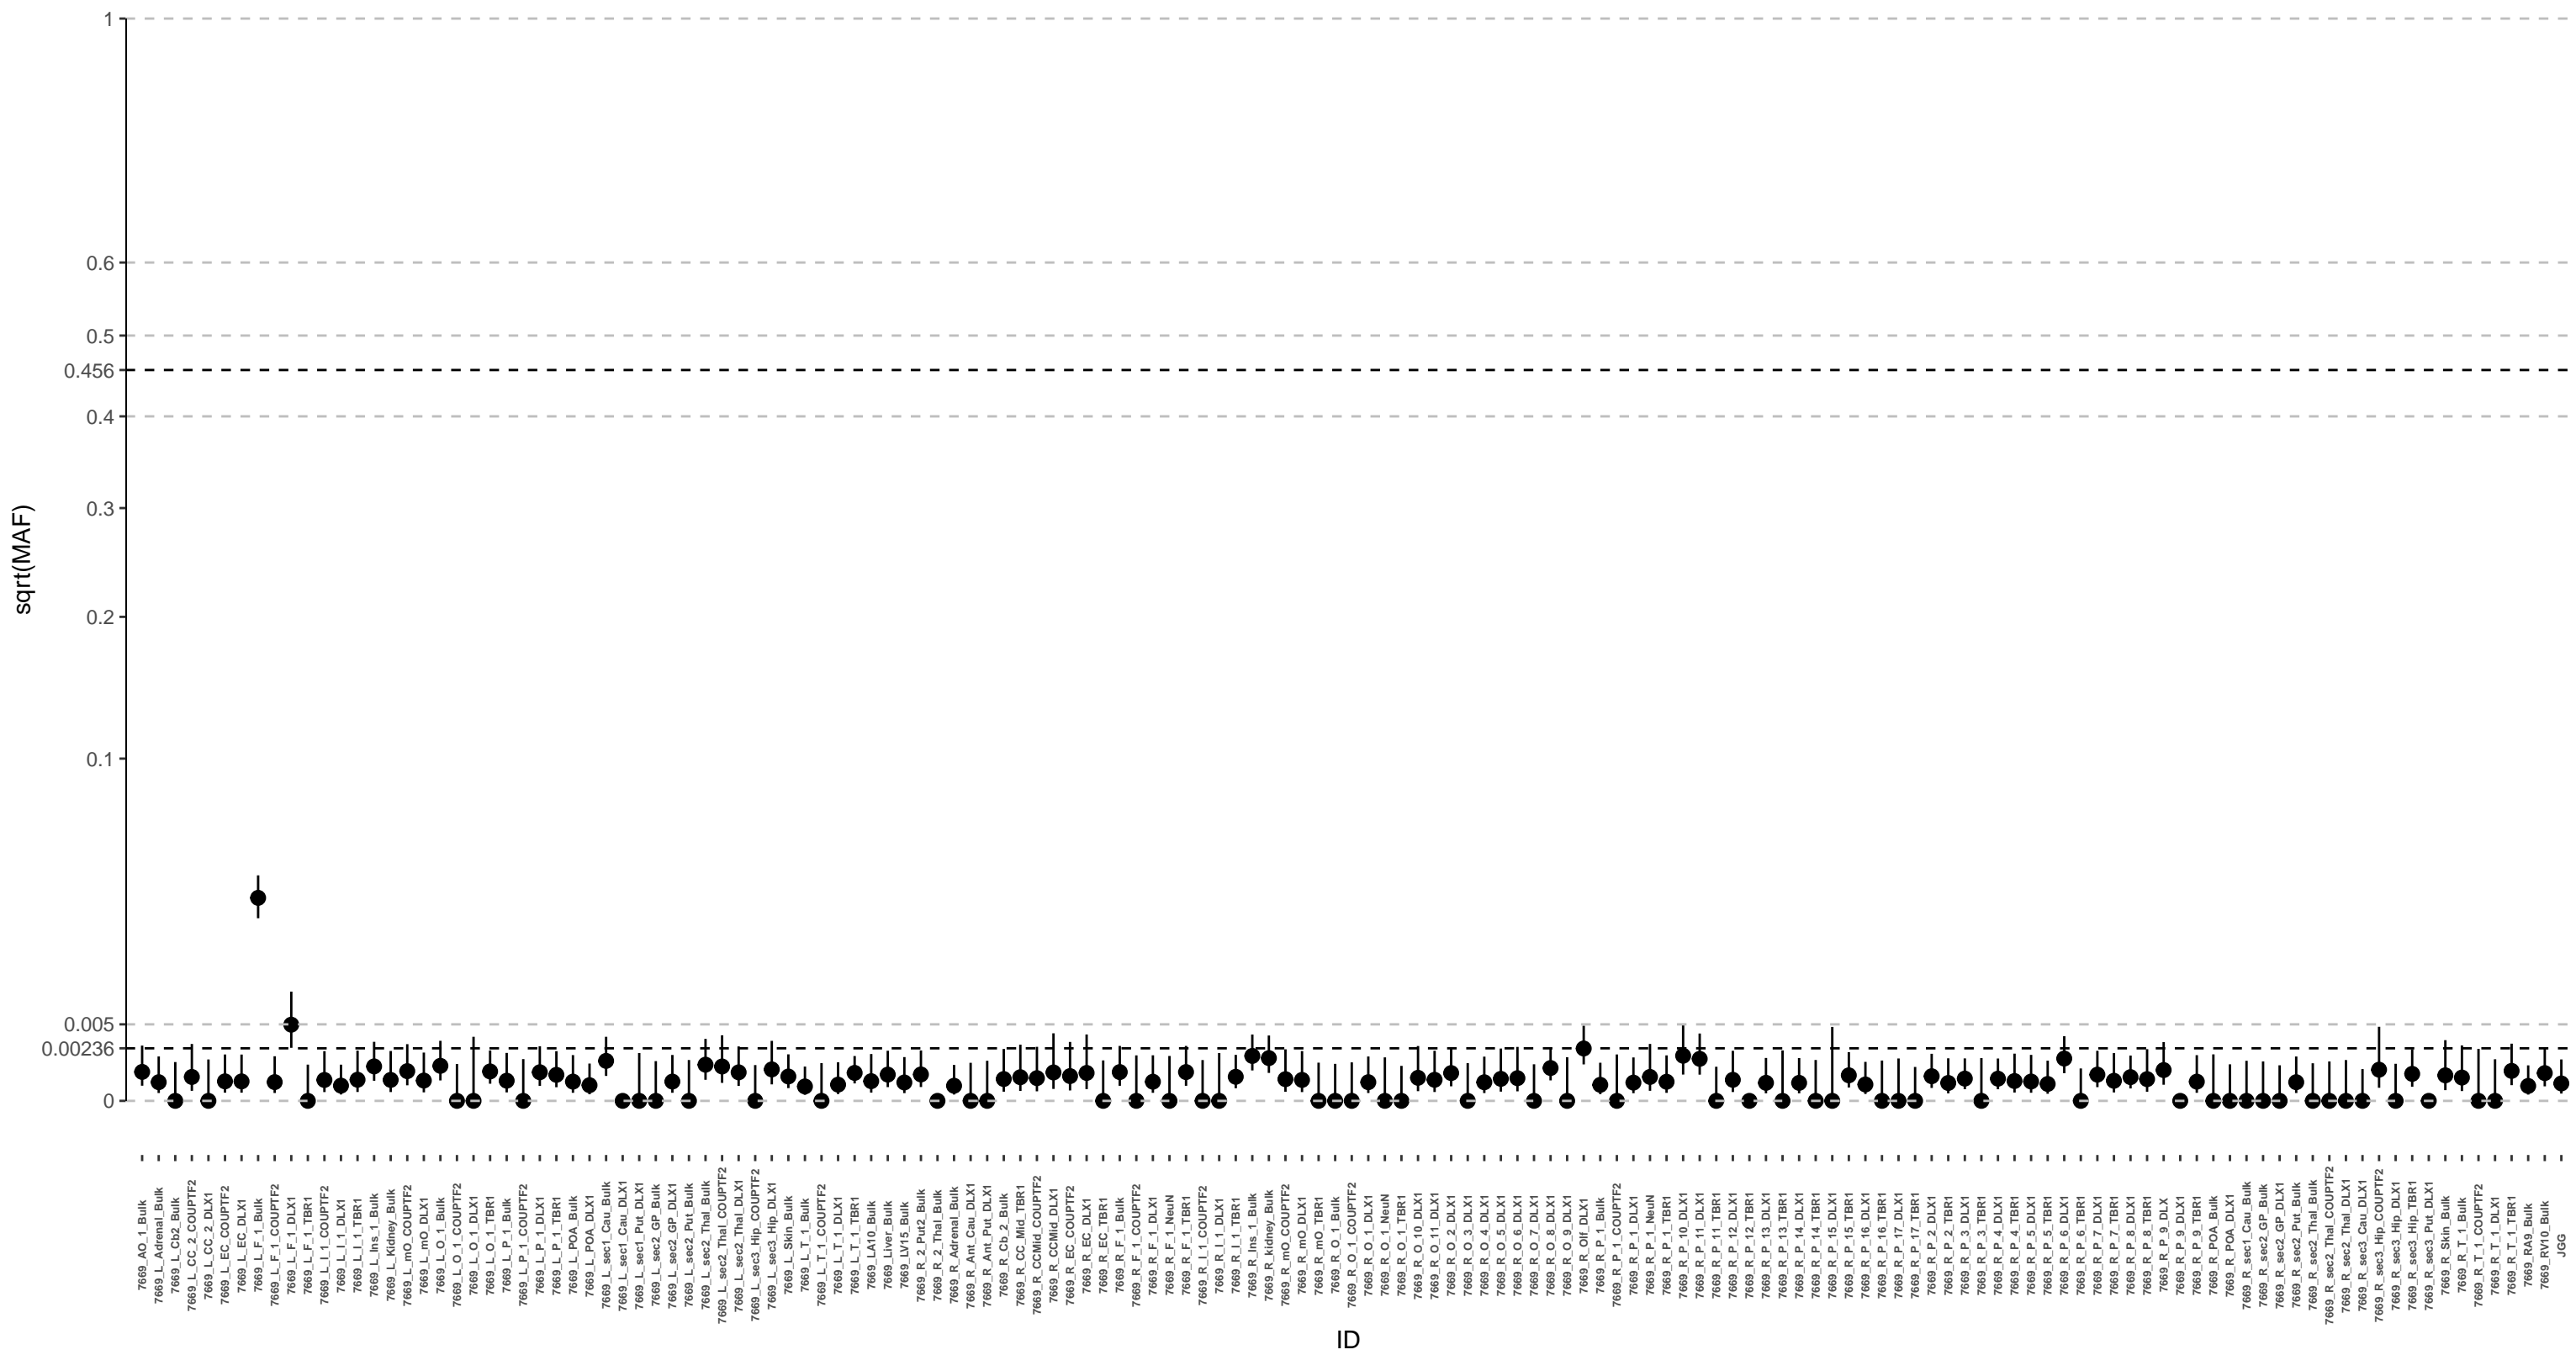



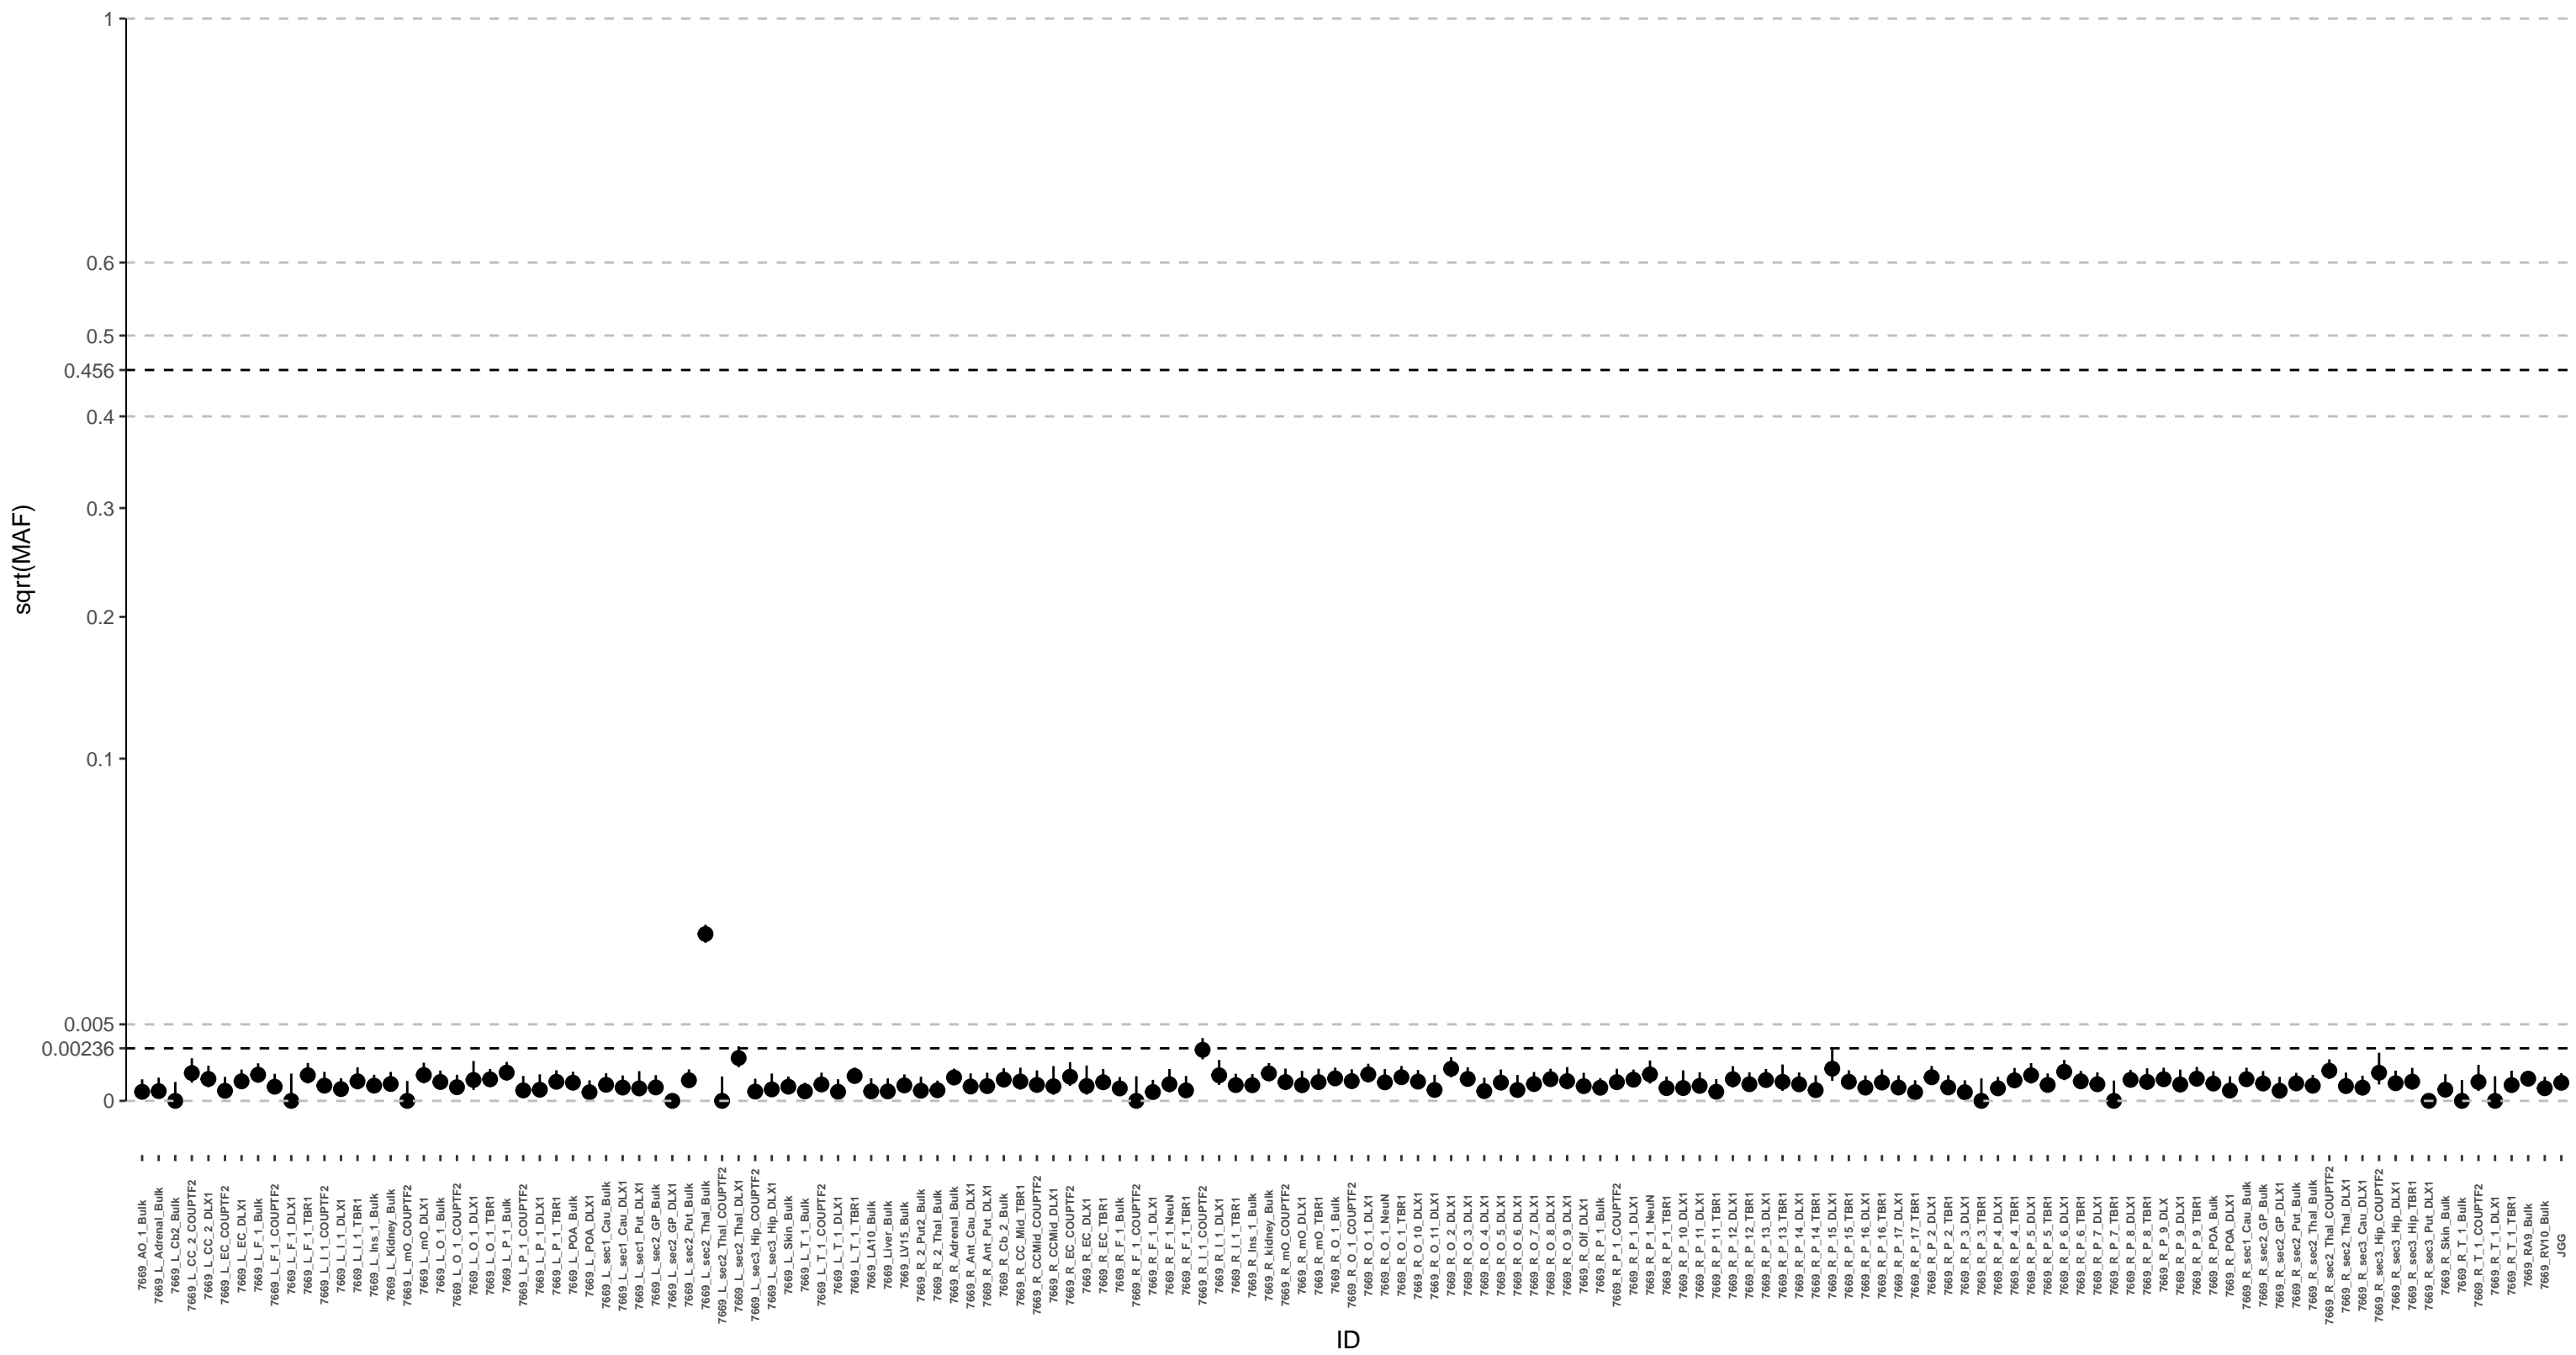

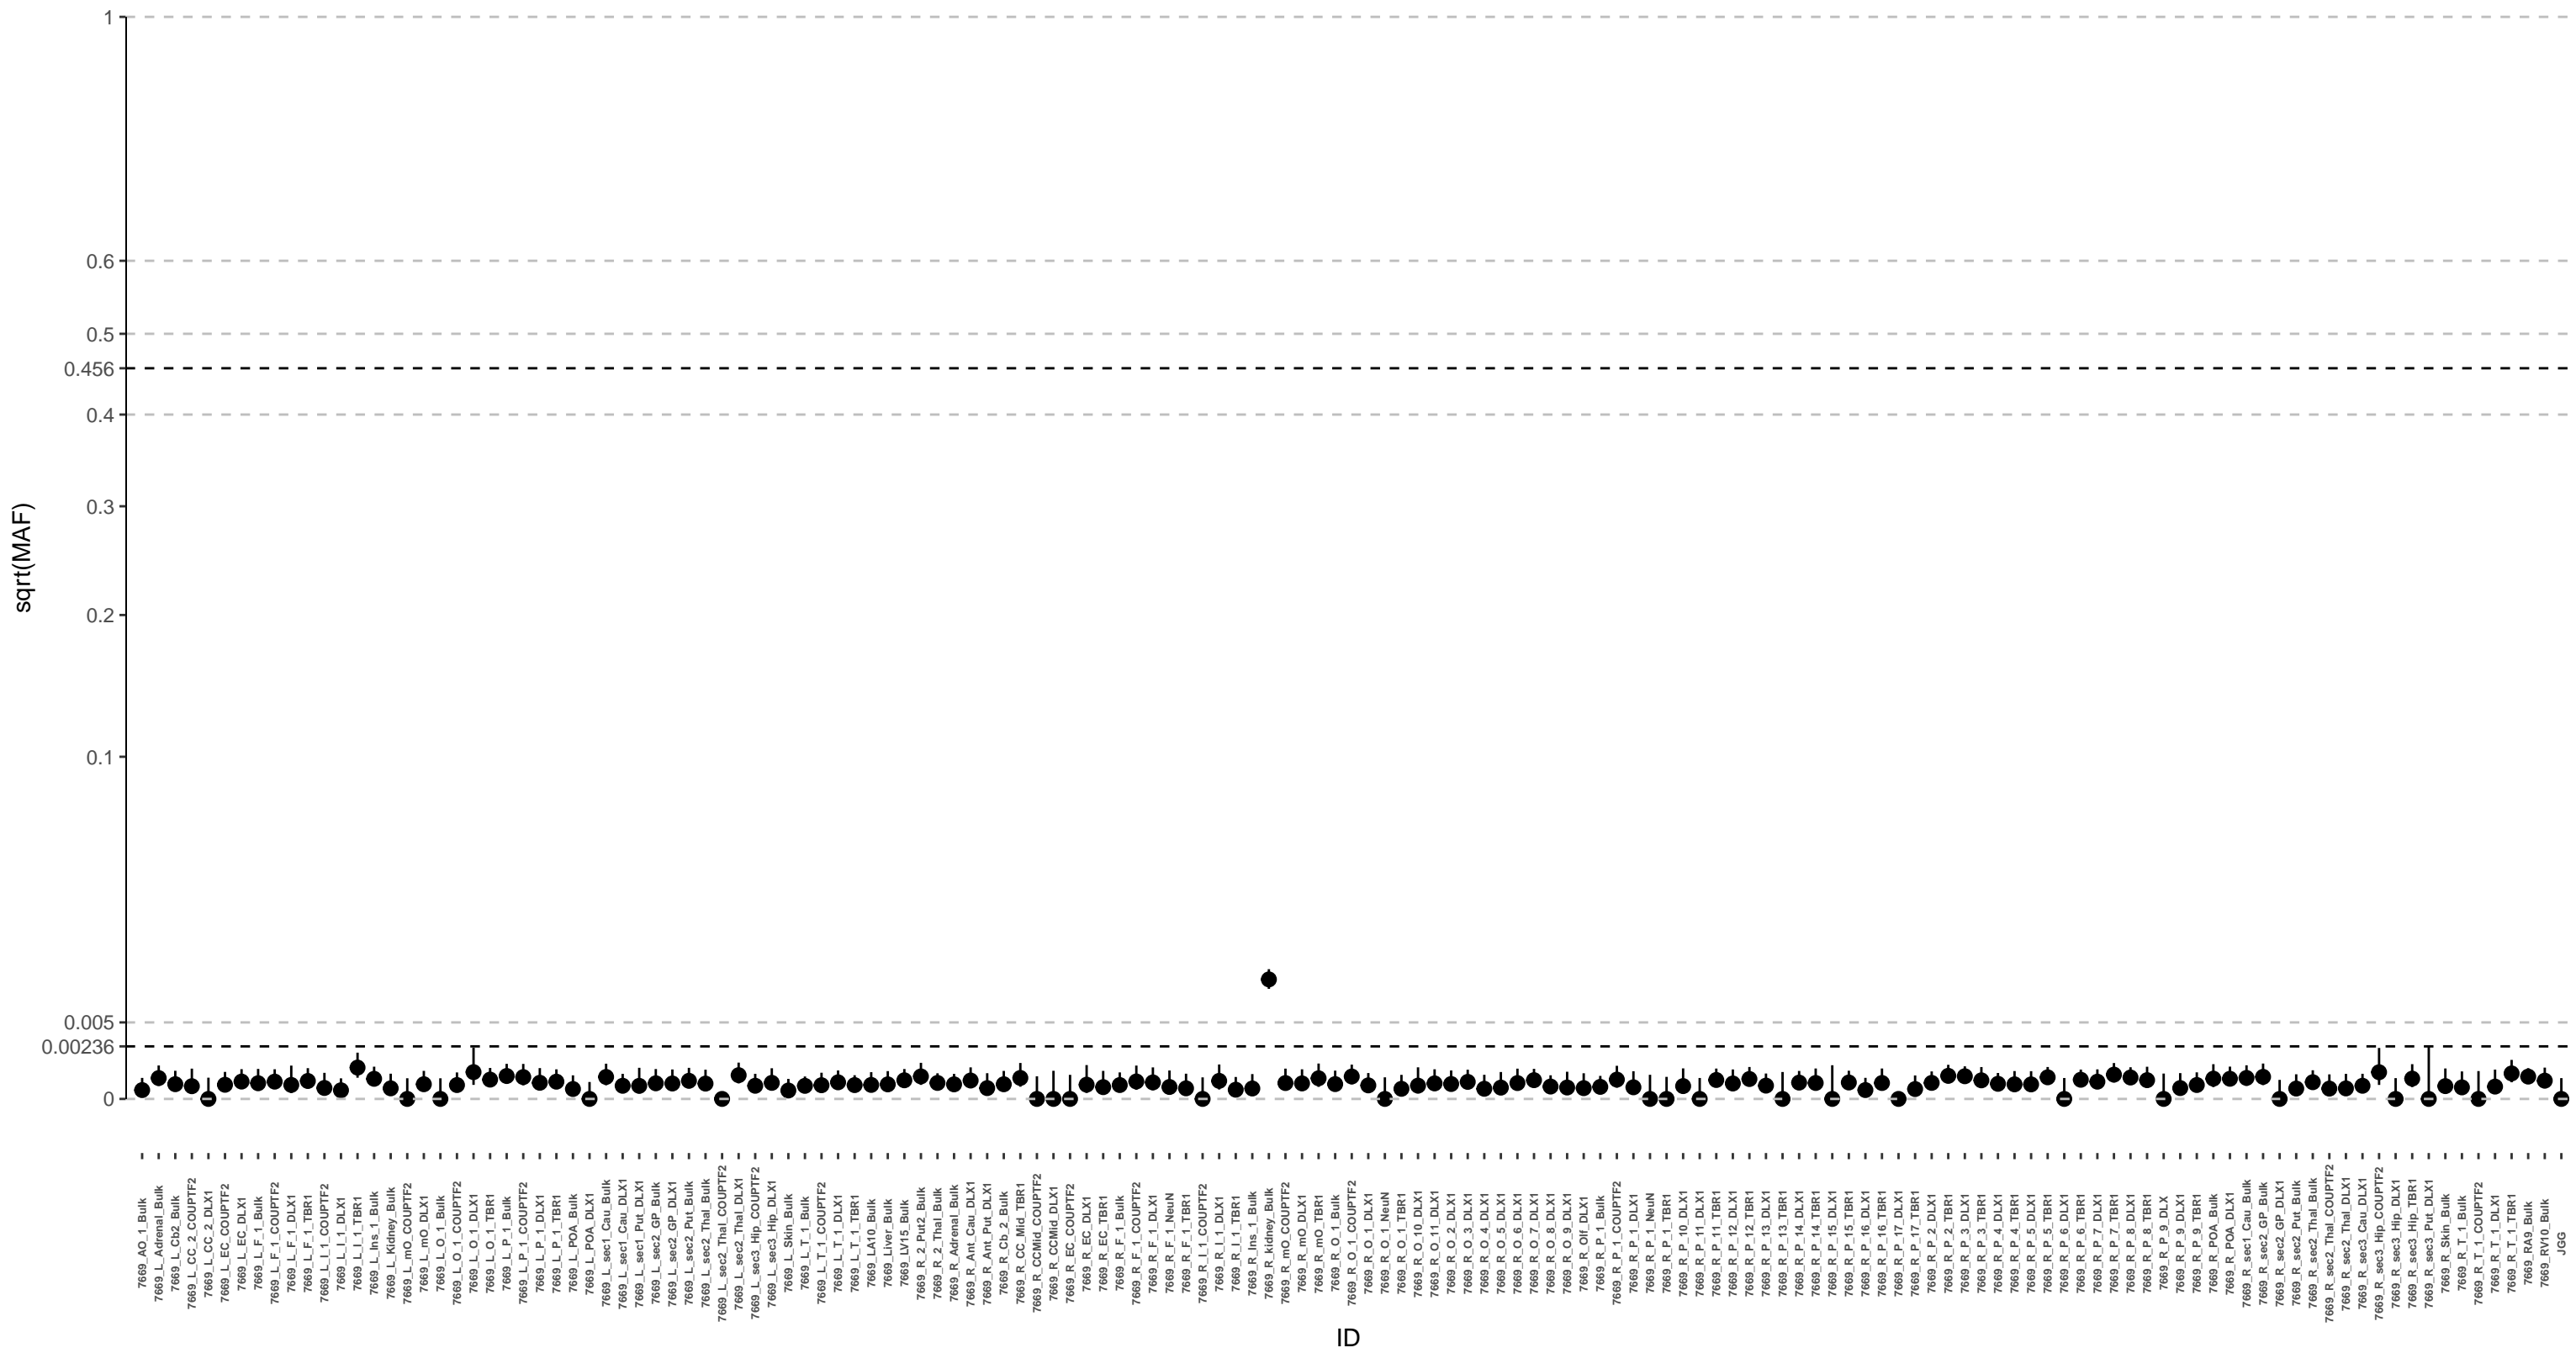

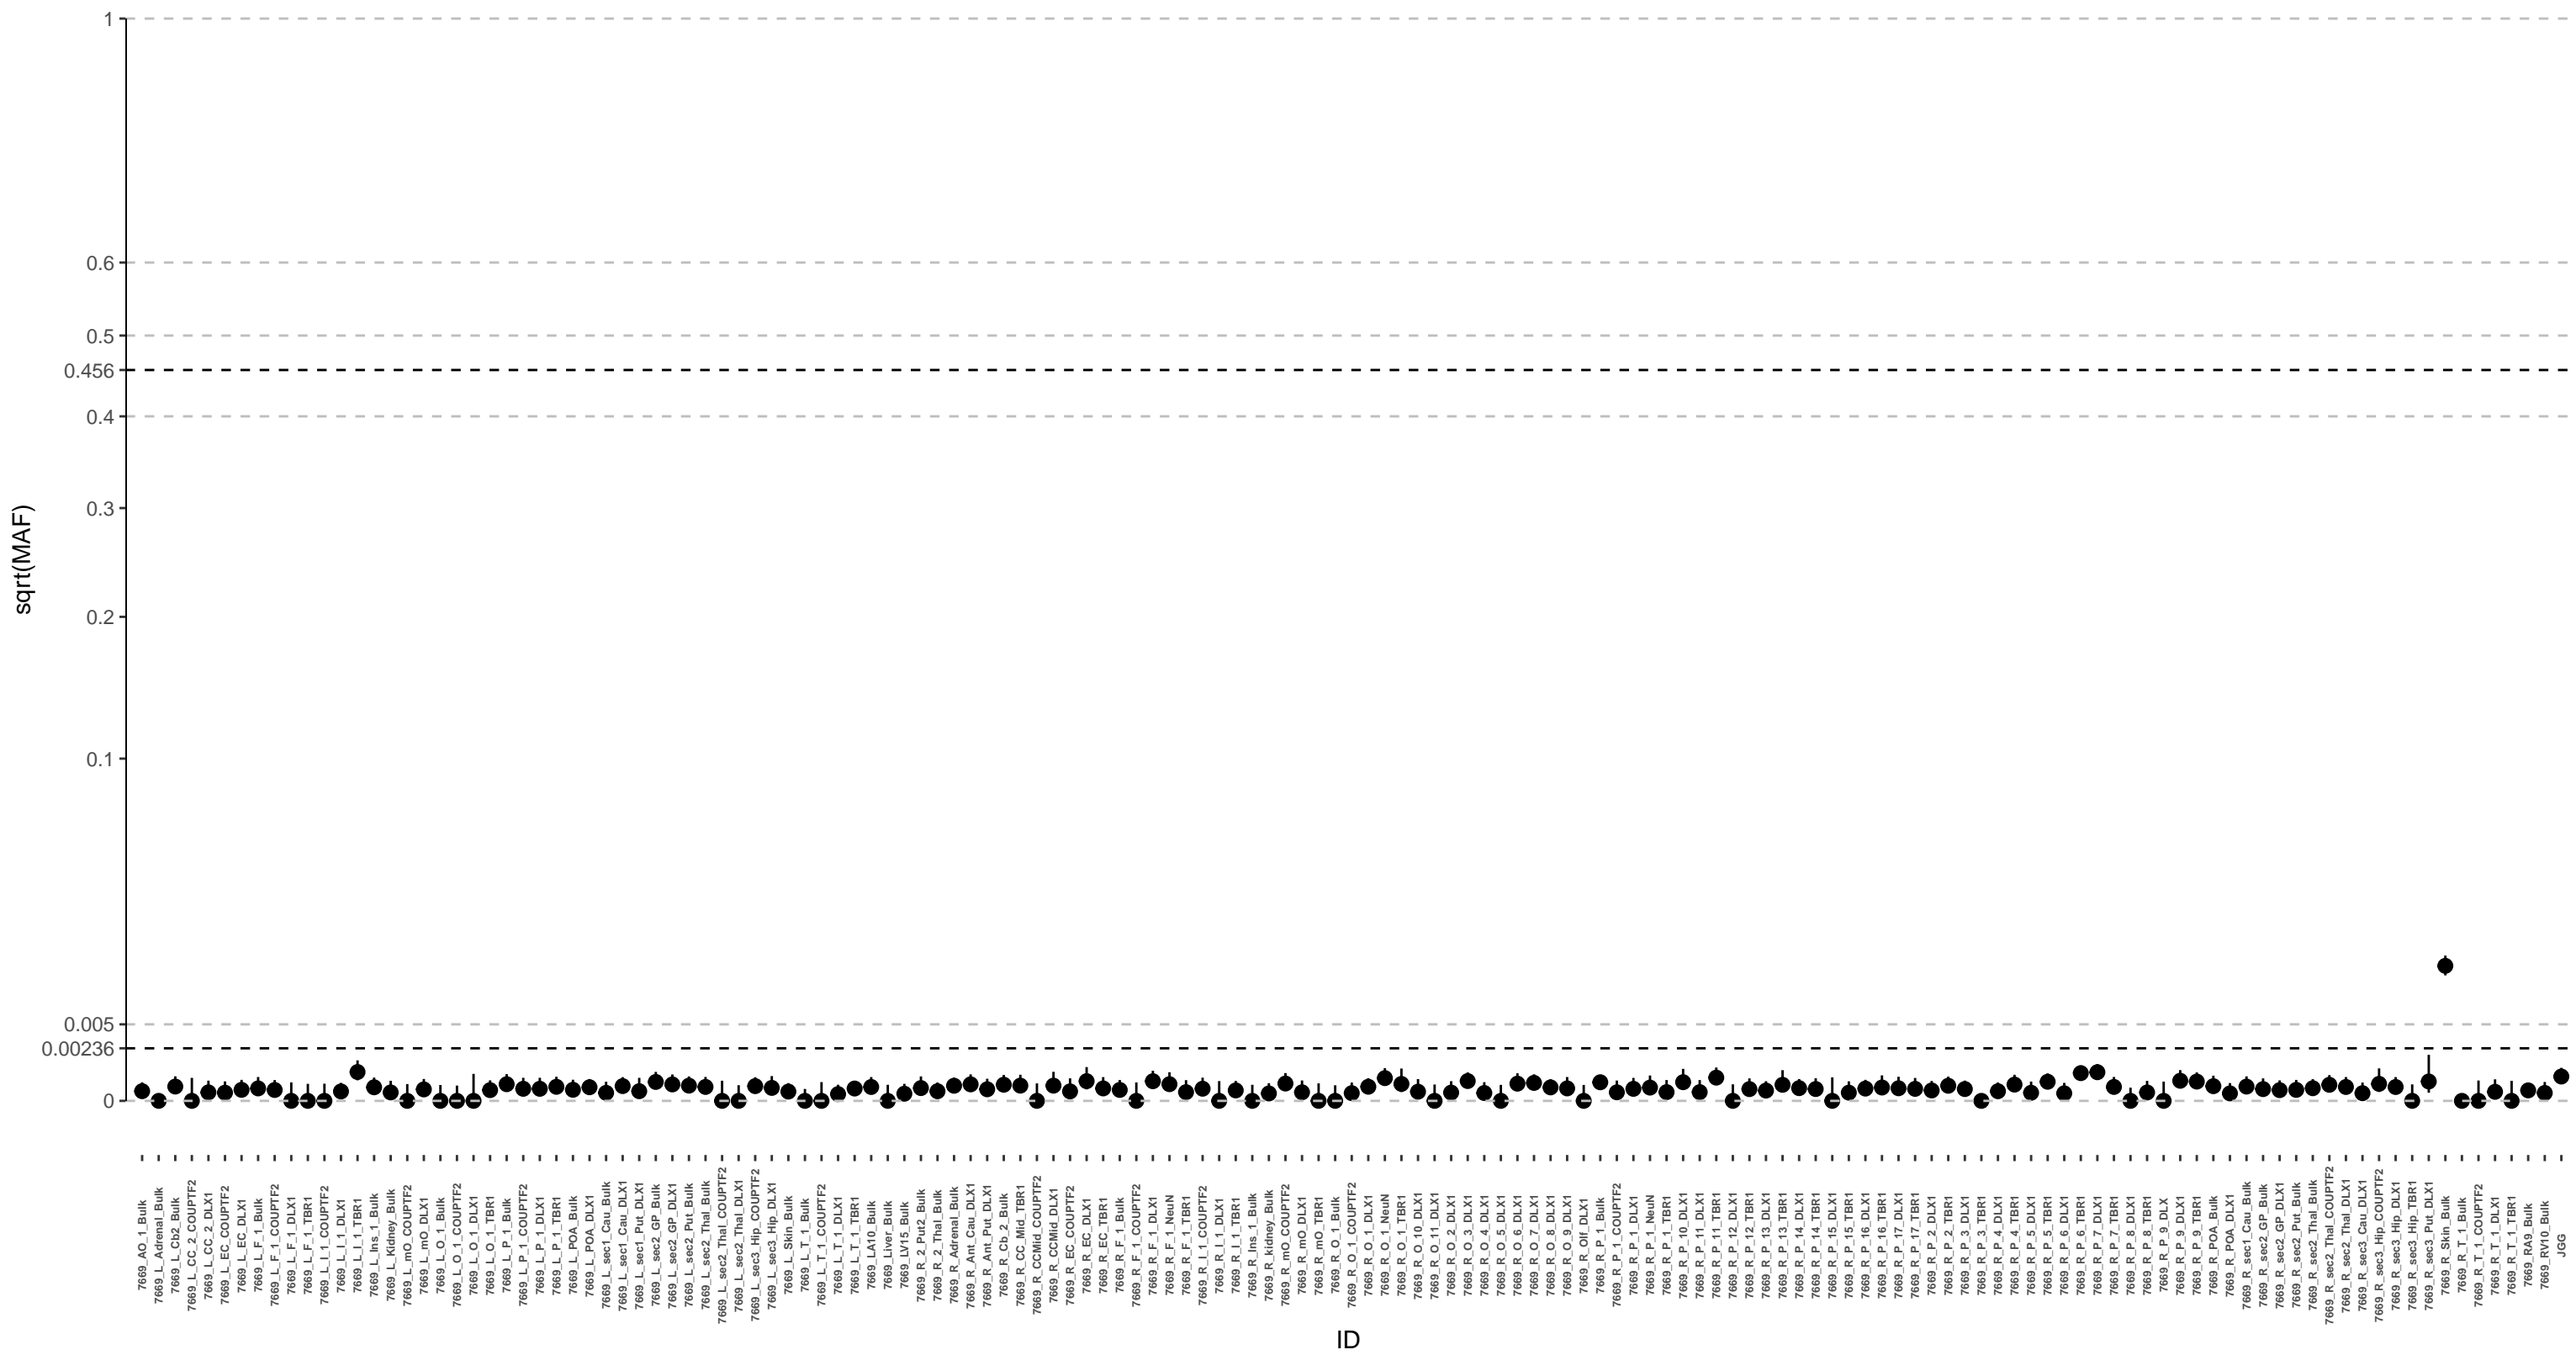

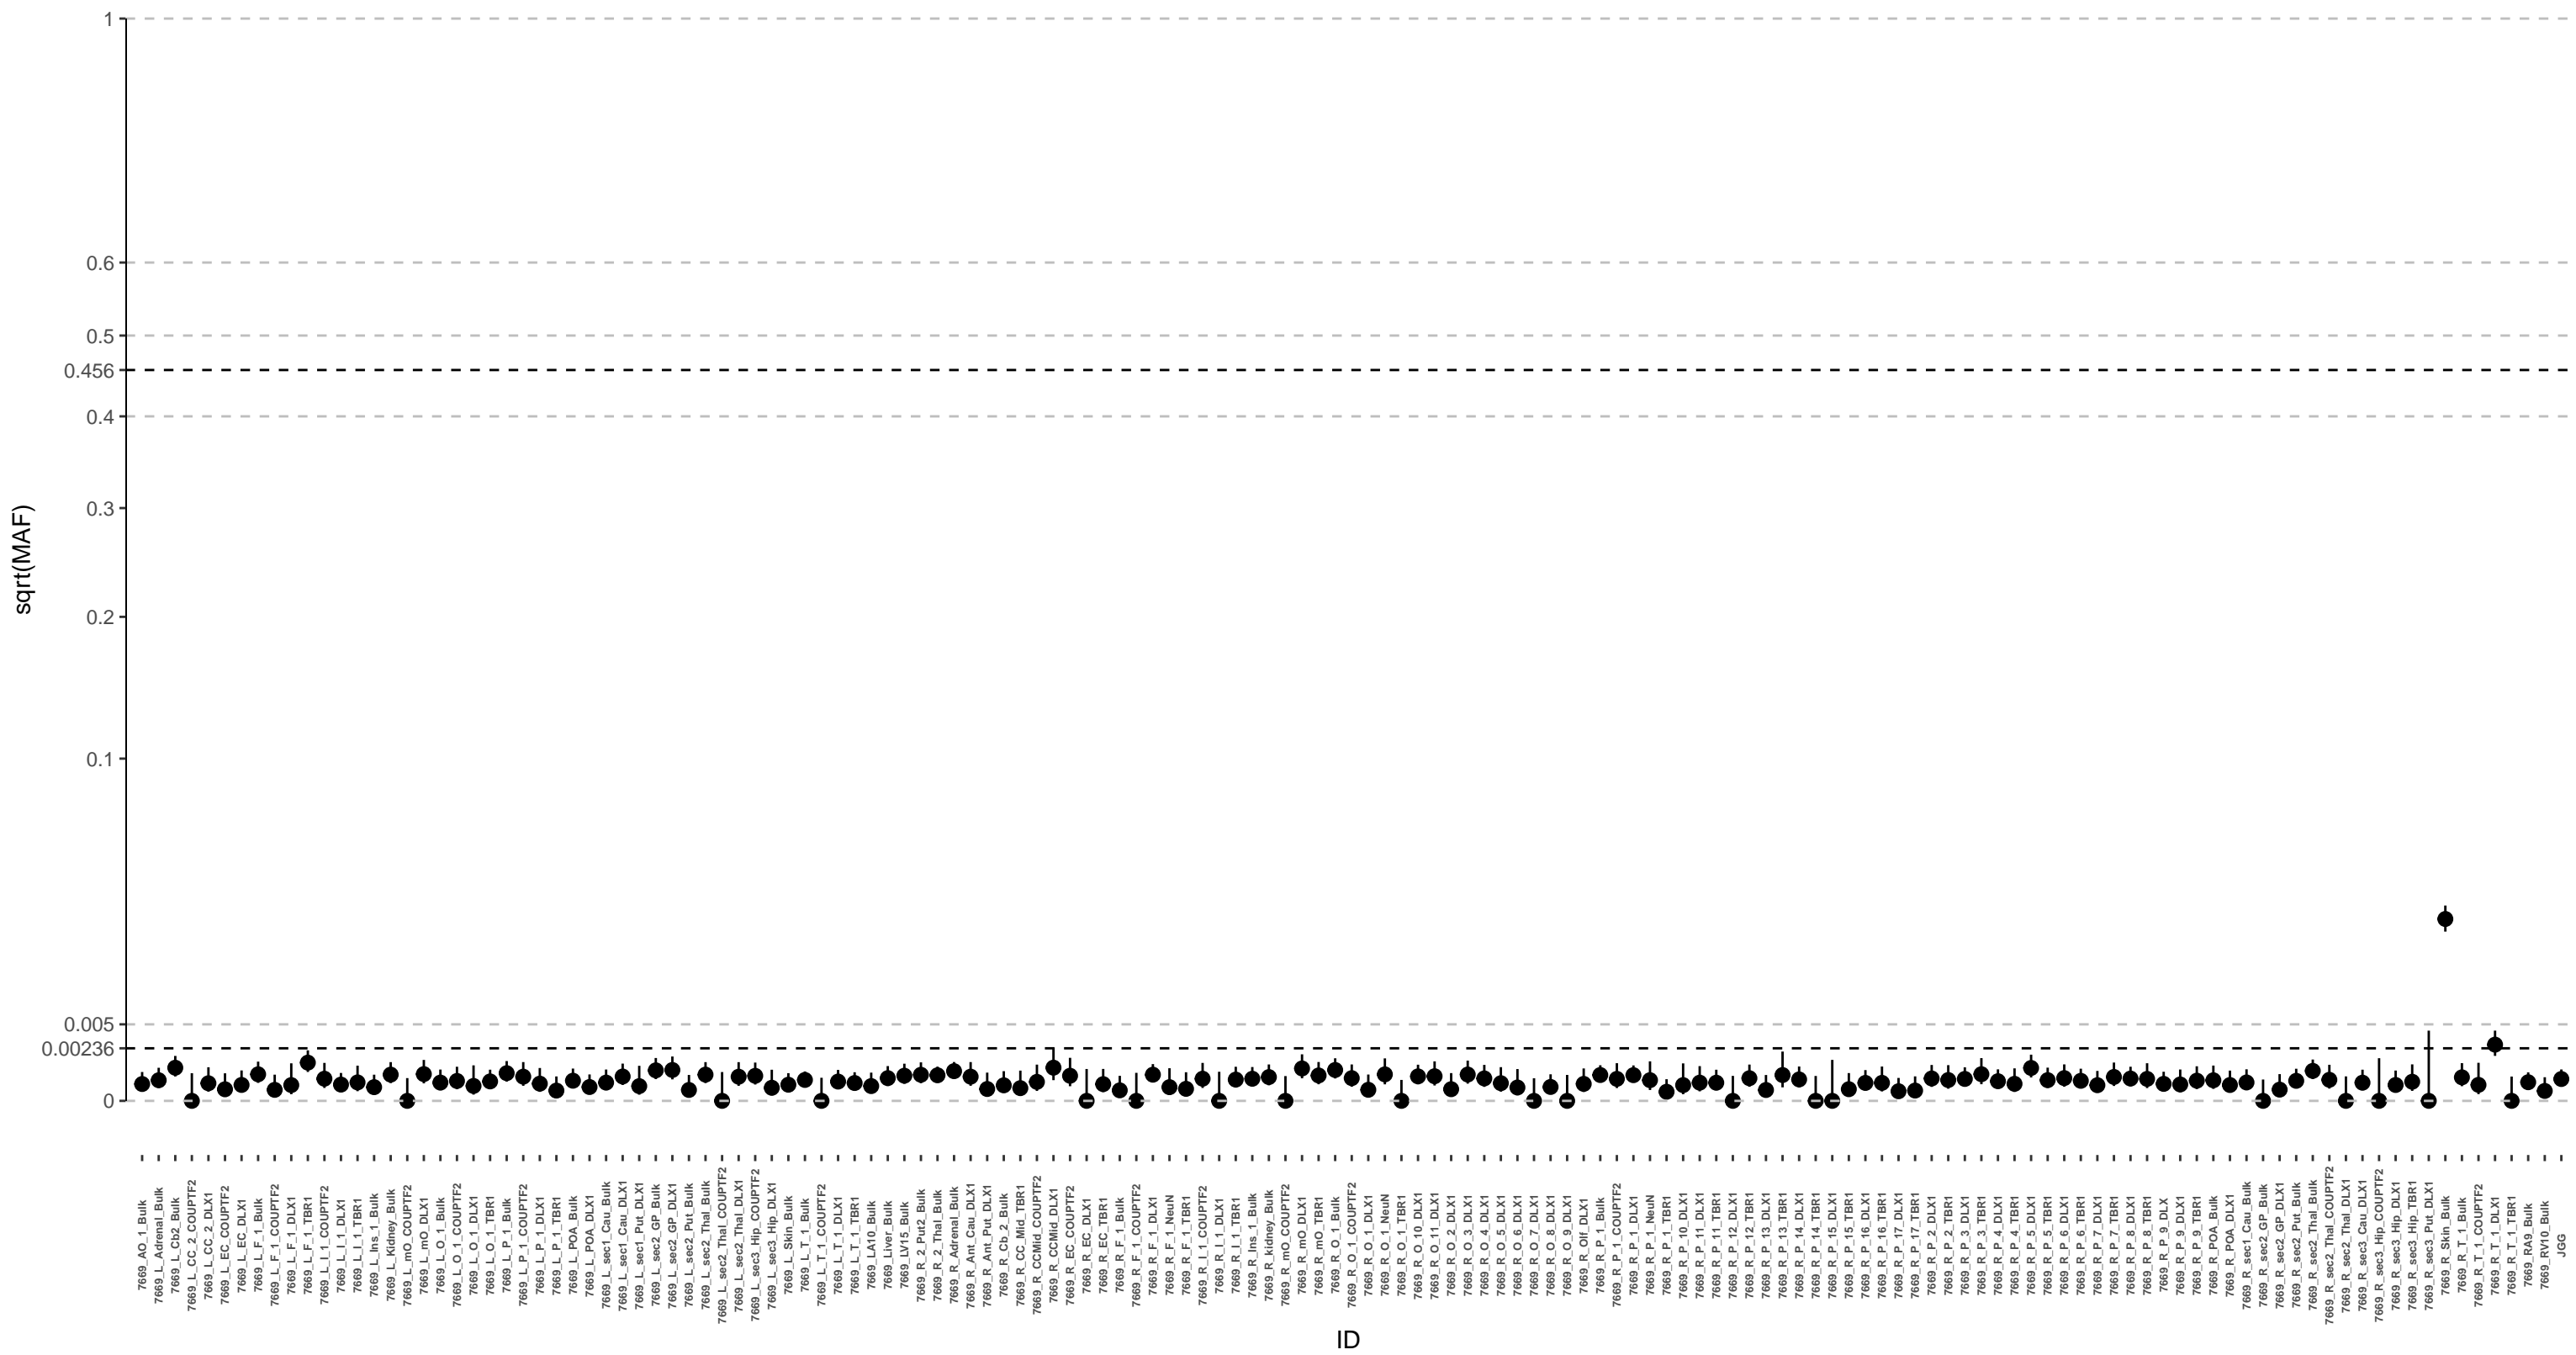

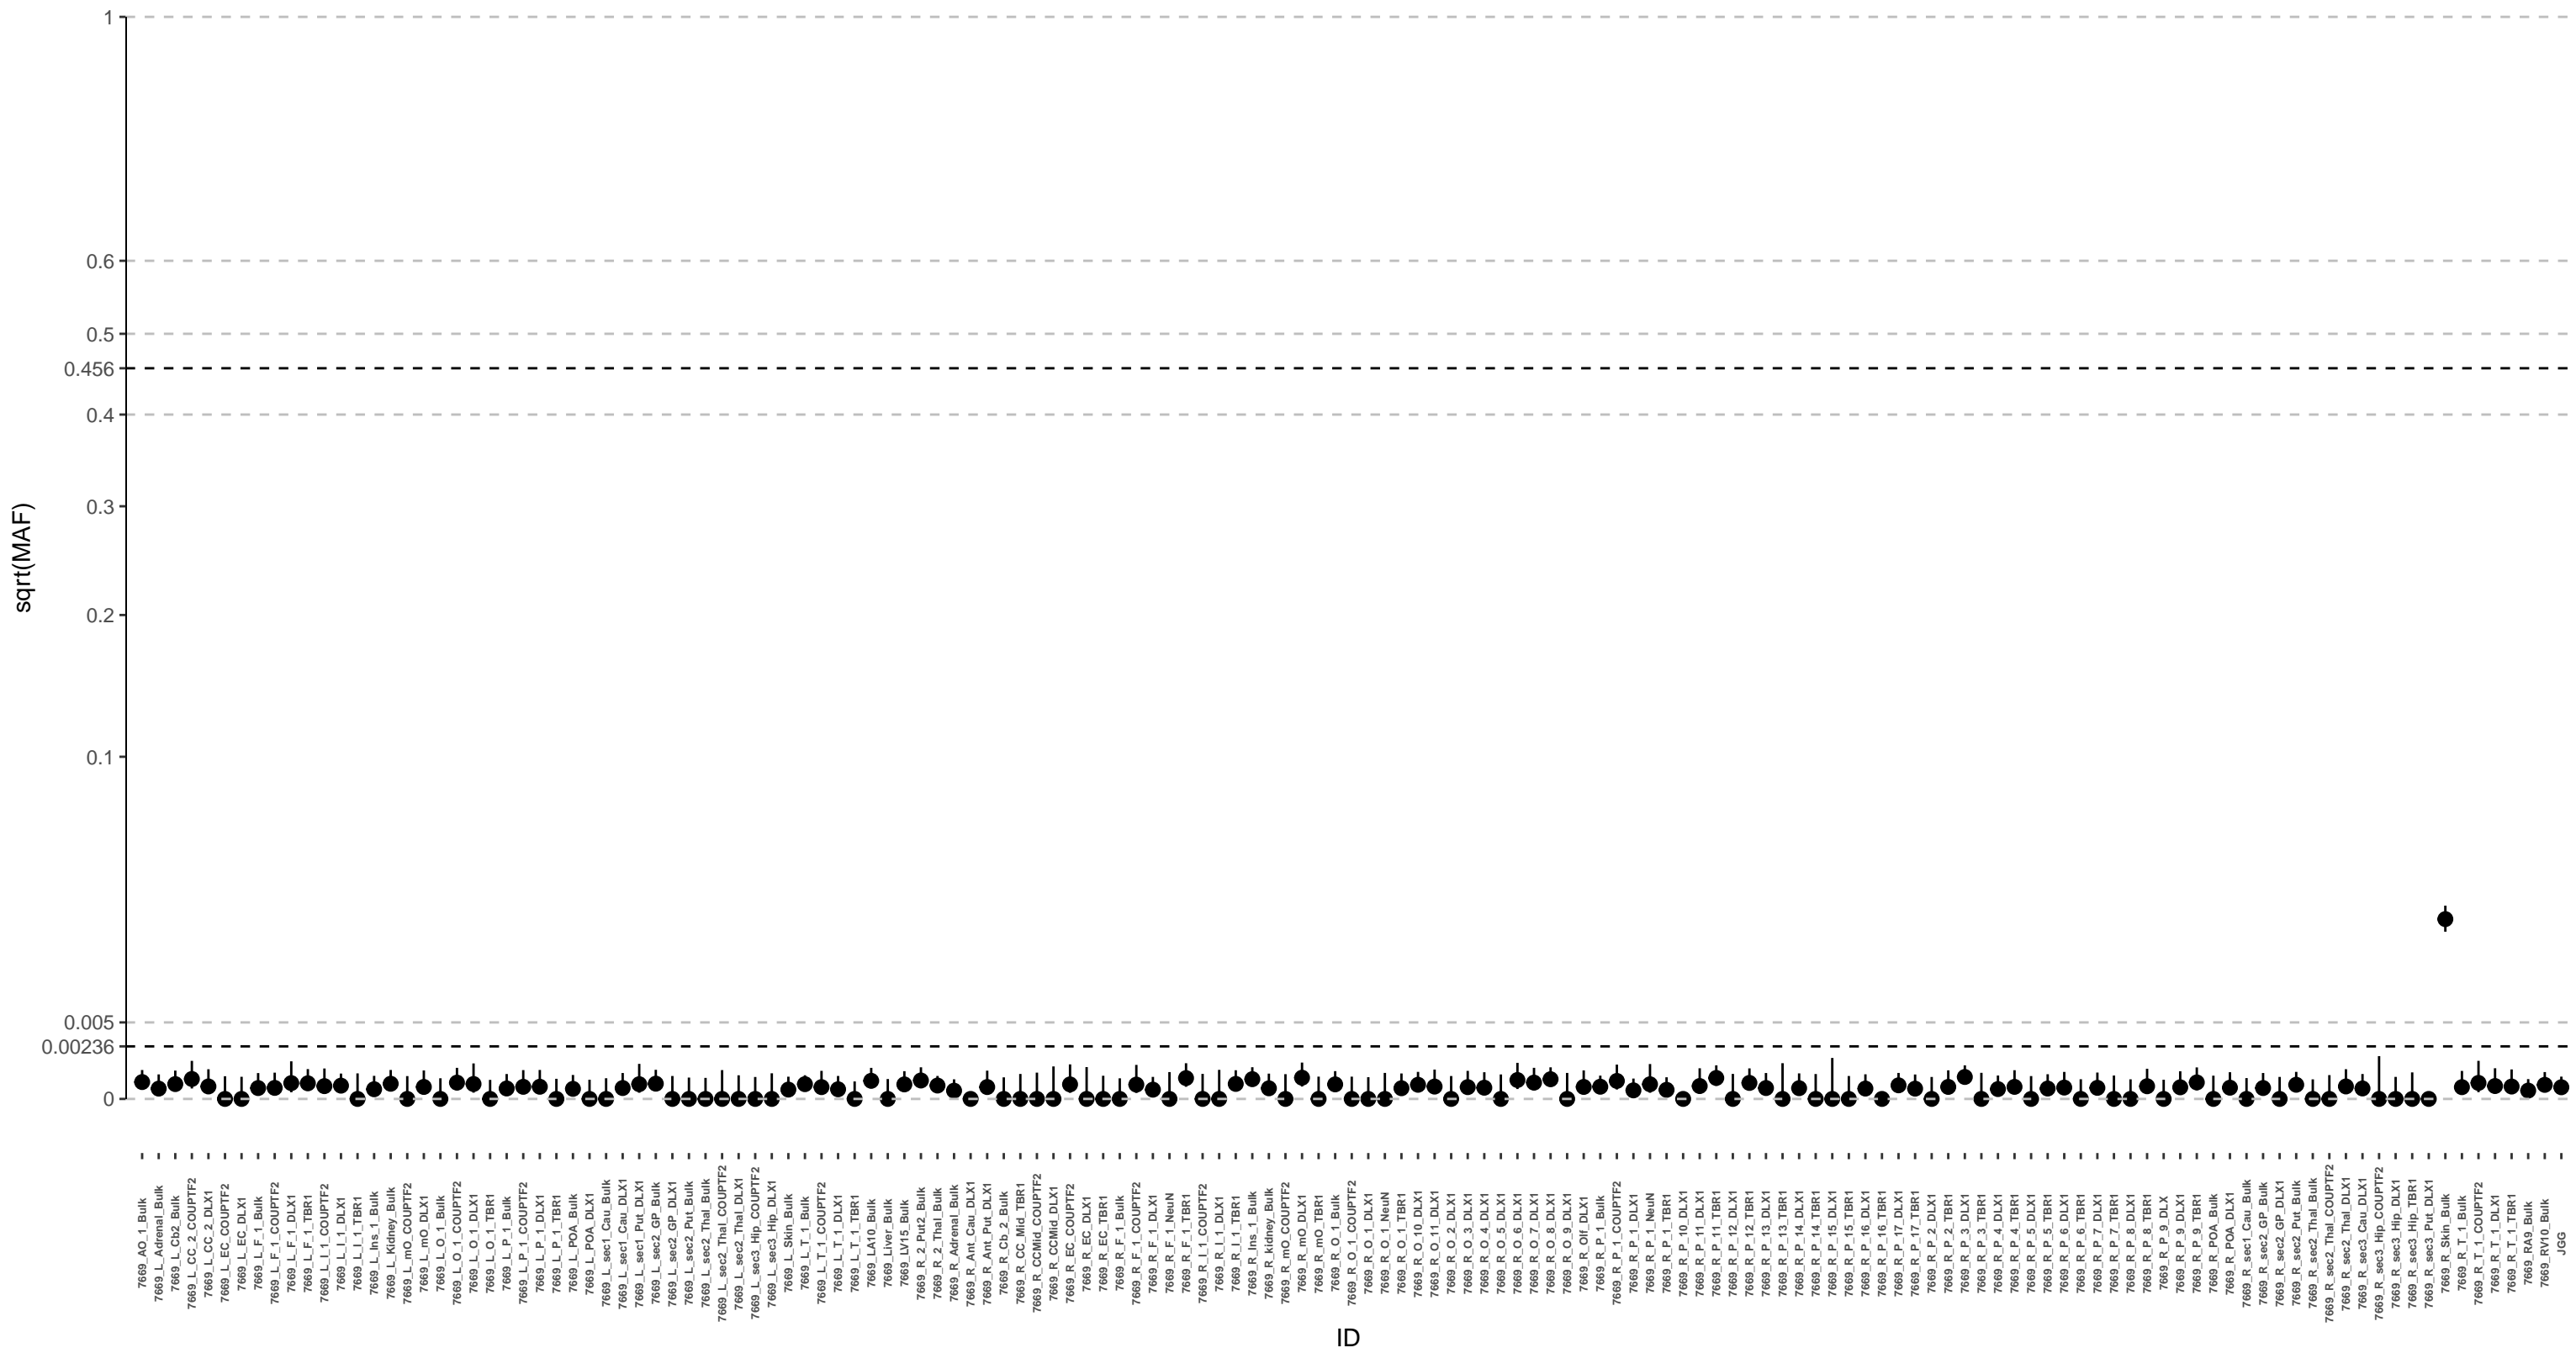

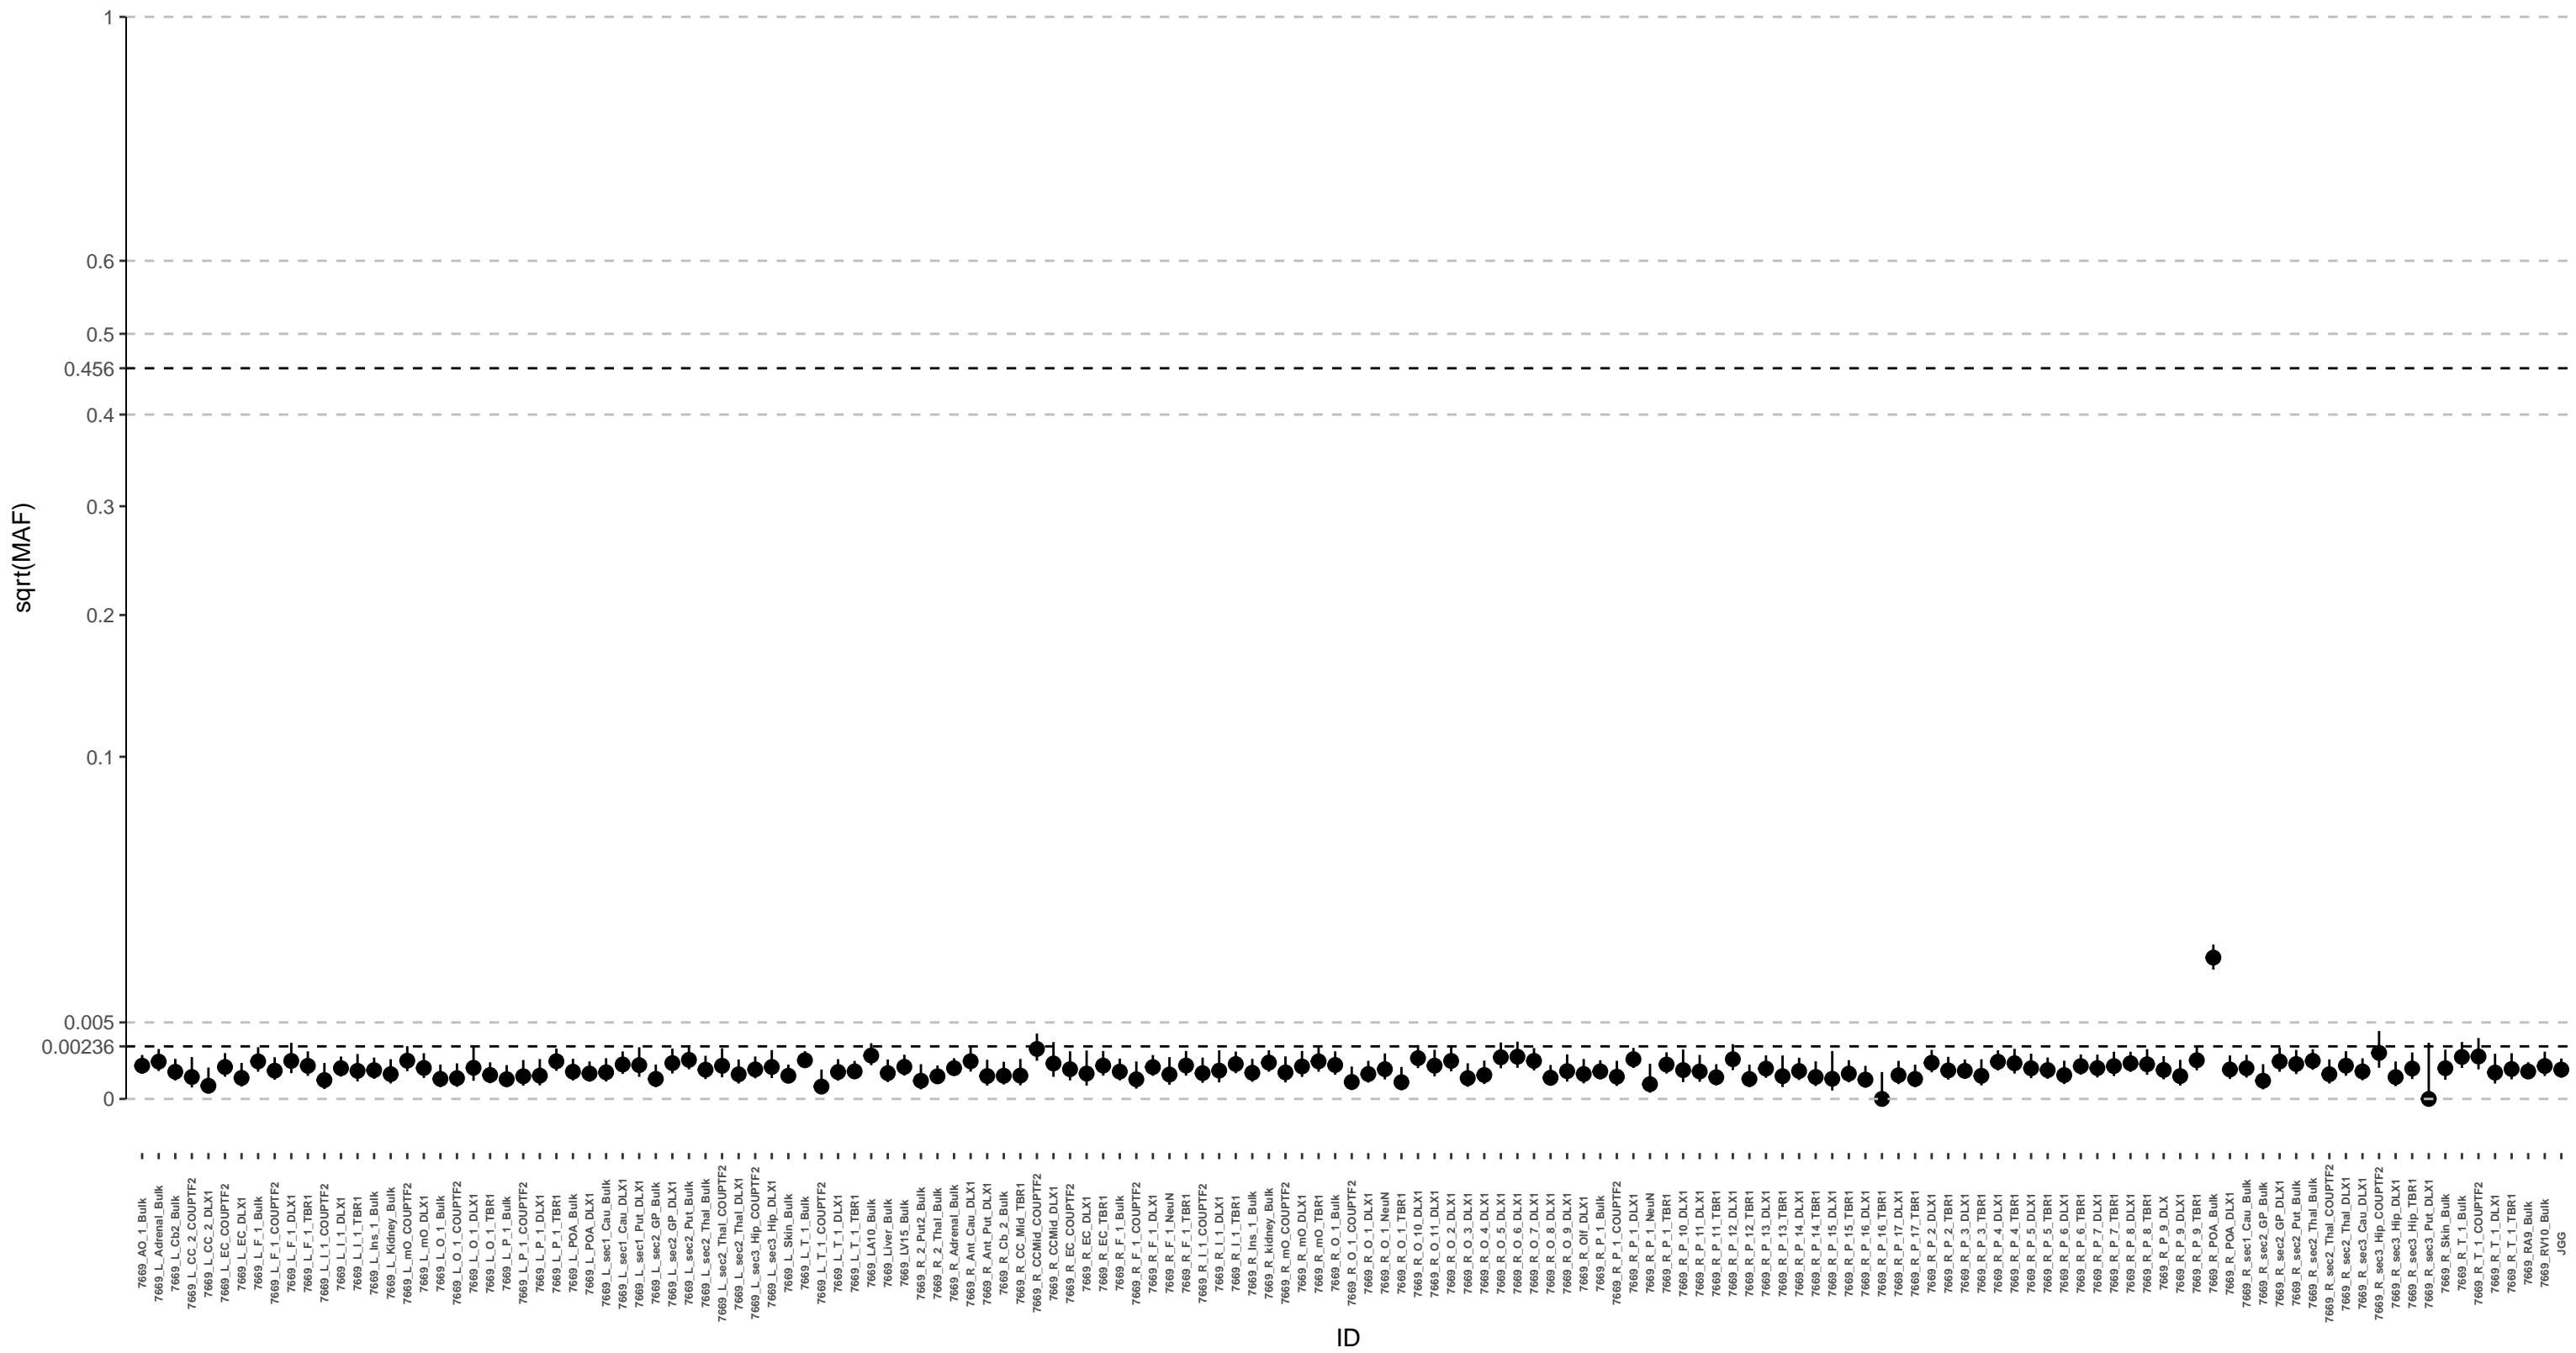

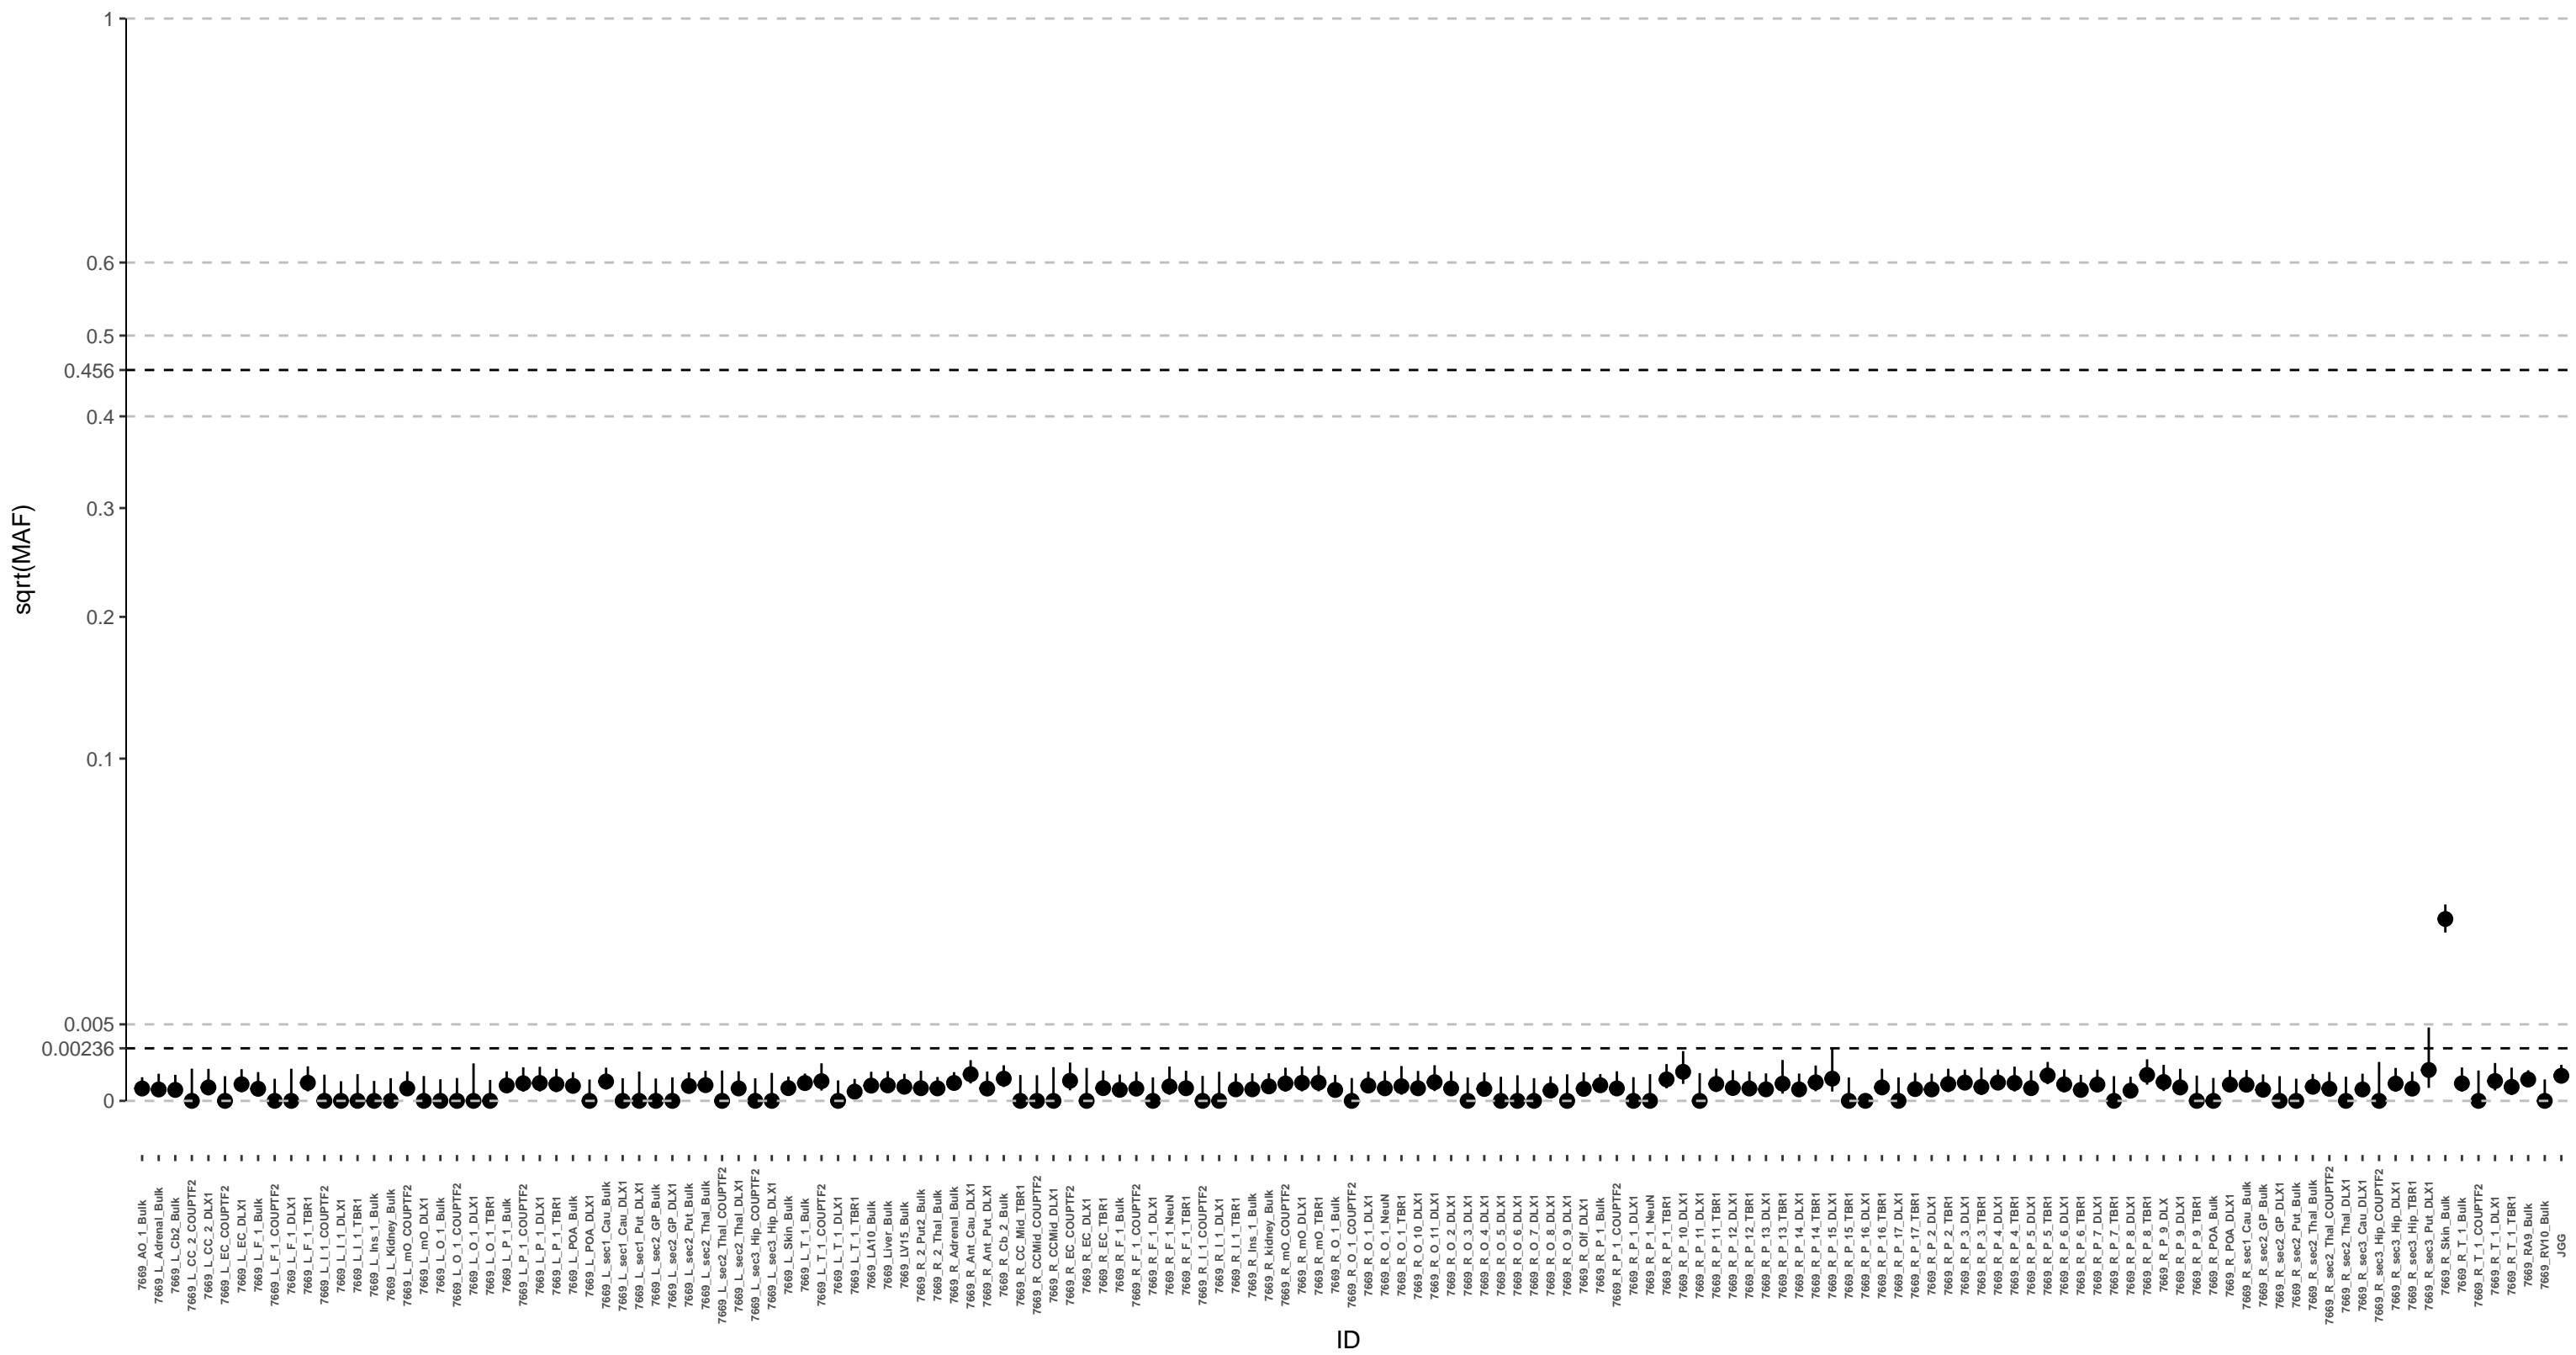

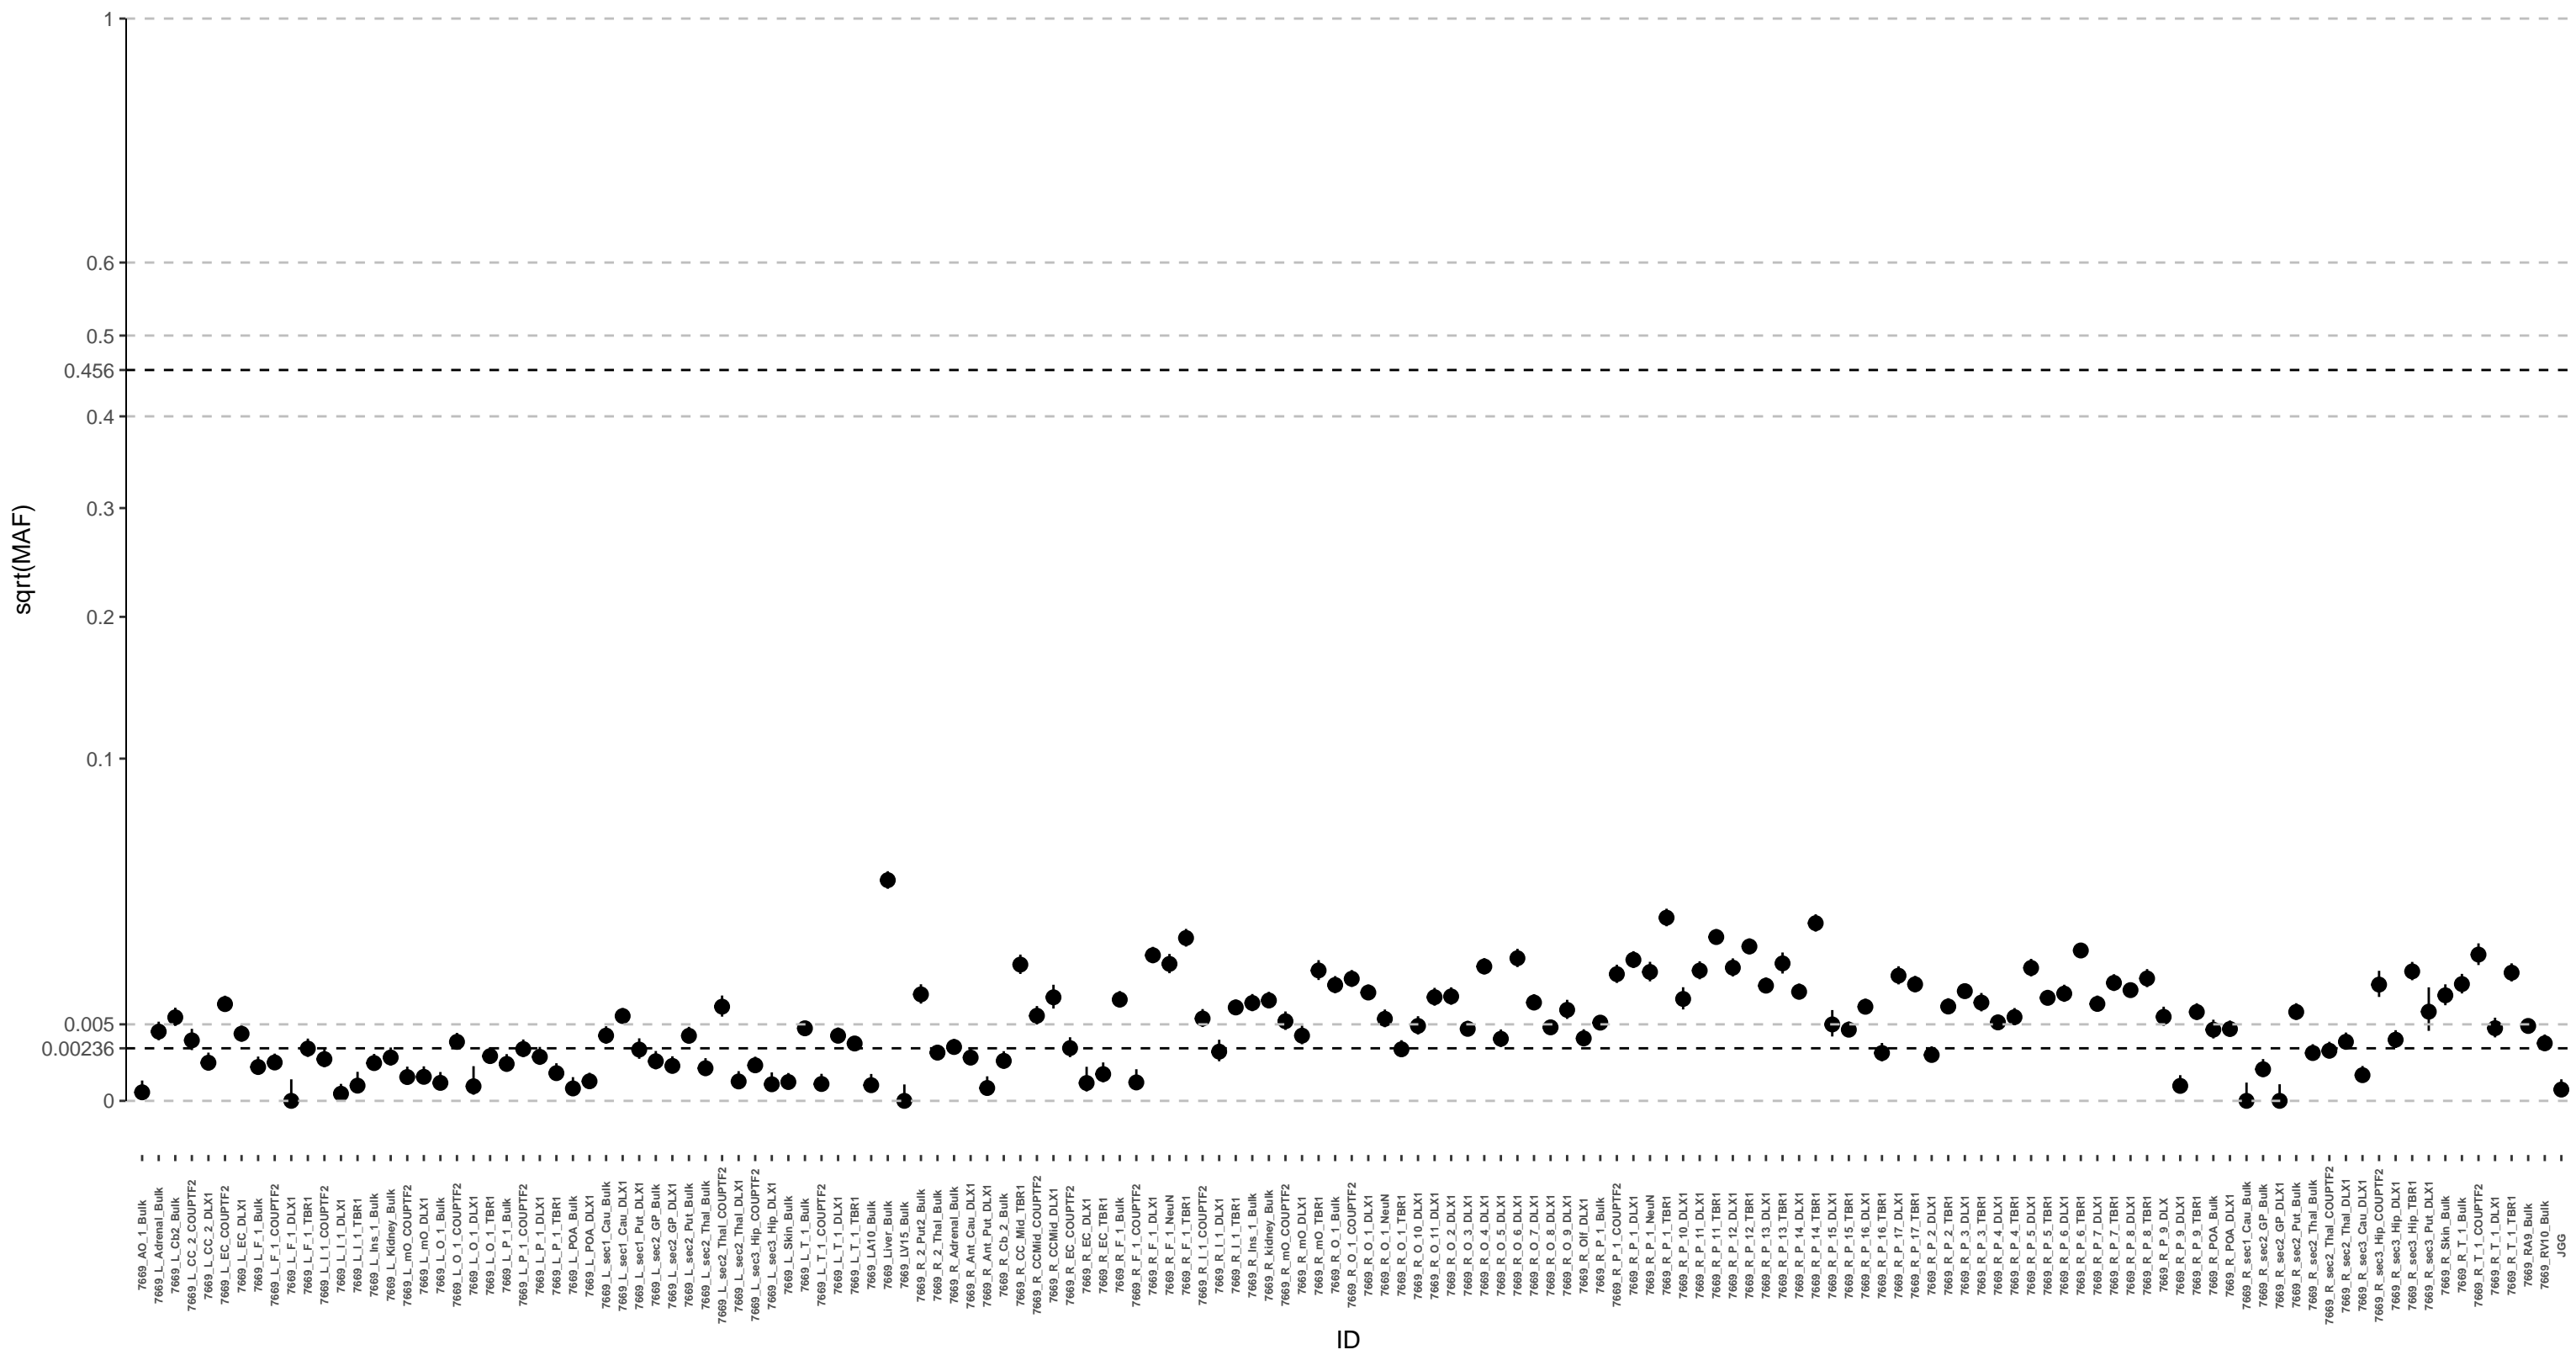



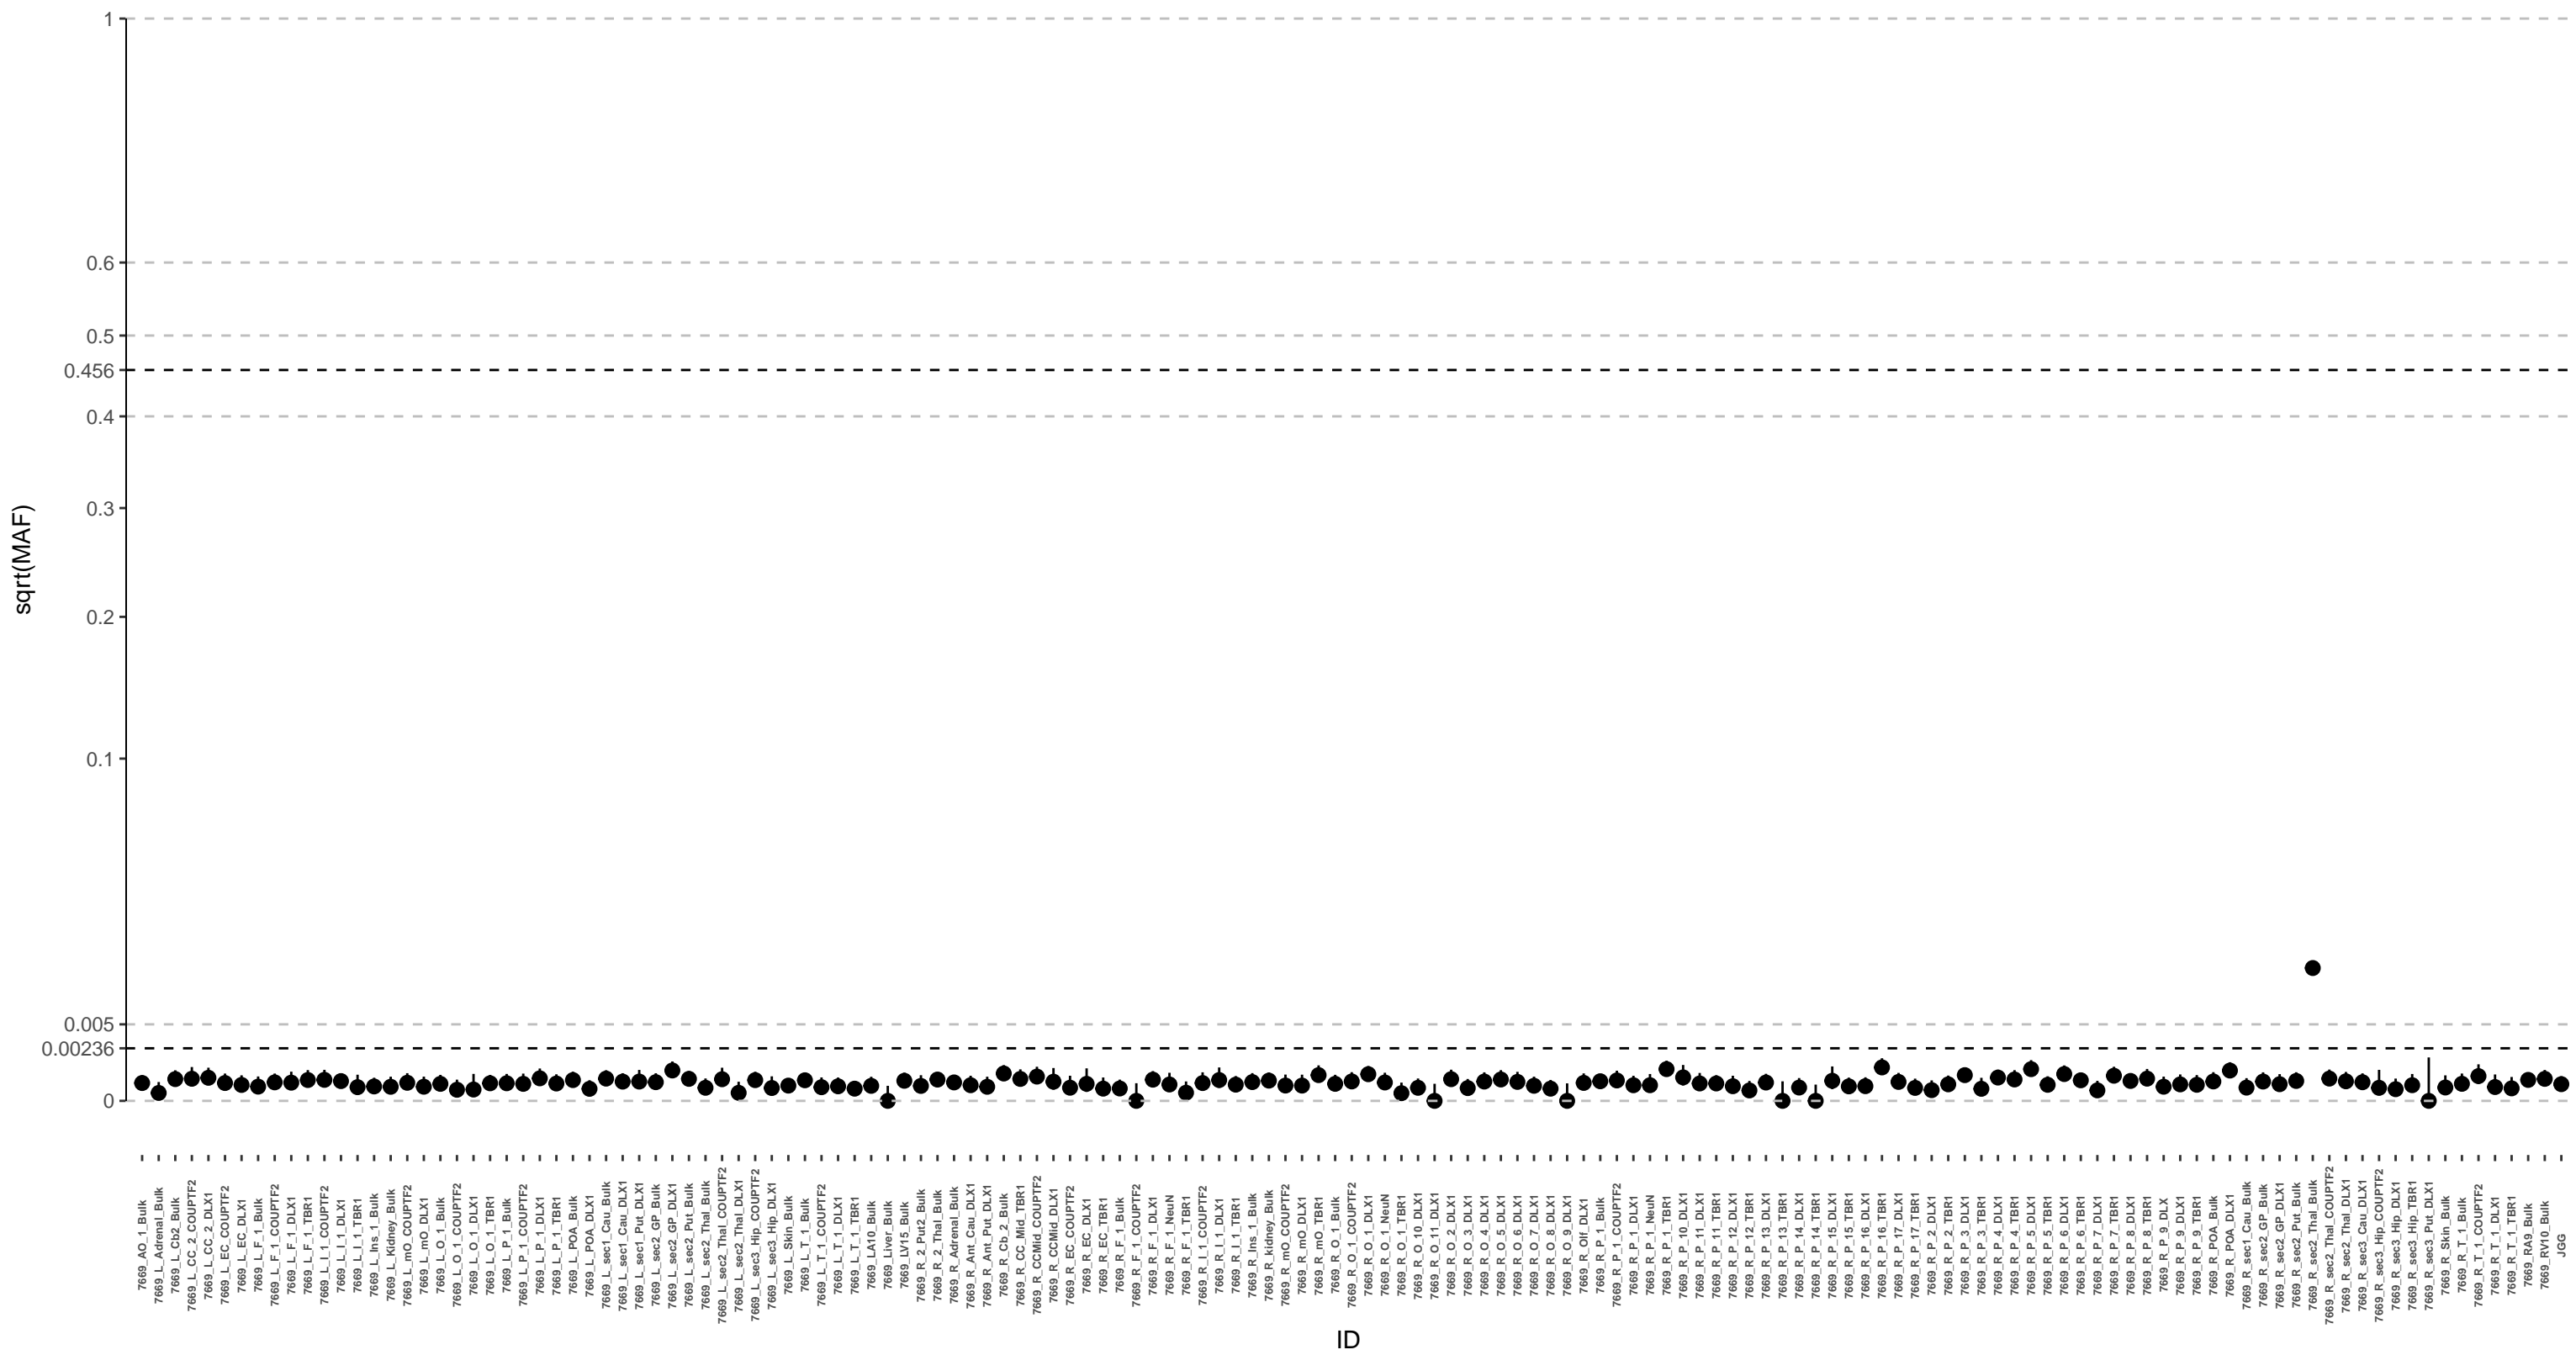

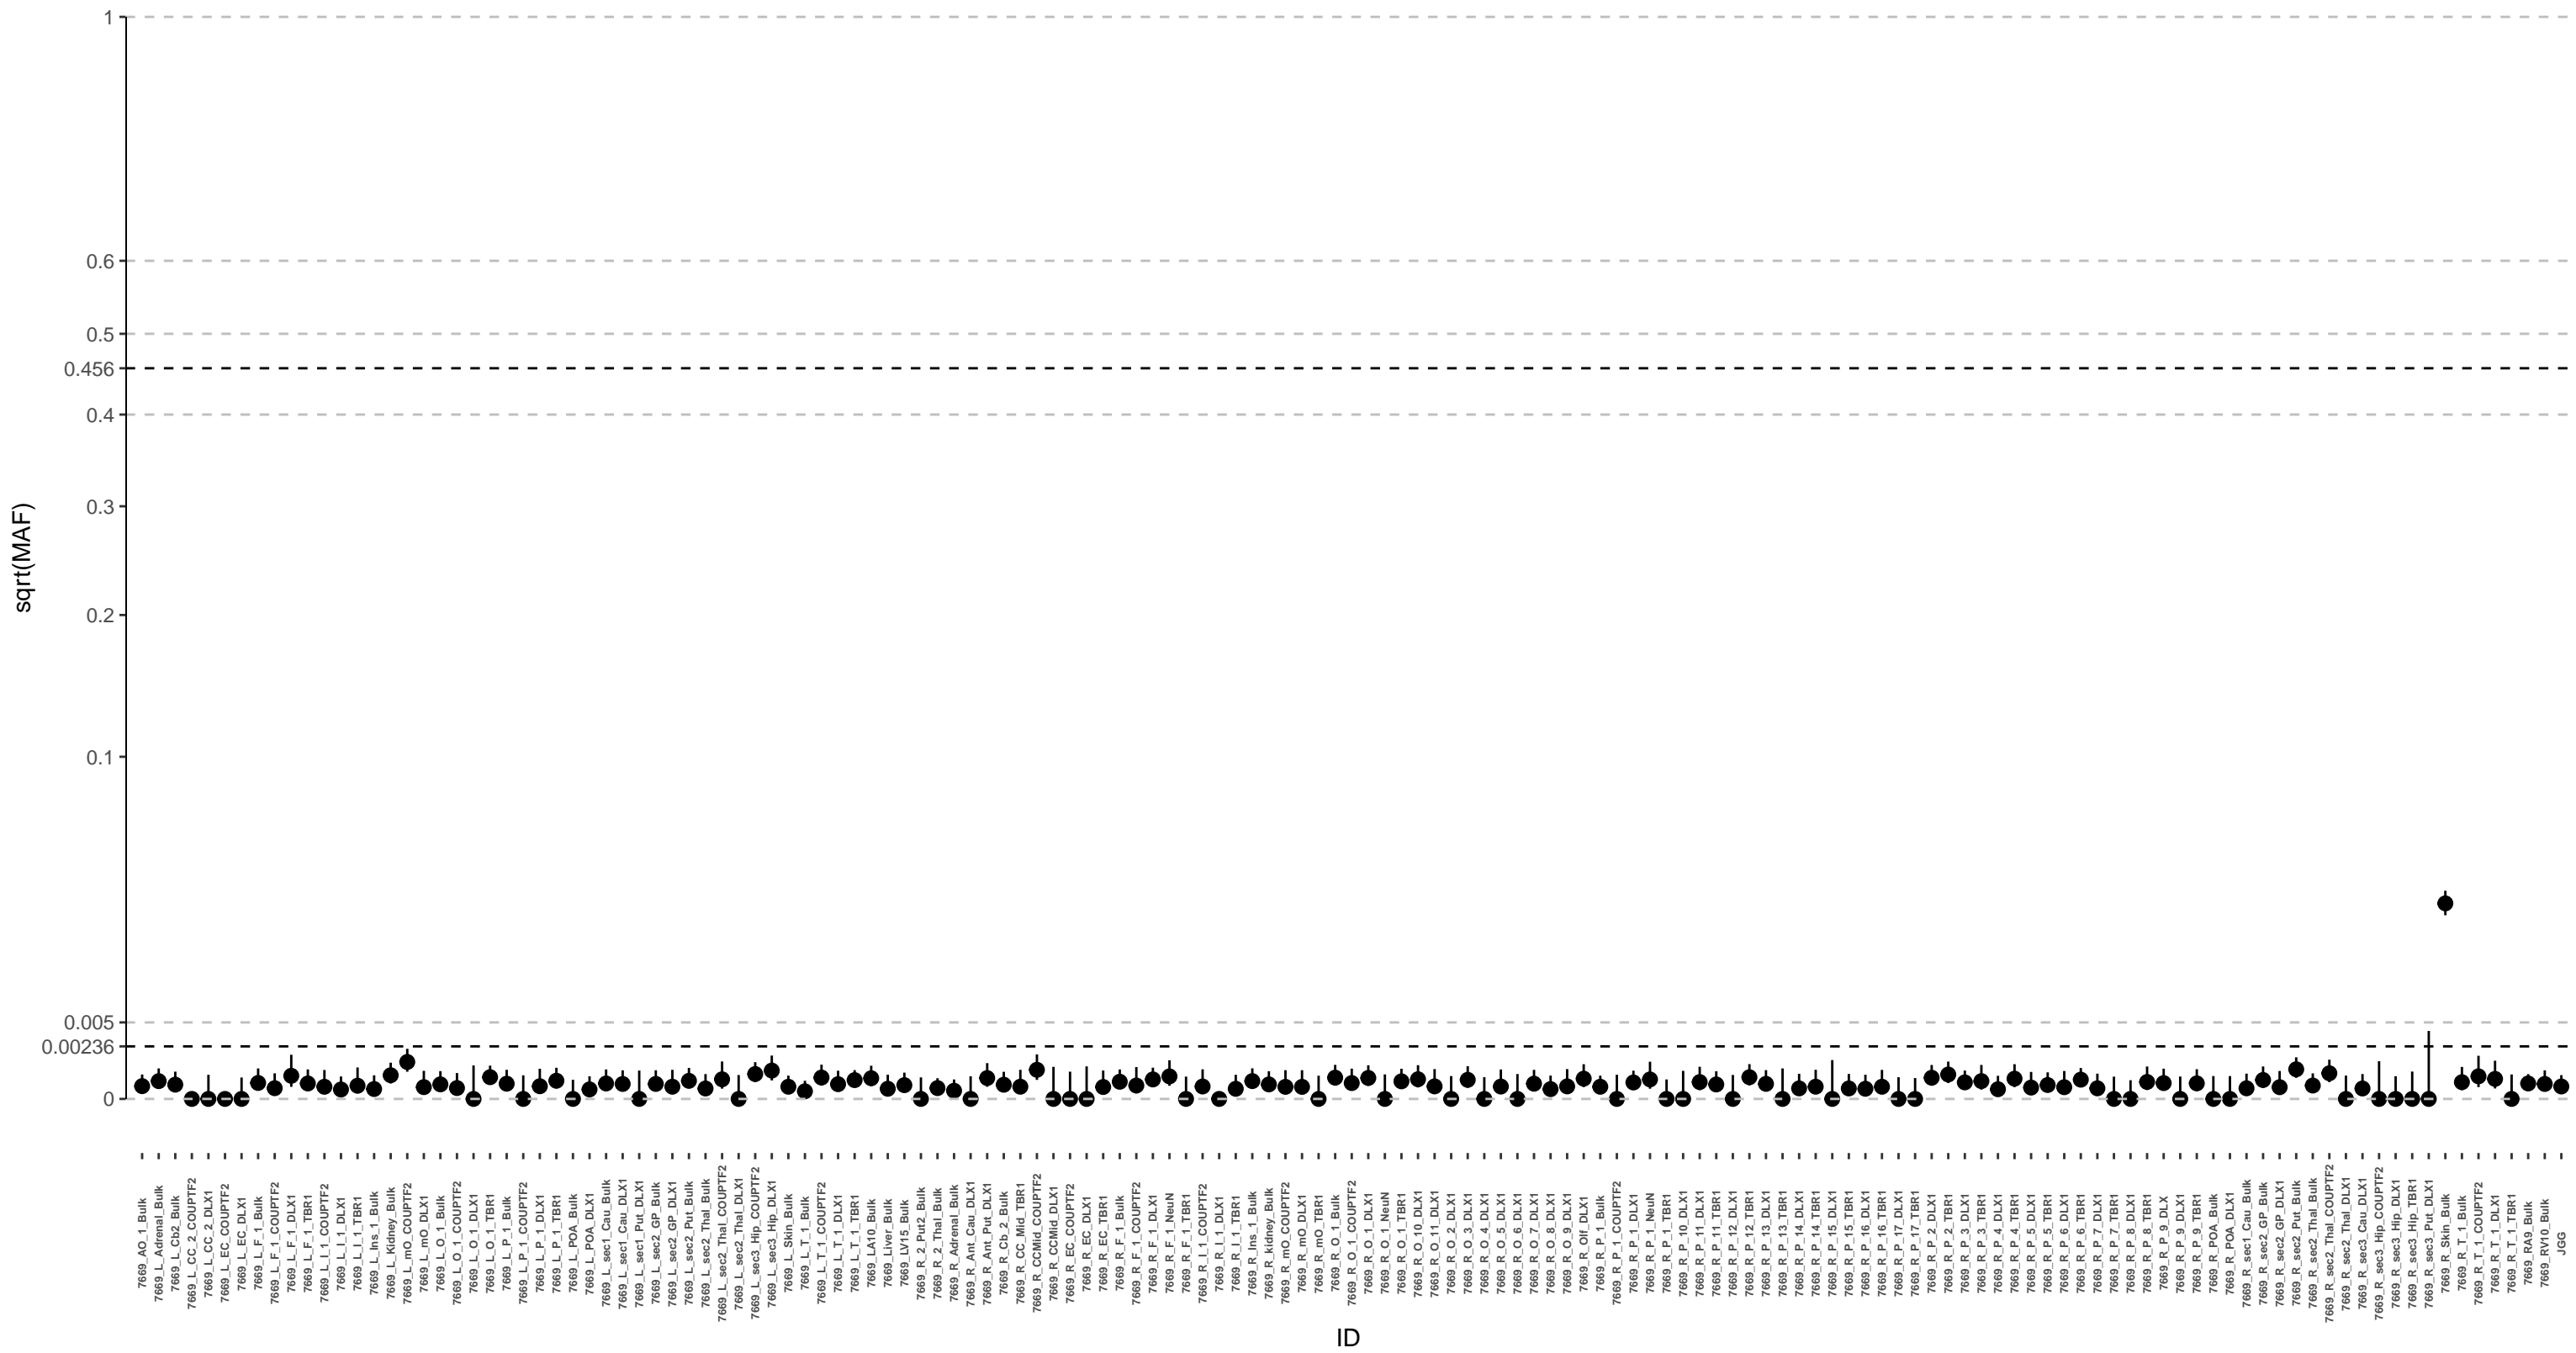

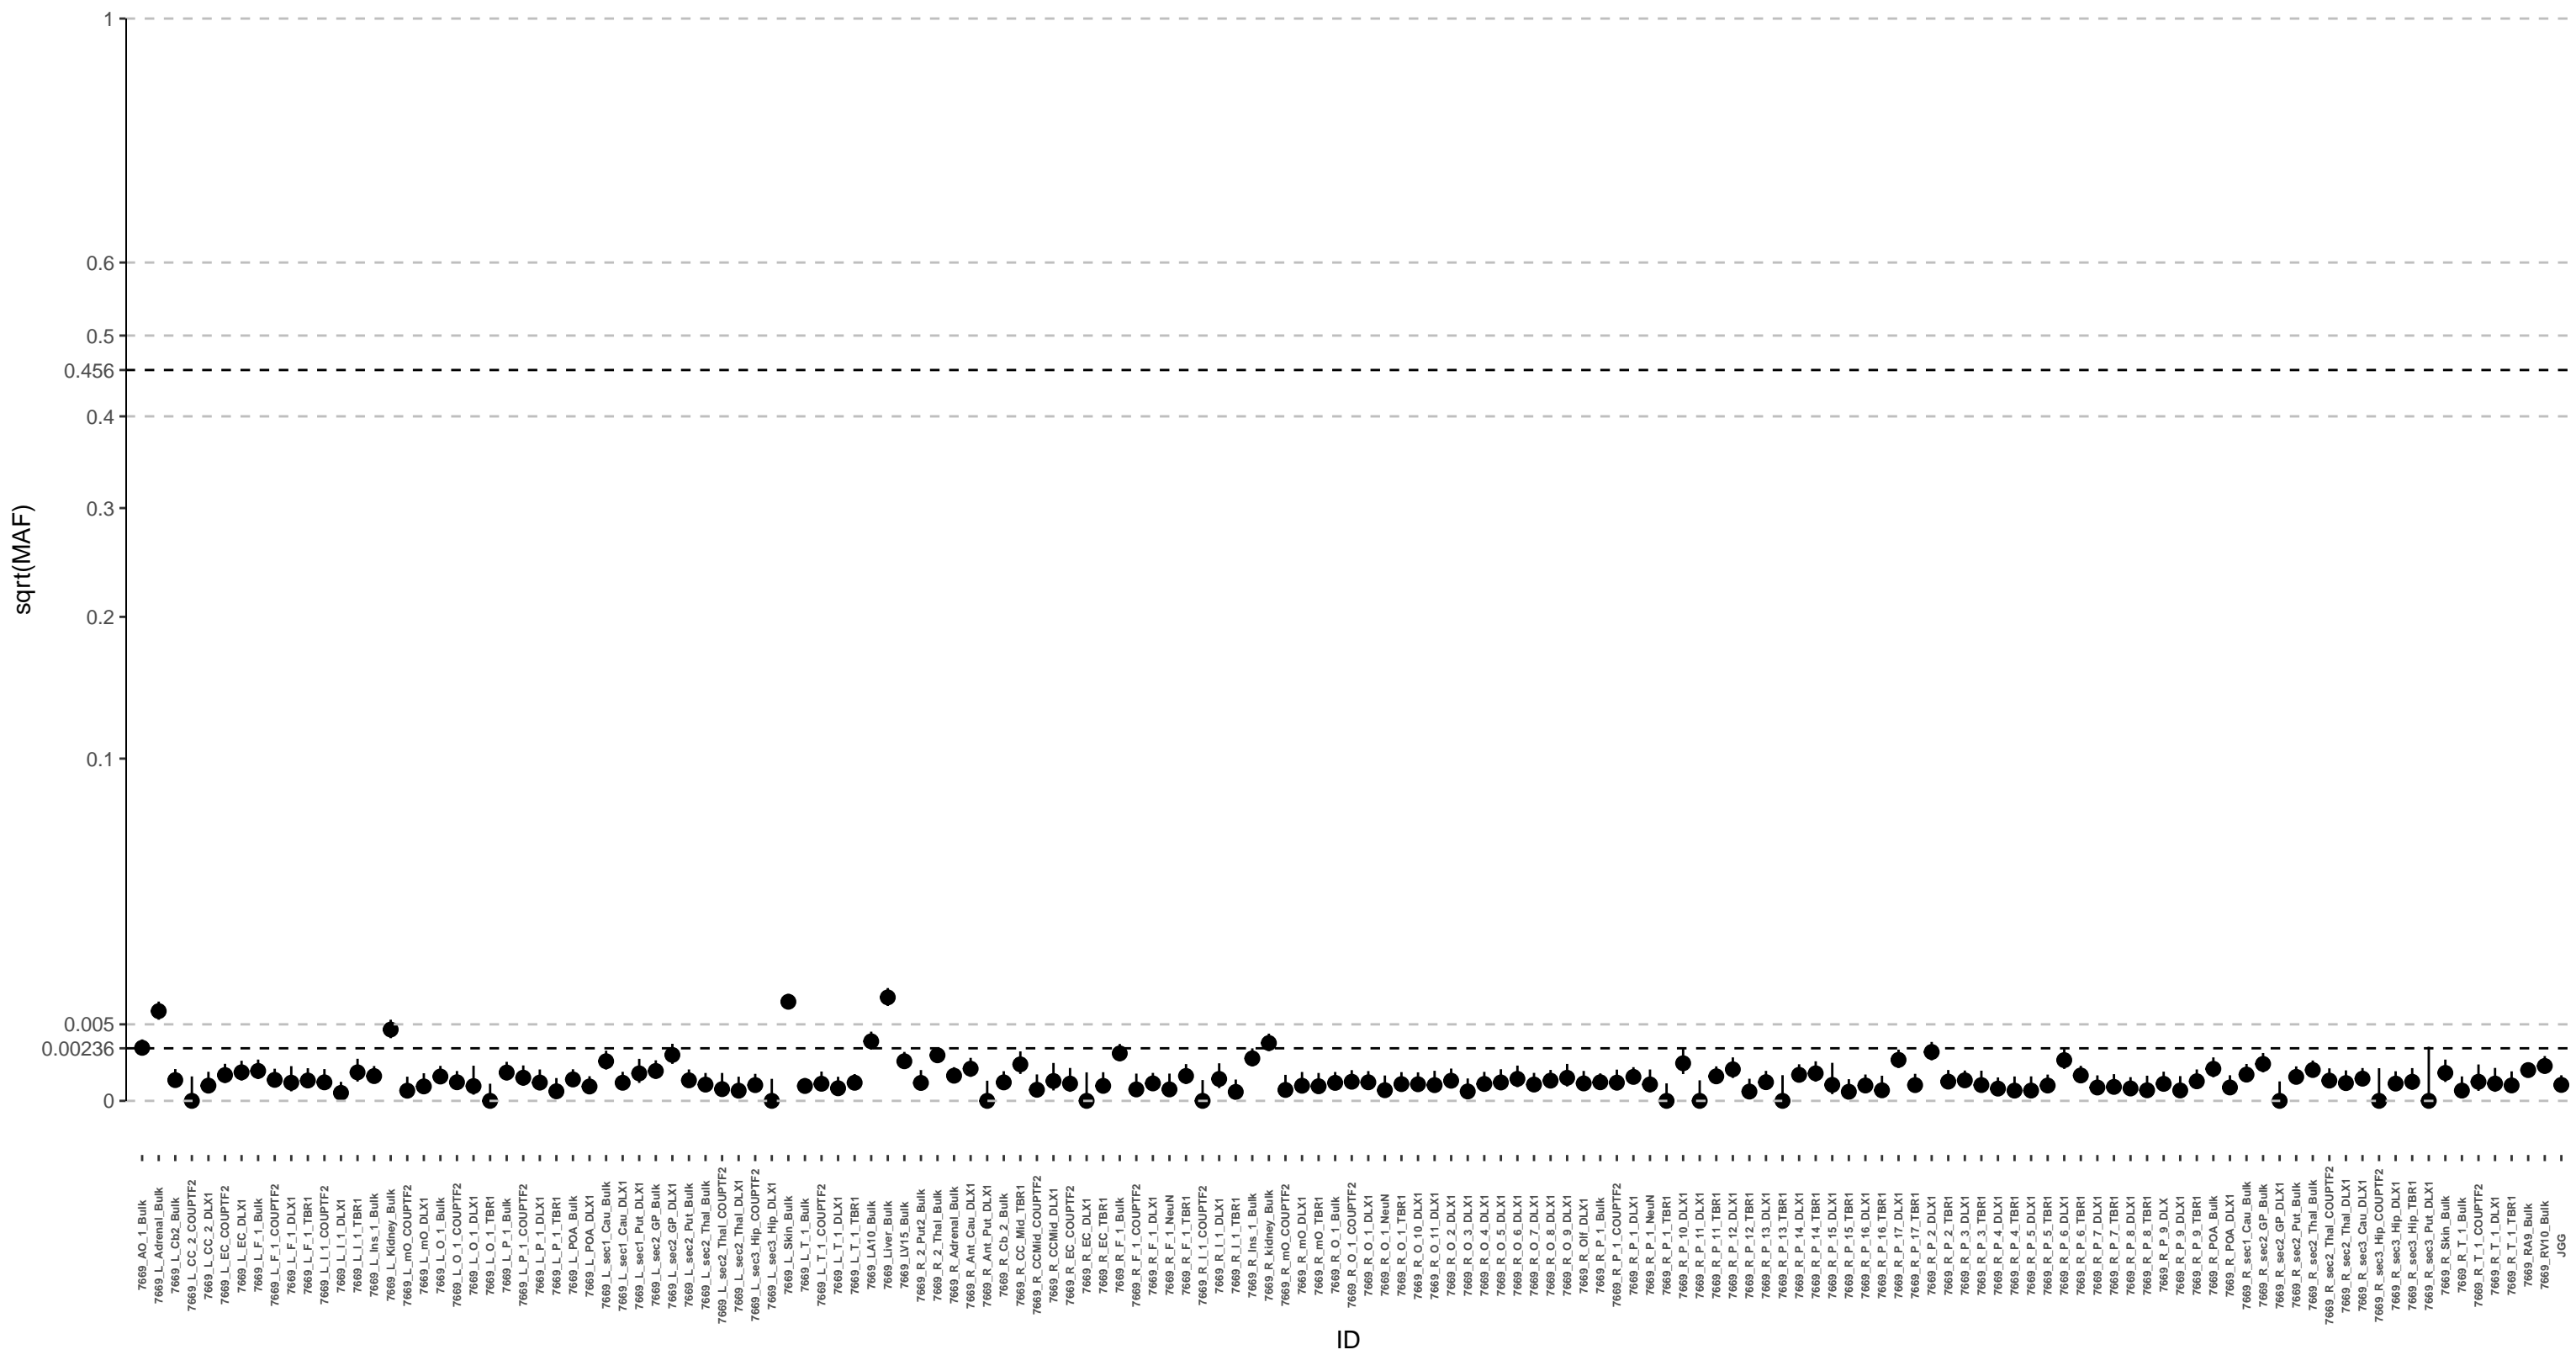

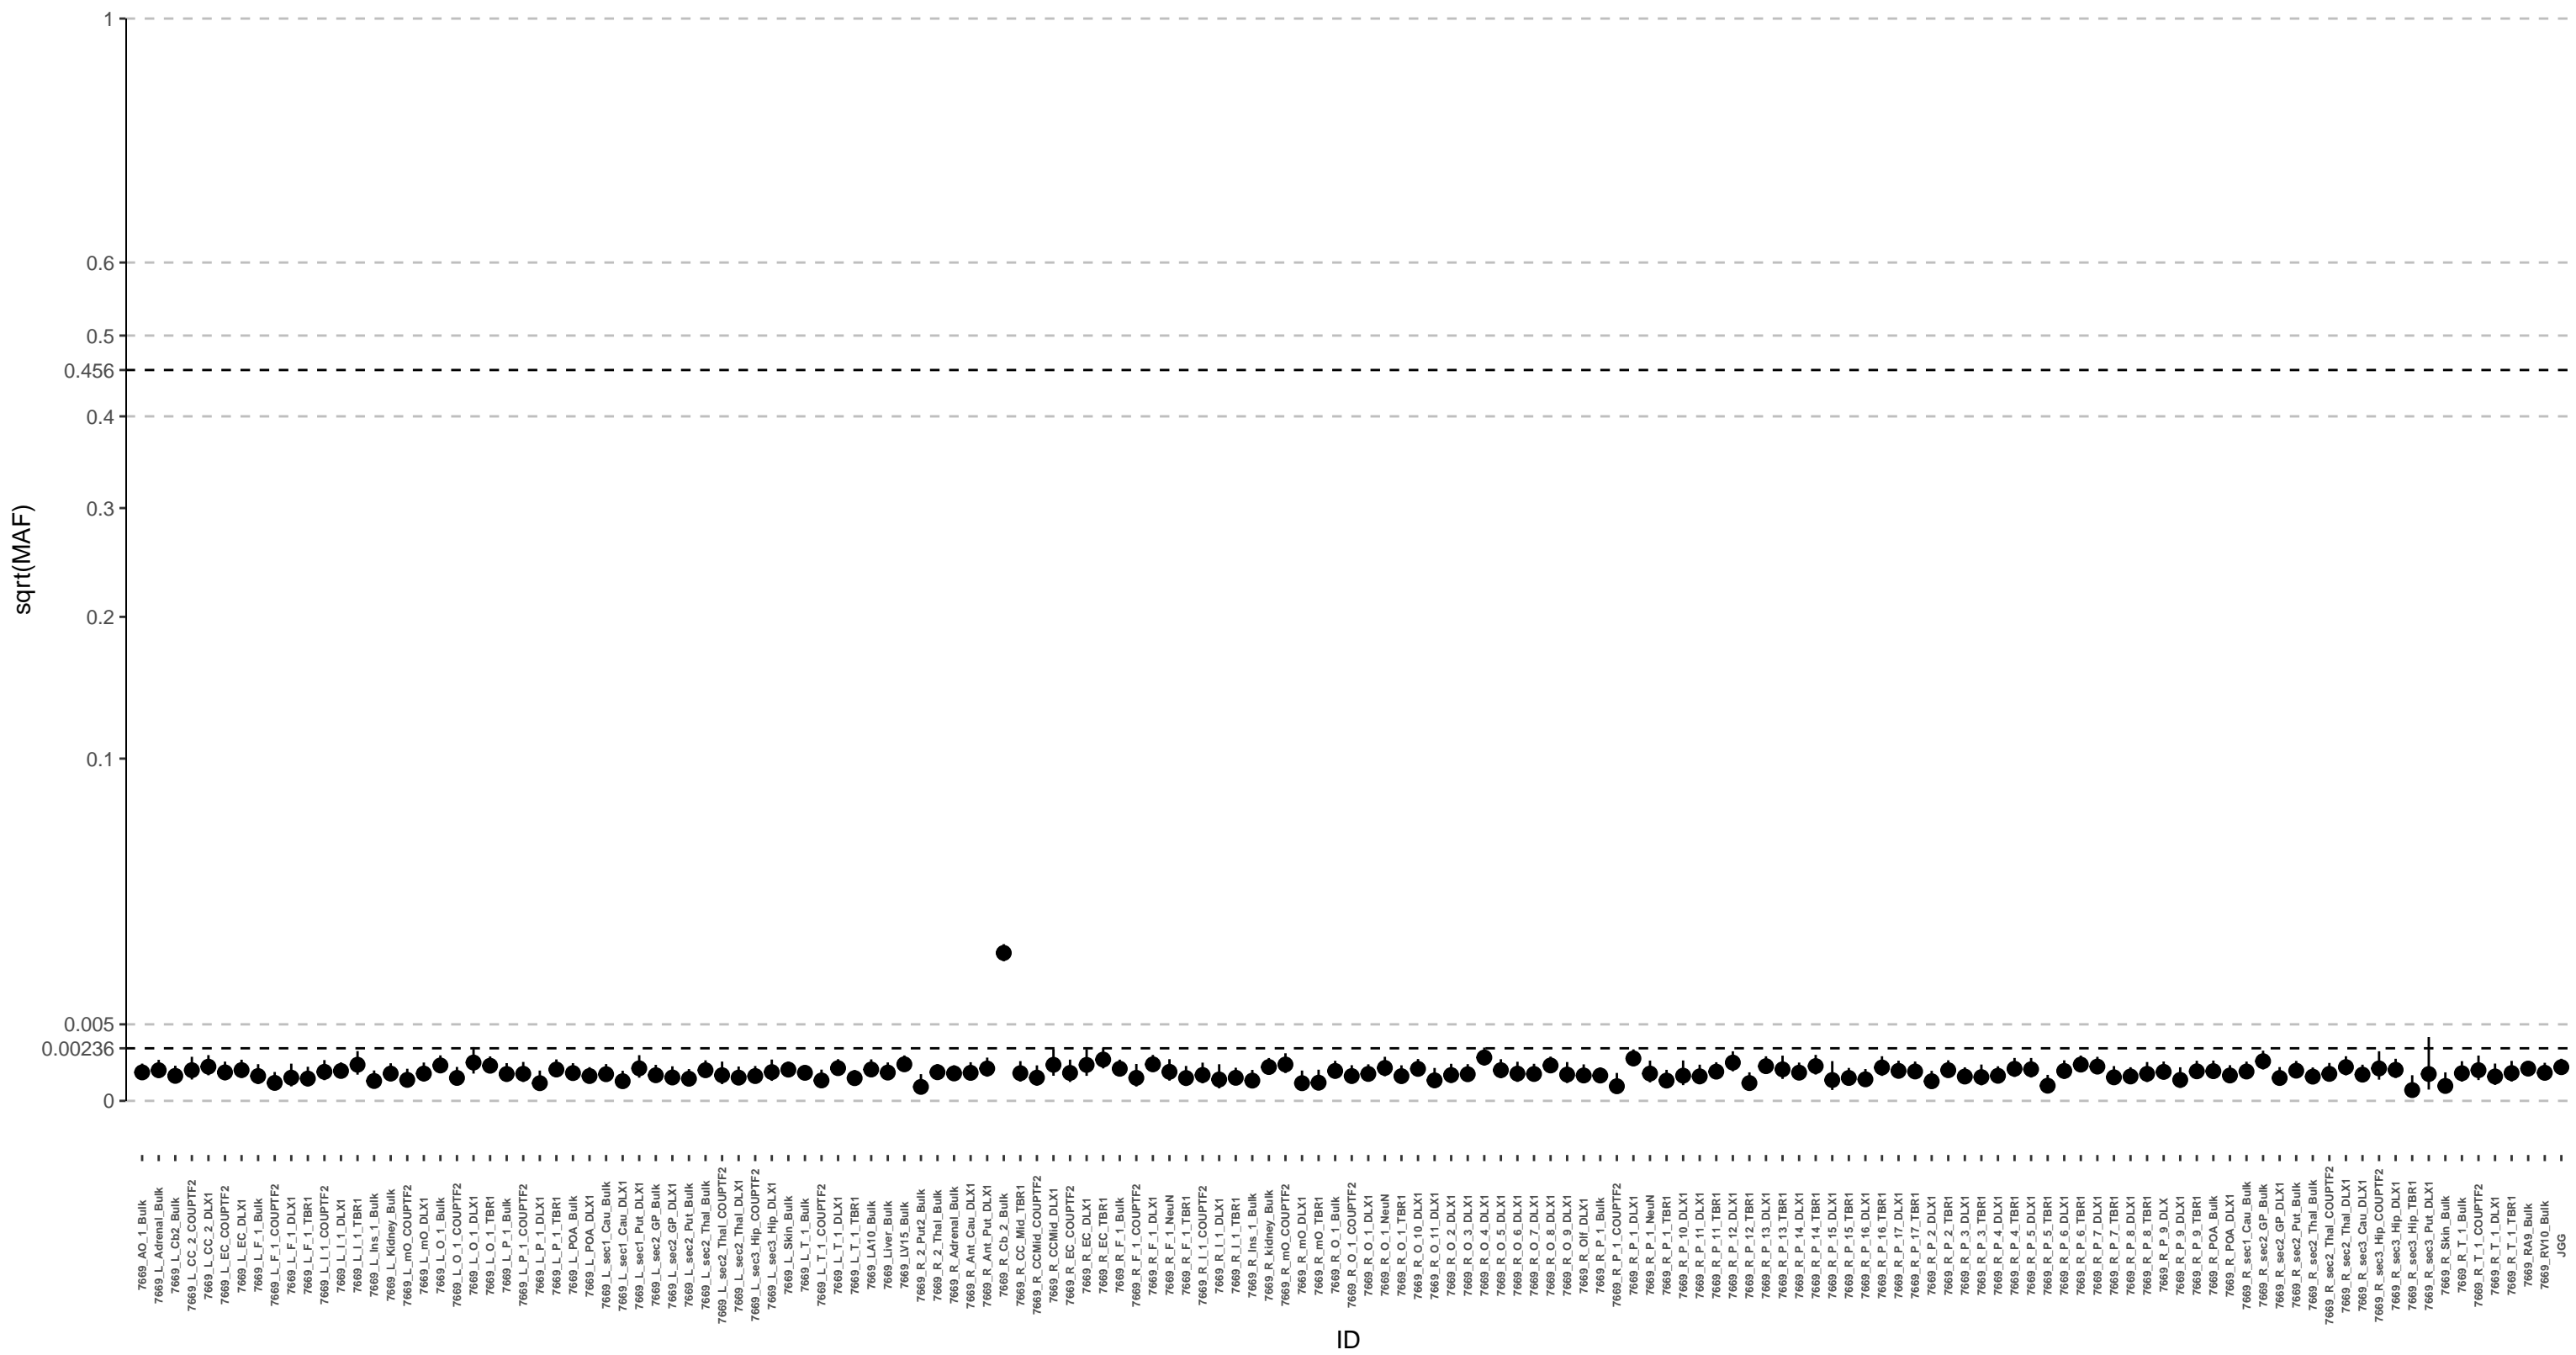

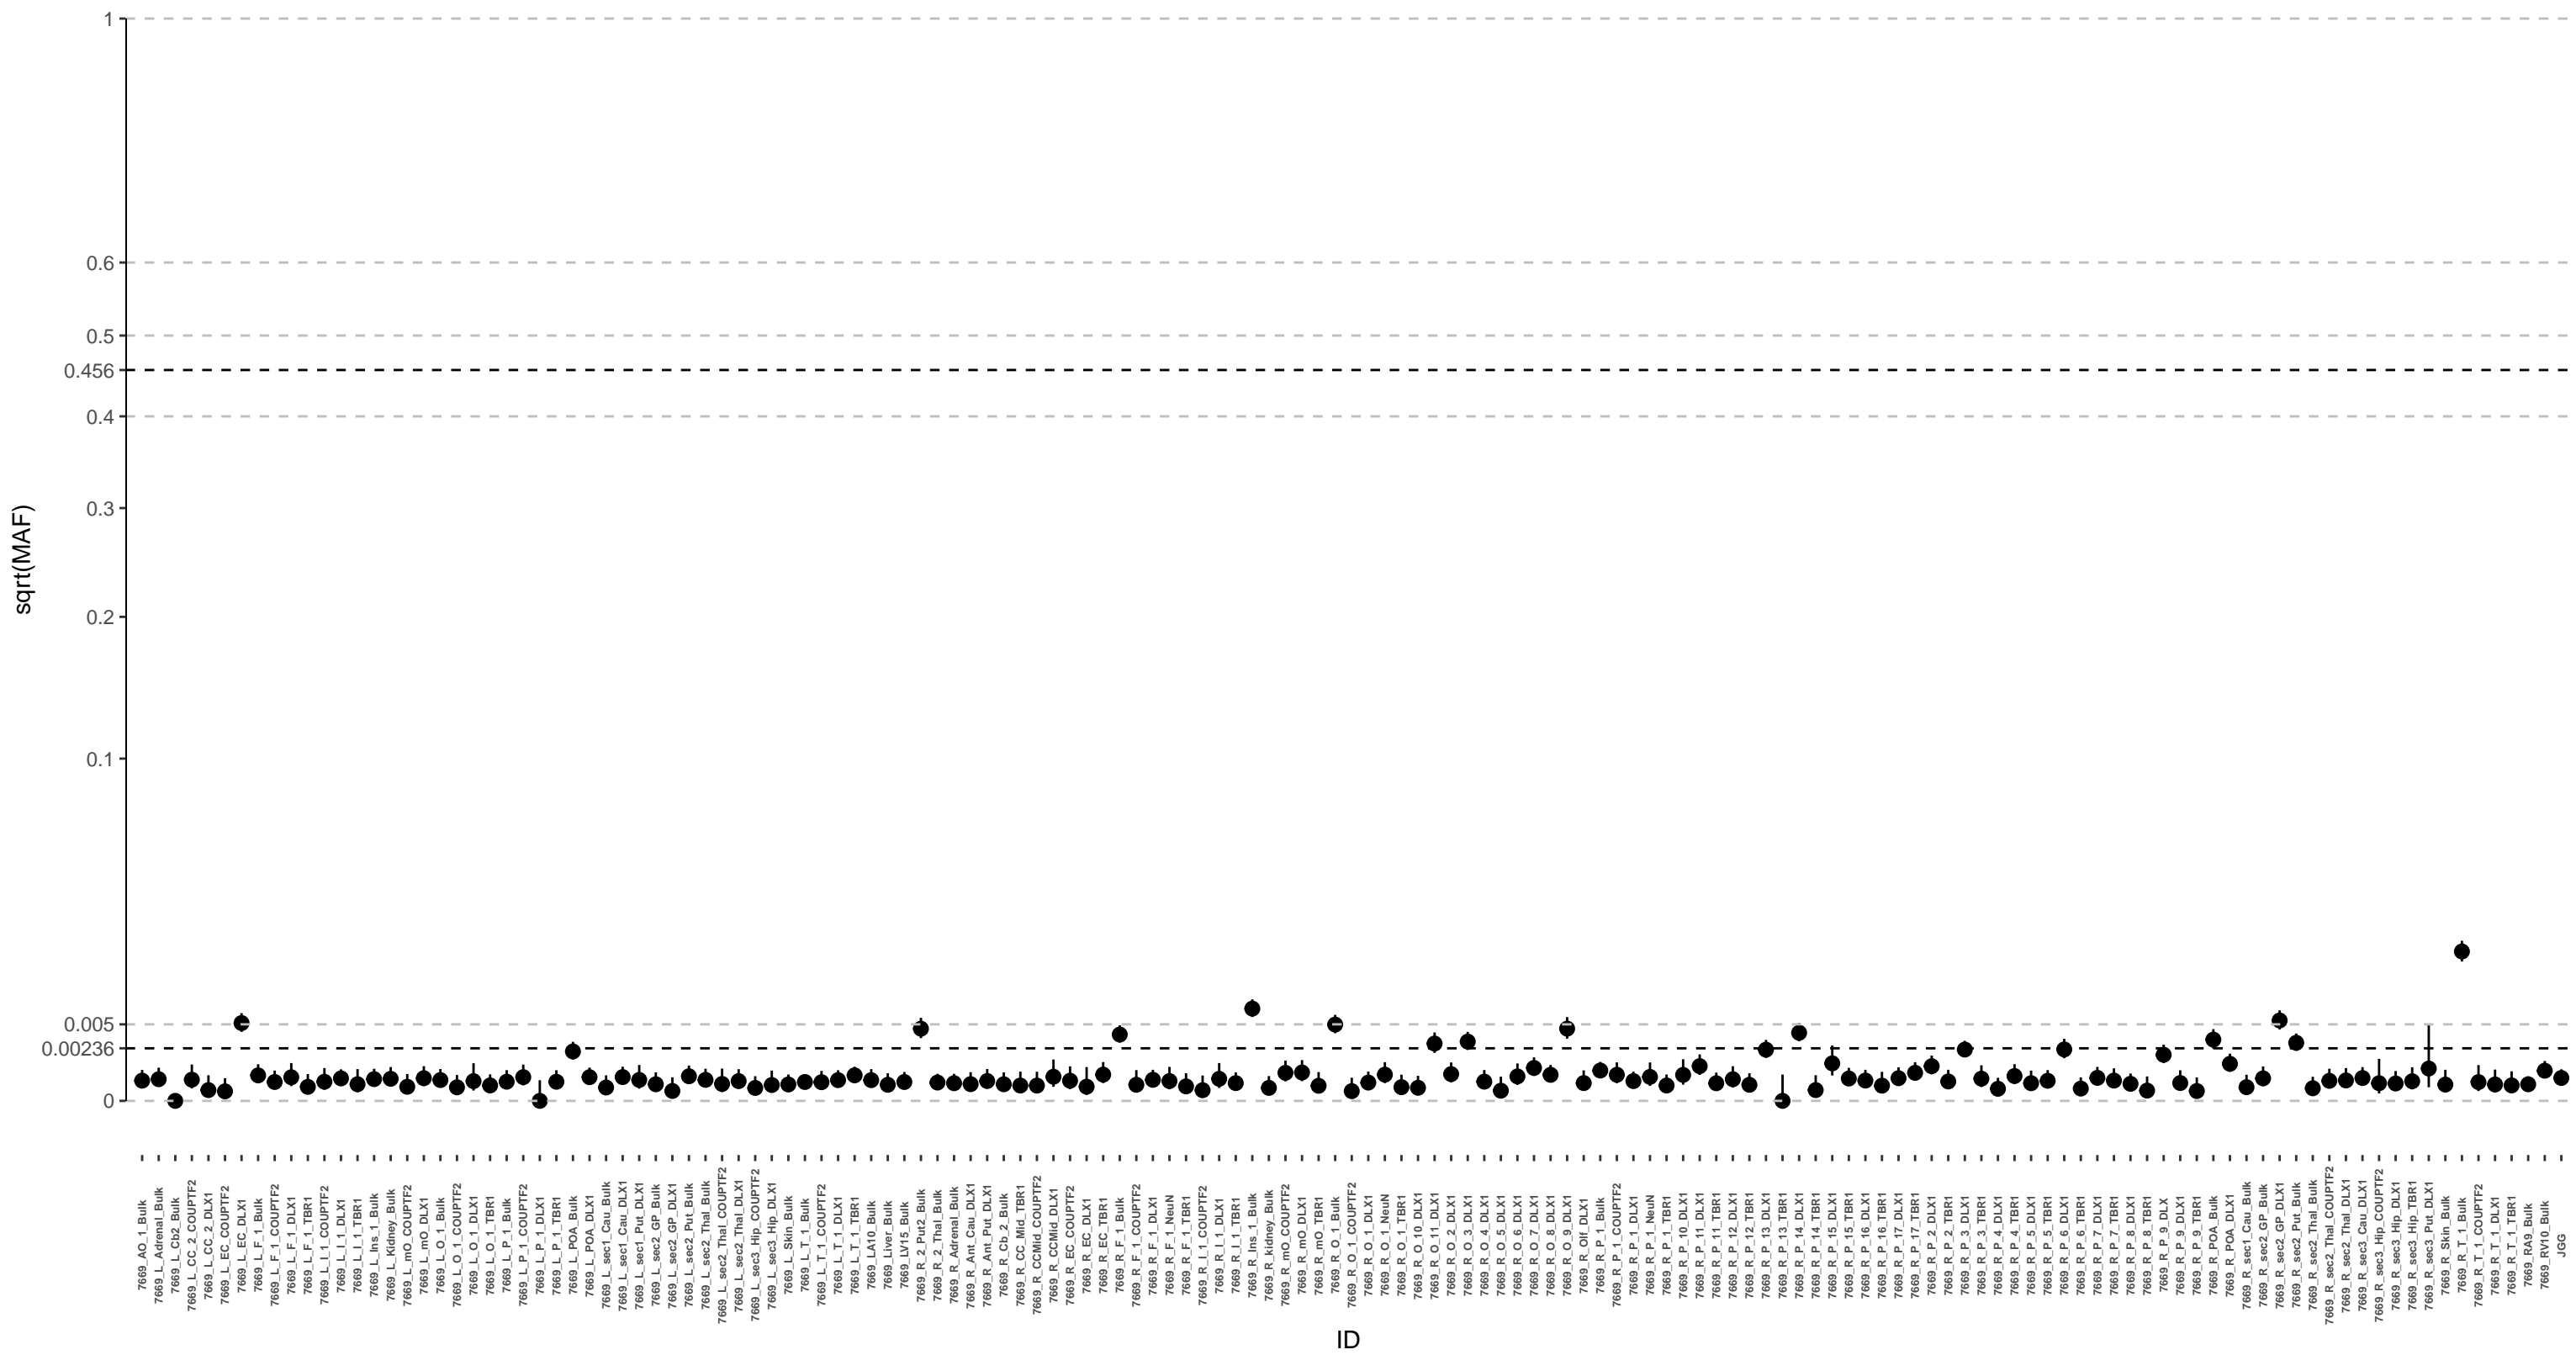

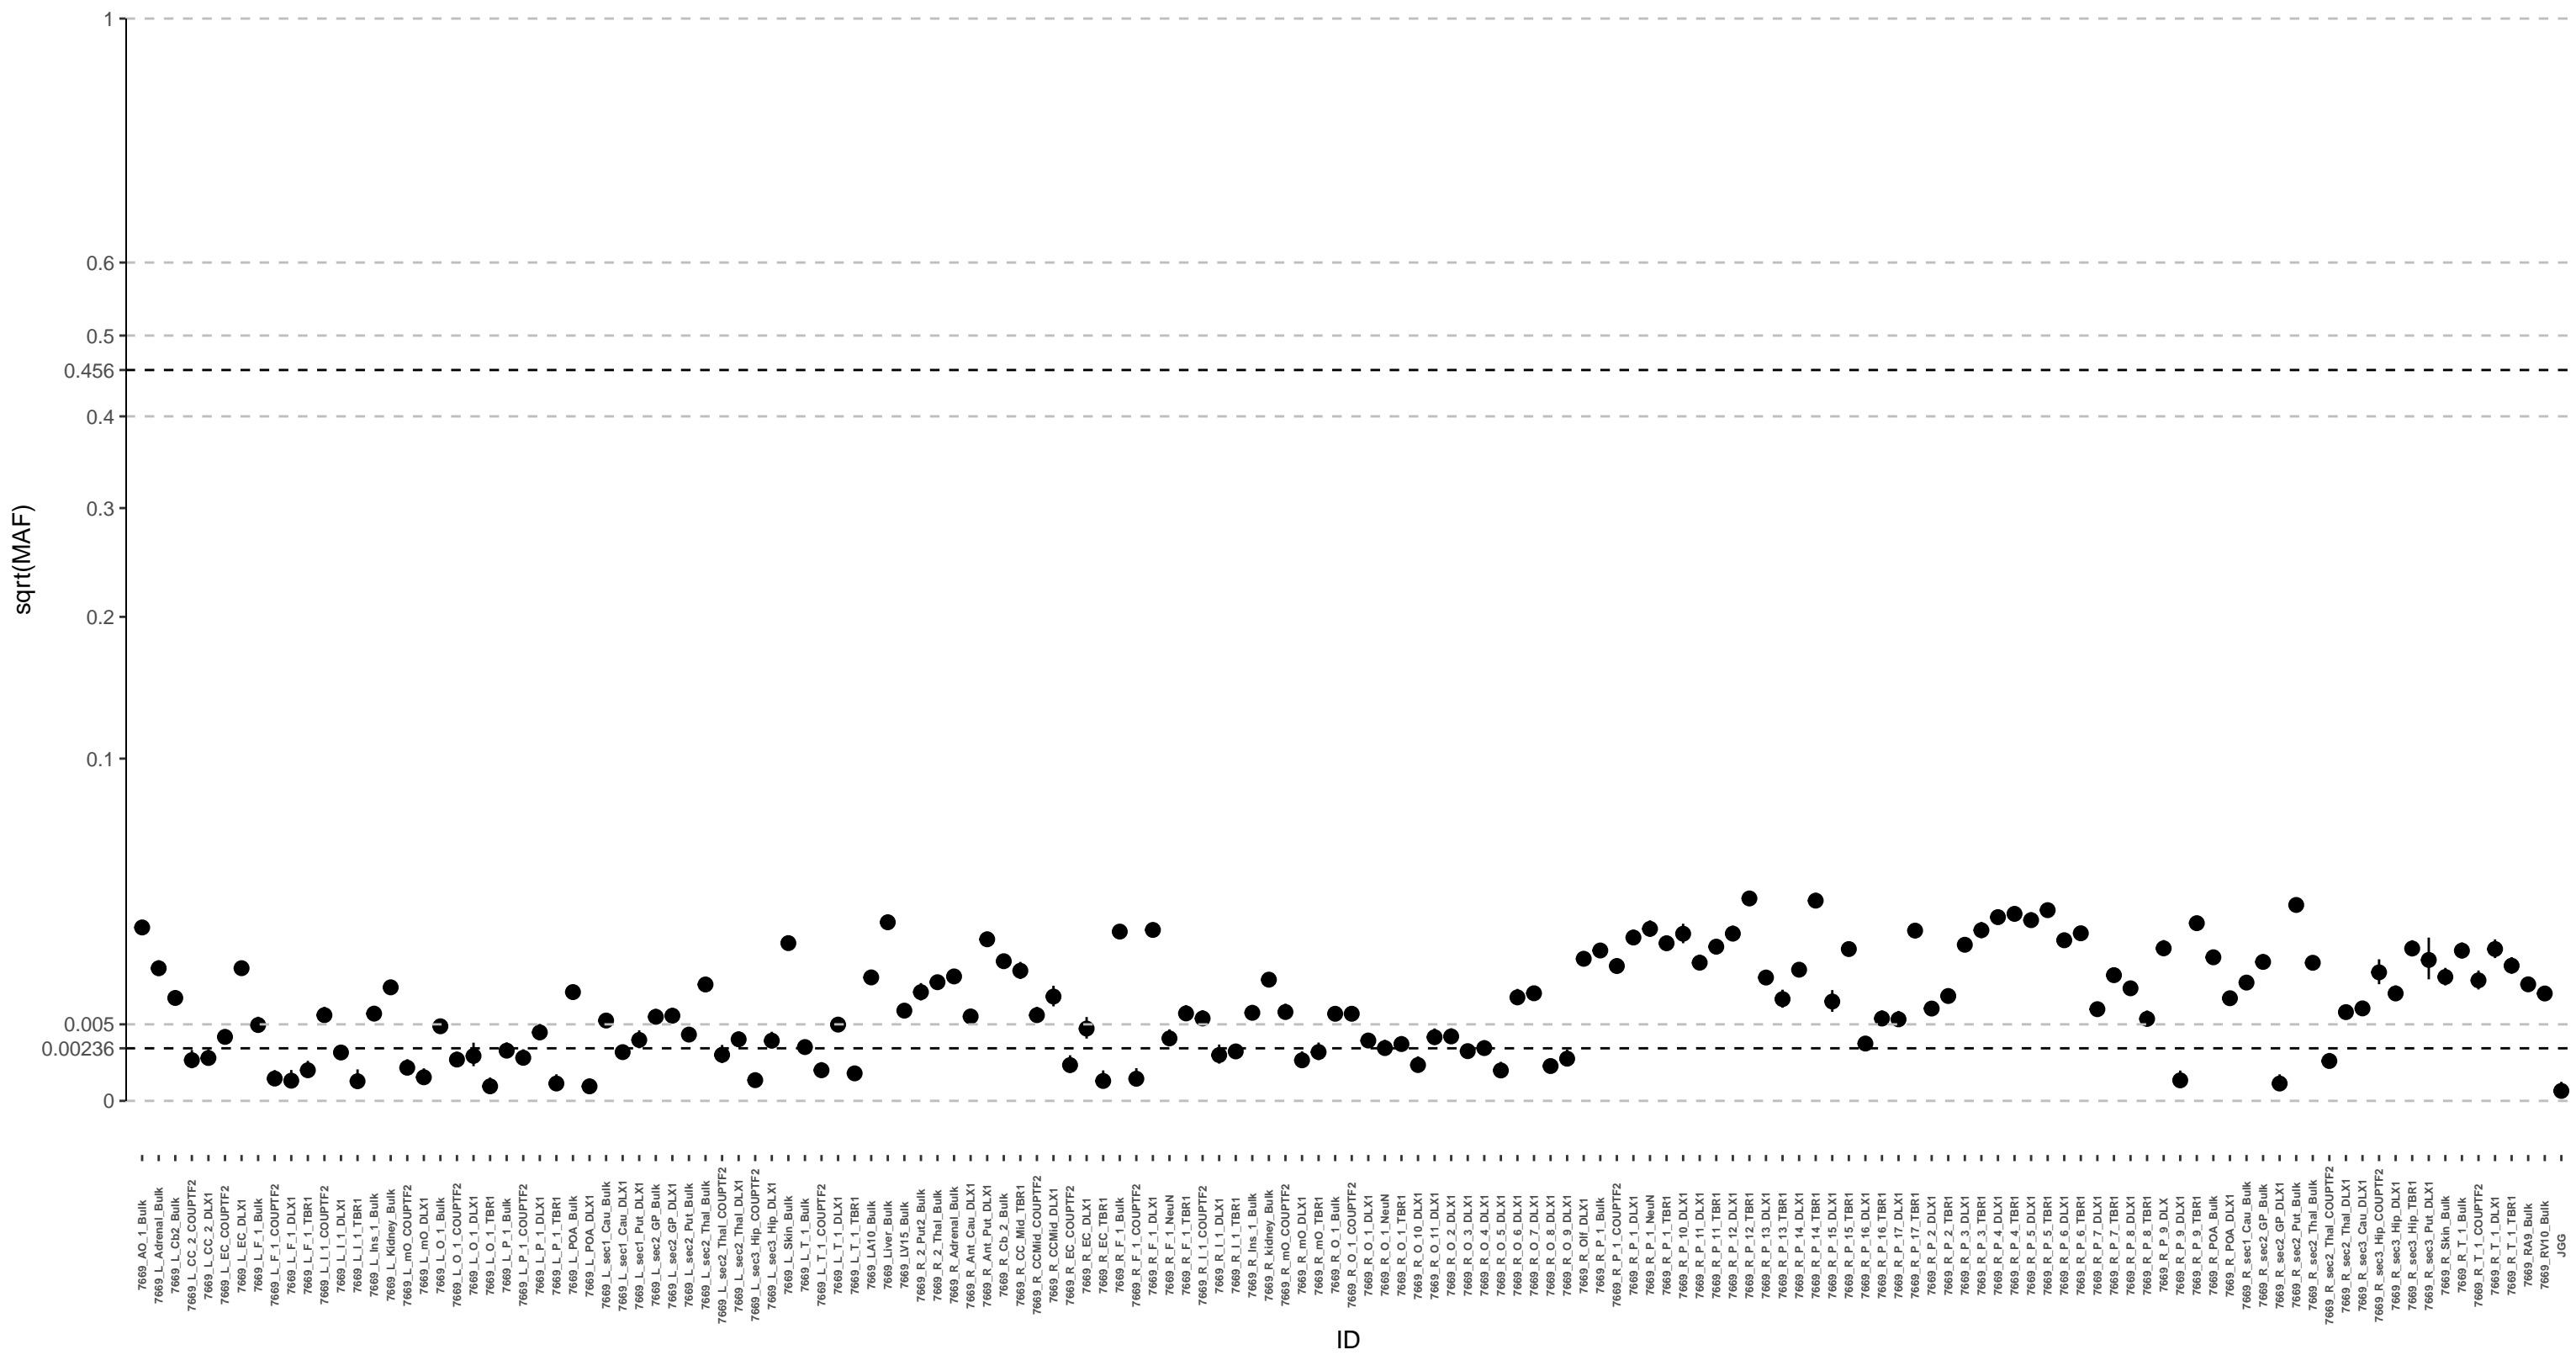

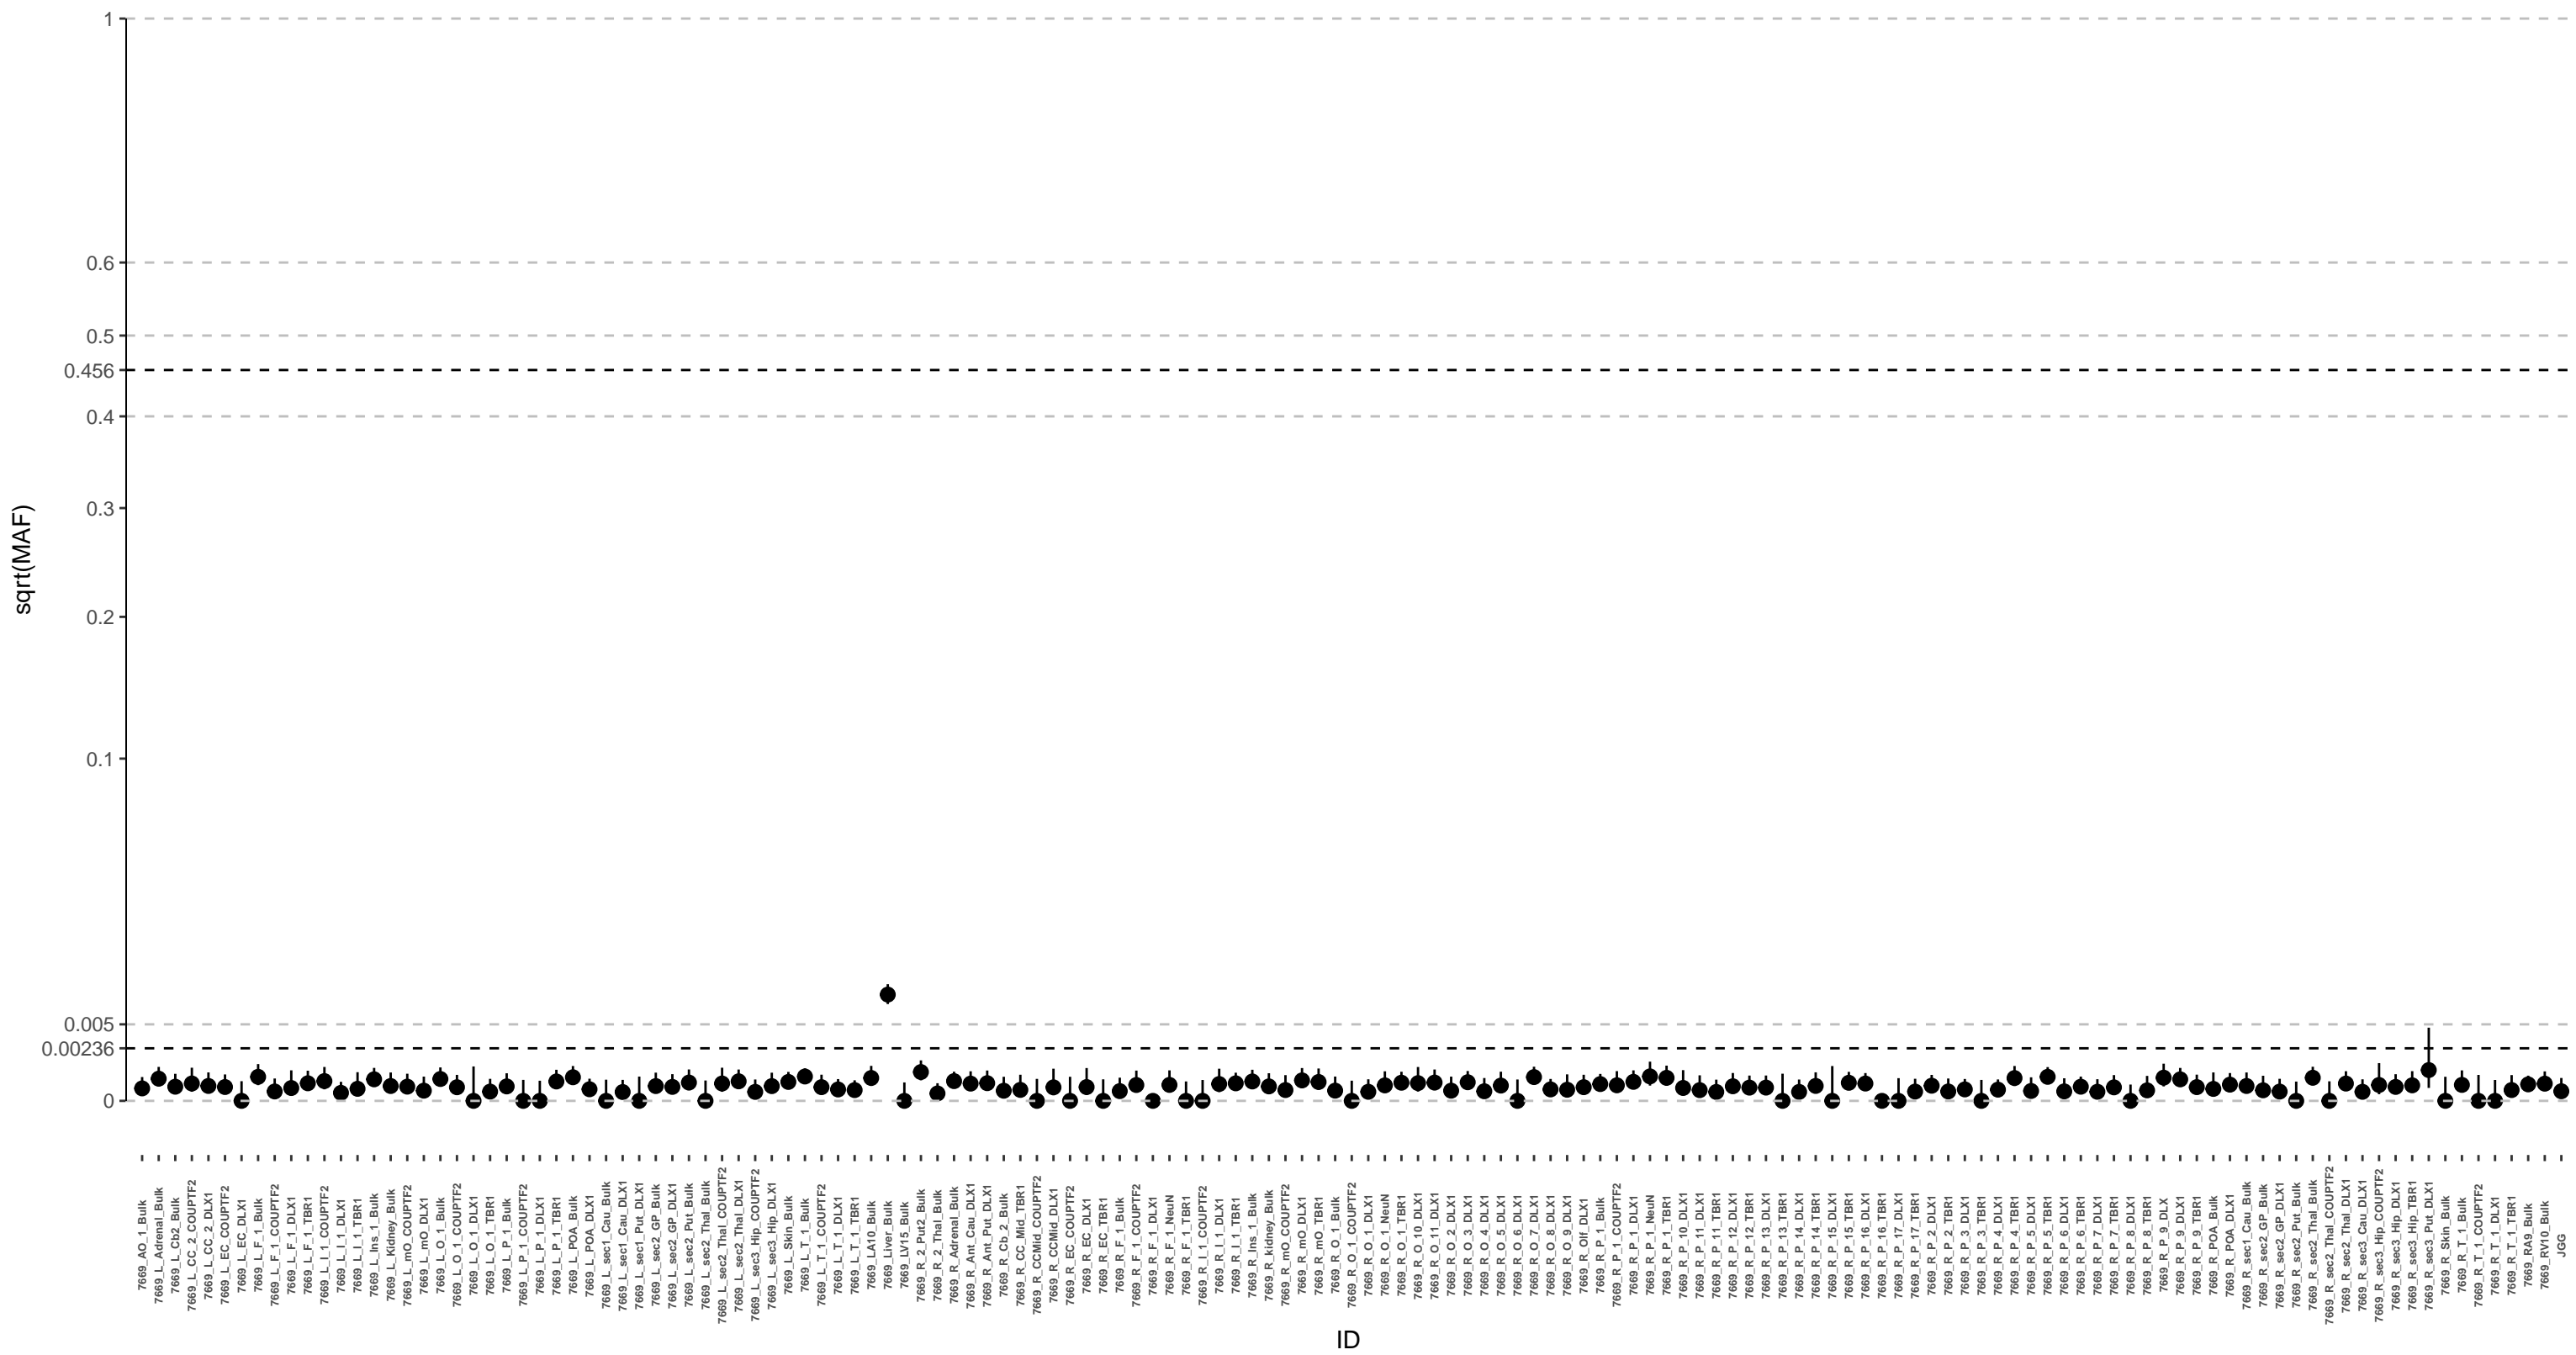

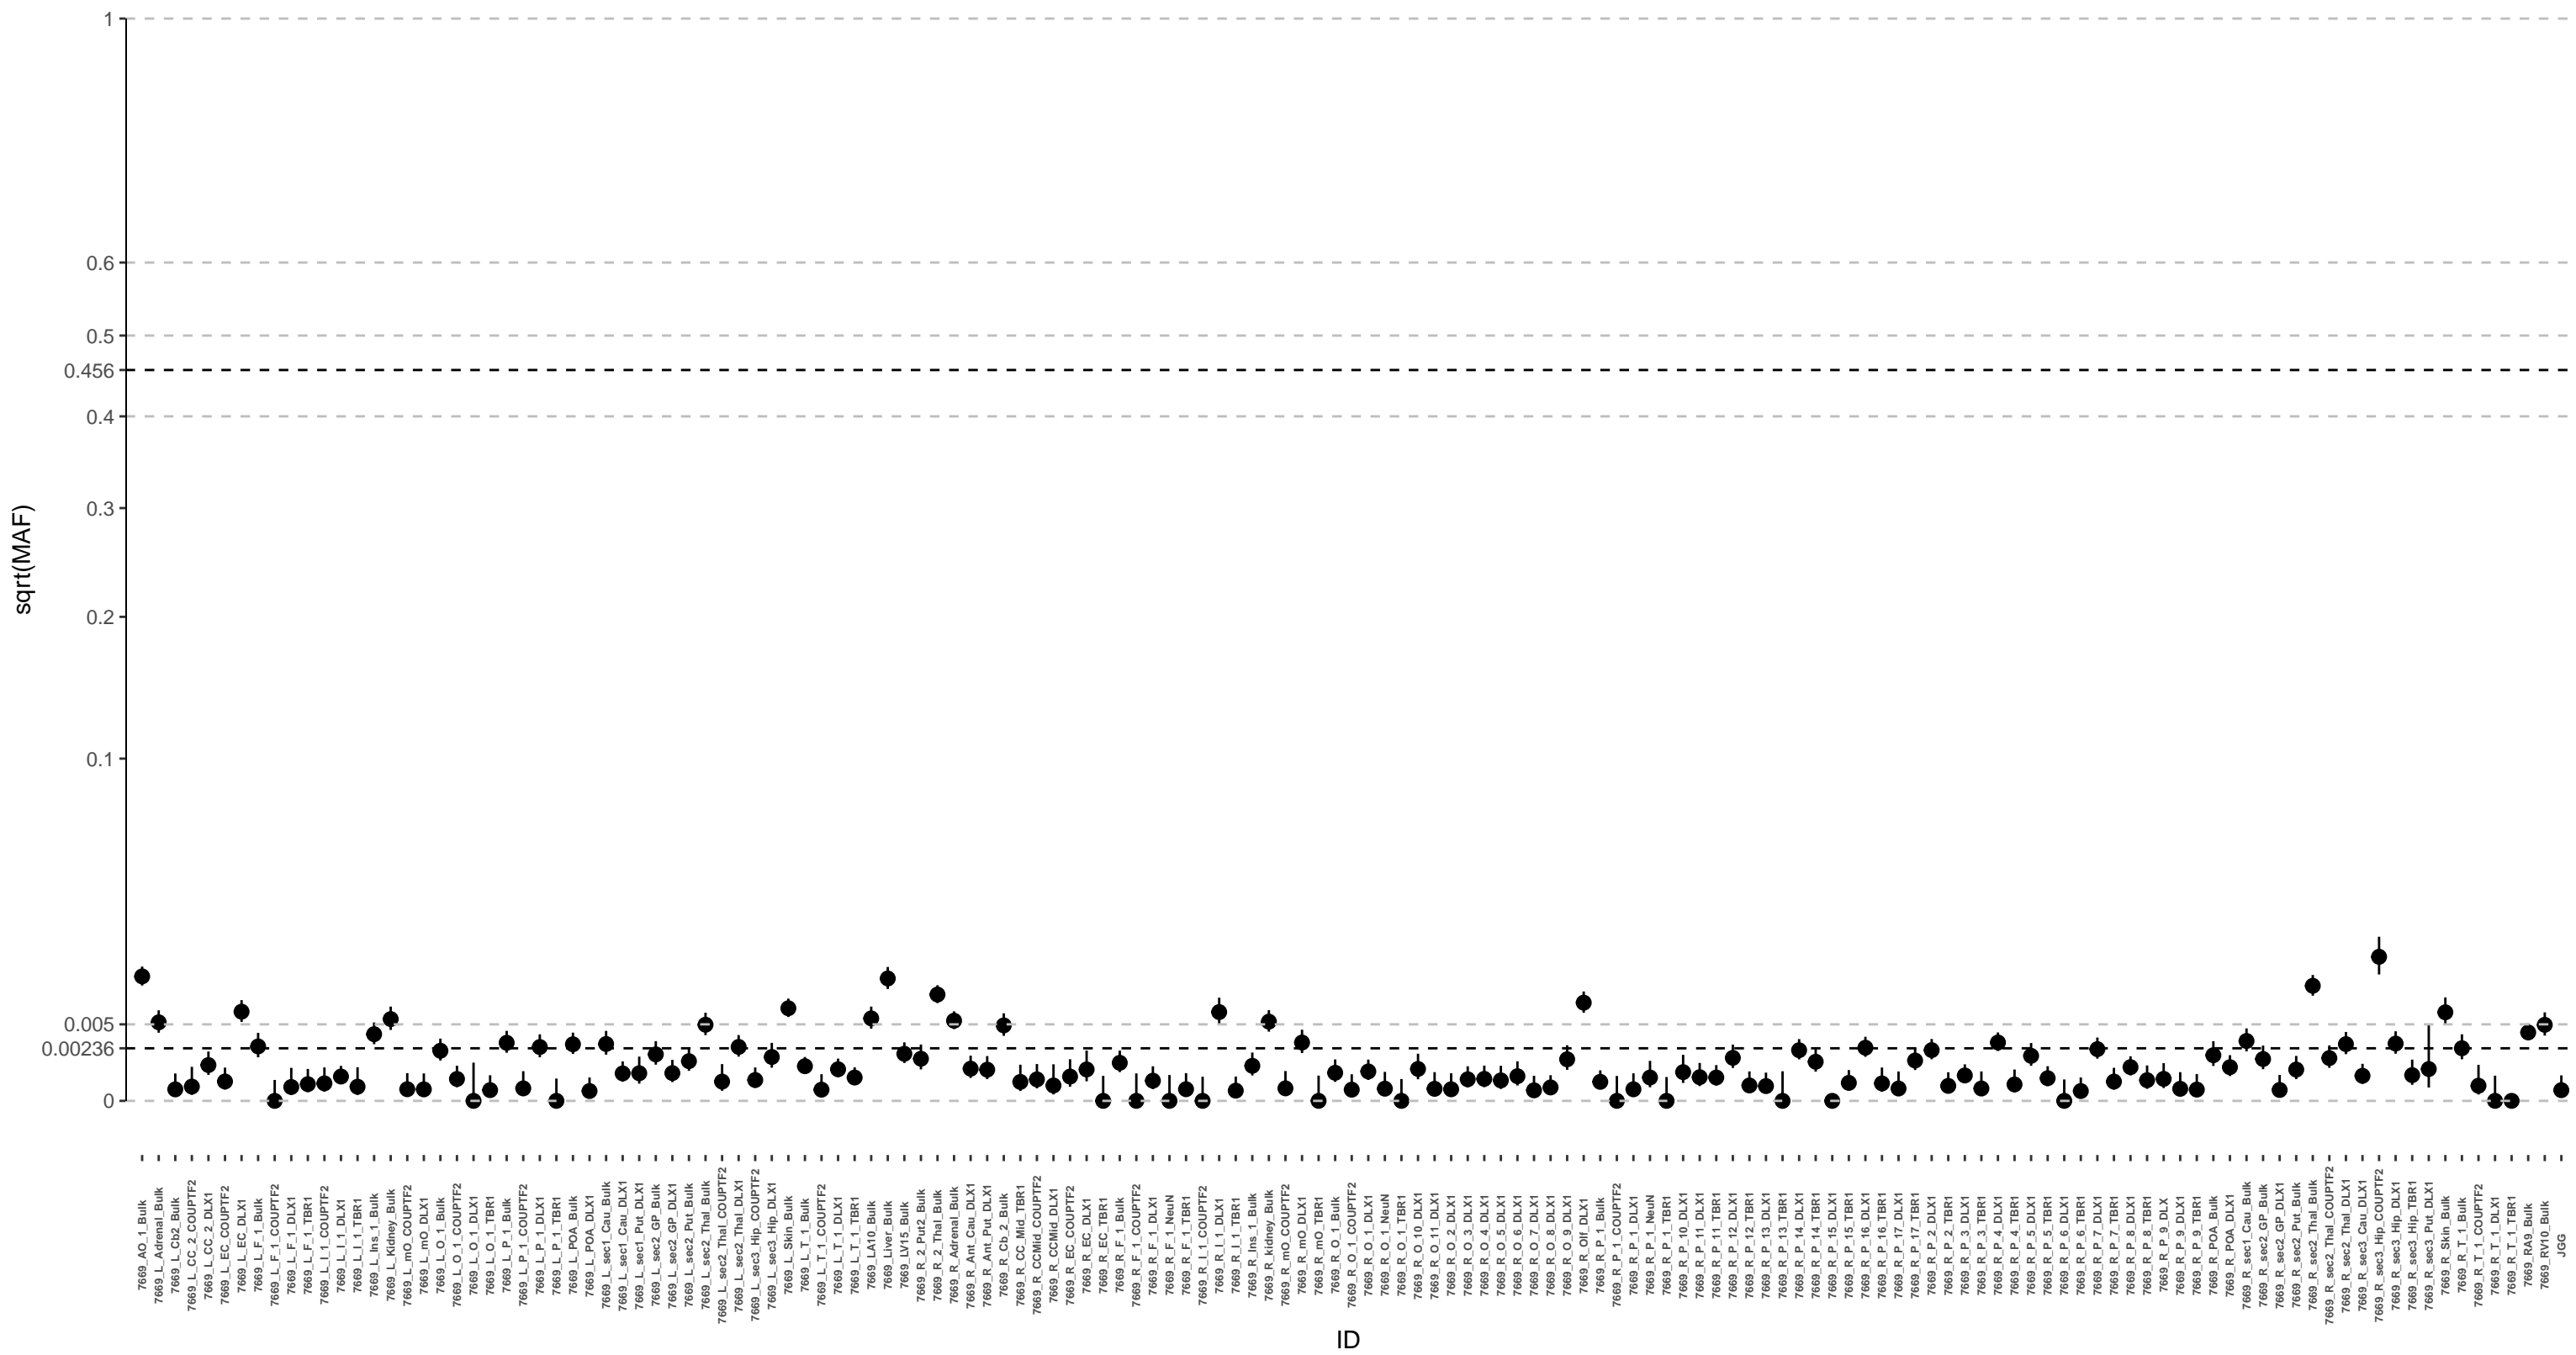



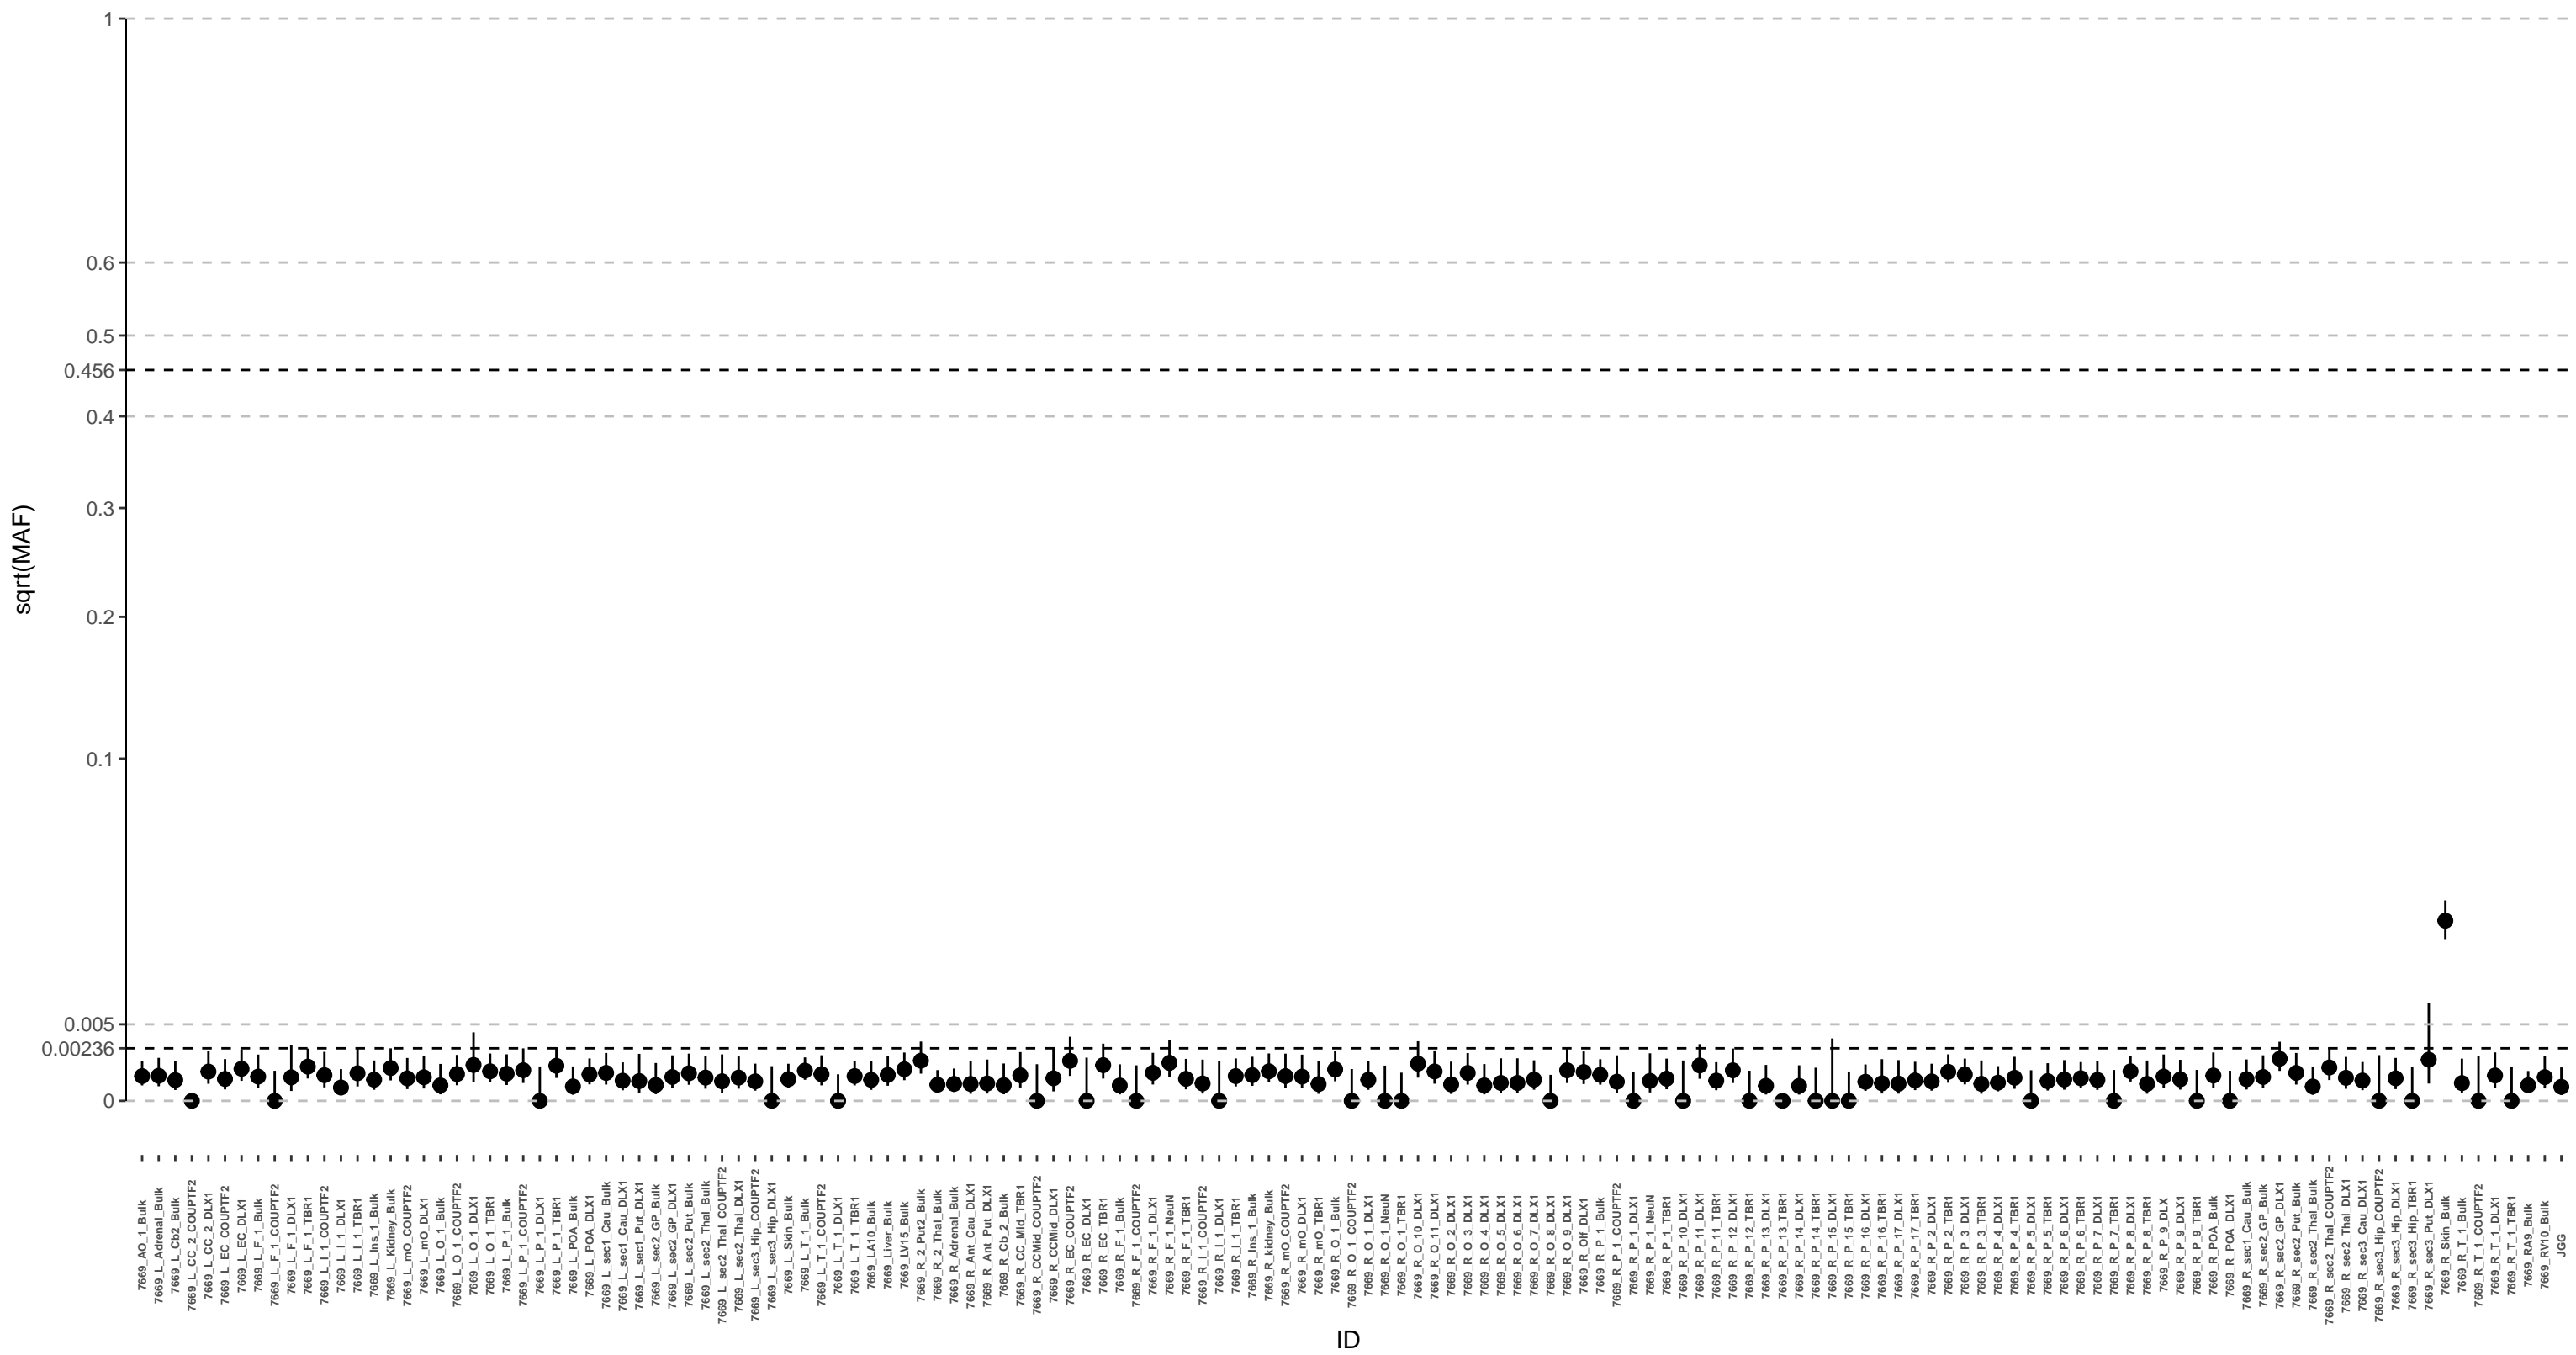

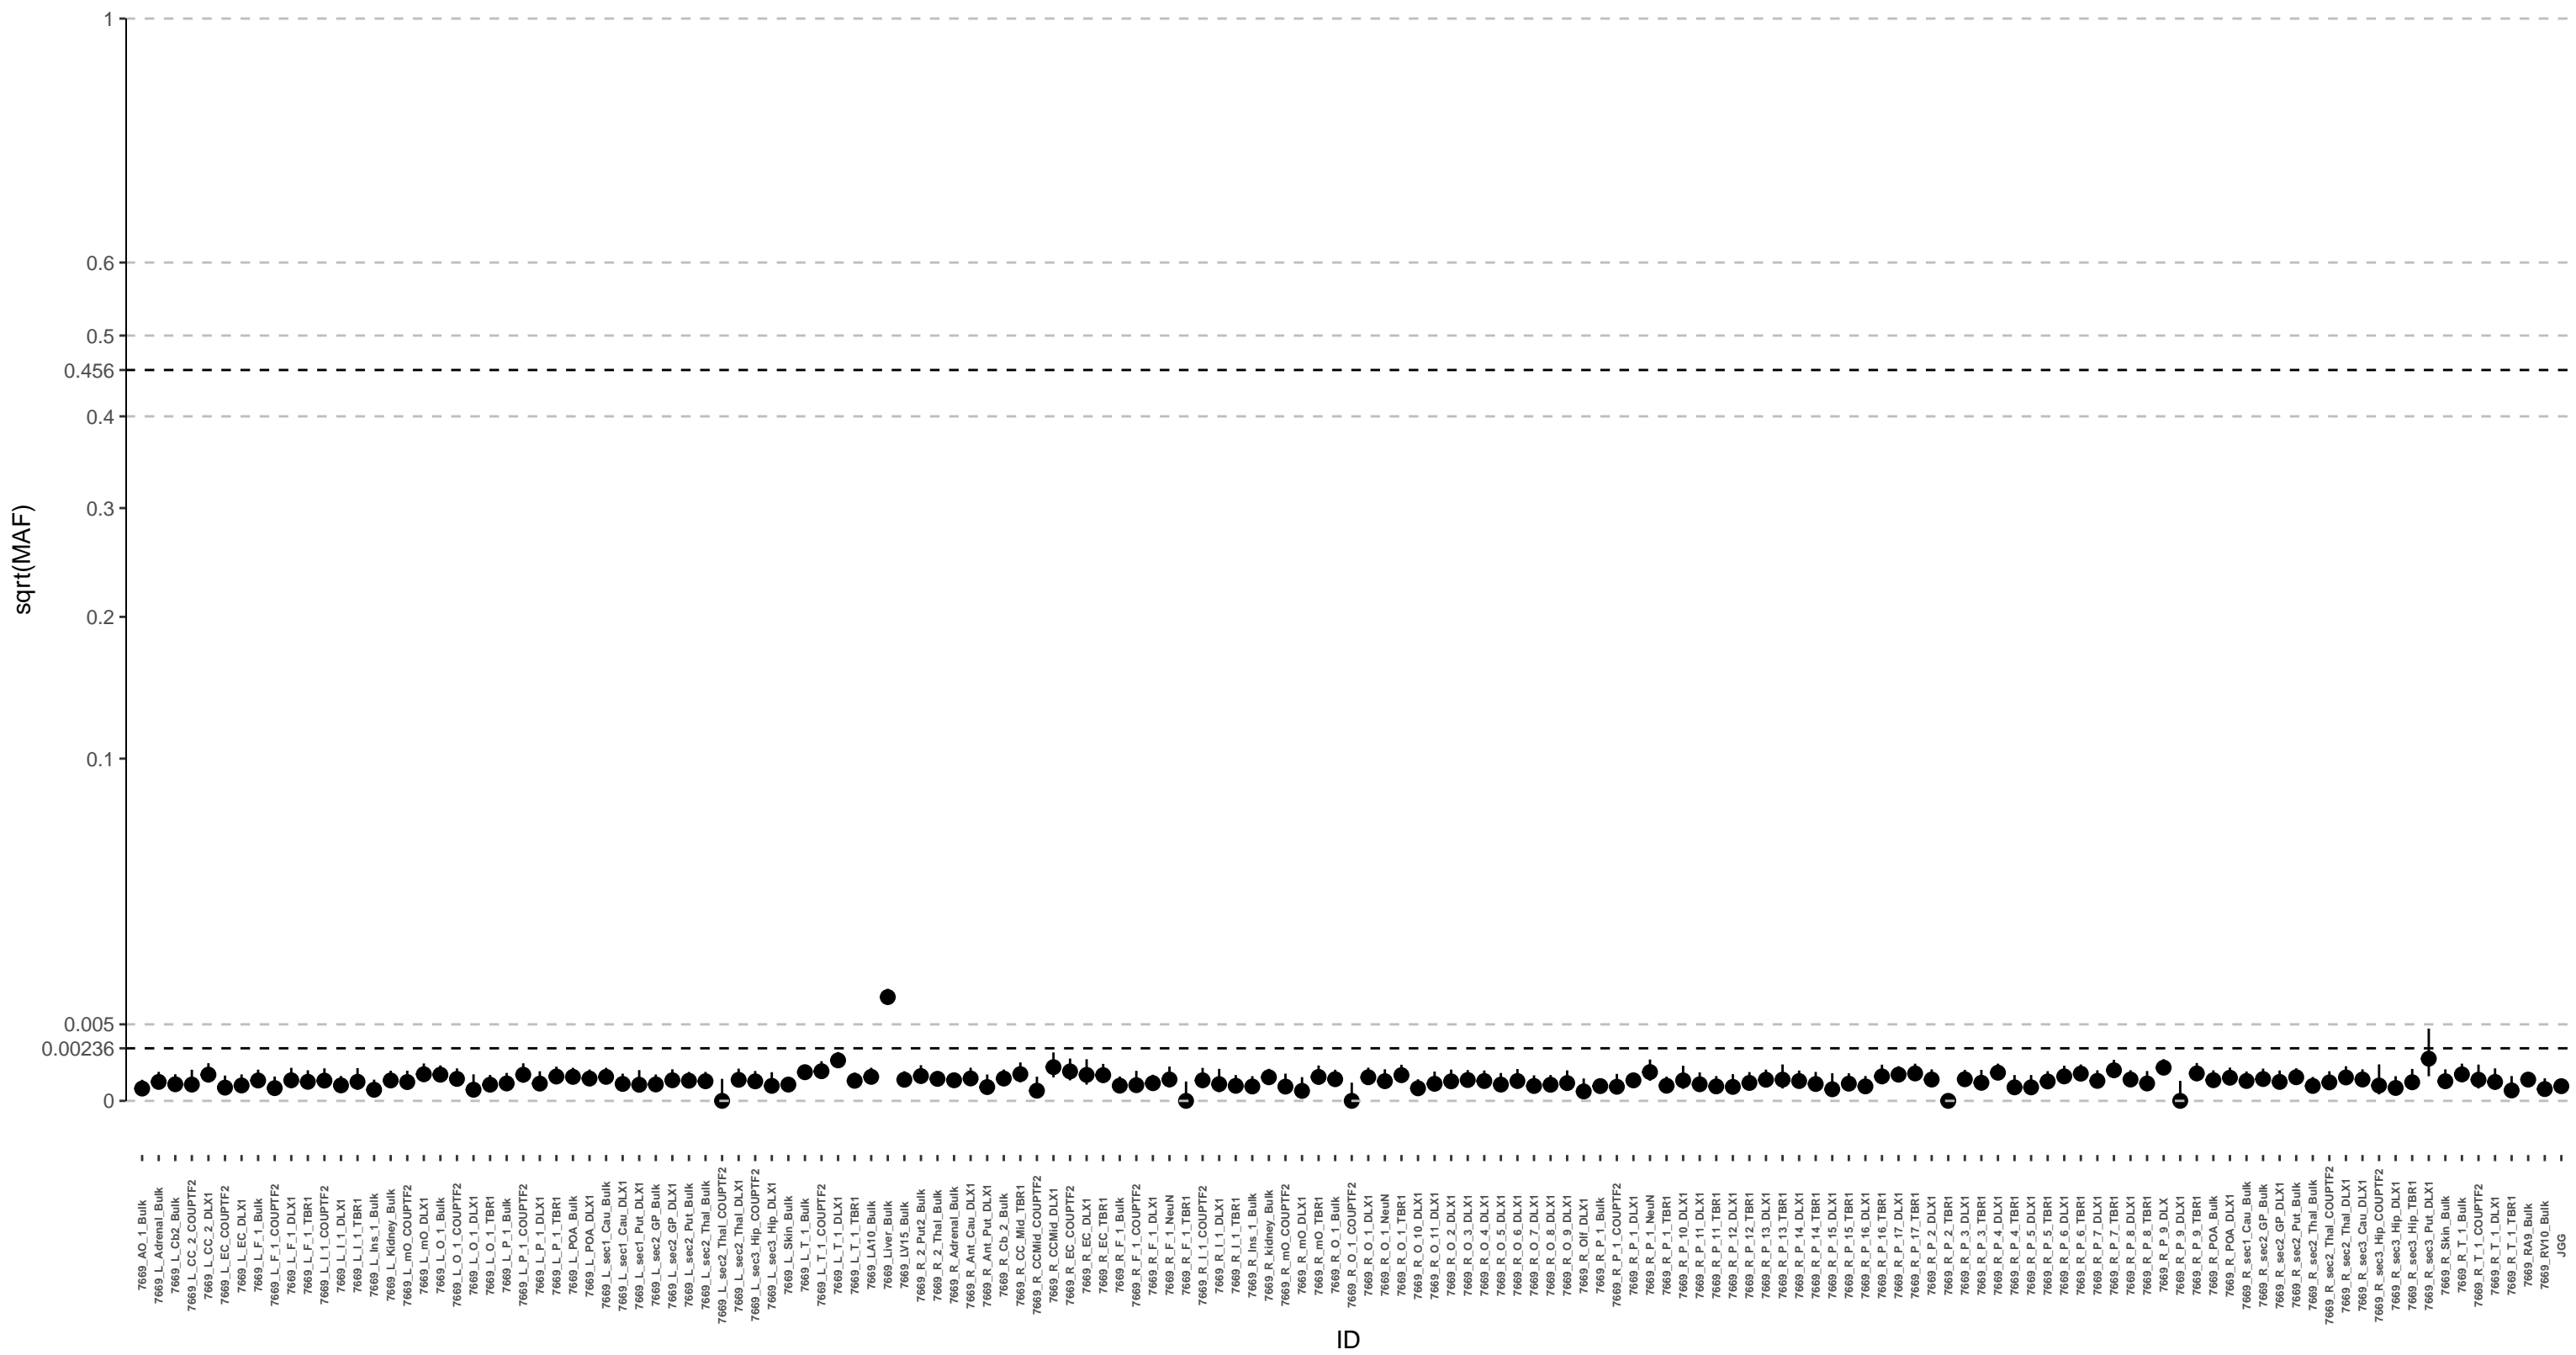

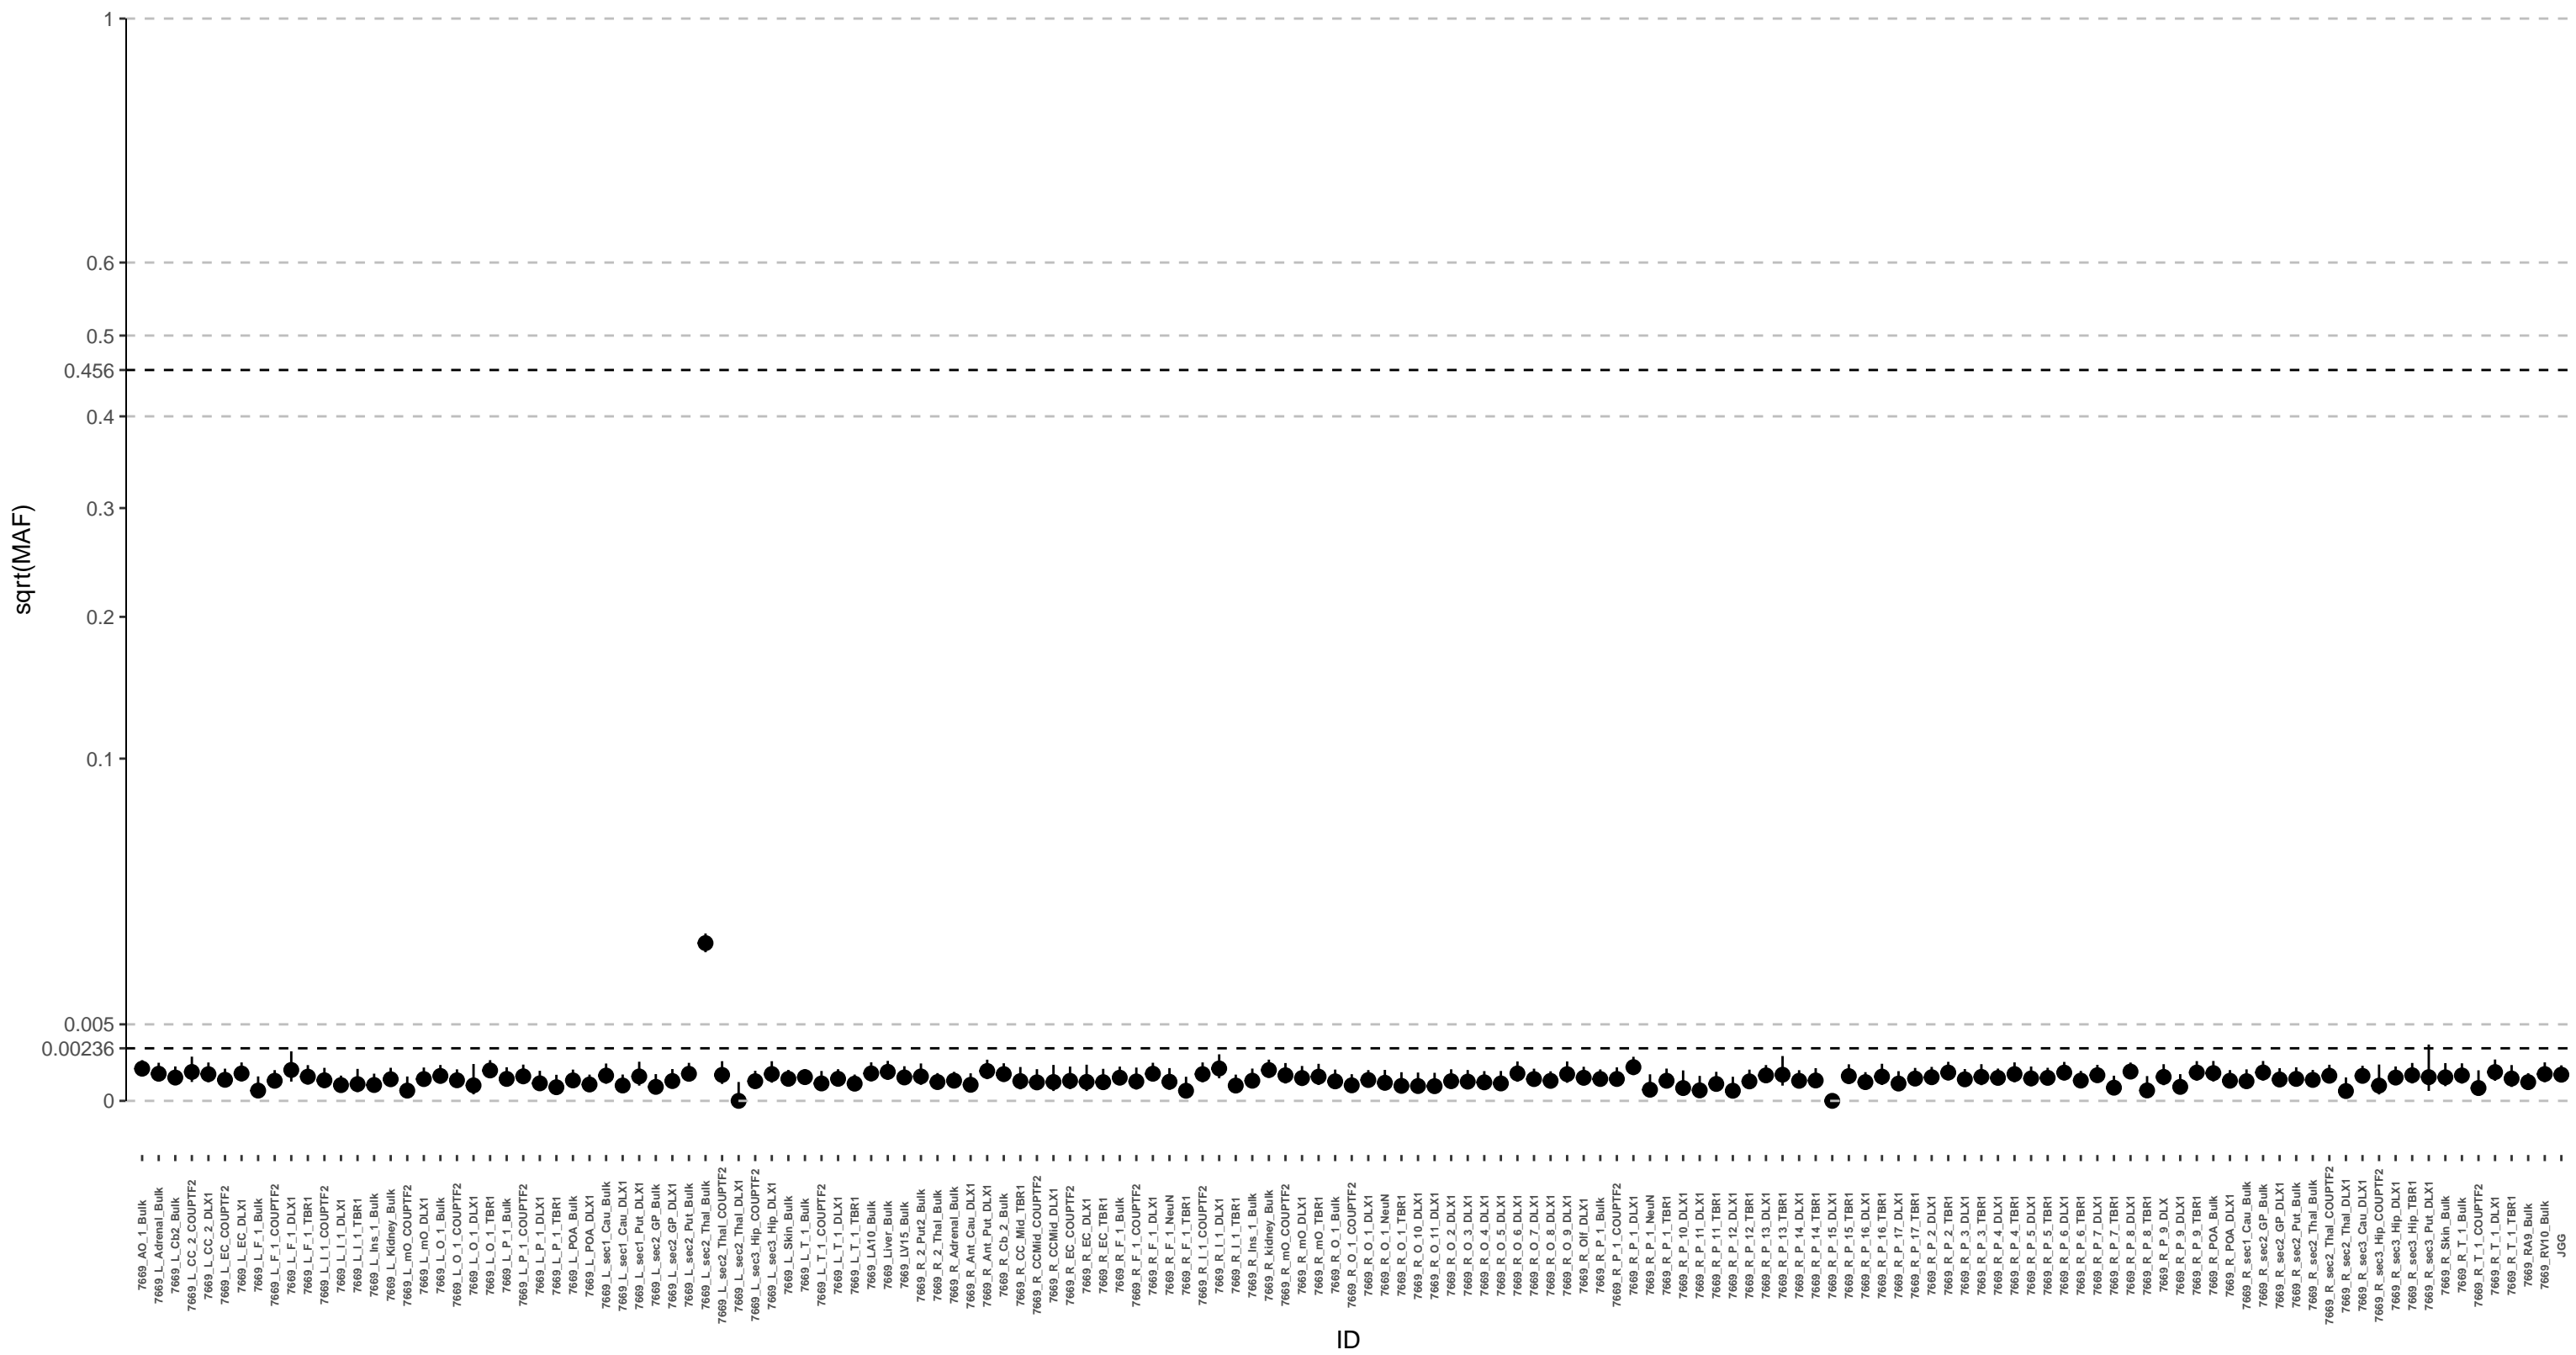

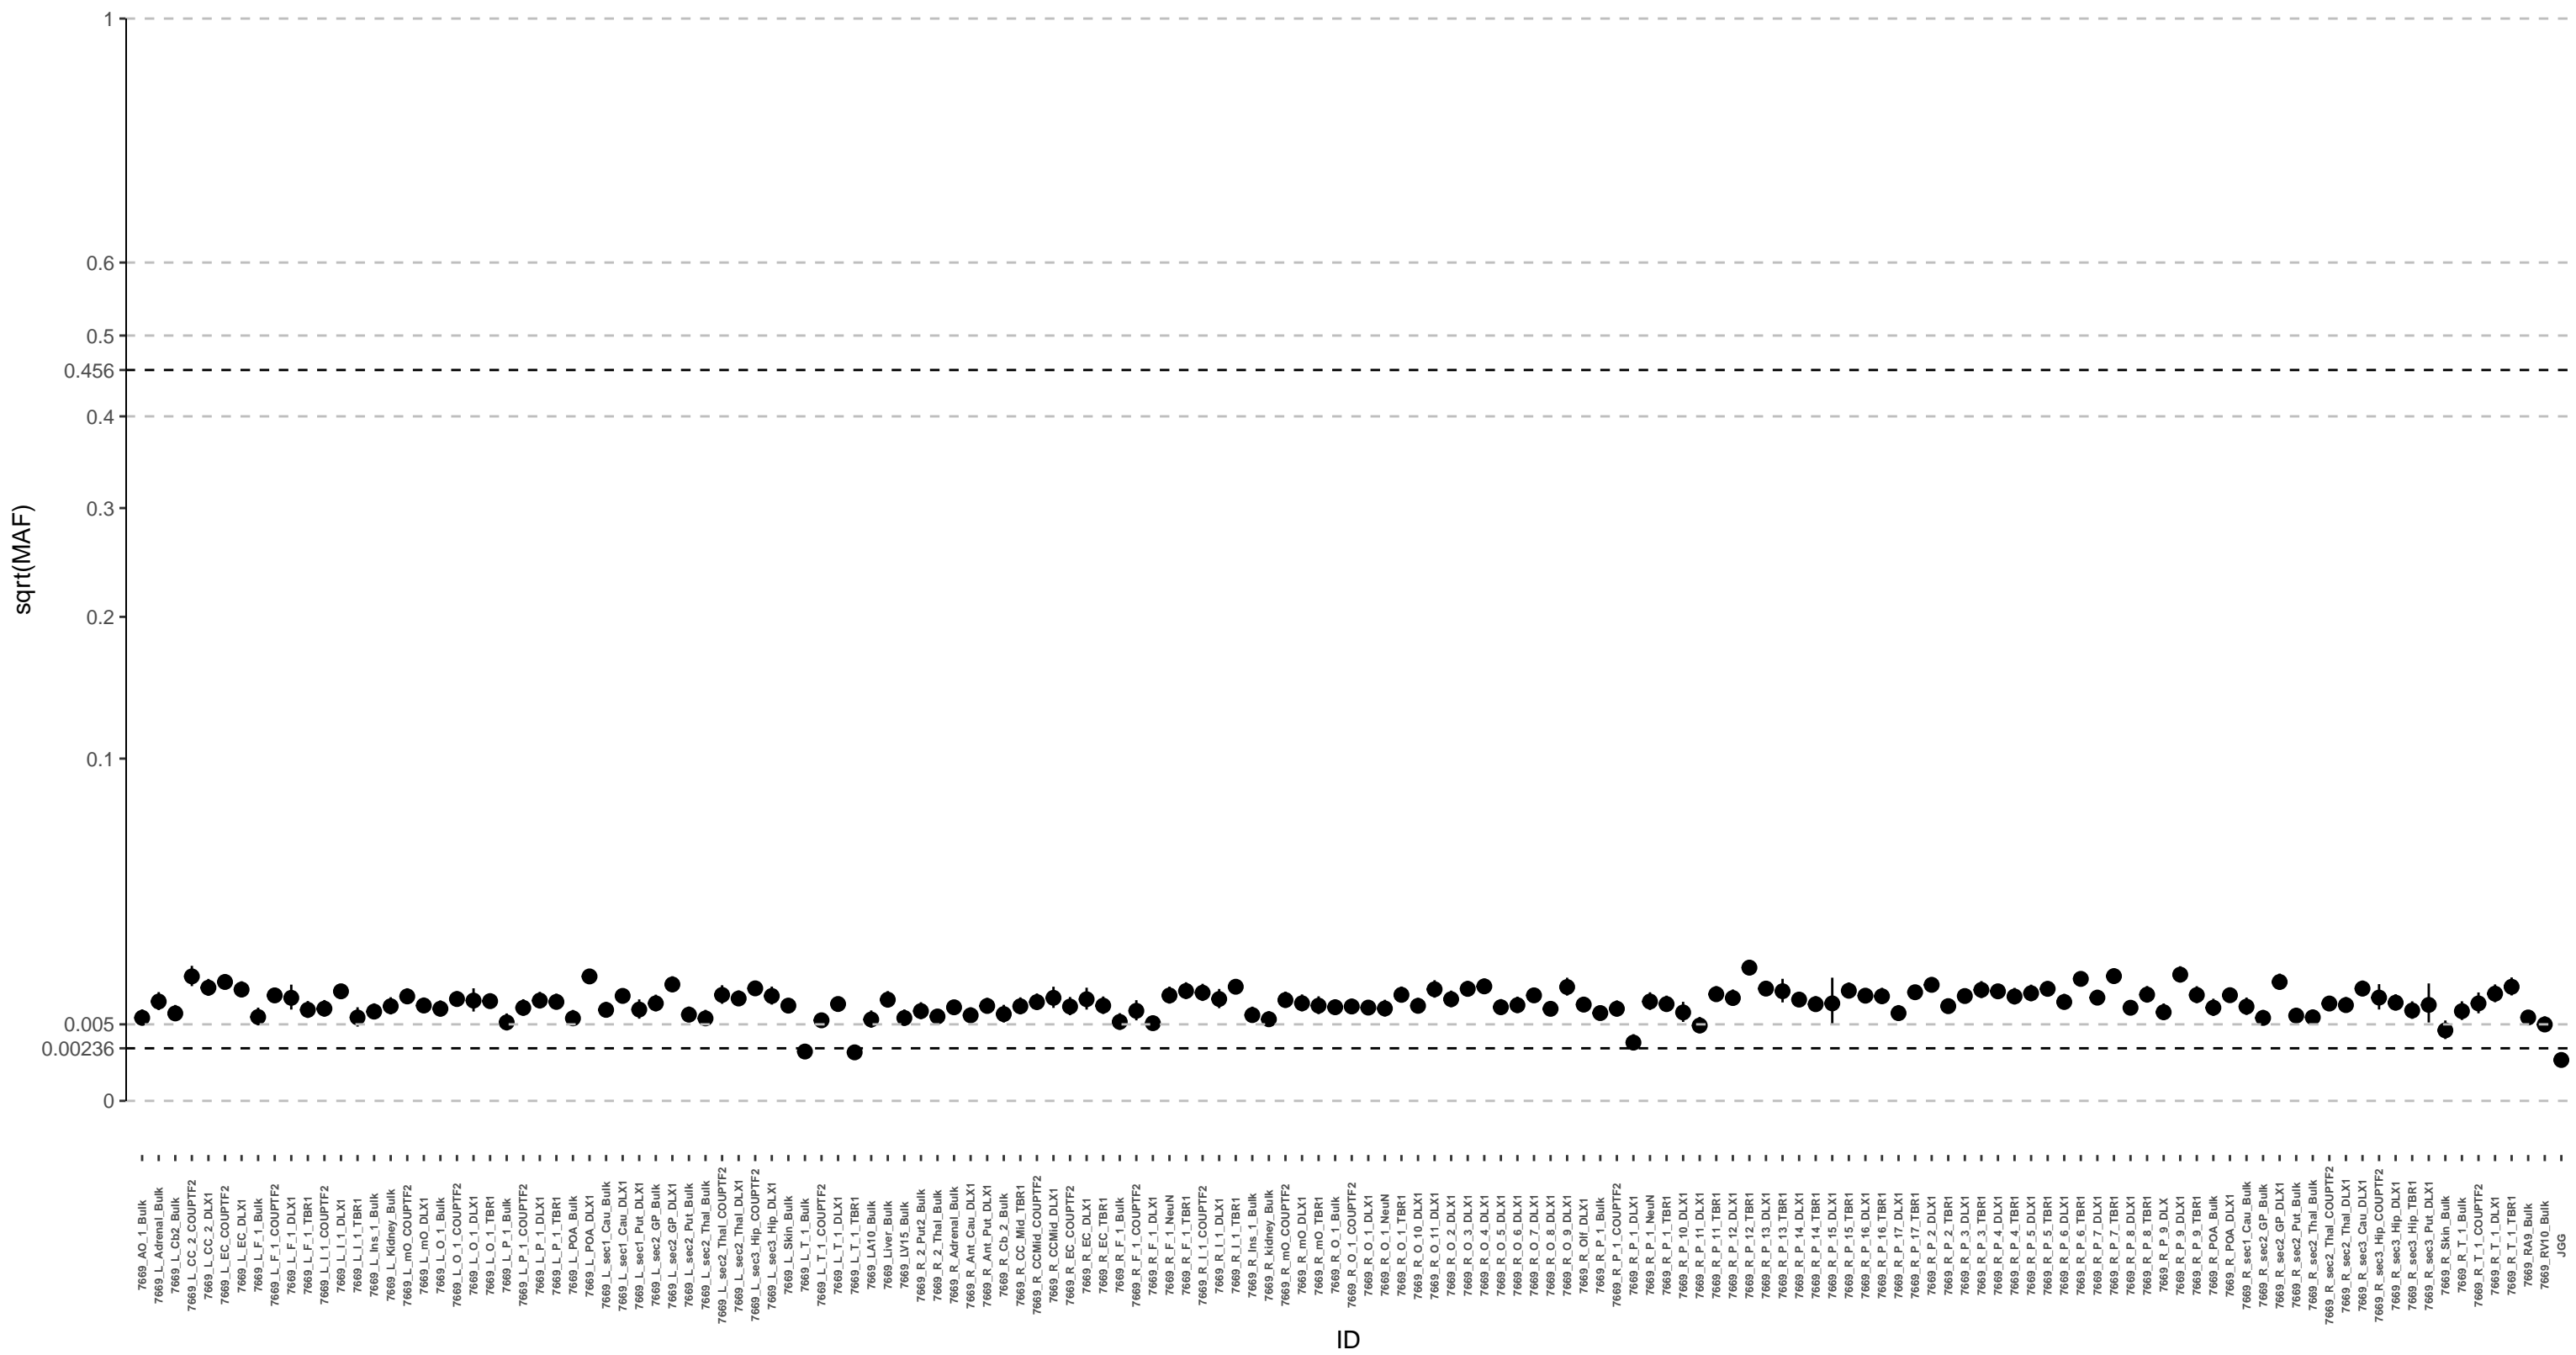

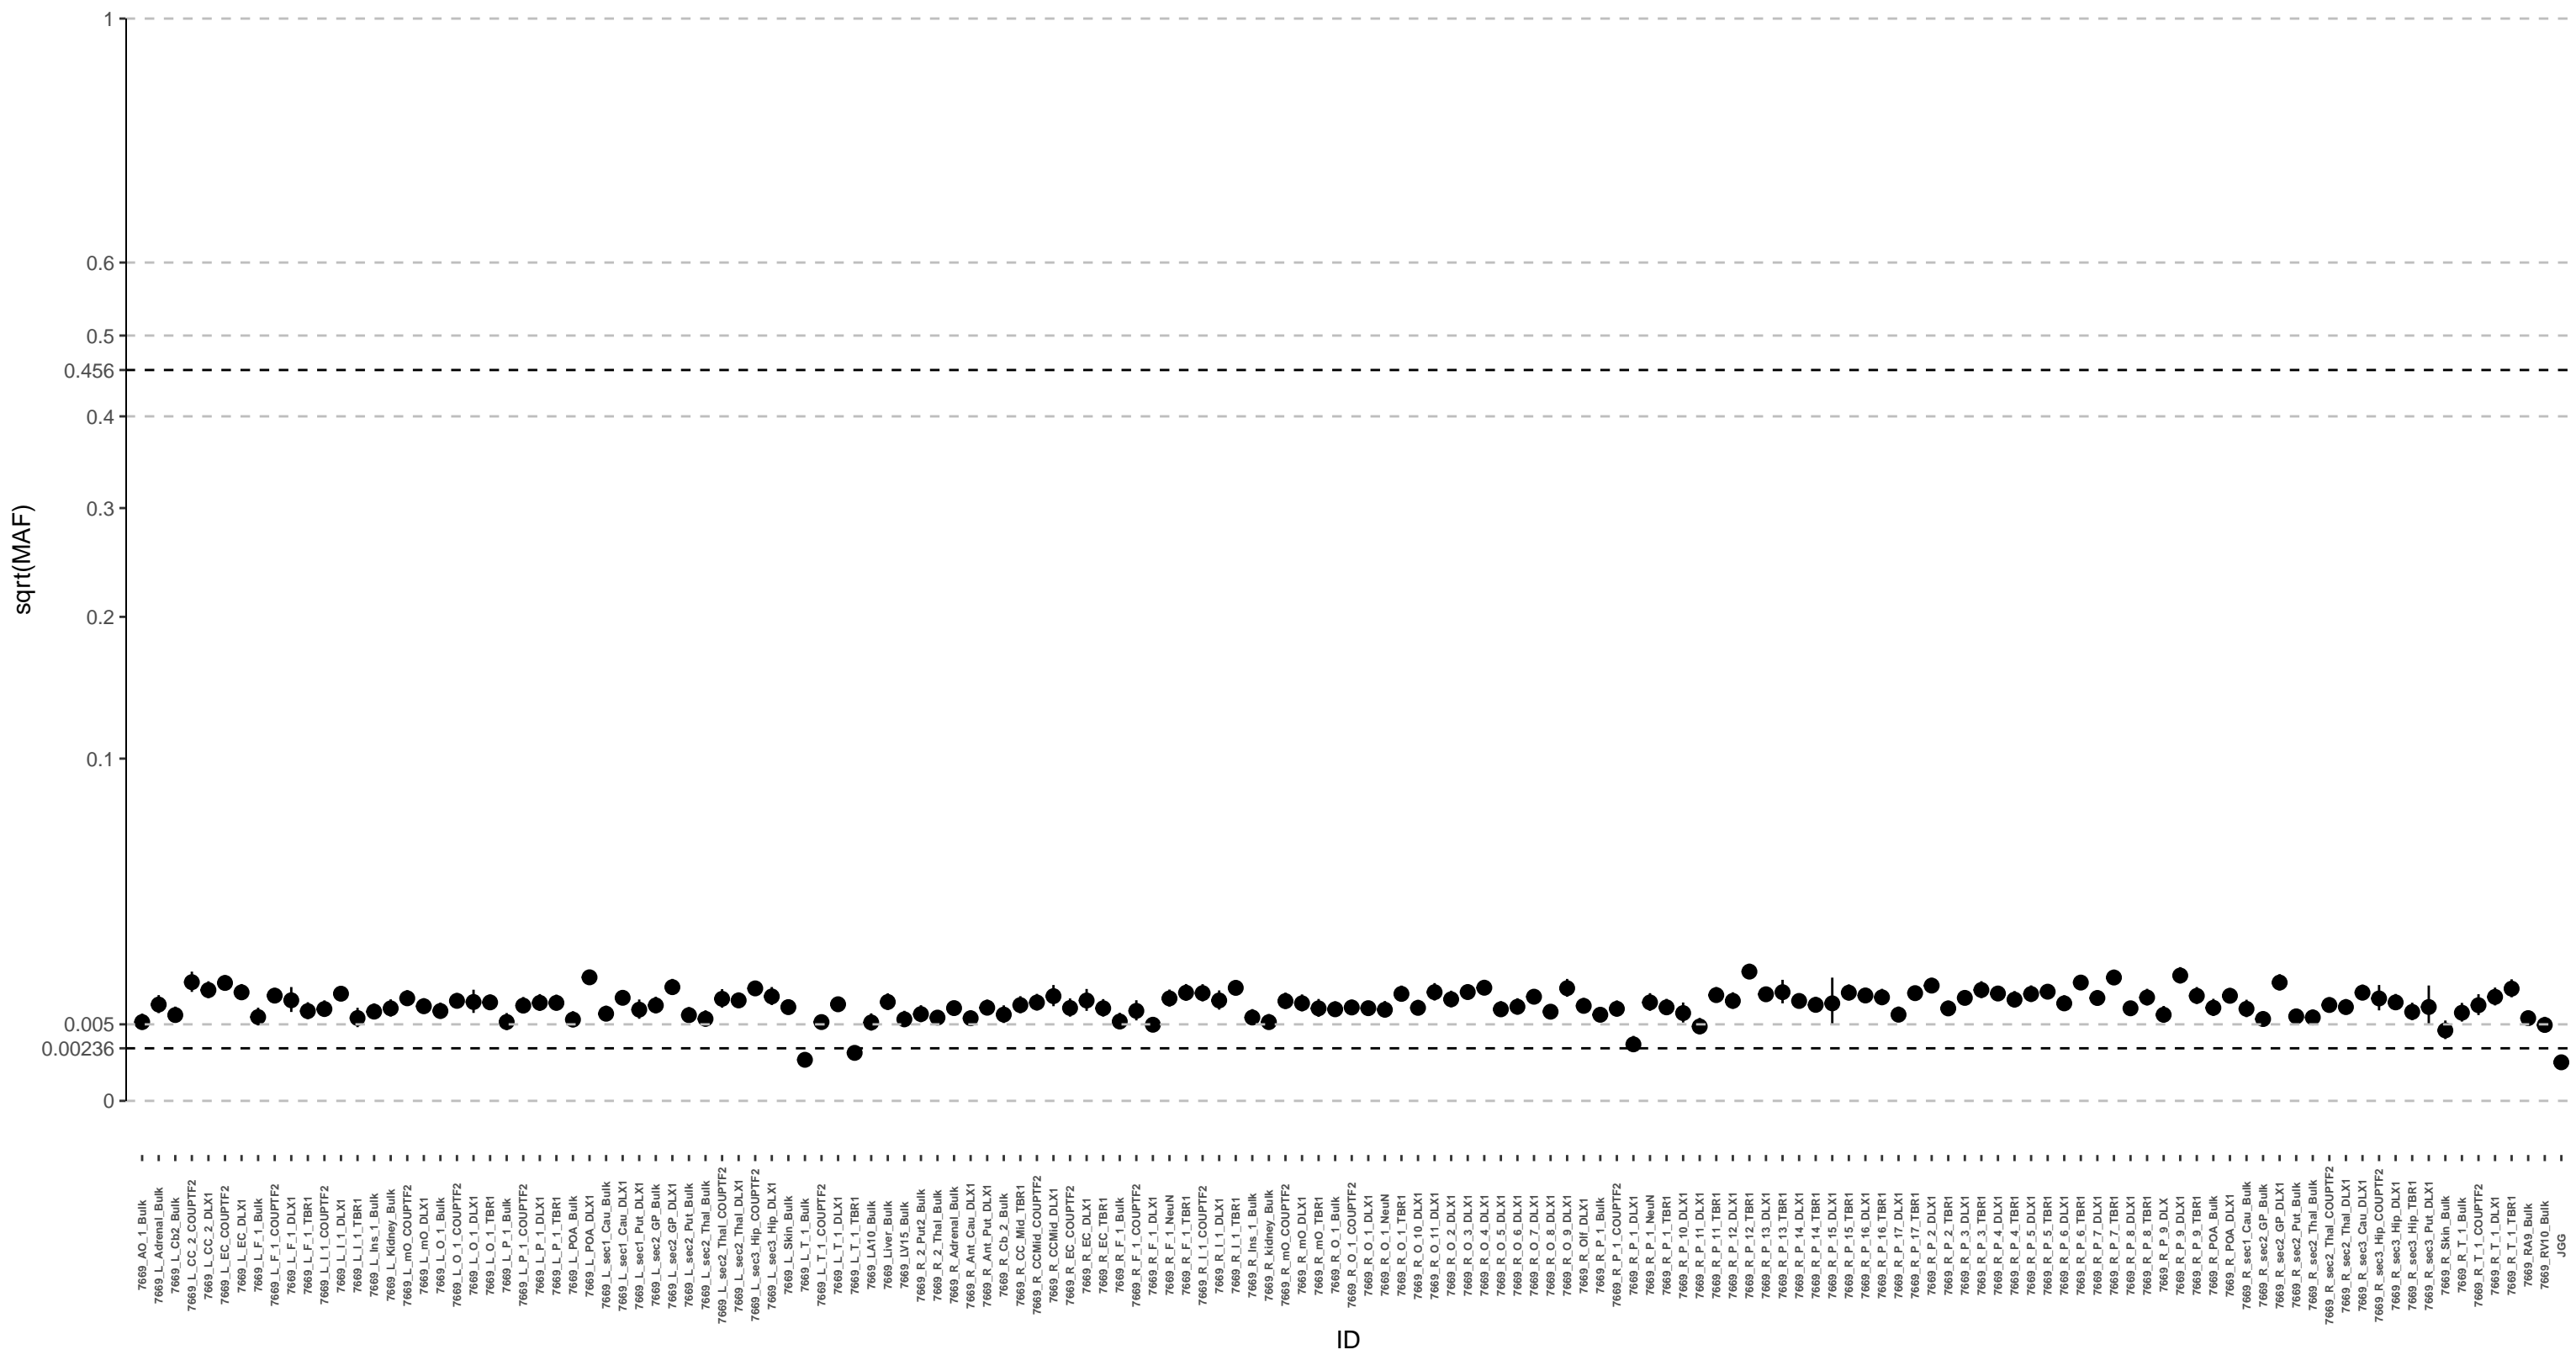

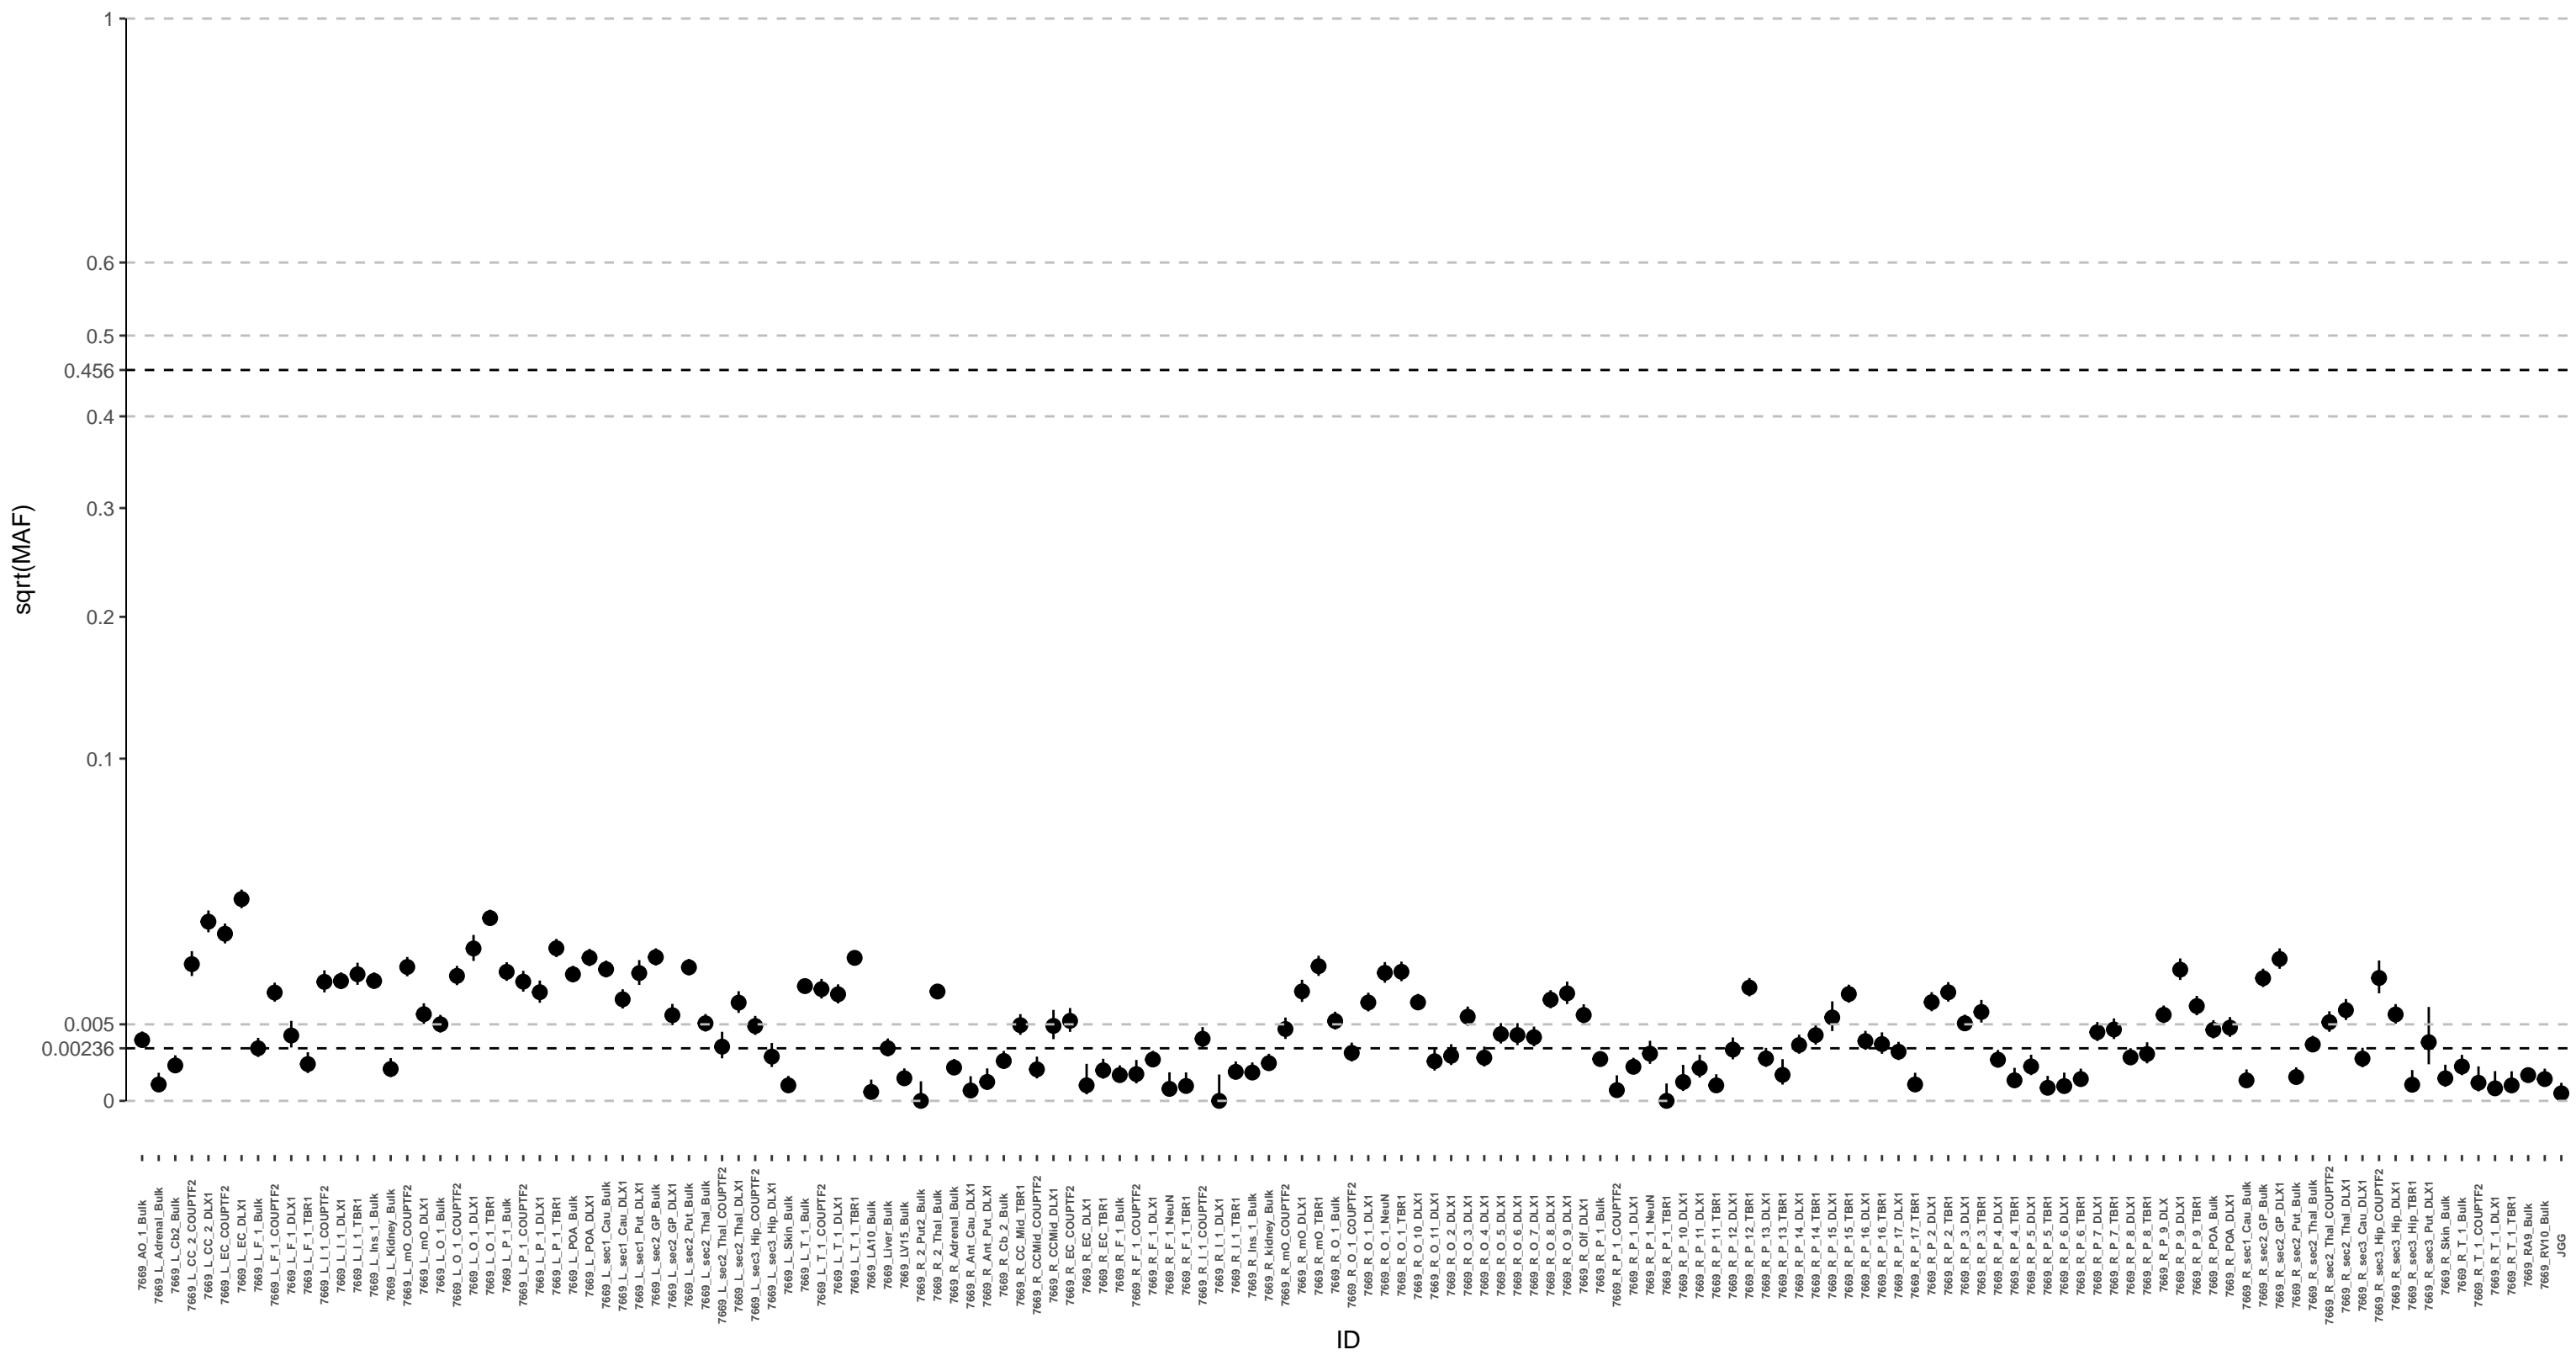

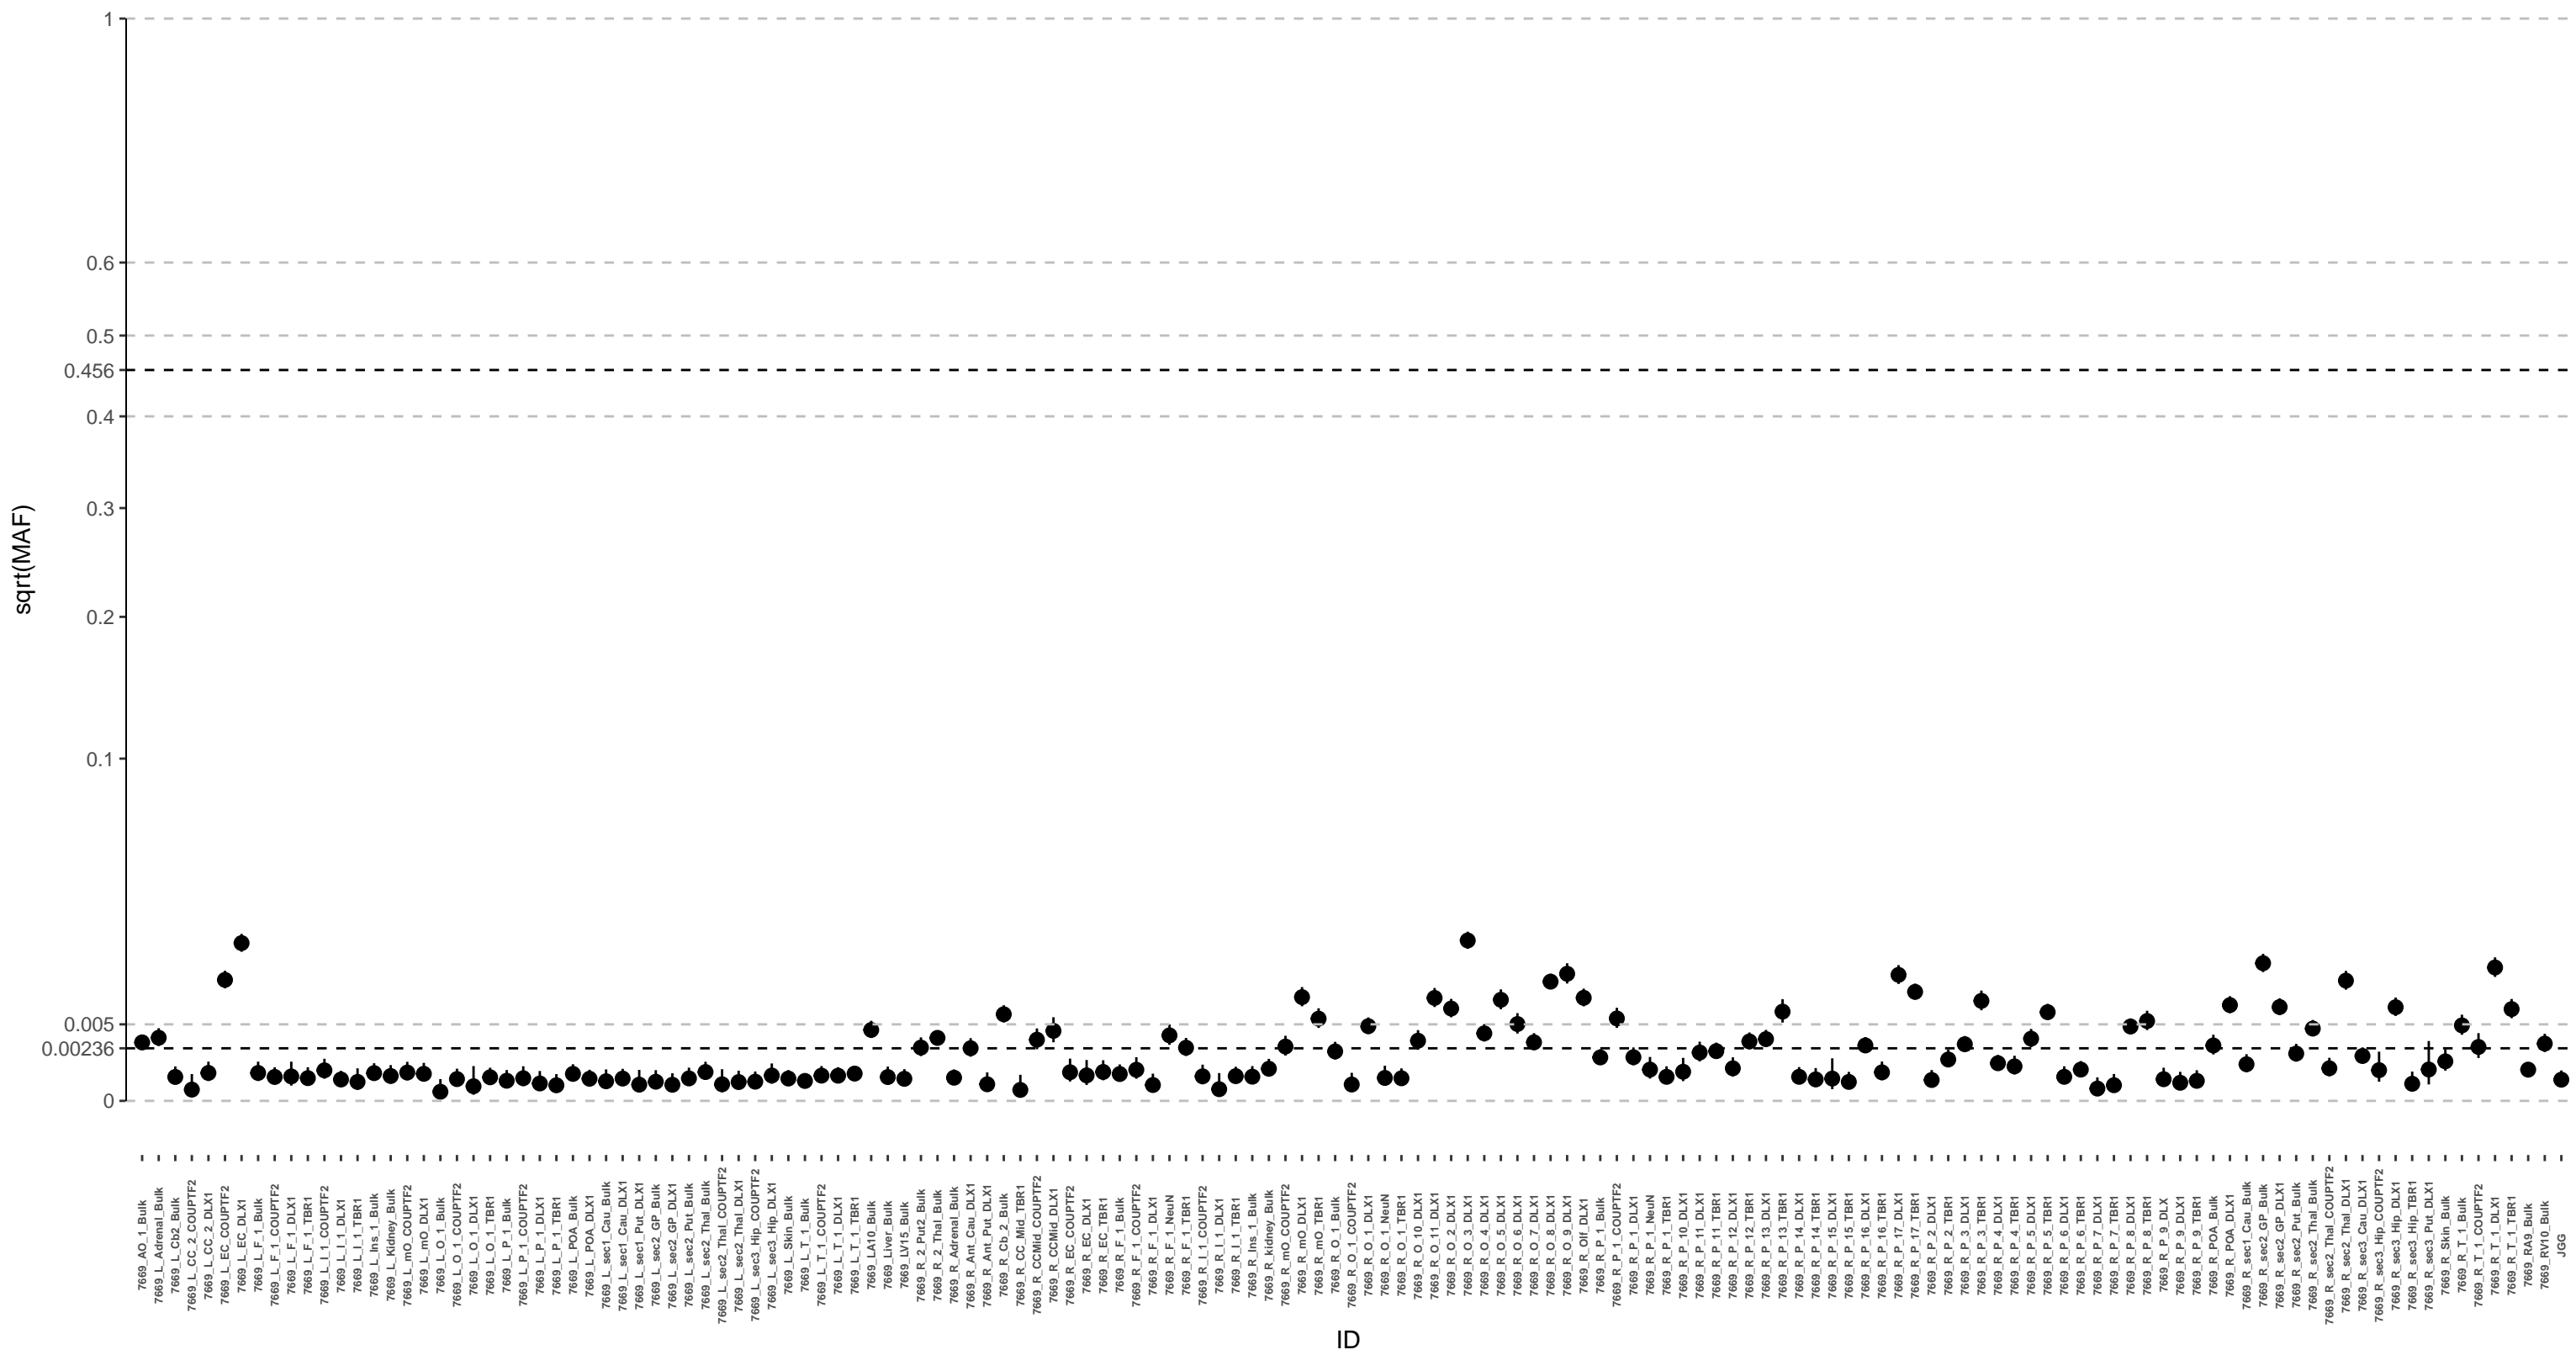

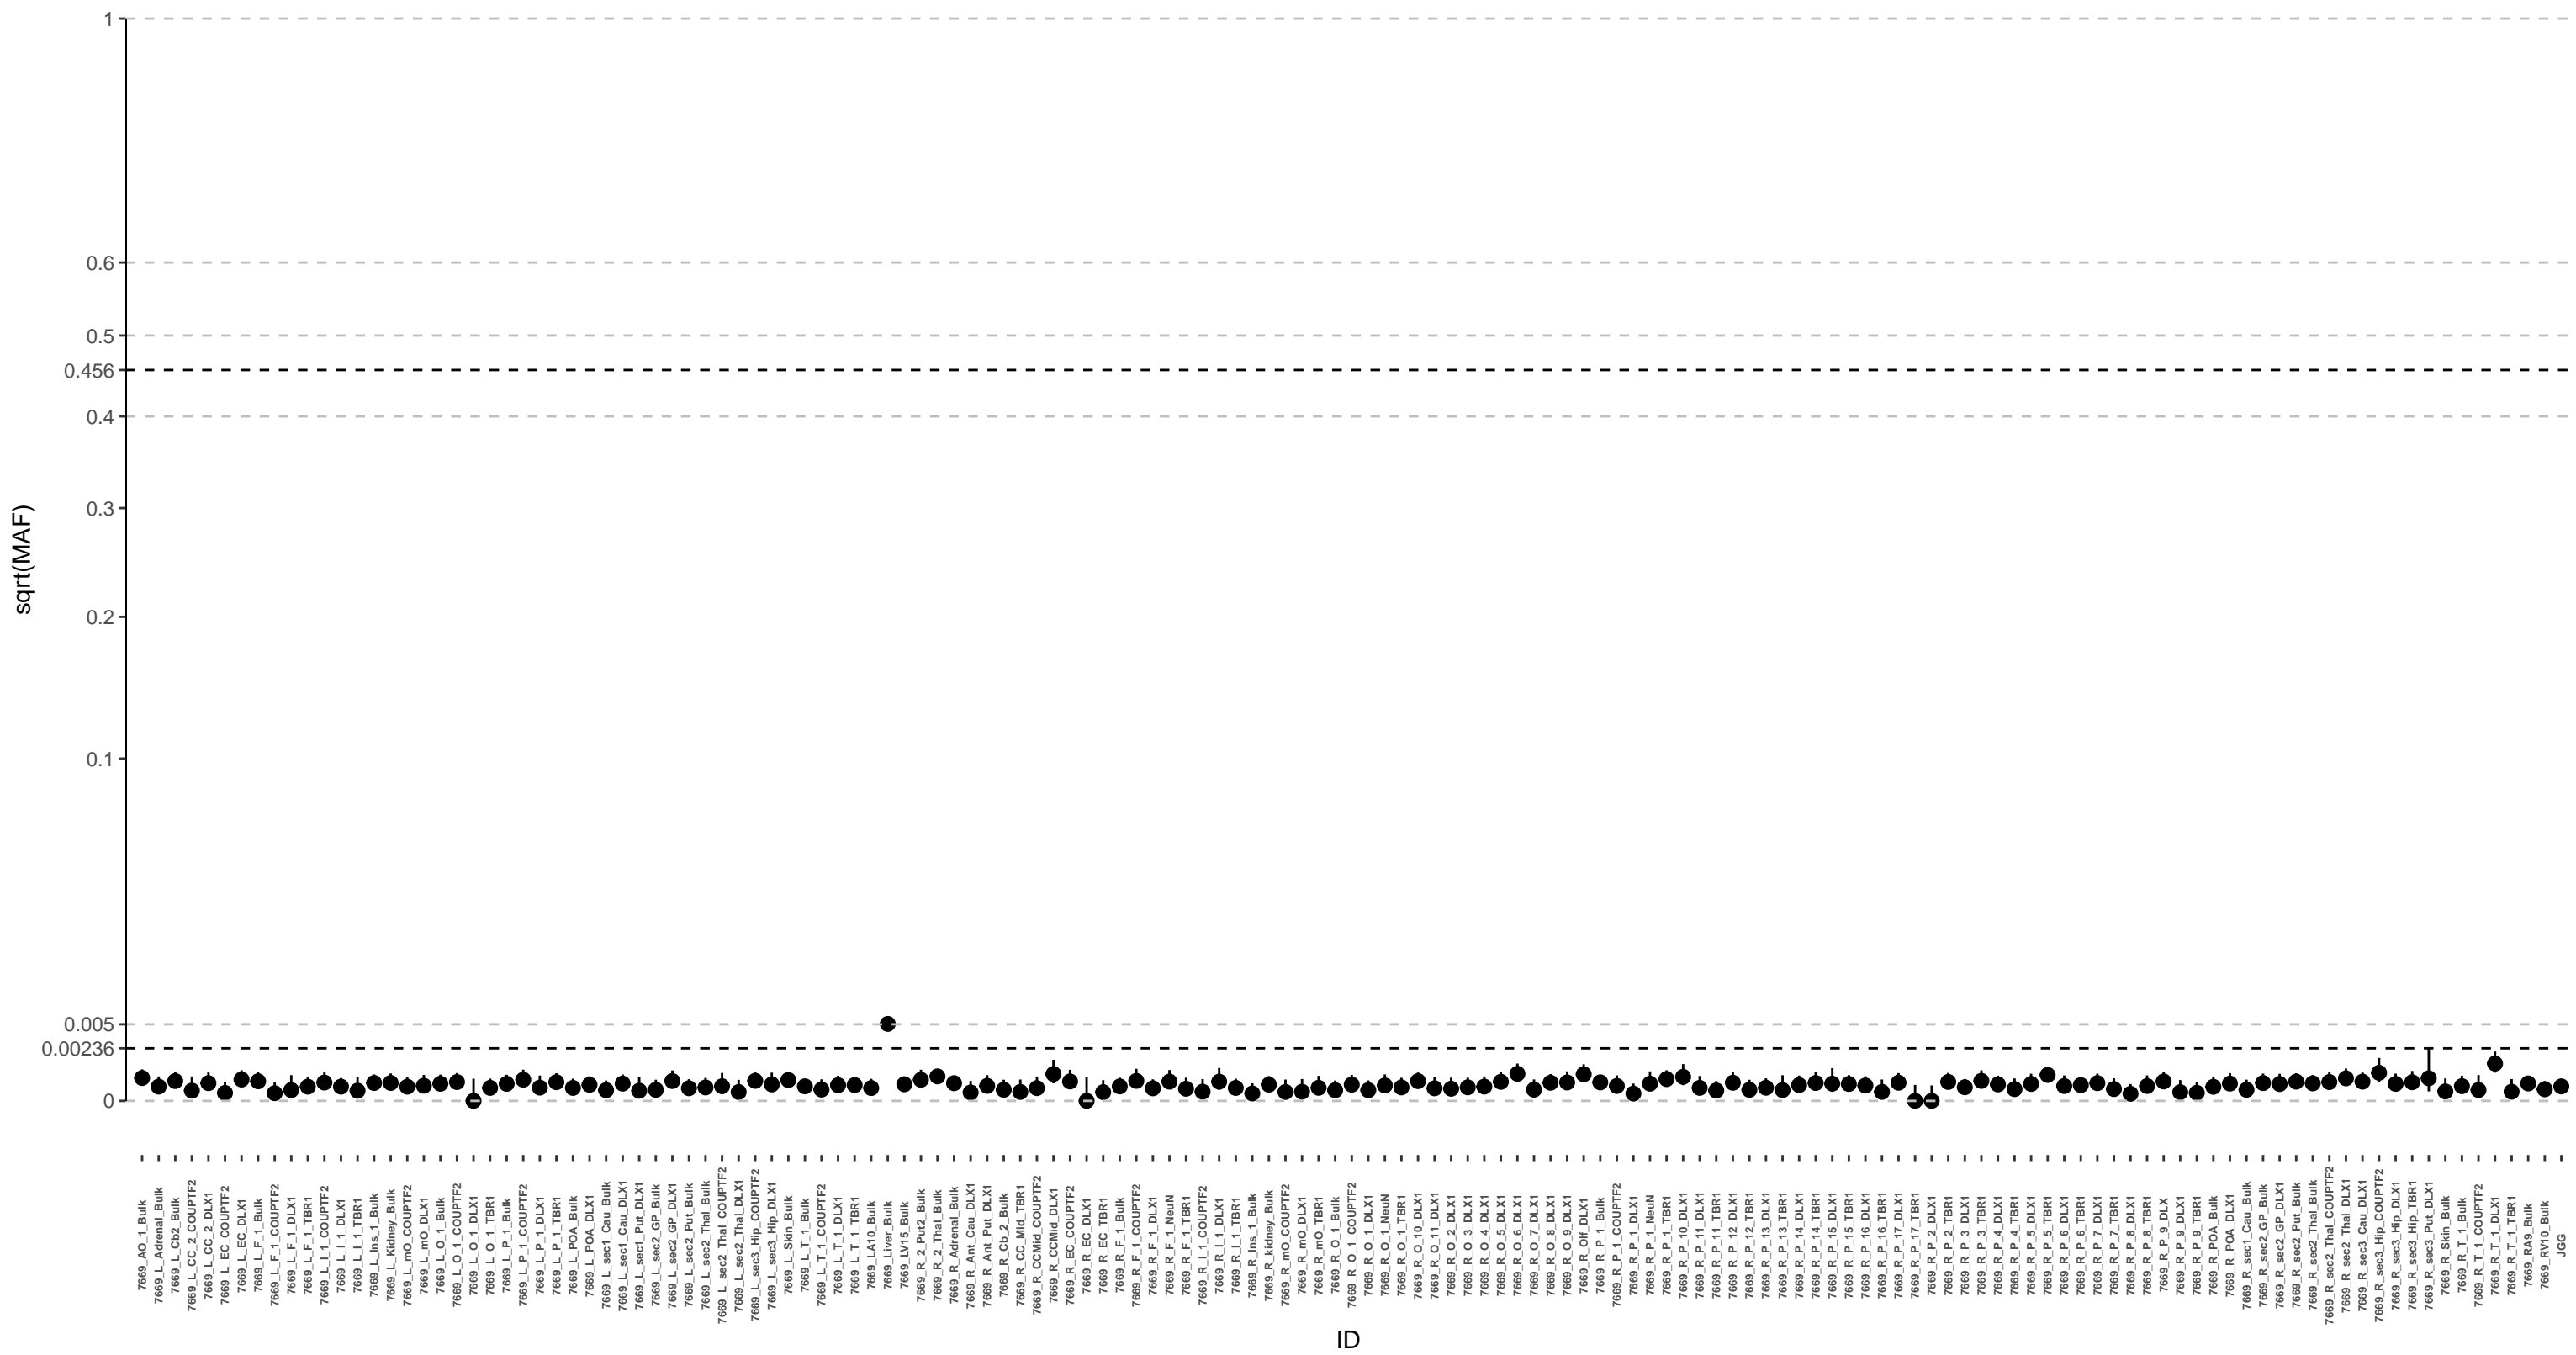



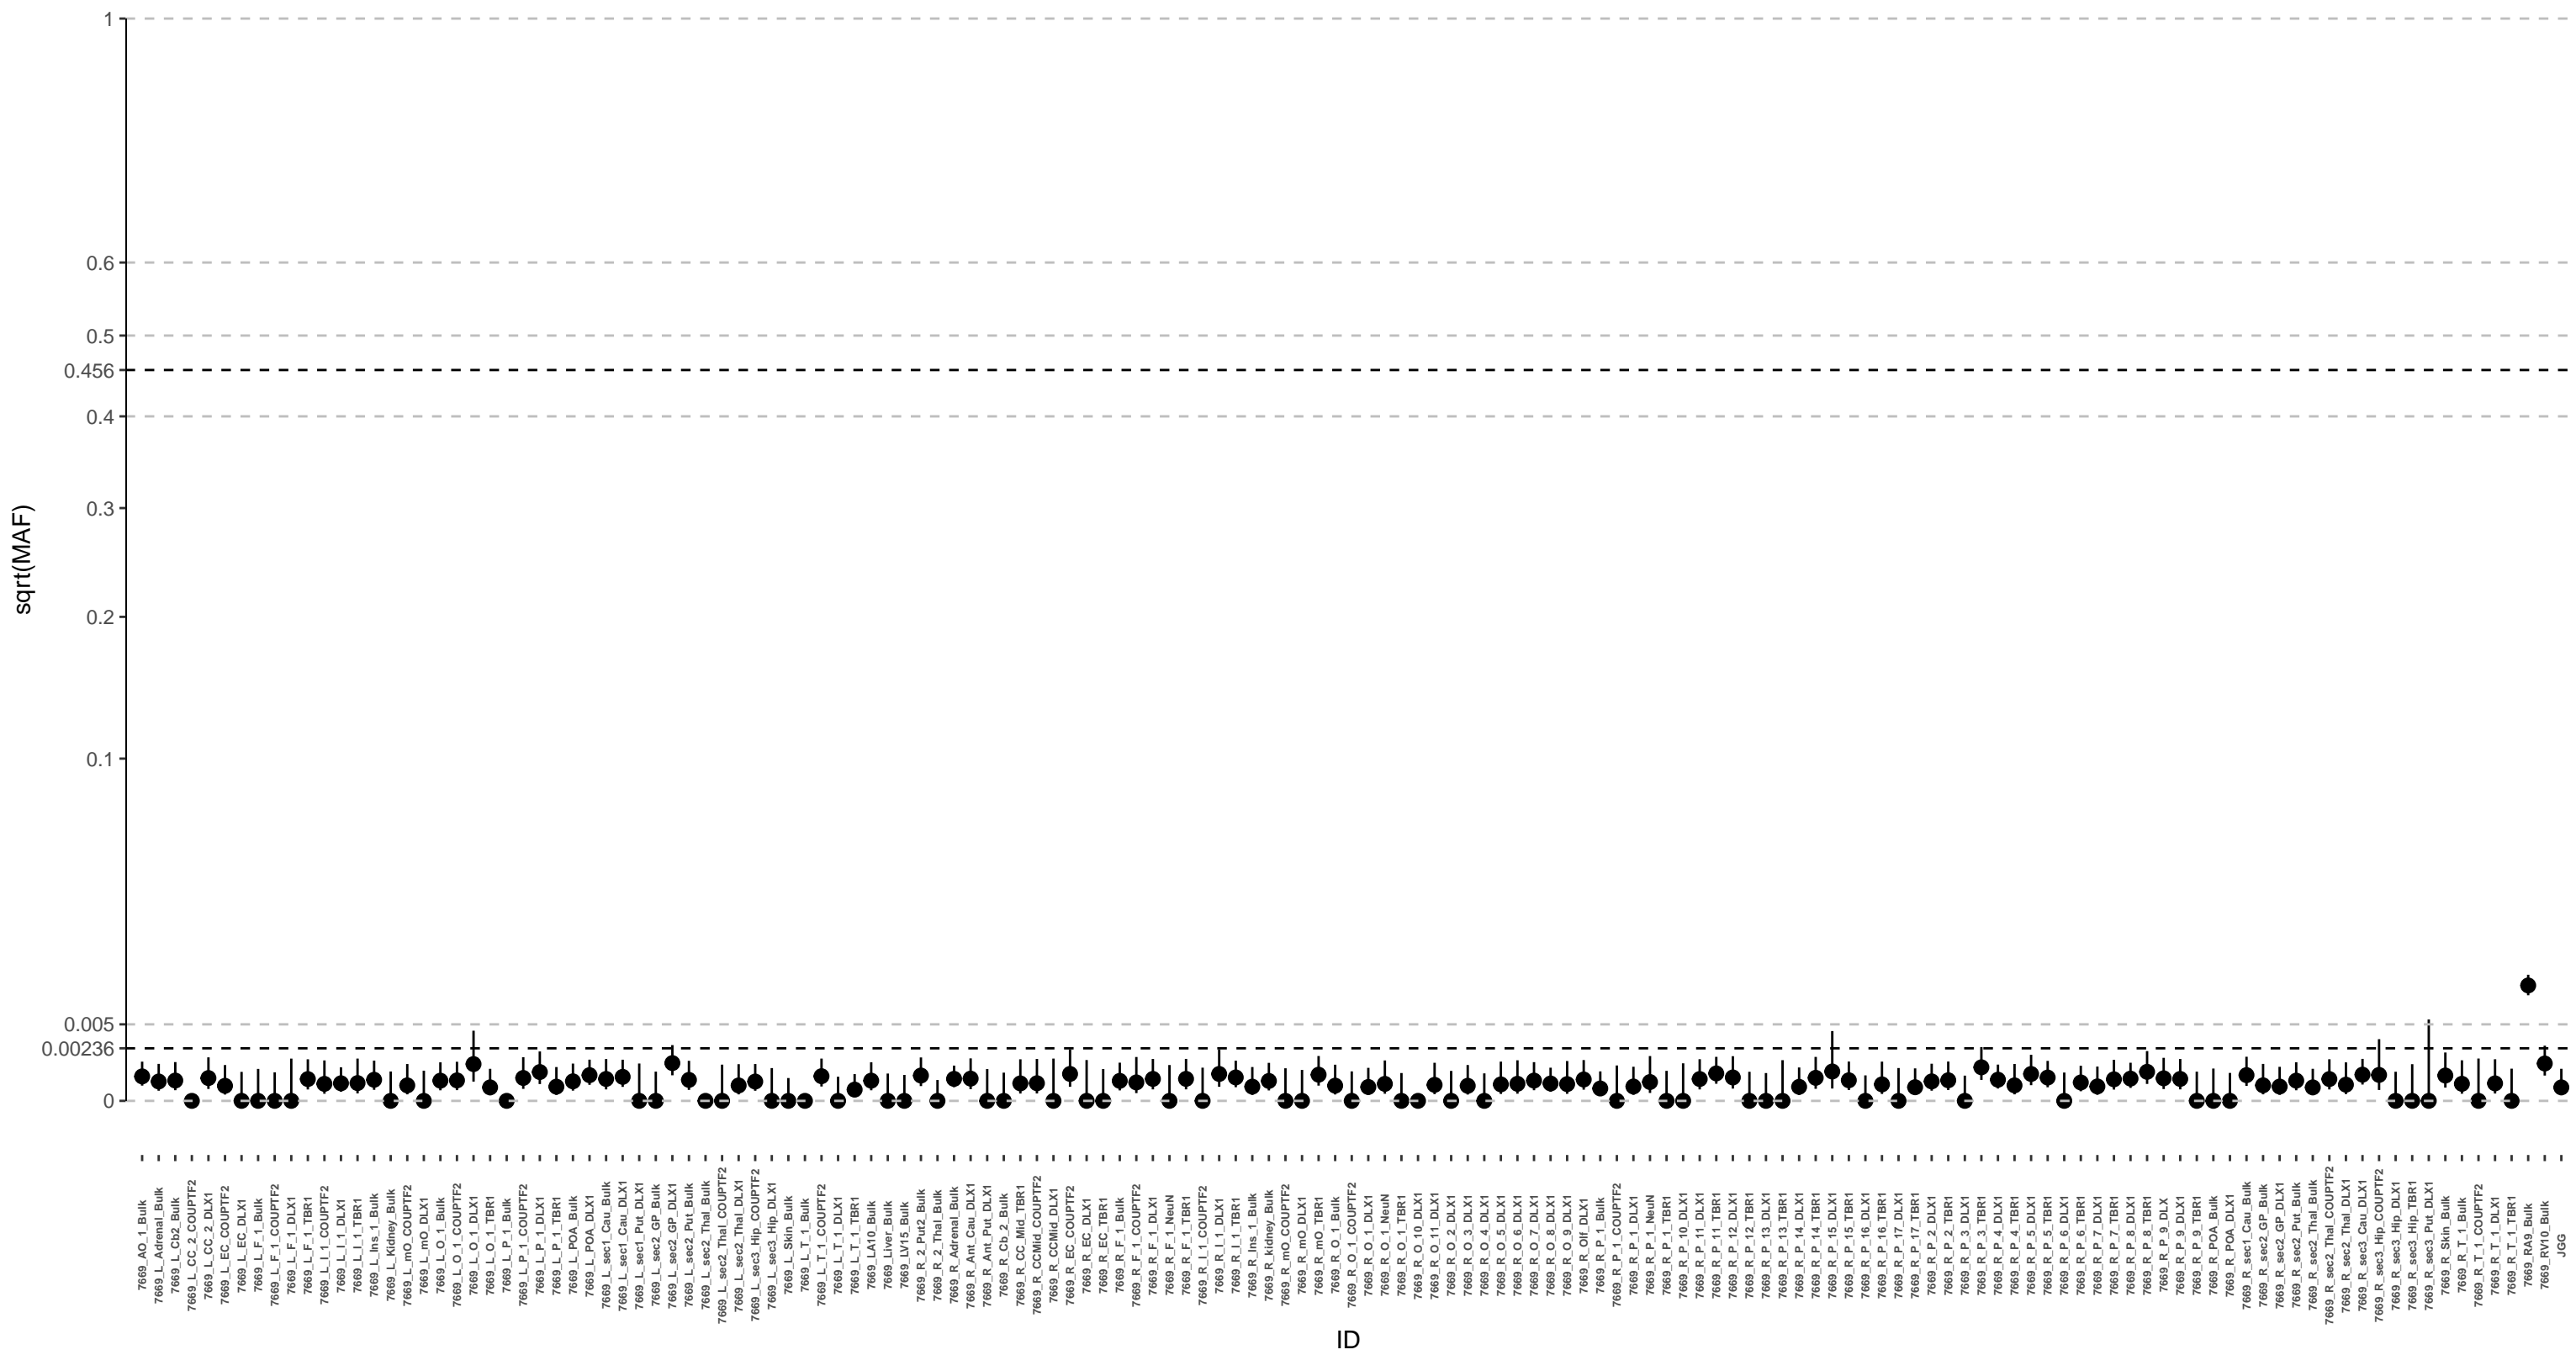

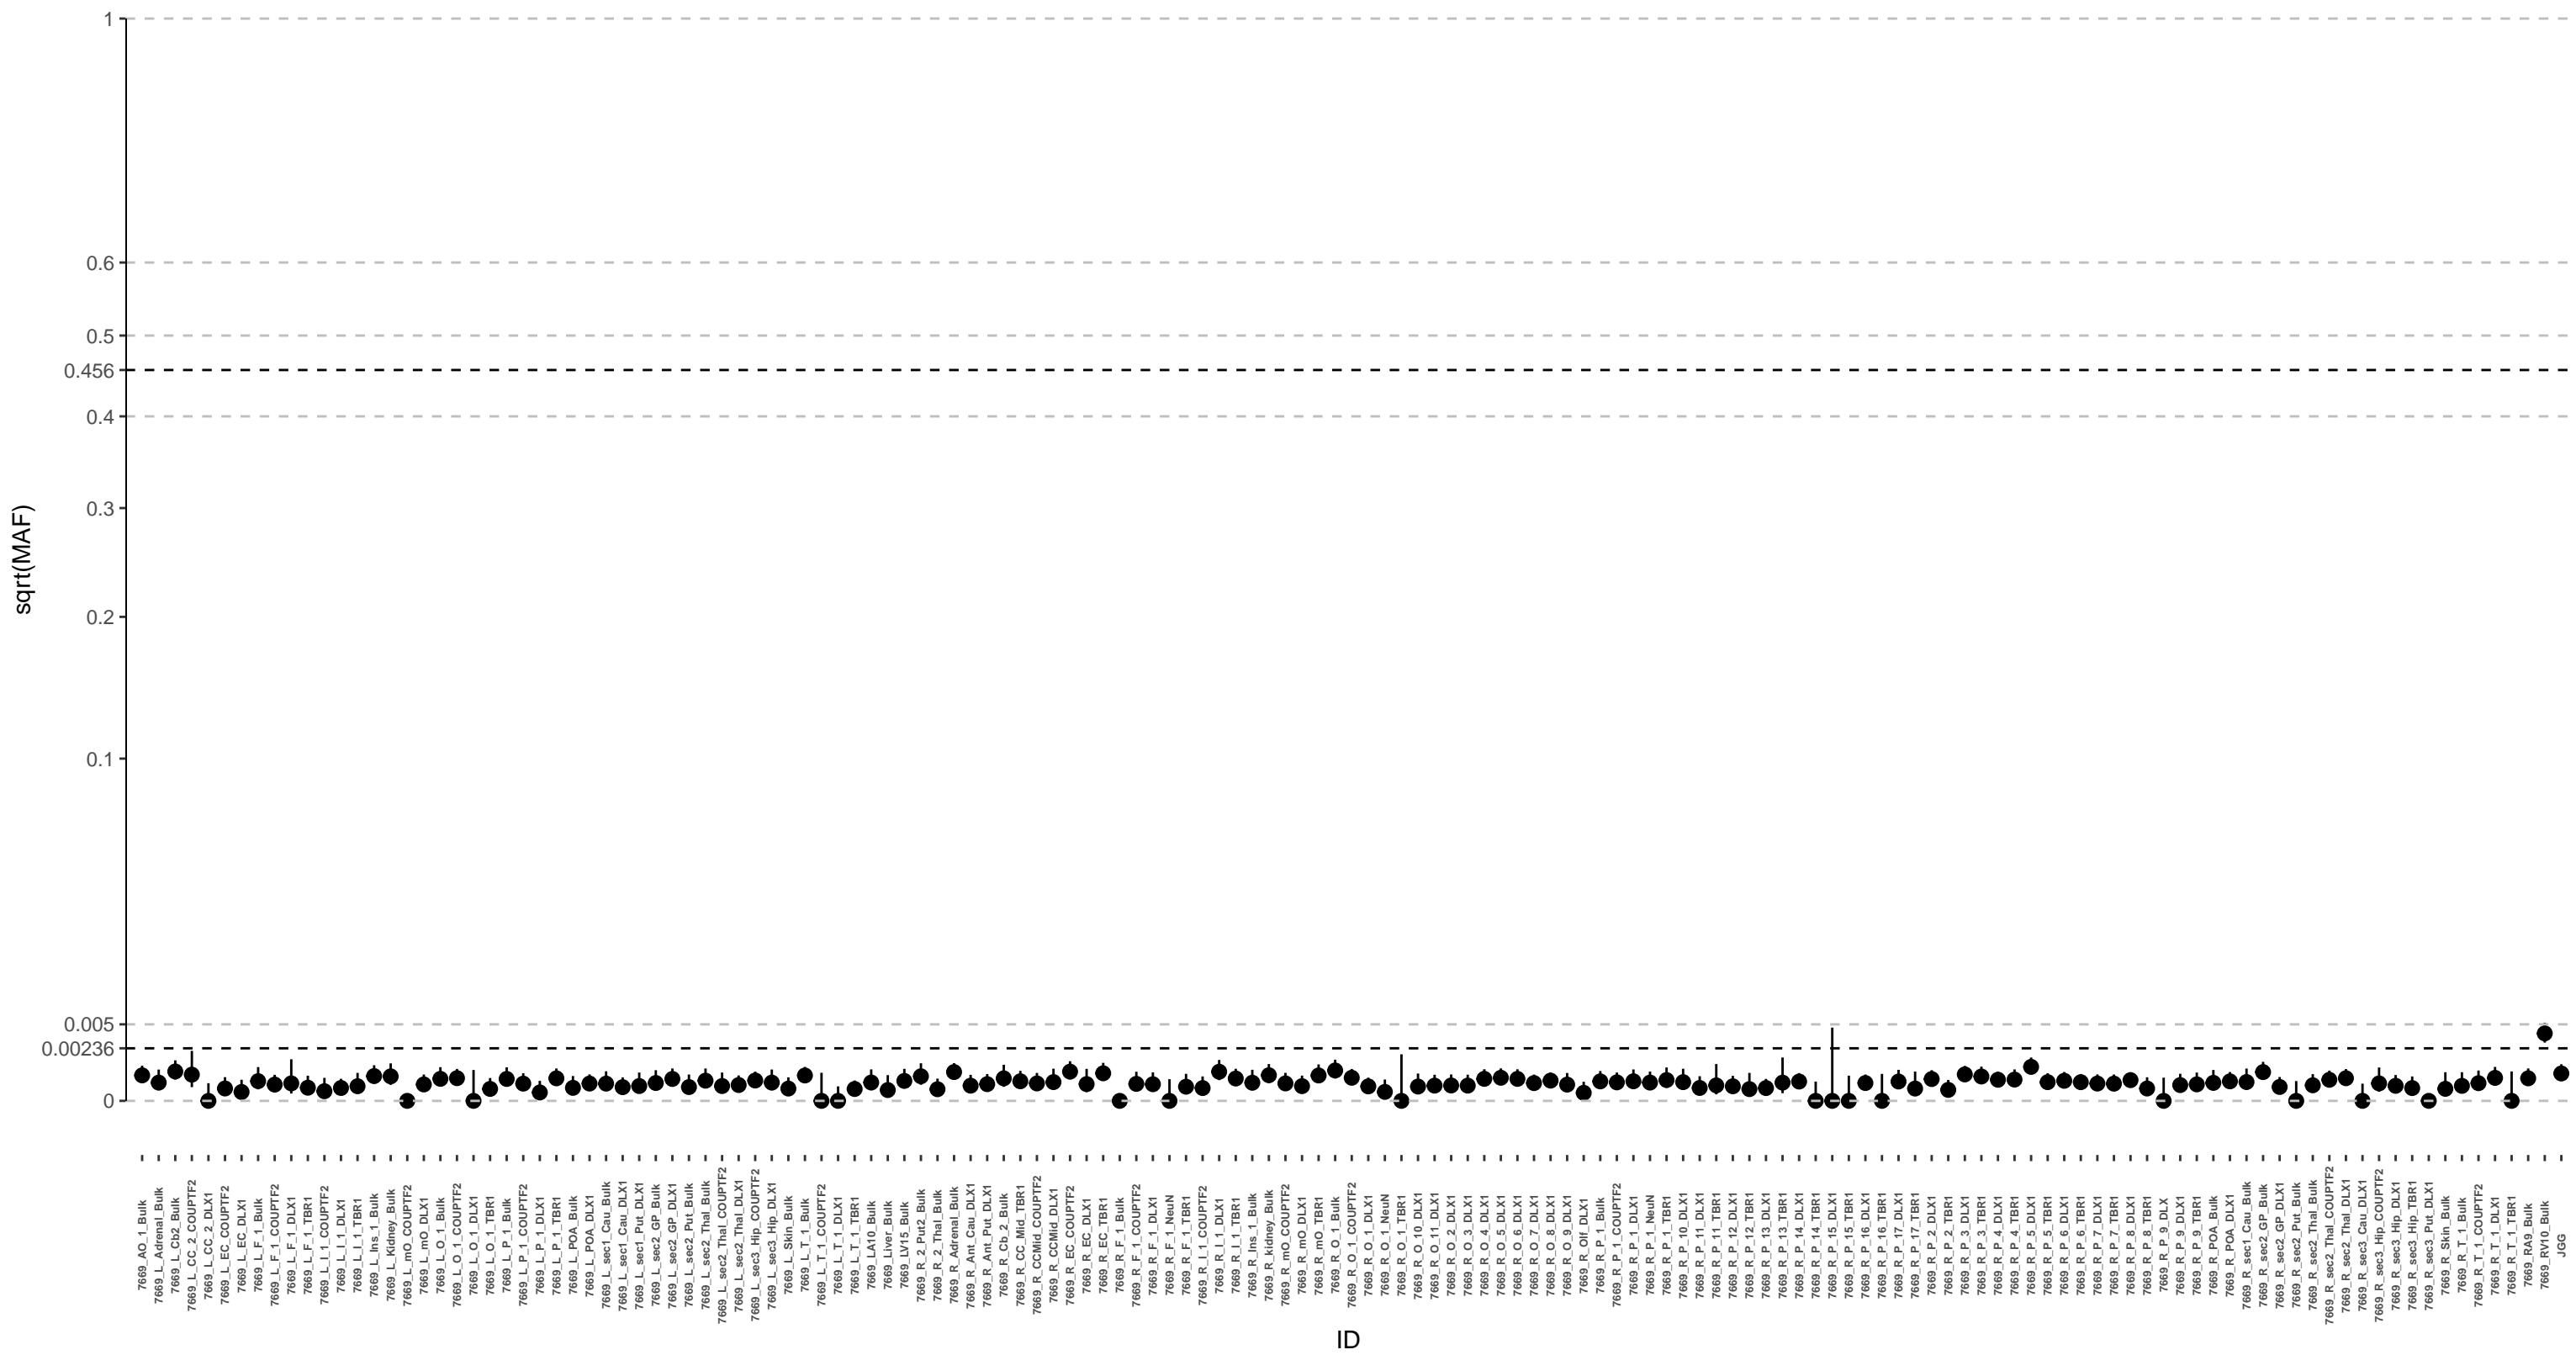

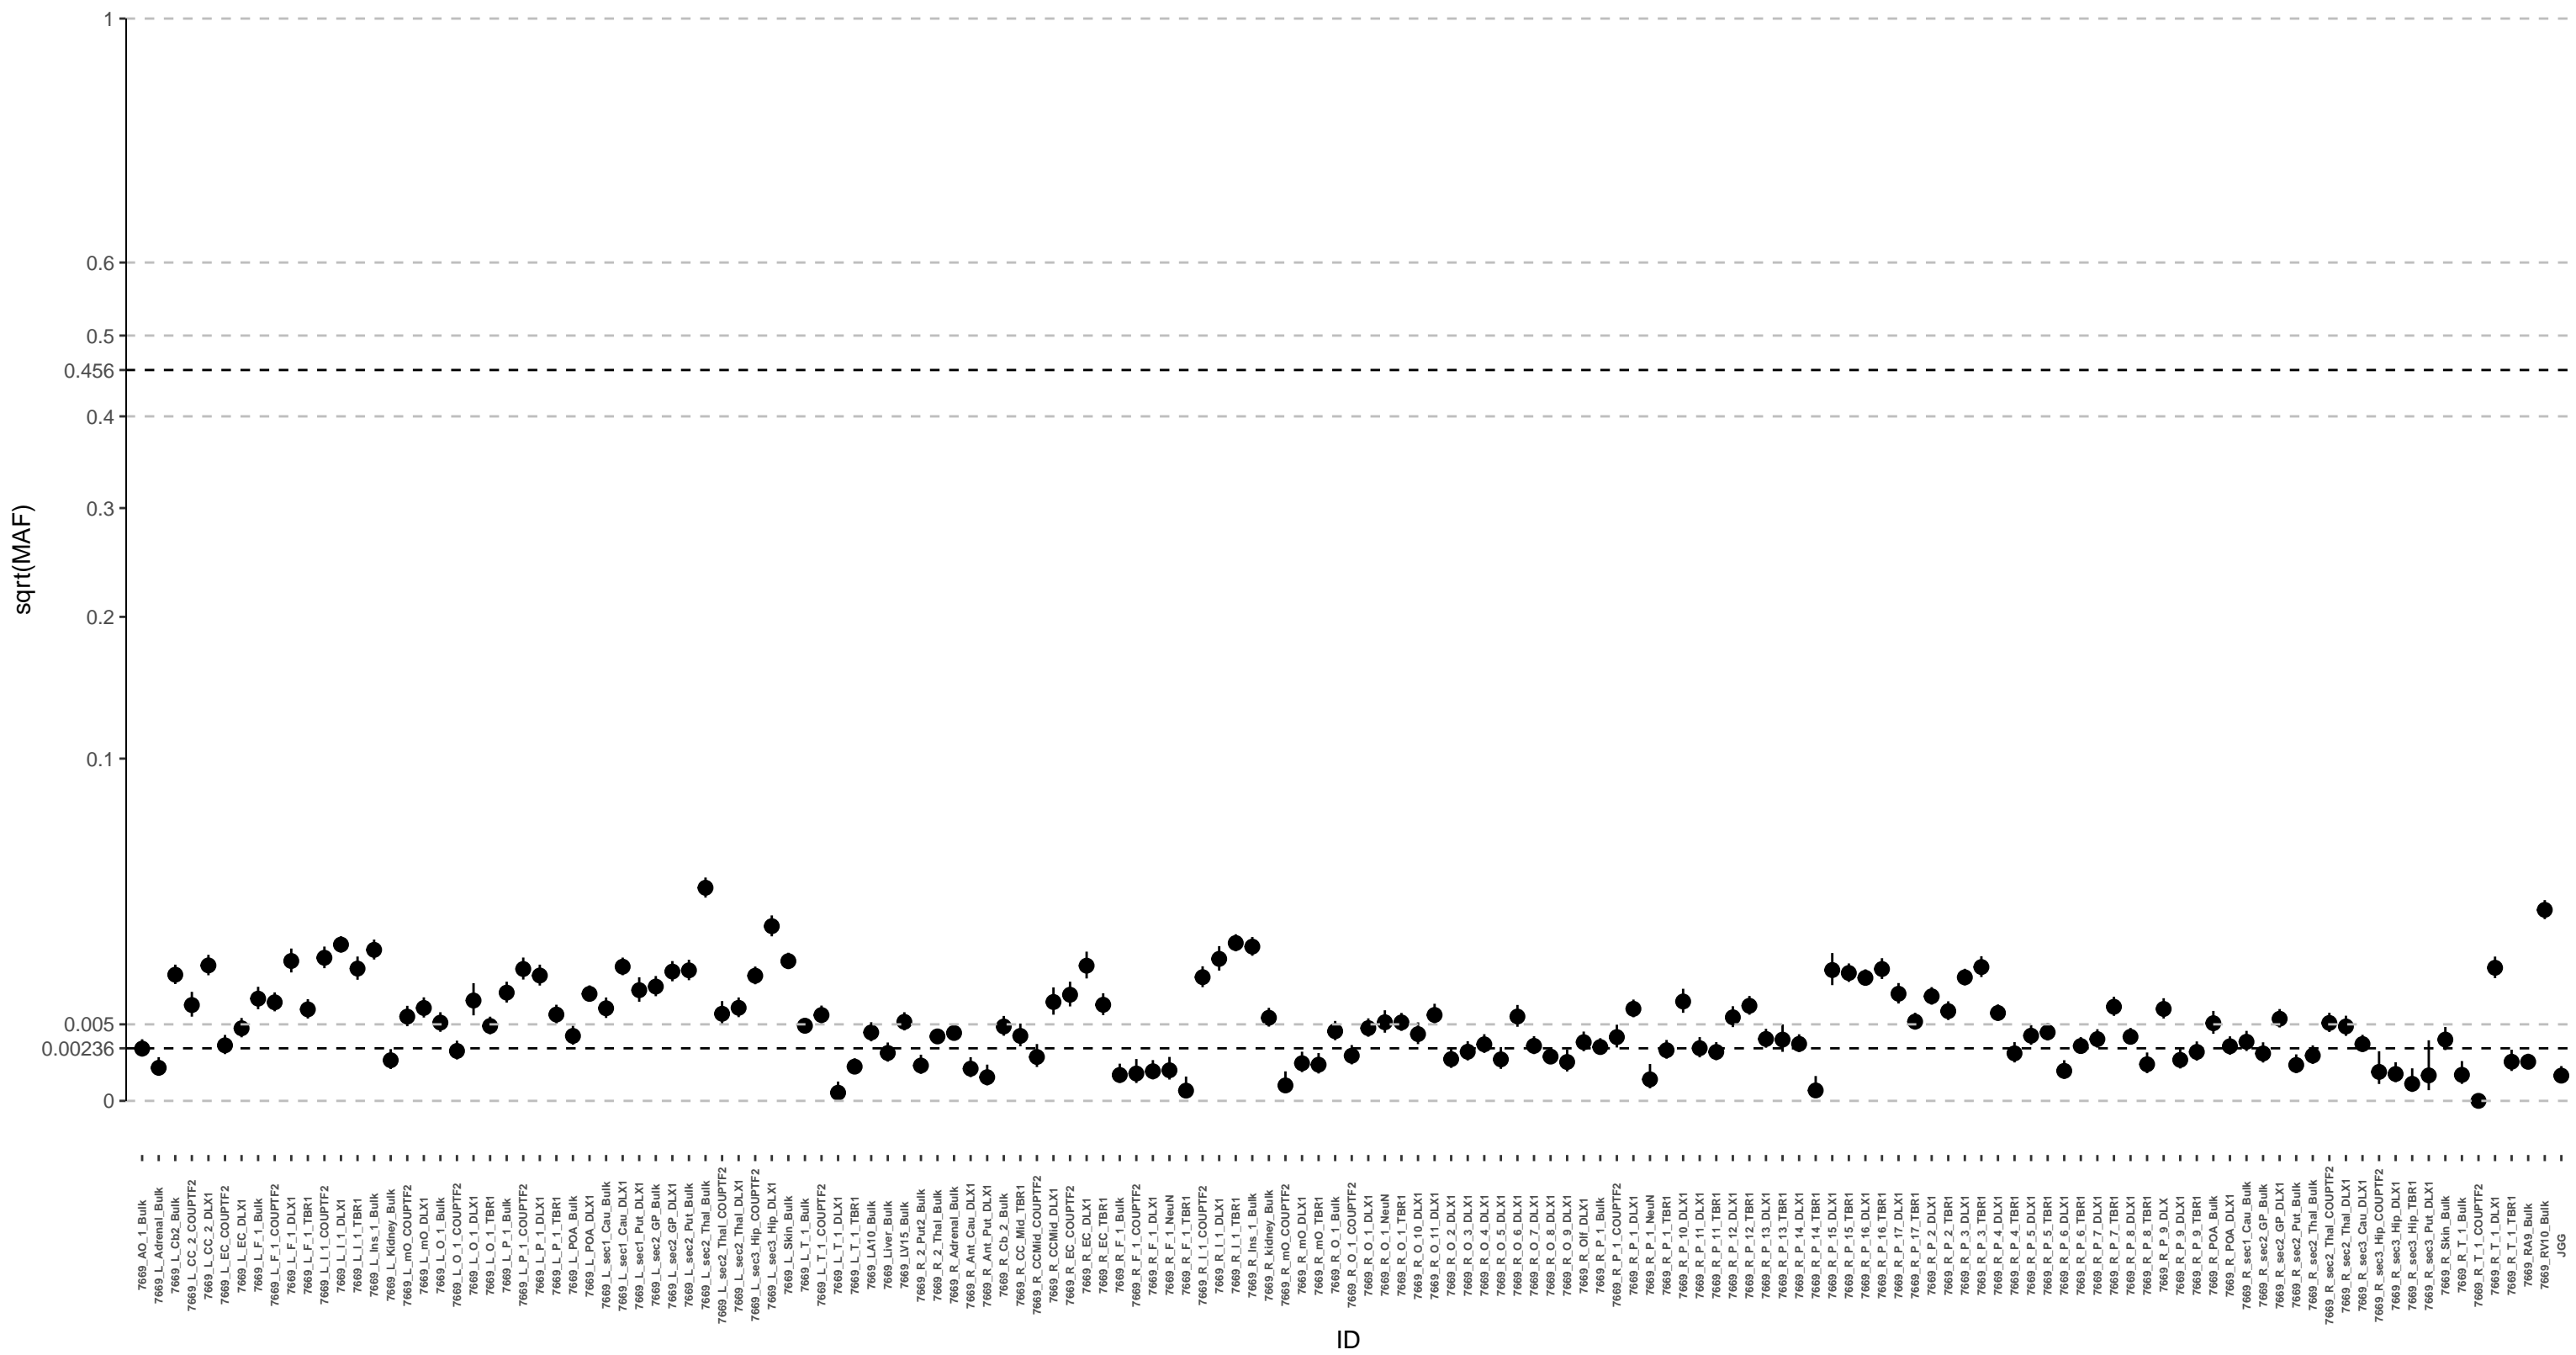

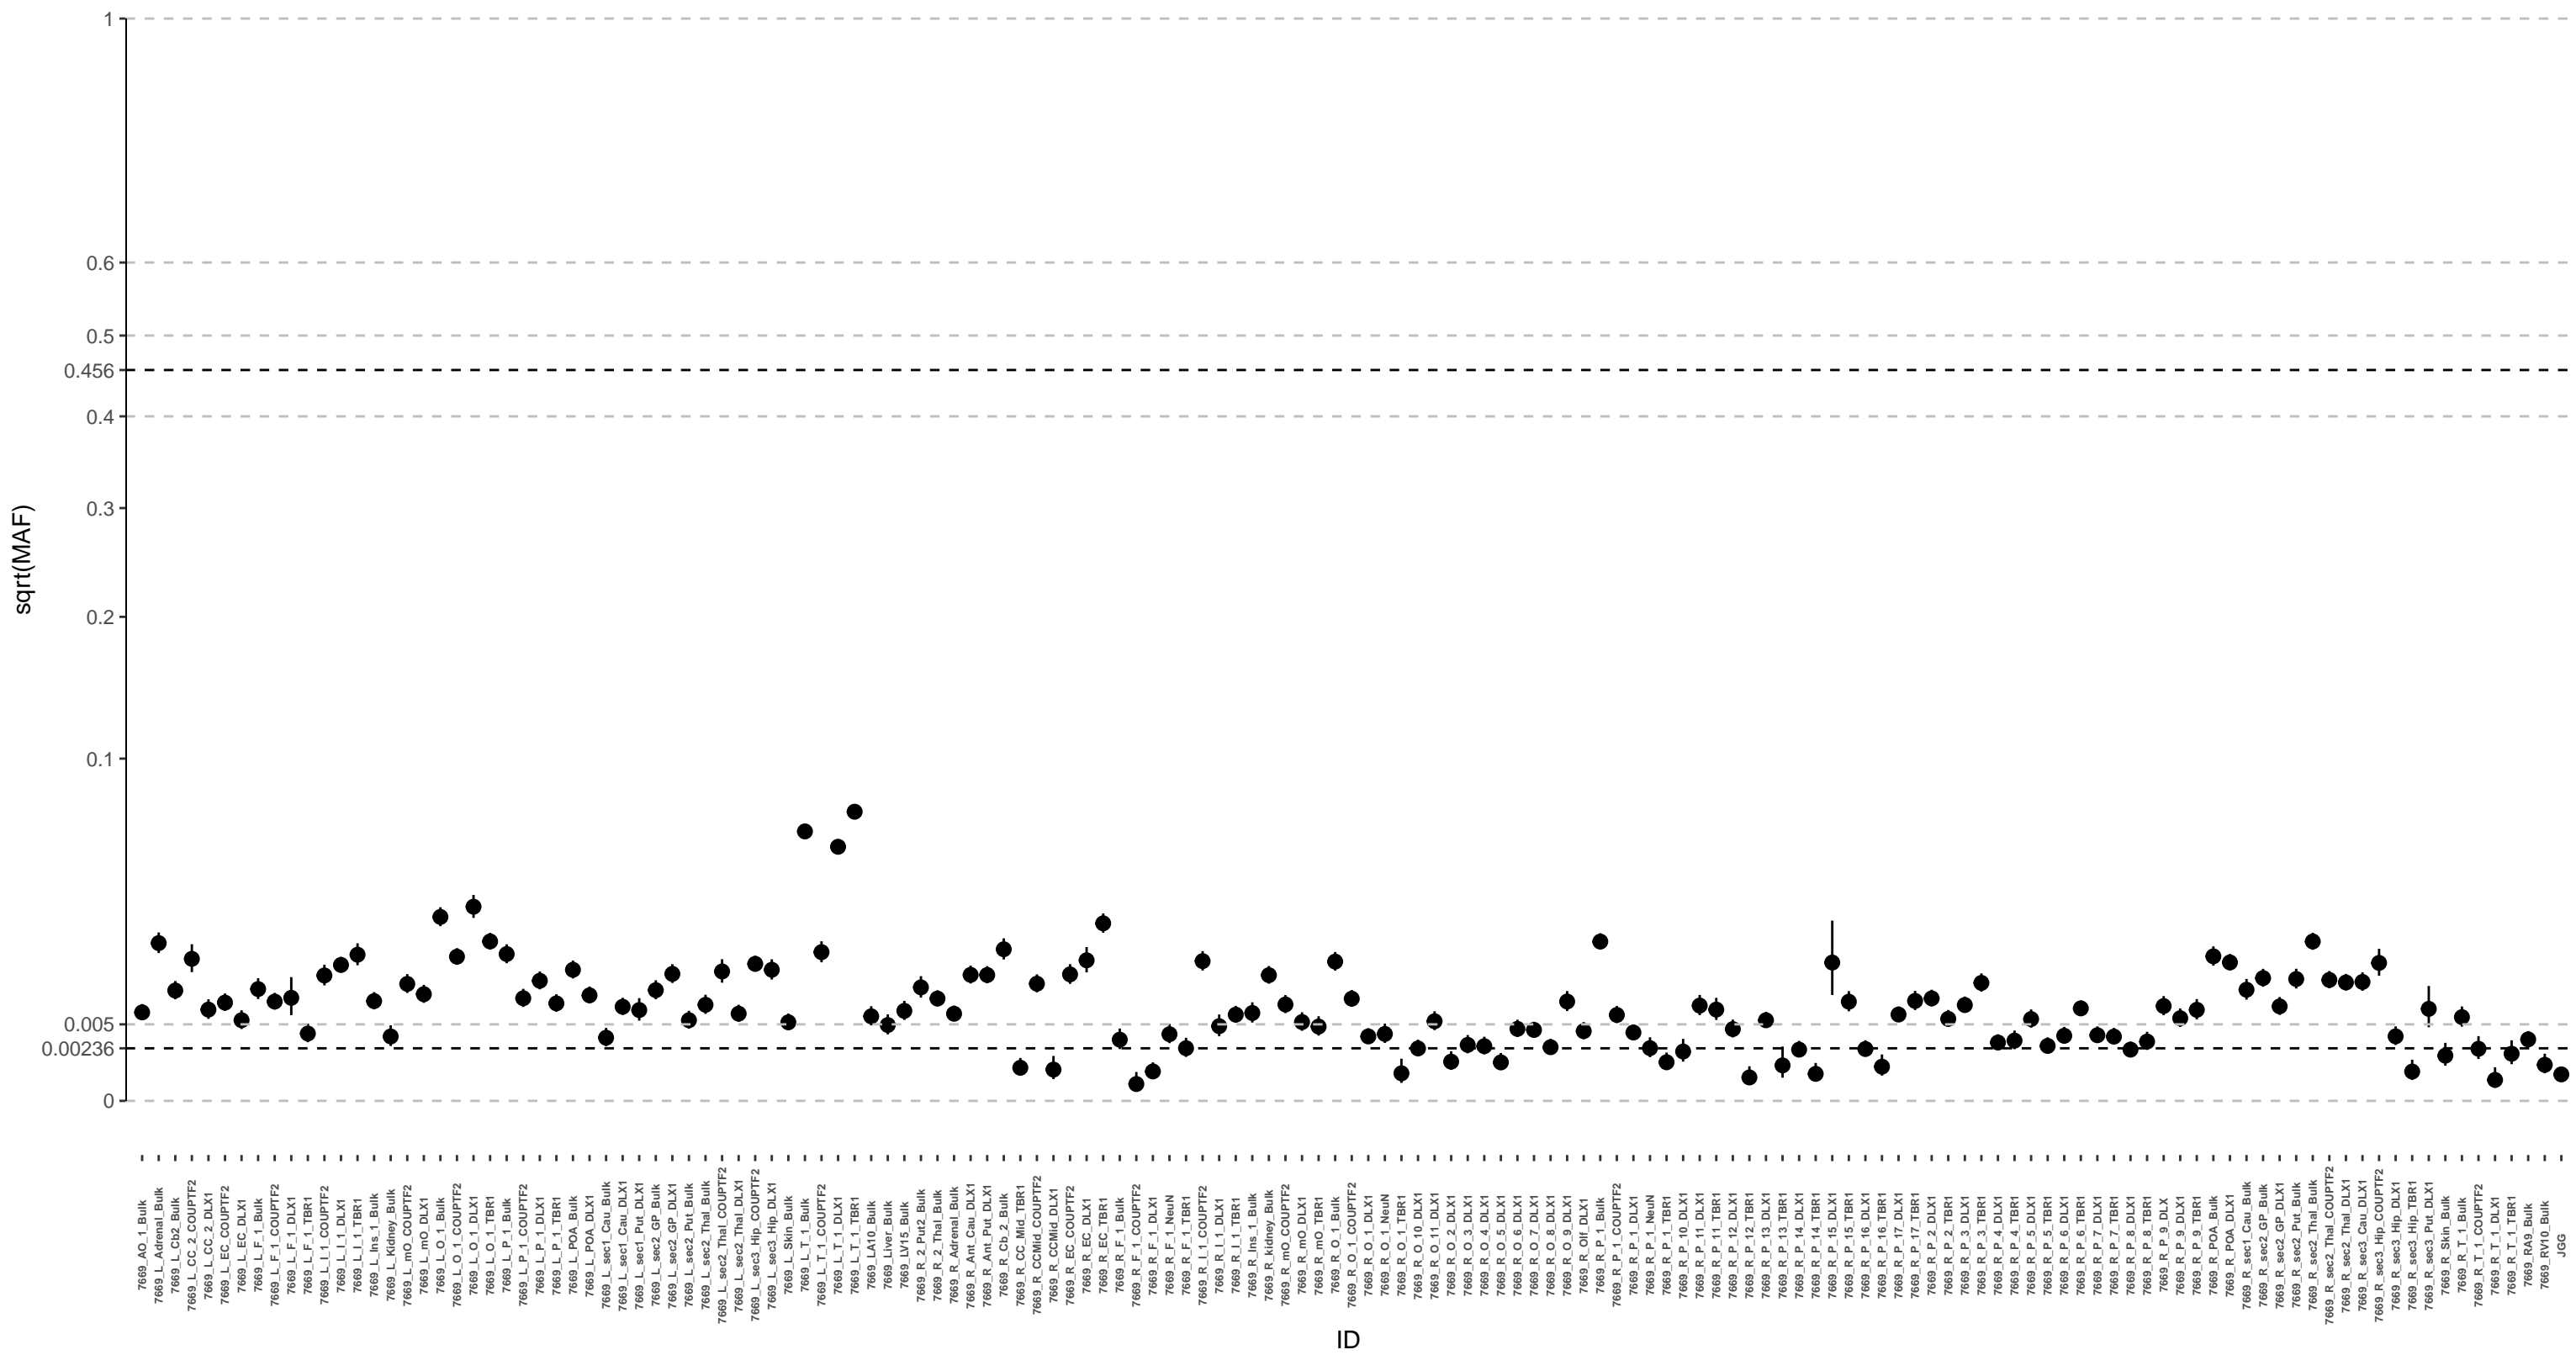

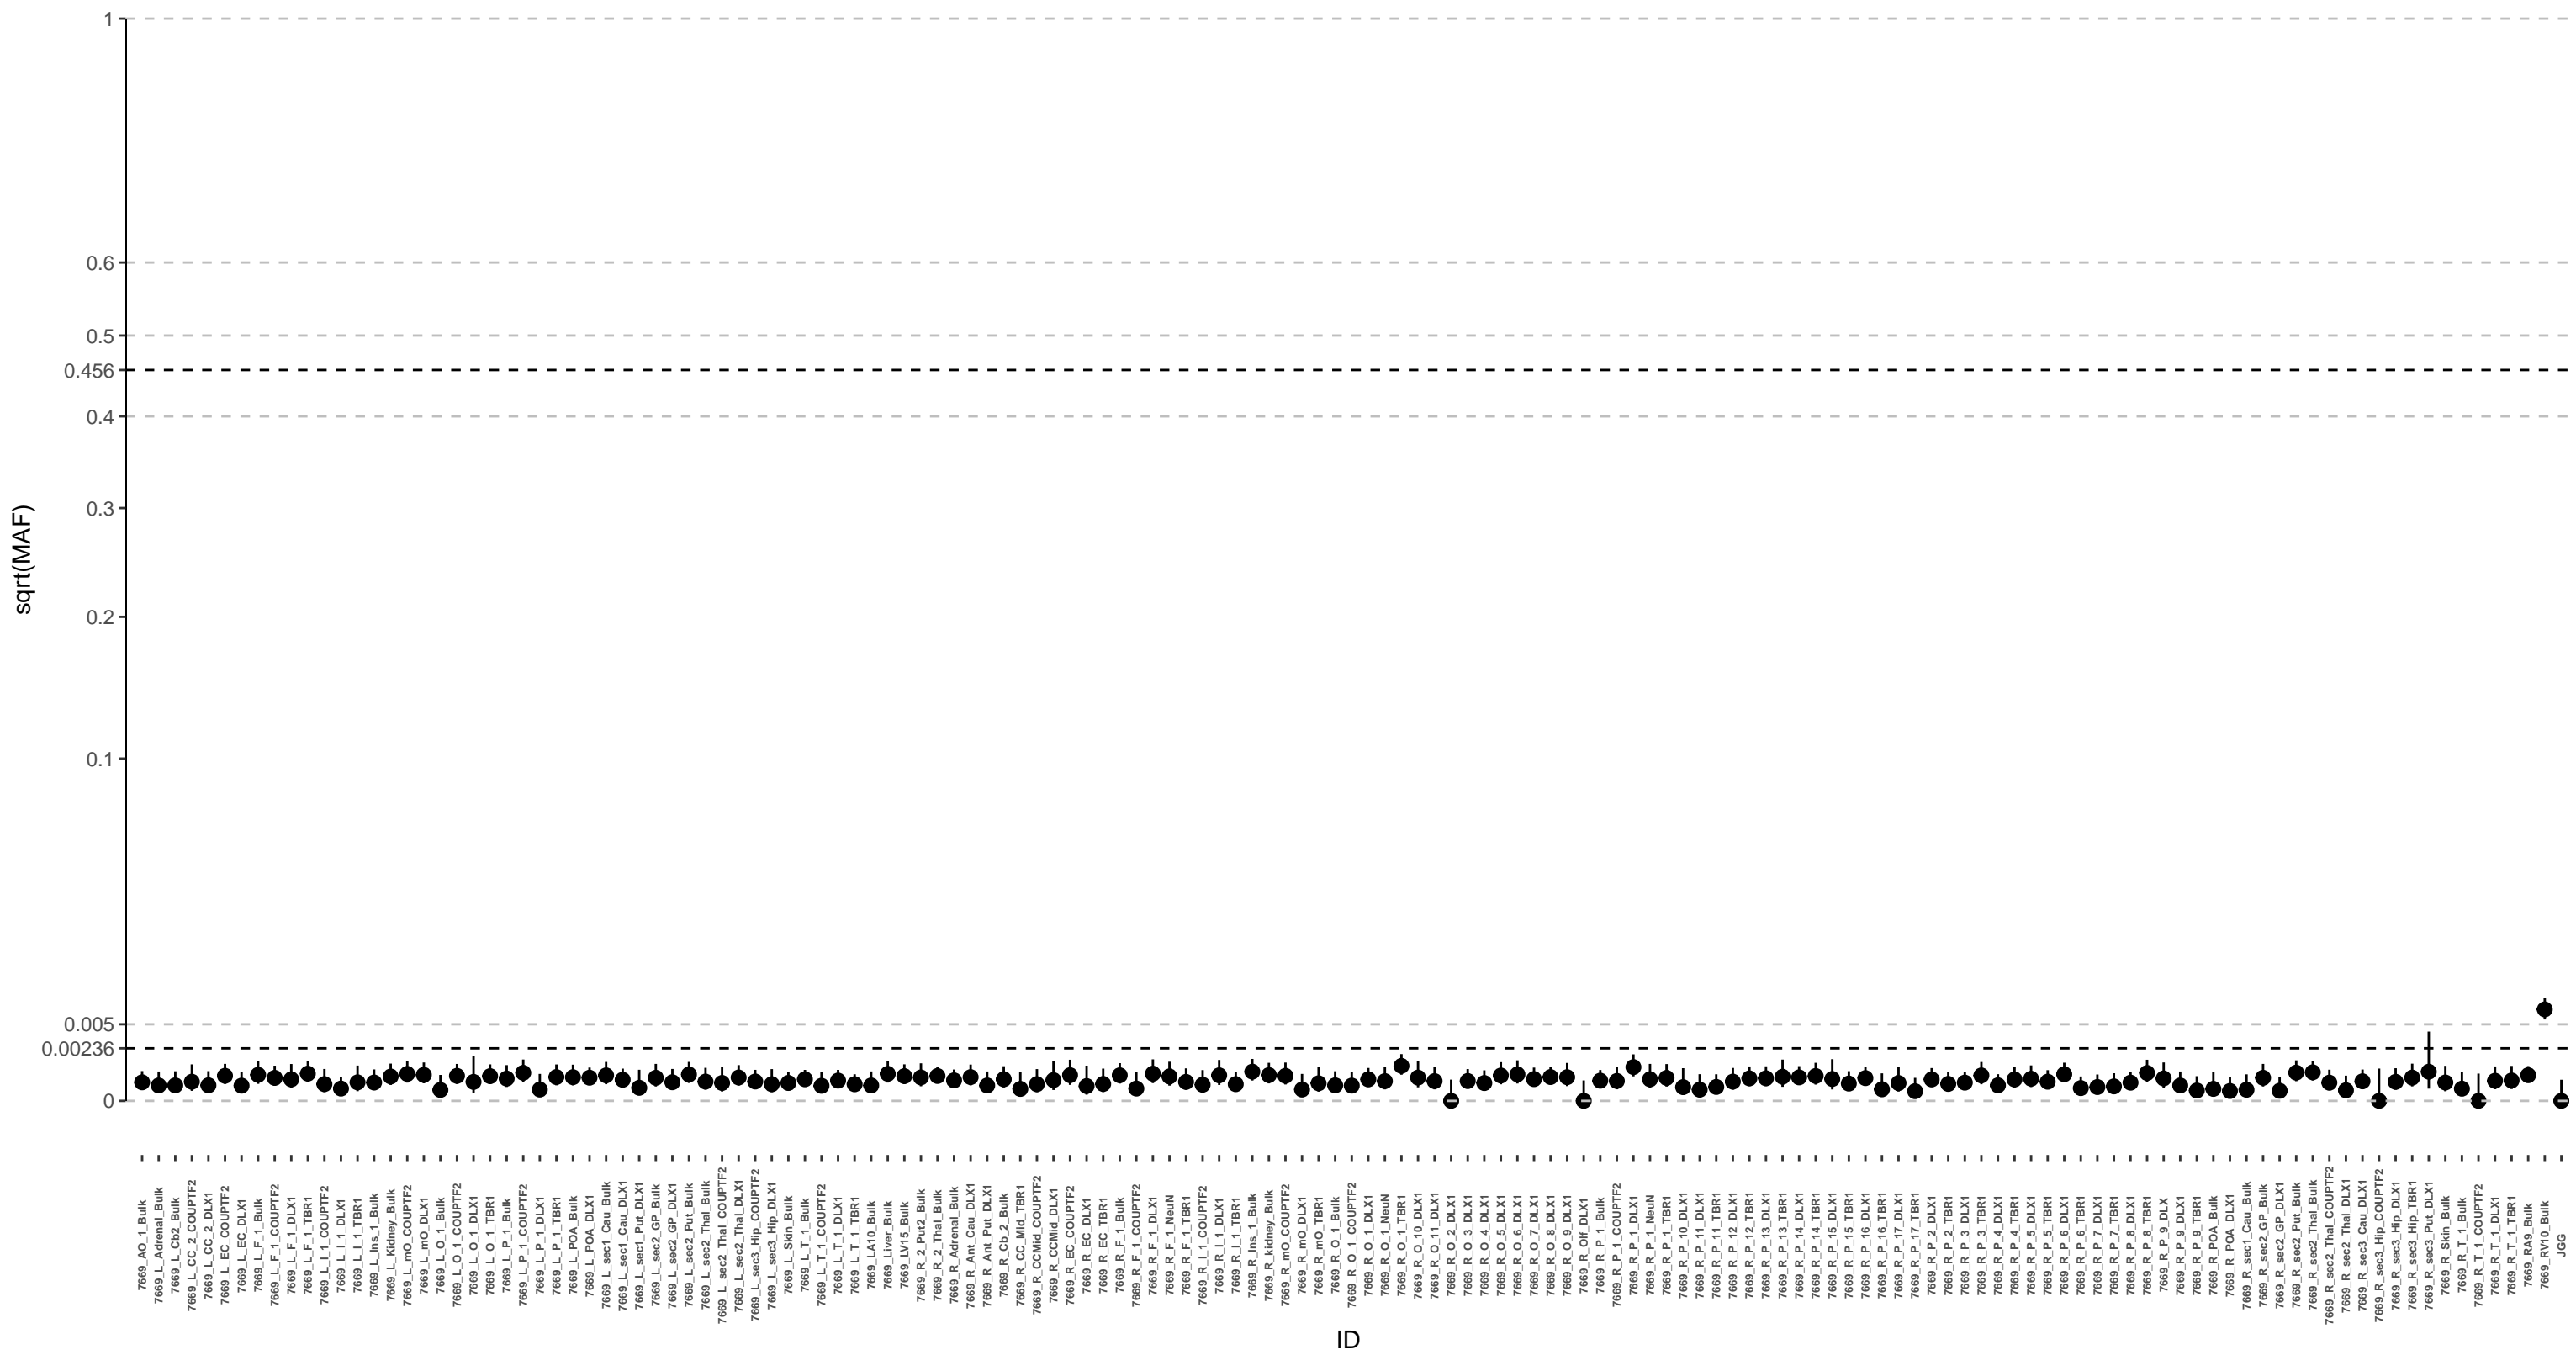

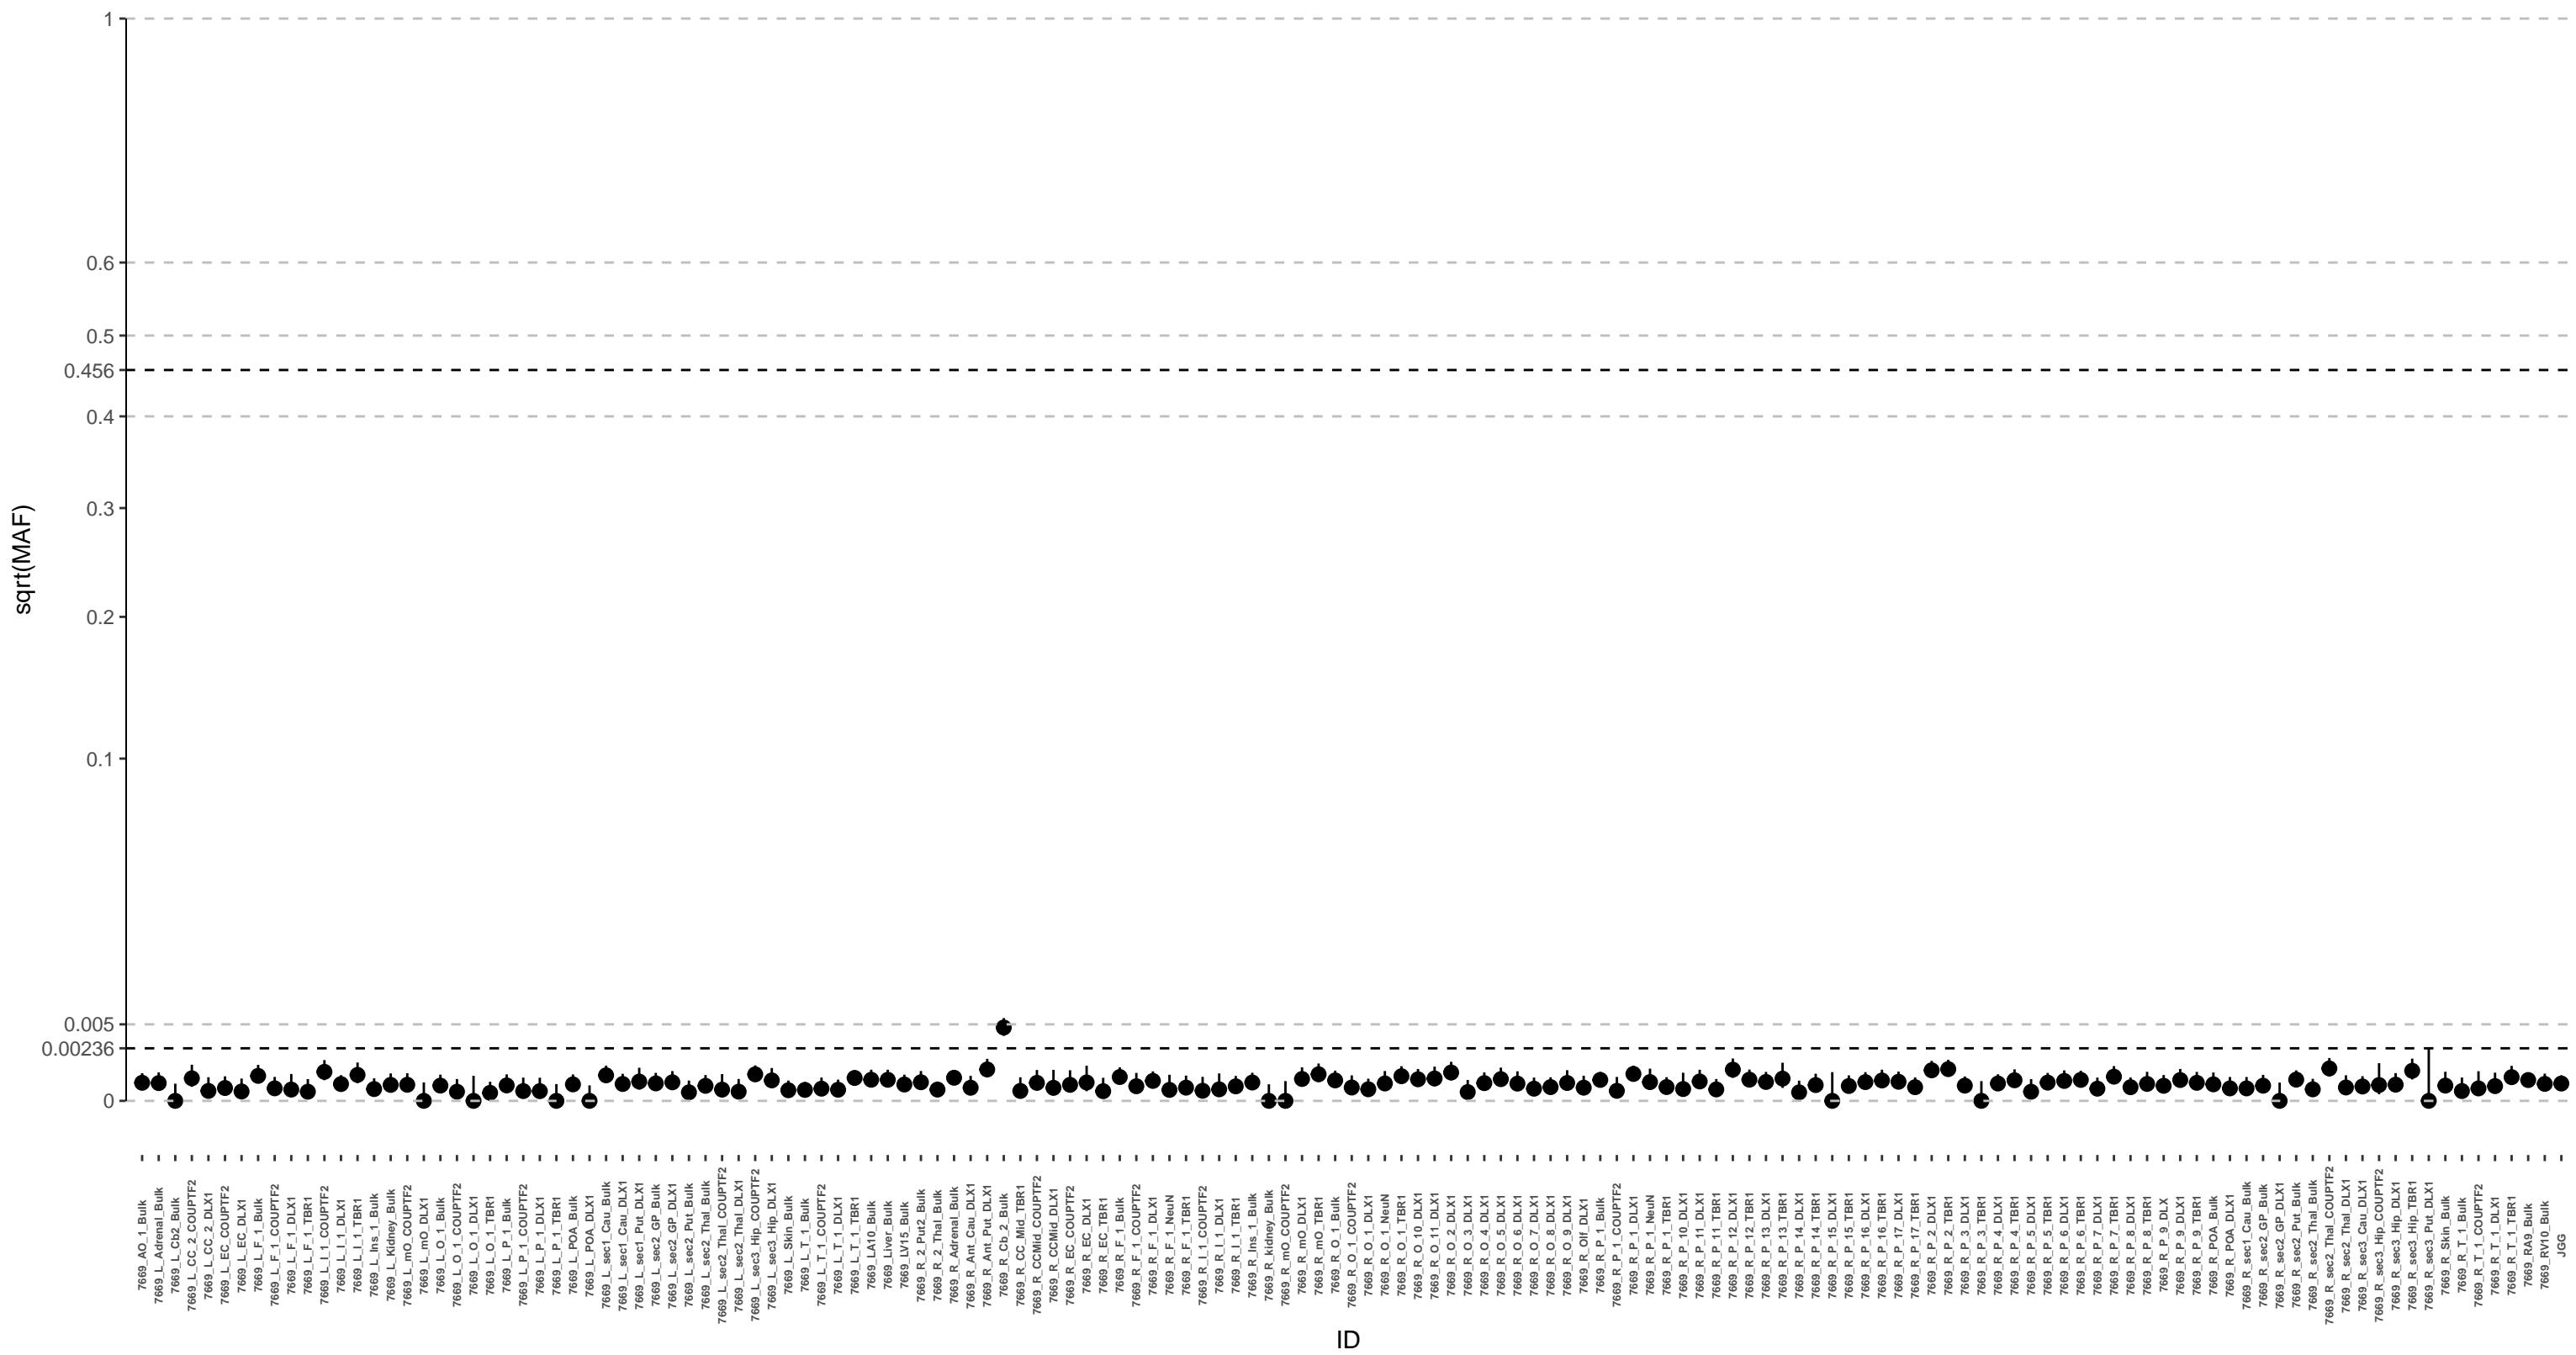

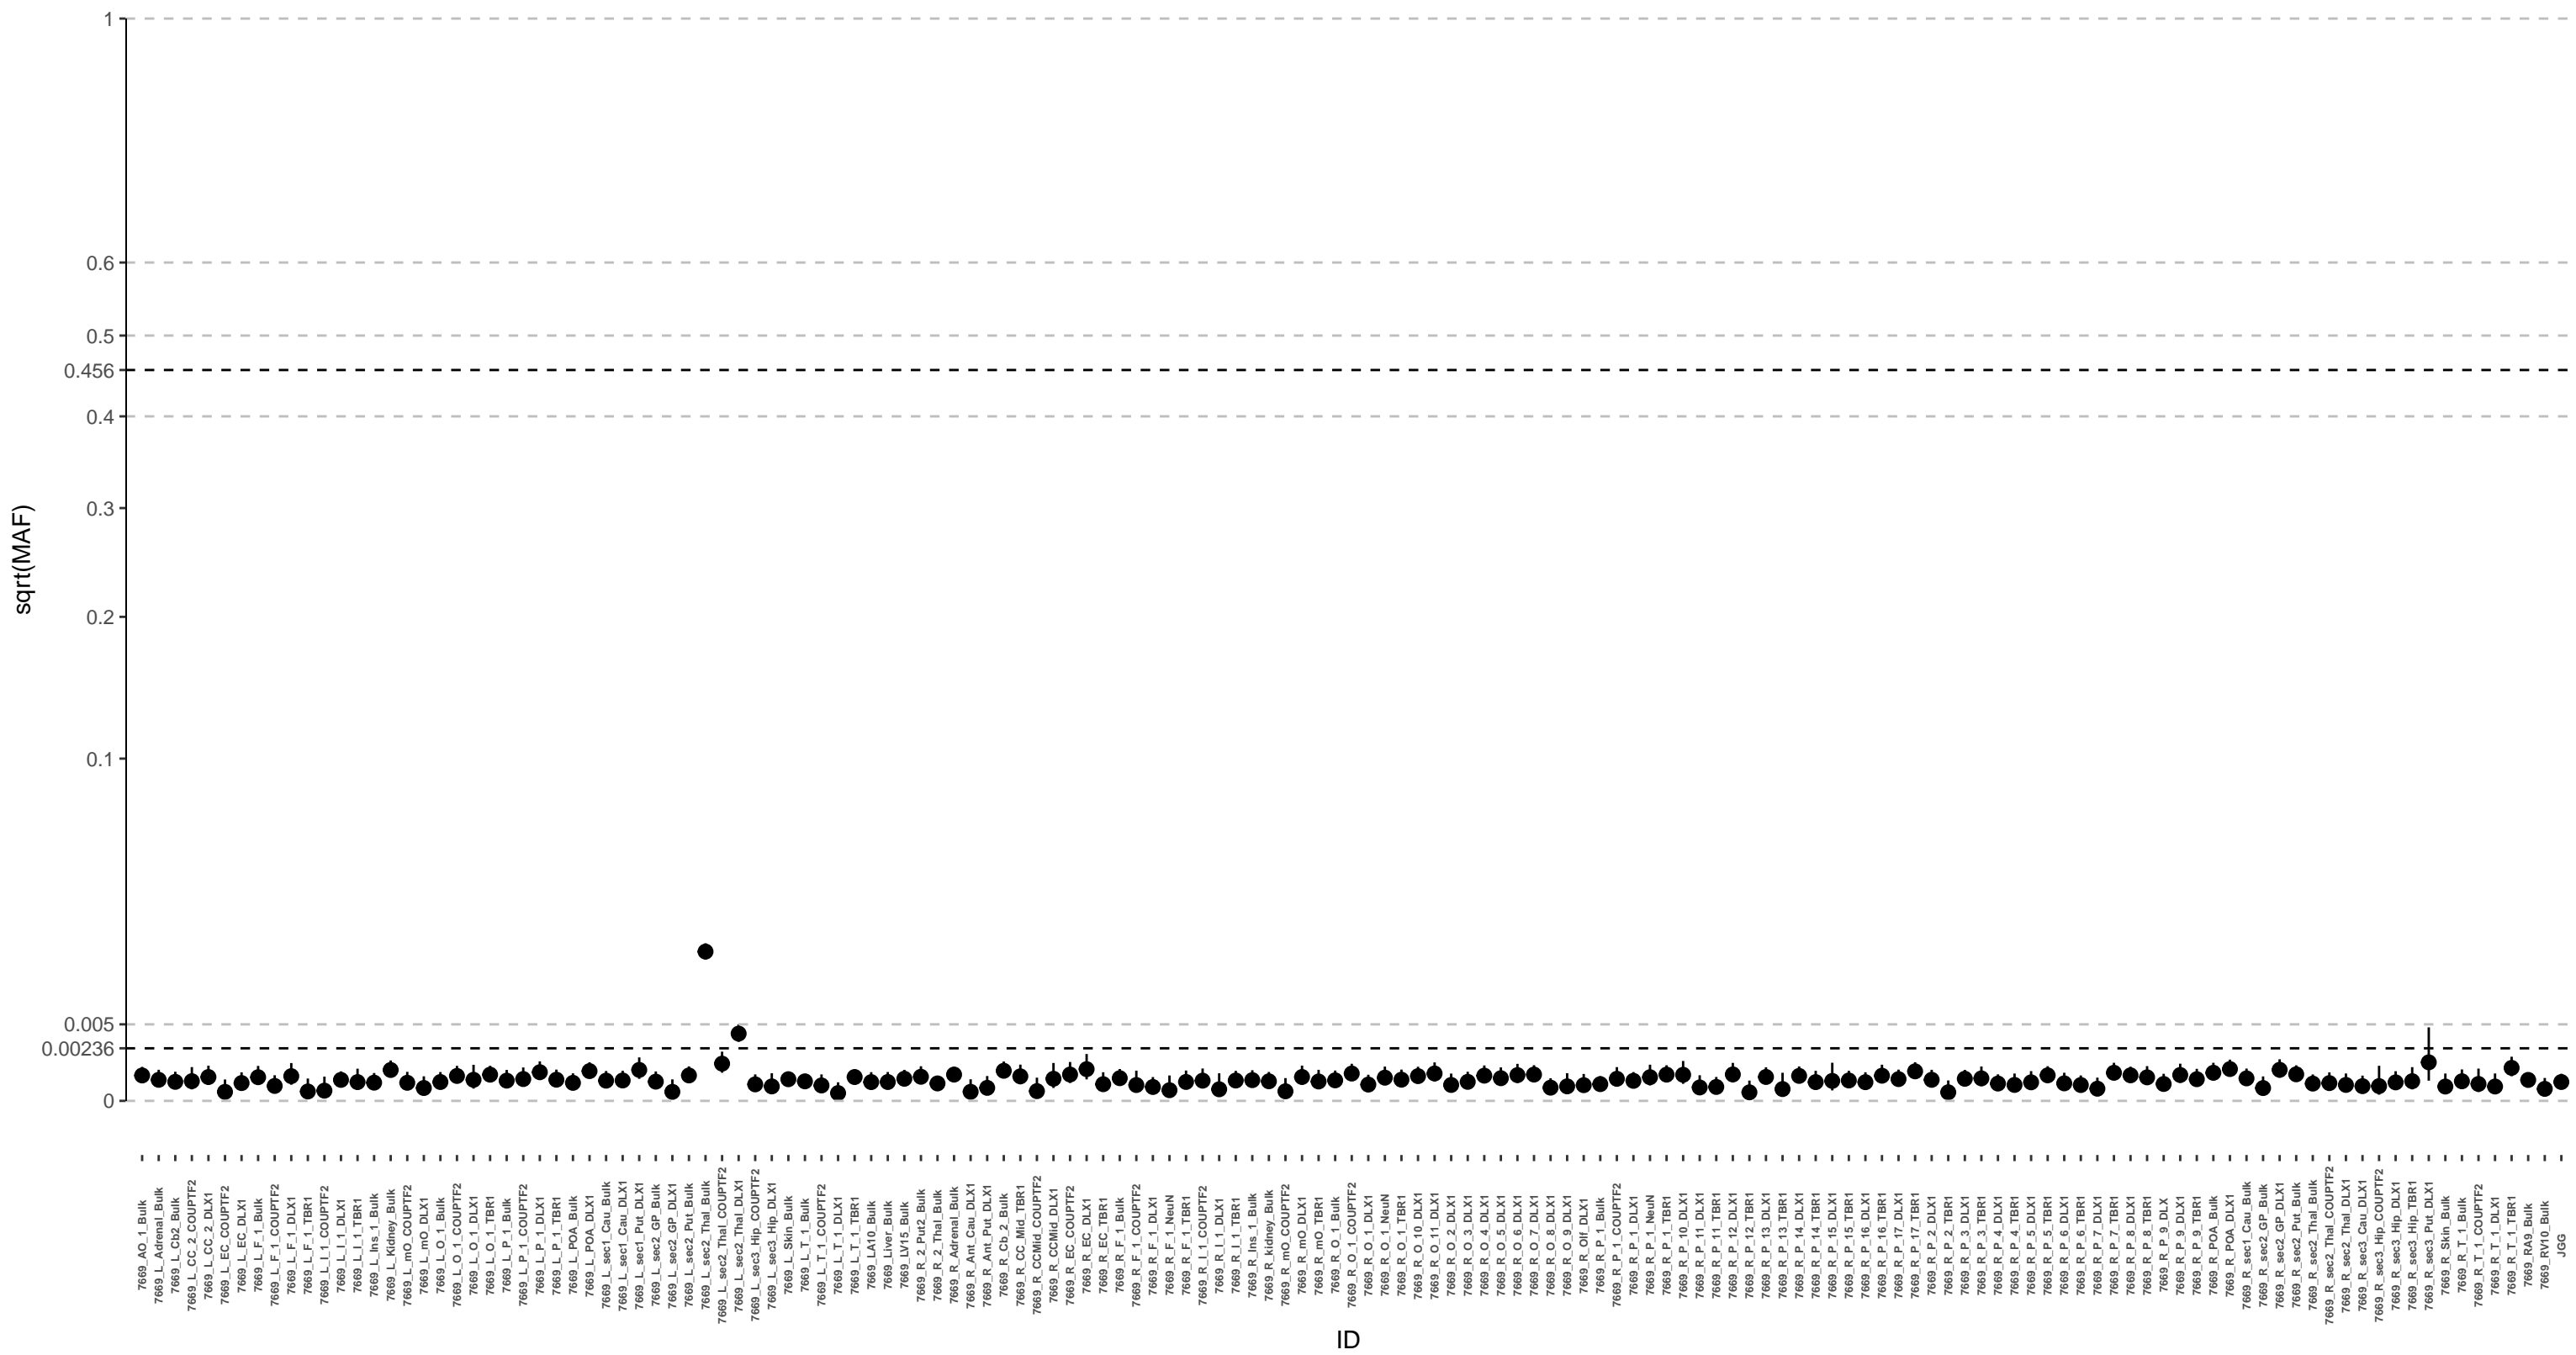

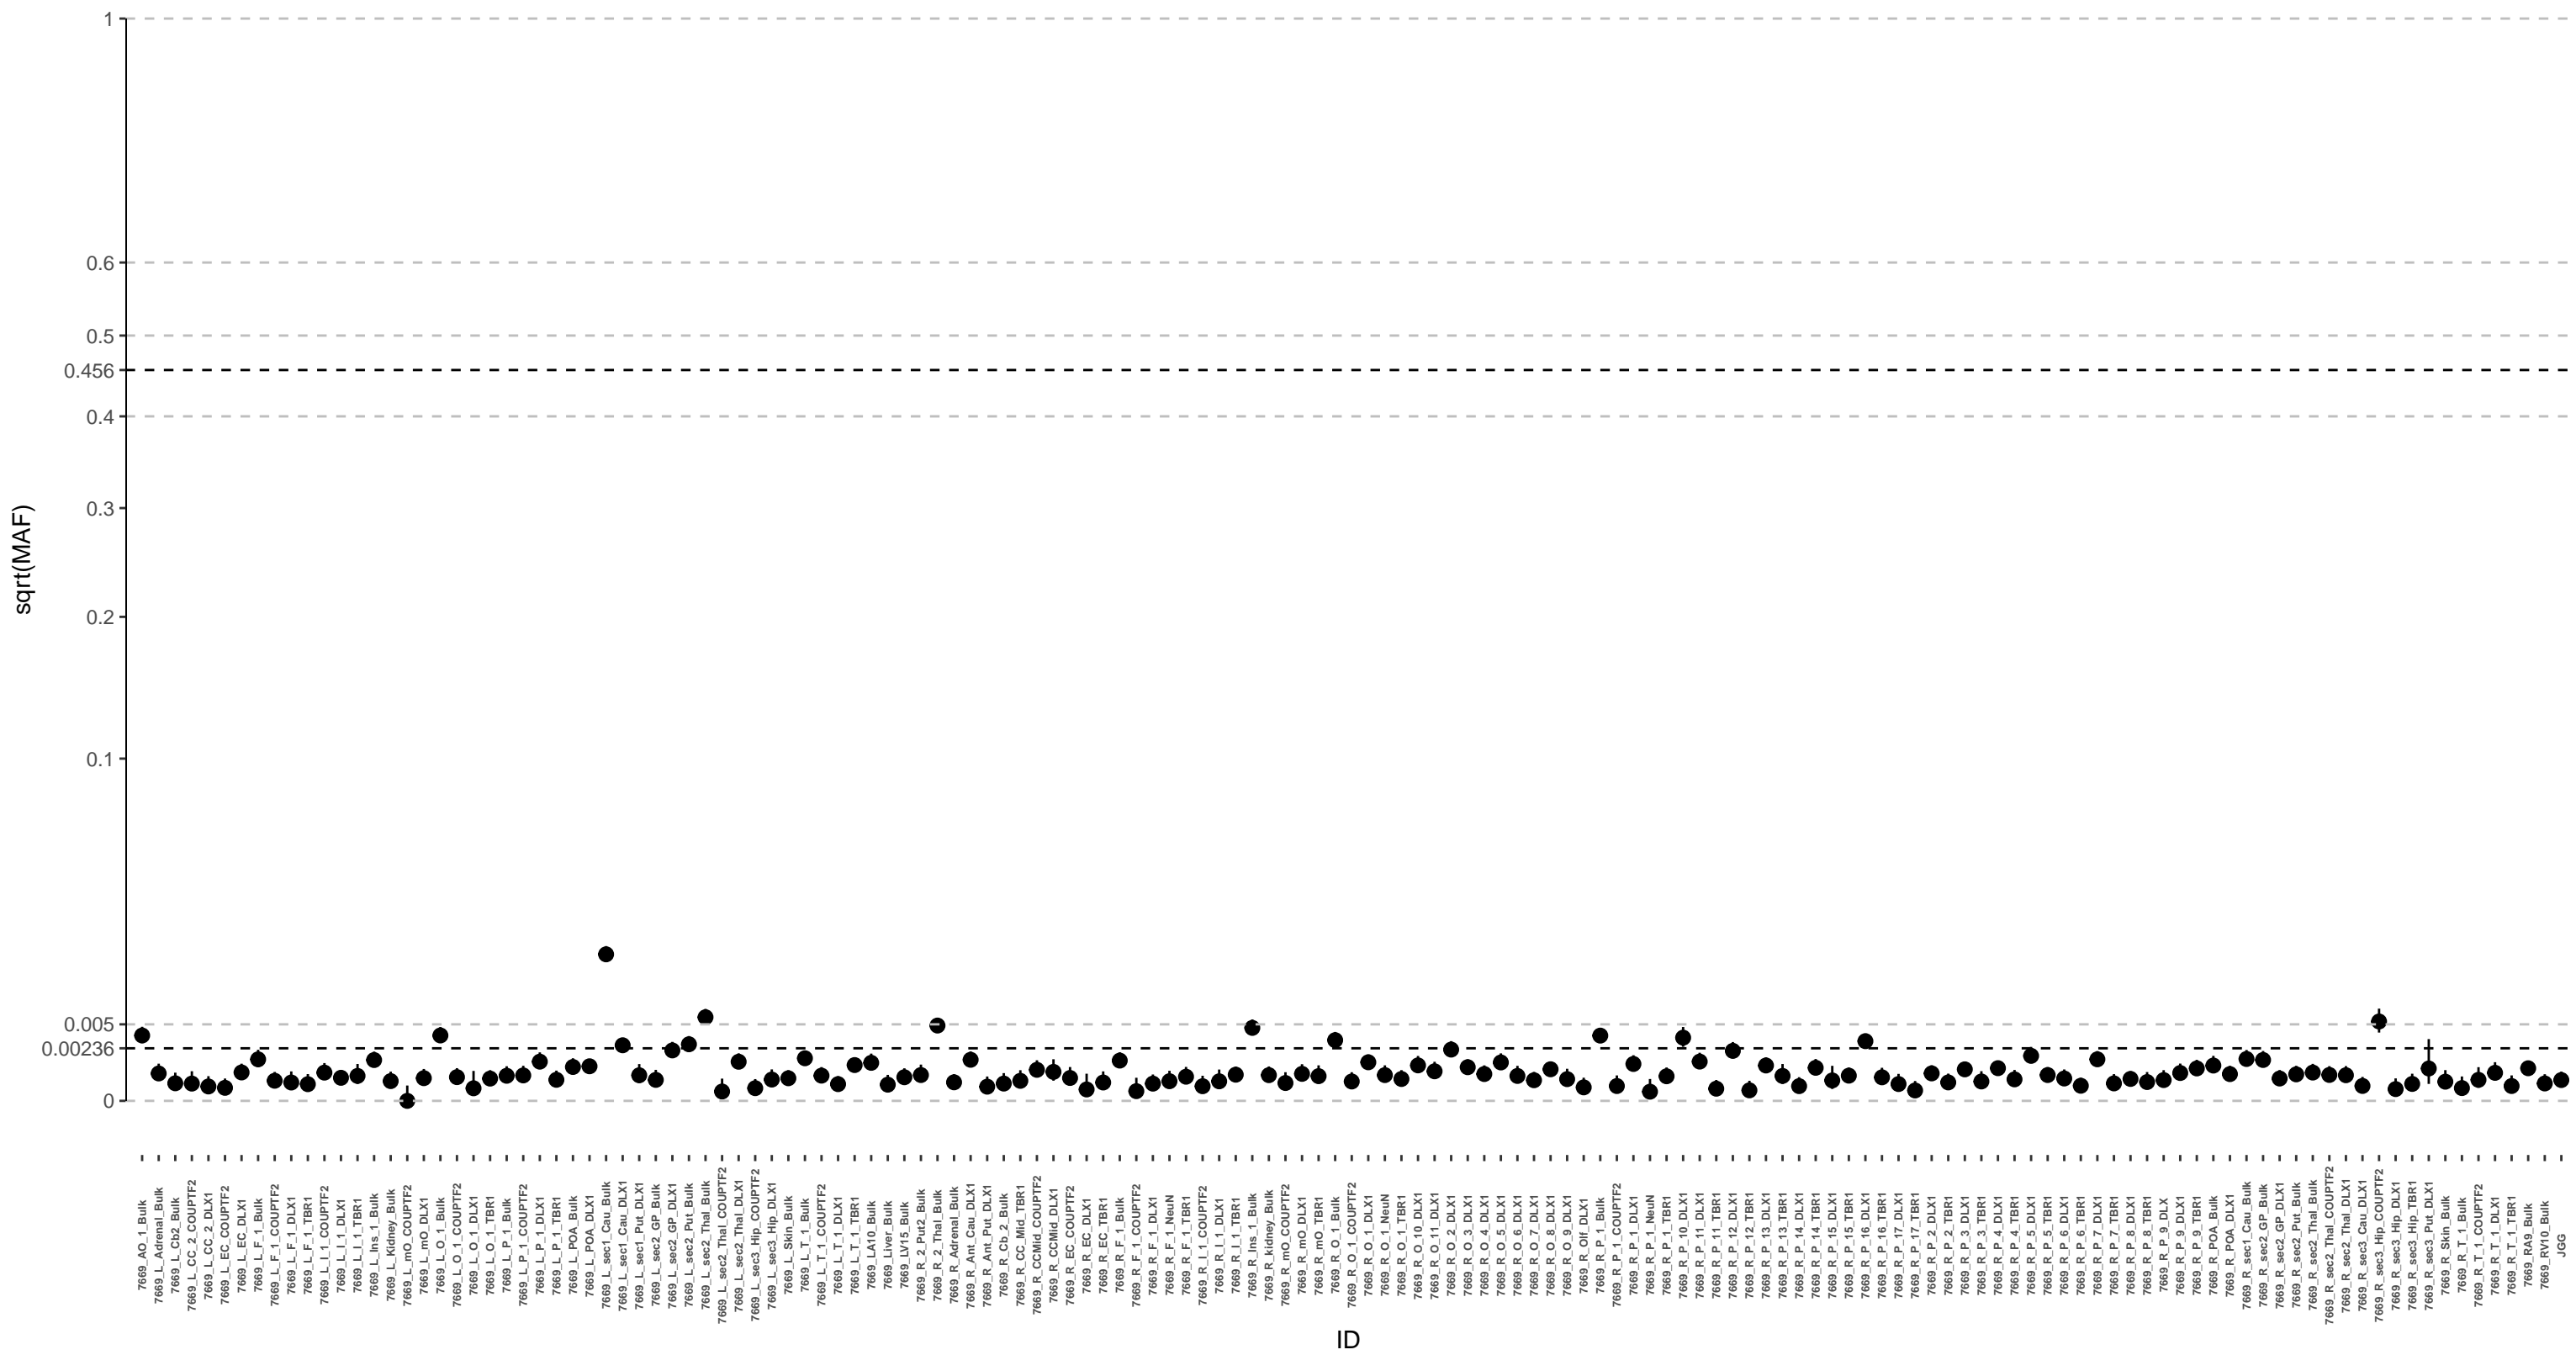



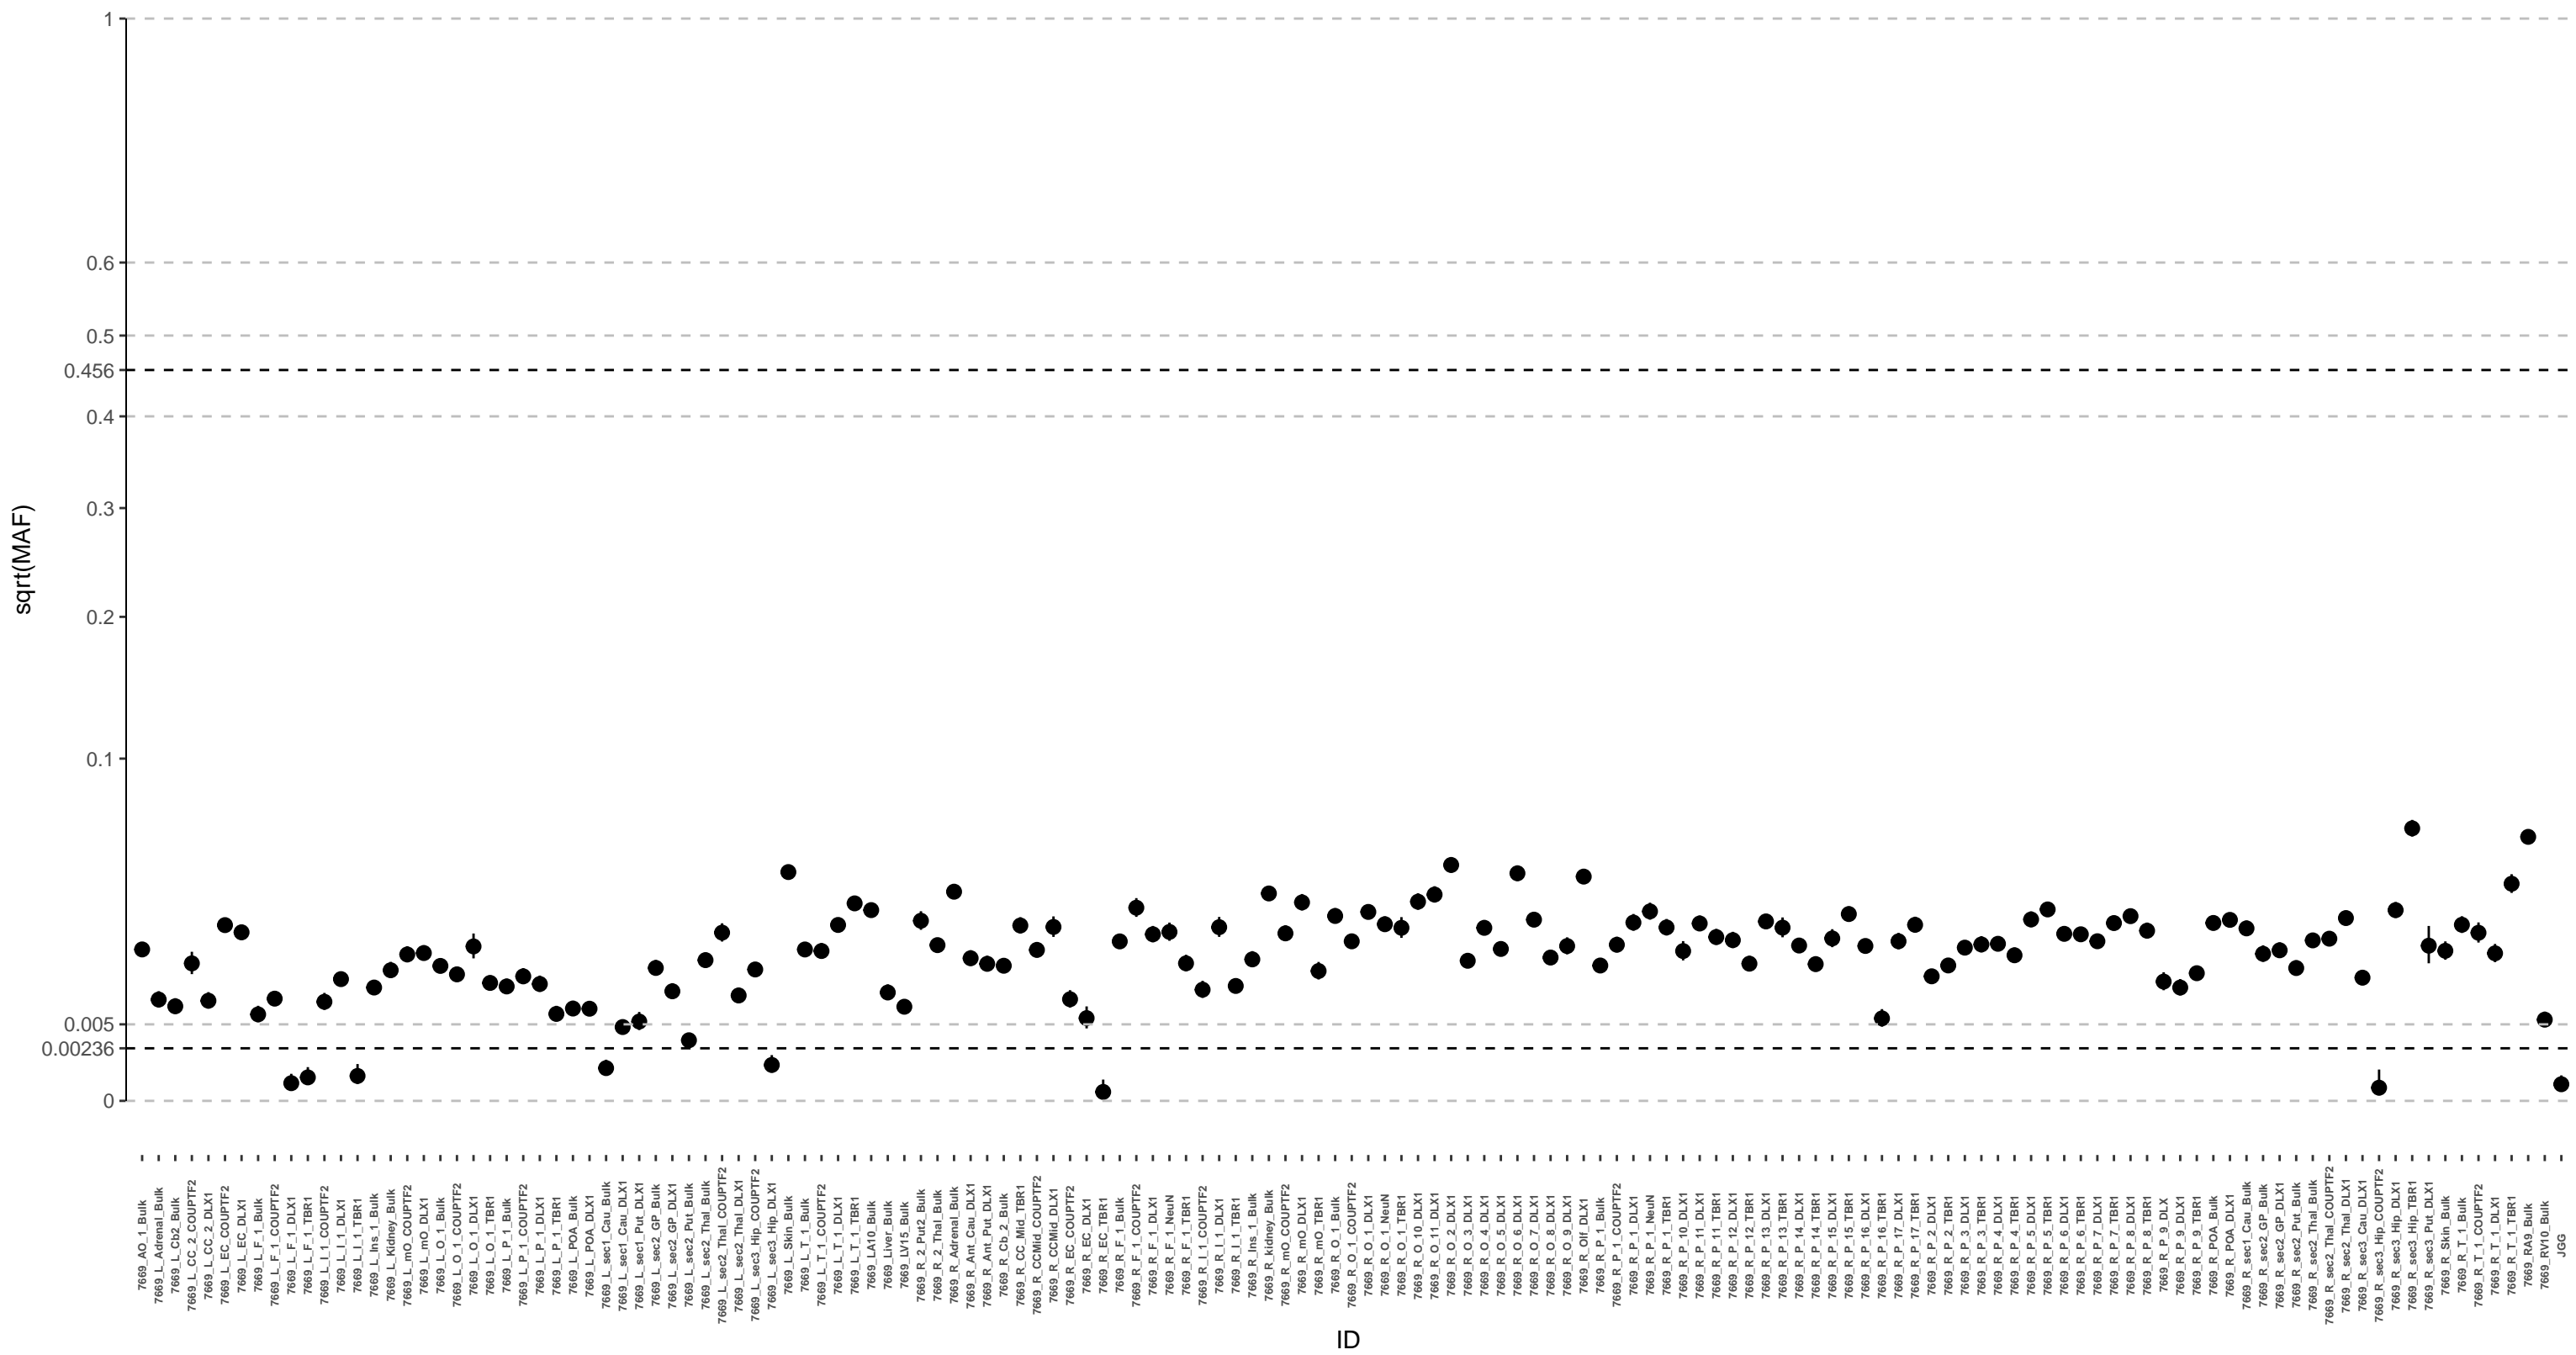

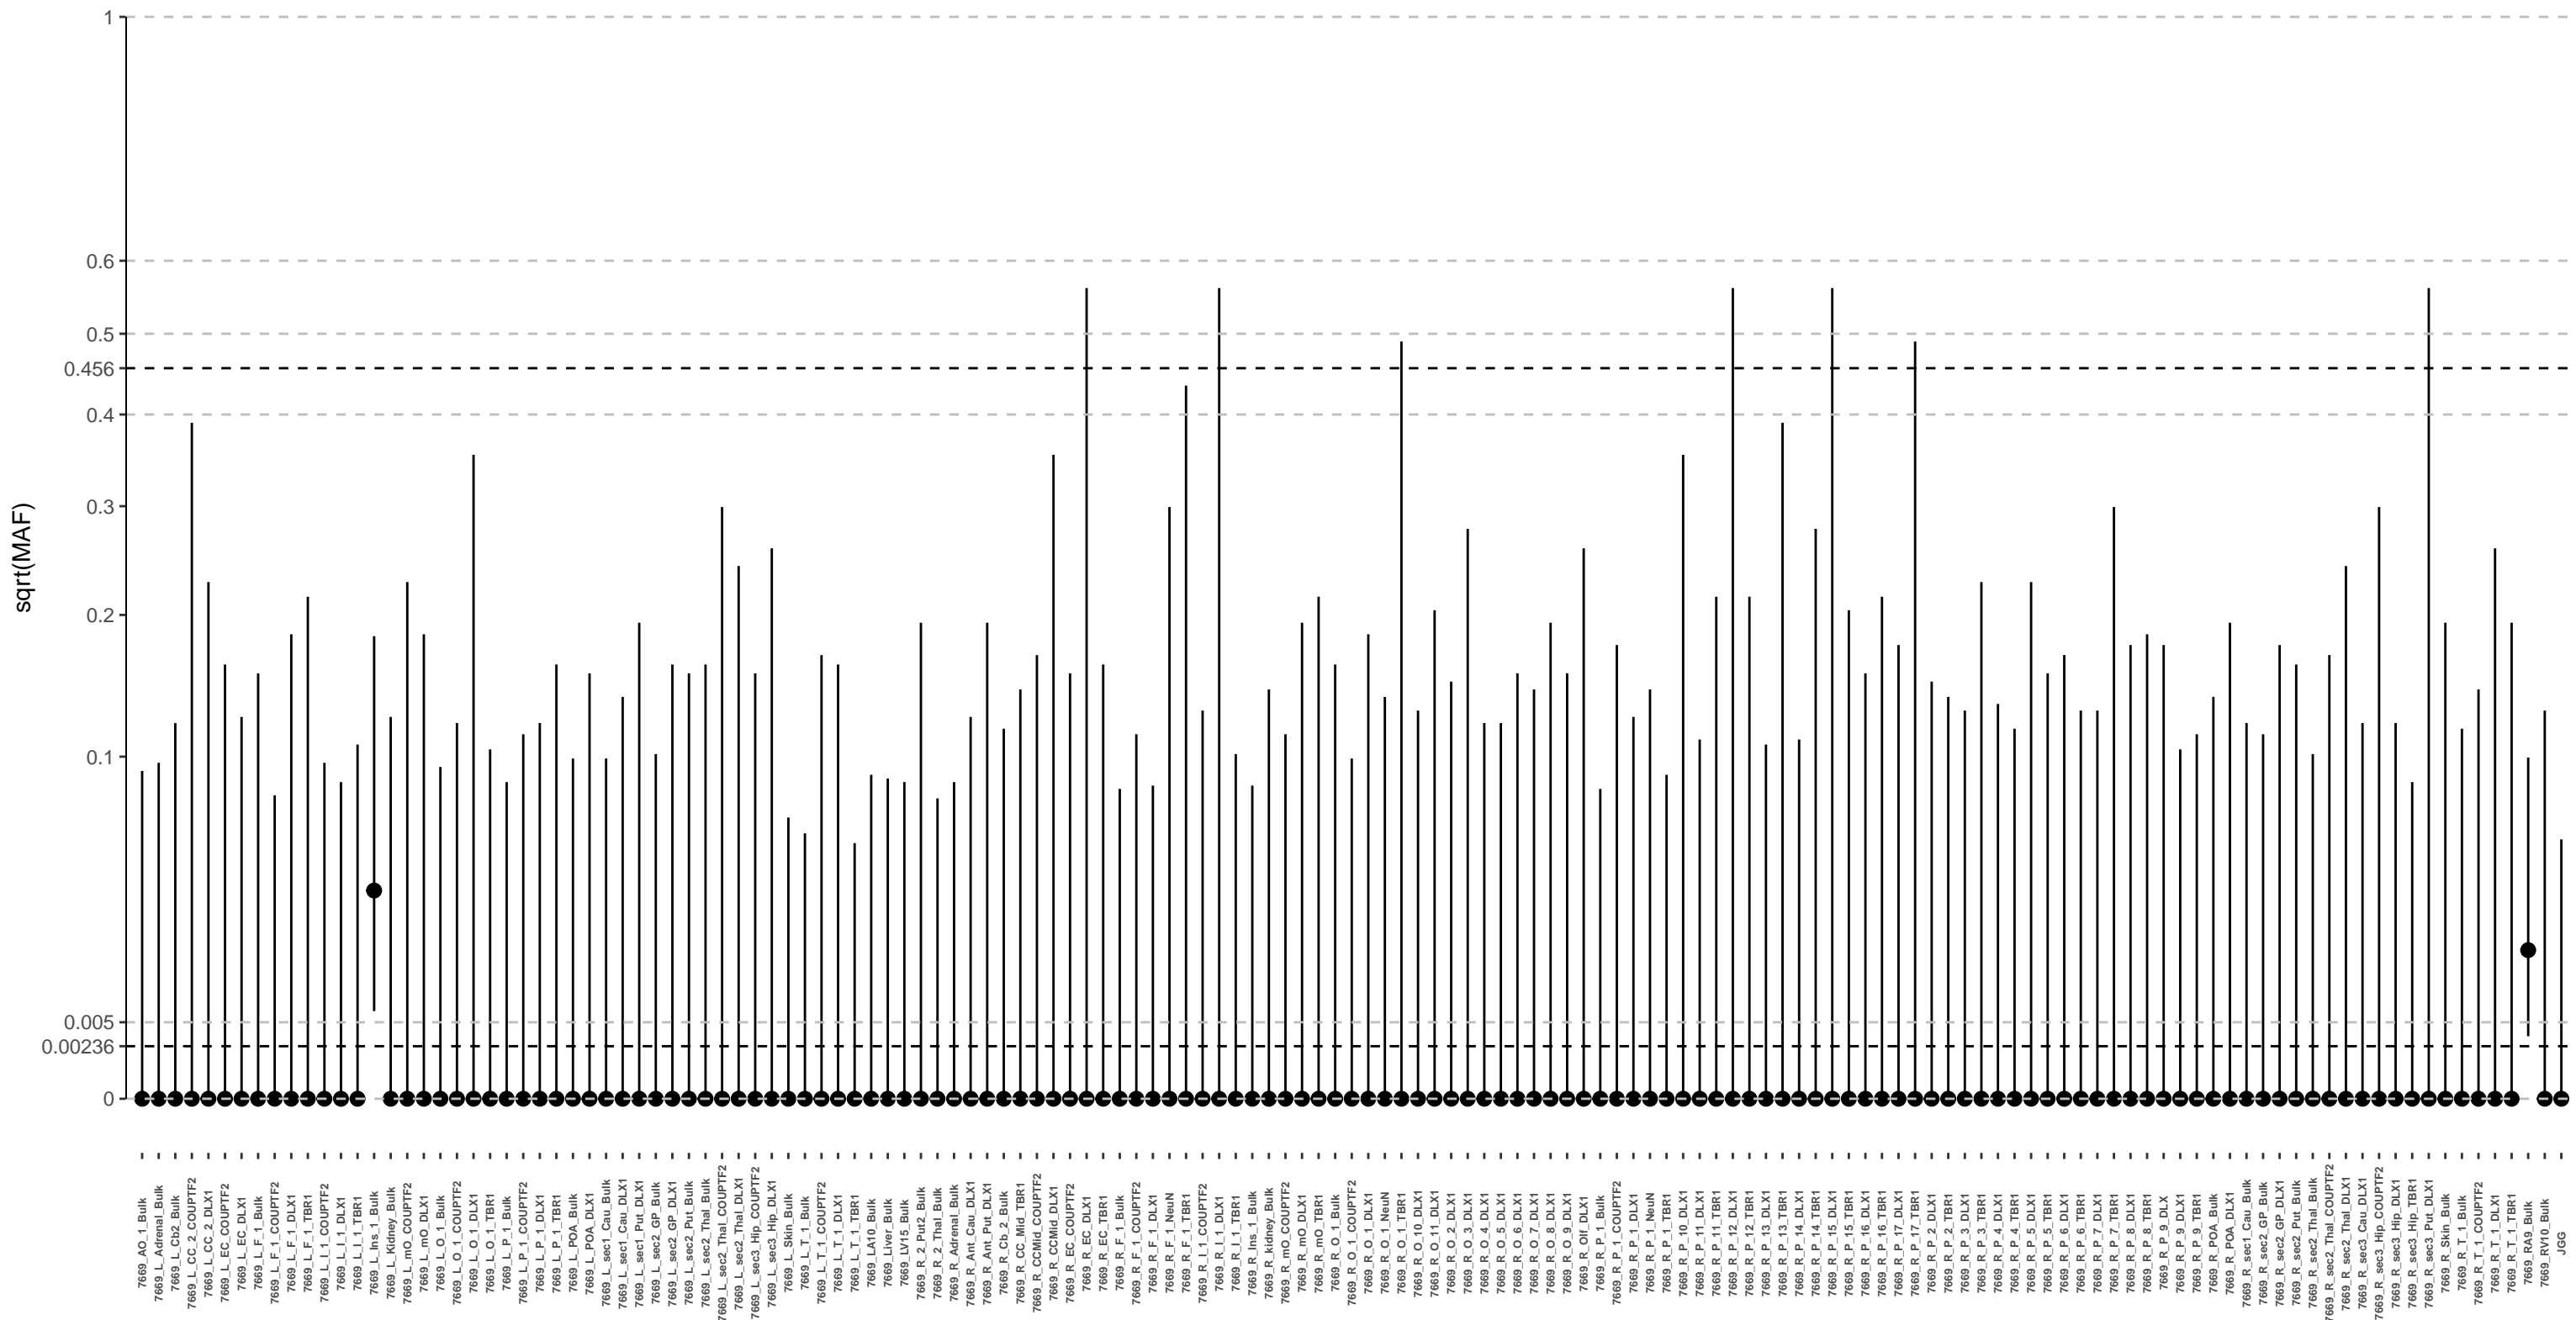

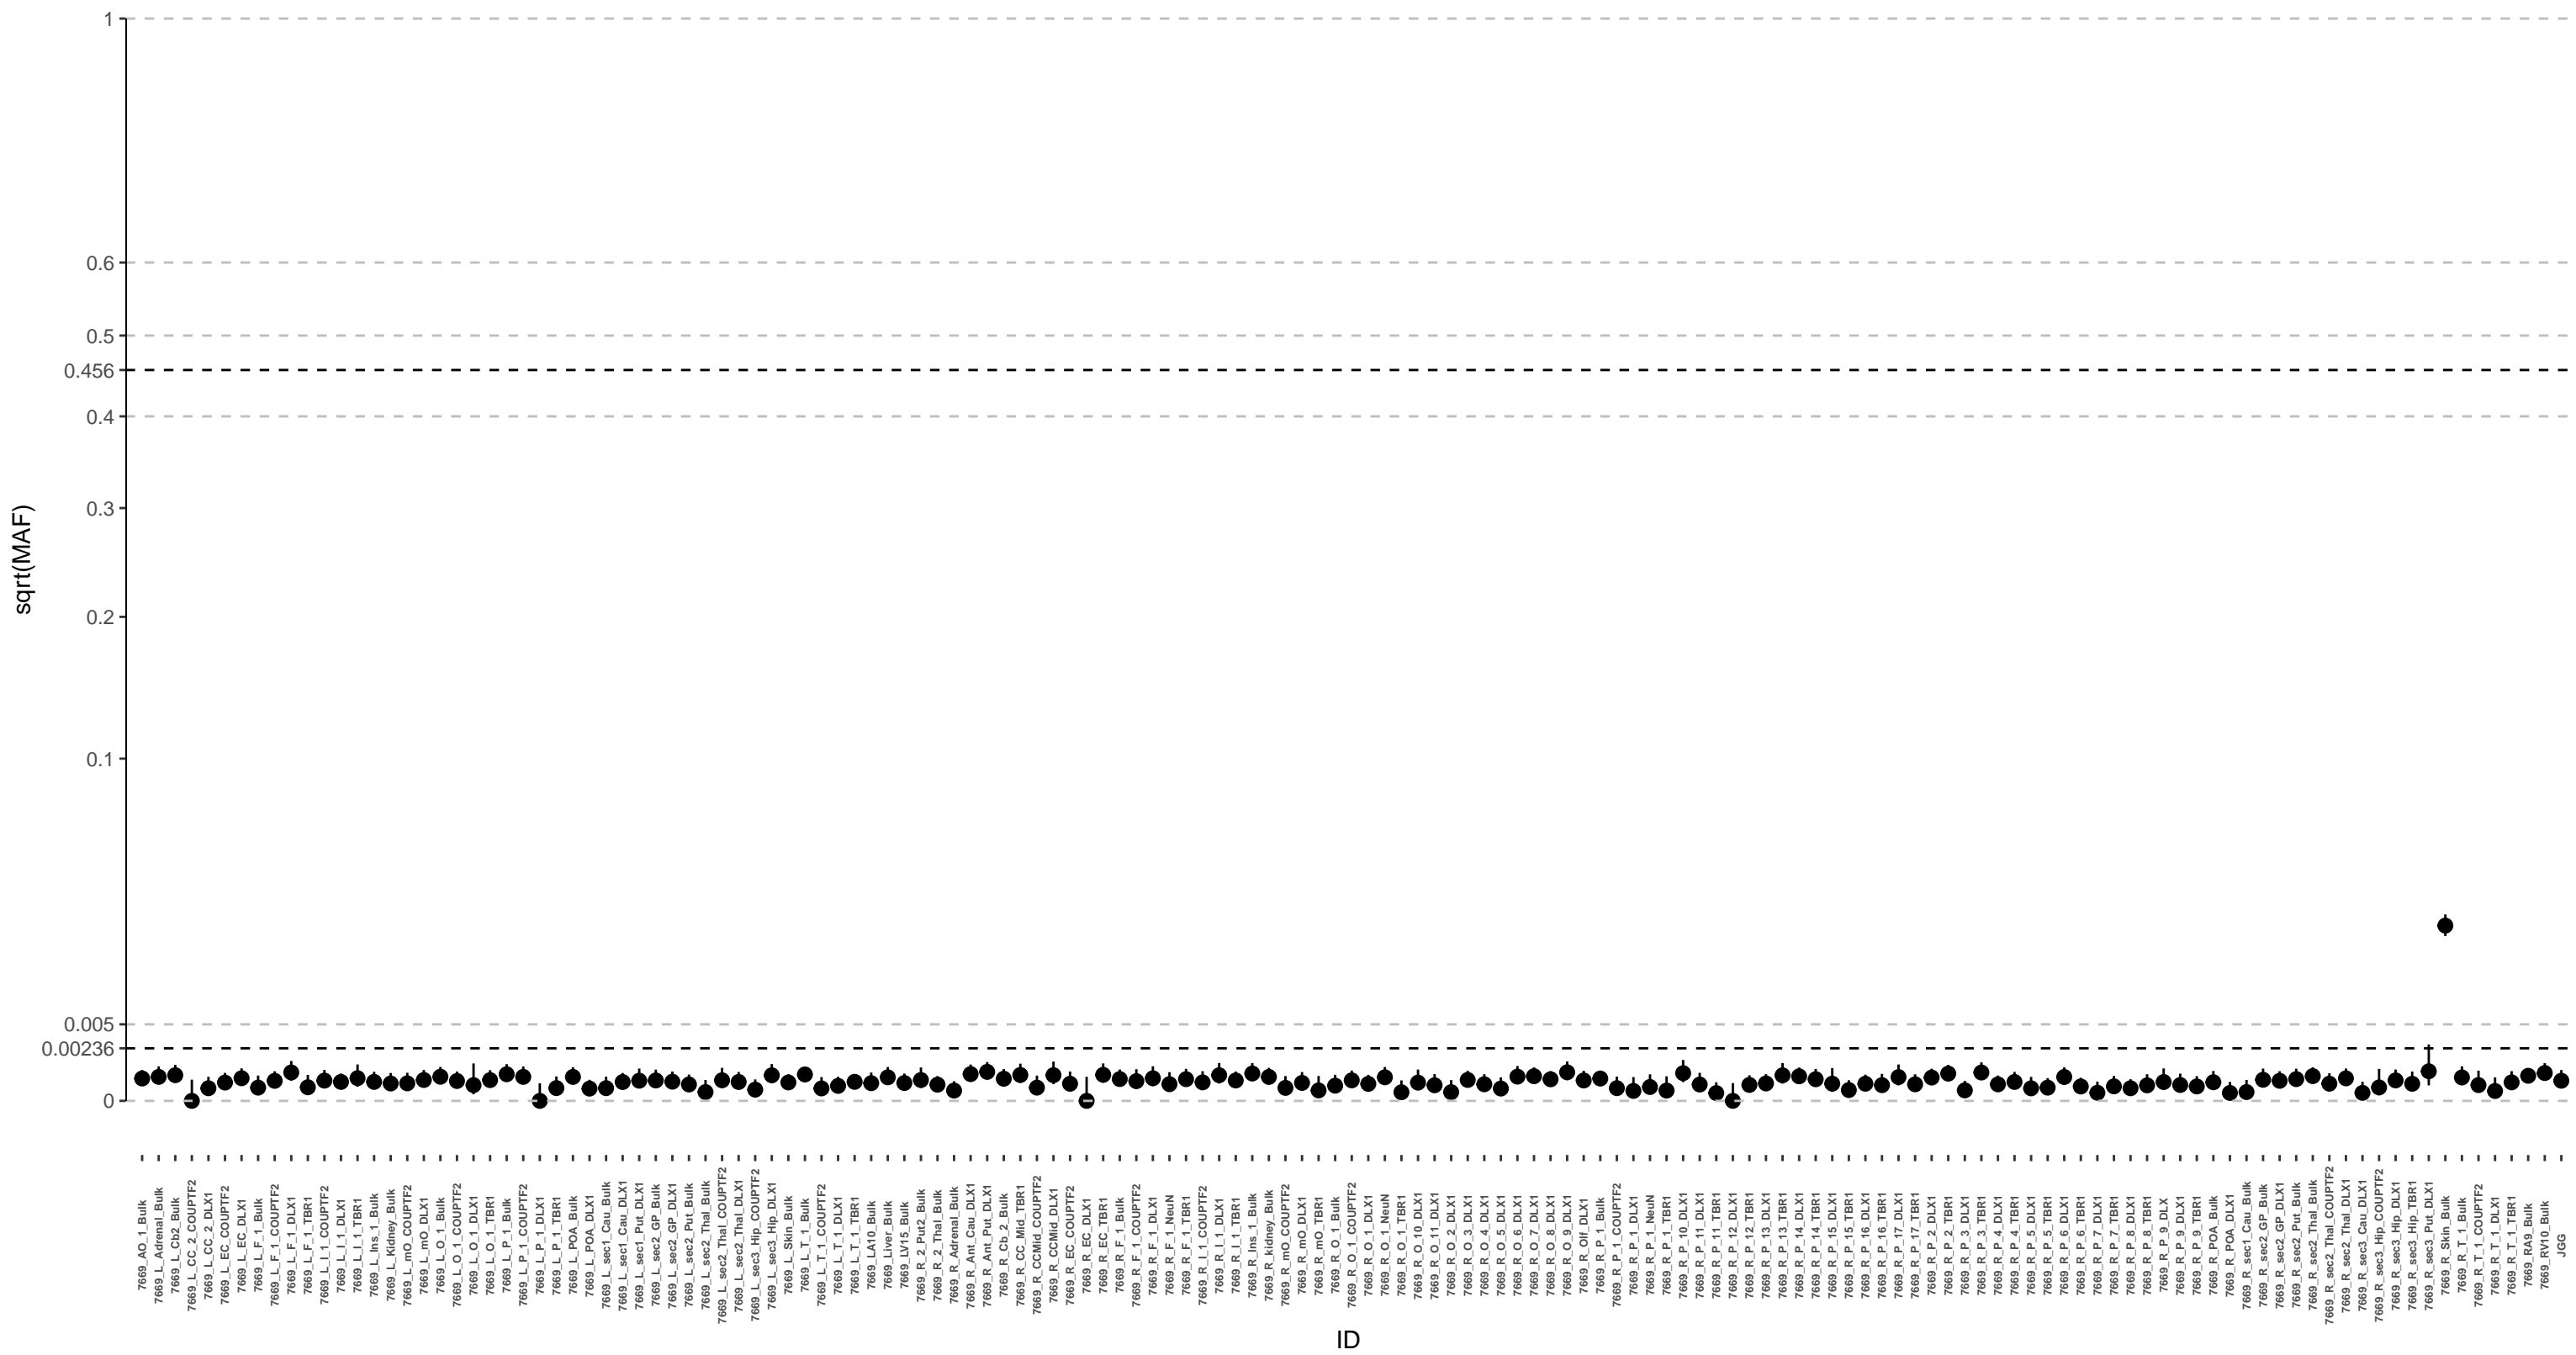

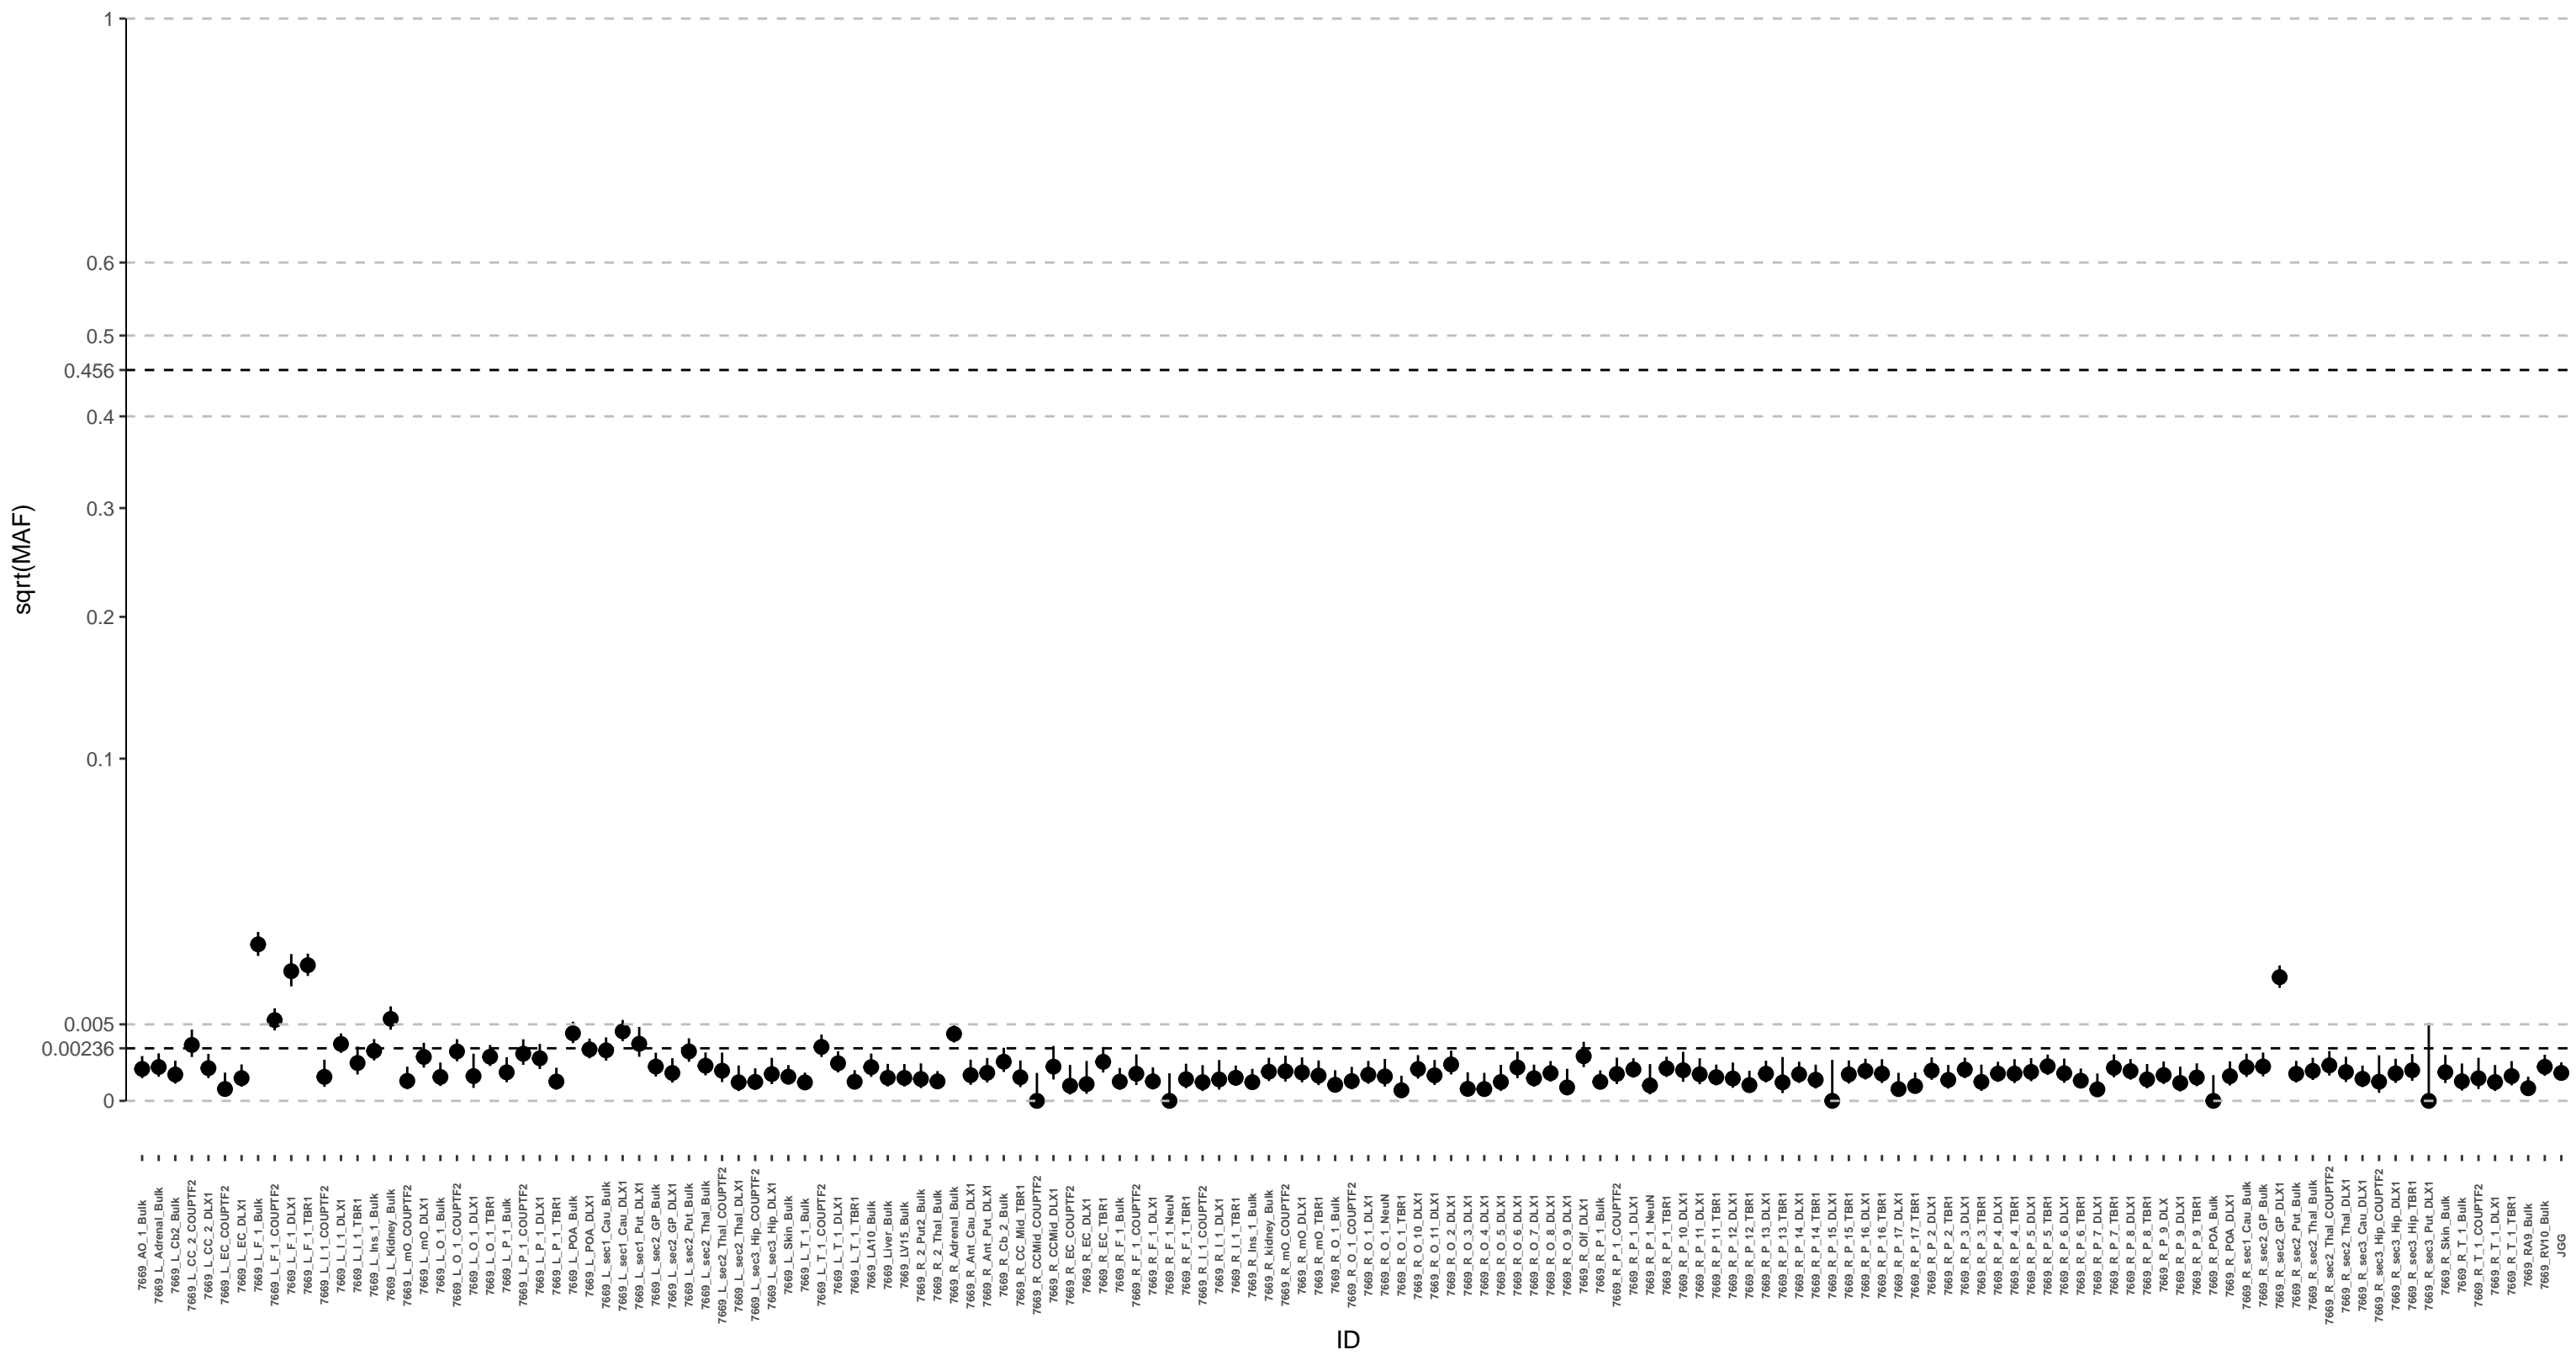

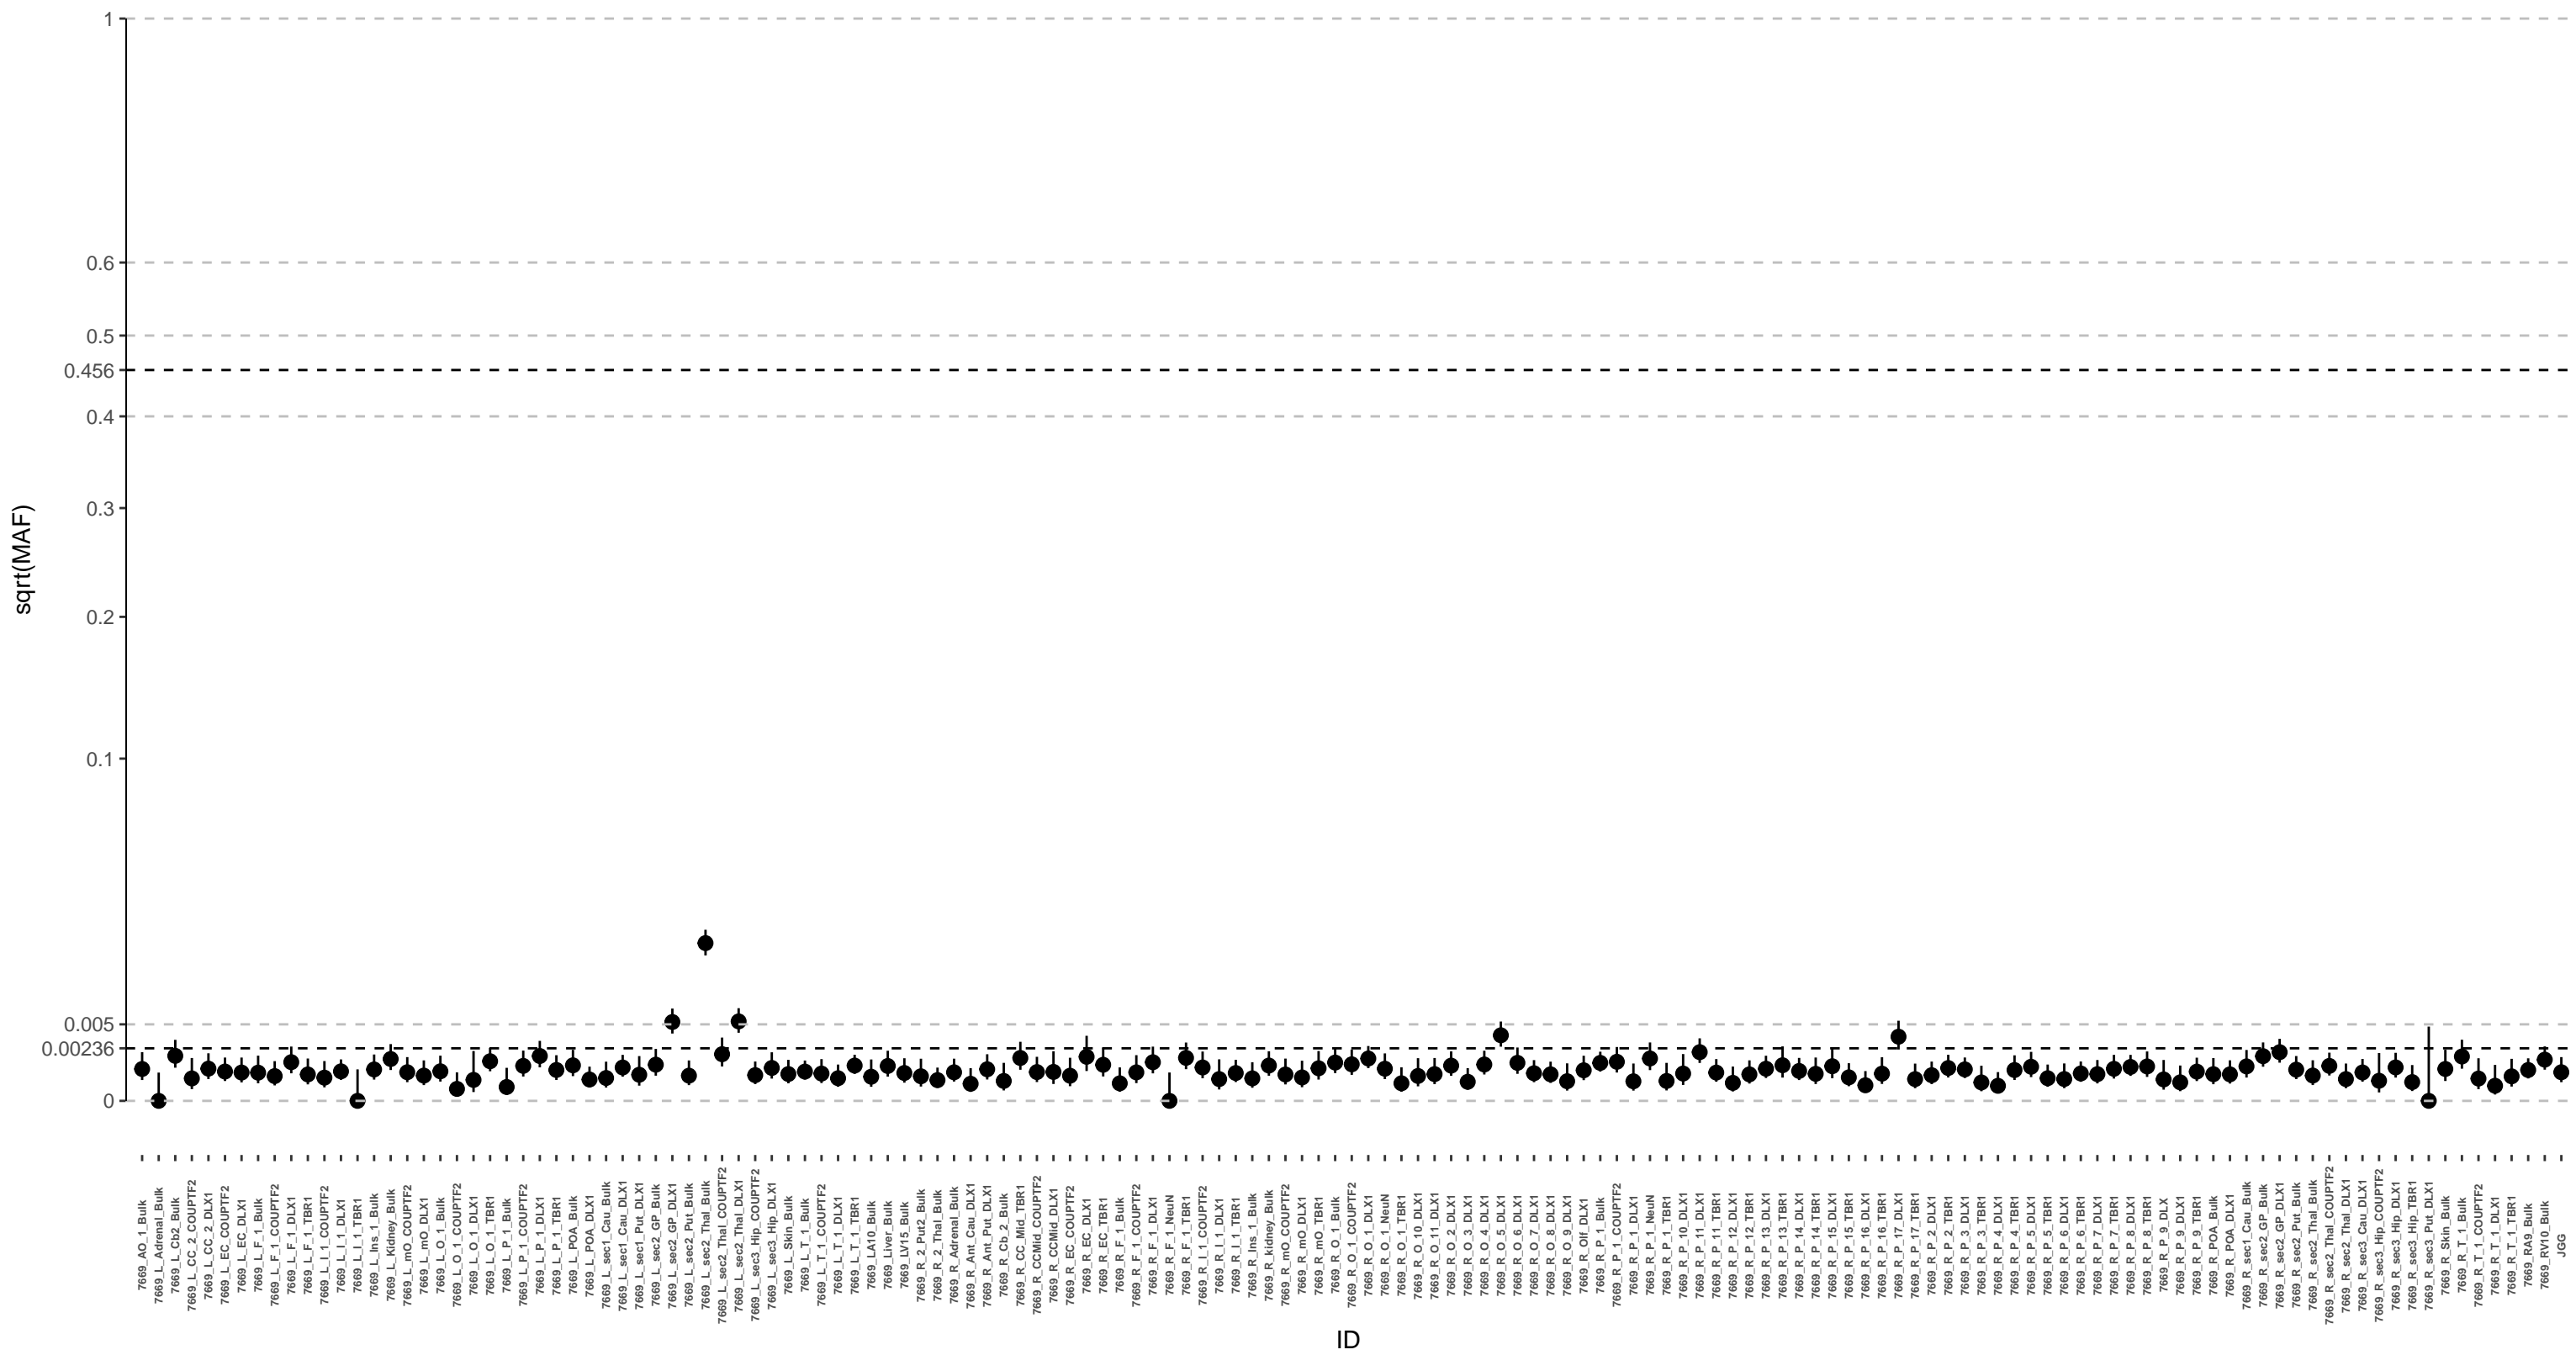

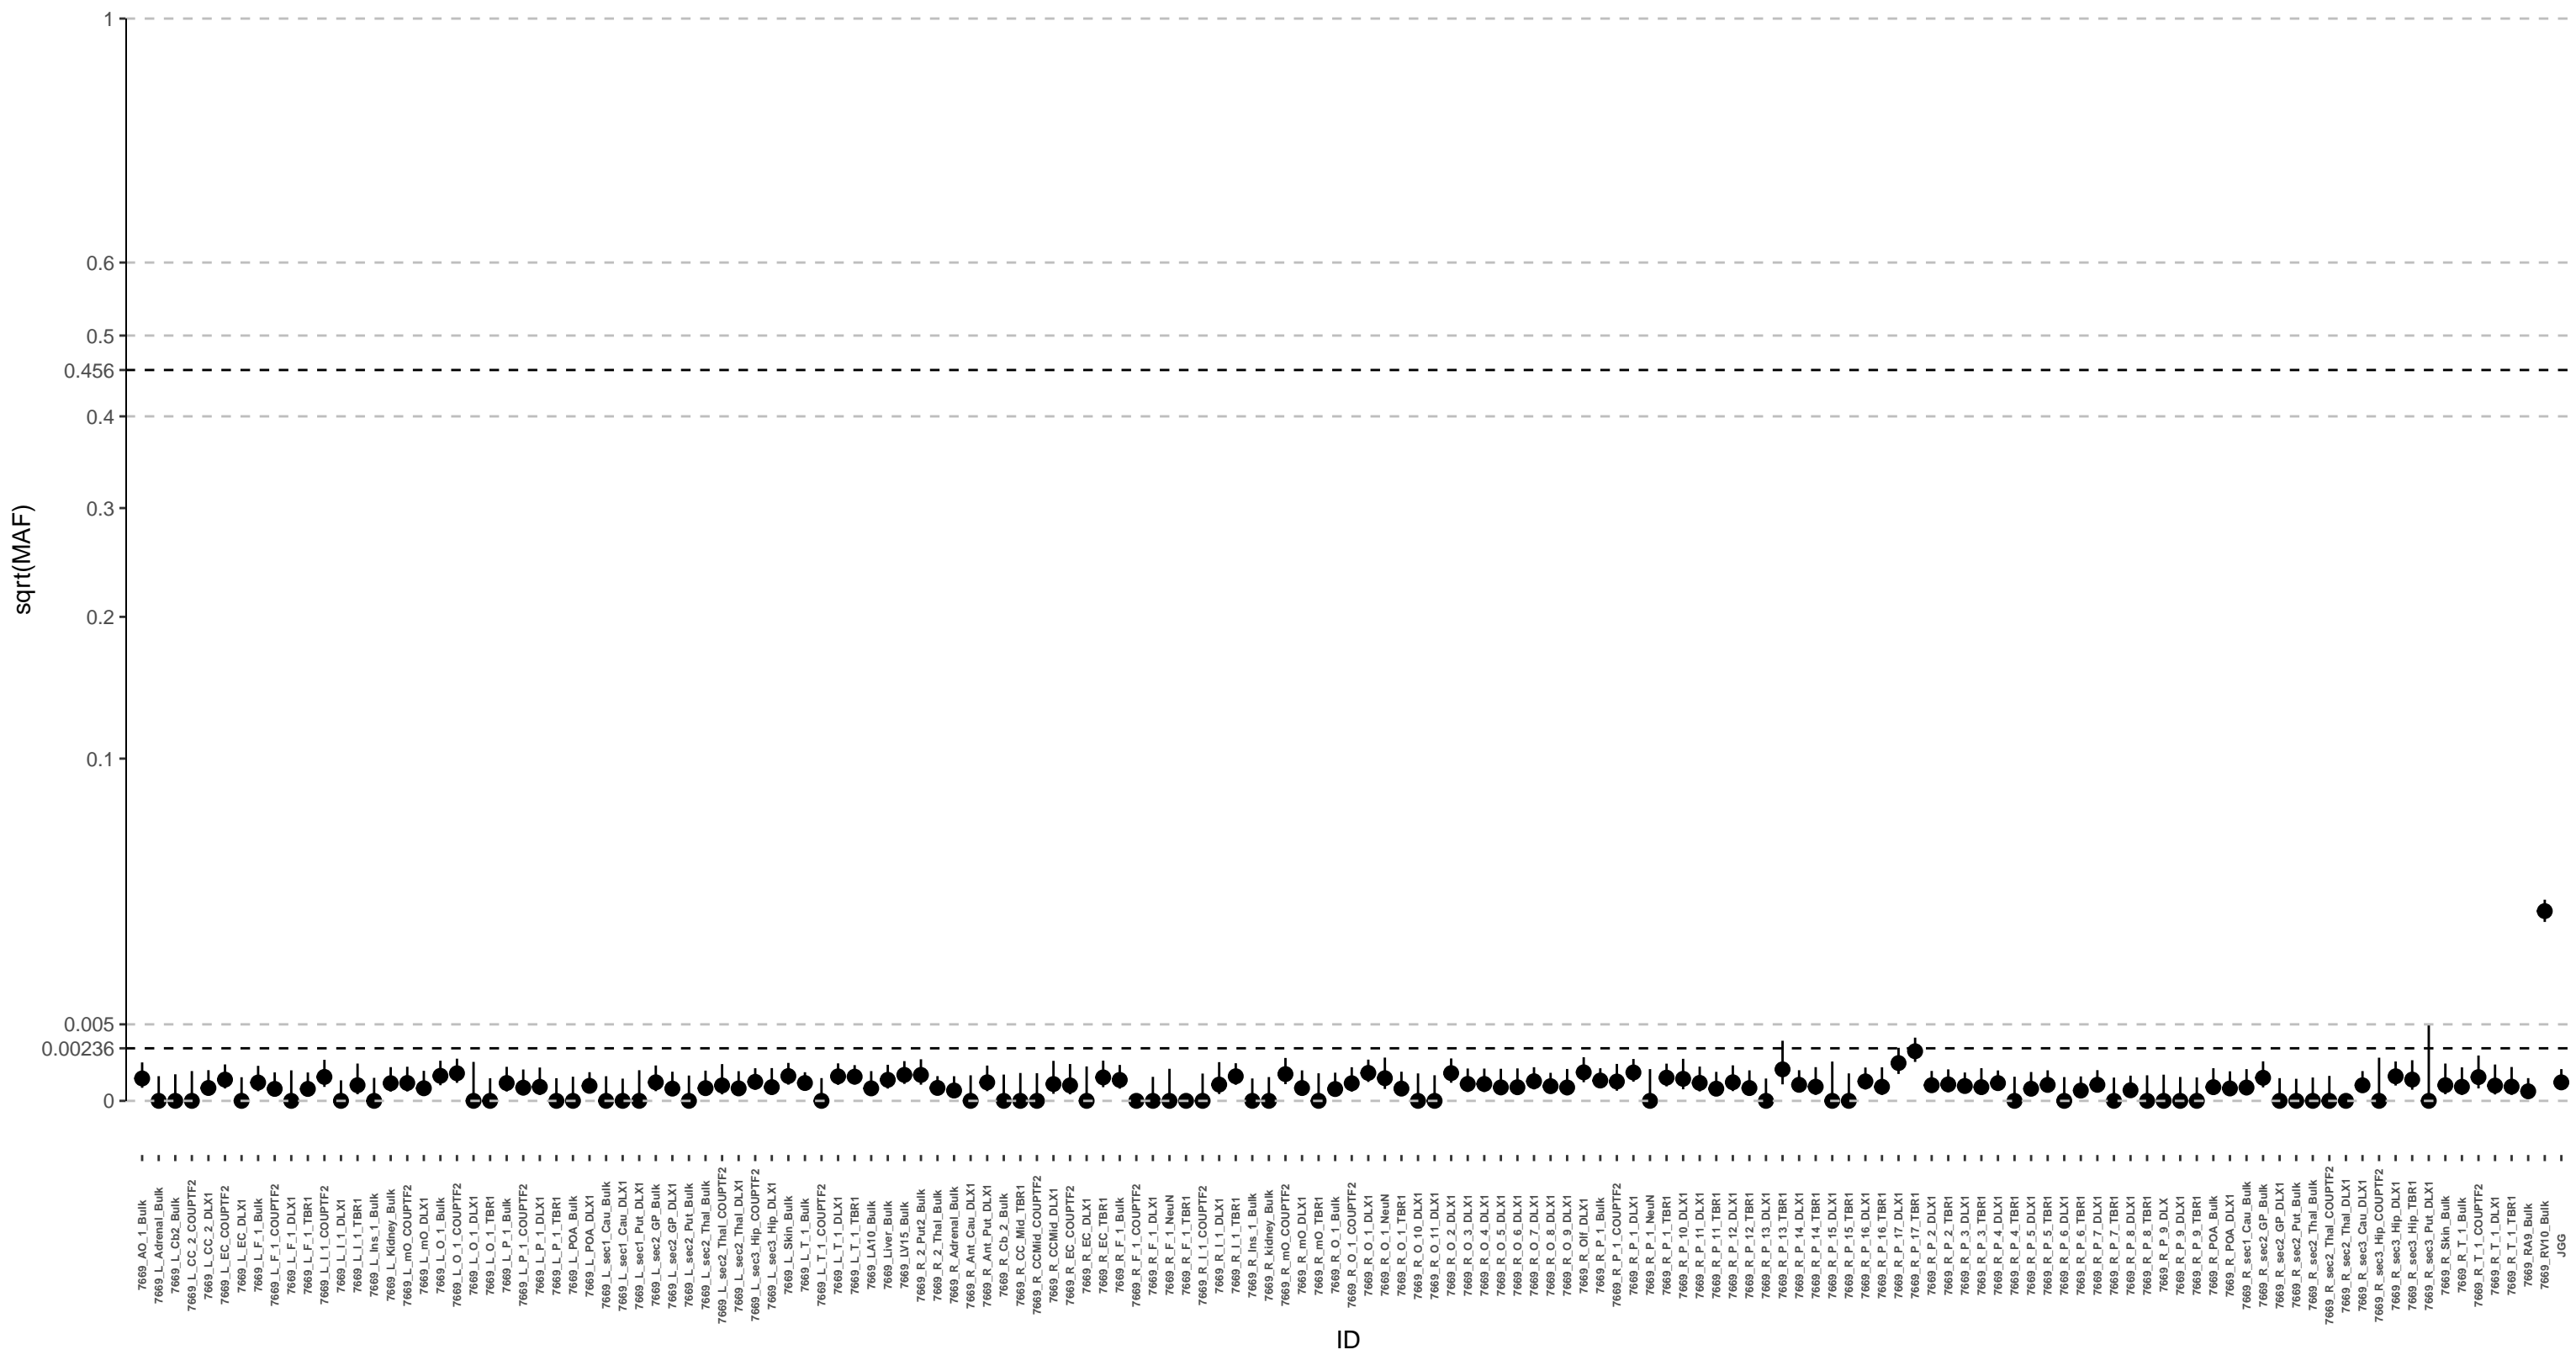

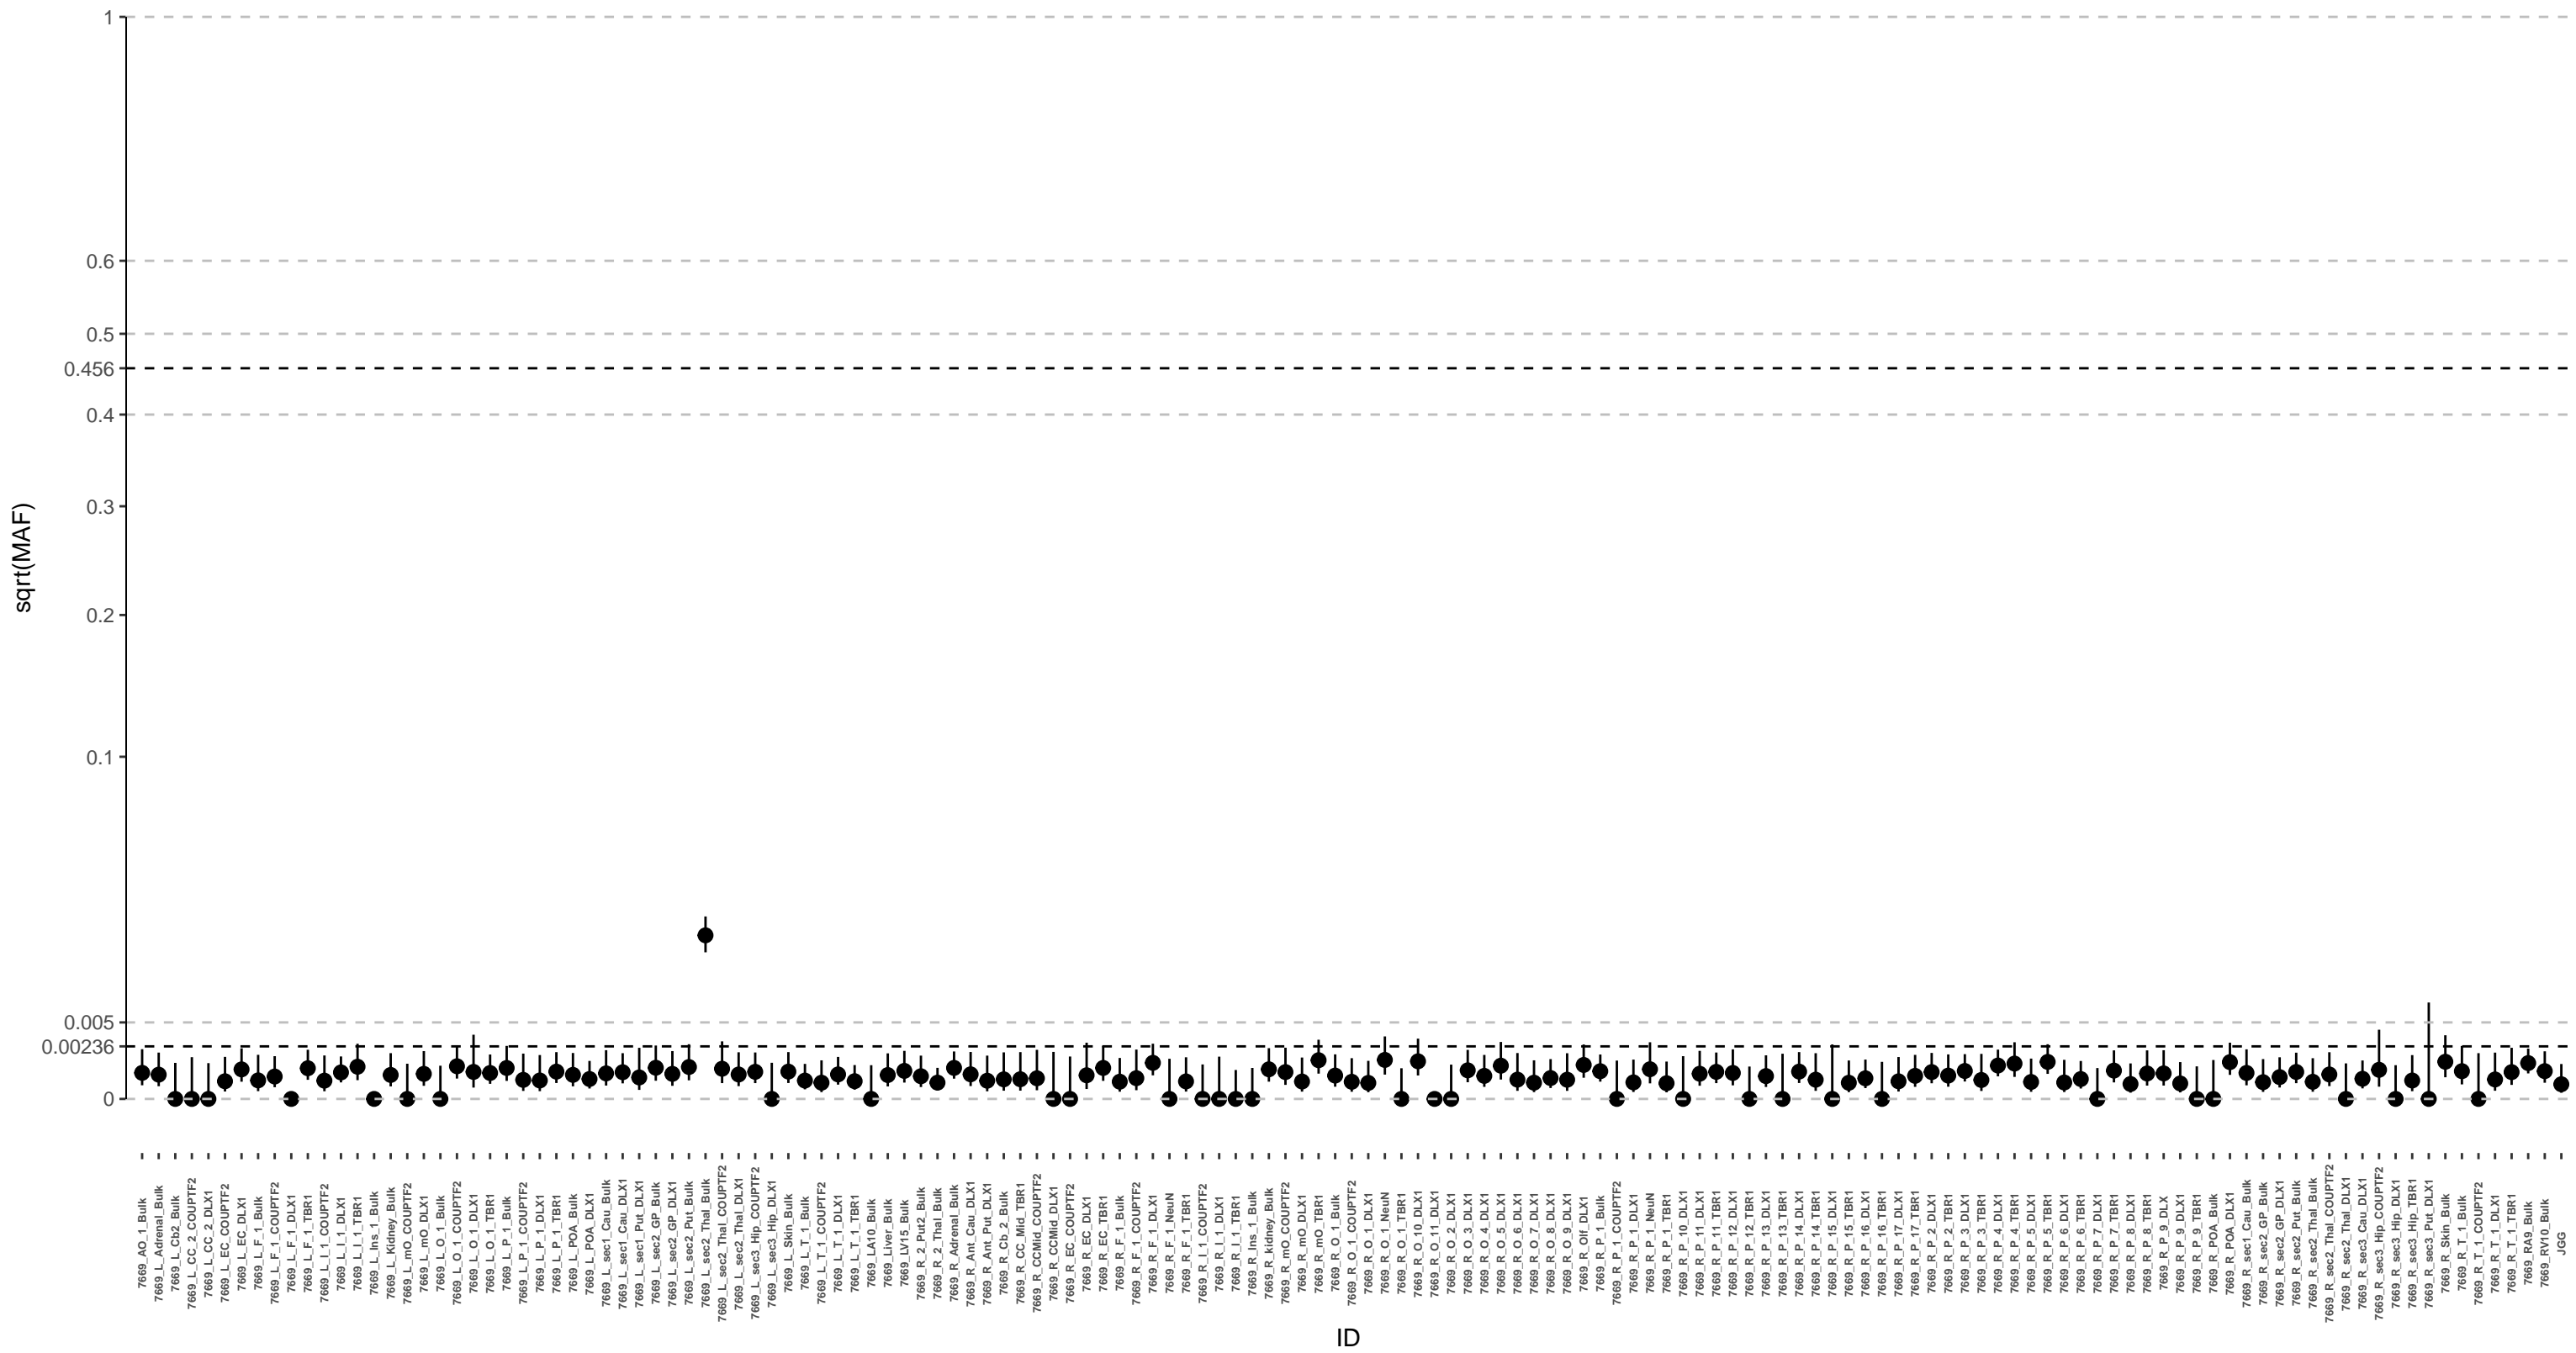

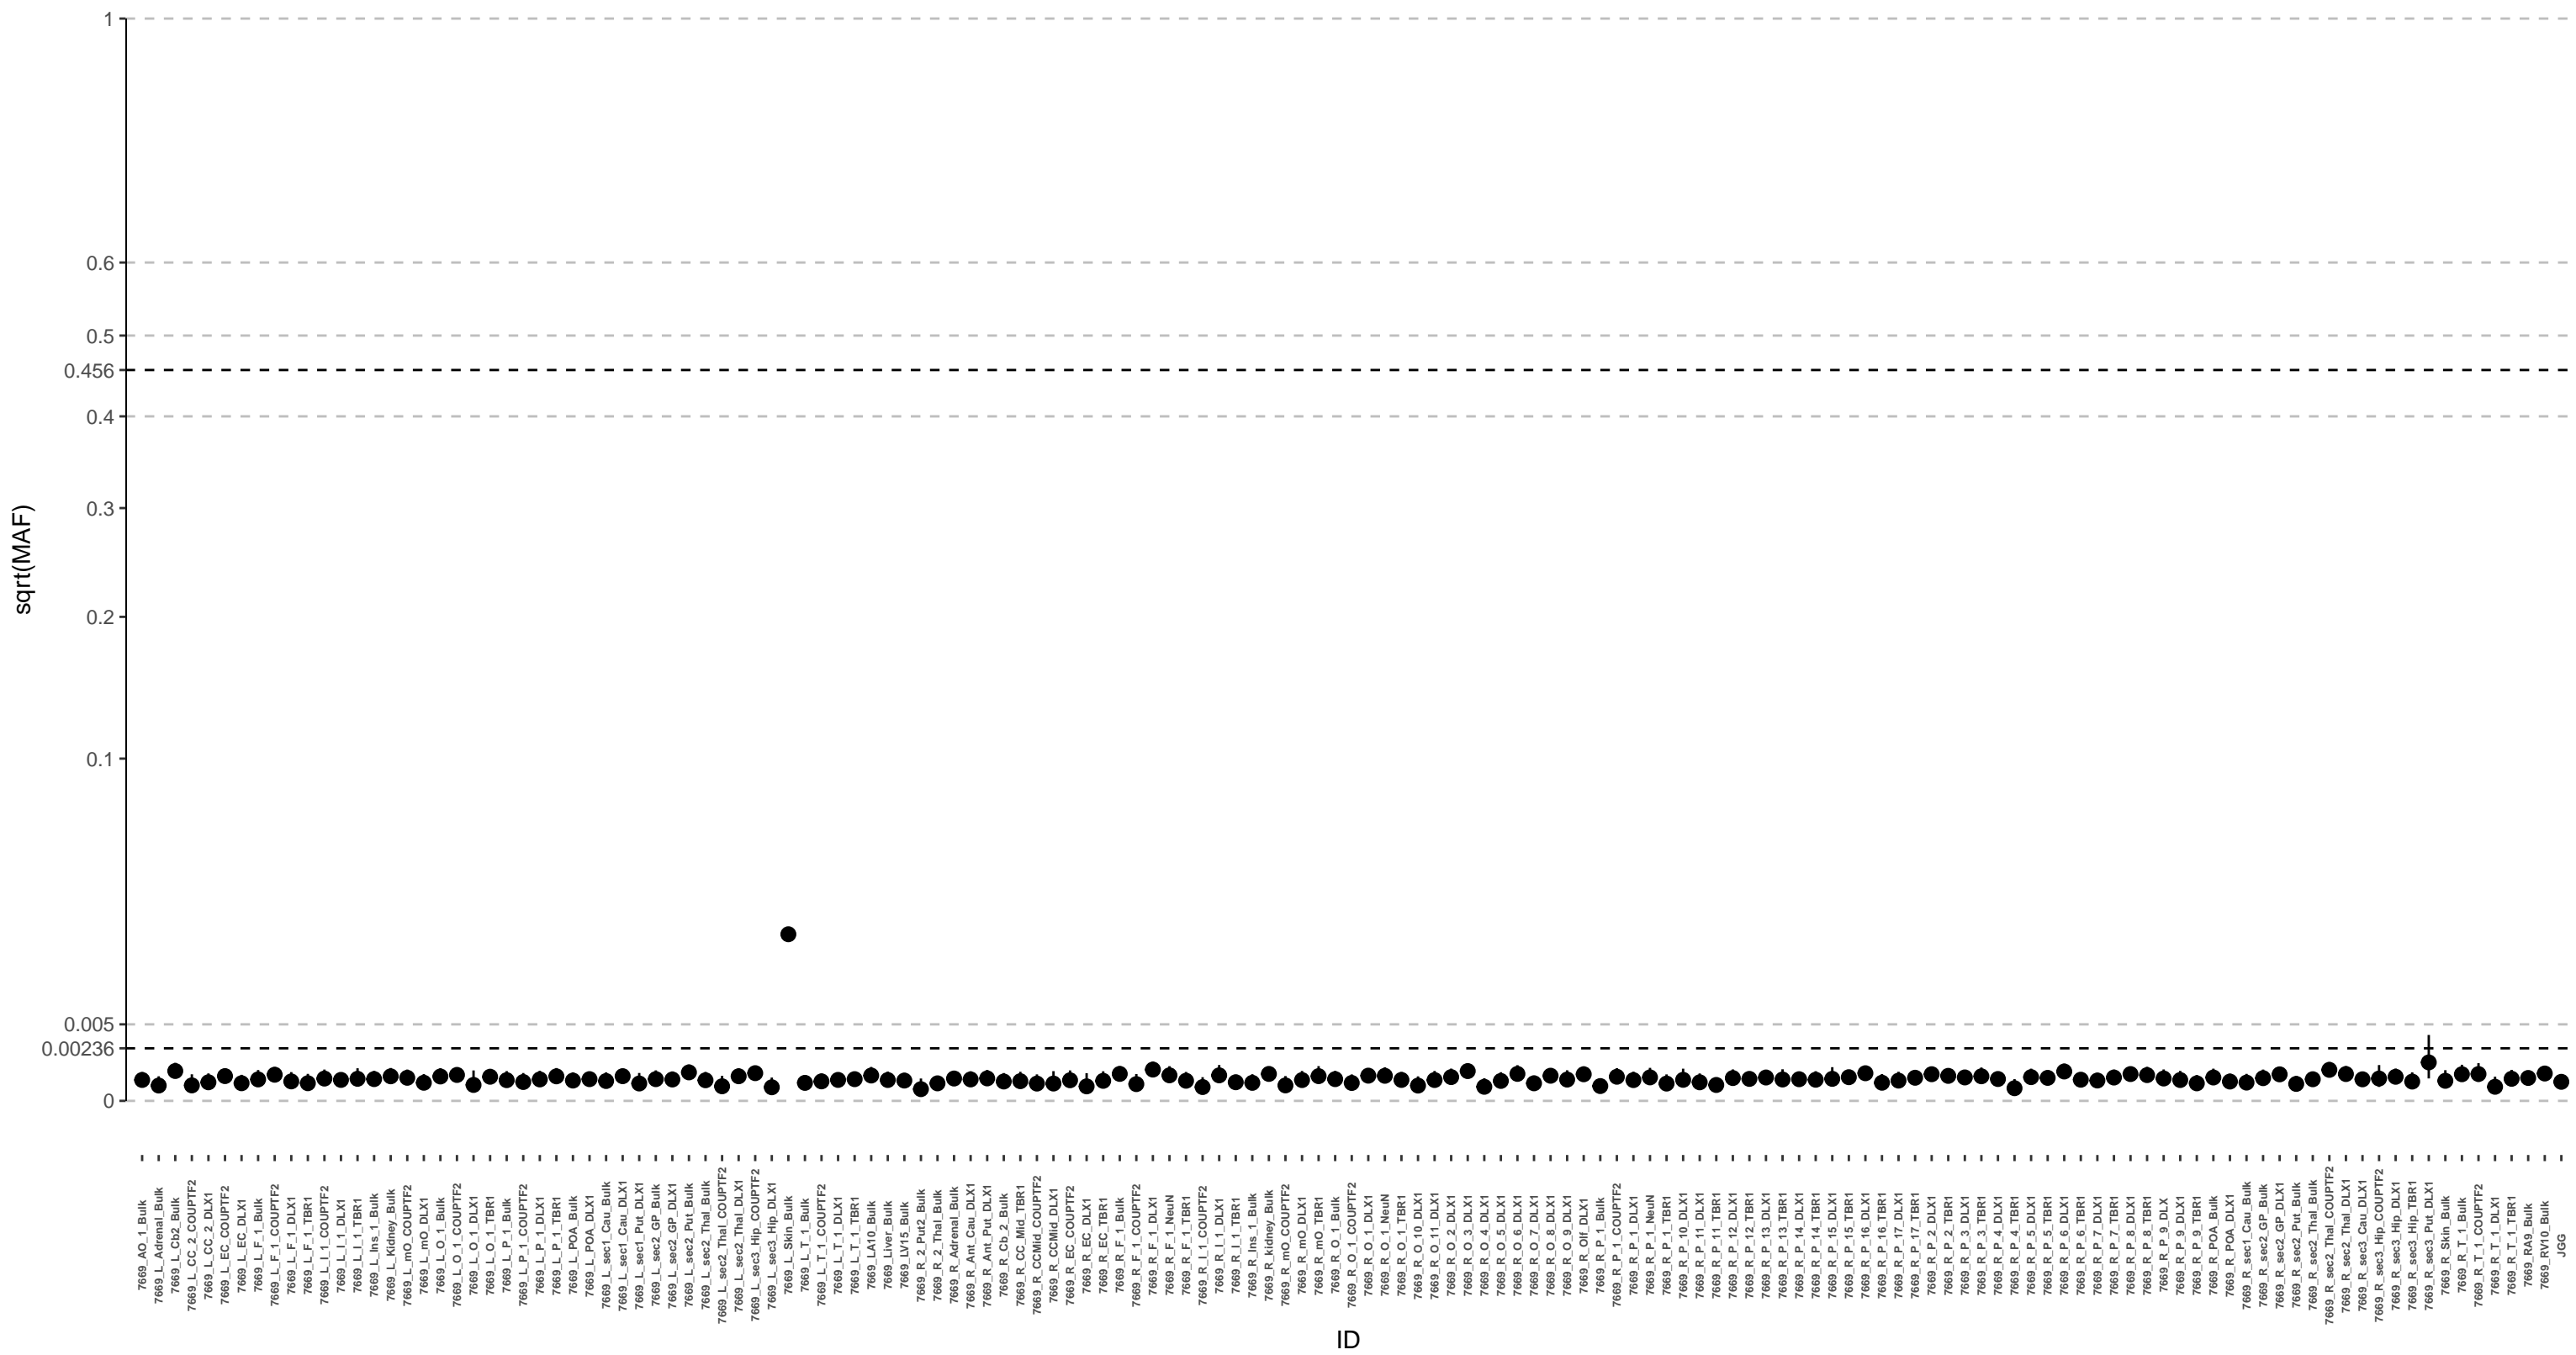



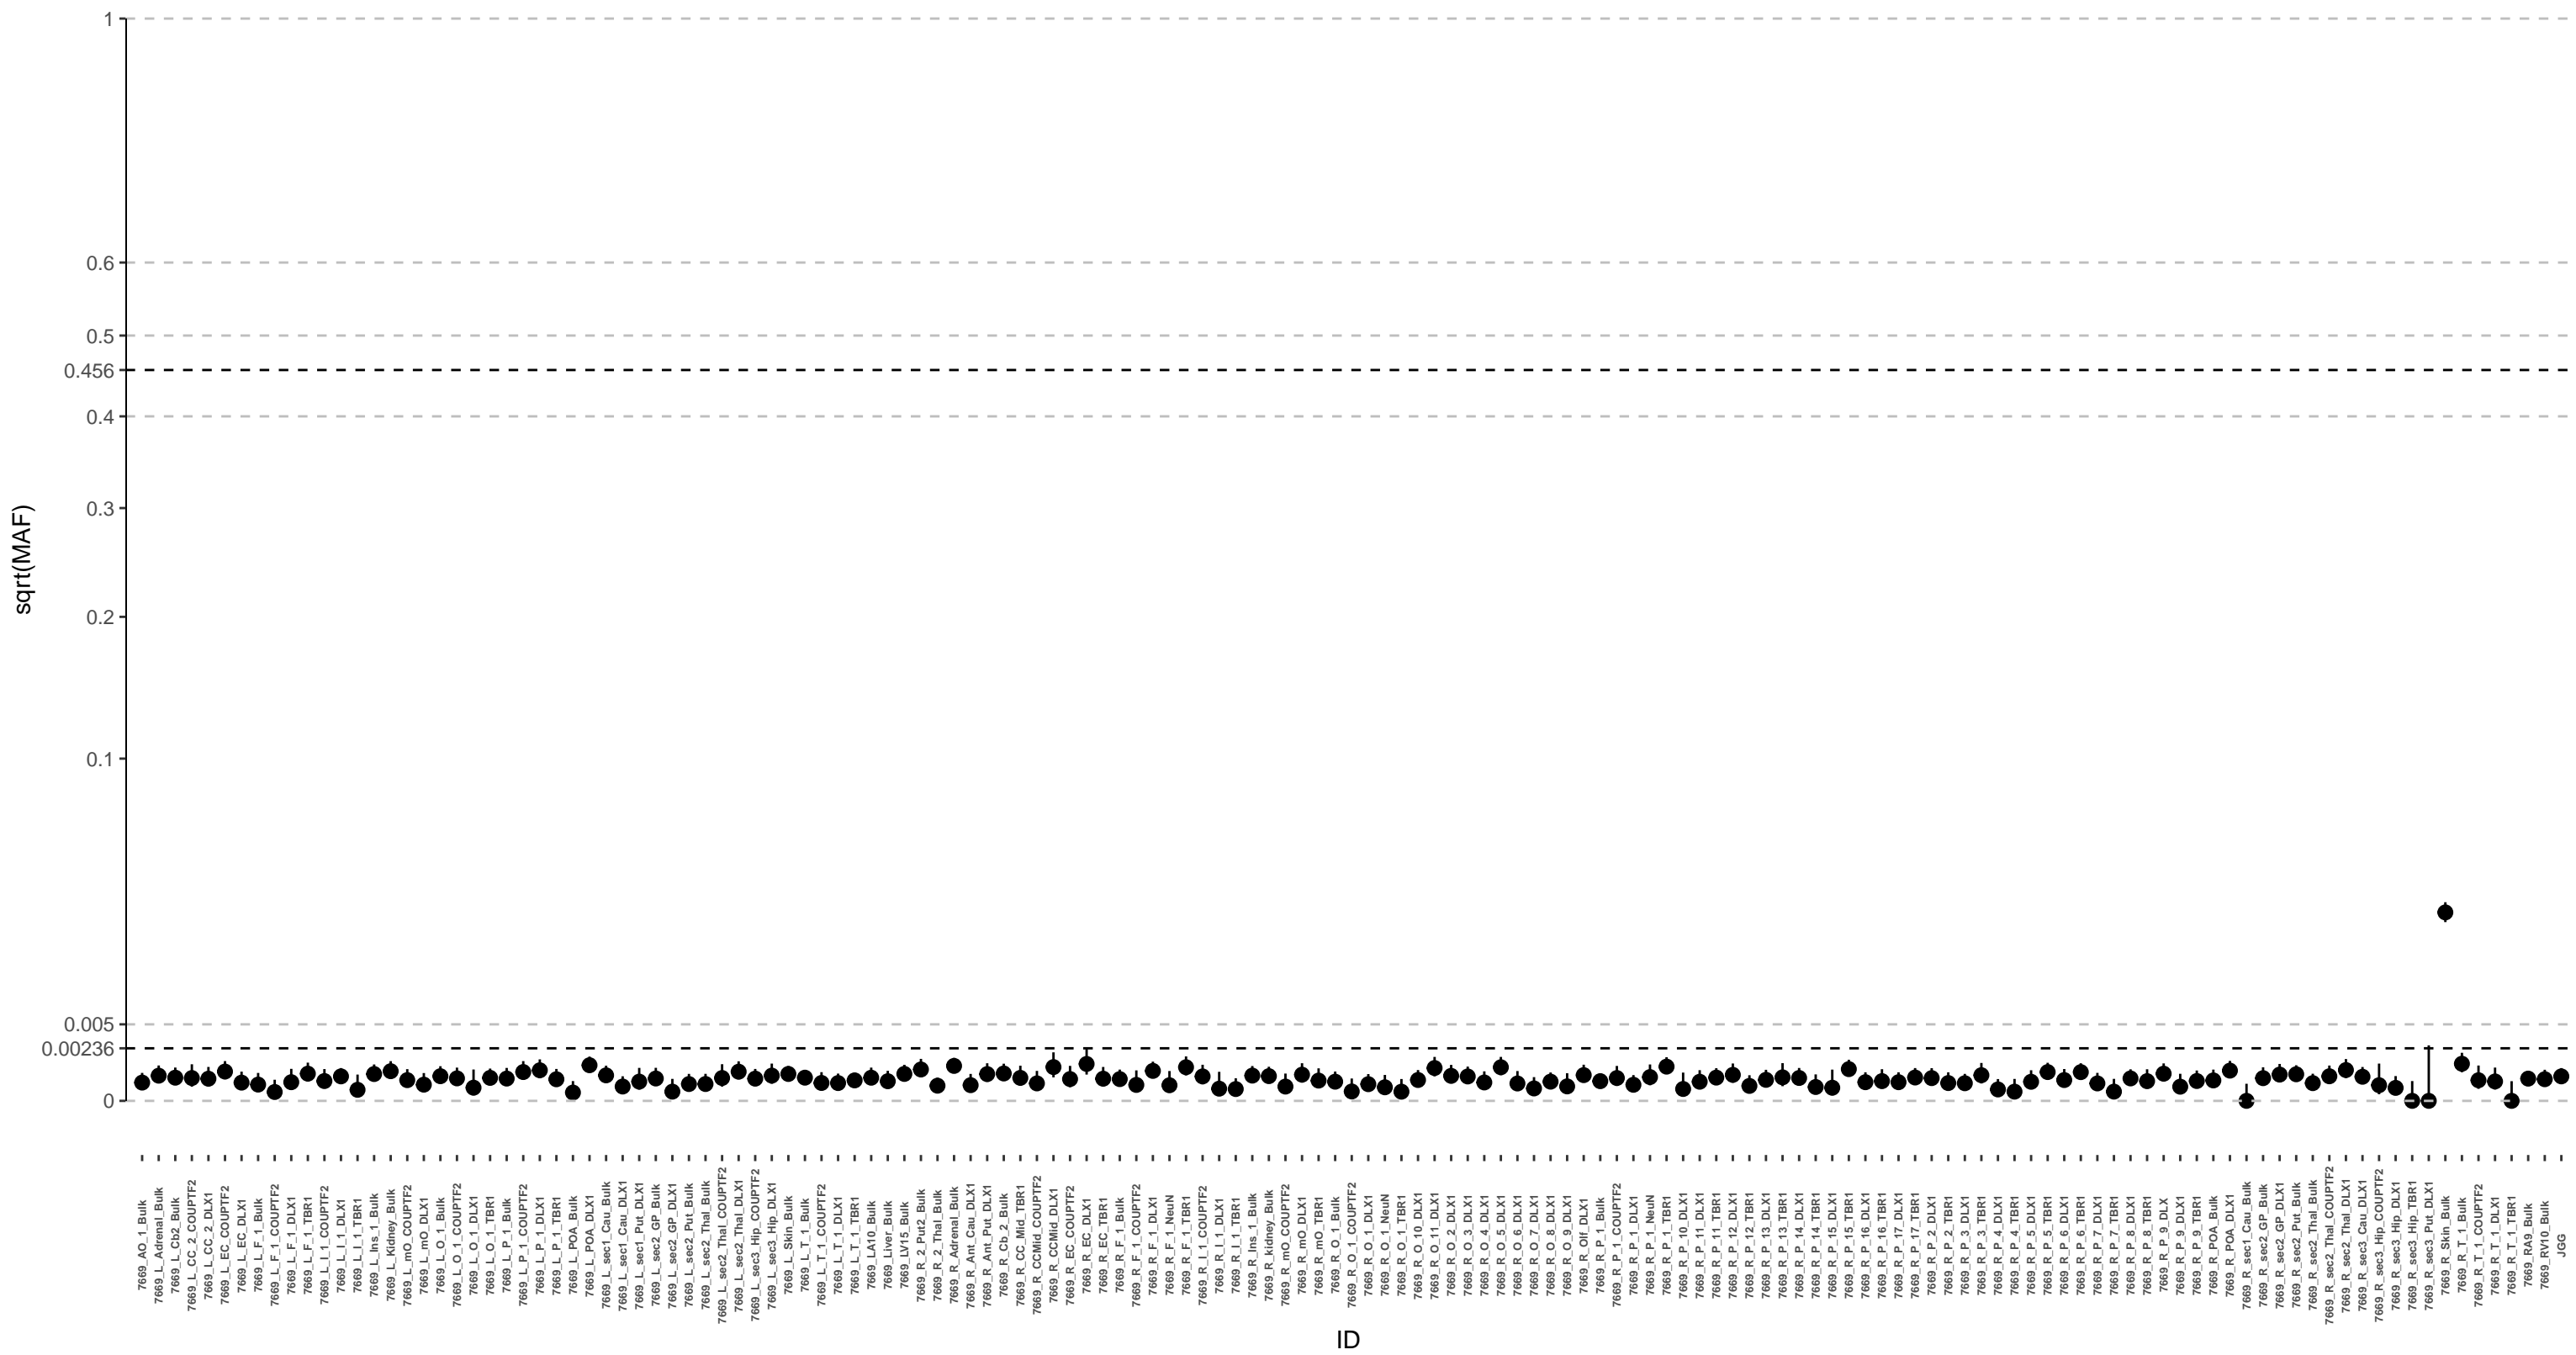

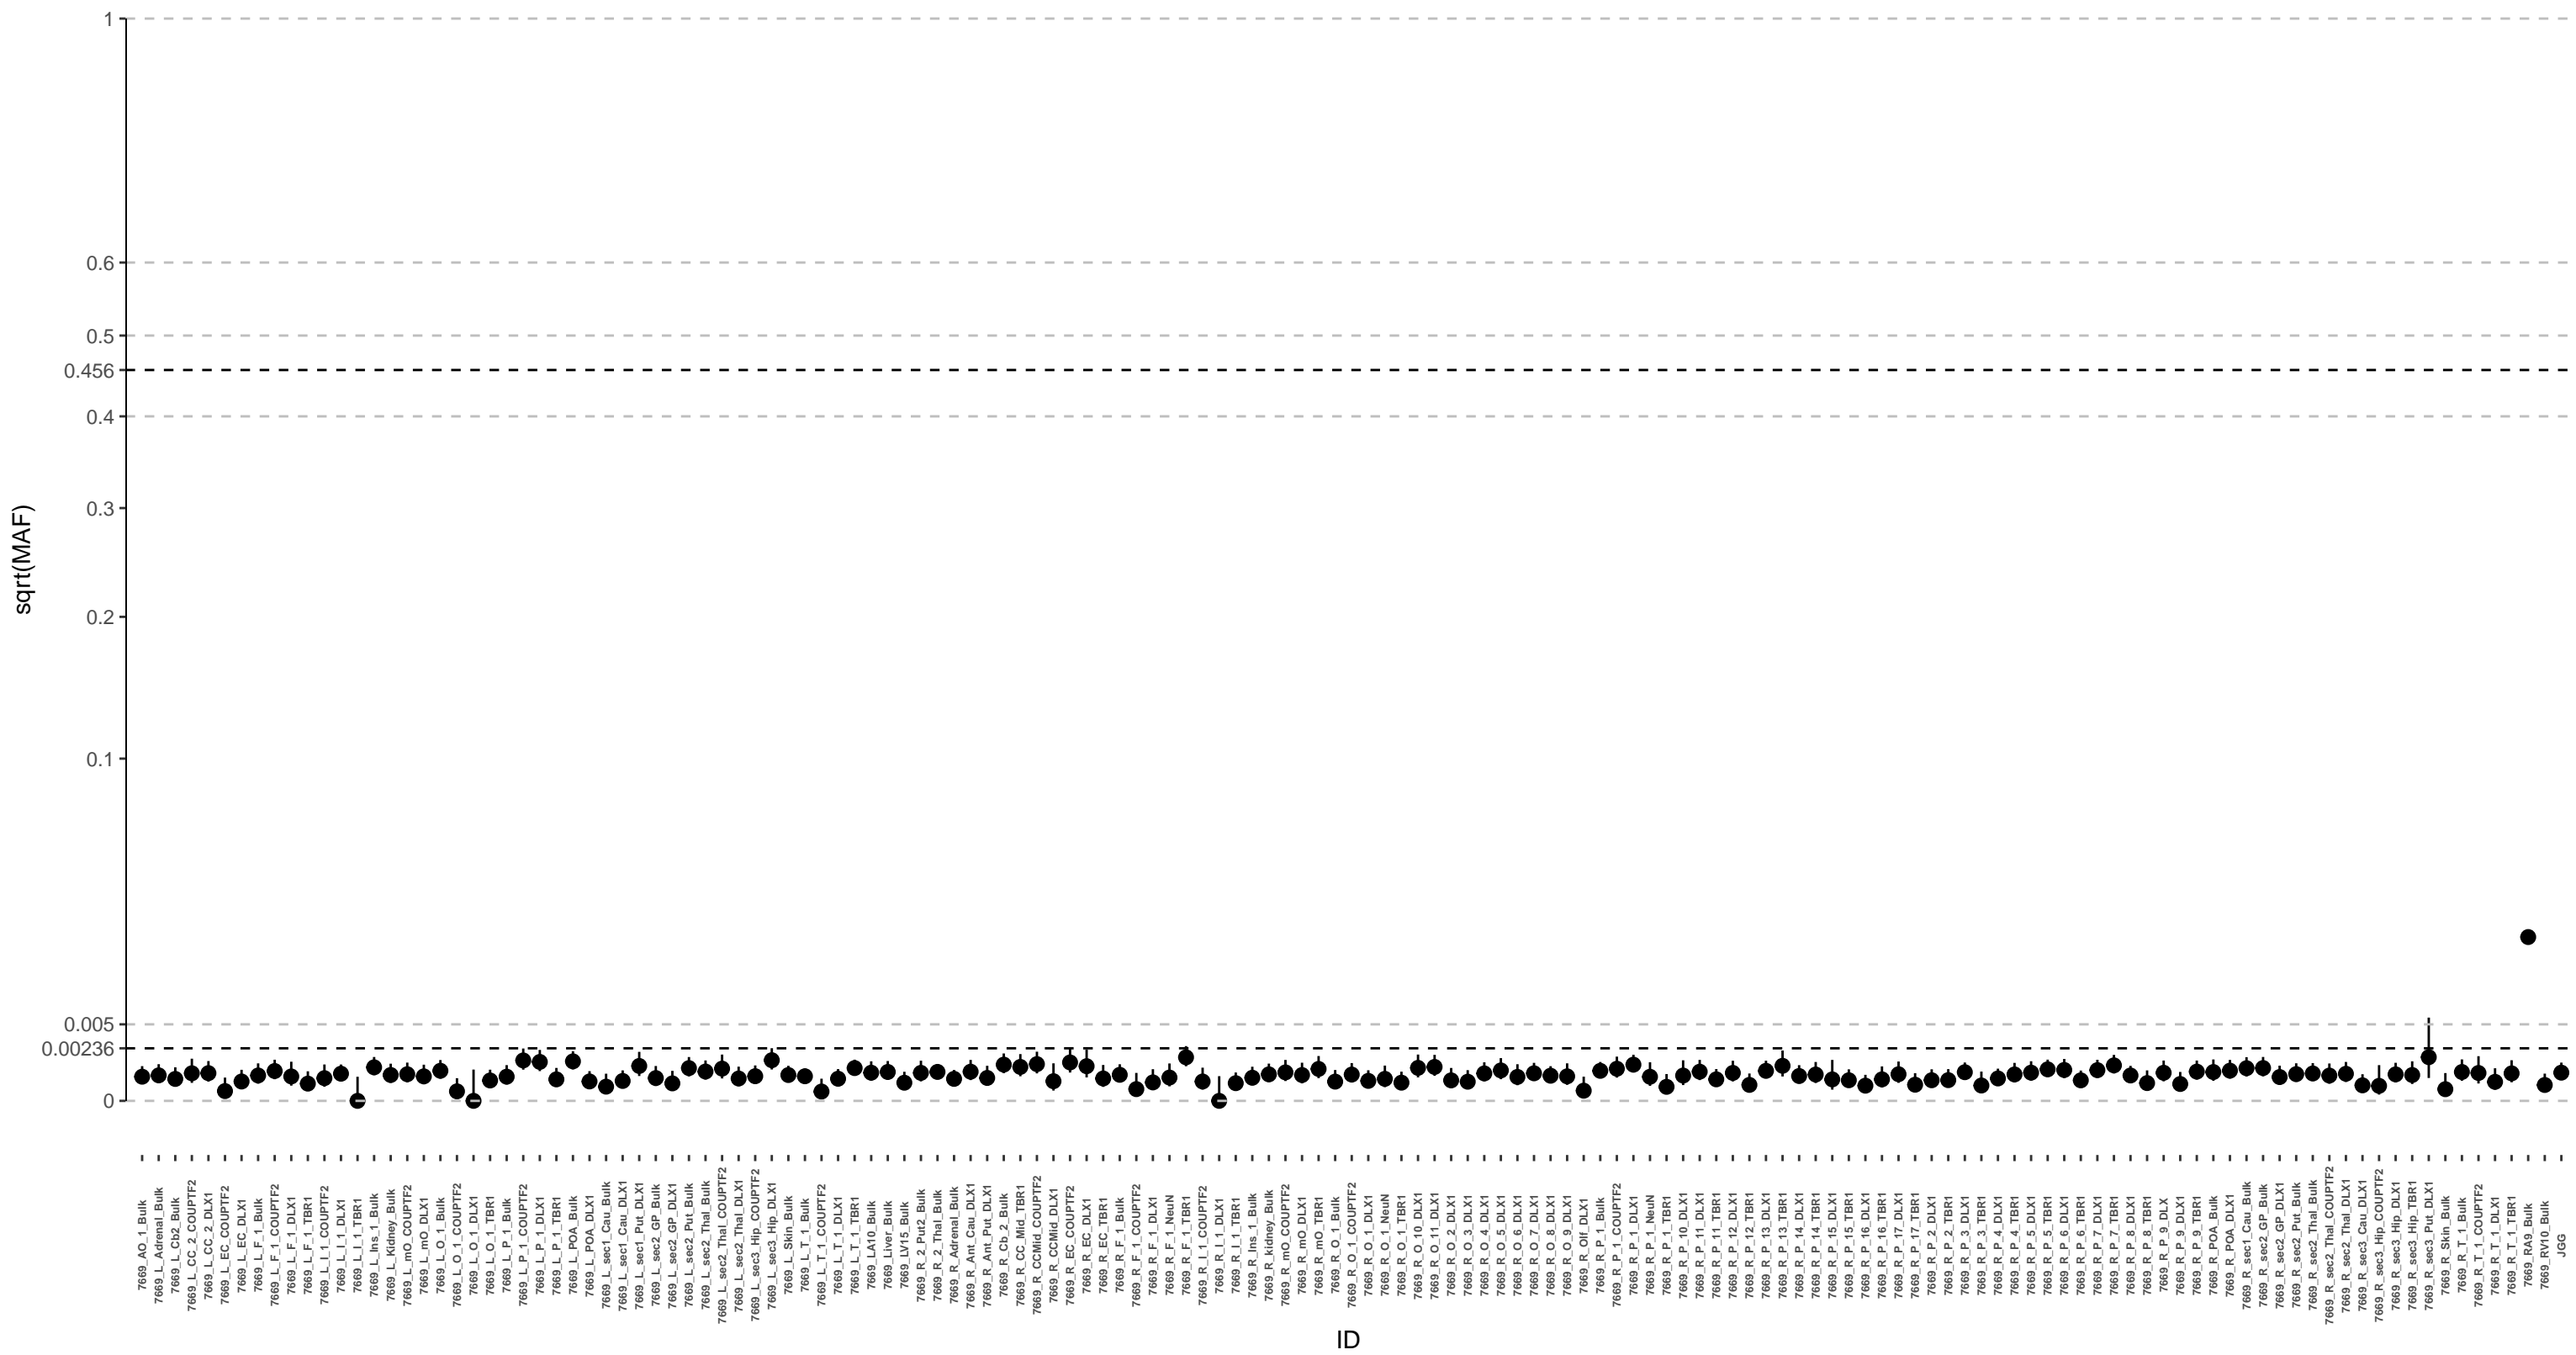

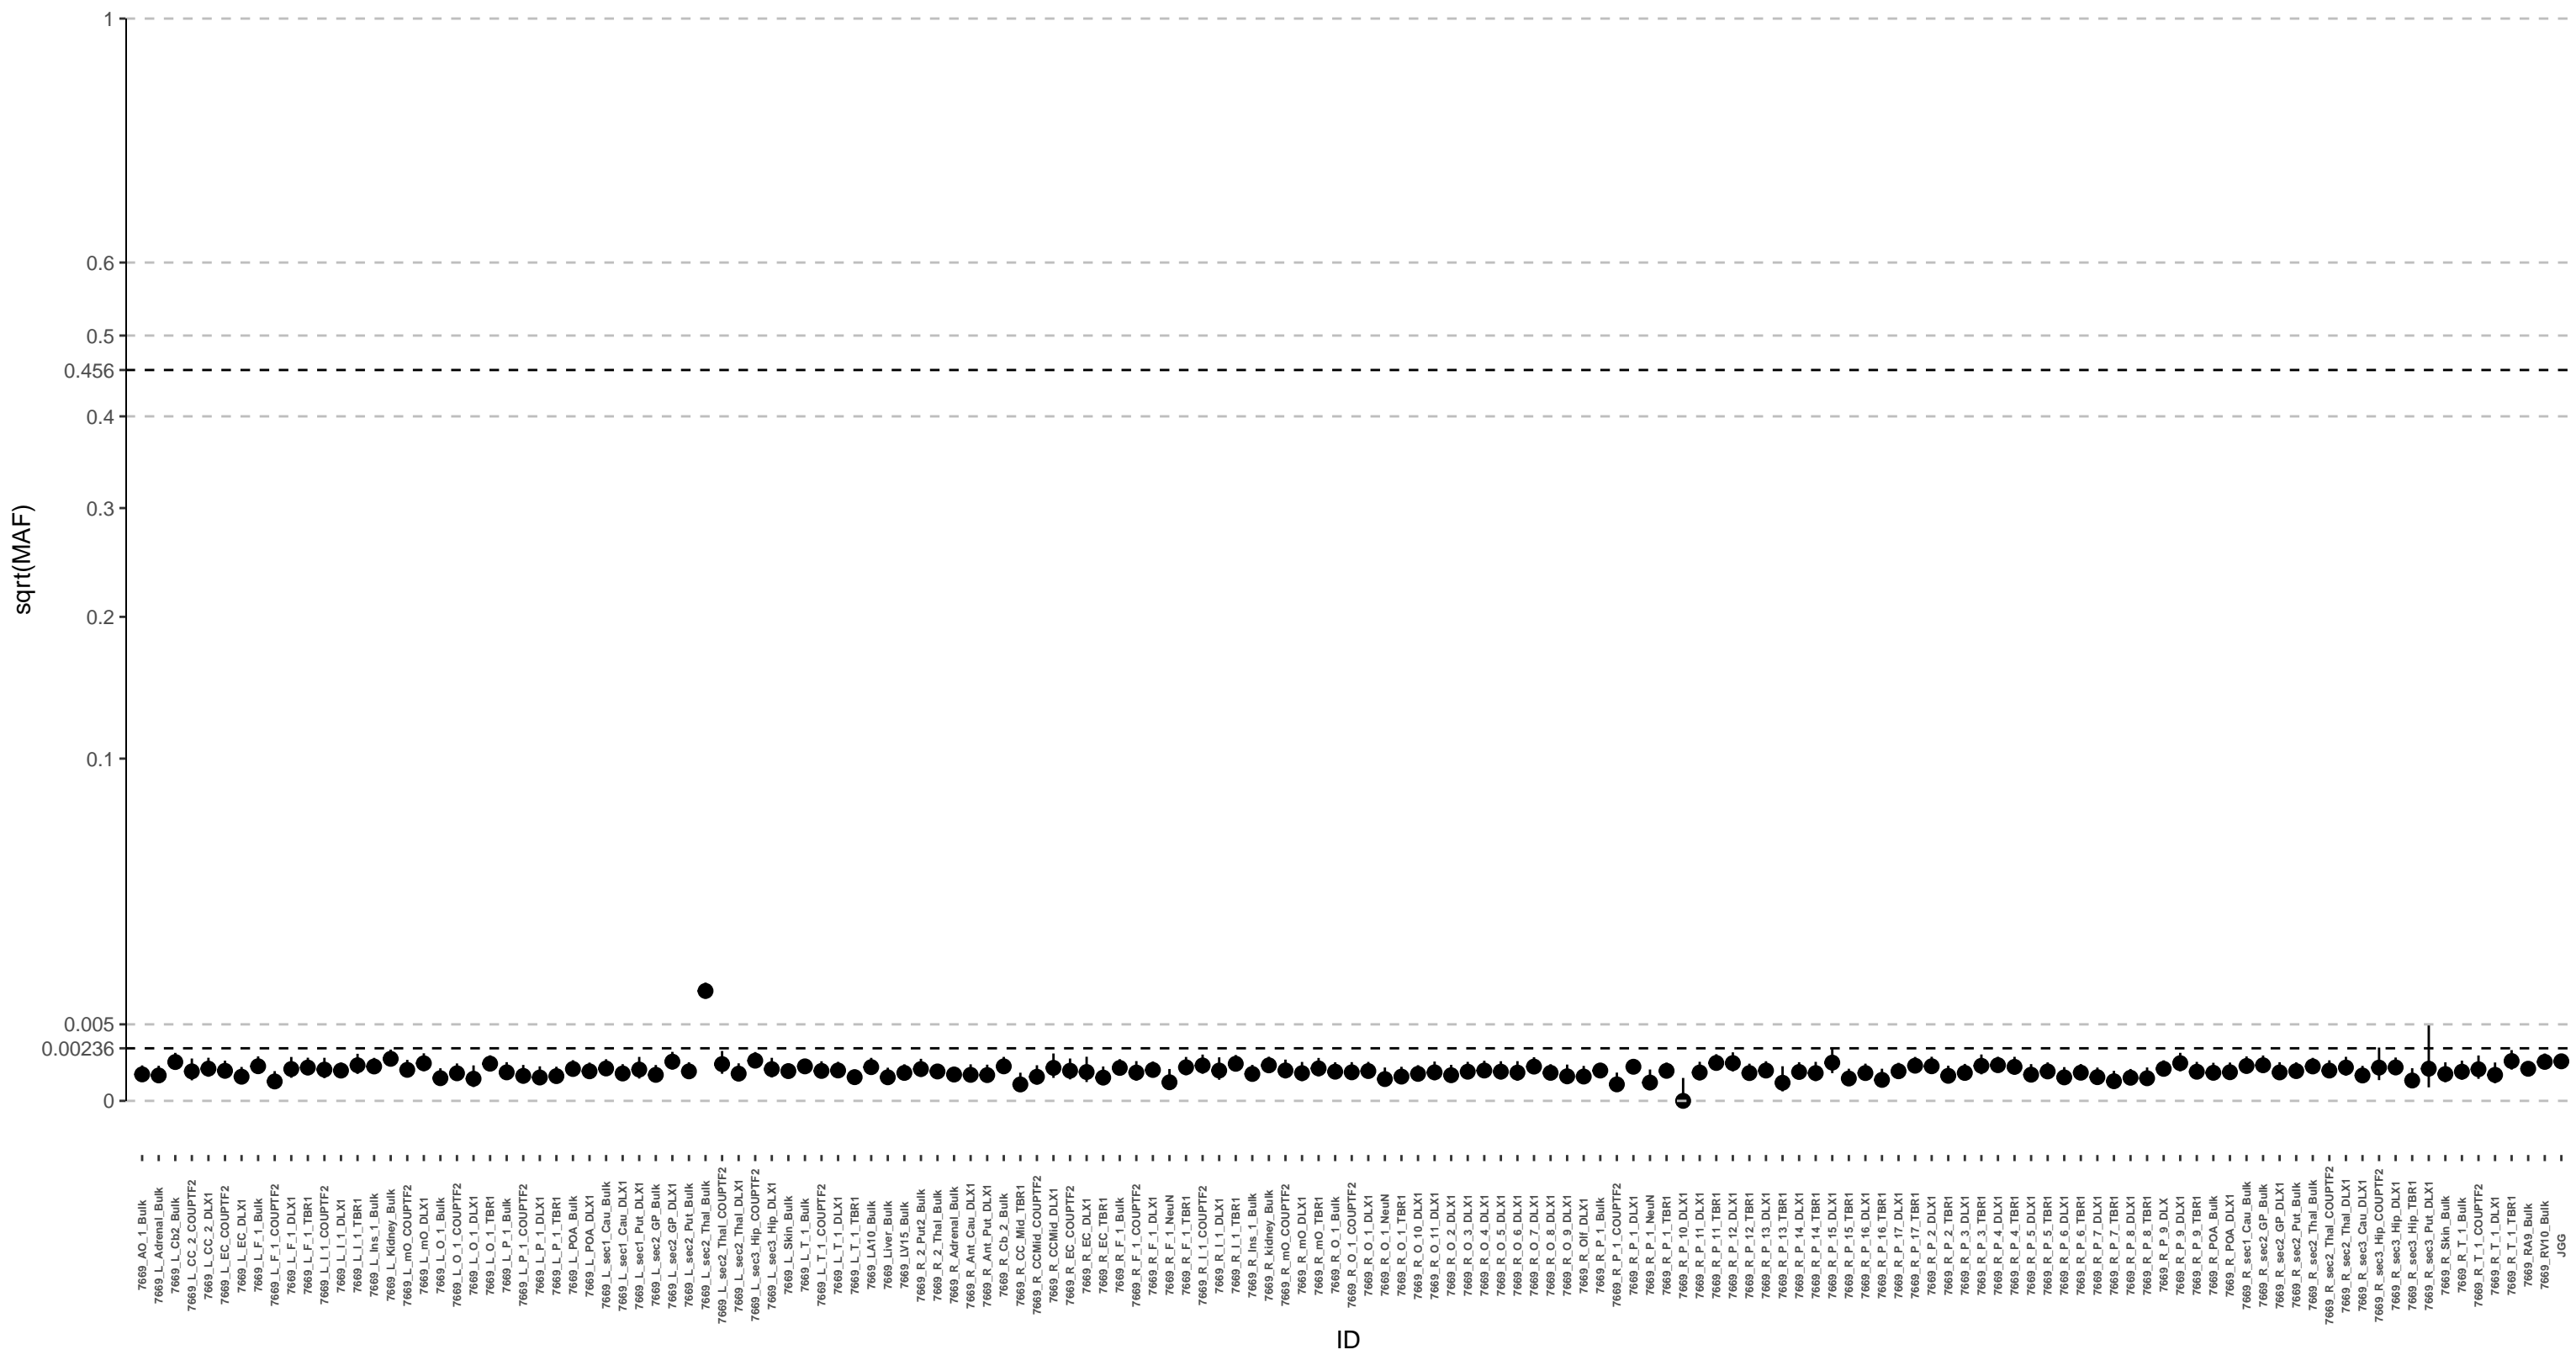

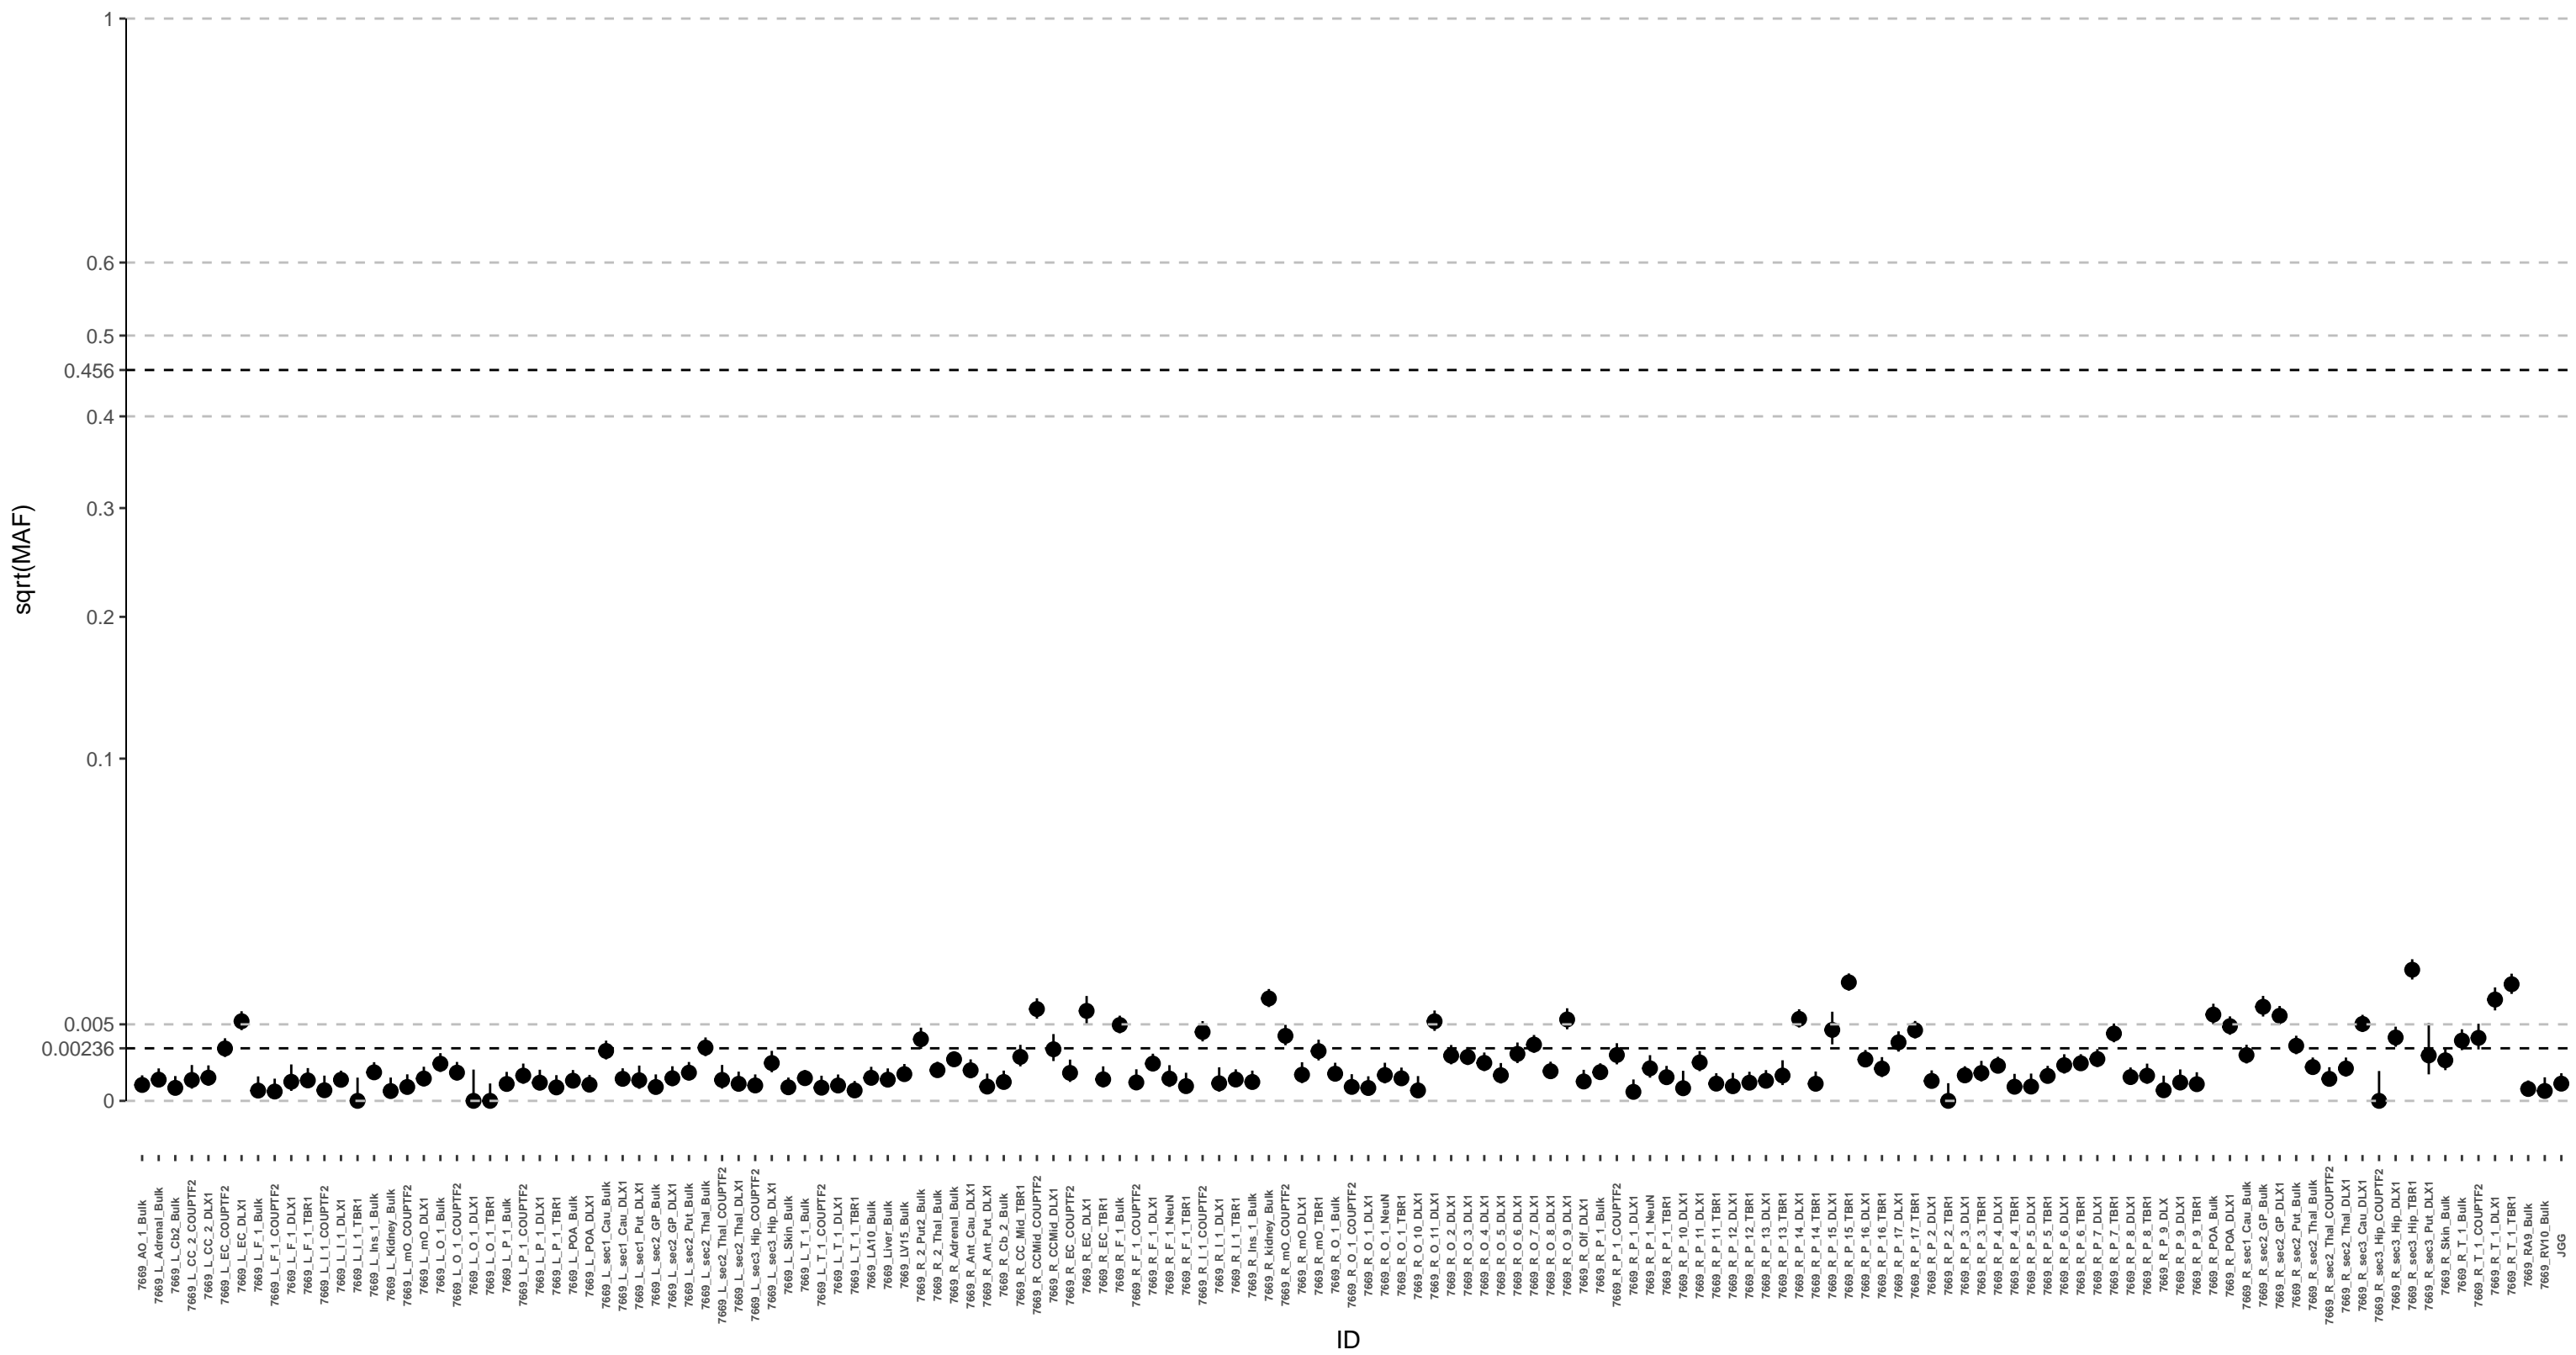

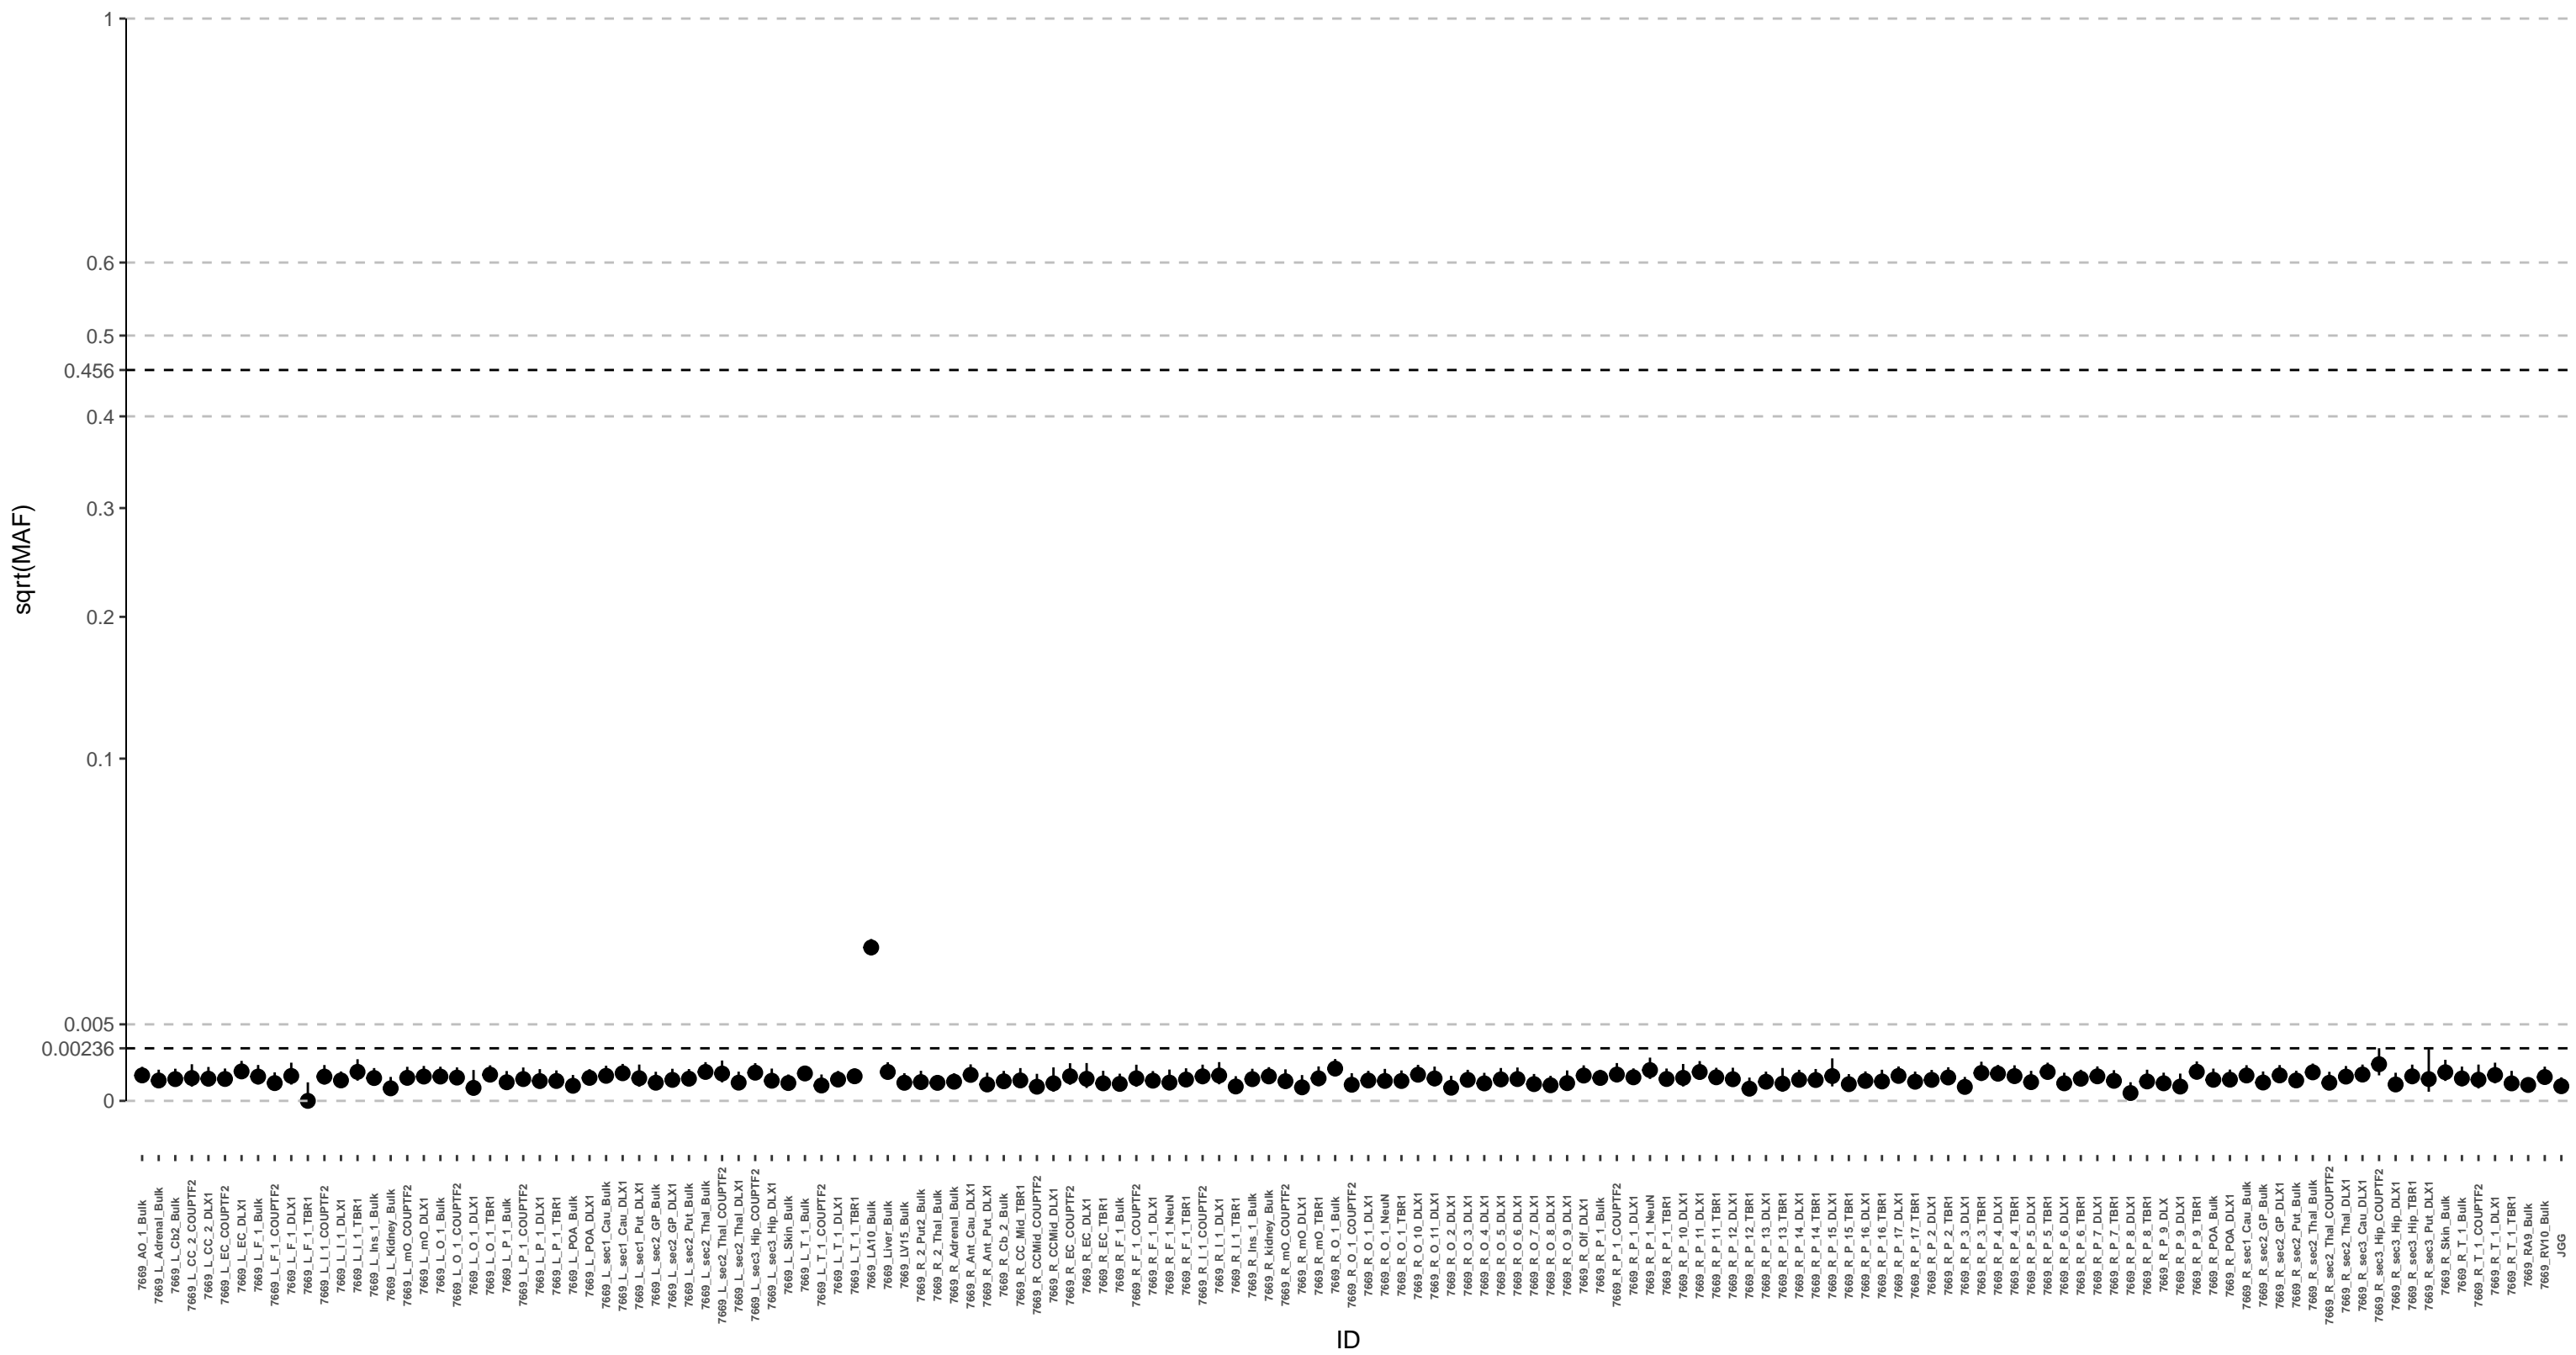

ID05 12-19615034-G-T

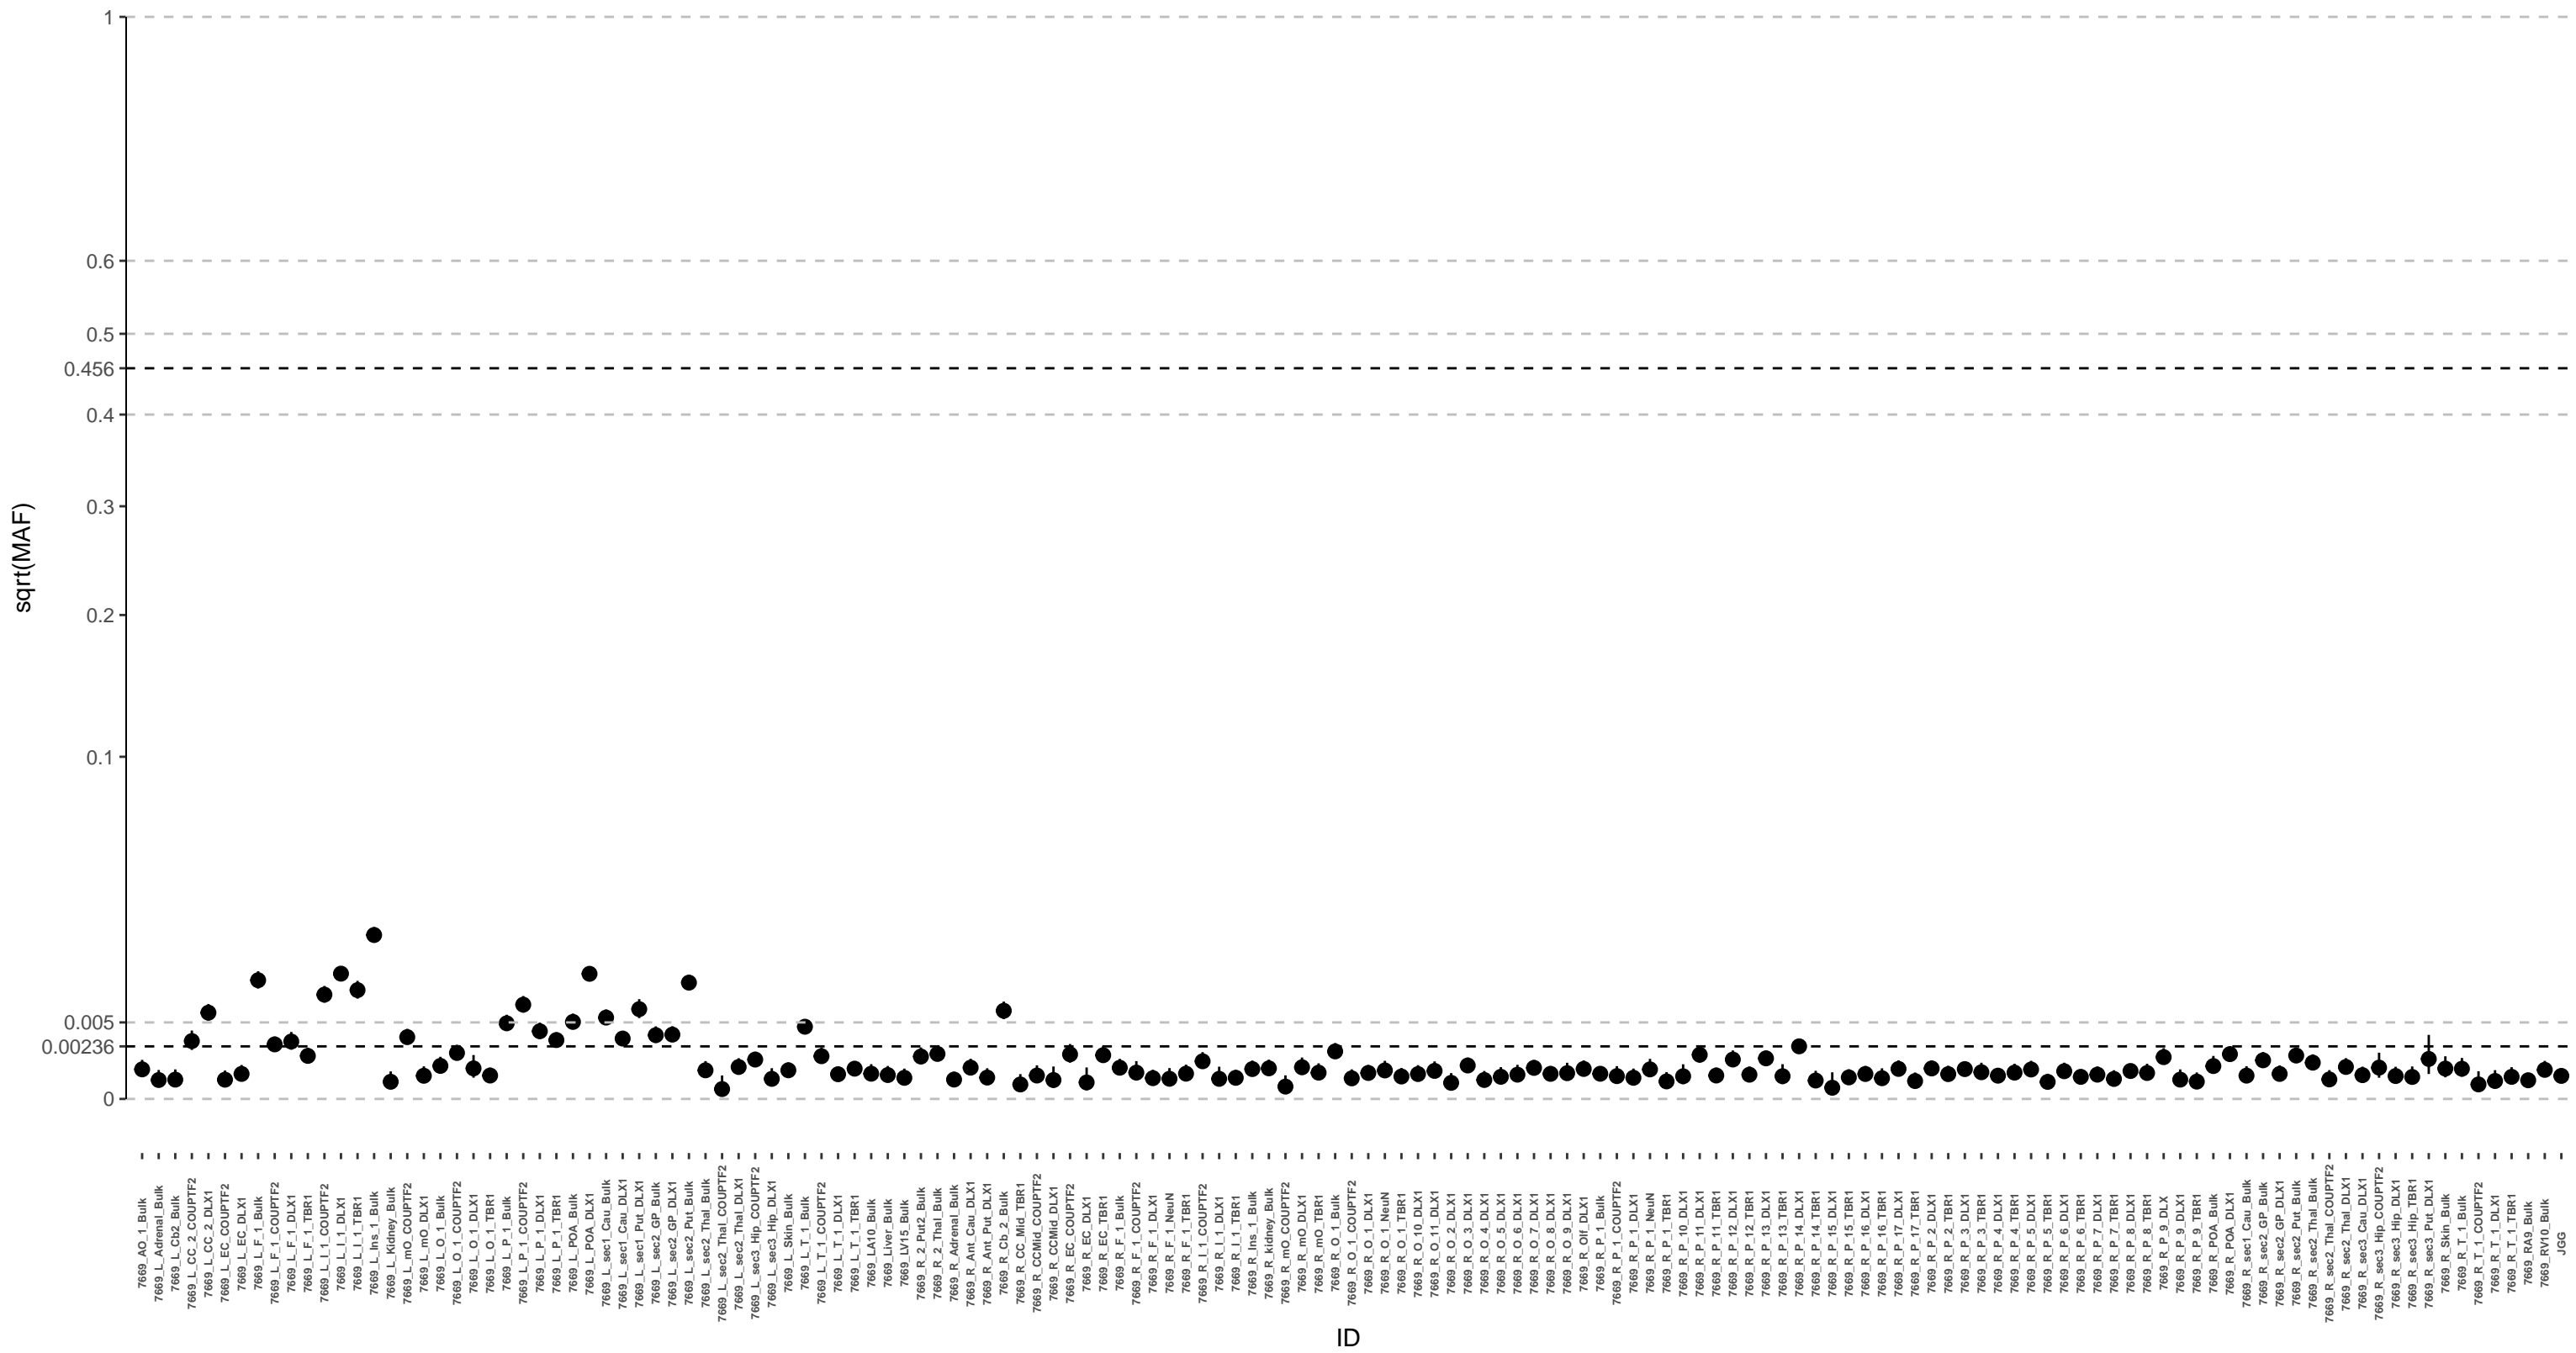

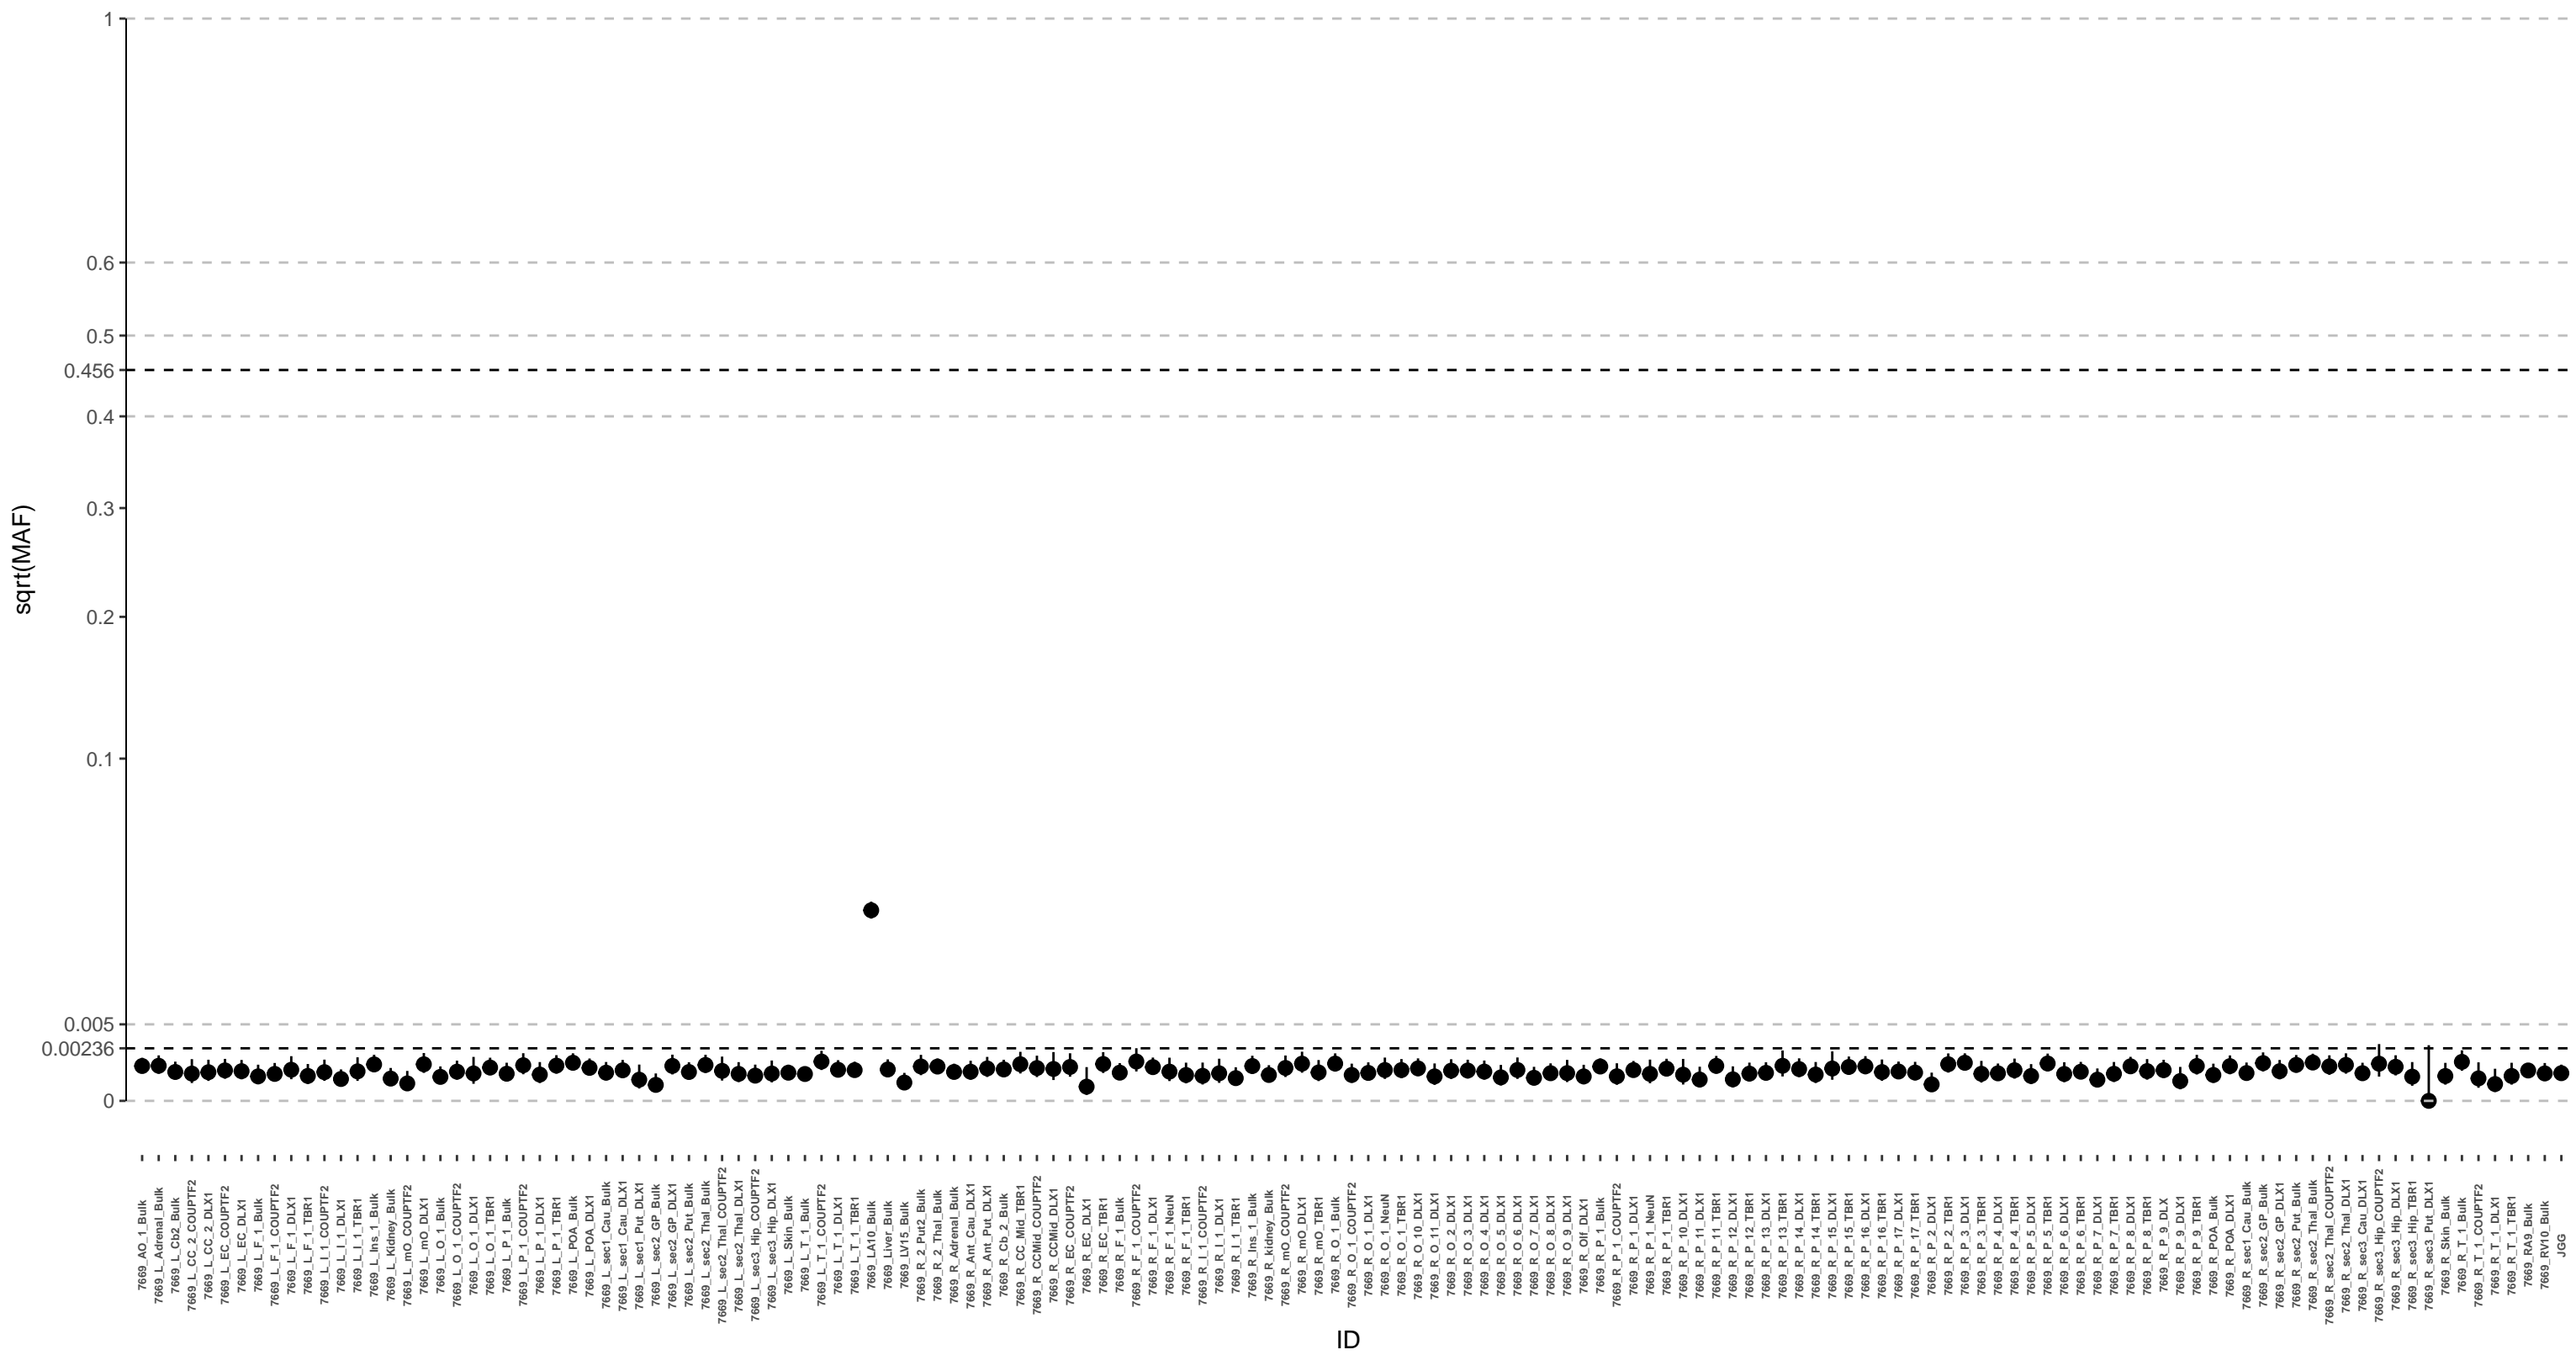

ID05 12-2204021-A-G

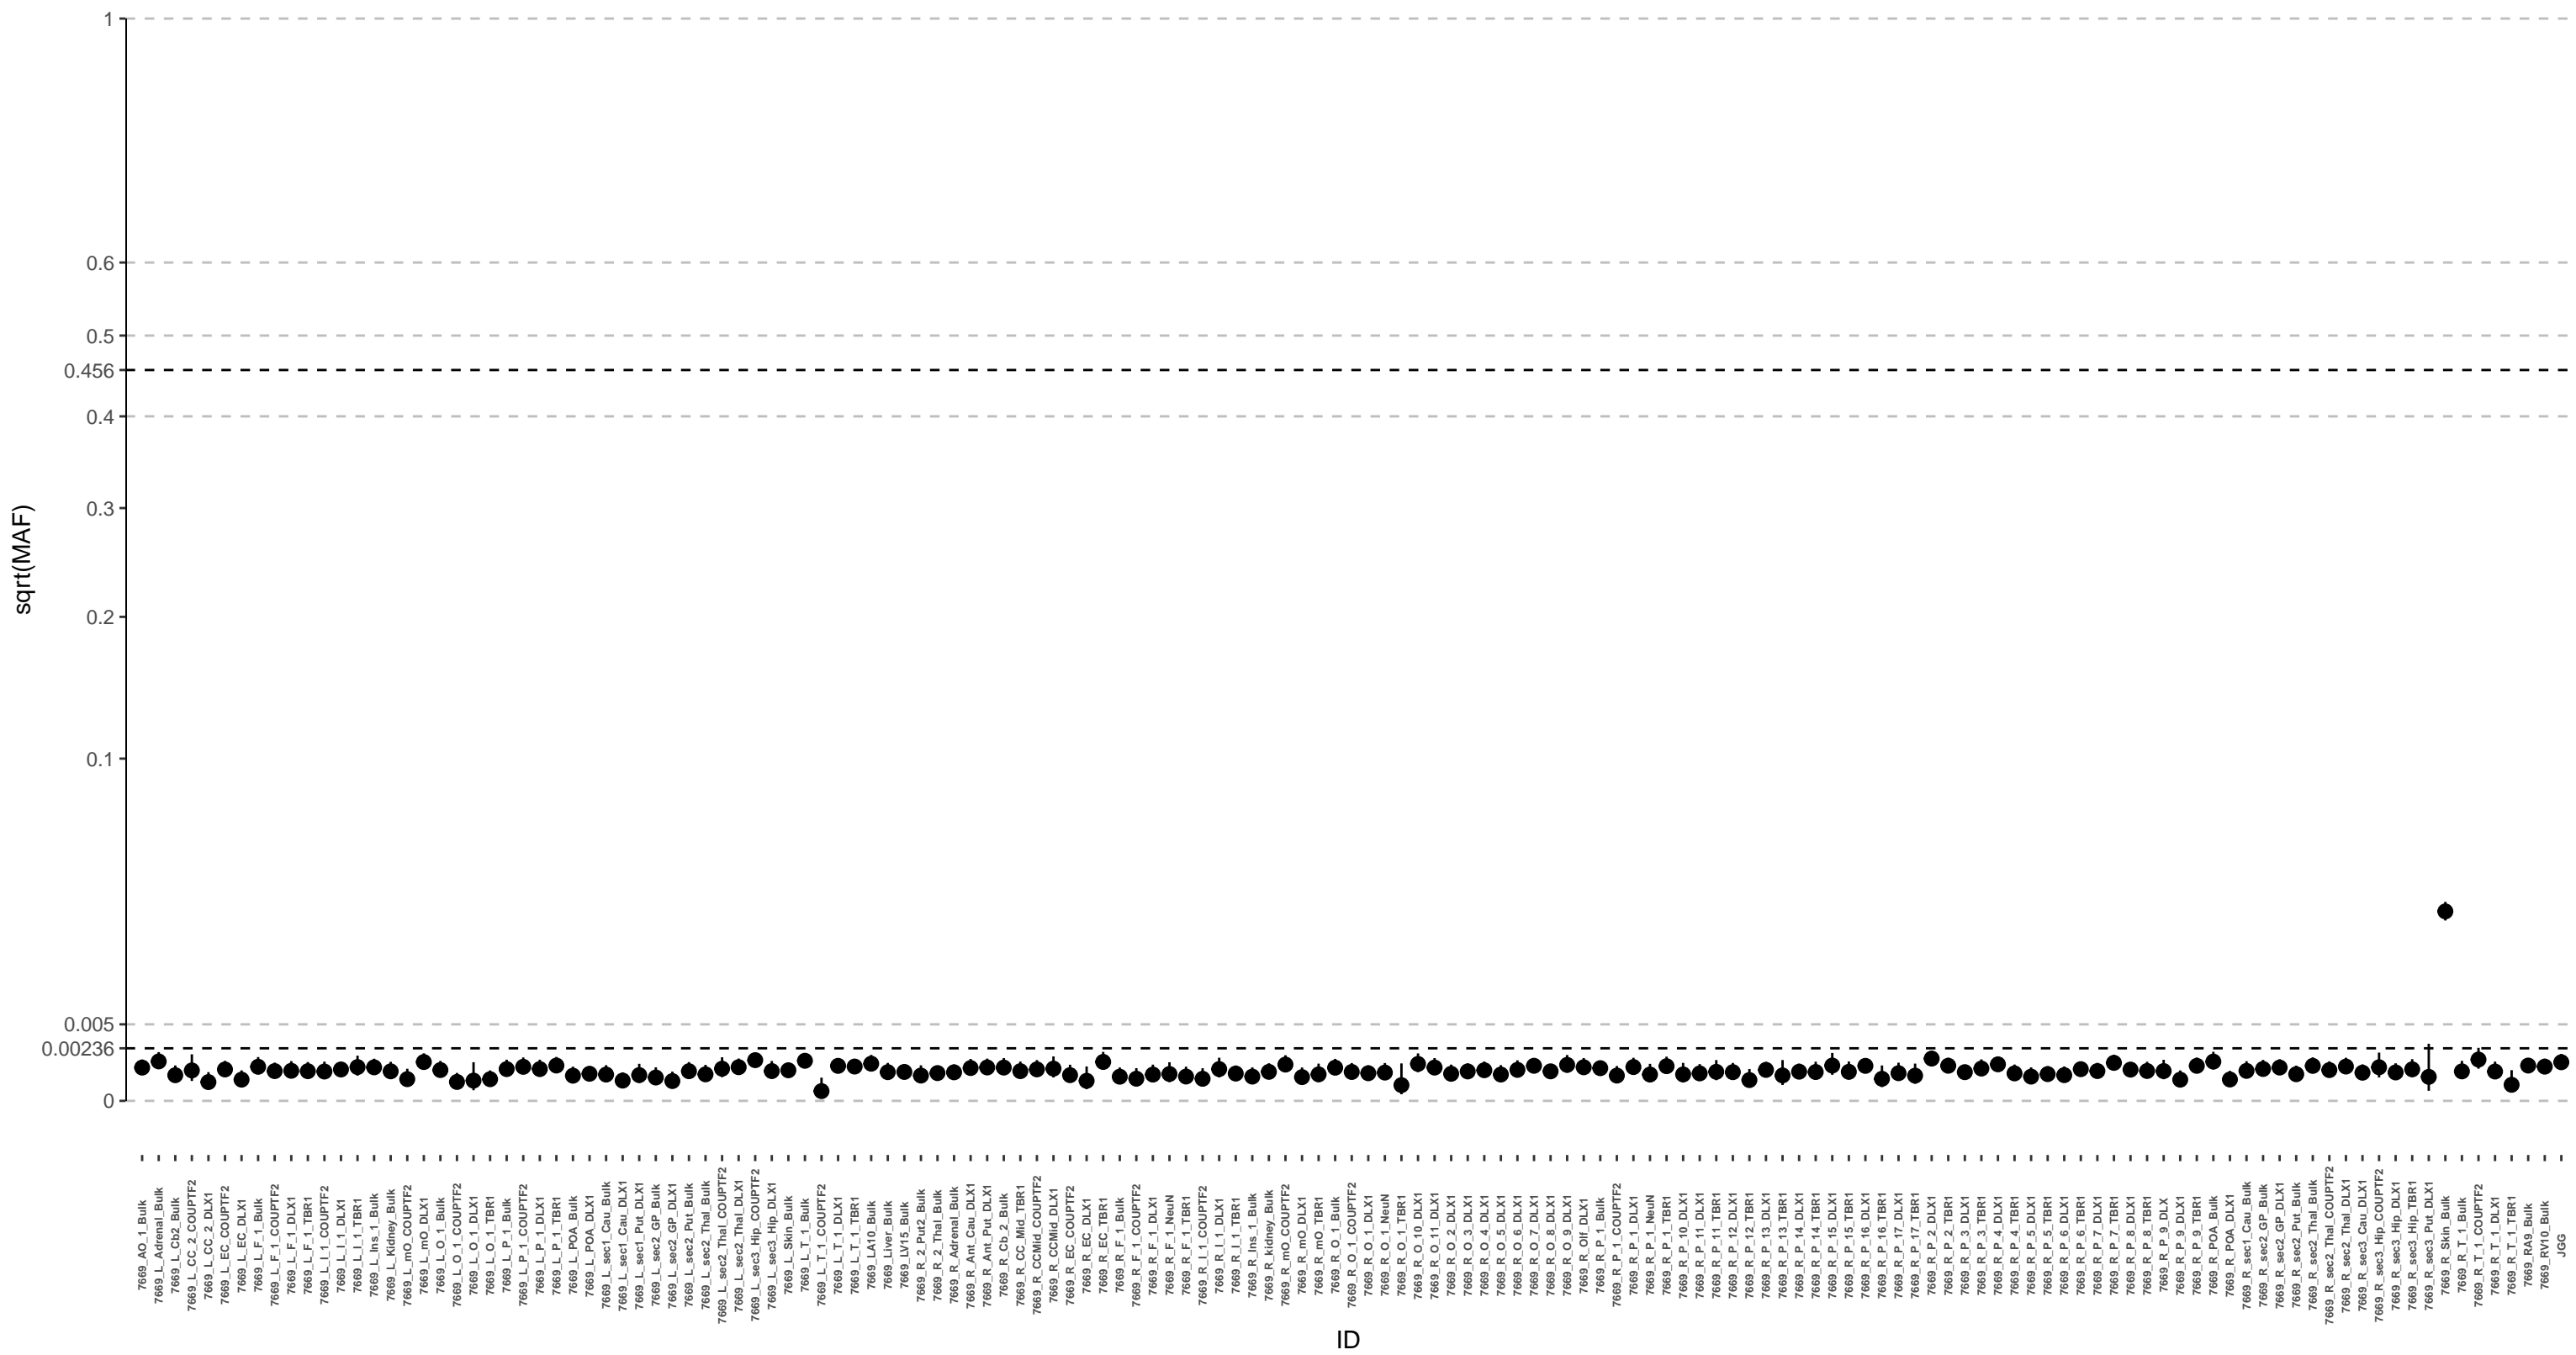



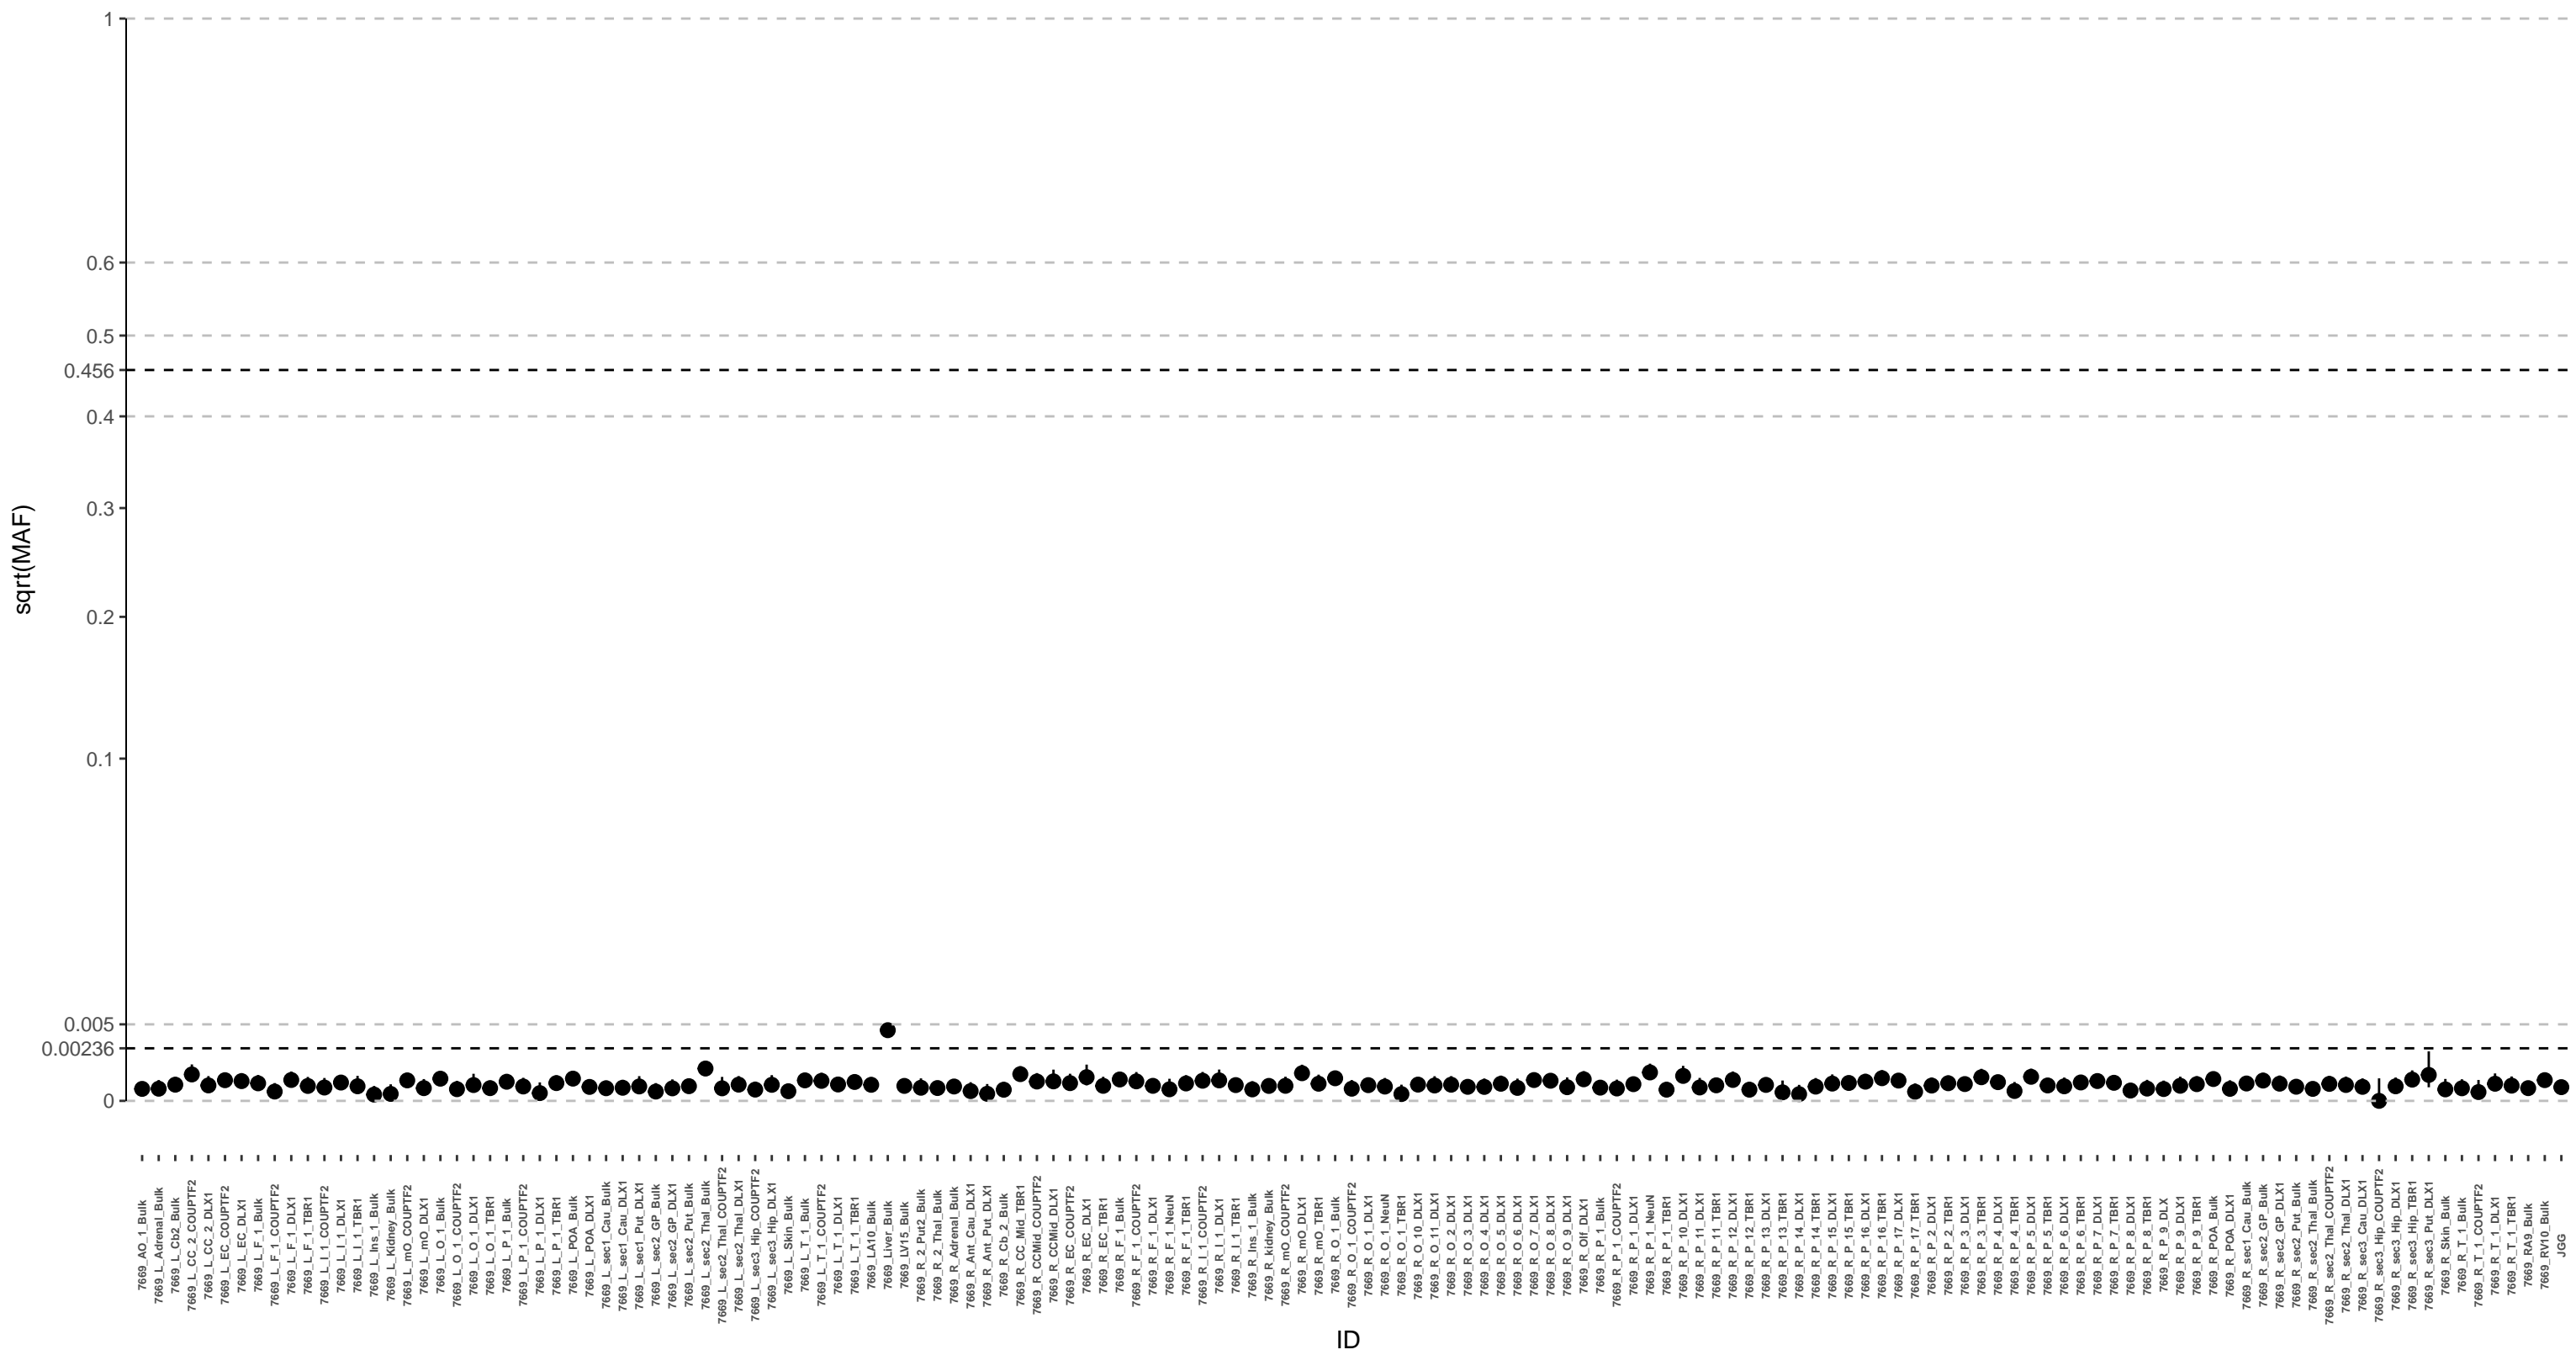

ID05 12-55677268-C-A

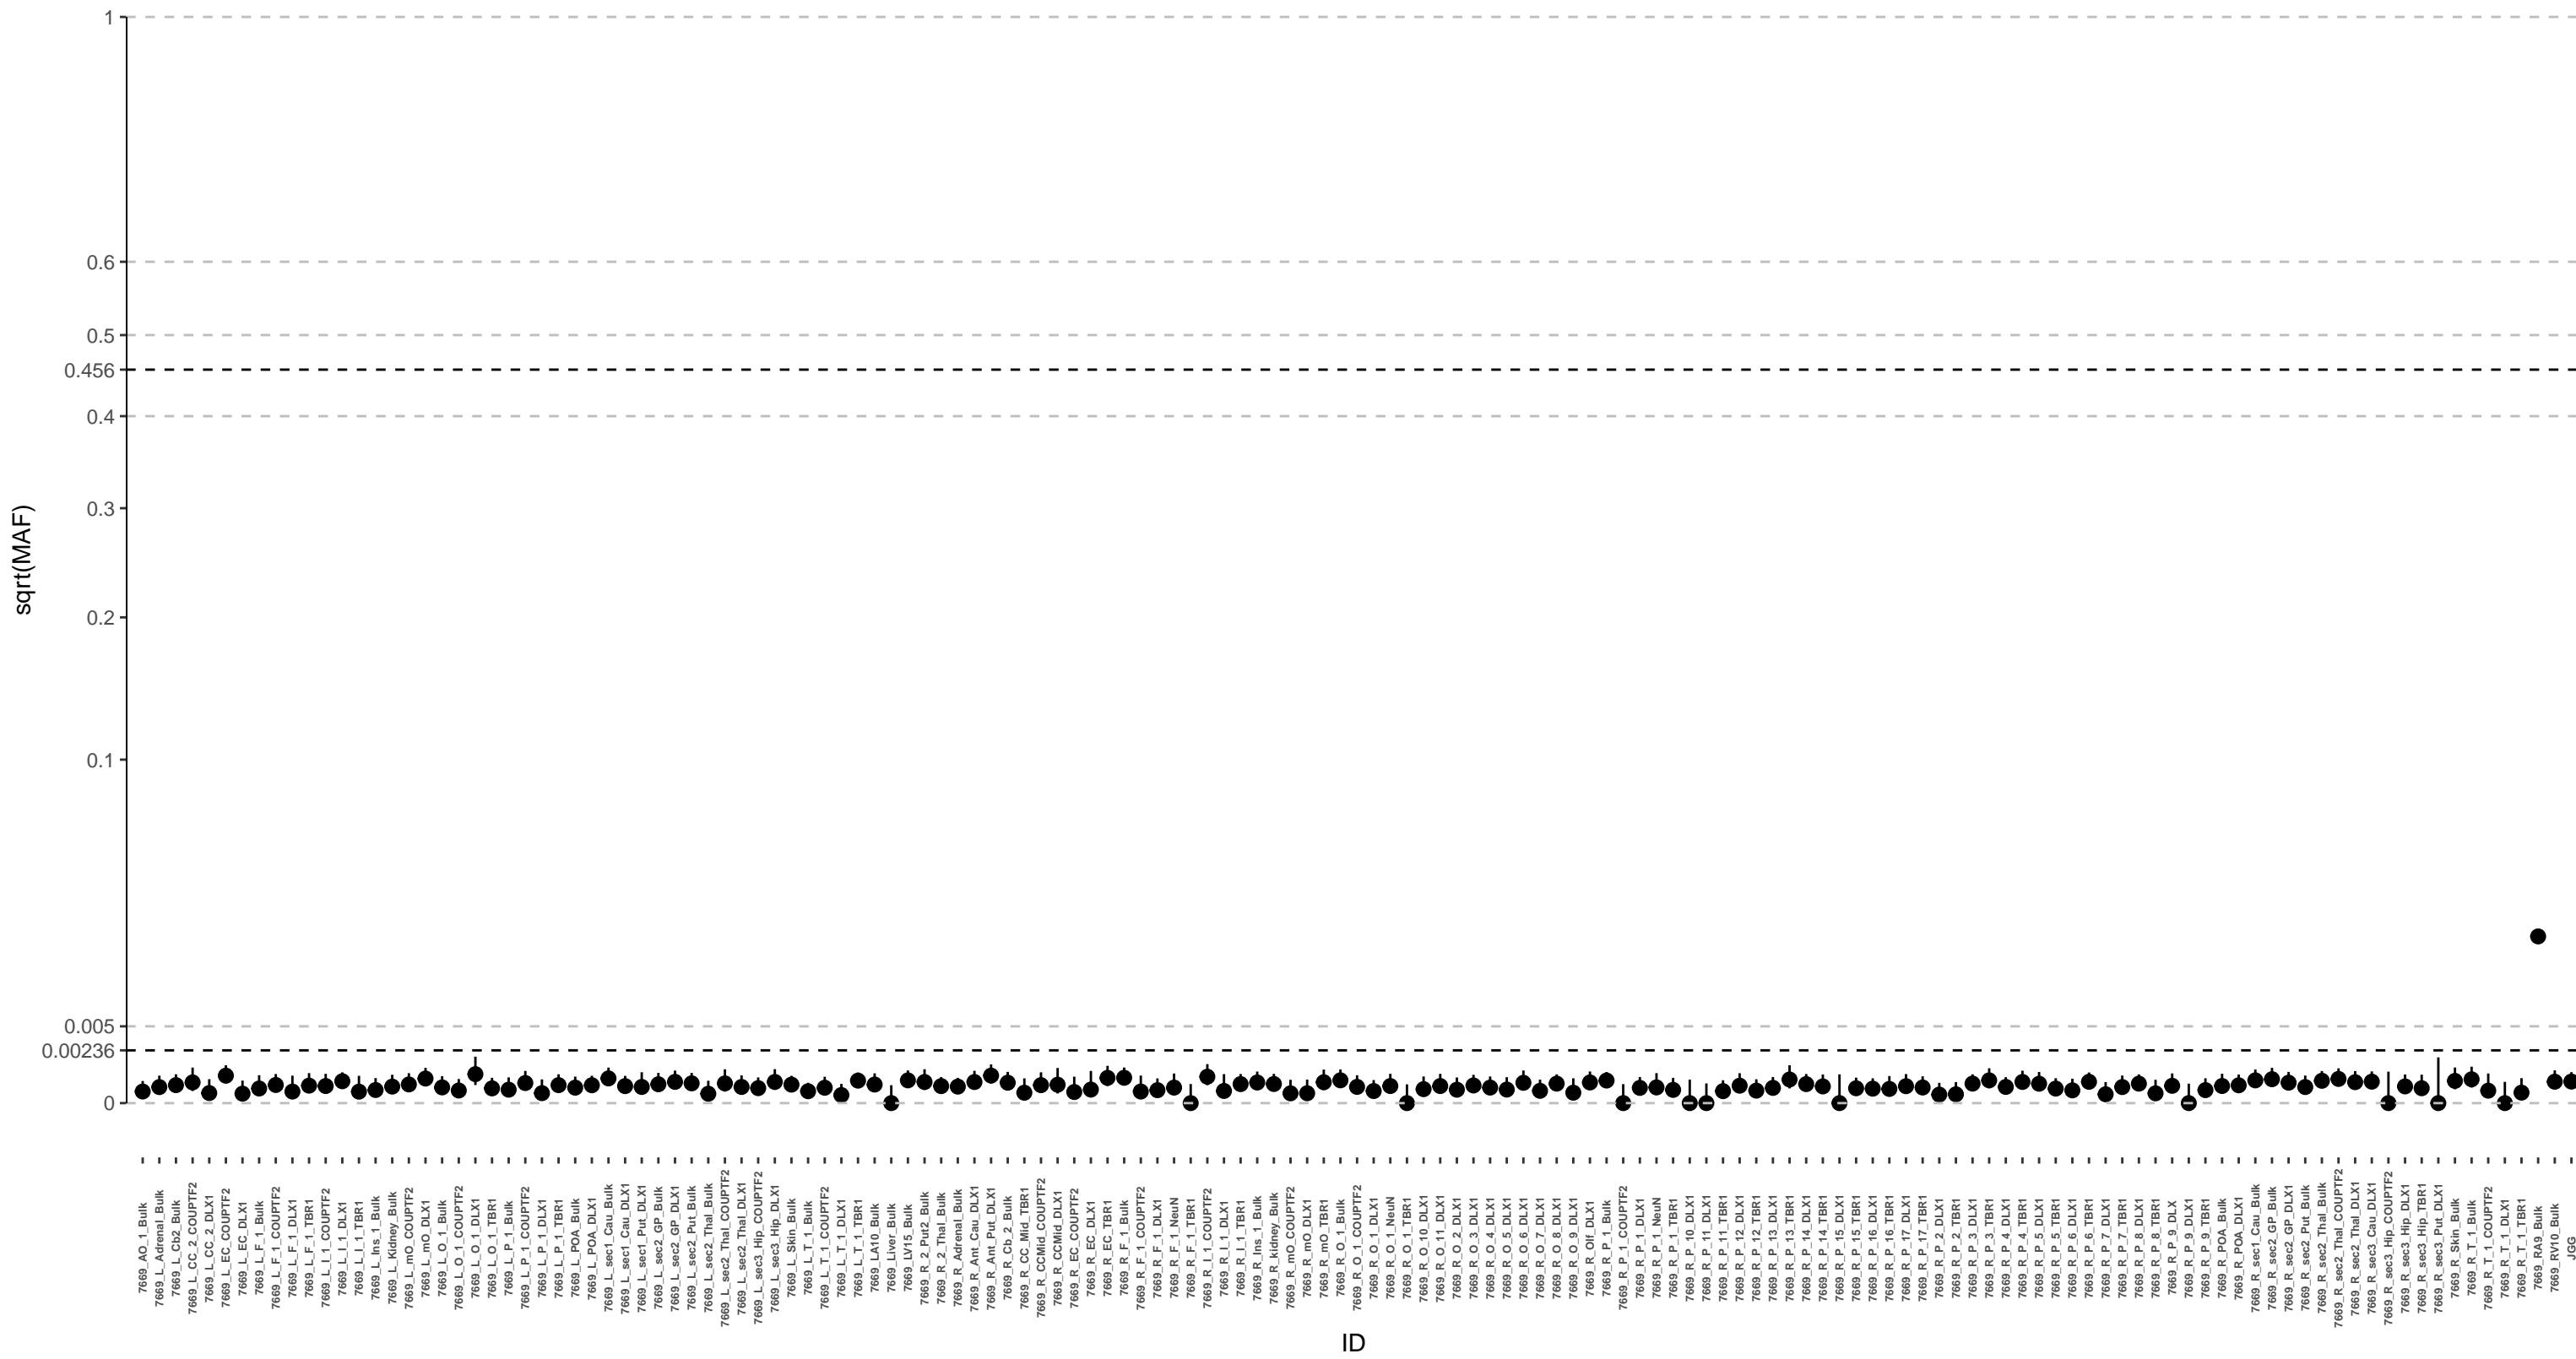

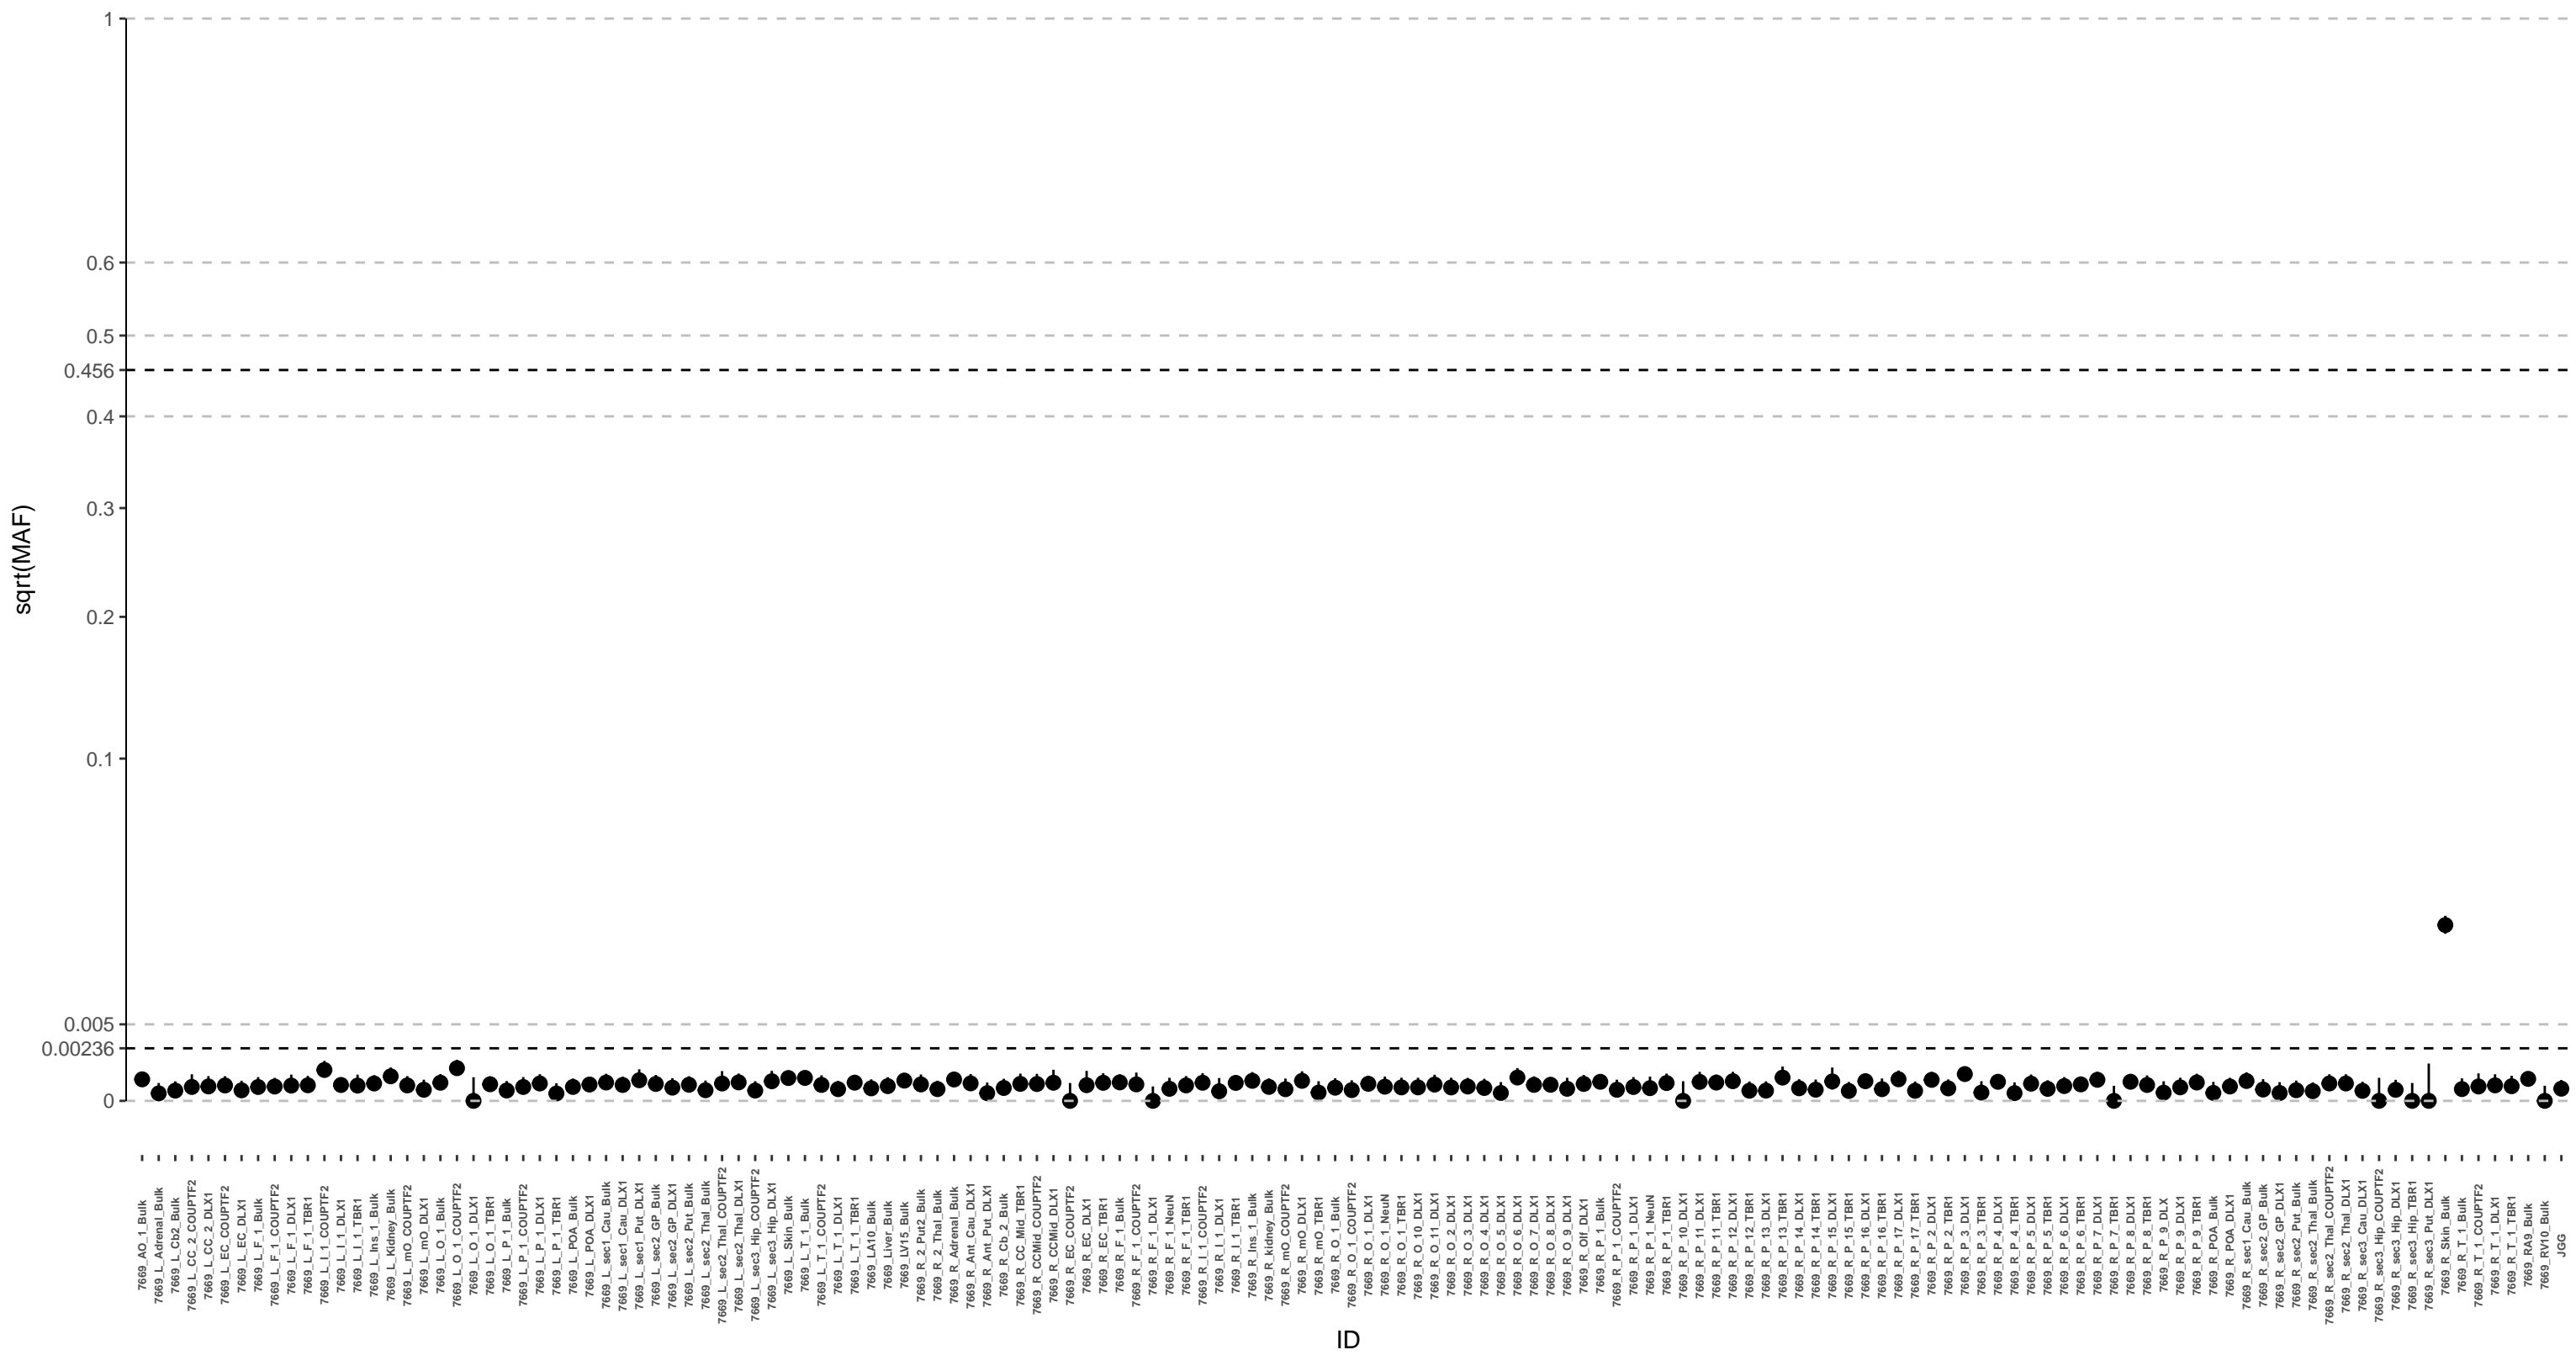

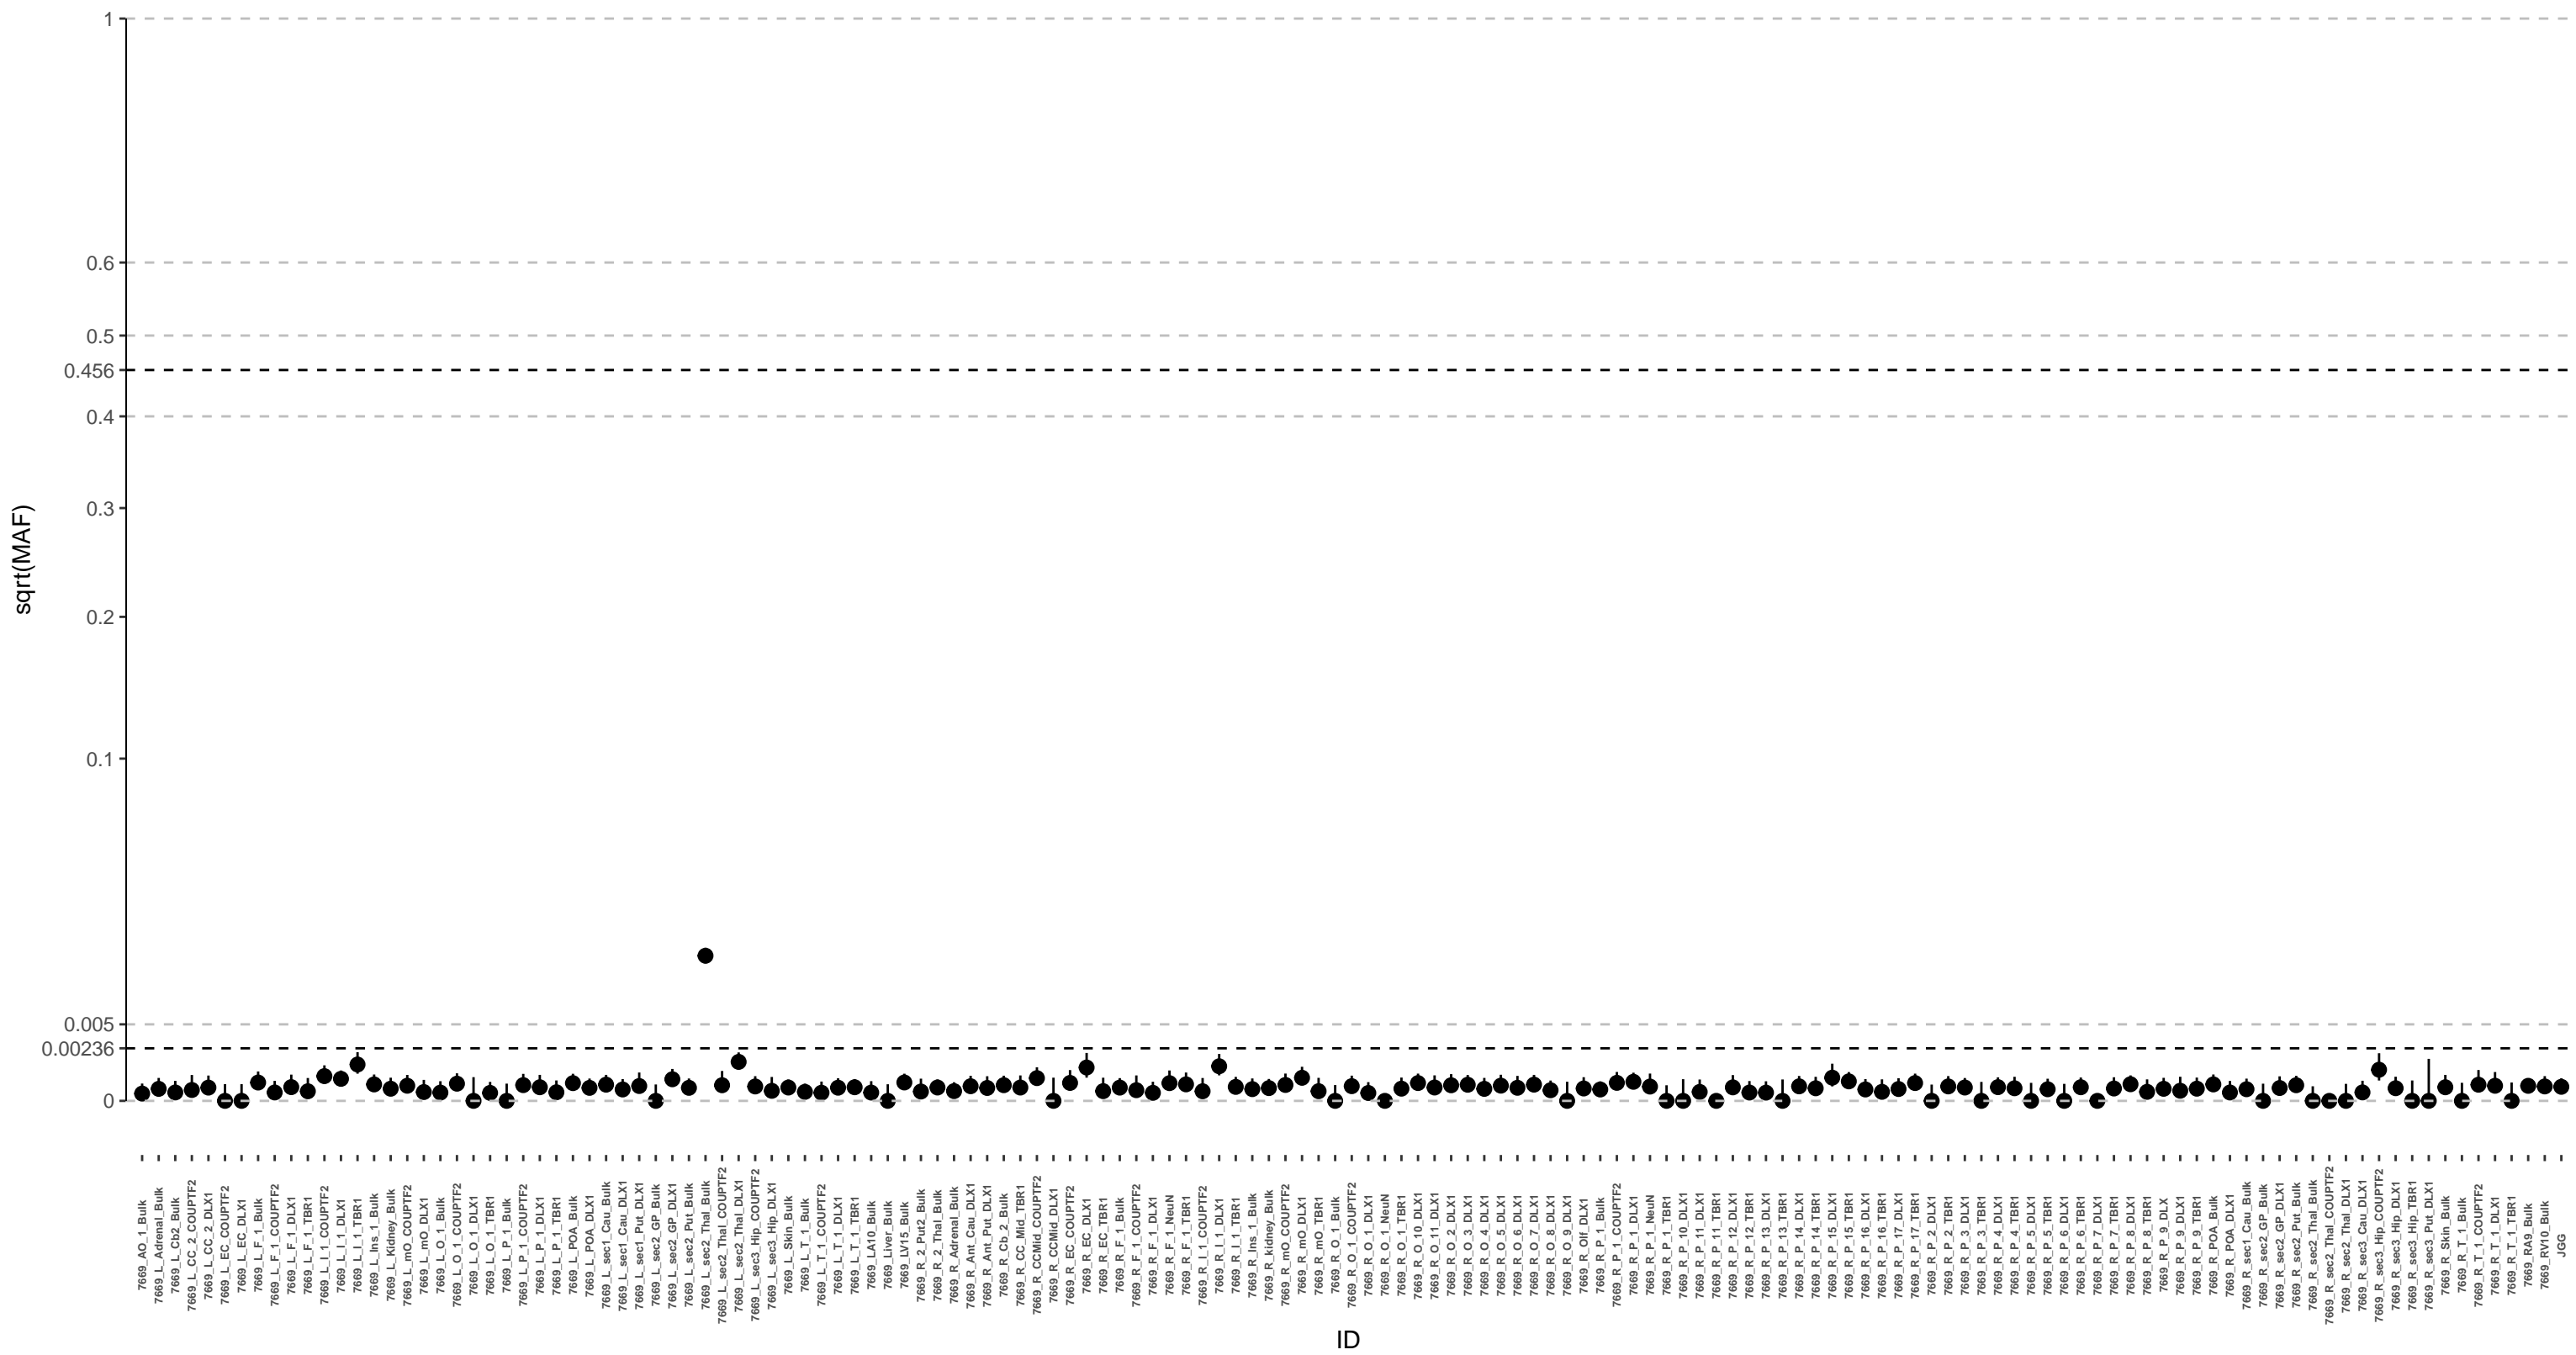

ID05 12-78761941-A-T

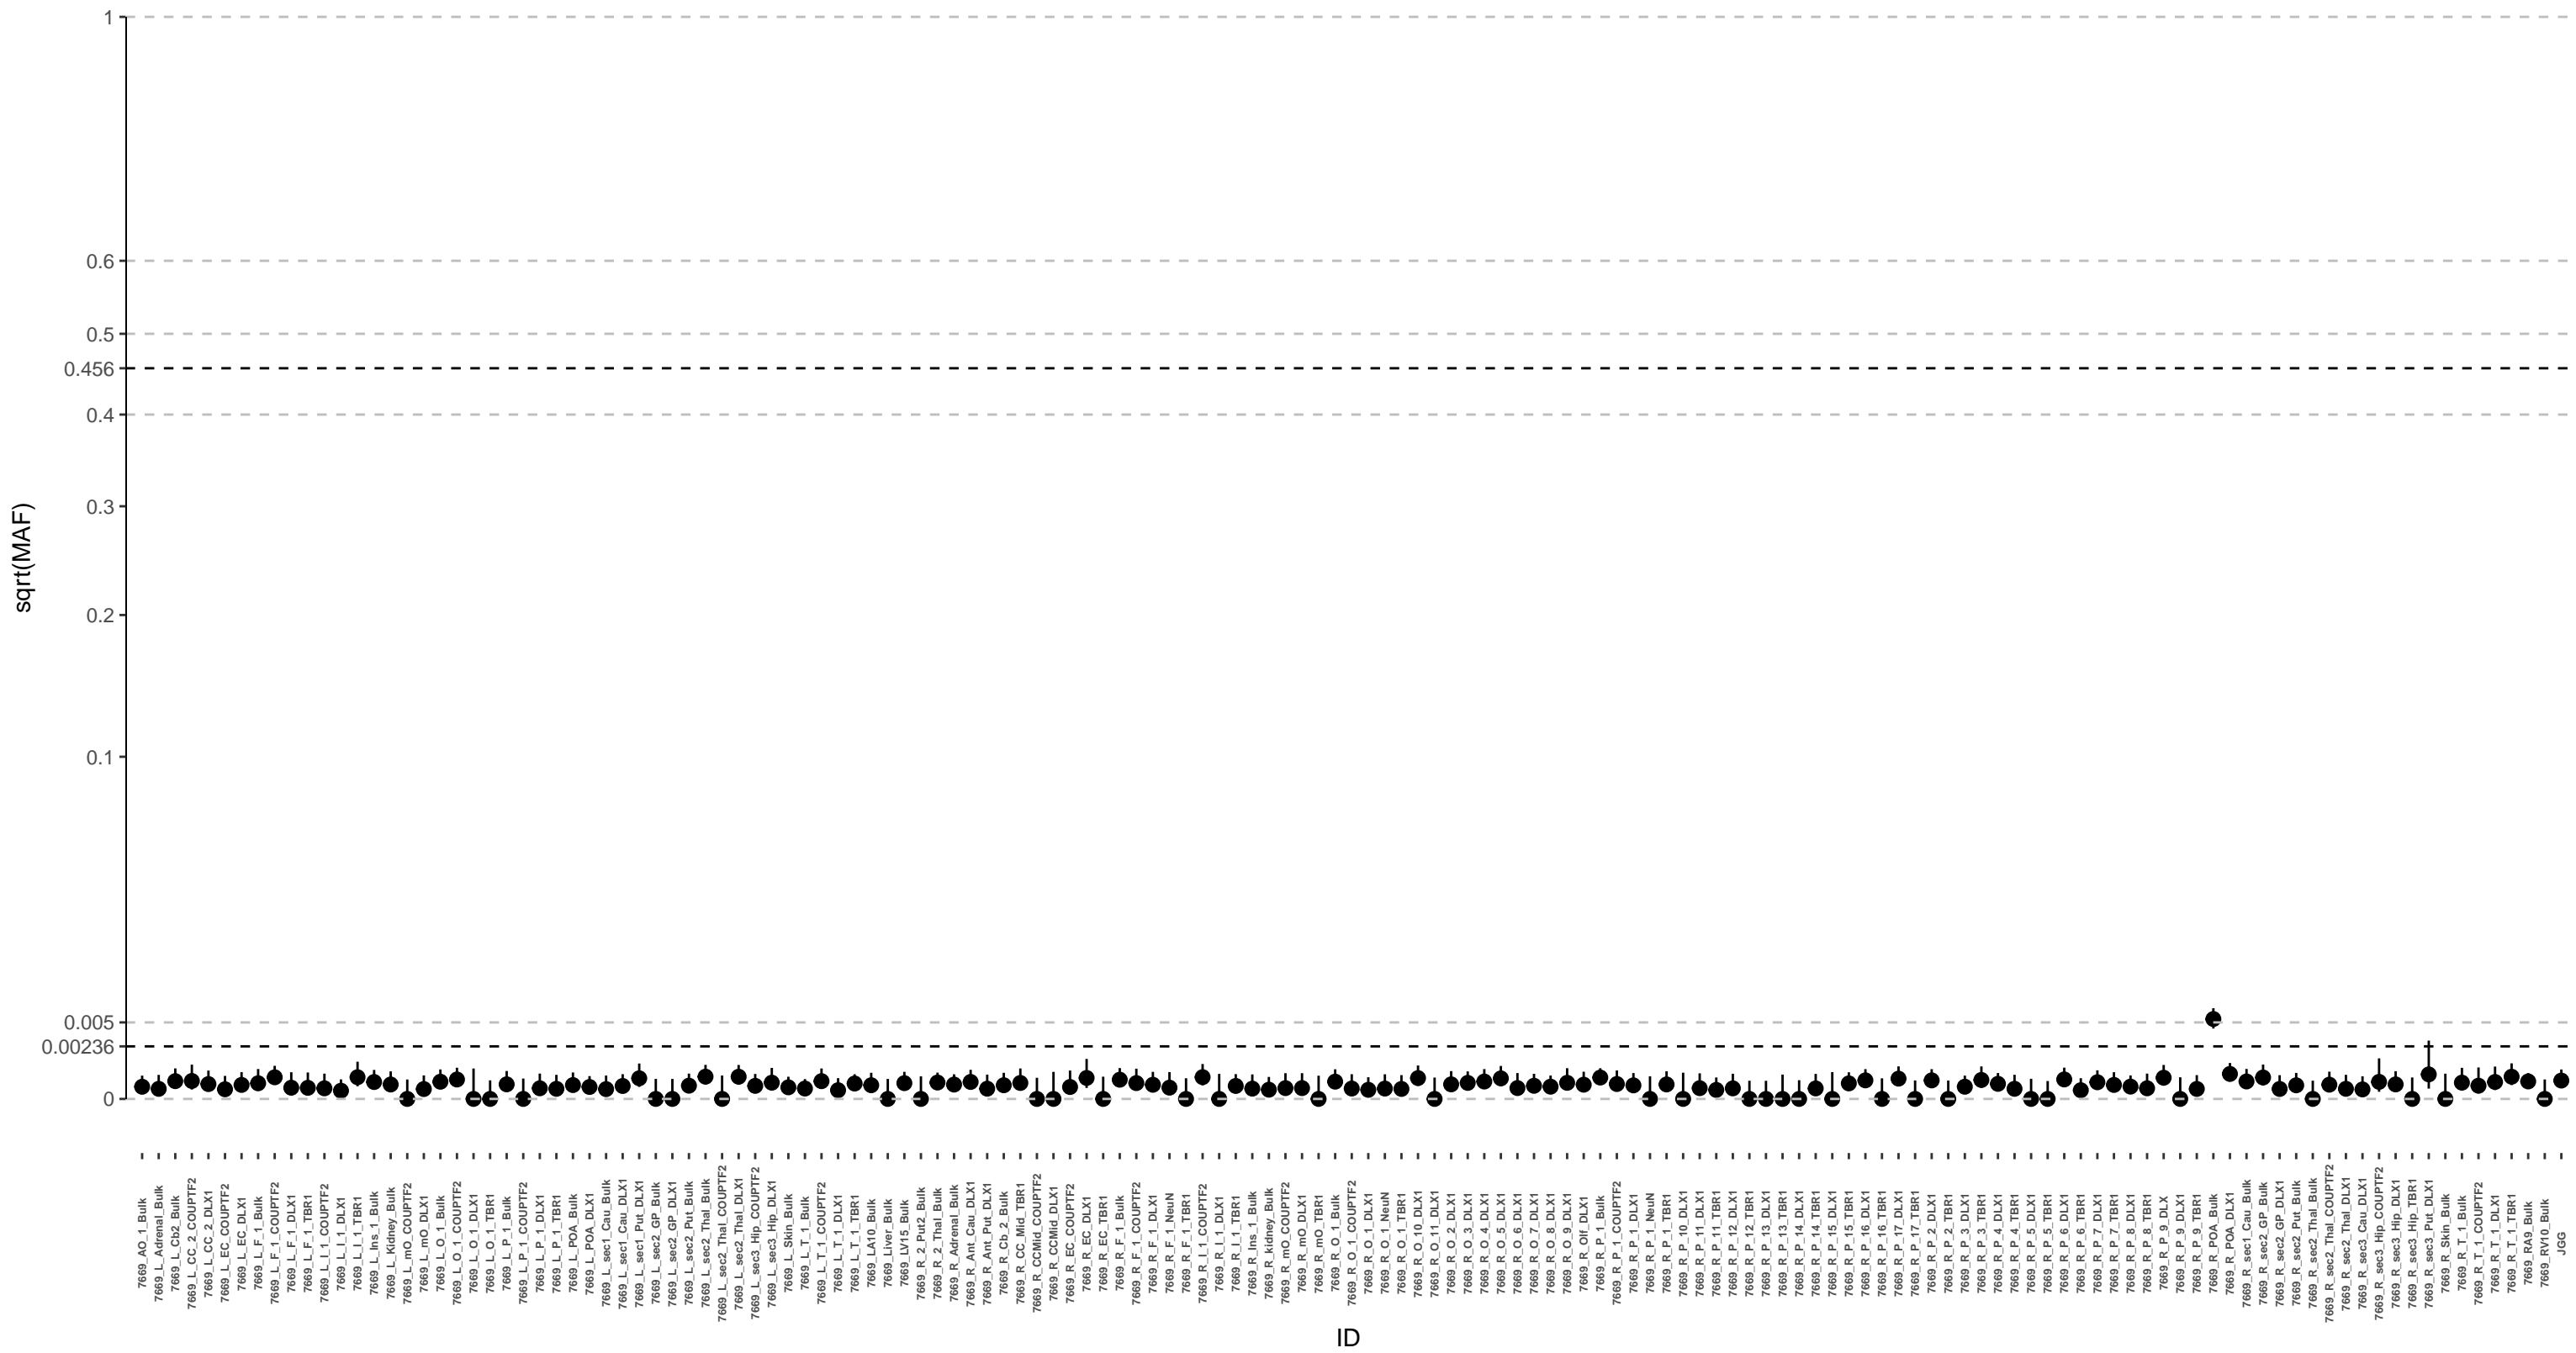

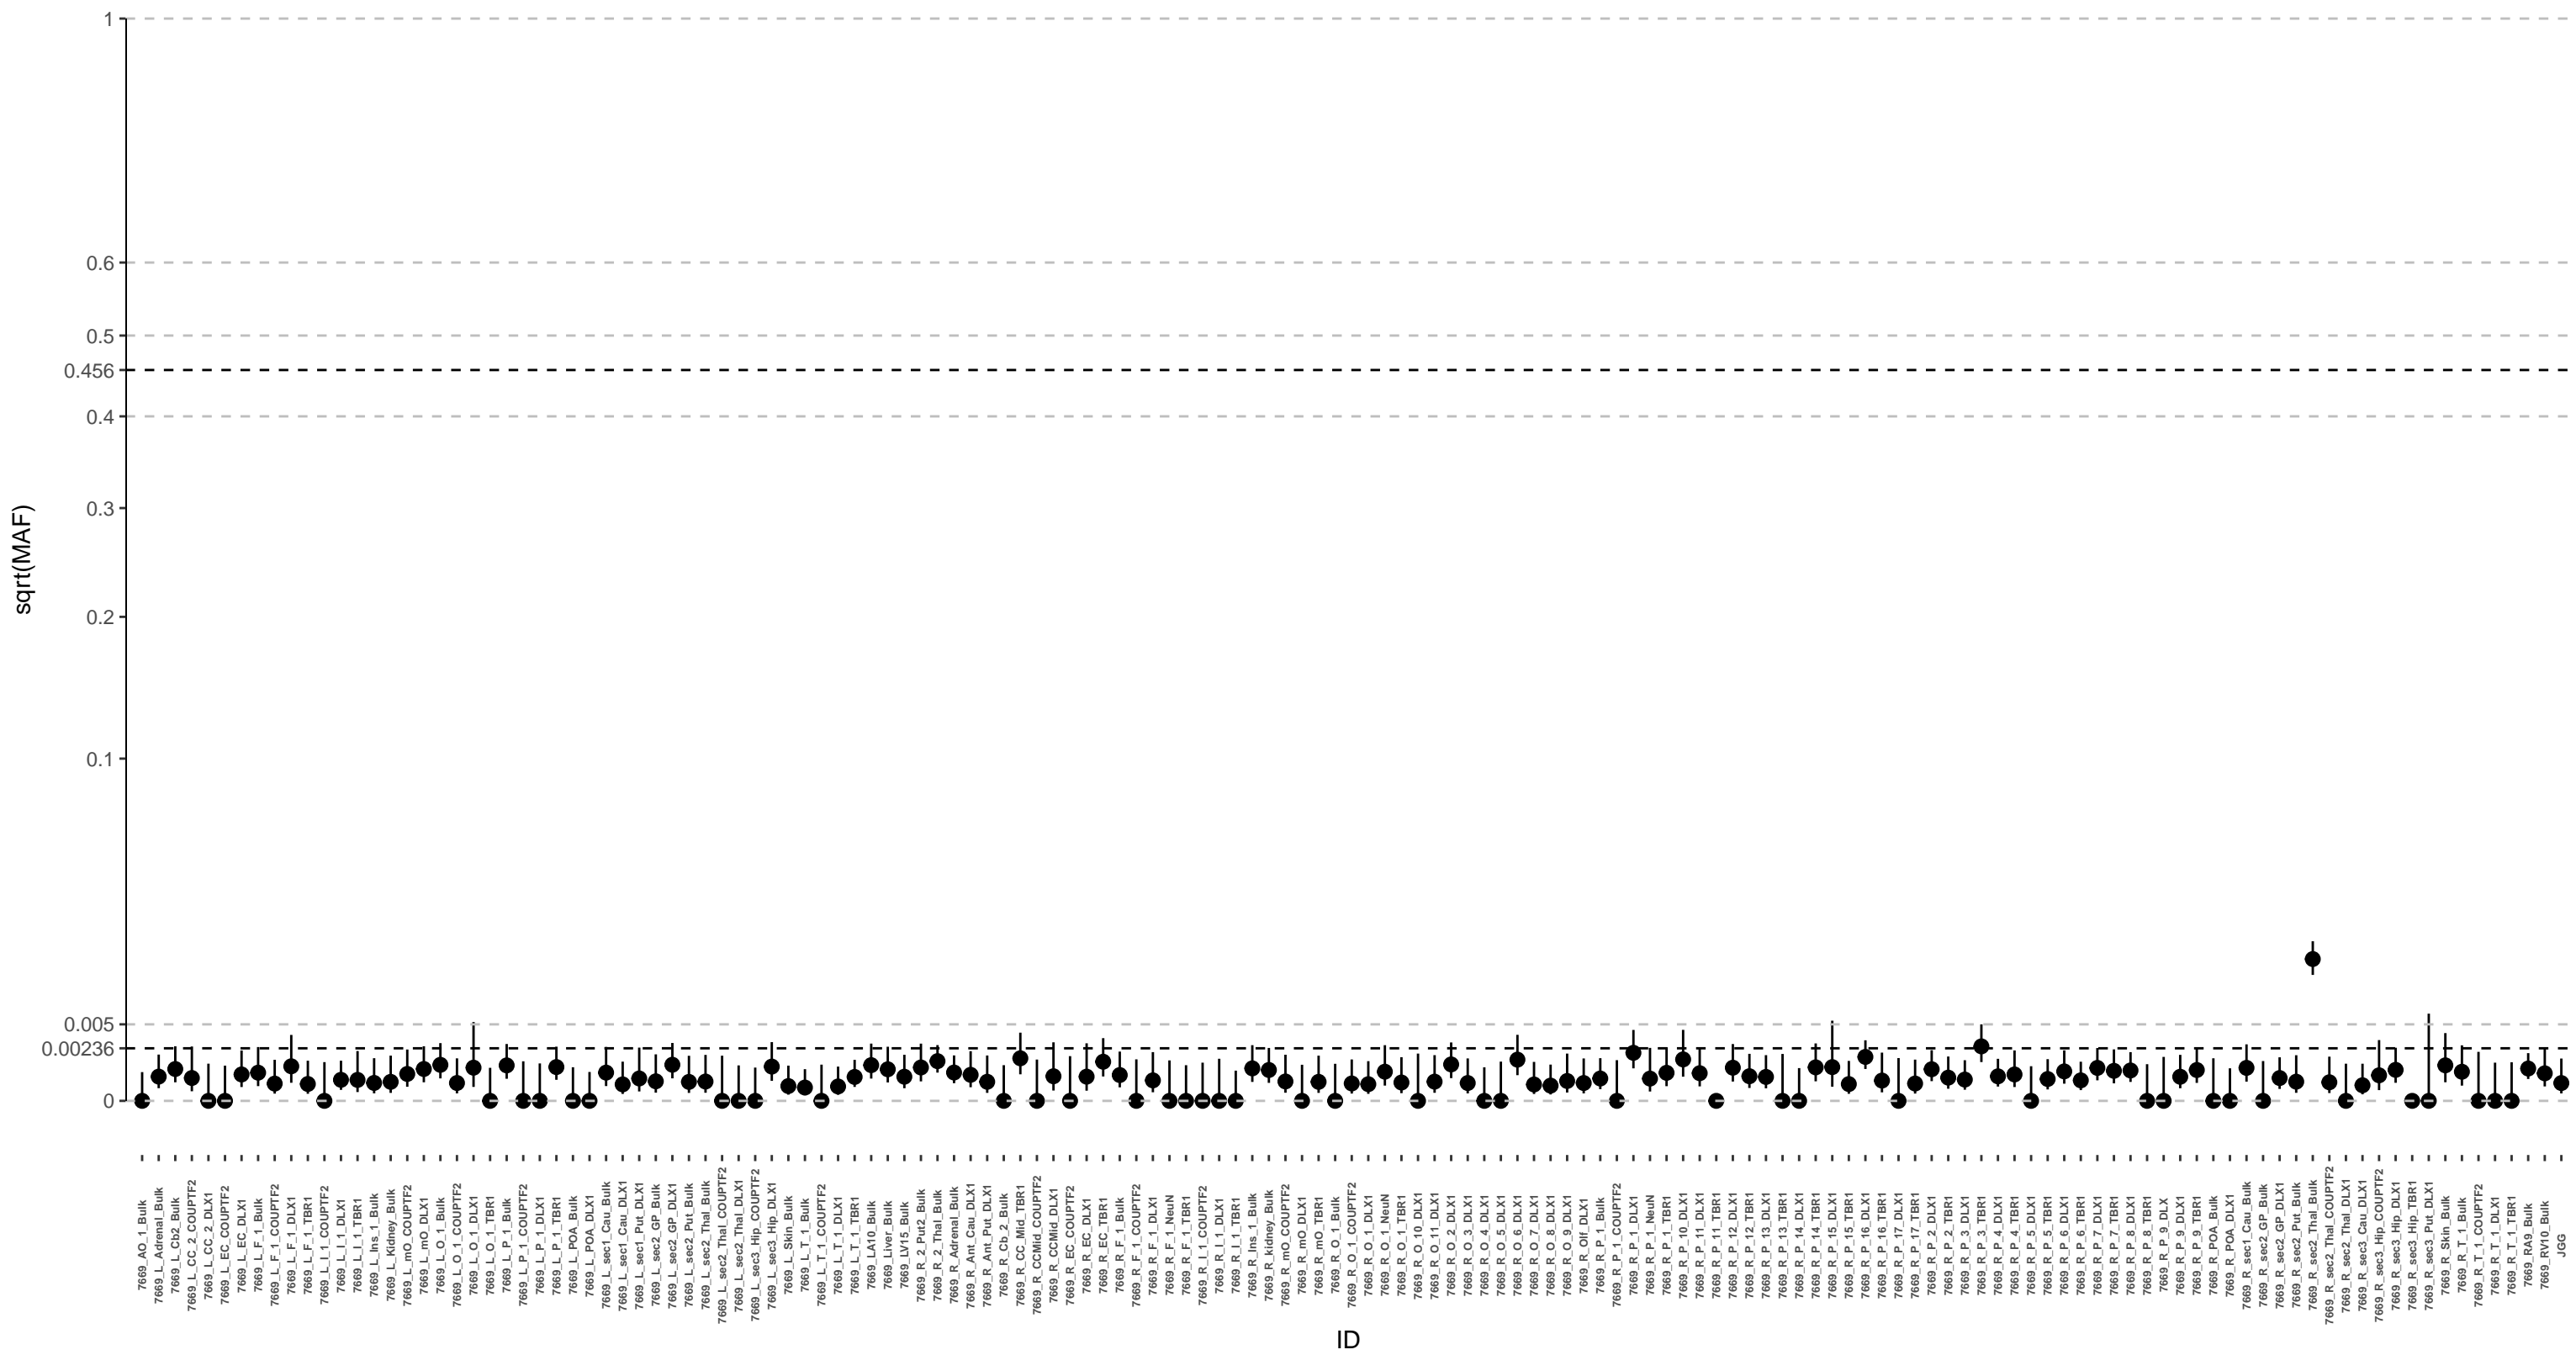

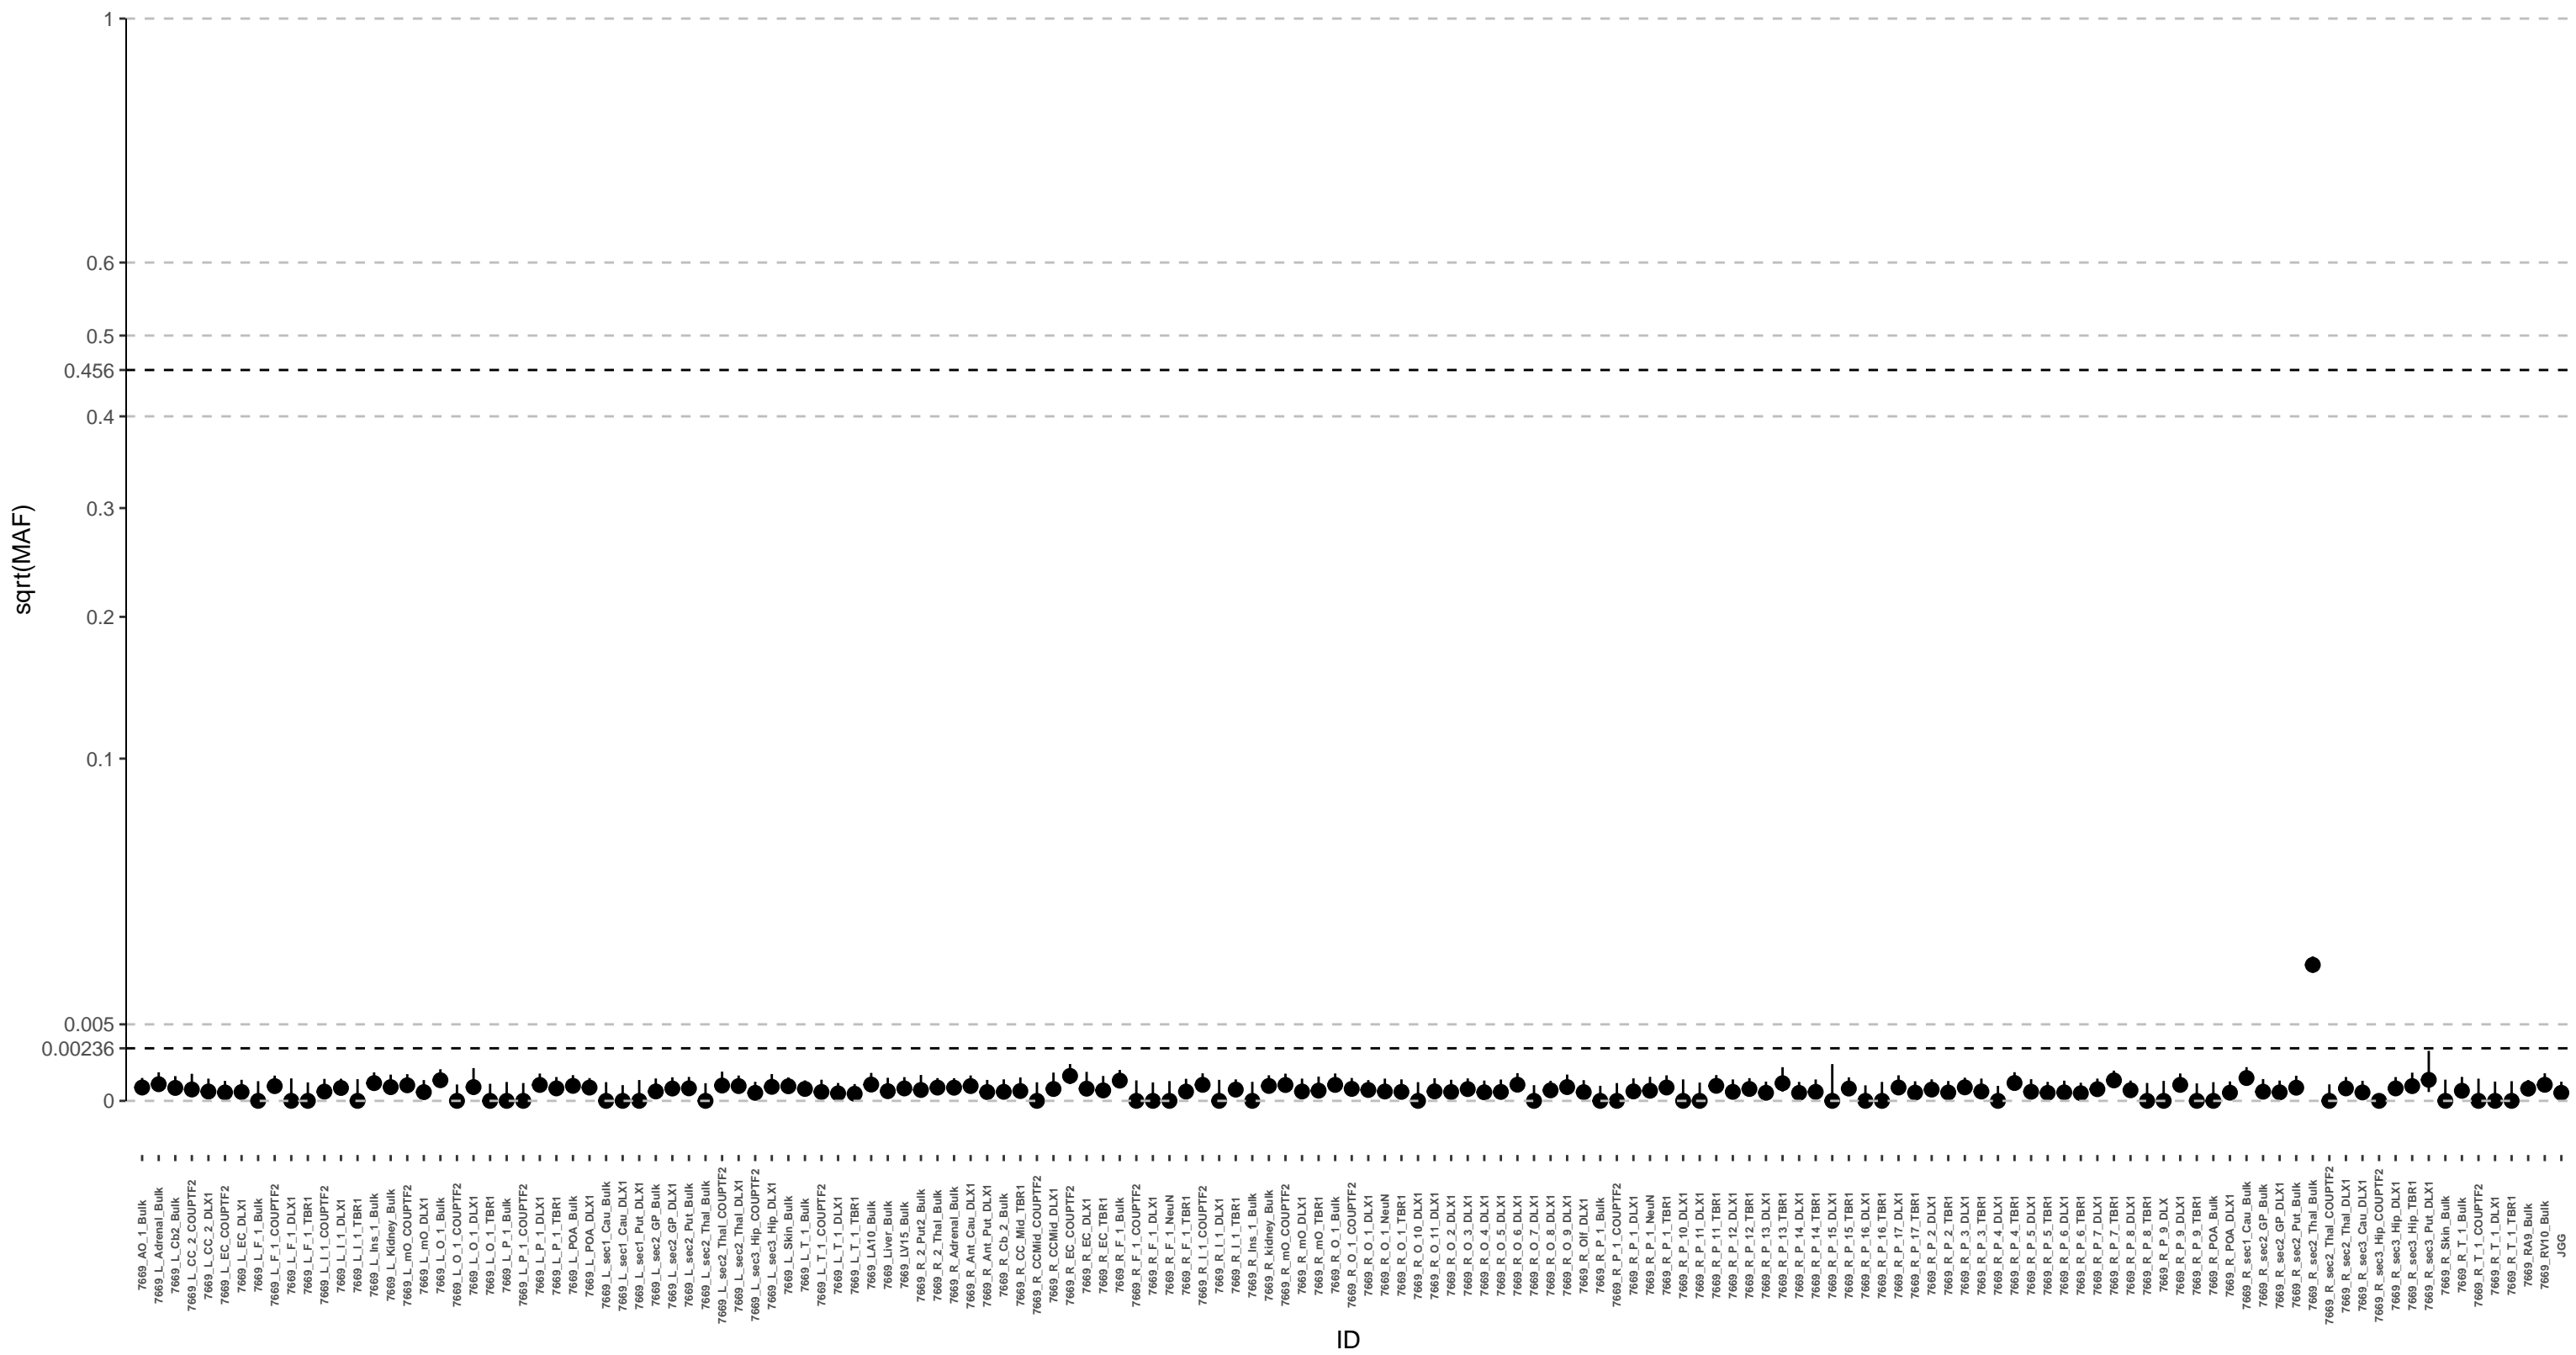

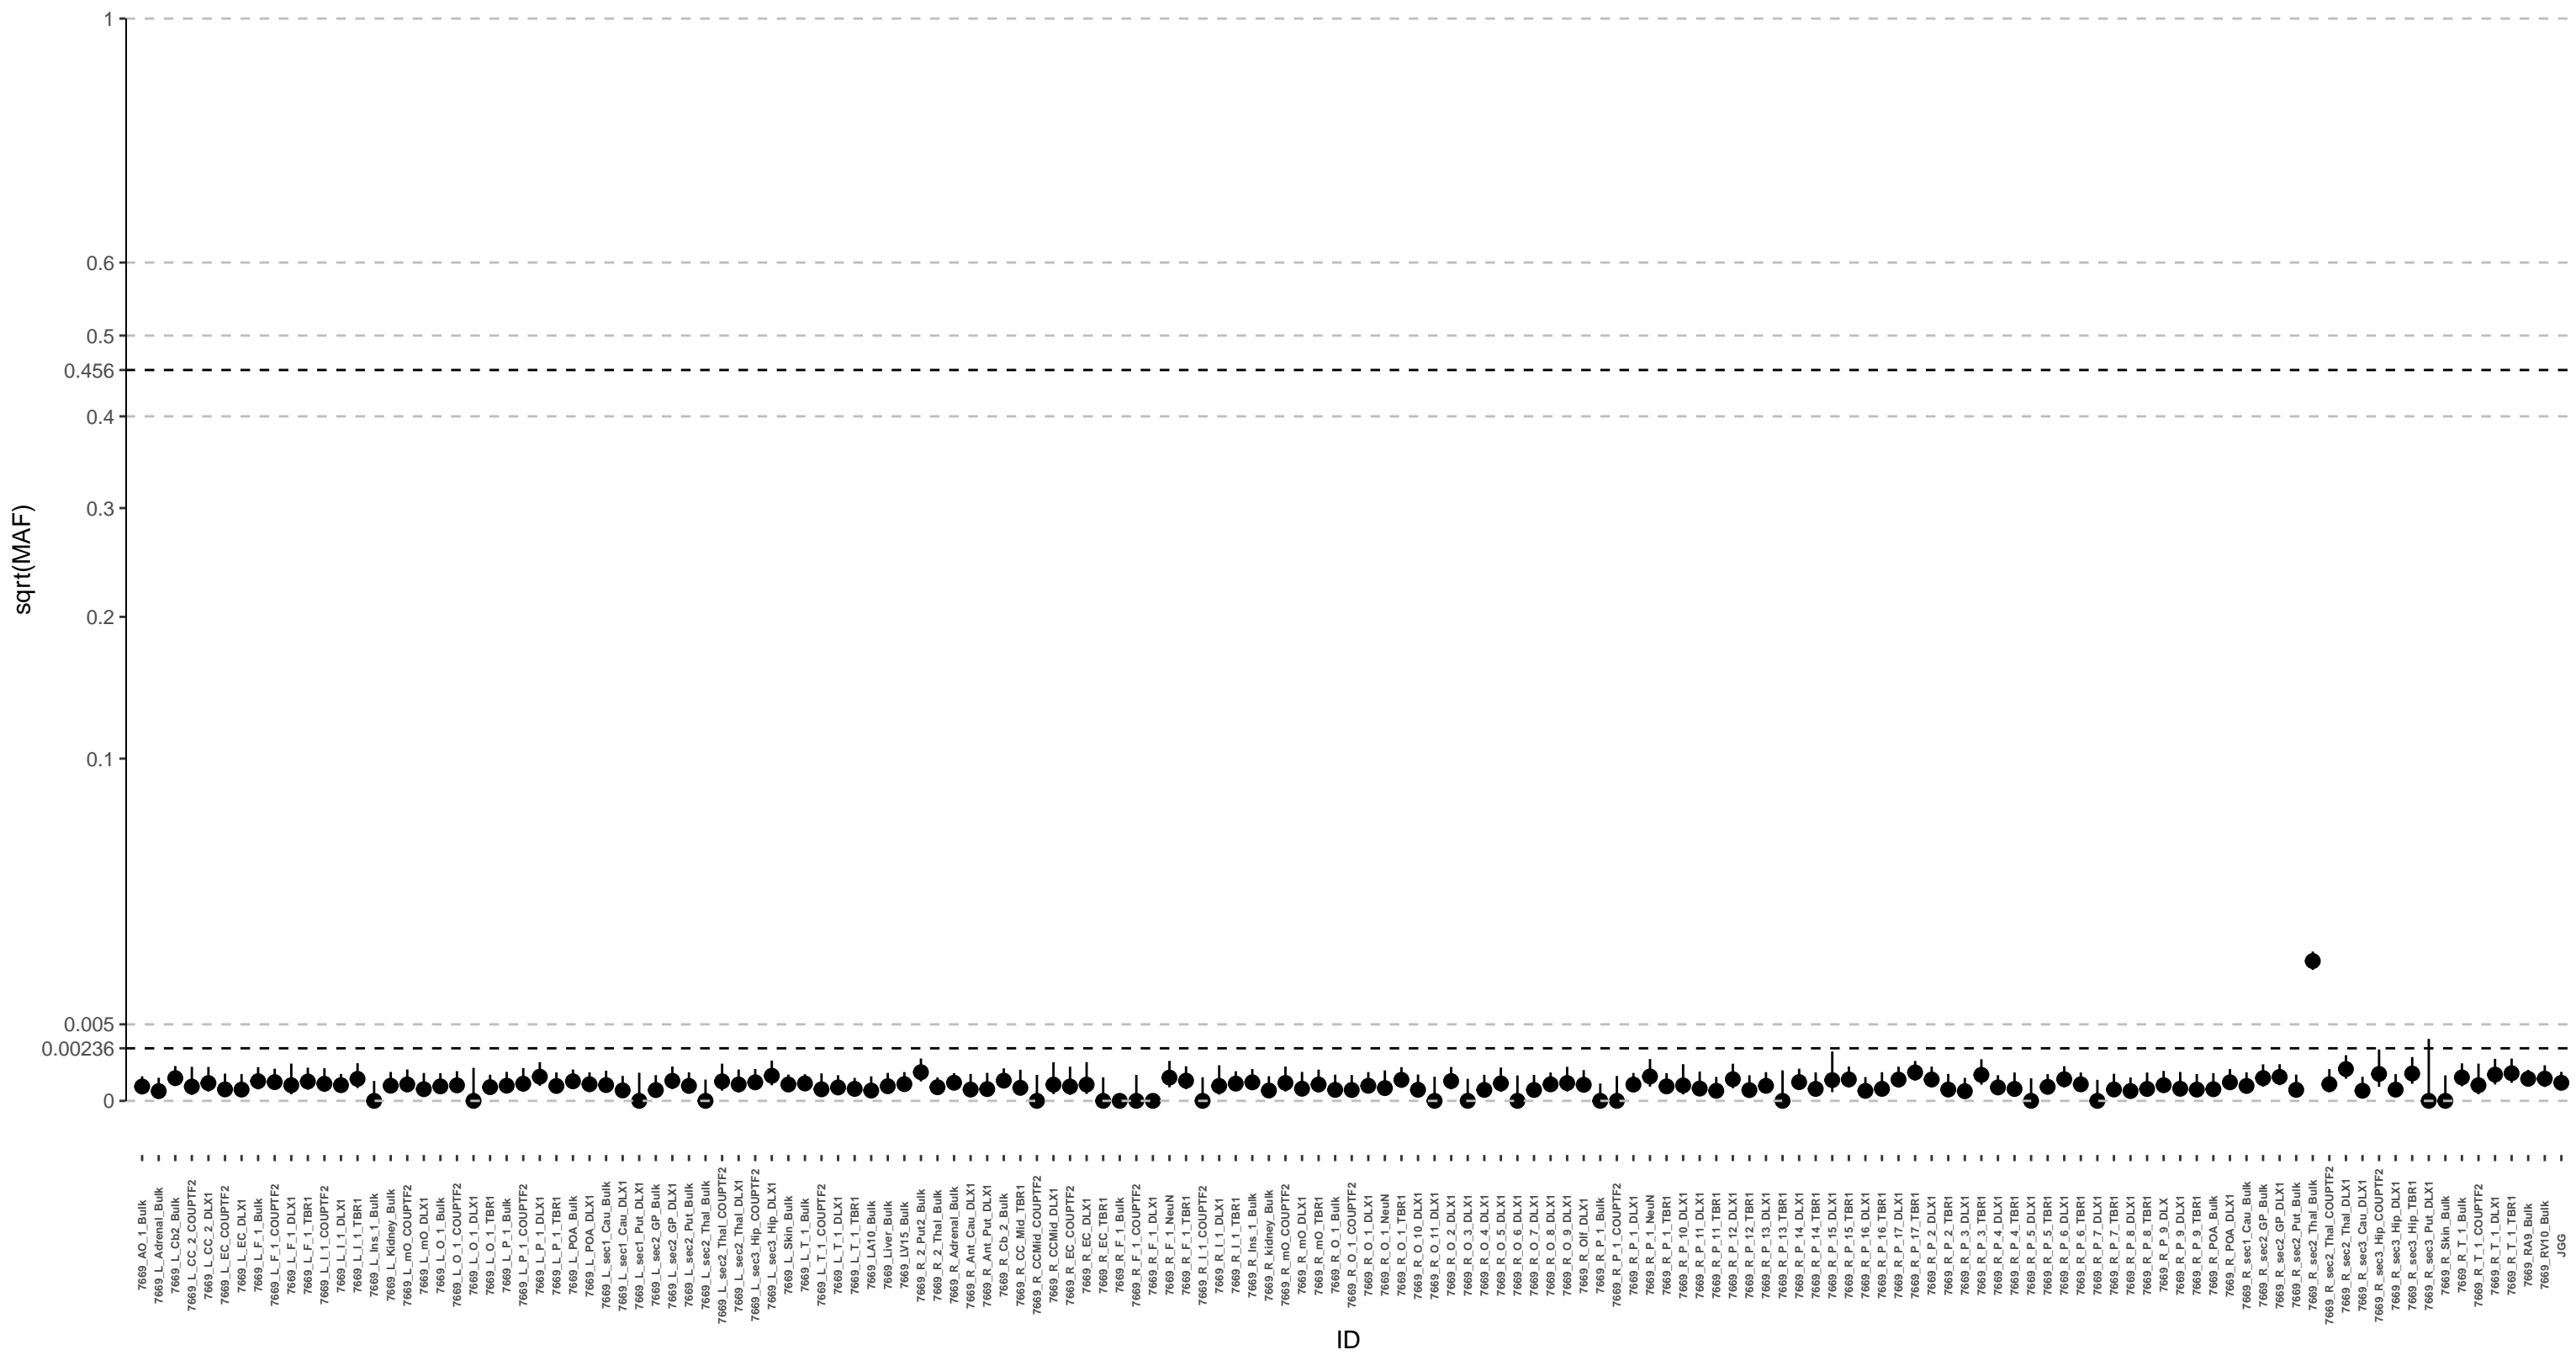



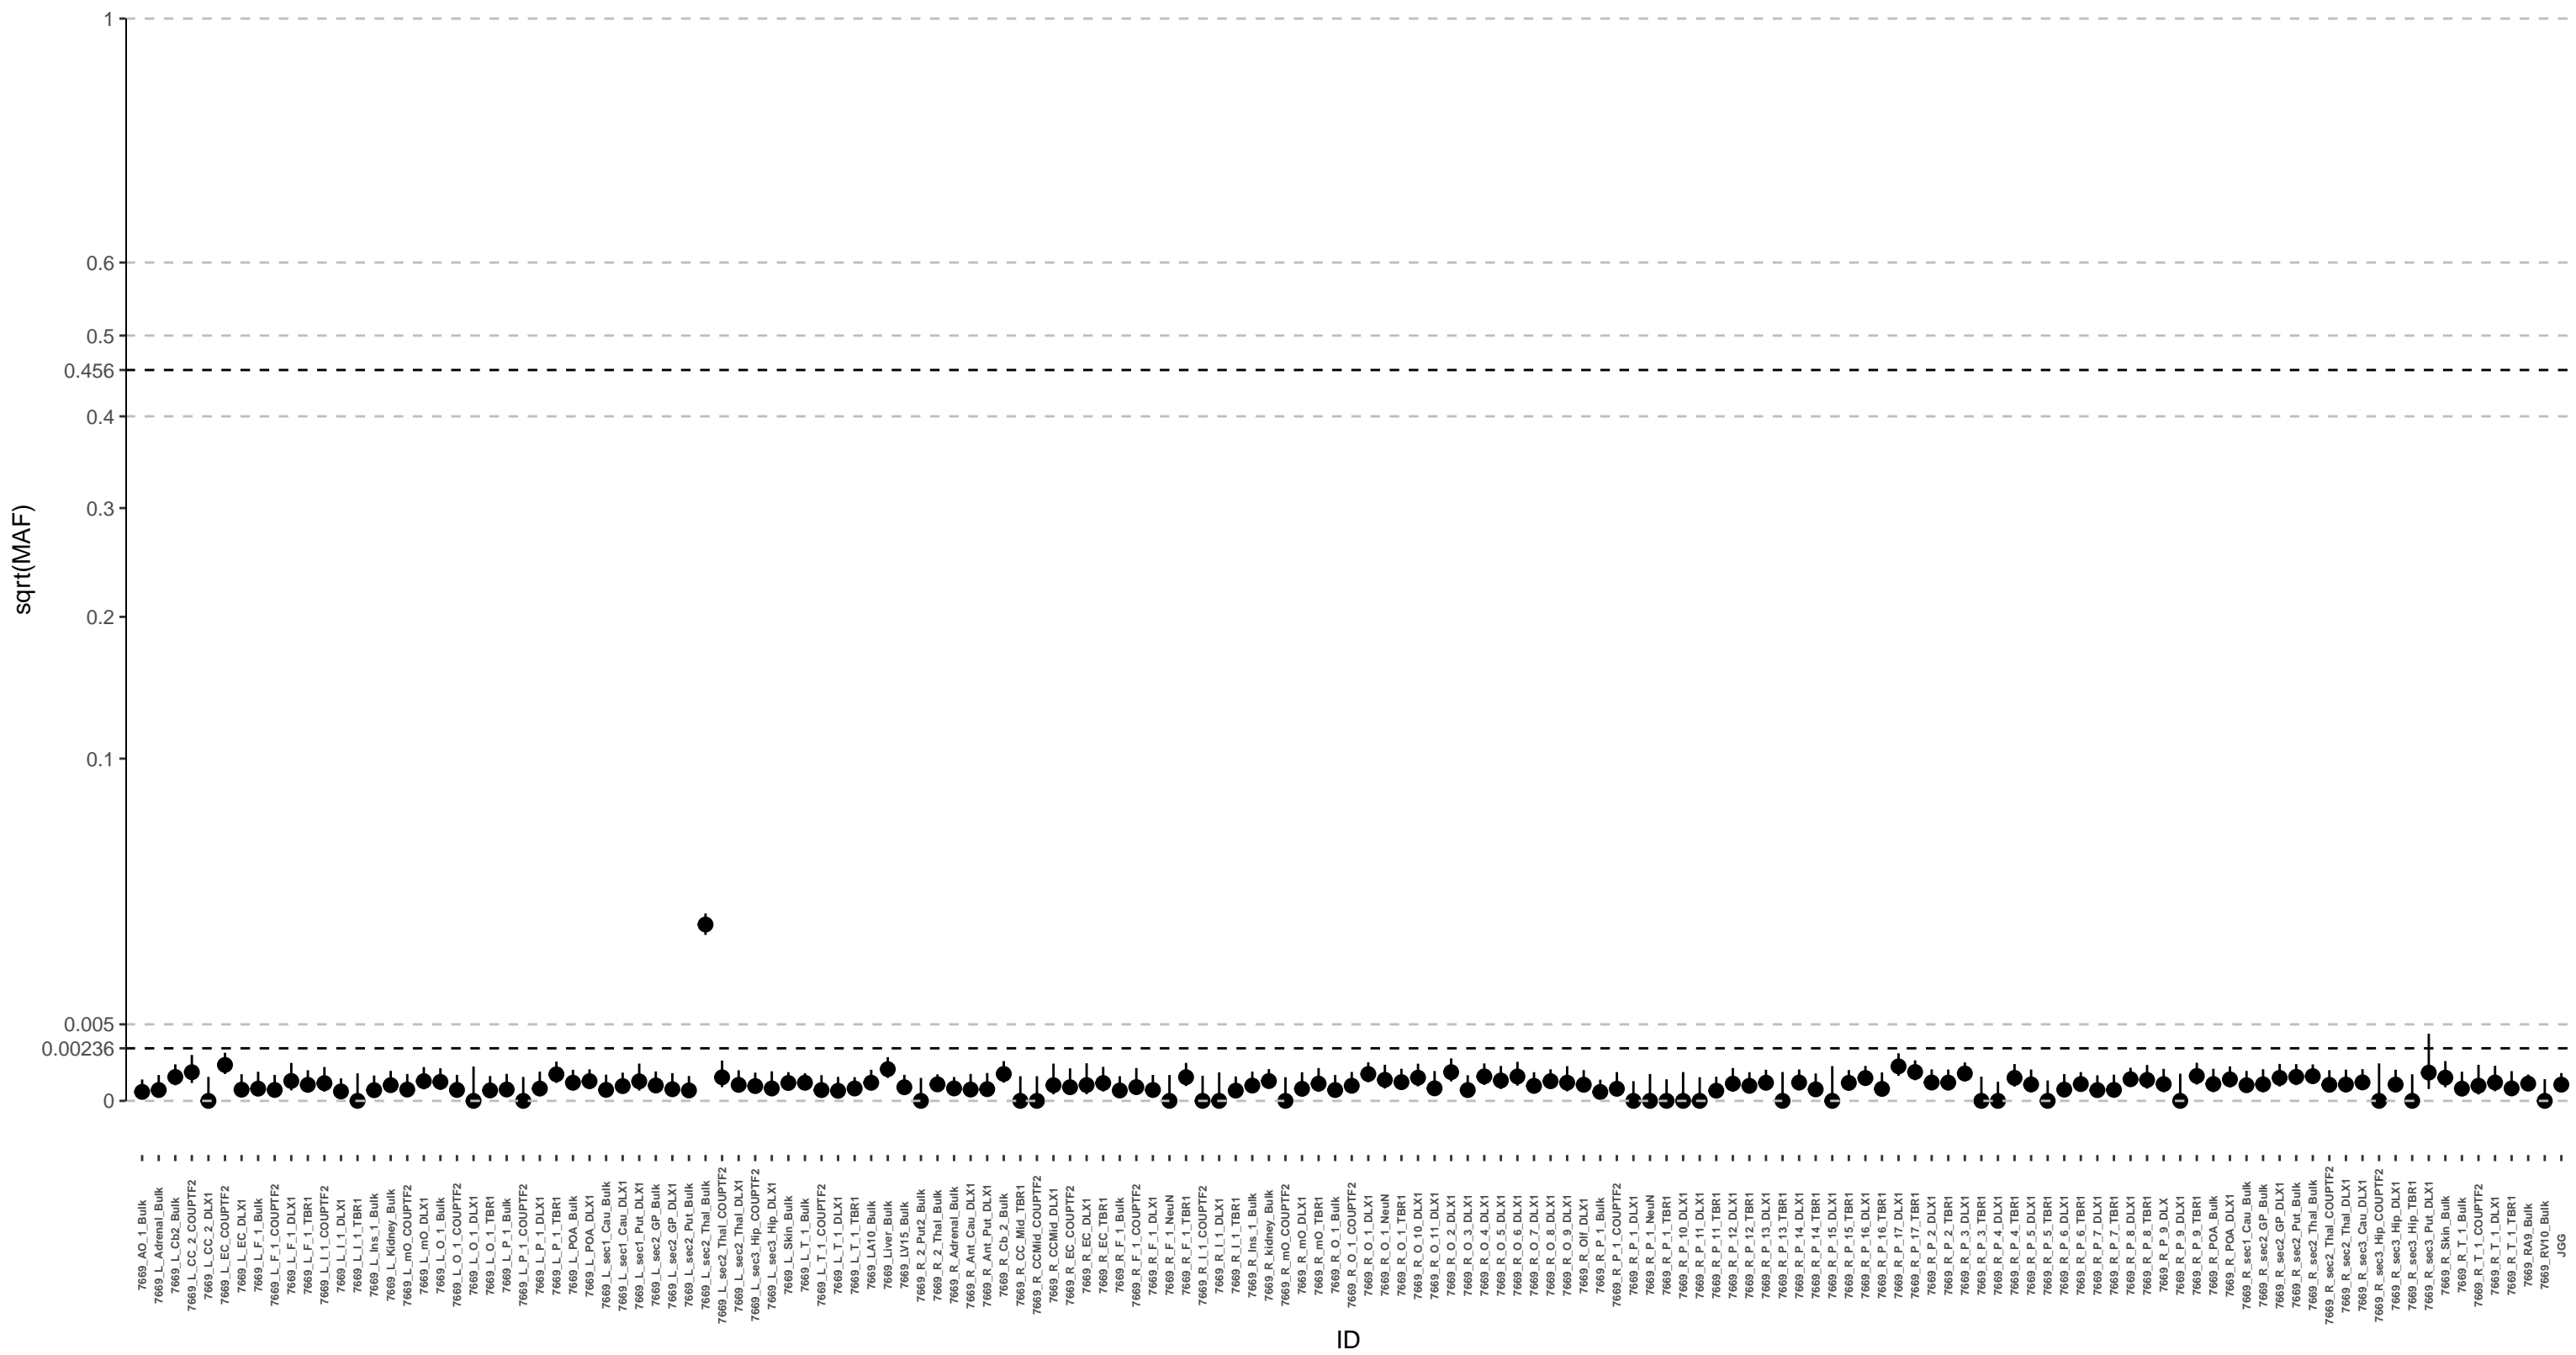

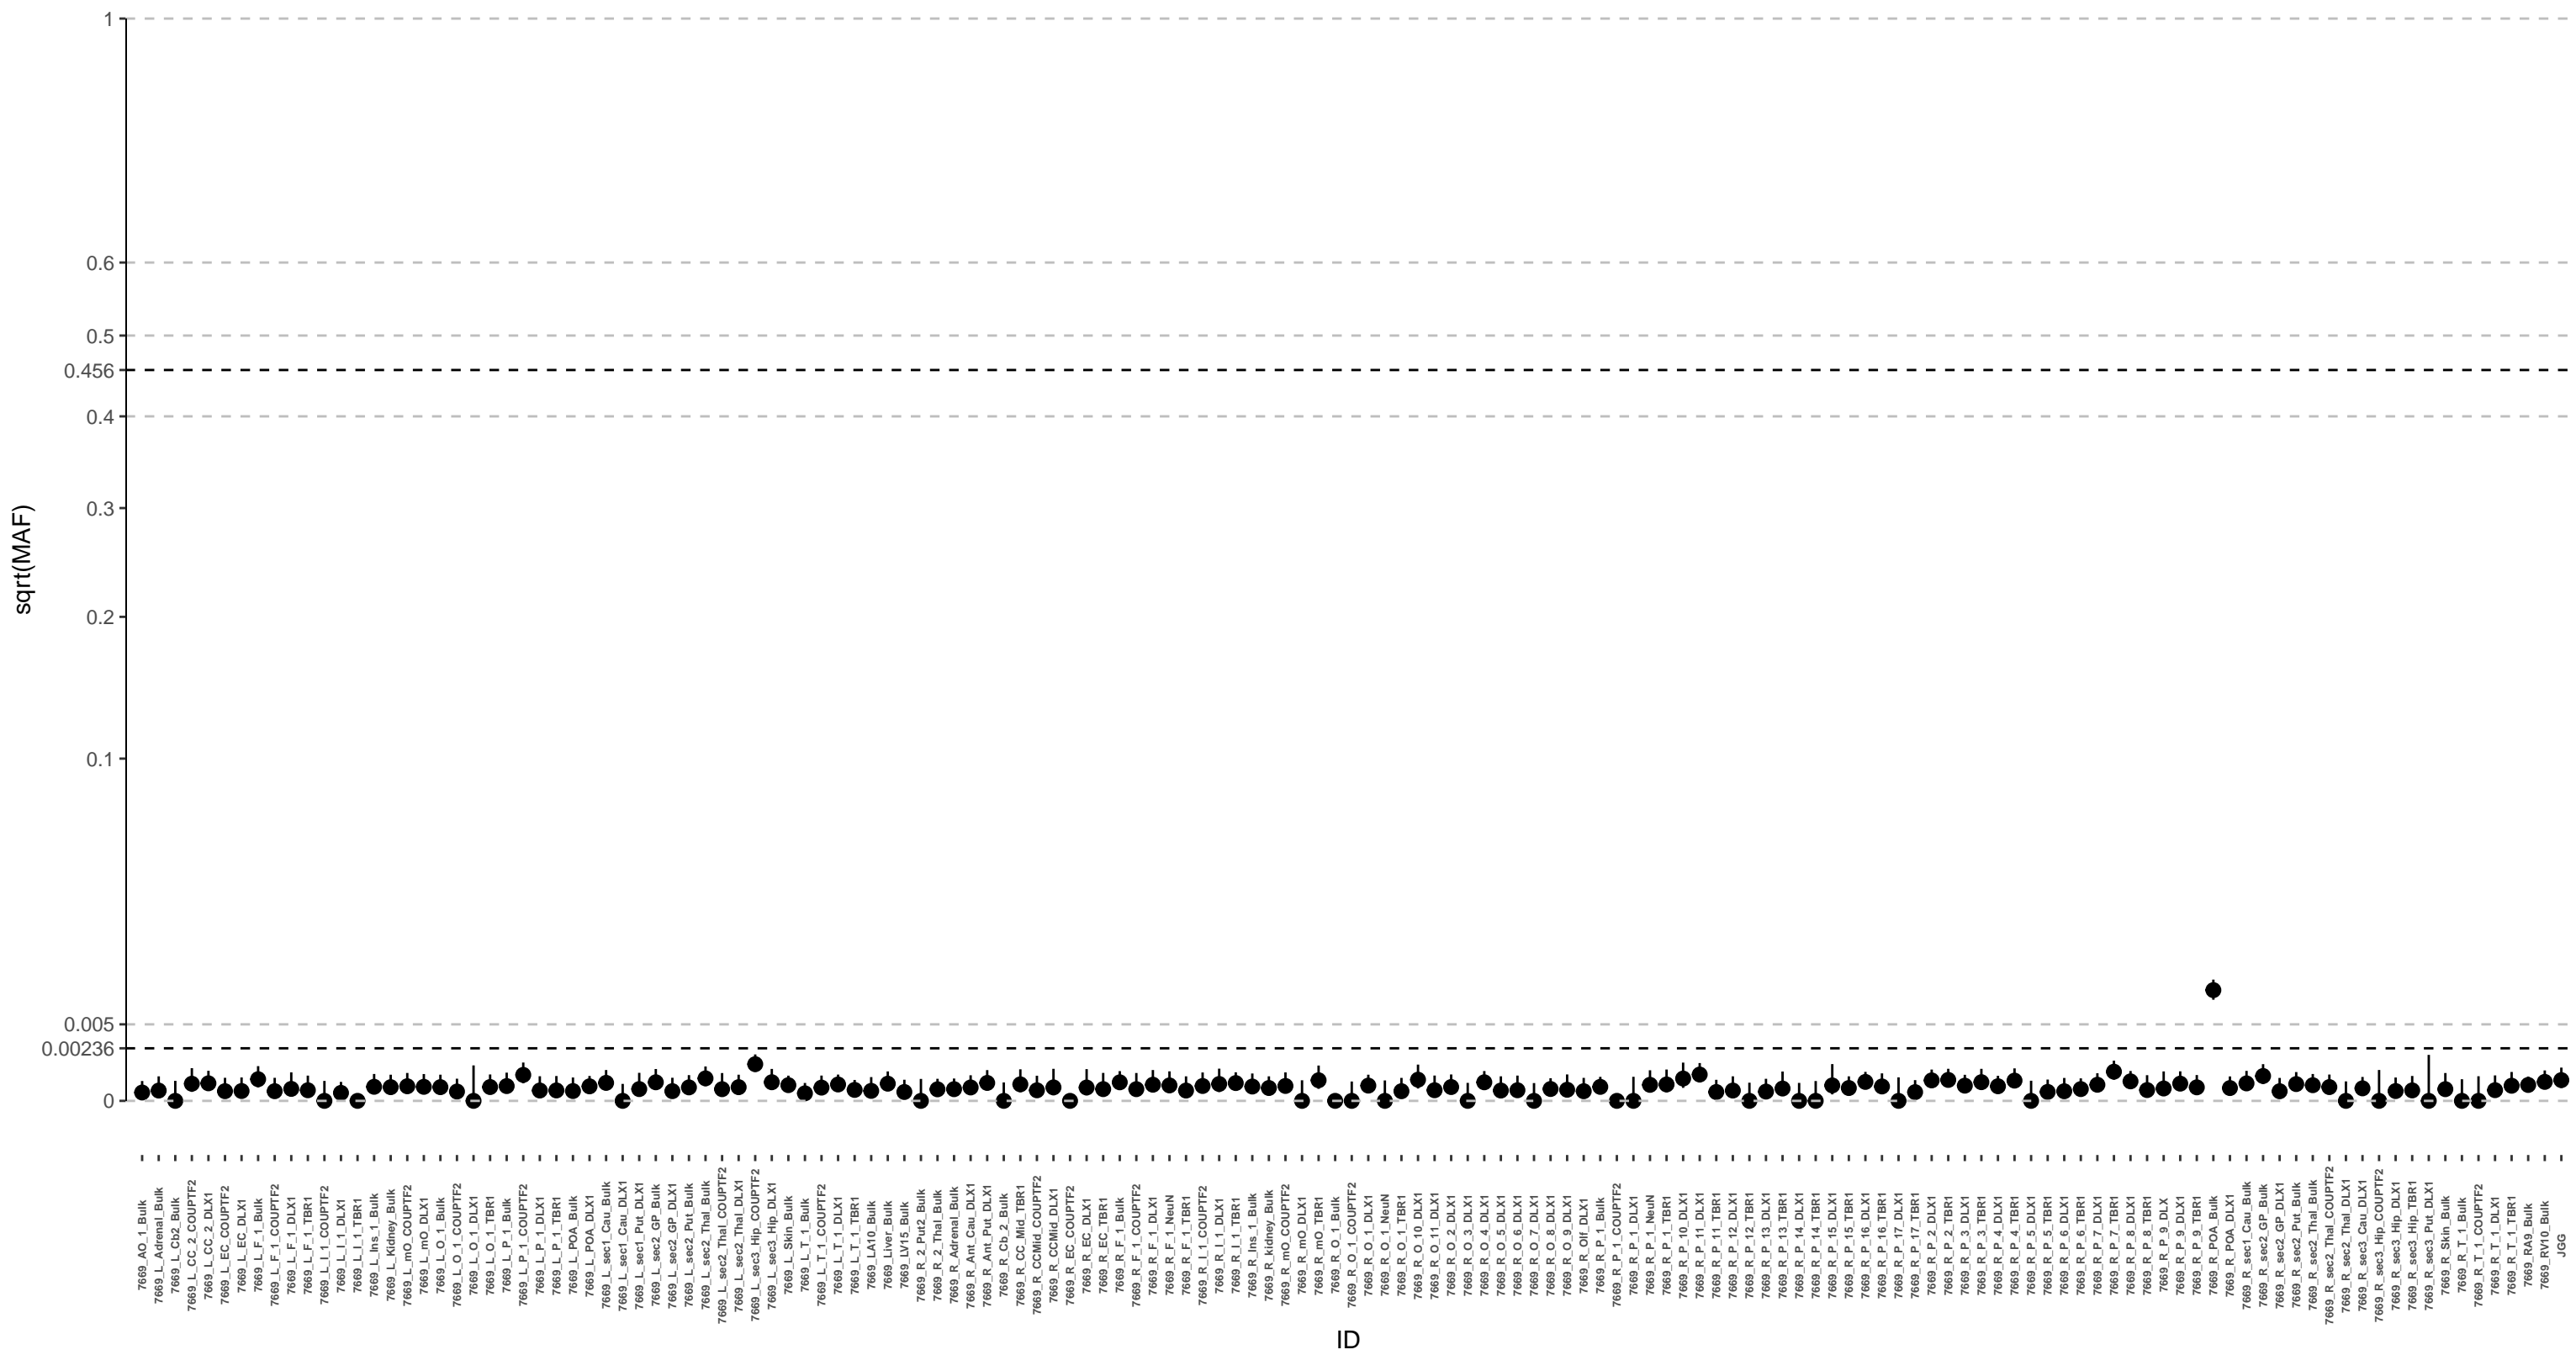

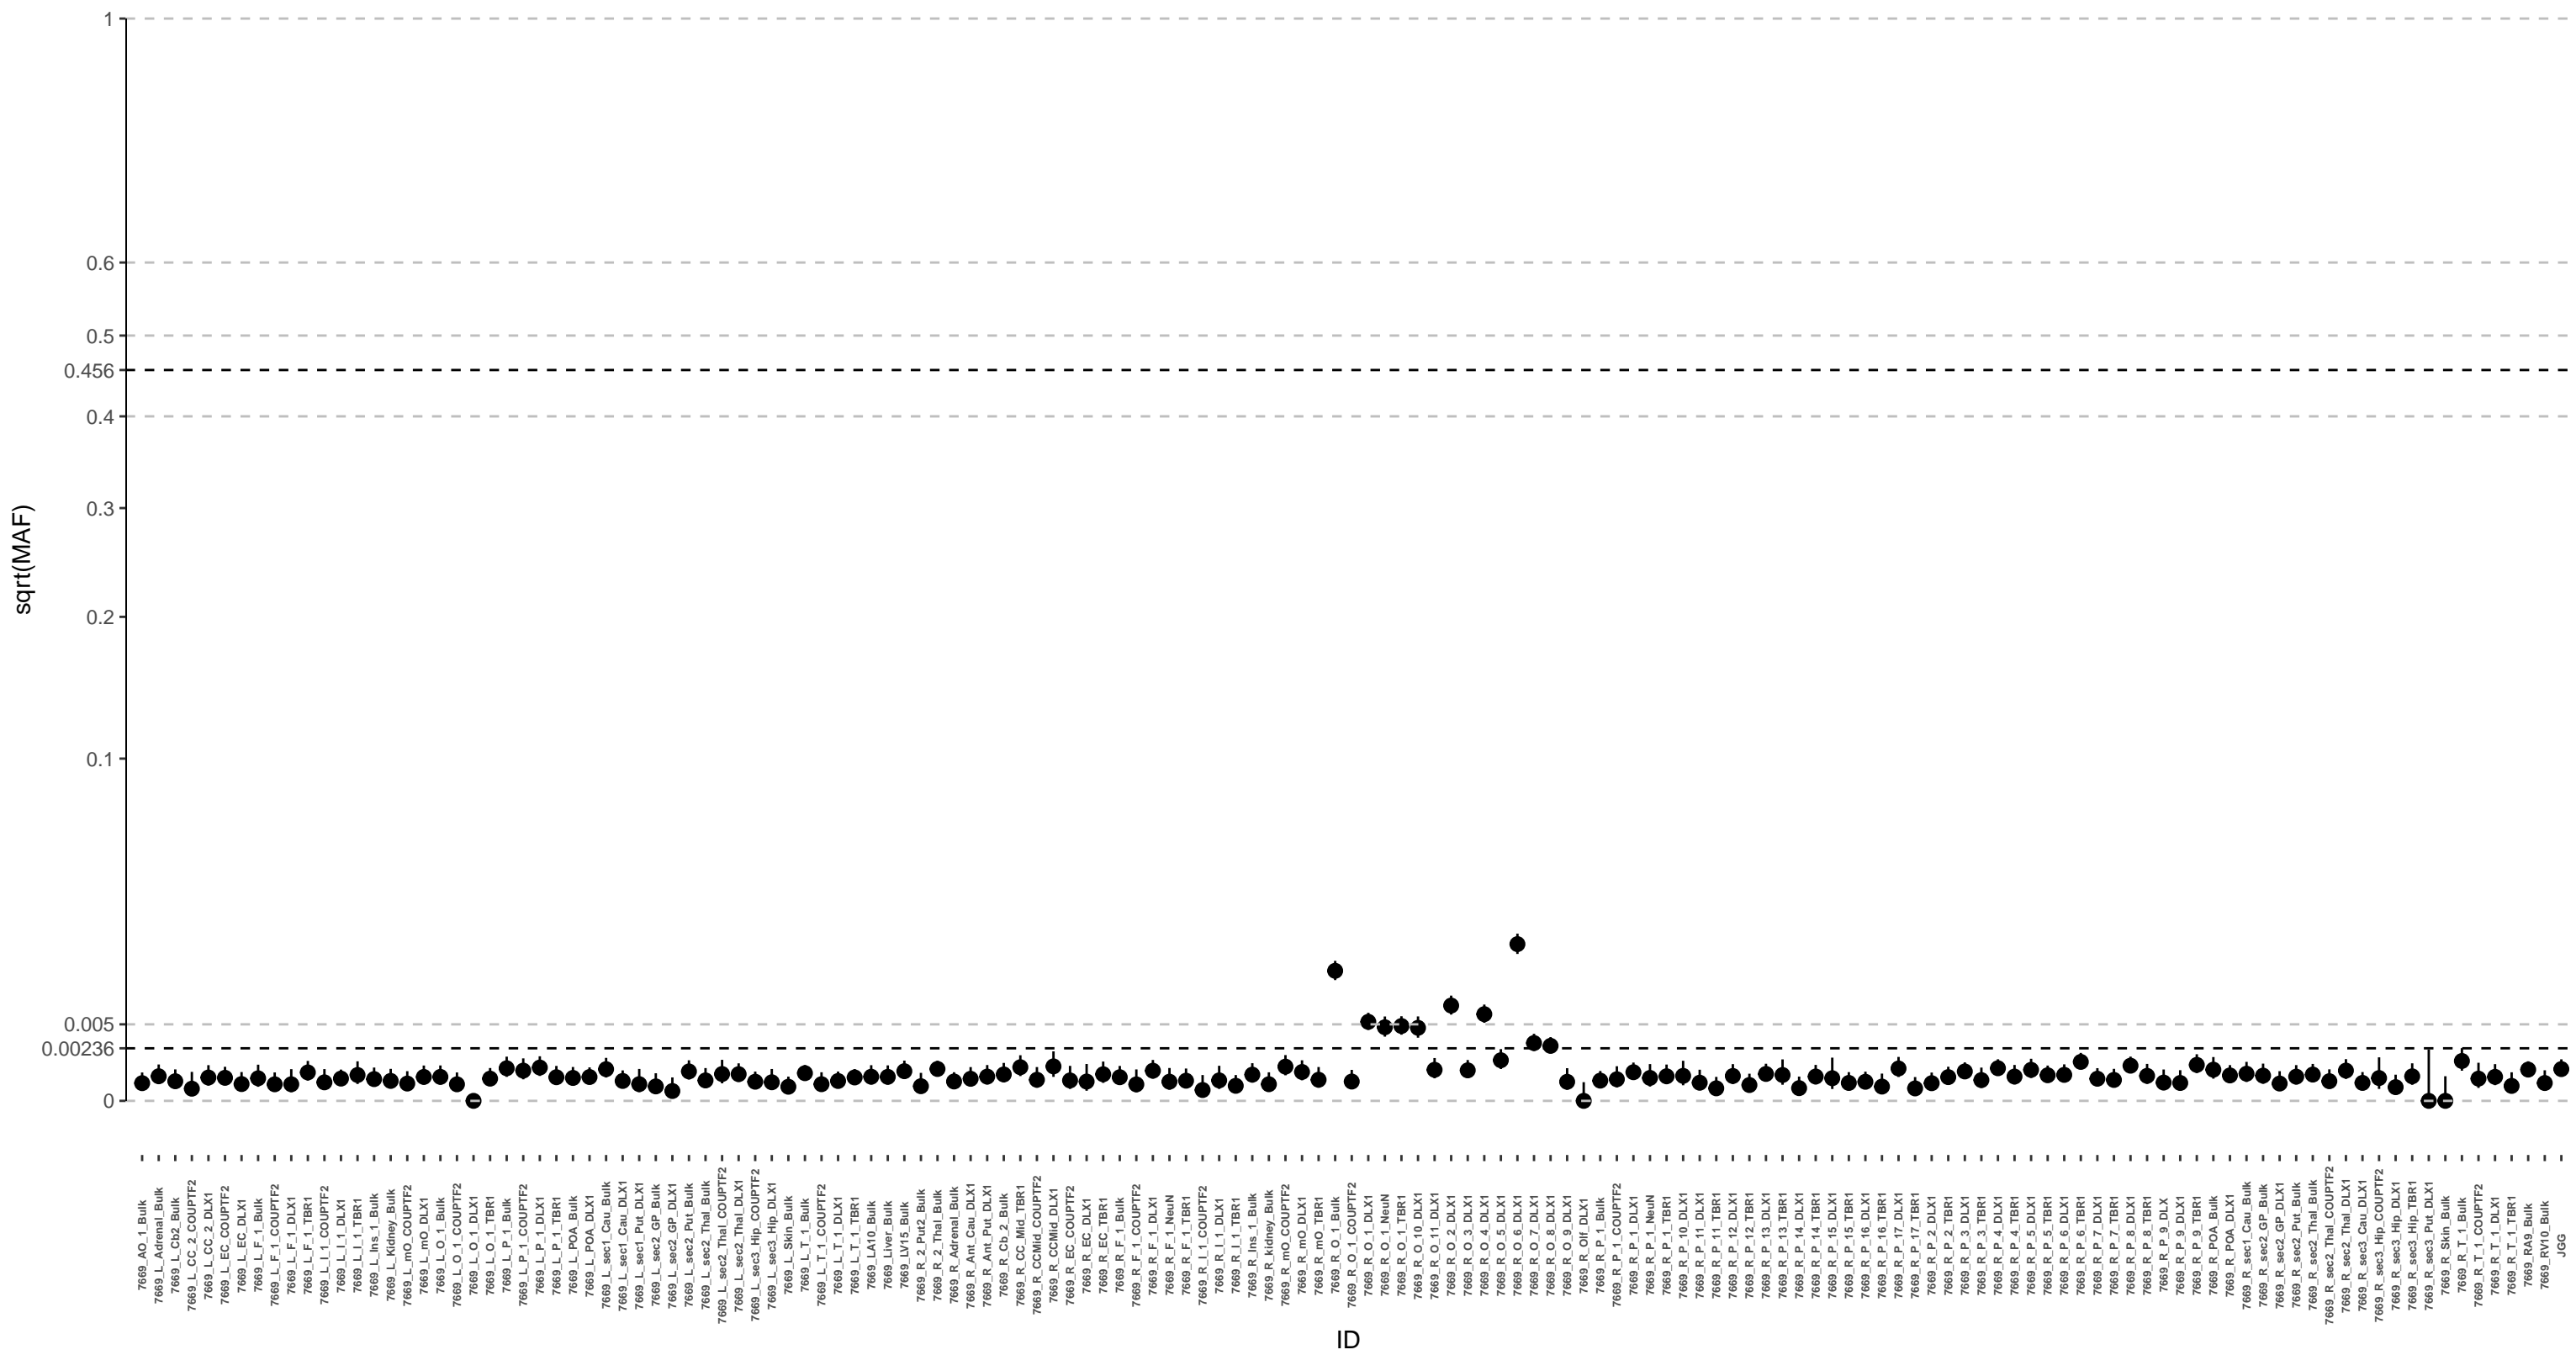

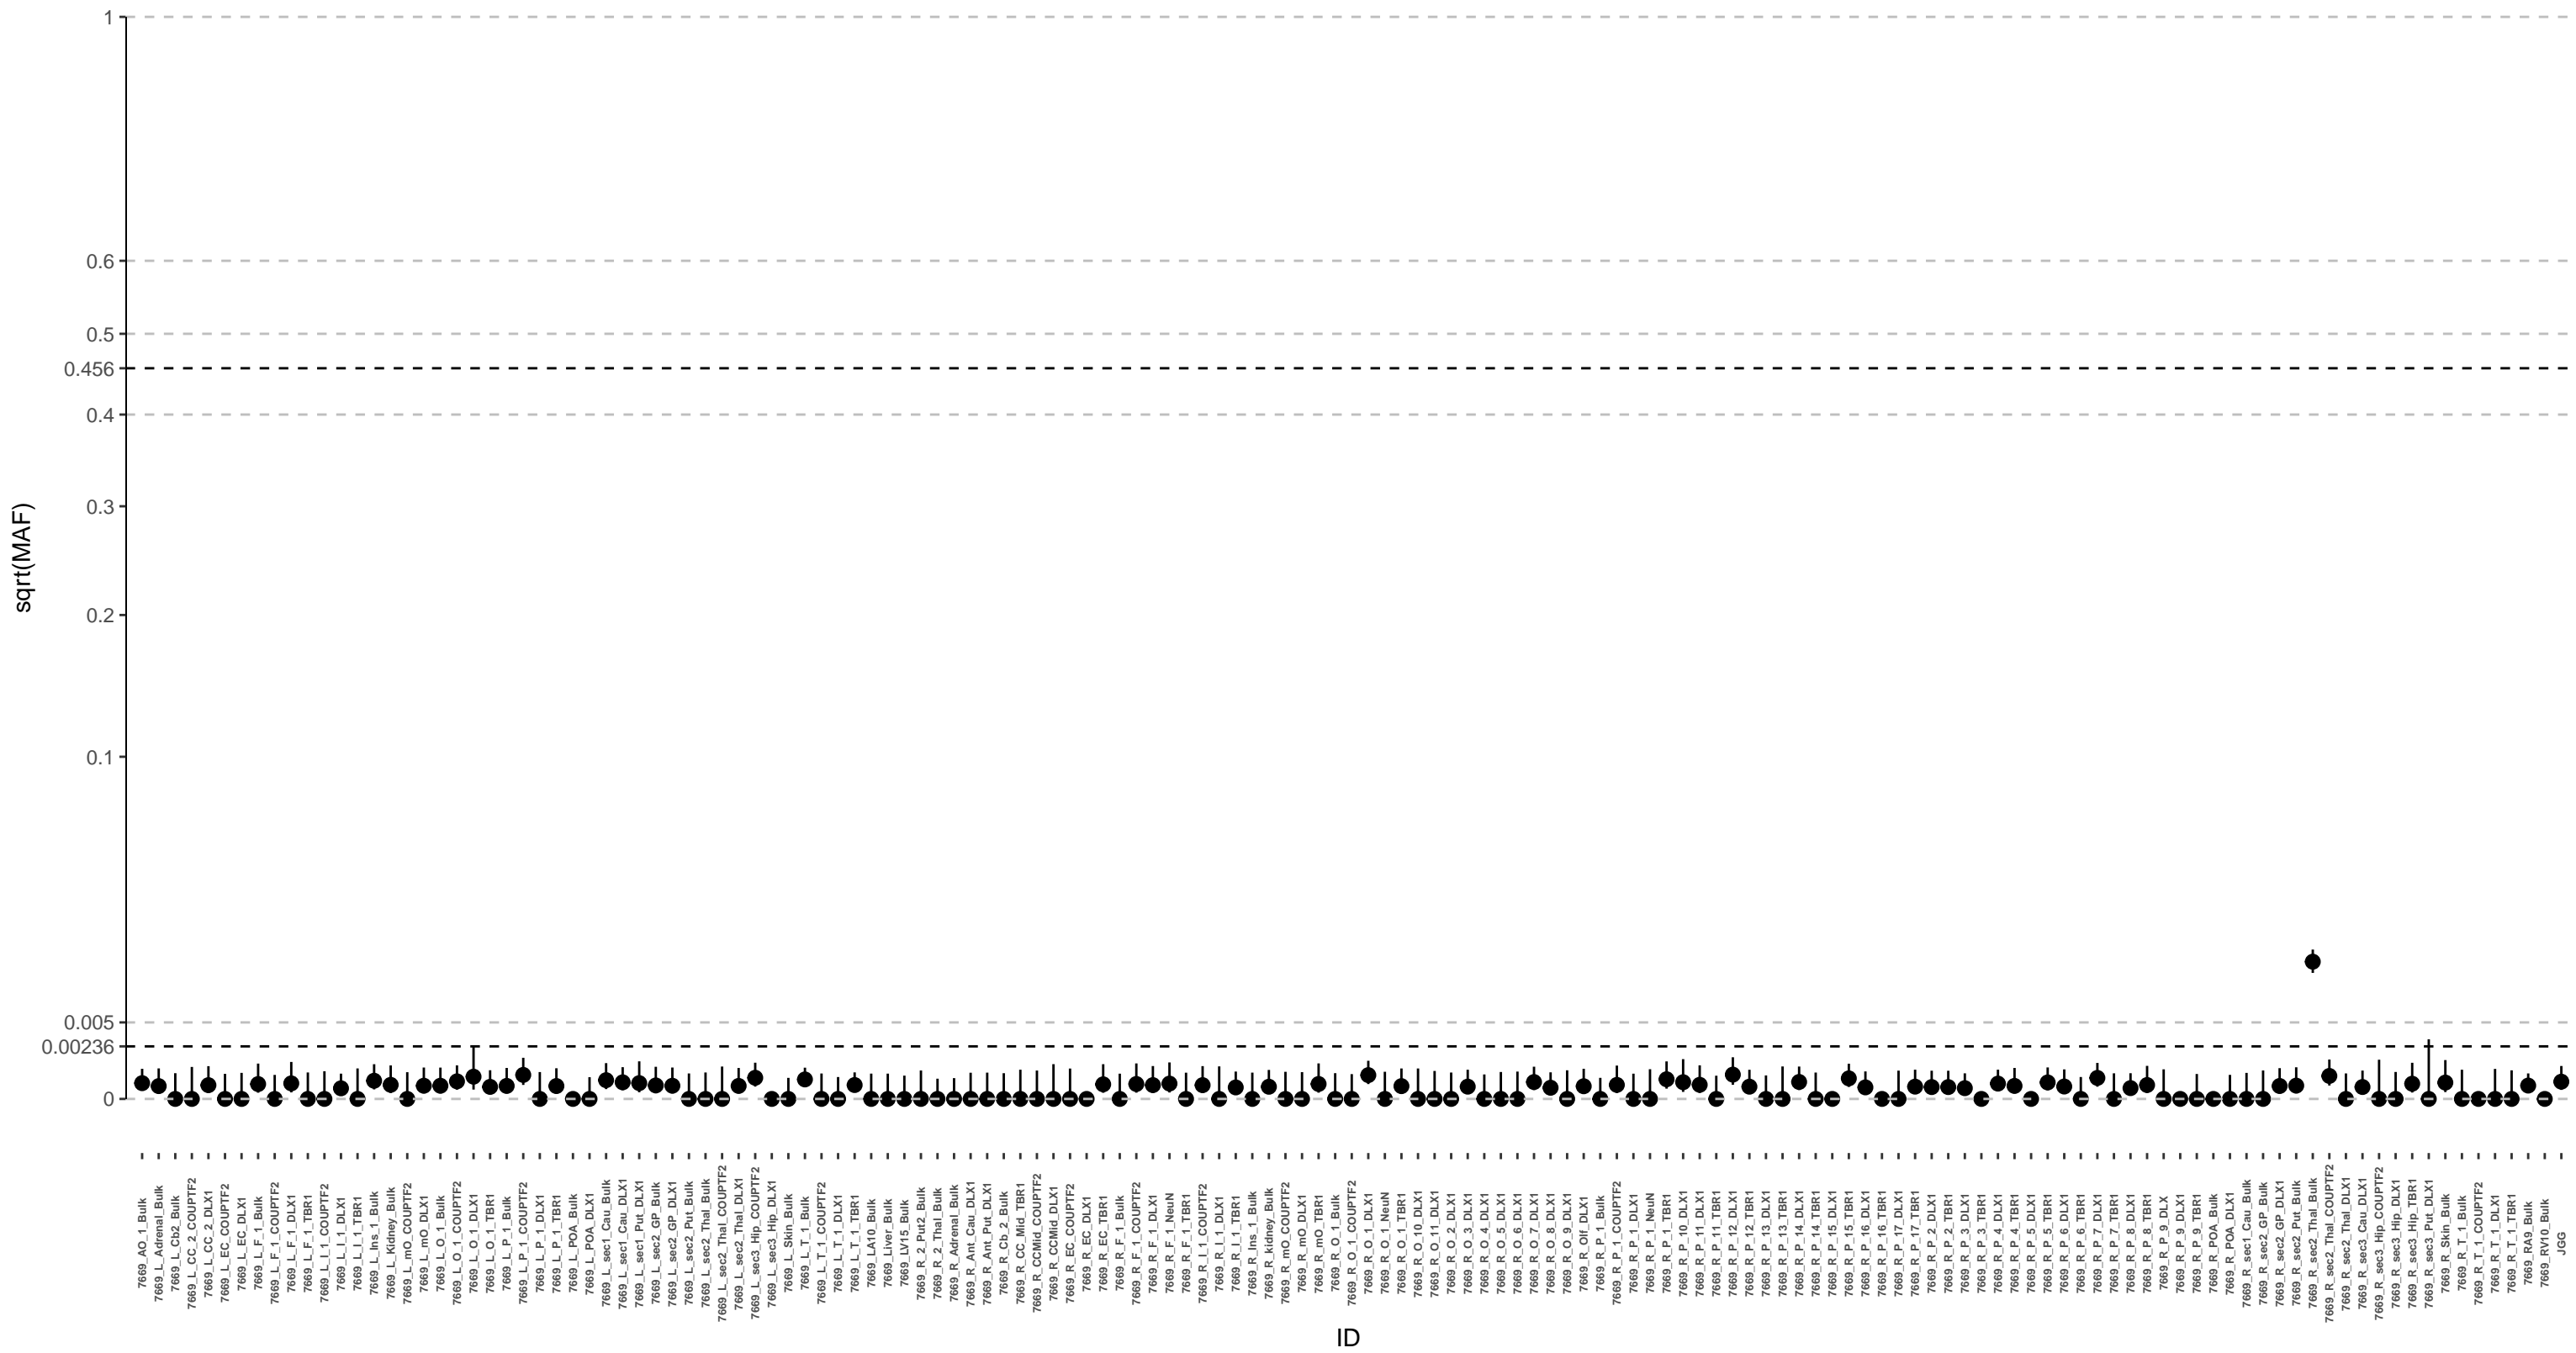

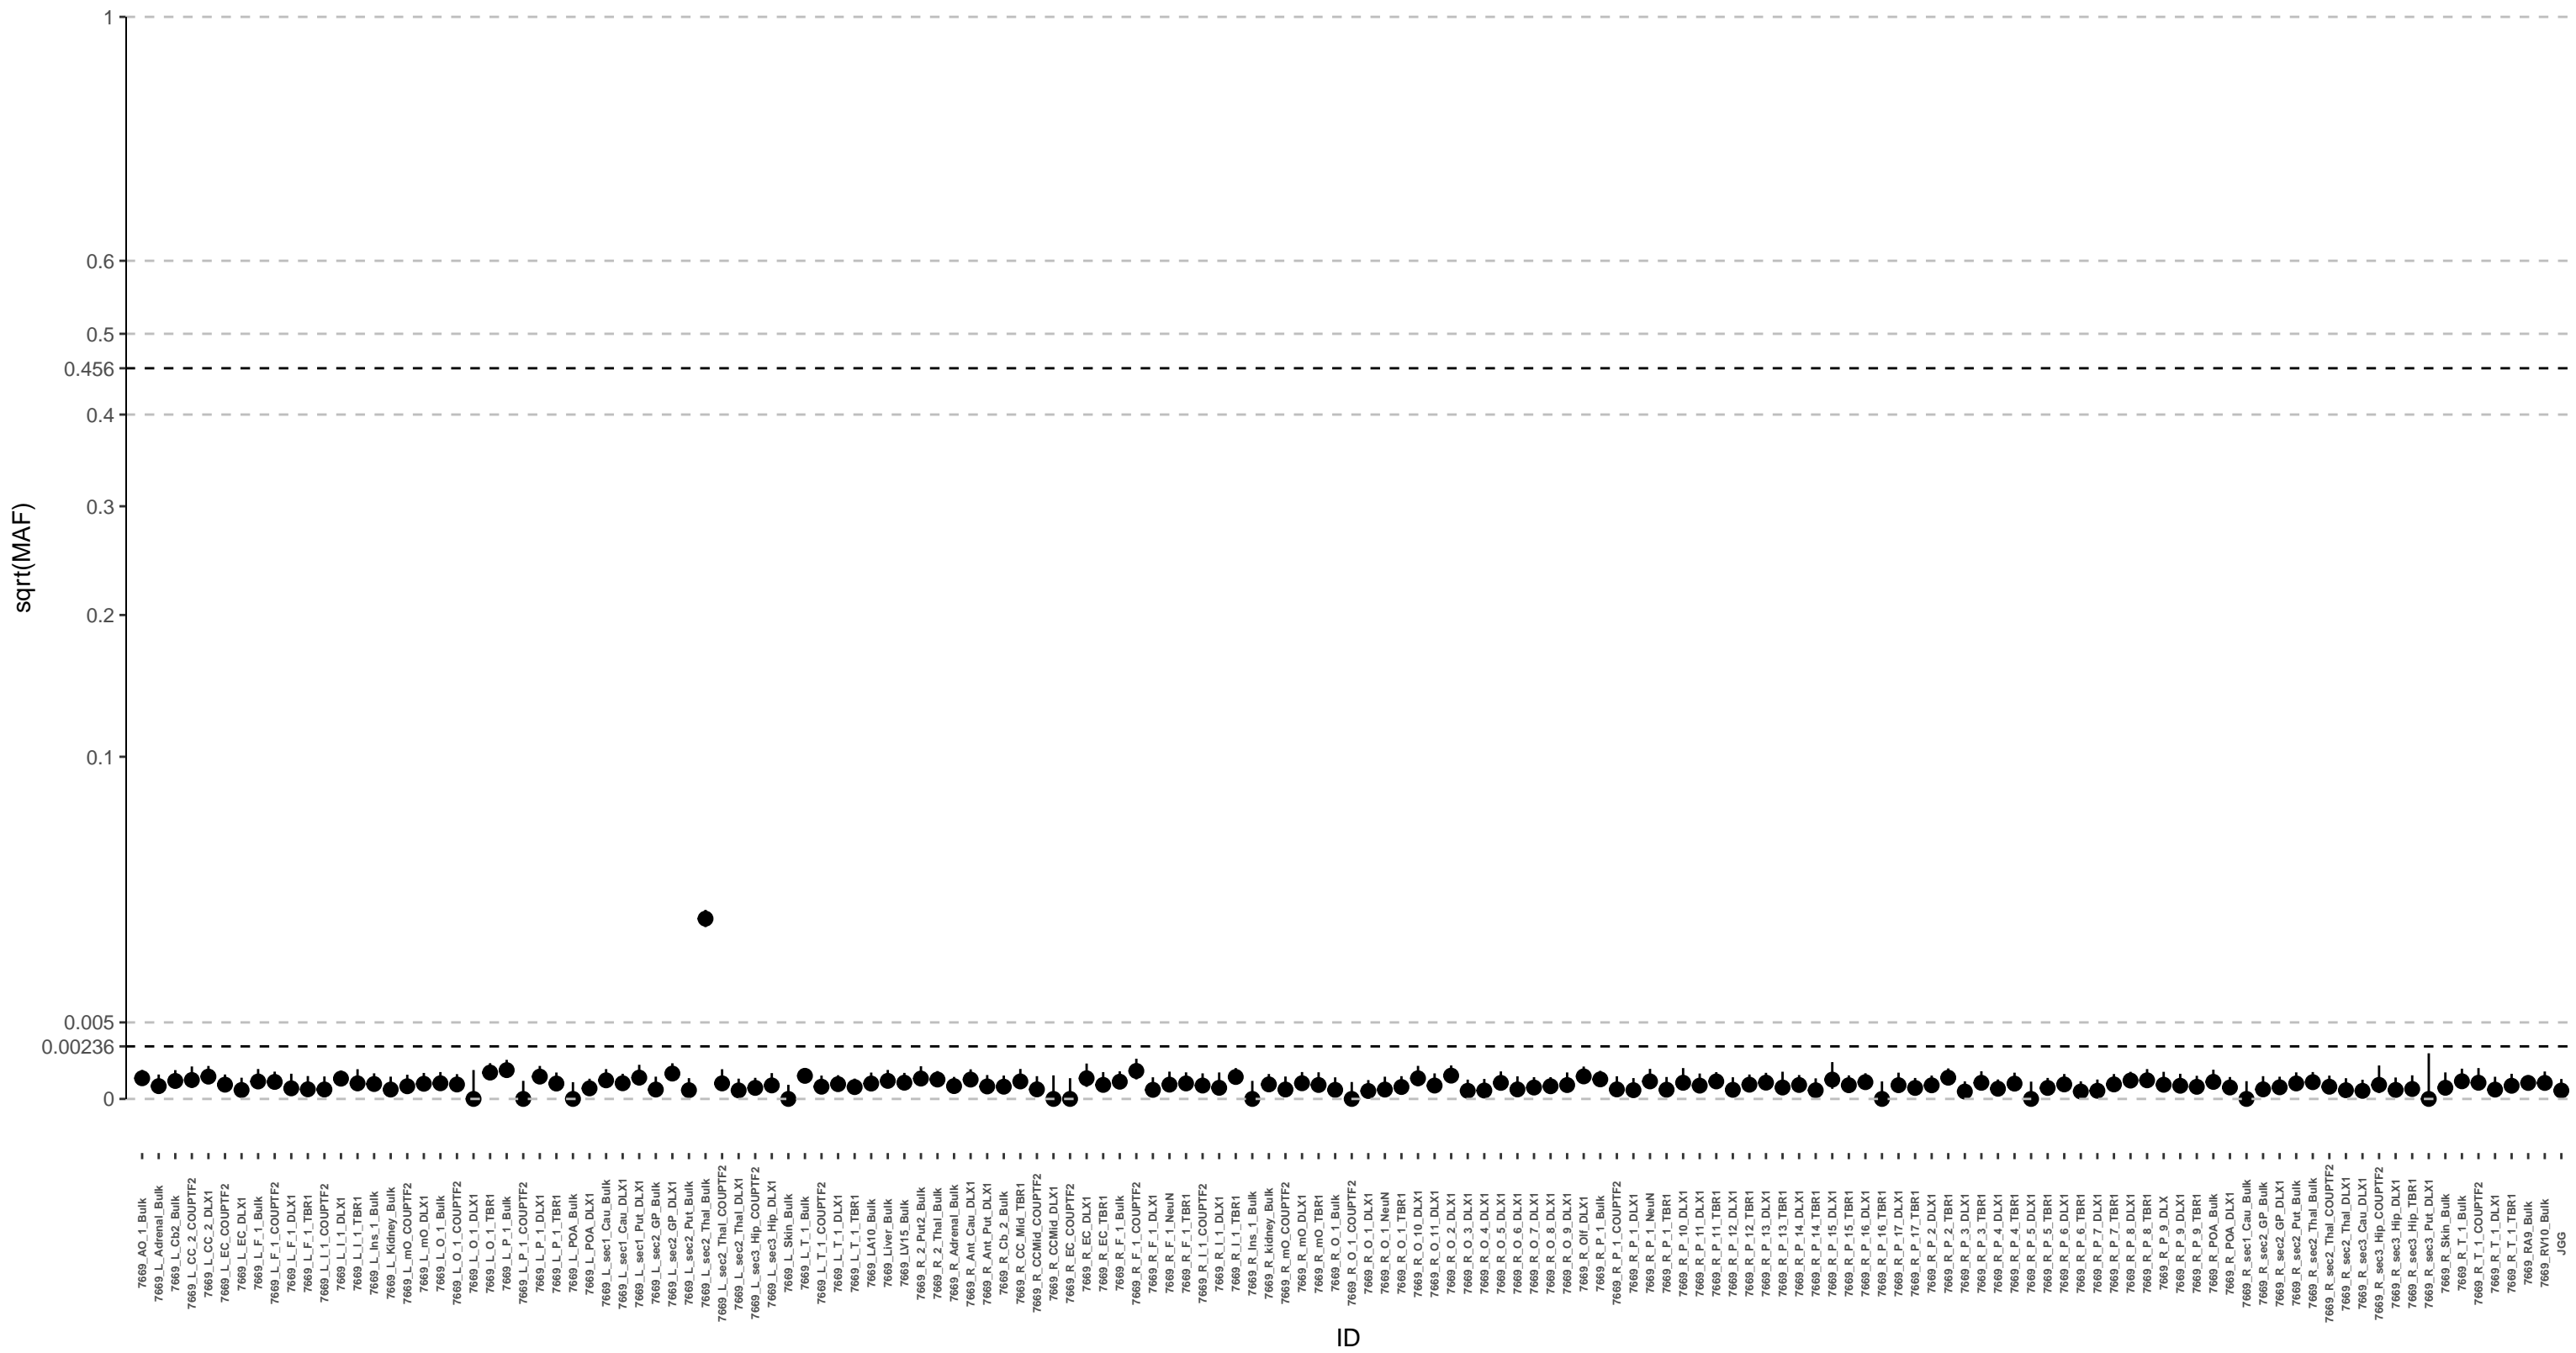

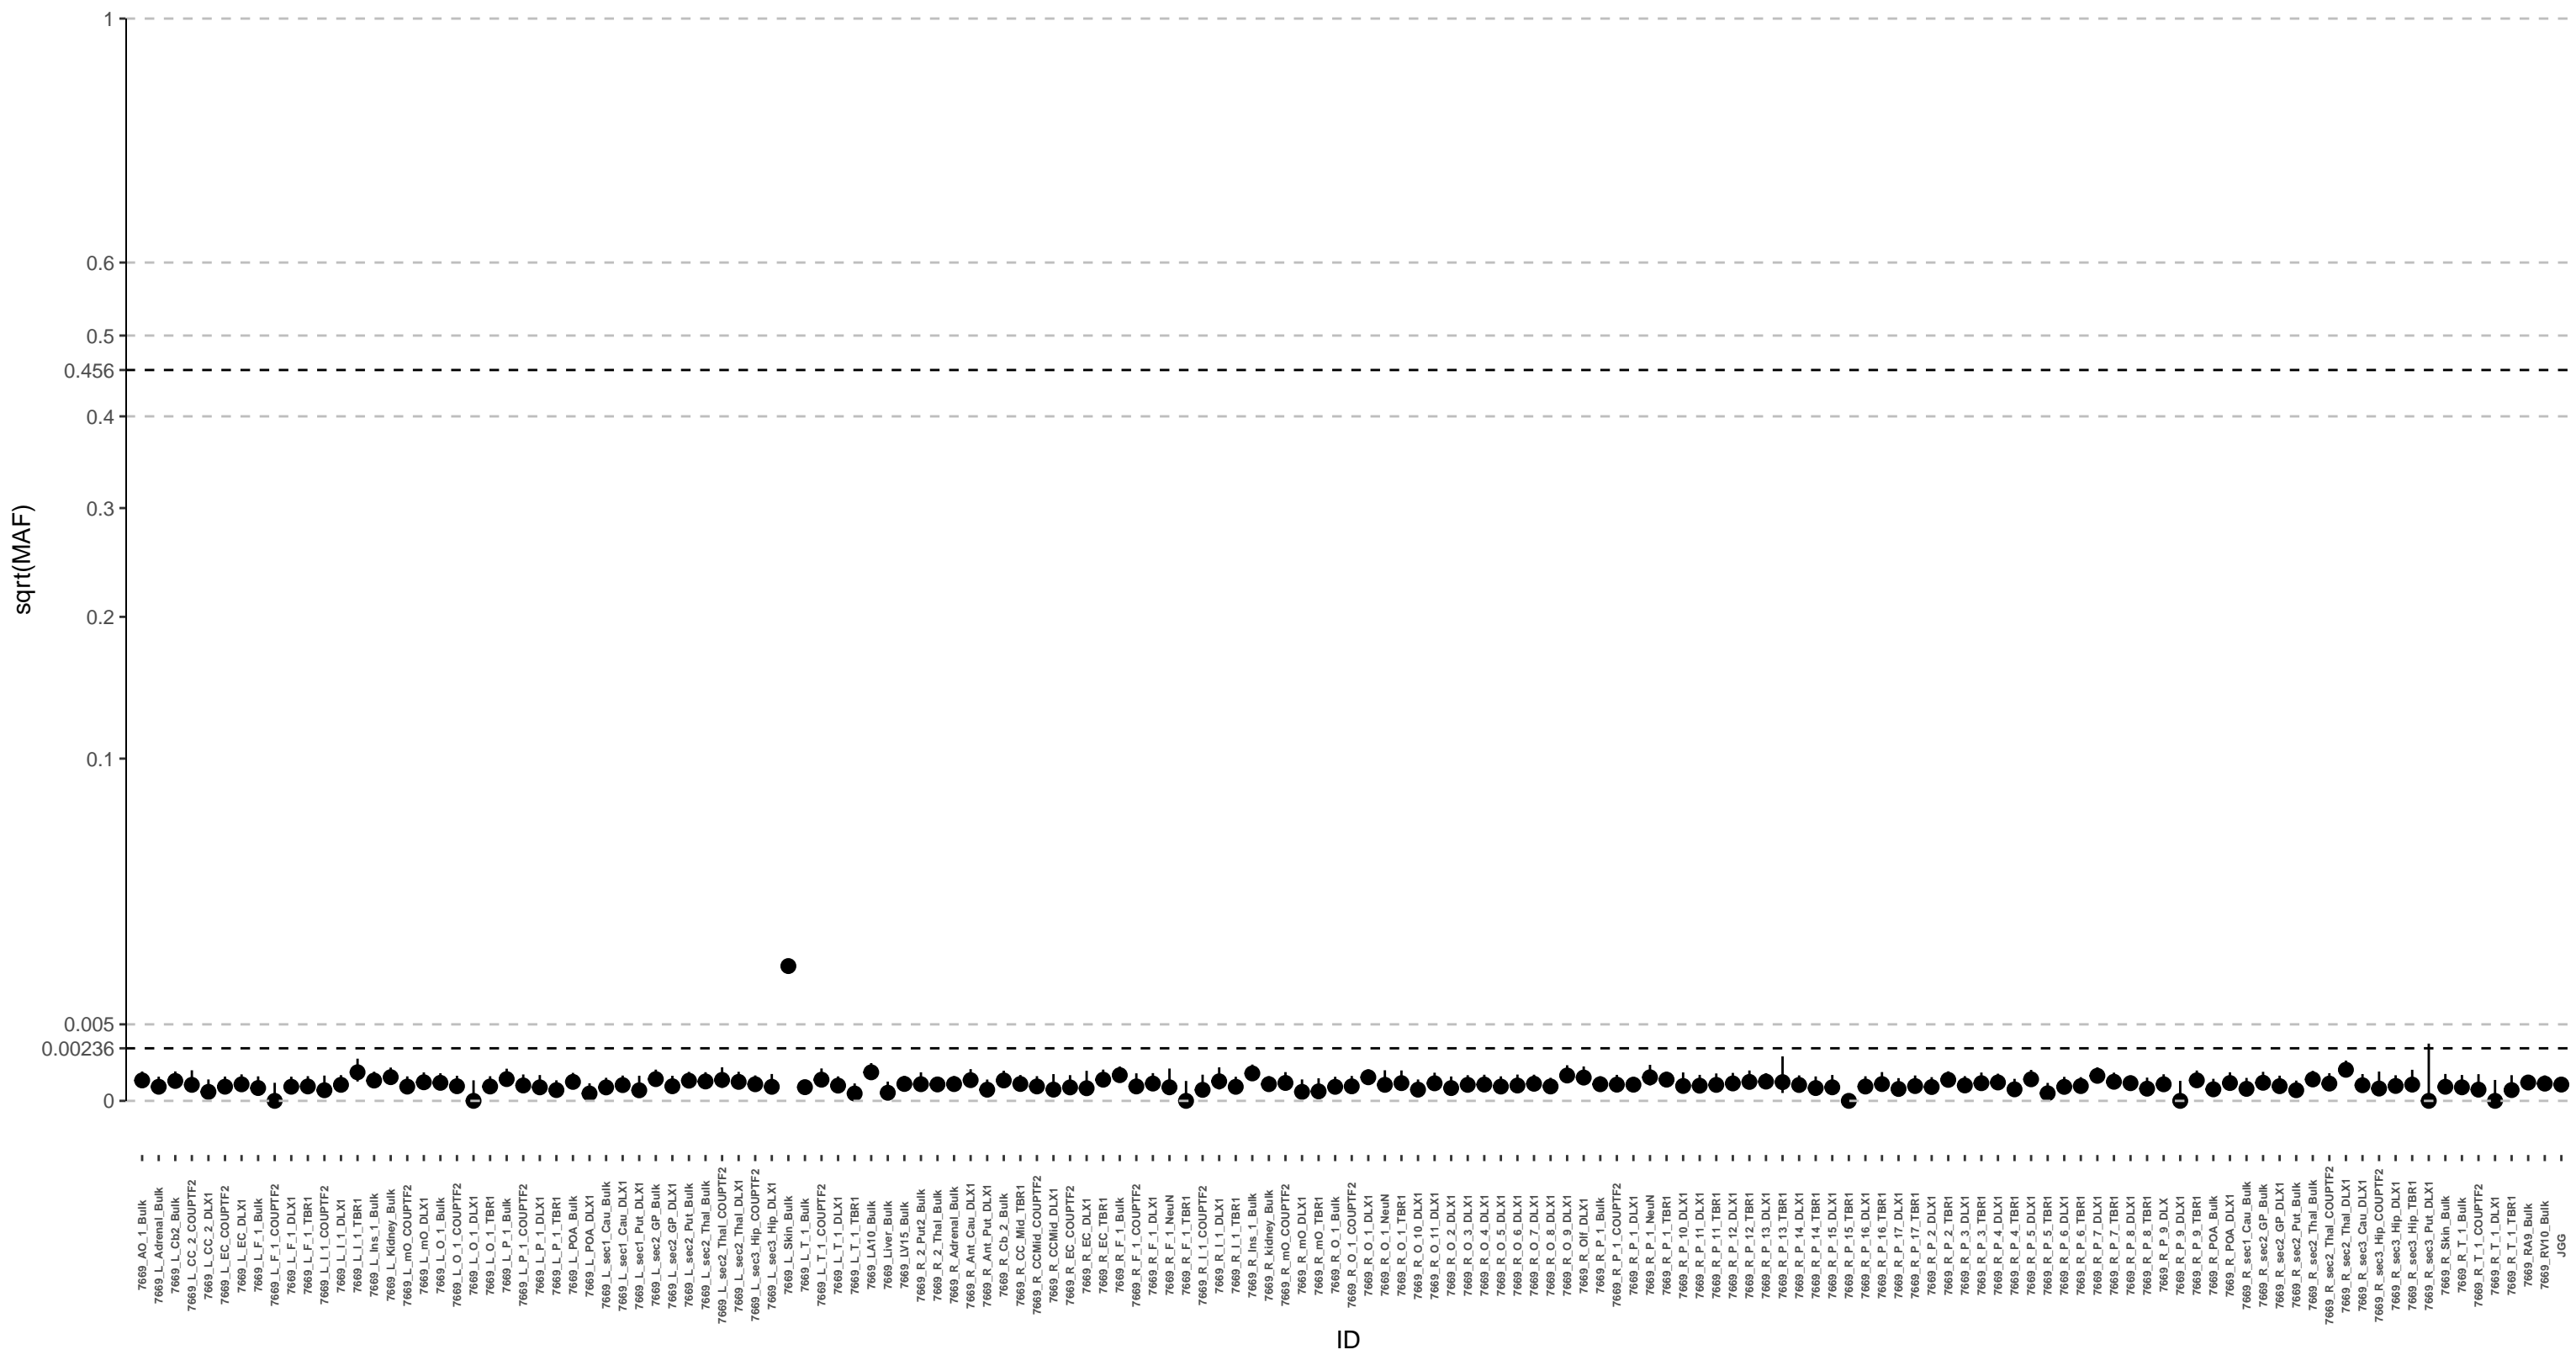

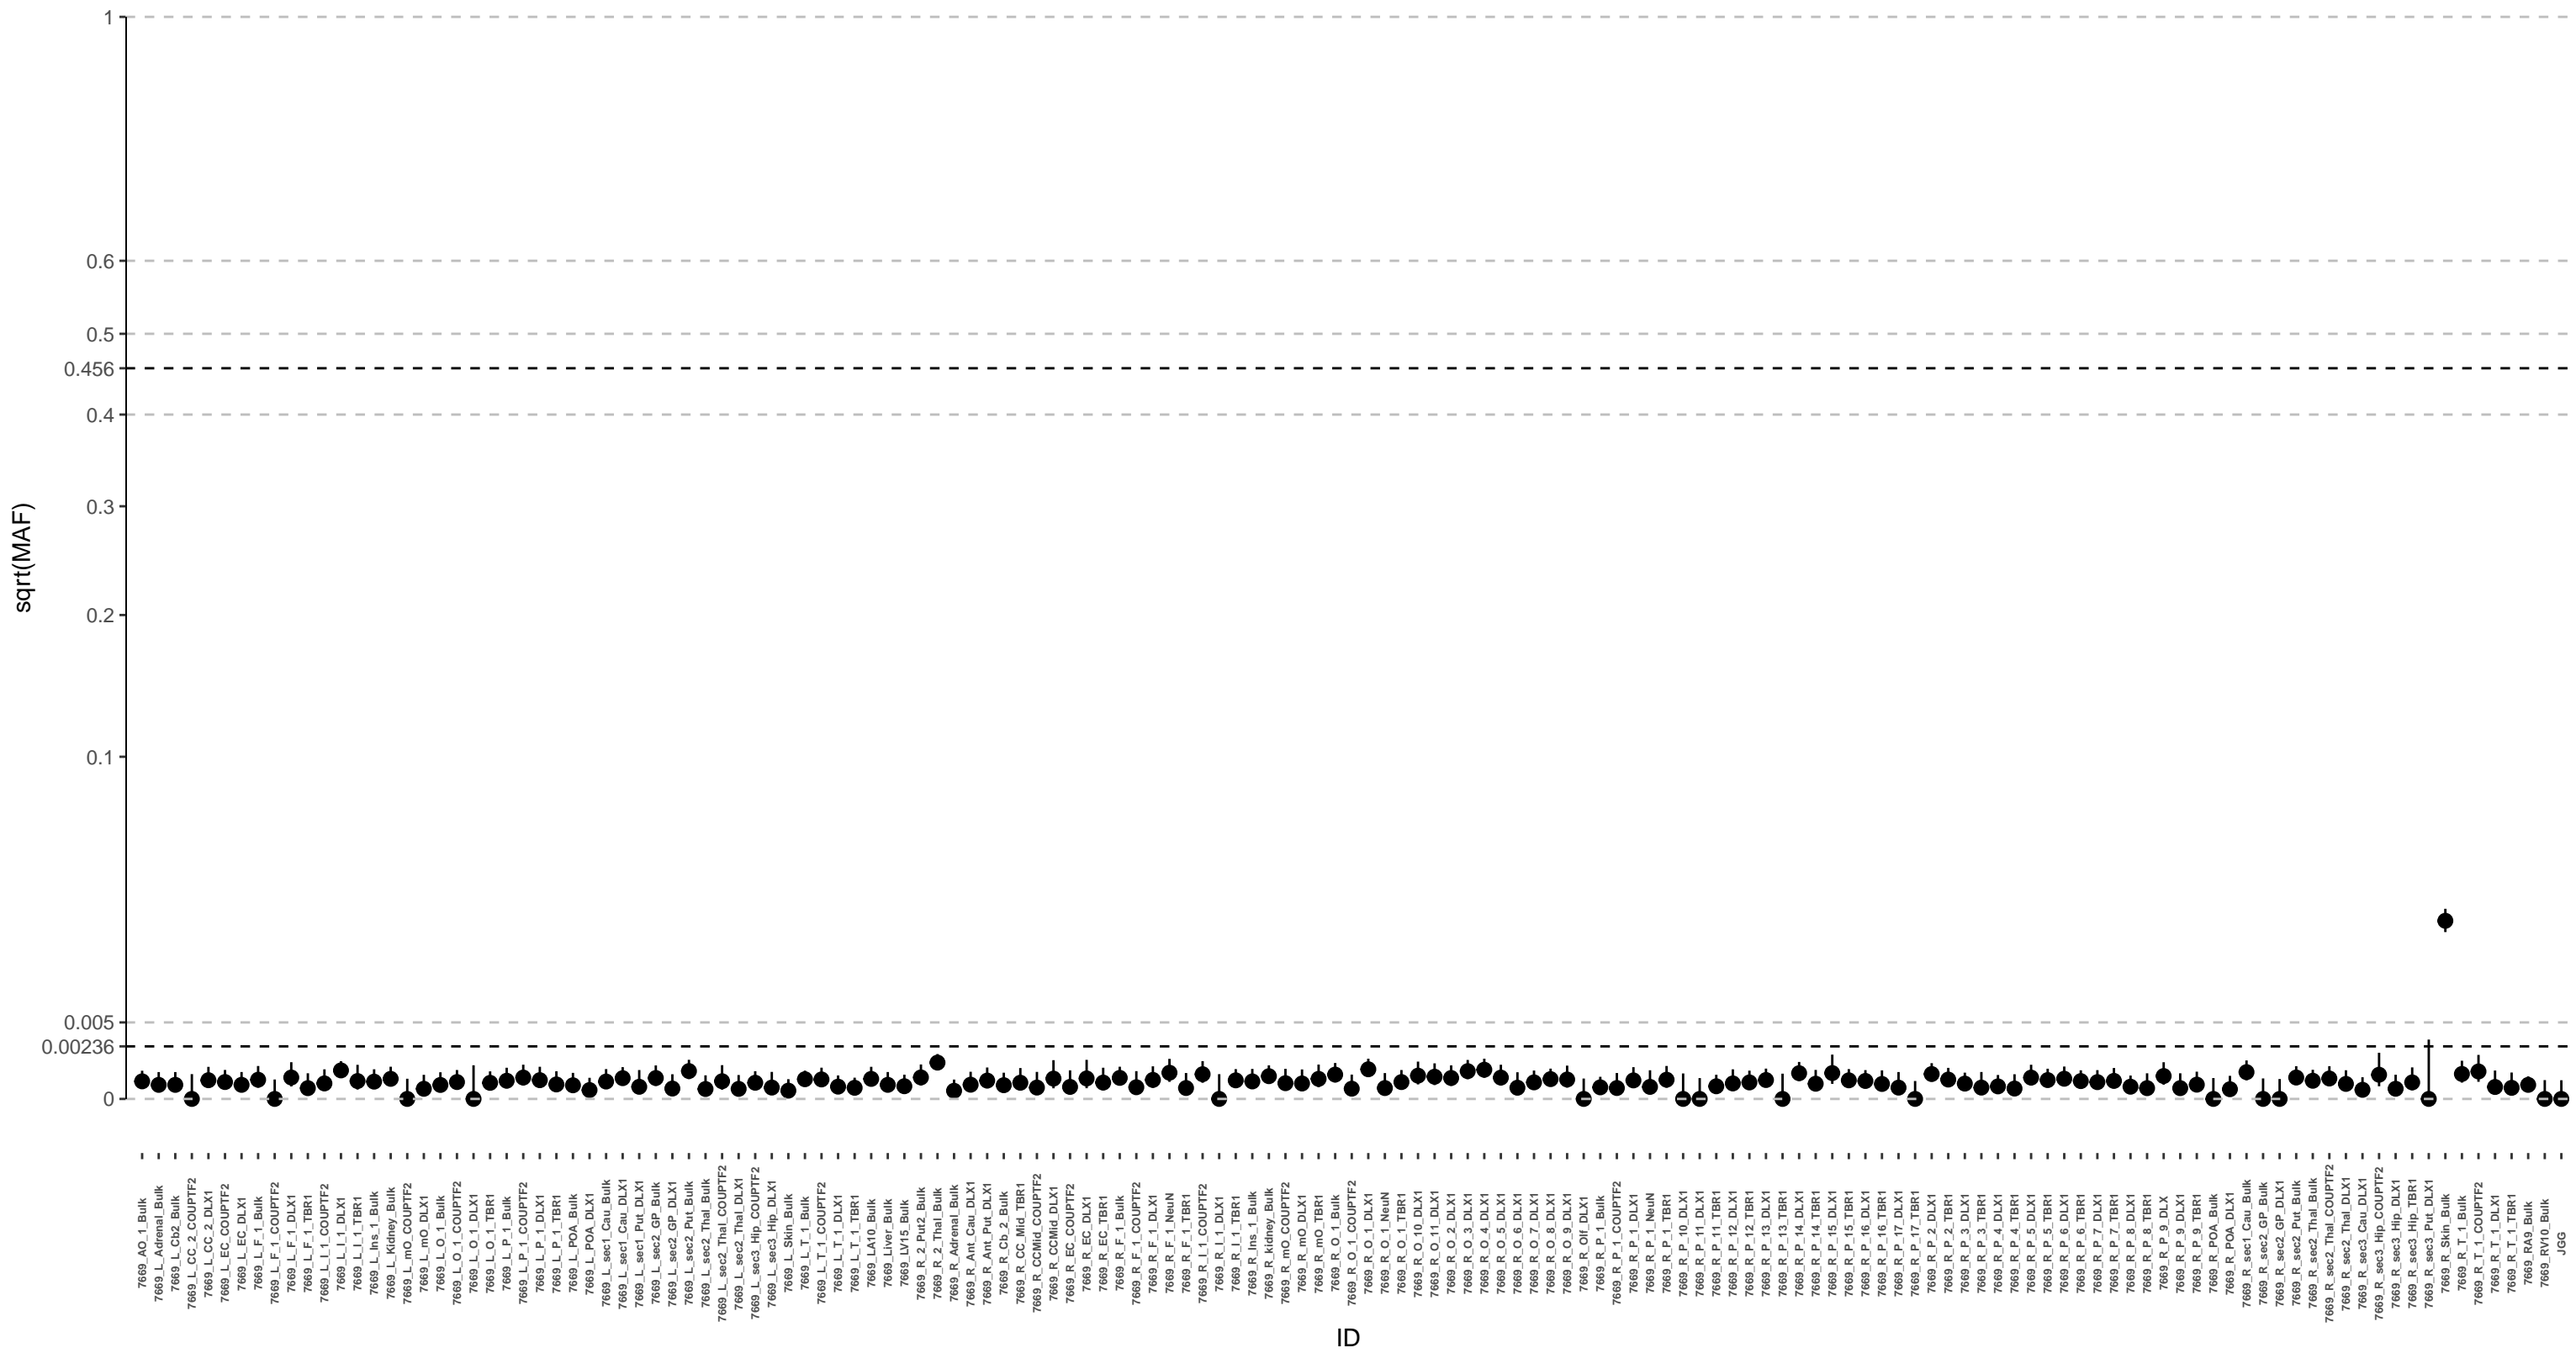

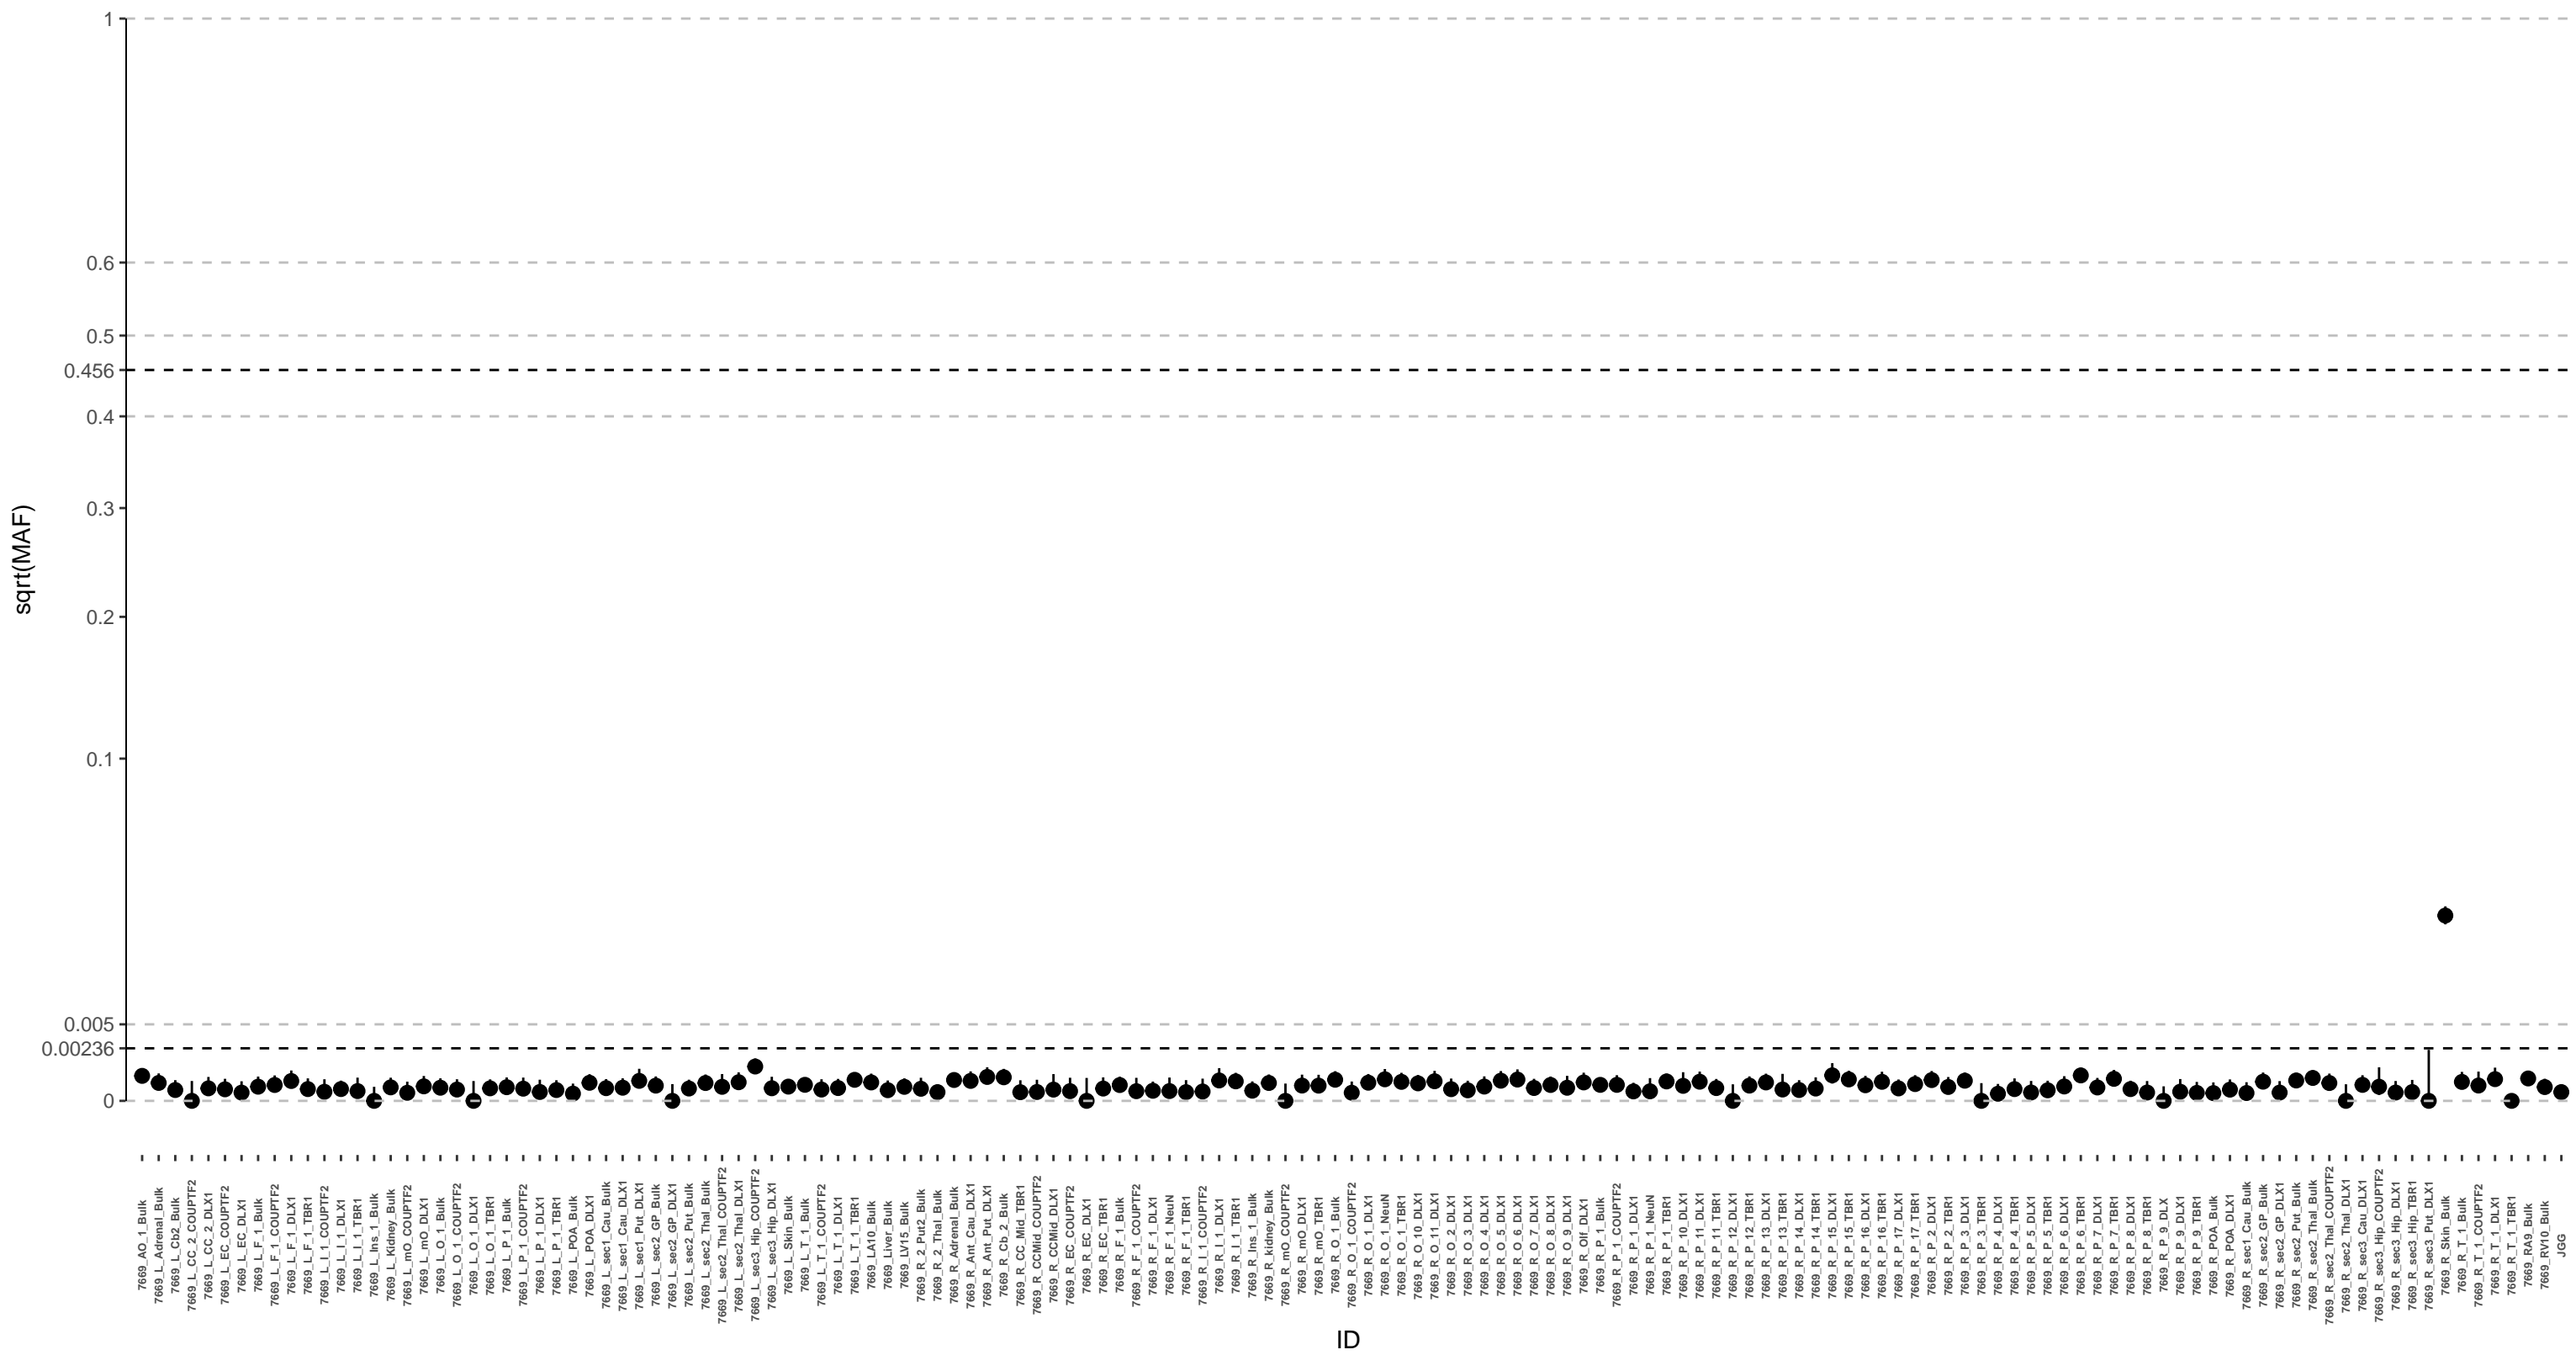



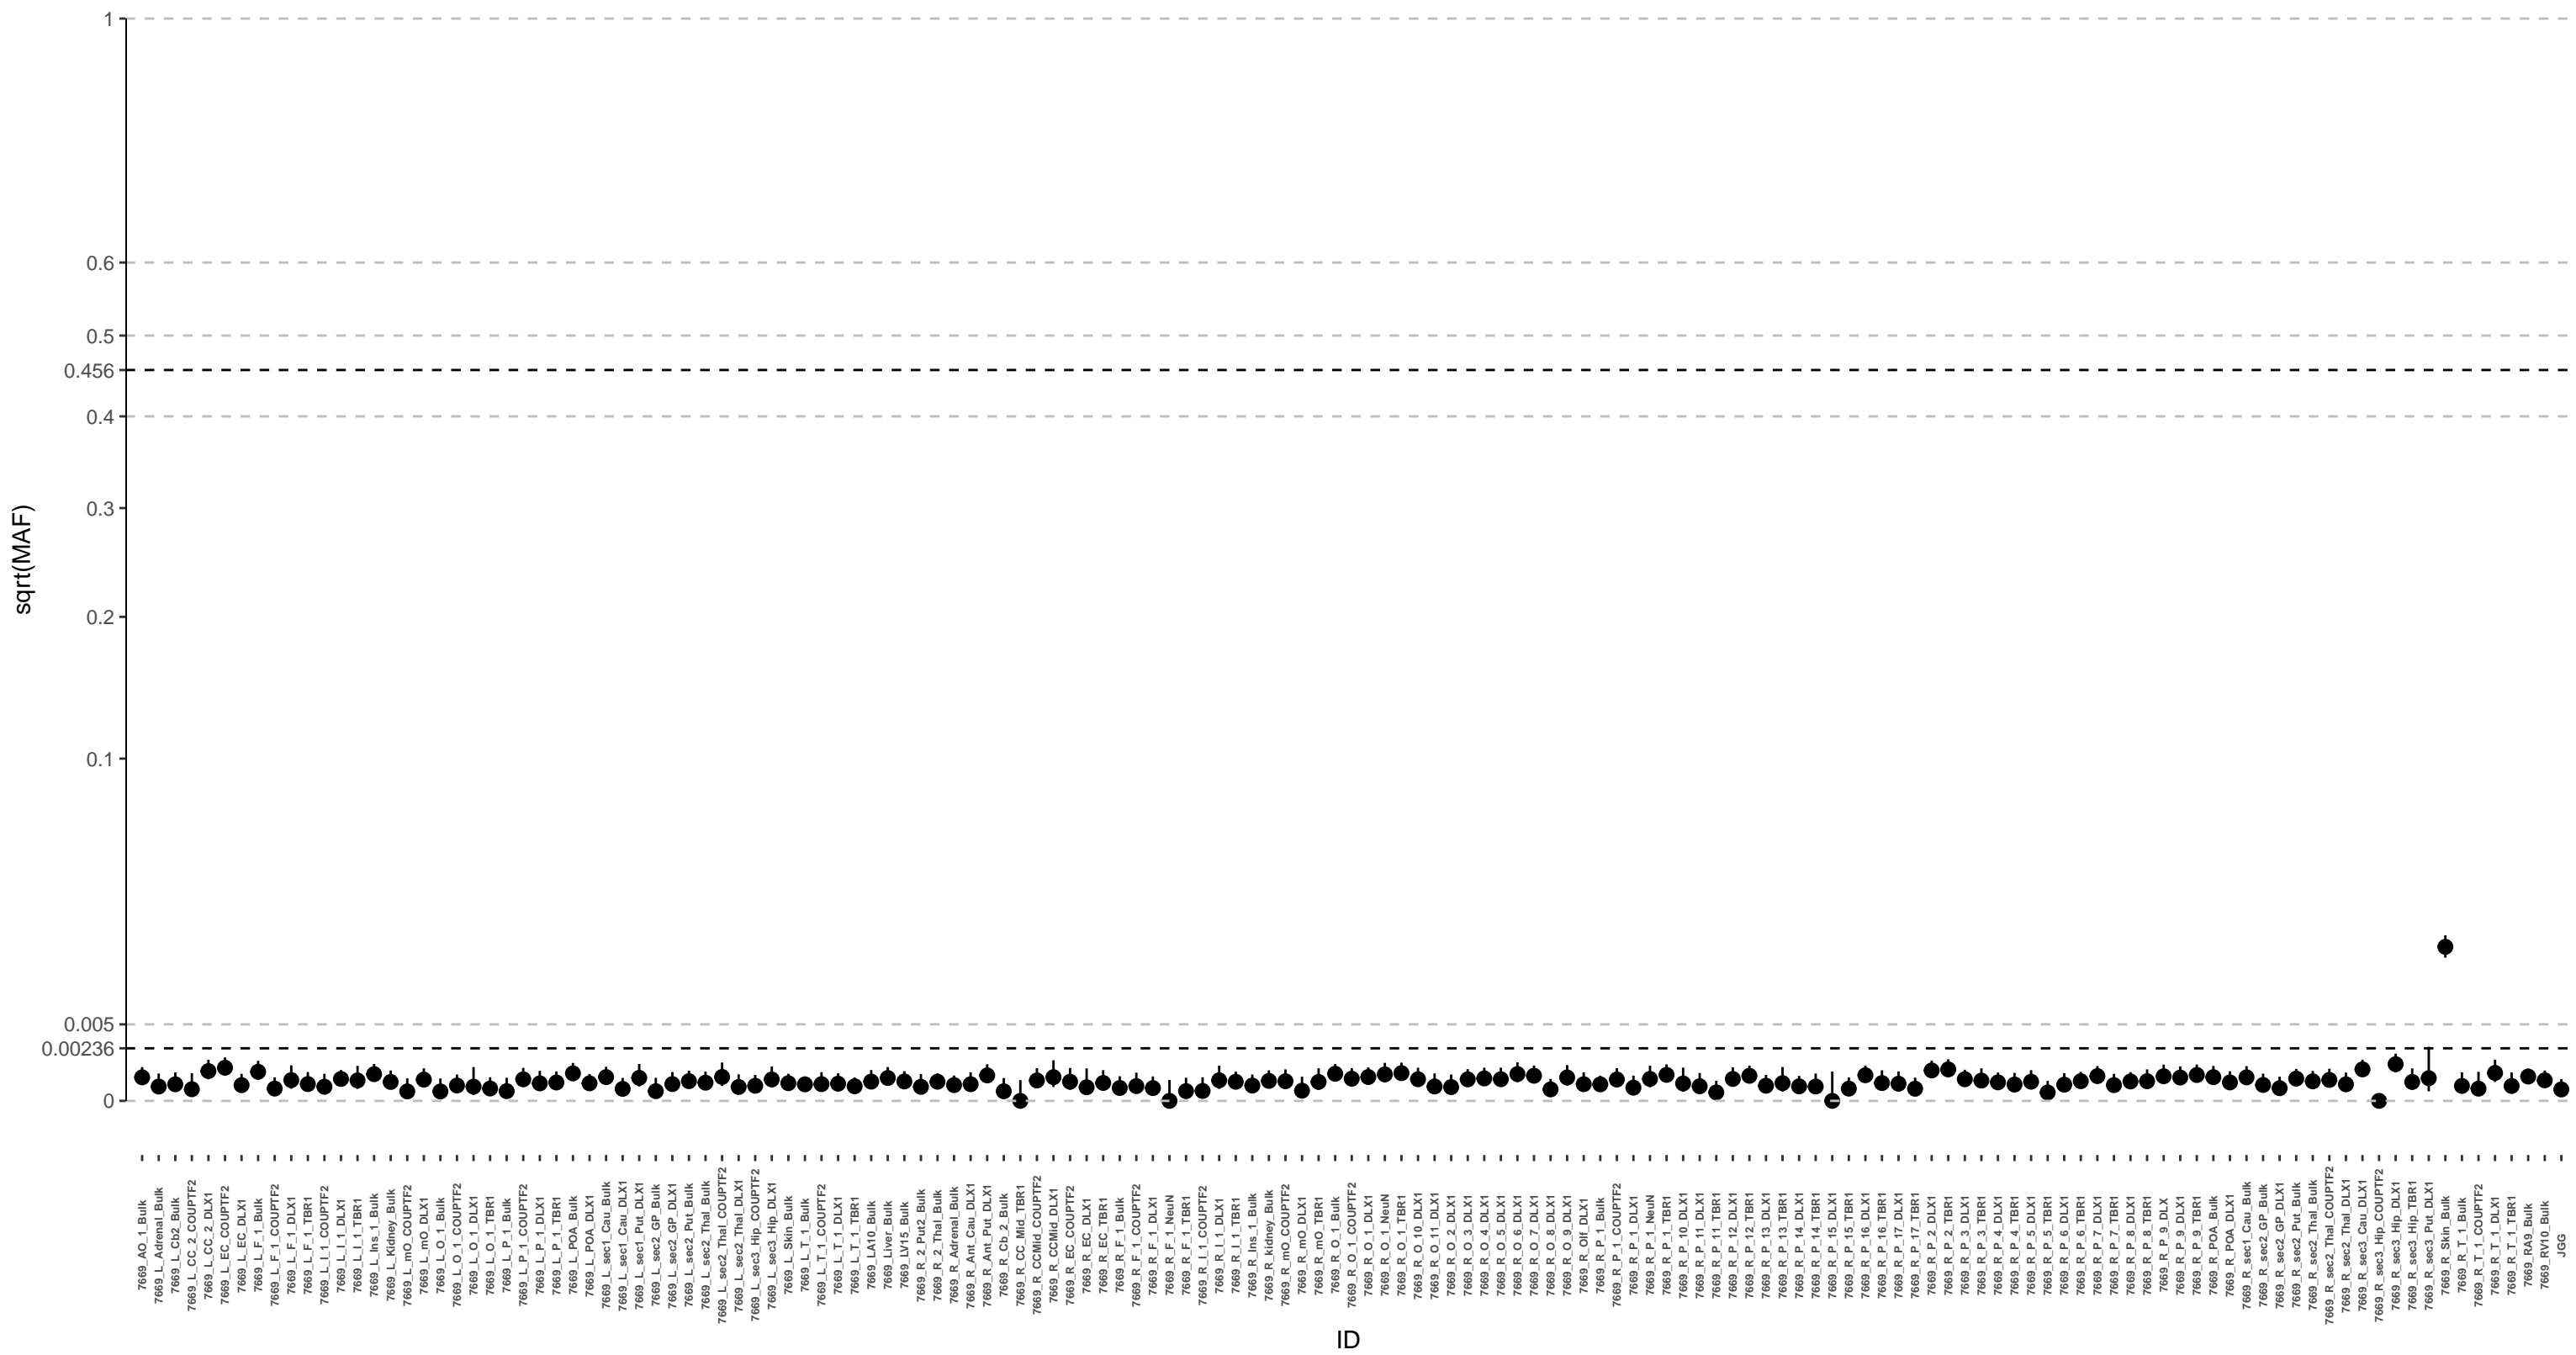

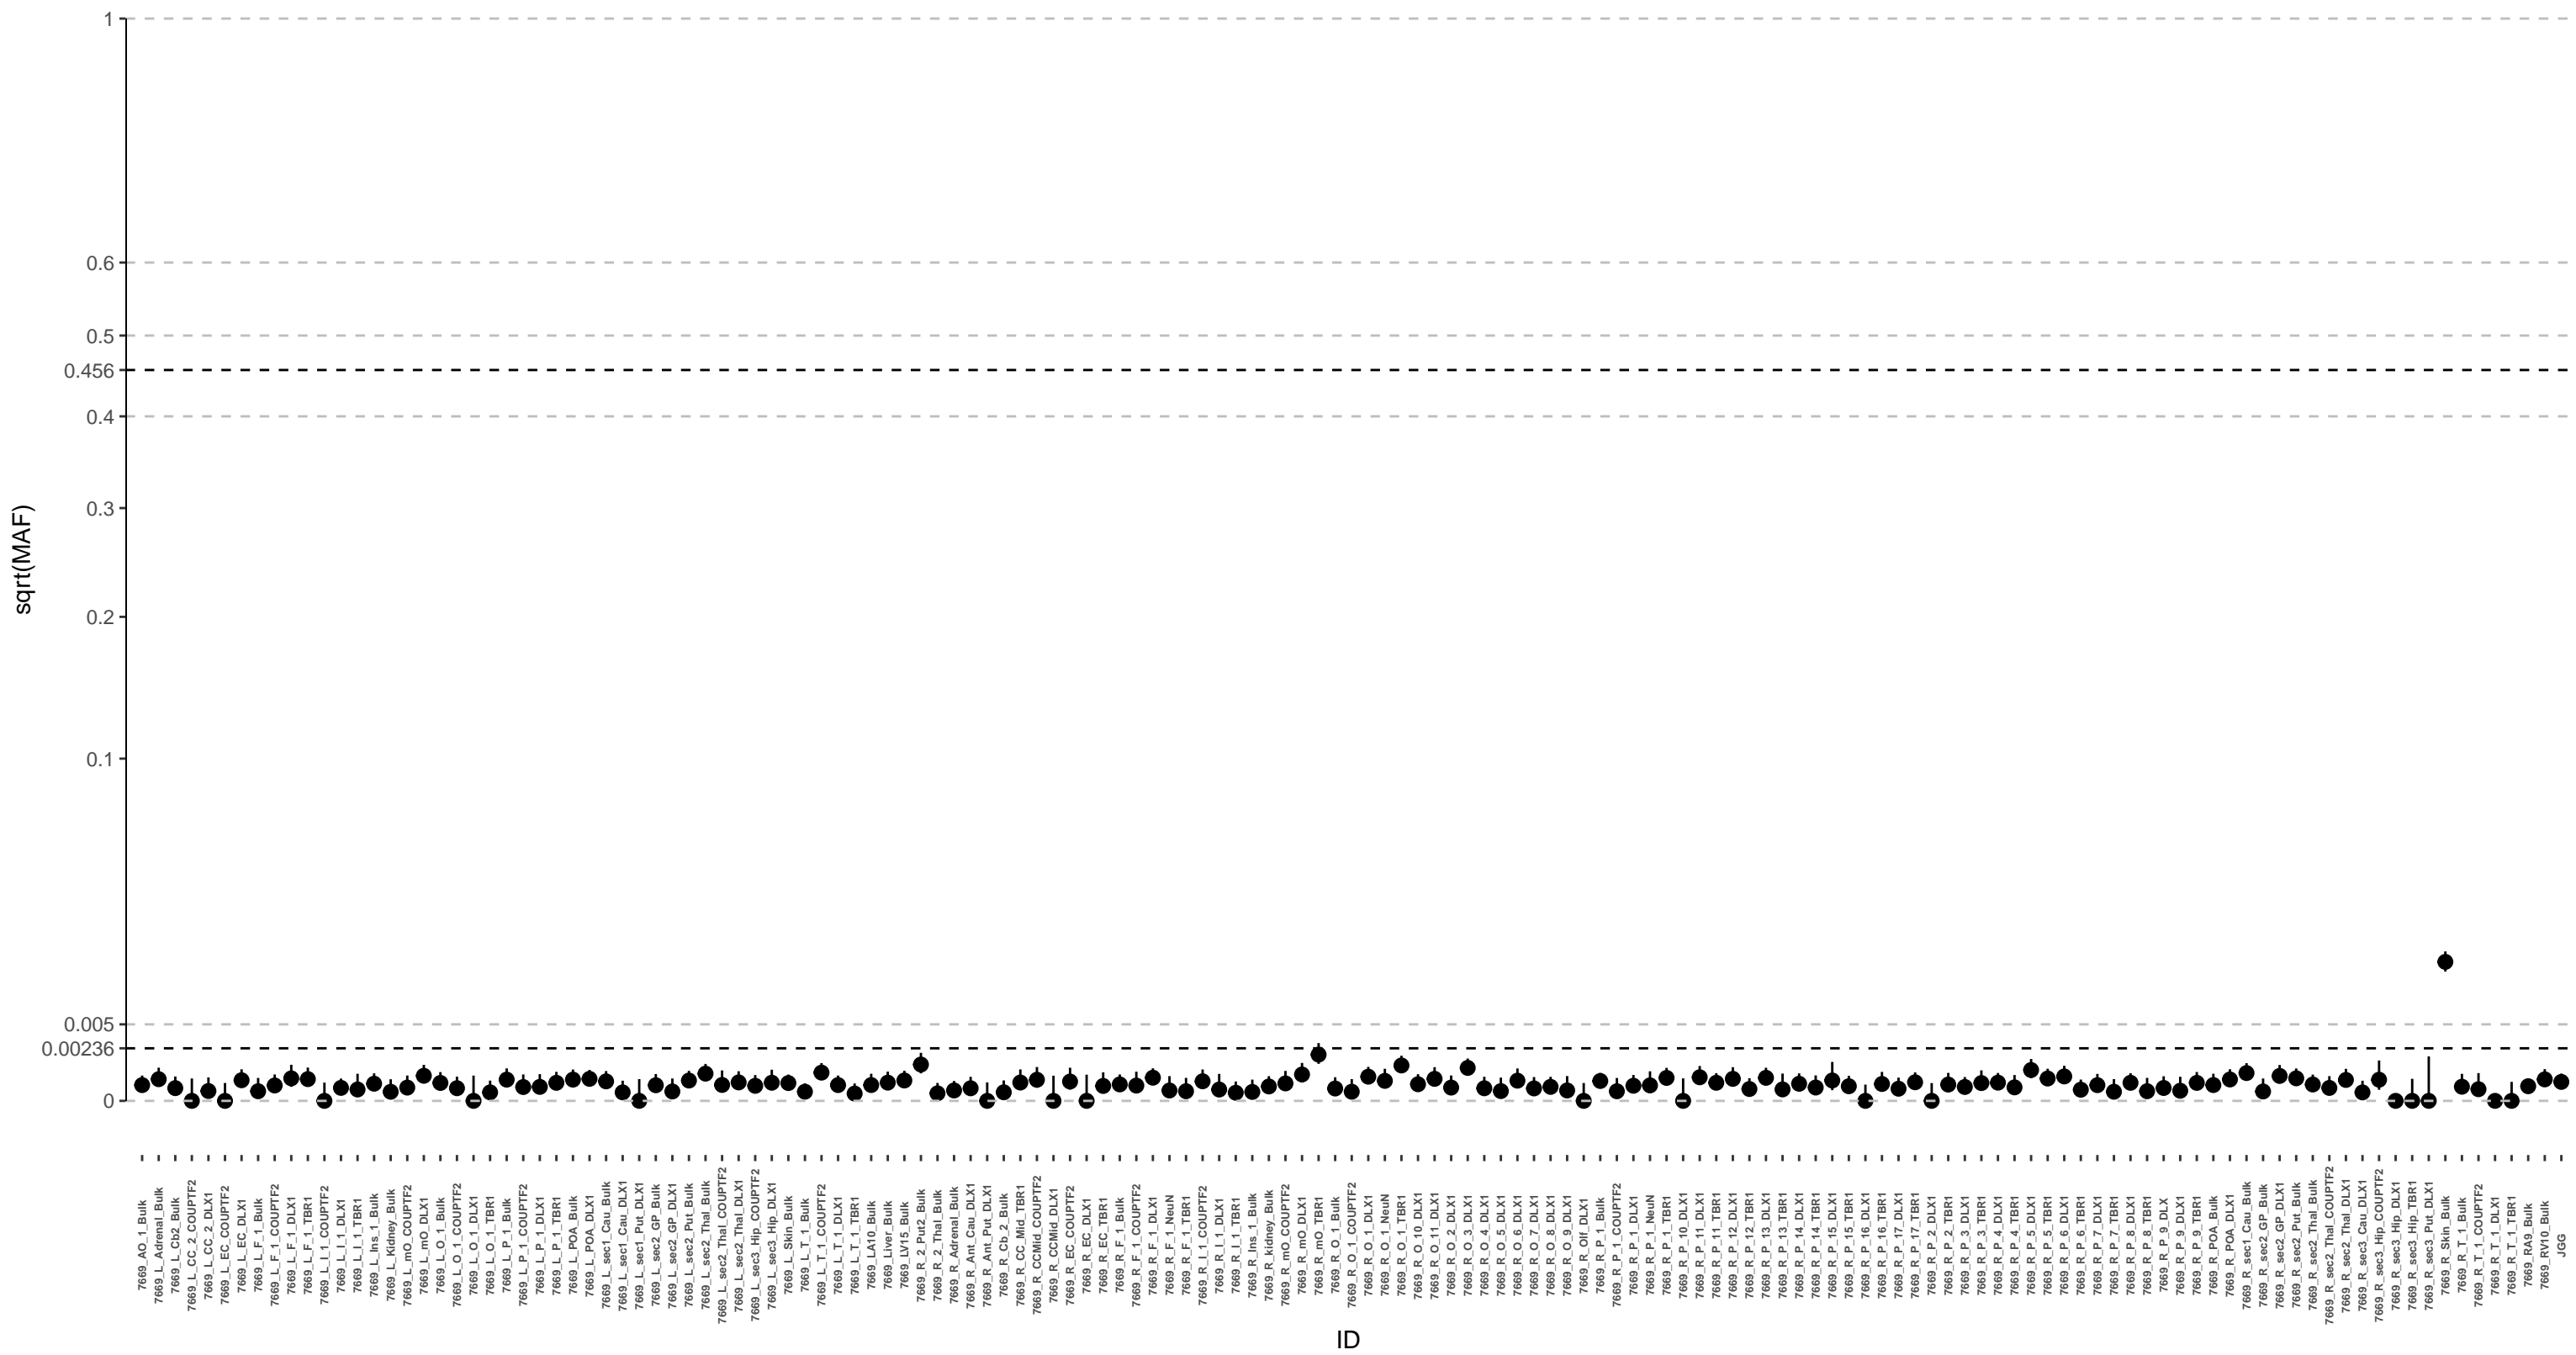

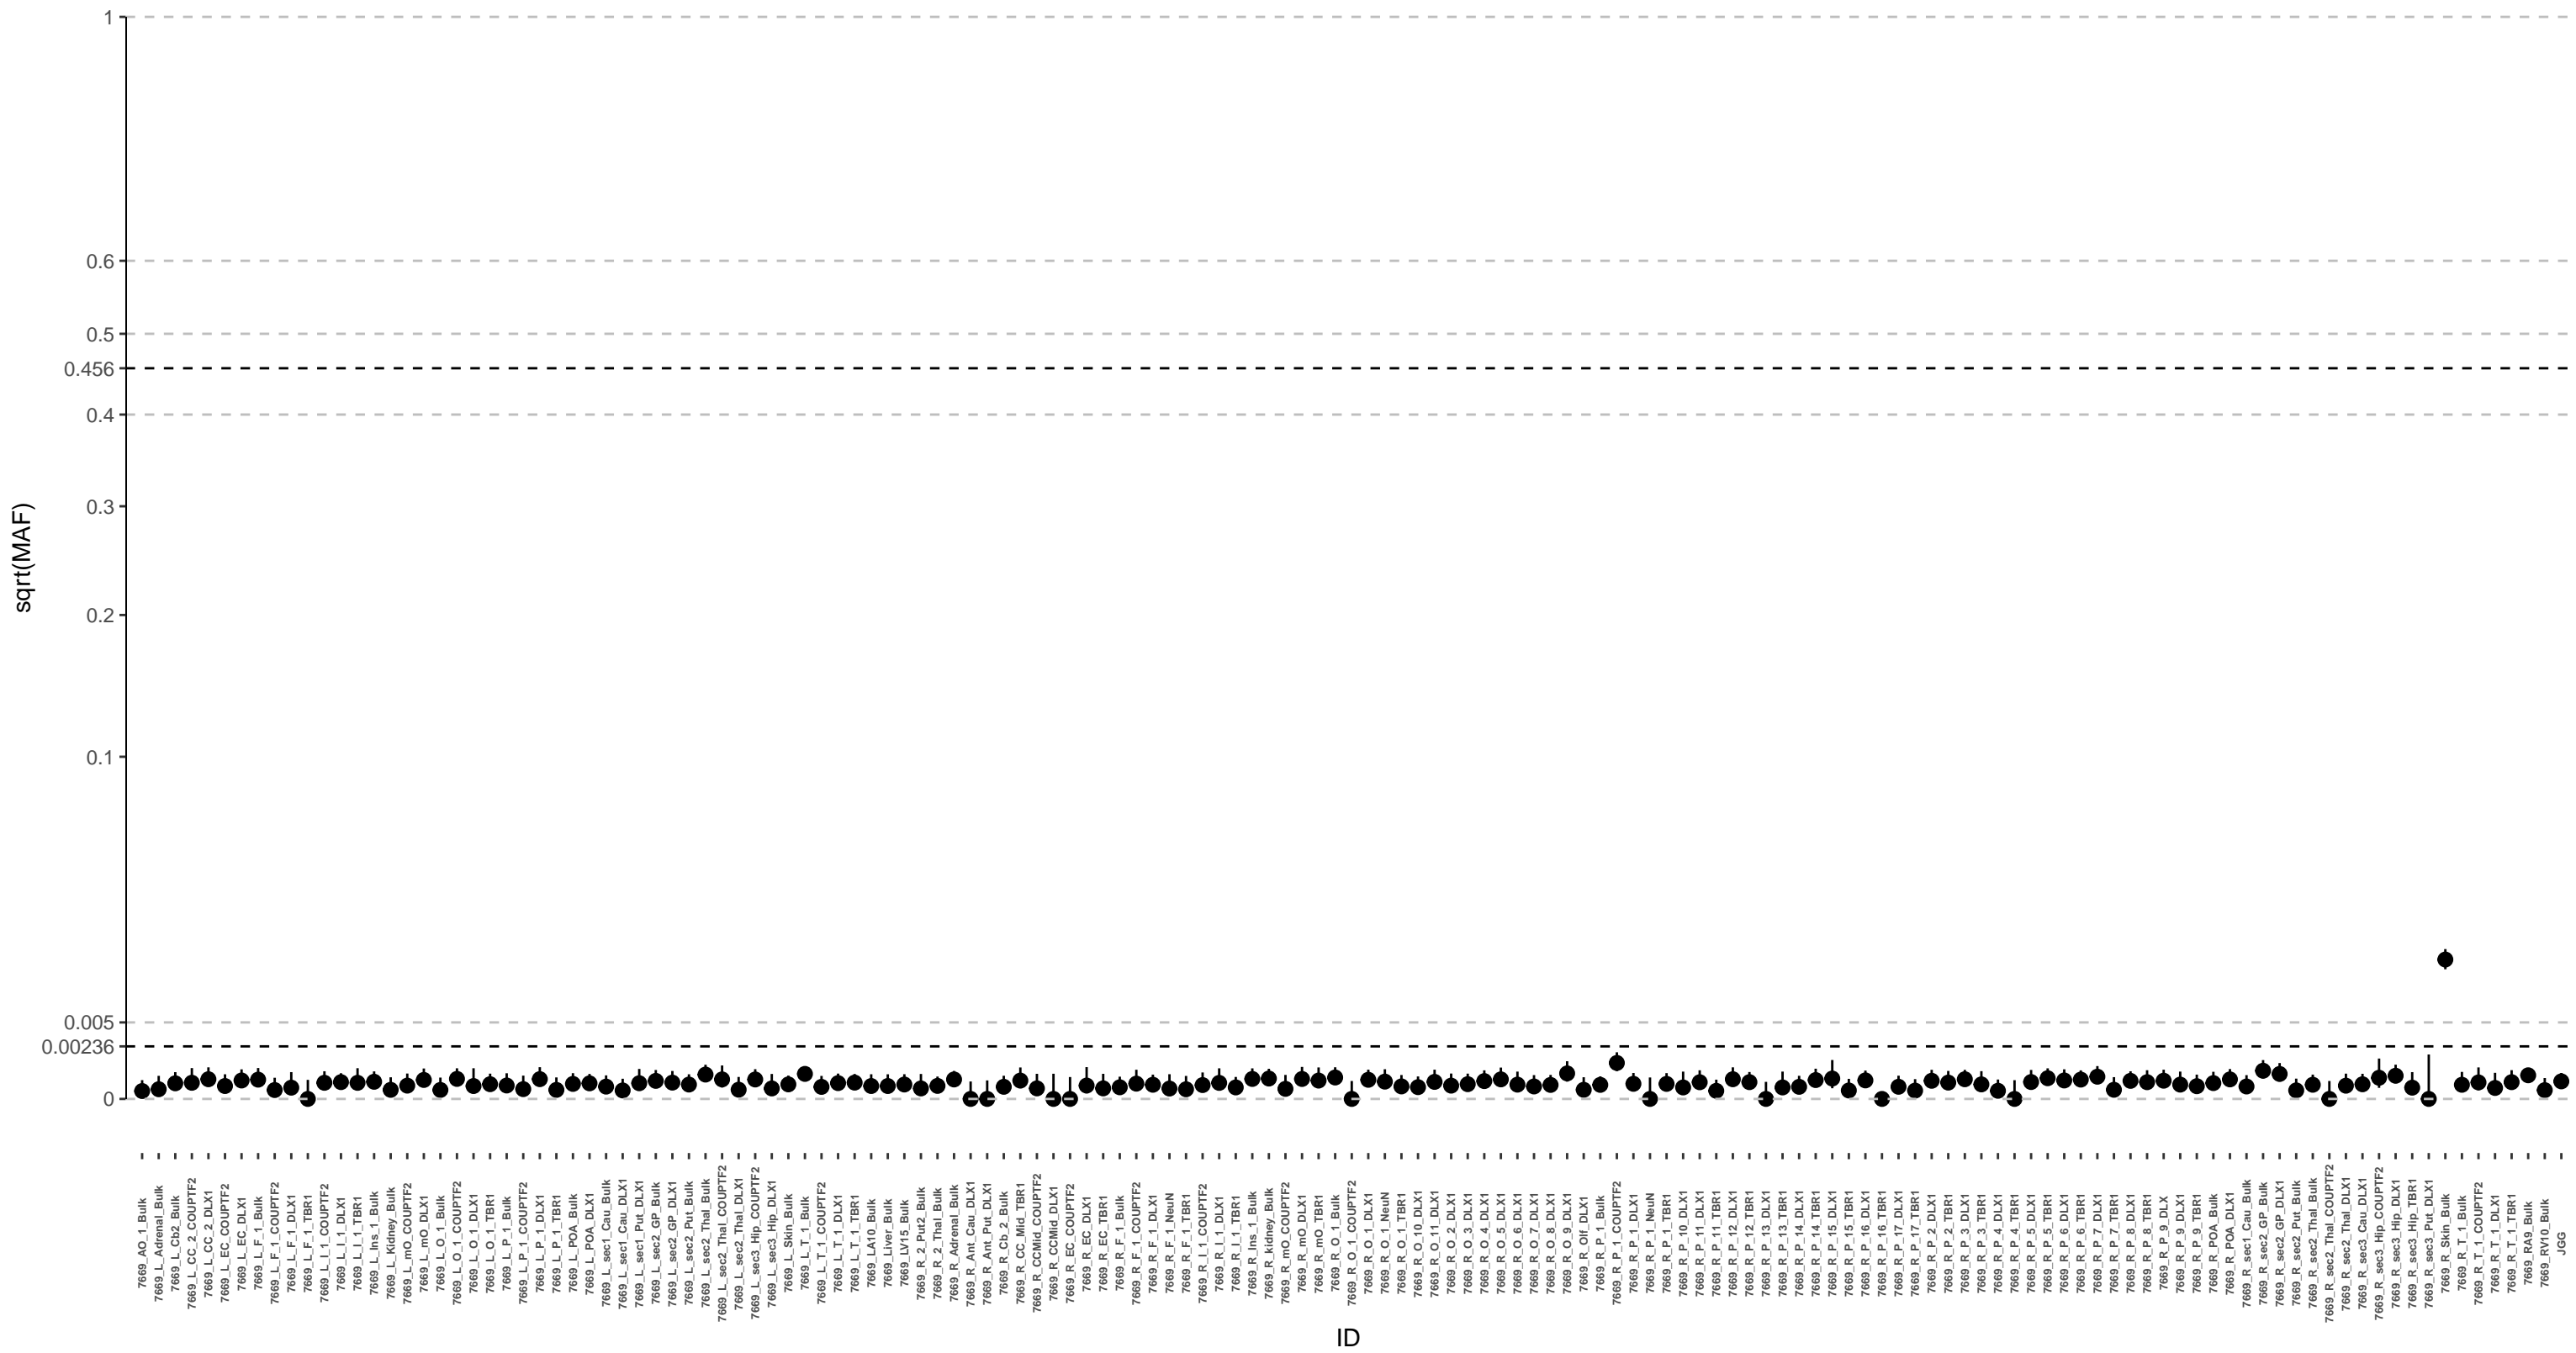

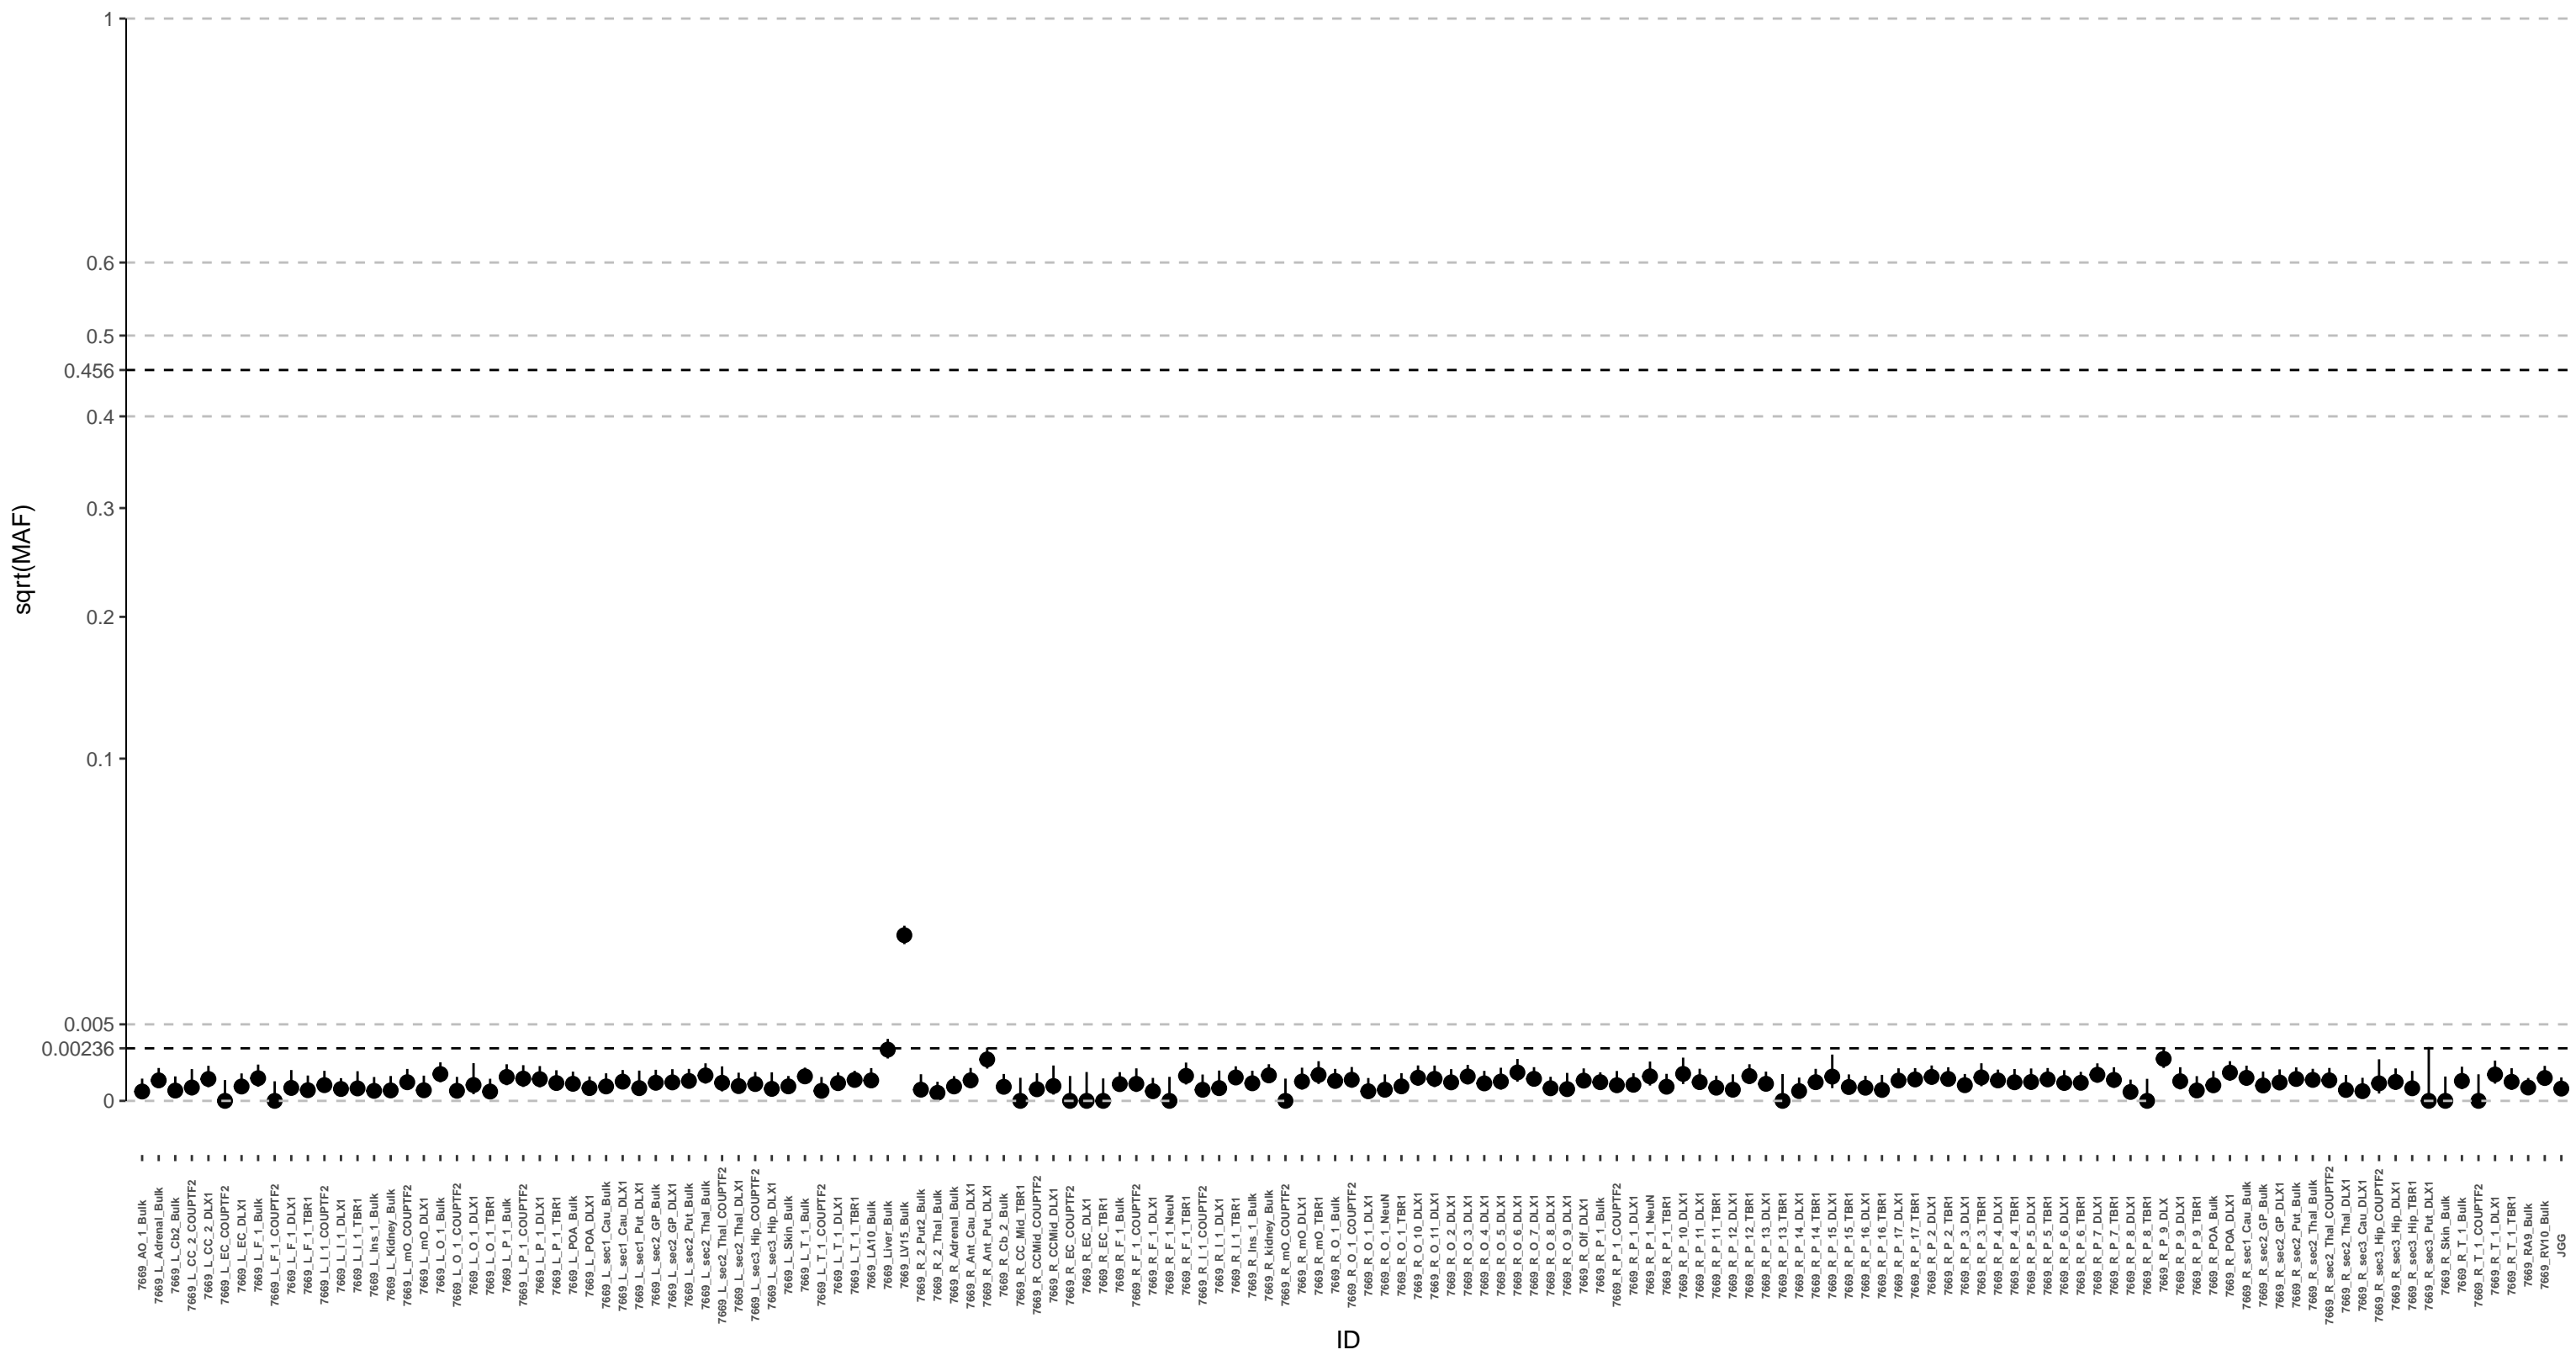

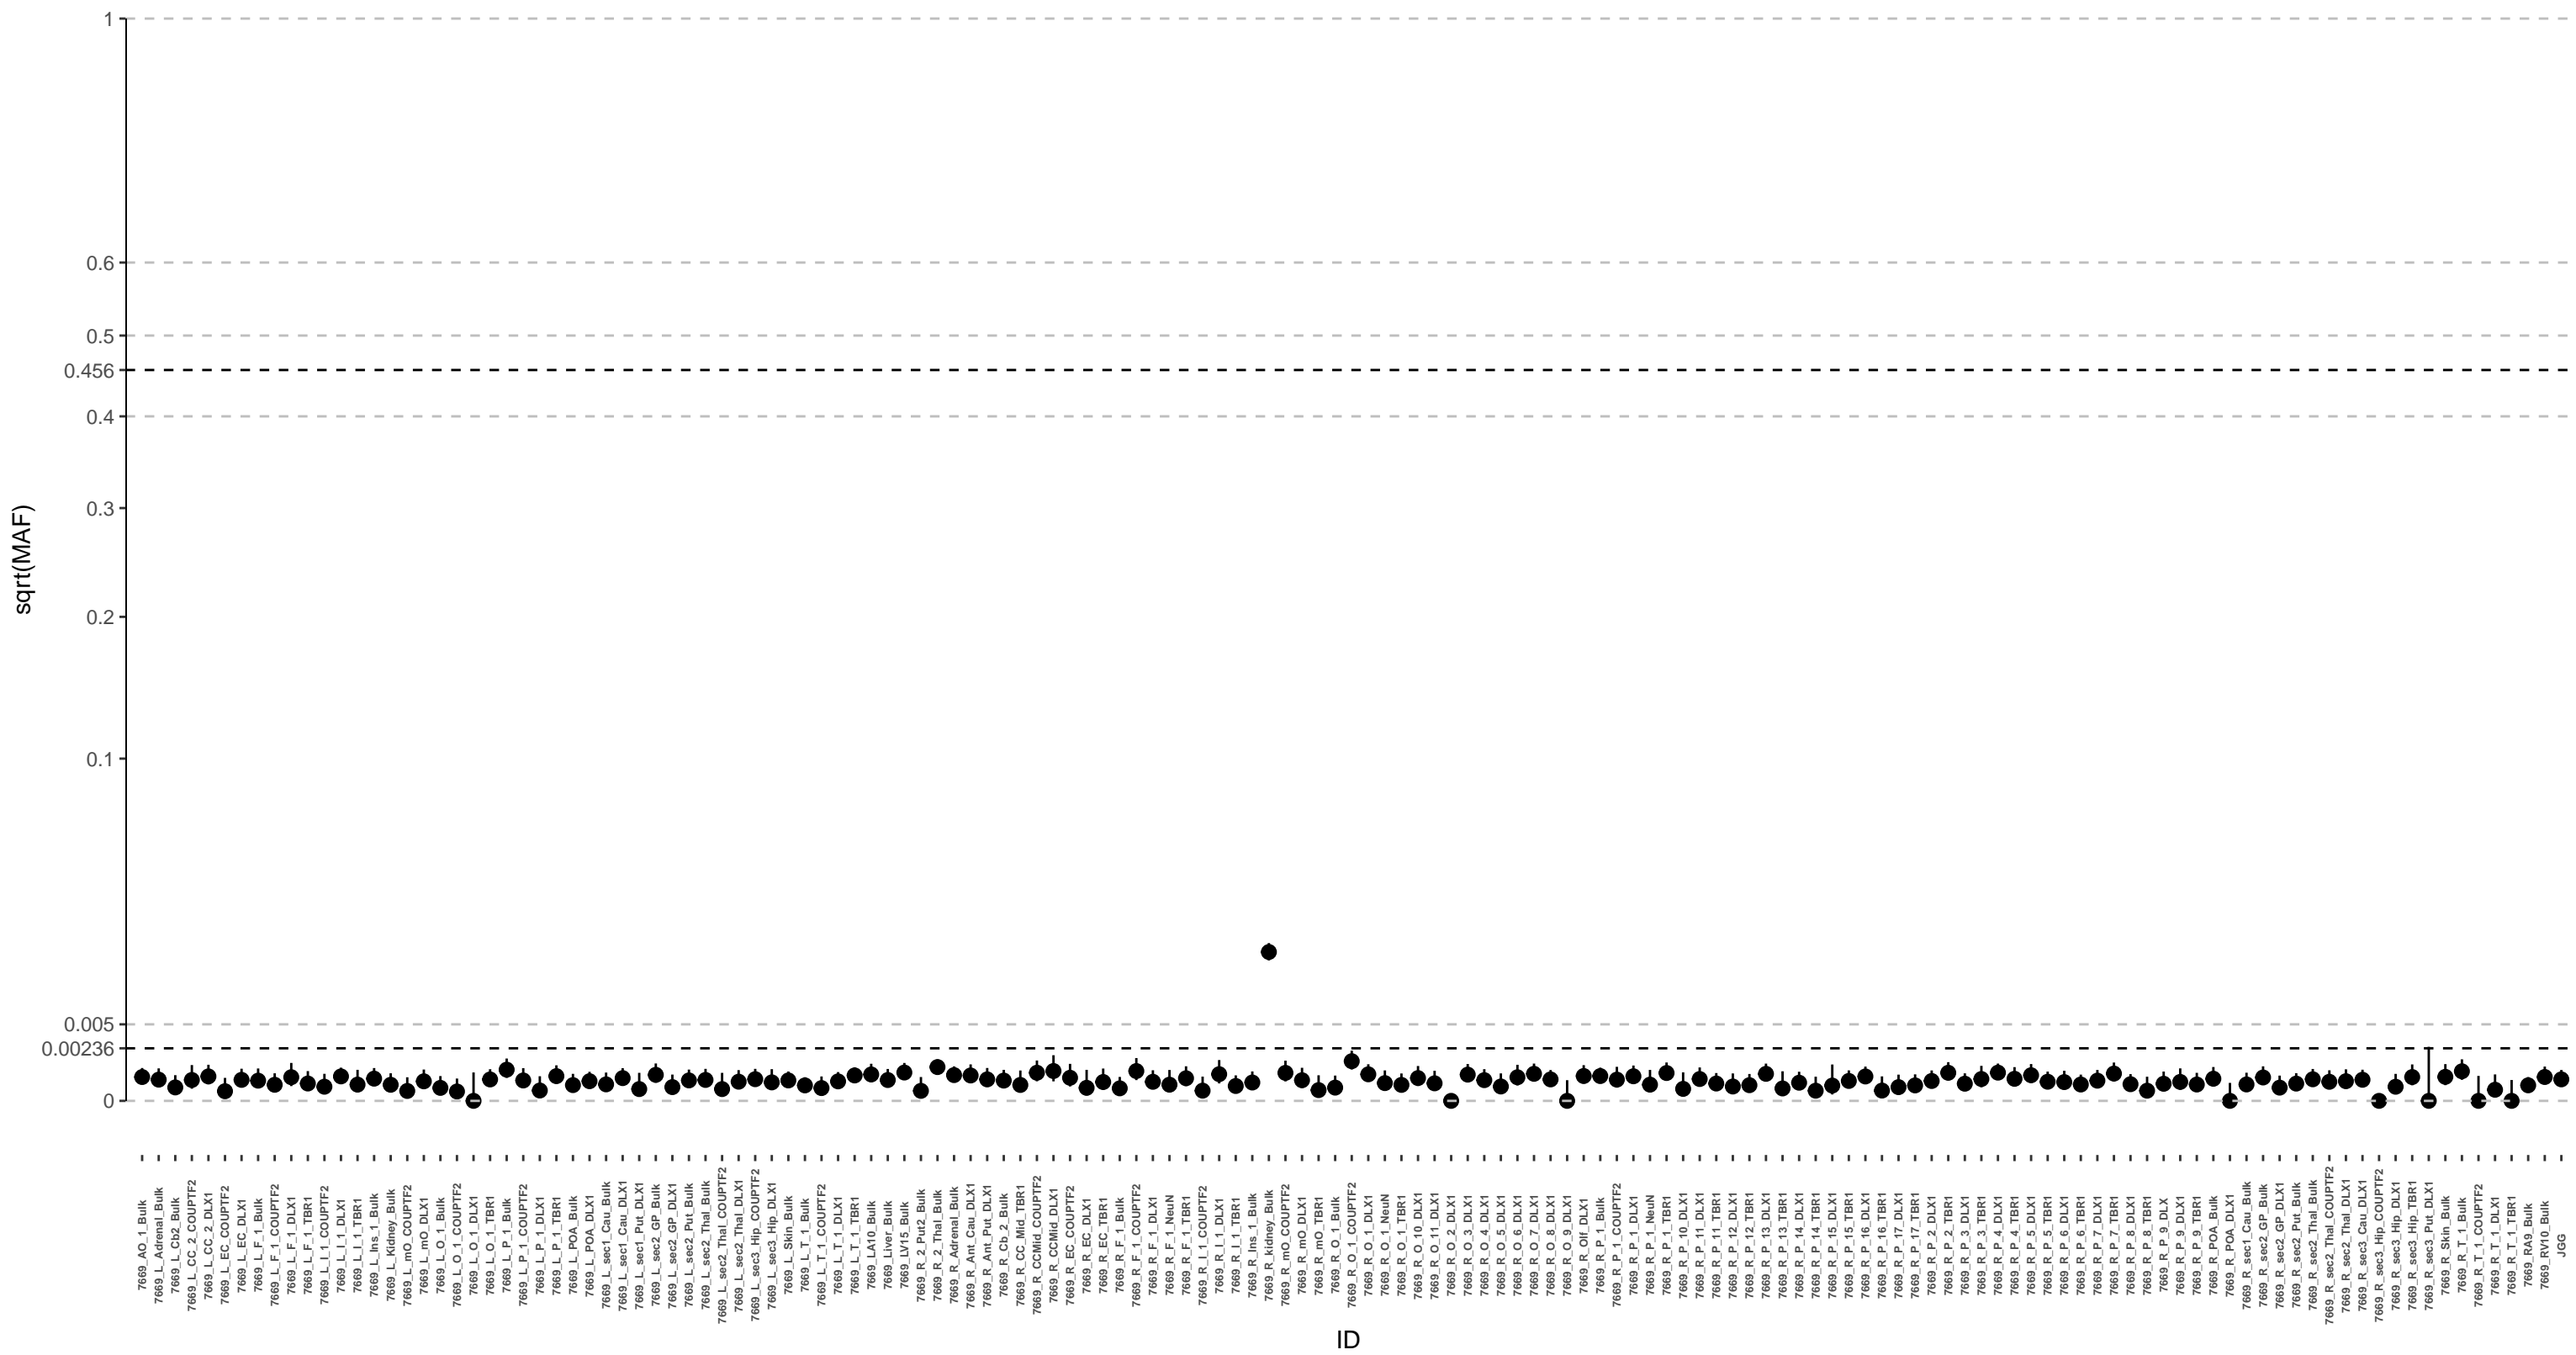

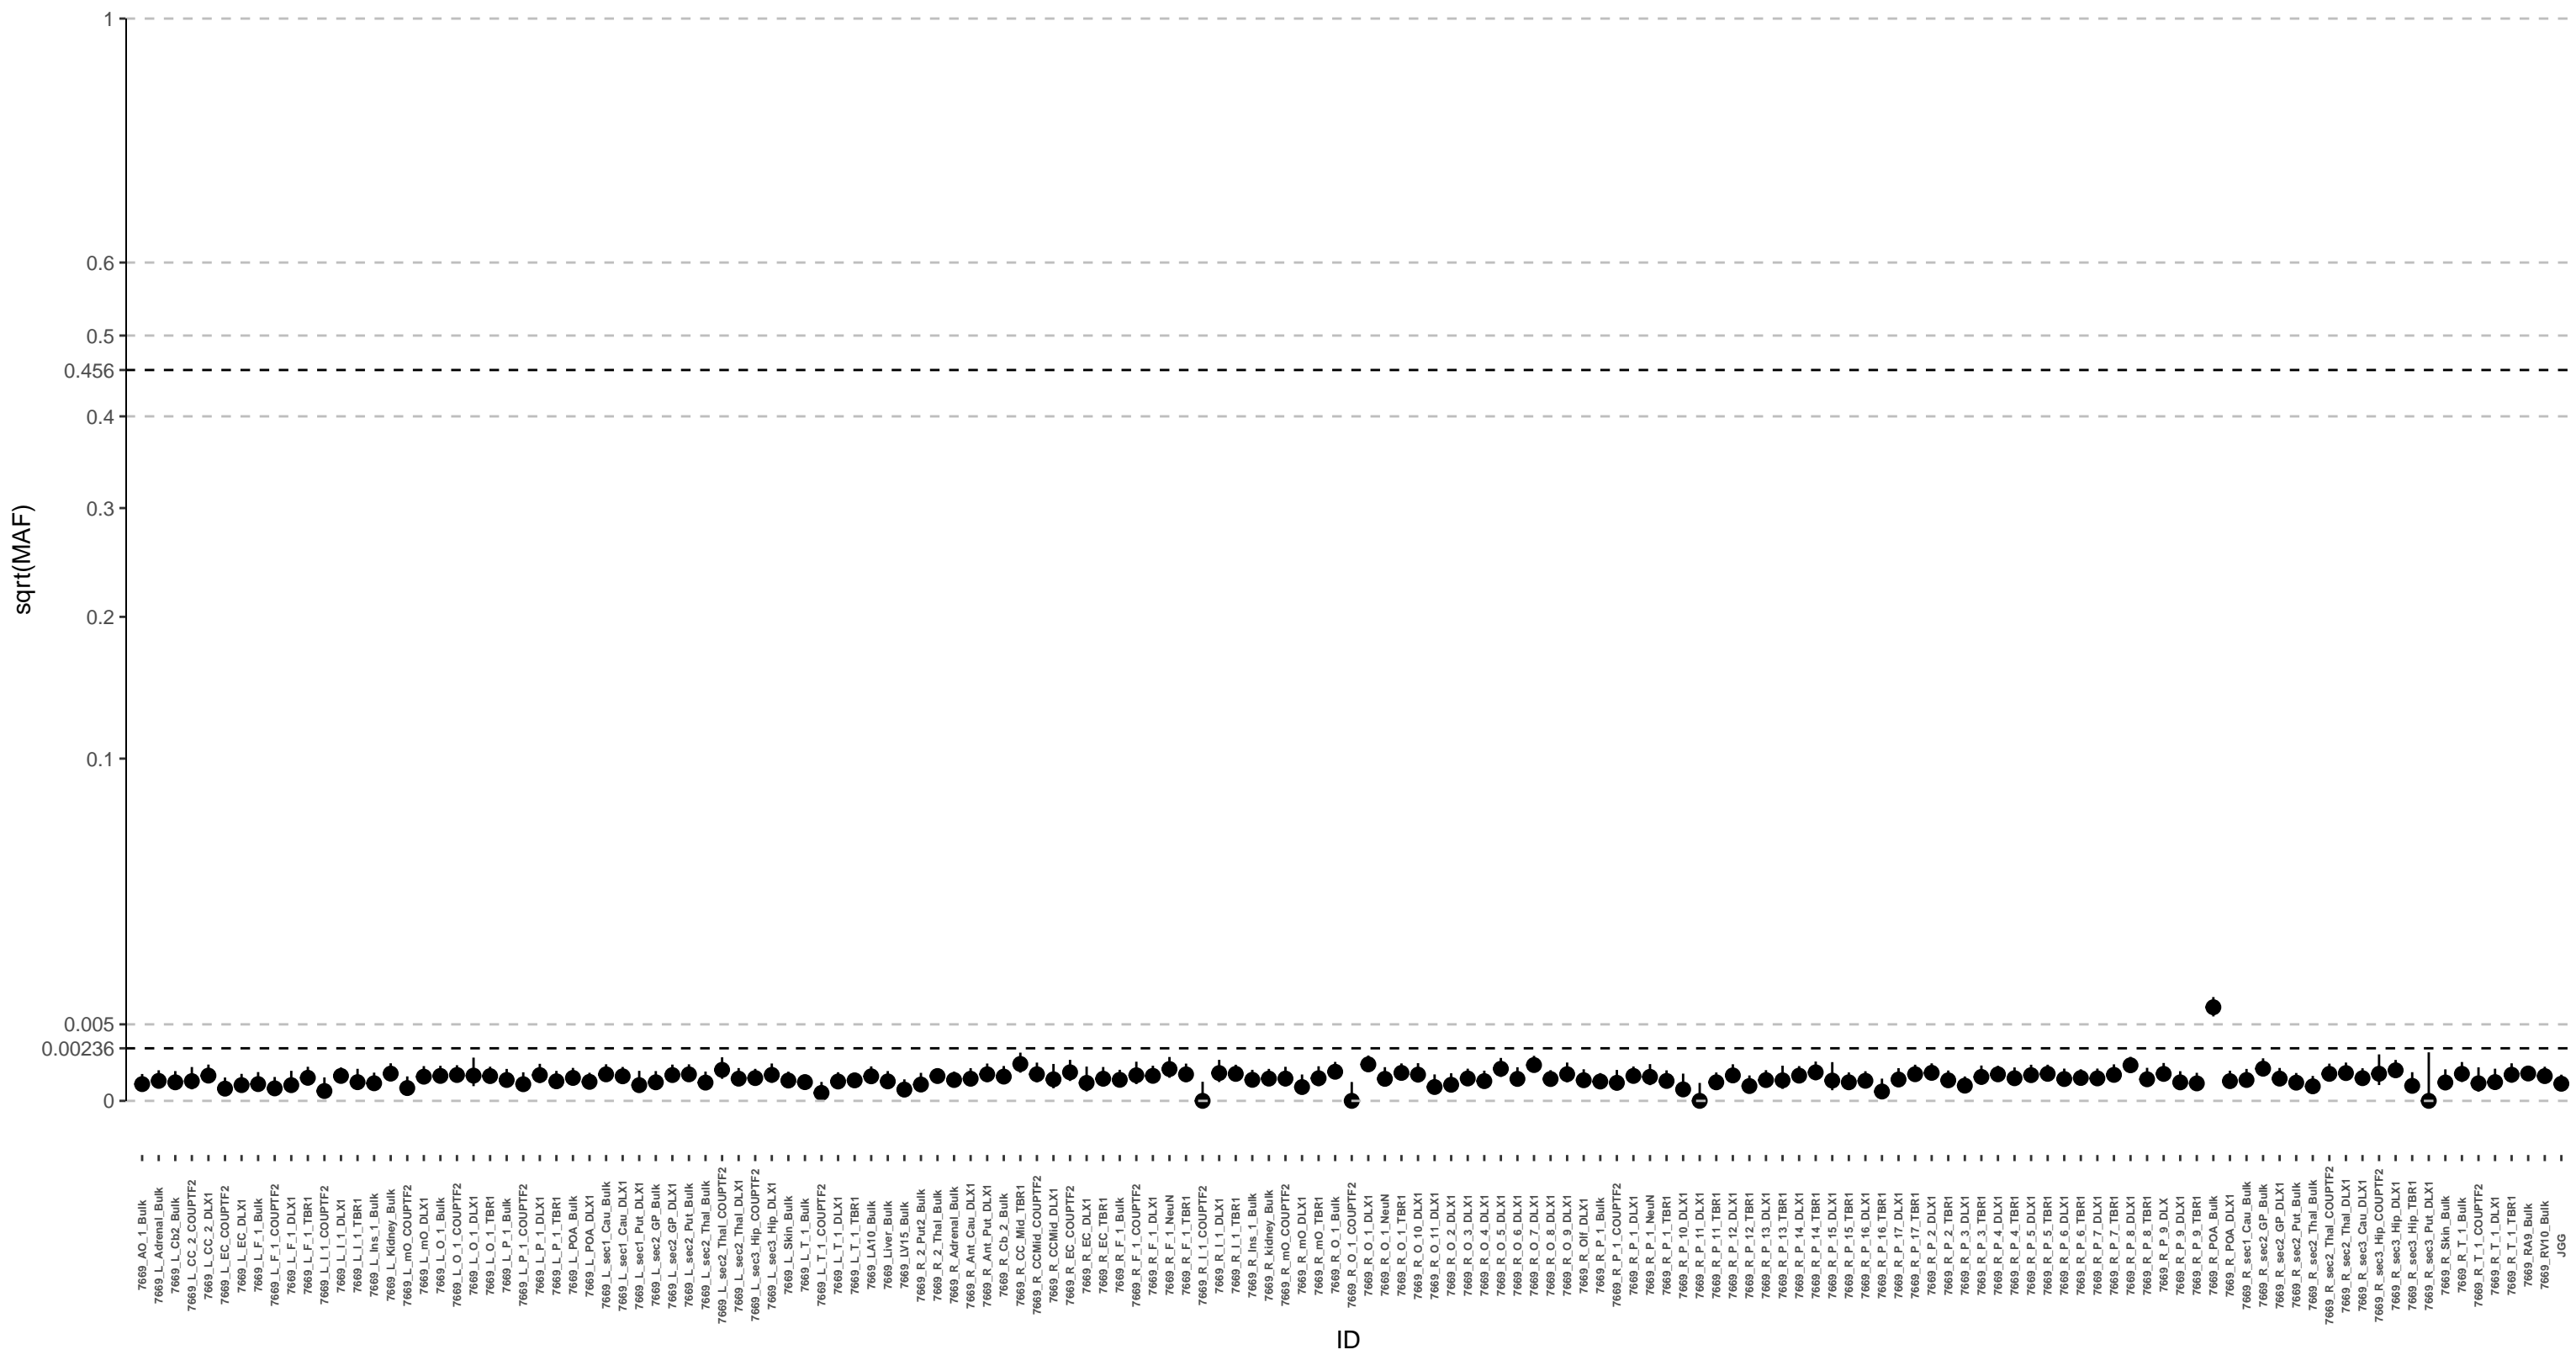

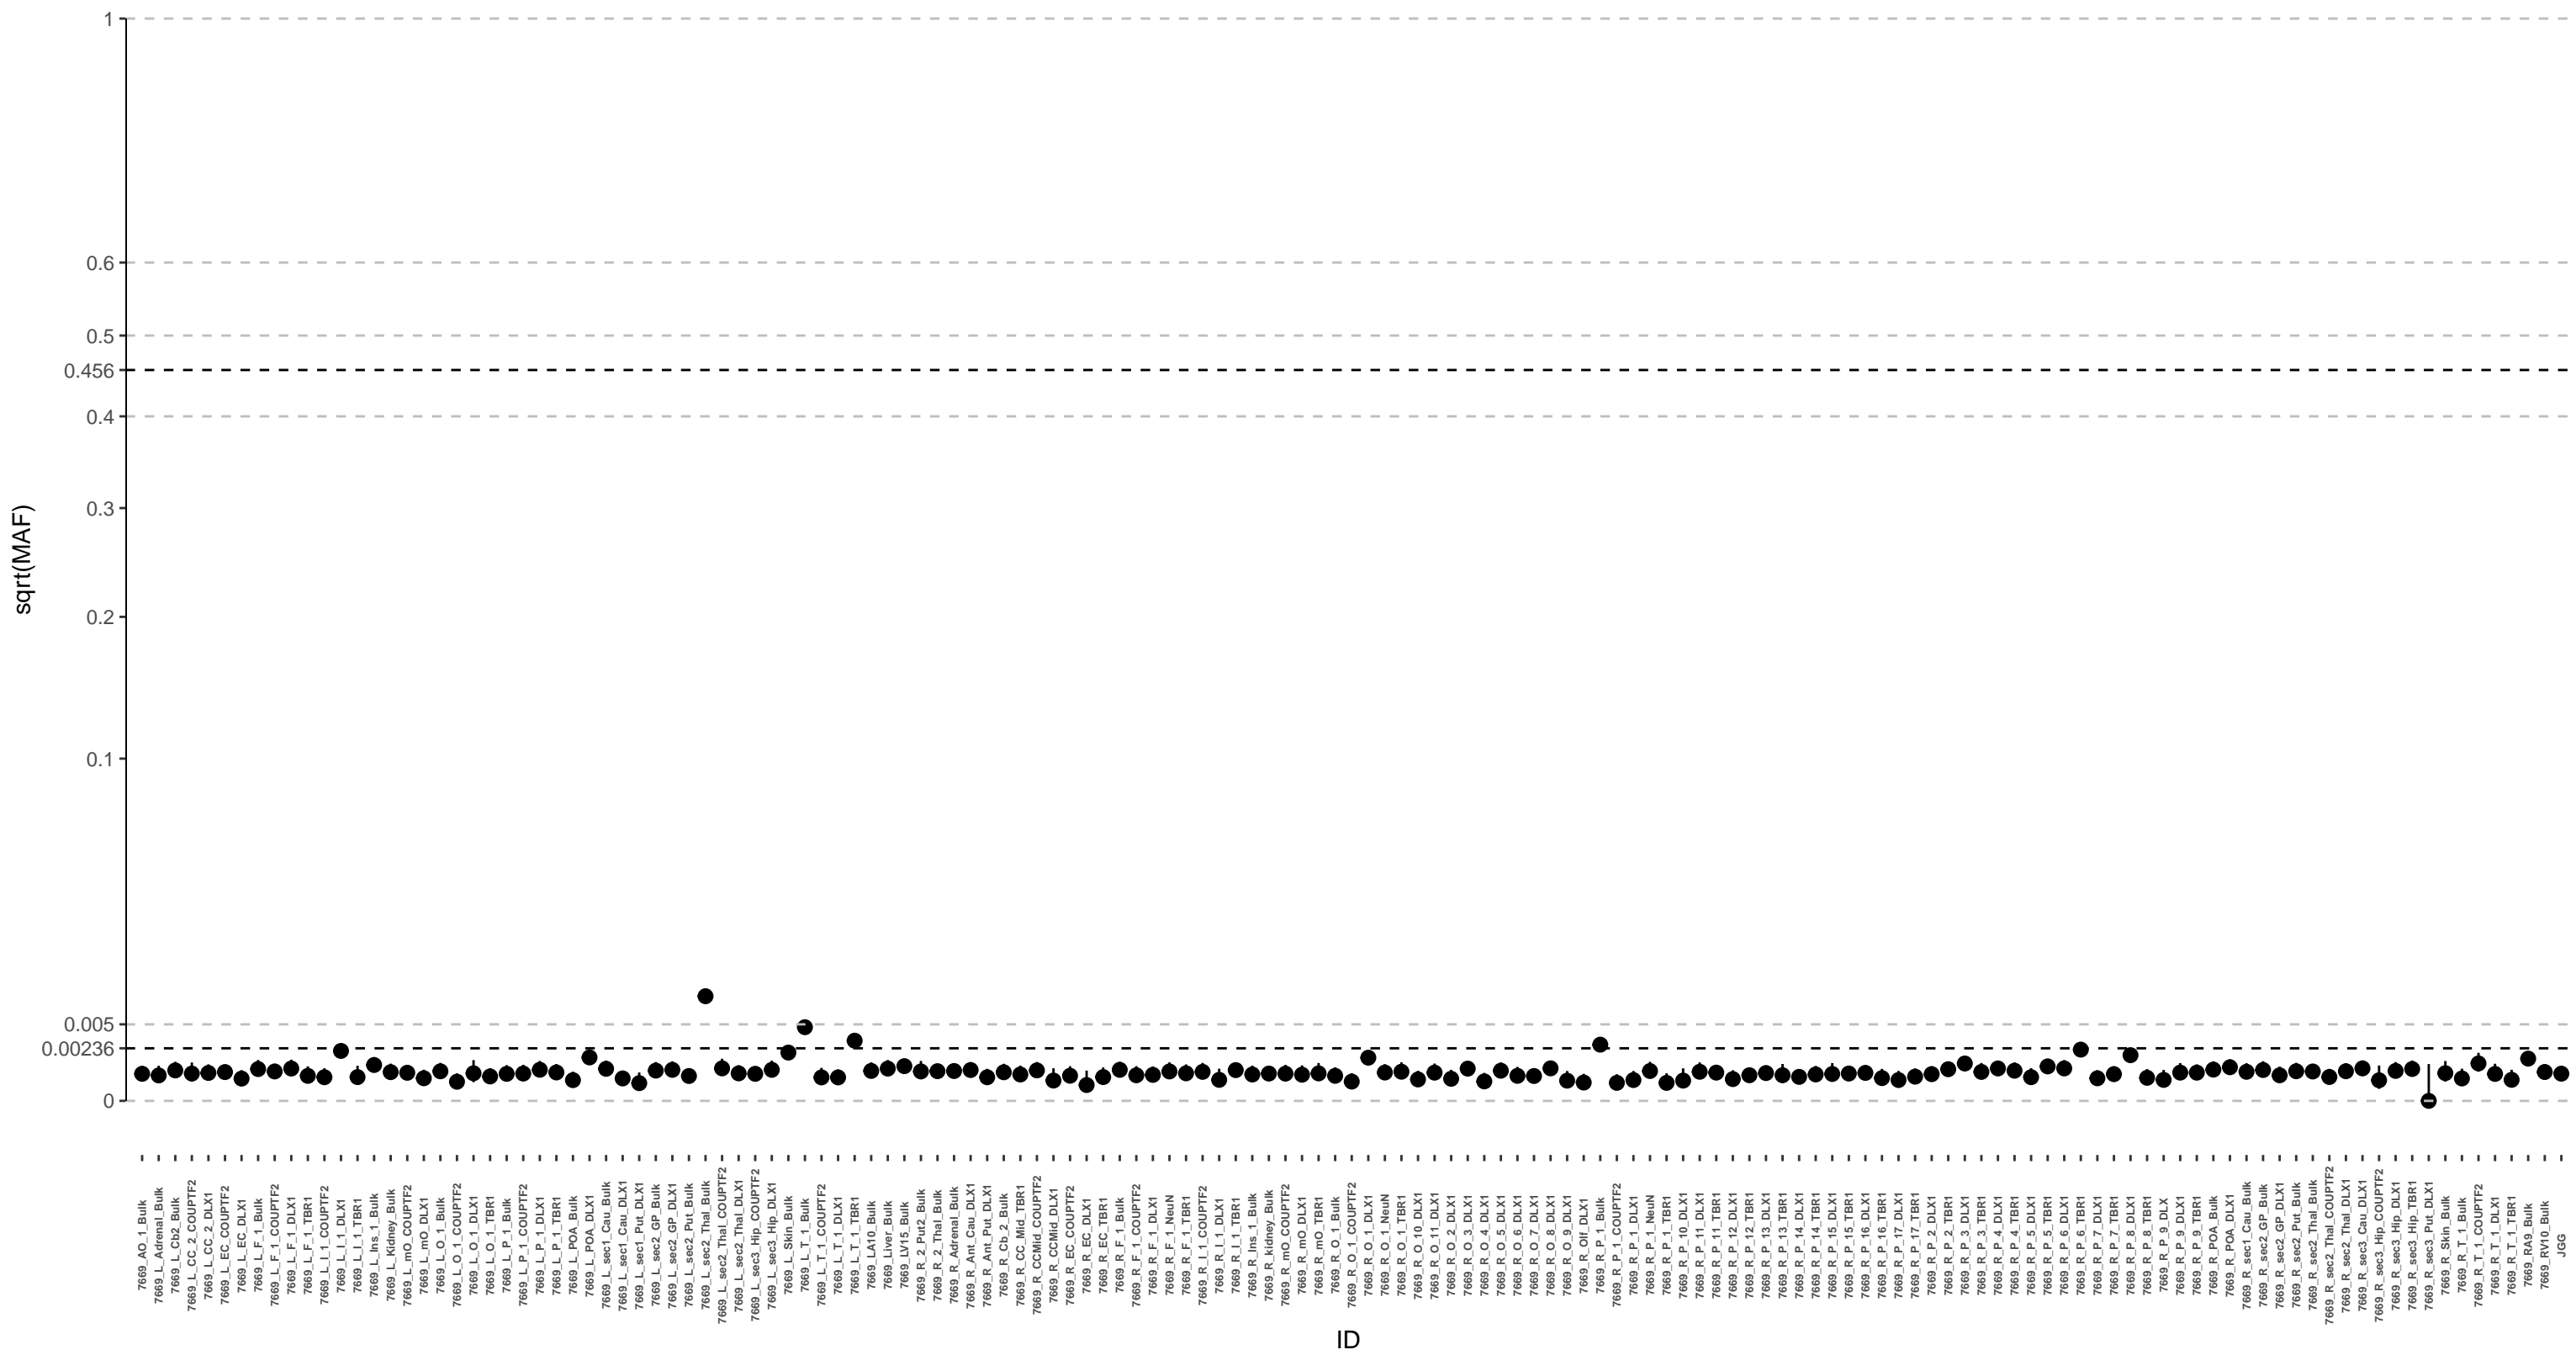

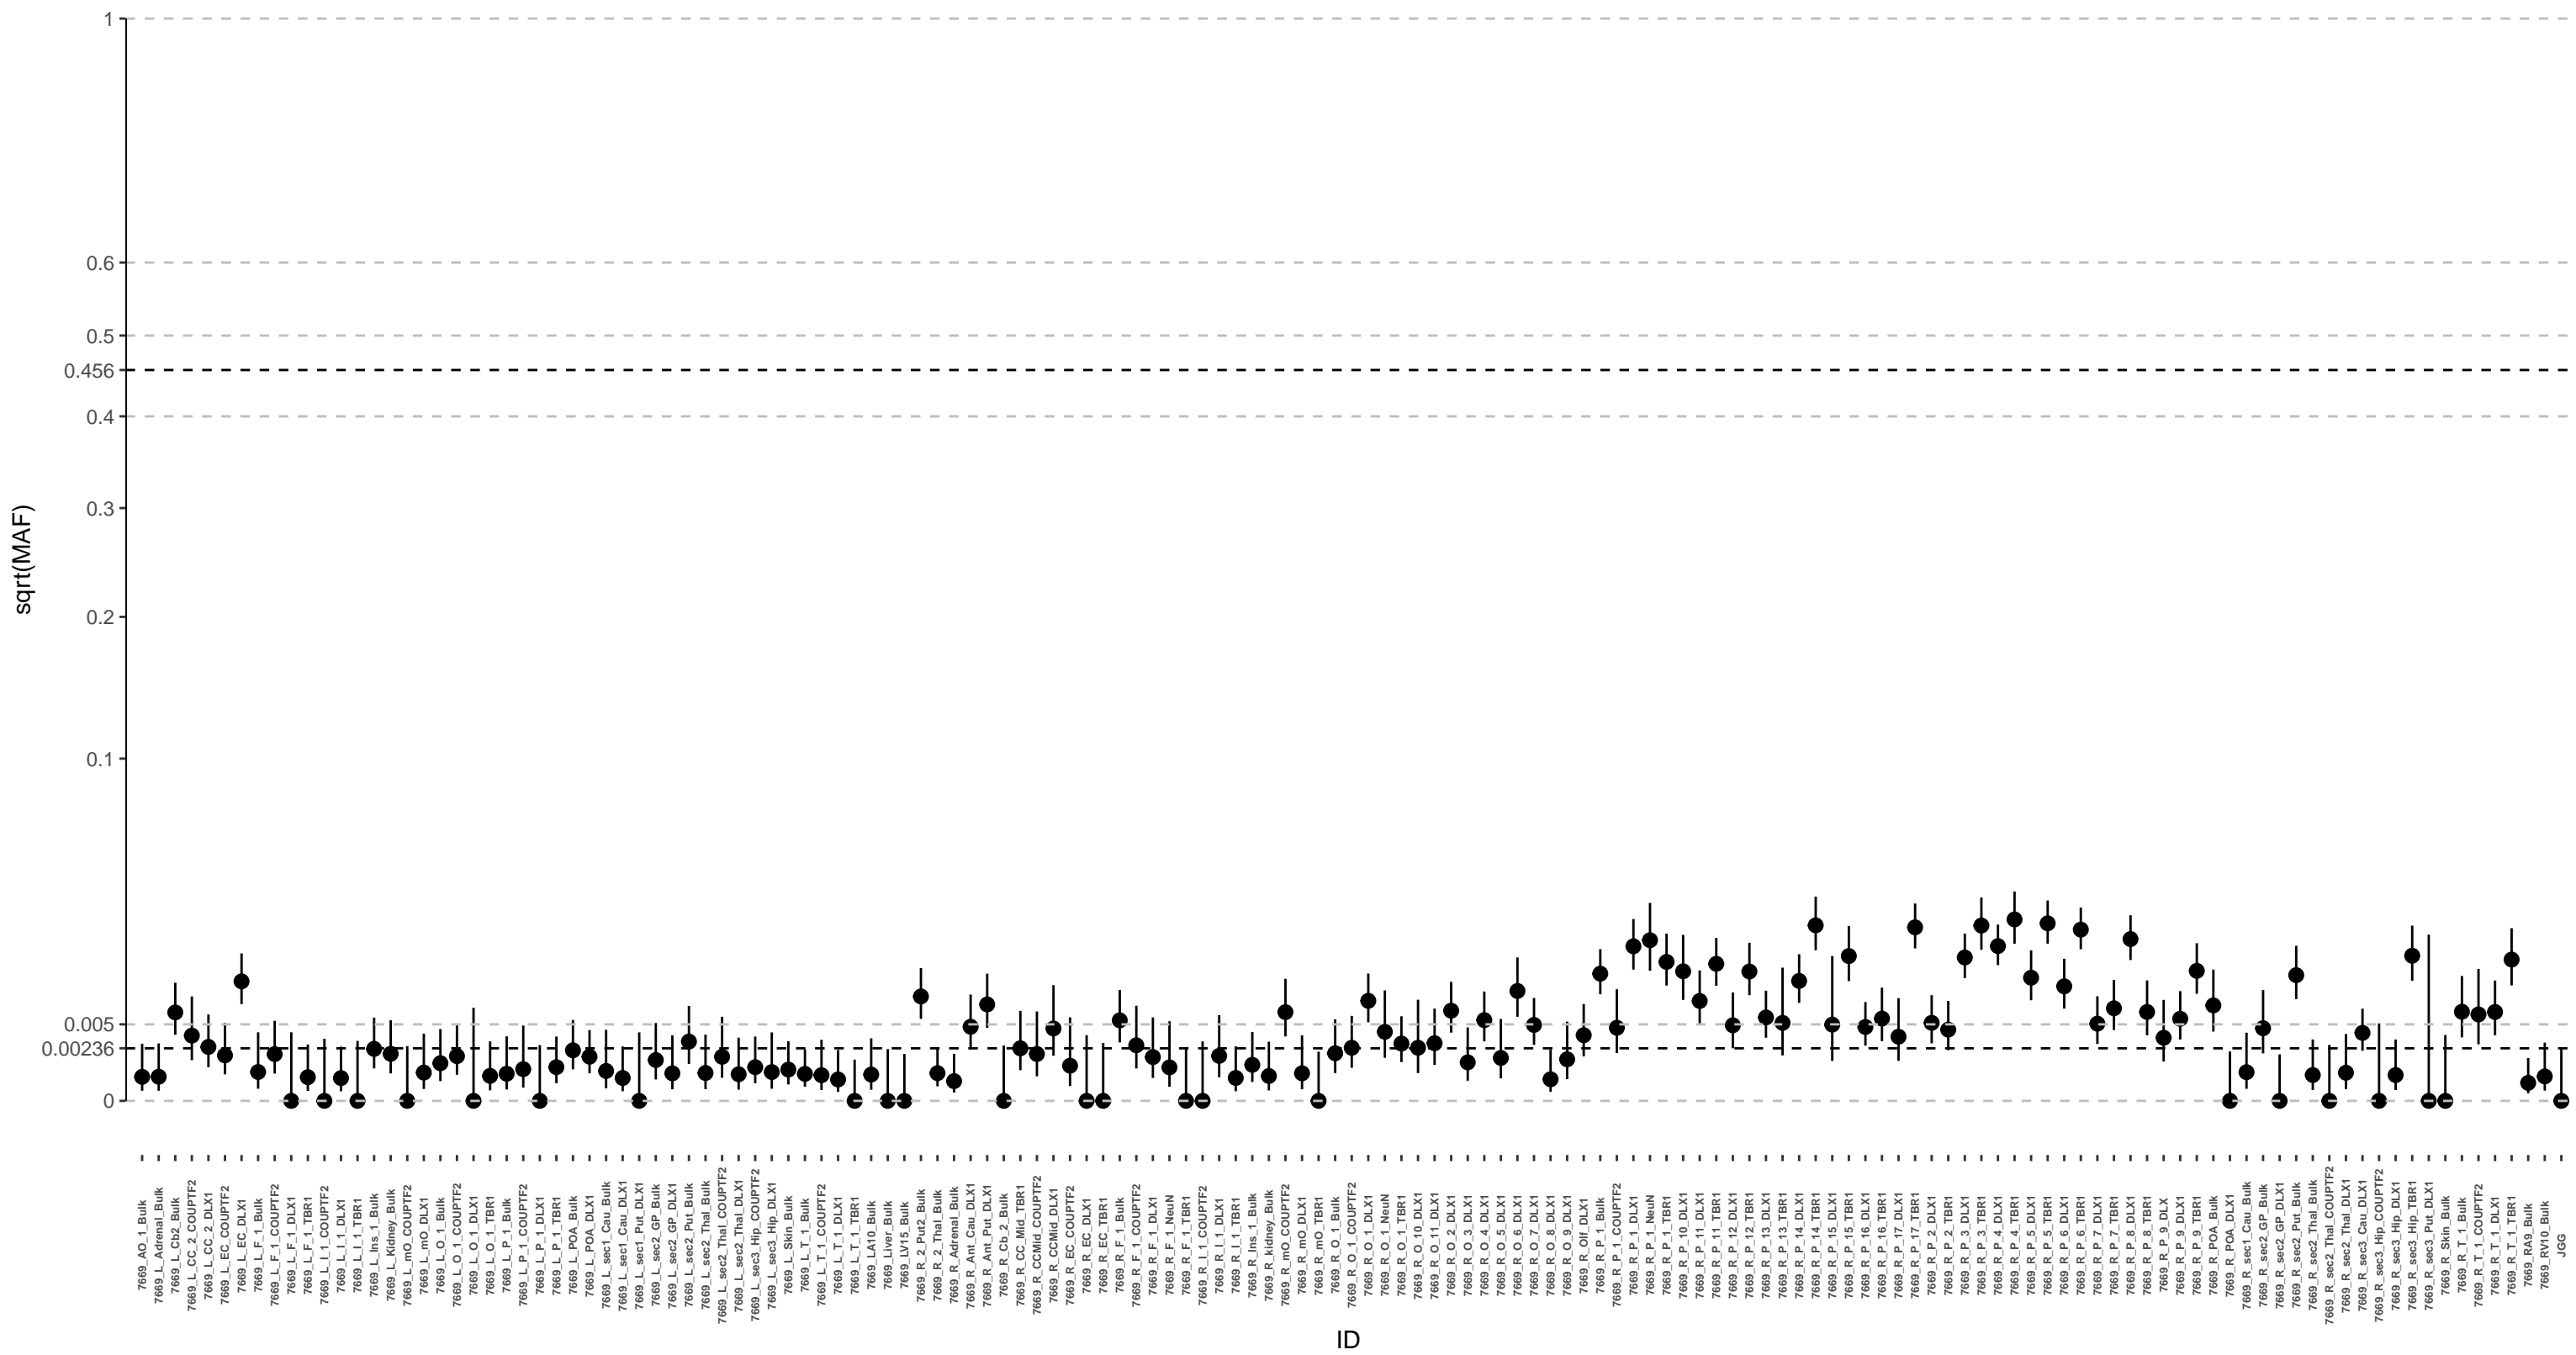



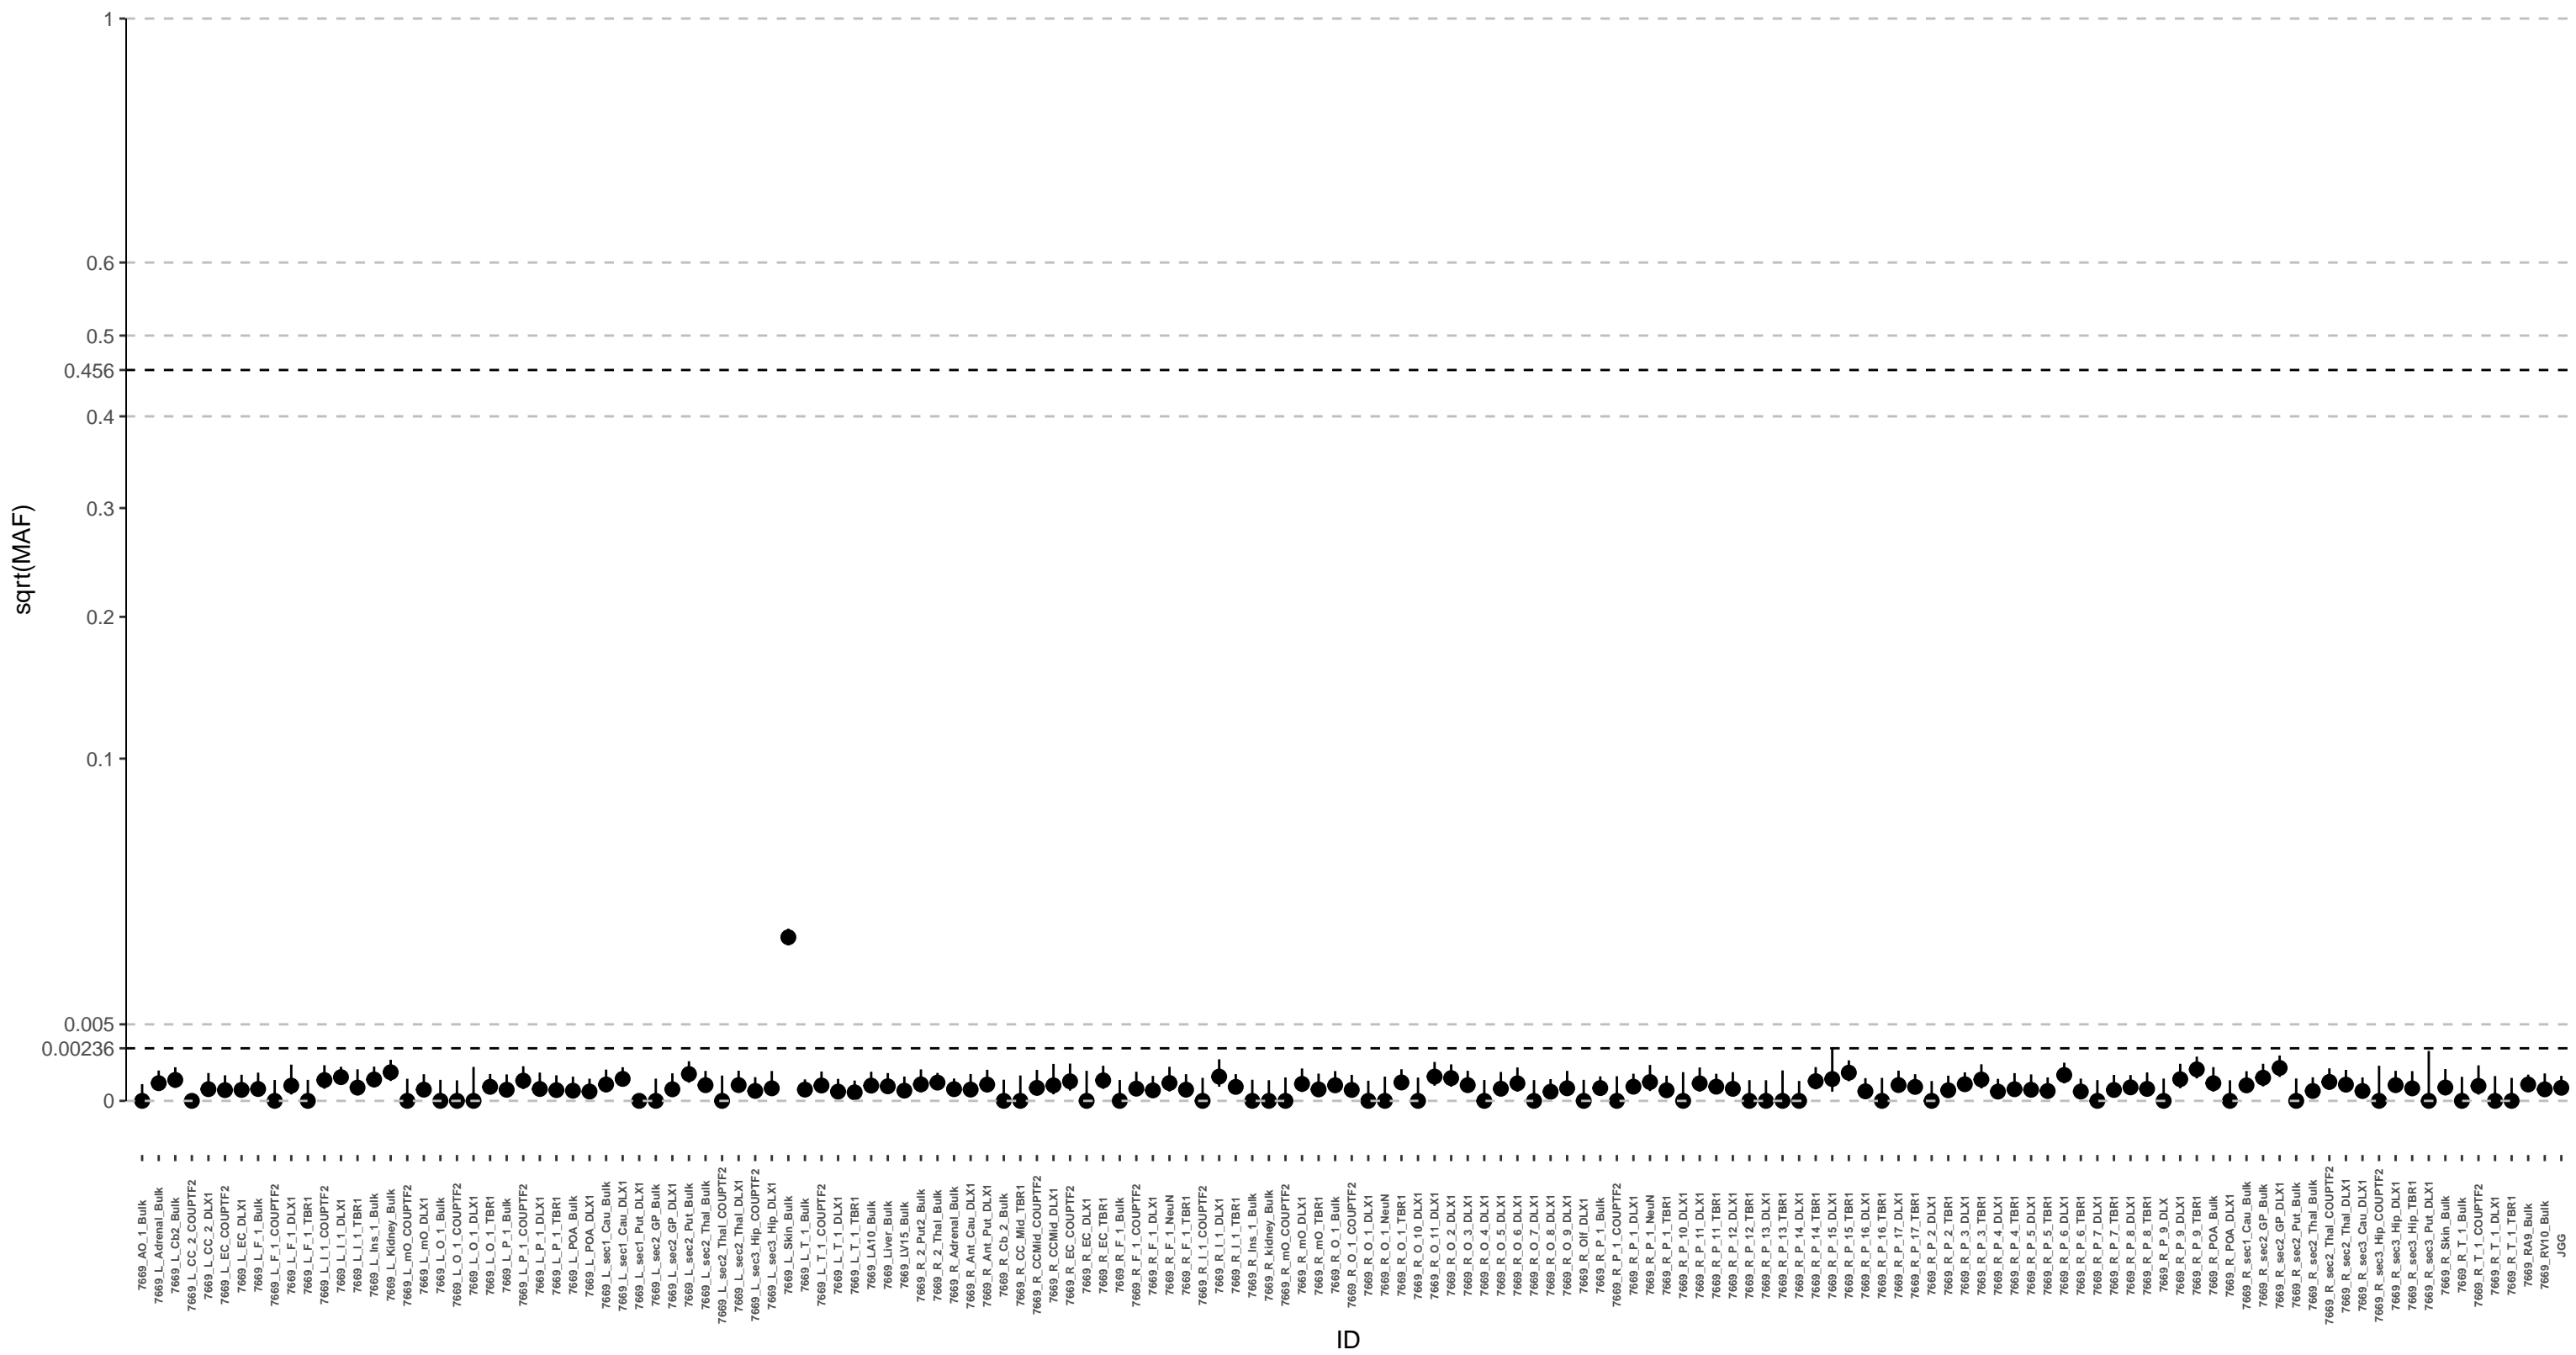

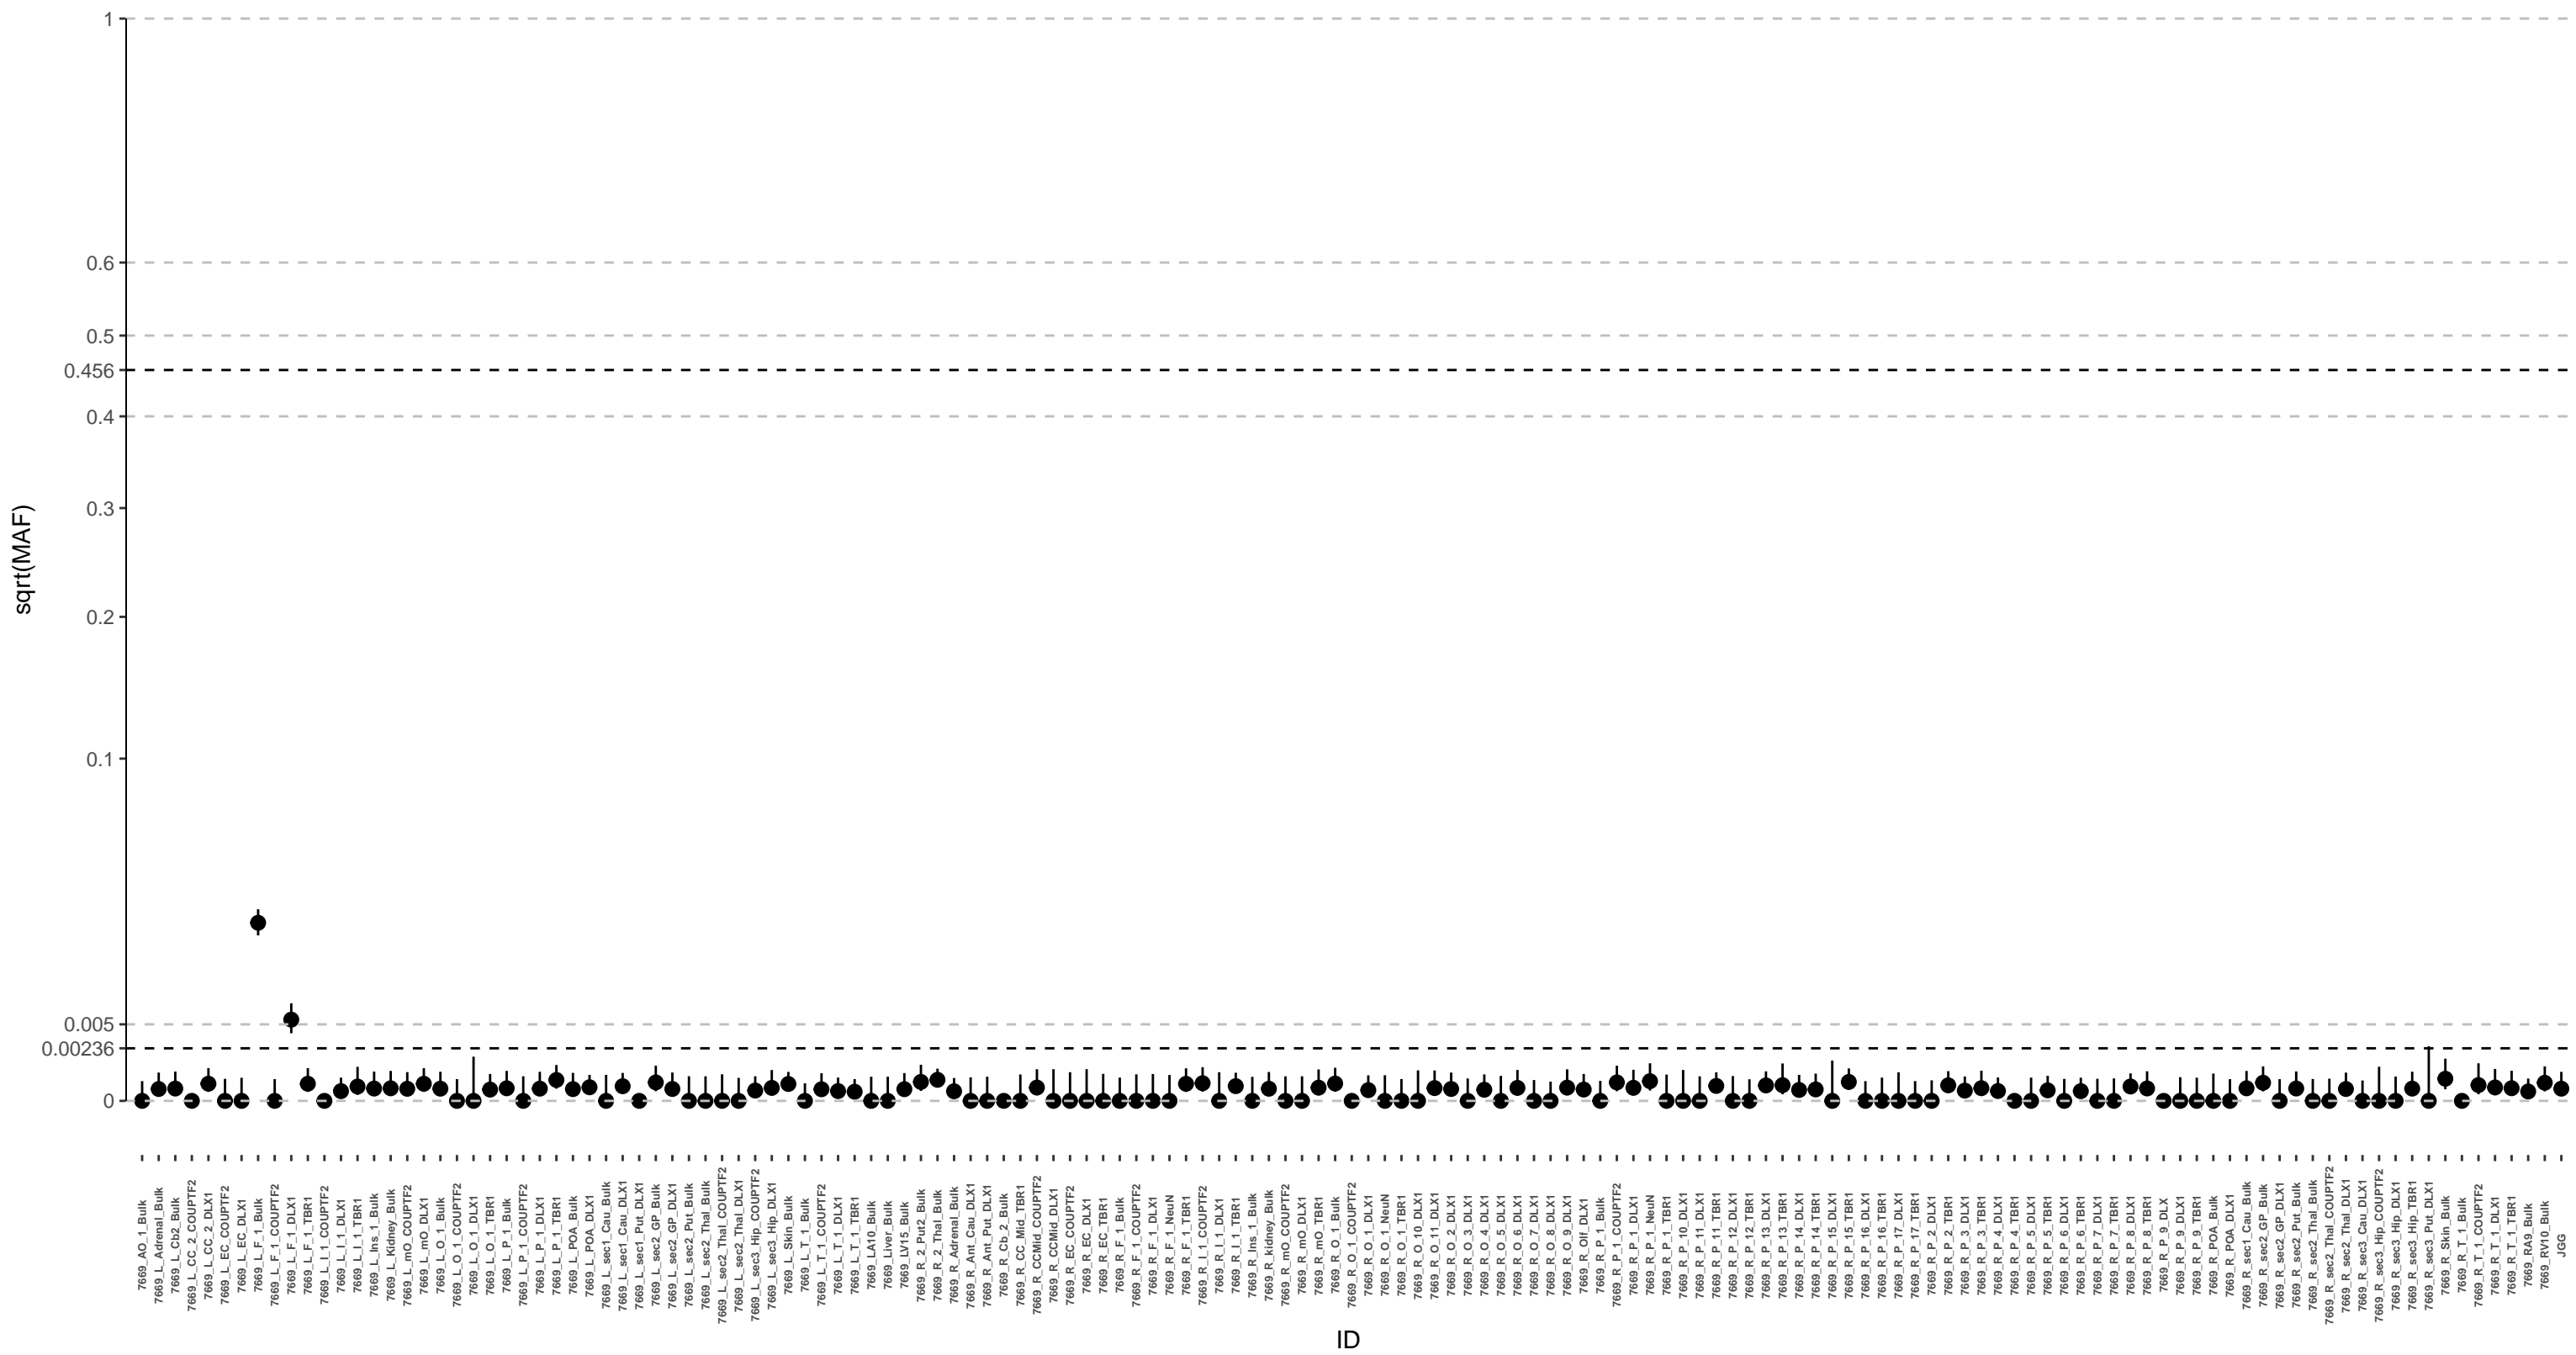

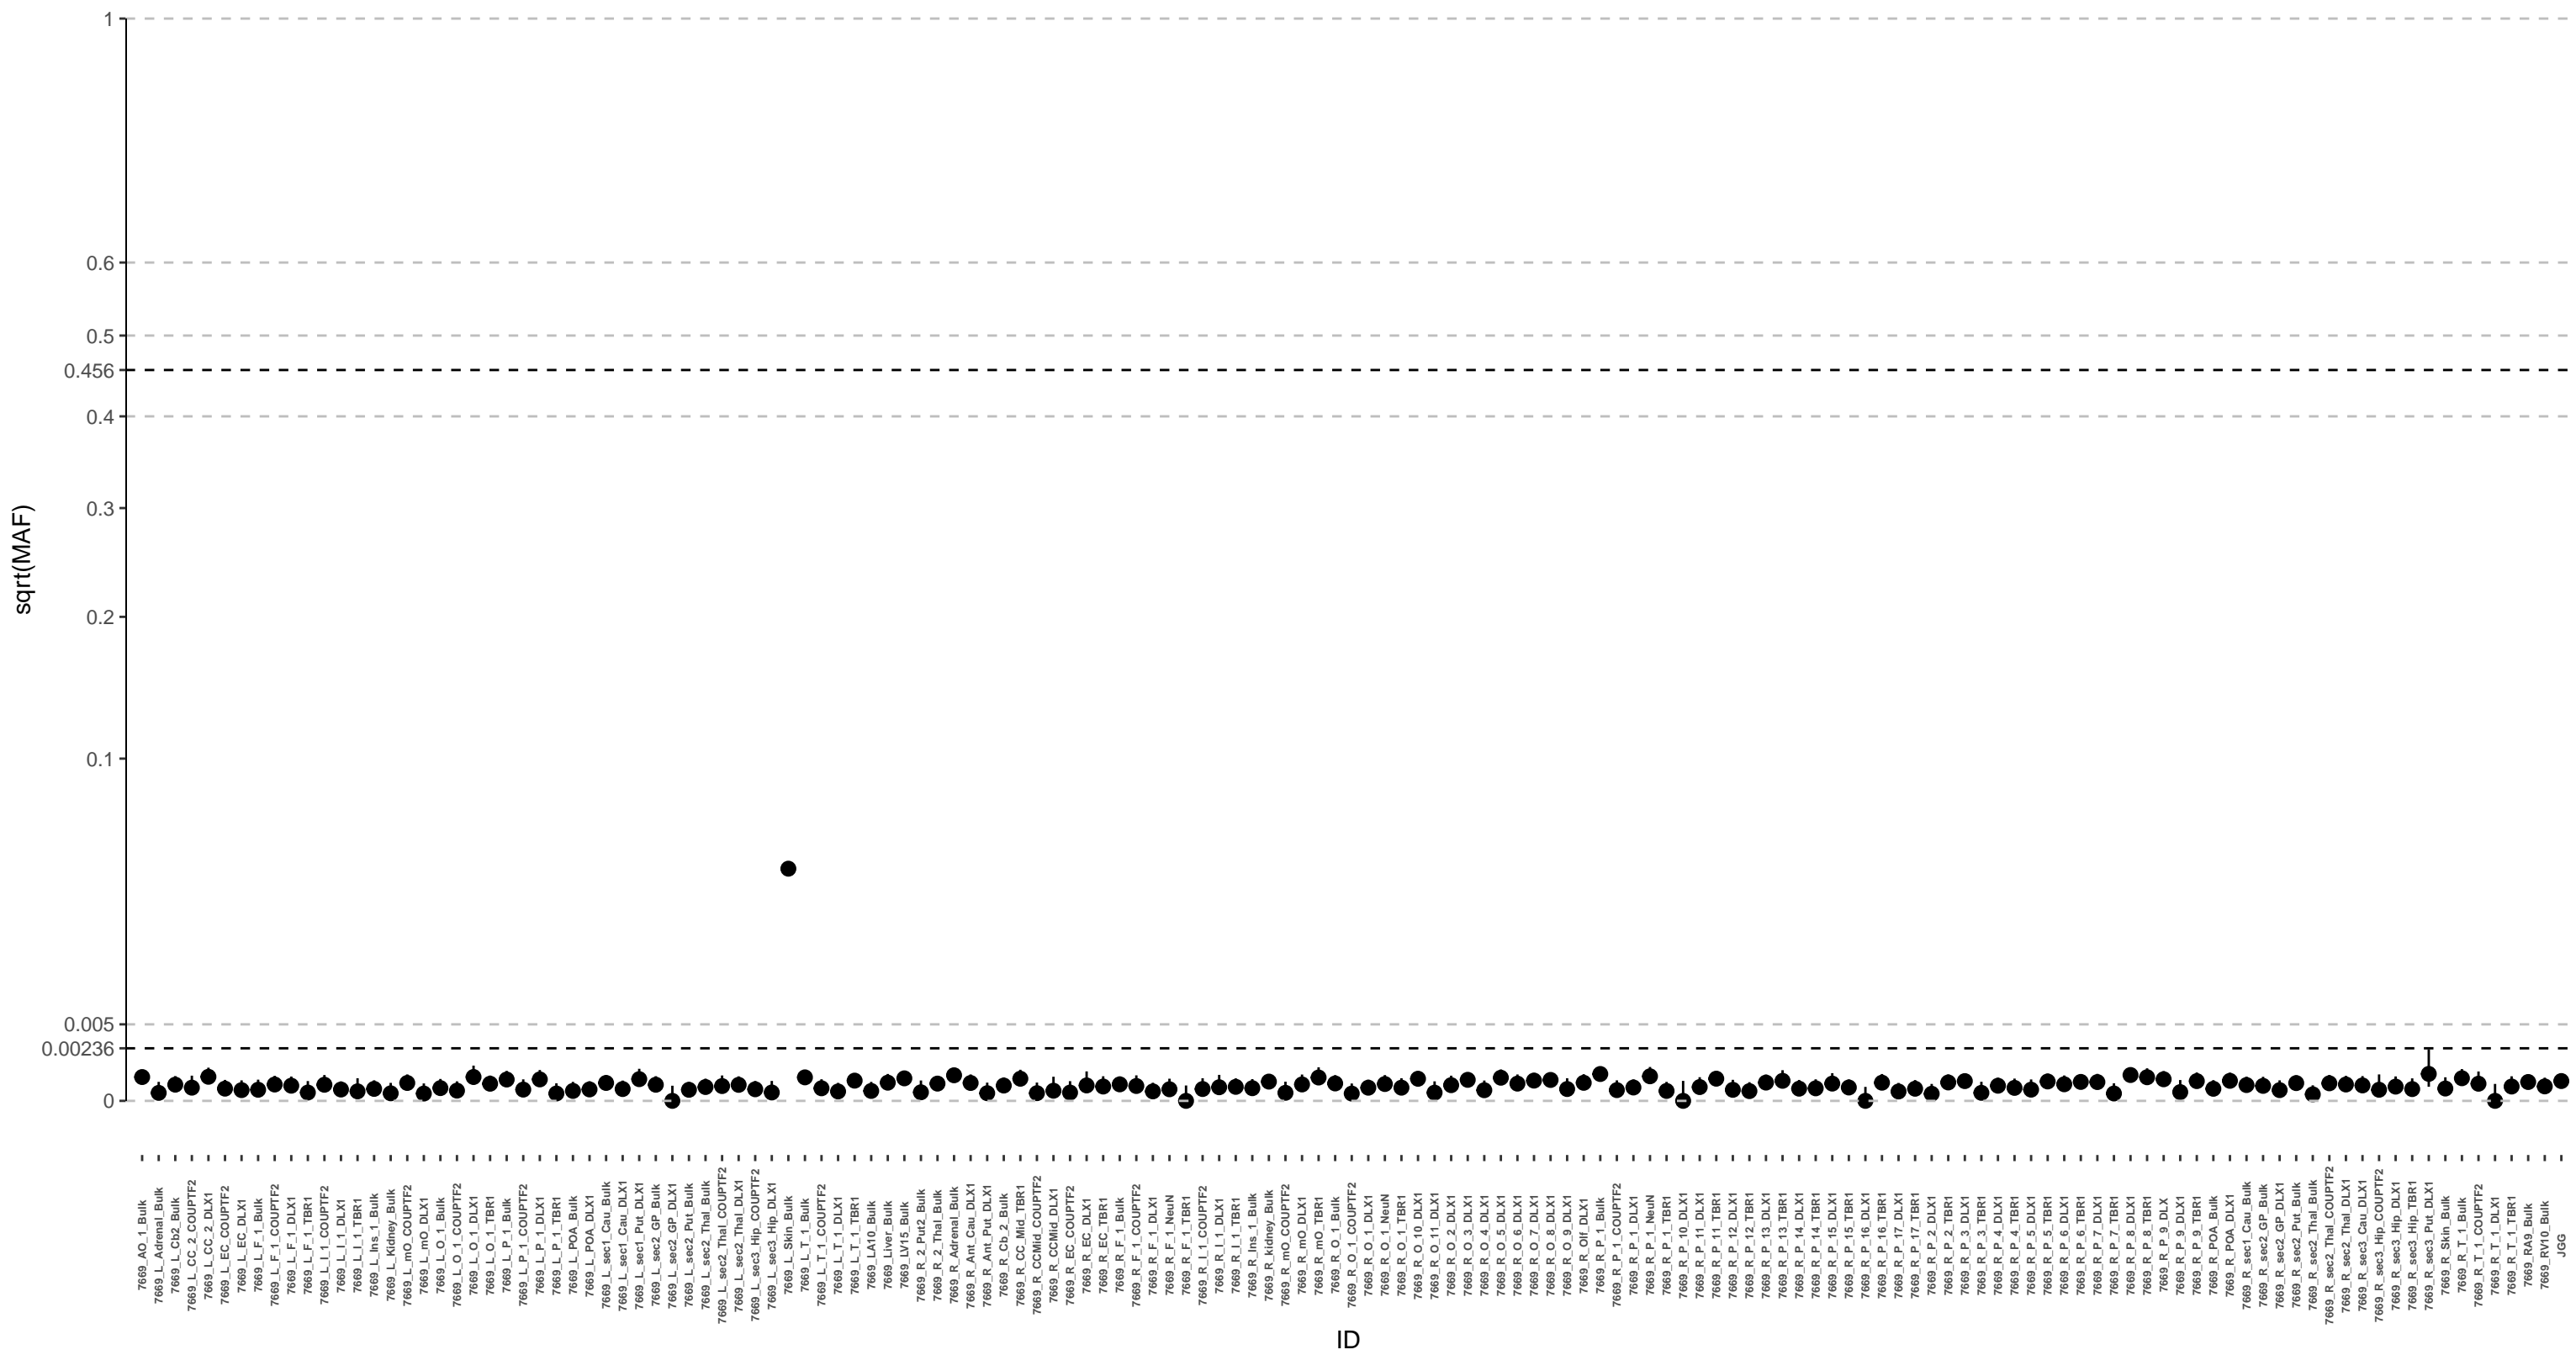

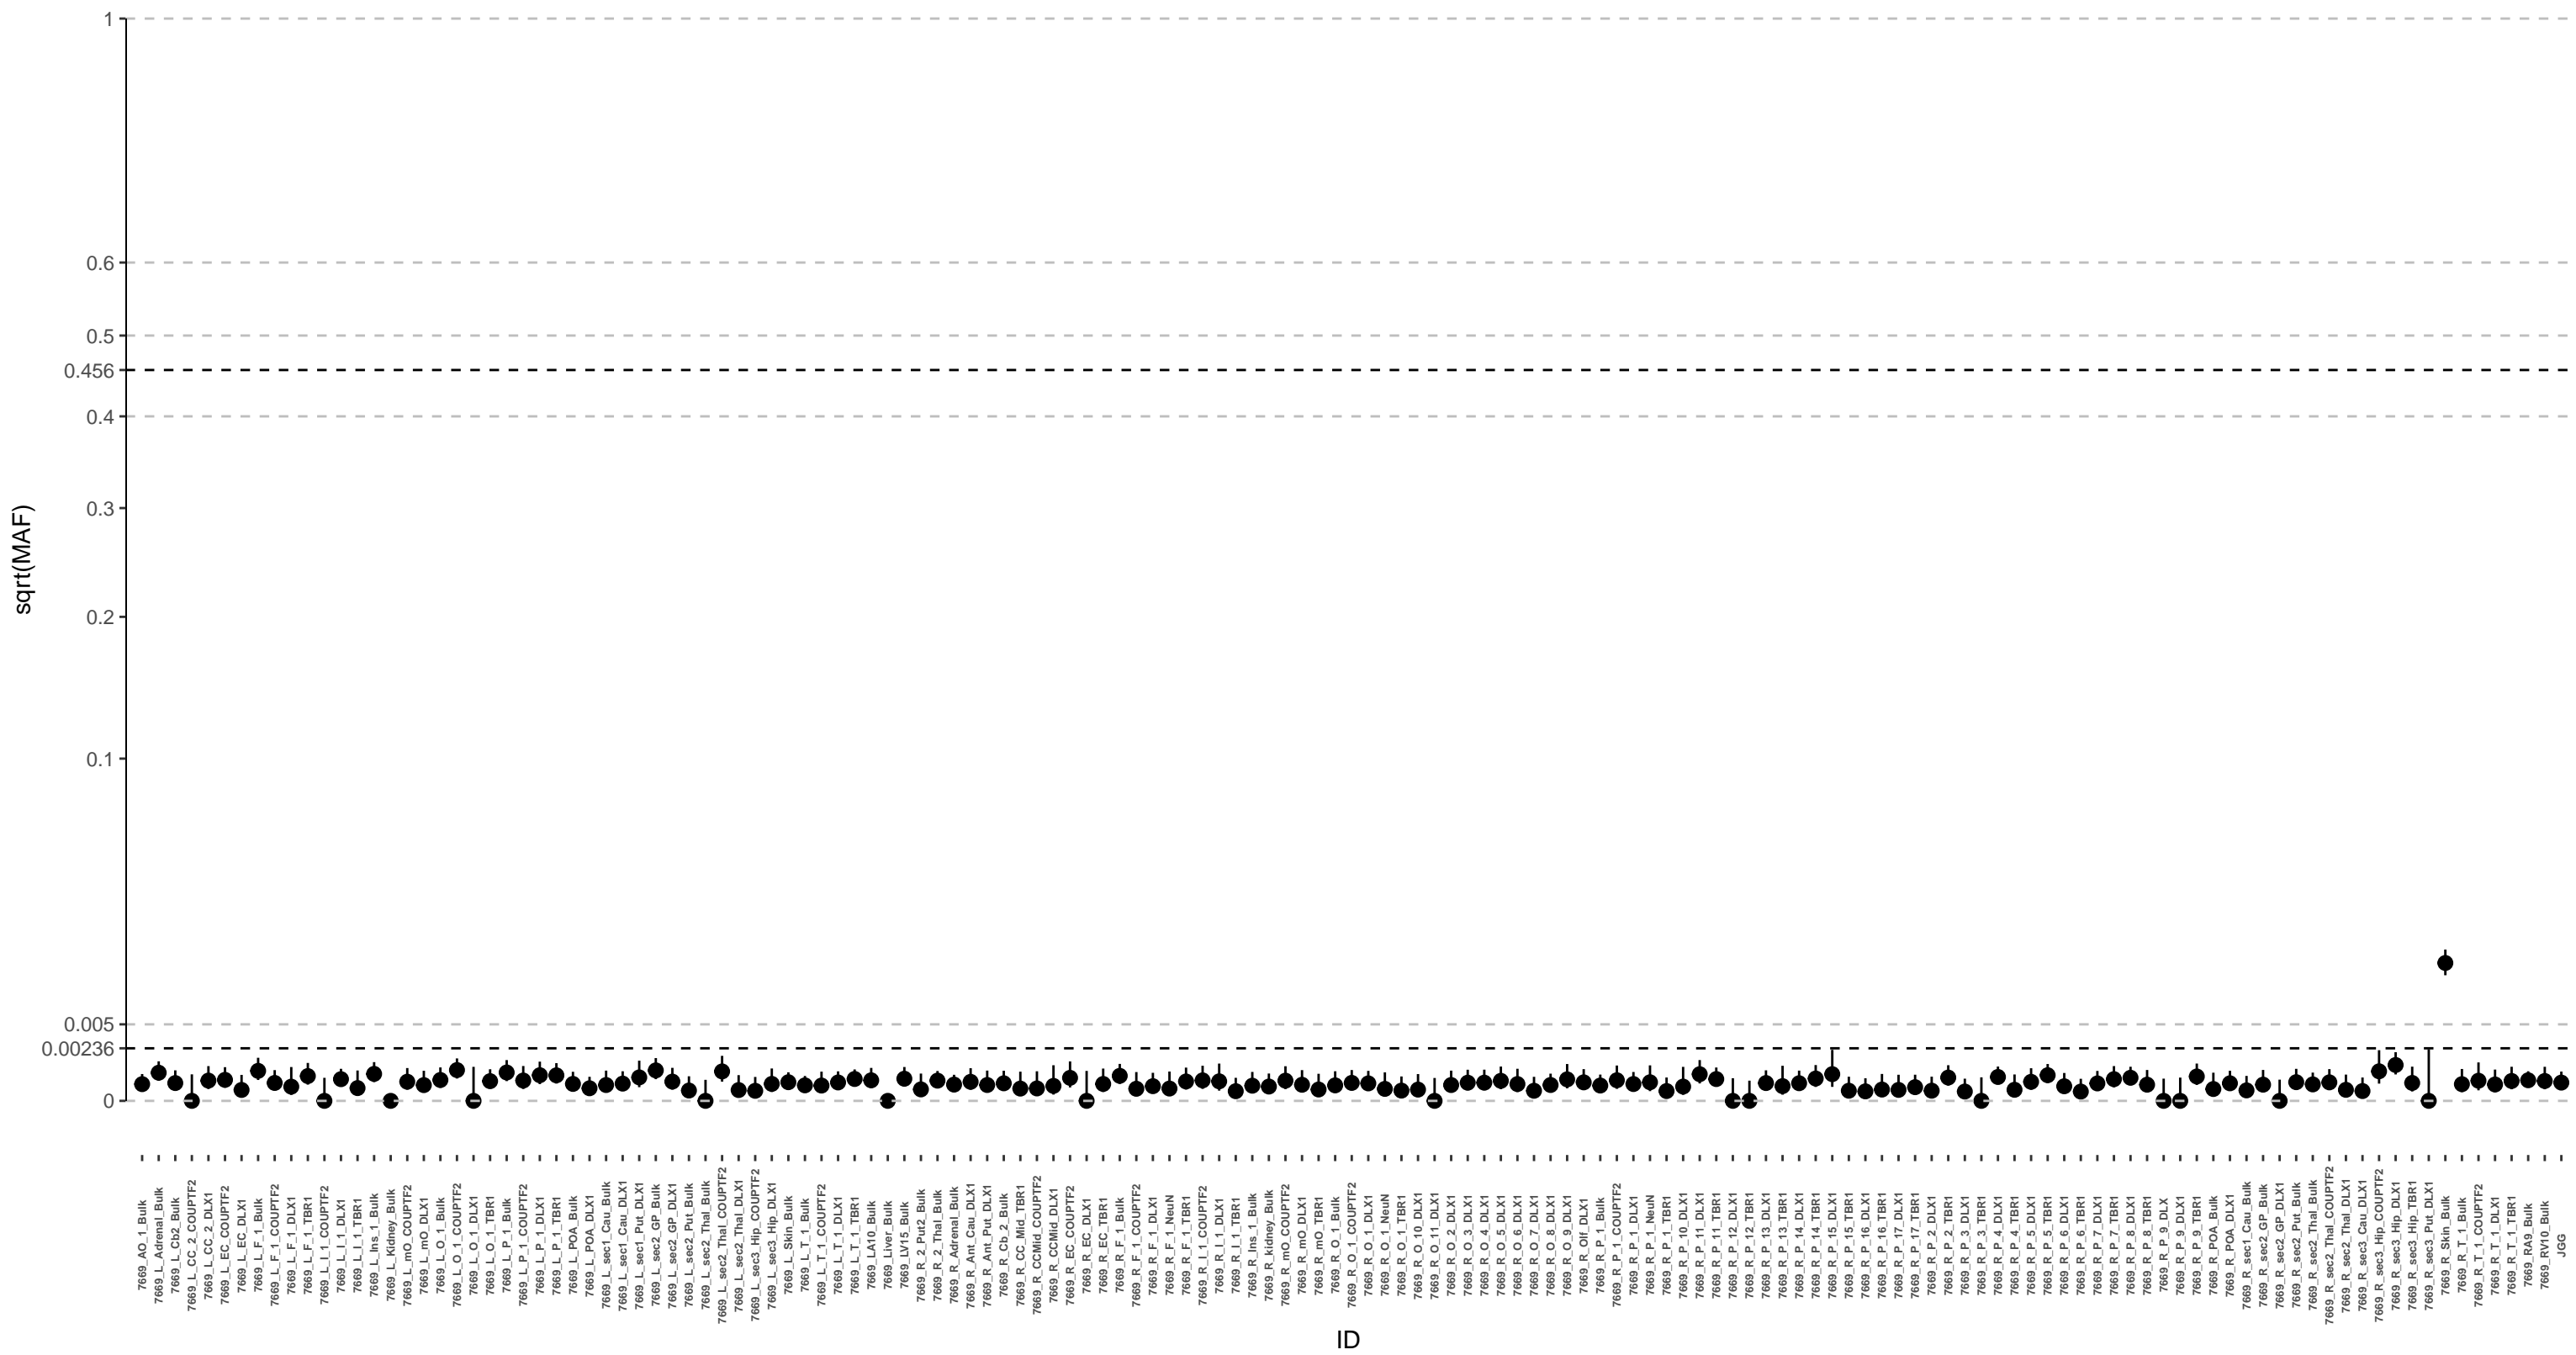

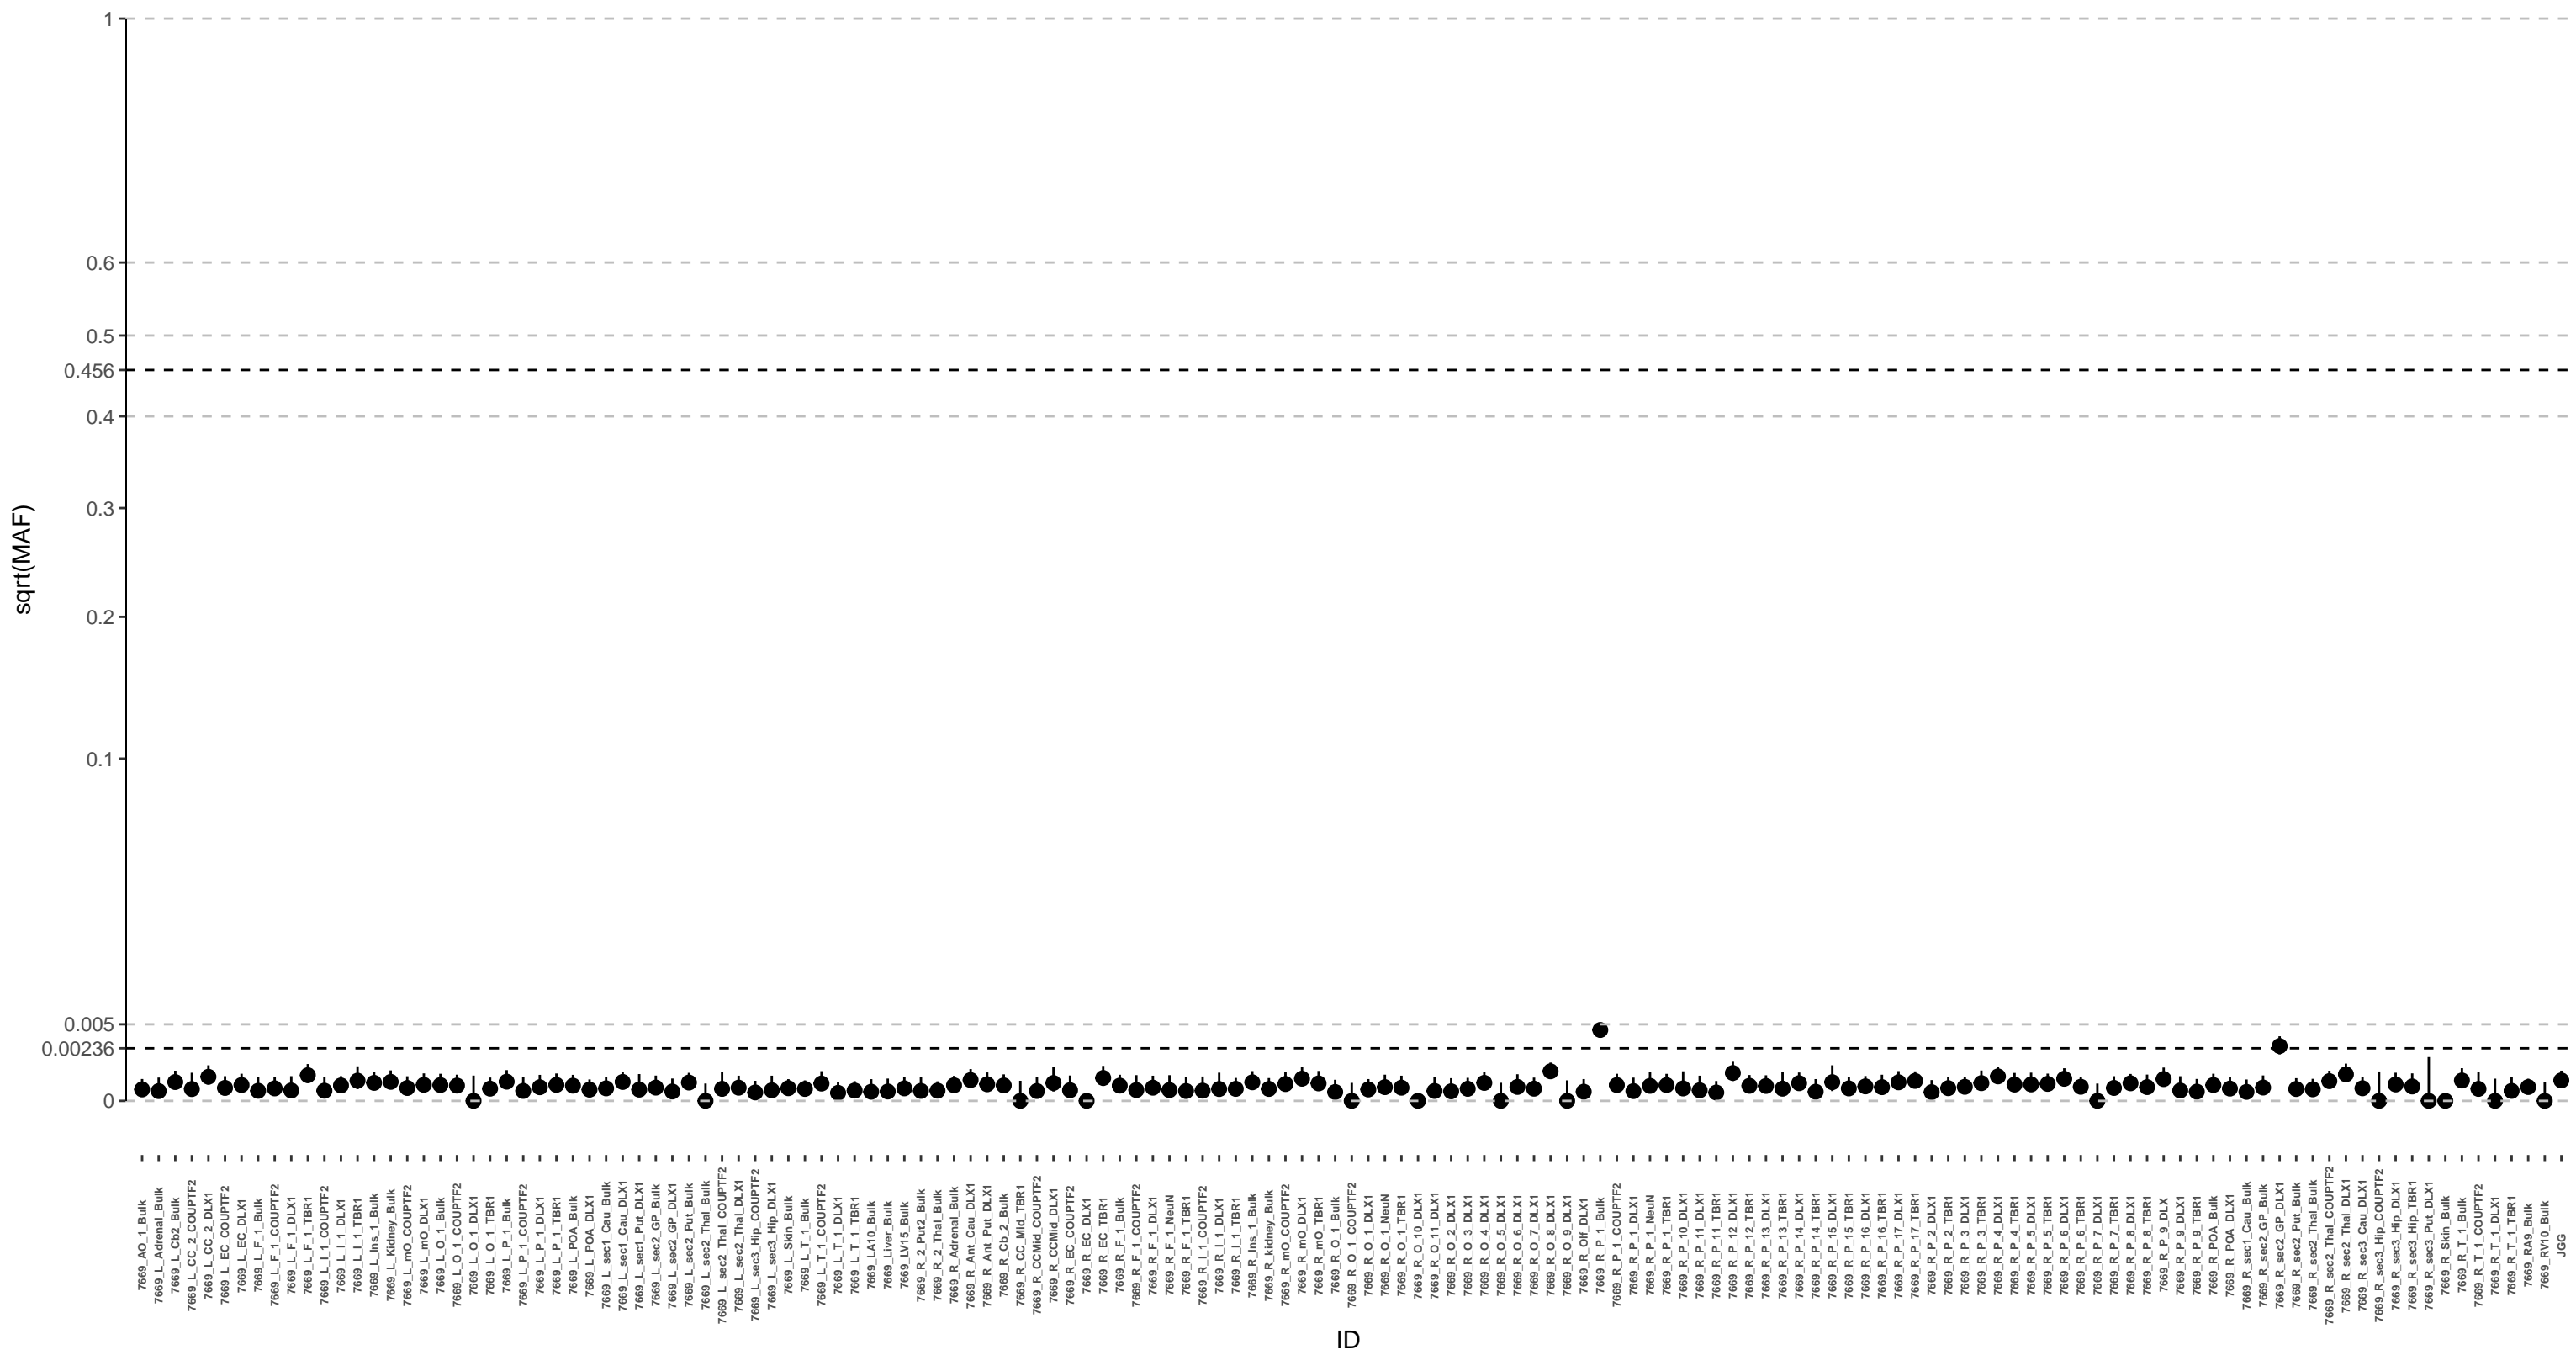

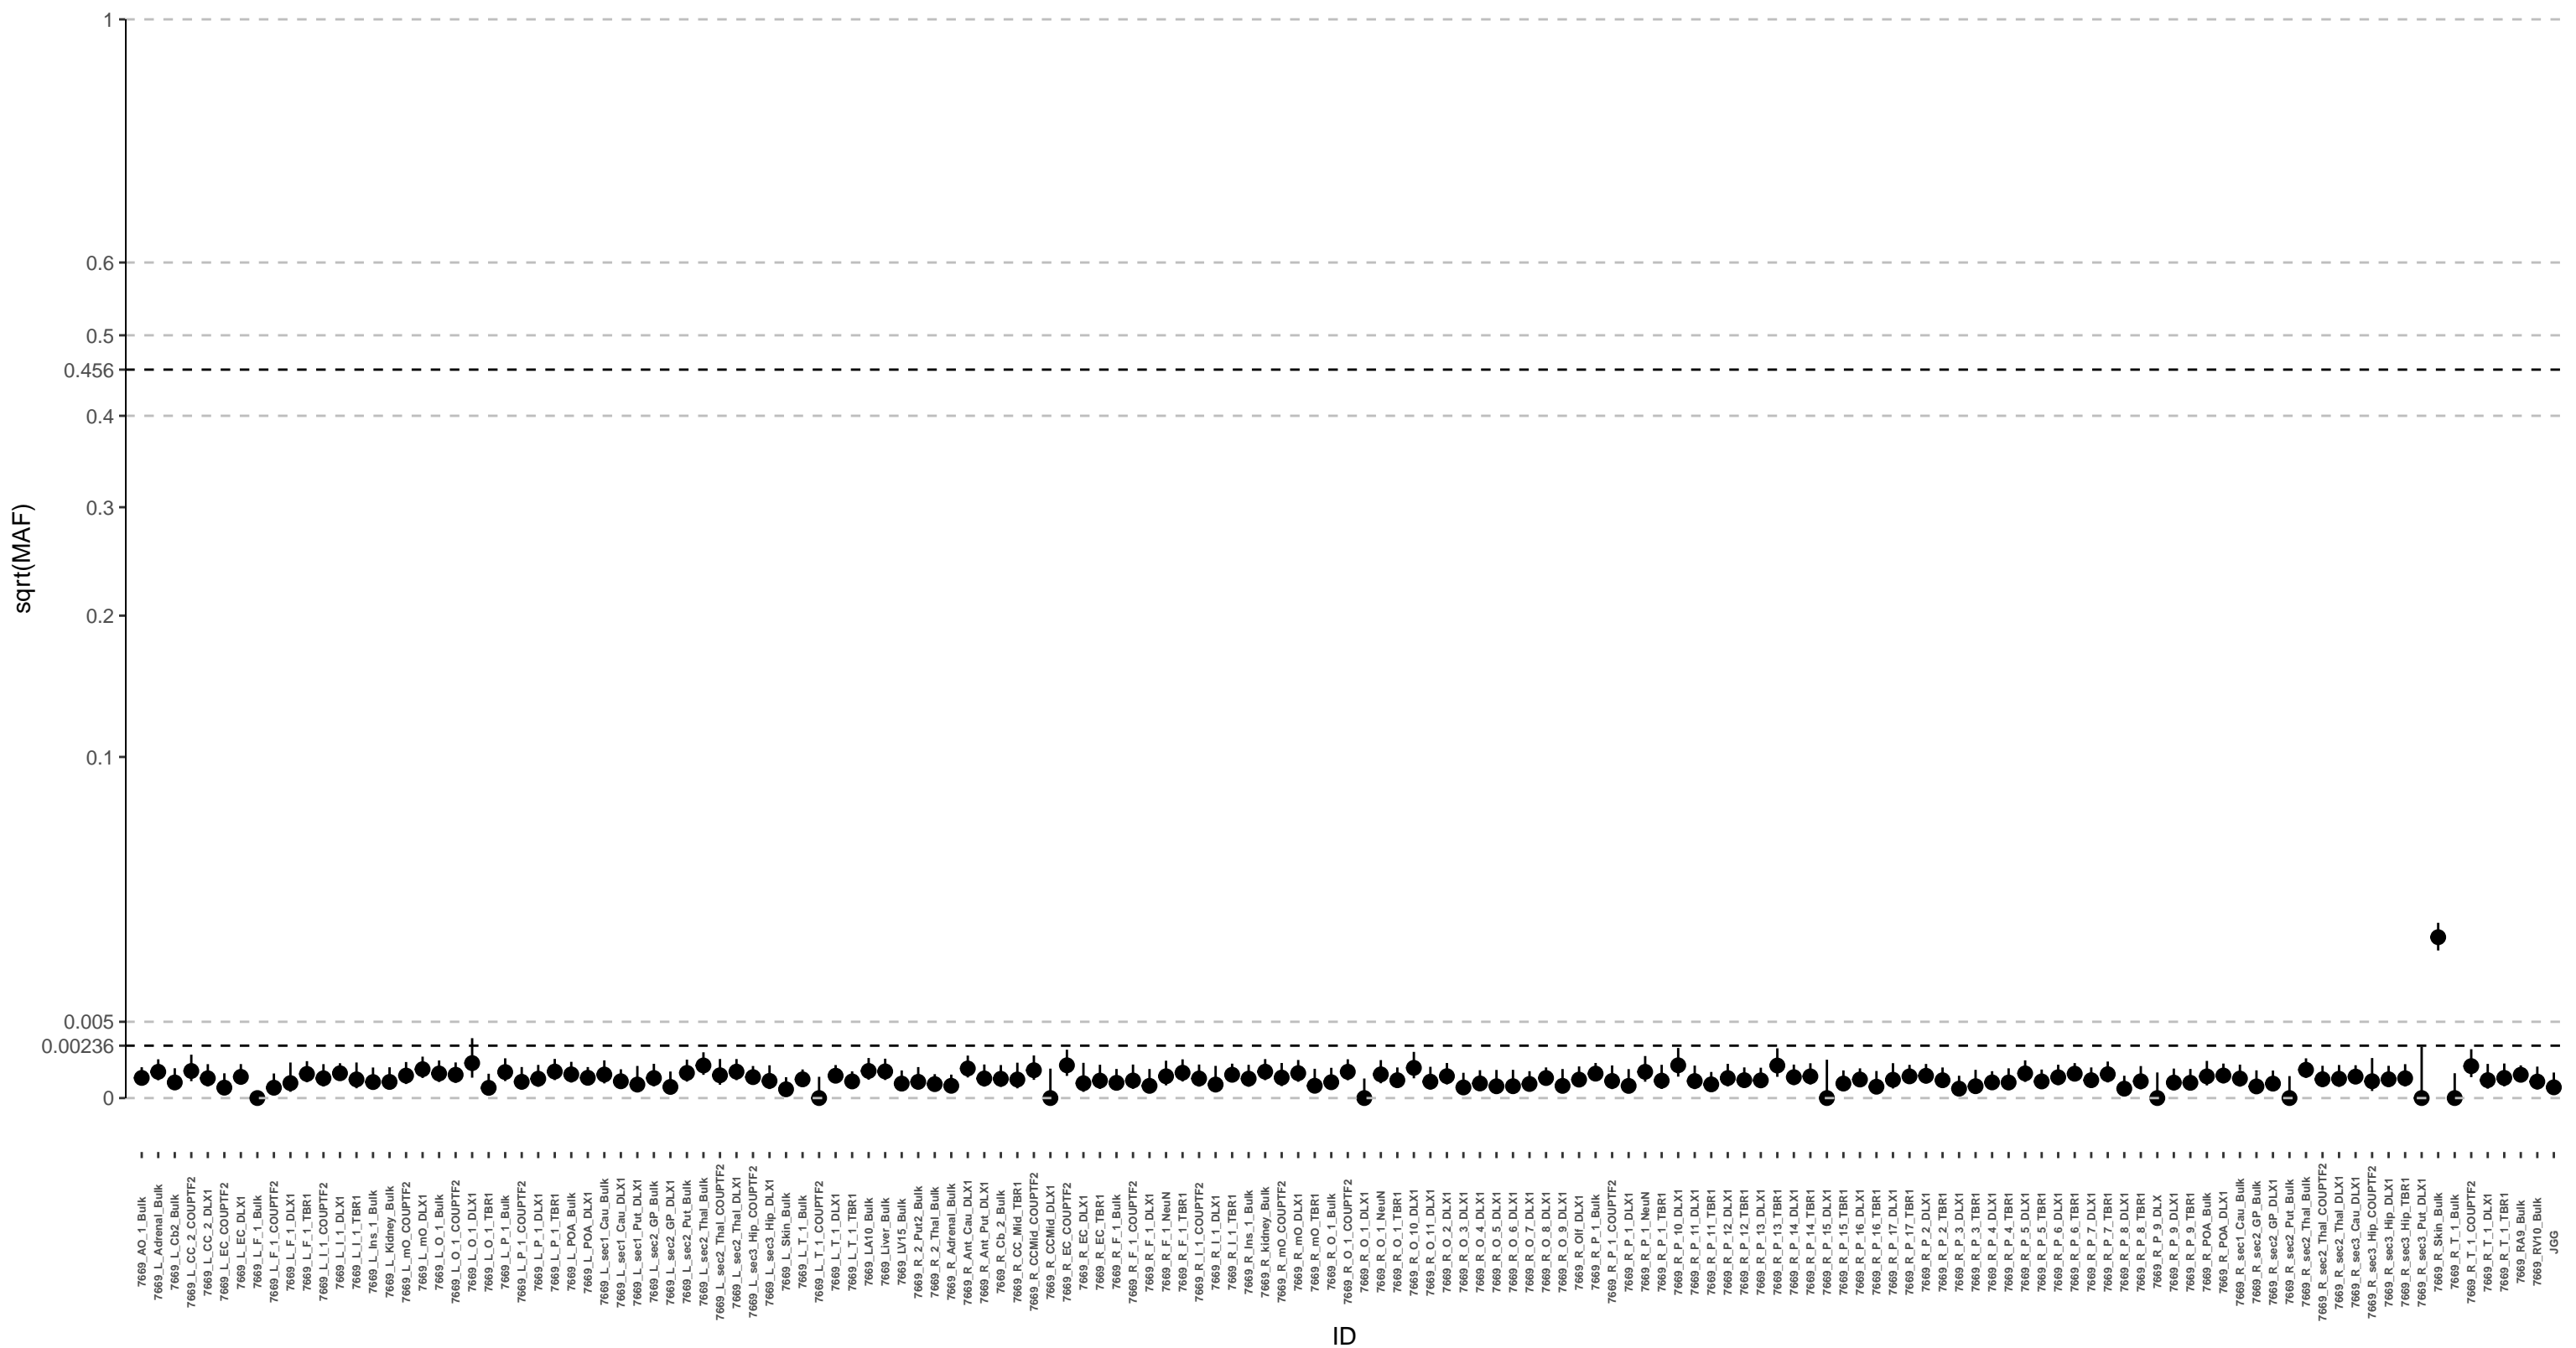

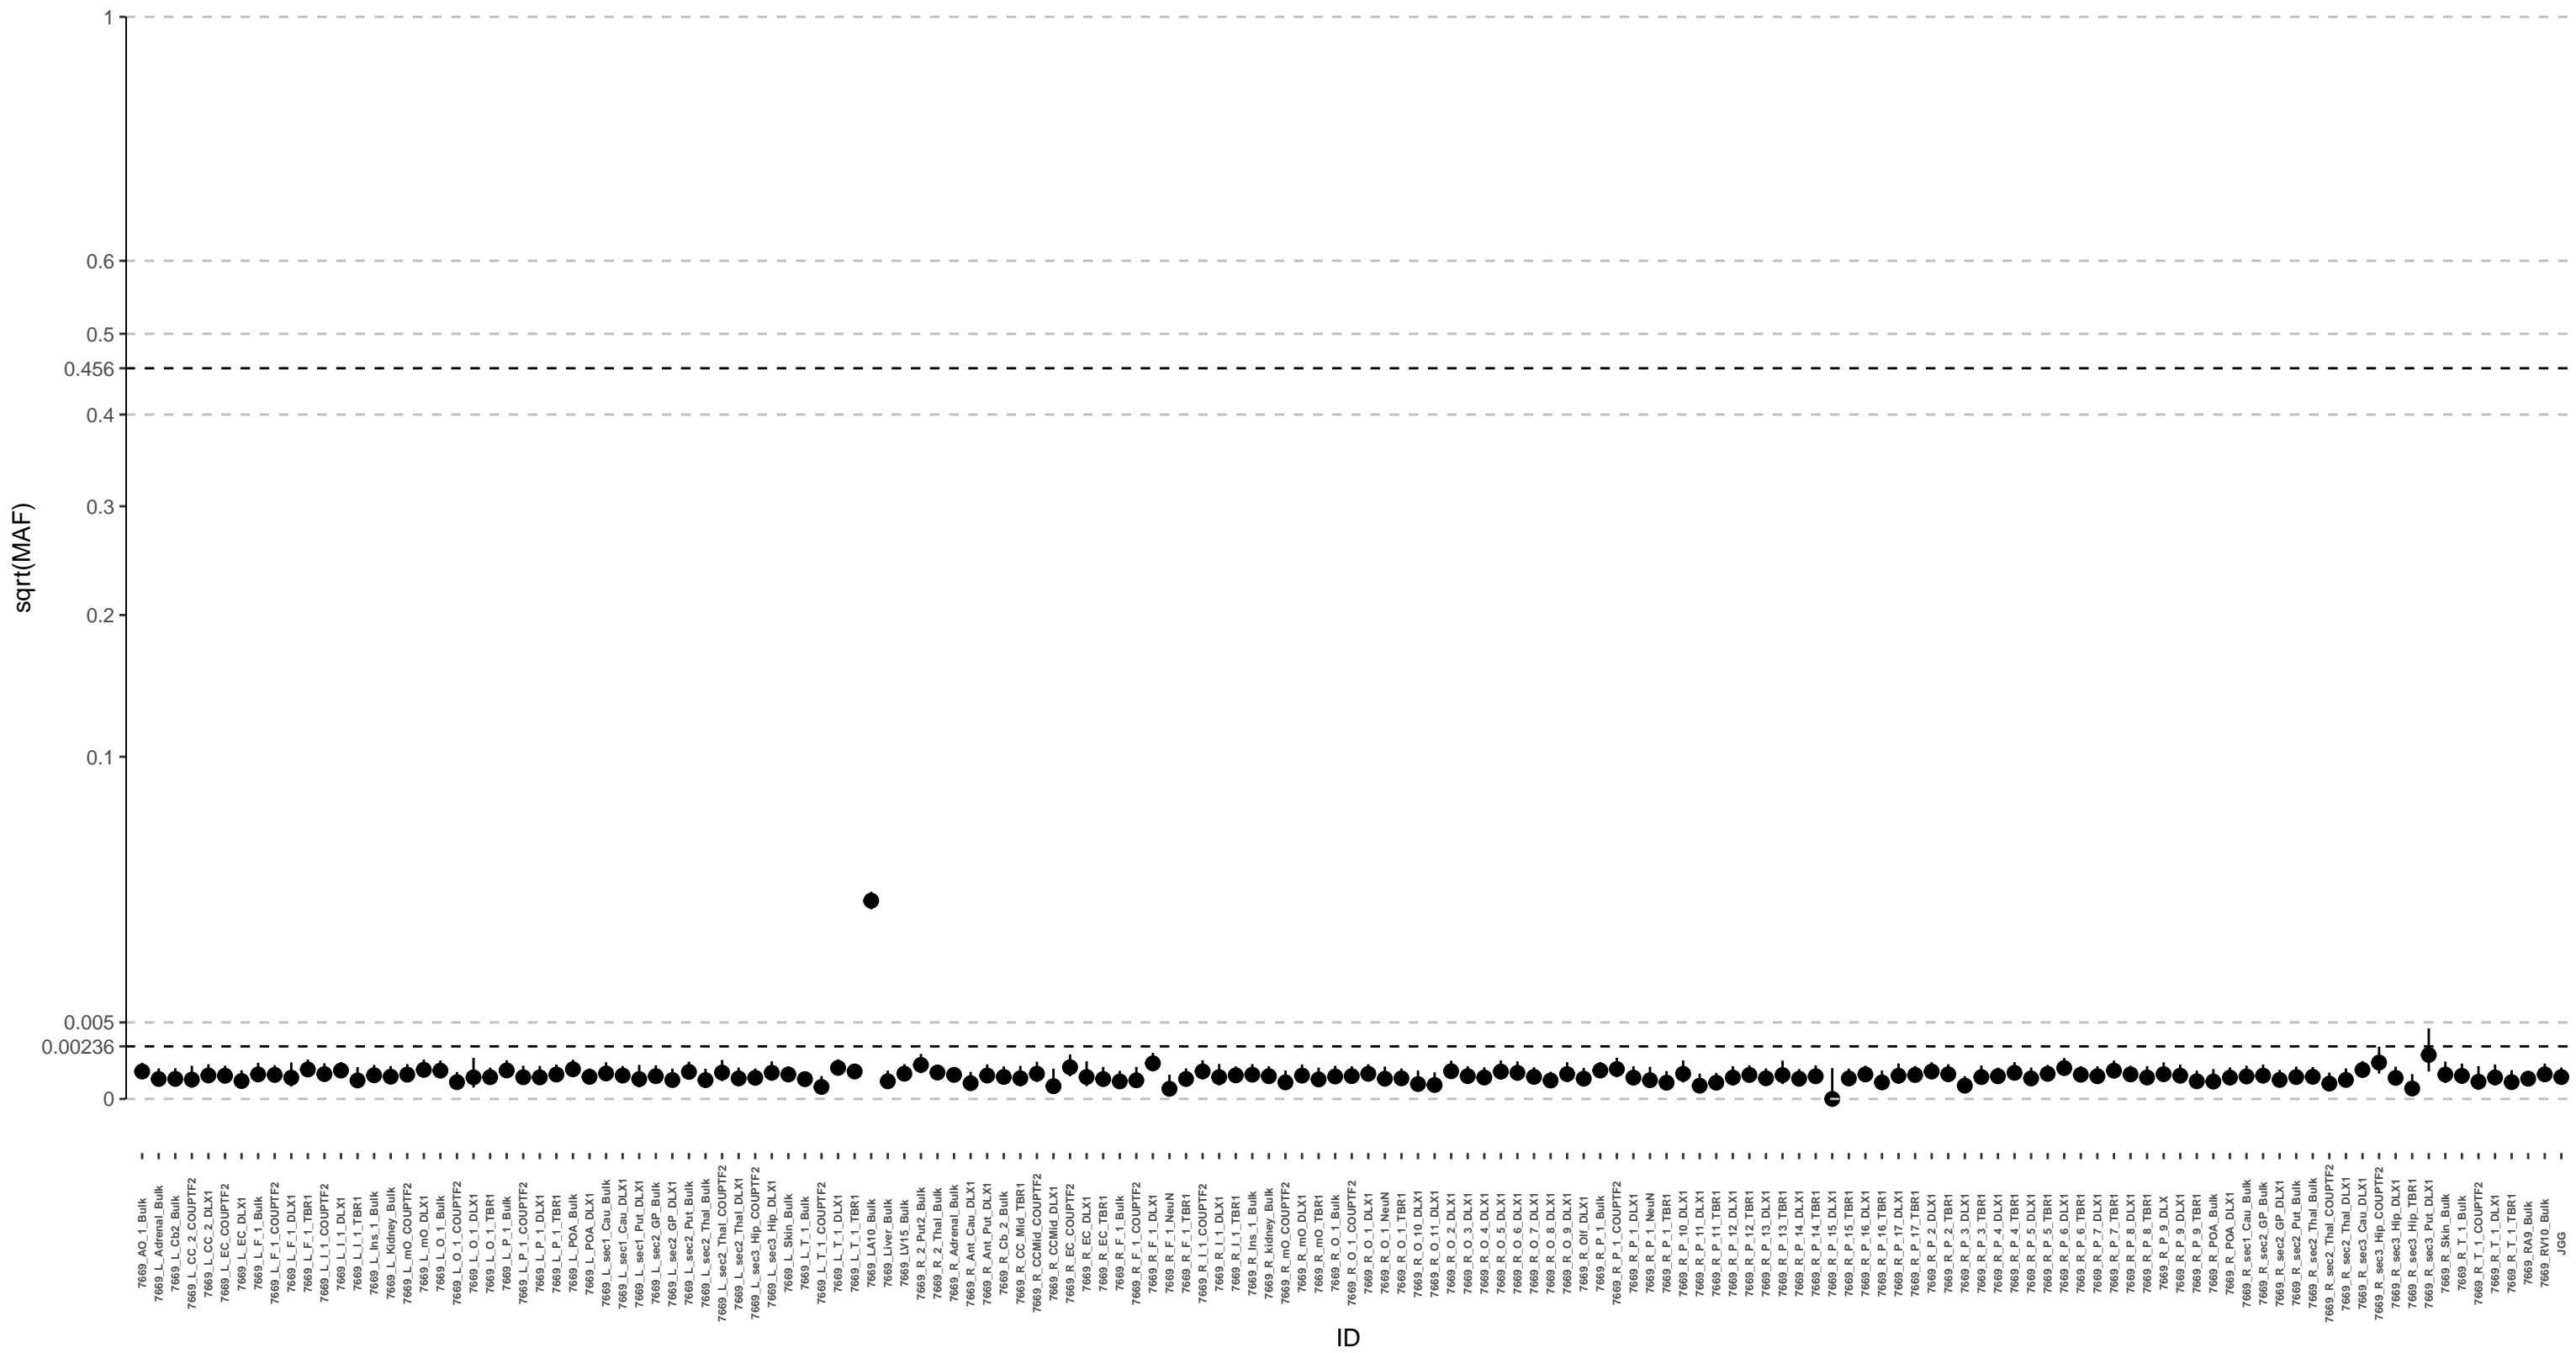

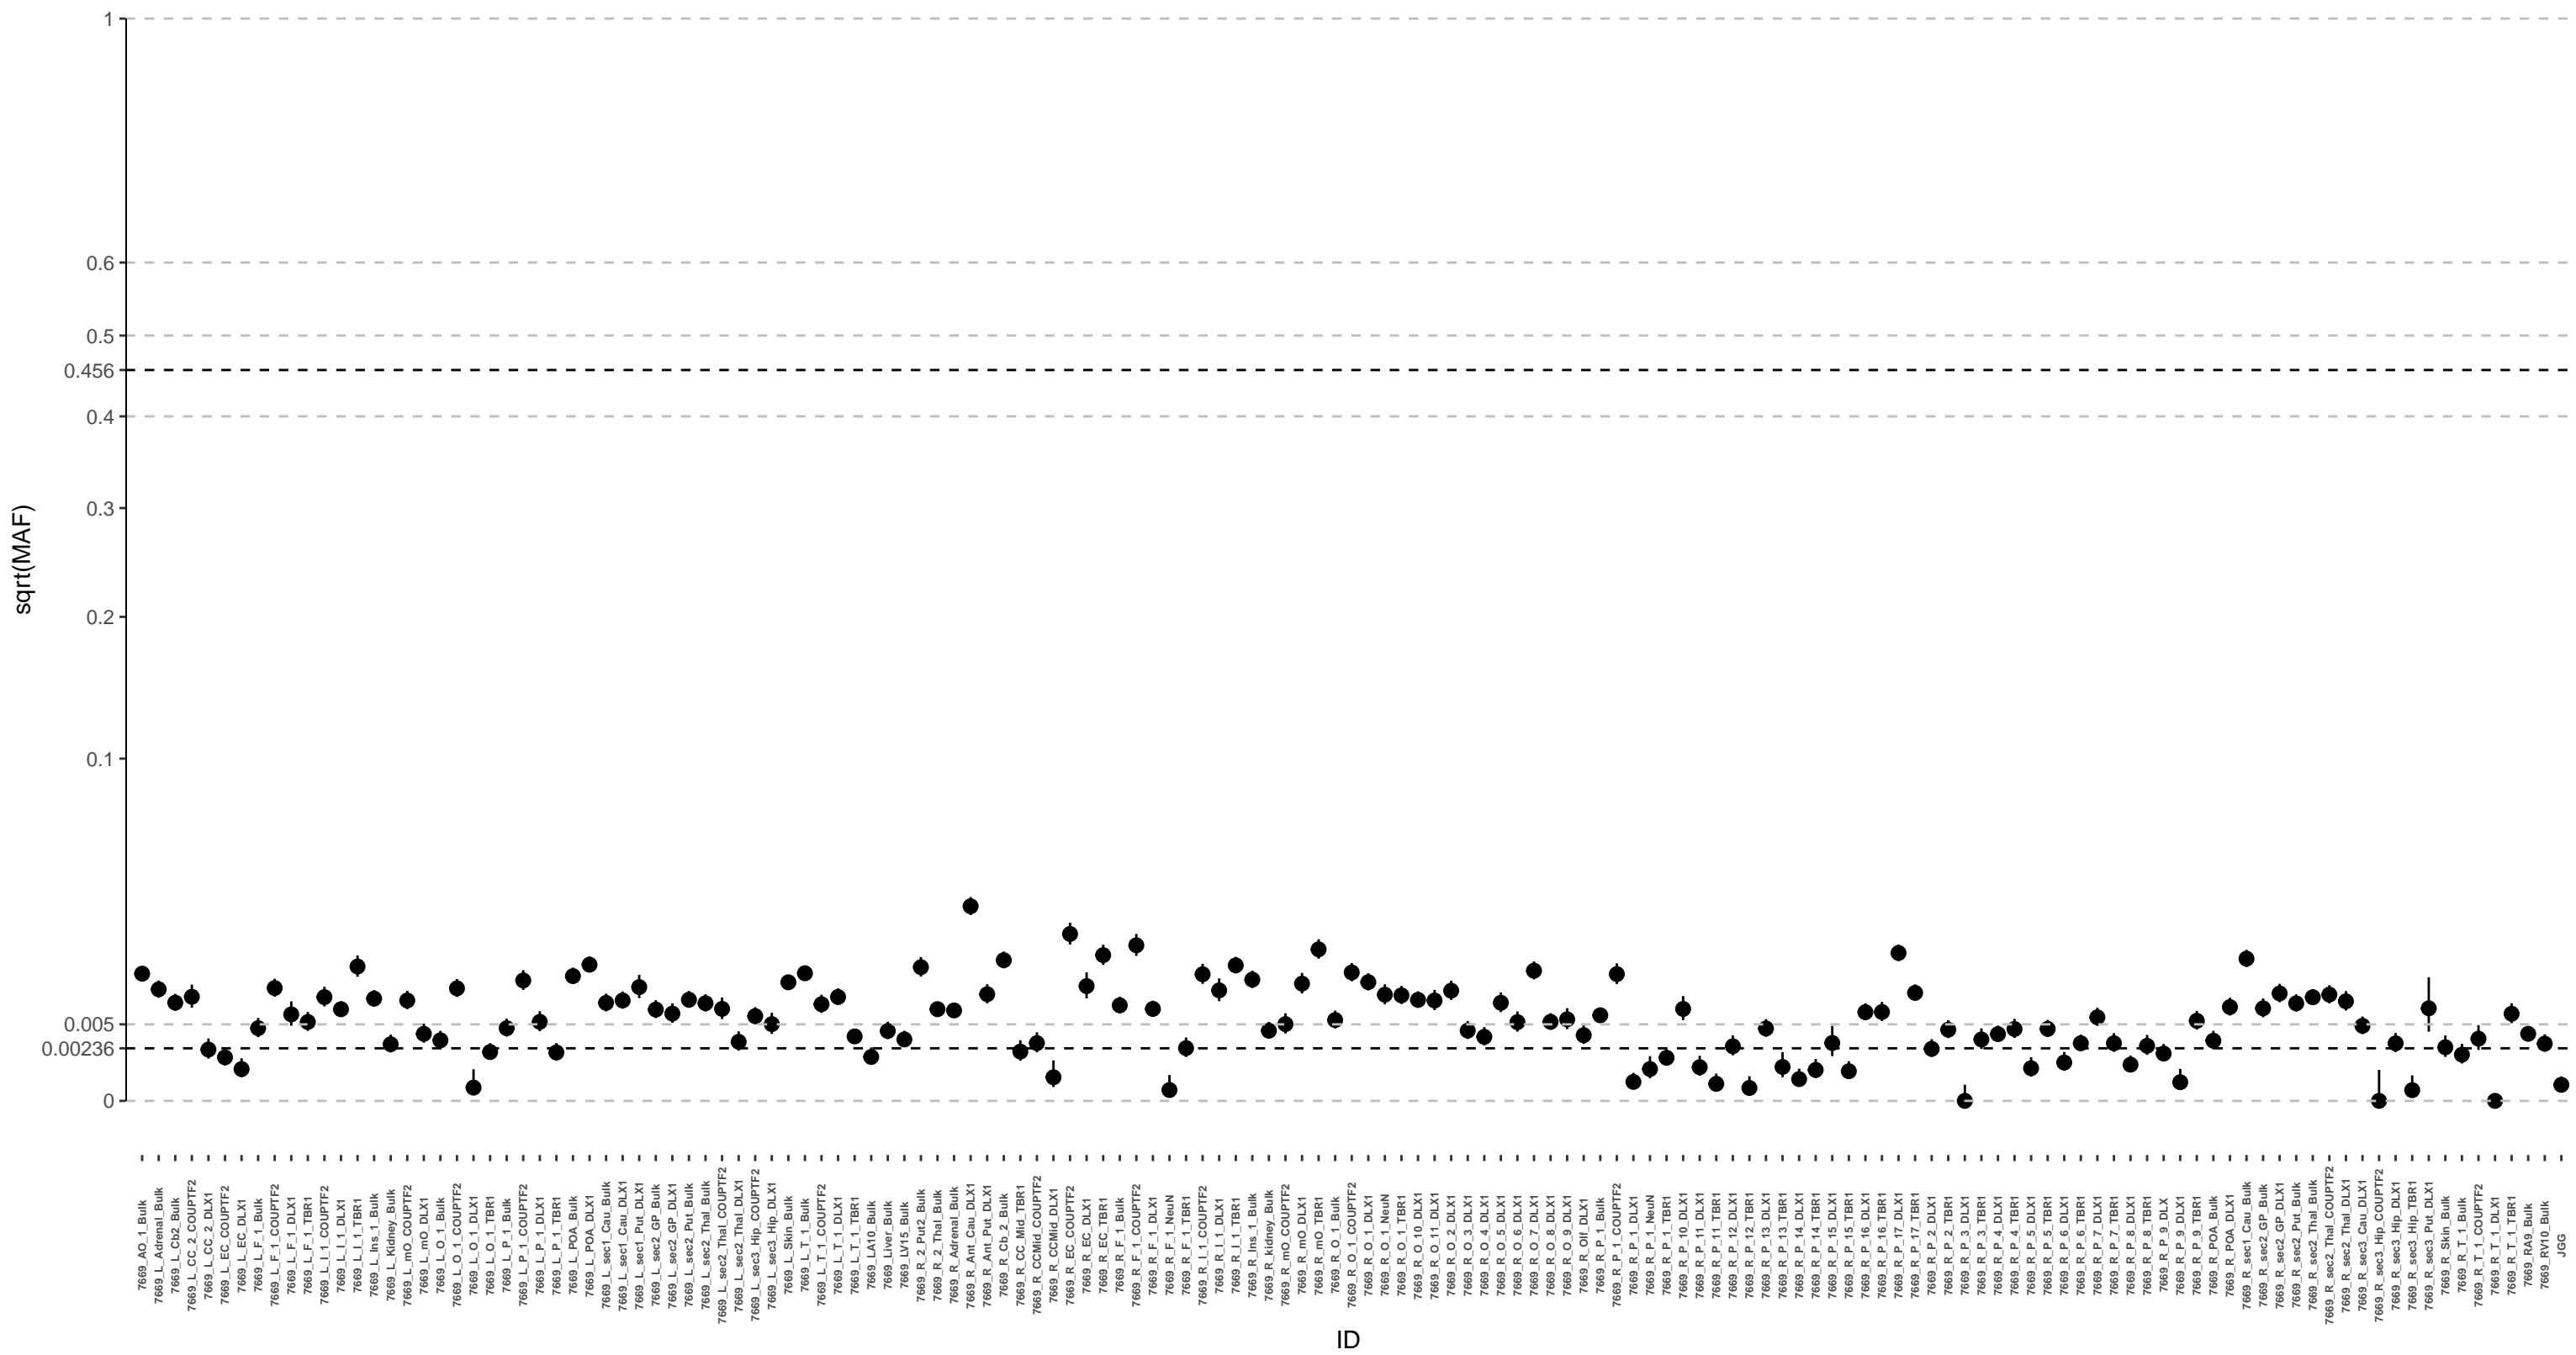



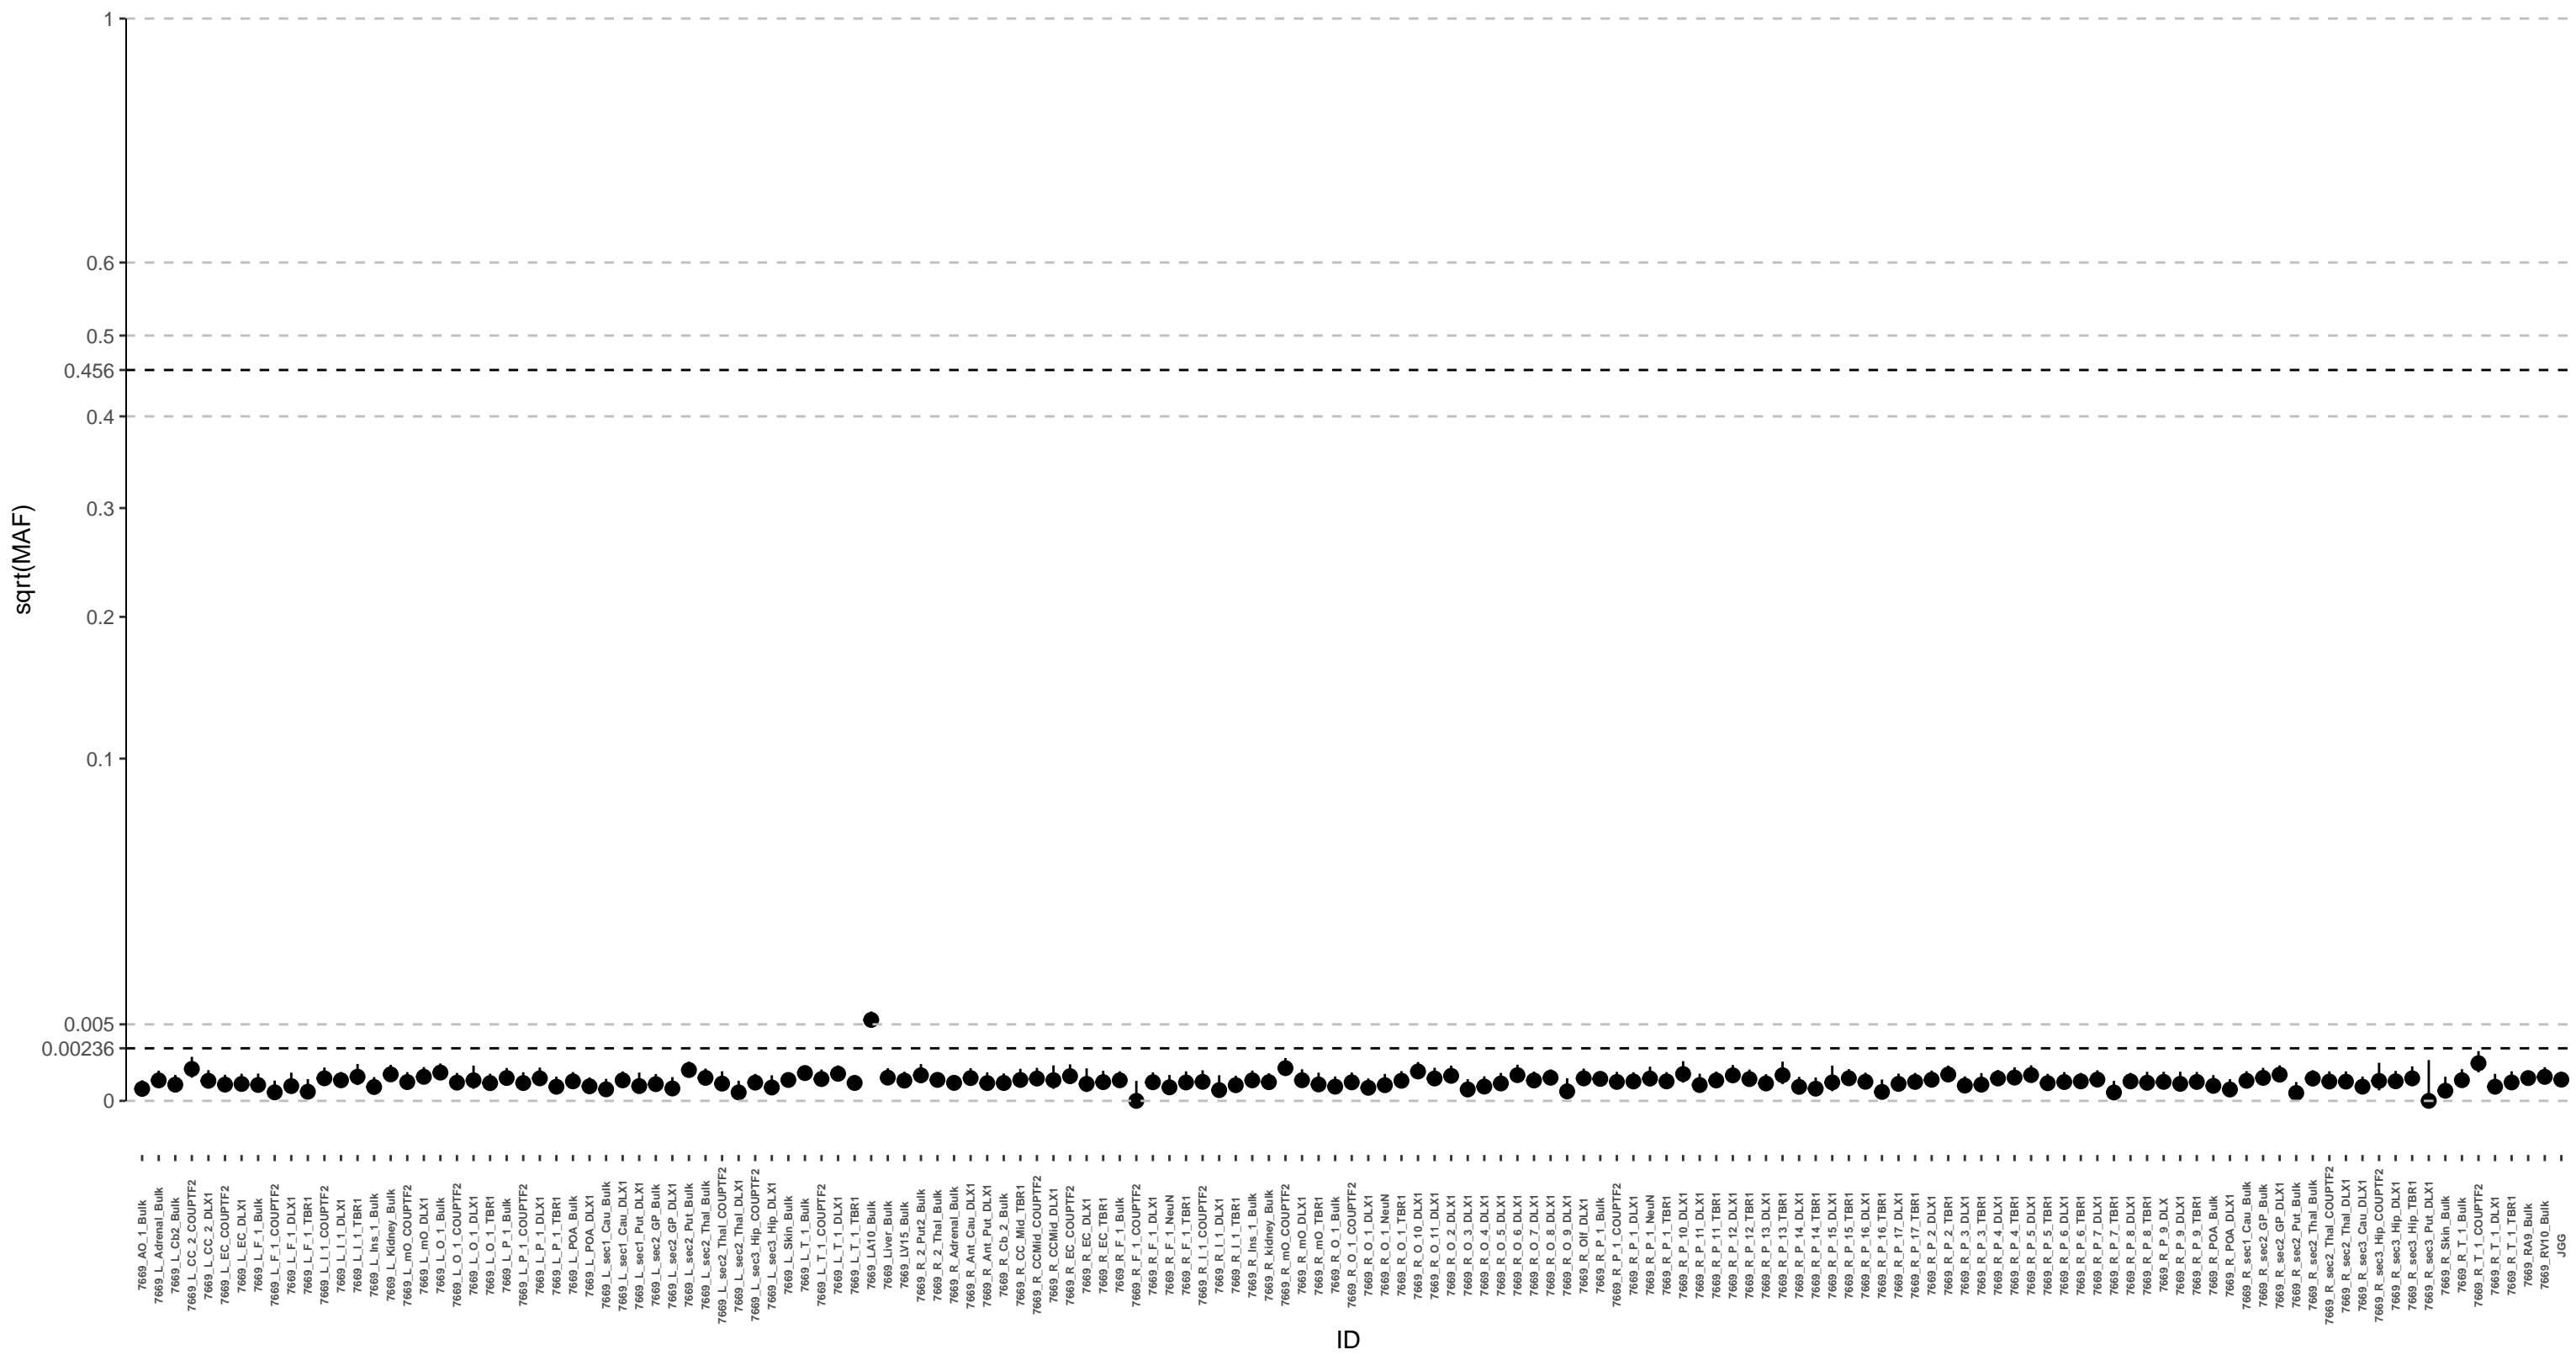

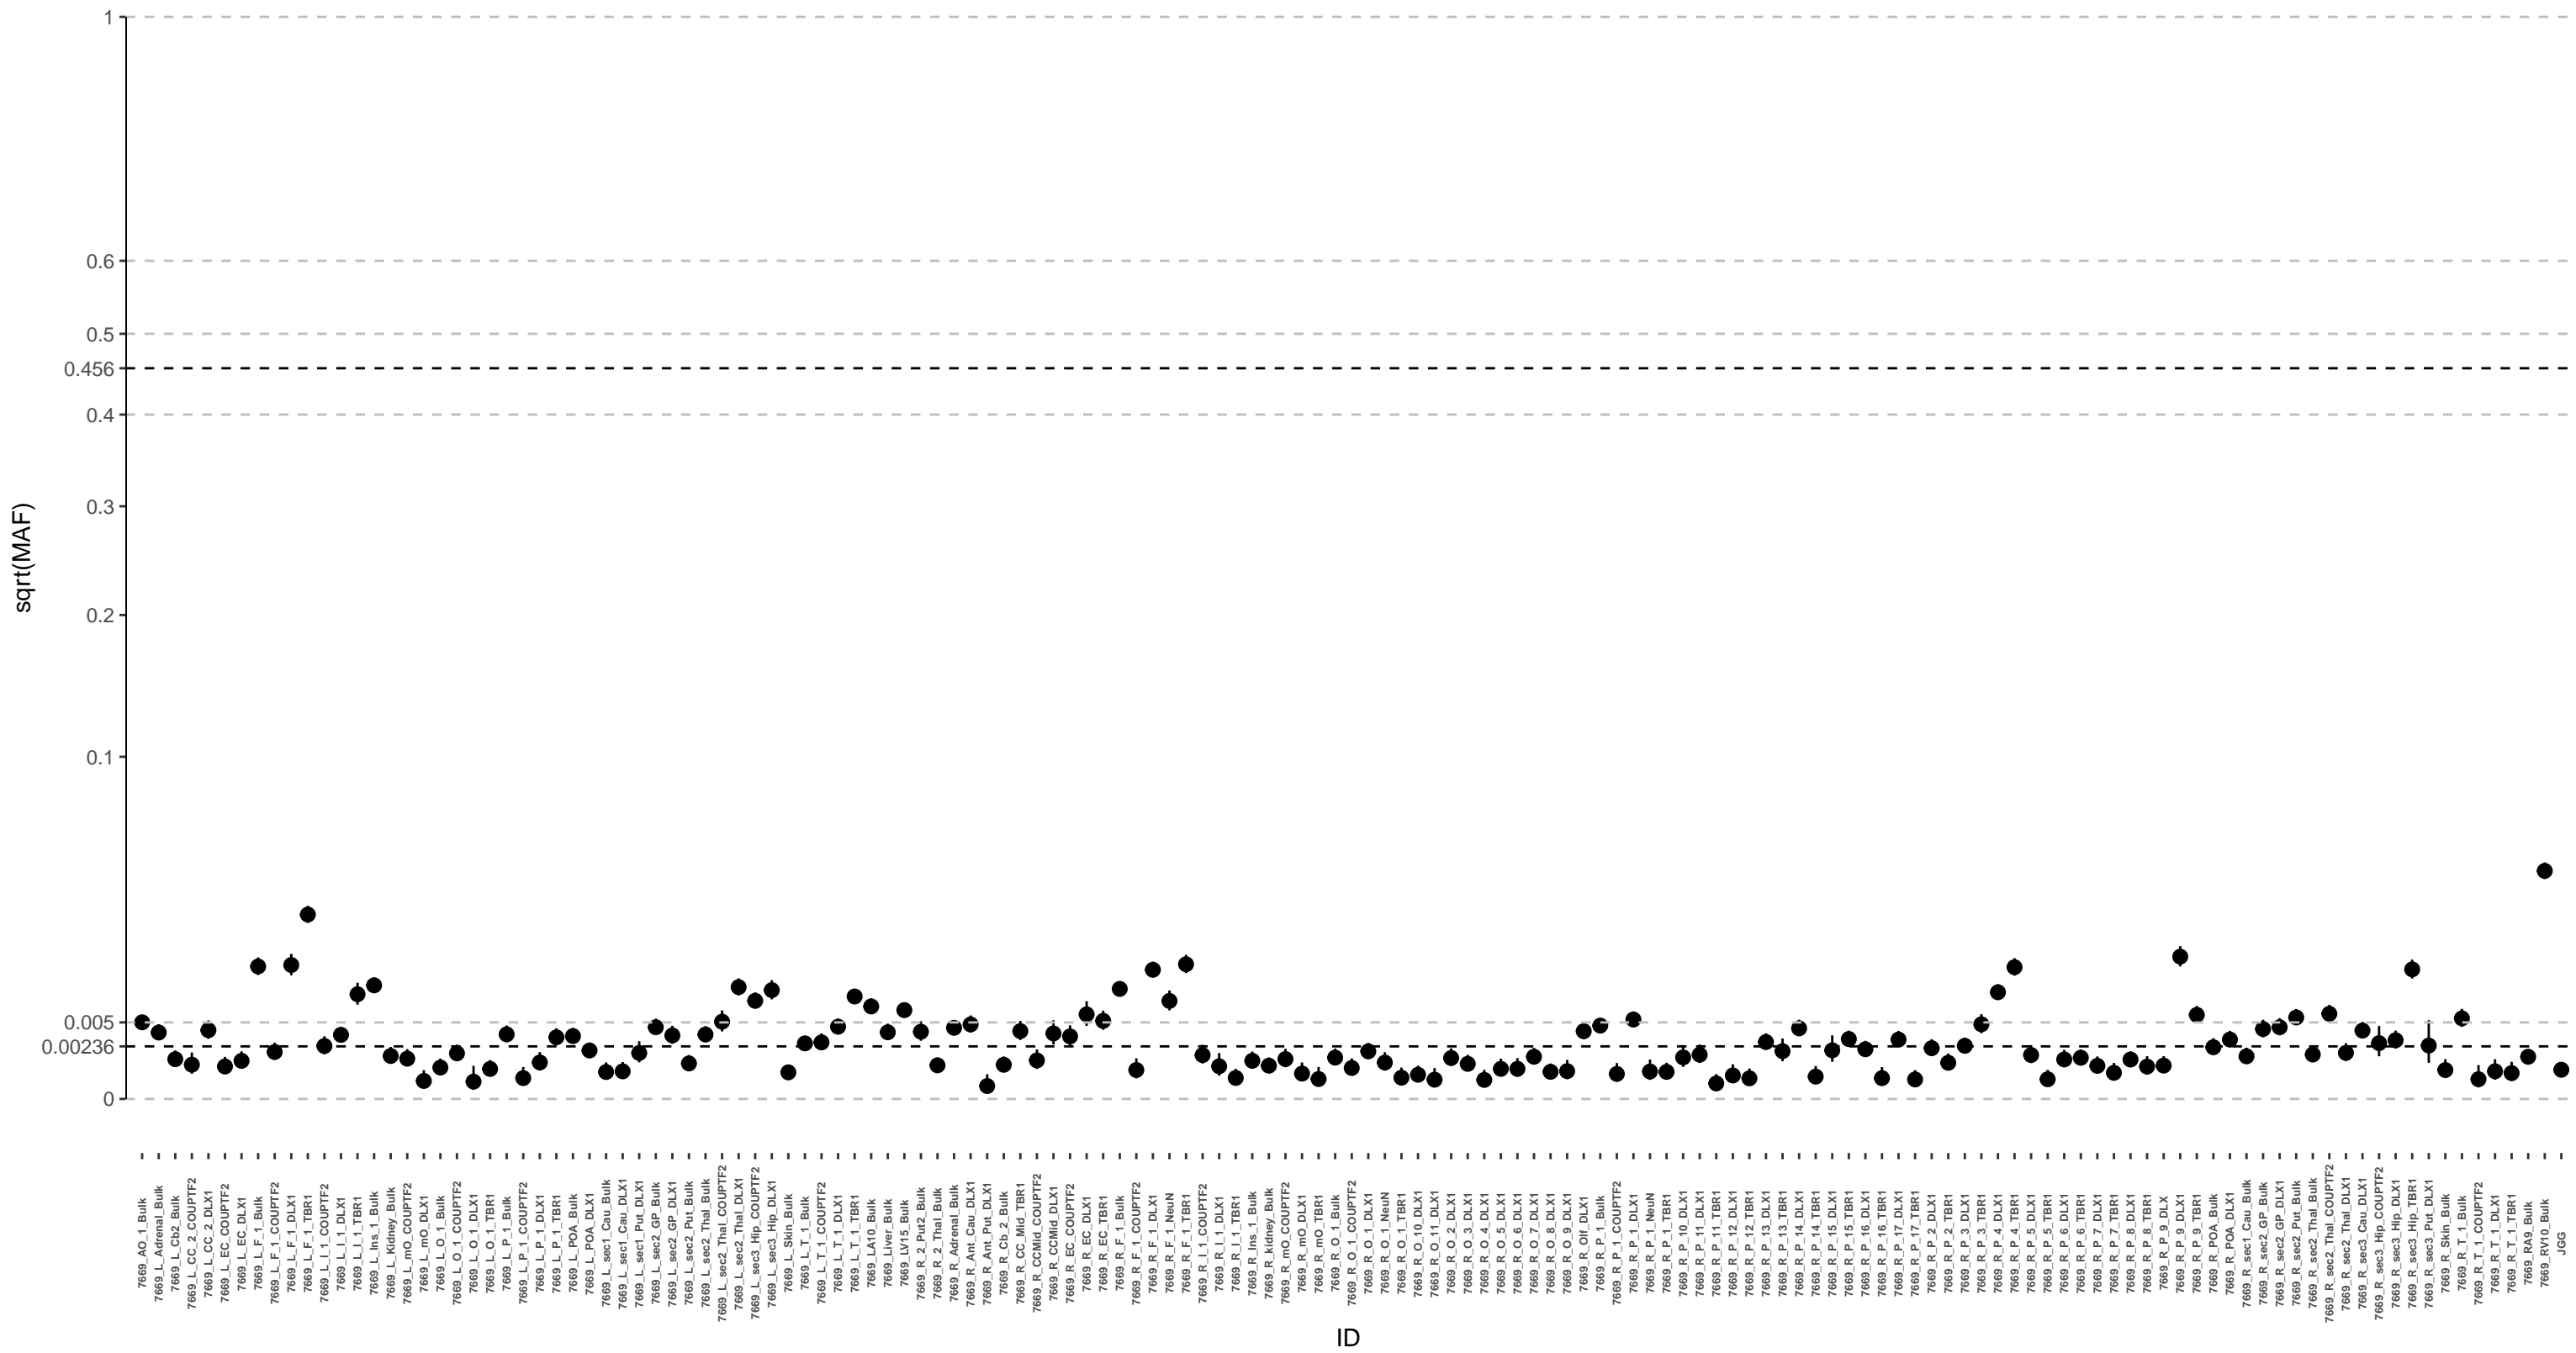

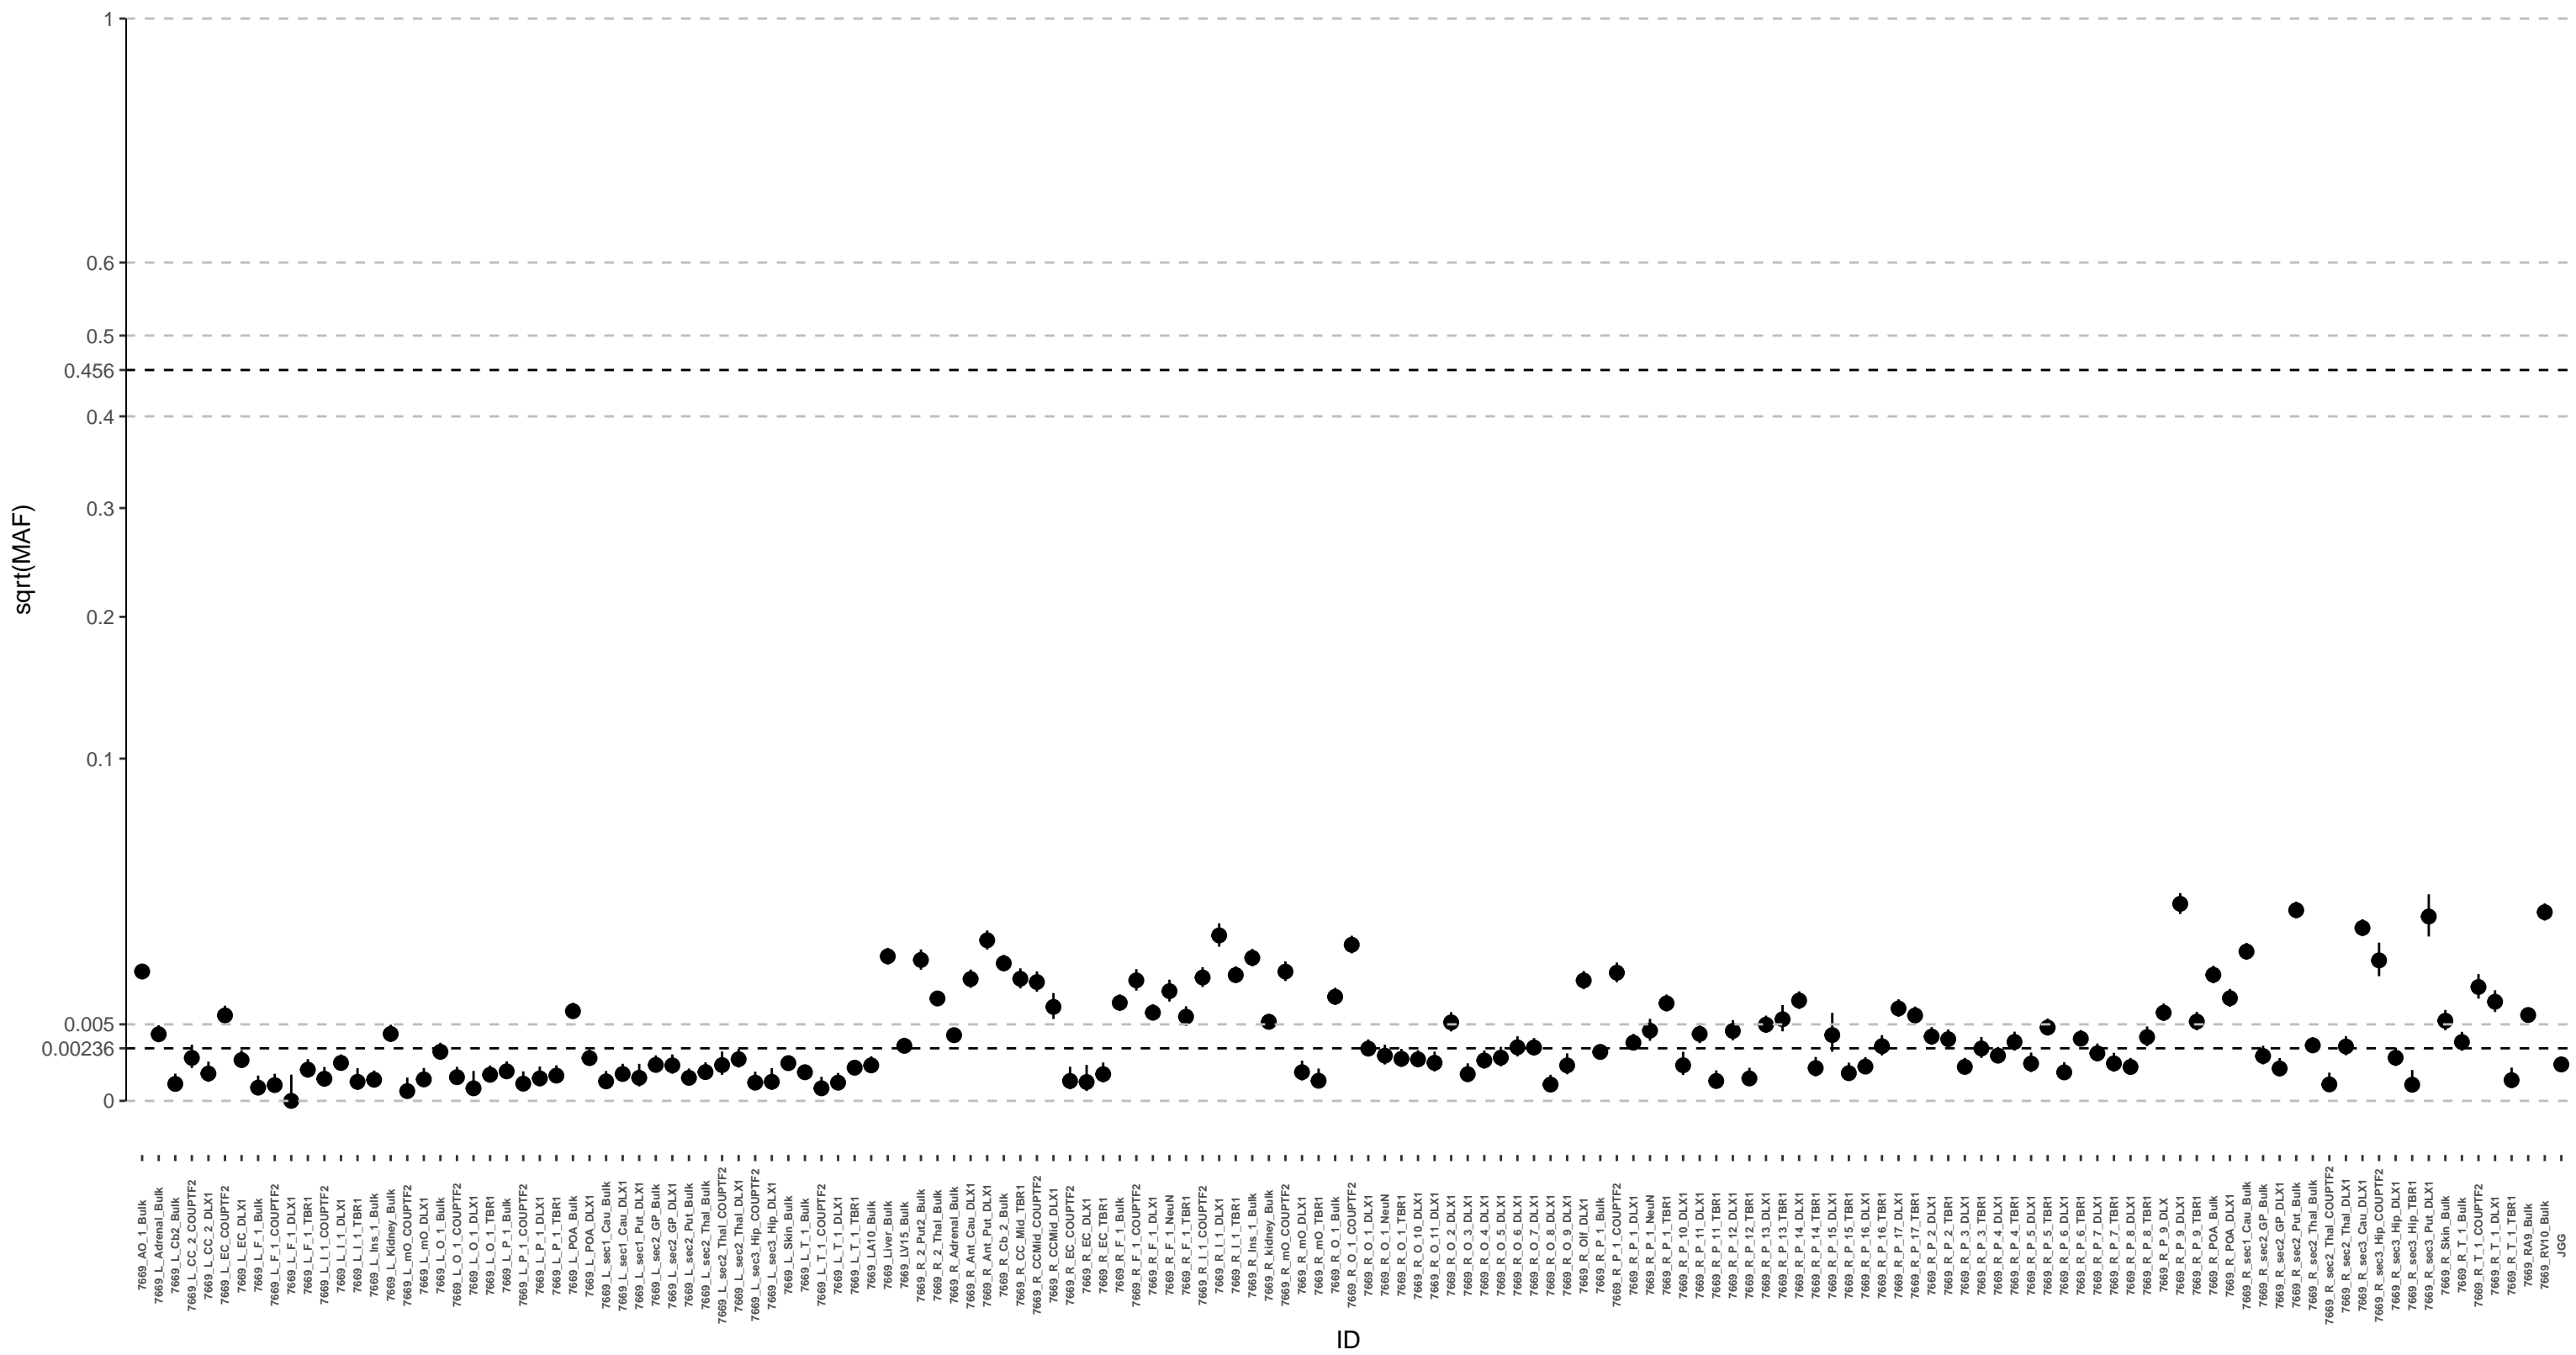

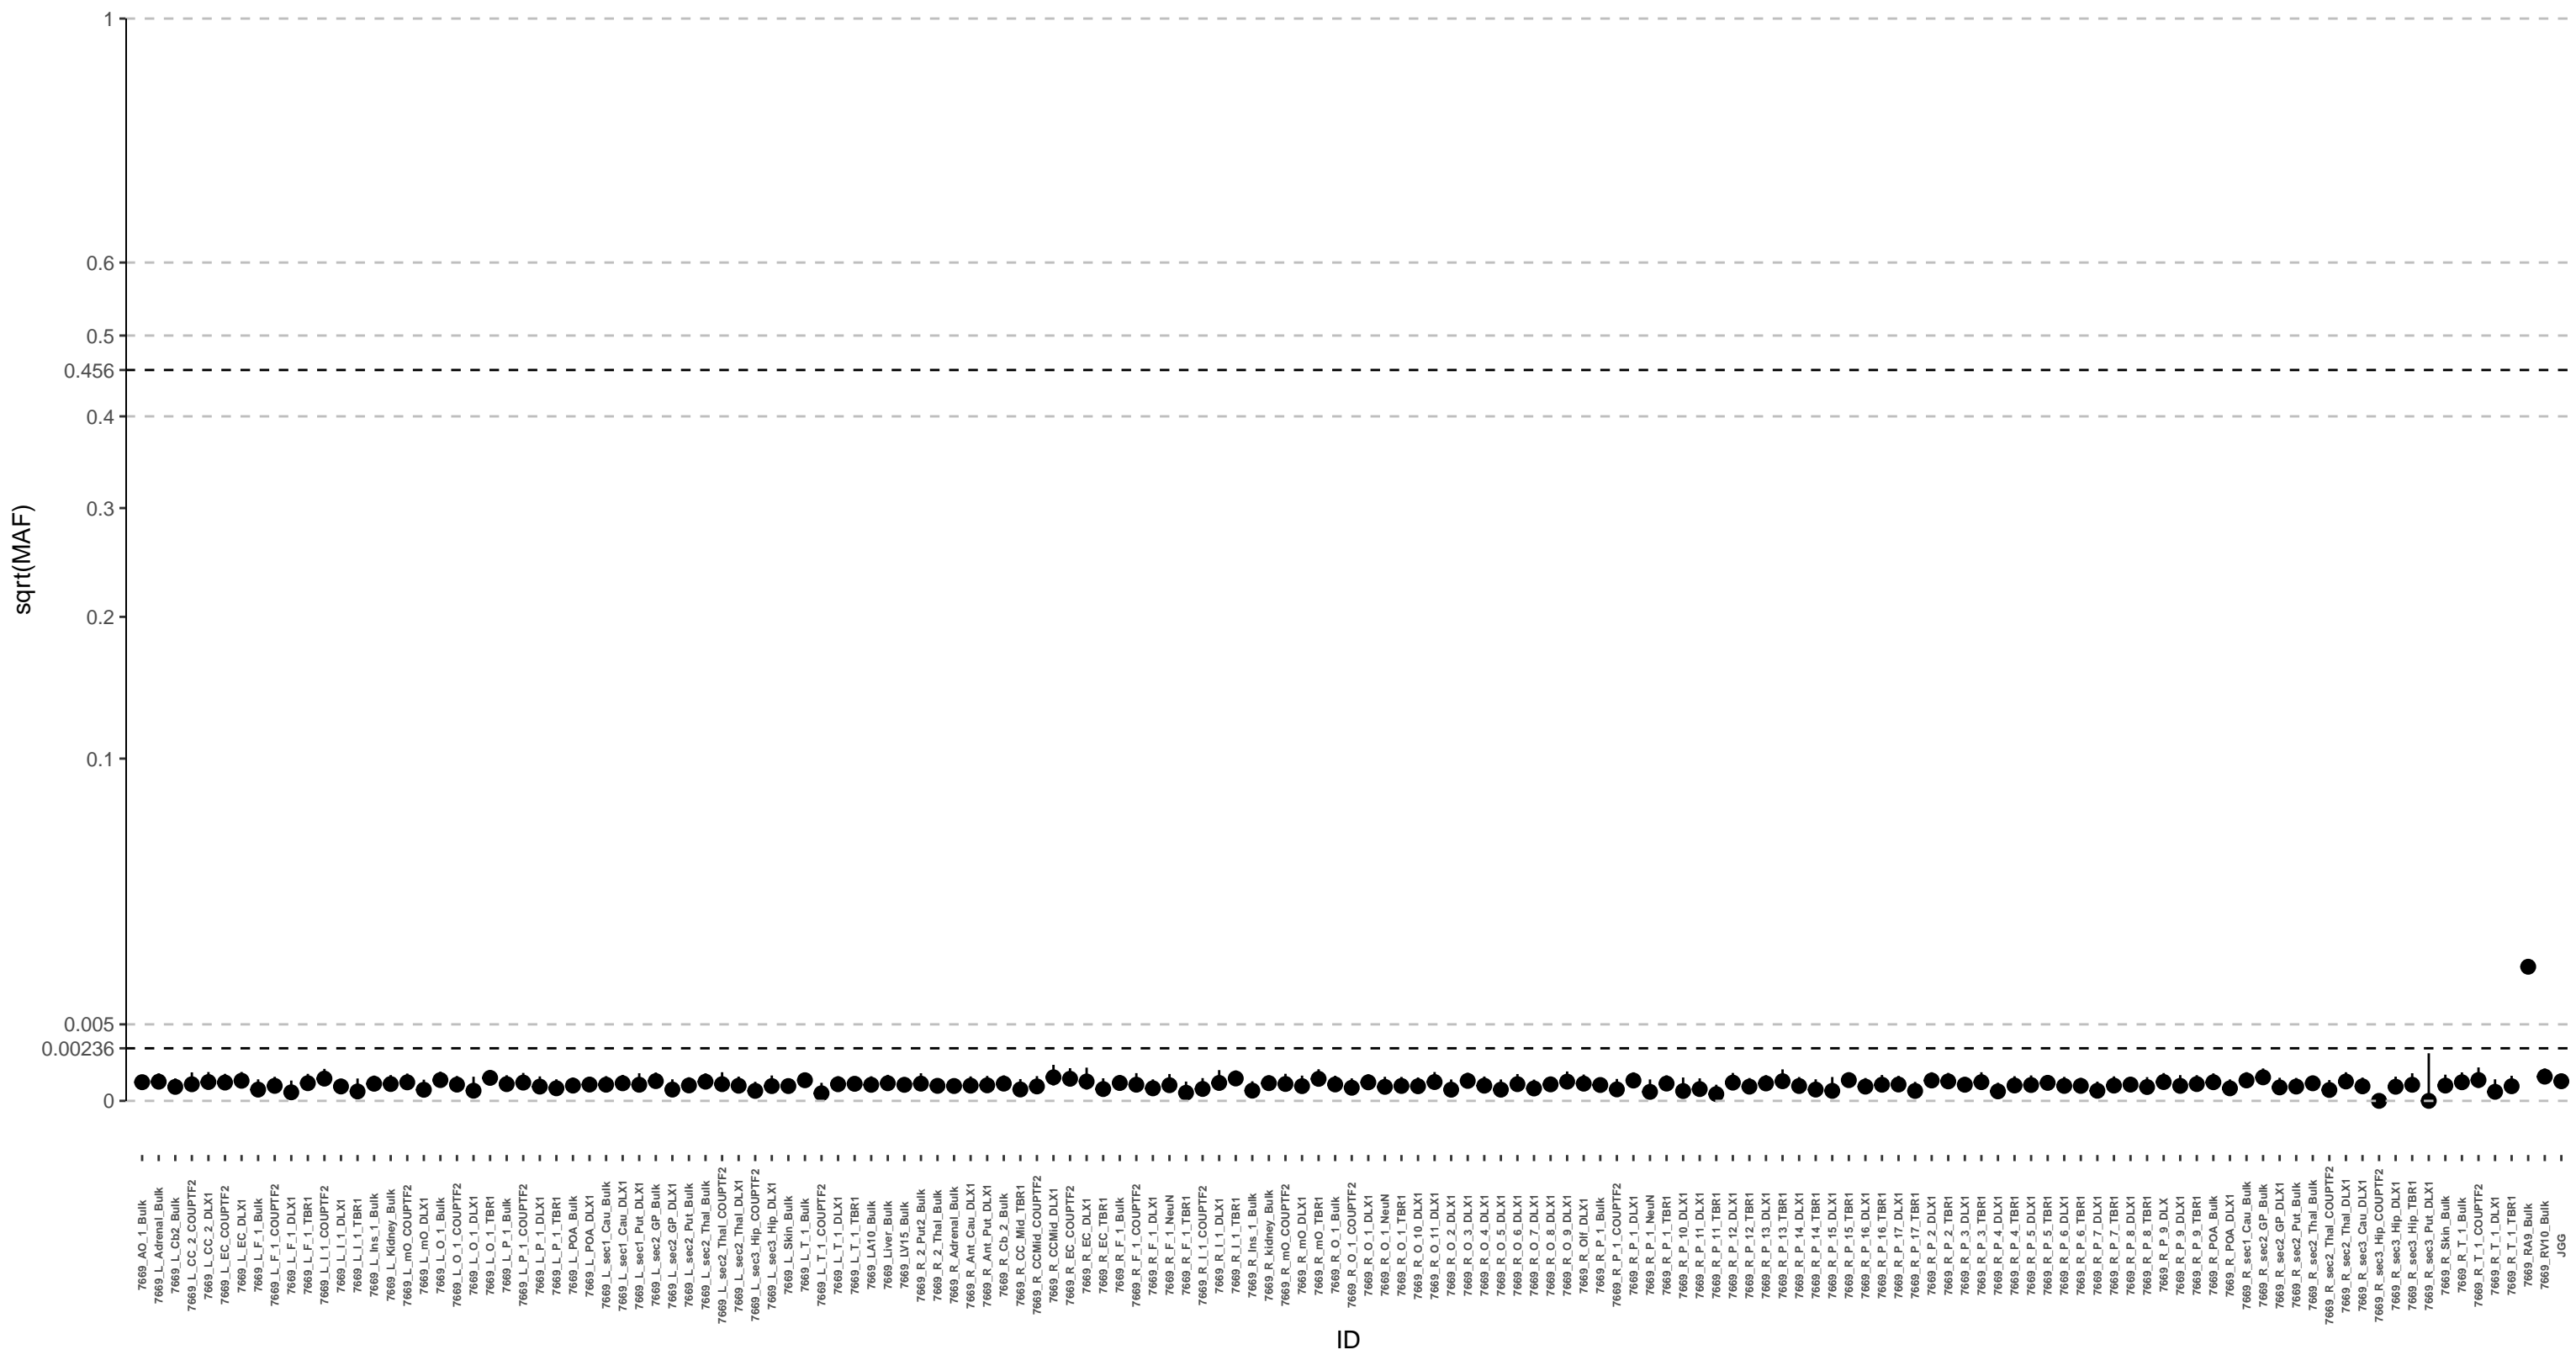

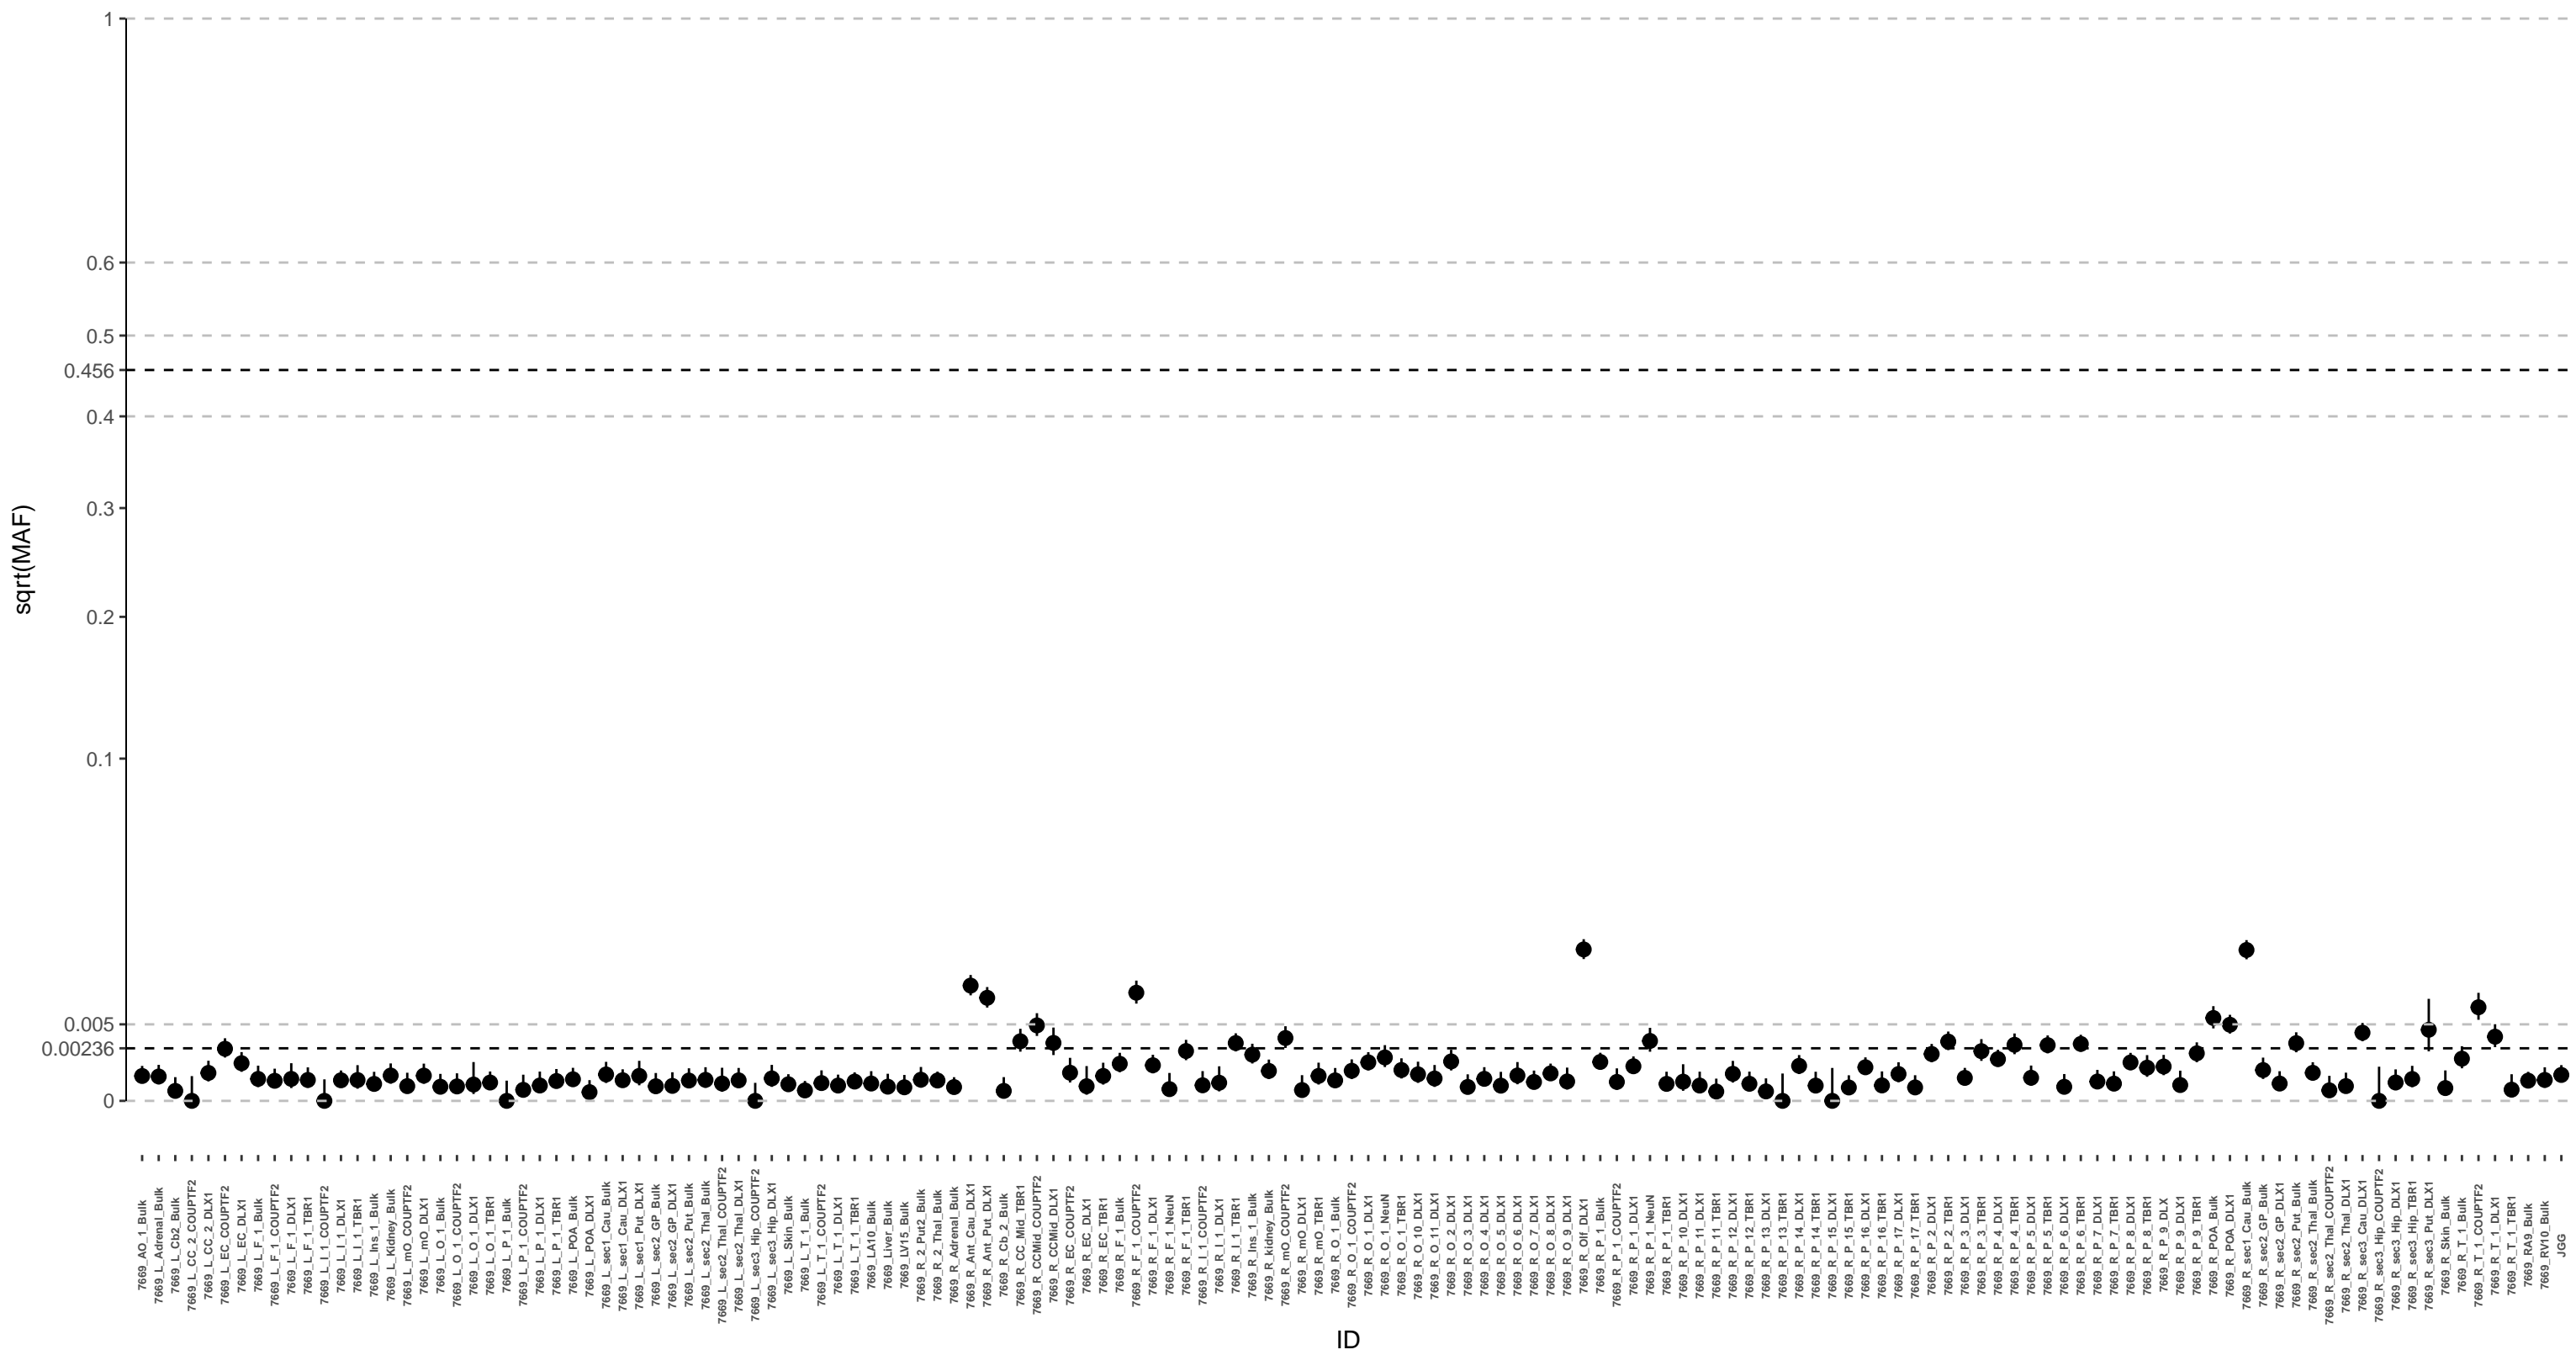

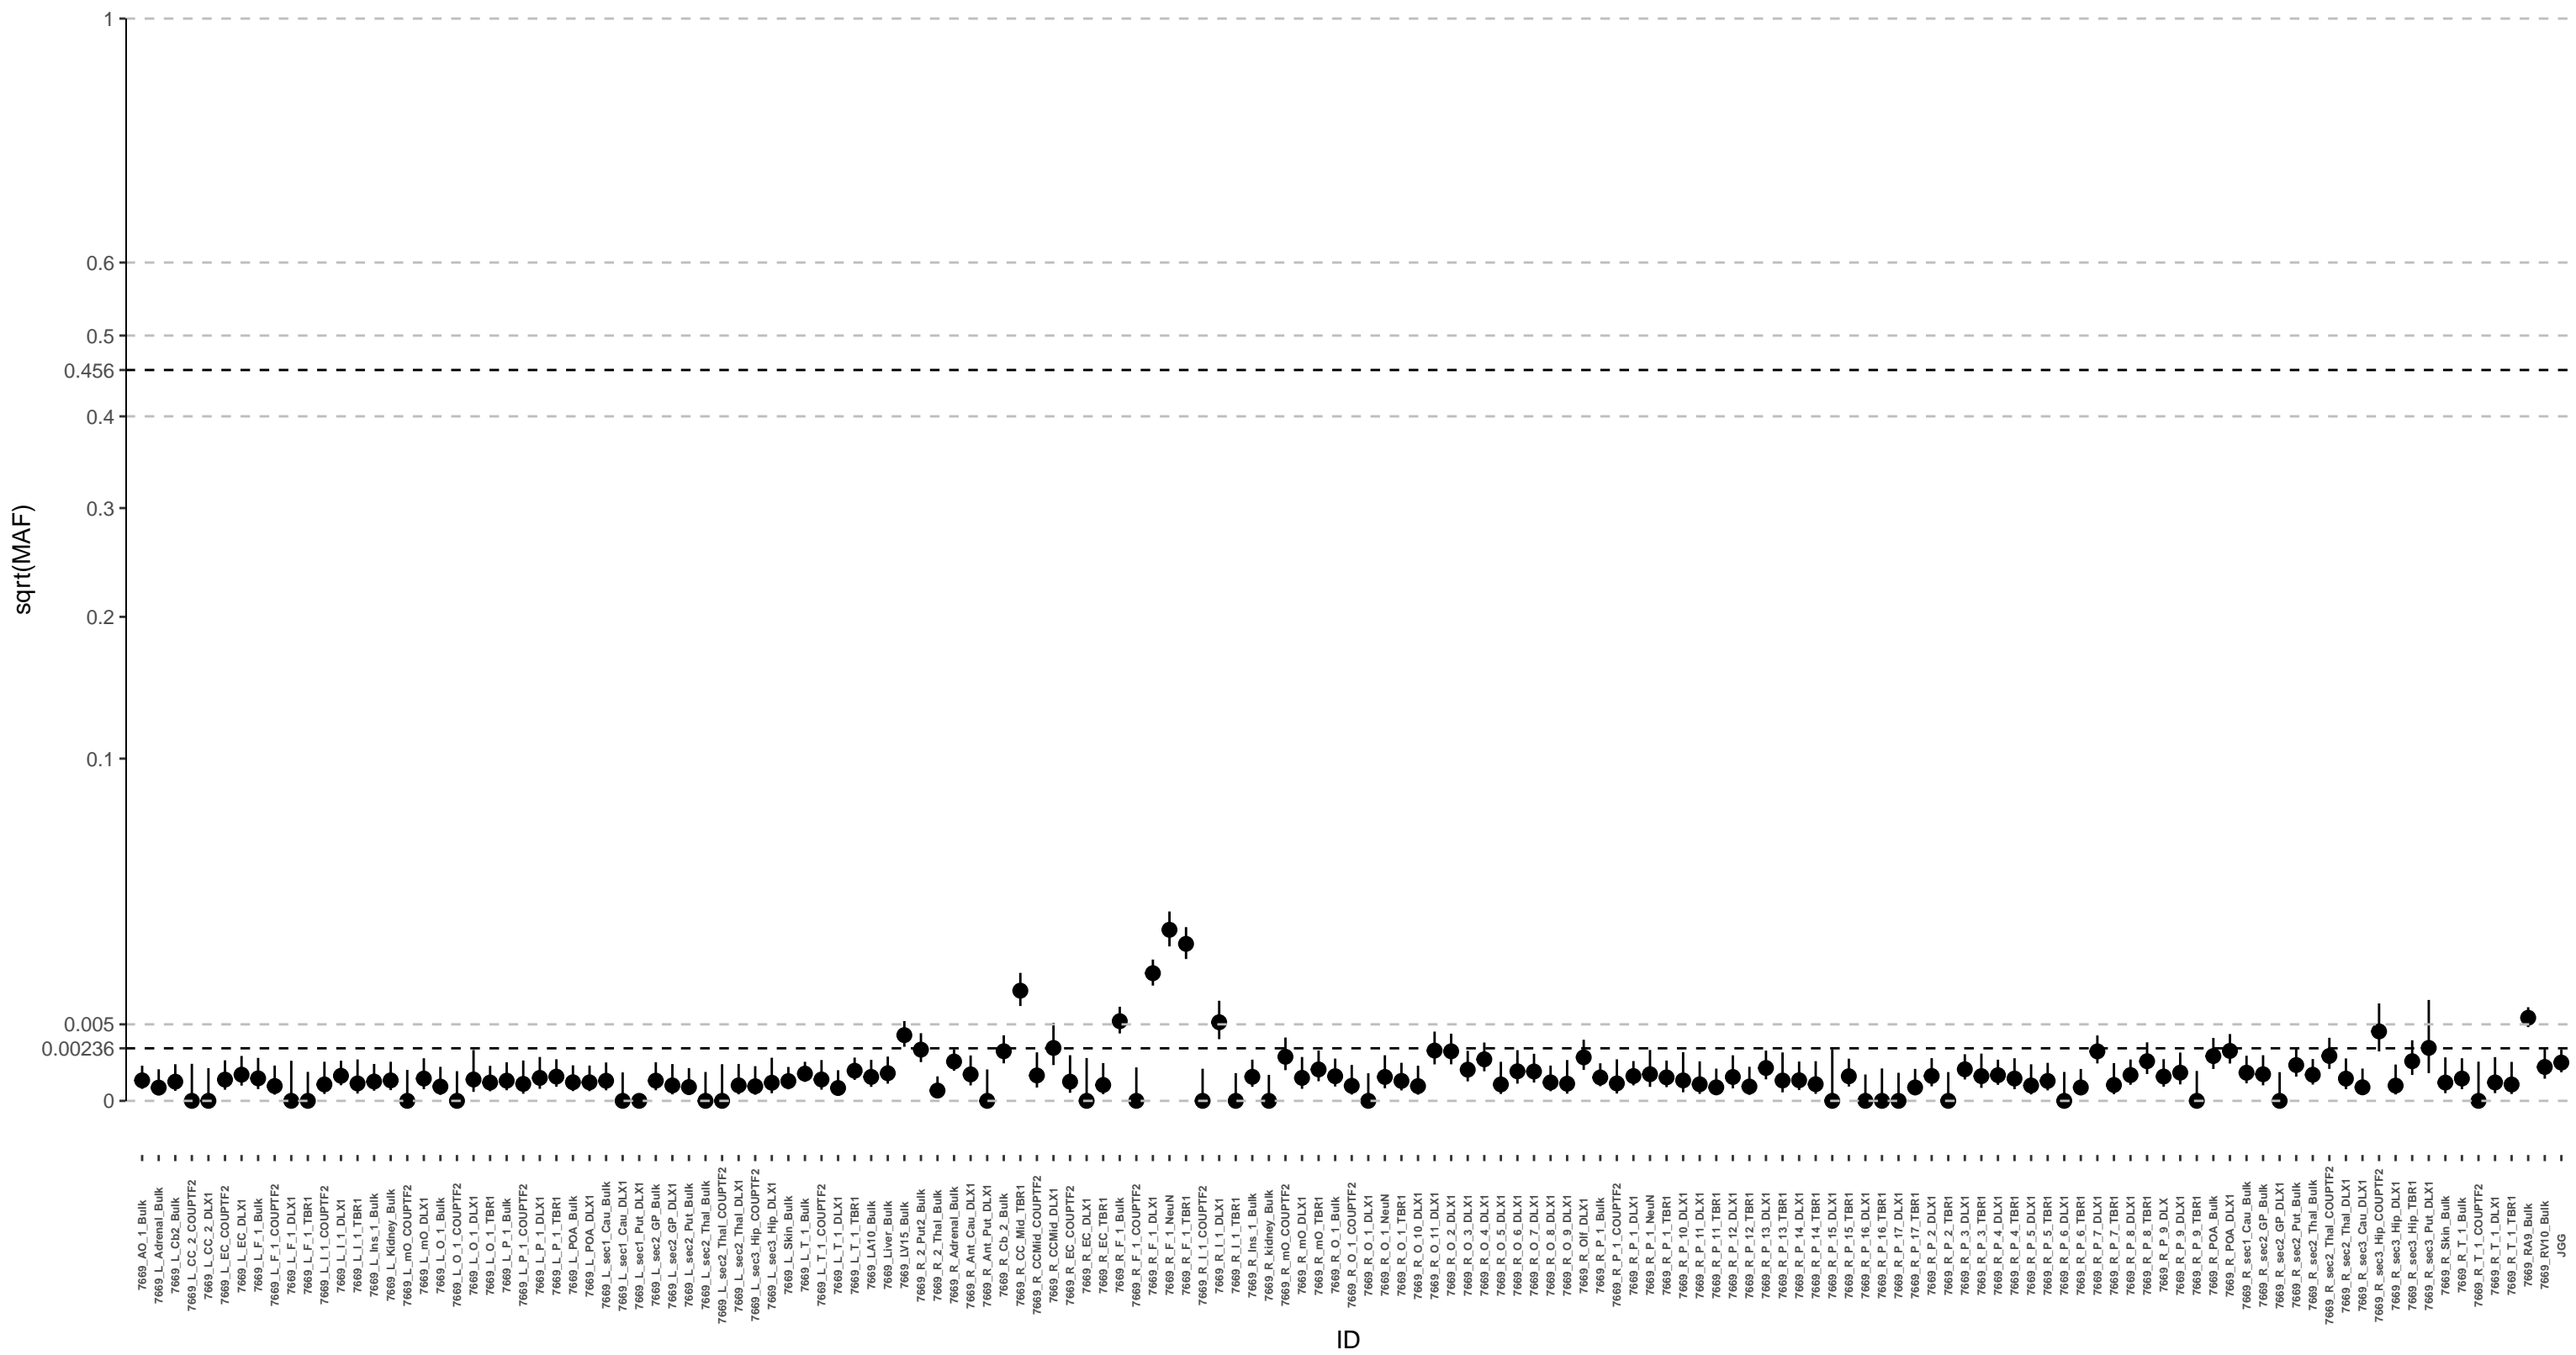

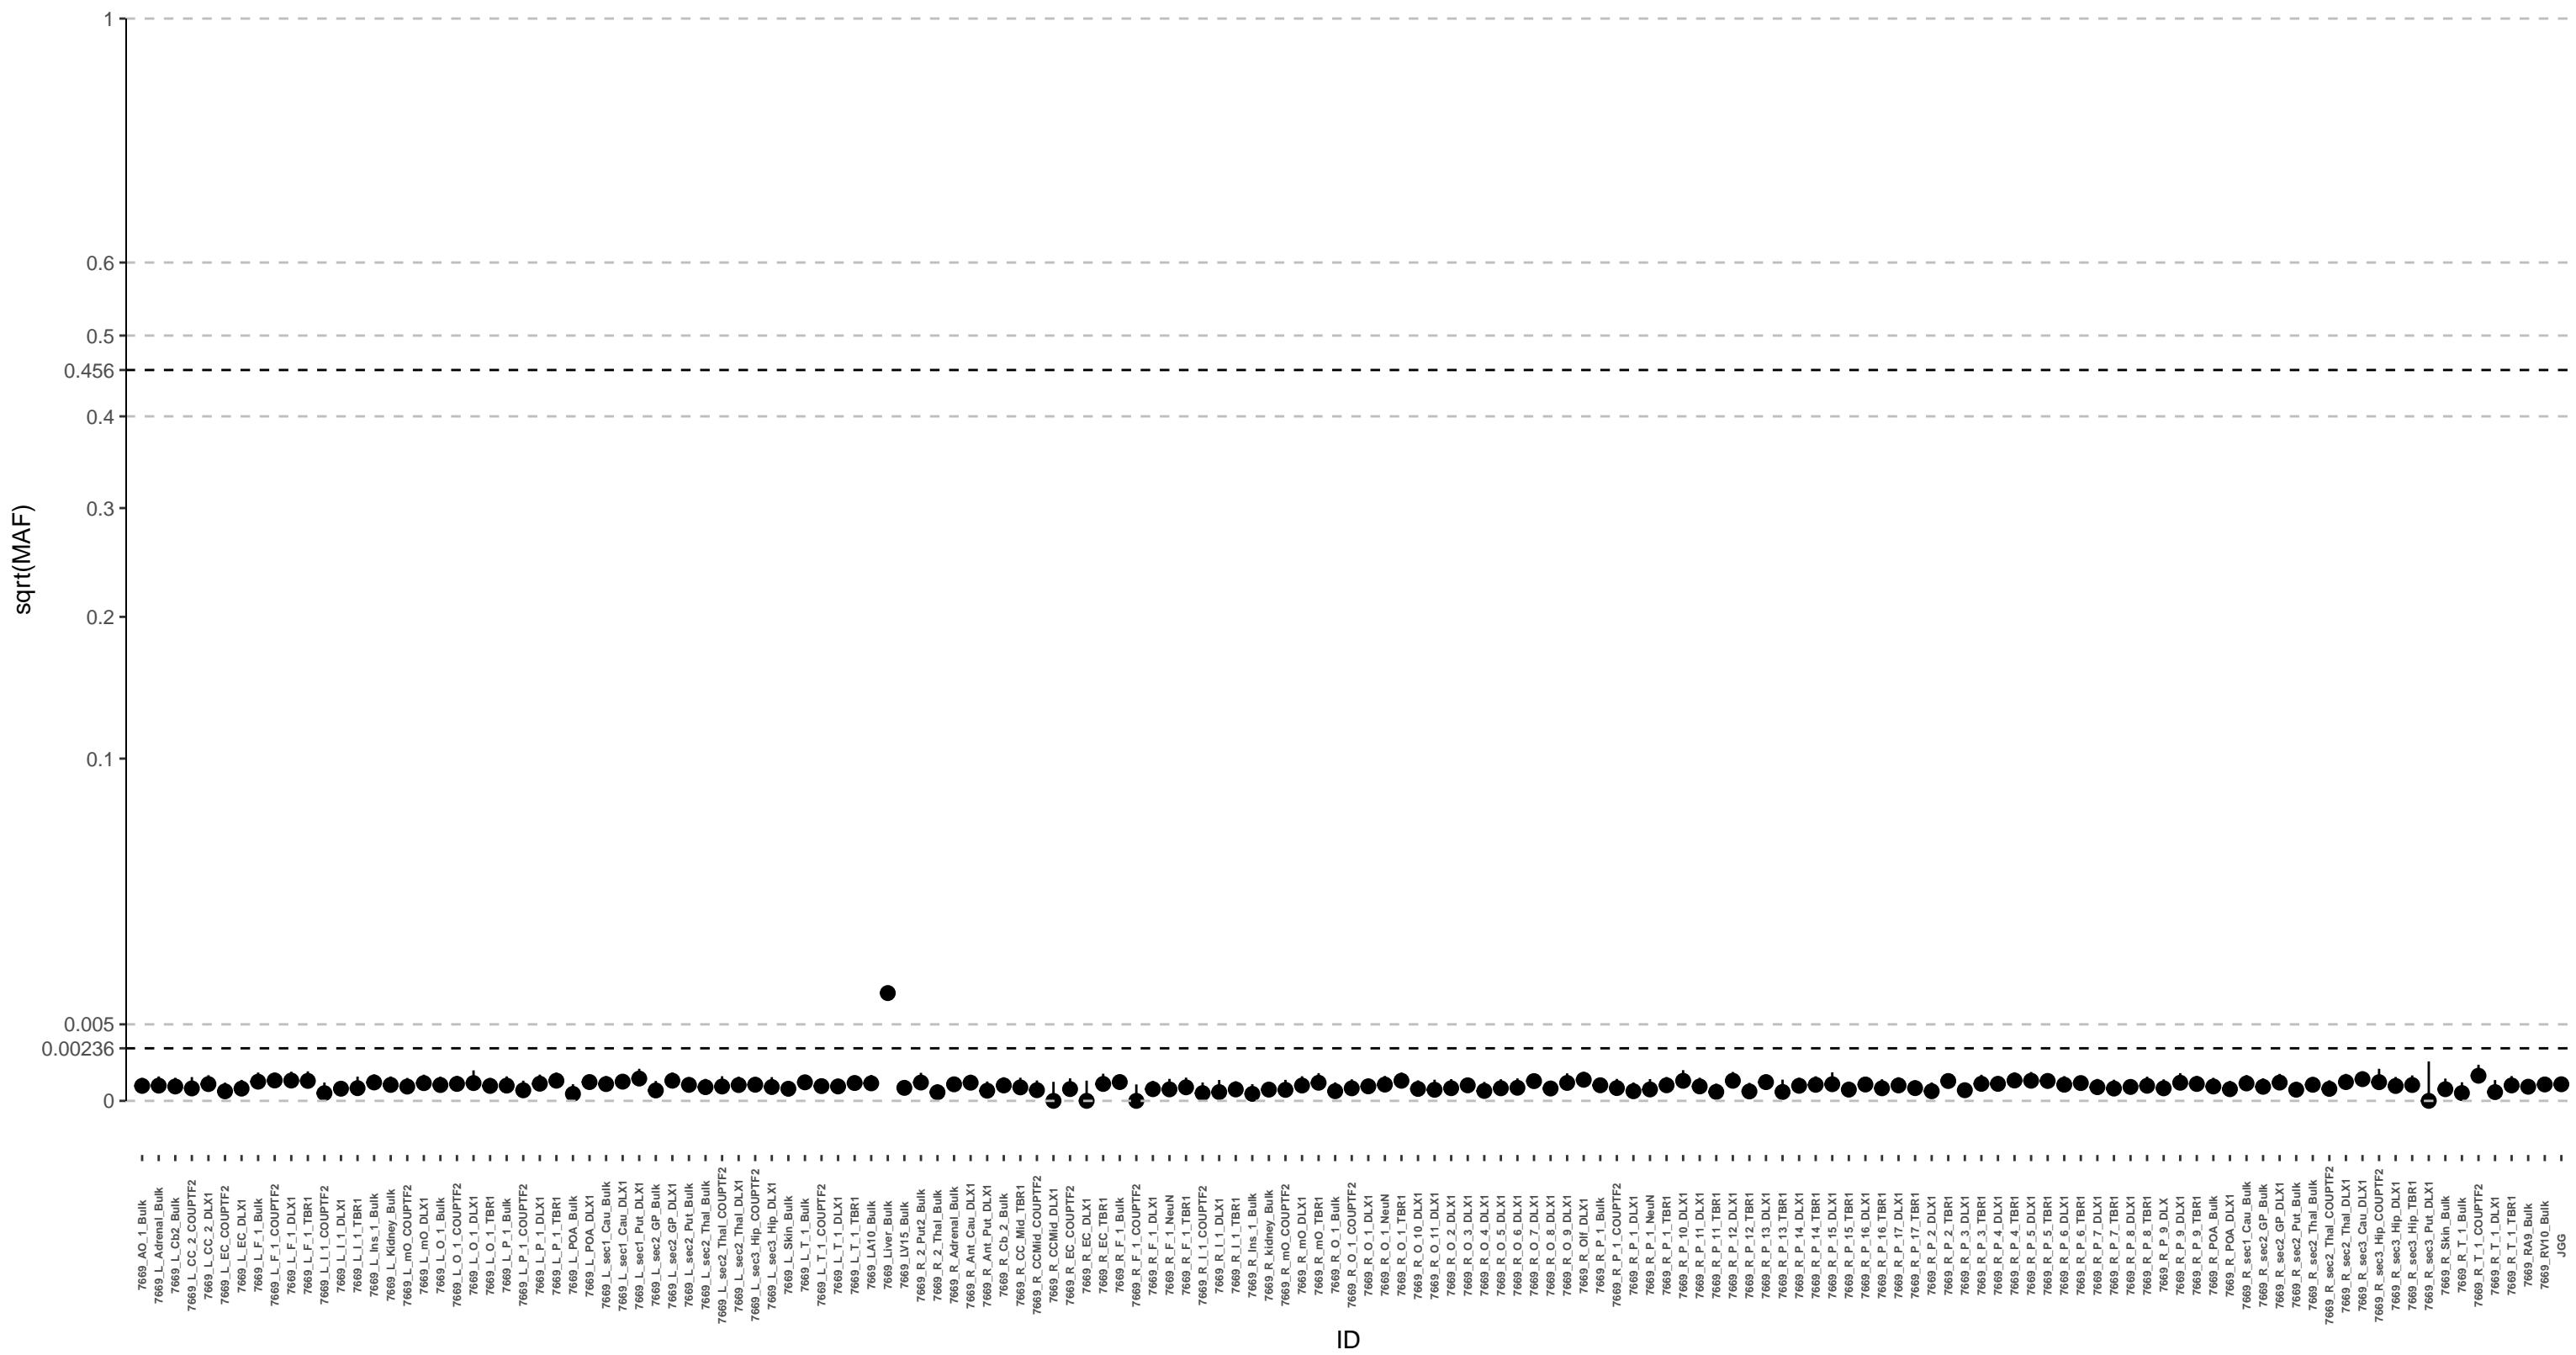

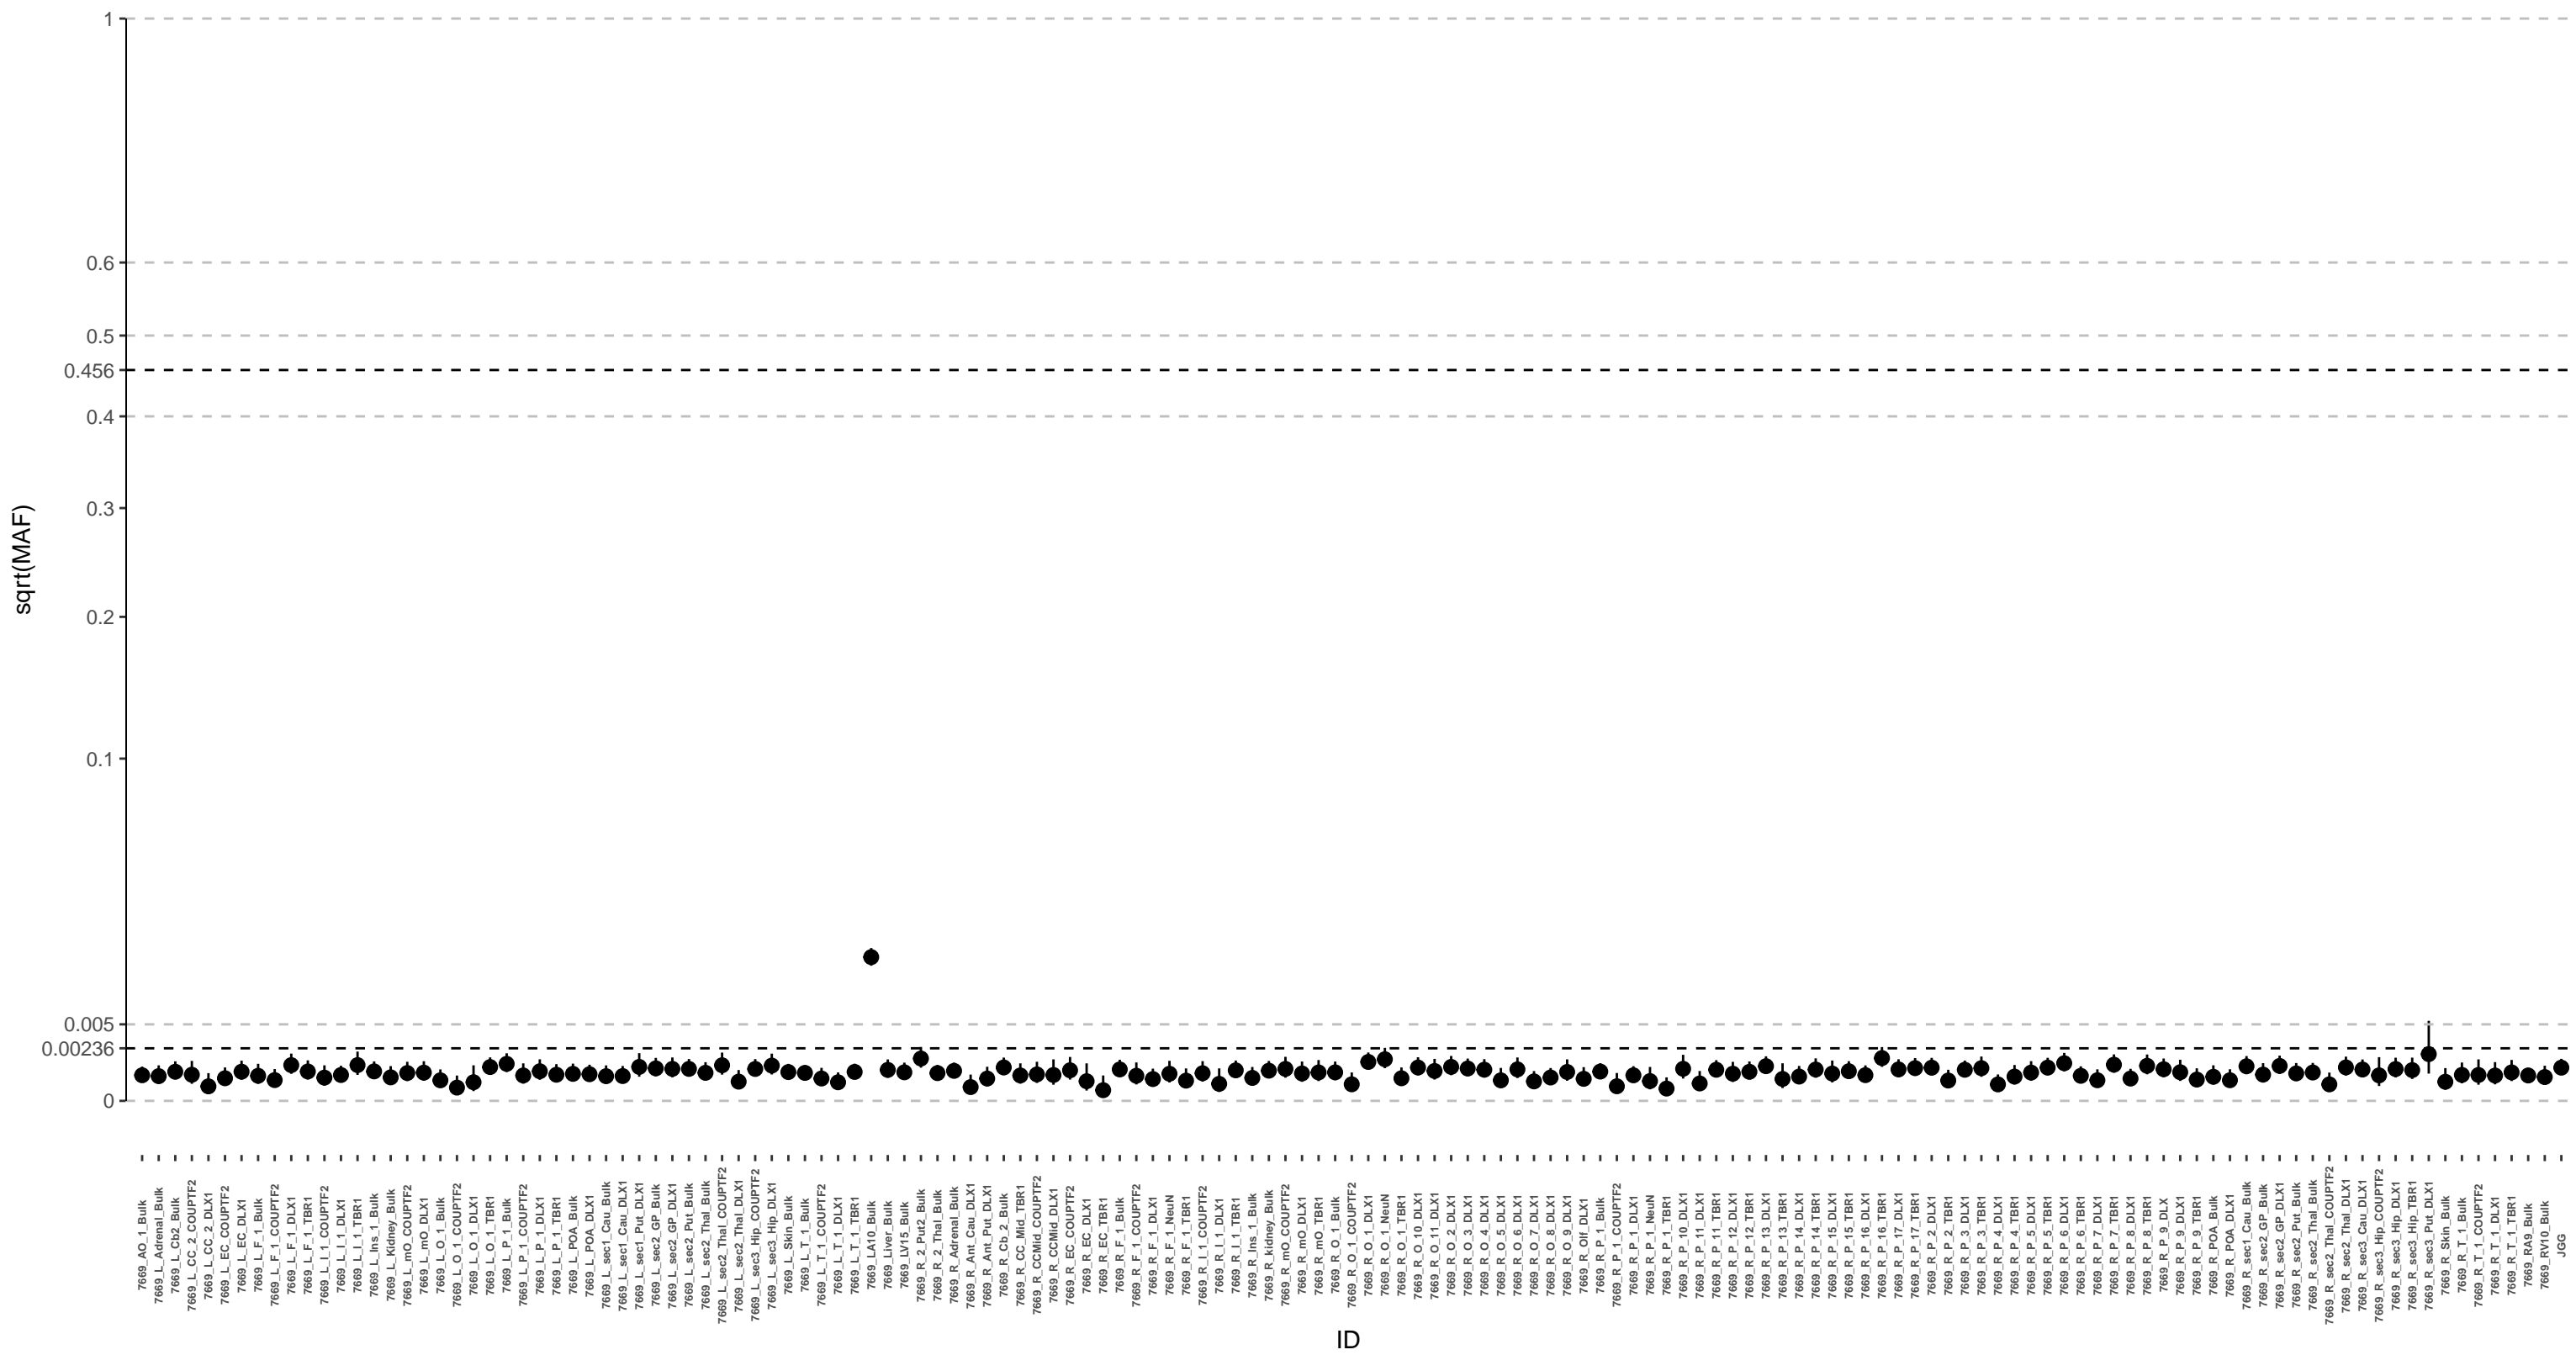



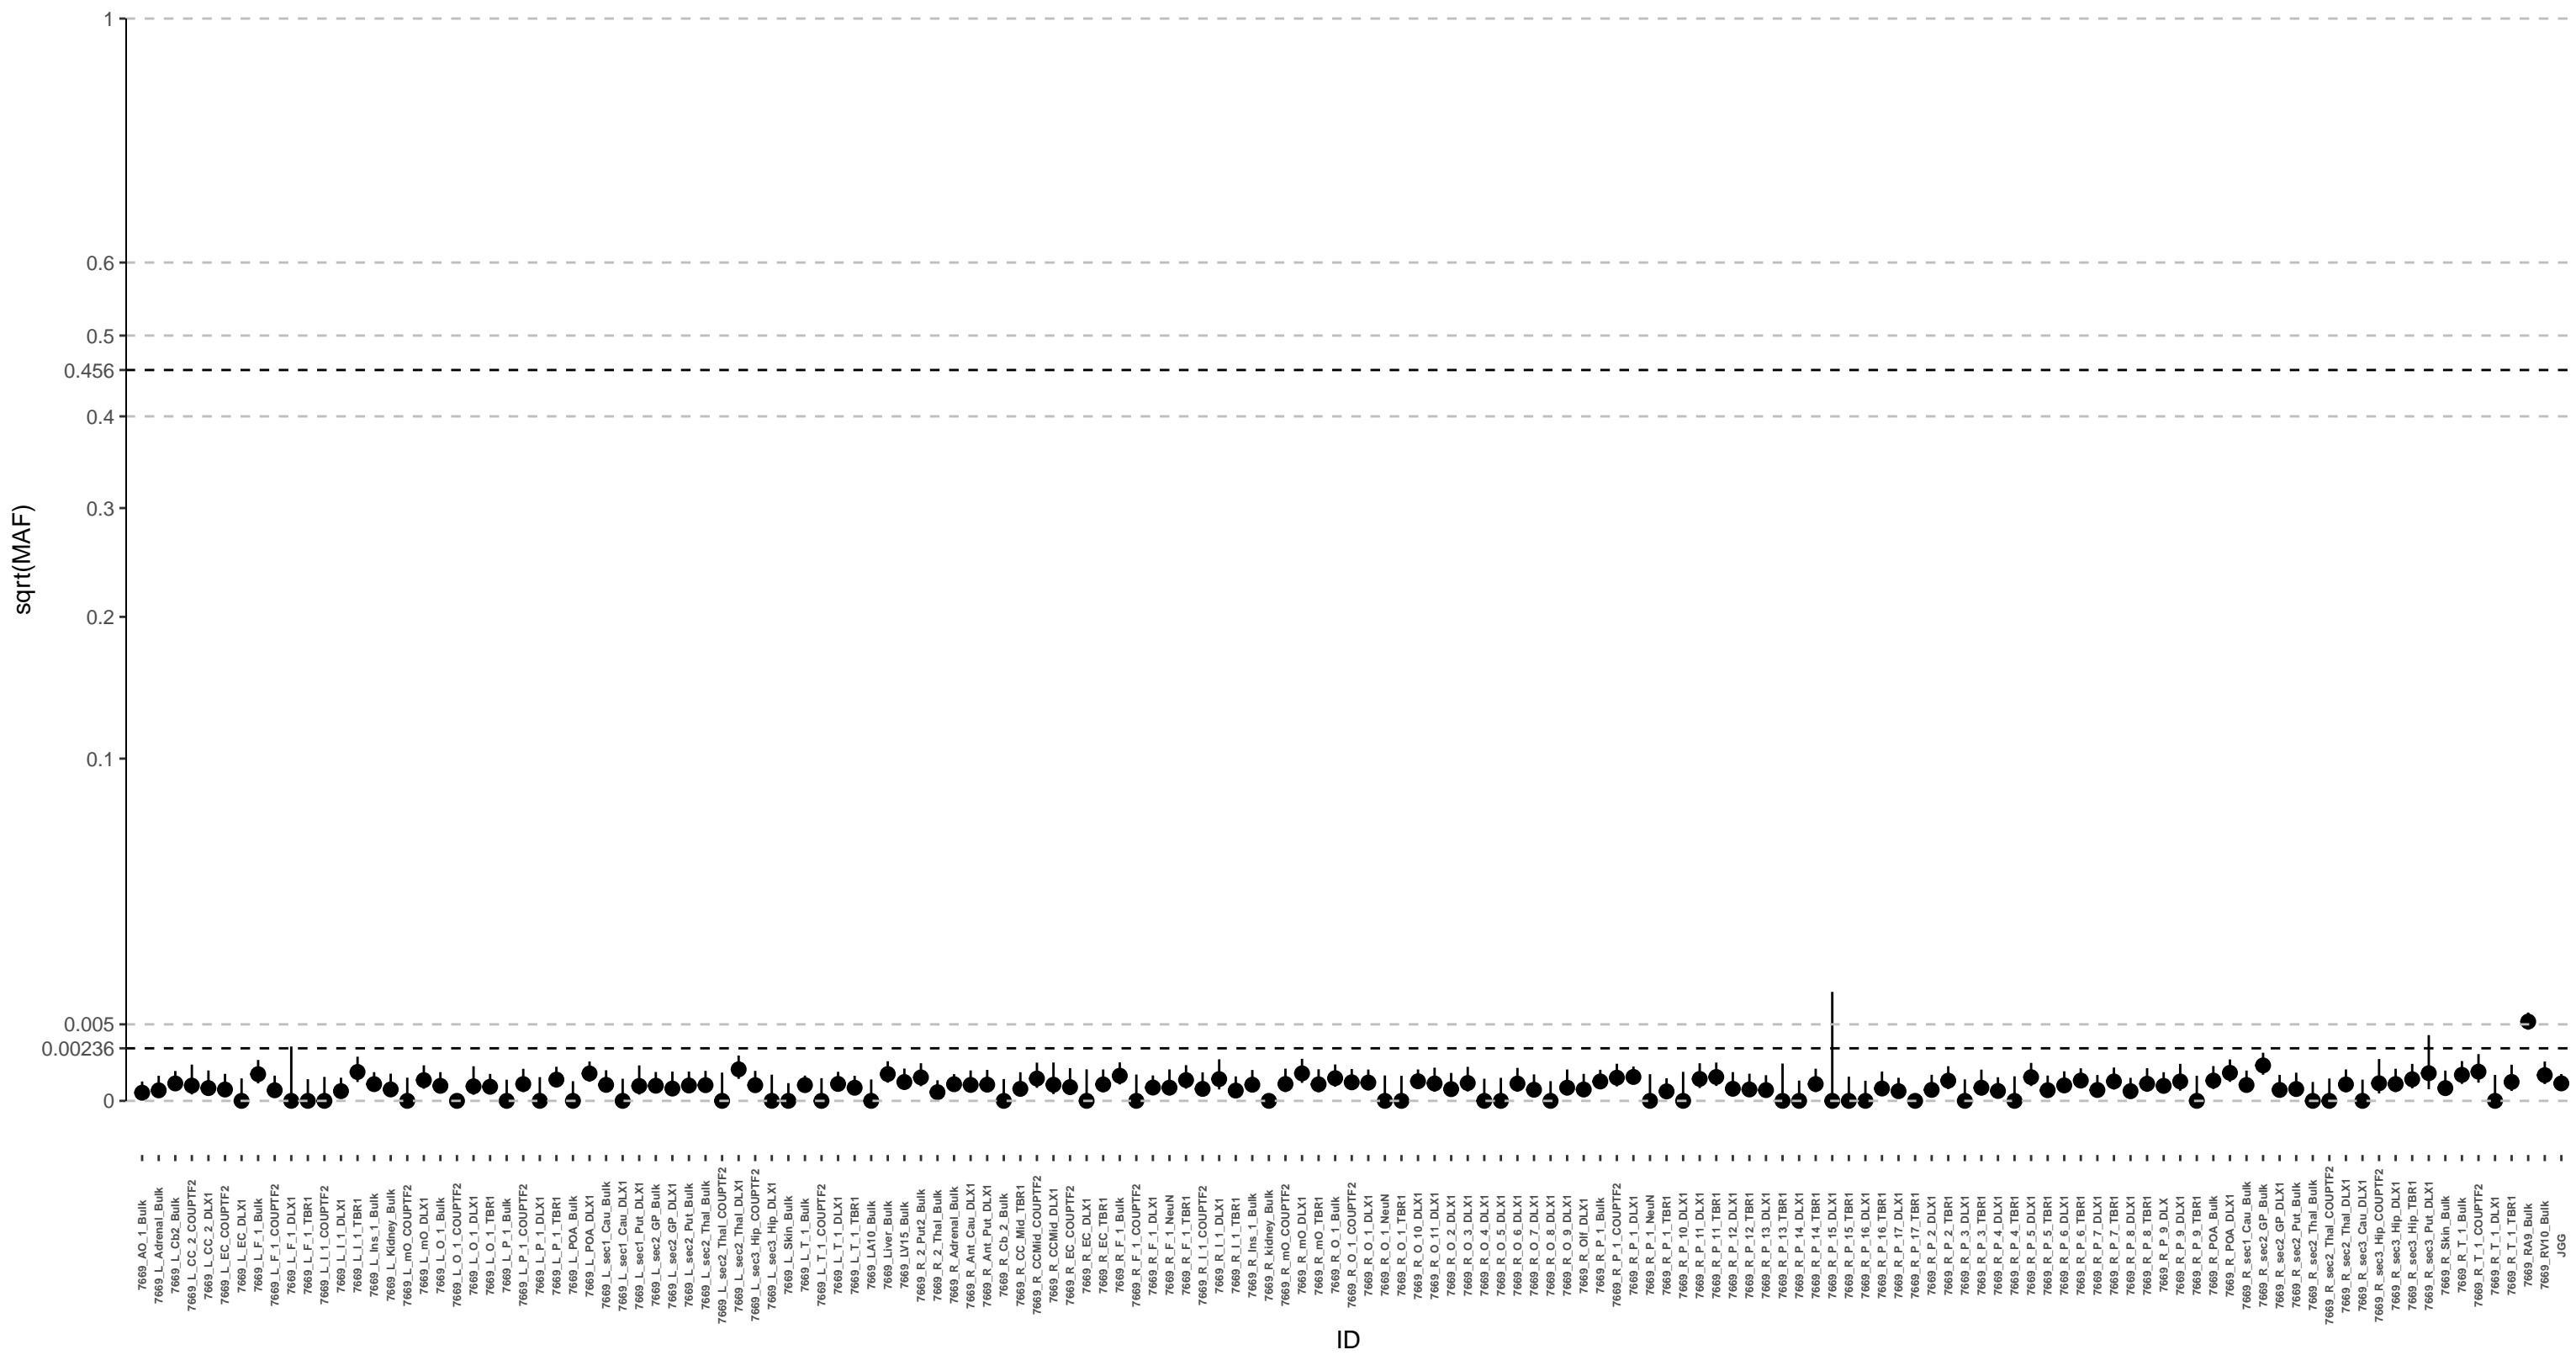

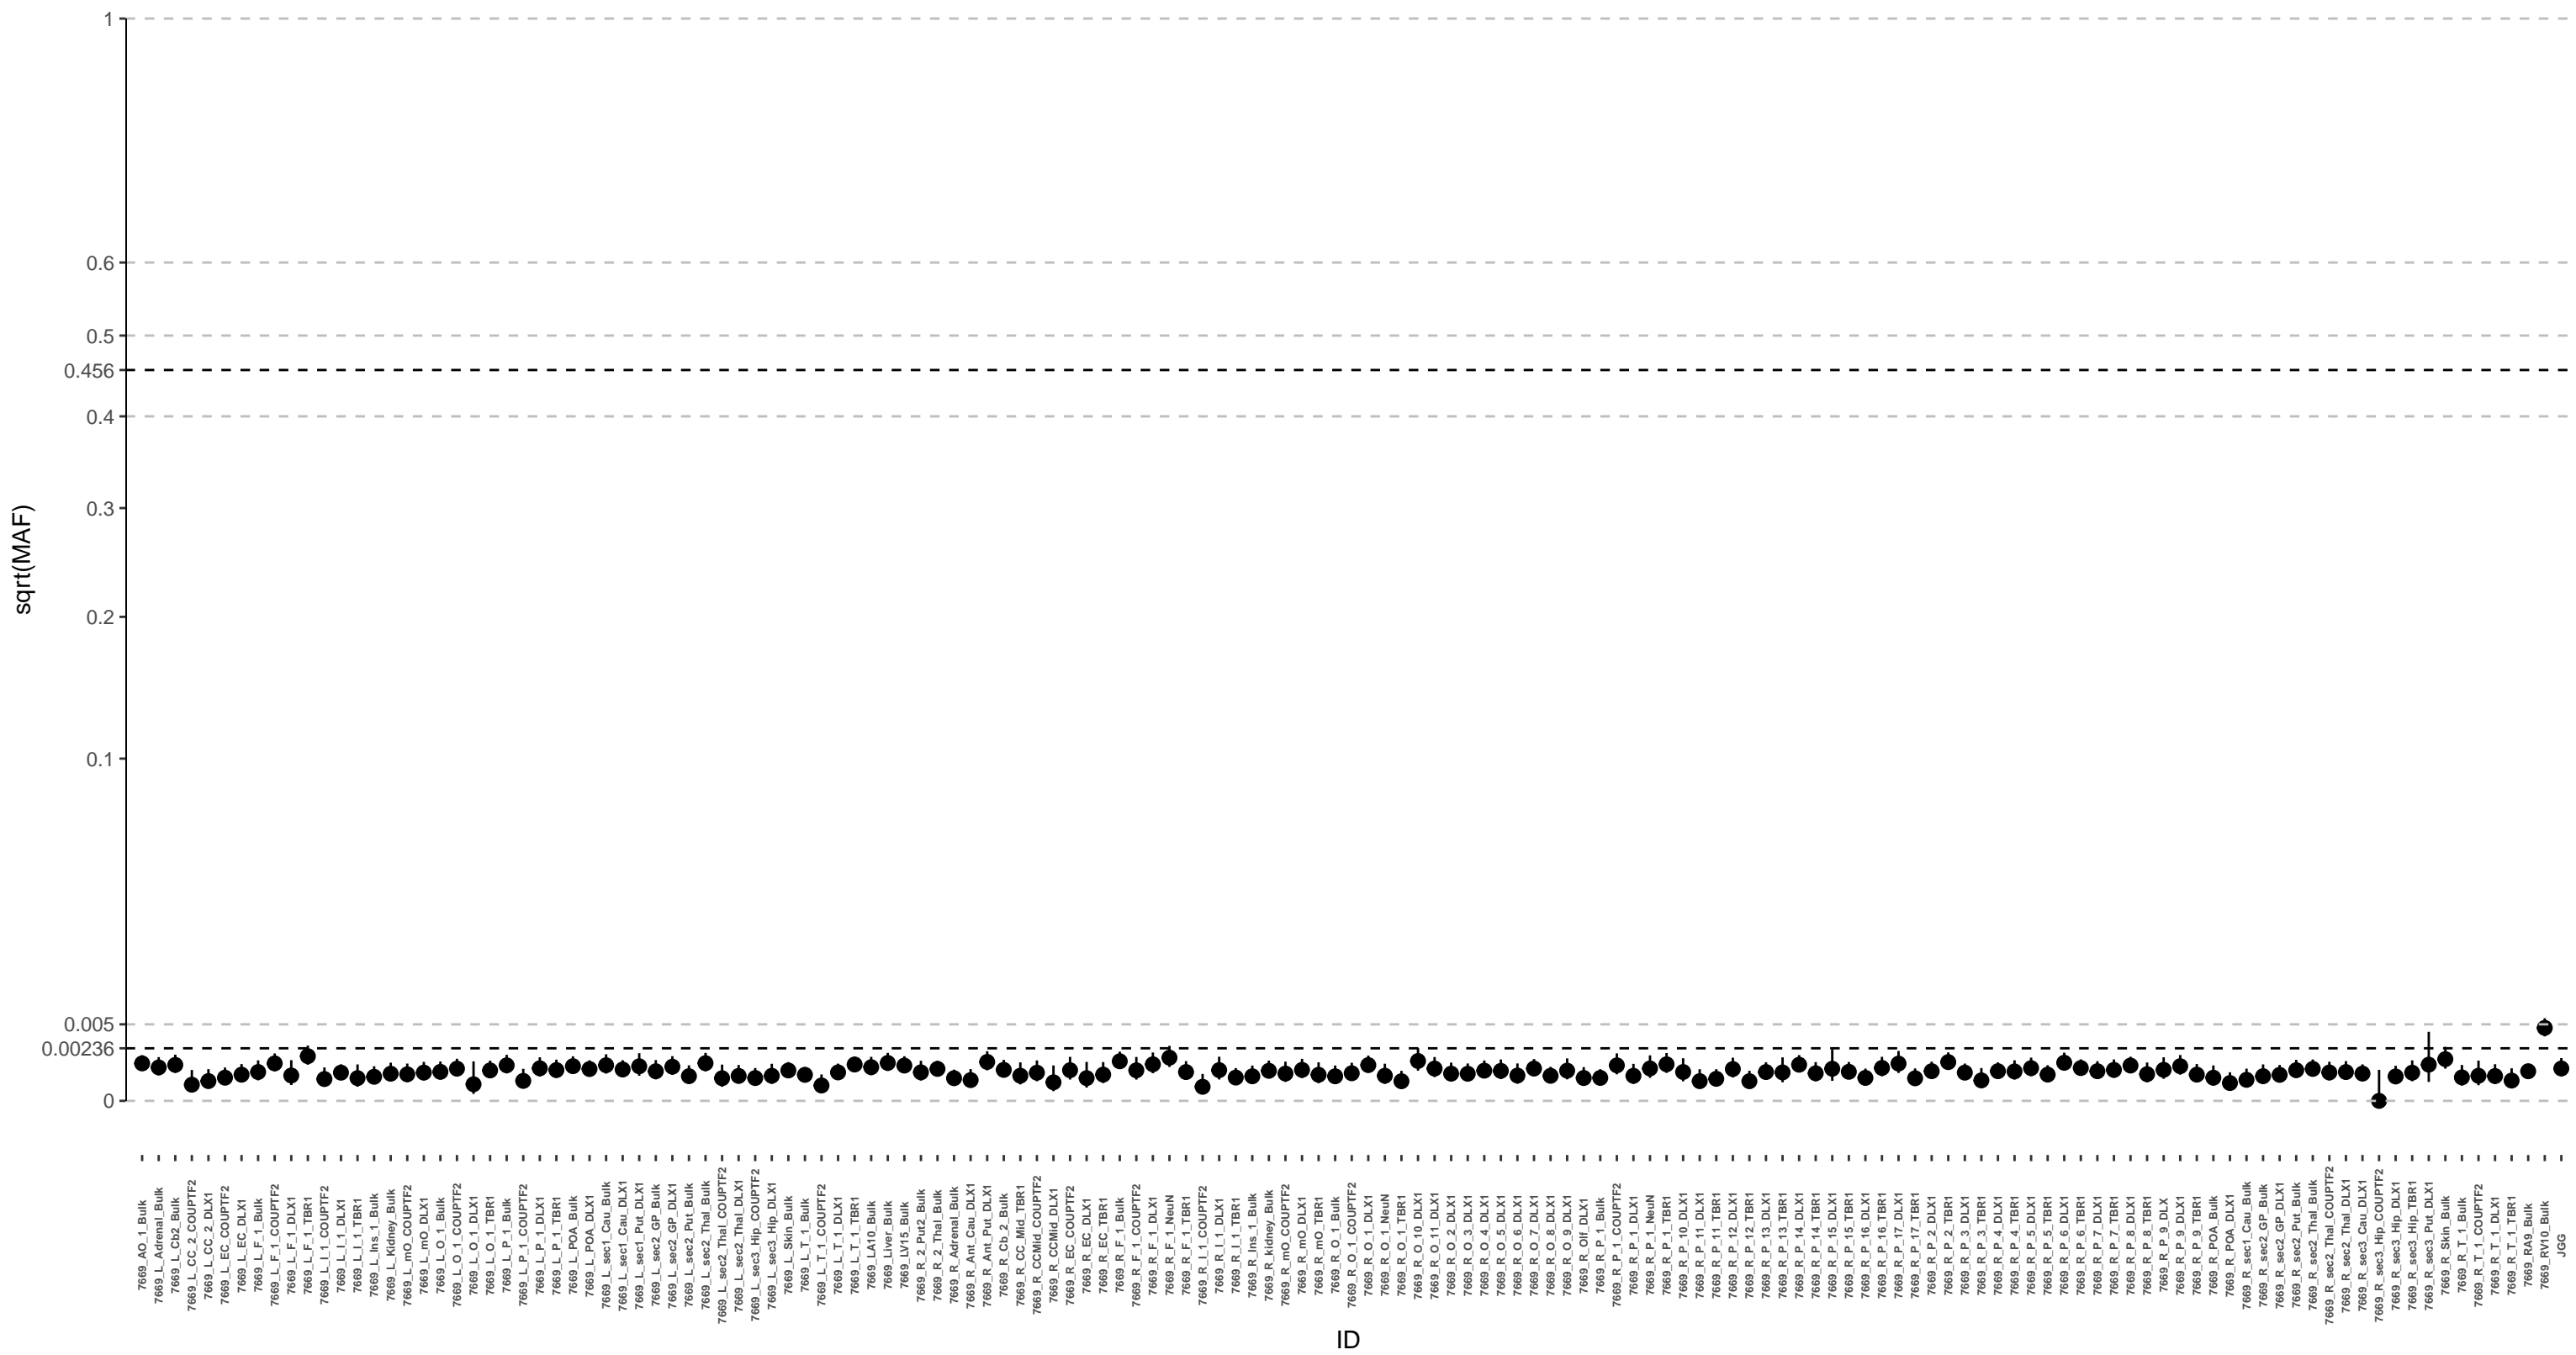

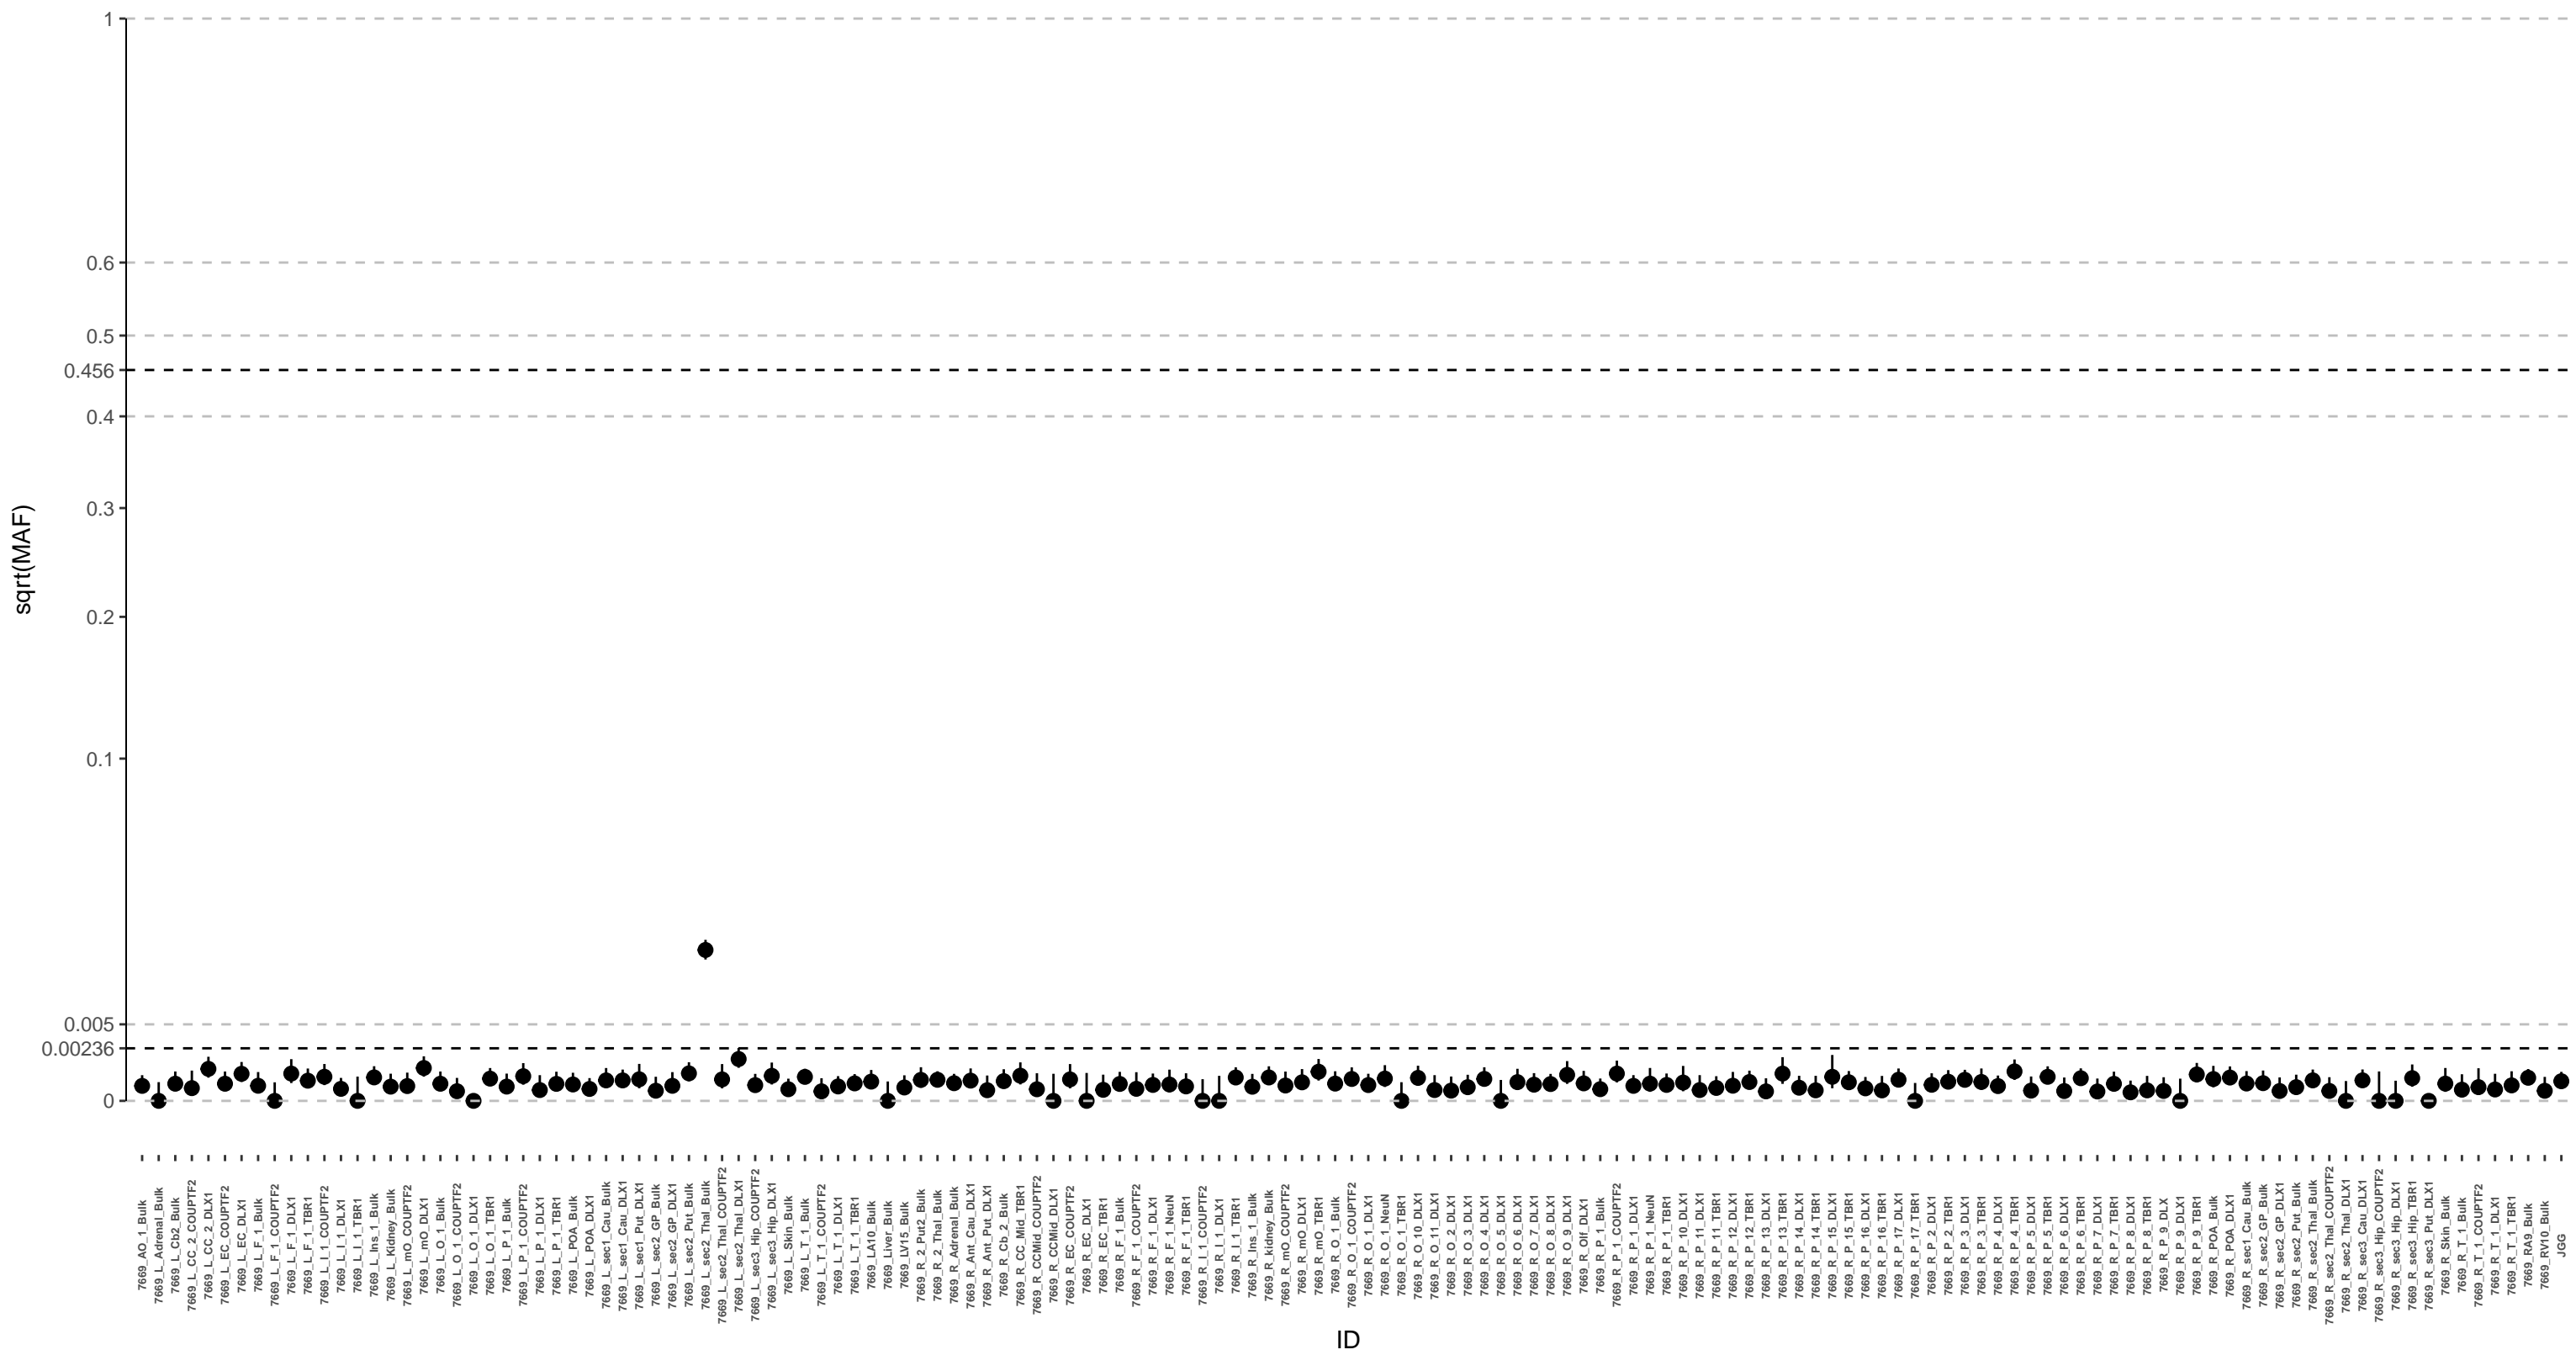

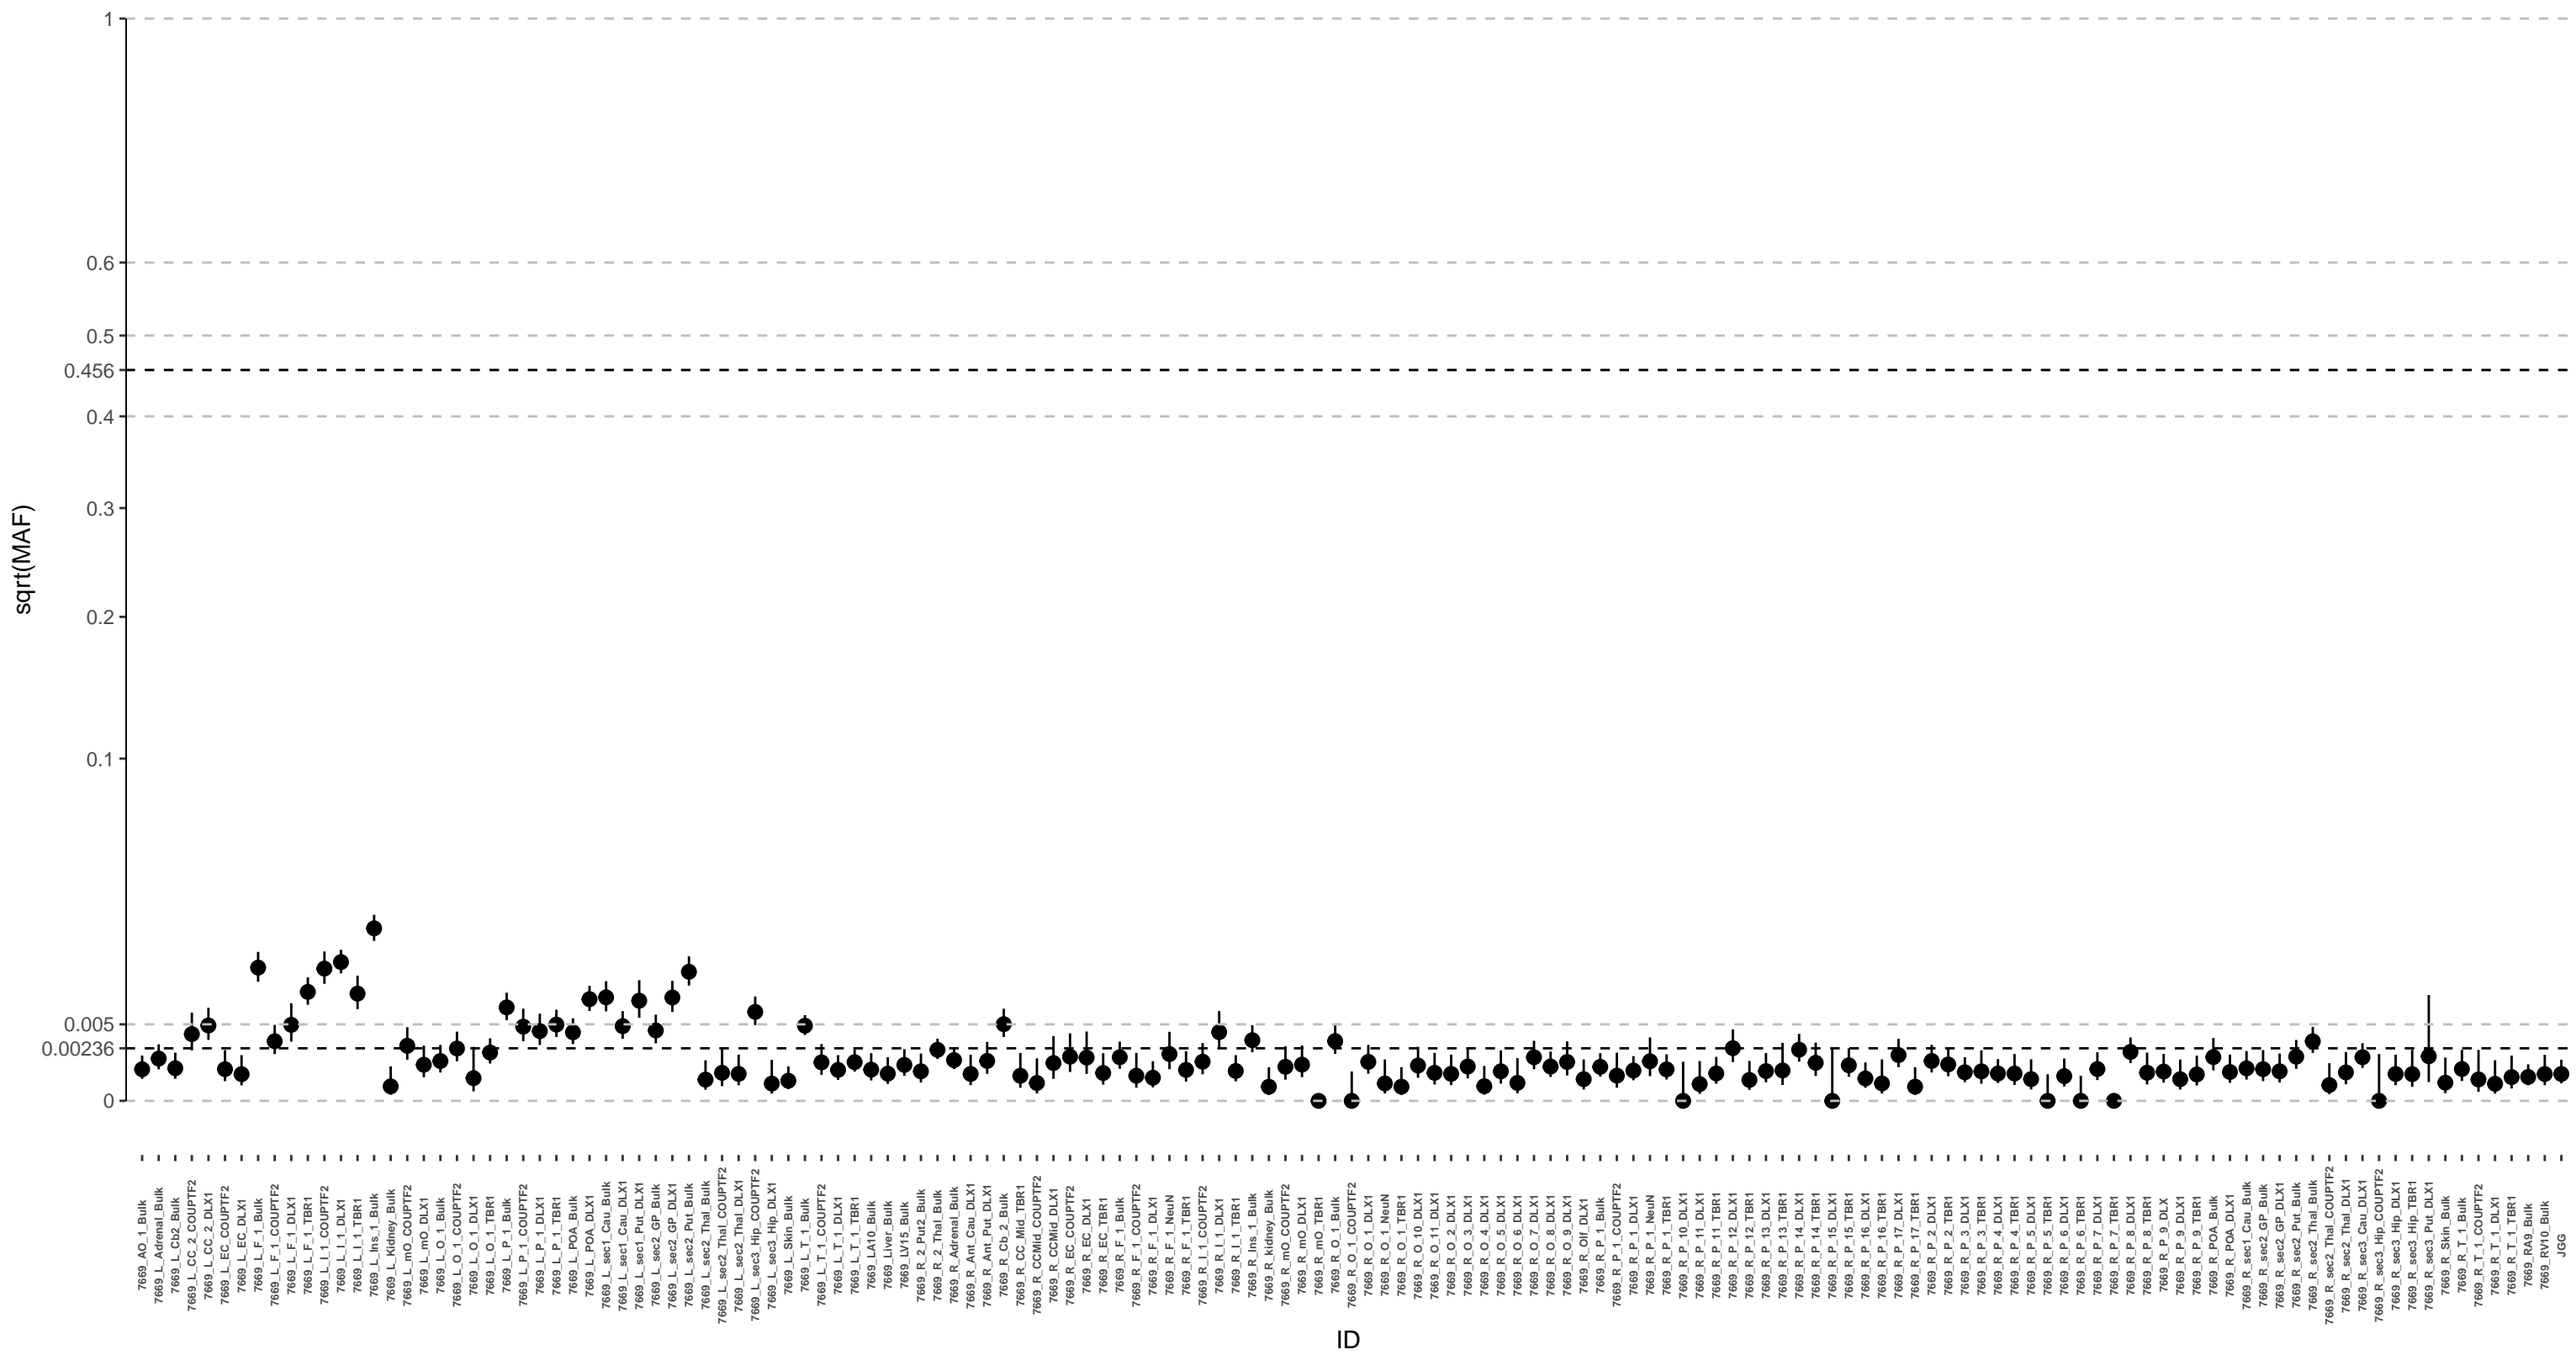

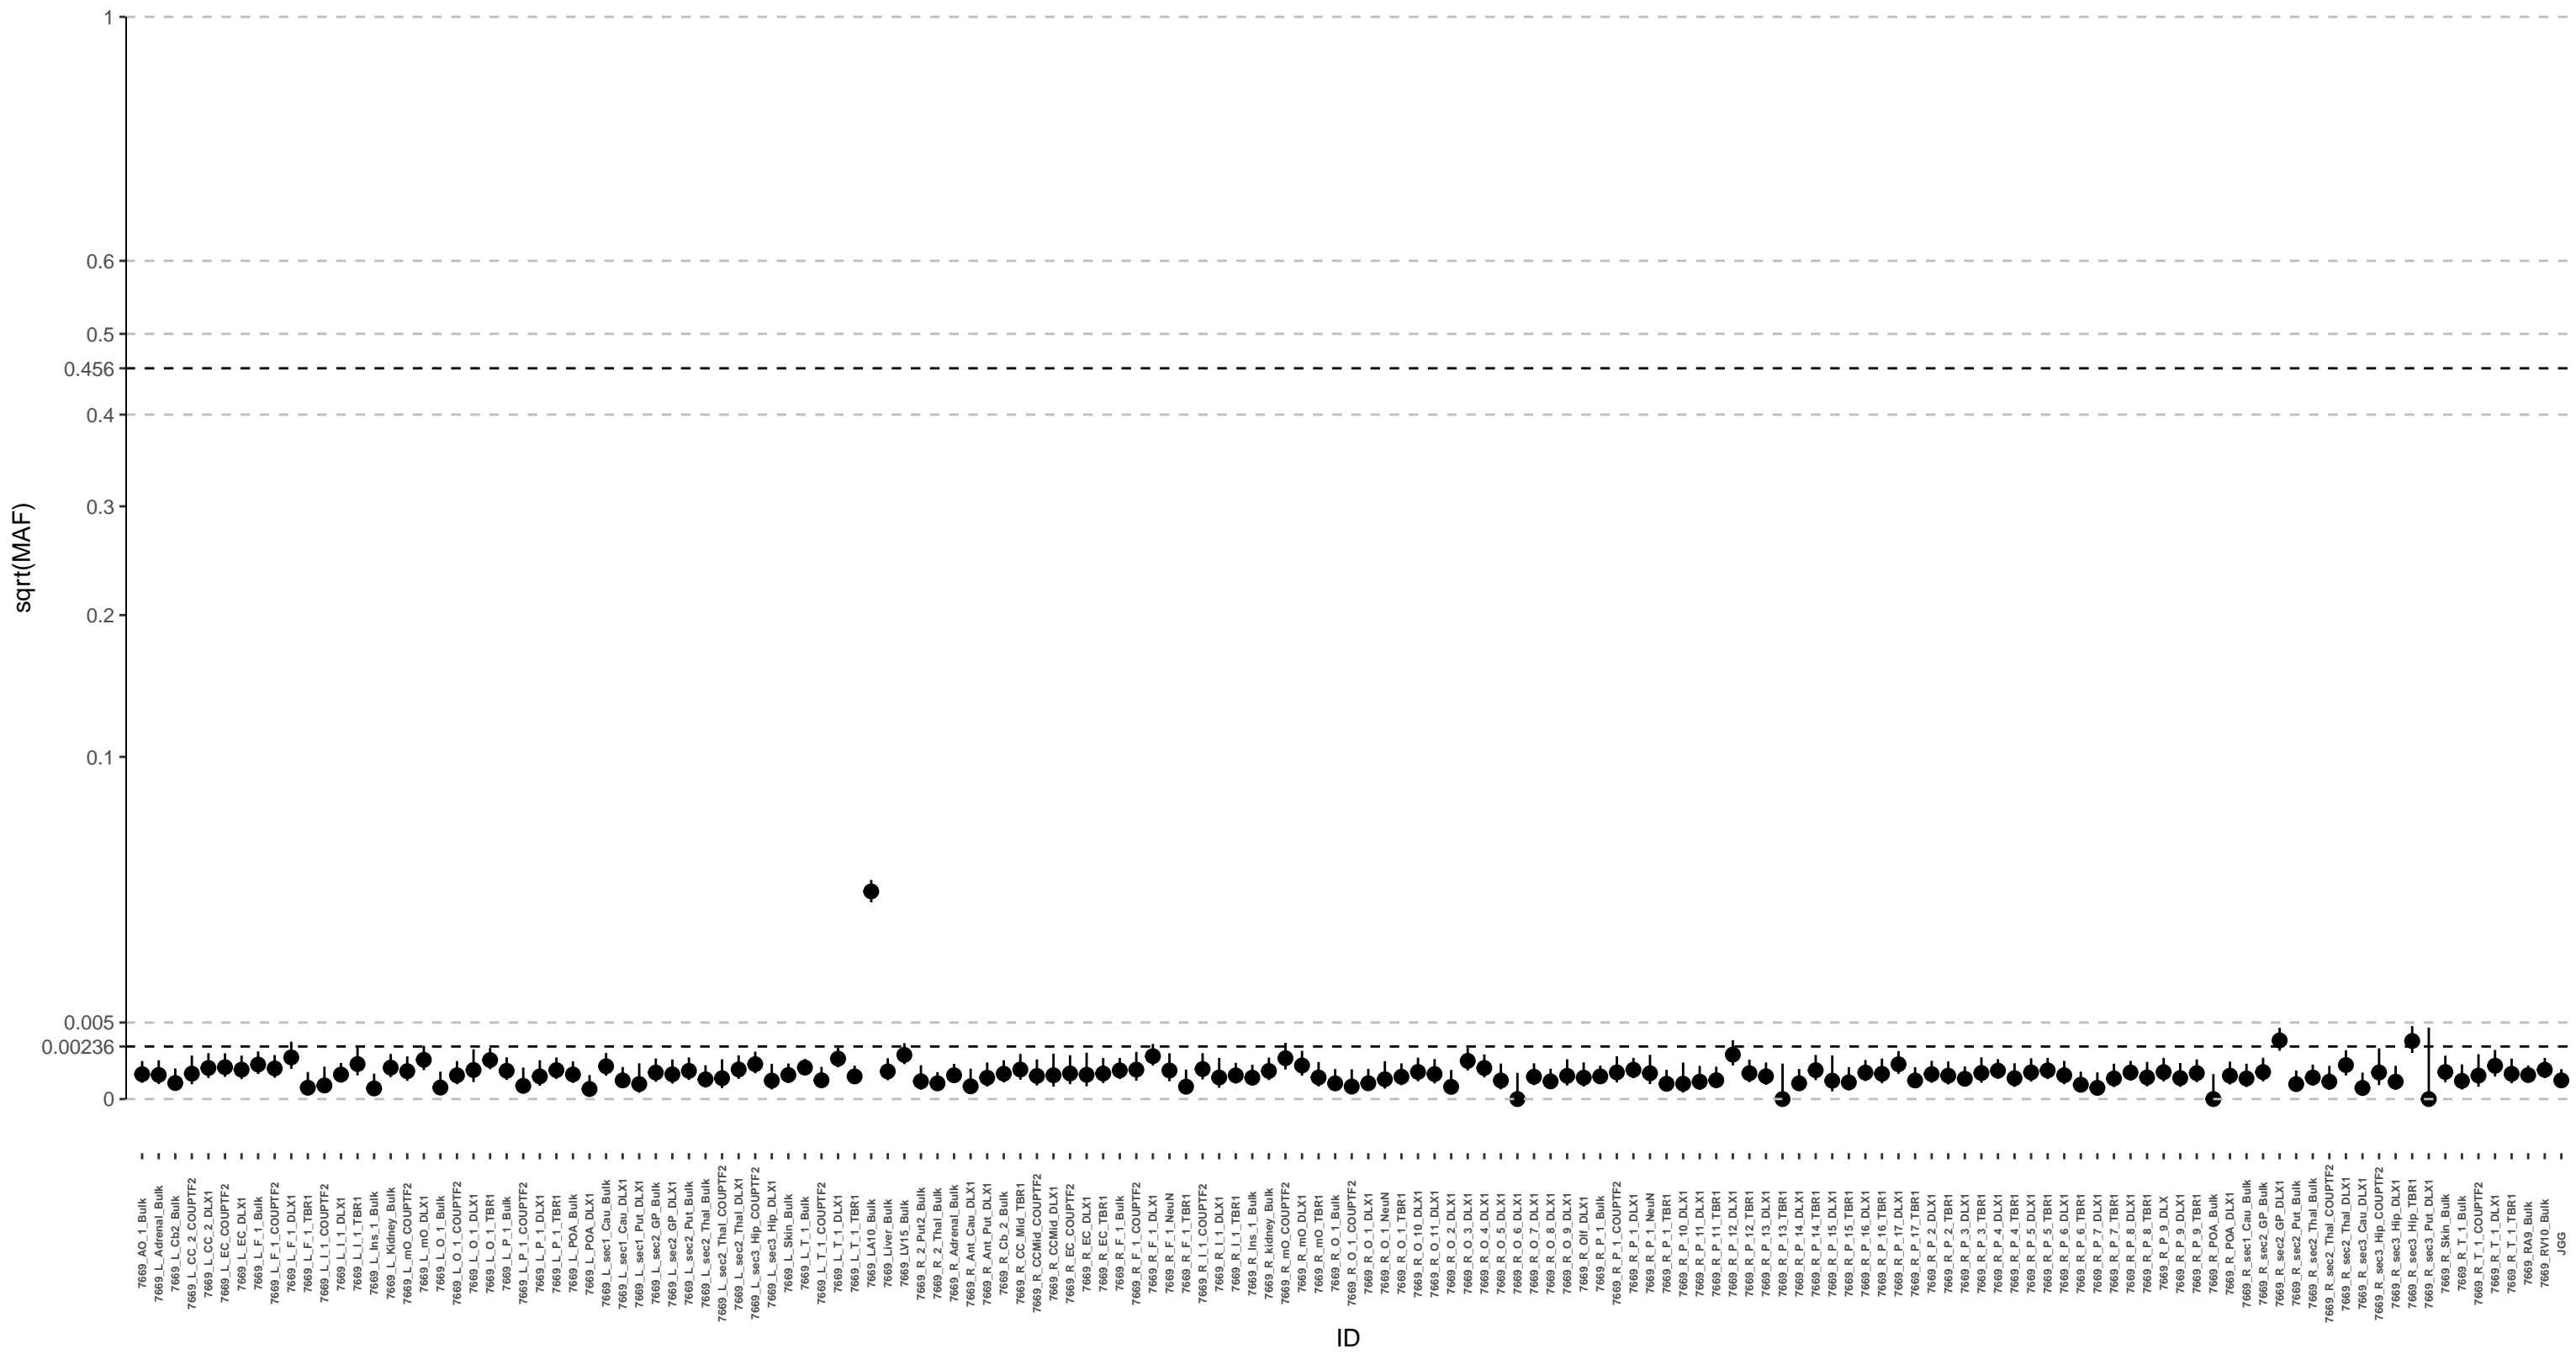

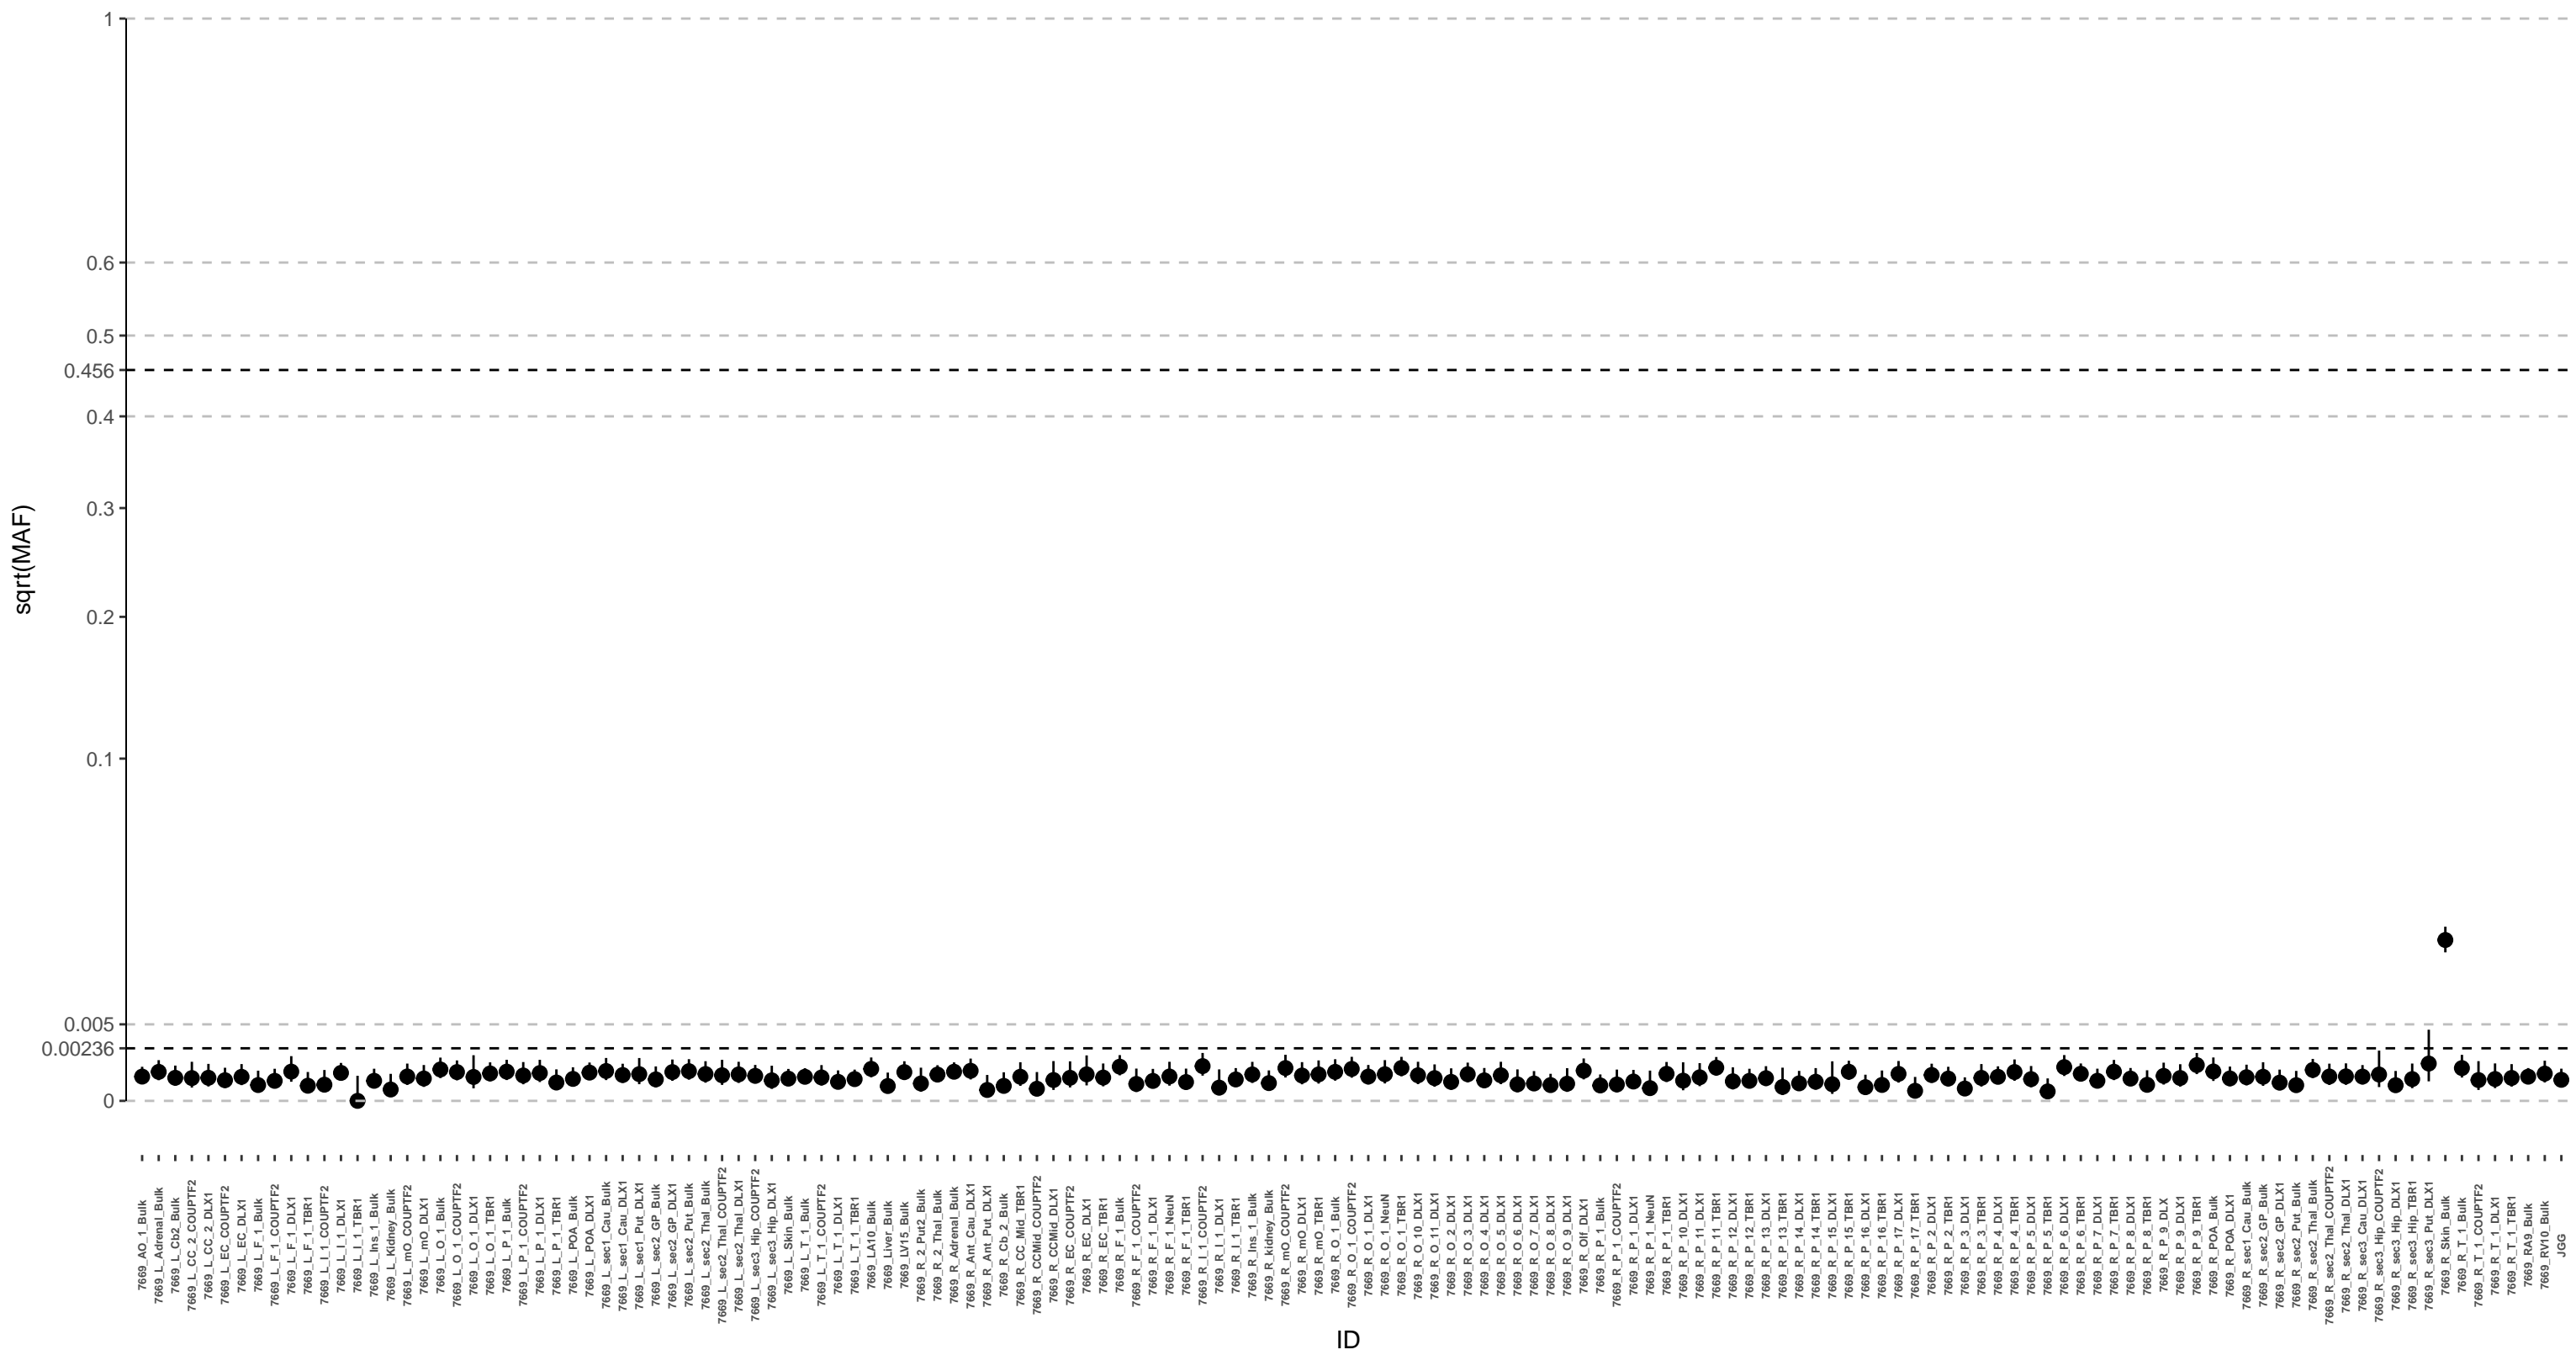

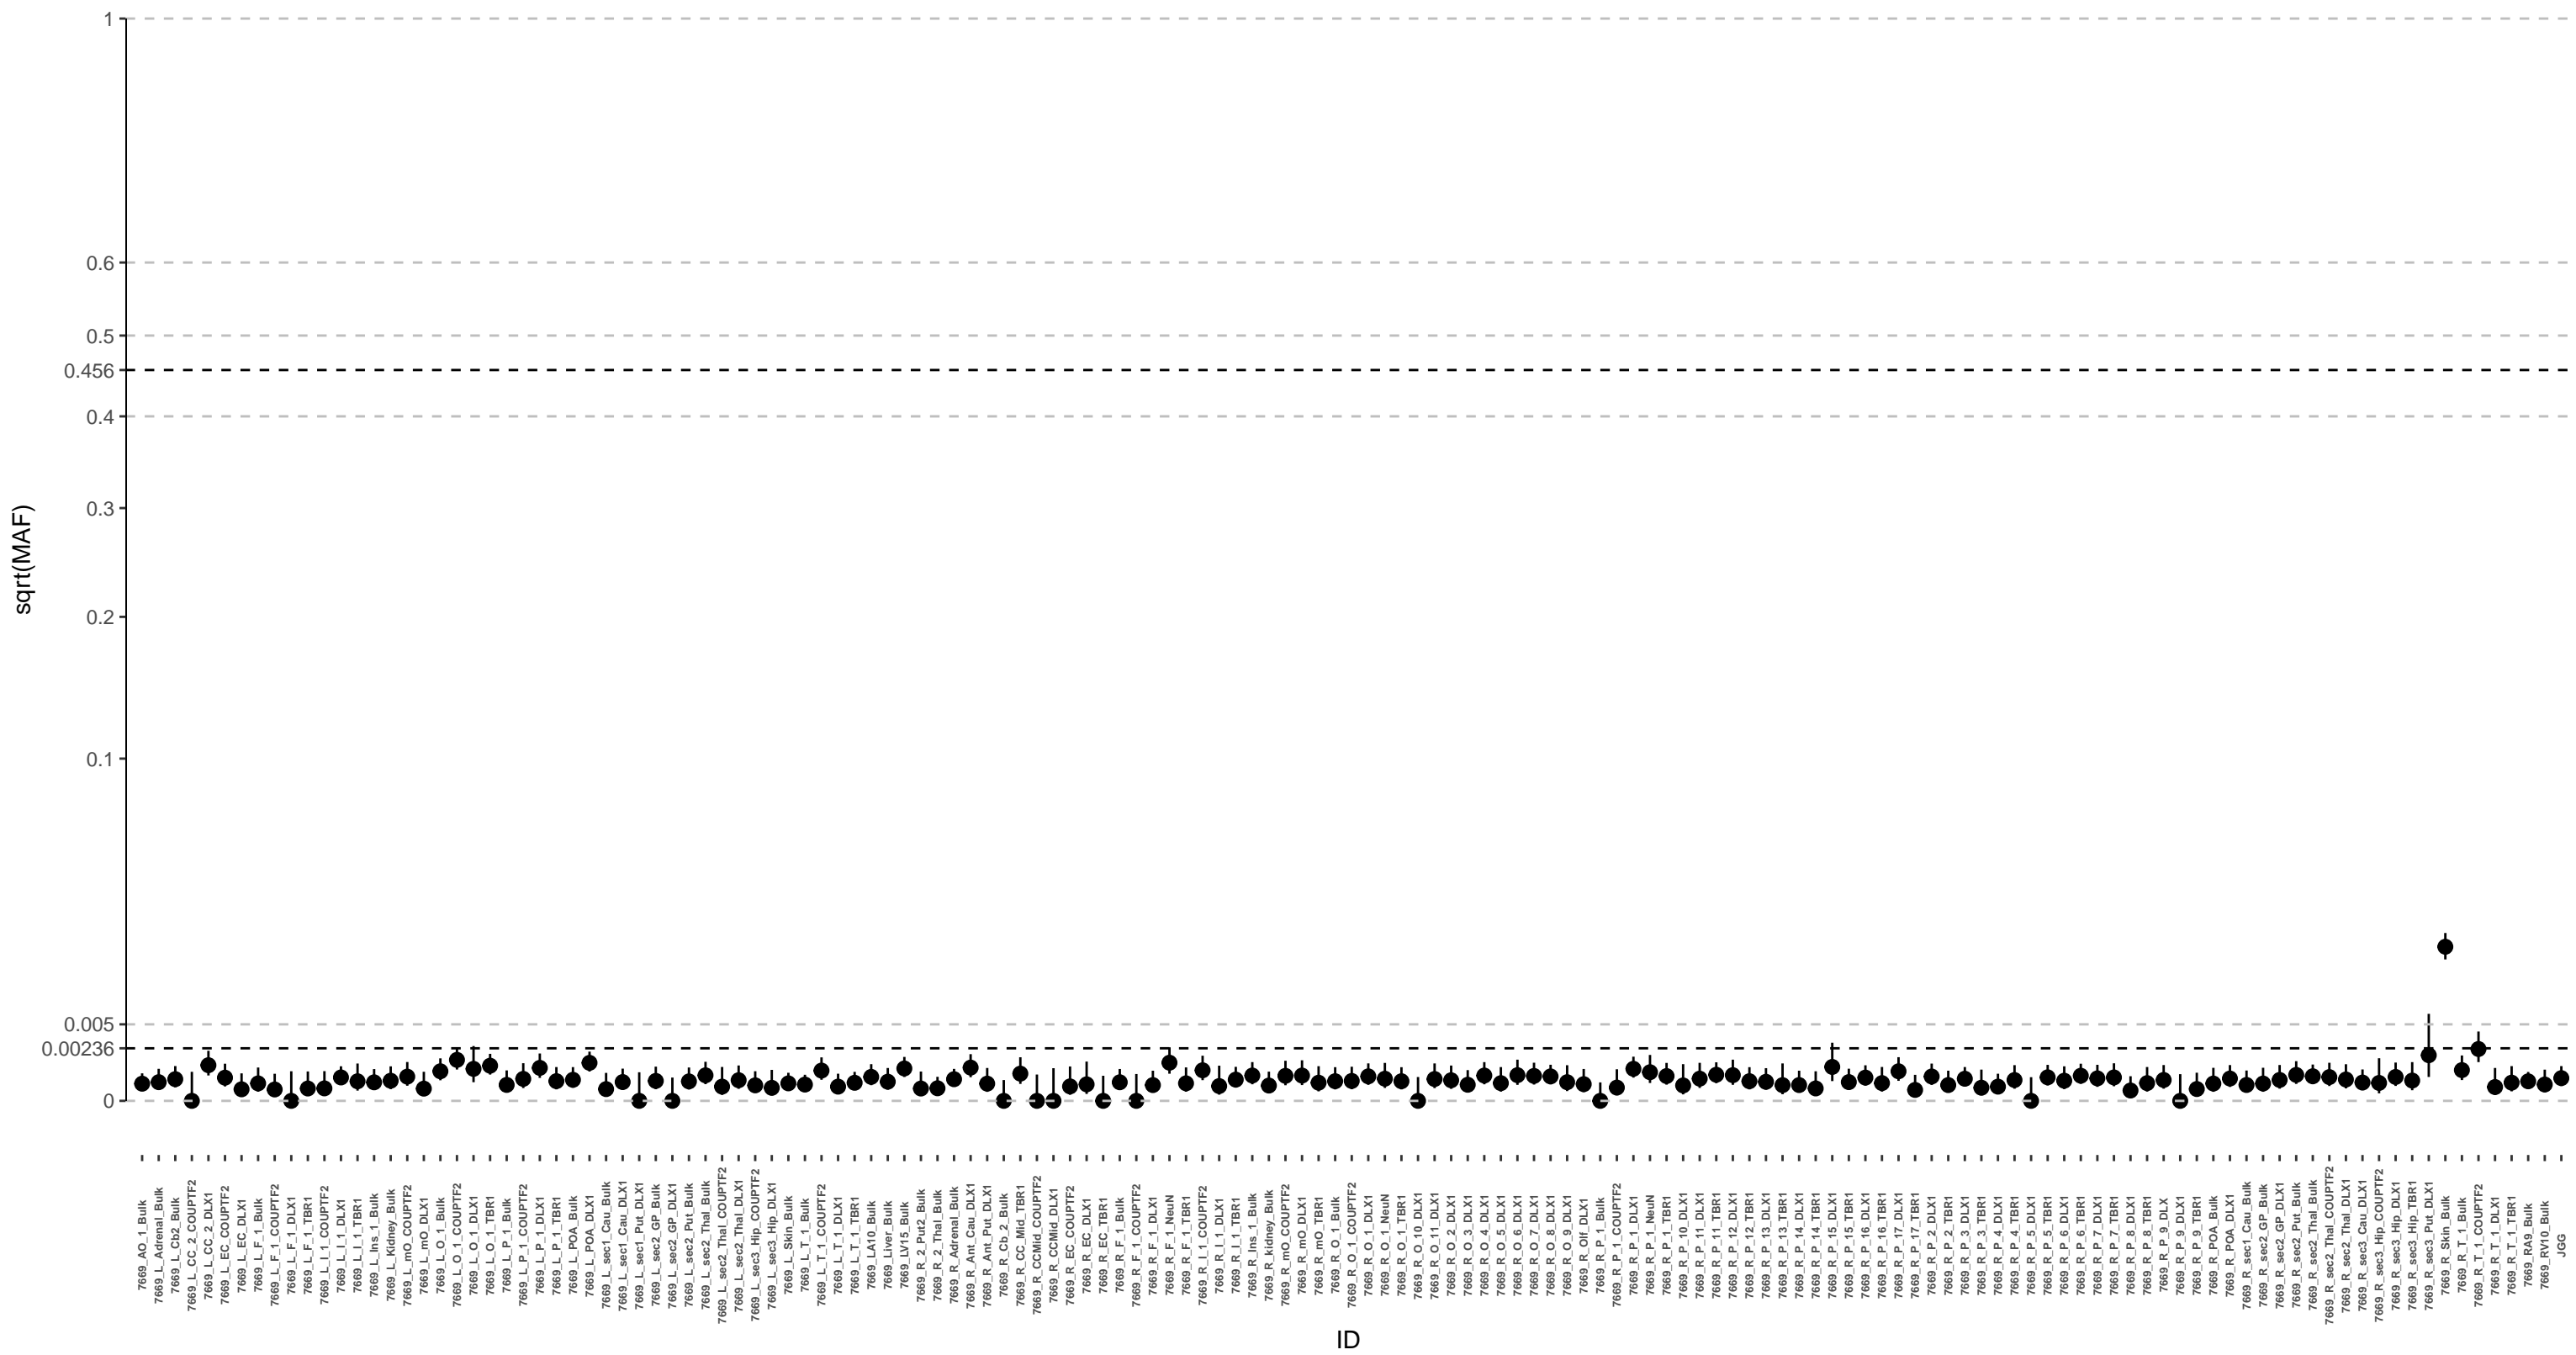

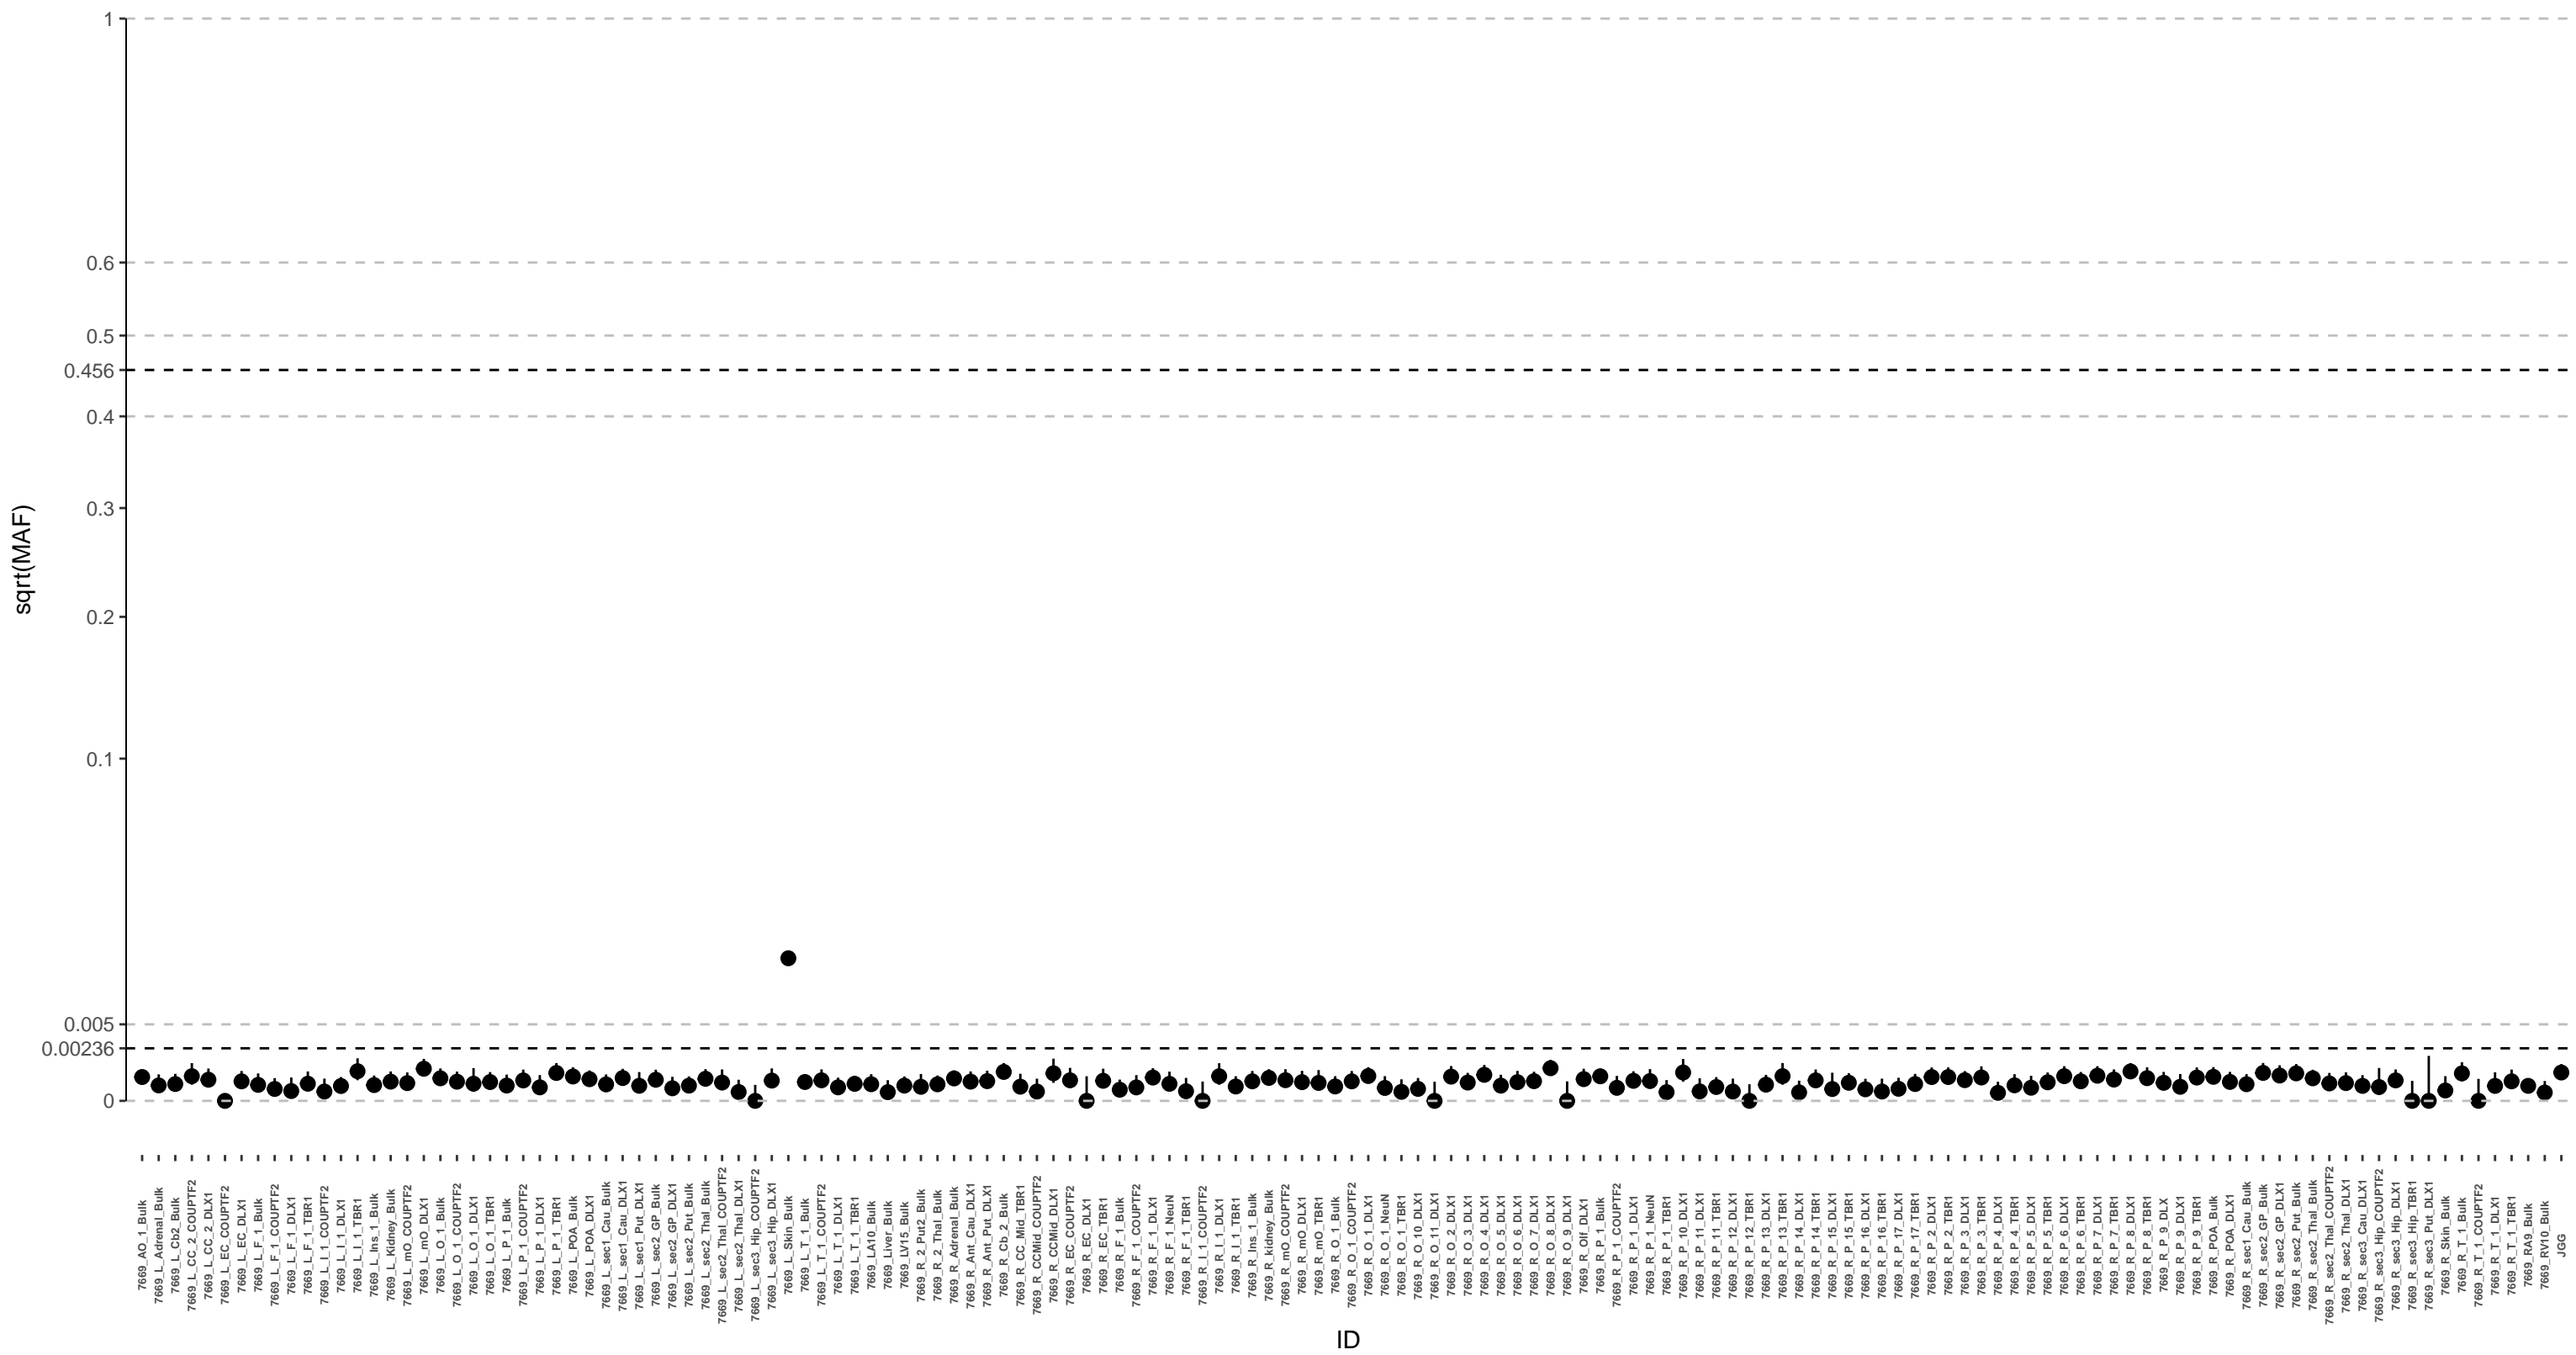



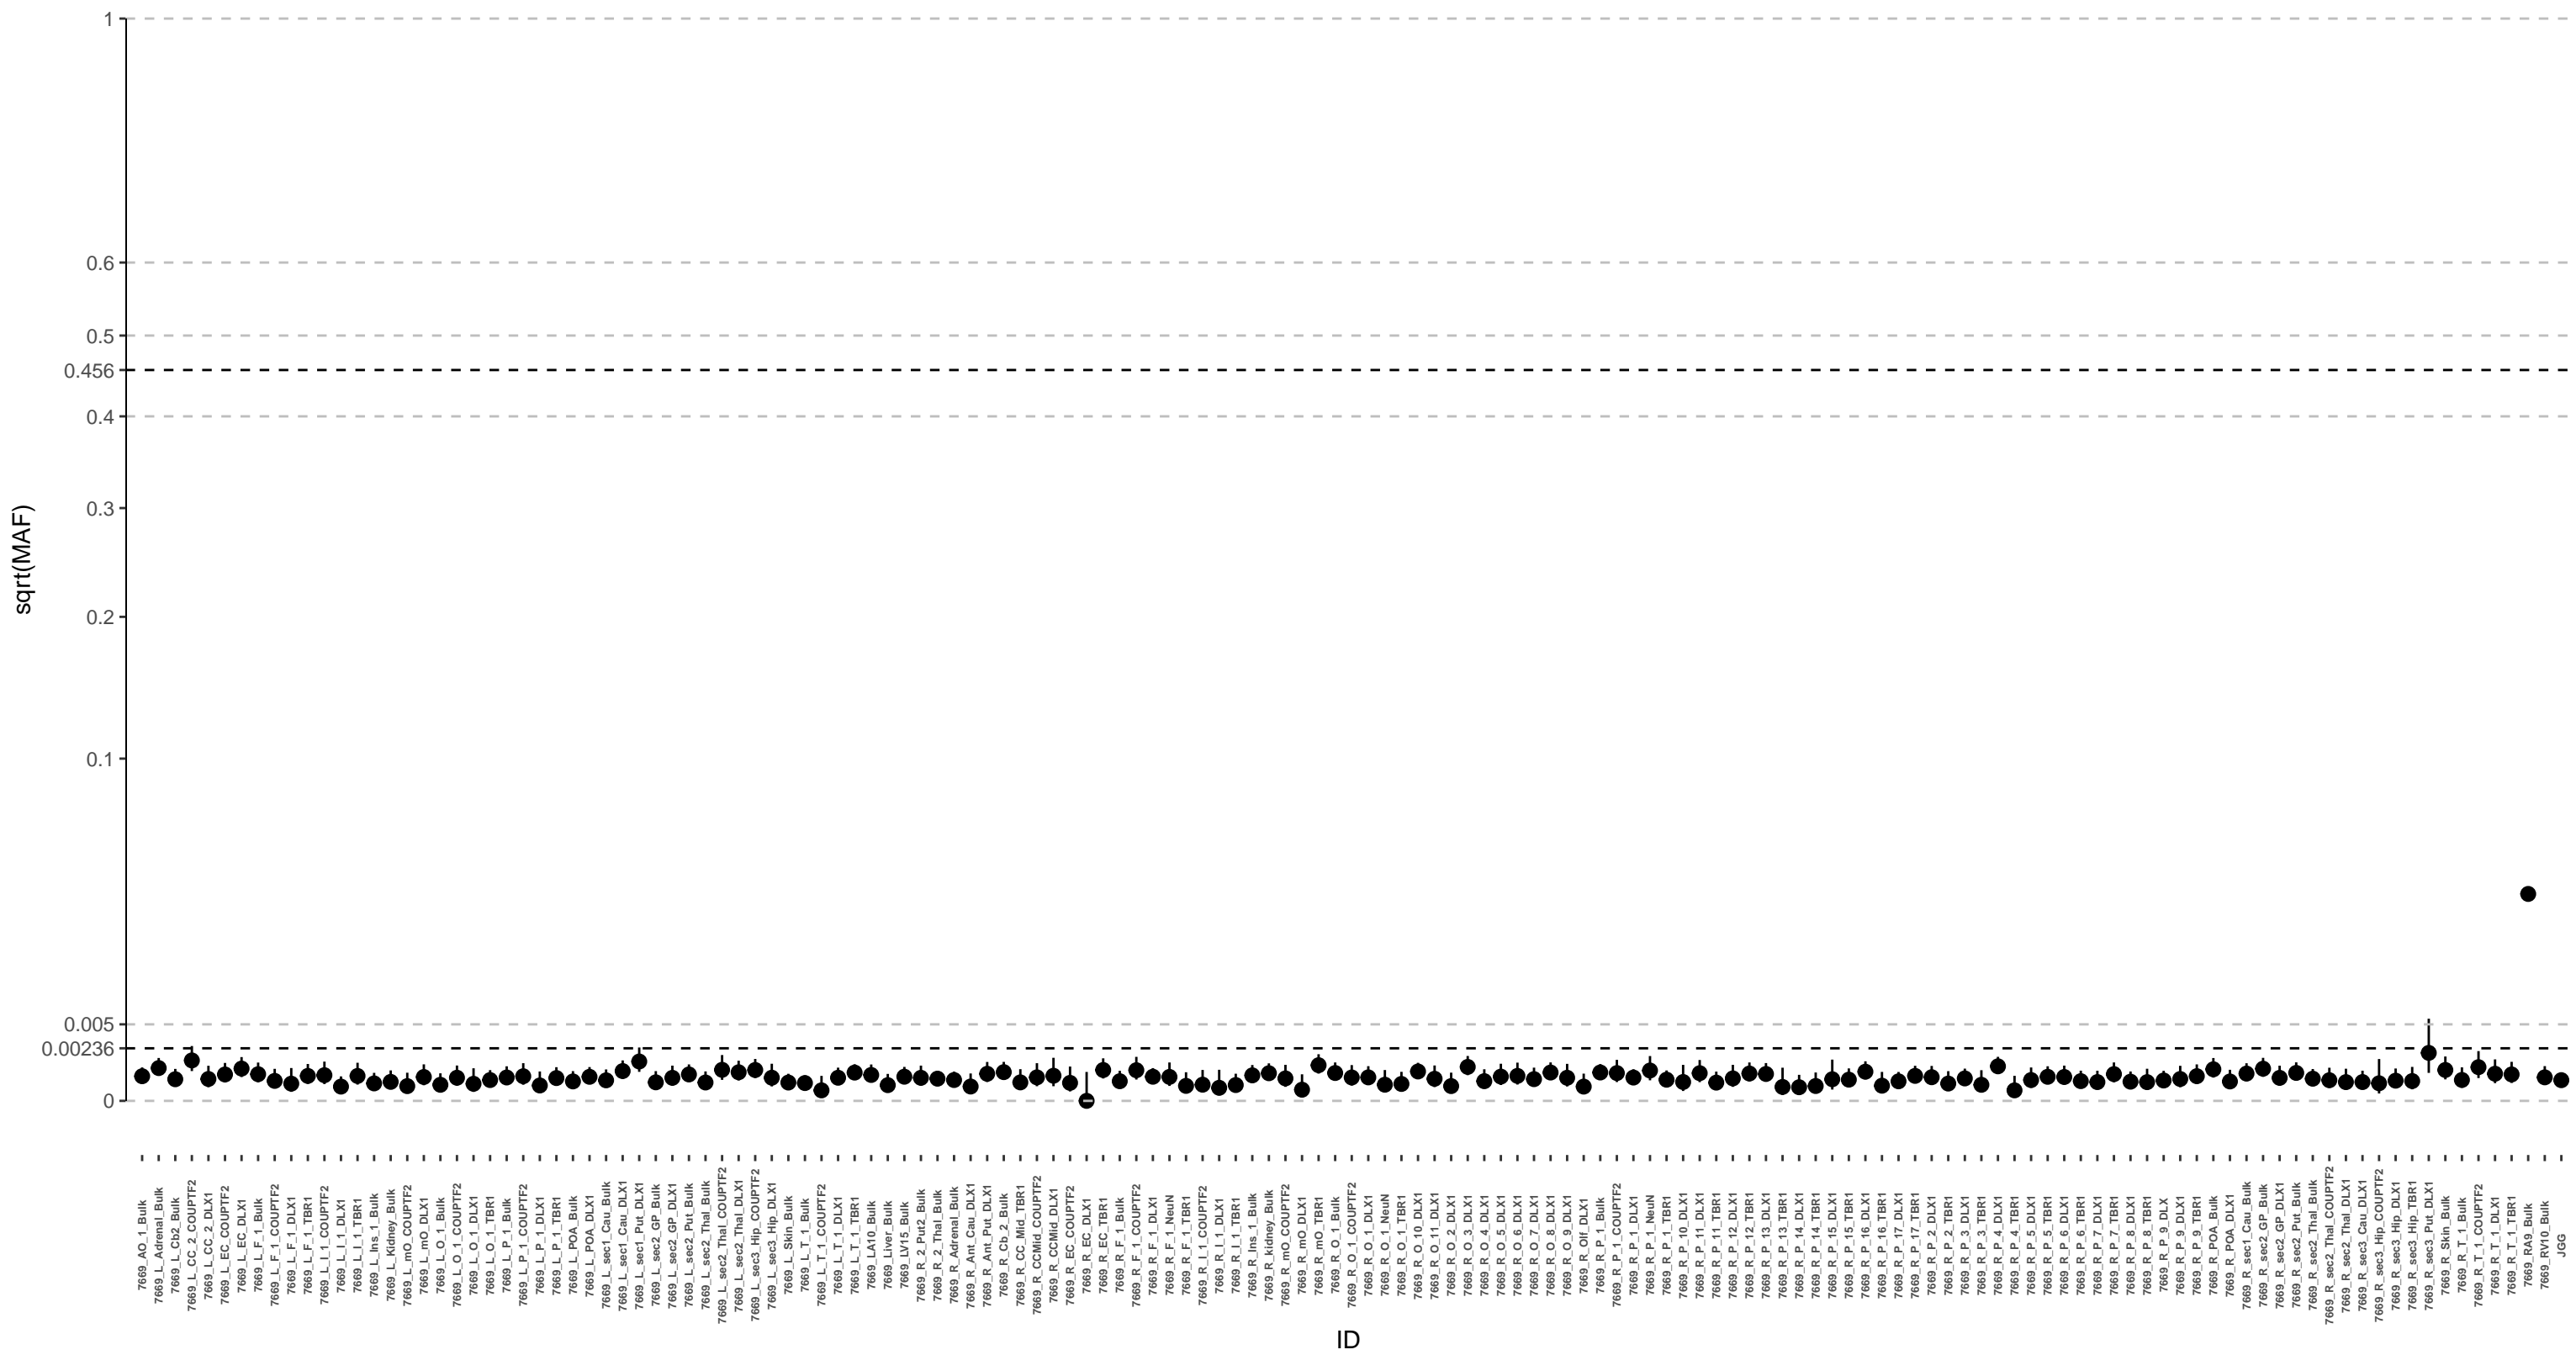

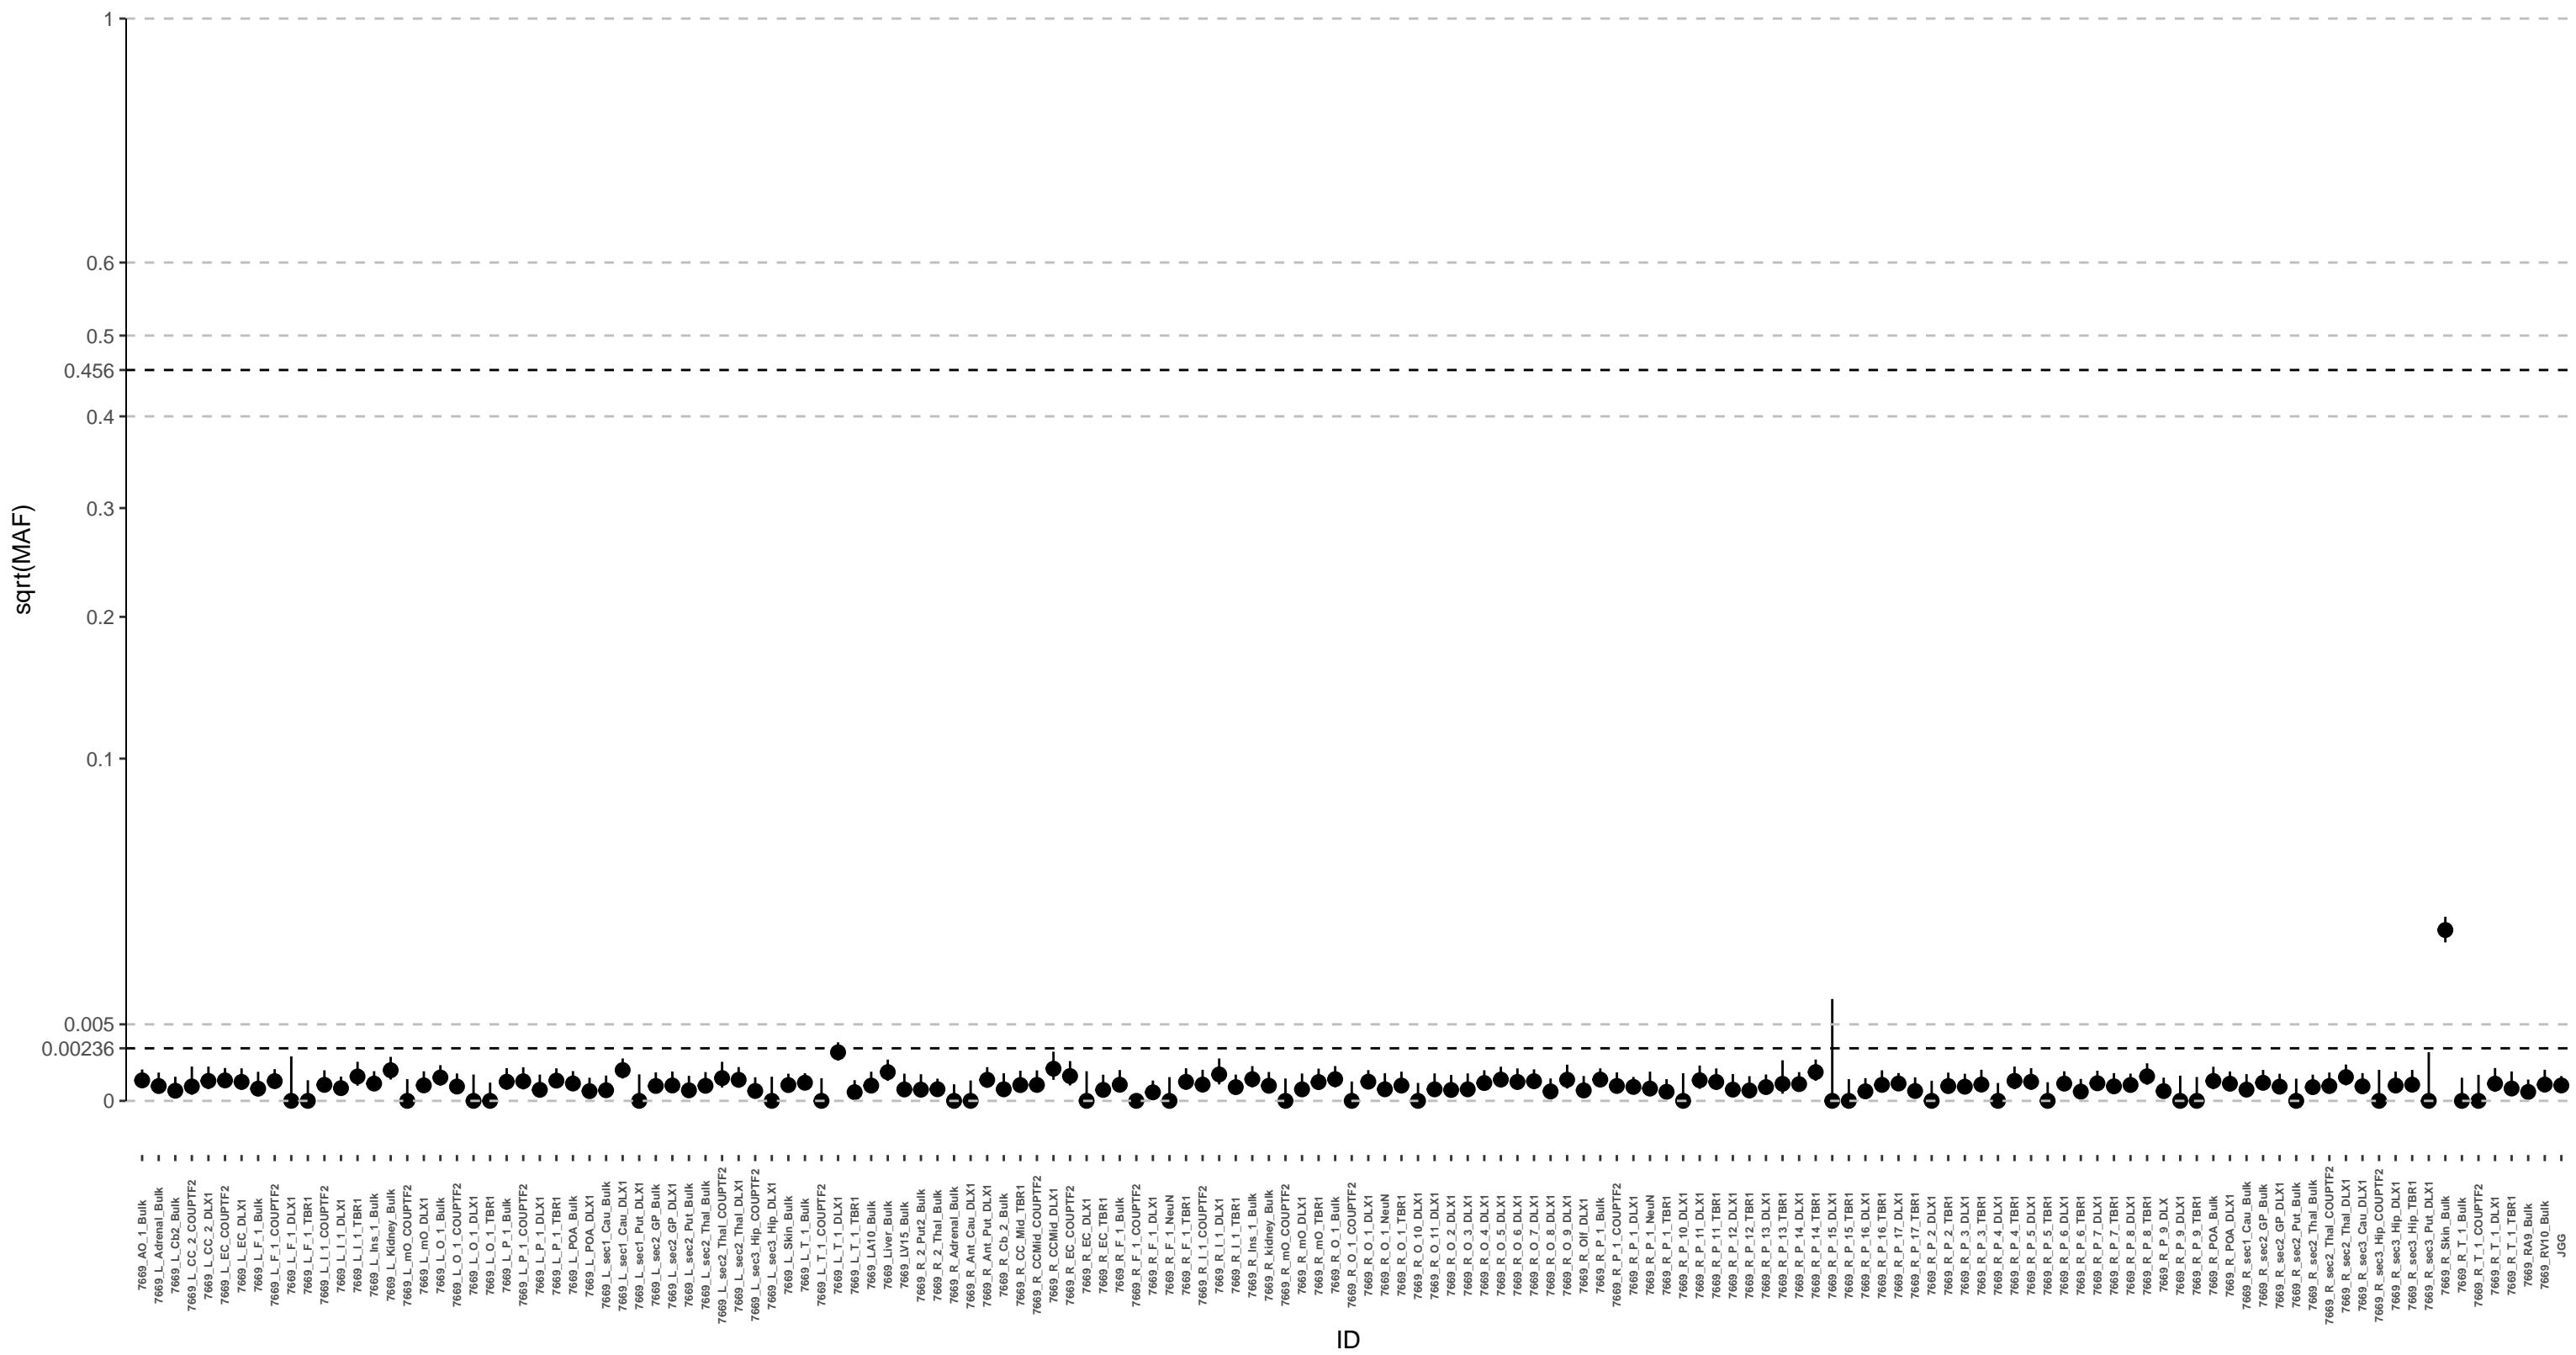

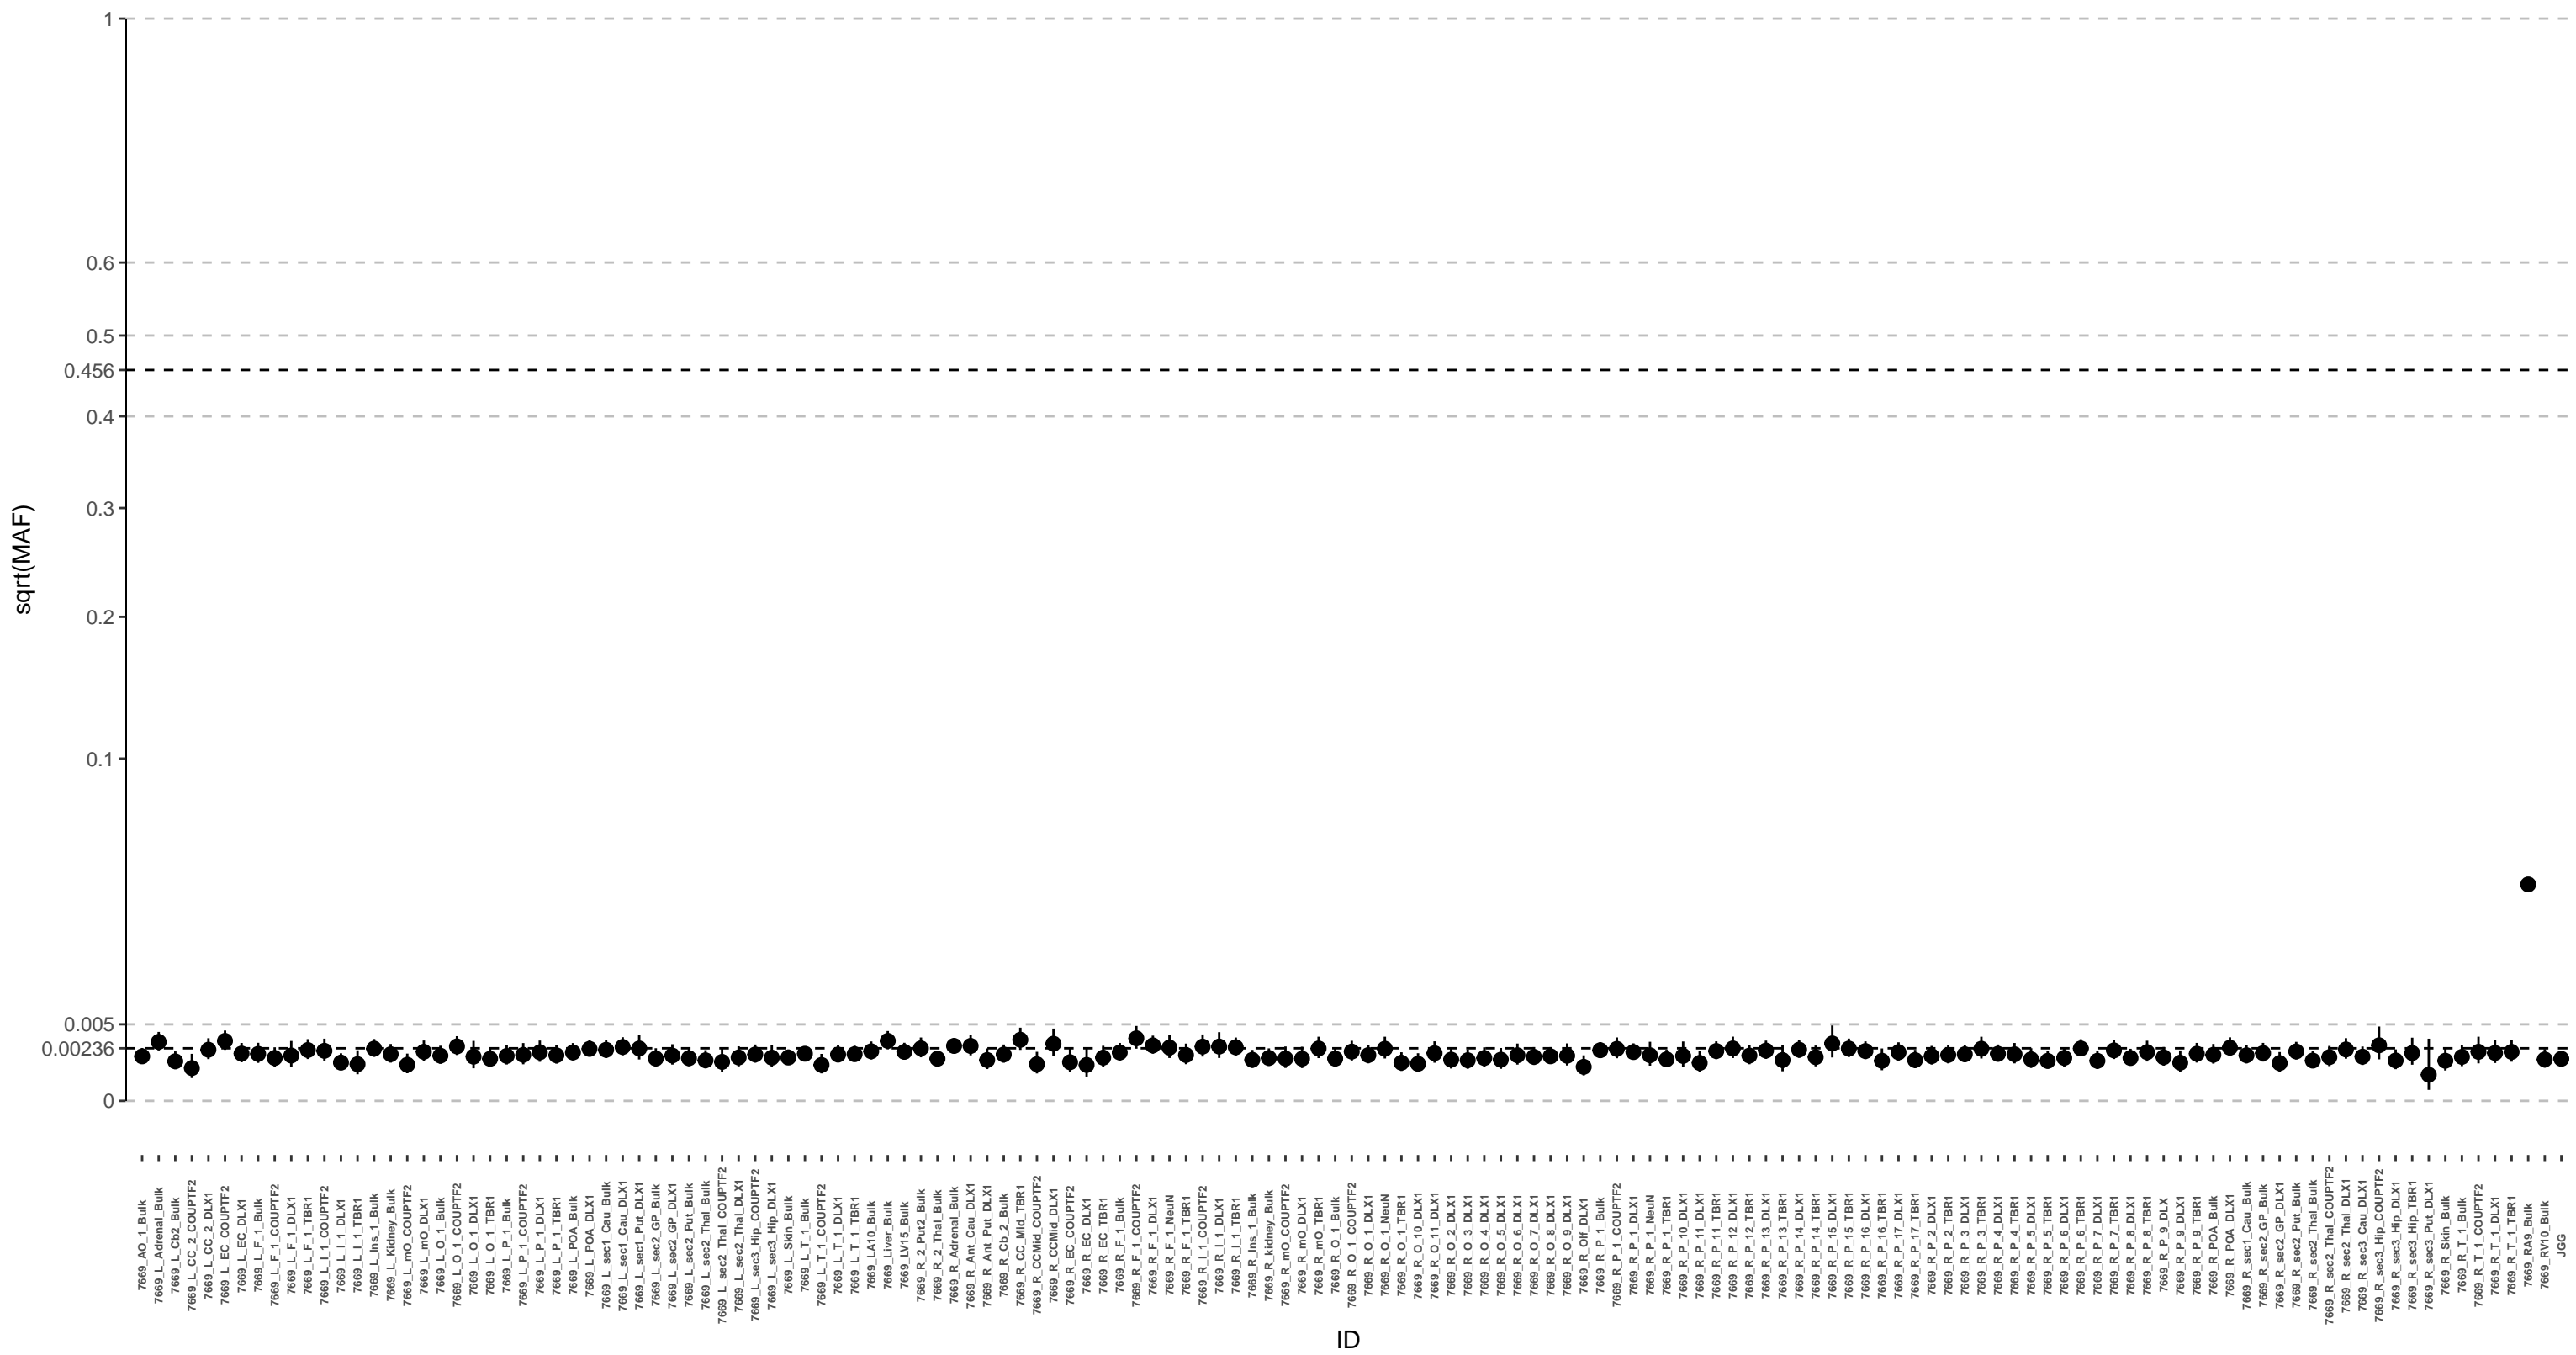

ID05 14-51478747-T-C

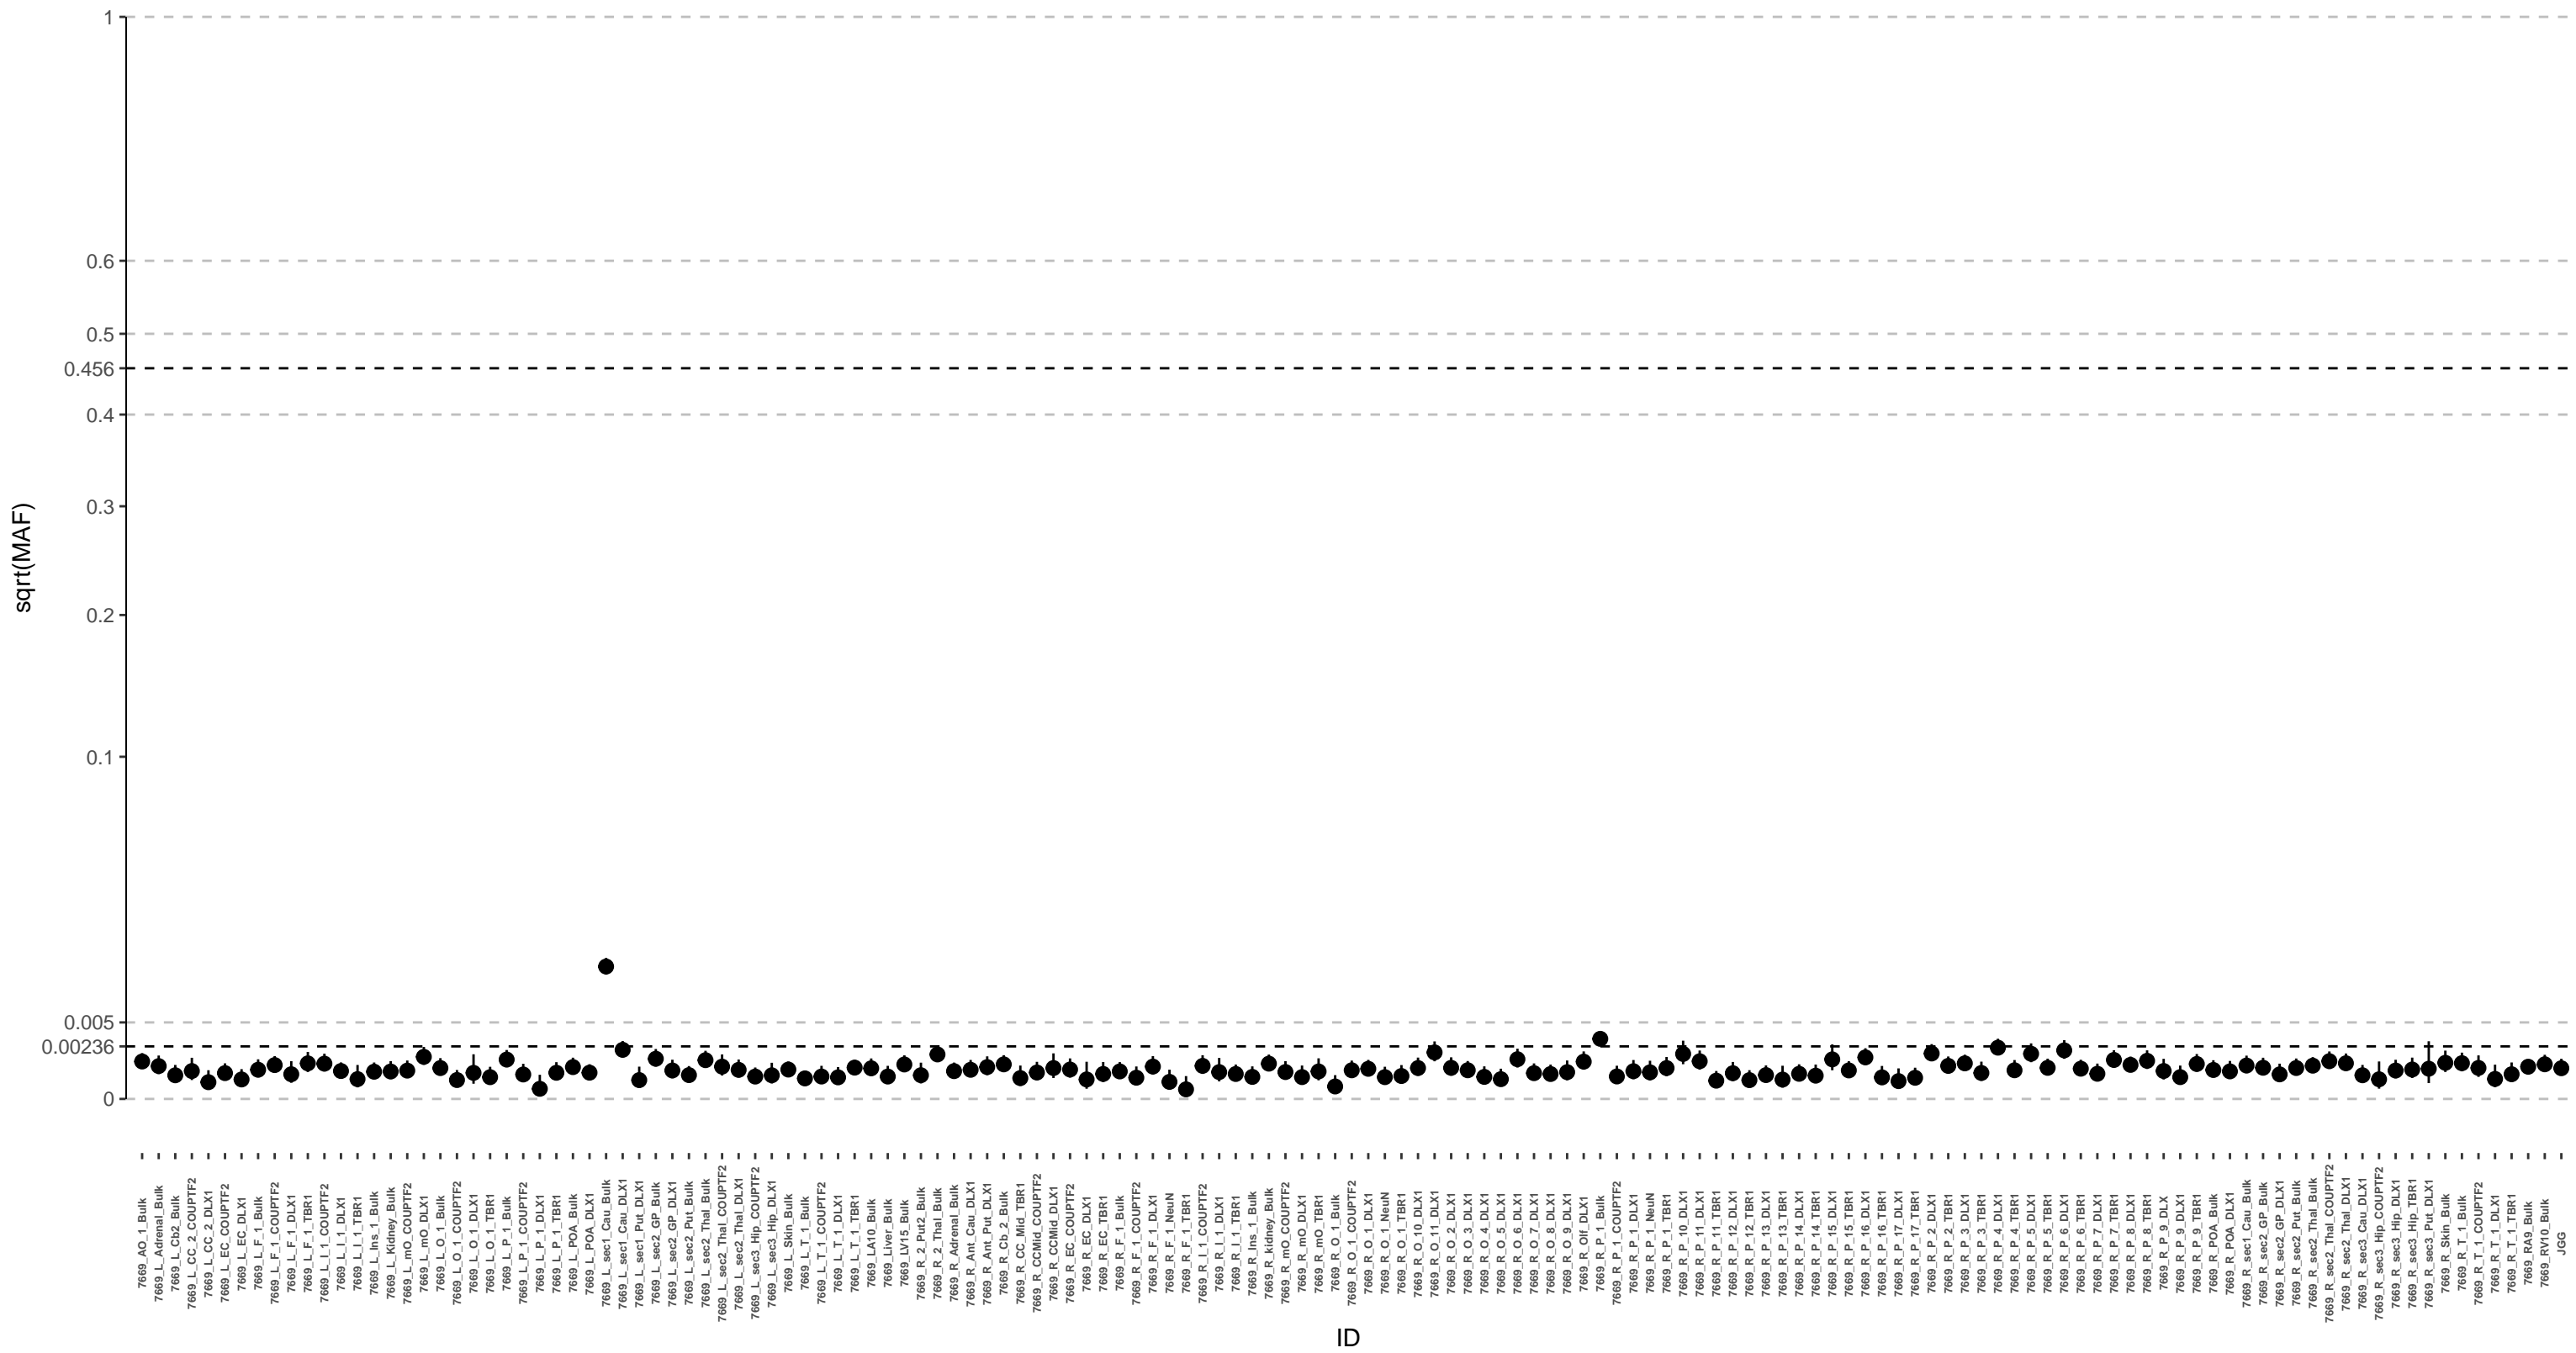

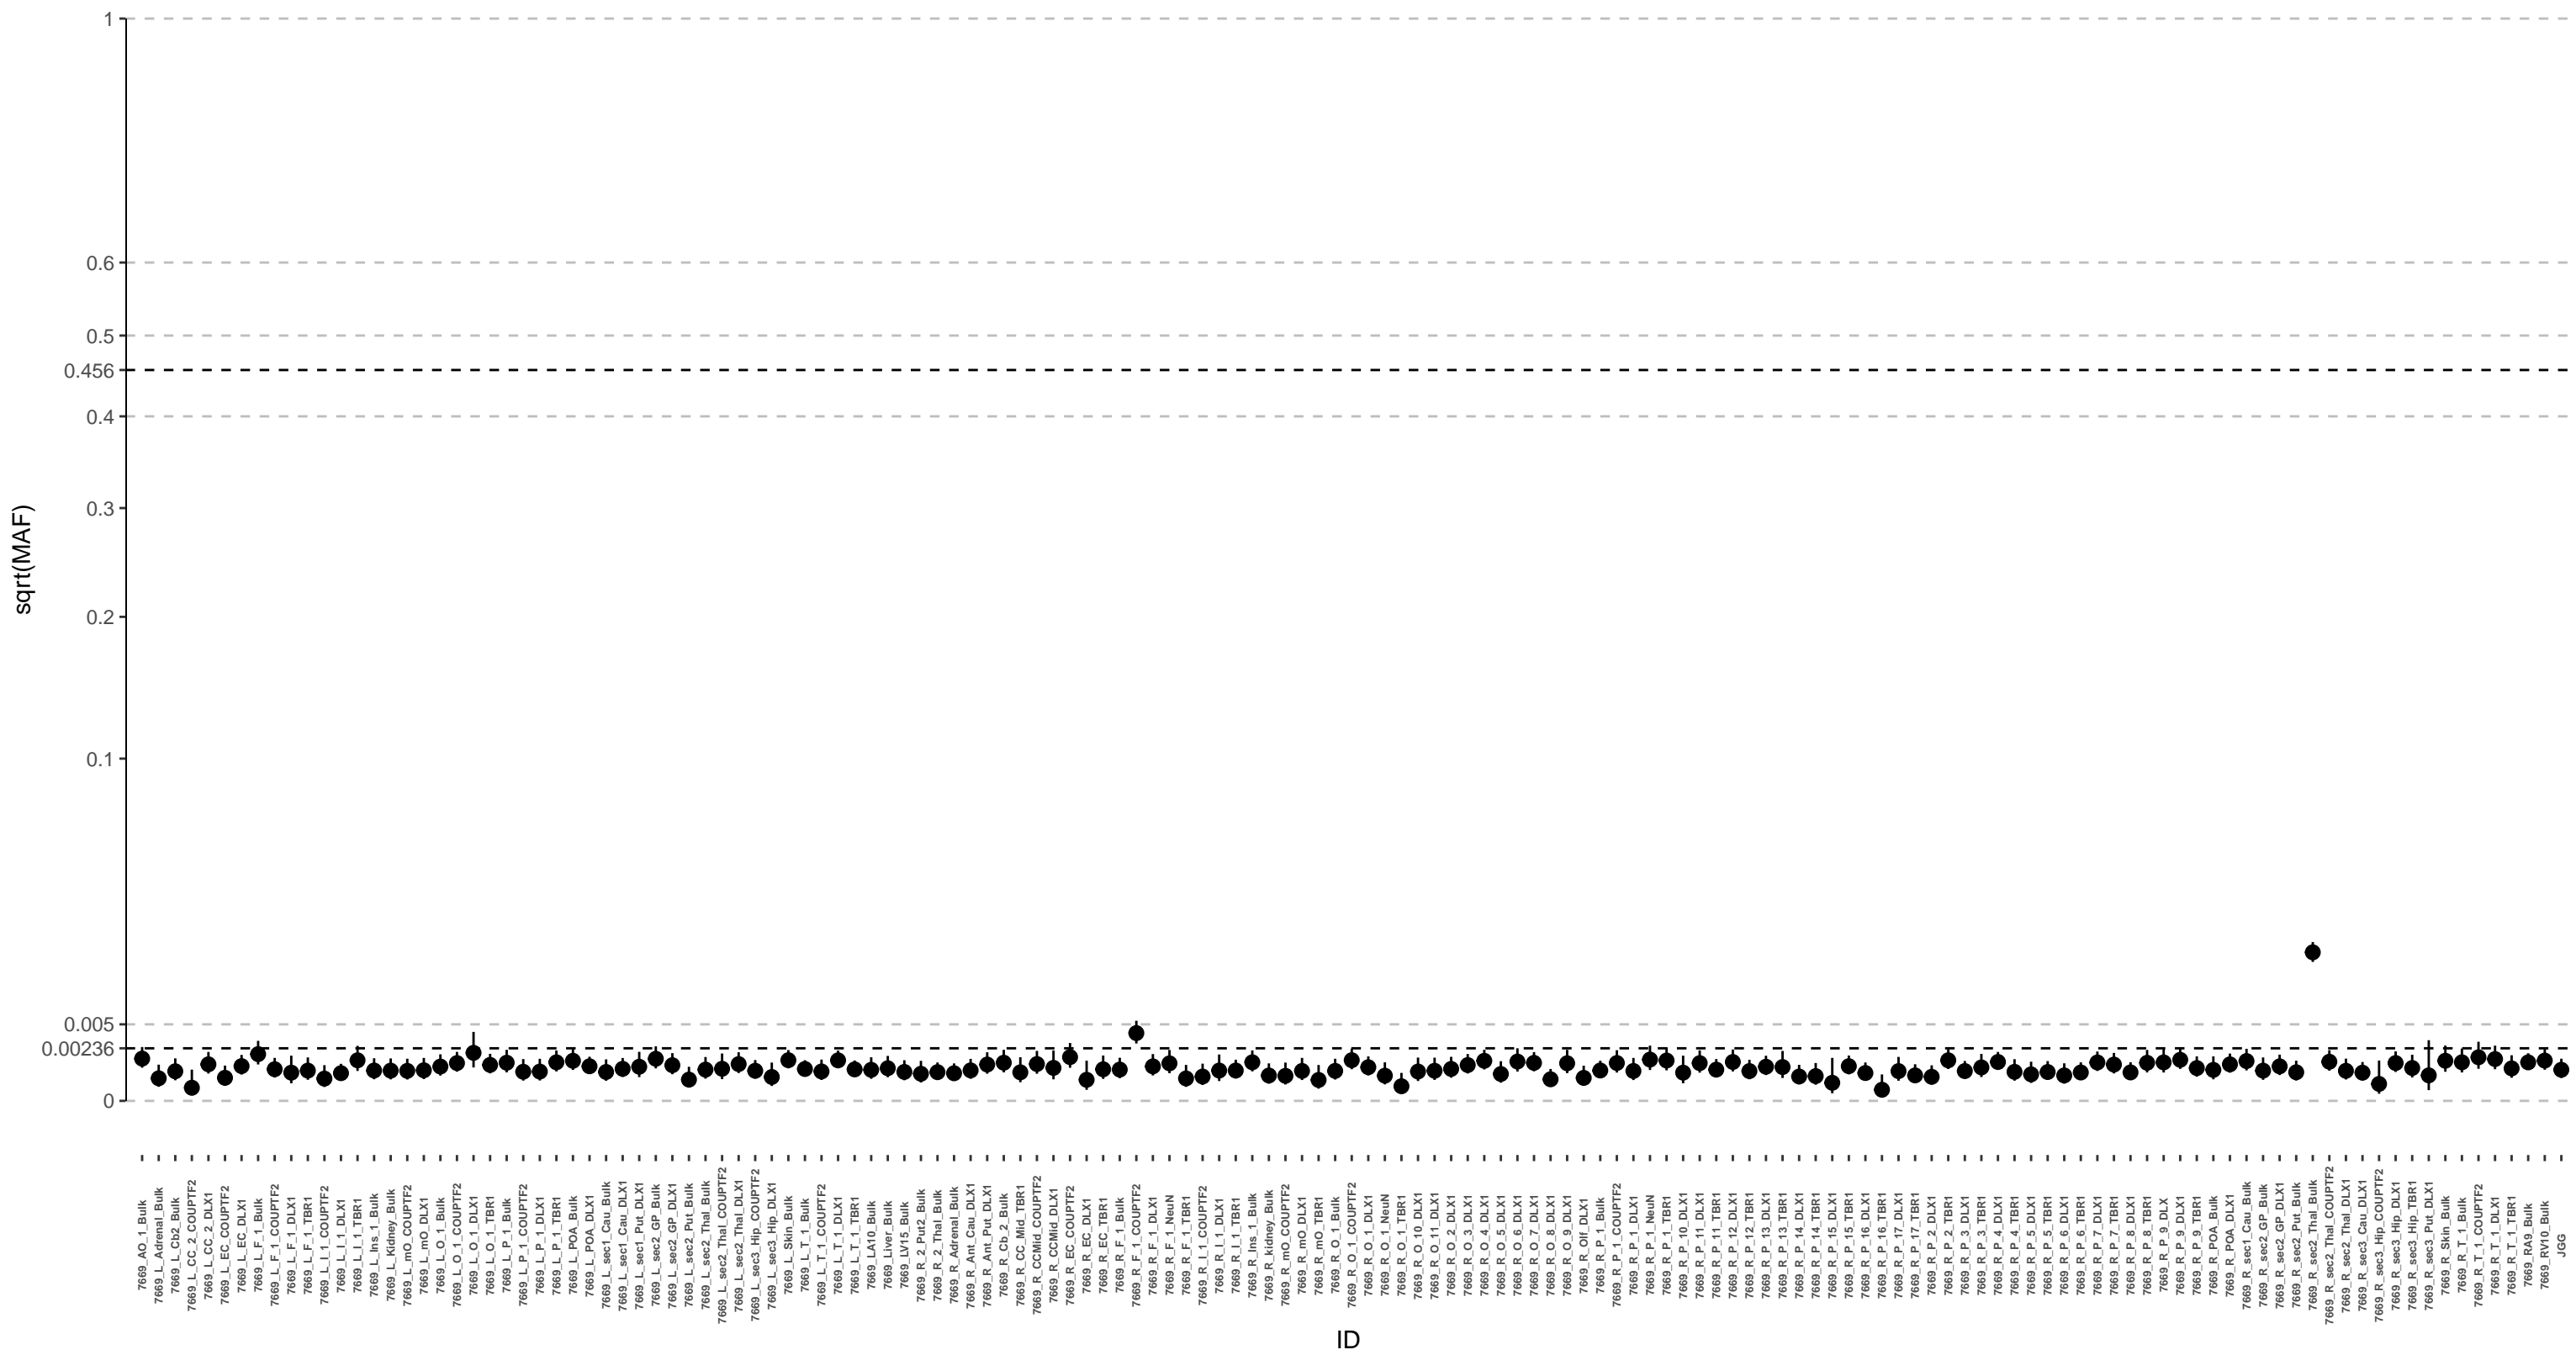

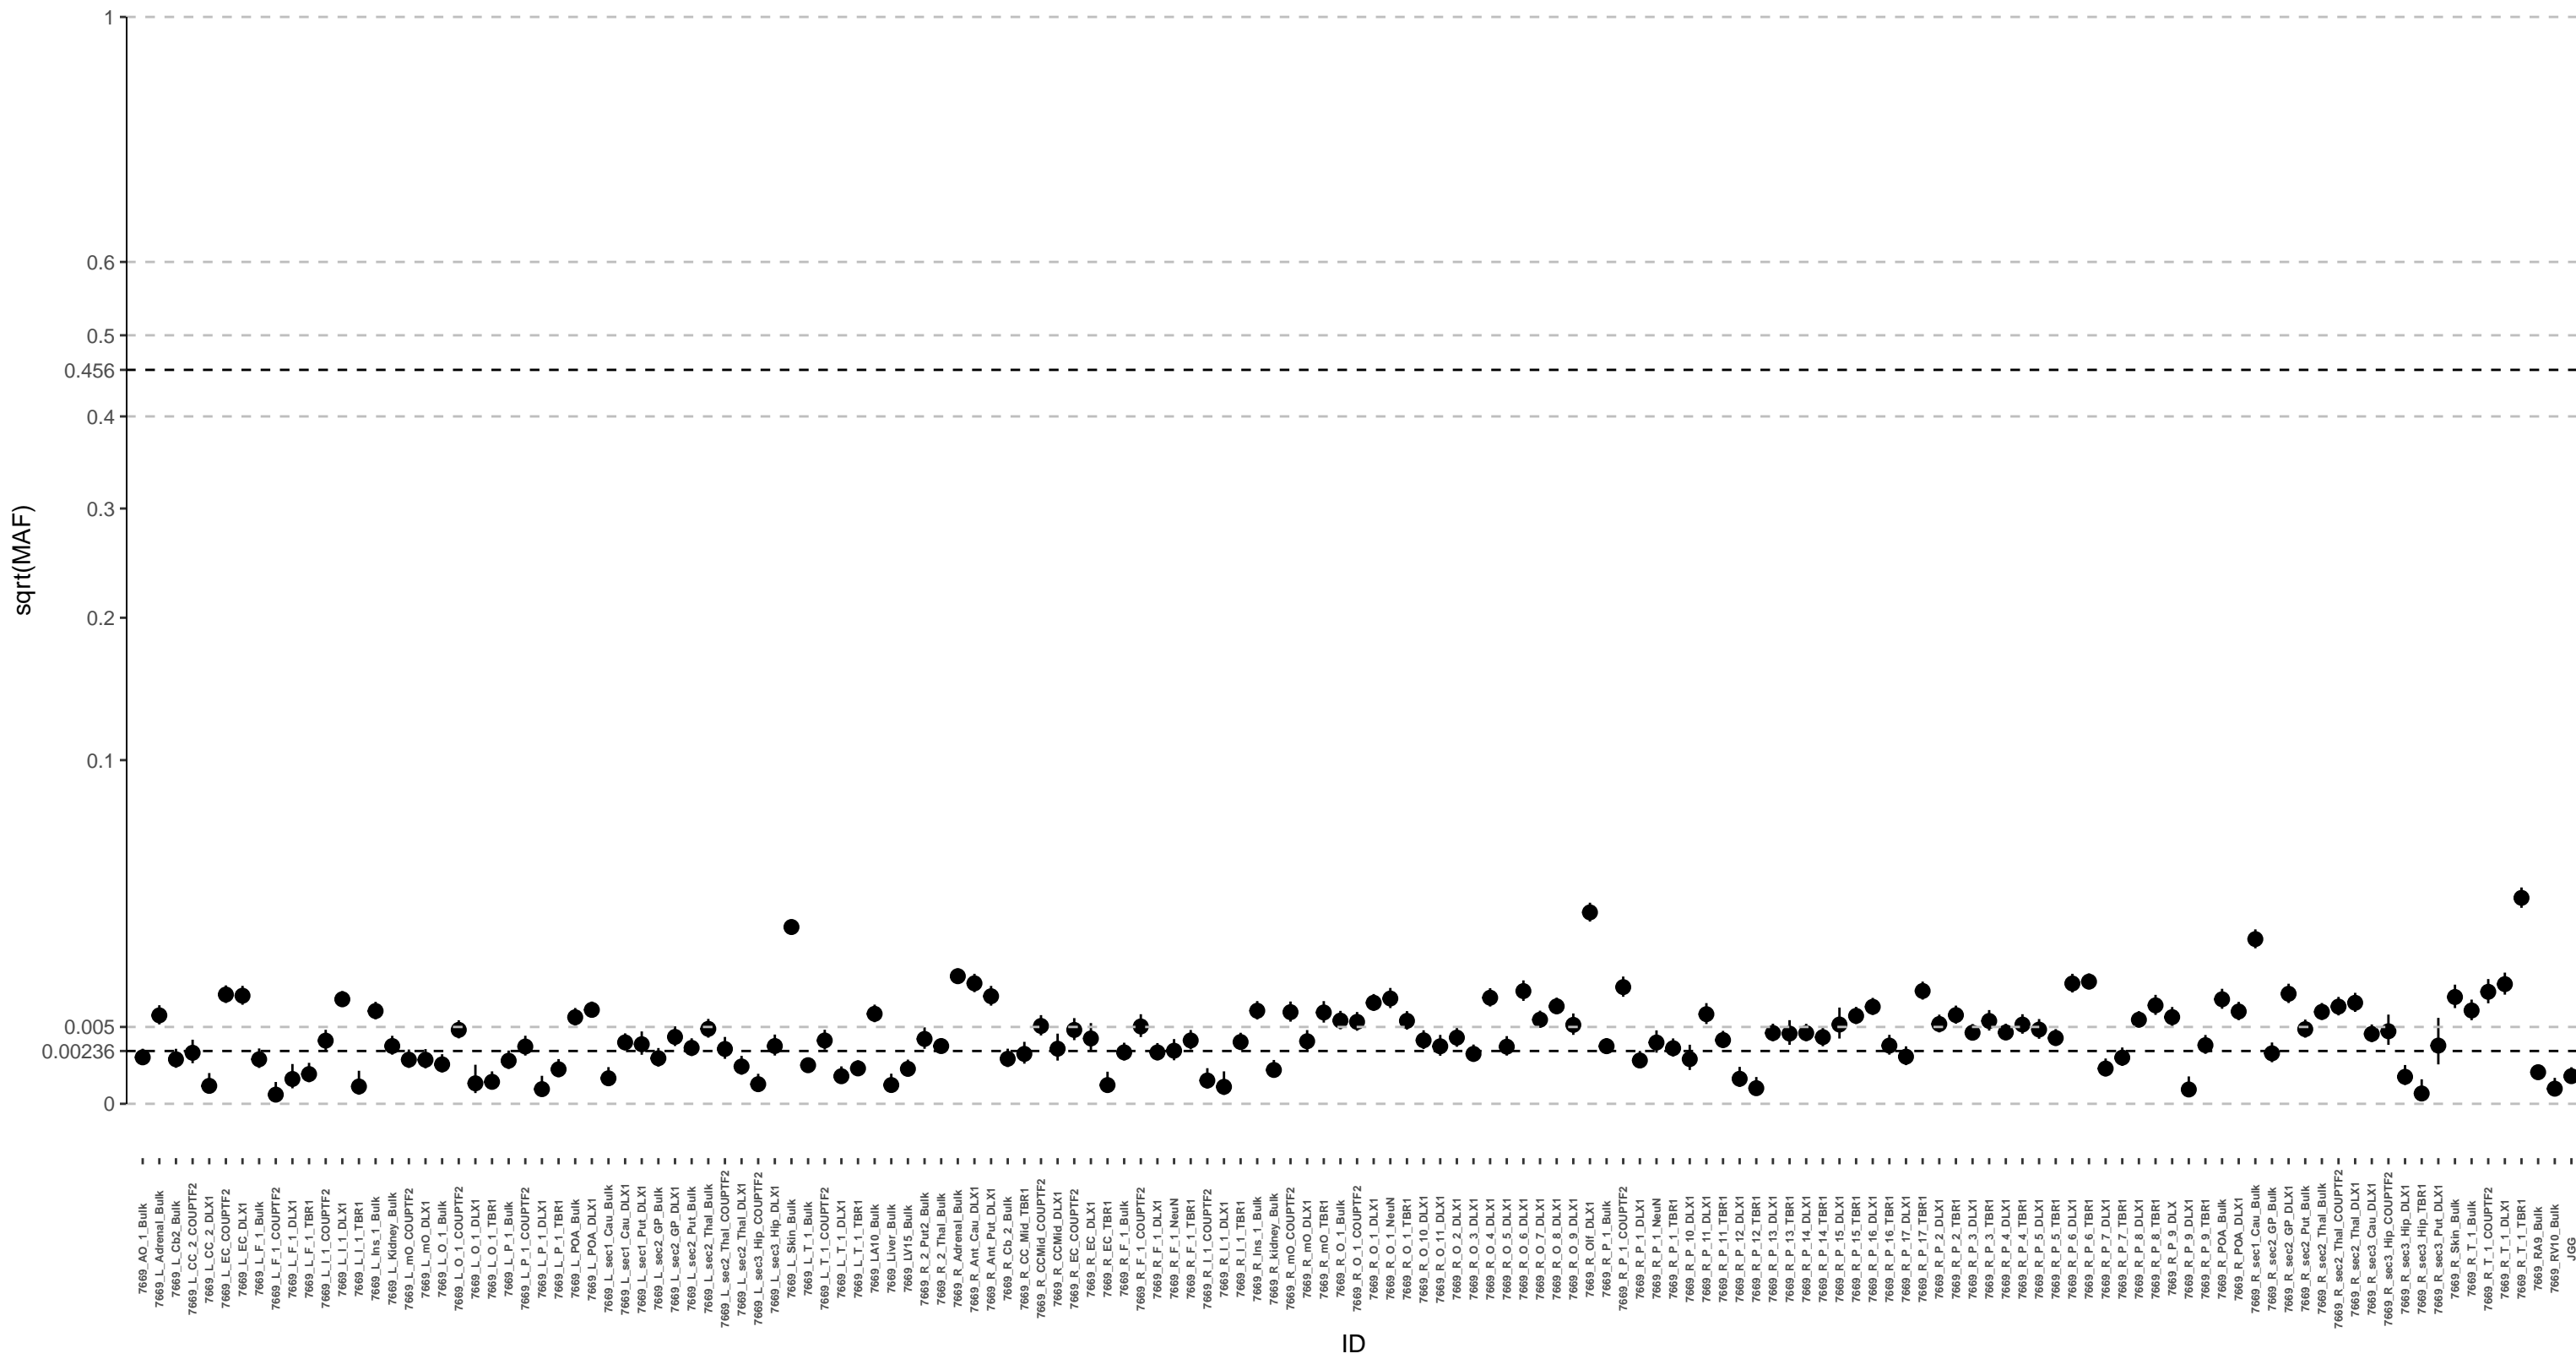

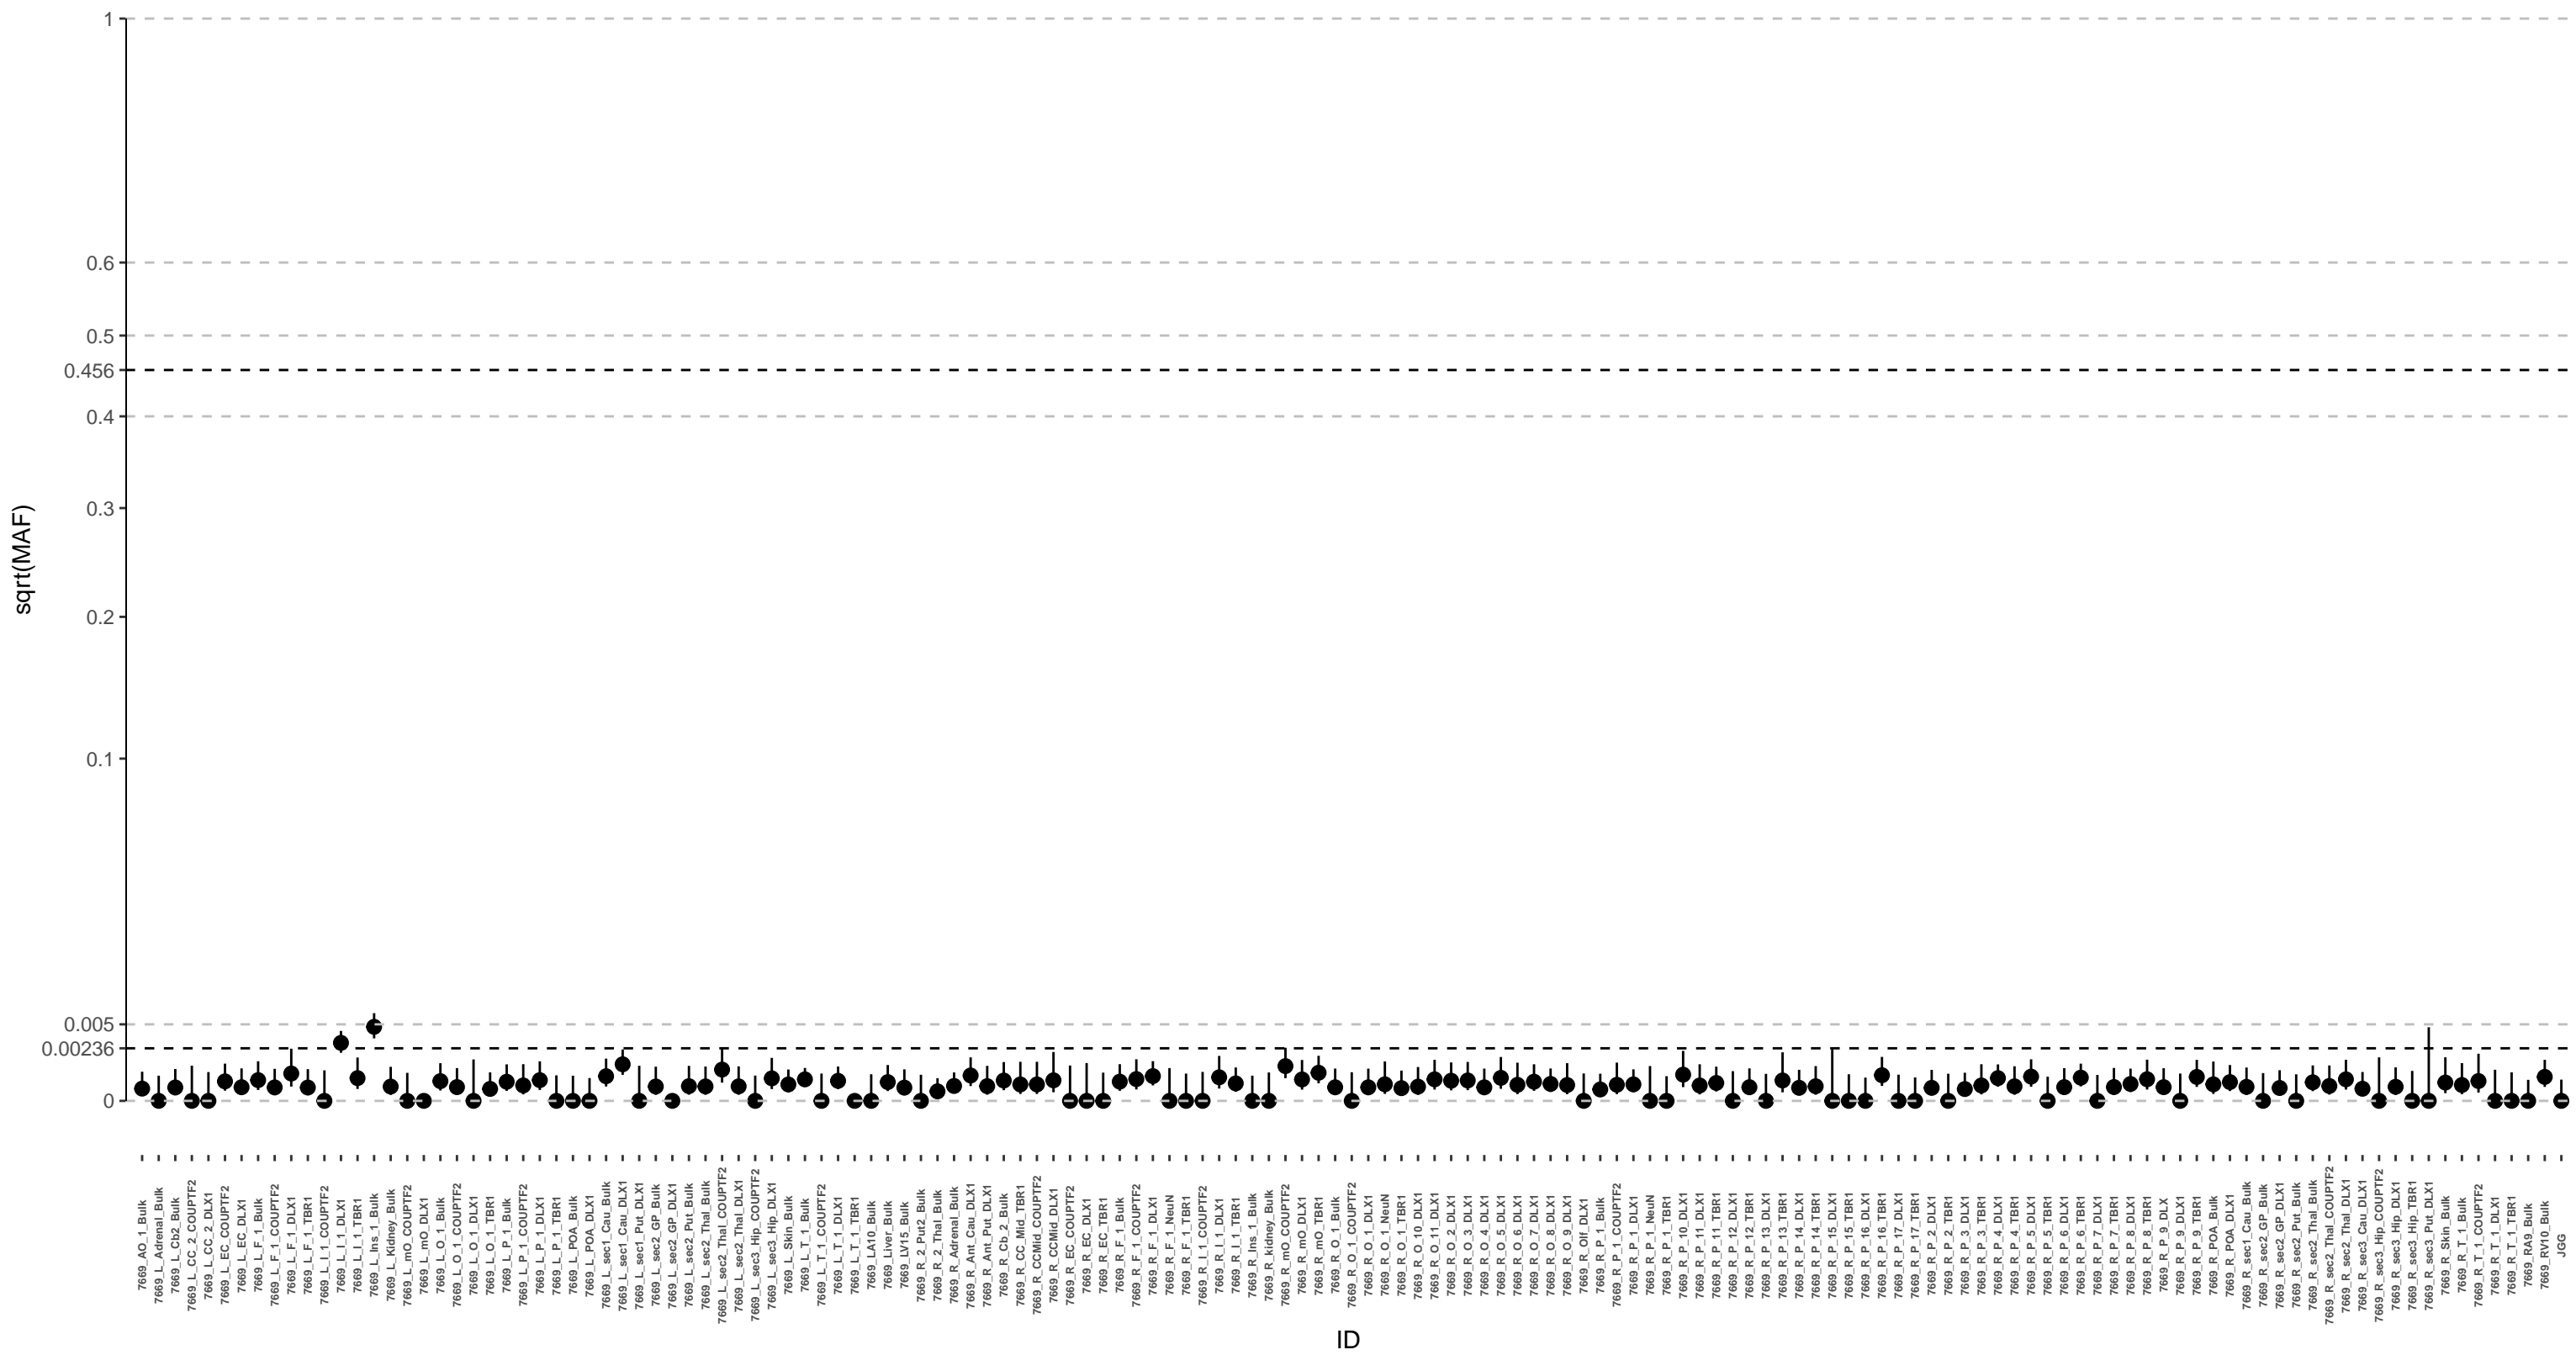

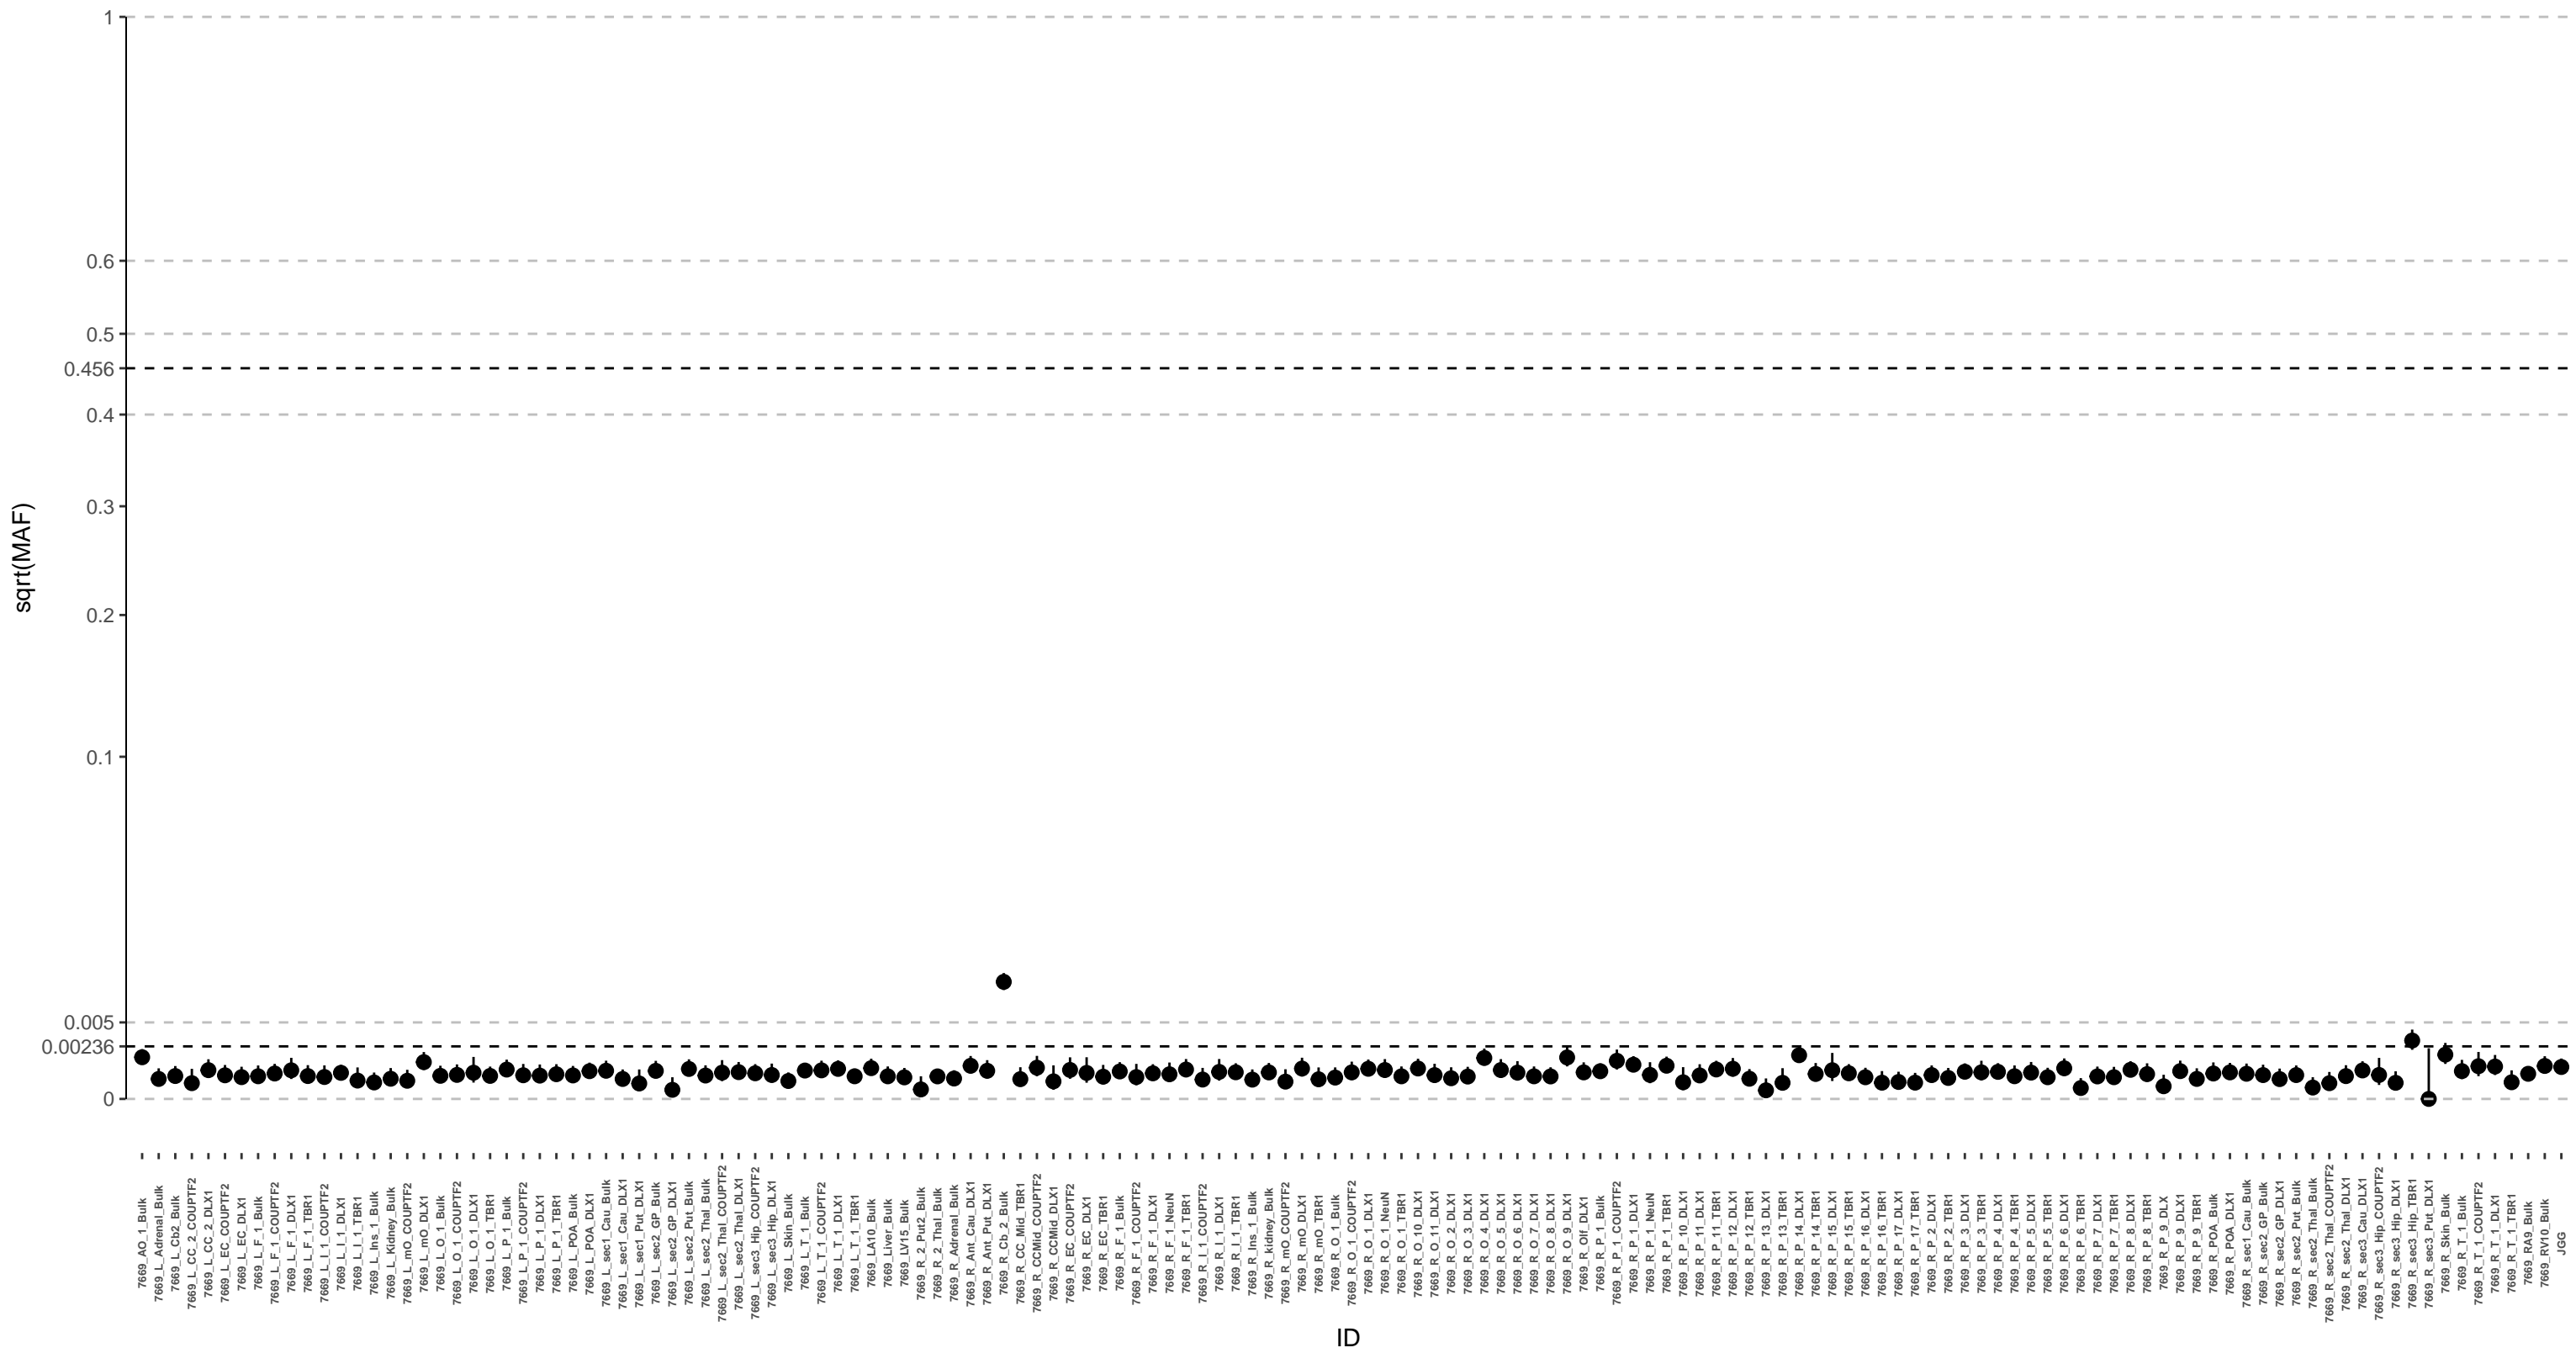



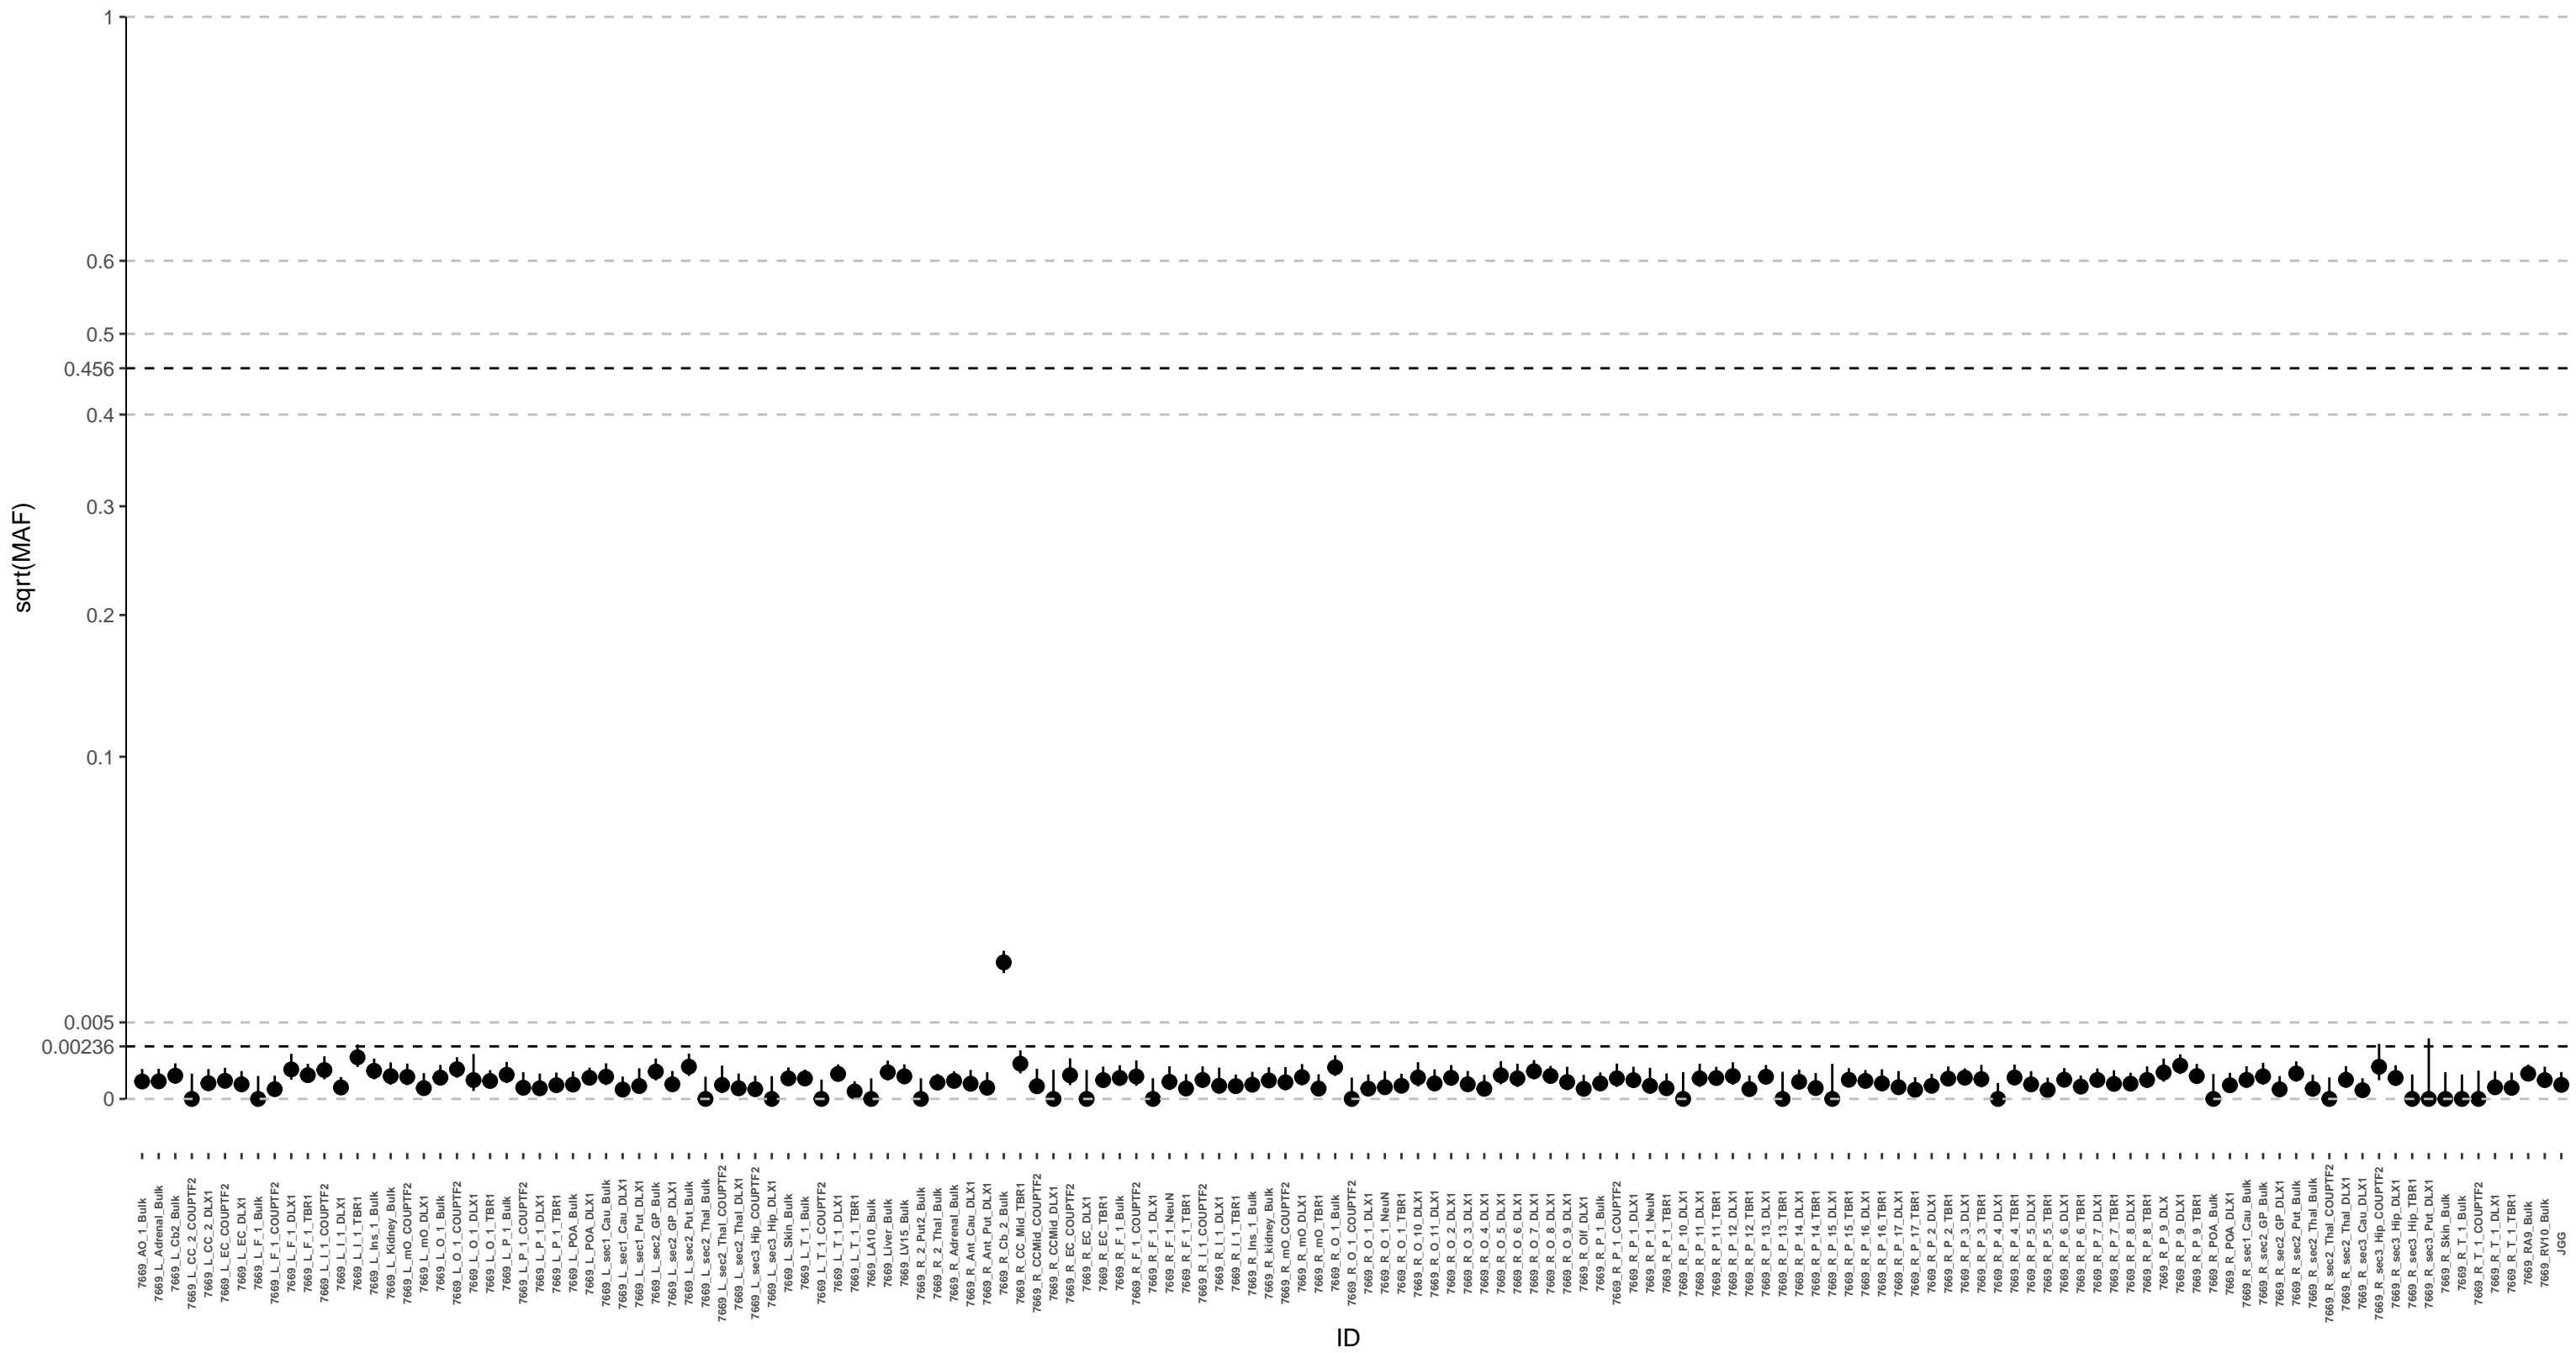

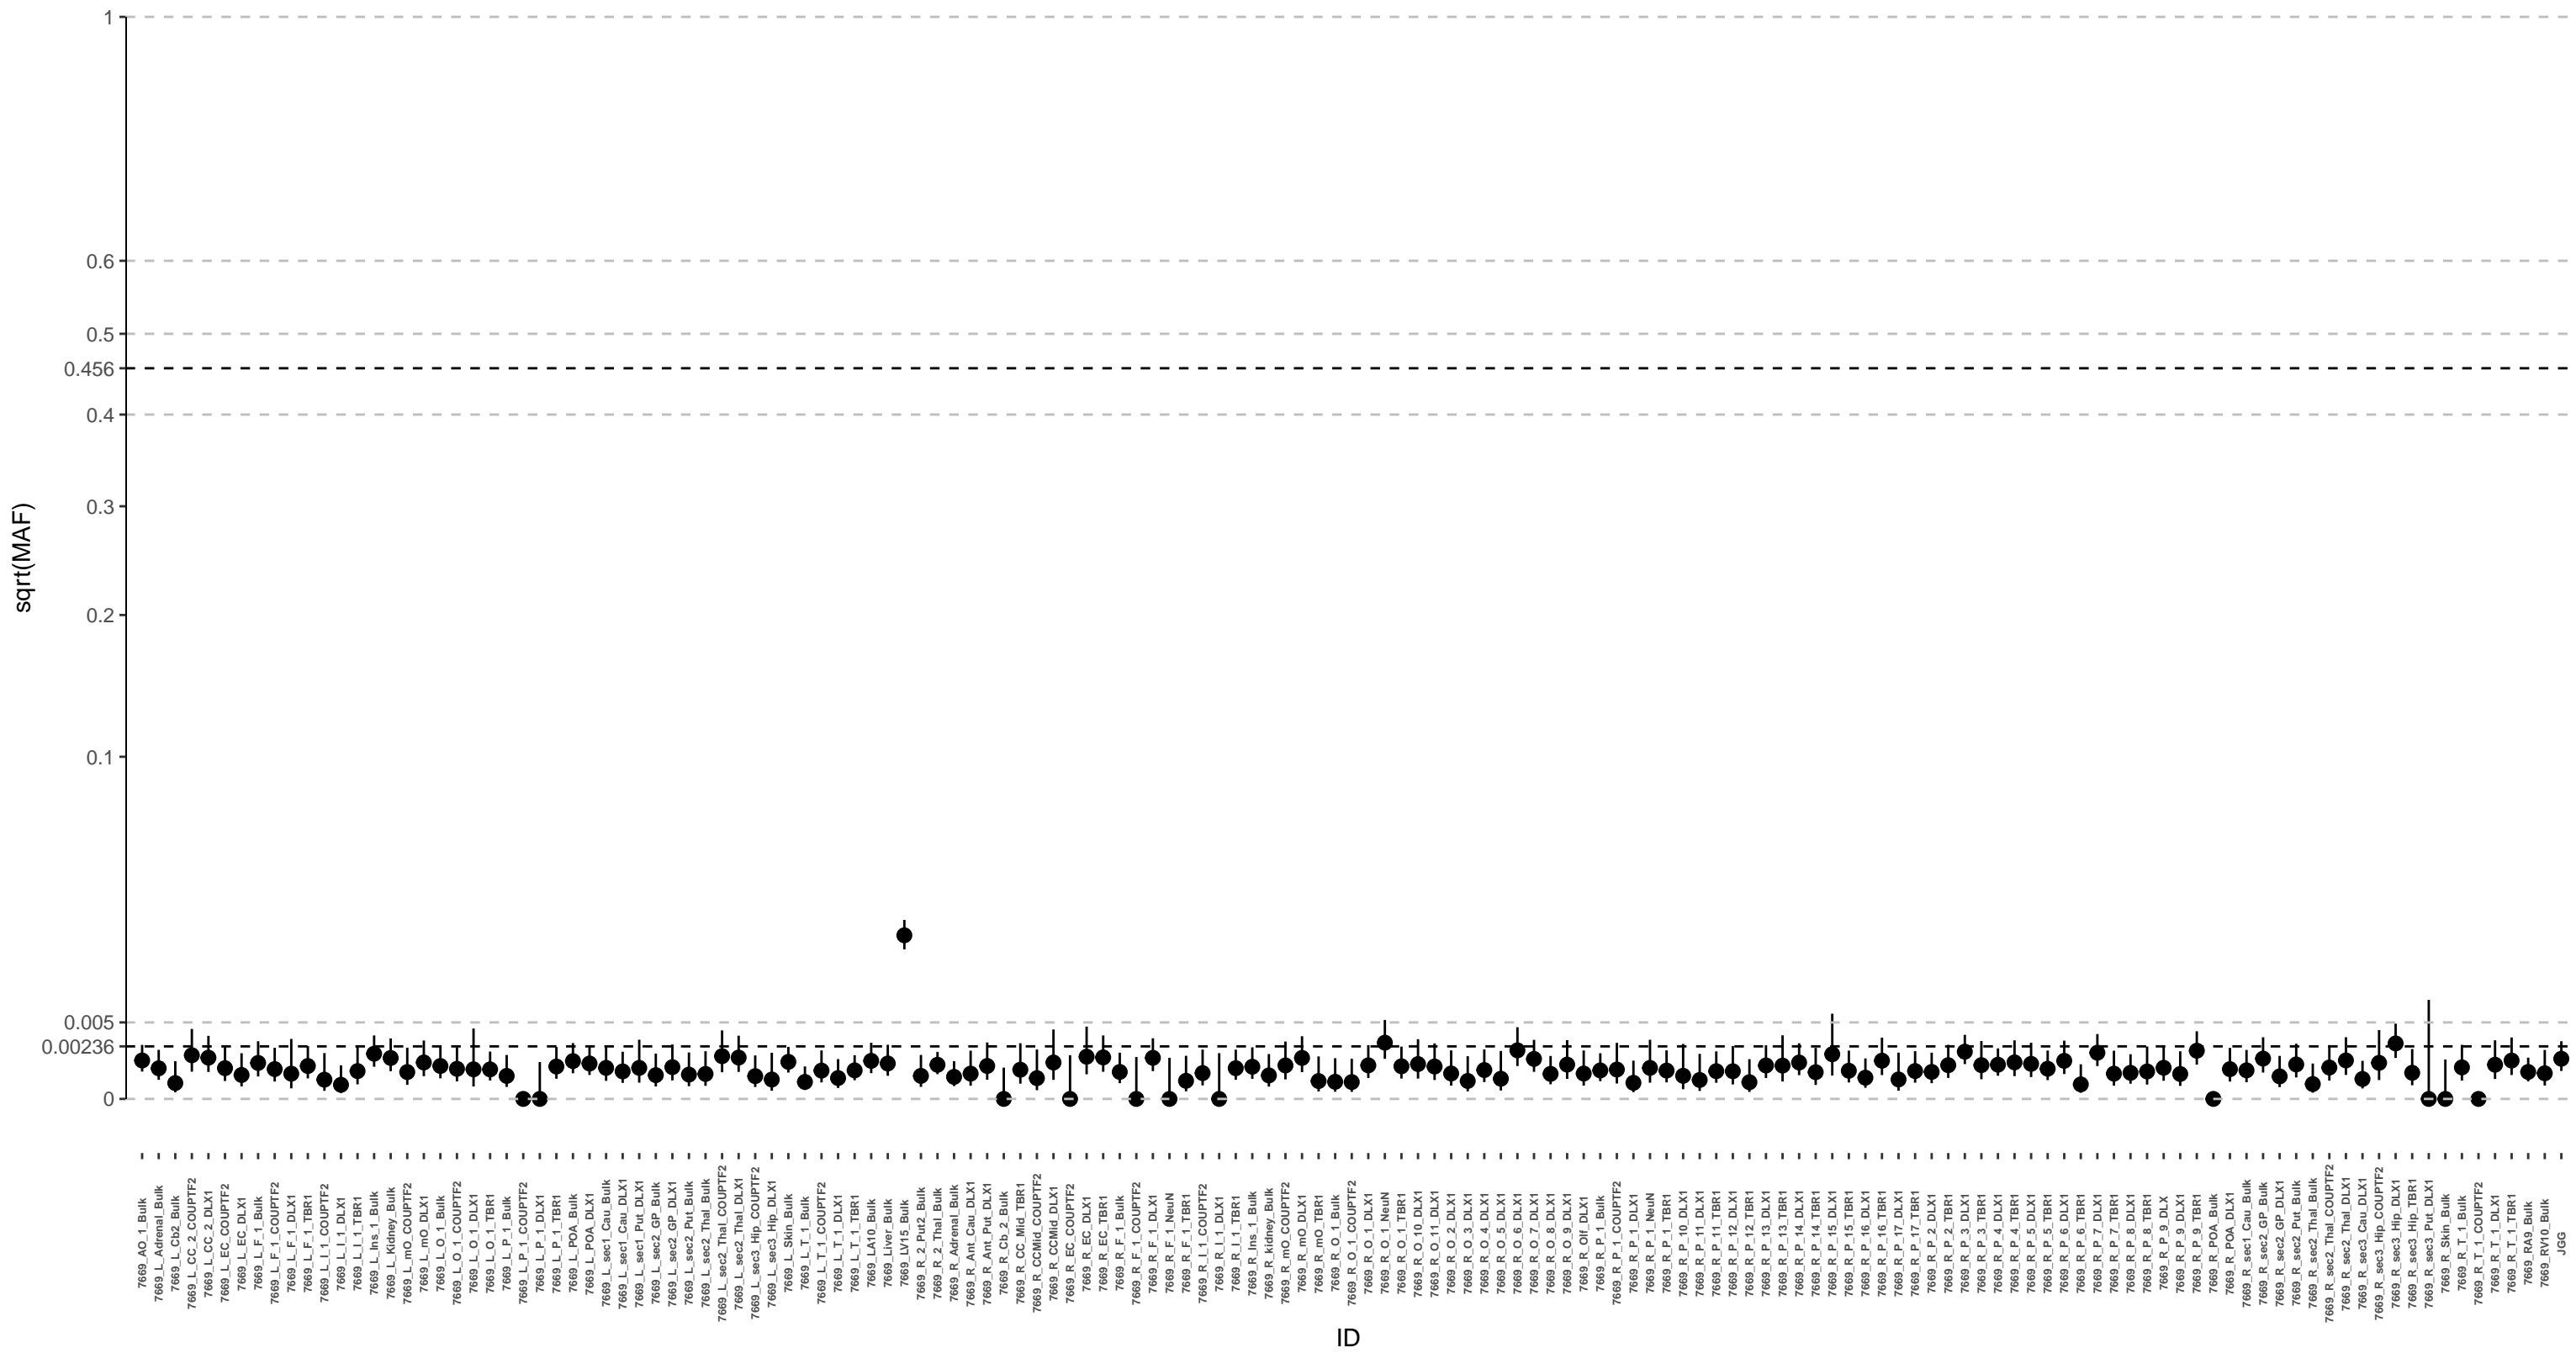

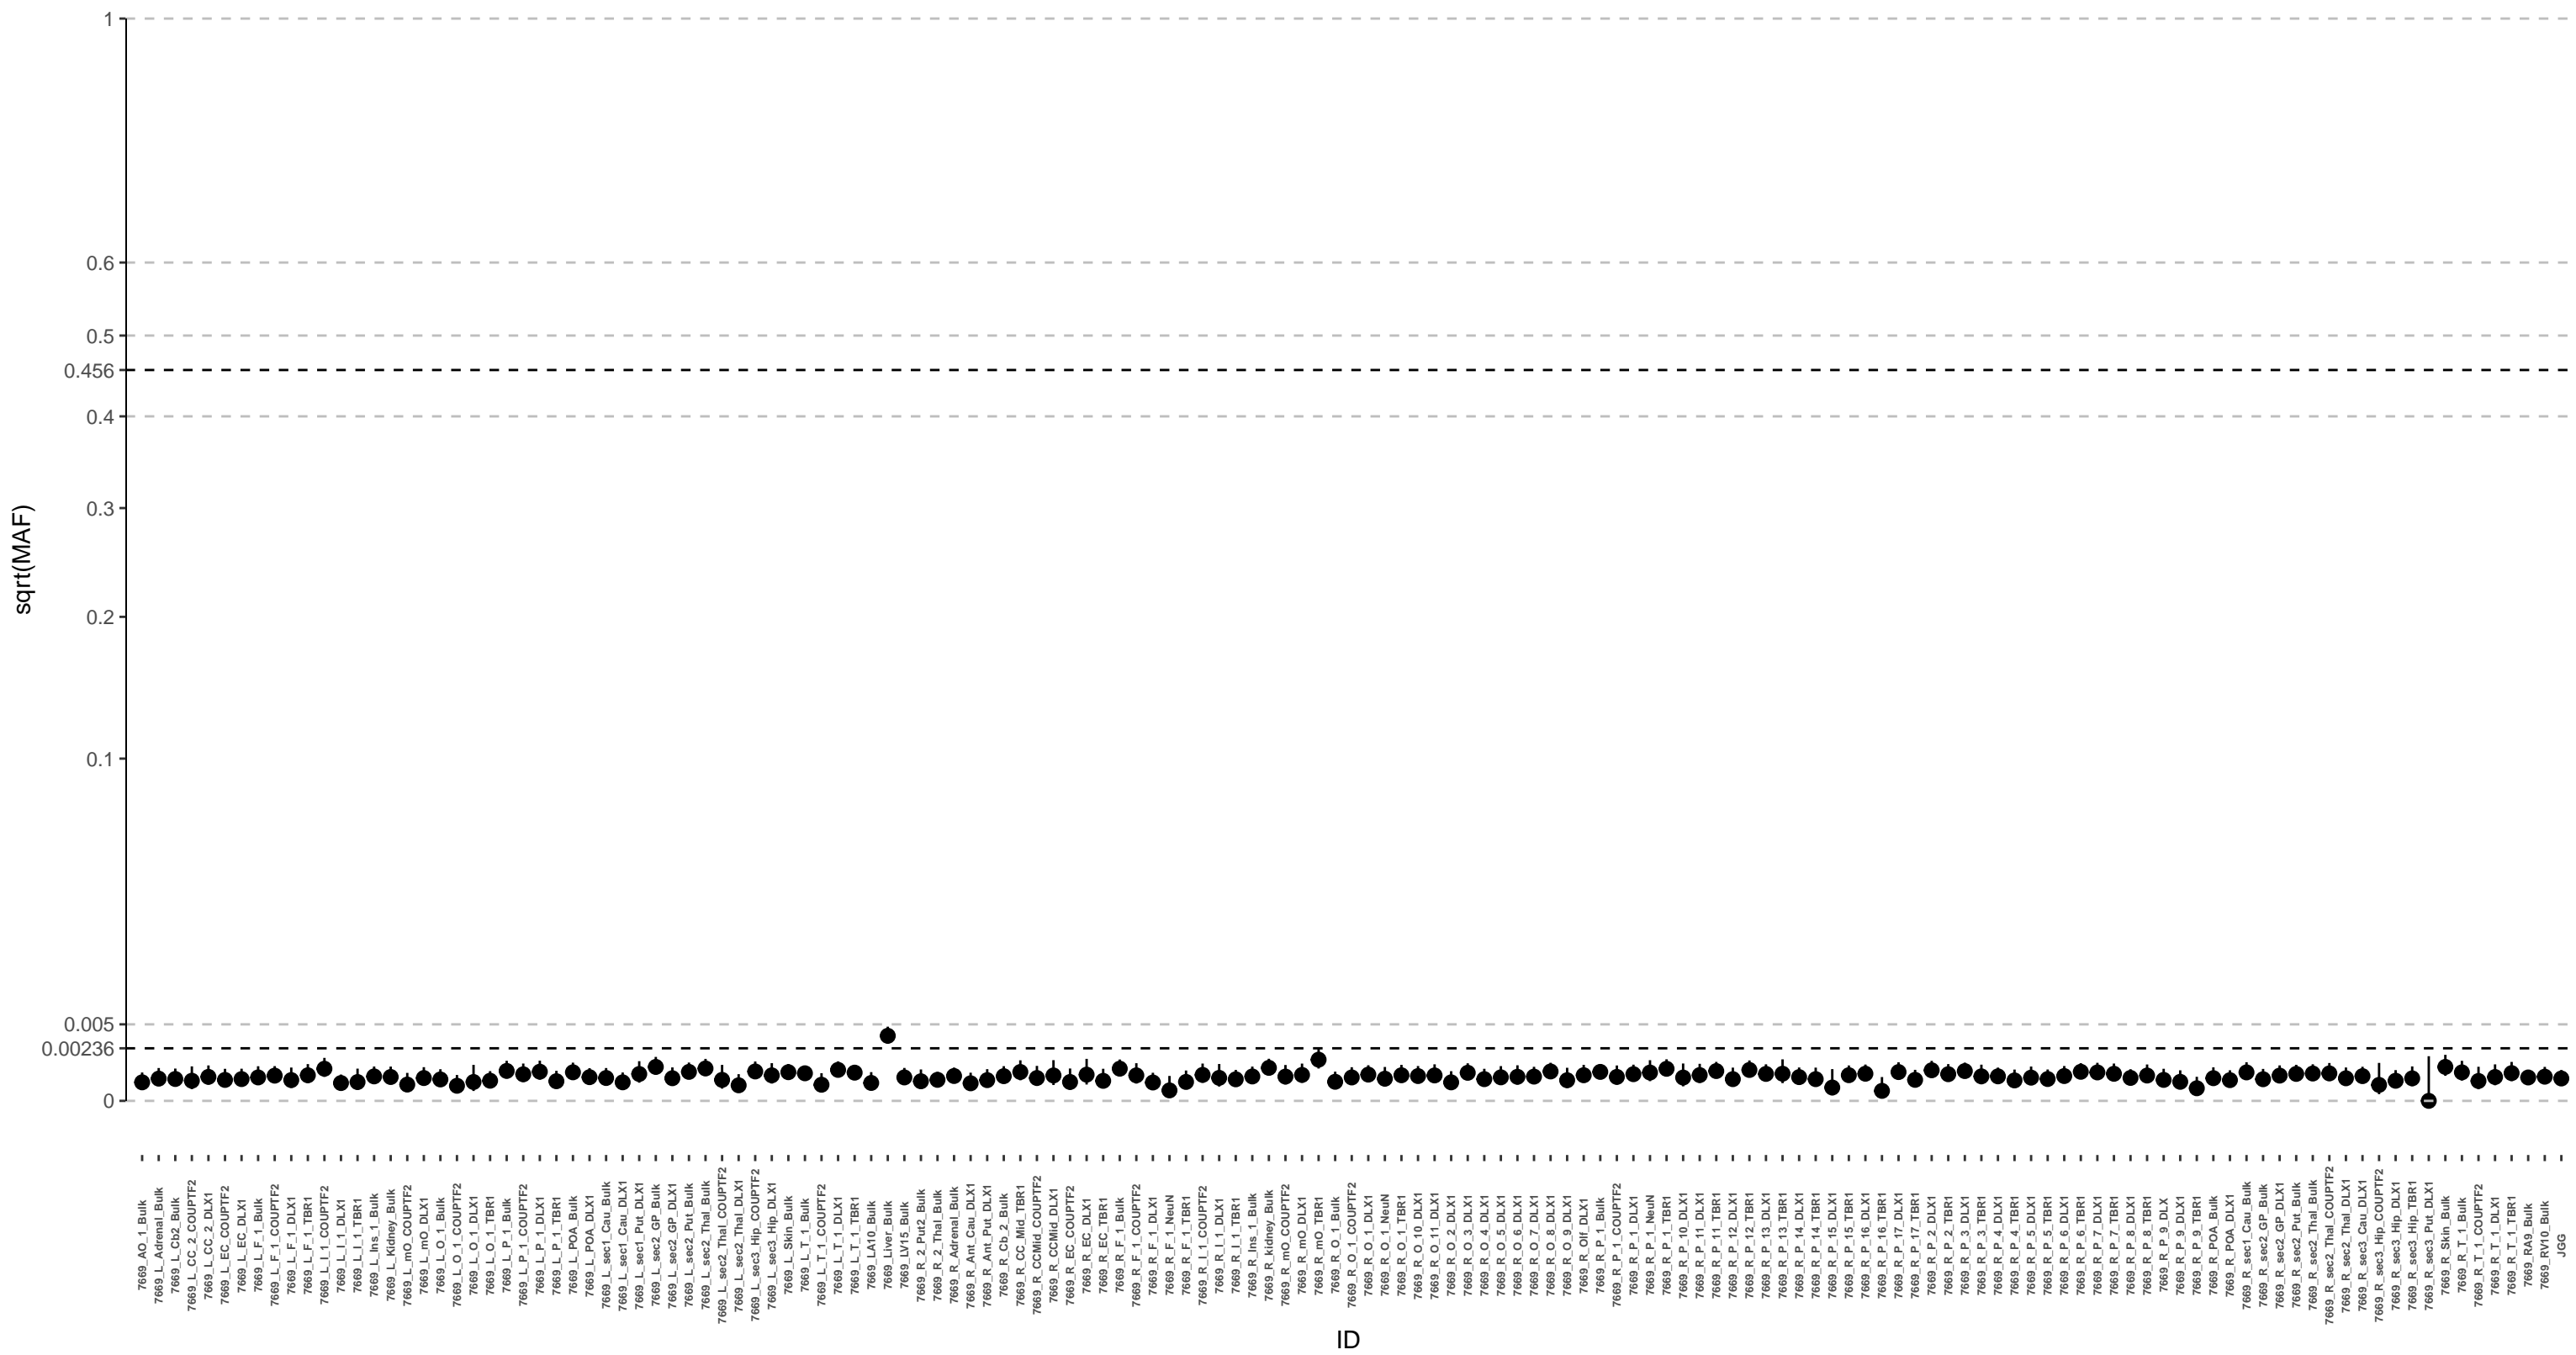

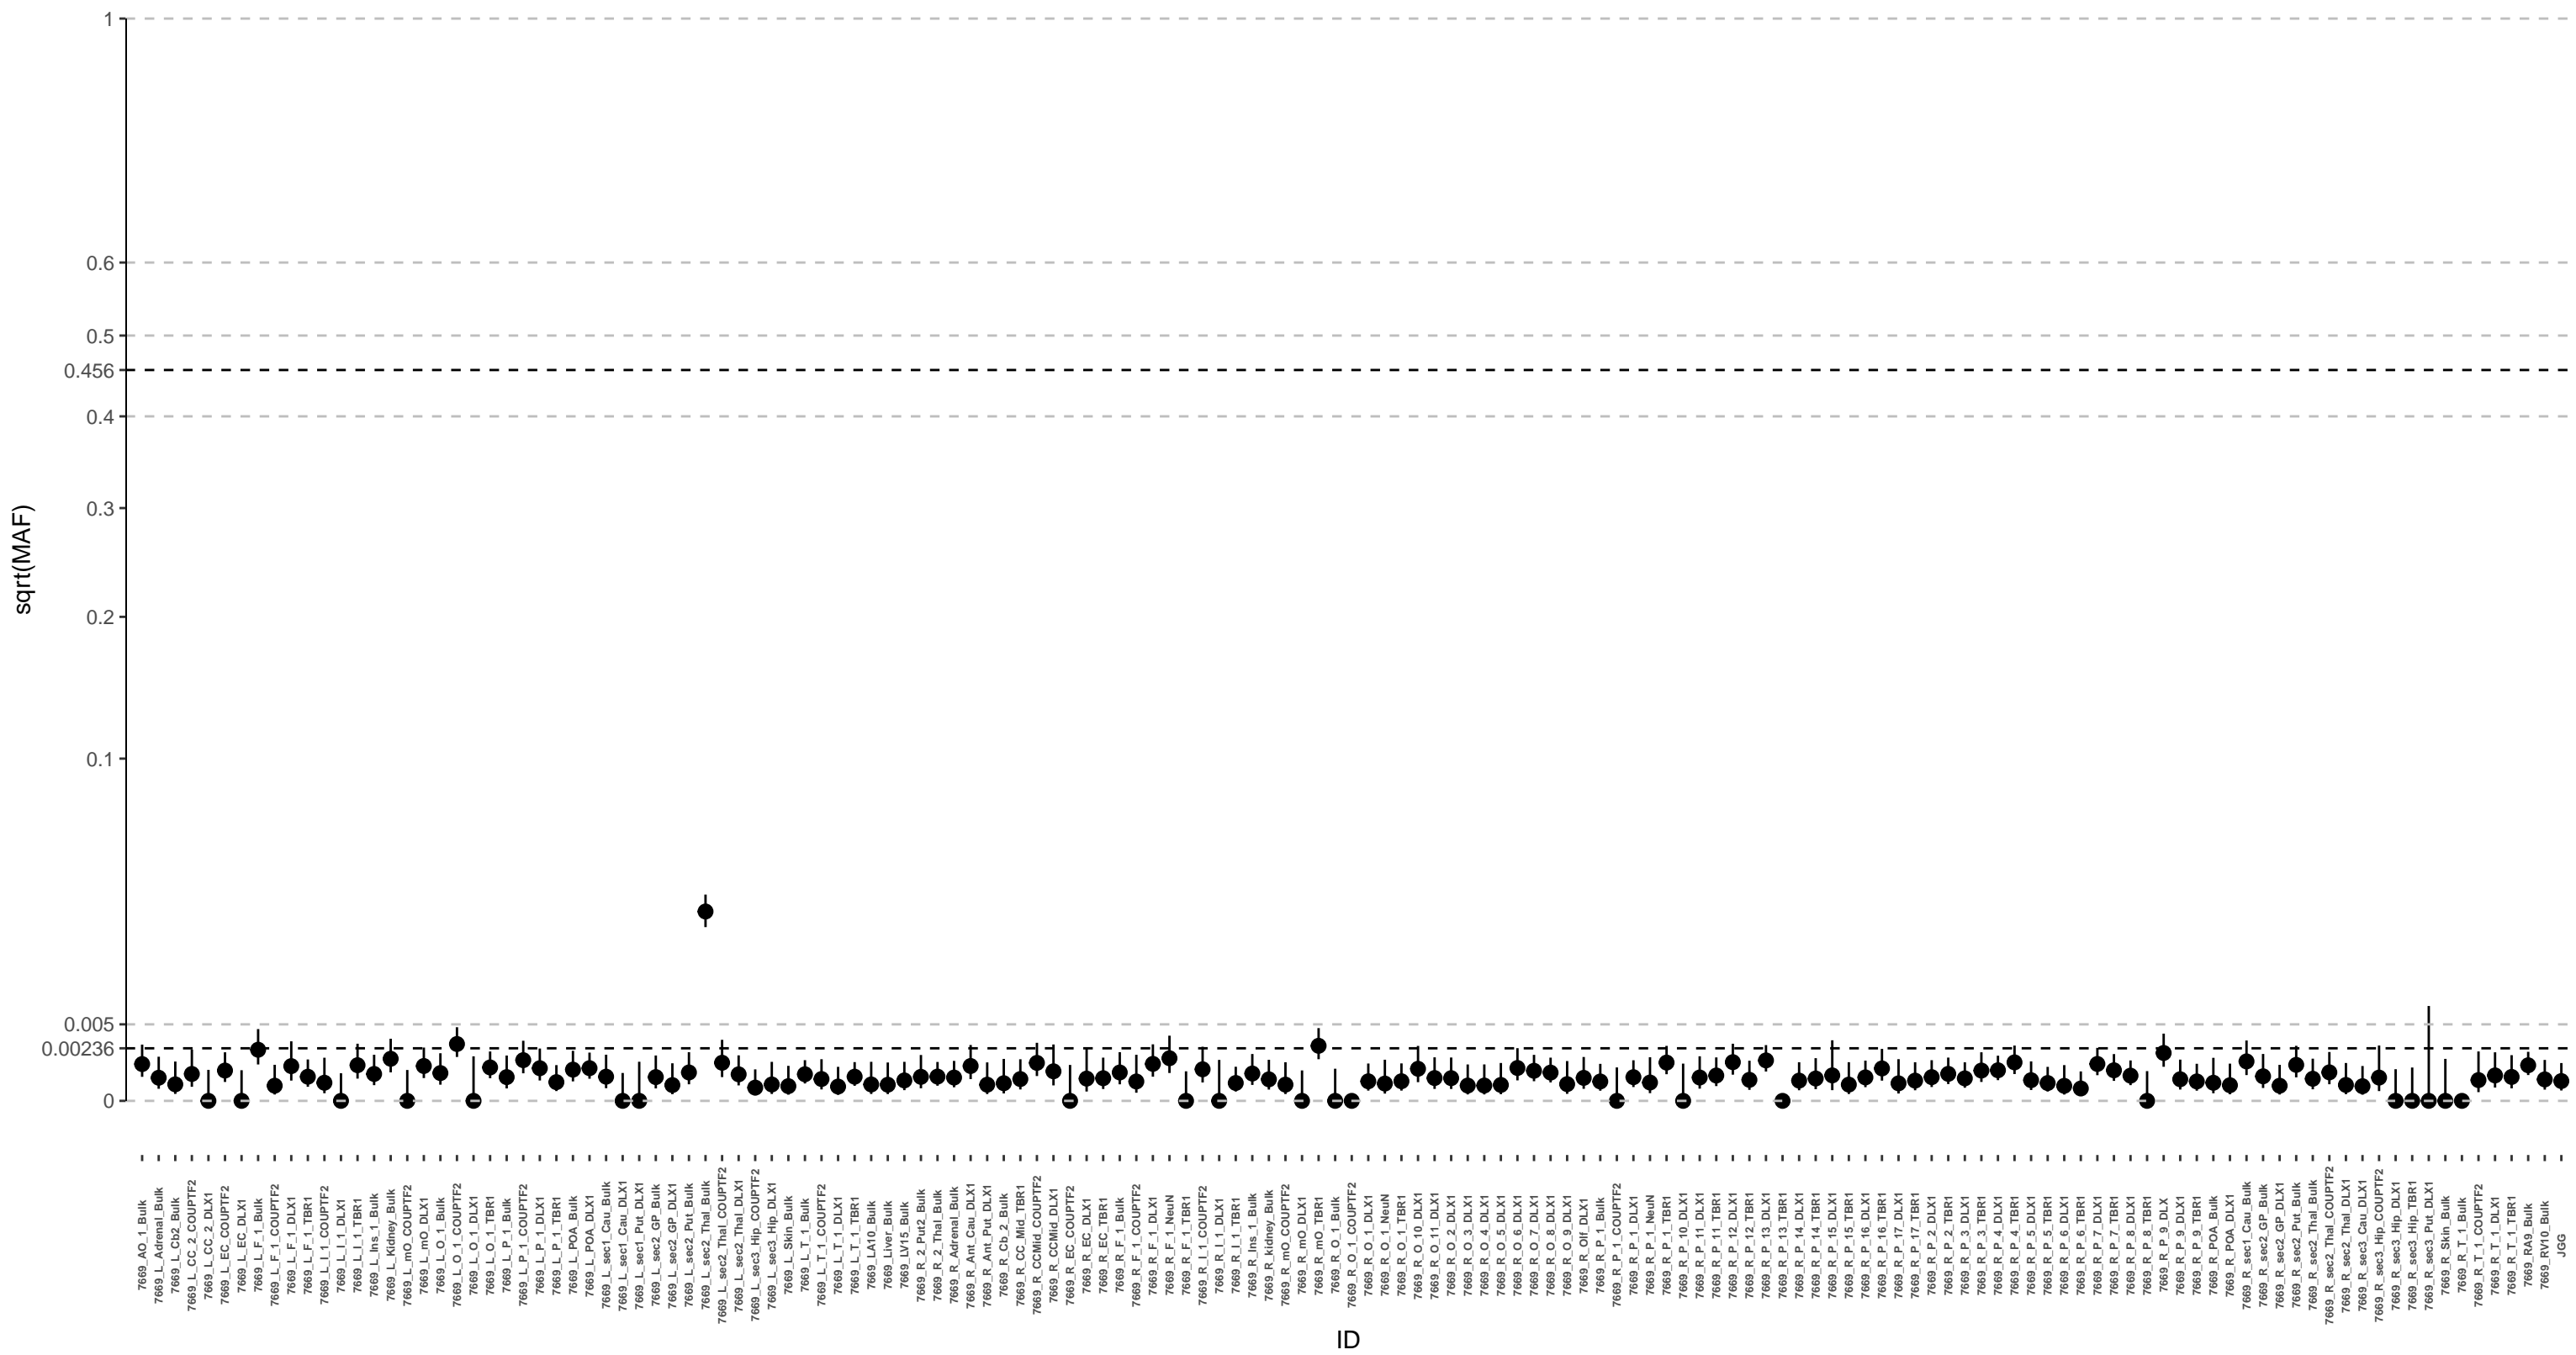

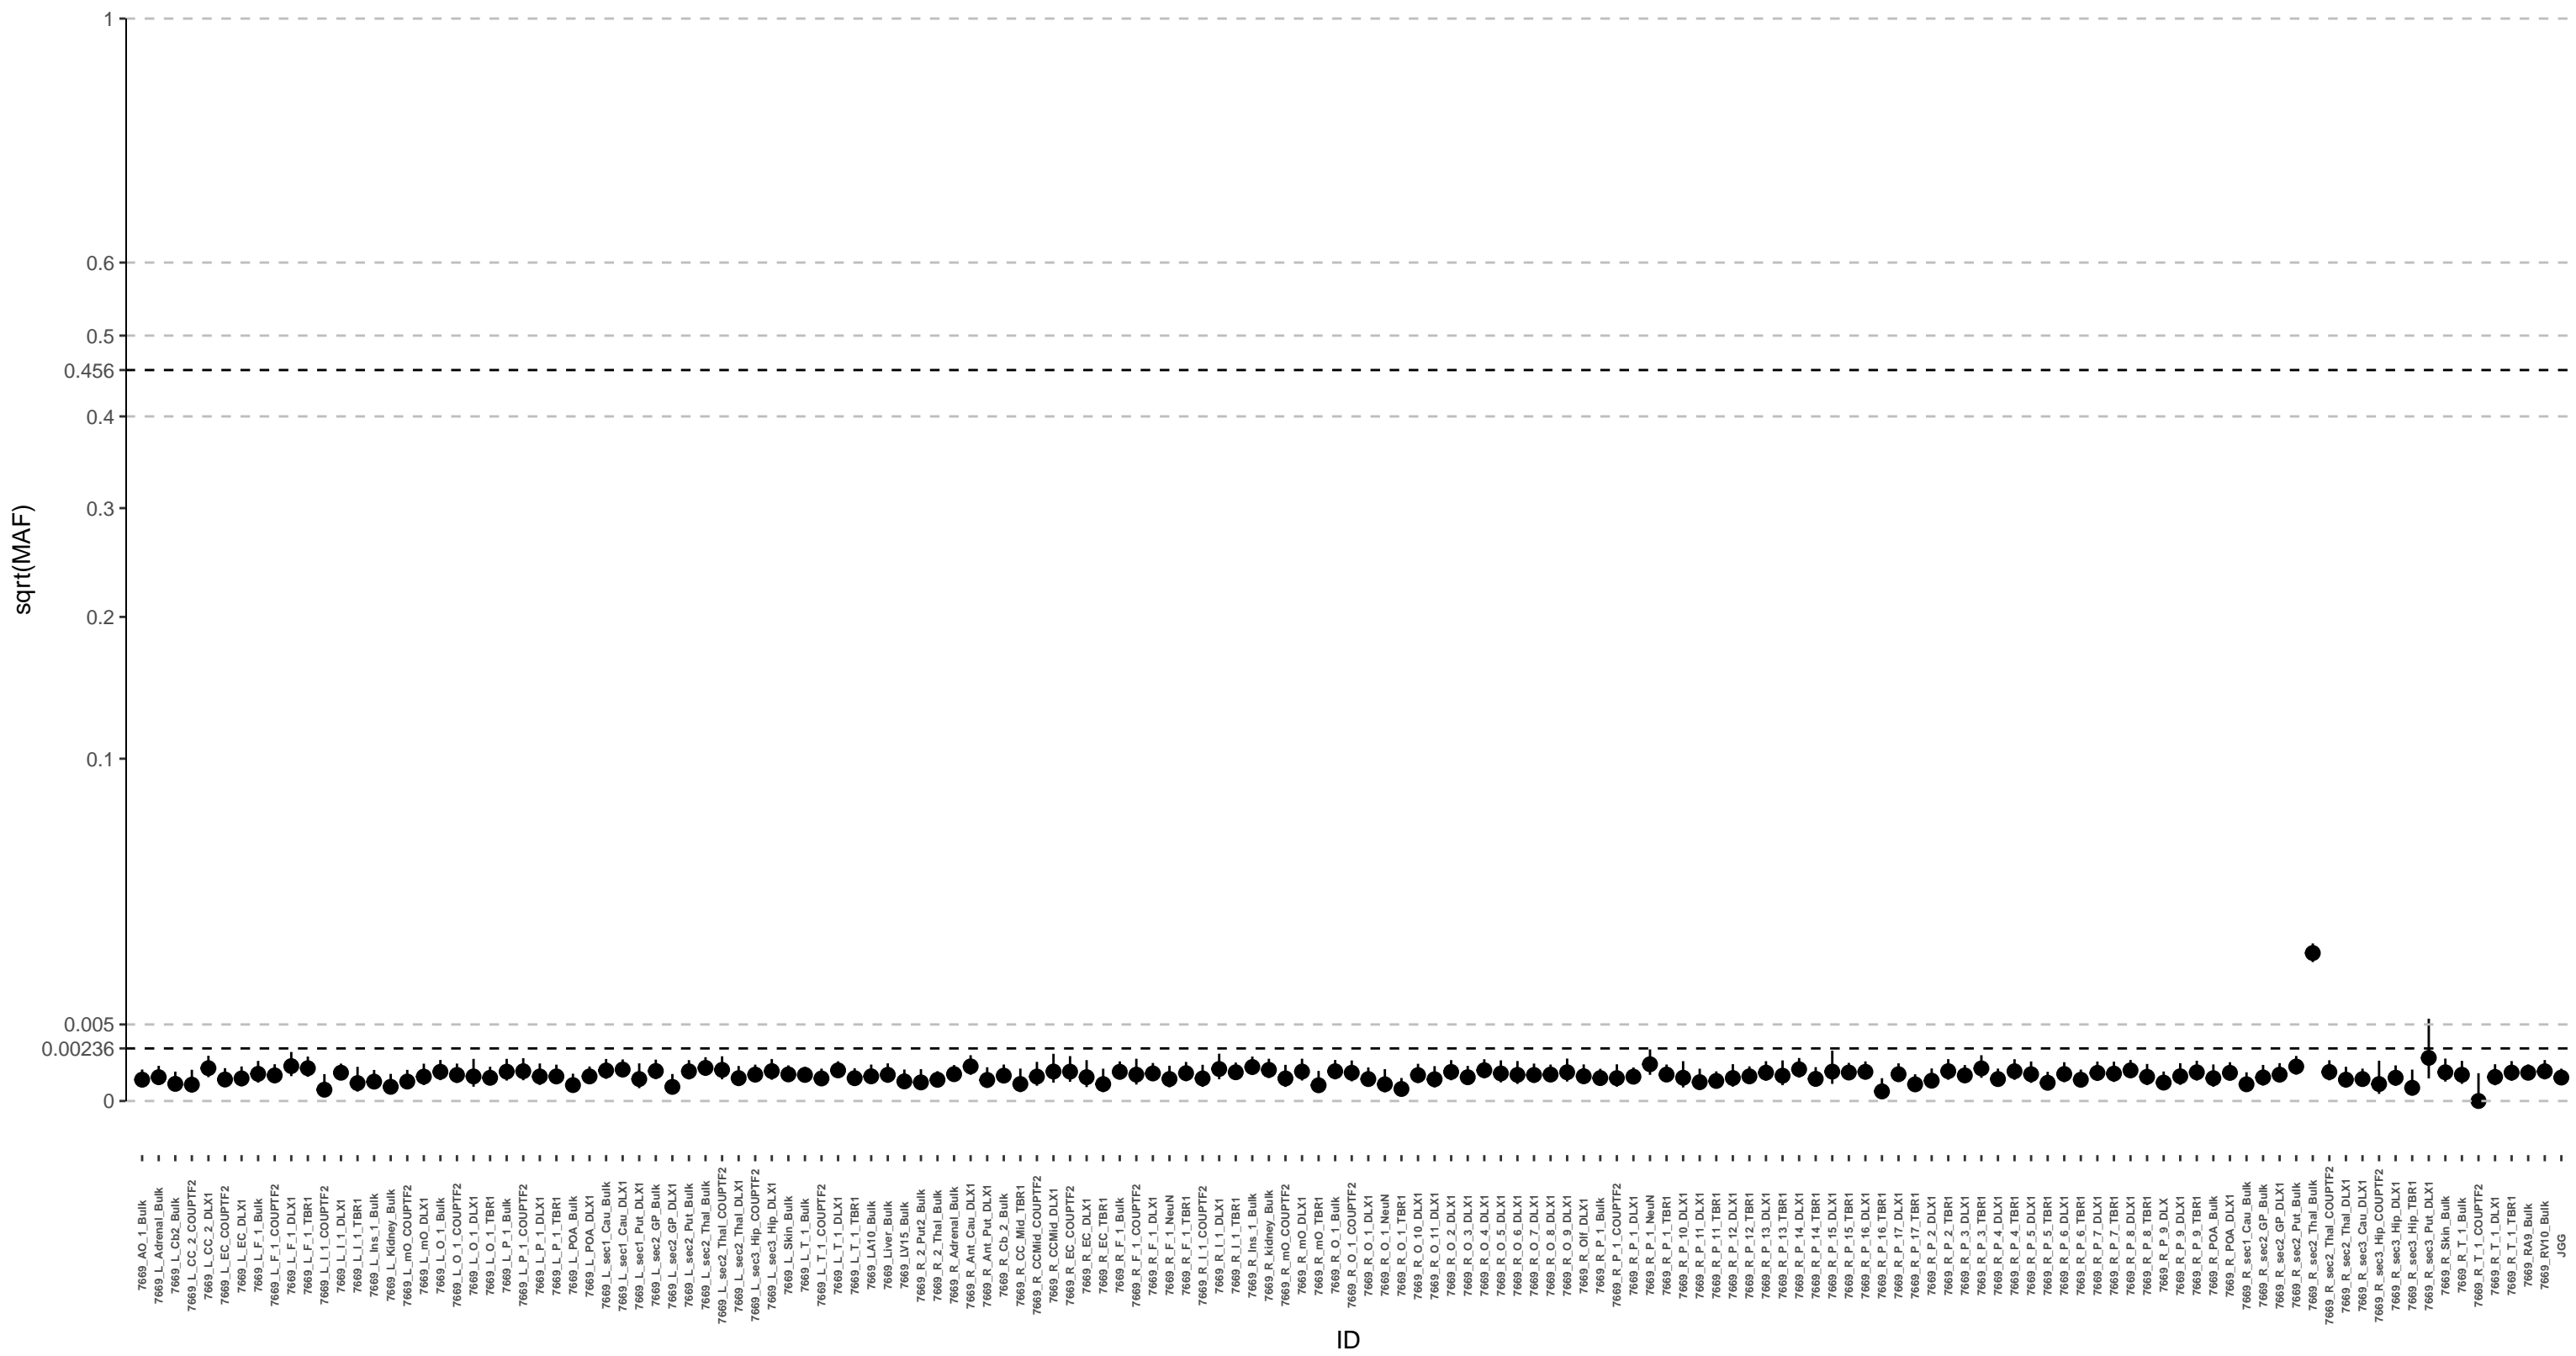

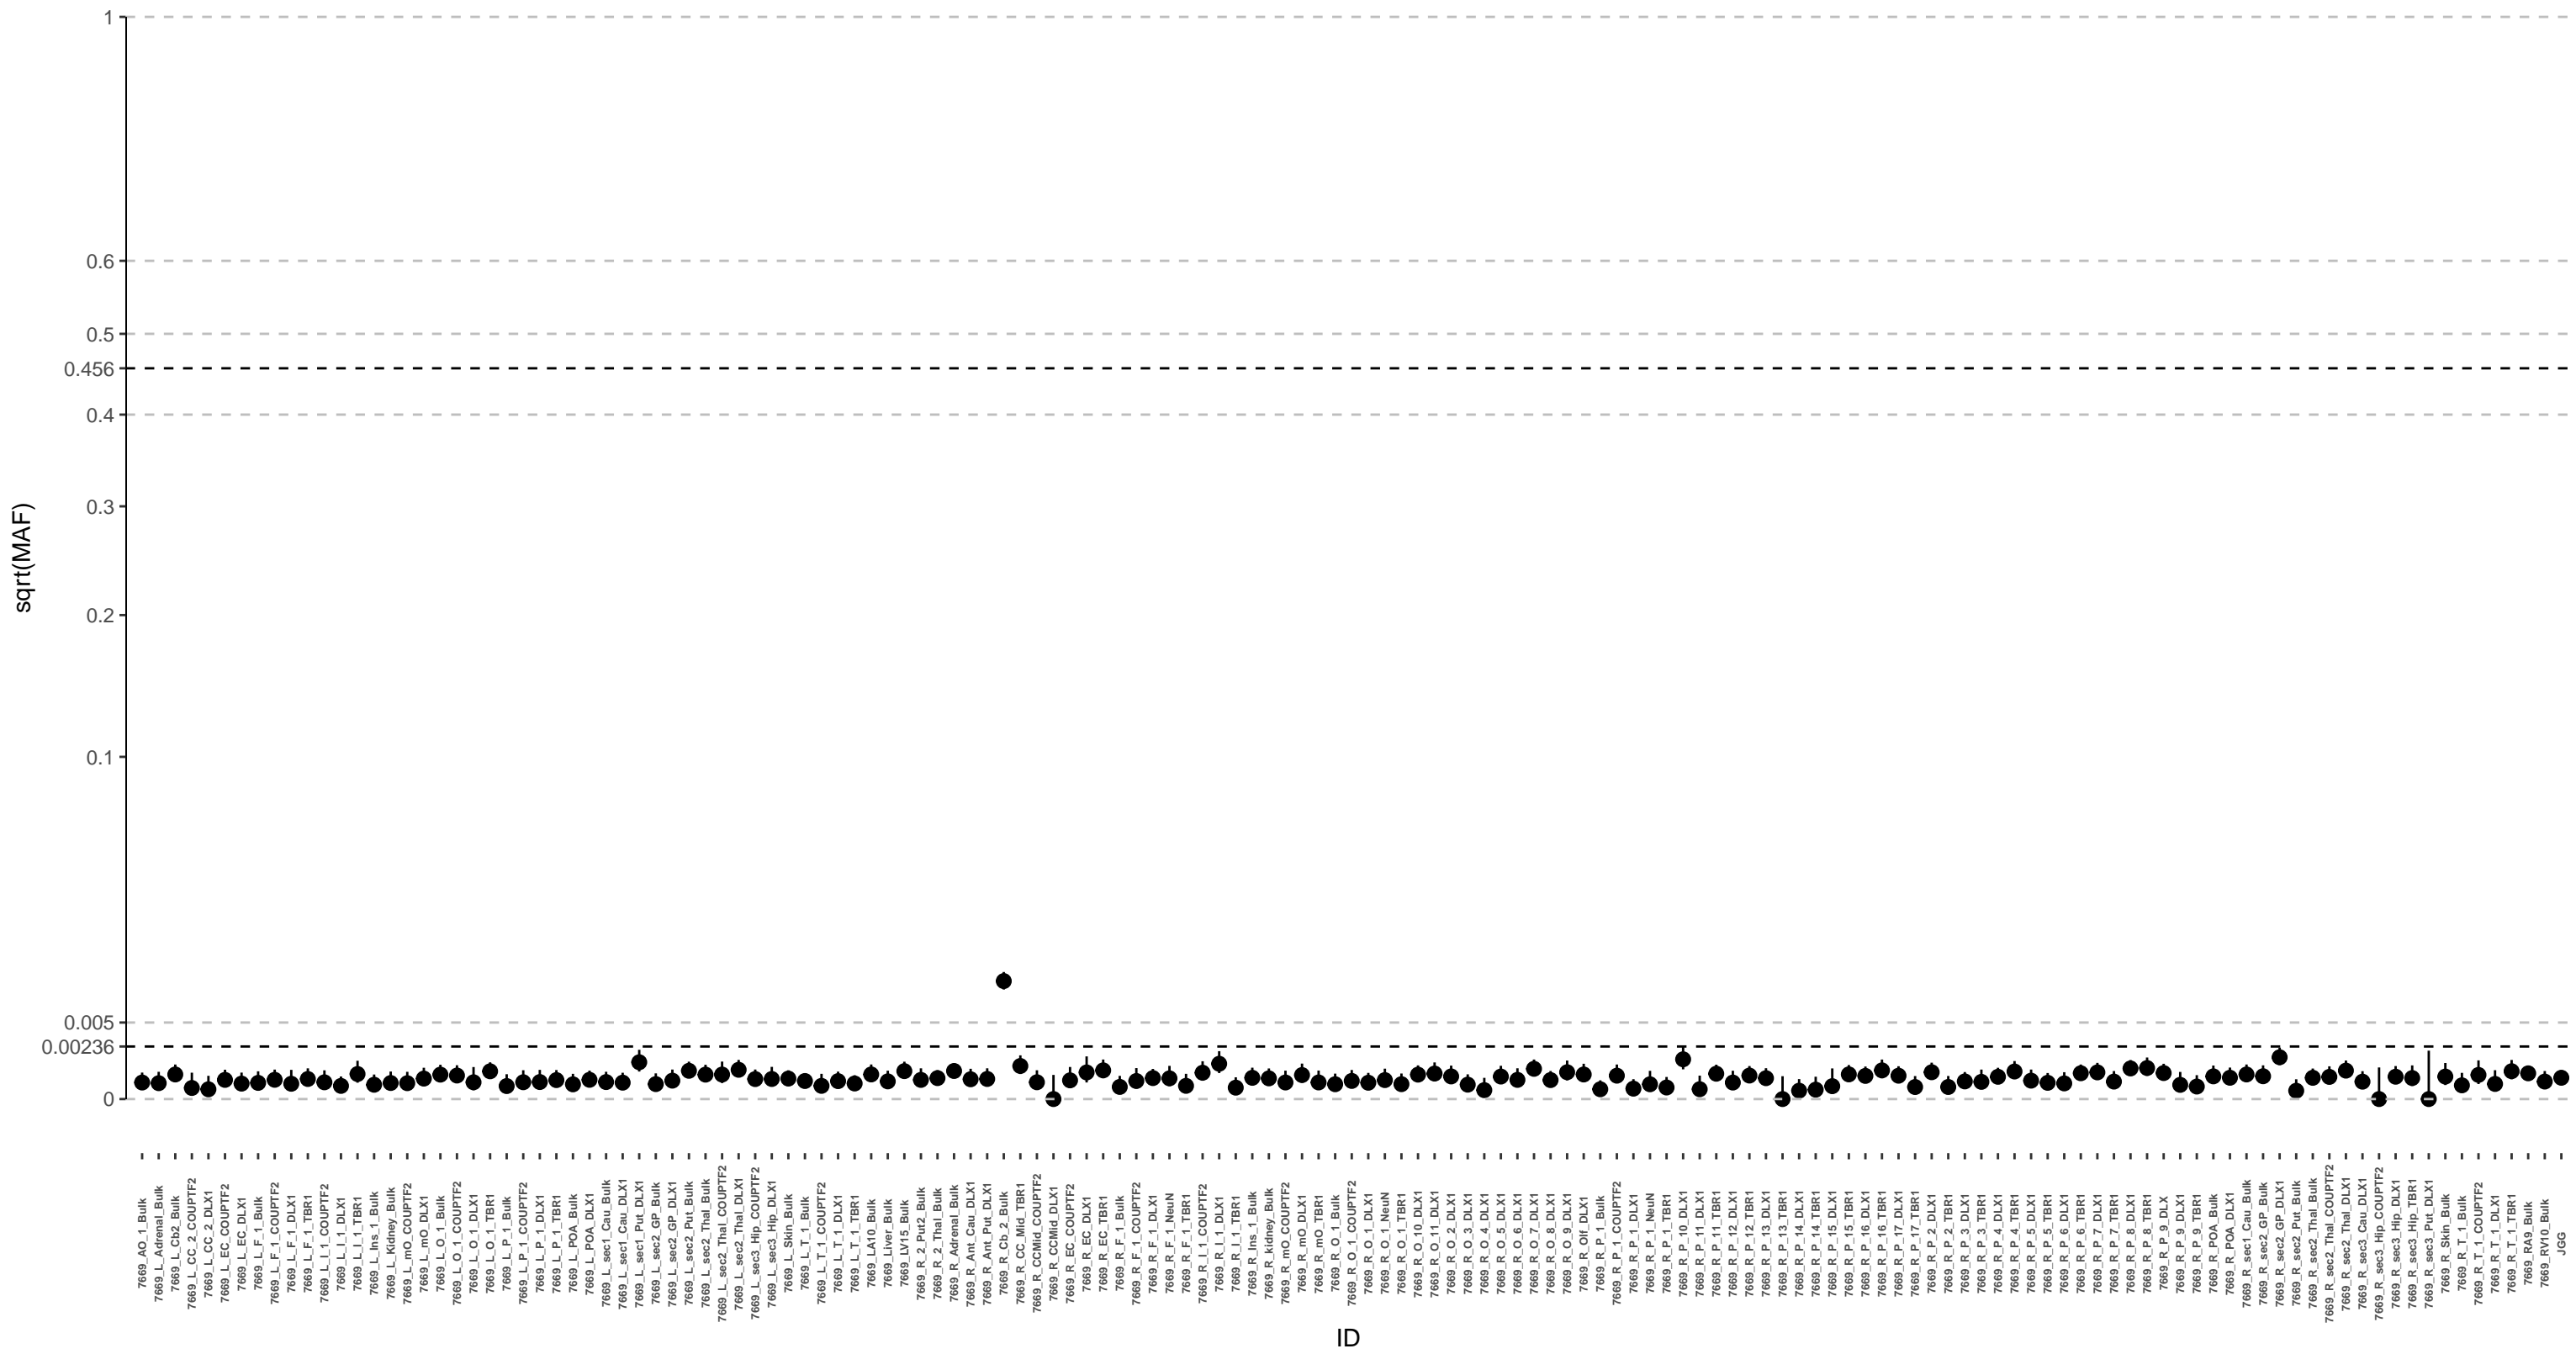

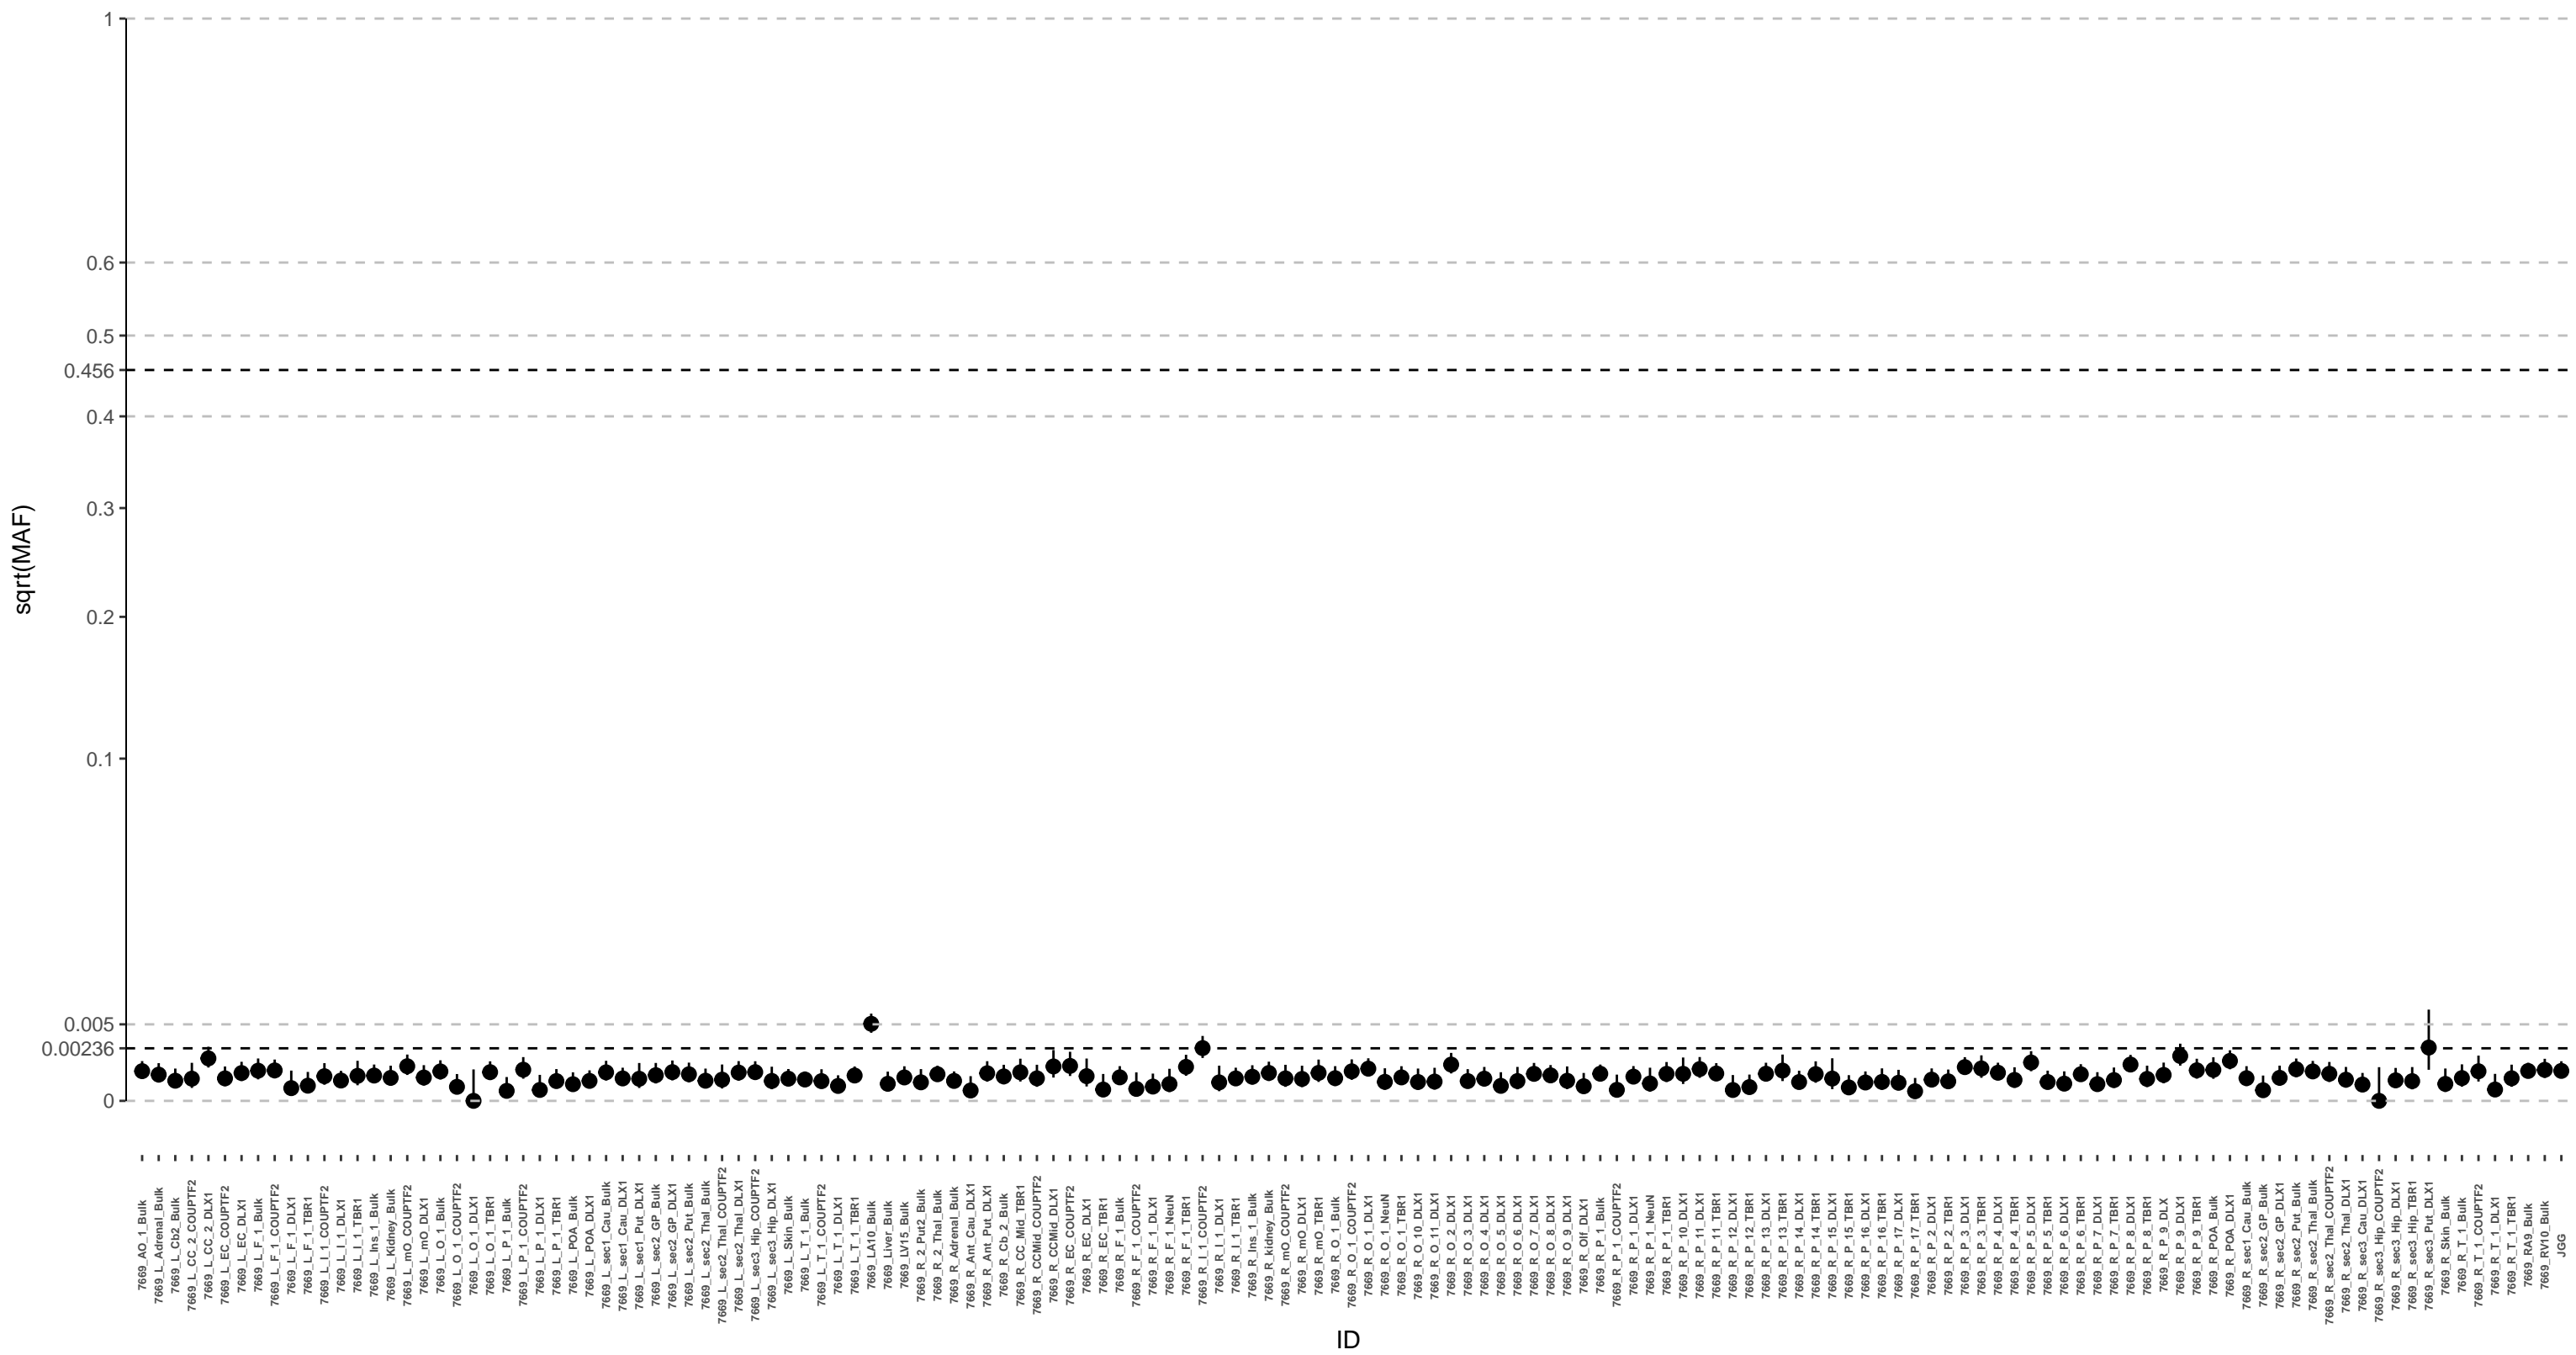

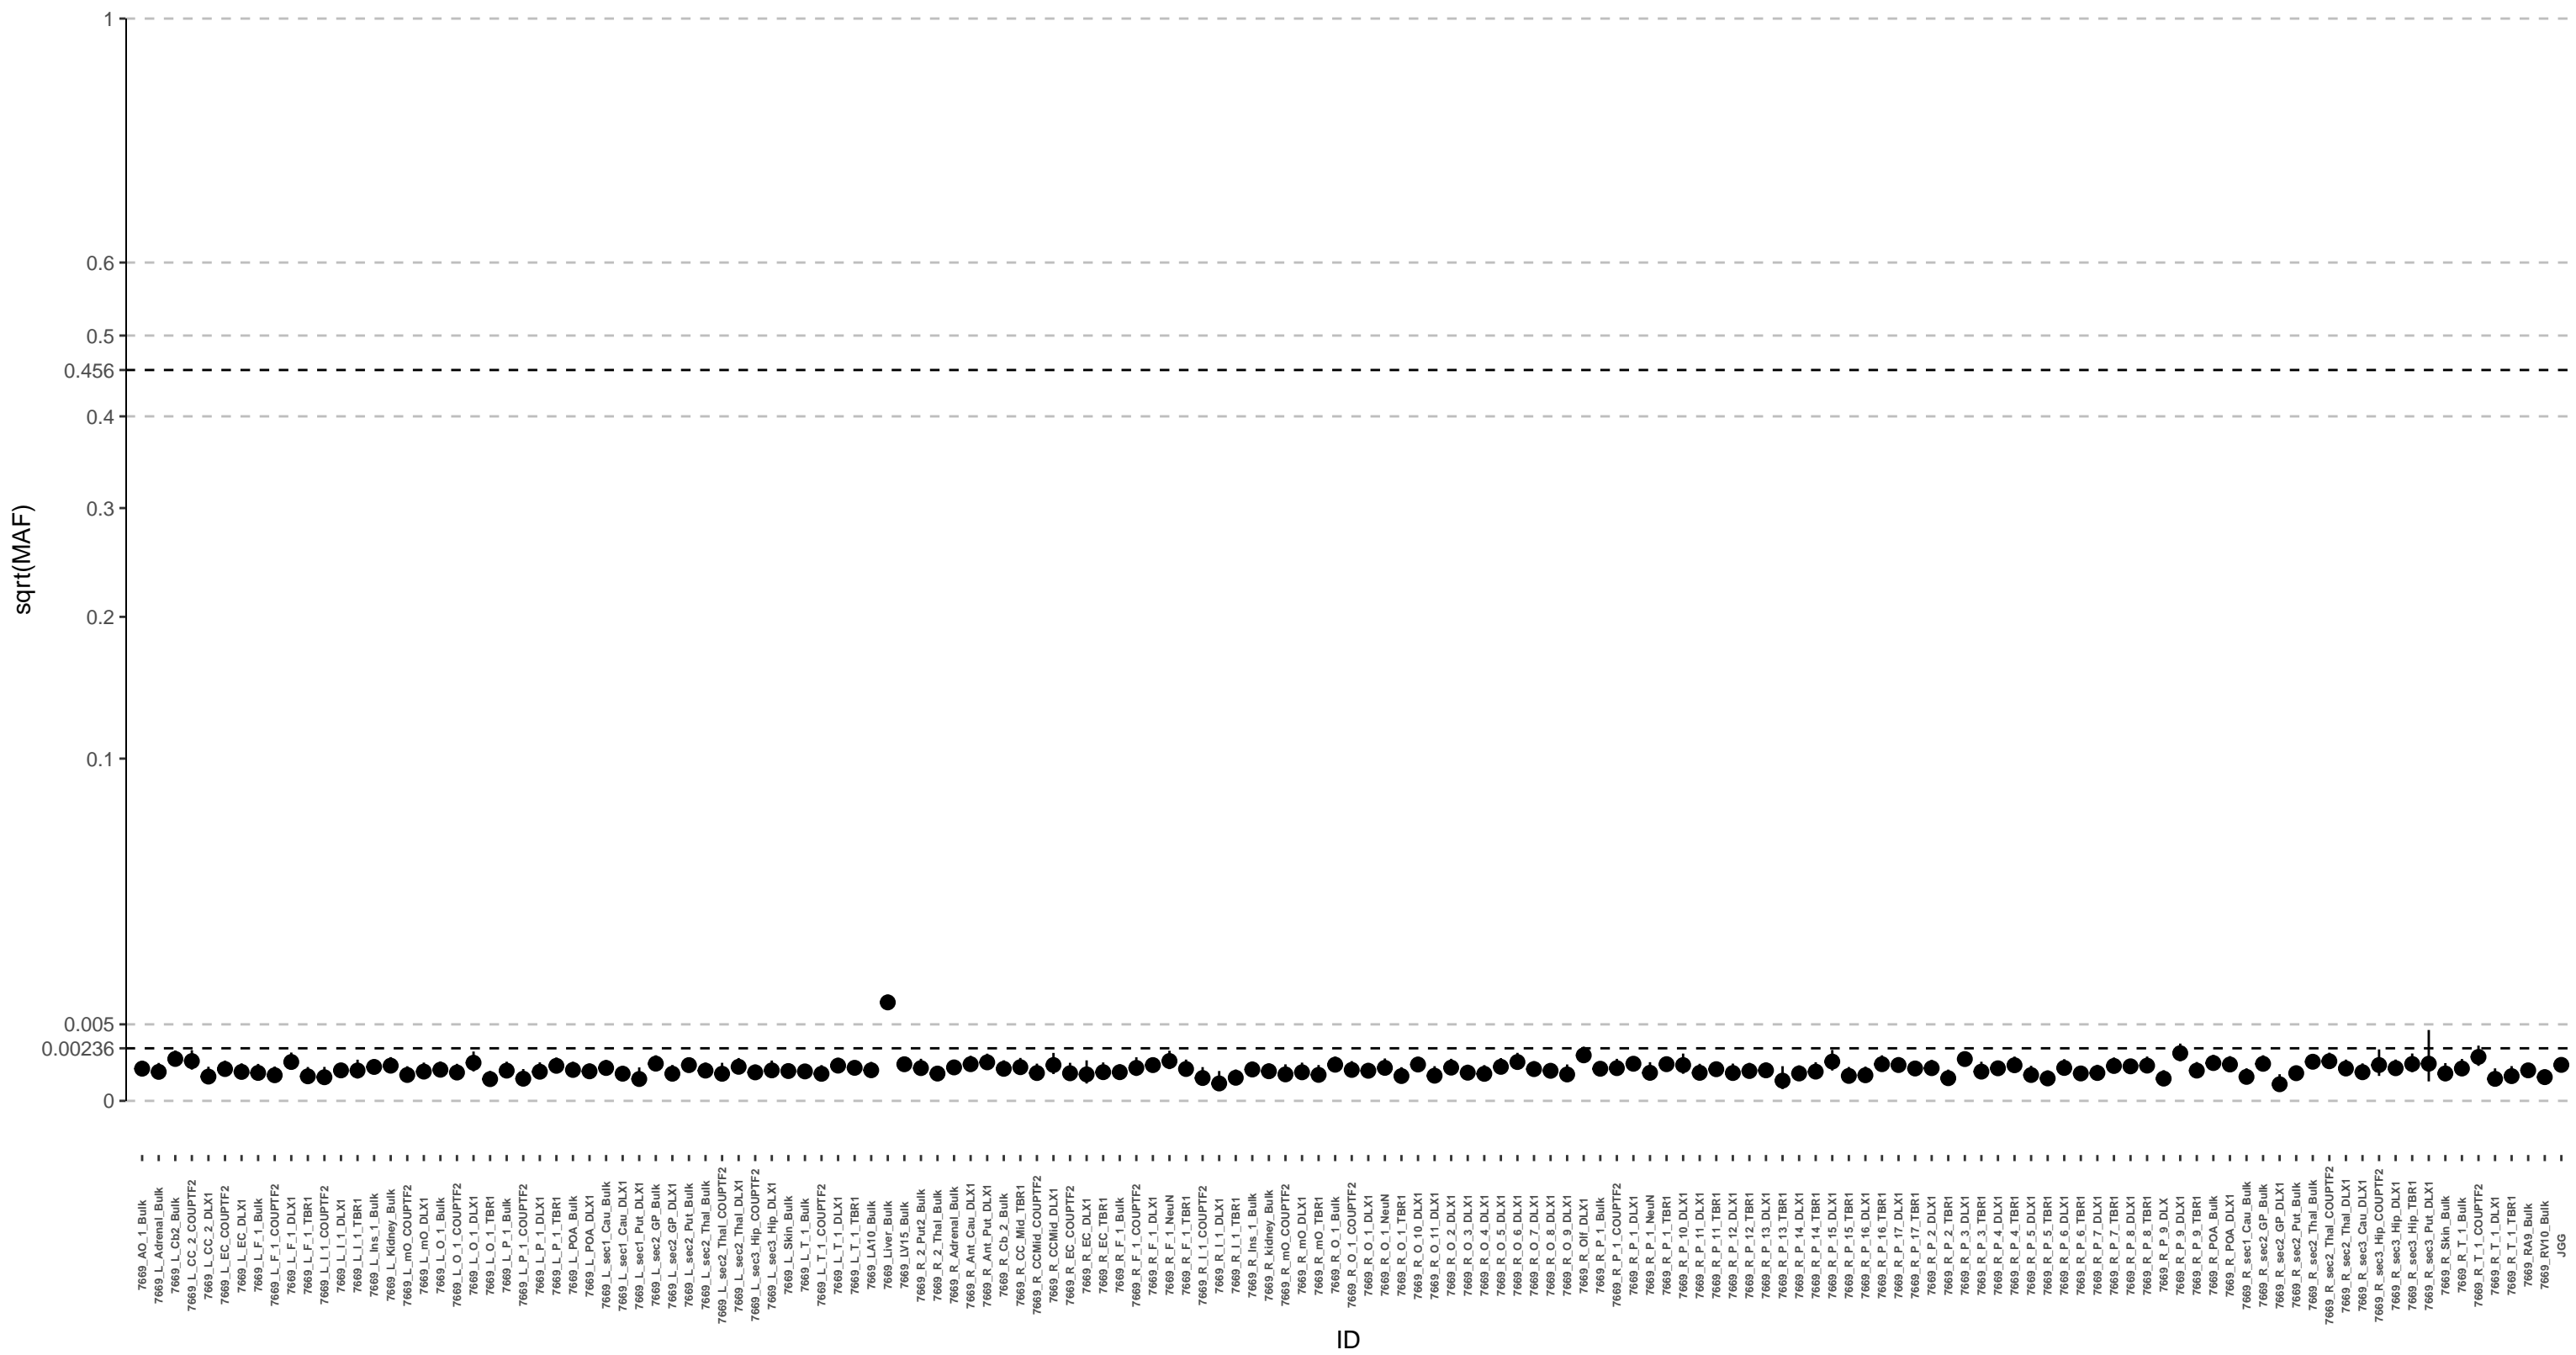



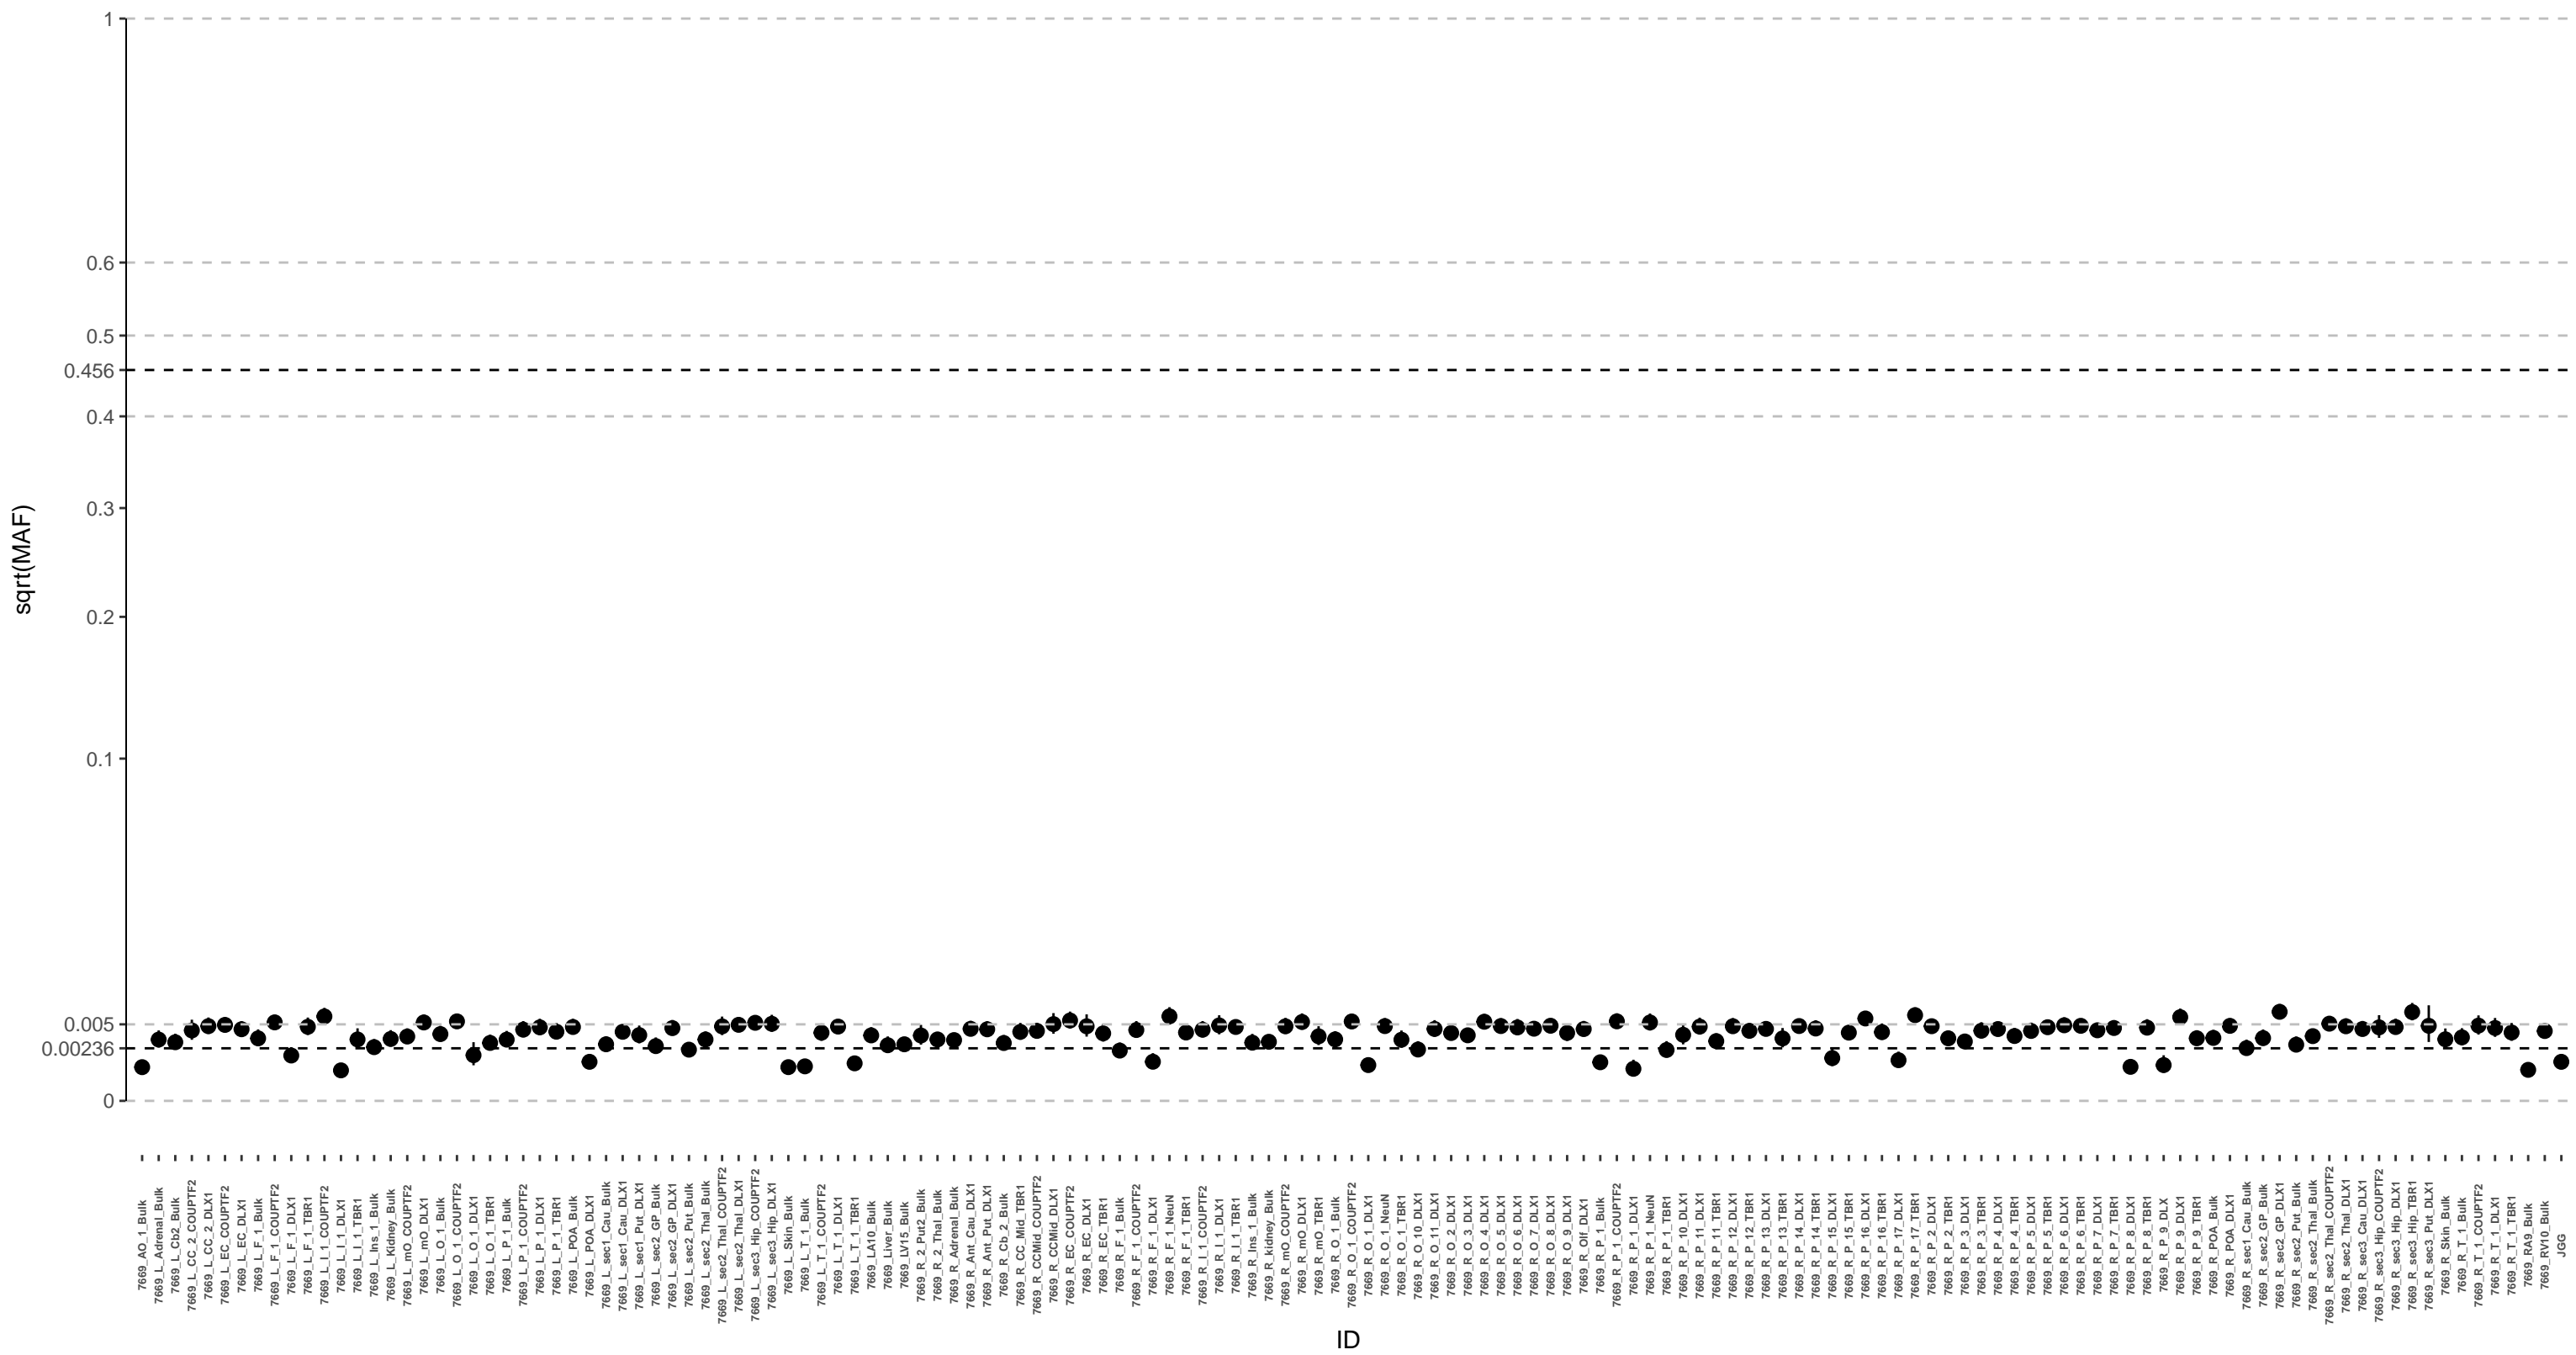

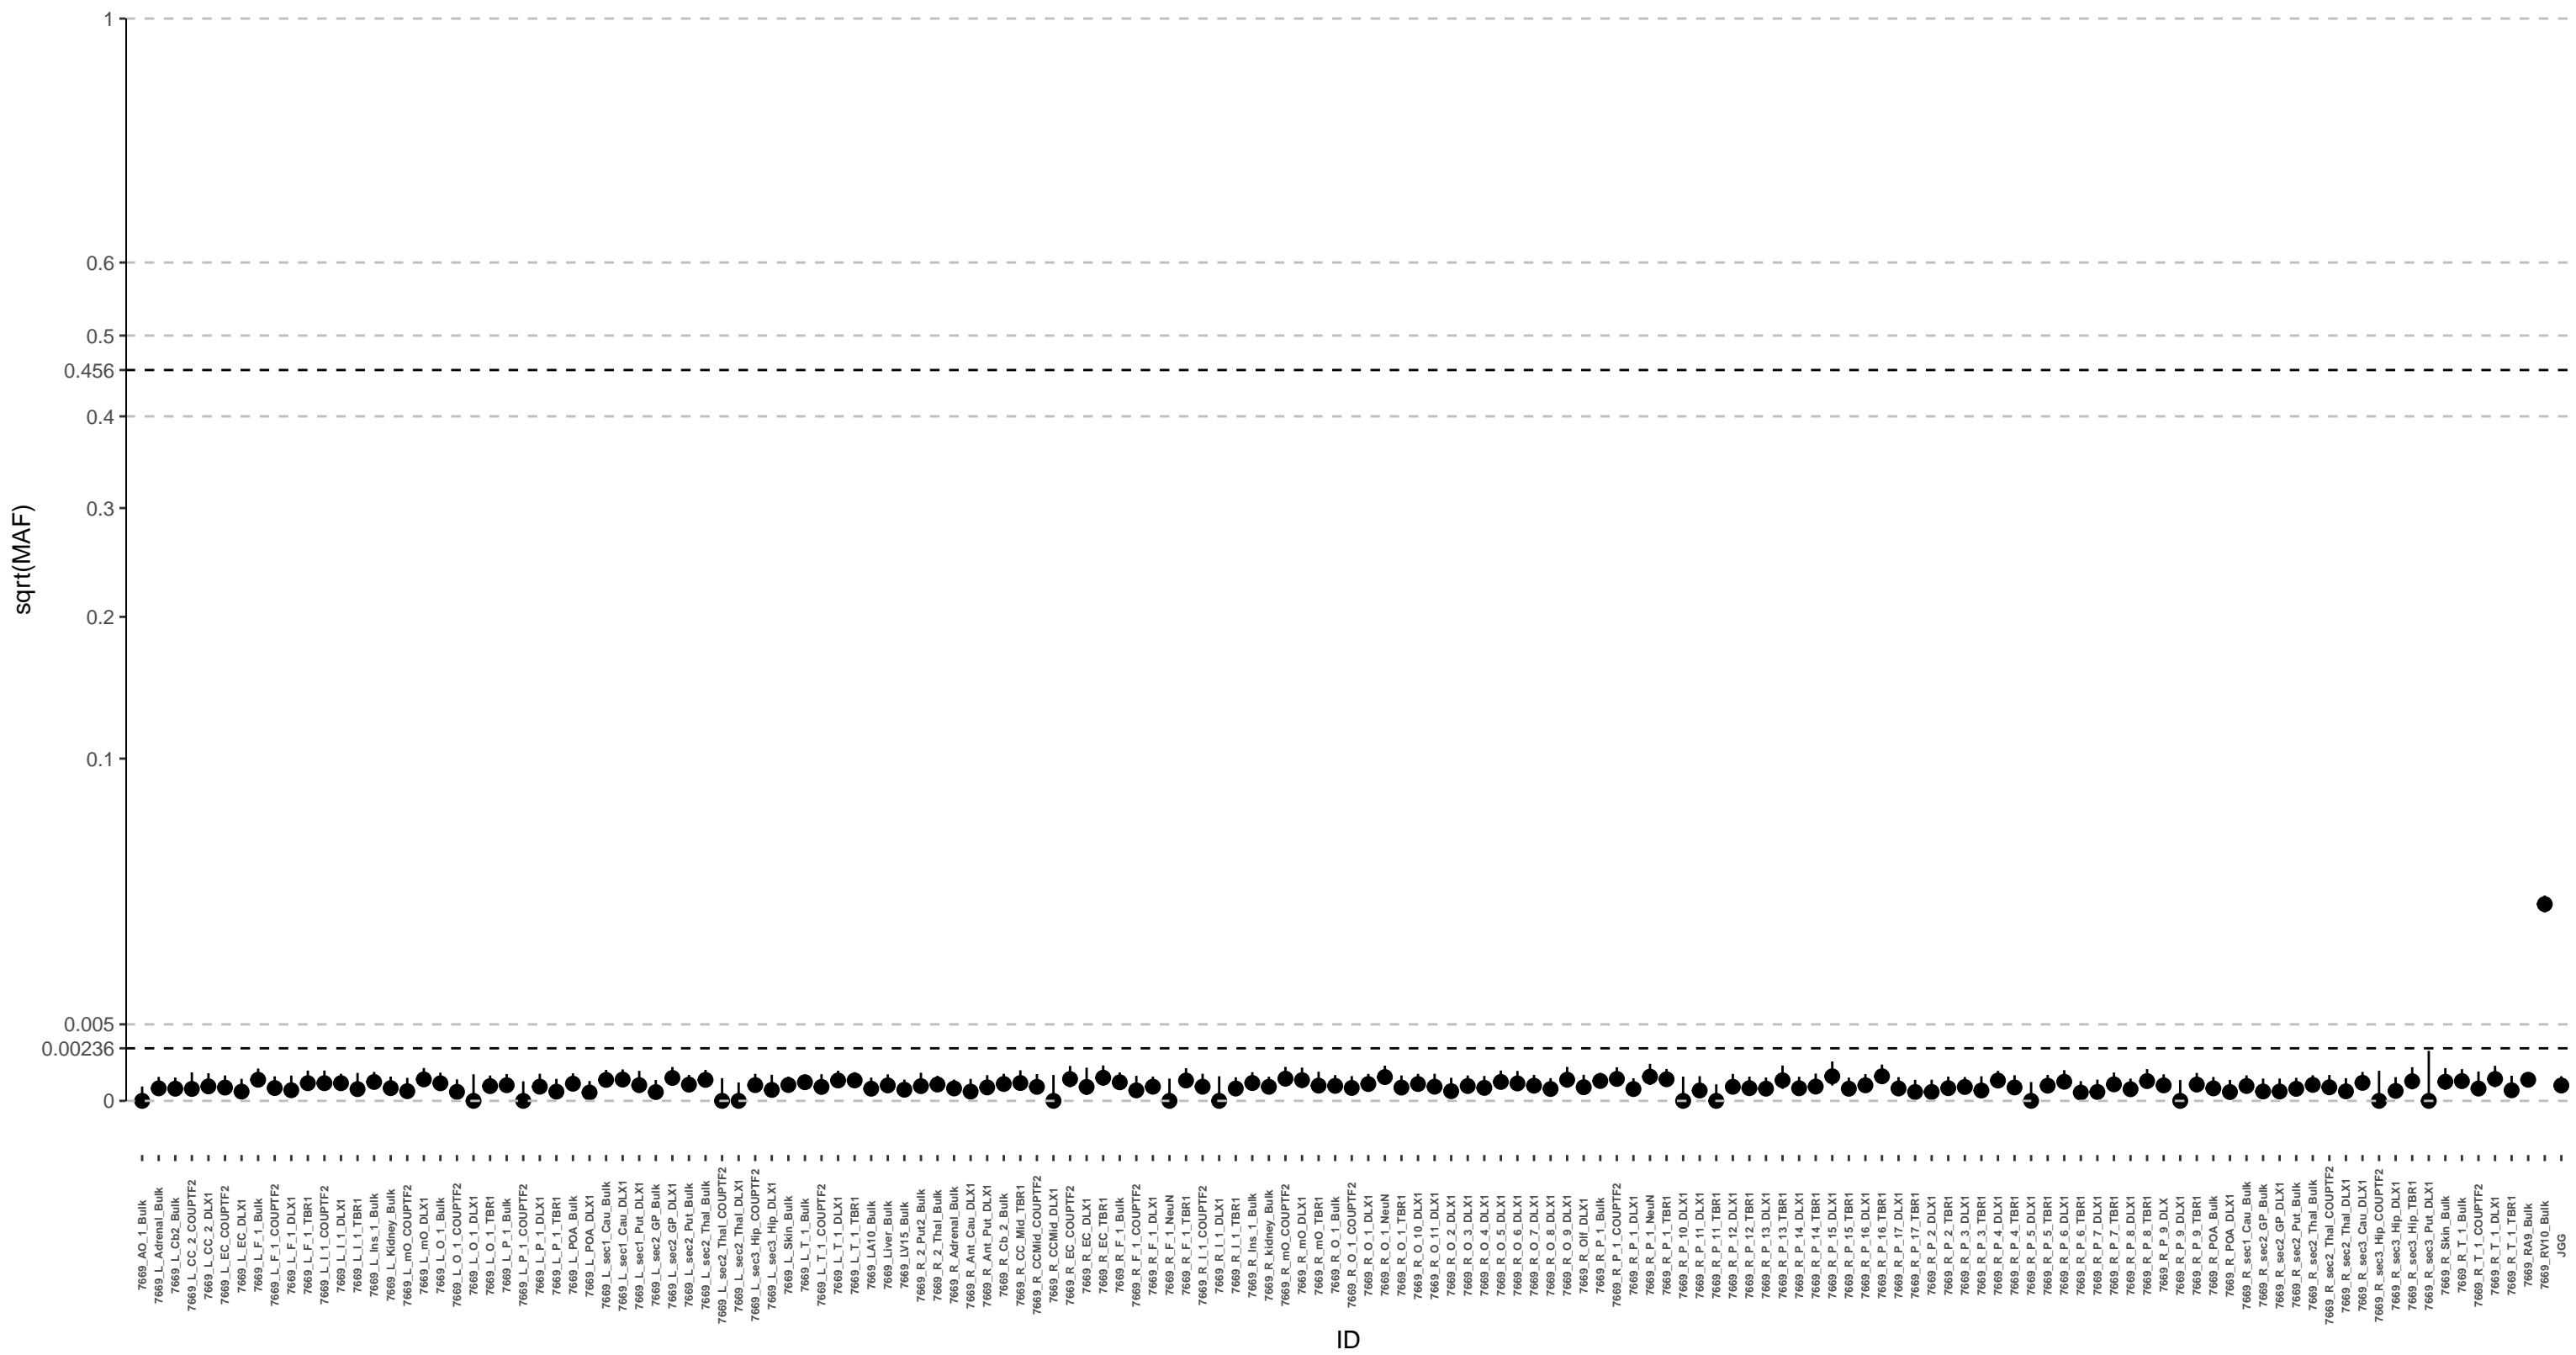

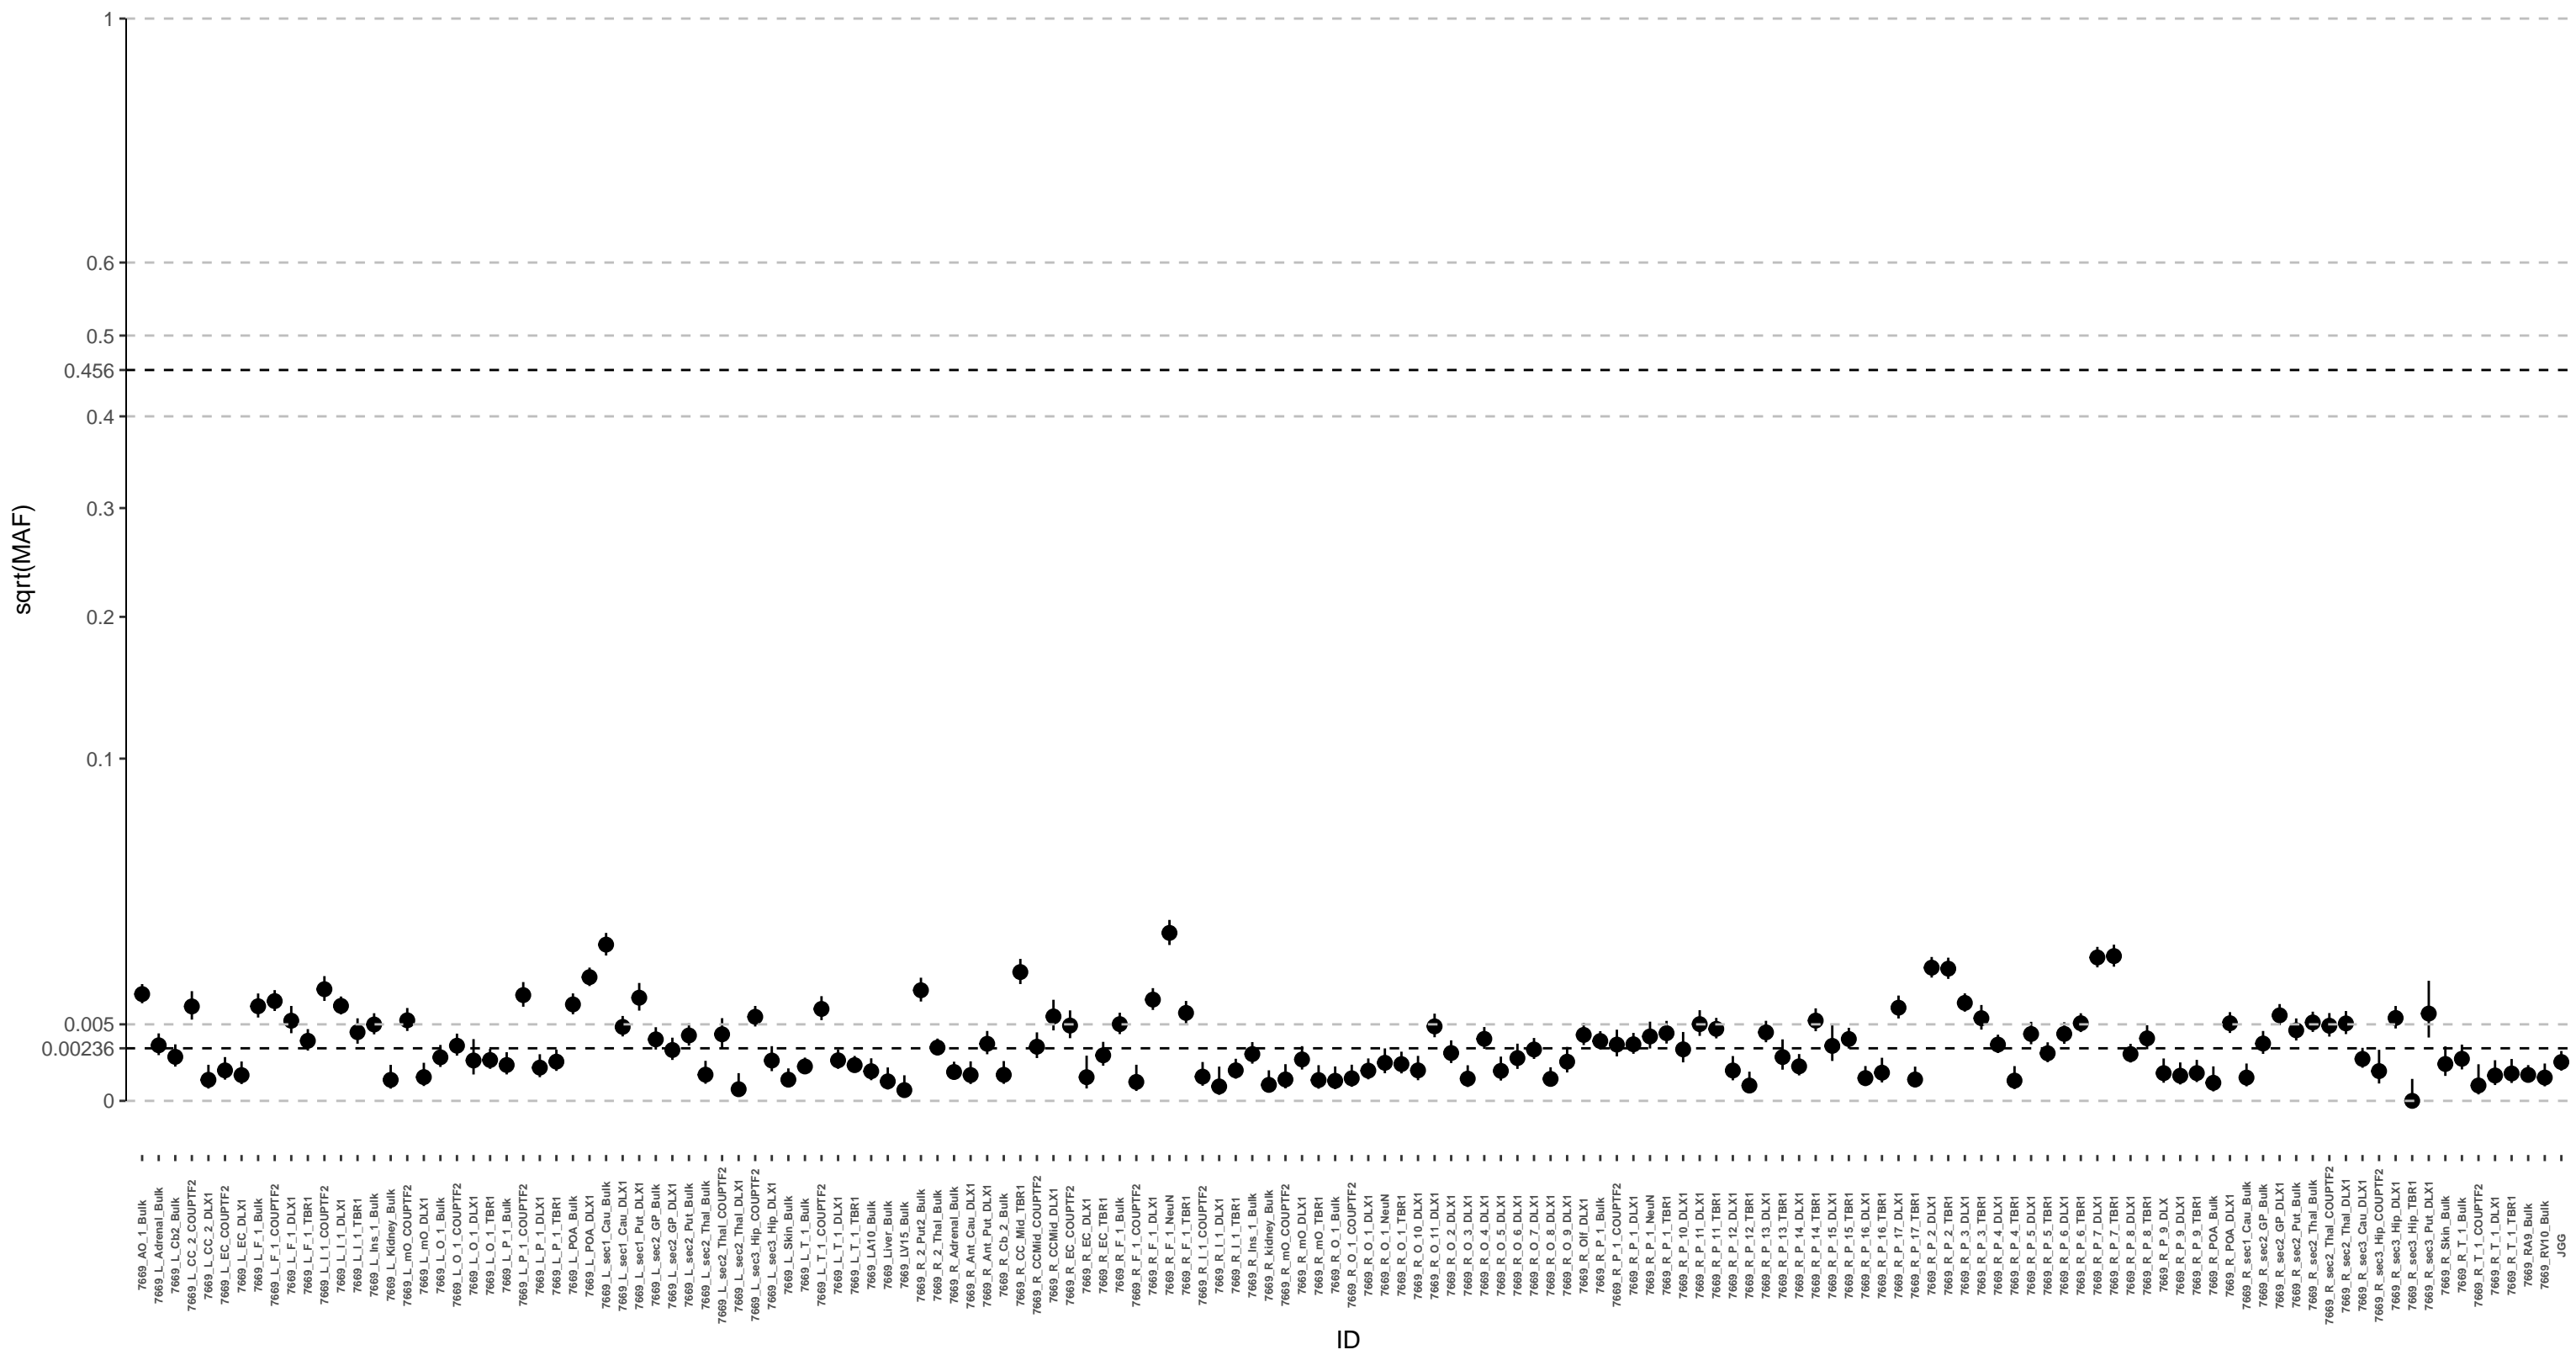

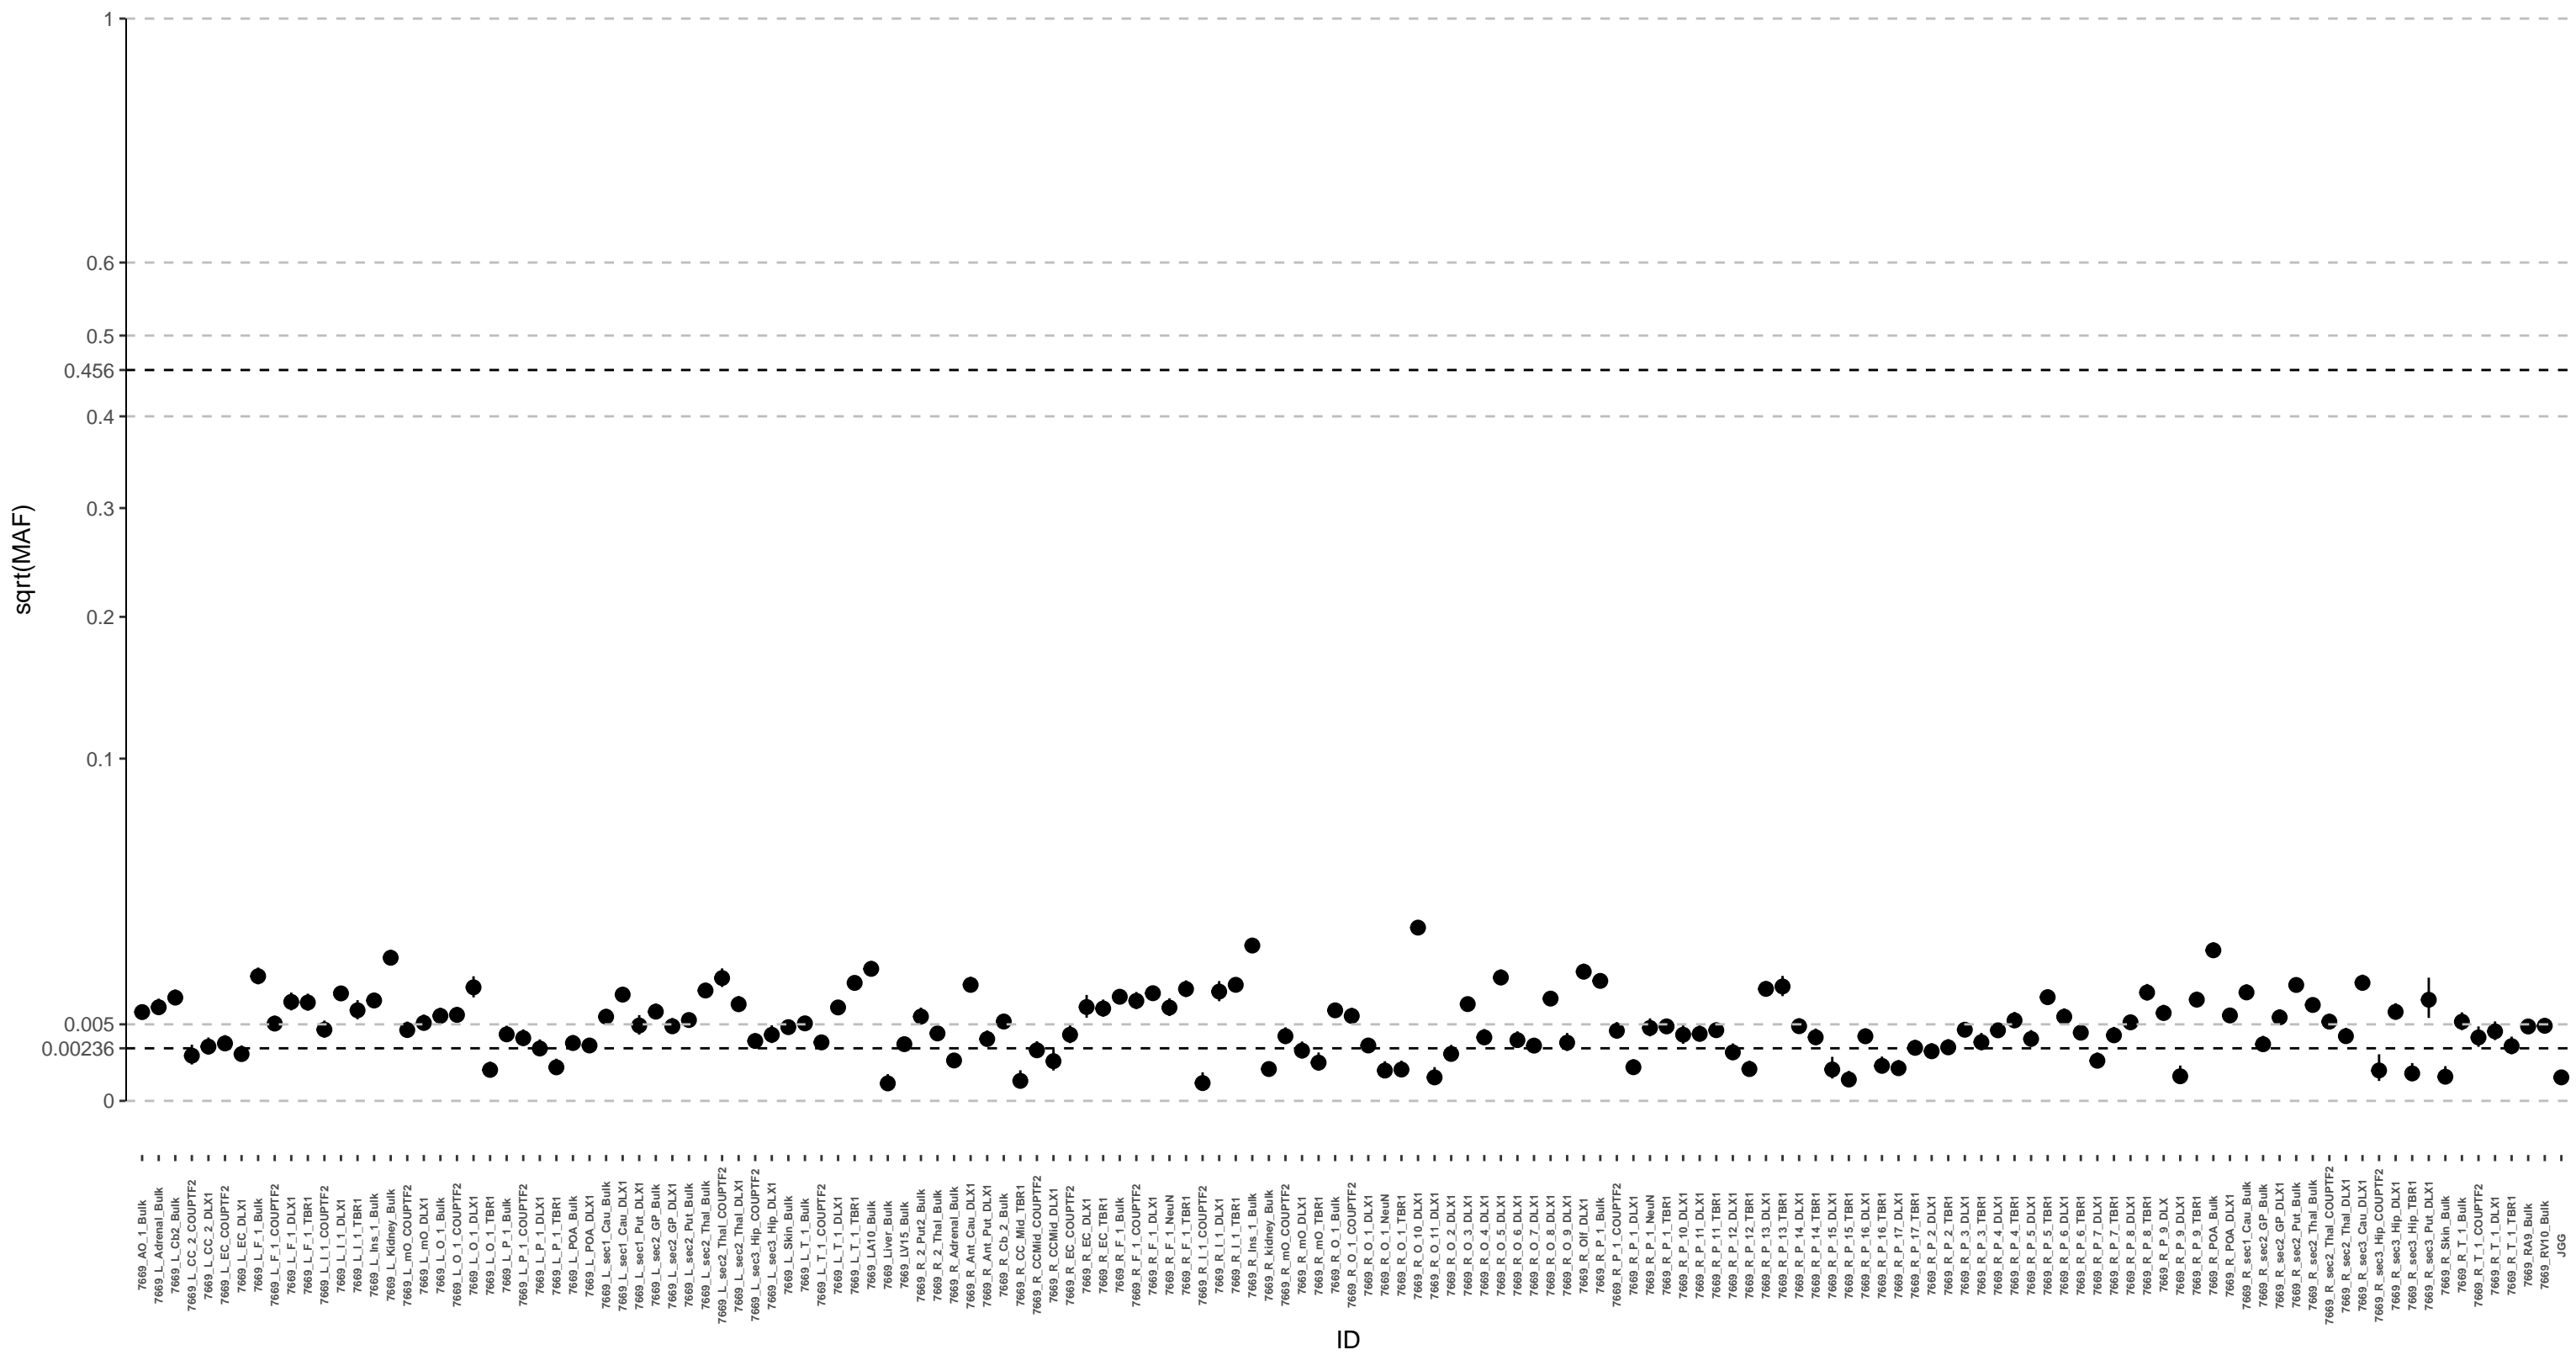

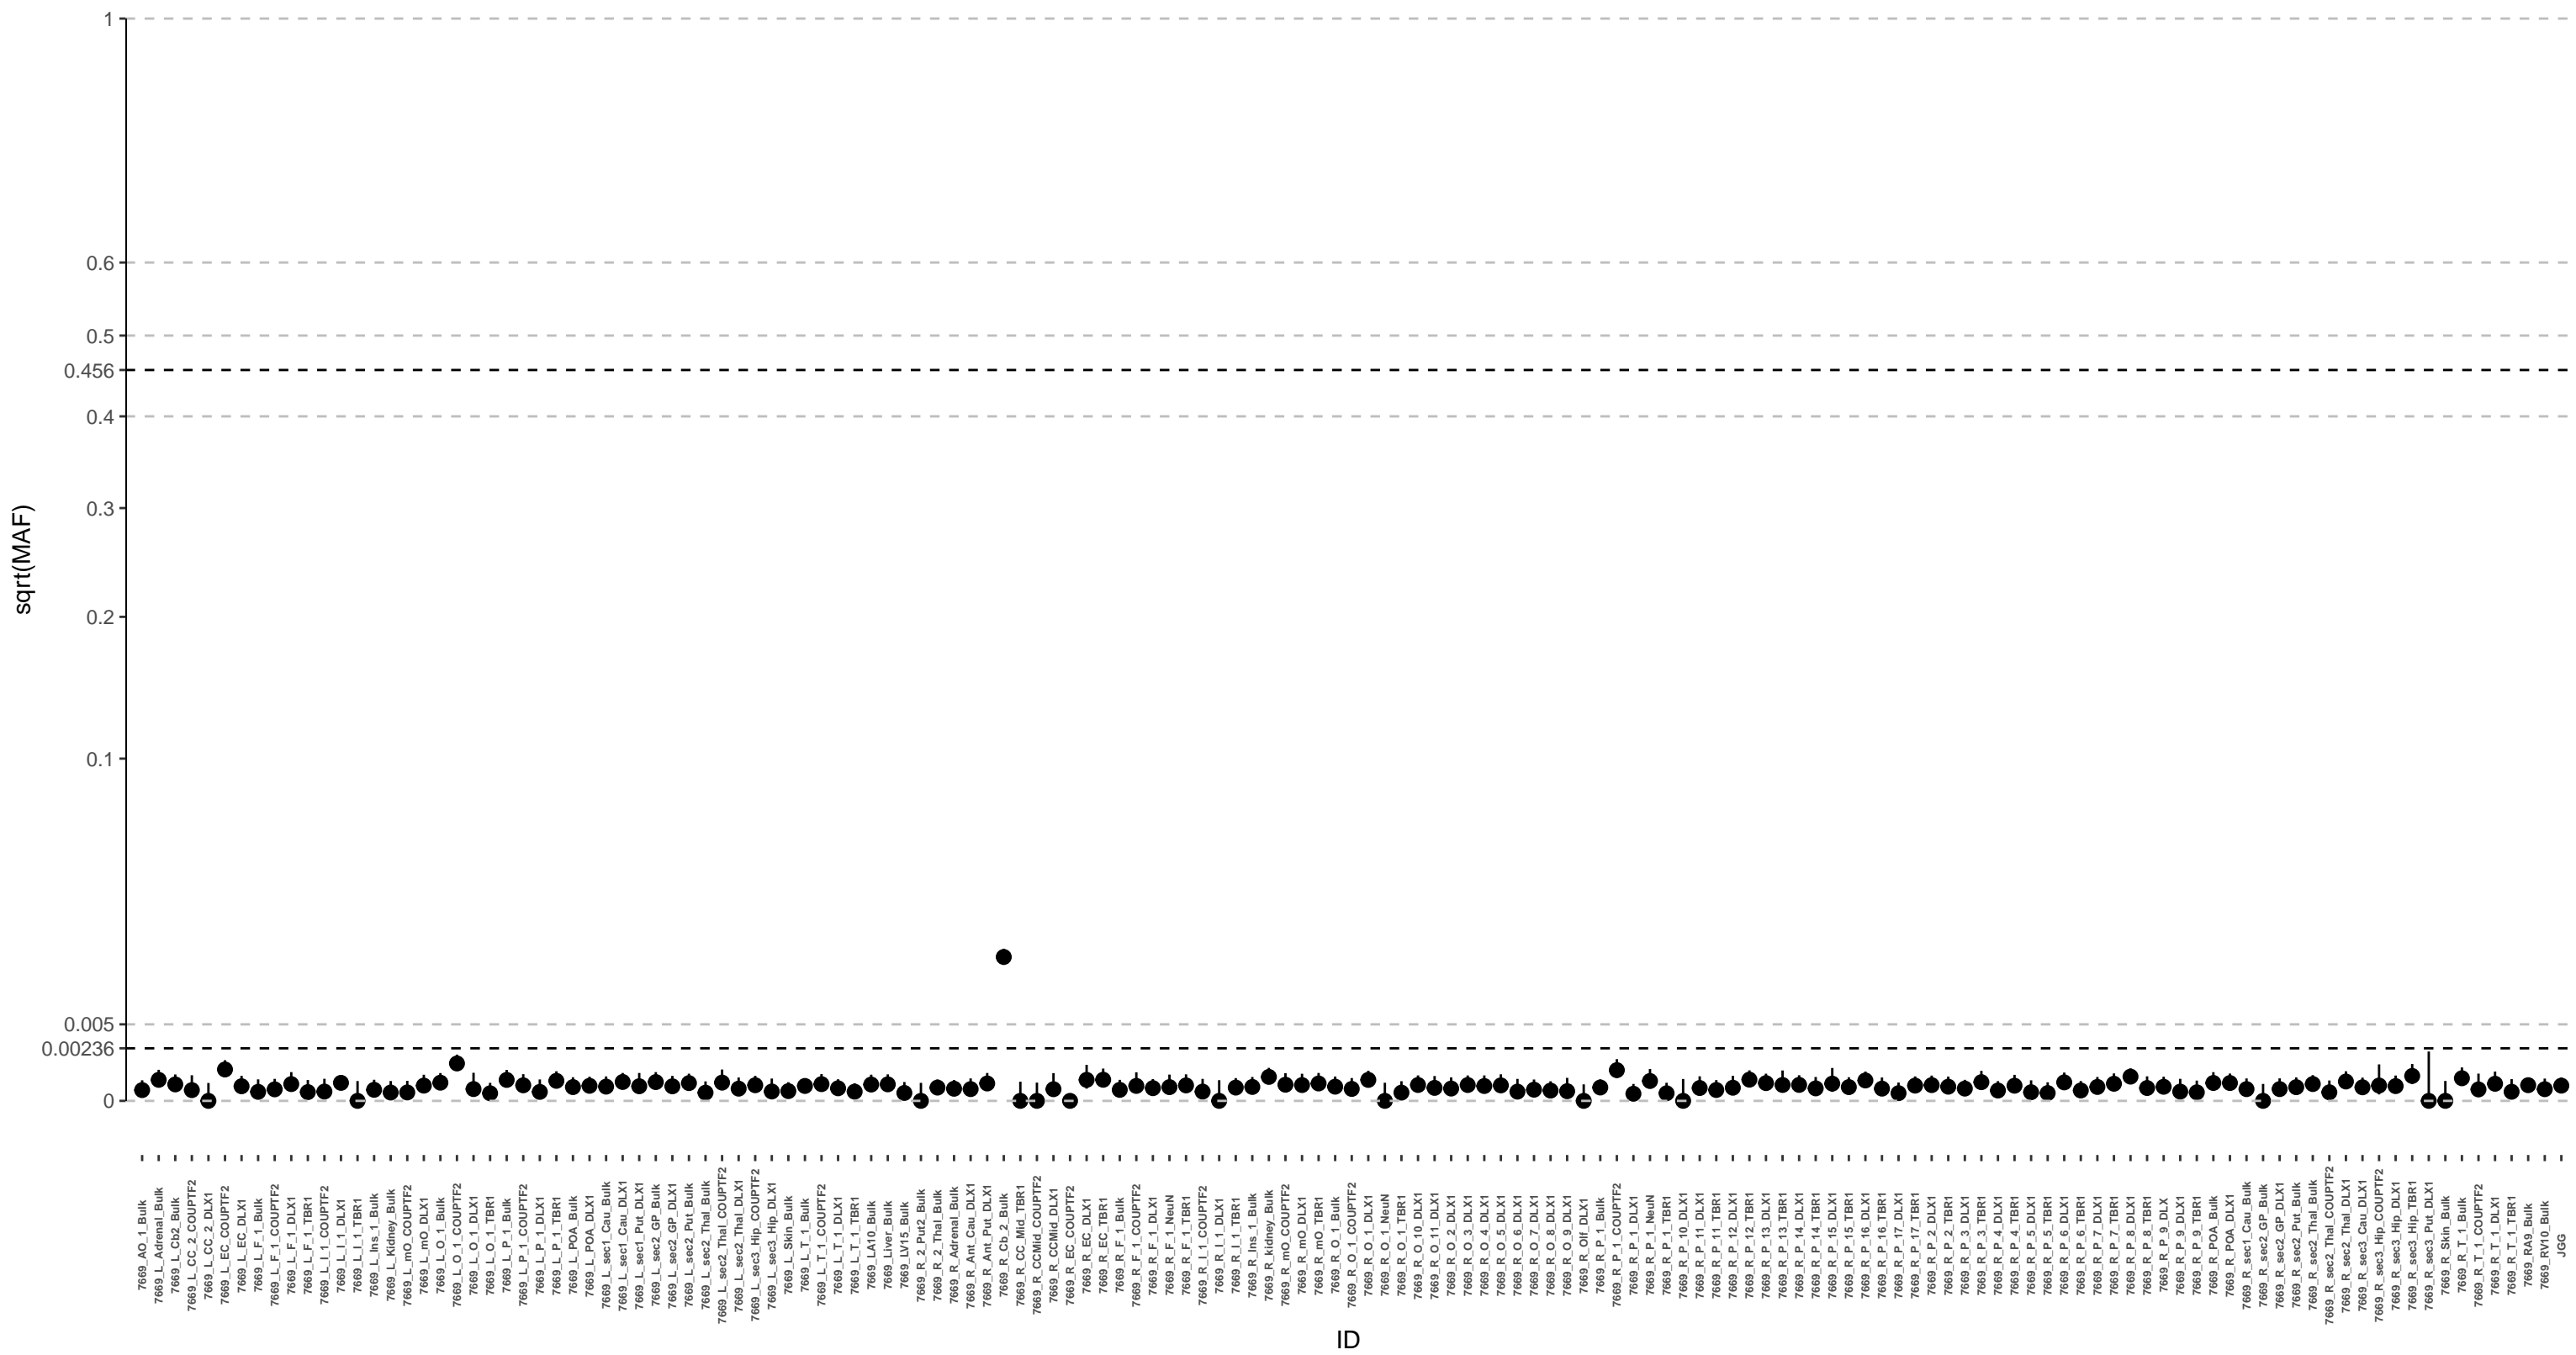

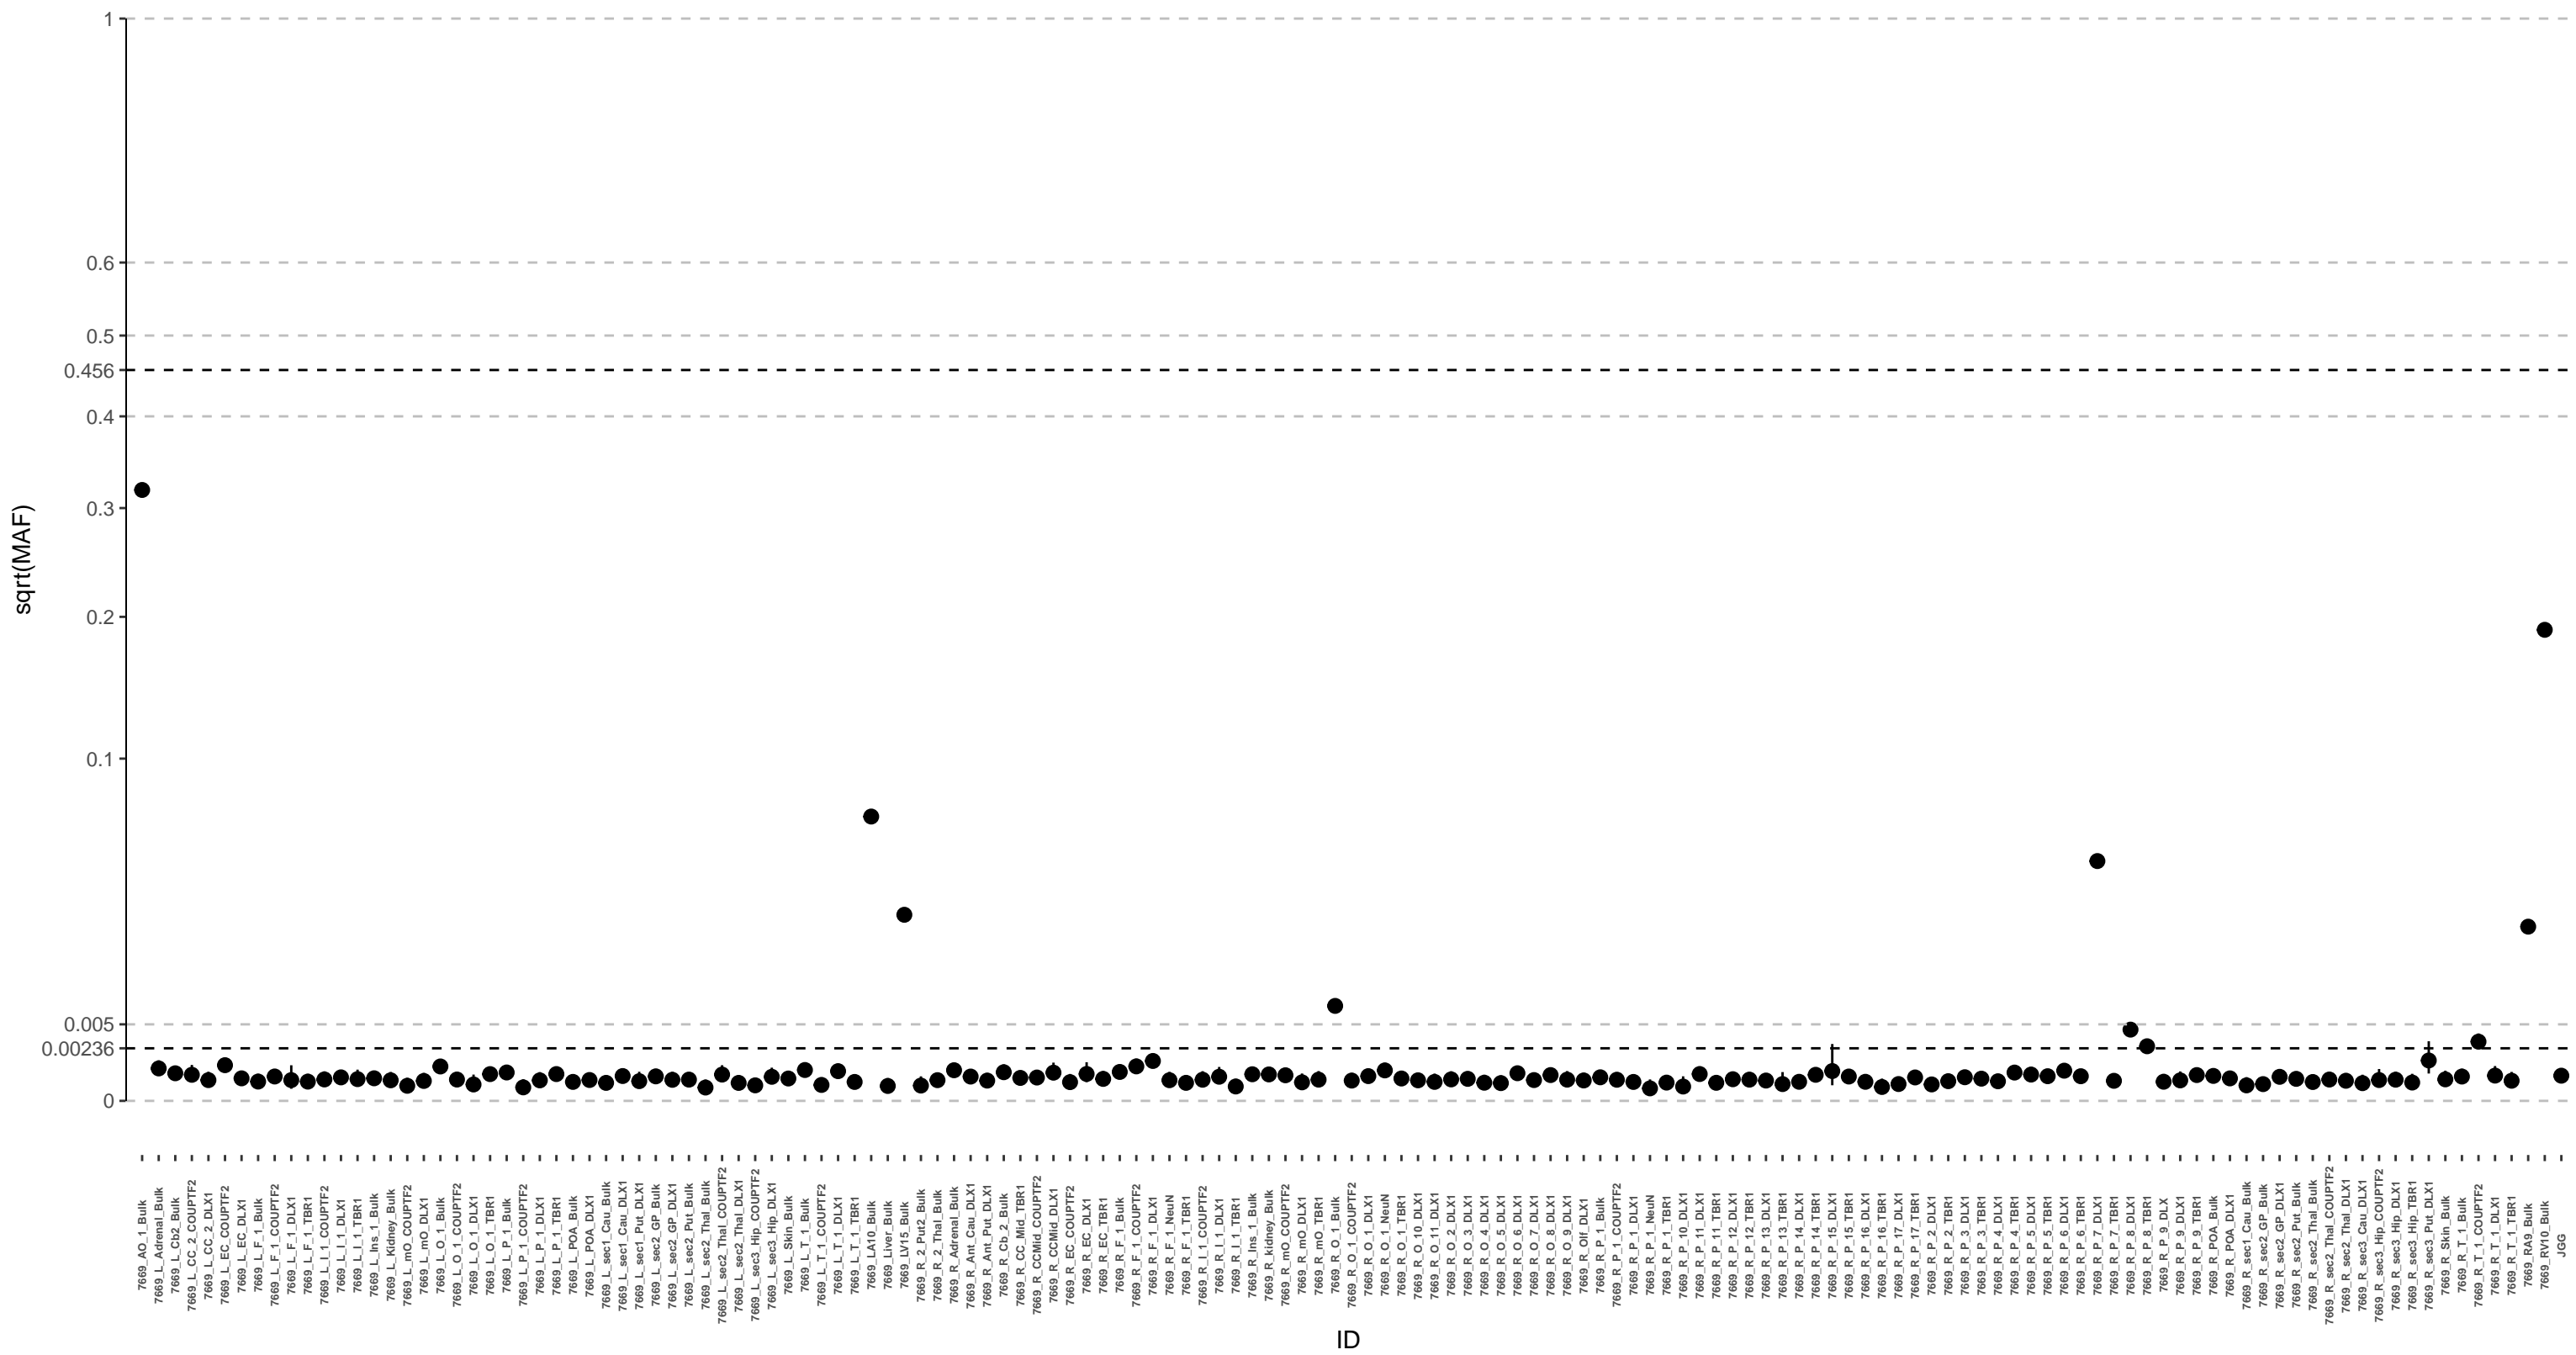

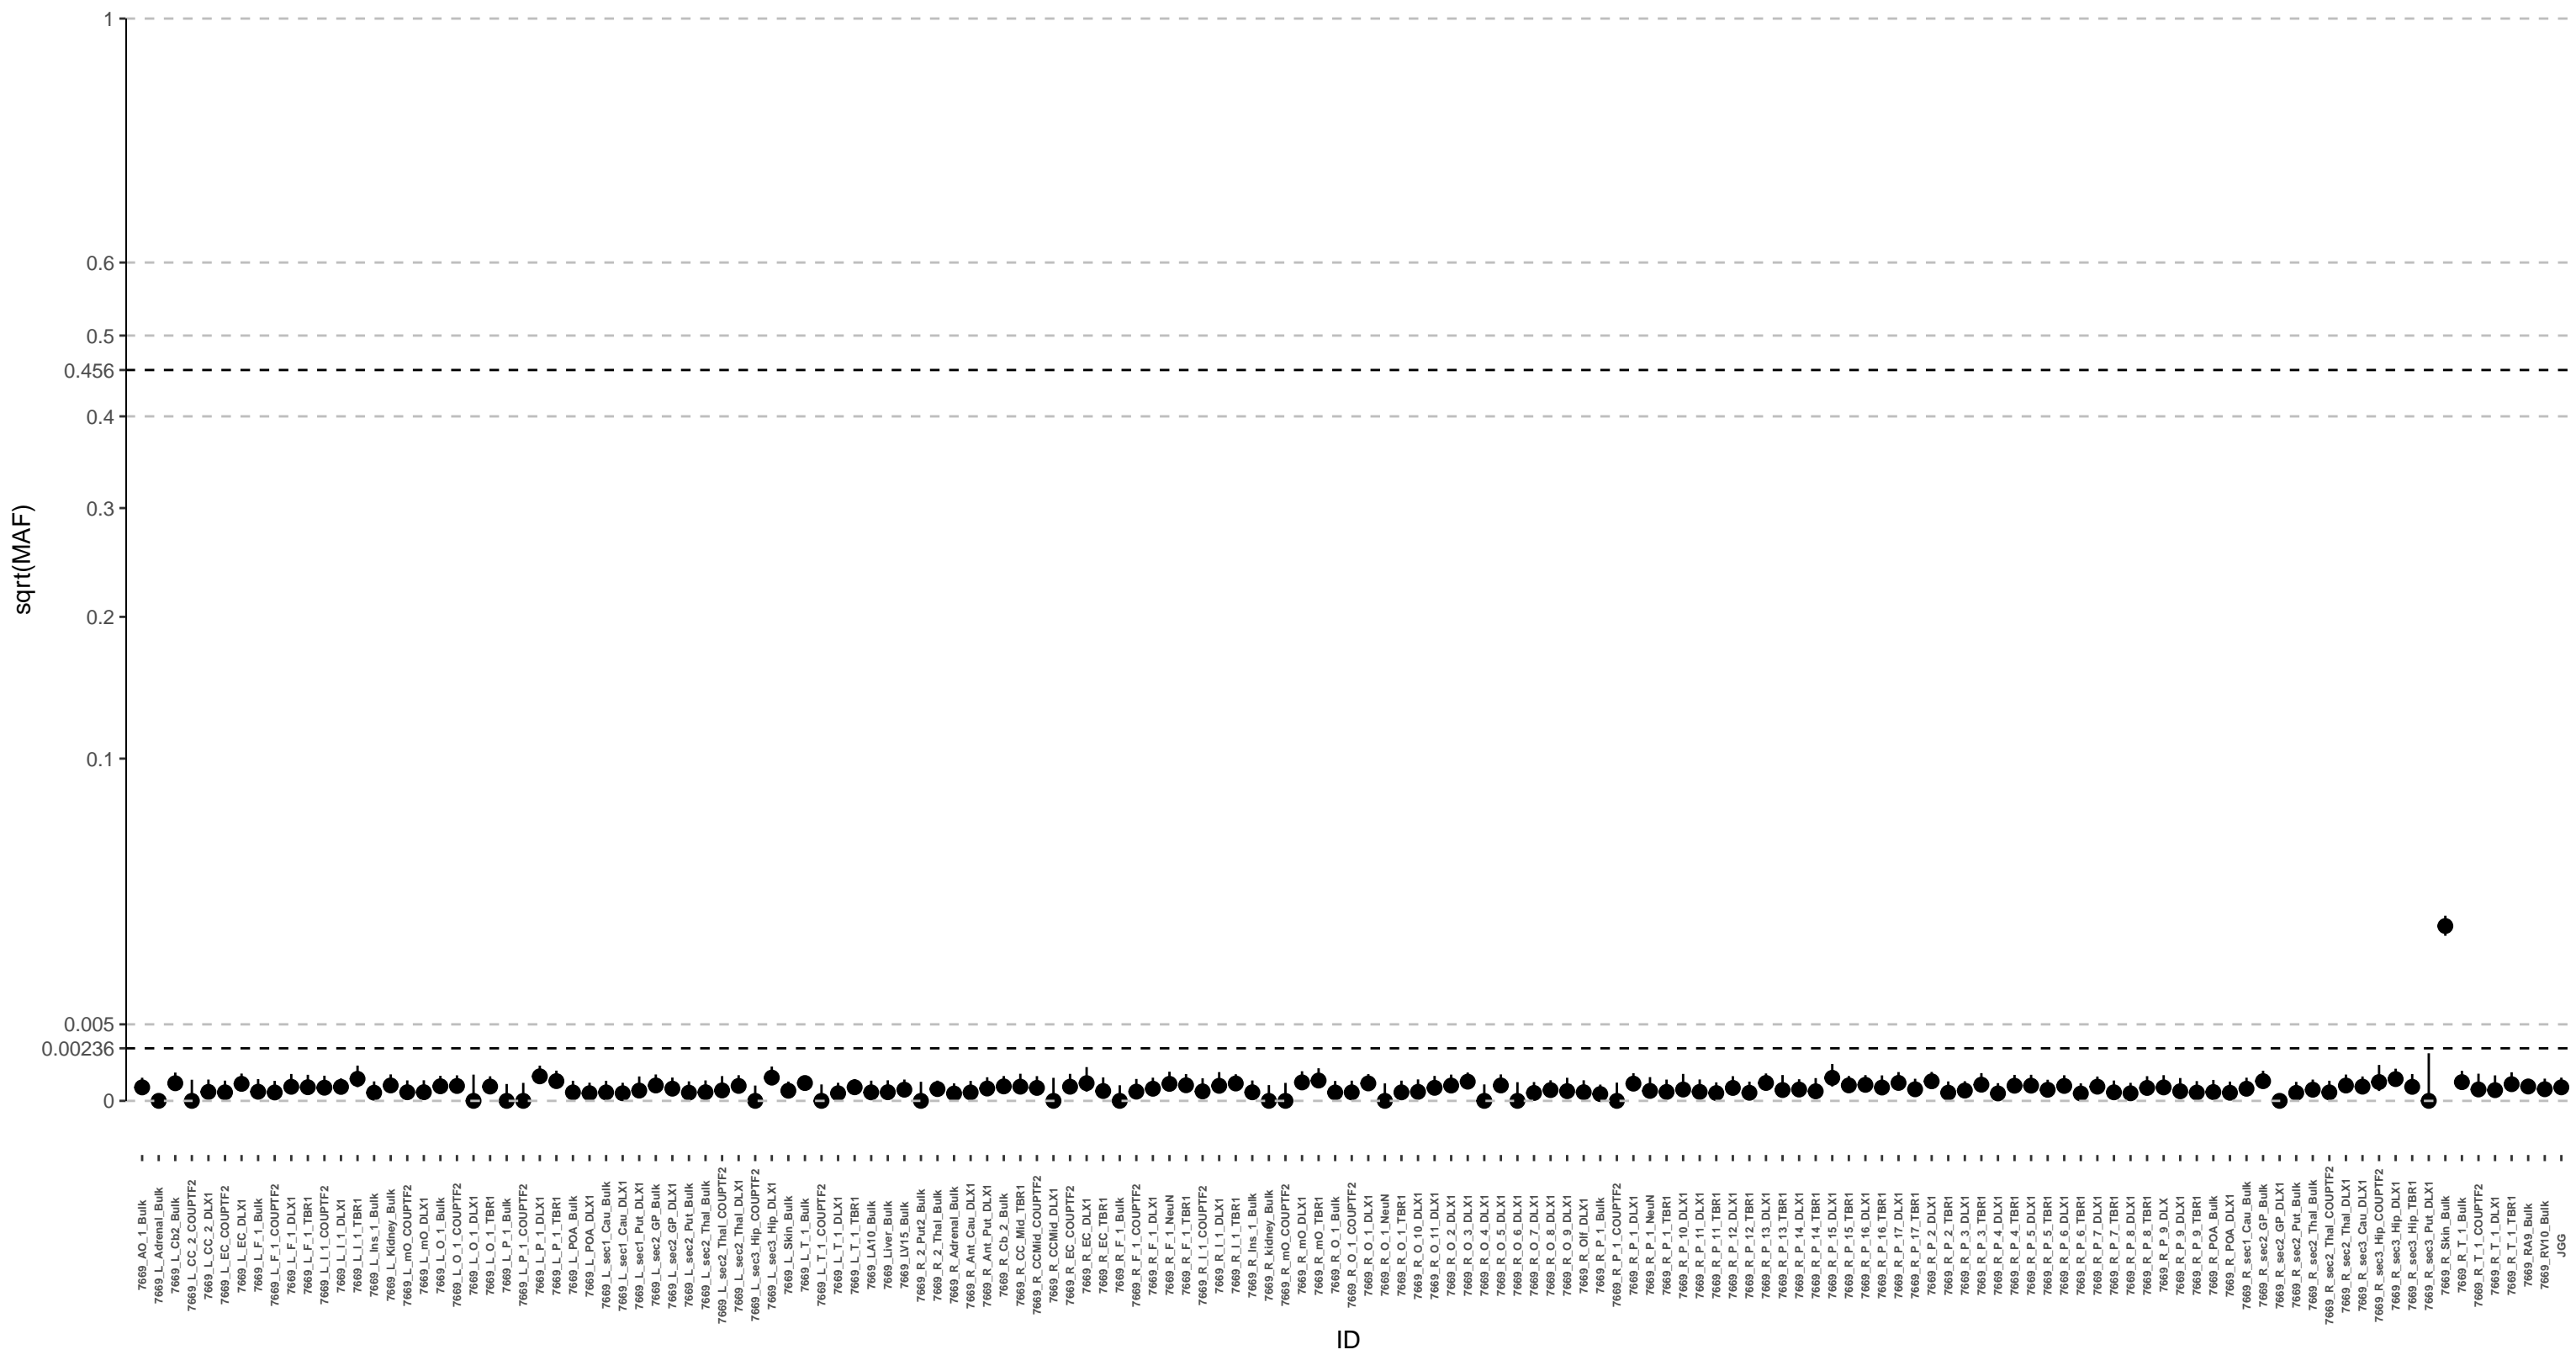

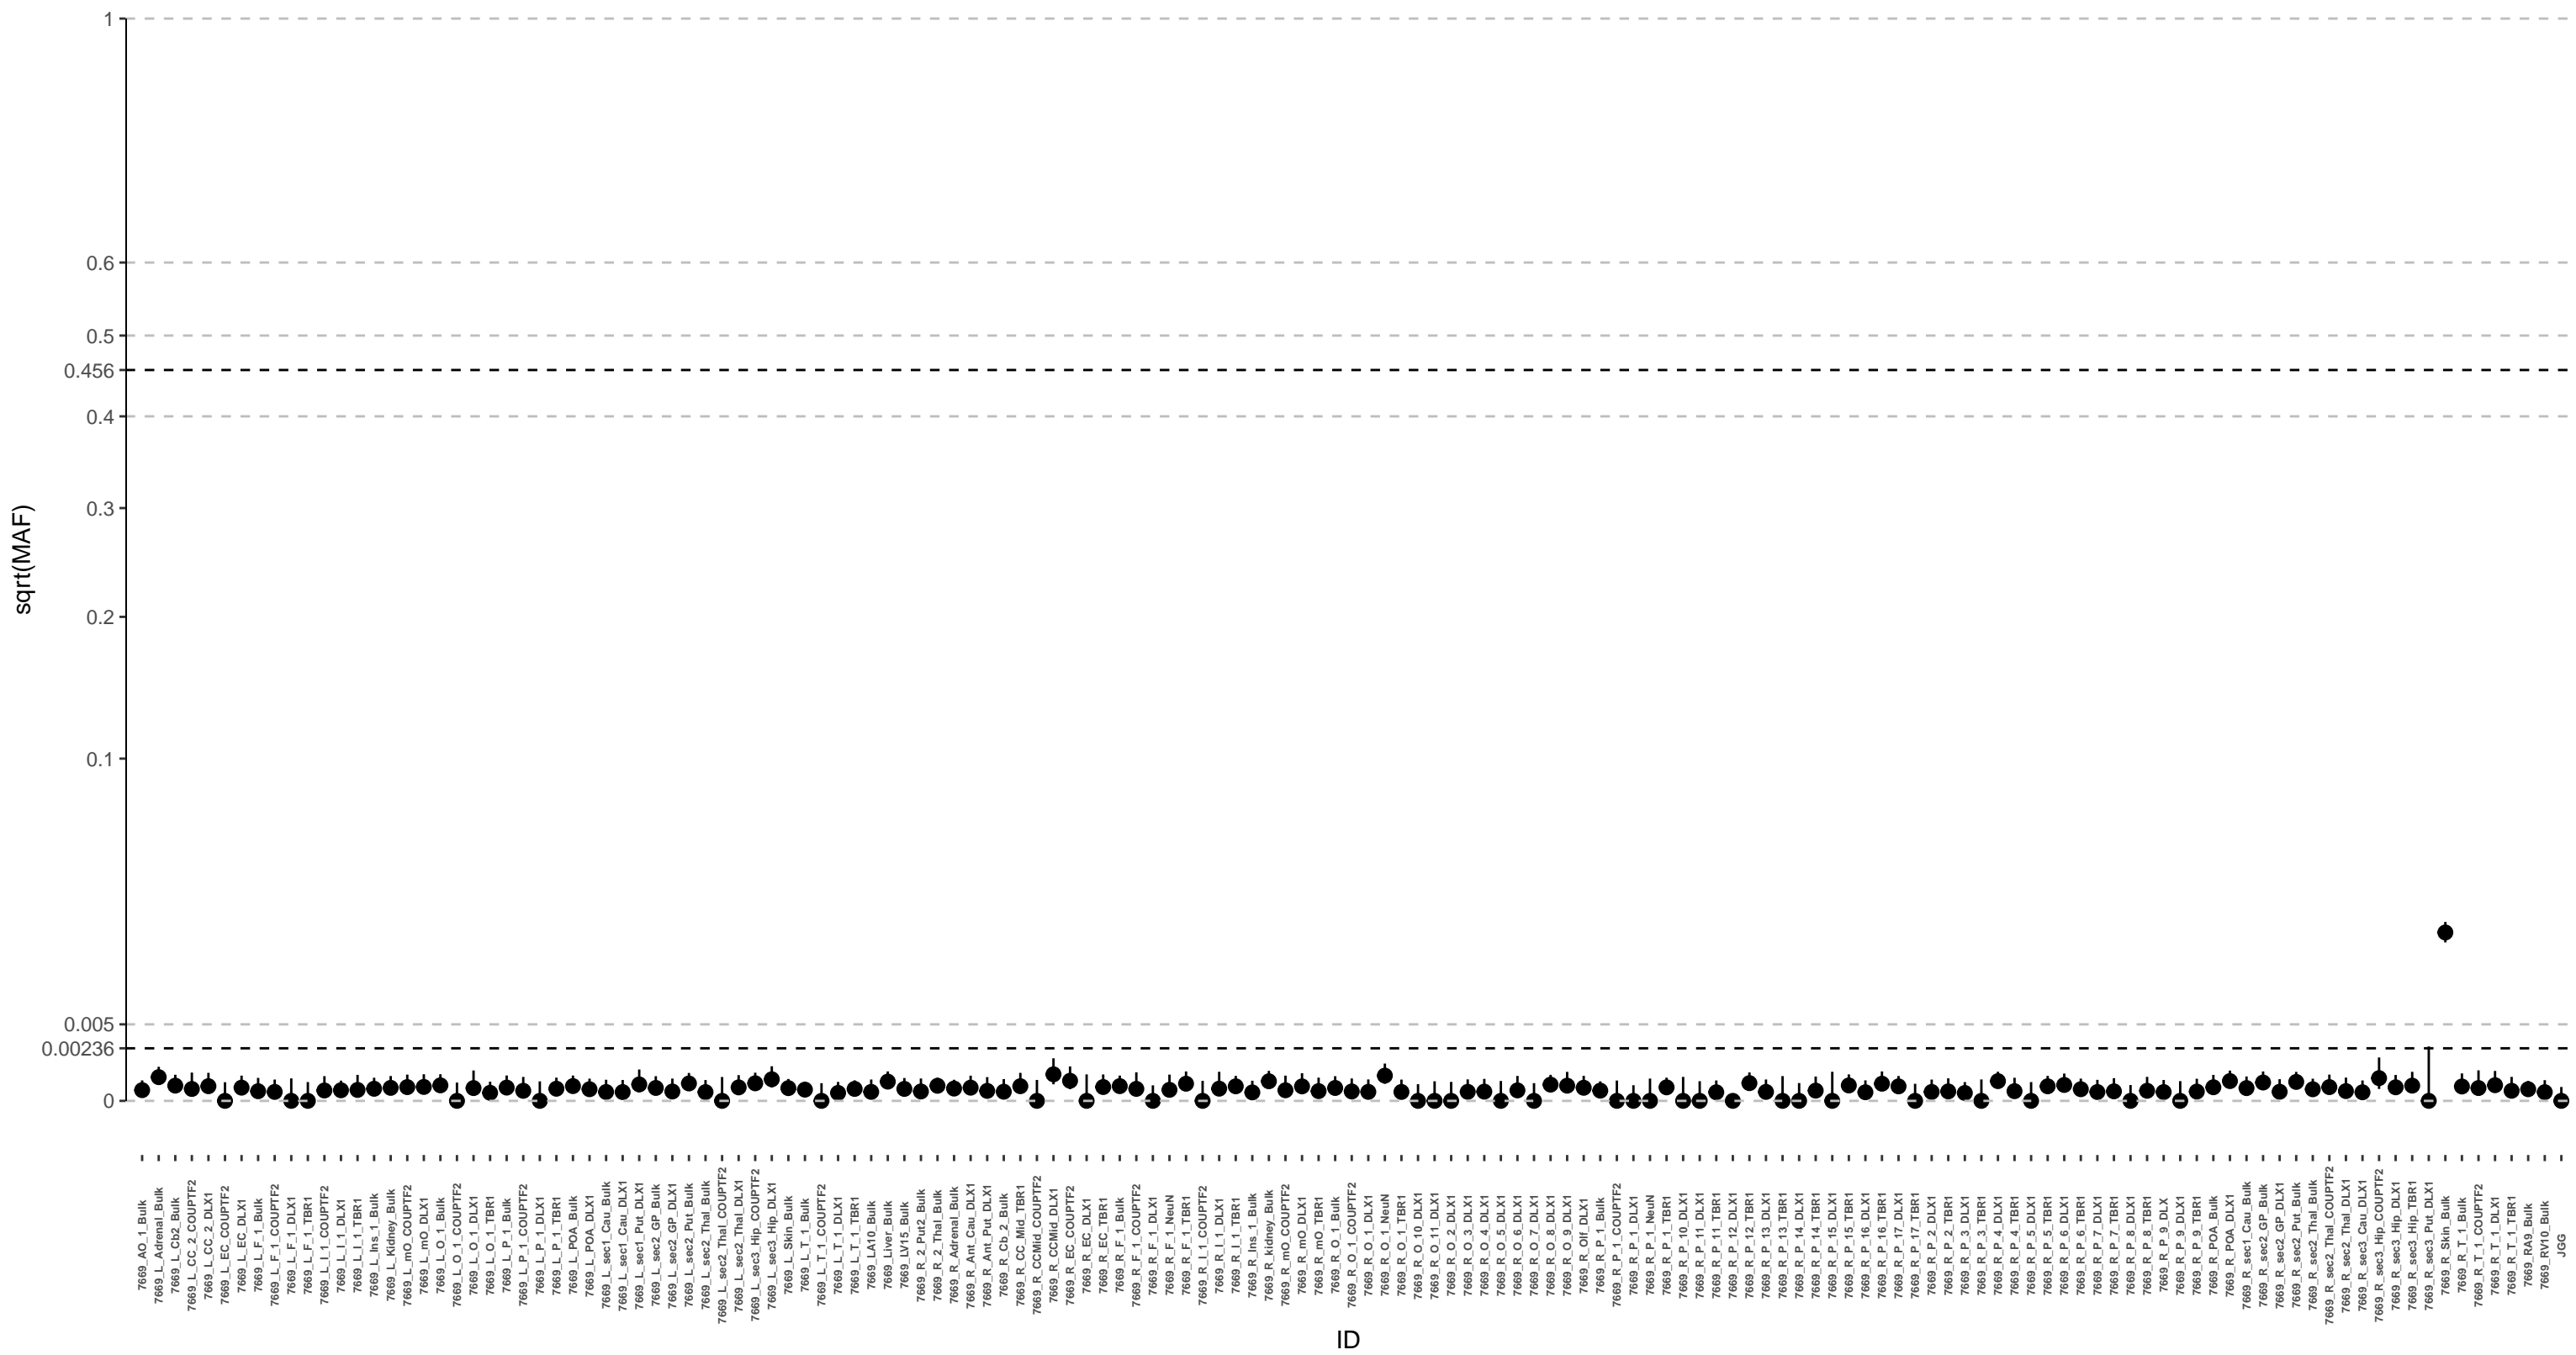



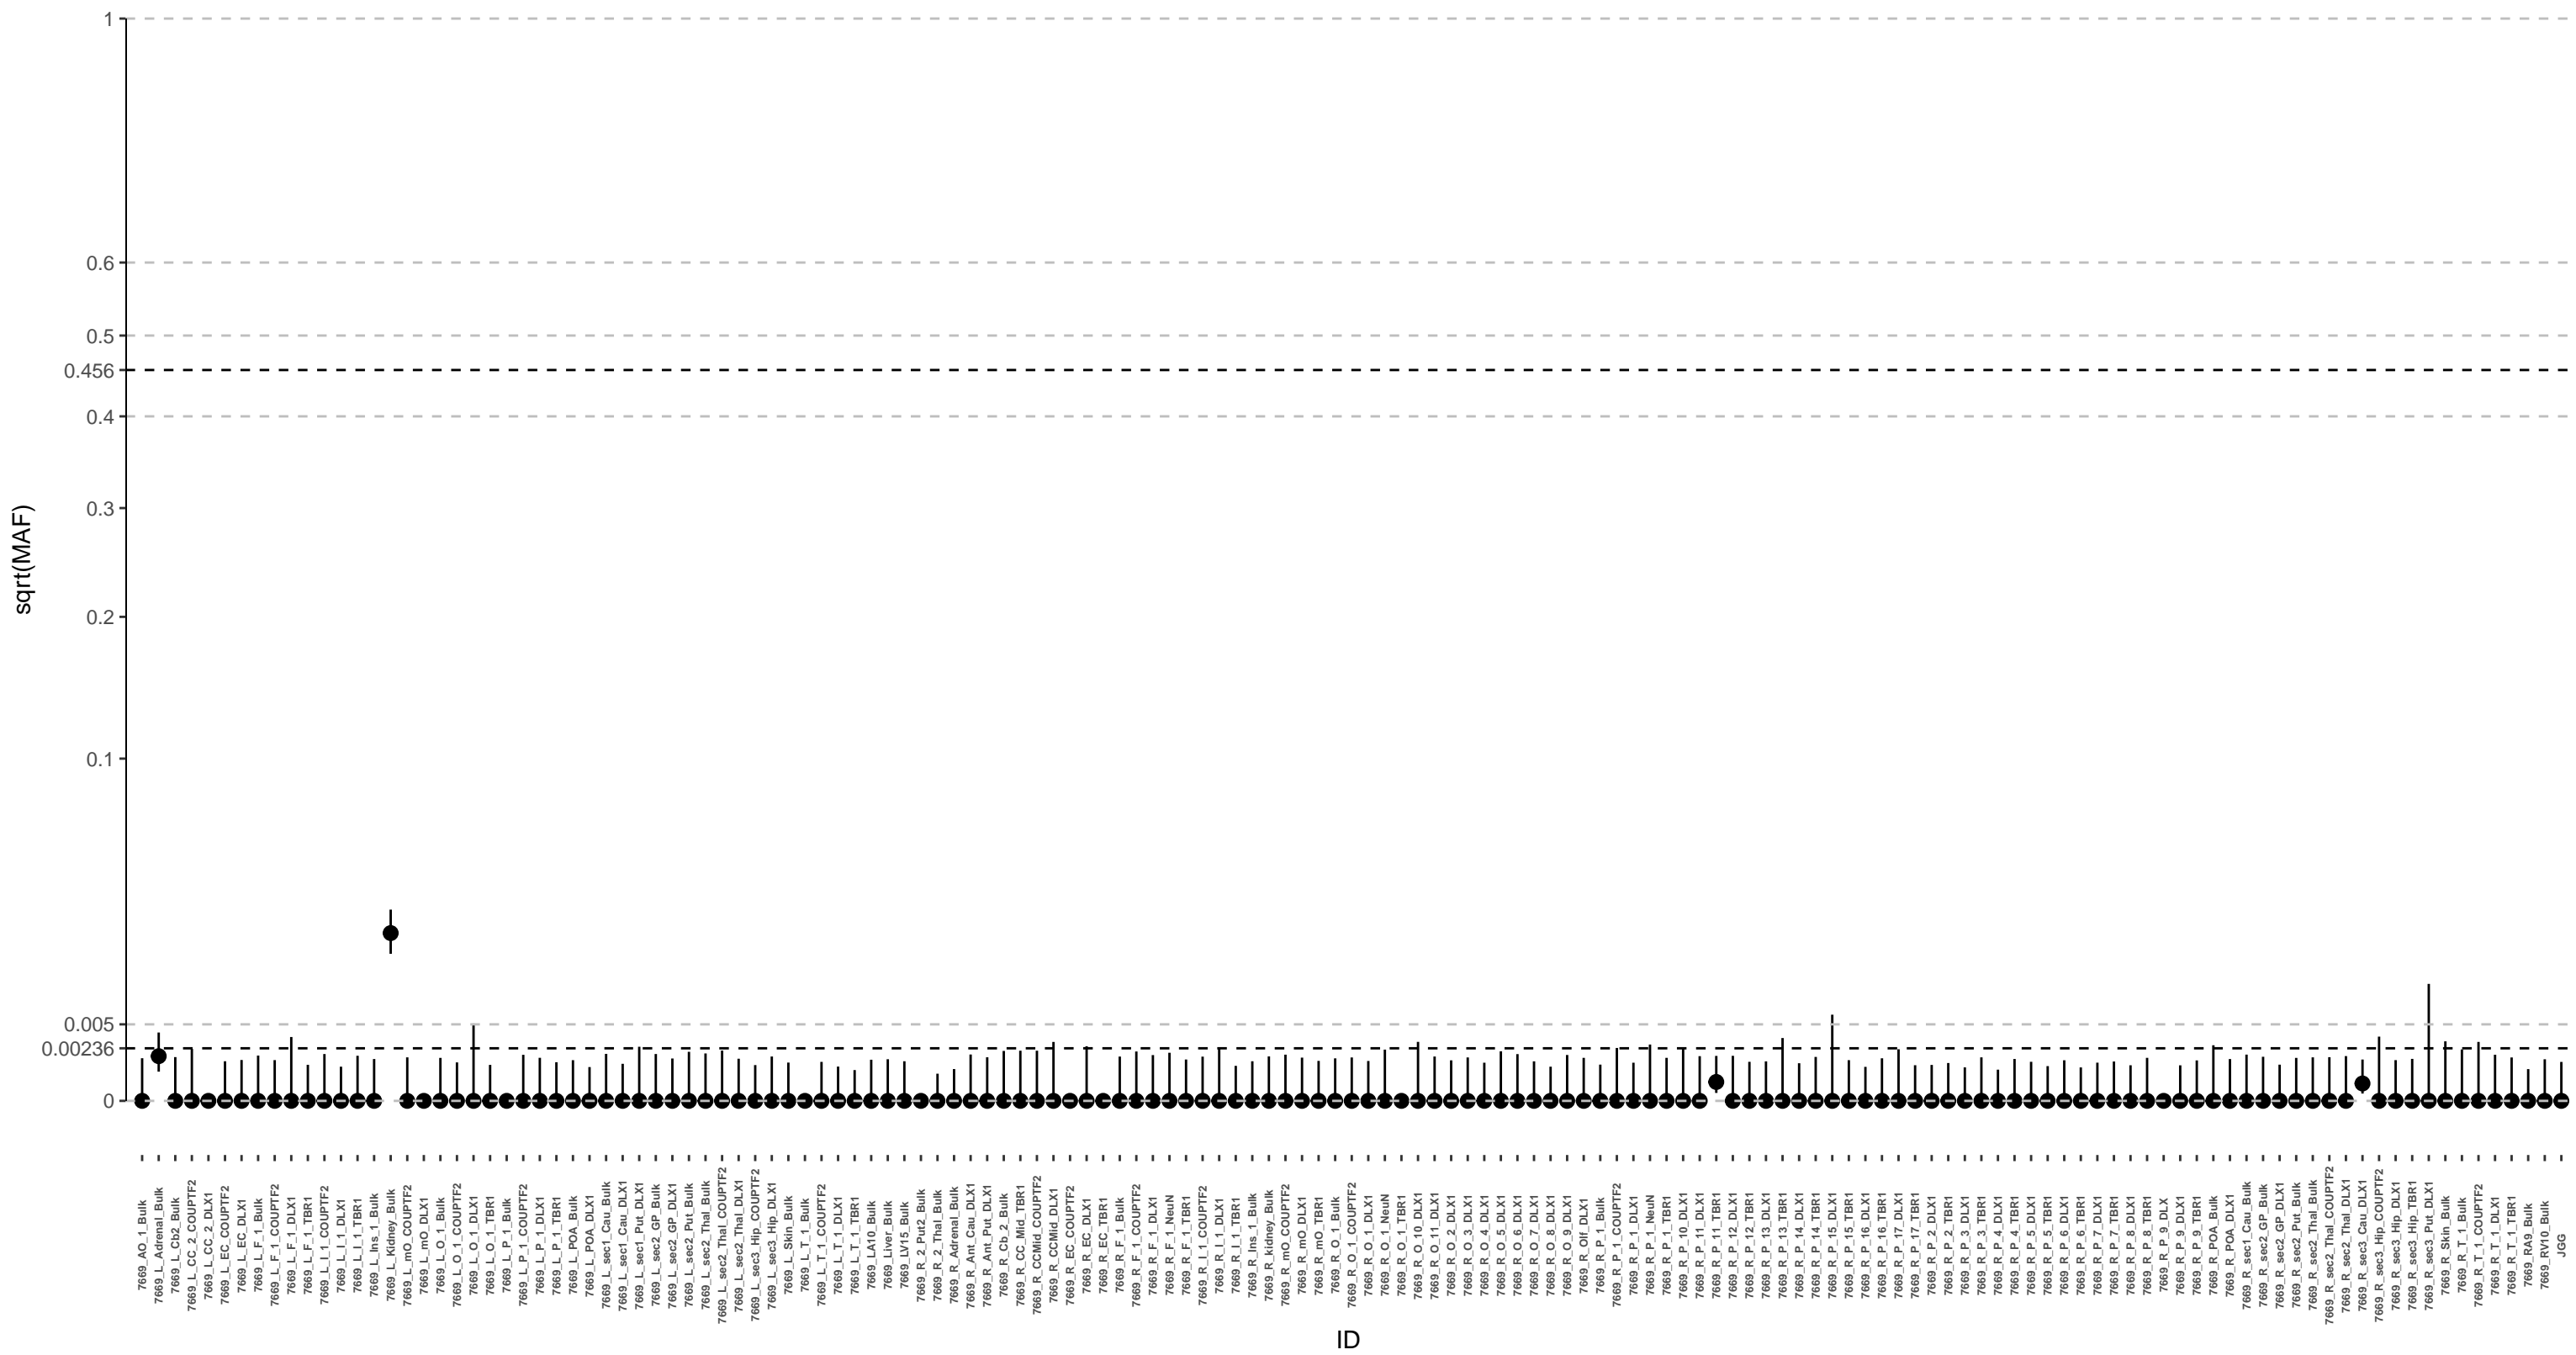

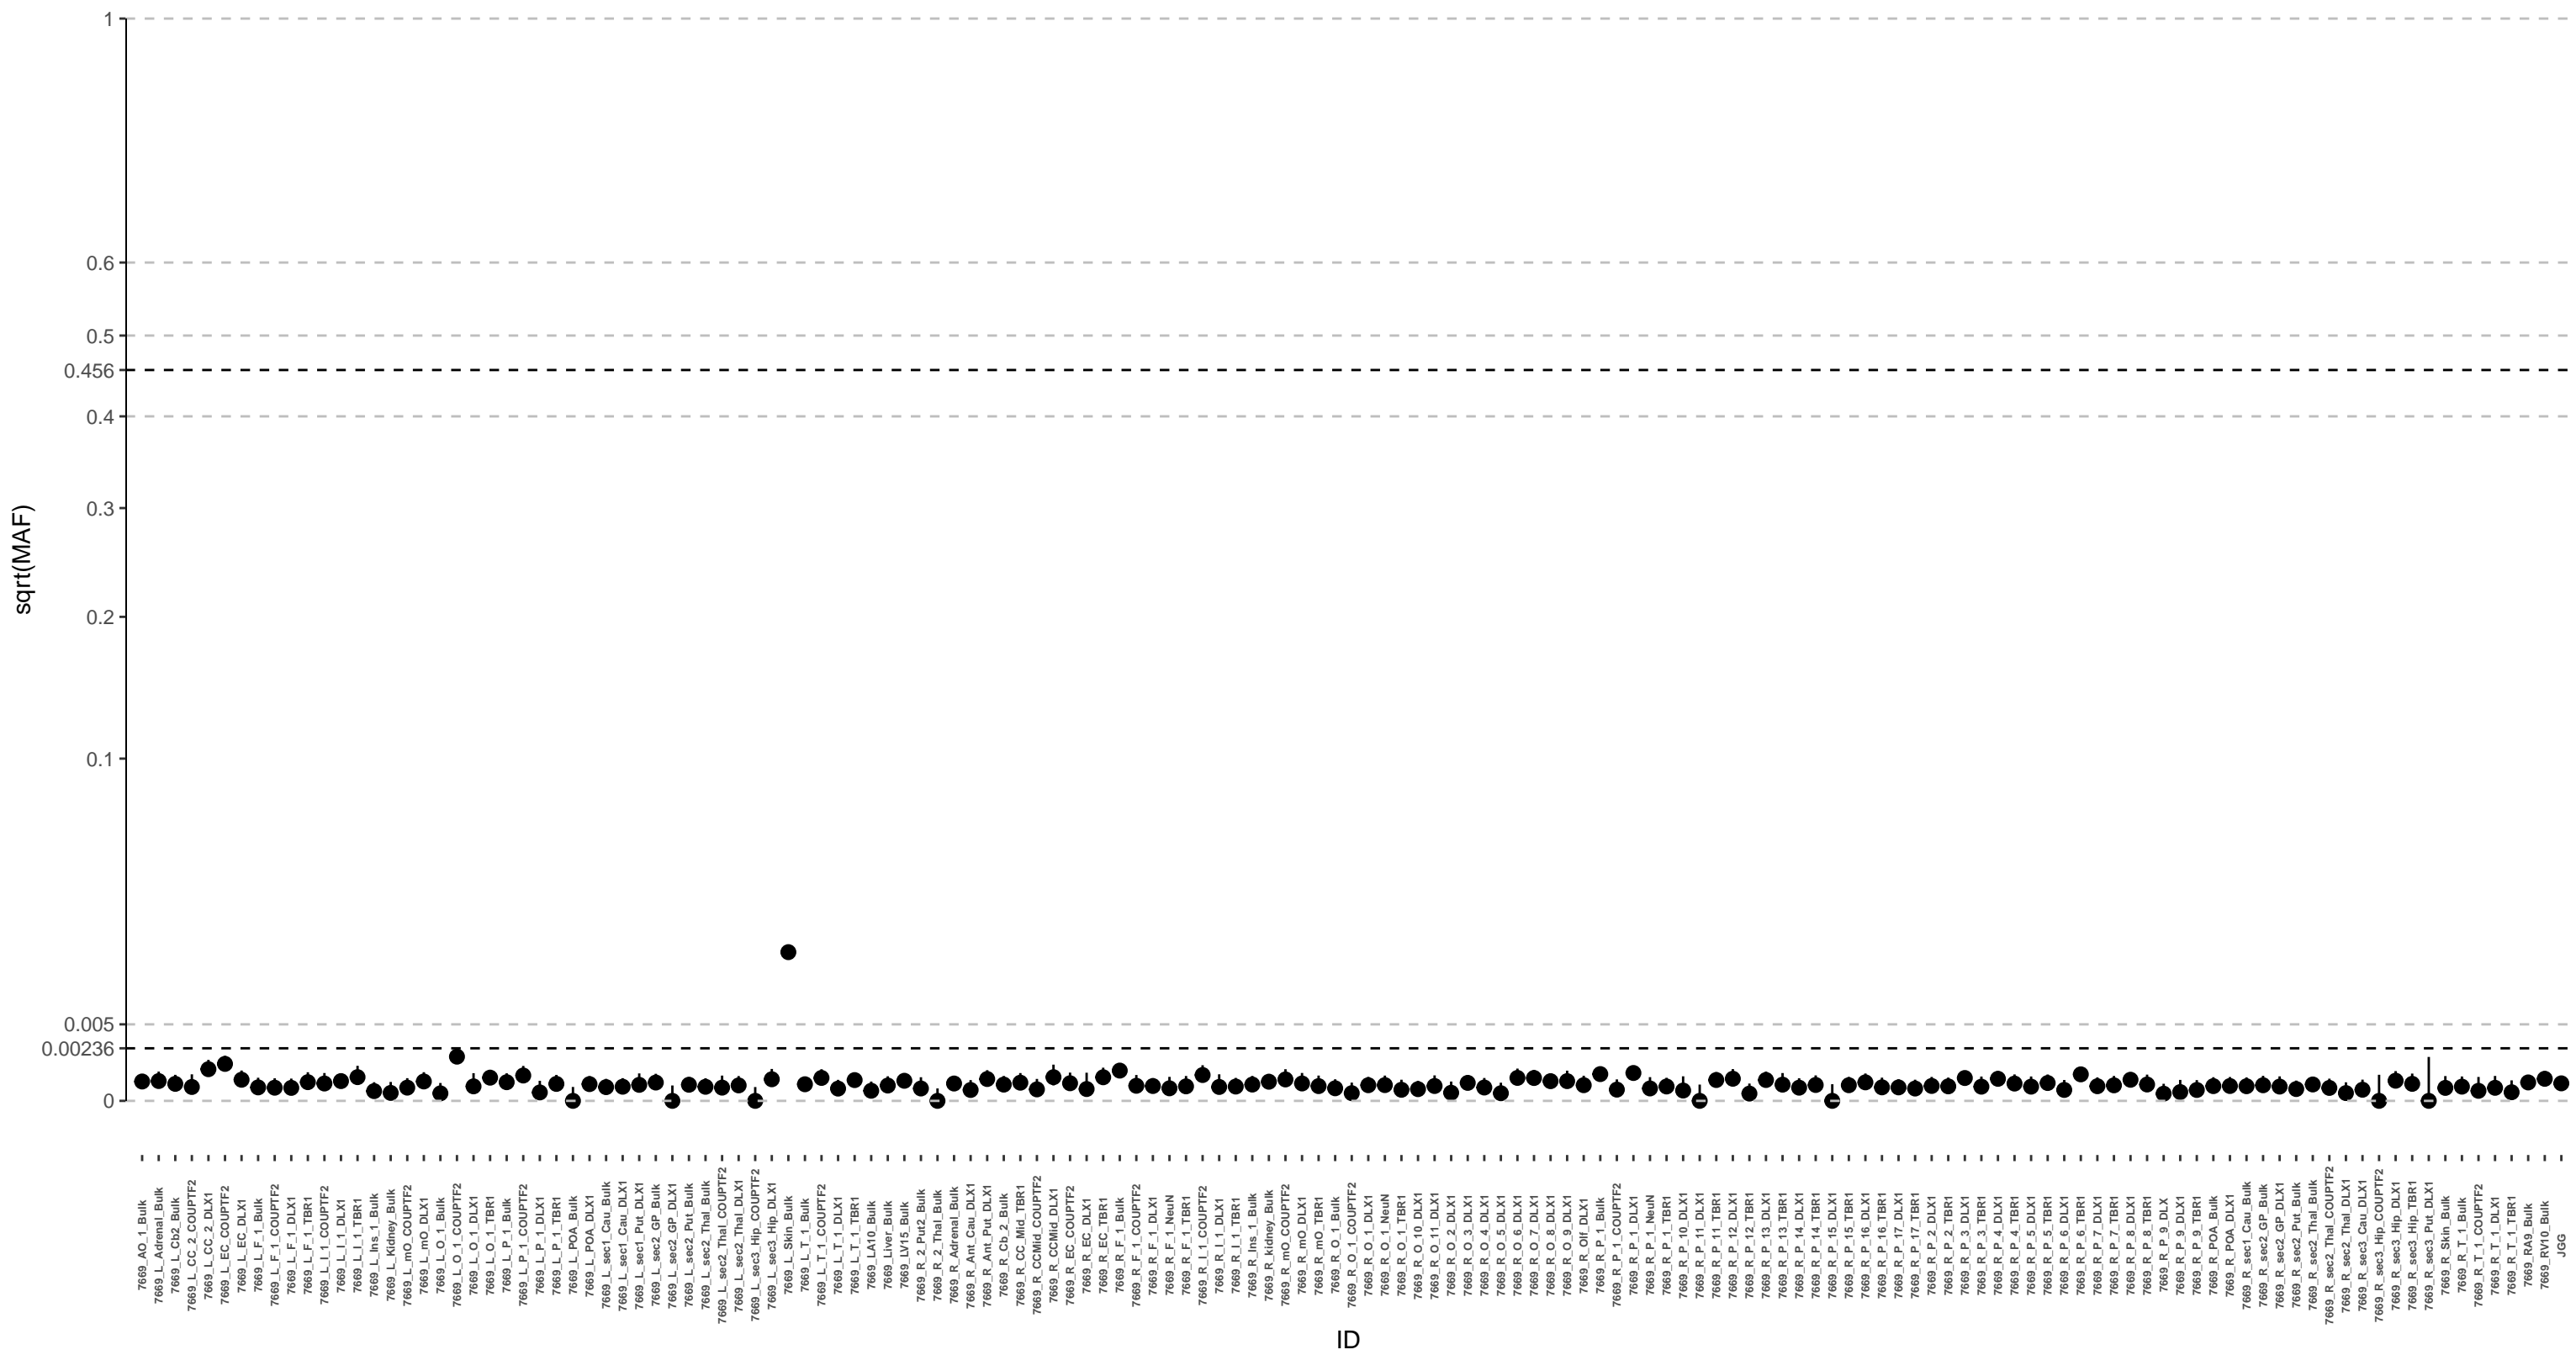

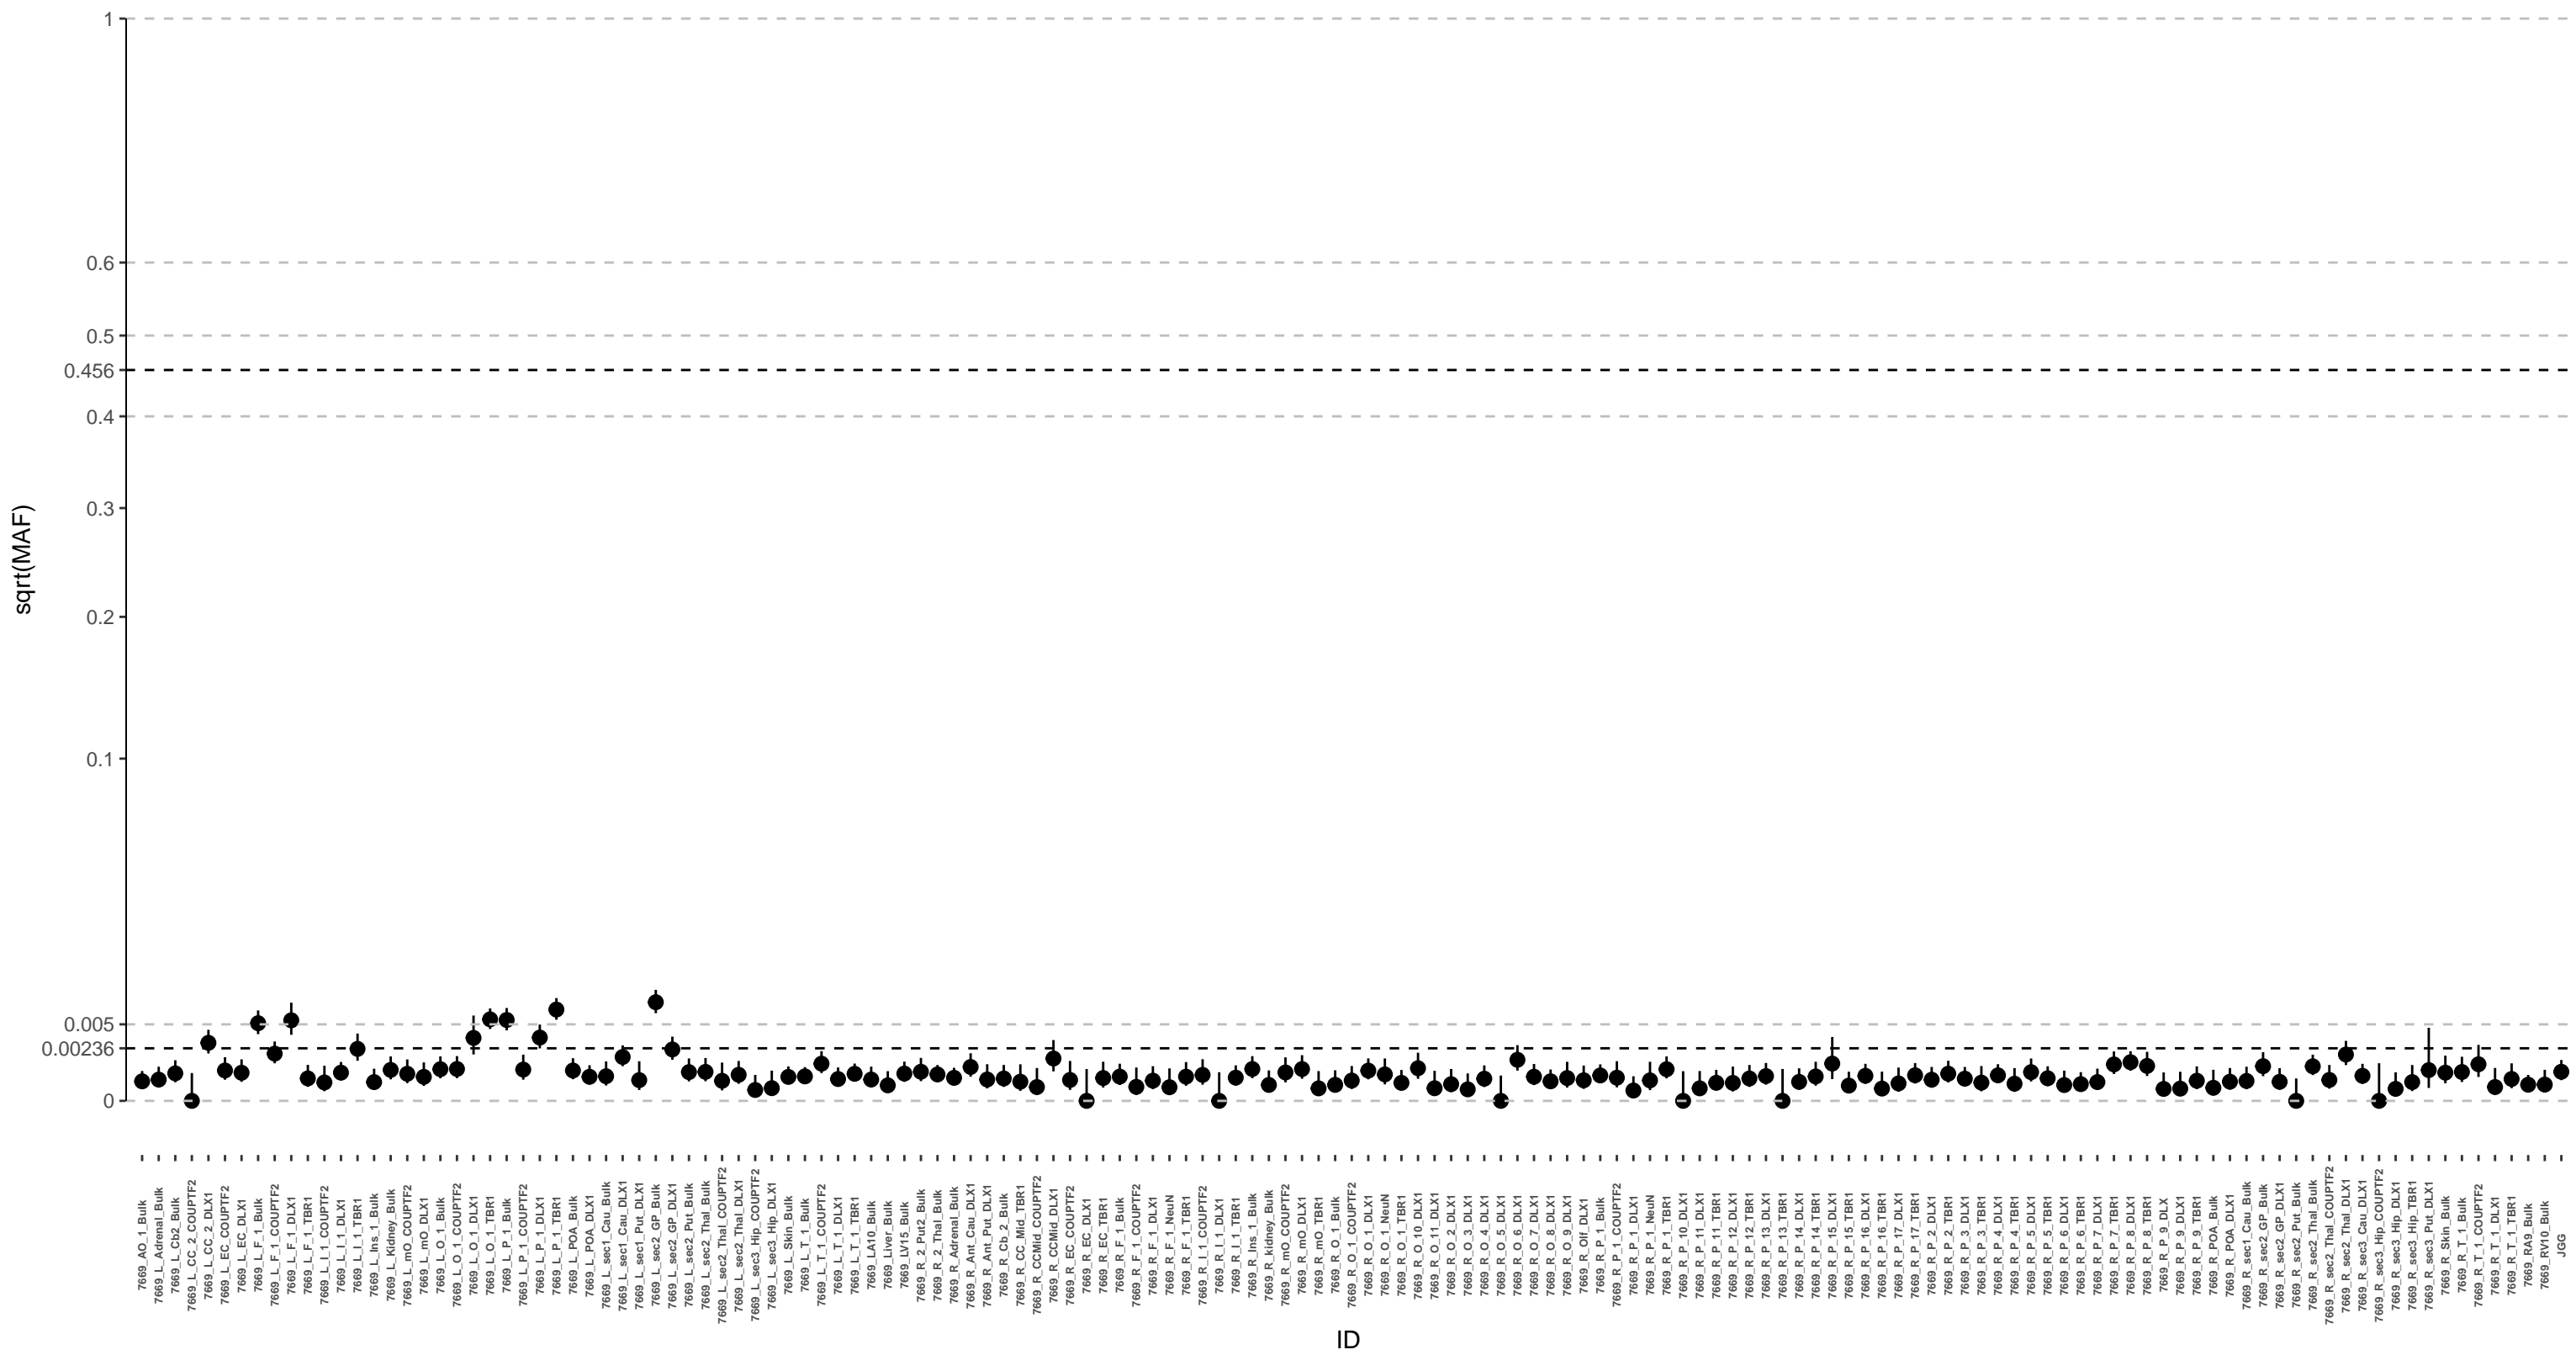

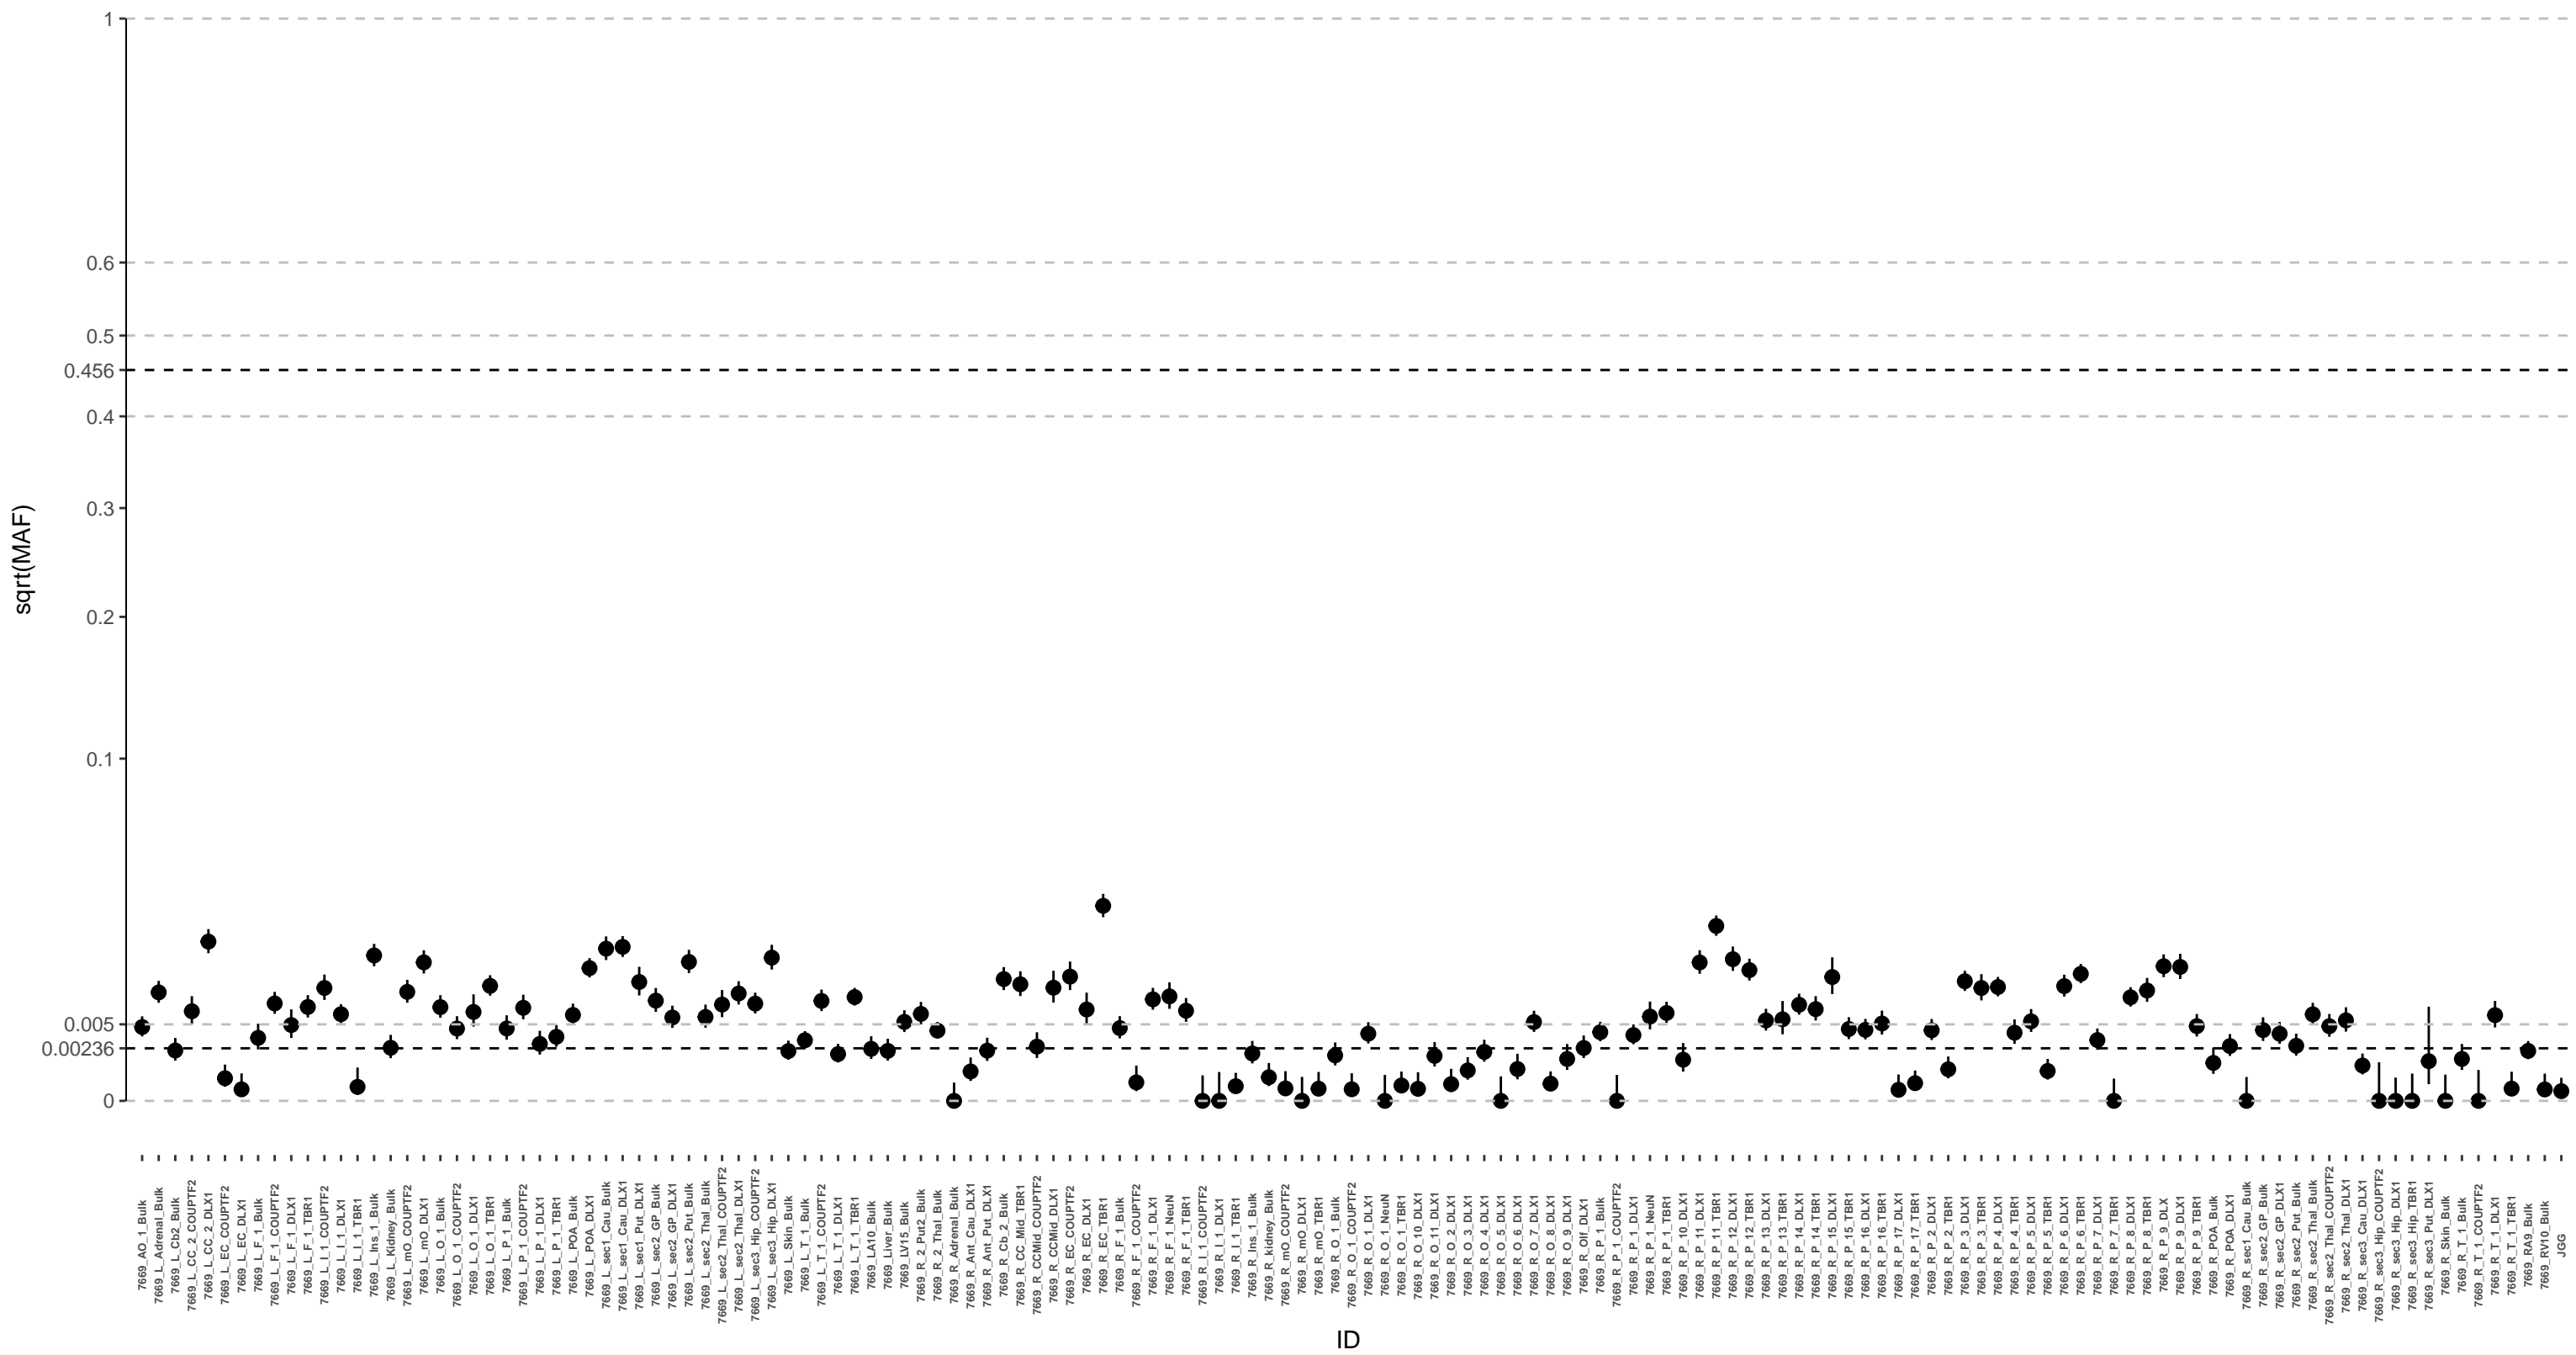

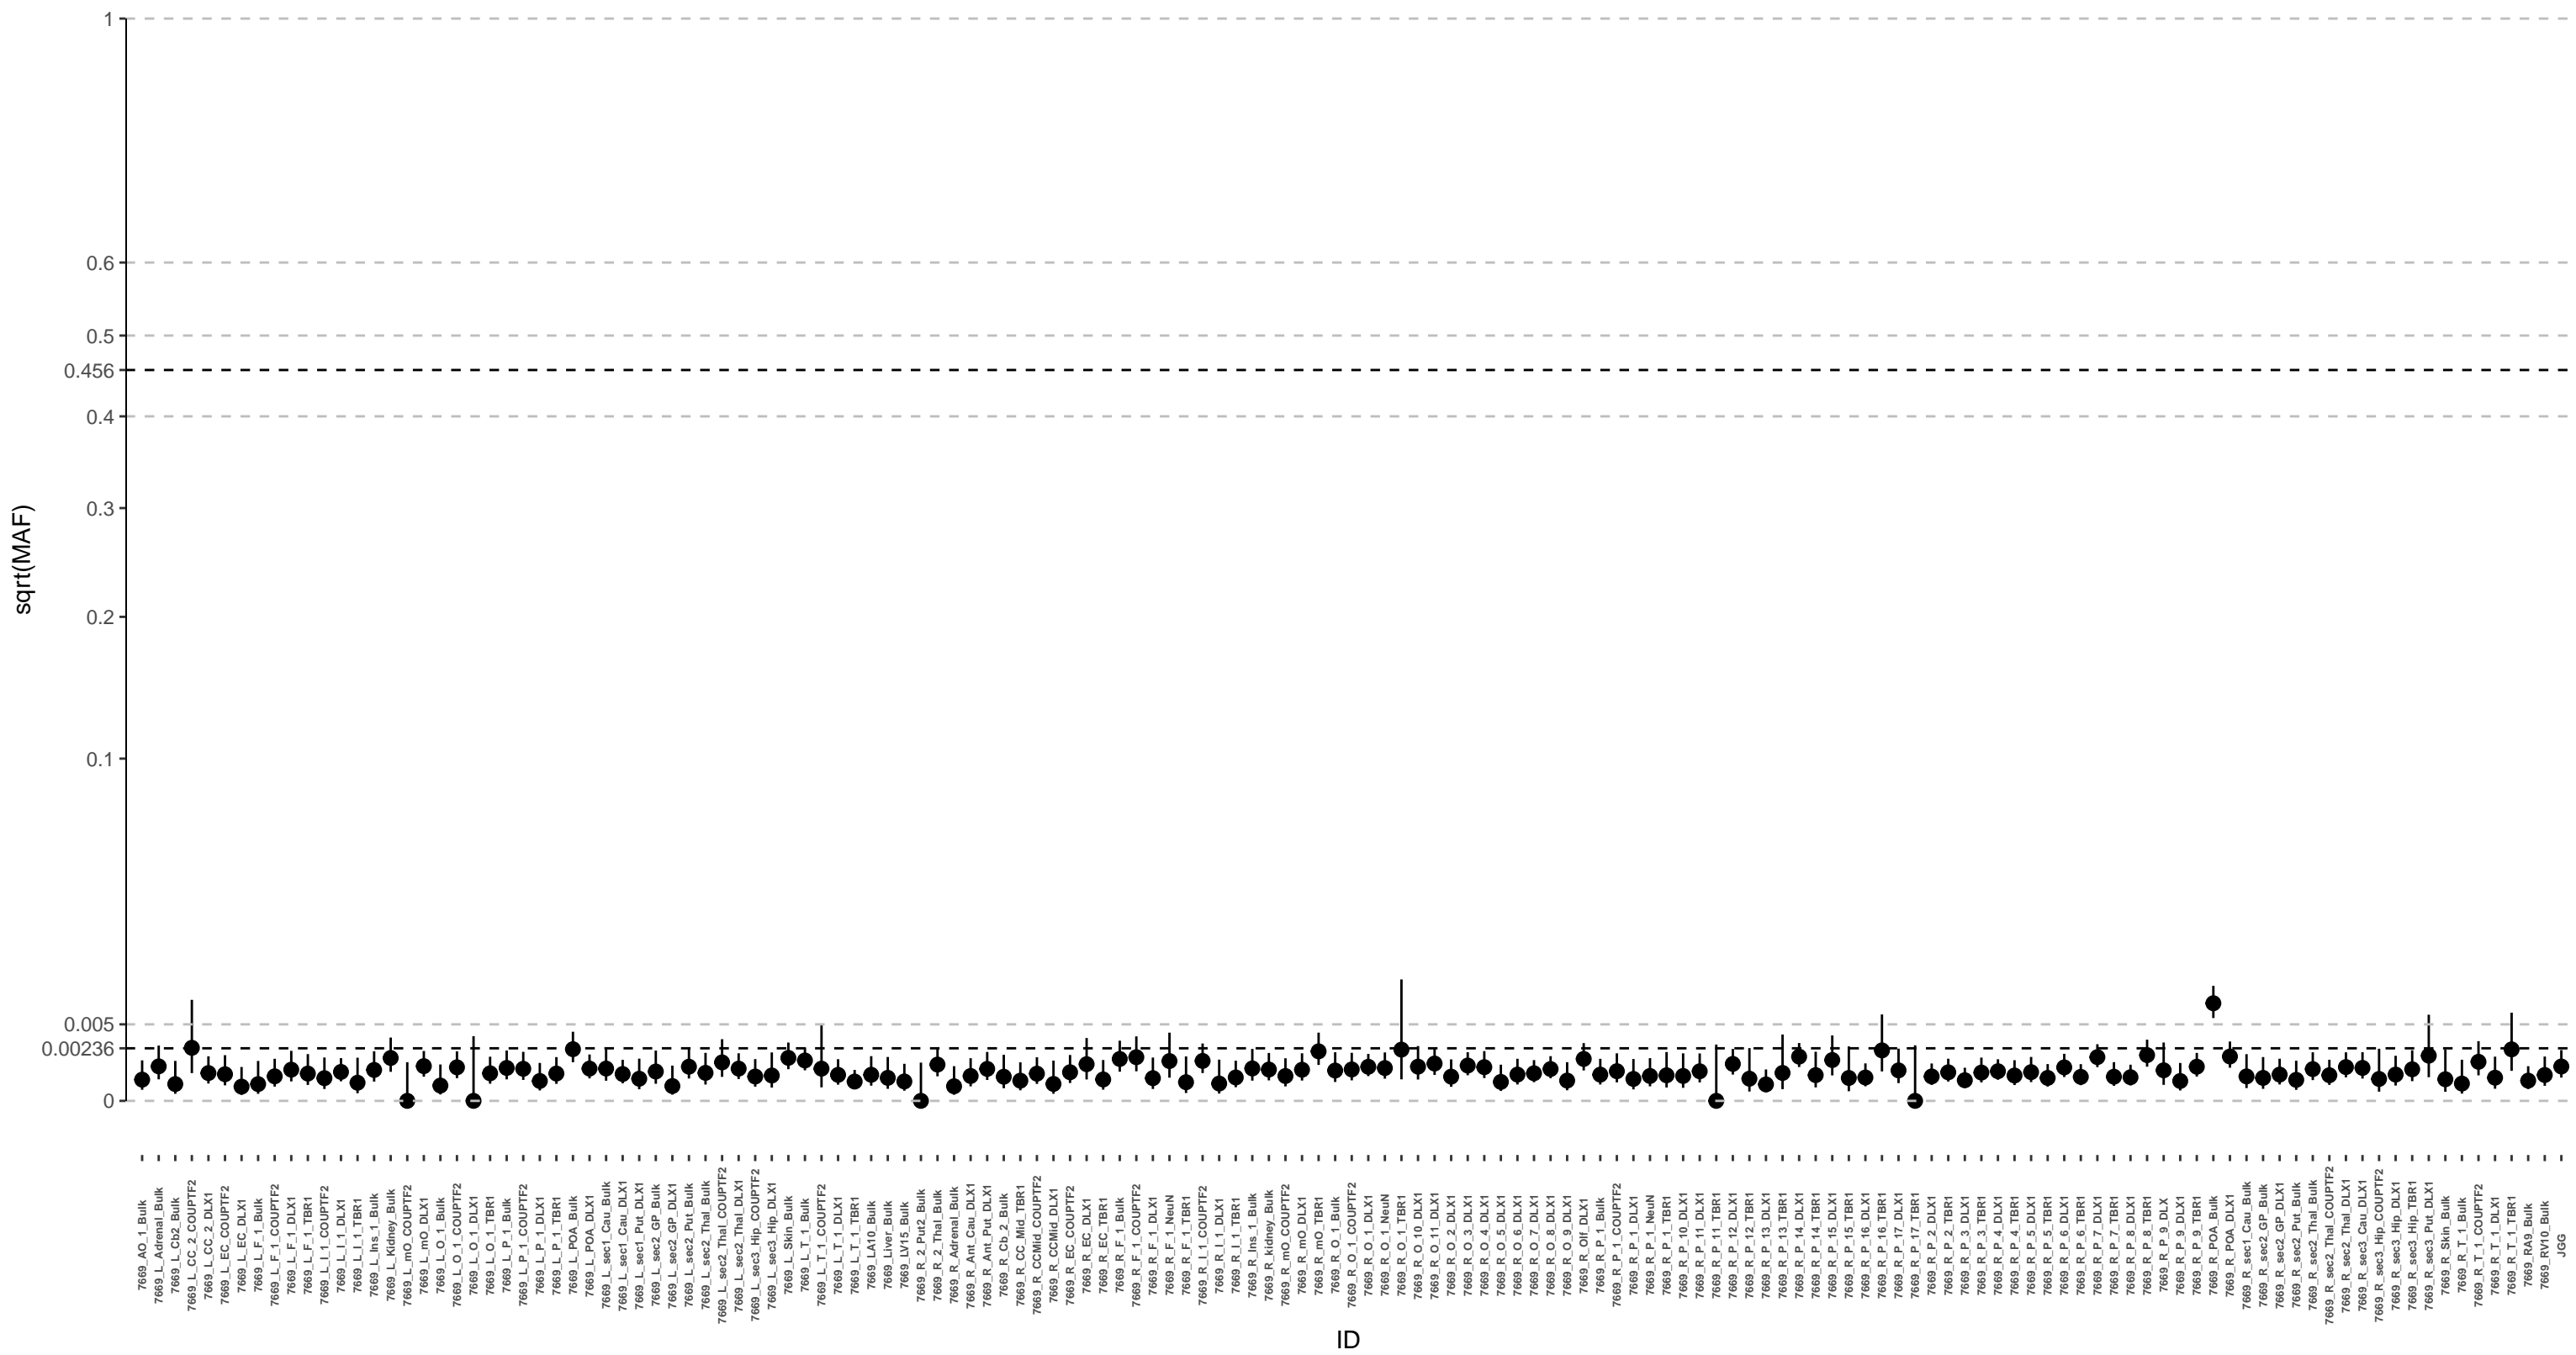

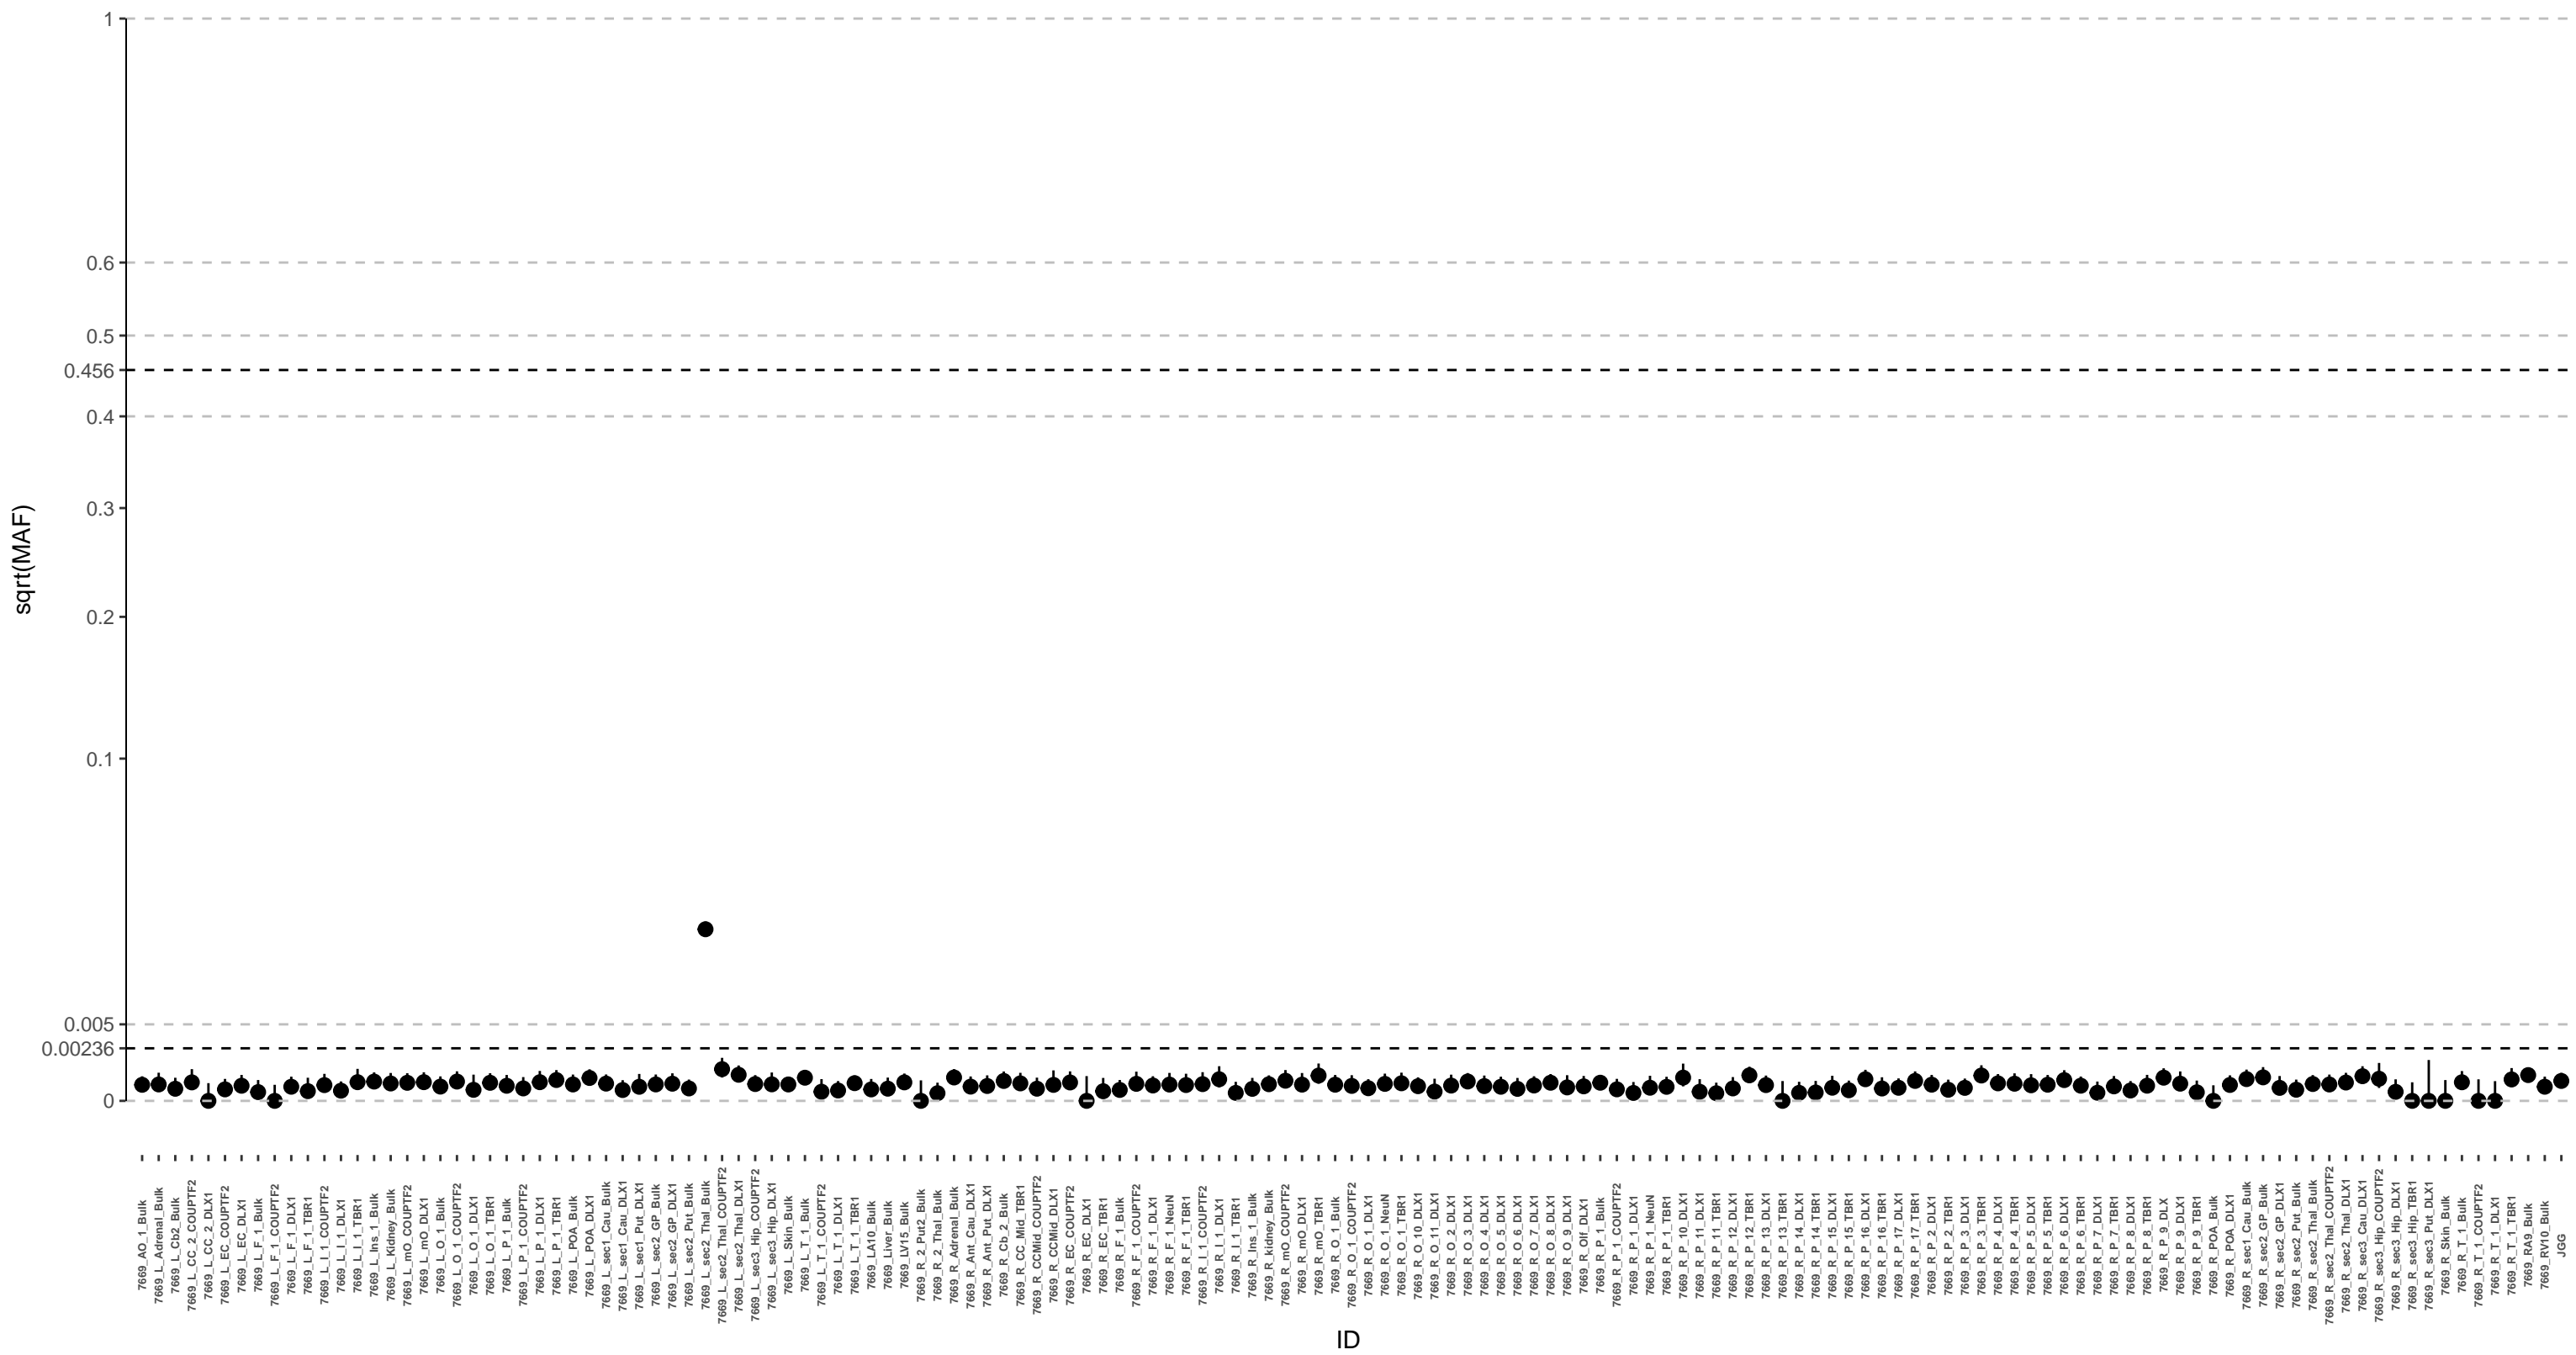

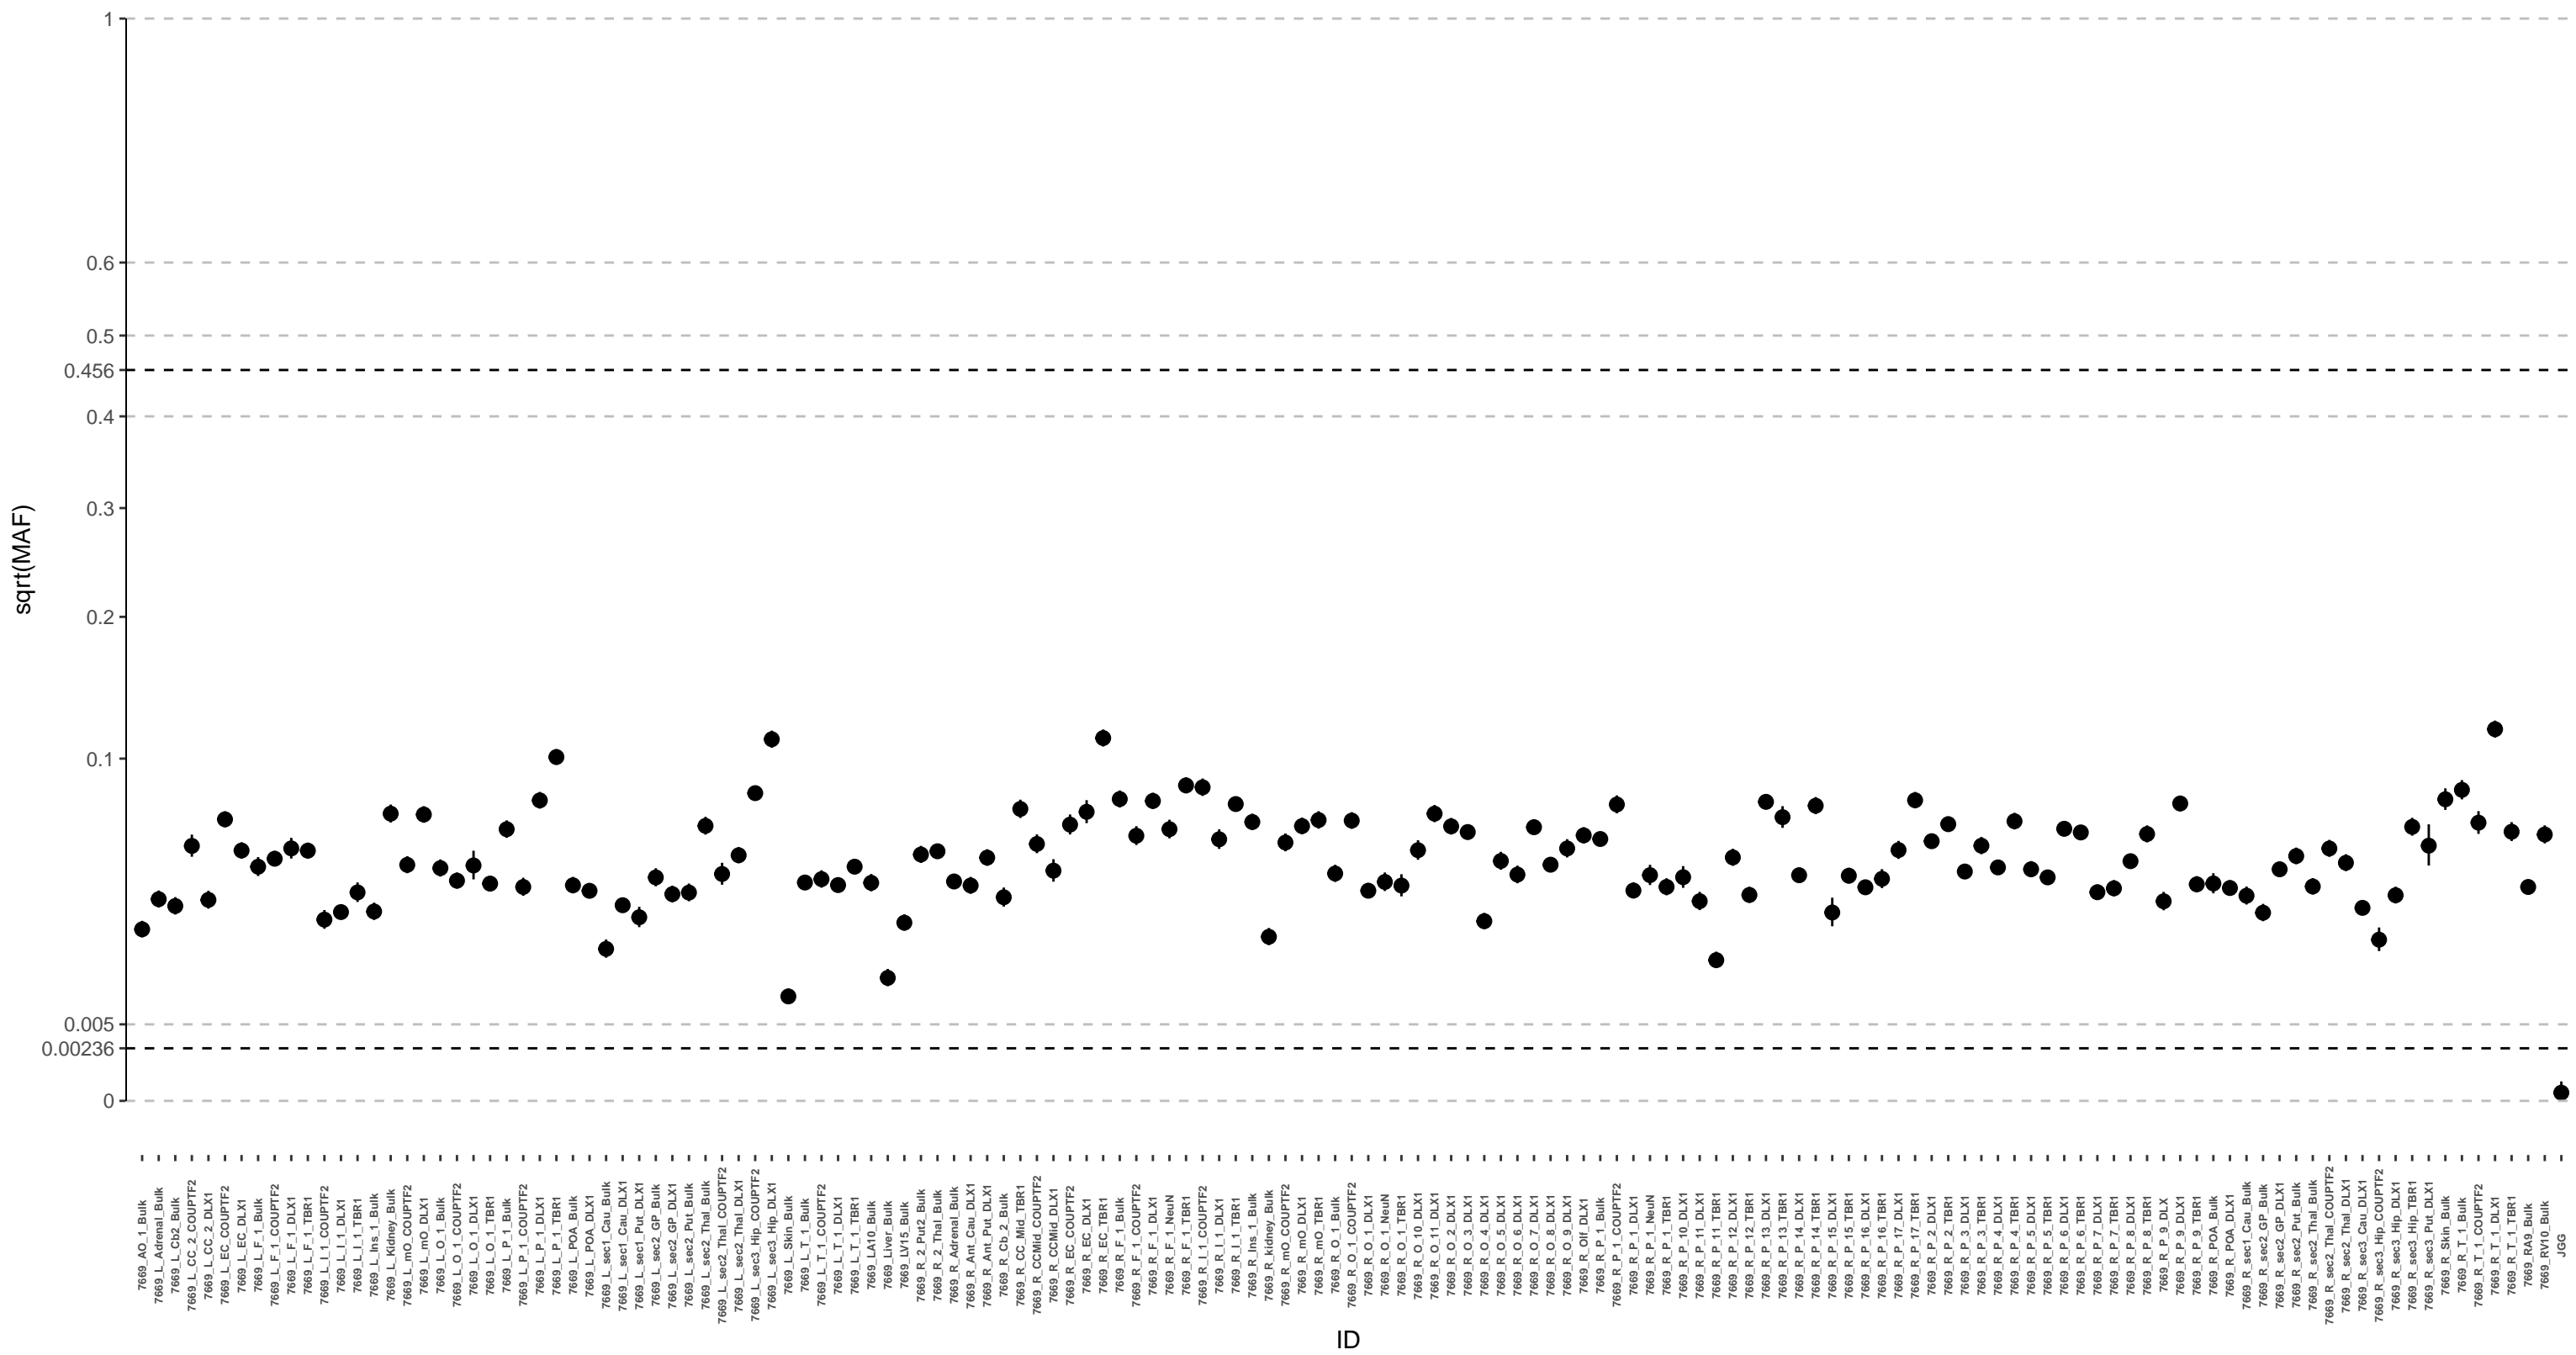

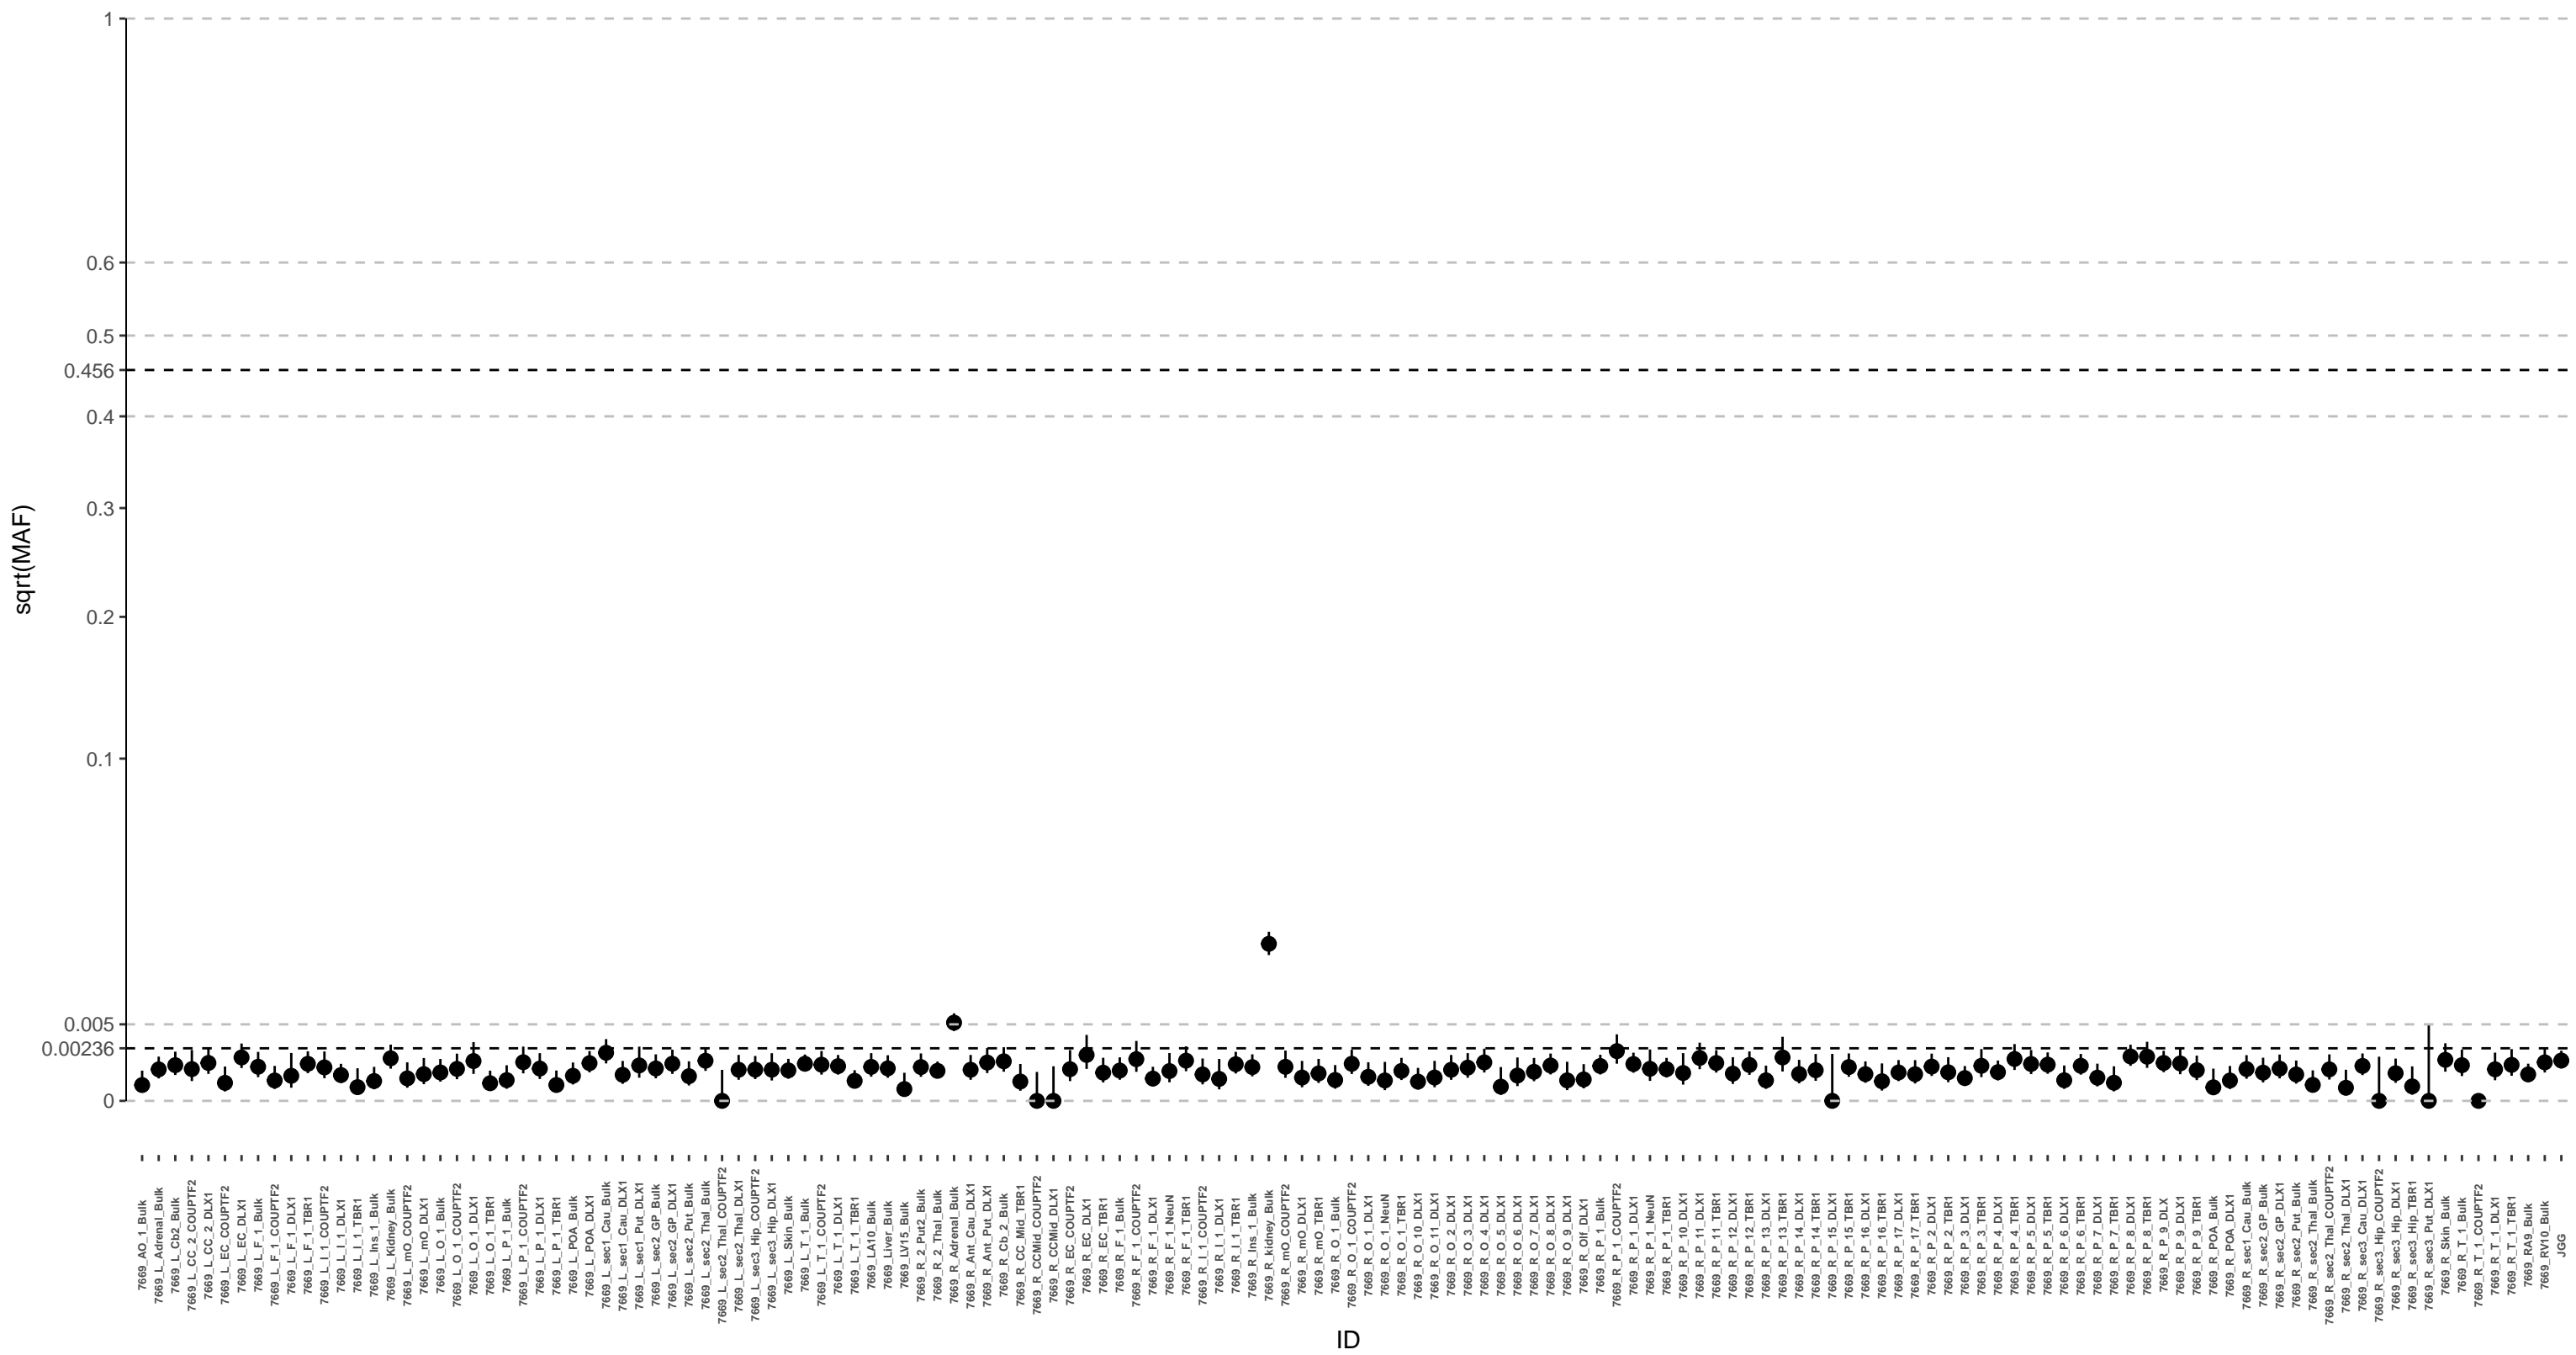



ID05 16-4649206-C-T

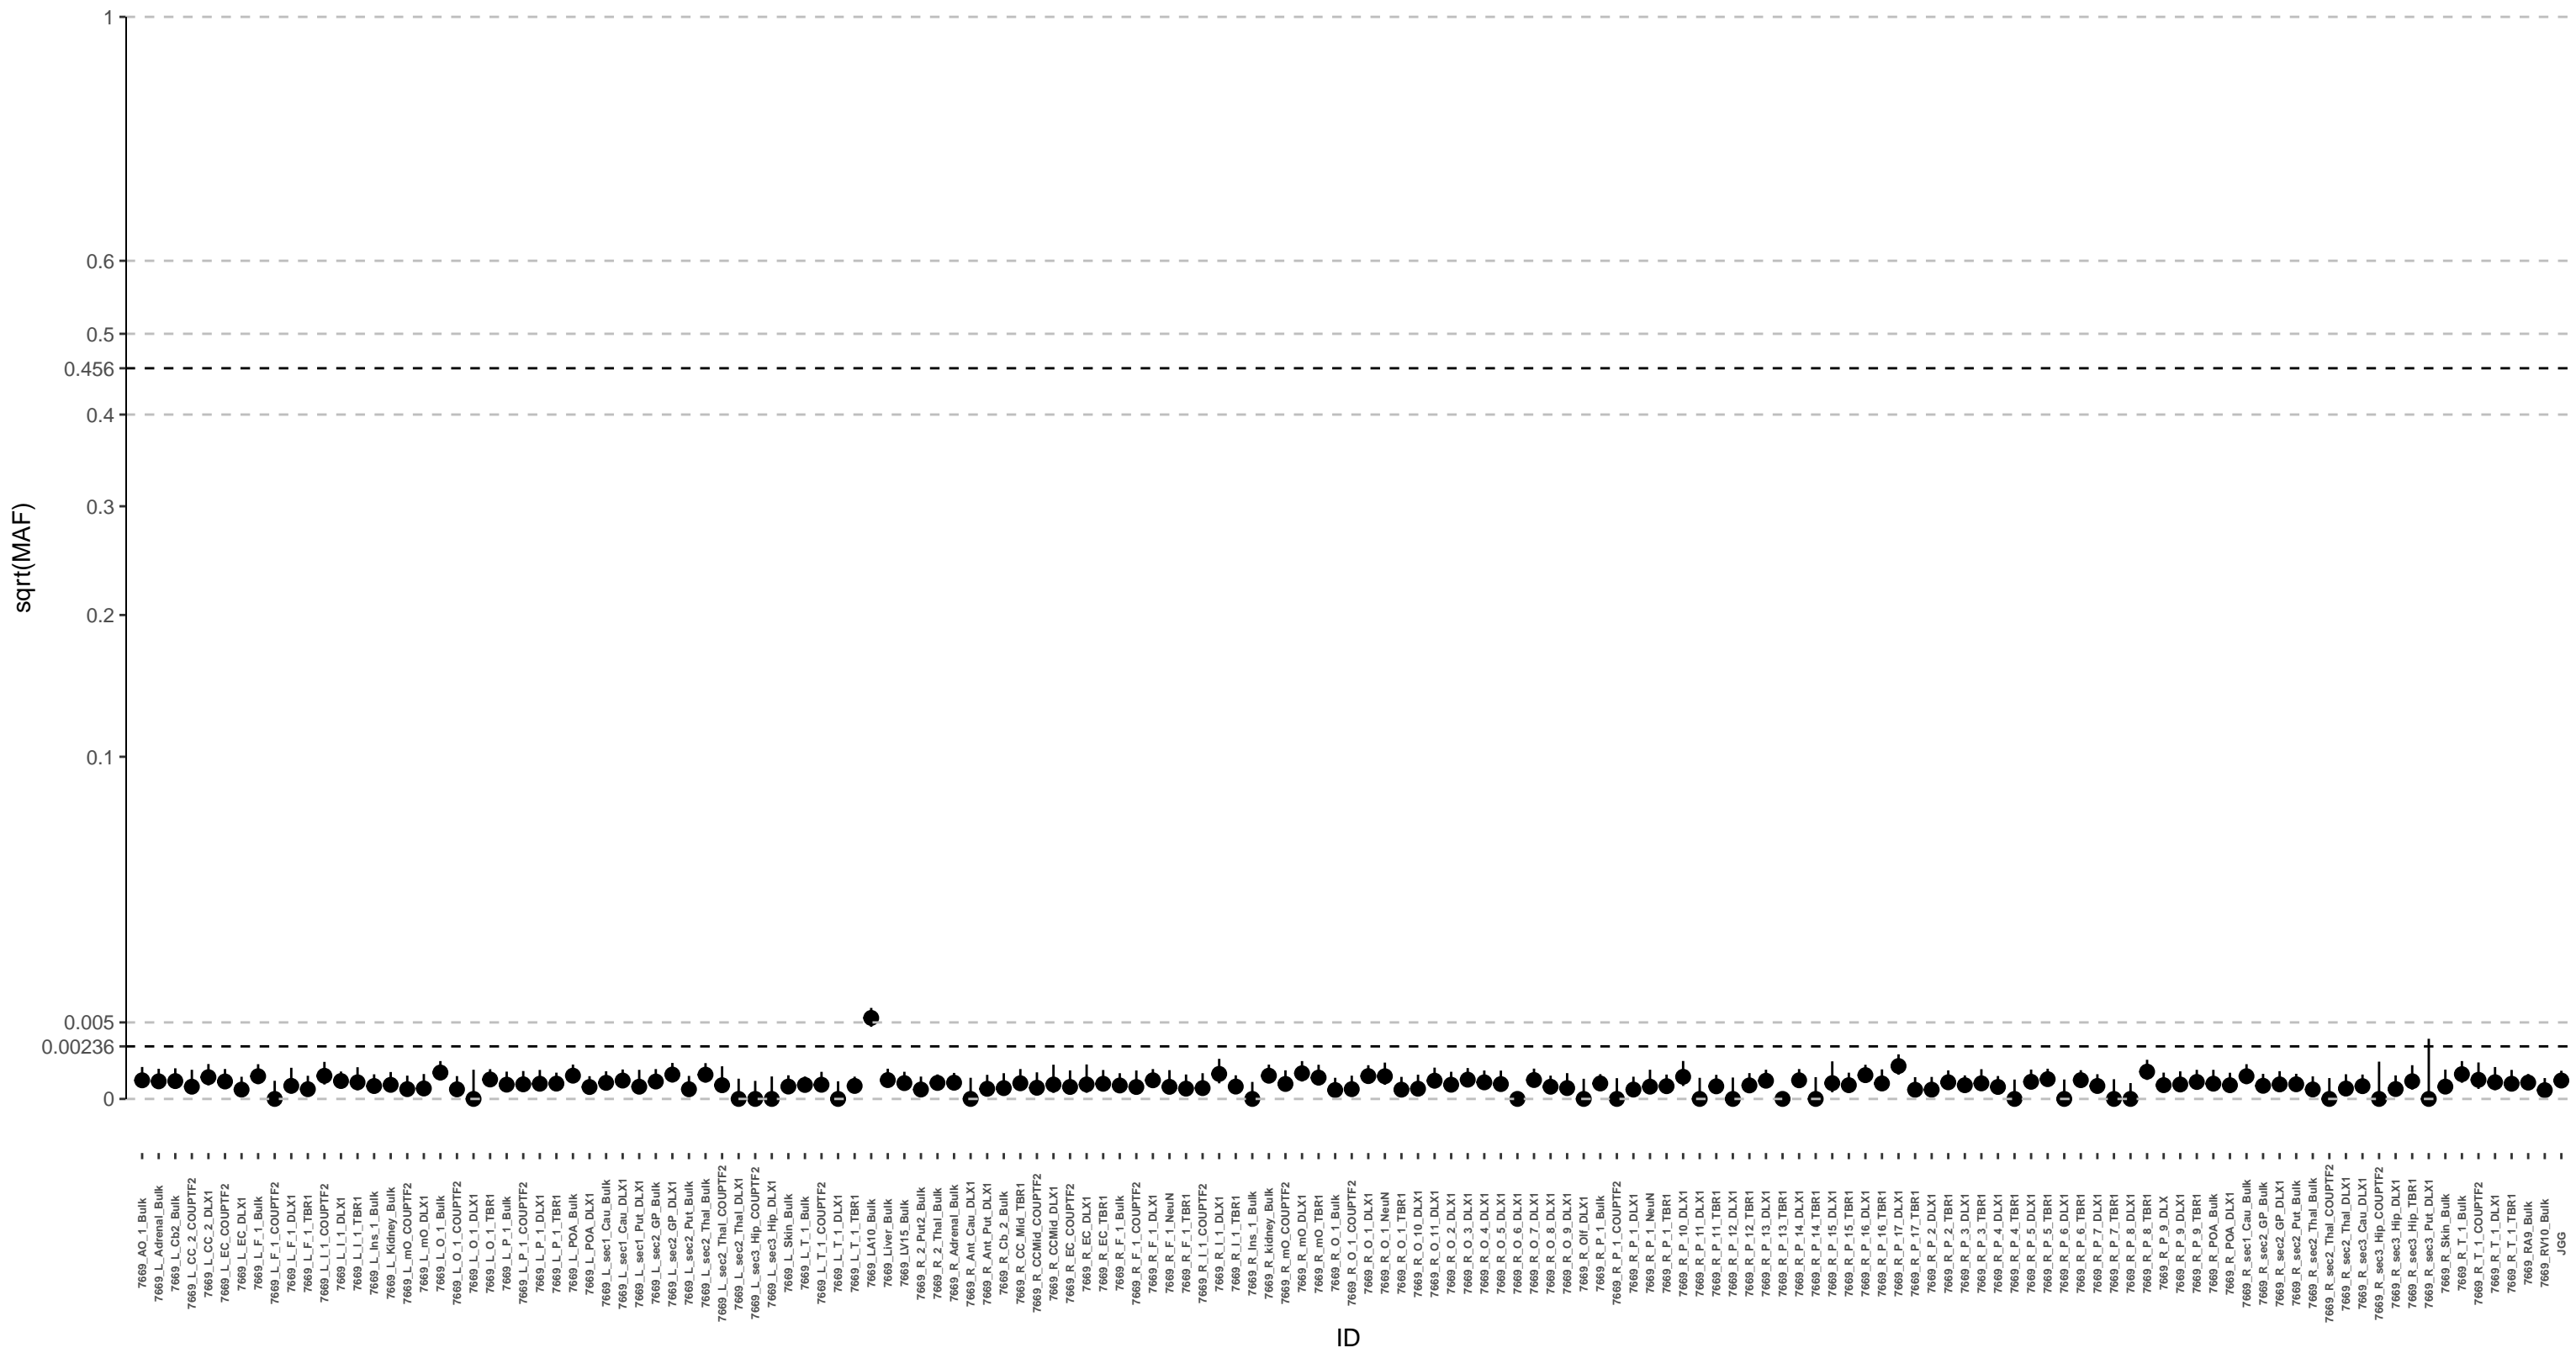

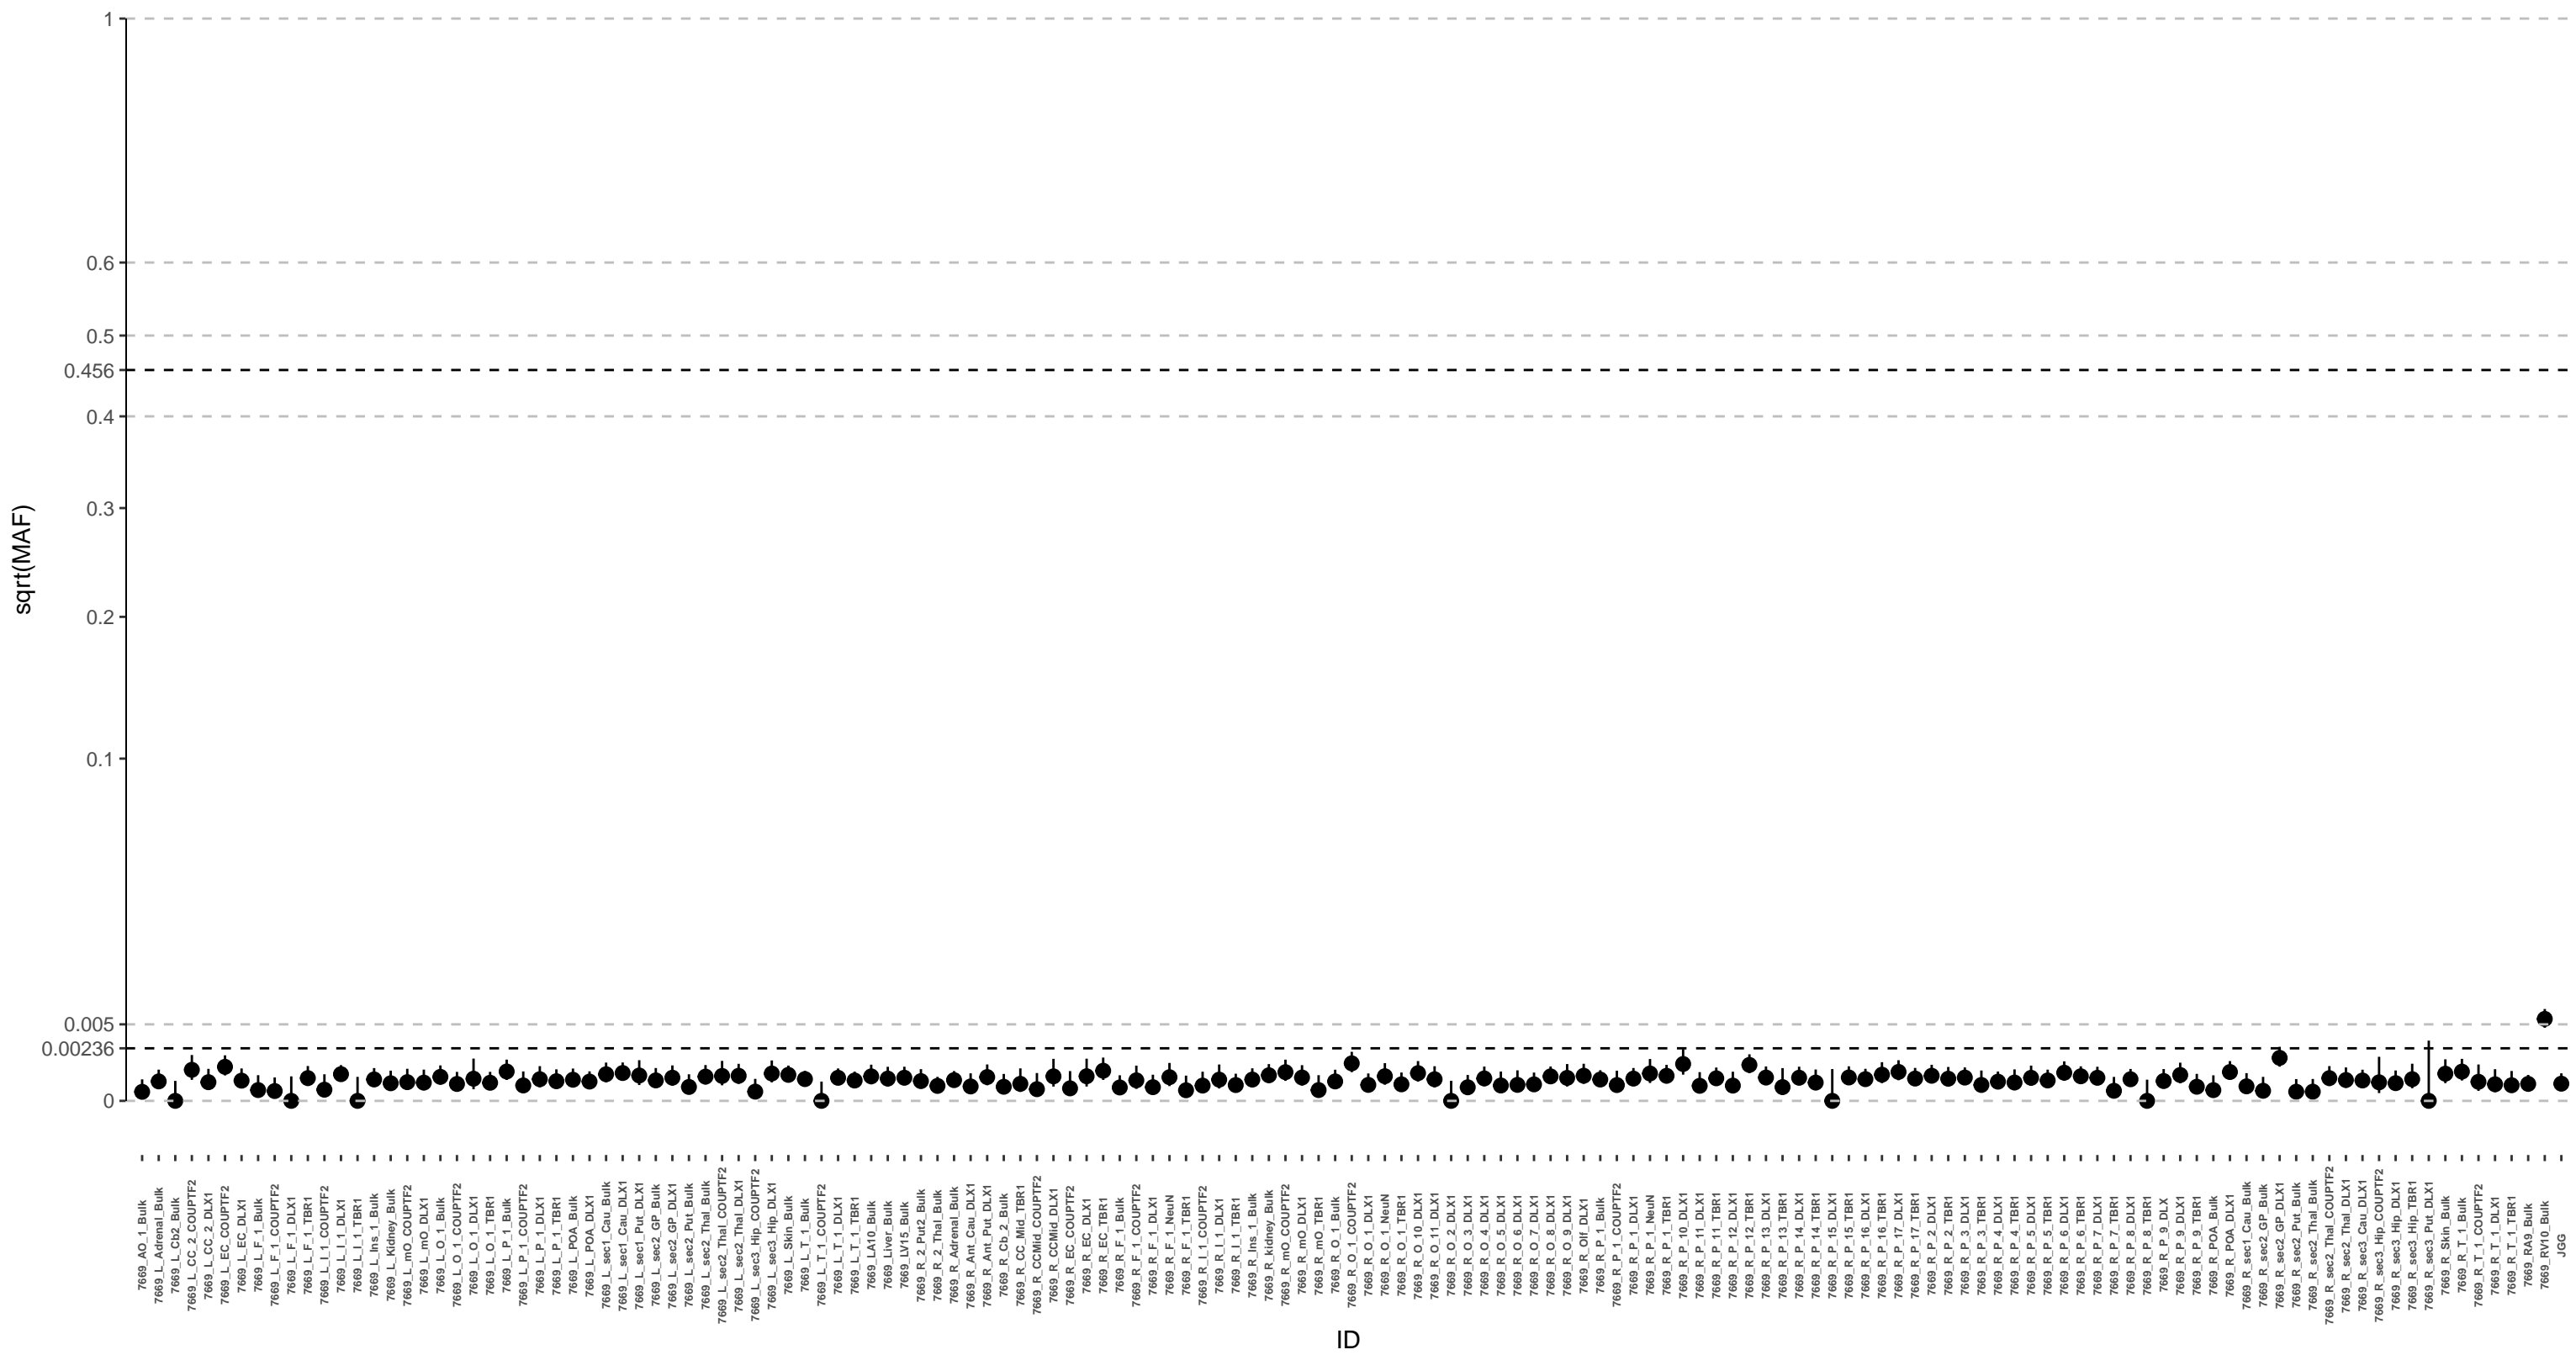

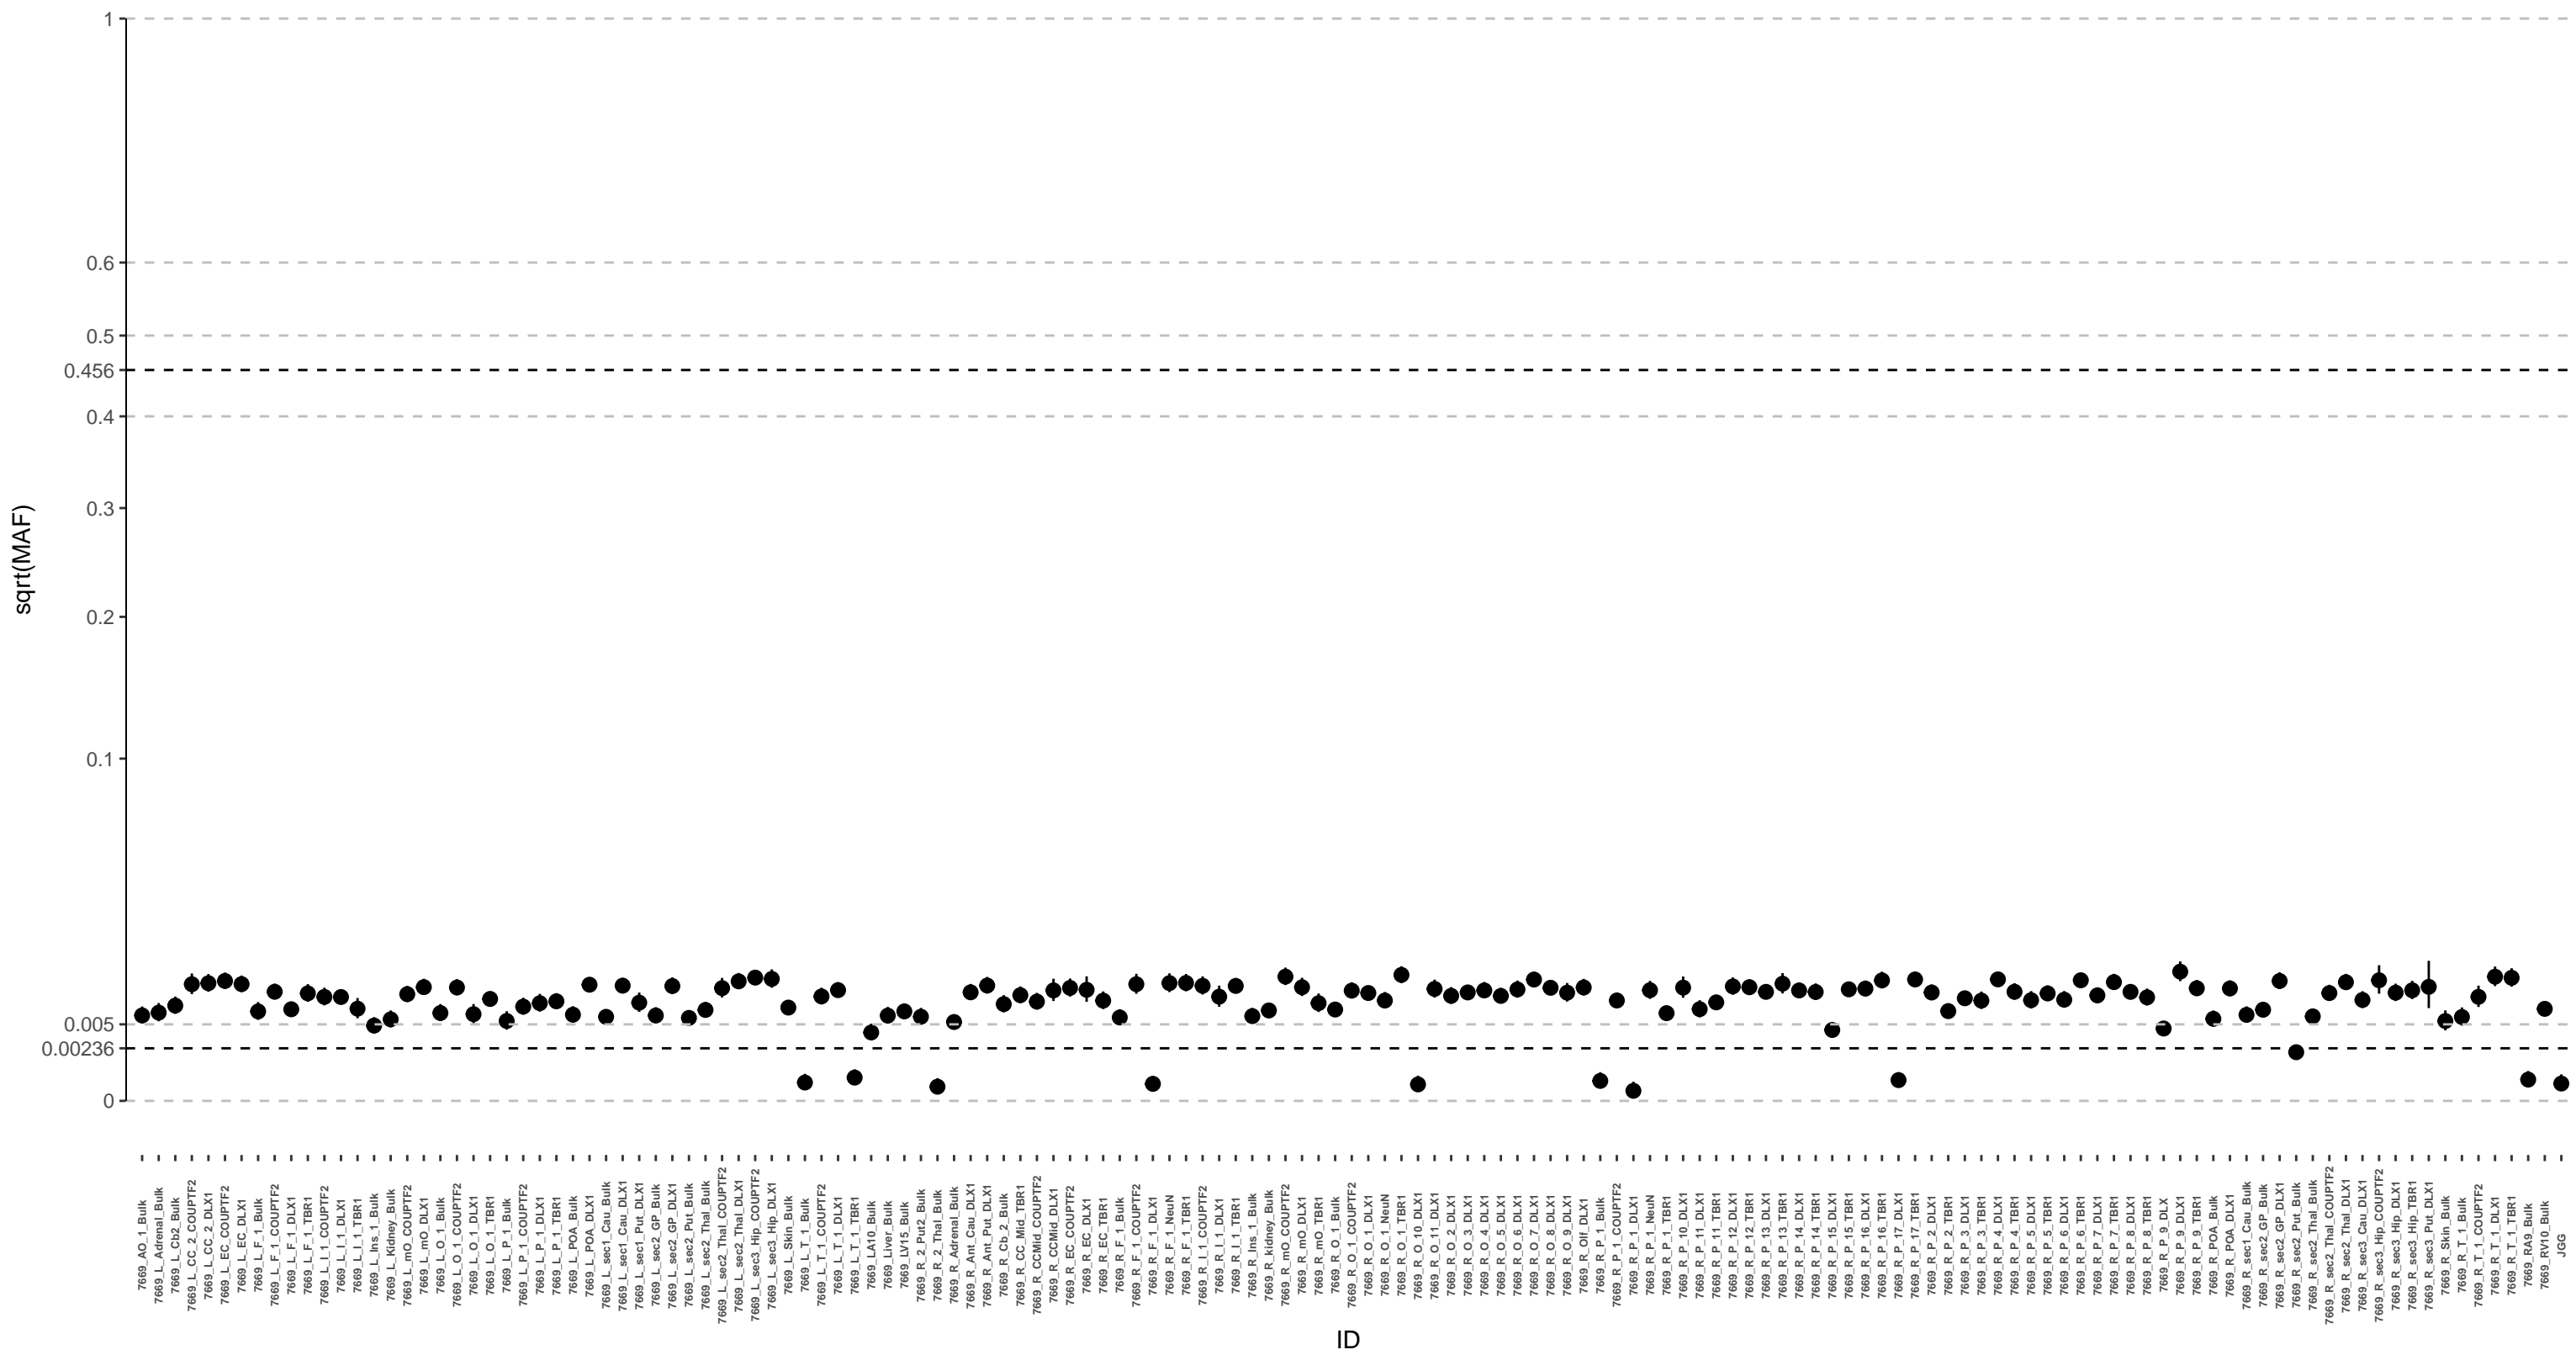

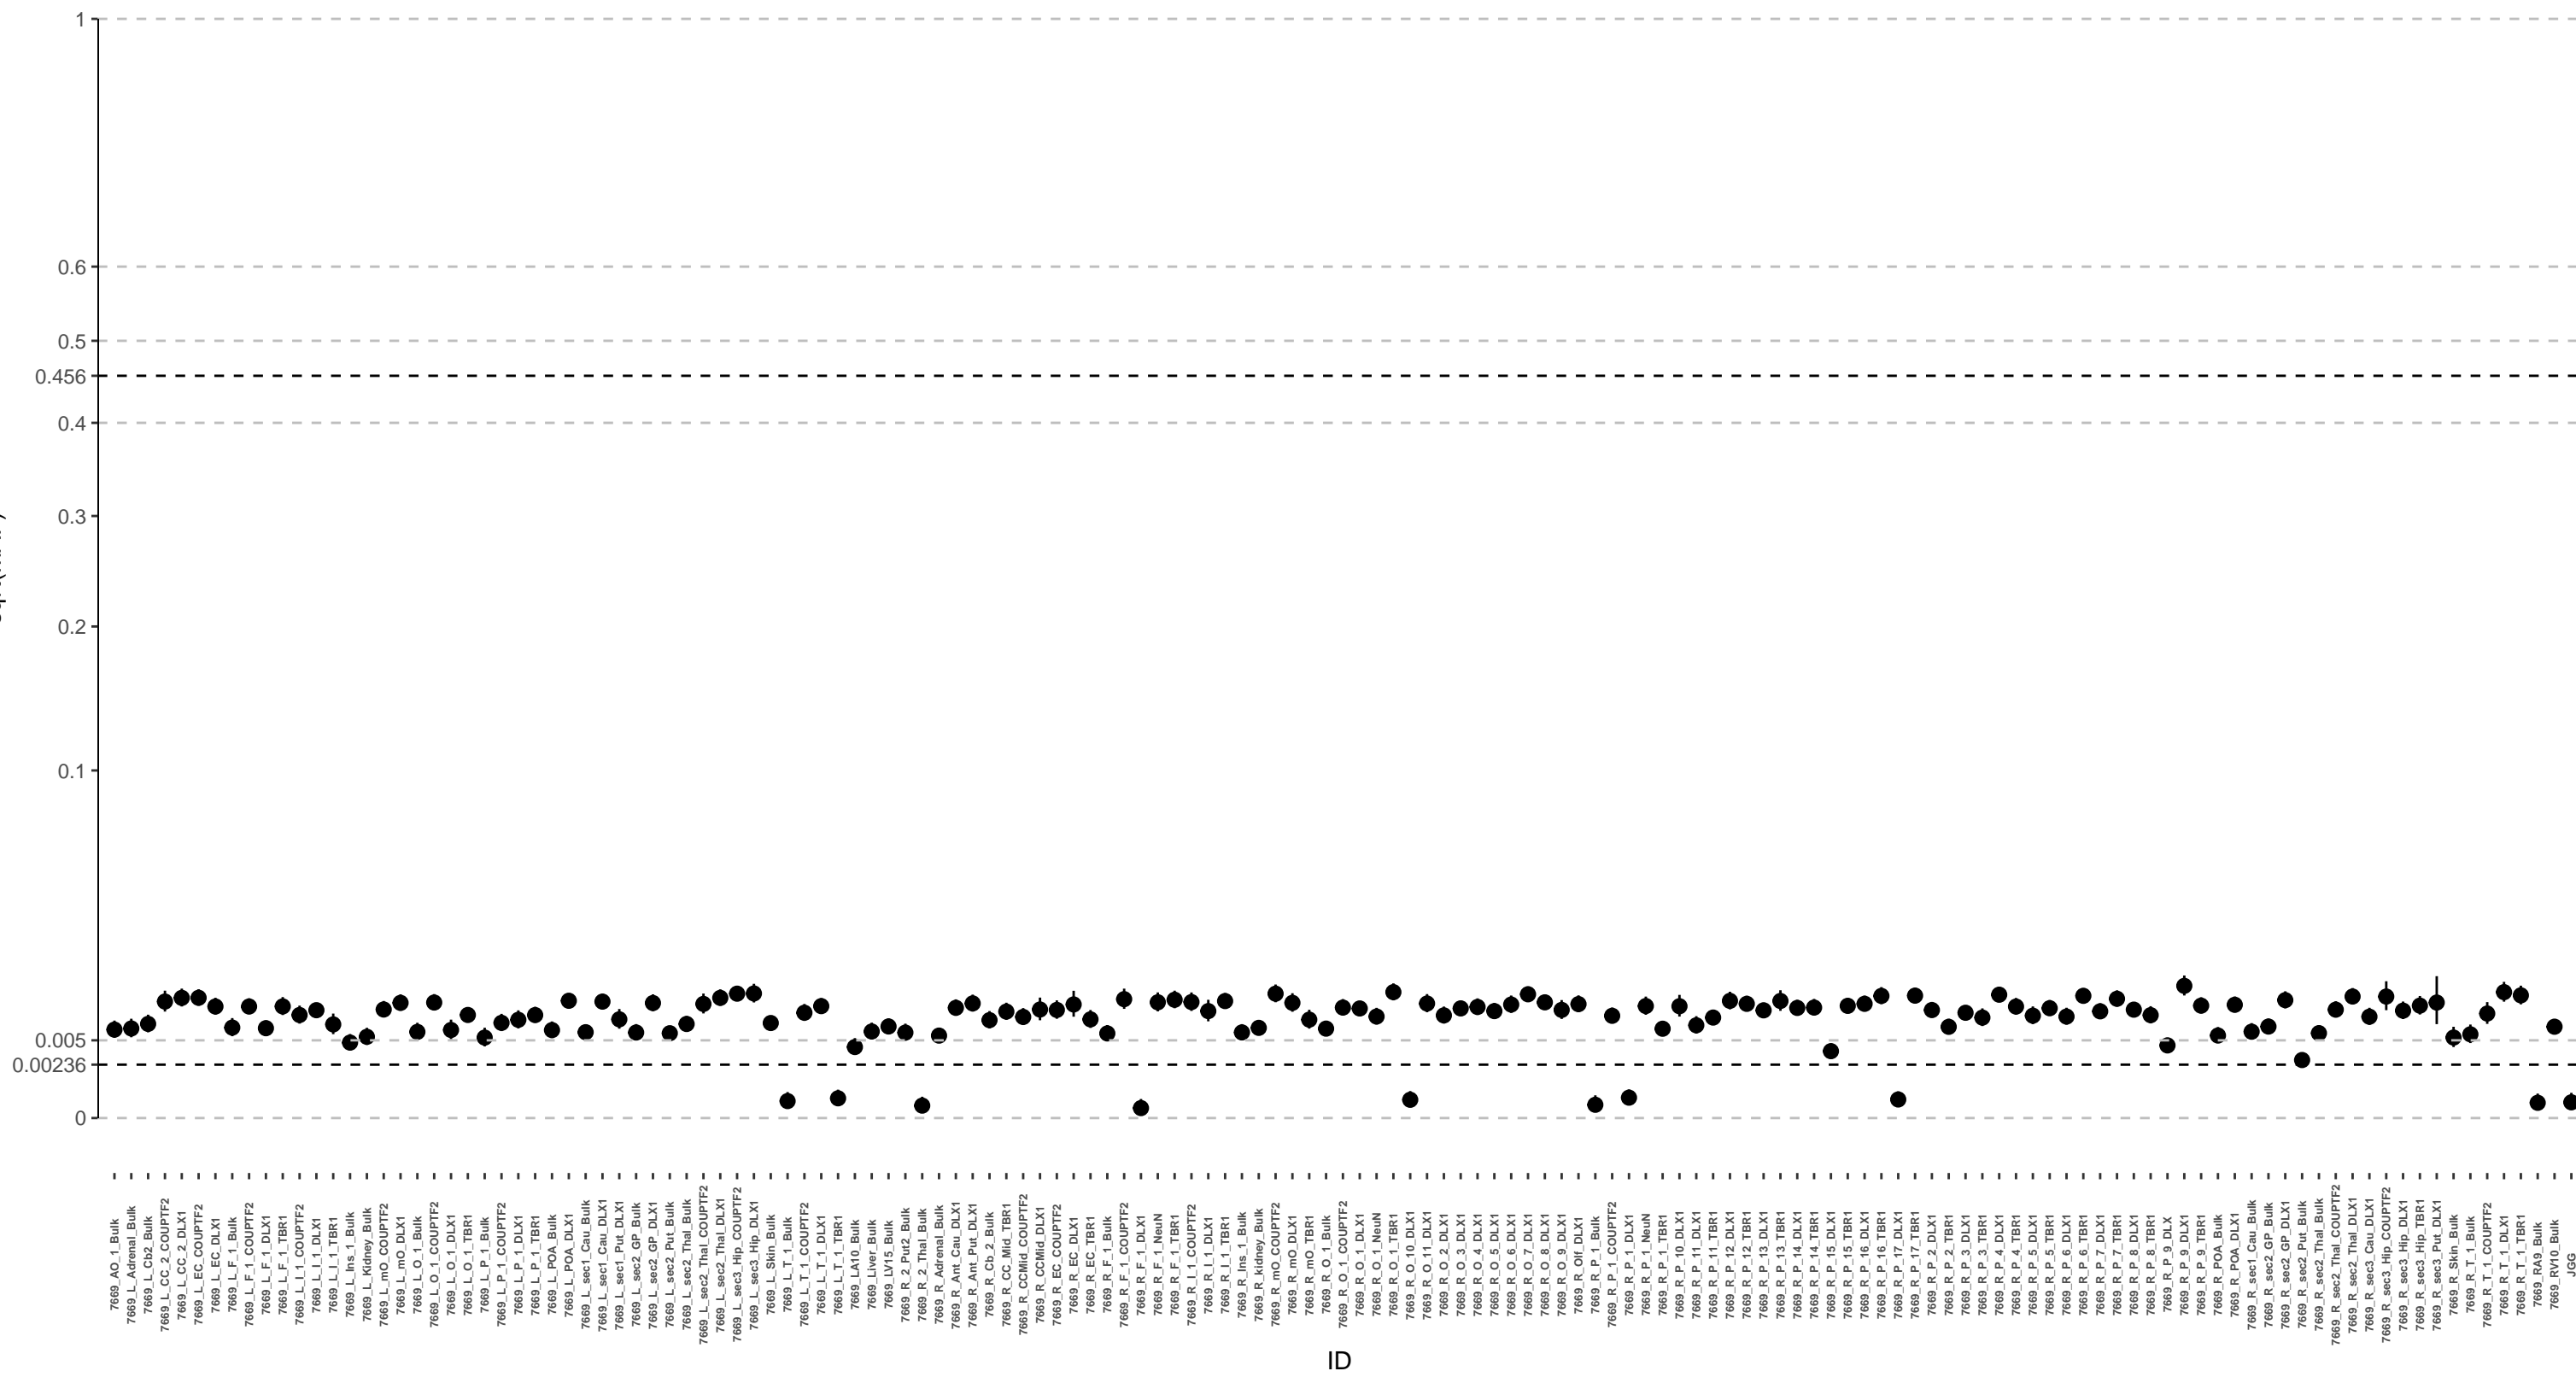

ID05 16-5864193-G-T

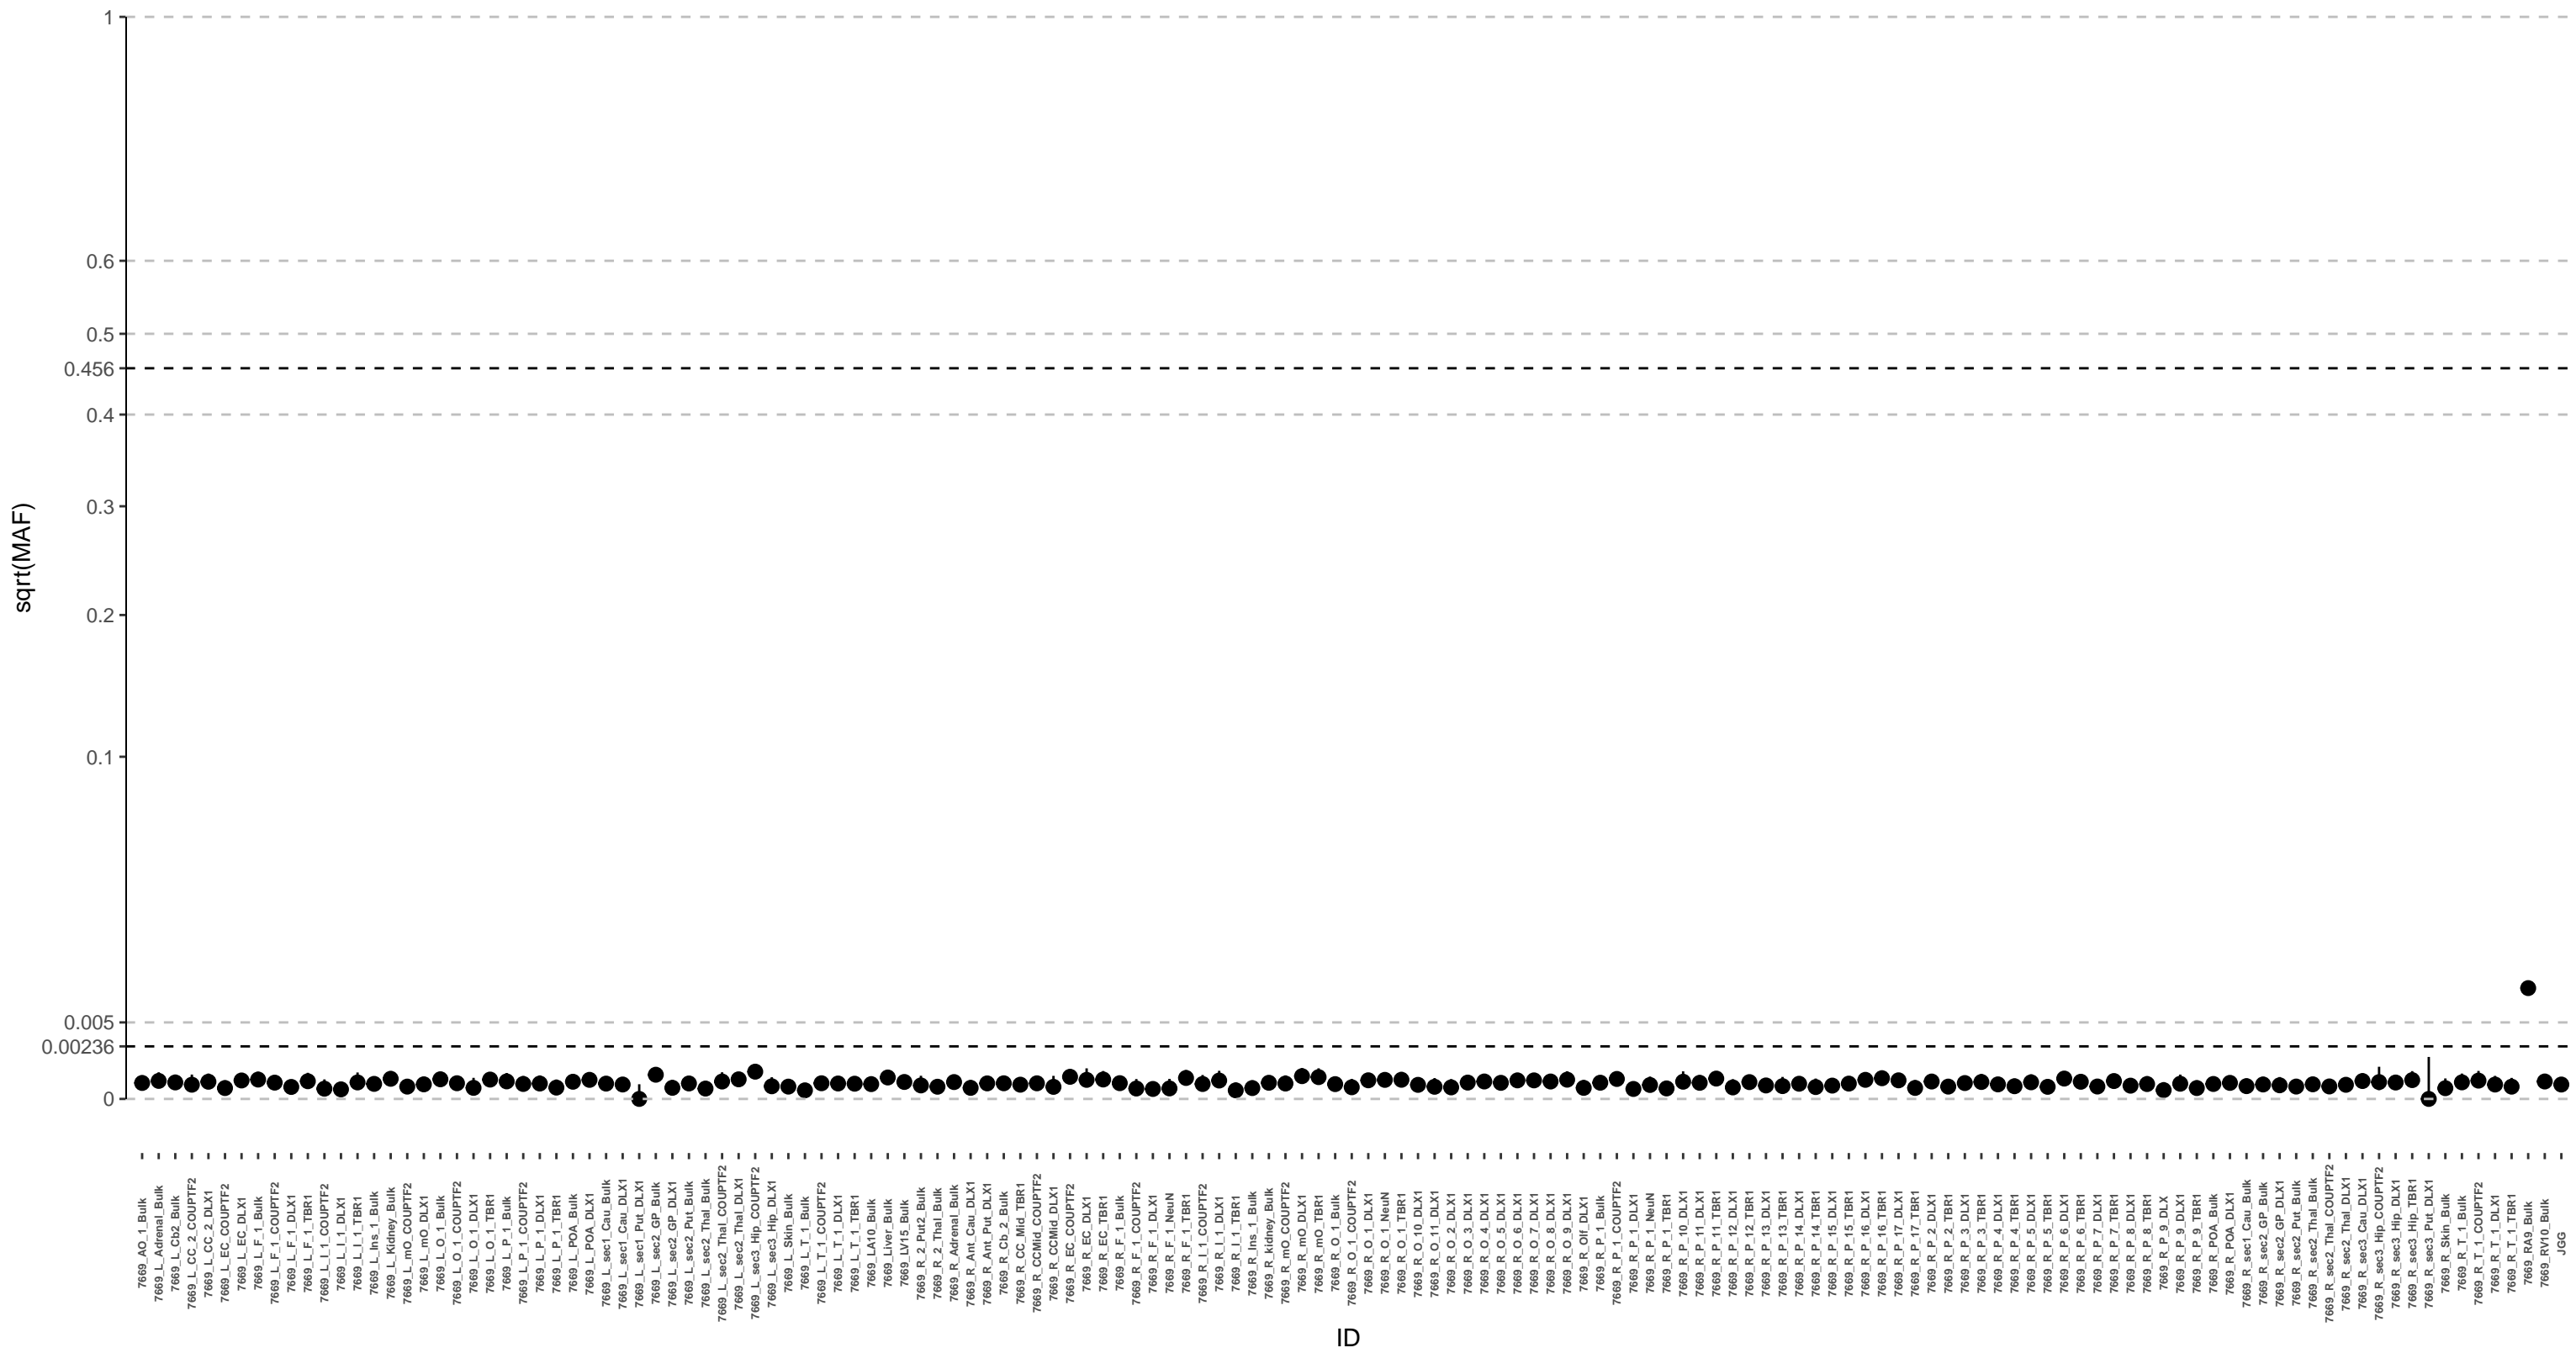

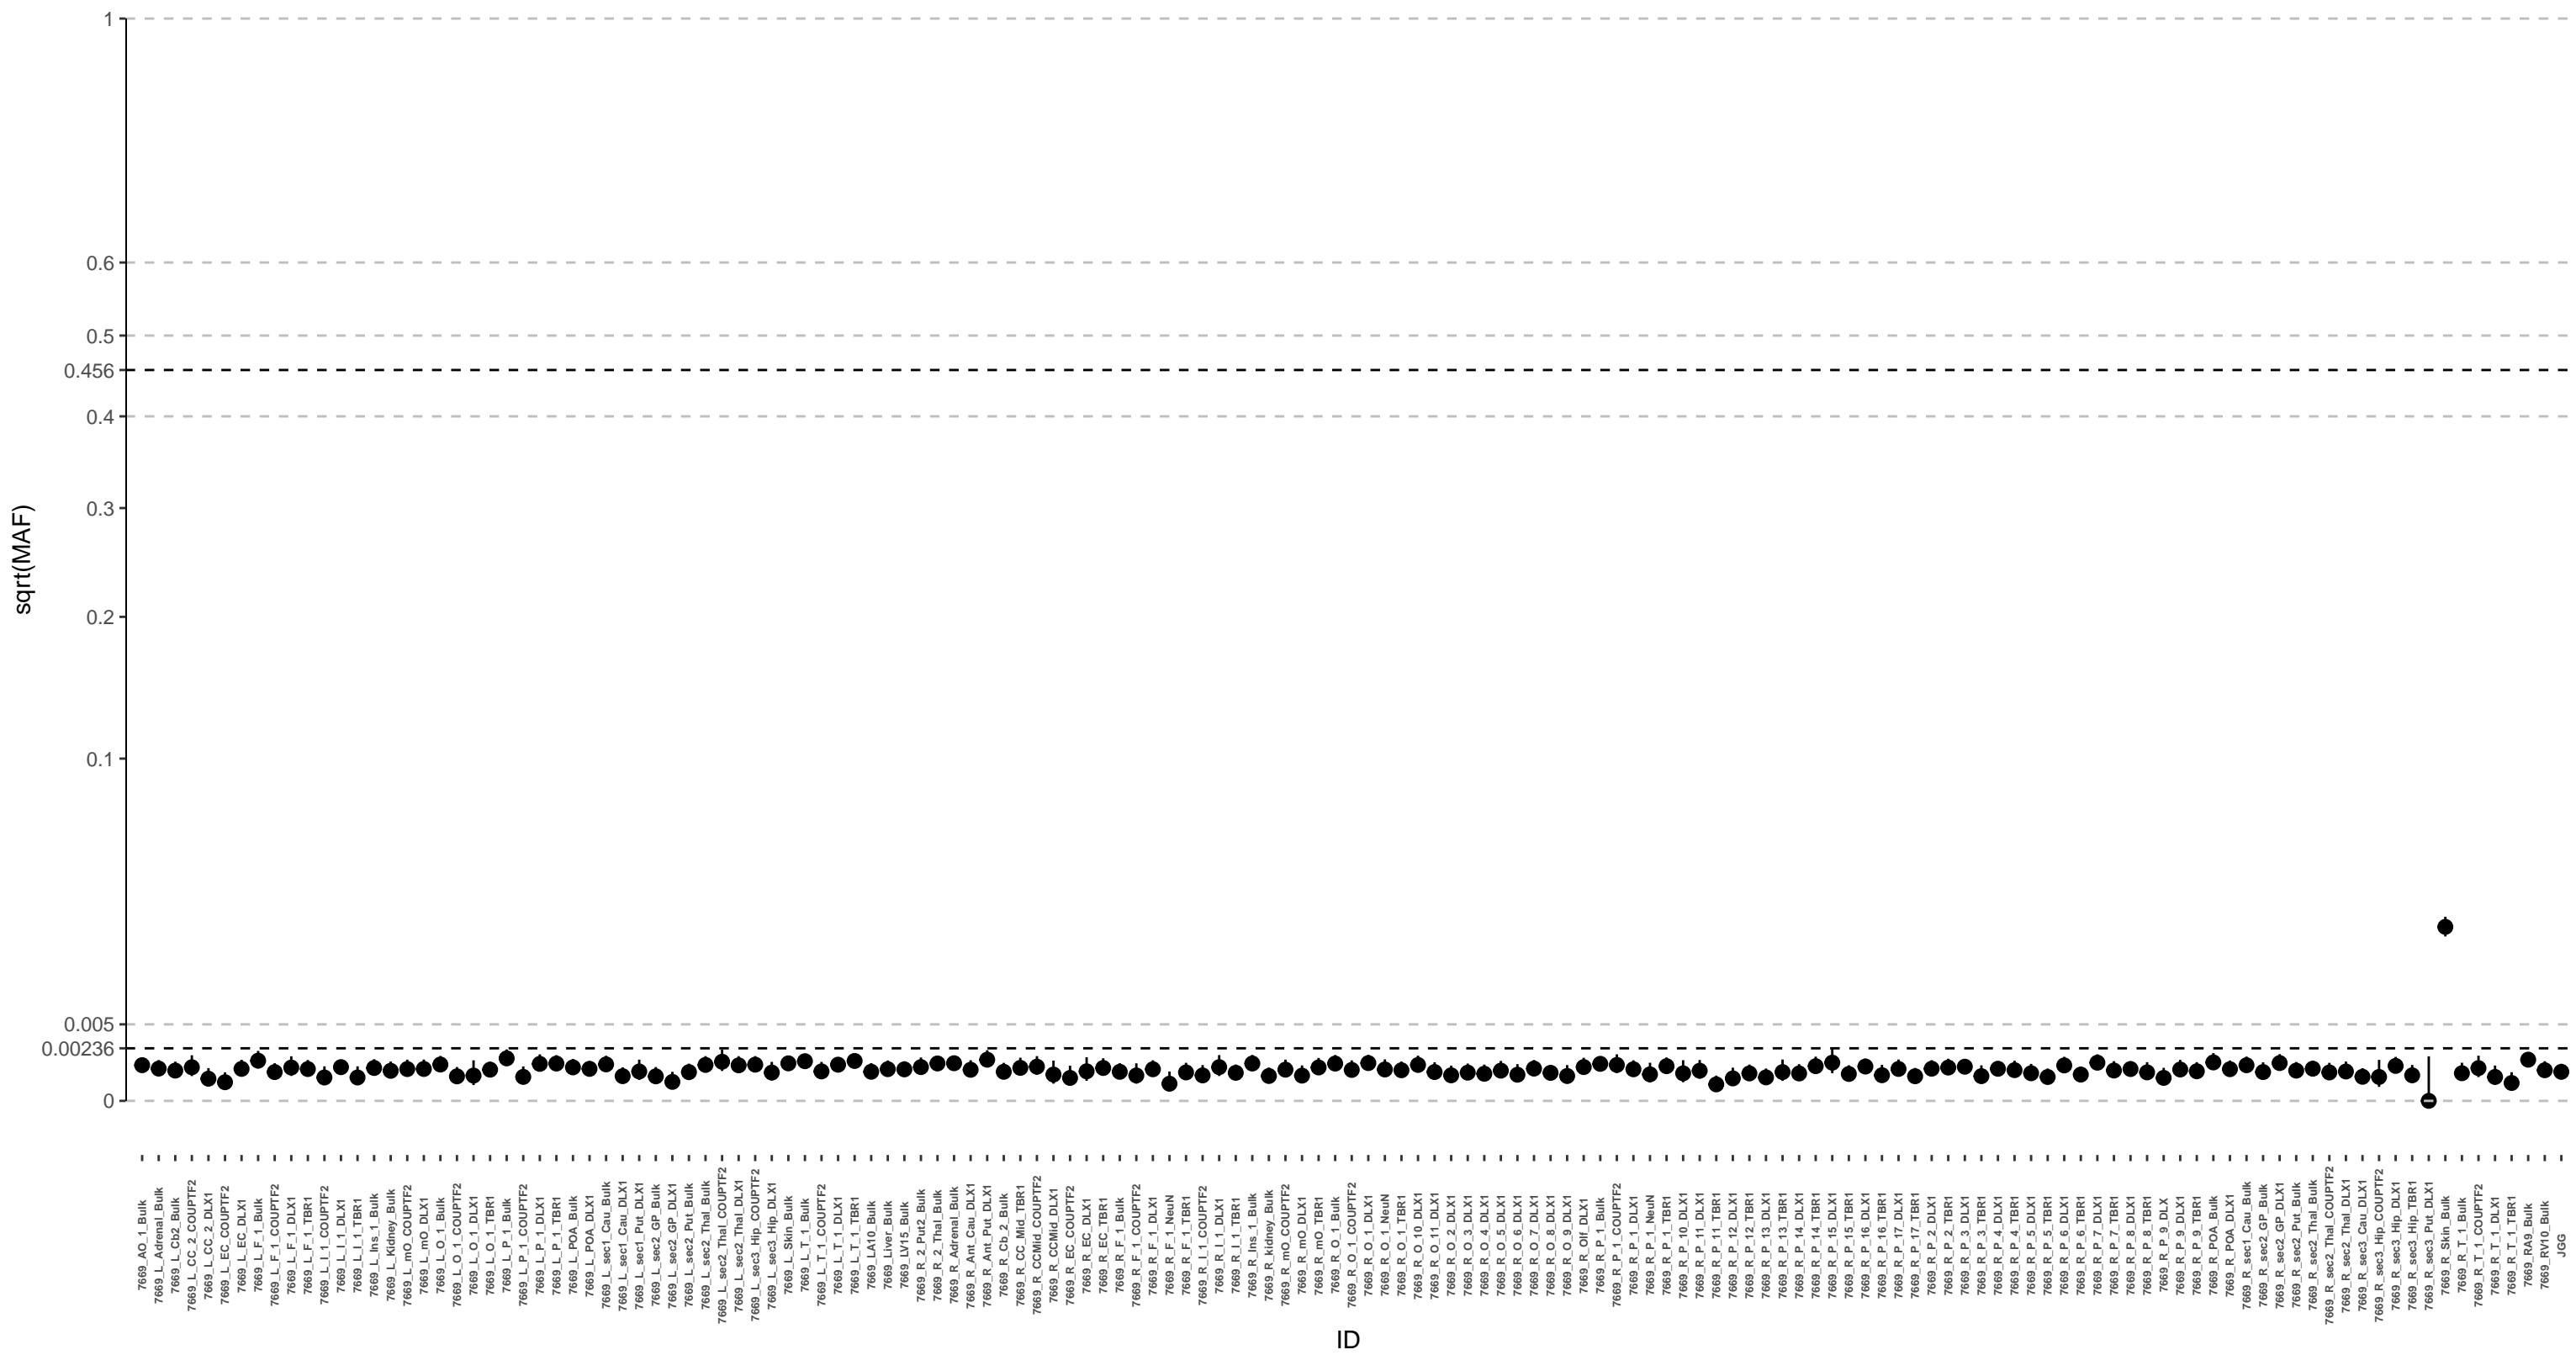

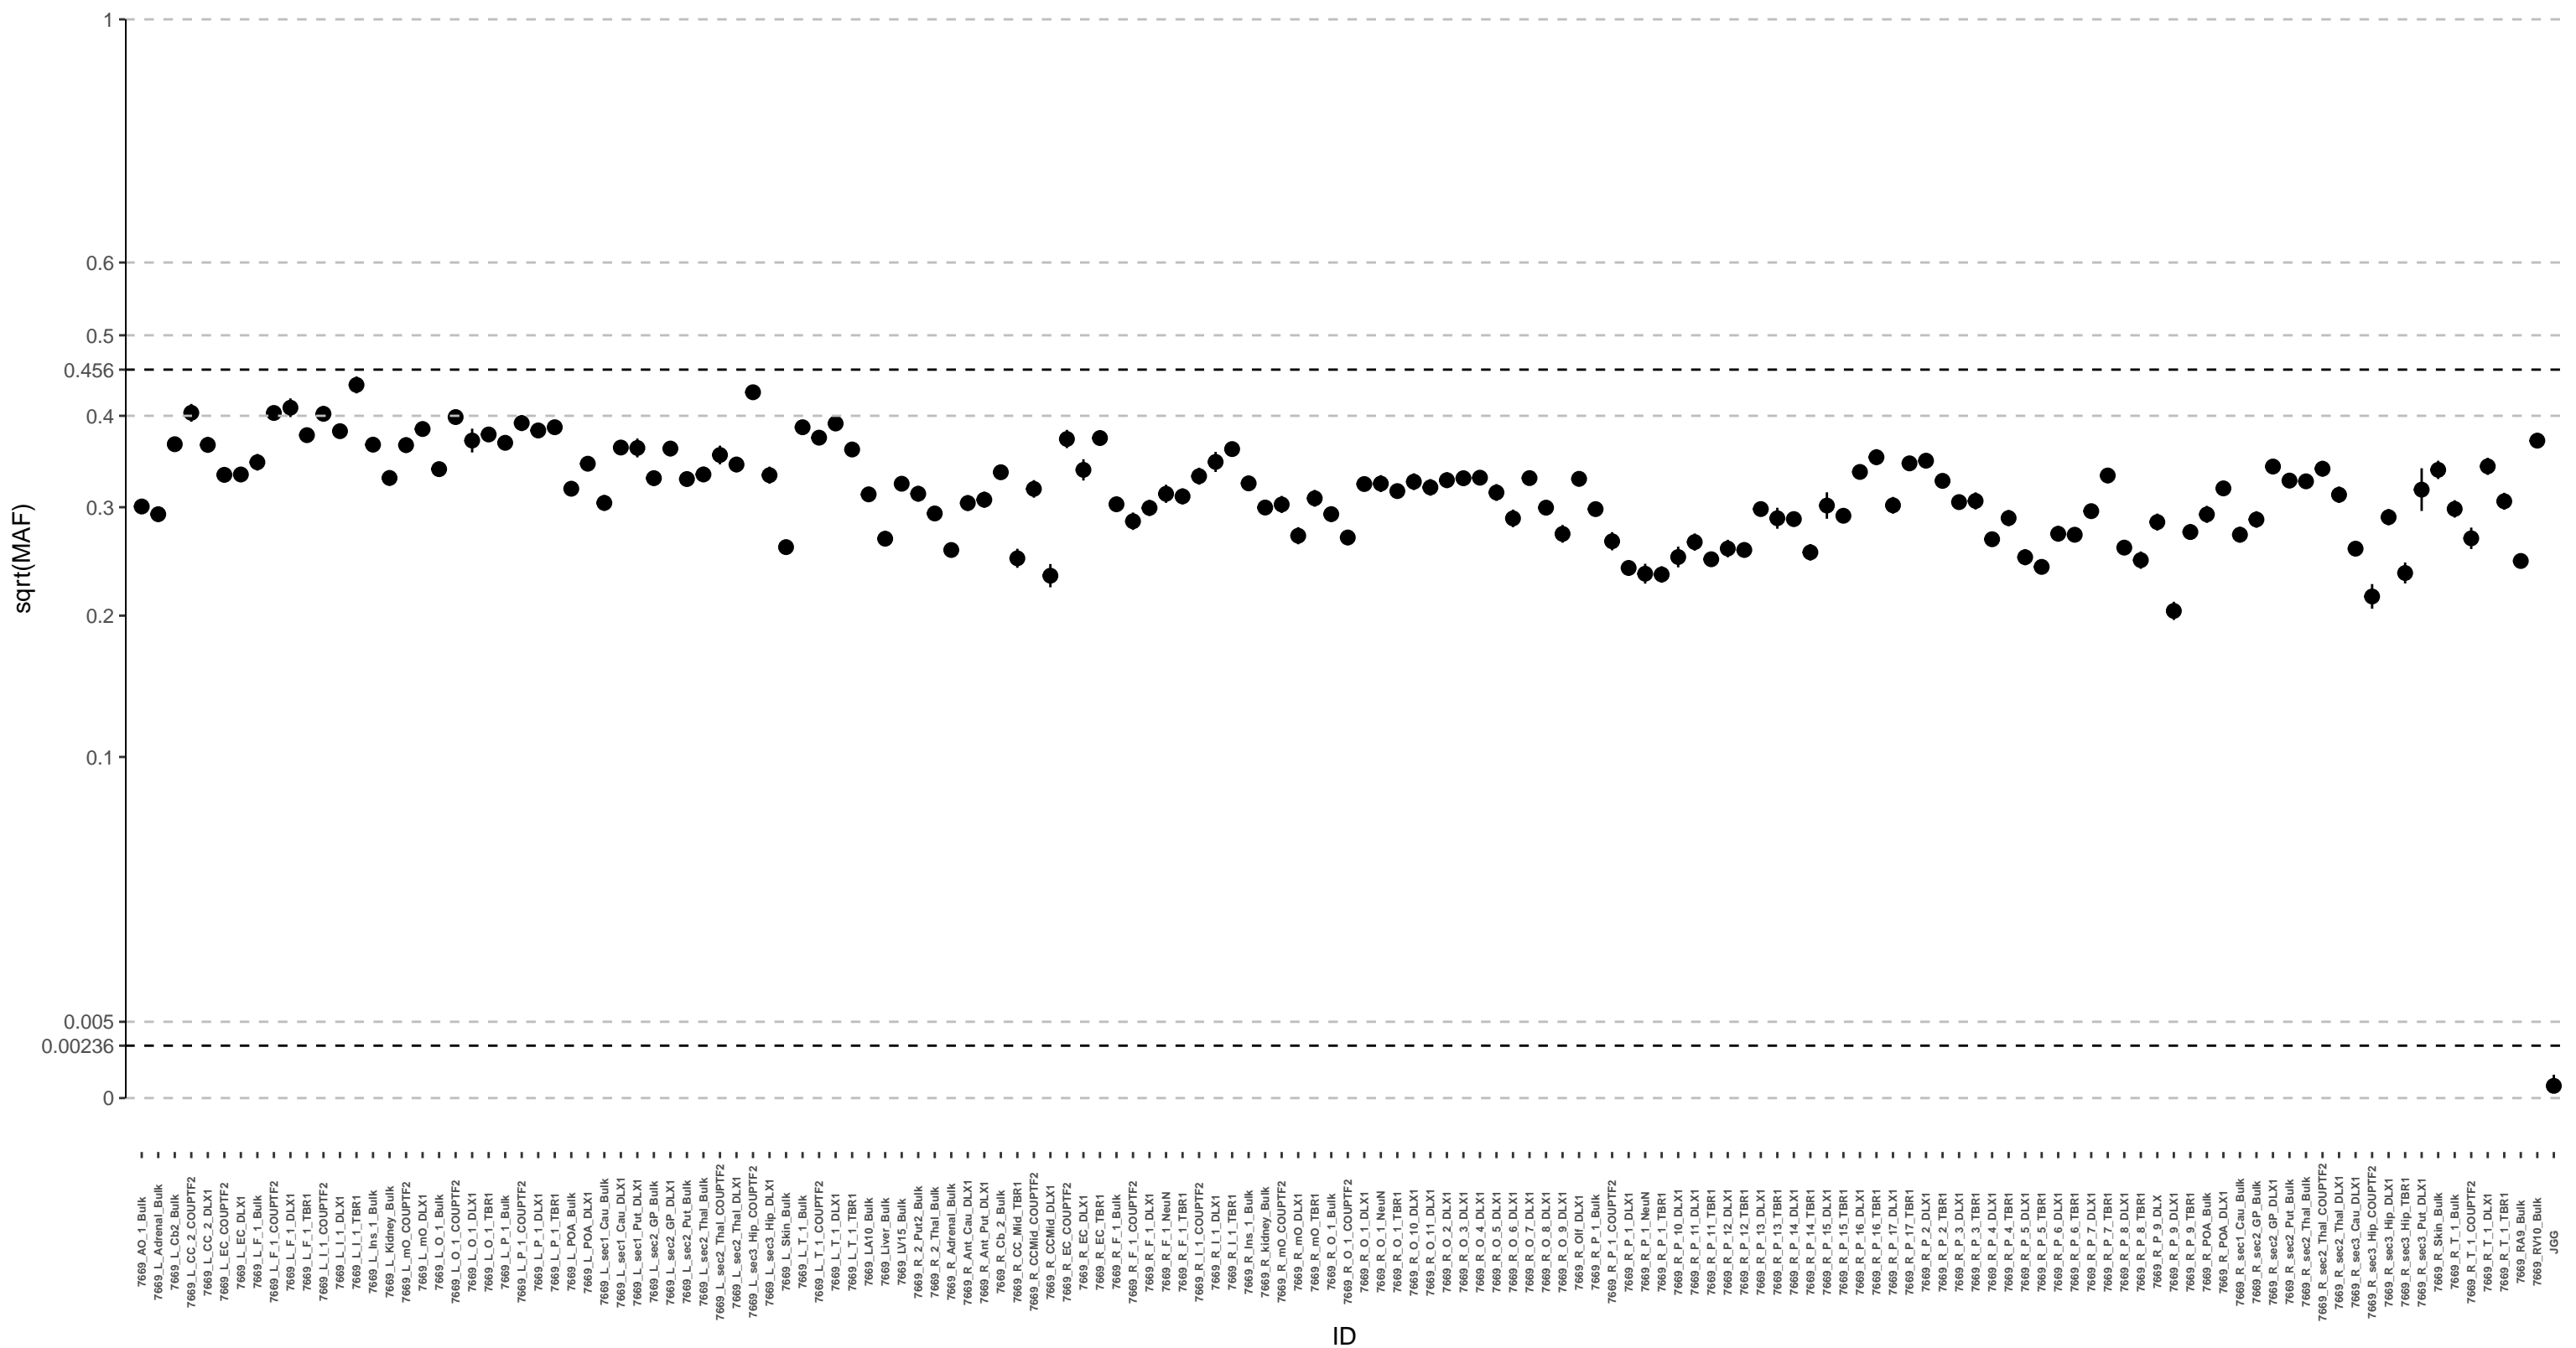

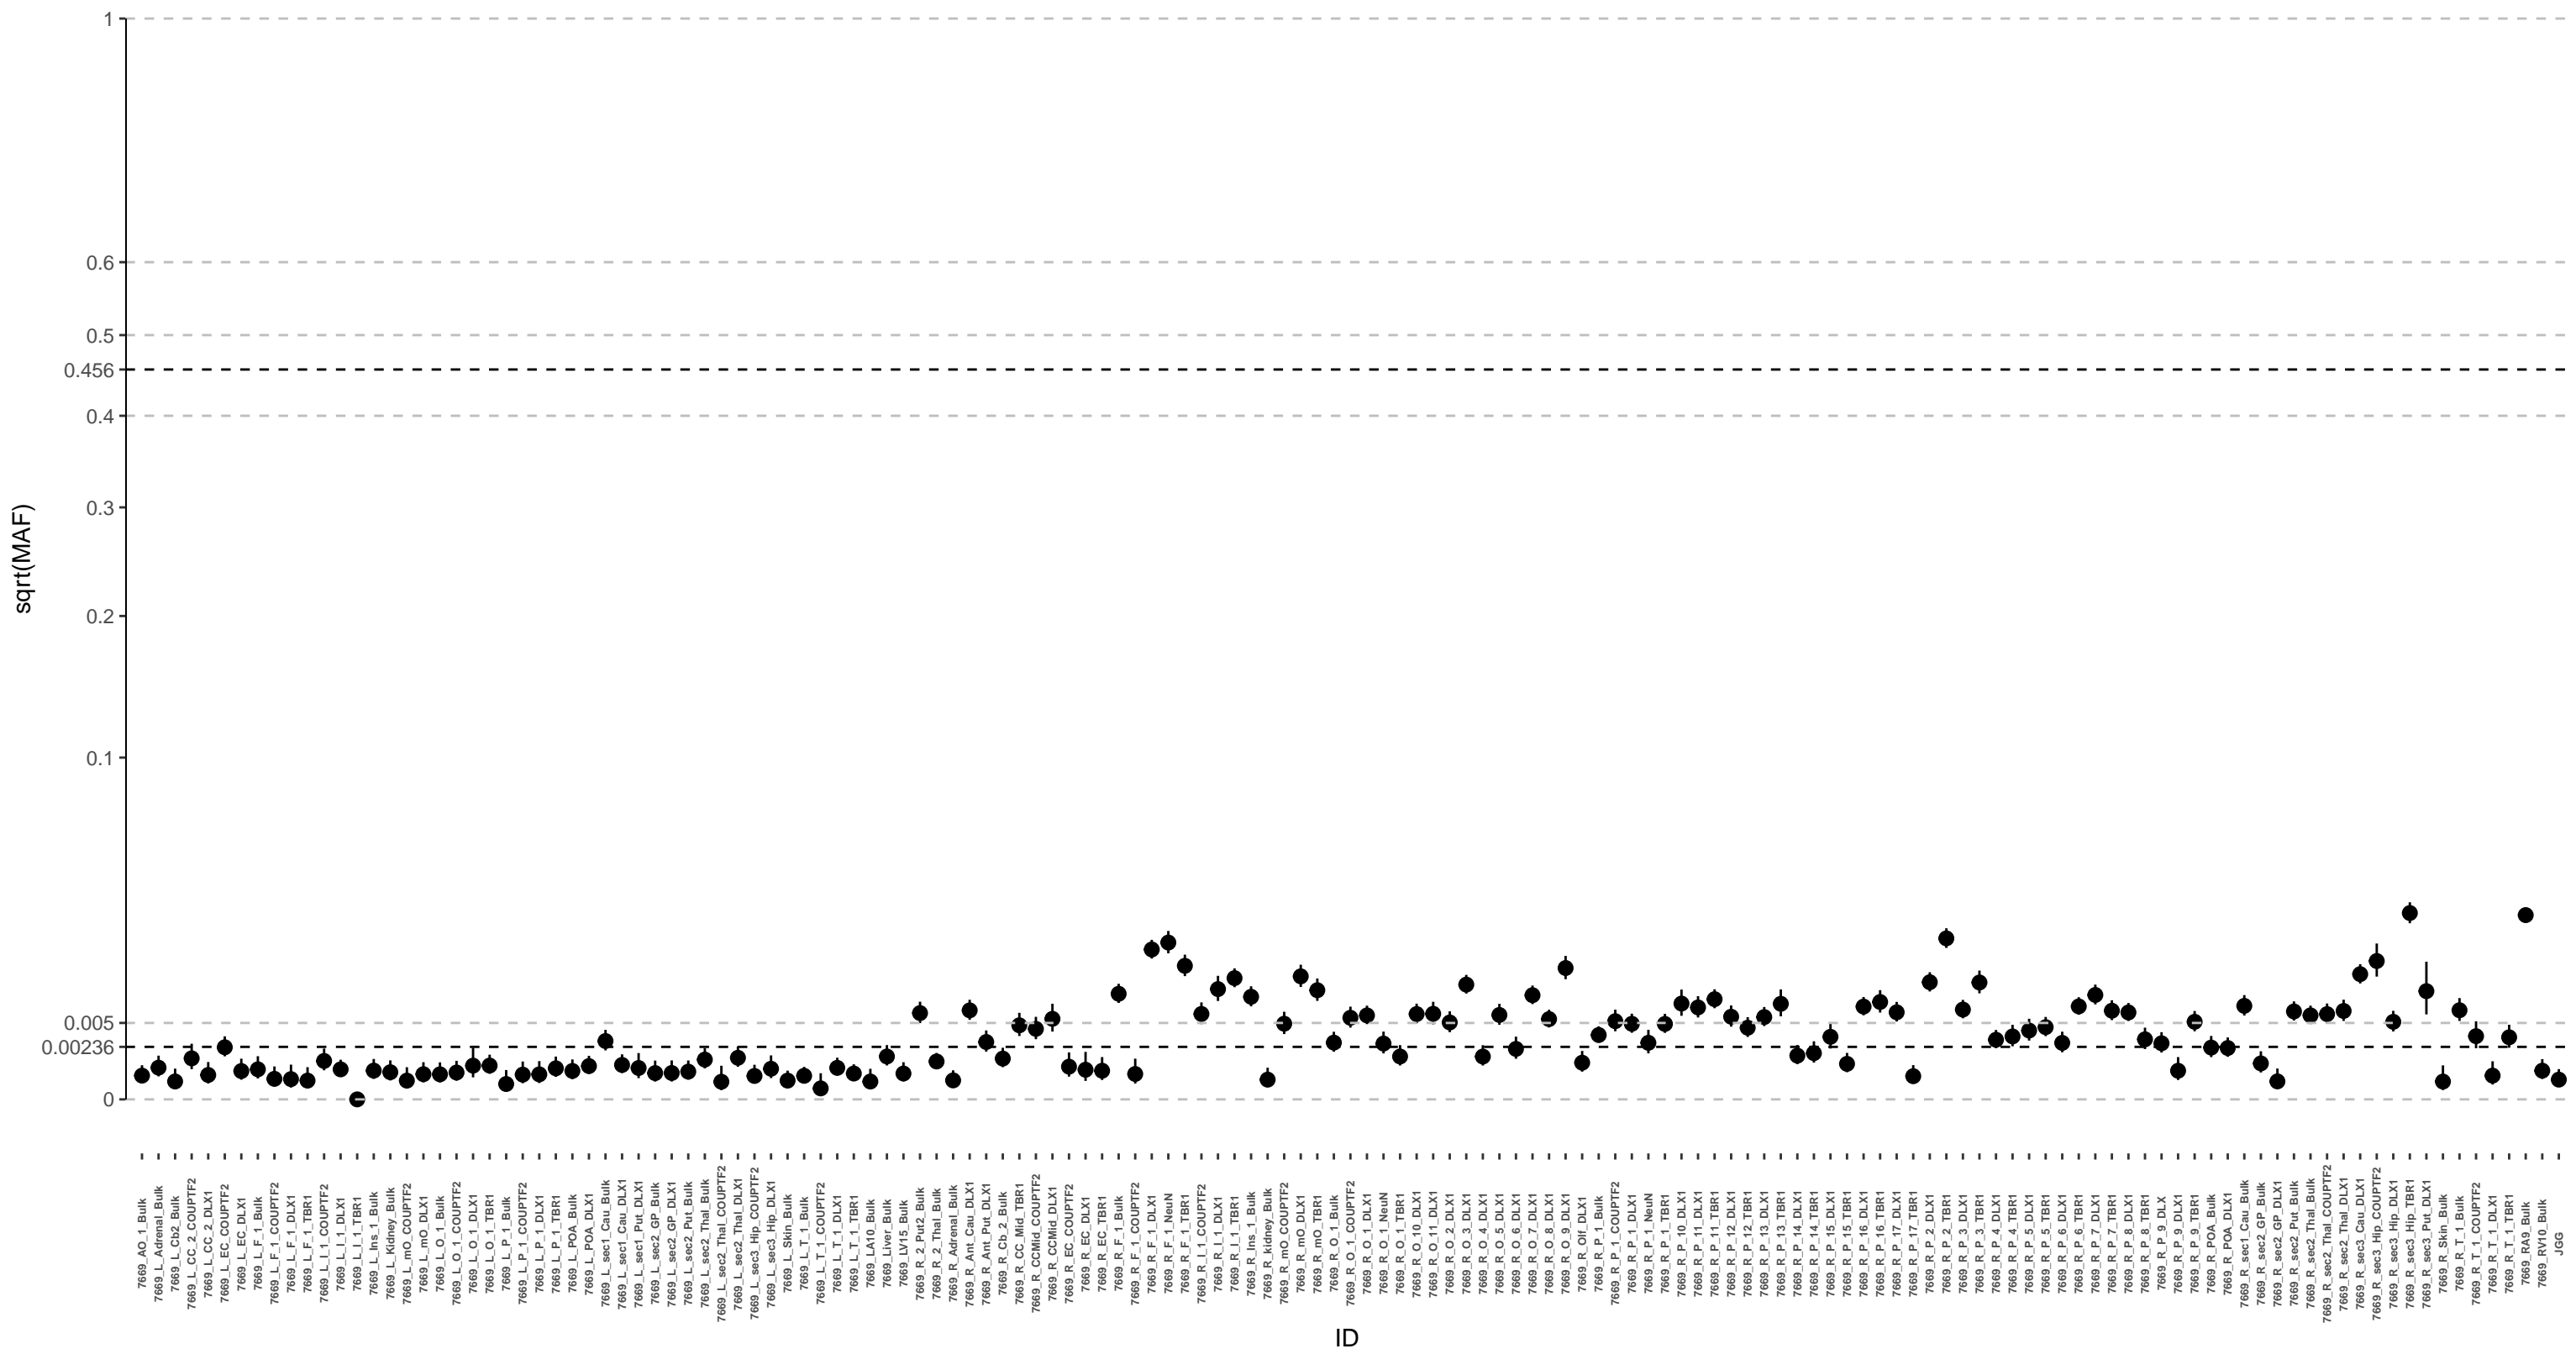



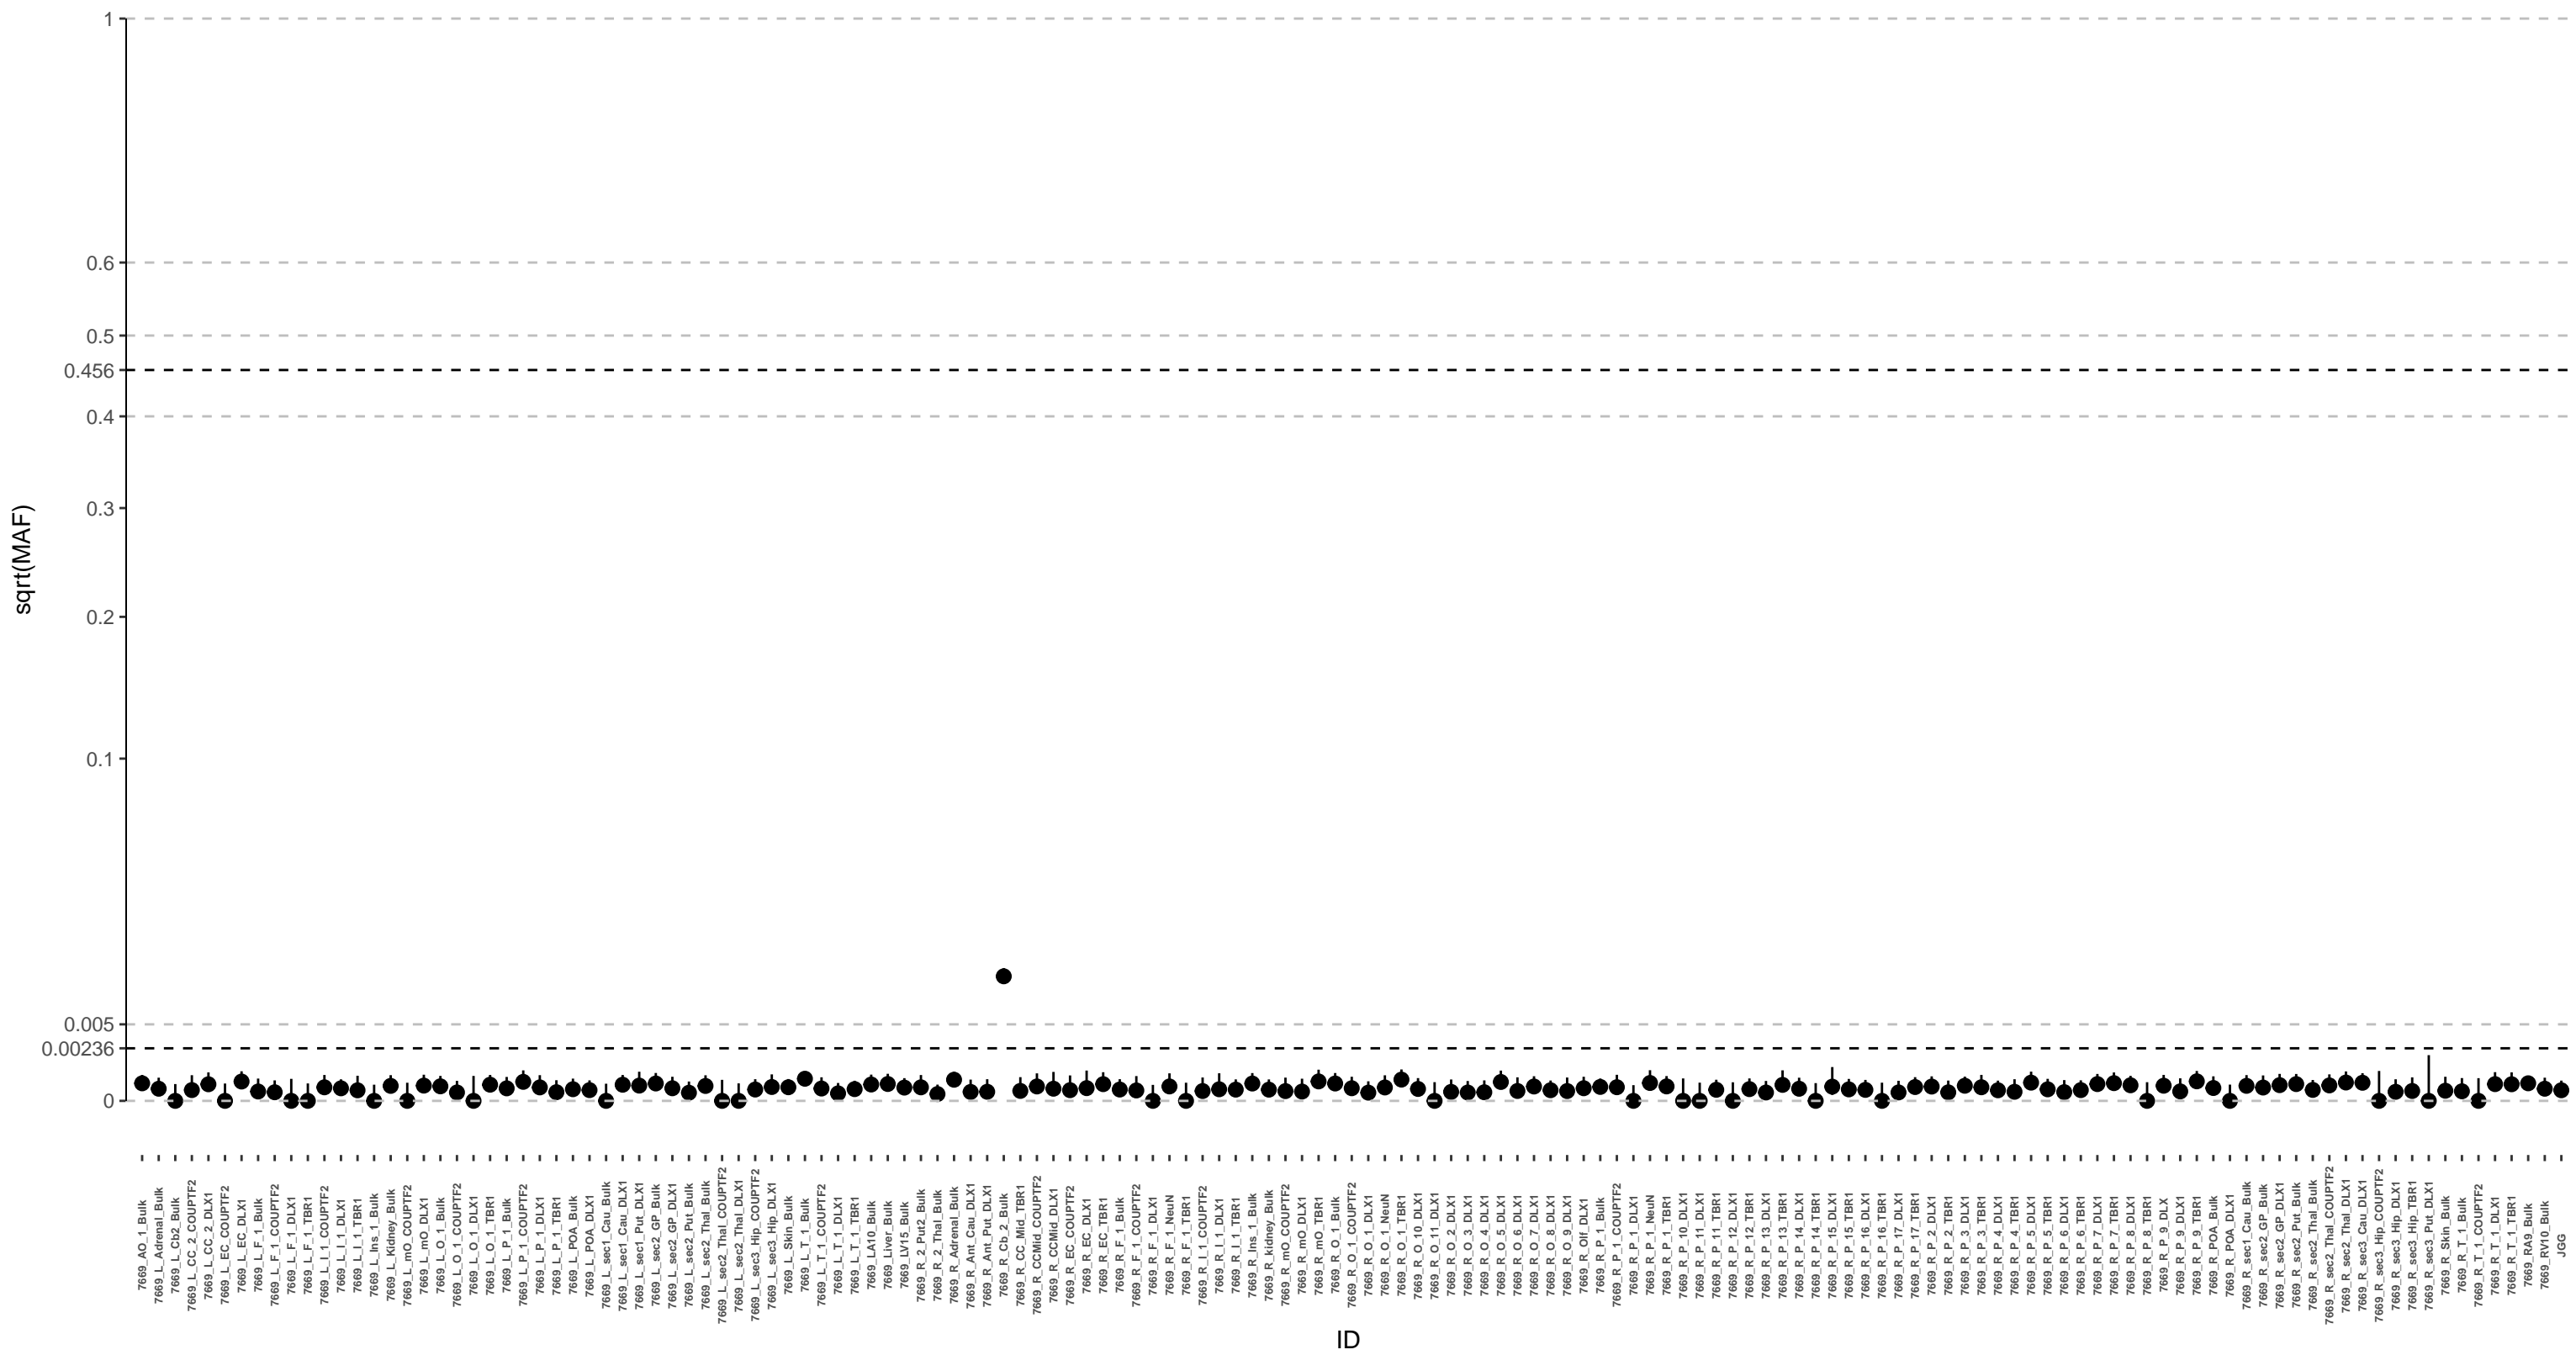

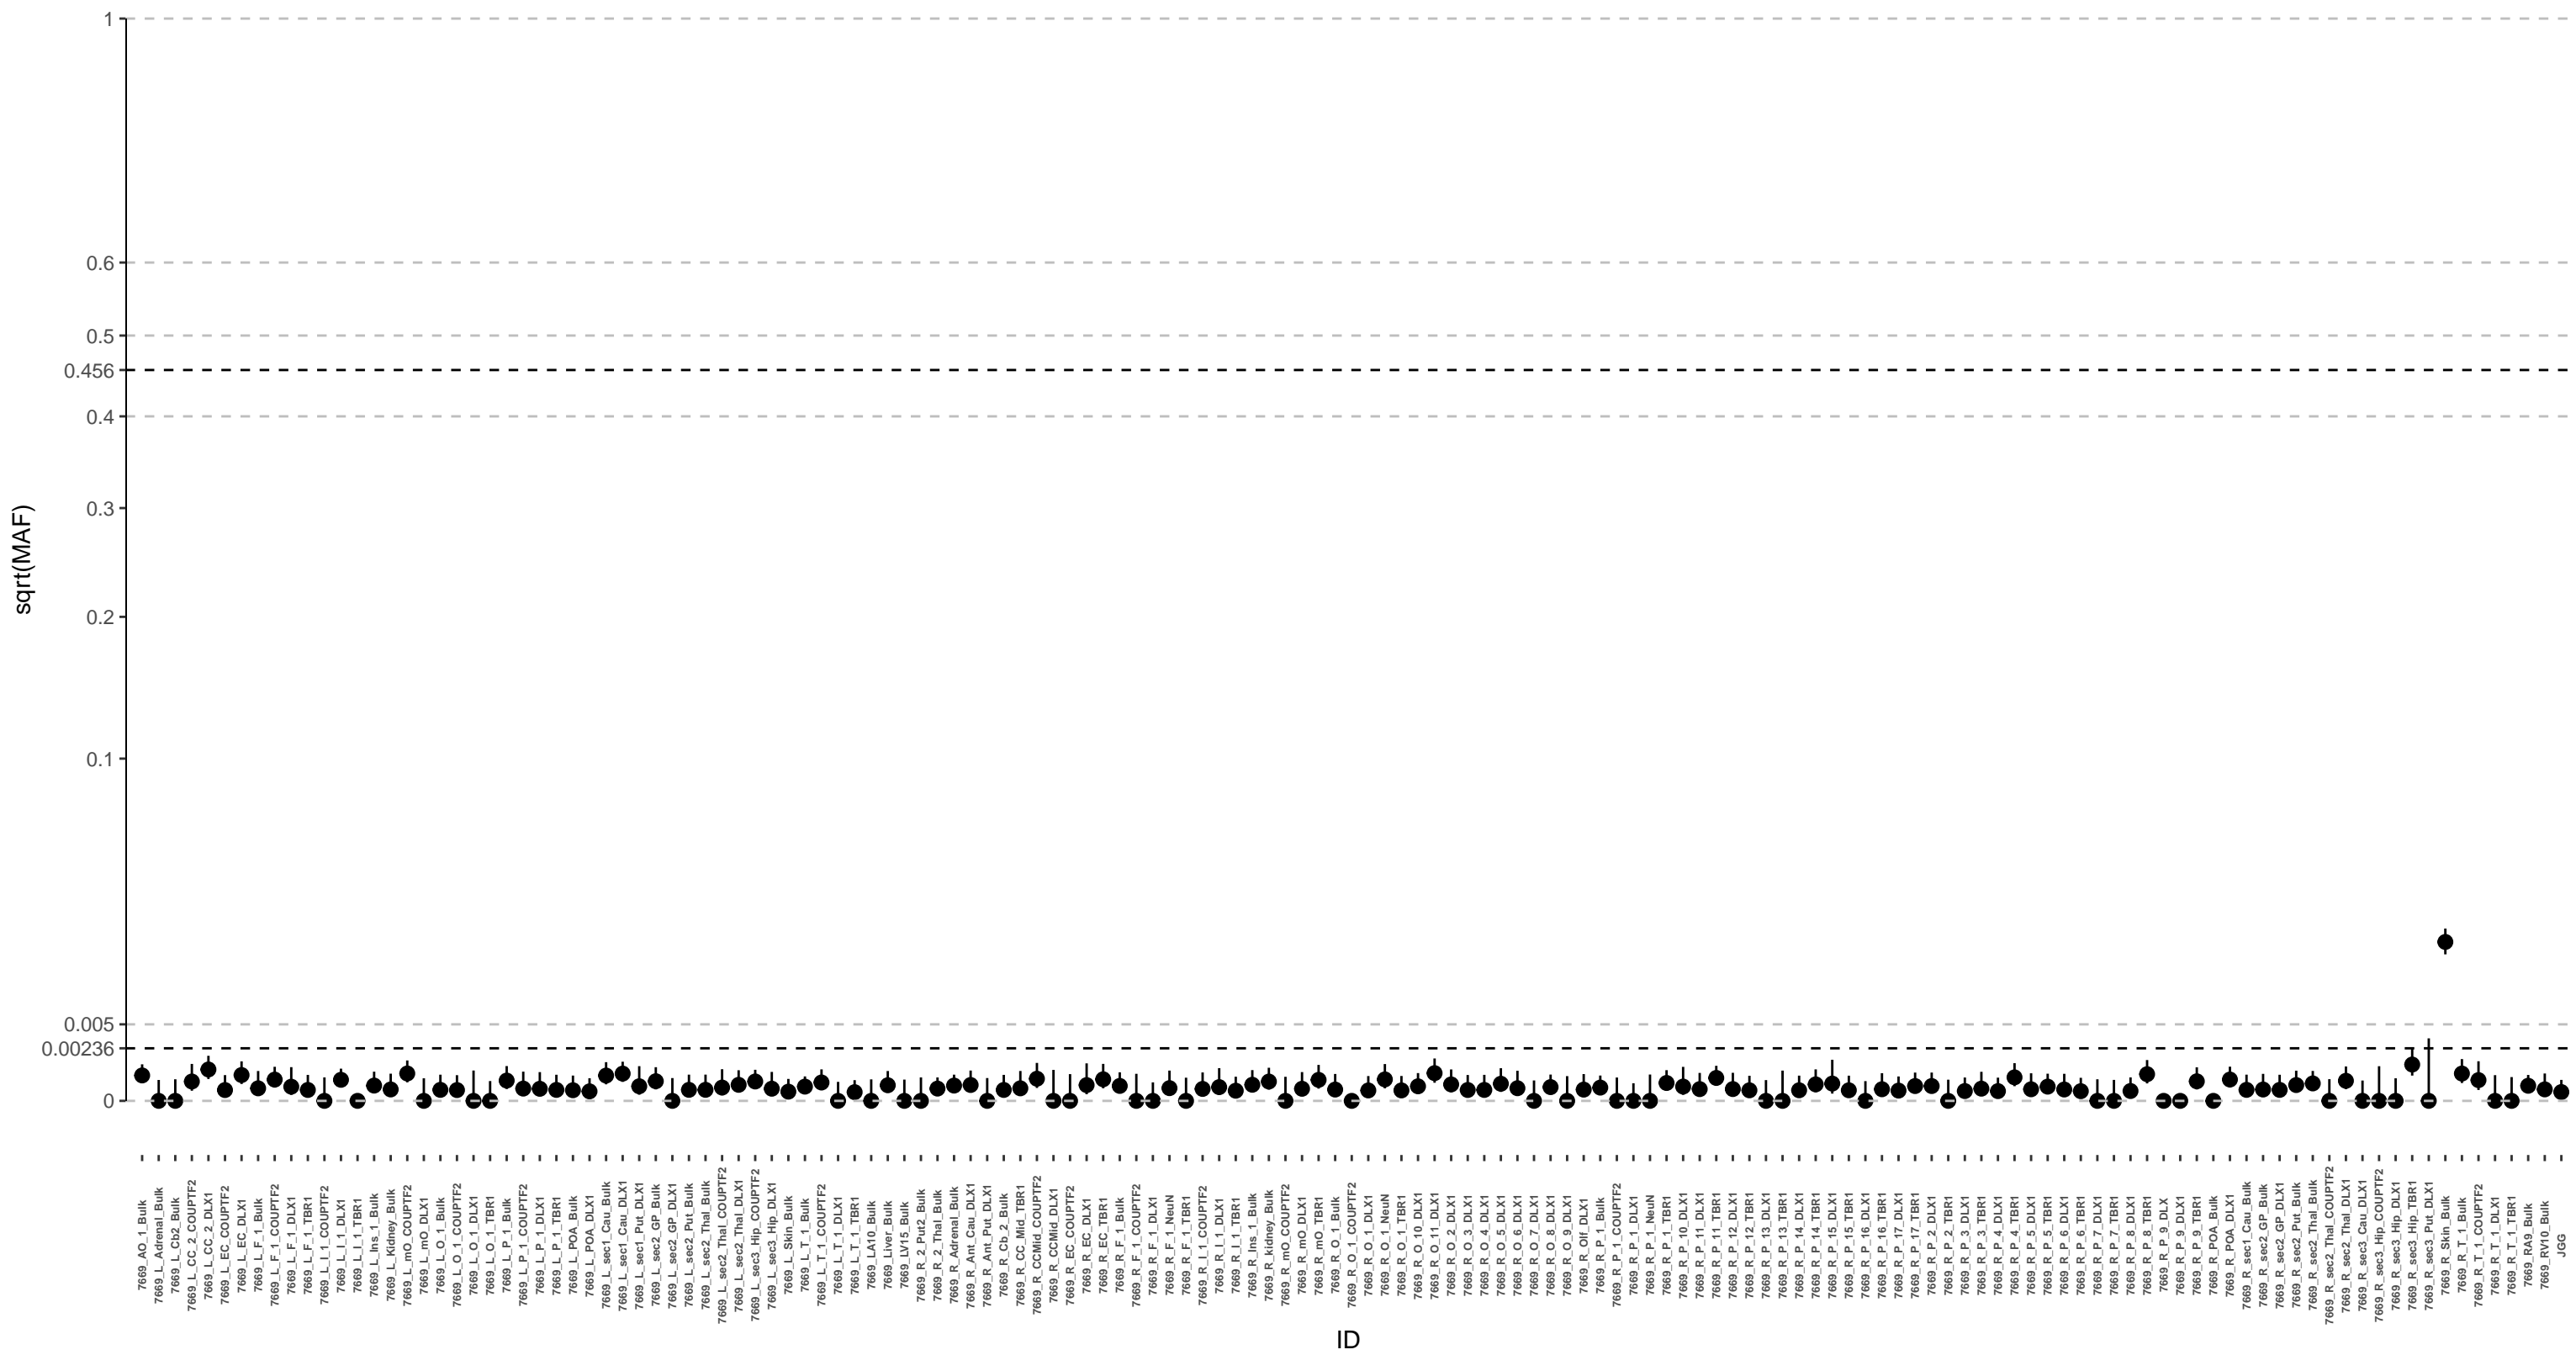

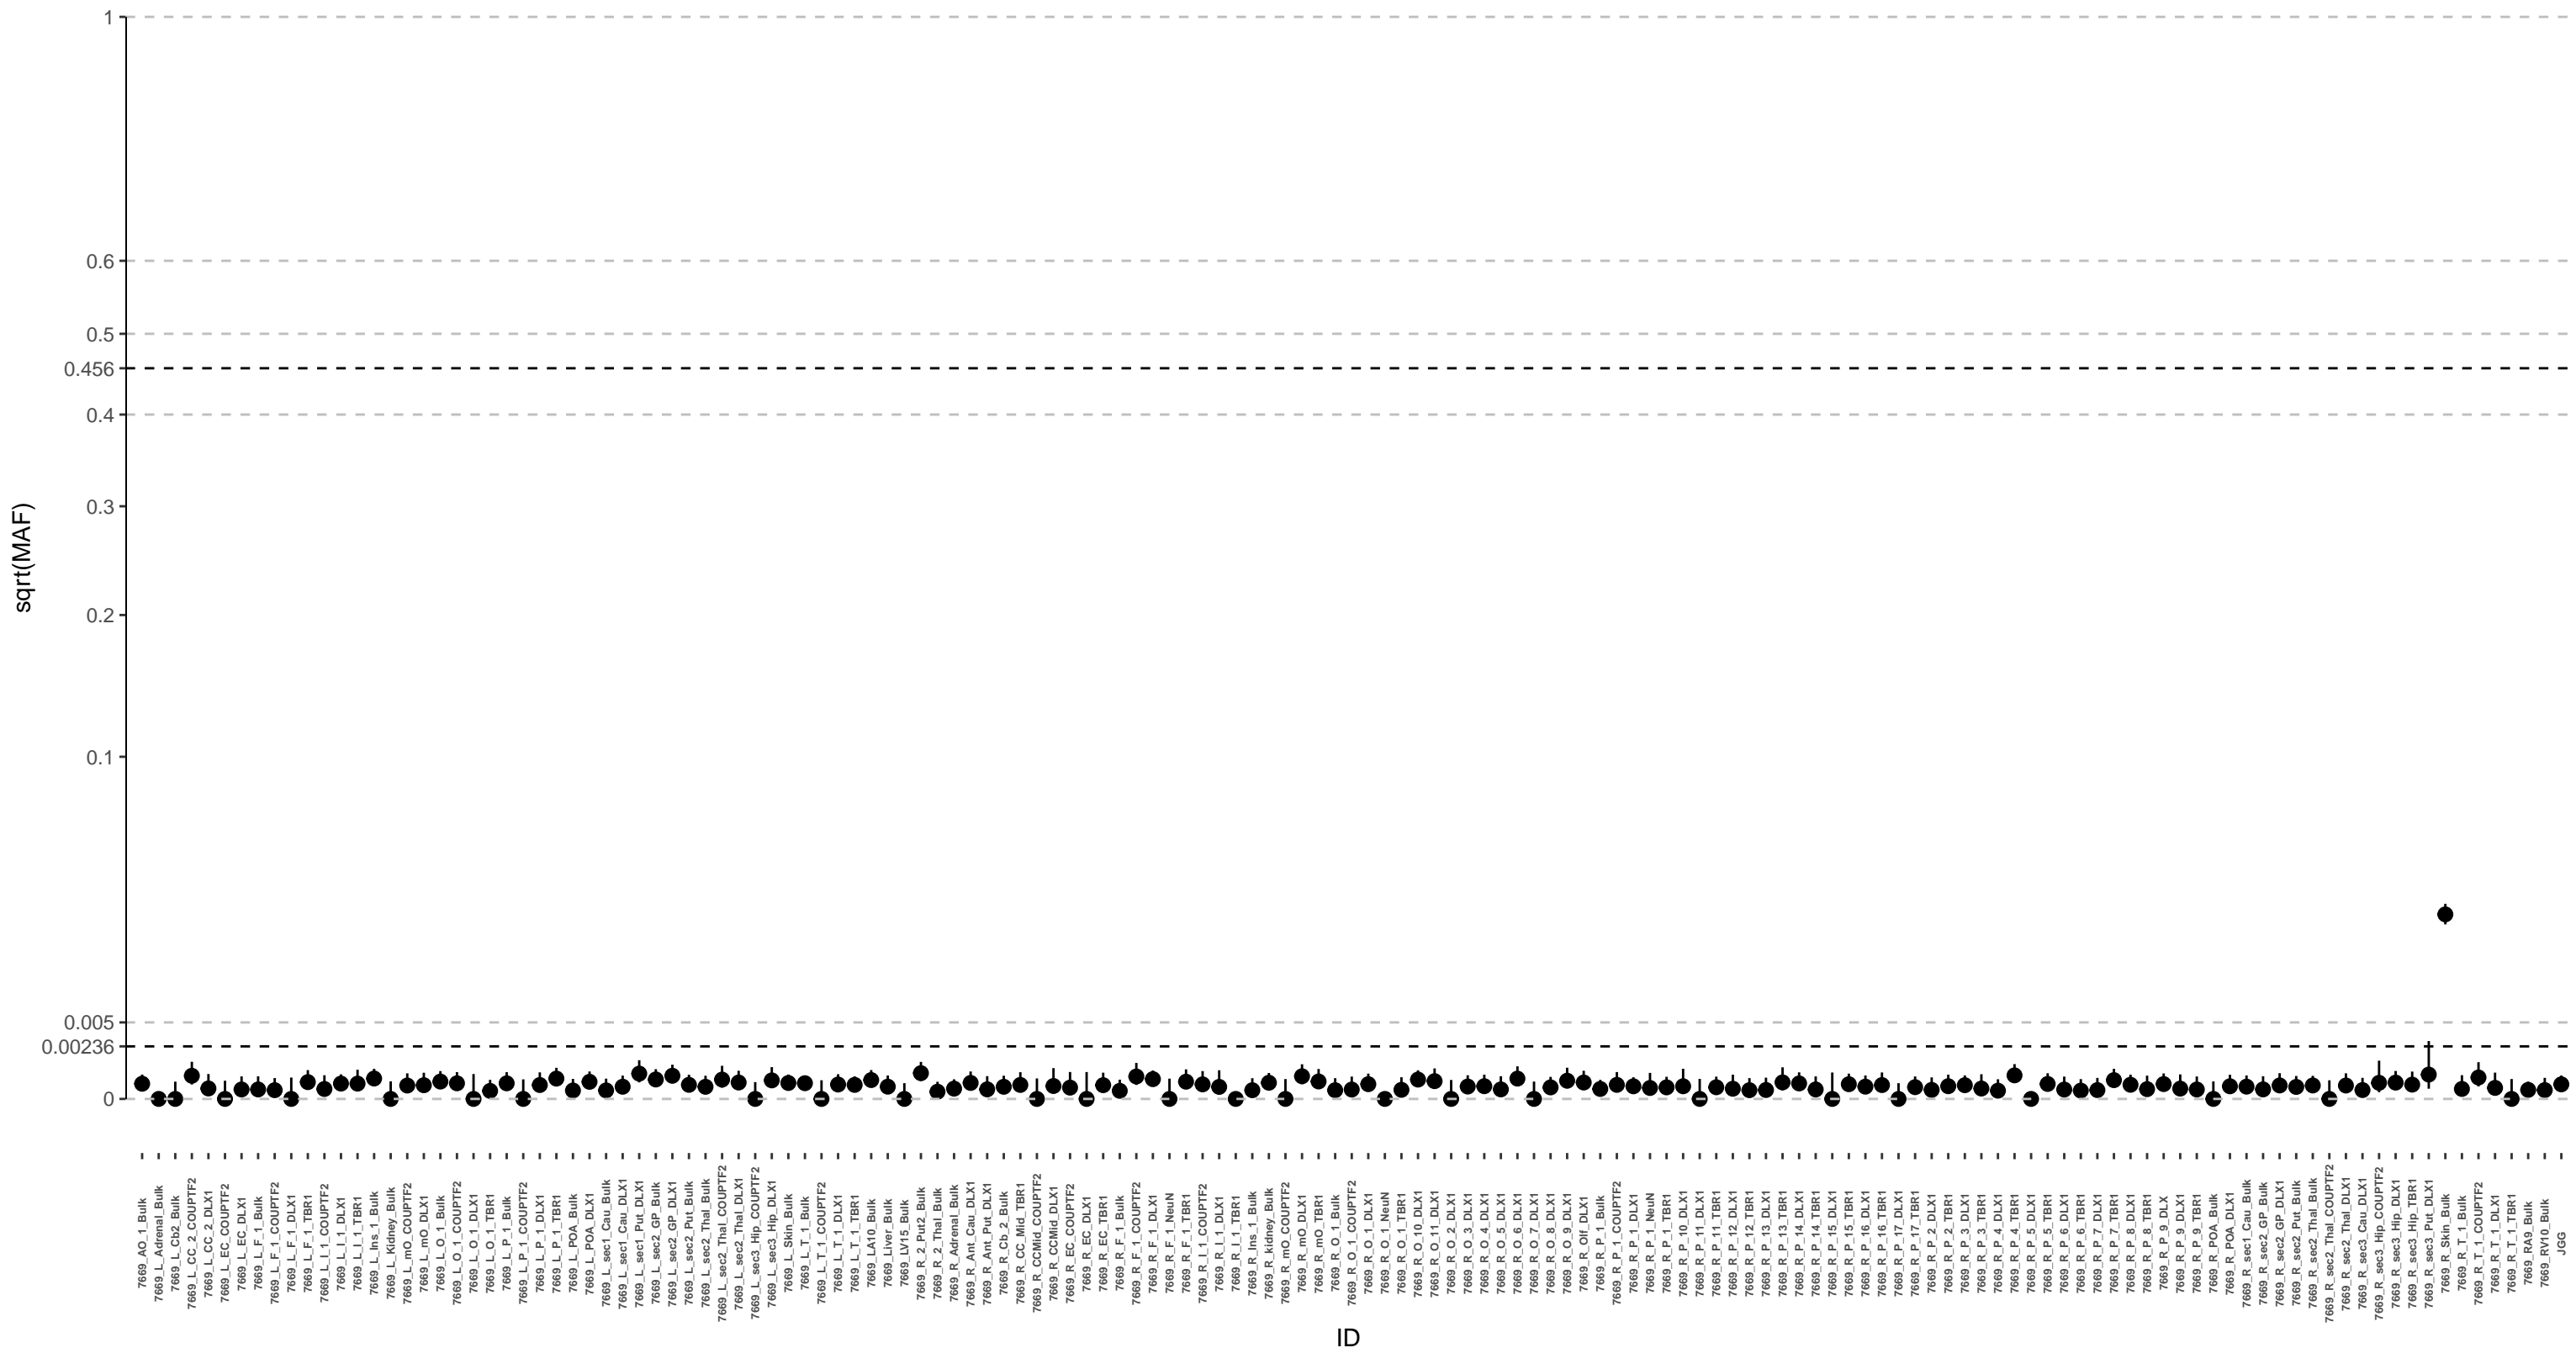

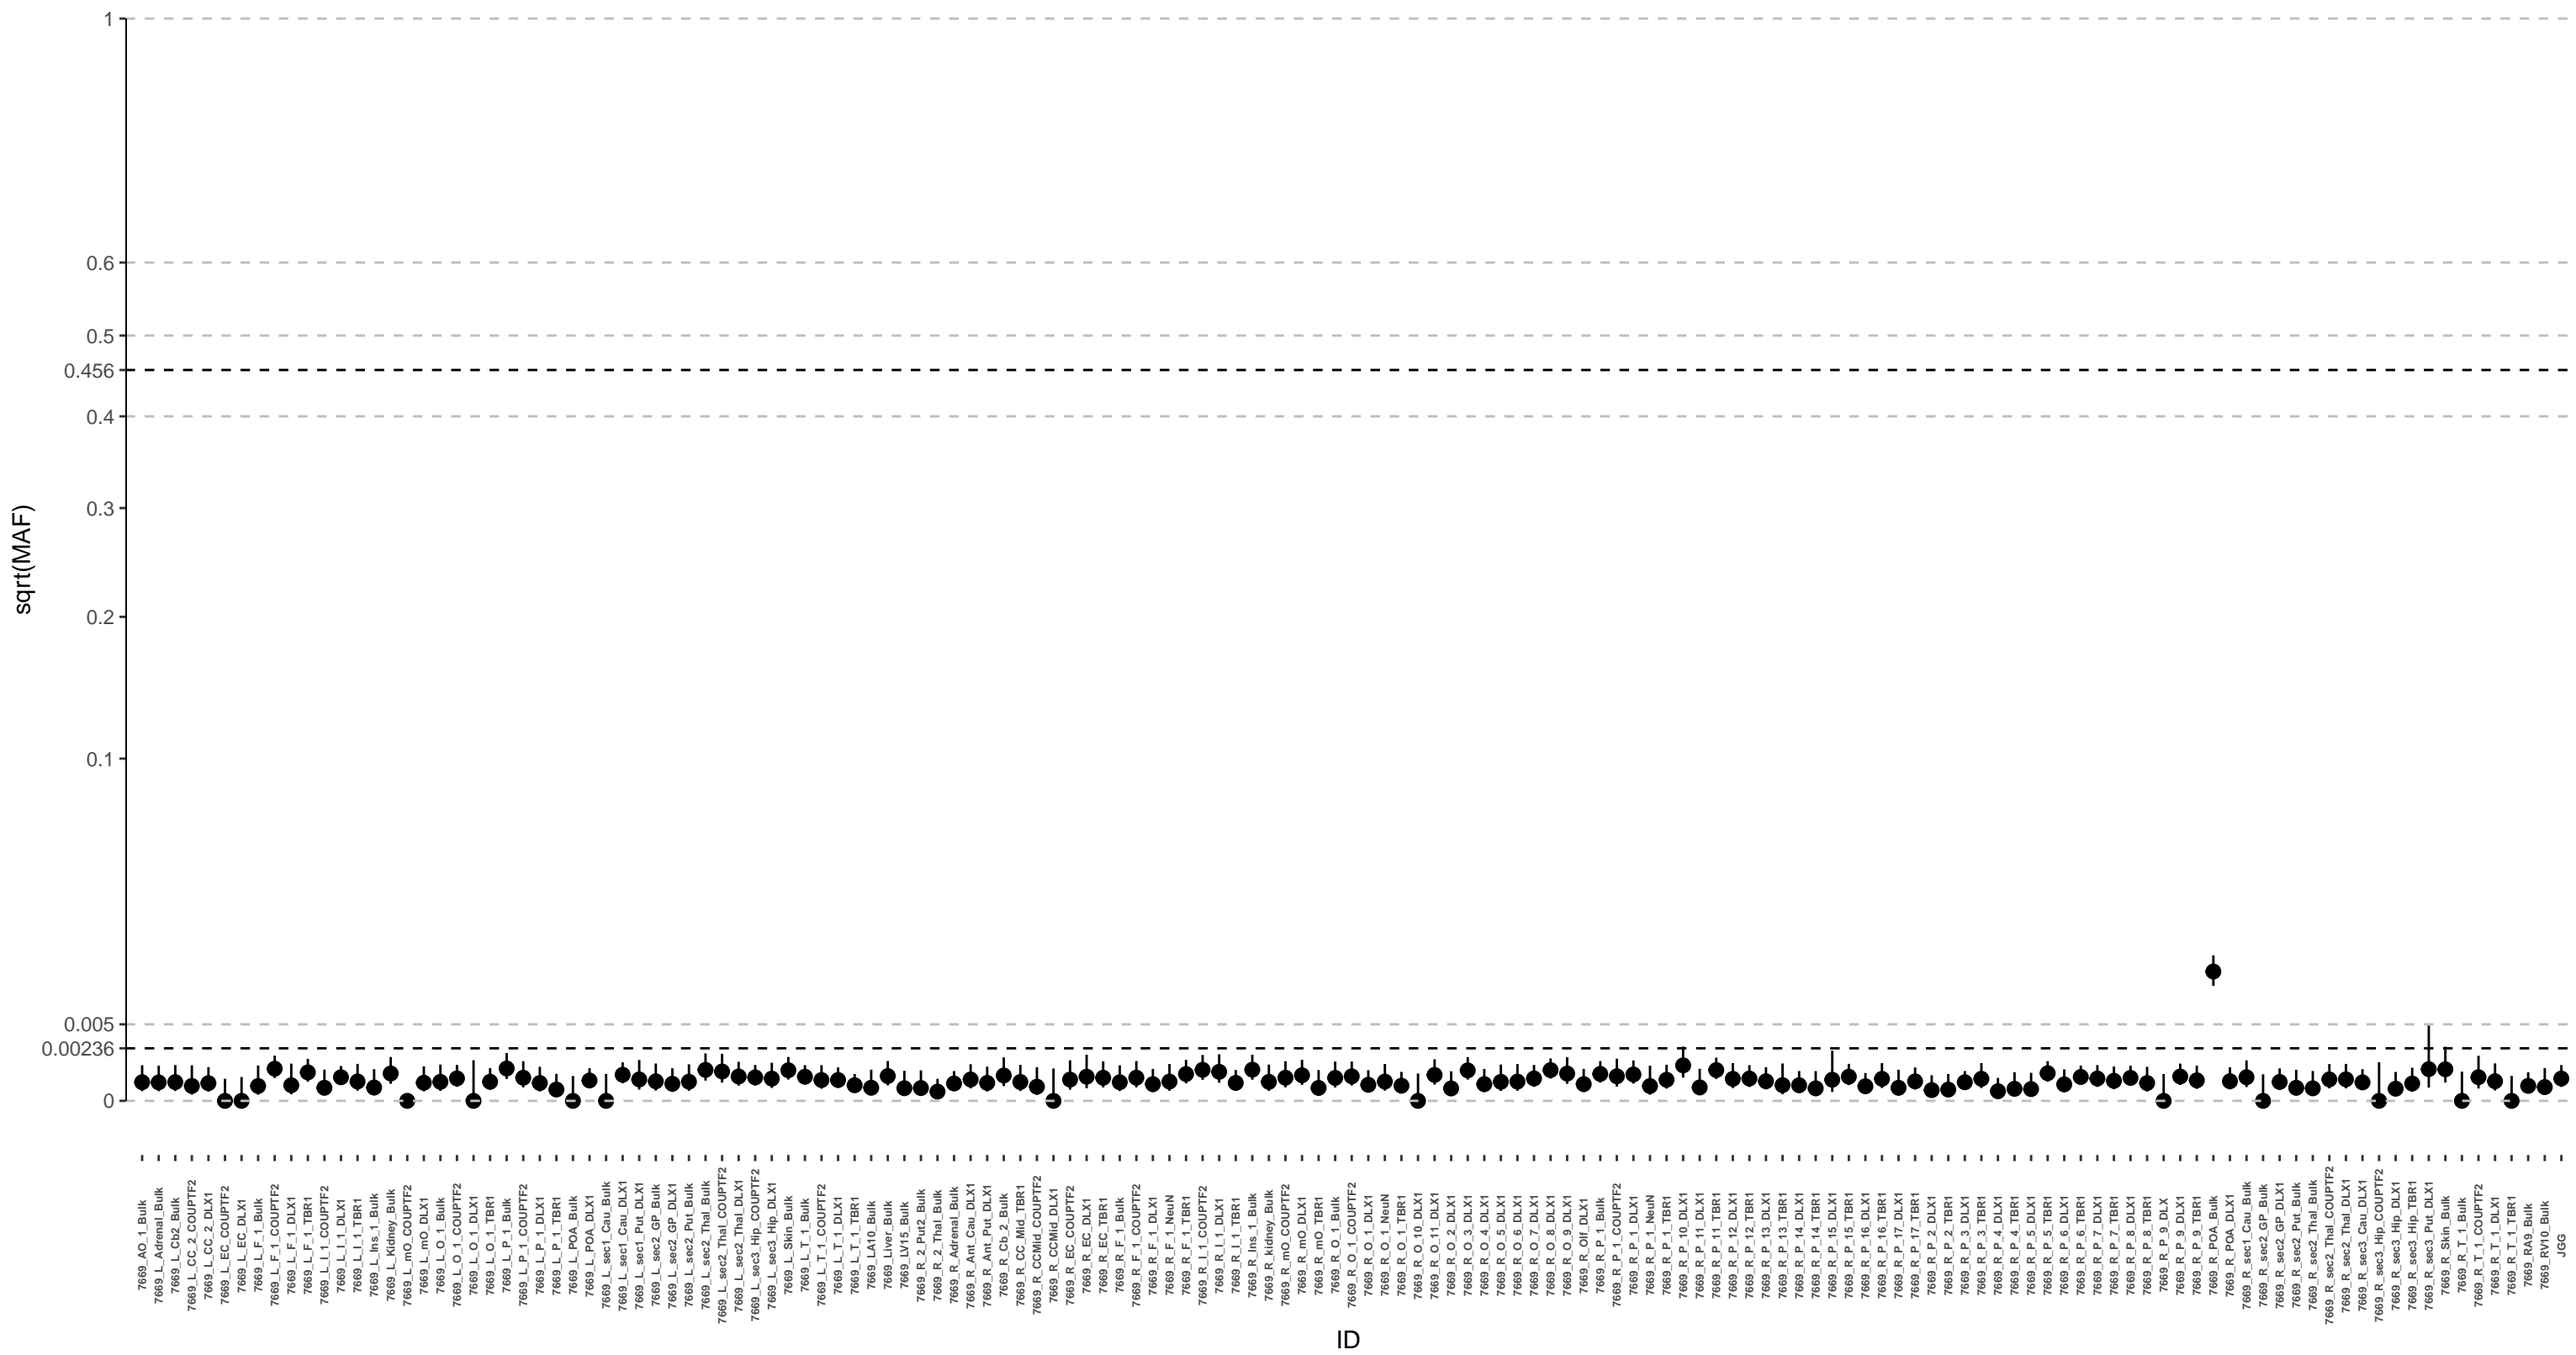

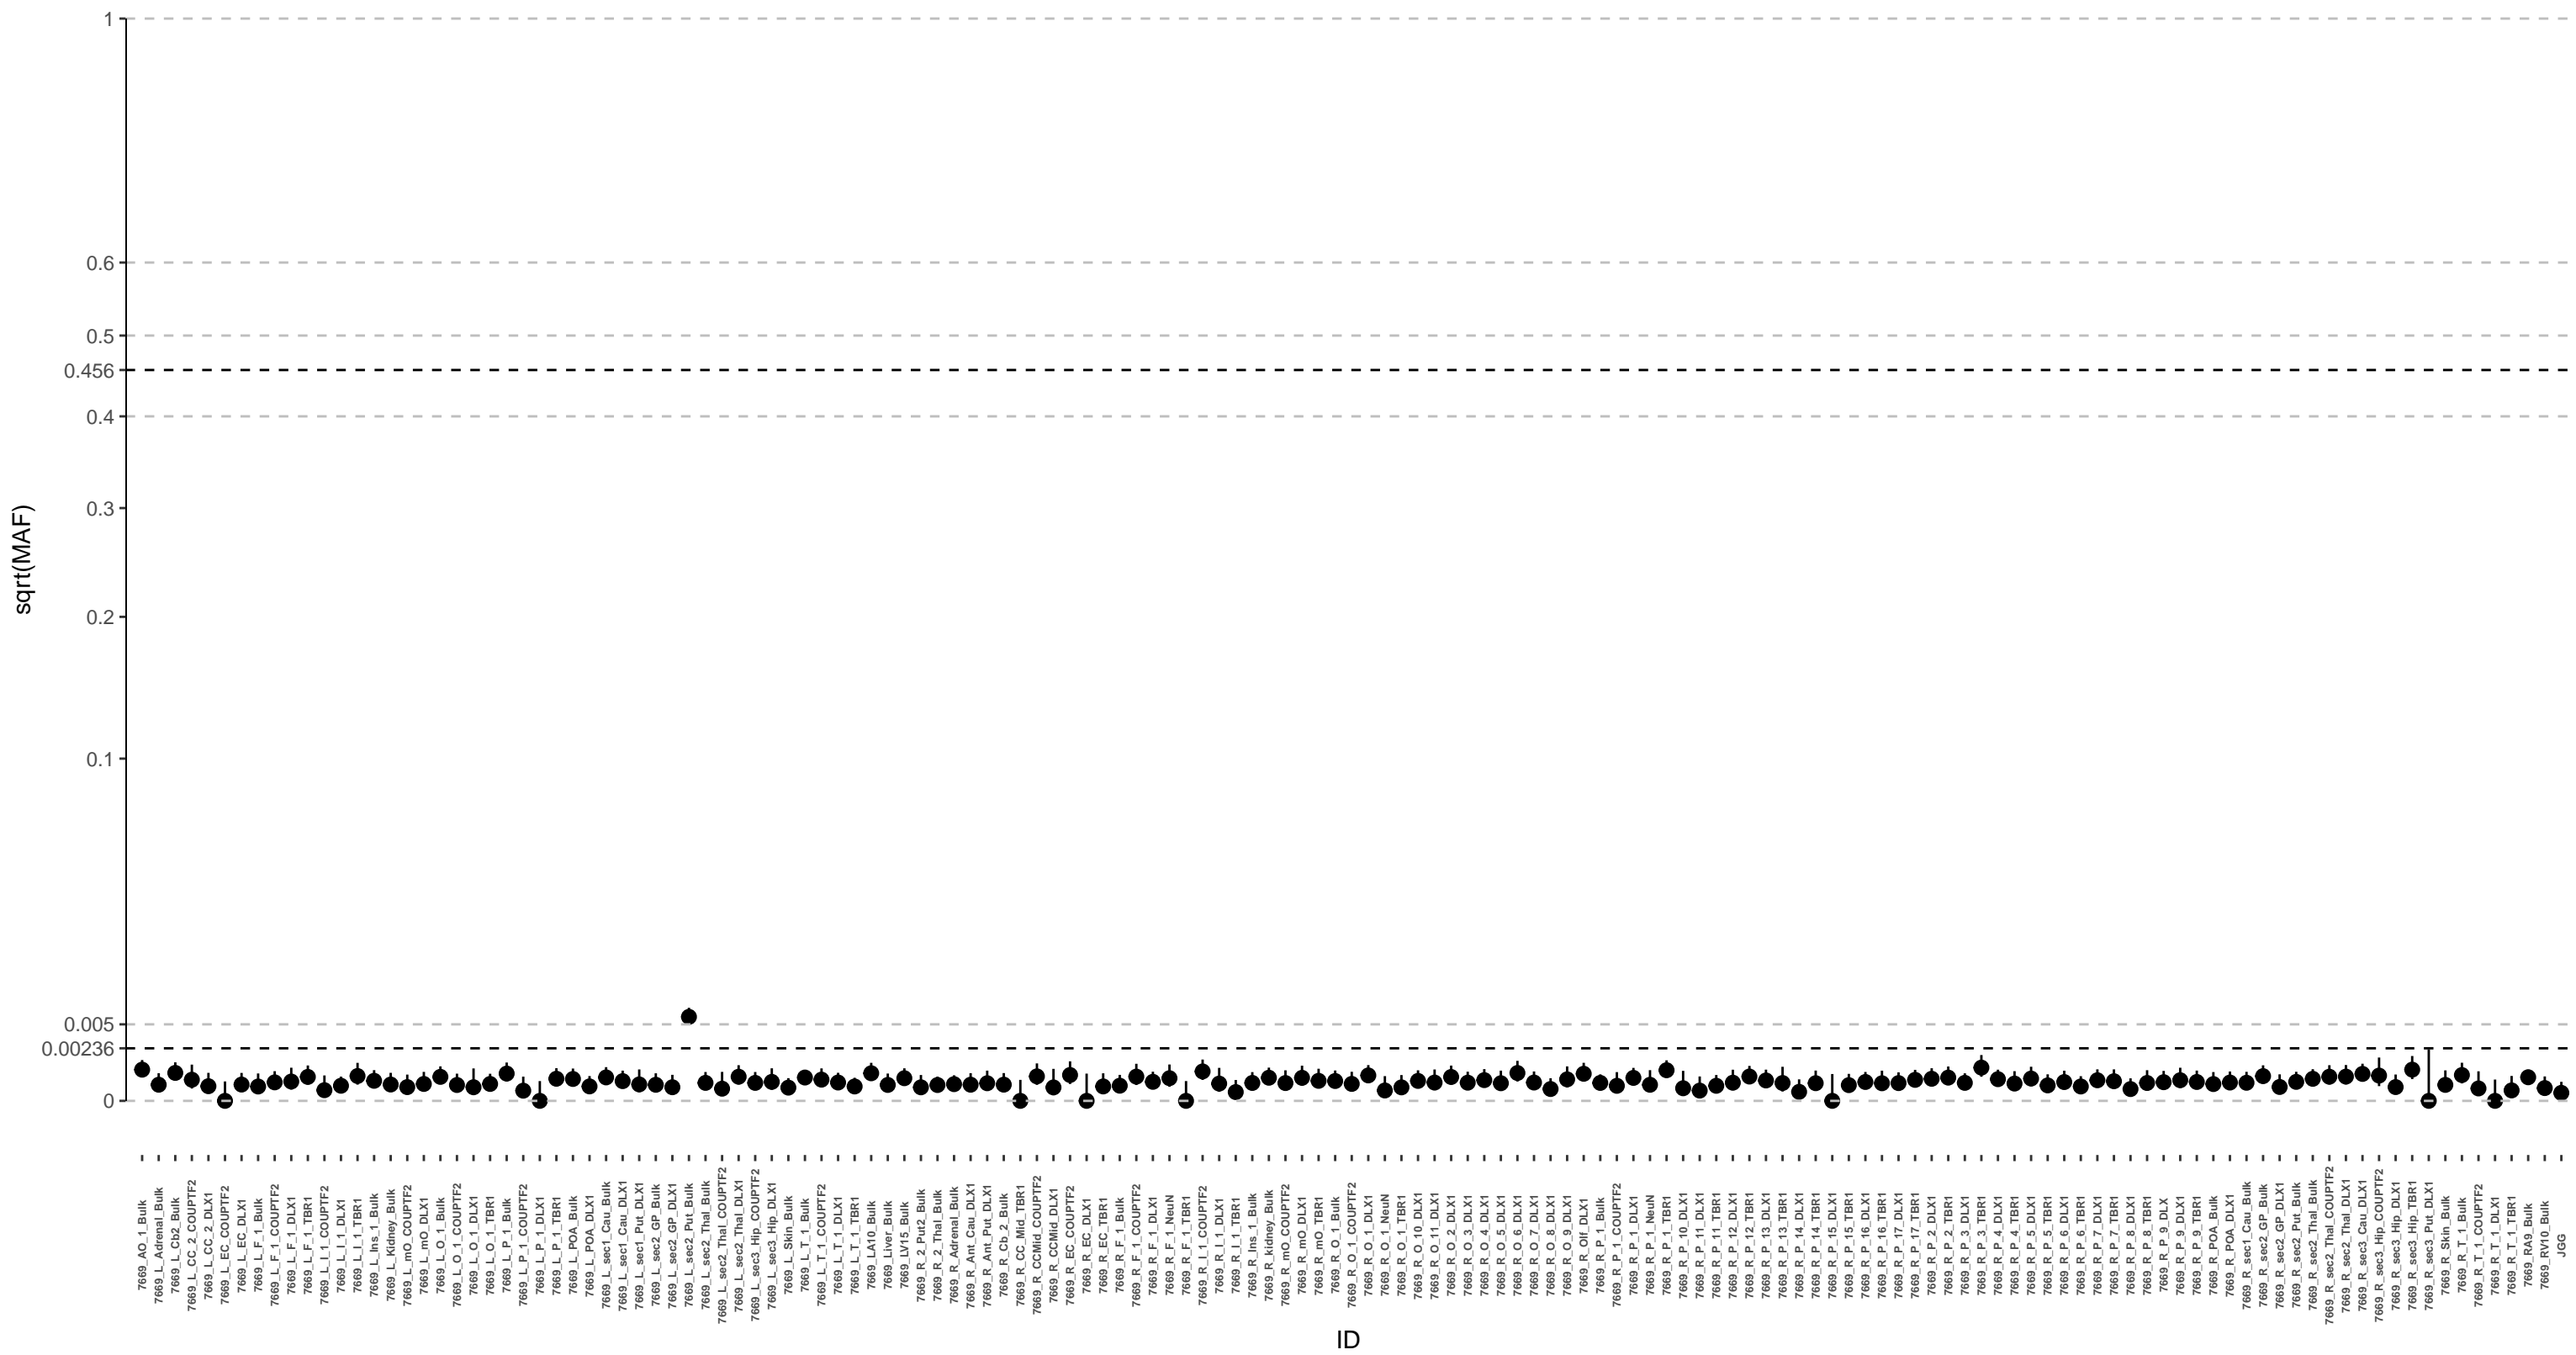

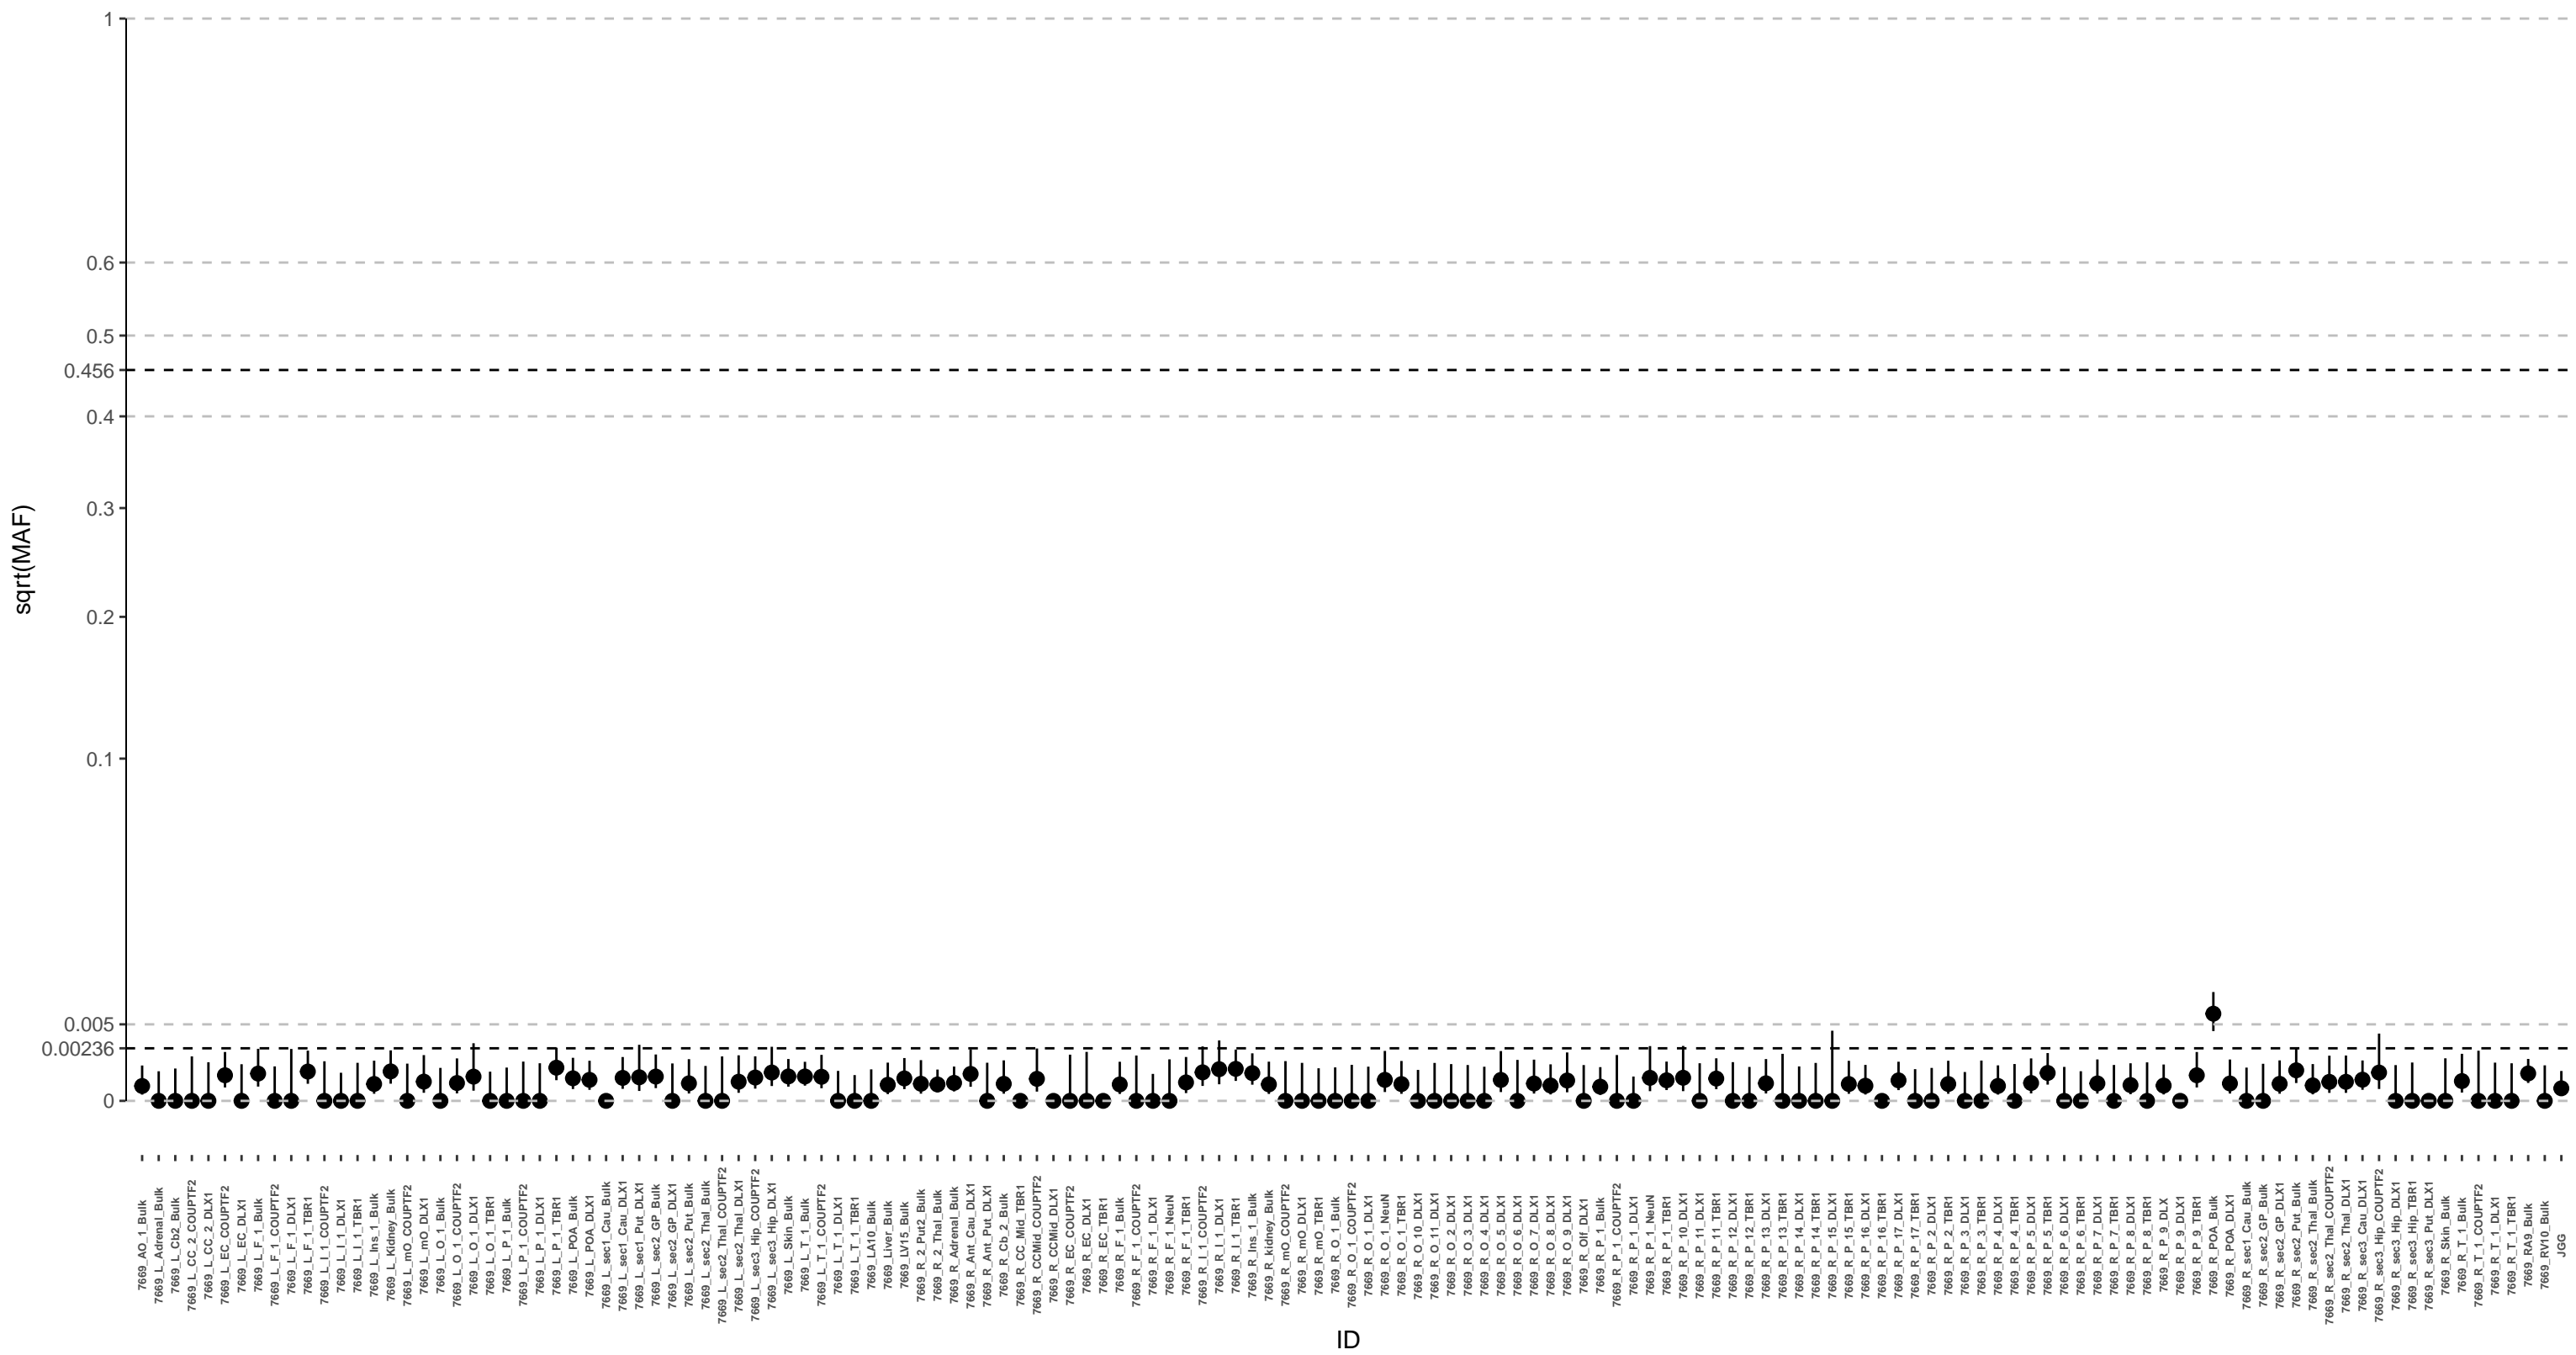

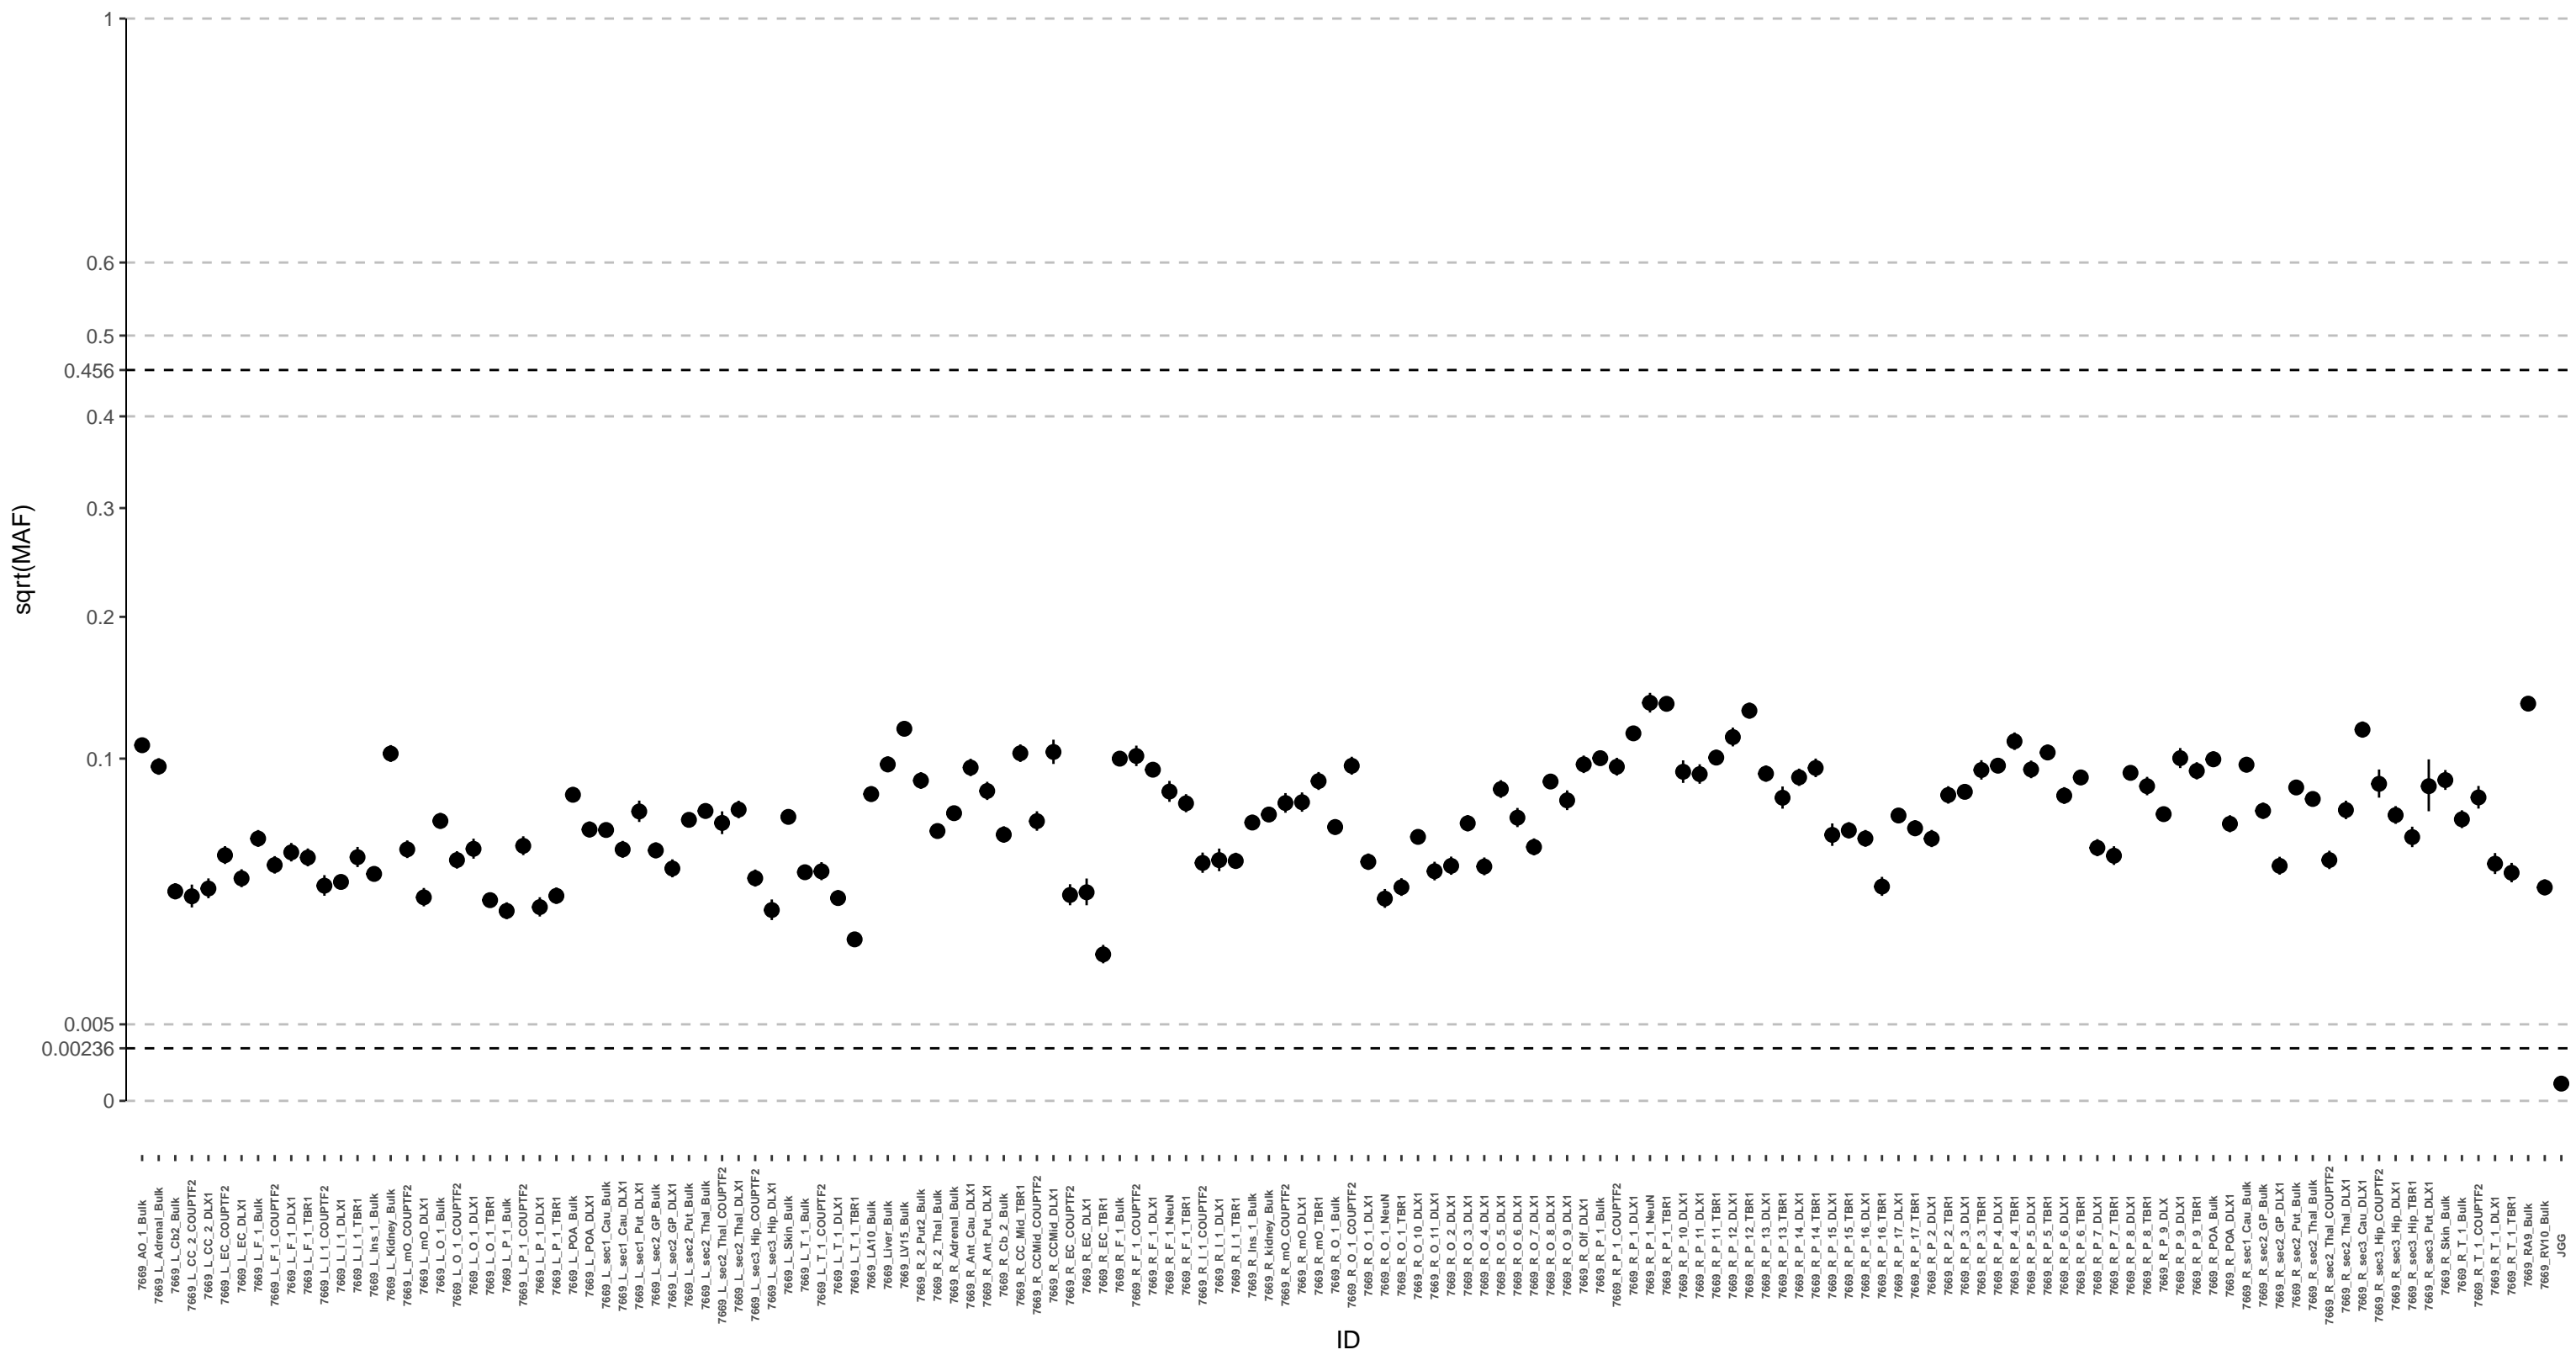

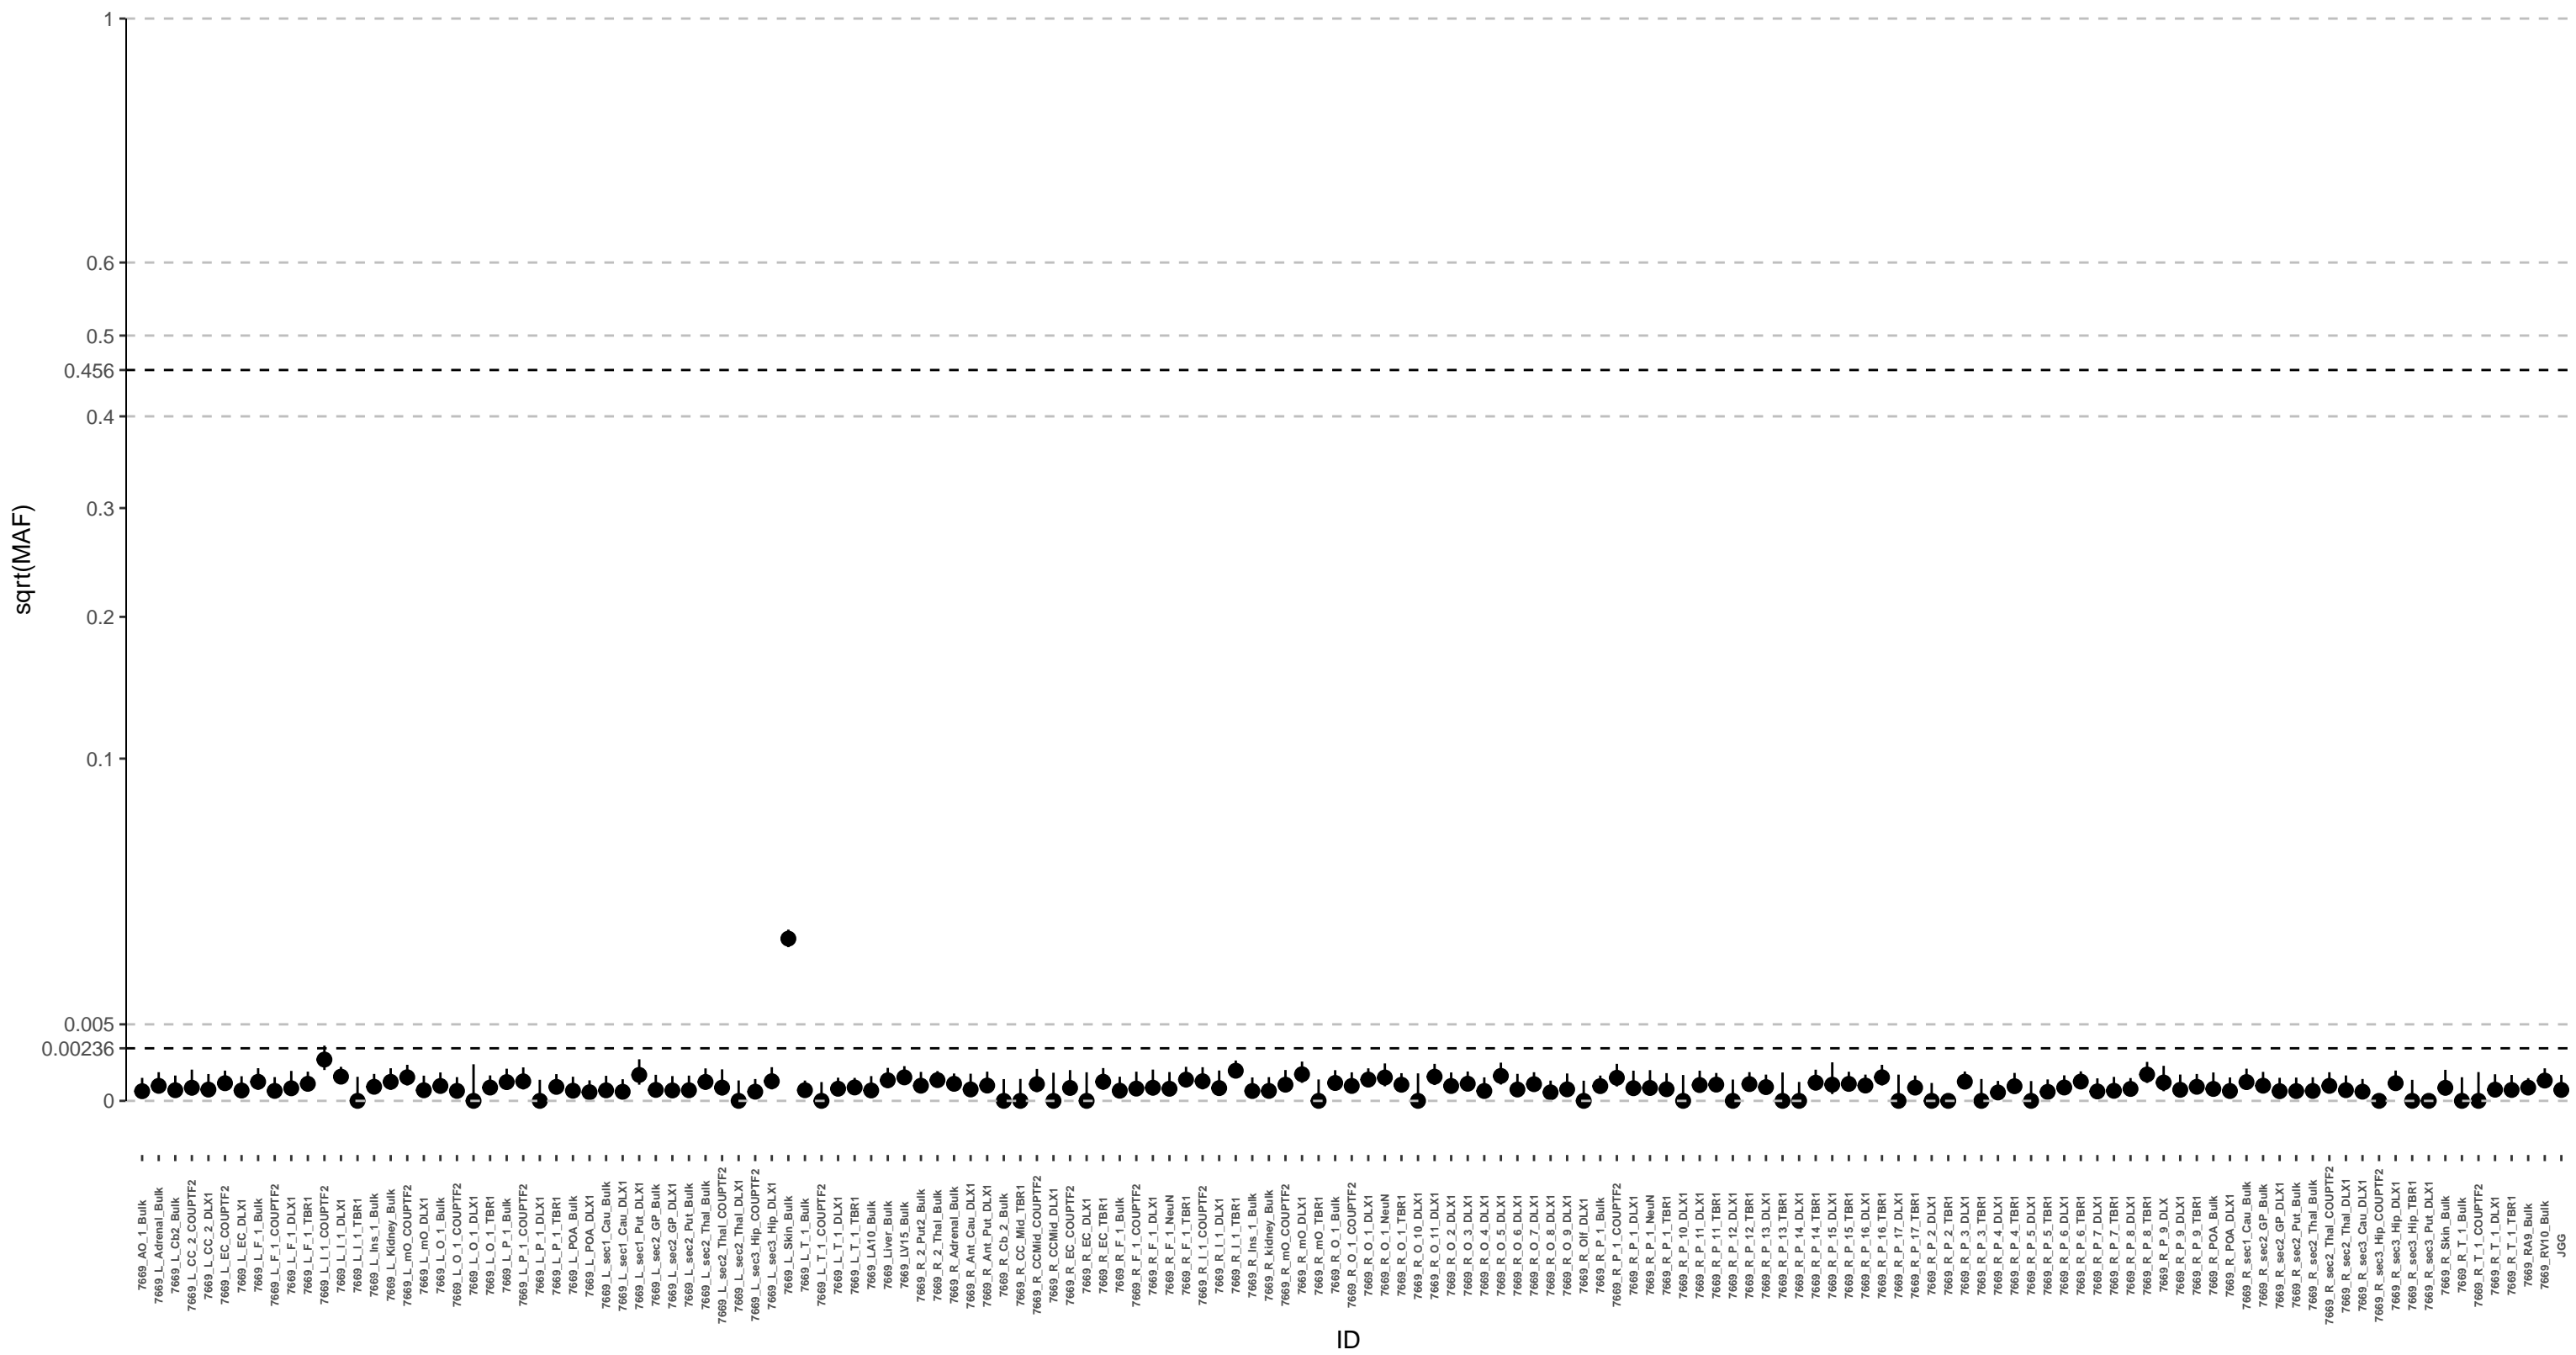



ID05 16-8802550-C-T

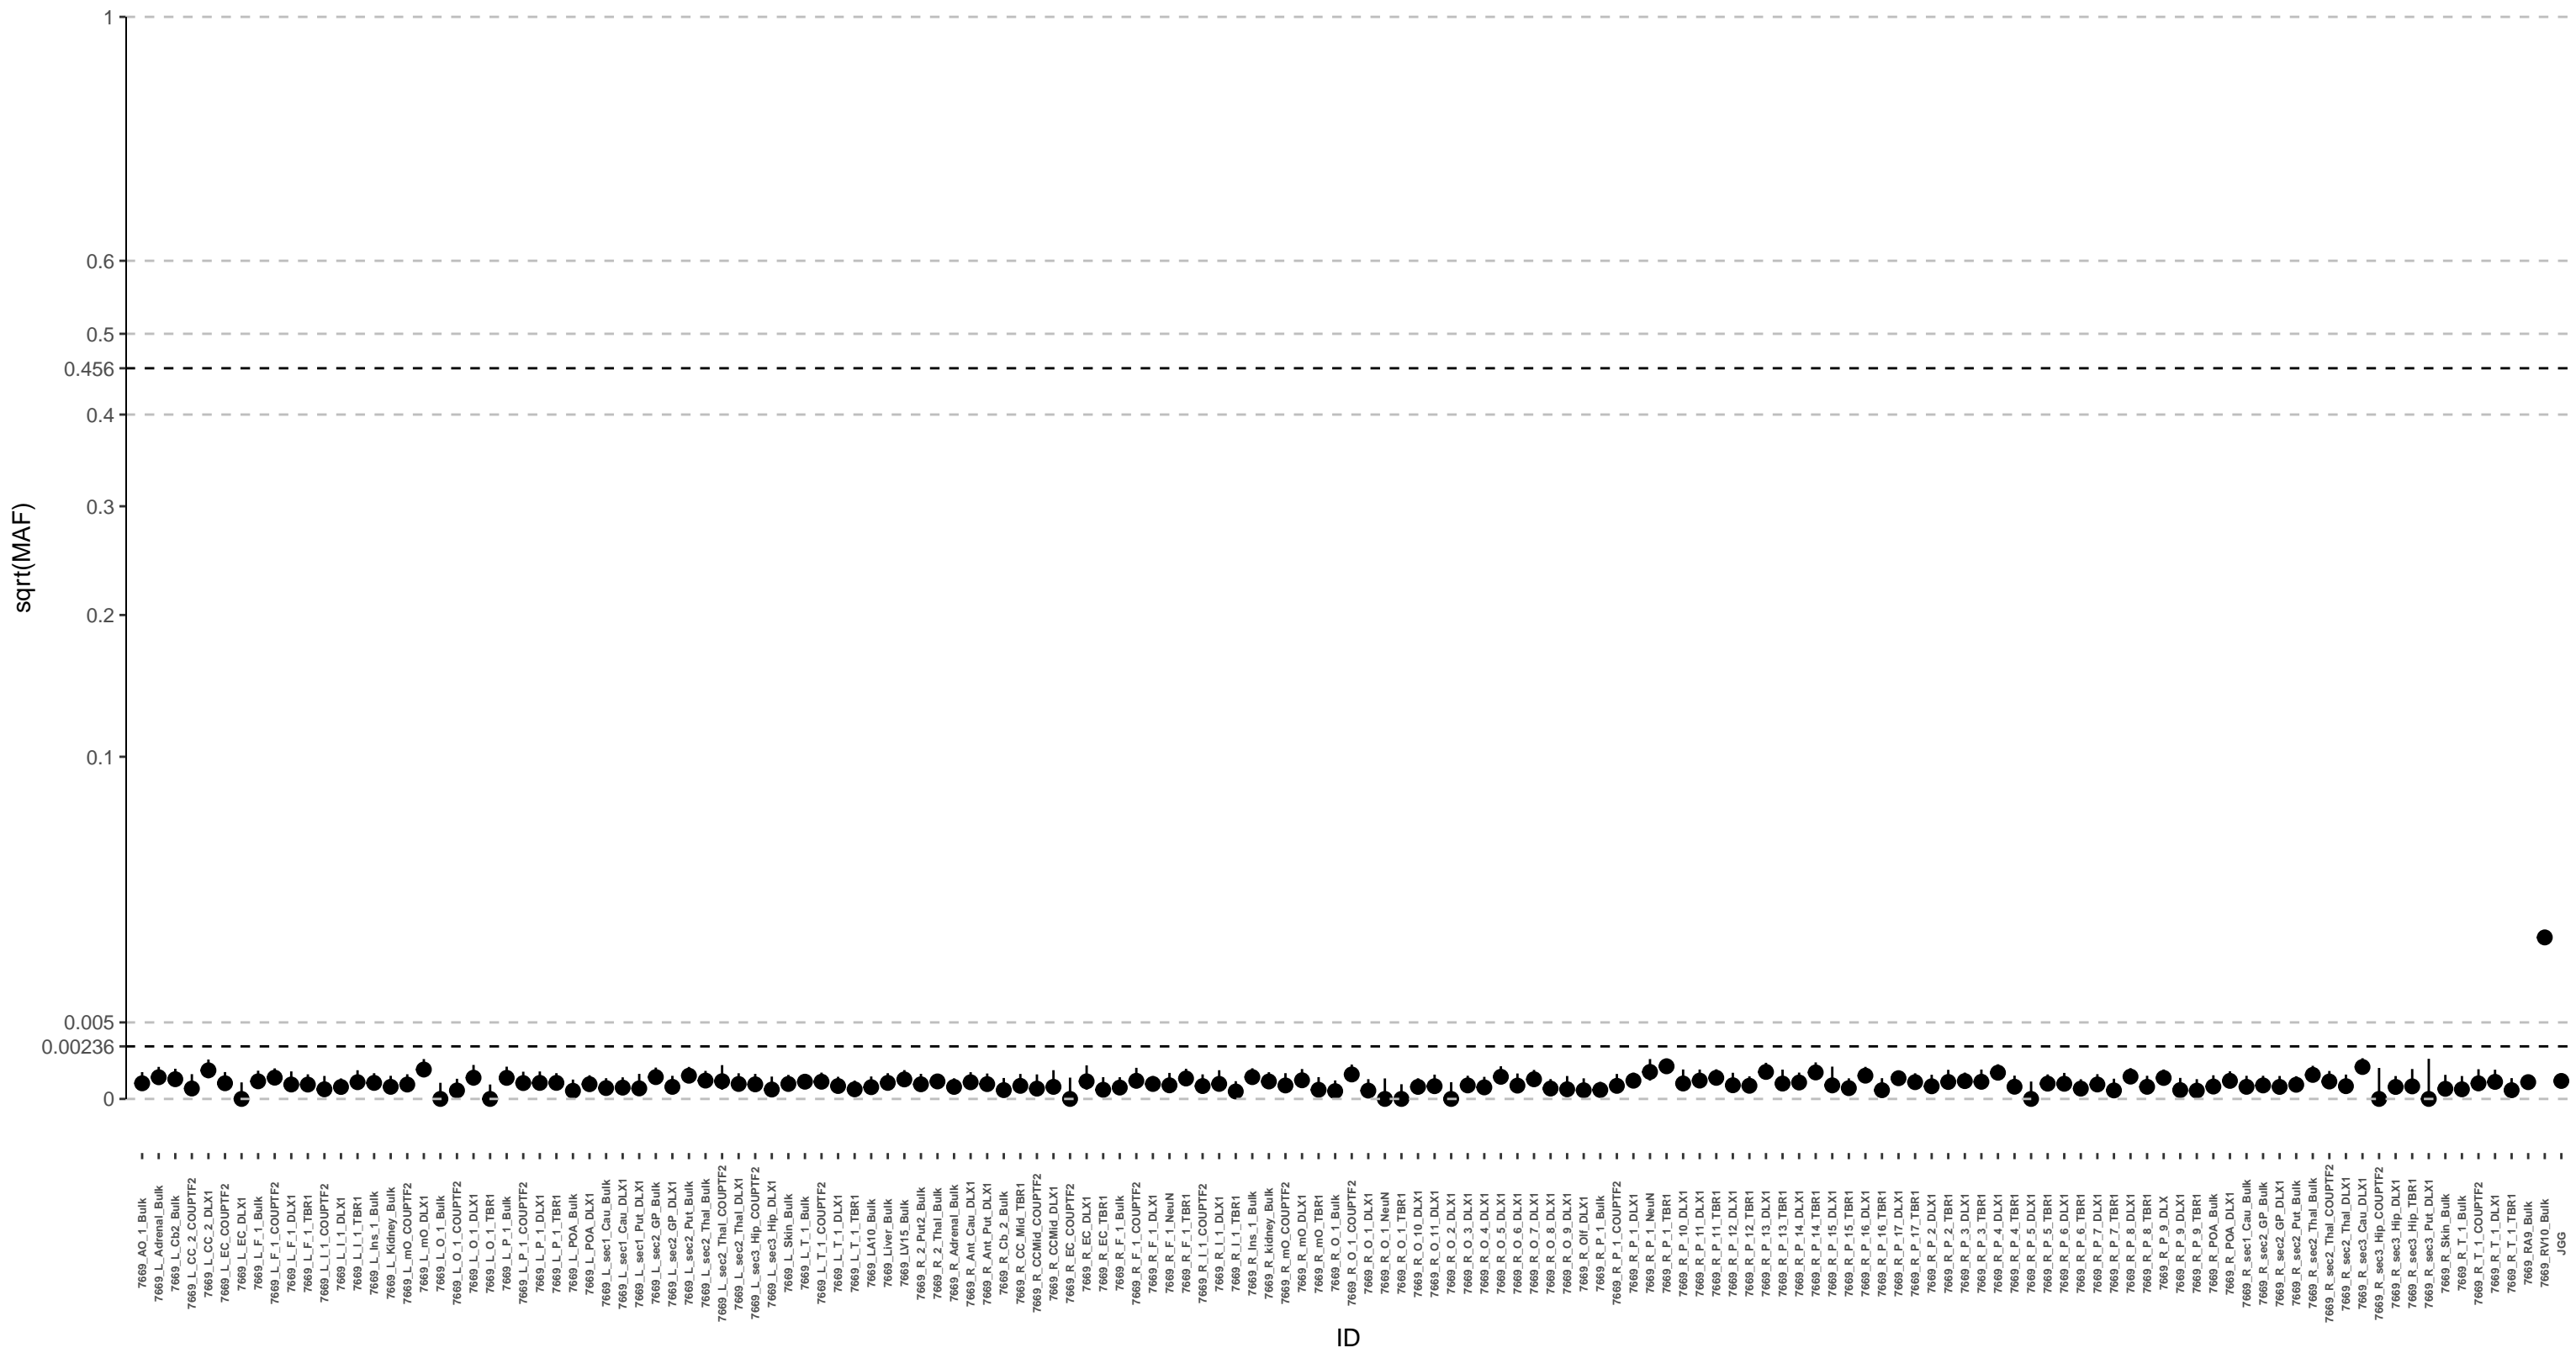

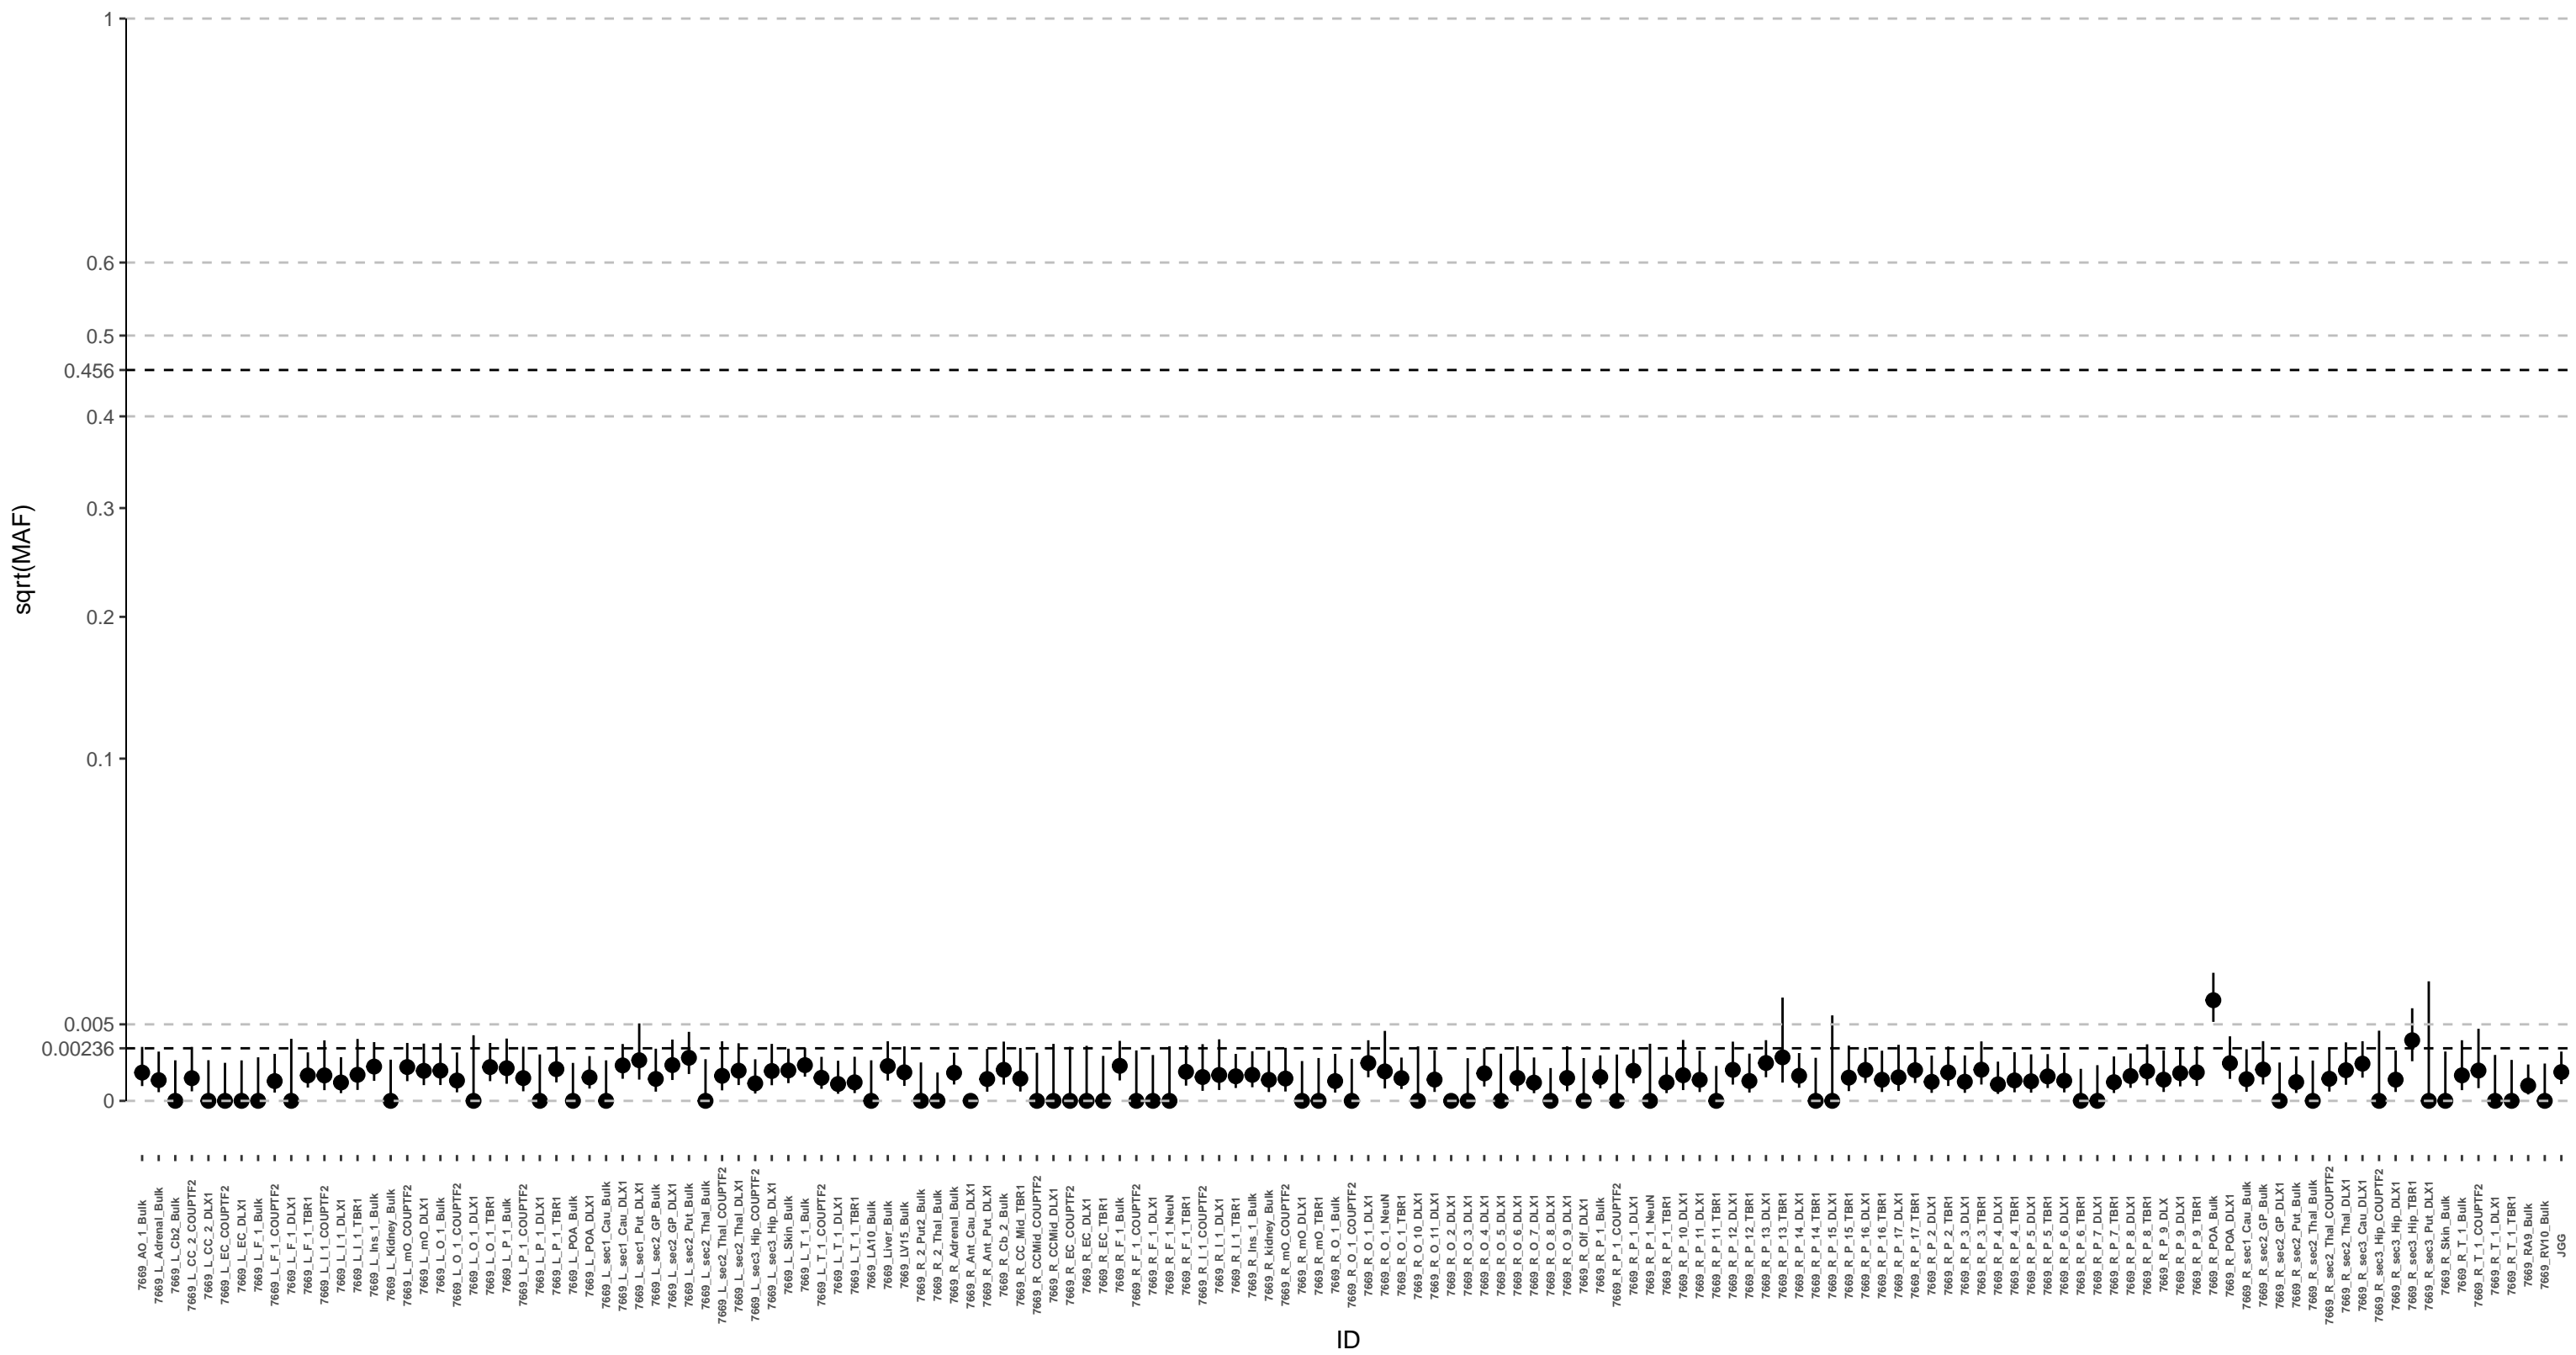

ID05 16-9382504-C-T

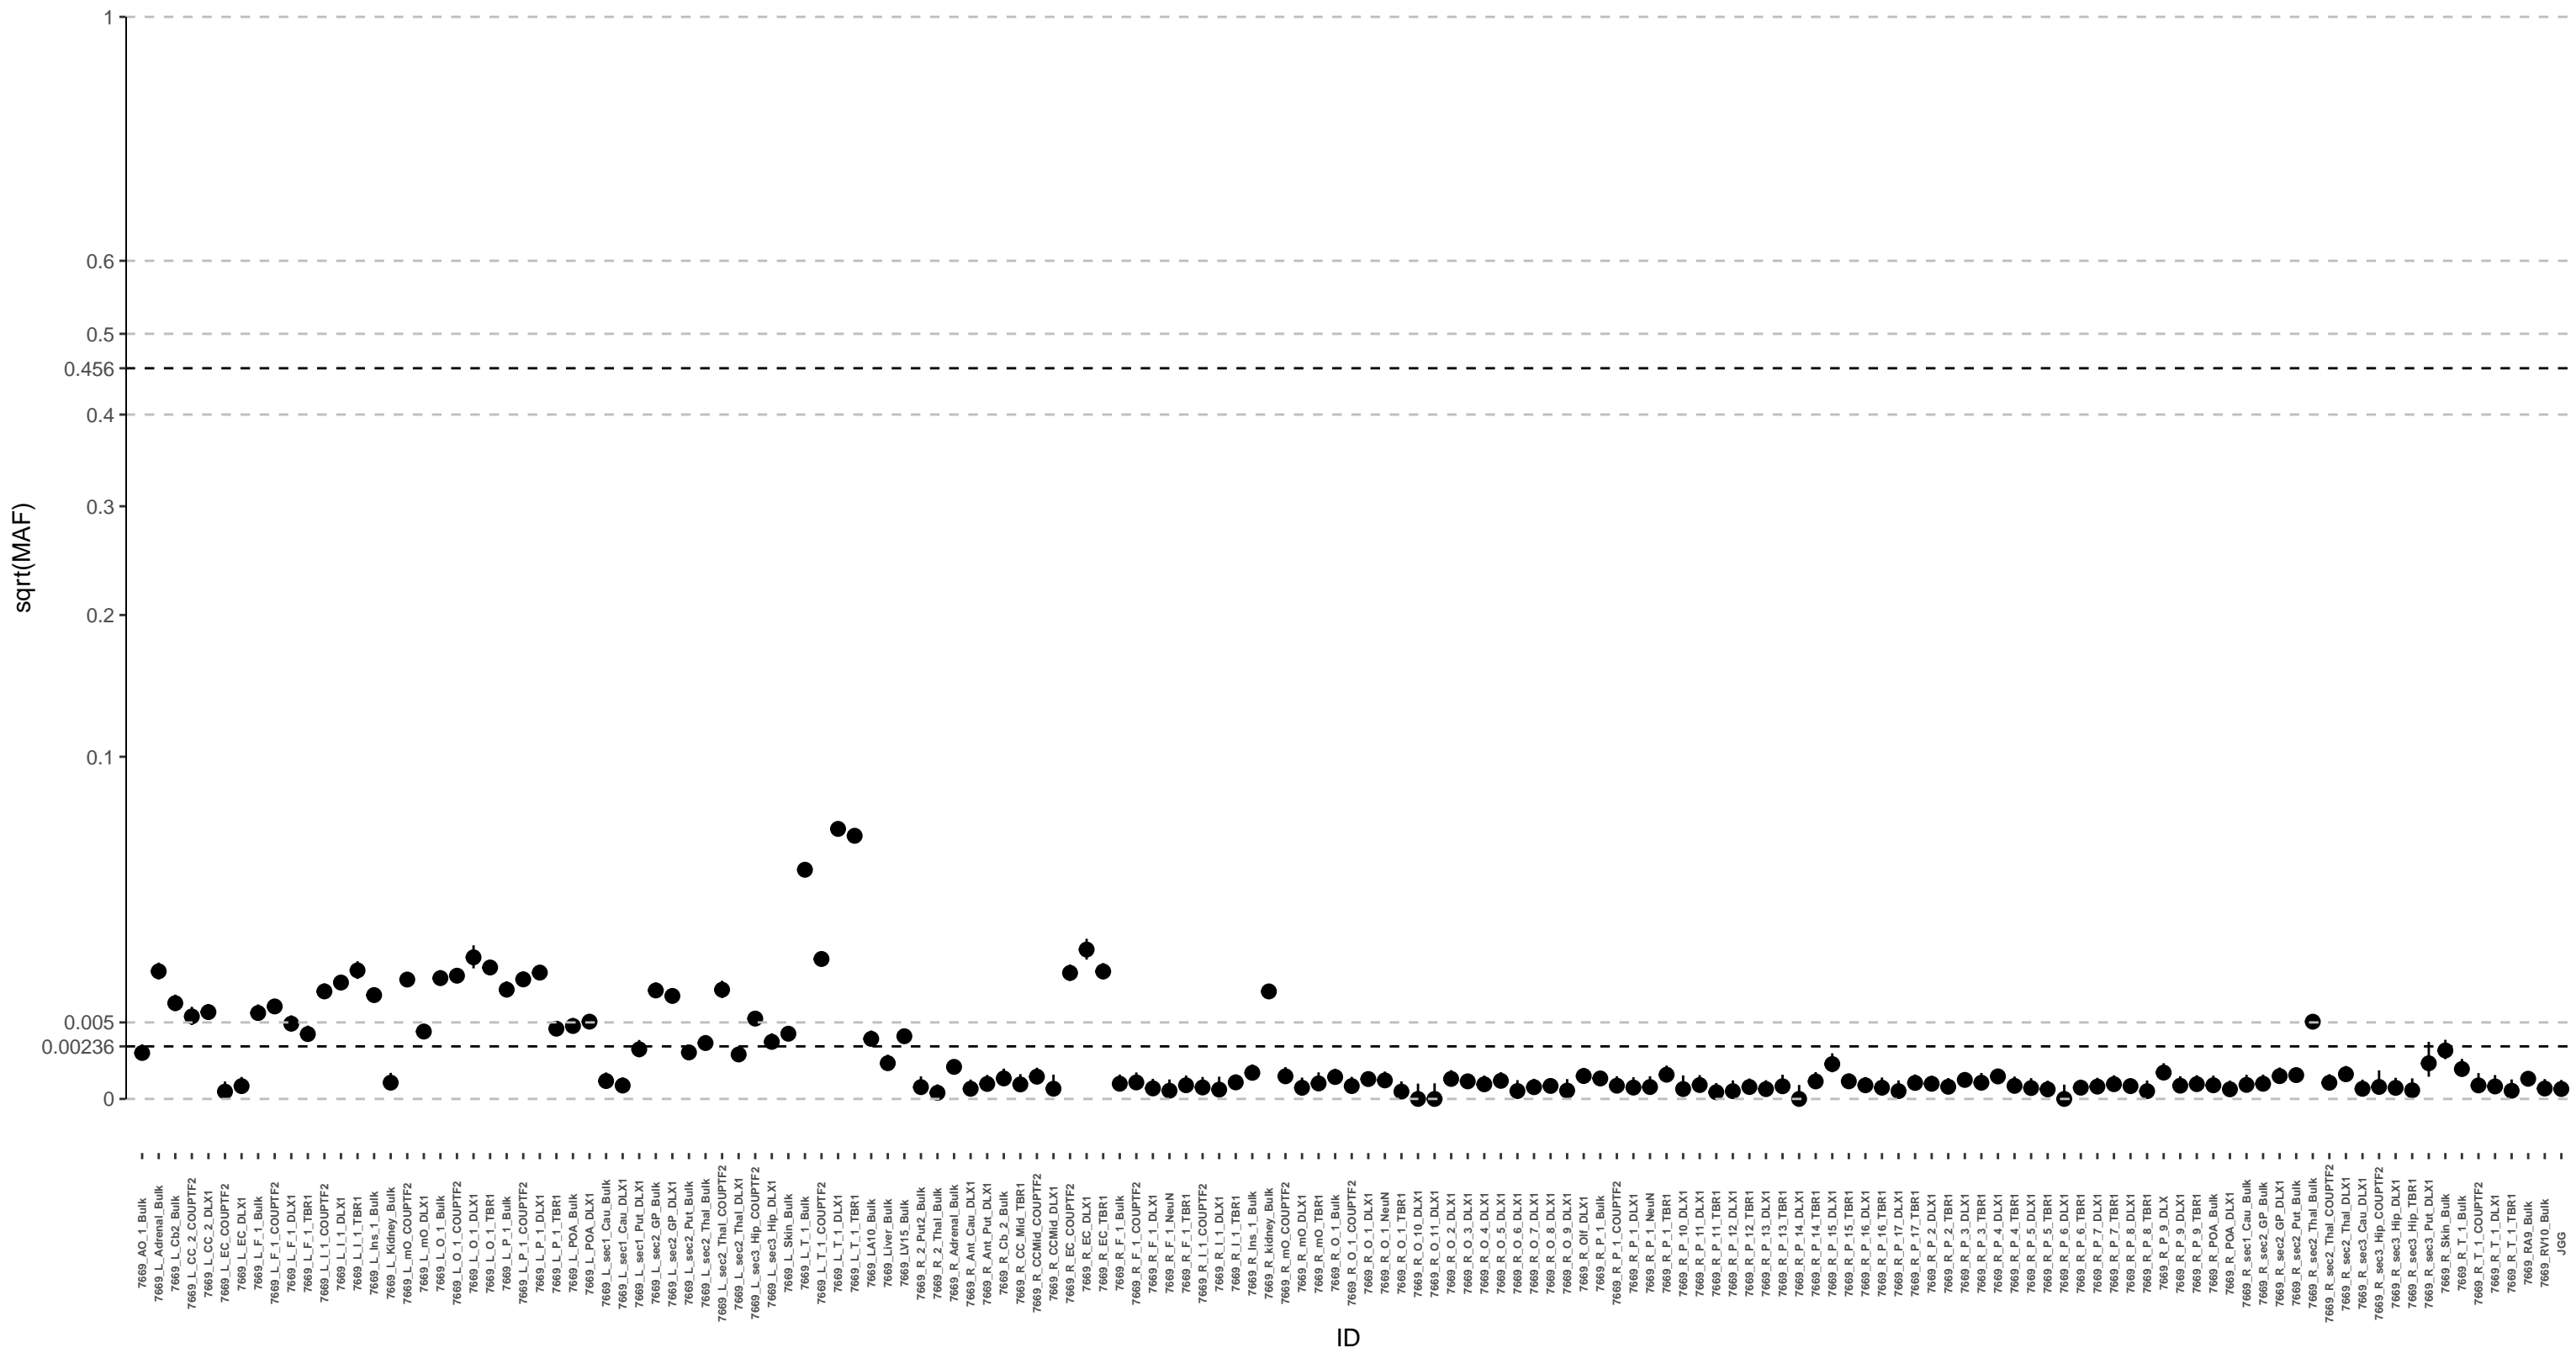

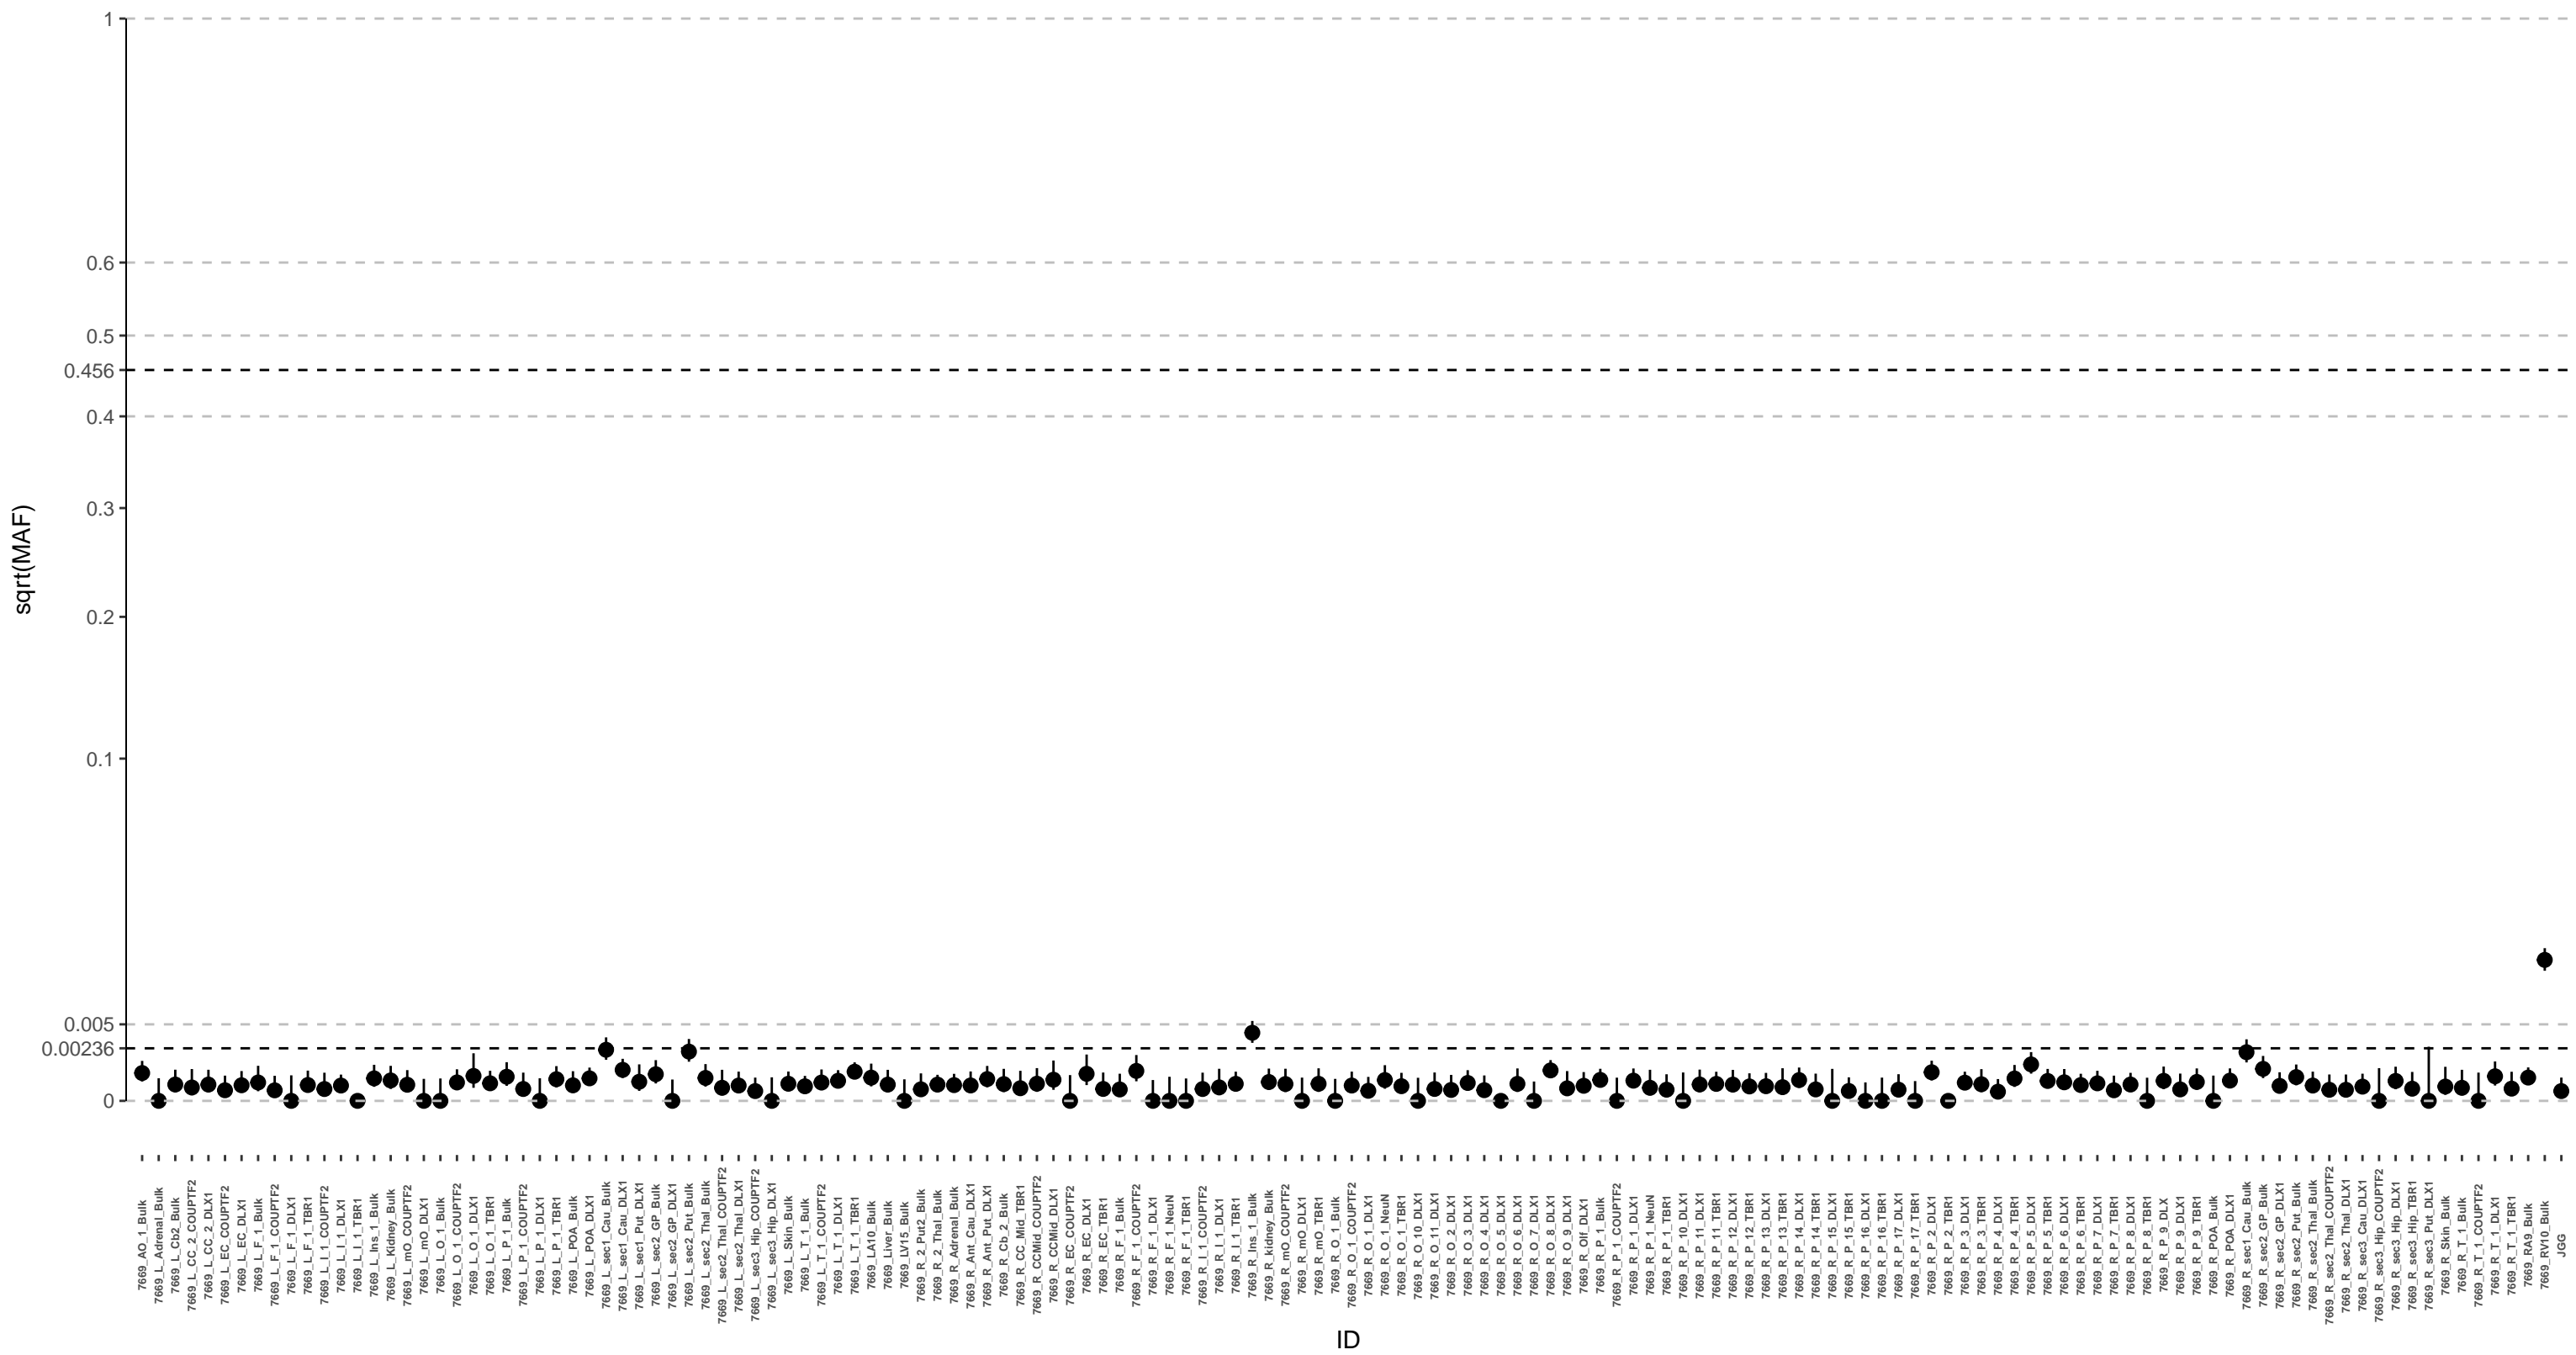

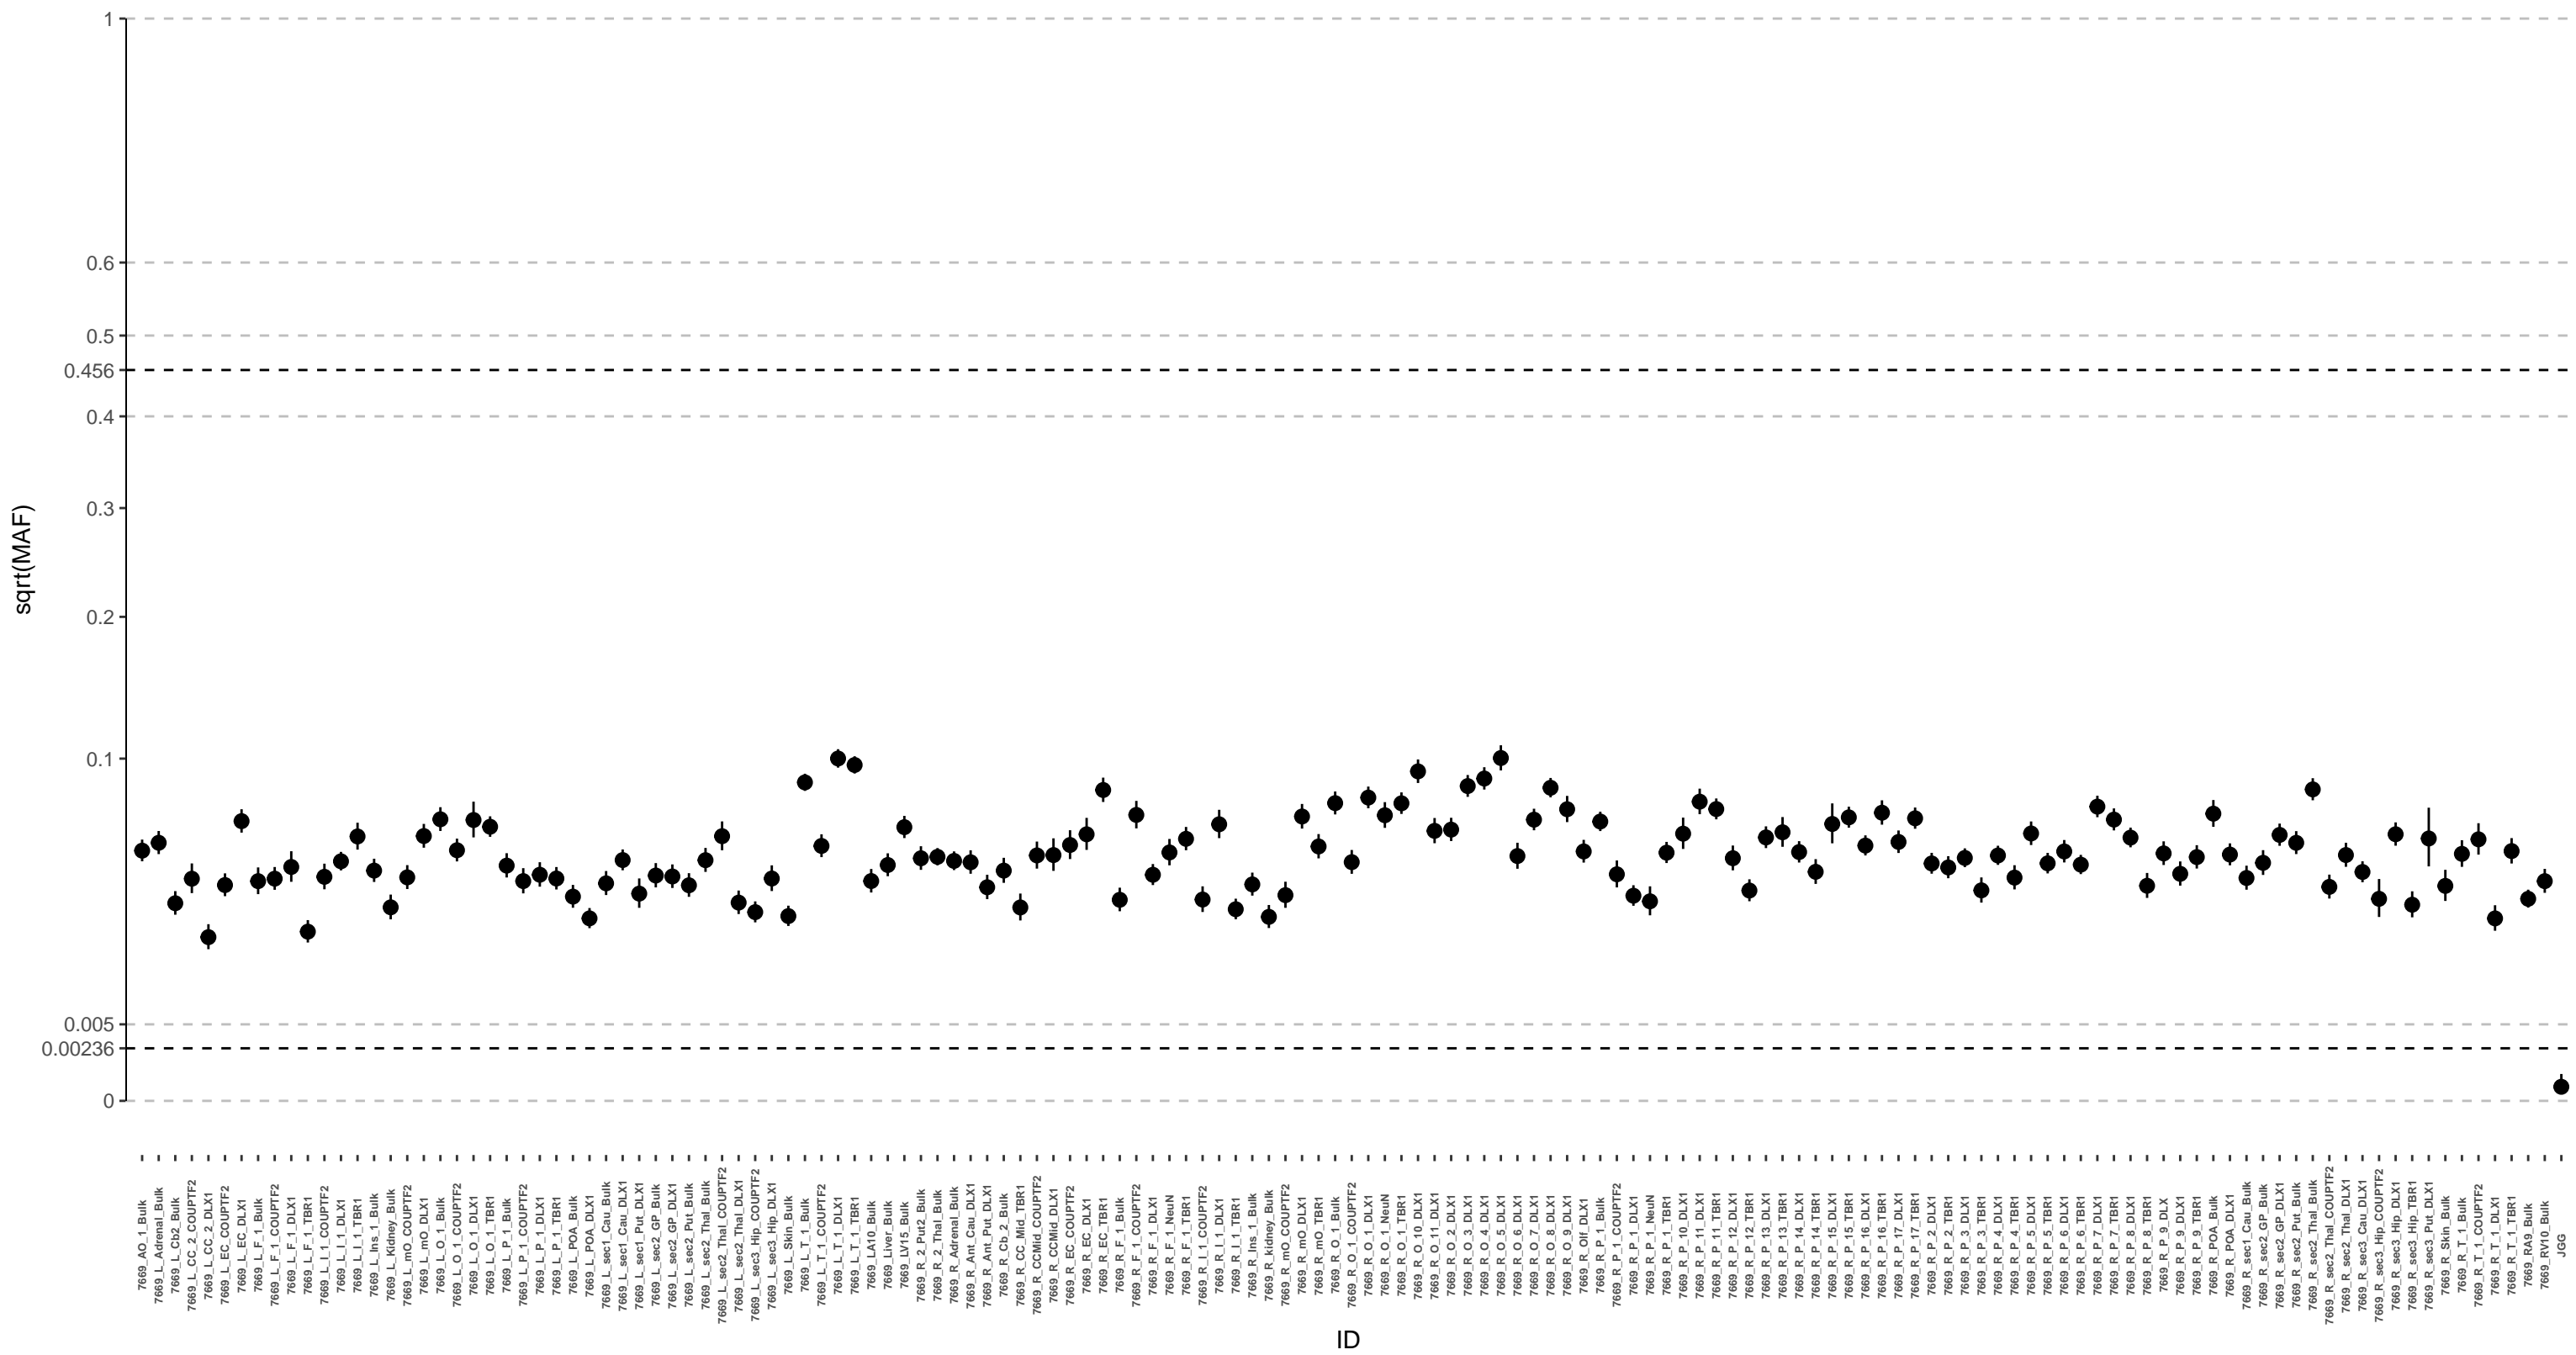

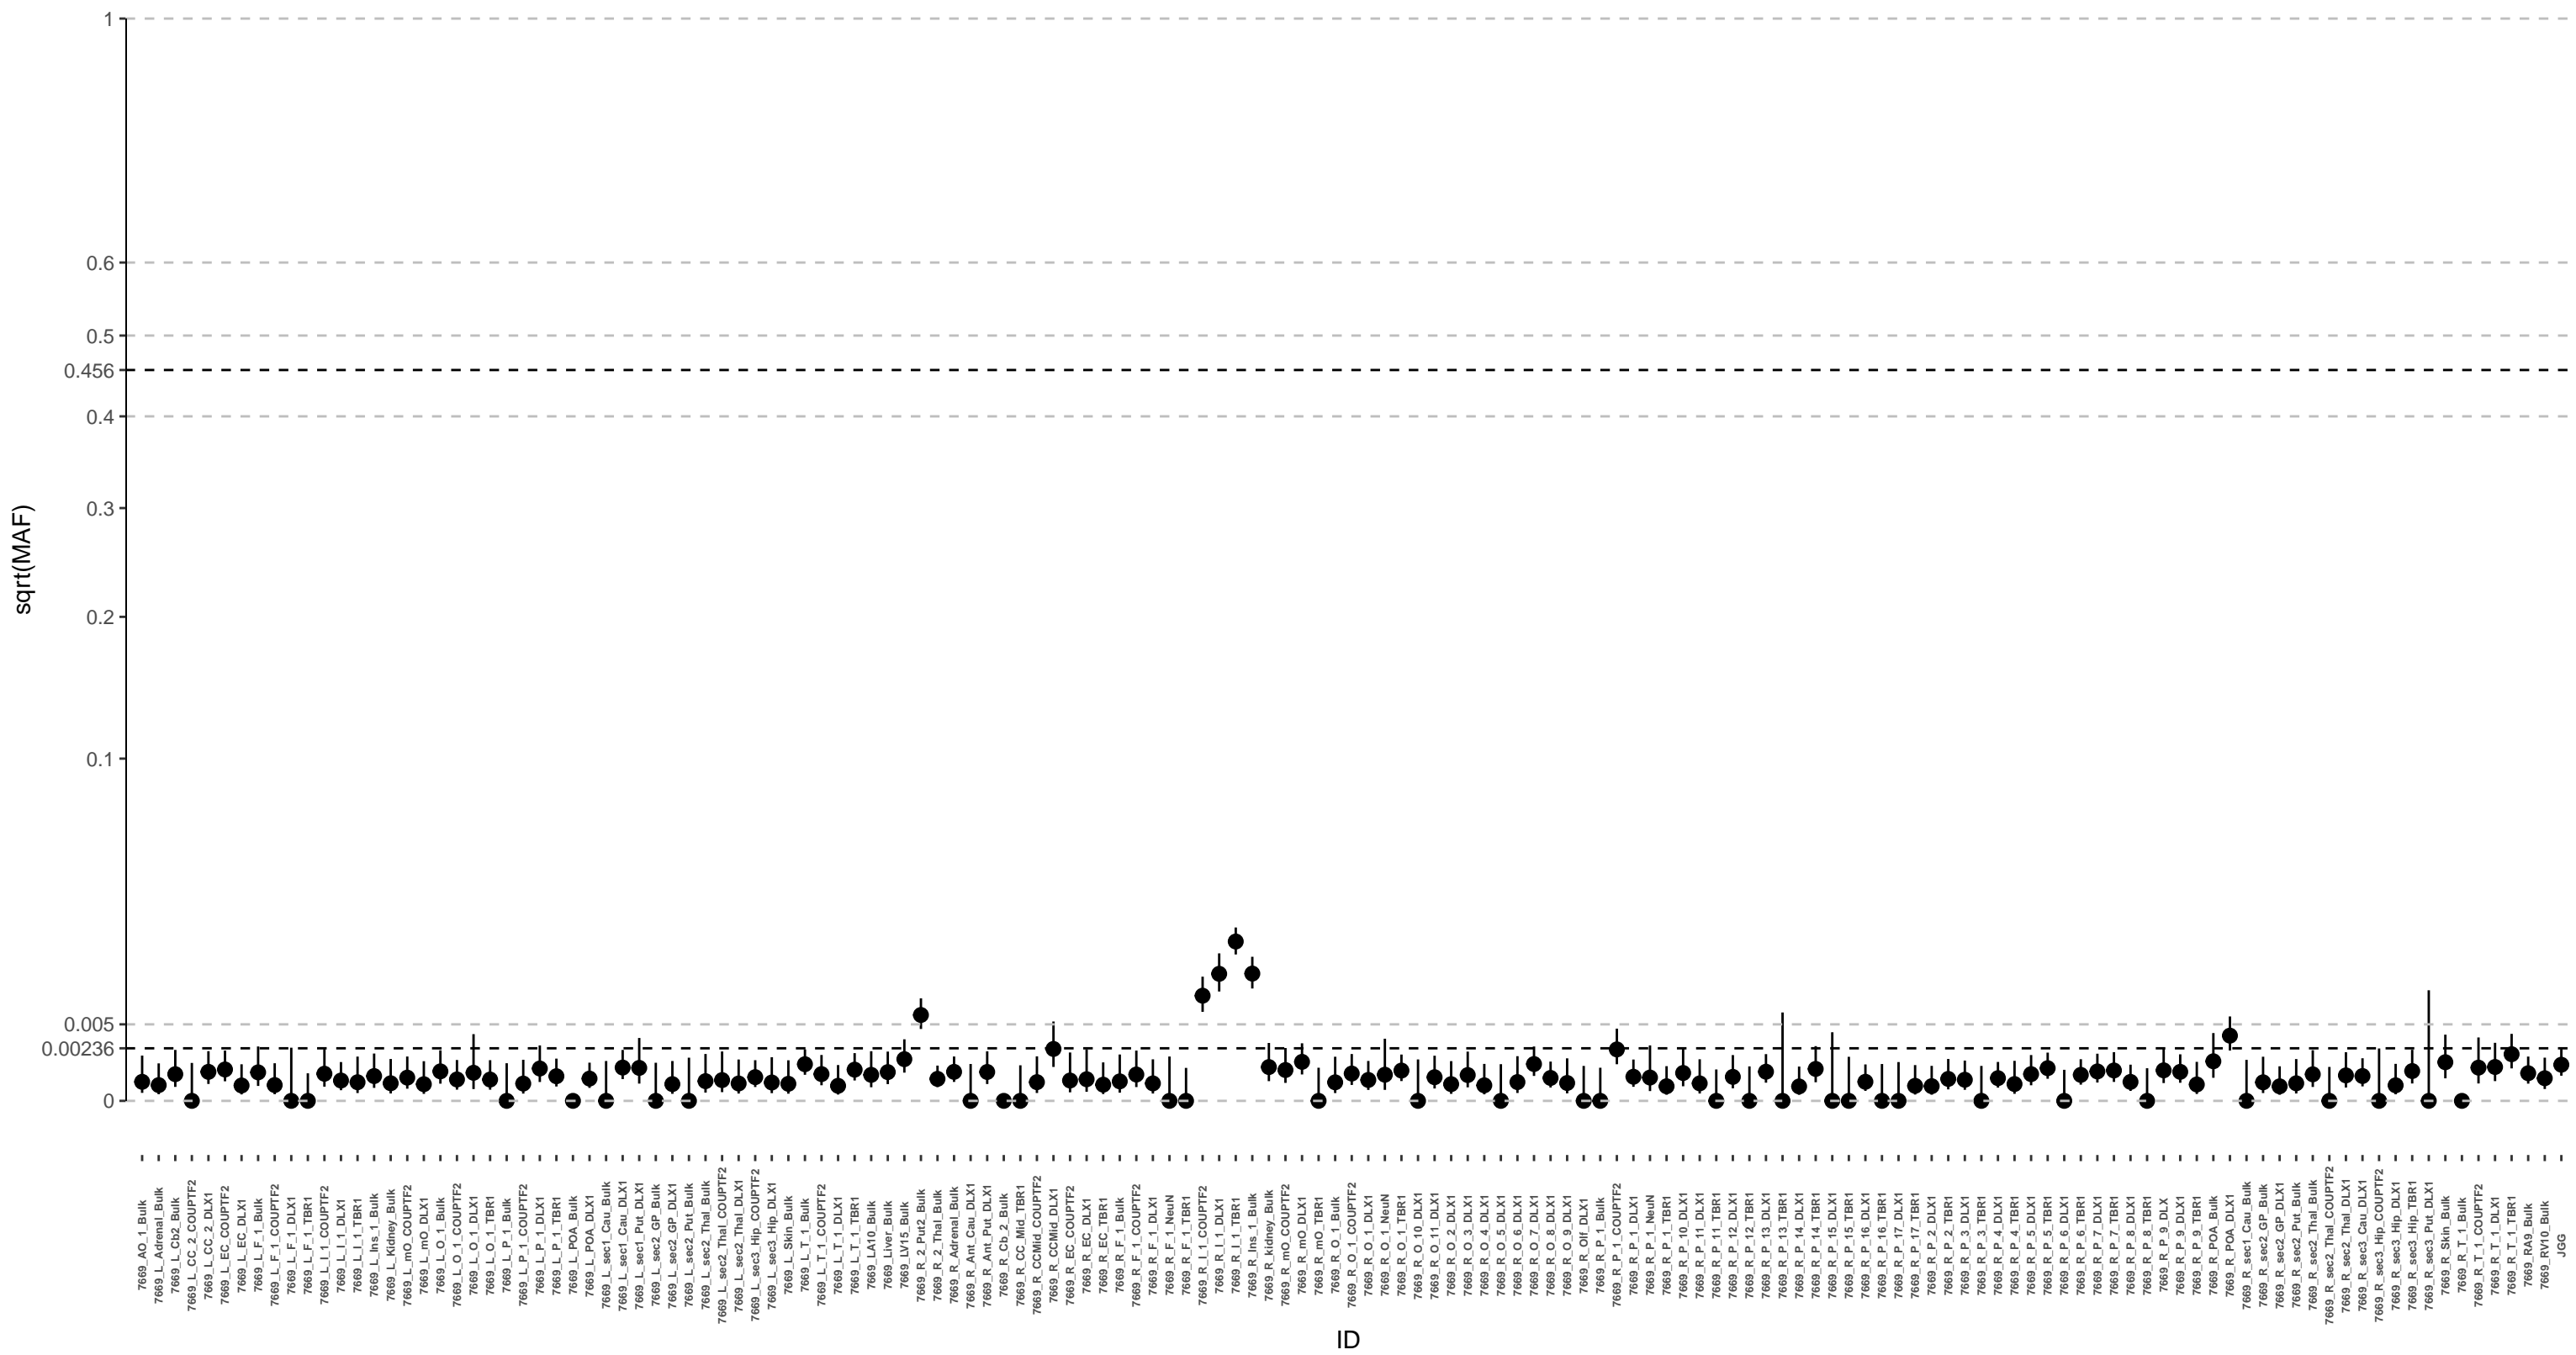

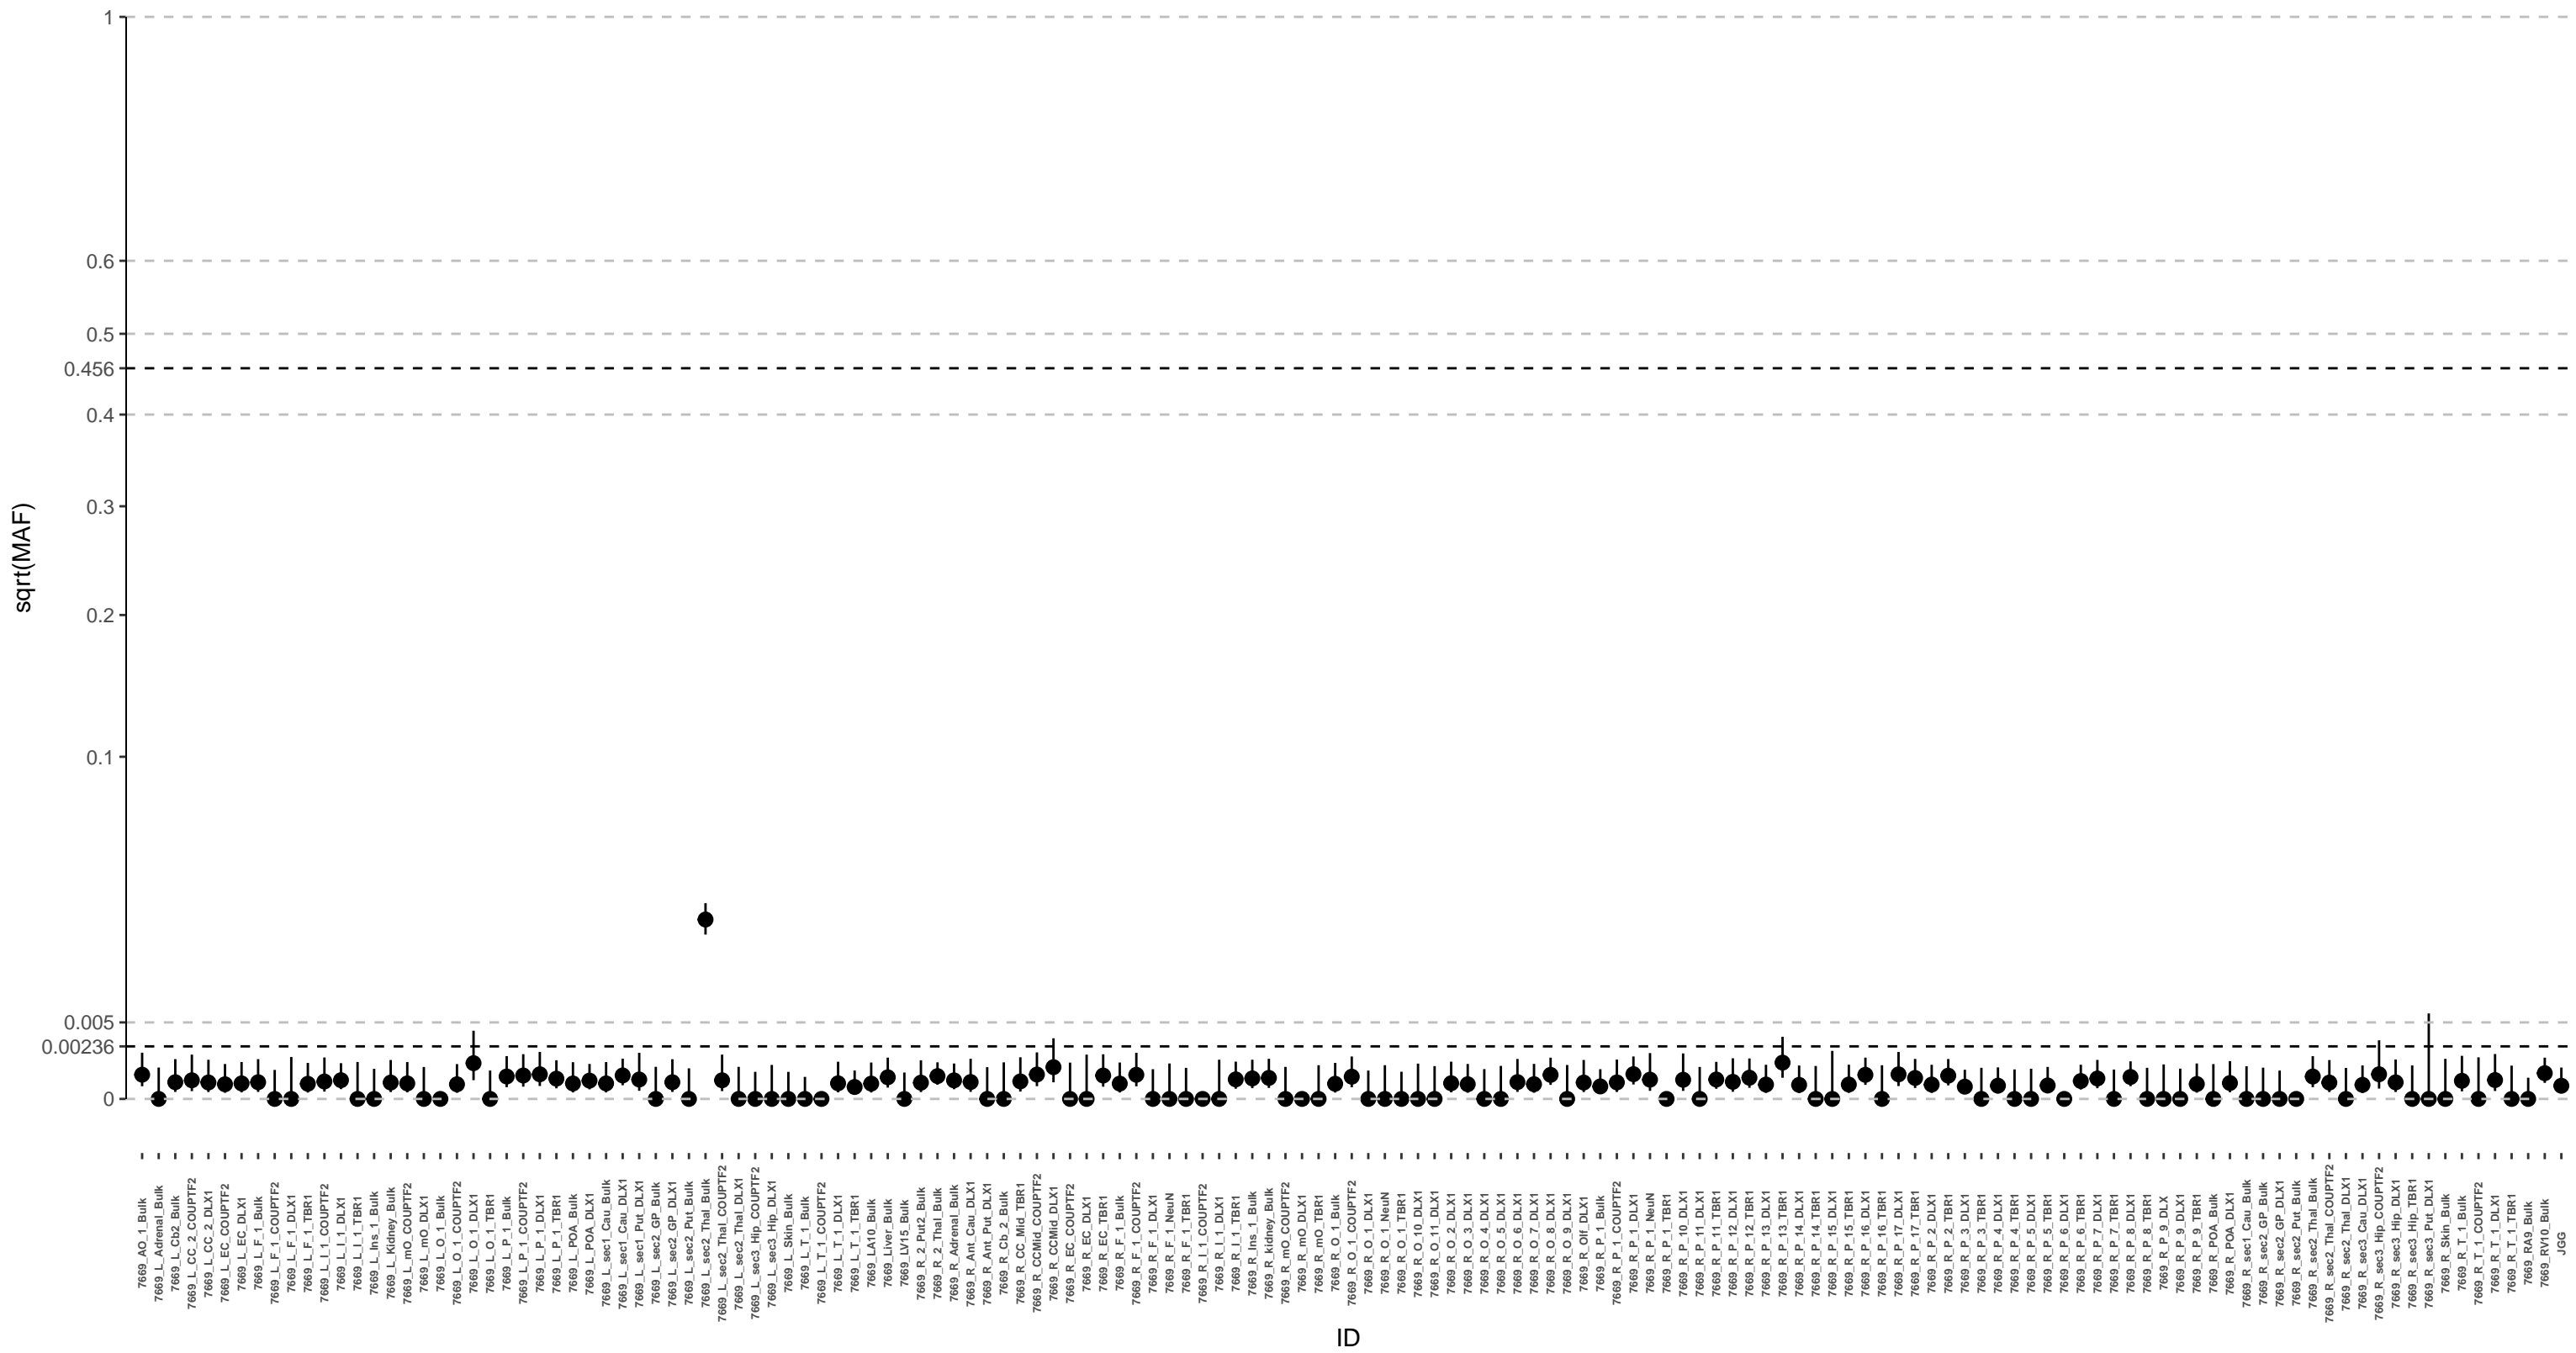

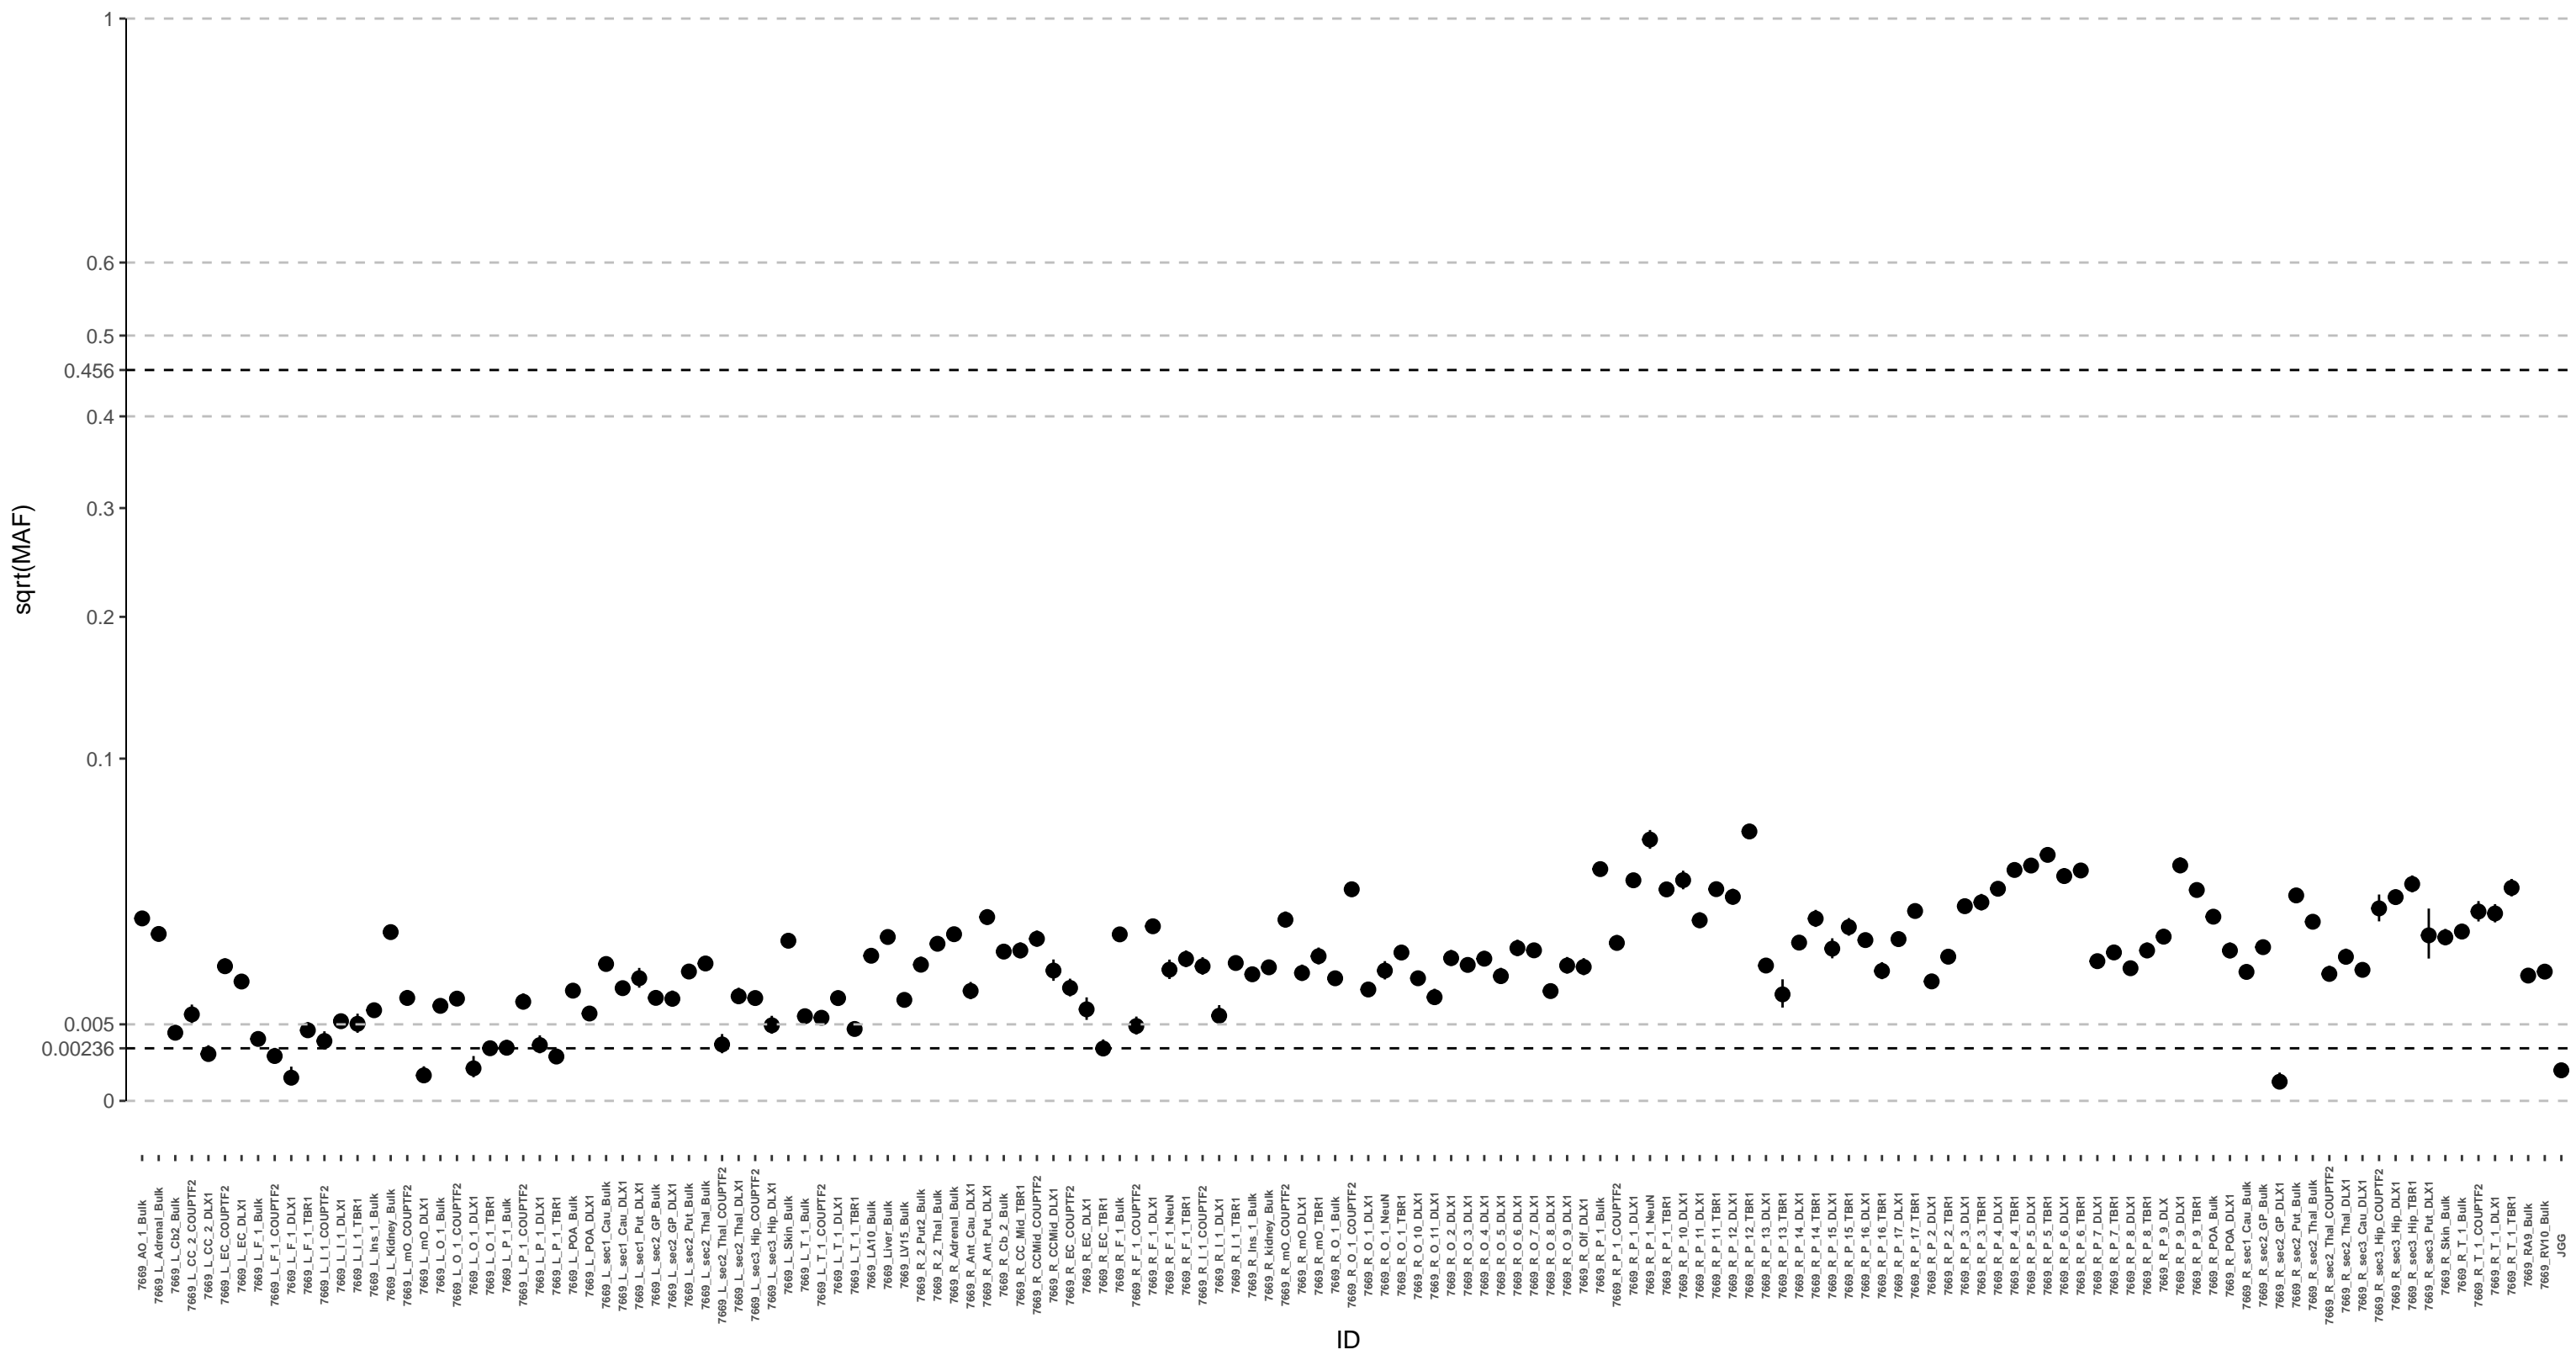



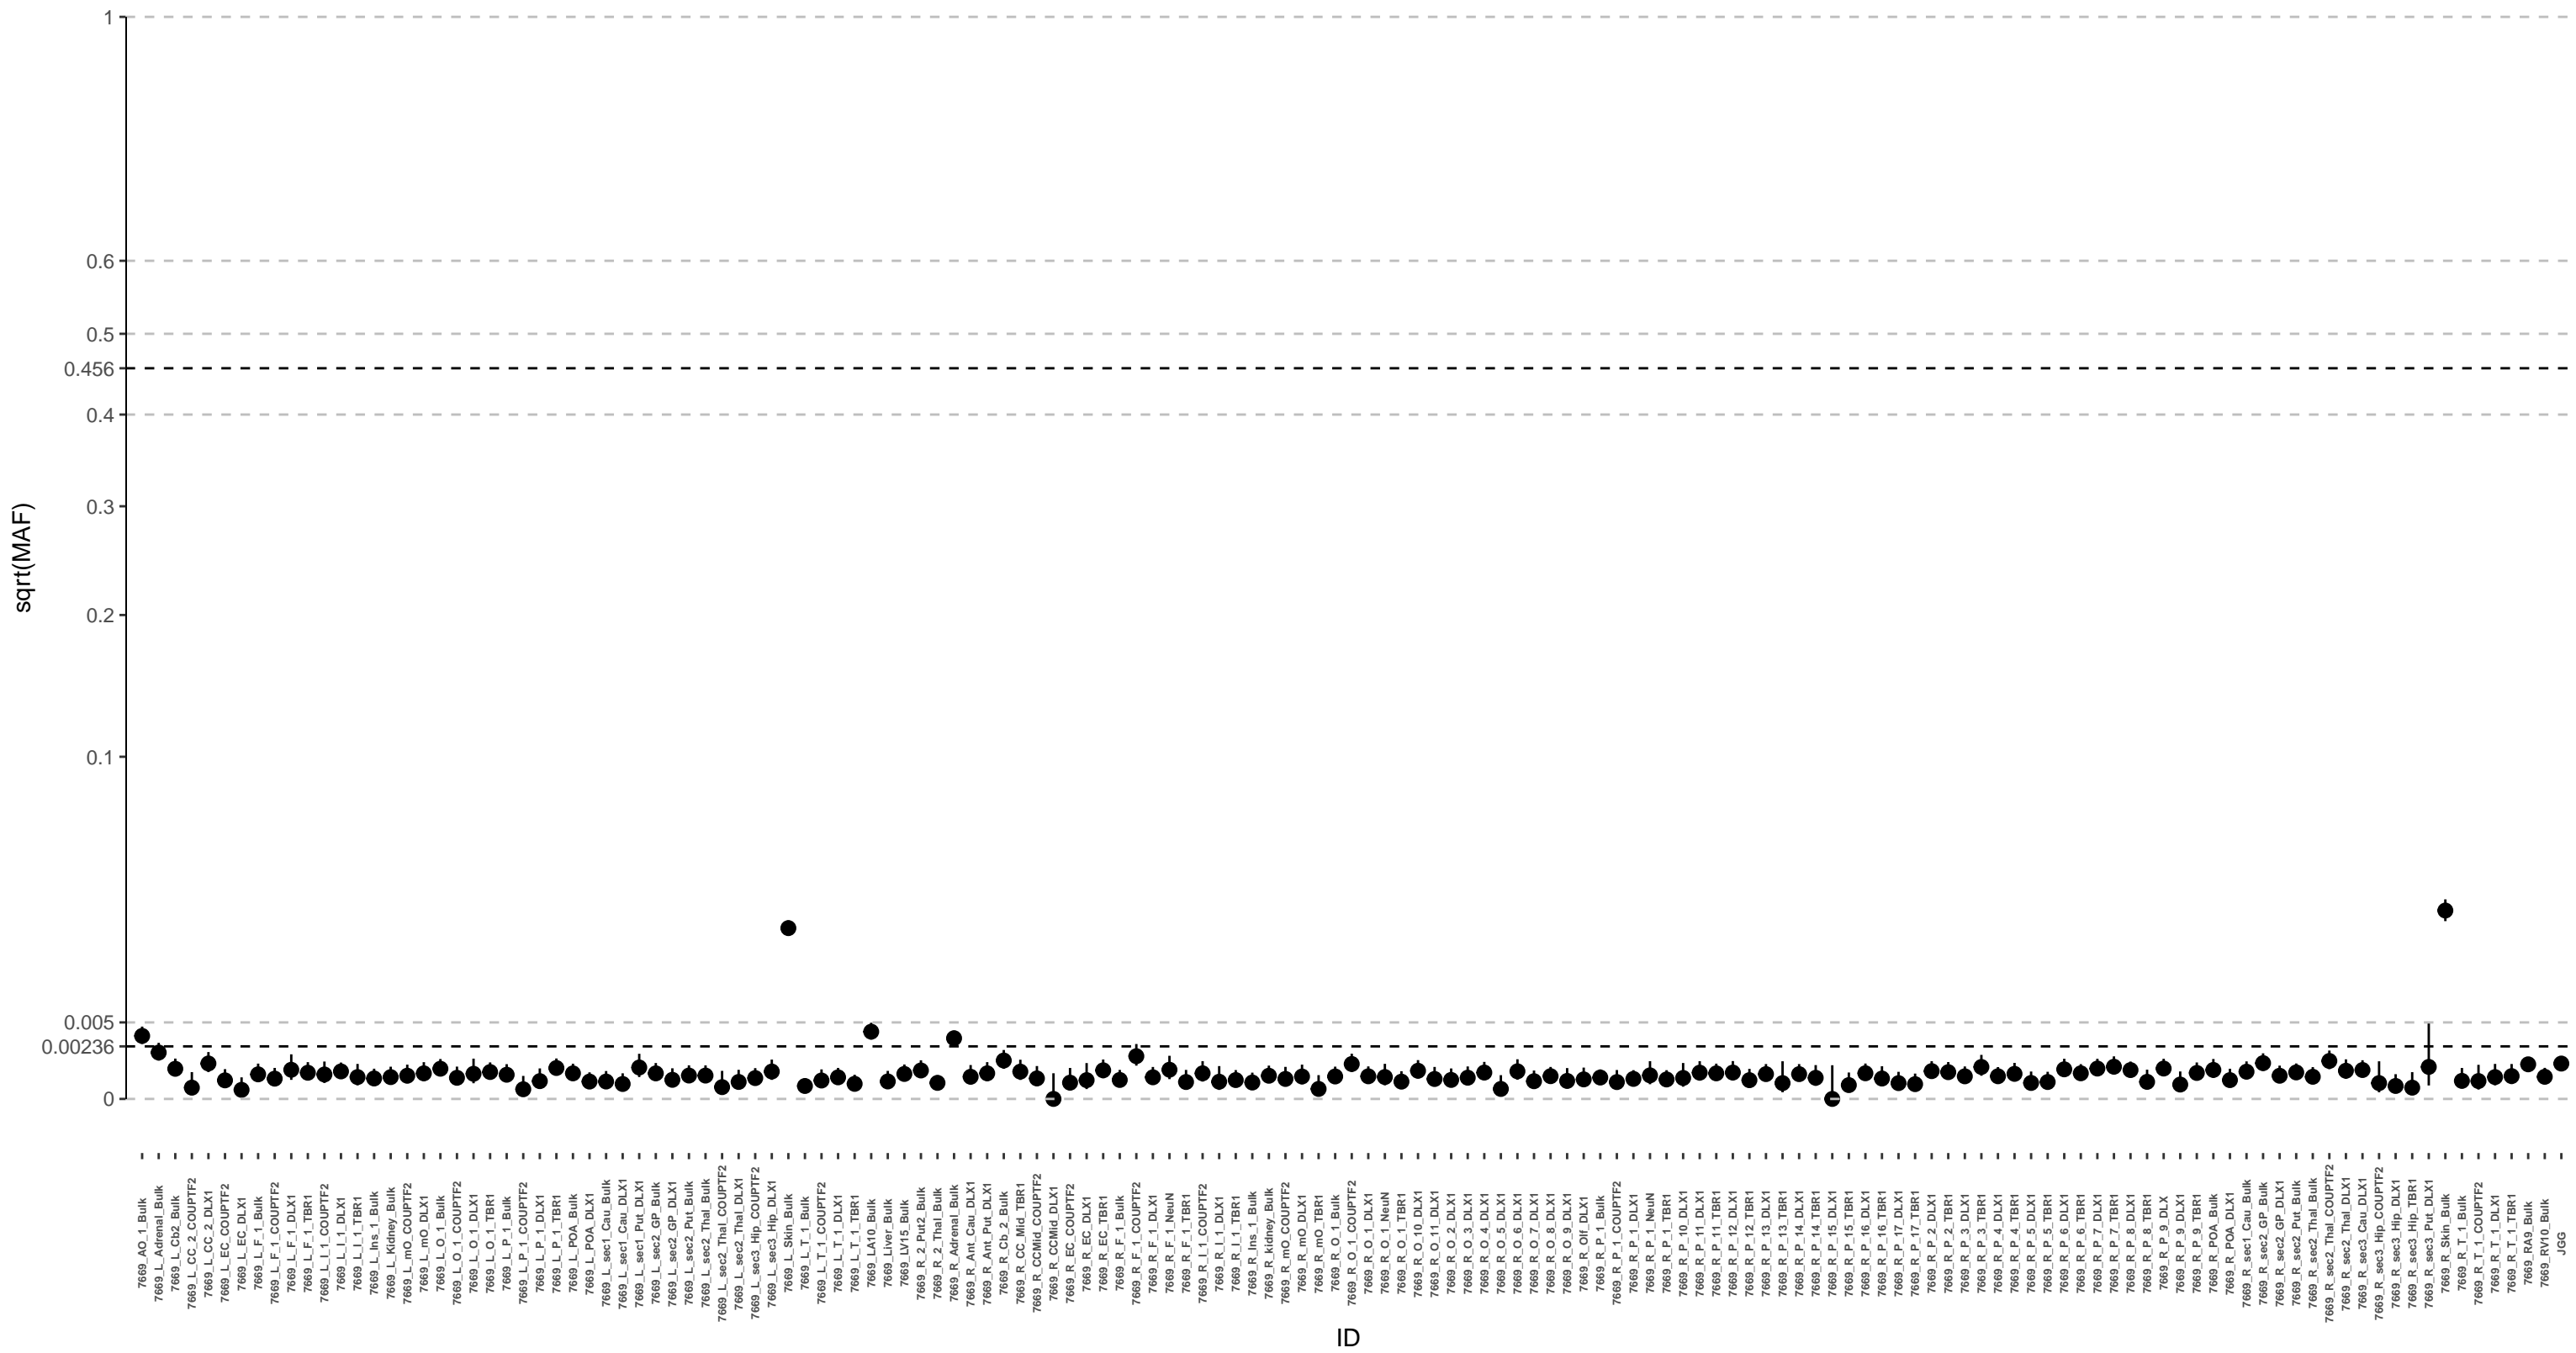

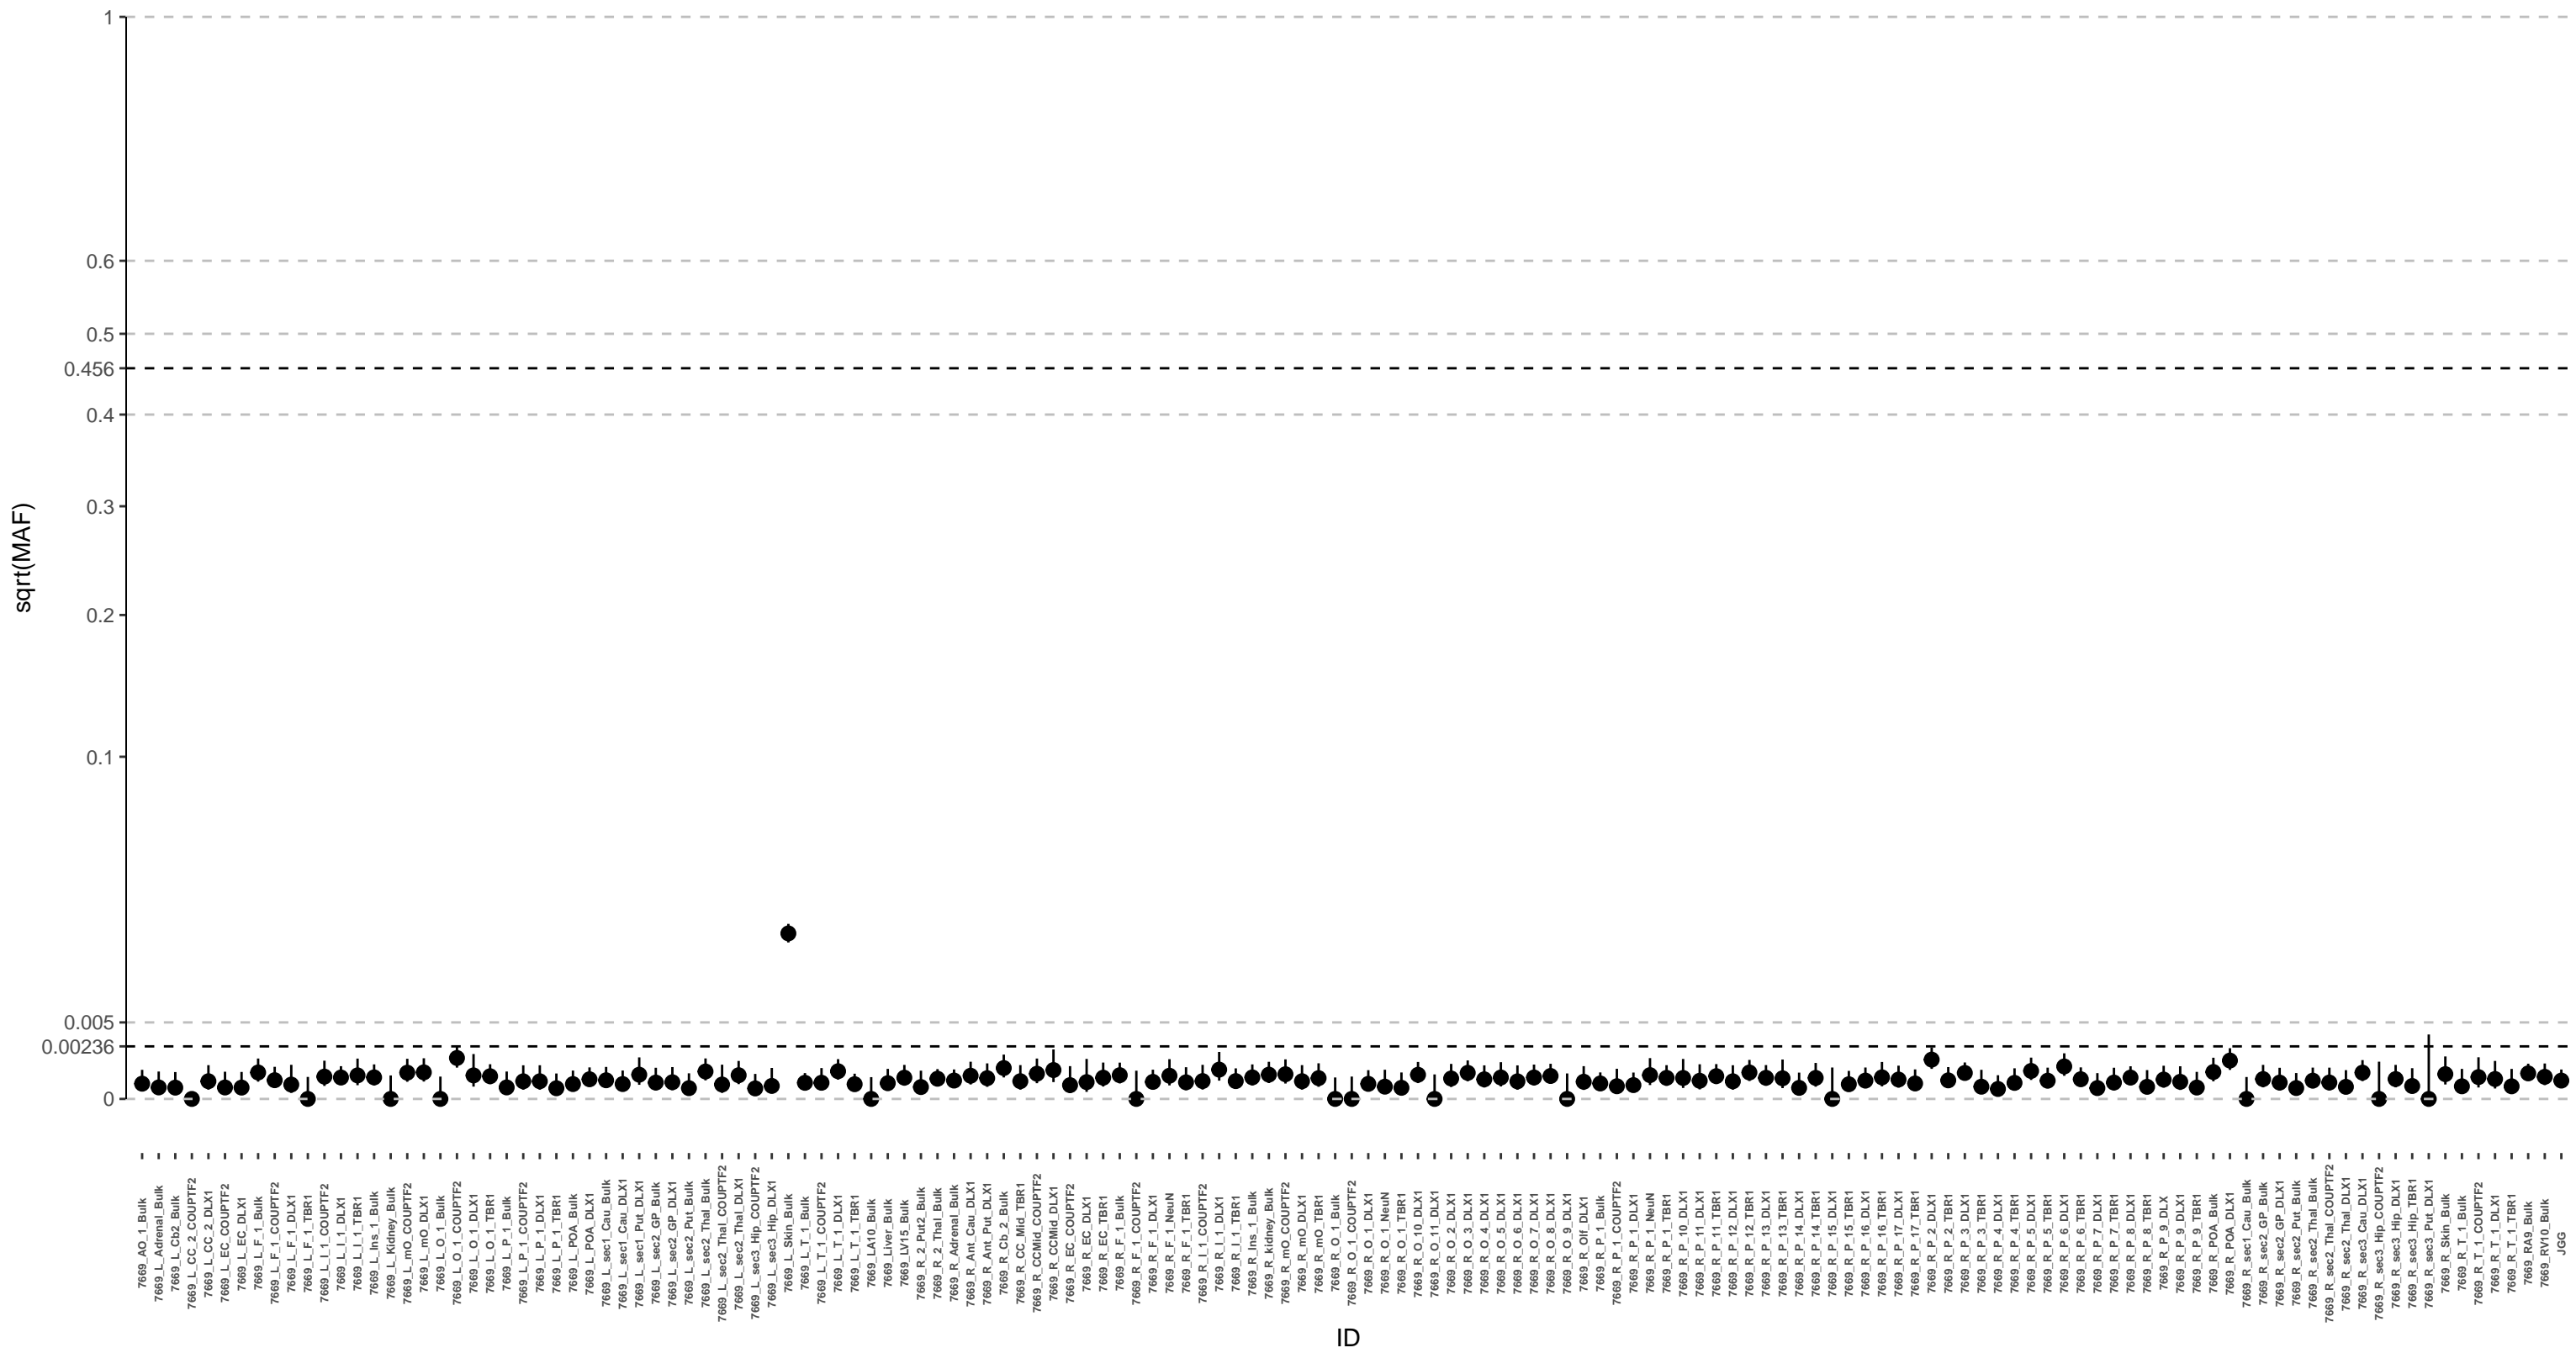

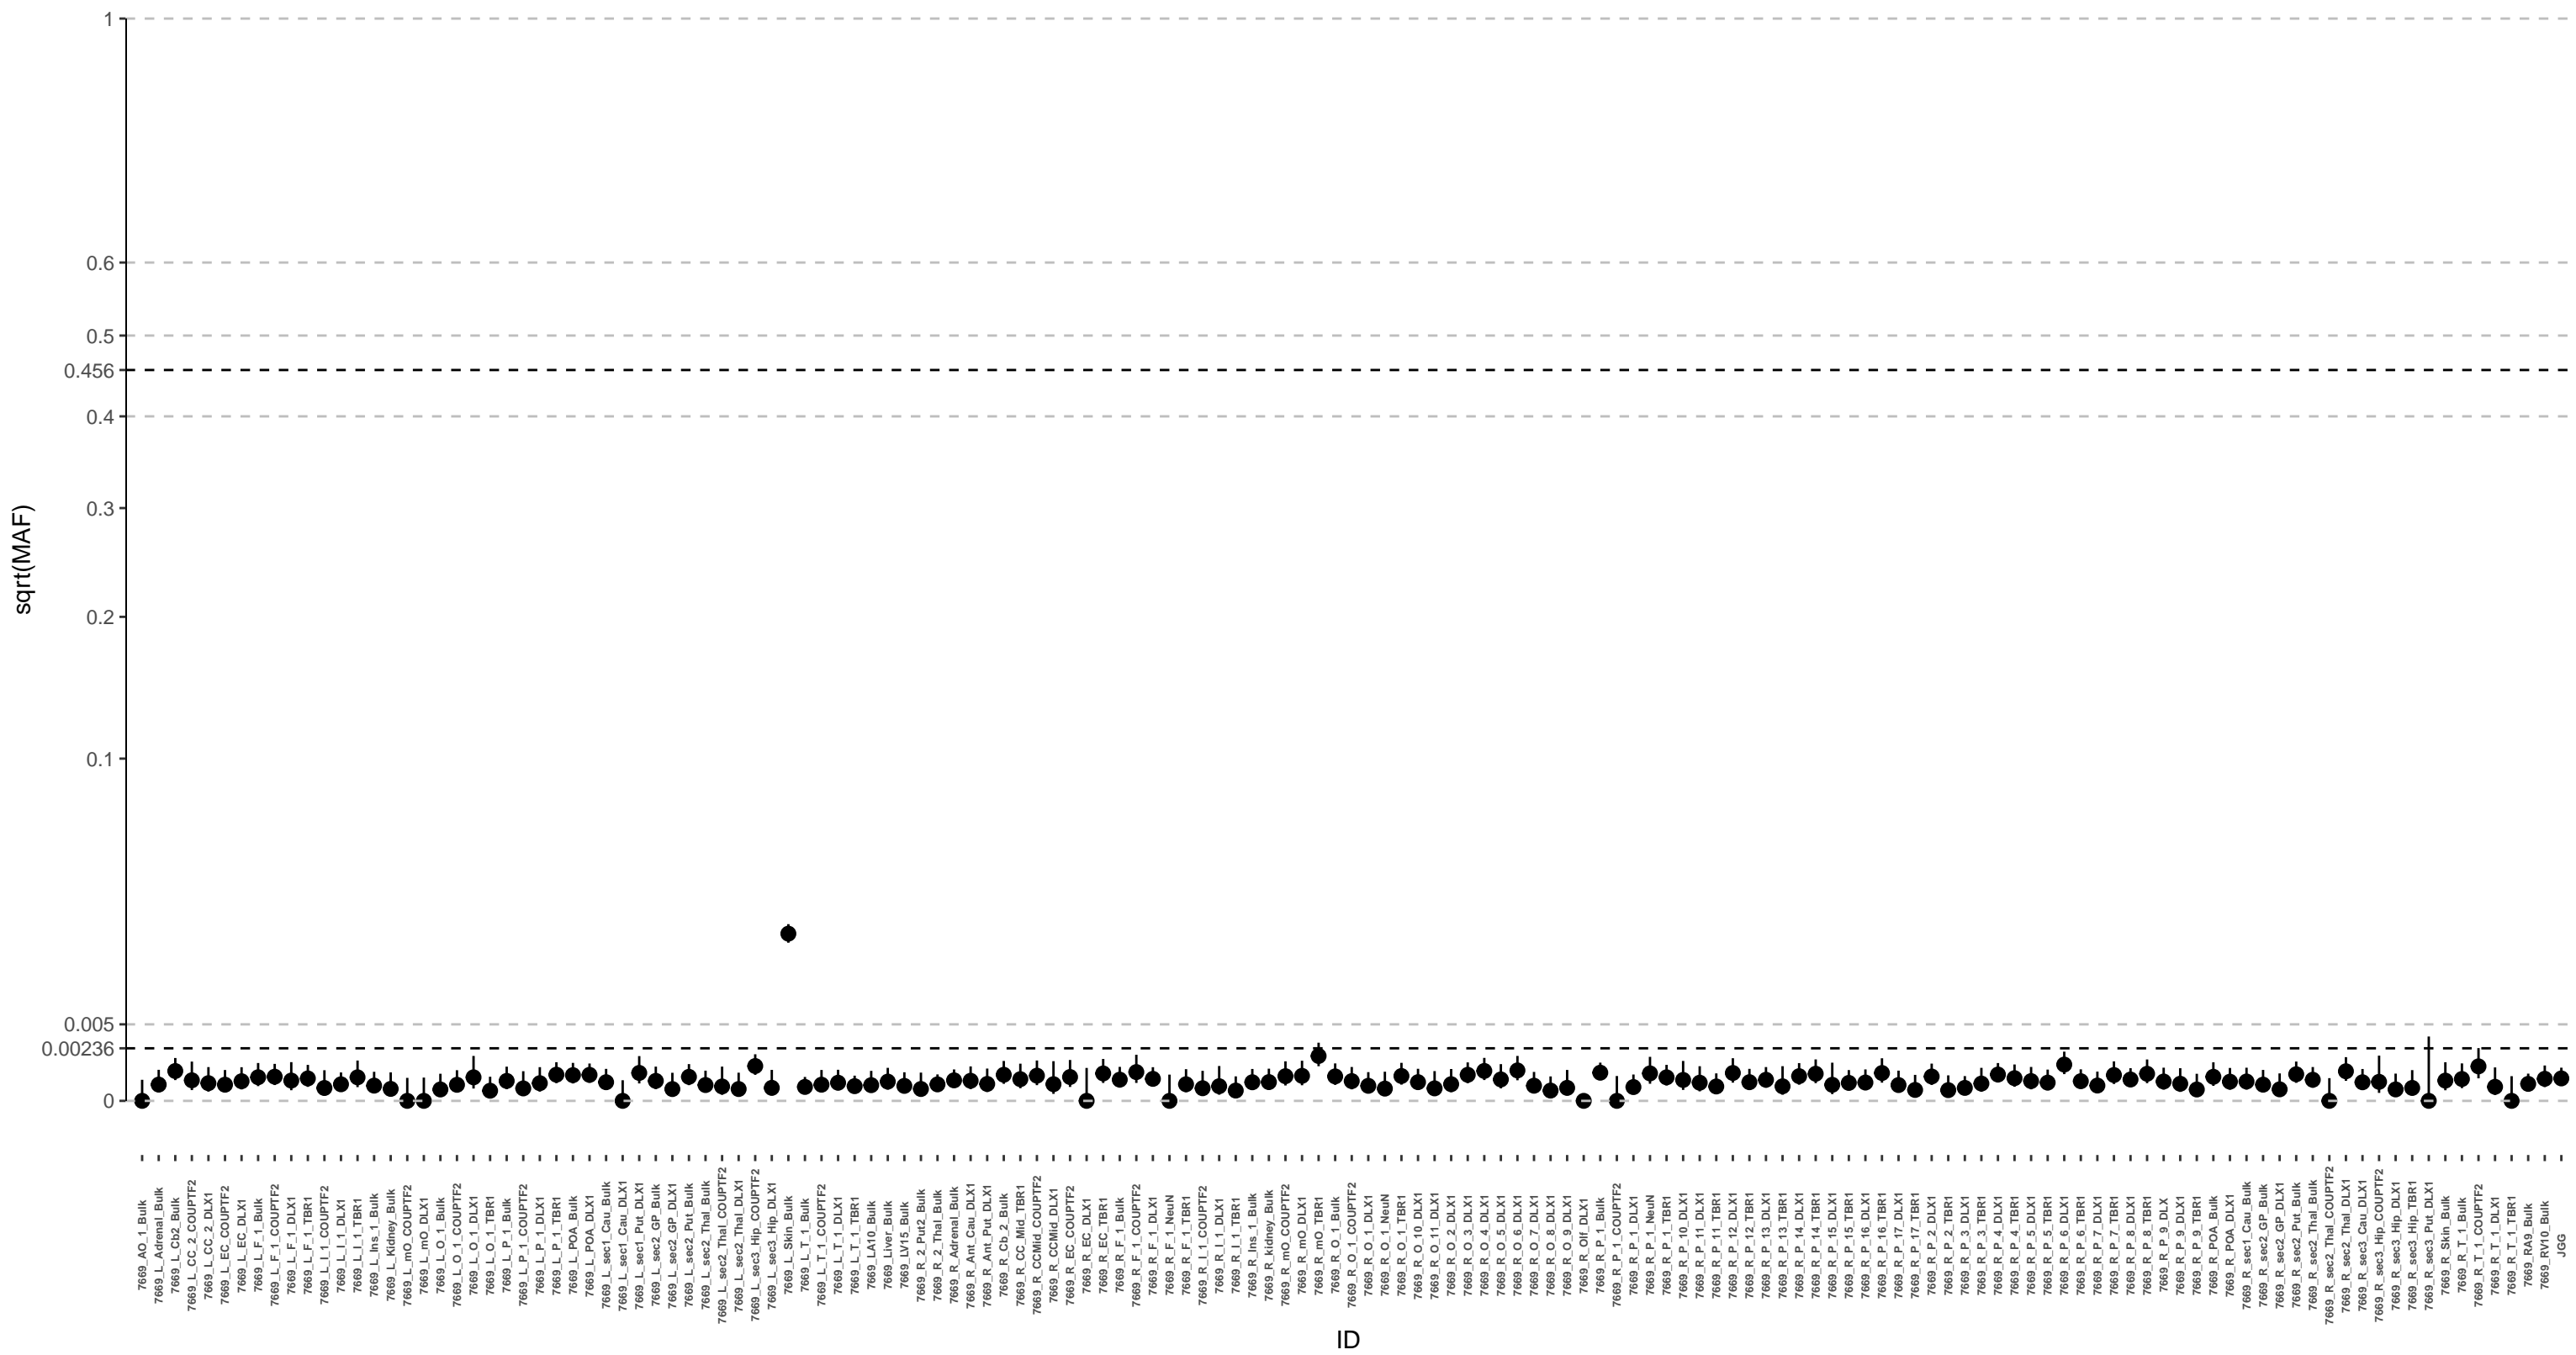

ID05 17-28171971-C-T

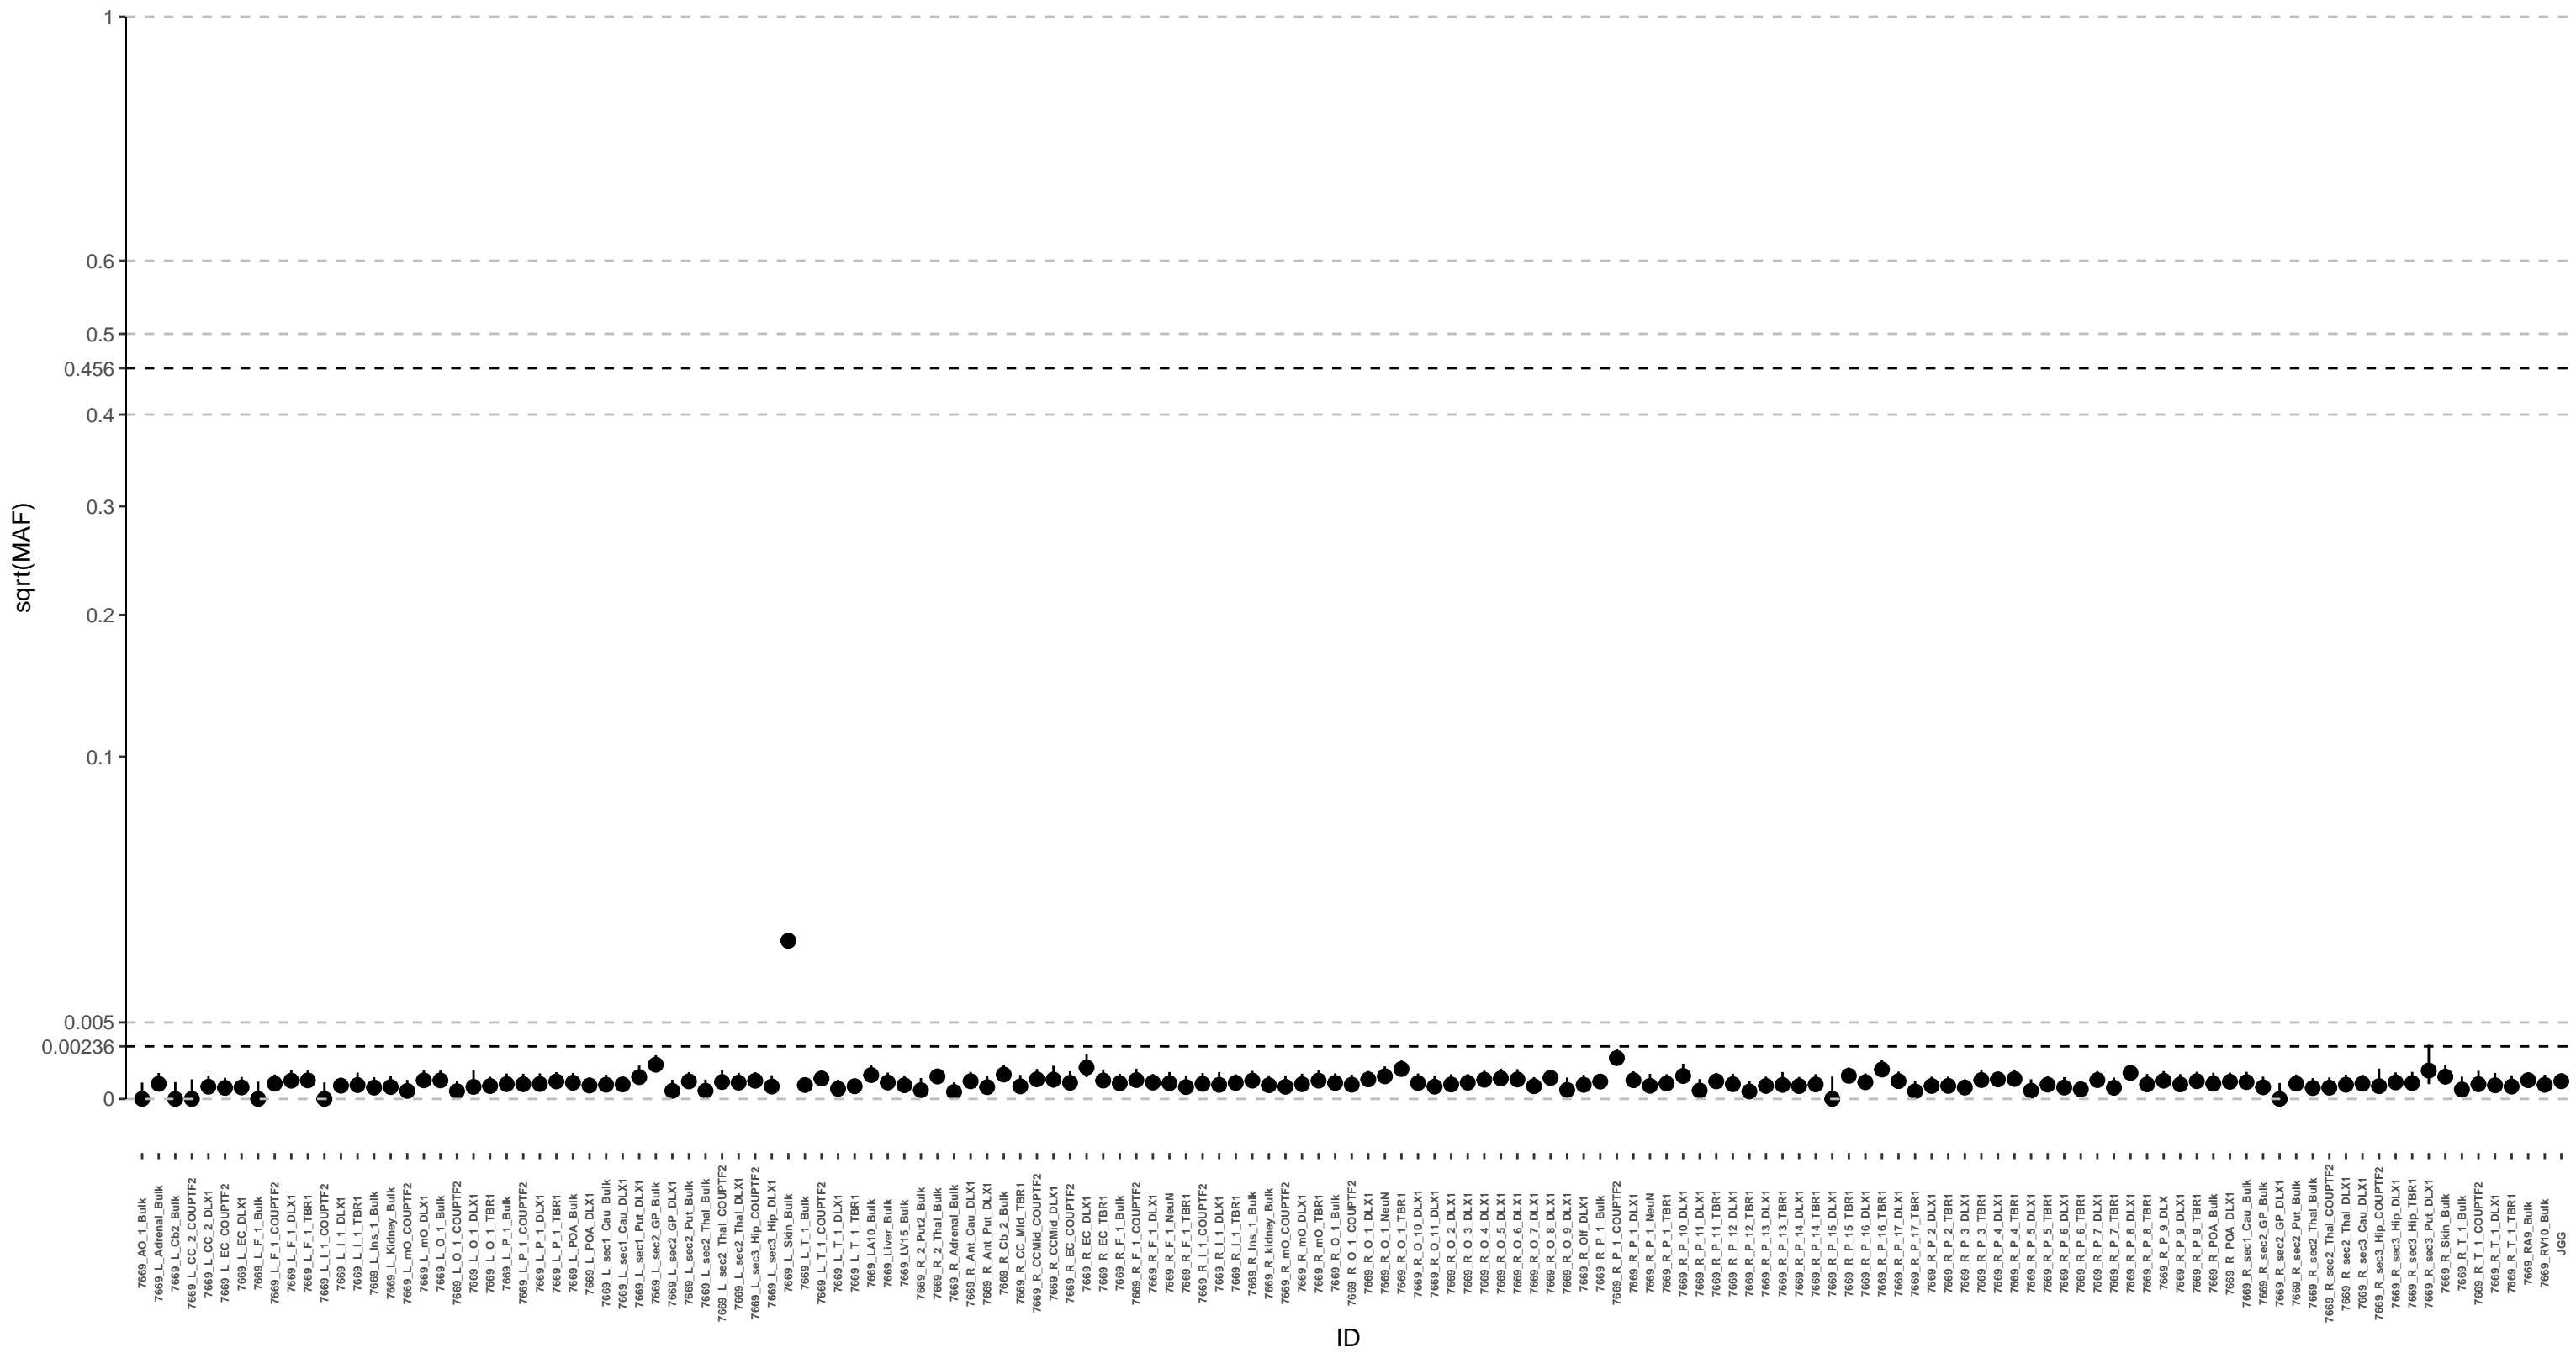

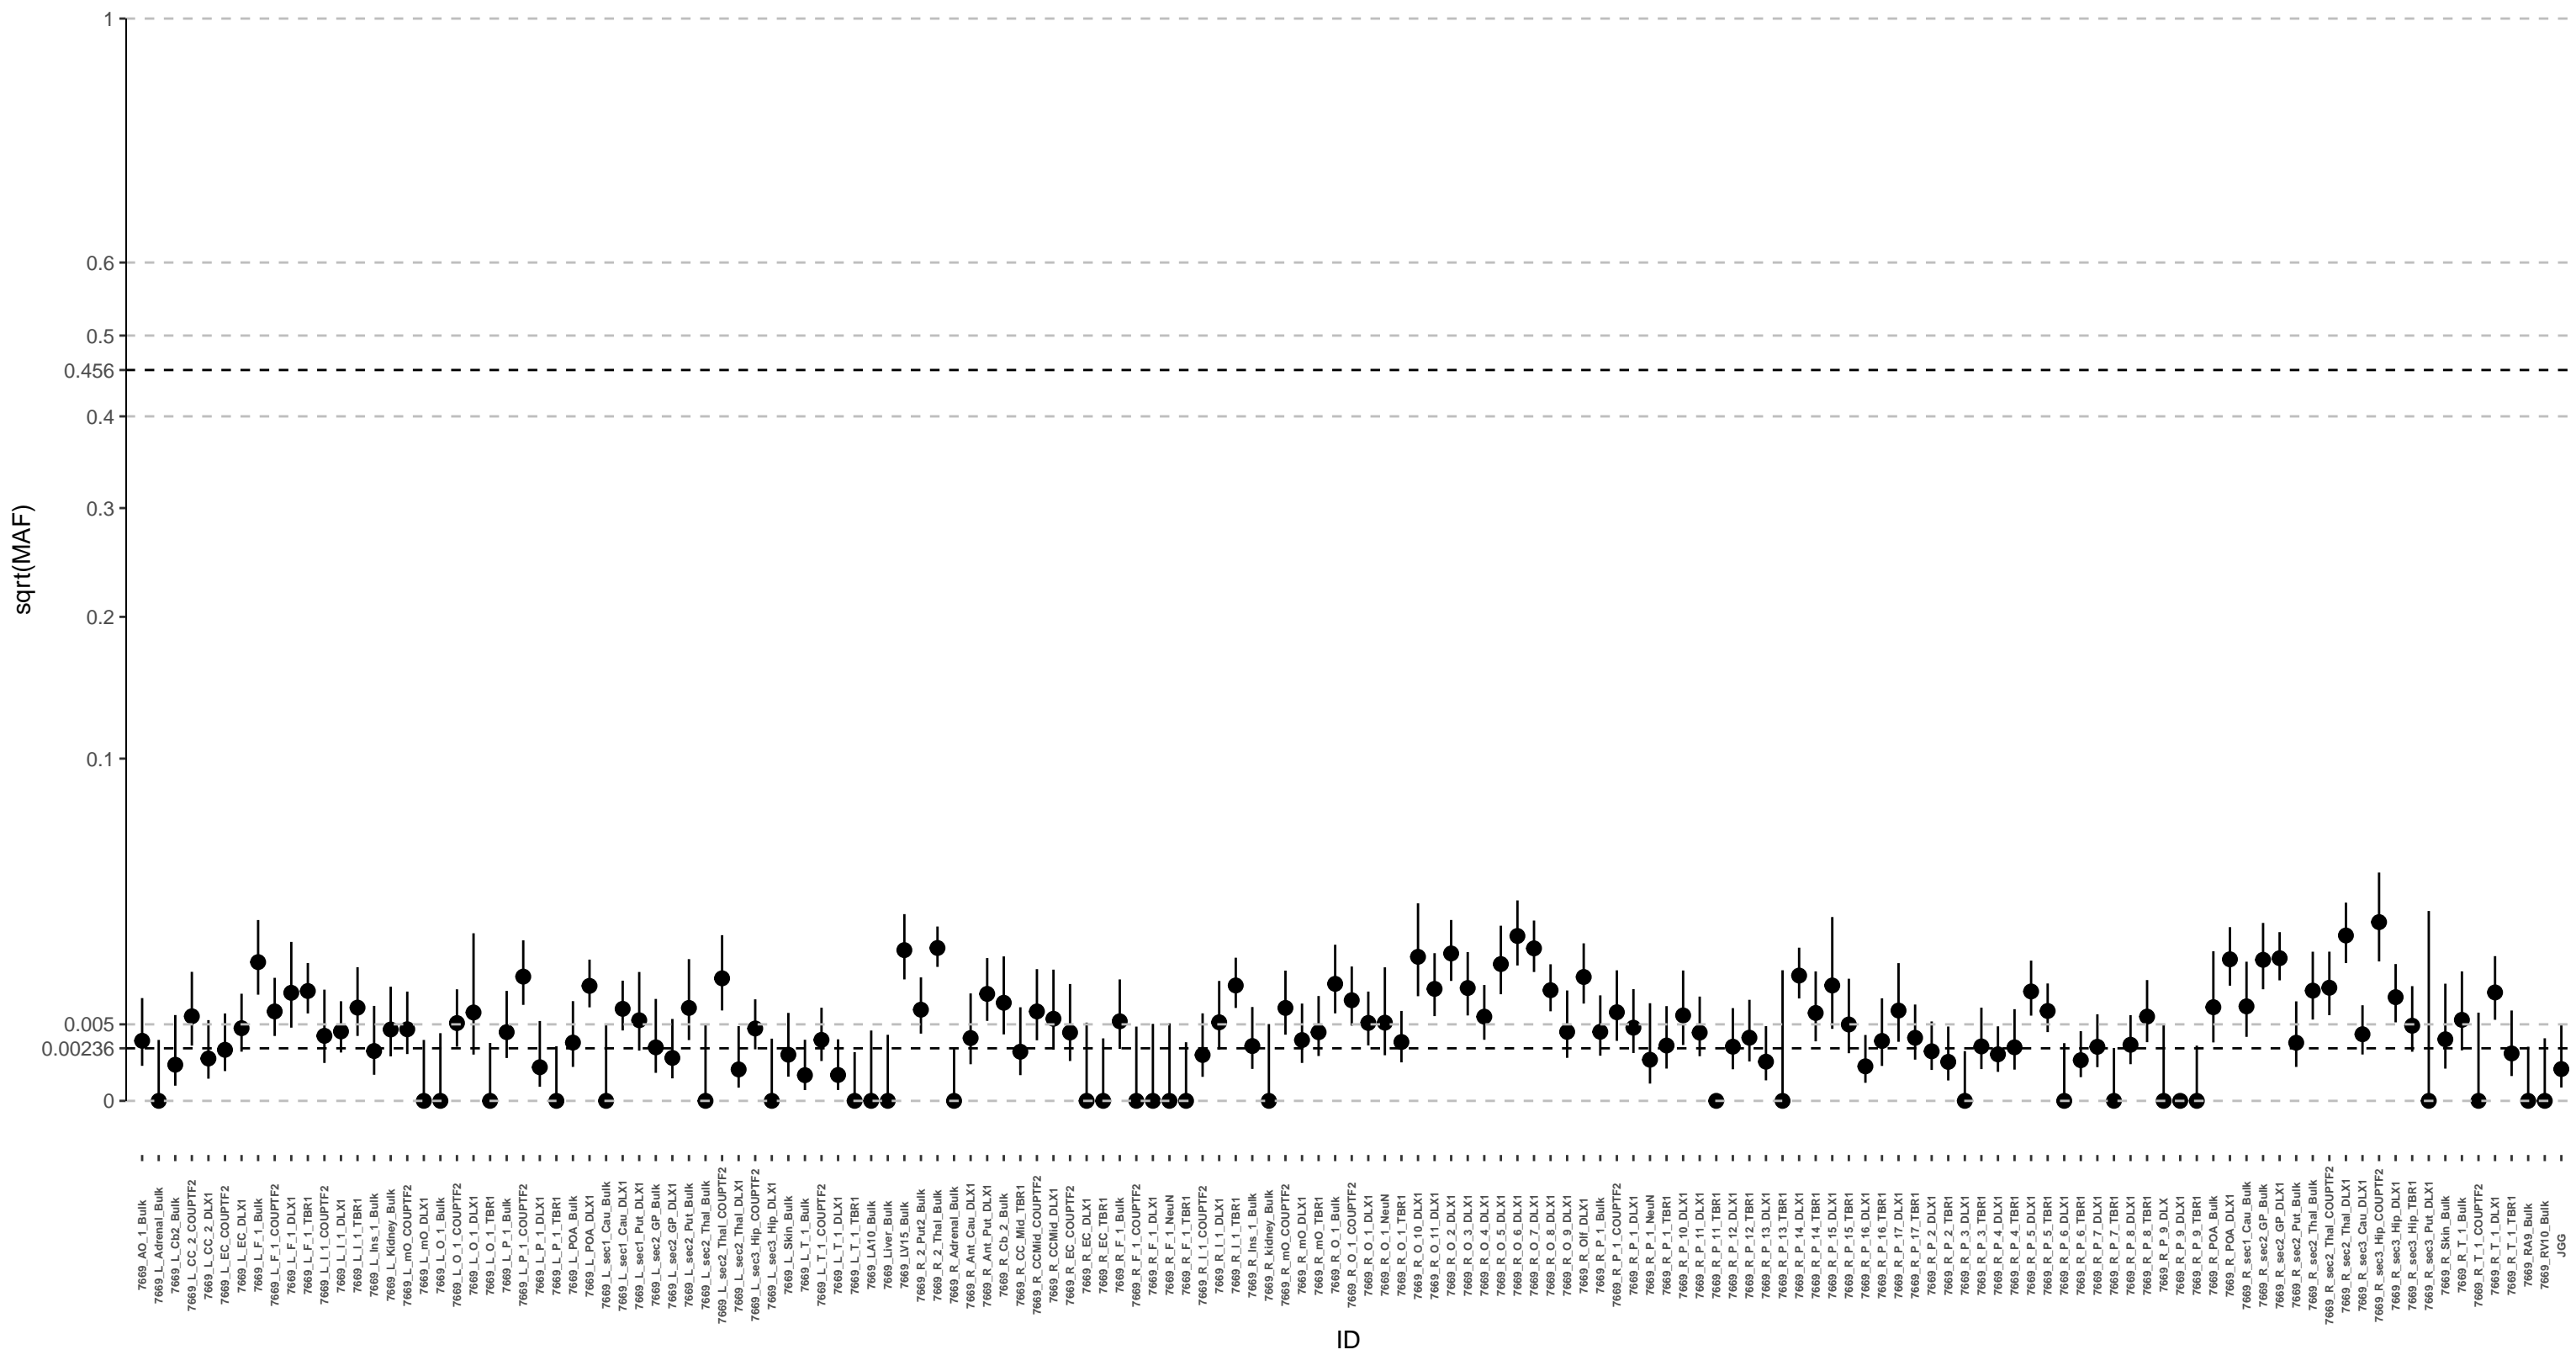

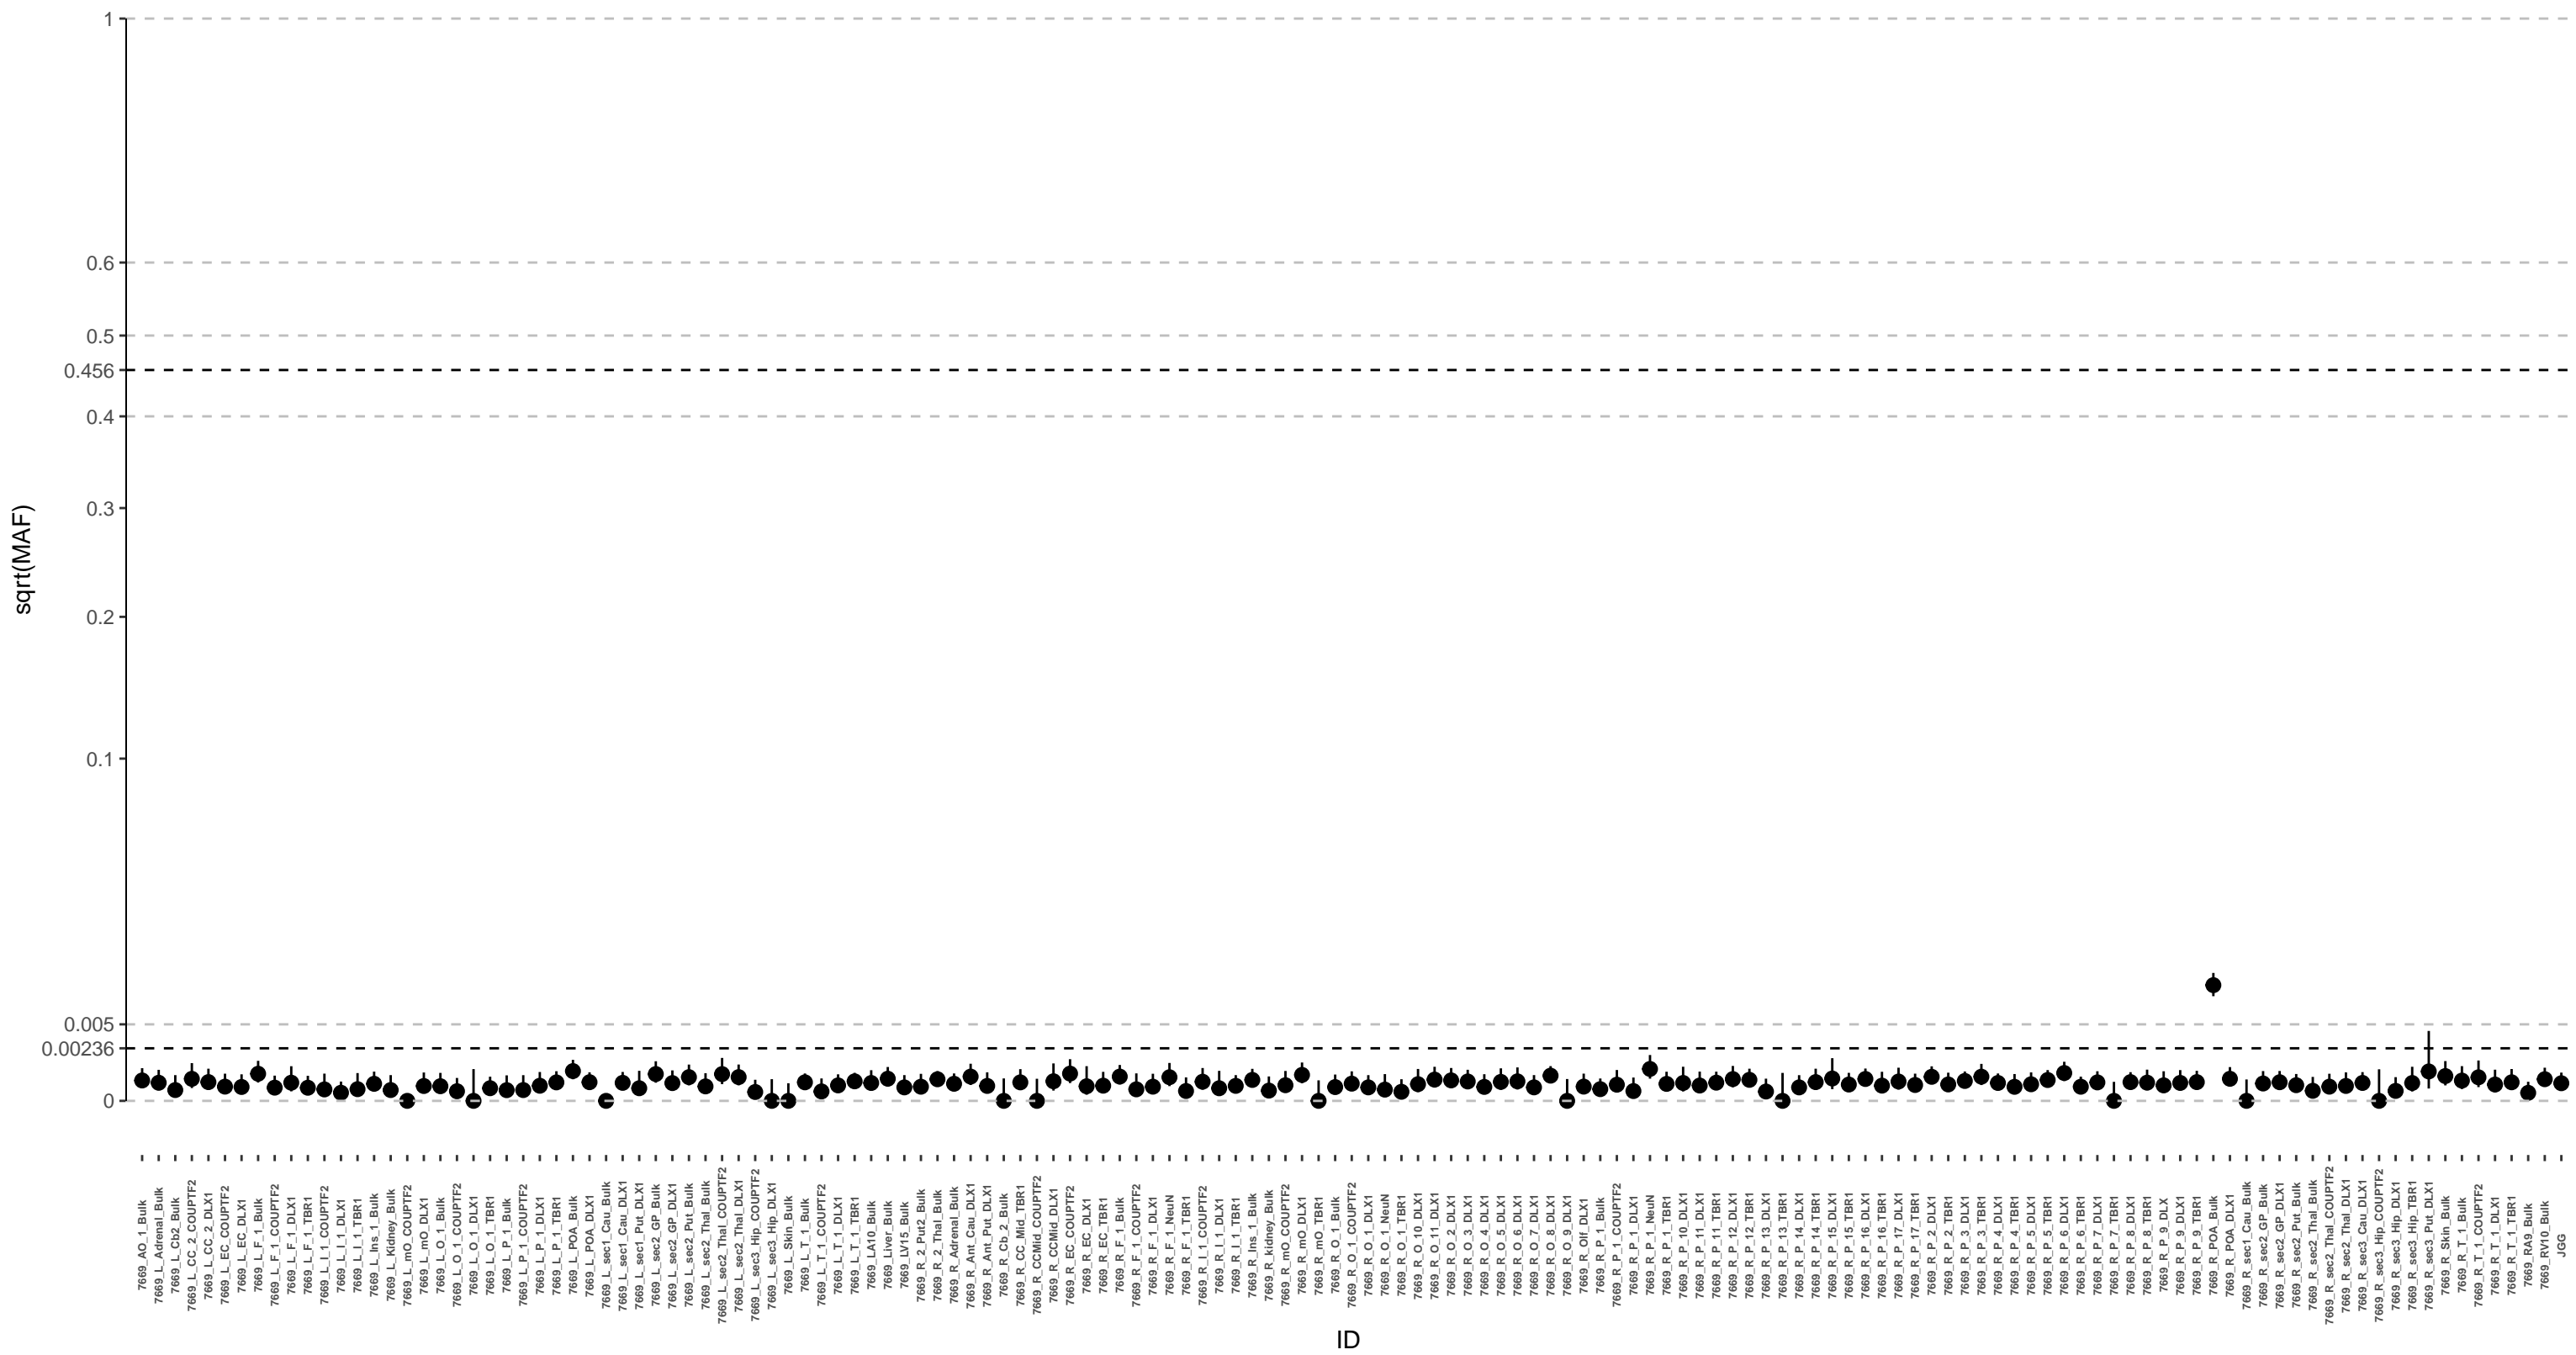

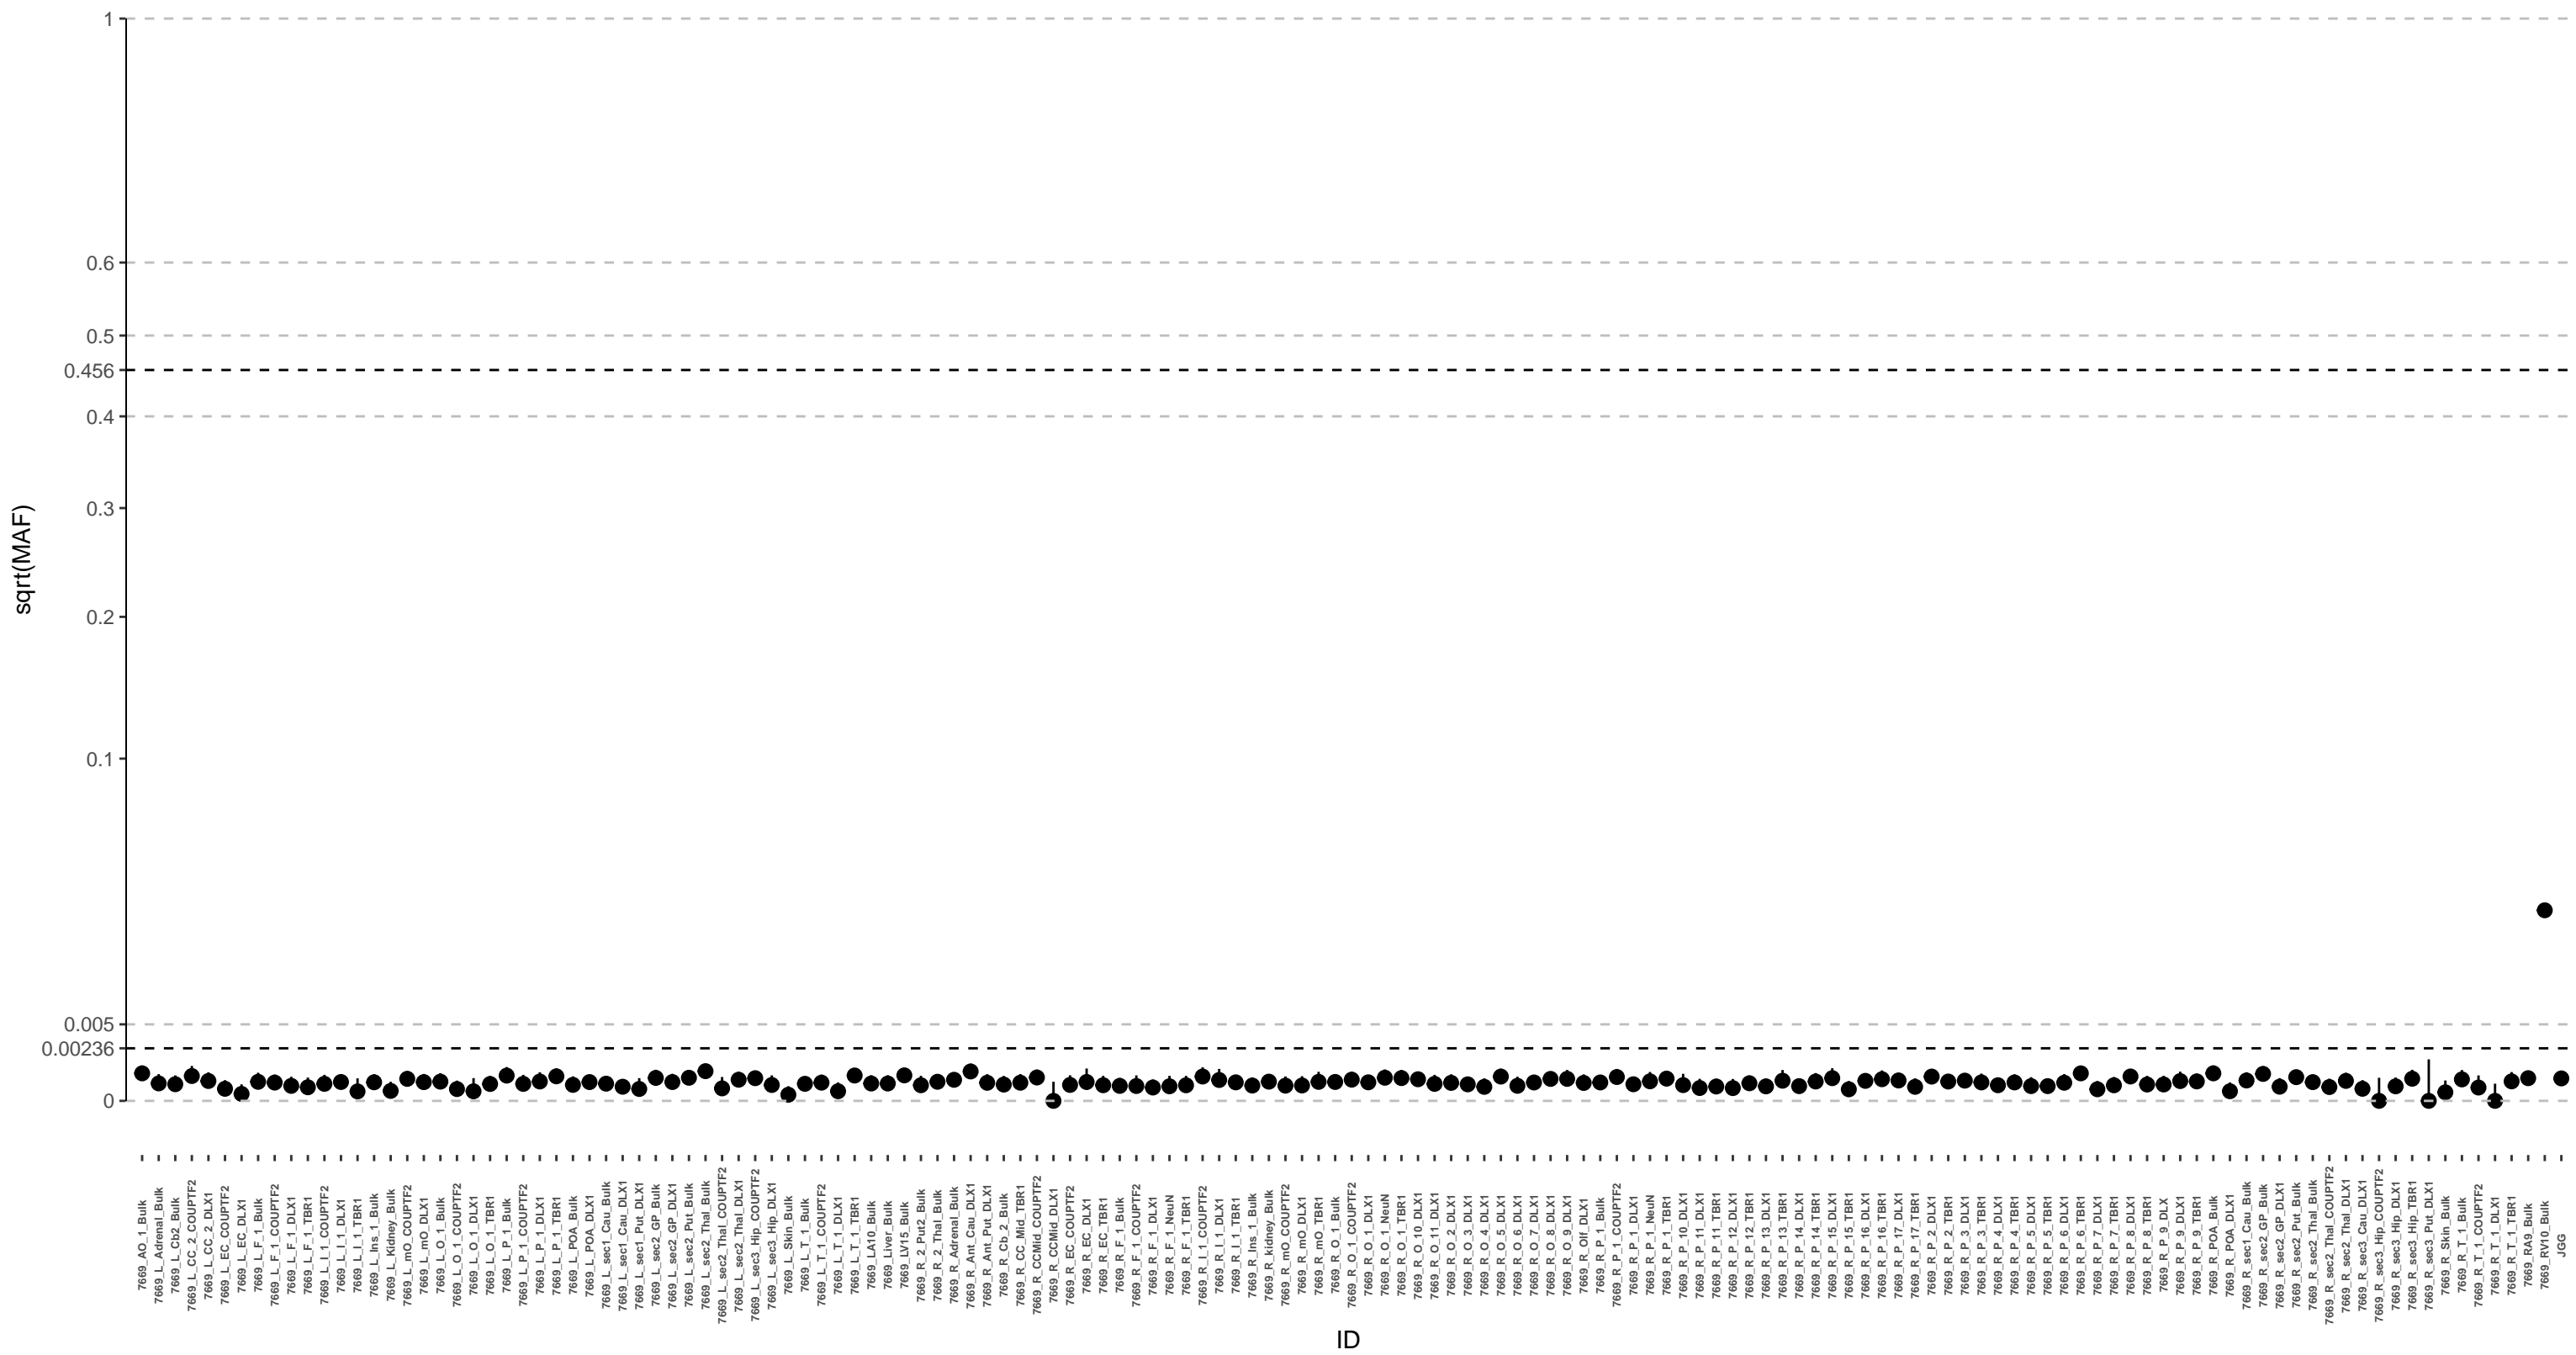

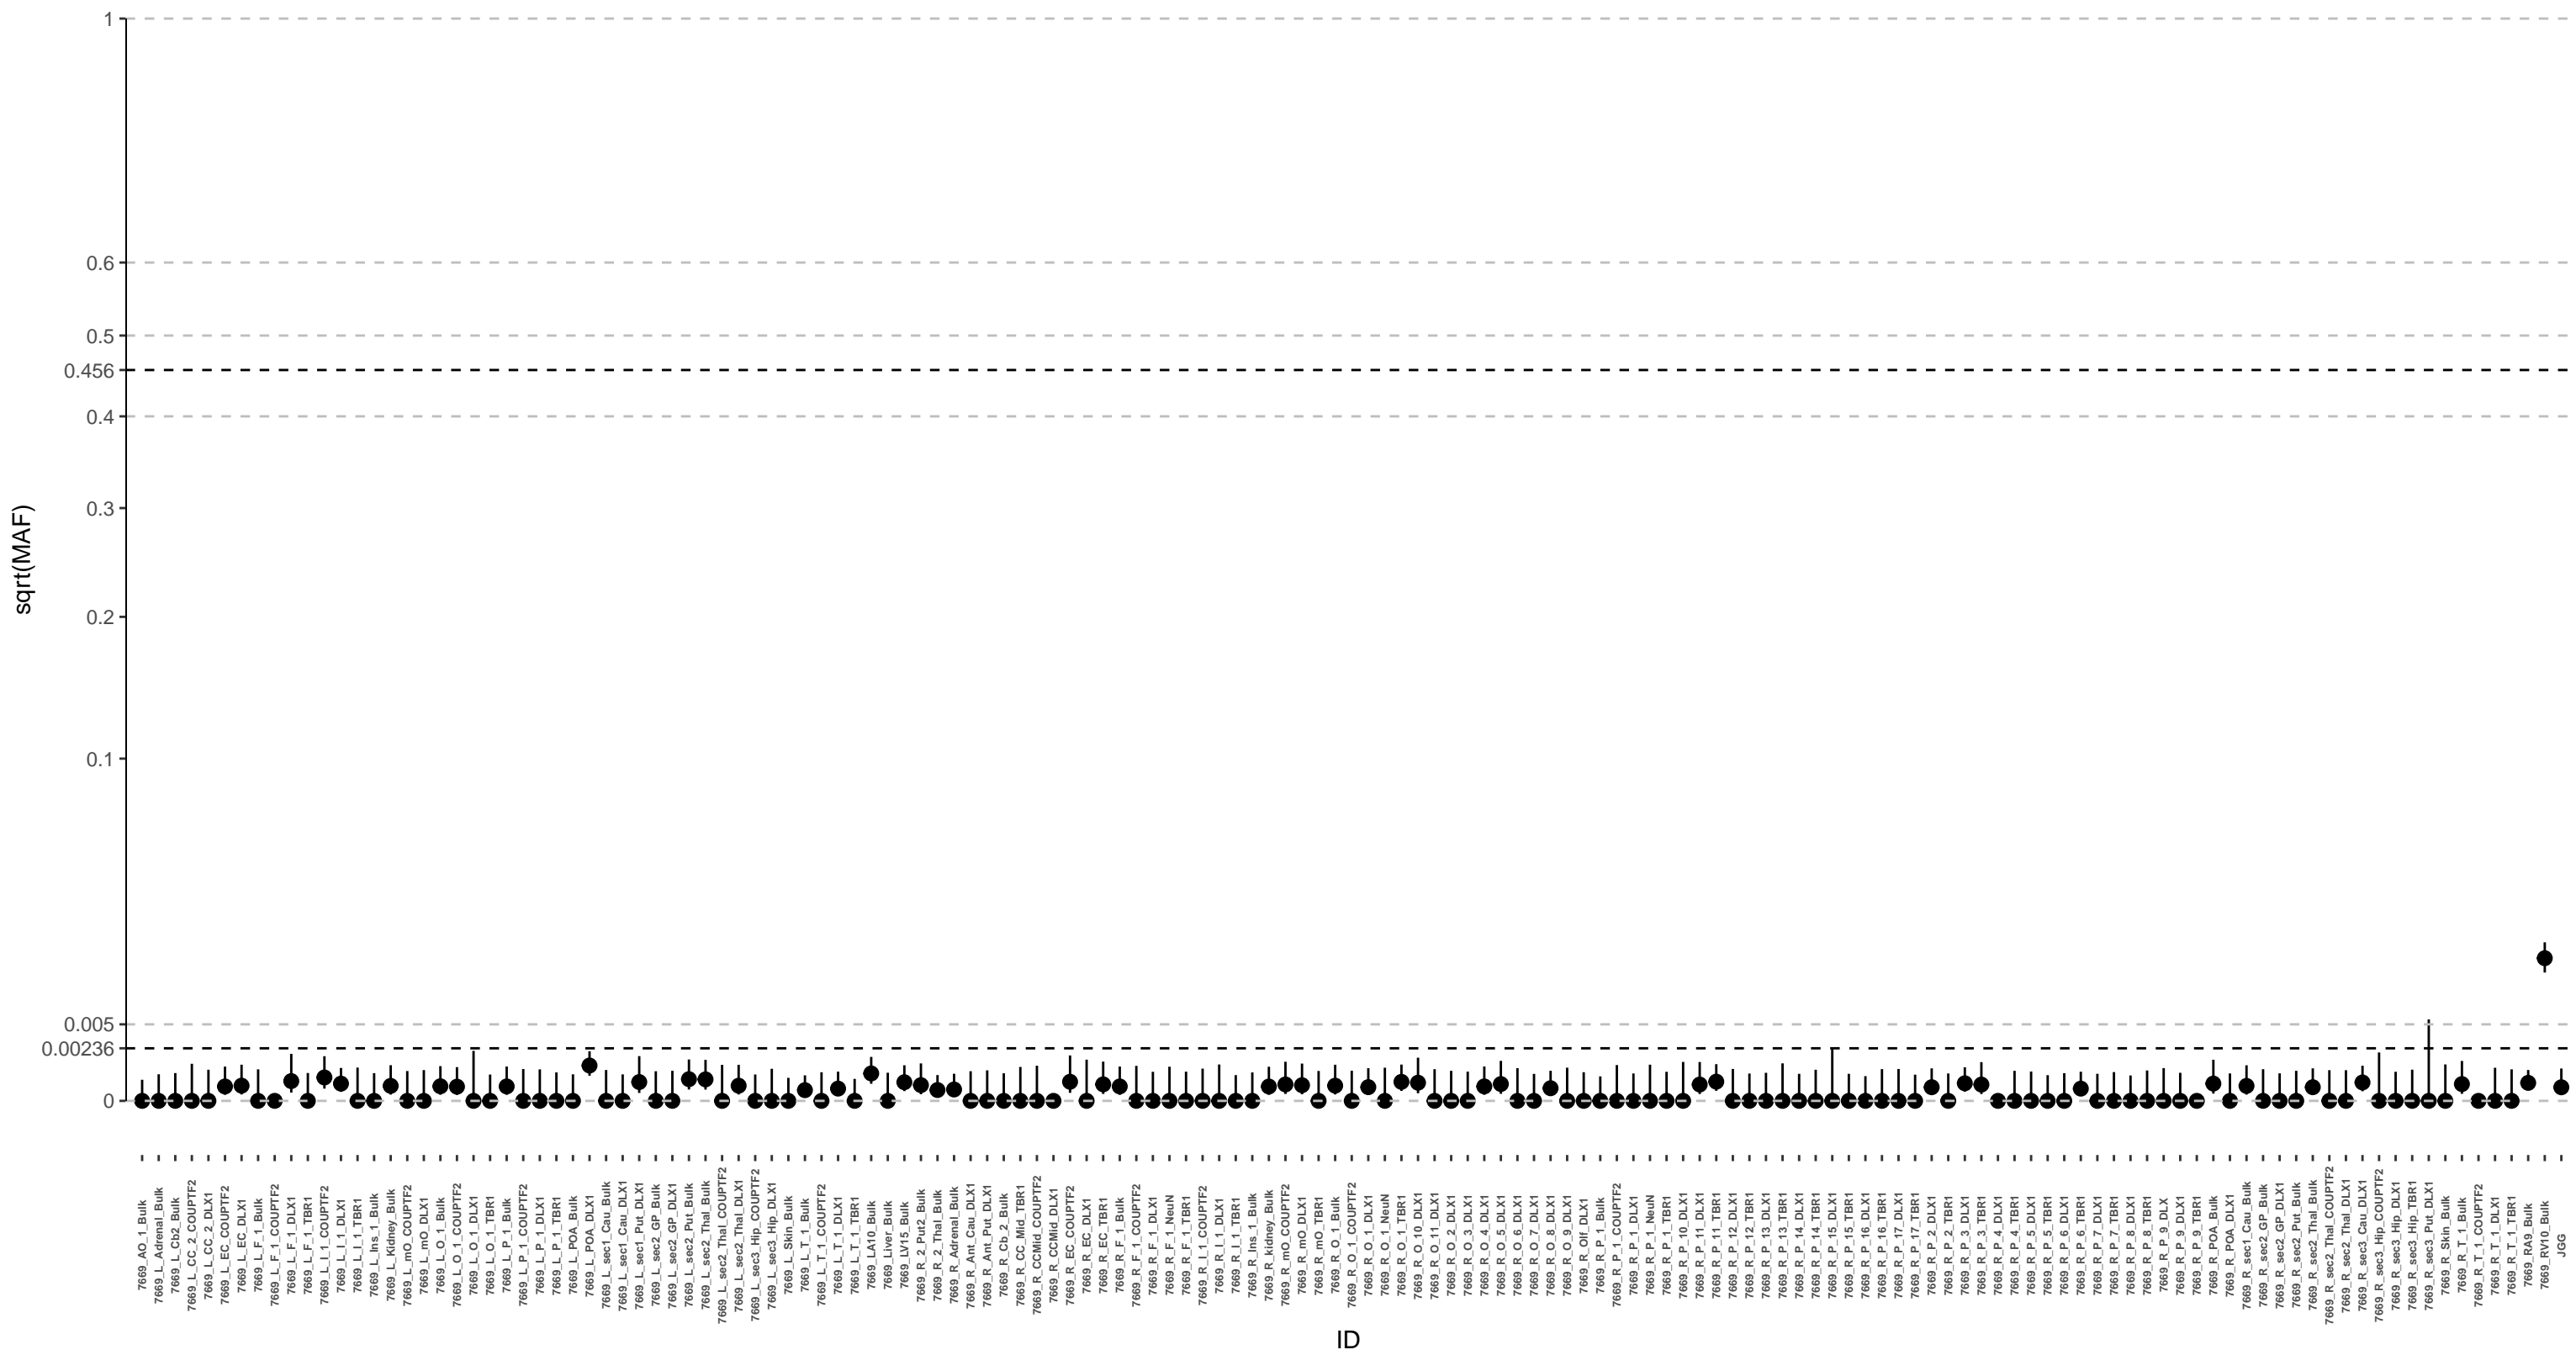



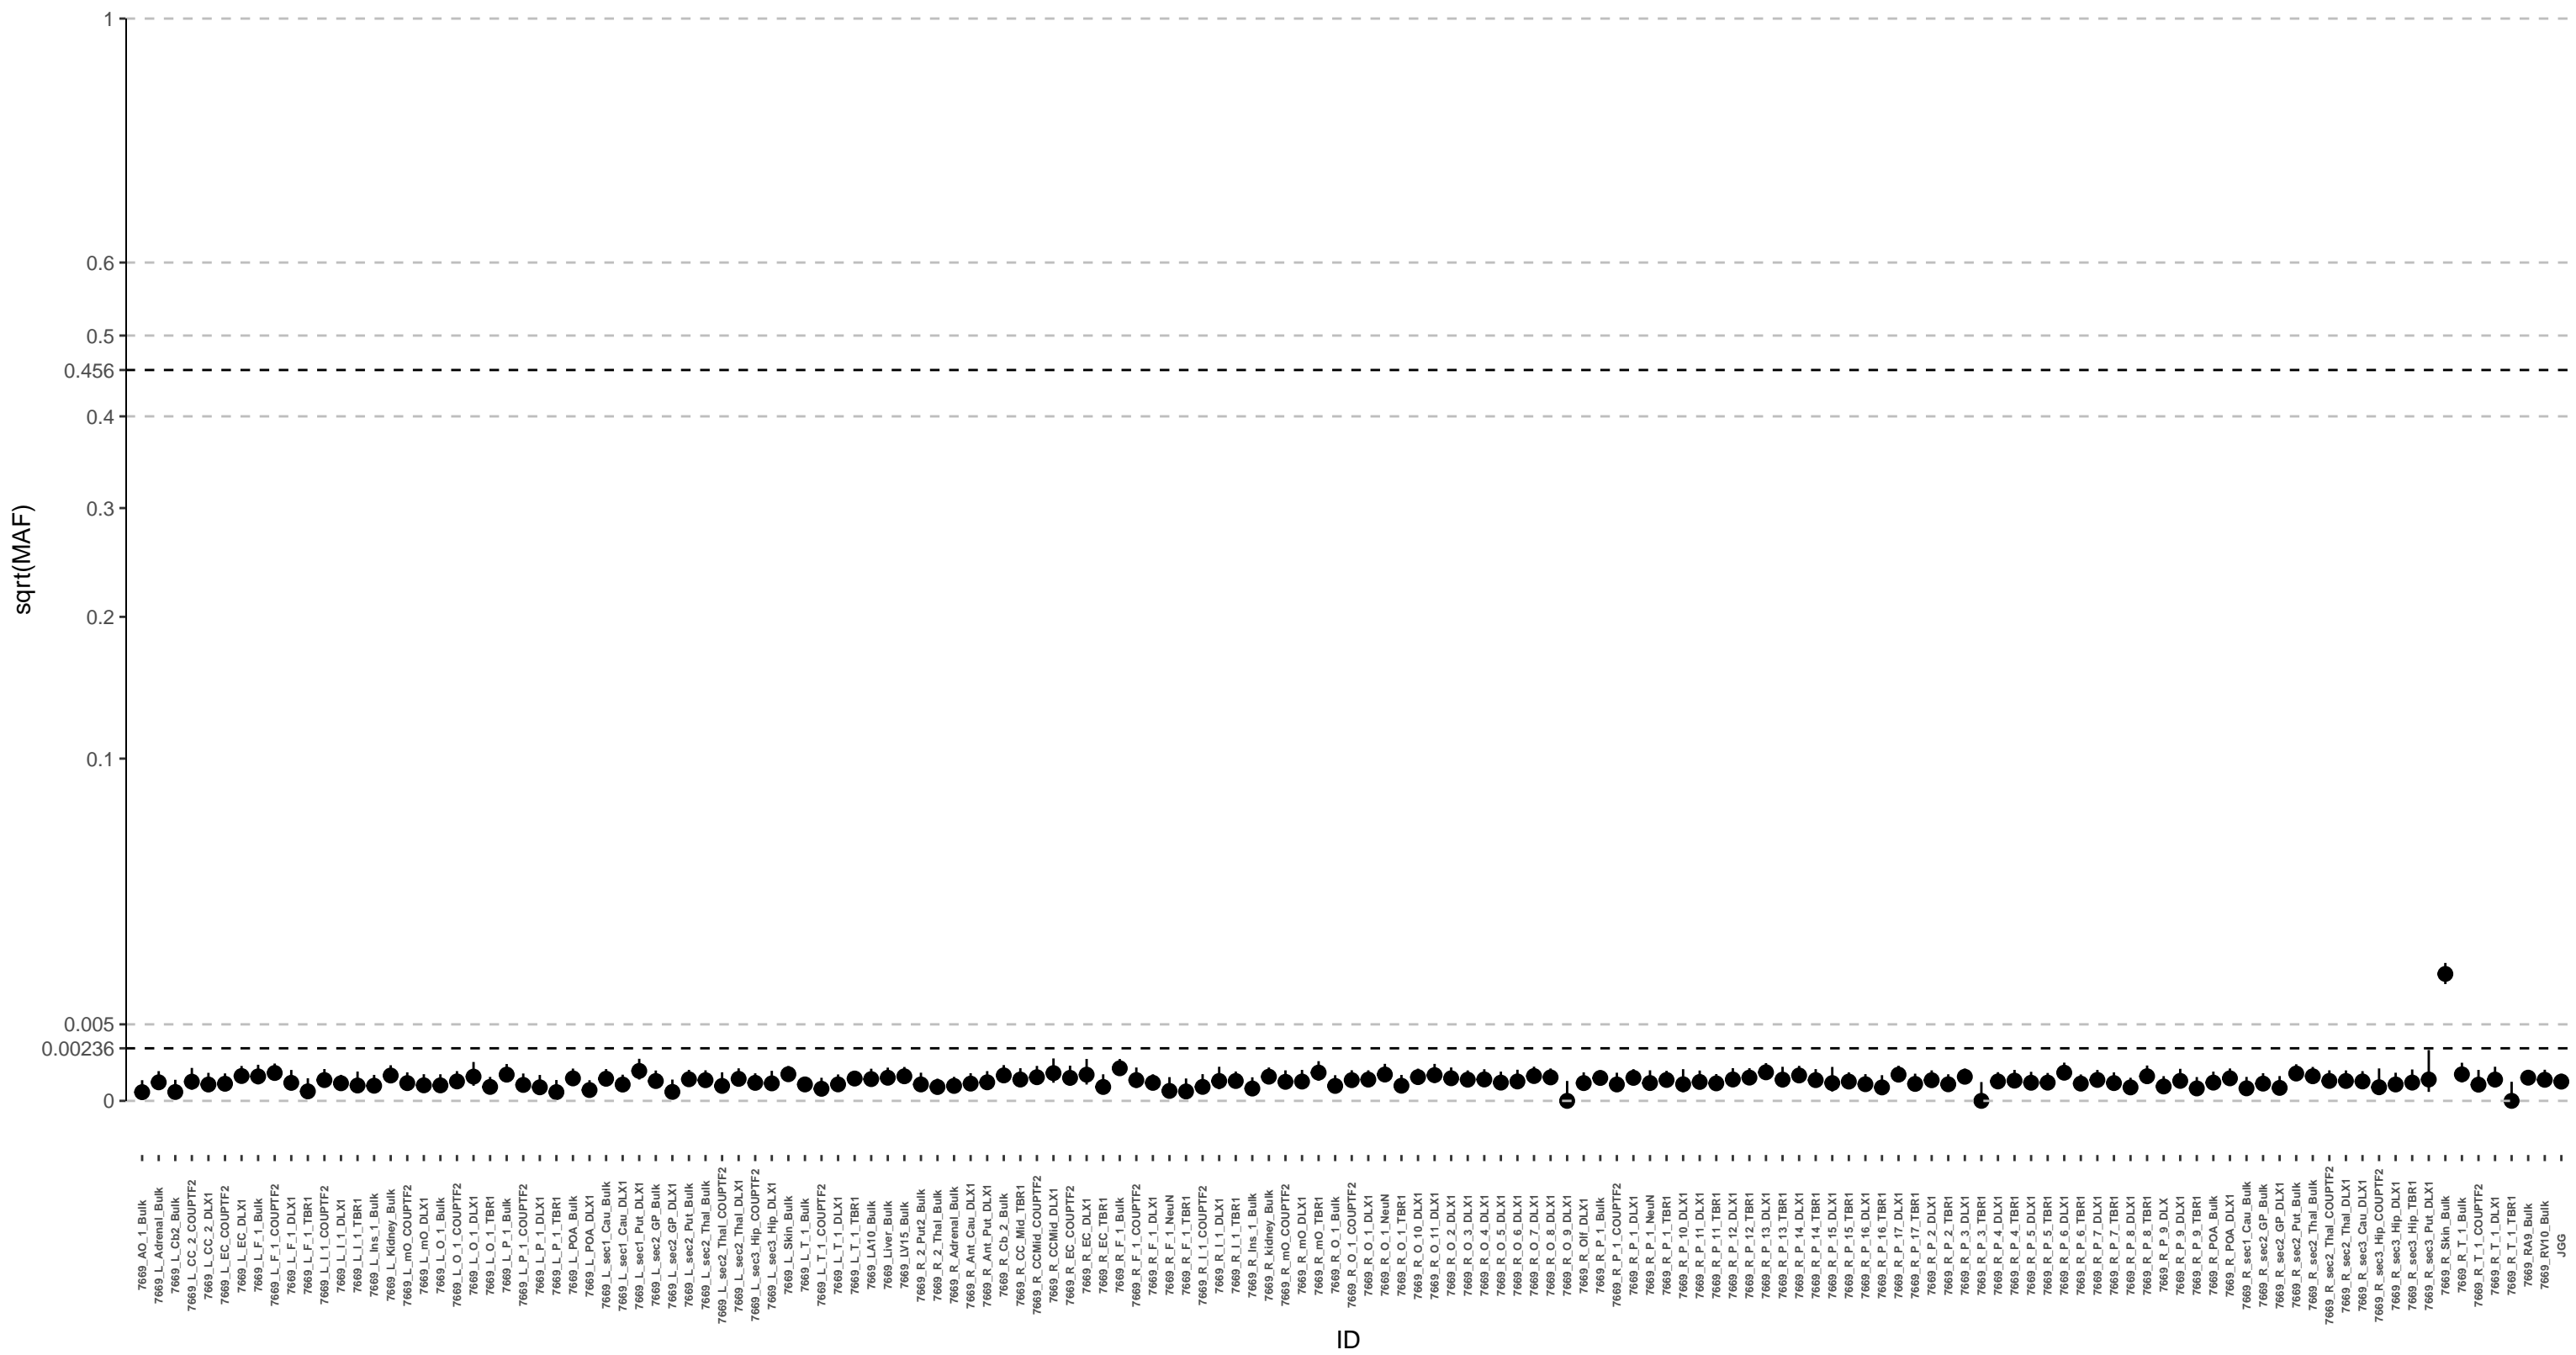

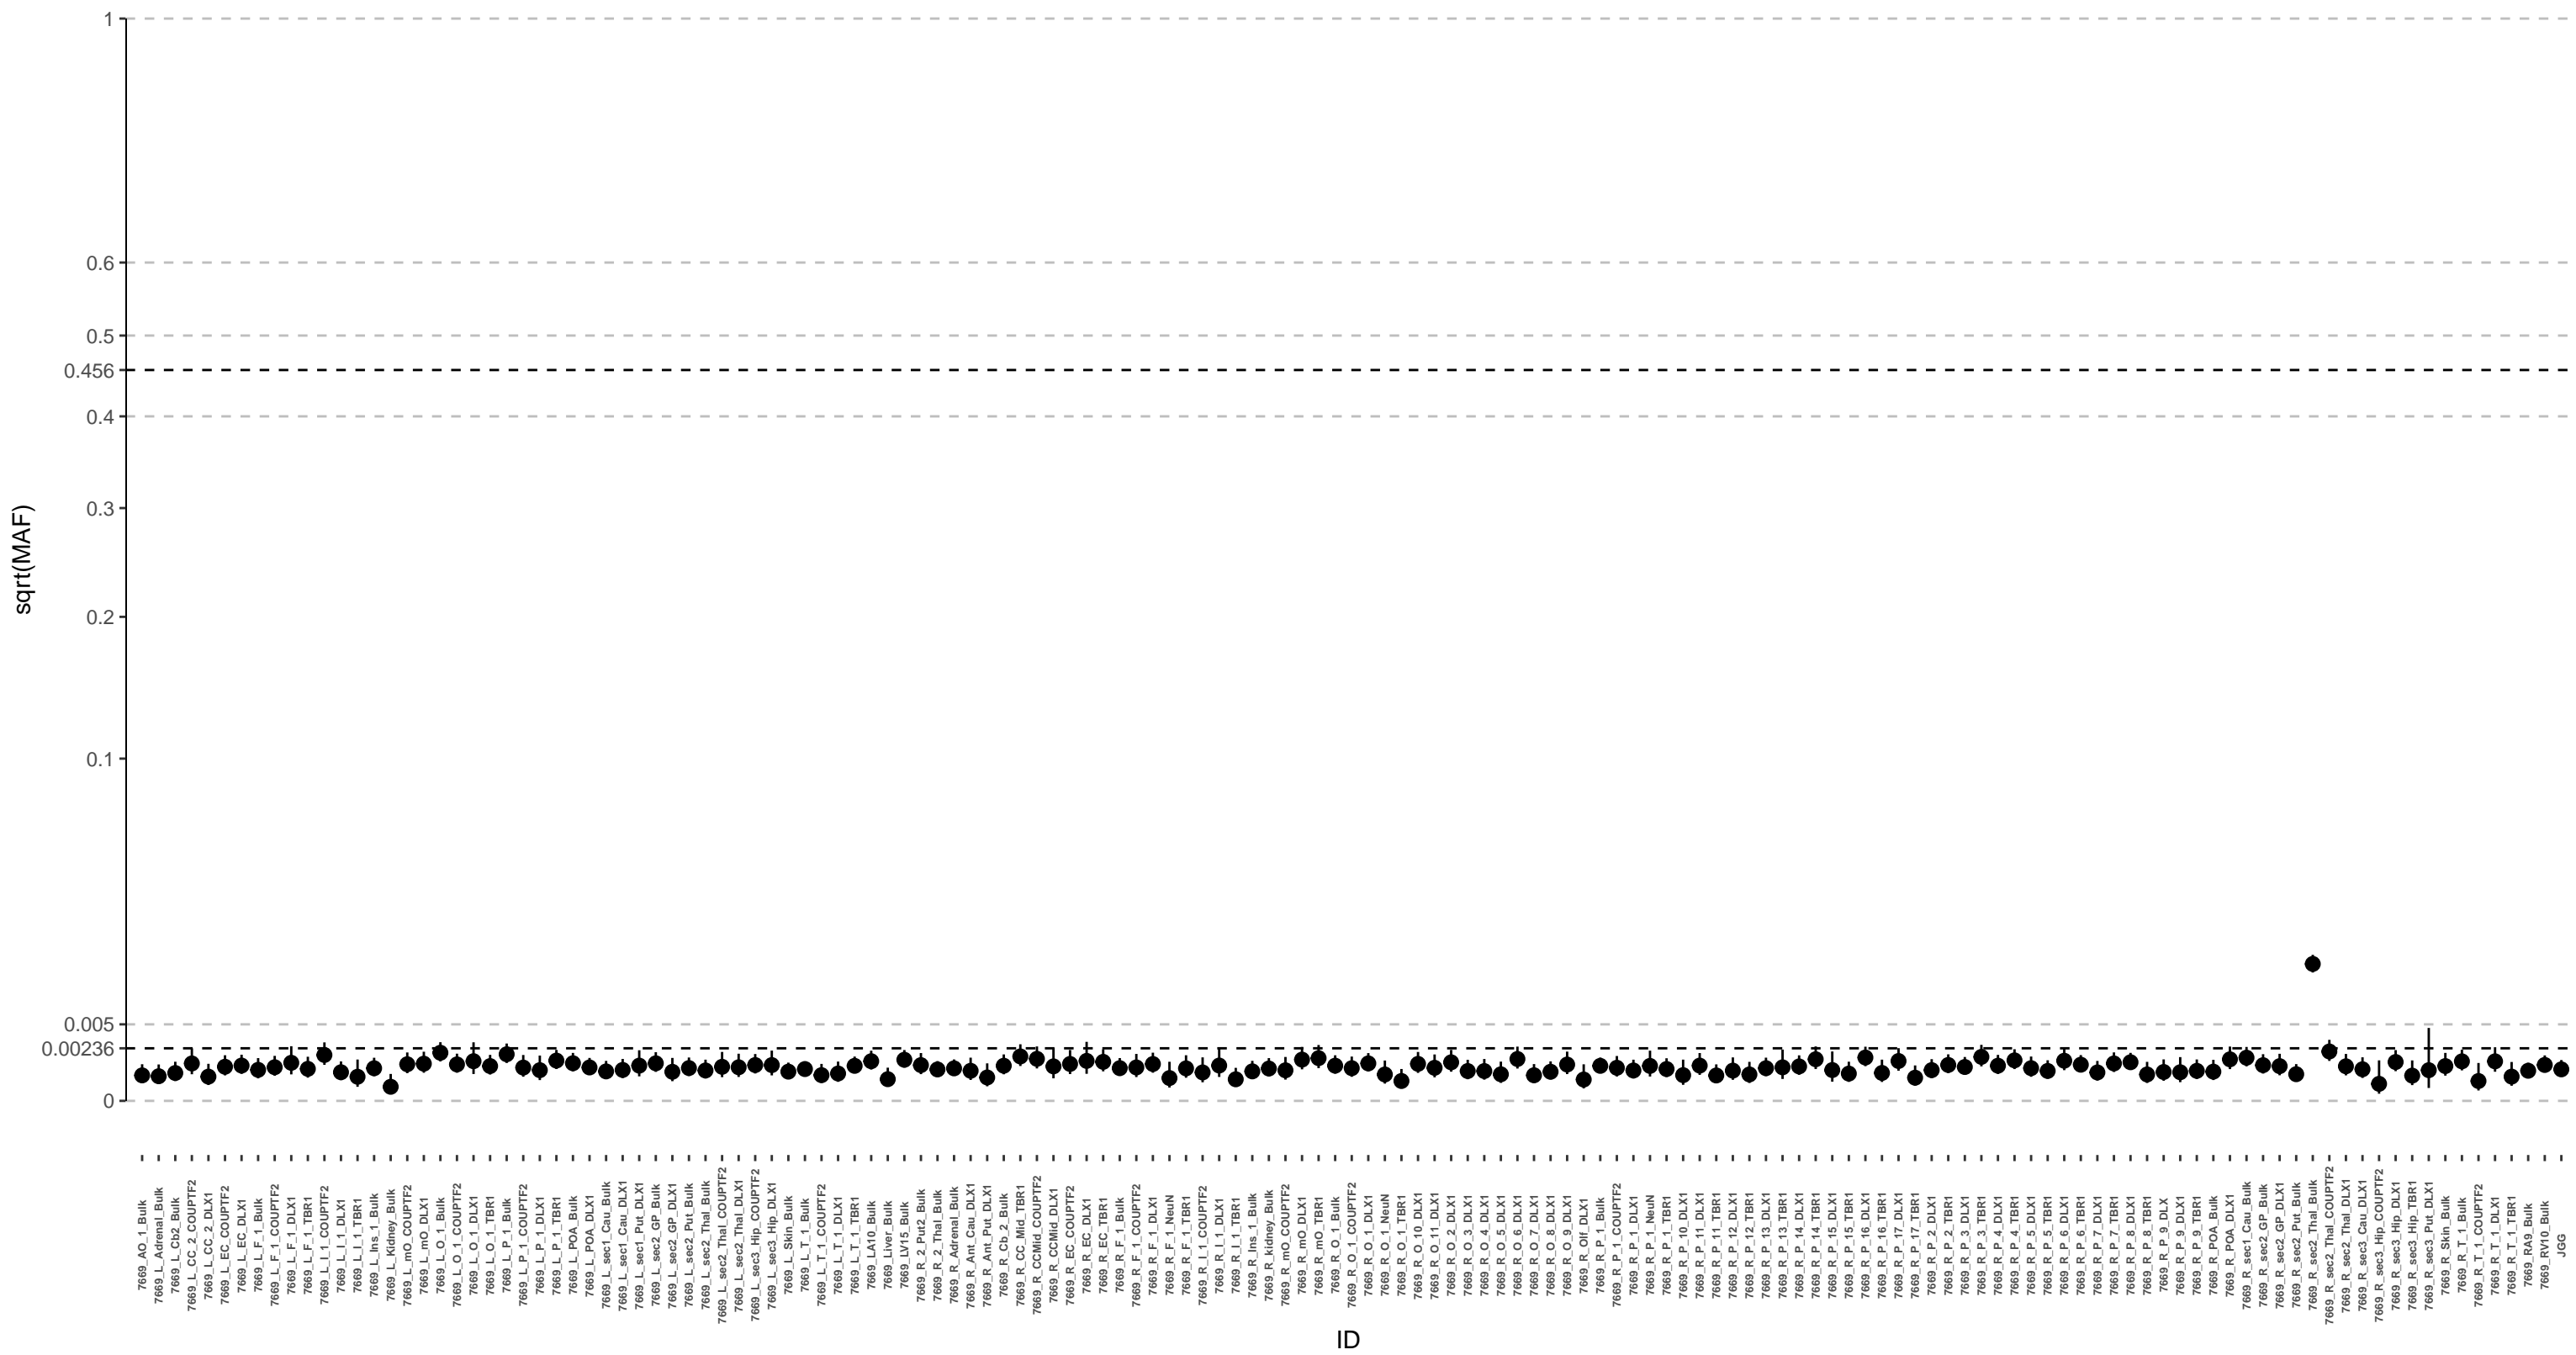

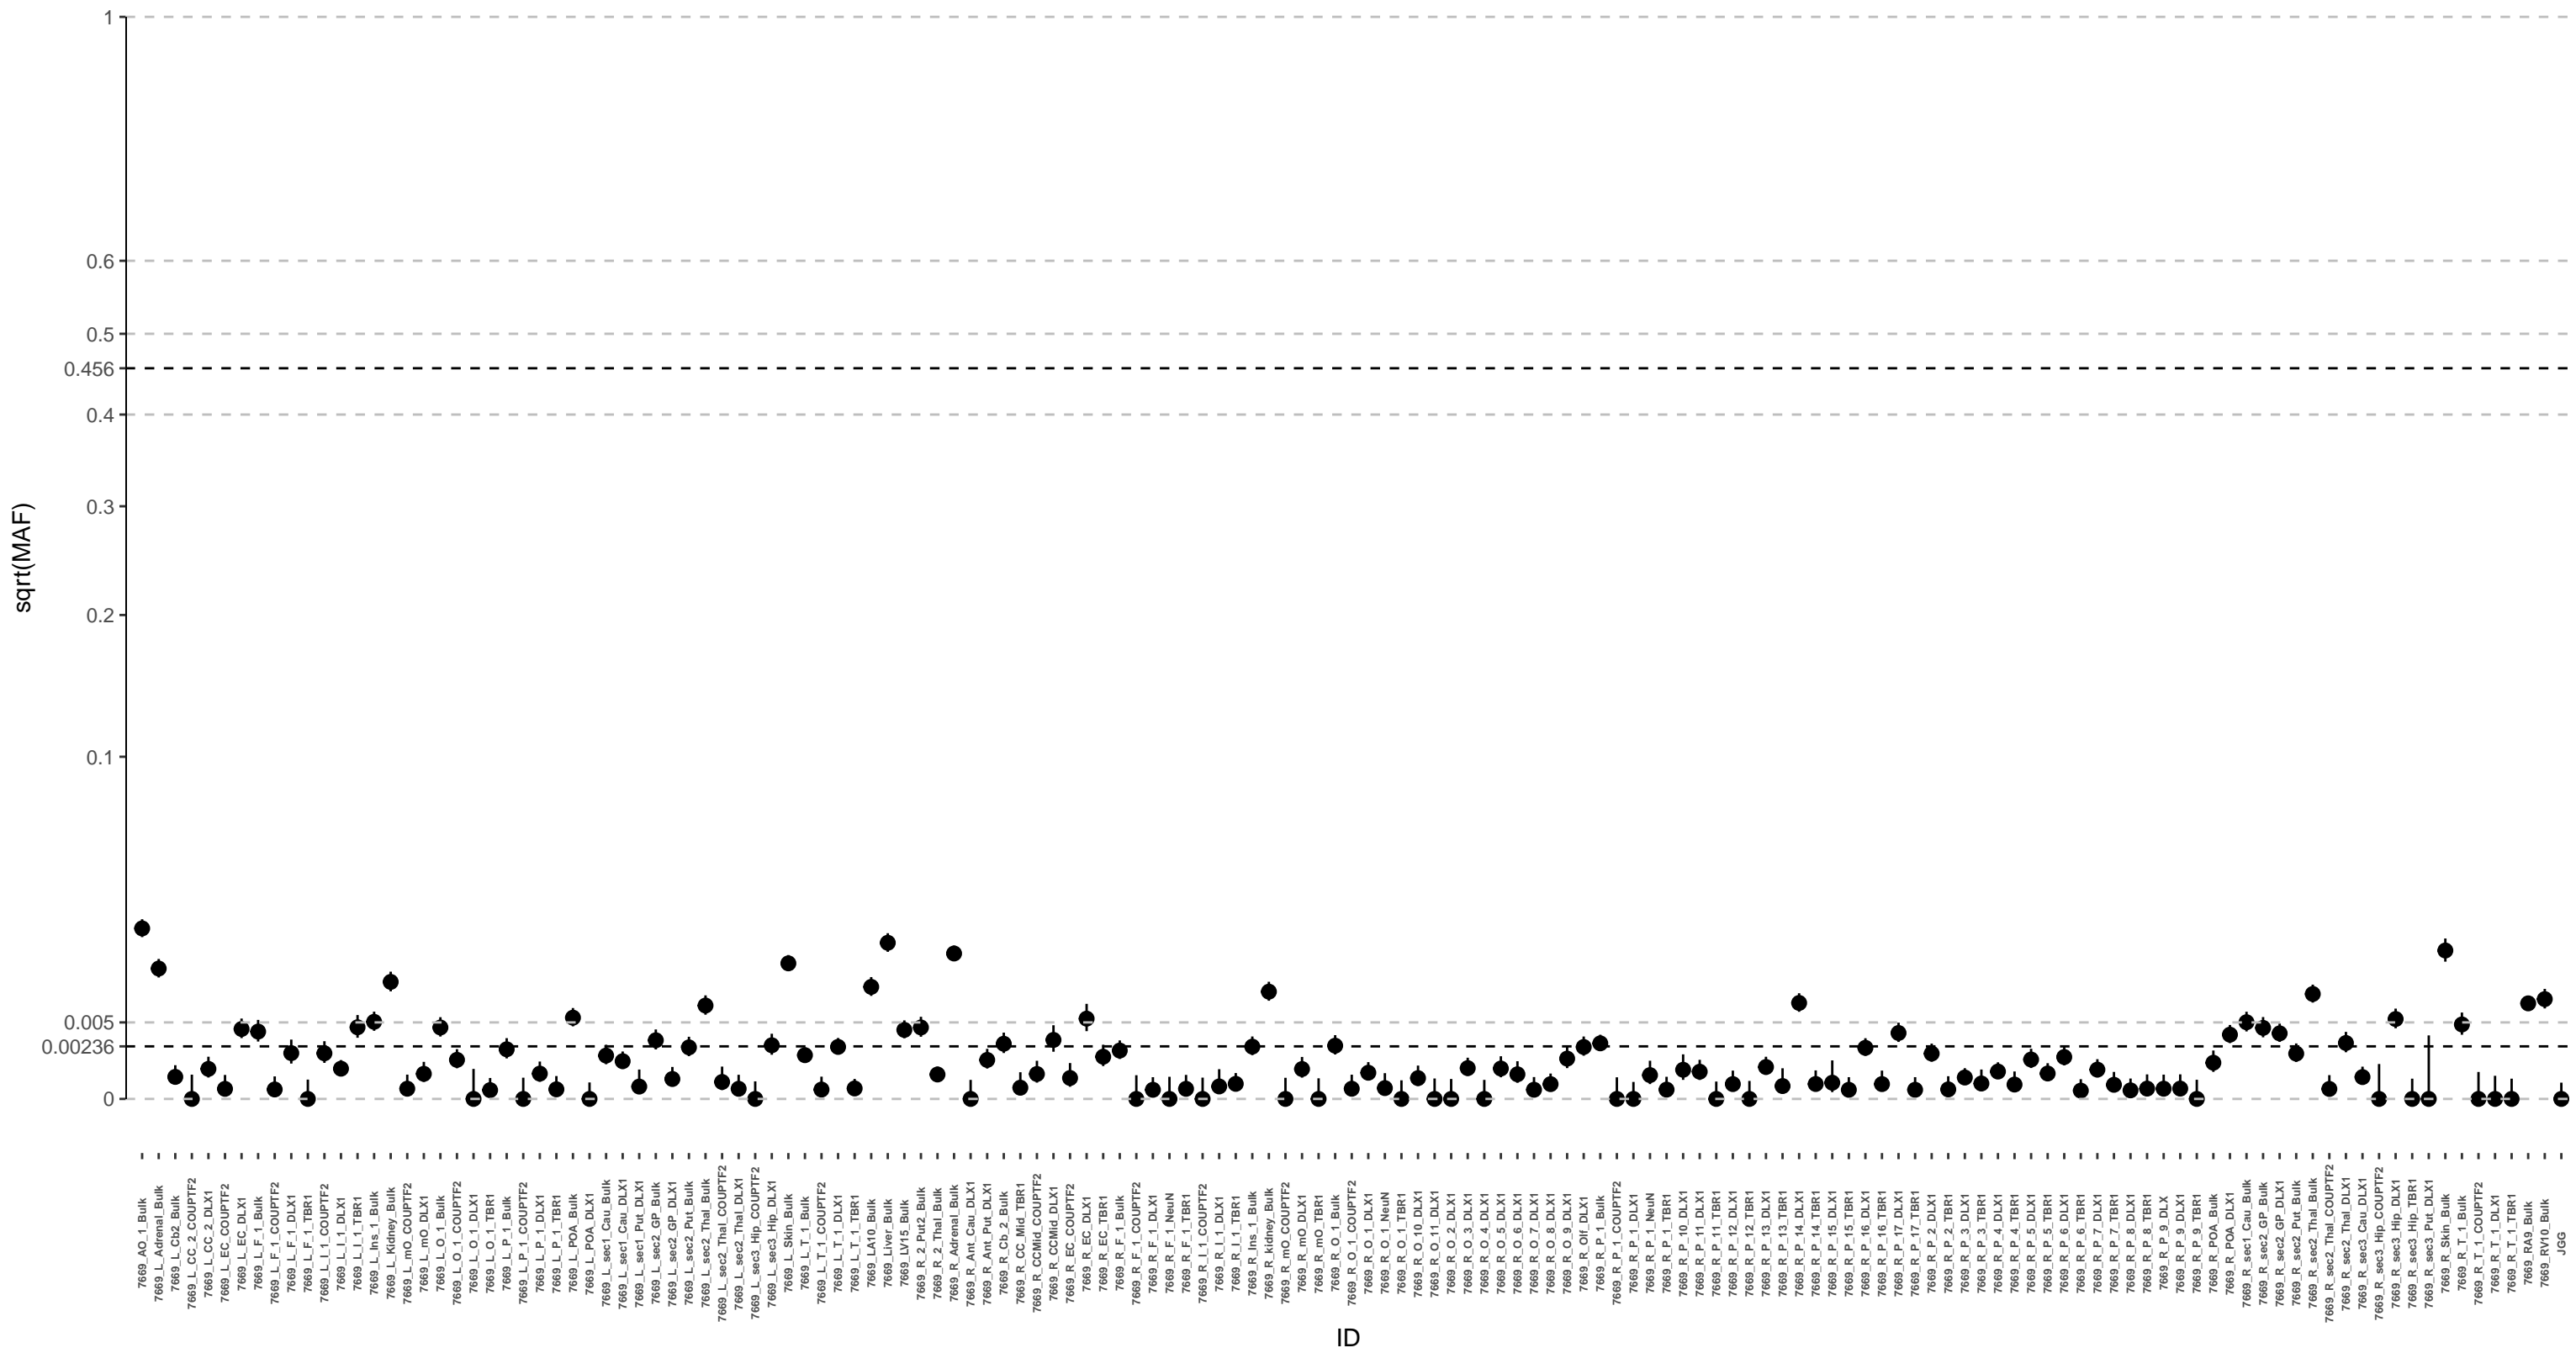

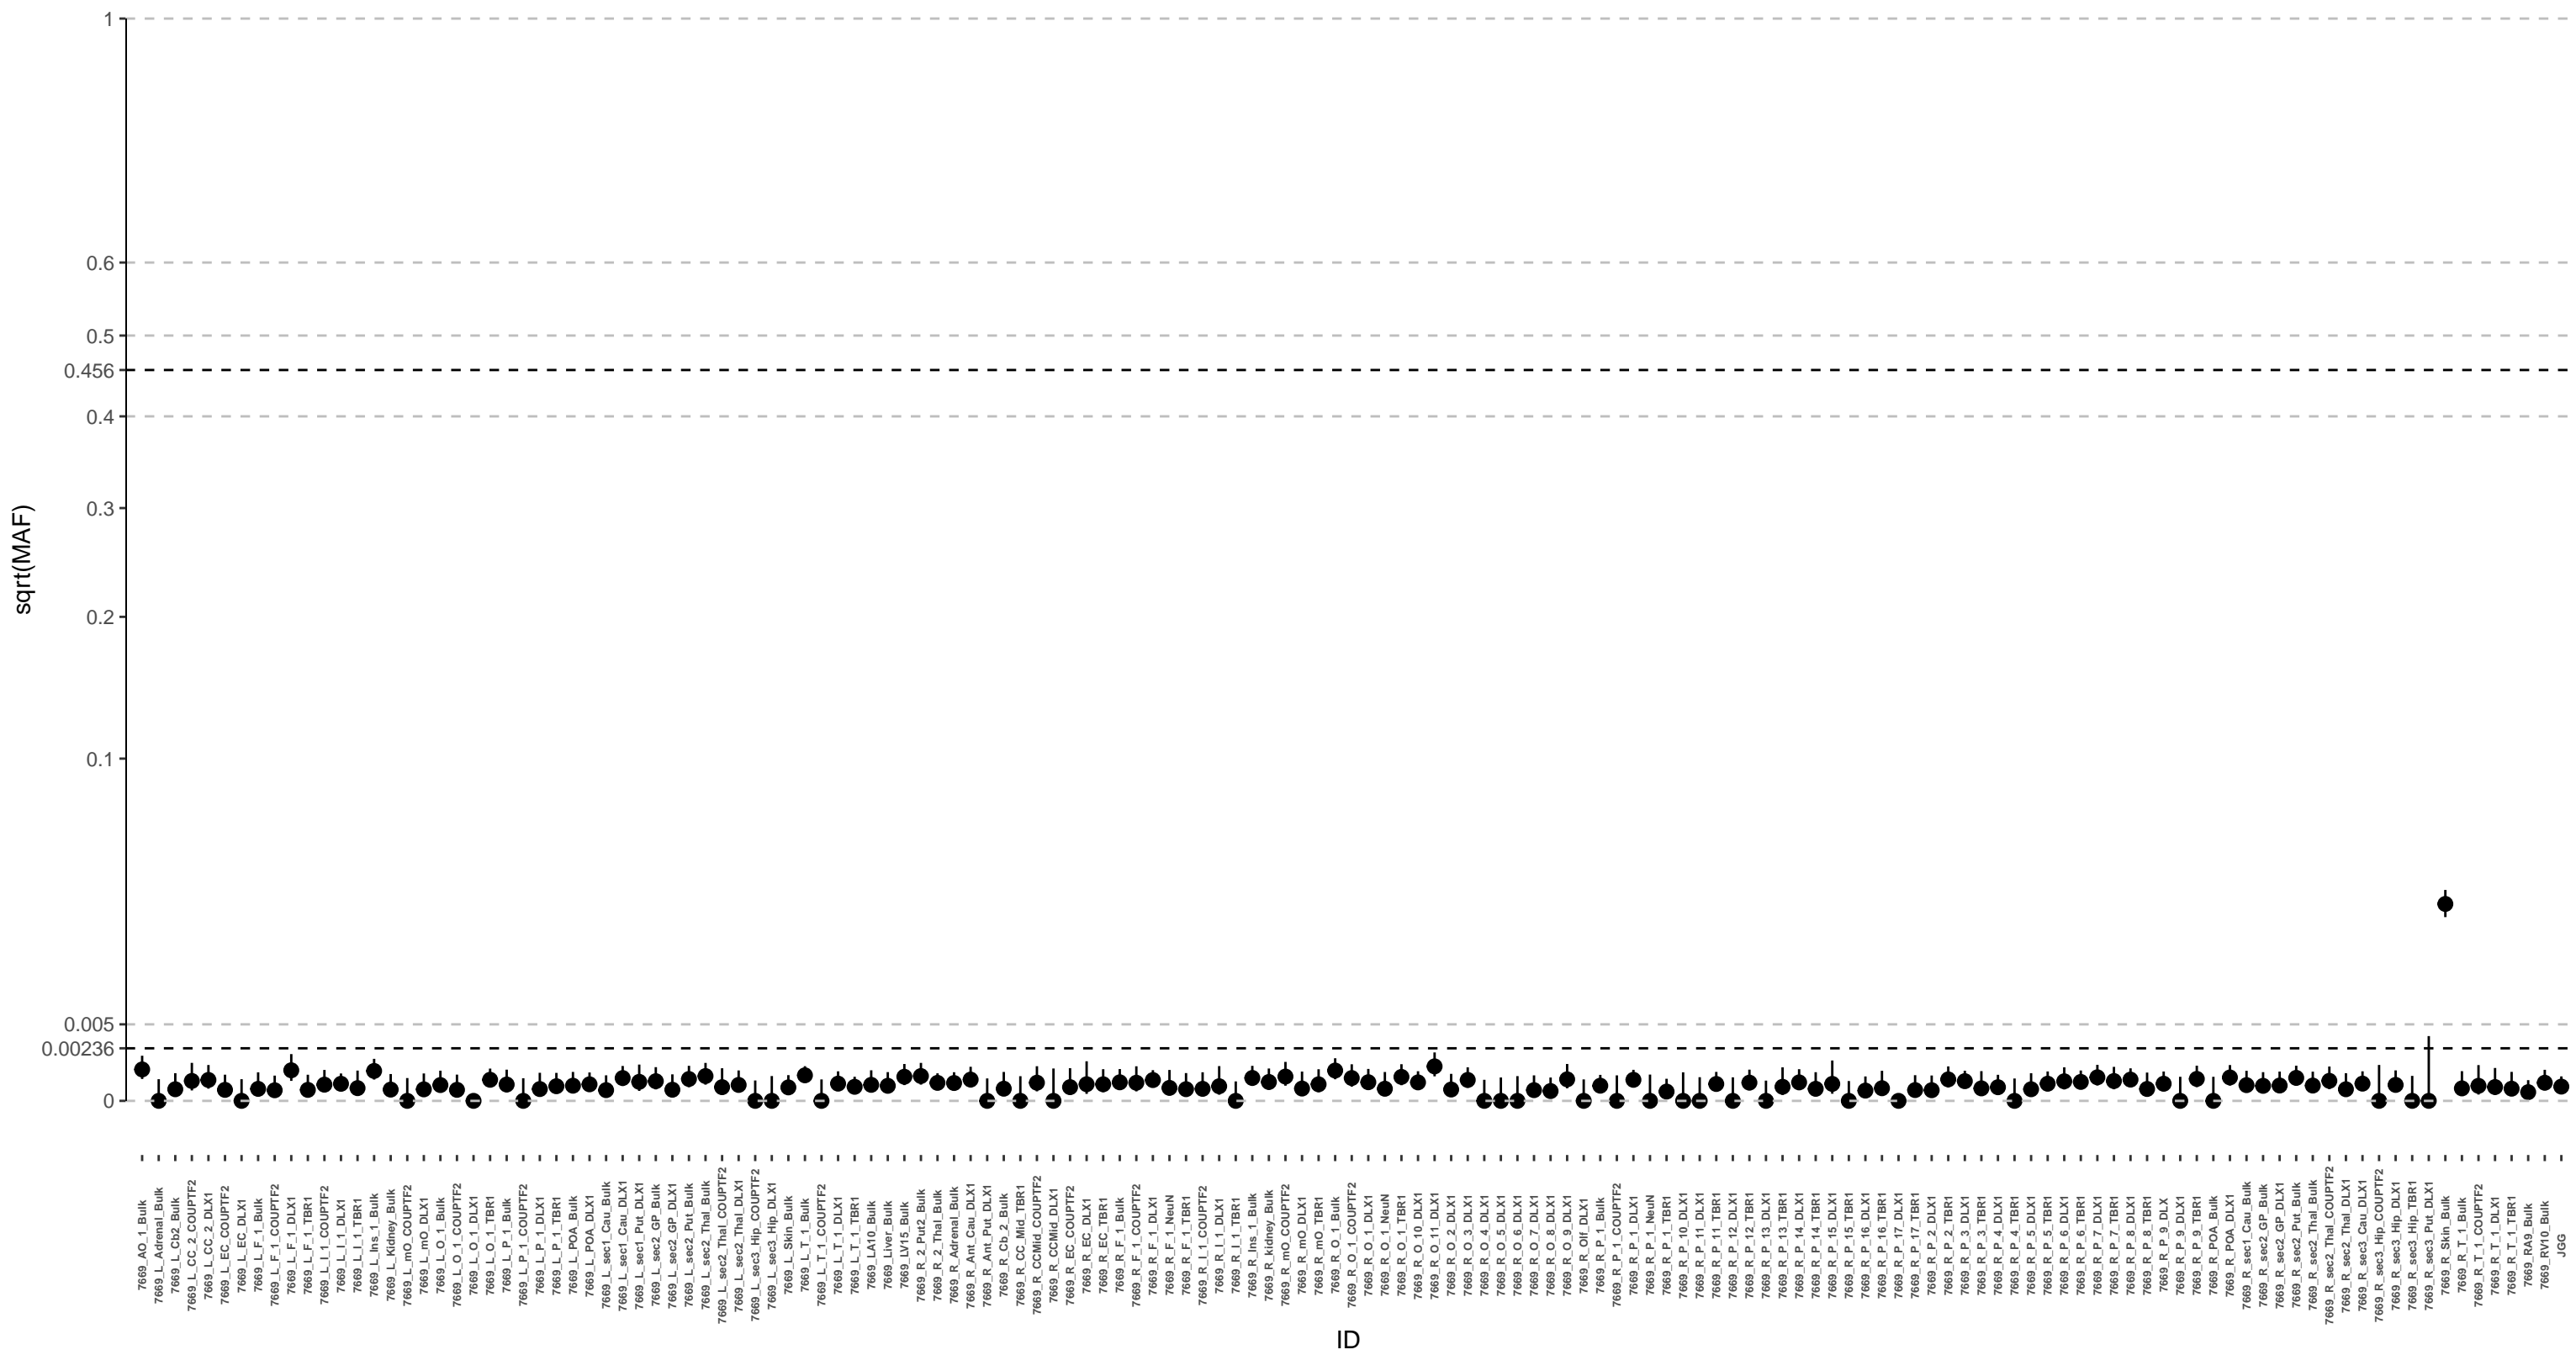

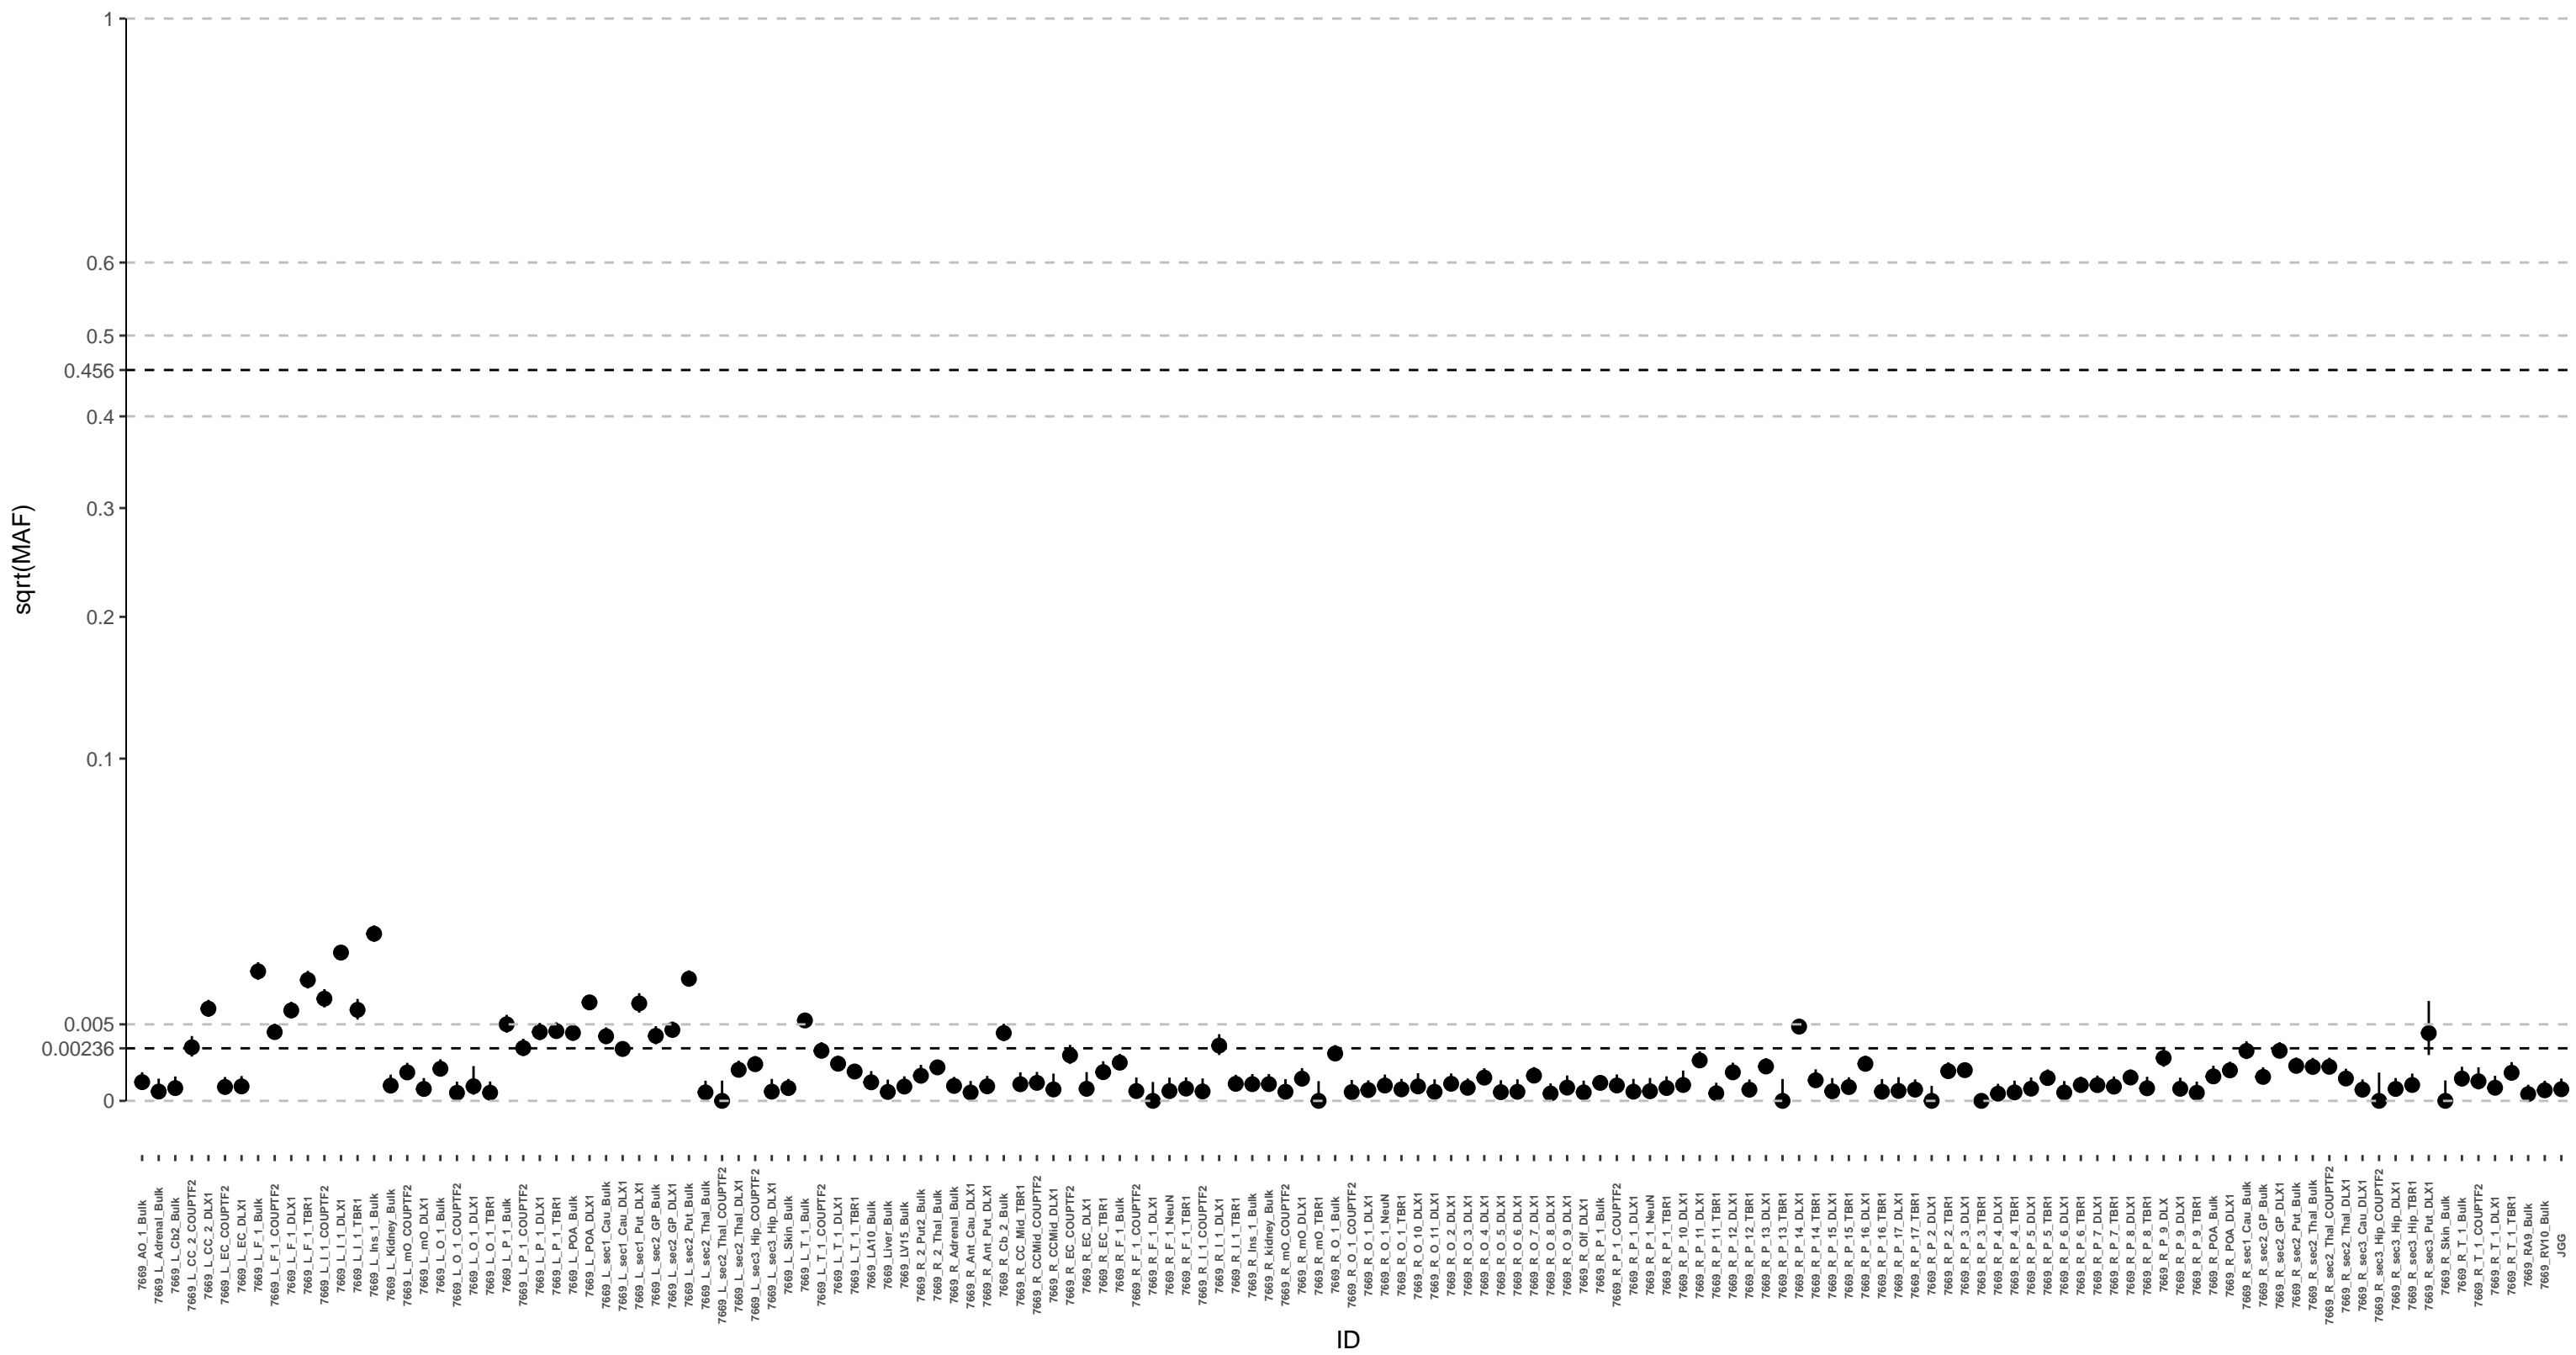

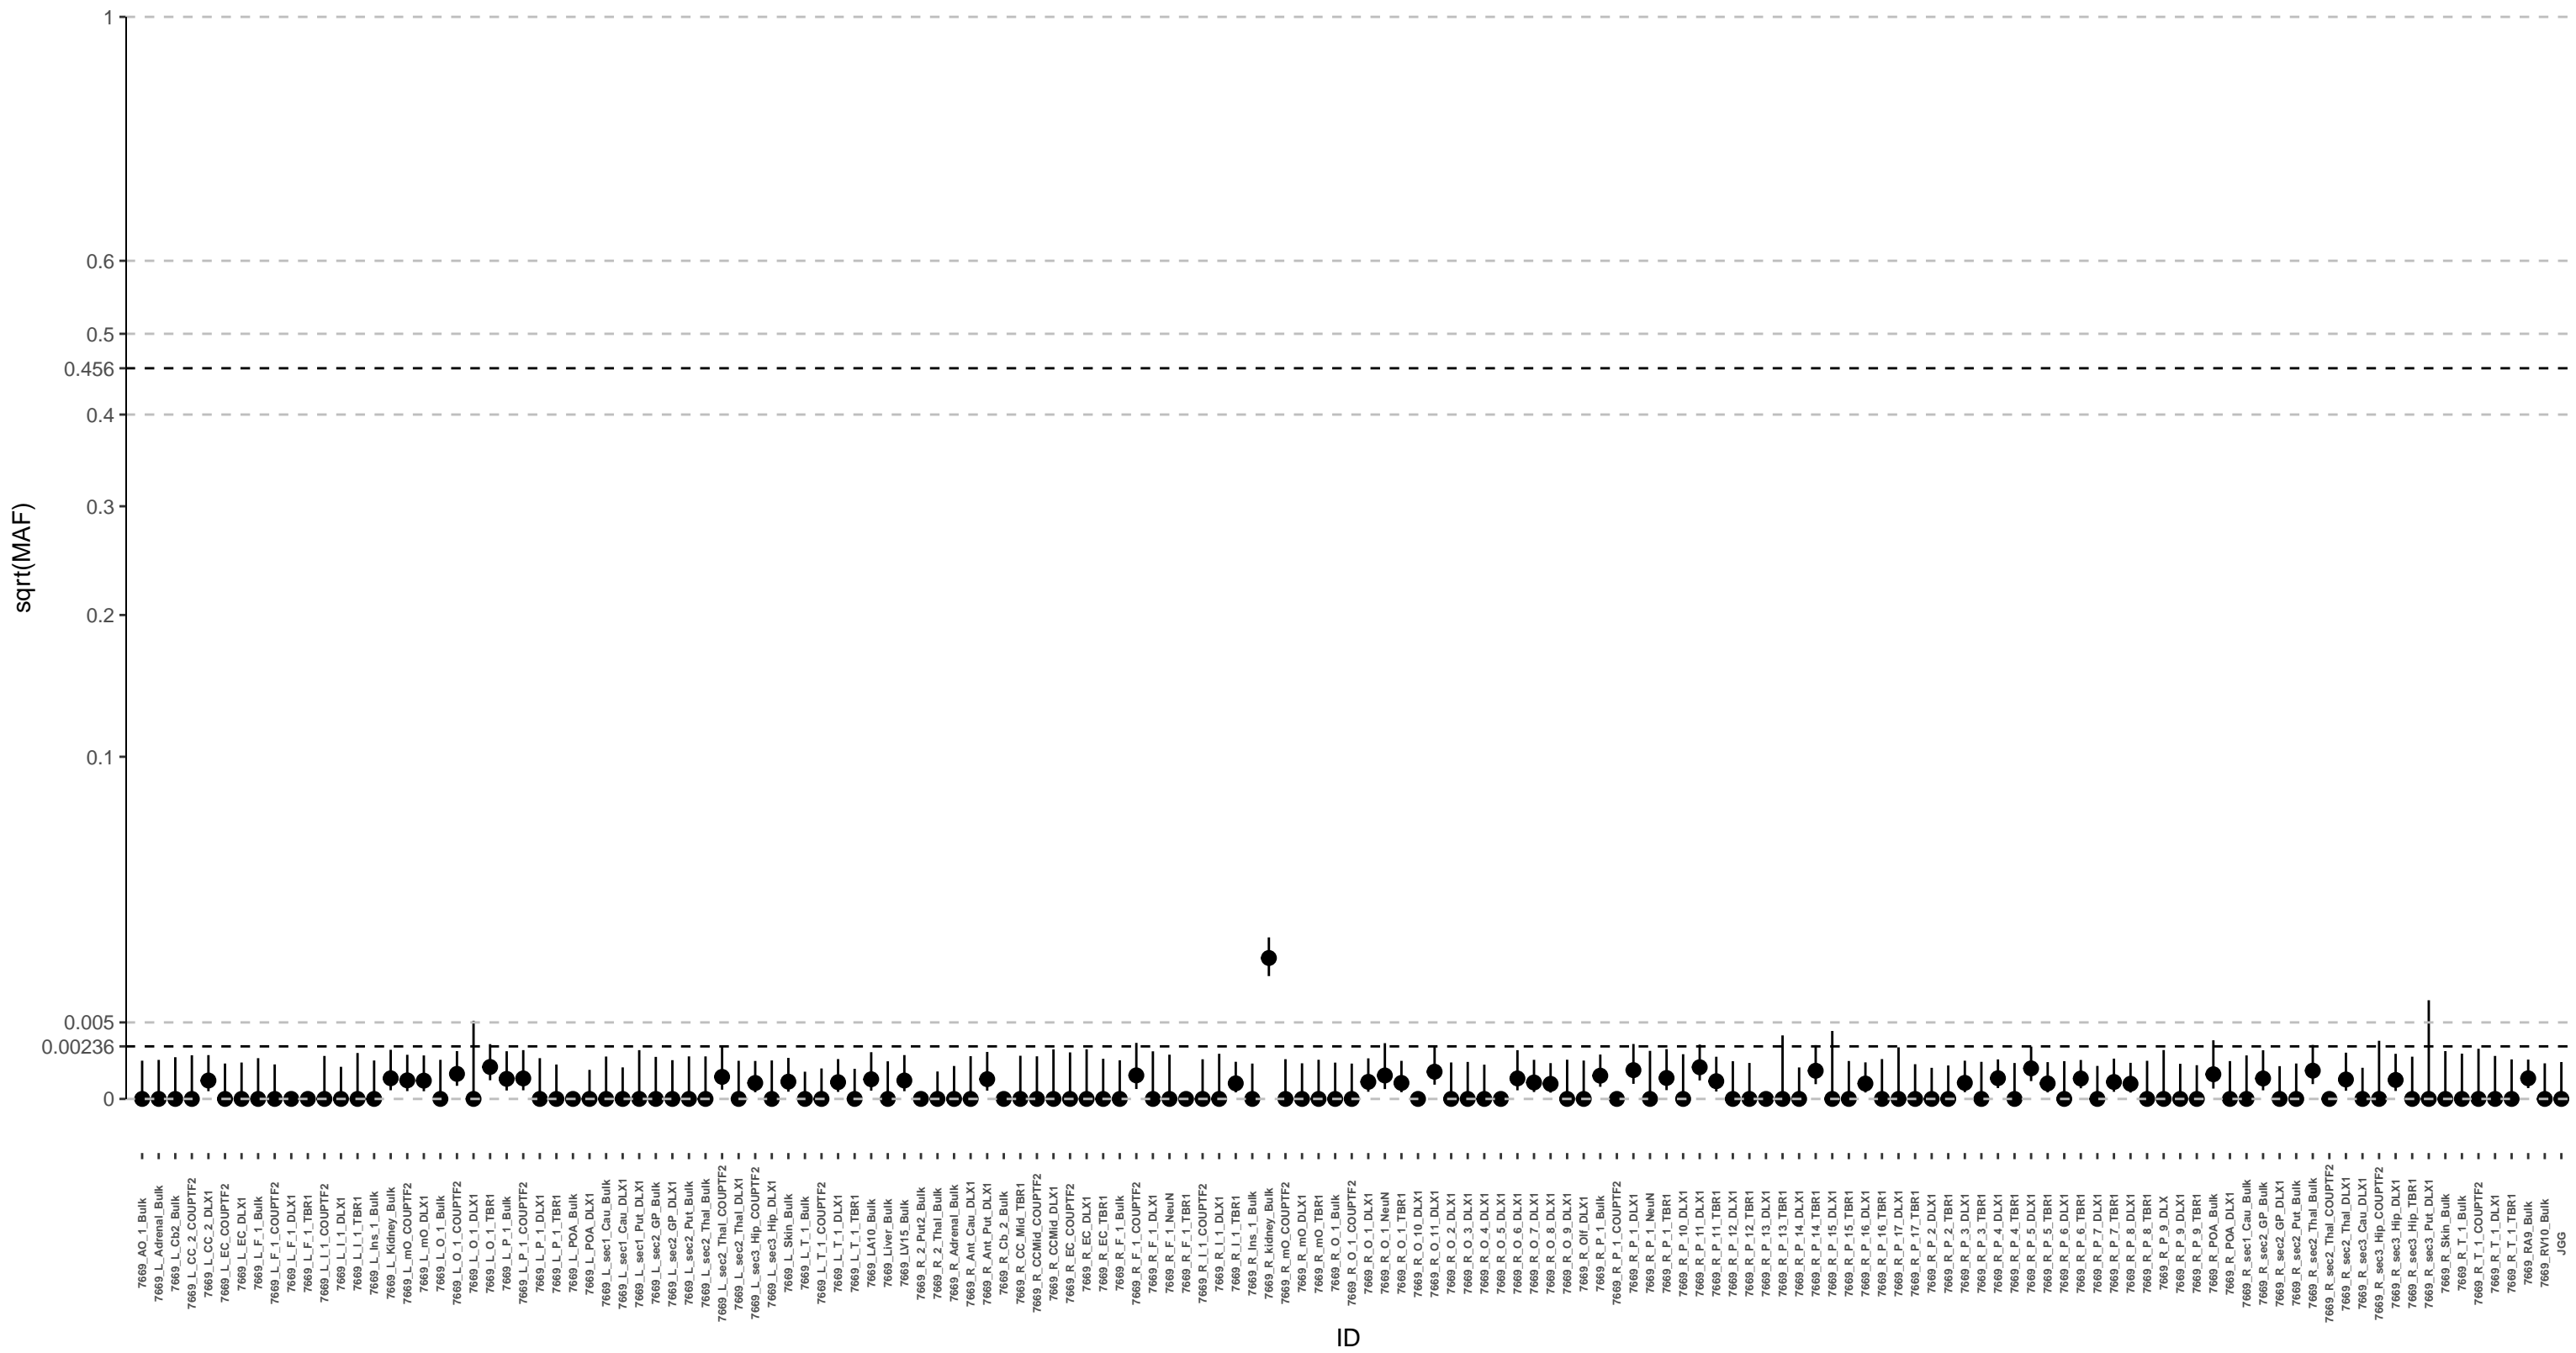

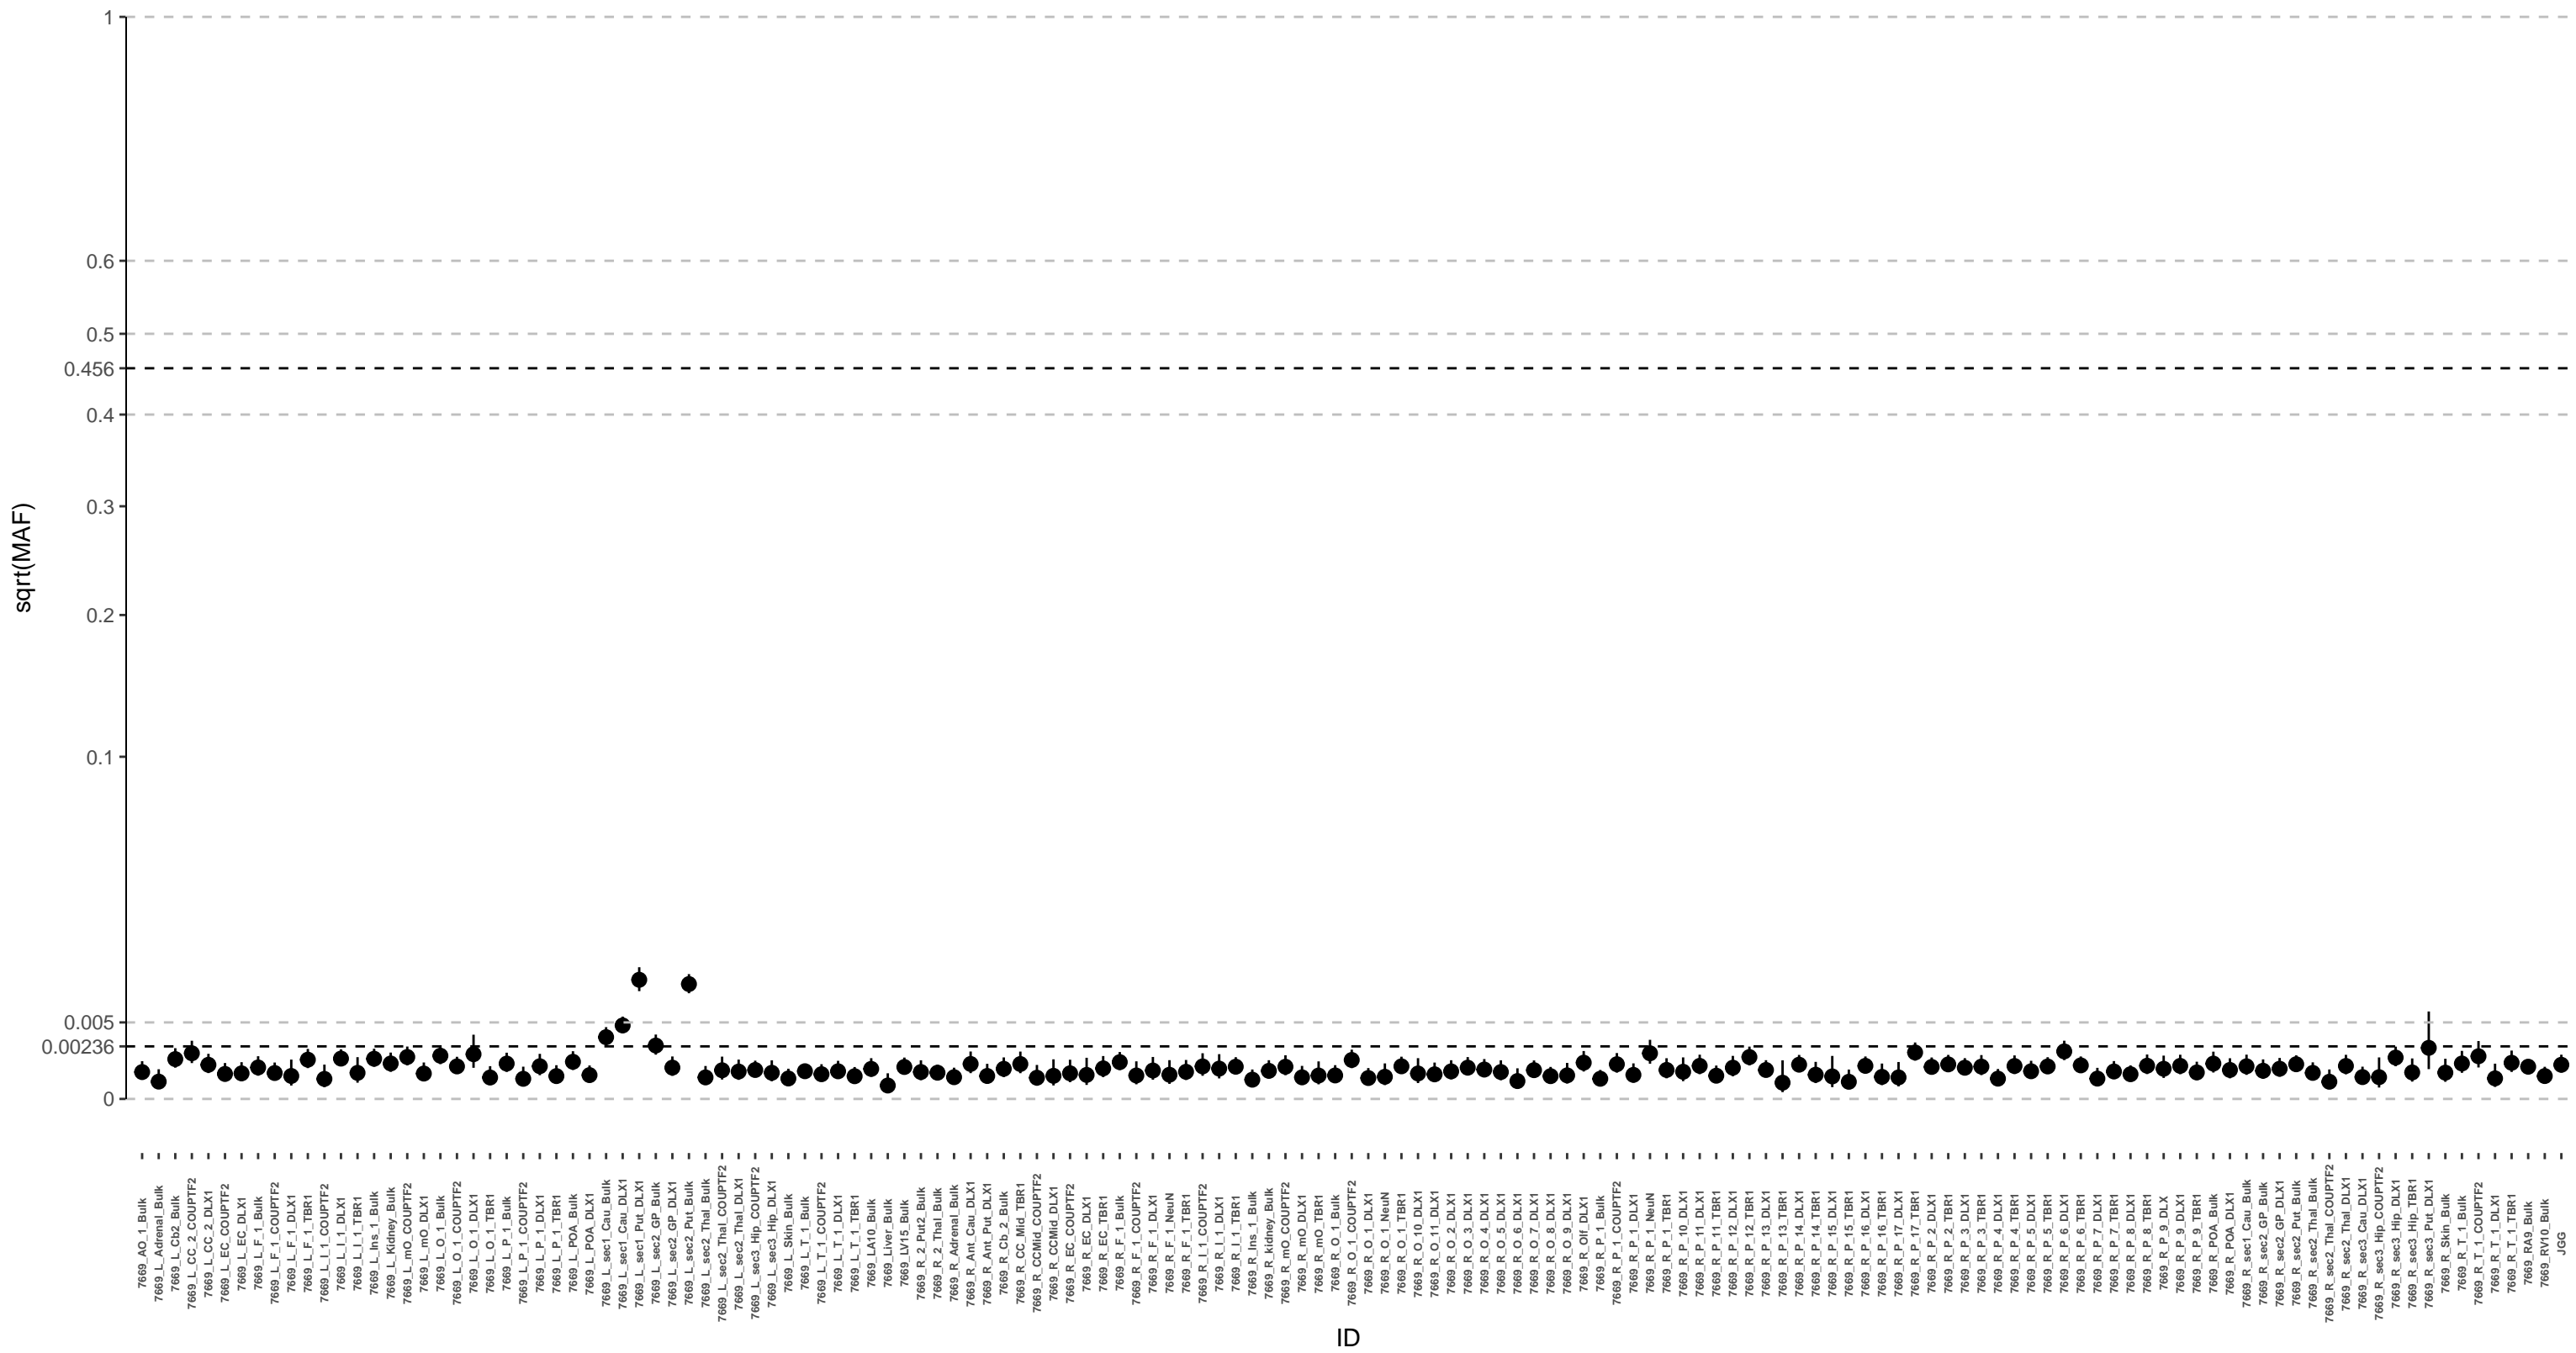

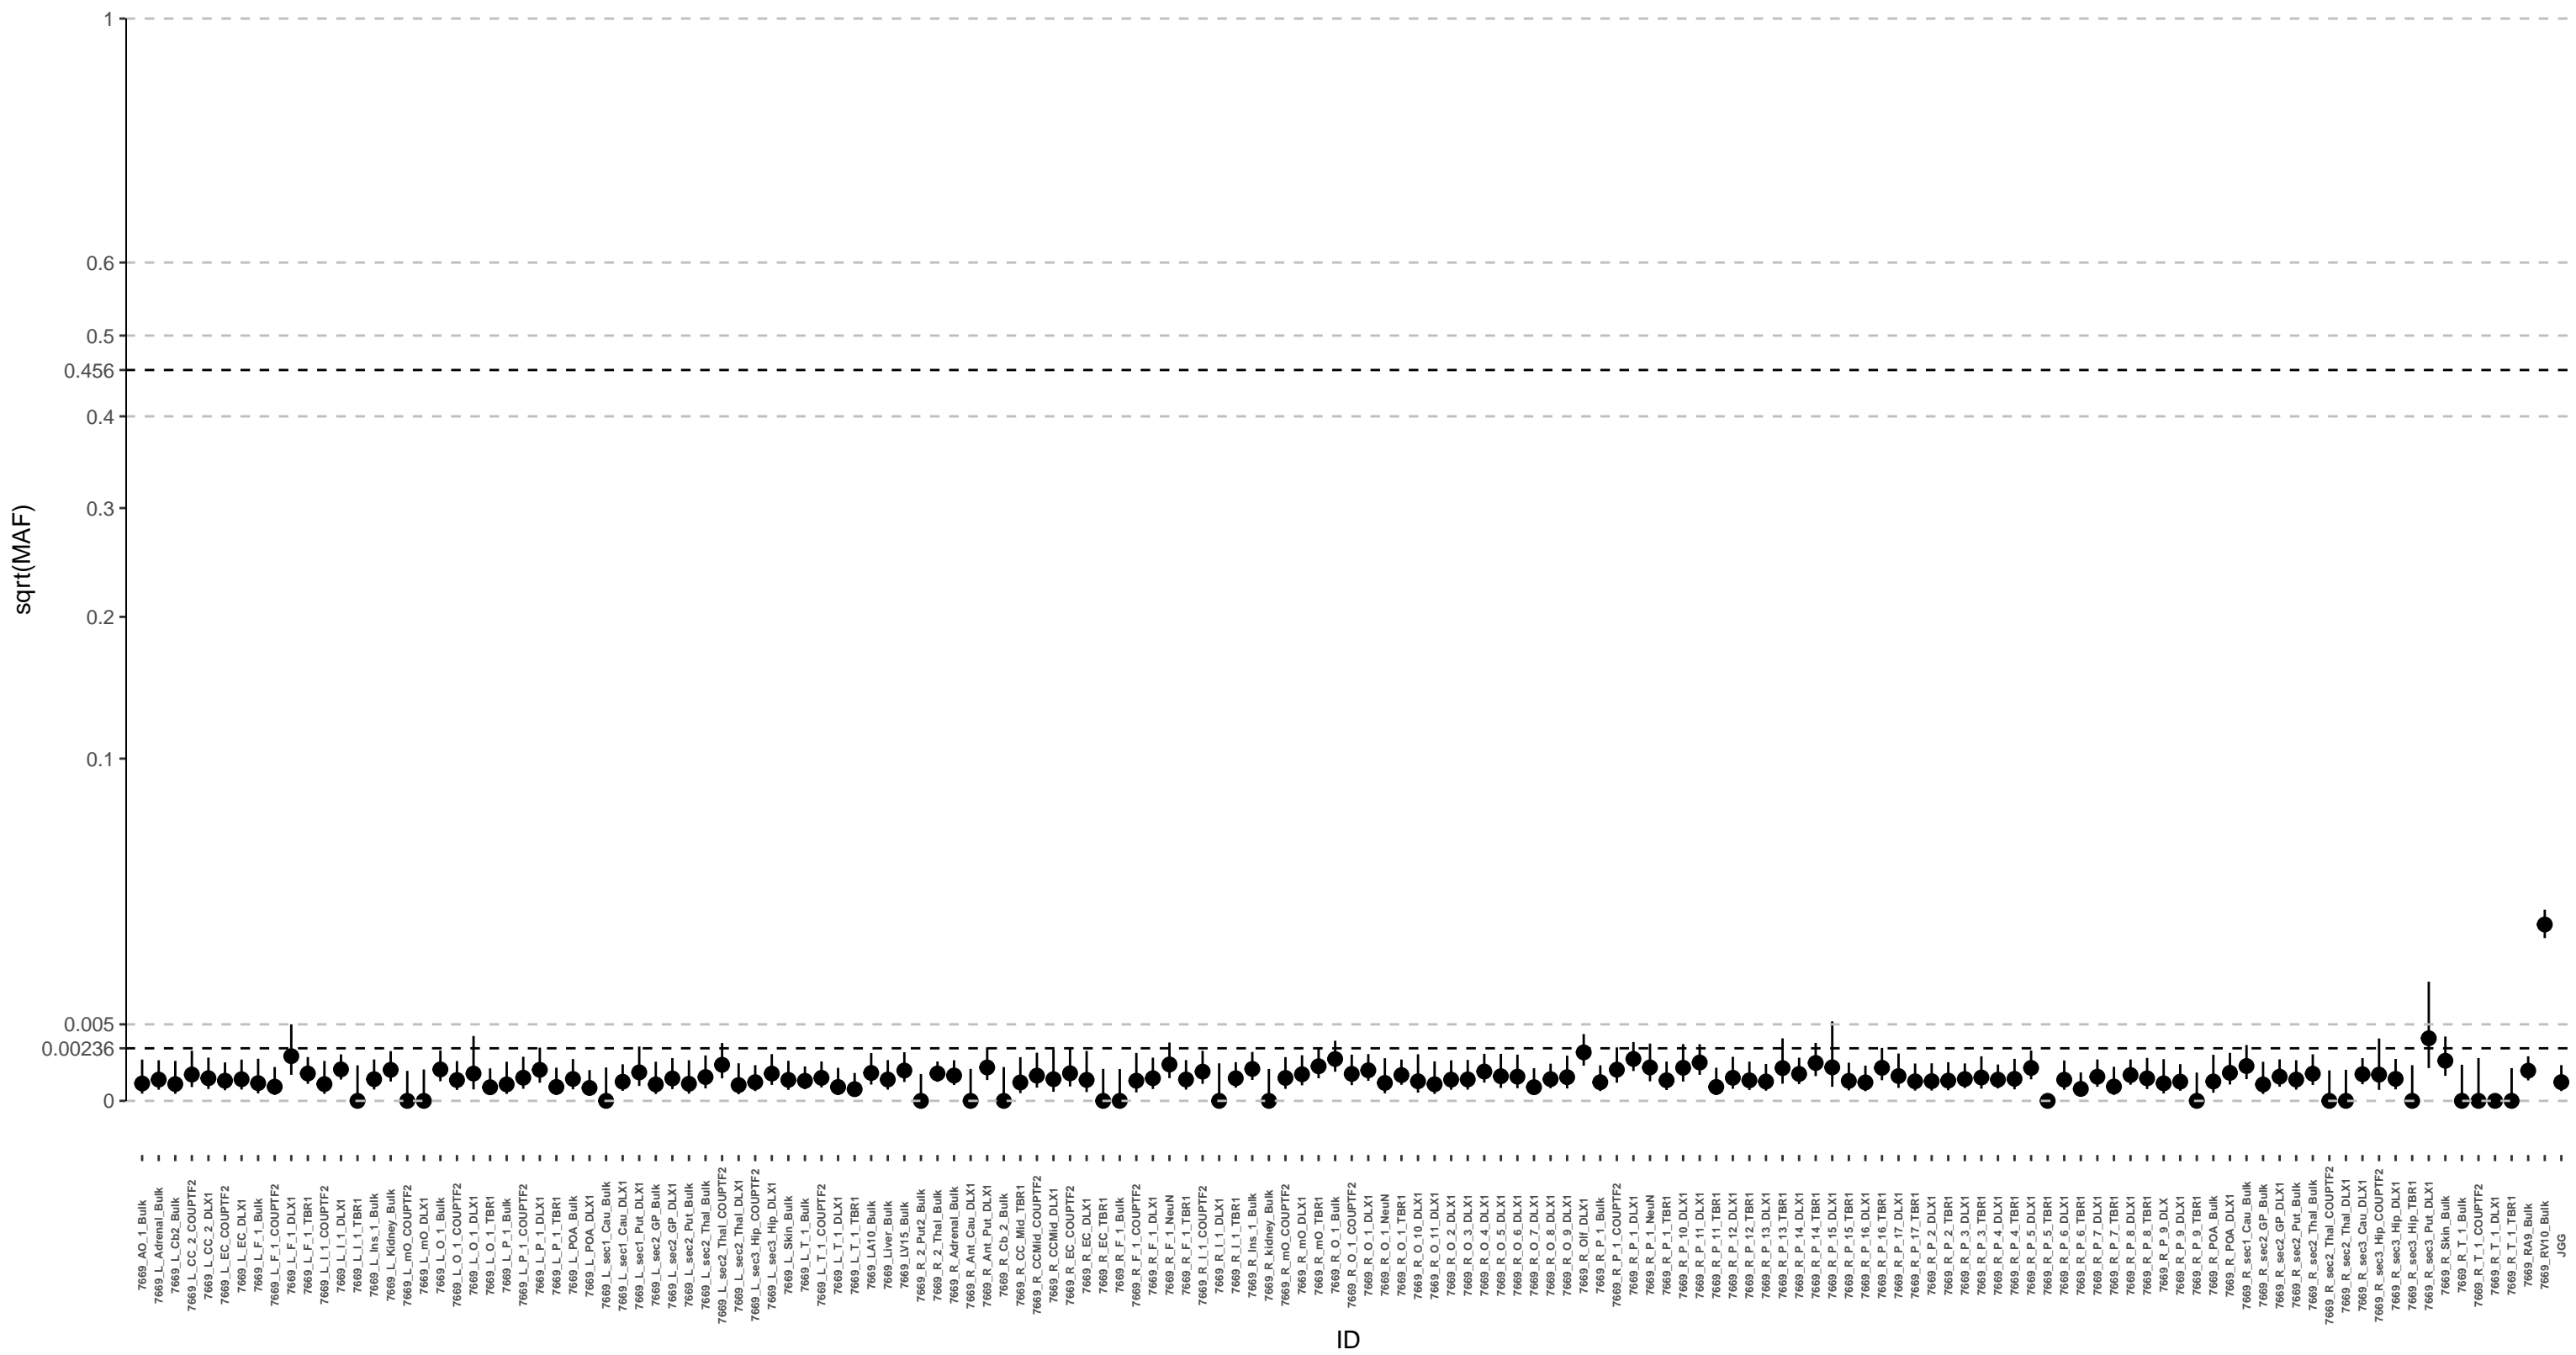



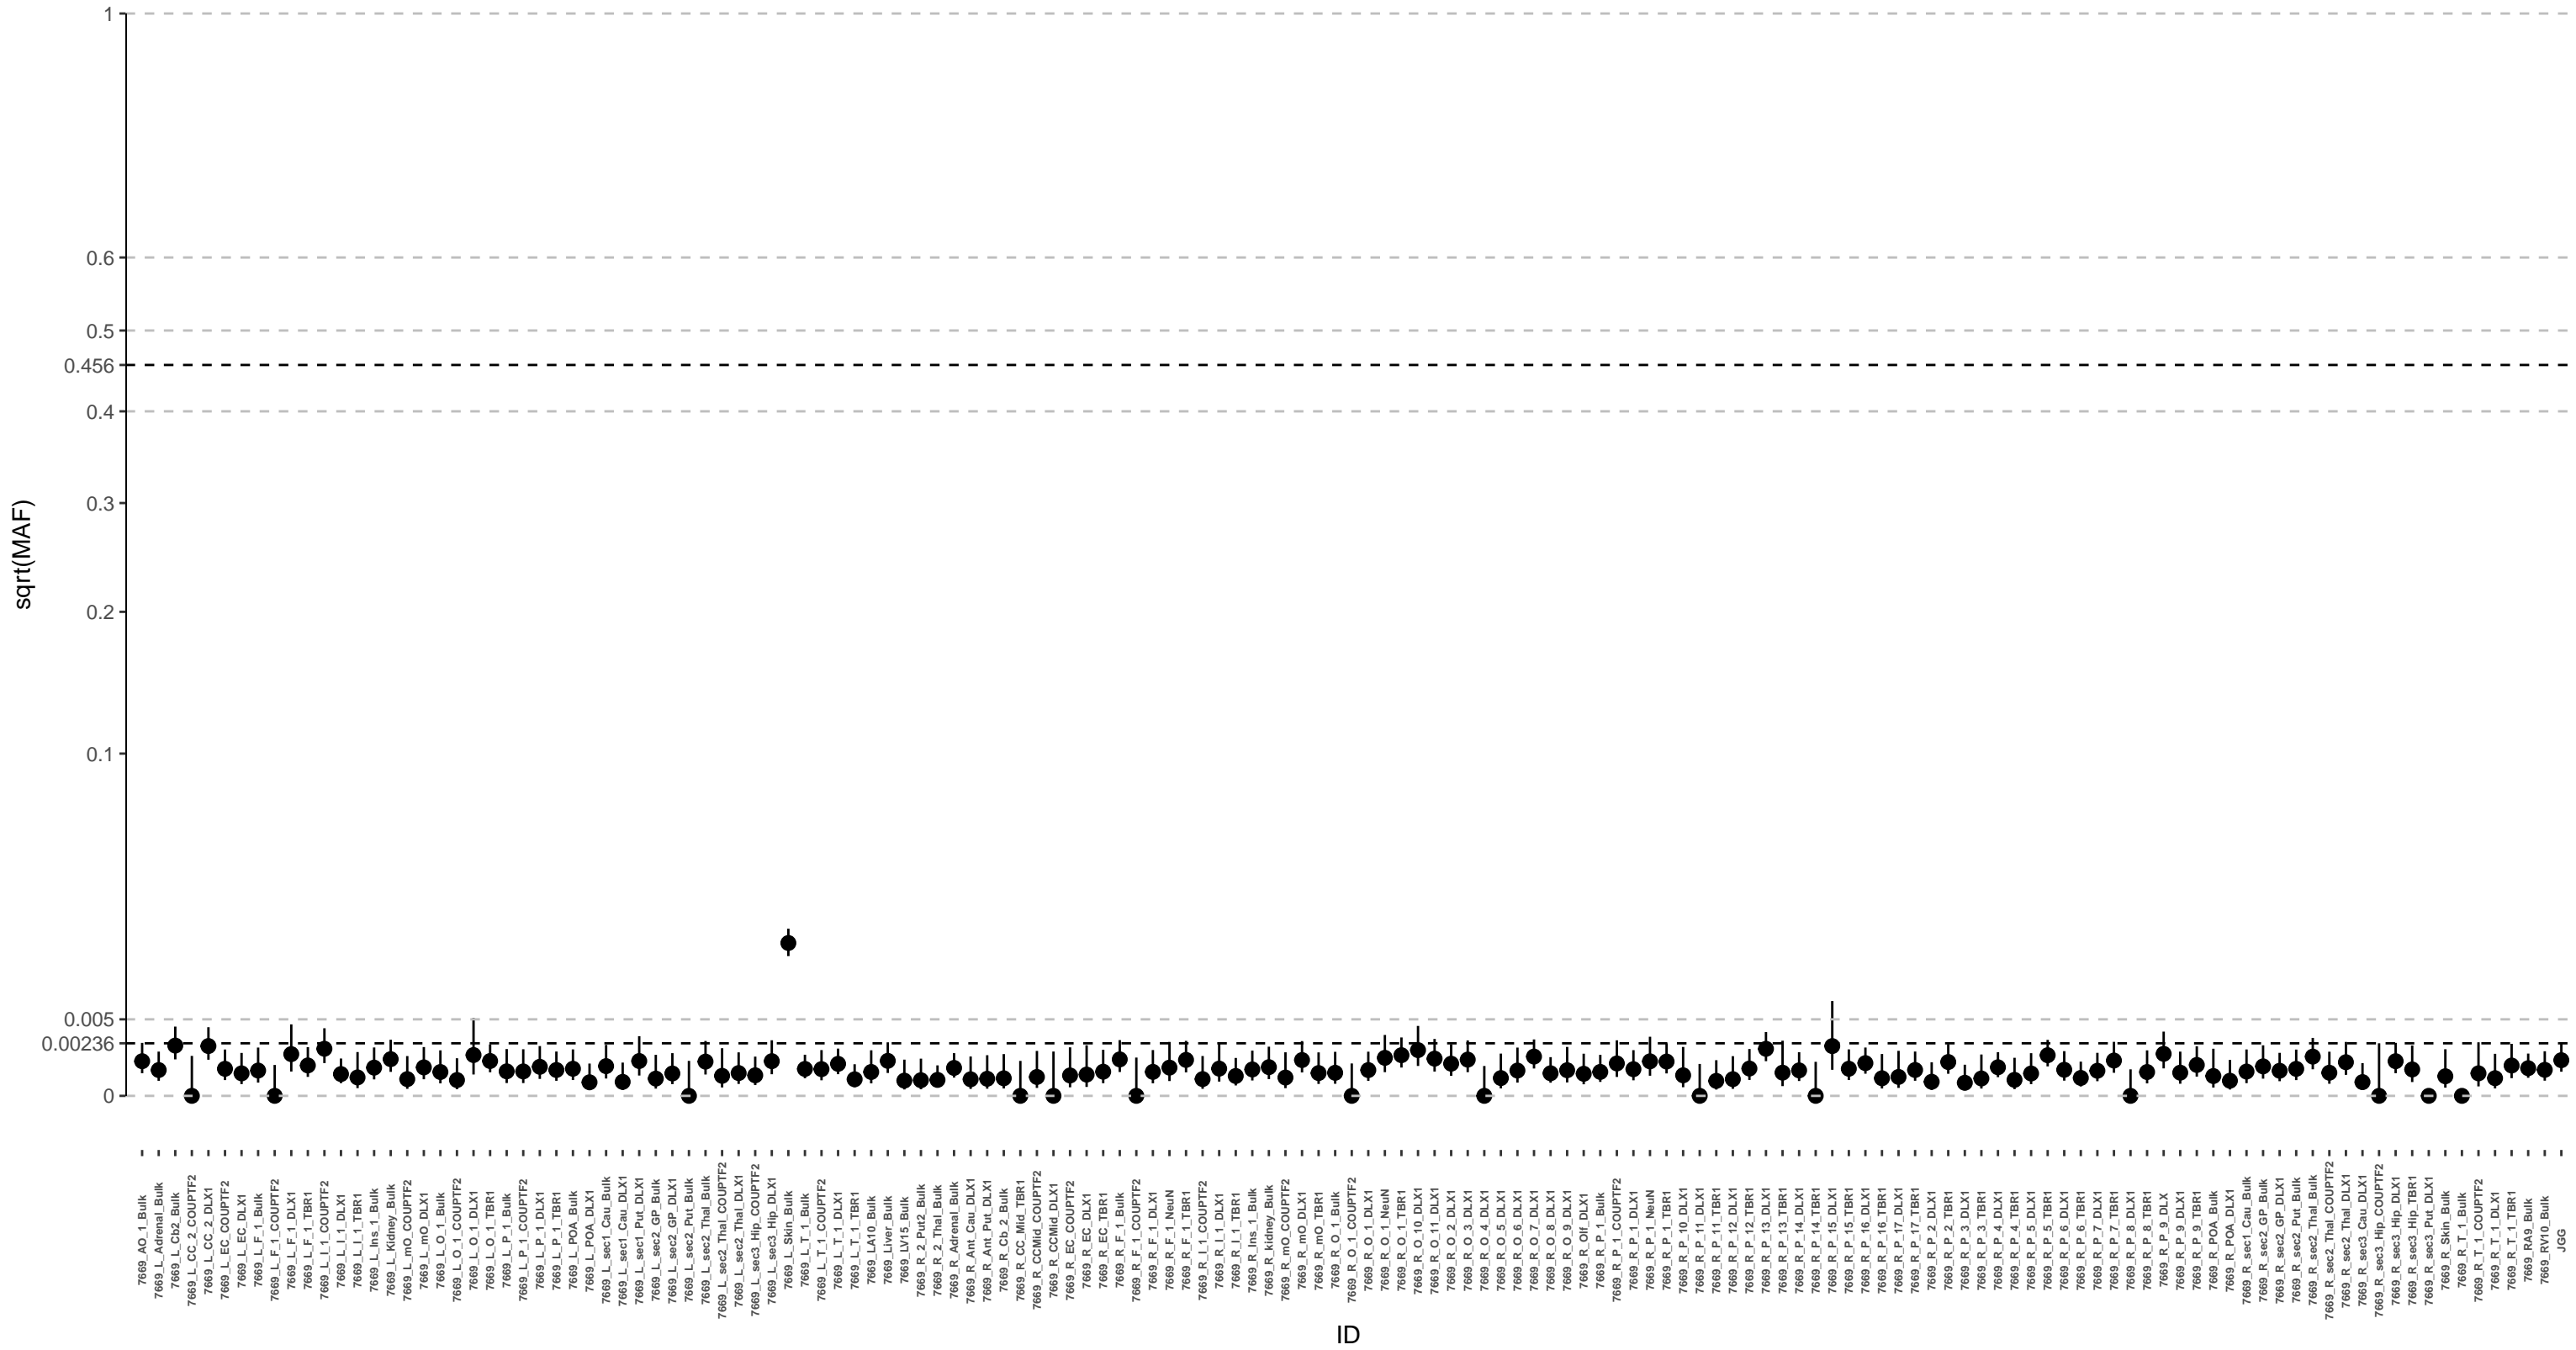

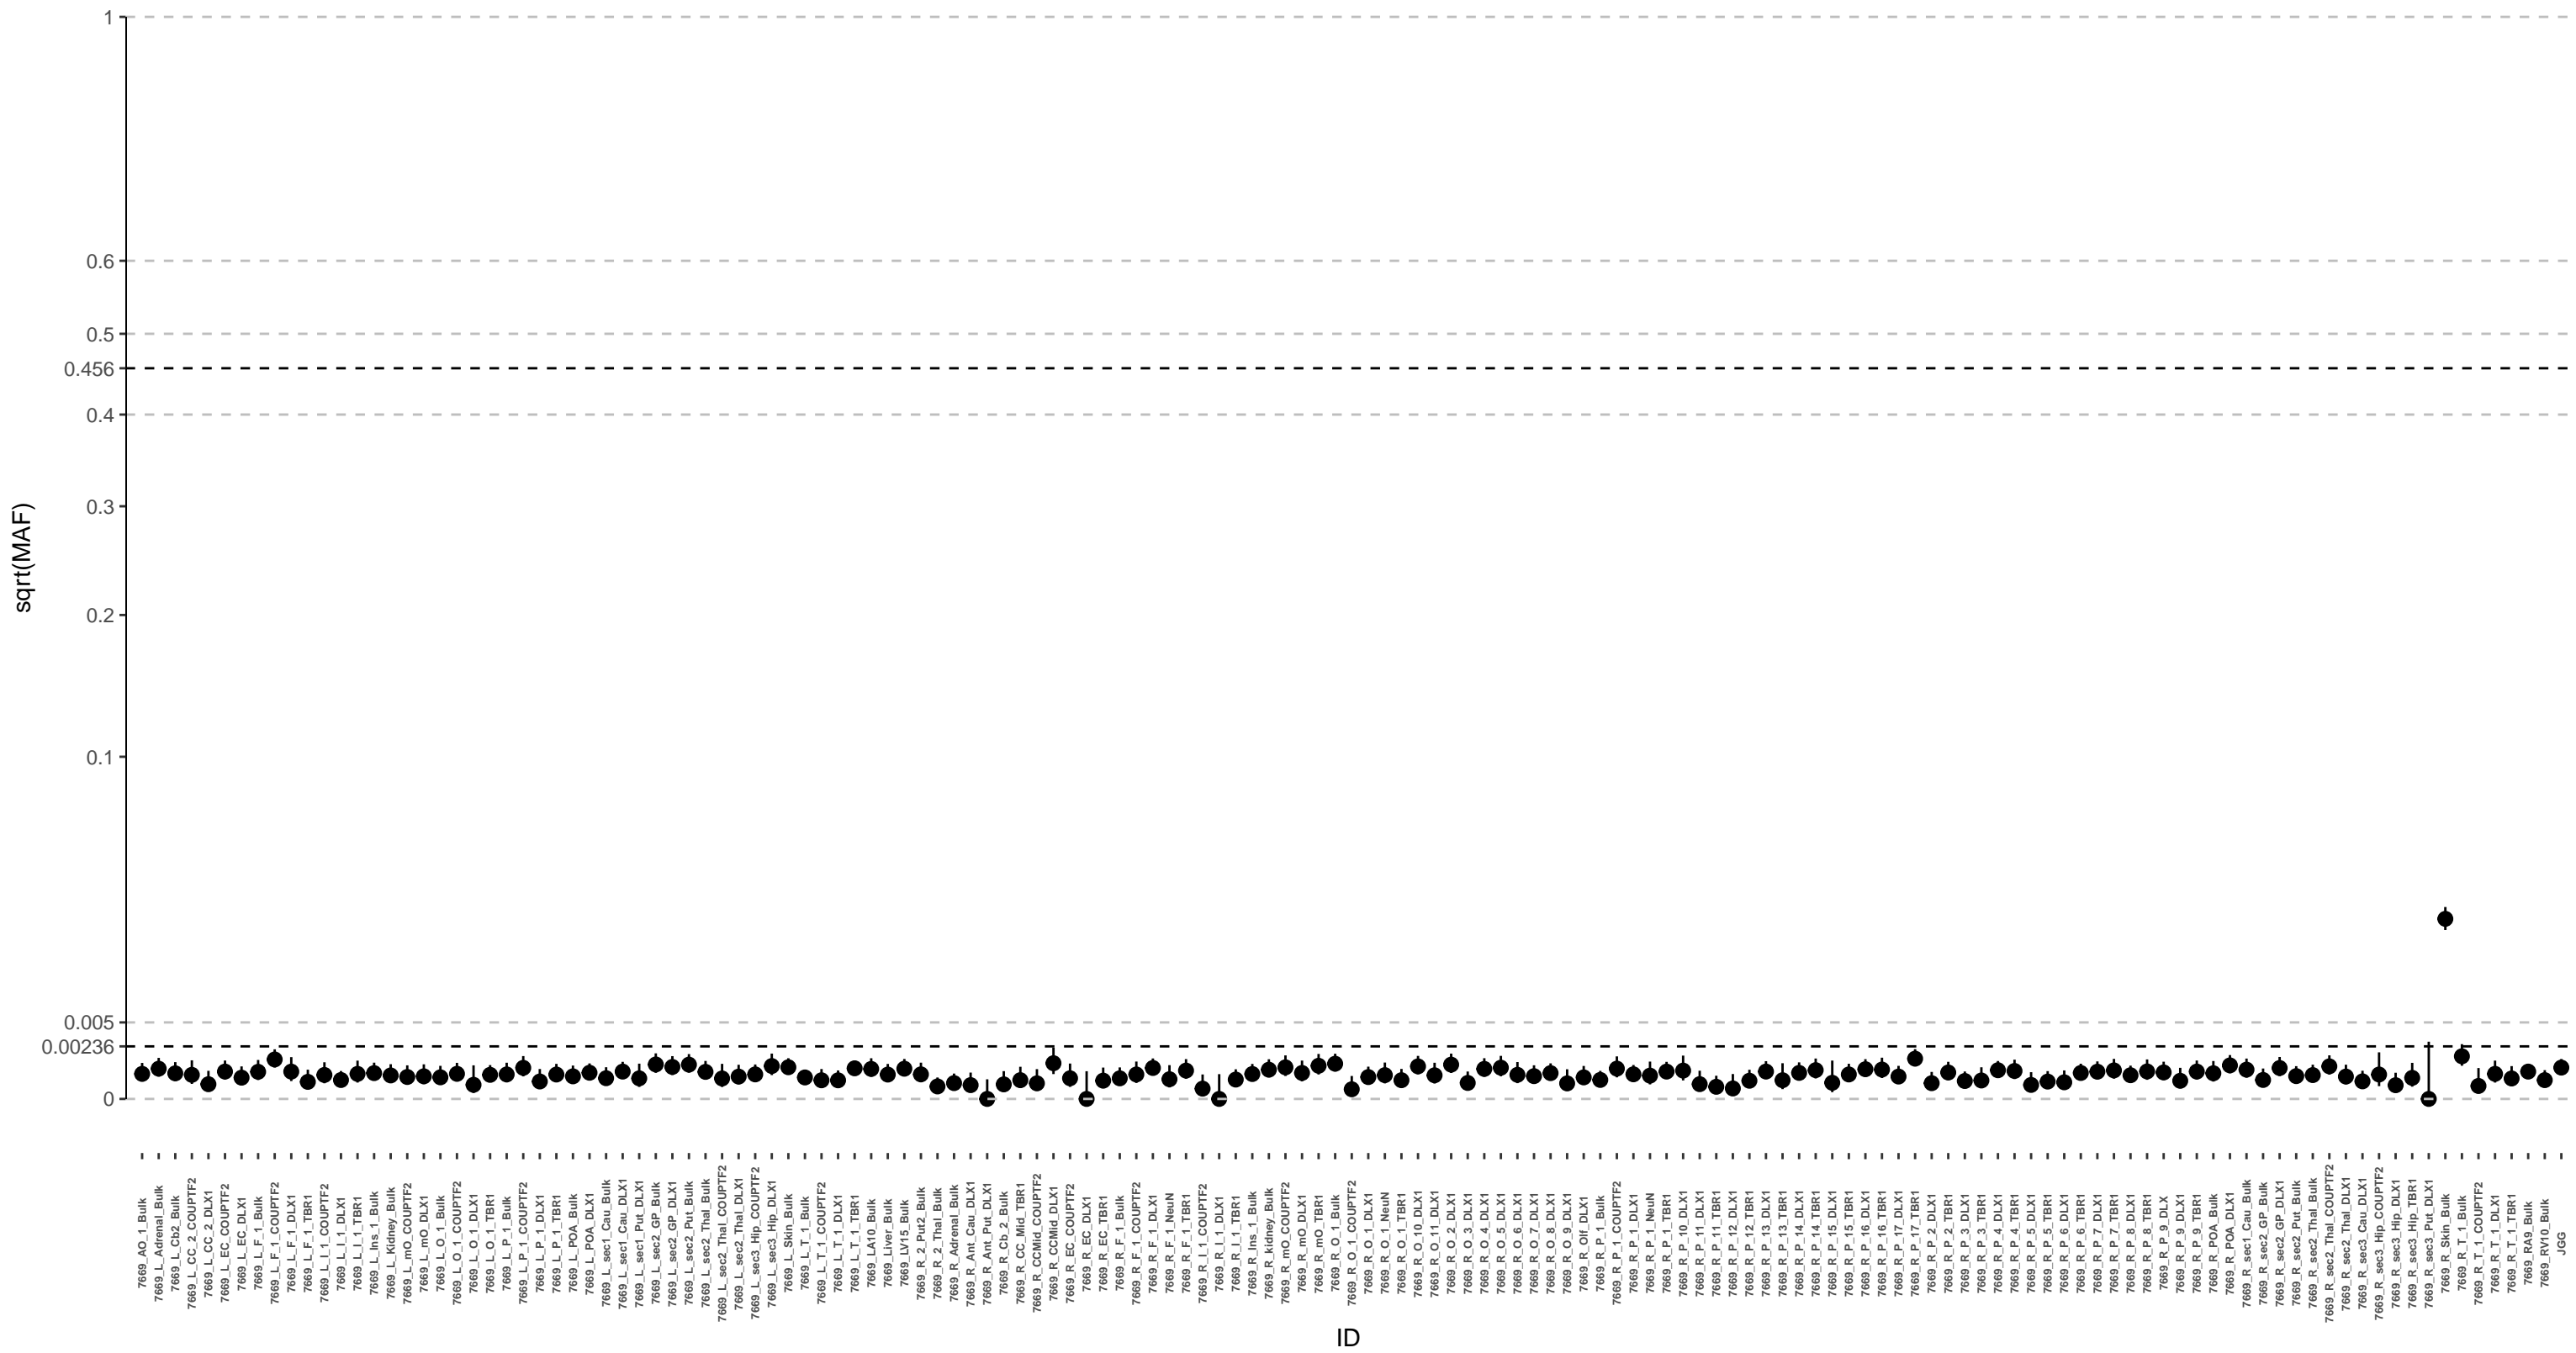

ID05 18-1735890-A-C

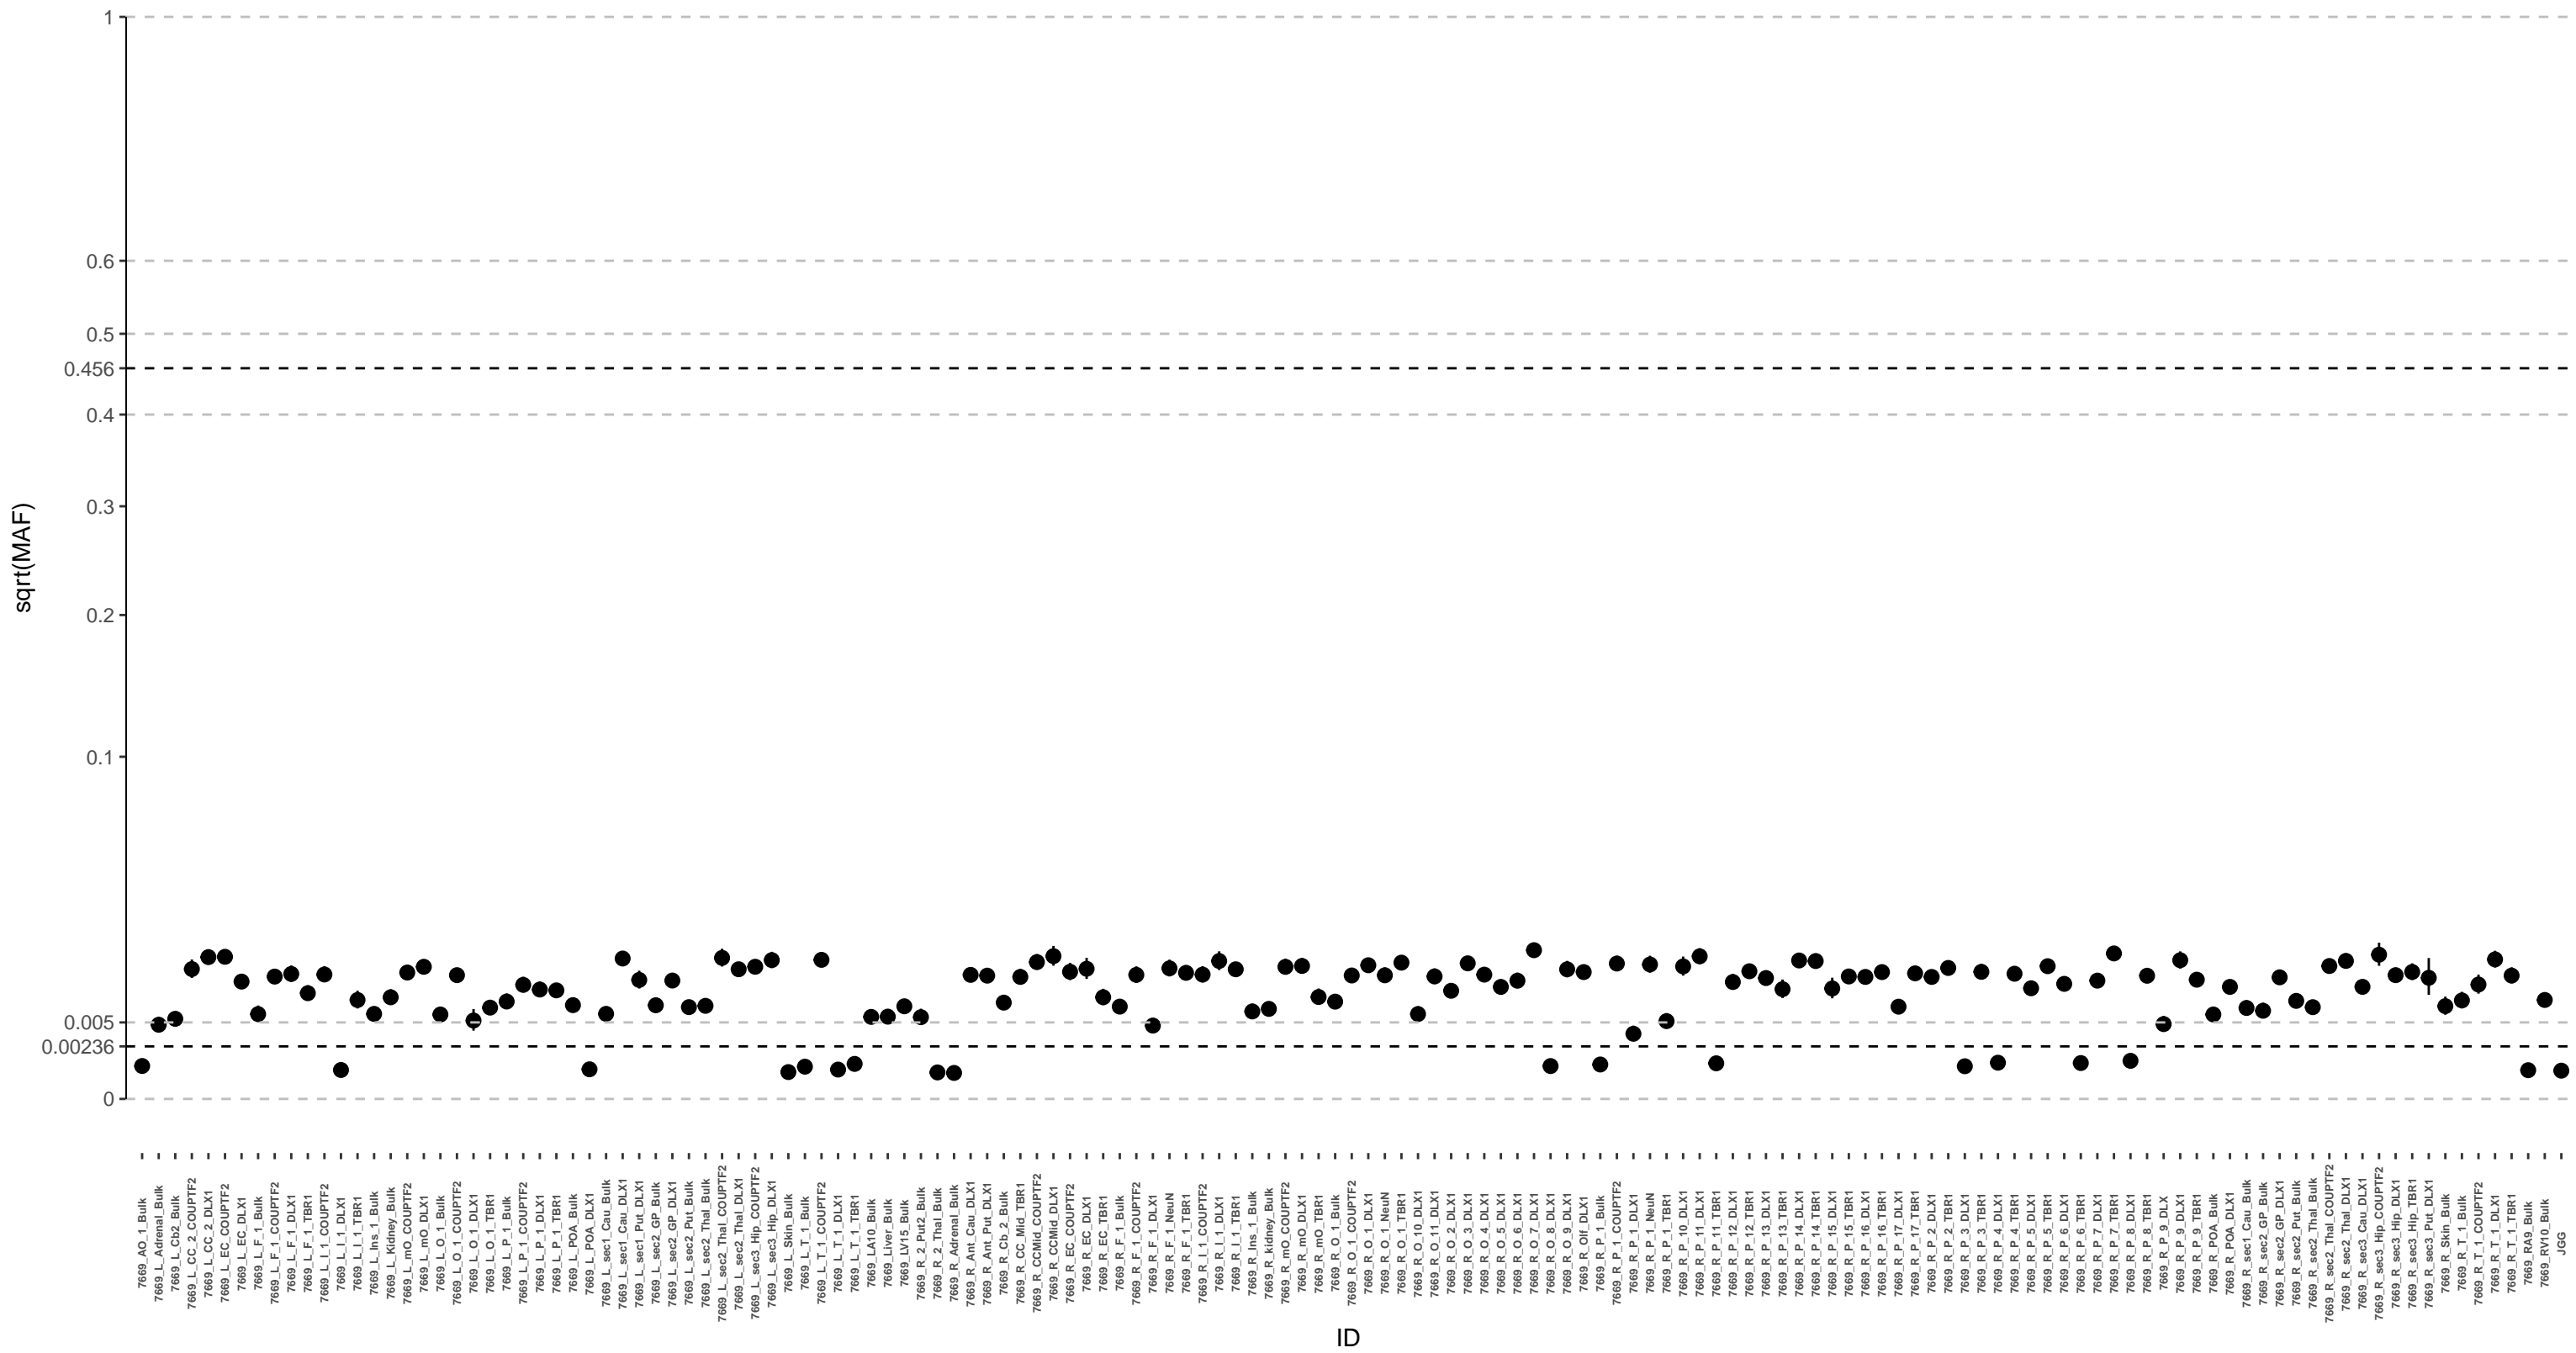

ID05 18-1735891-G-T

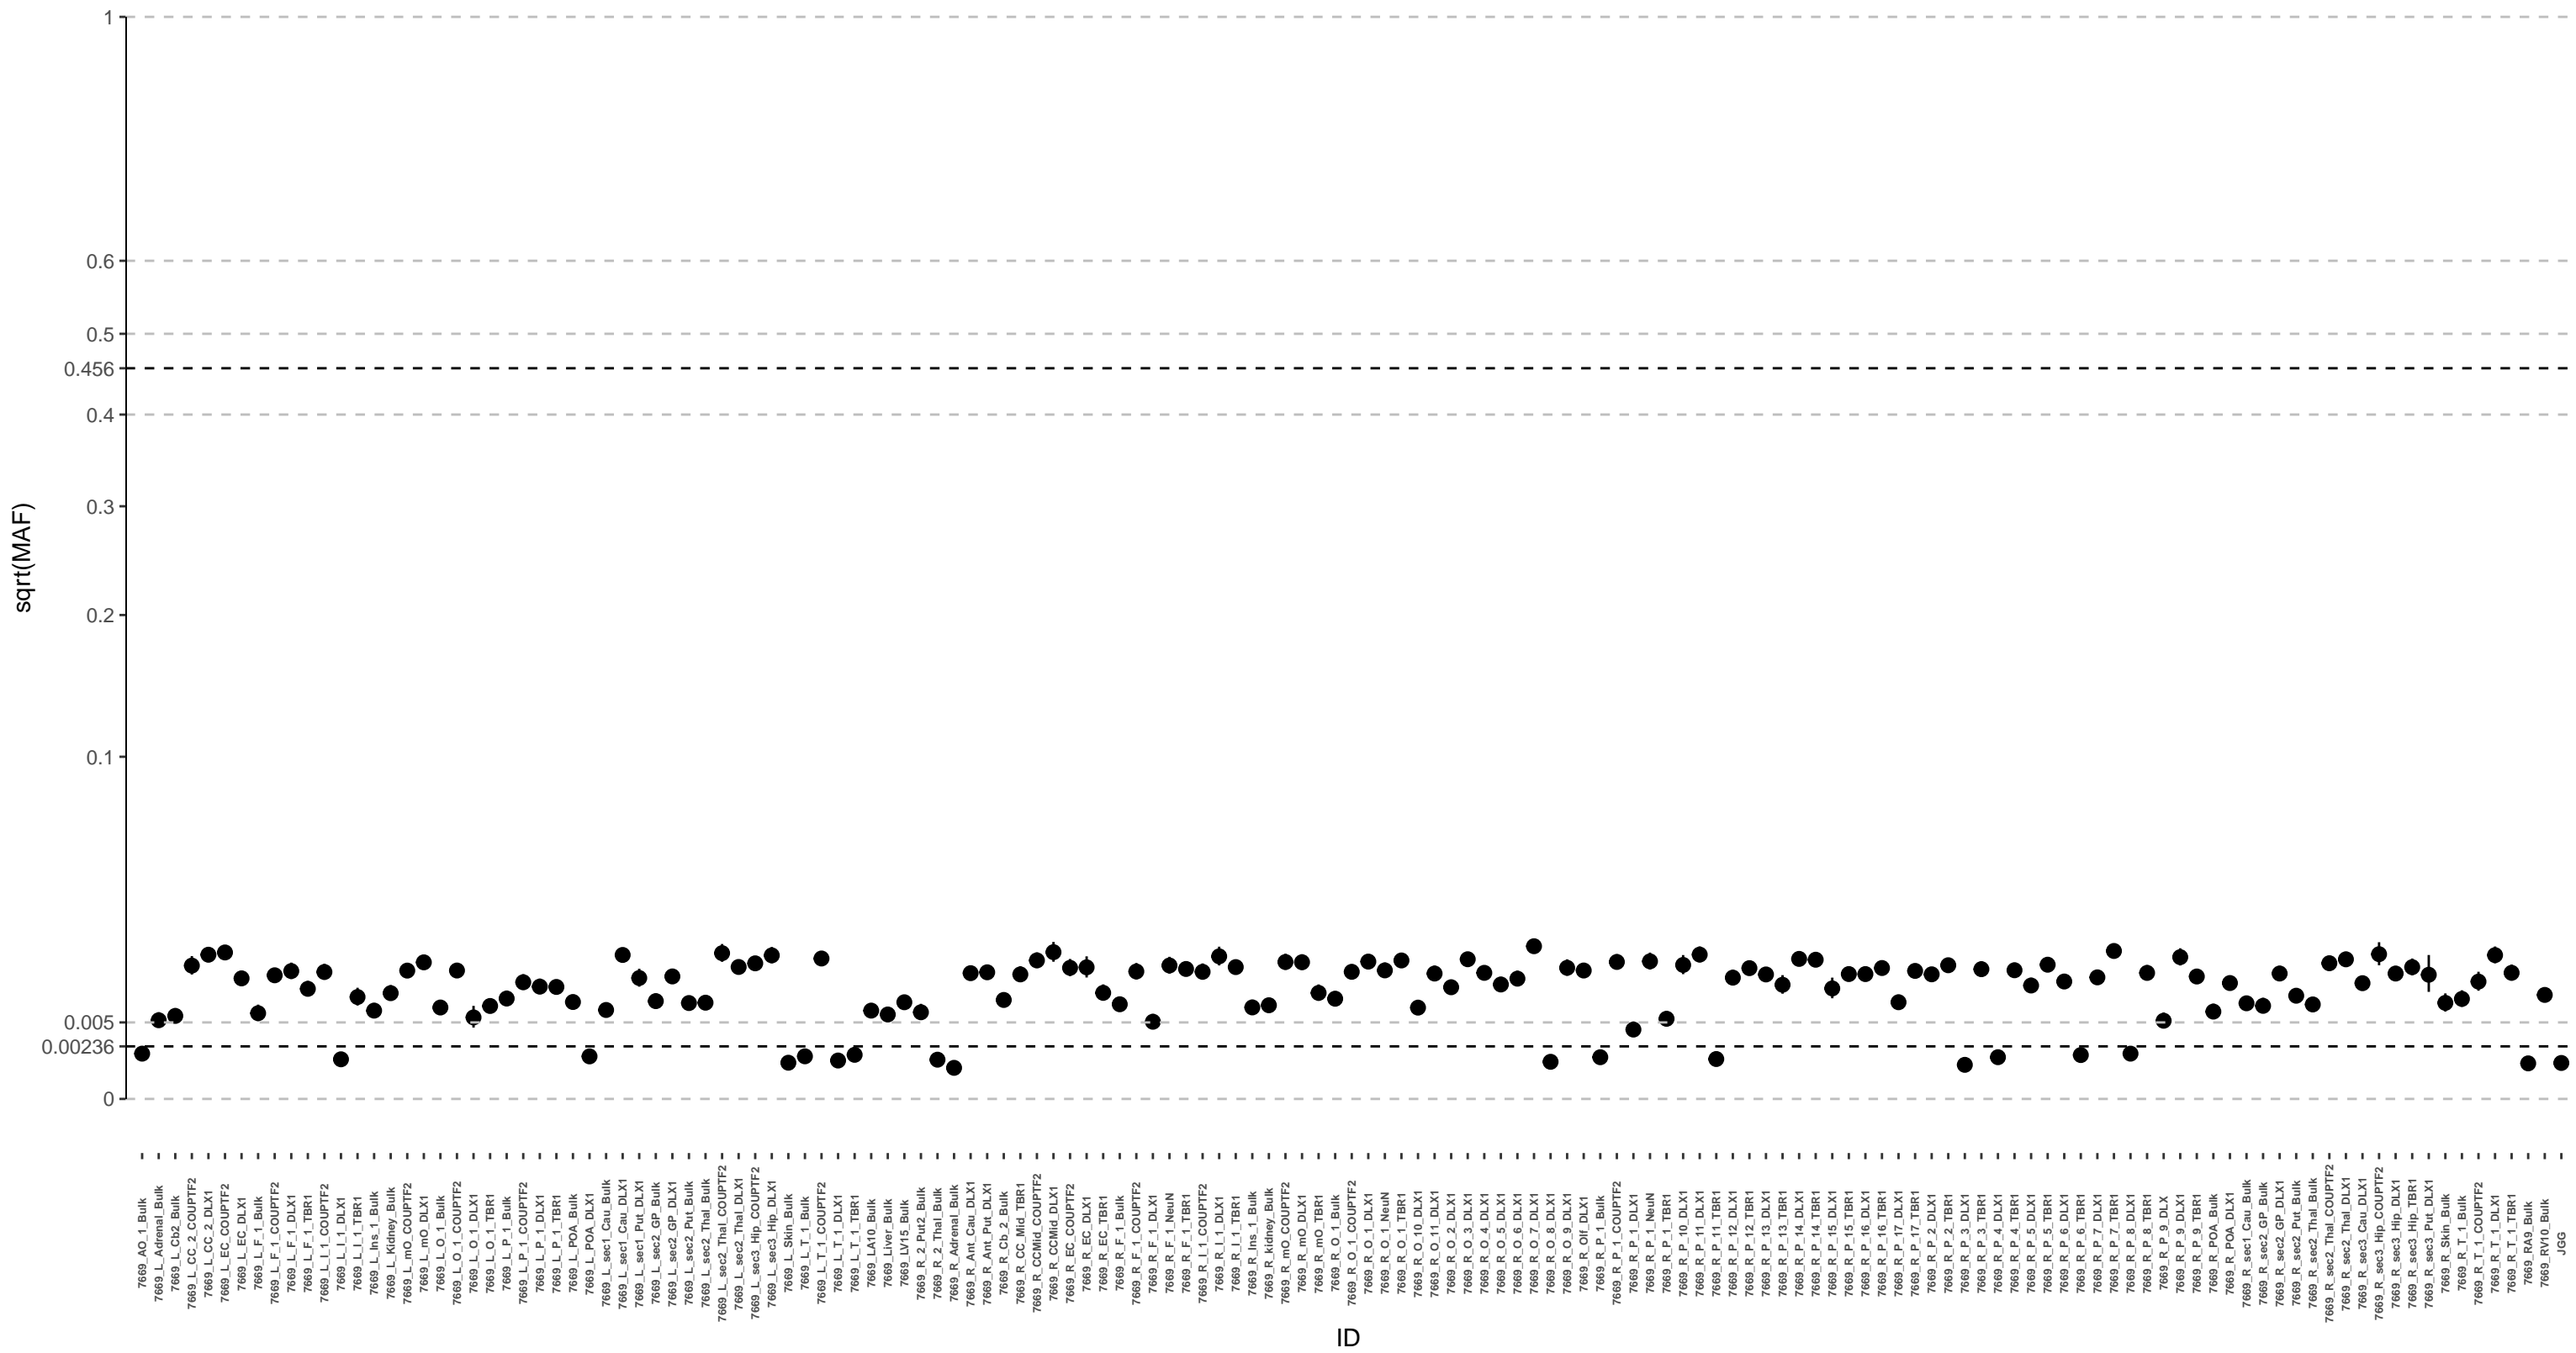

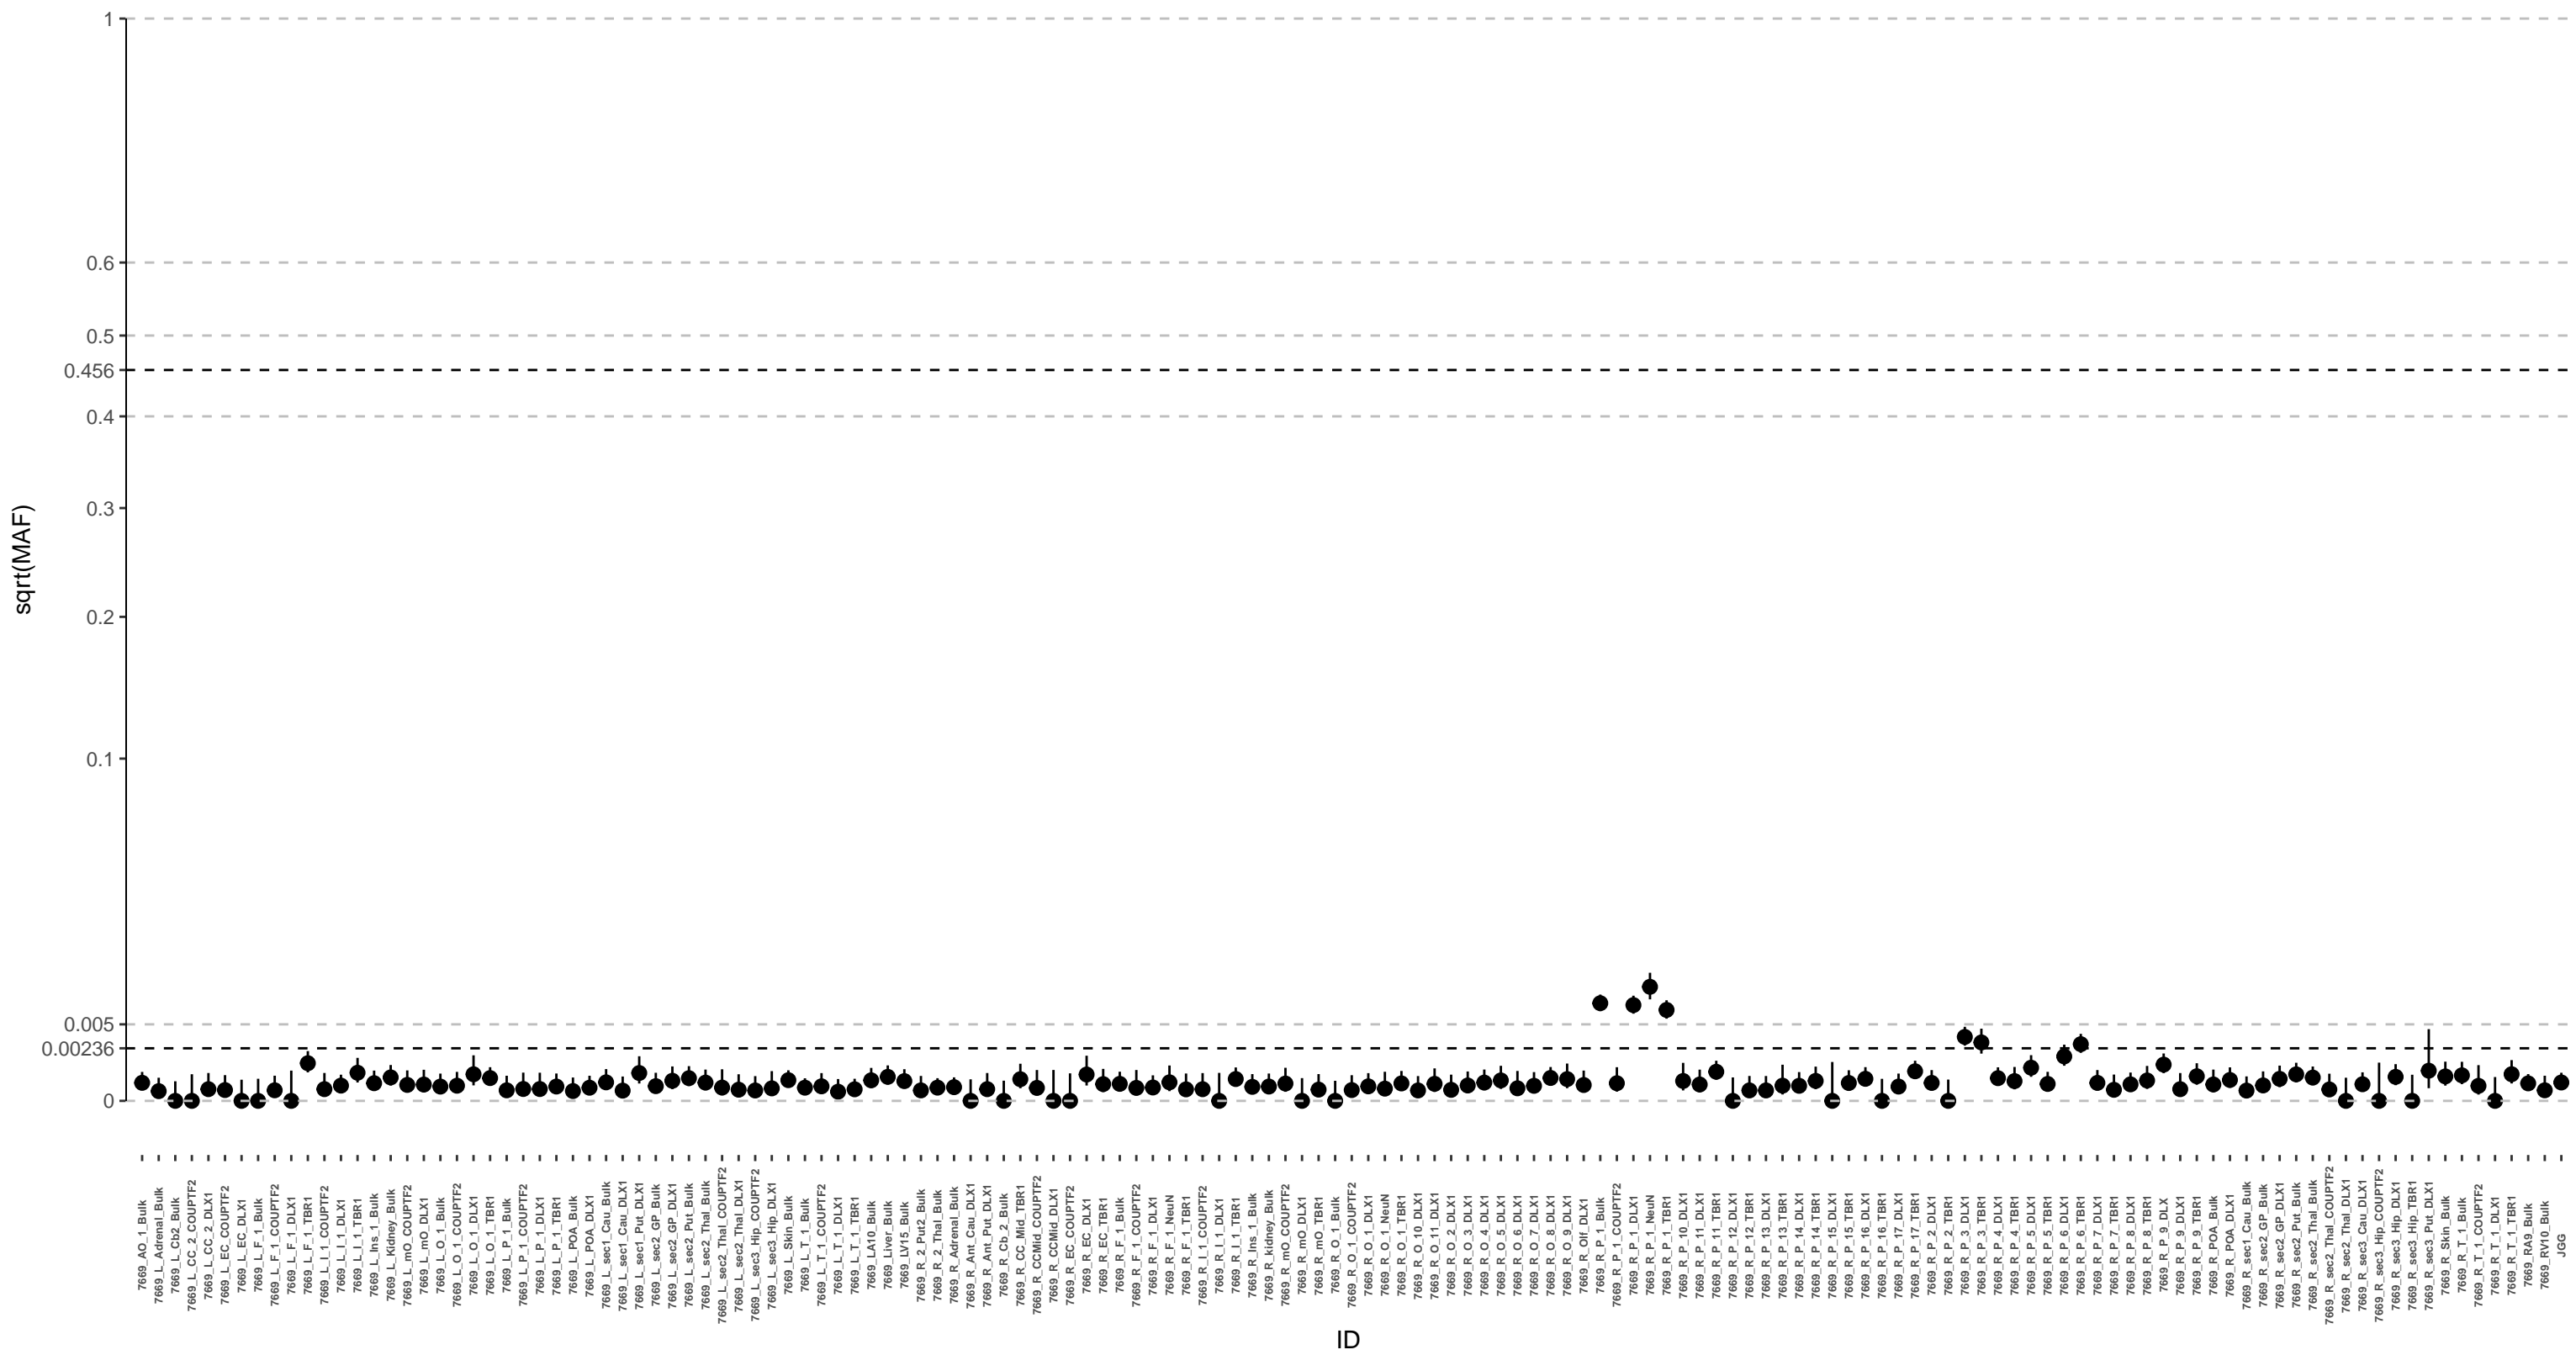

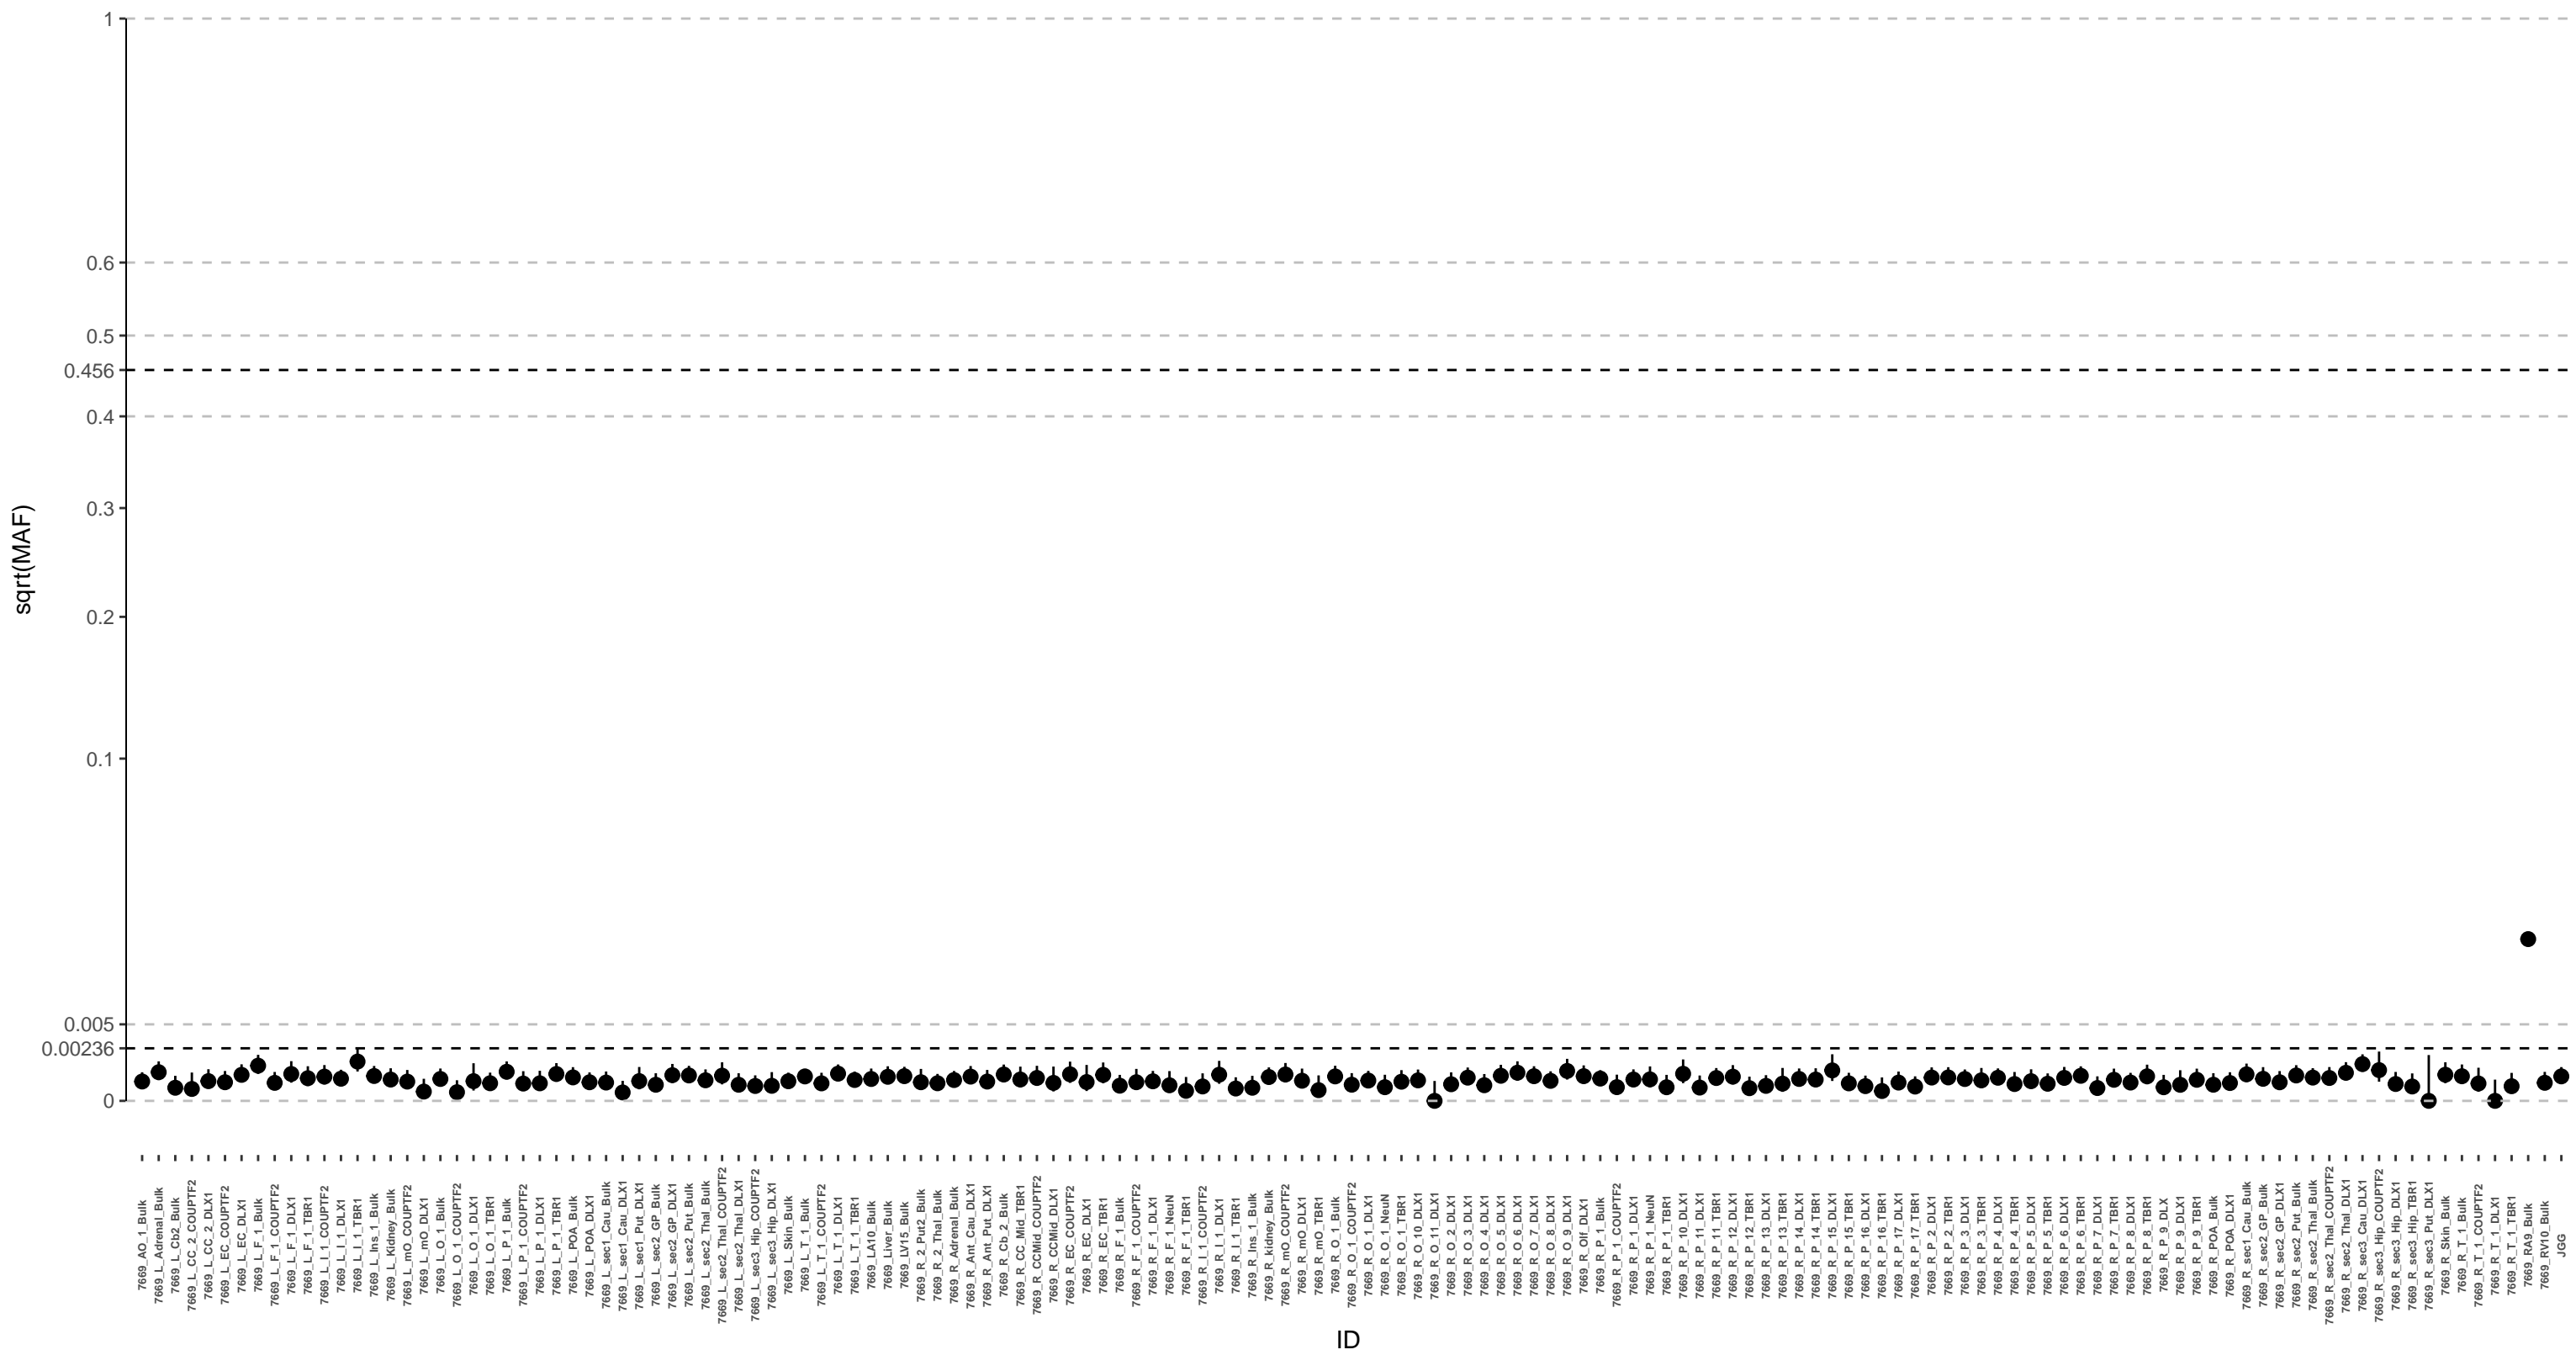

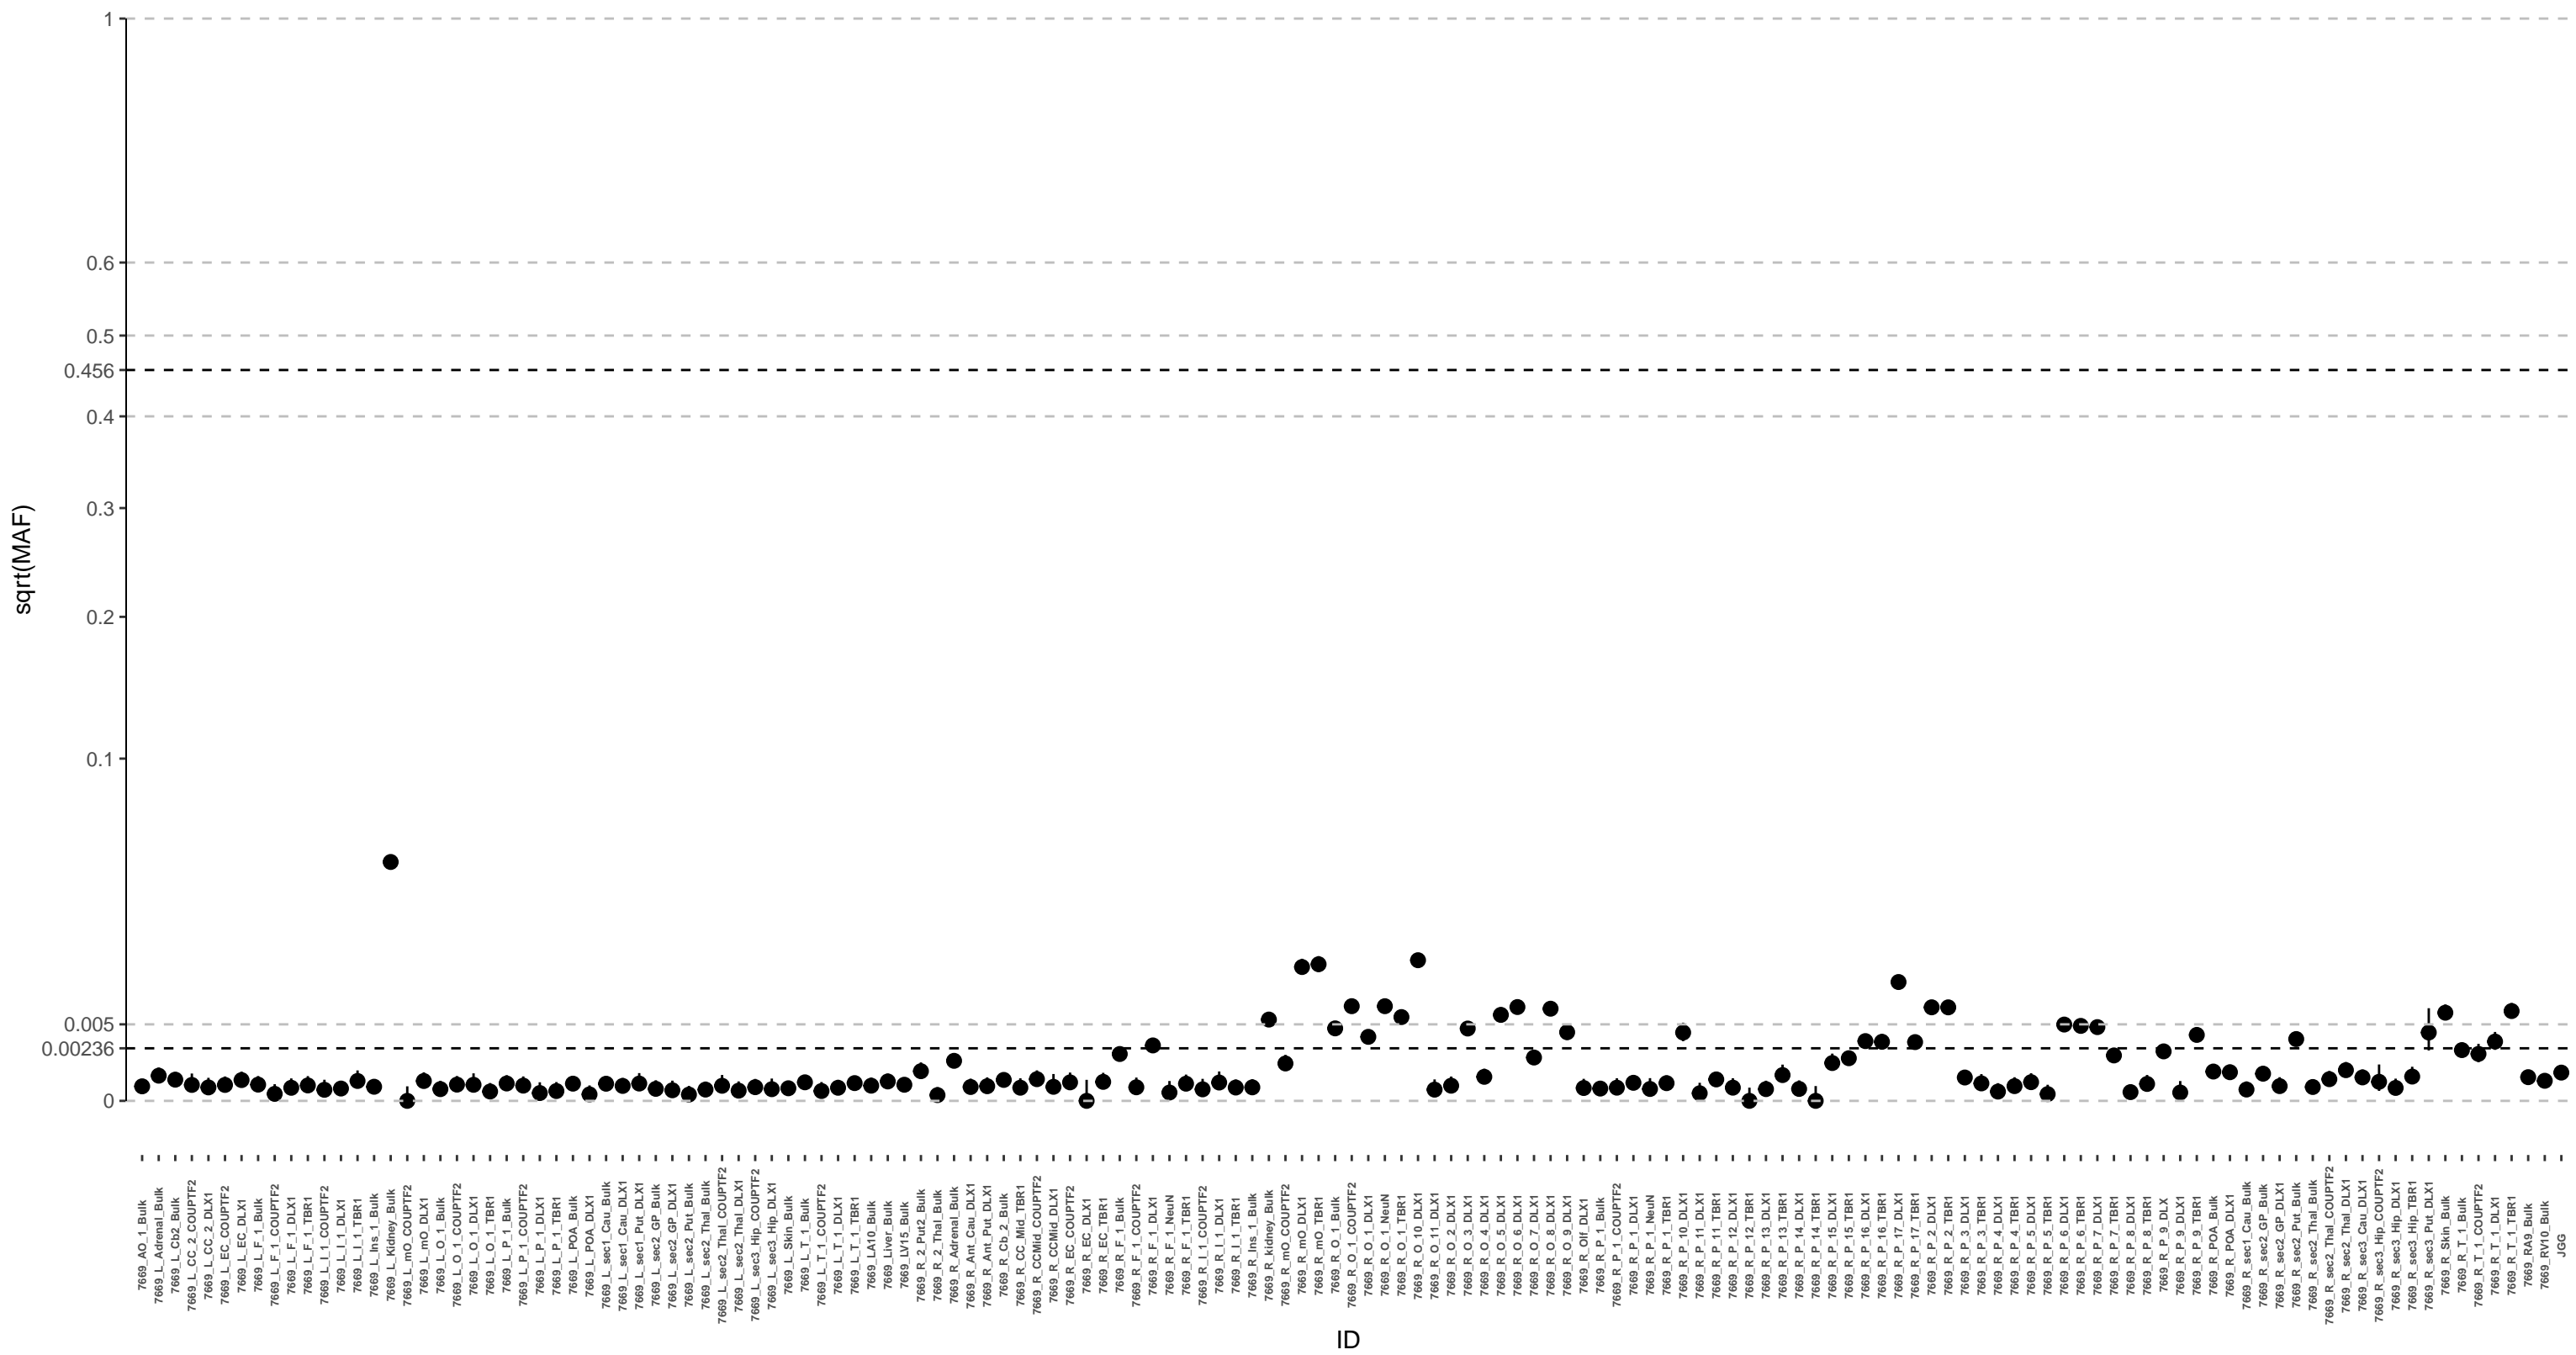

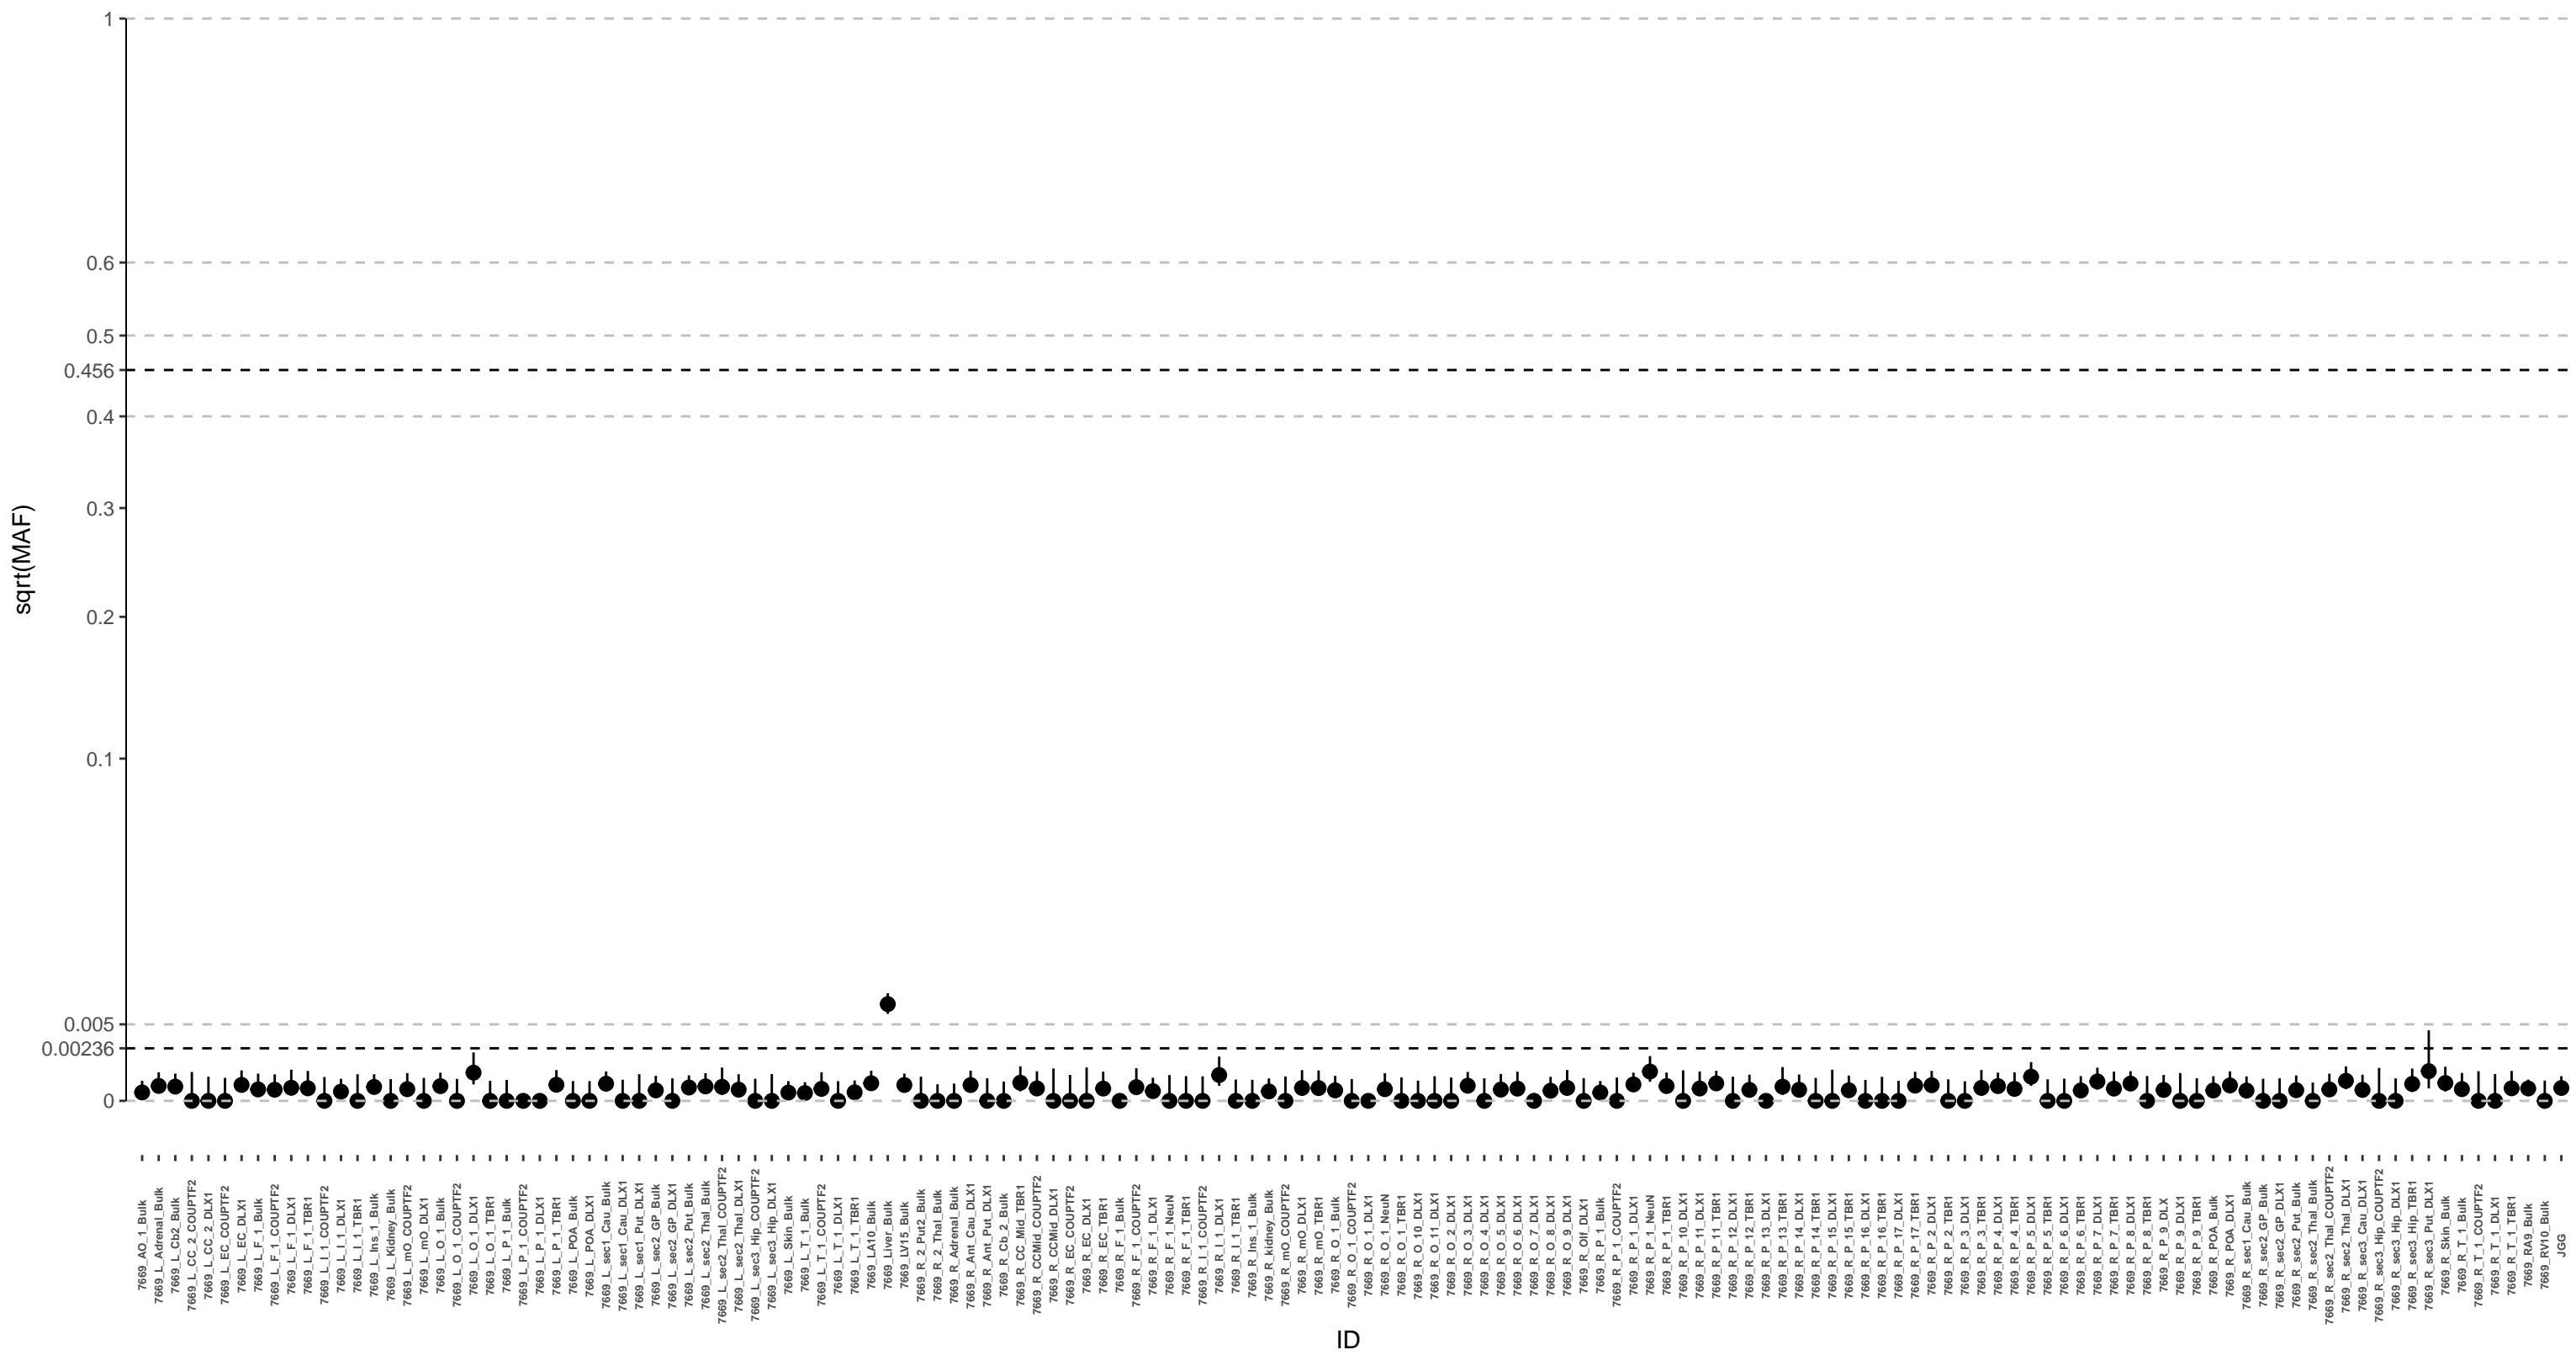



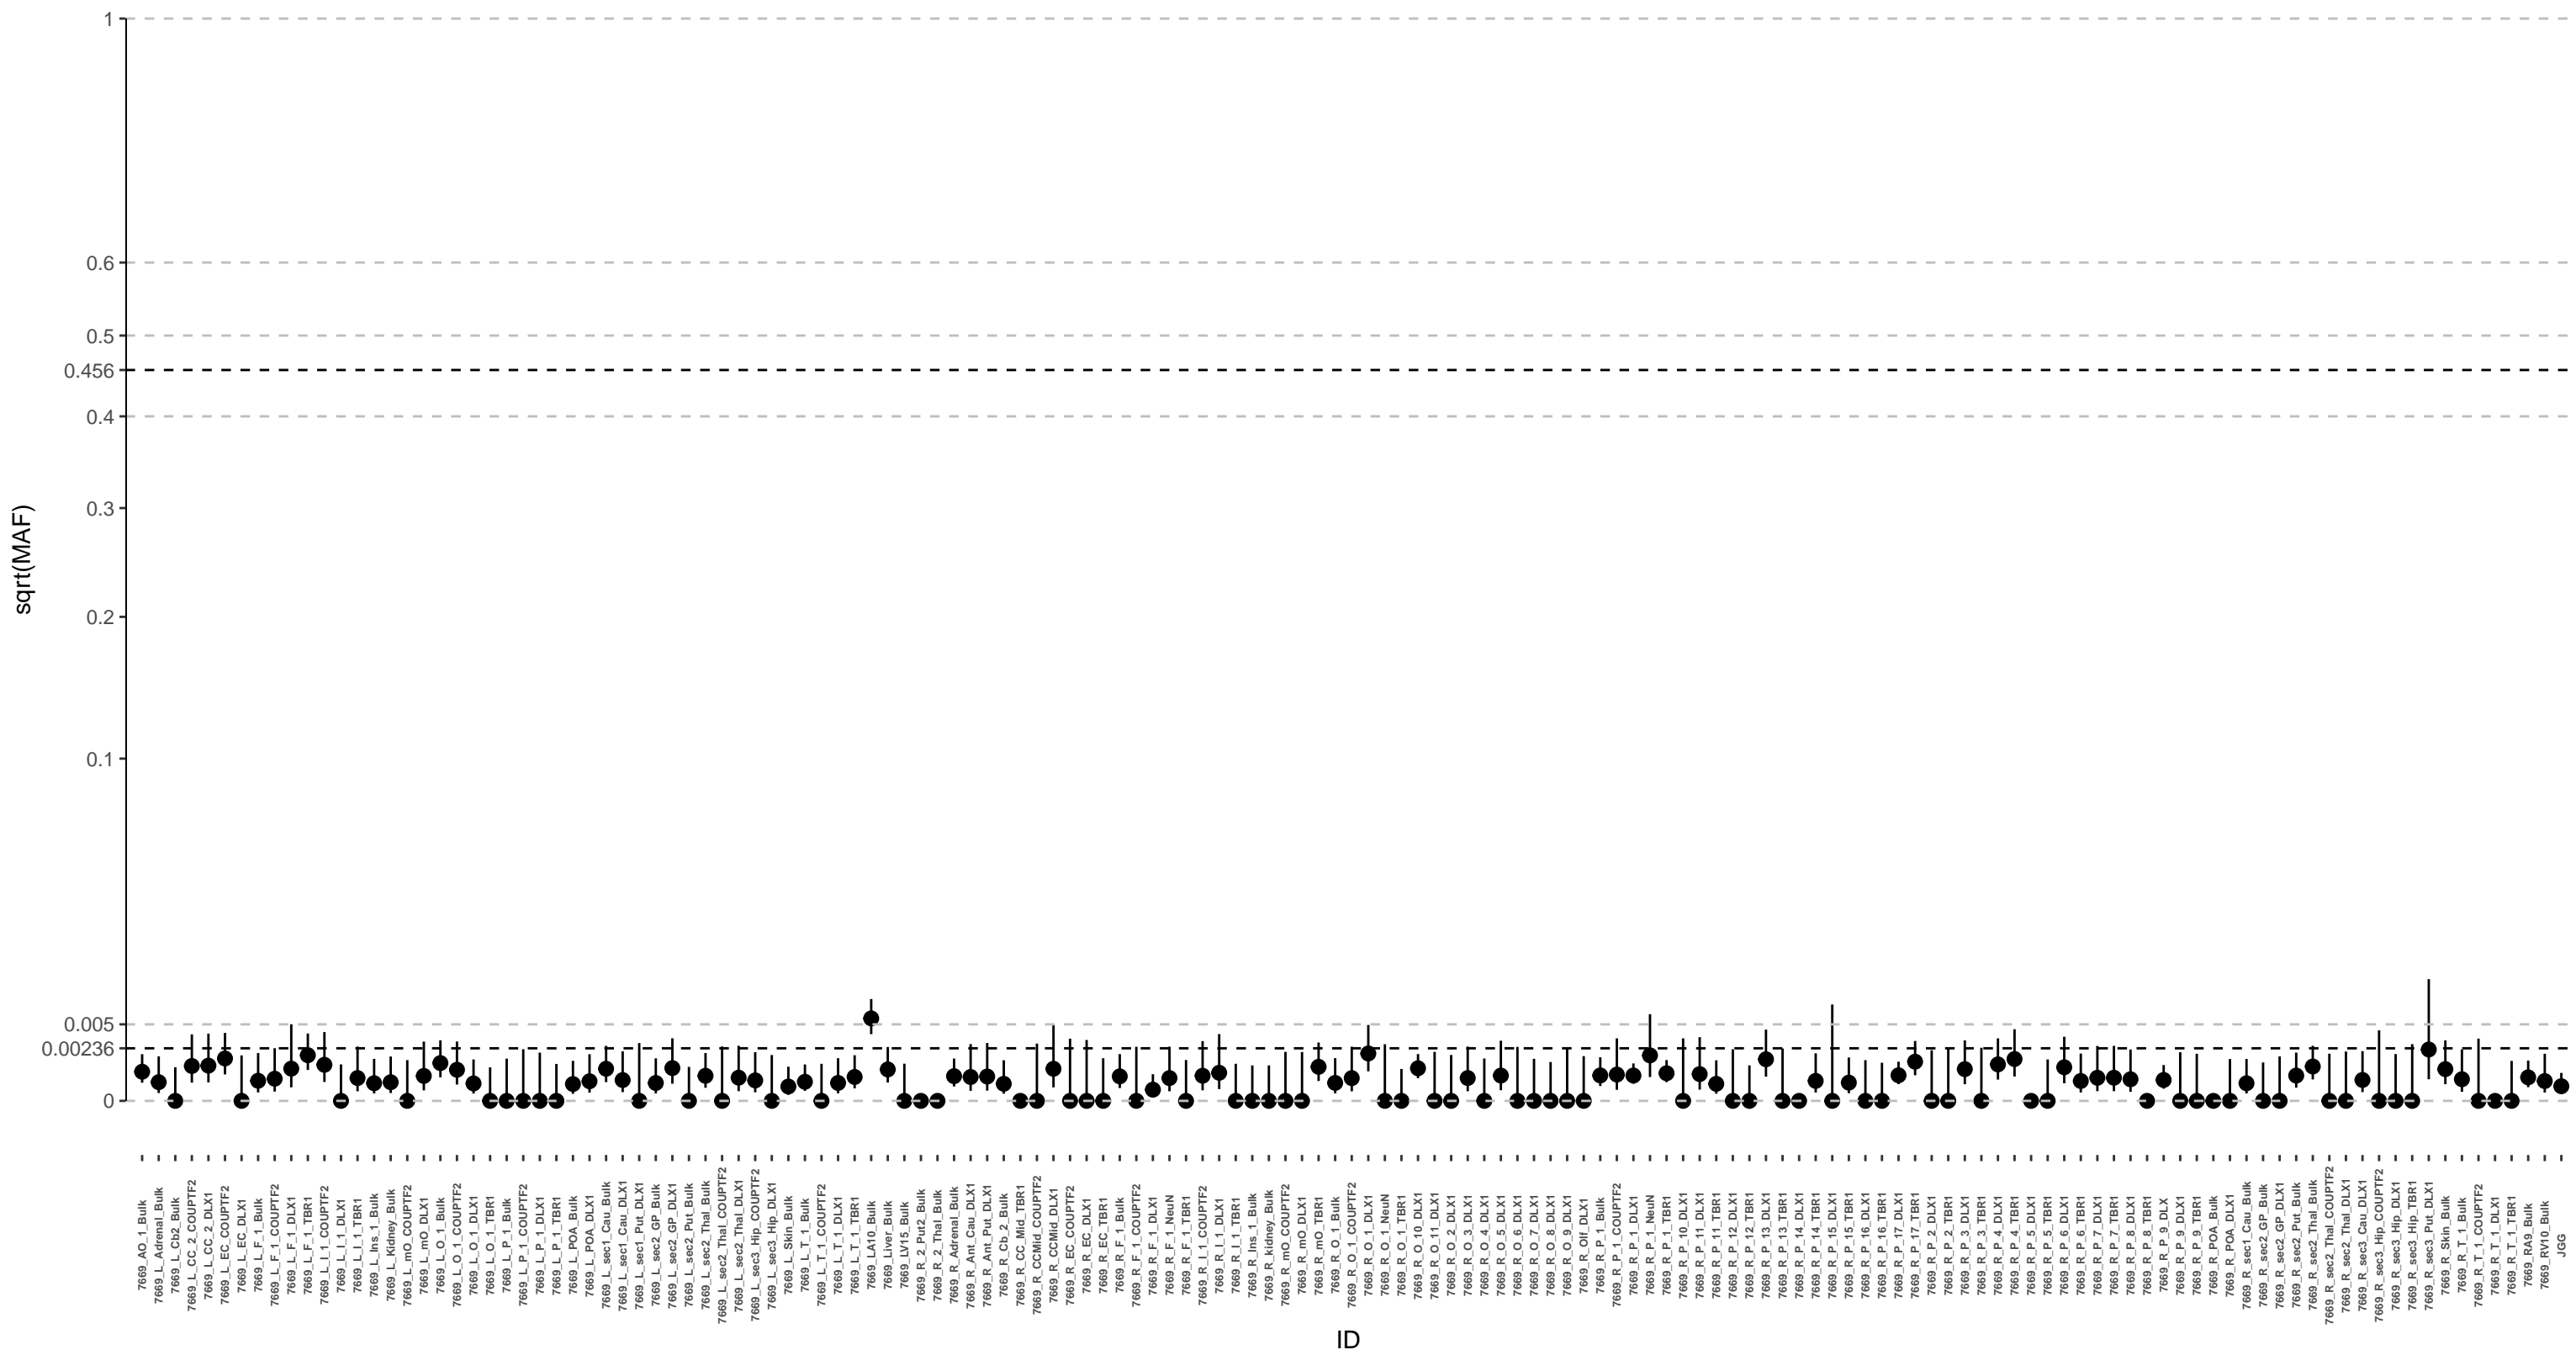

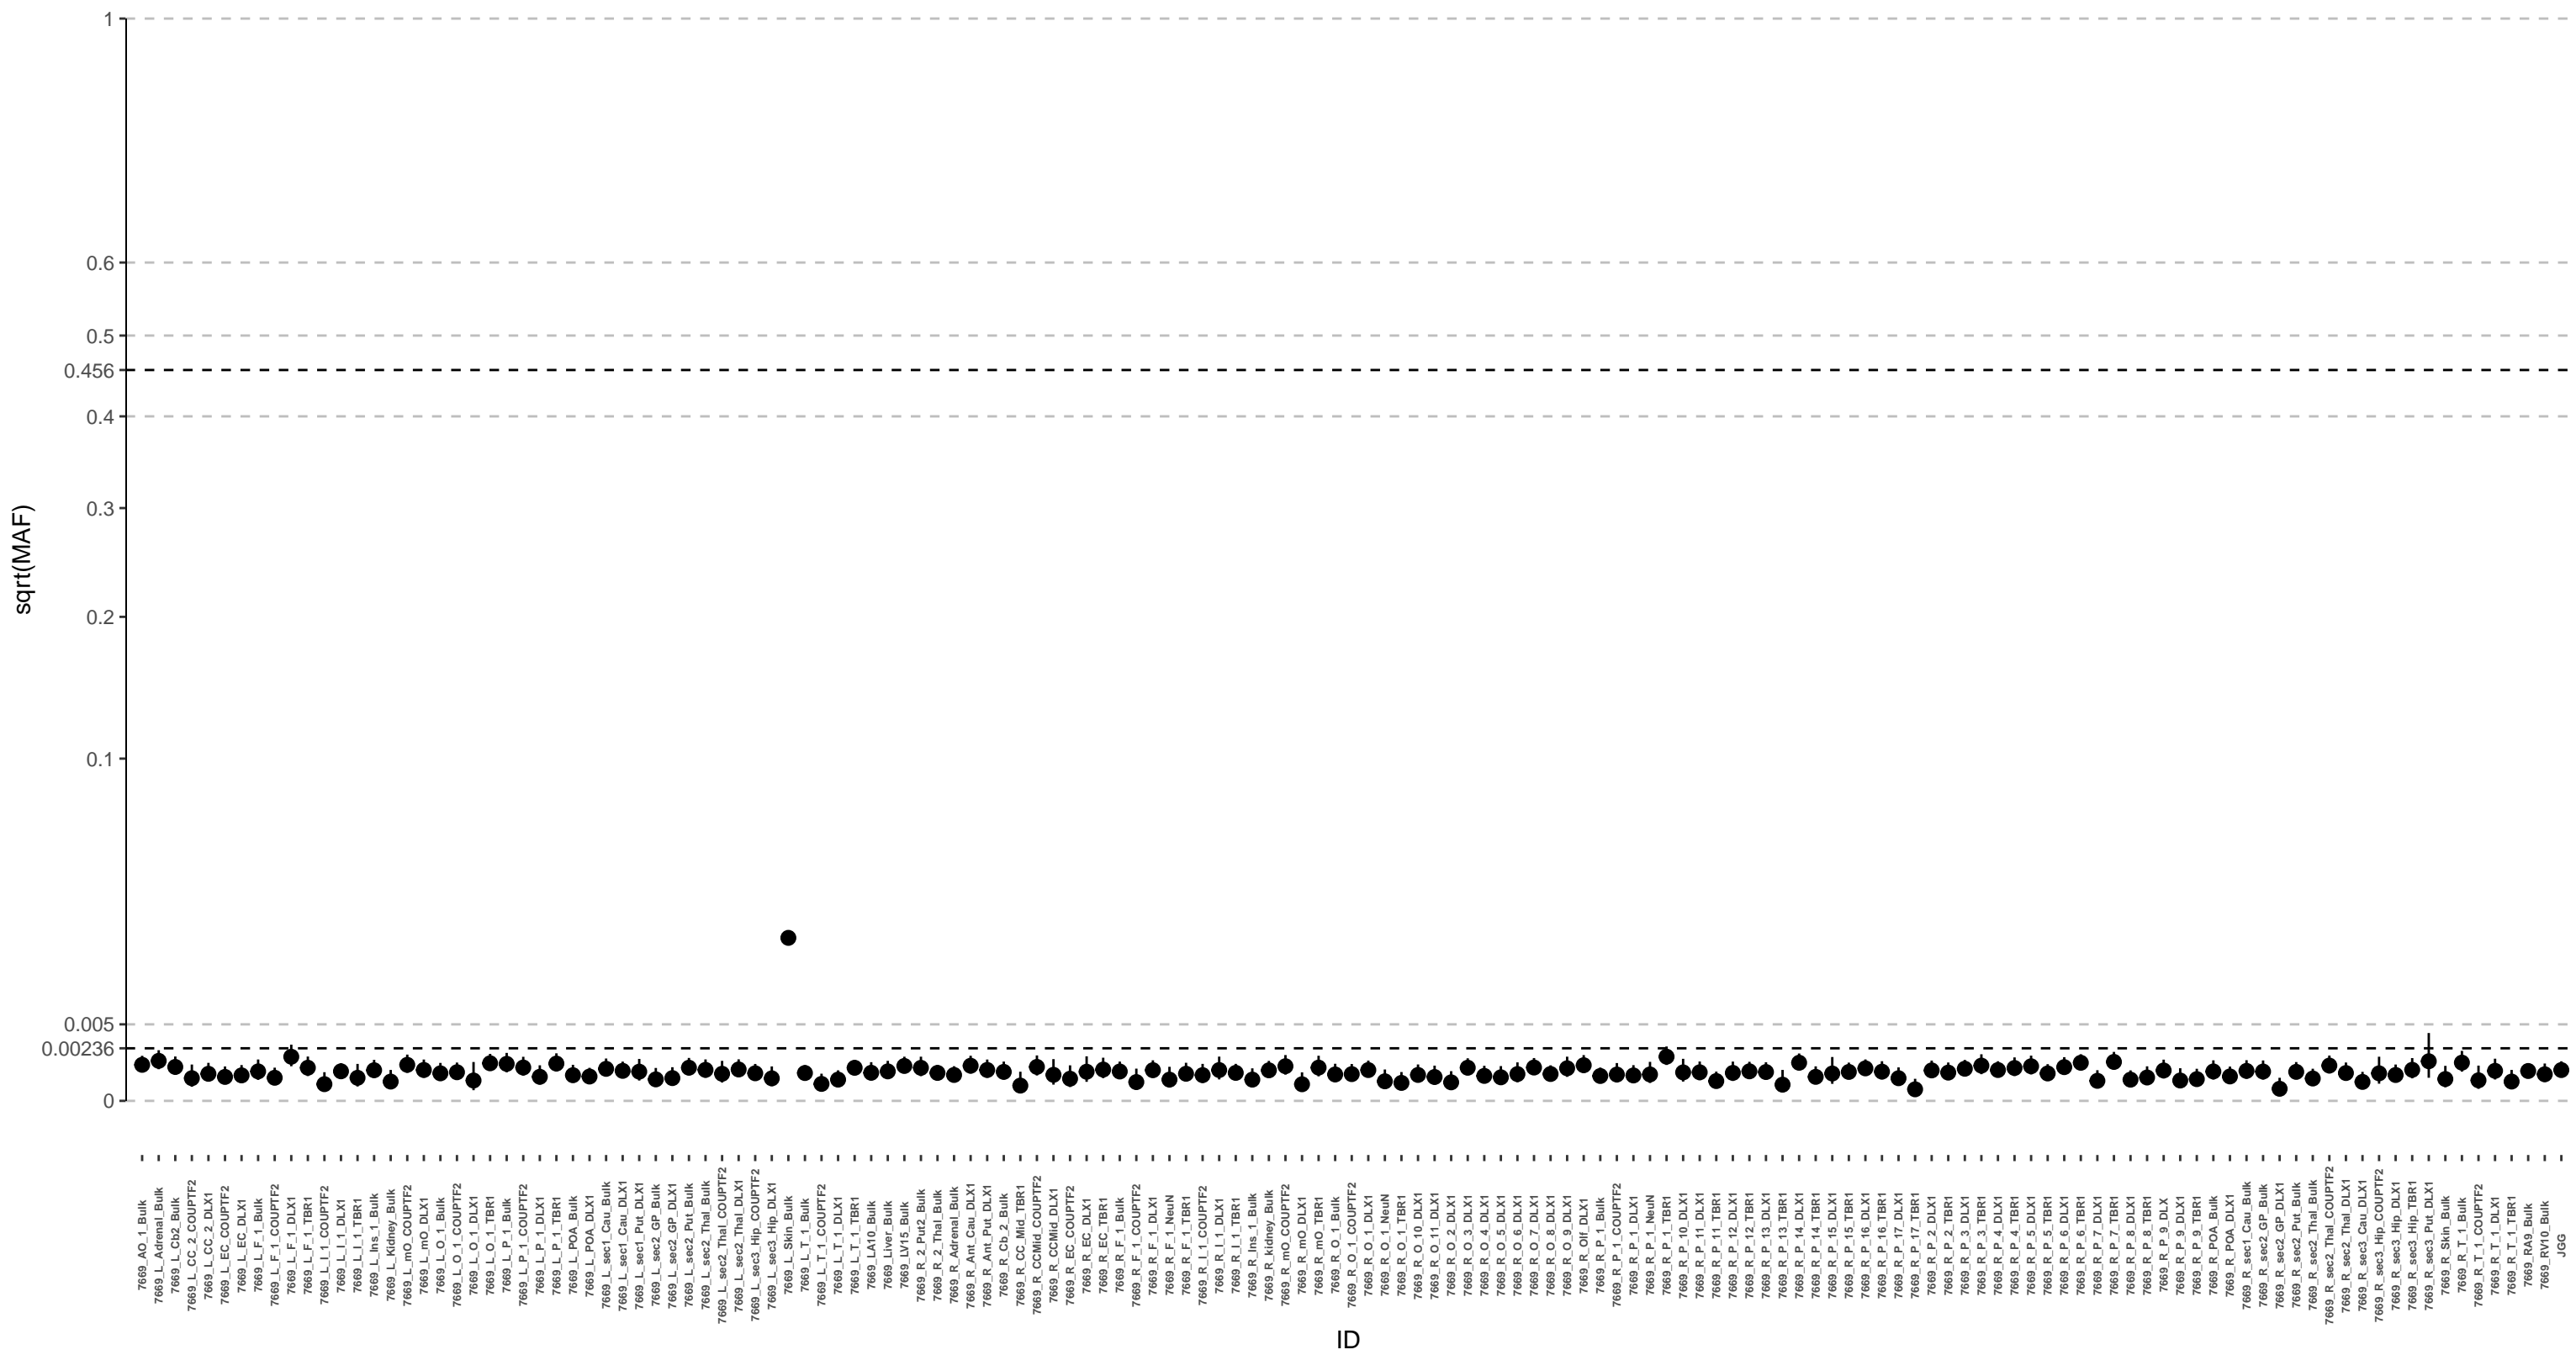

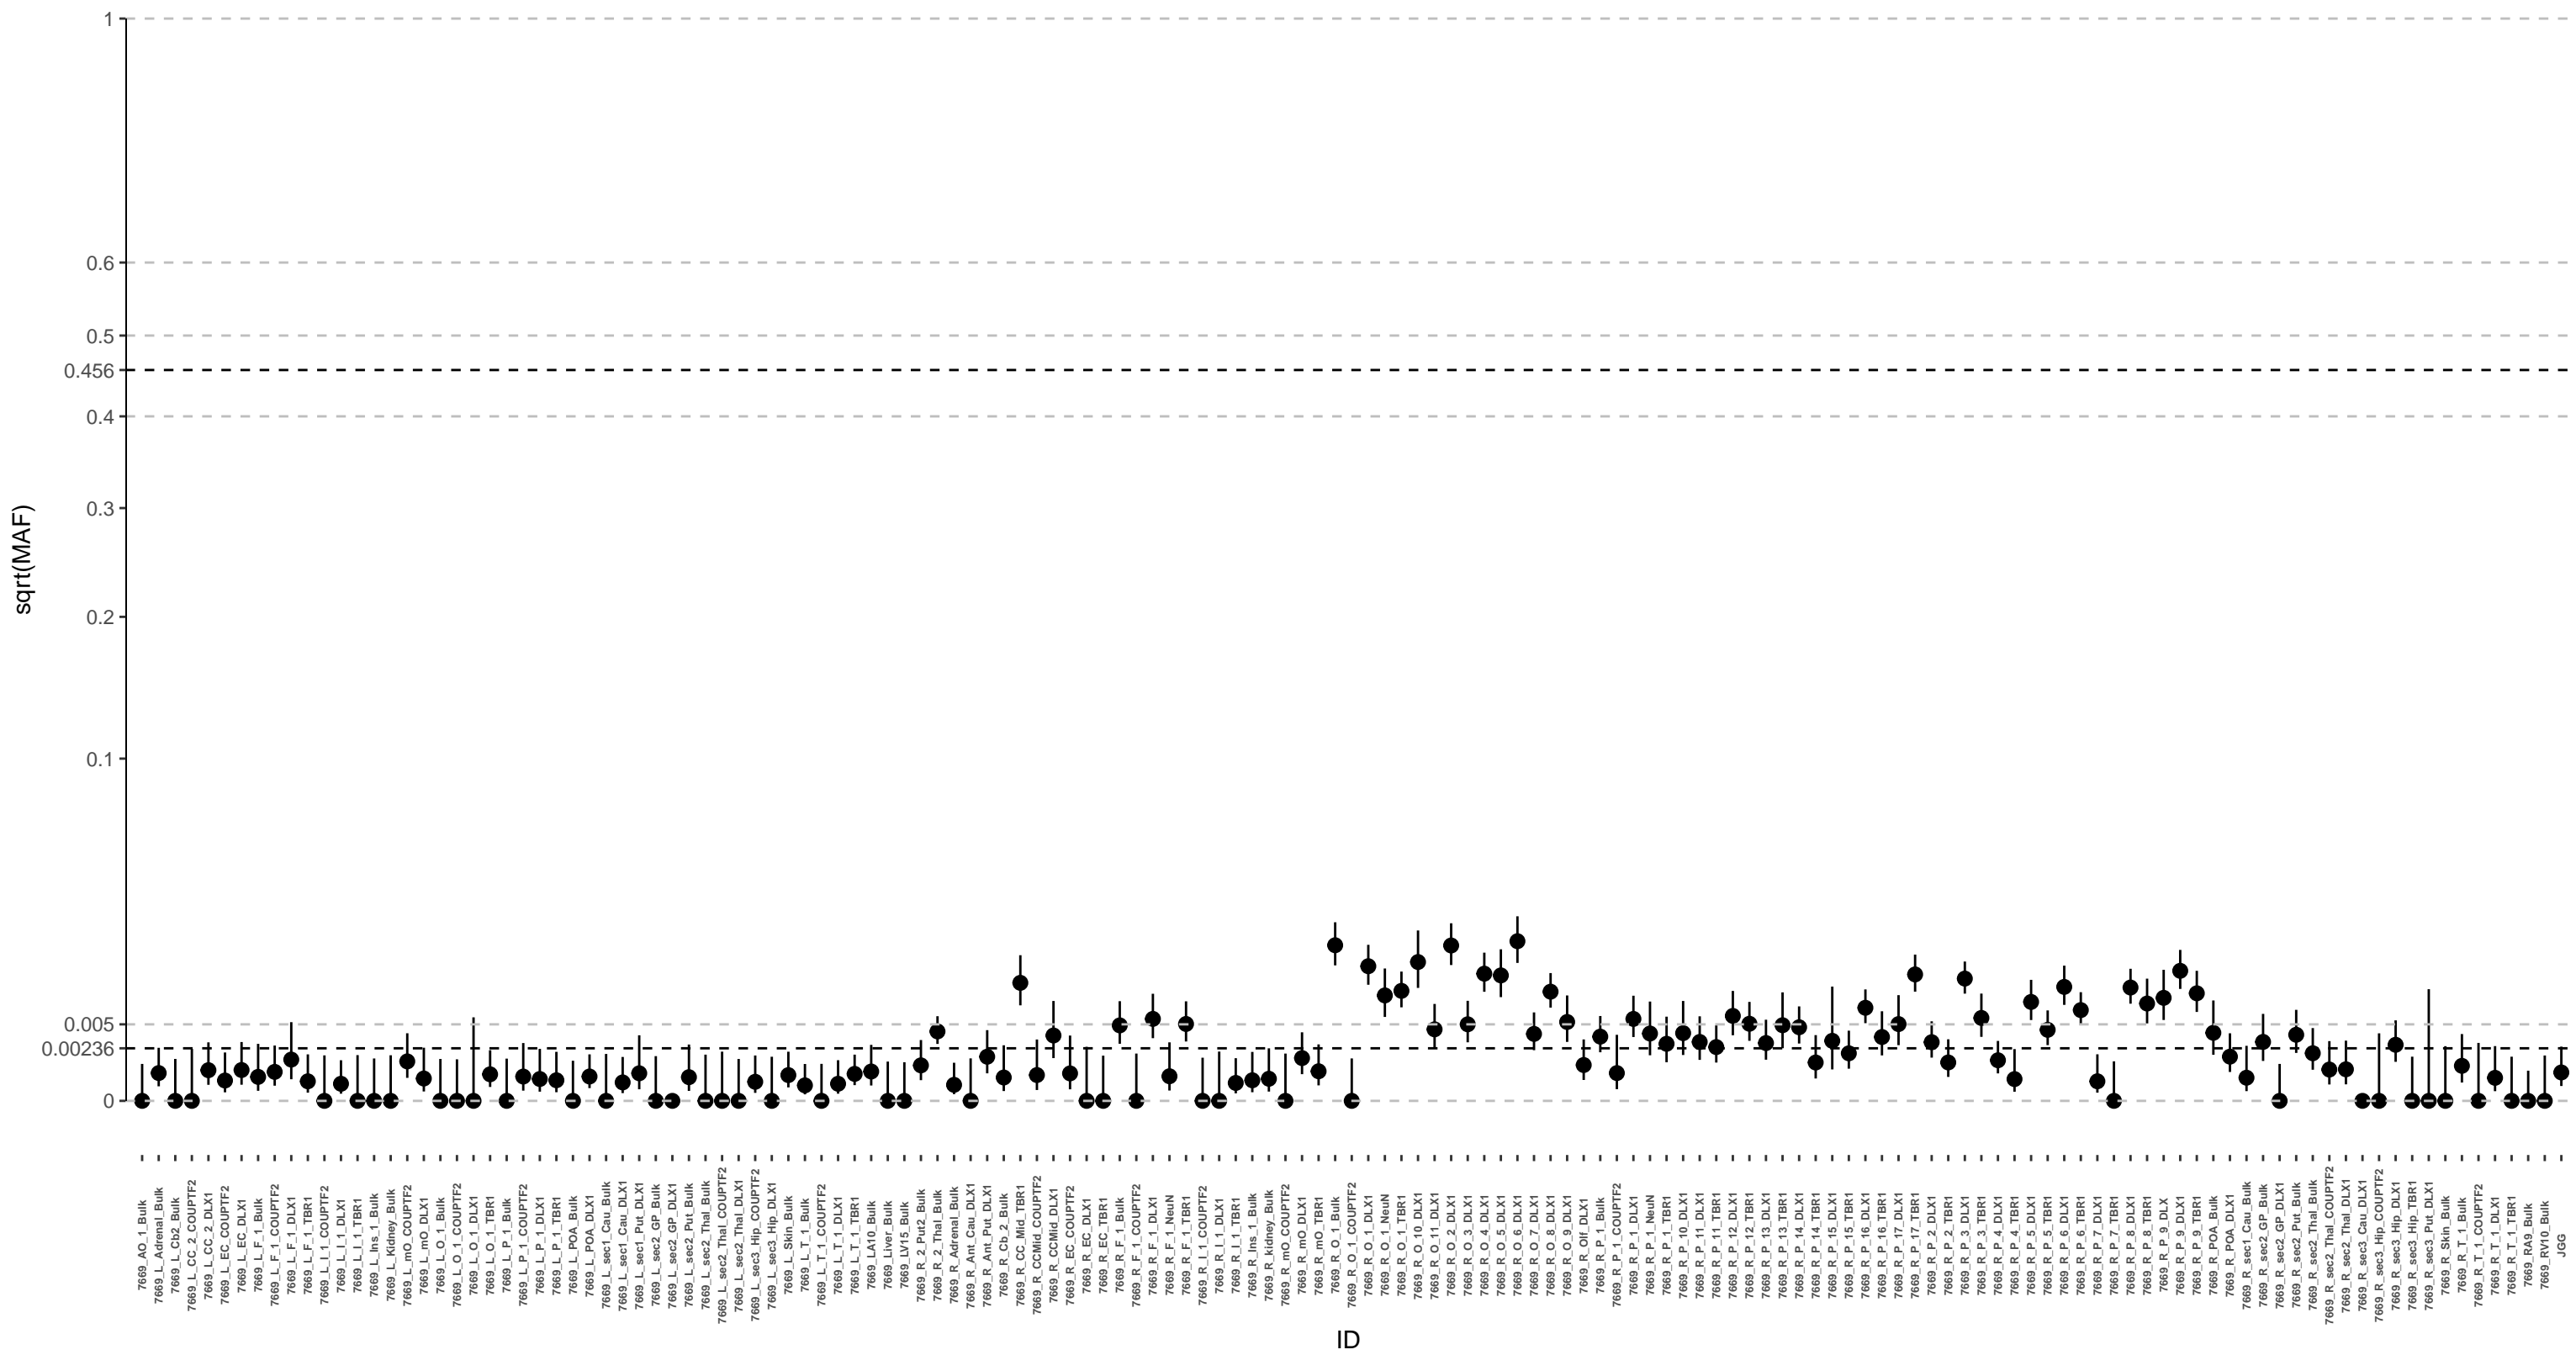

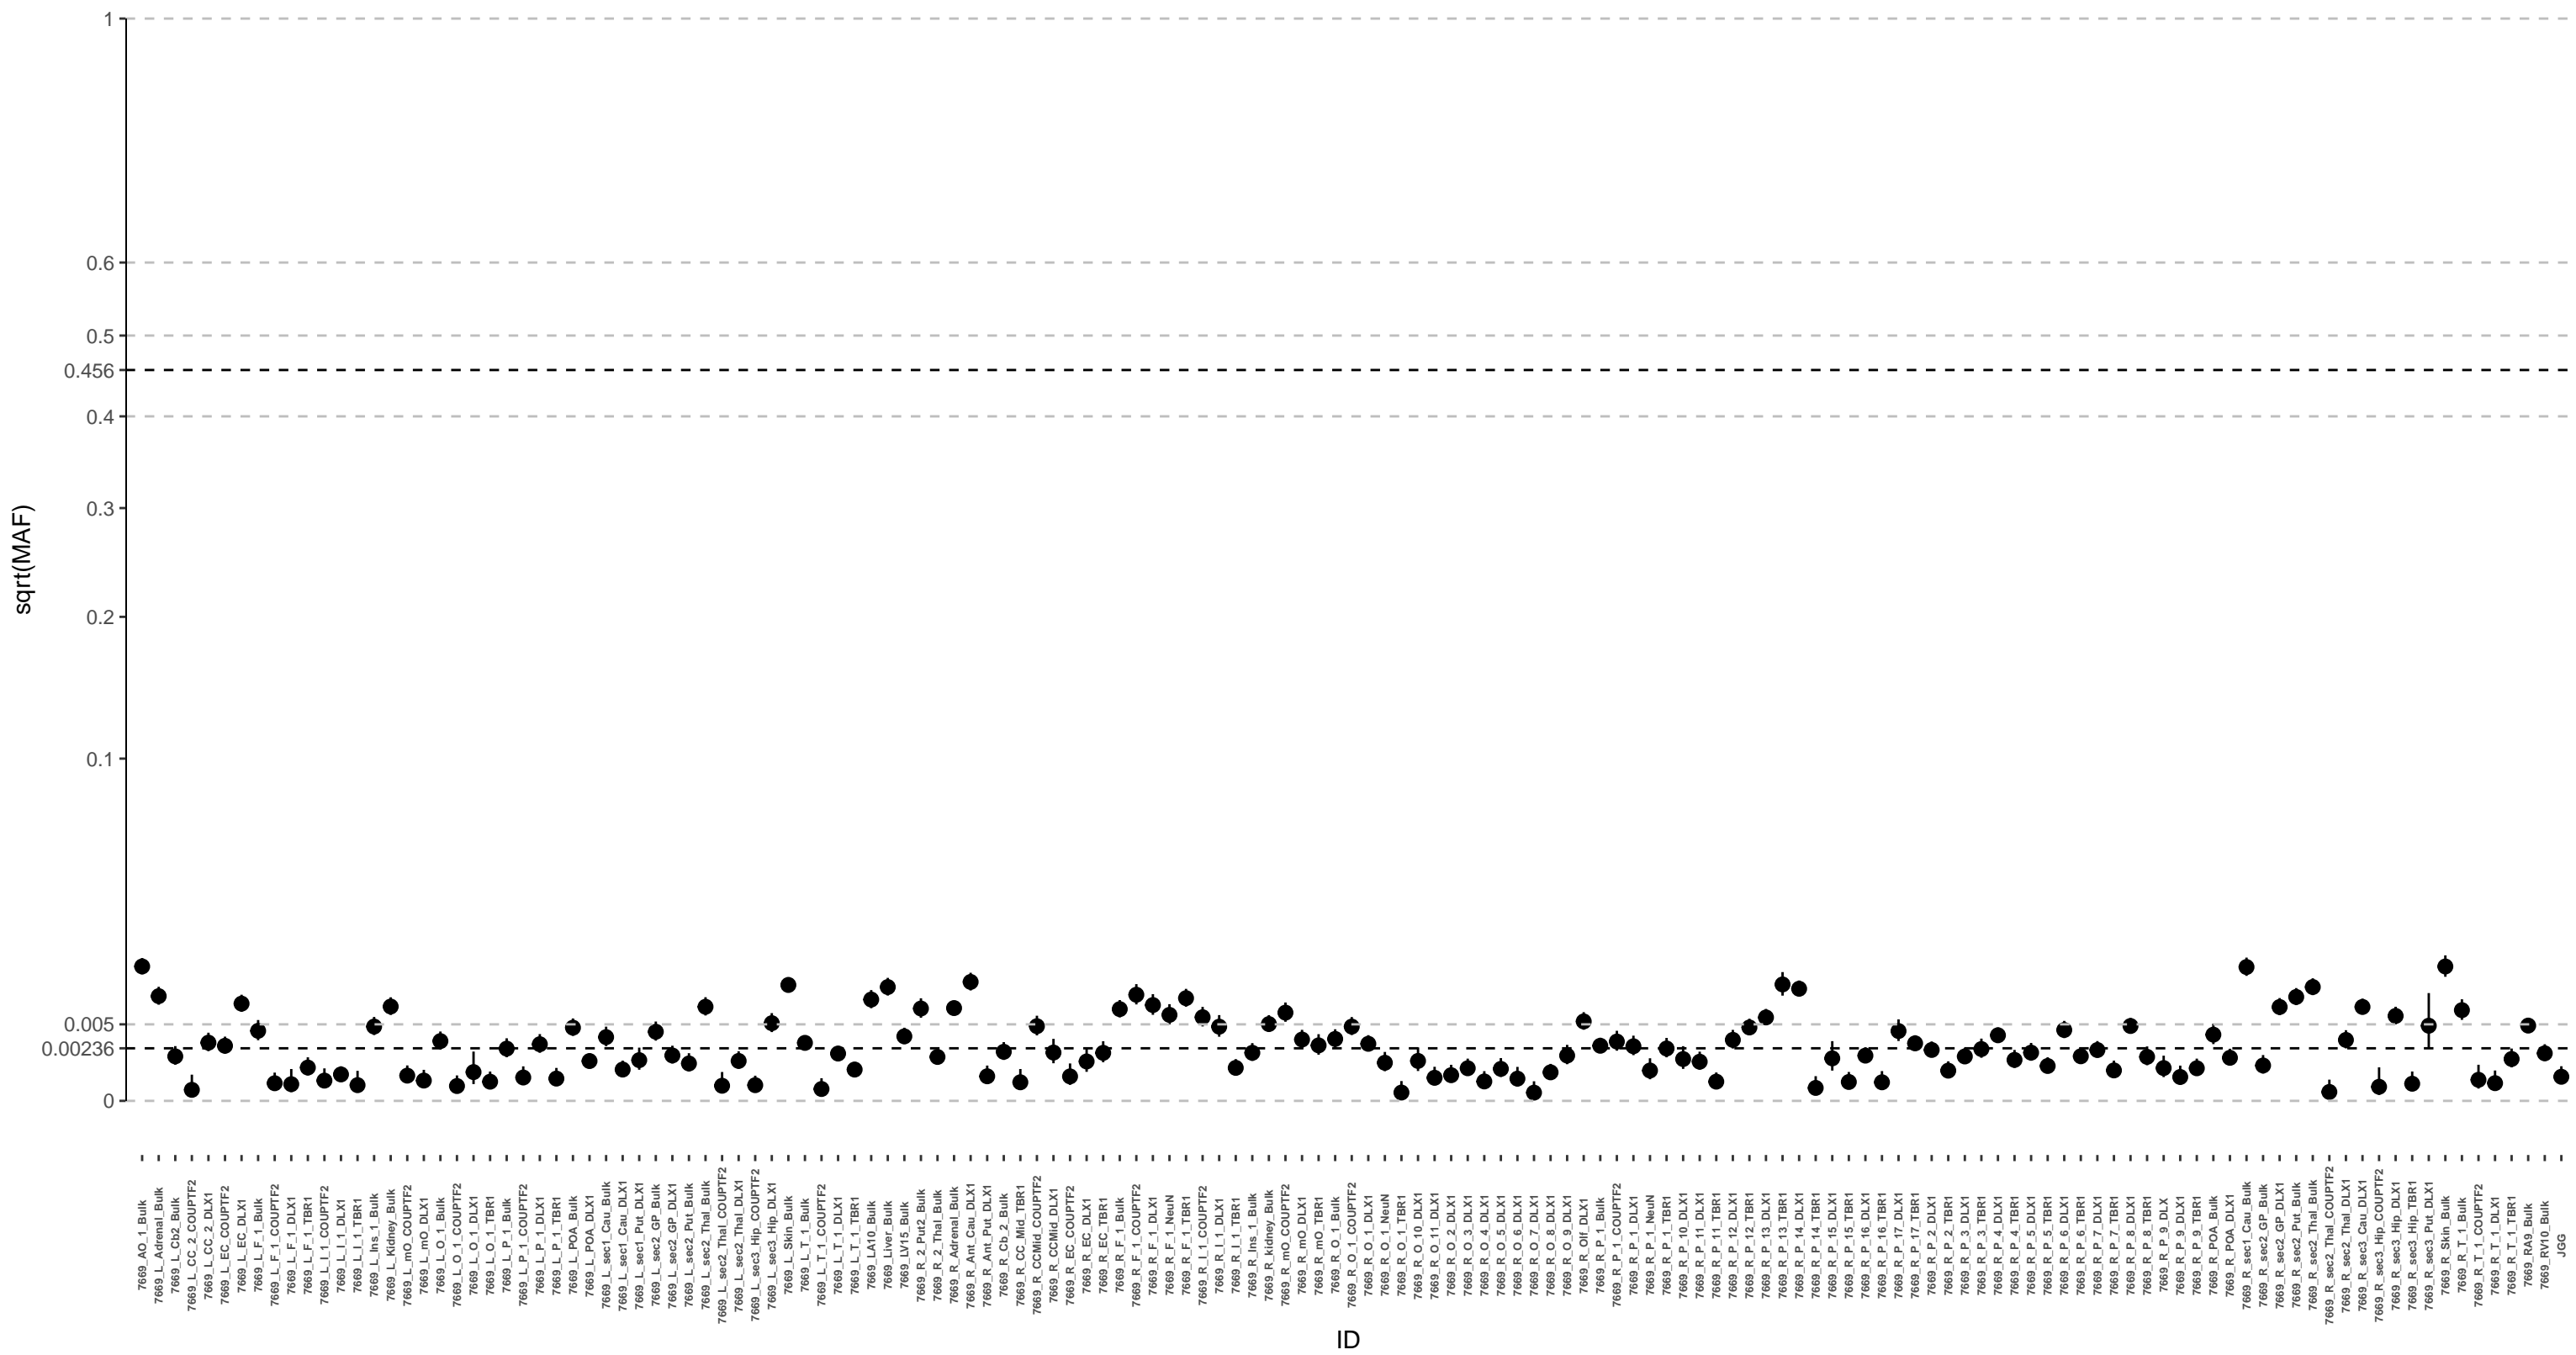

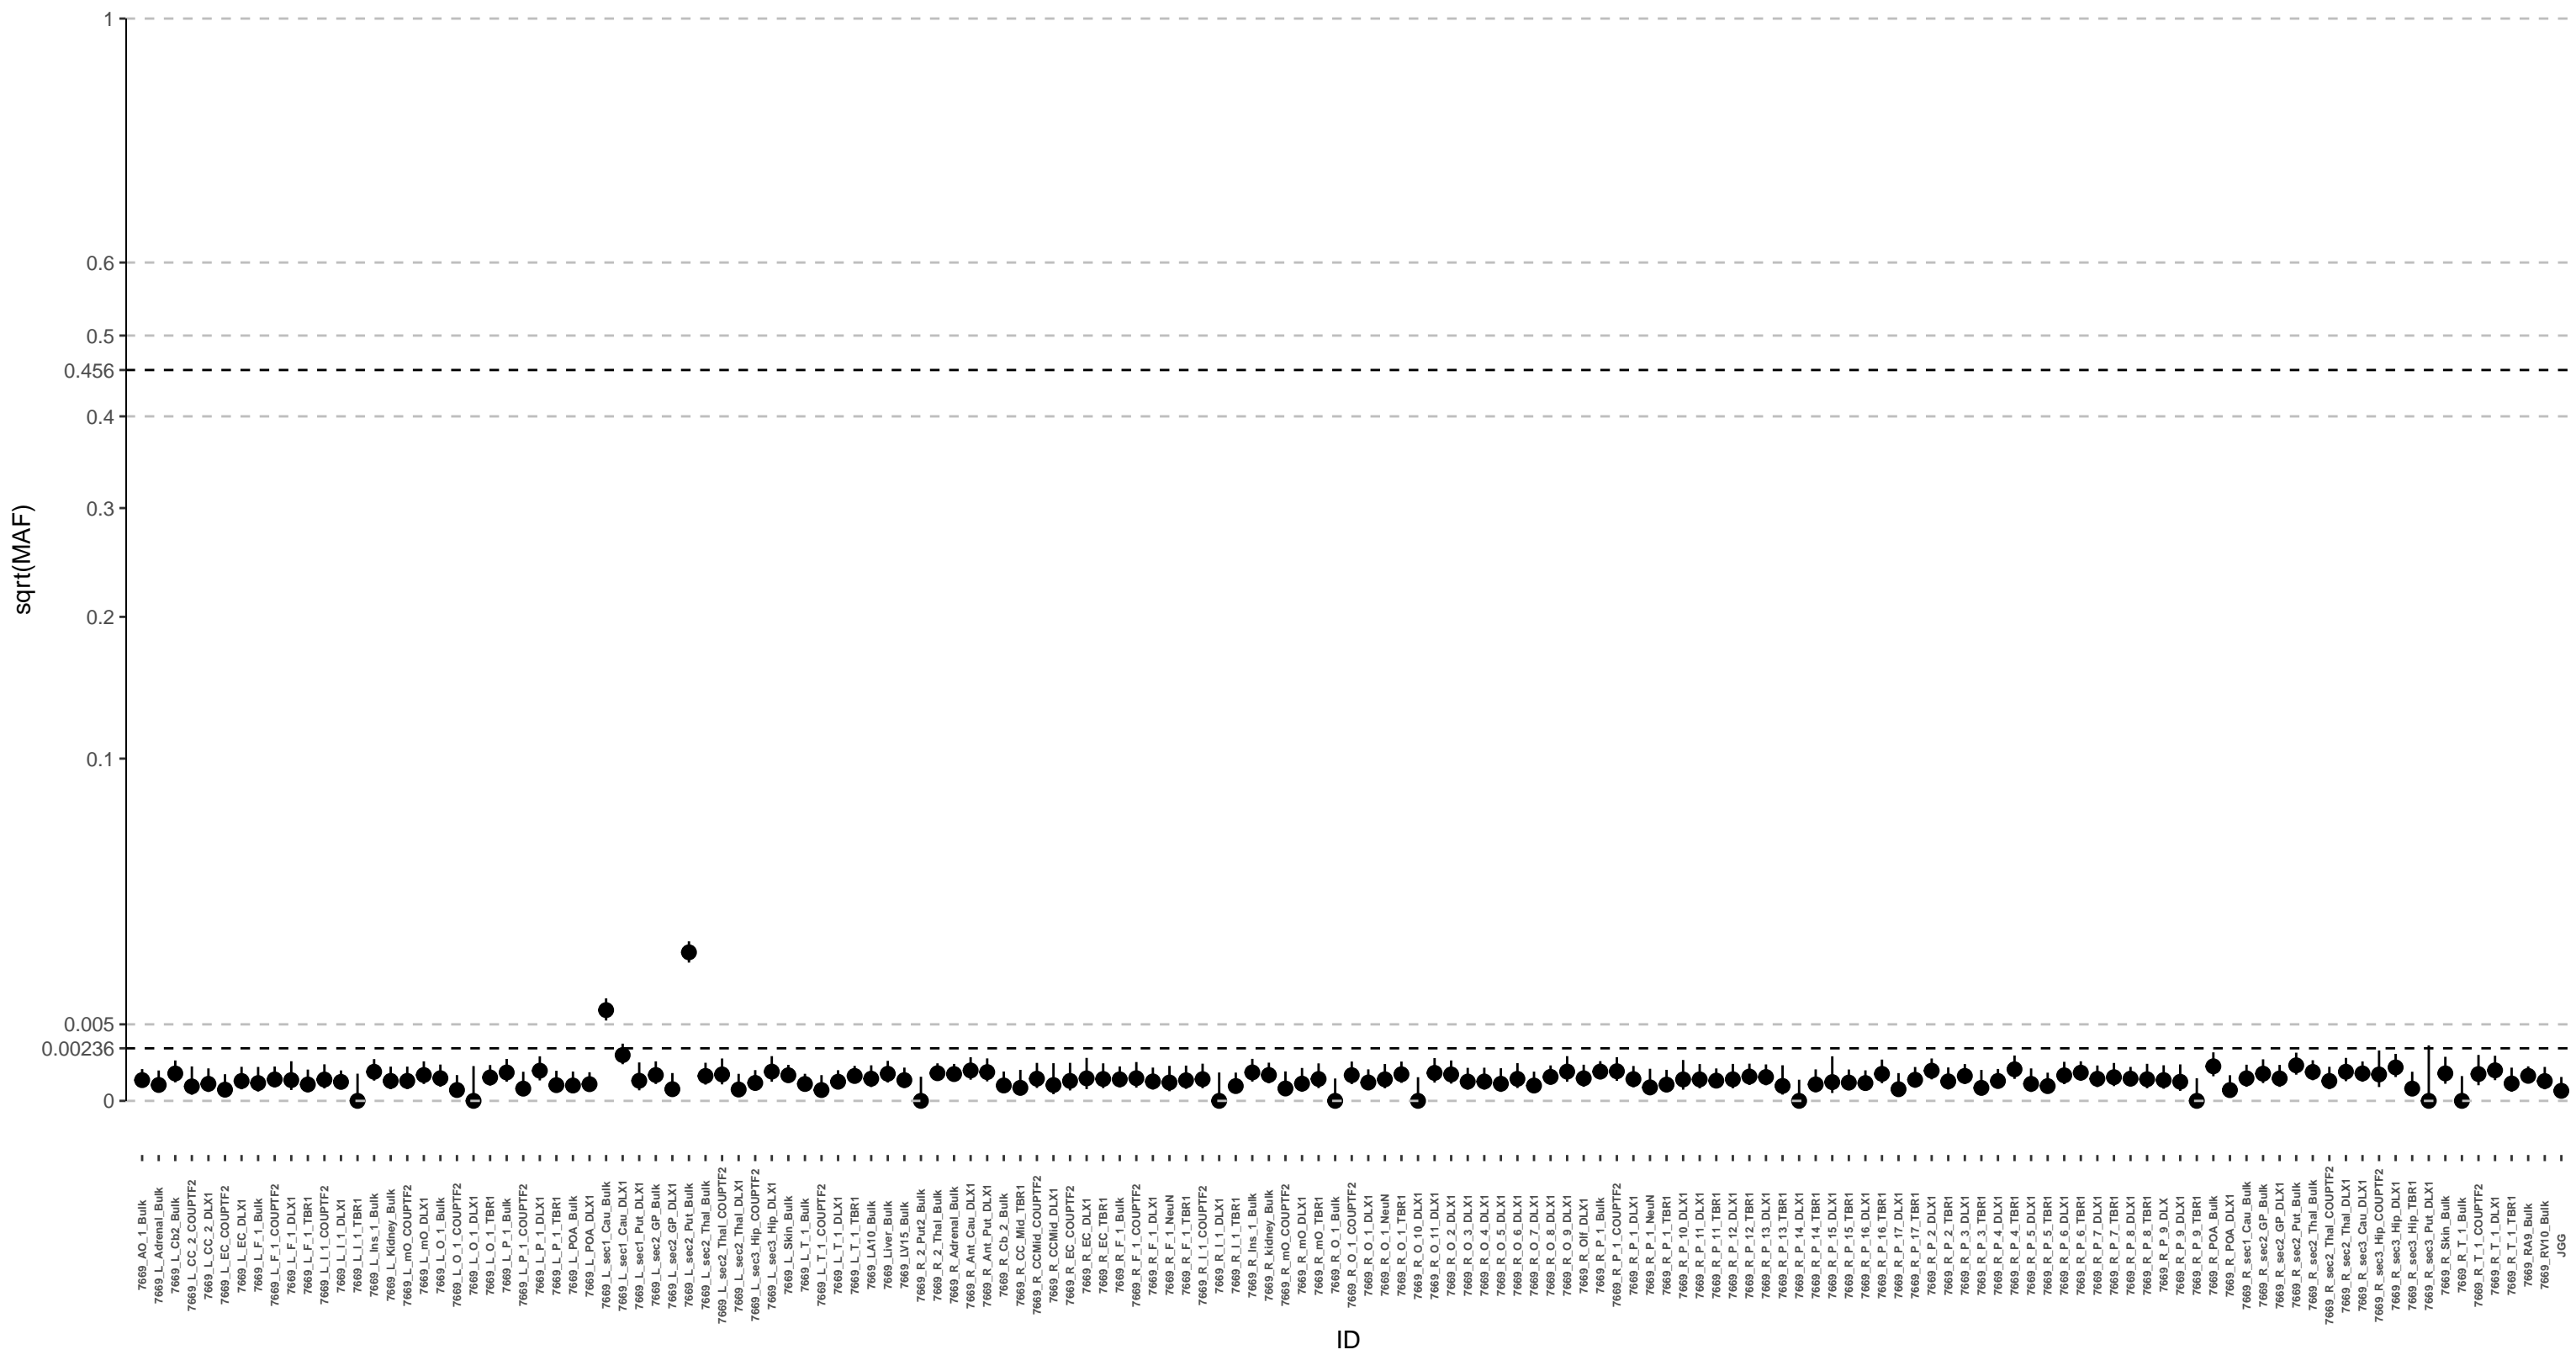

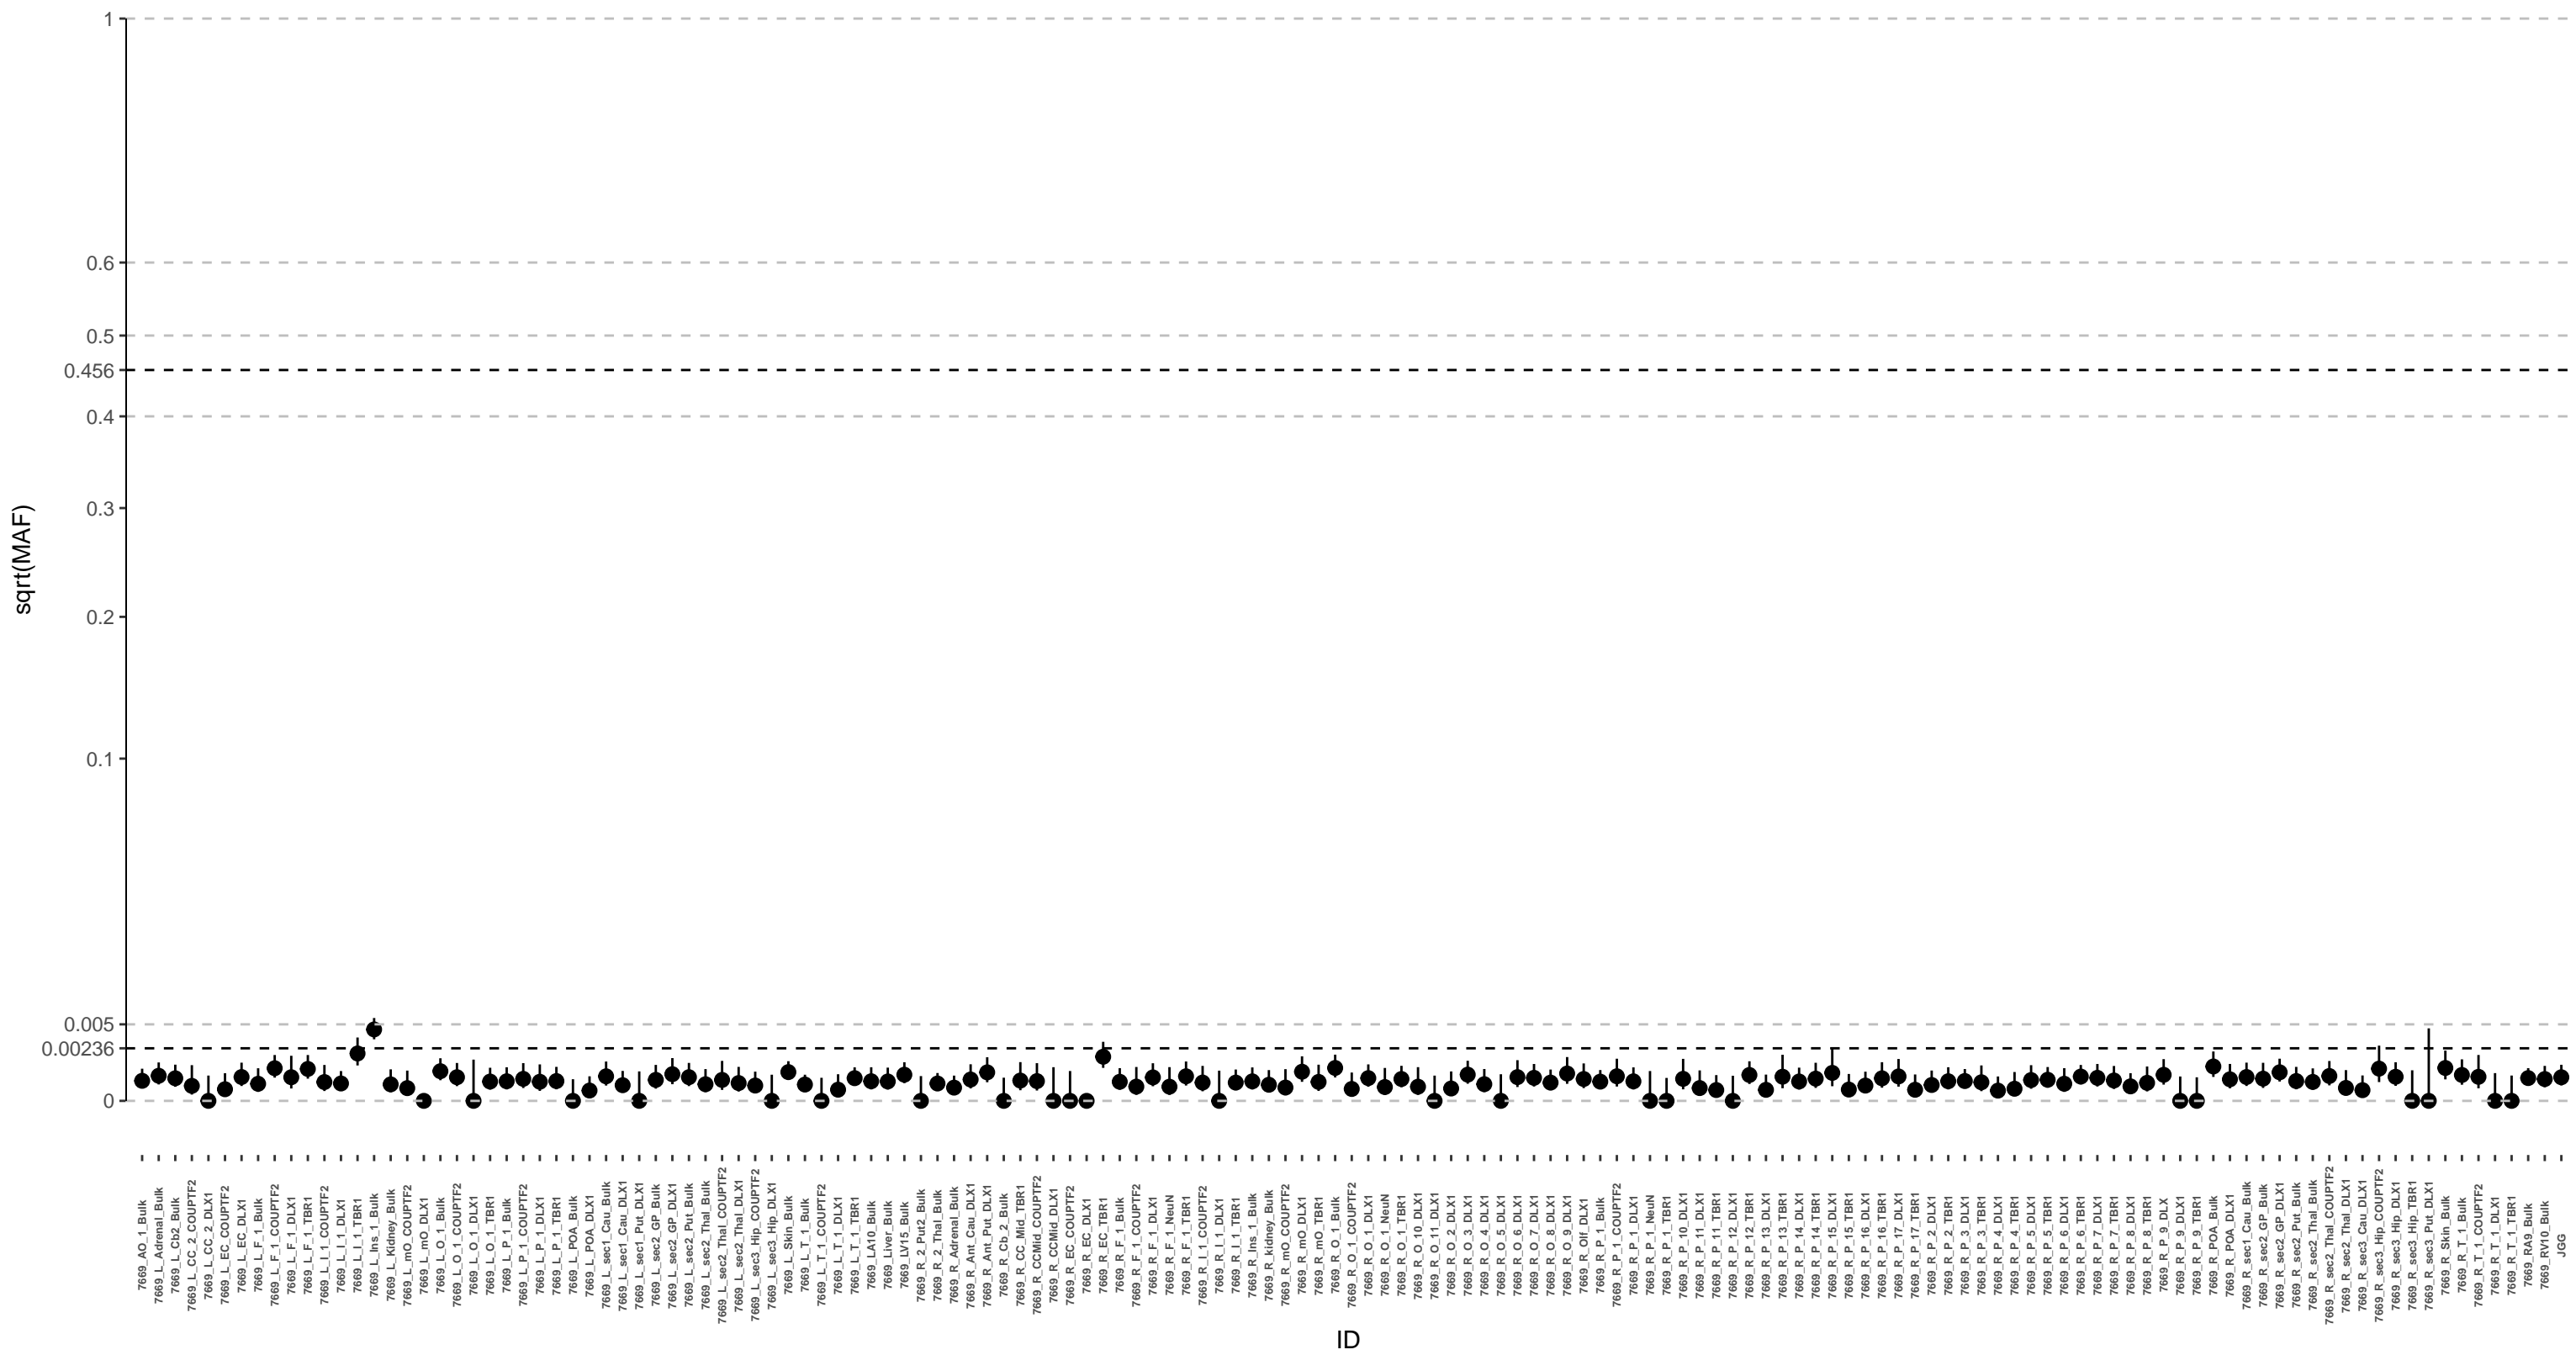

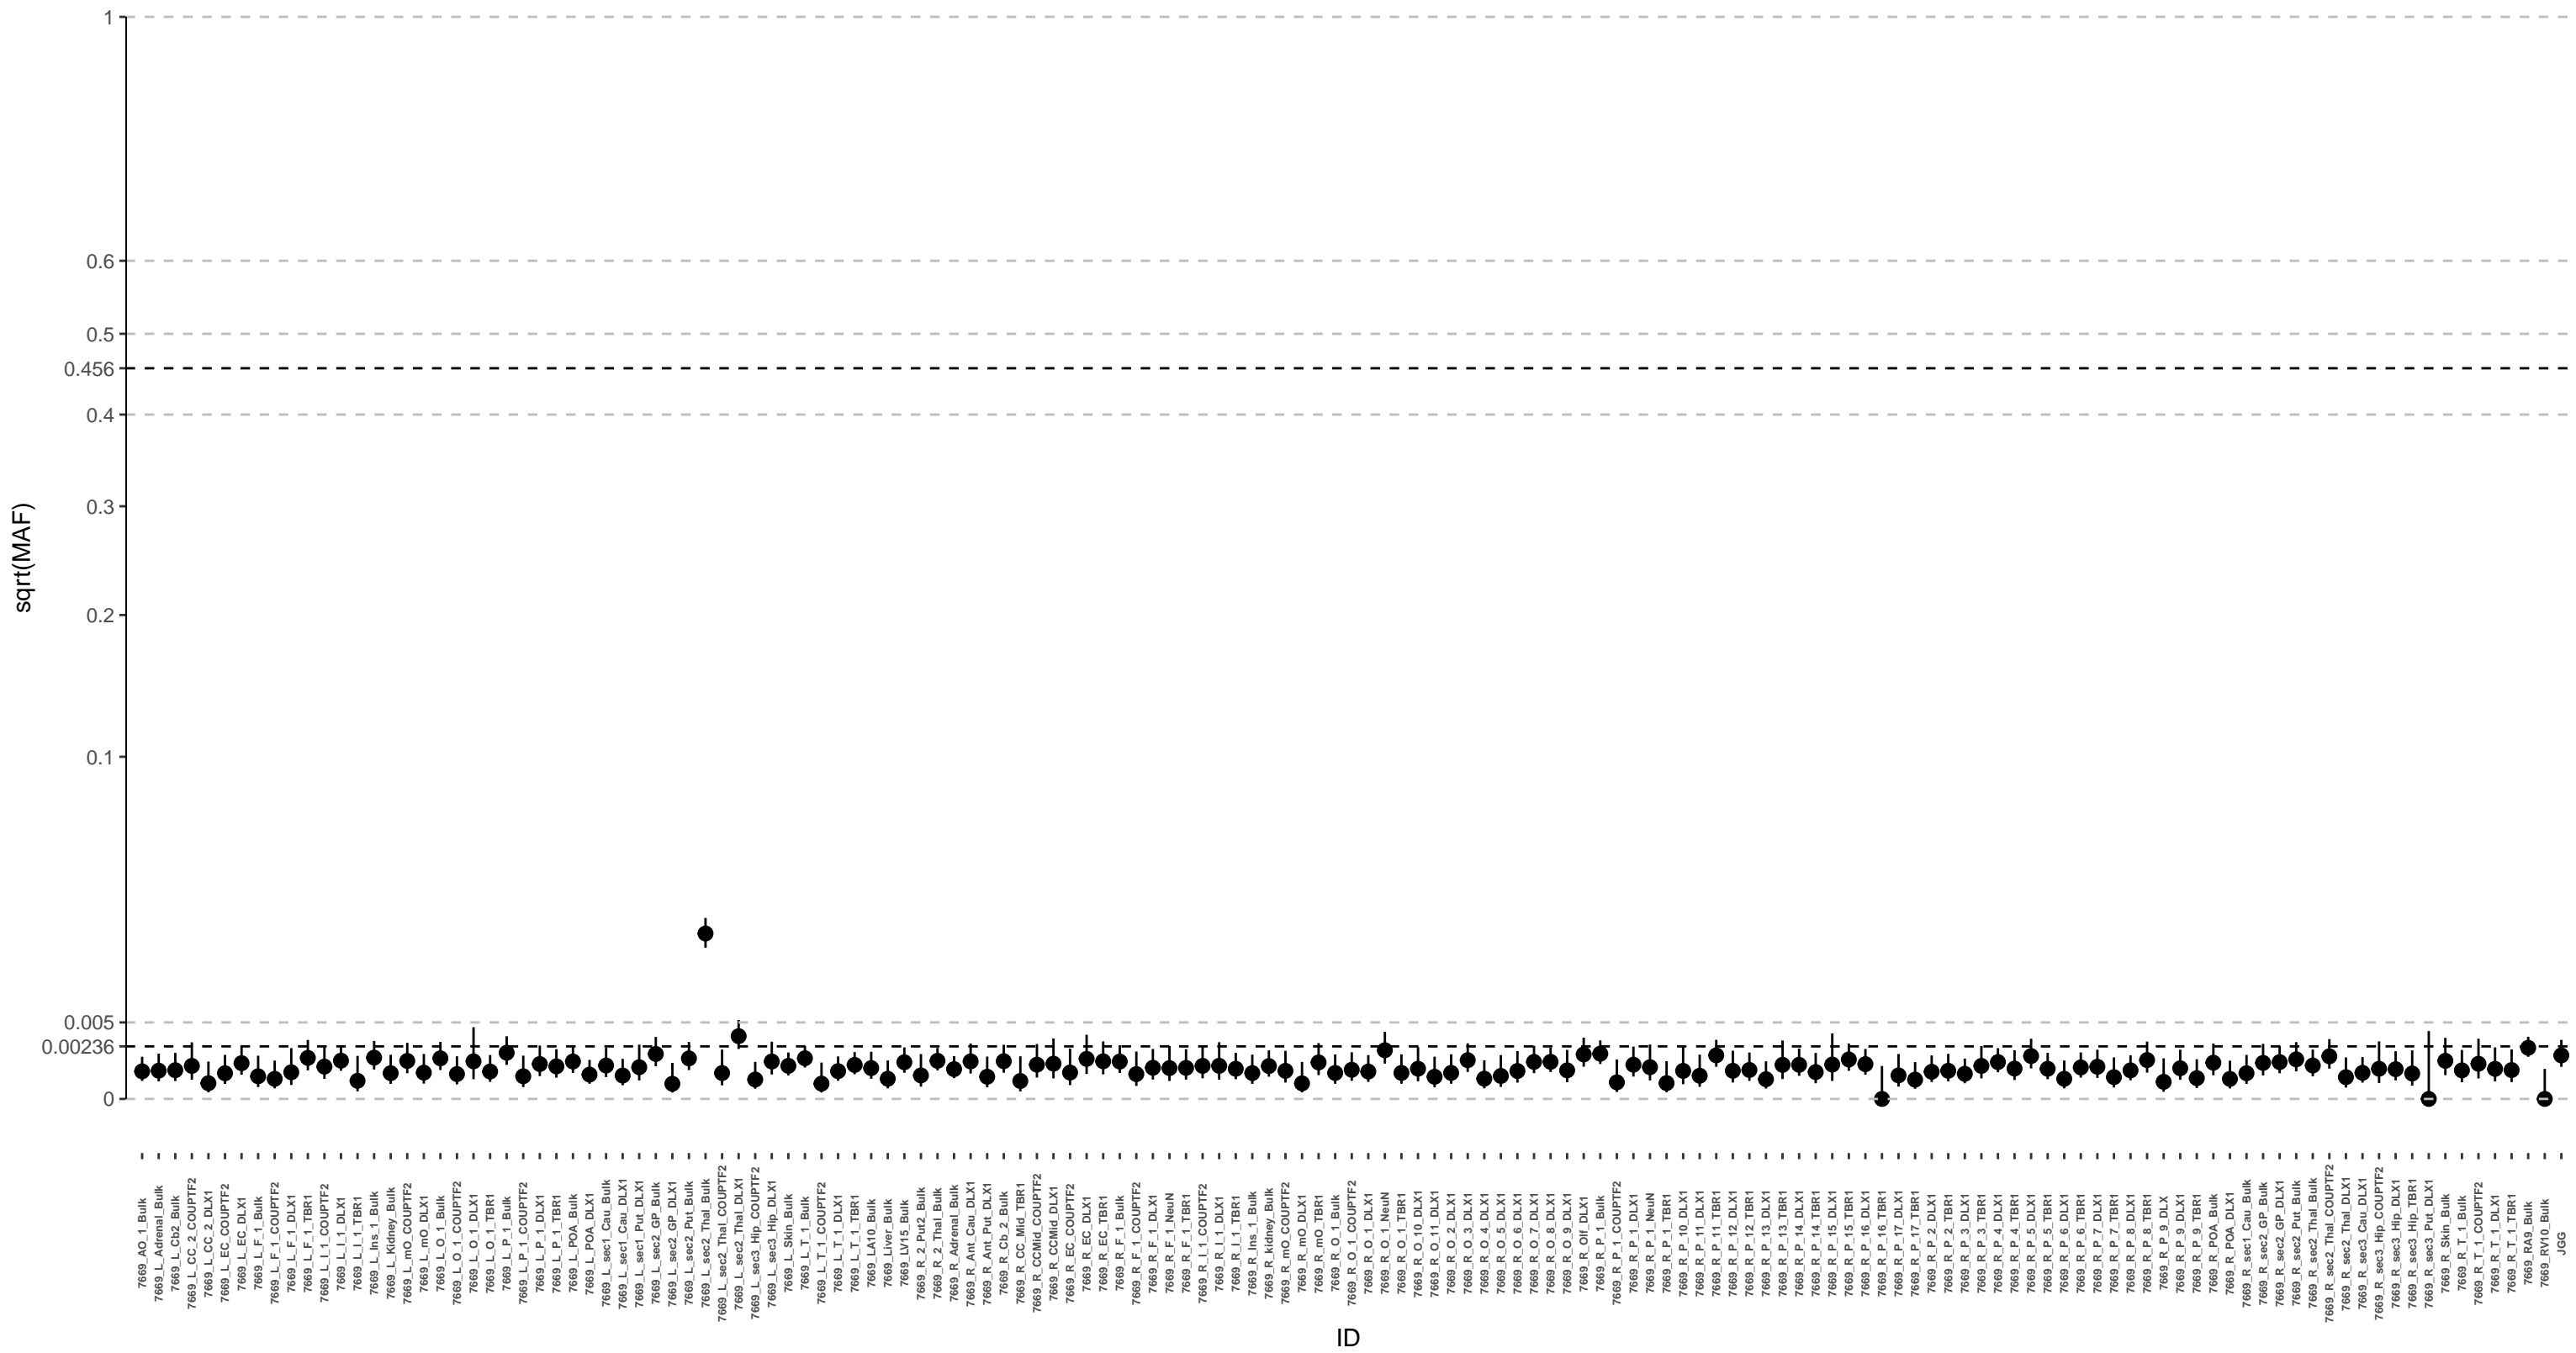

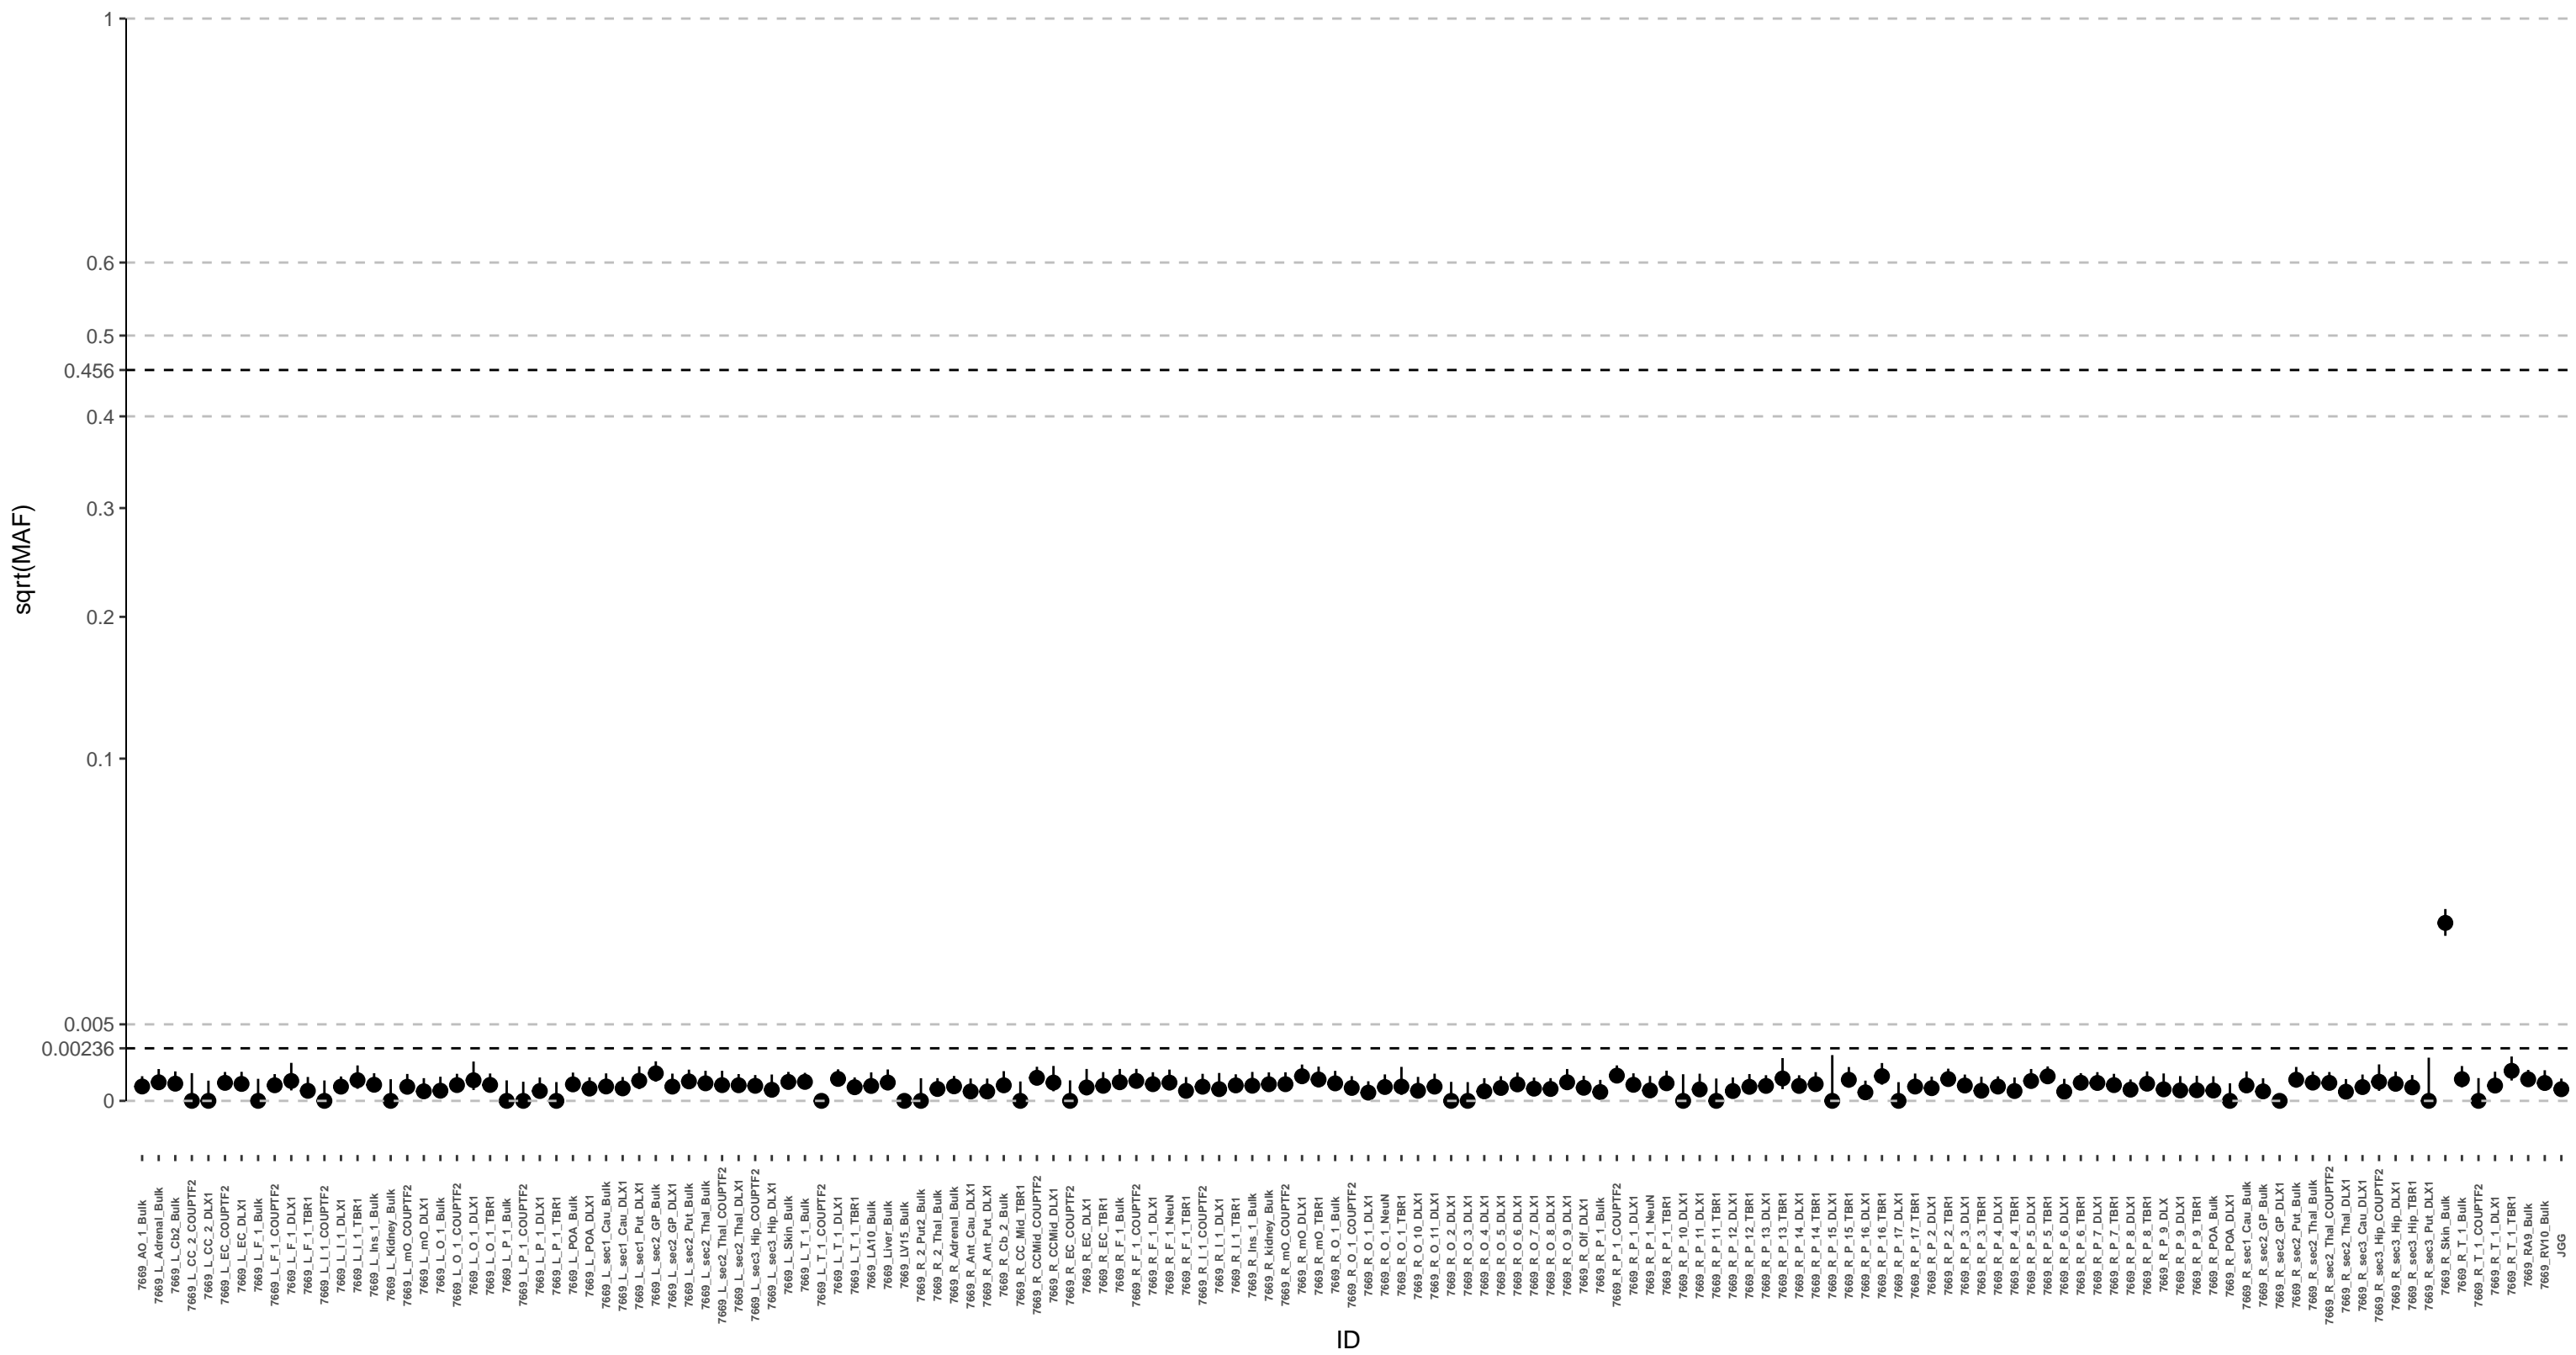



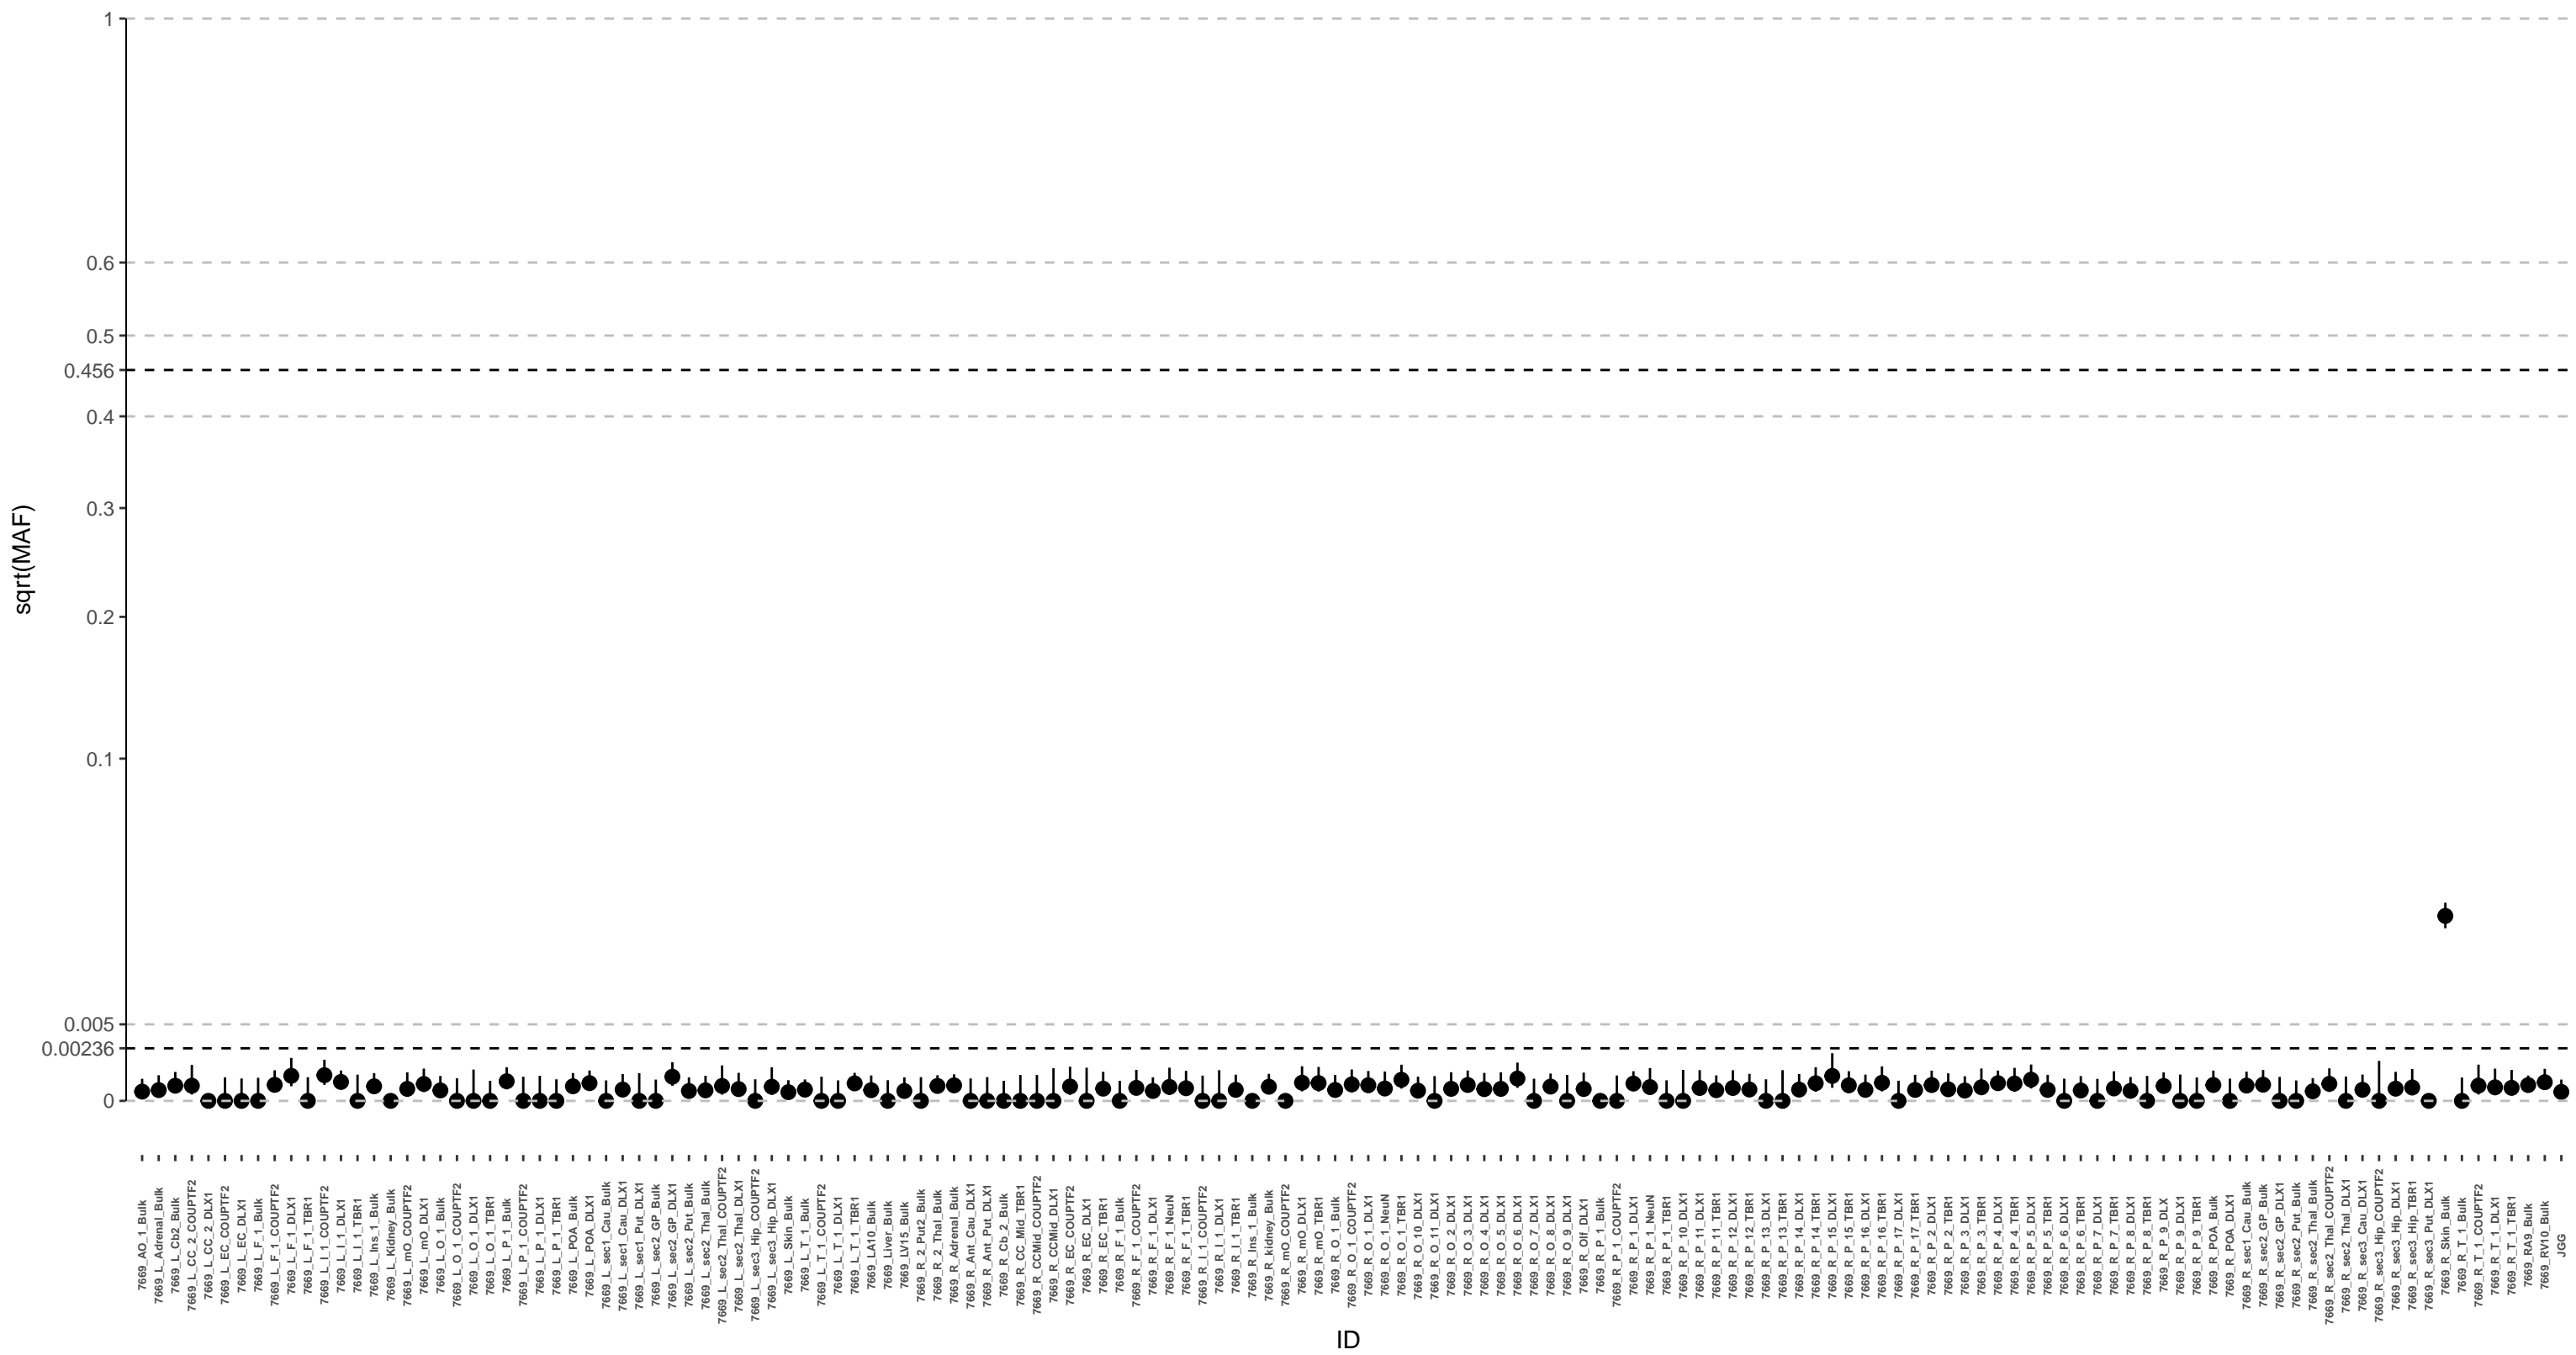

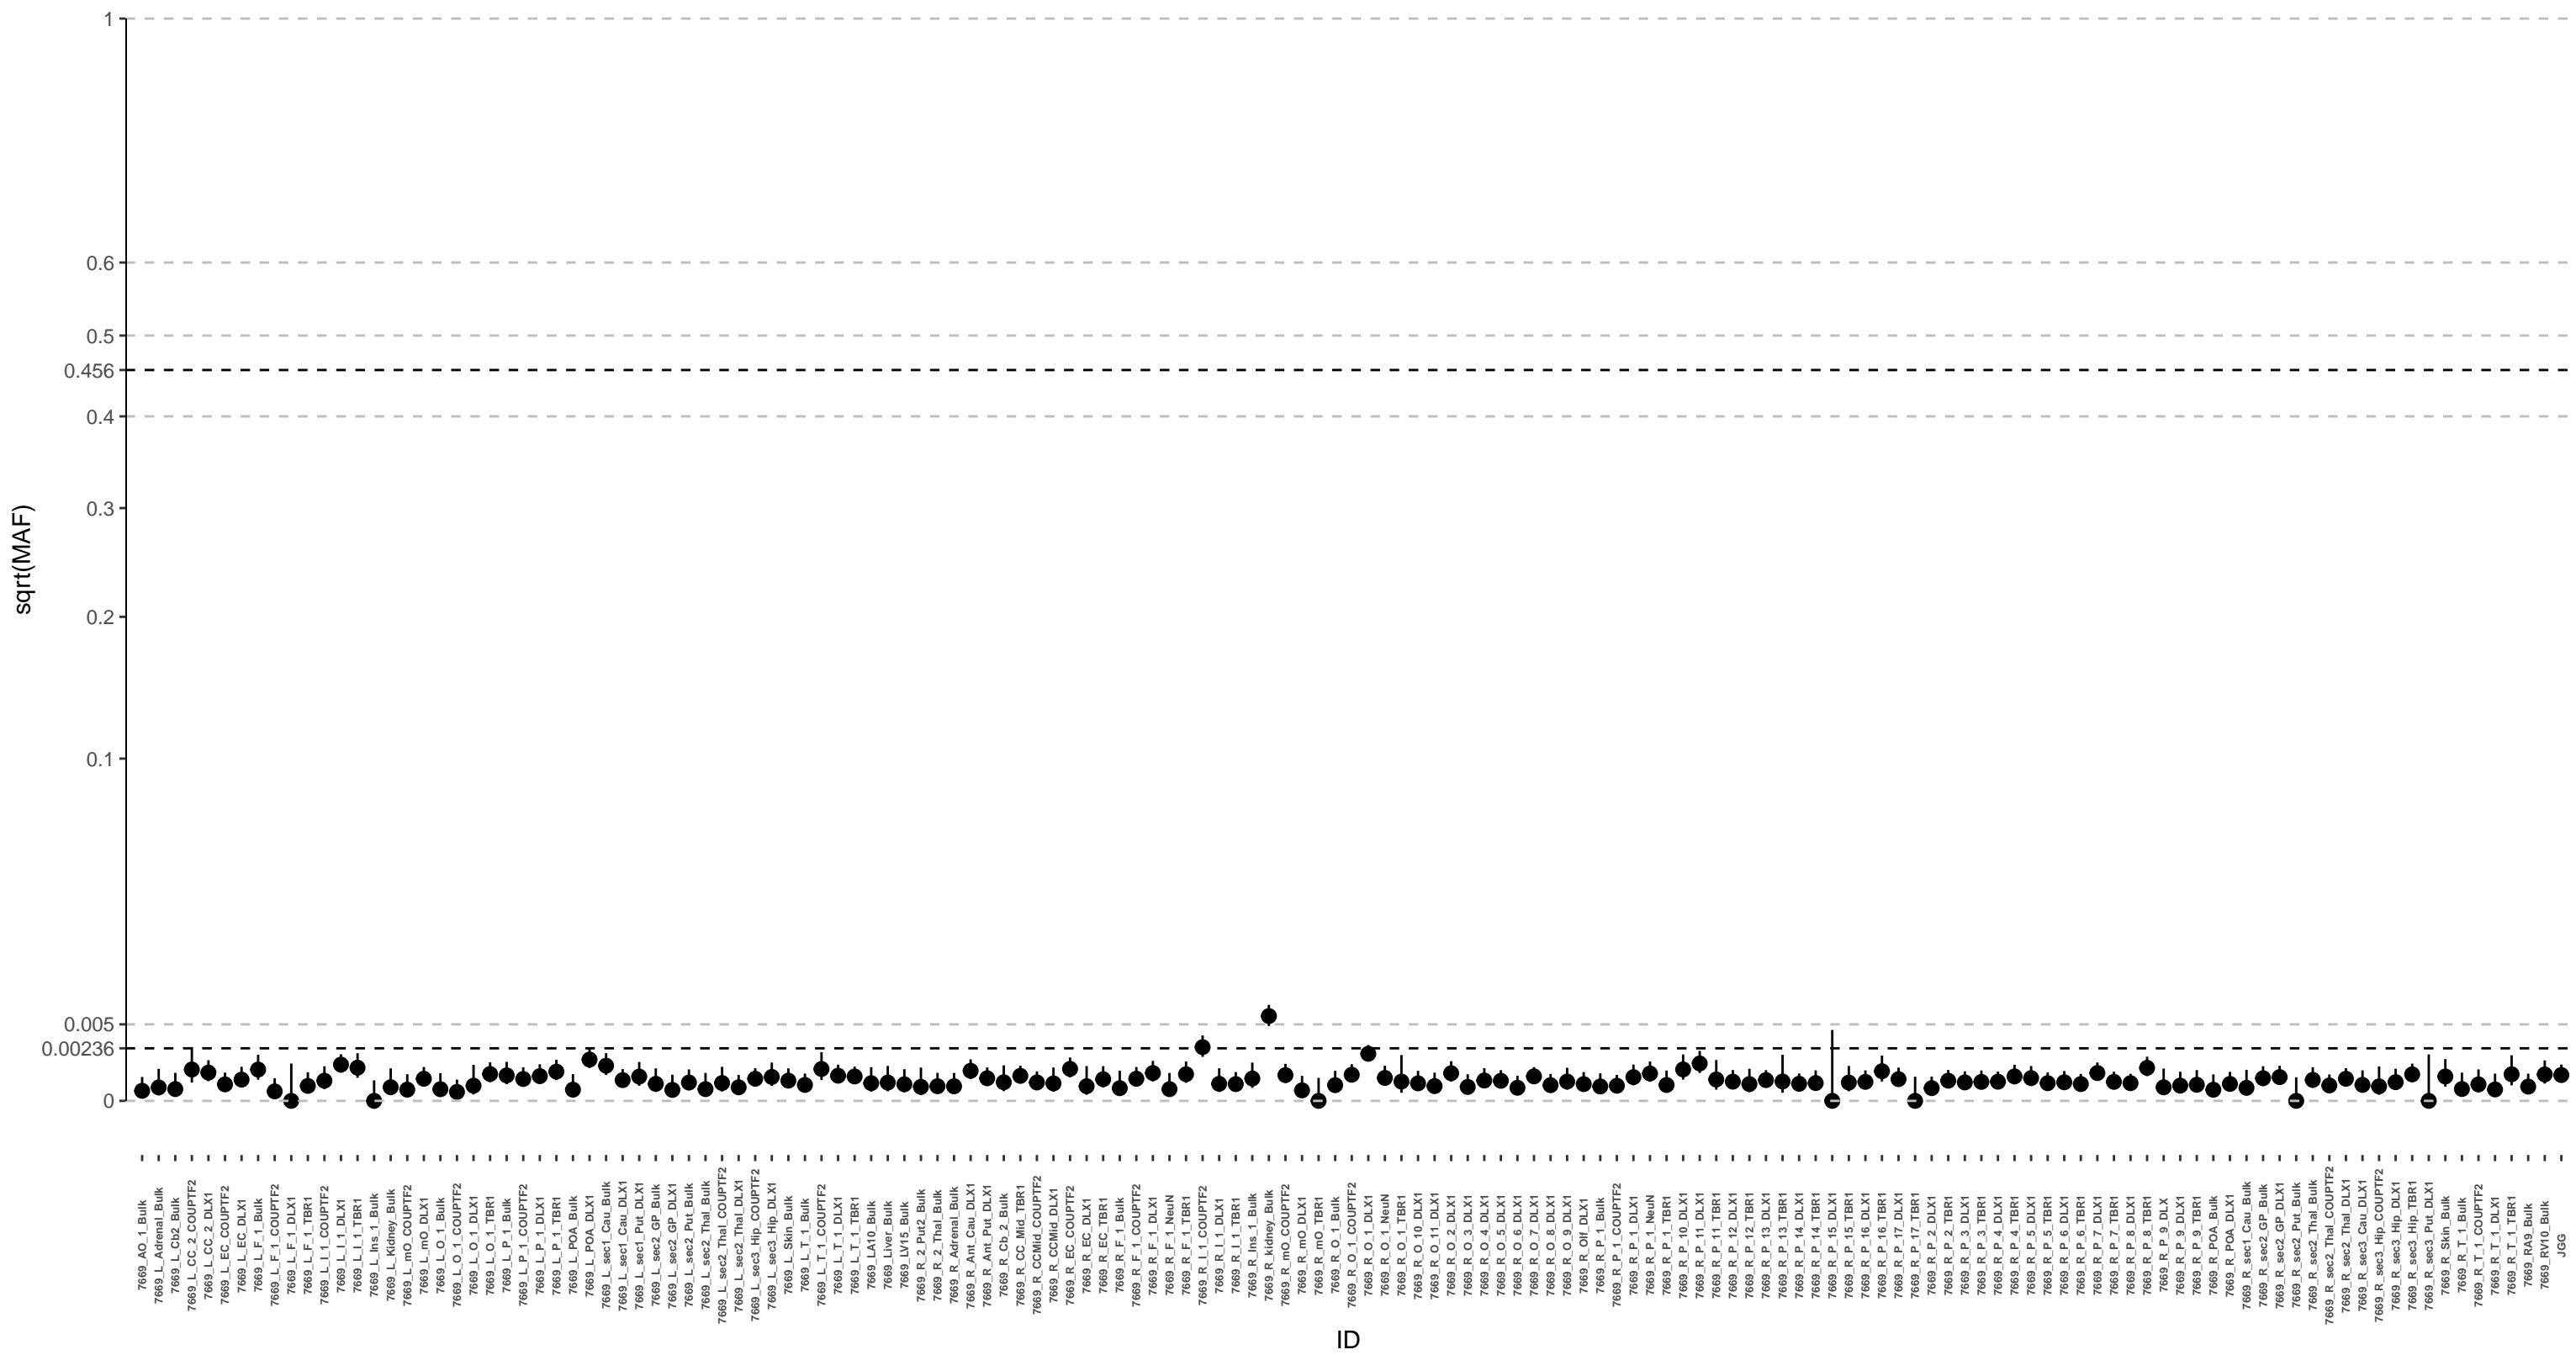

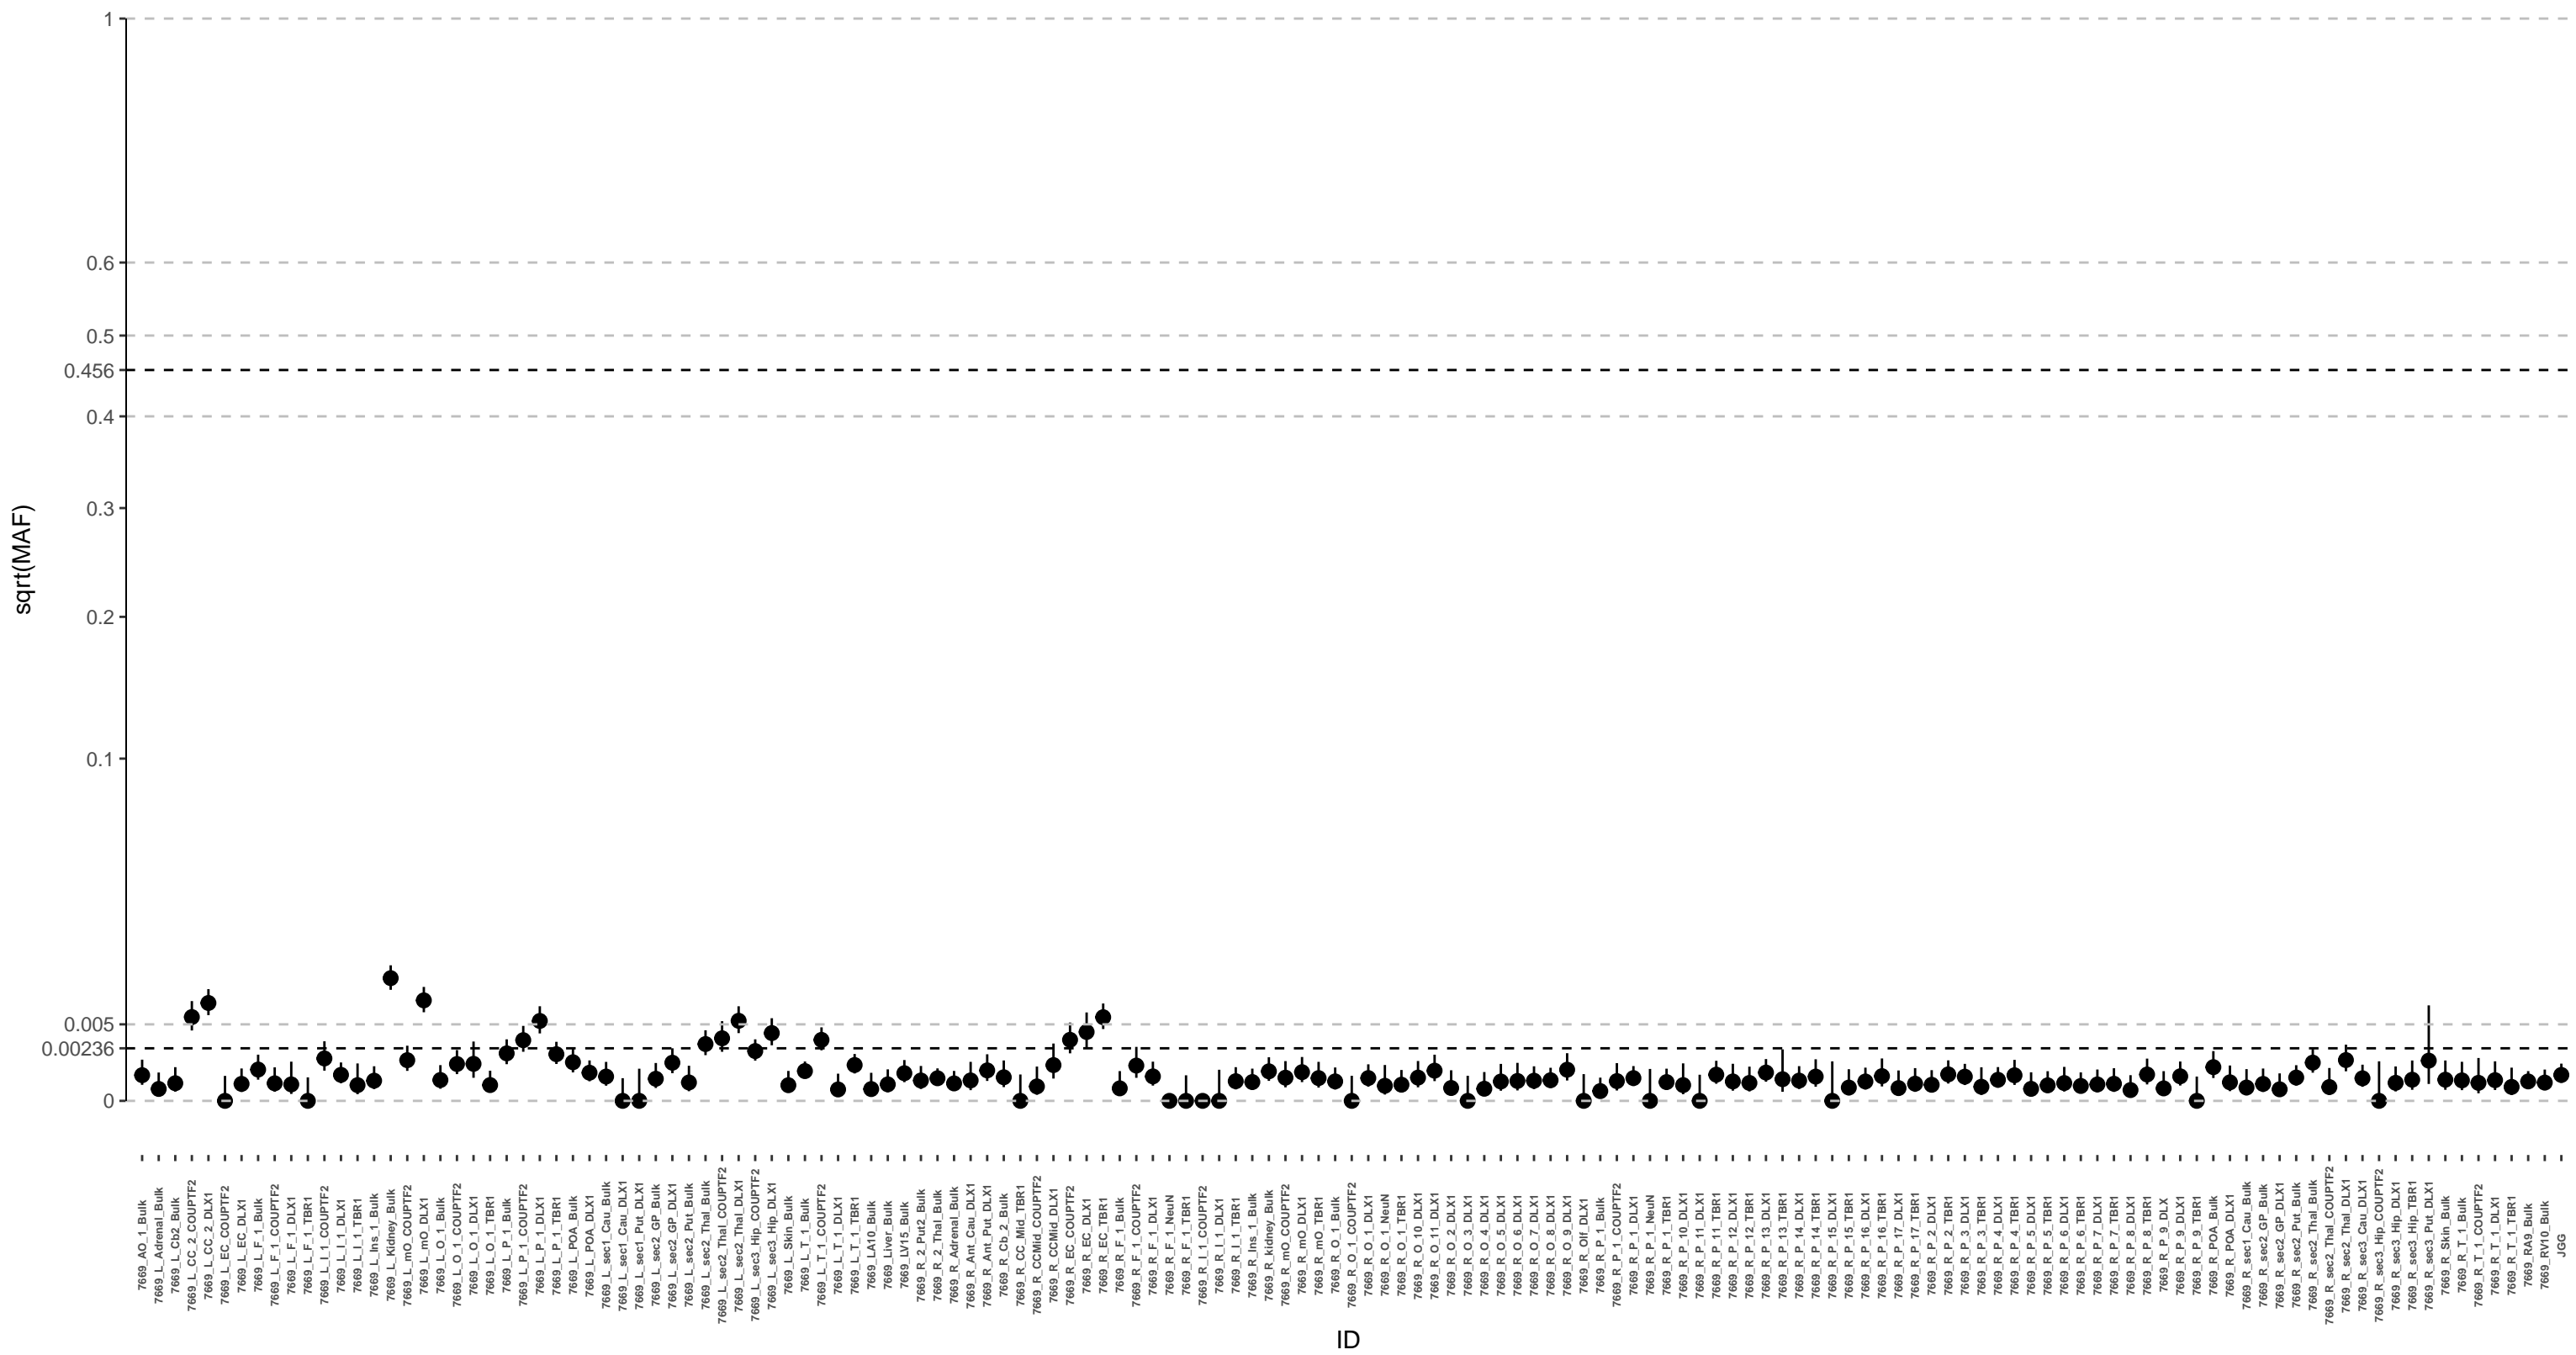

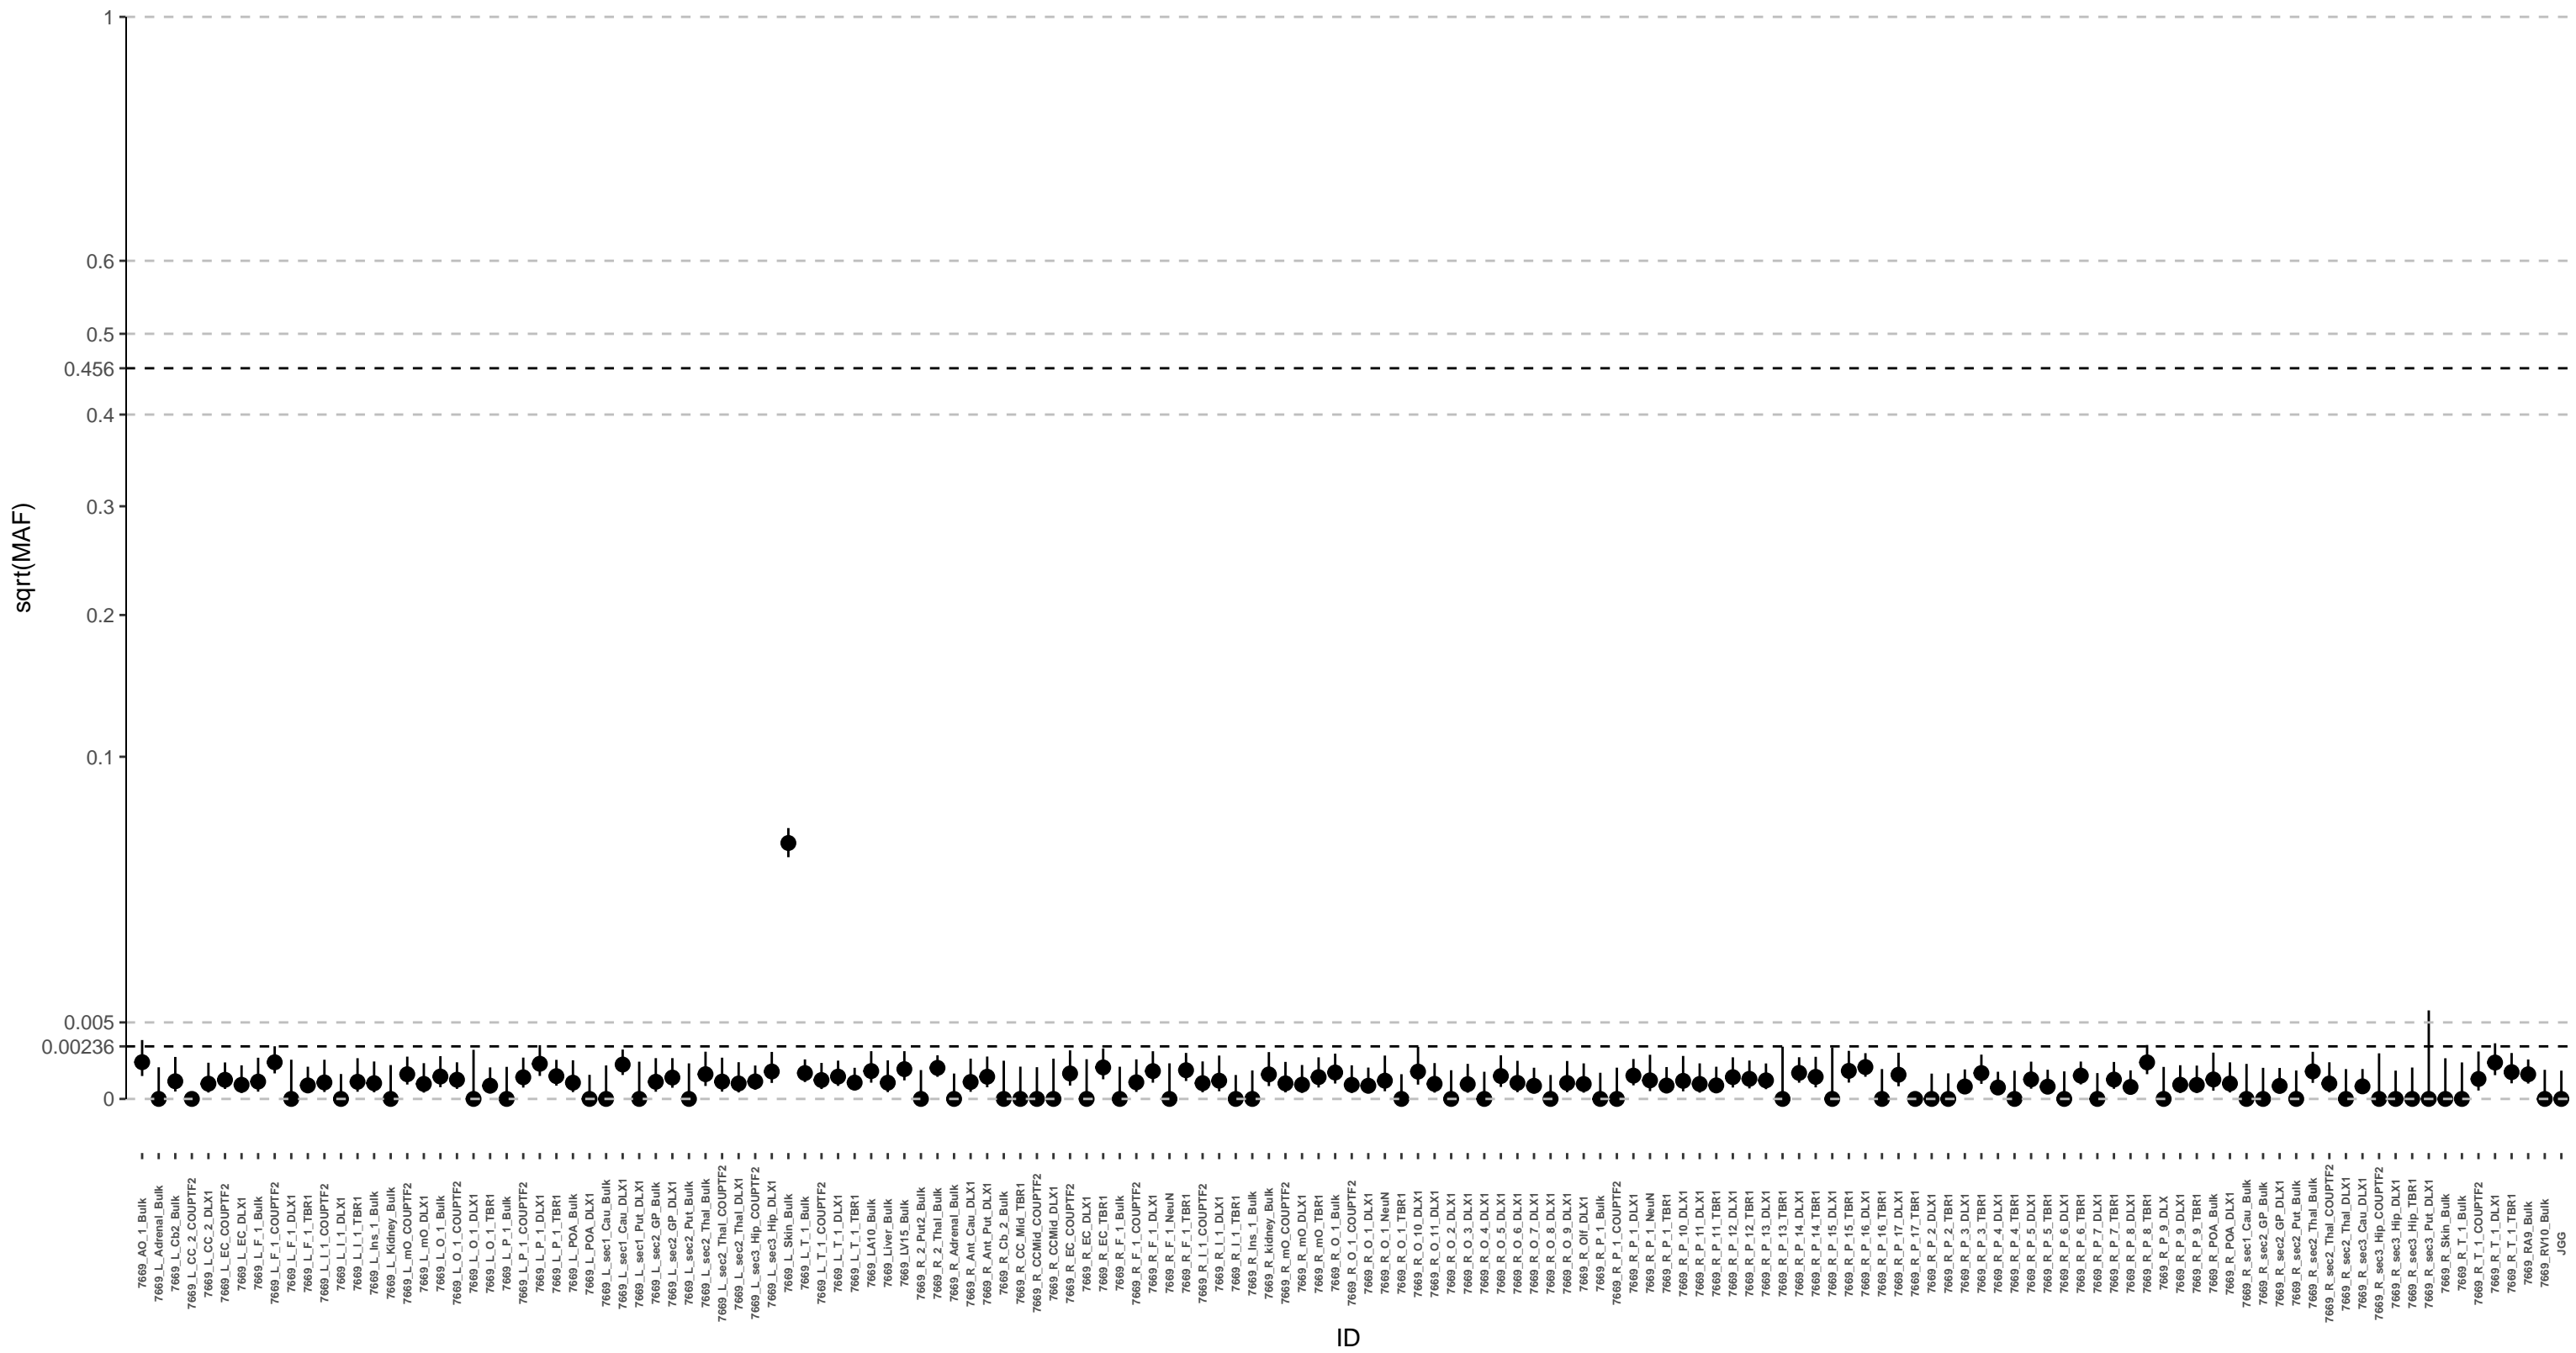

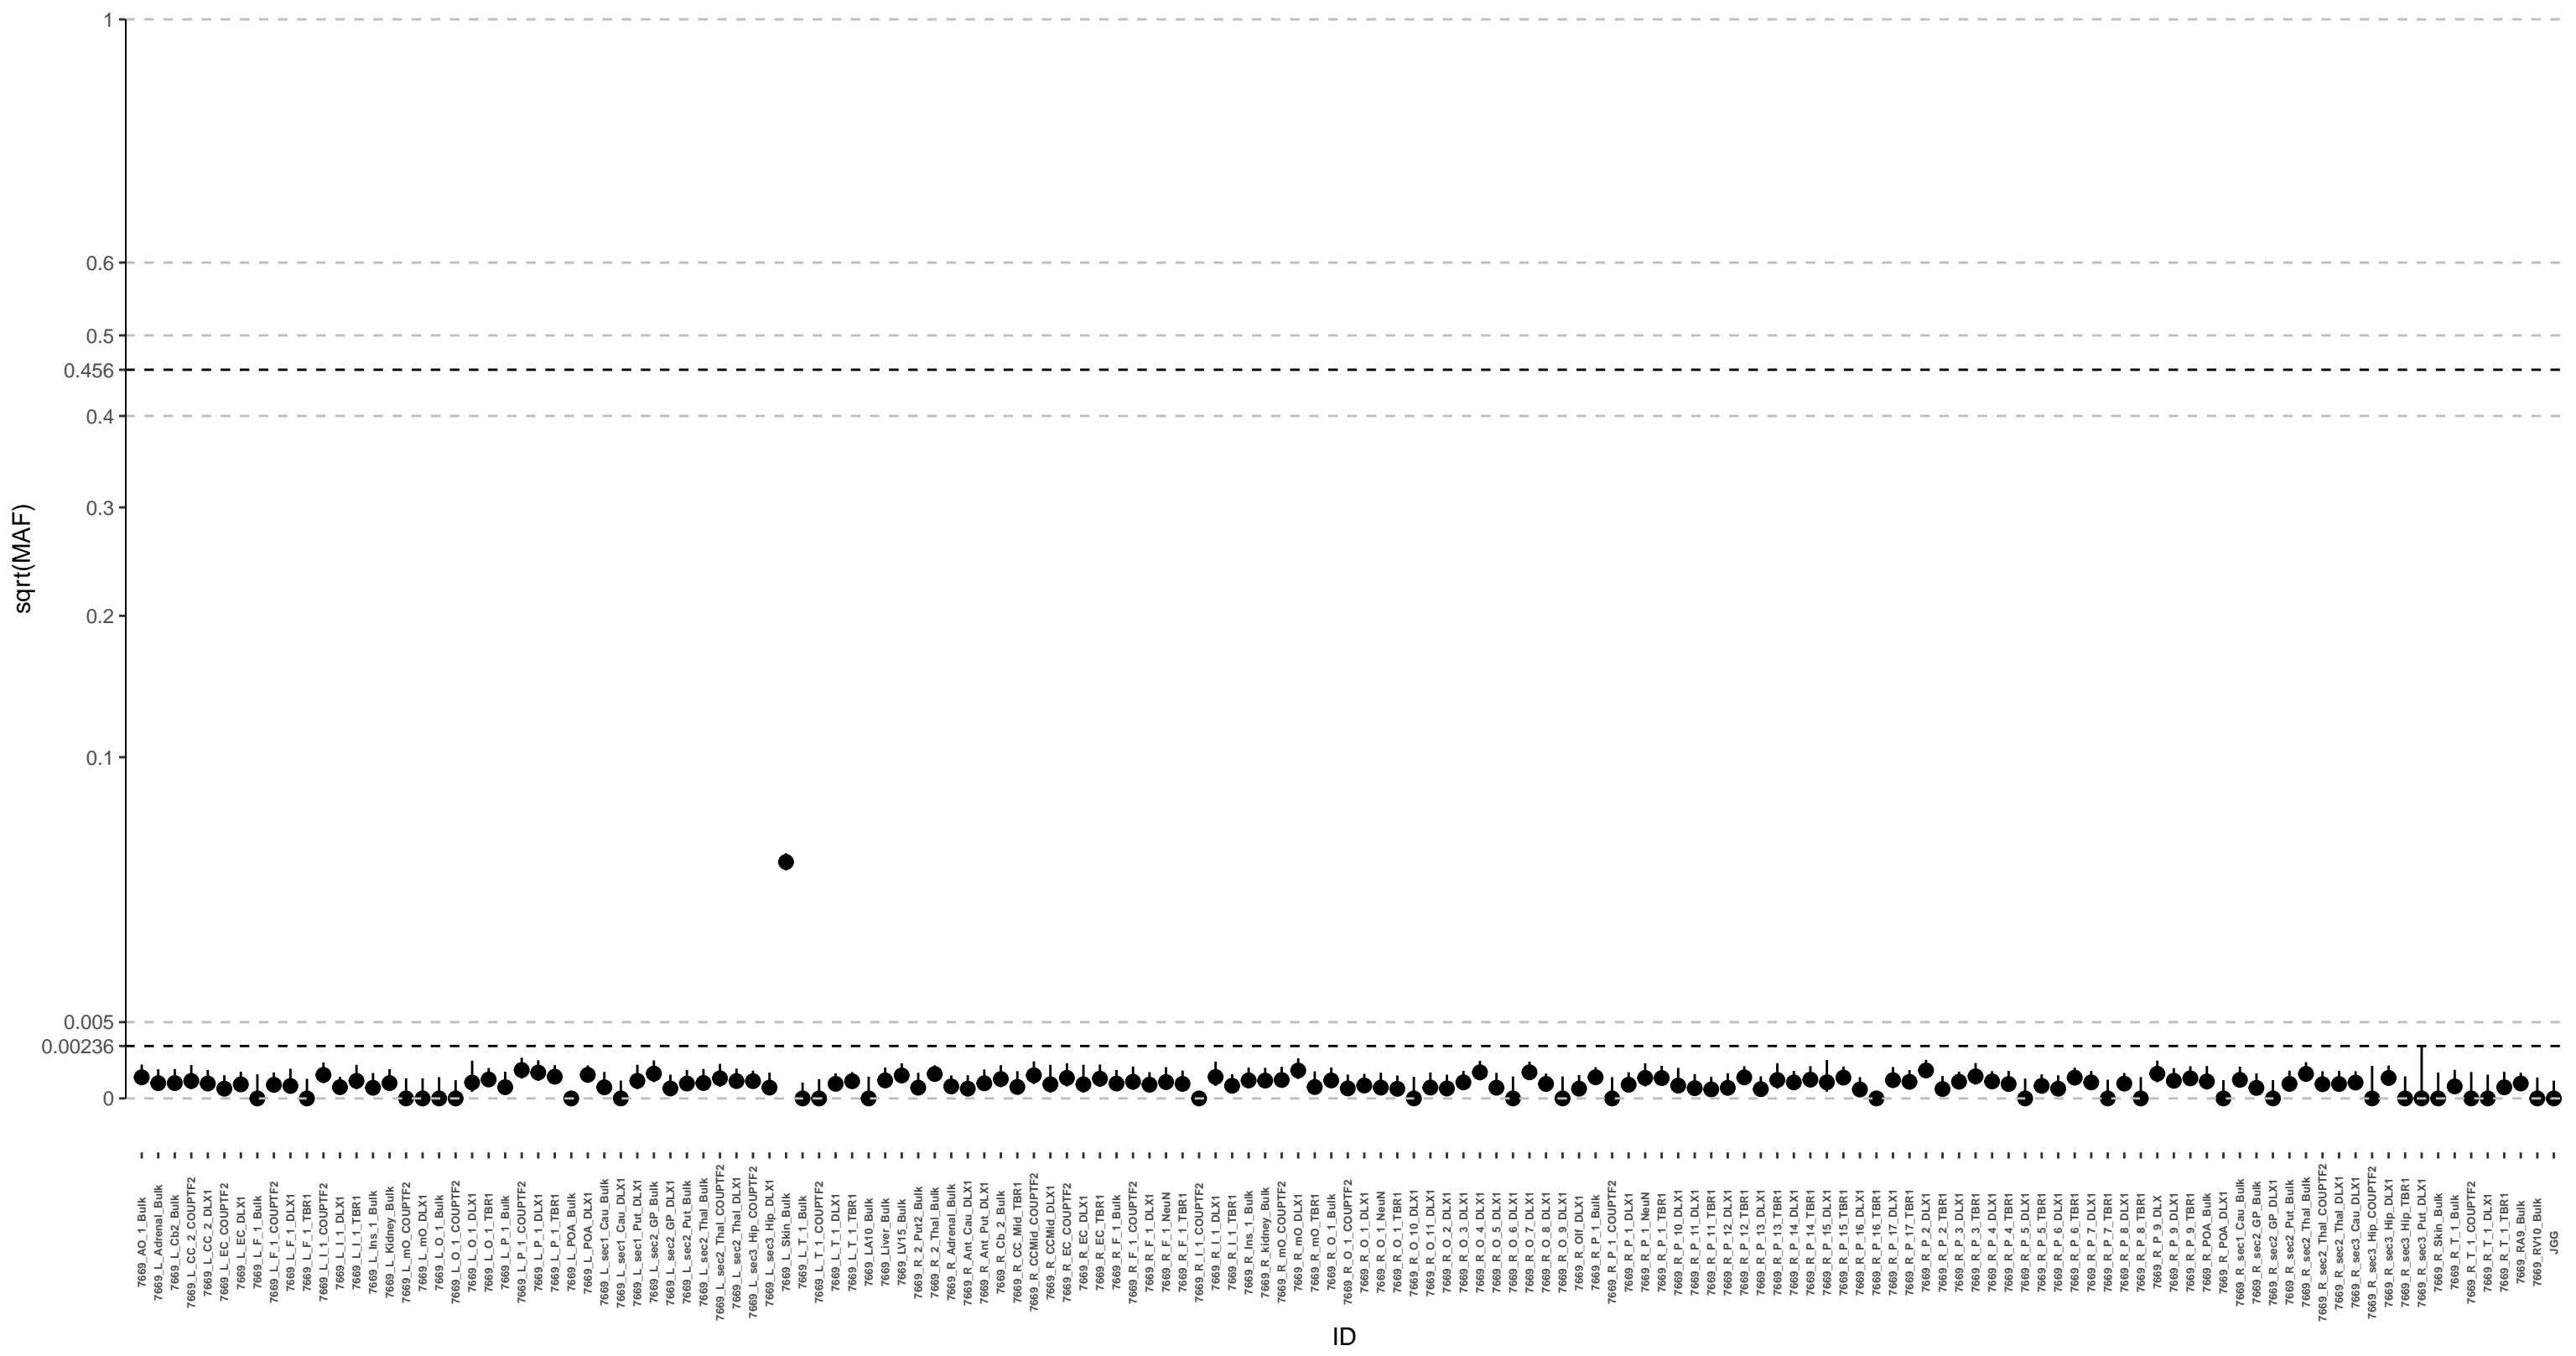

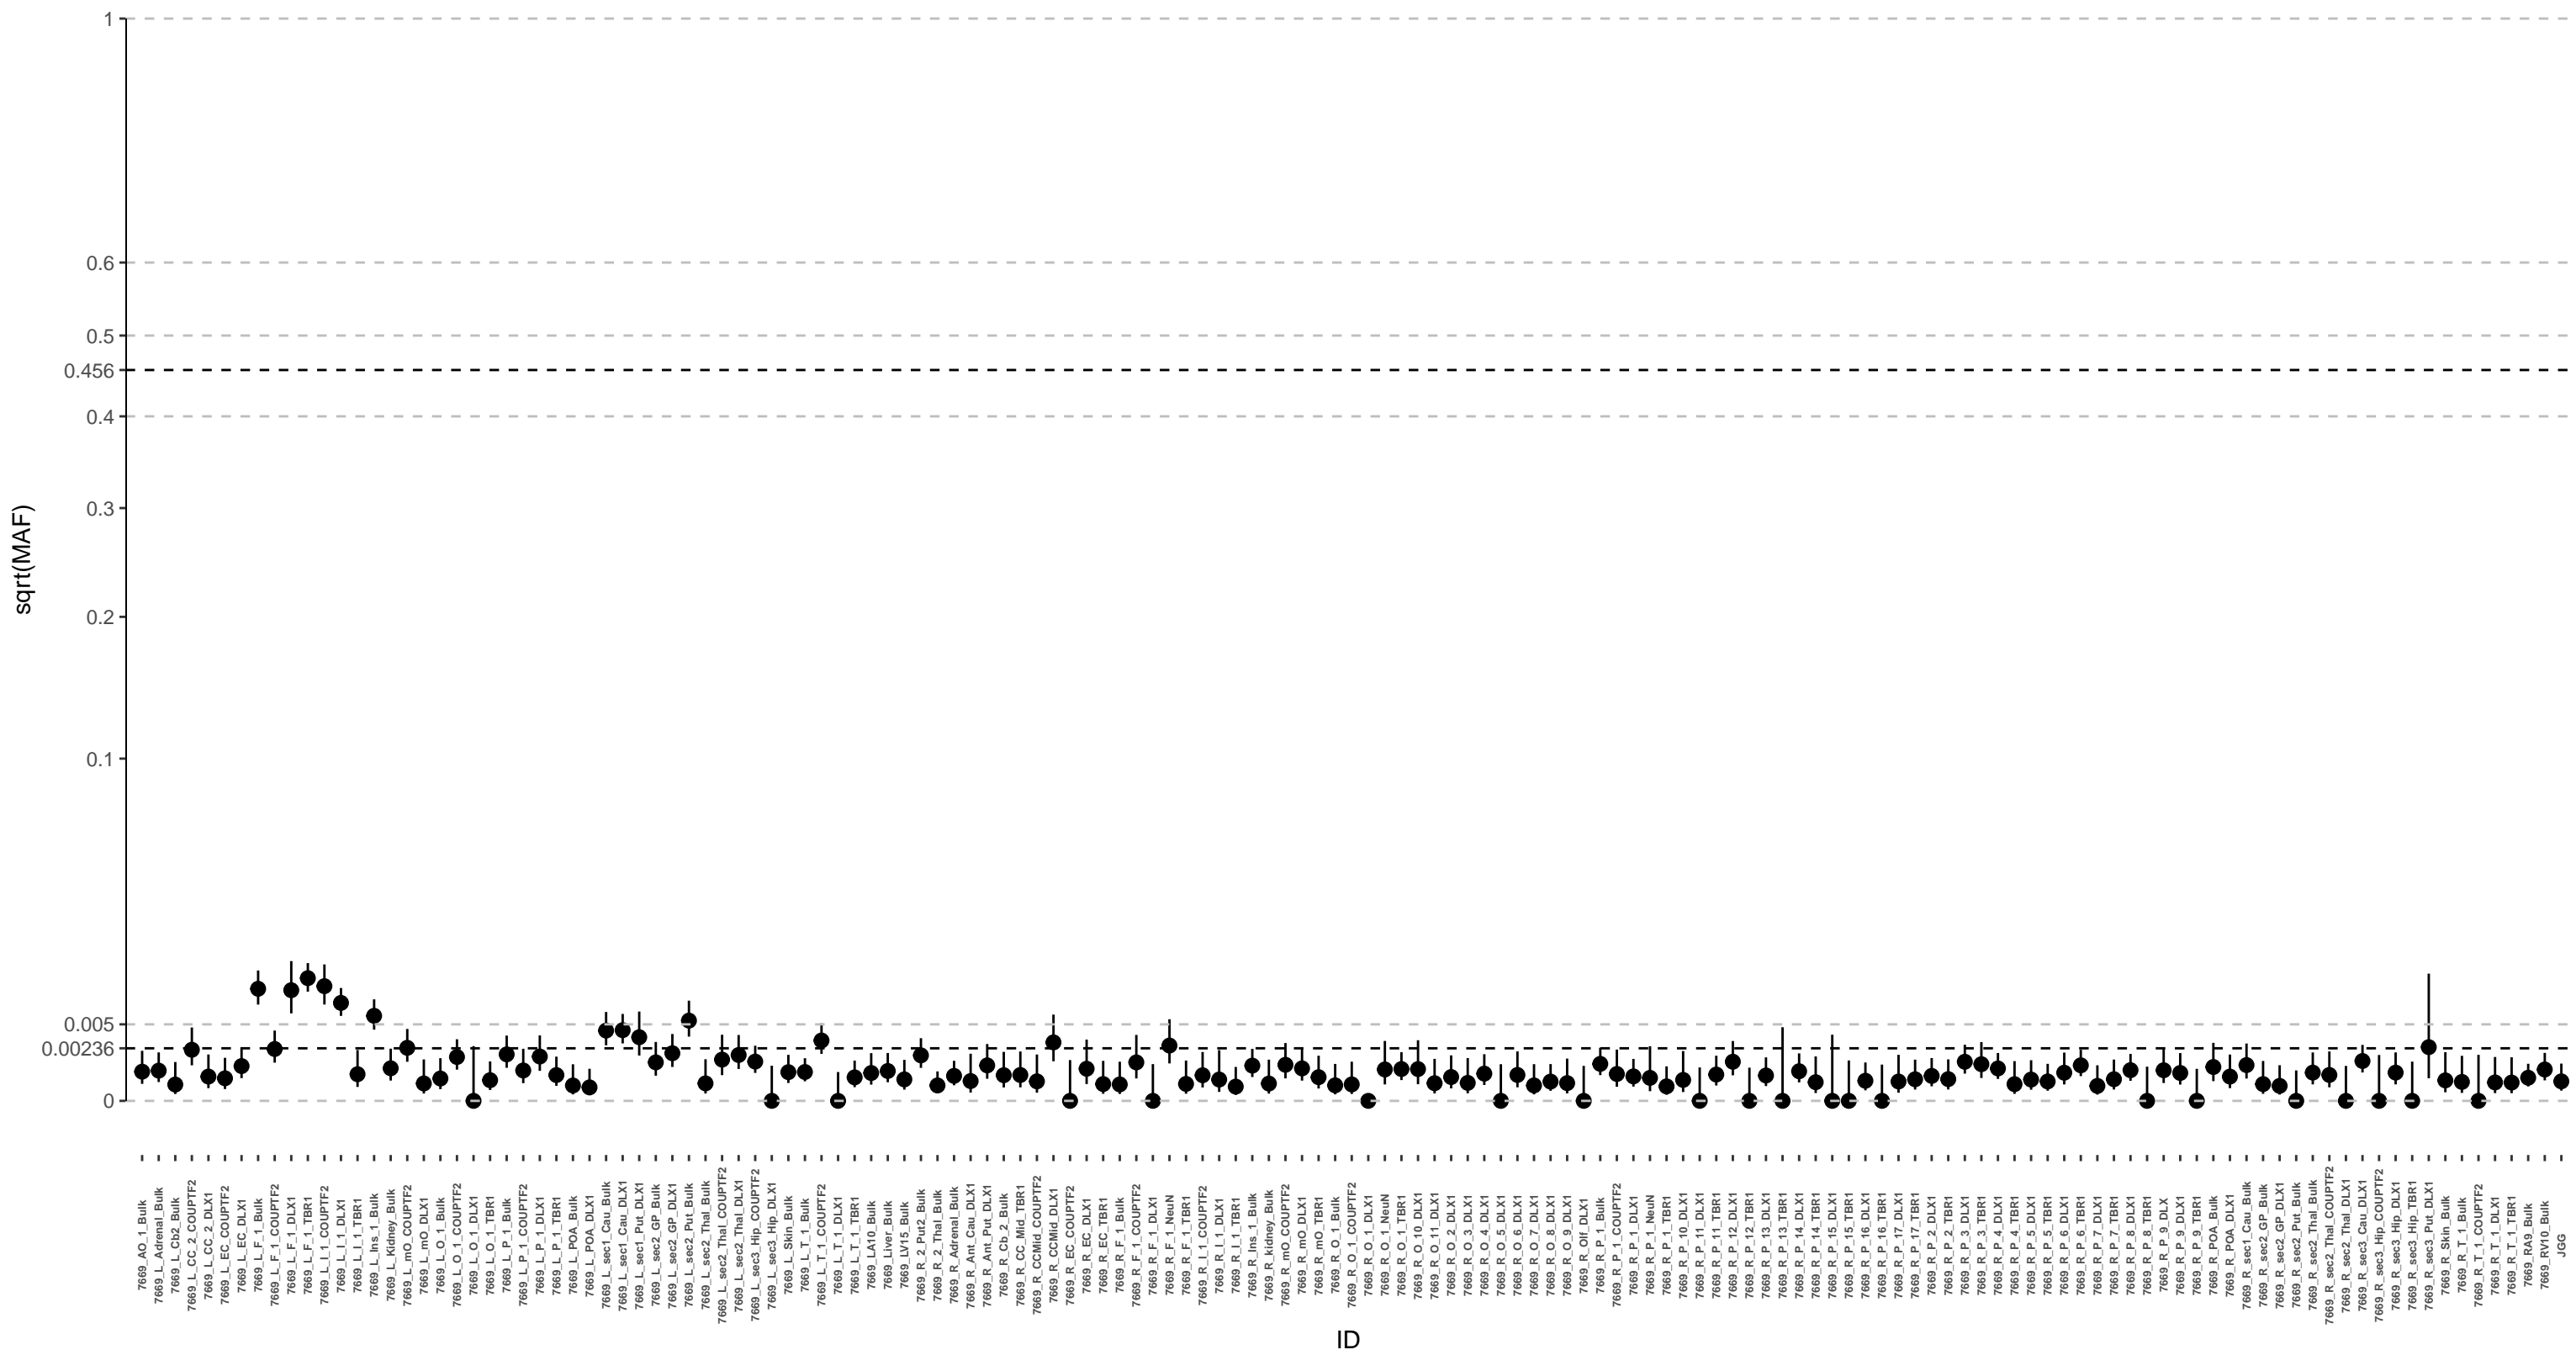

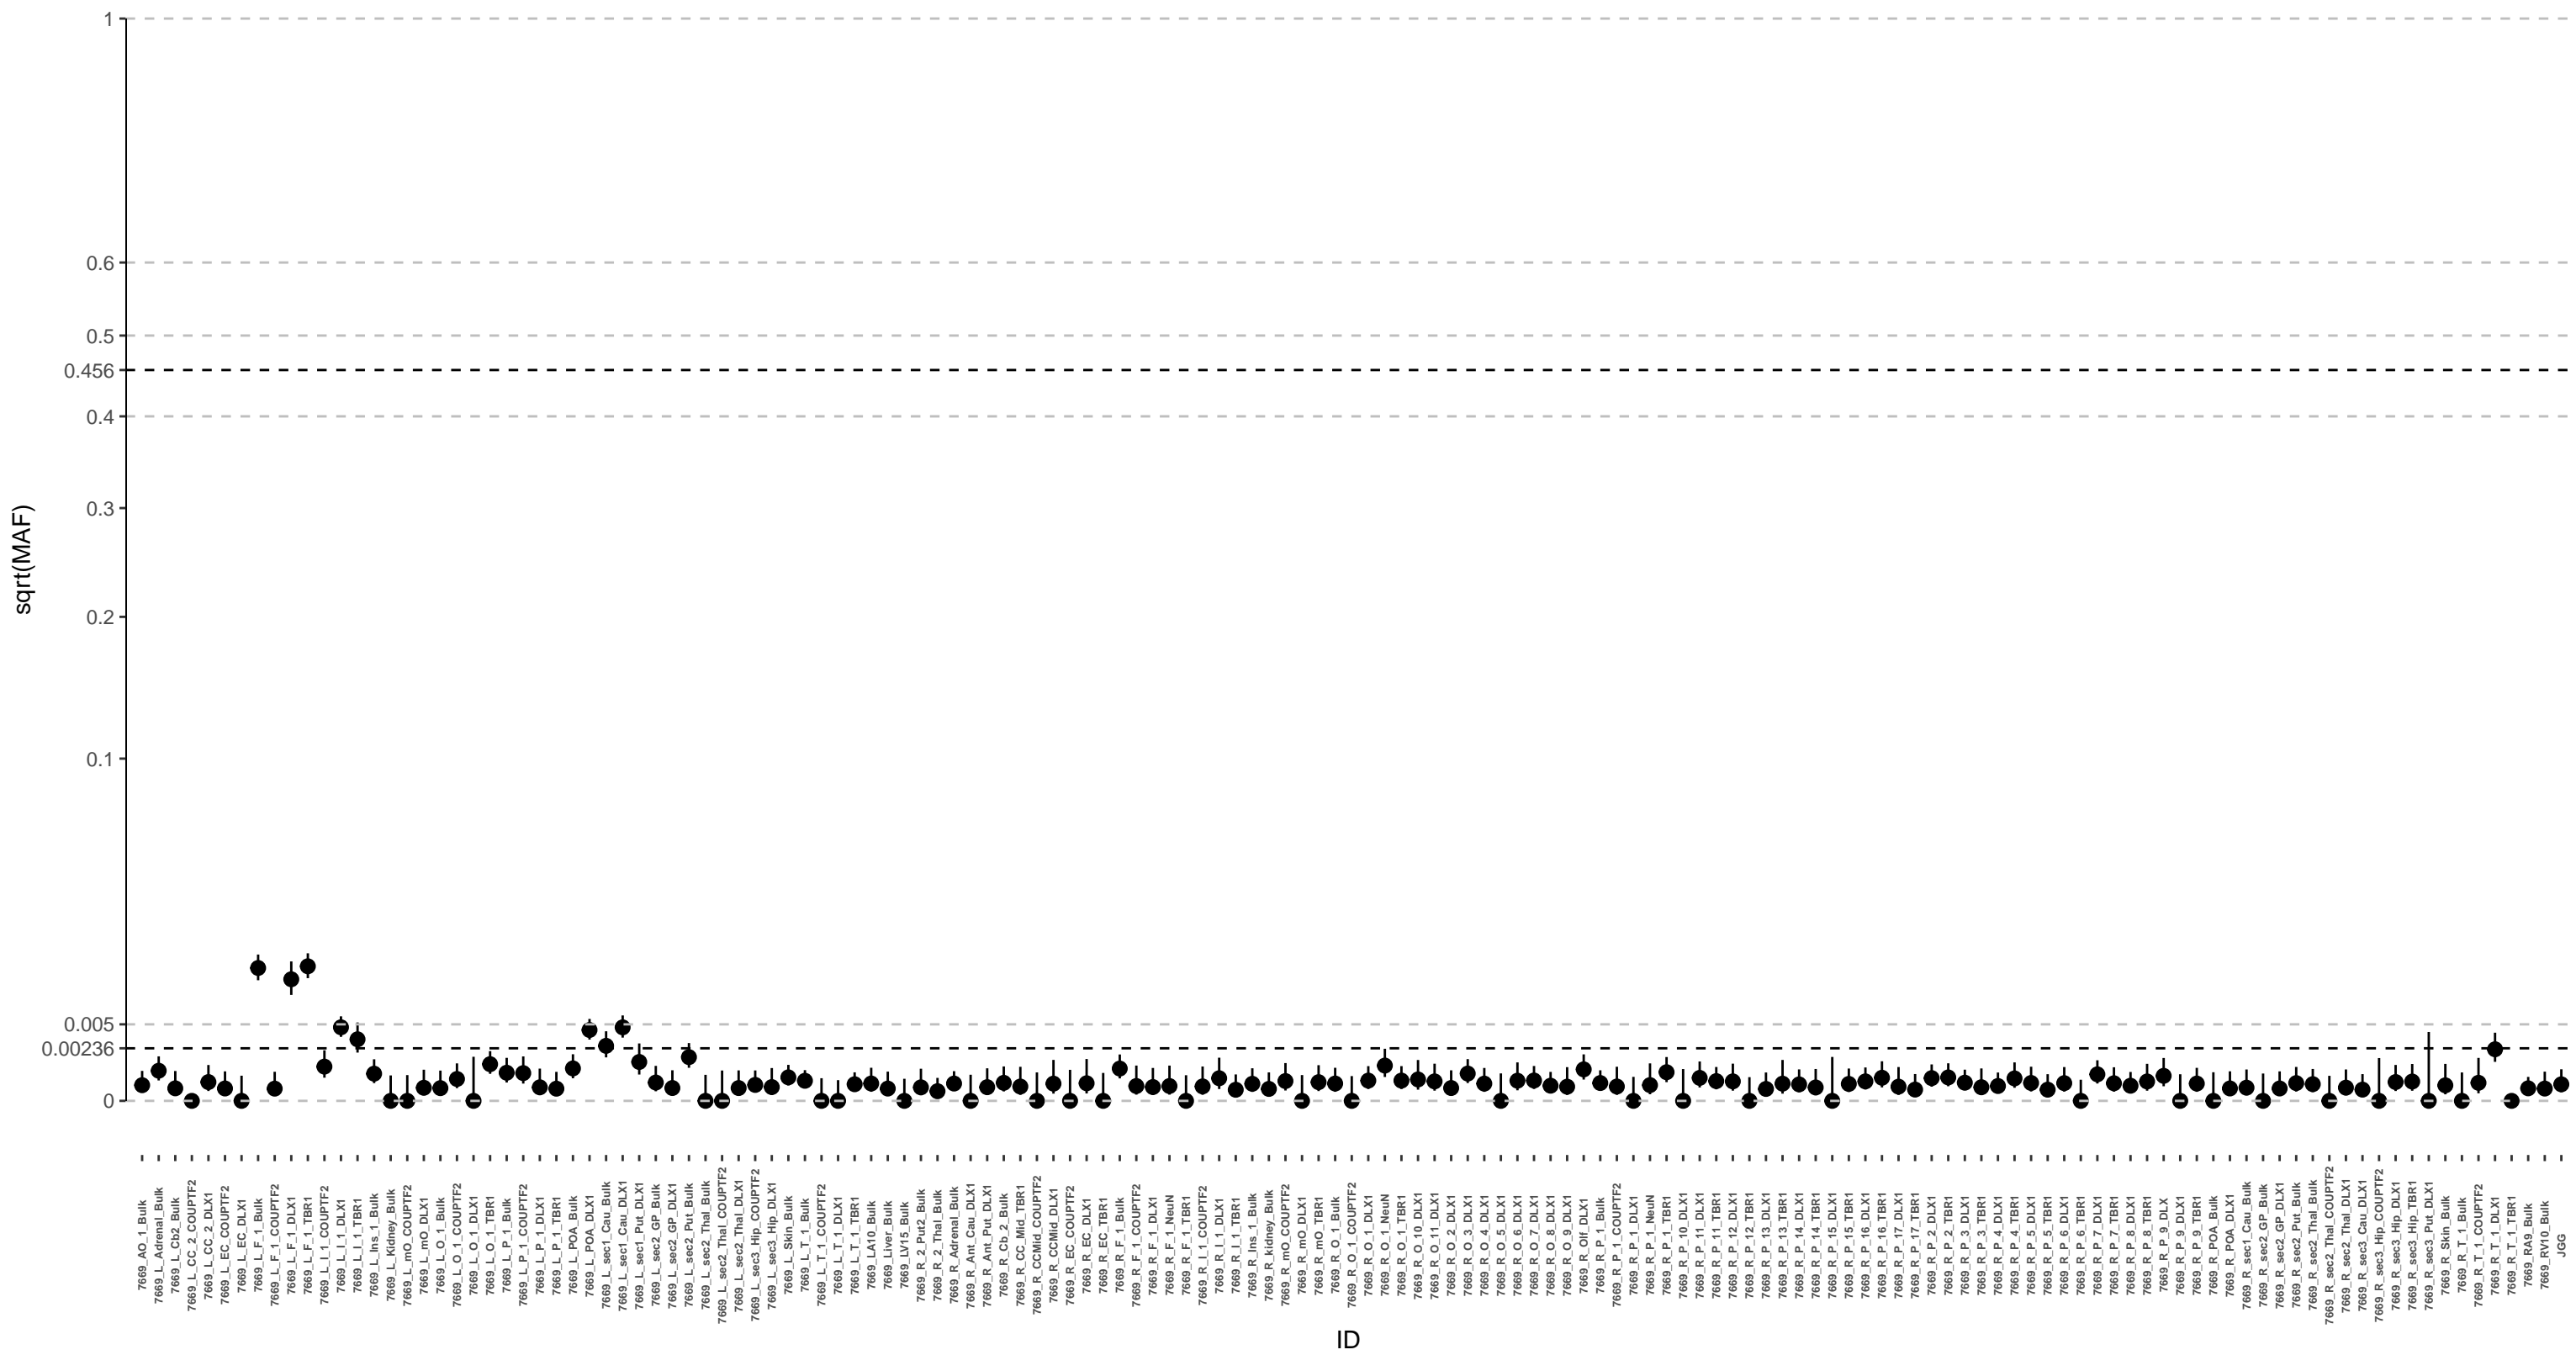

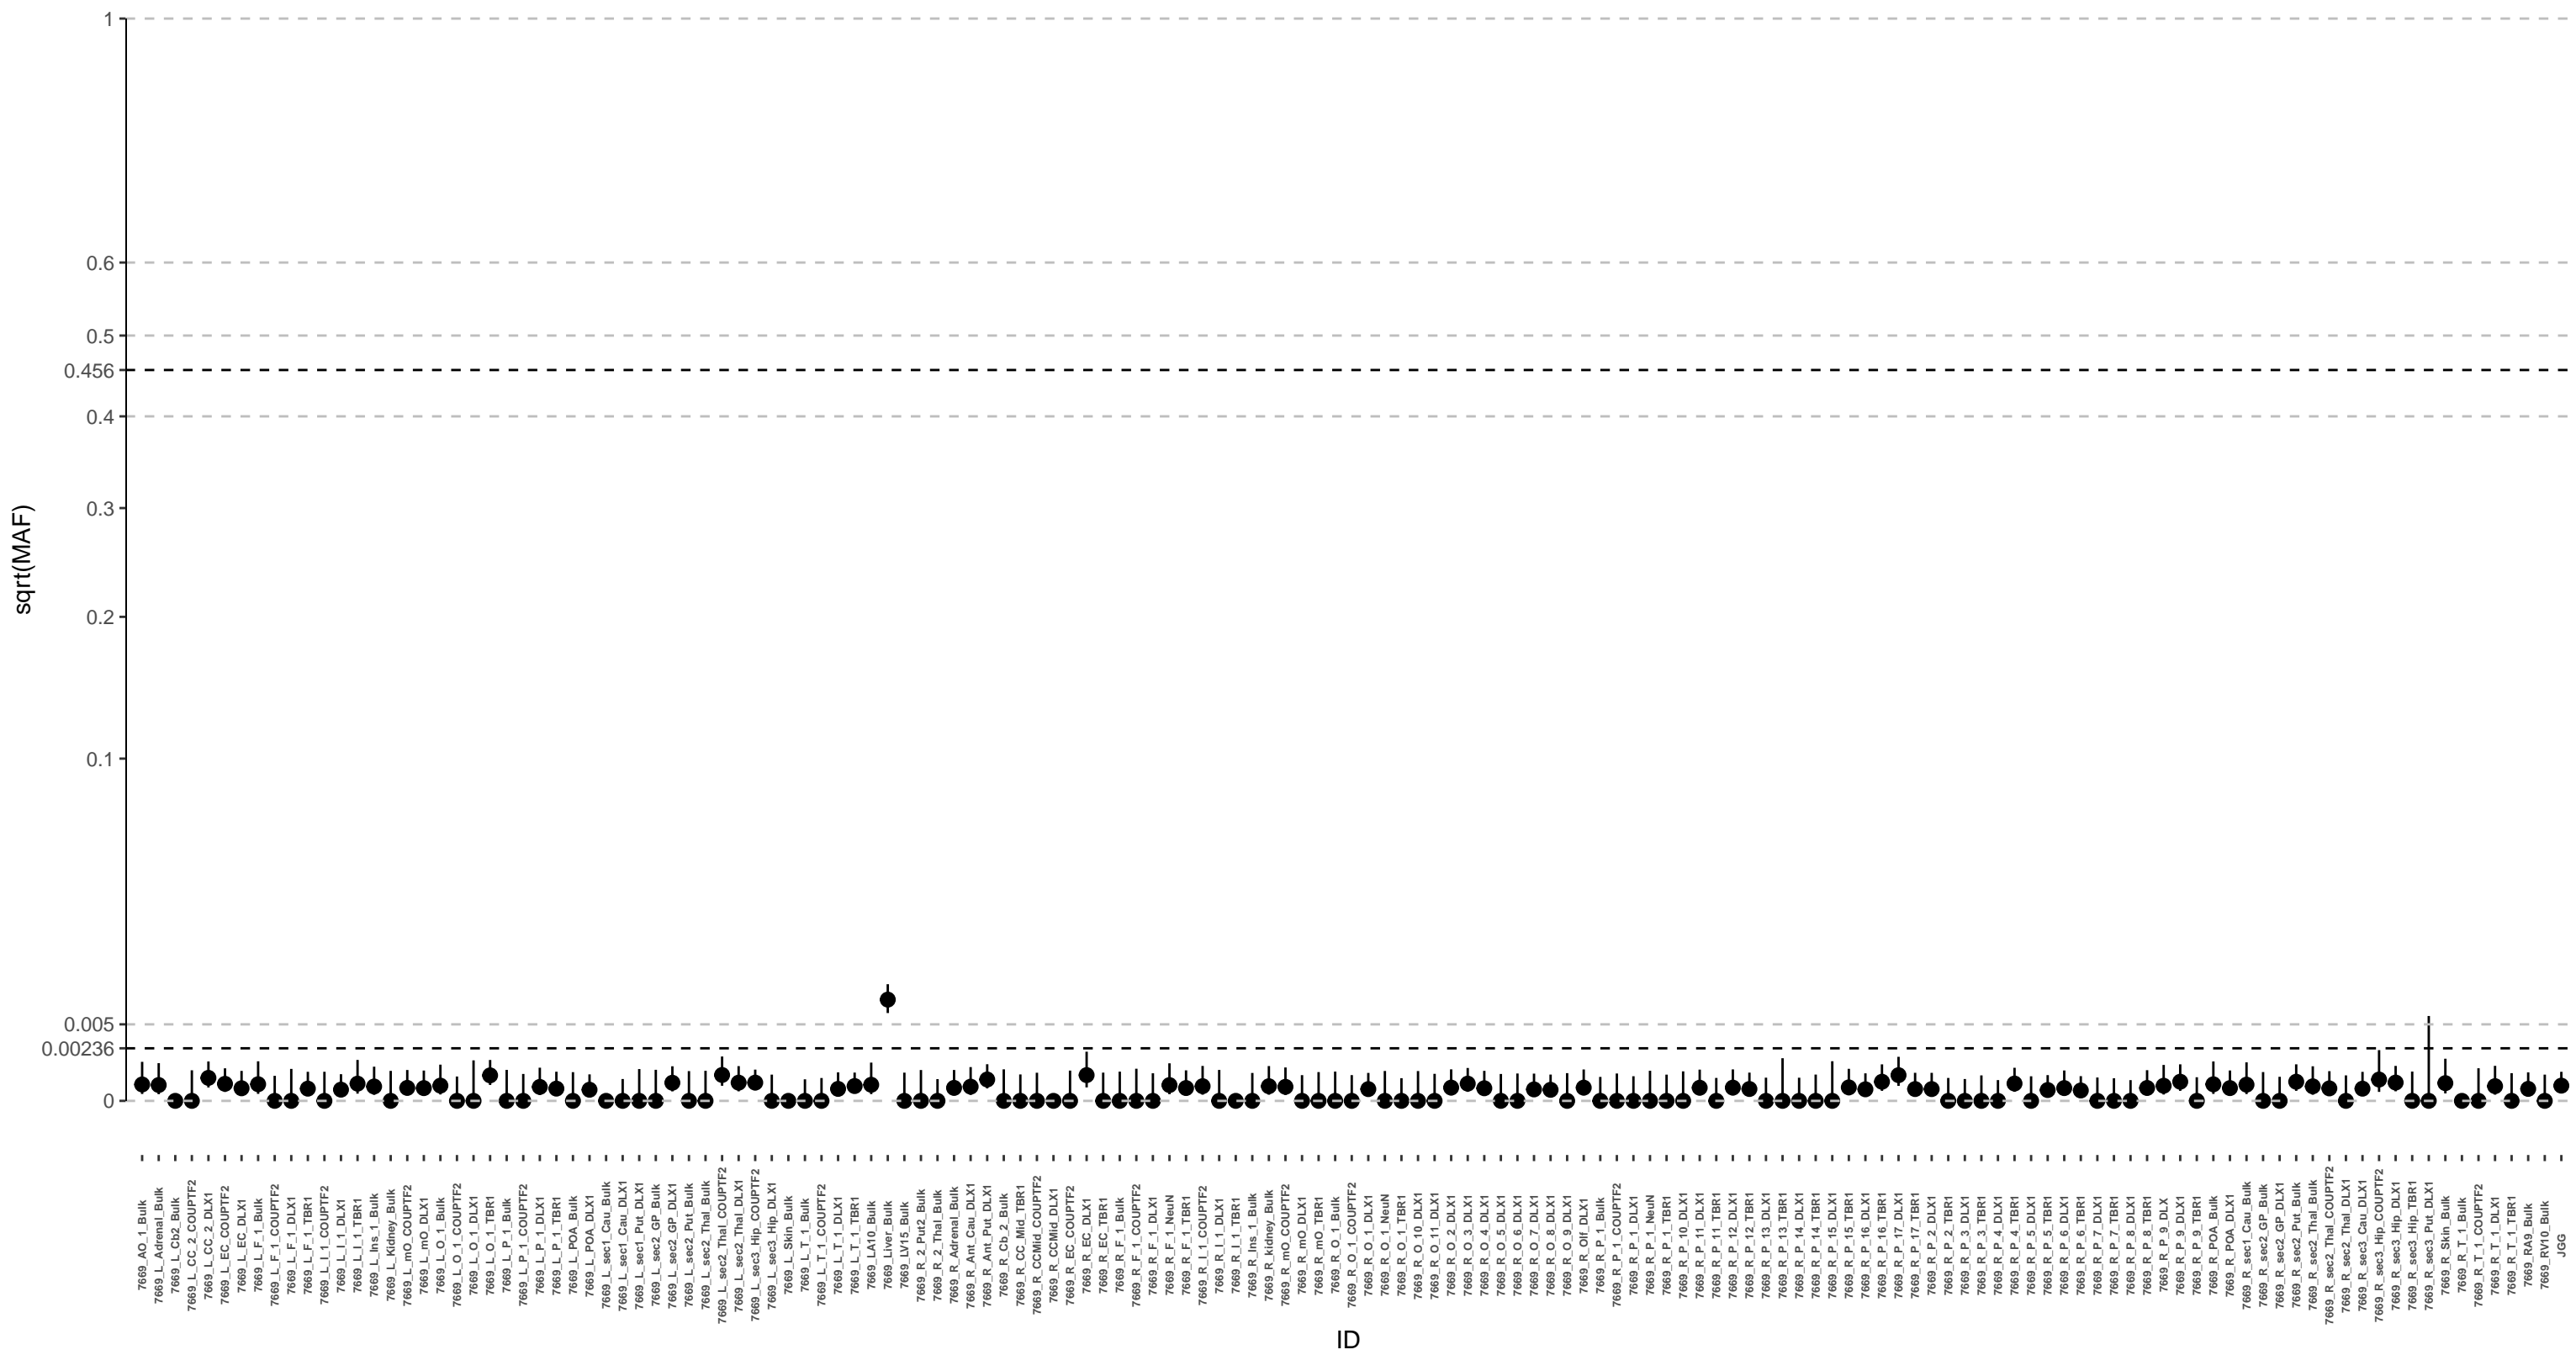



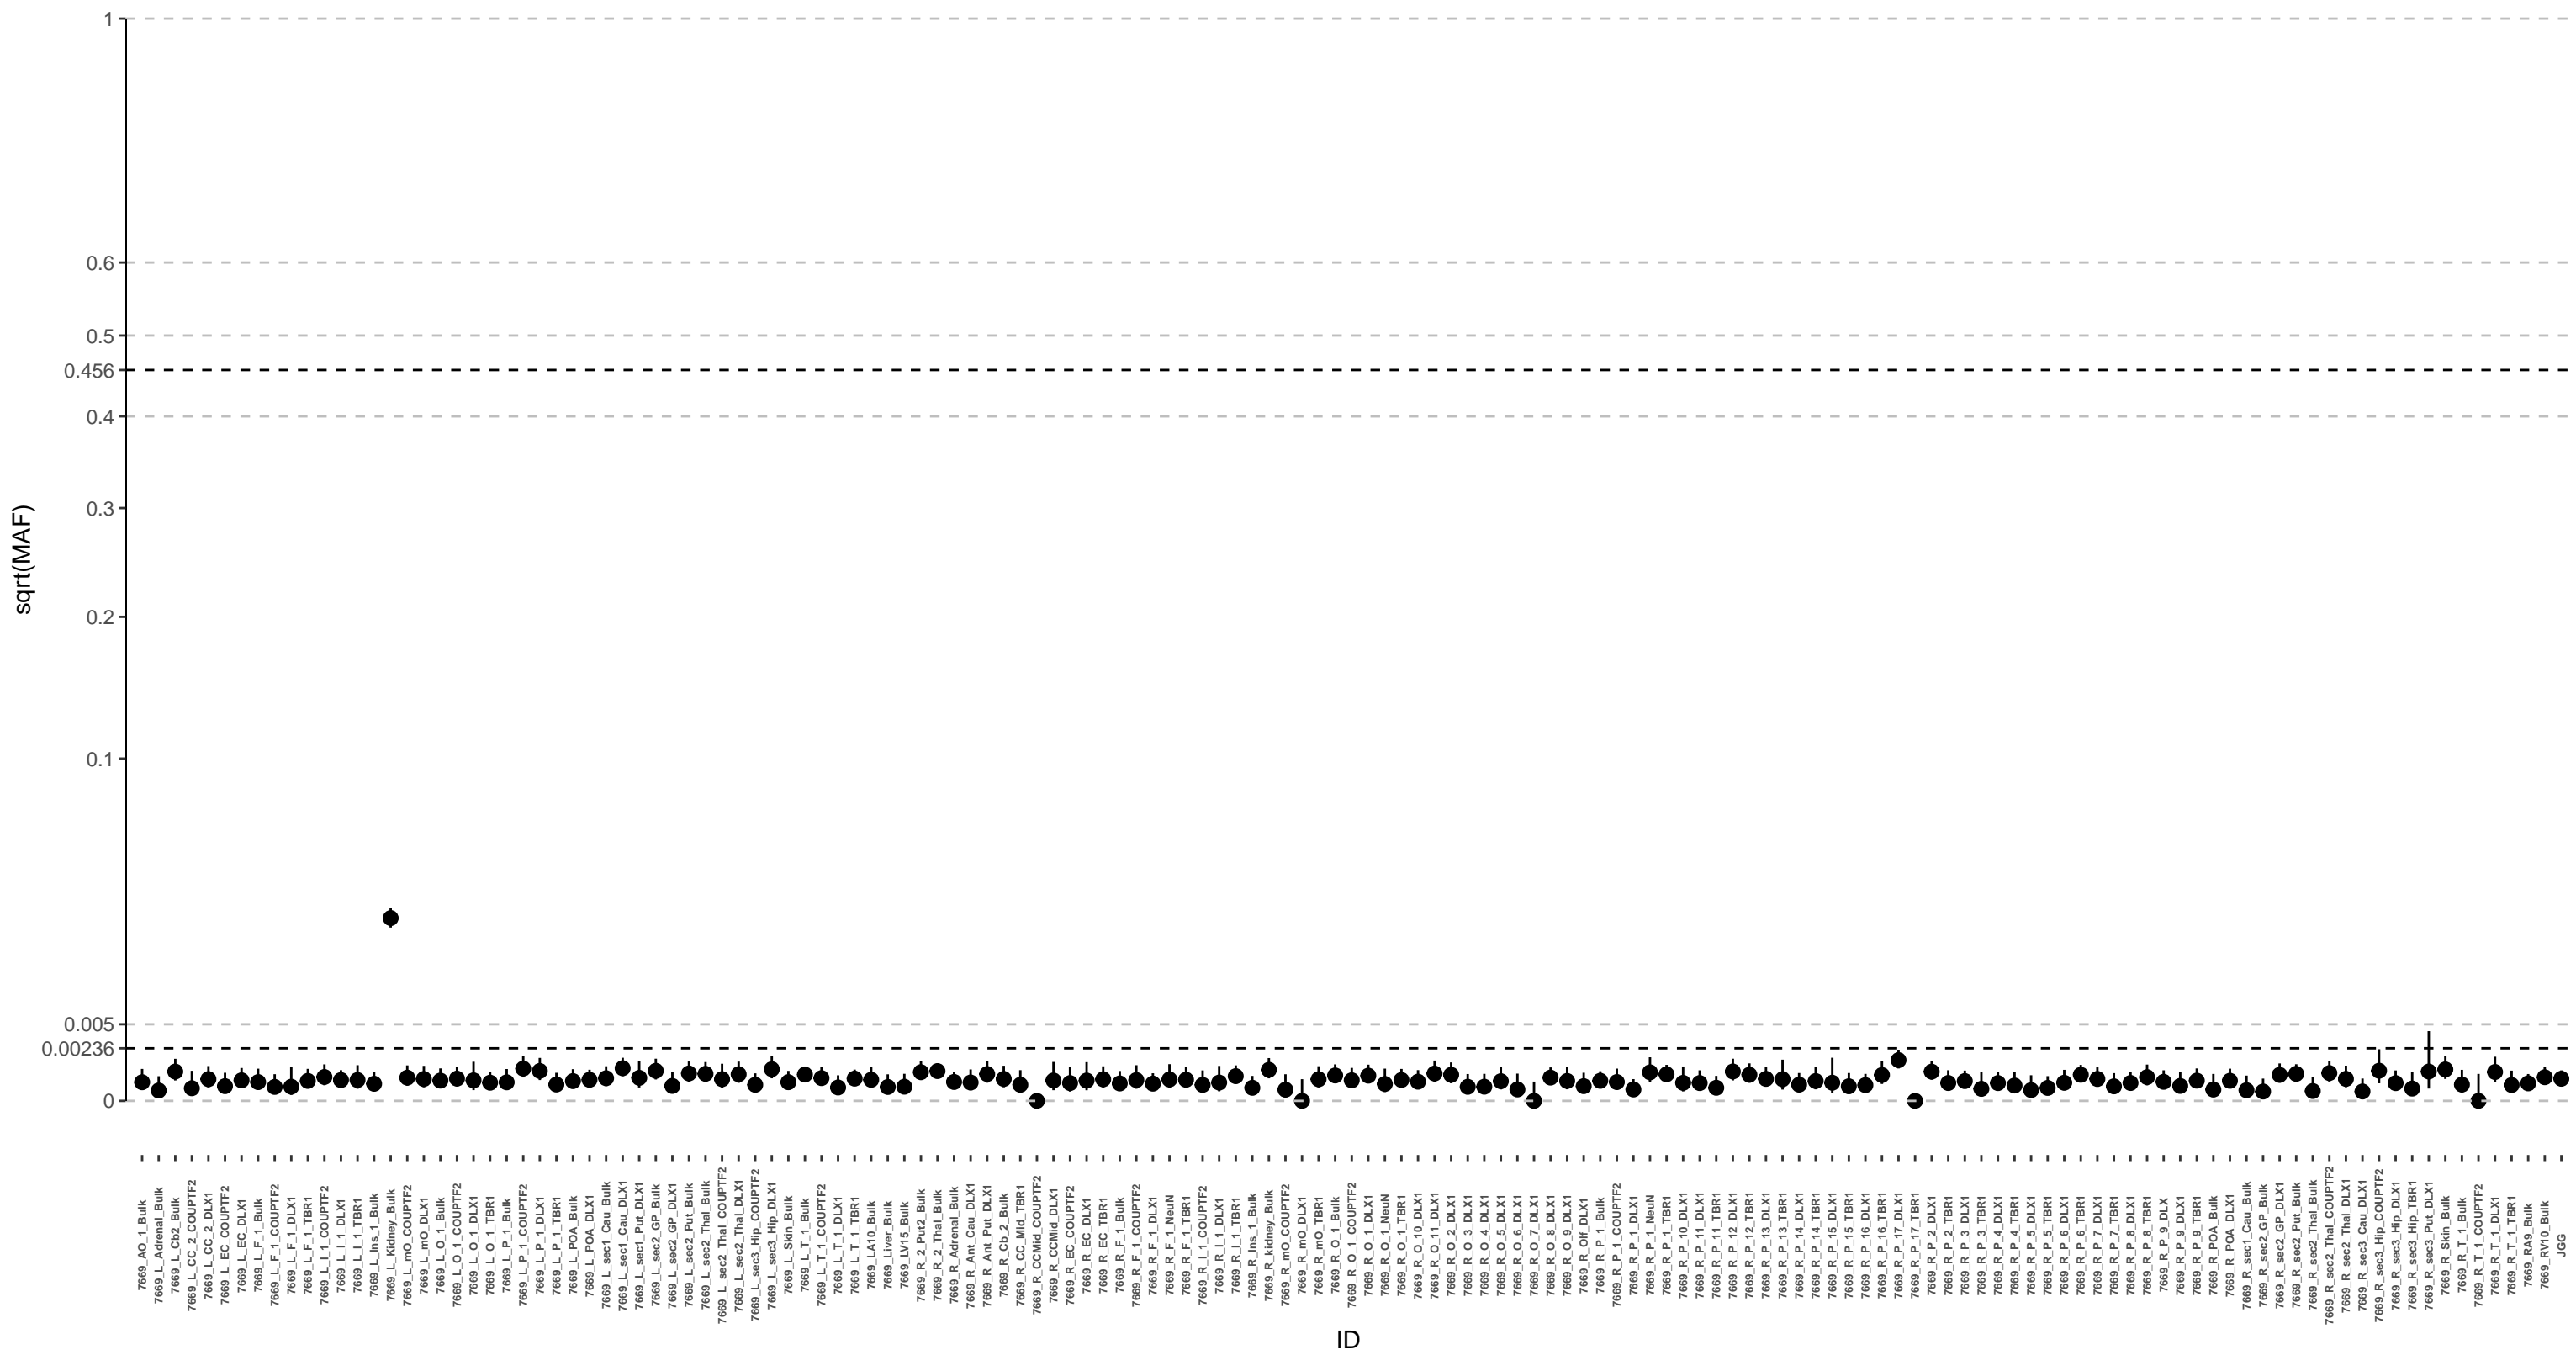

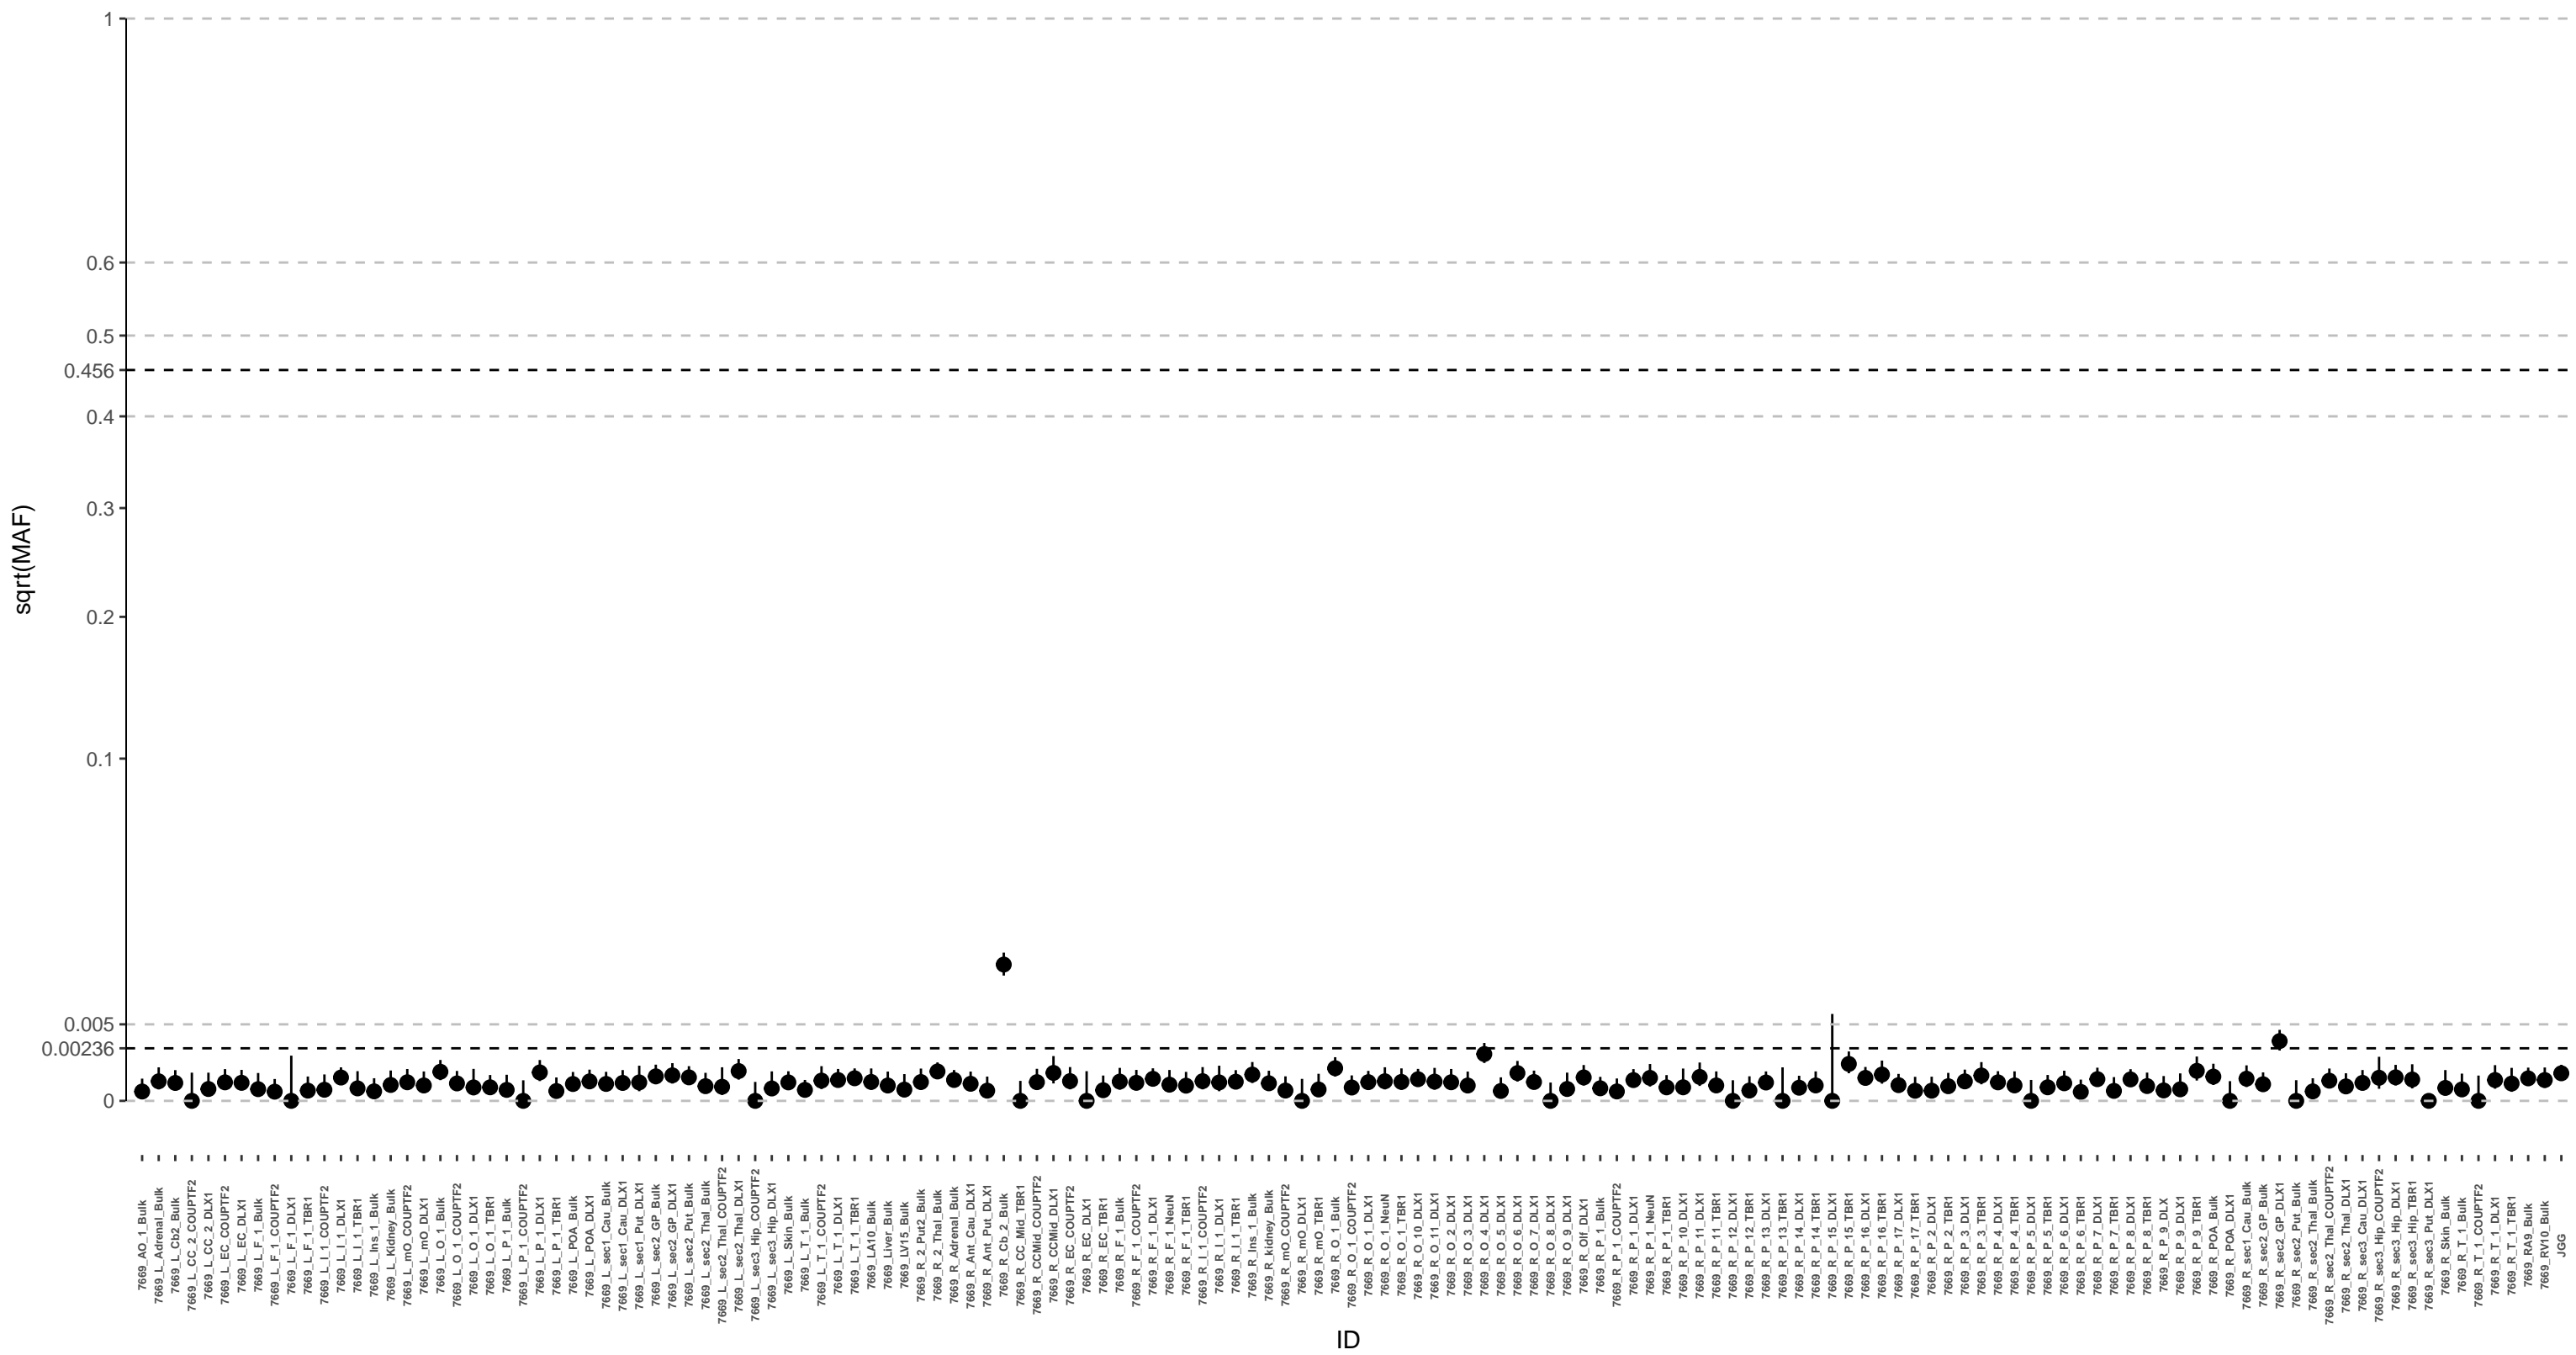

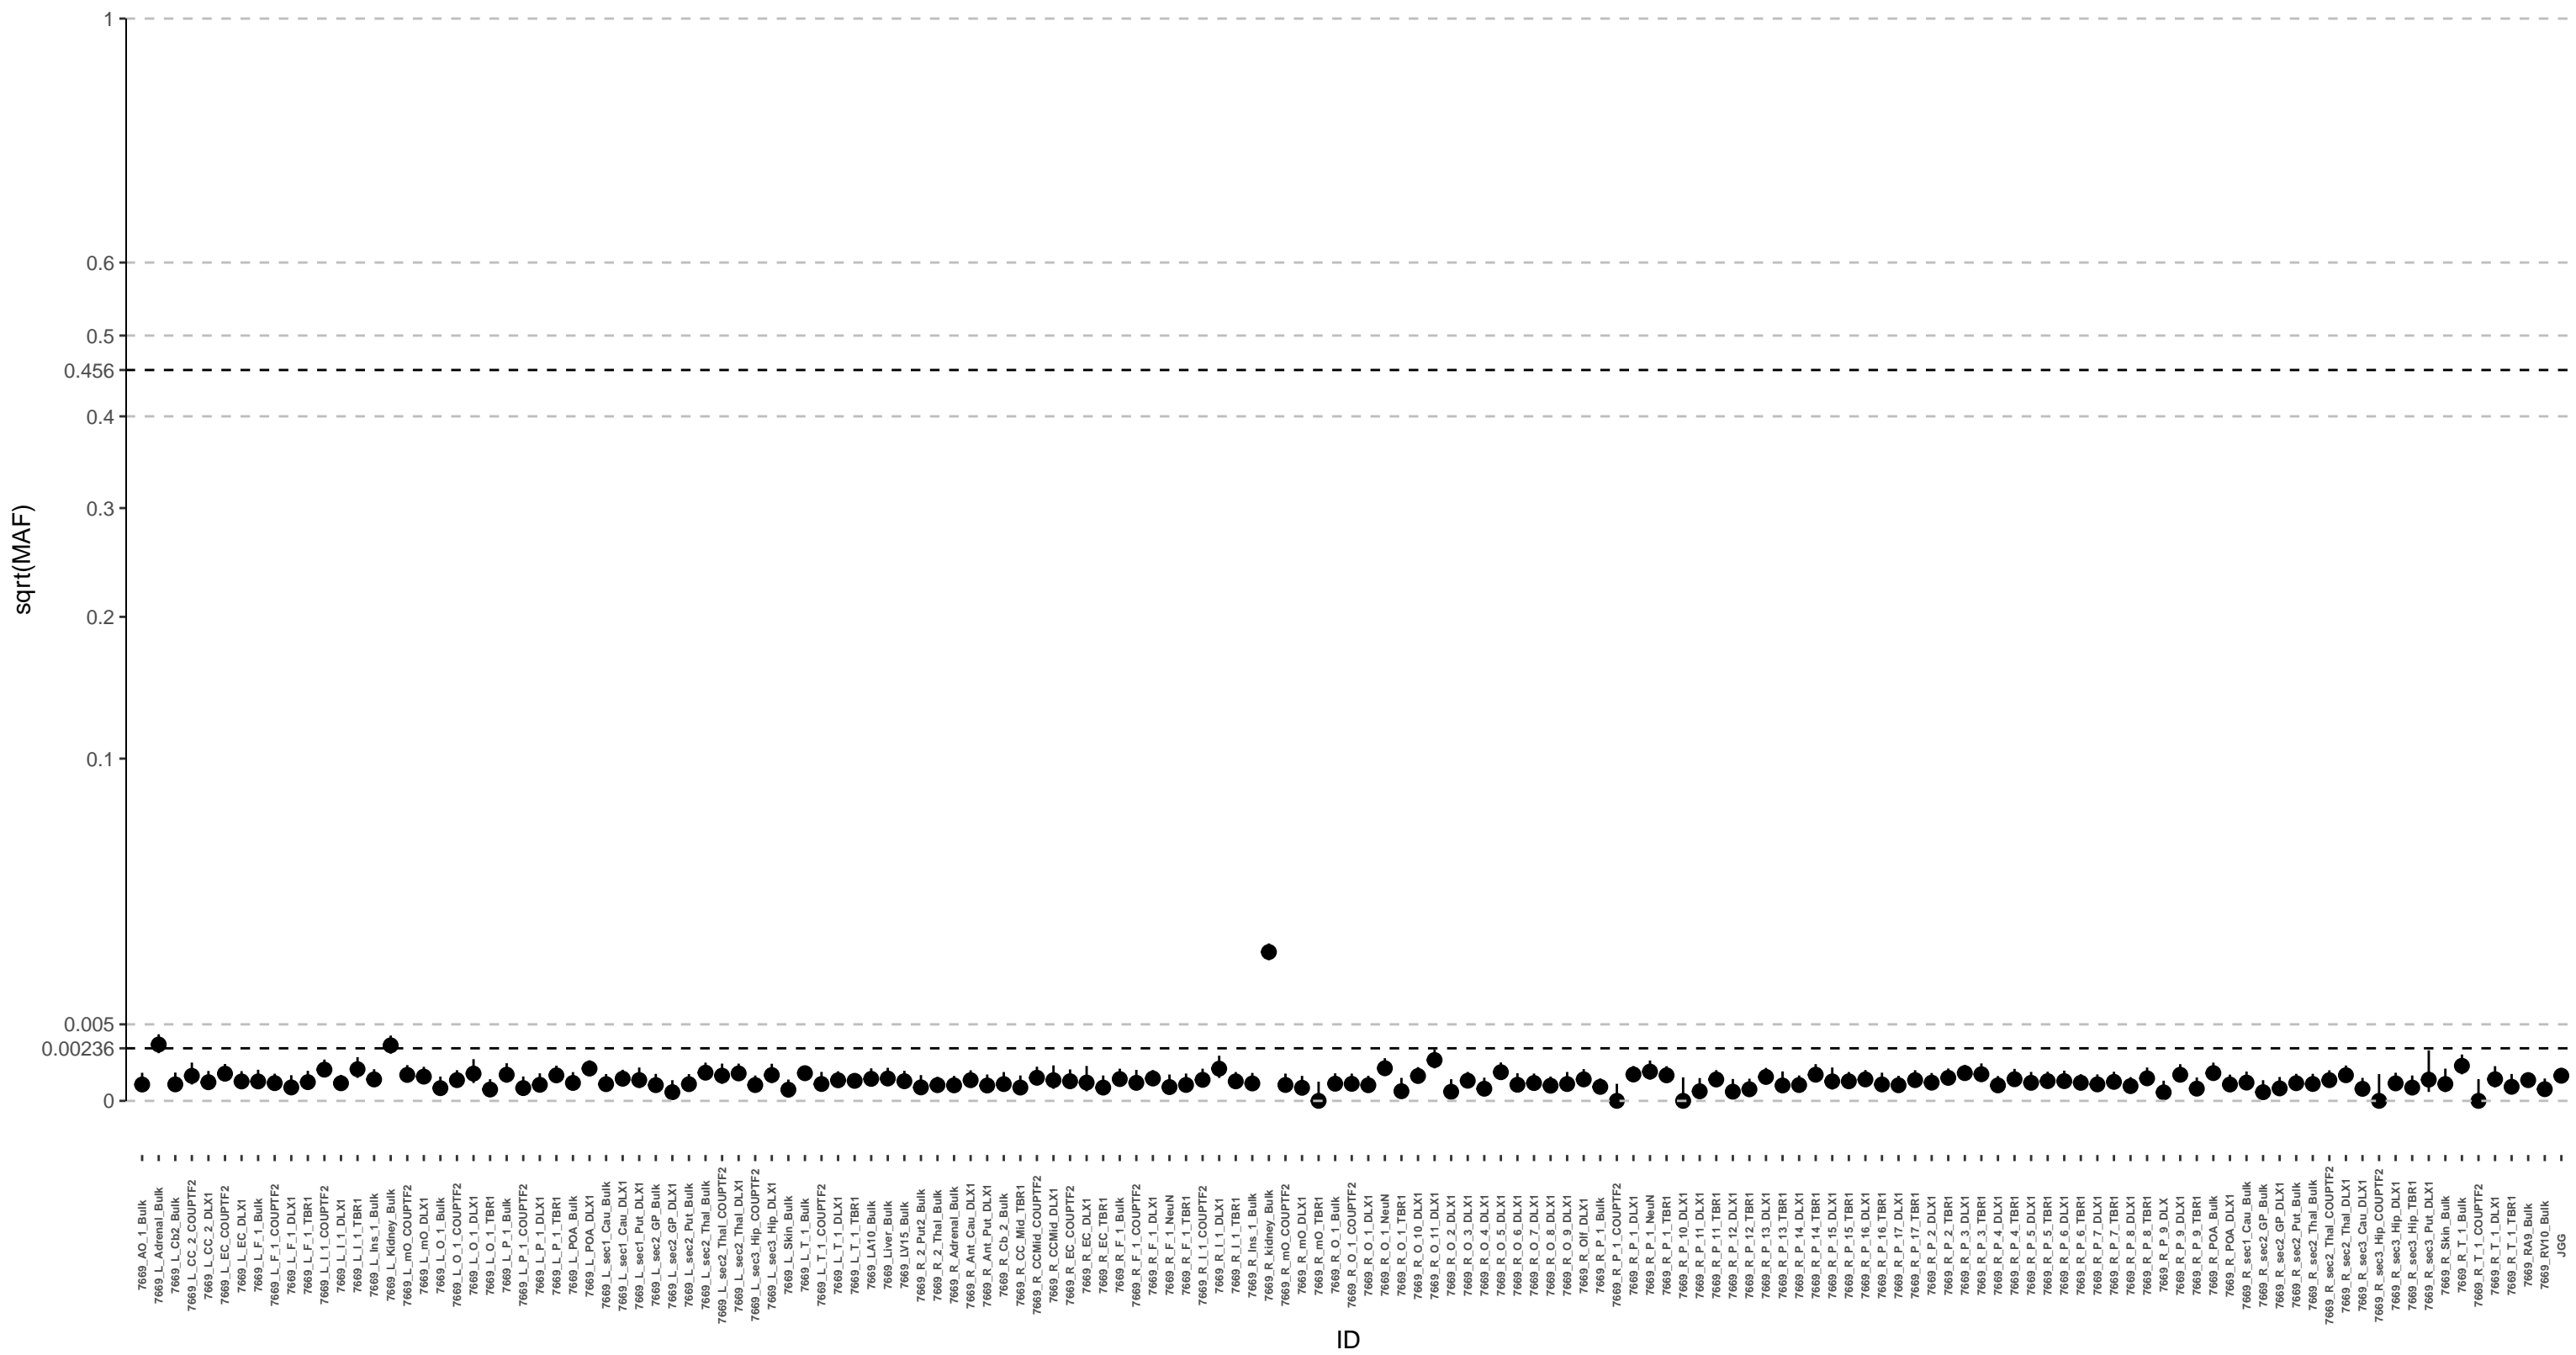

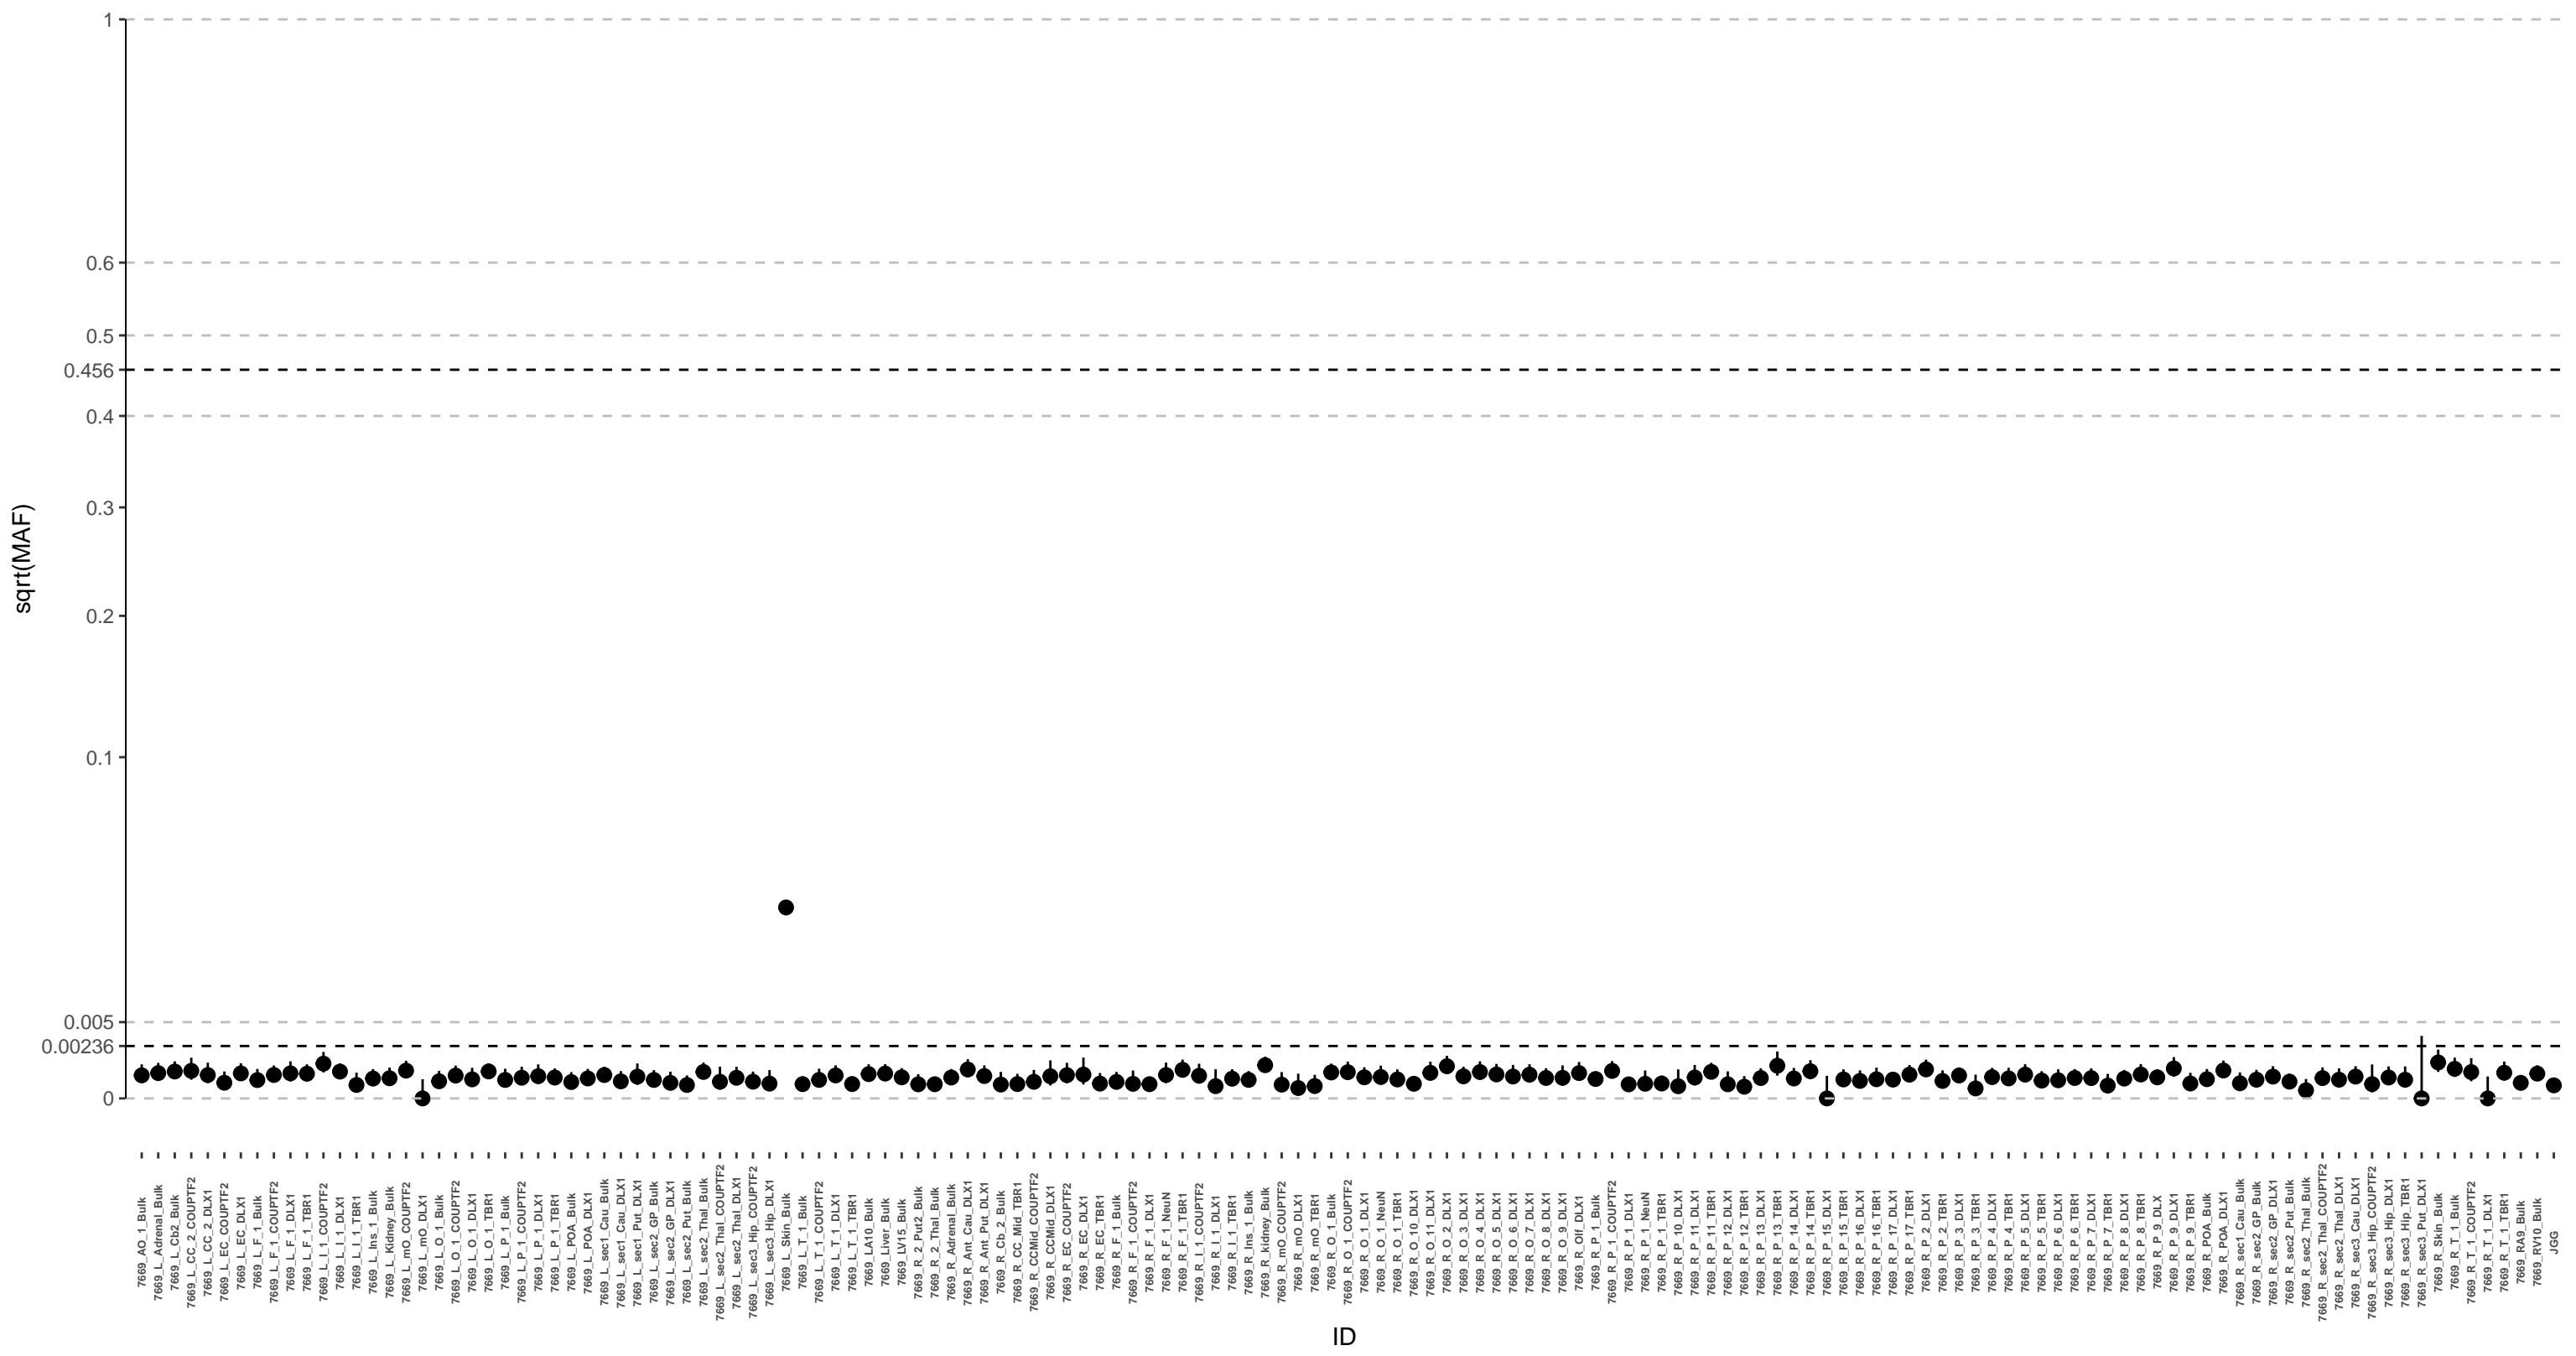

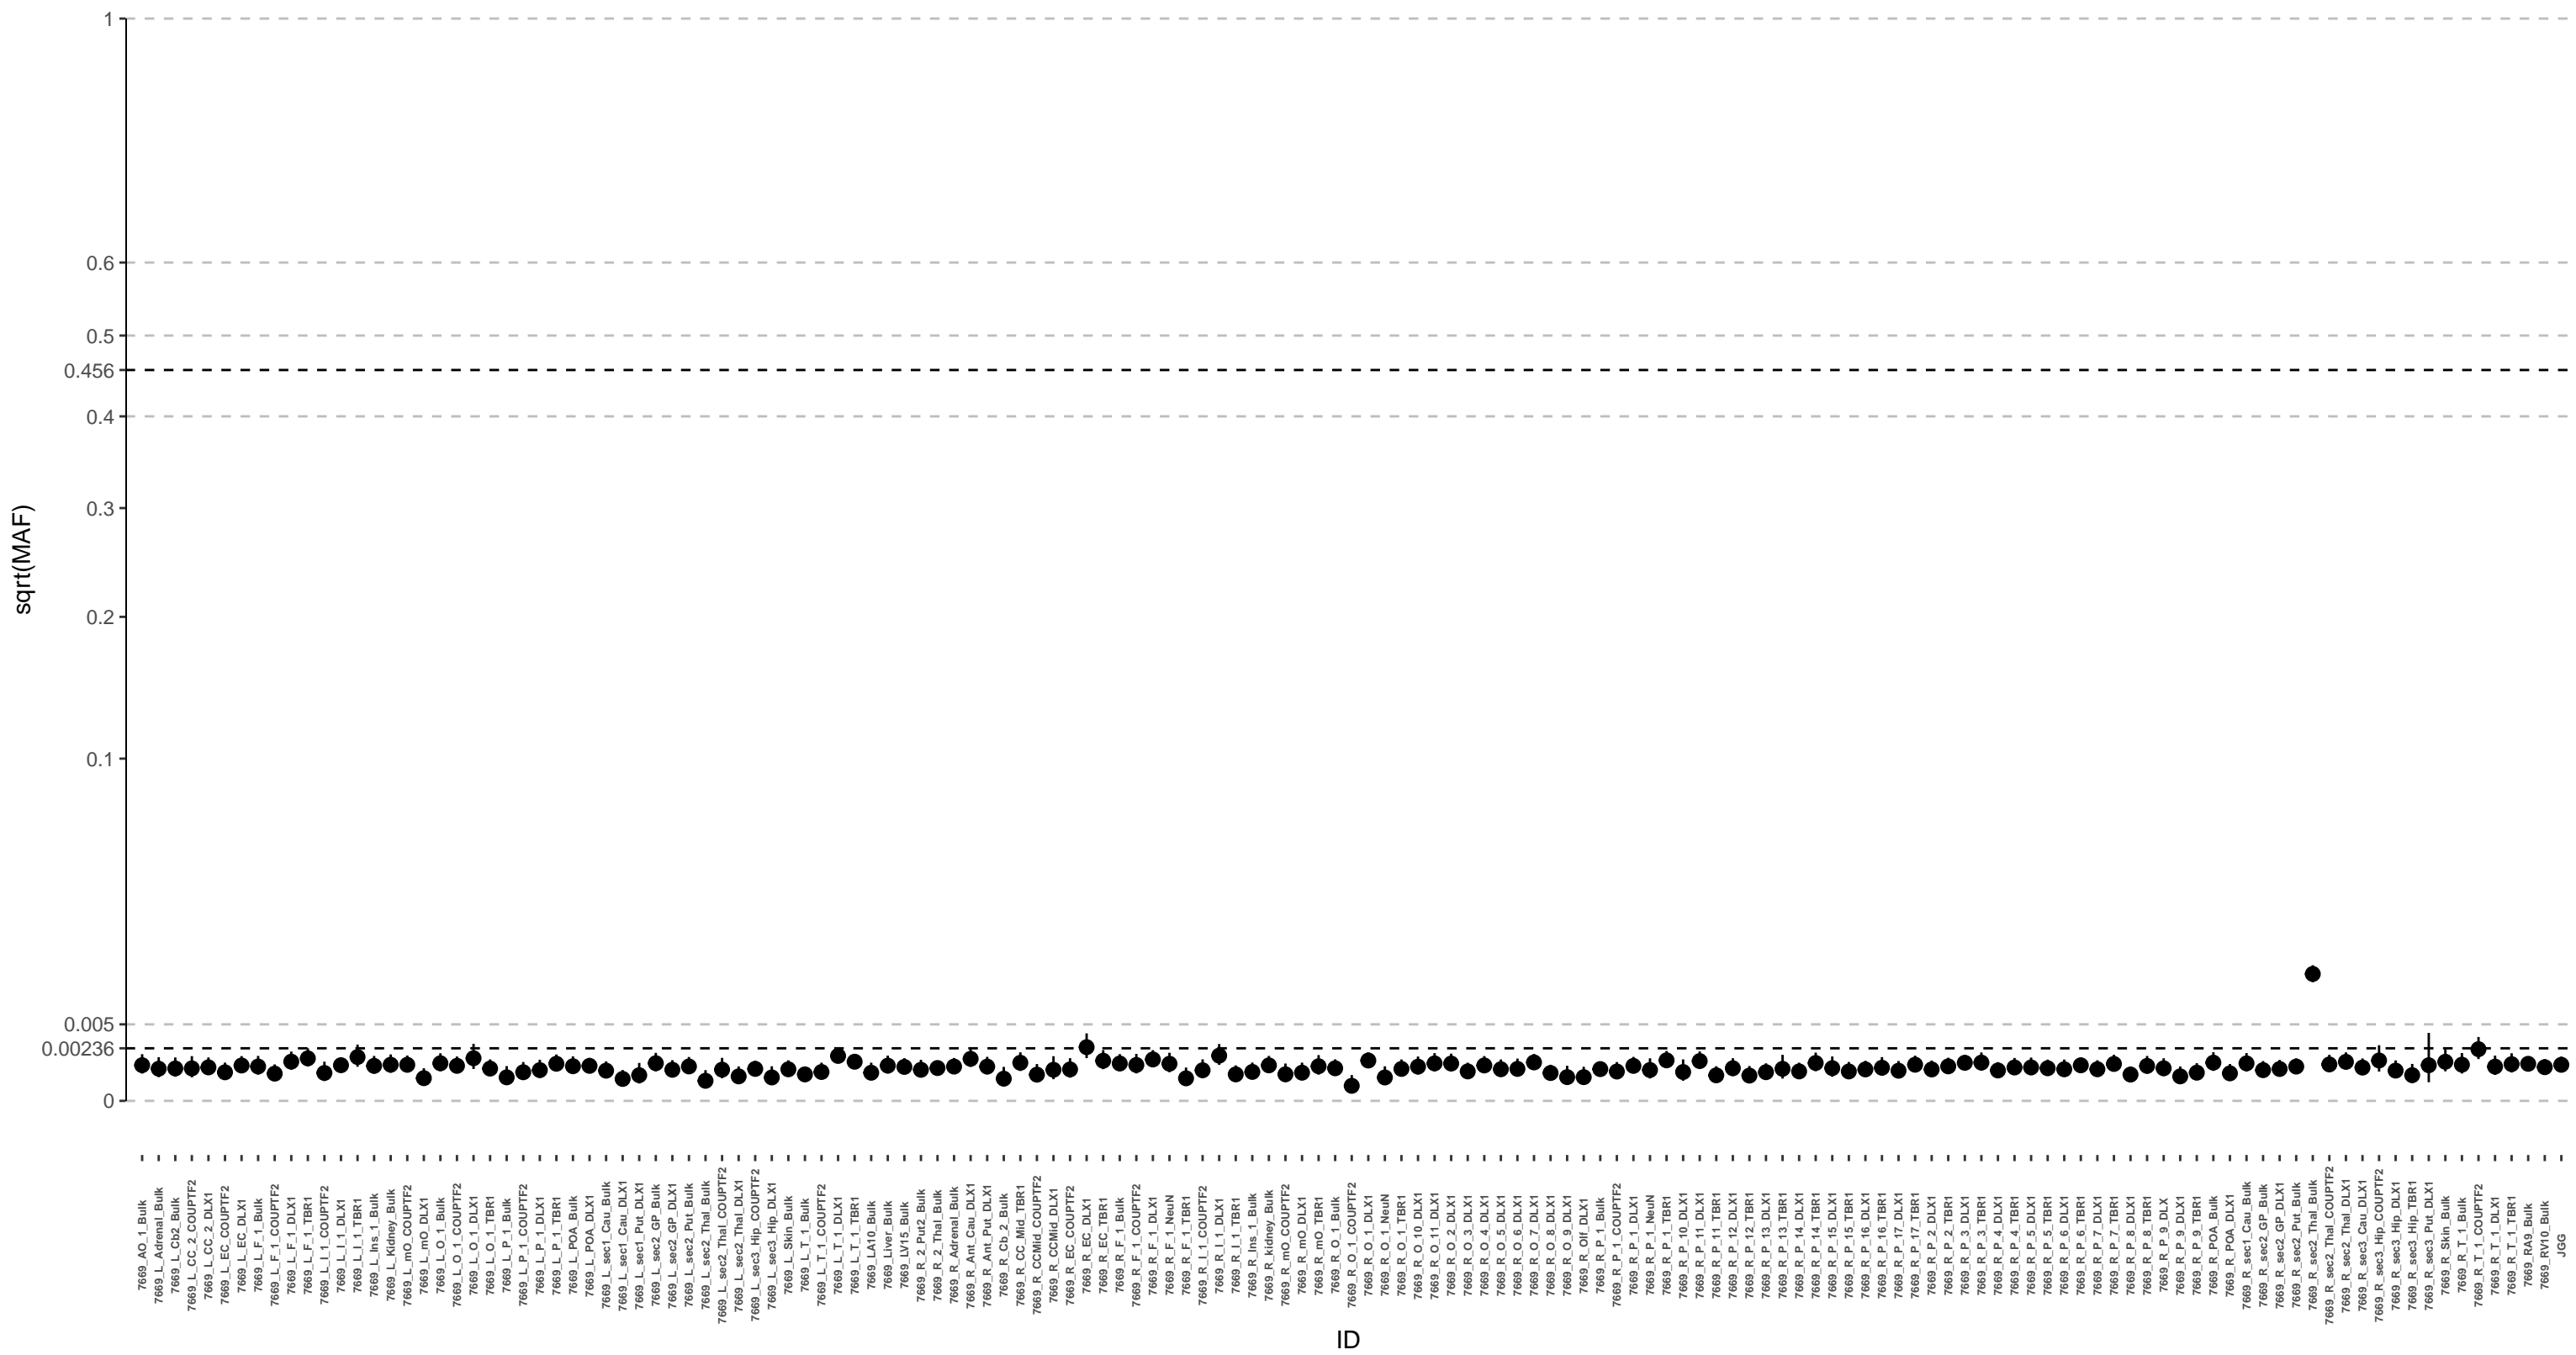

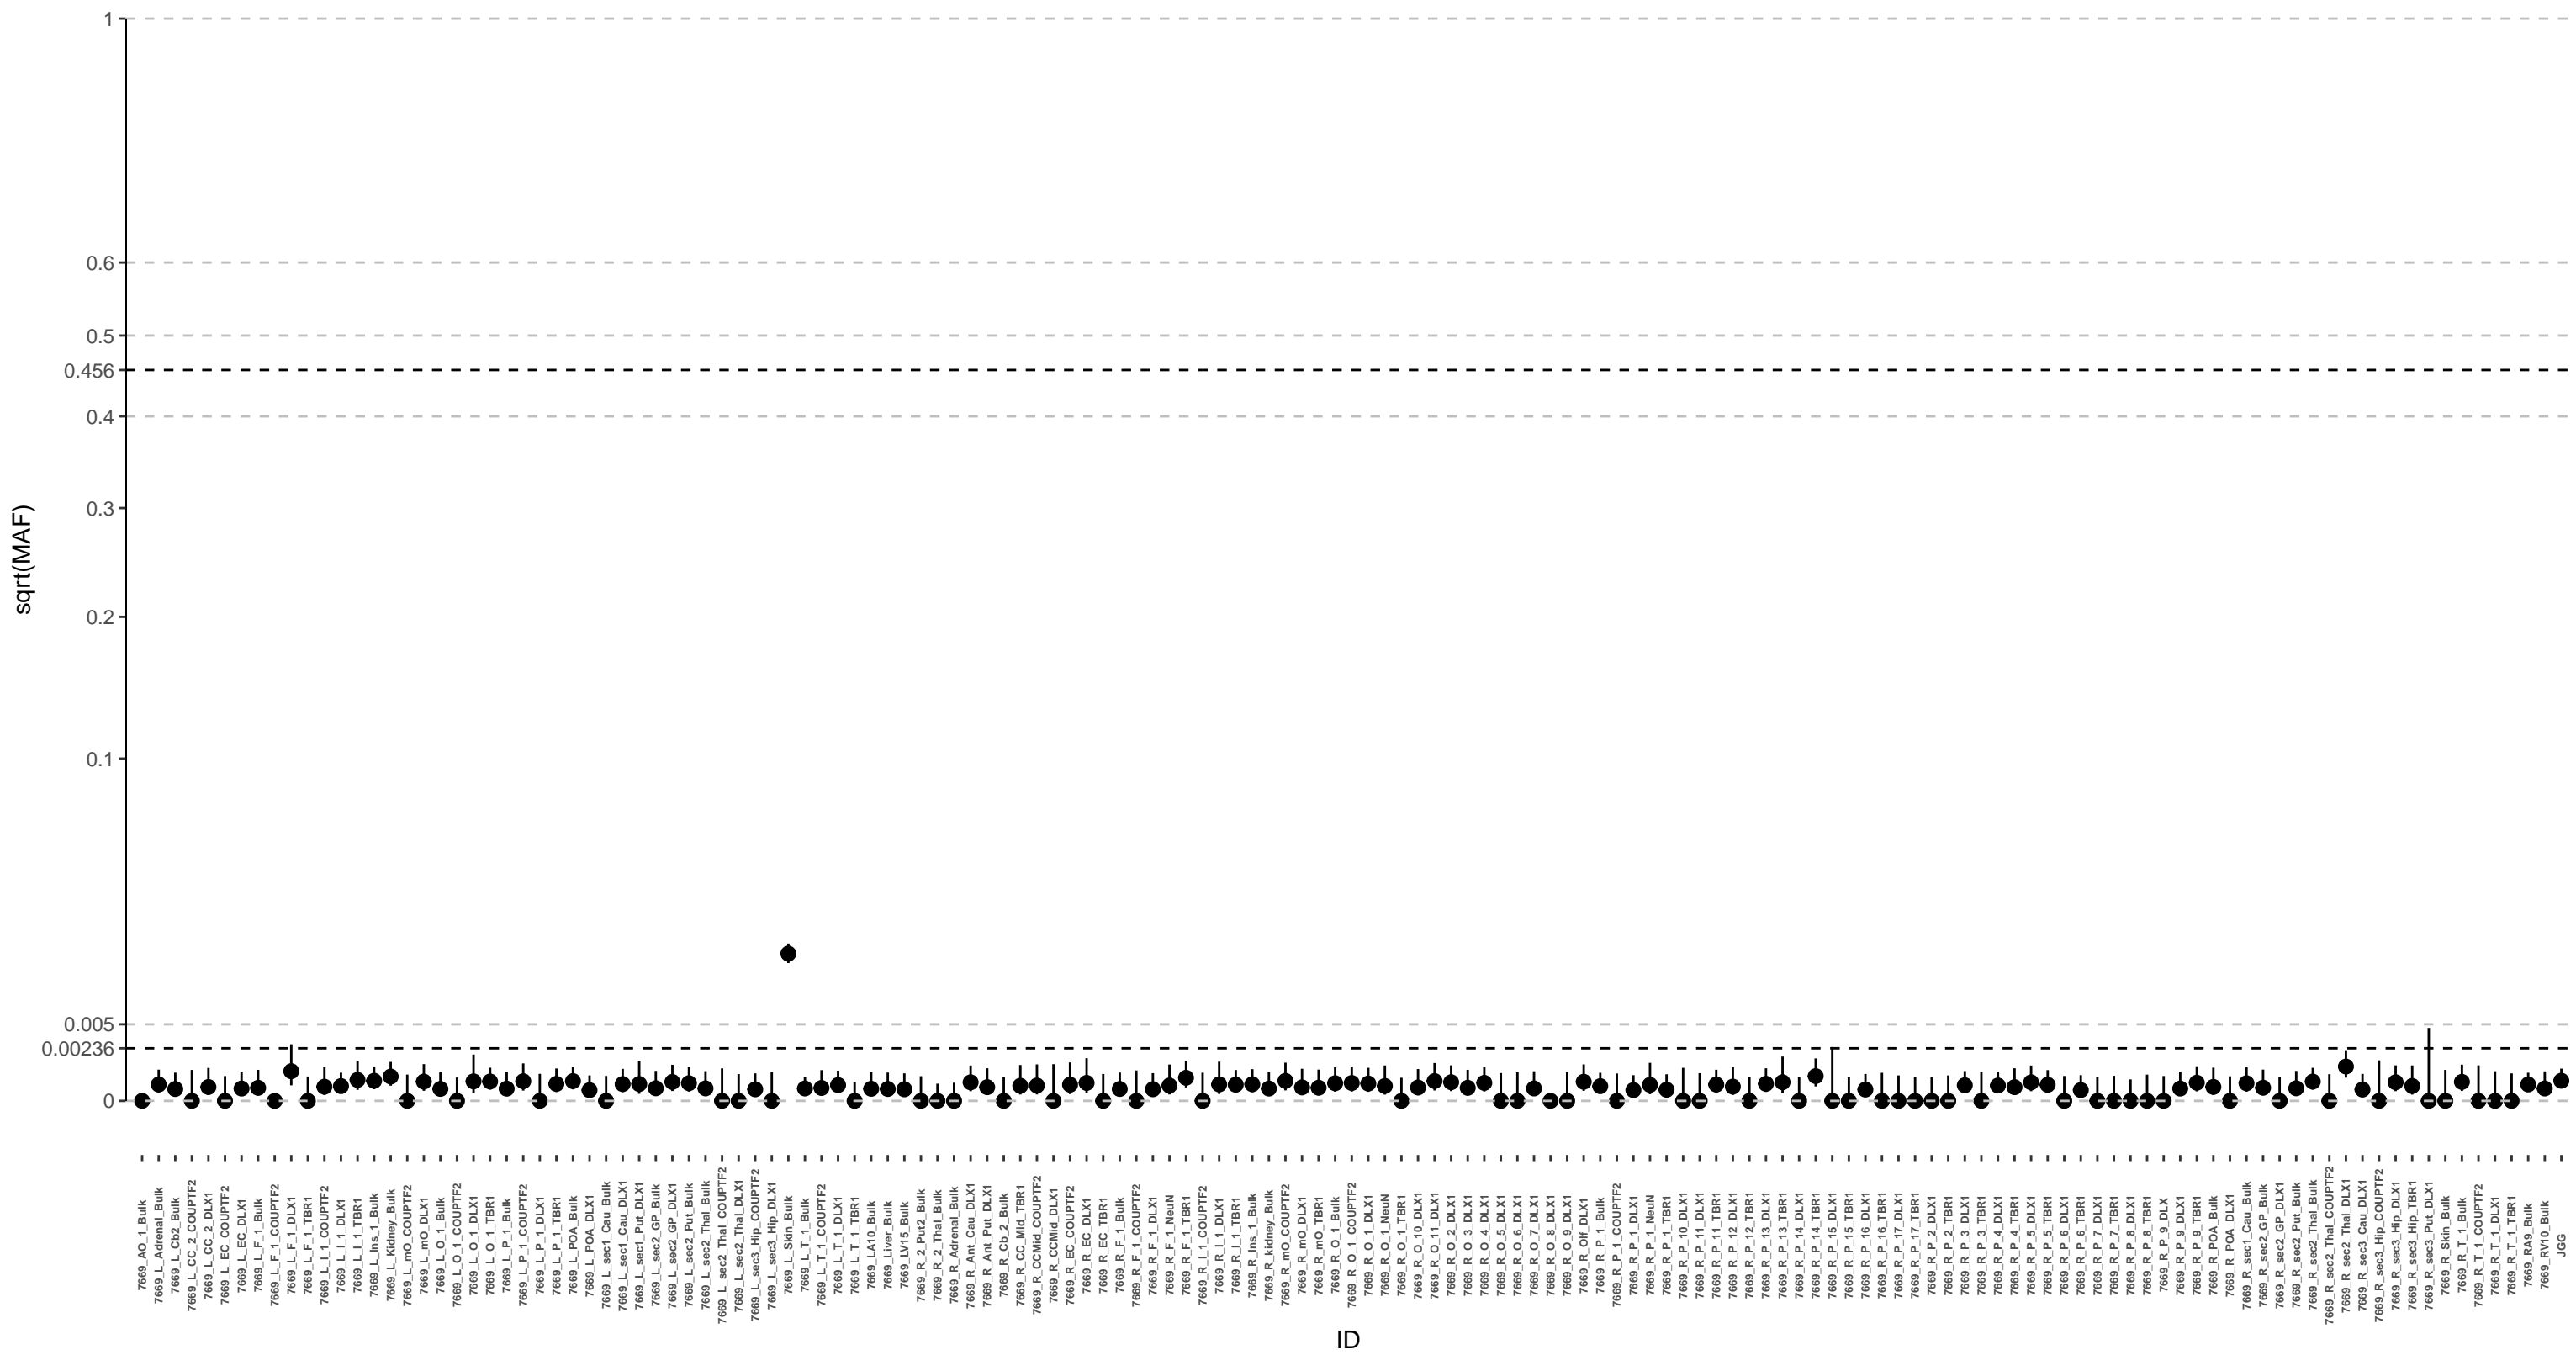

ID05 19-58610340-T-G

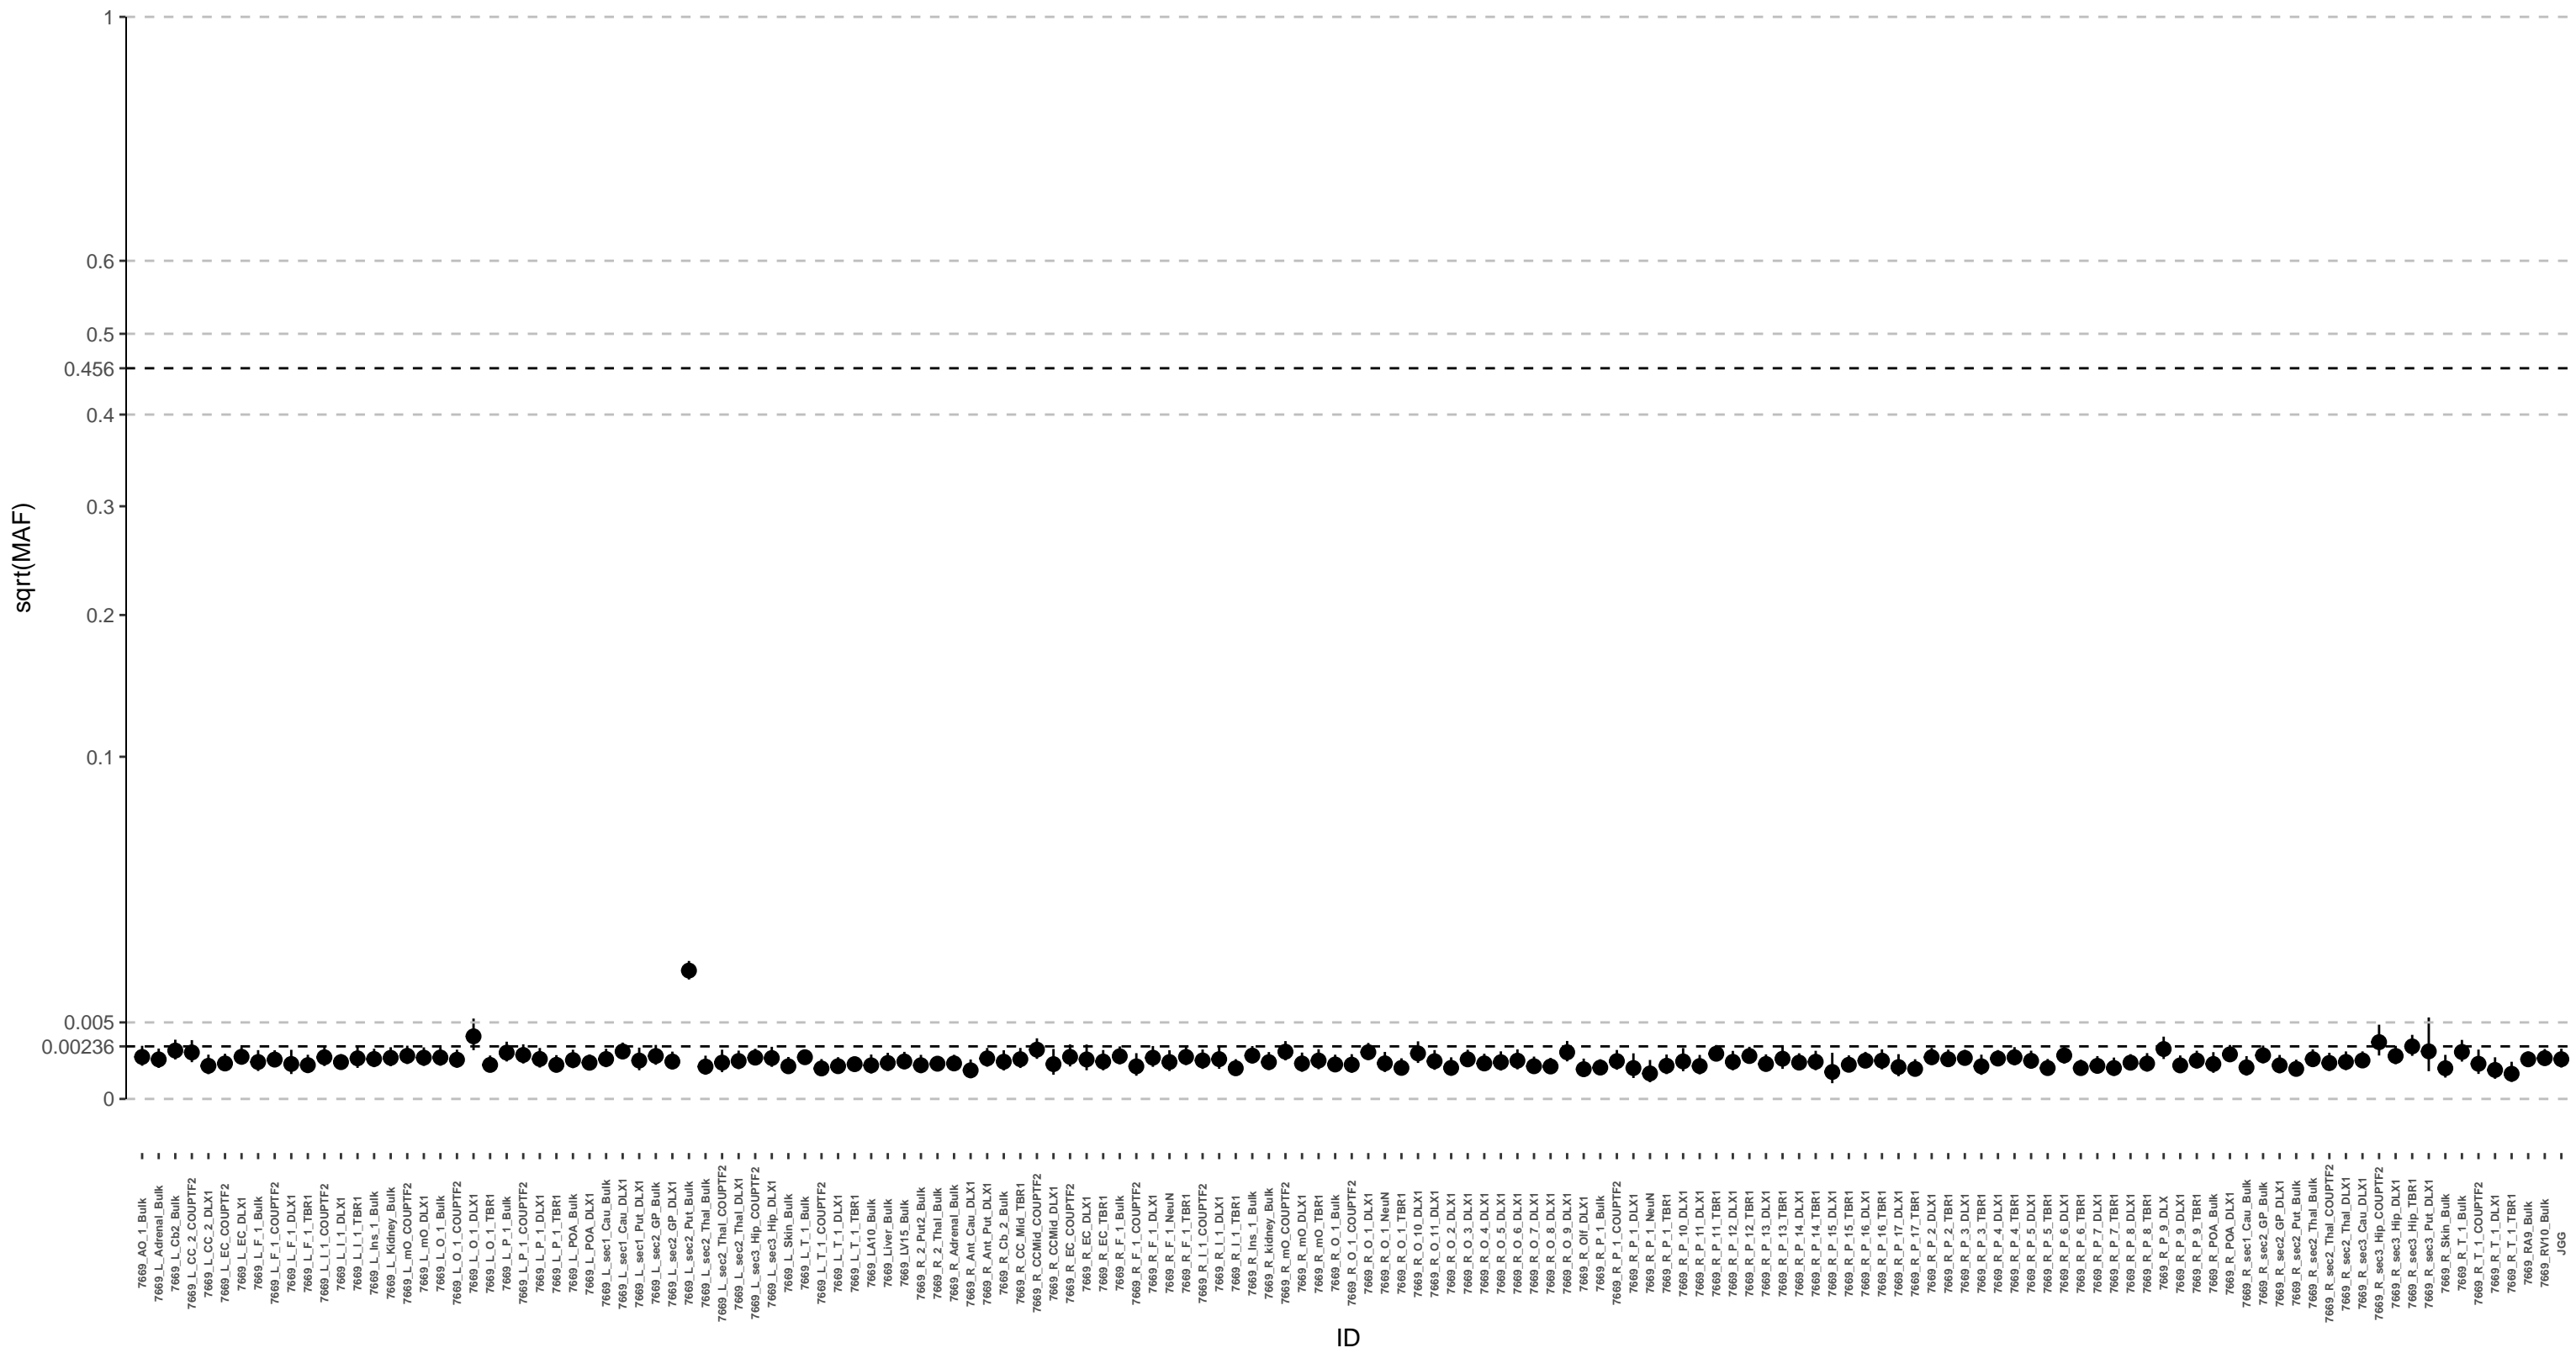

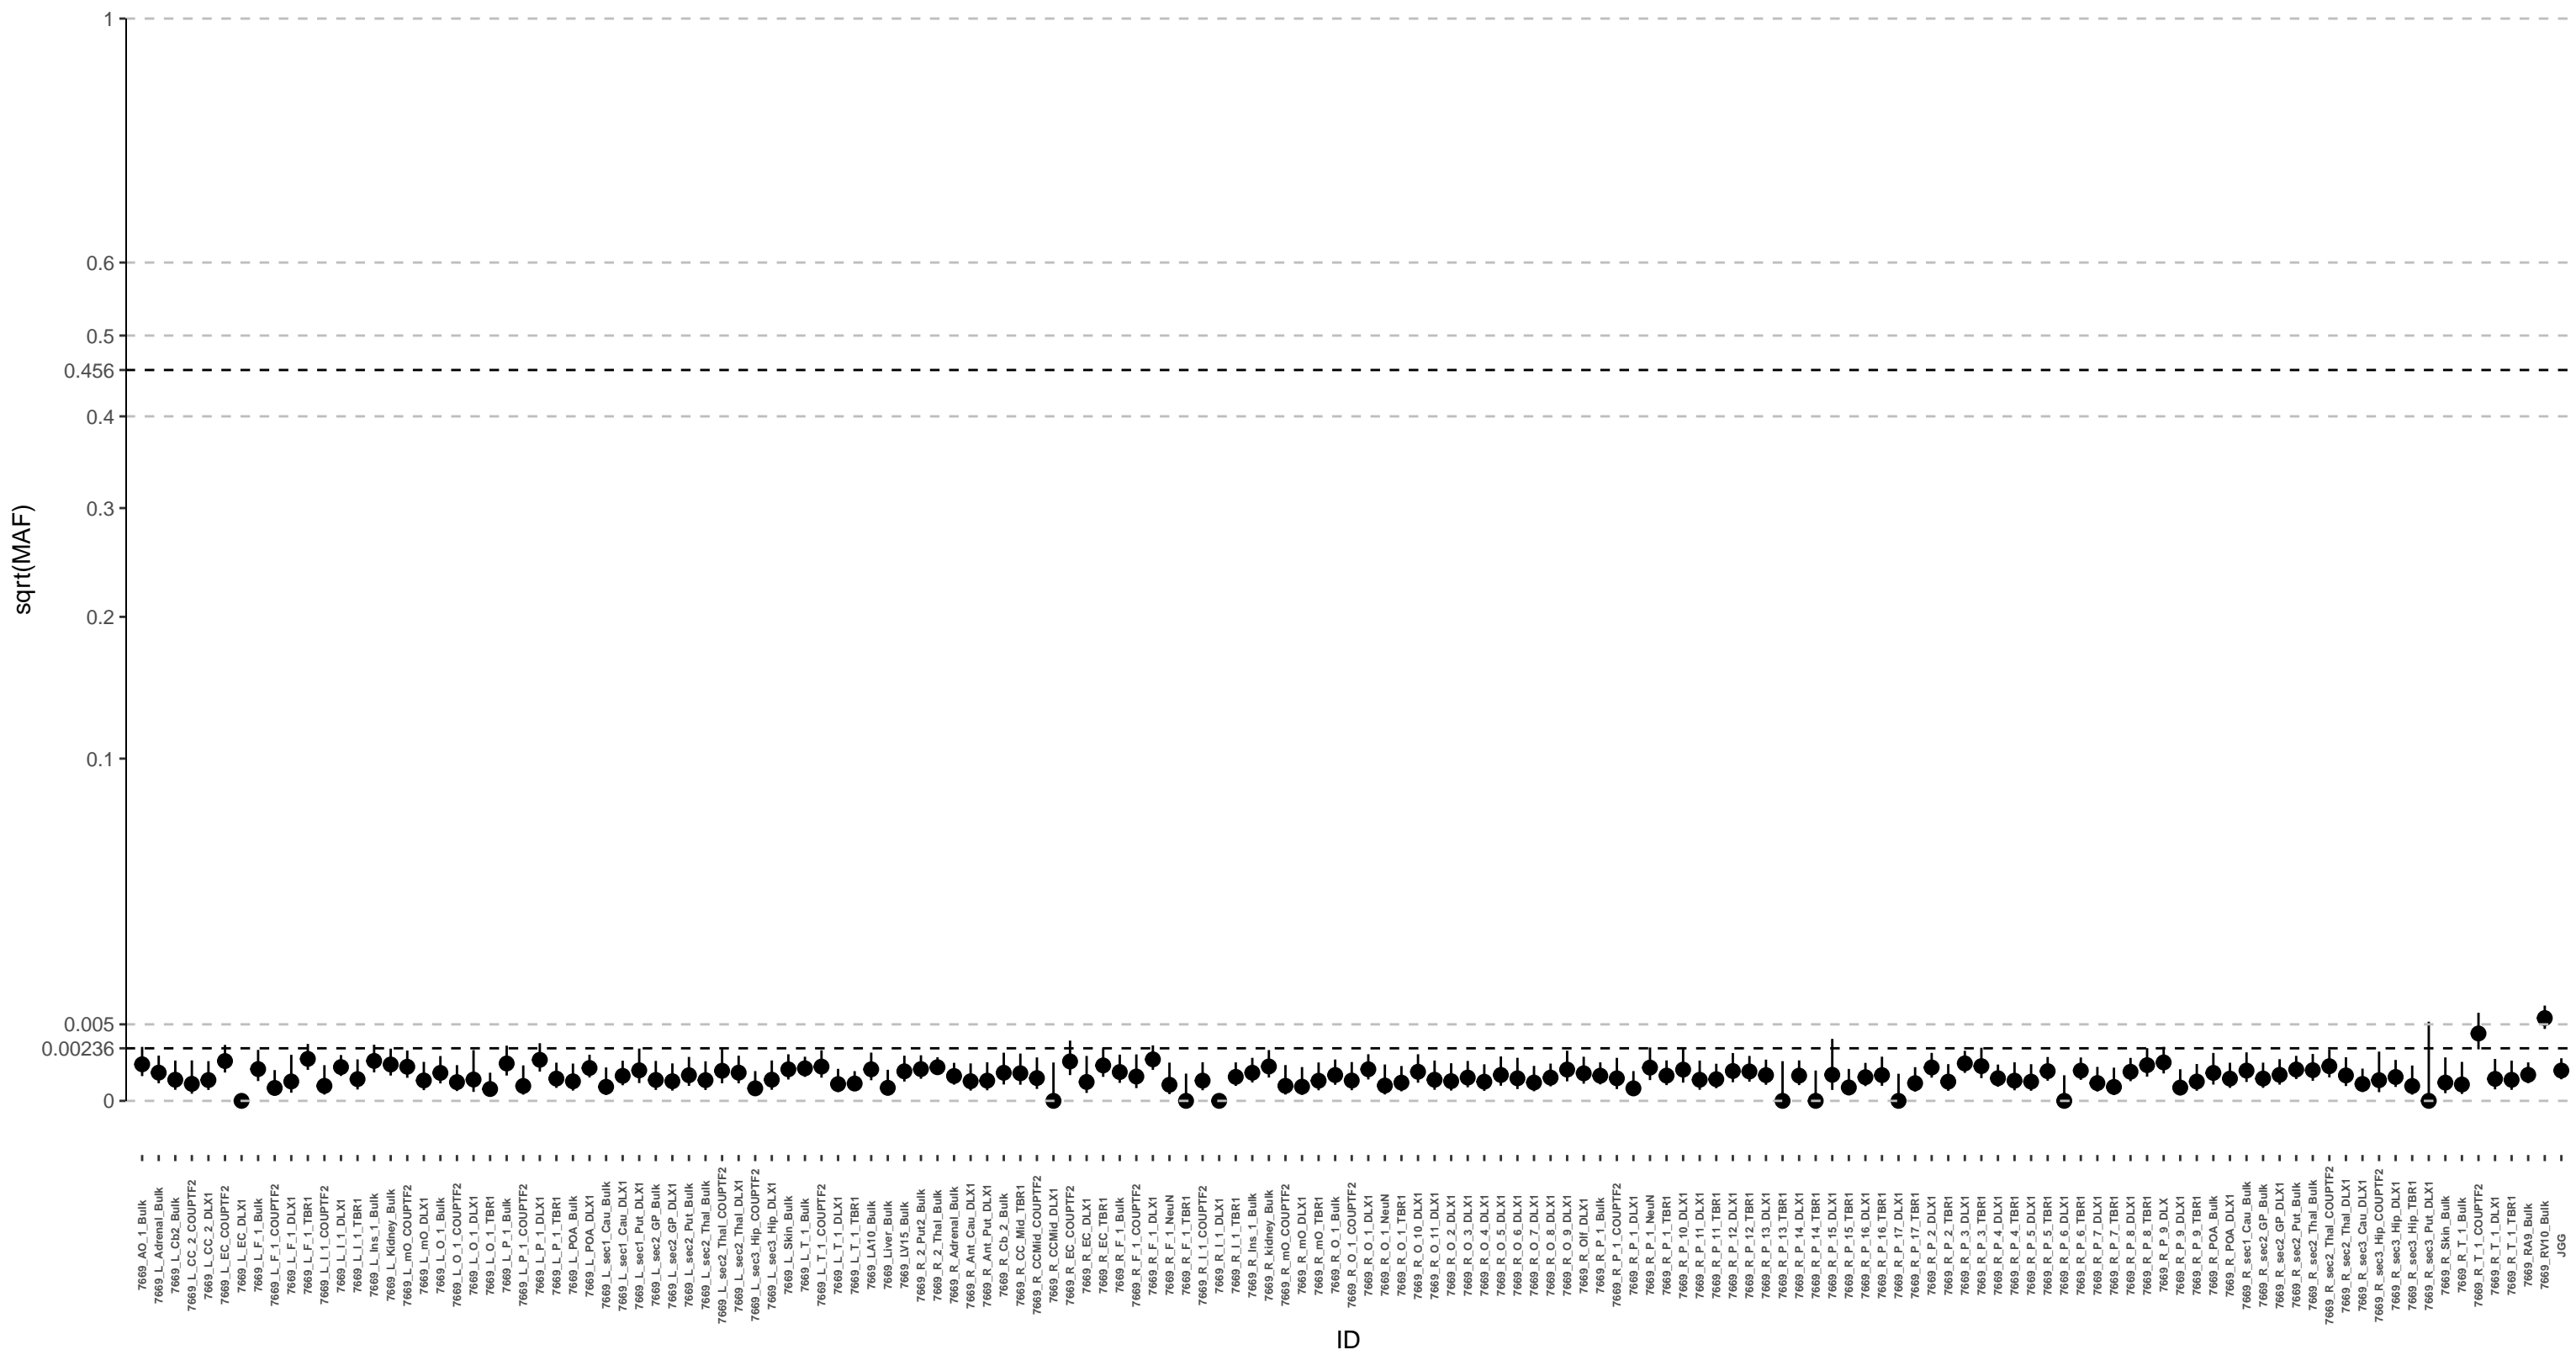



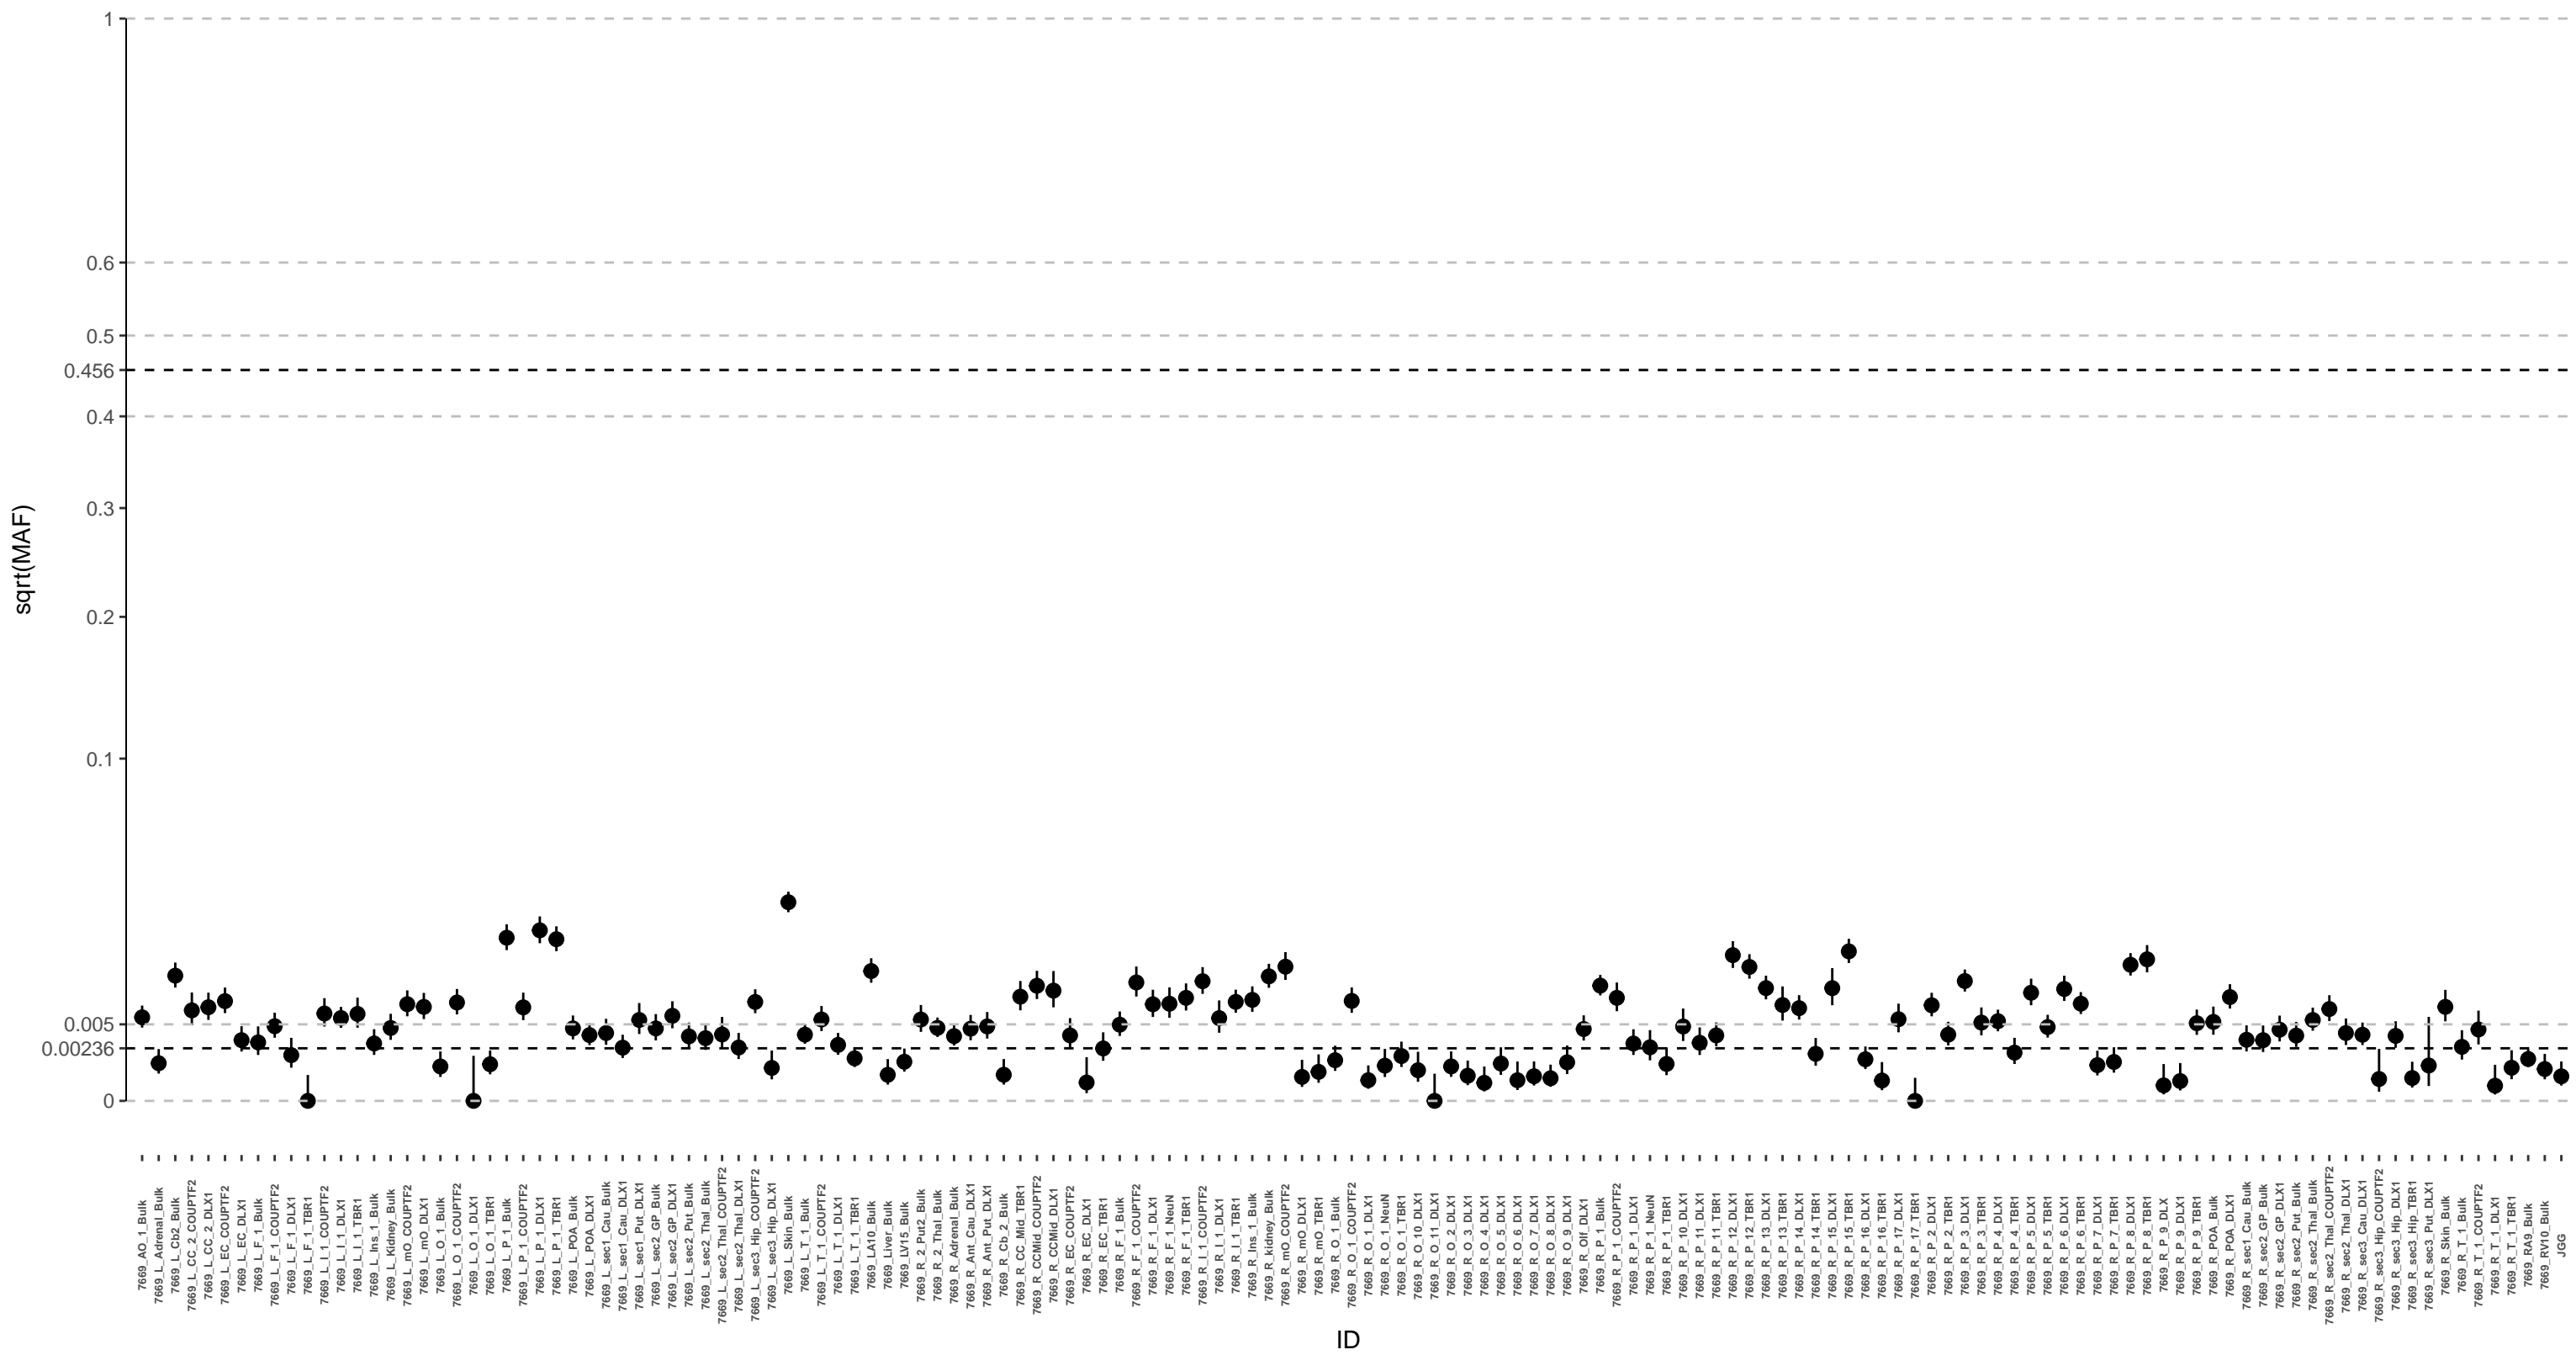

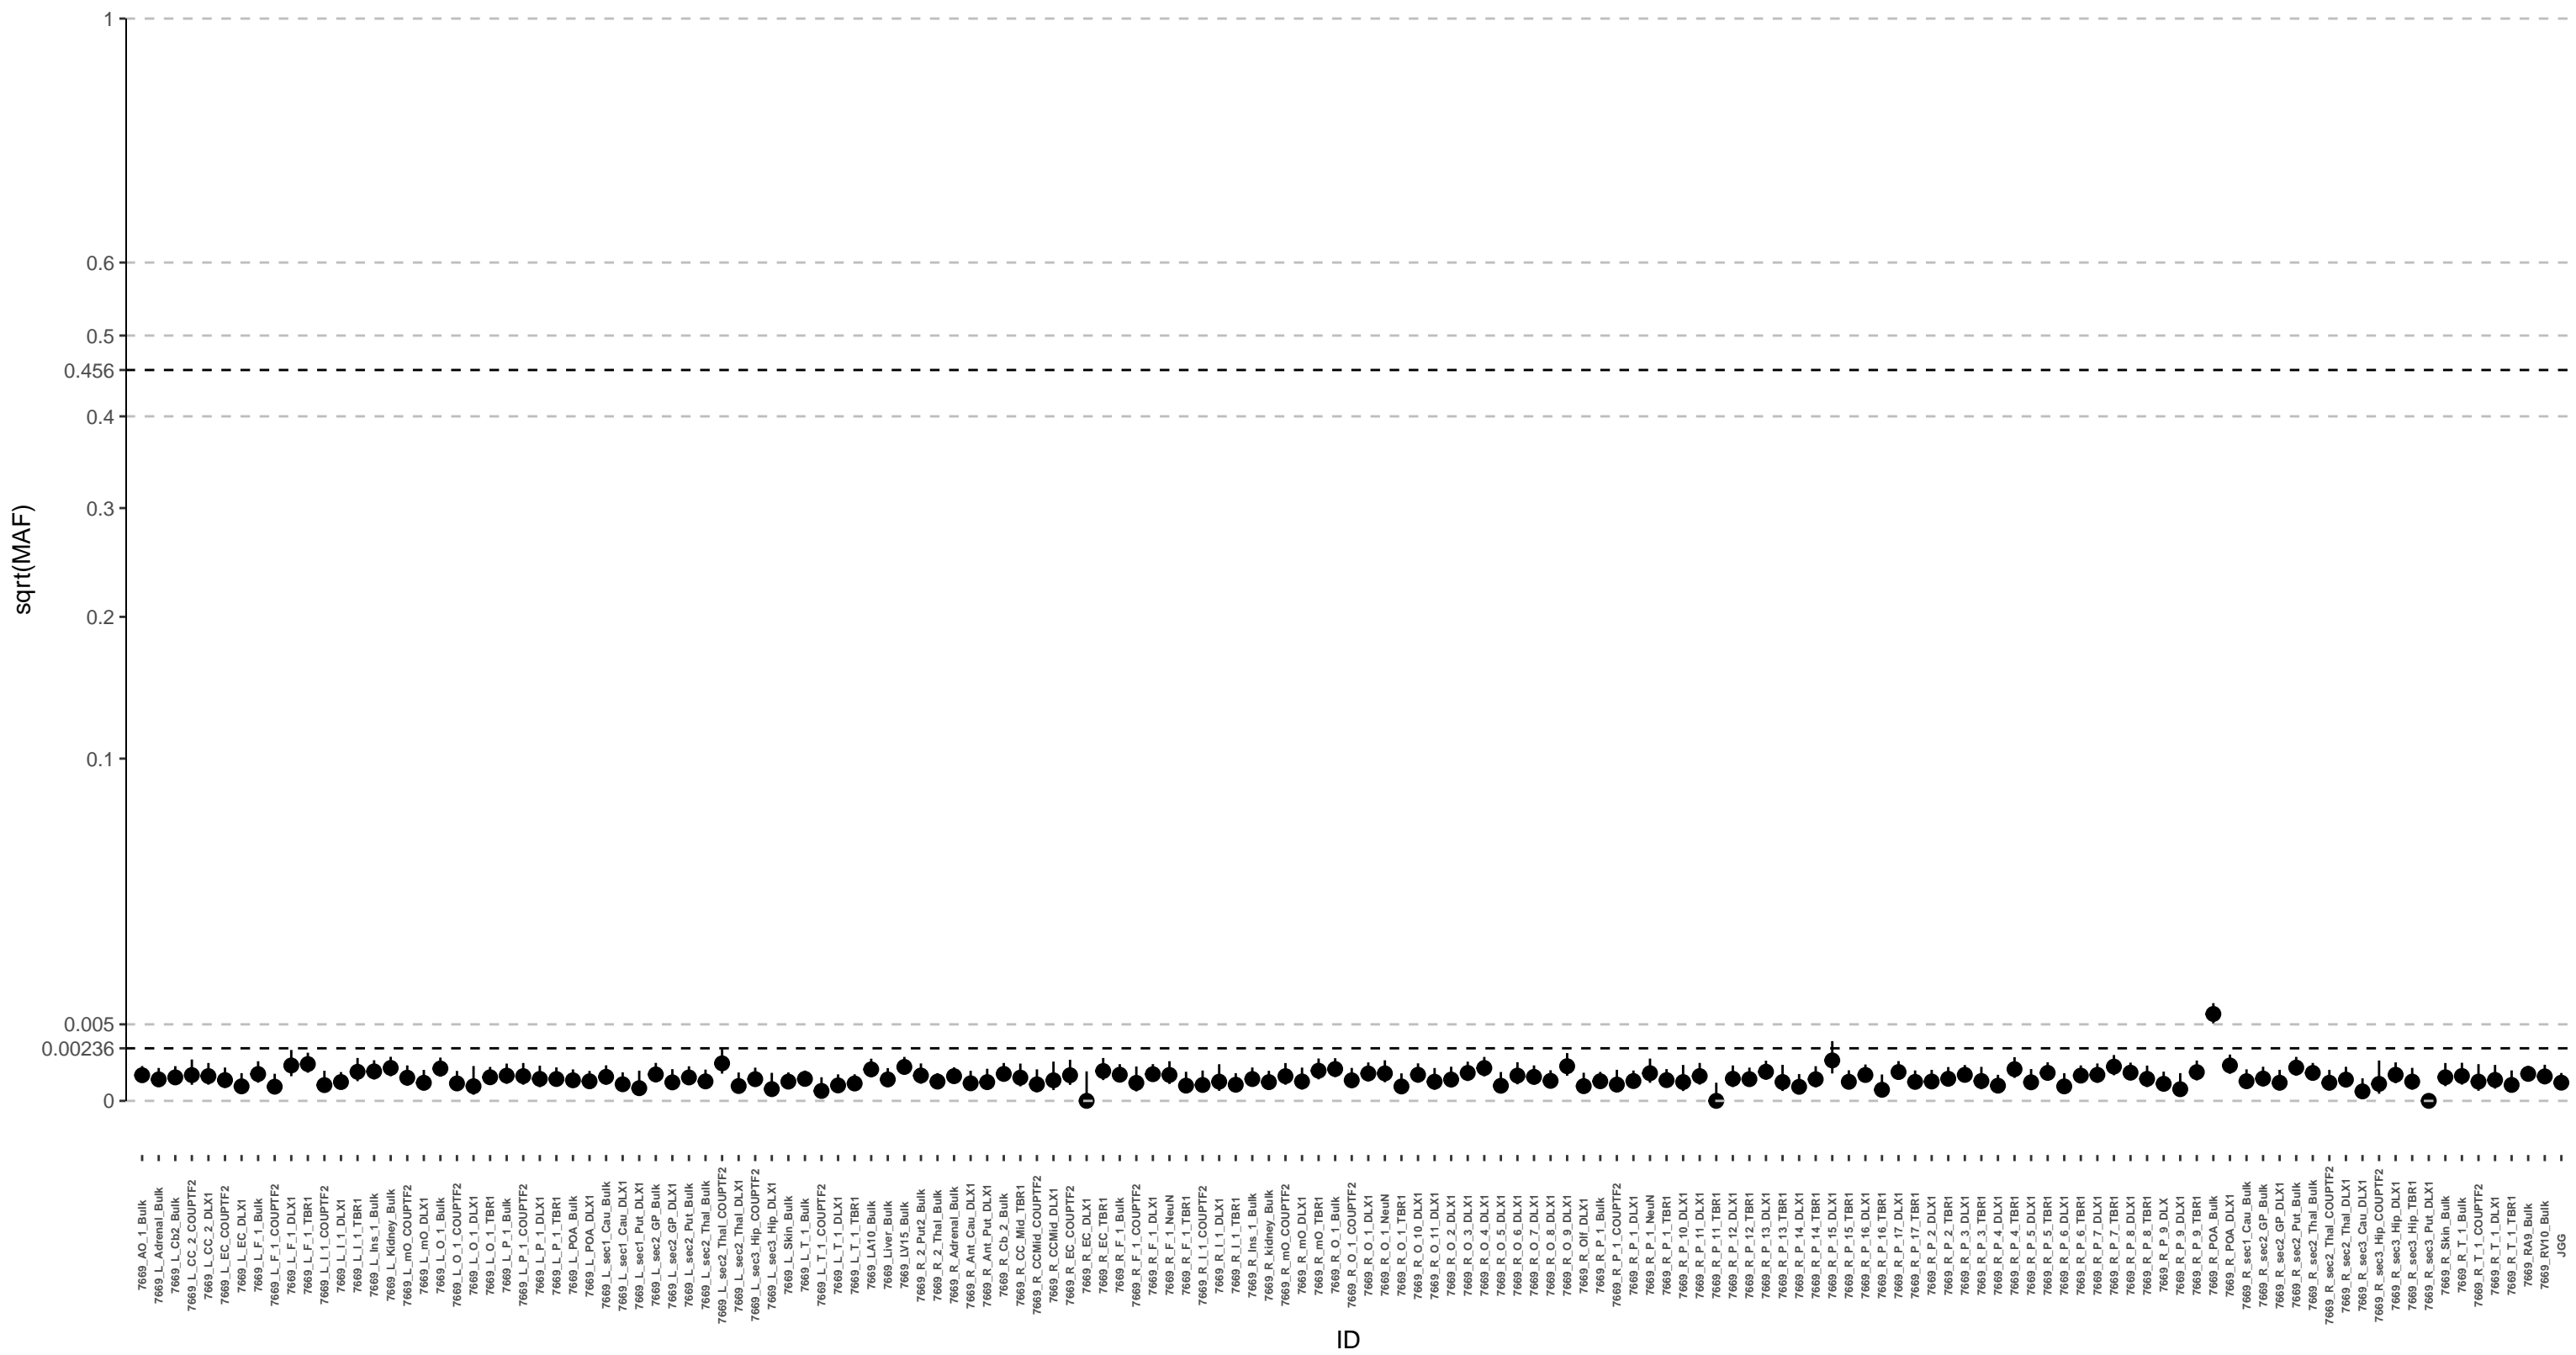

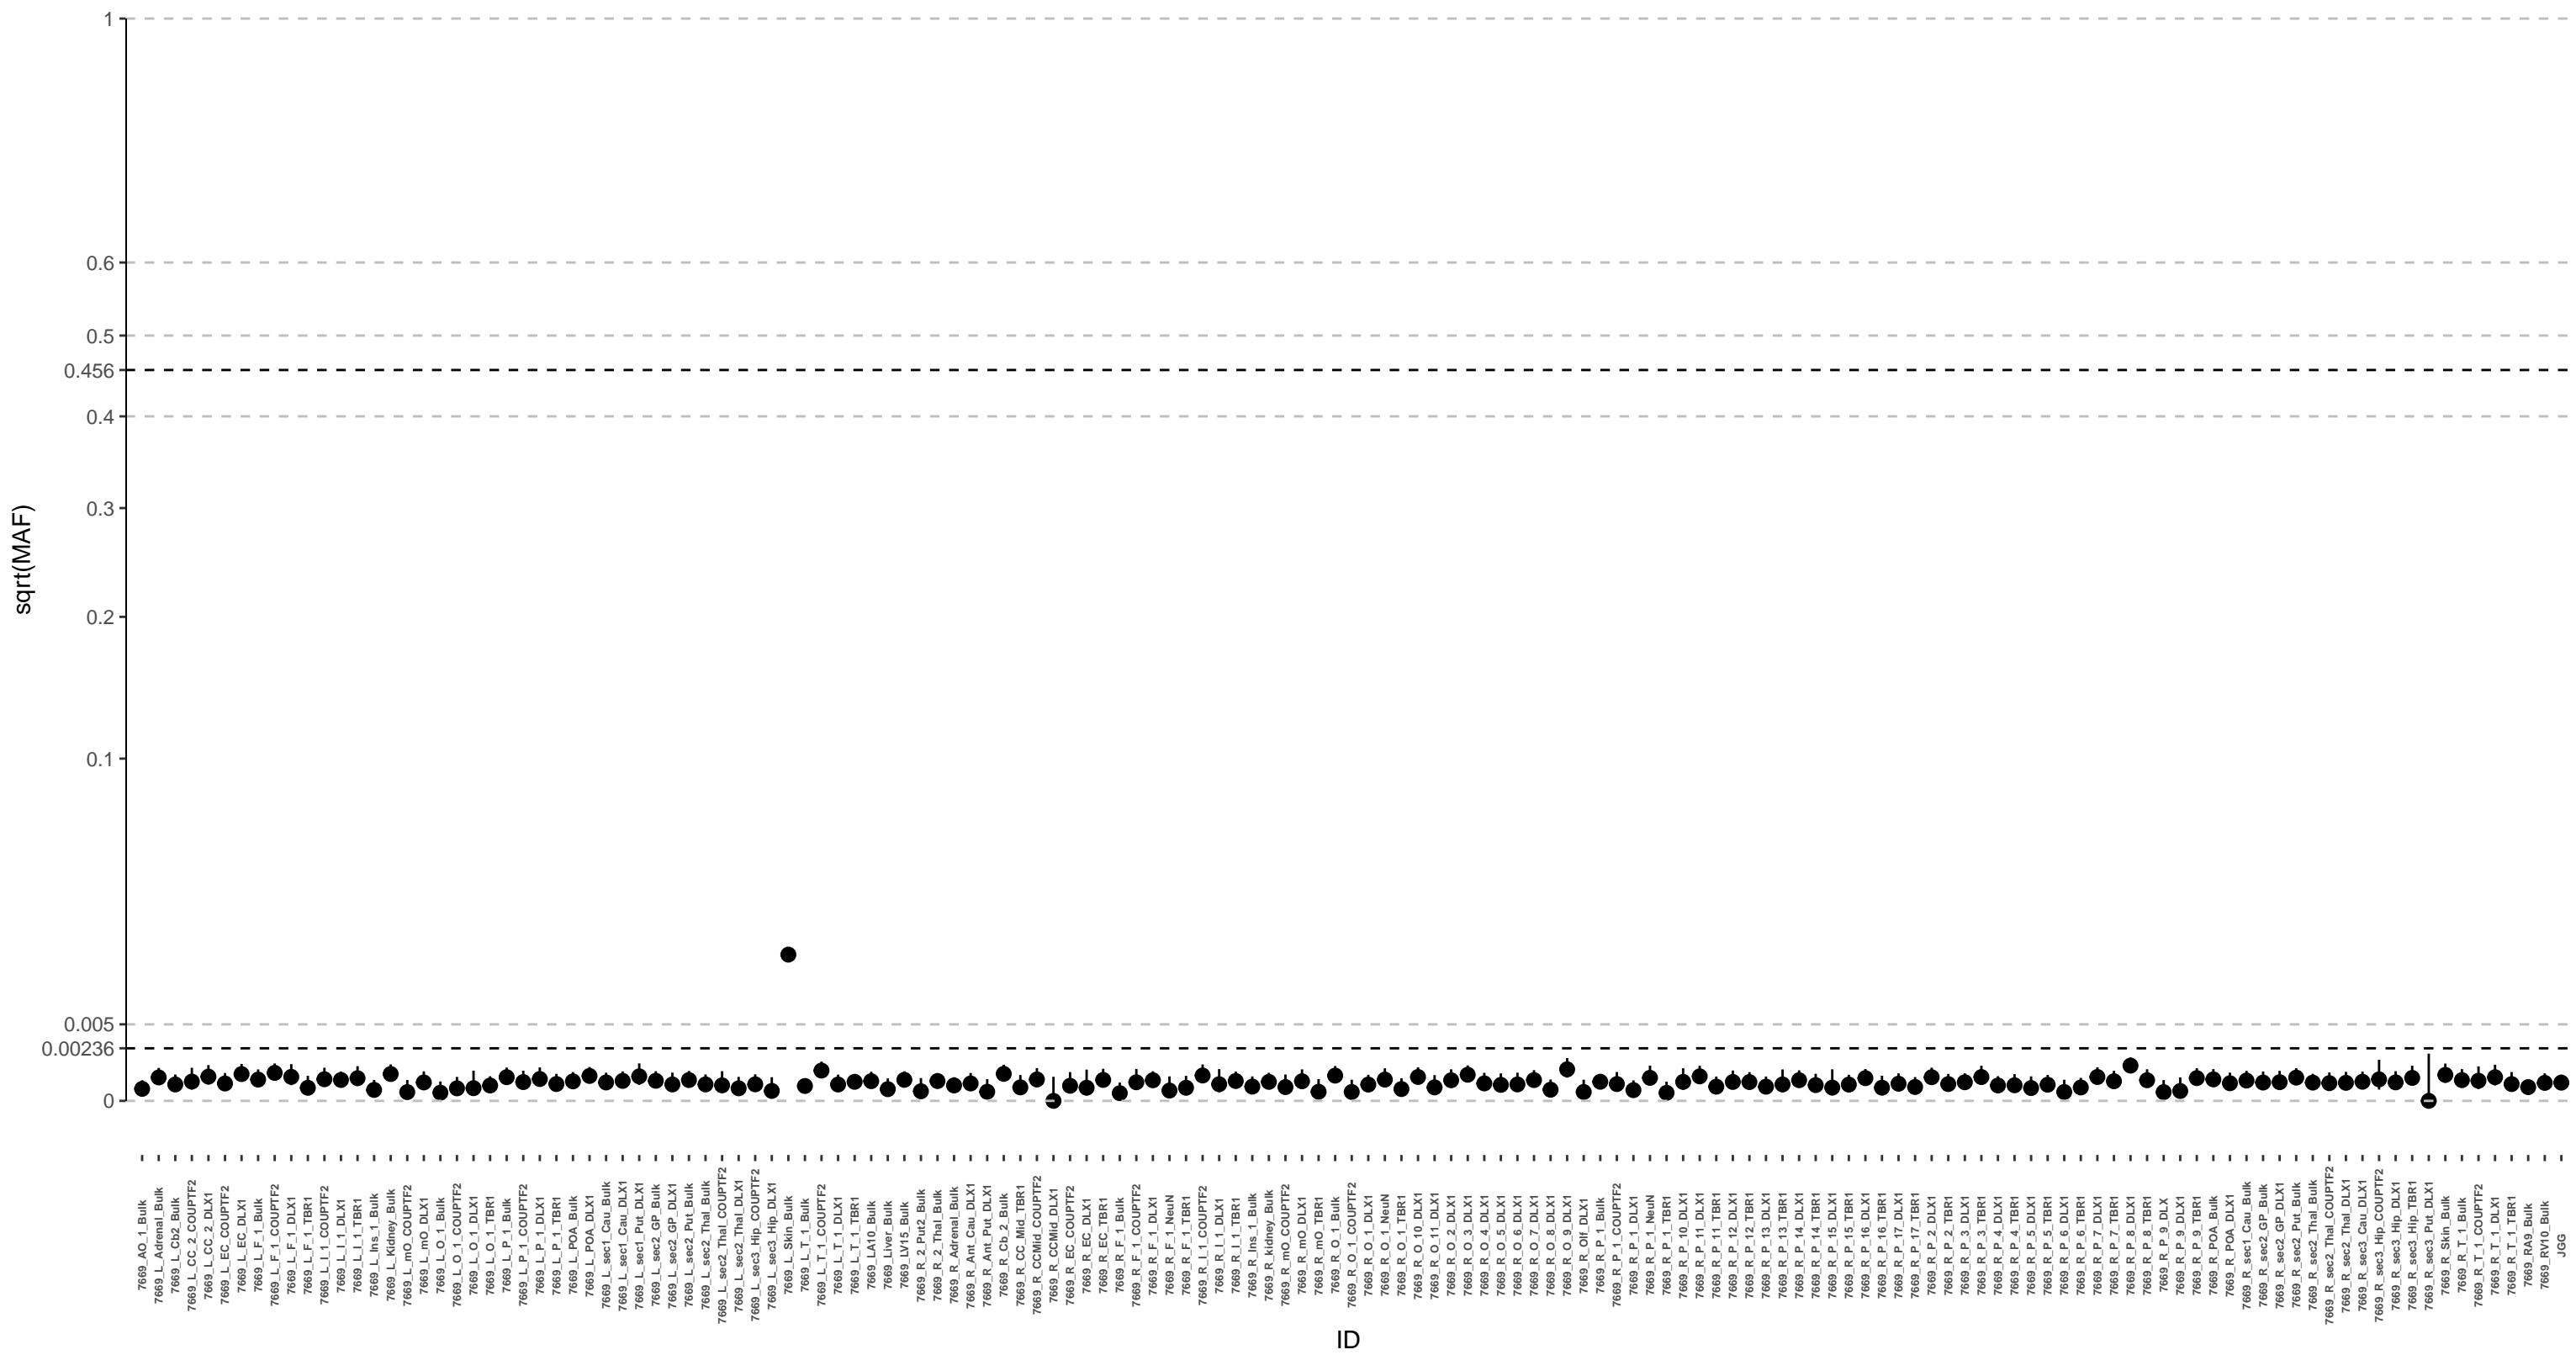

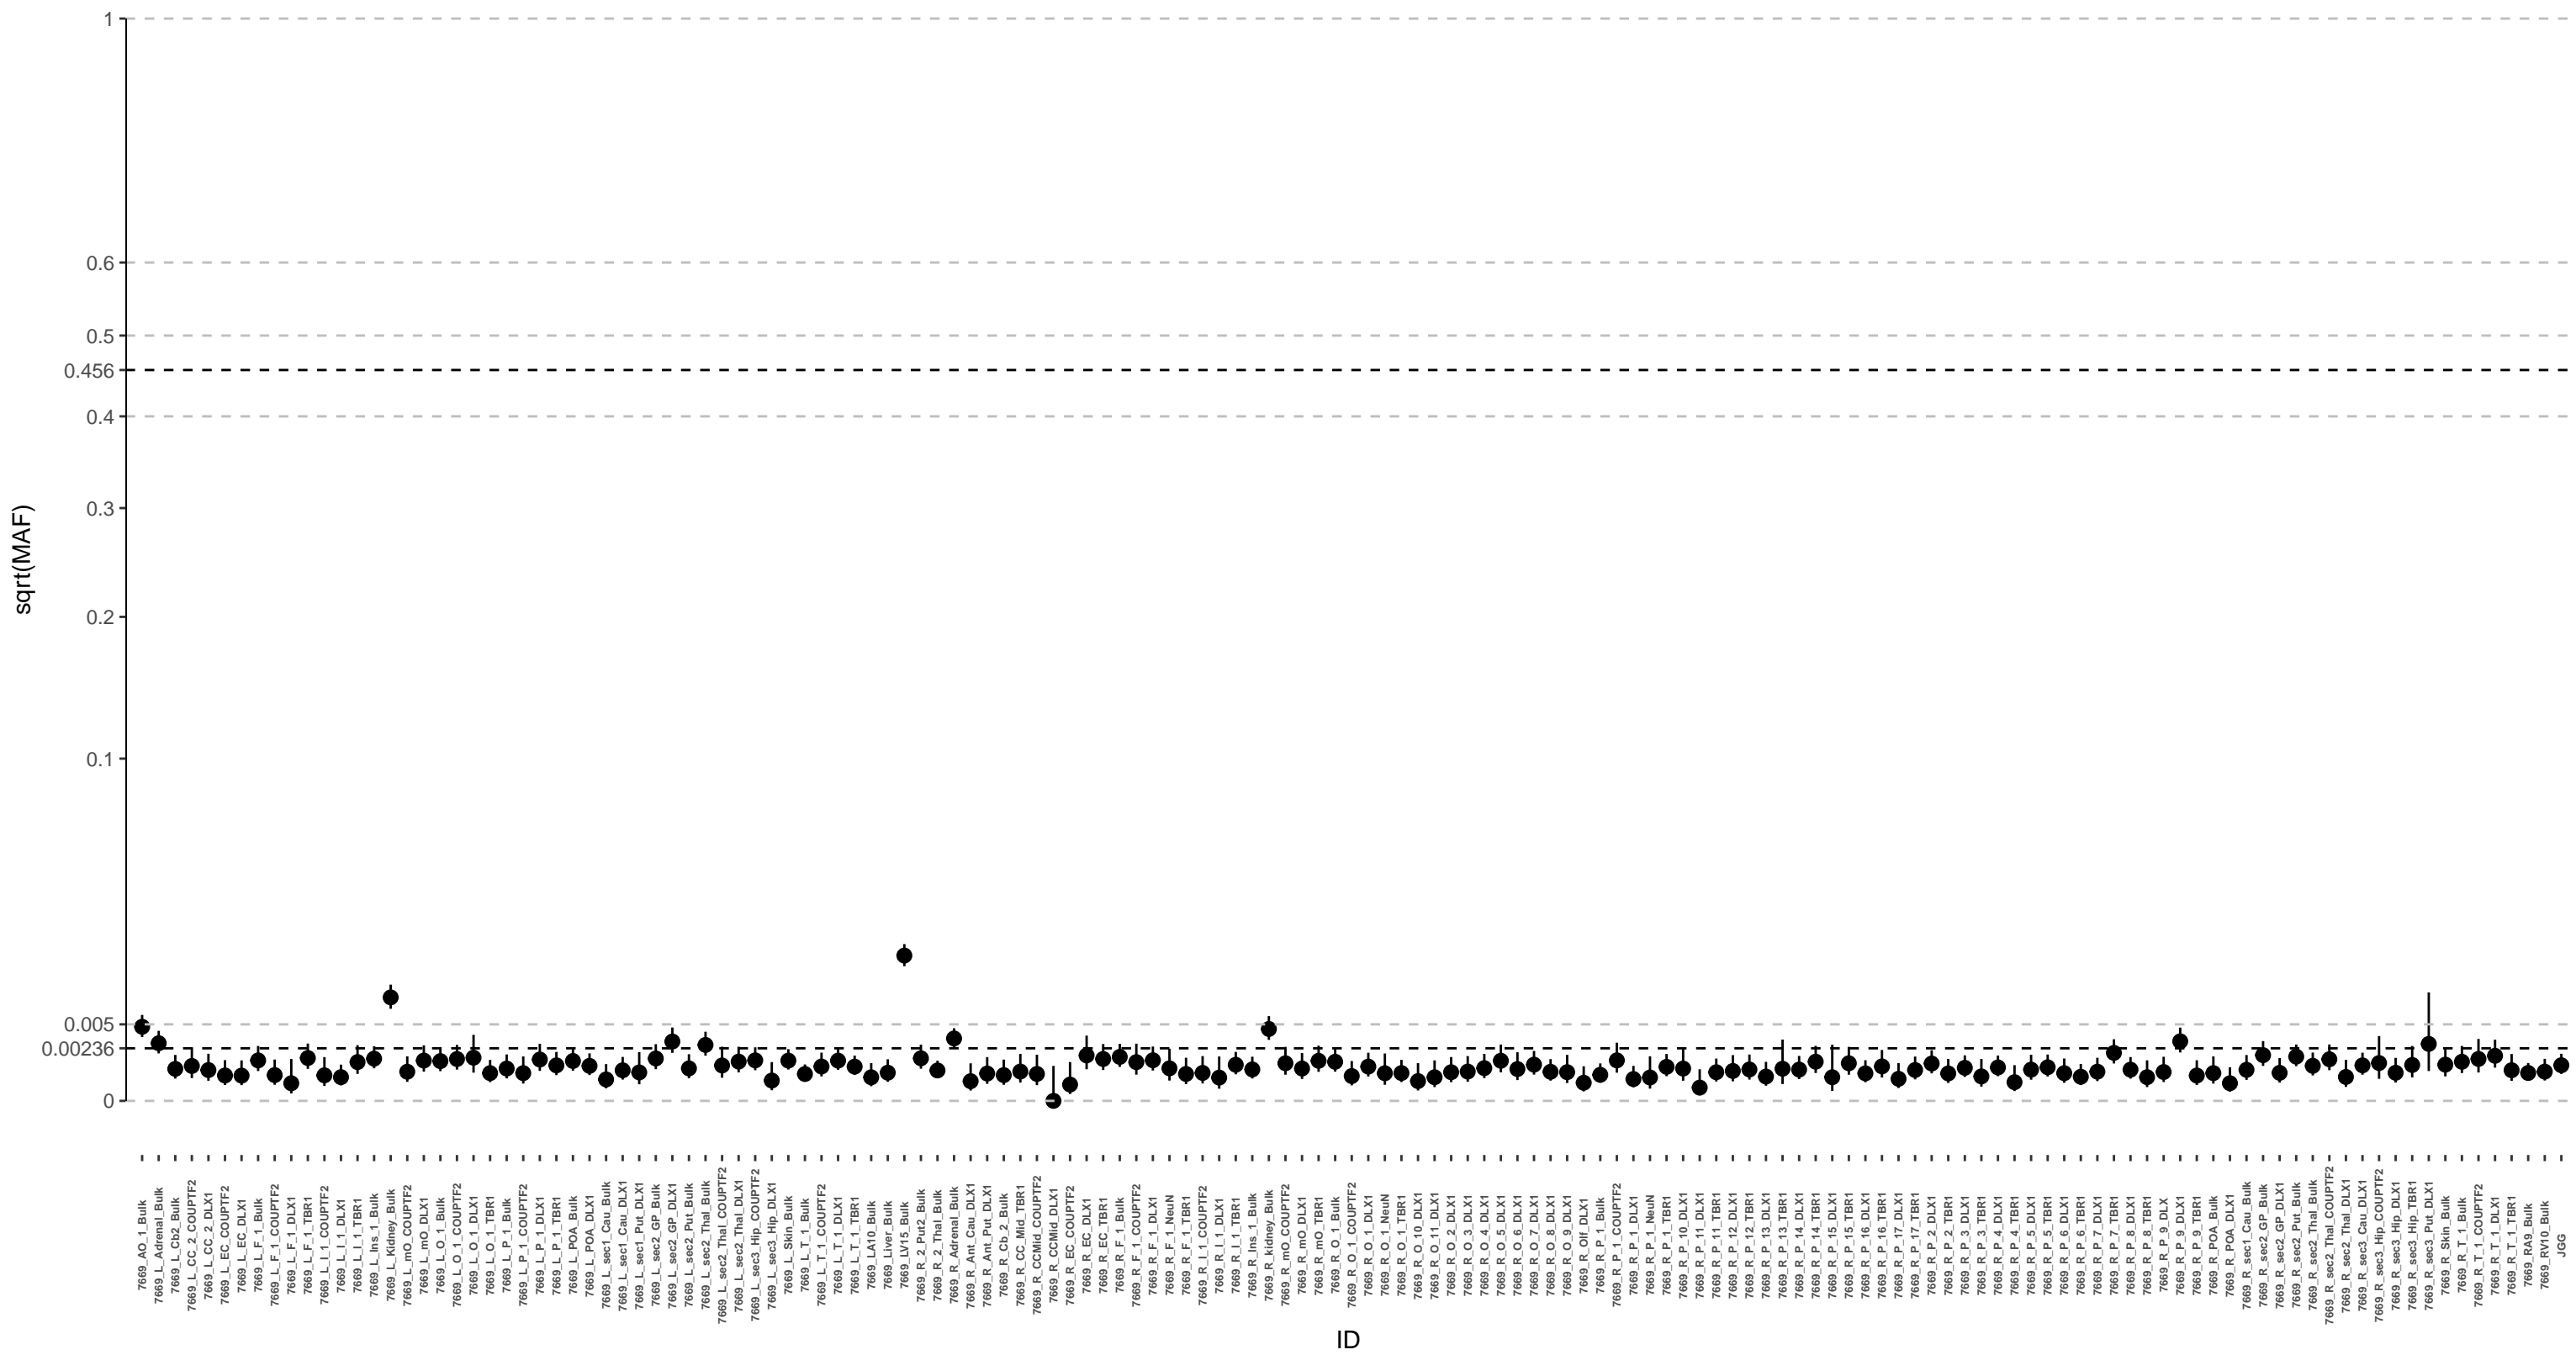

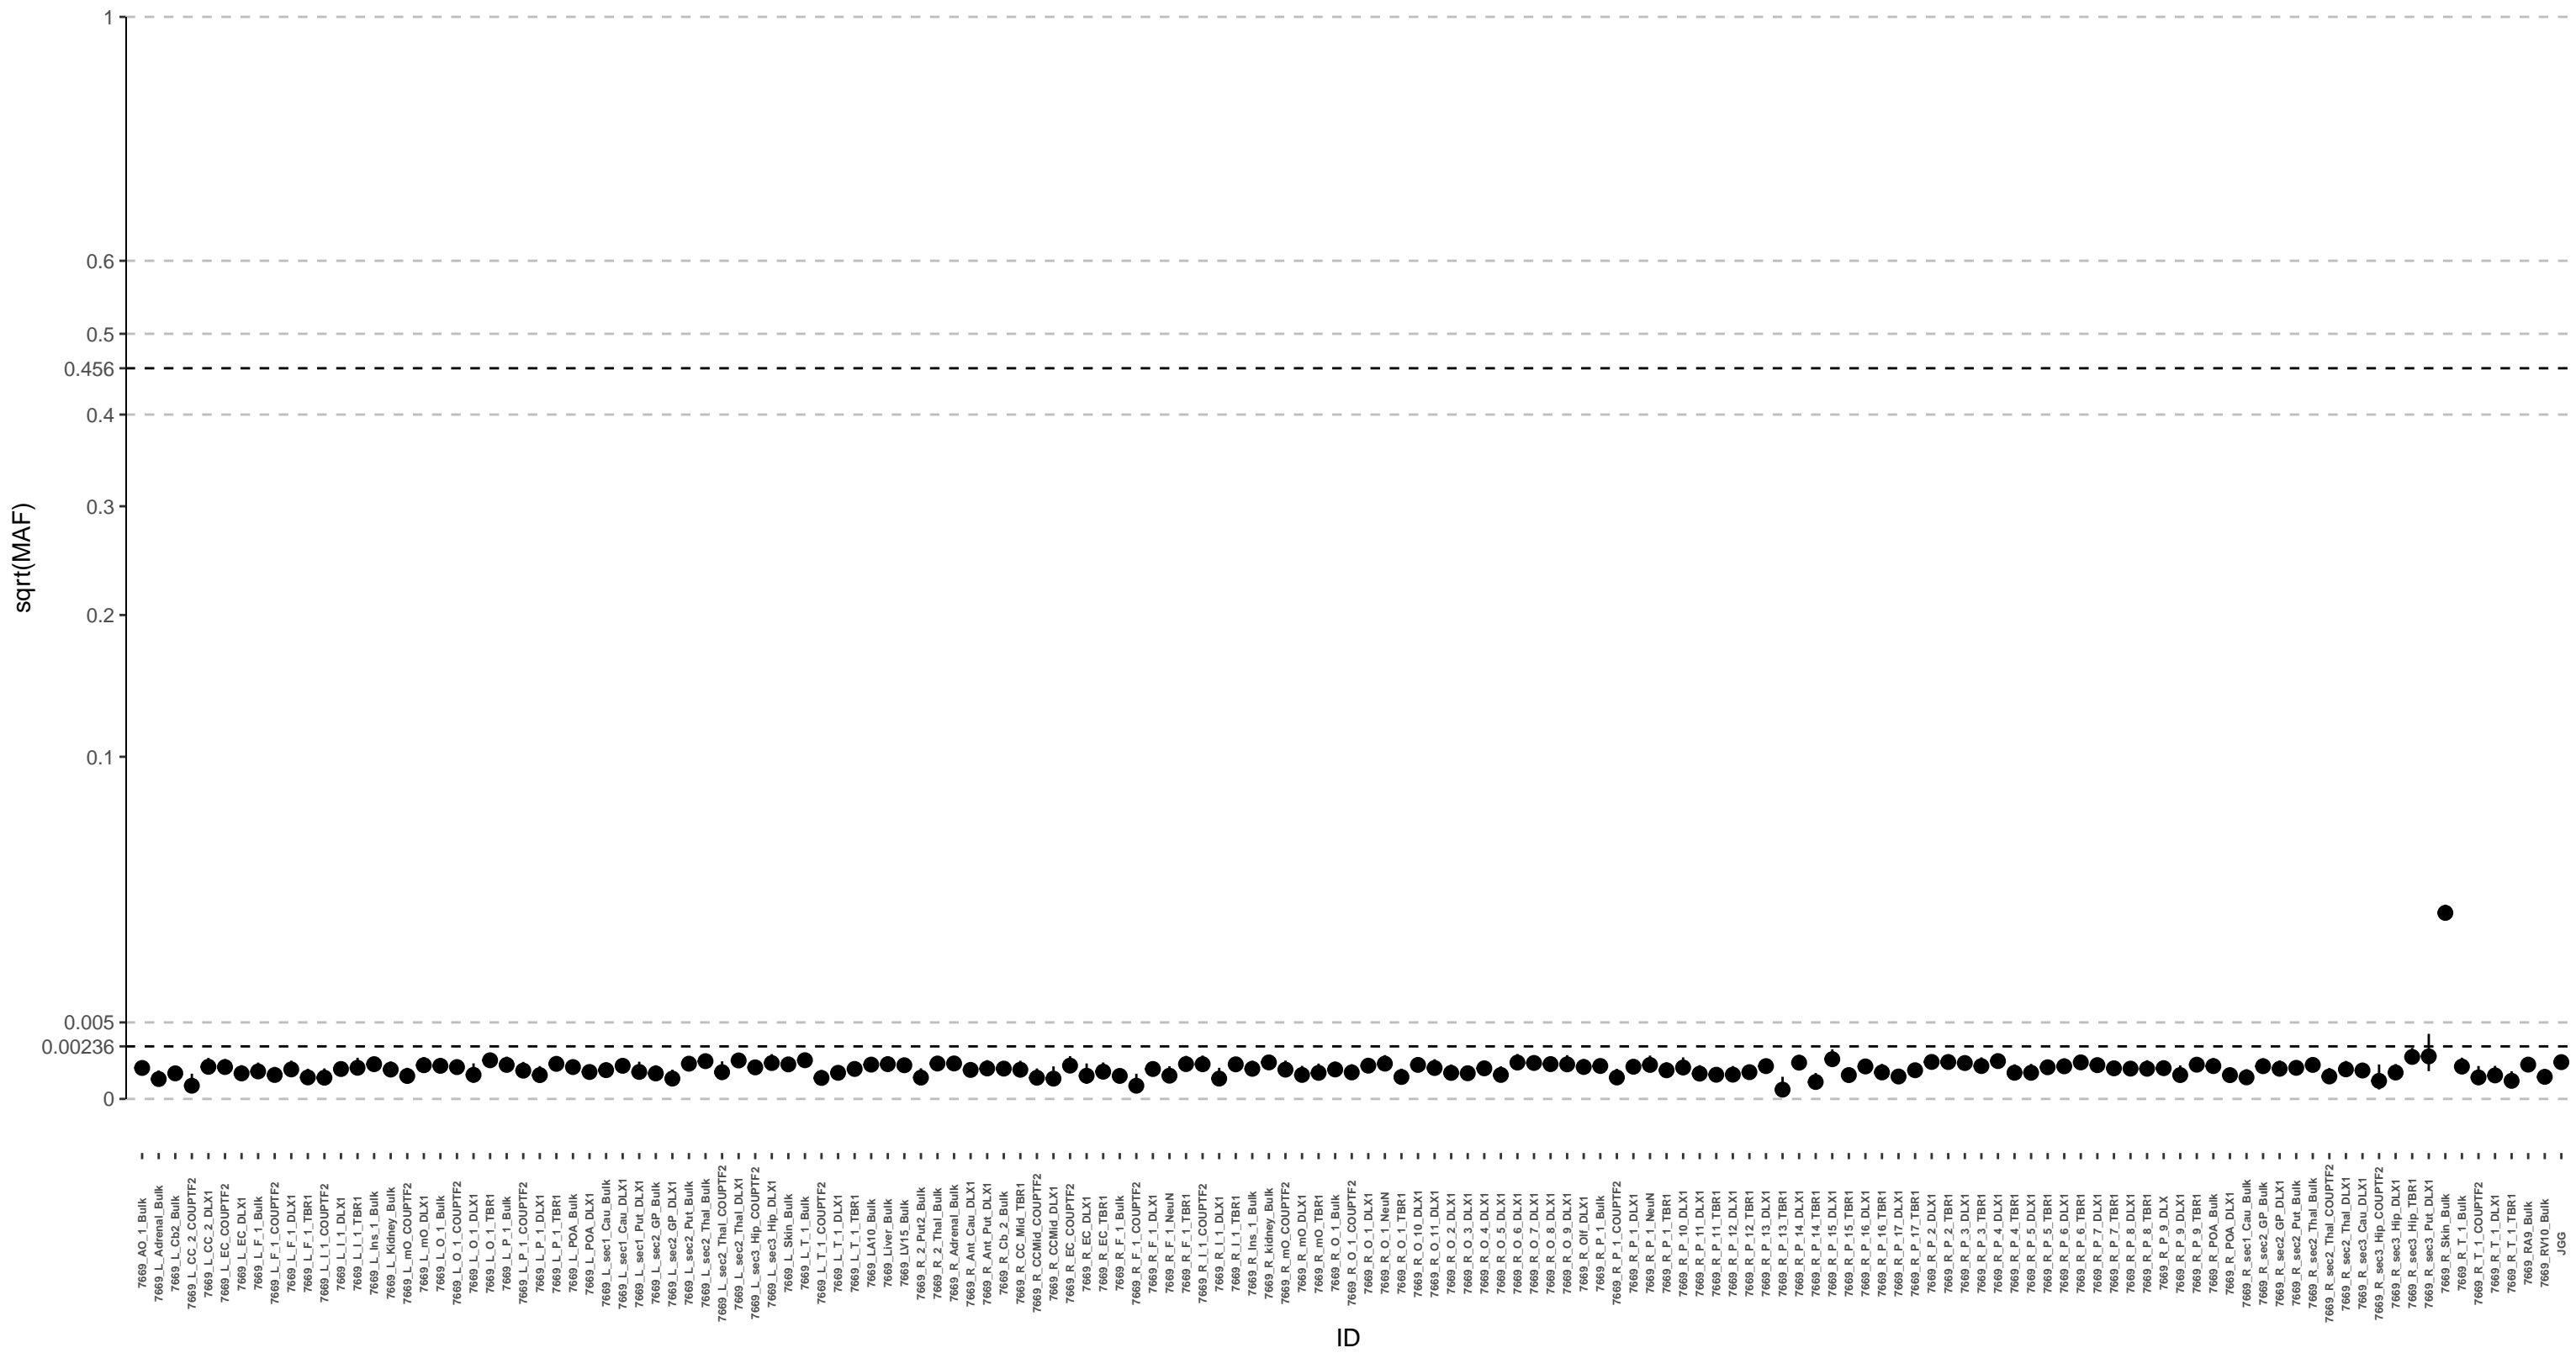

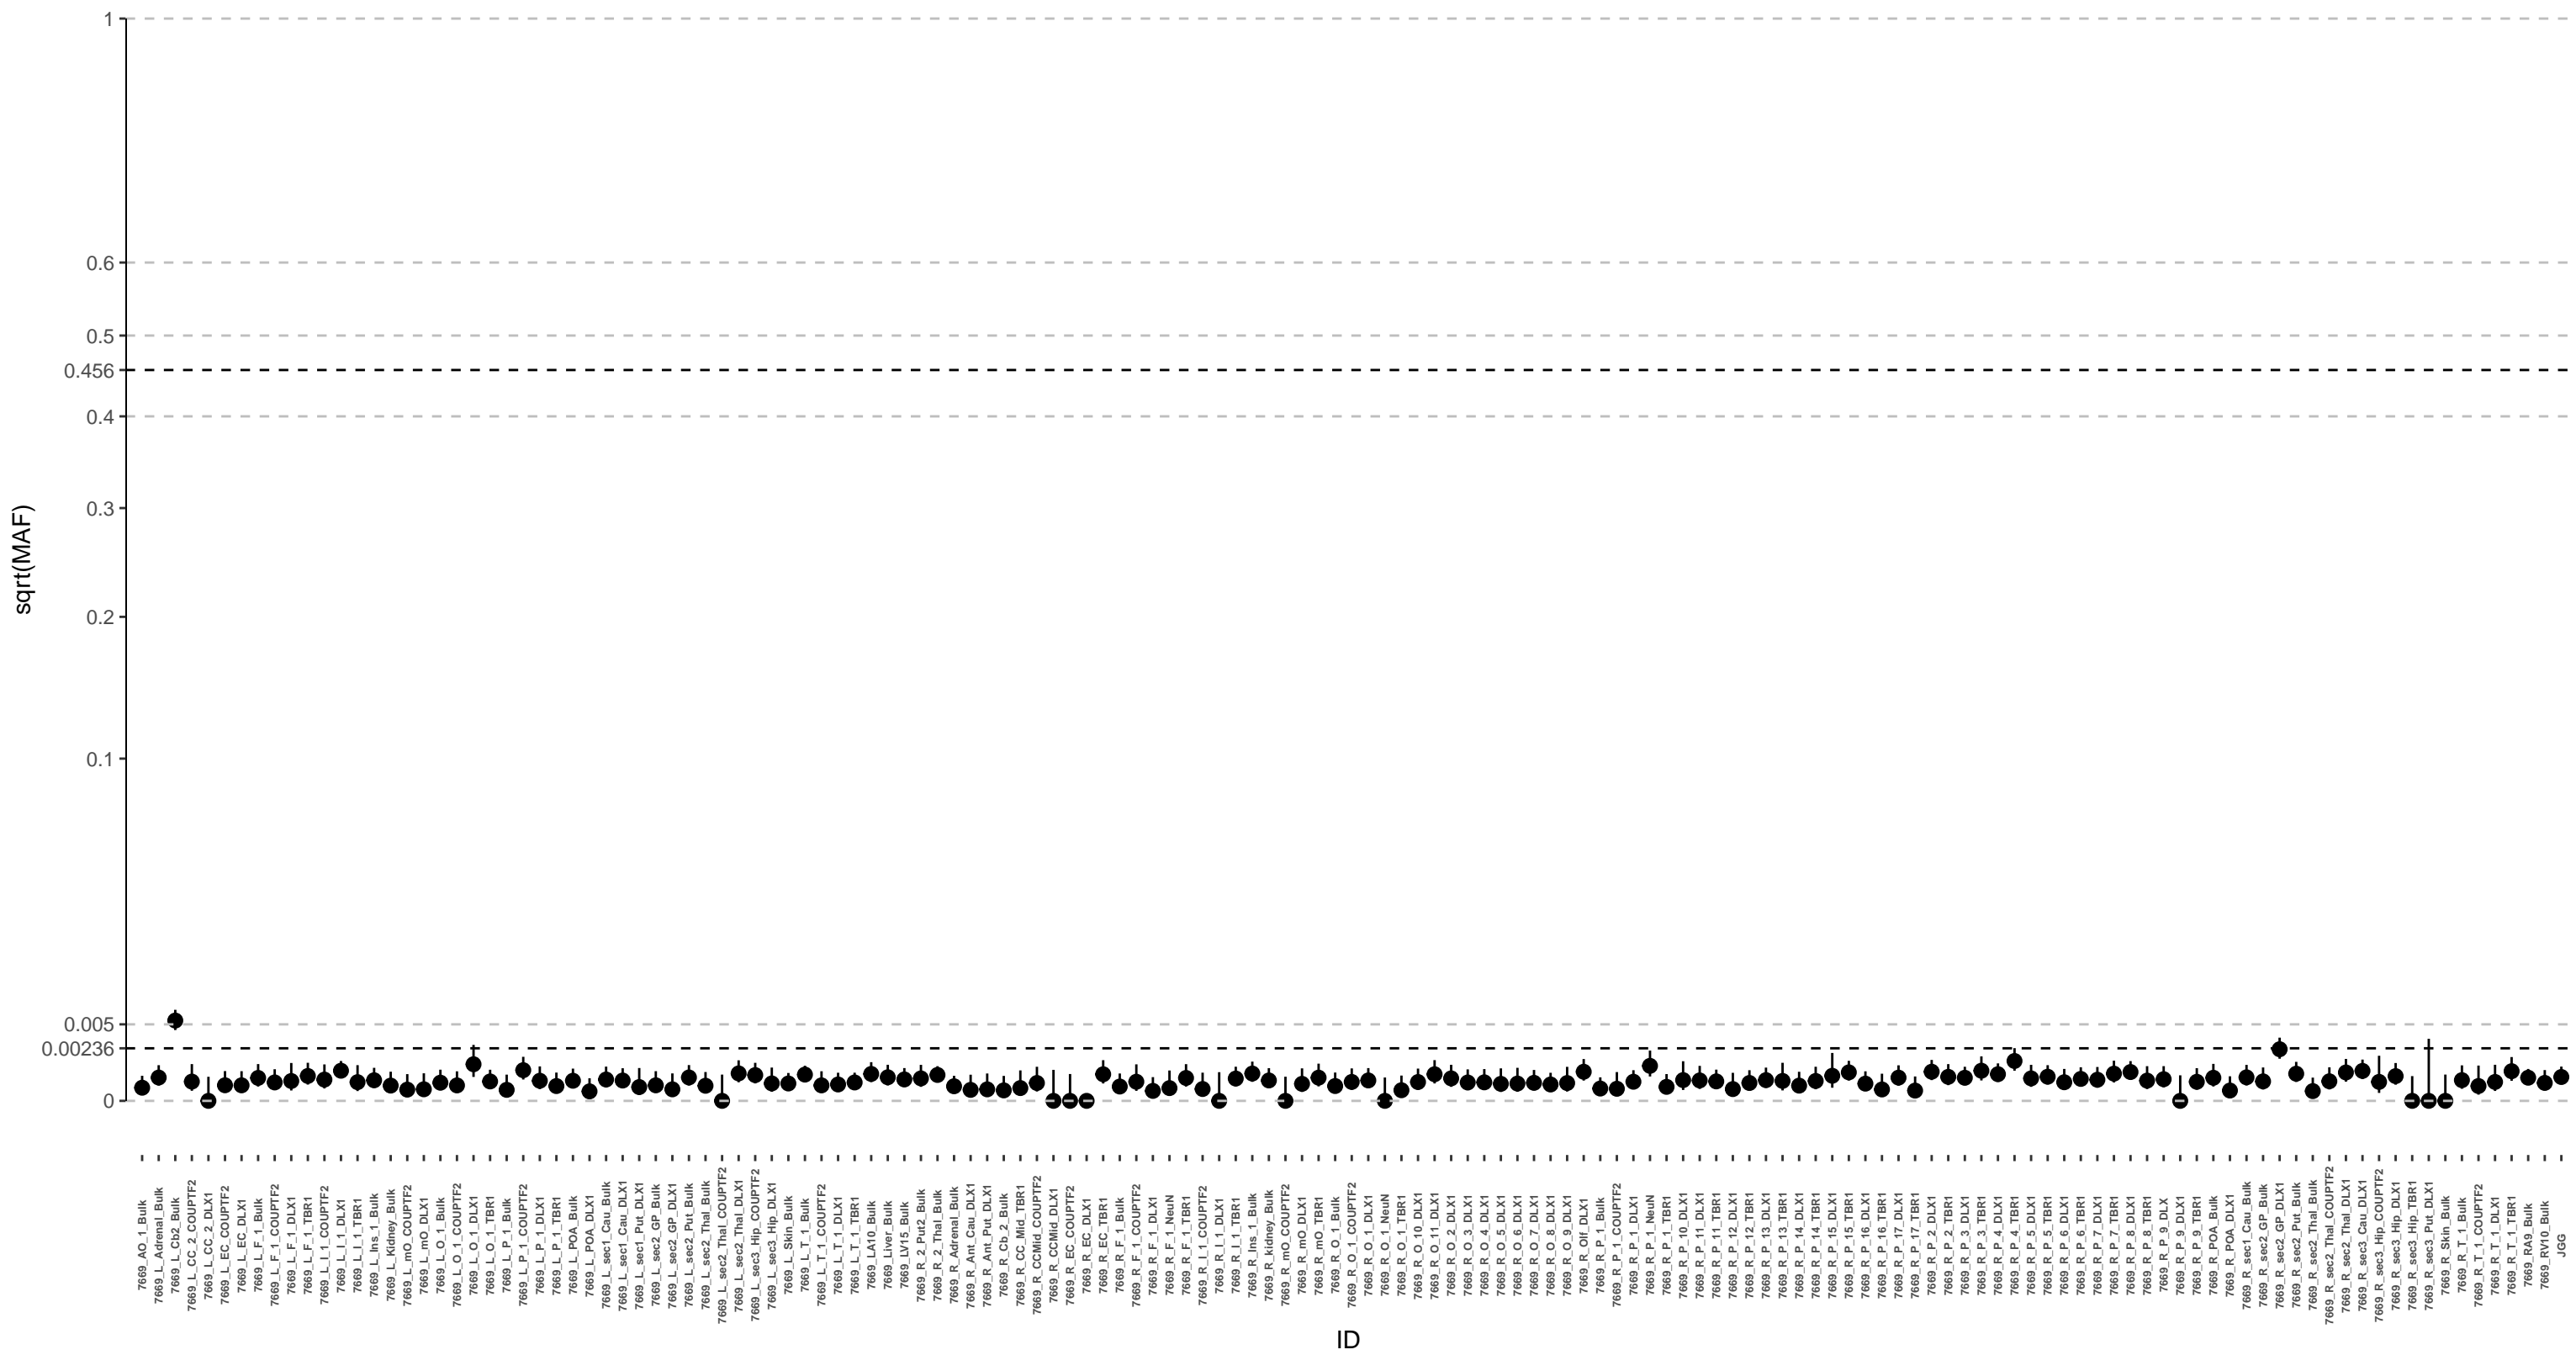

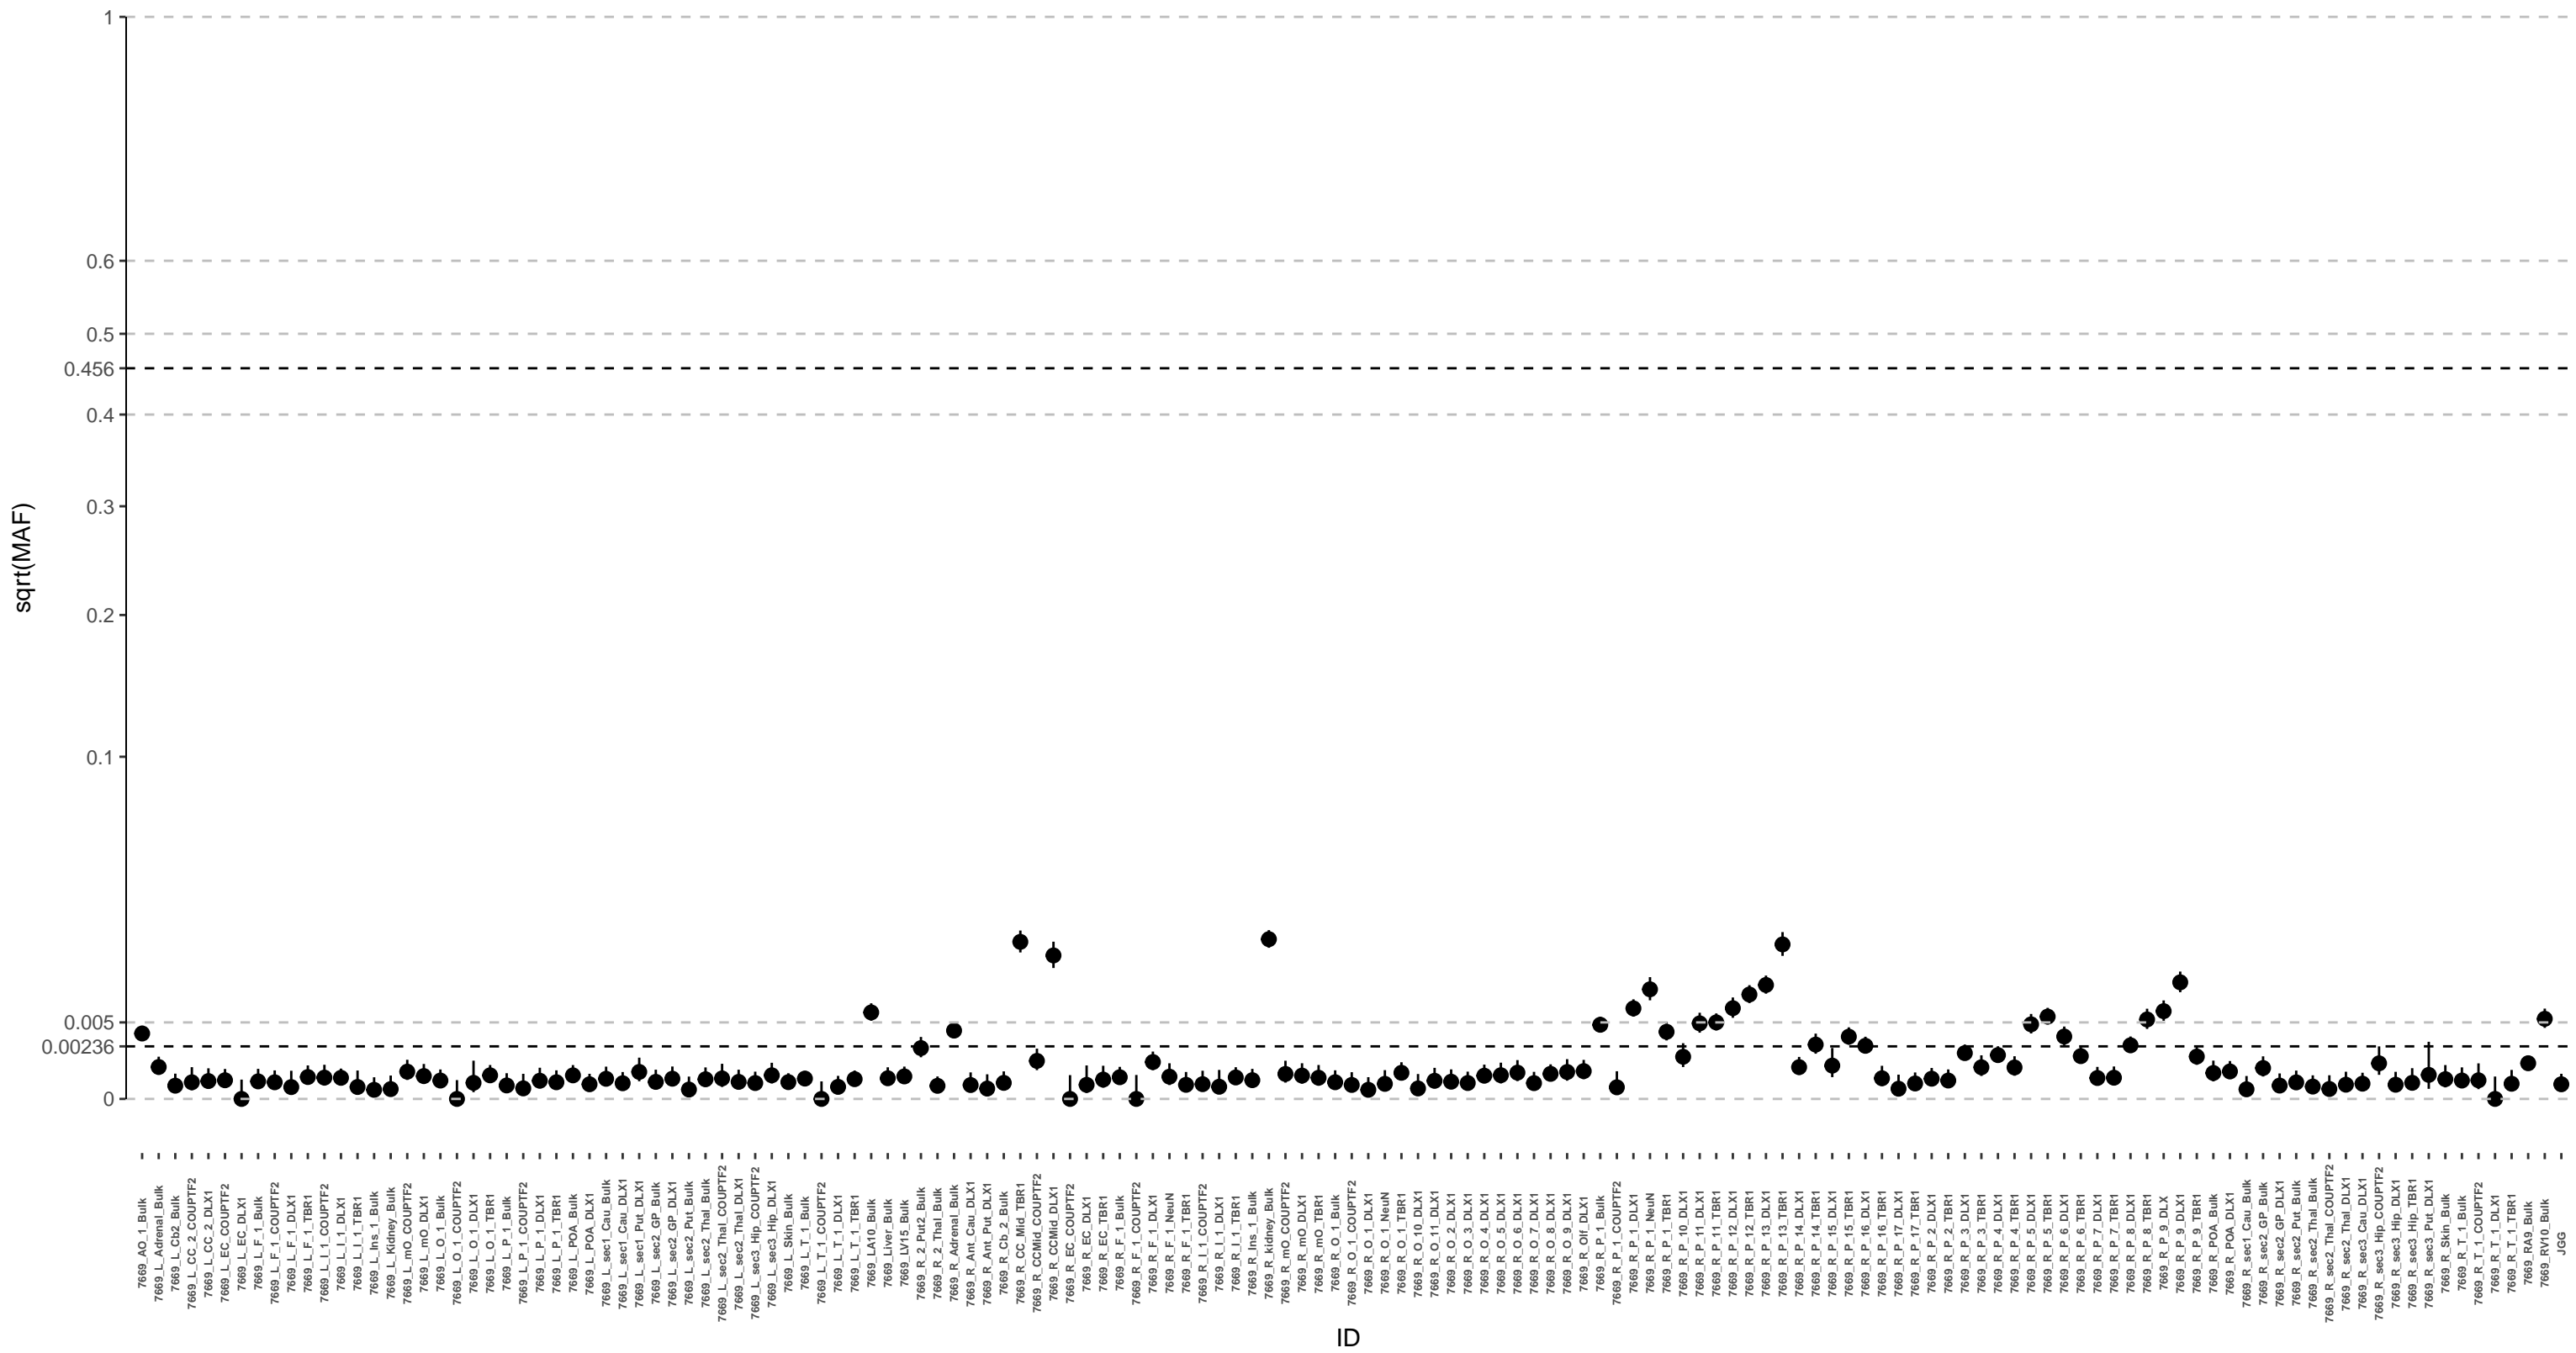

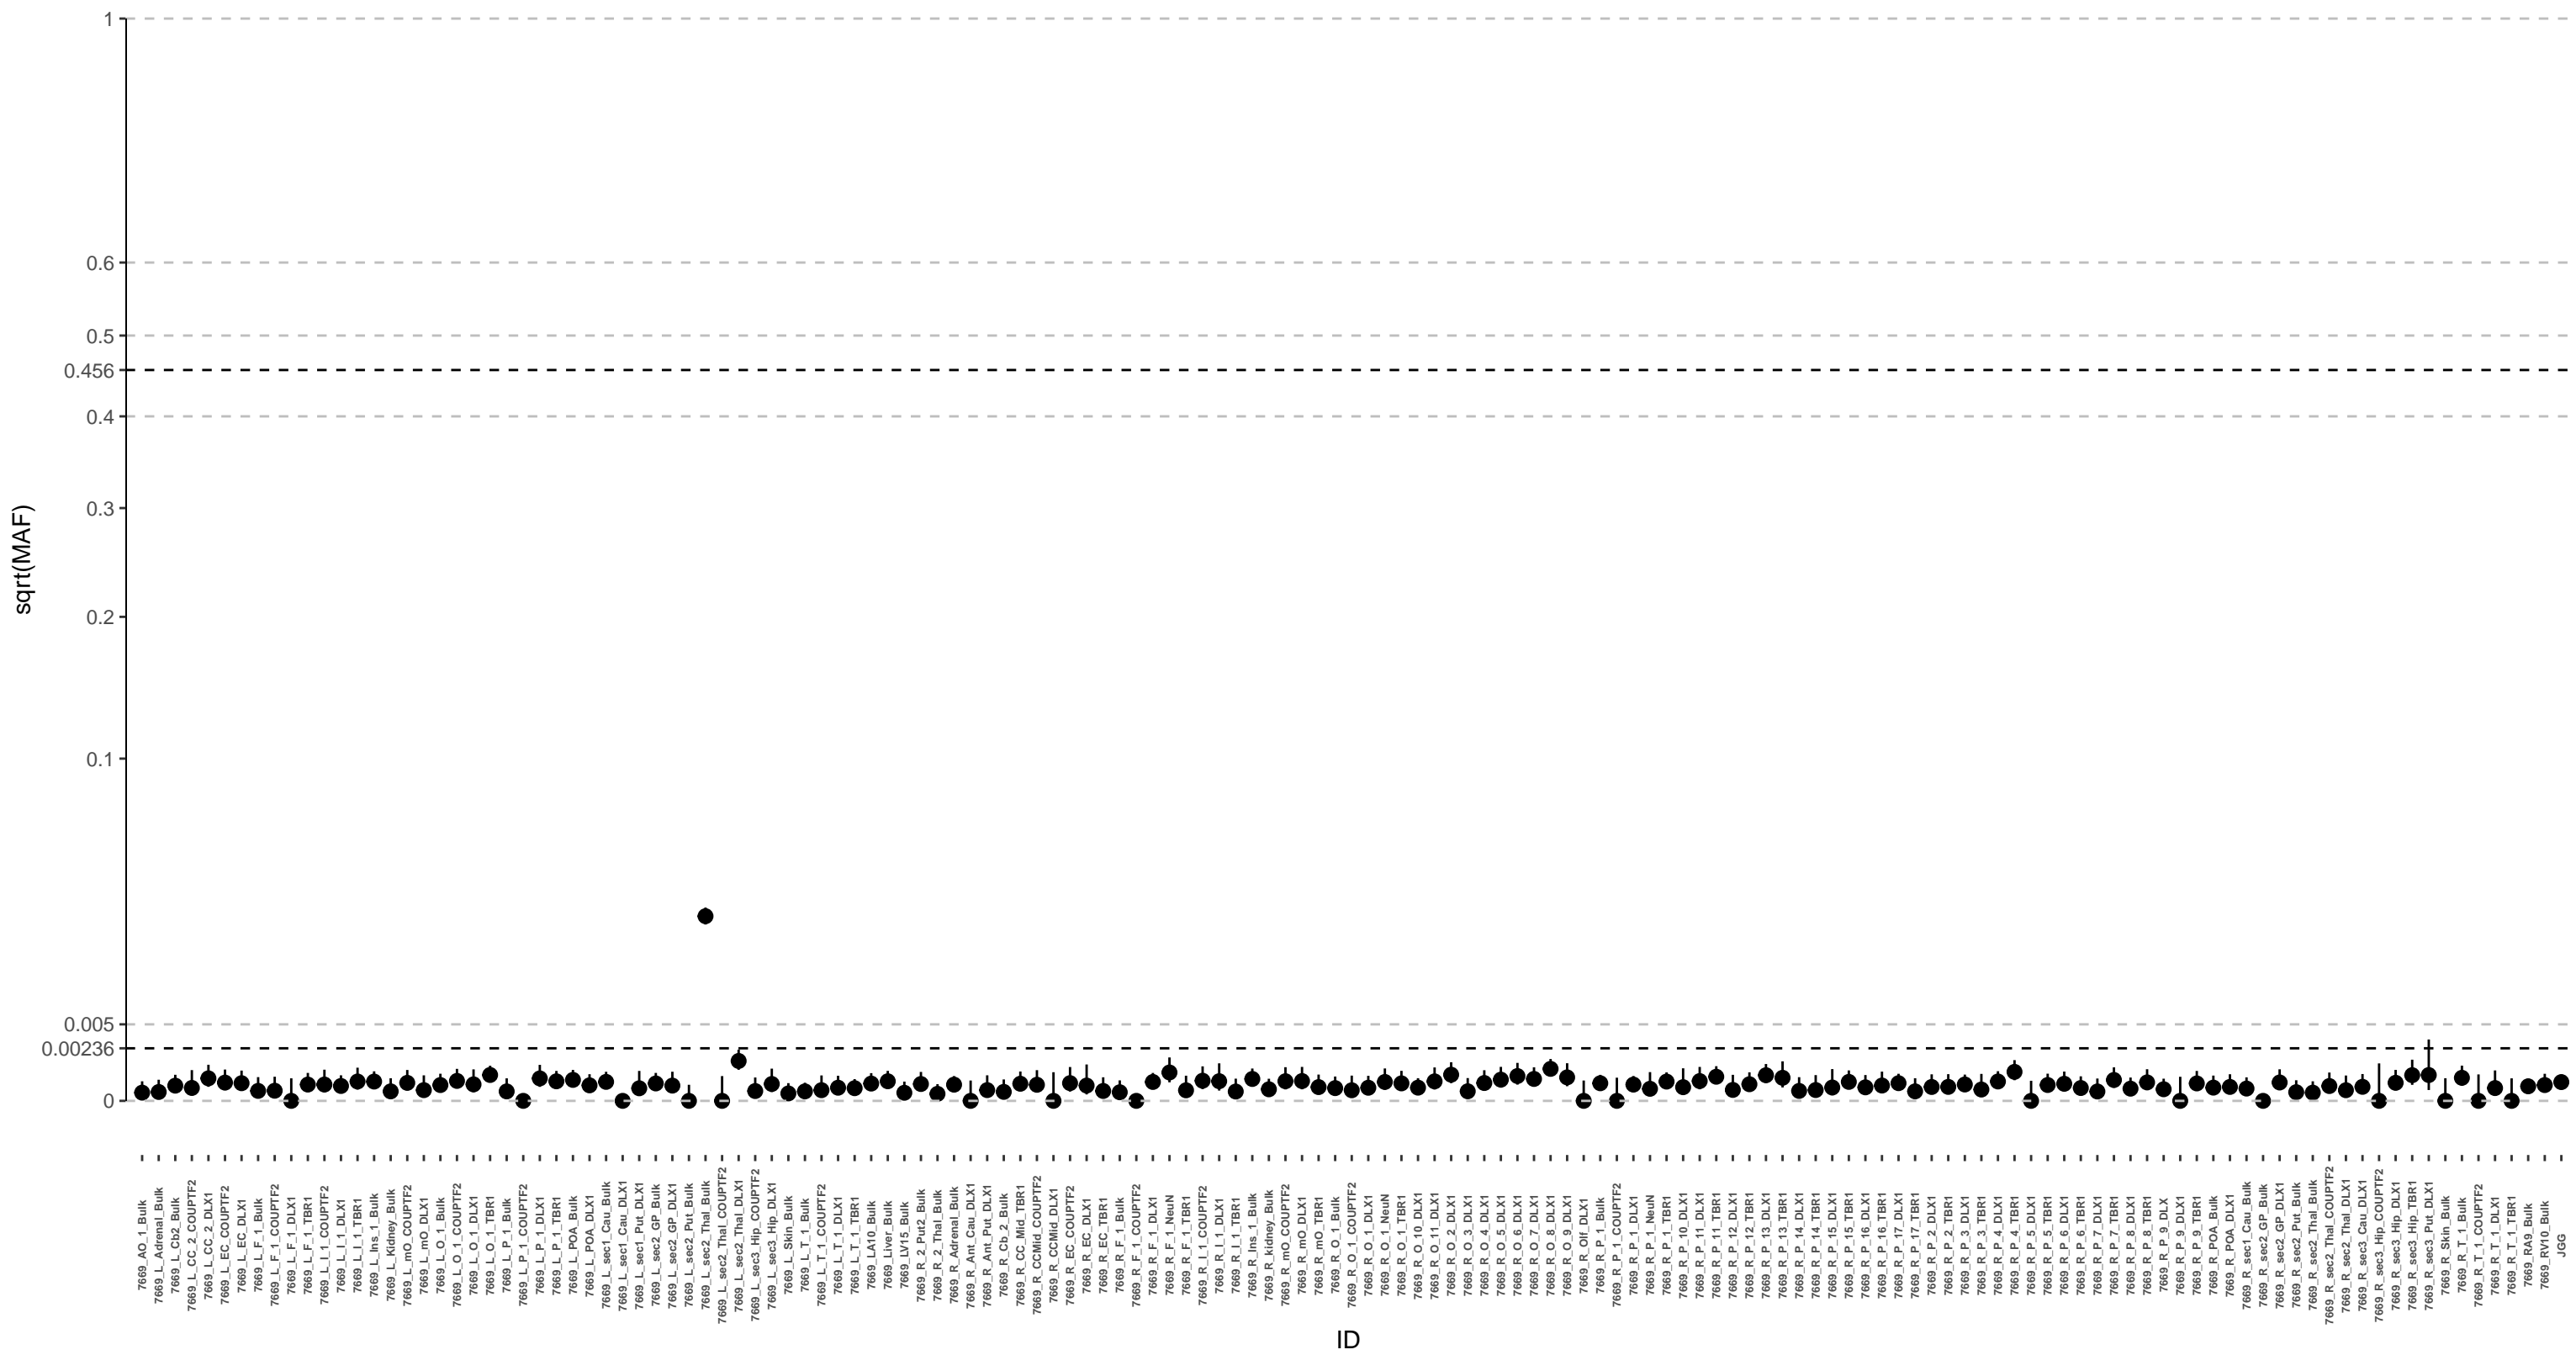



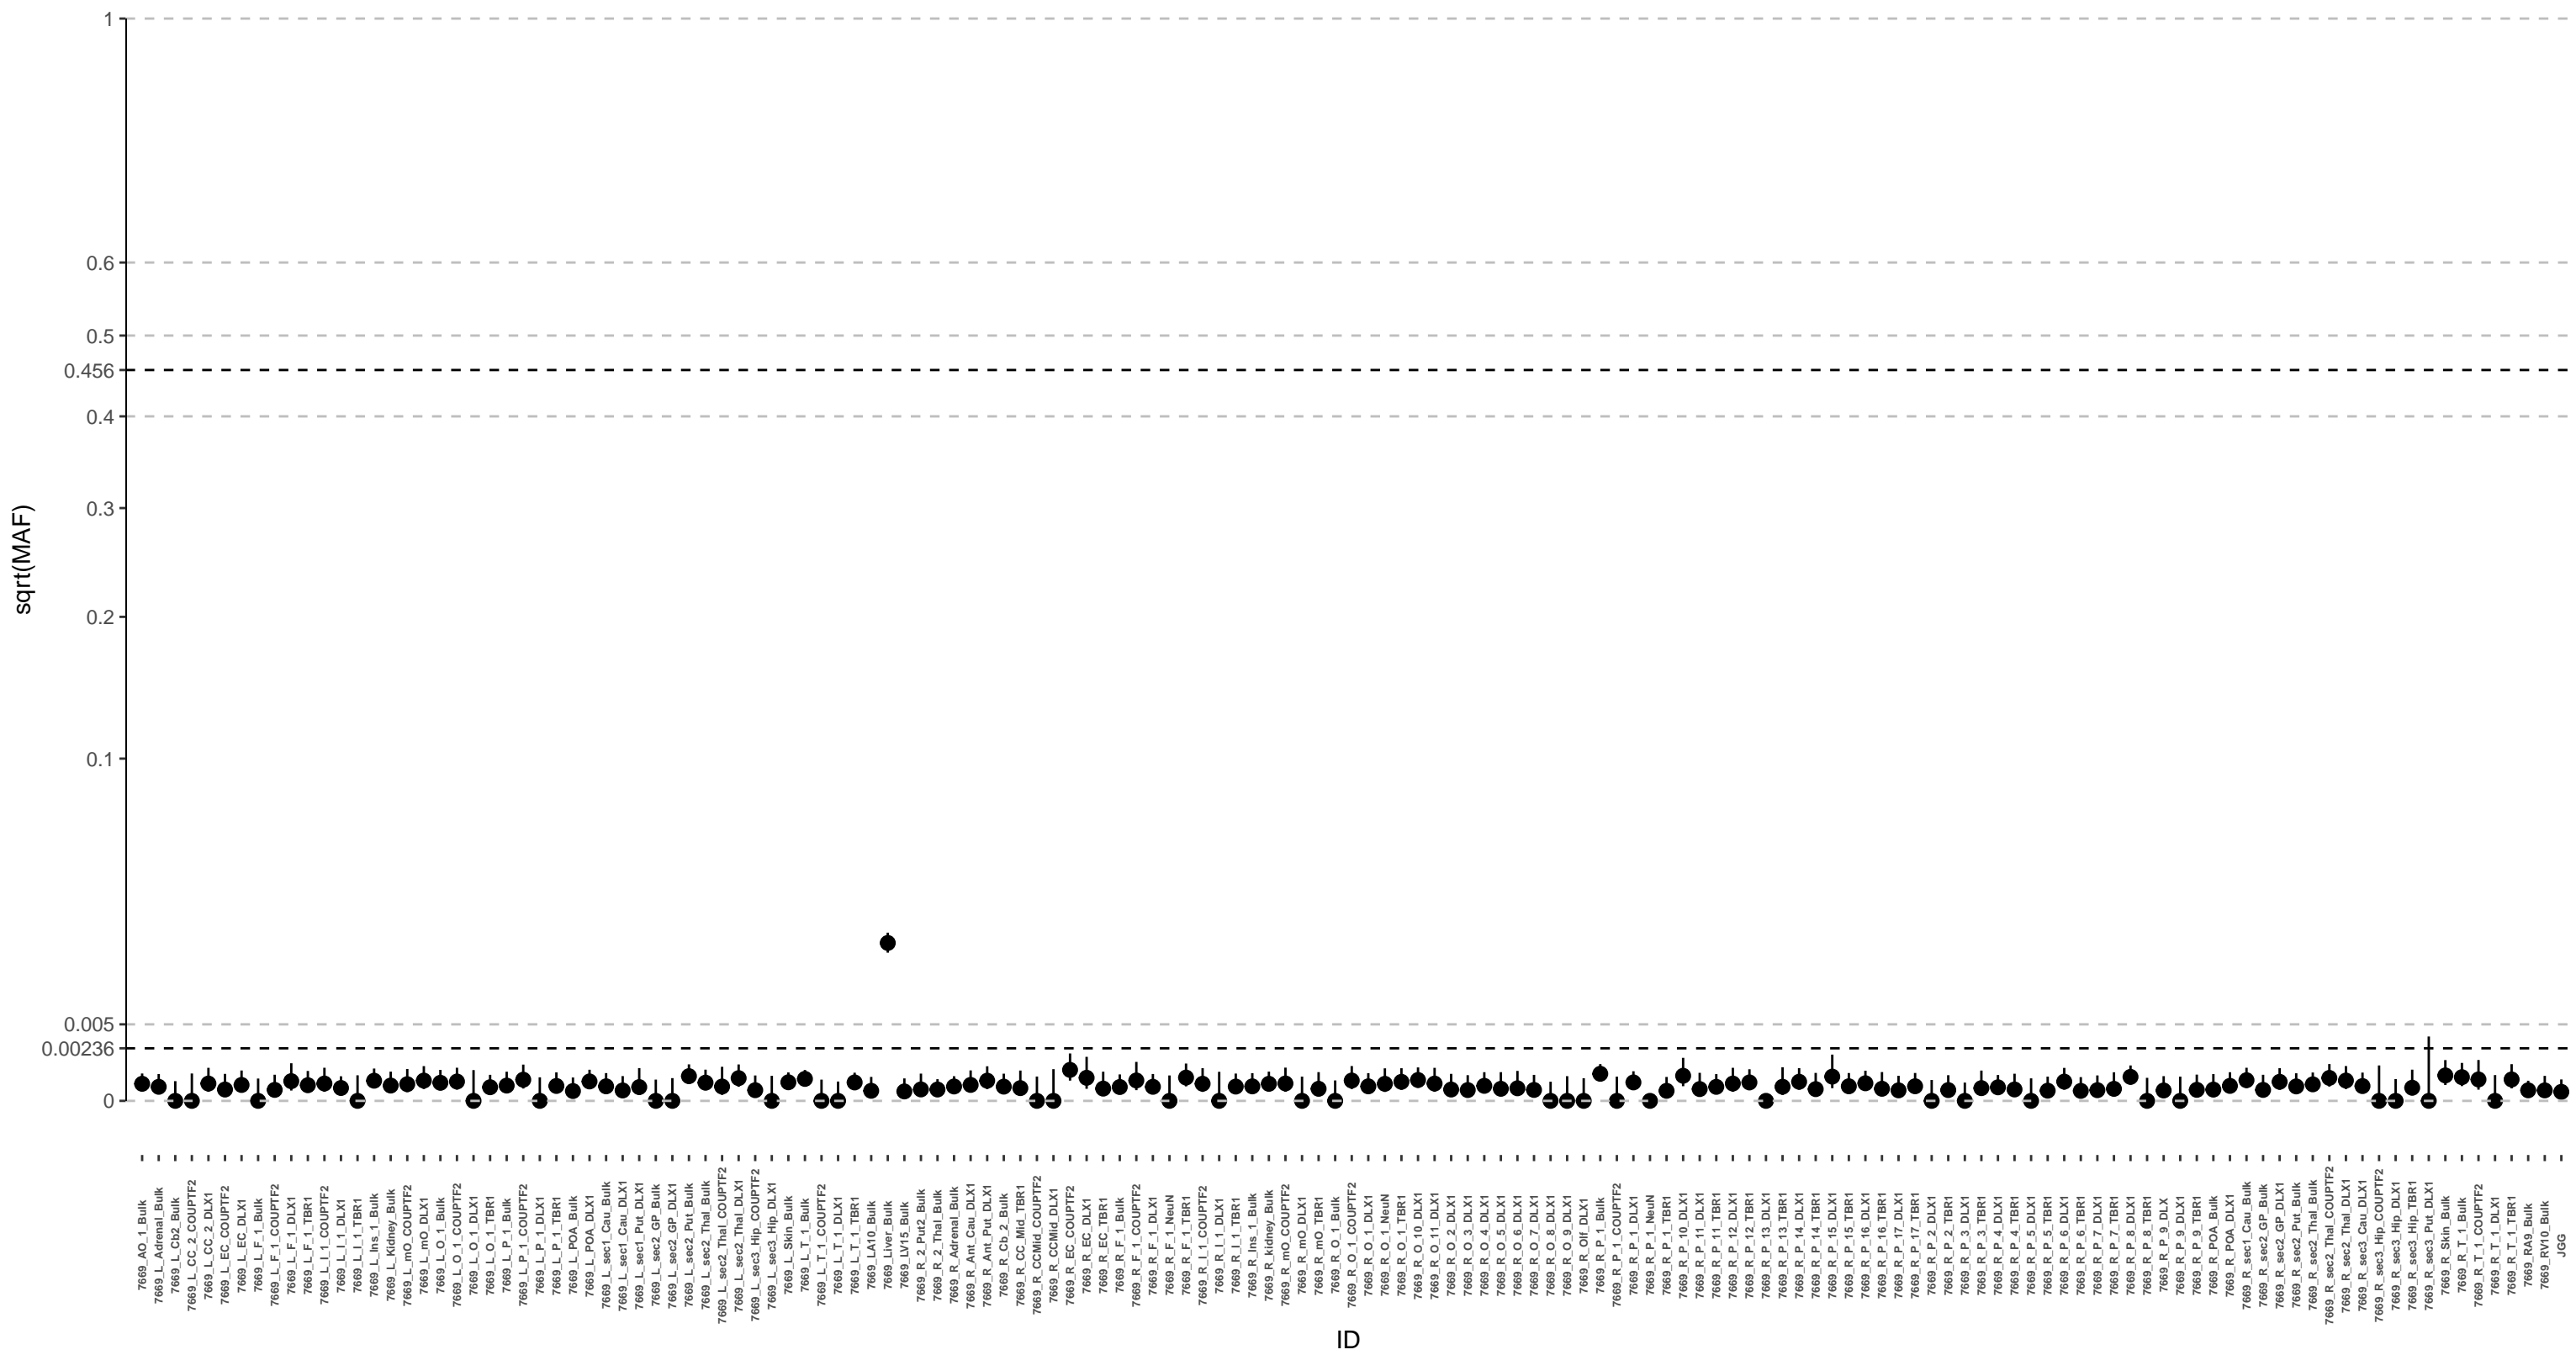

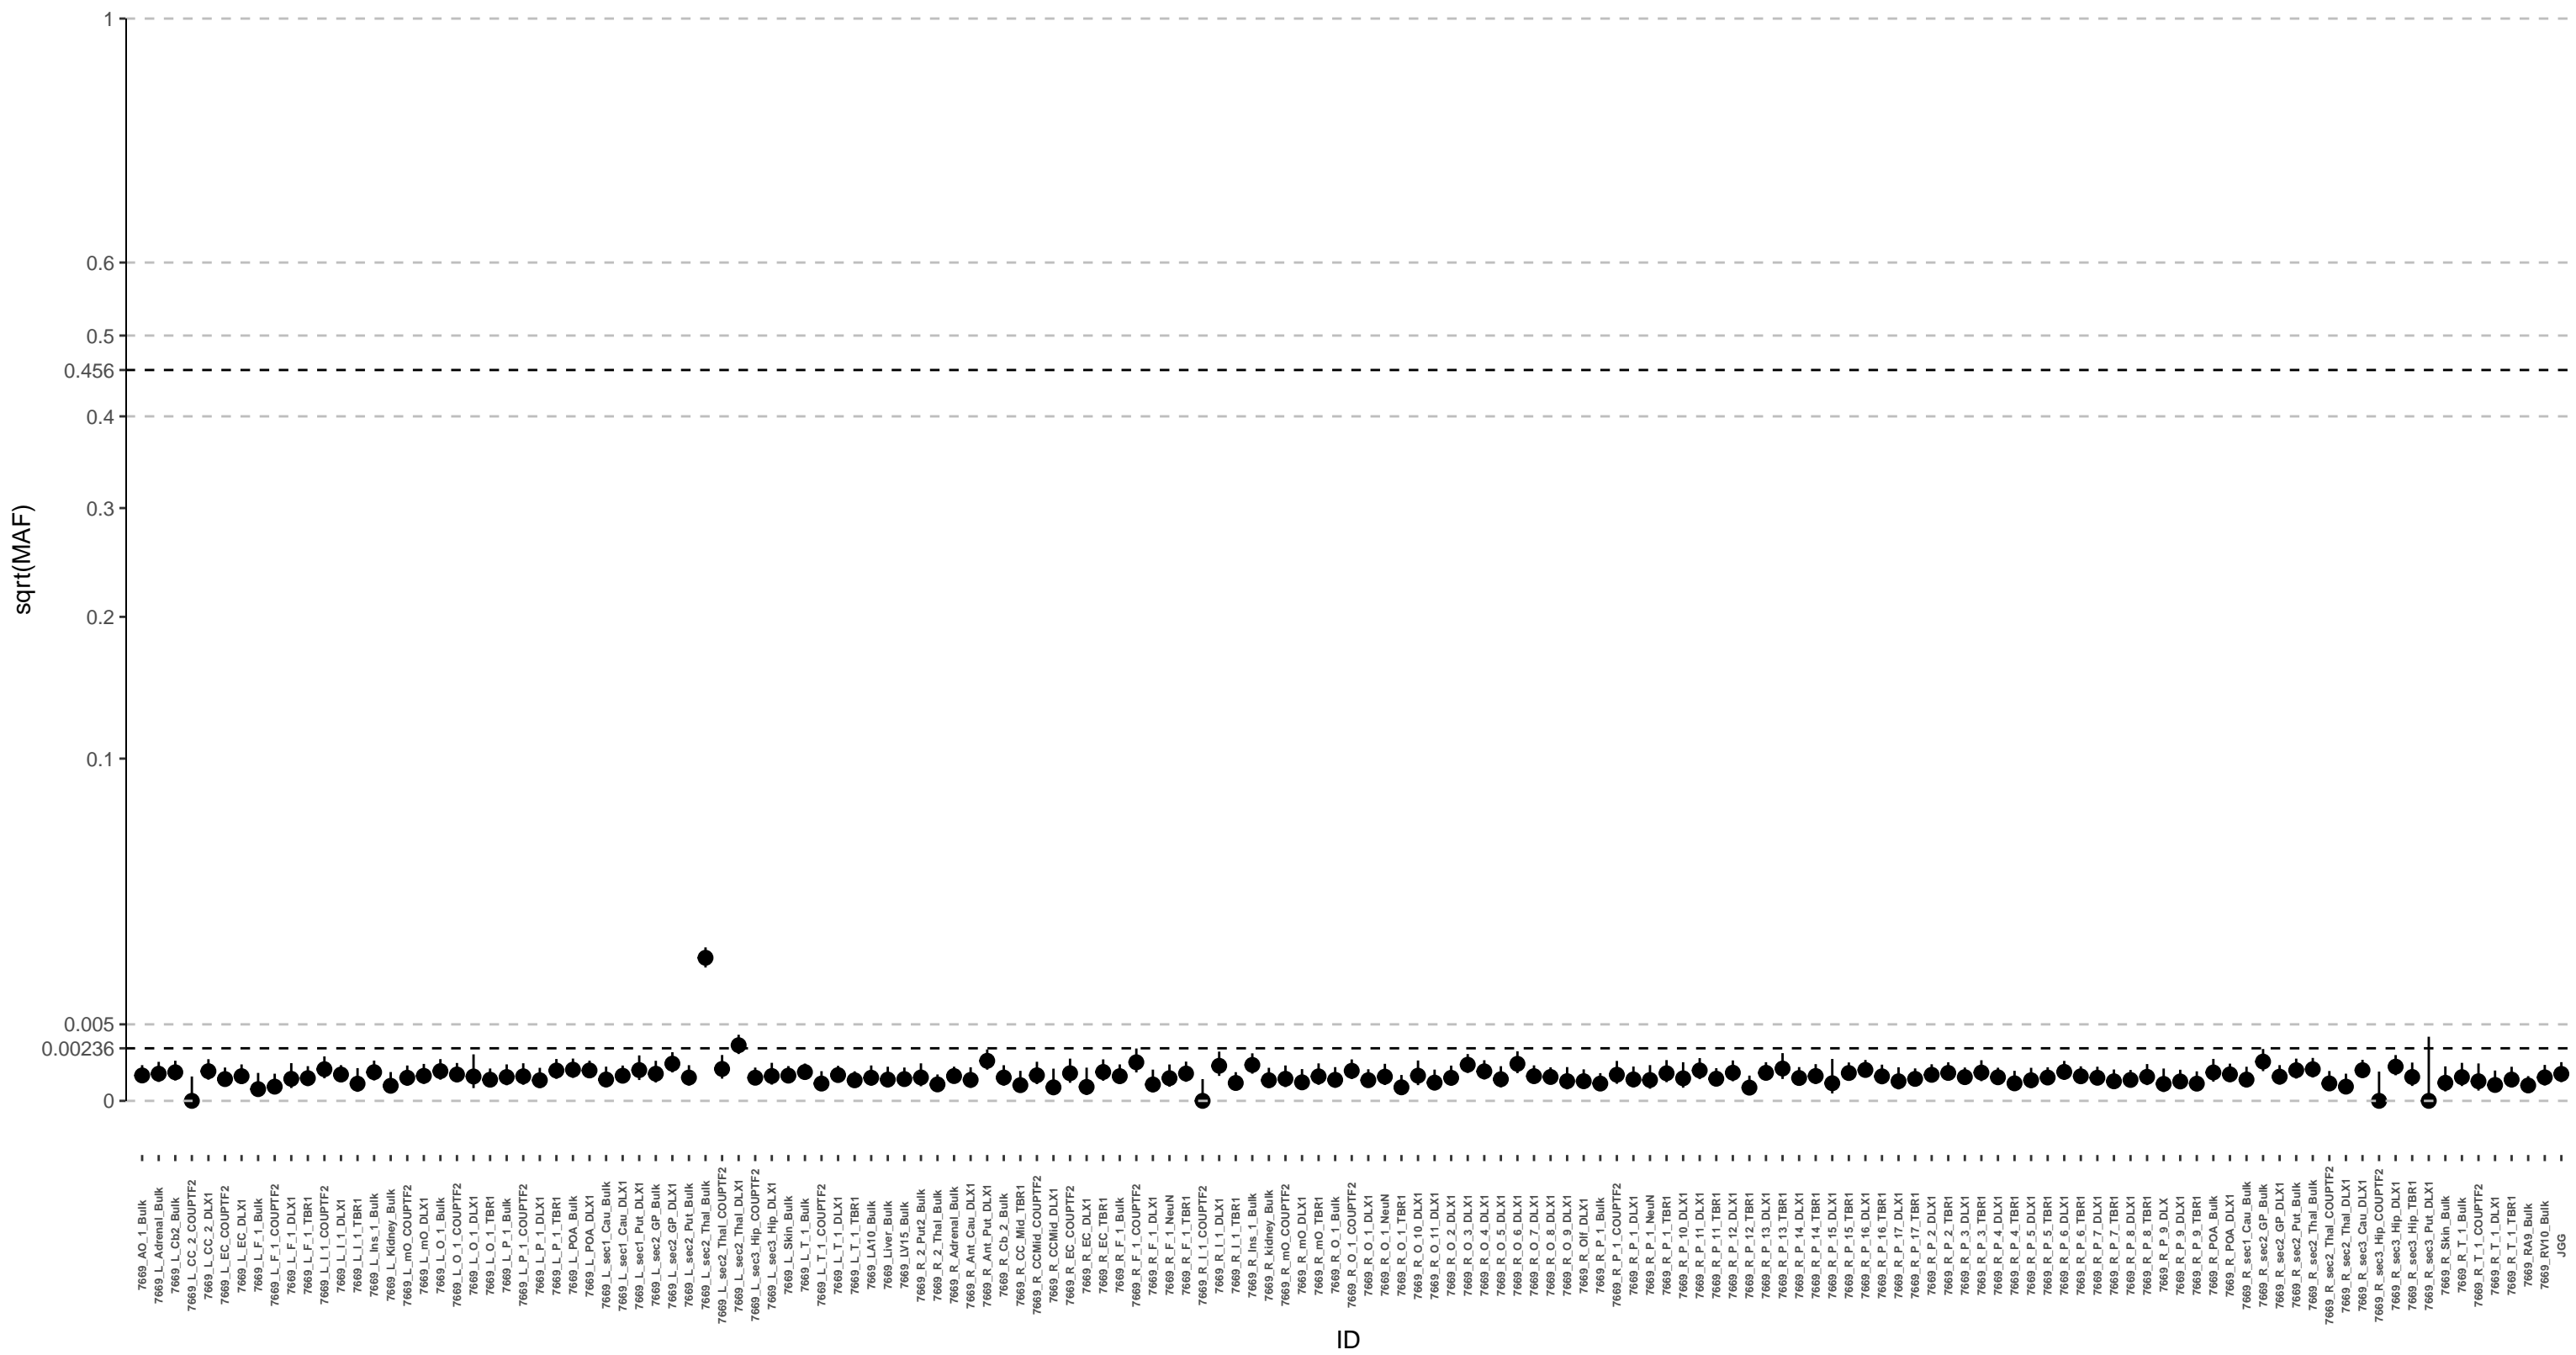

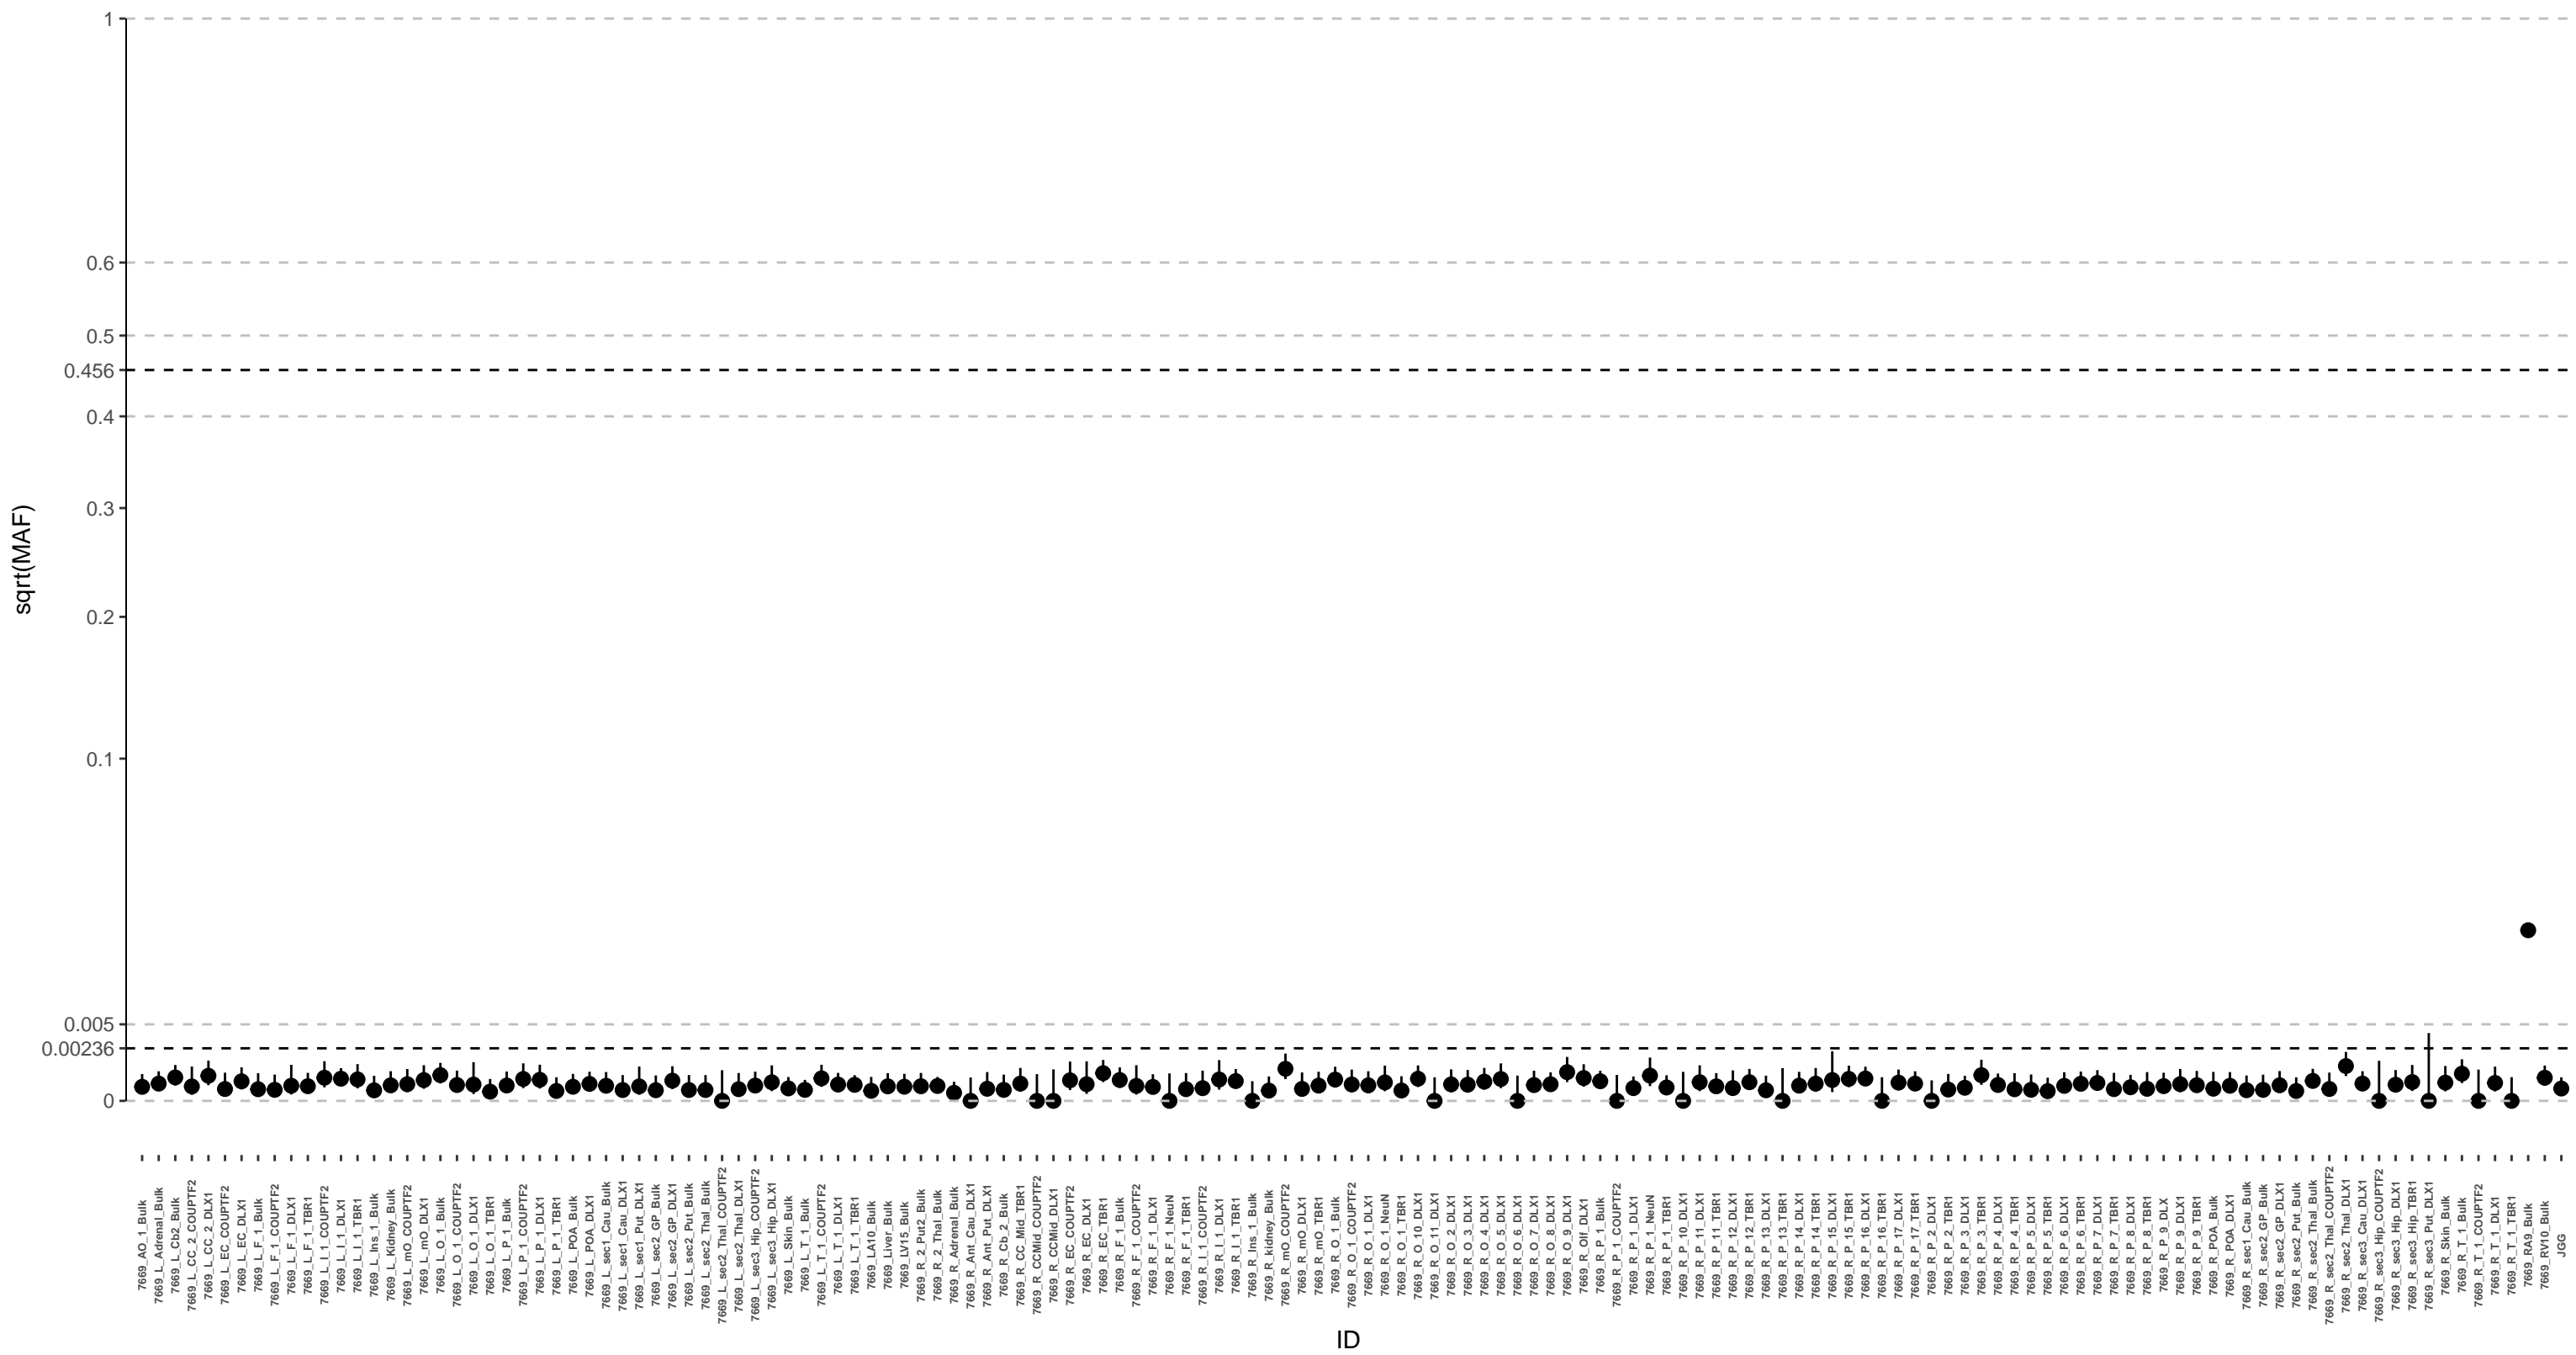

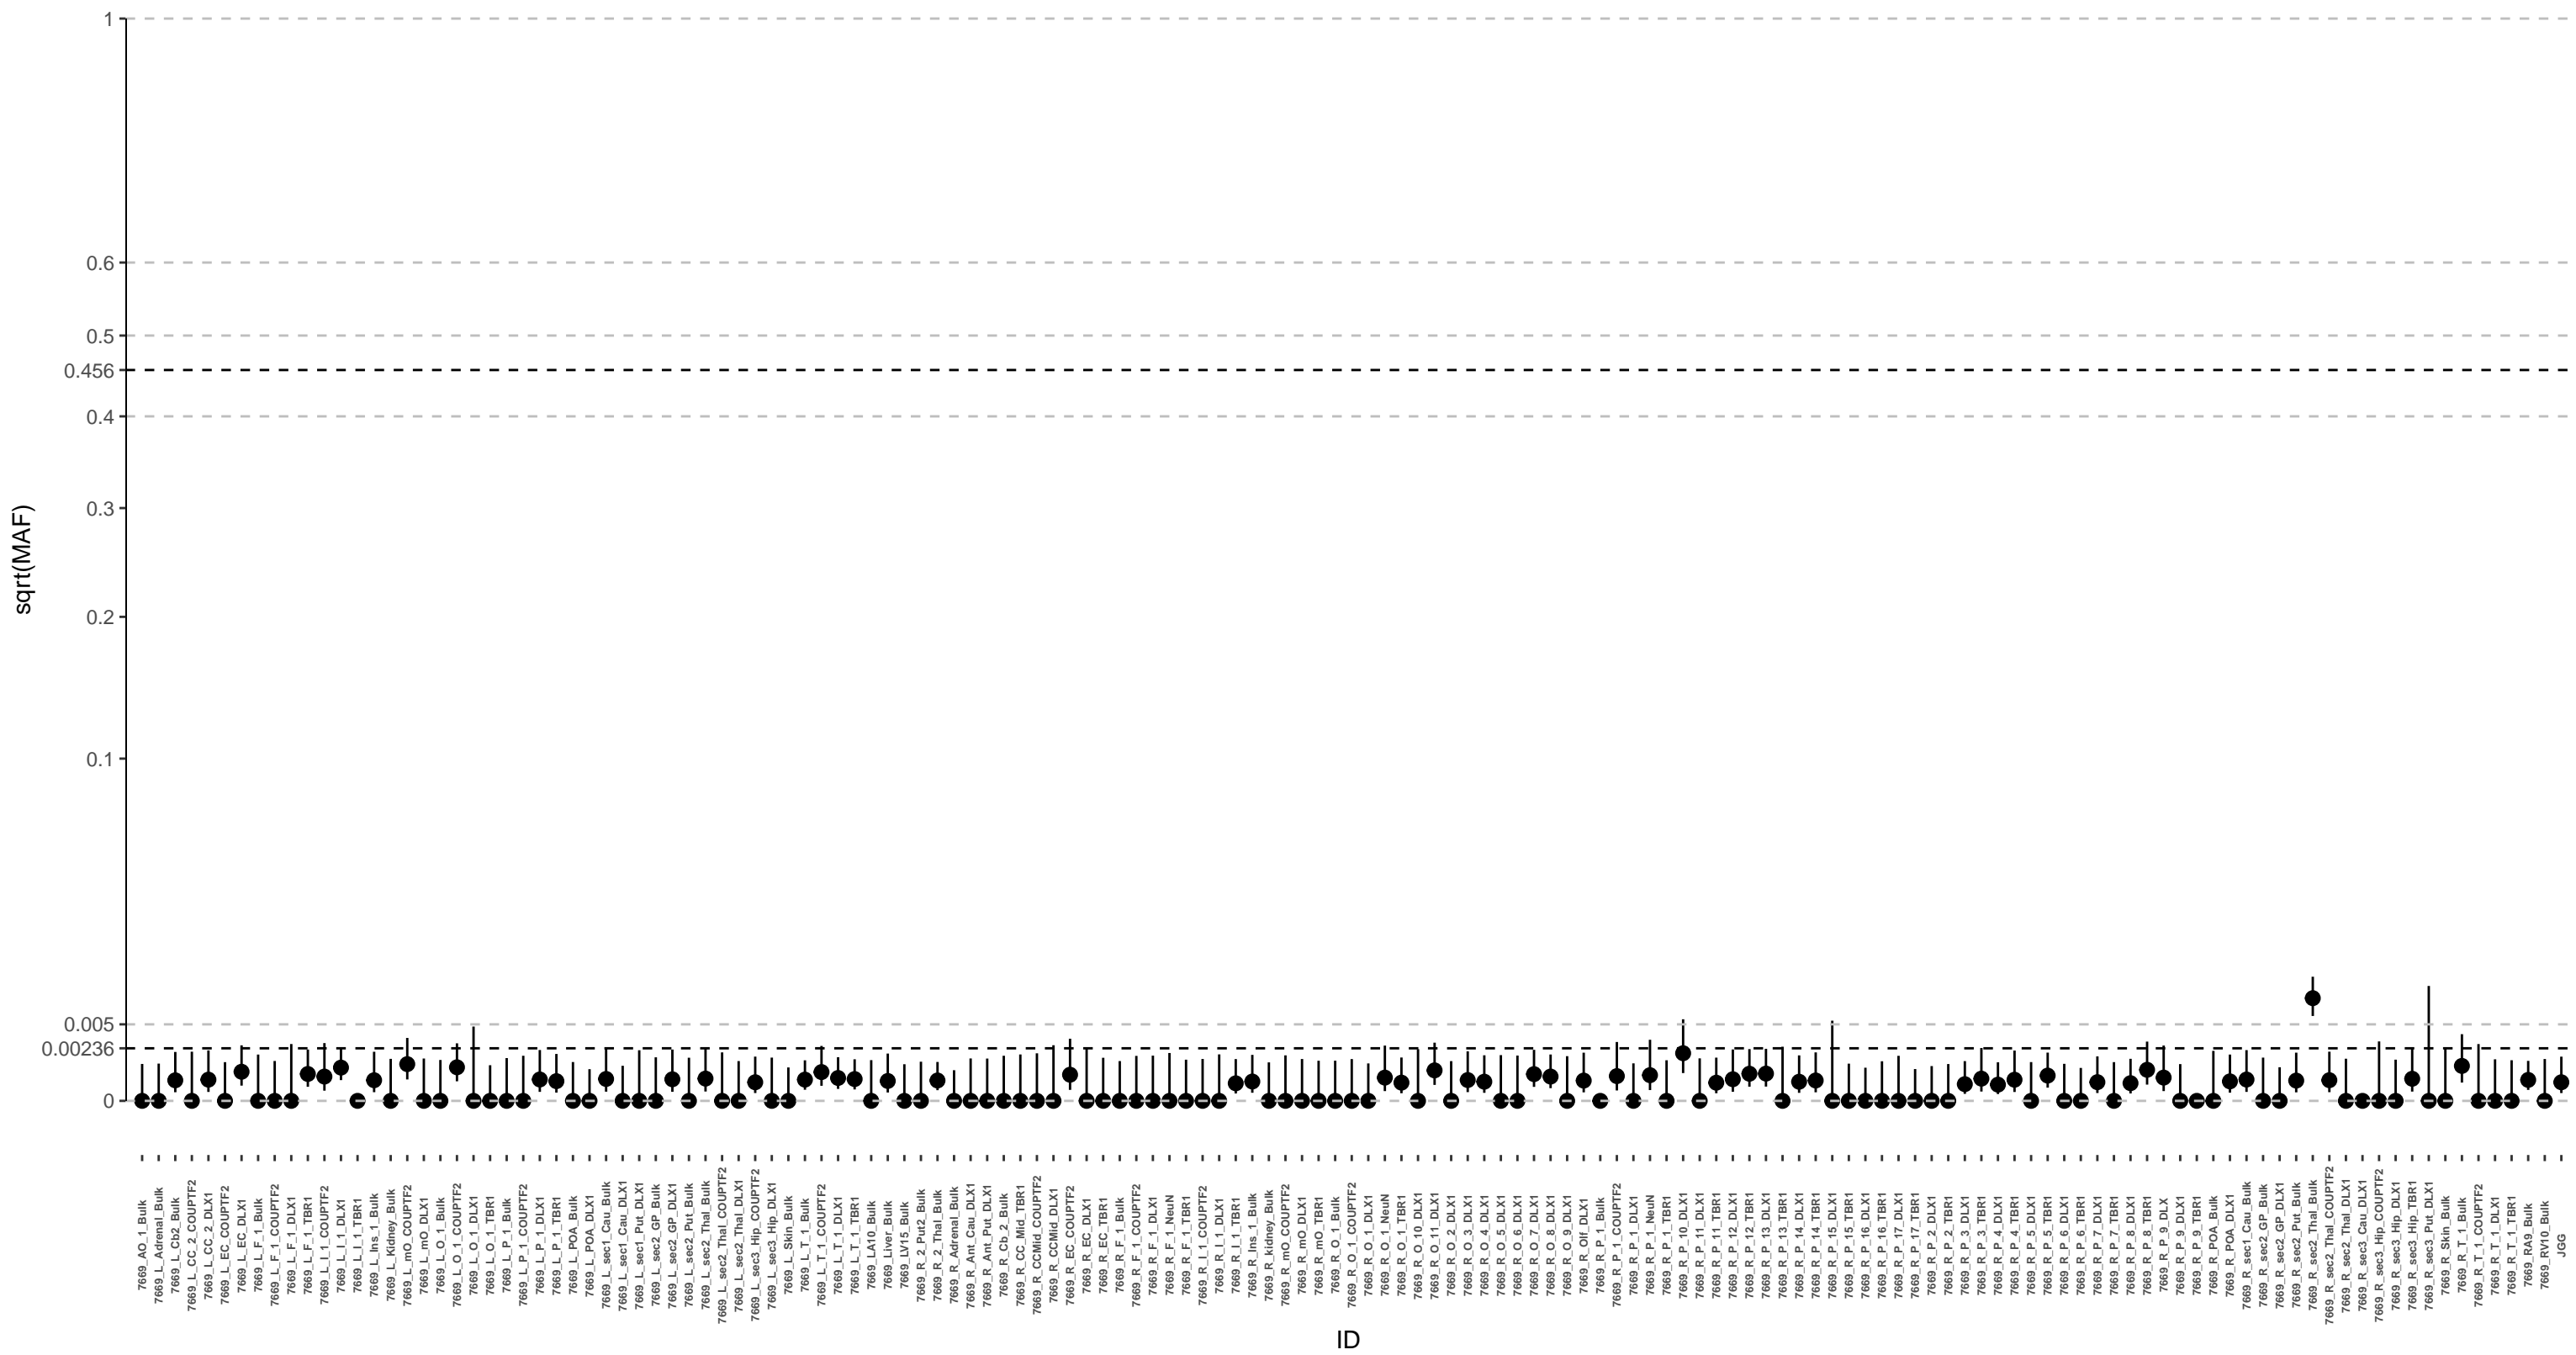

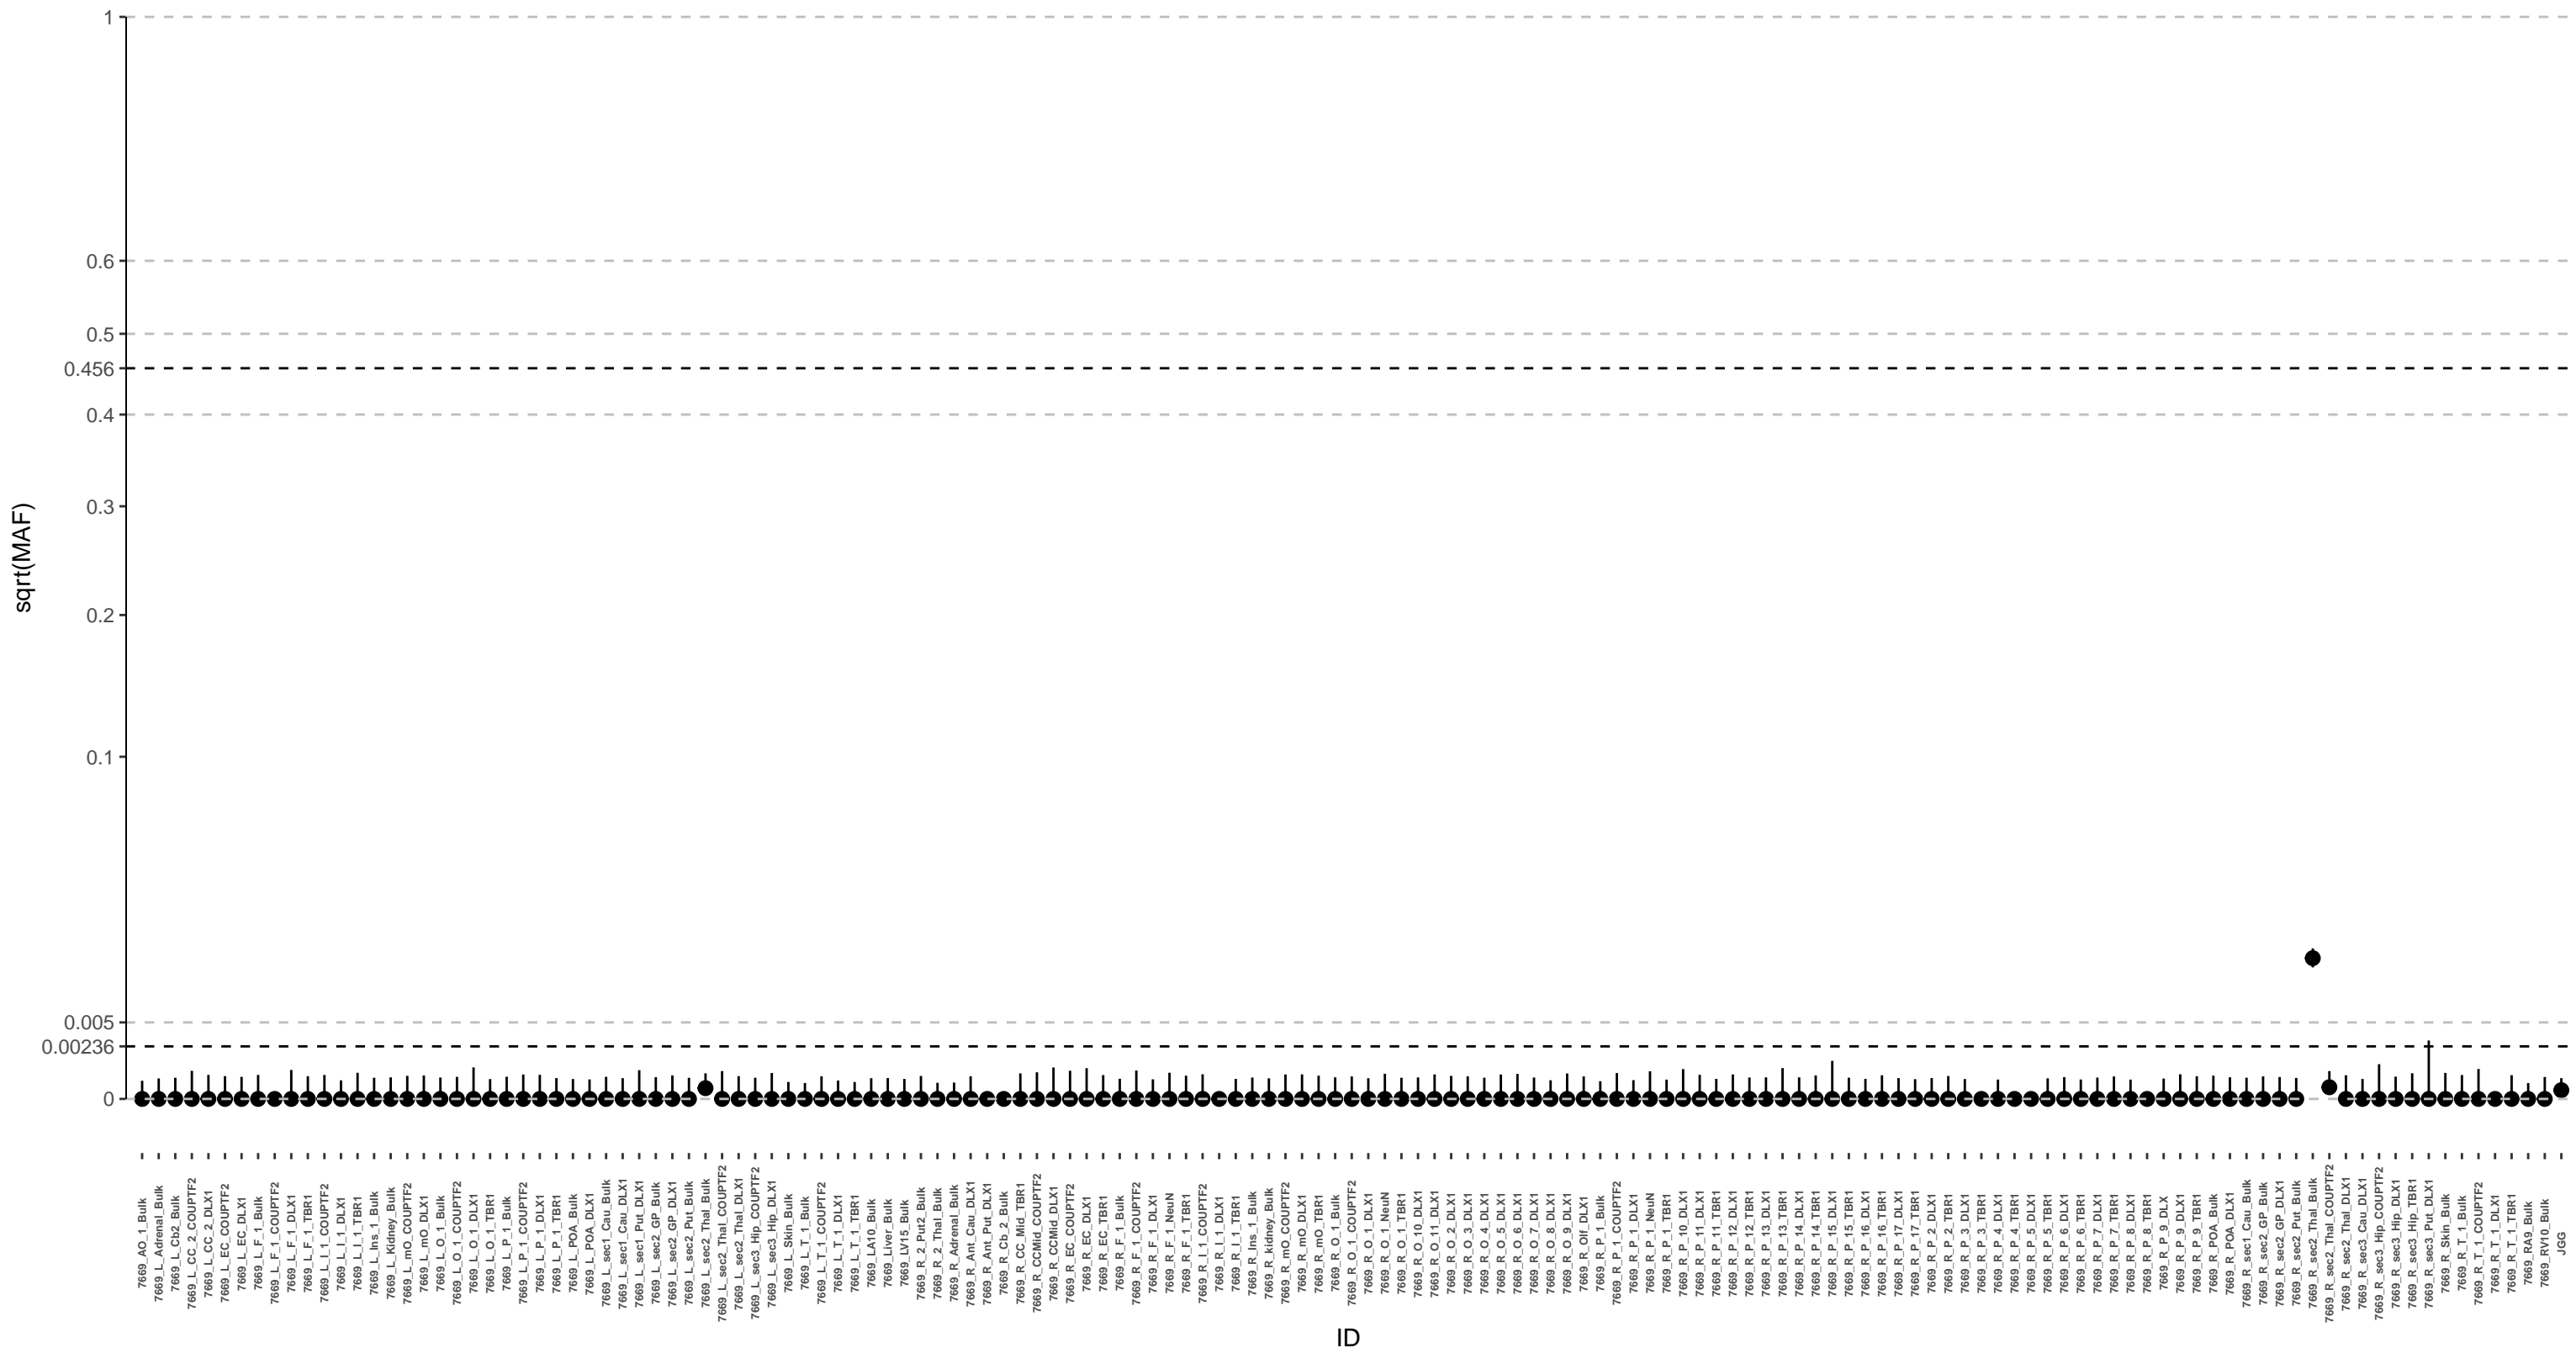

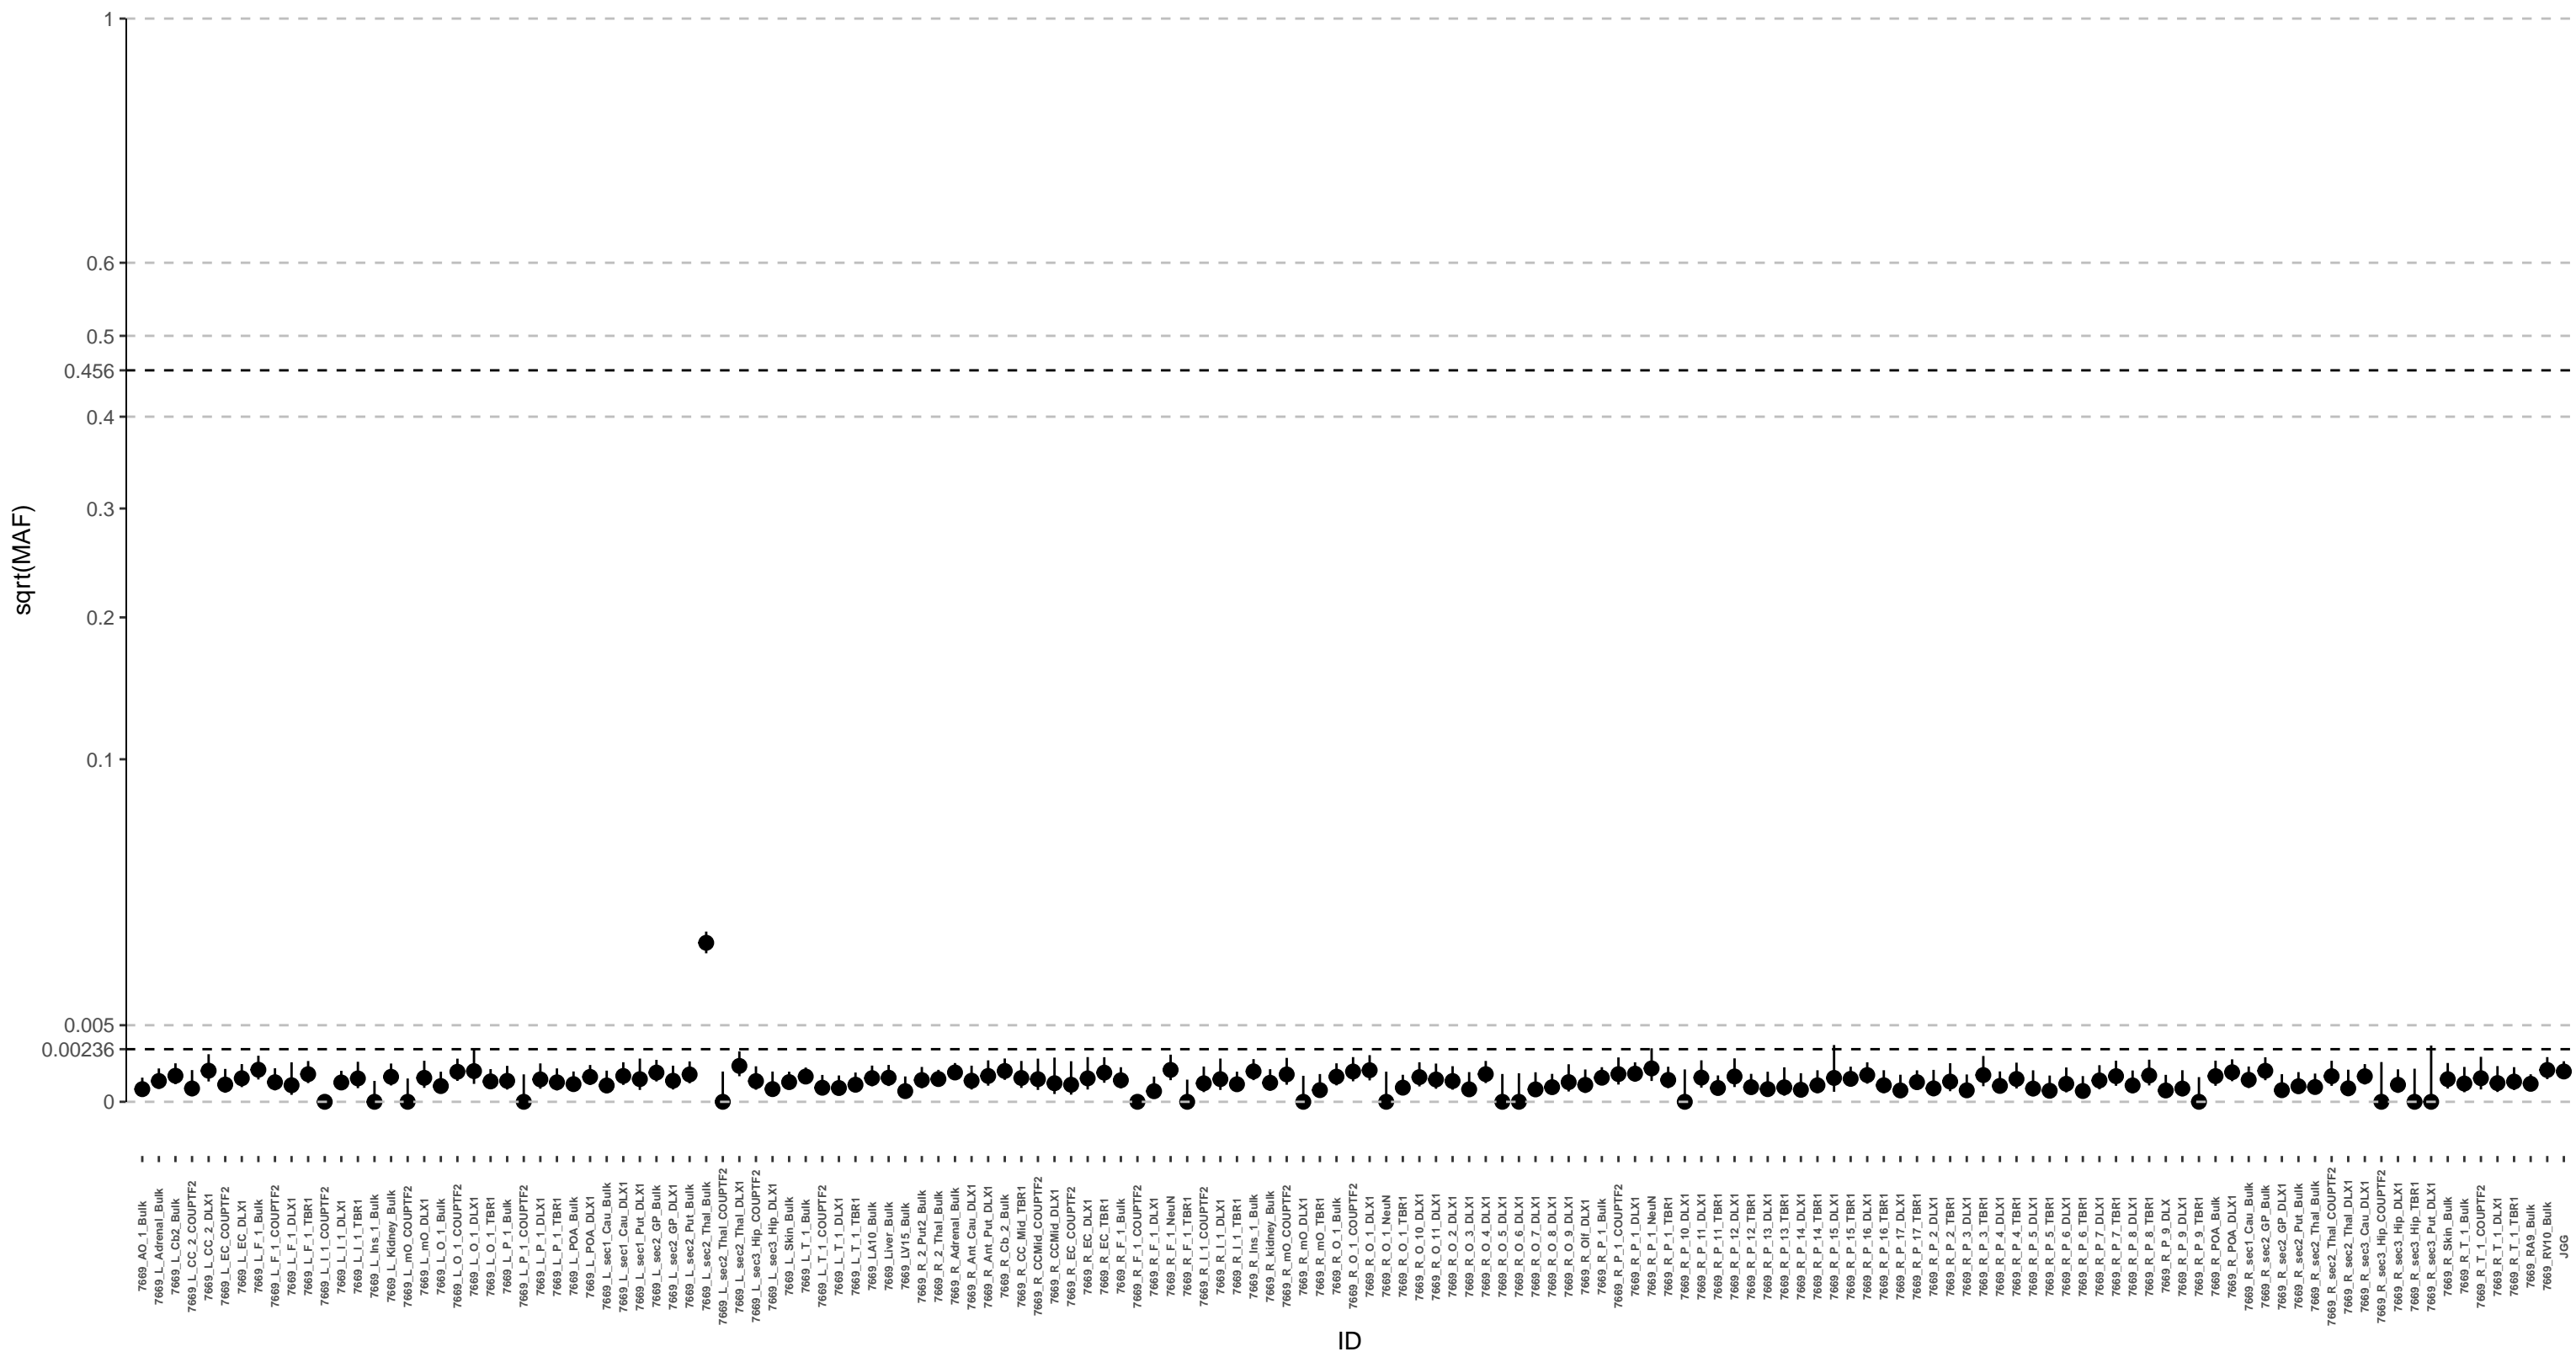

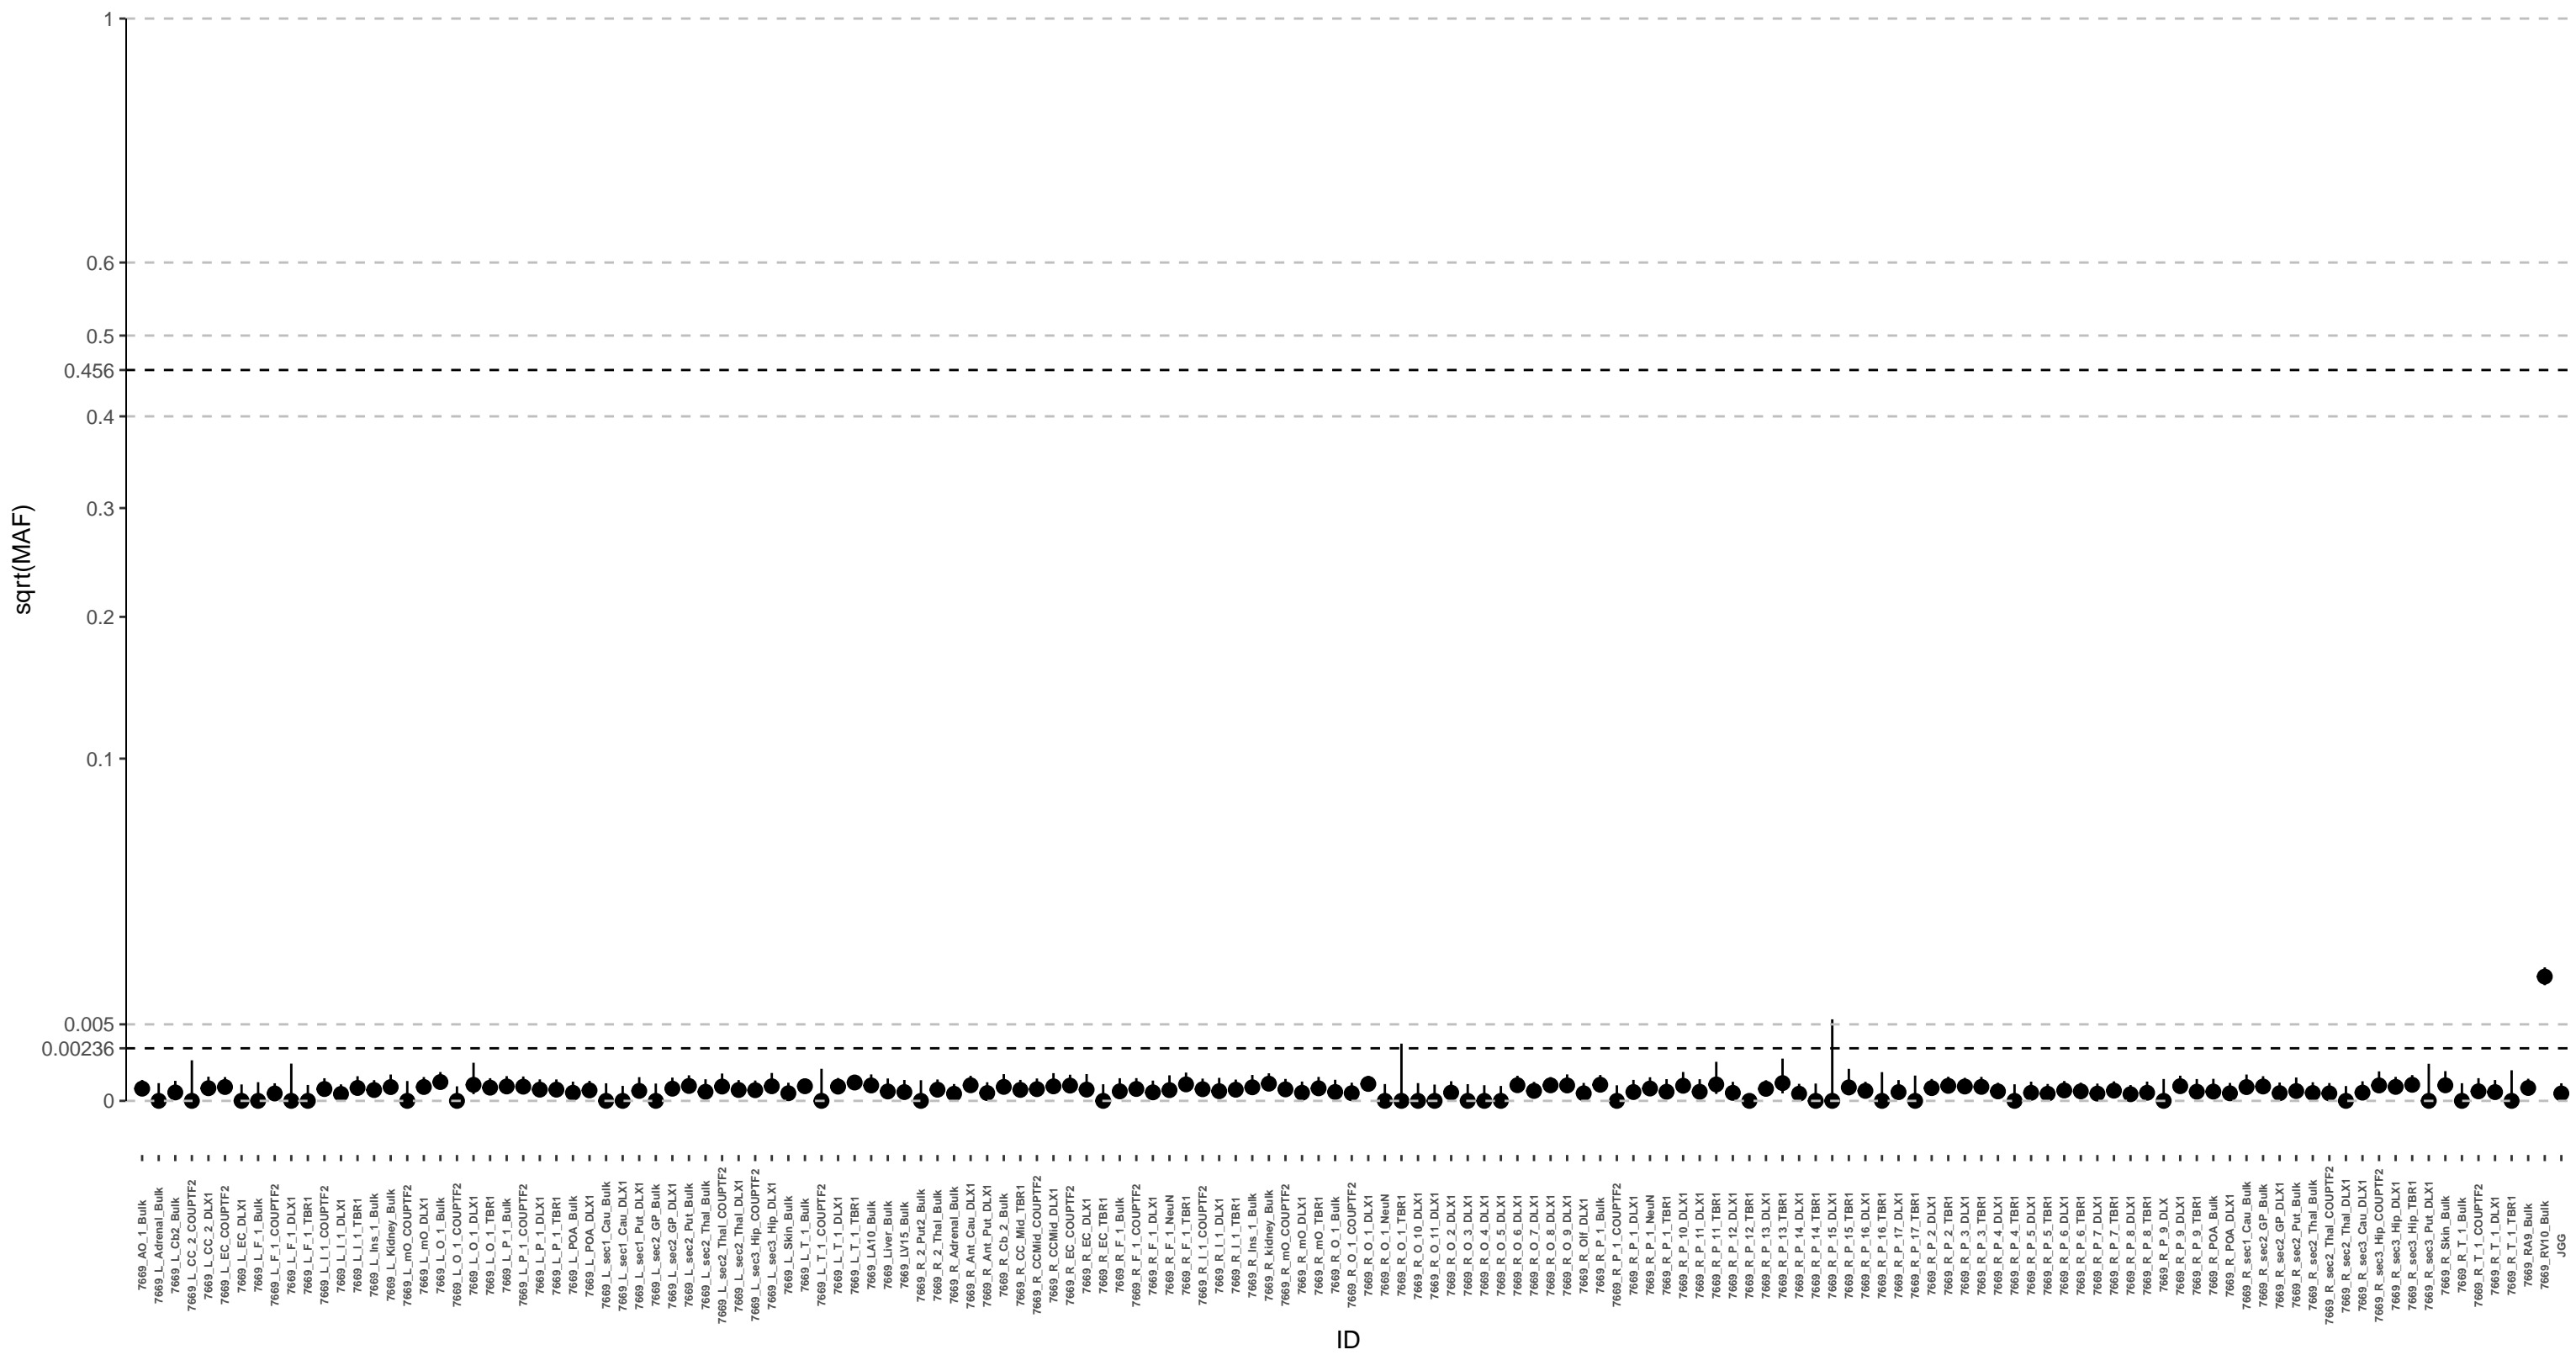

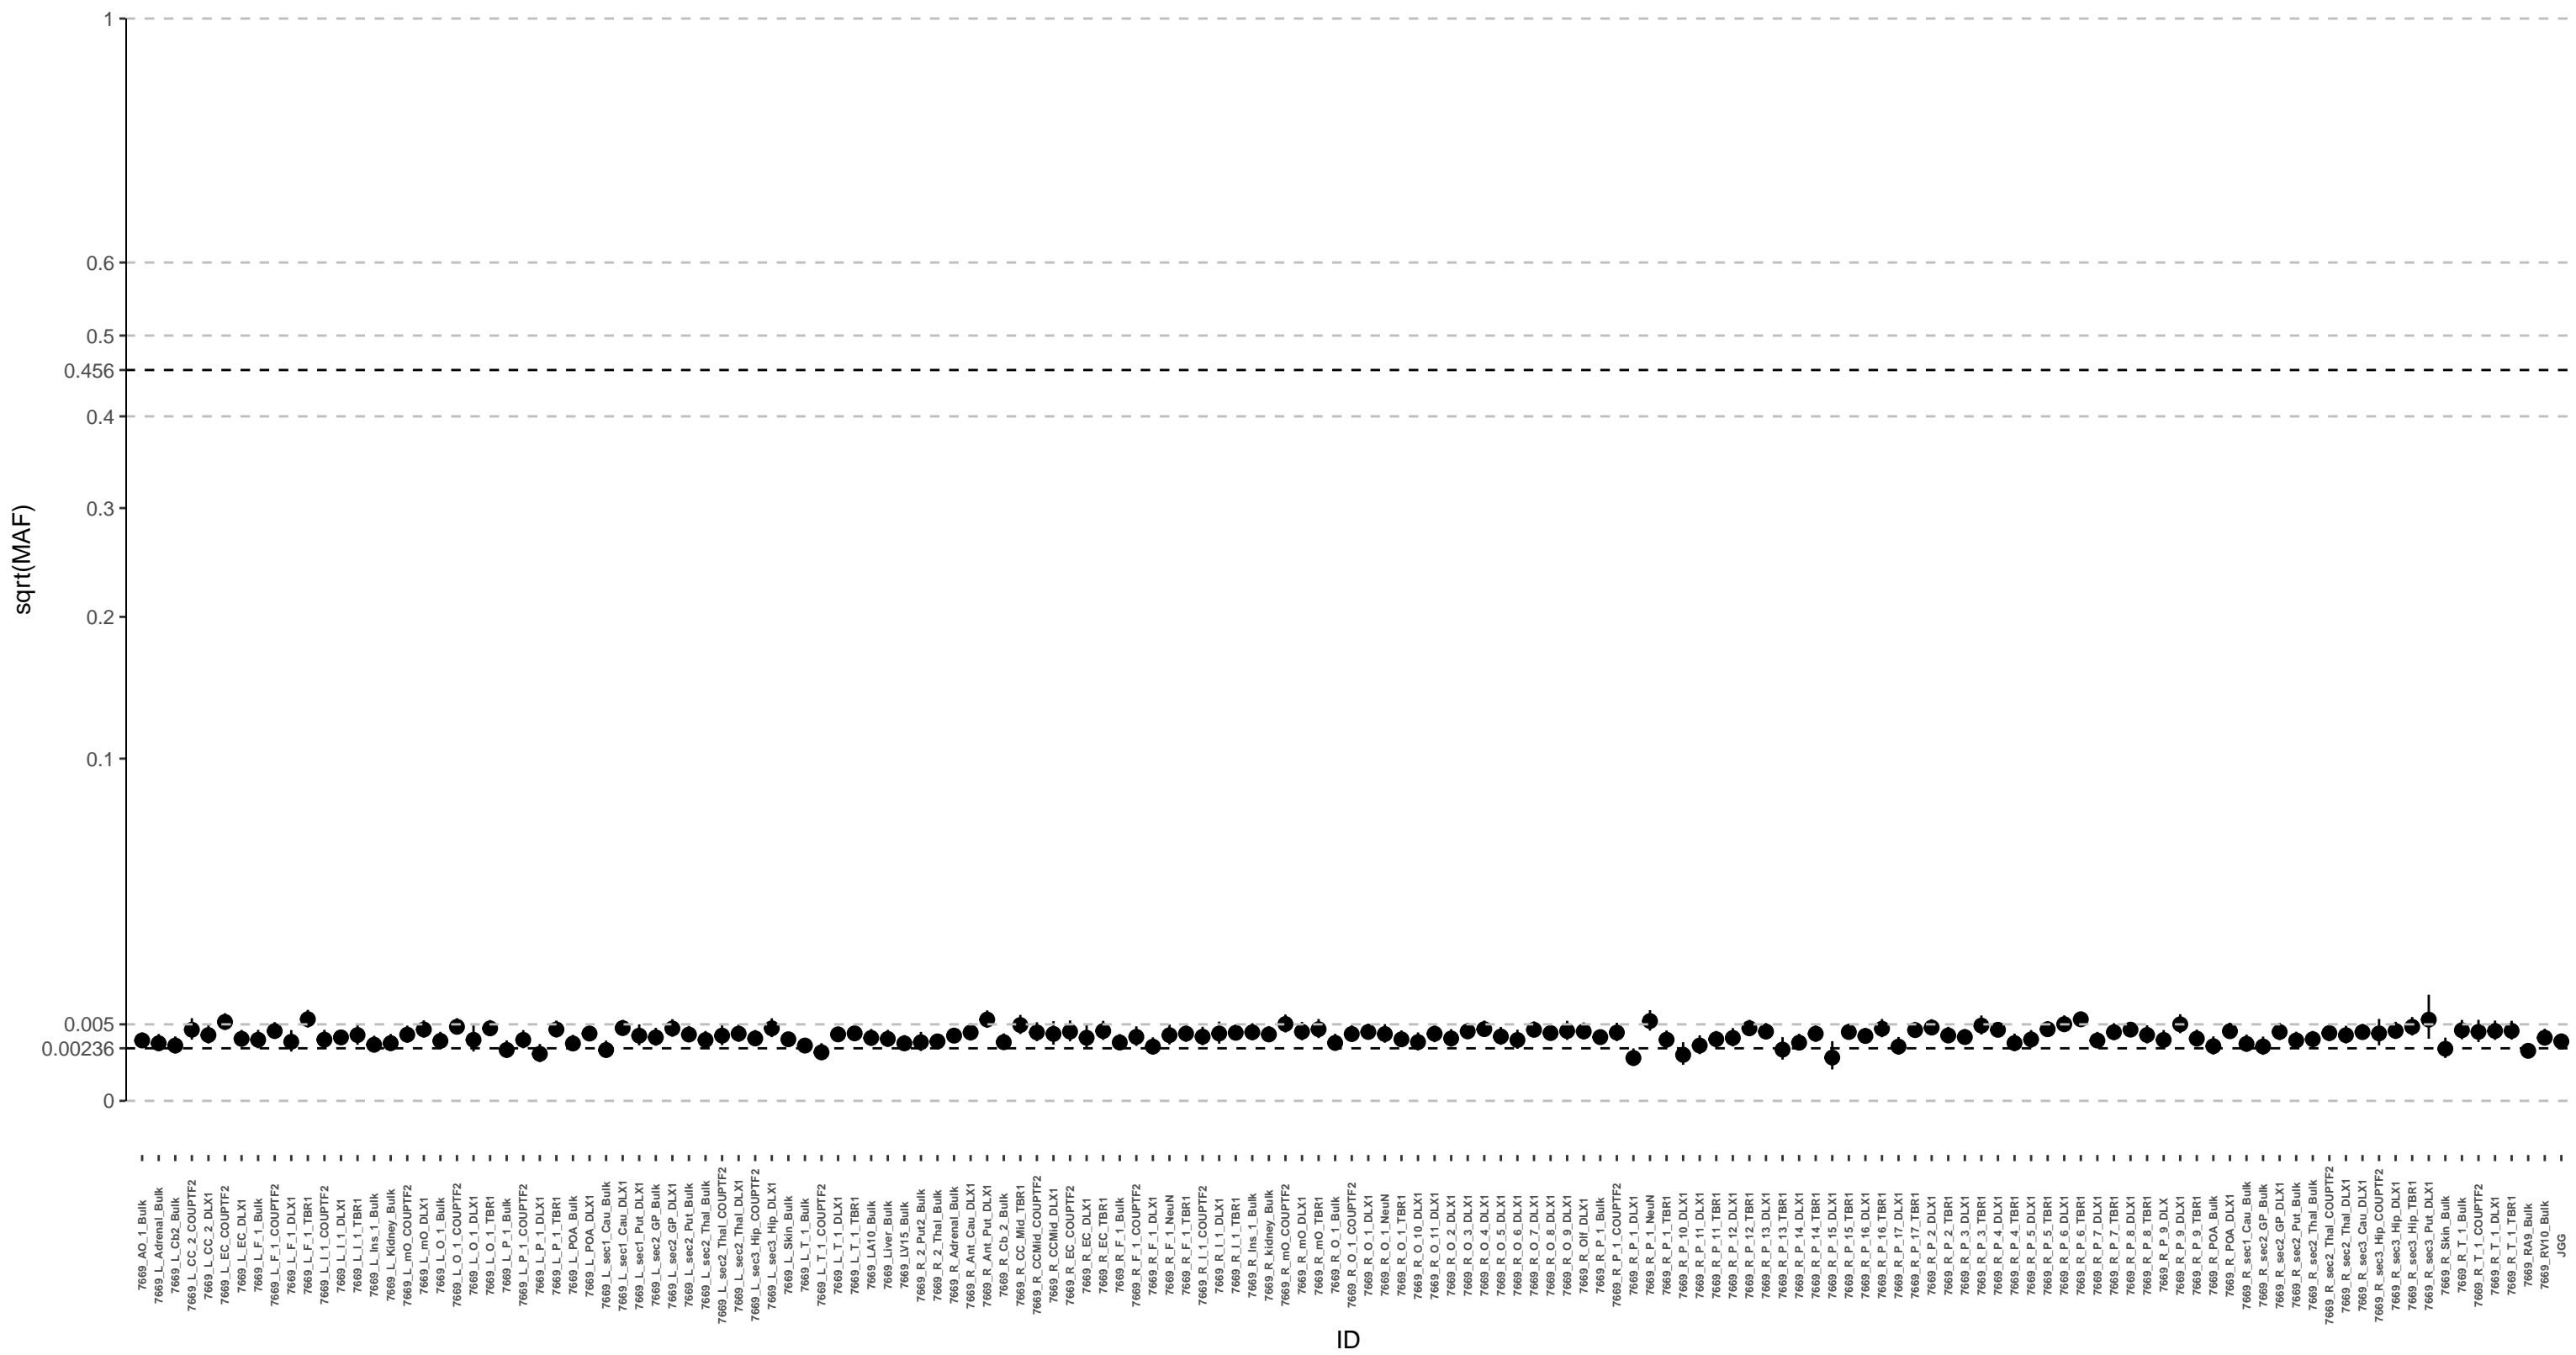



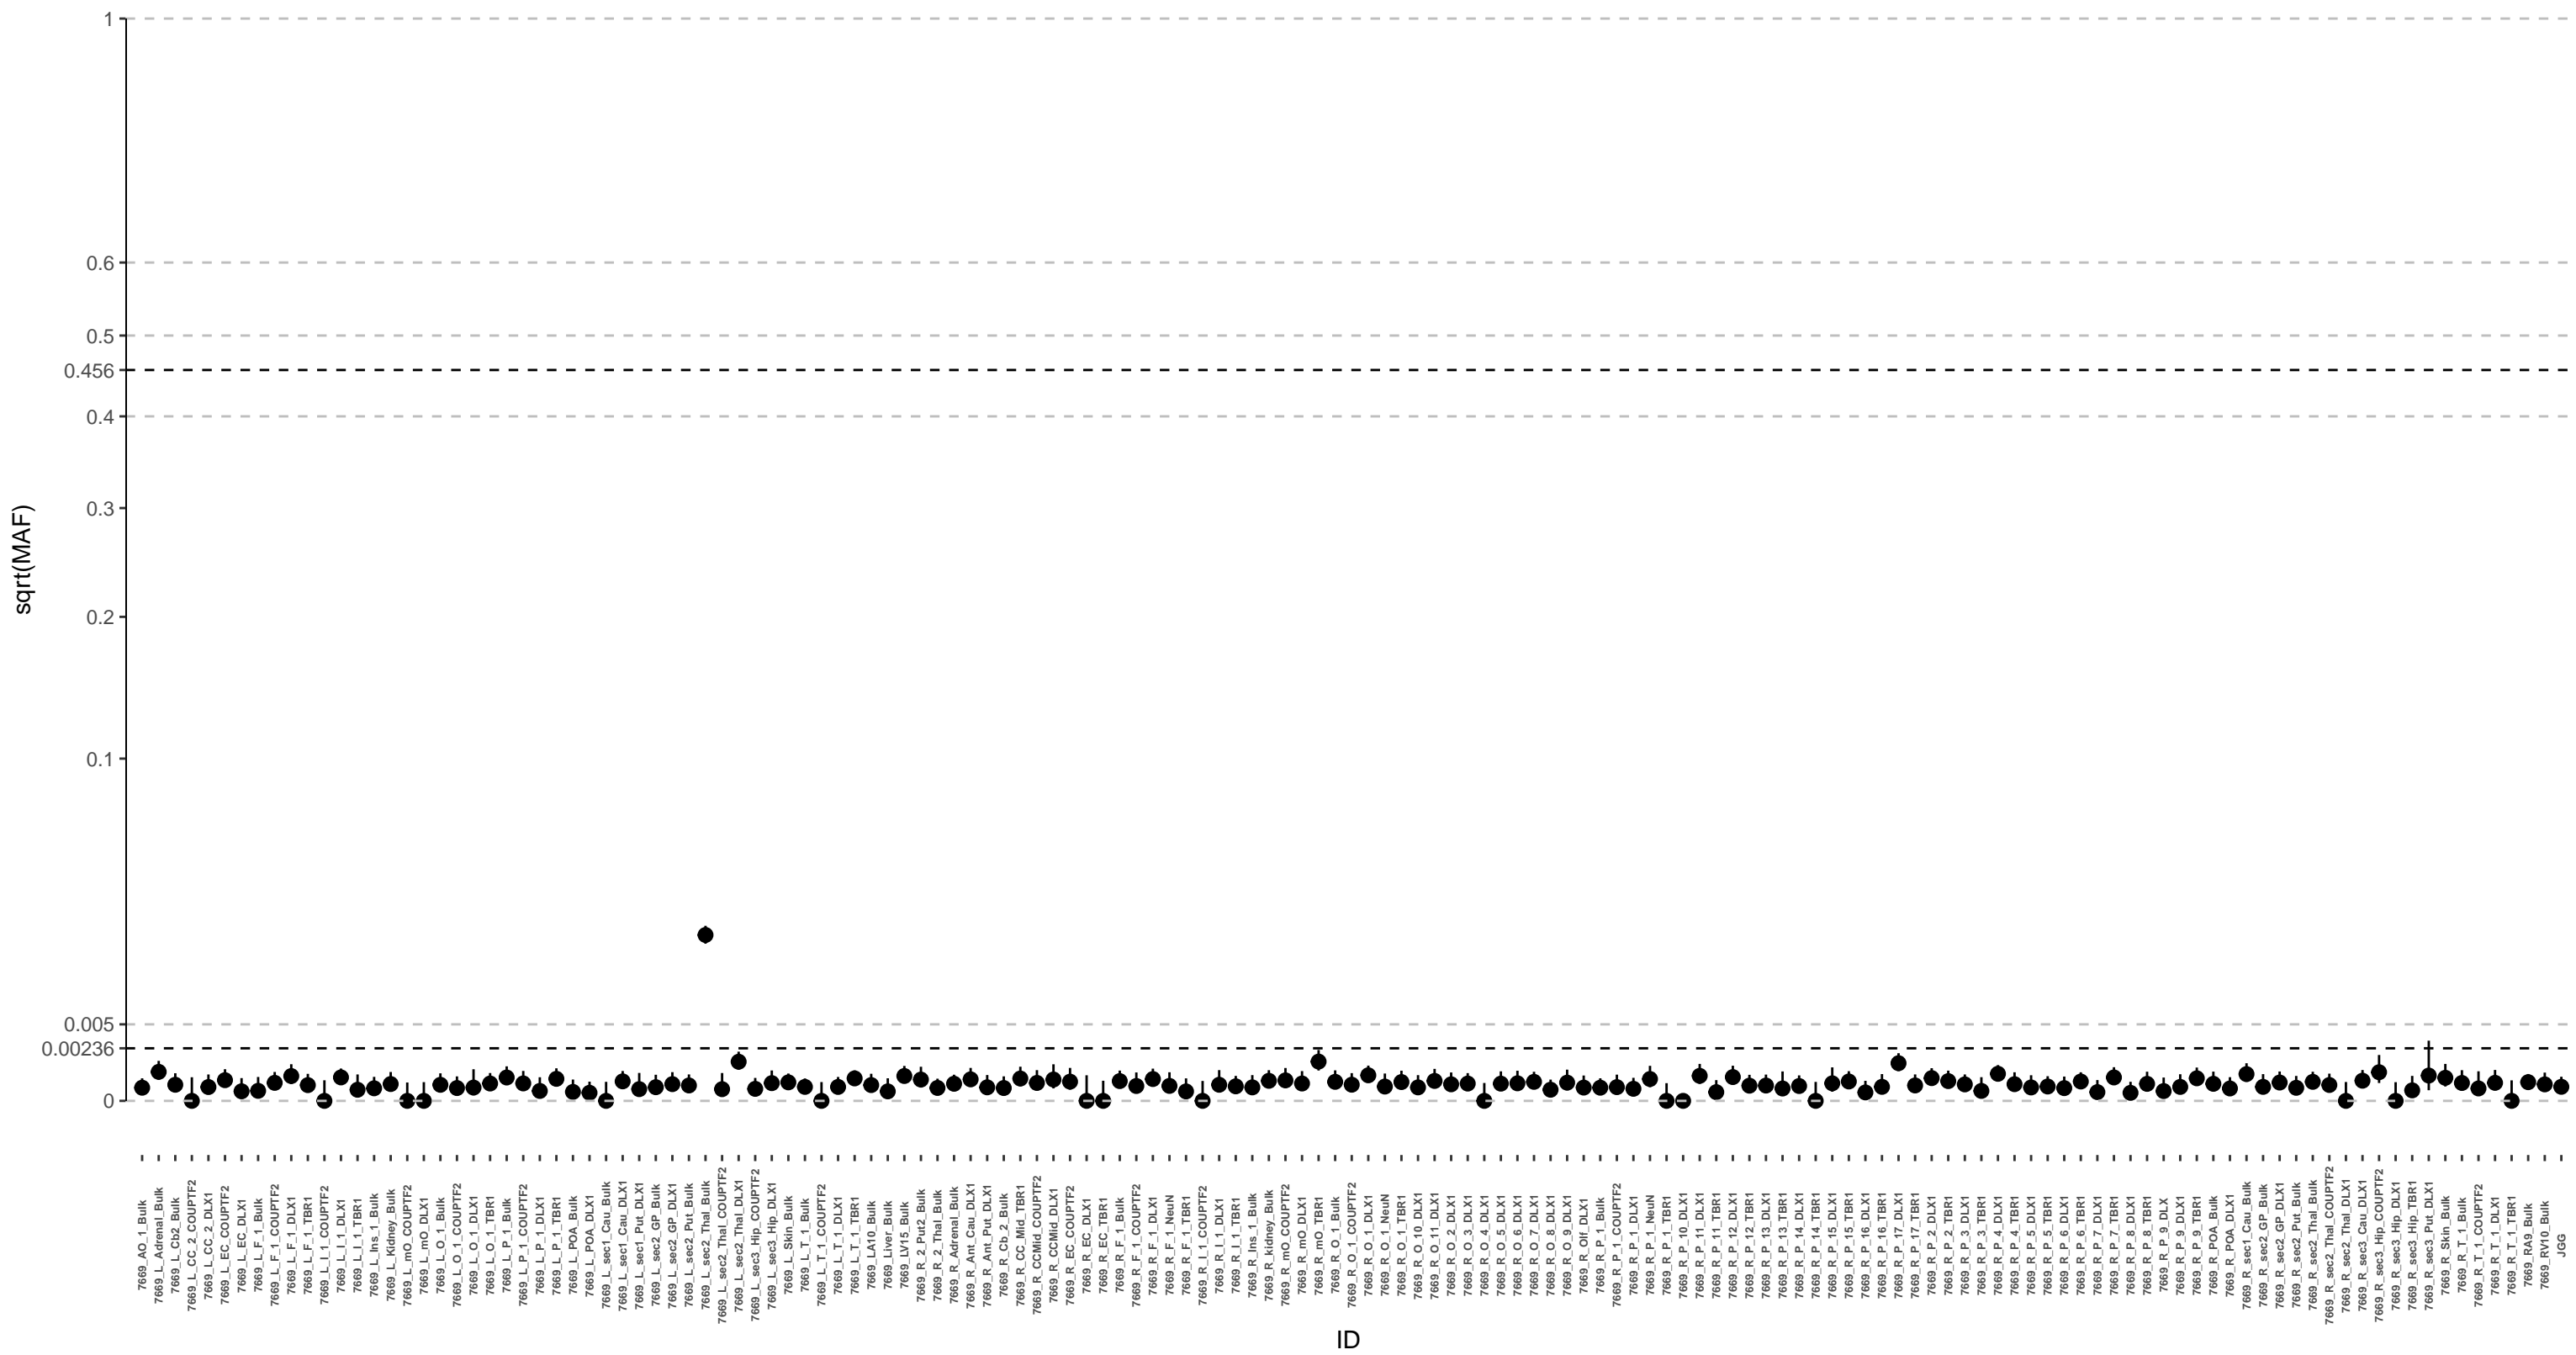

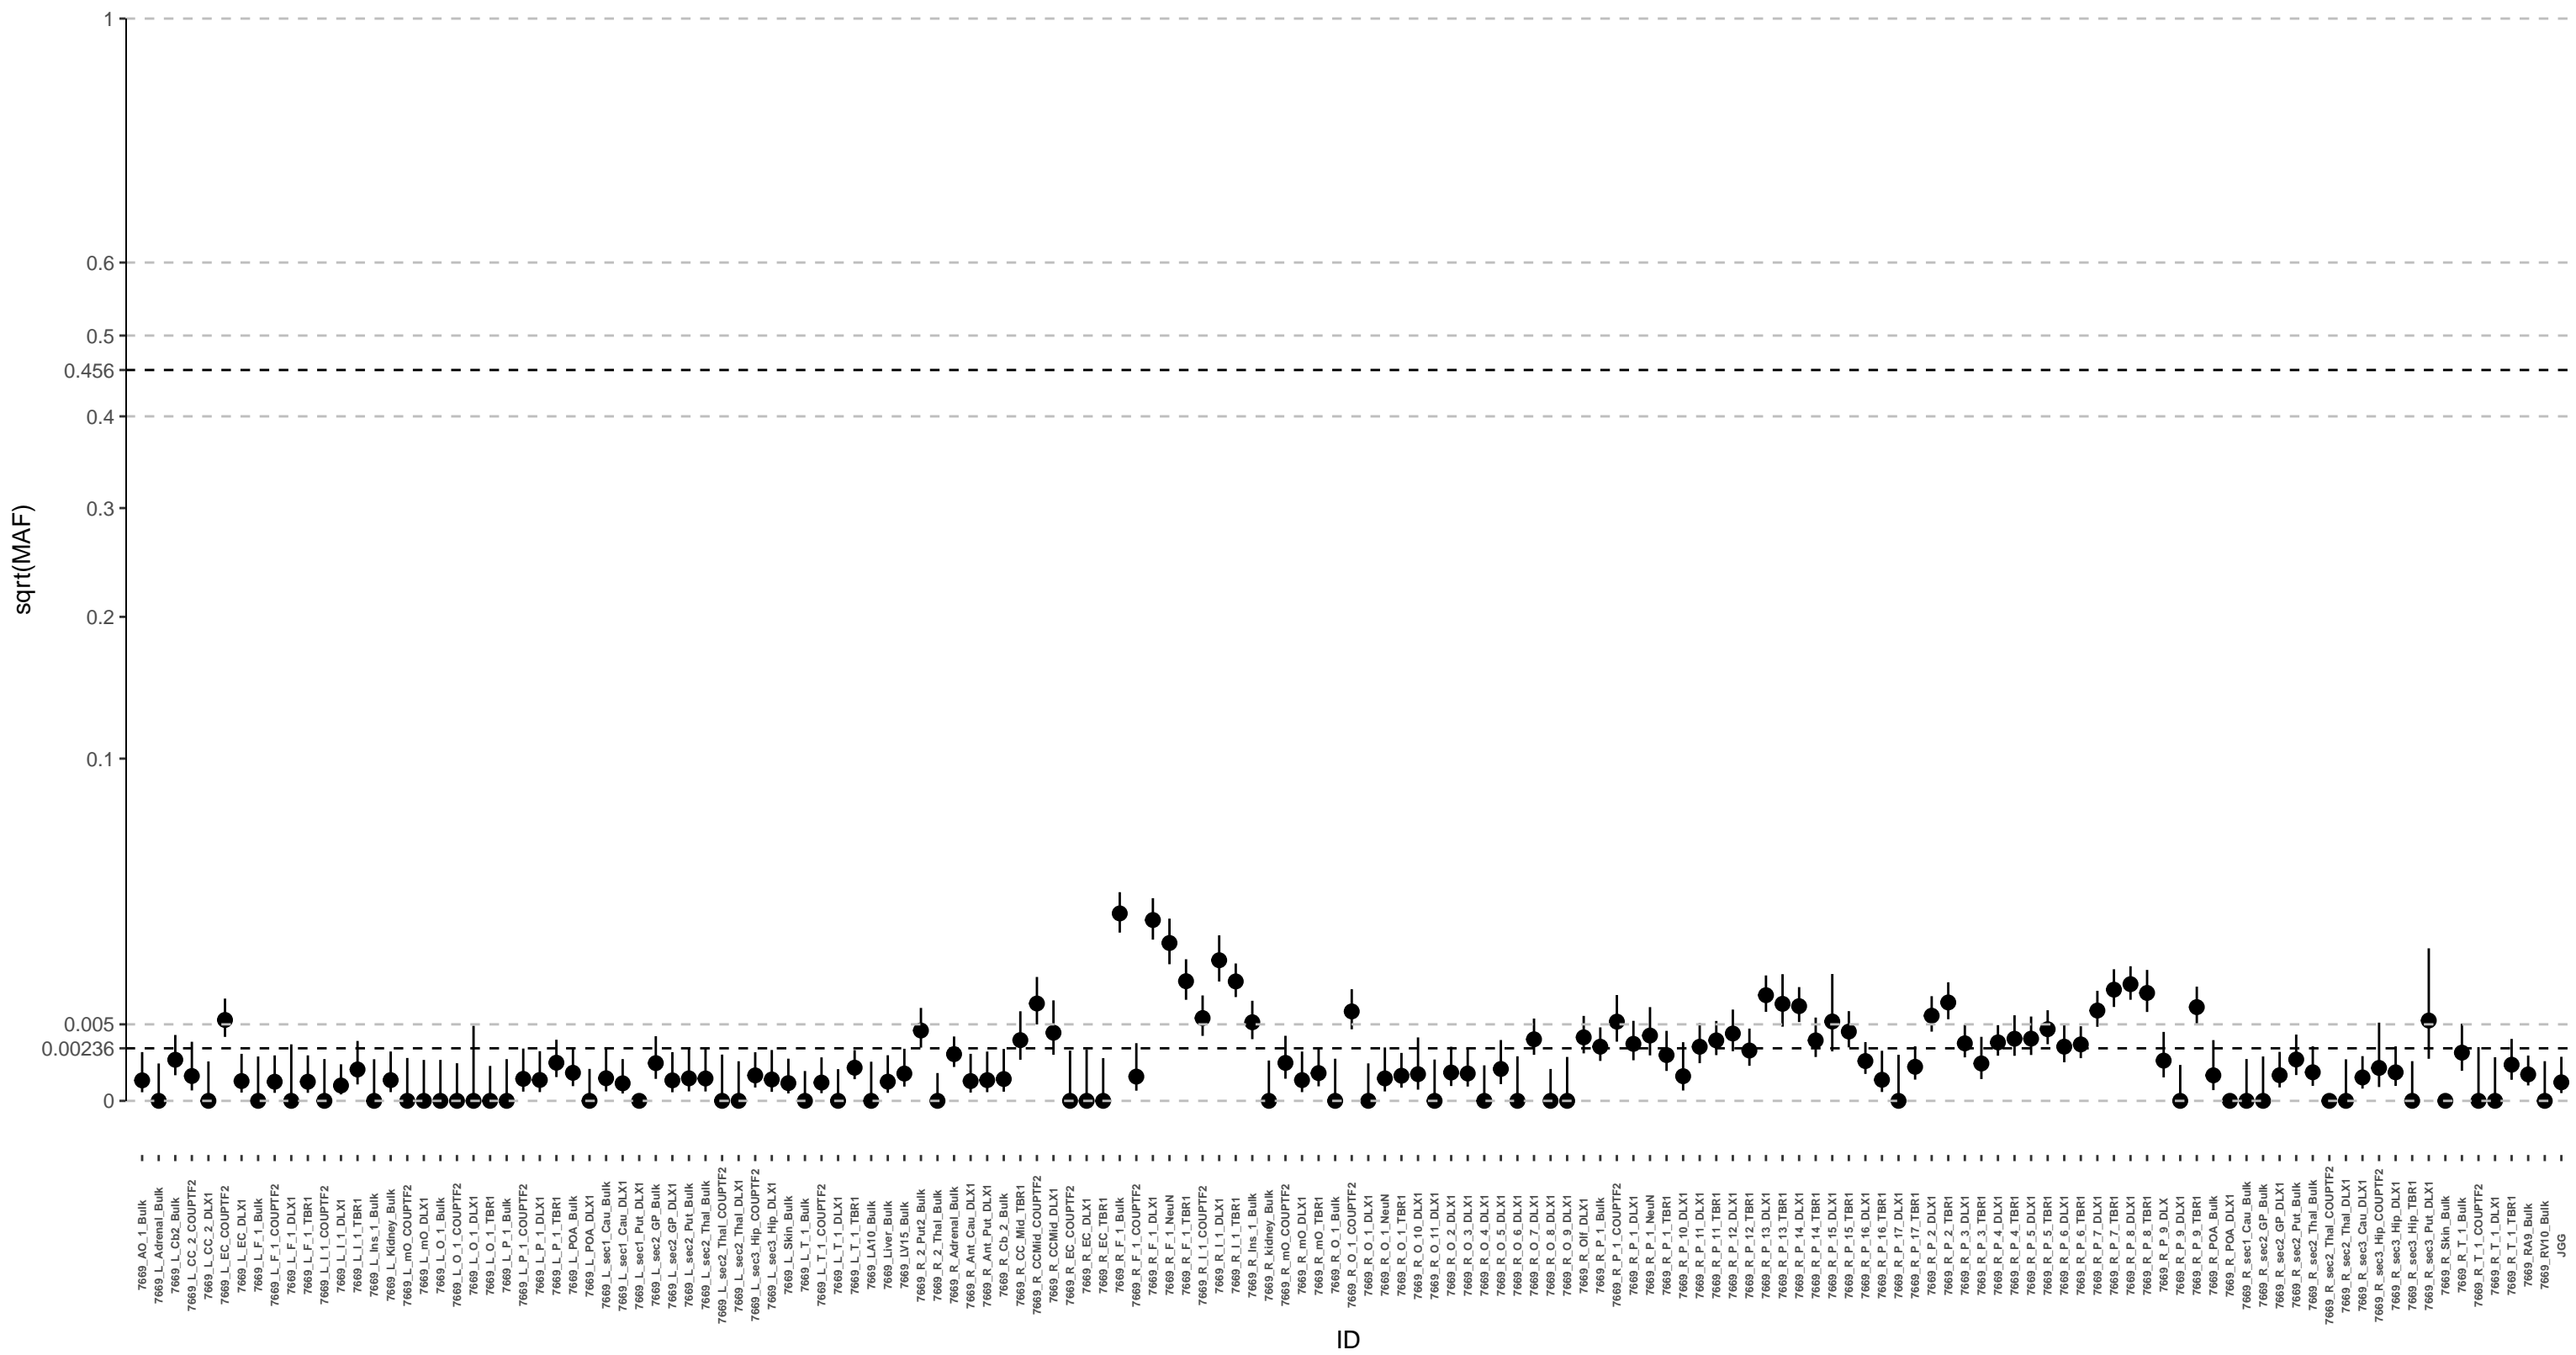

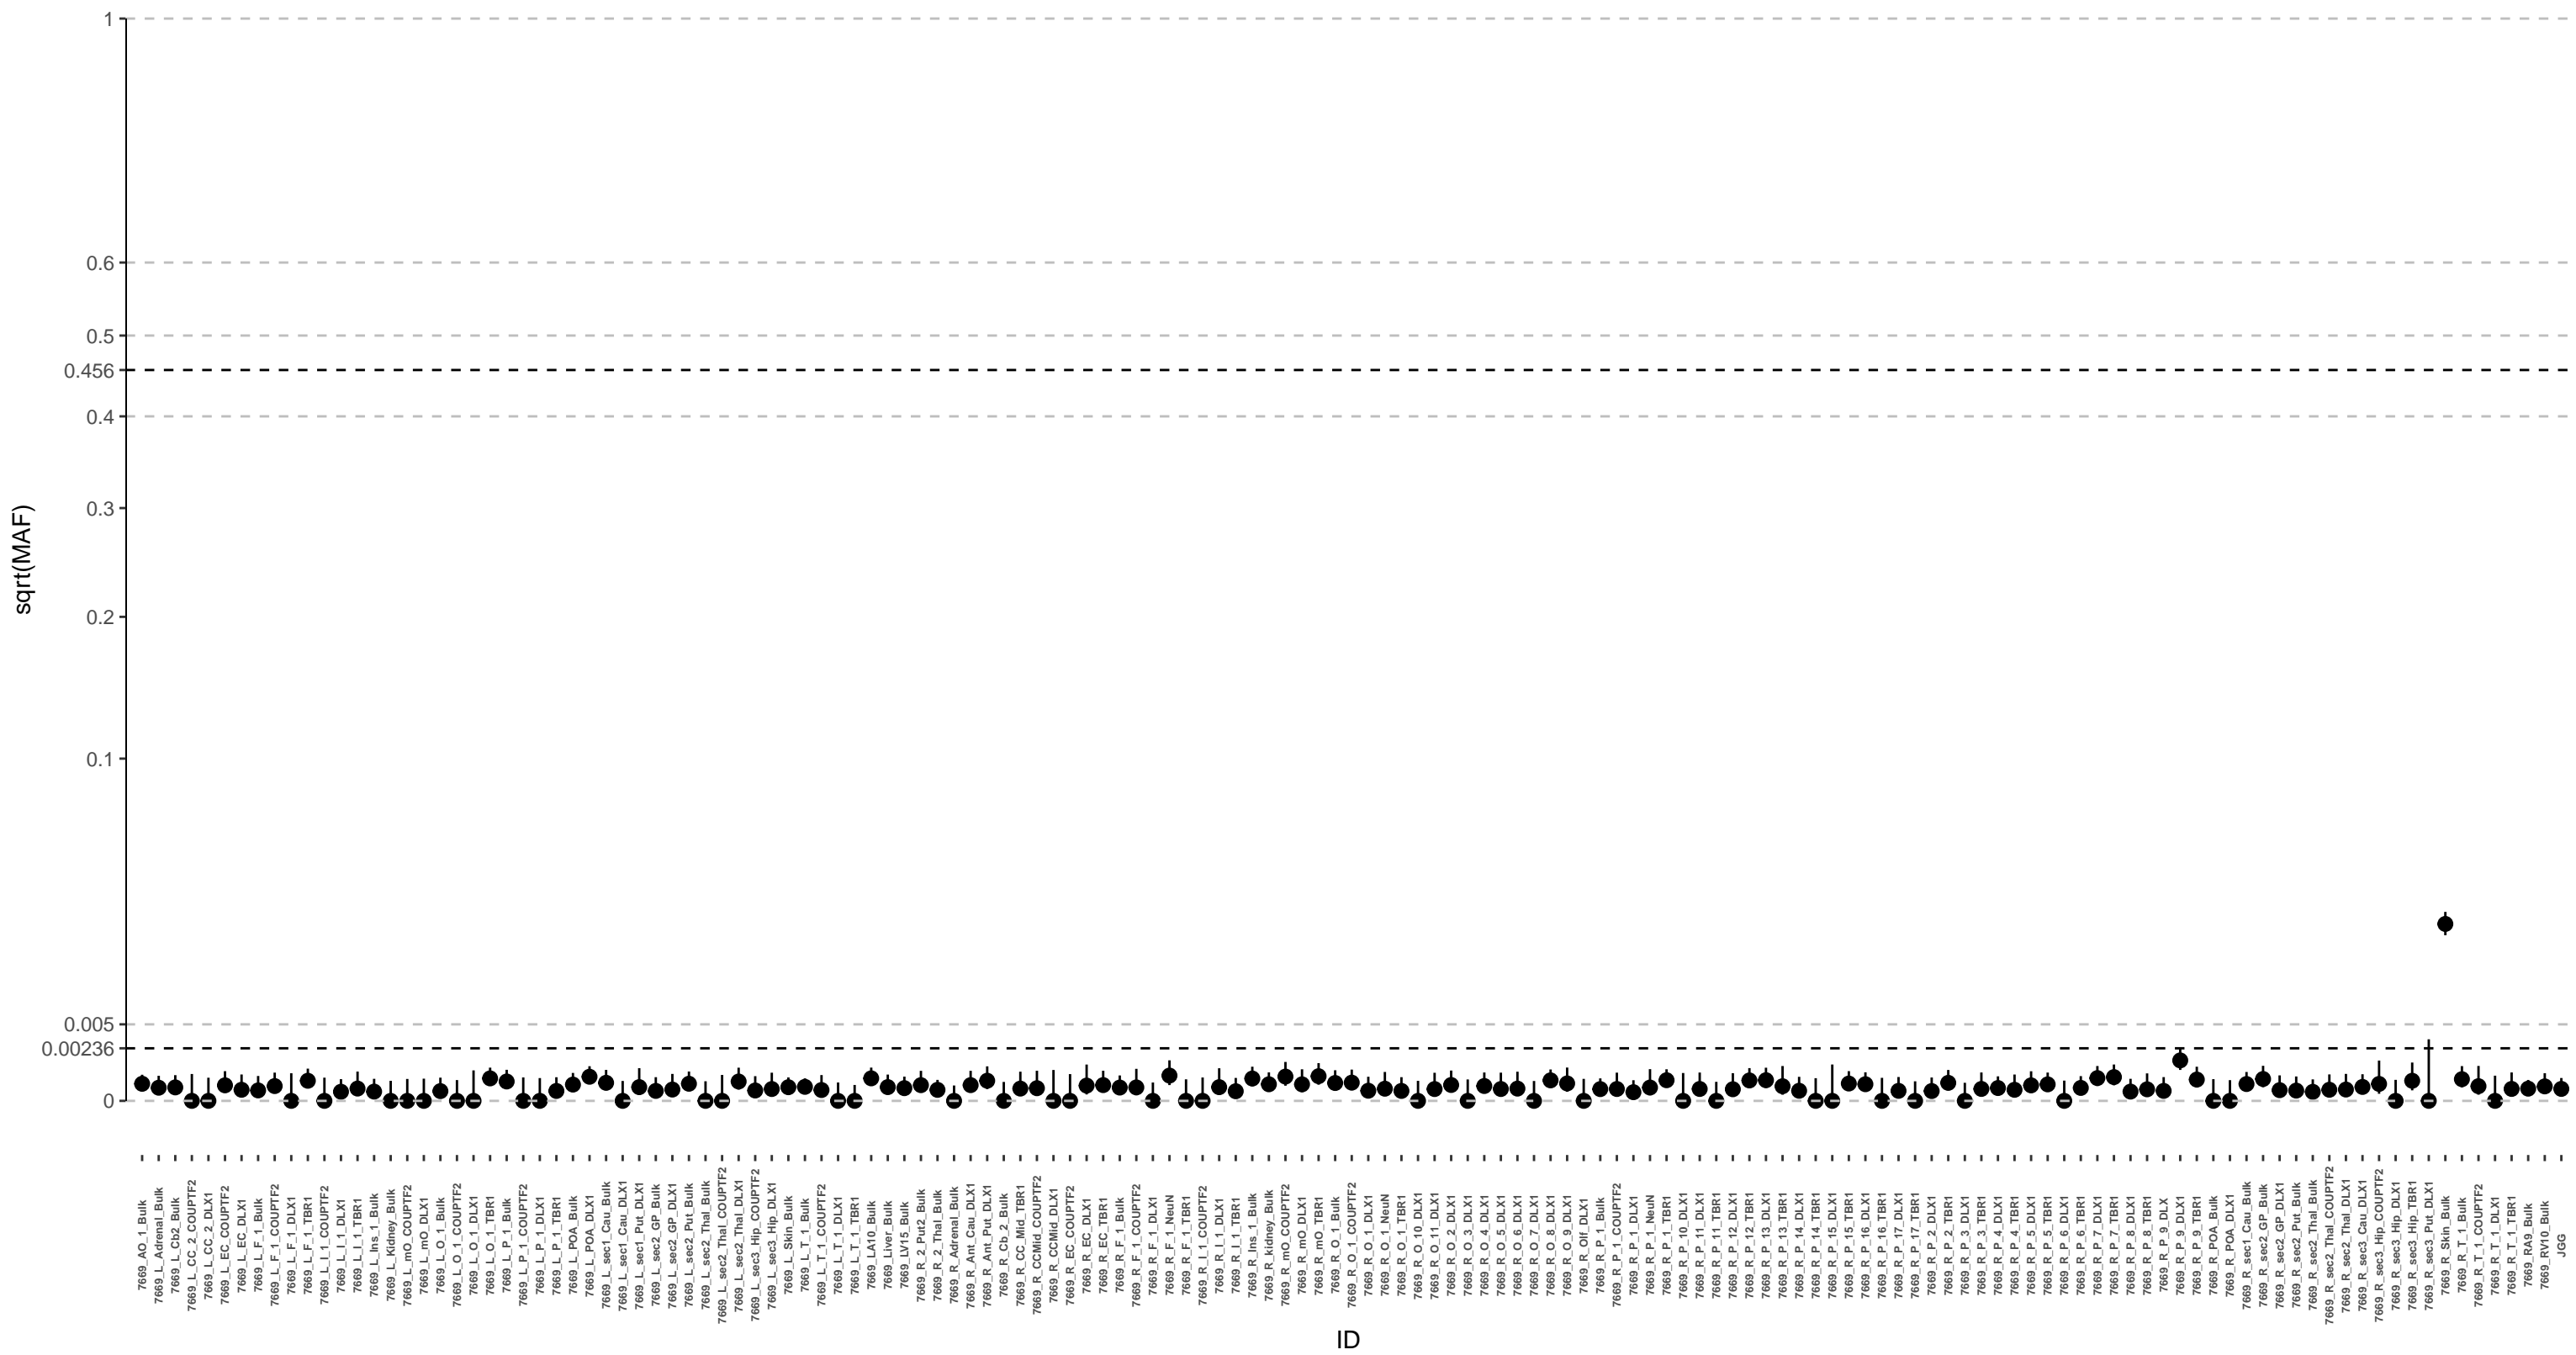

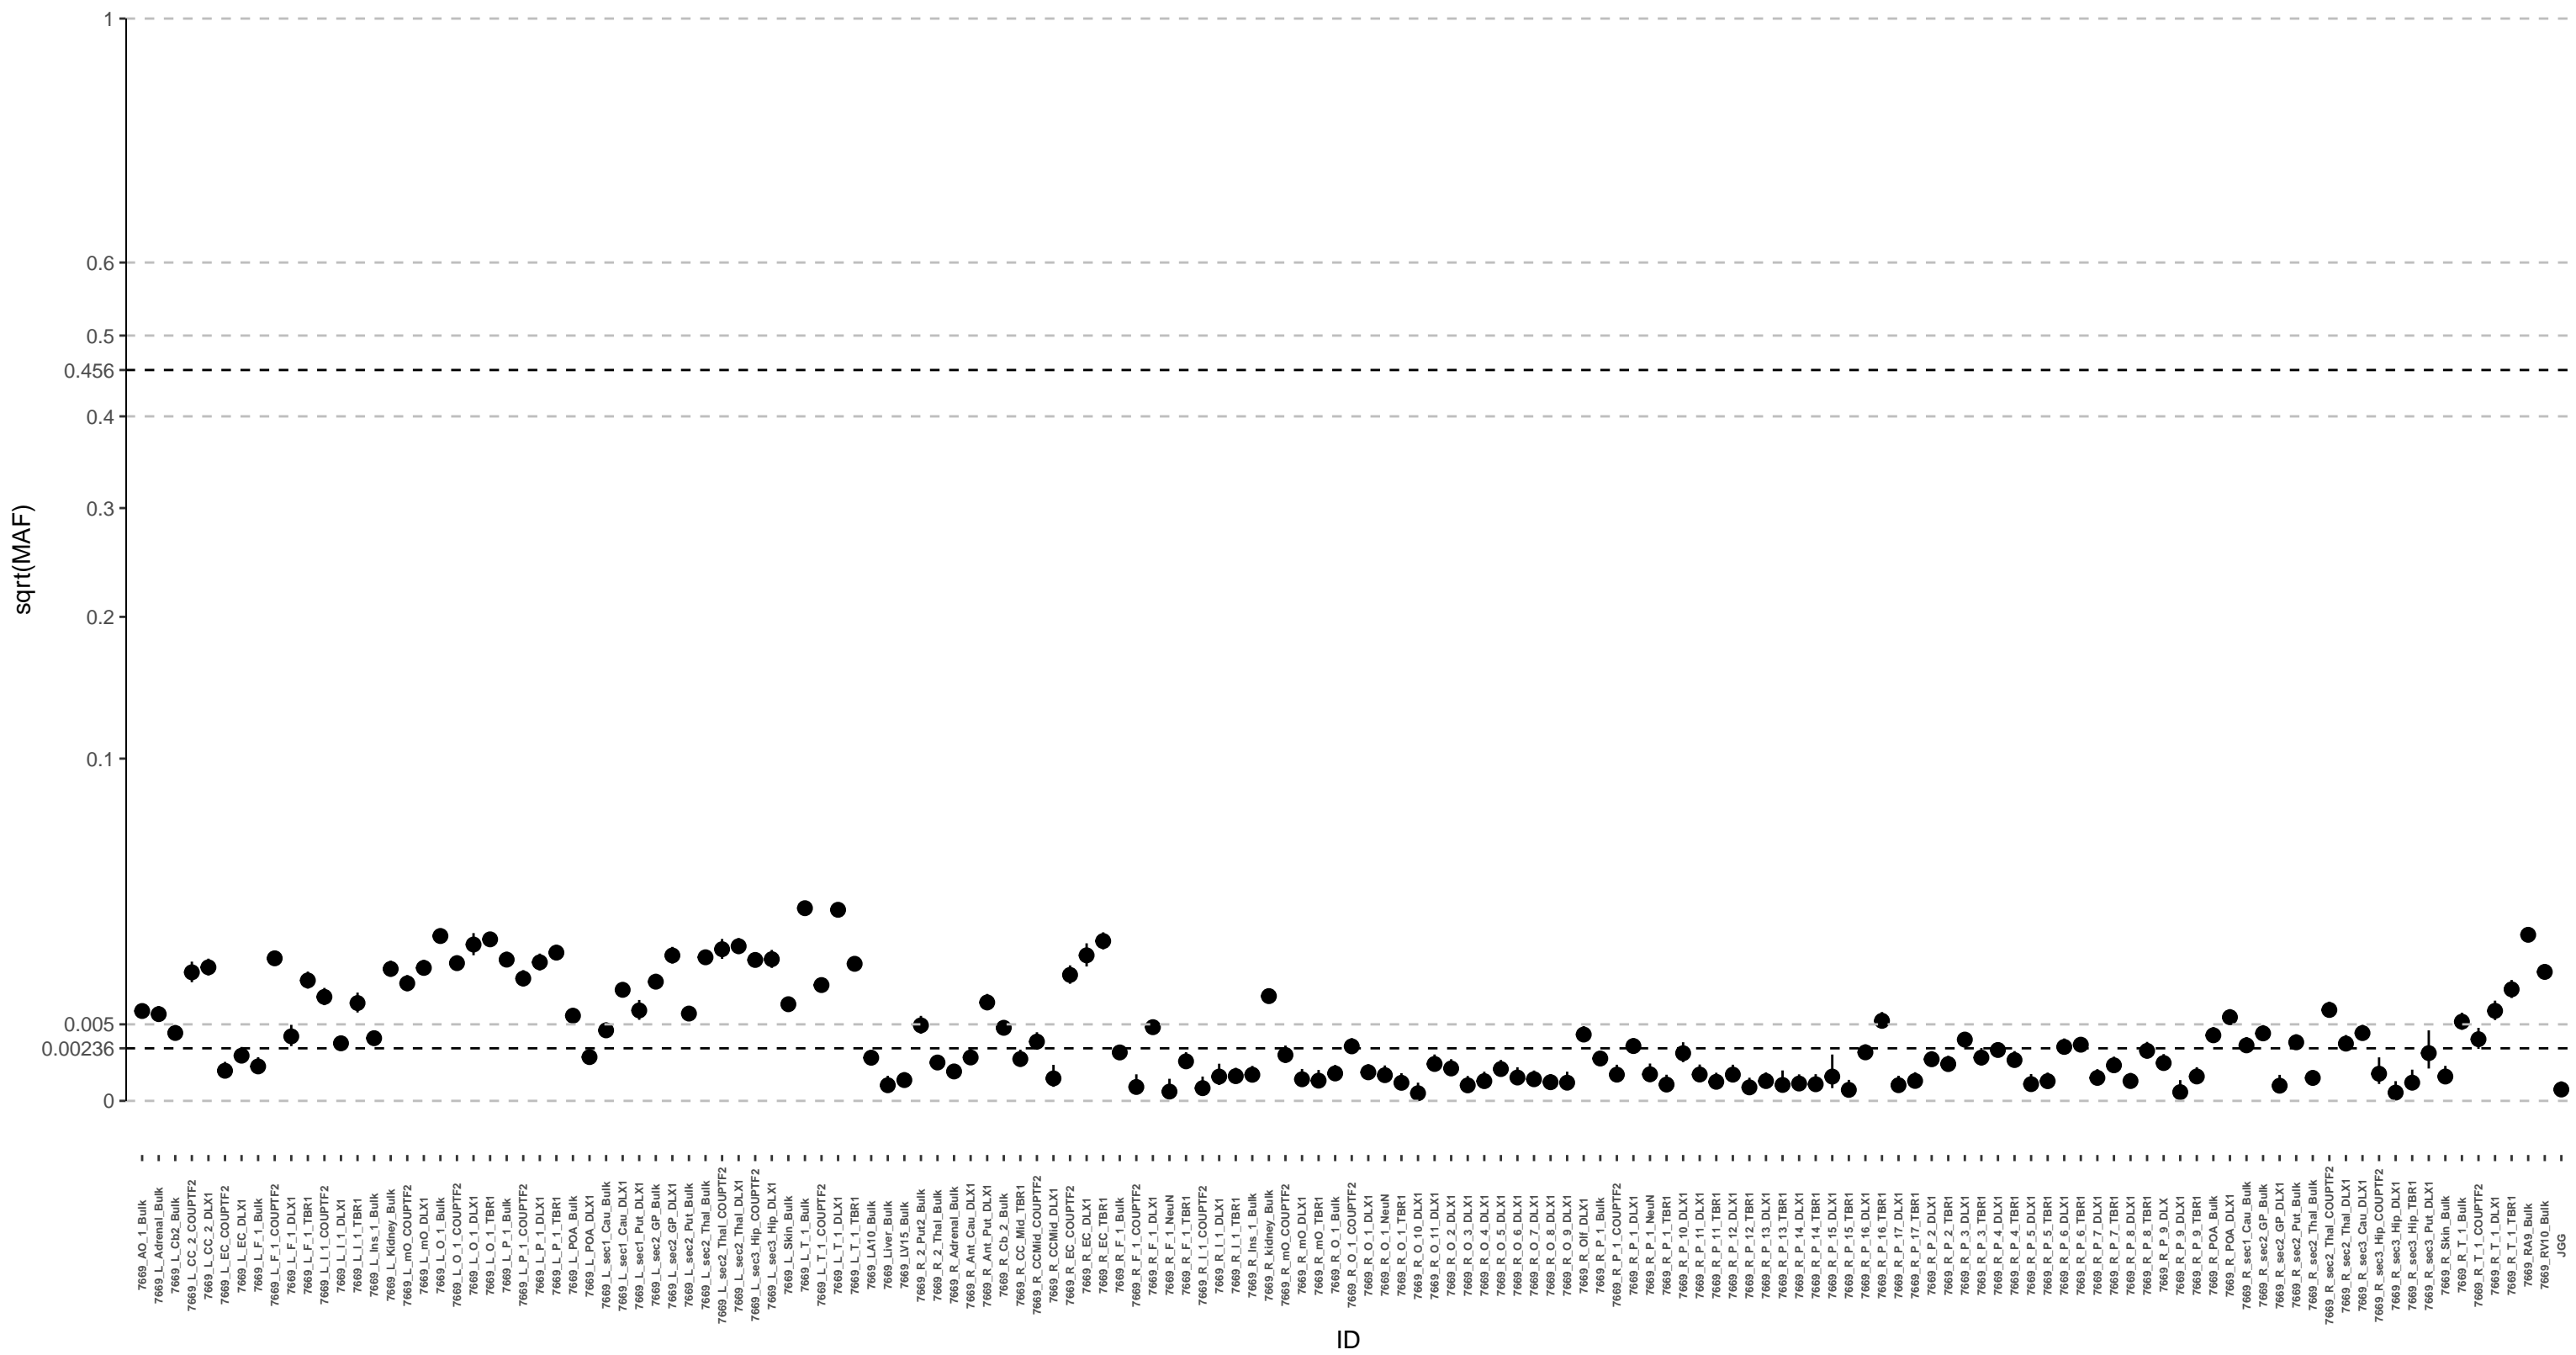

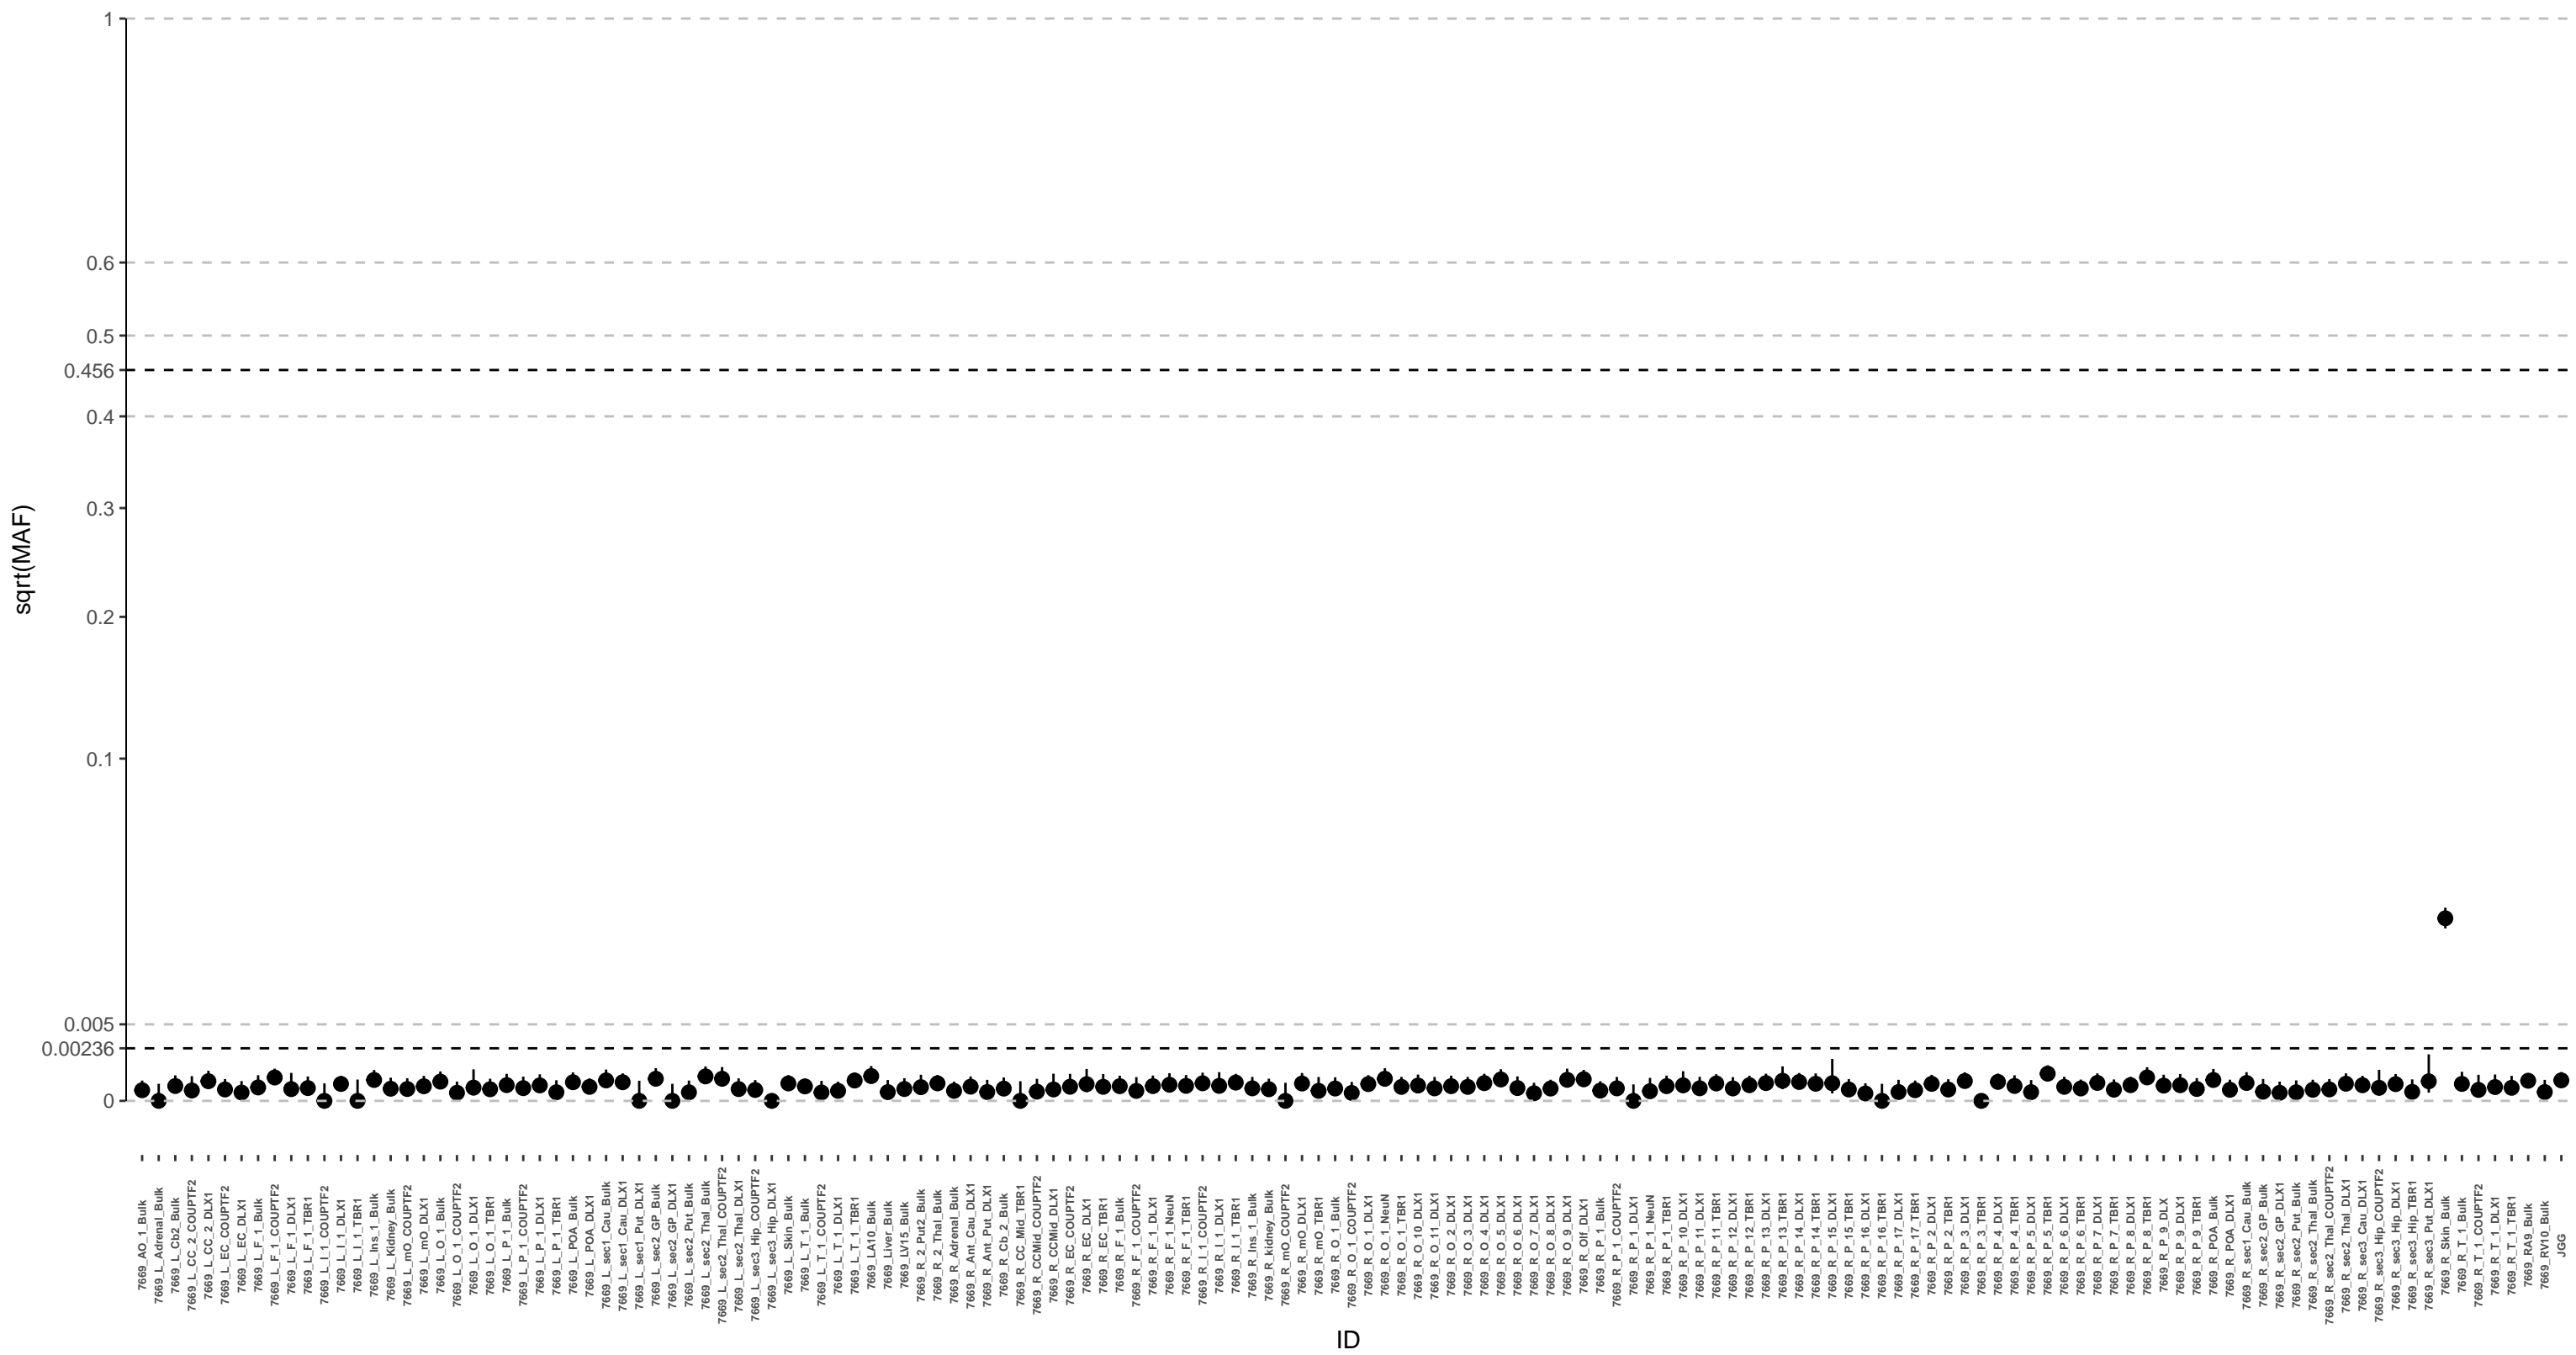

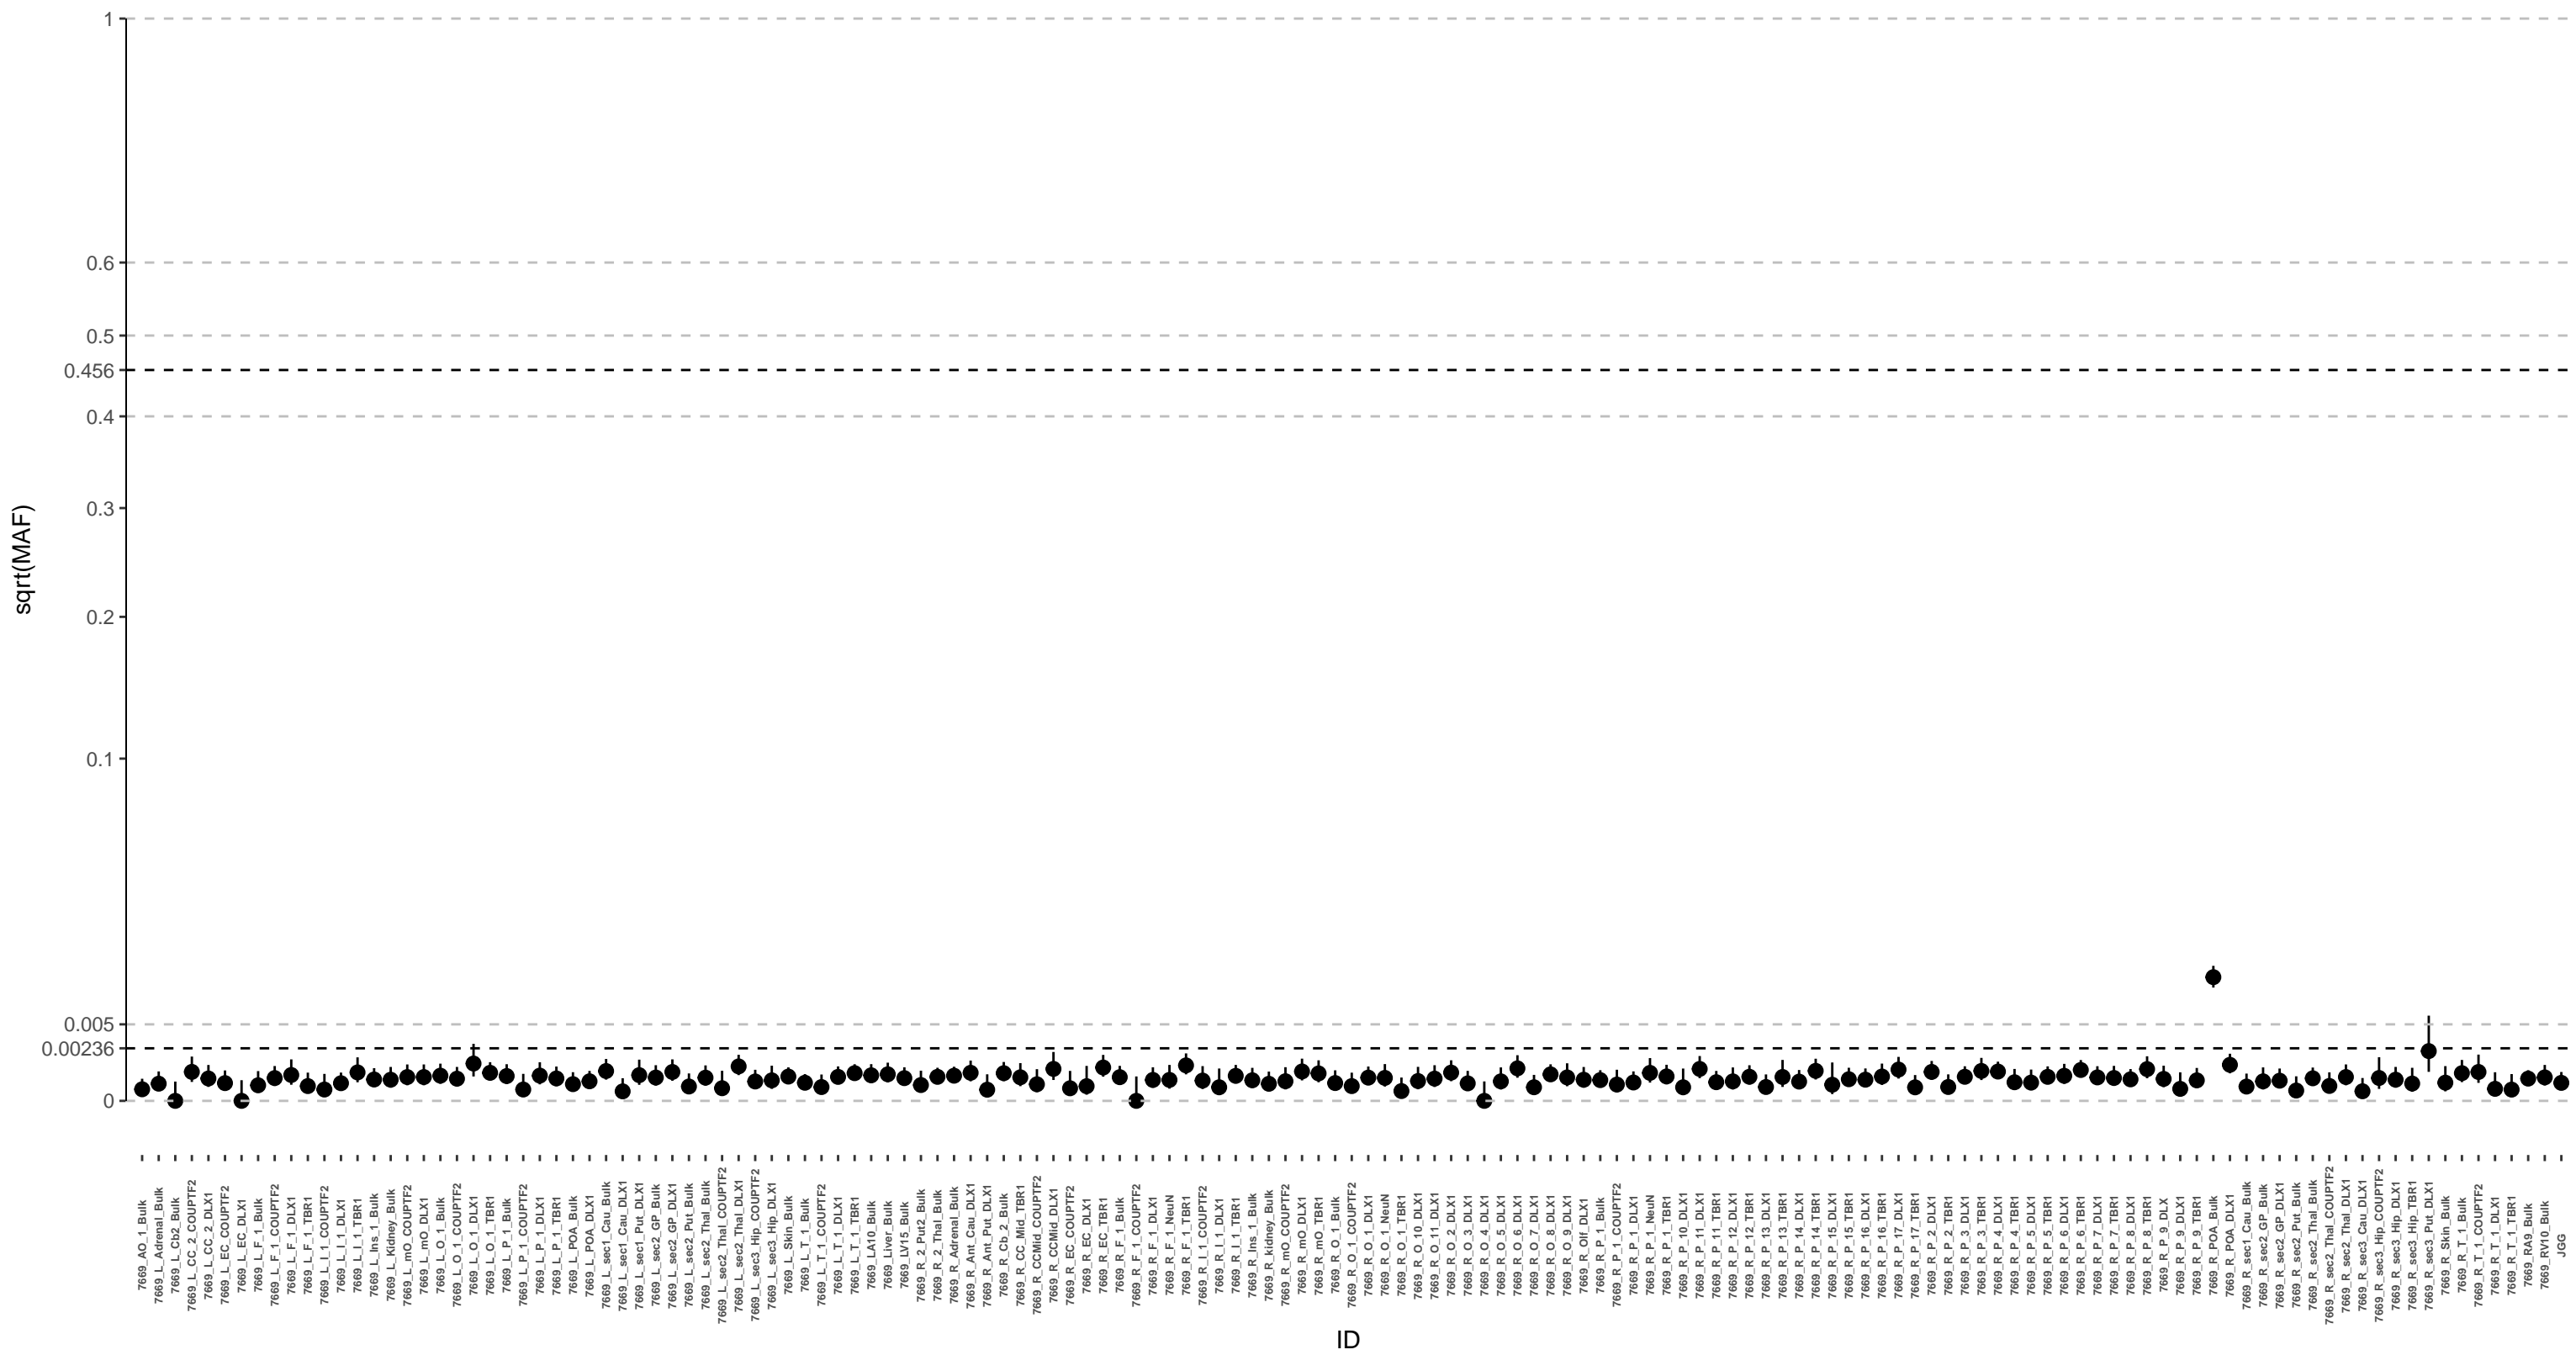

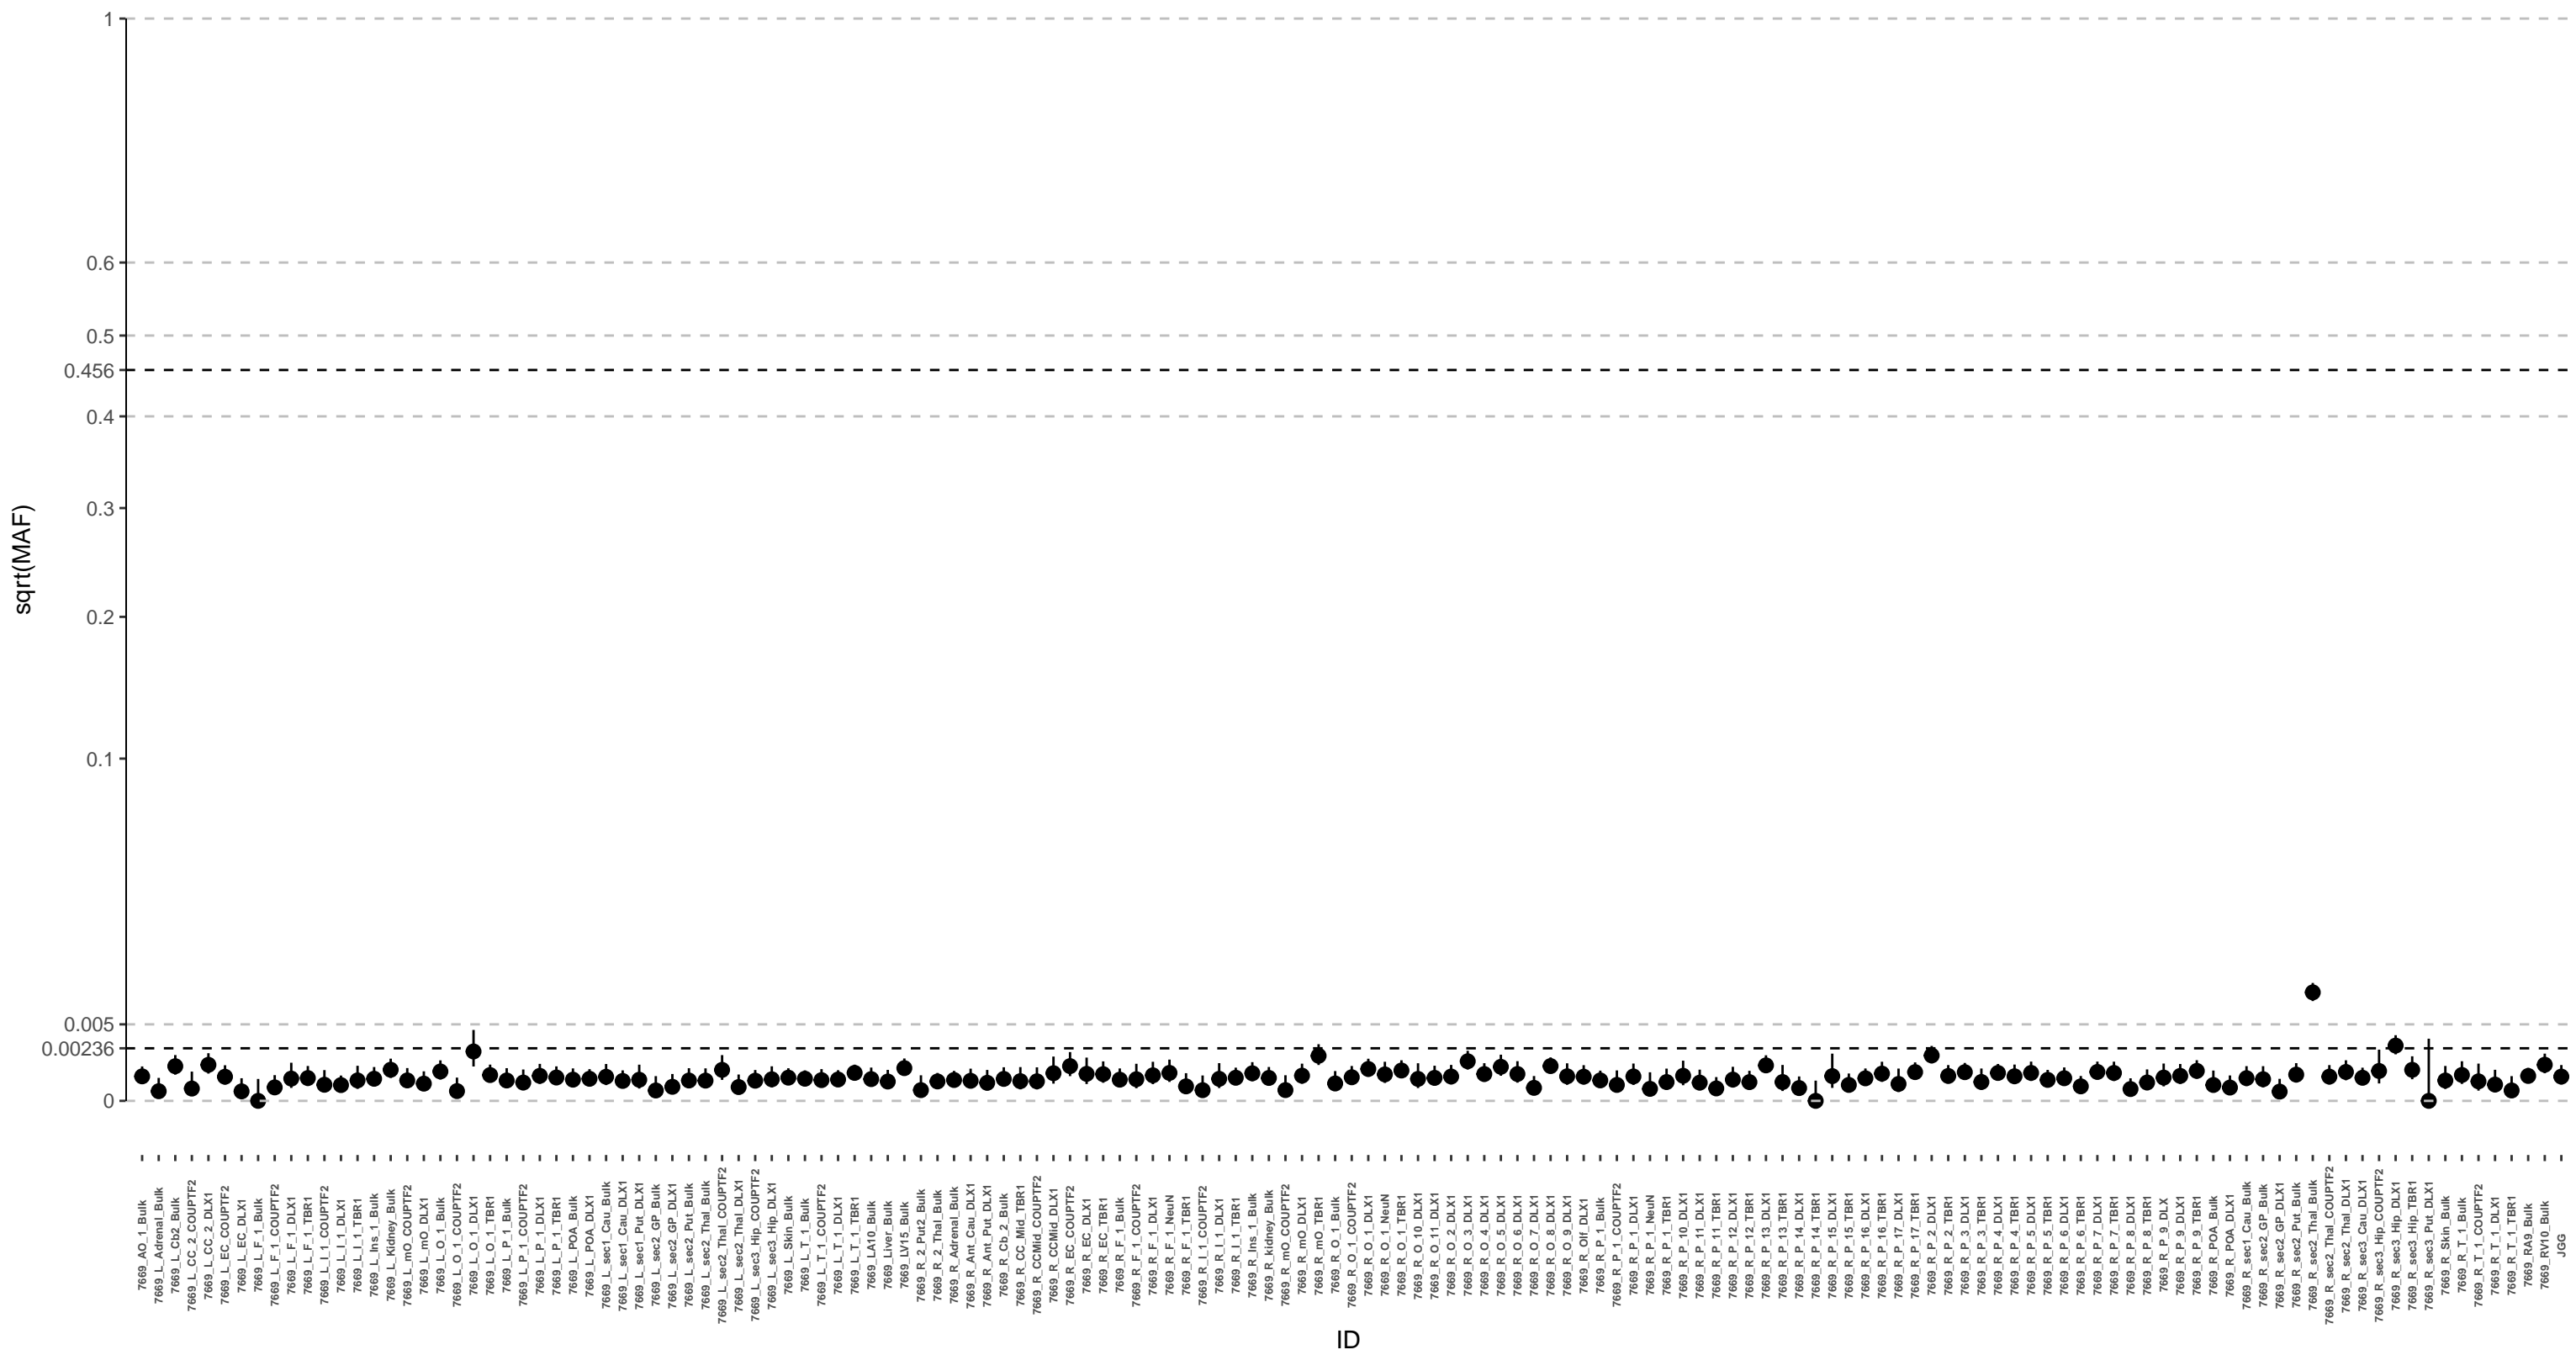

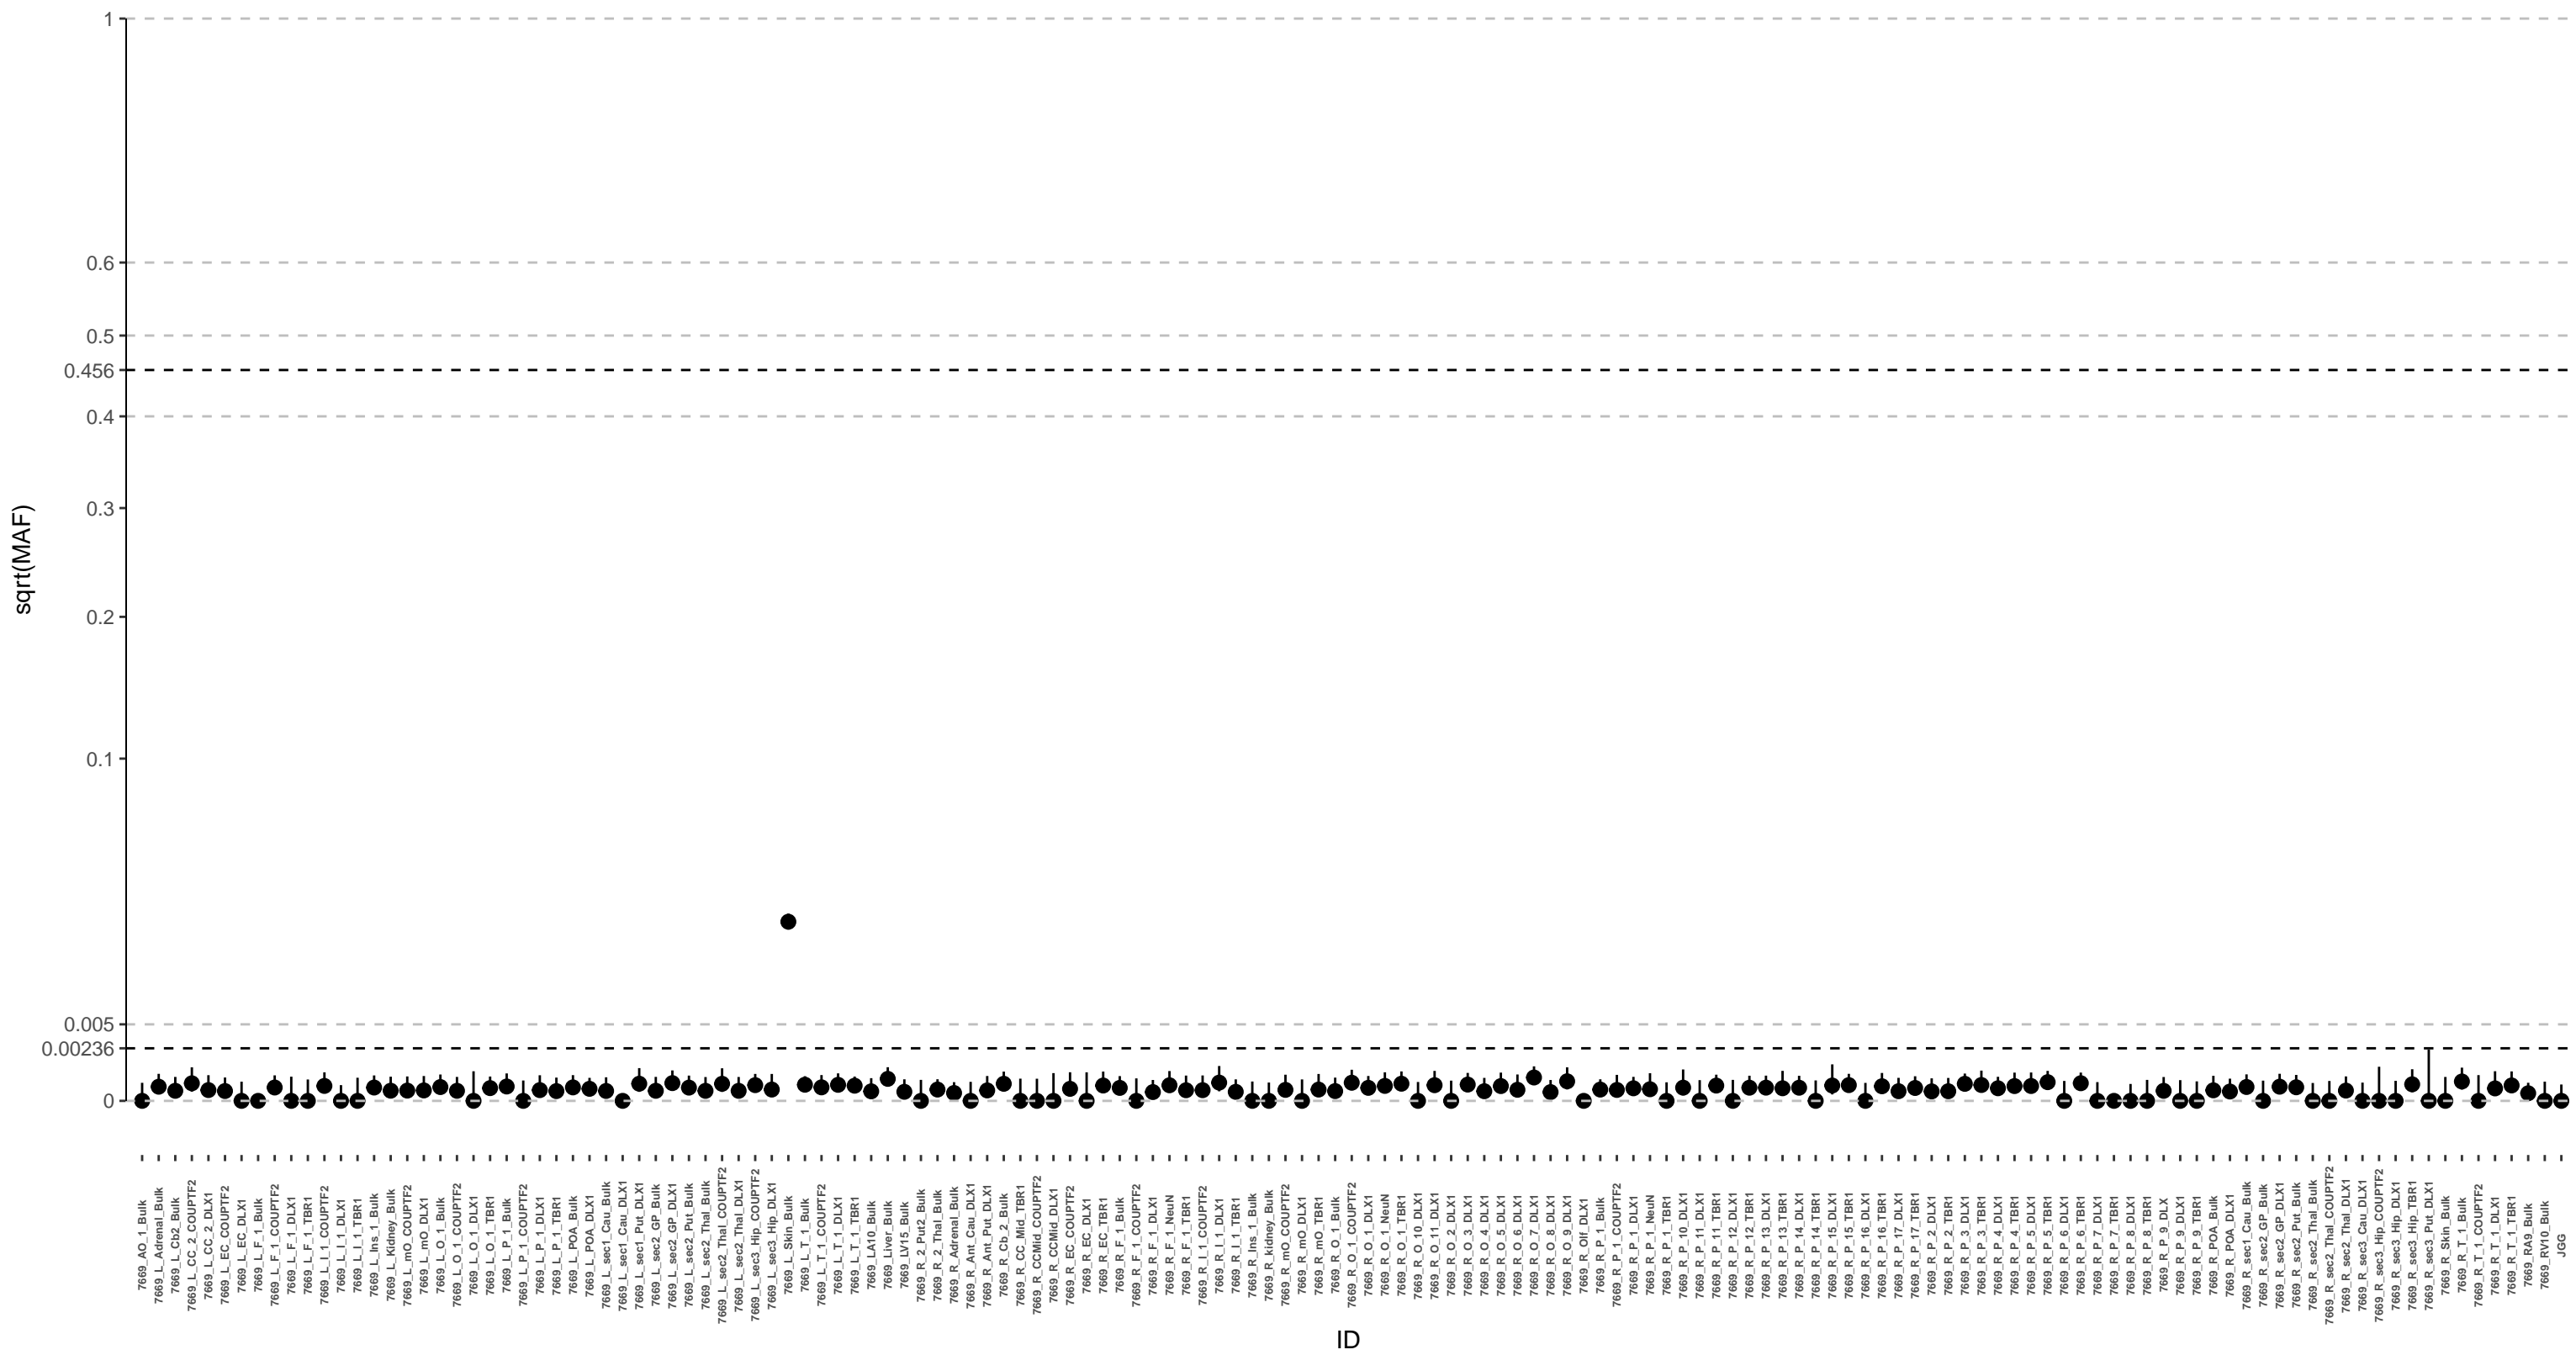



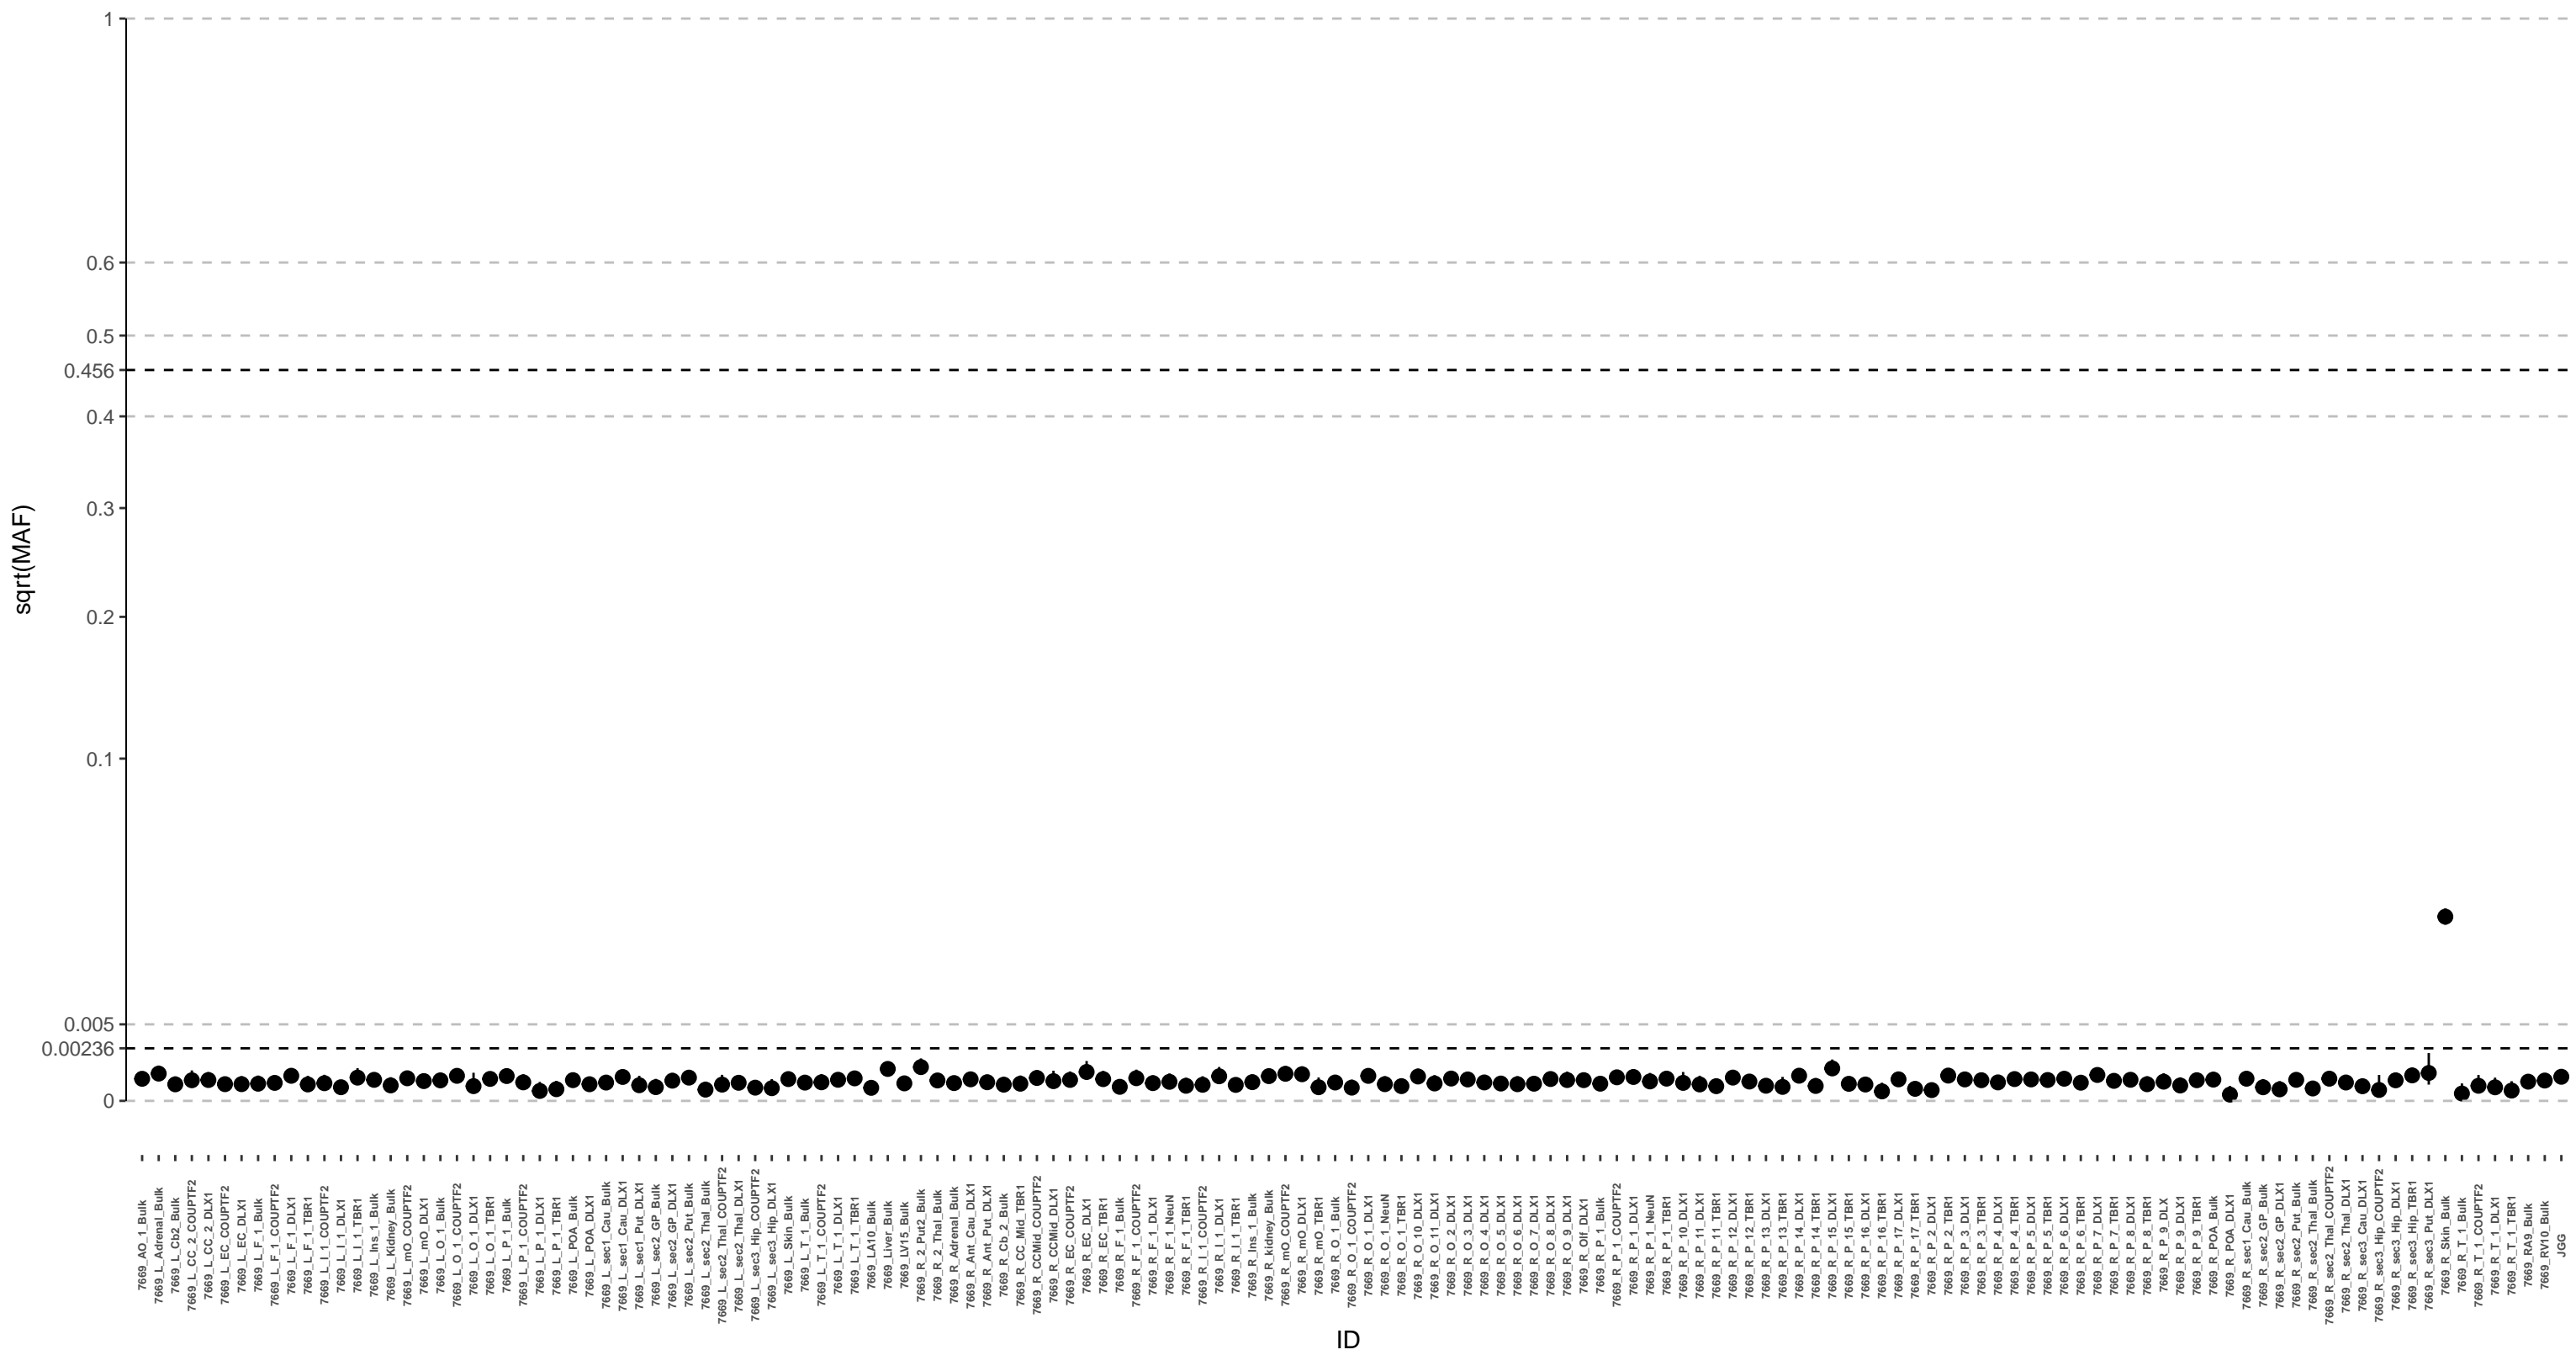

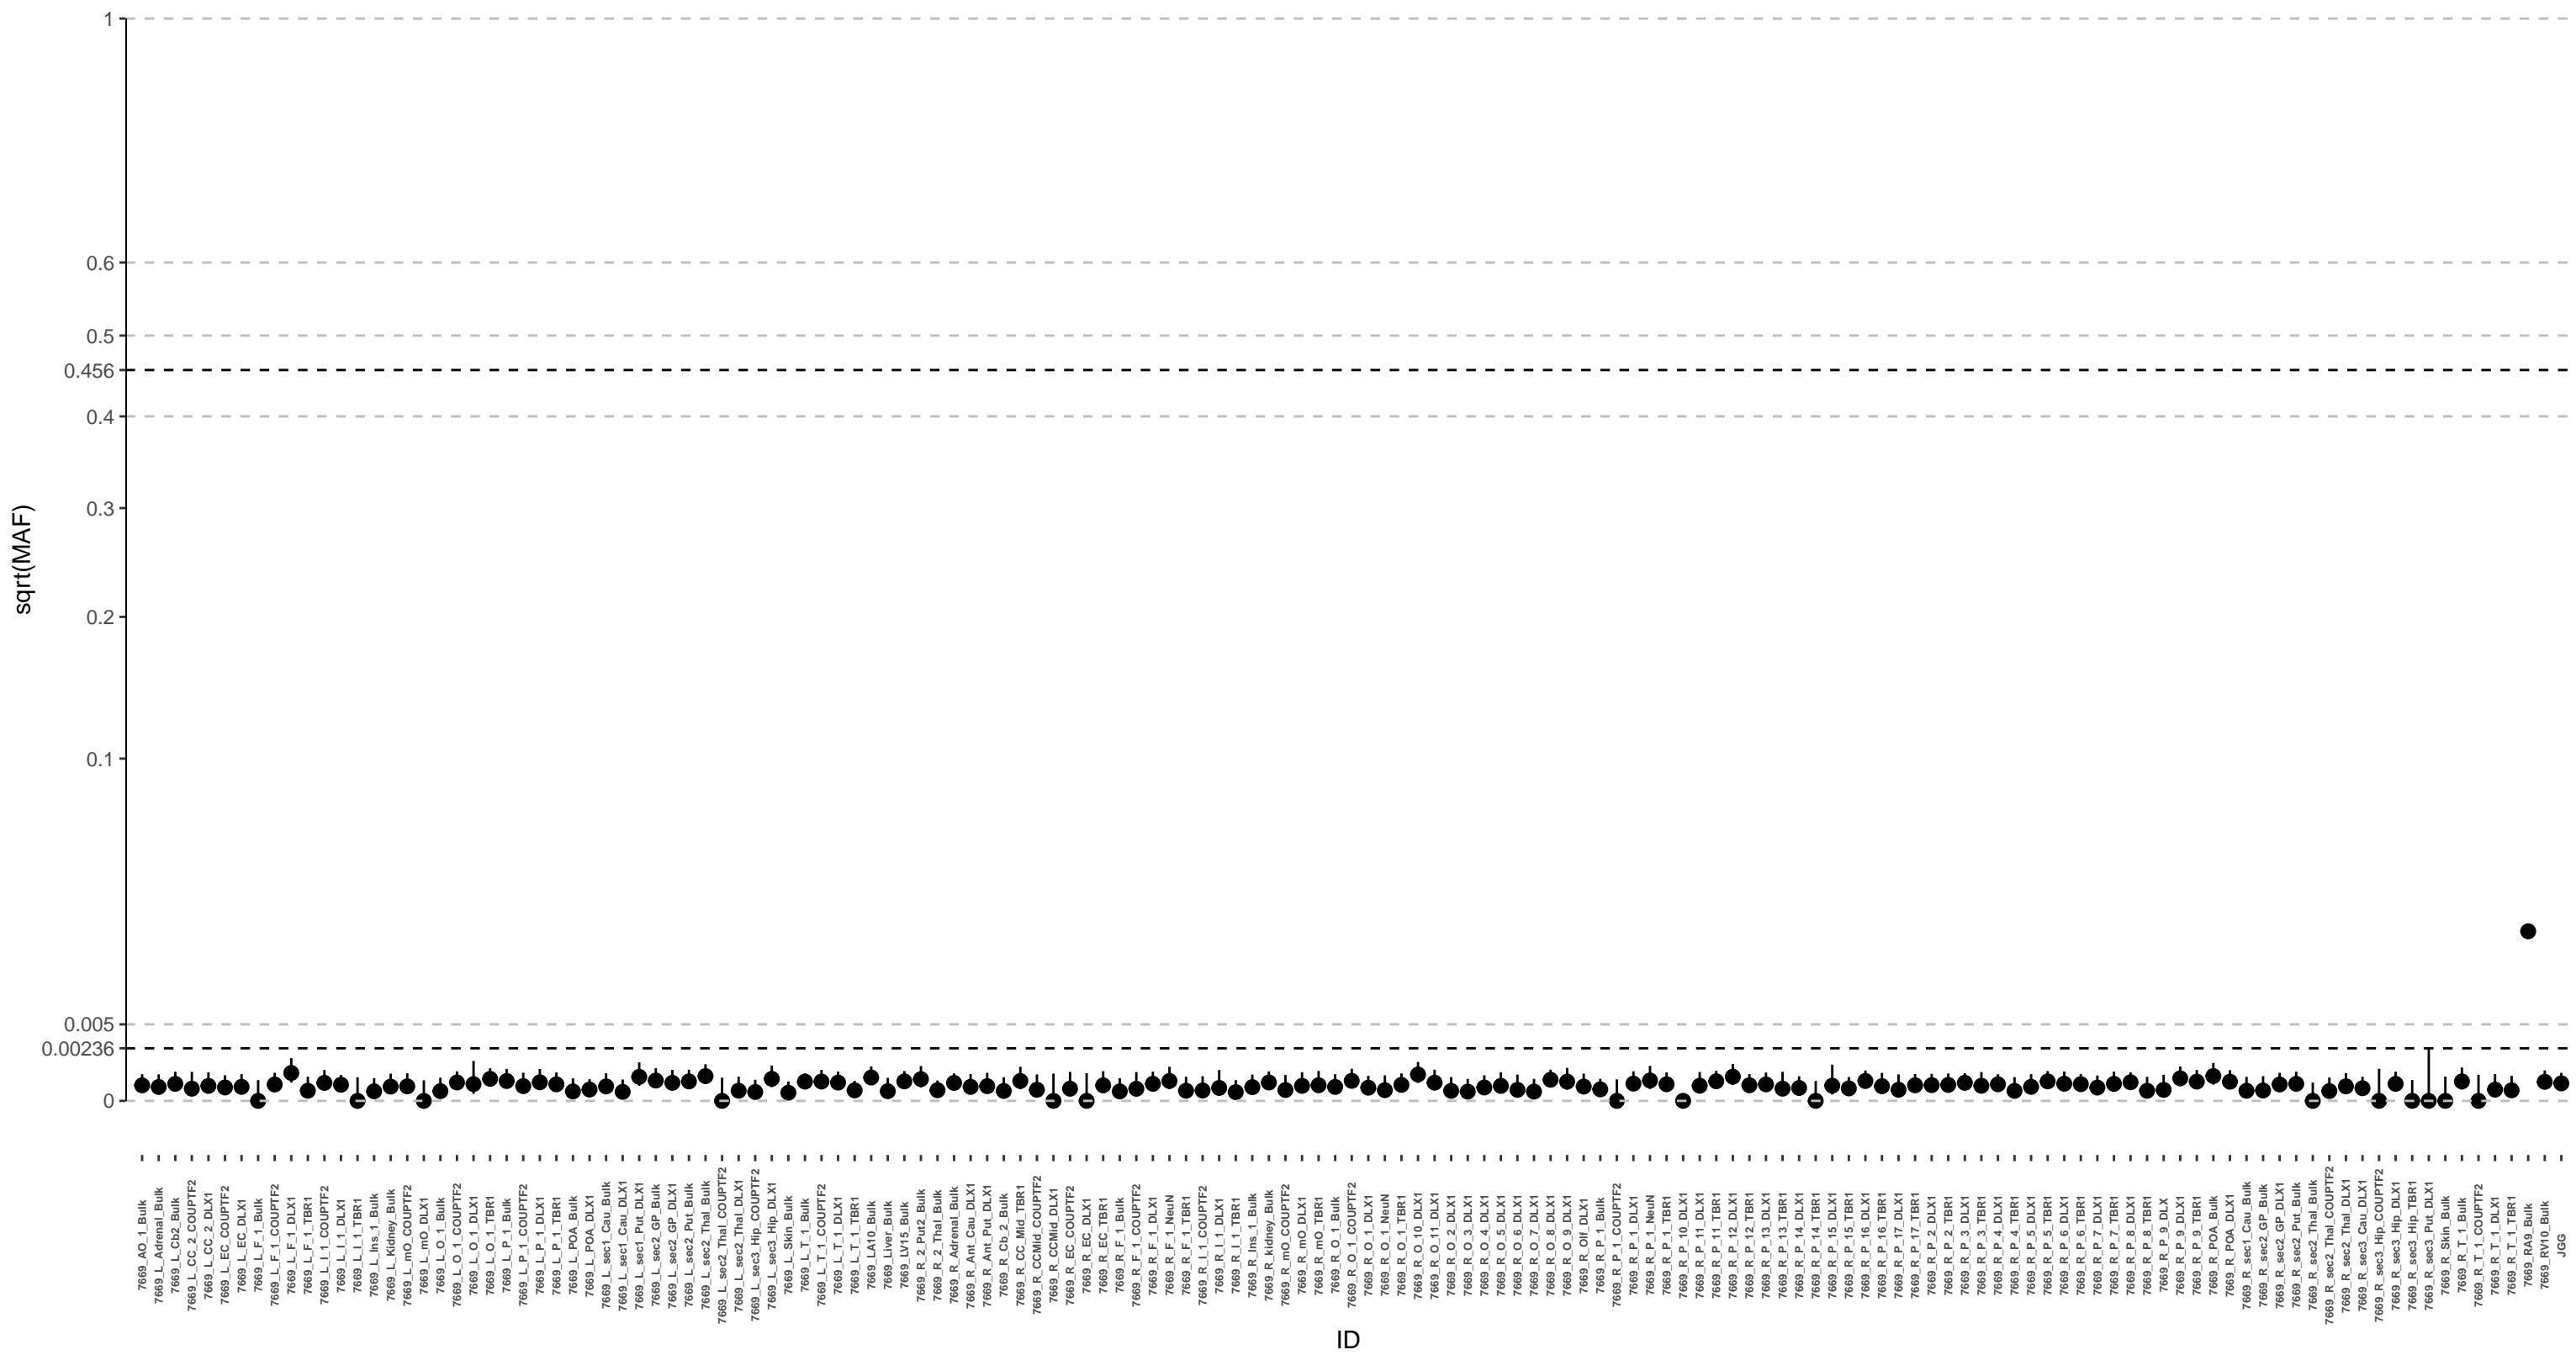

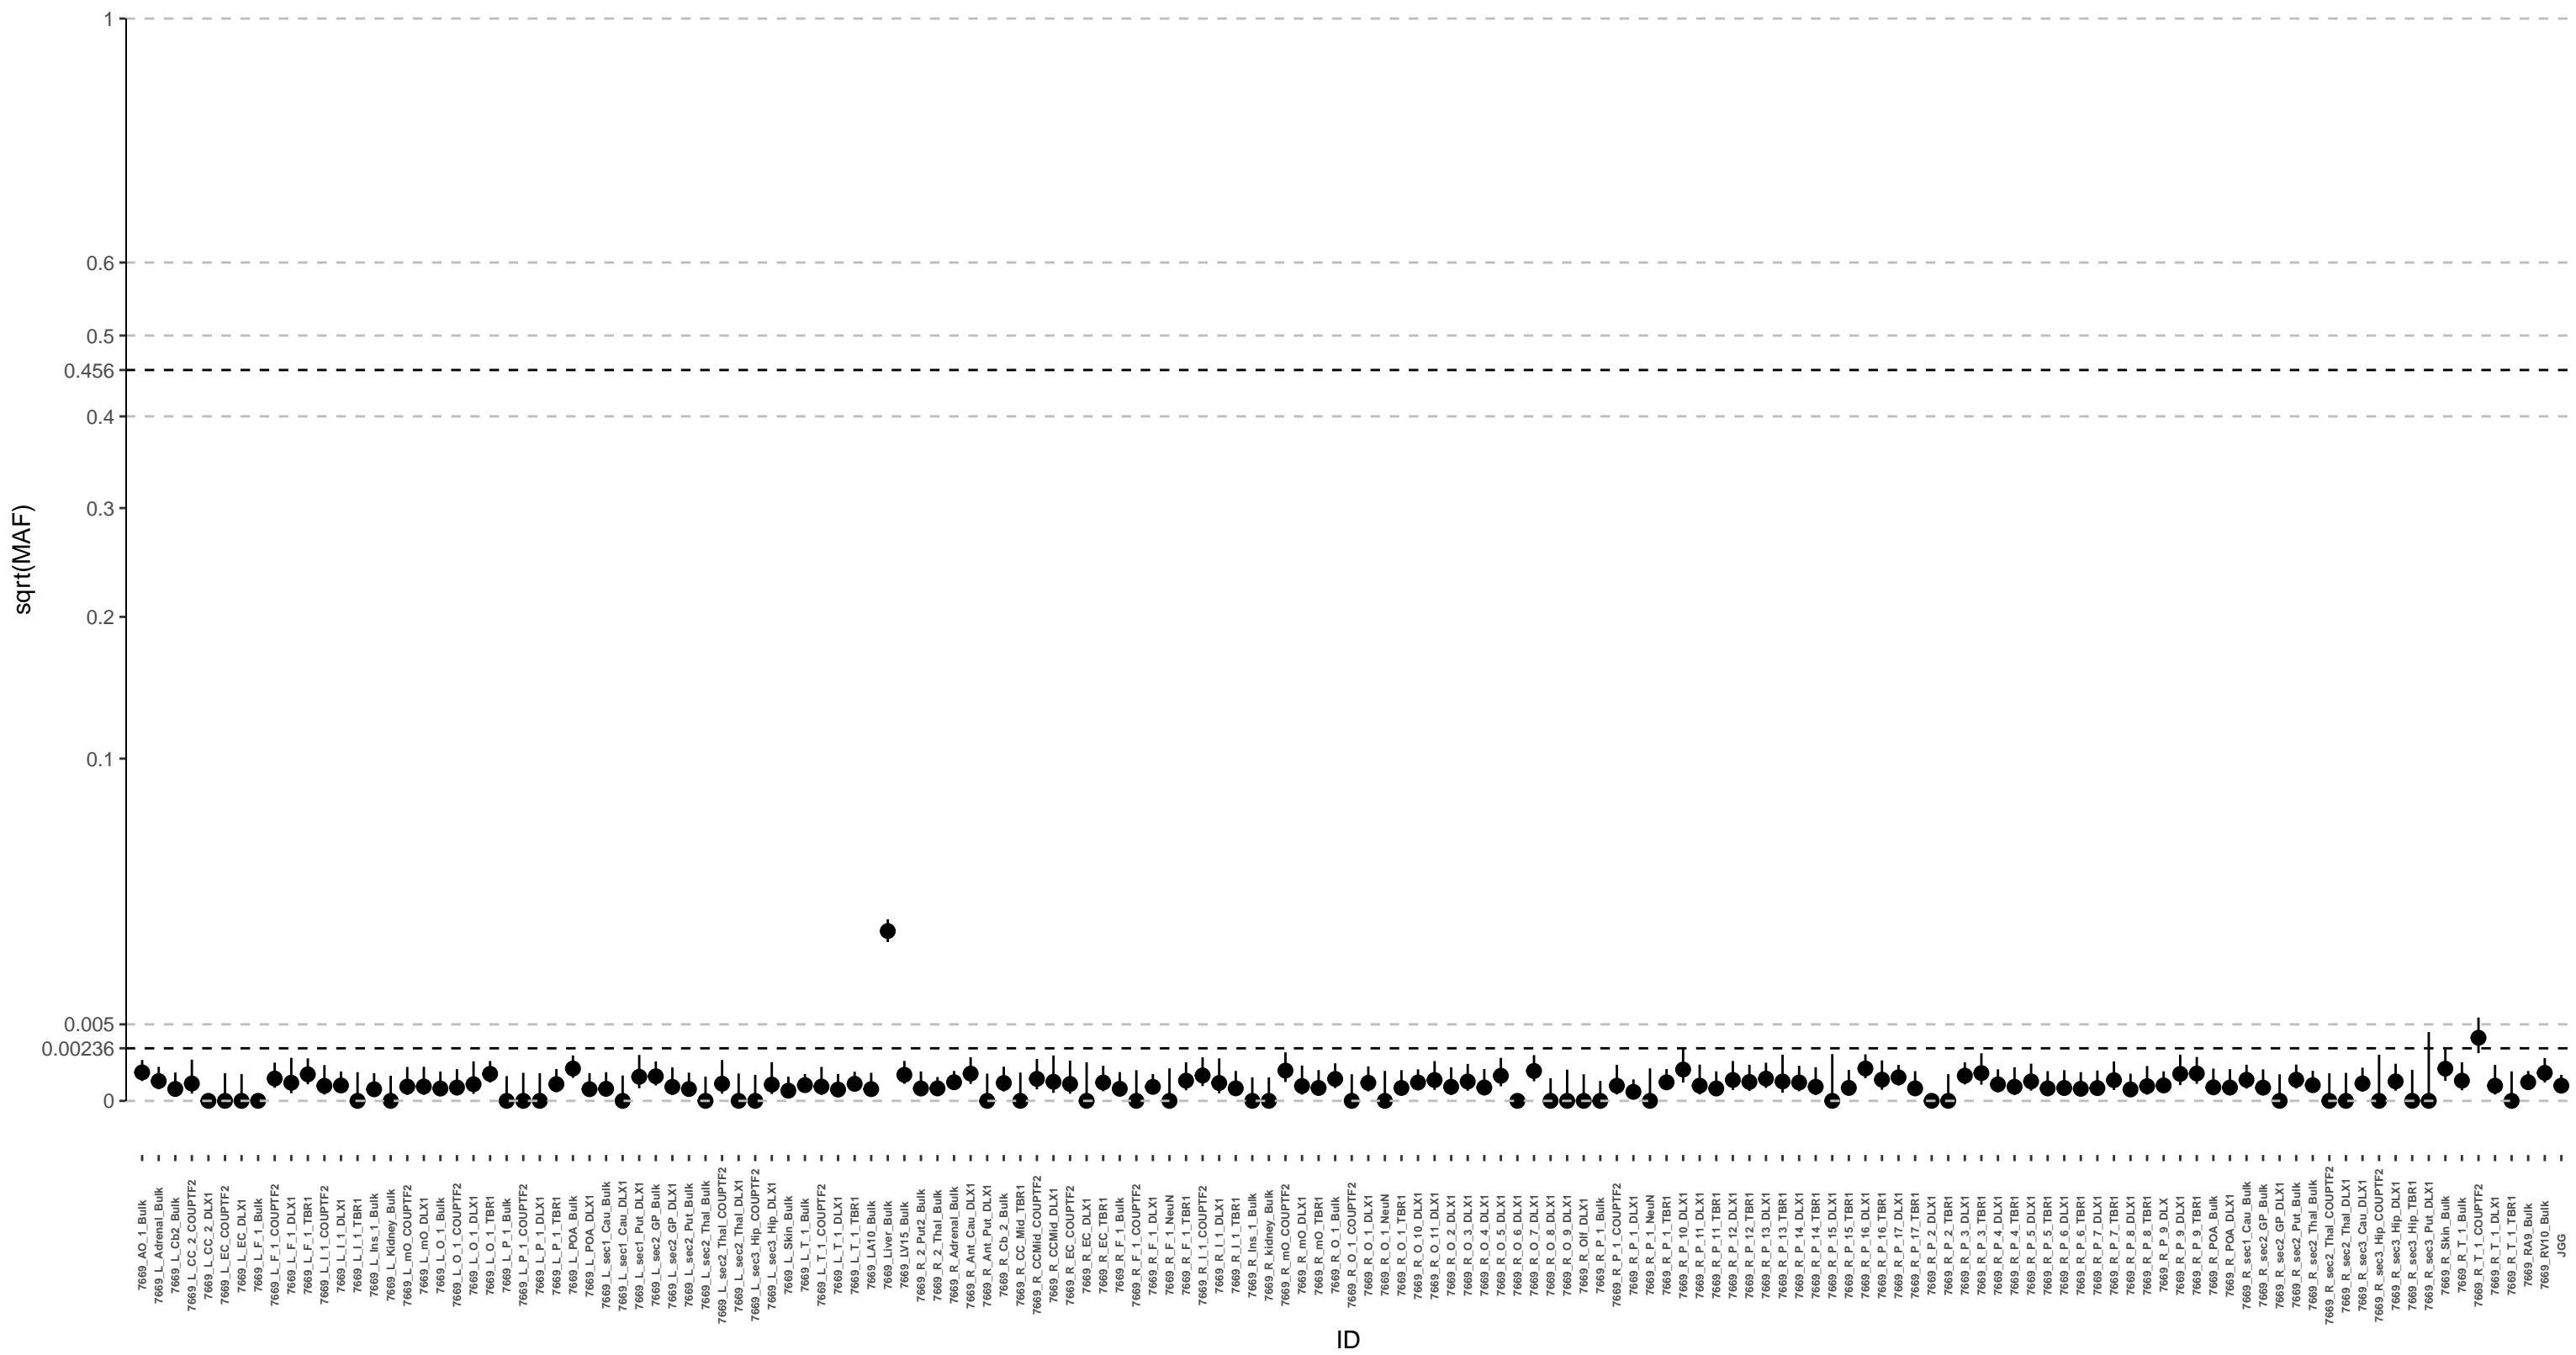

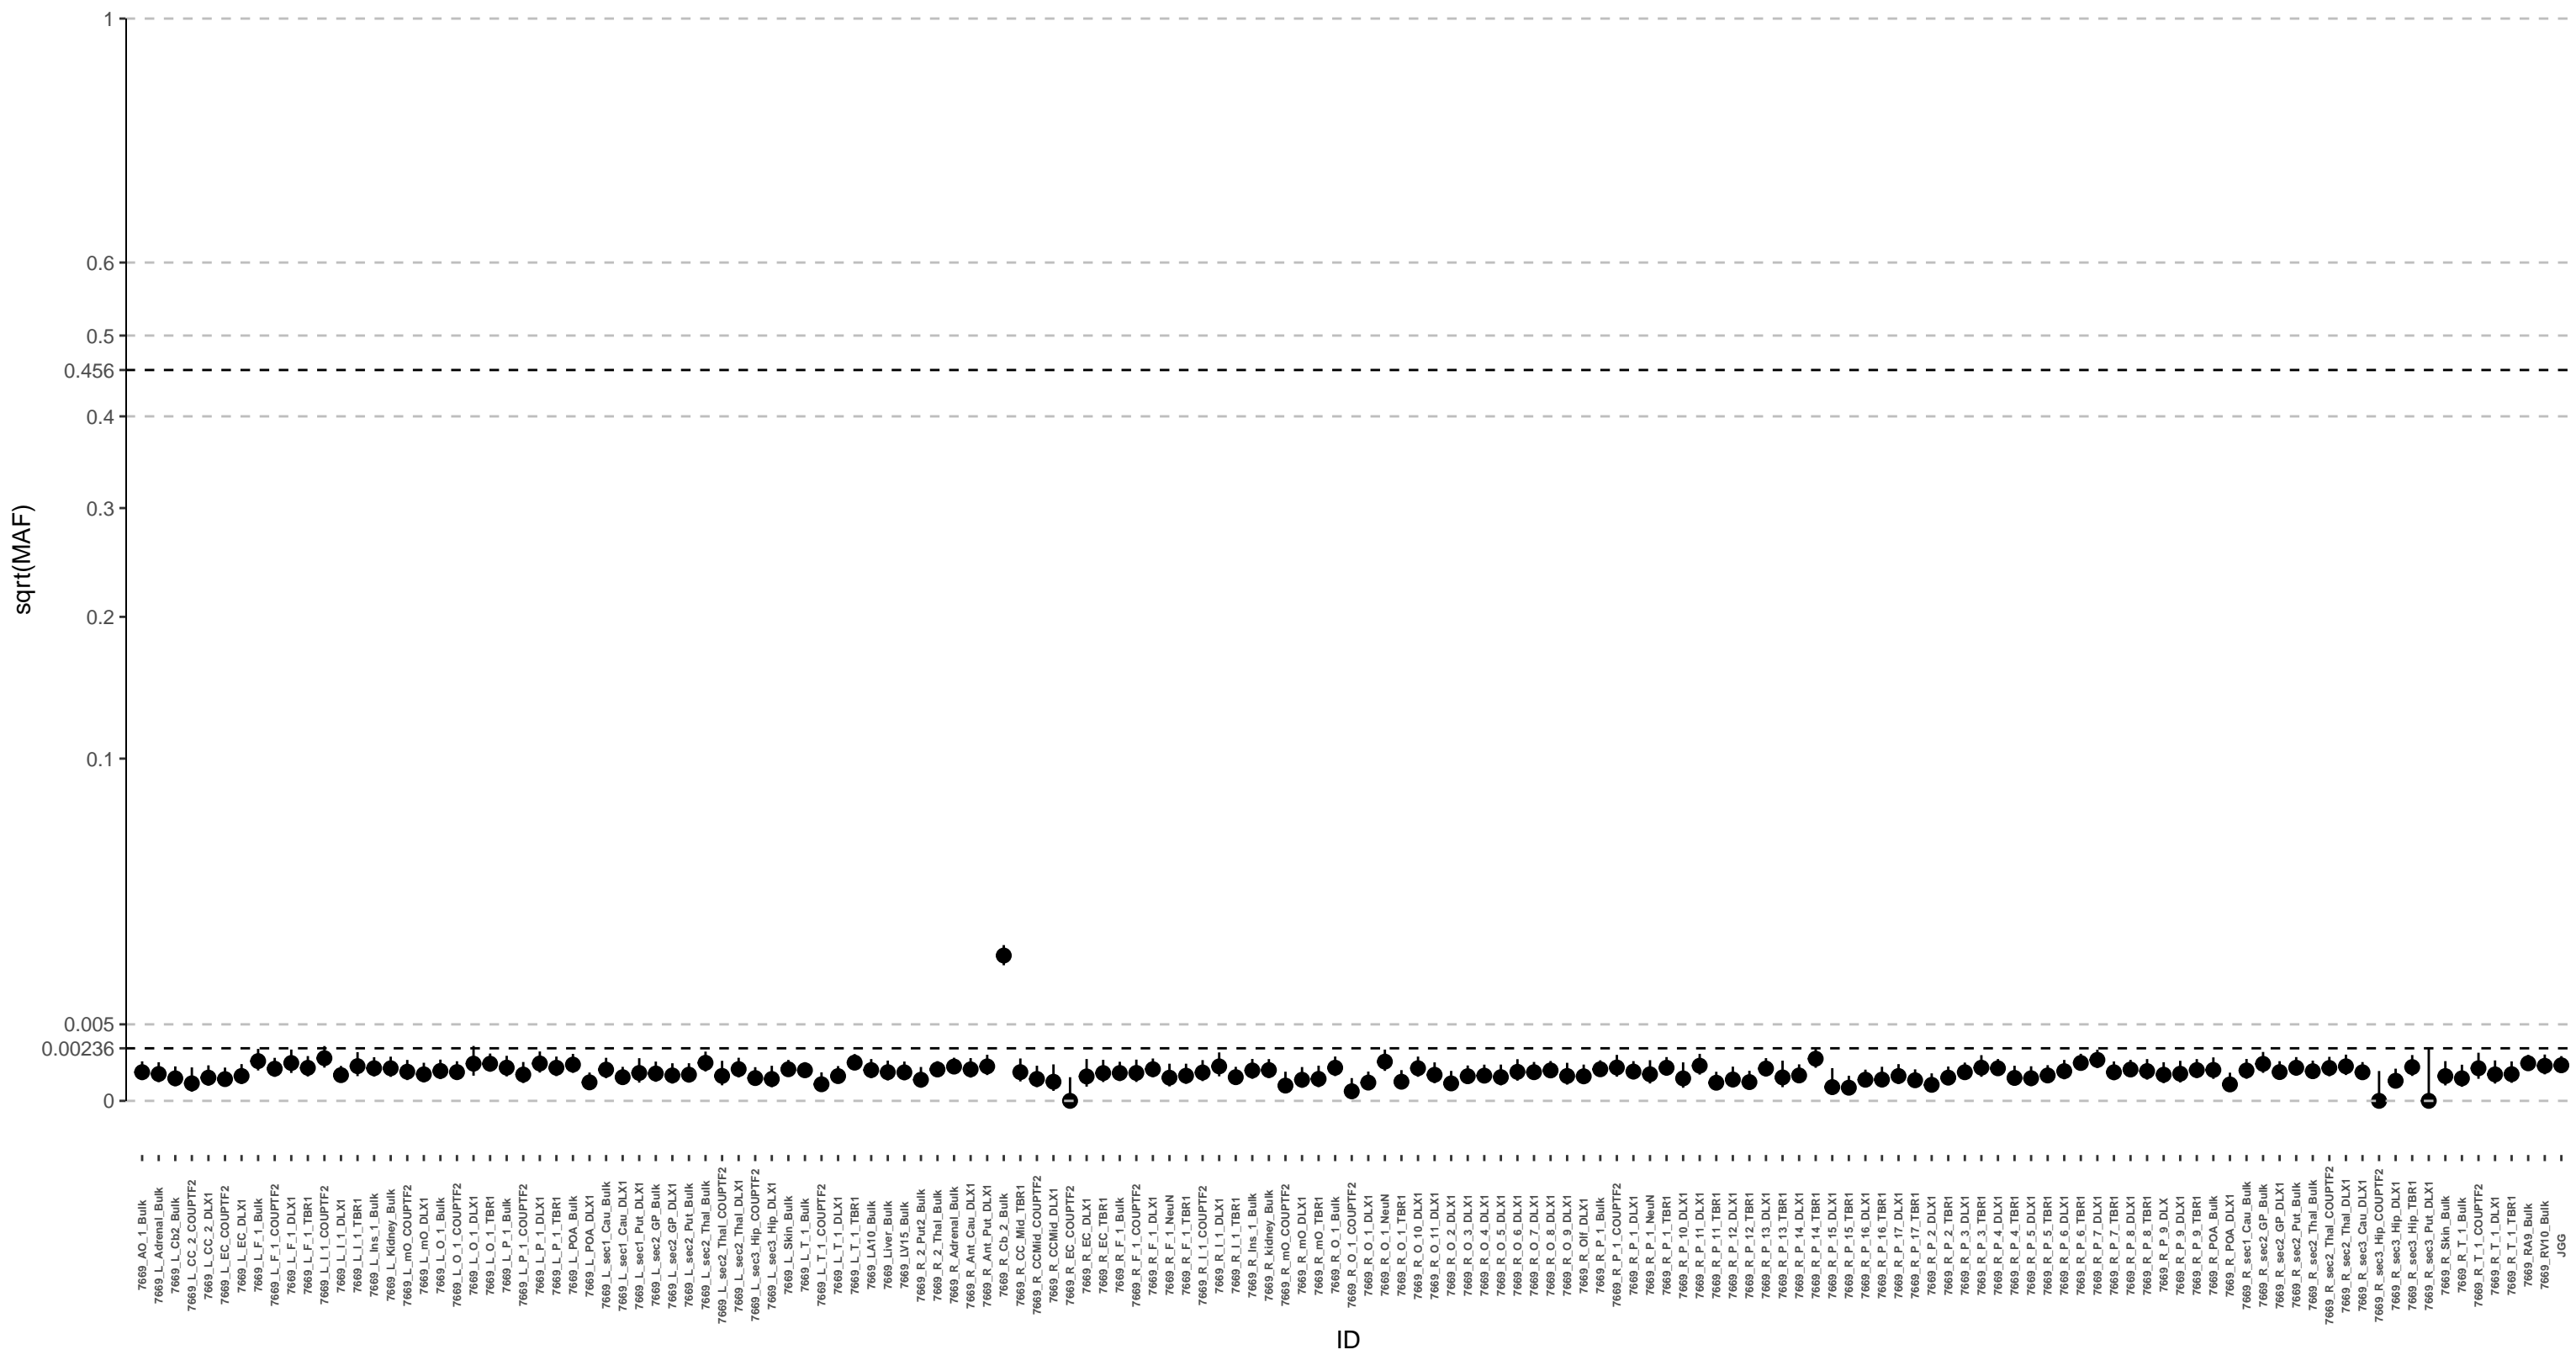

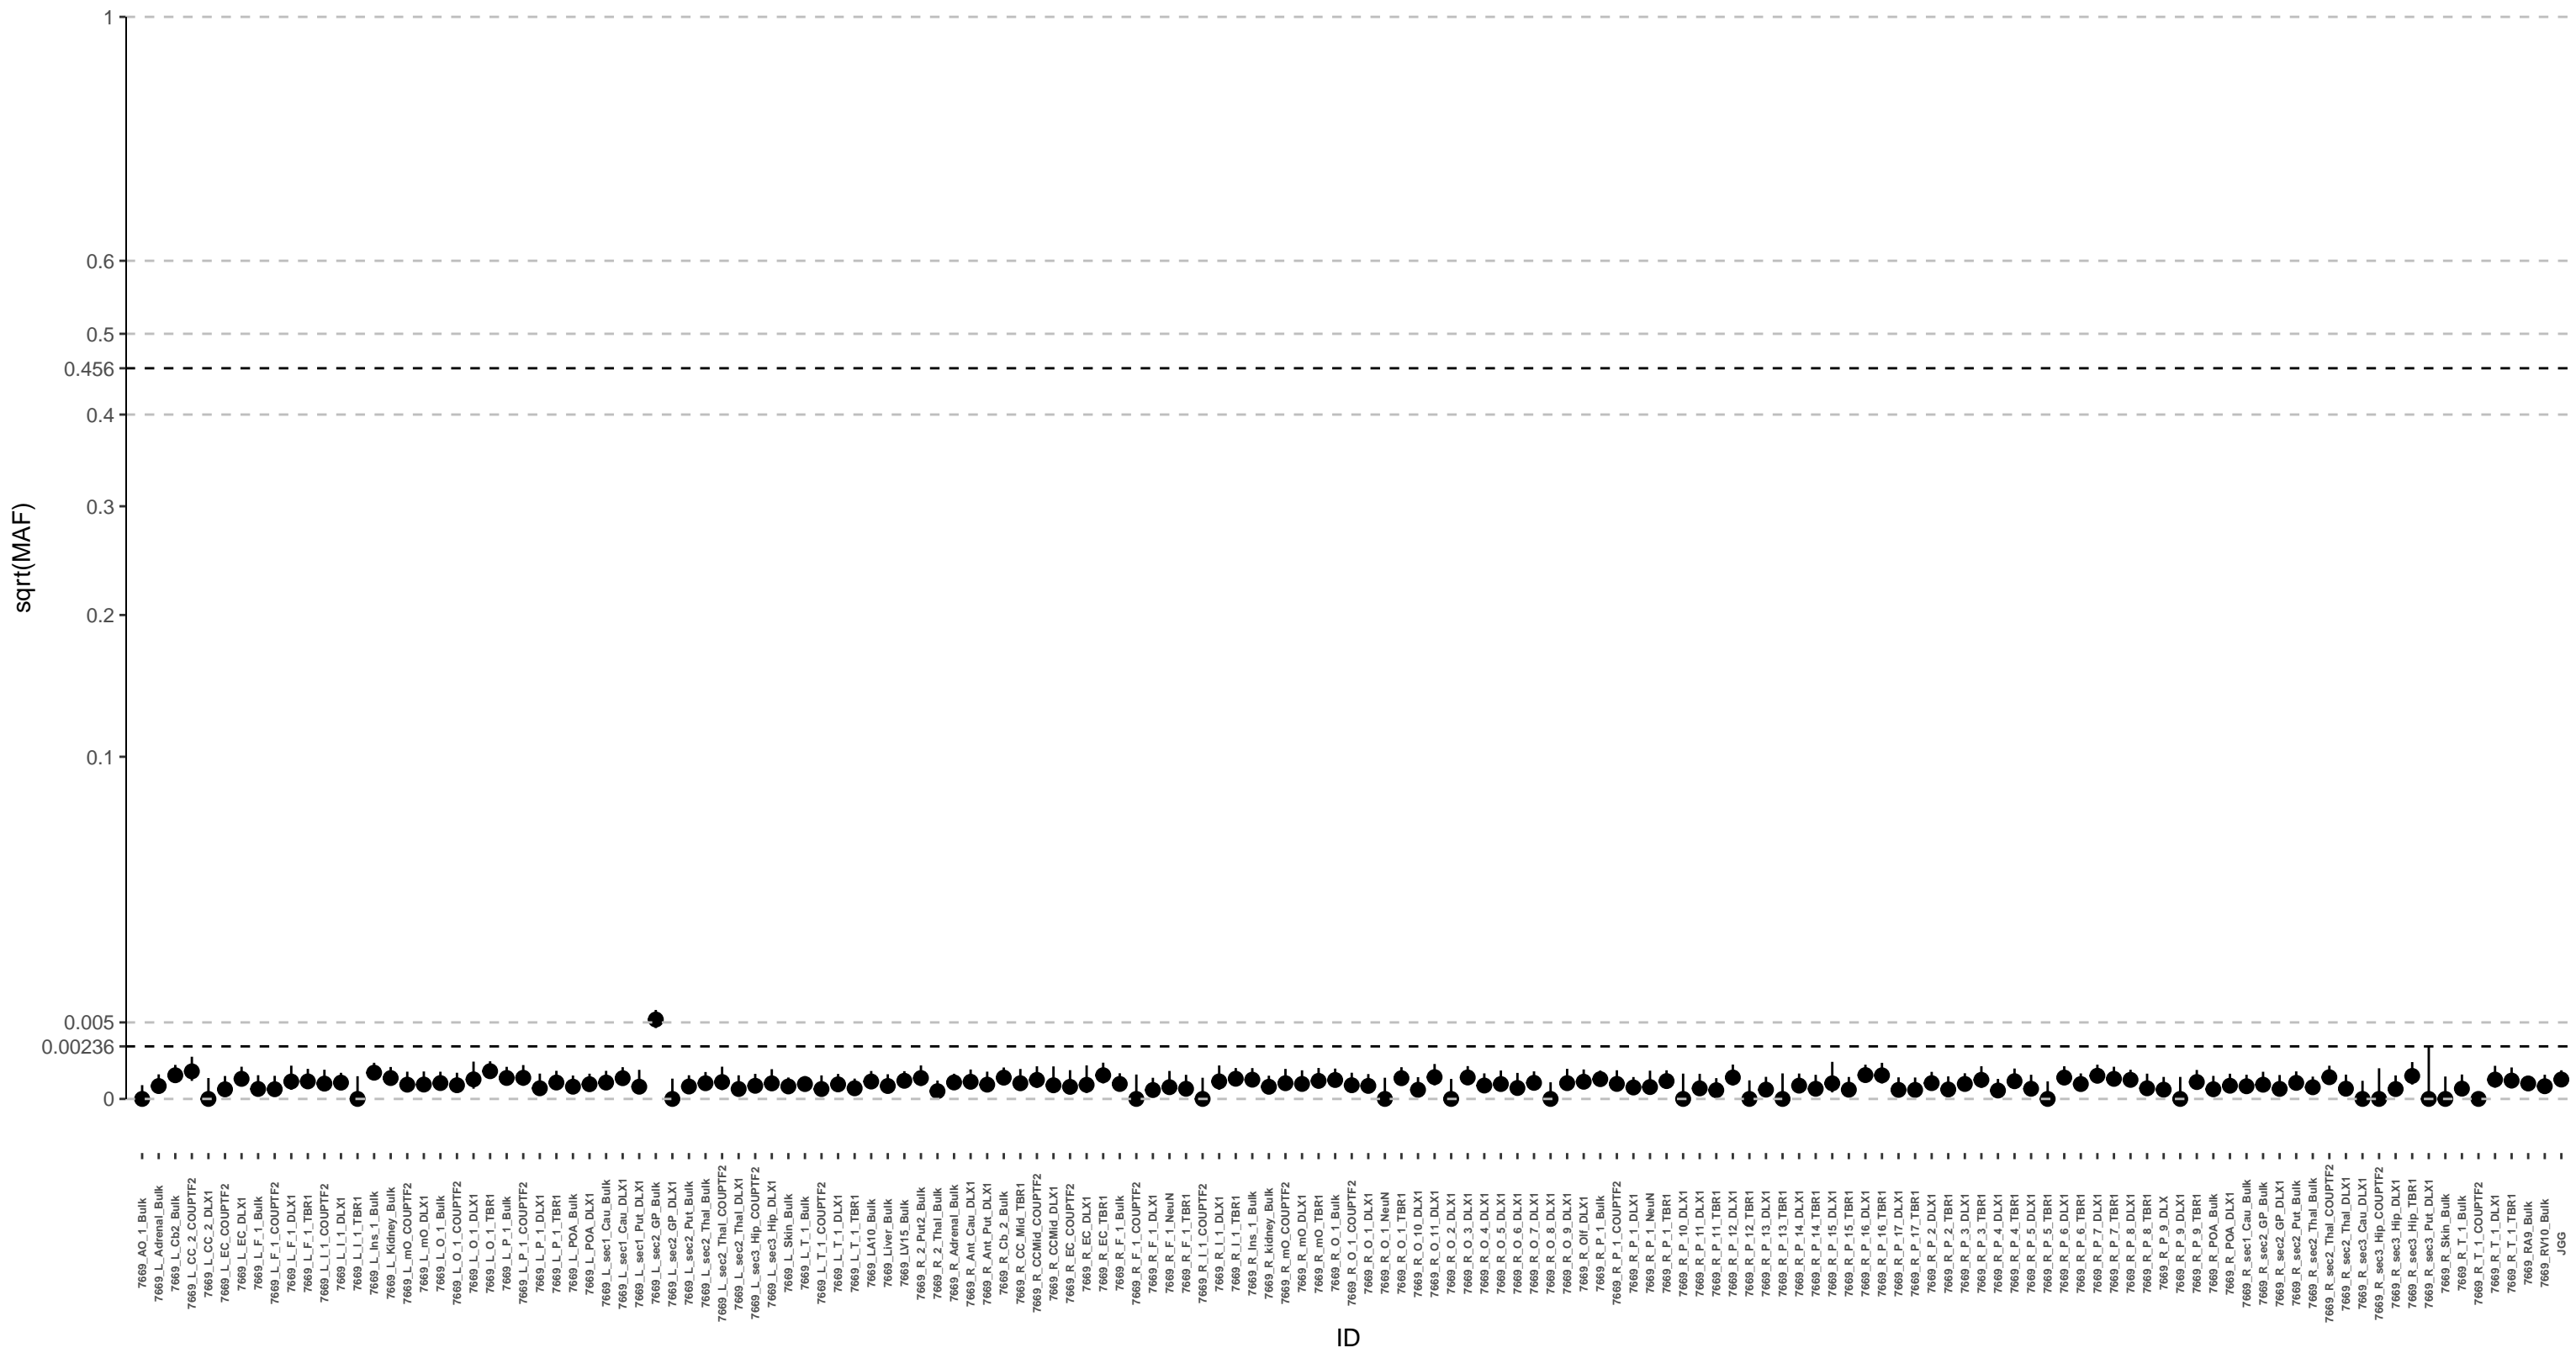

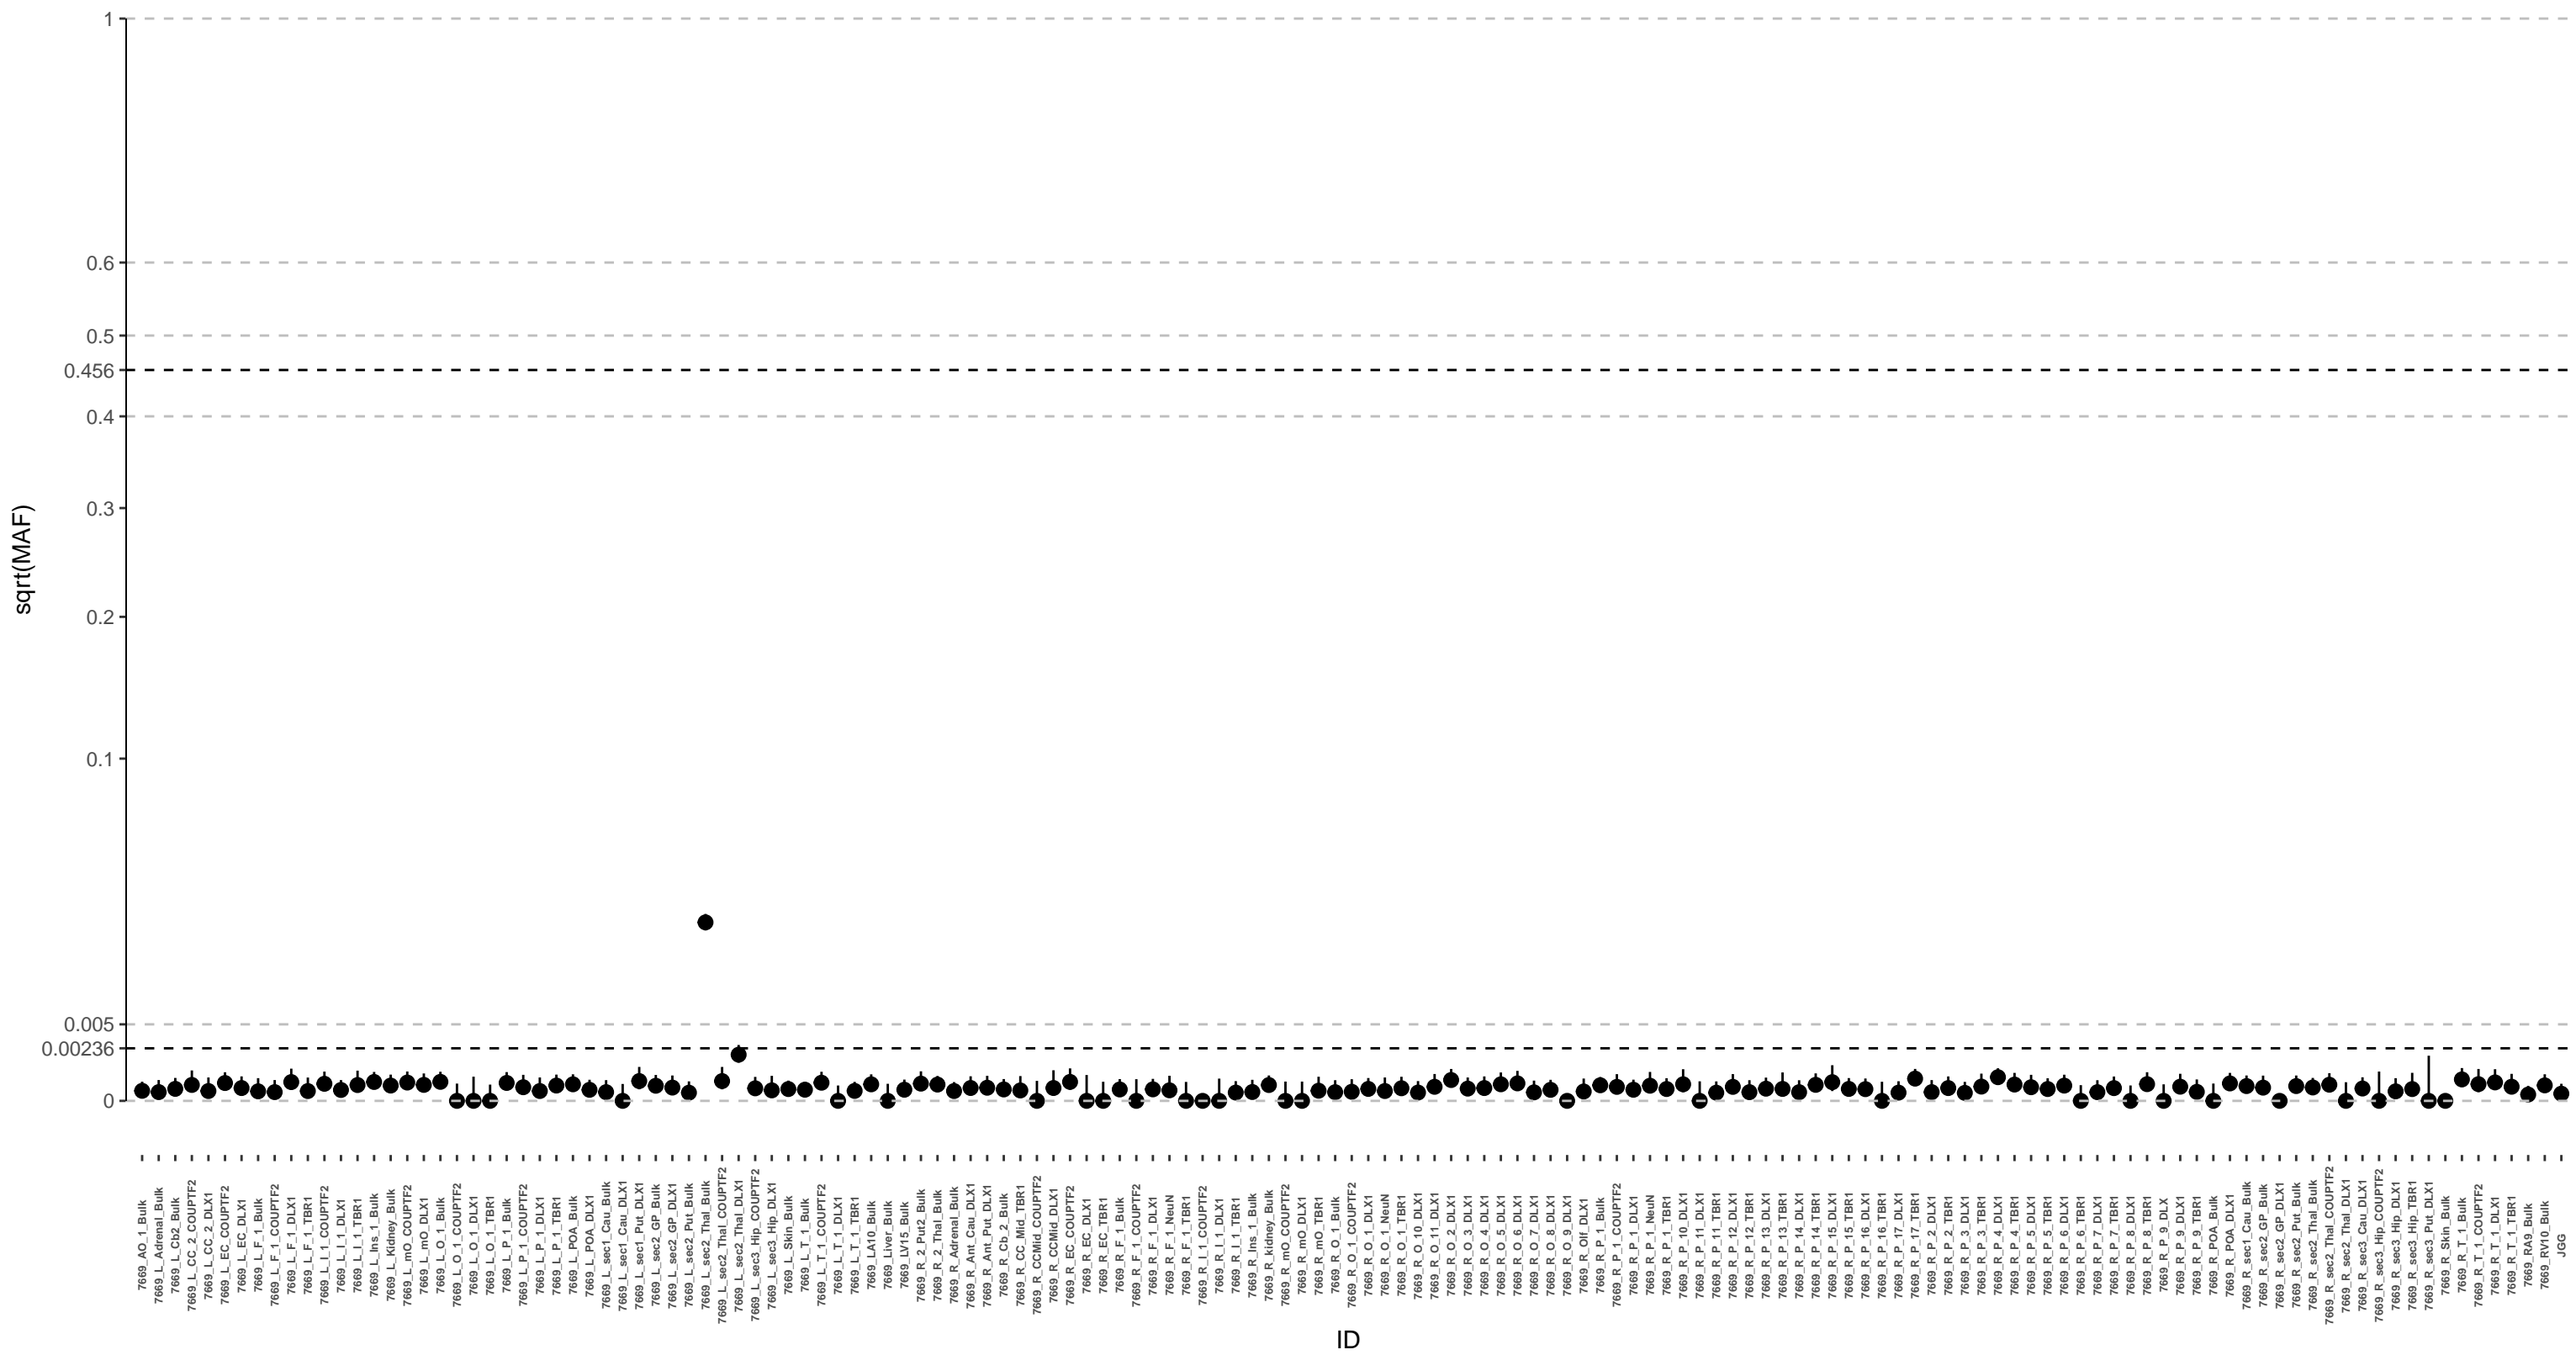

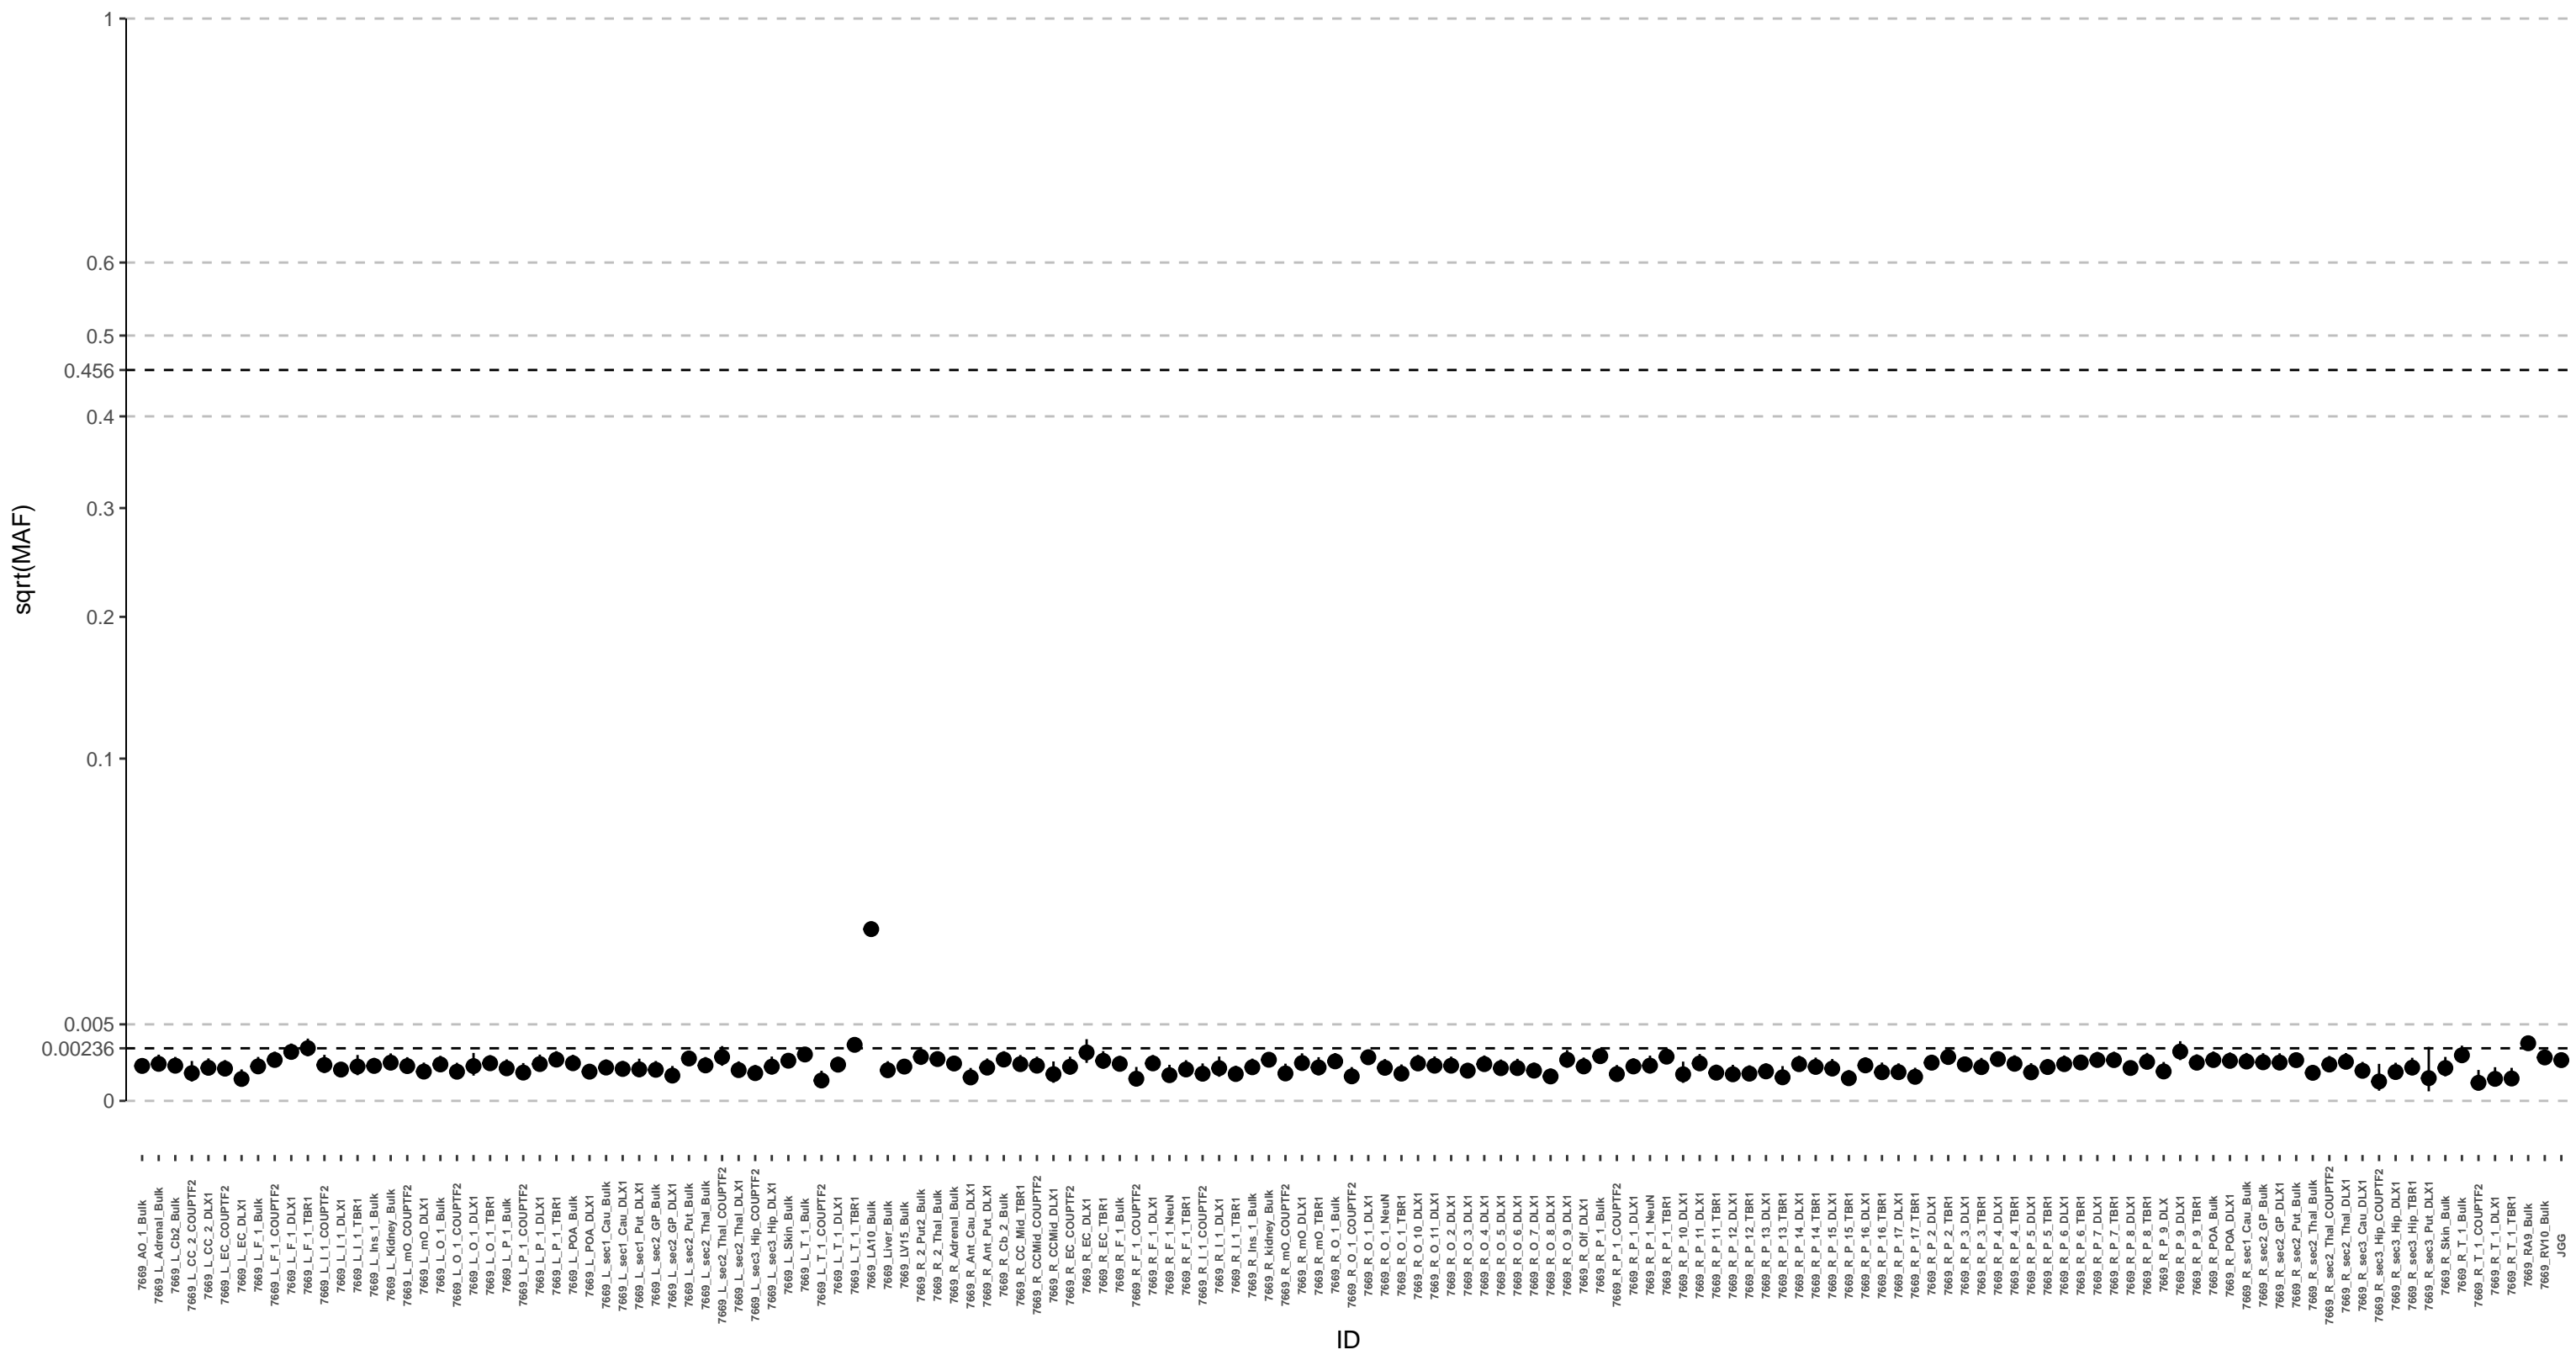

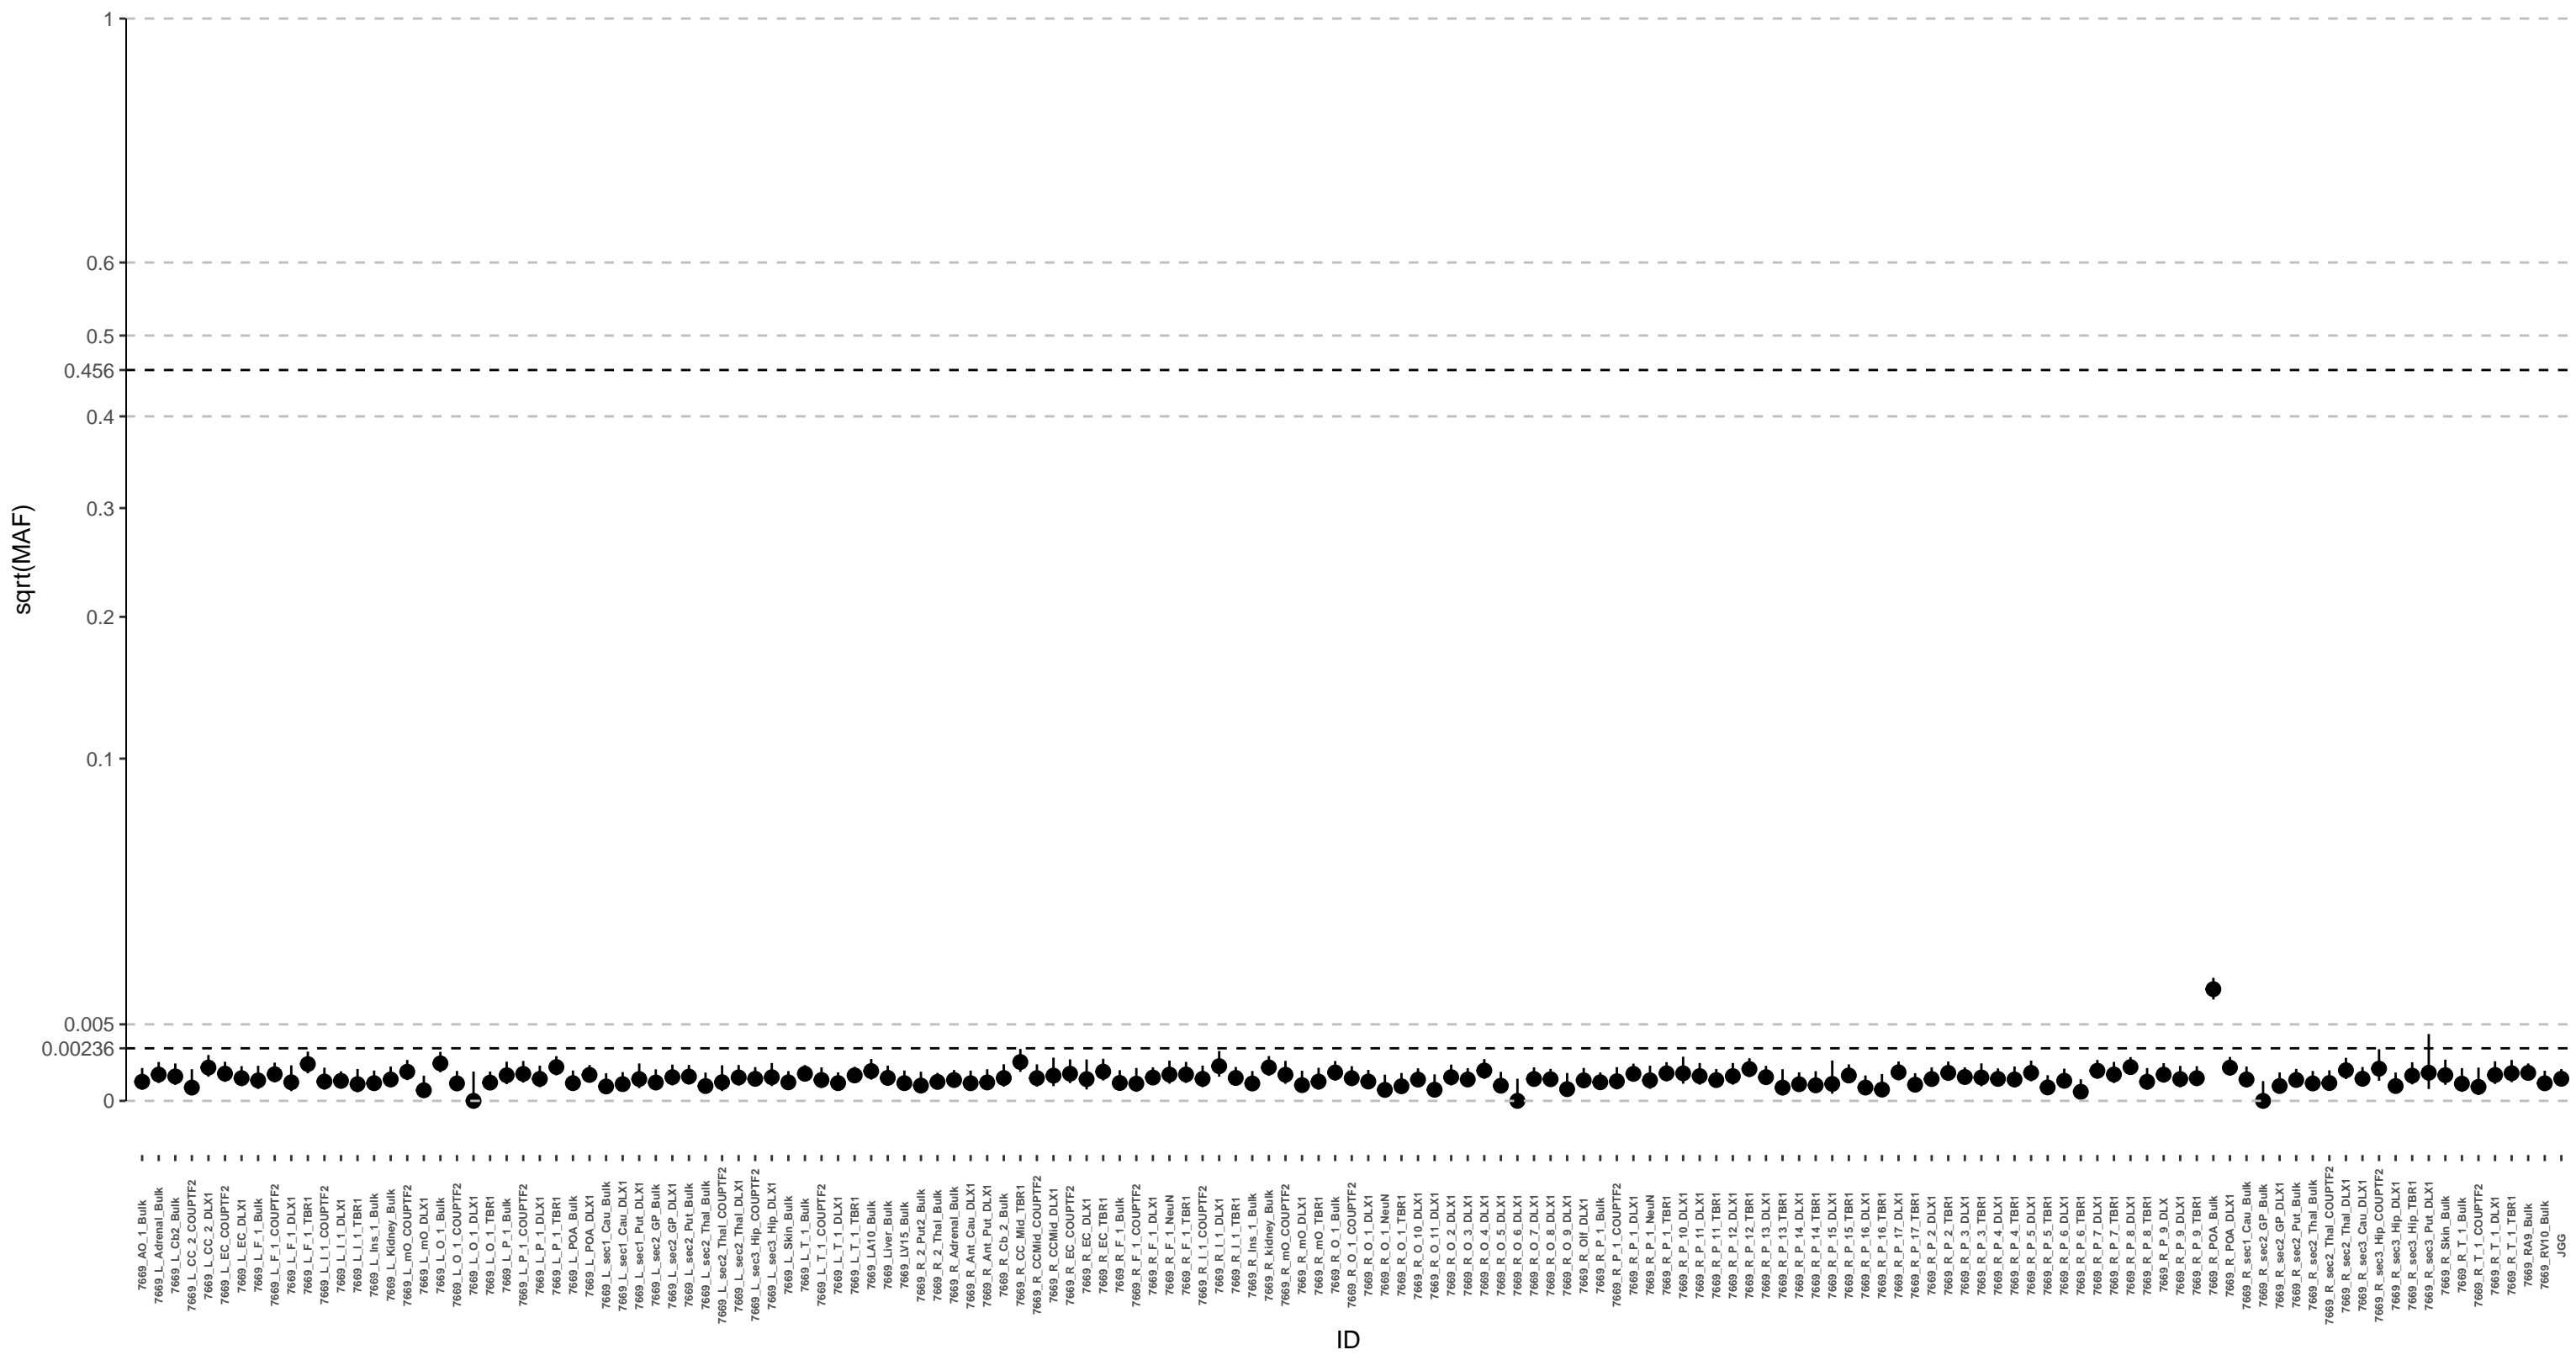



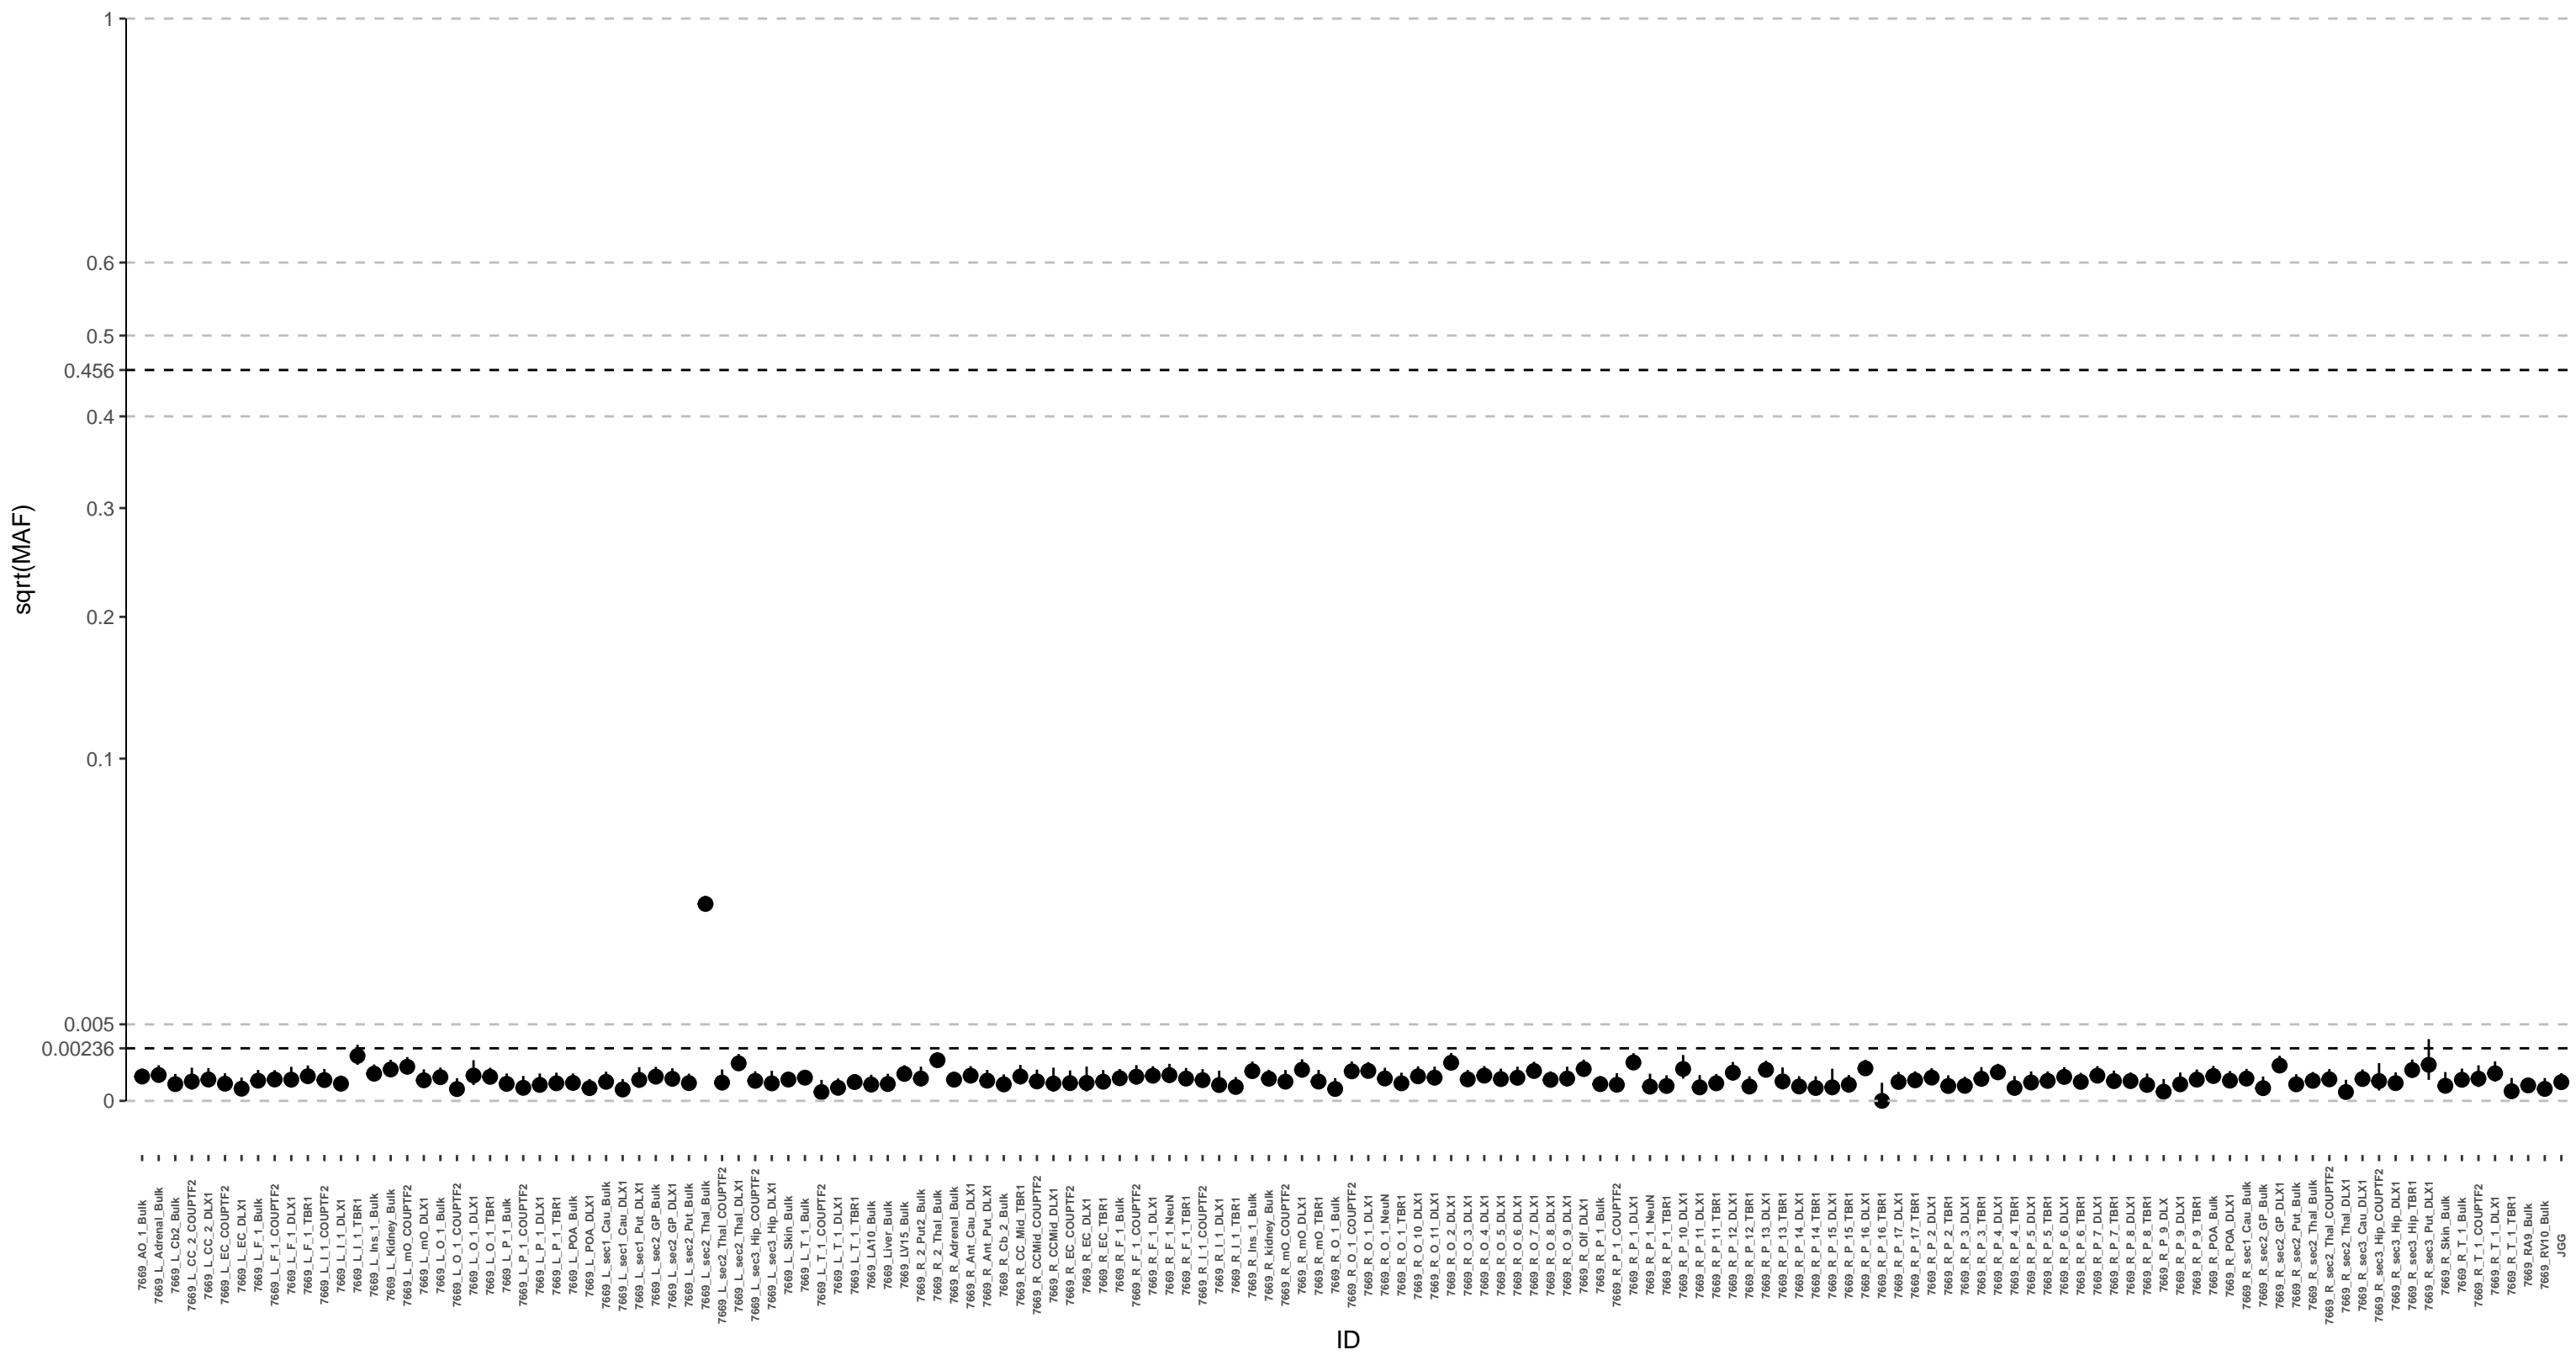

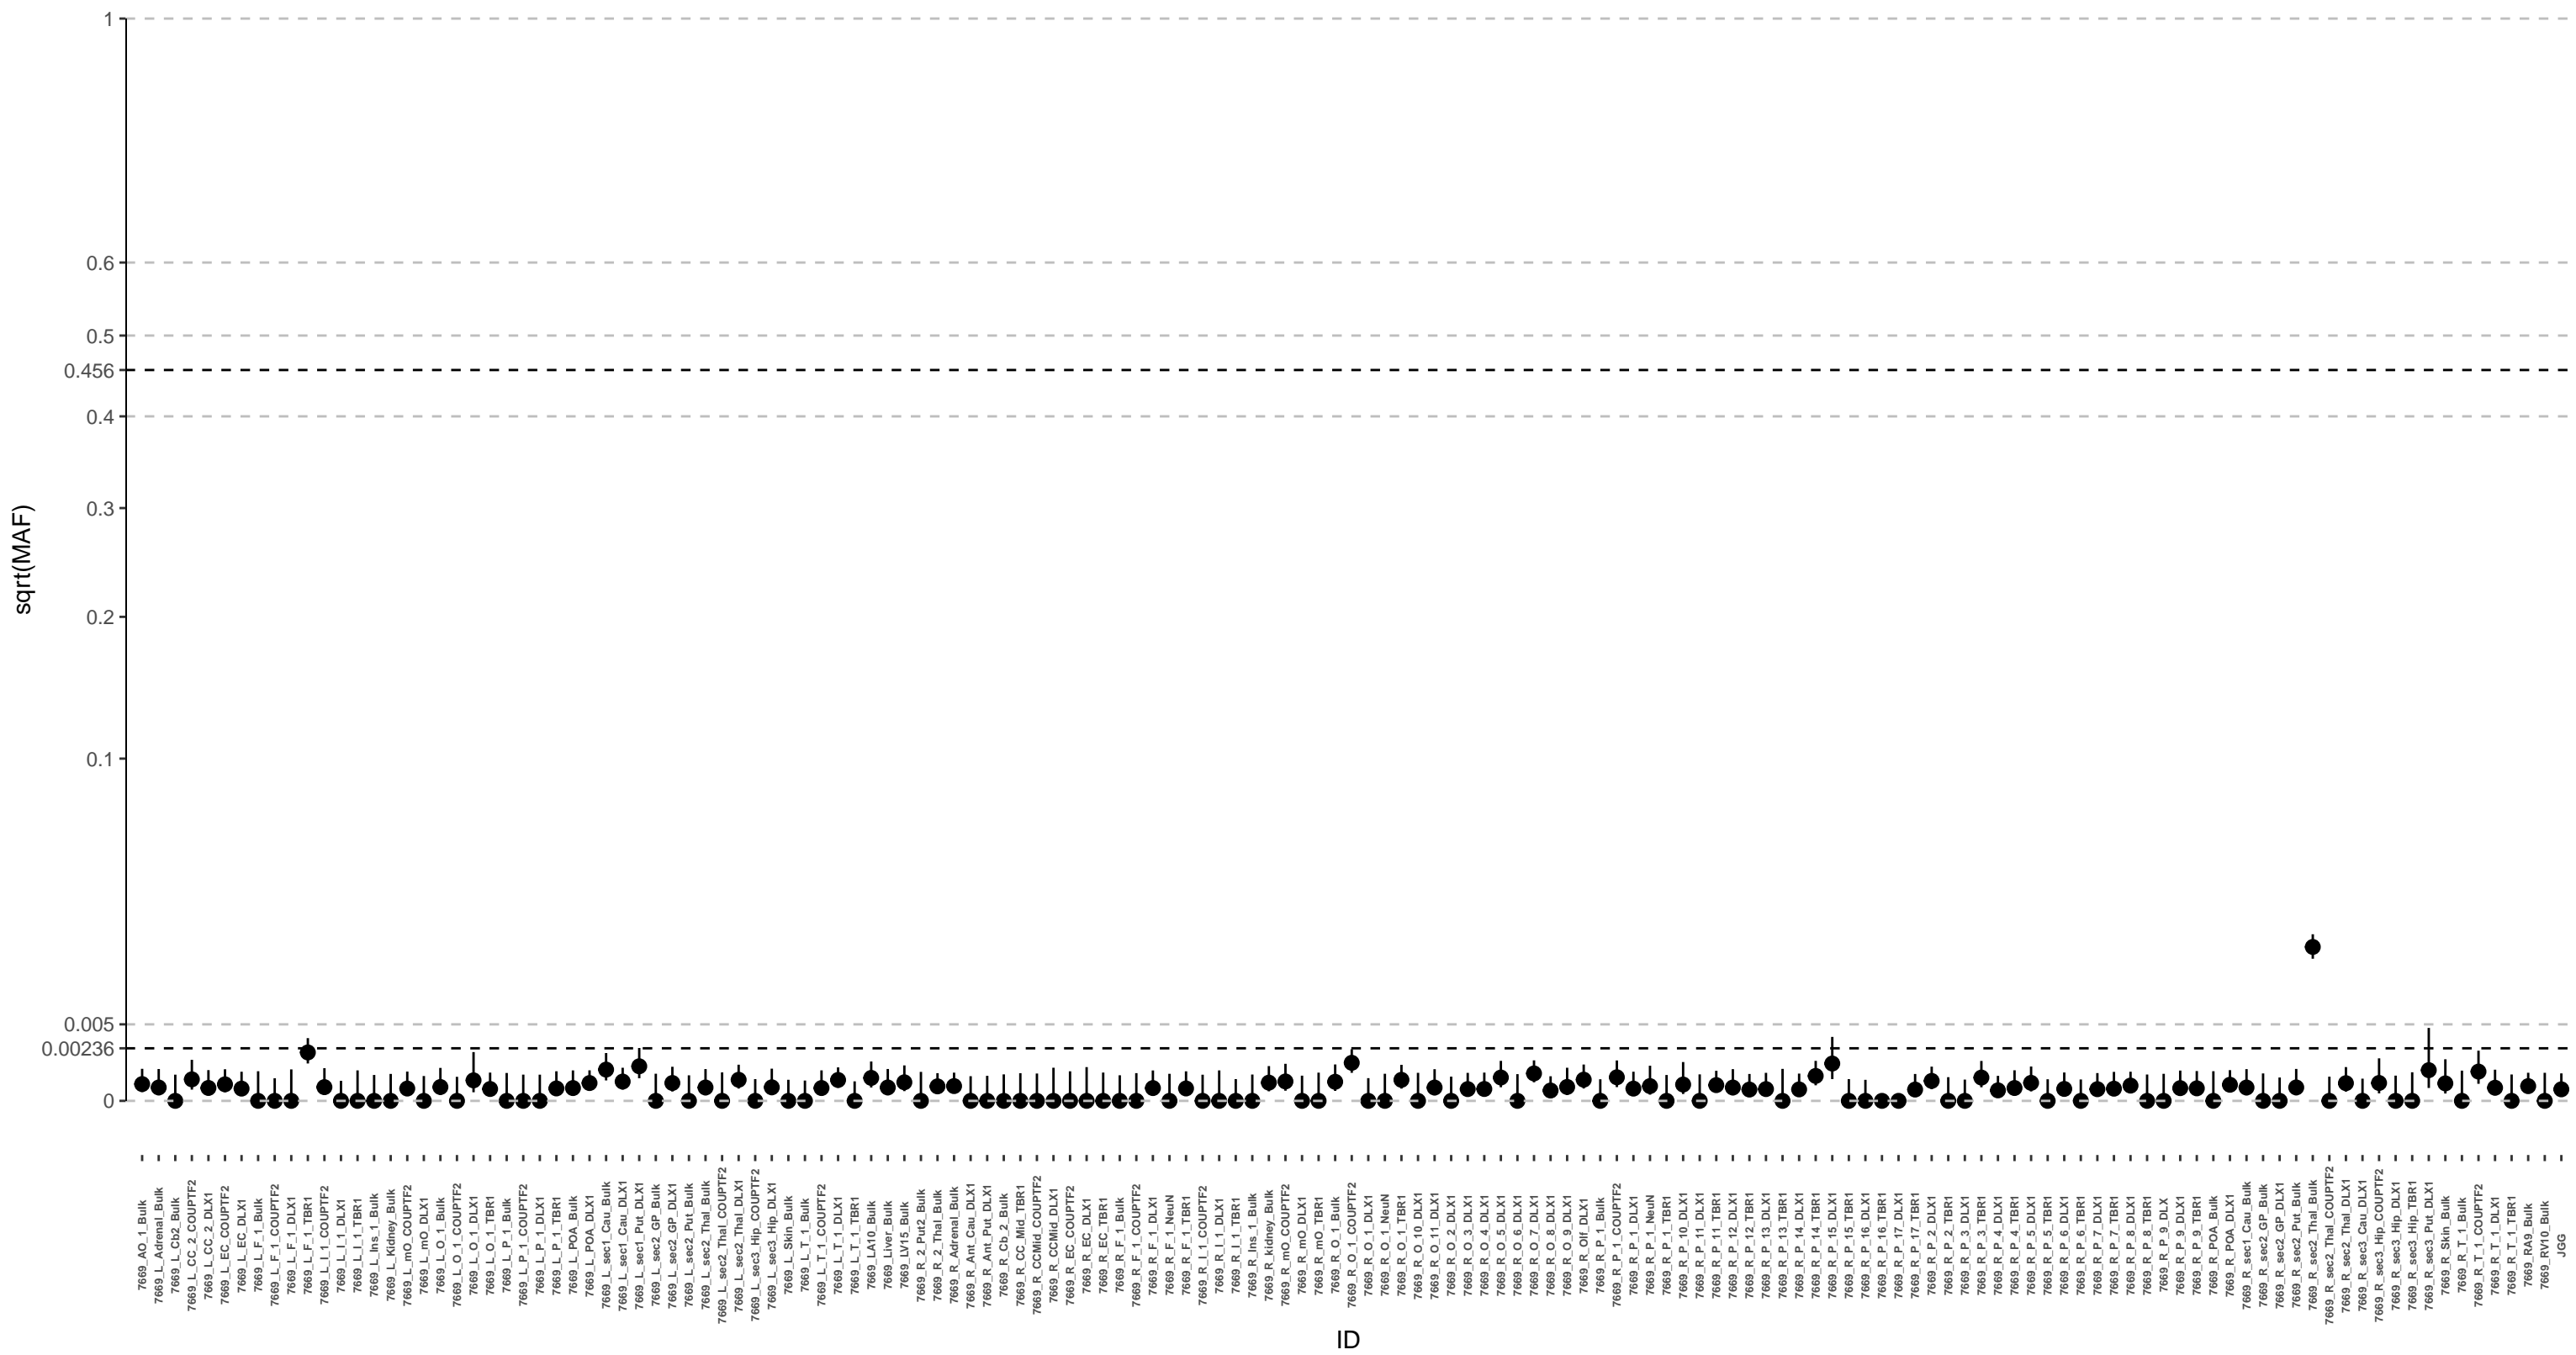

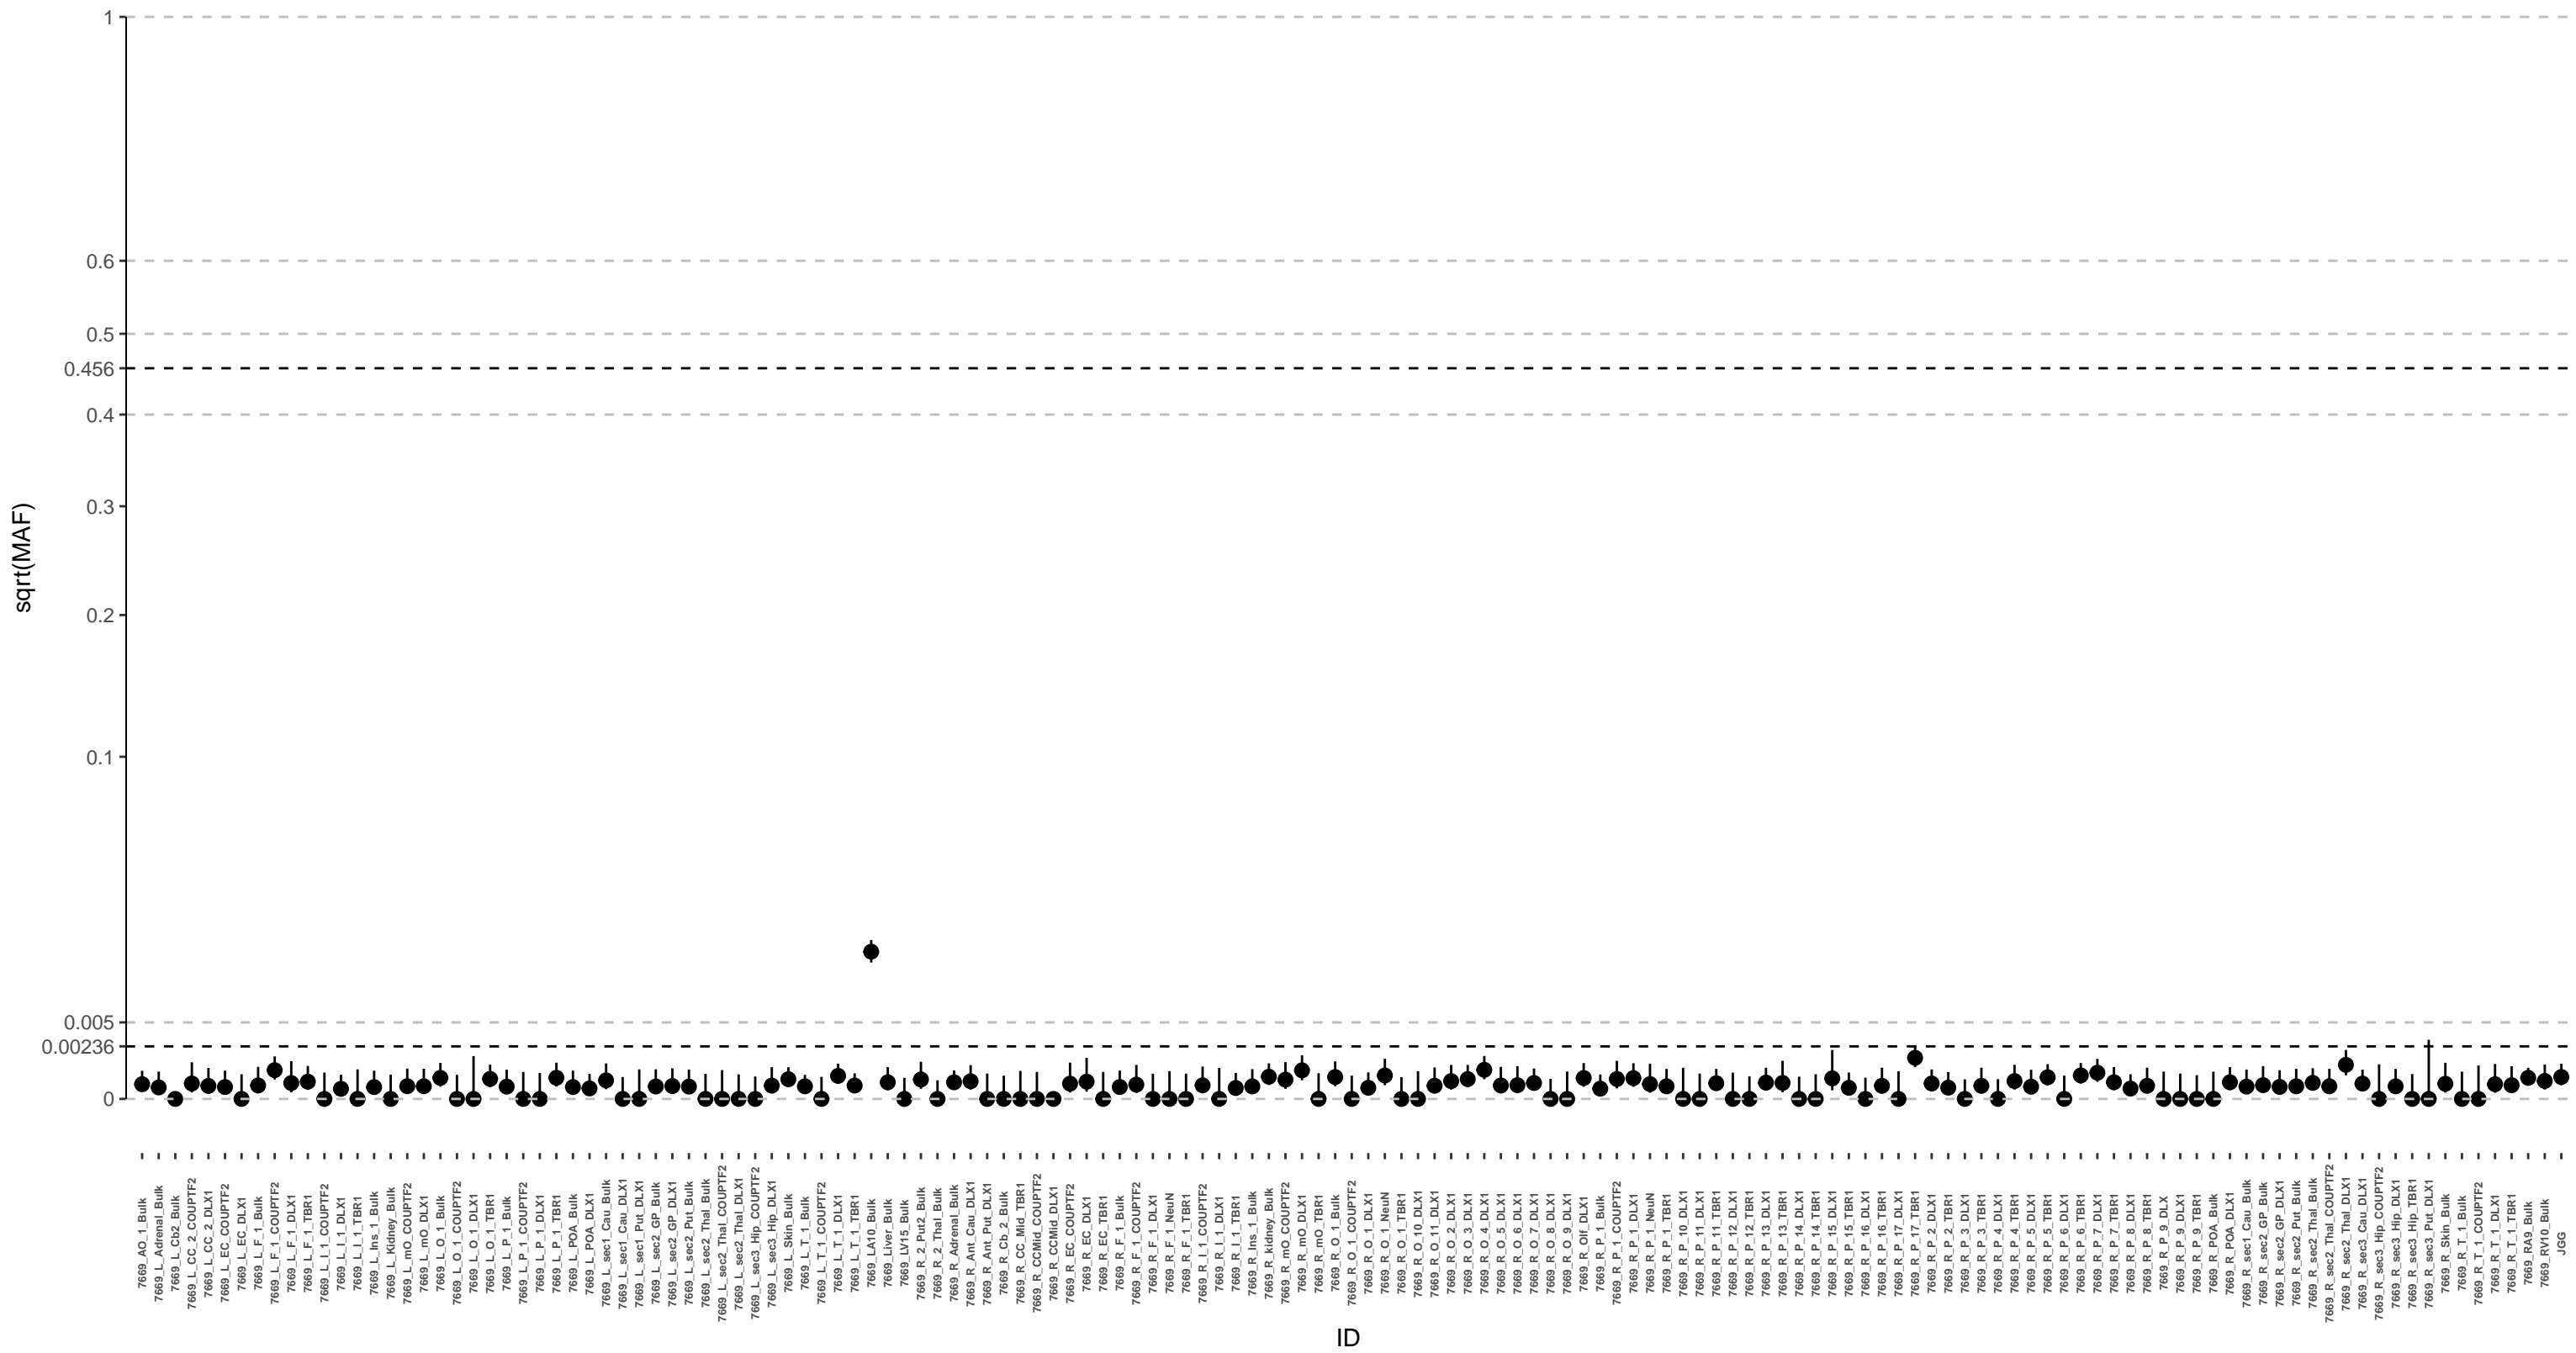

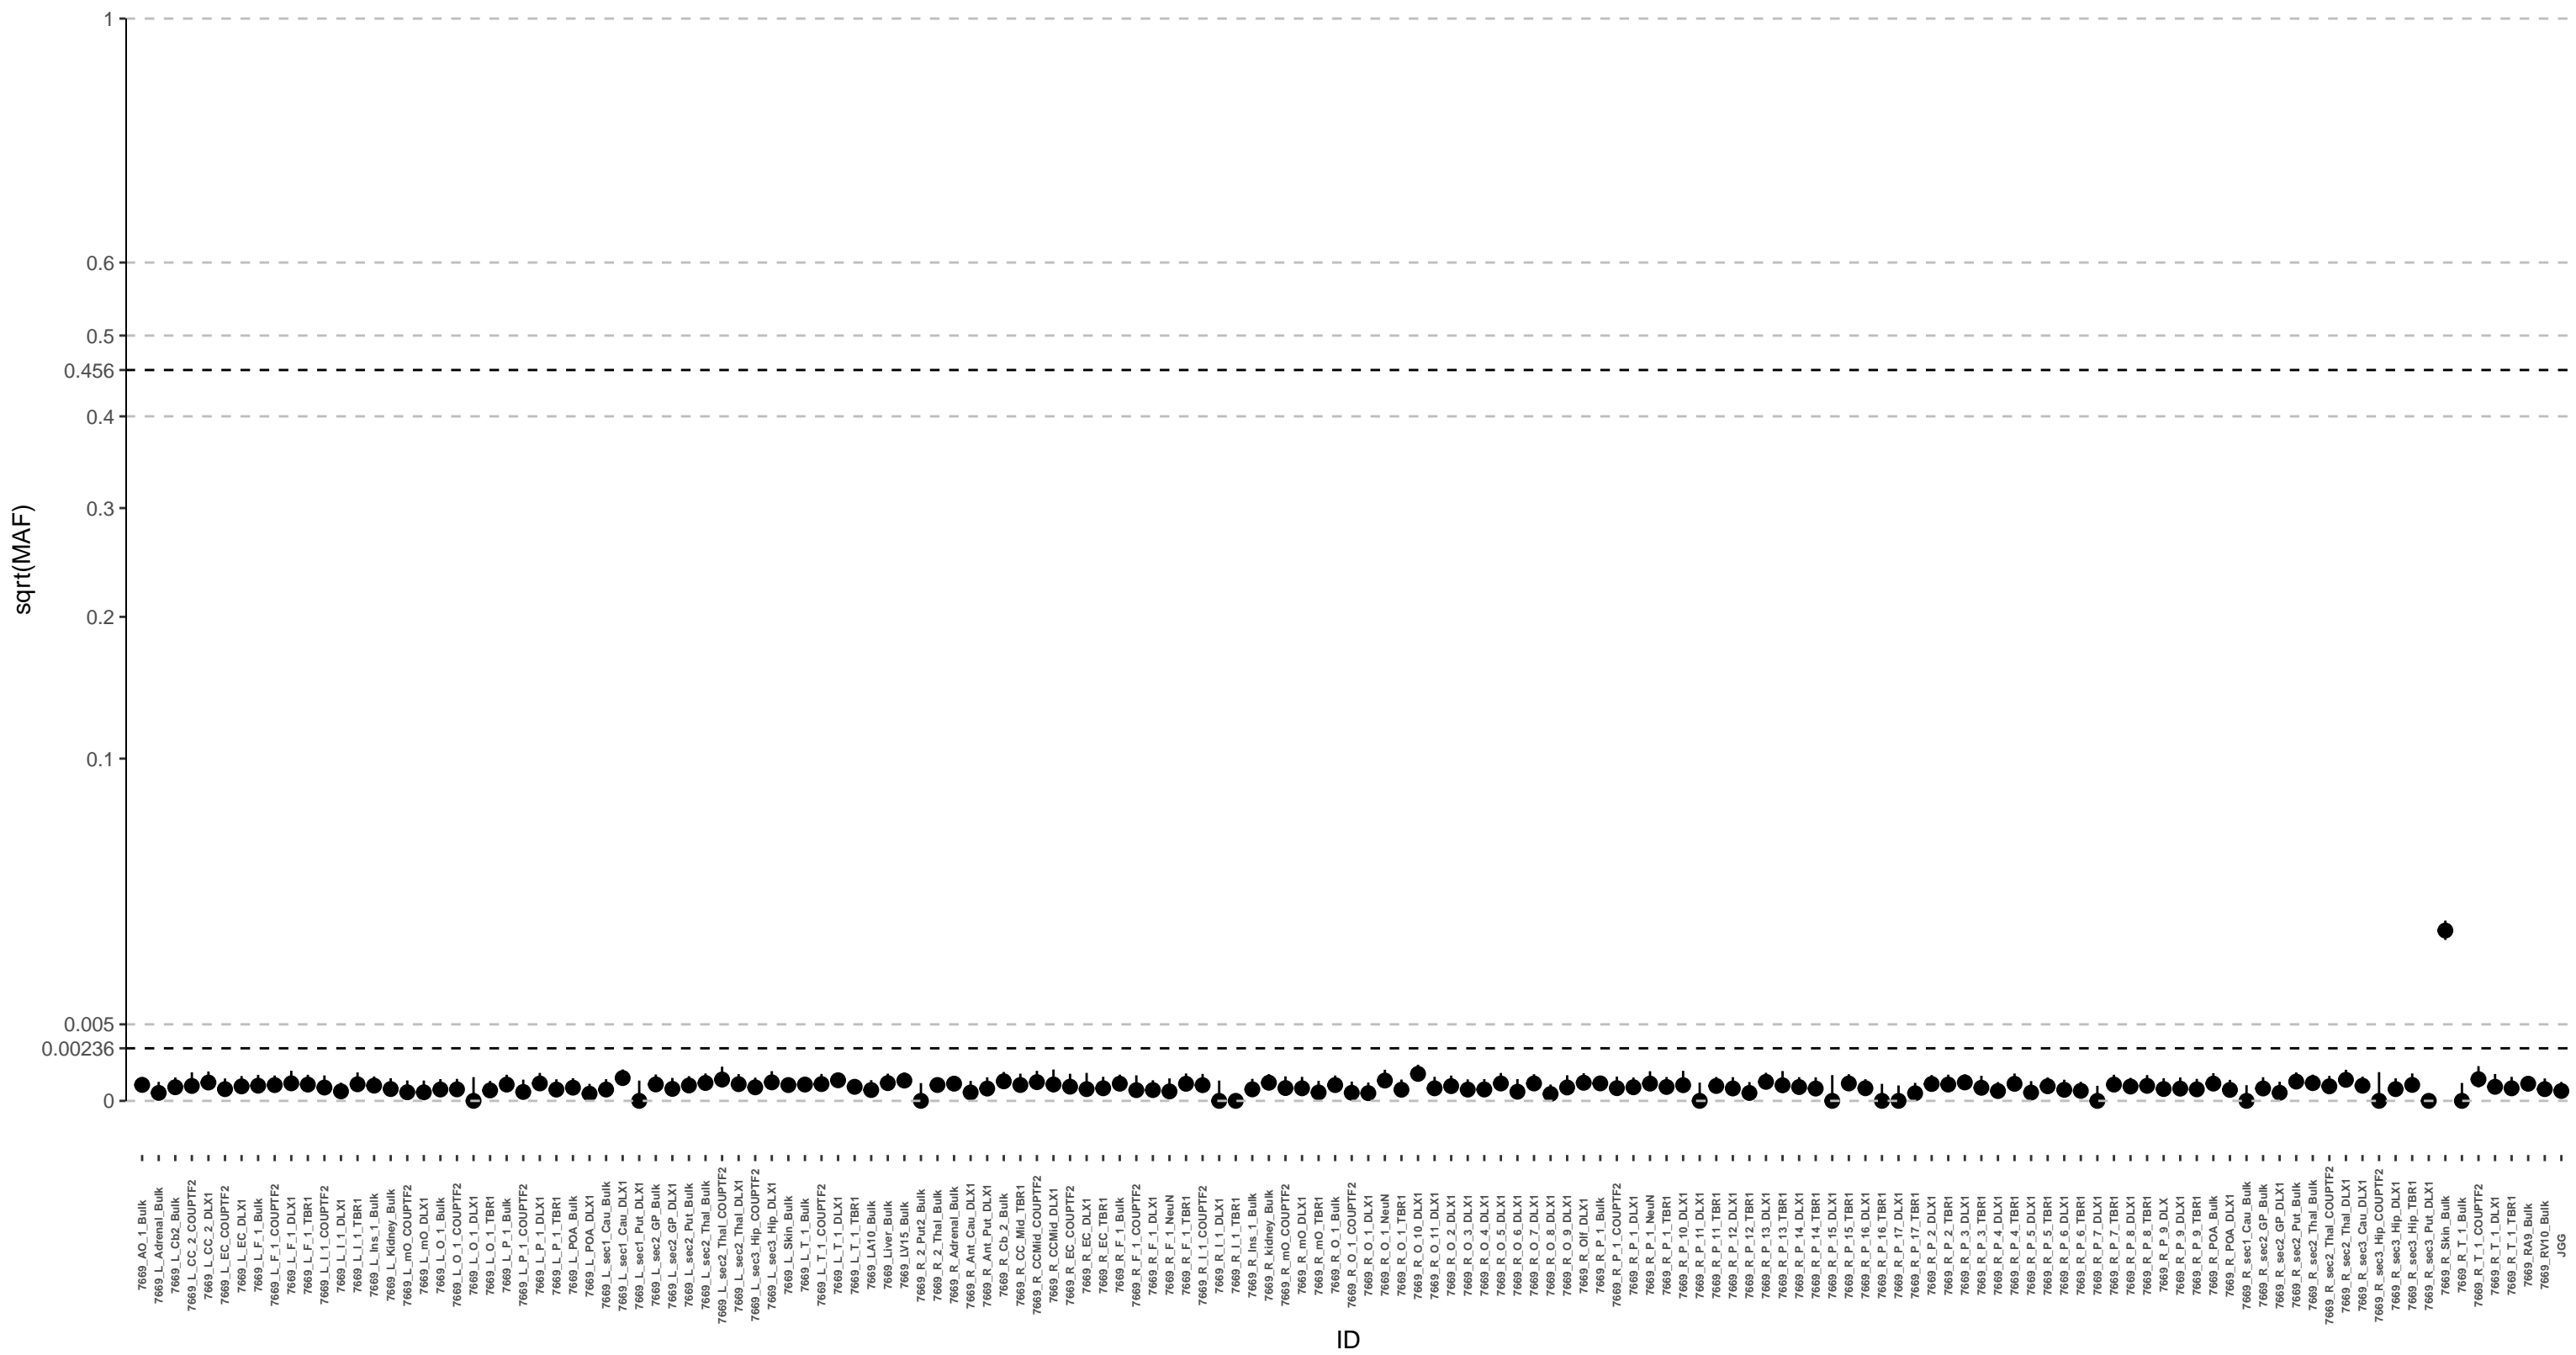

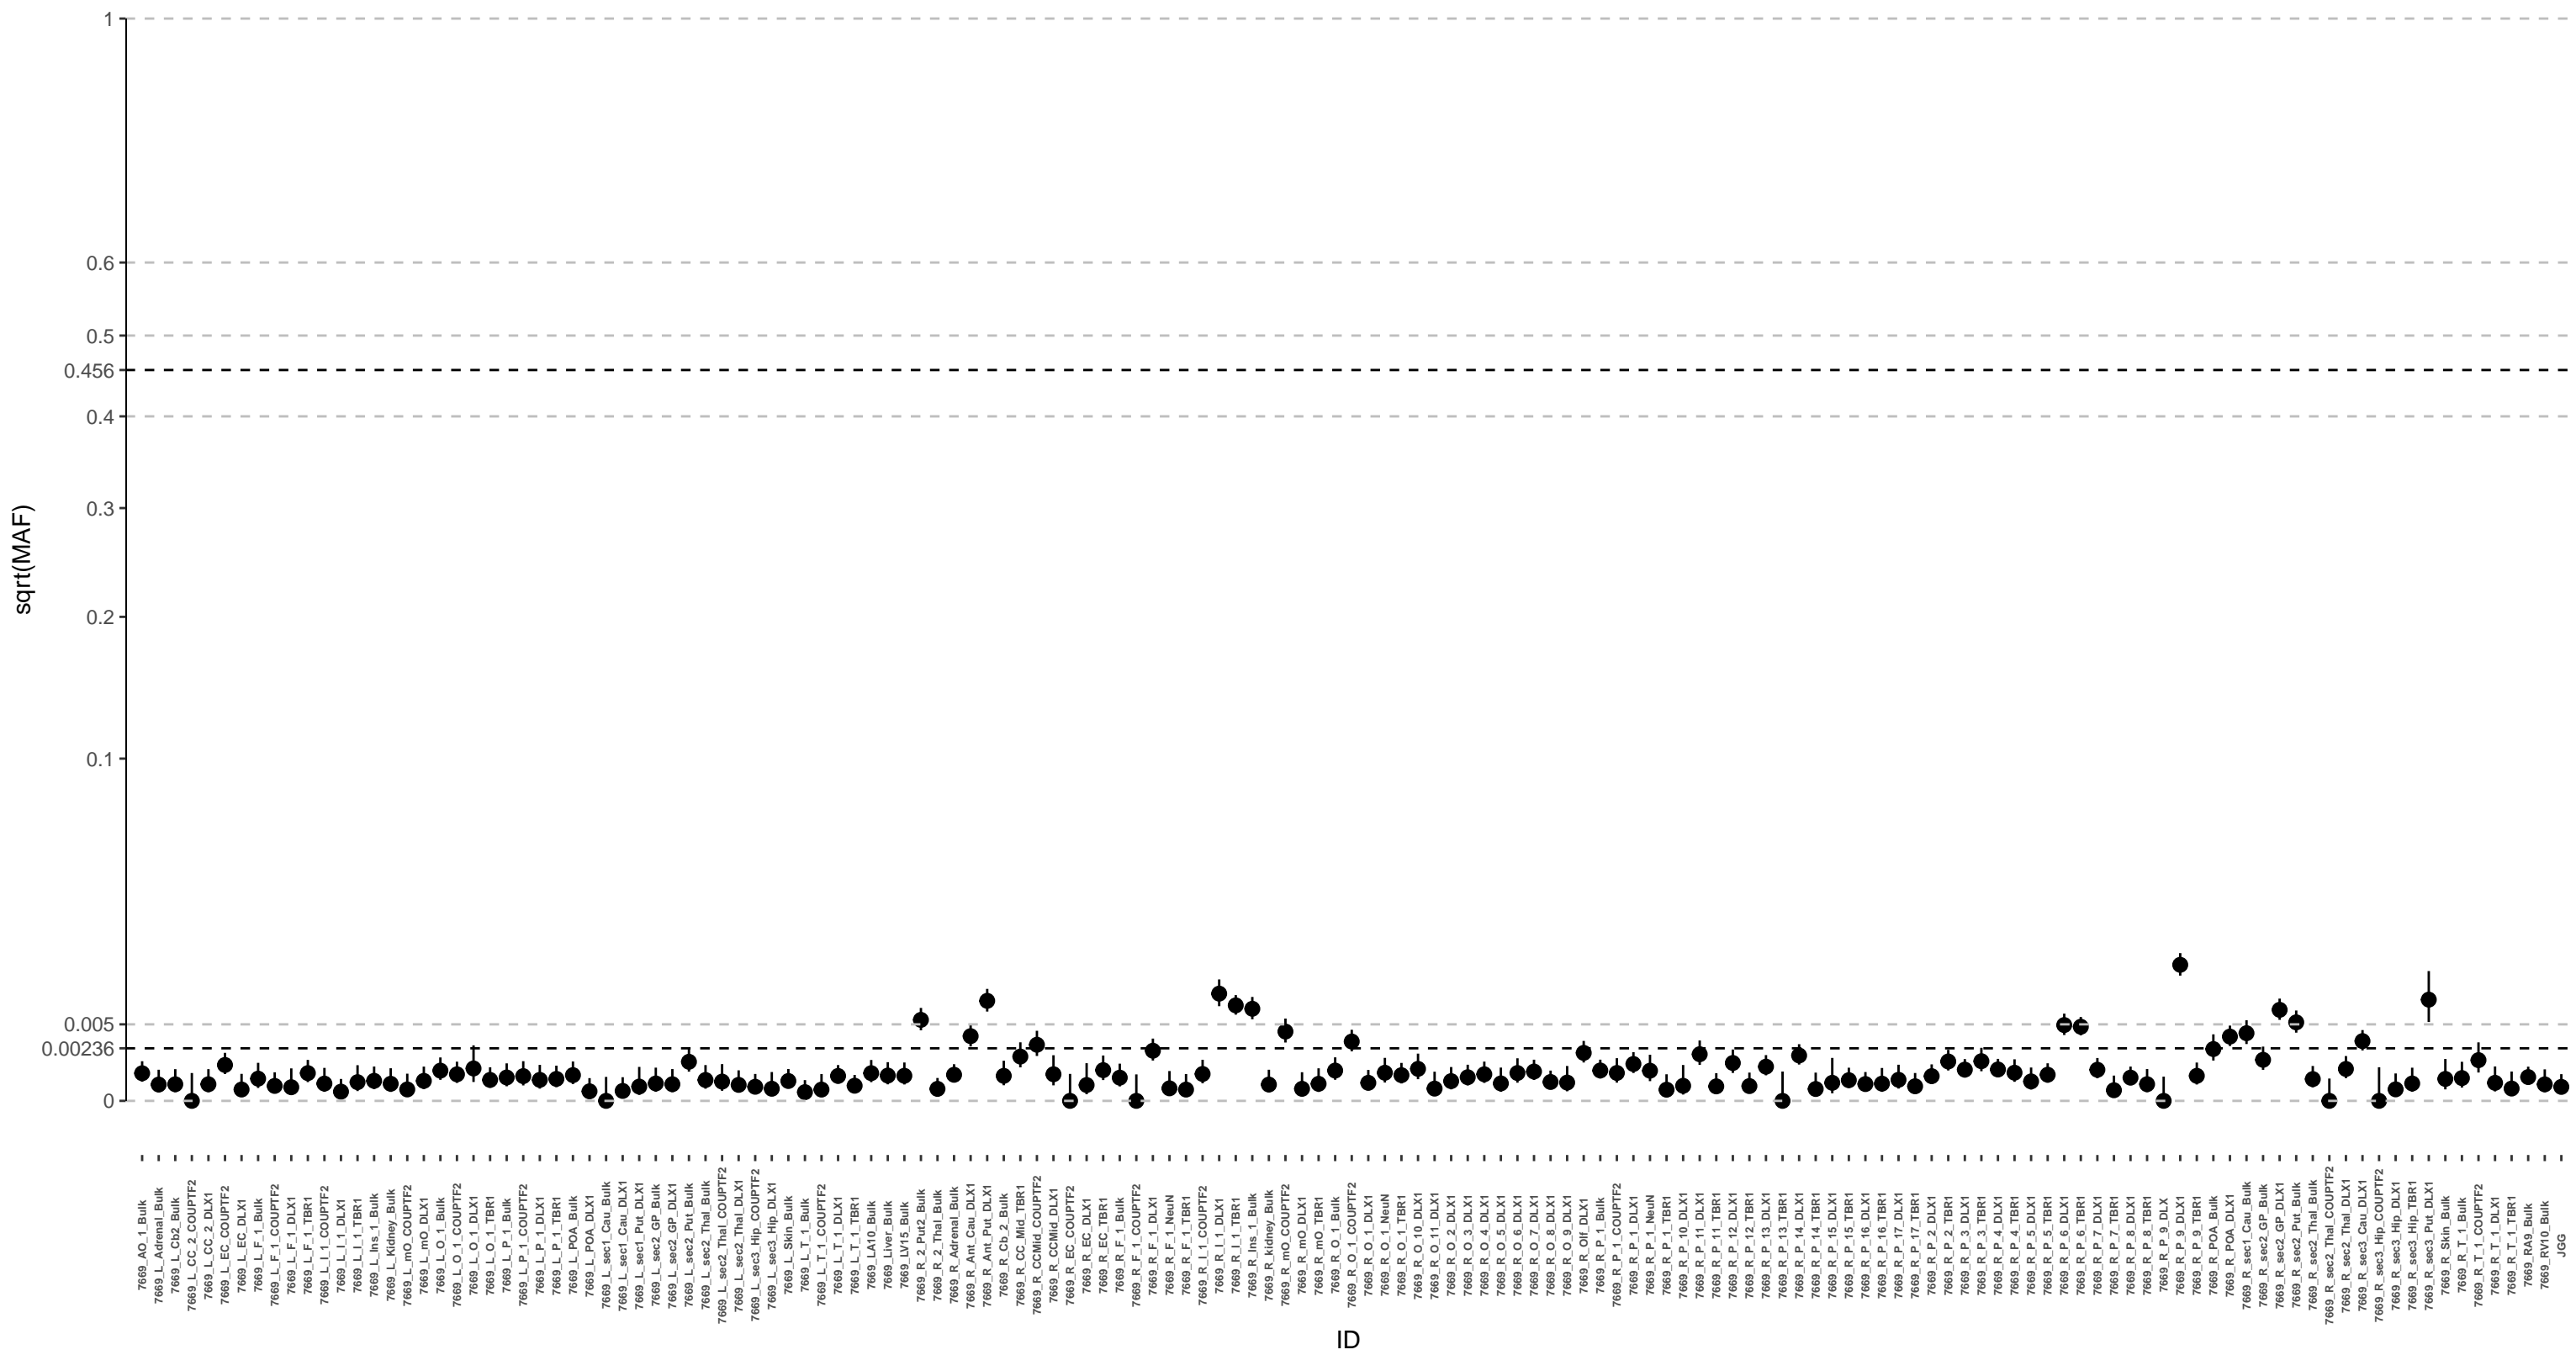

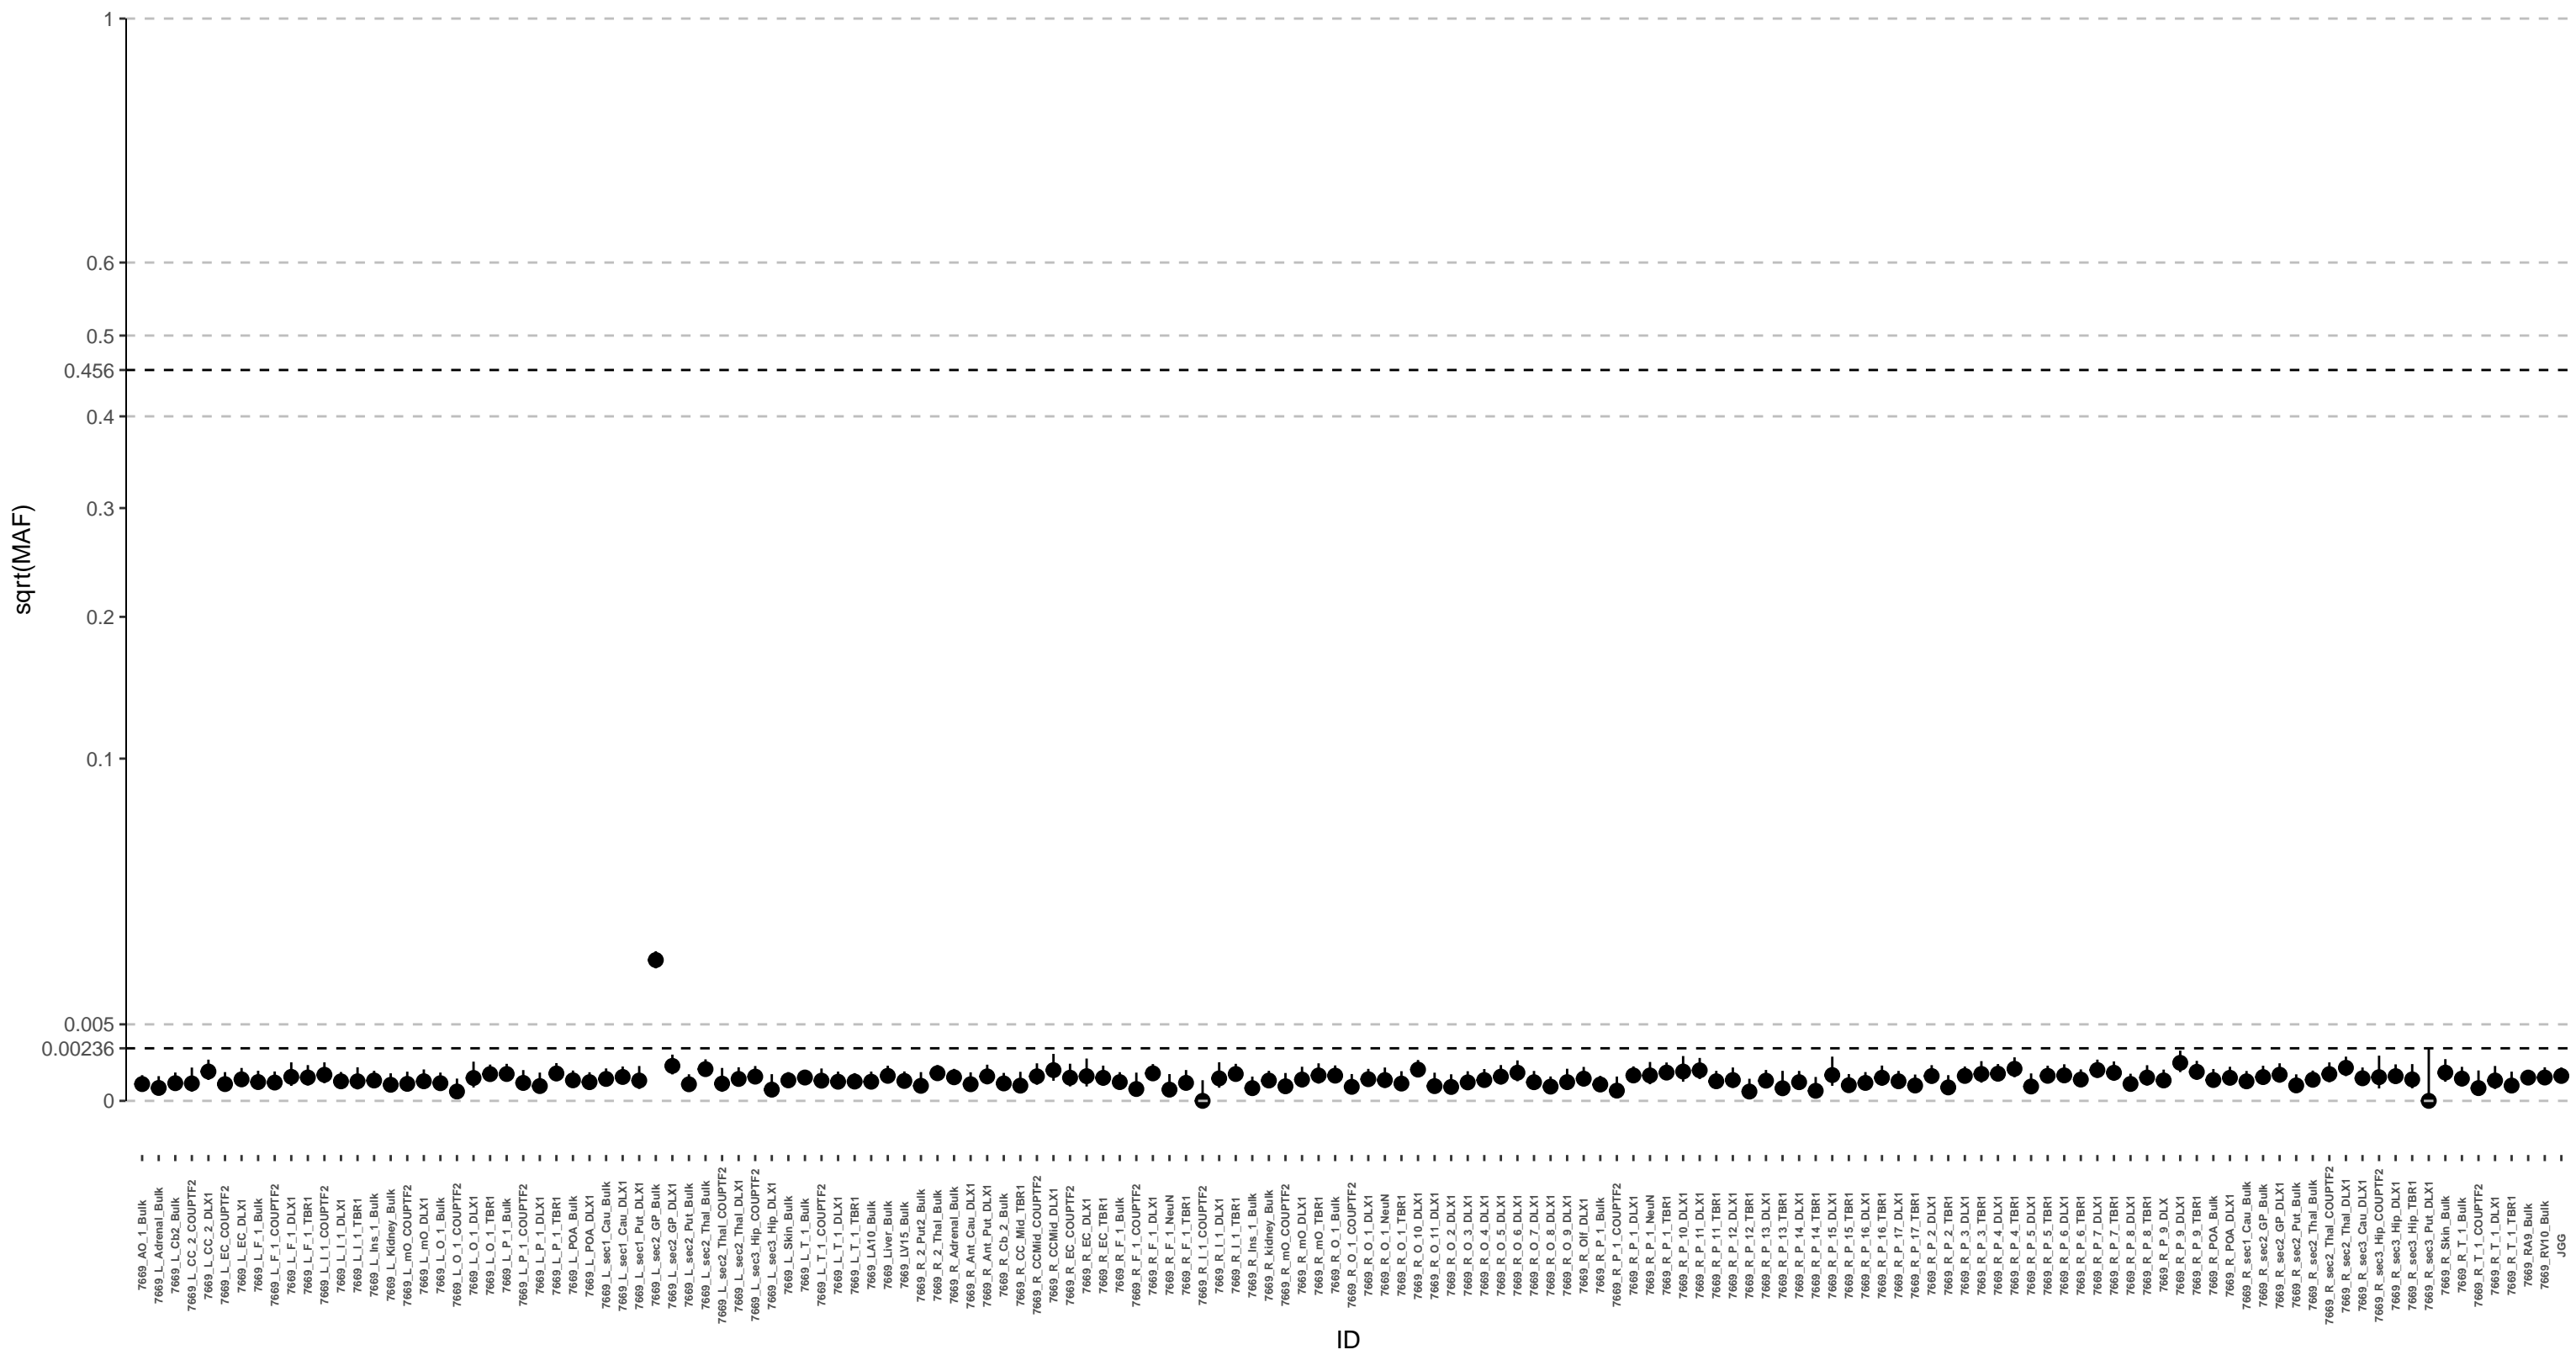

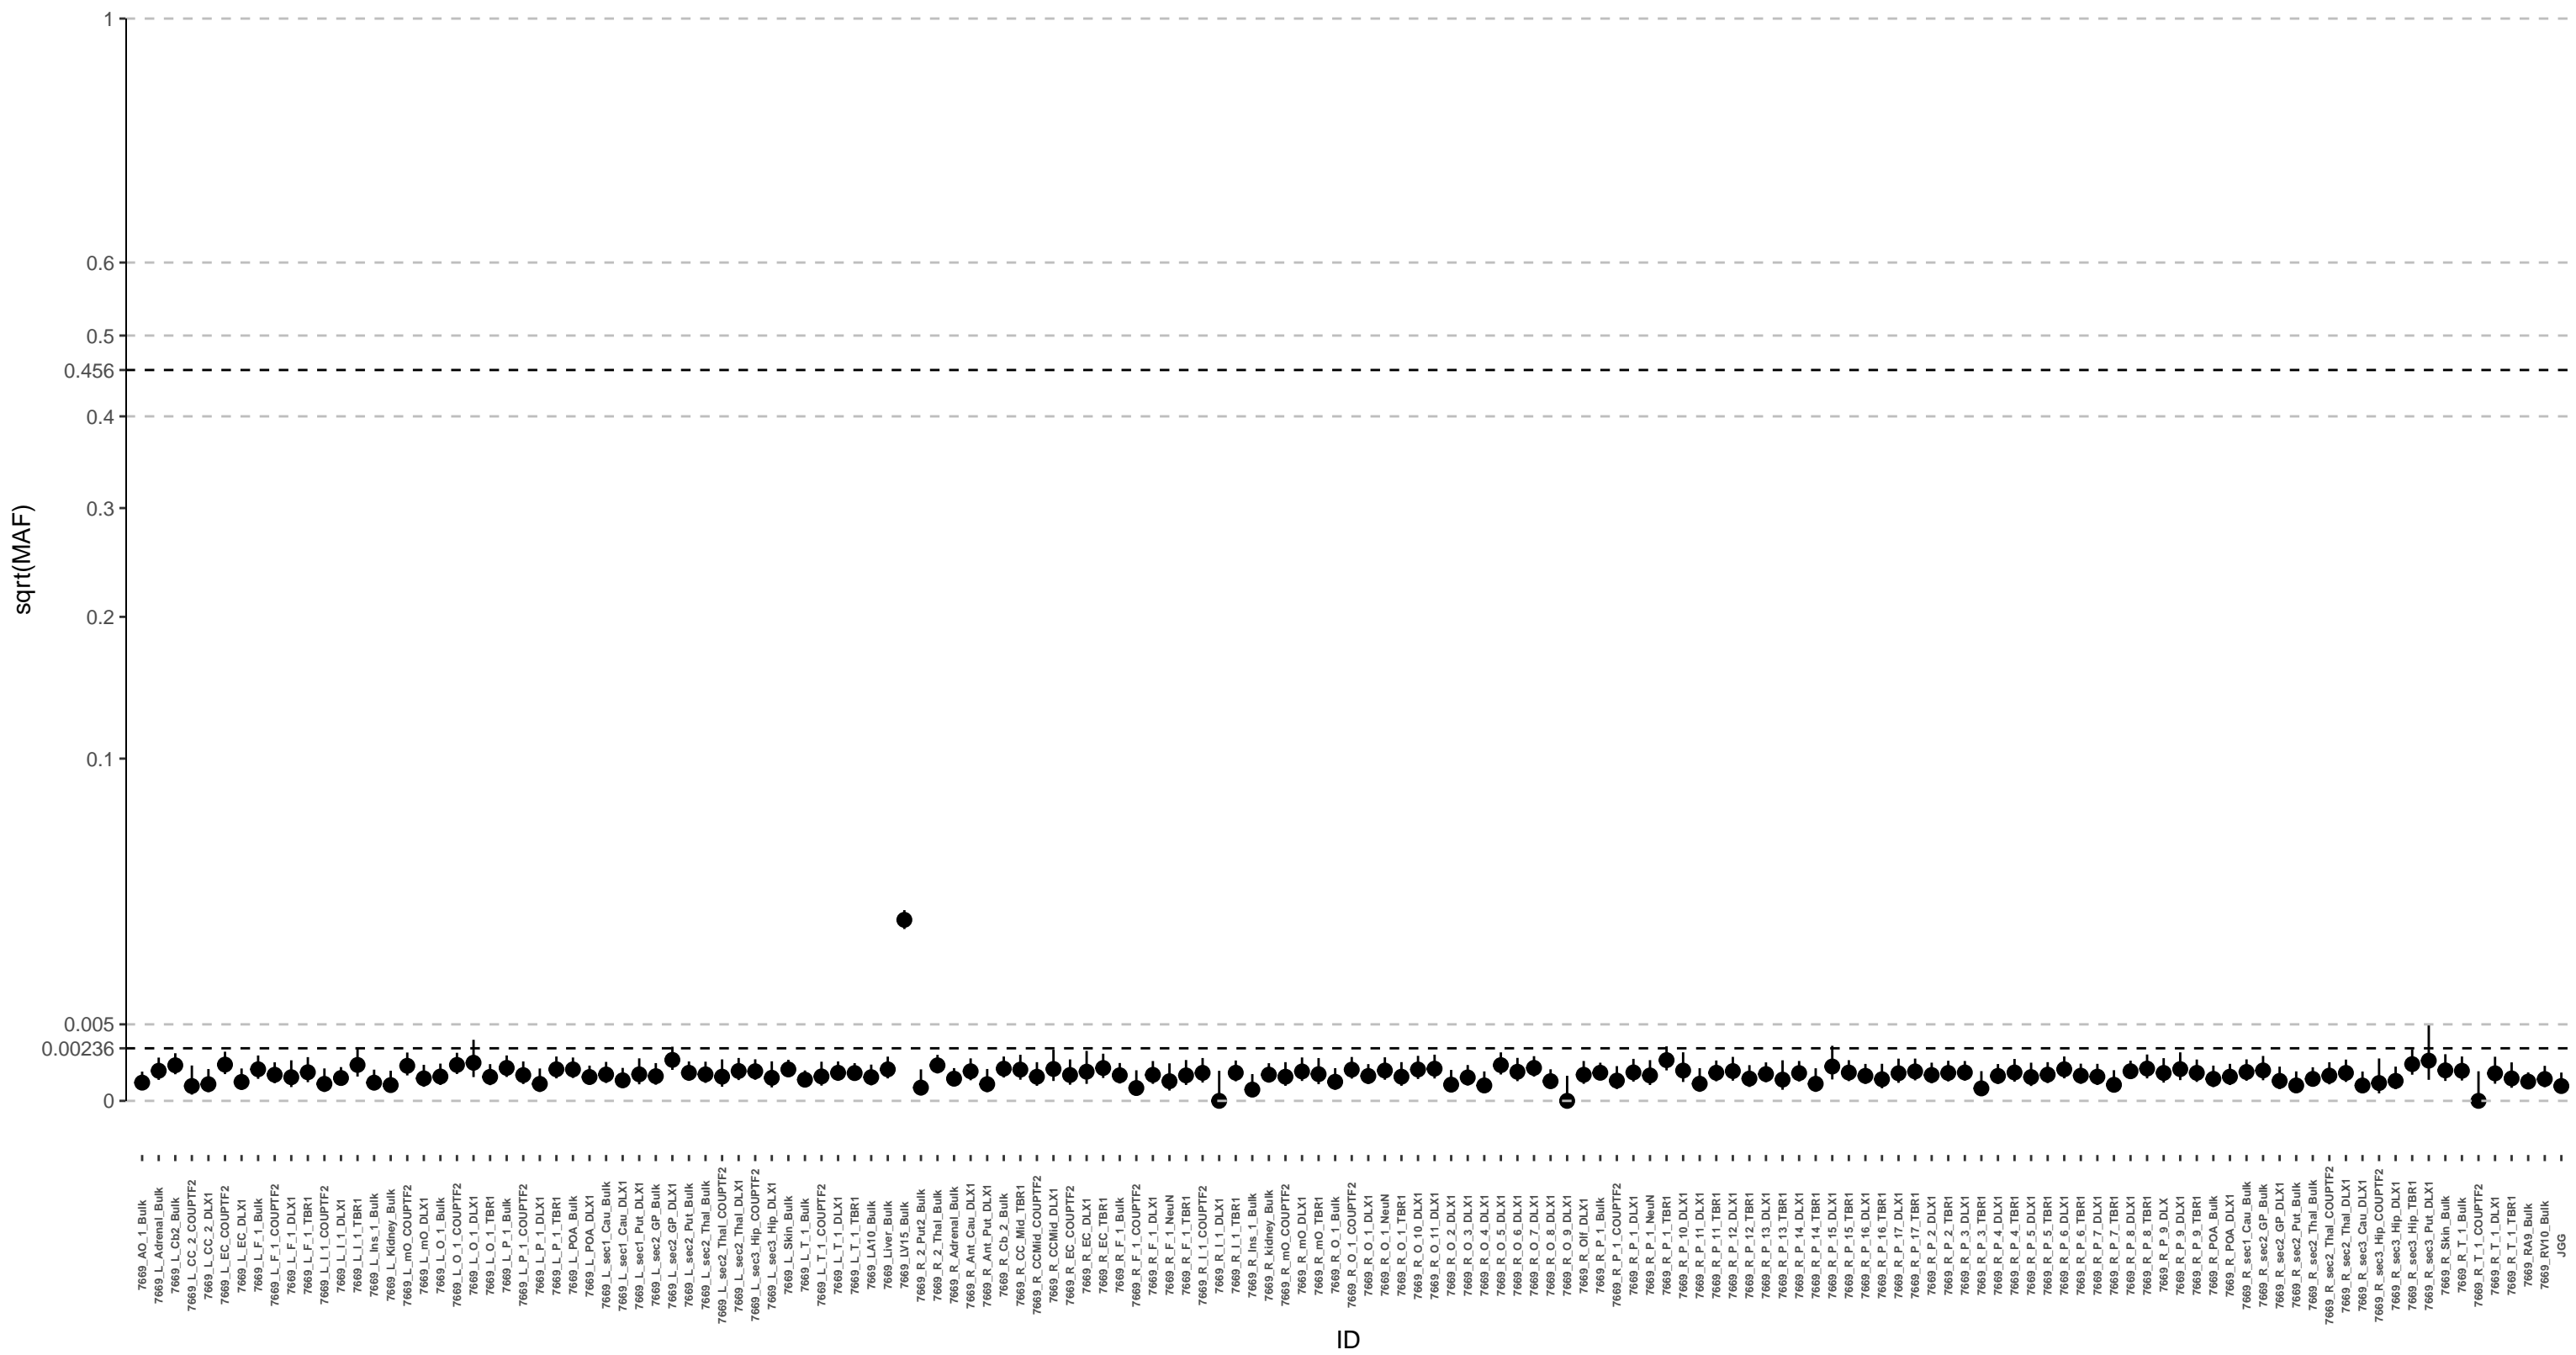

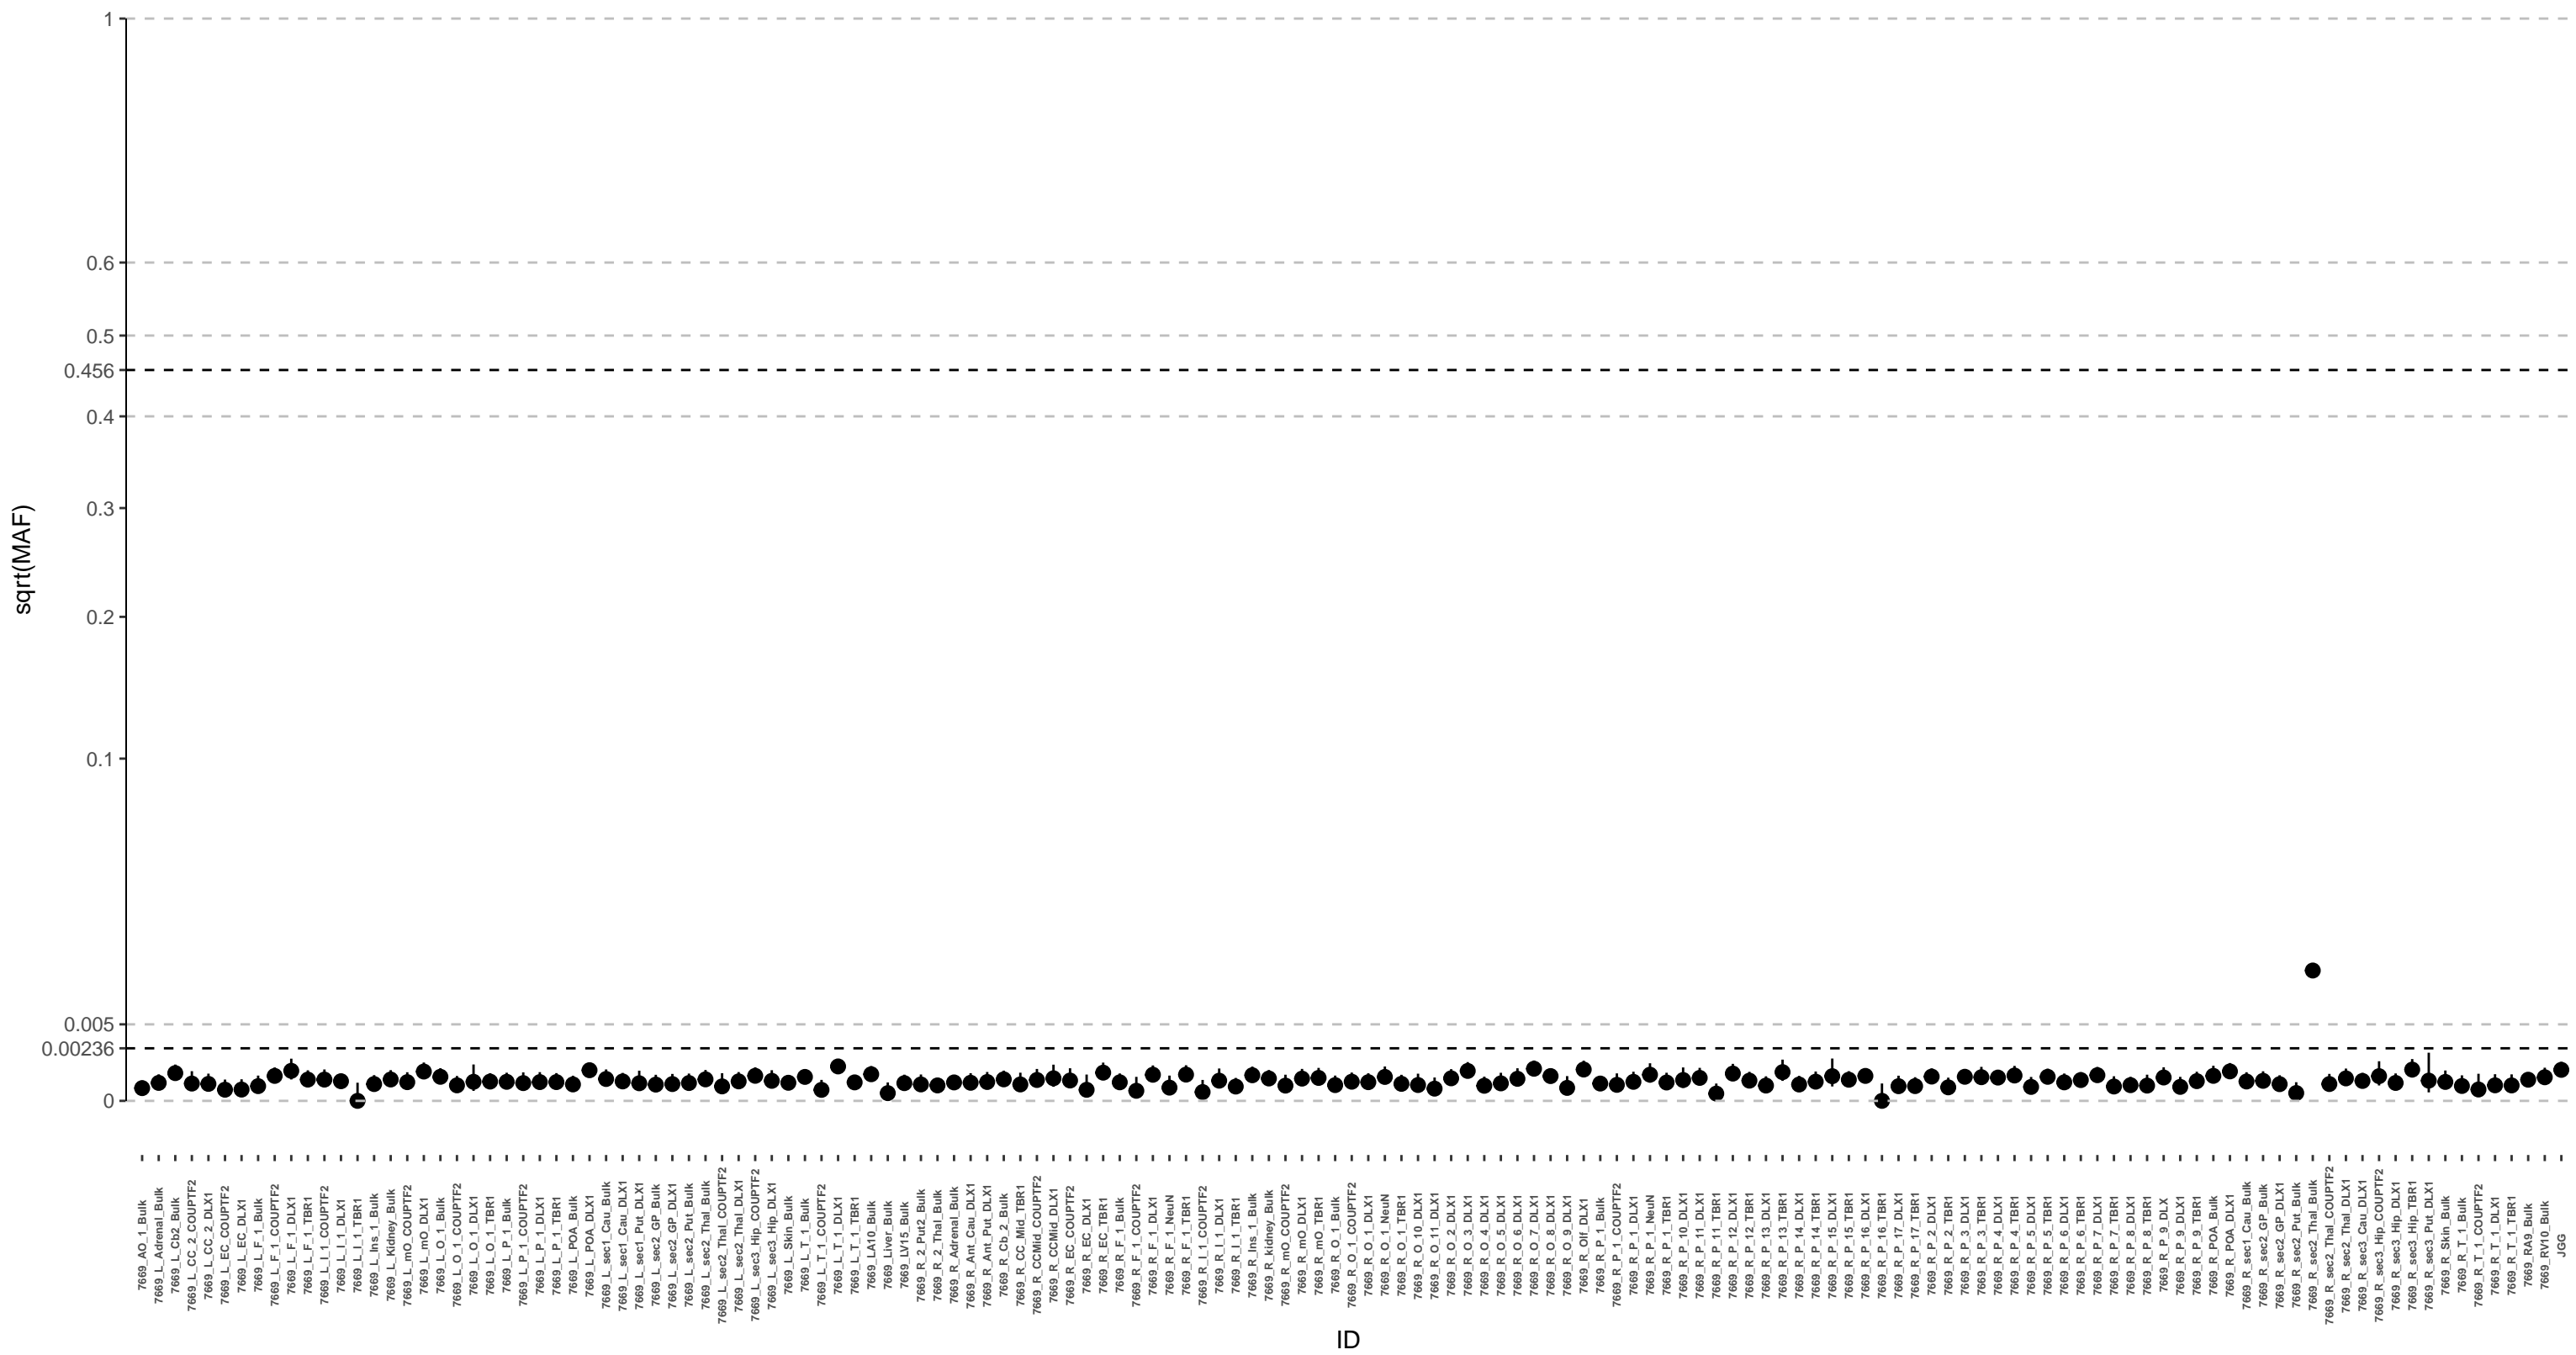



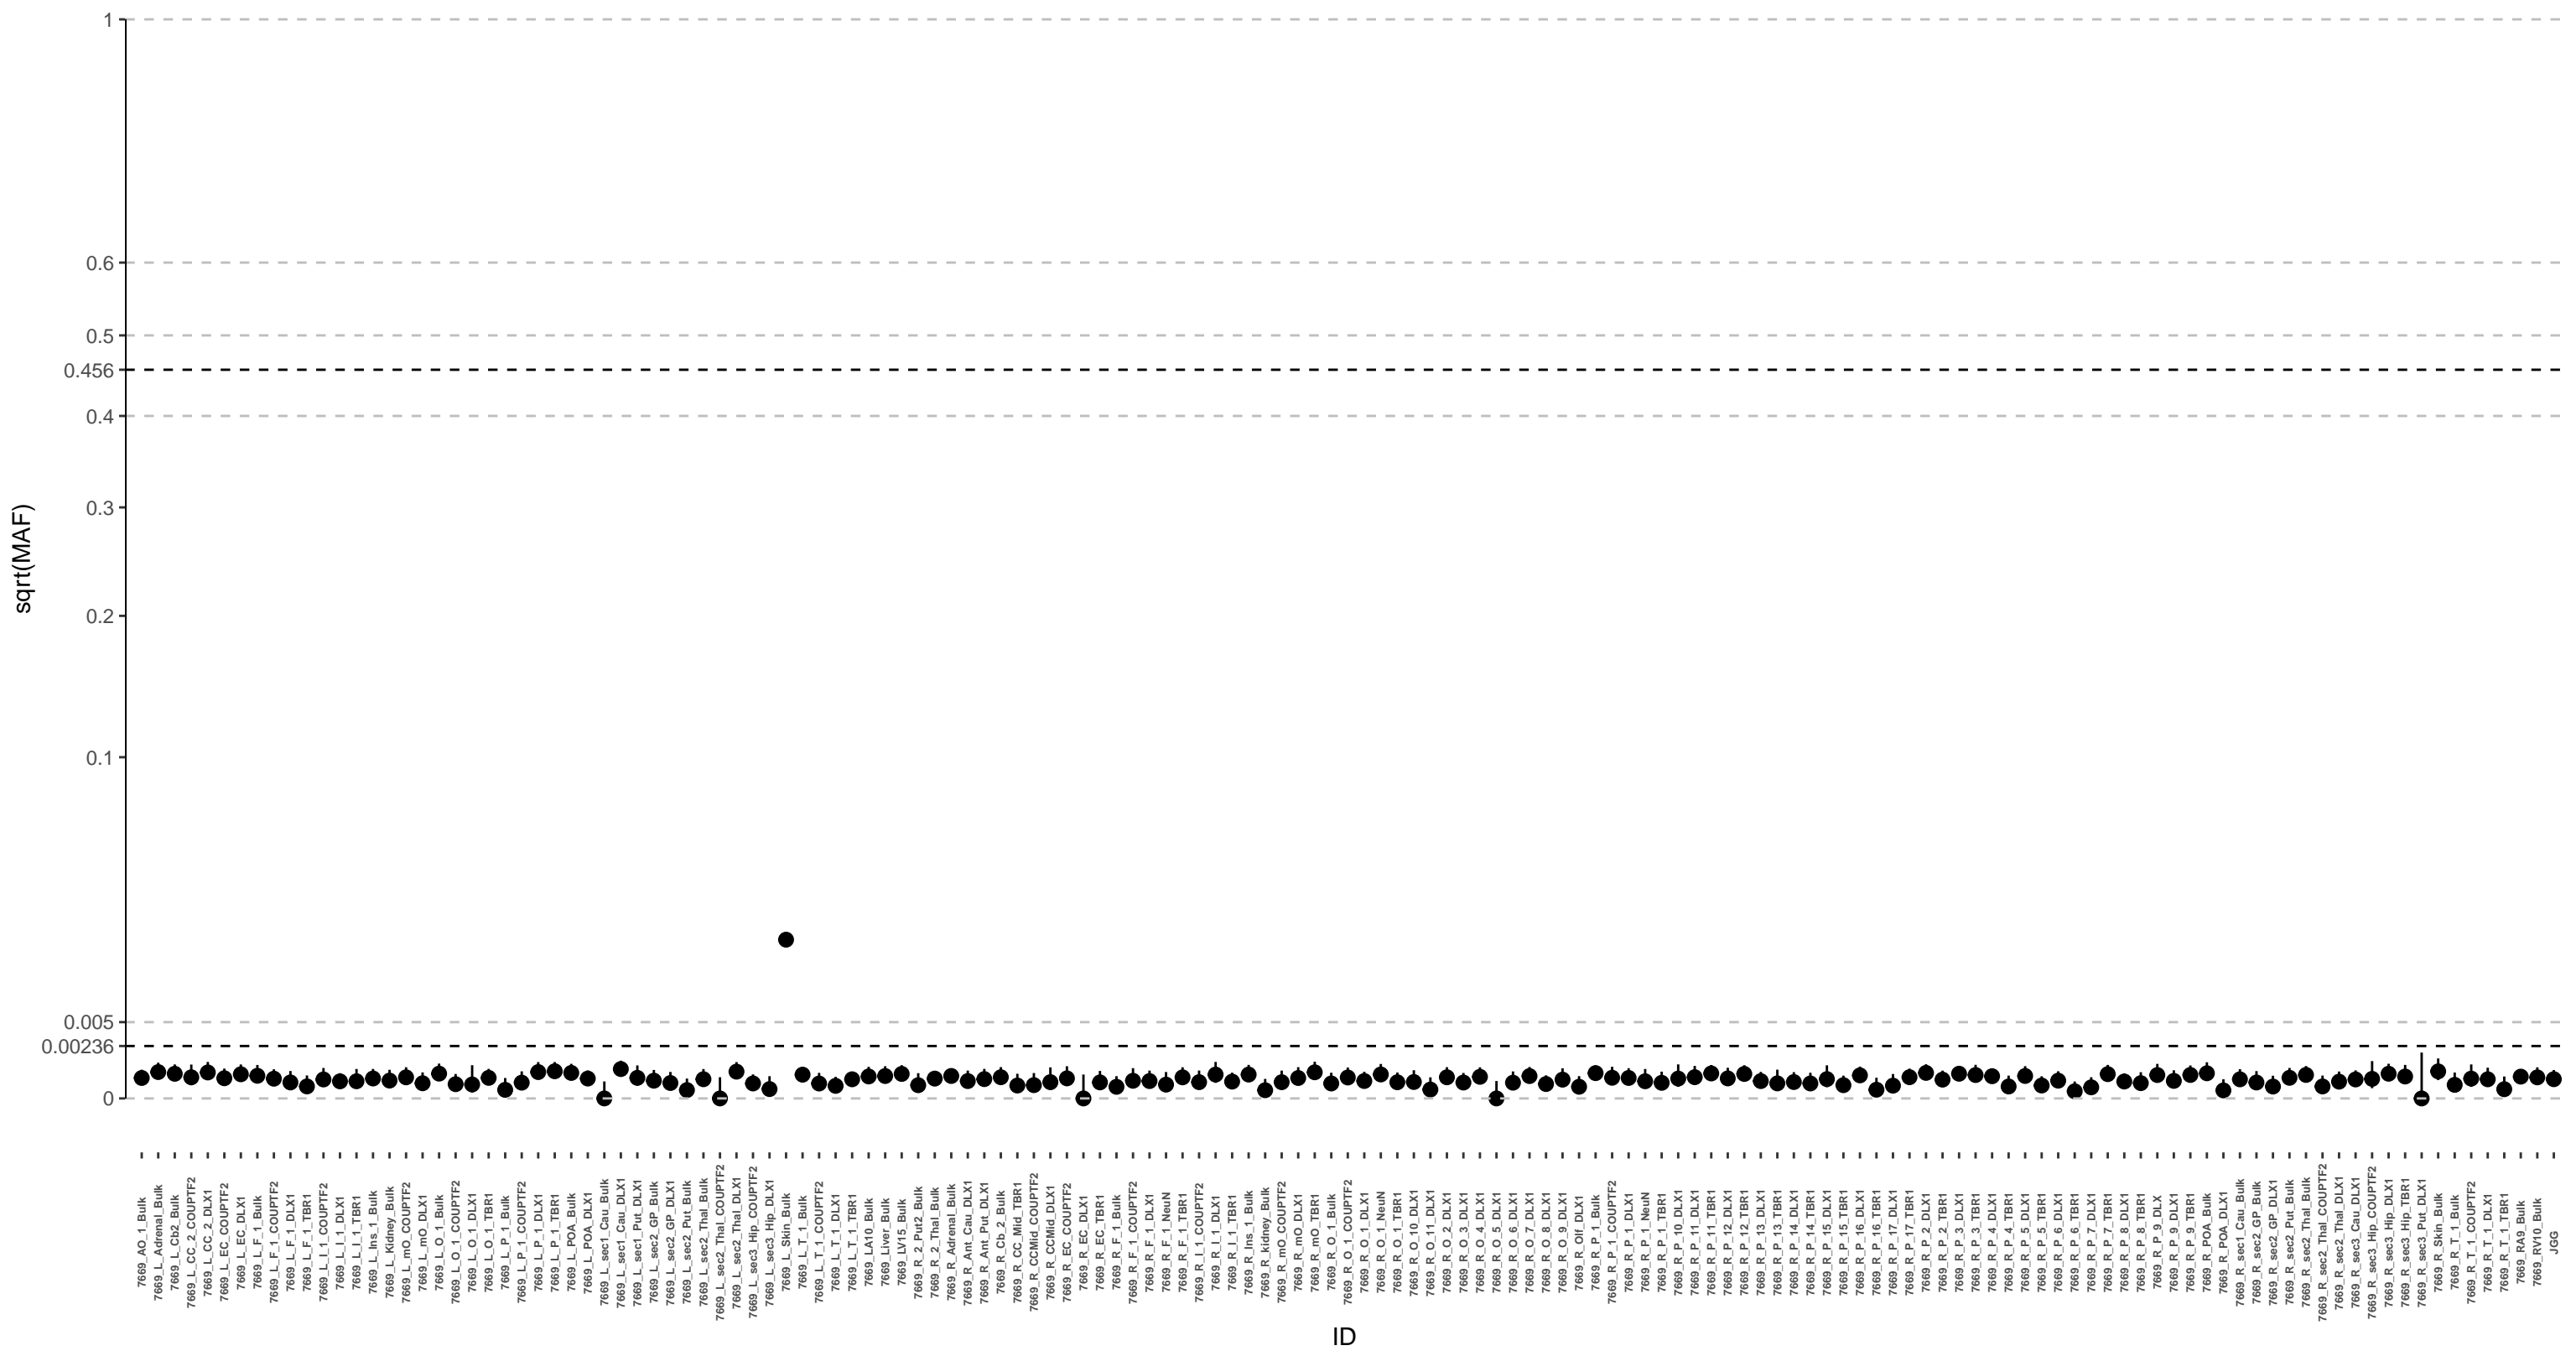

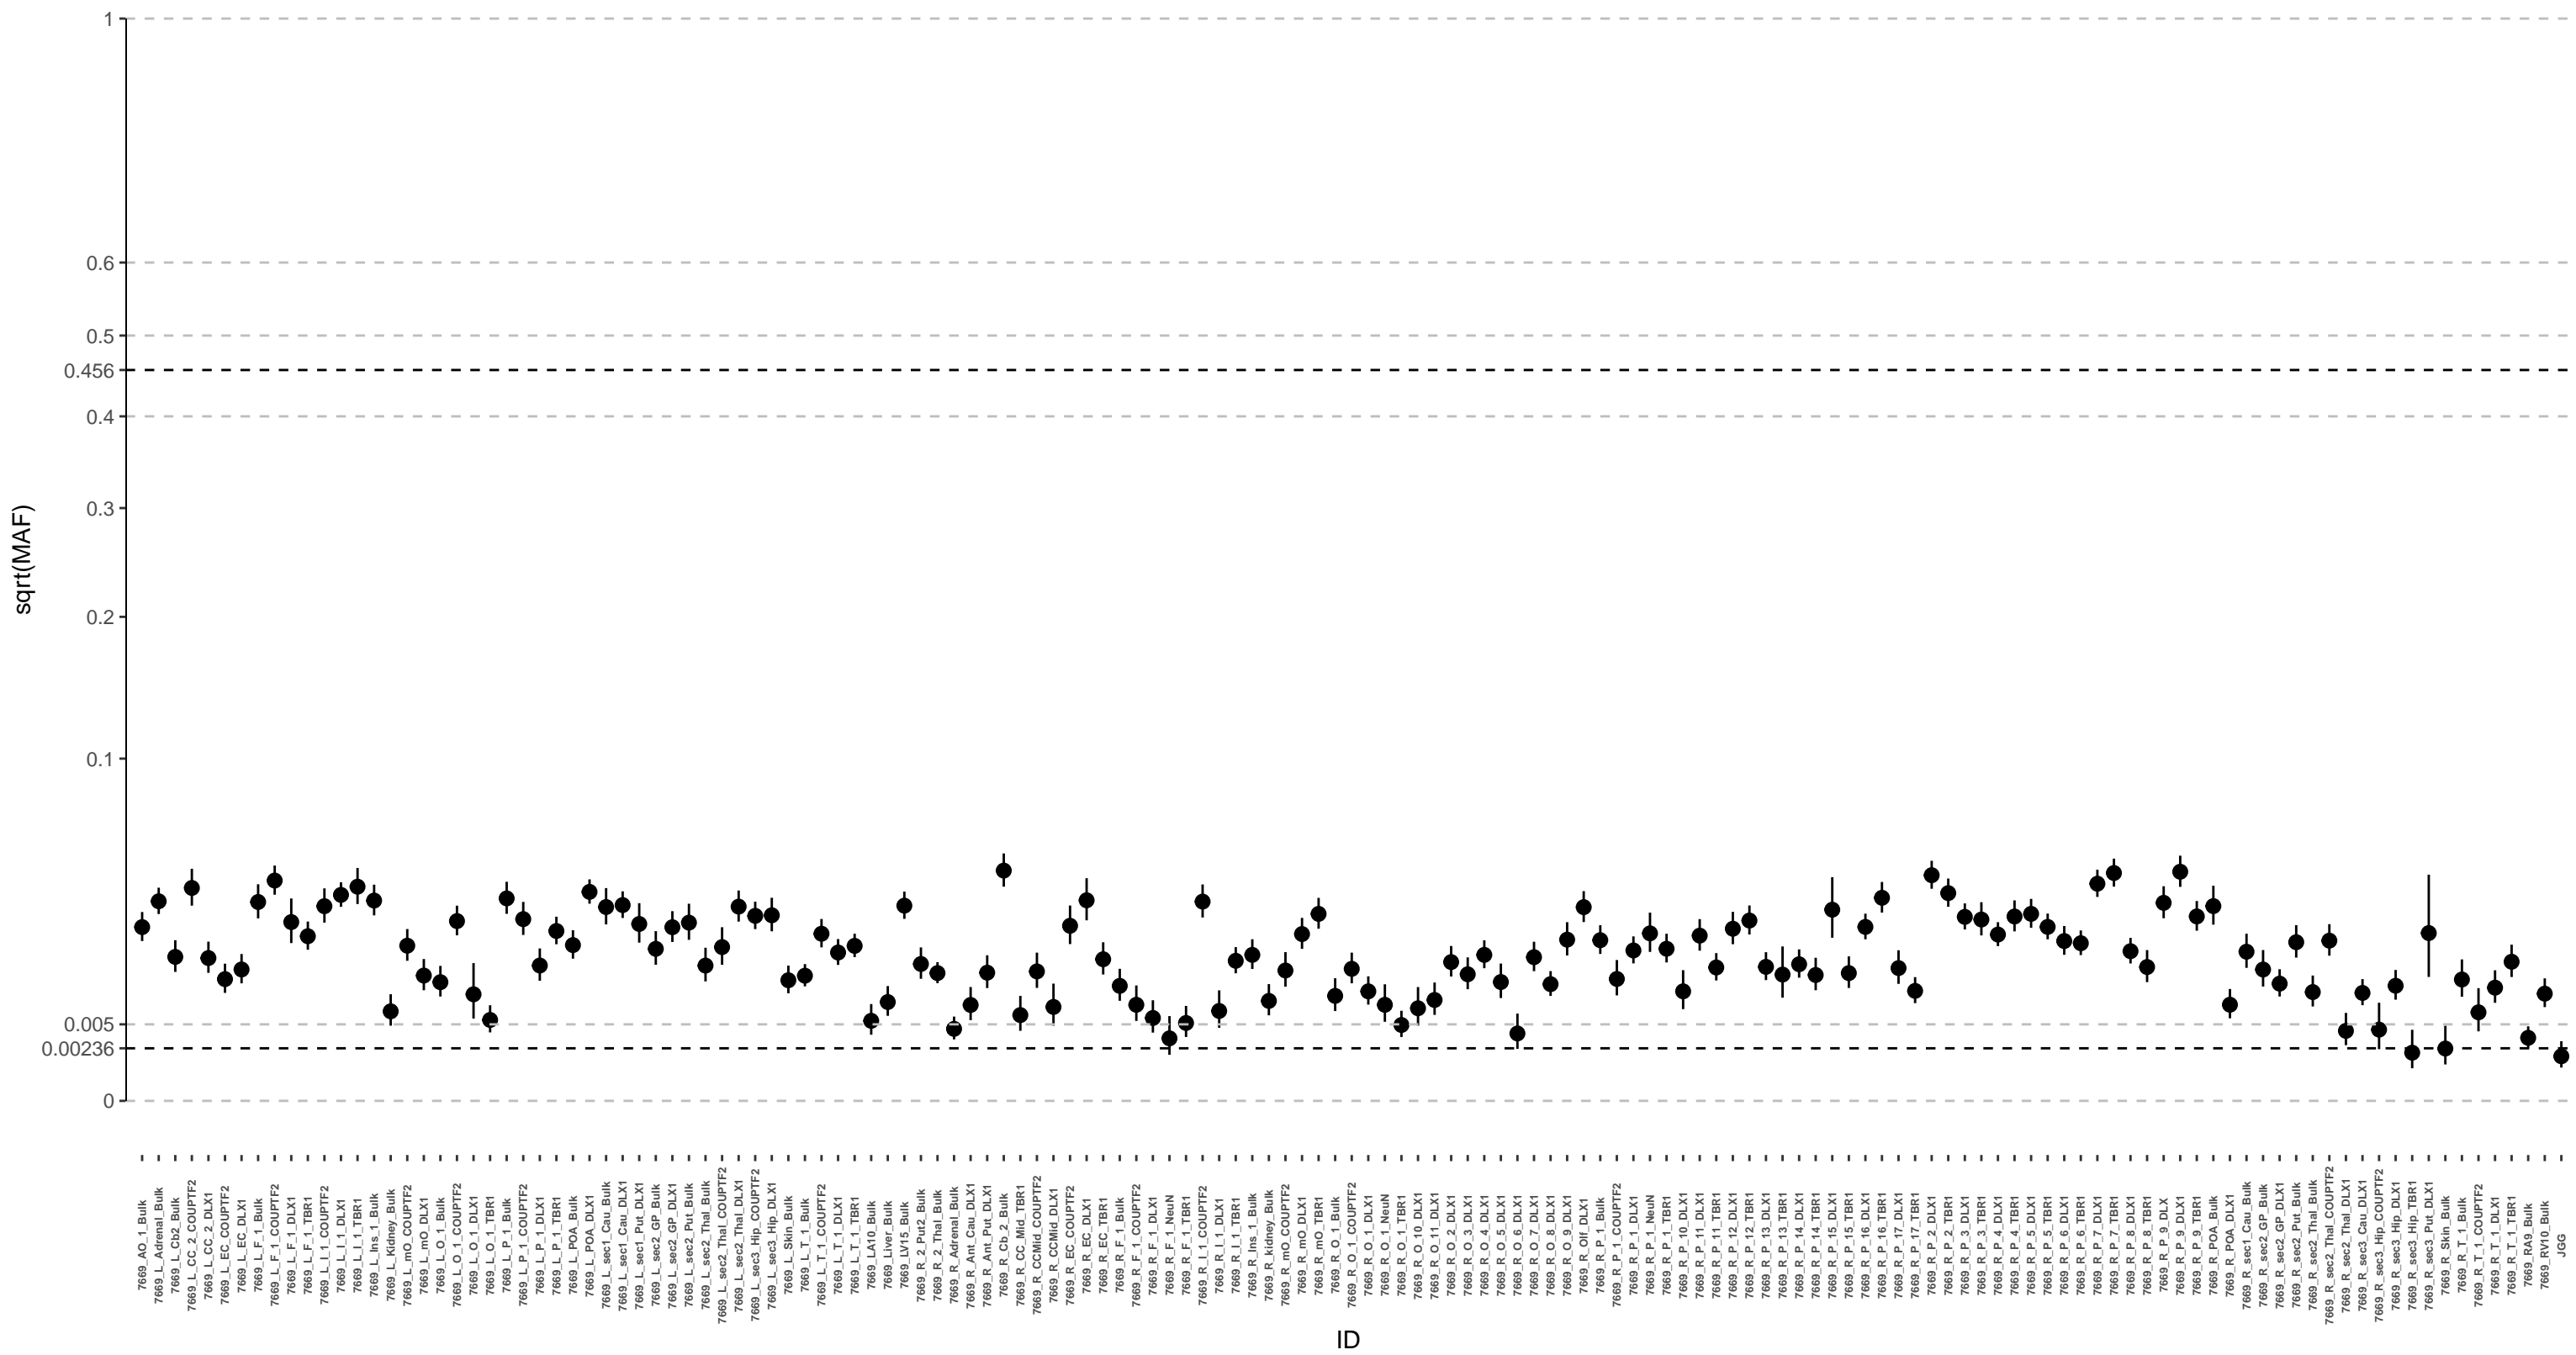

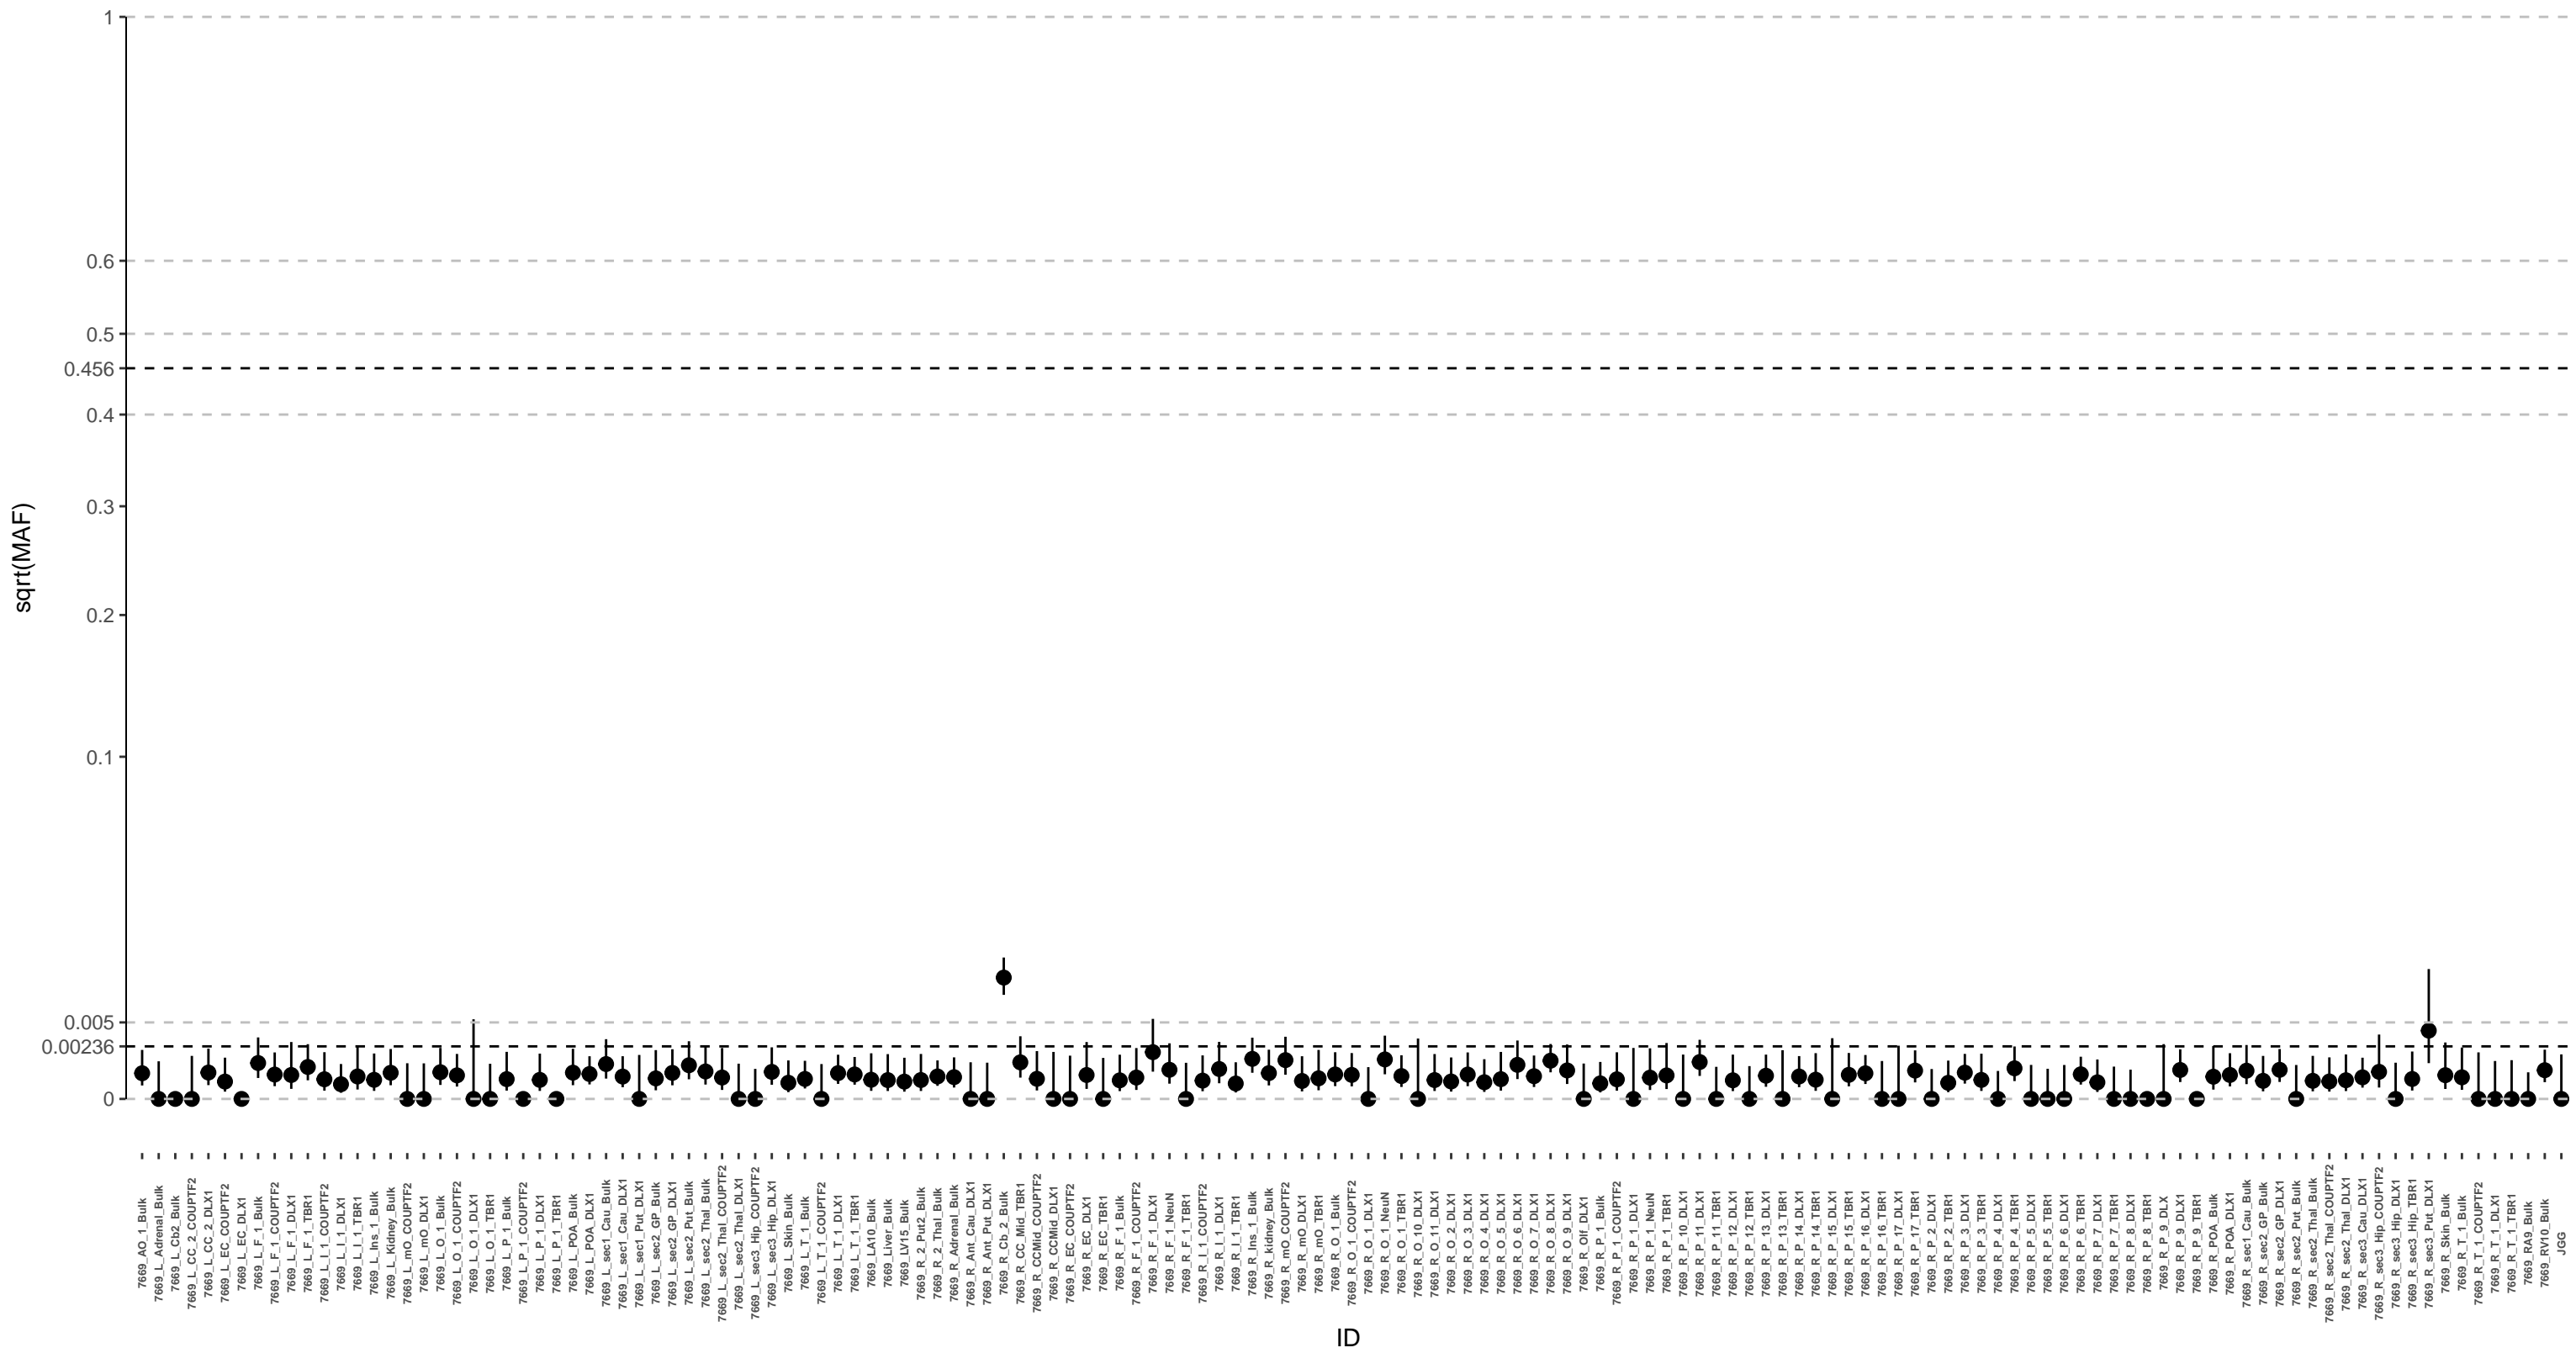

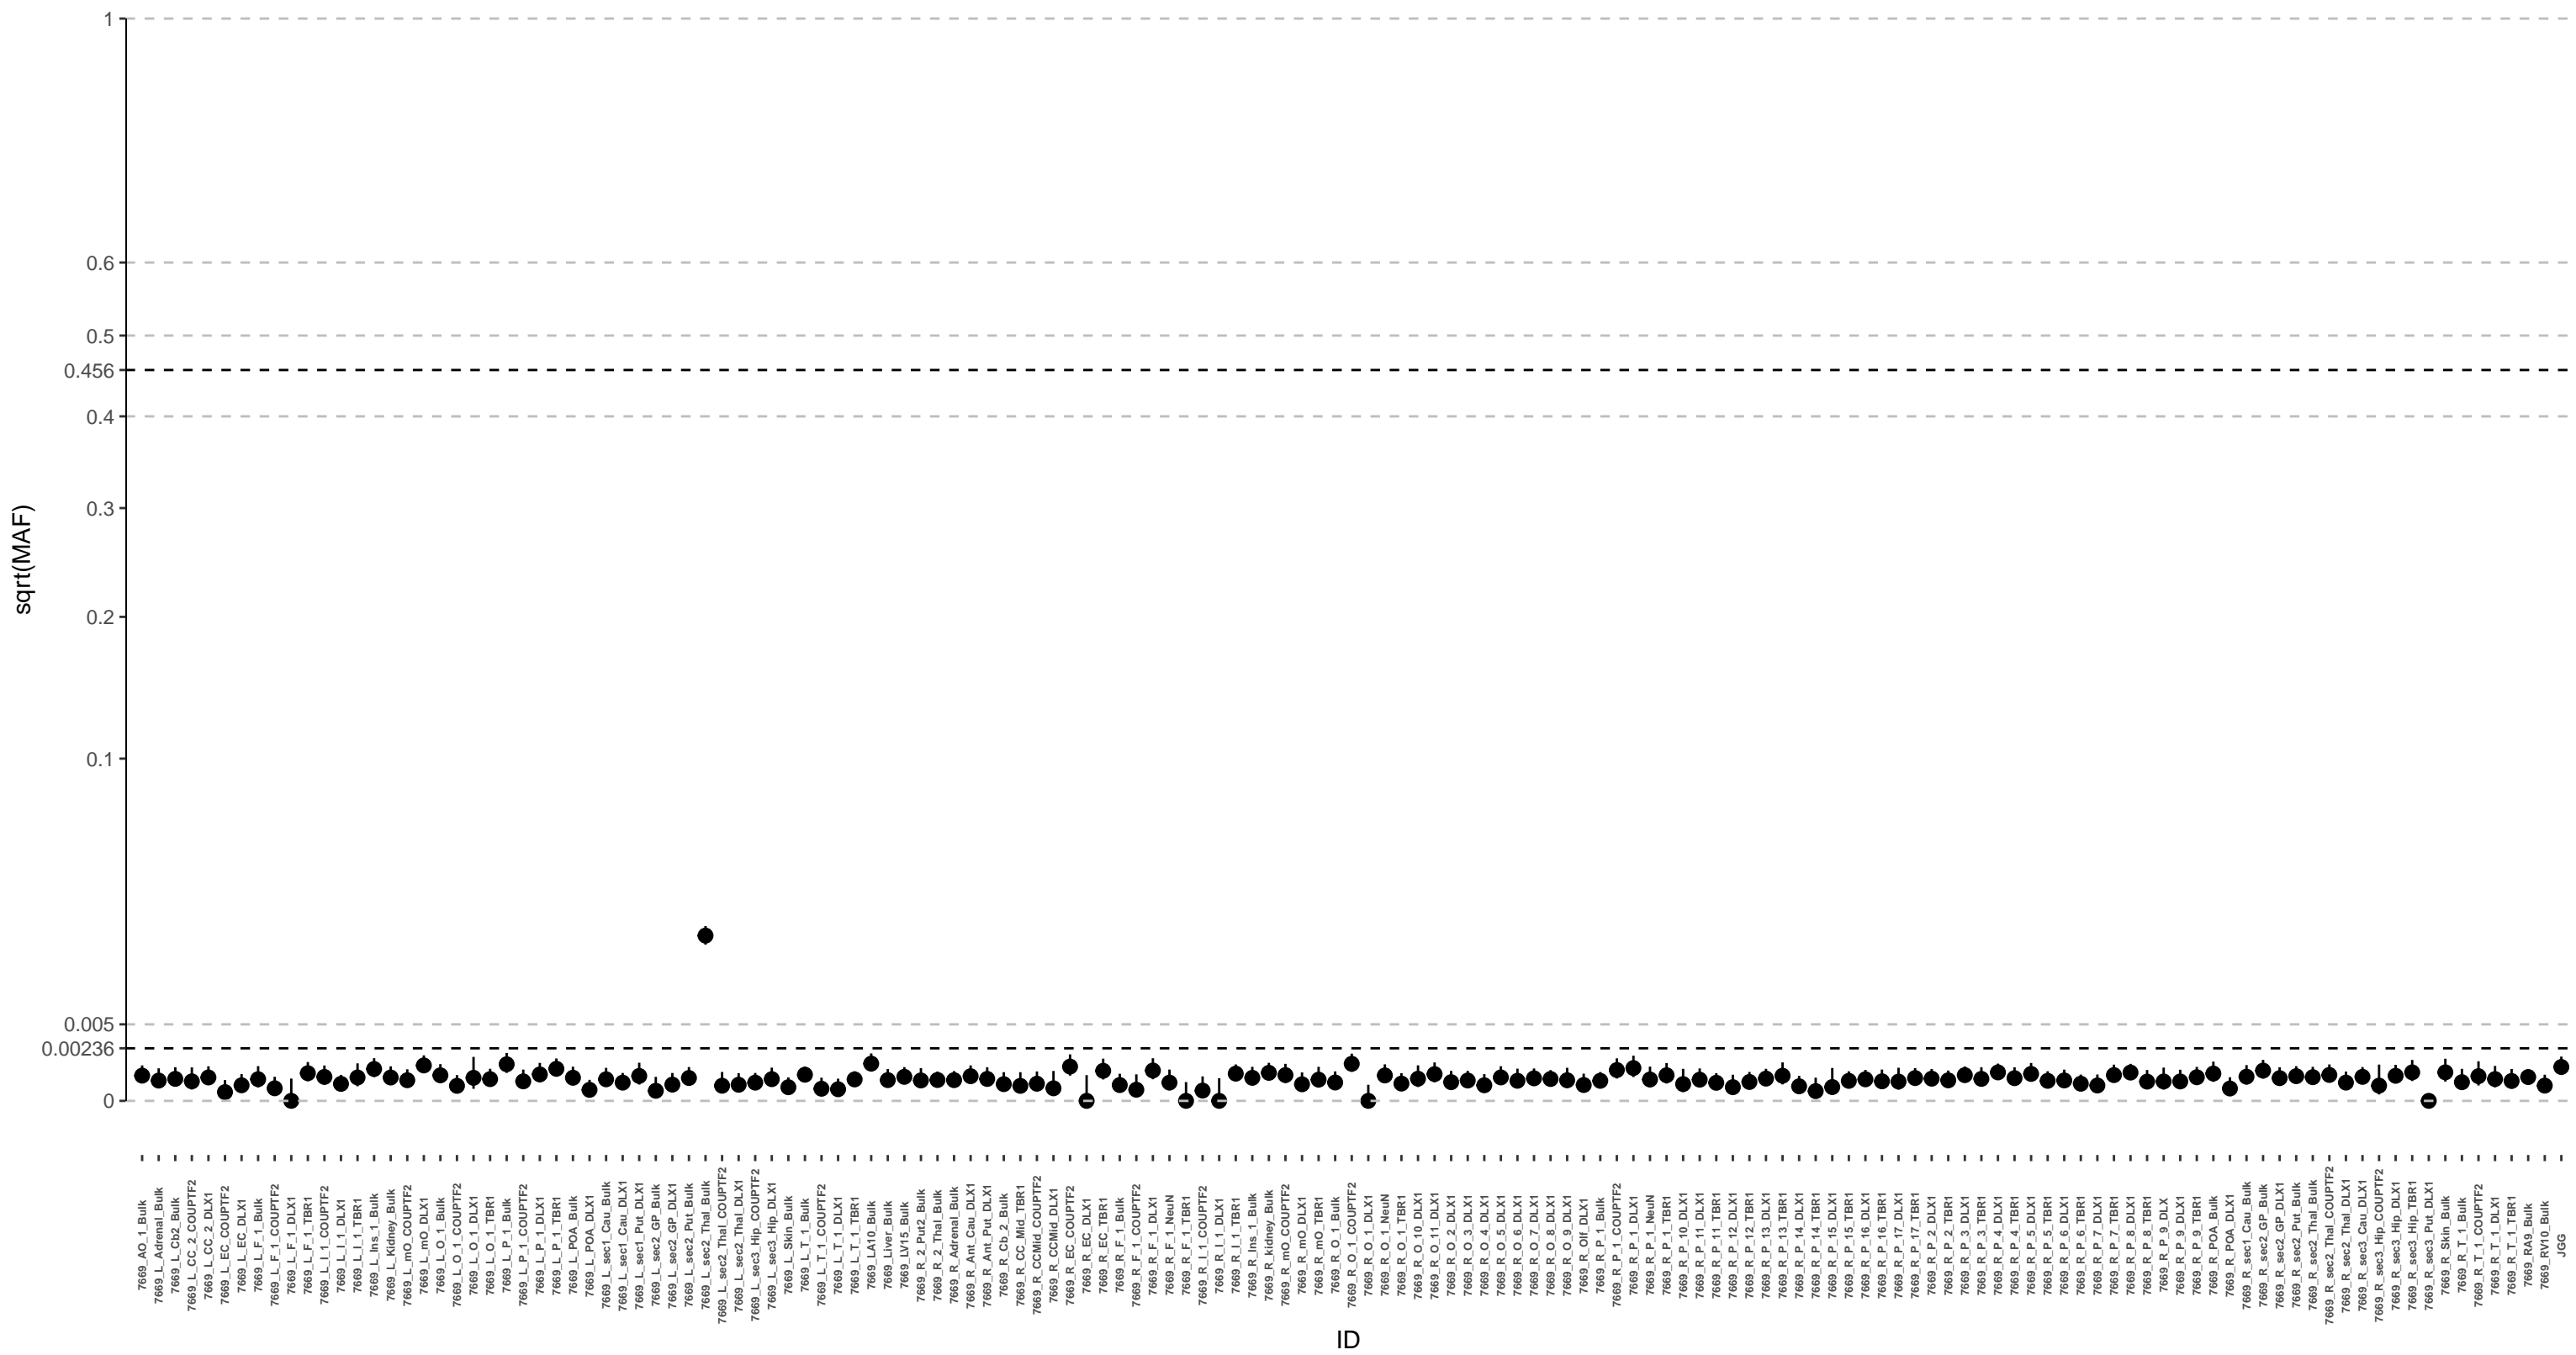

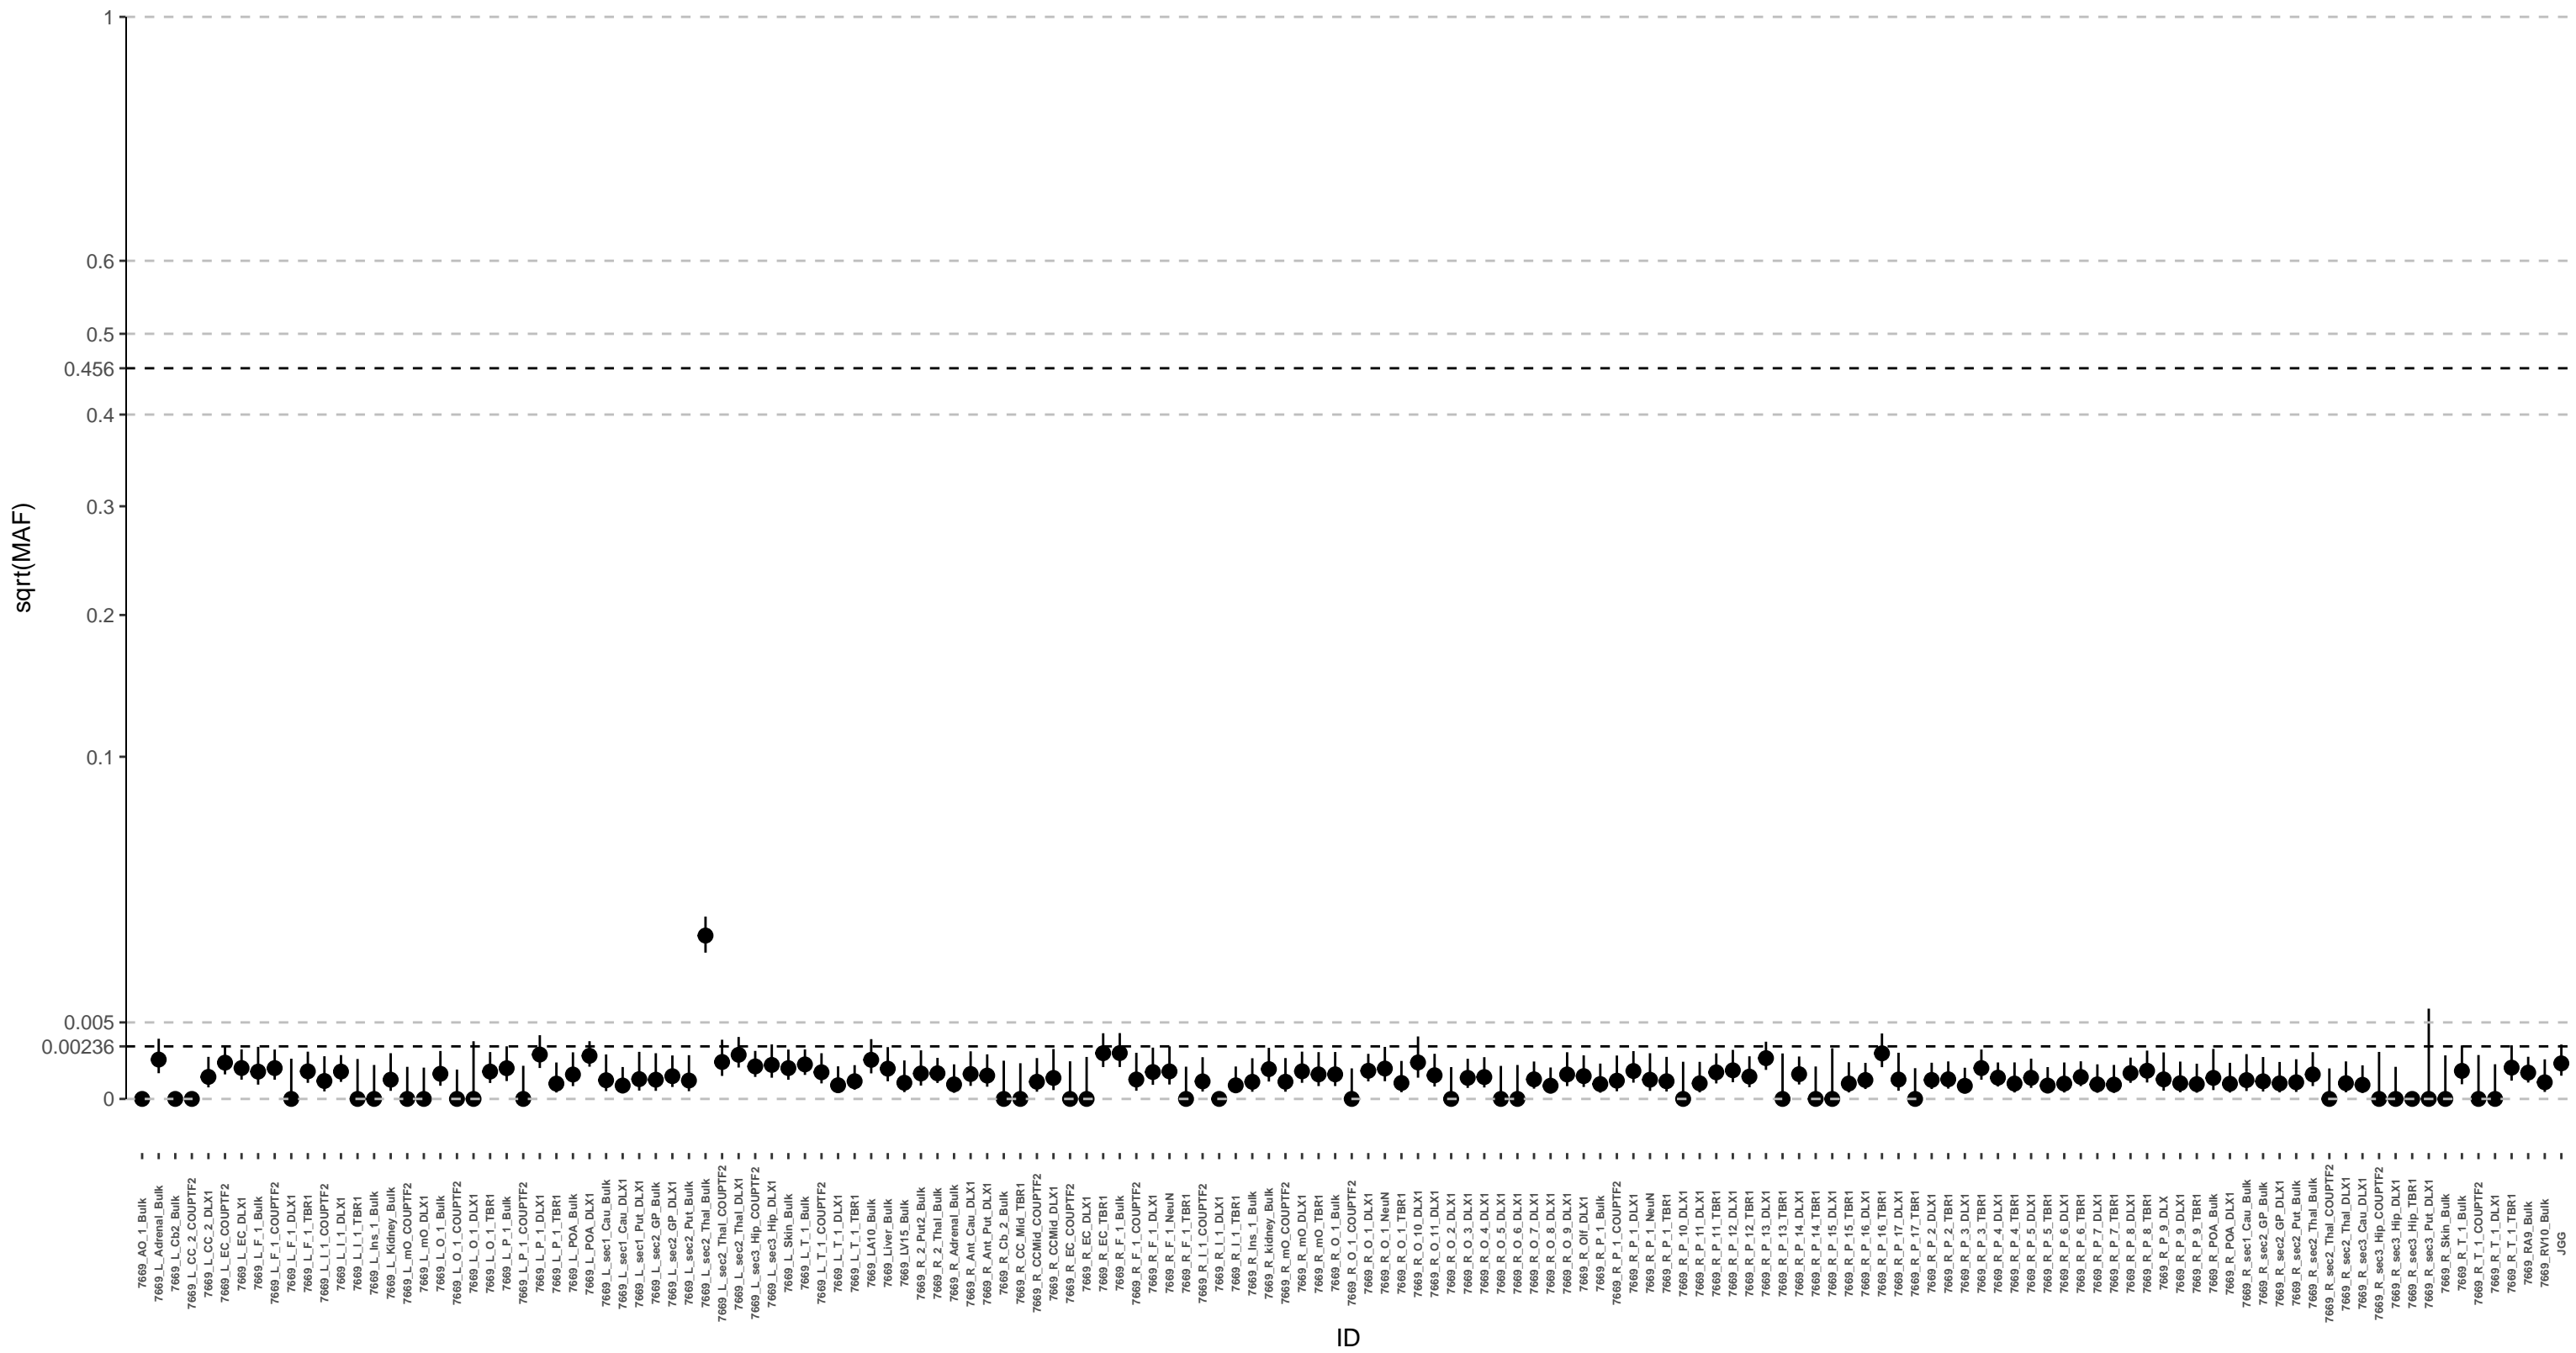

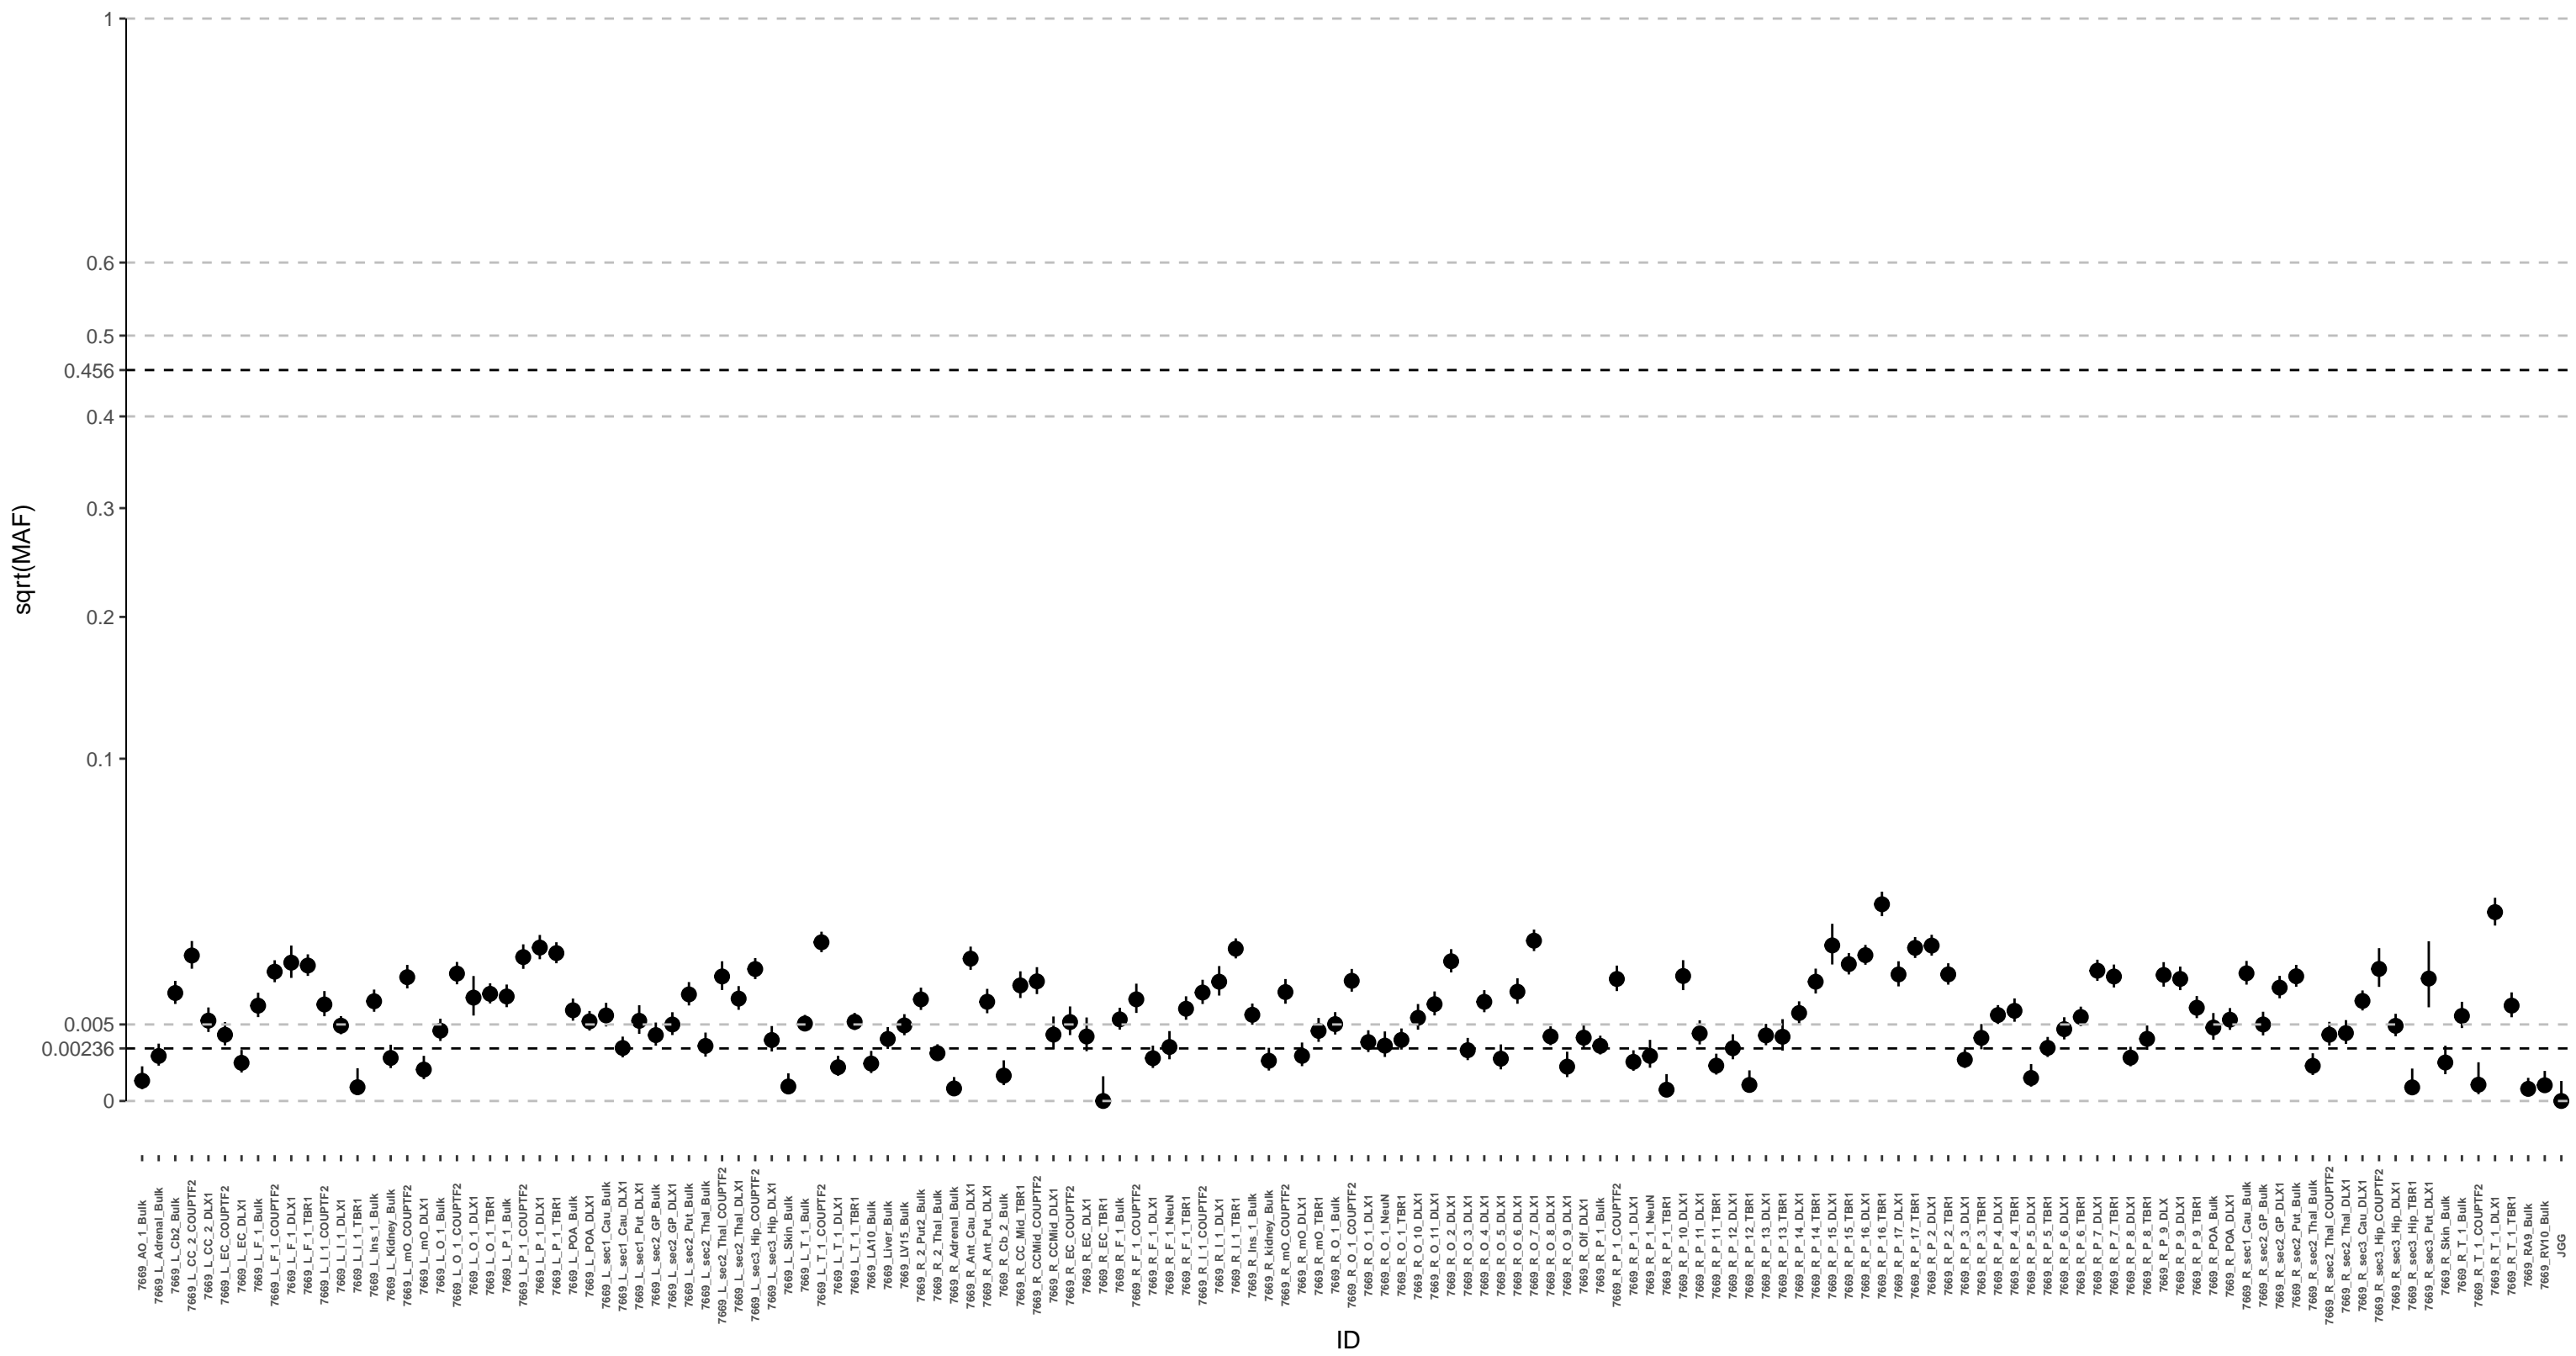

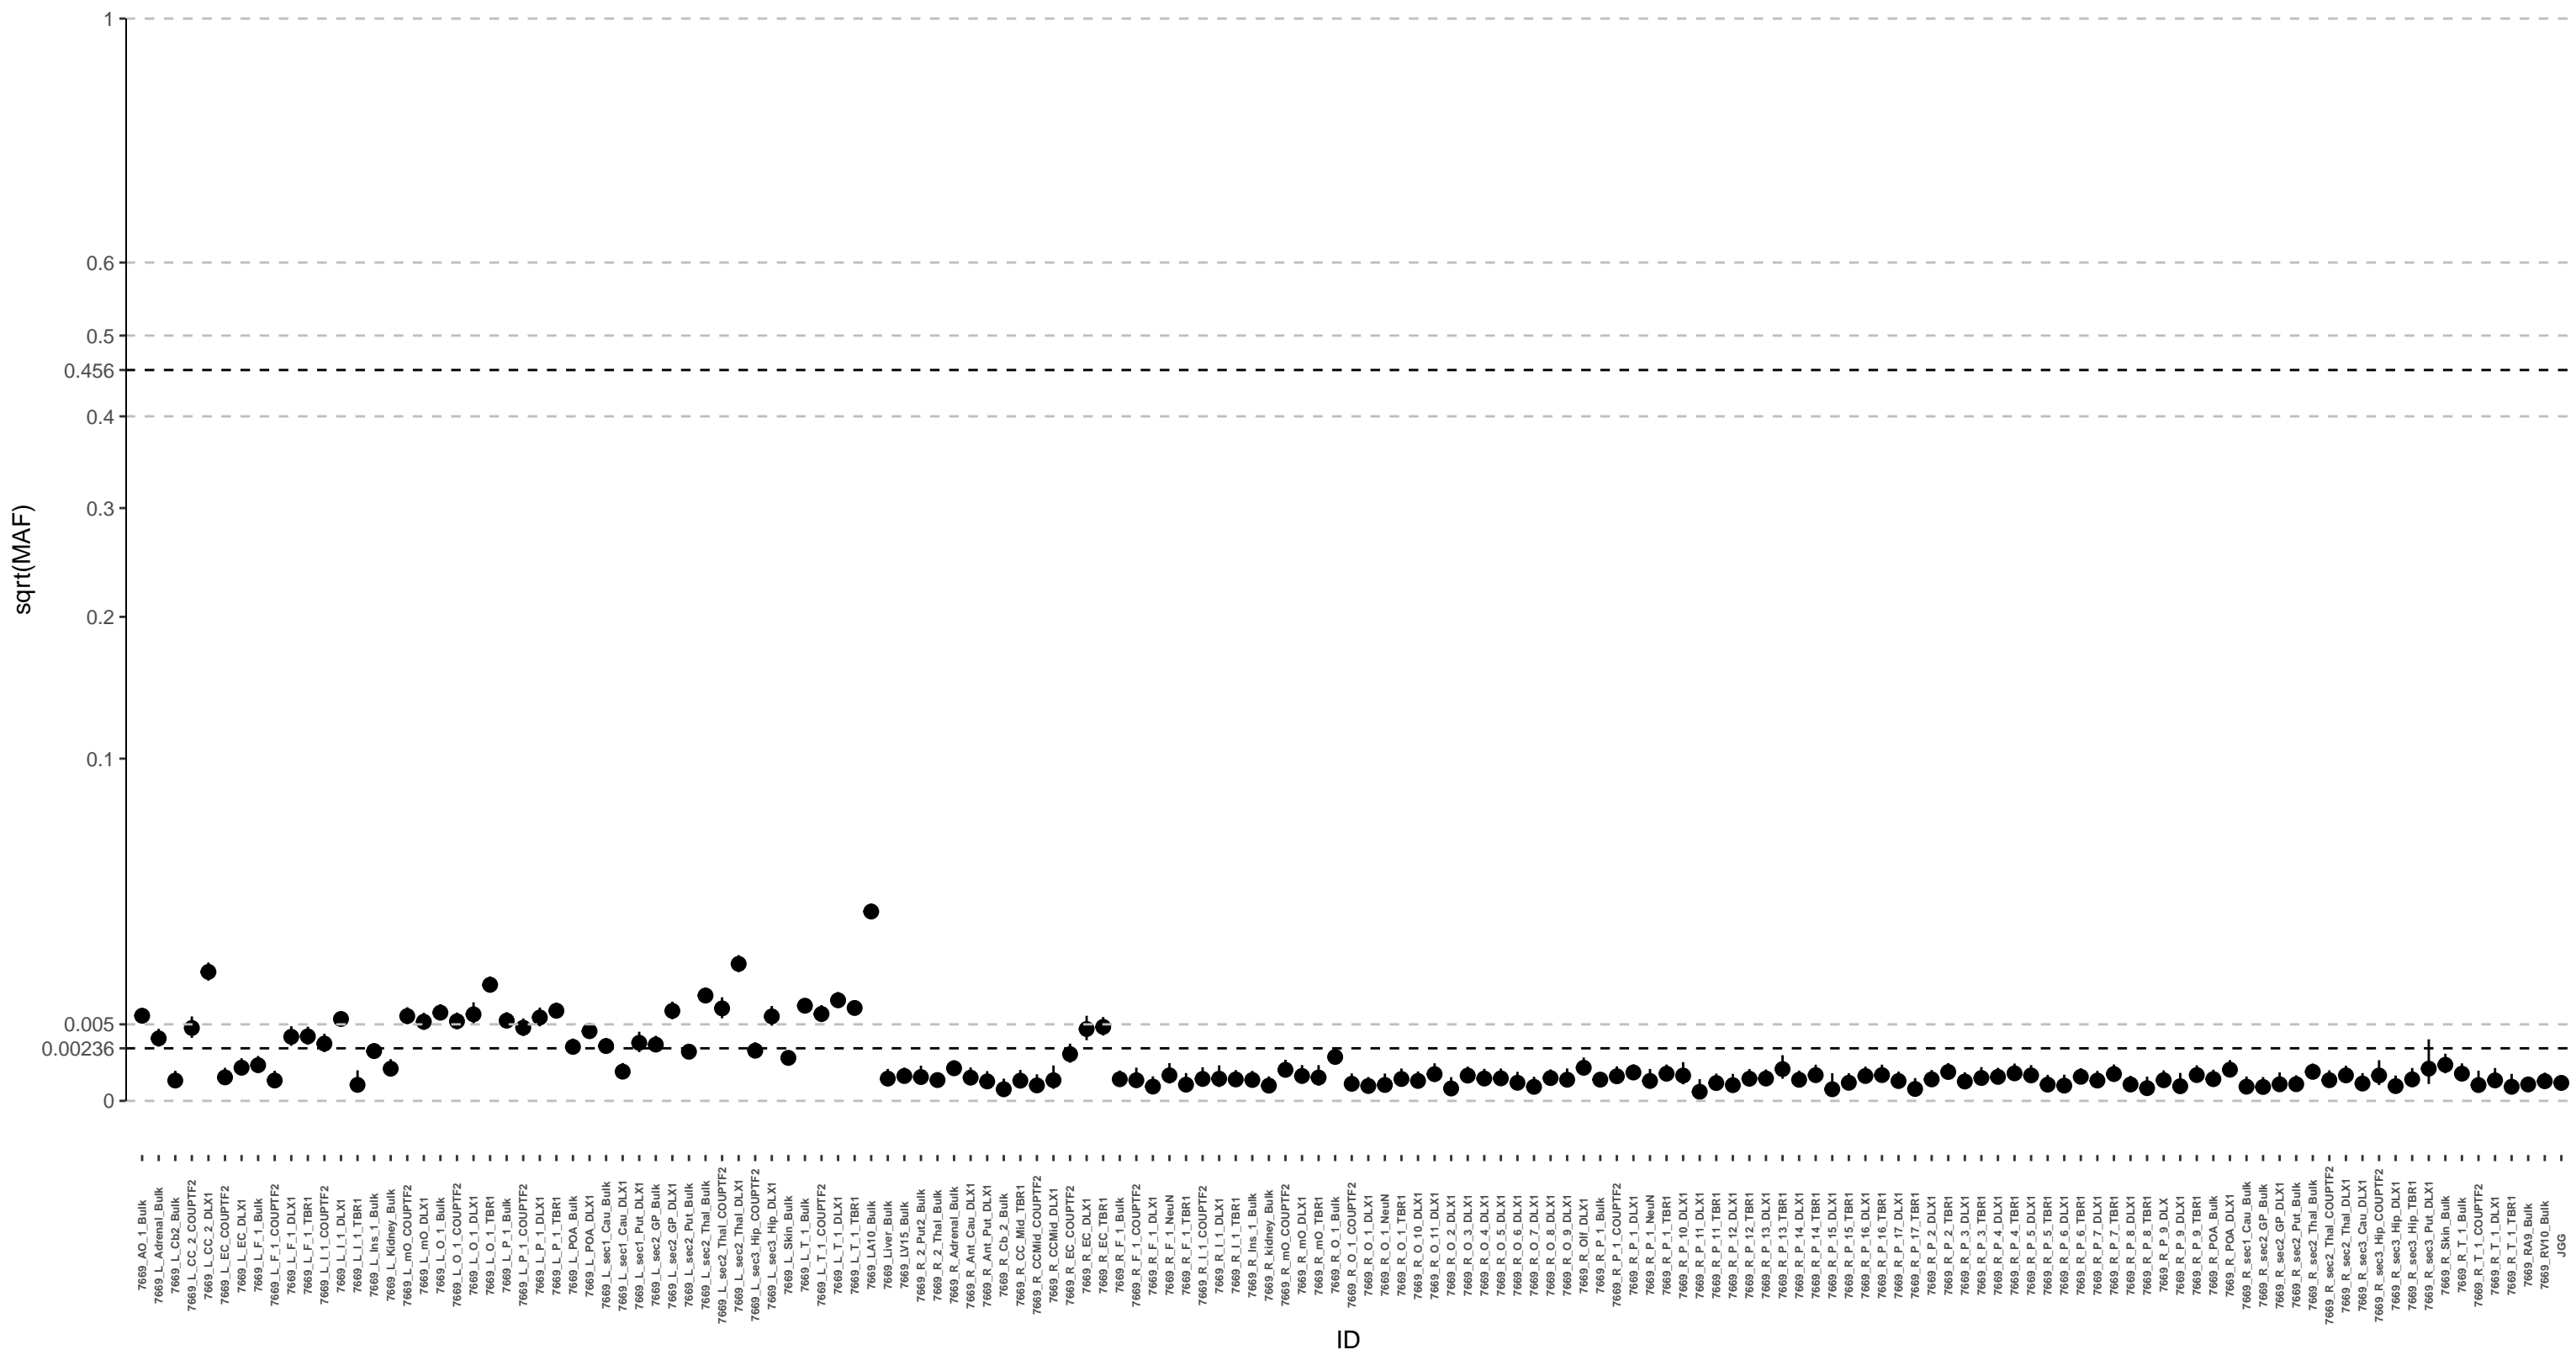

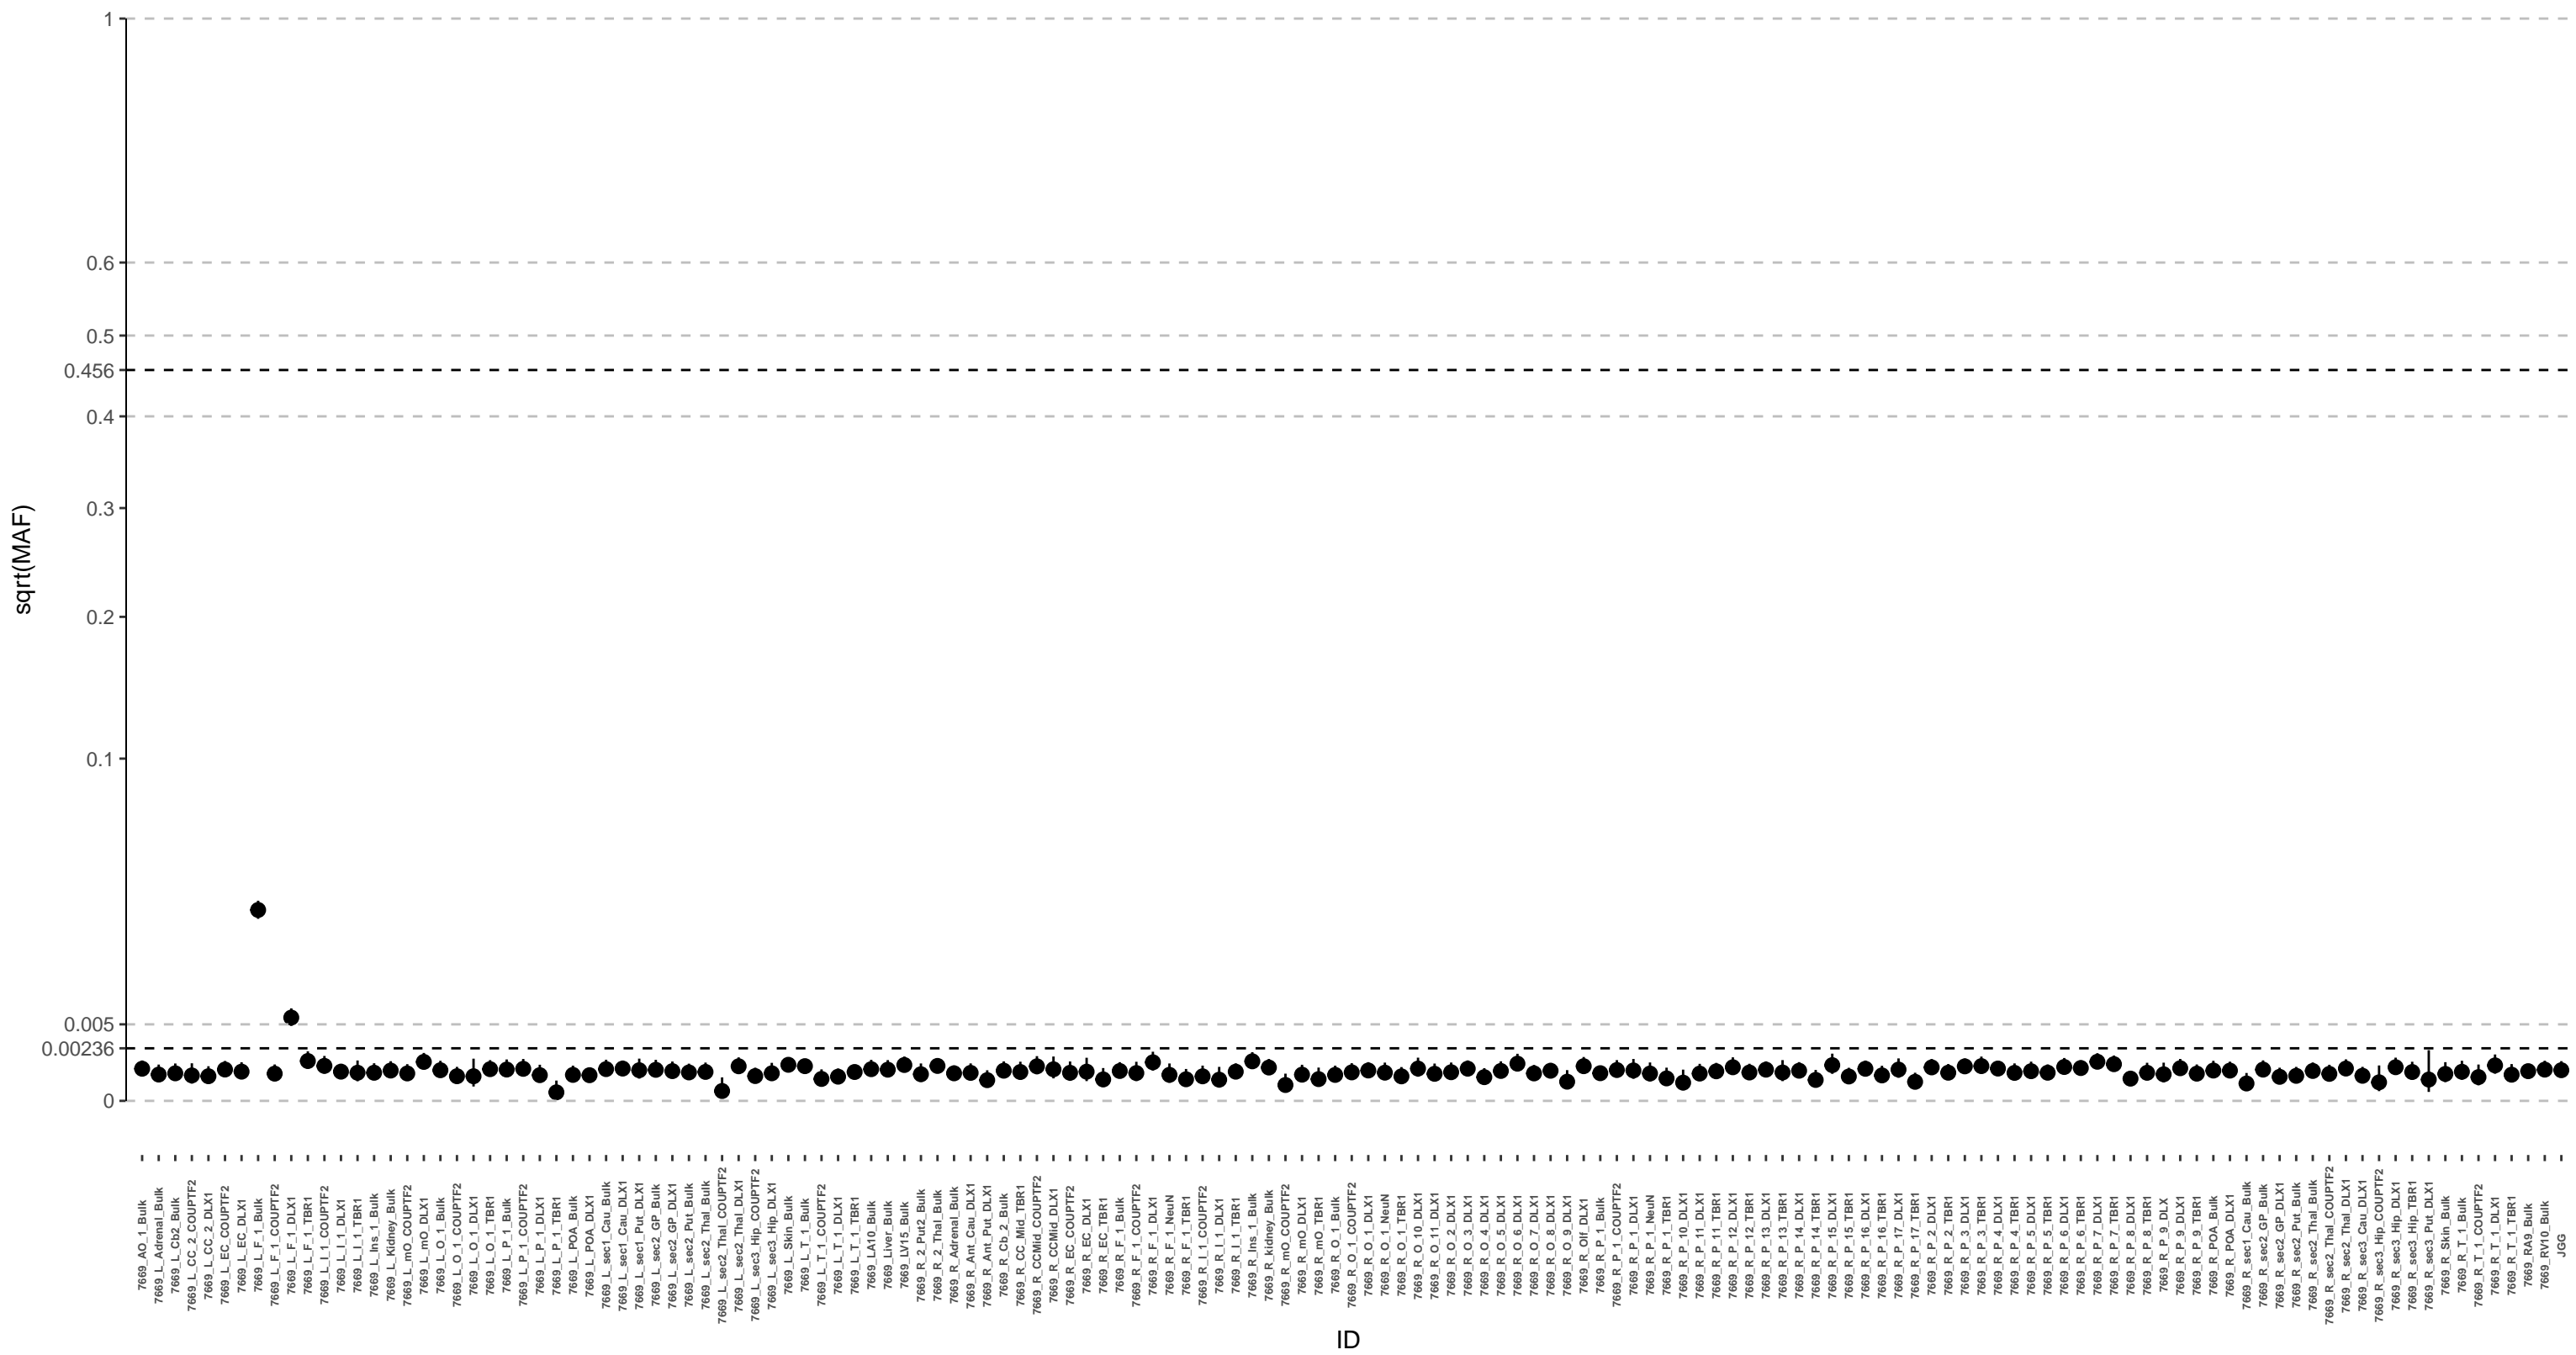



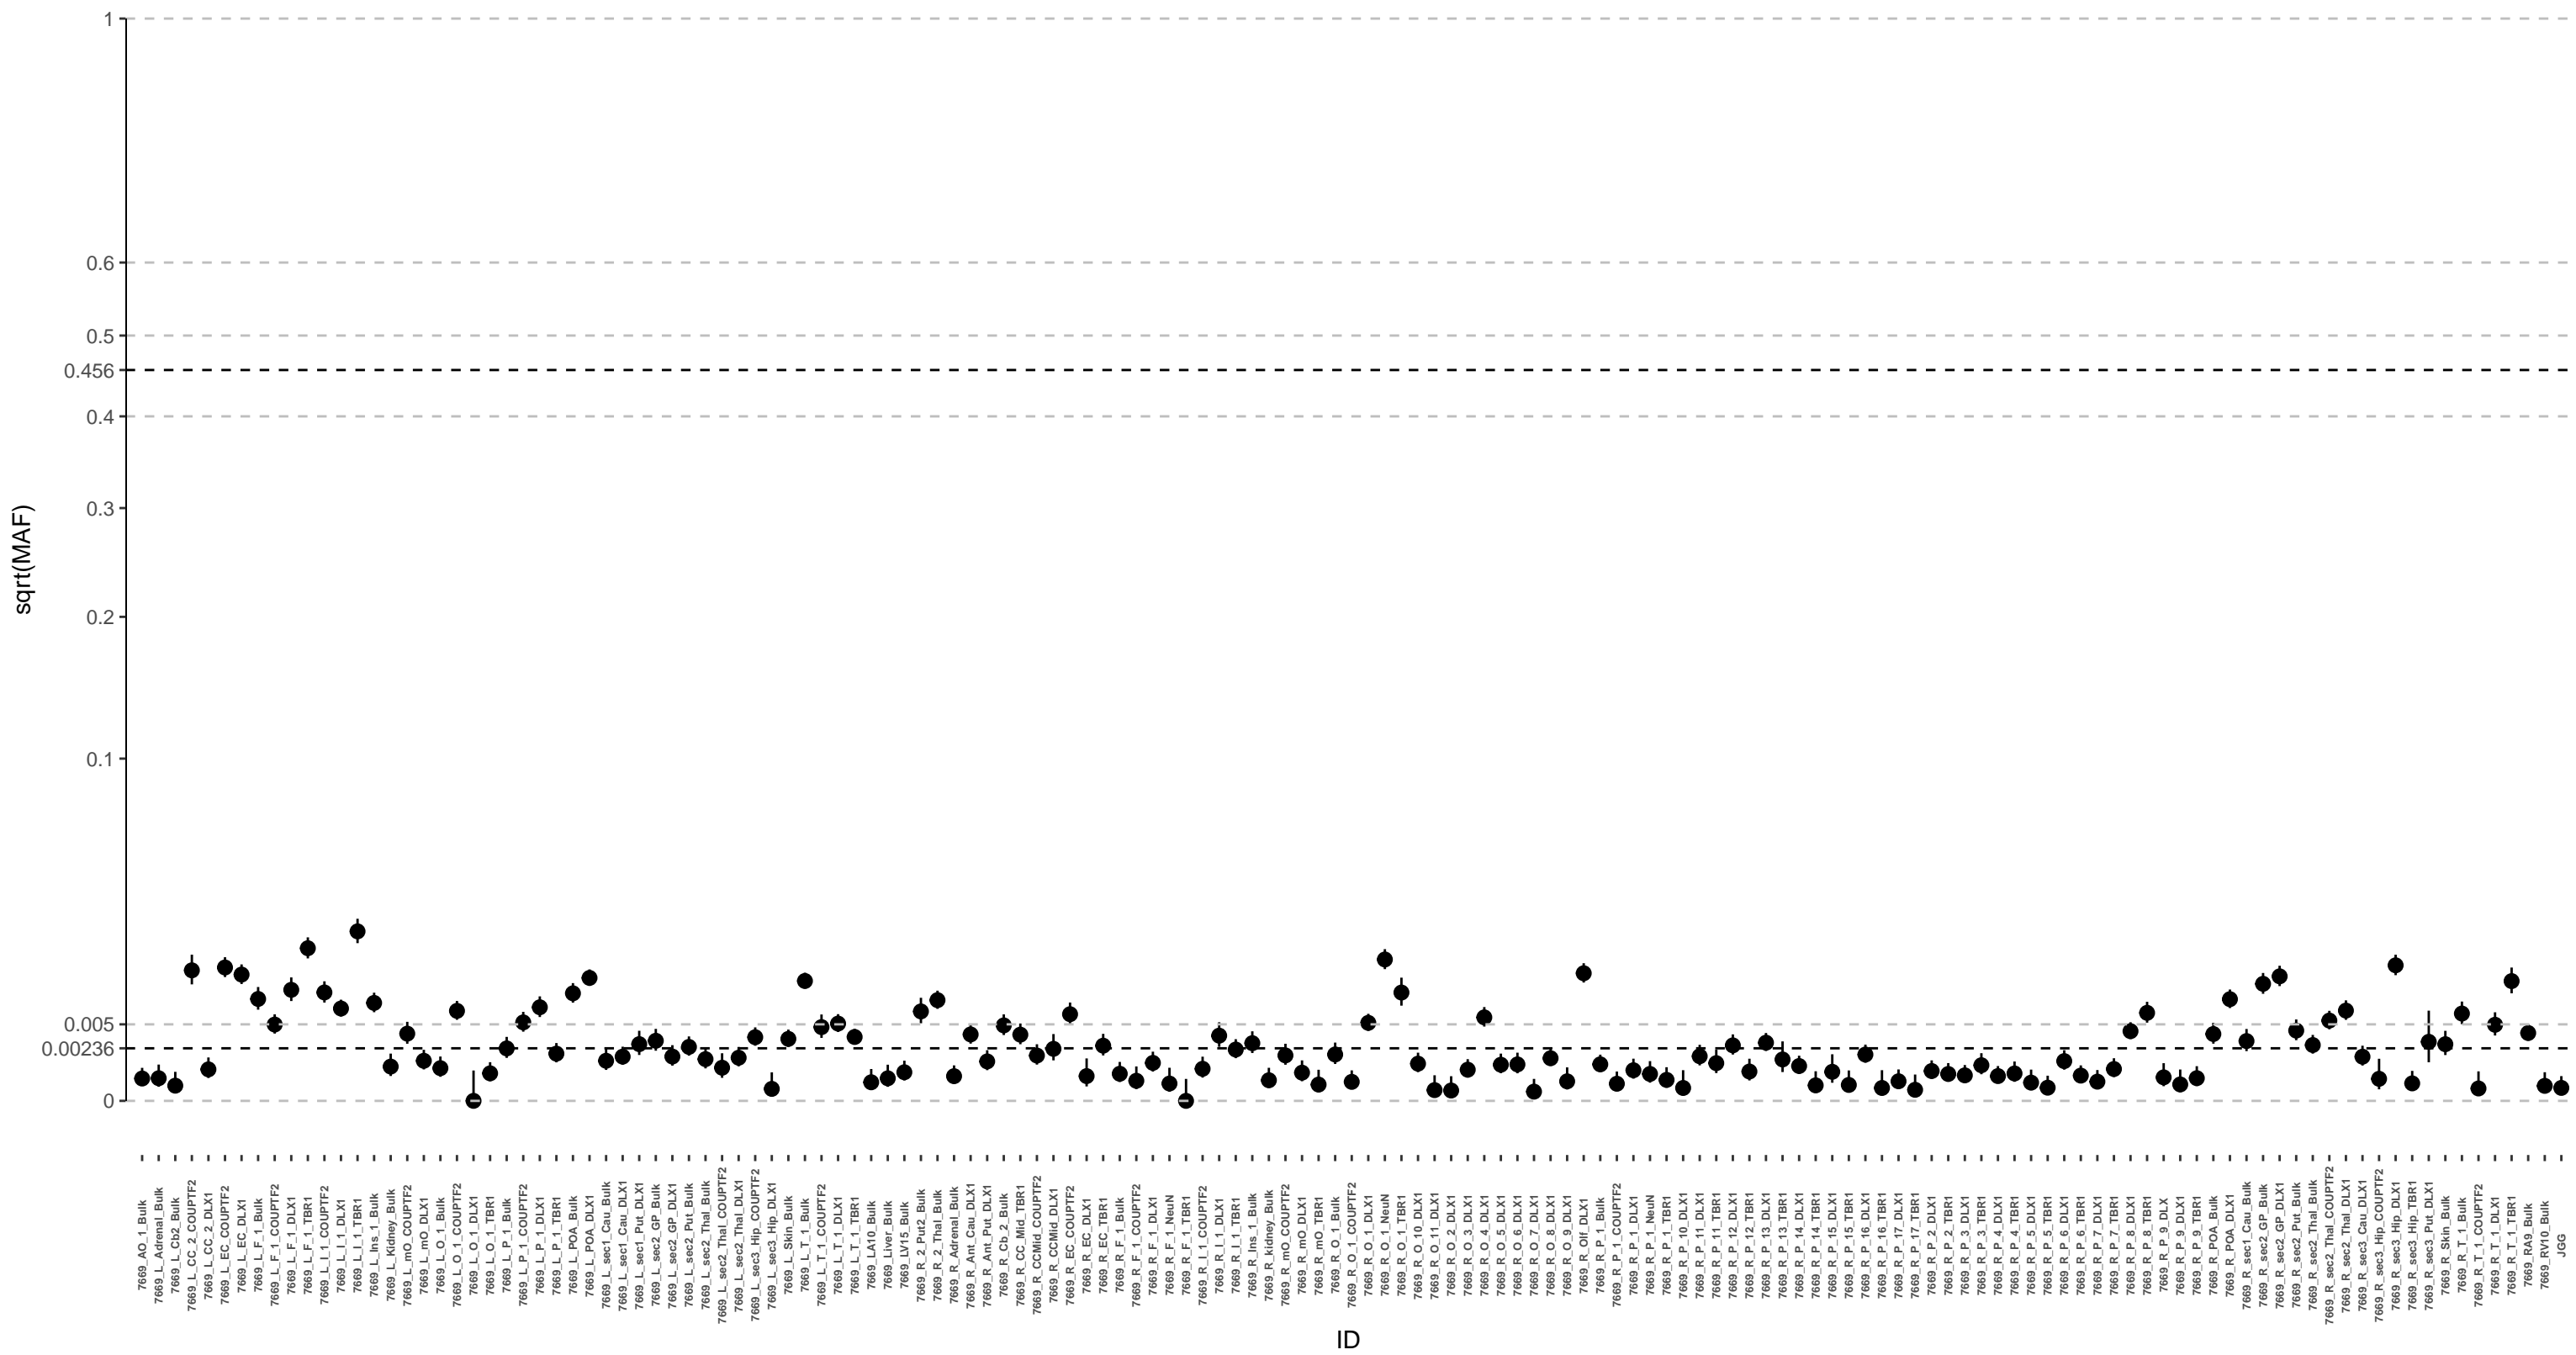

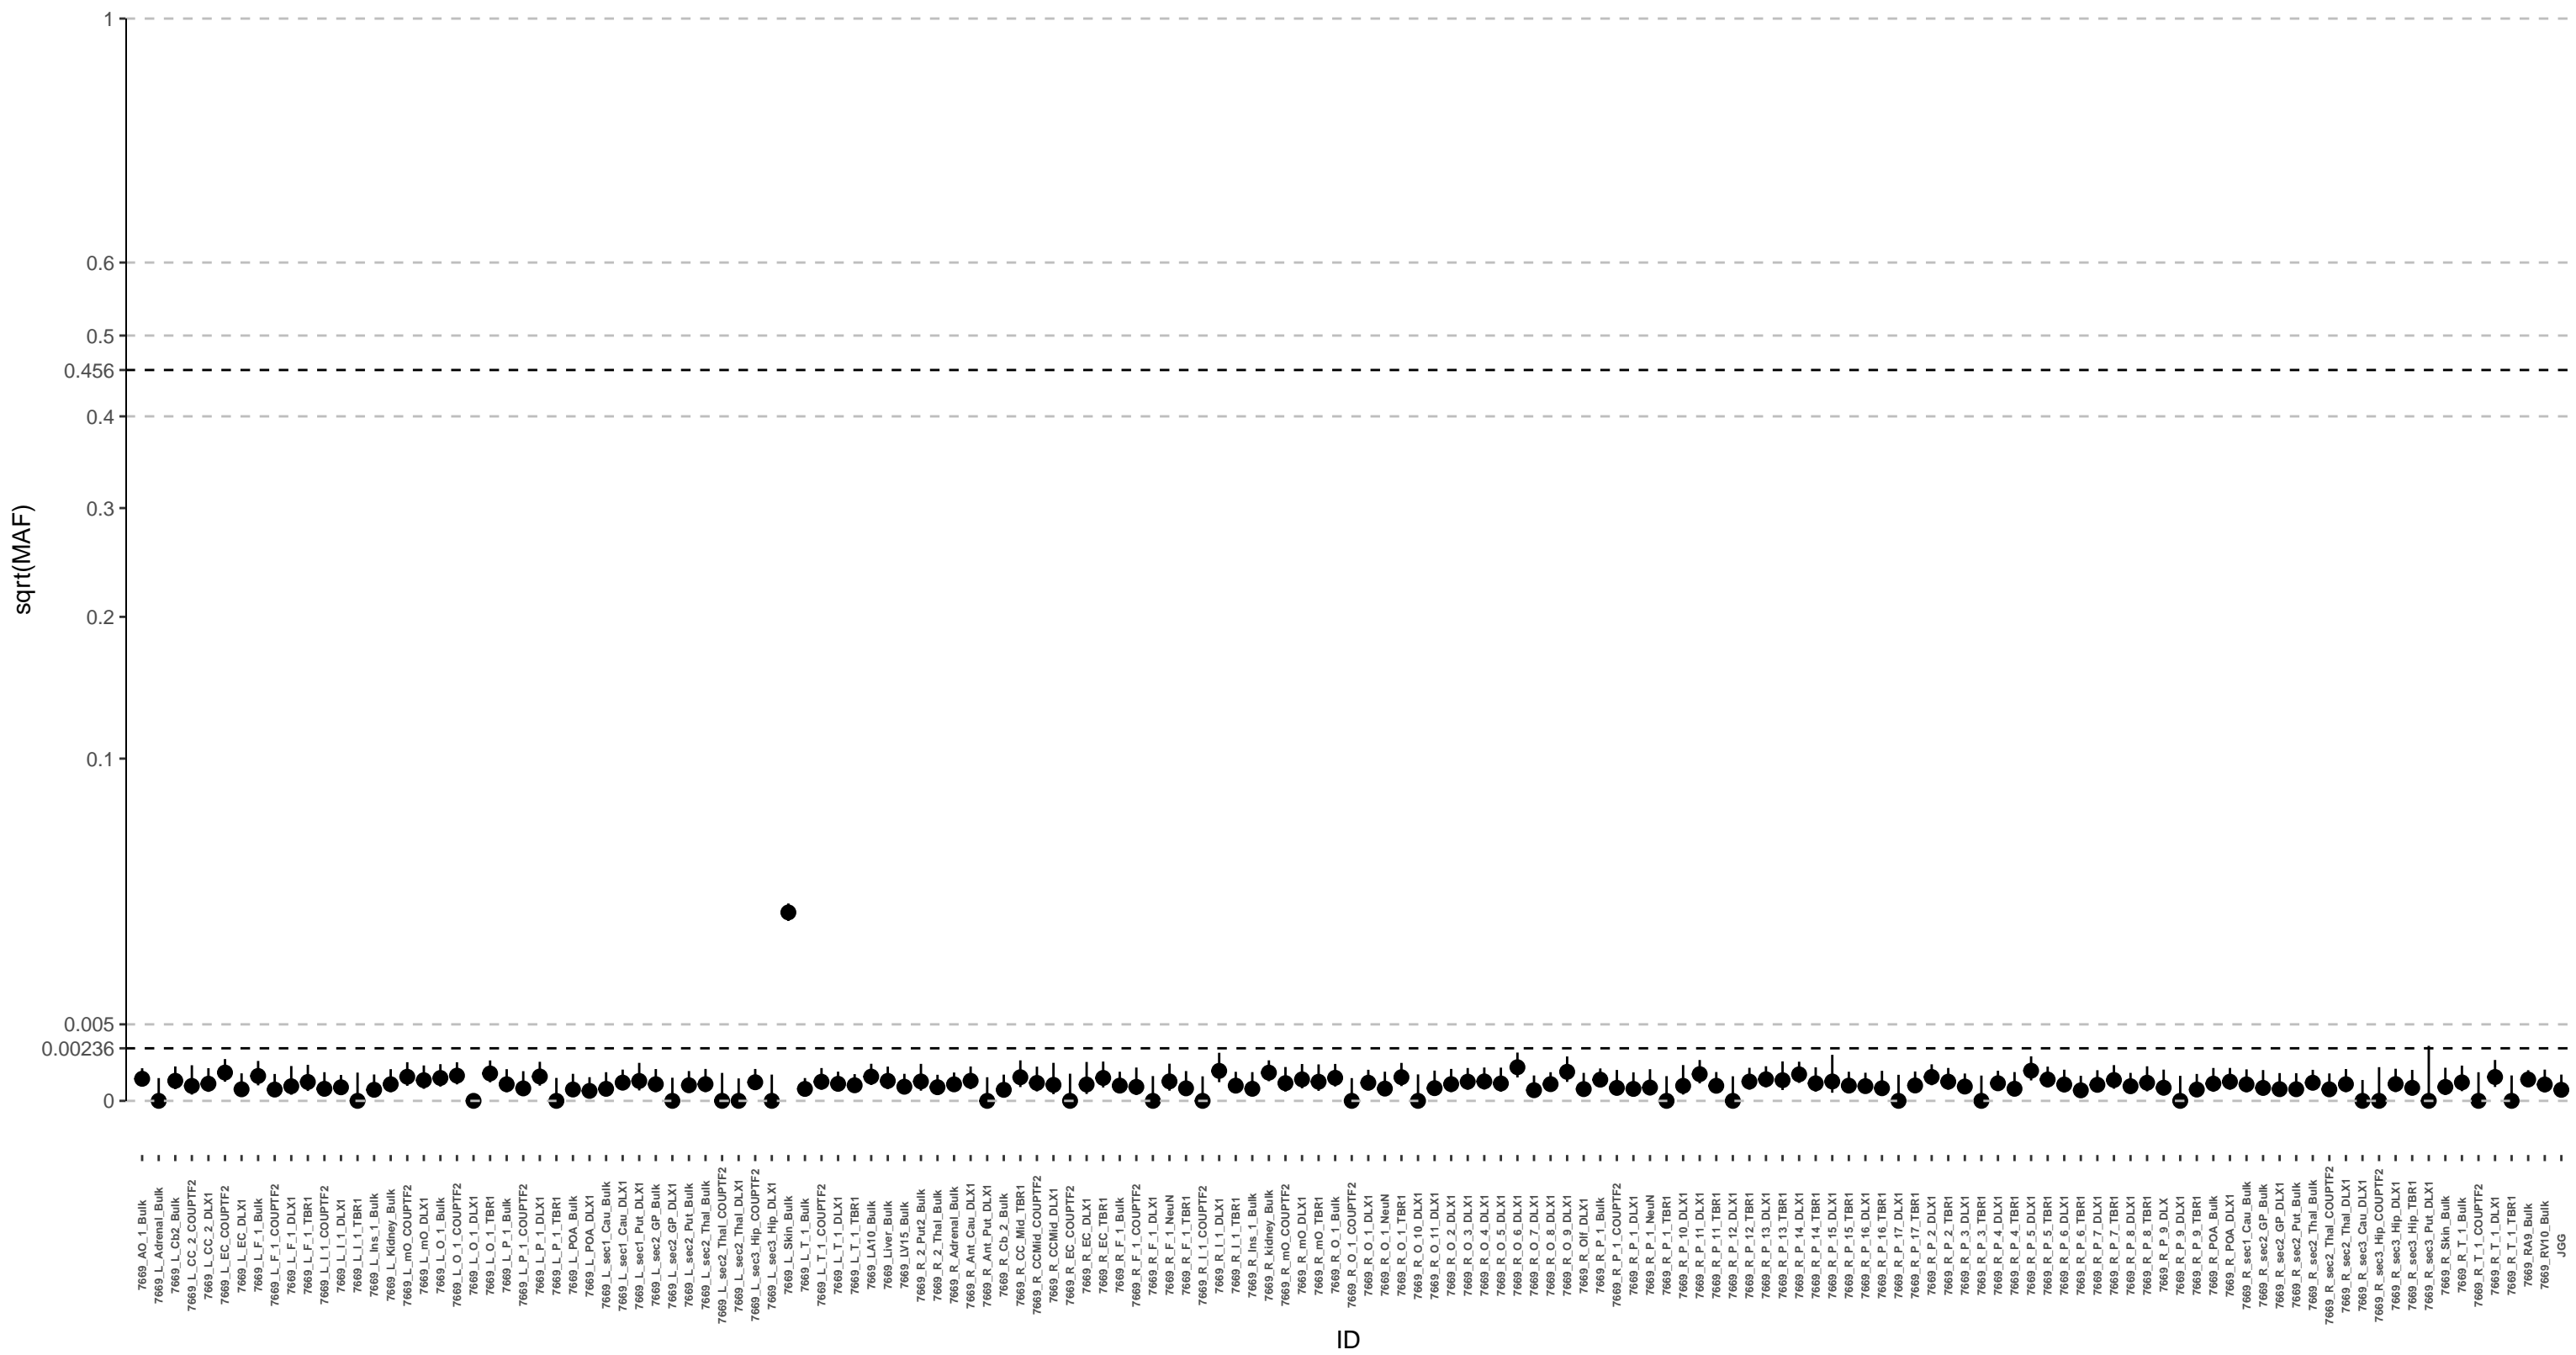

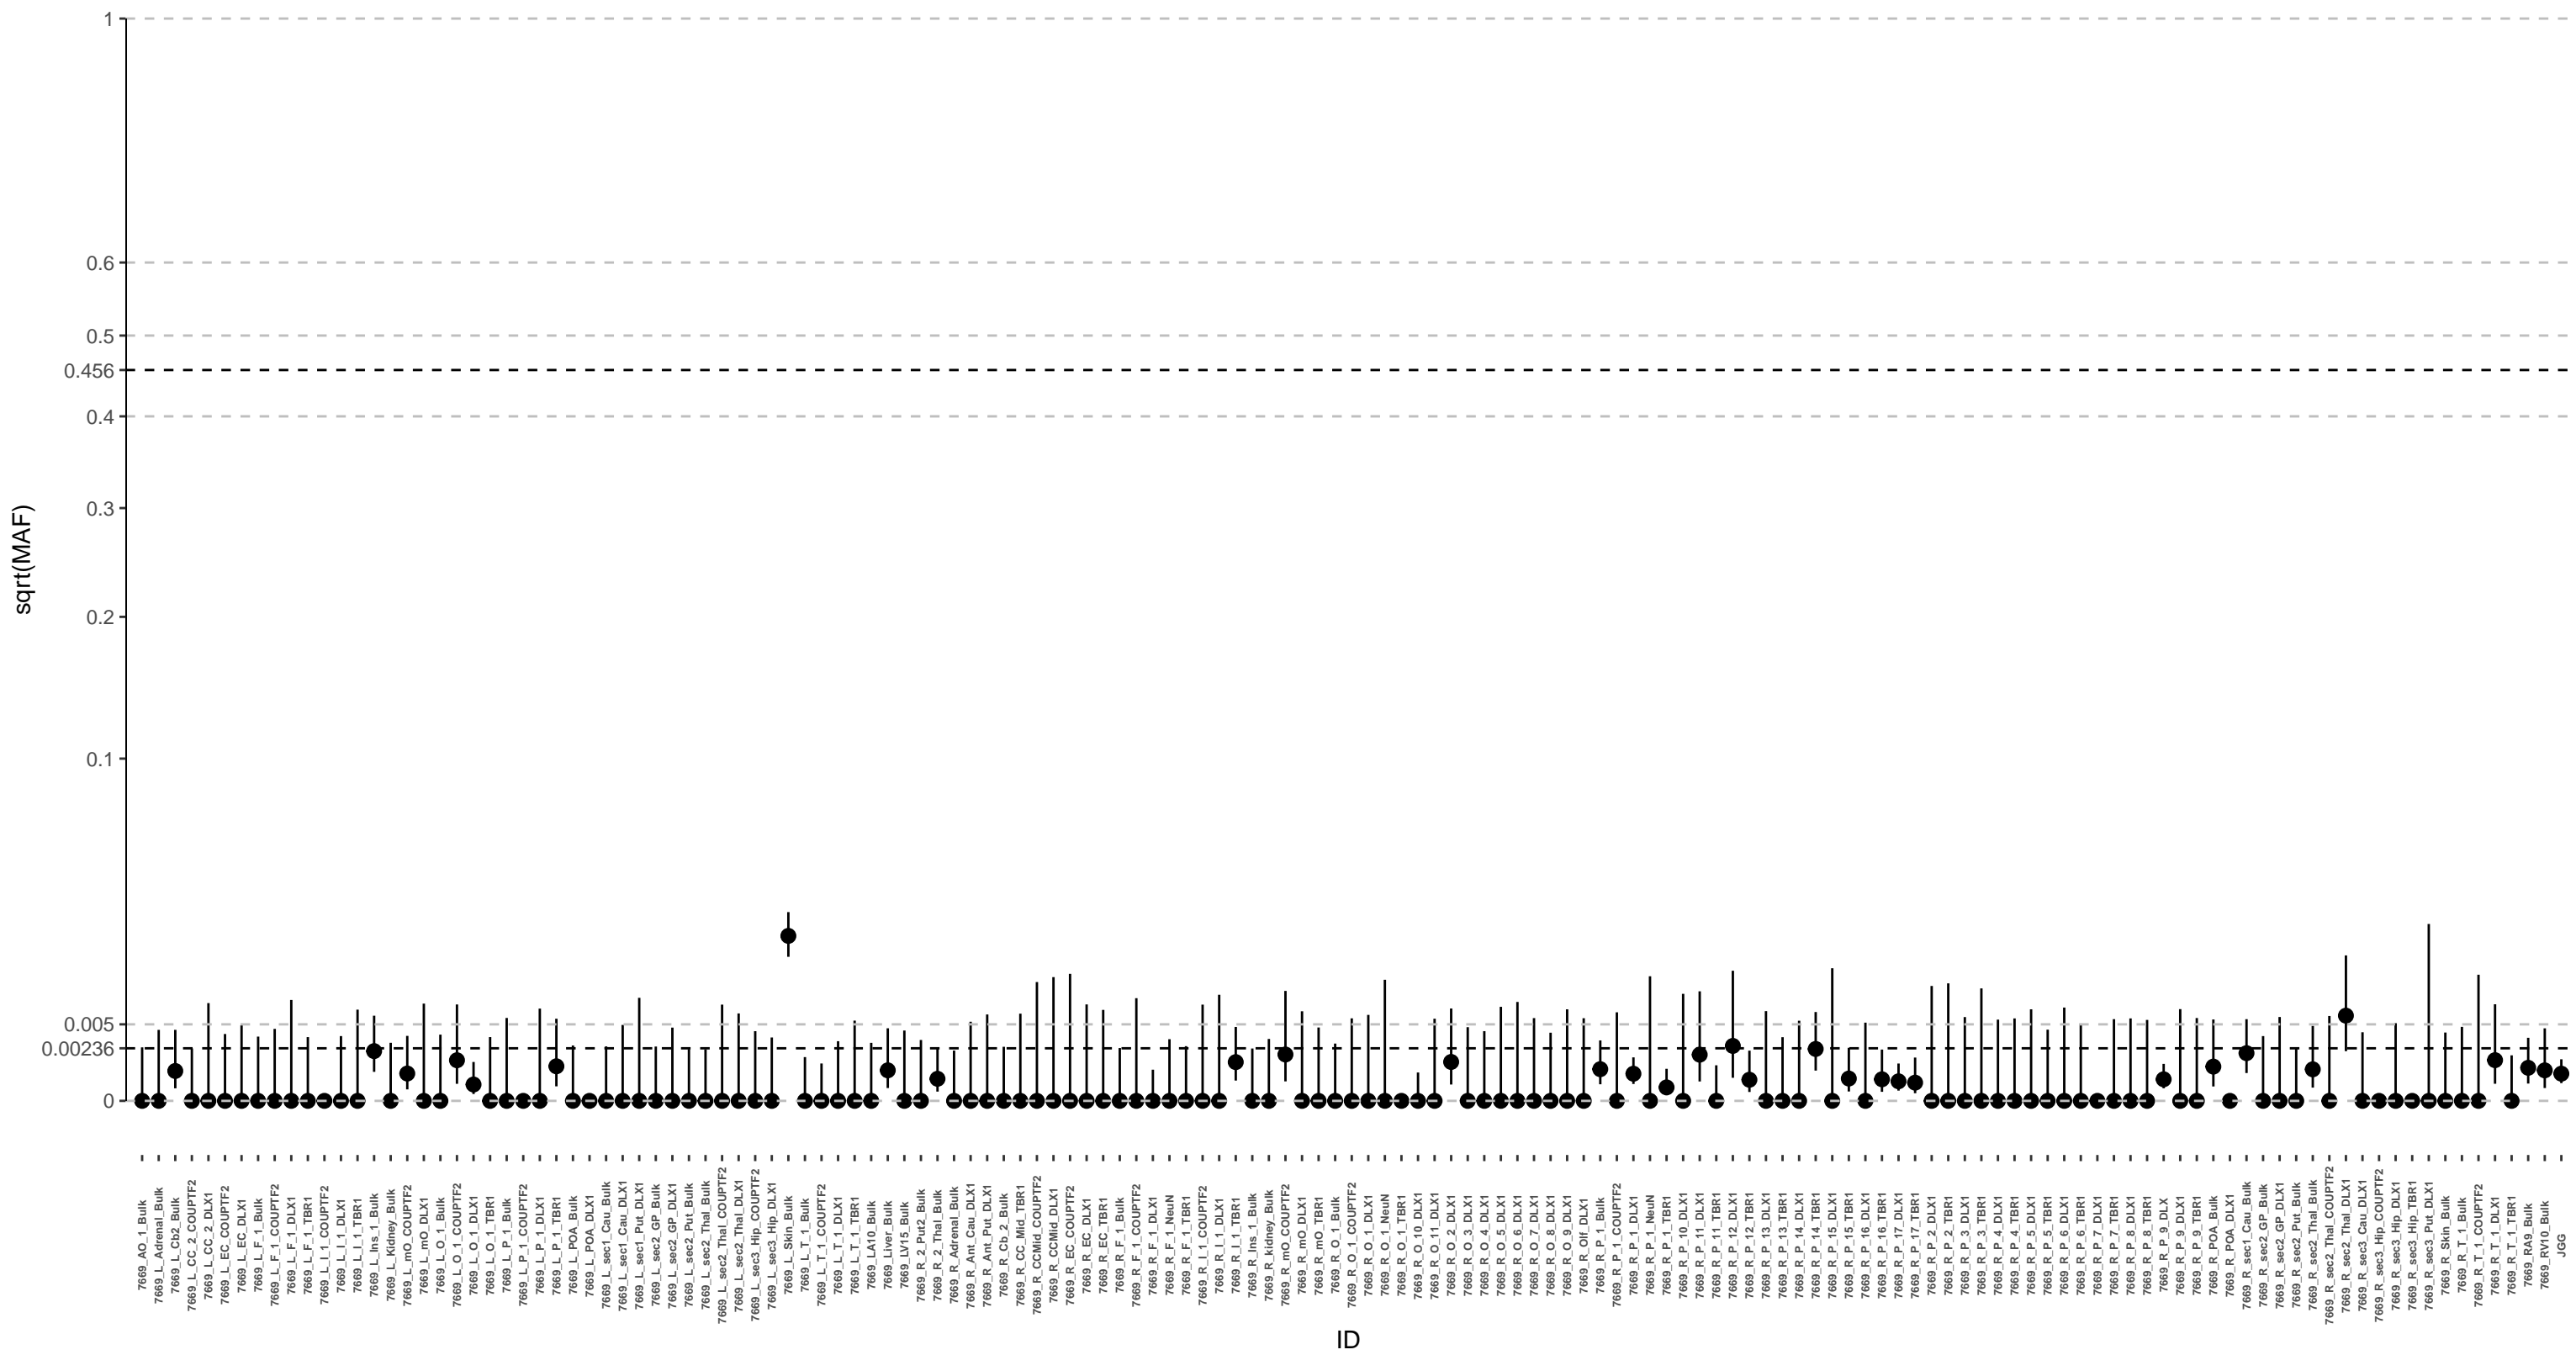

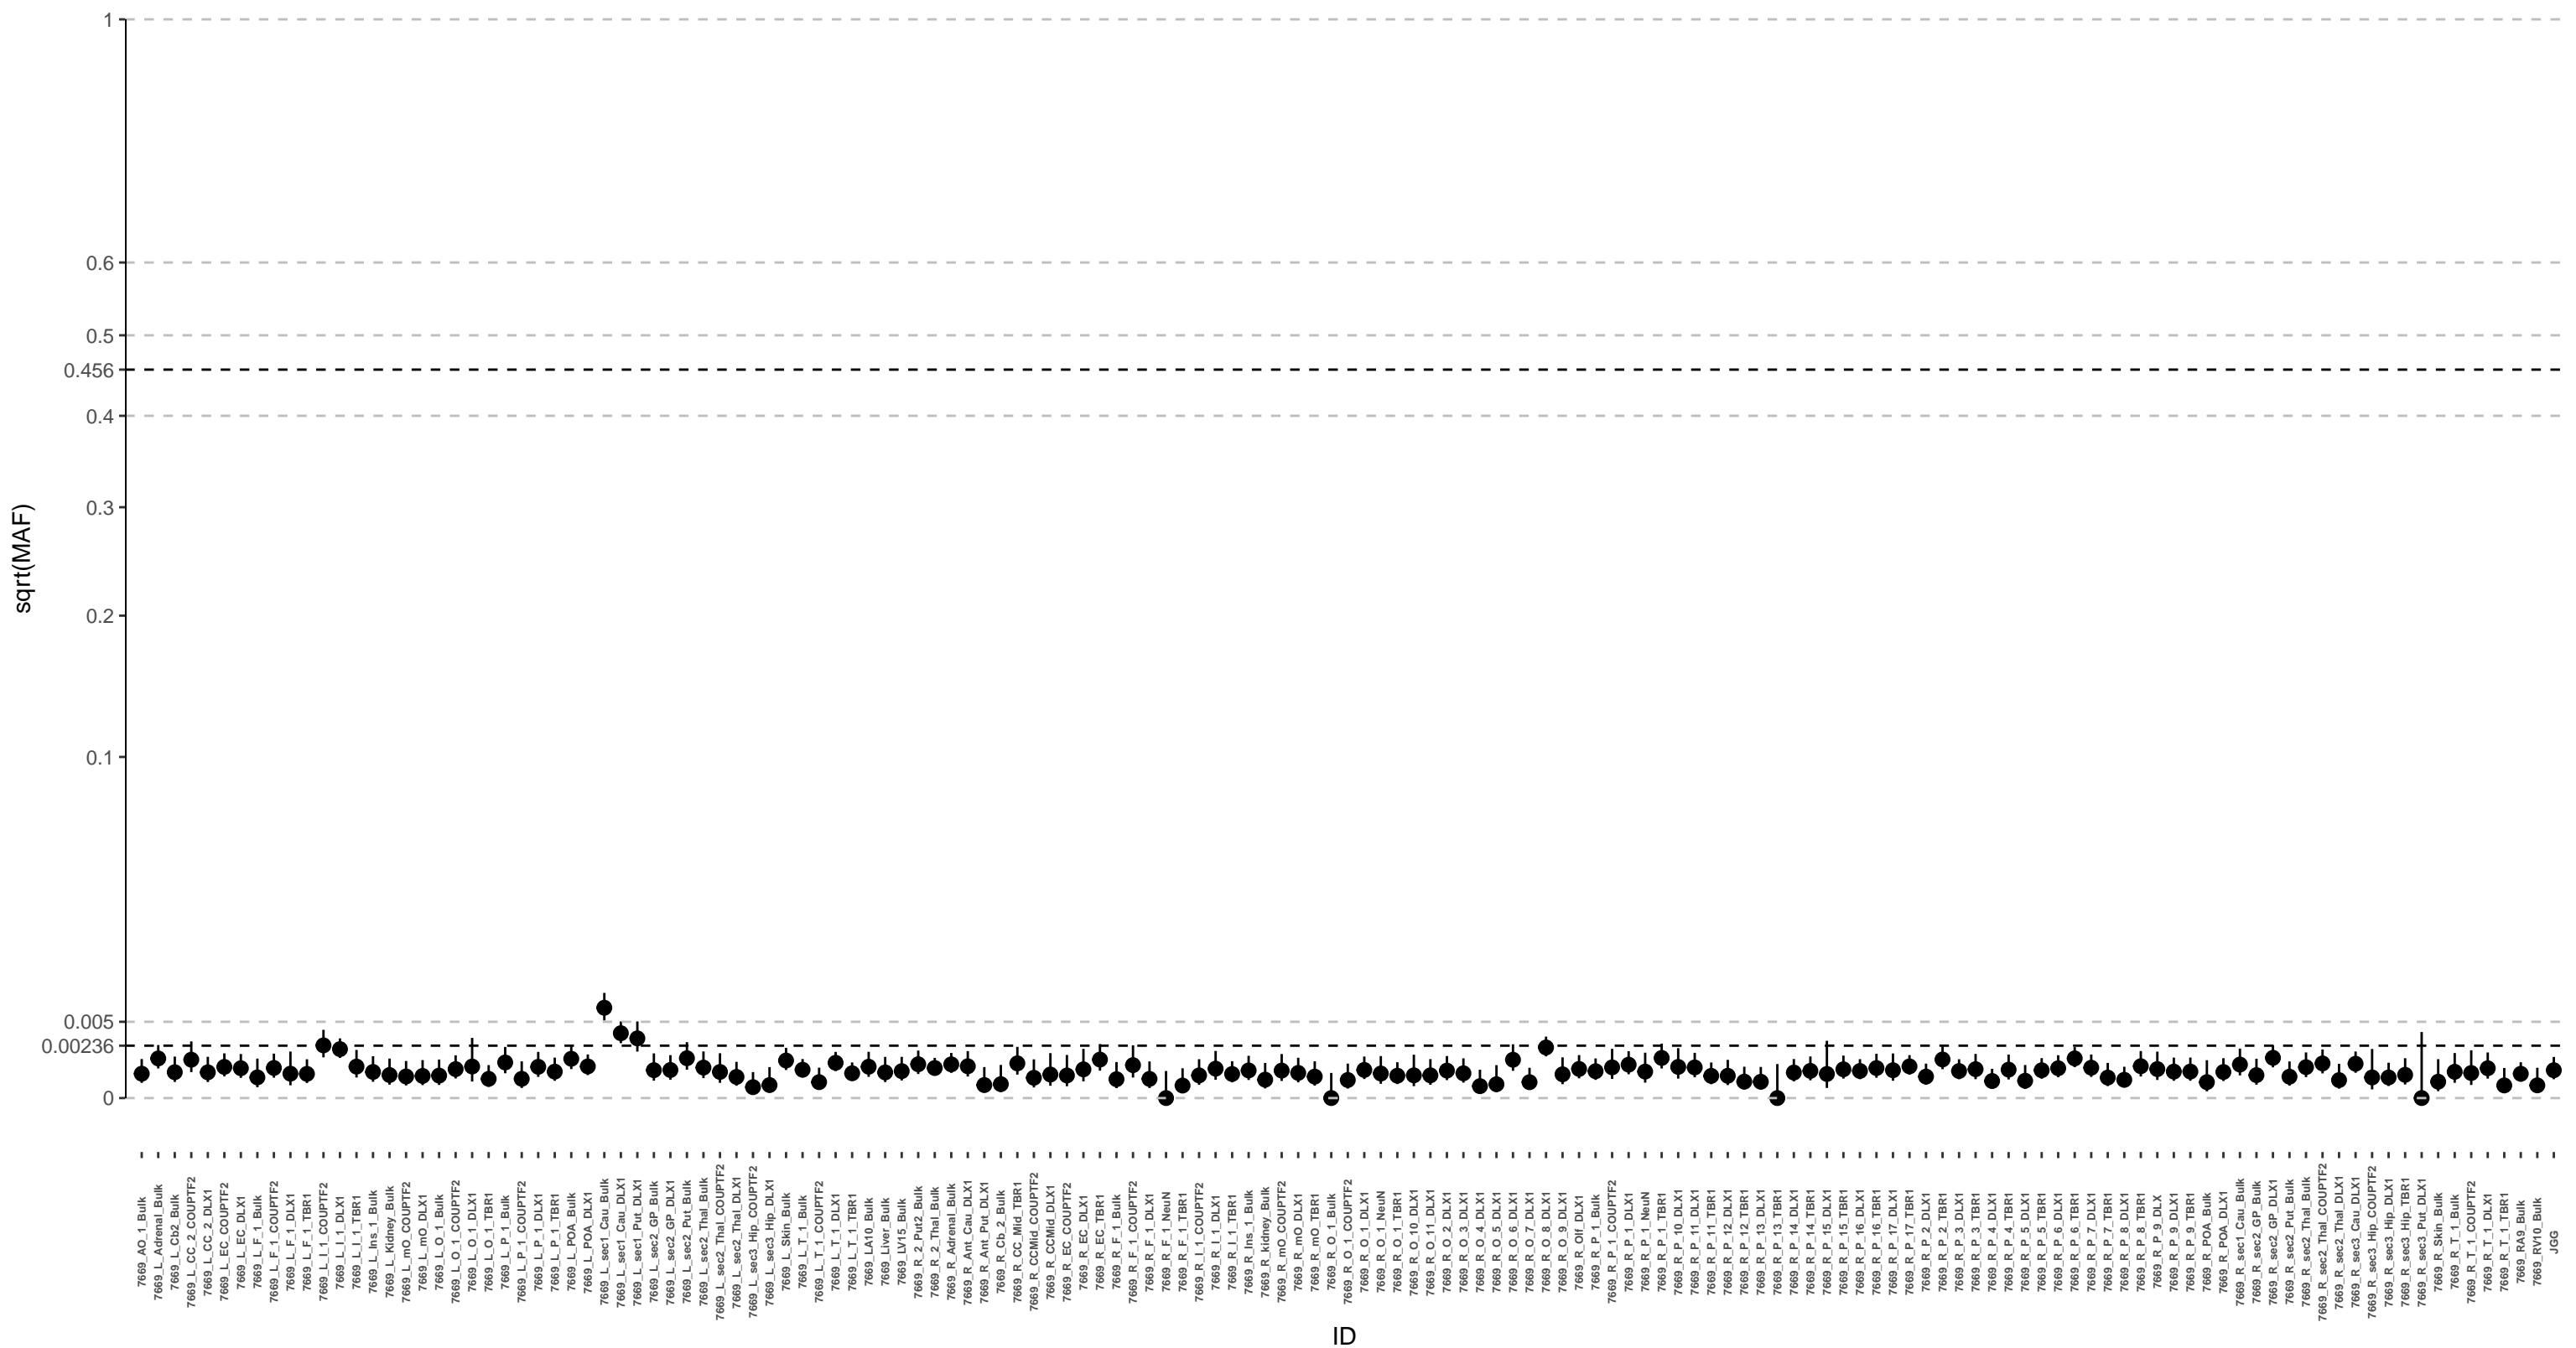

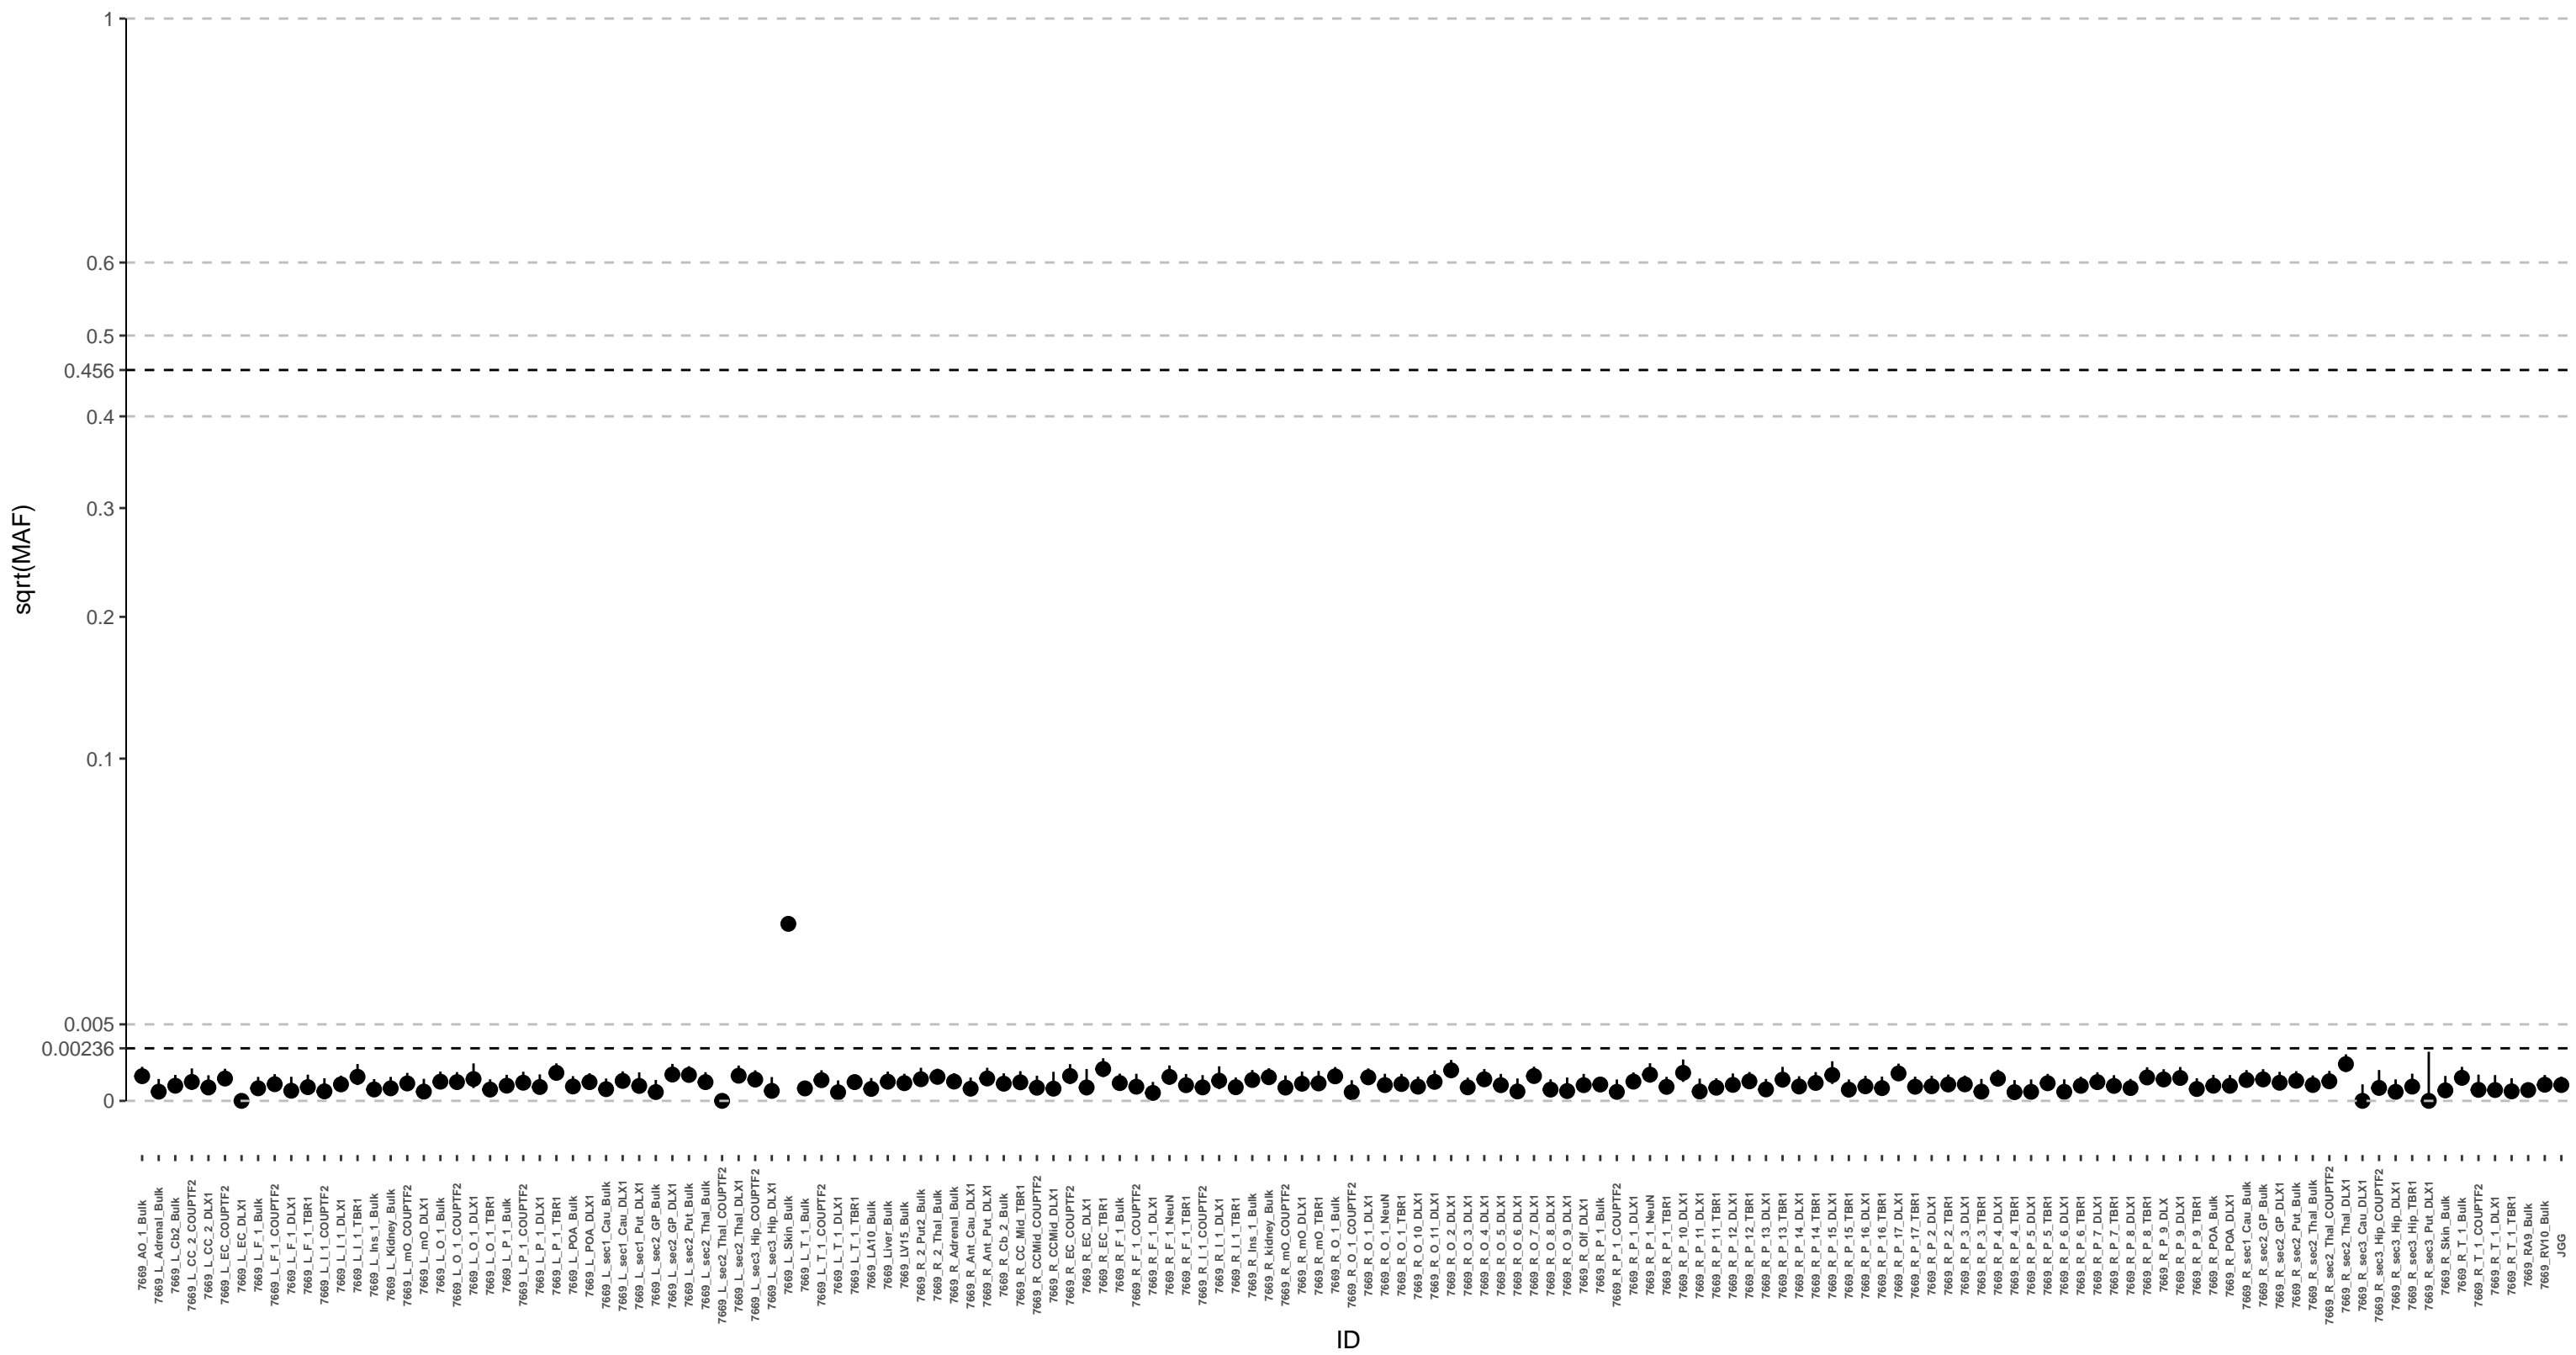

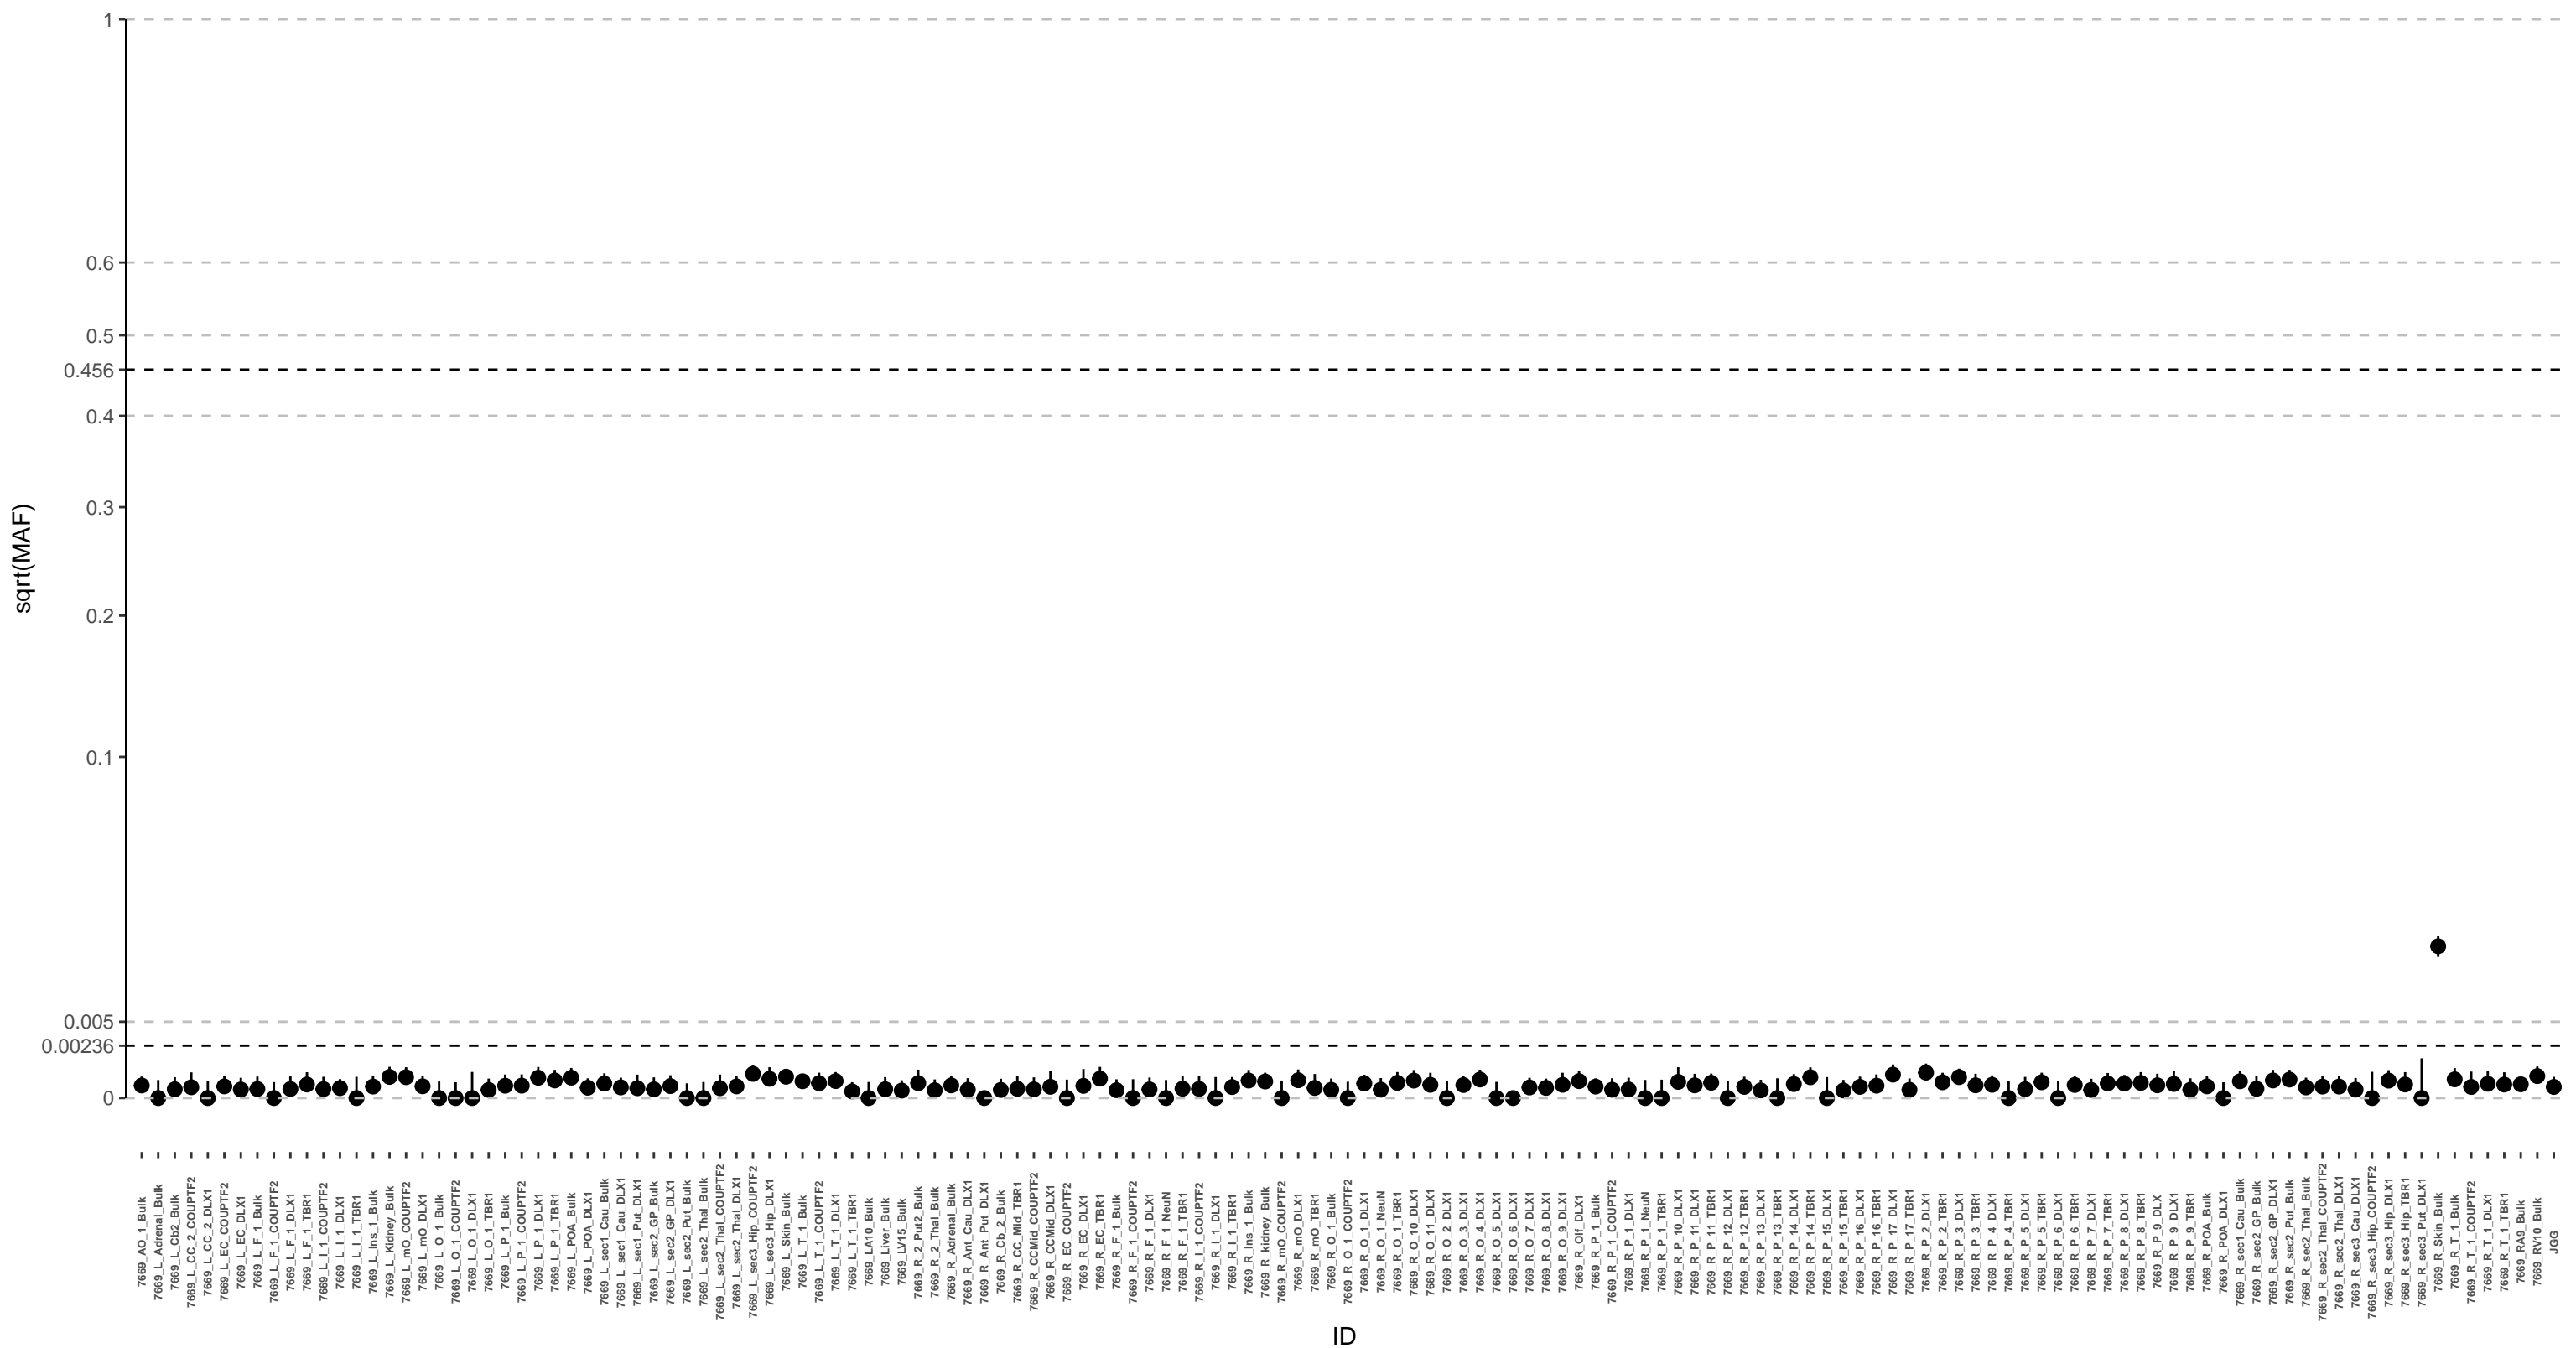

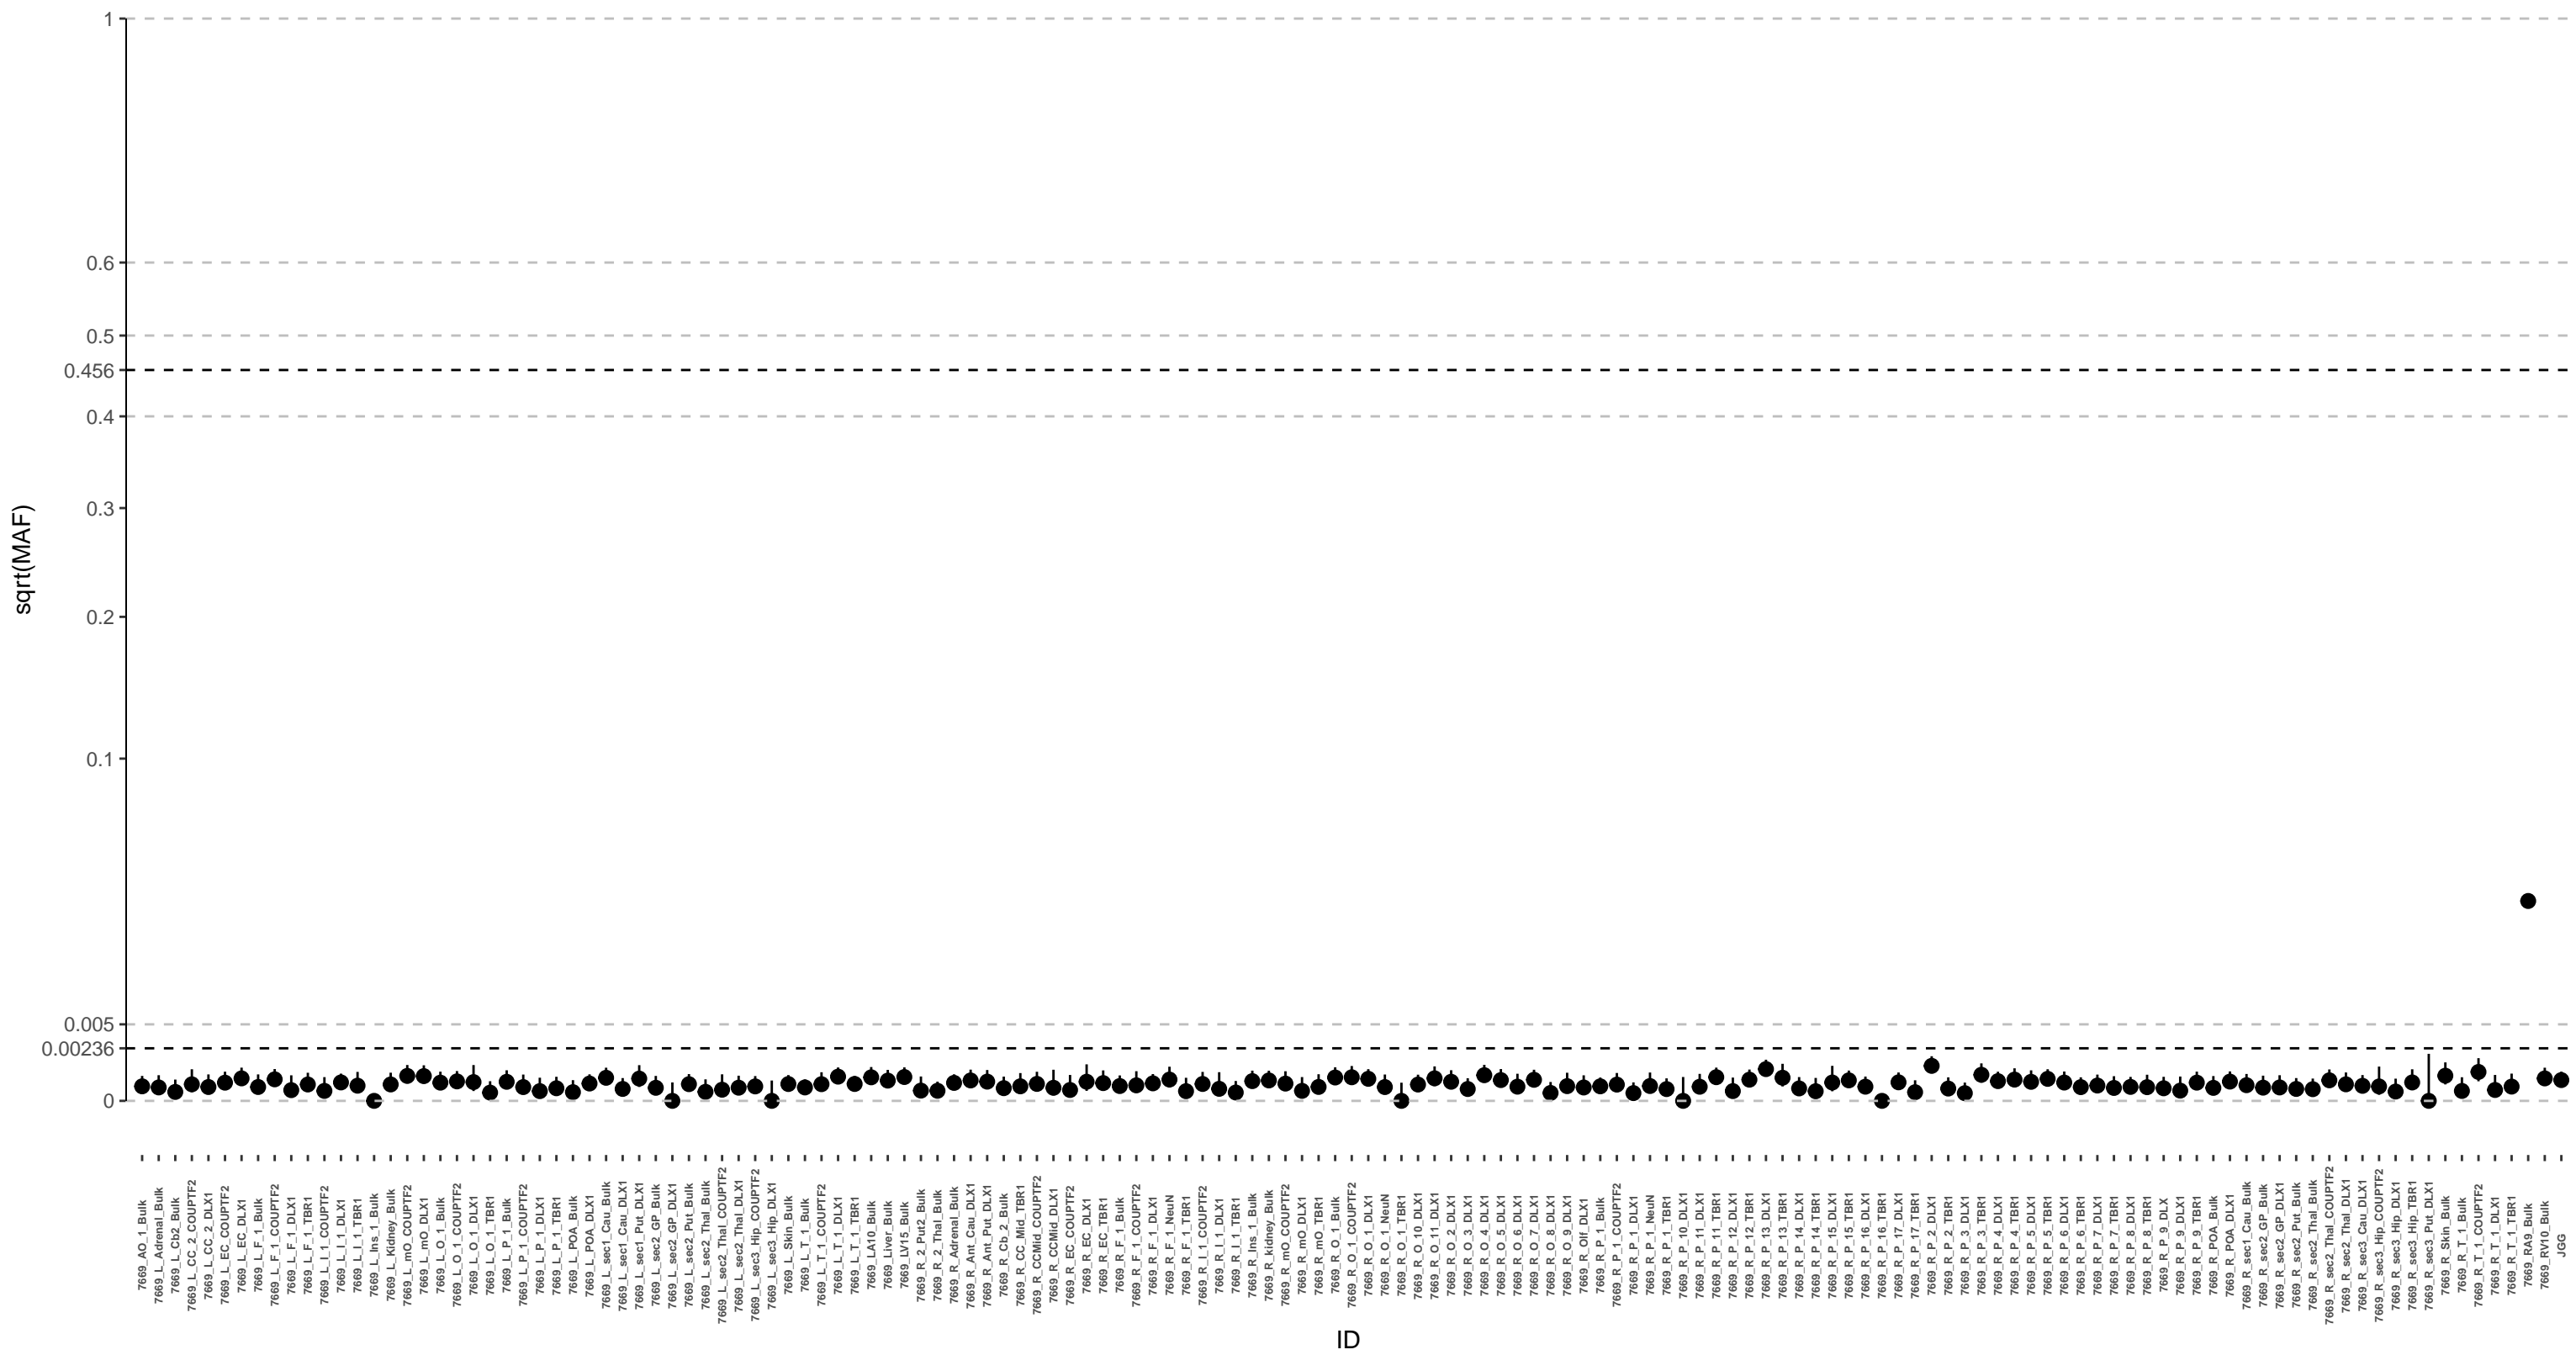

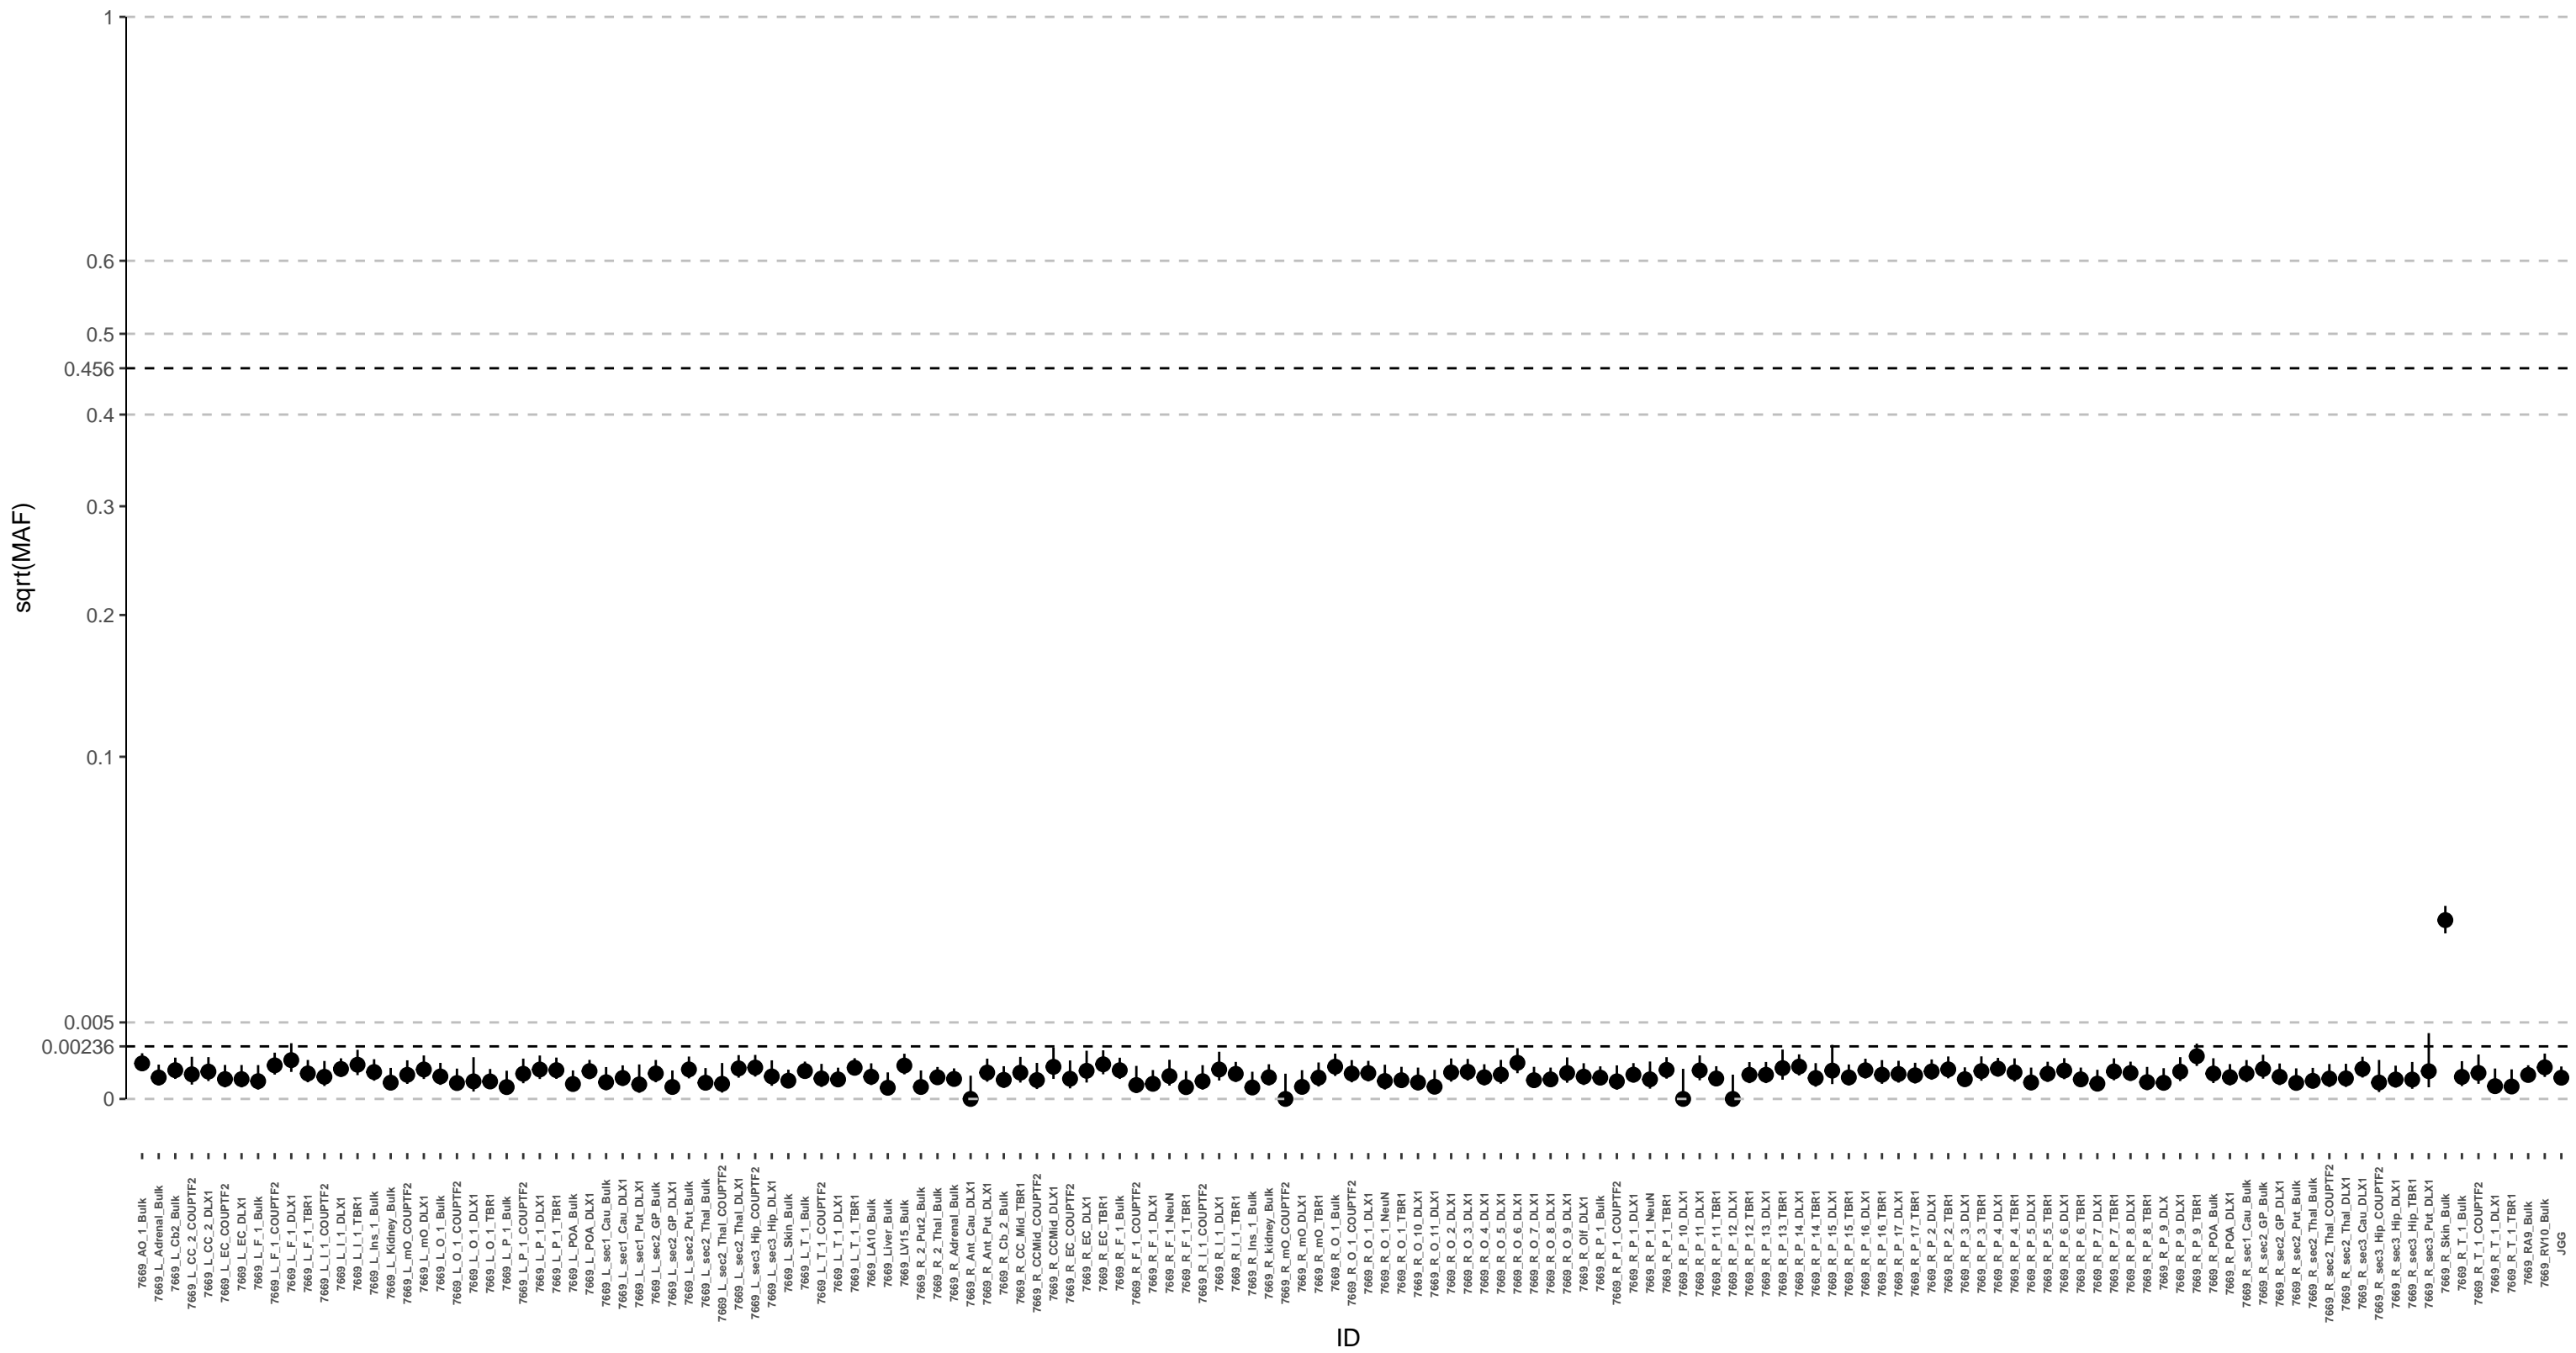



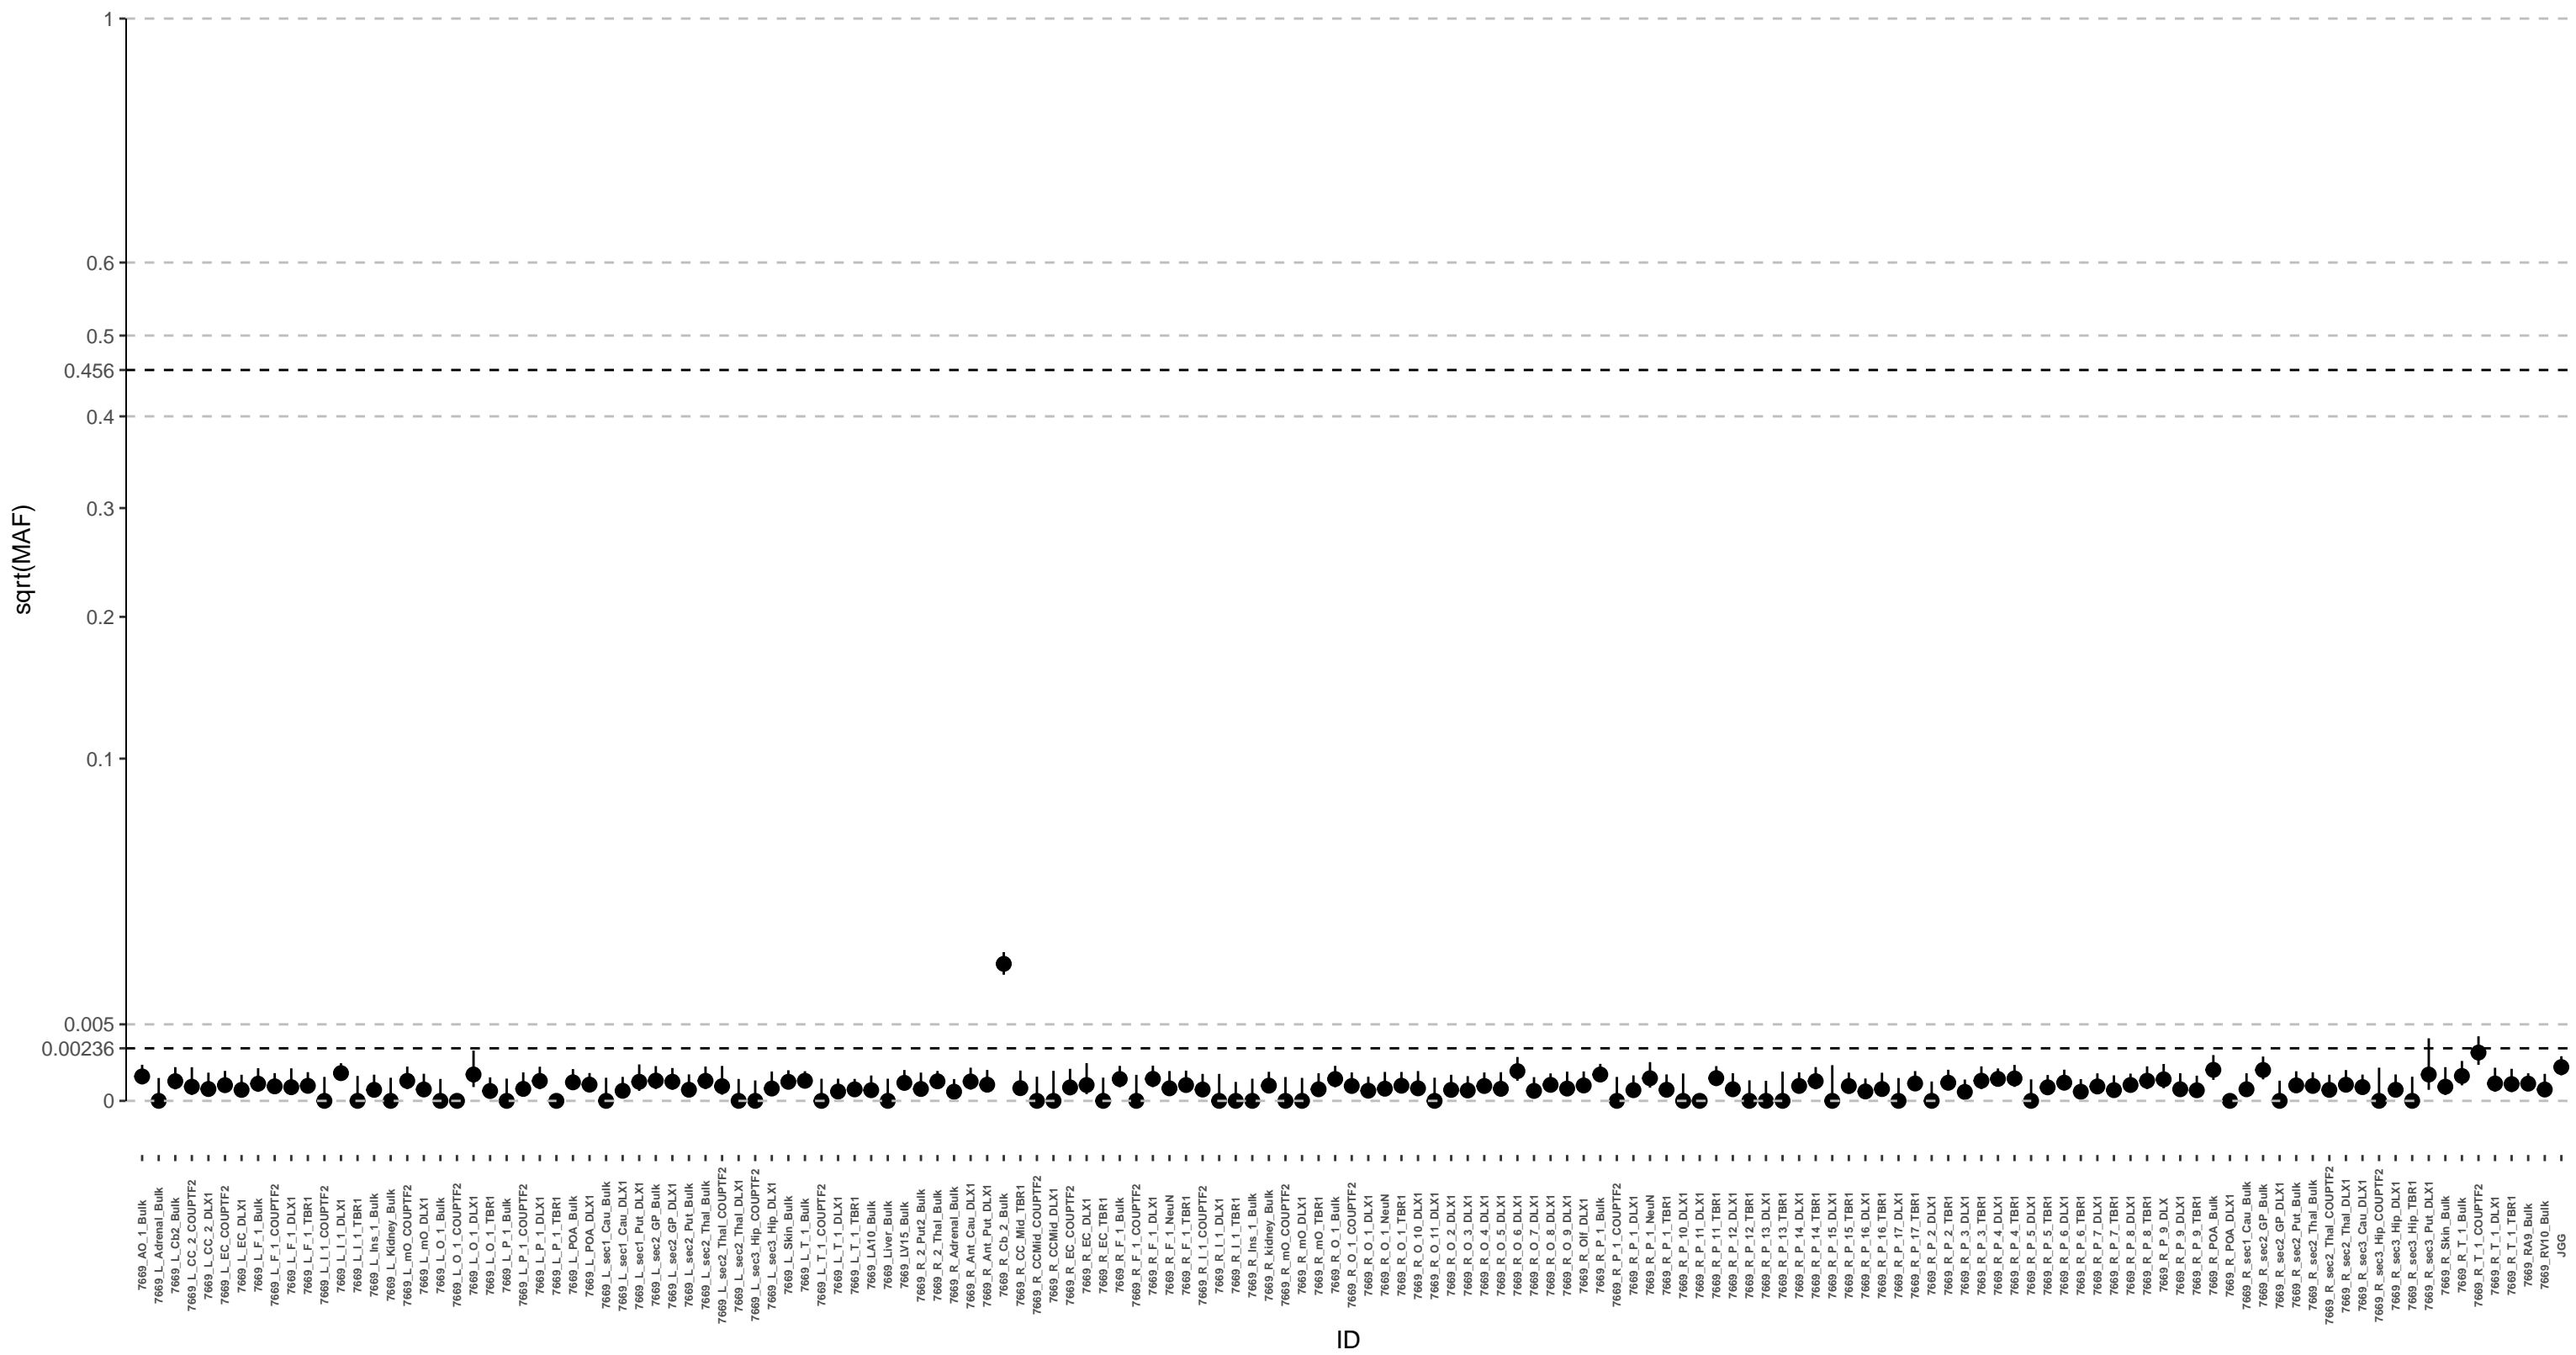

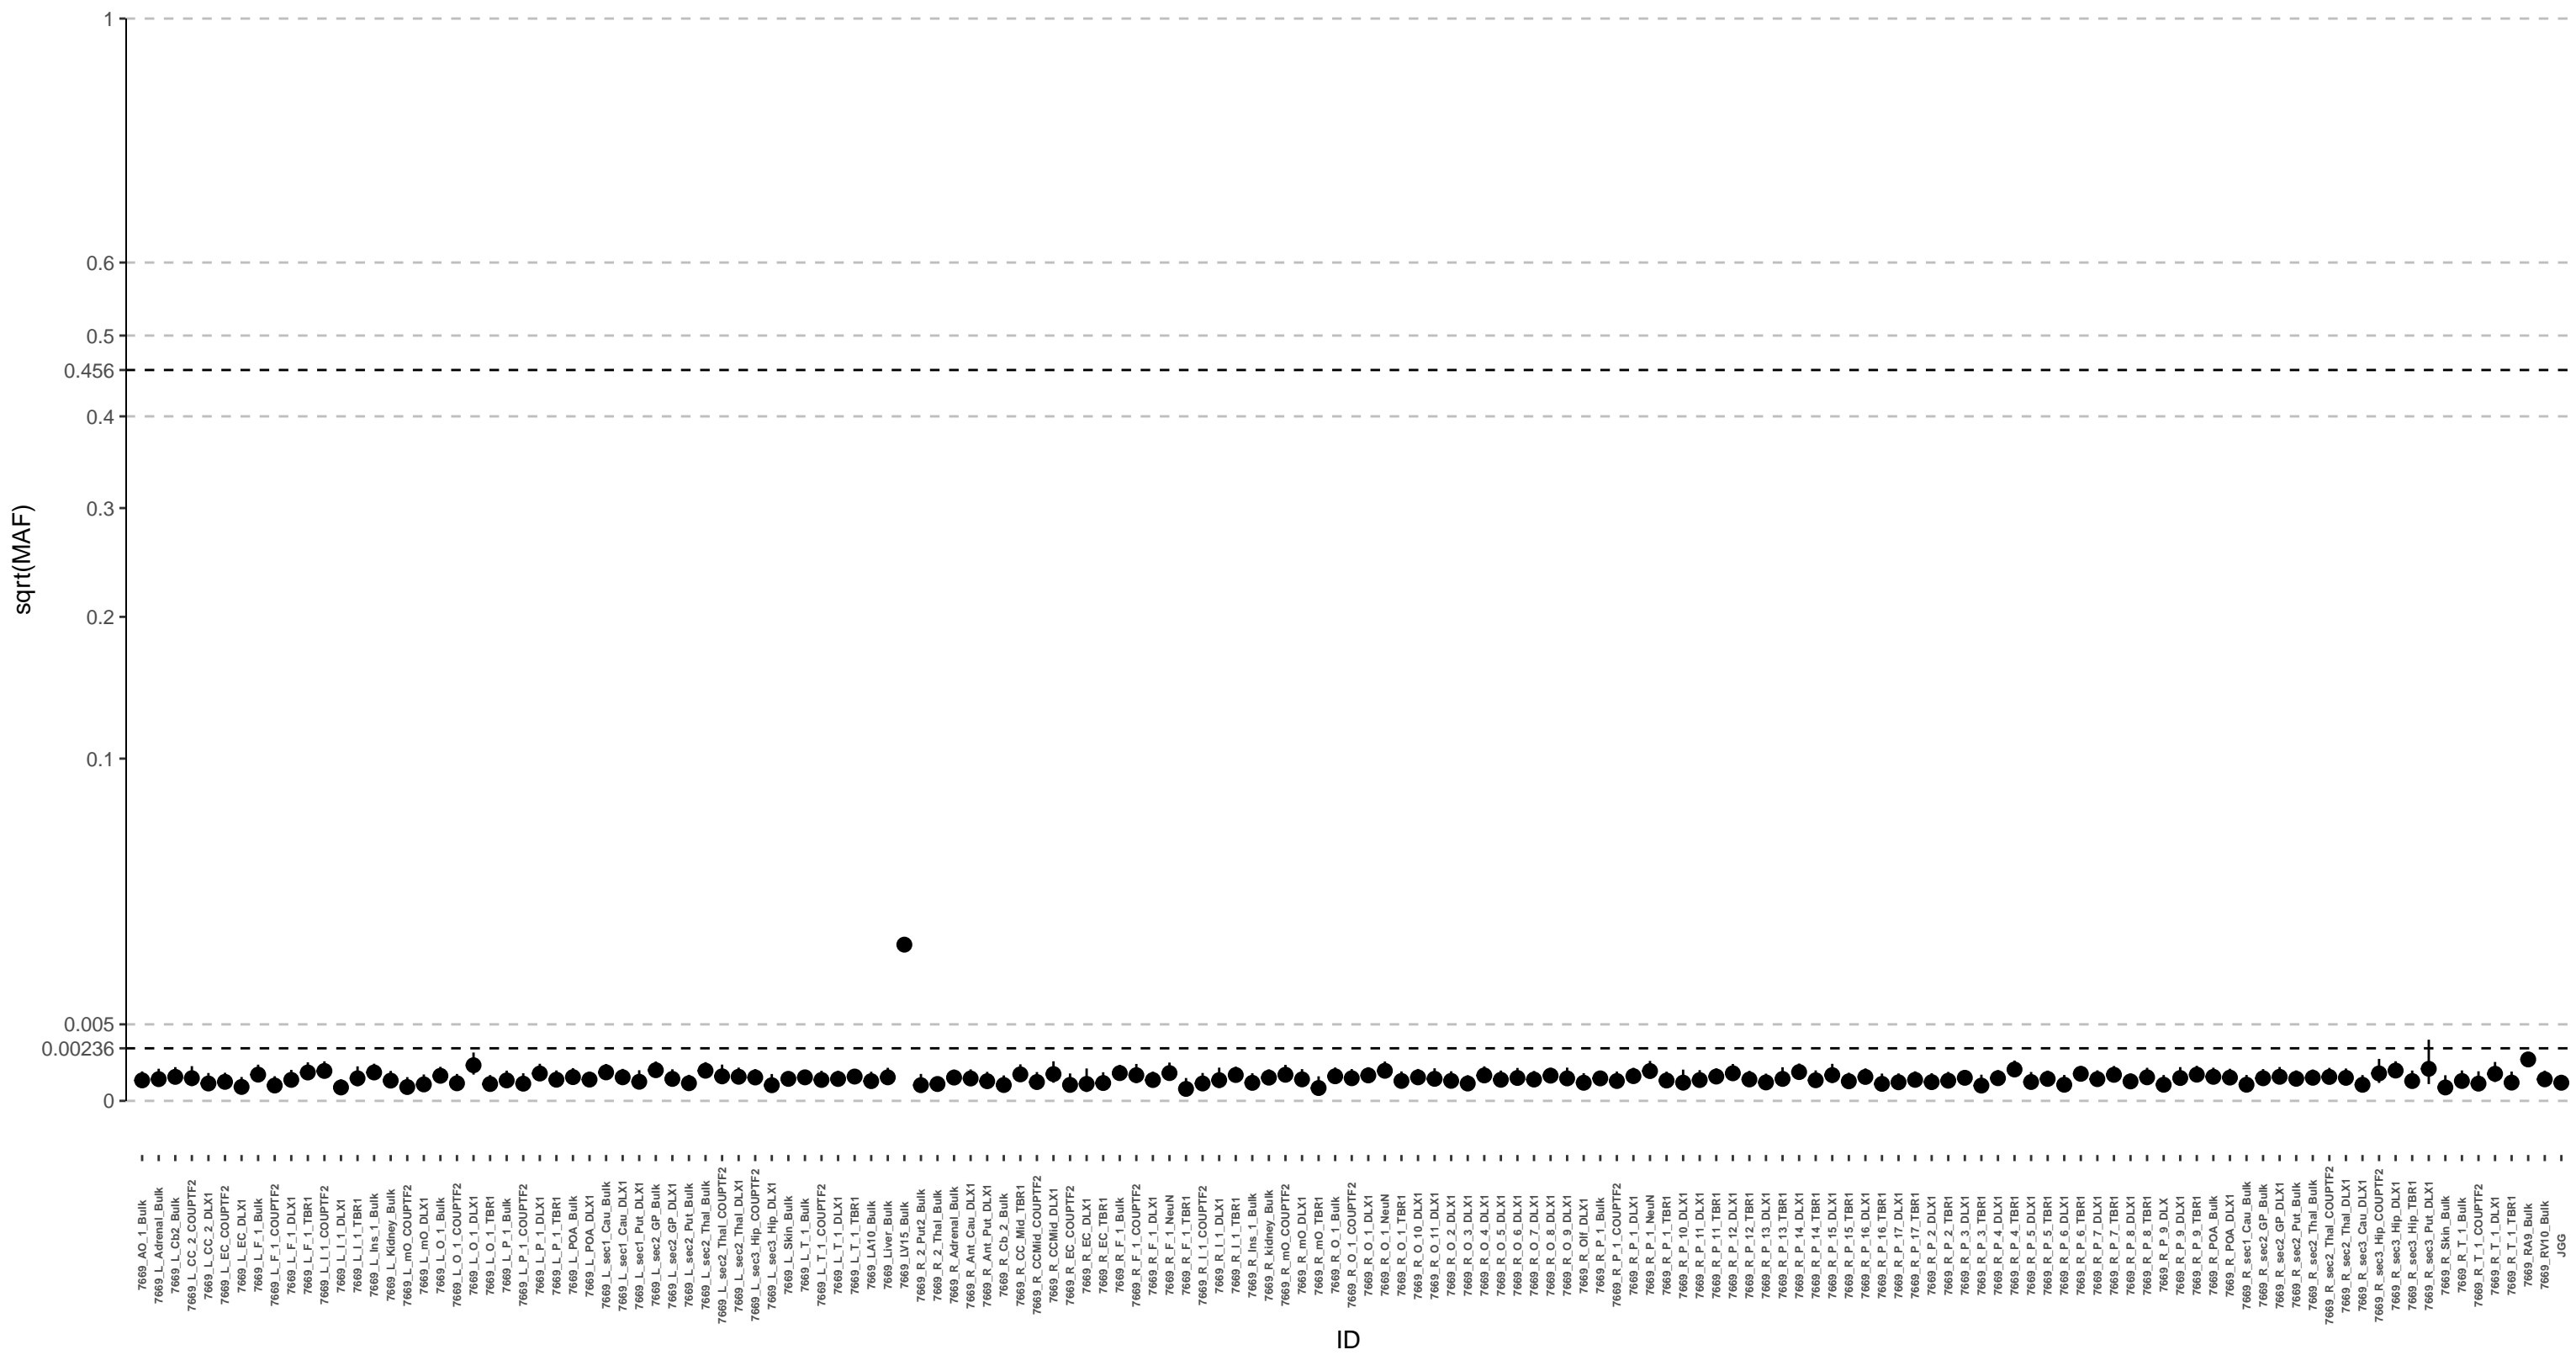

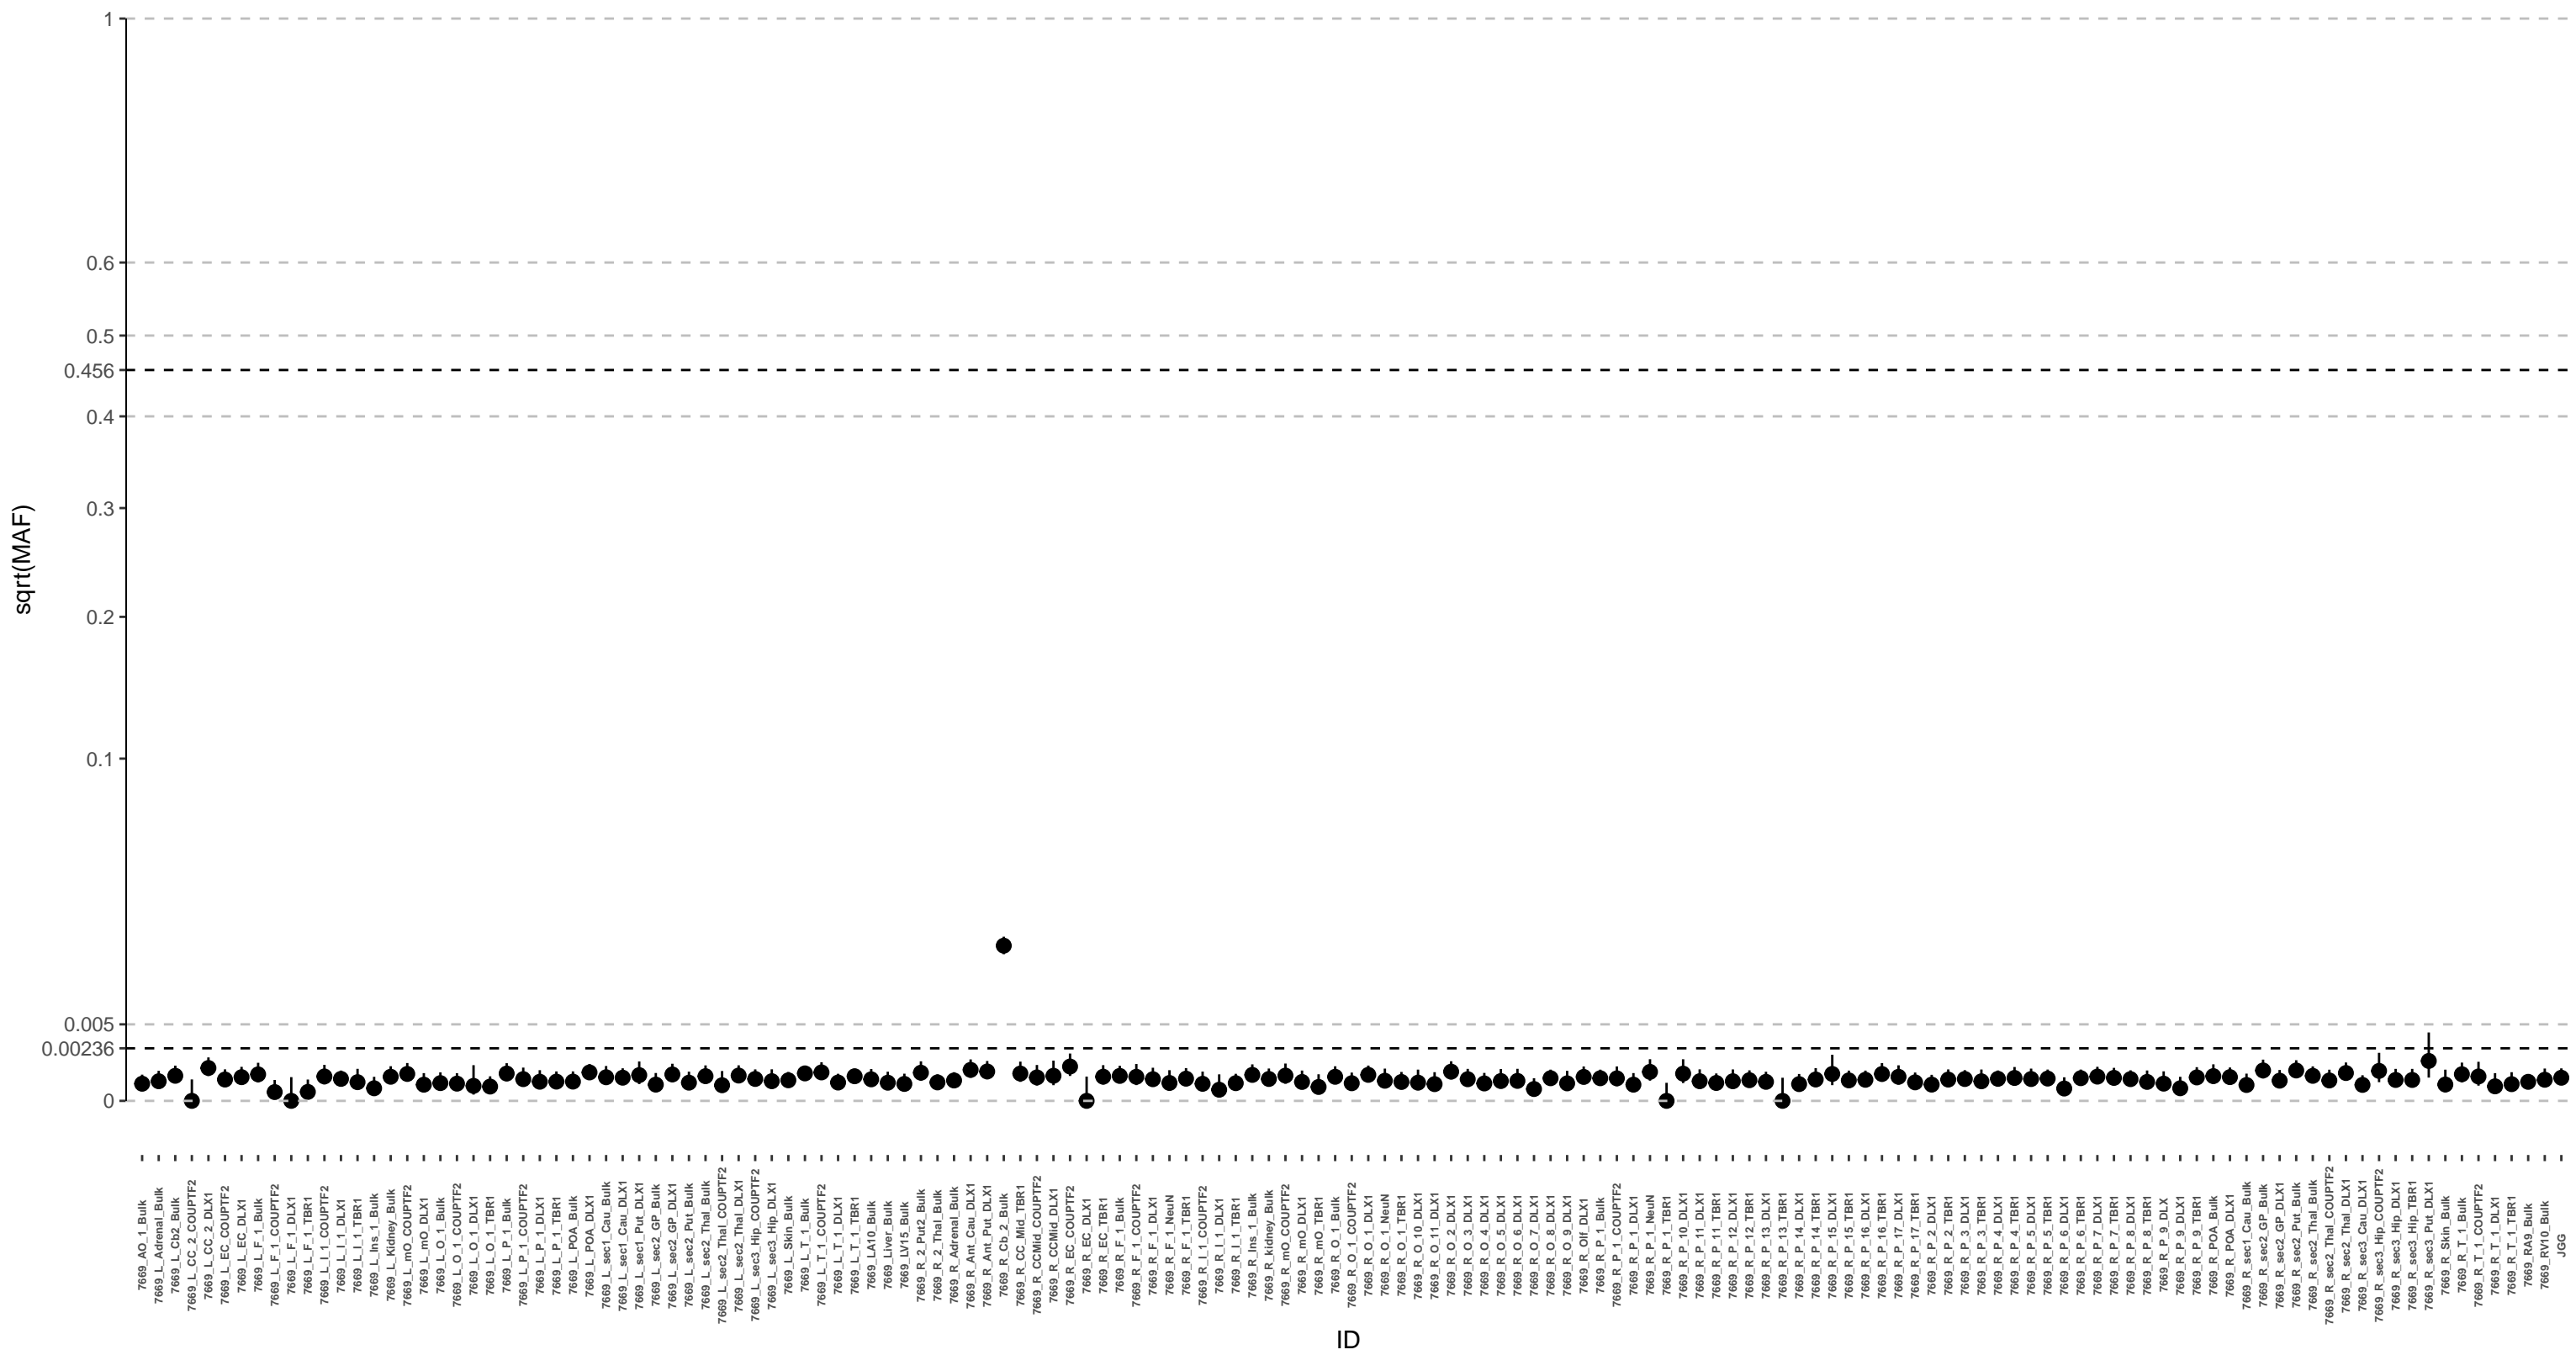

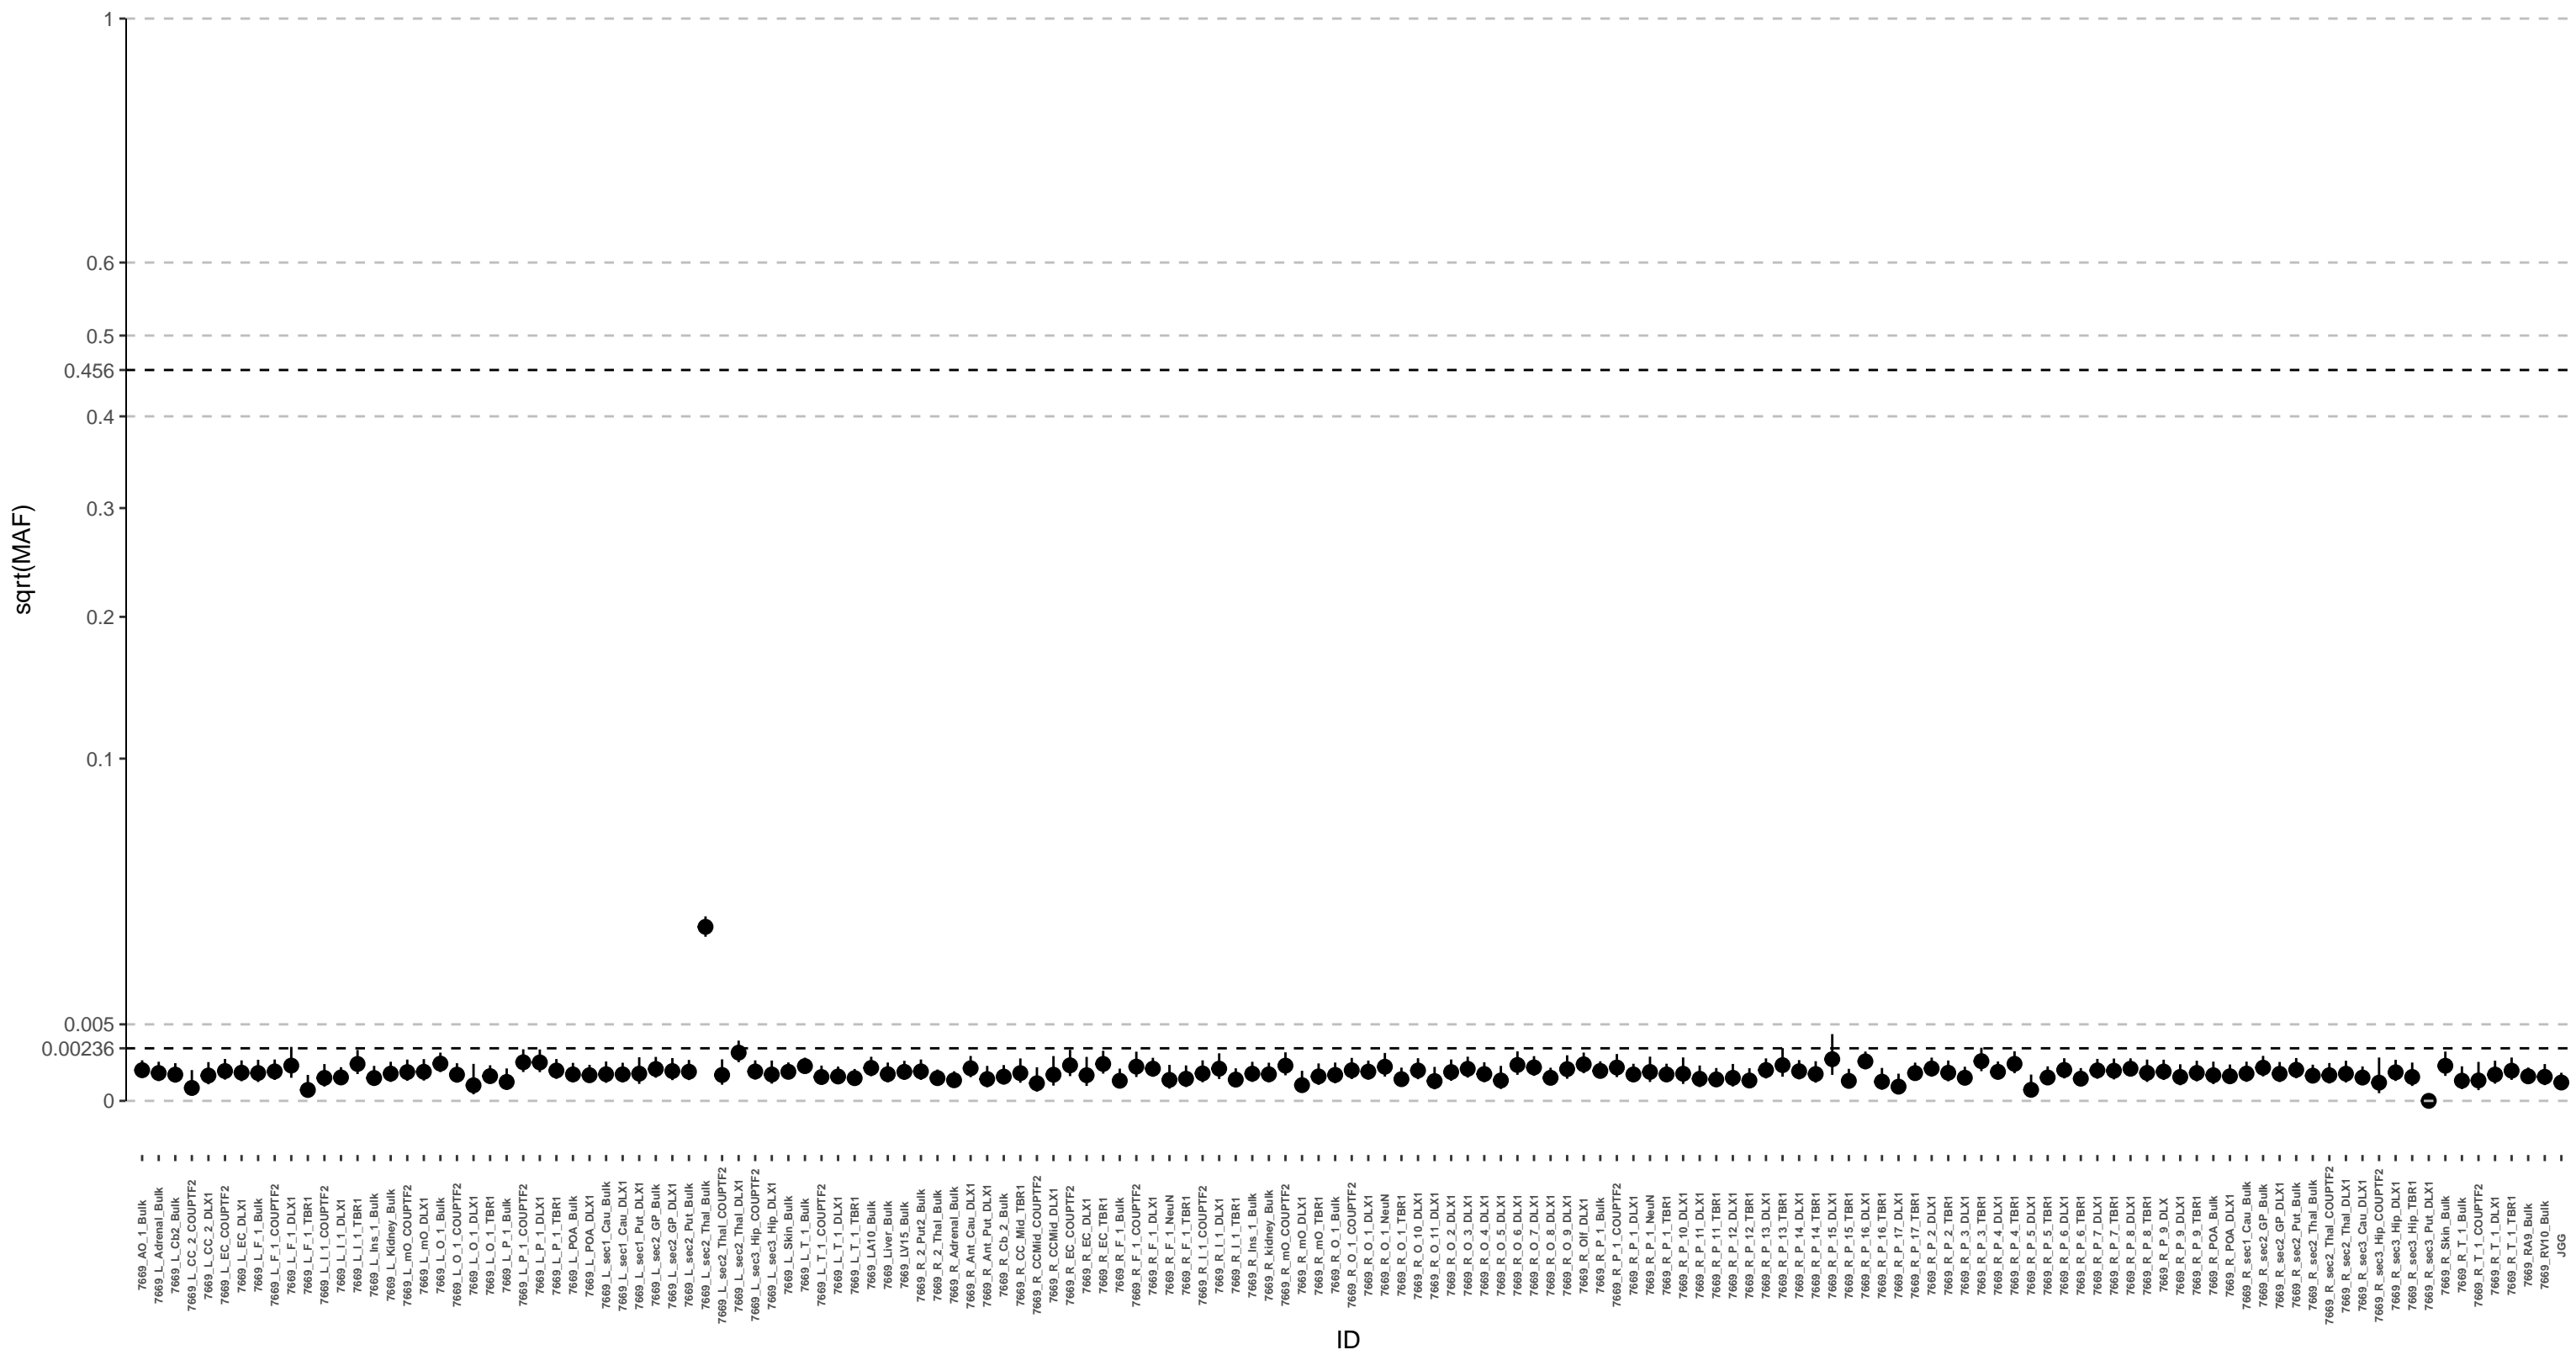

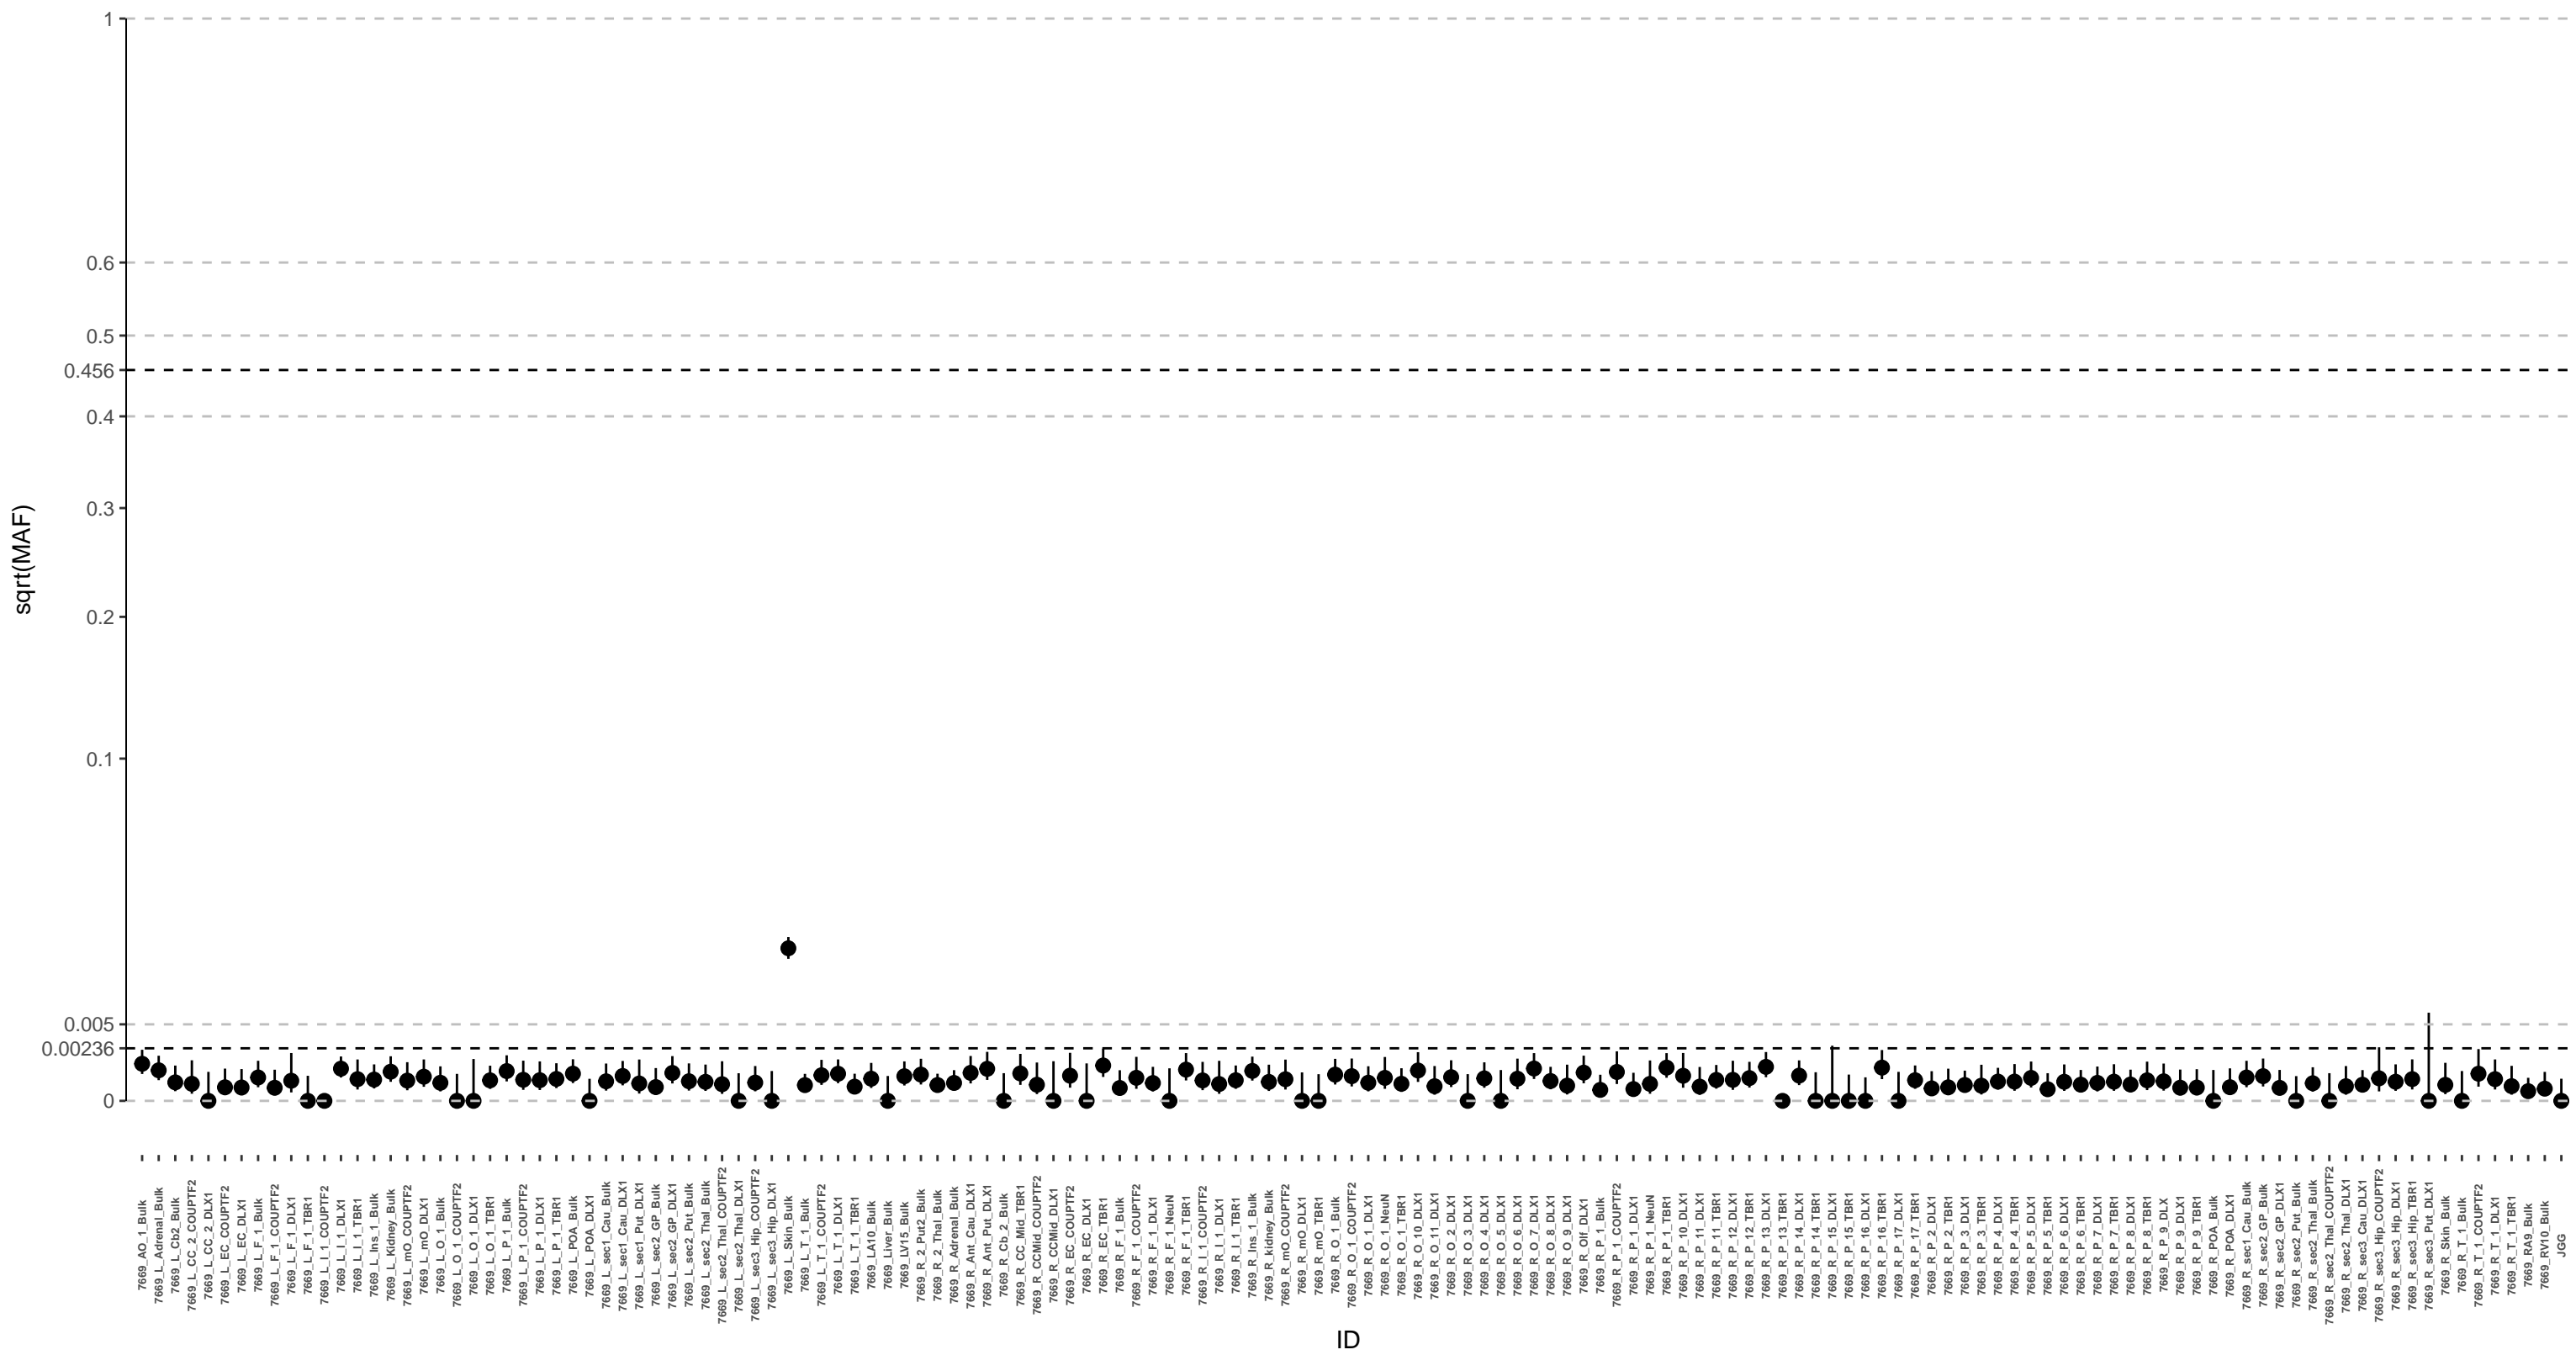

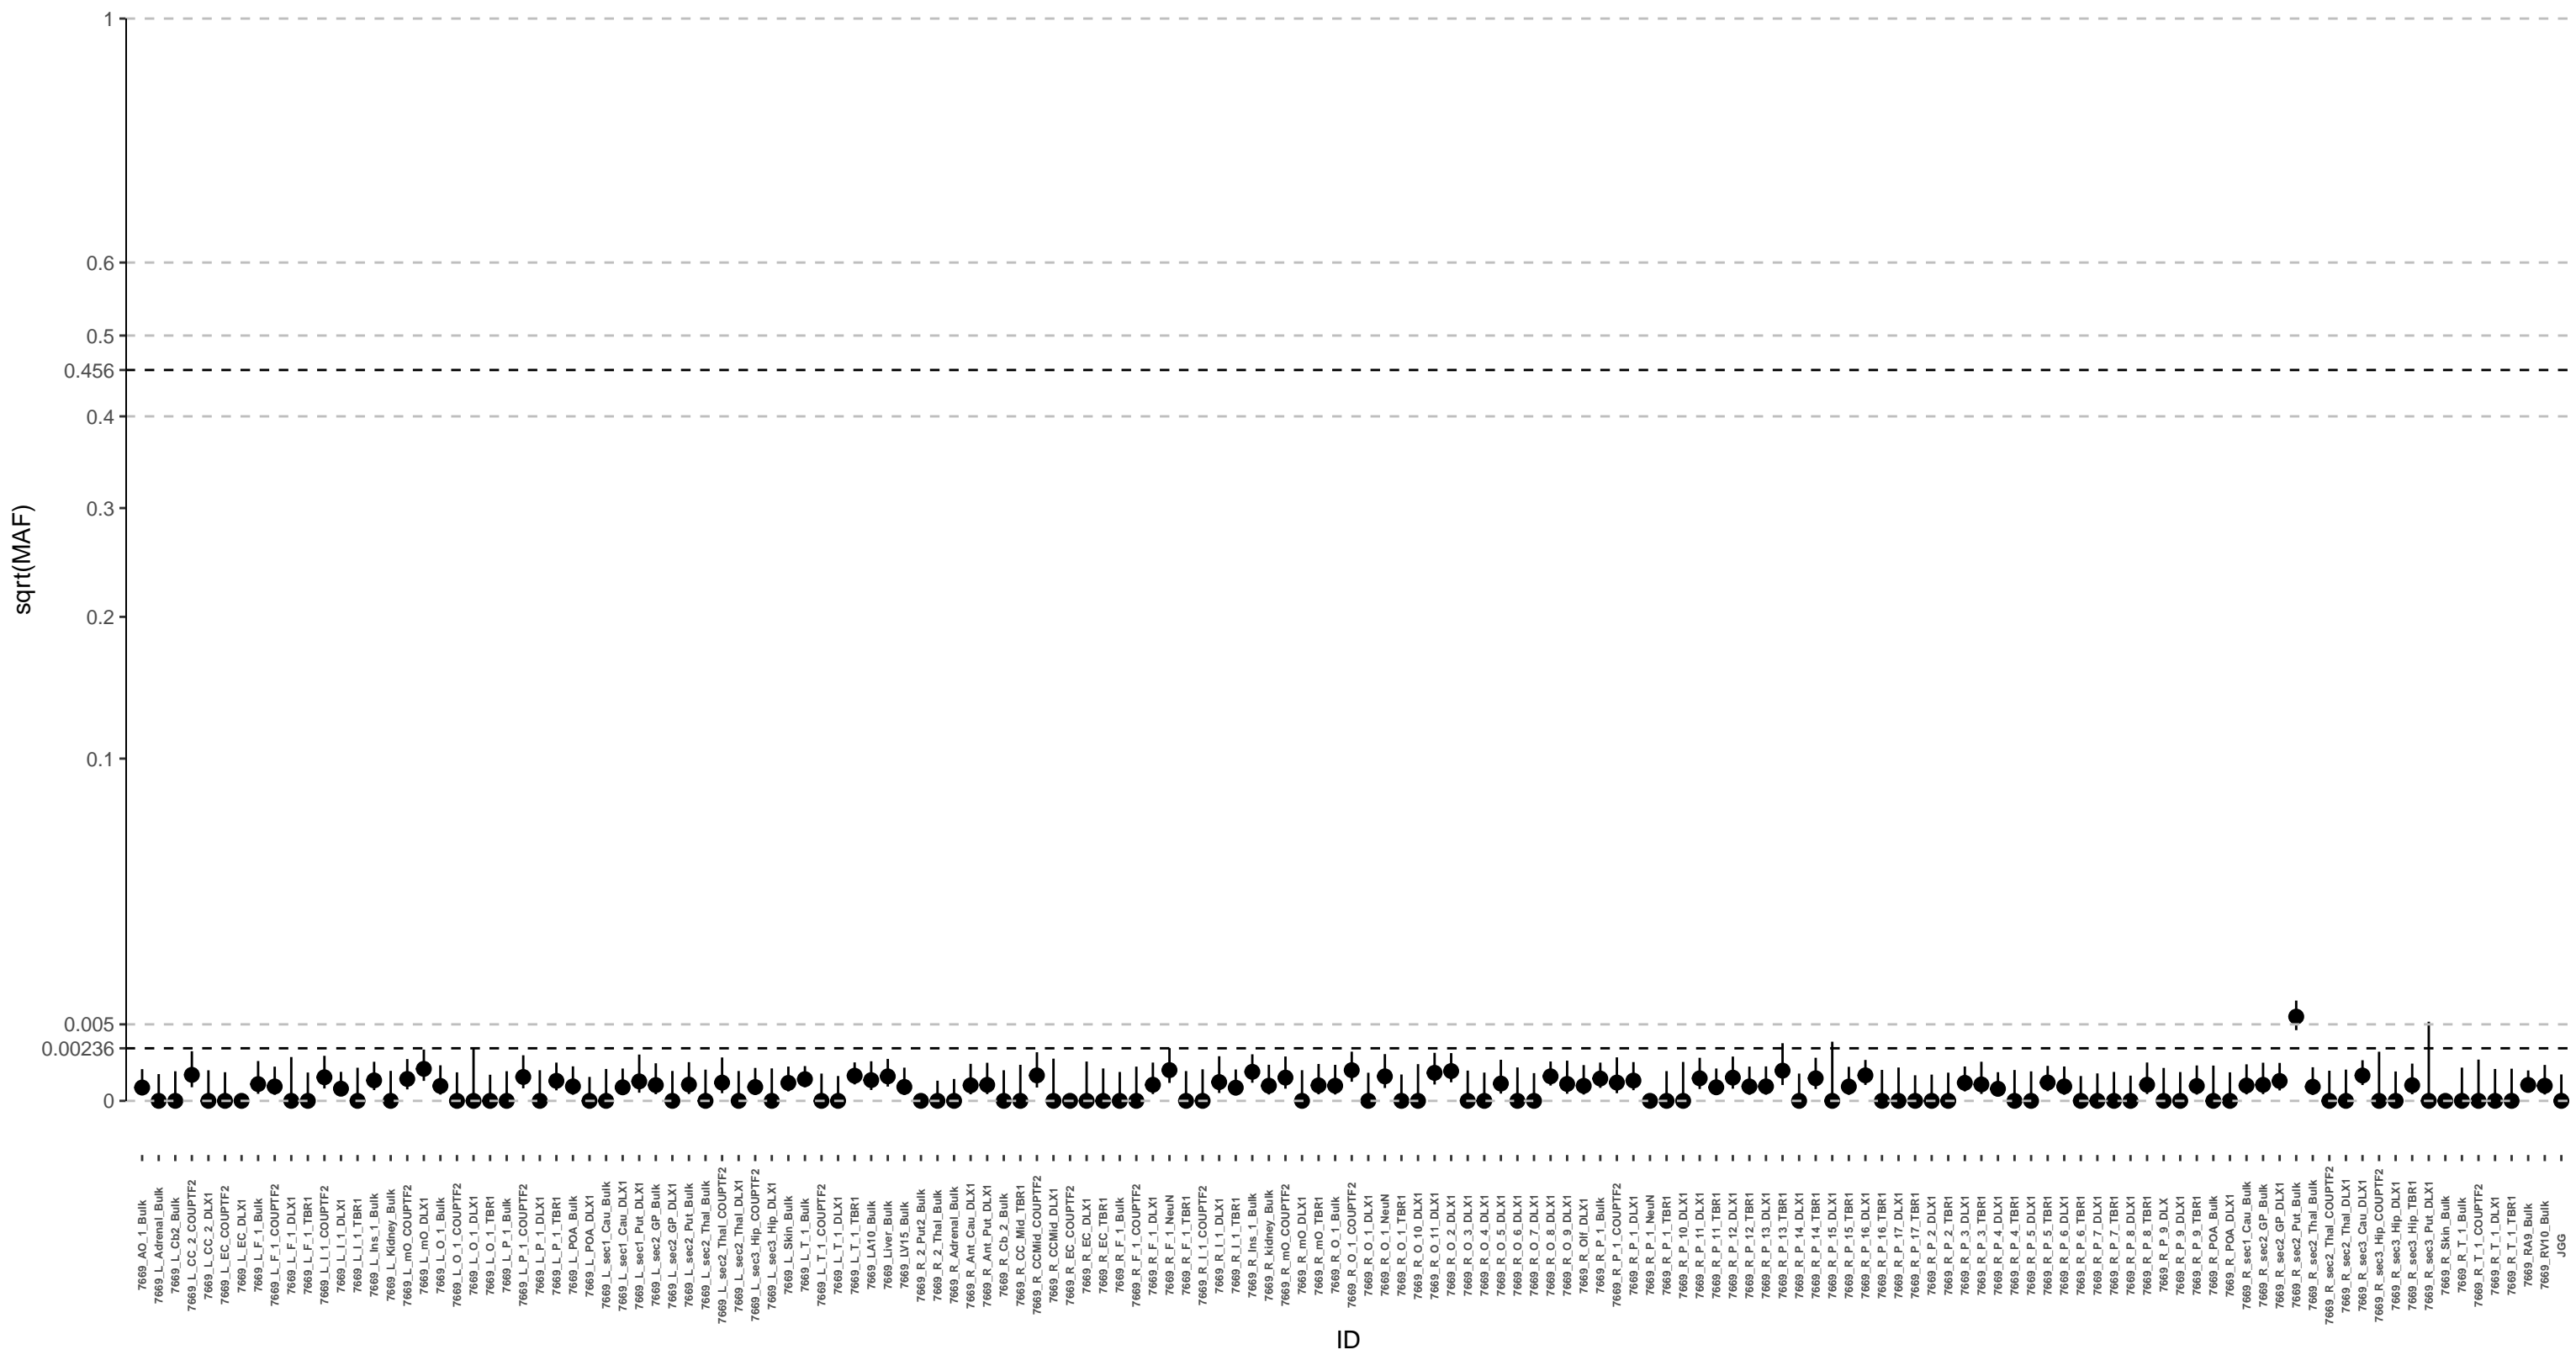

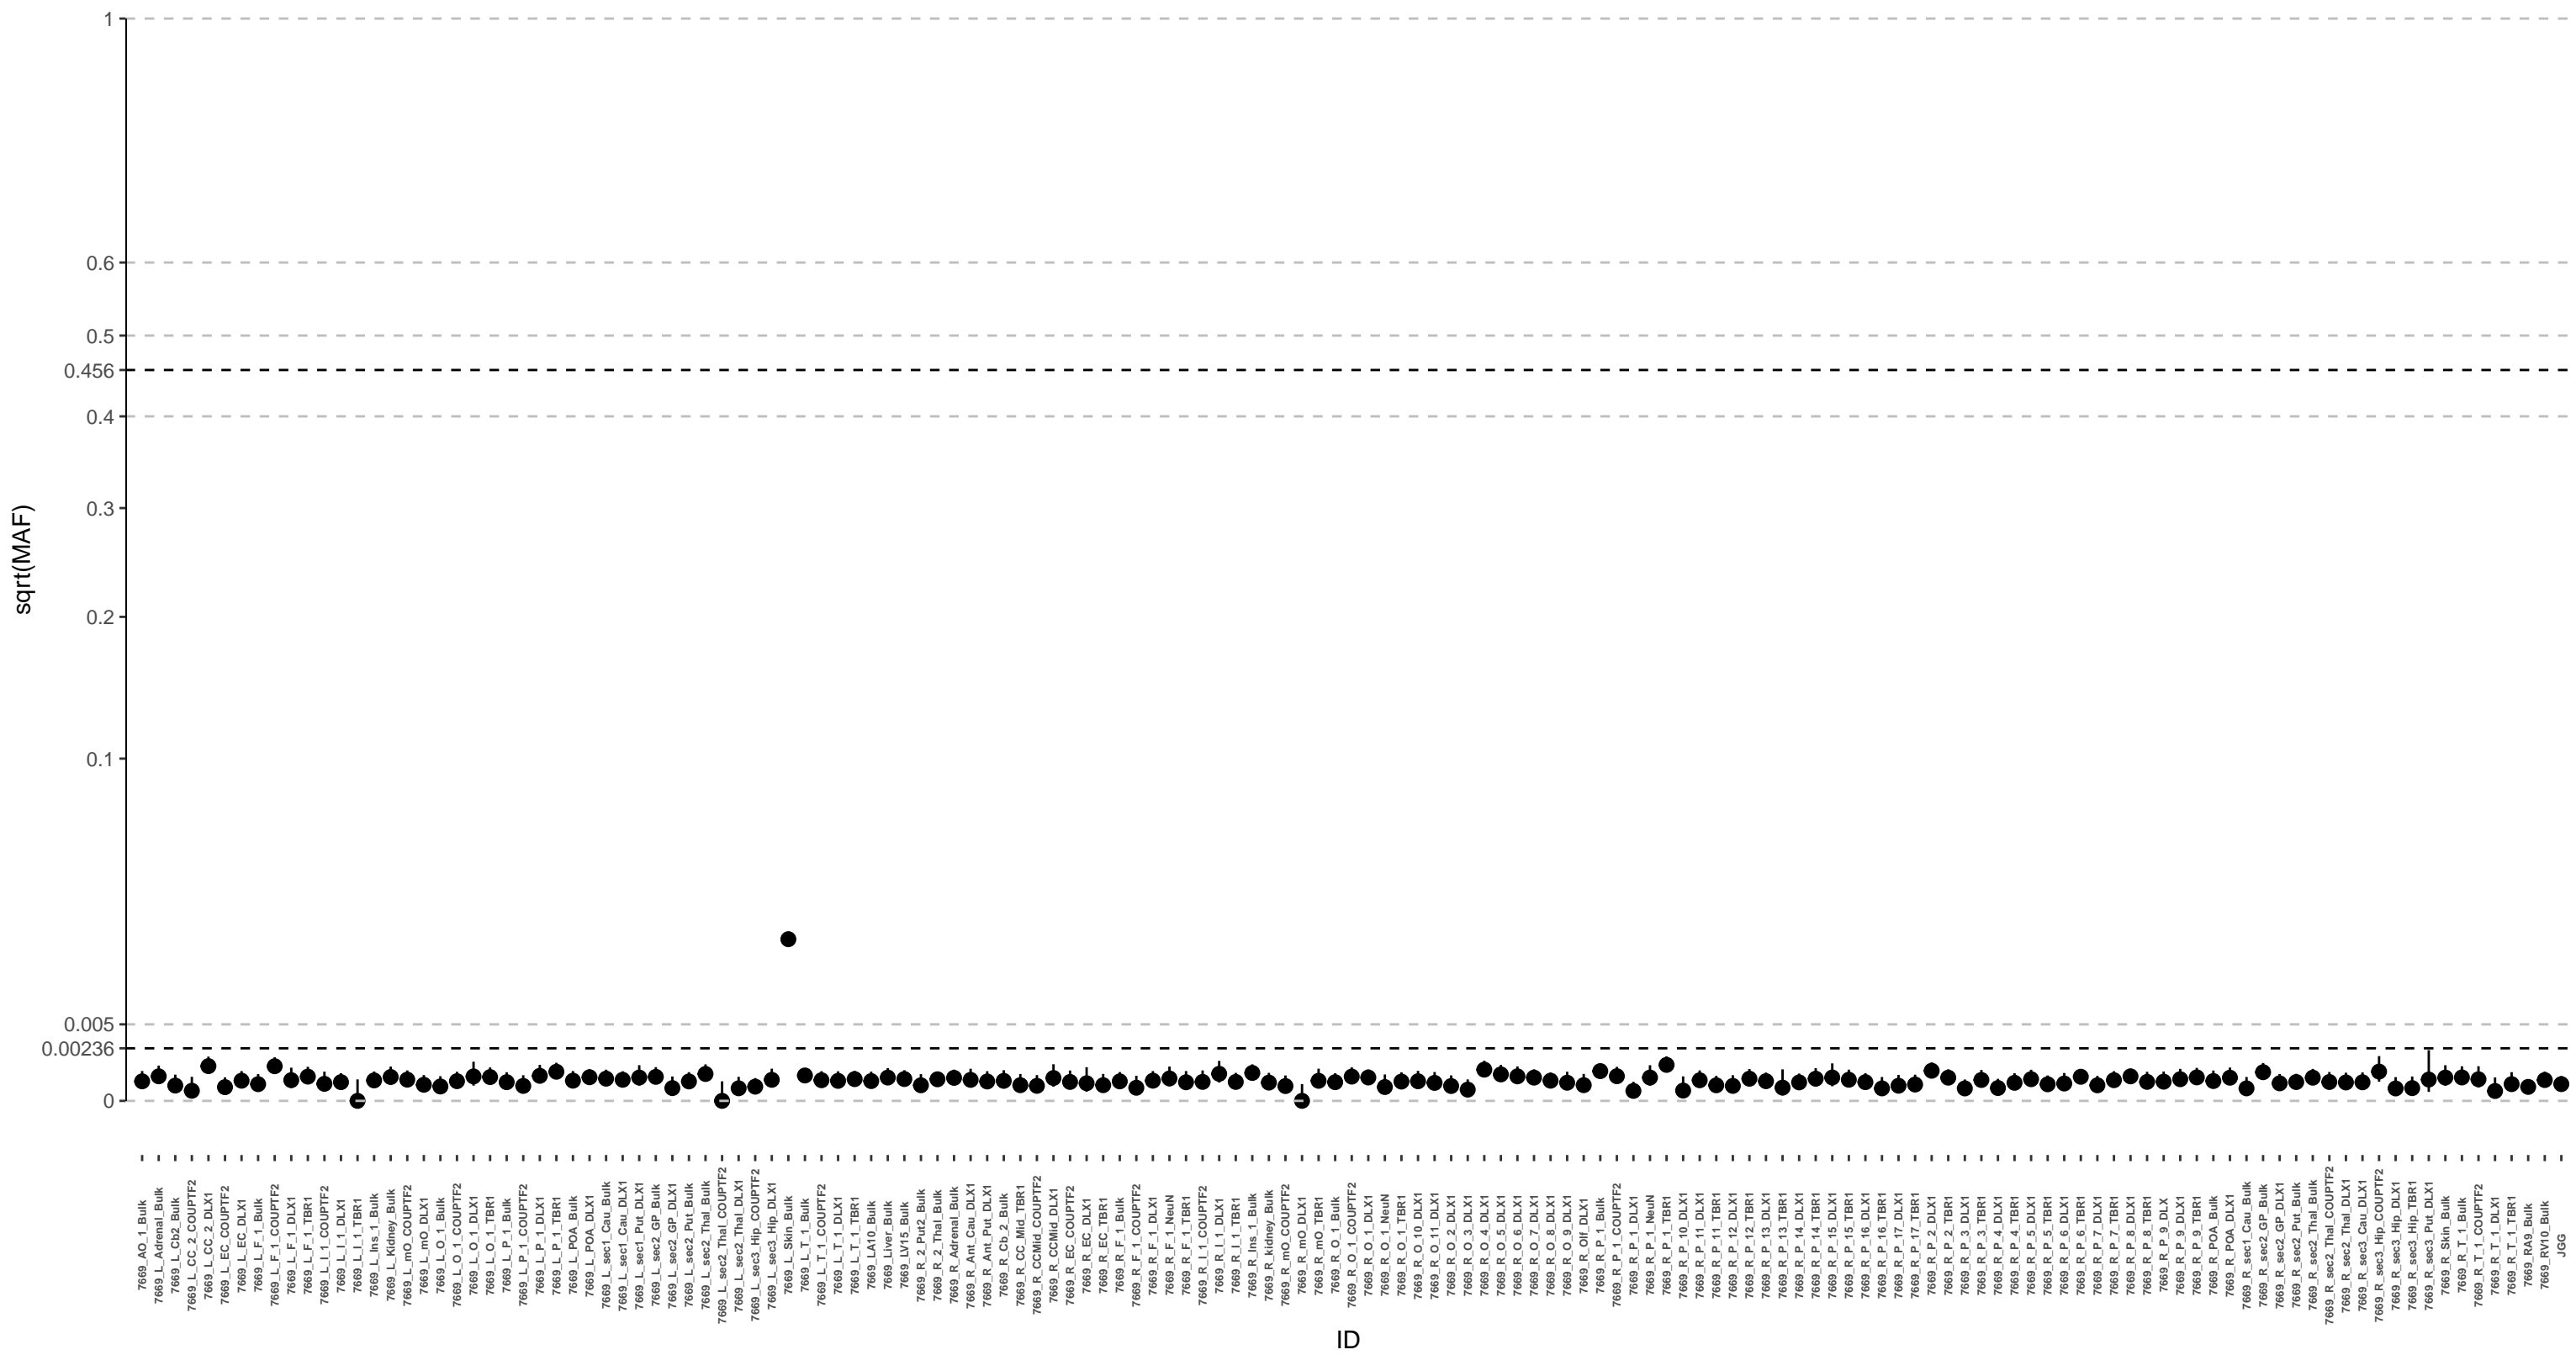

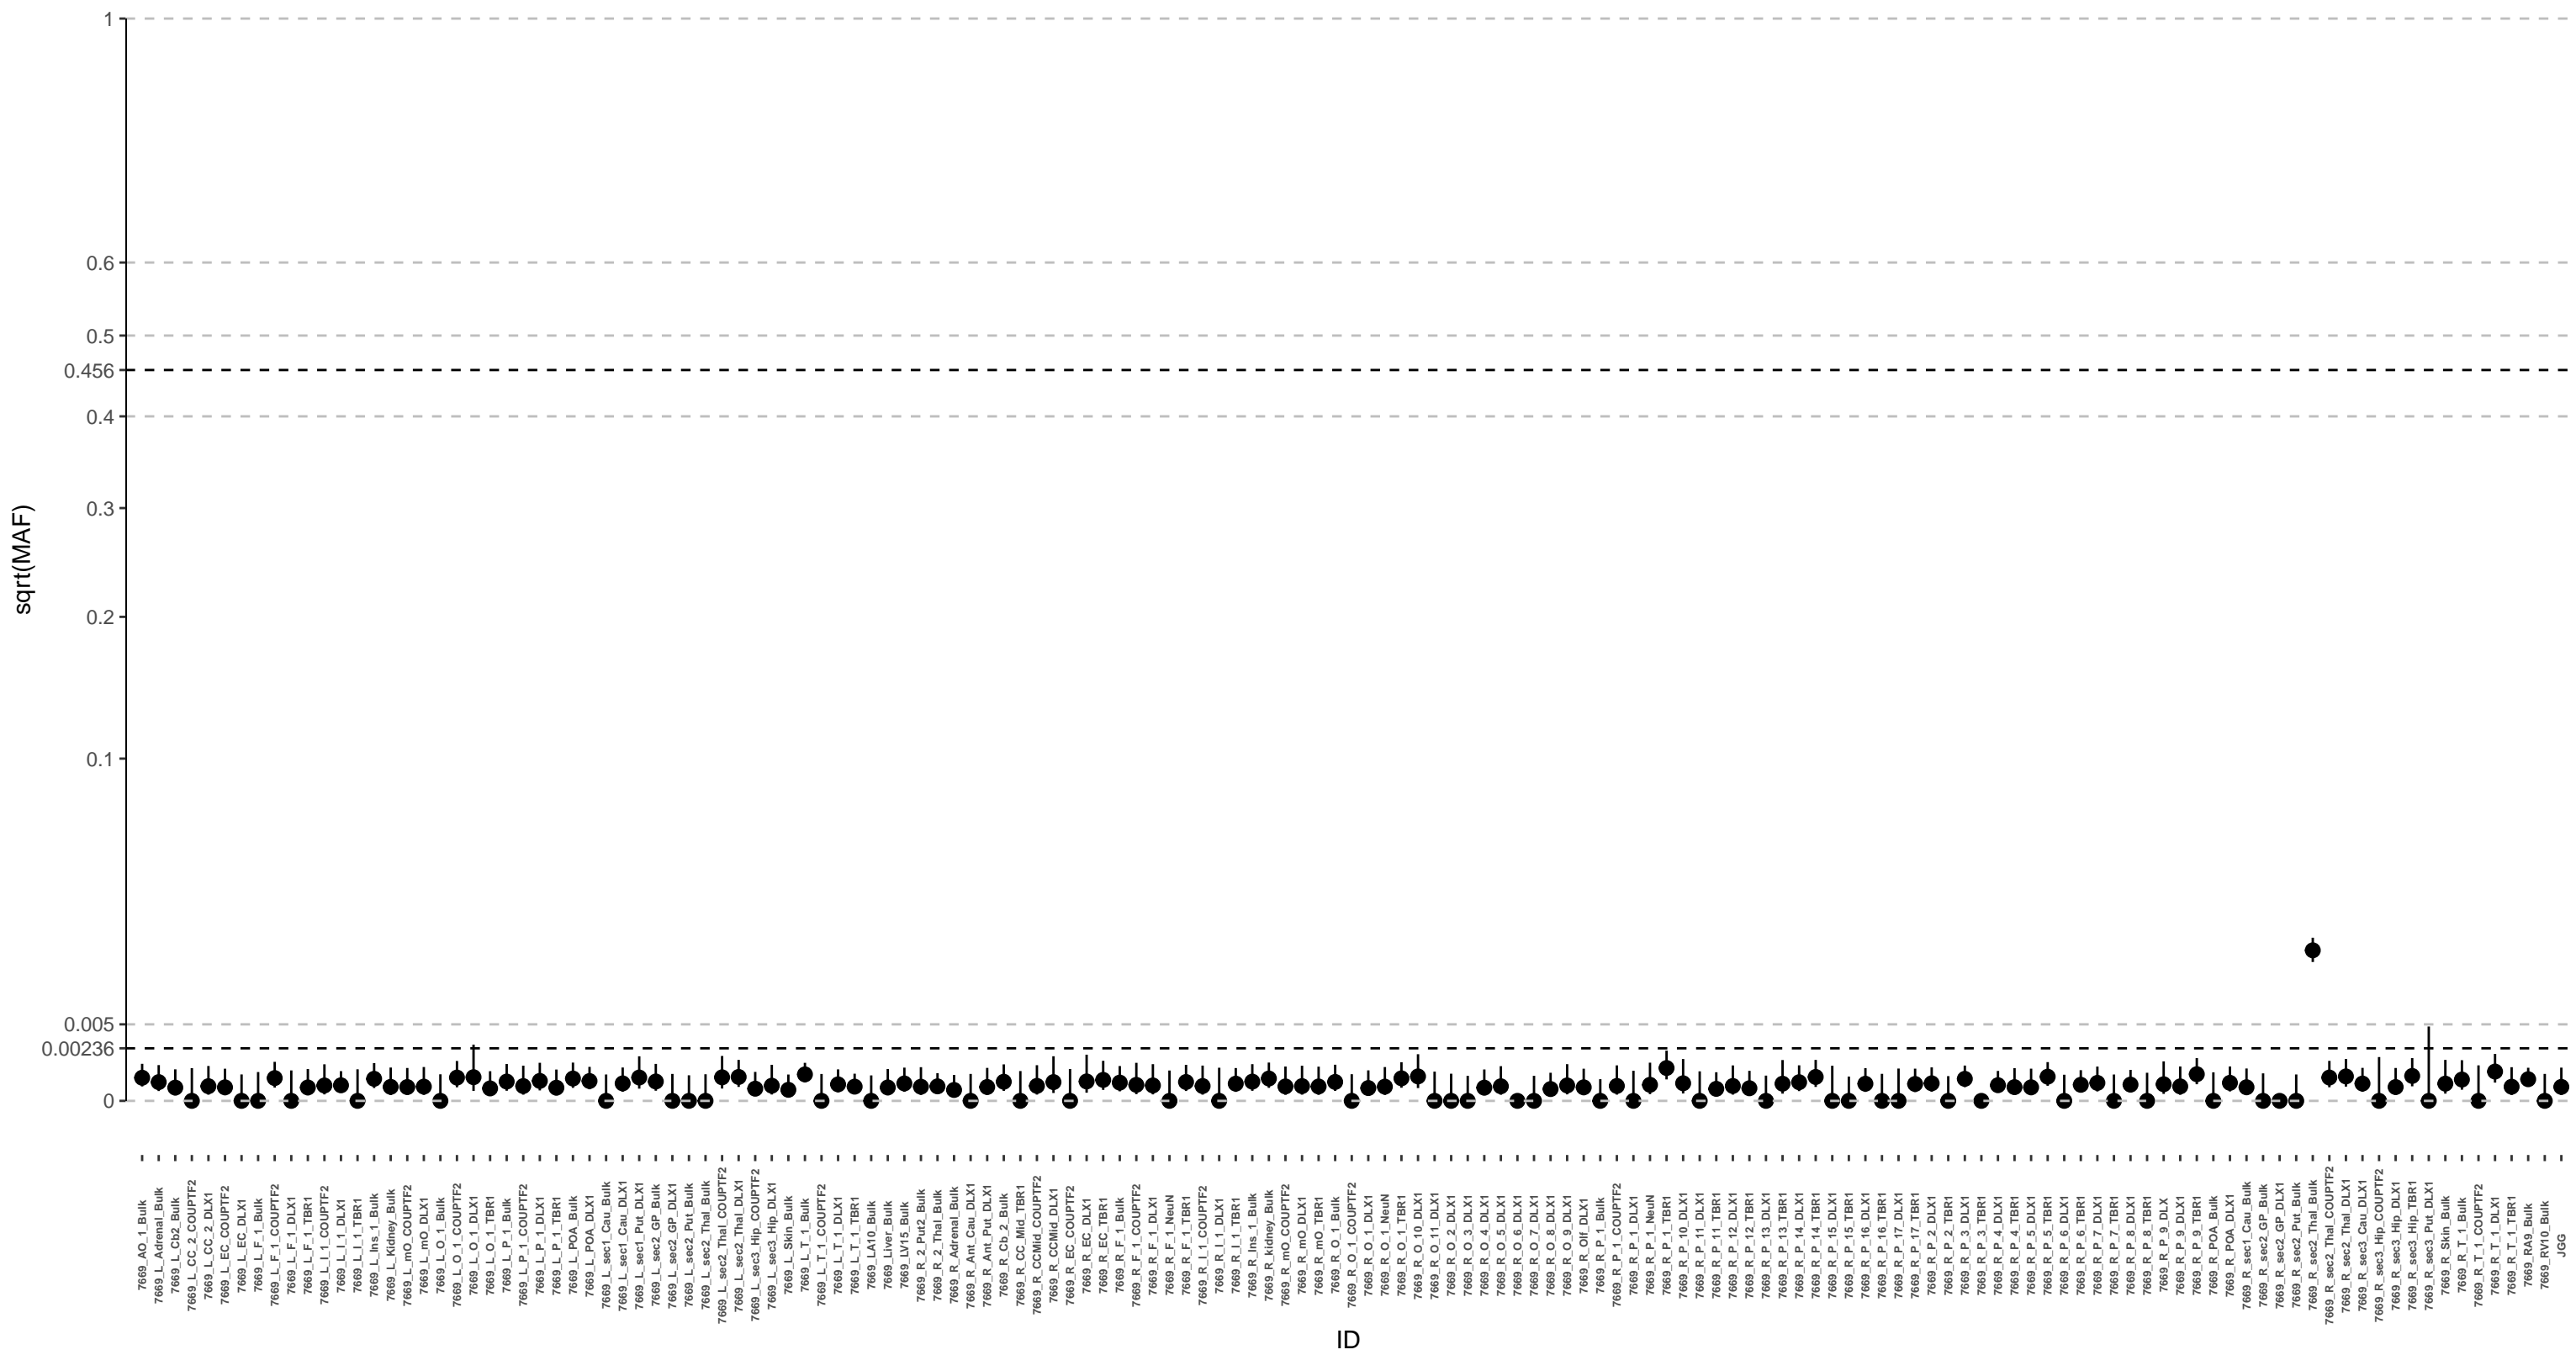



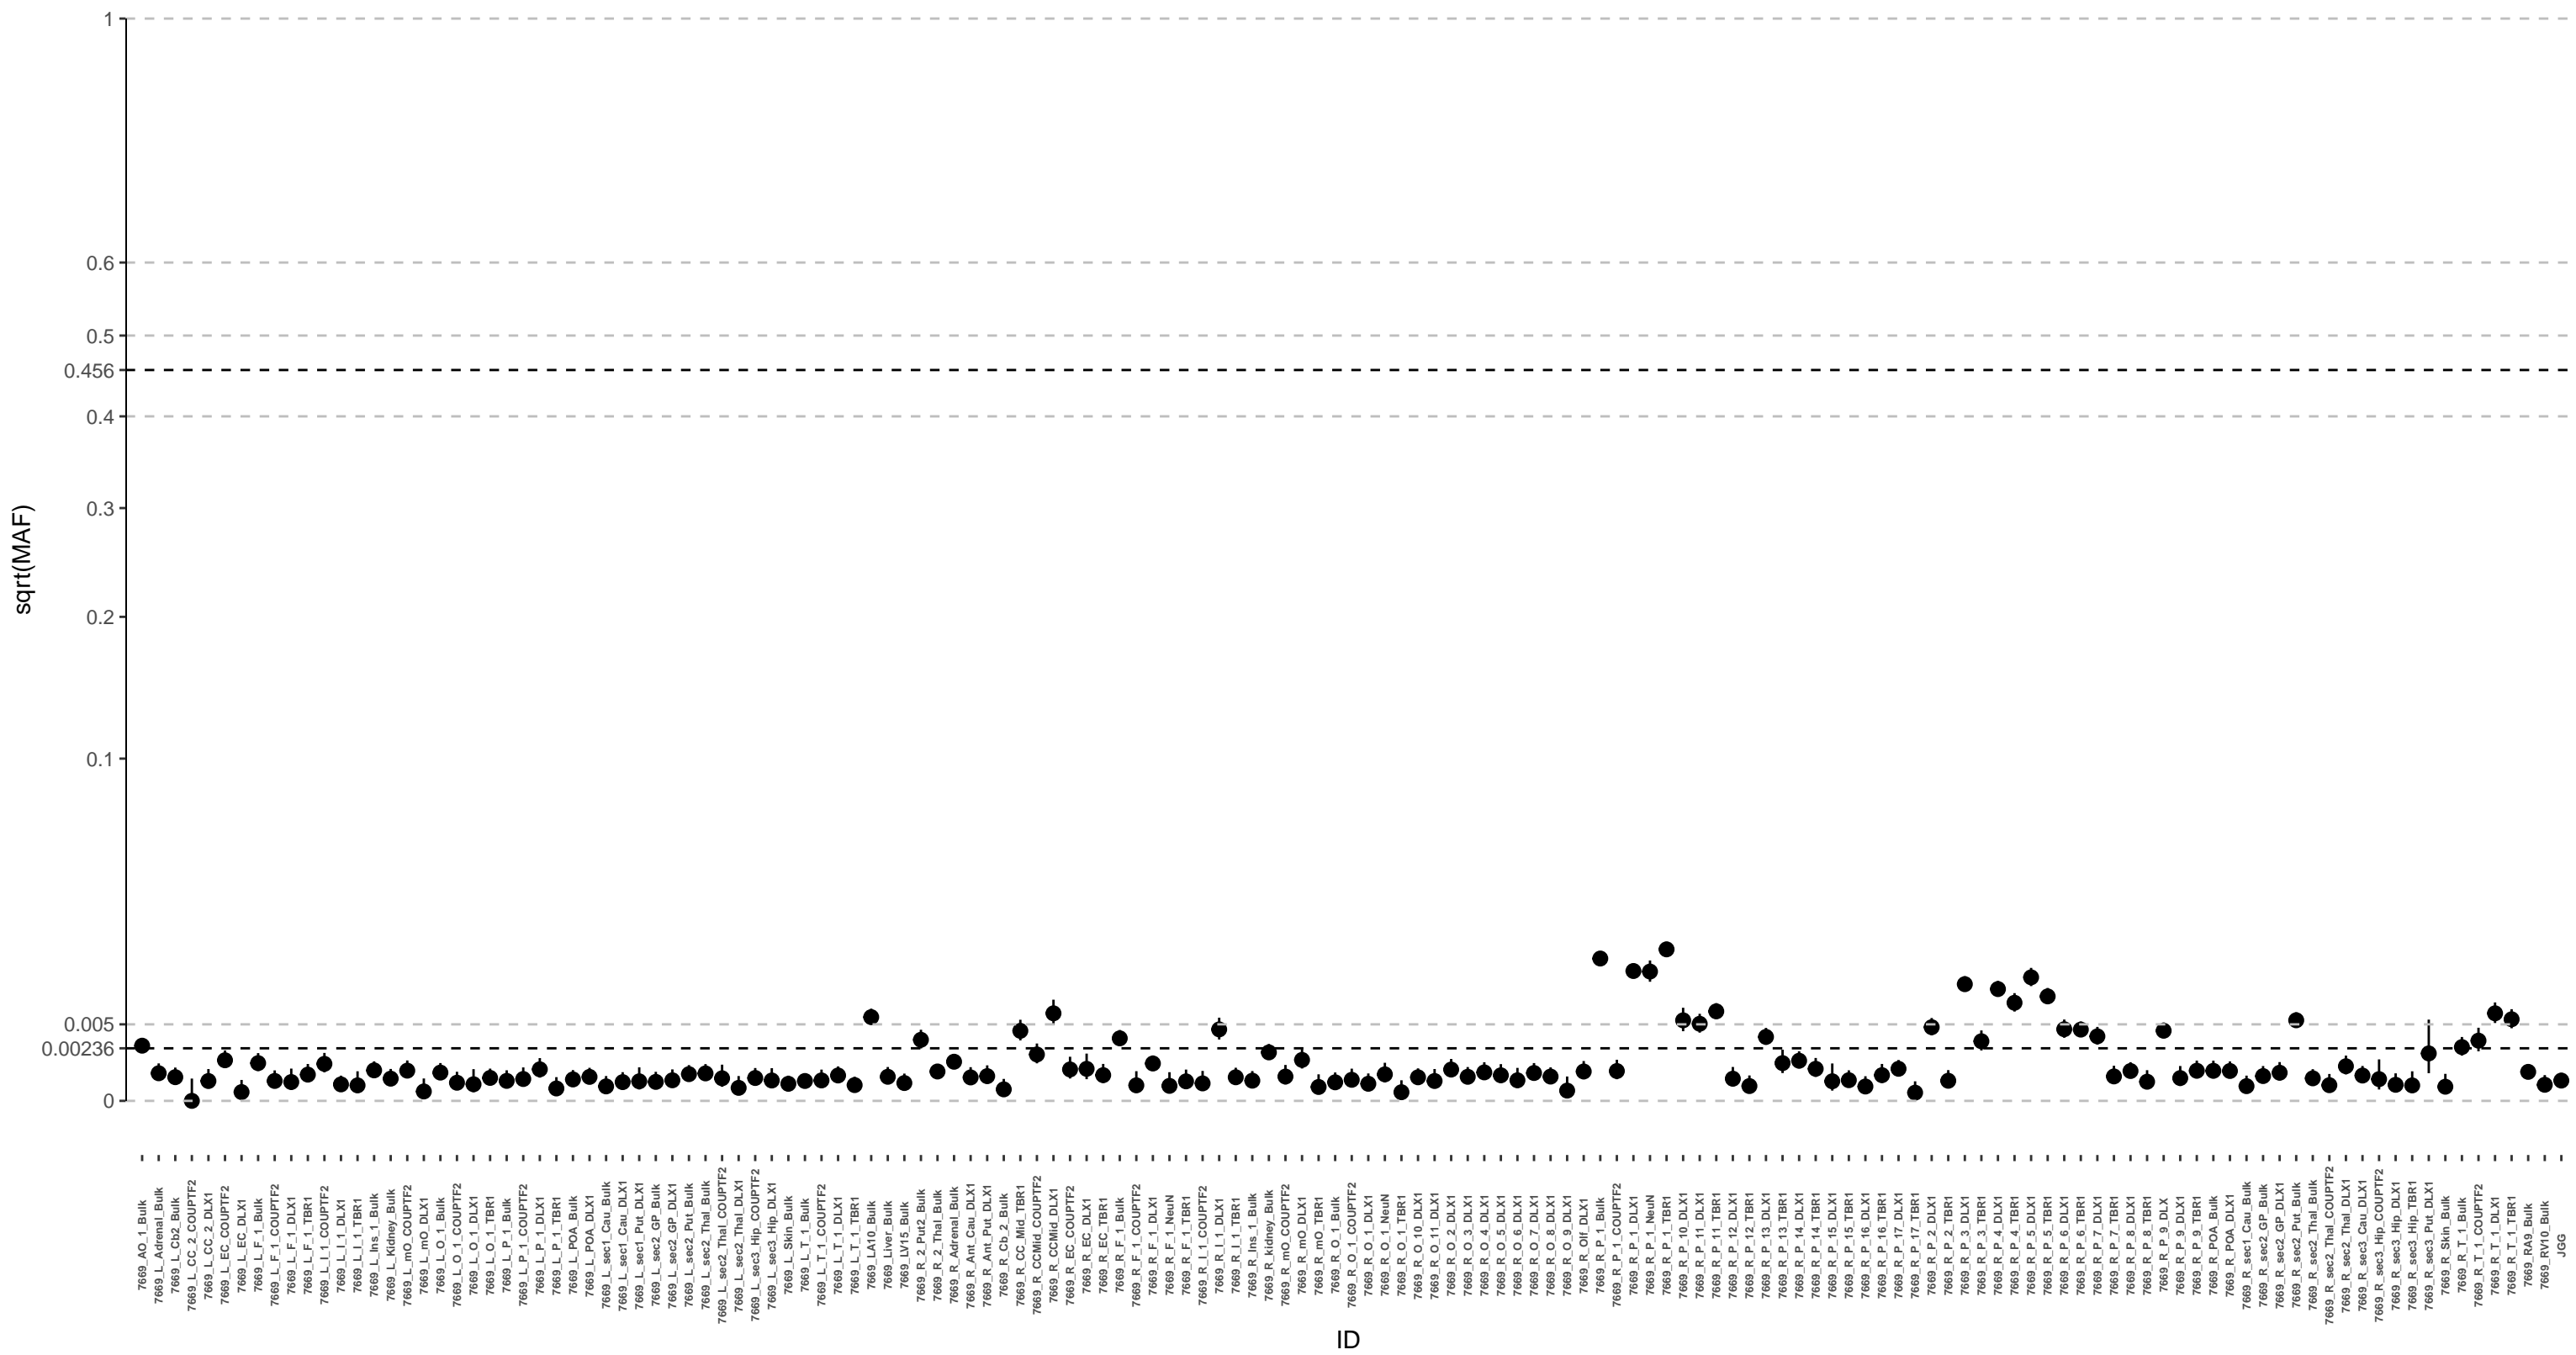

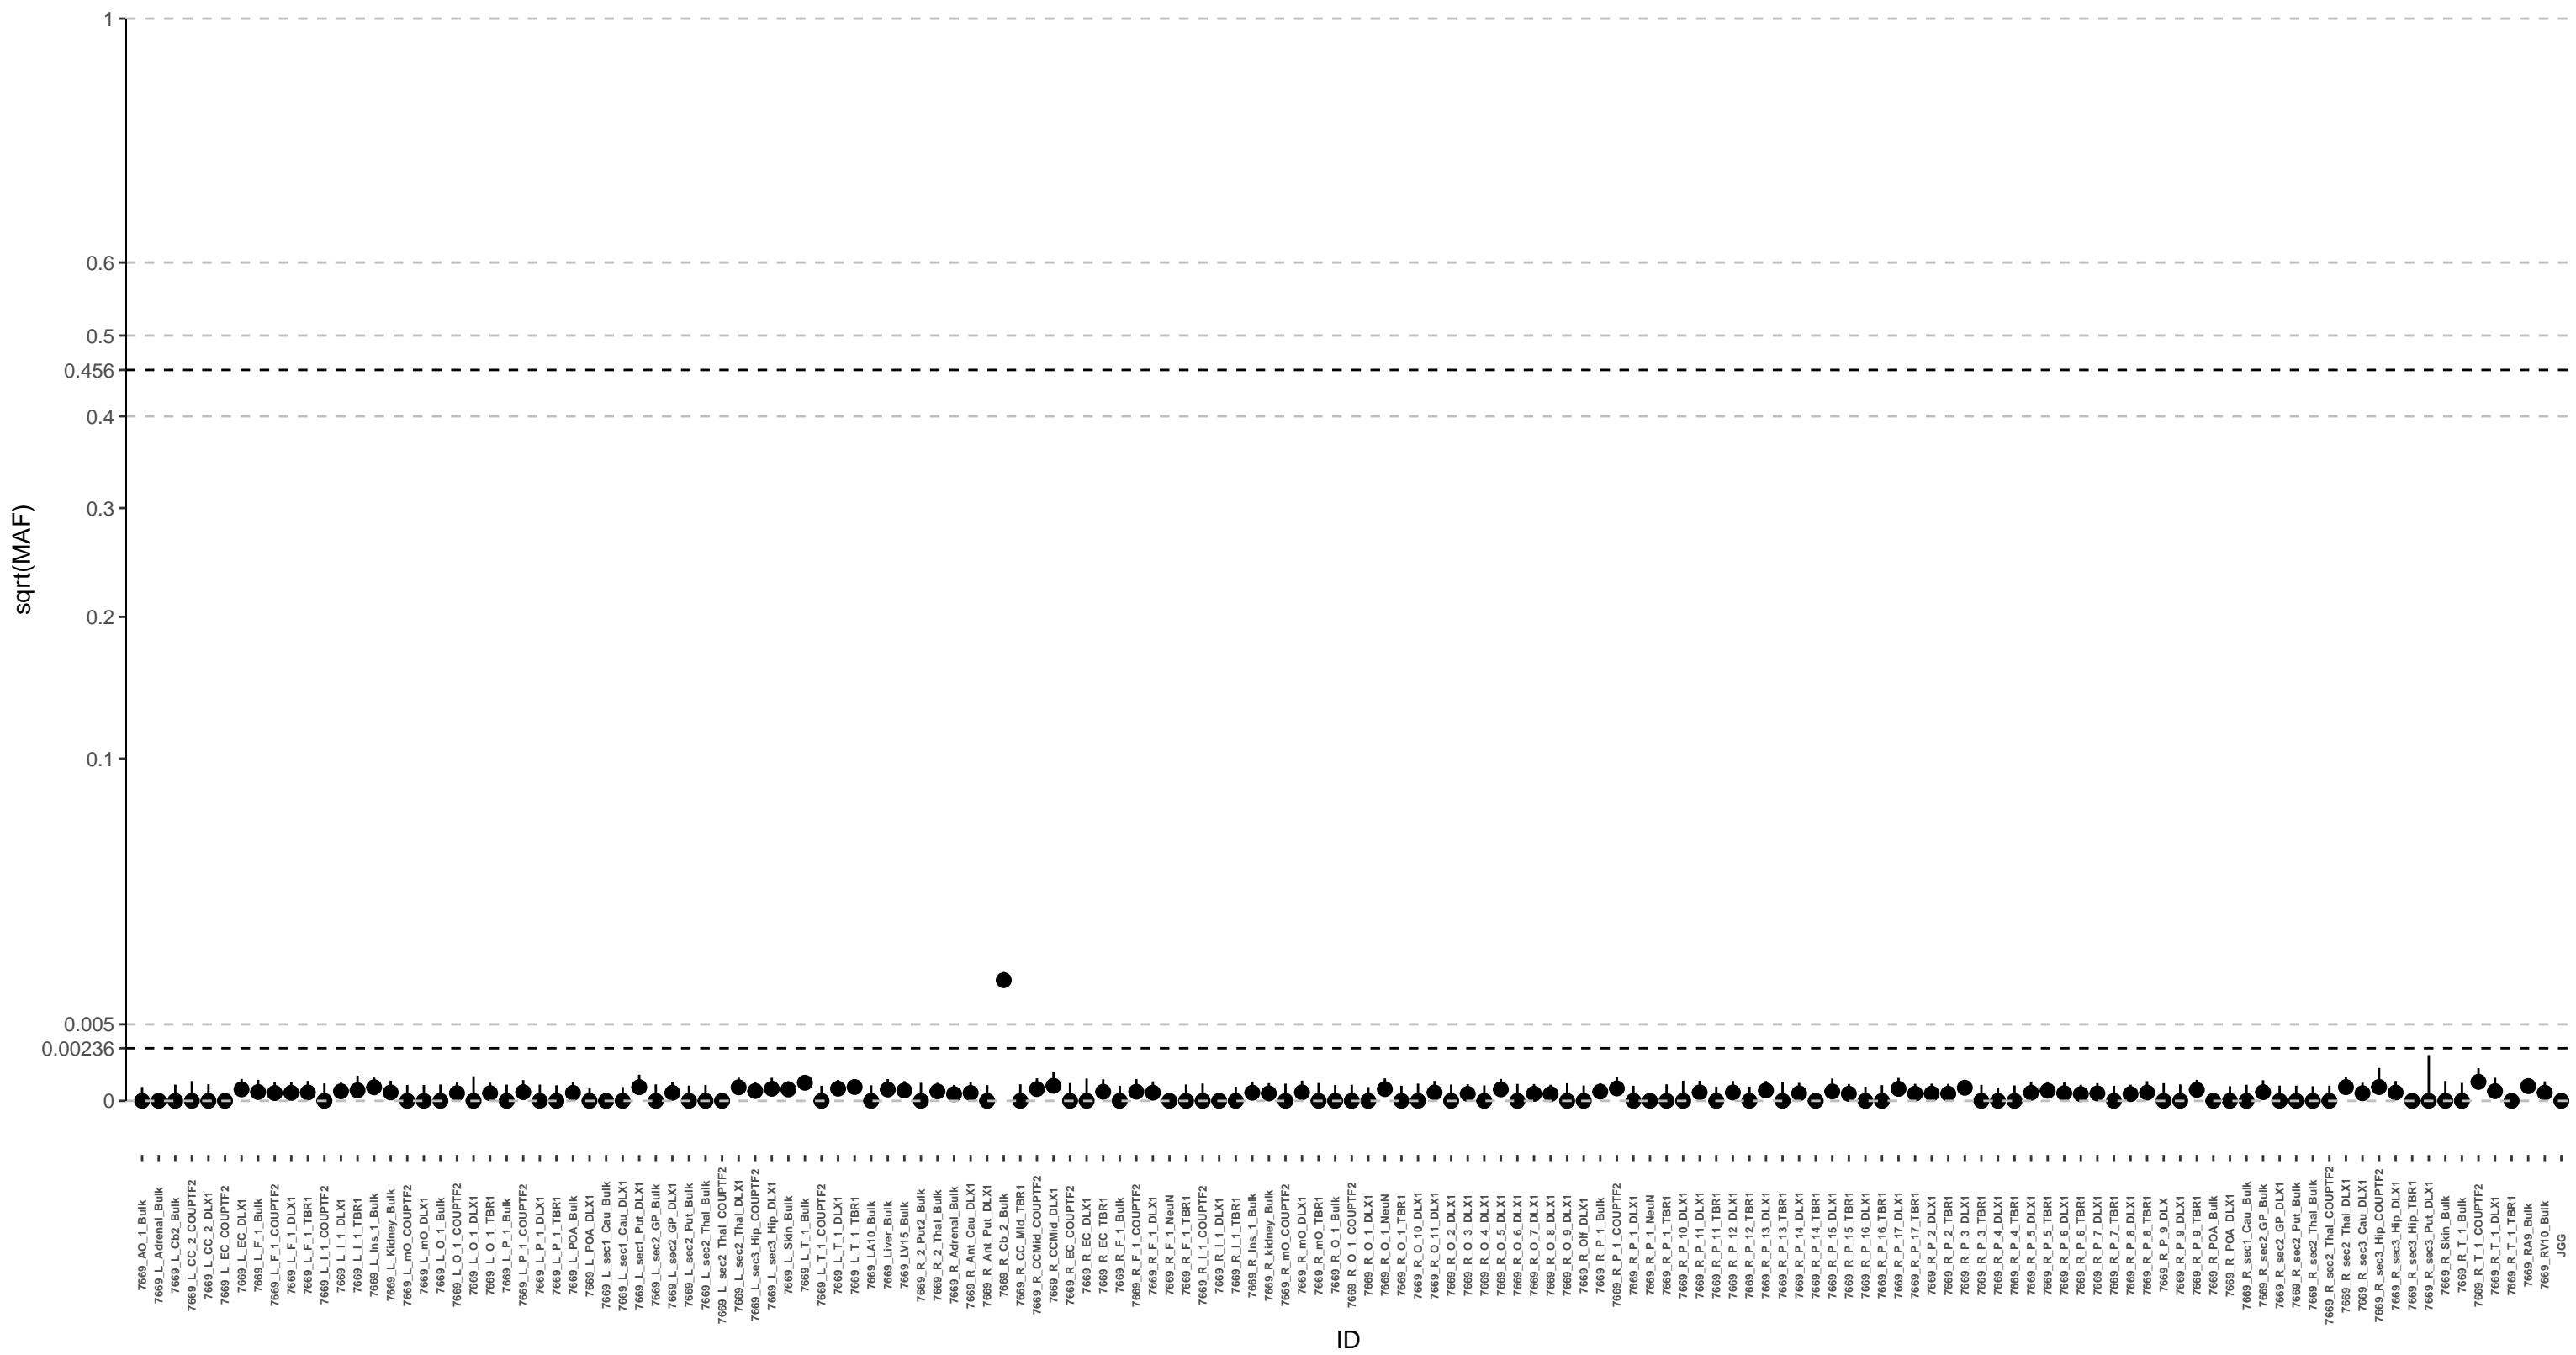

# ID05 20-12514966-T-G

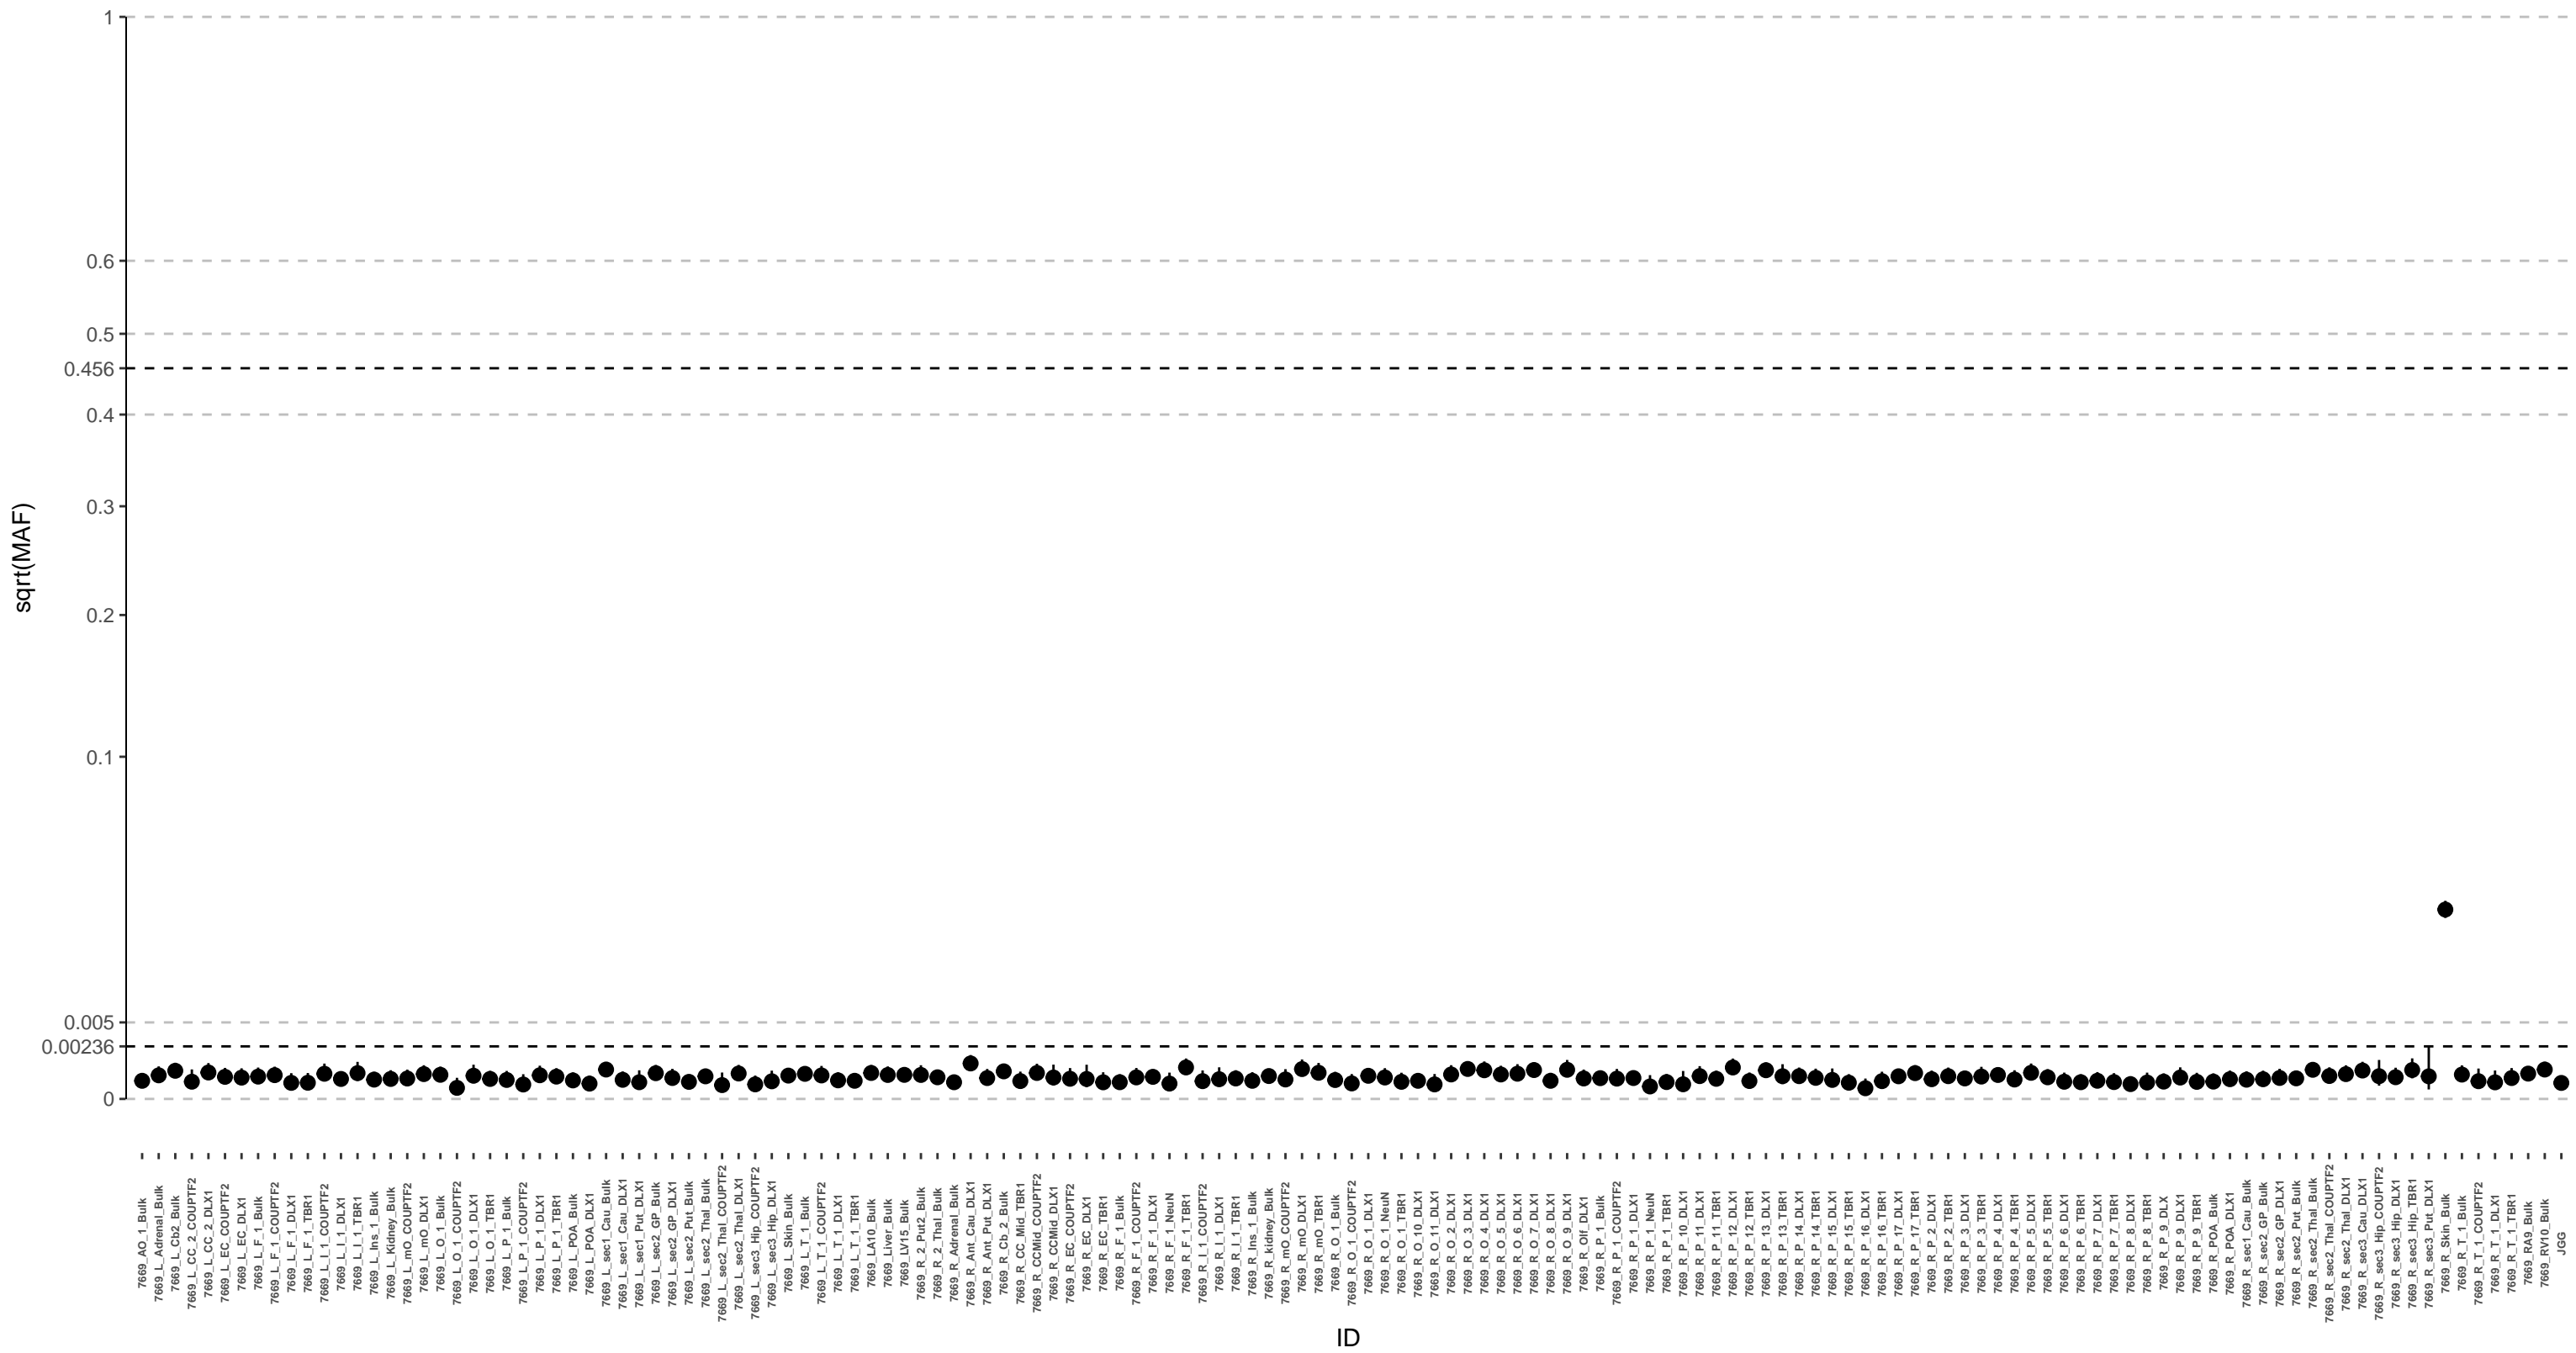

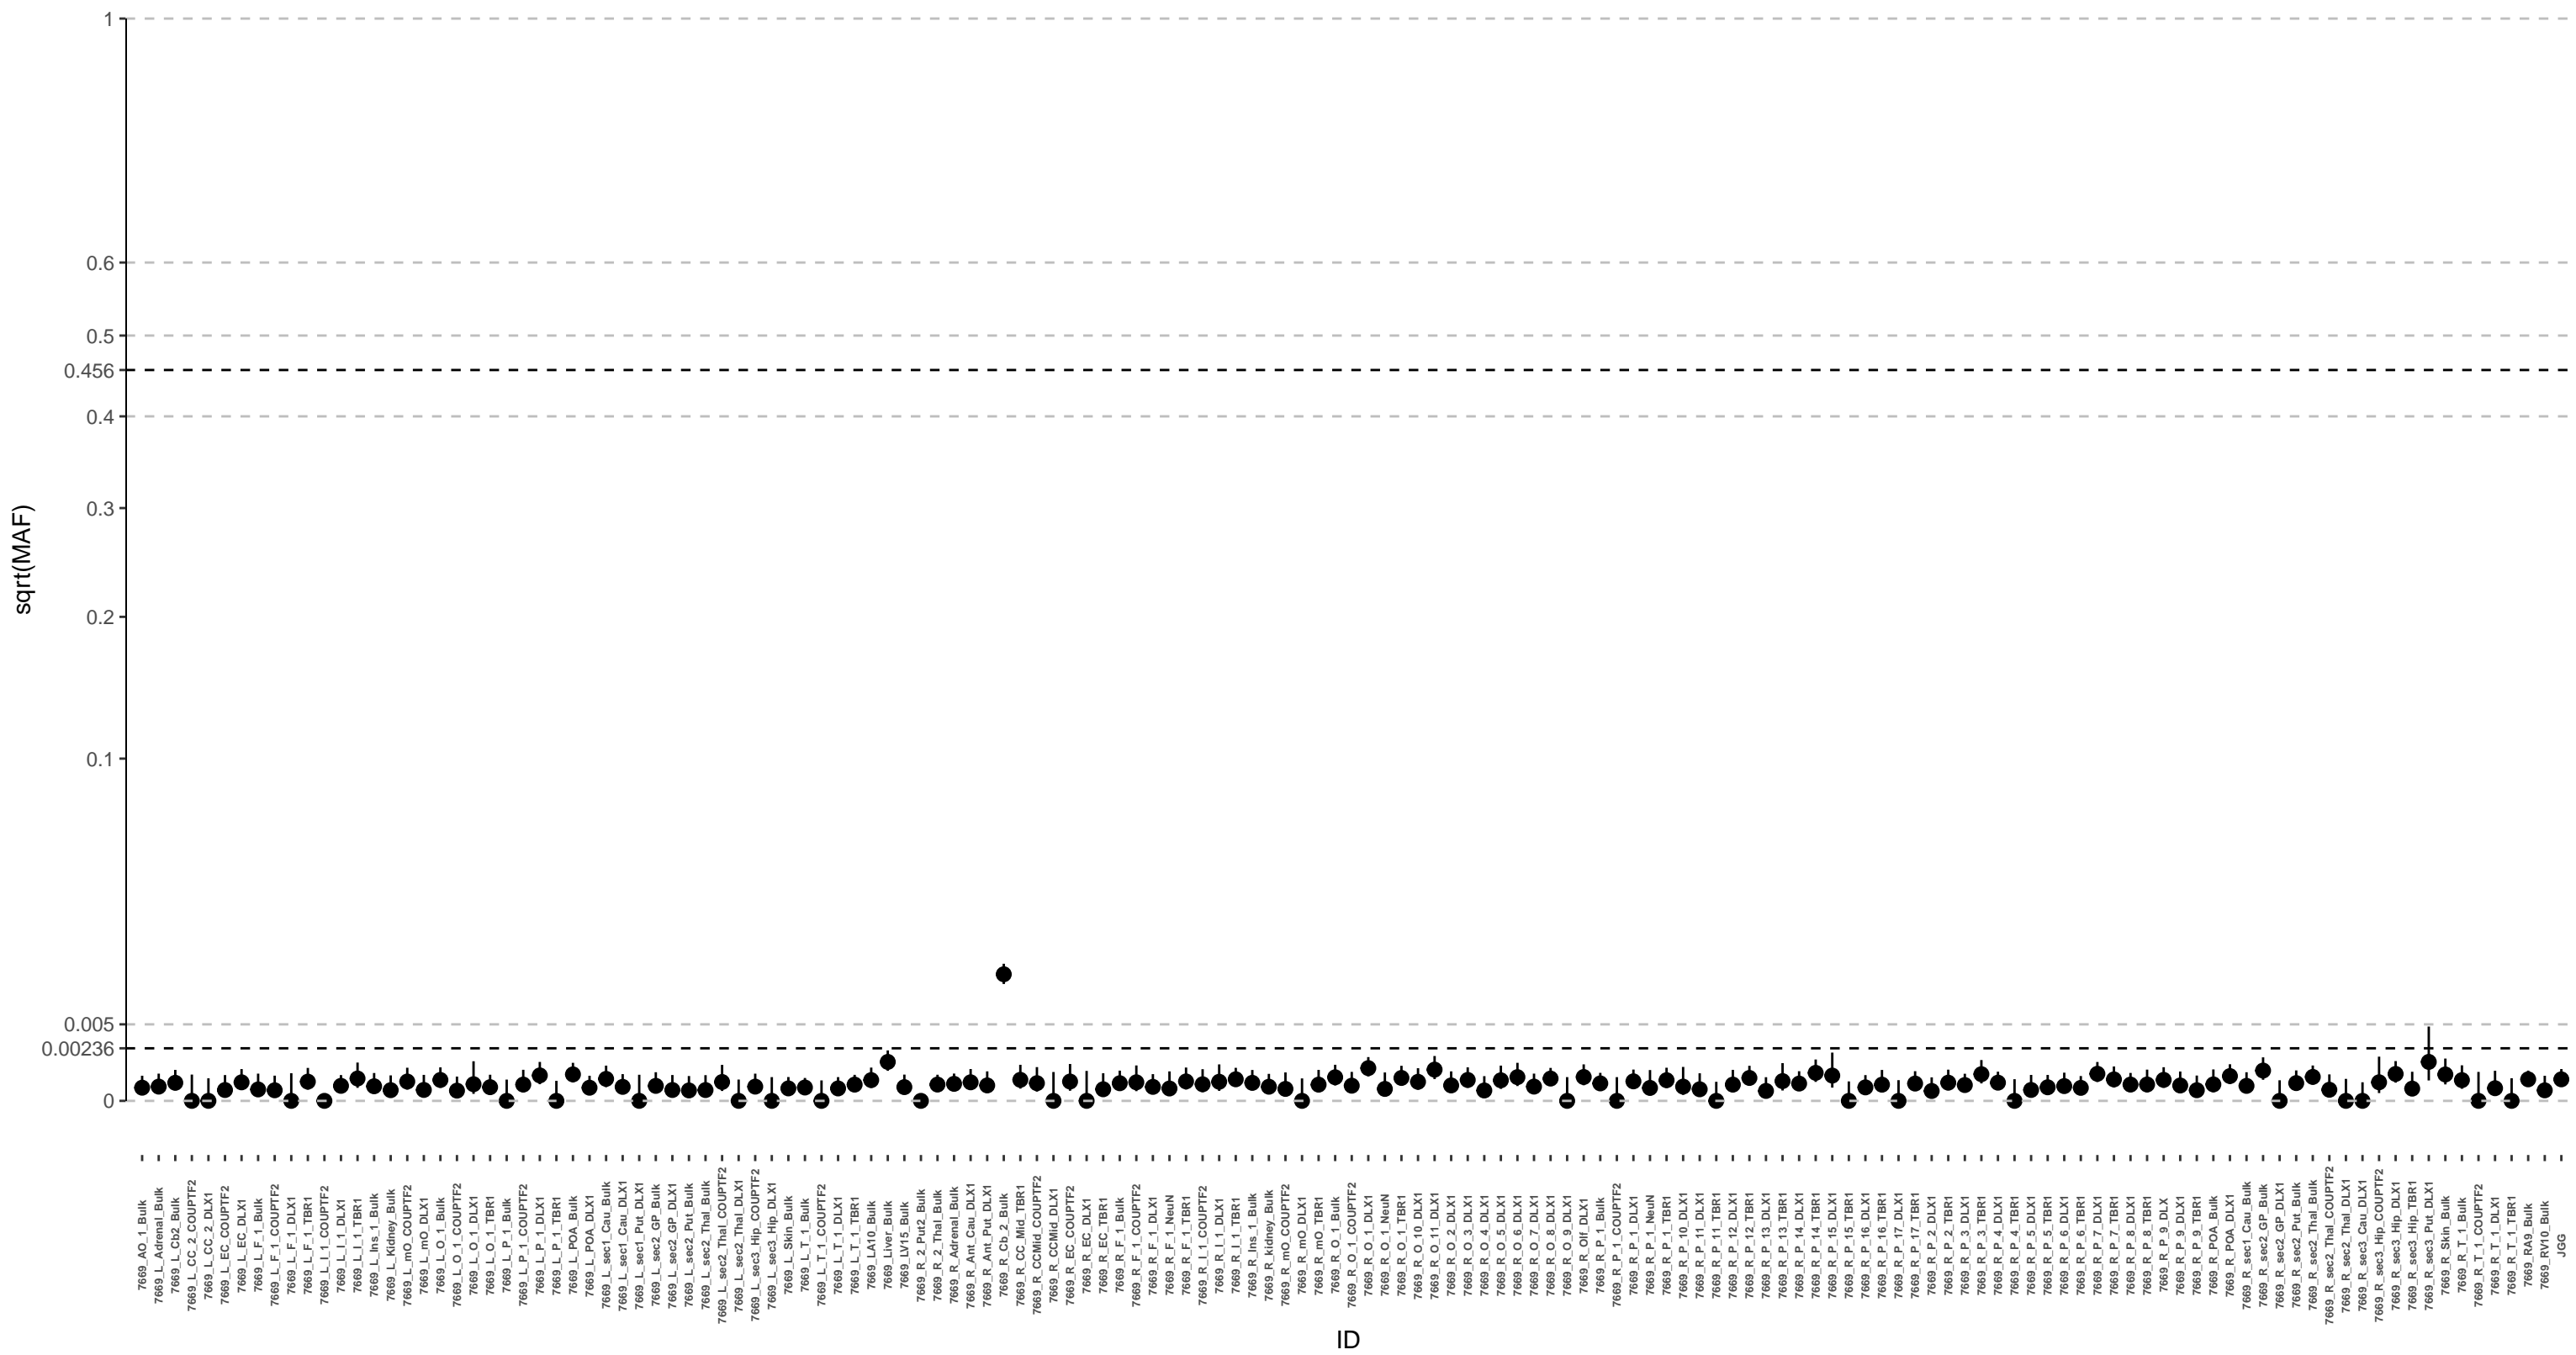

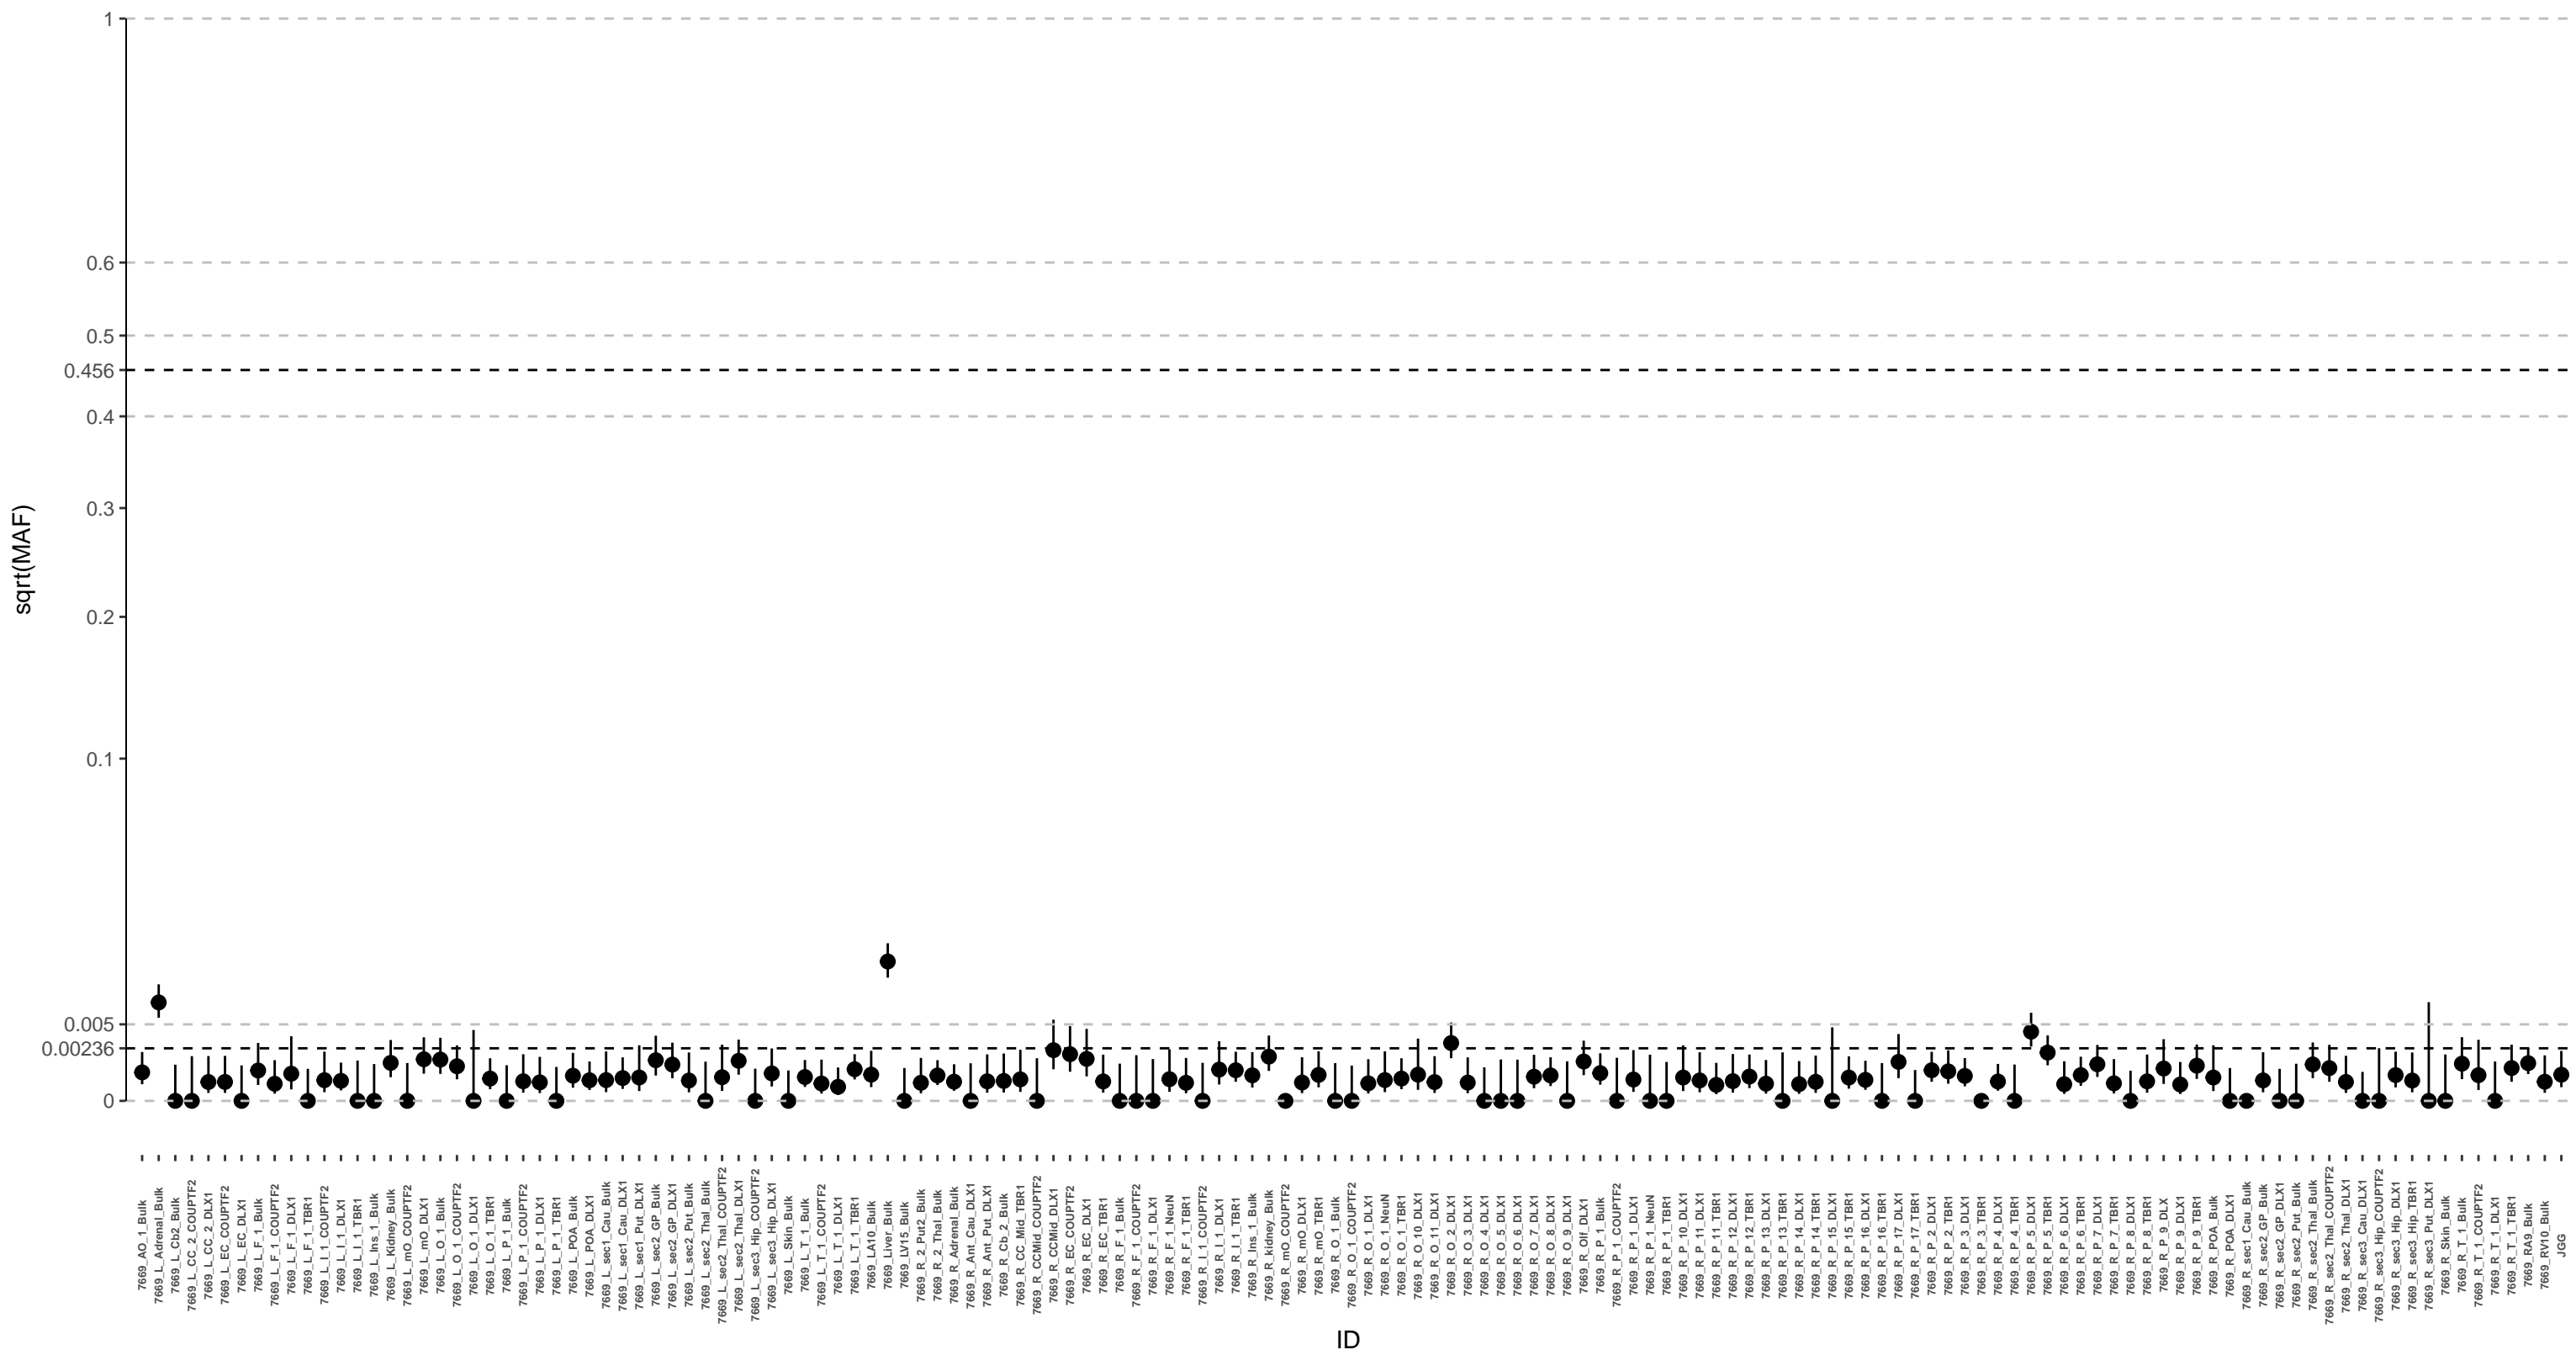

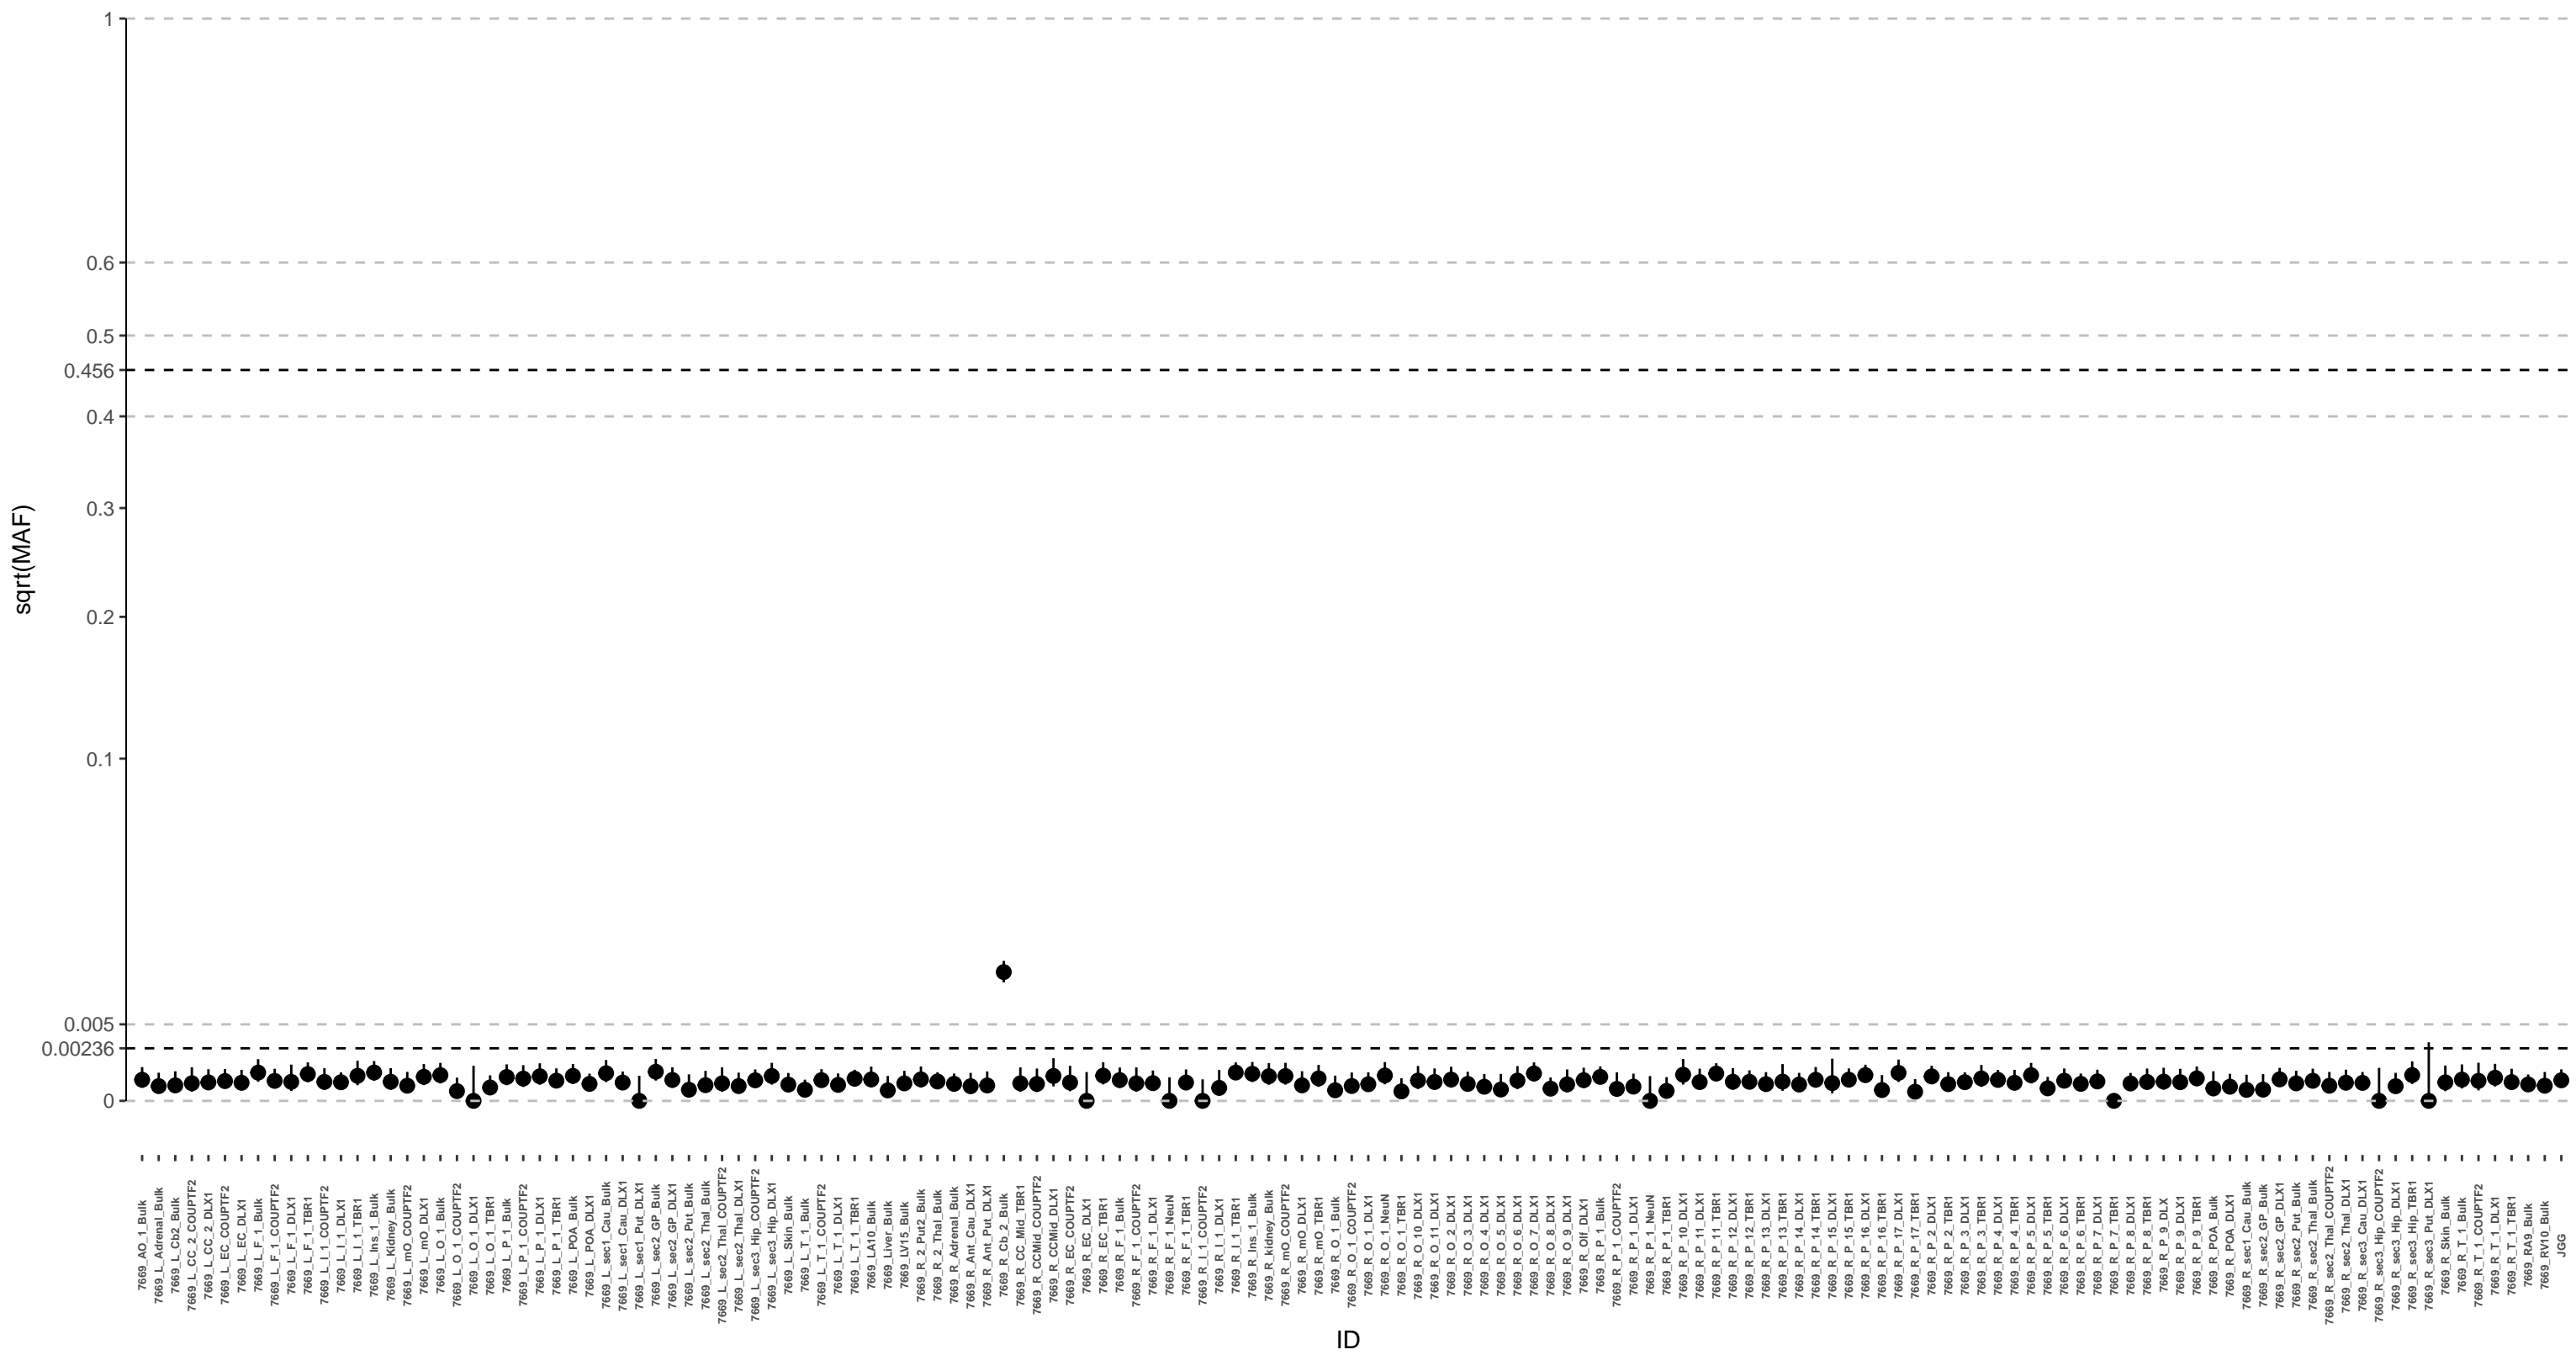

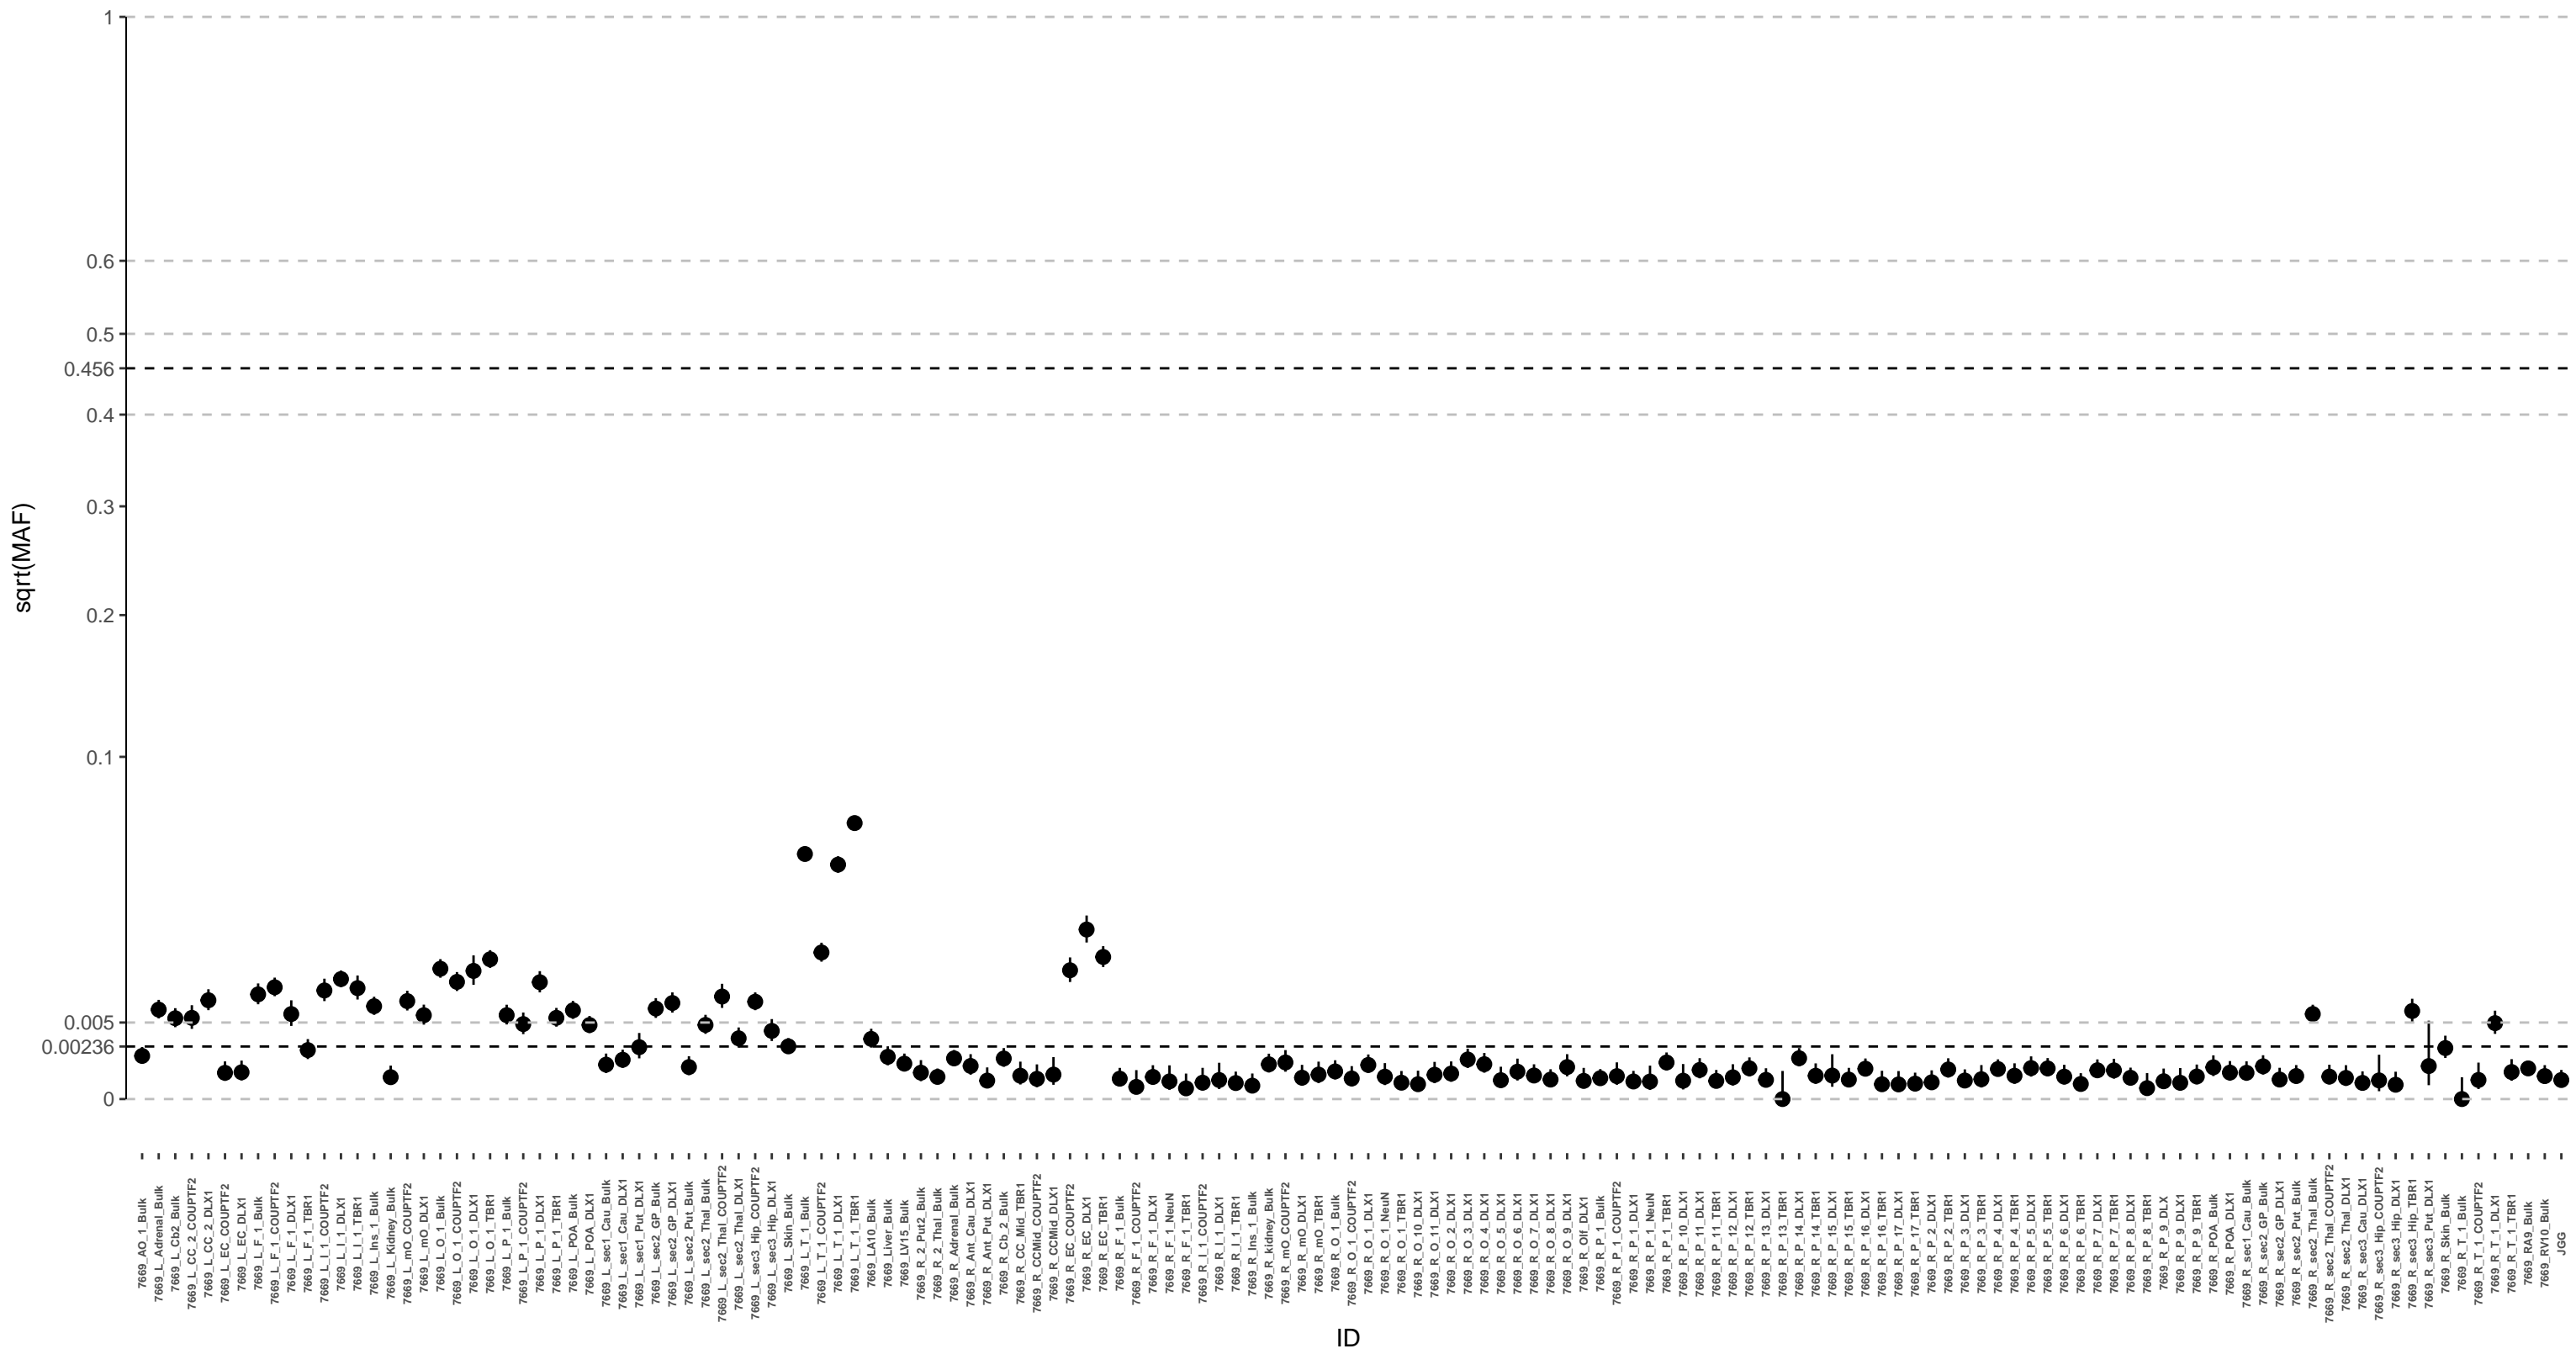

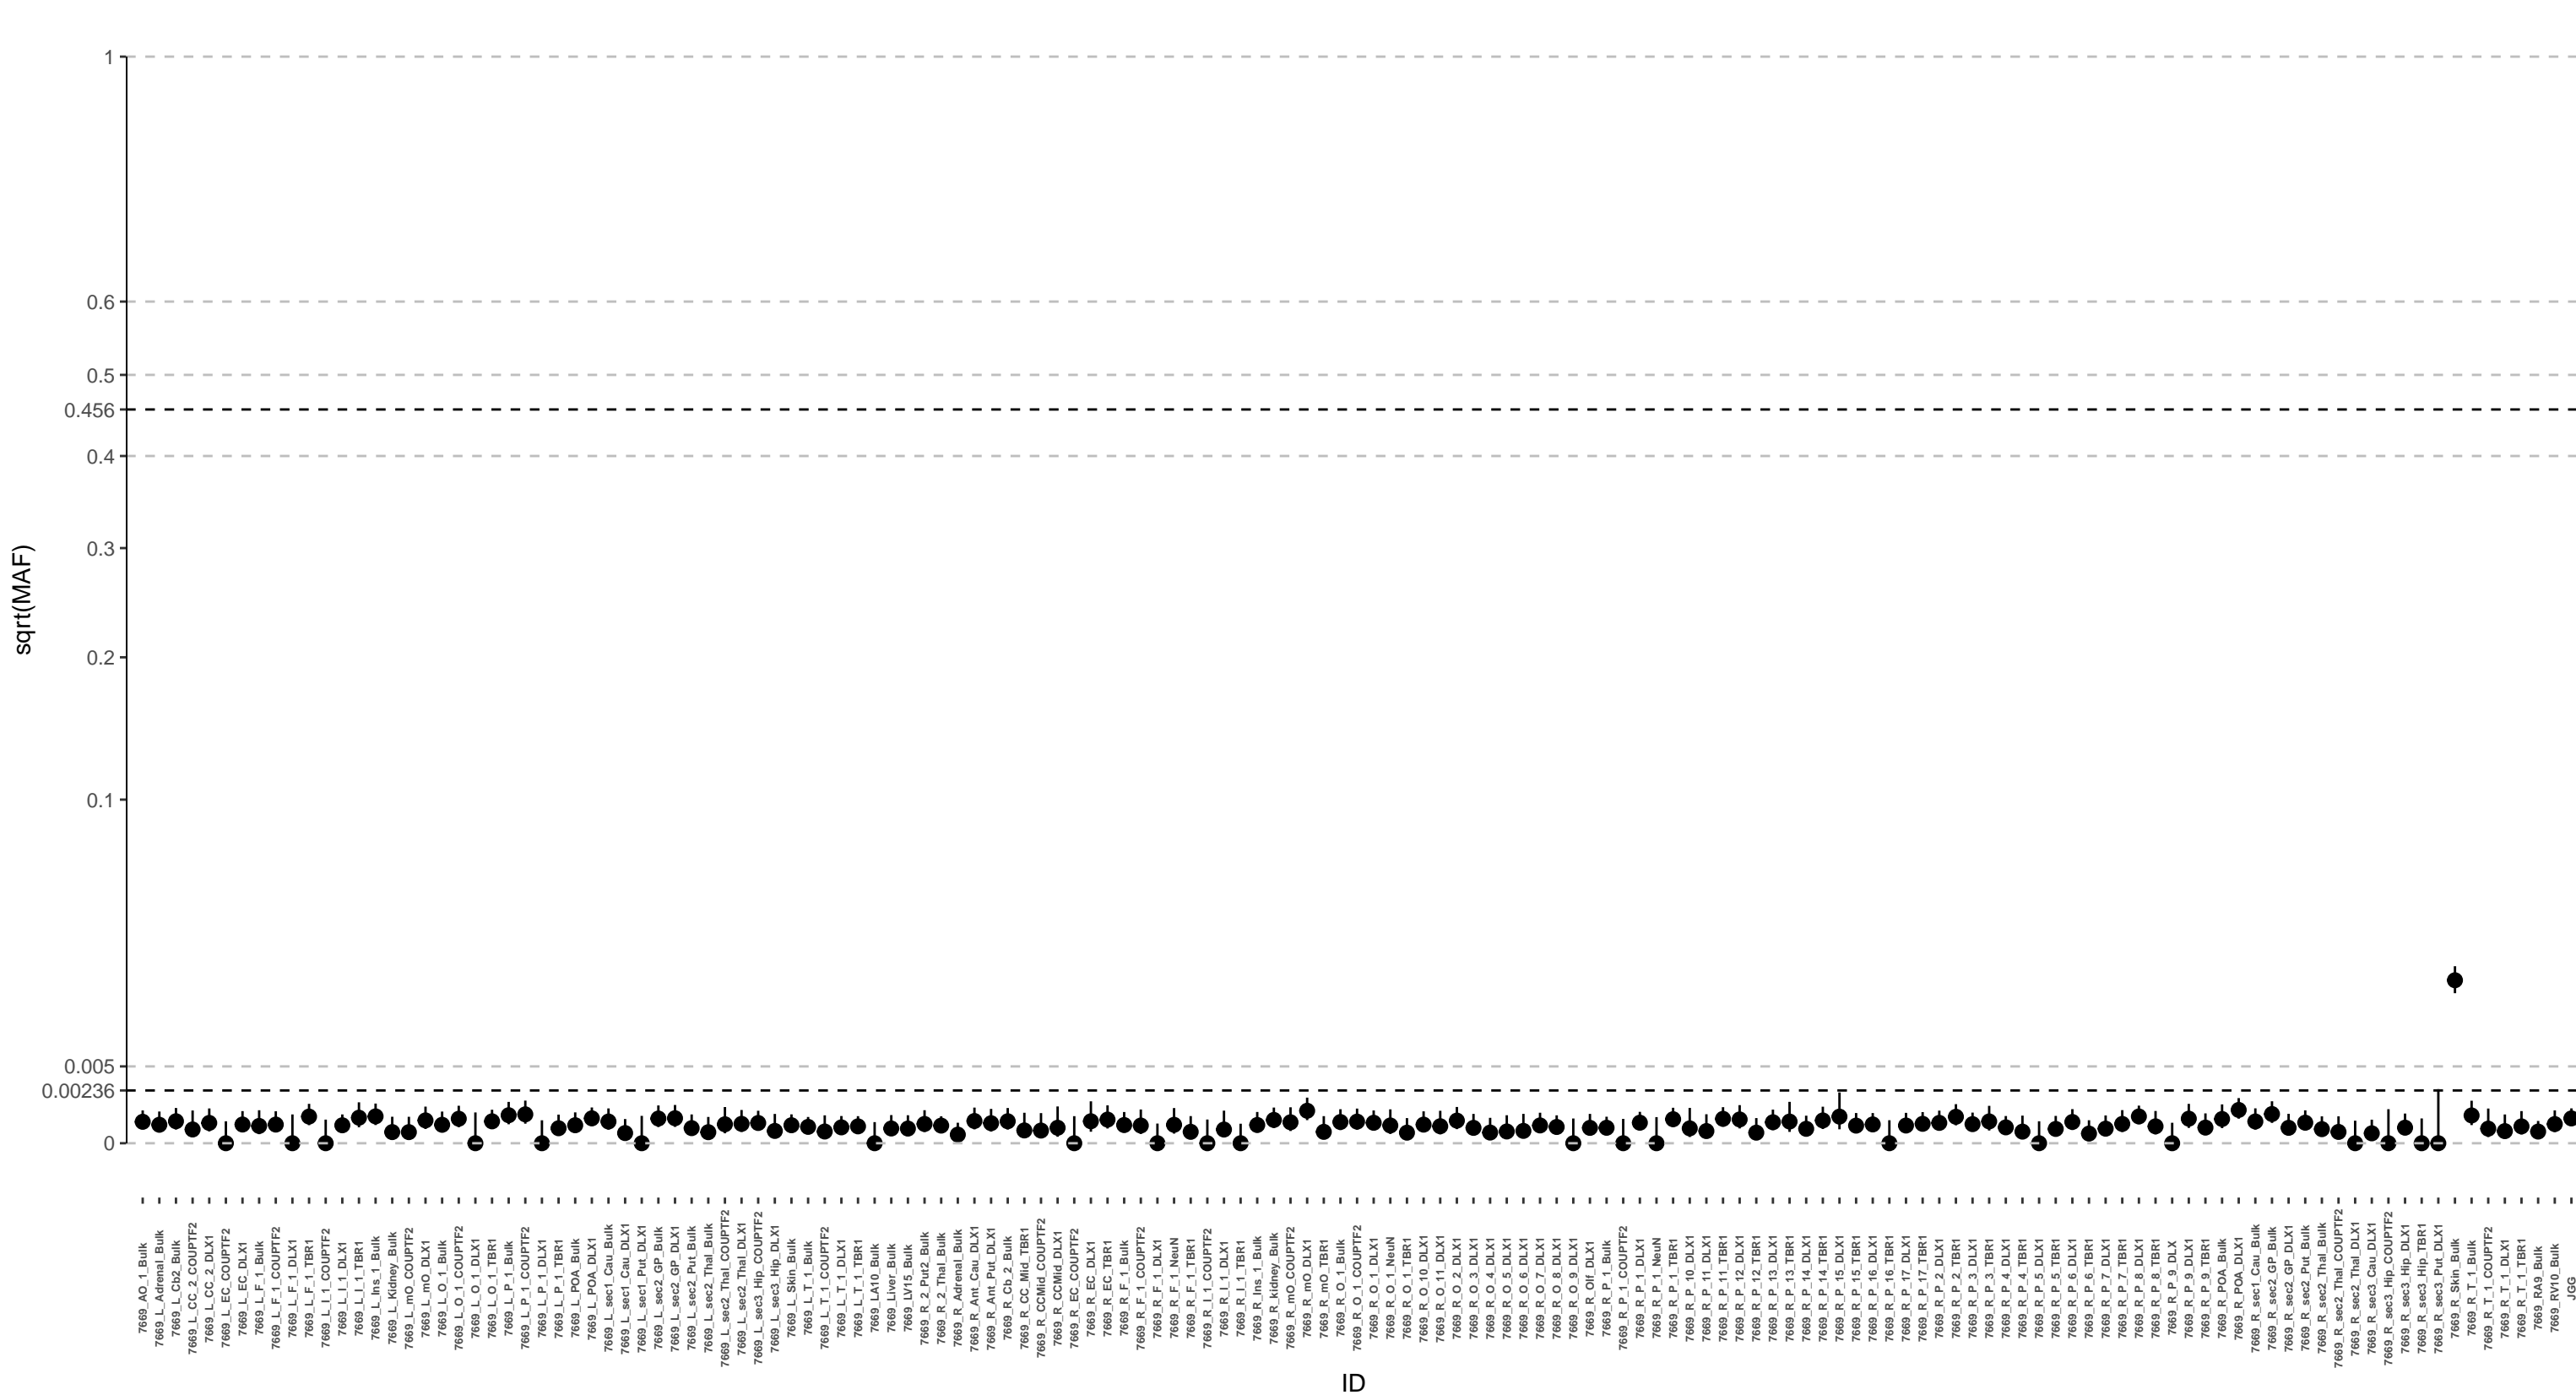



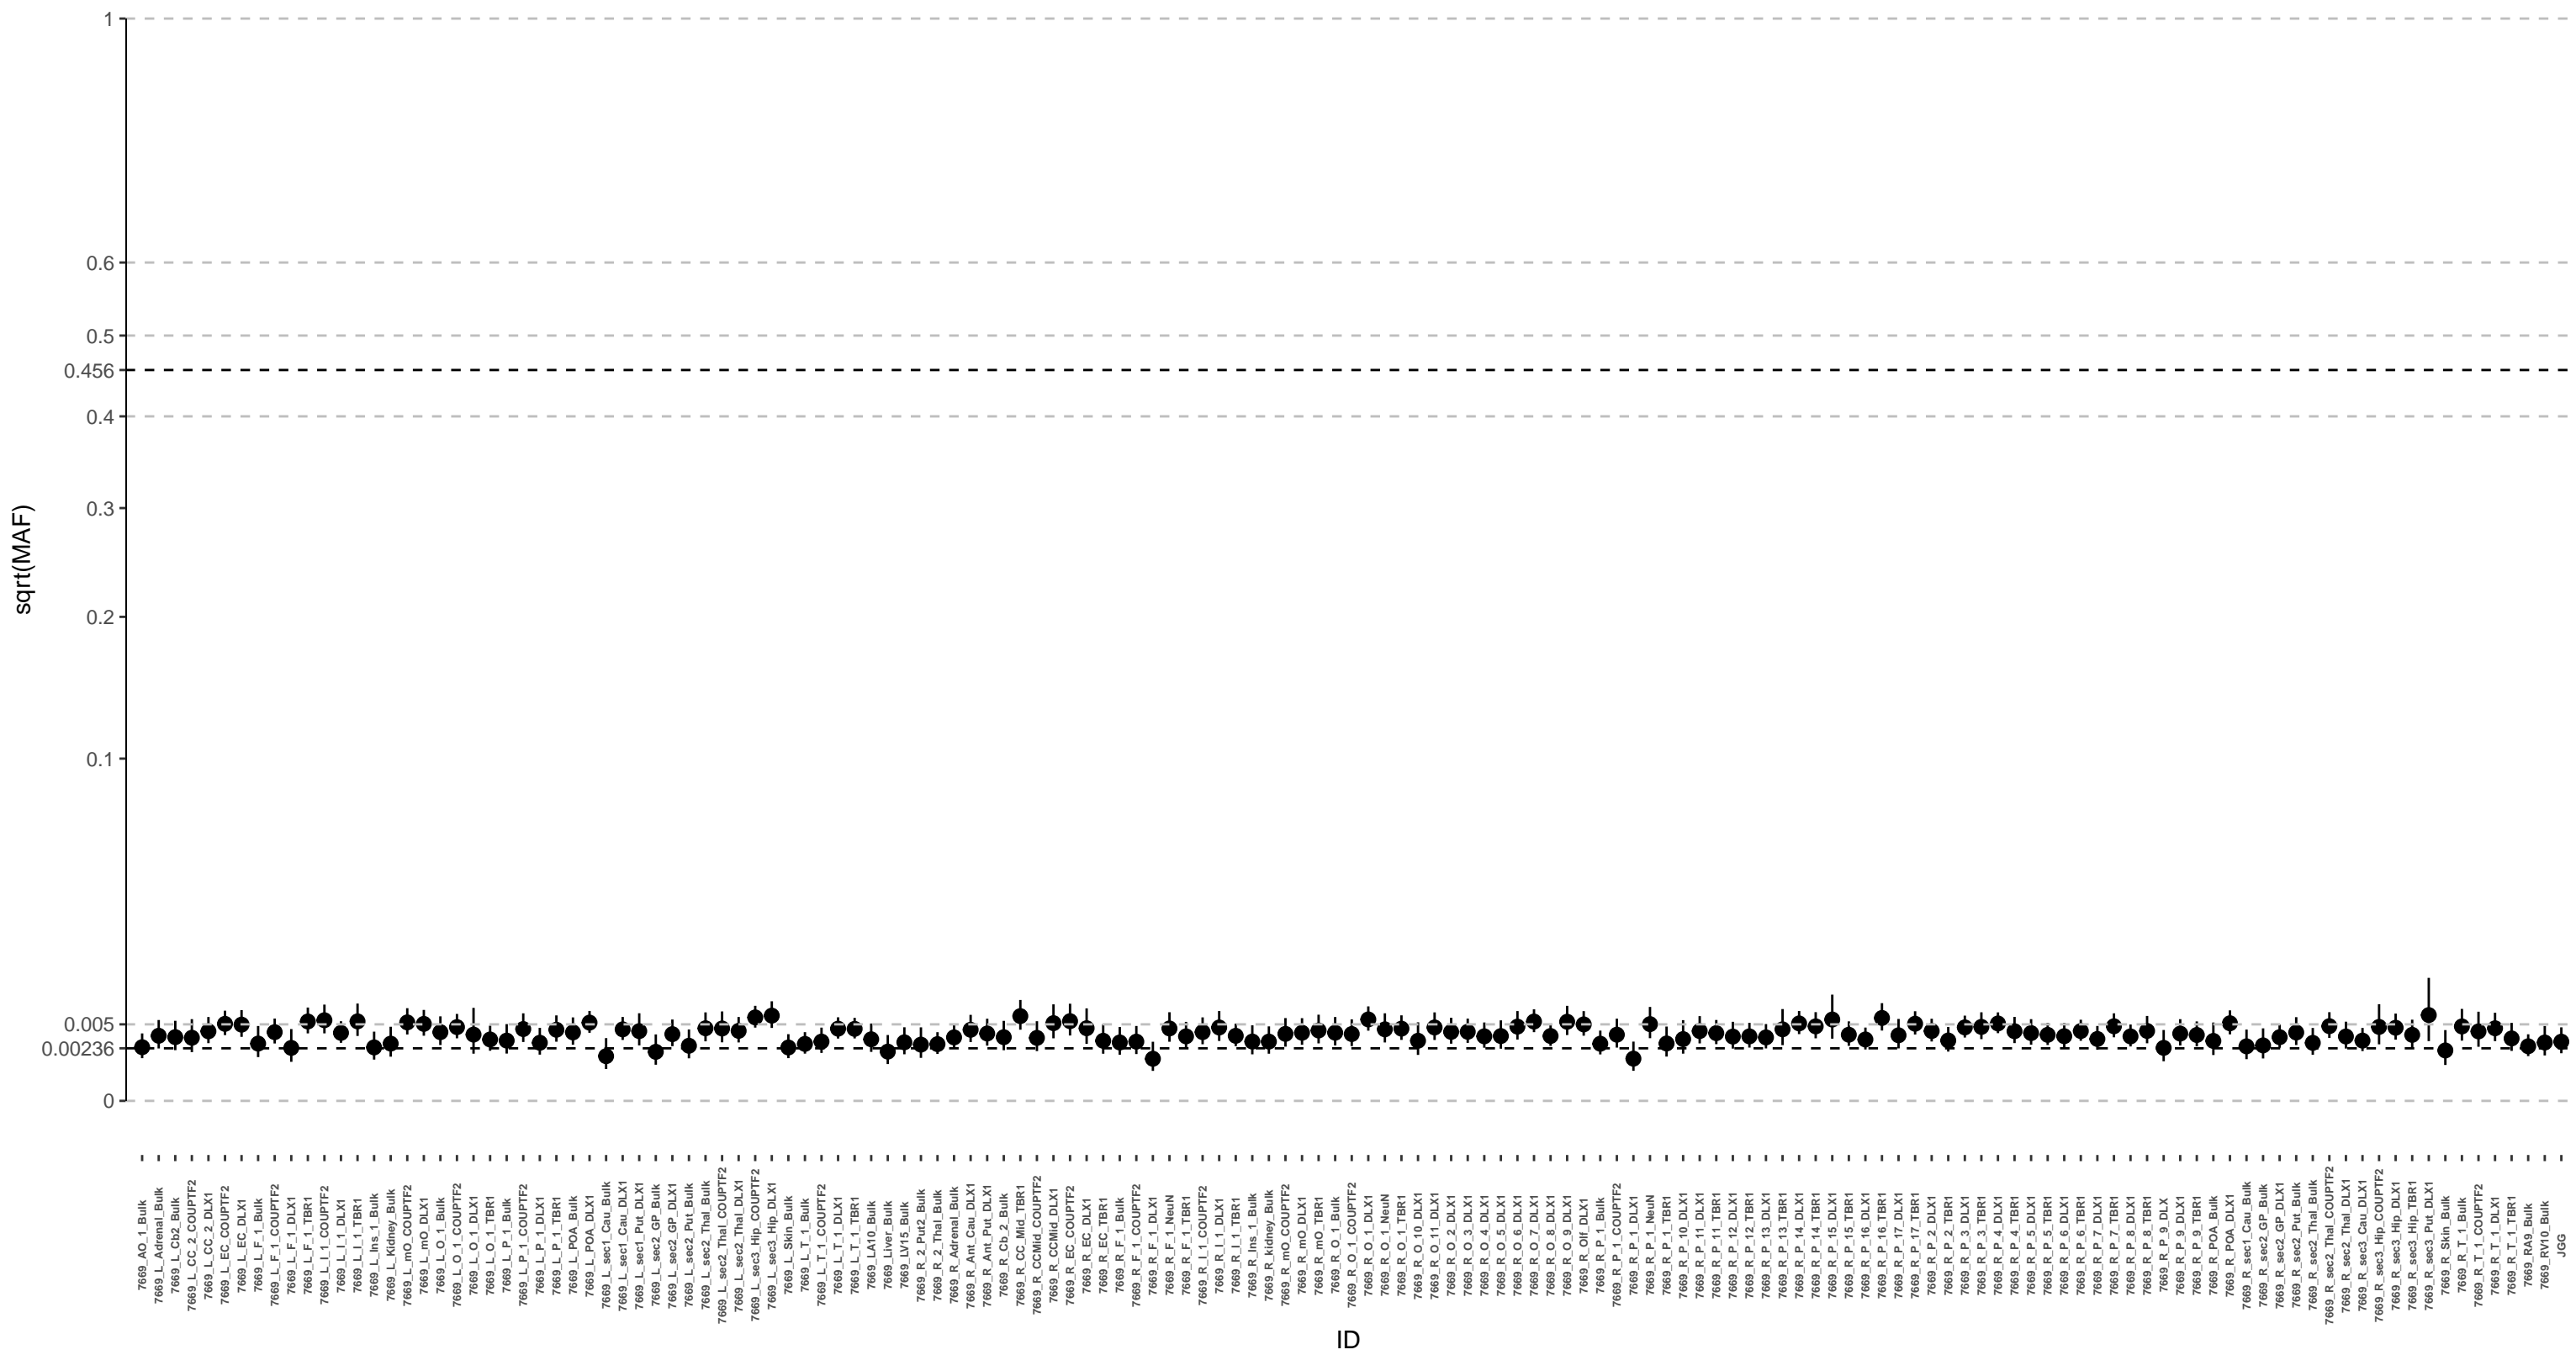

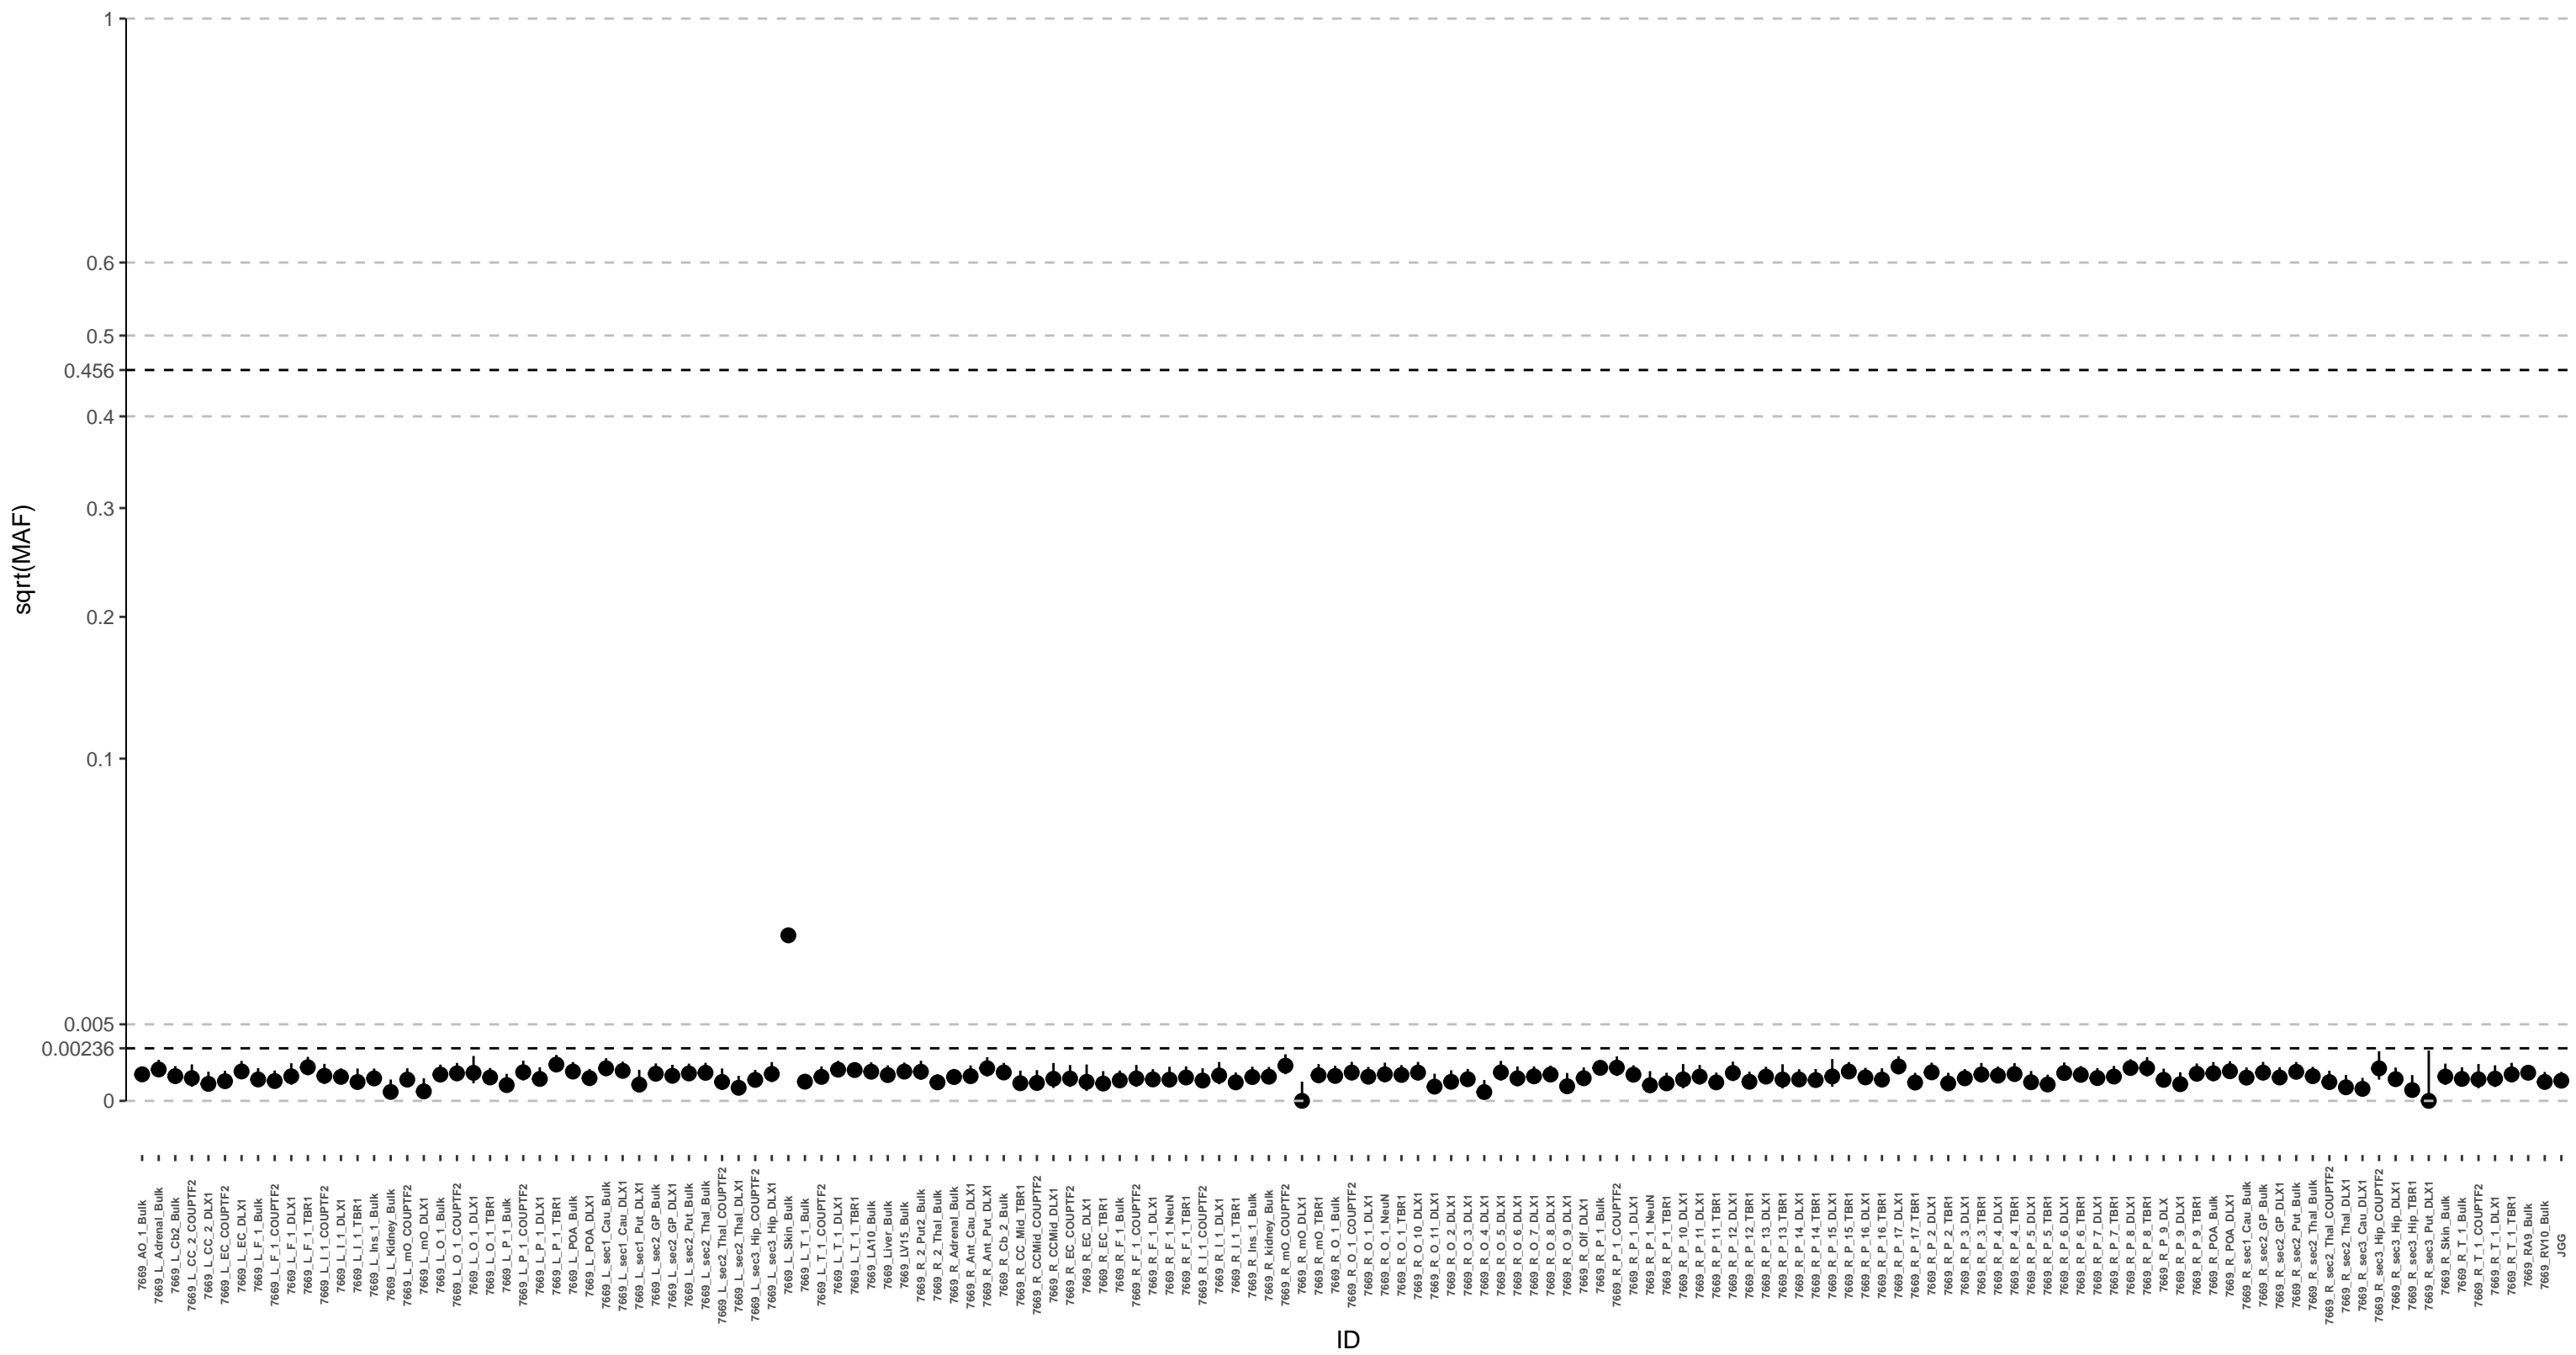

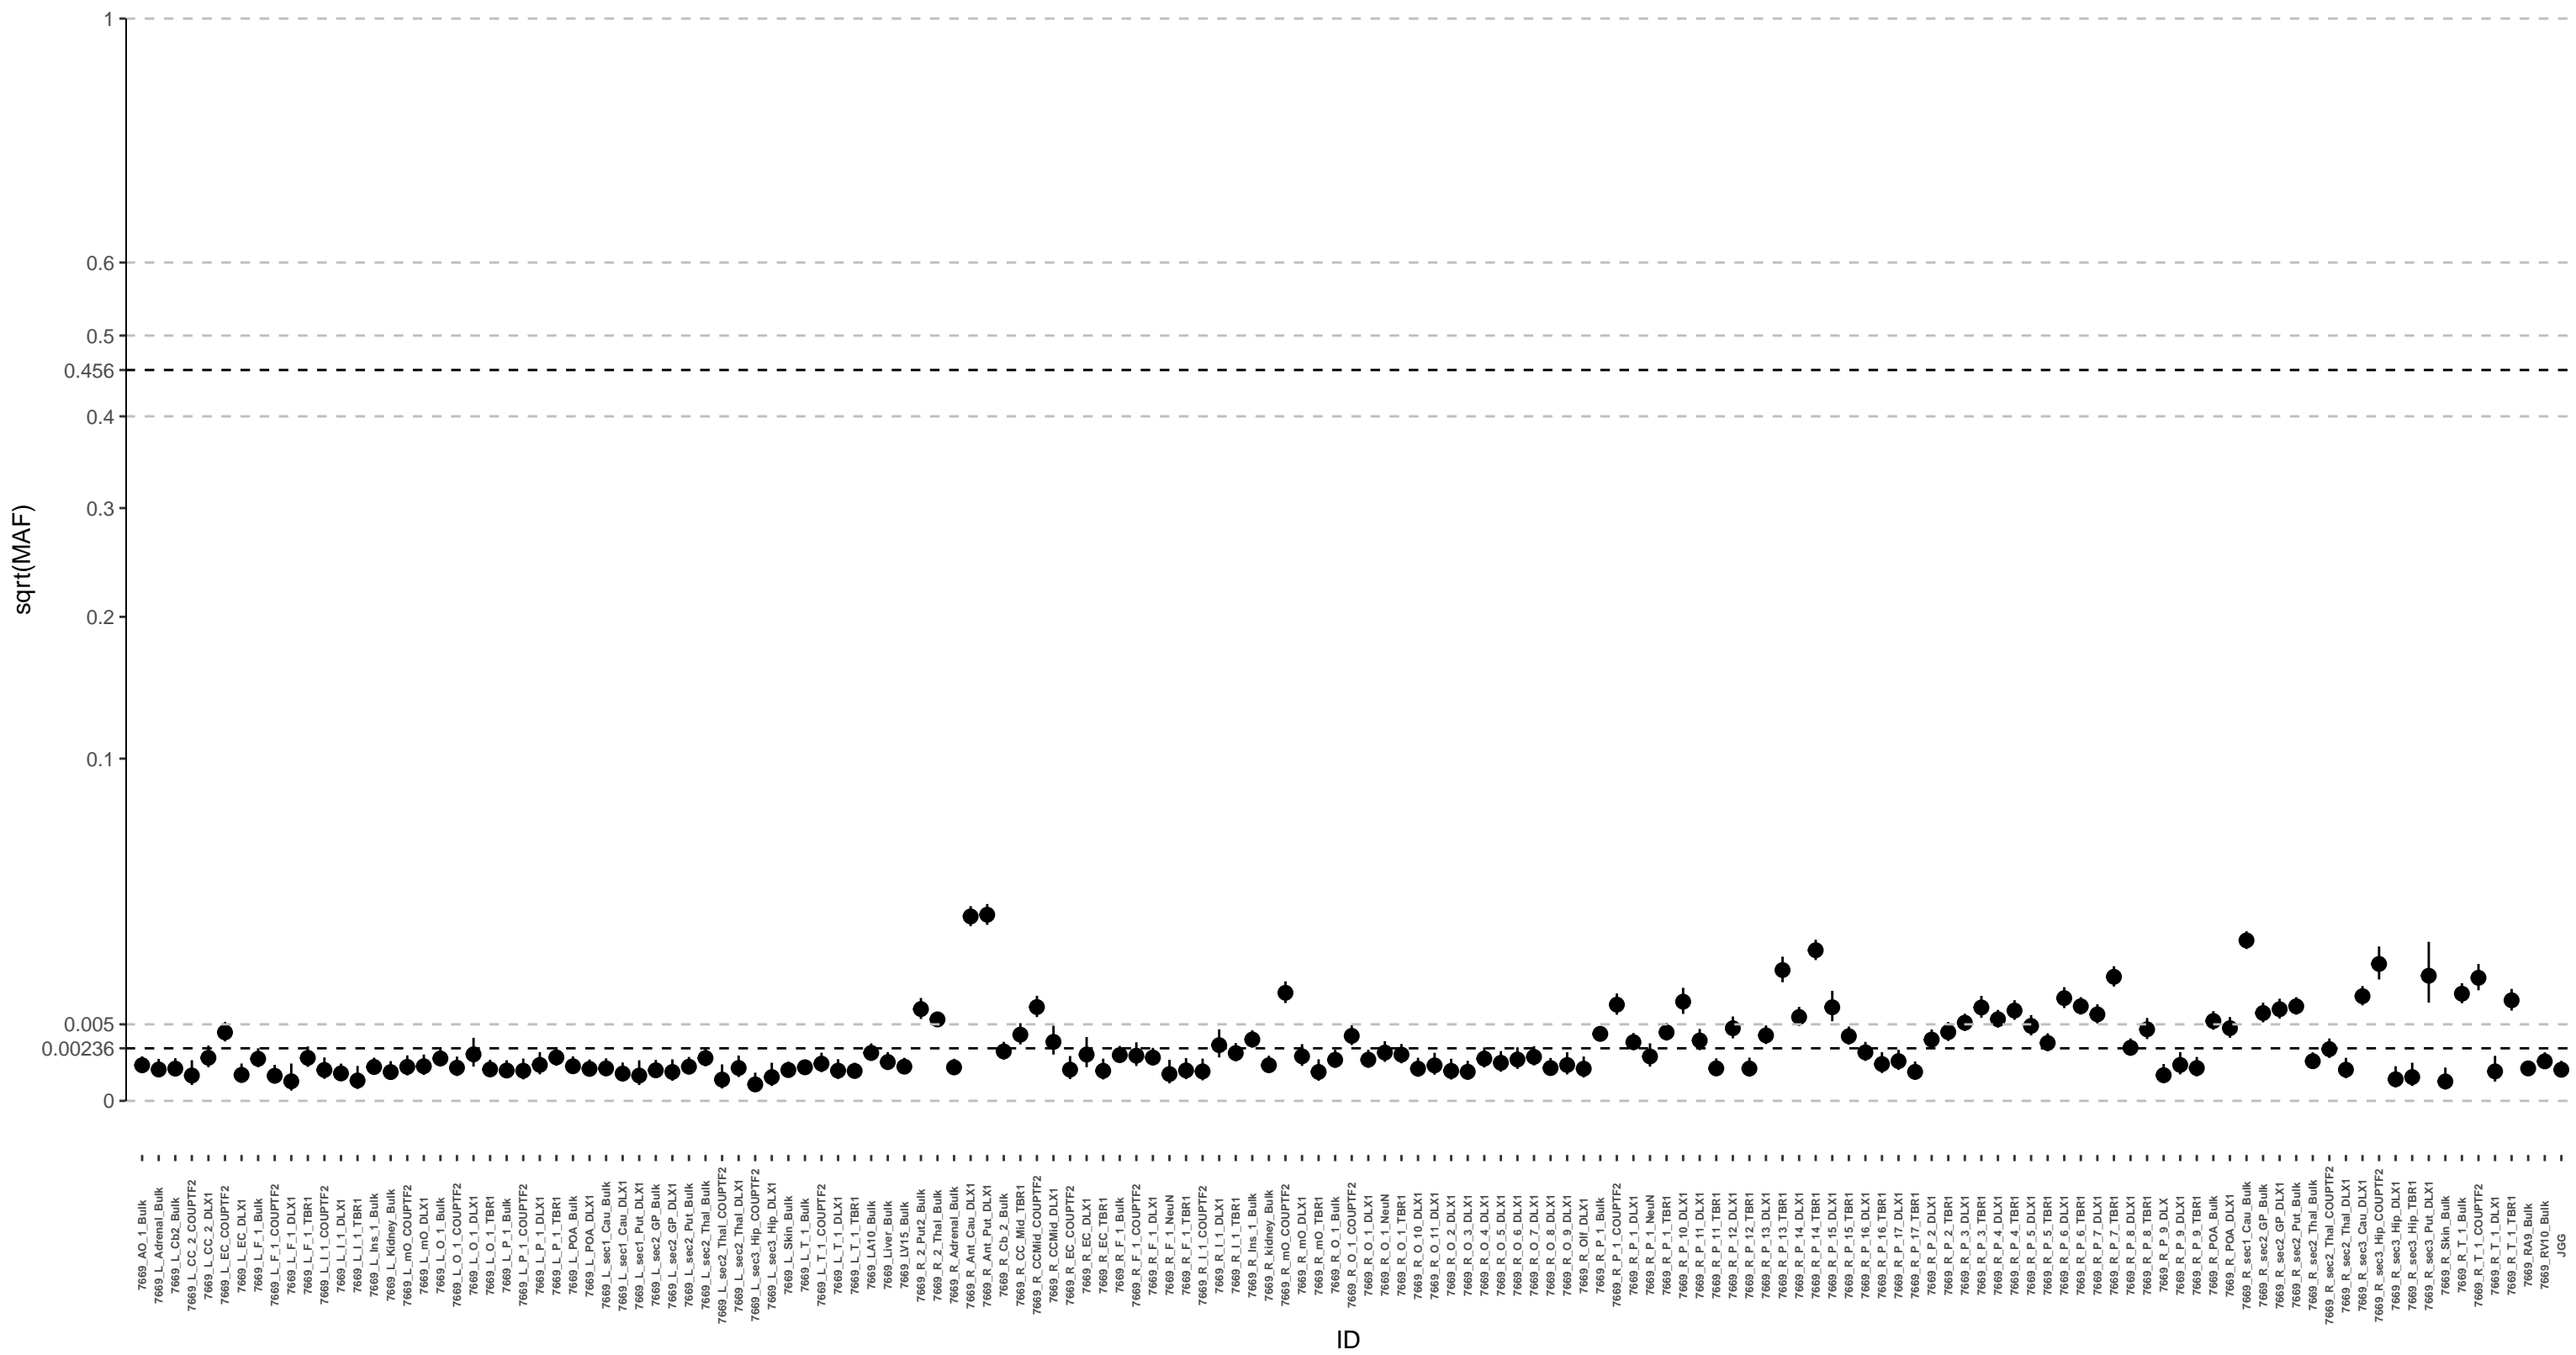

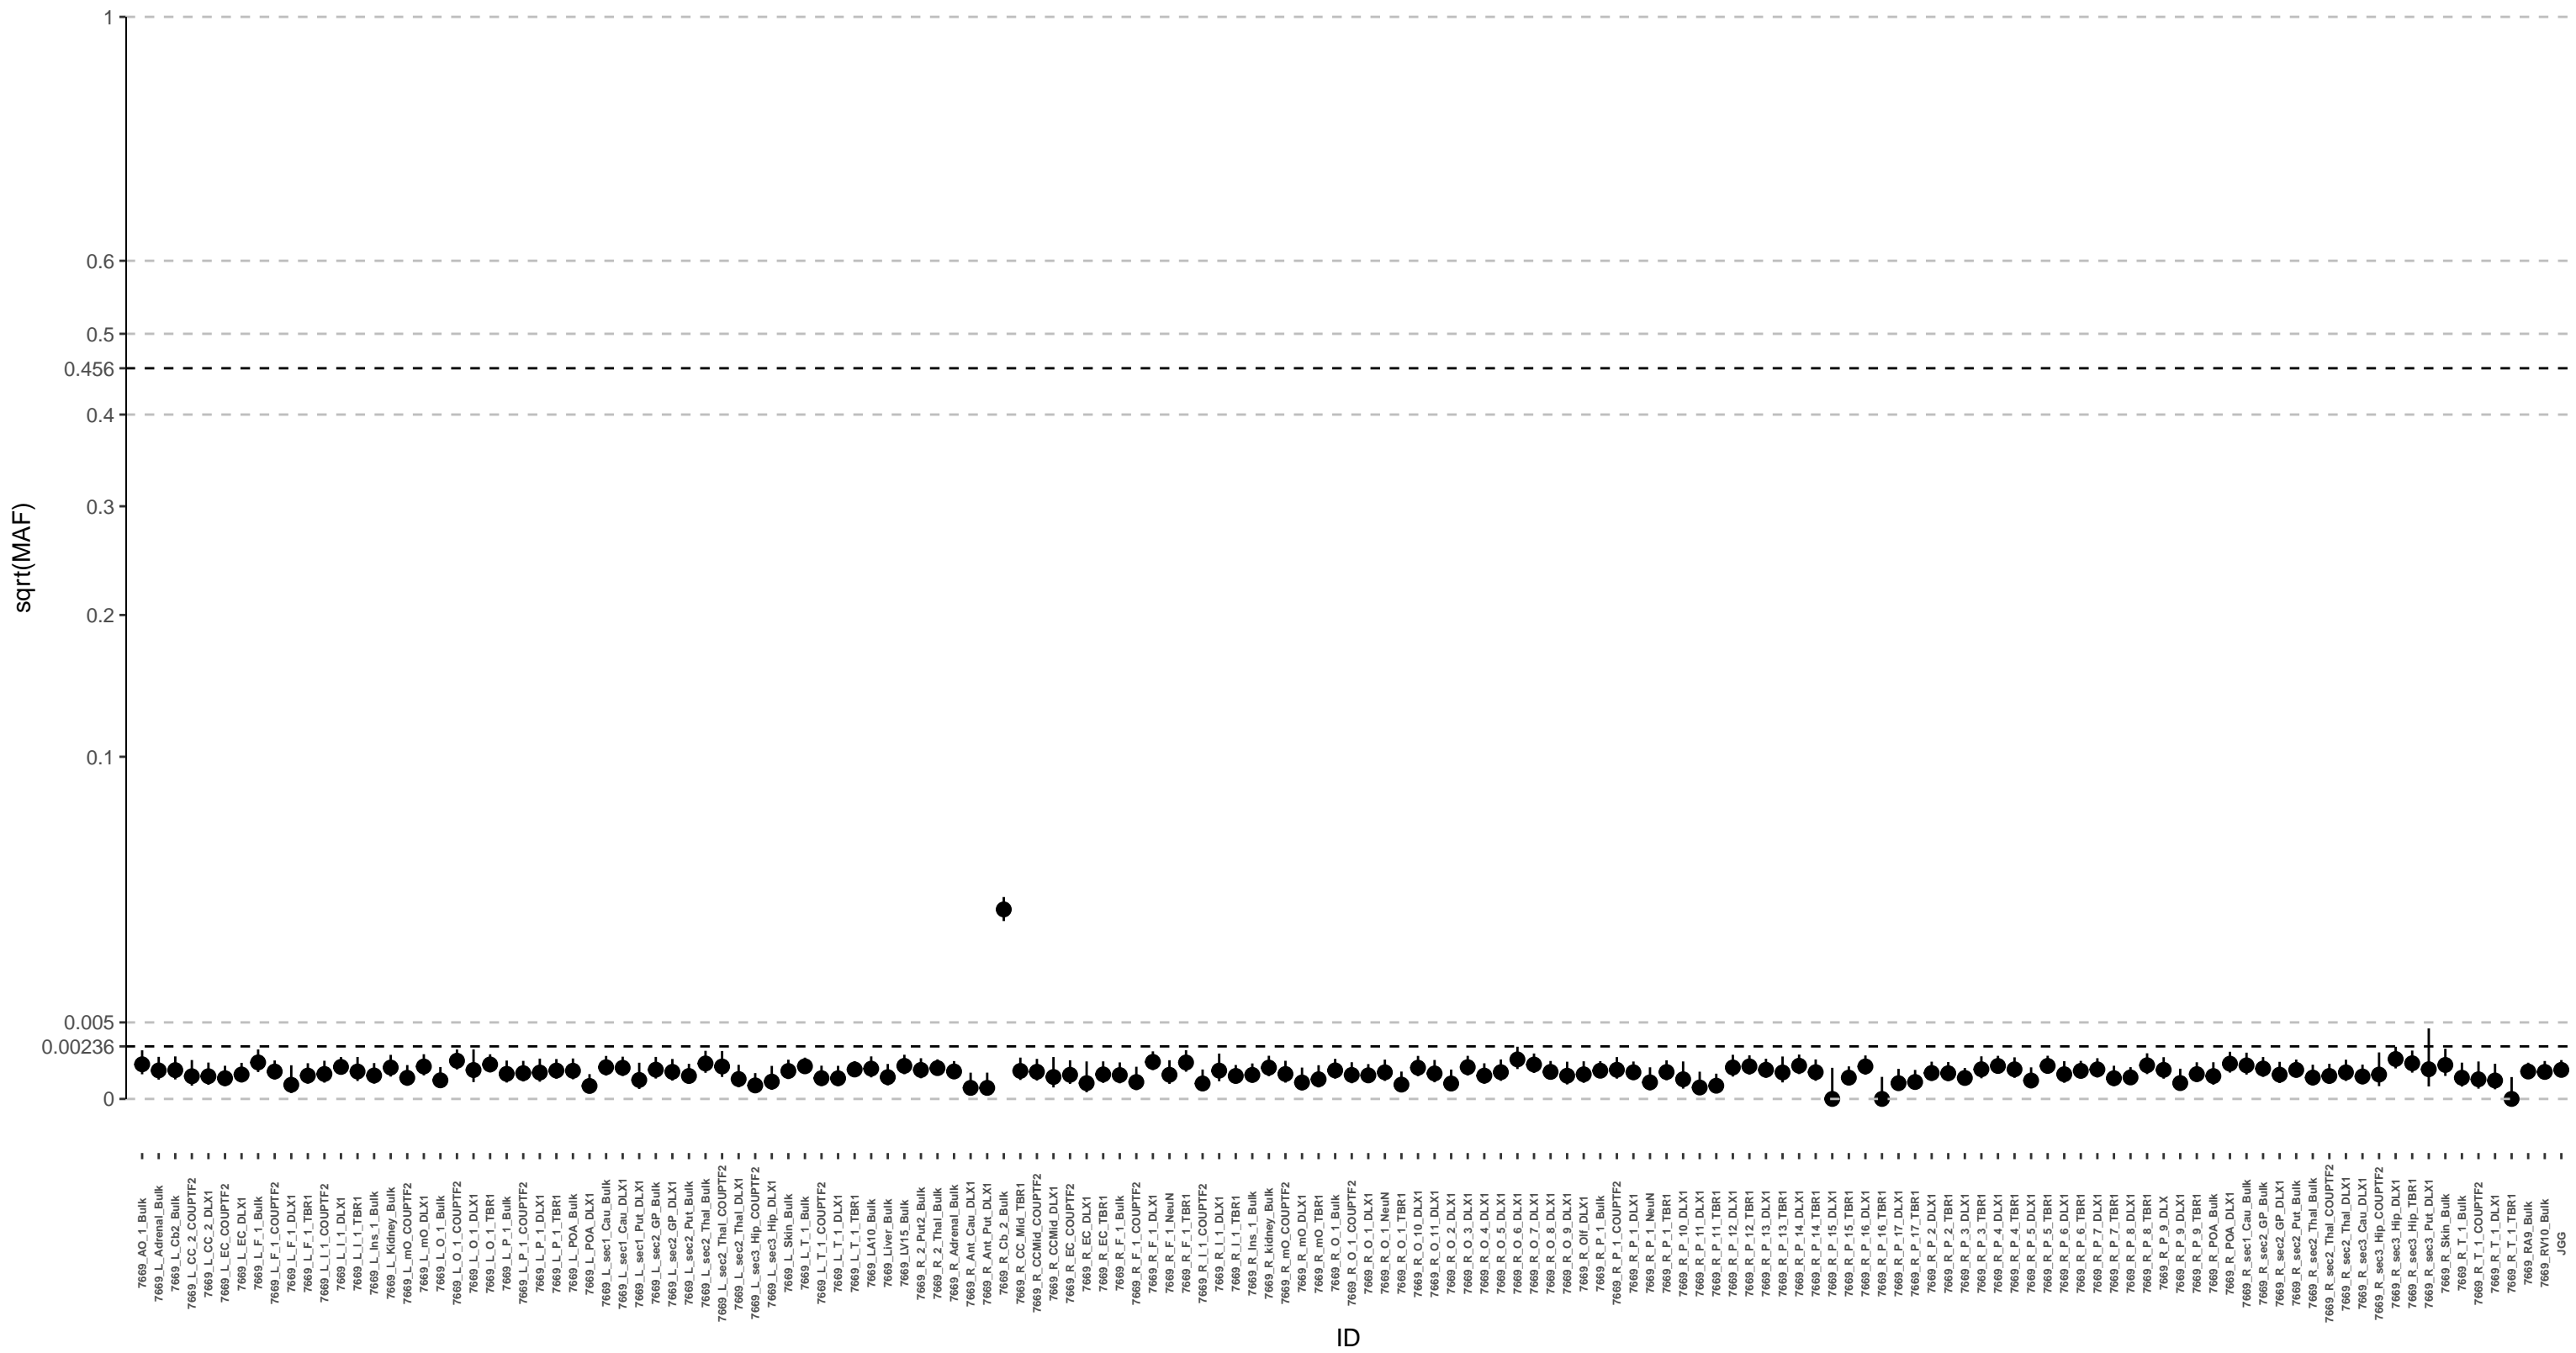

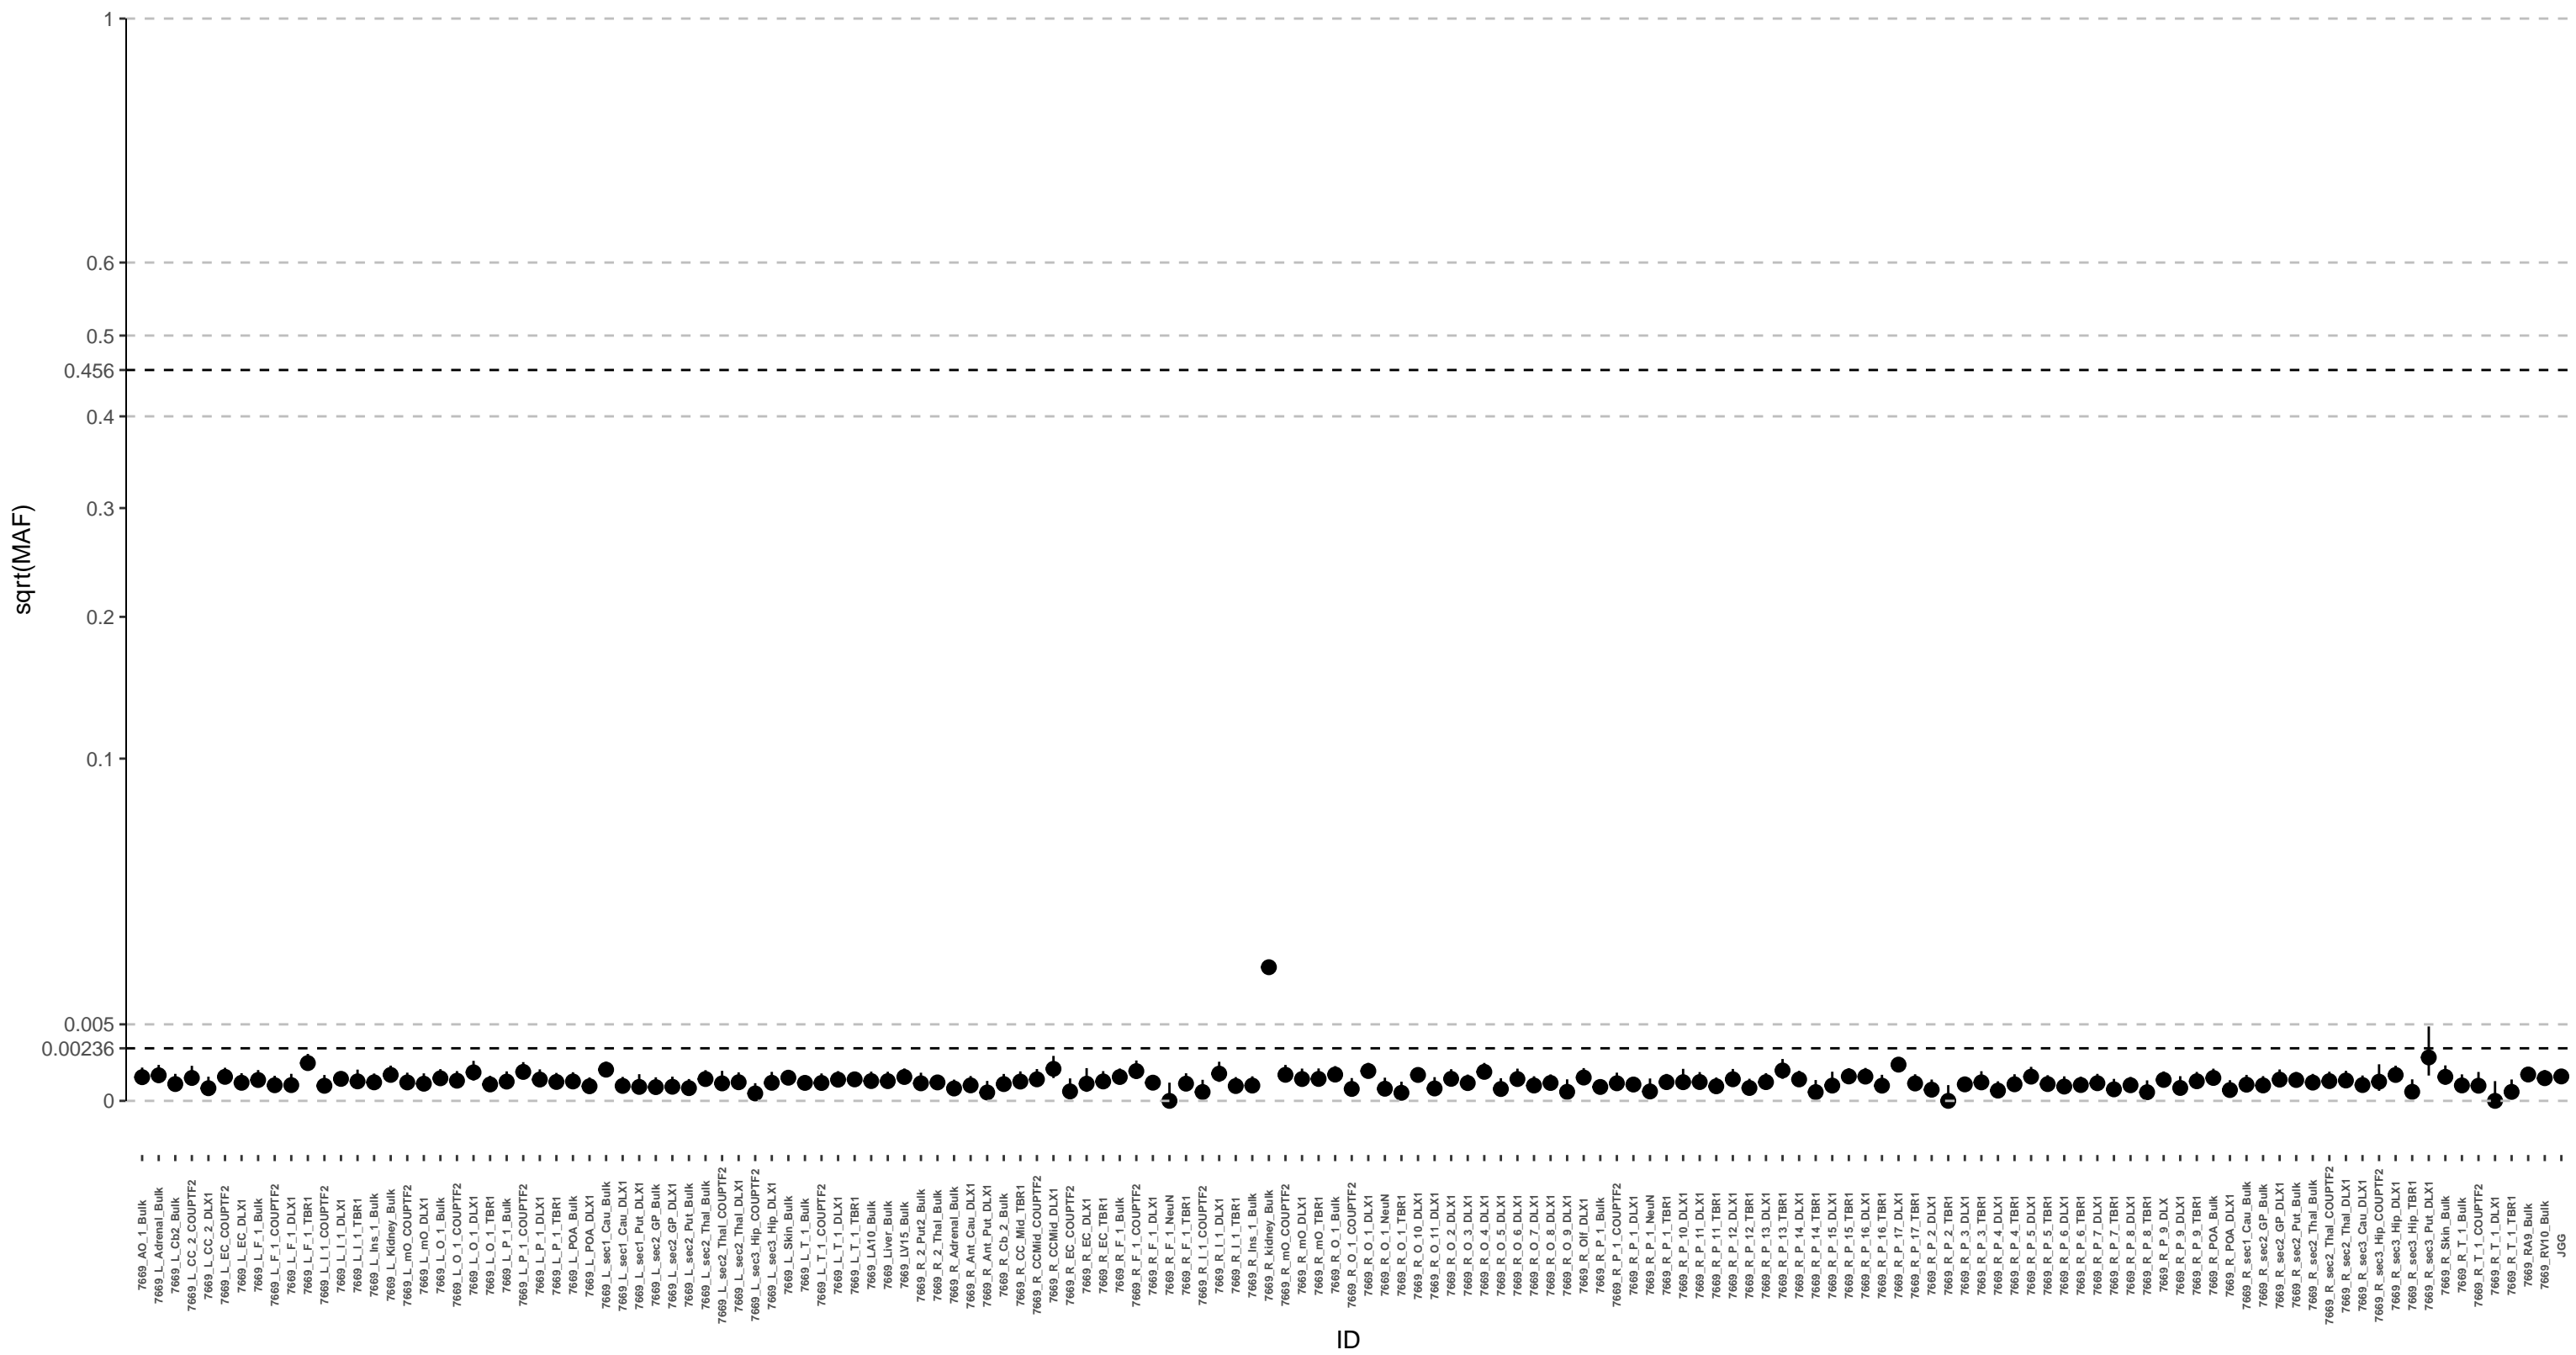

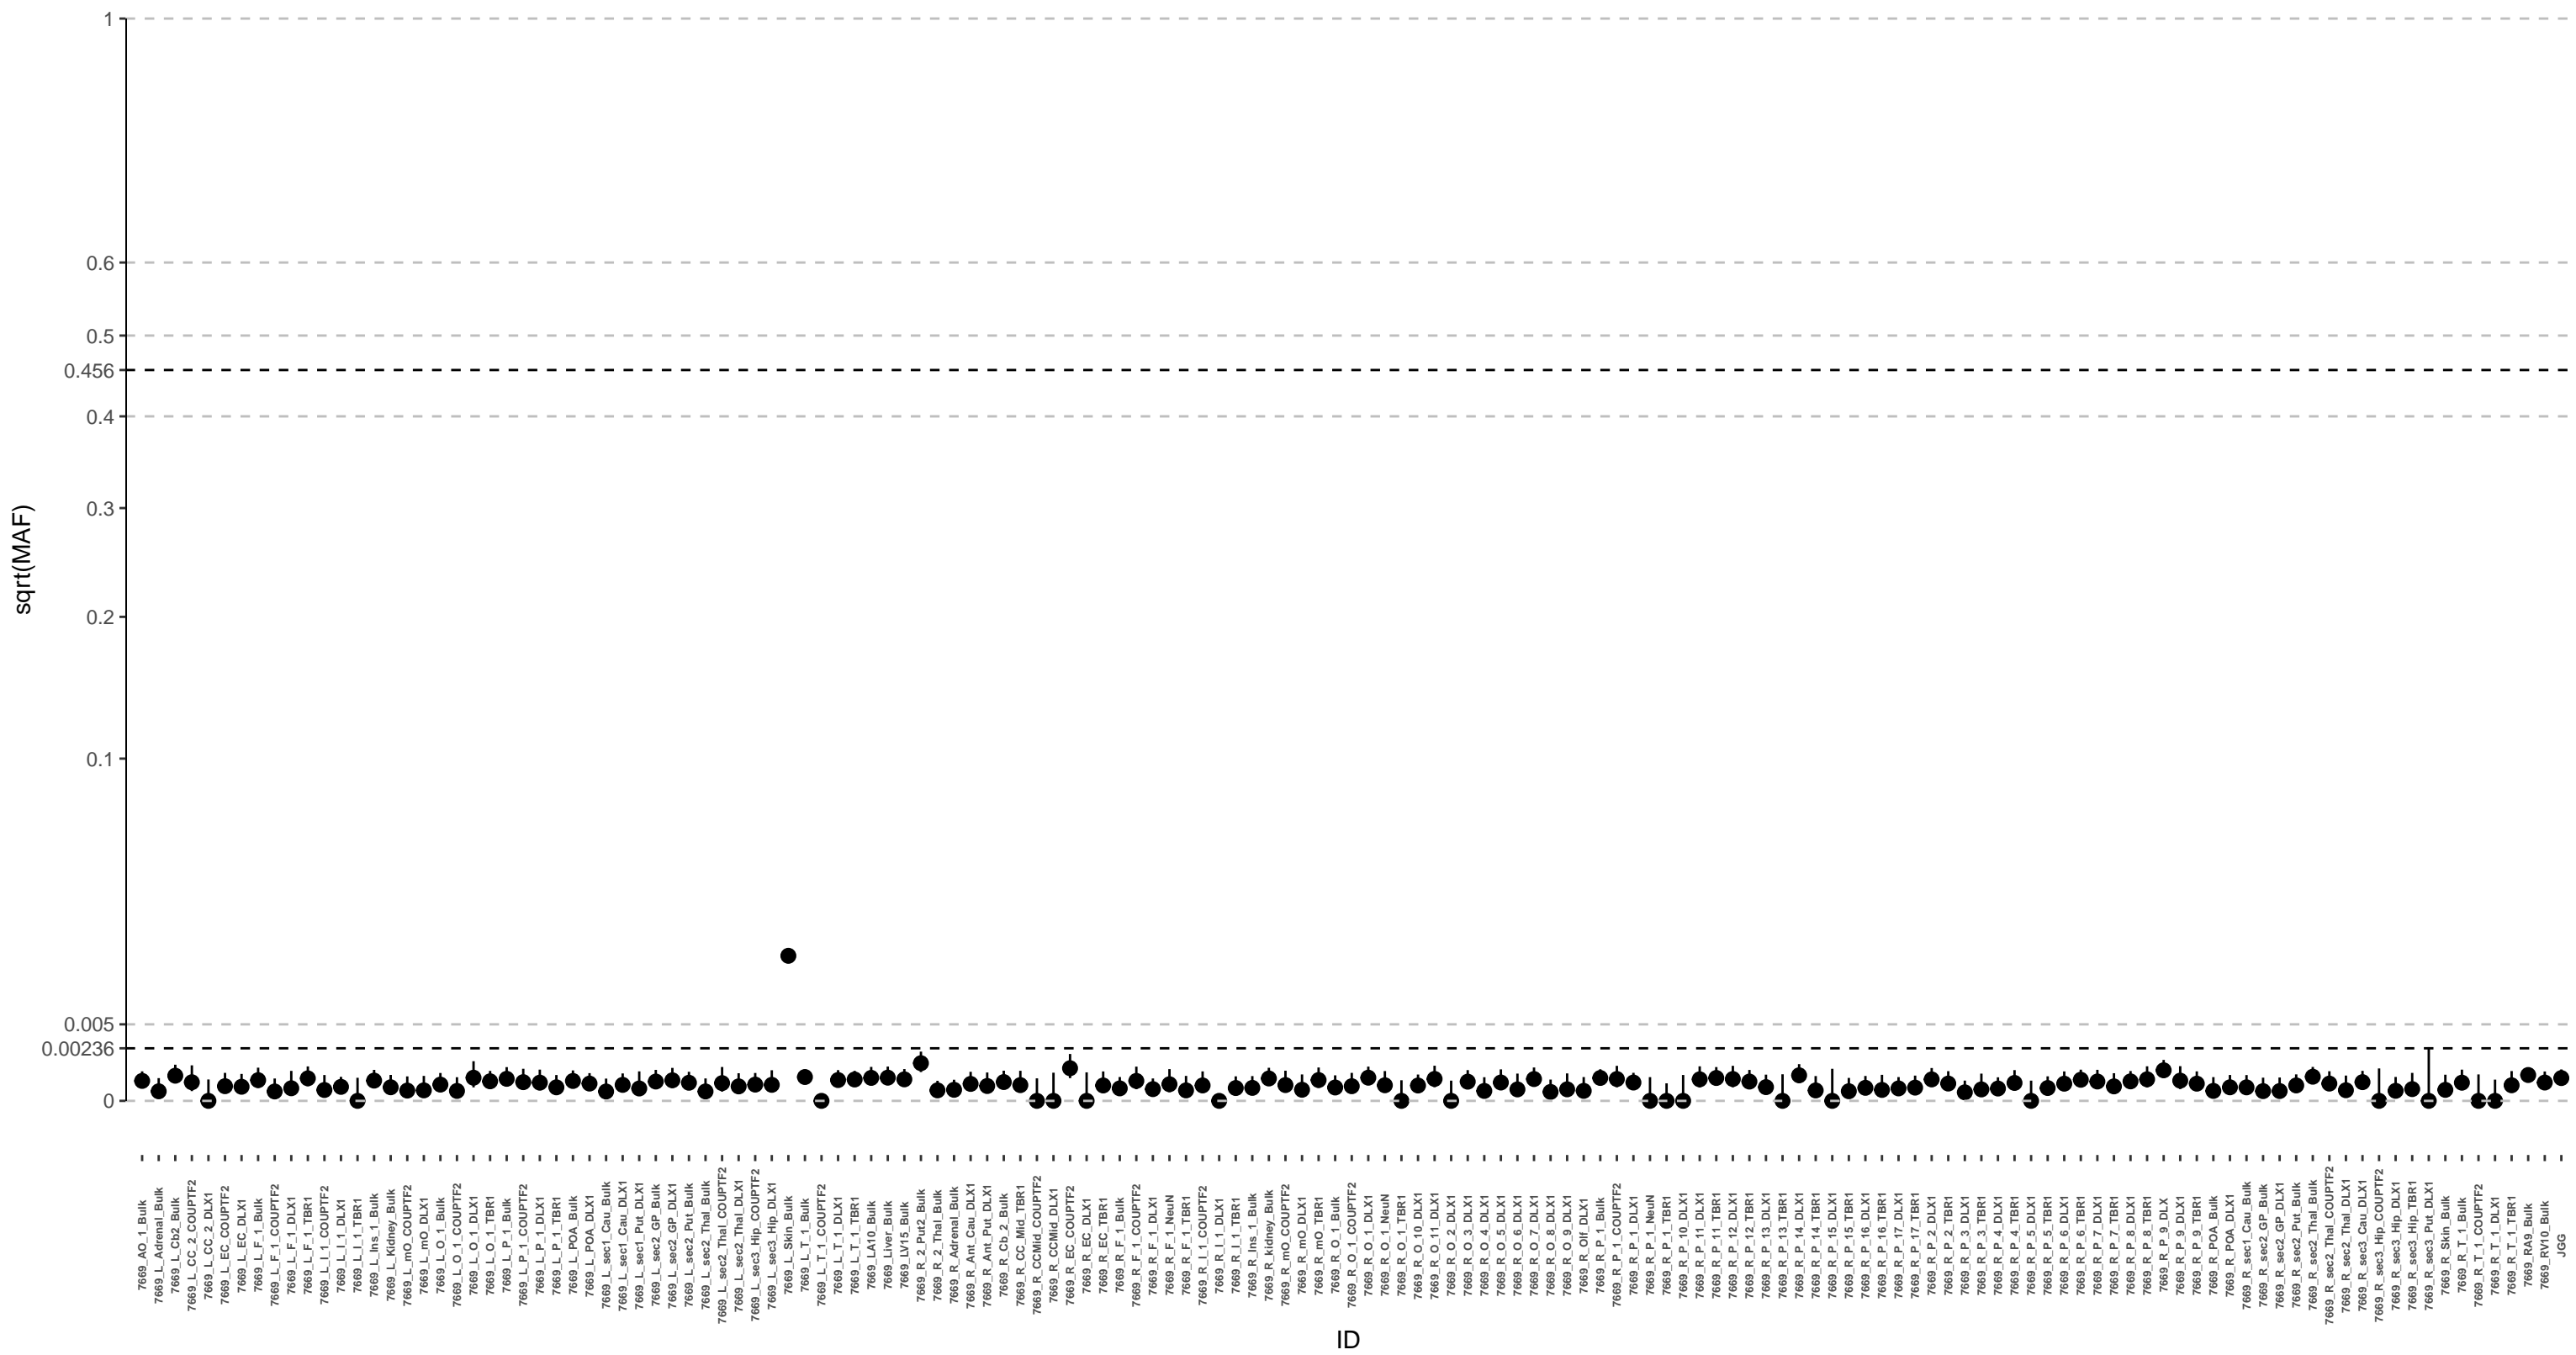

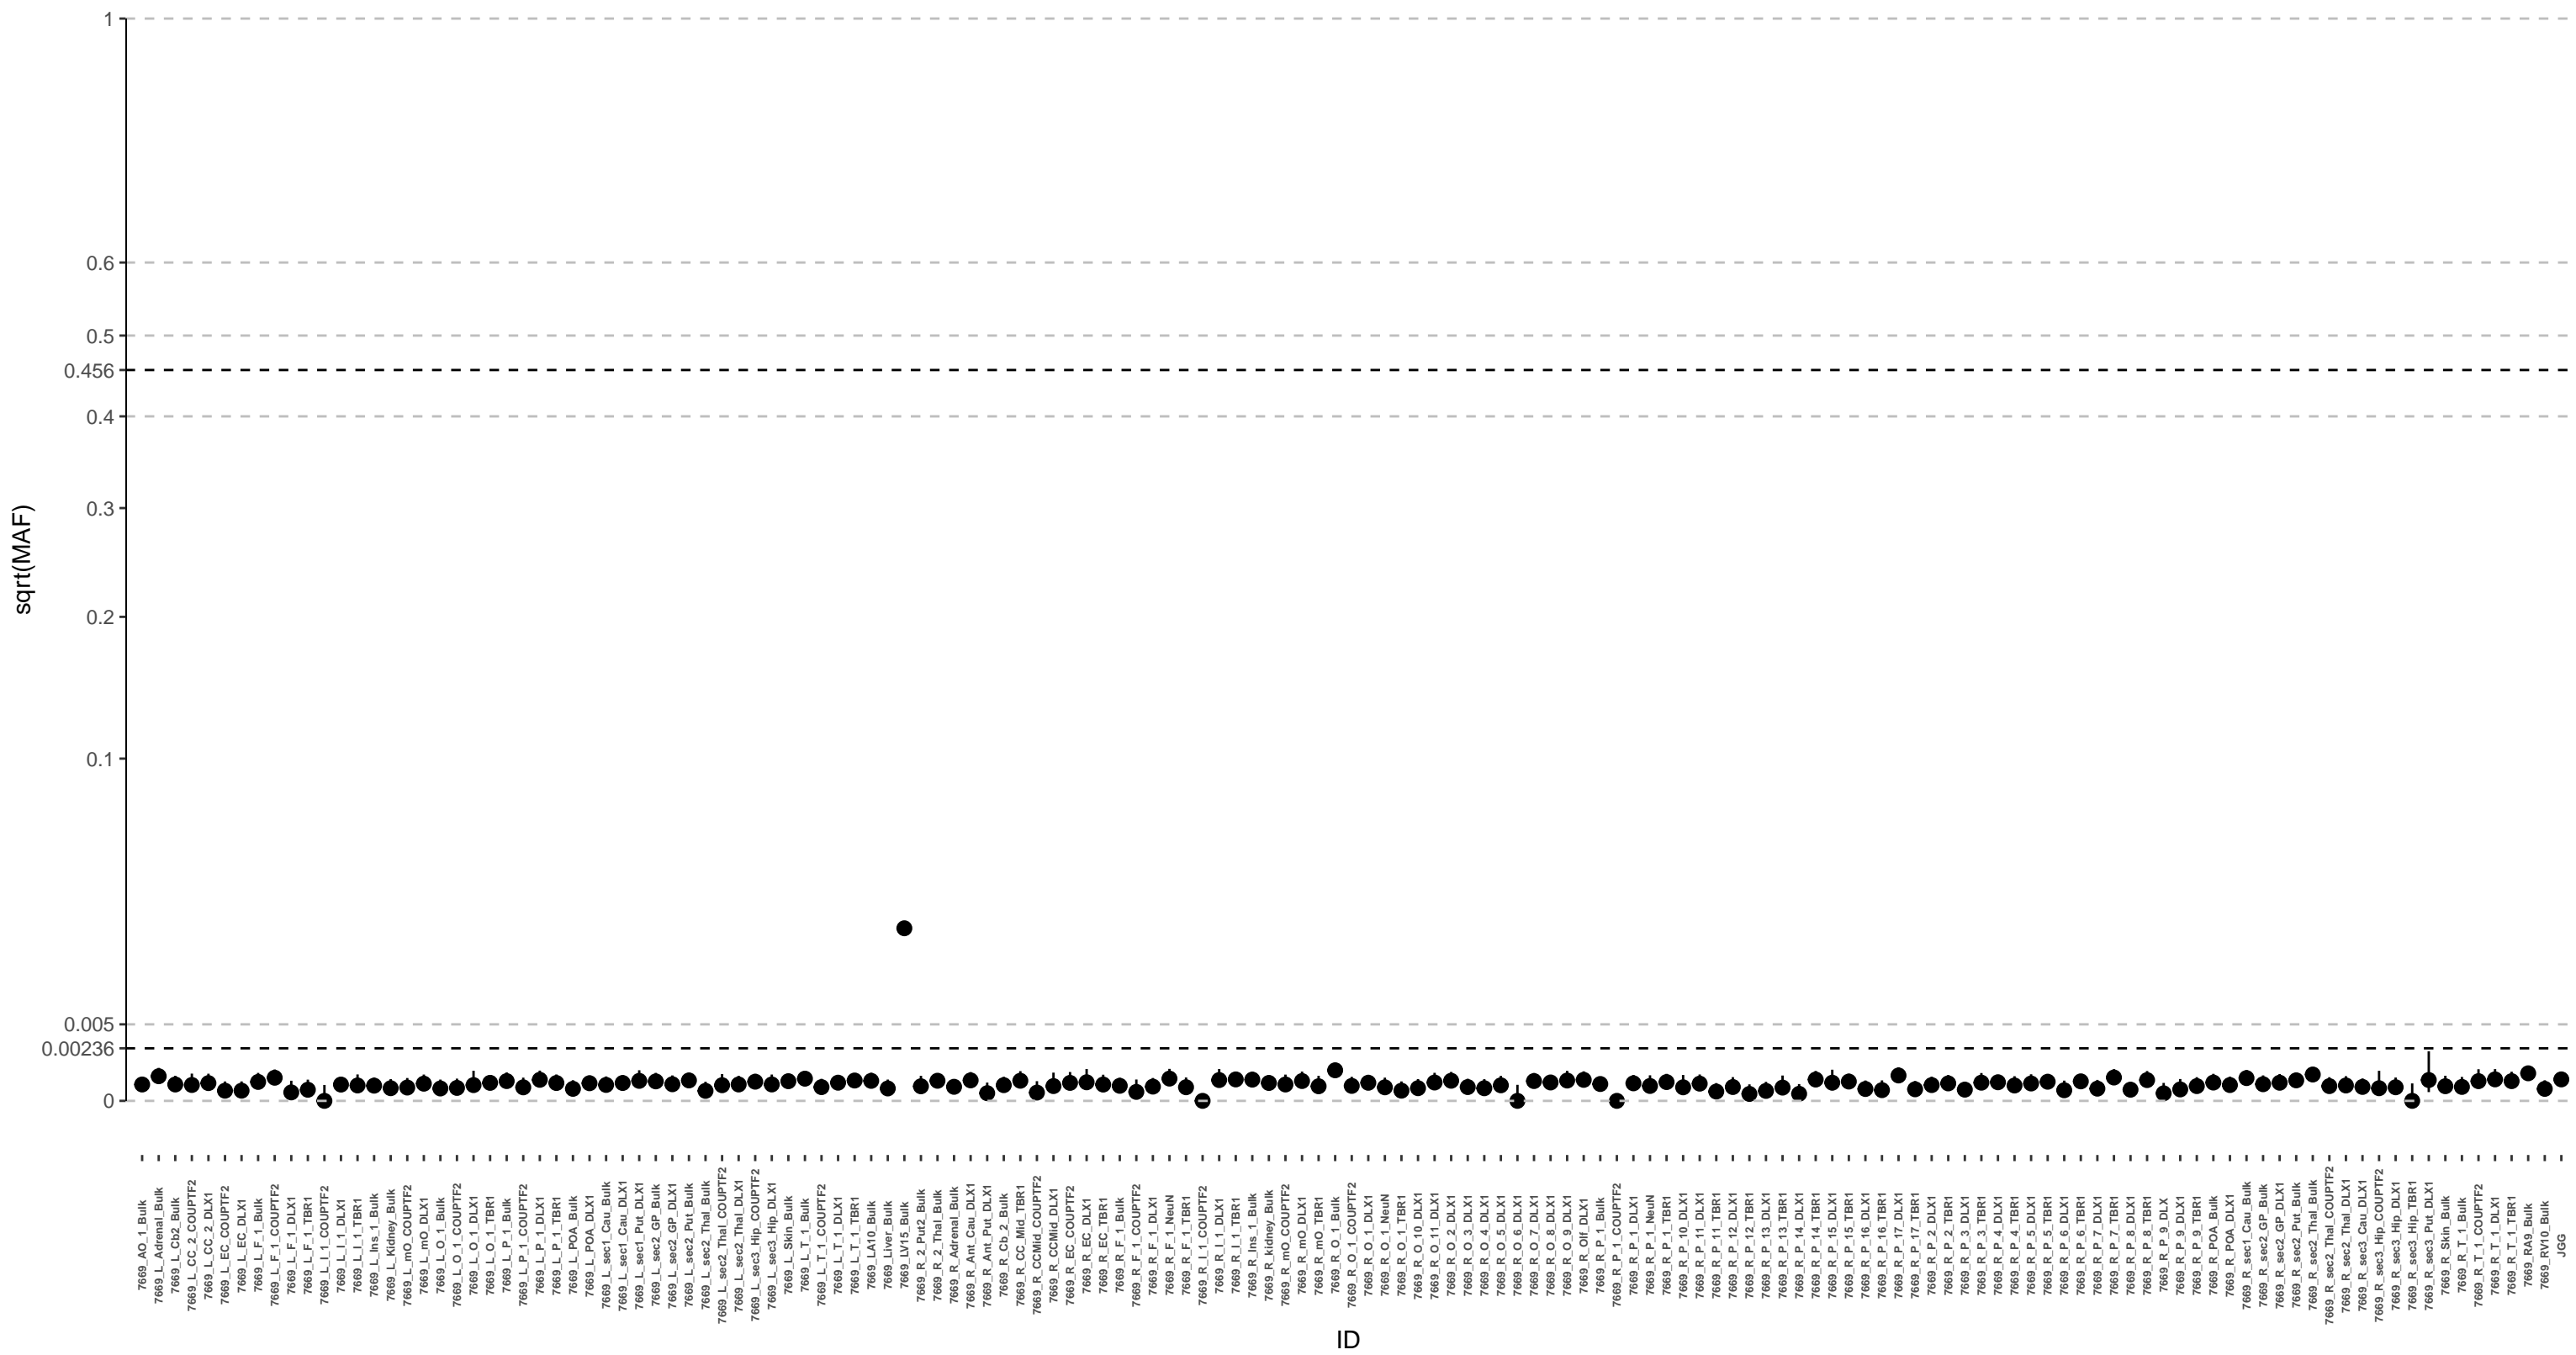

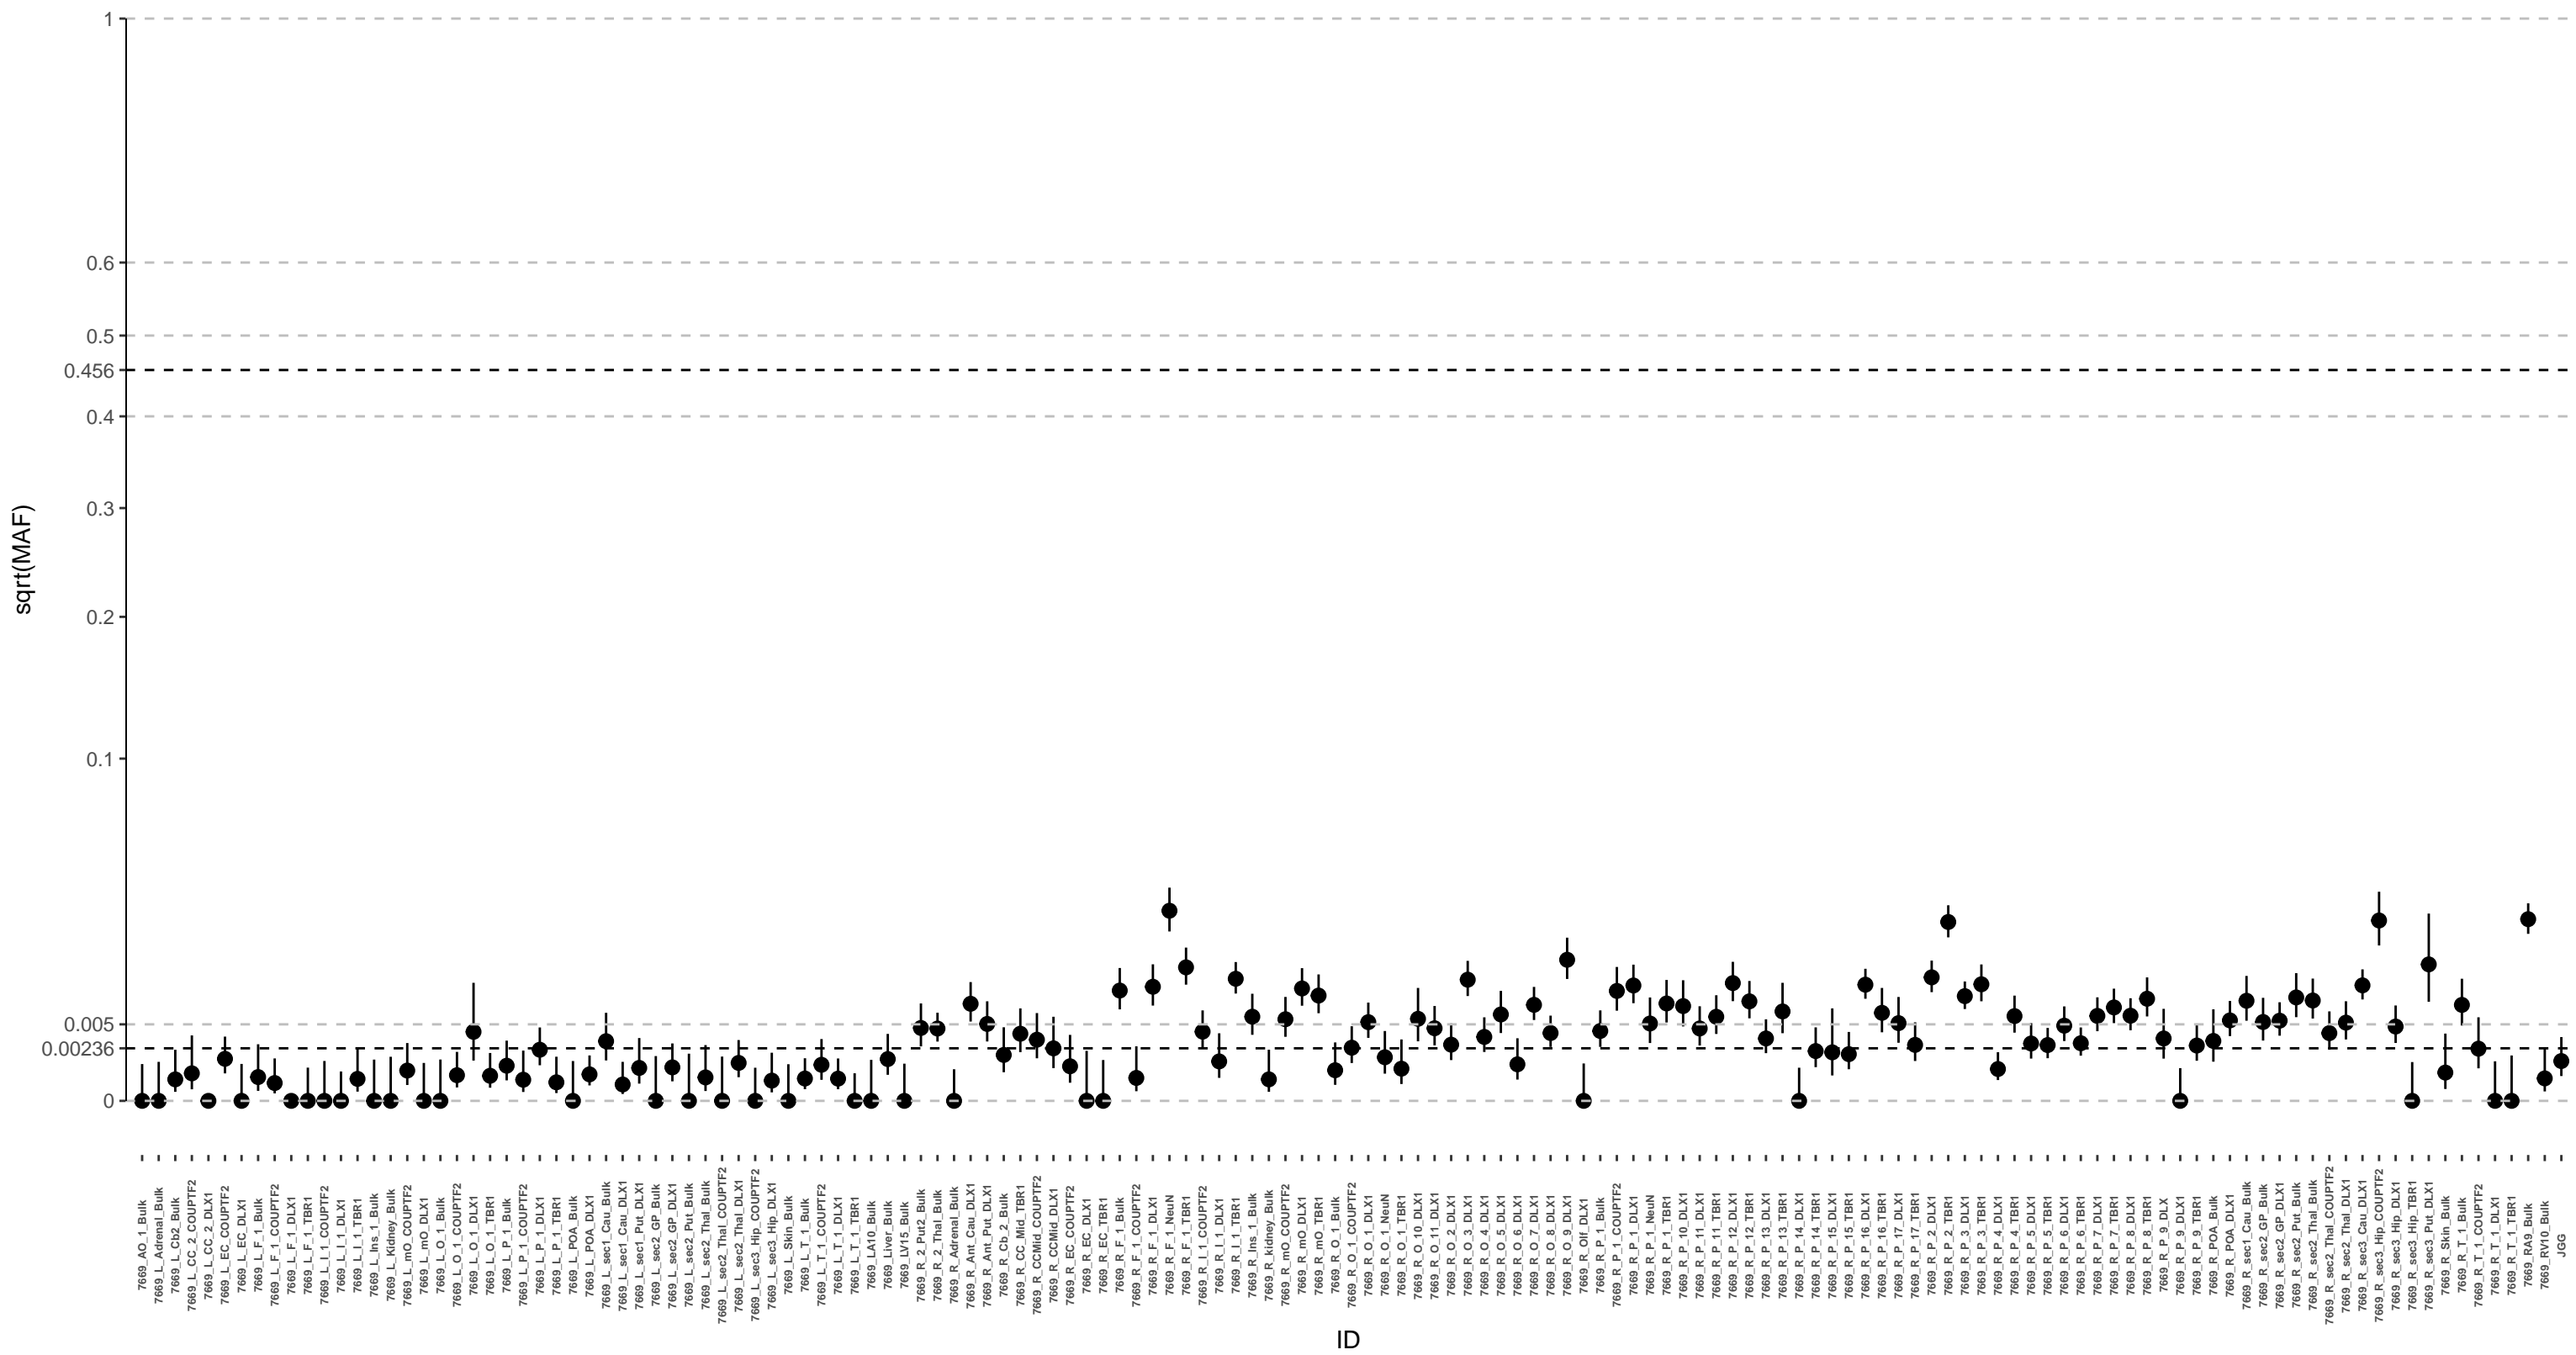



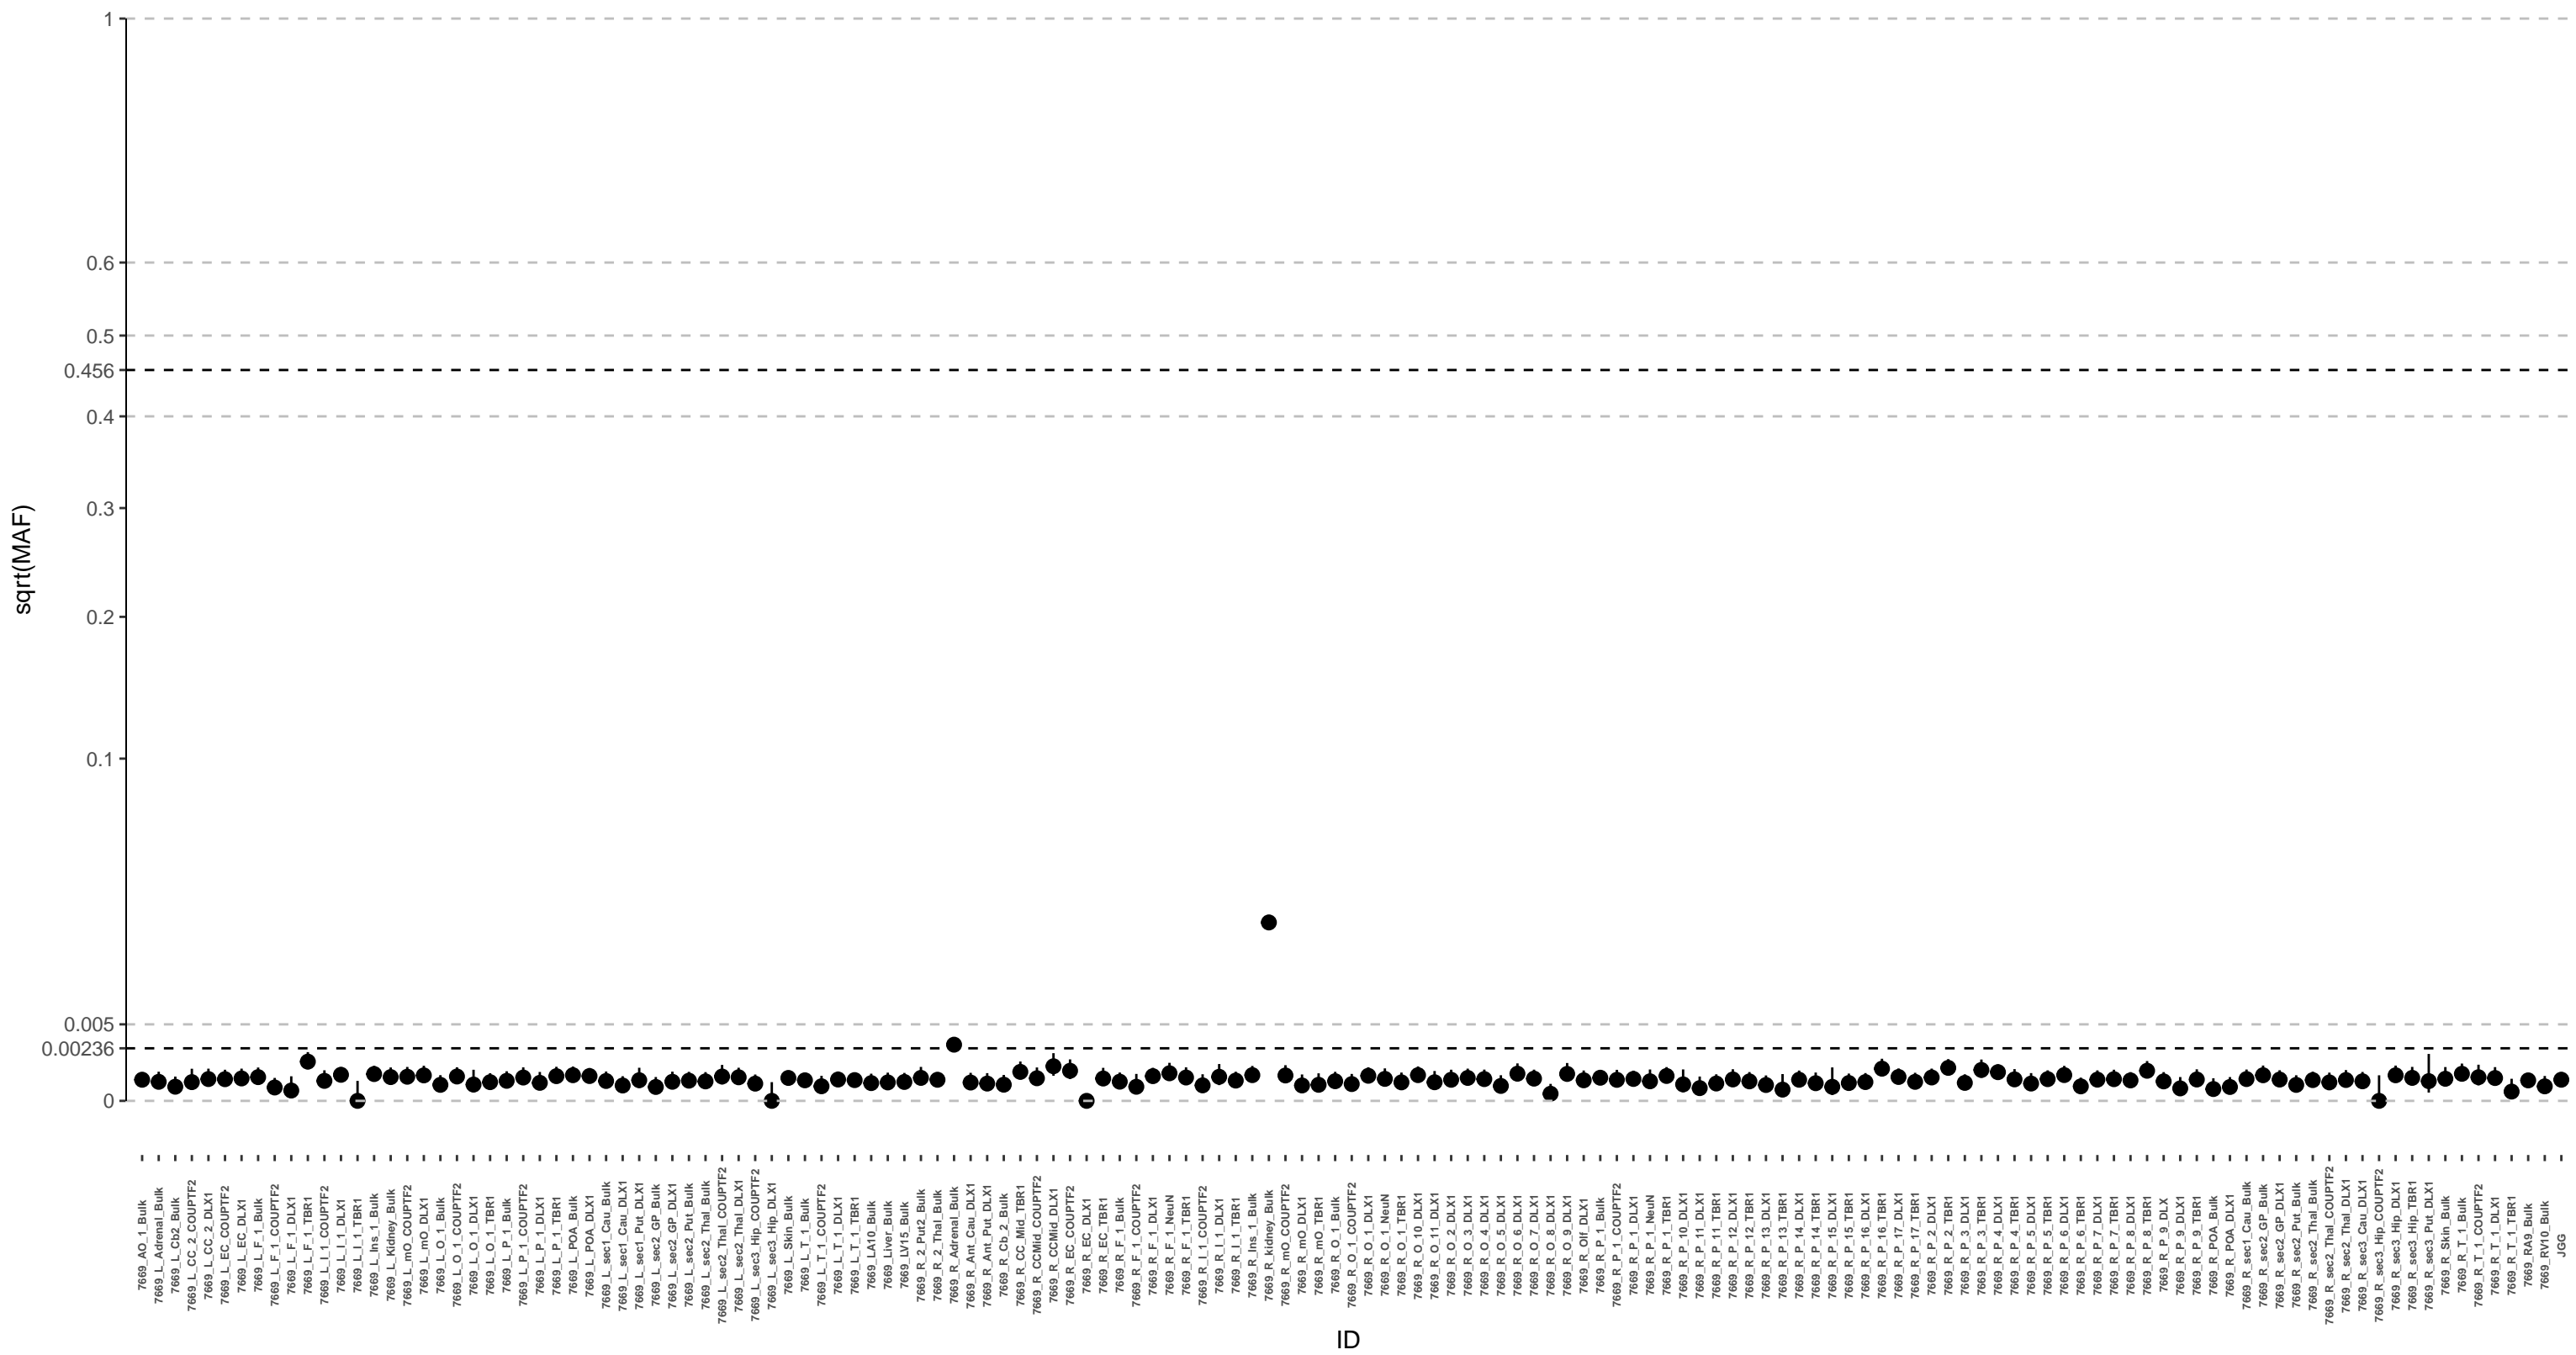

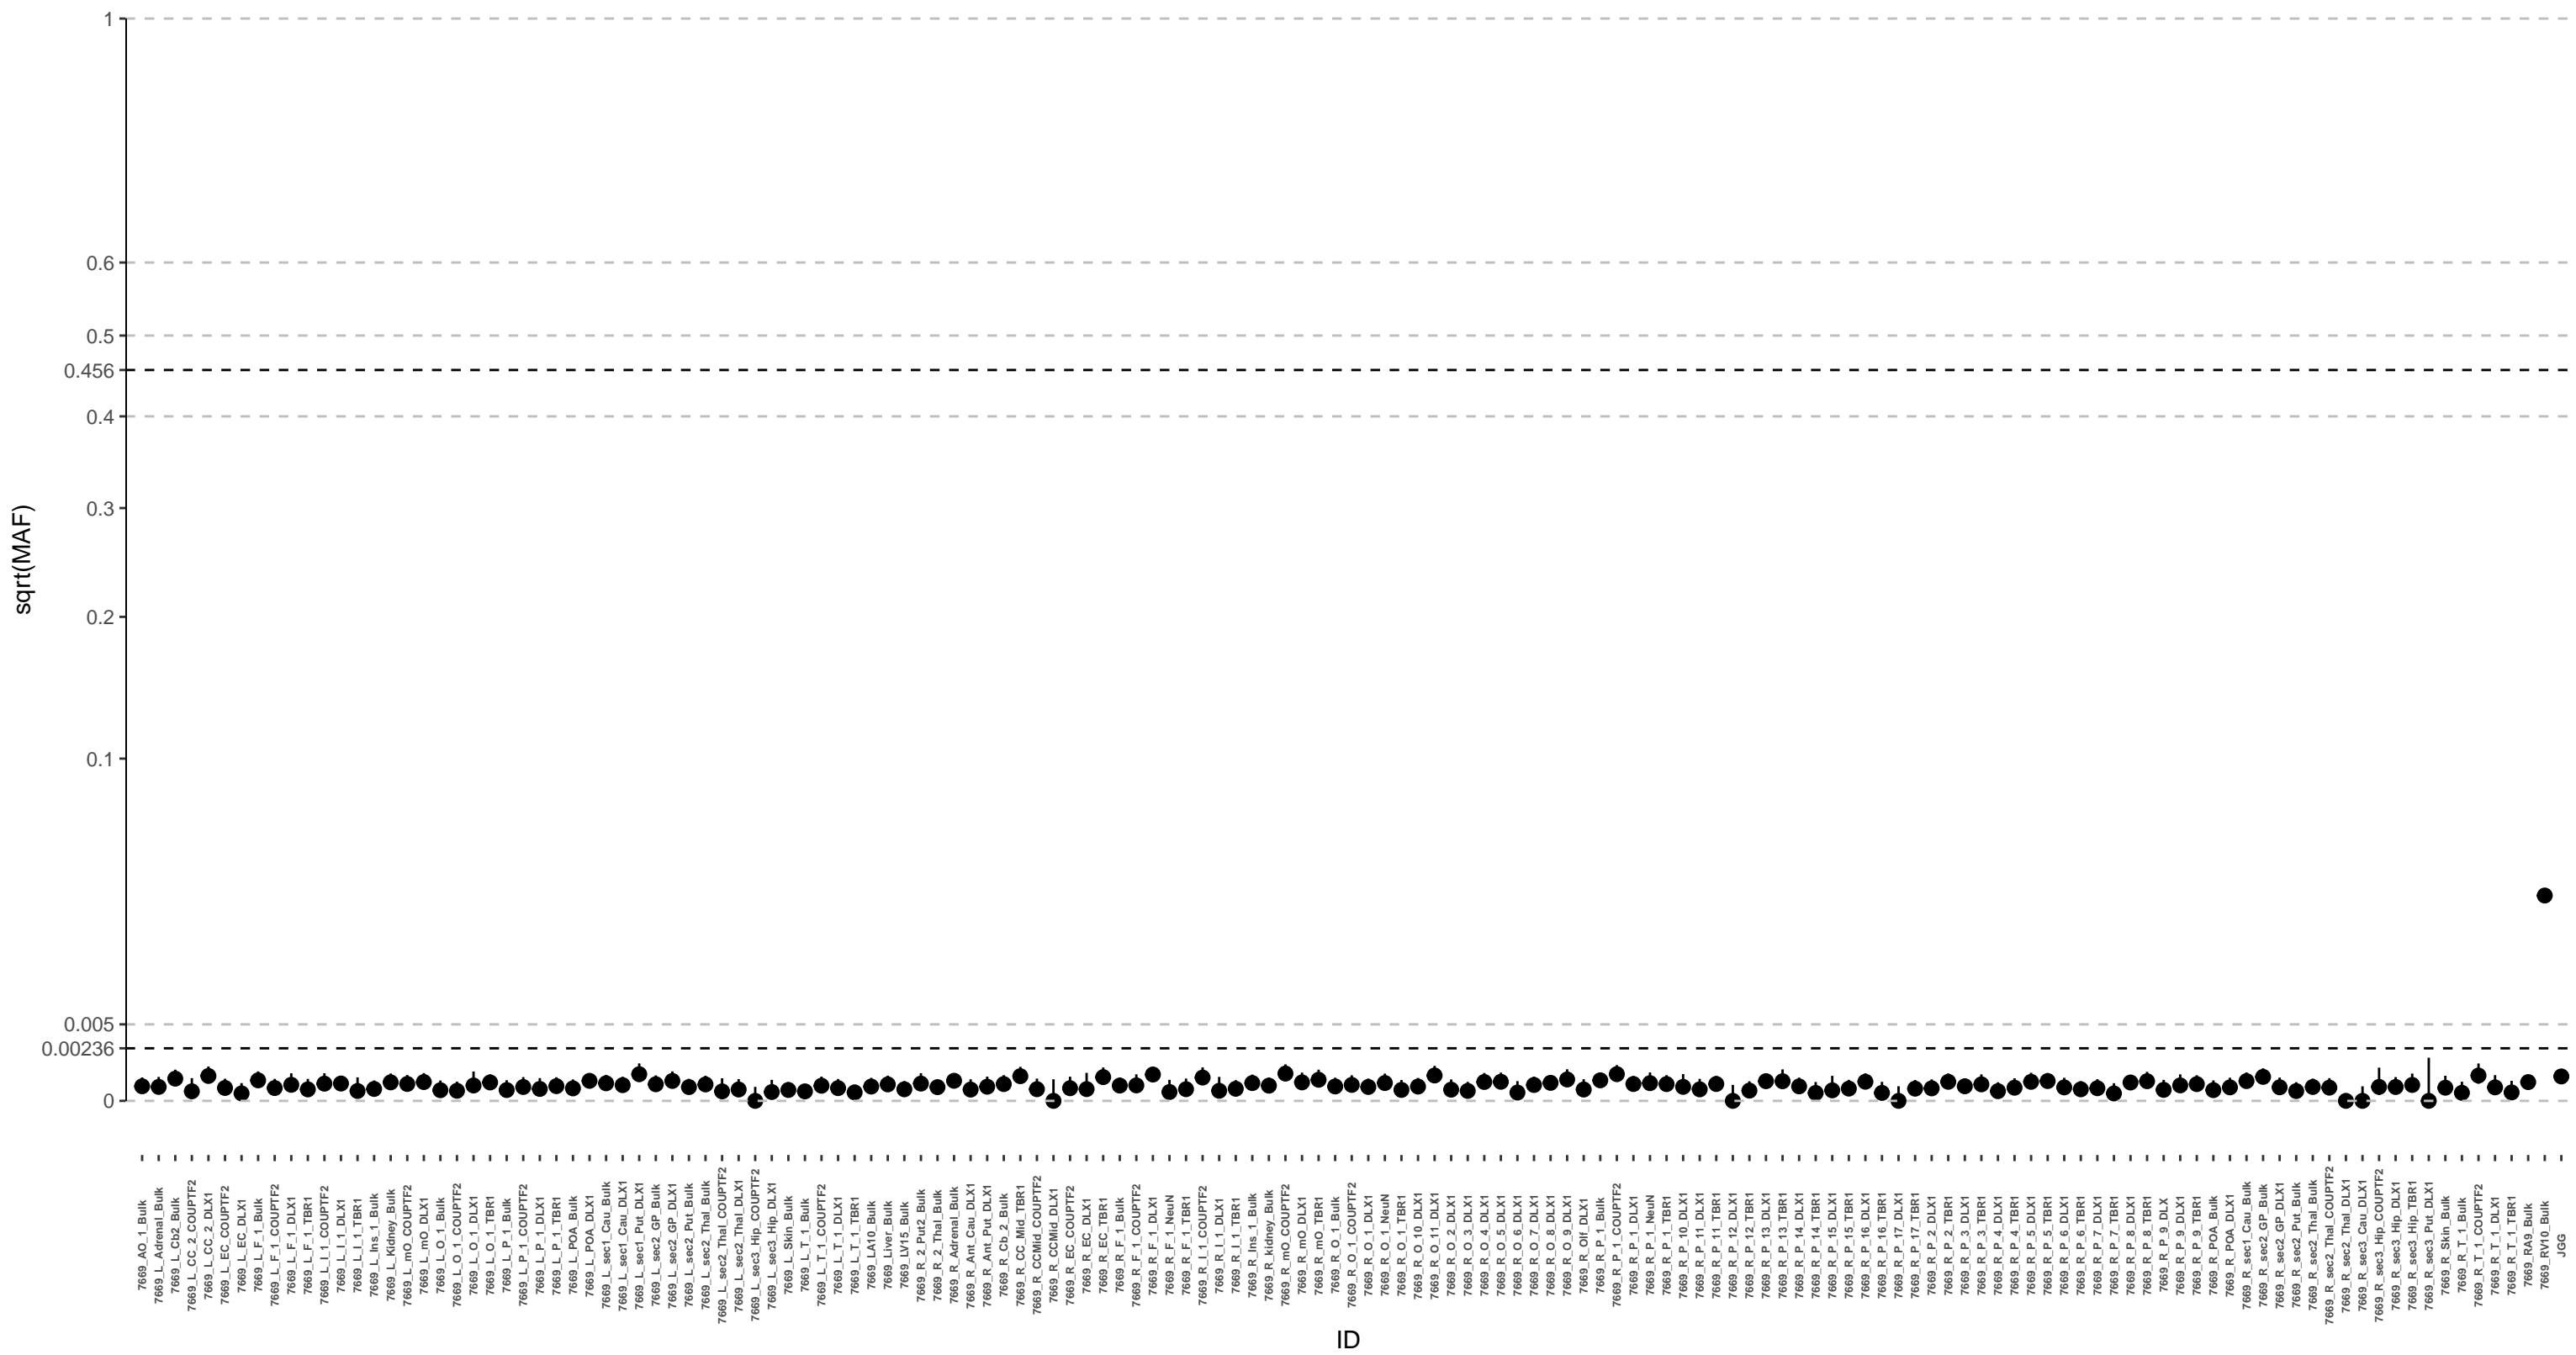

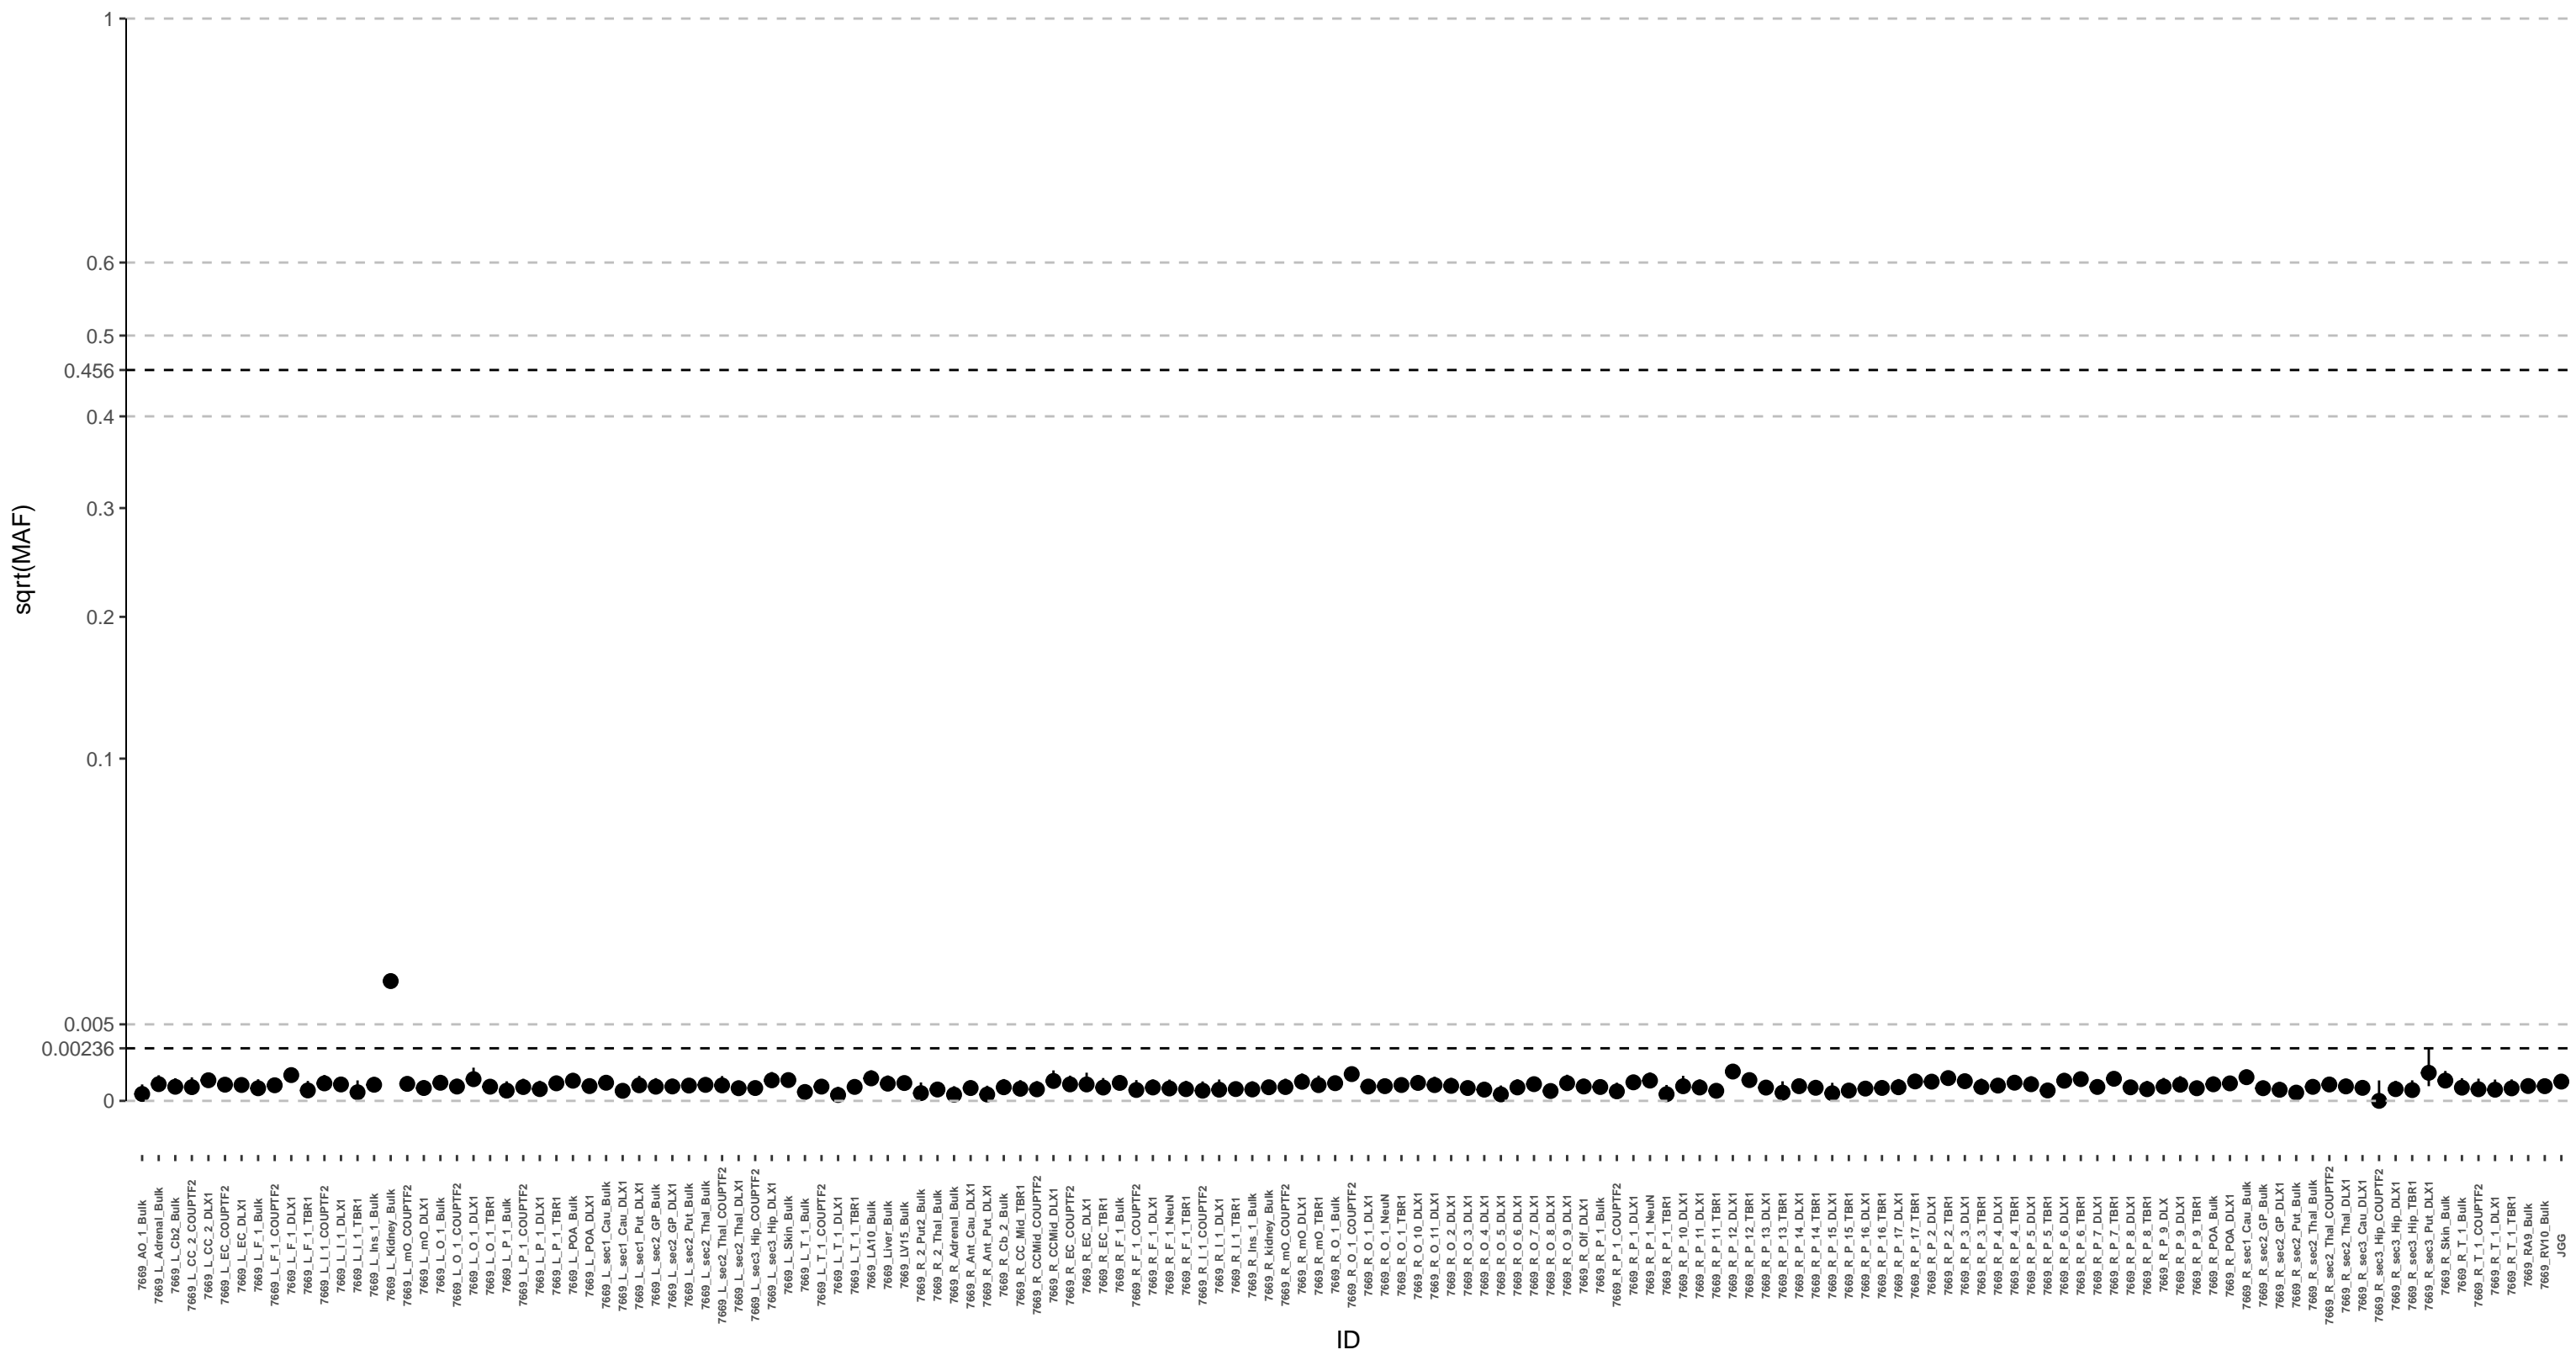

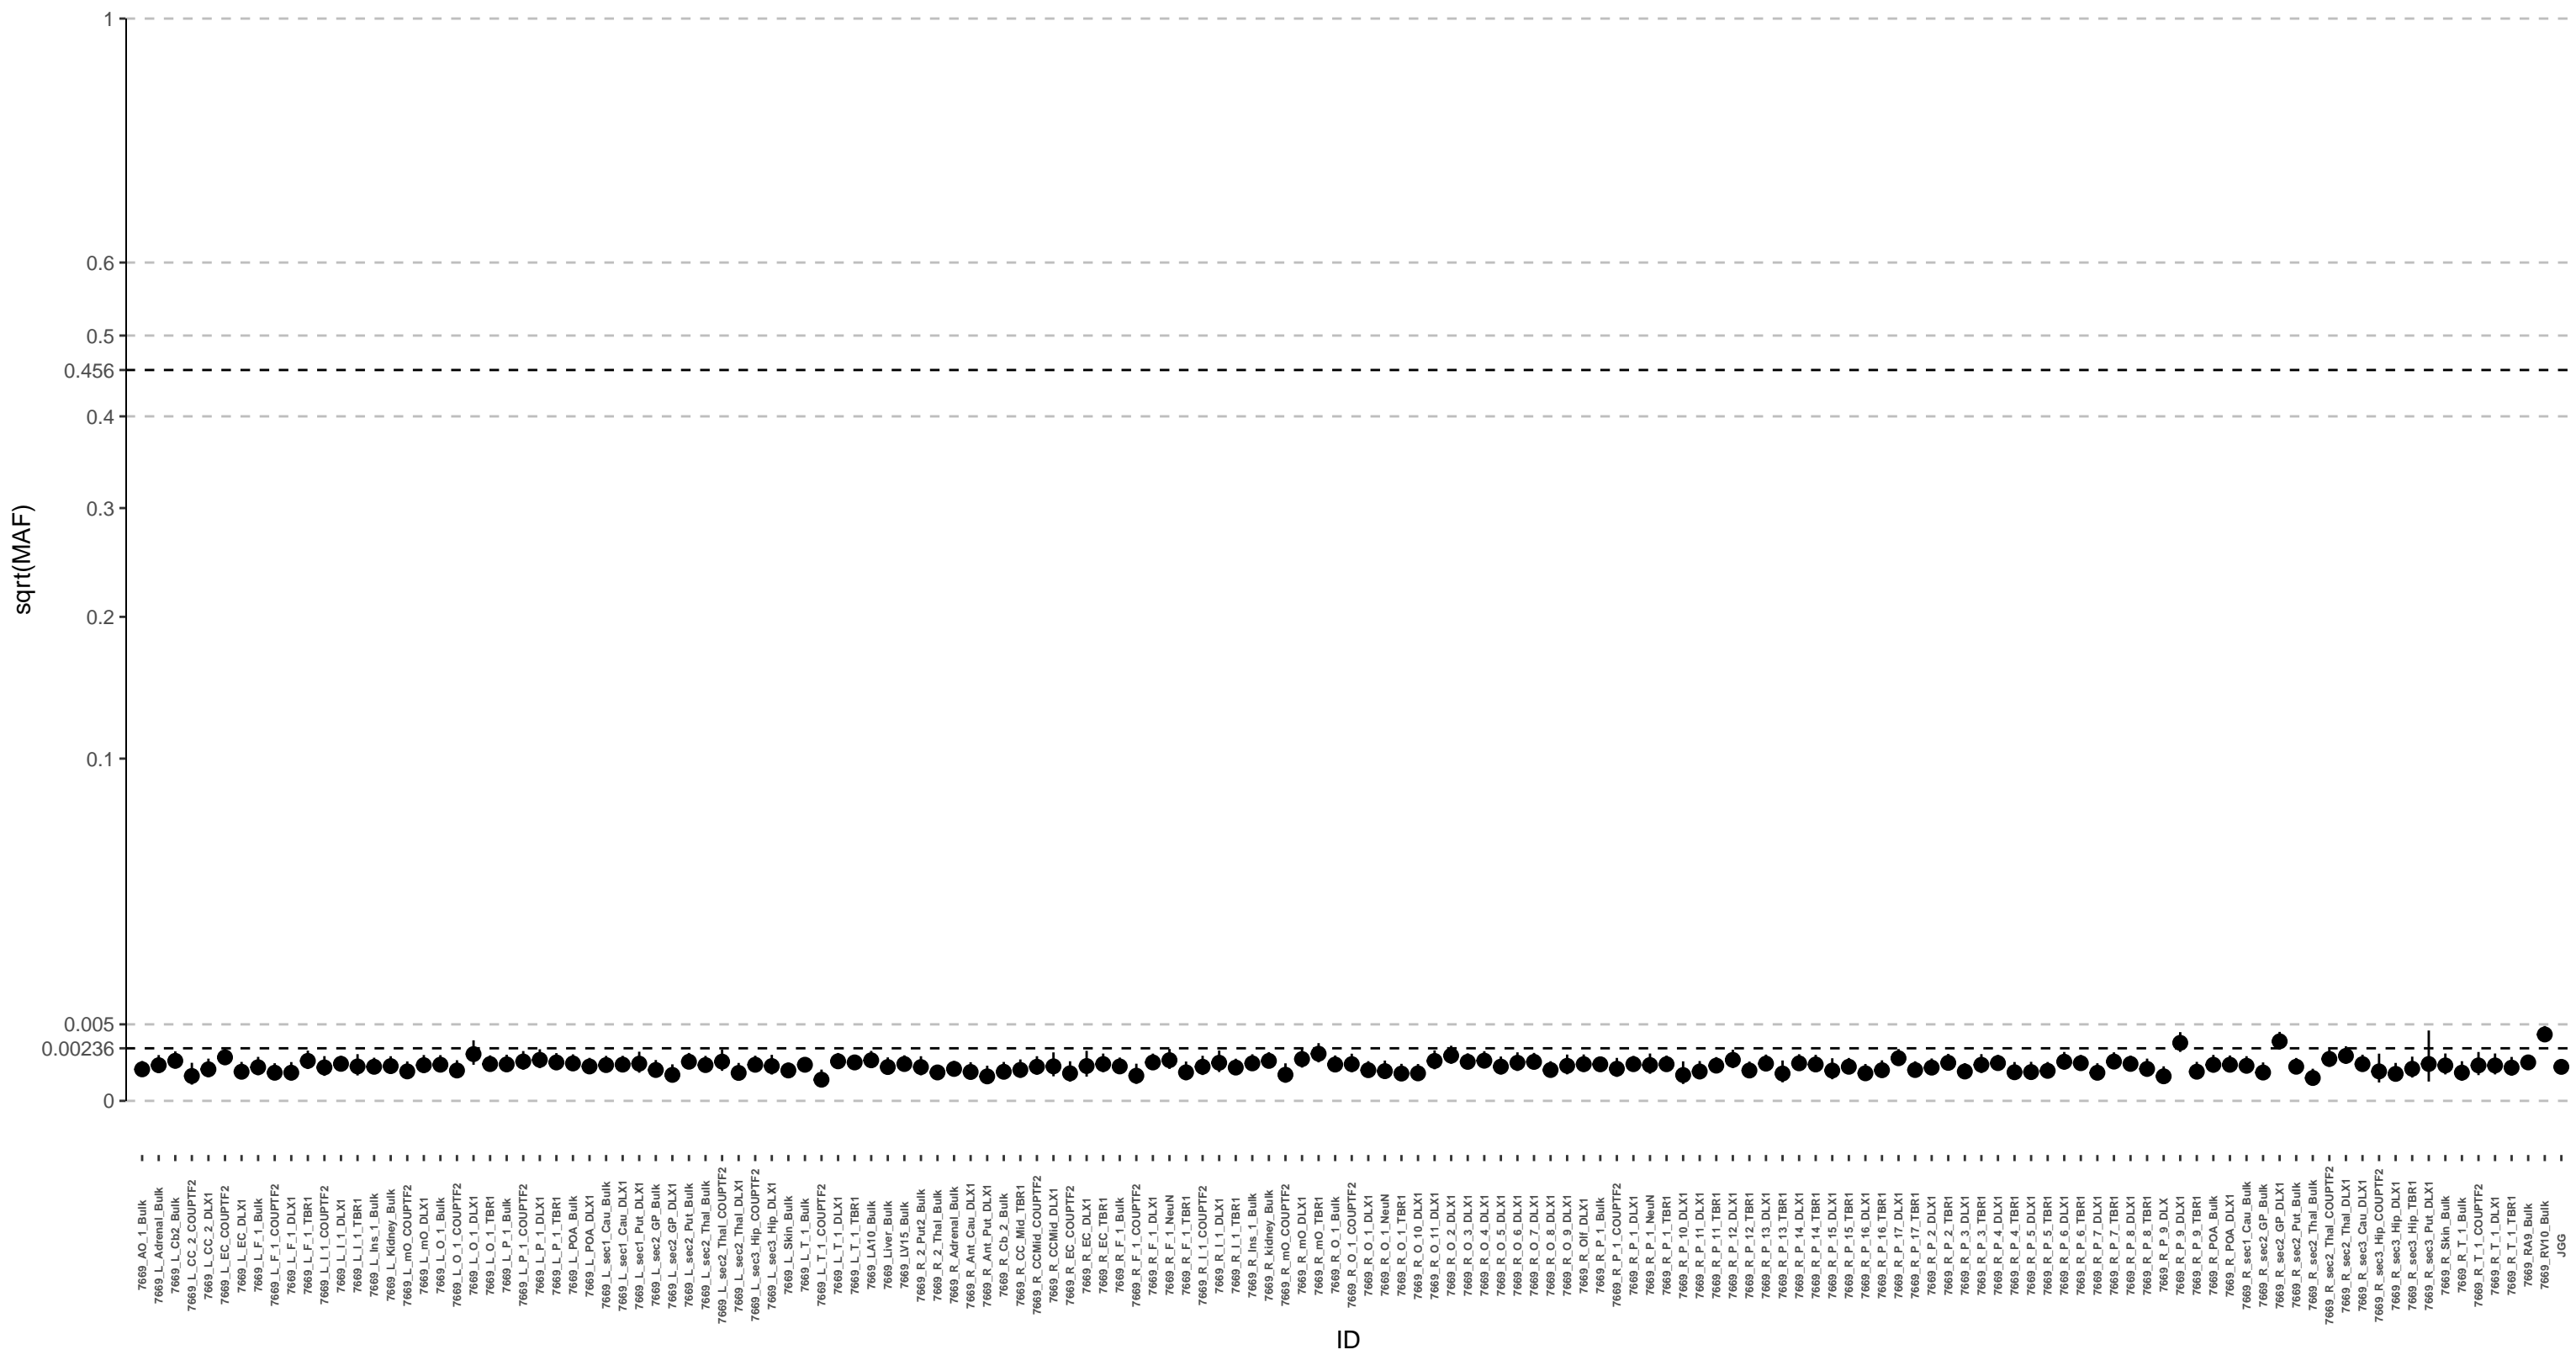

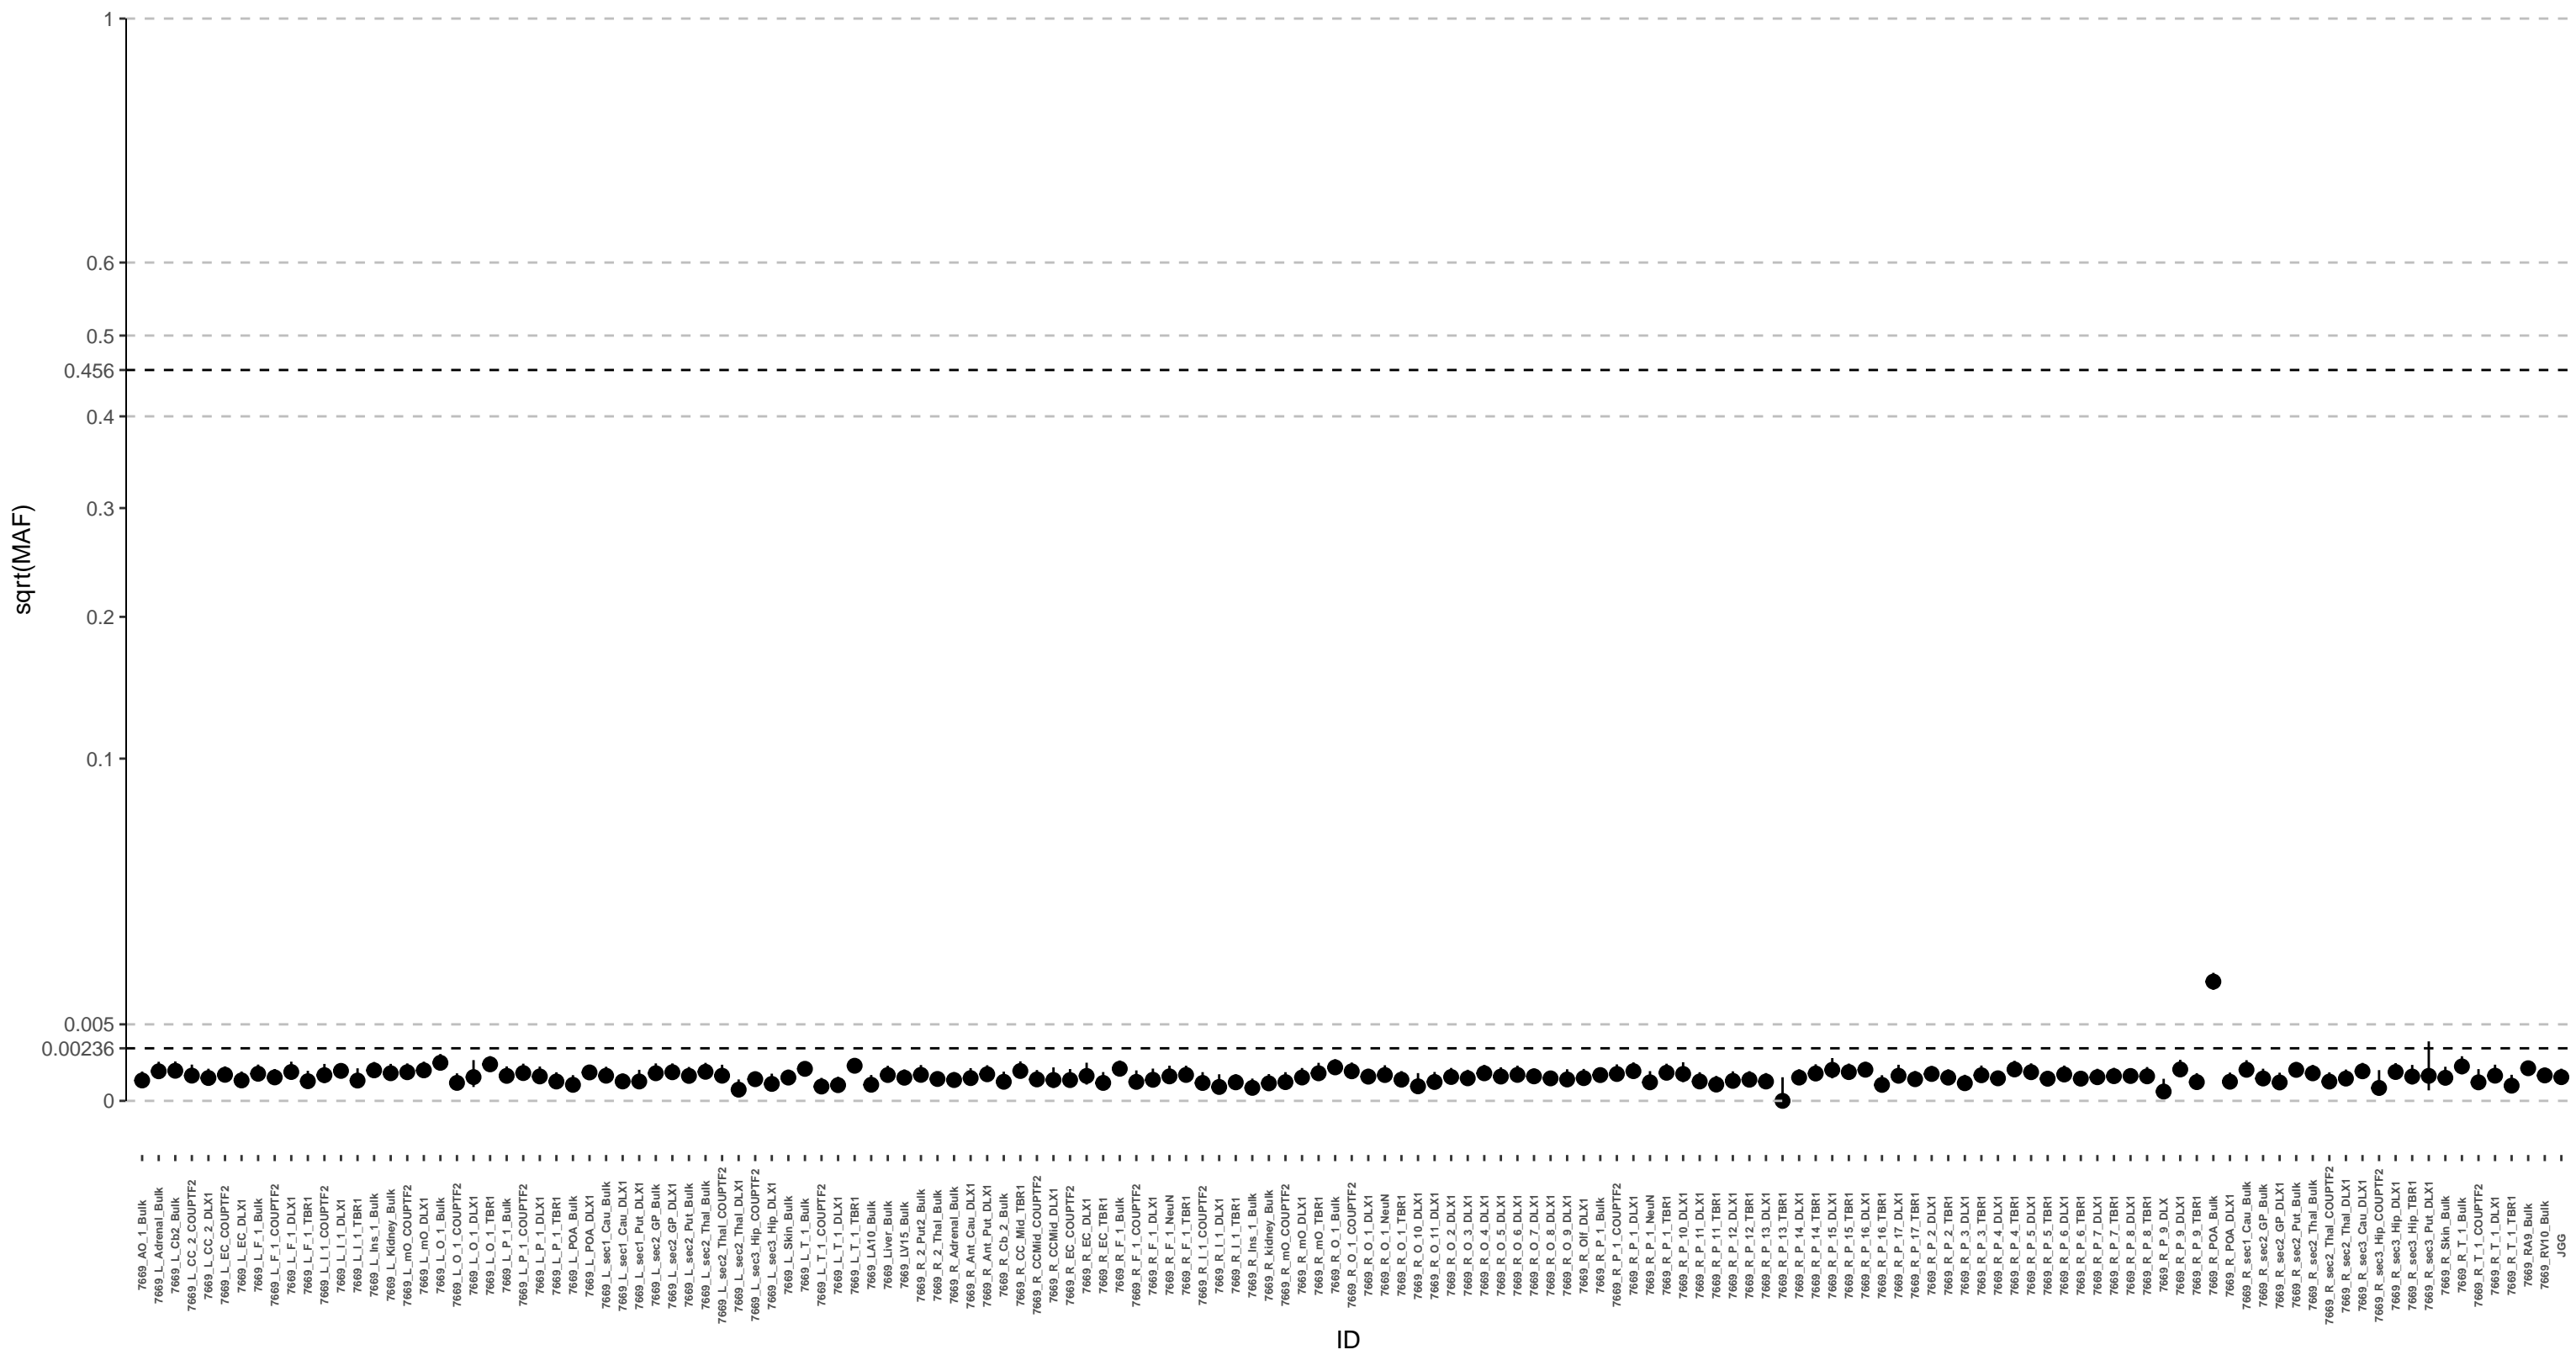

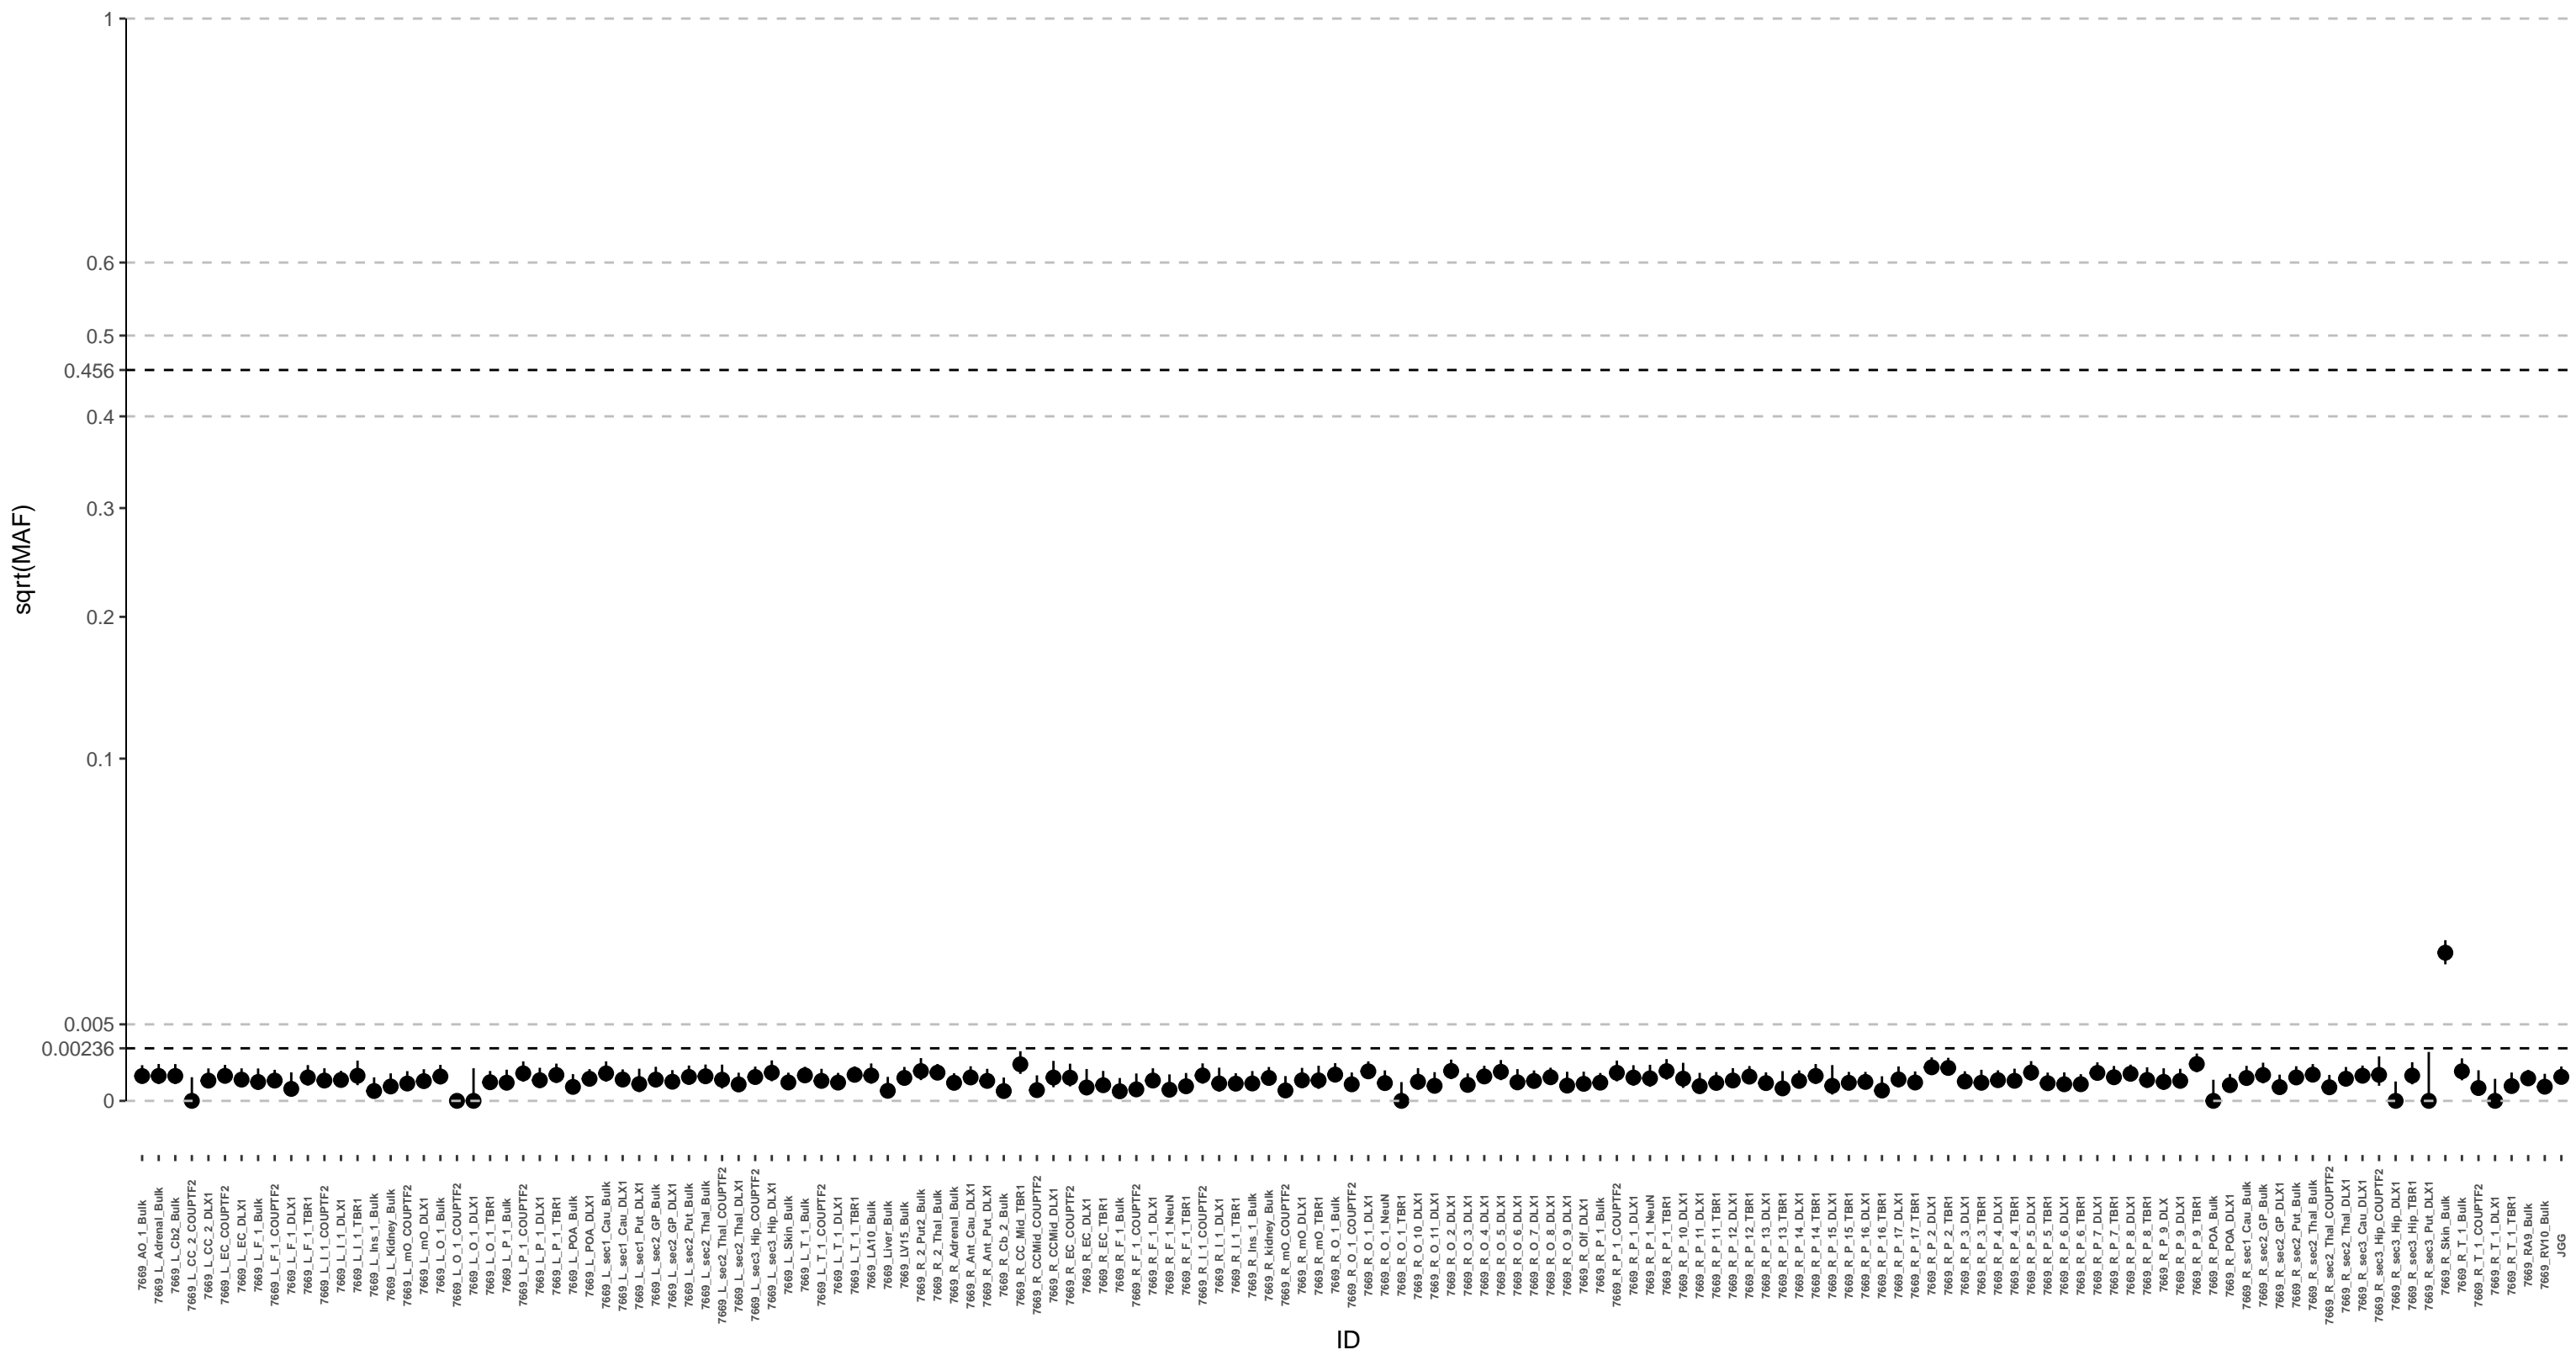

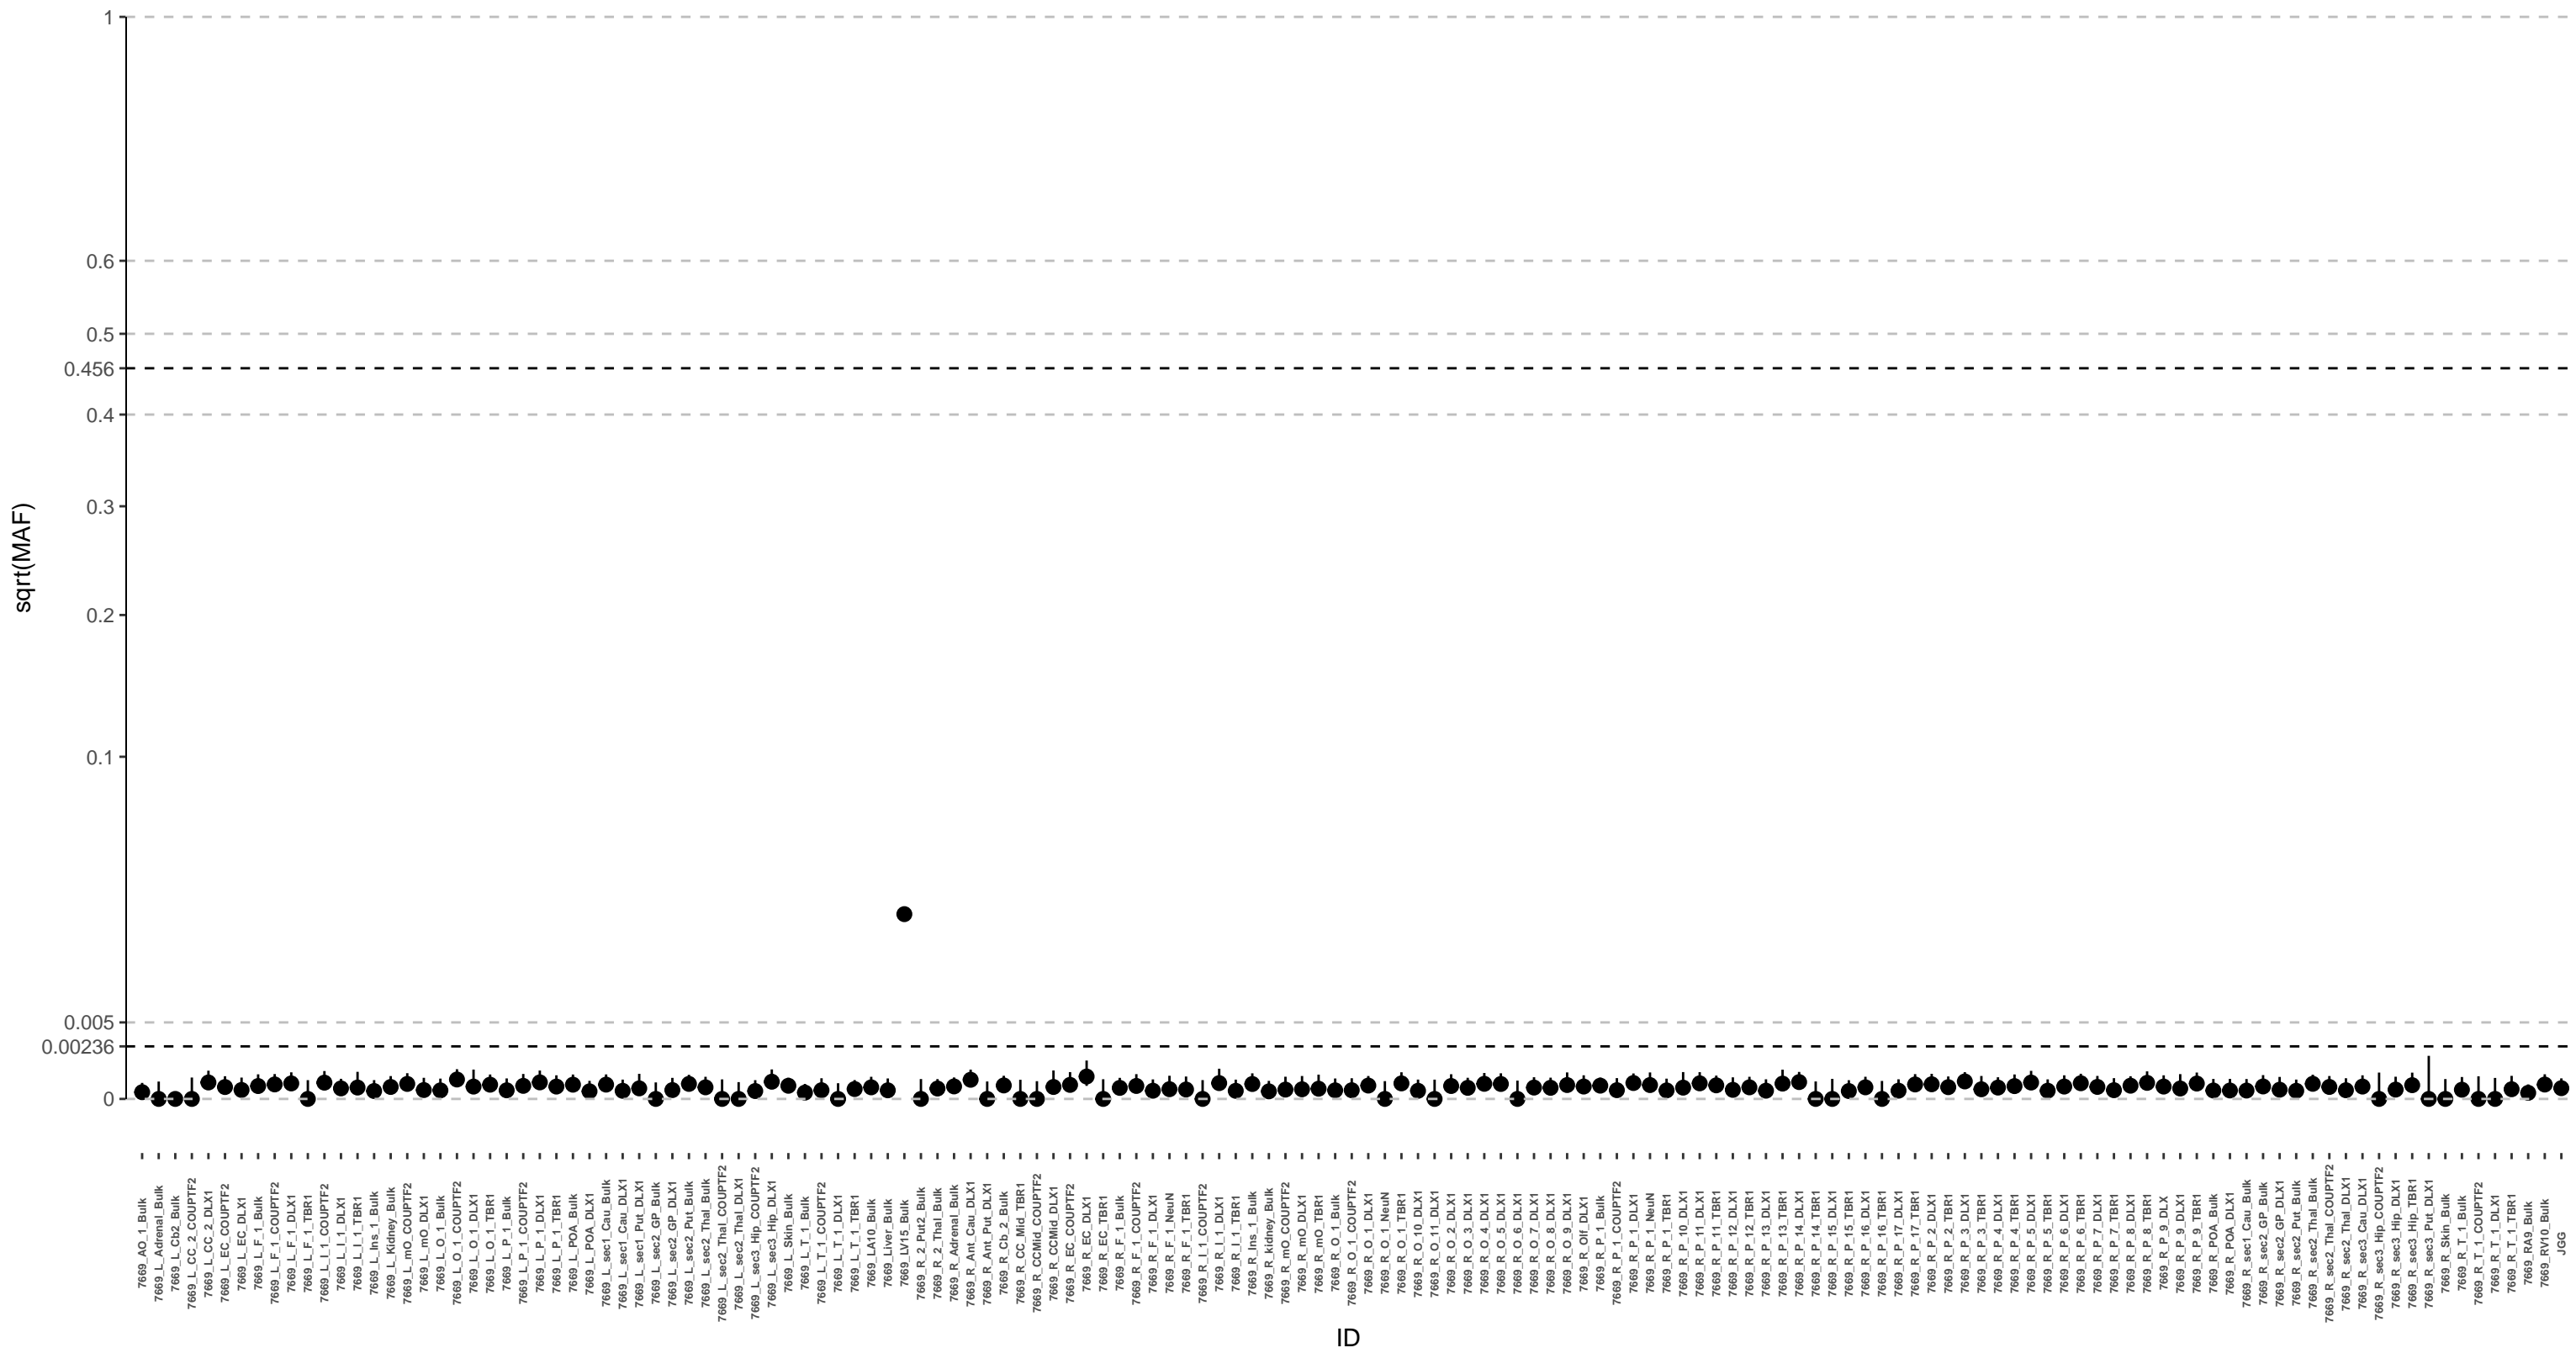

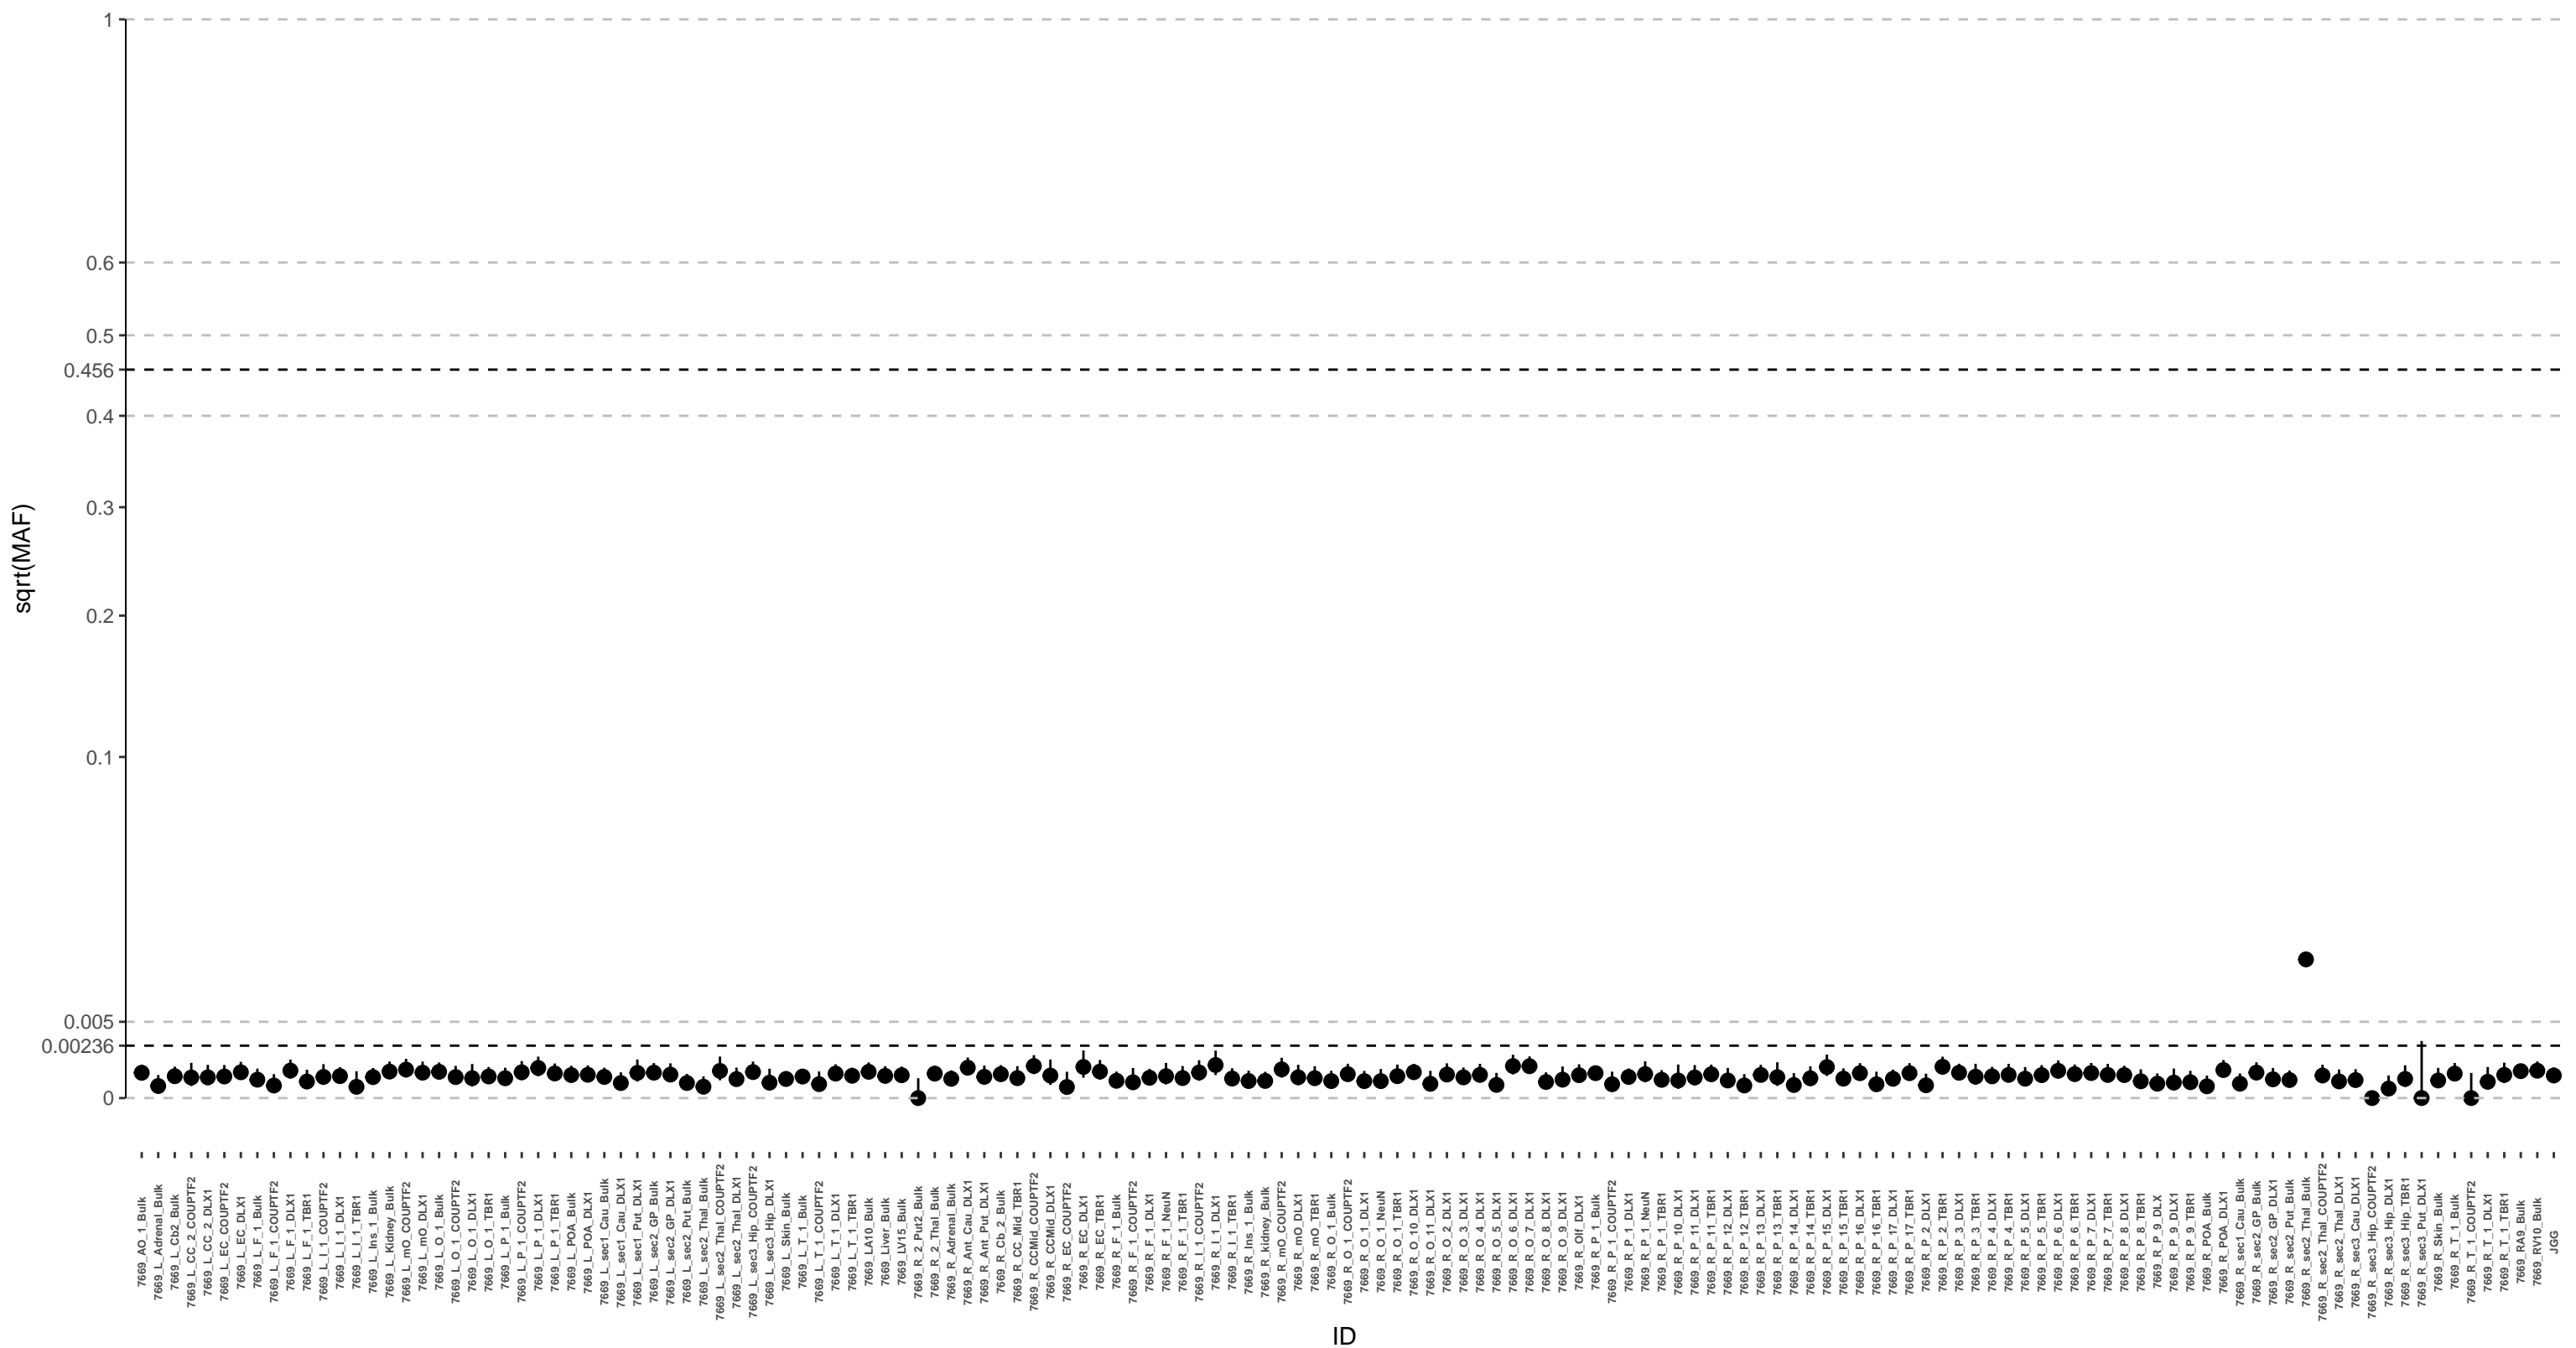



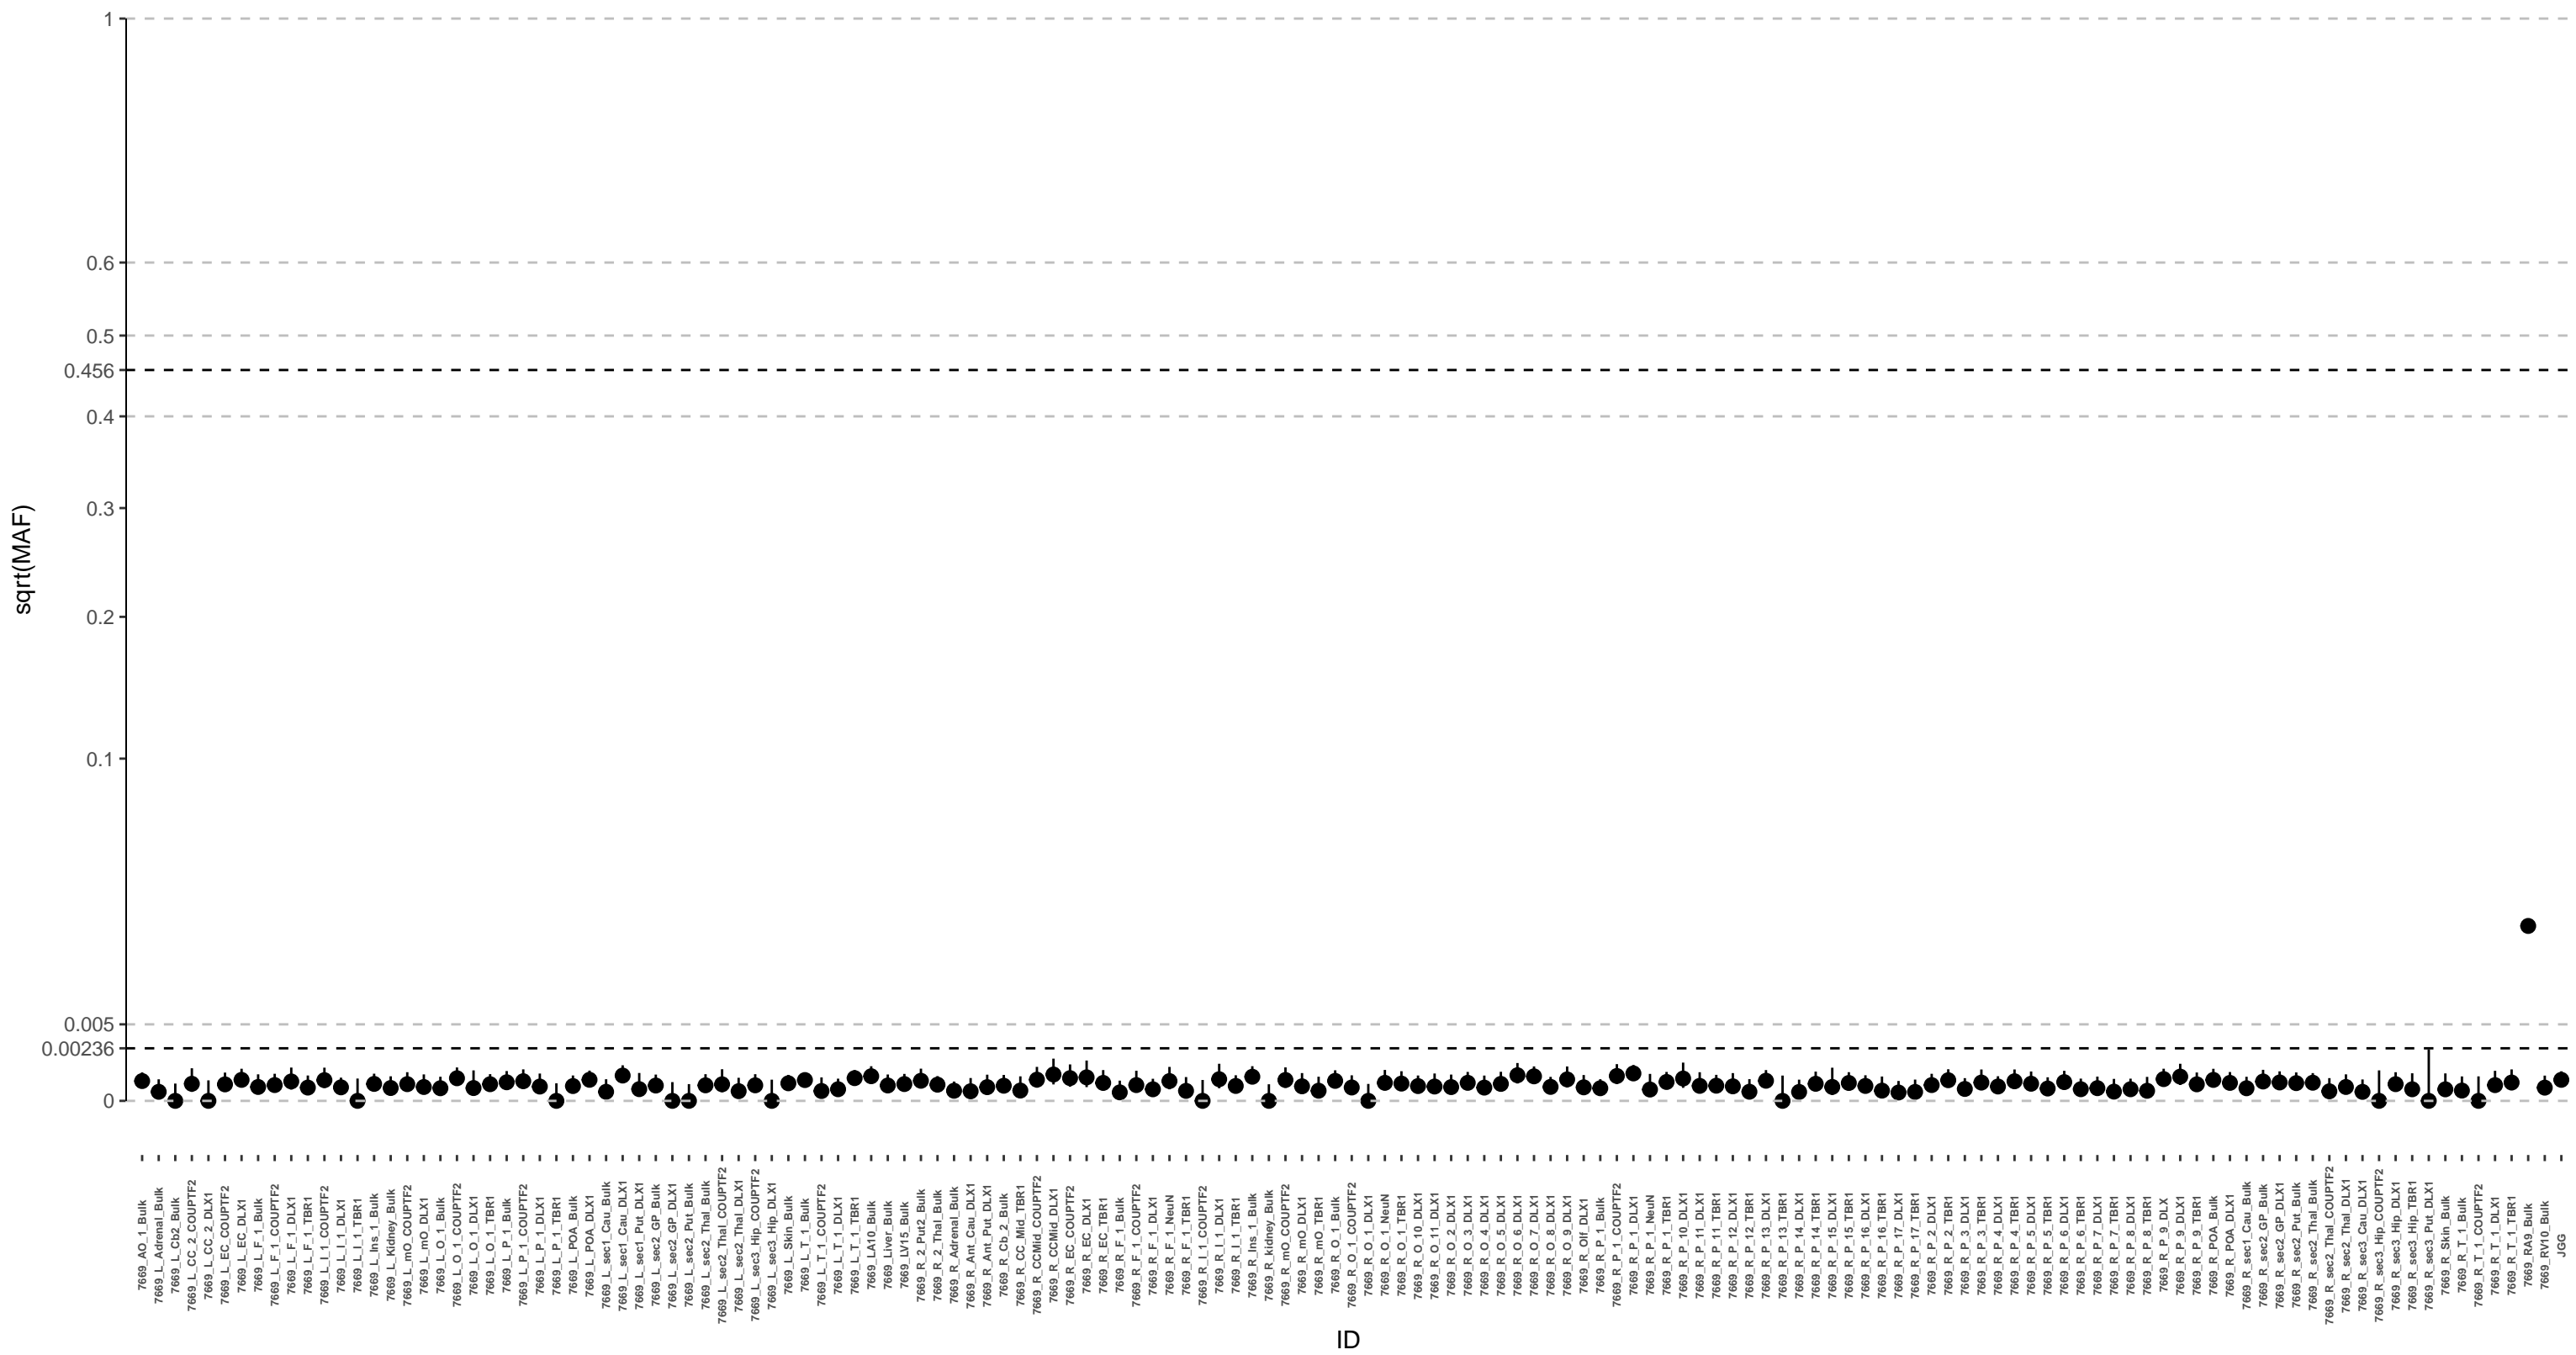

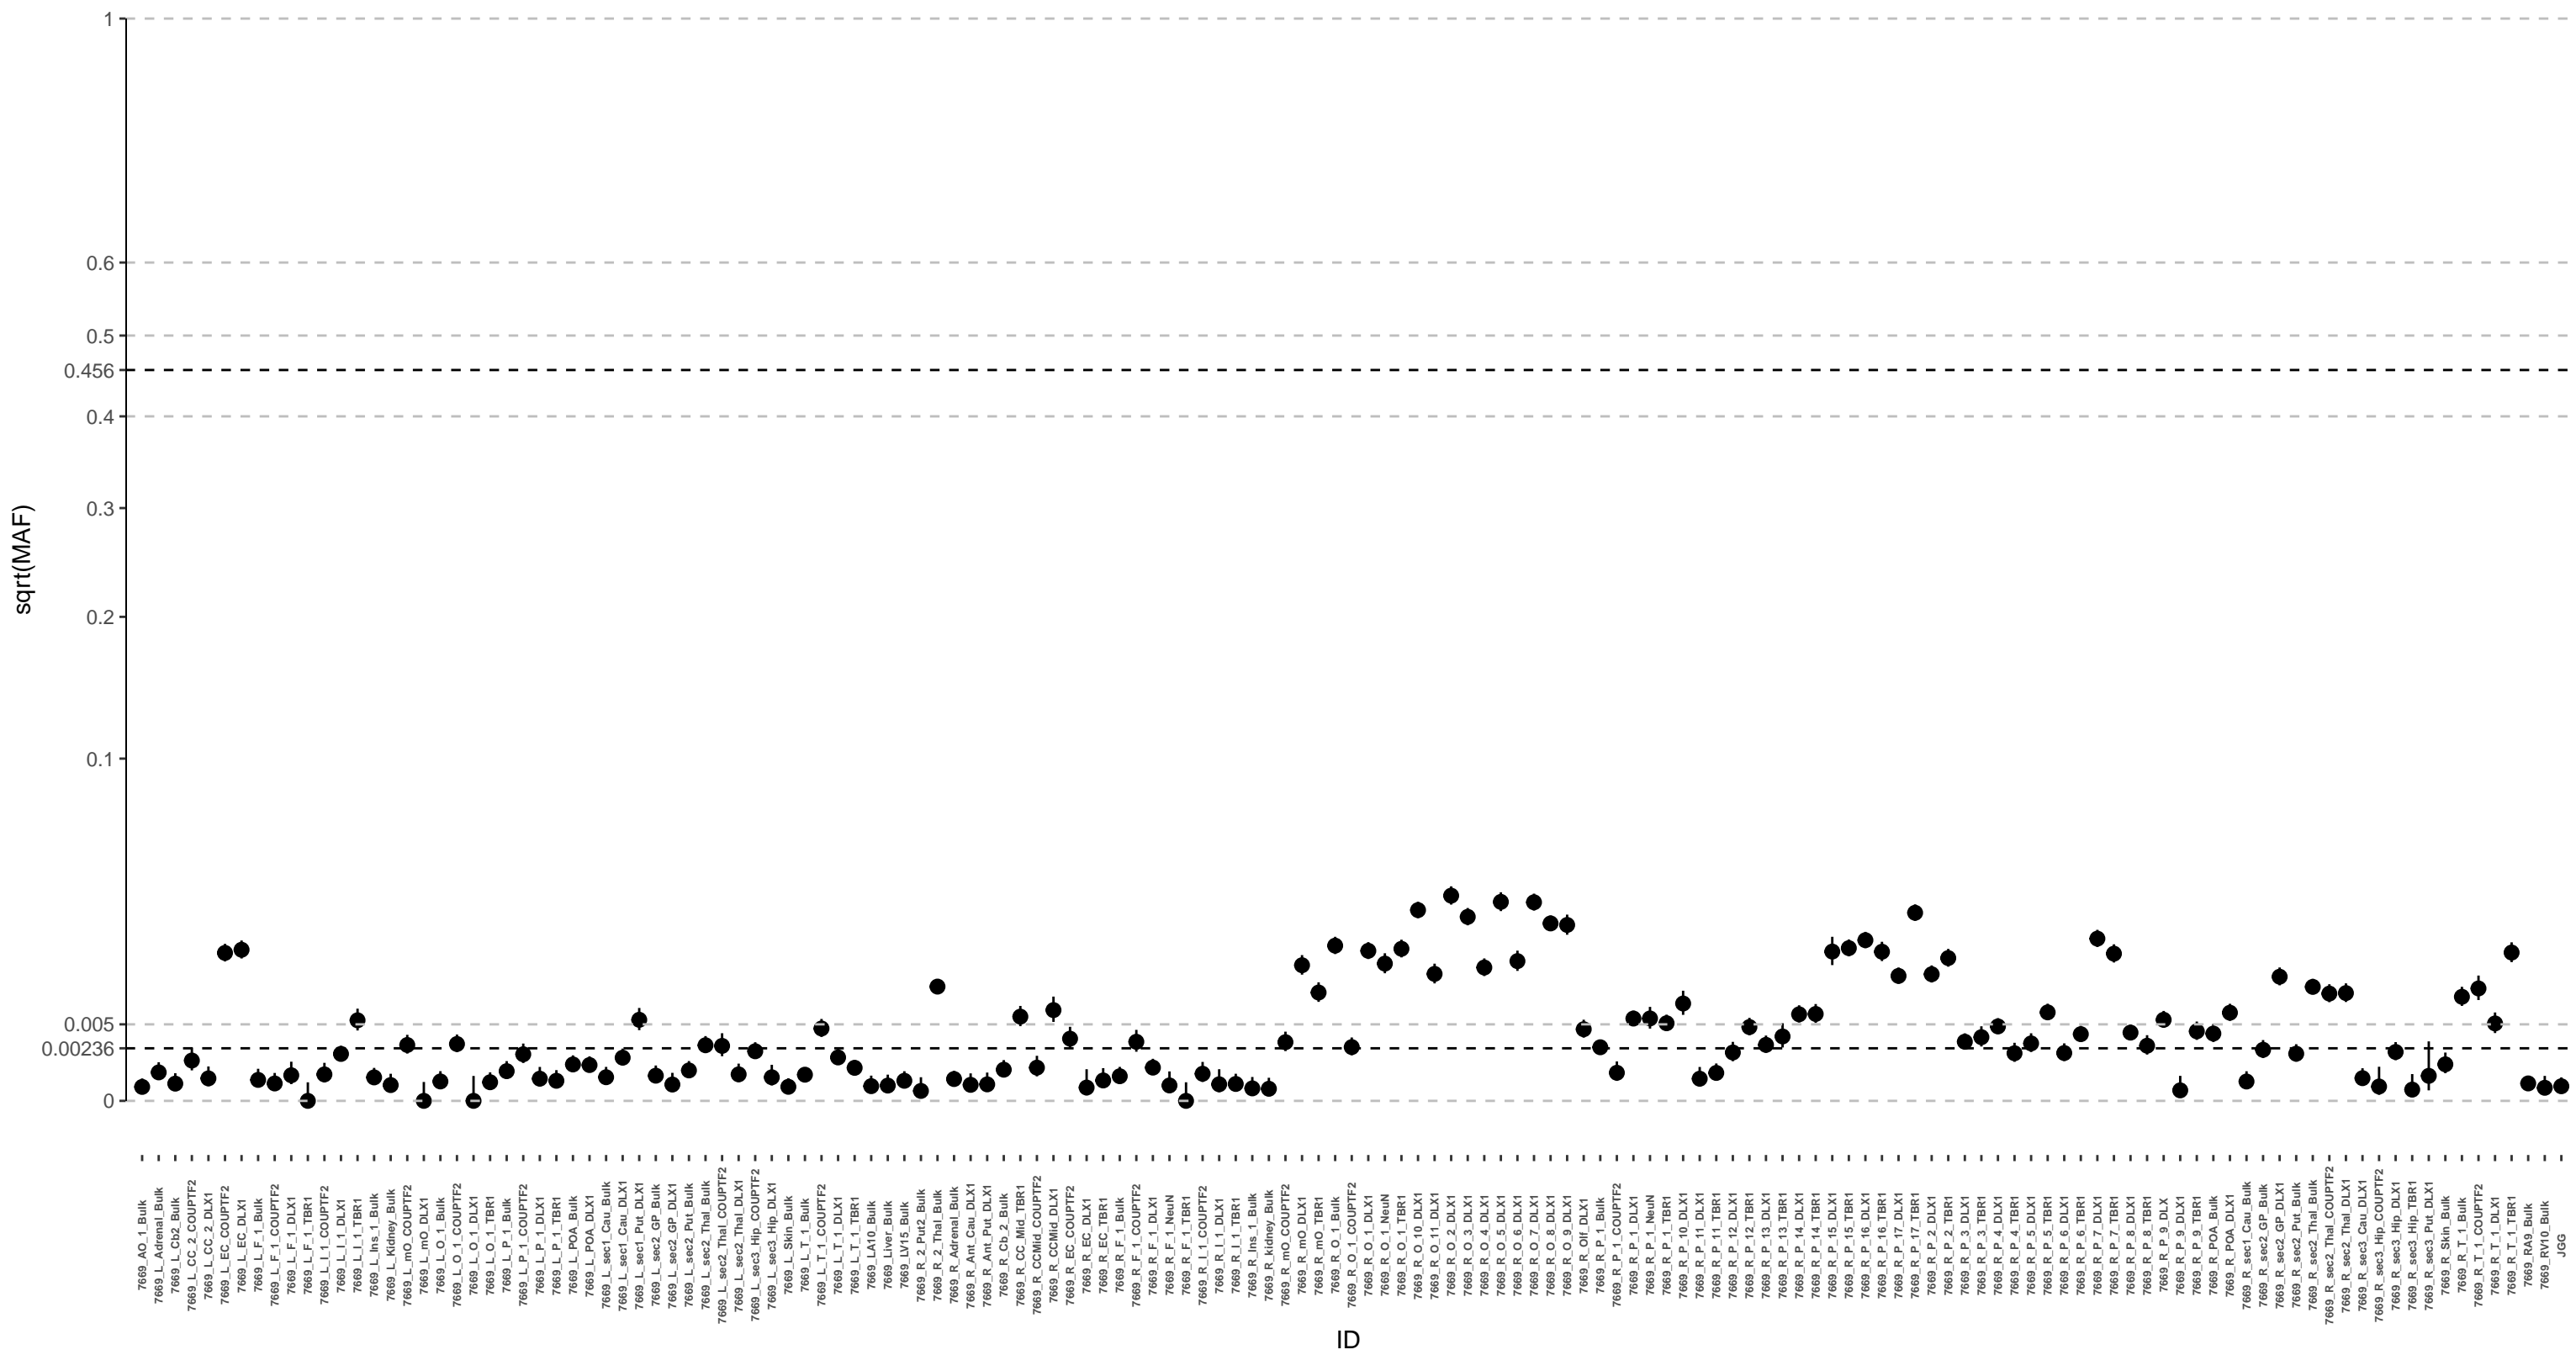

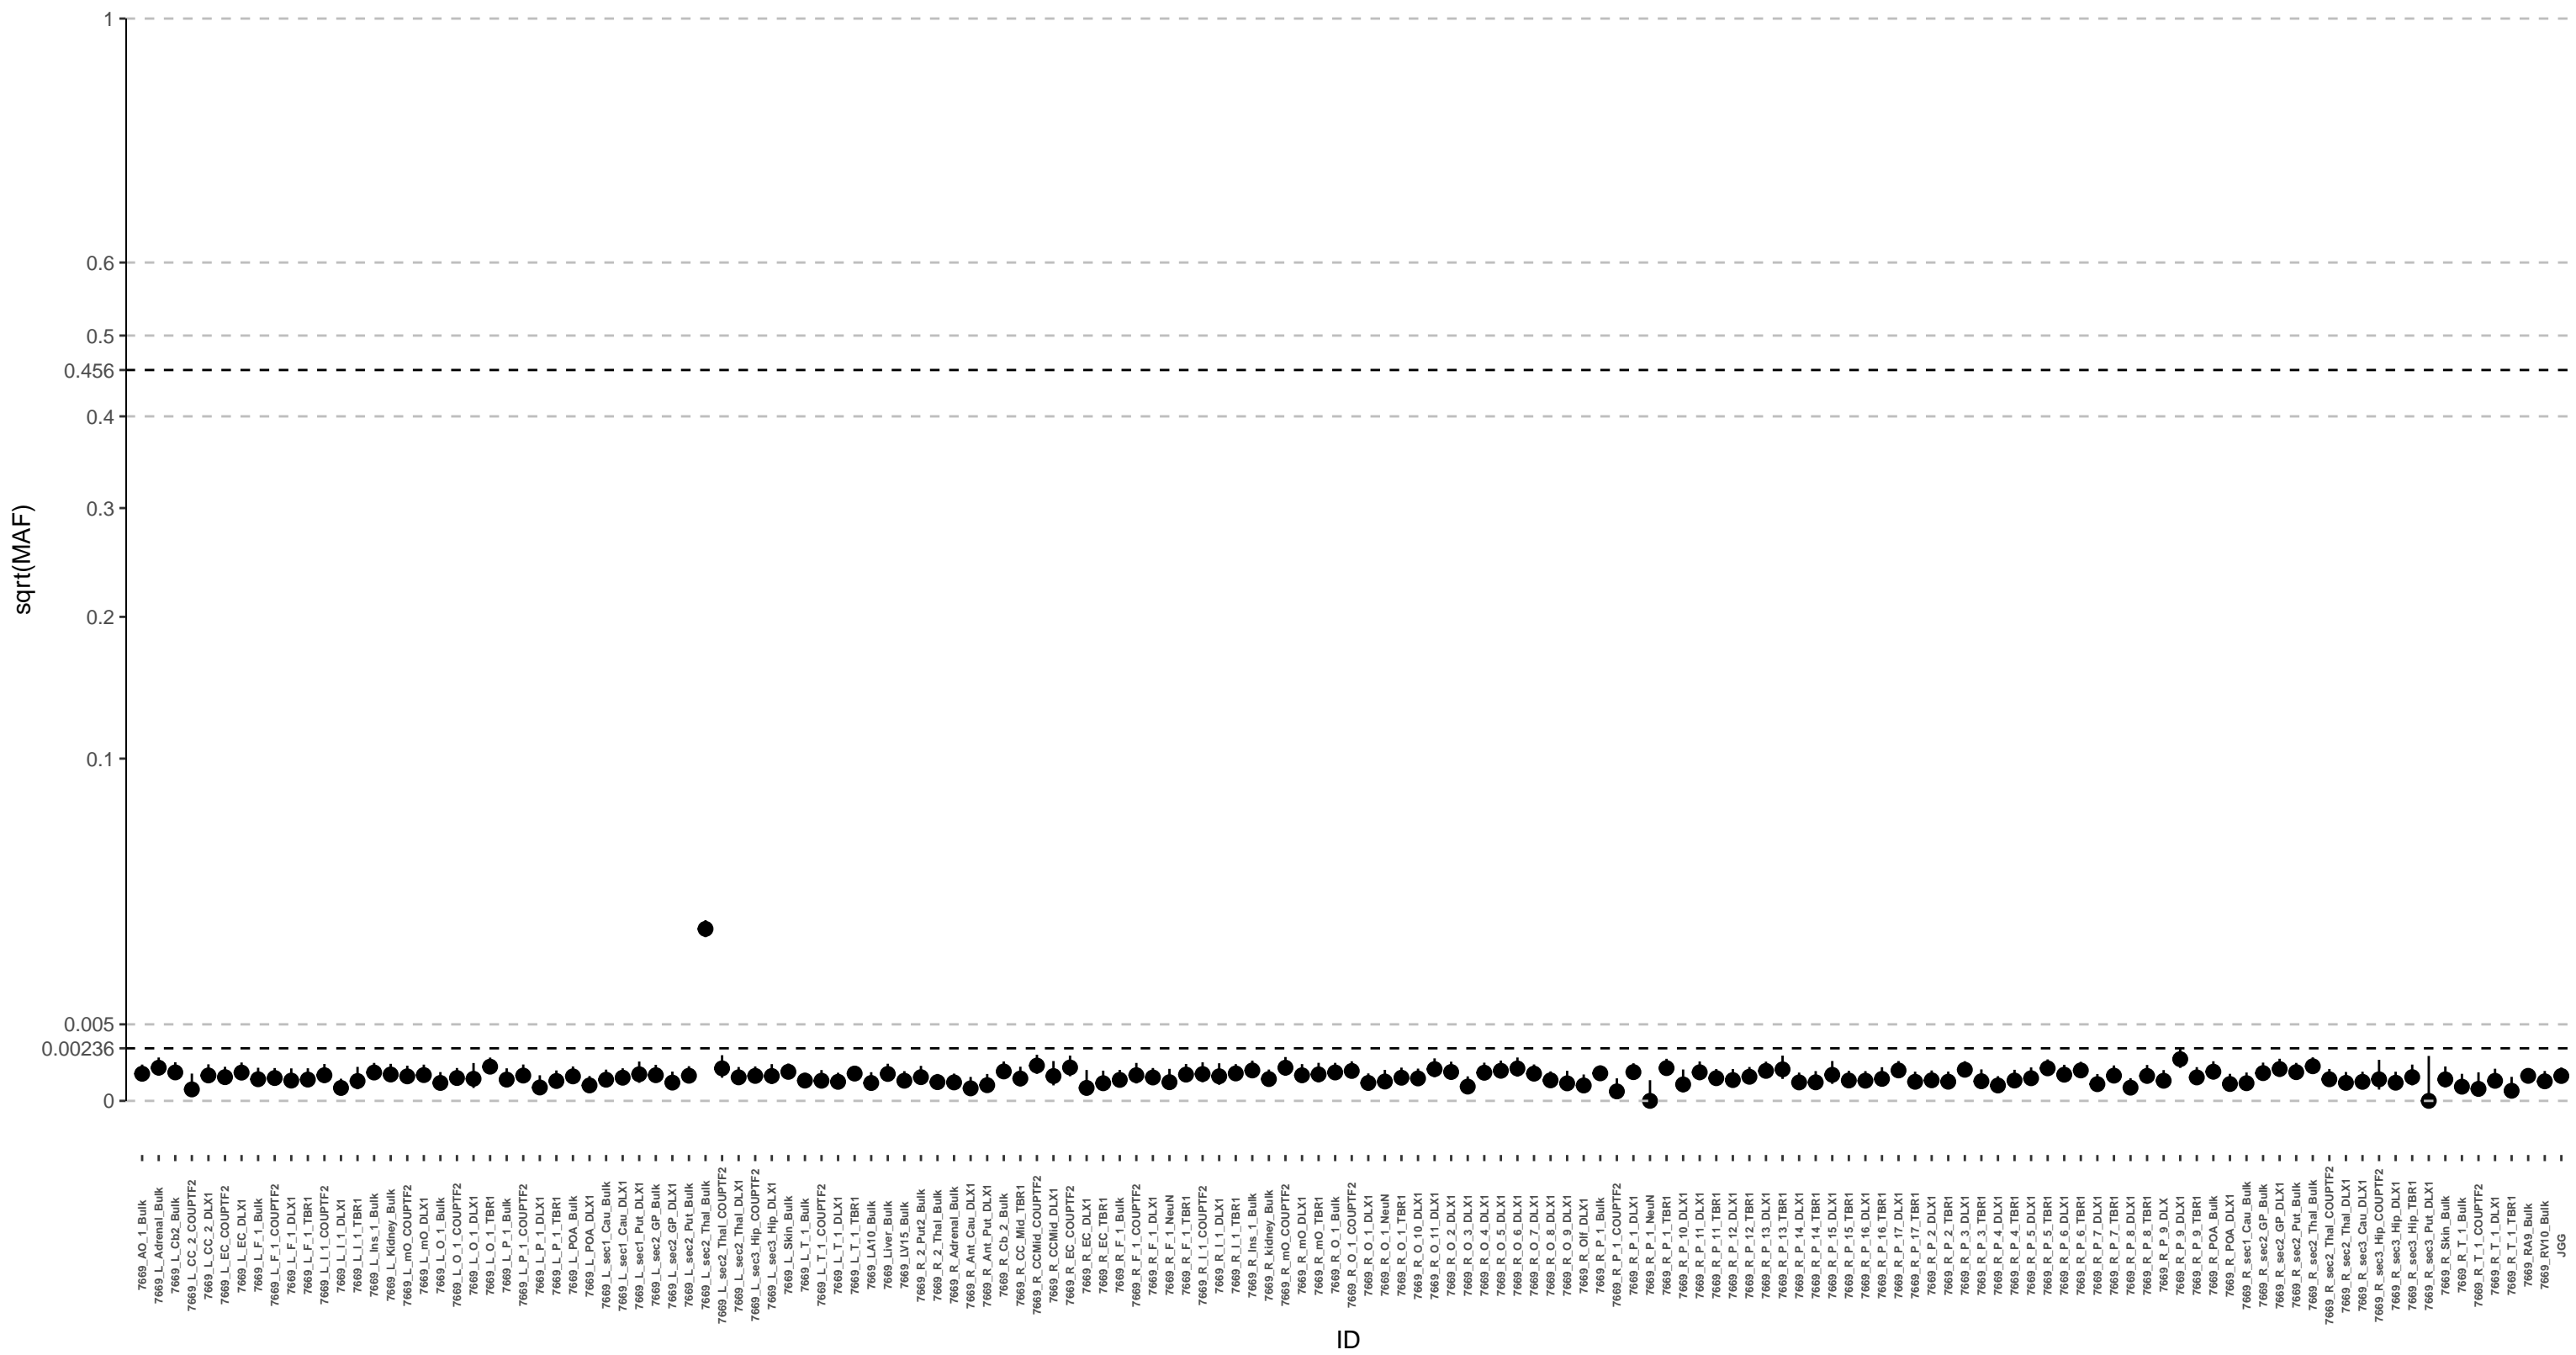

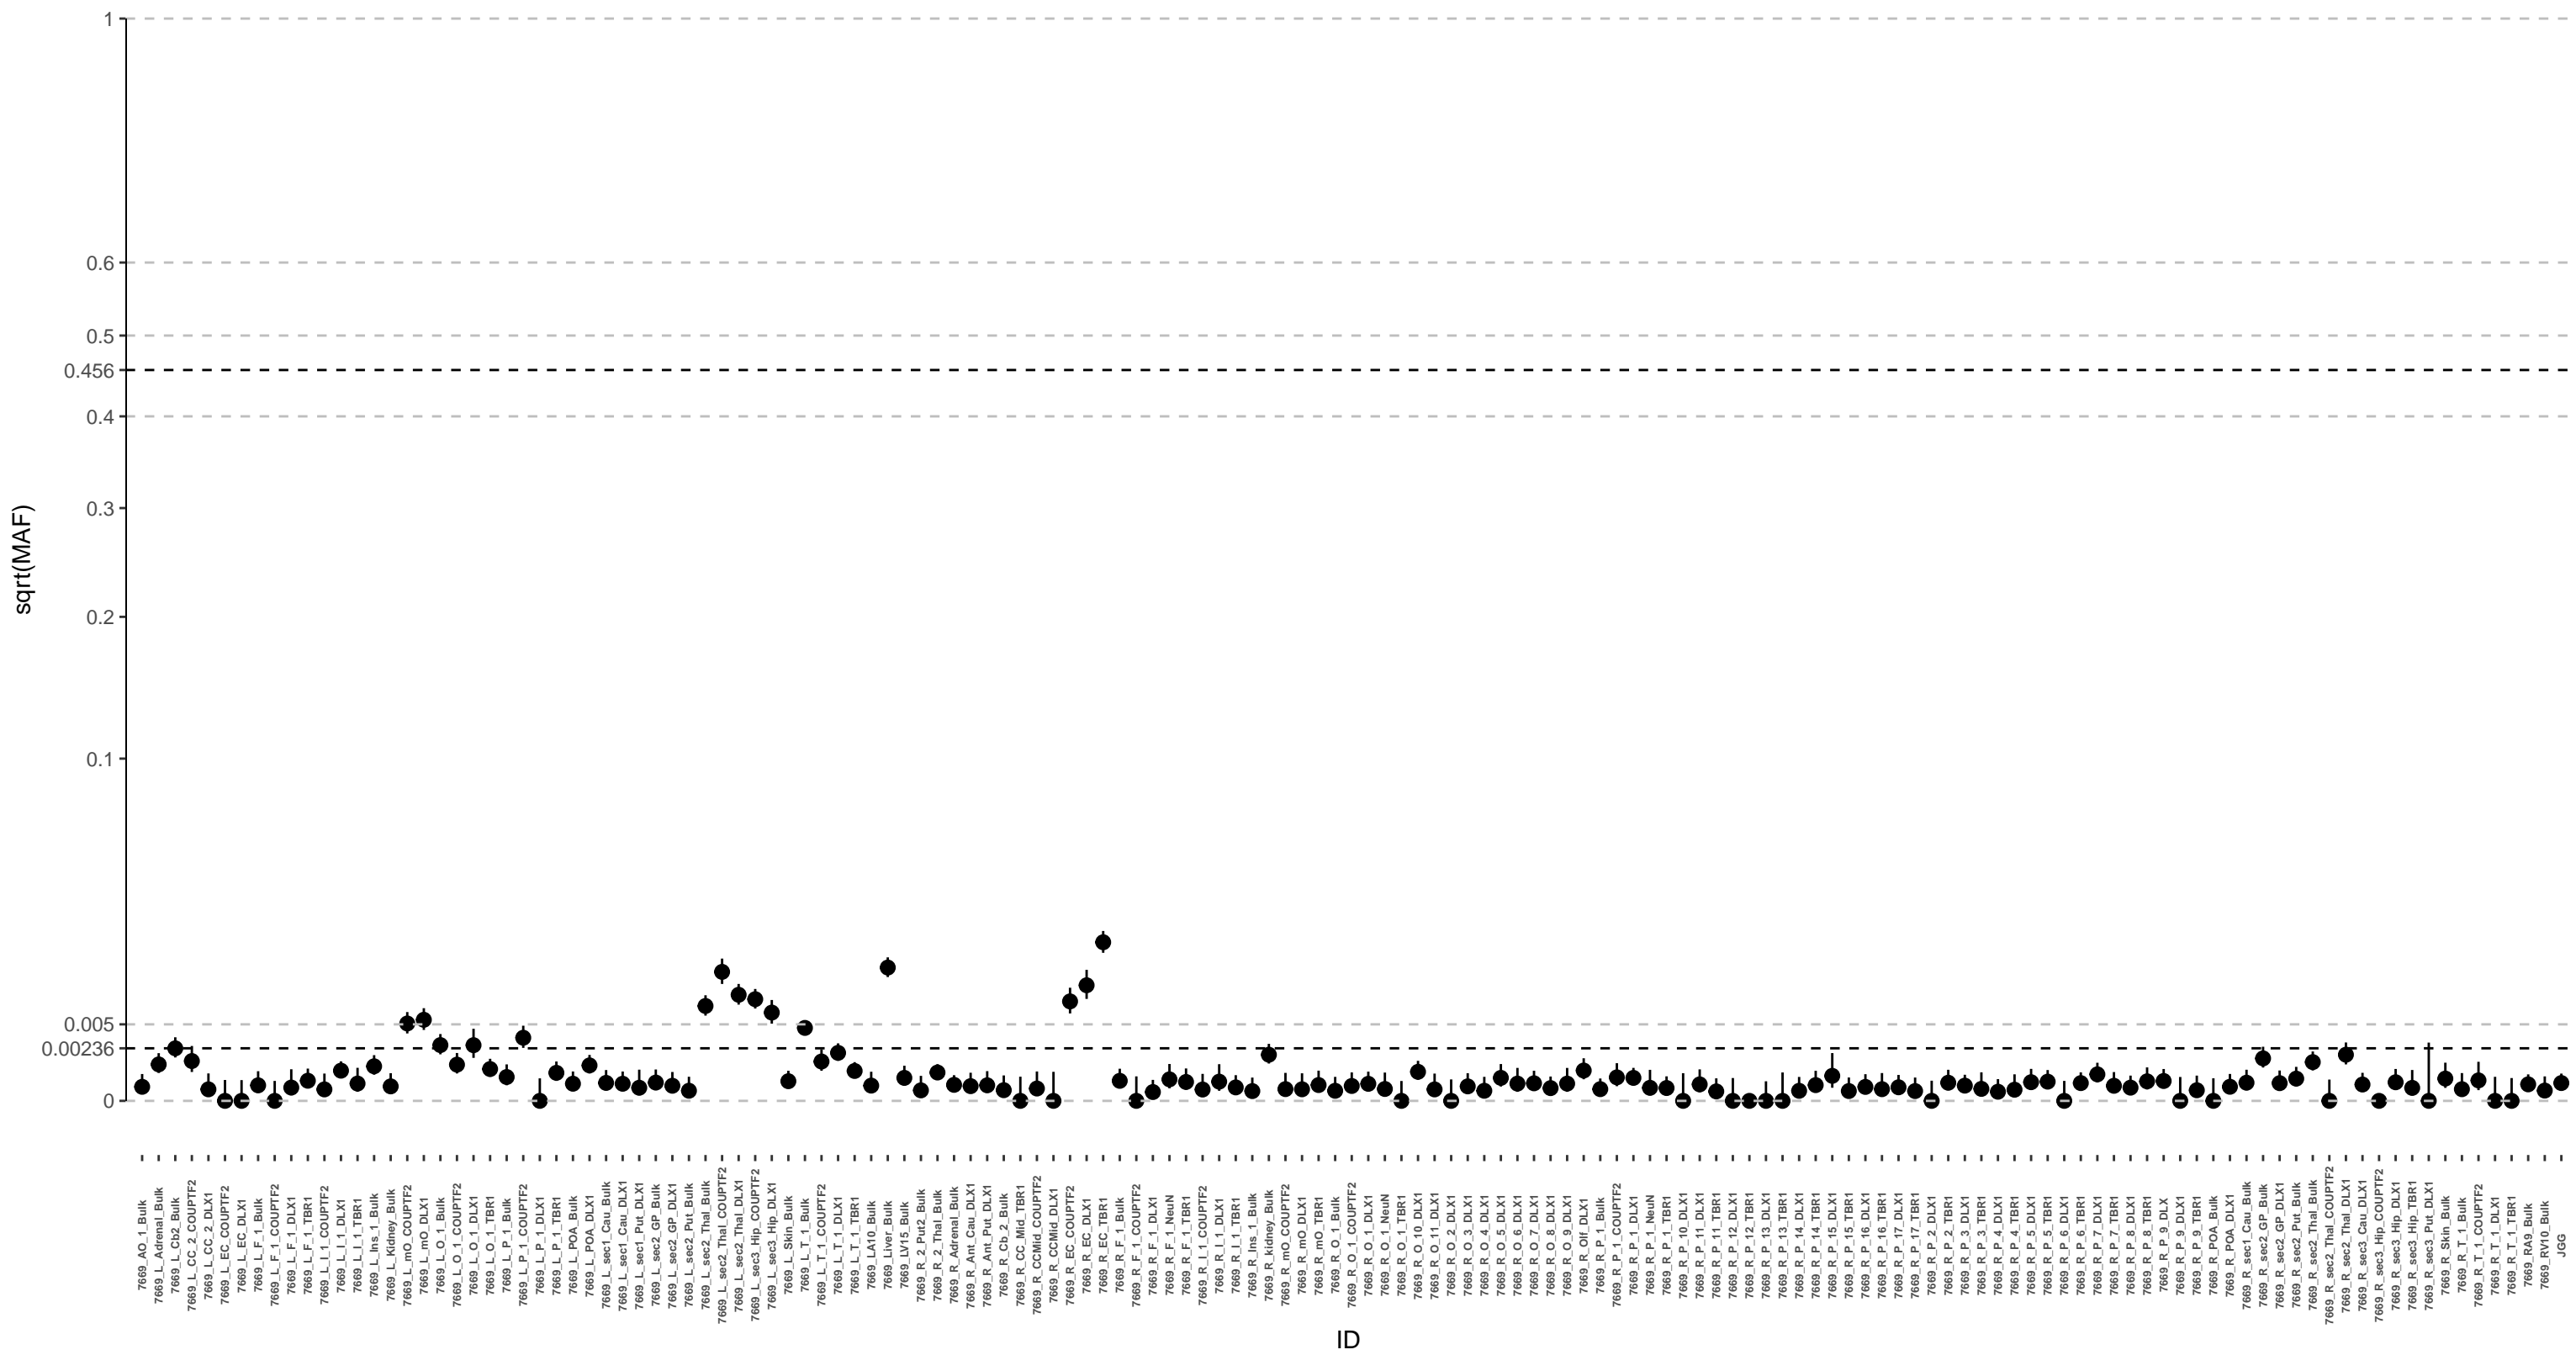

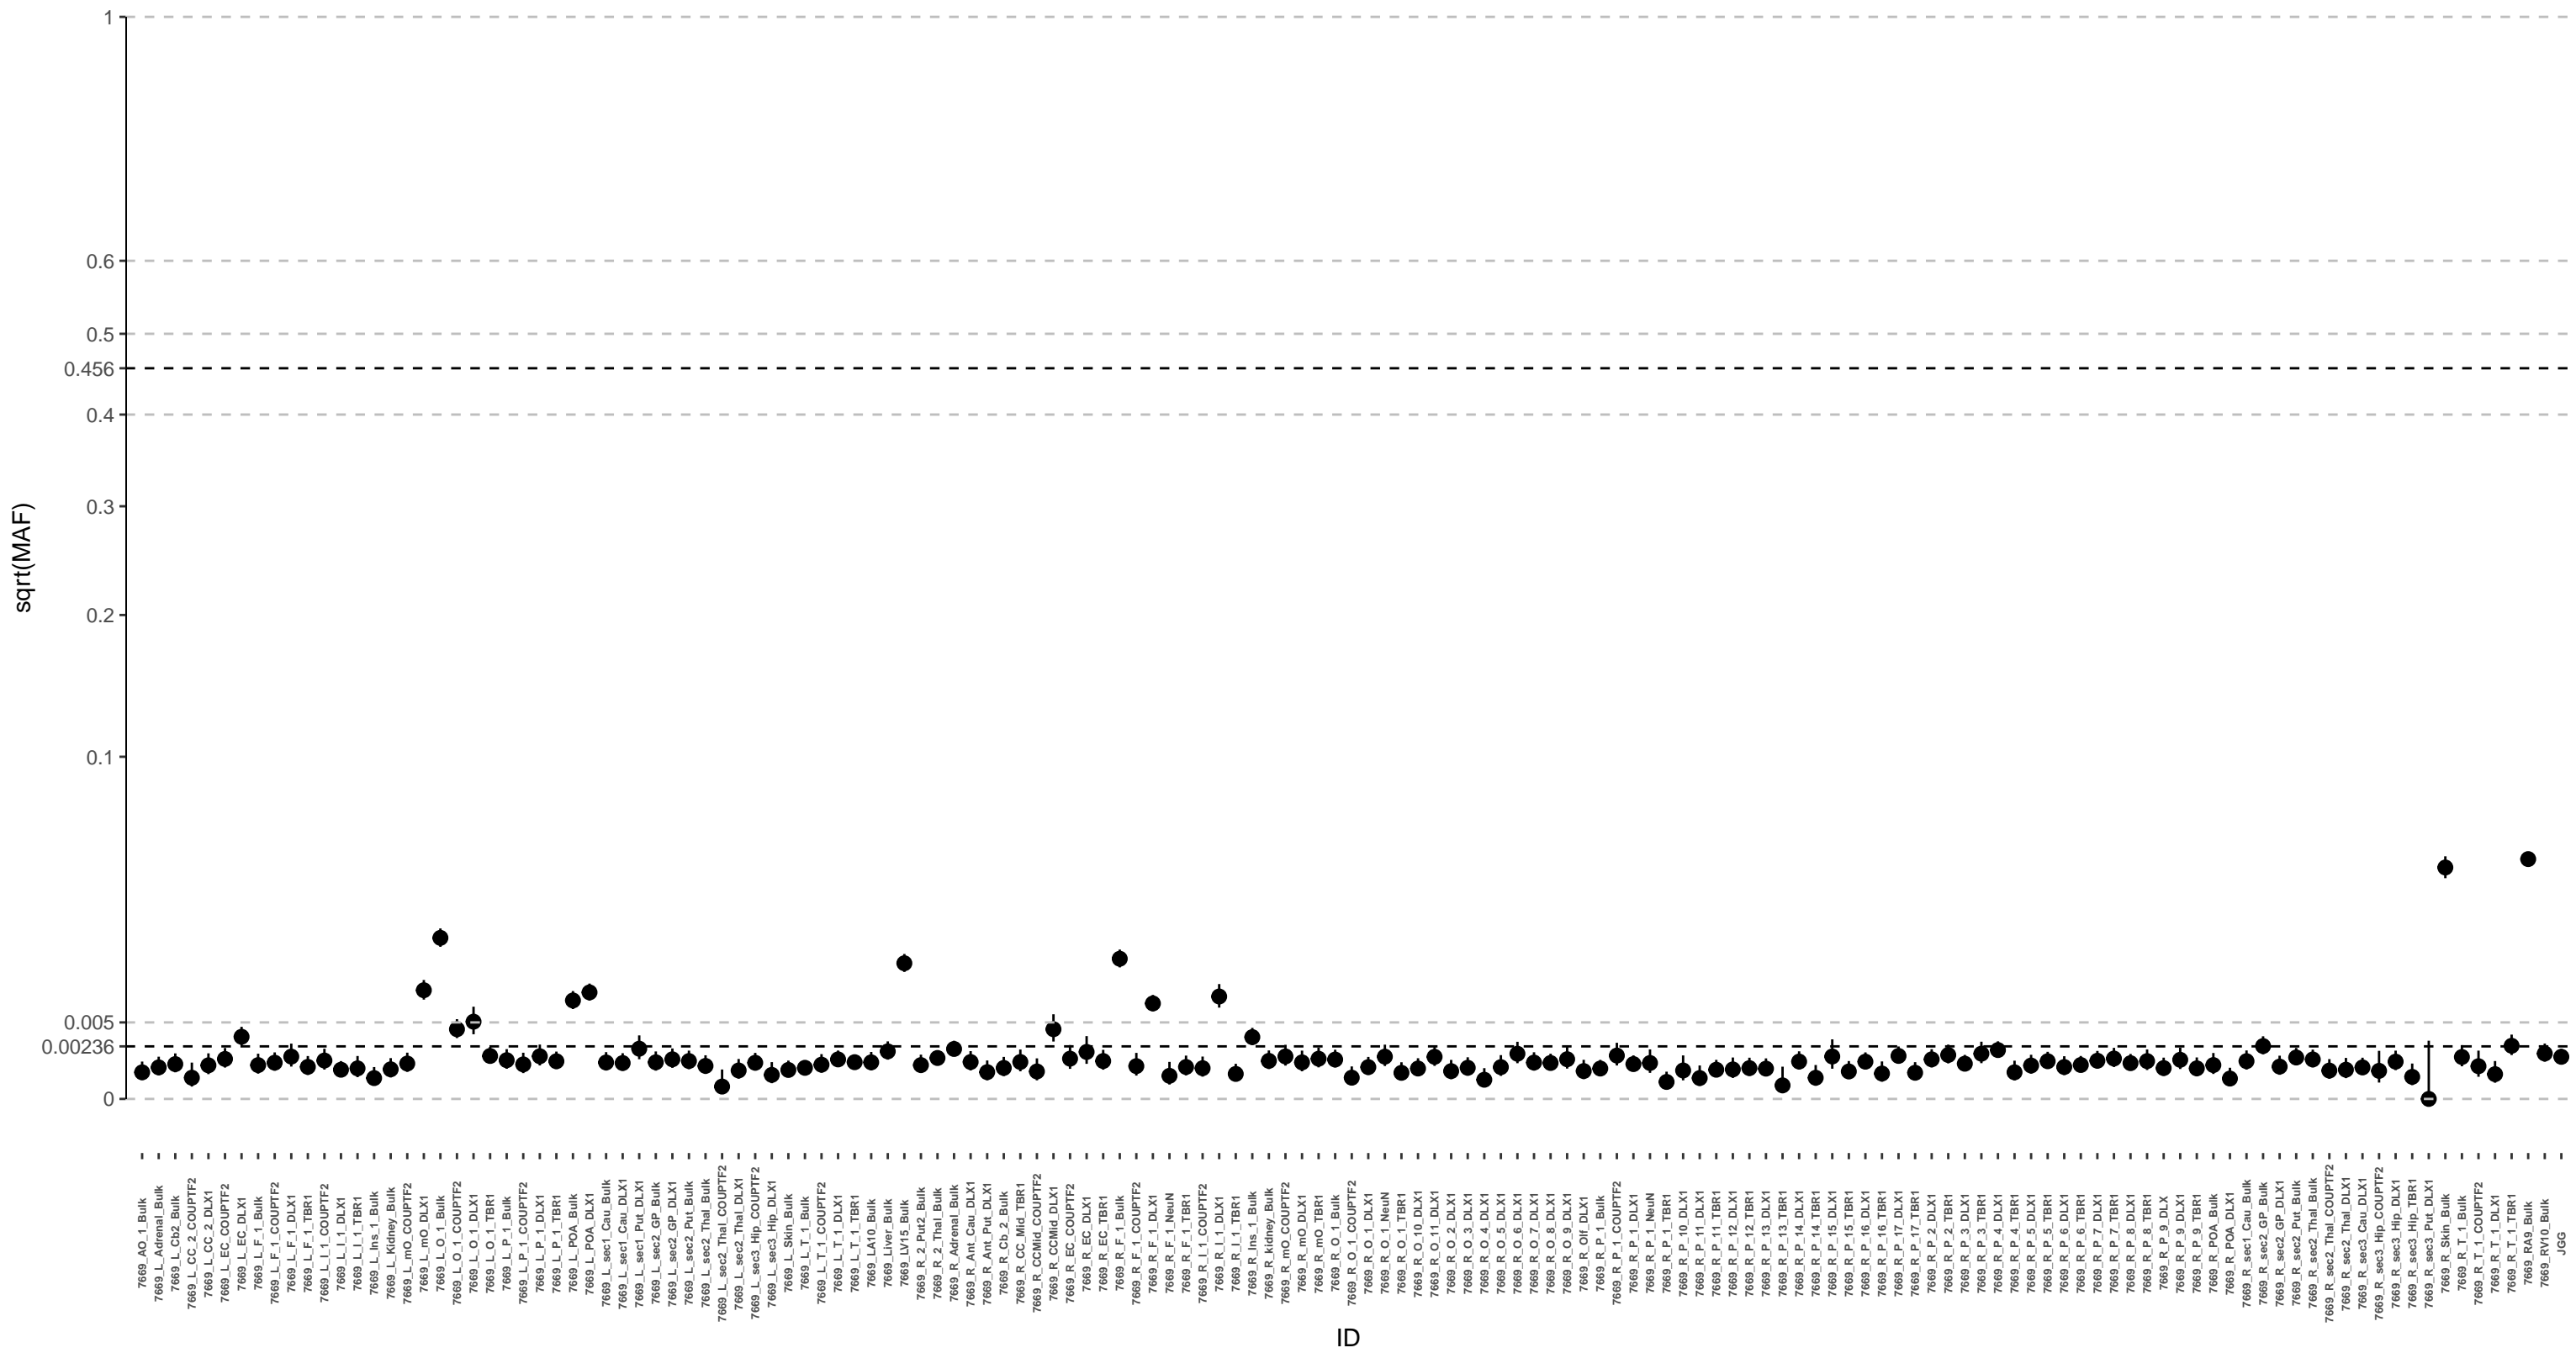

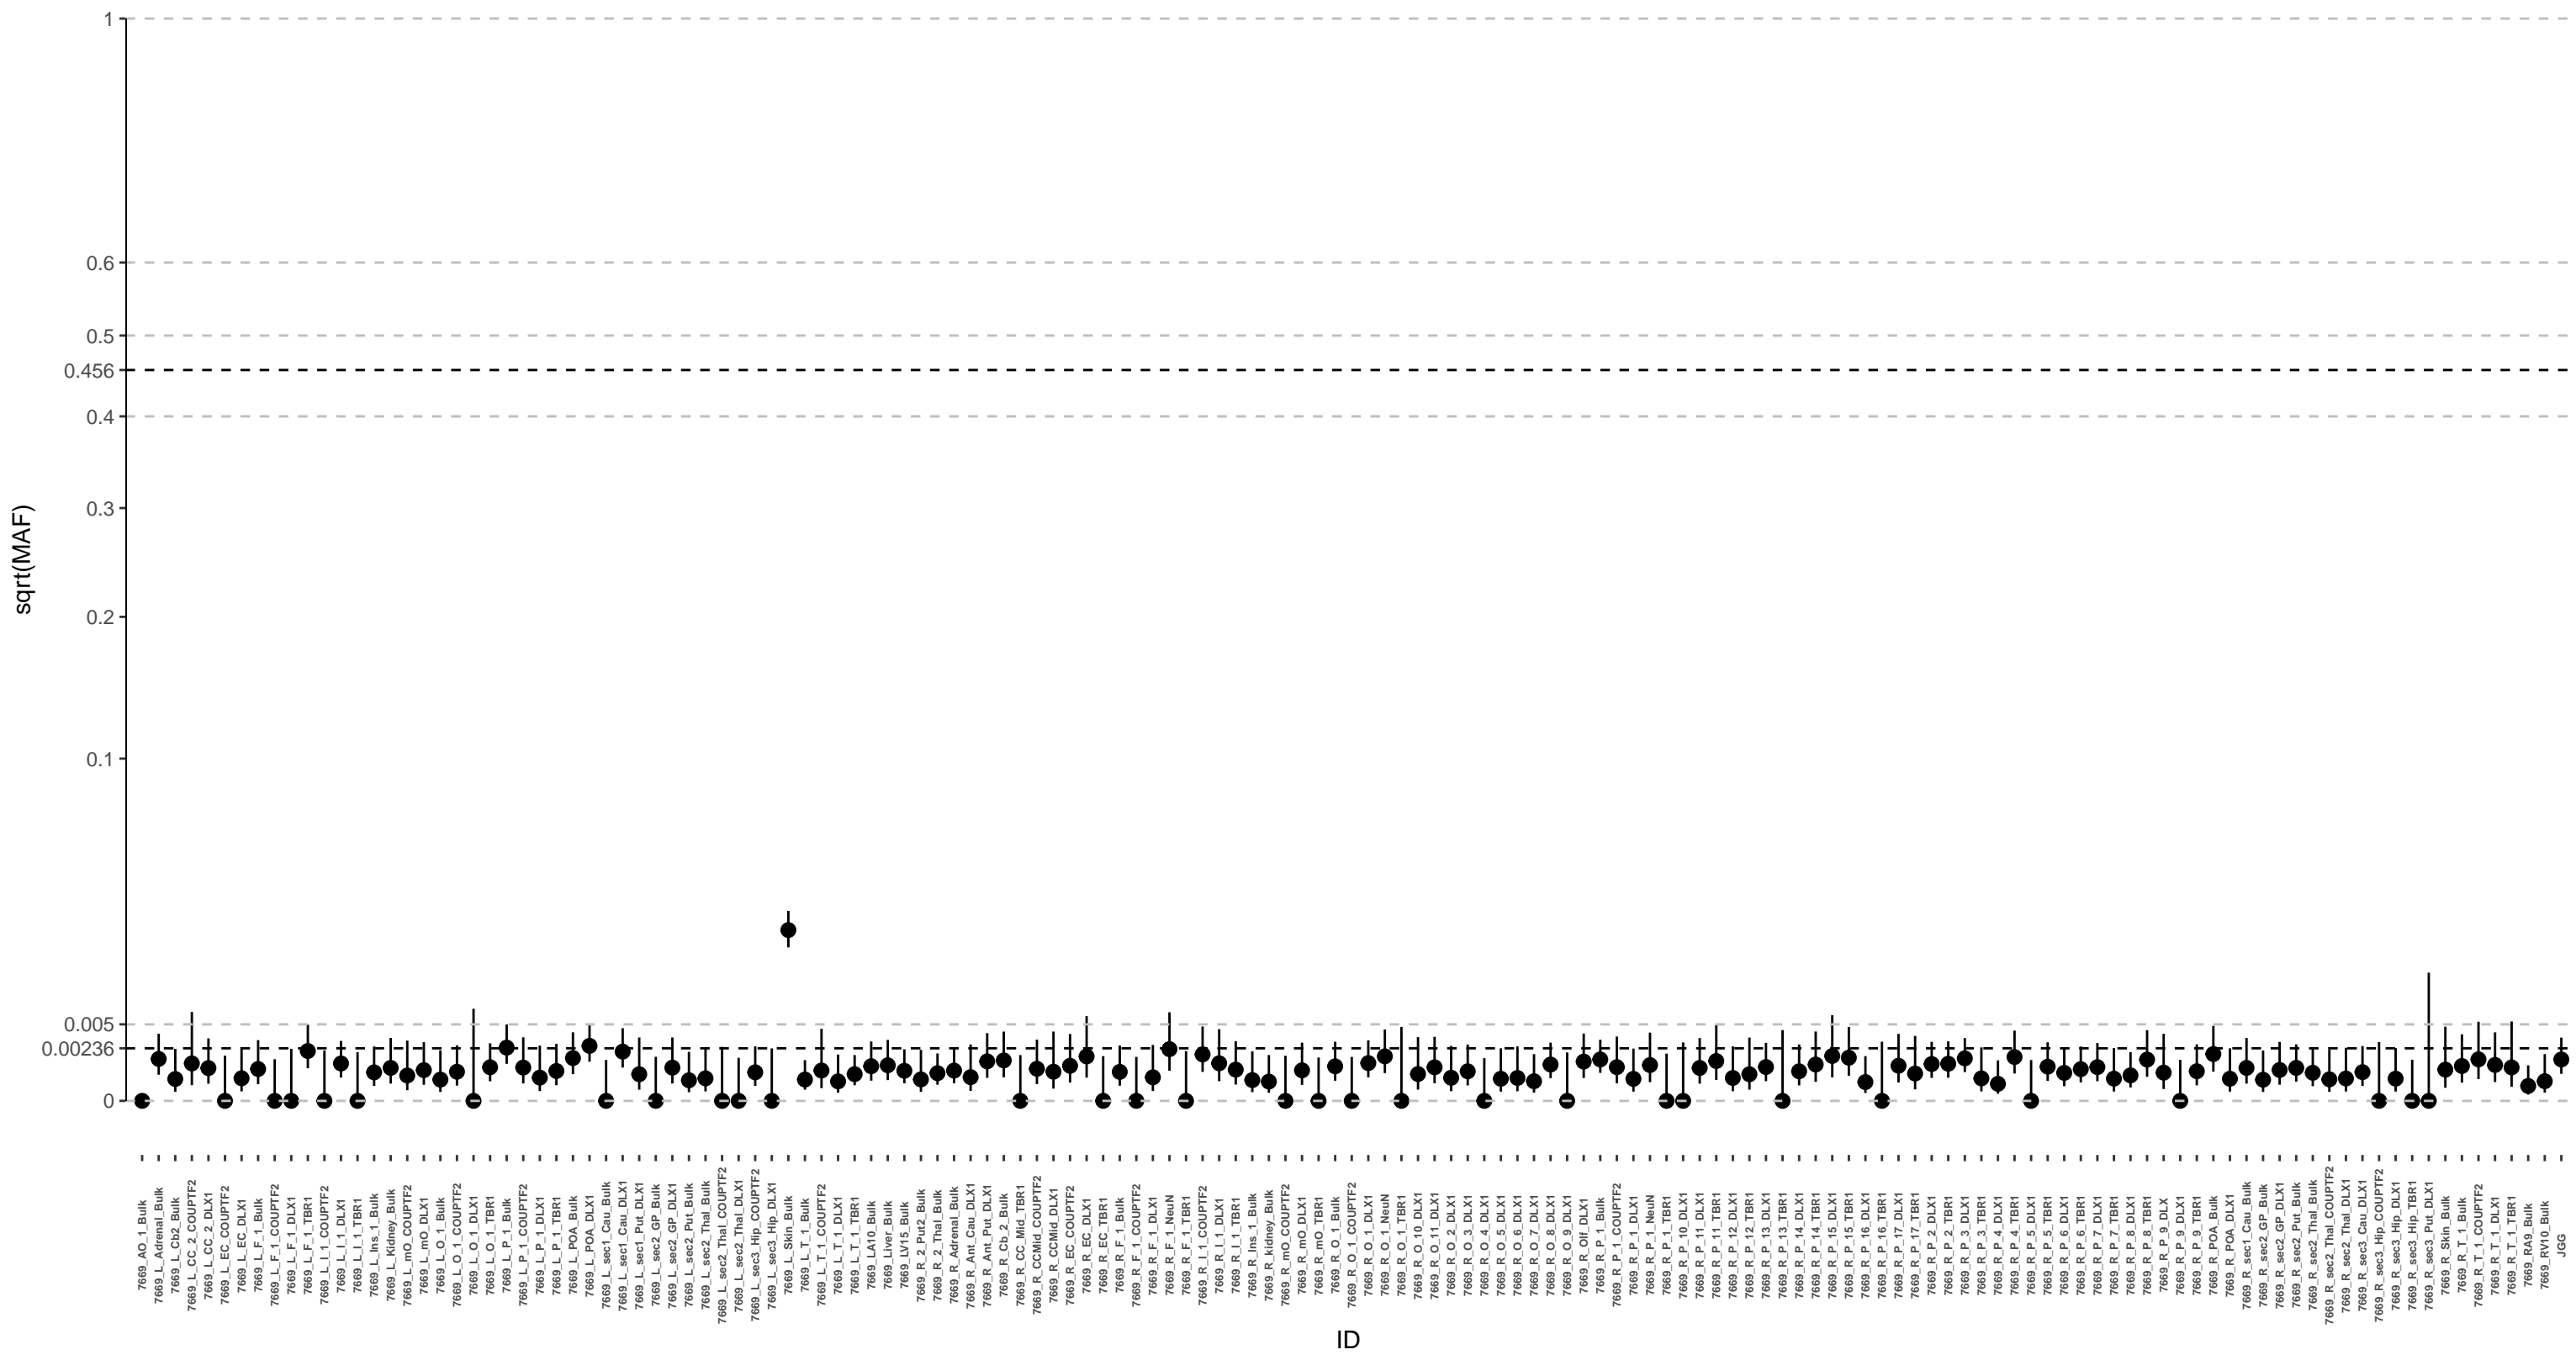

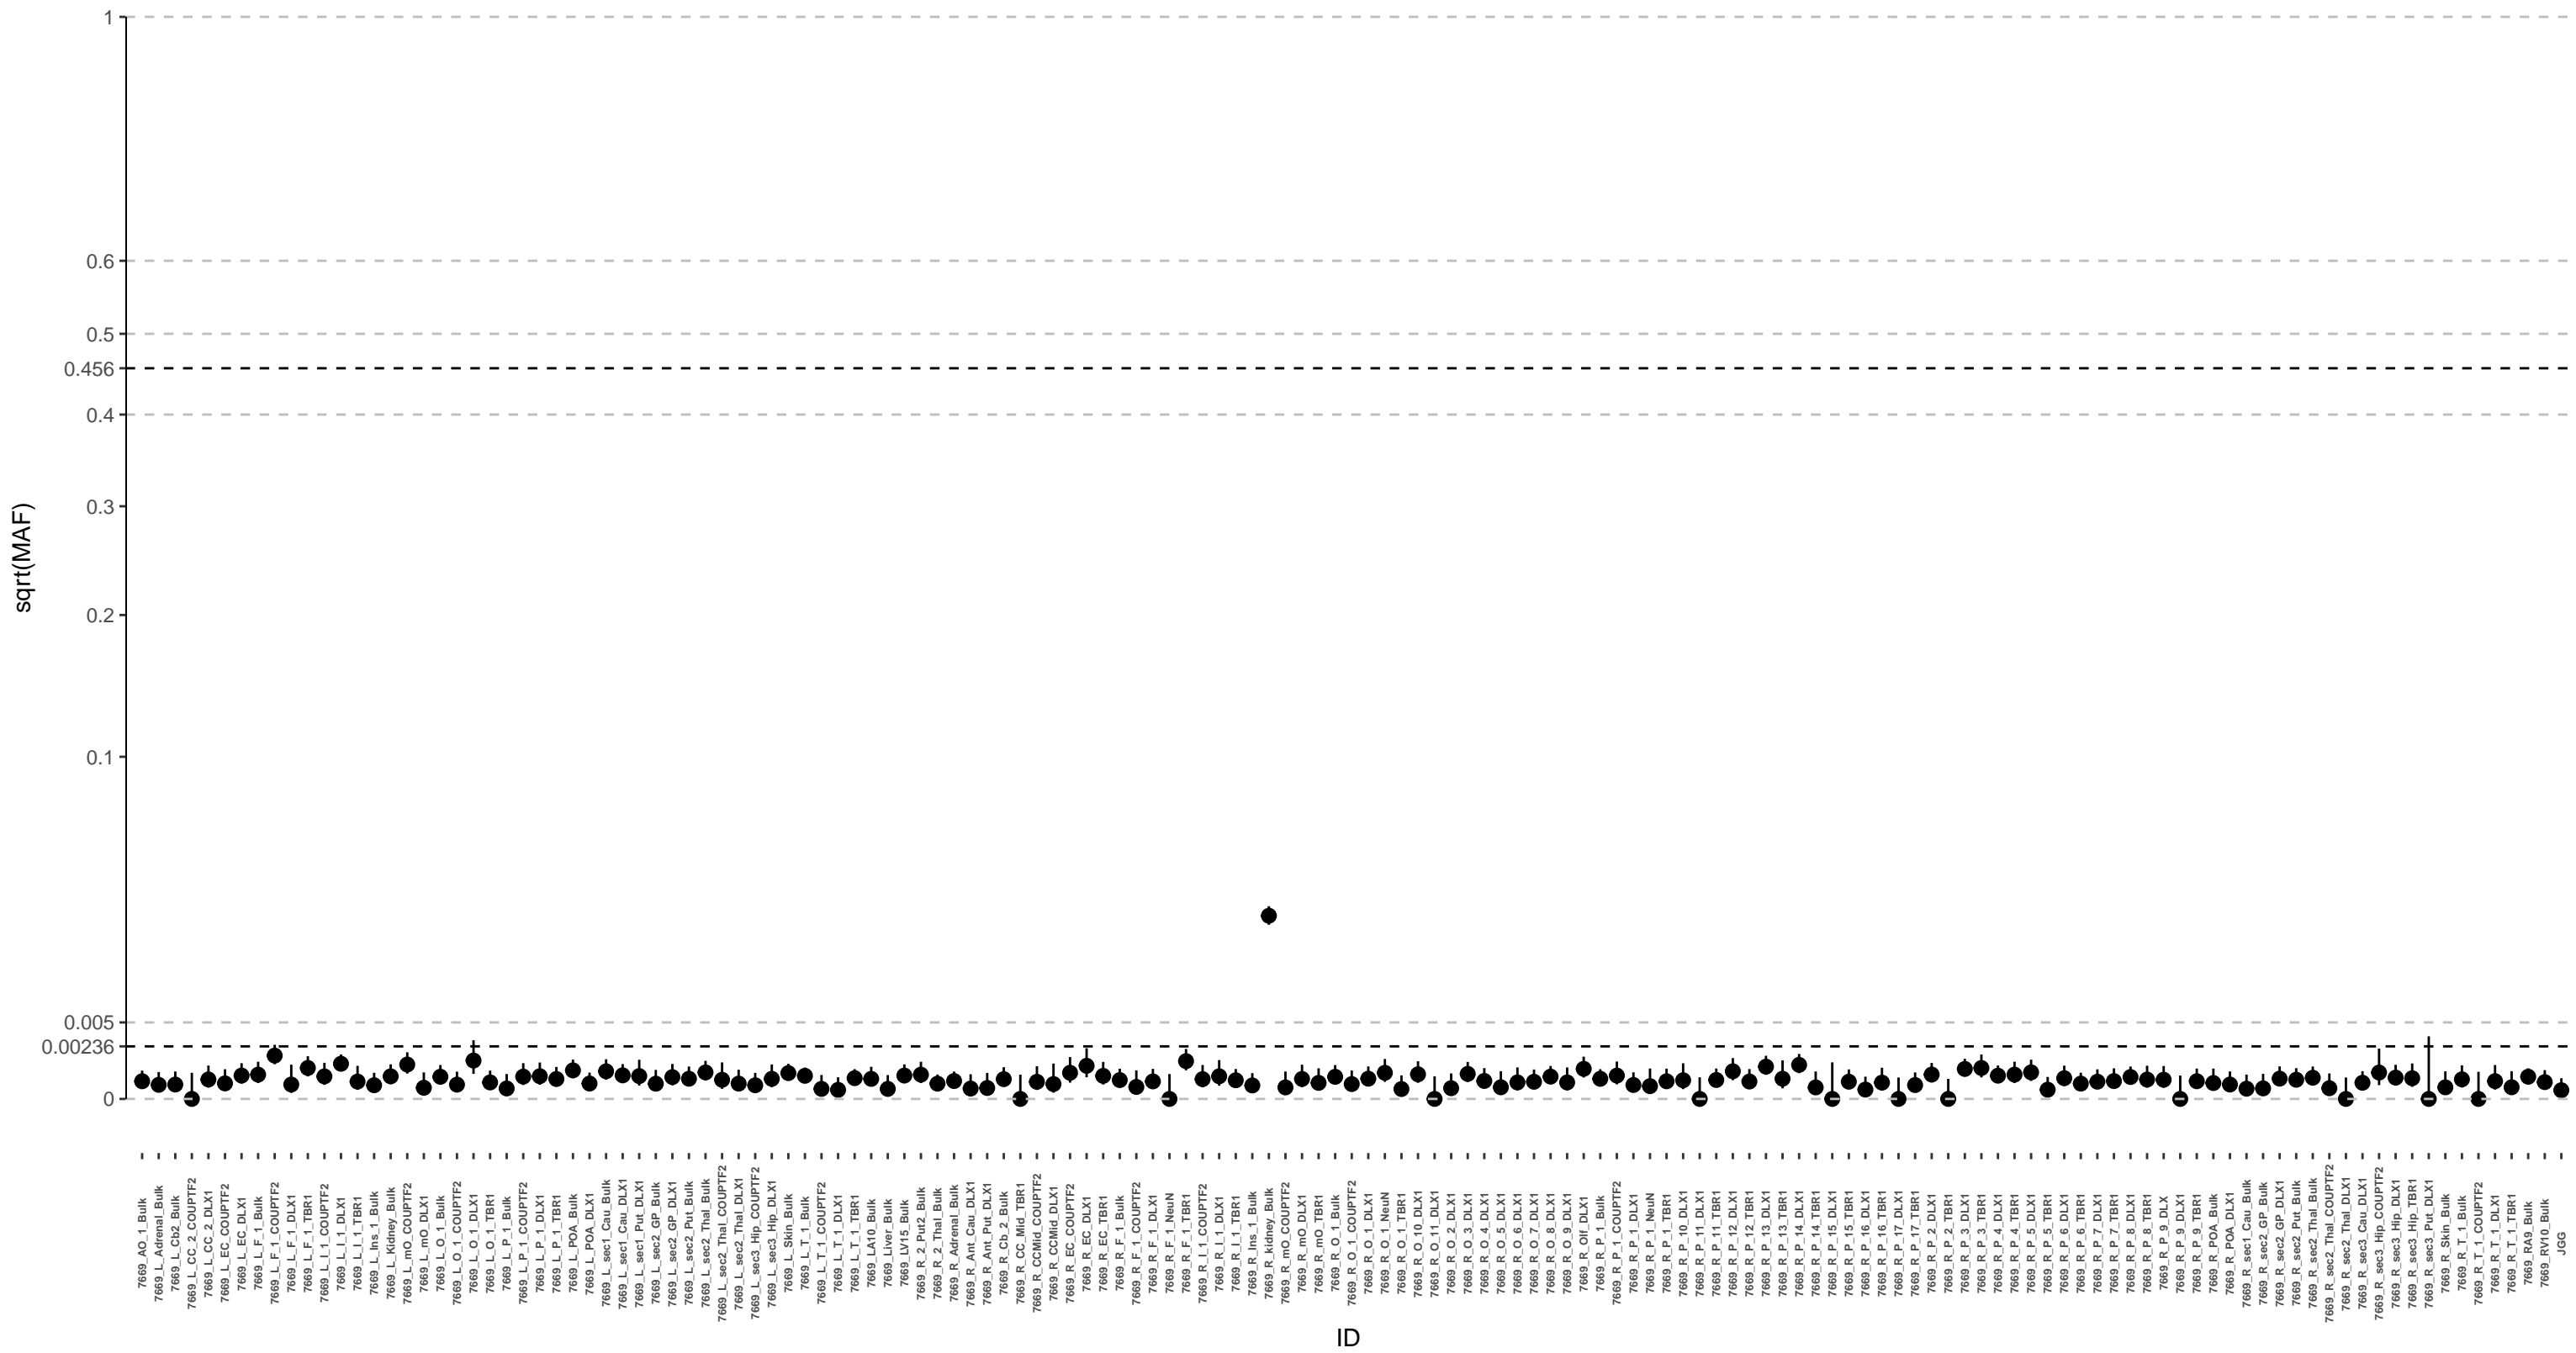

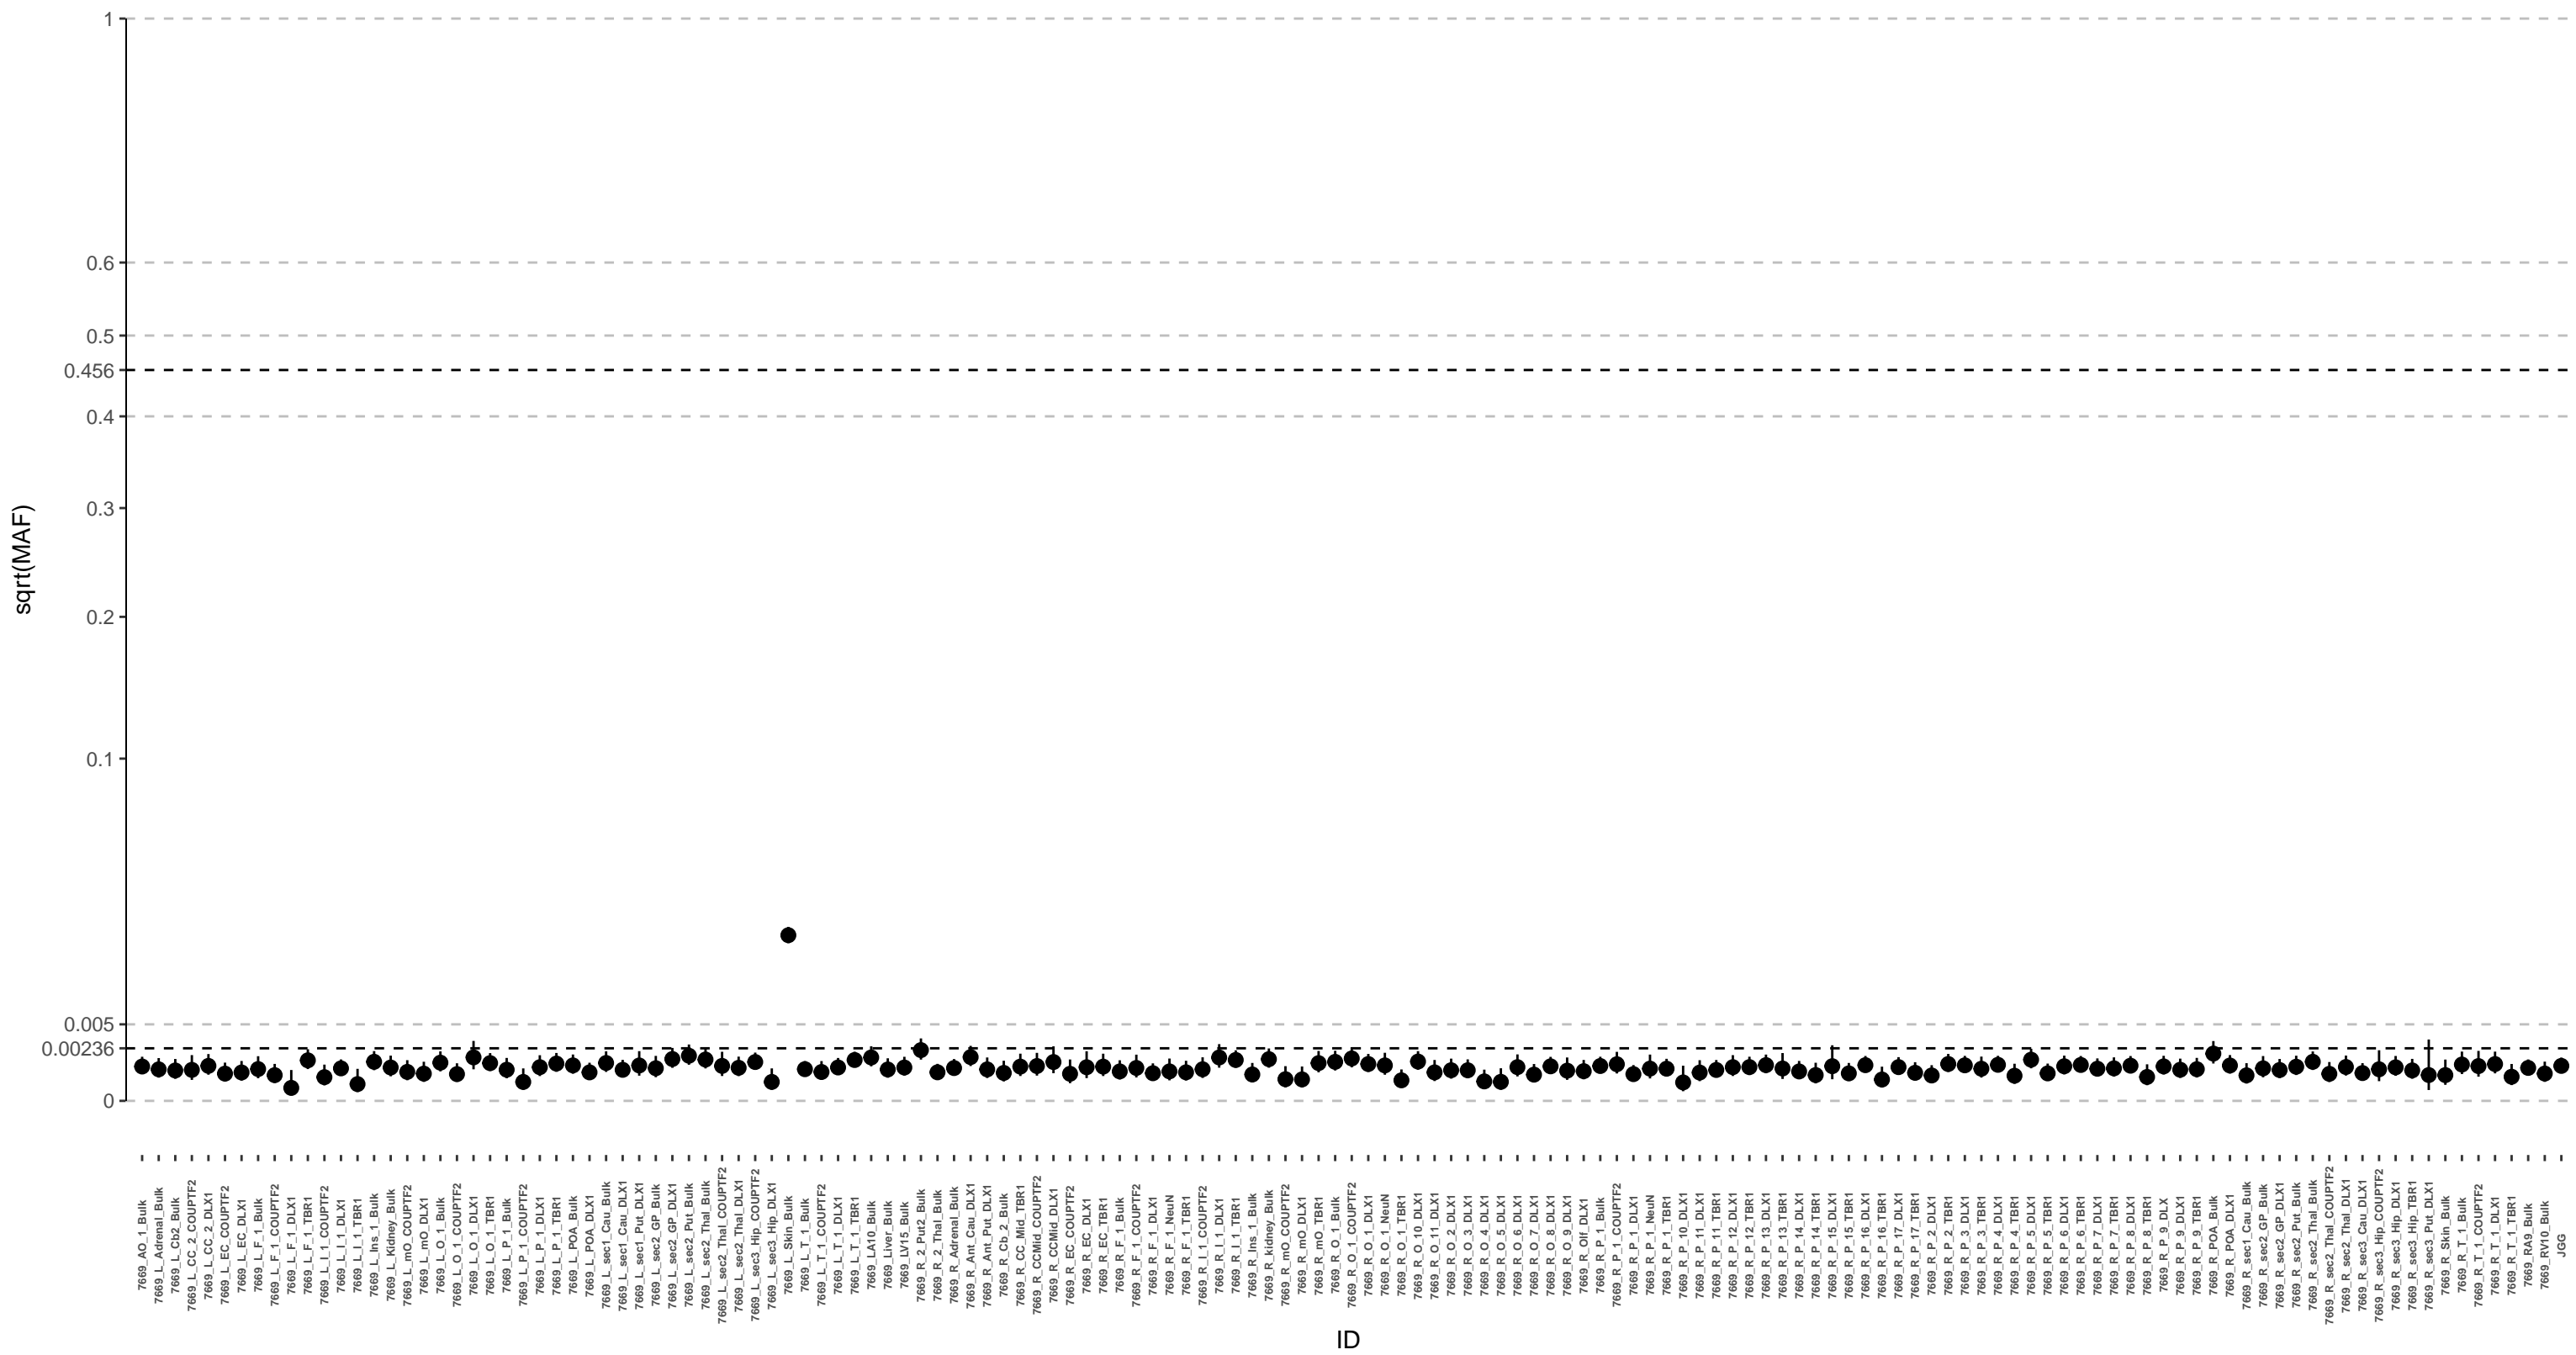



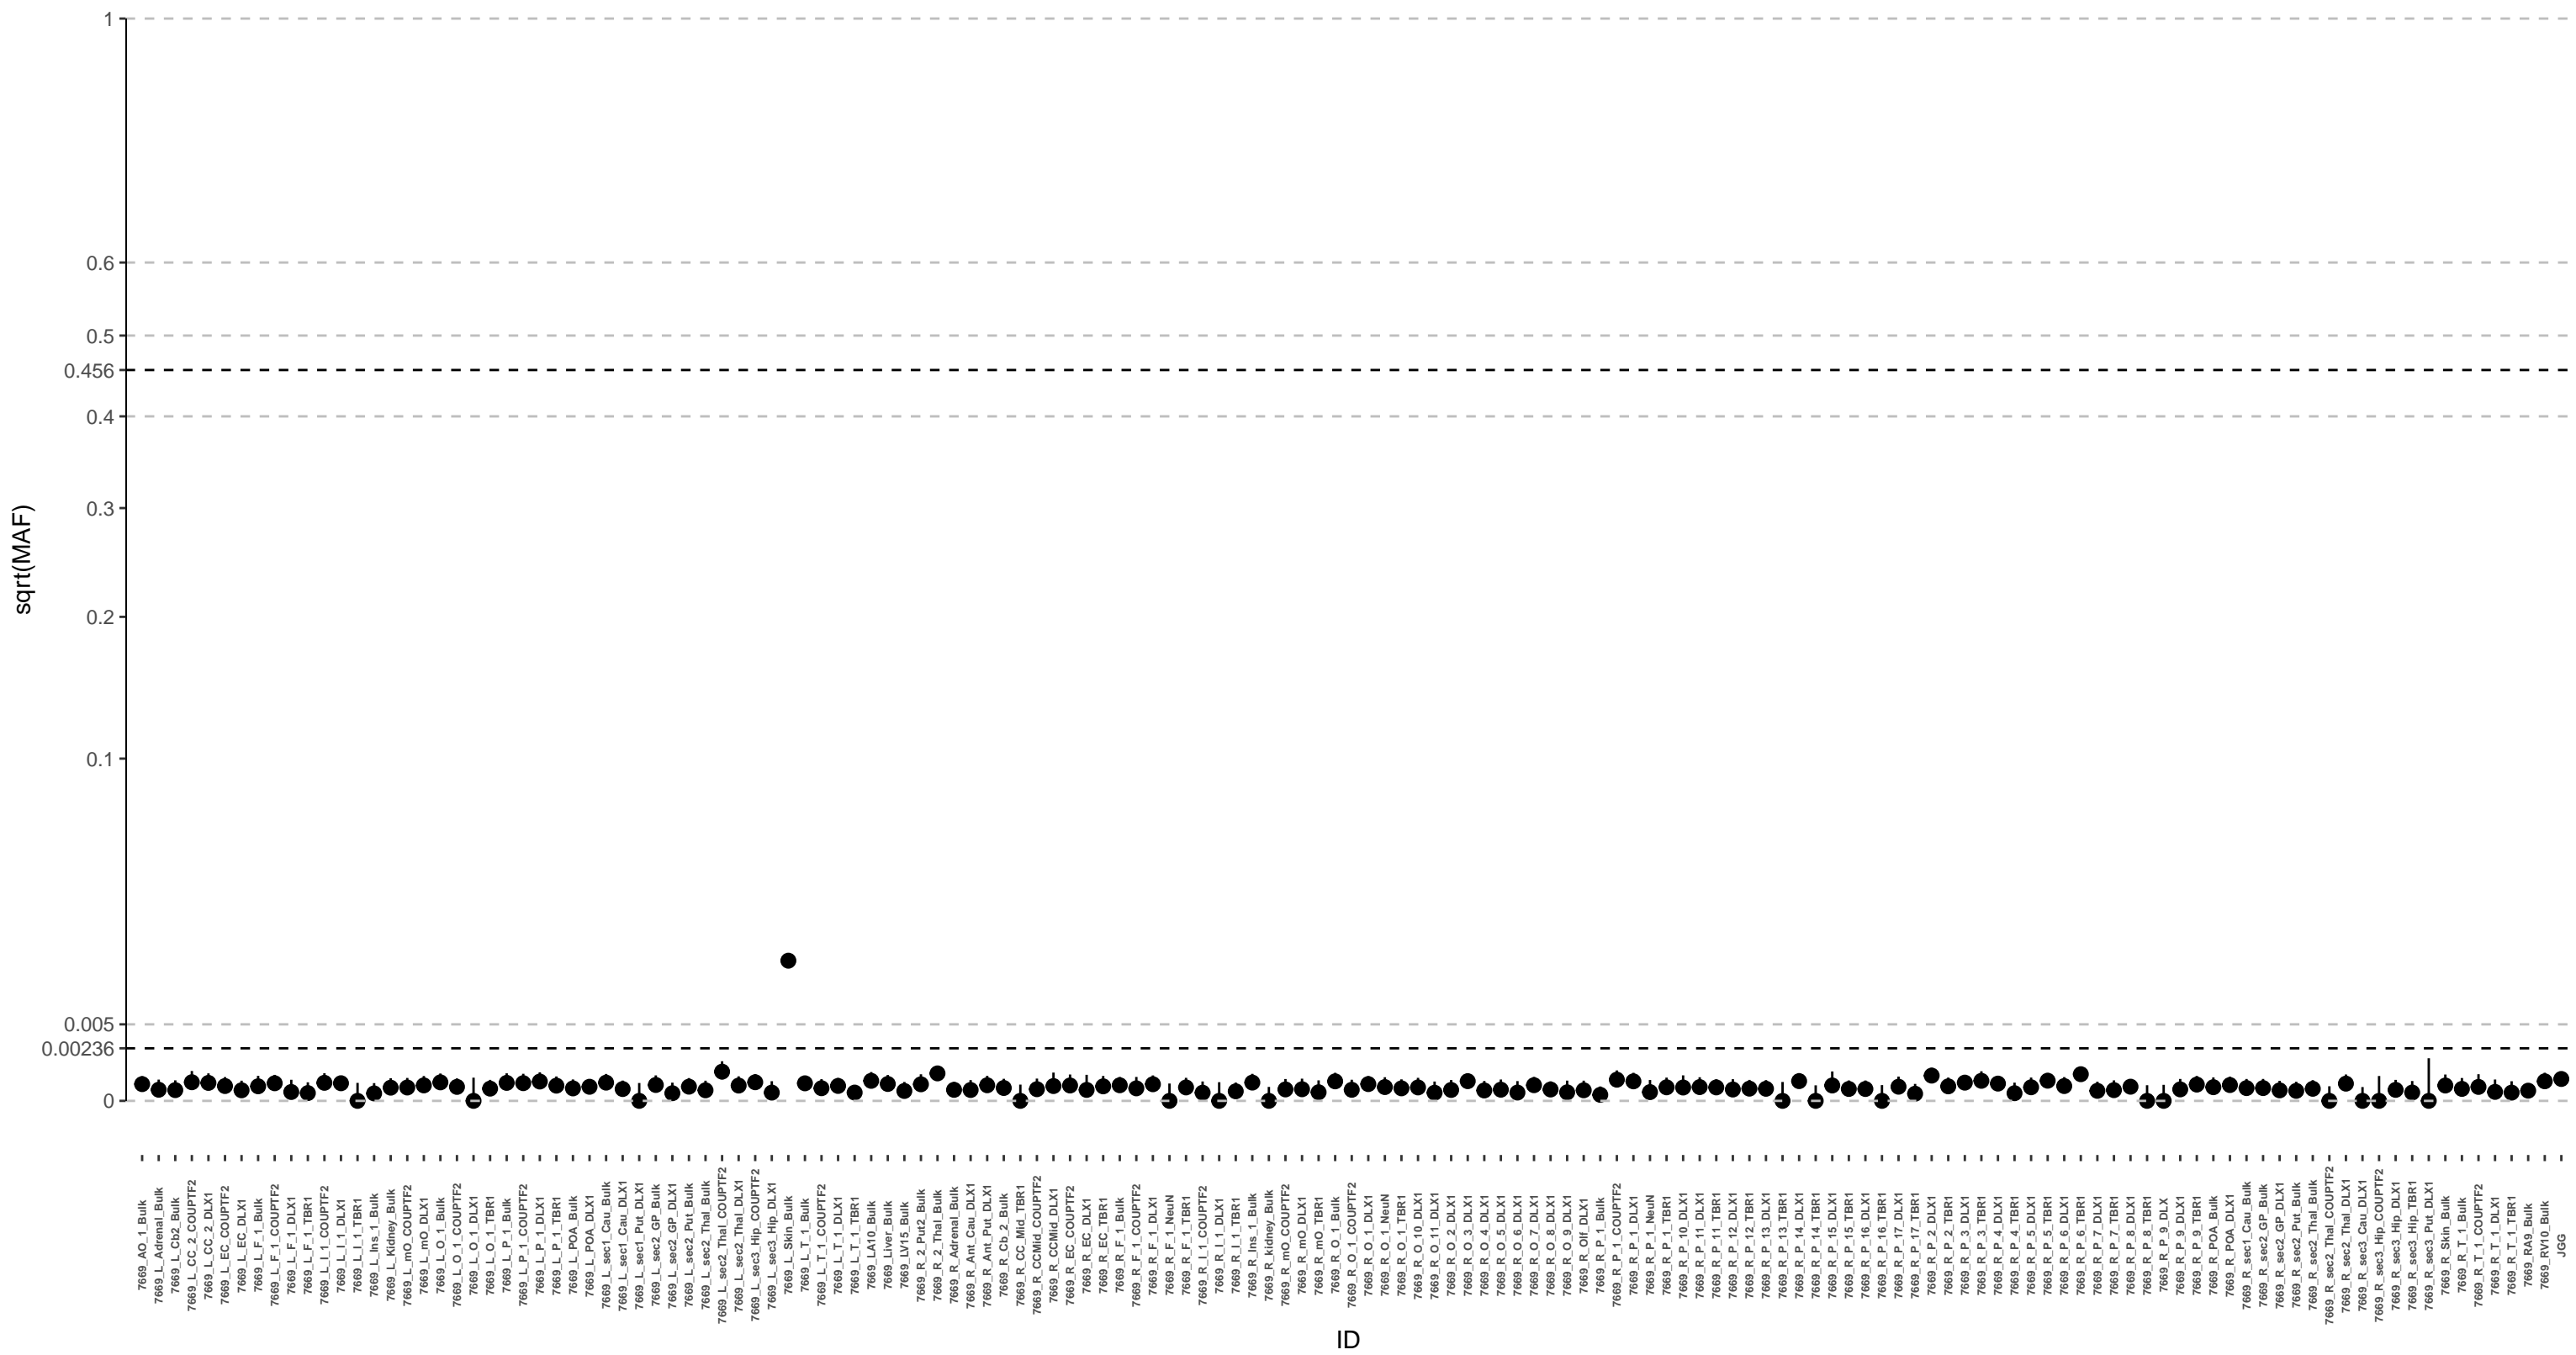

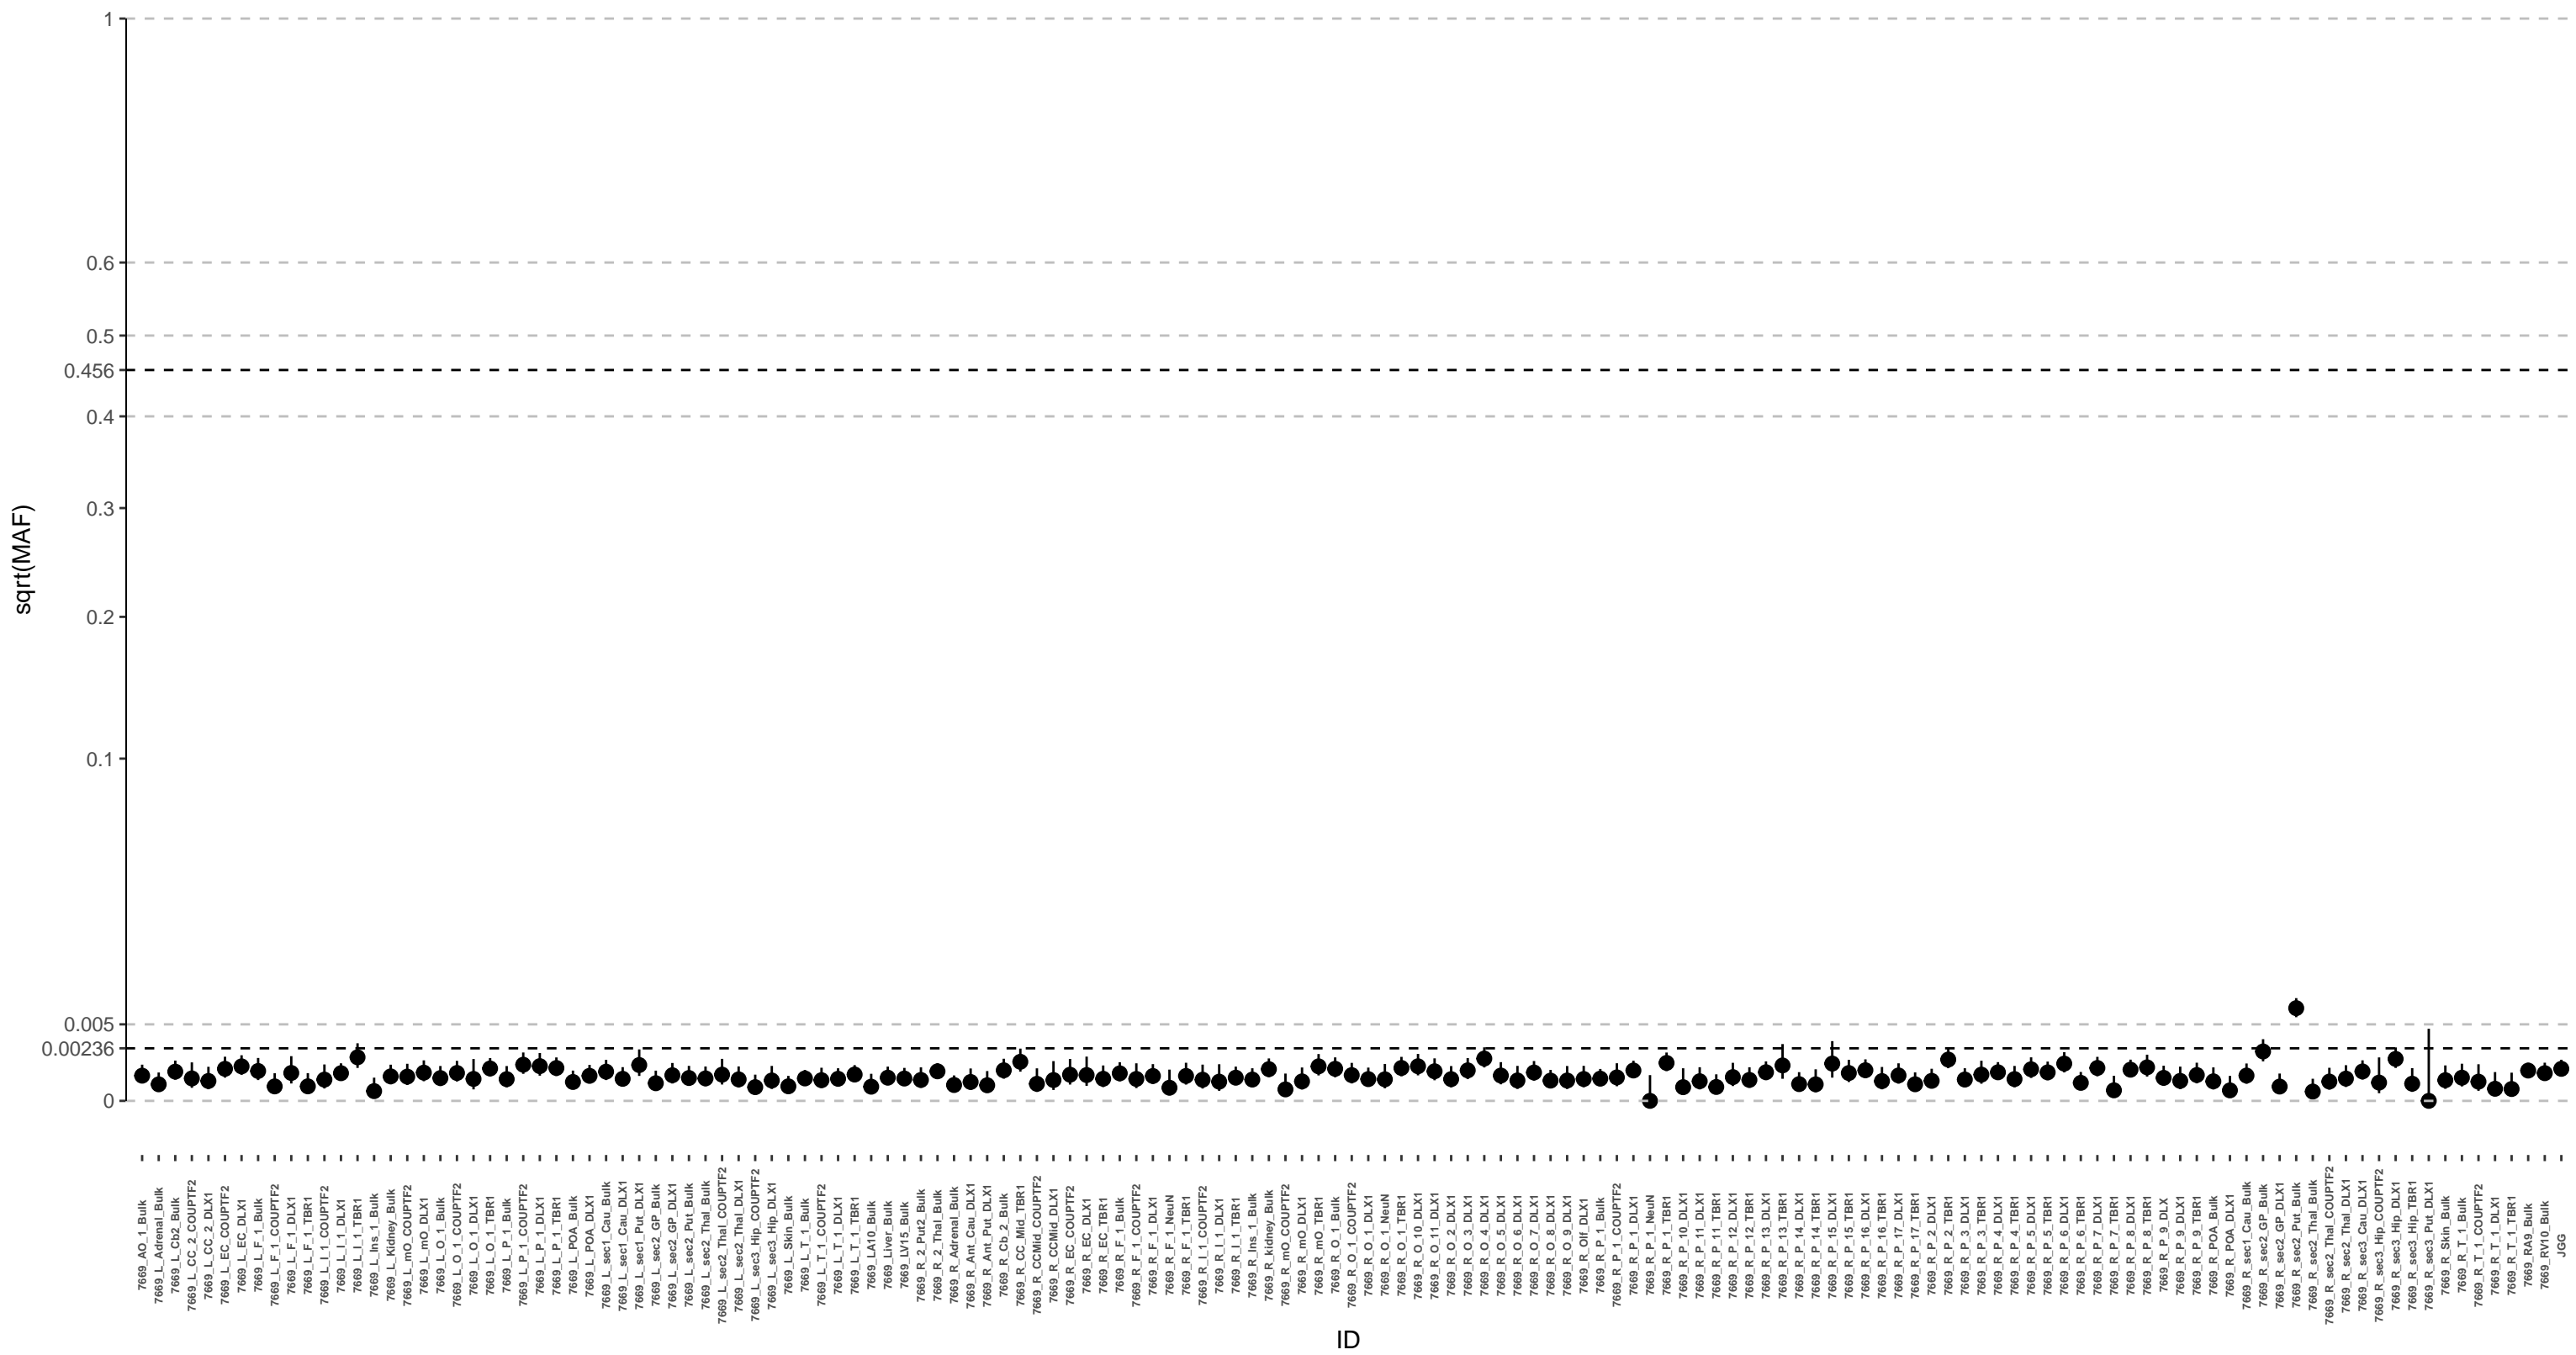

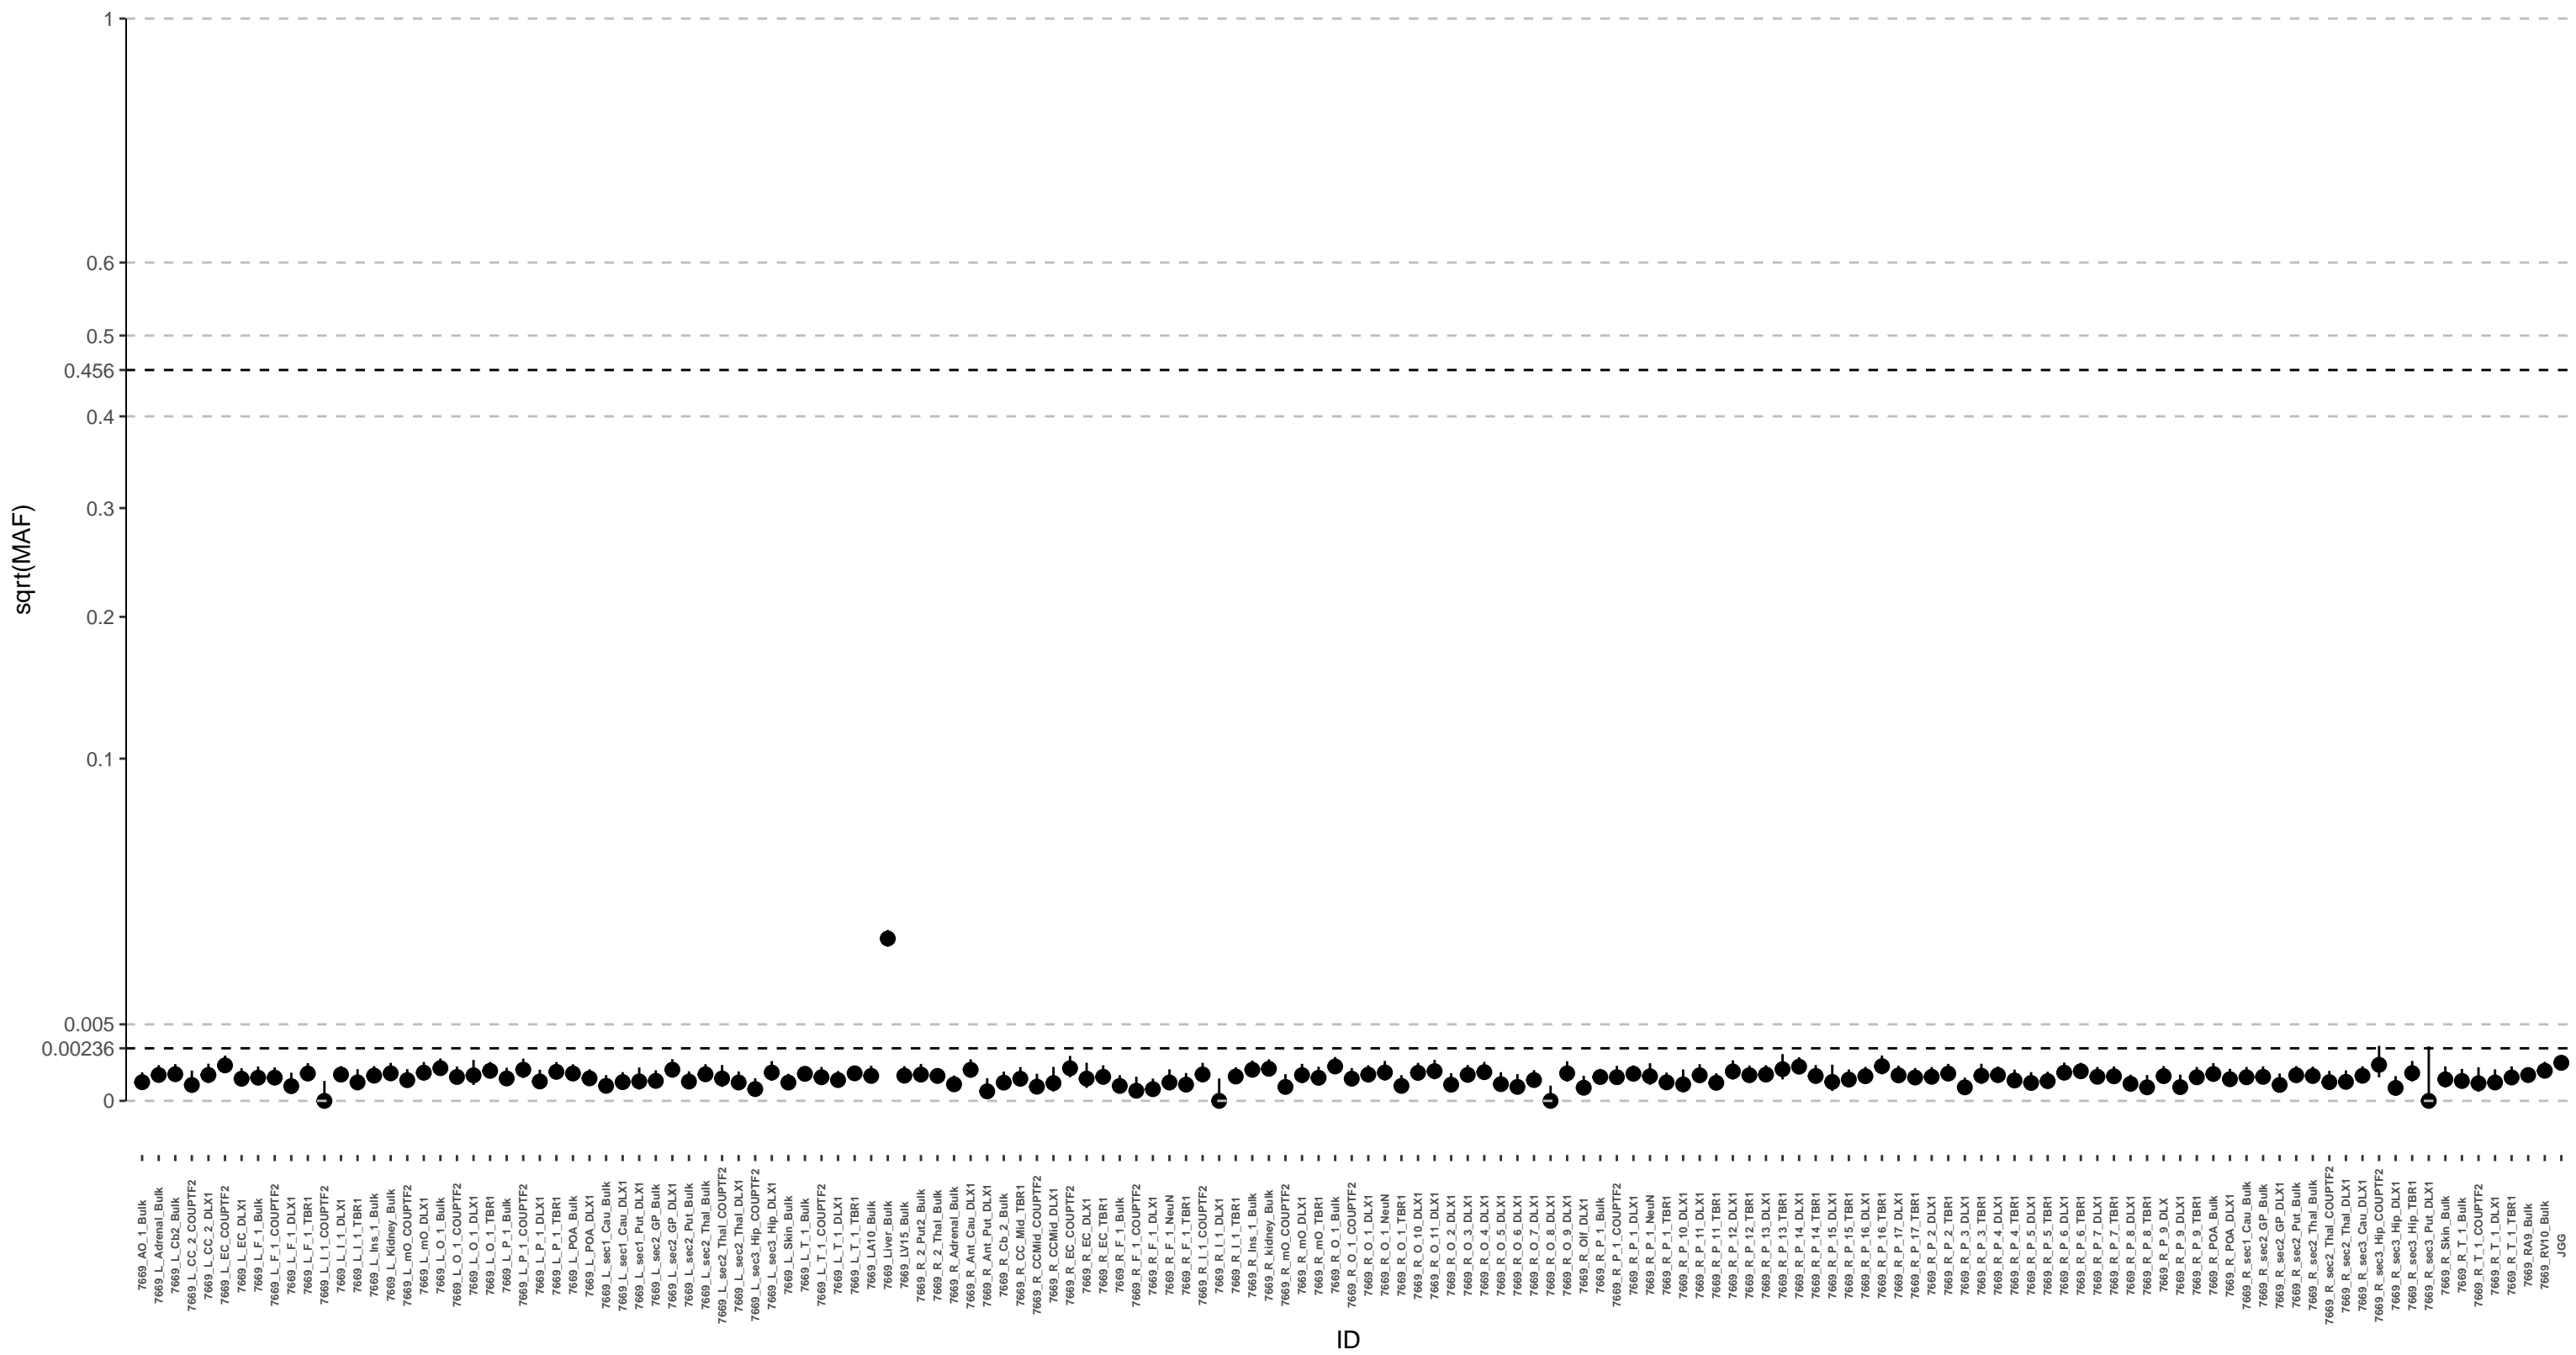

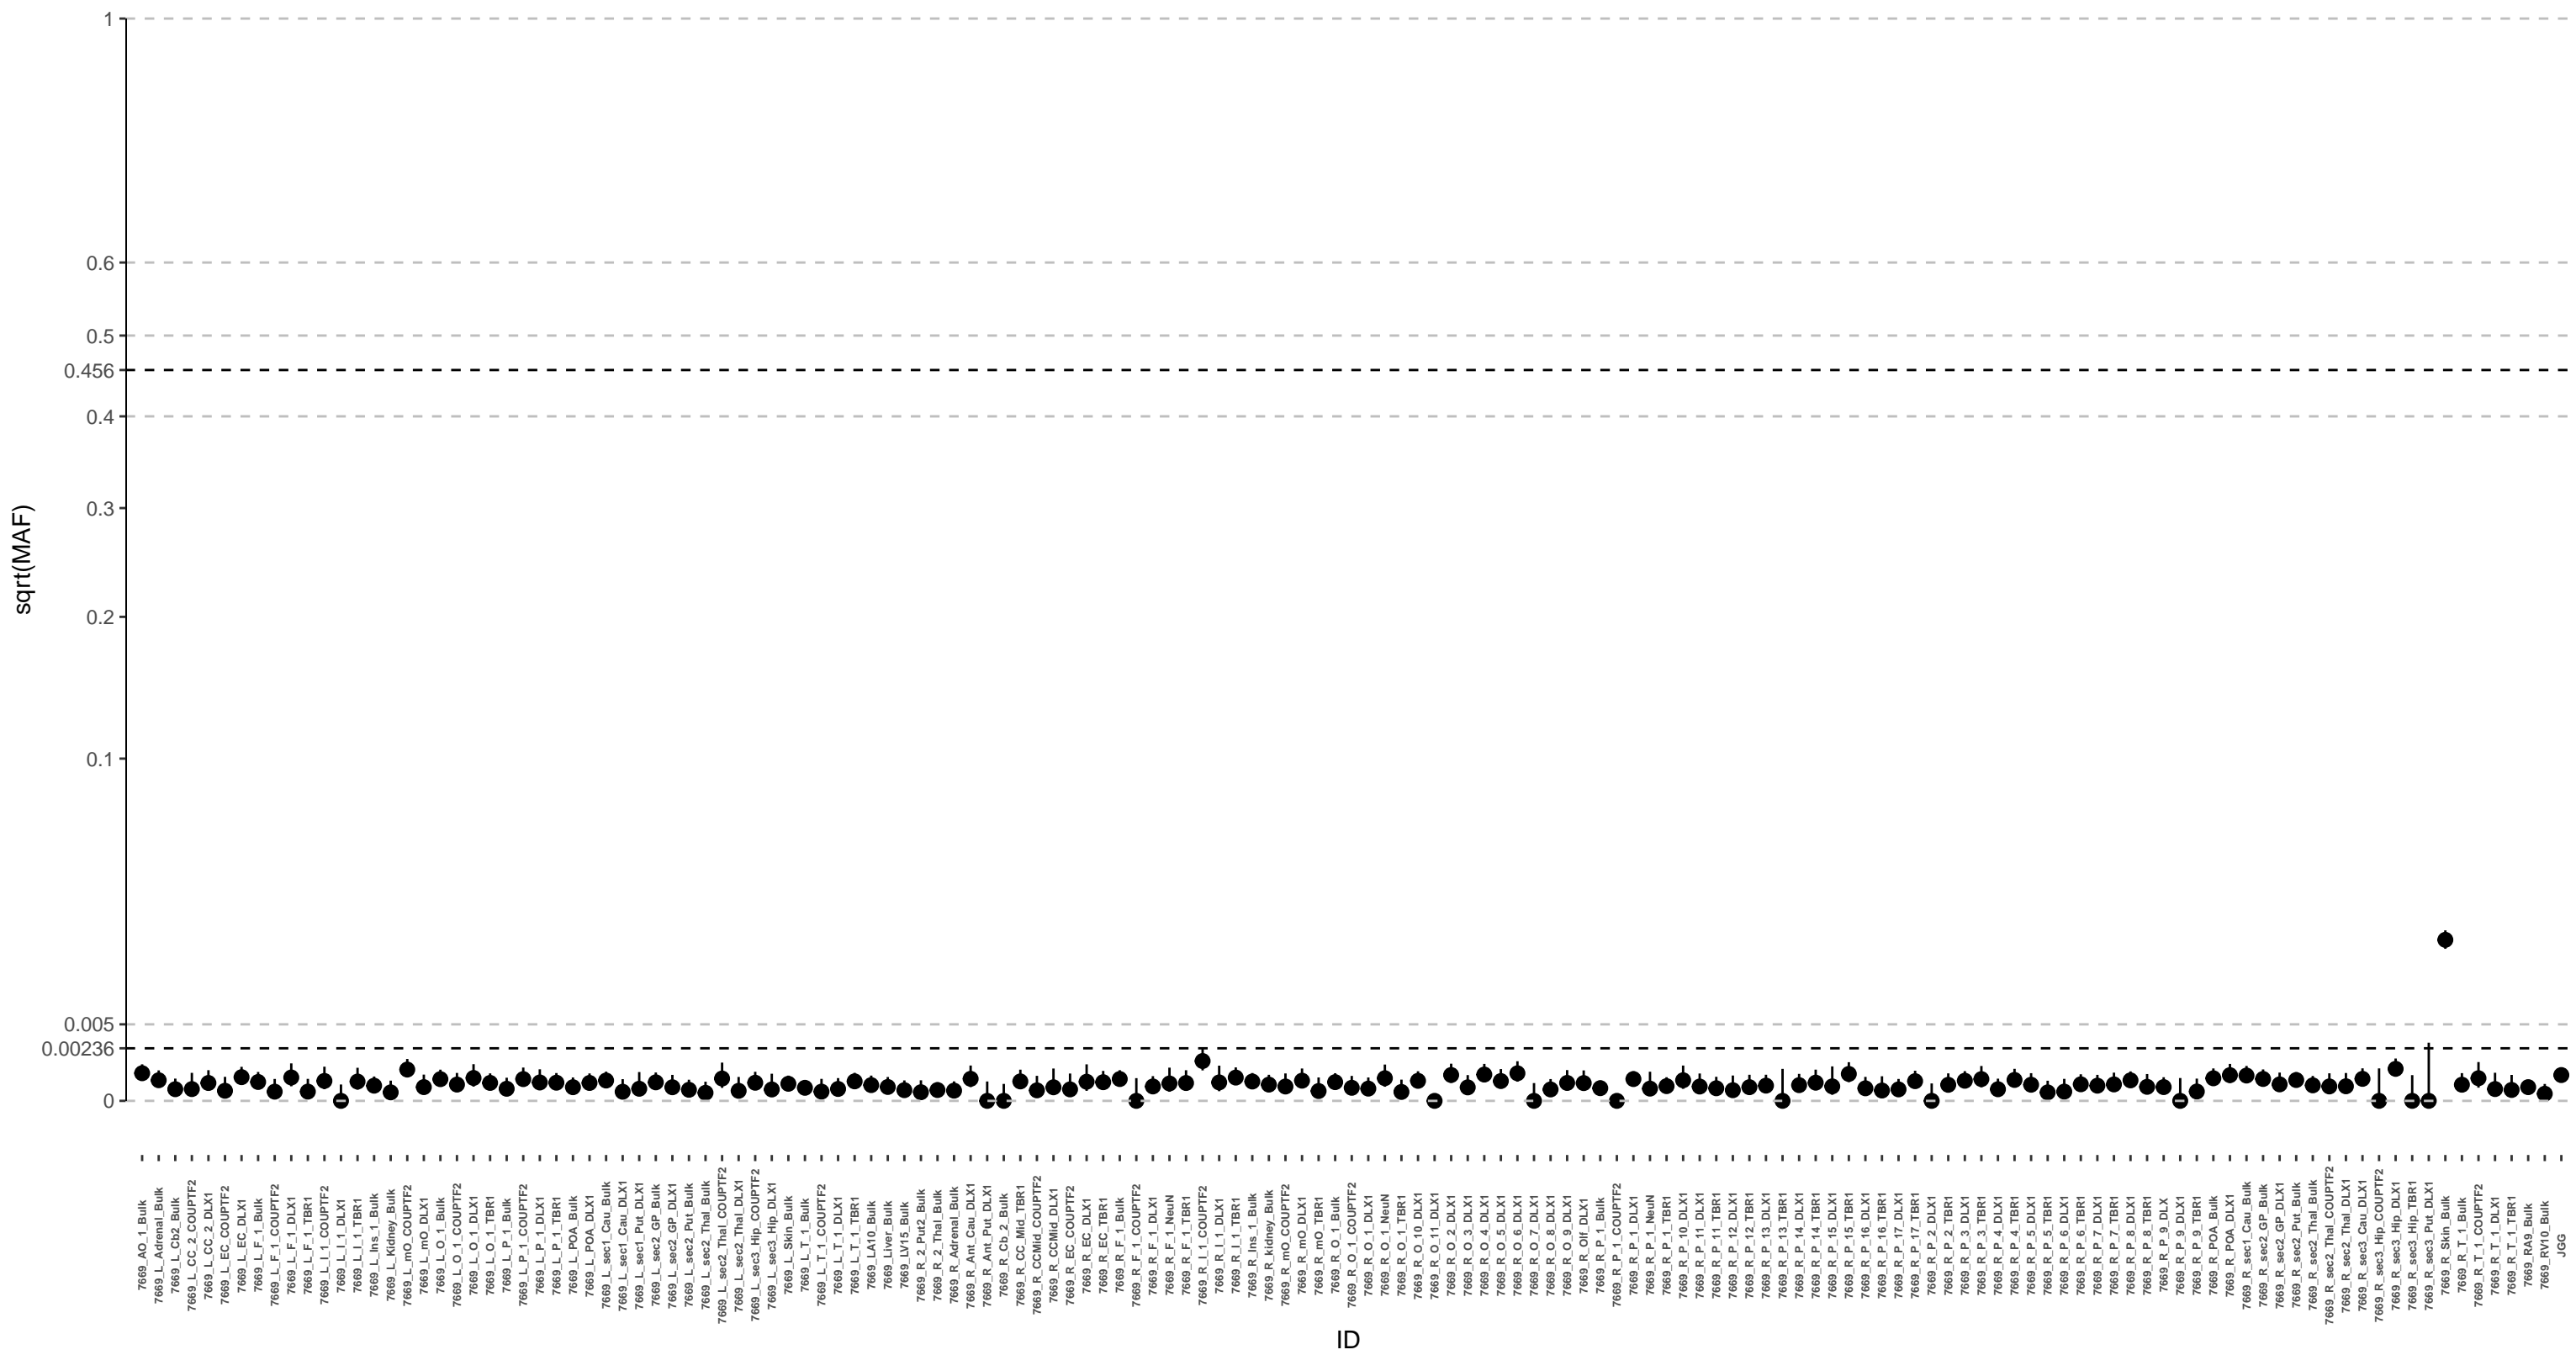

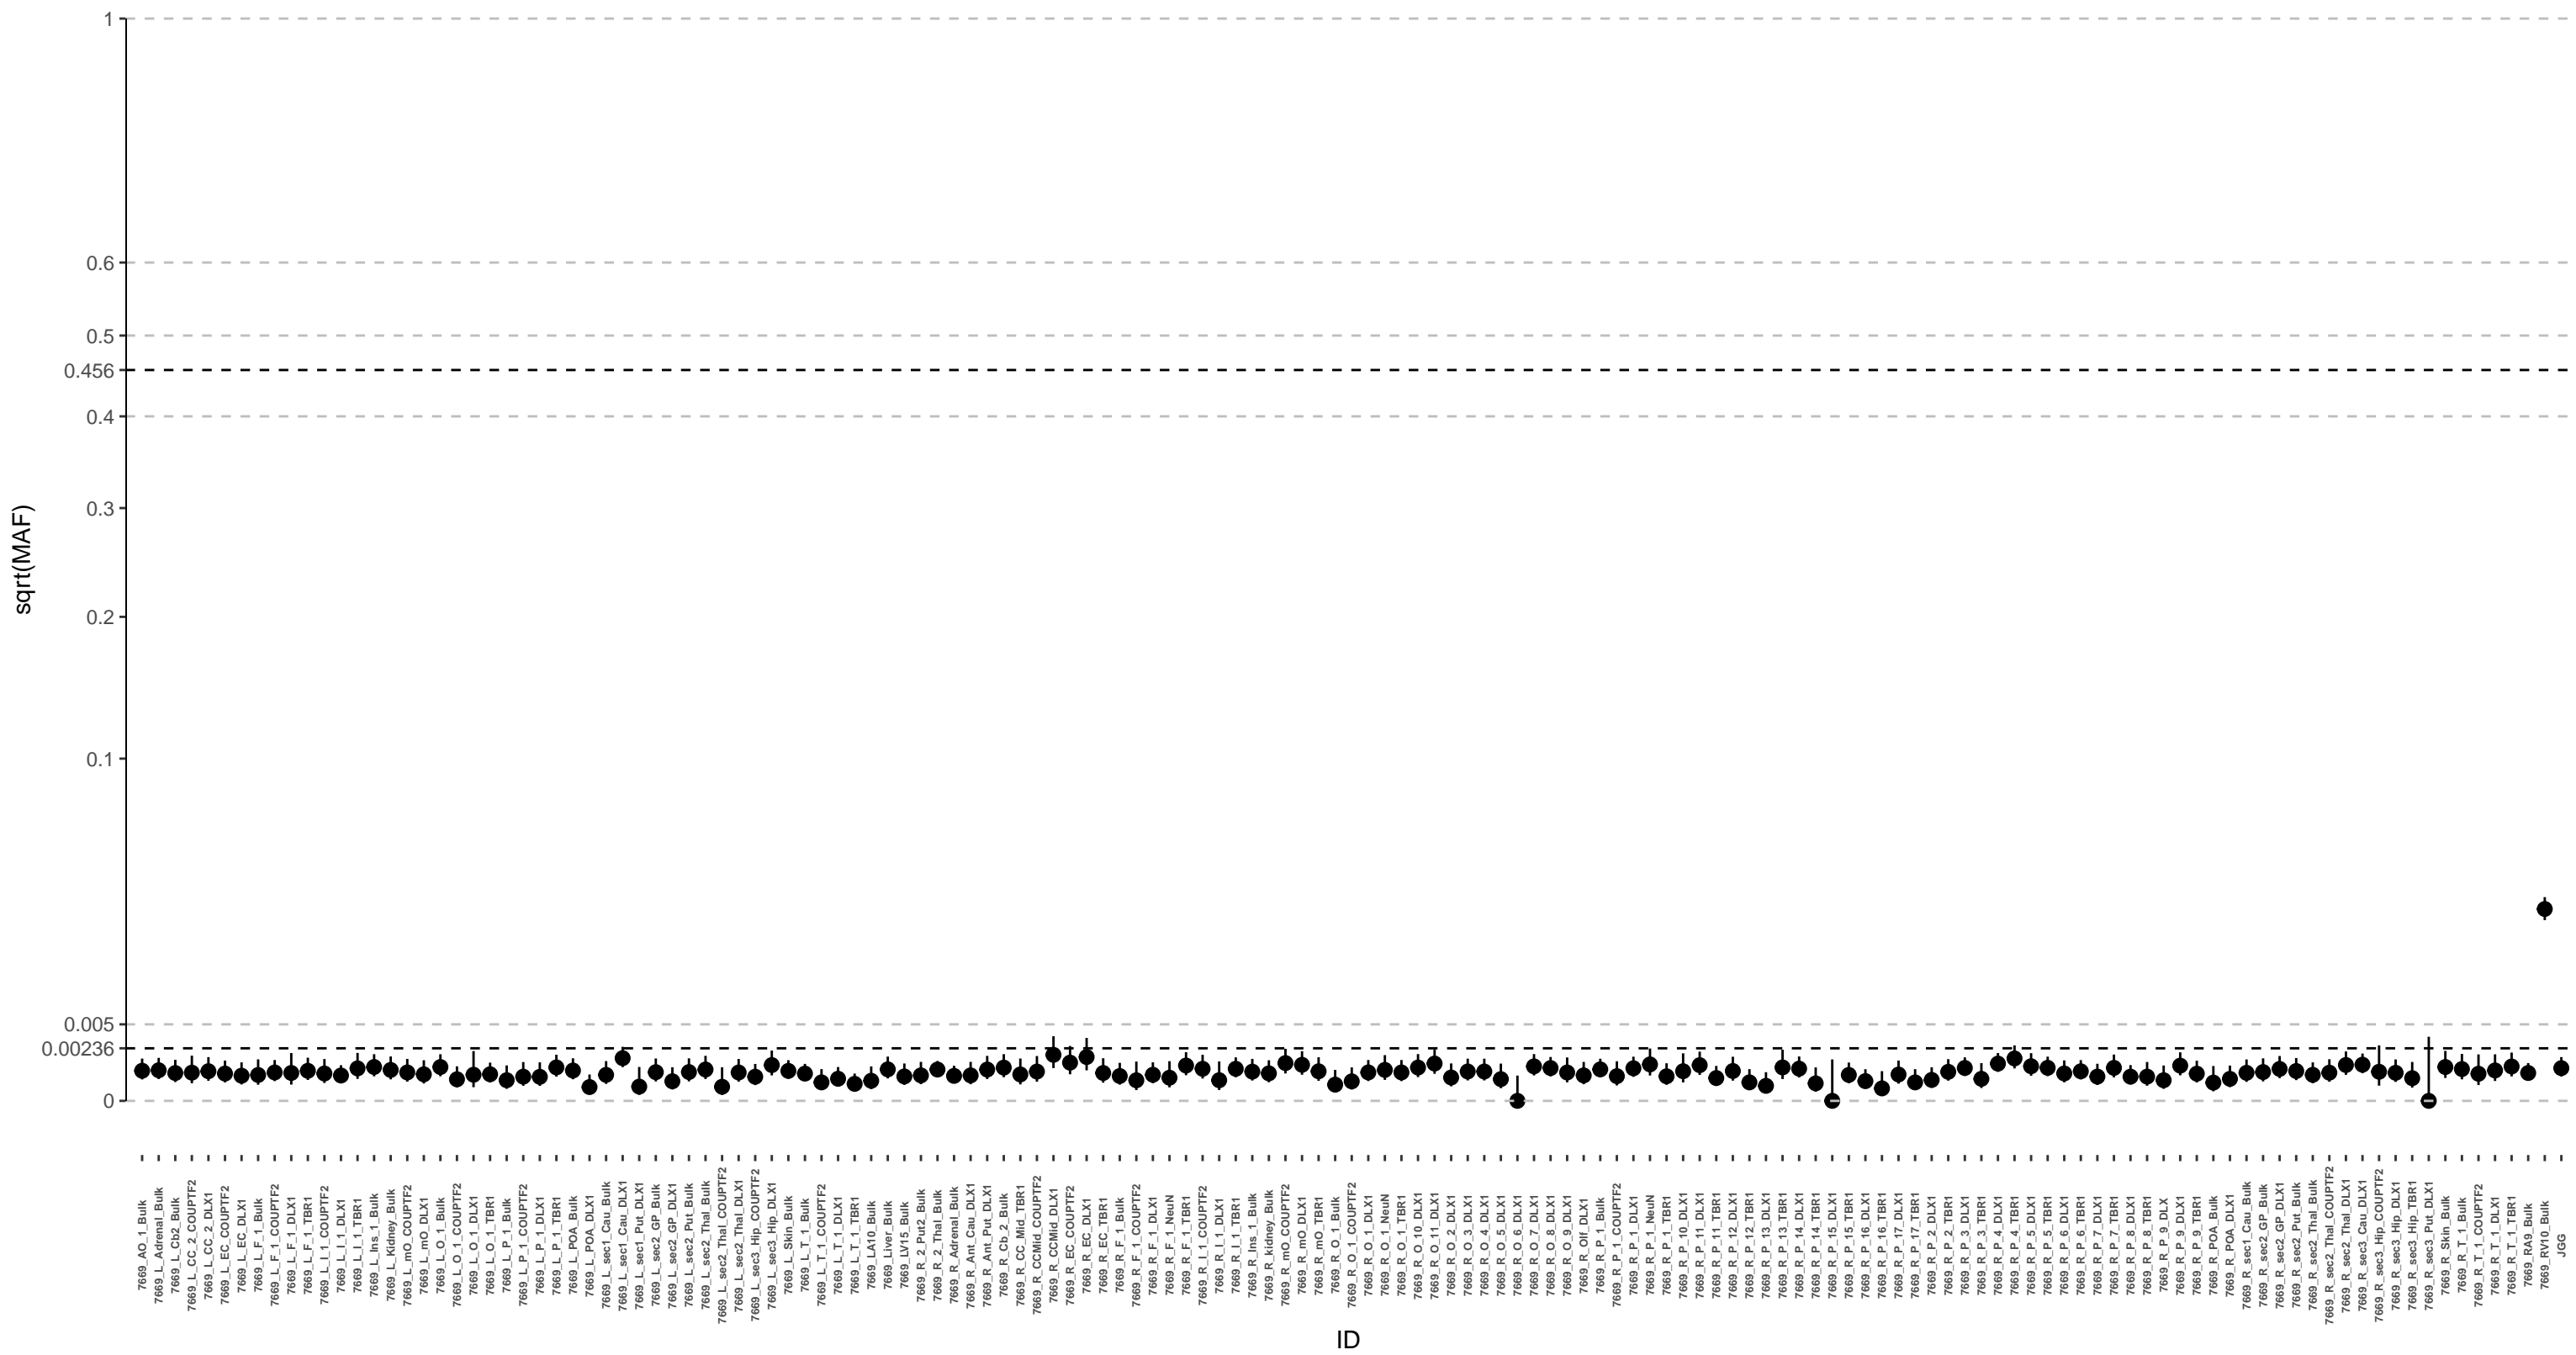

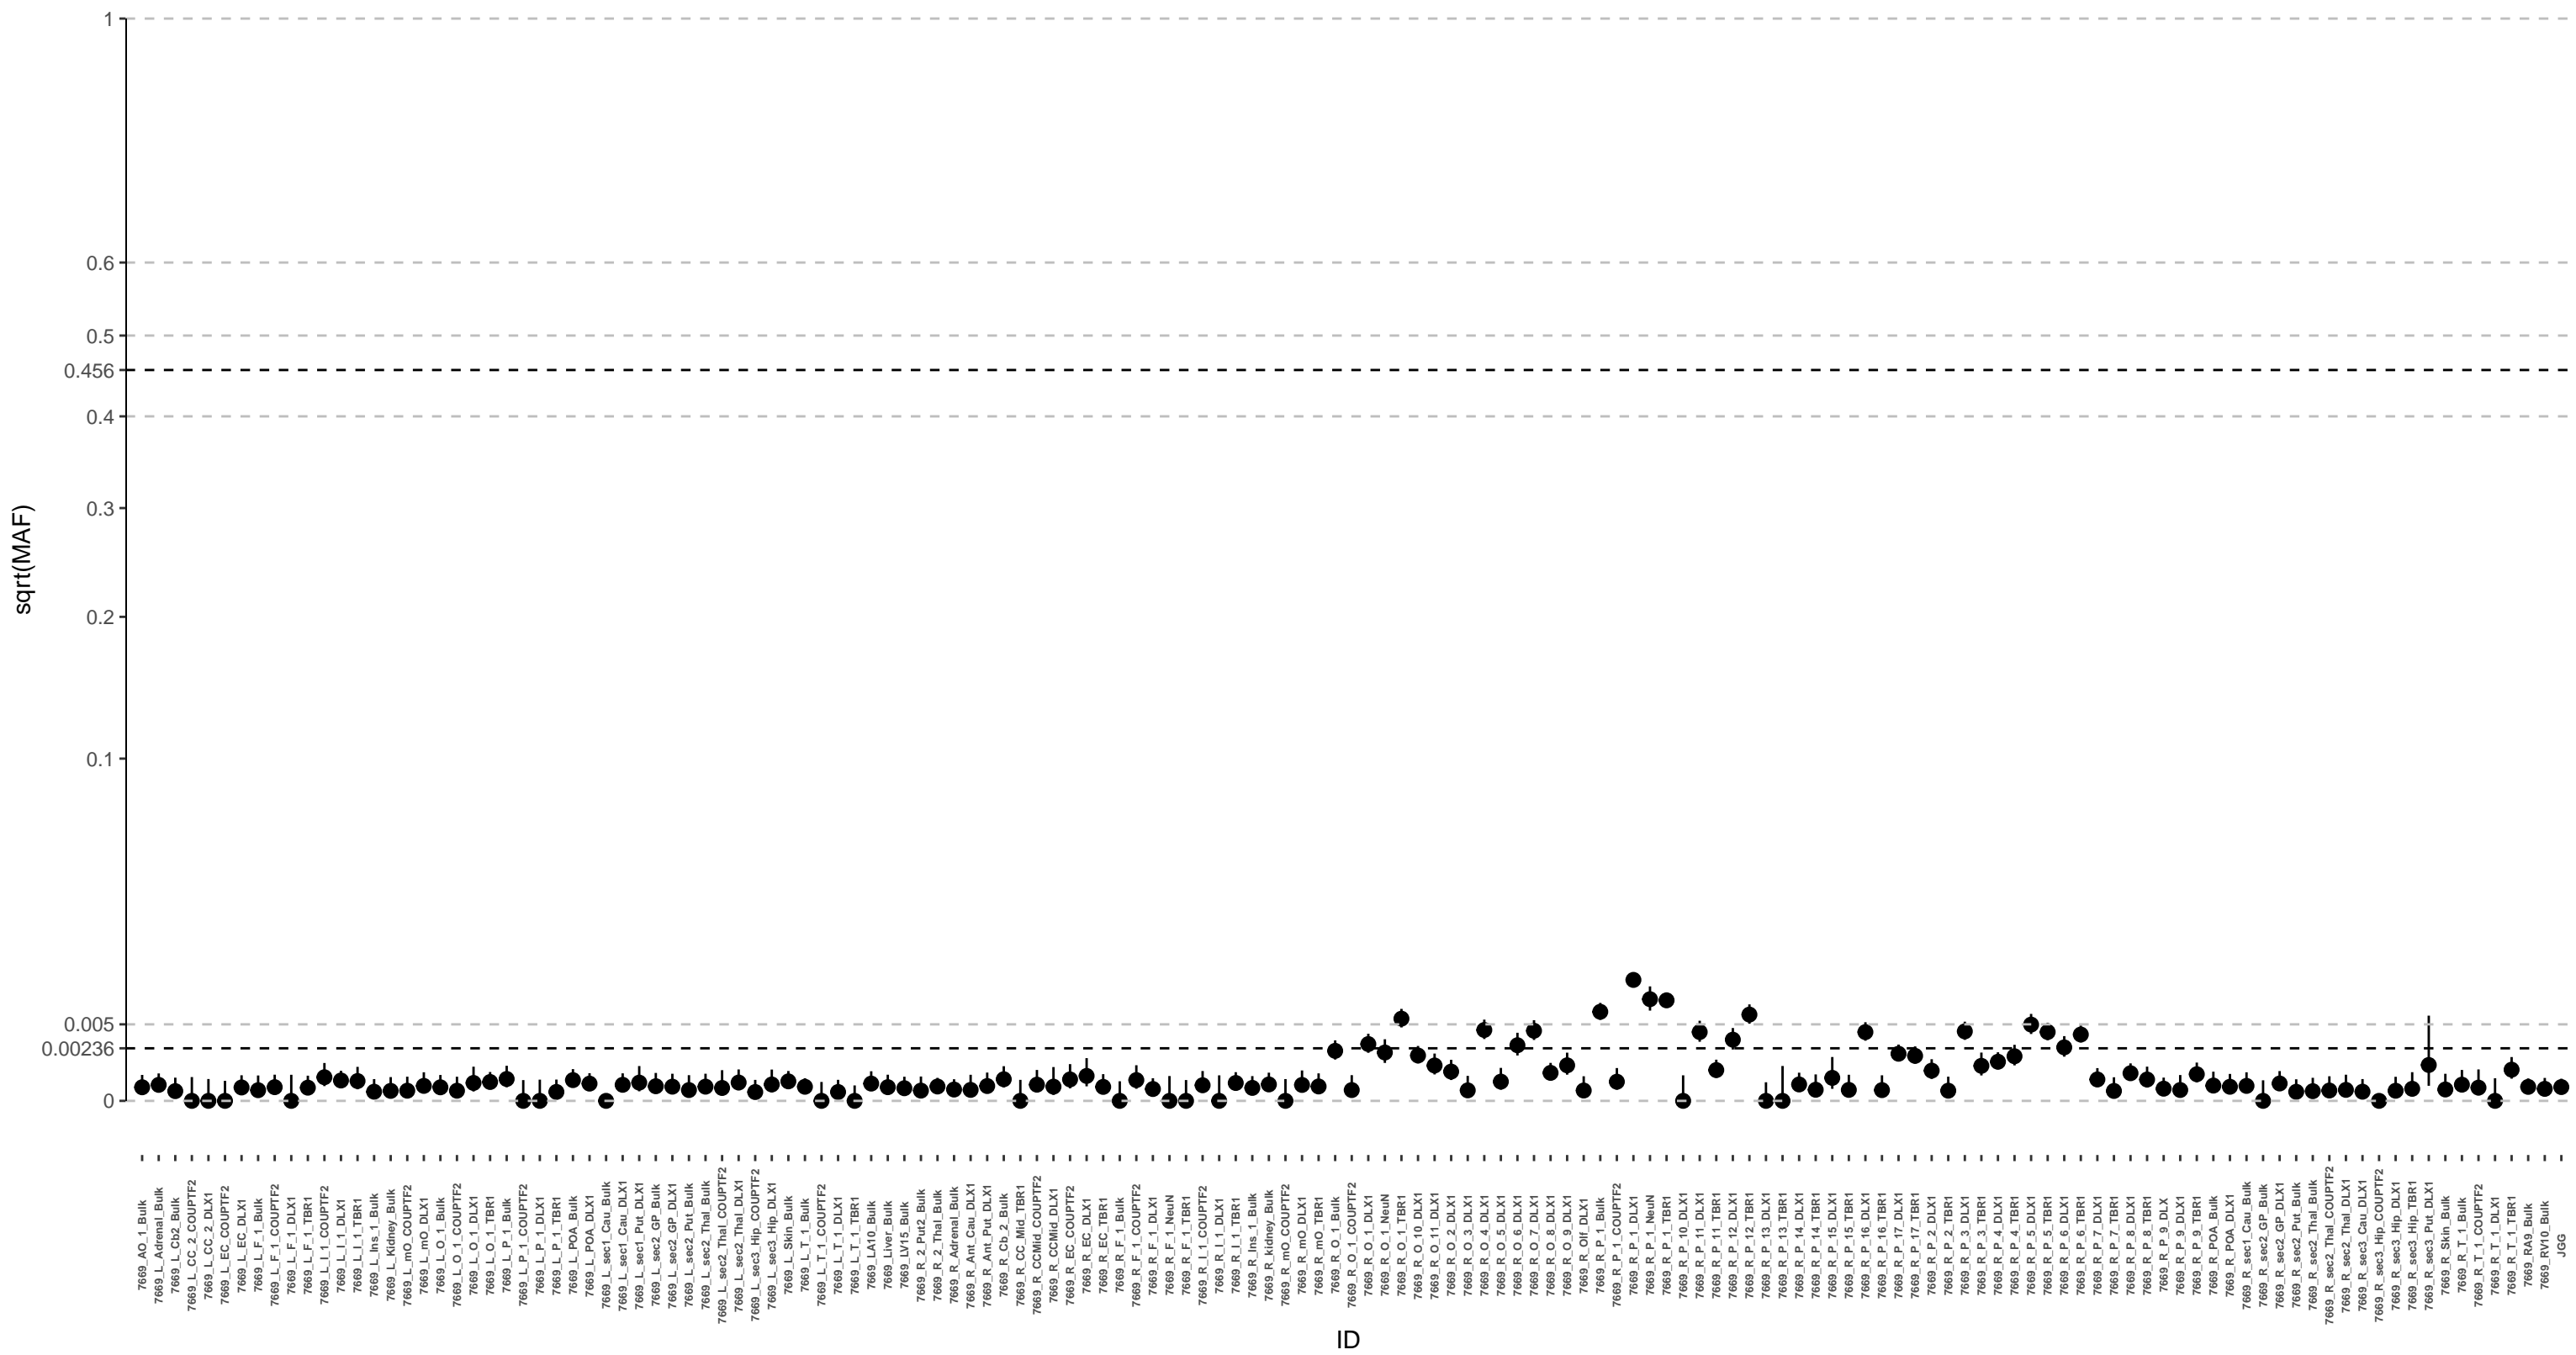

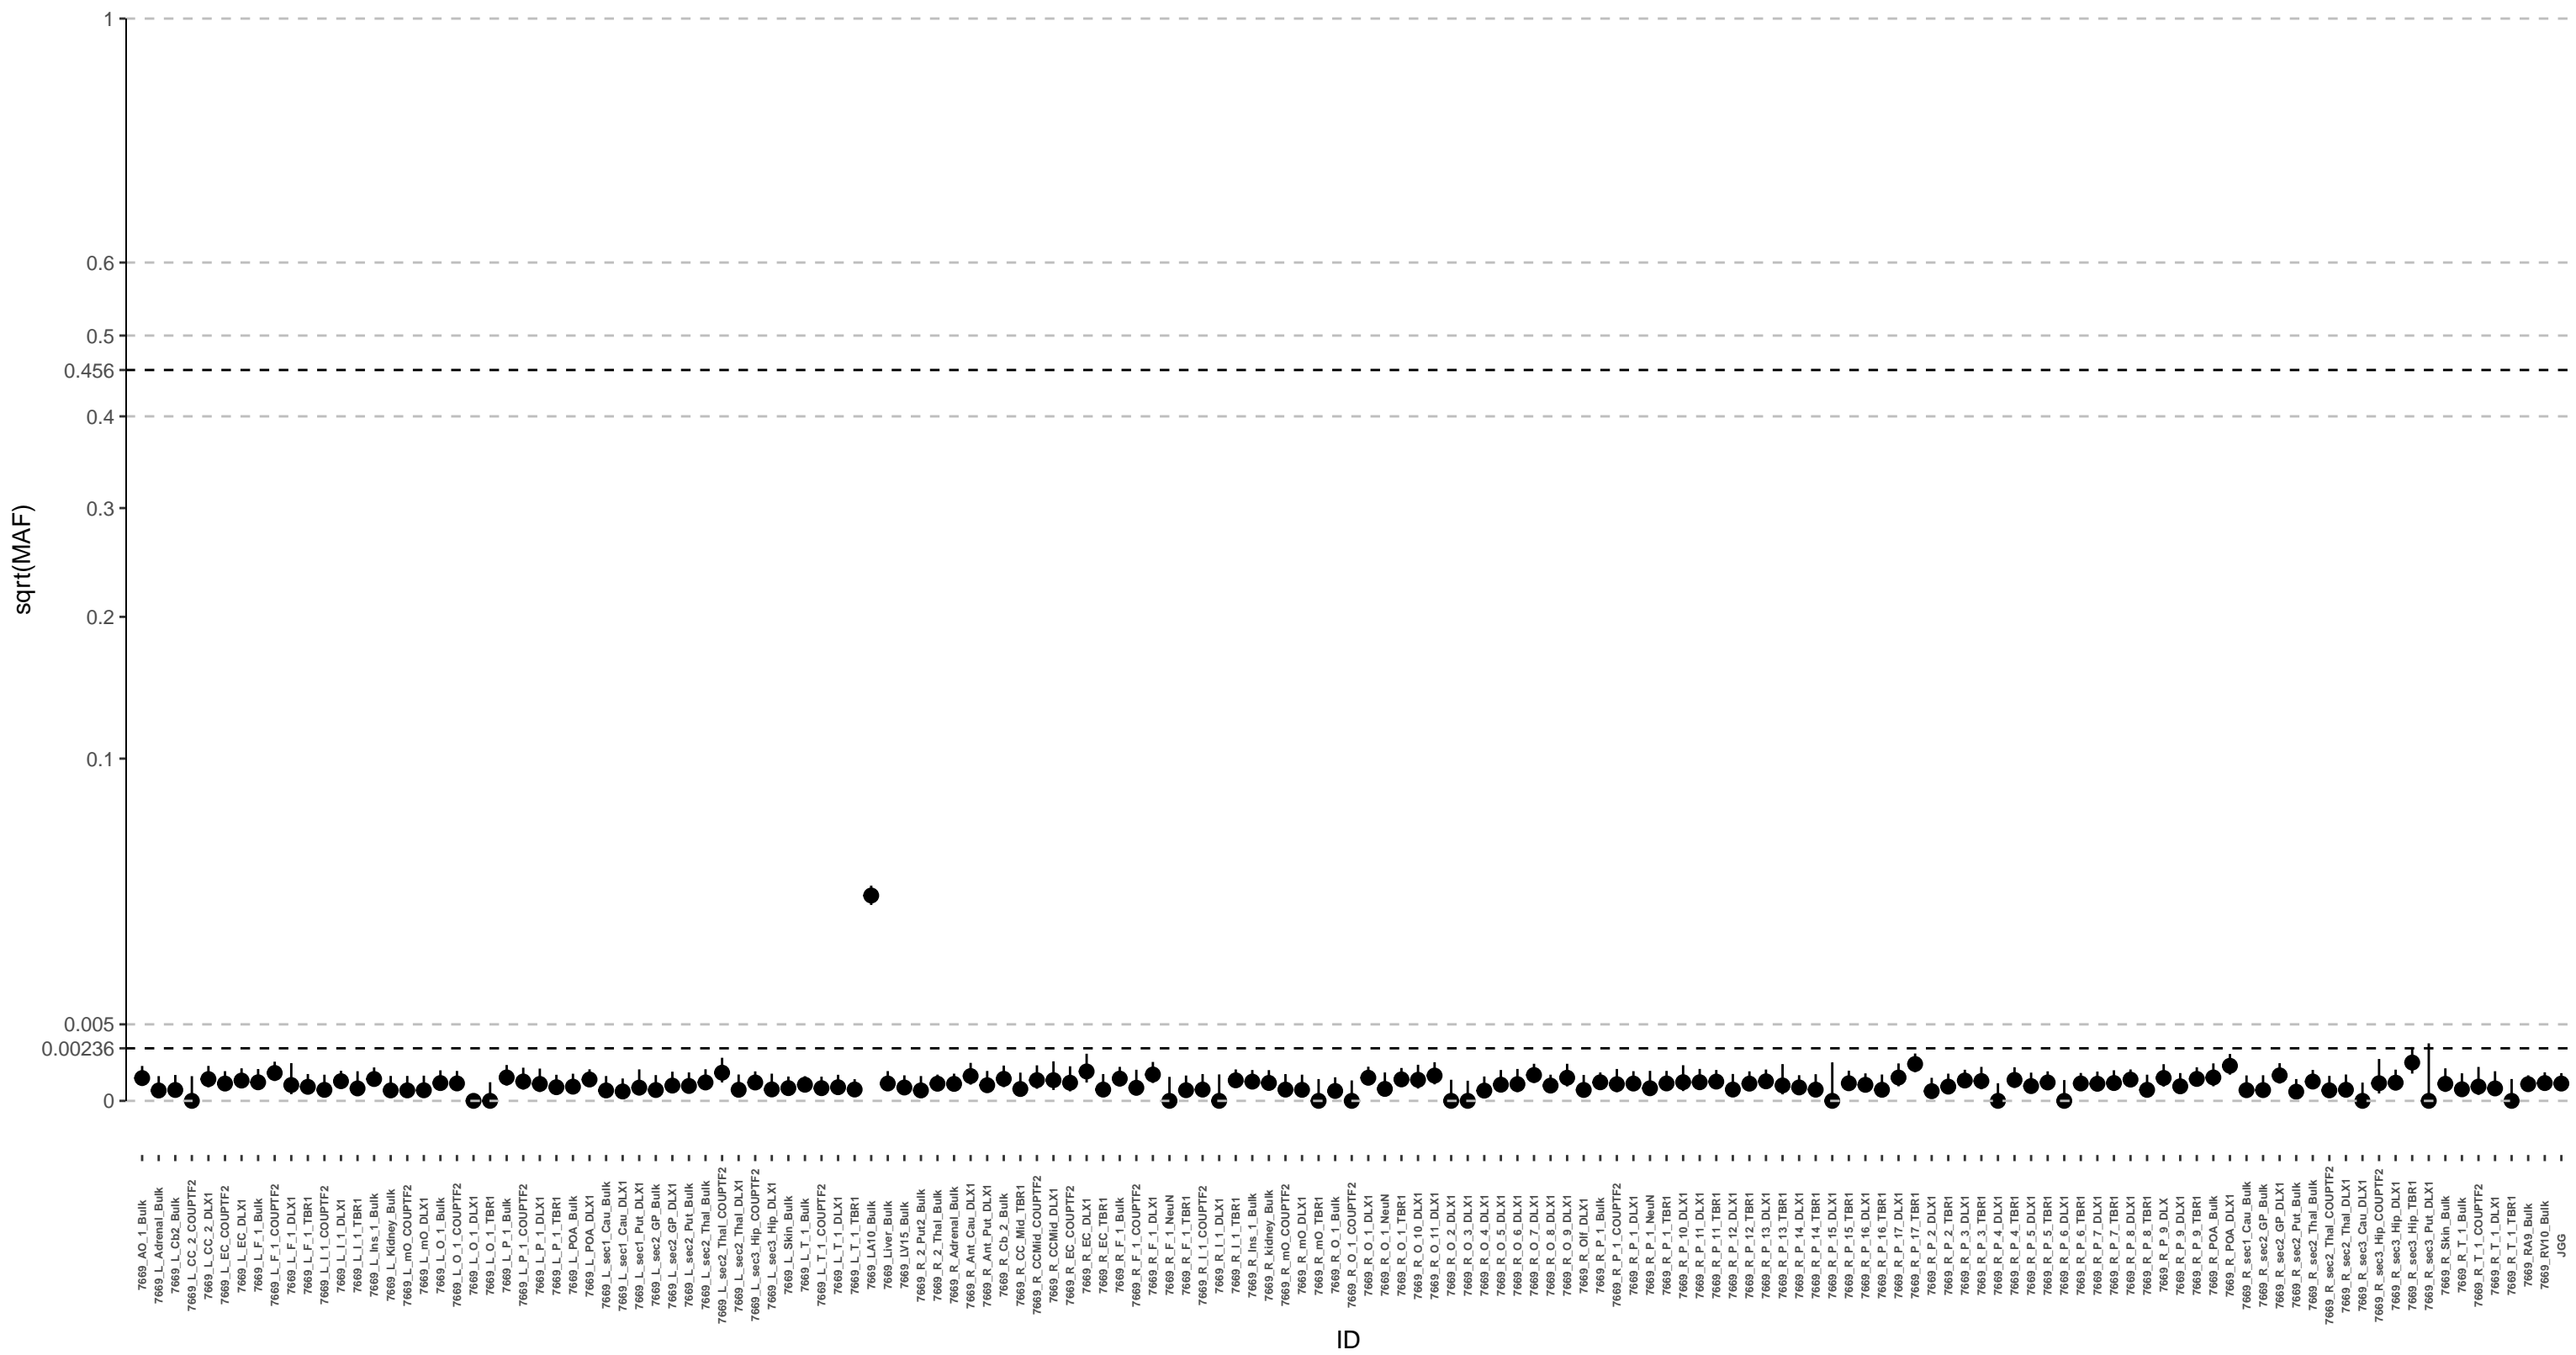

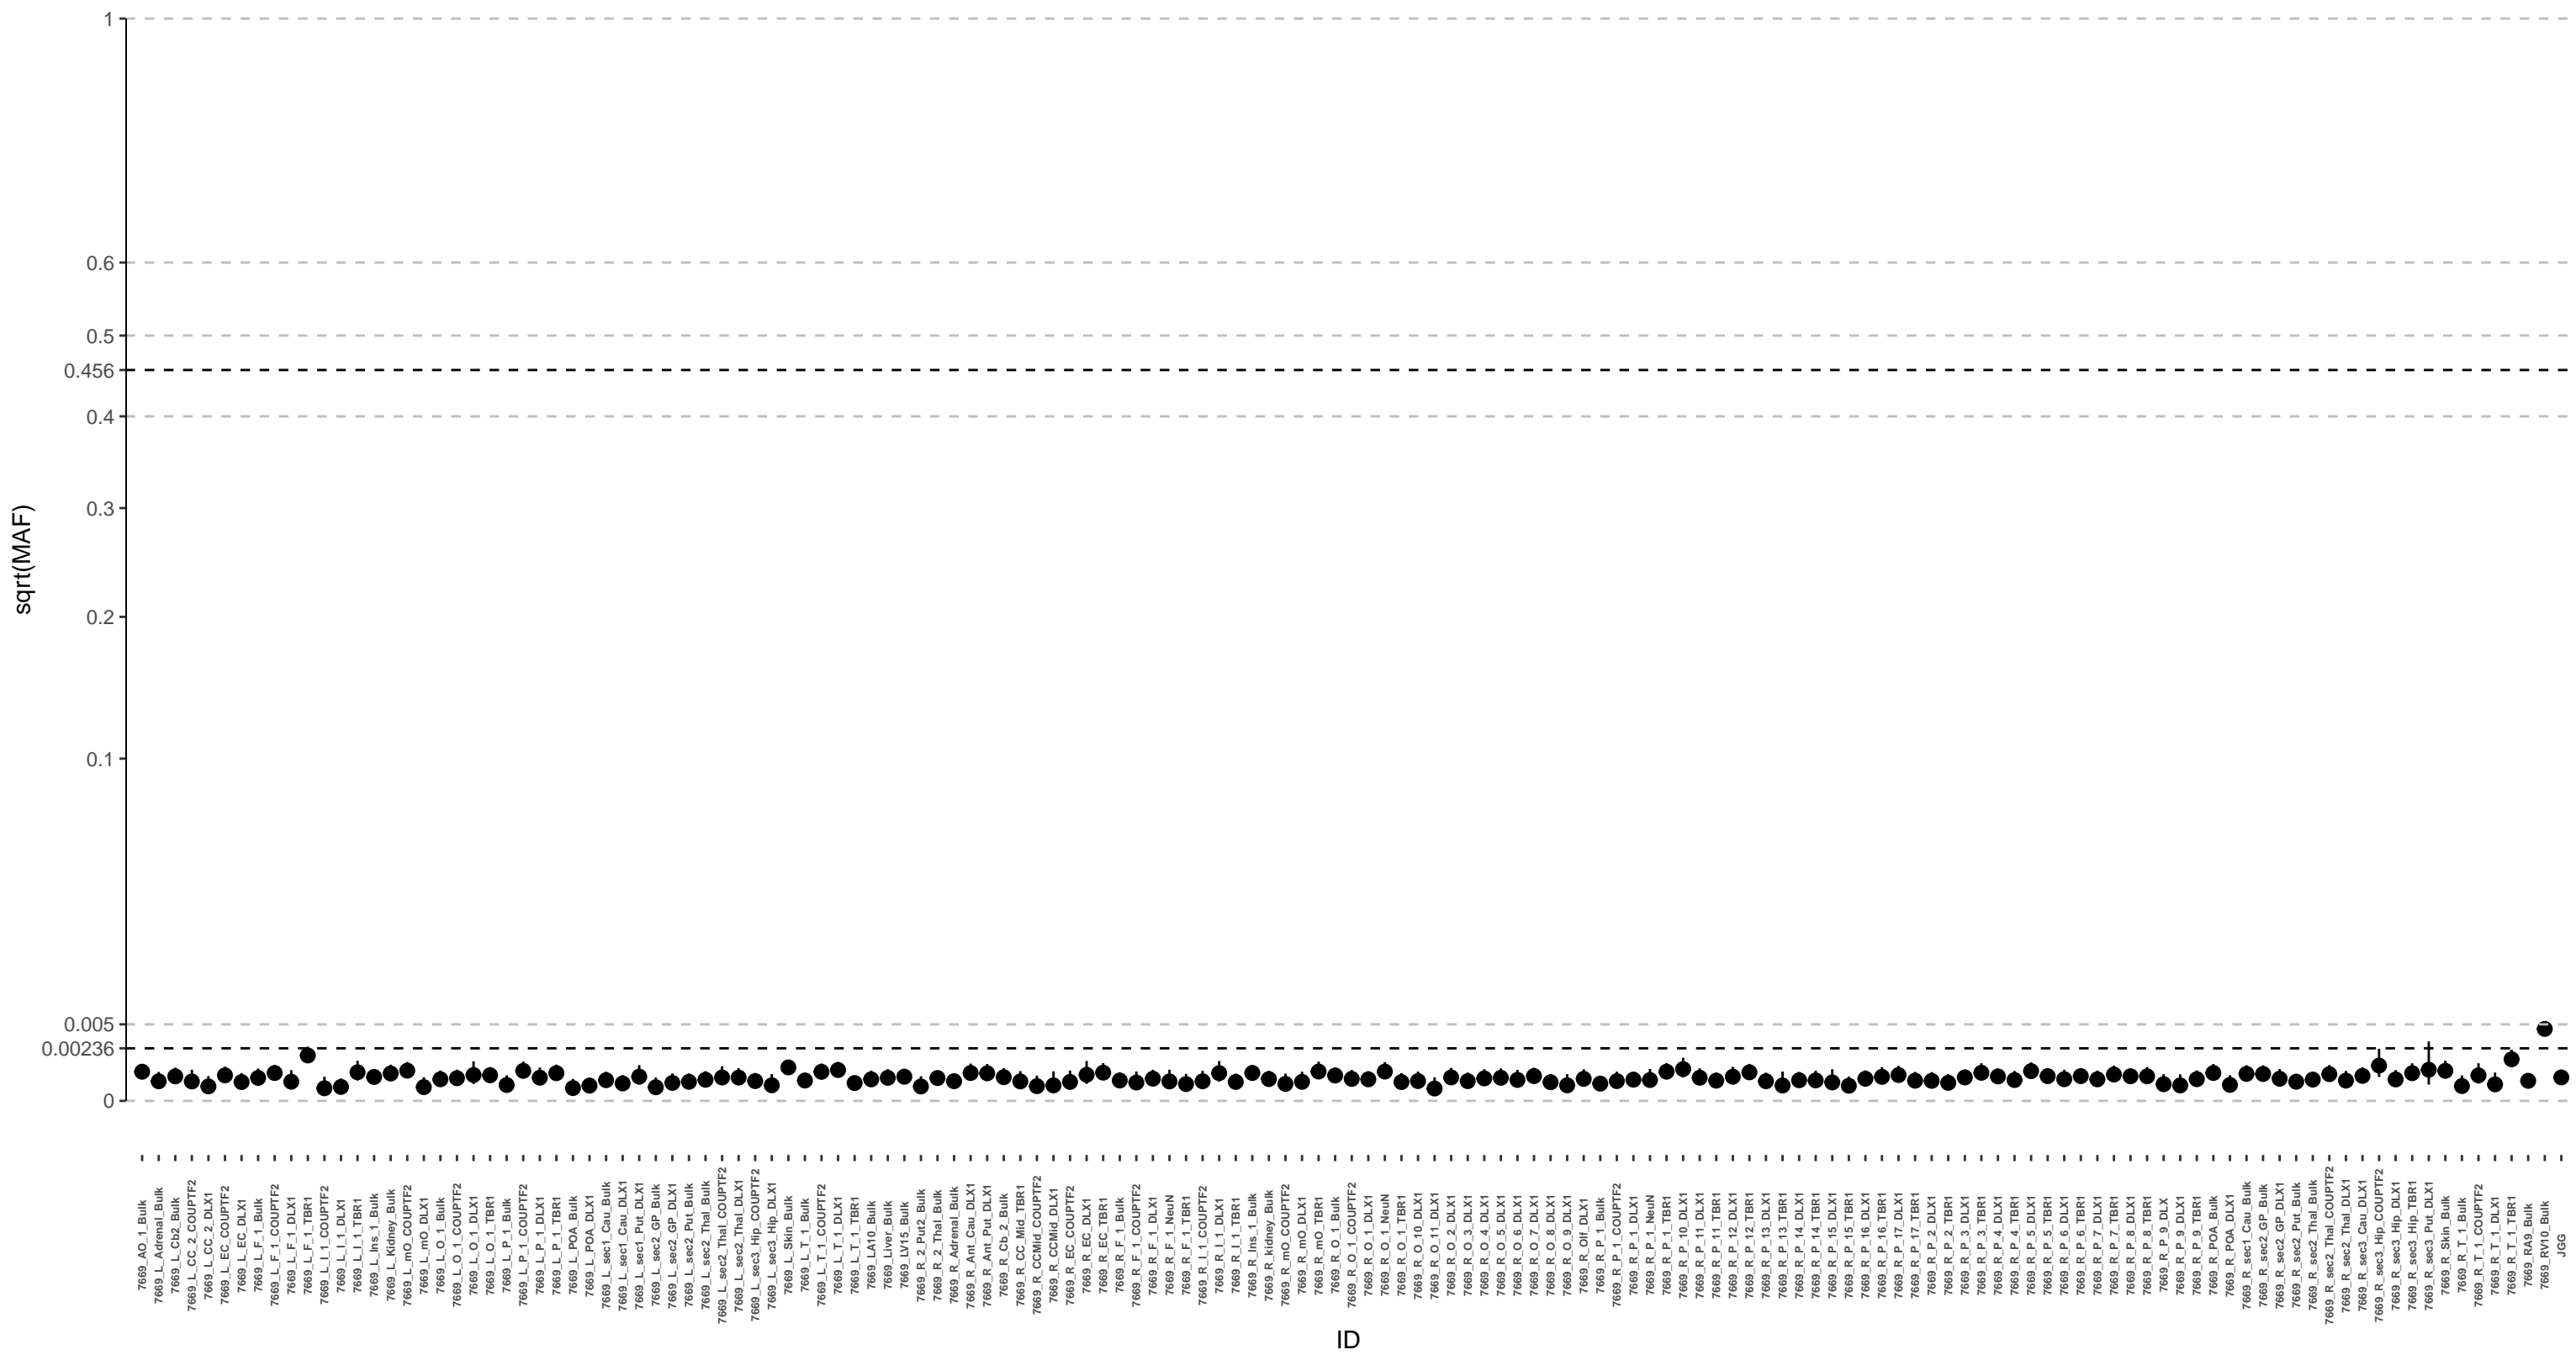



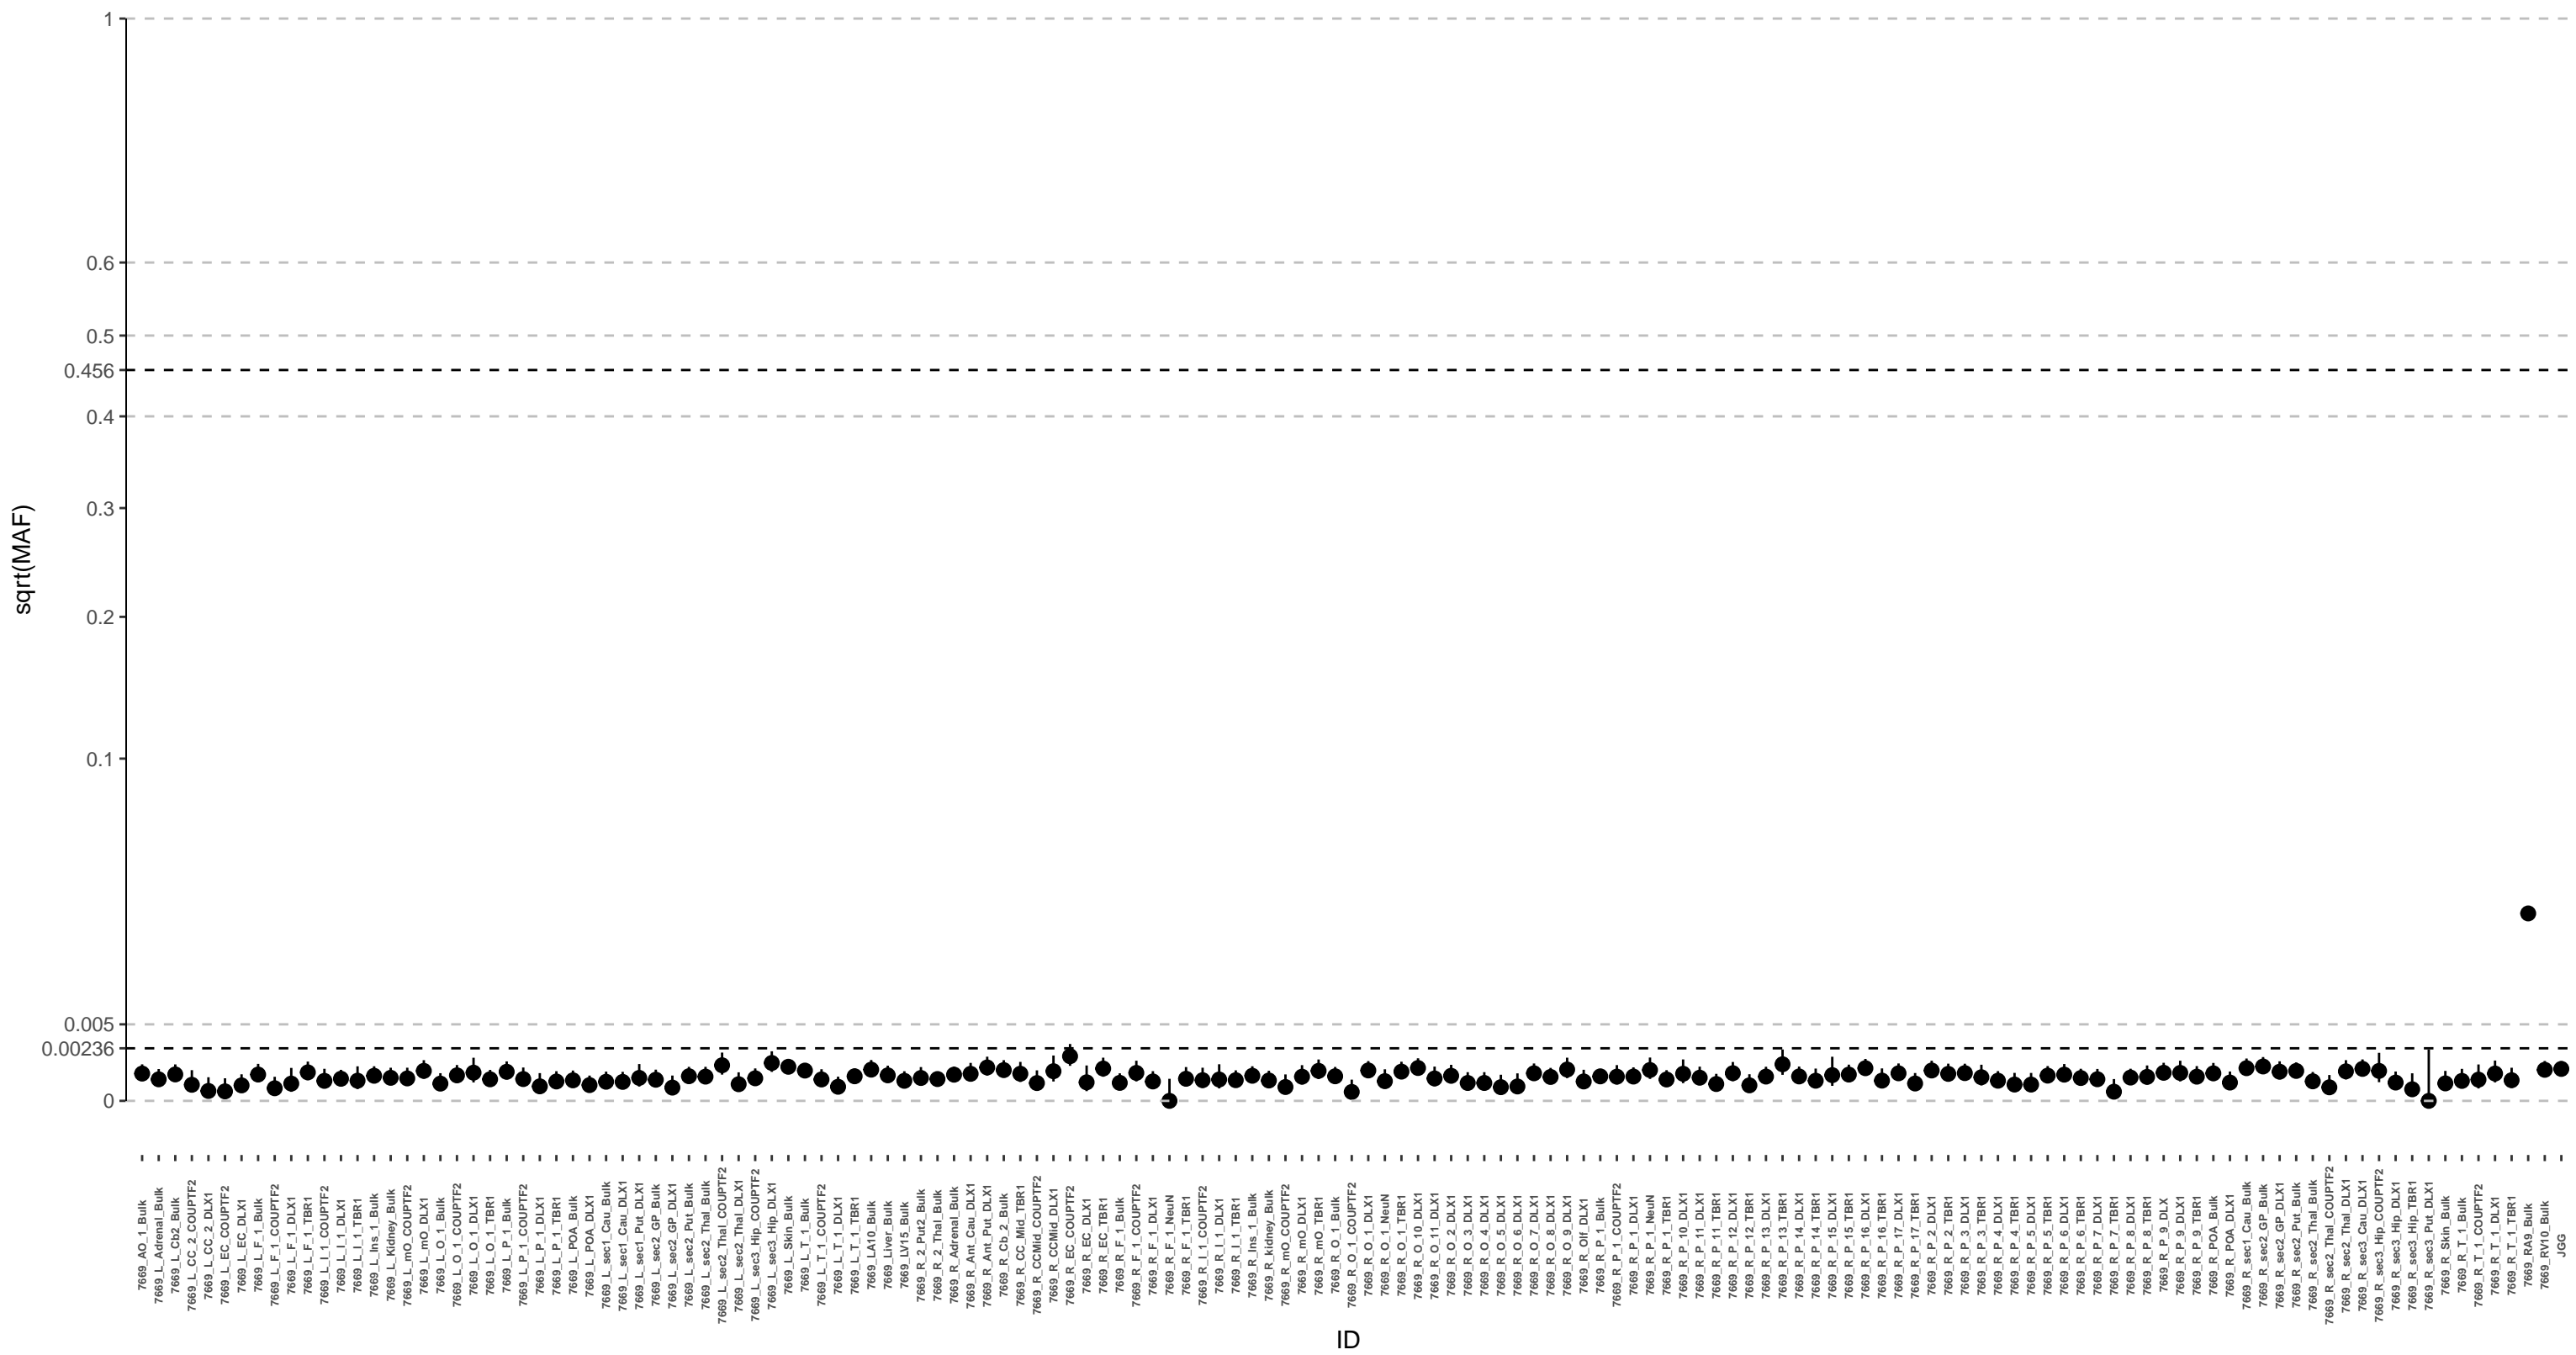

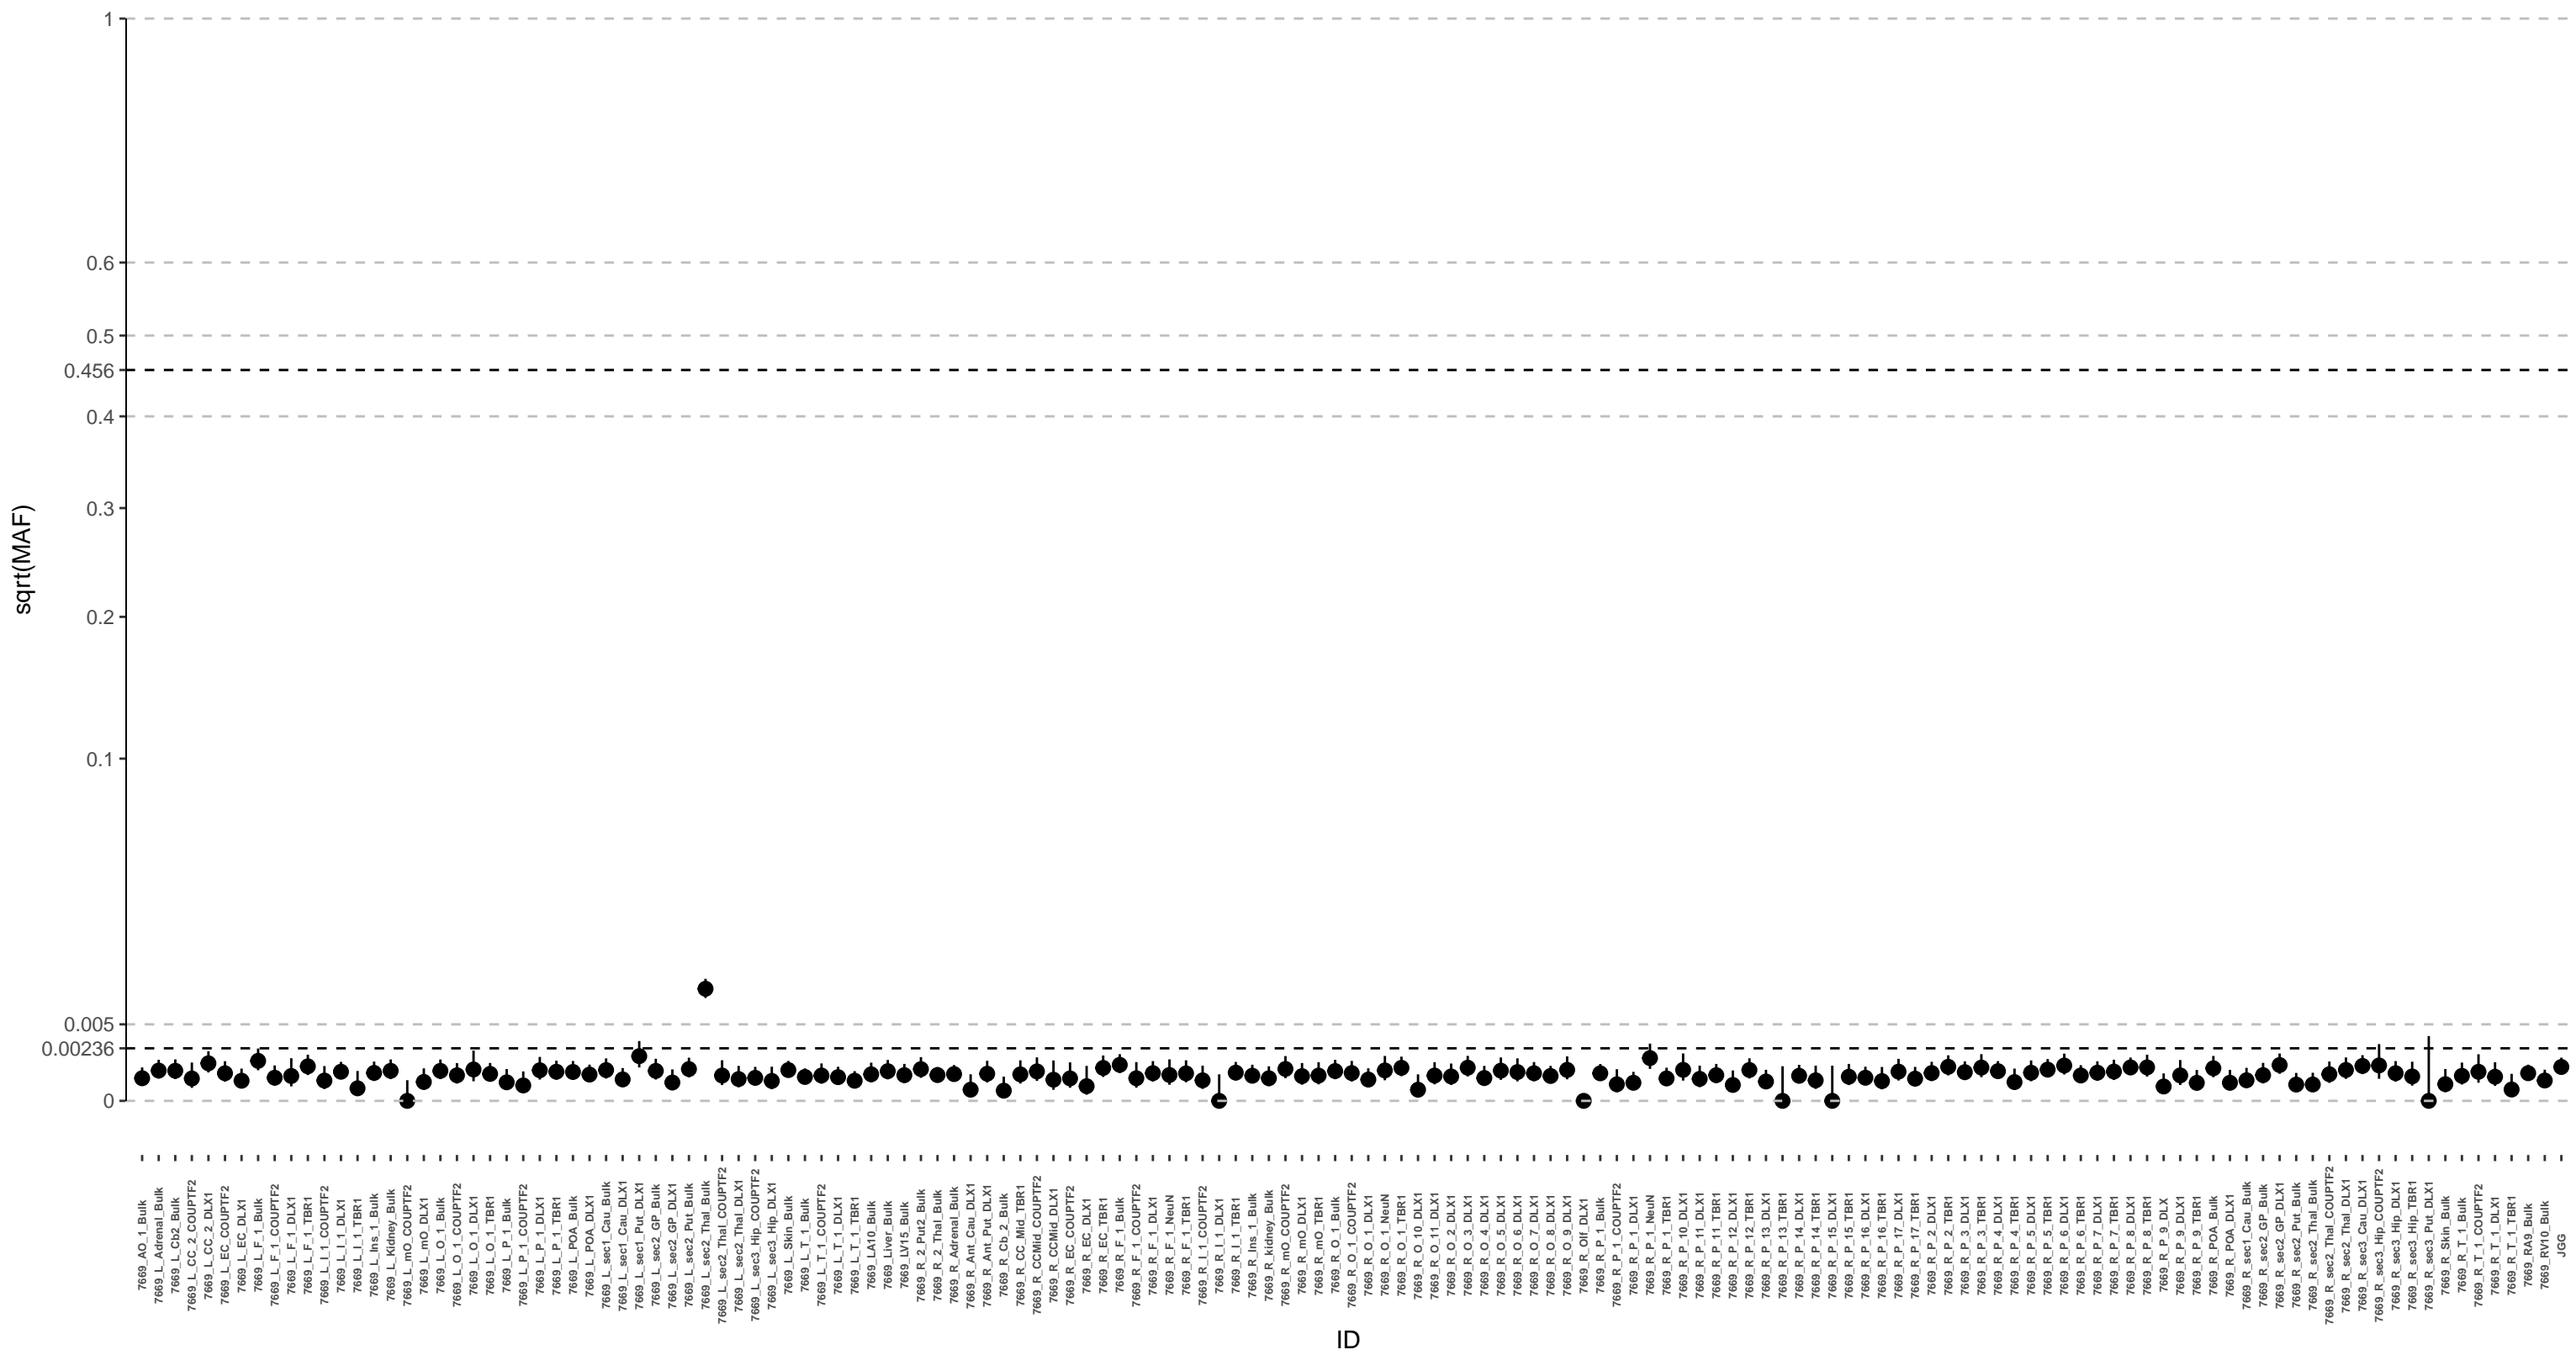

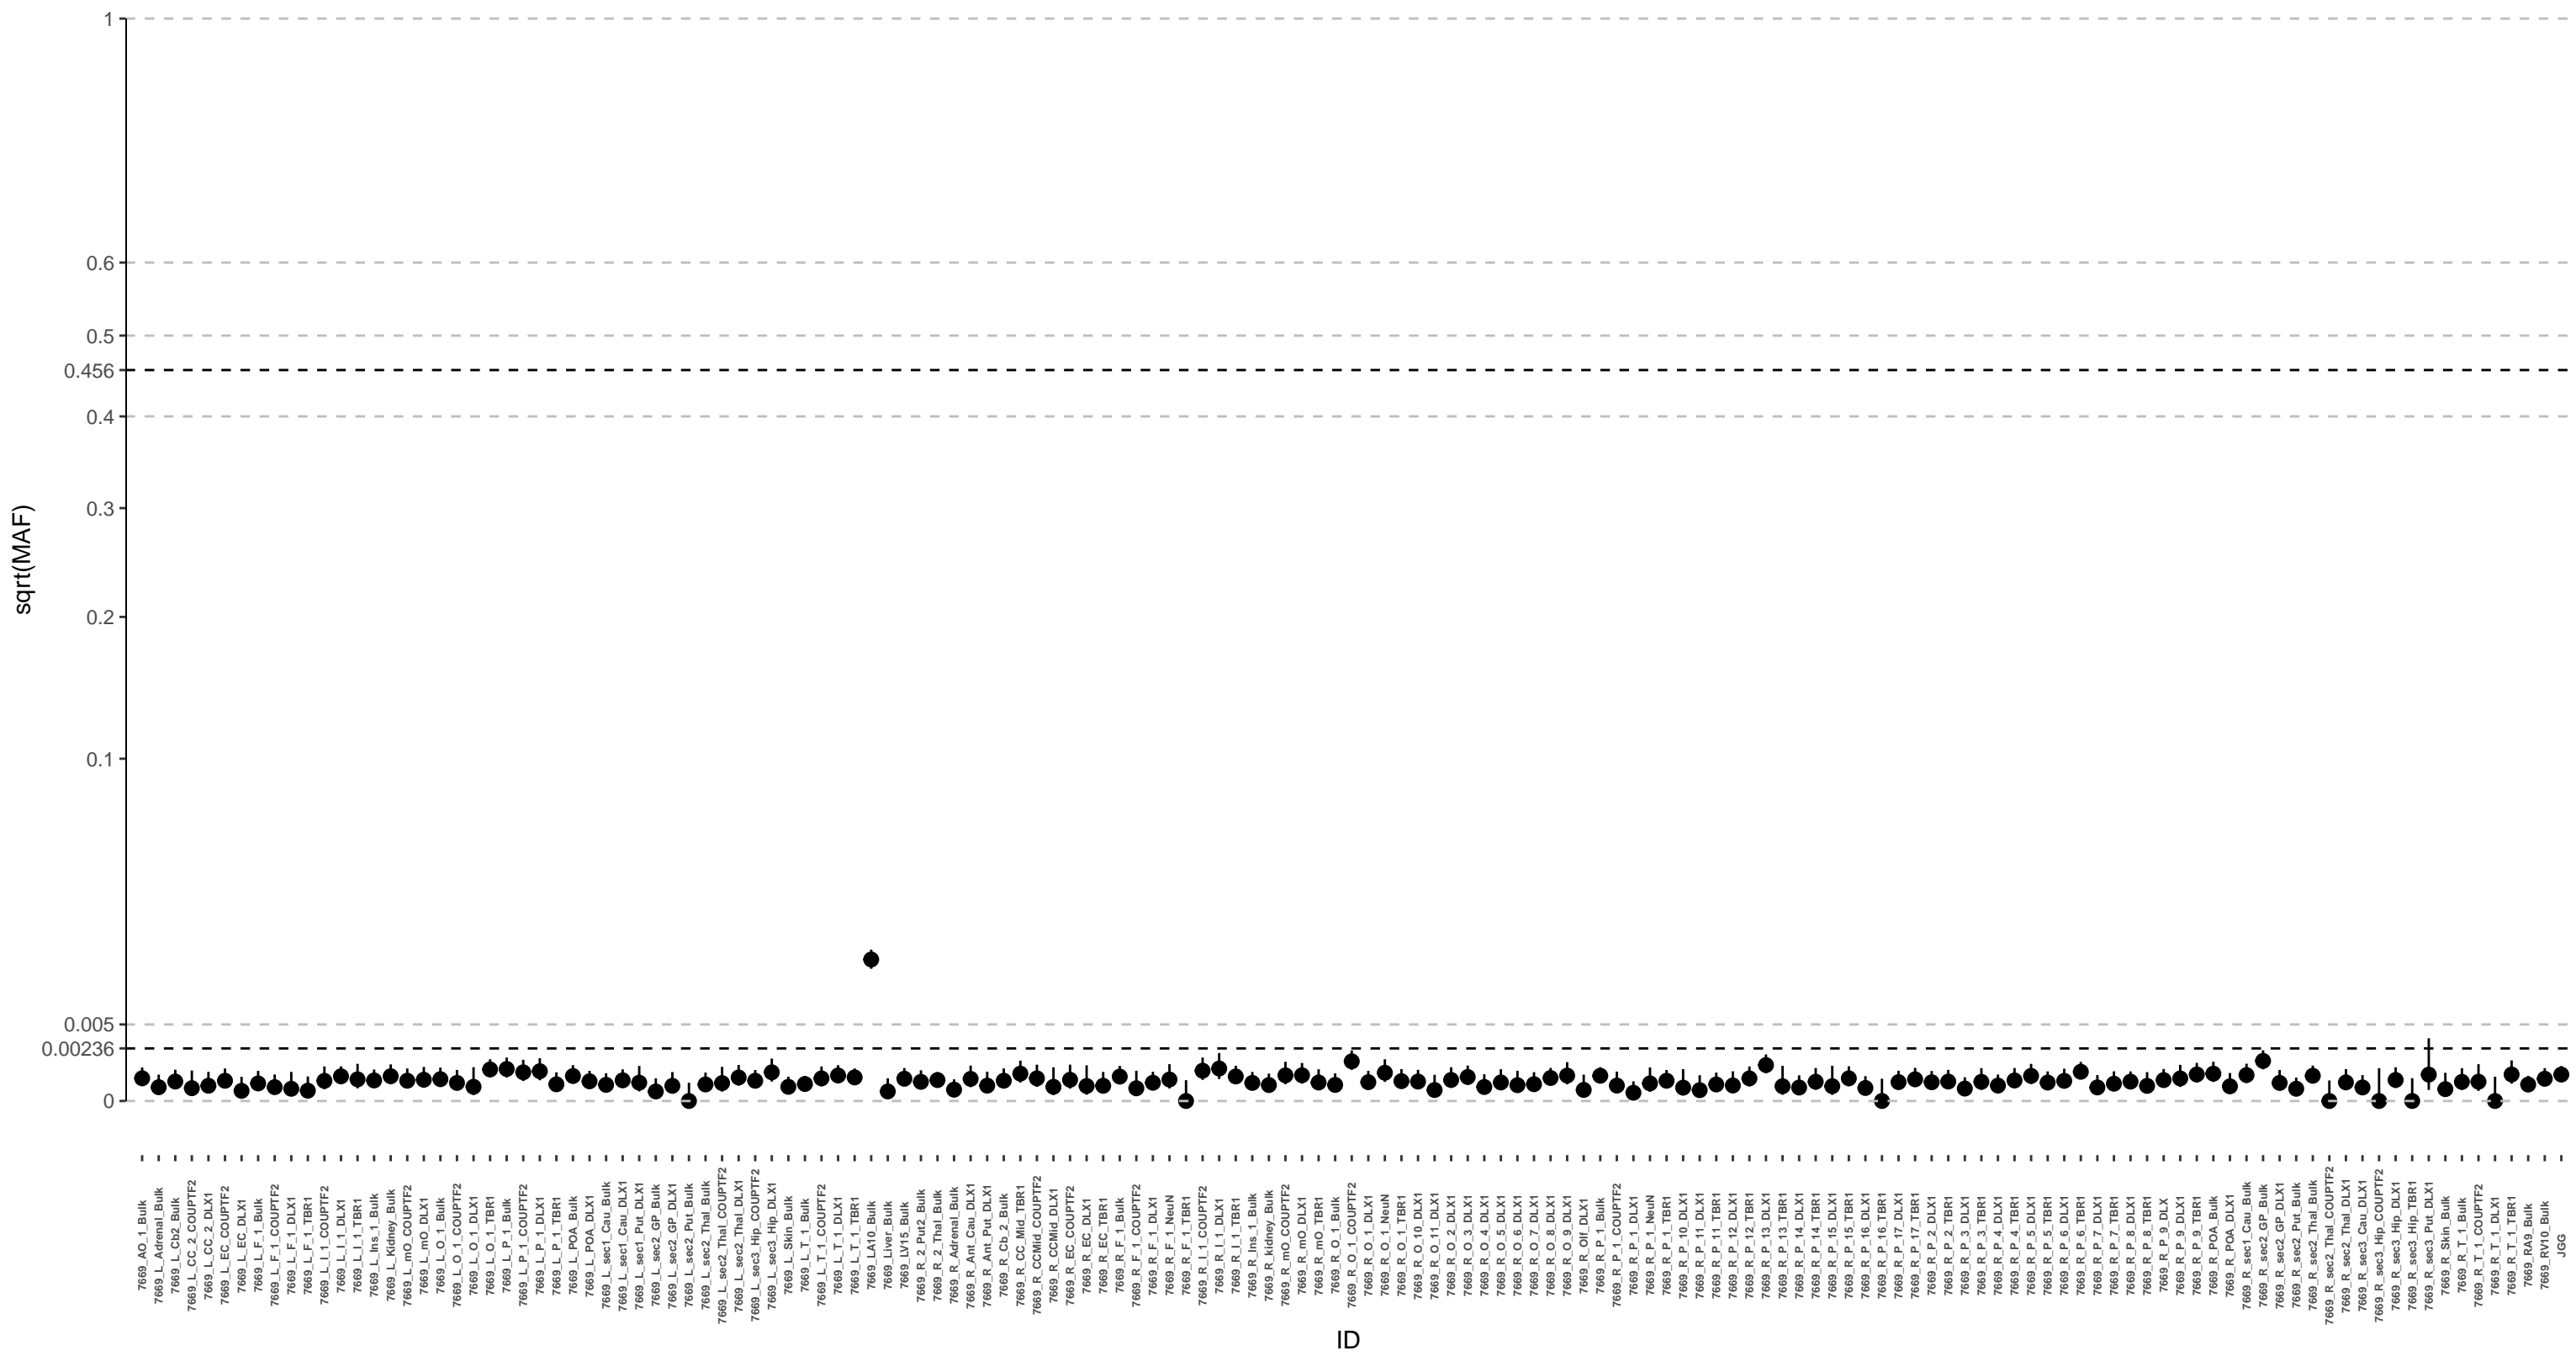

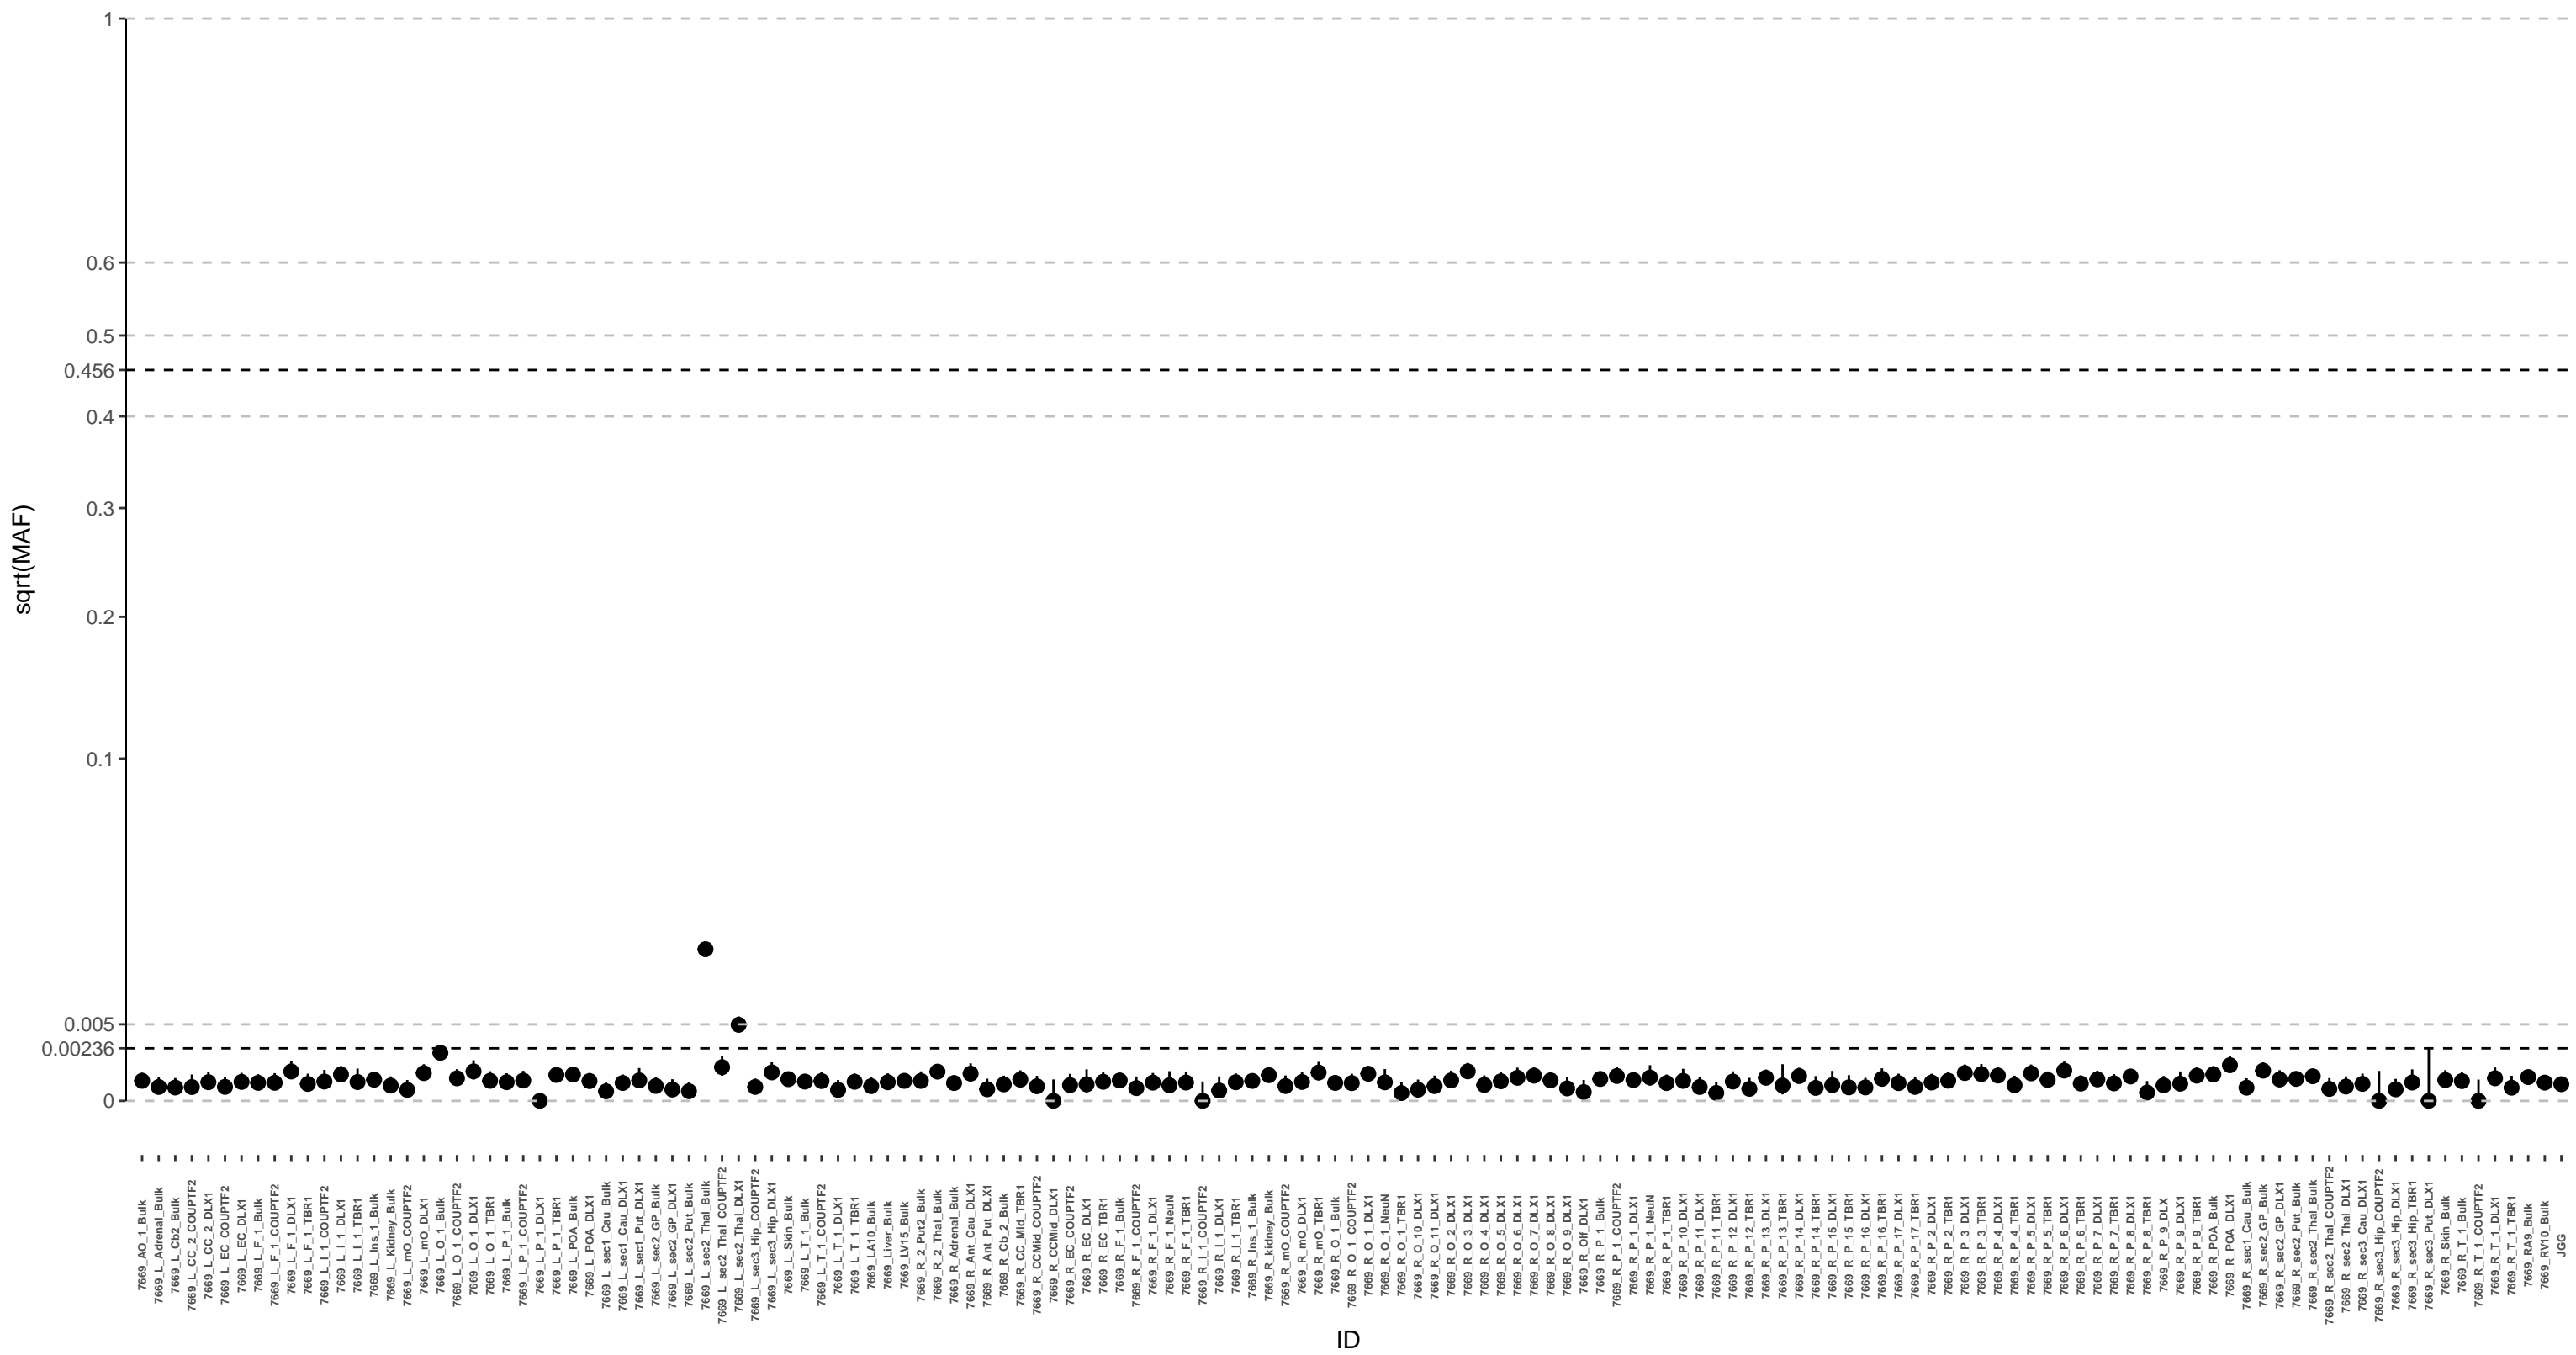

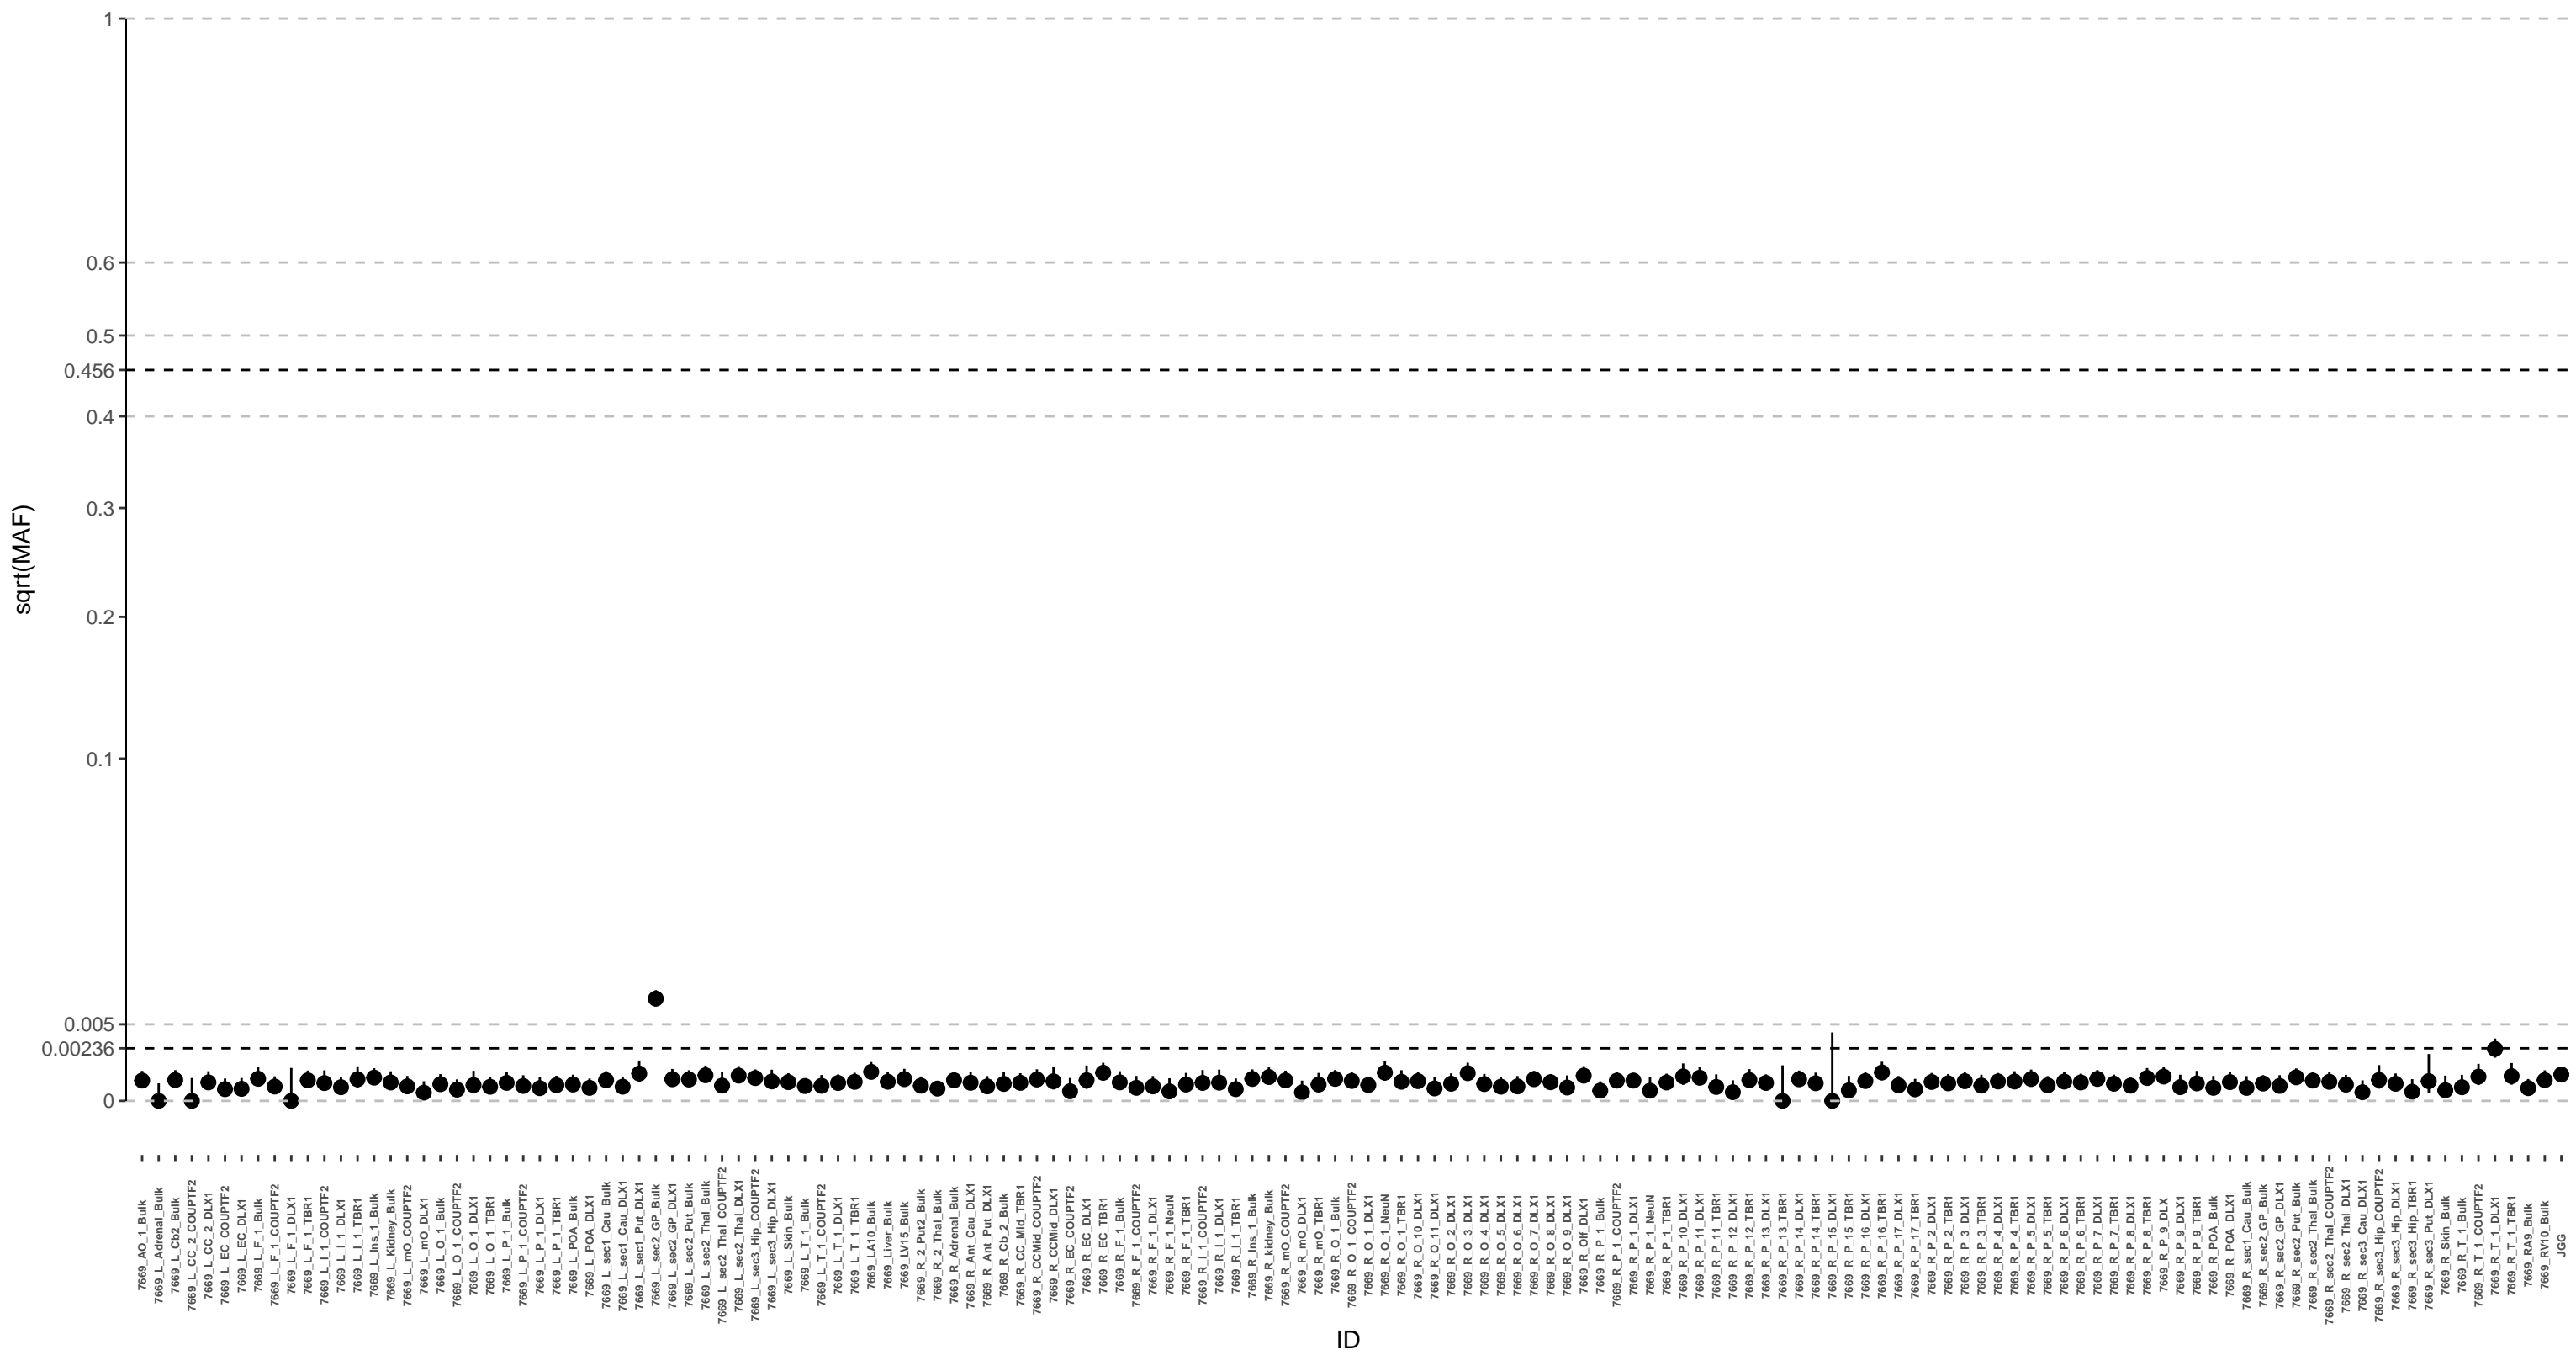

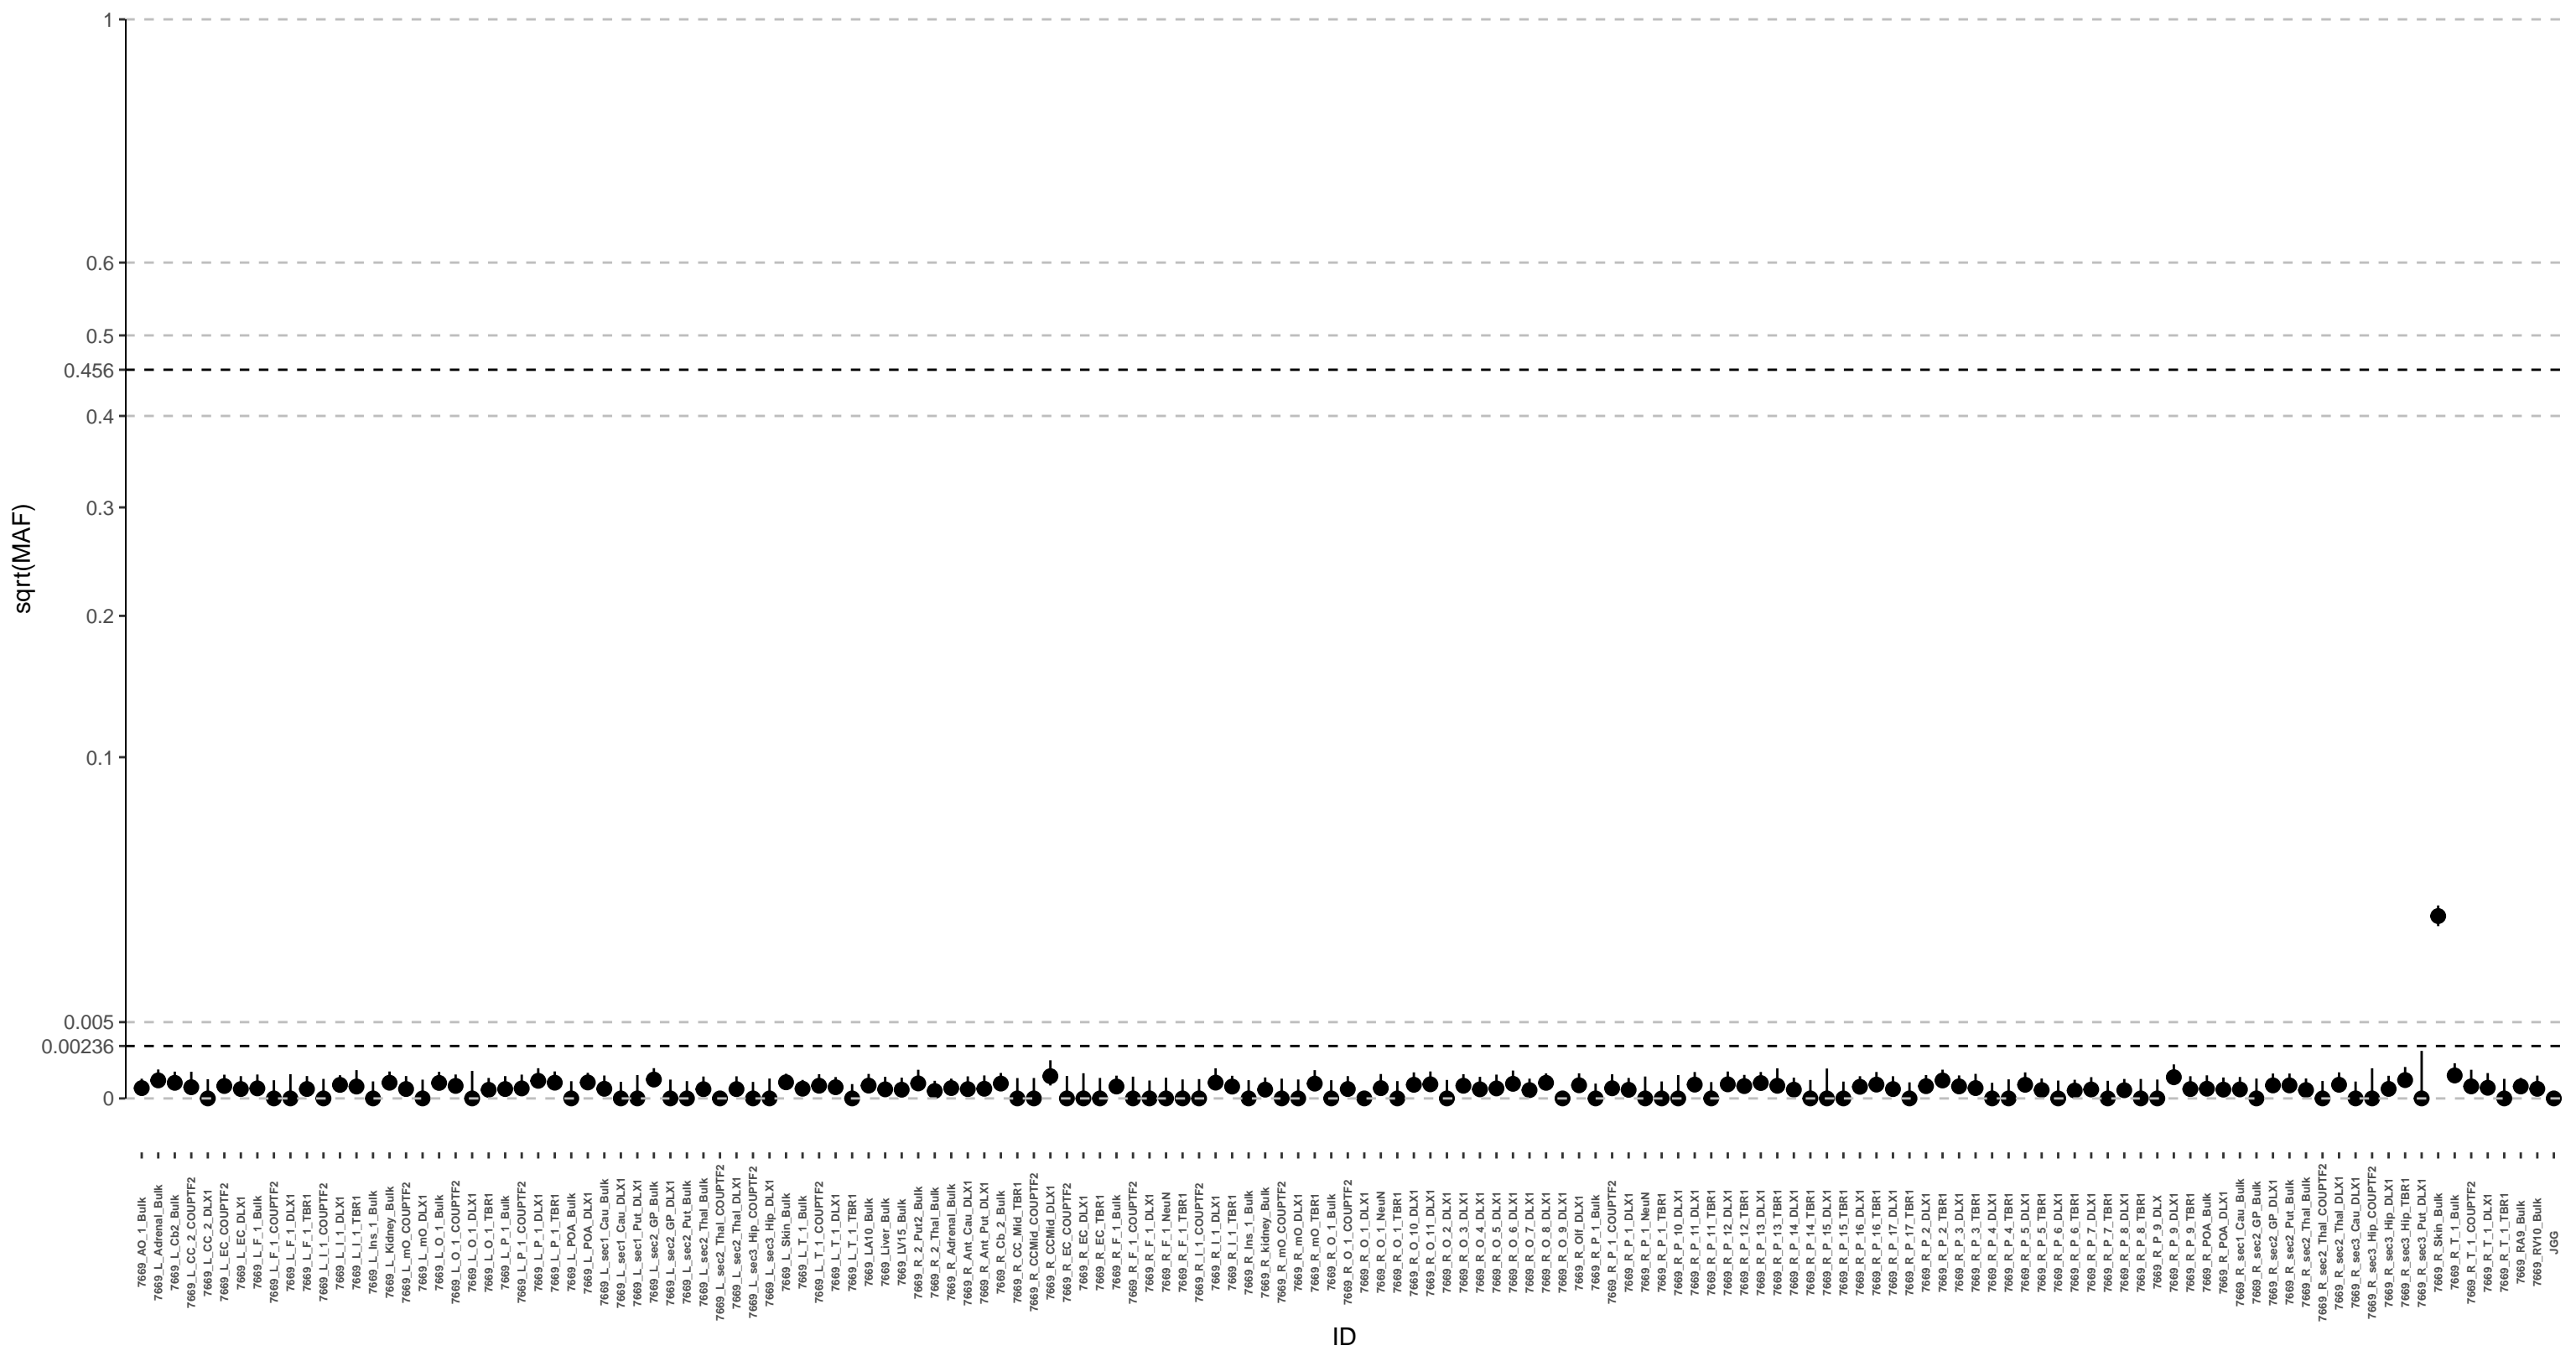

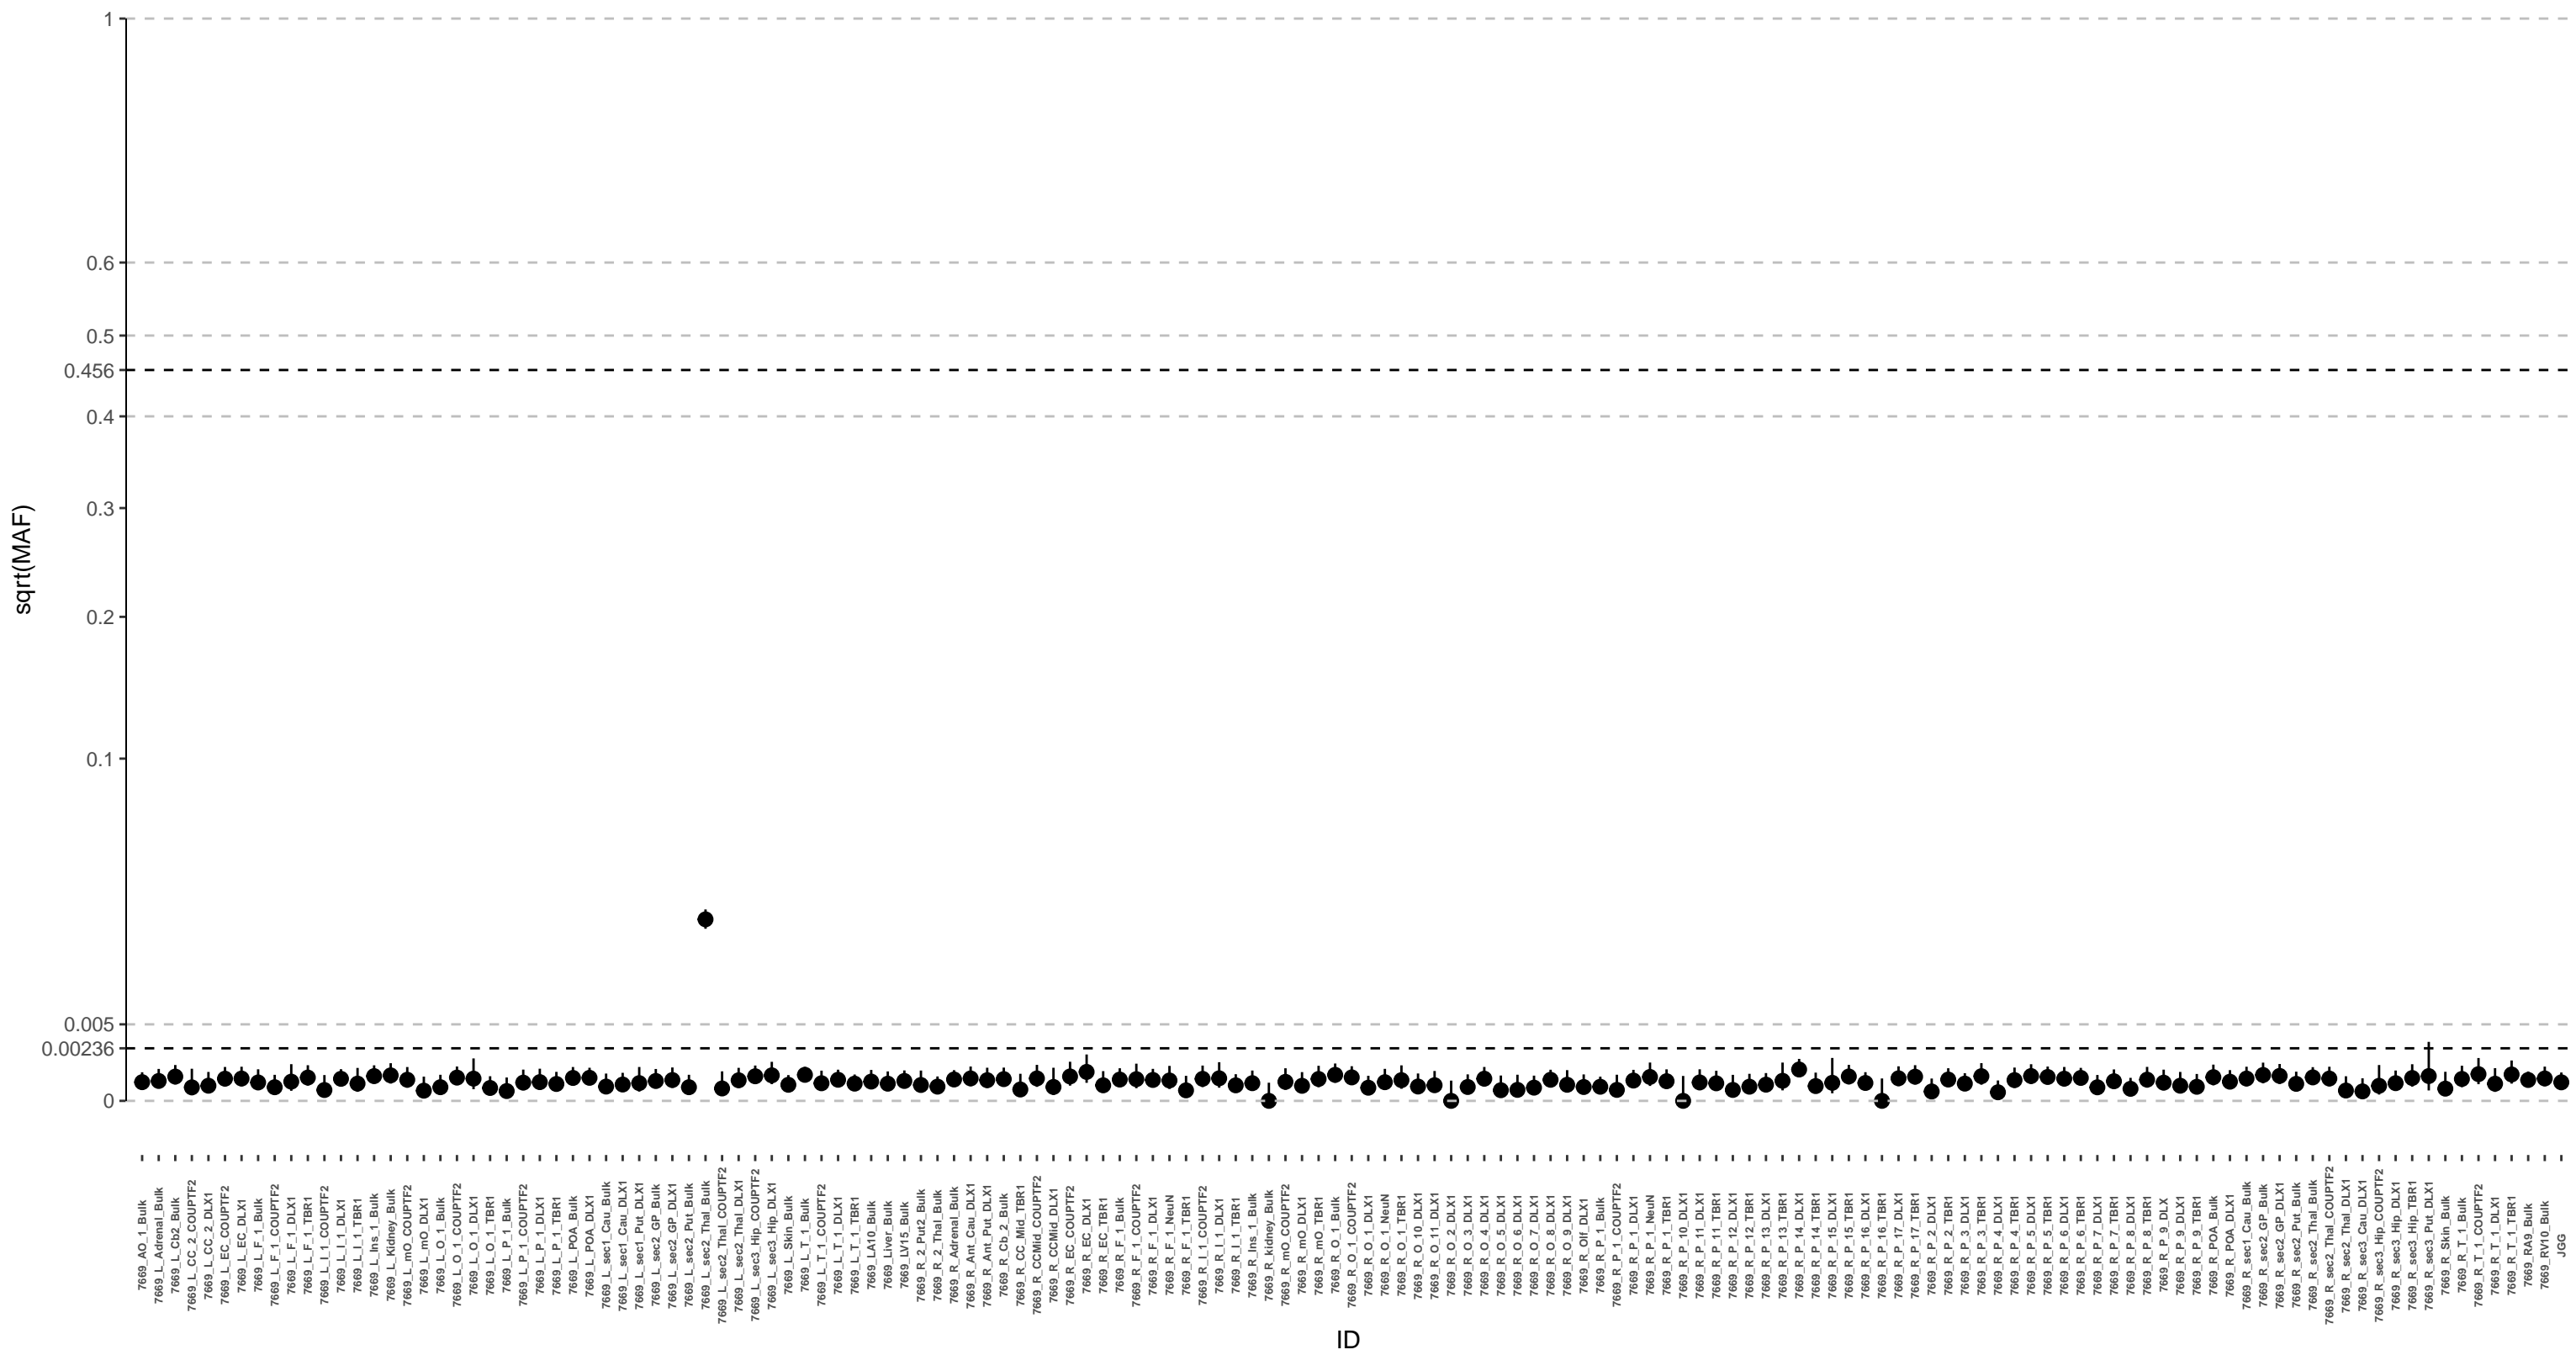

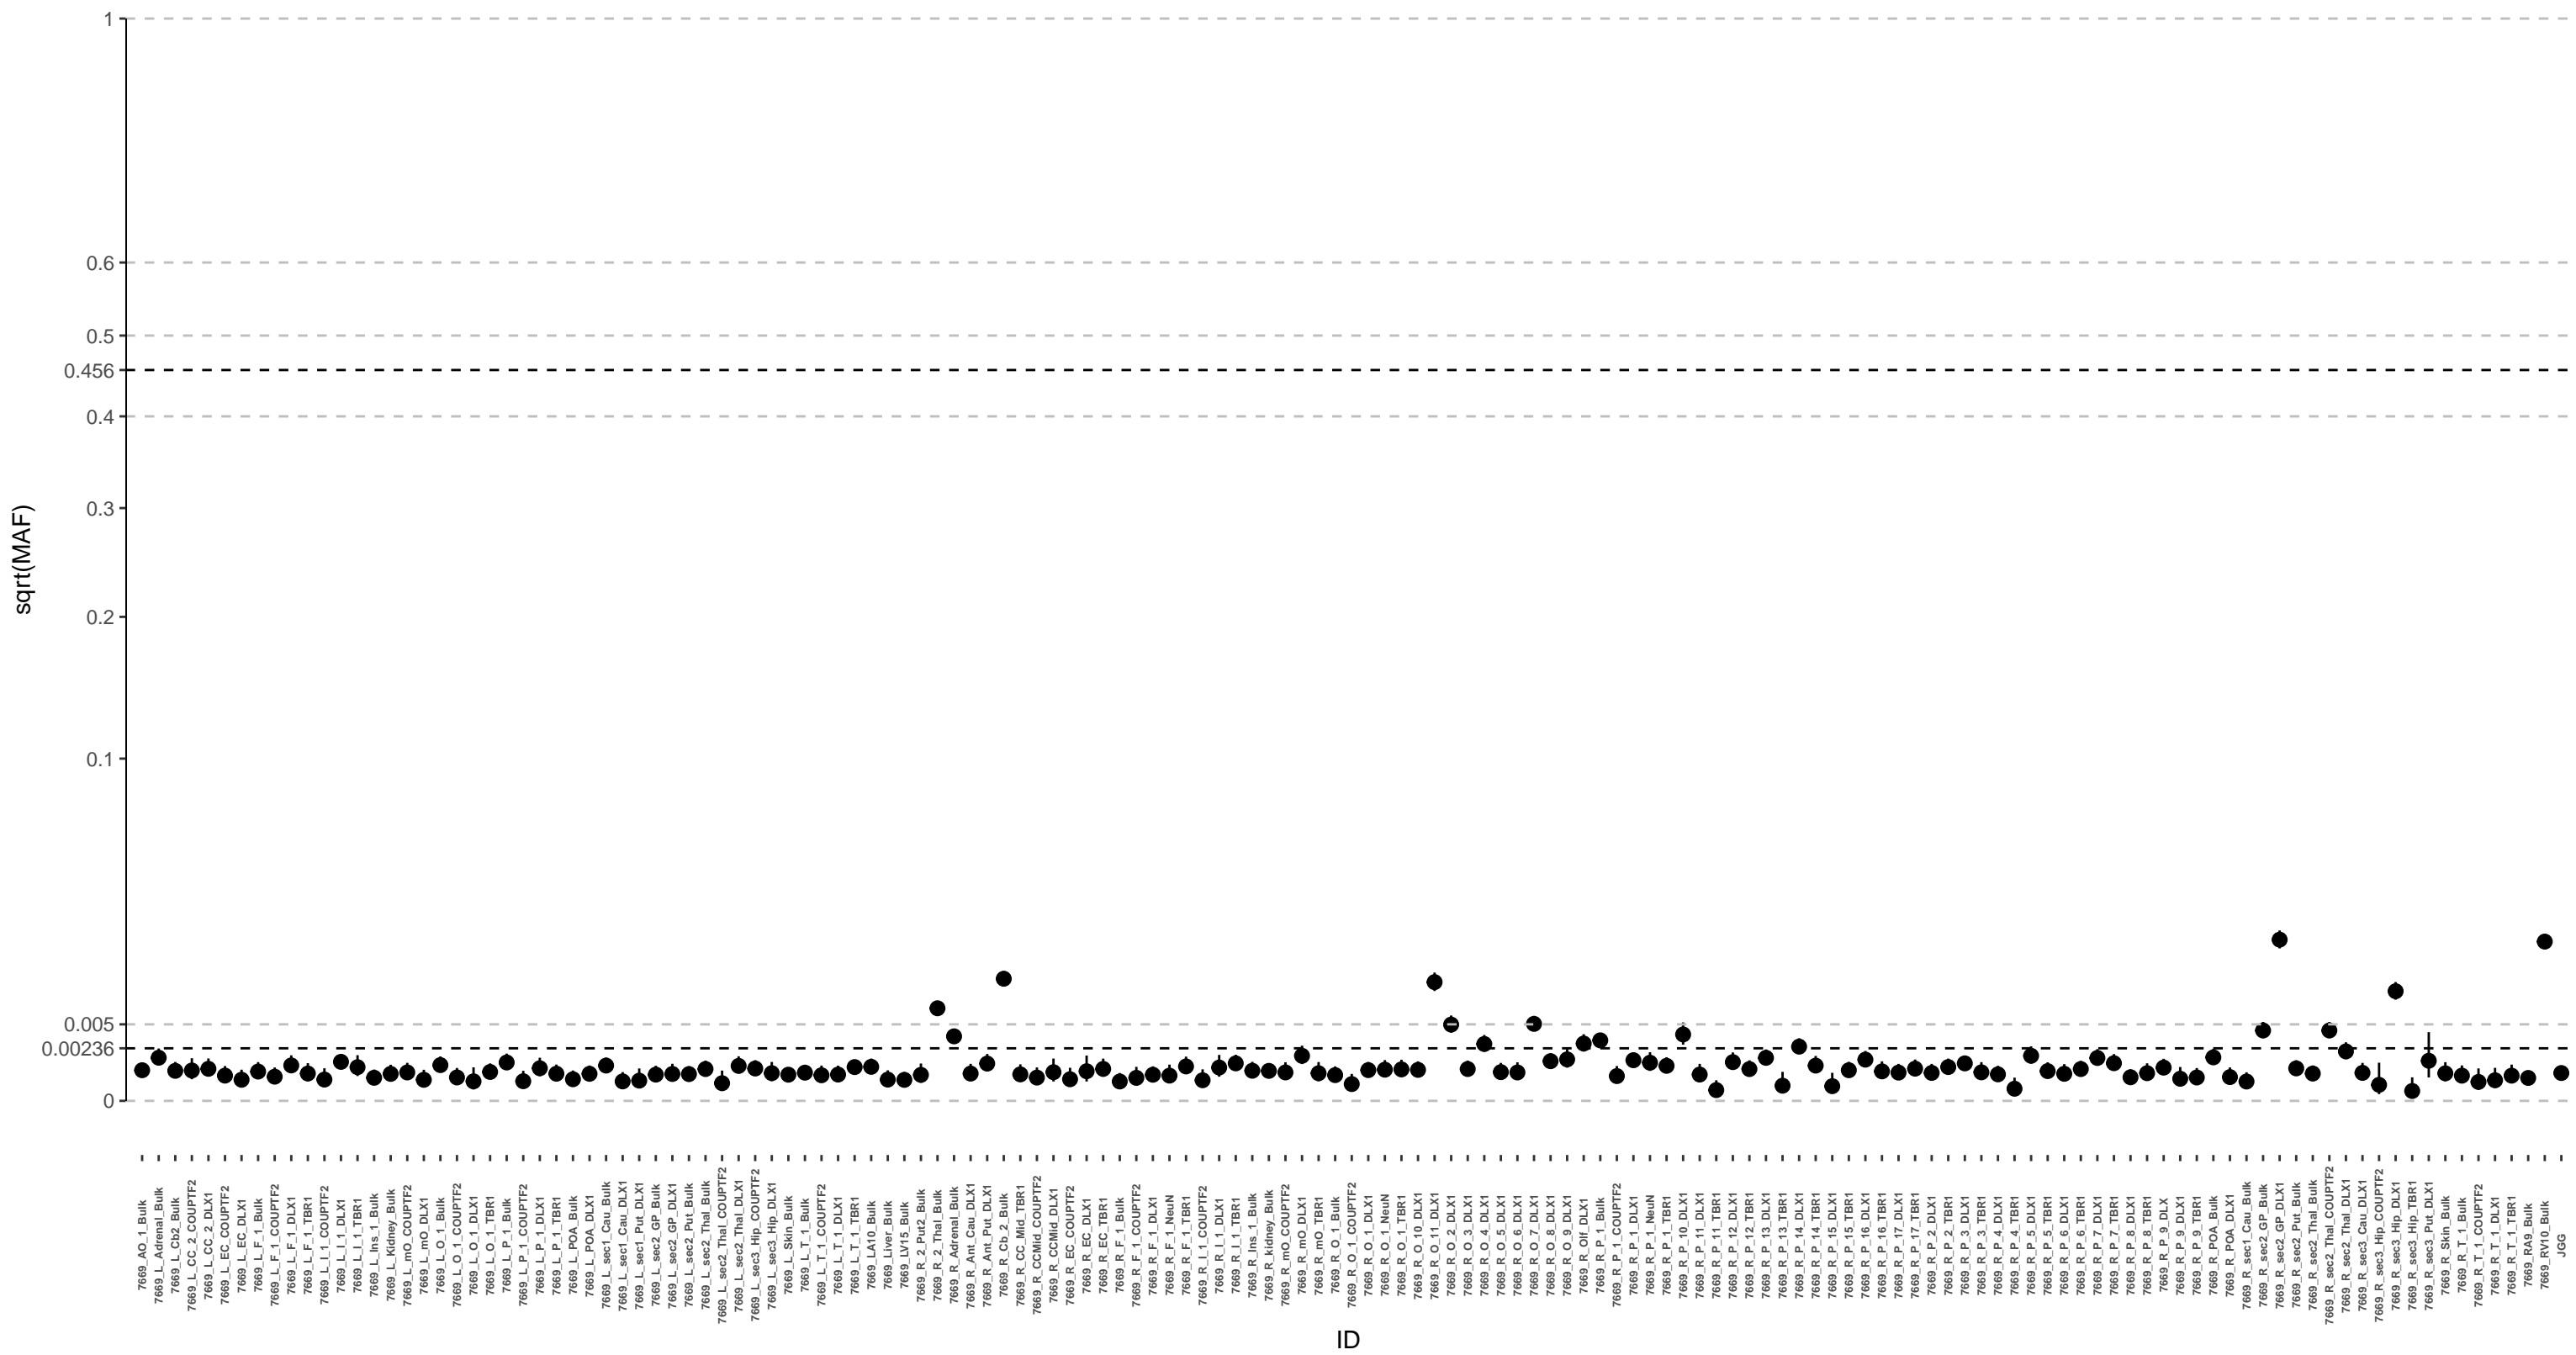



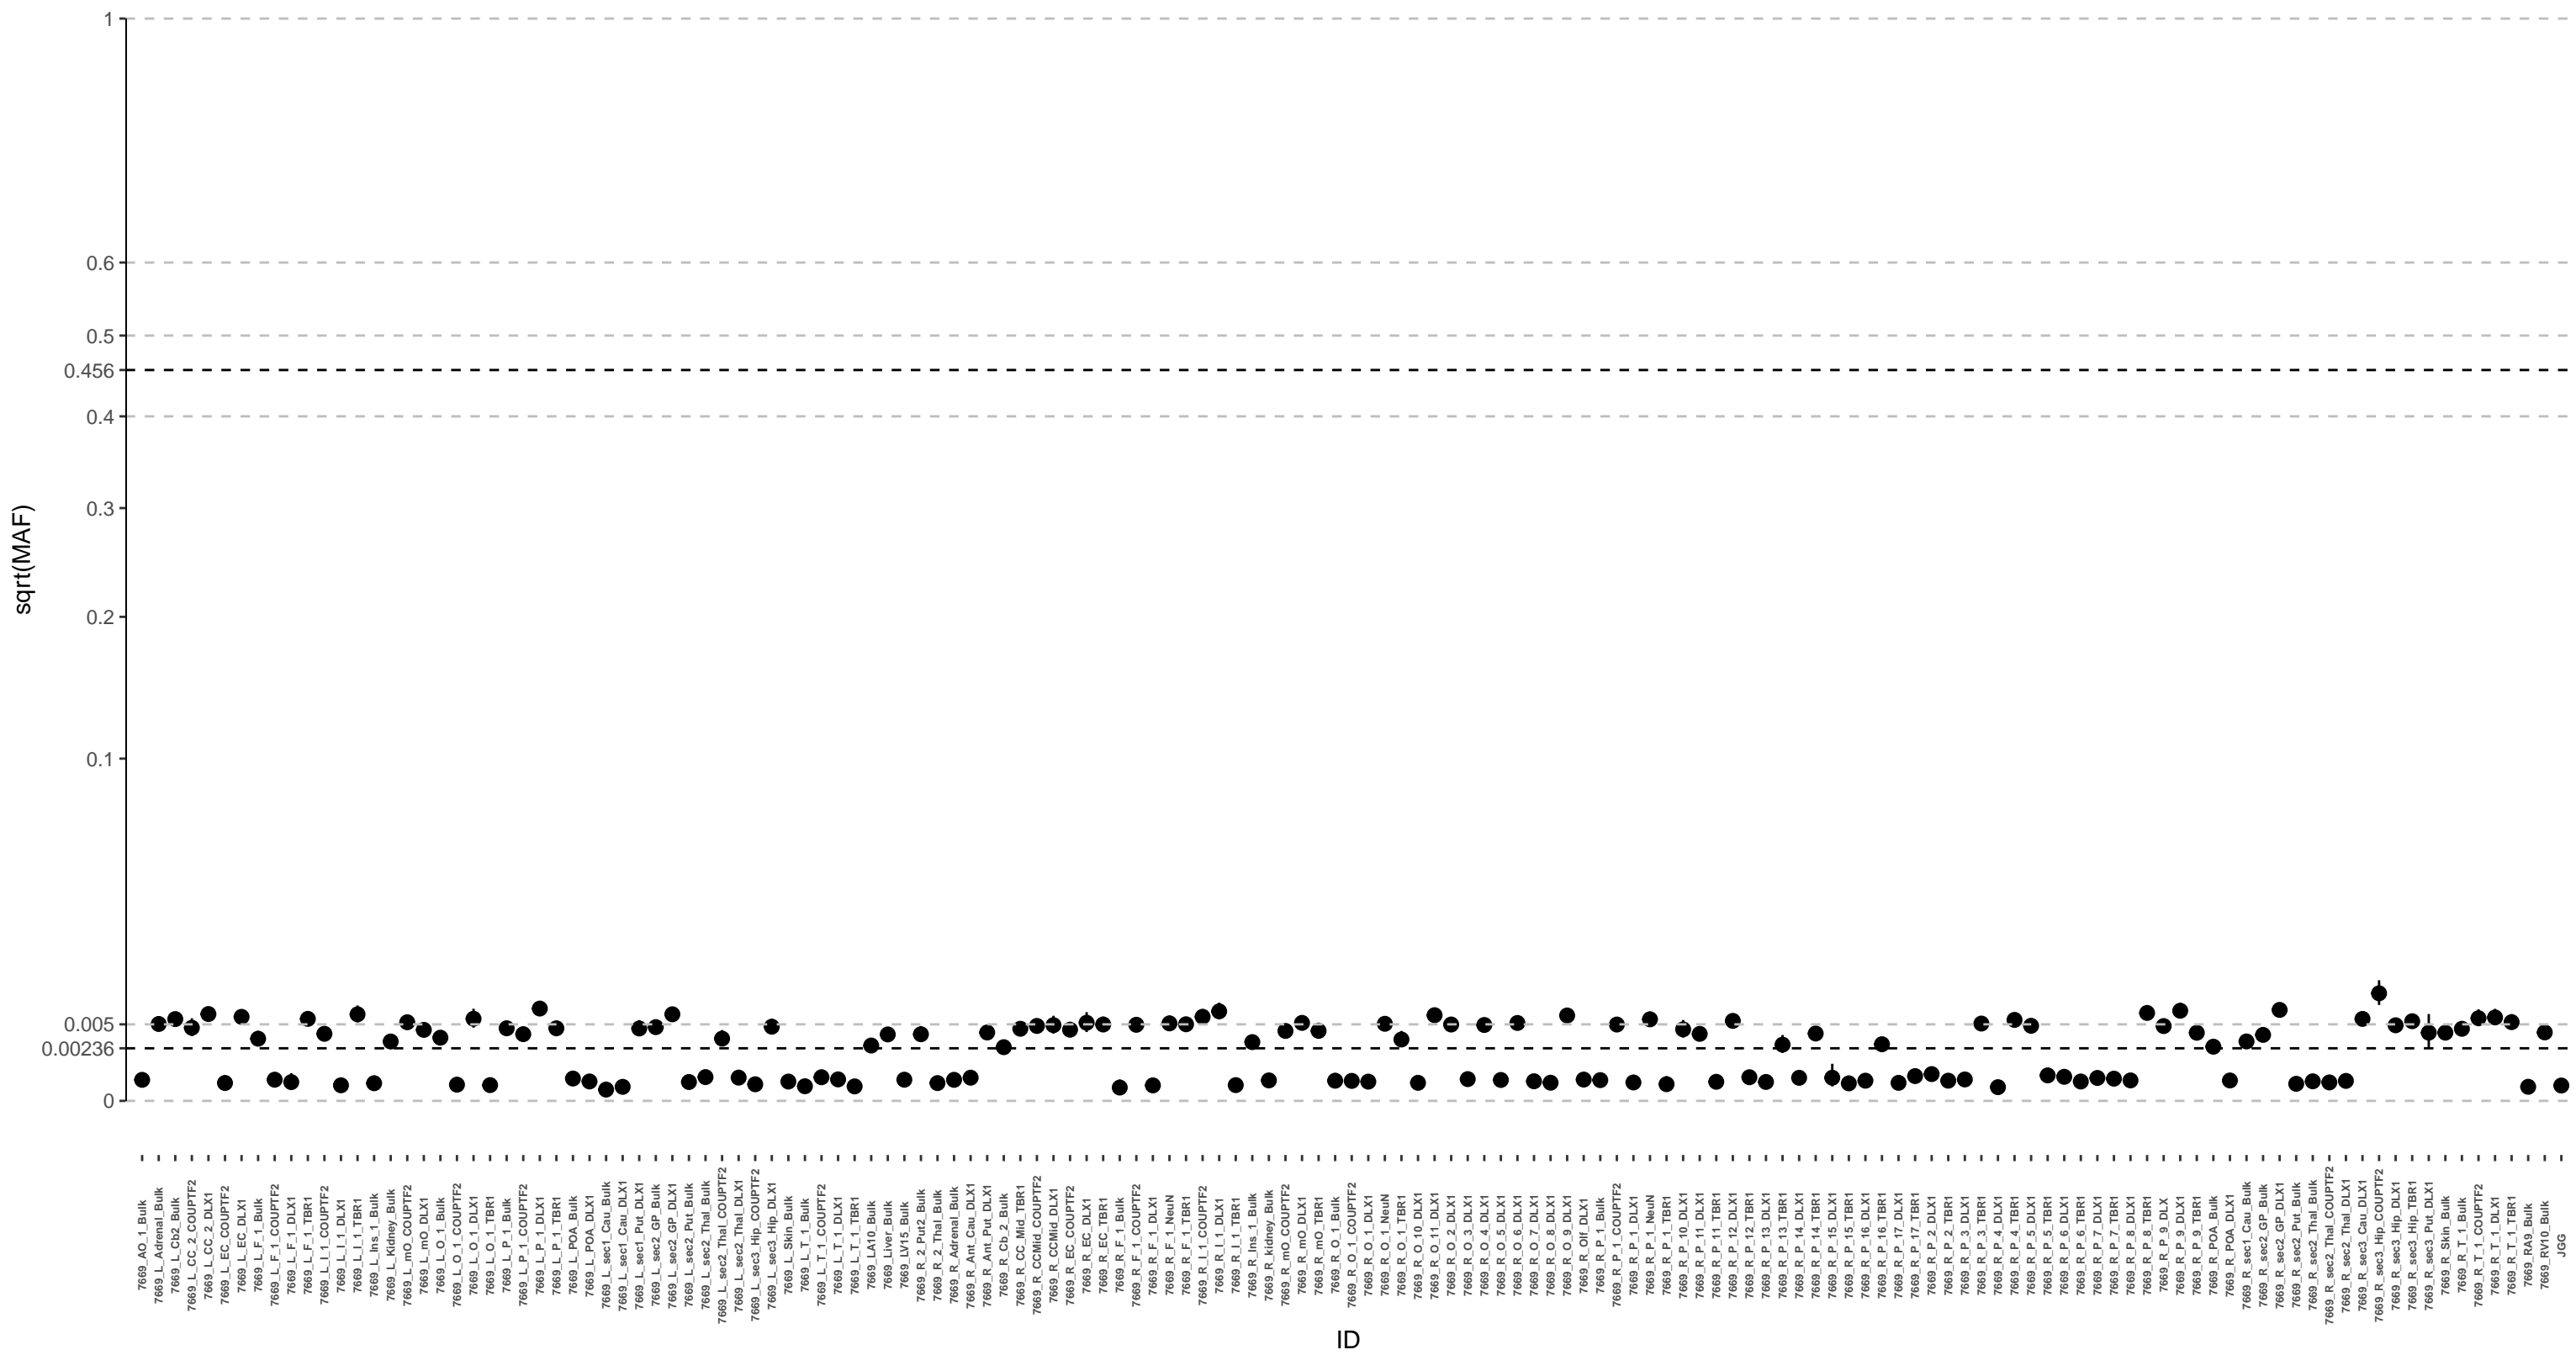

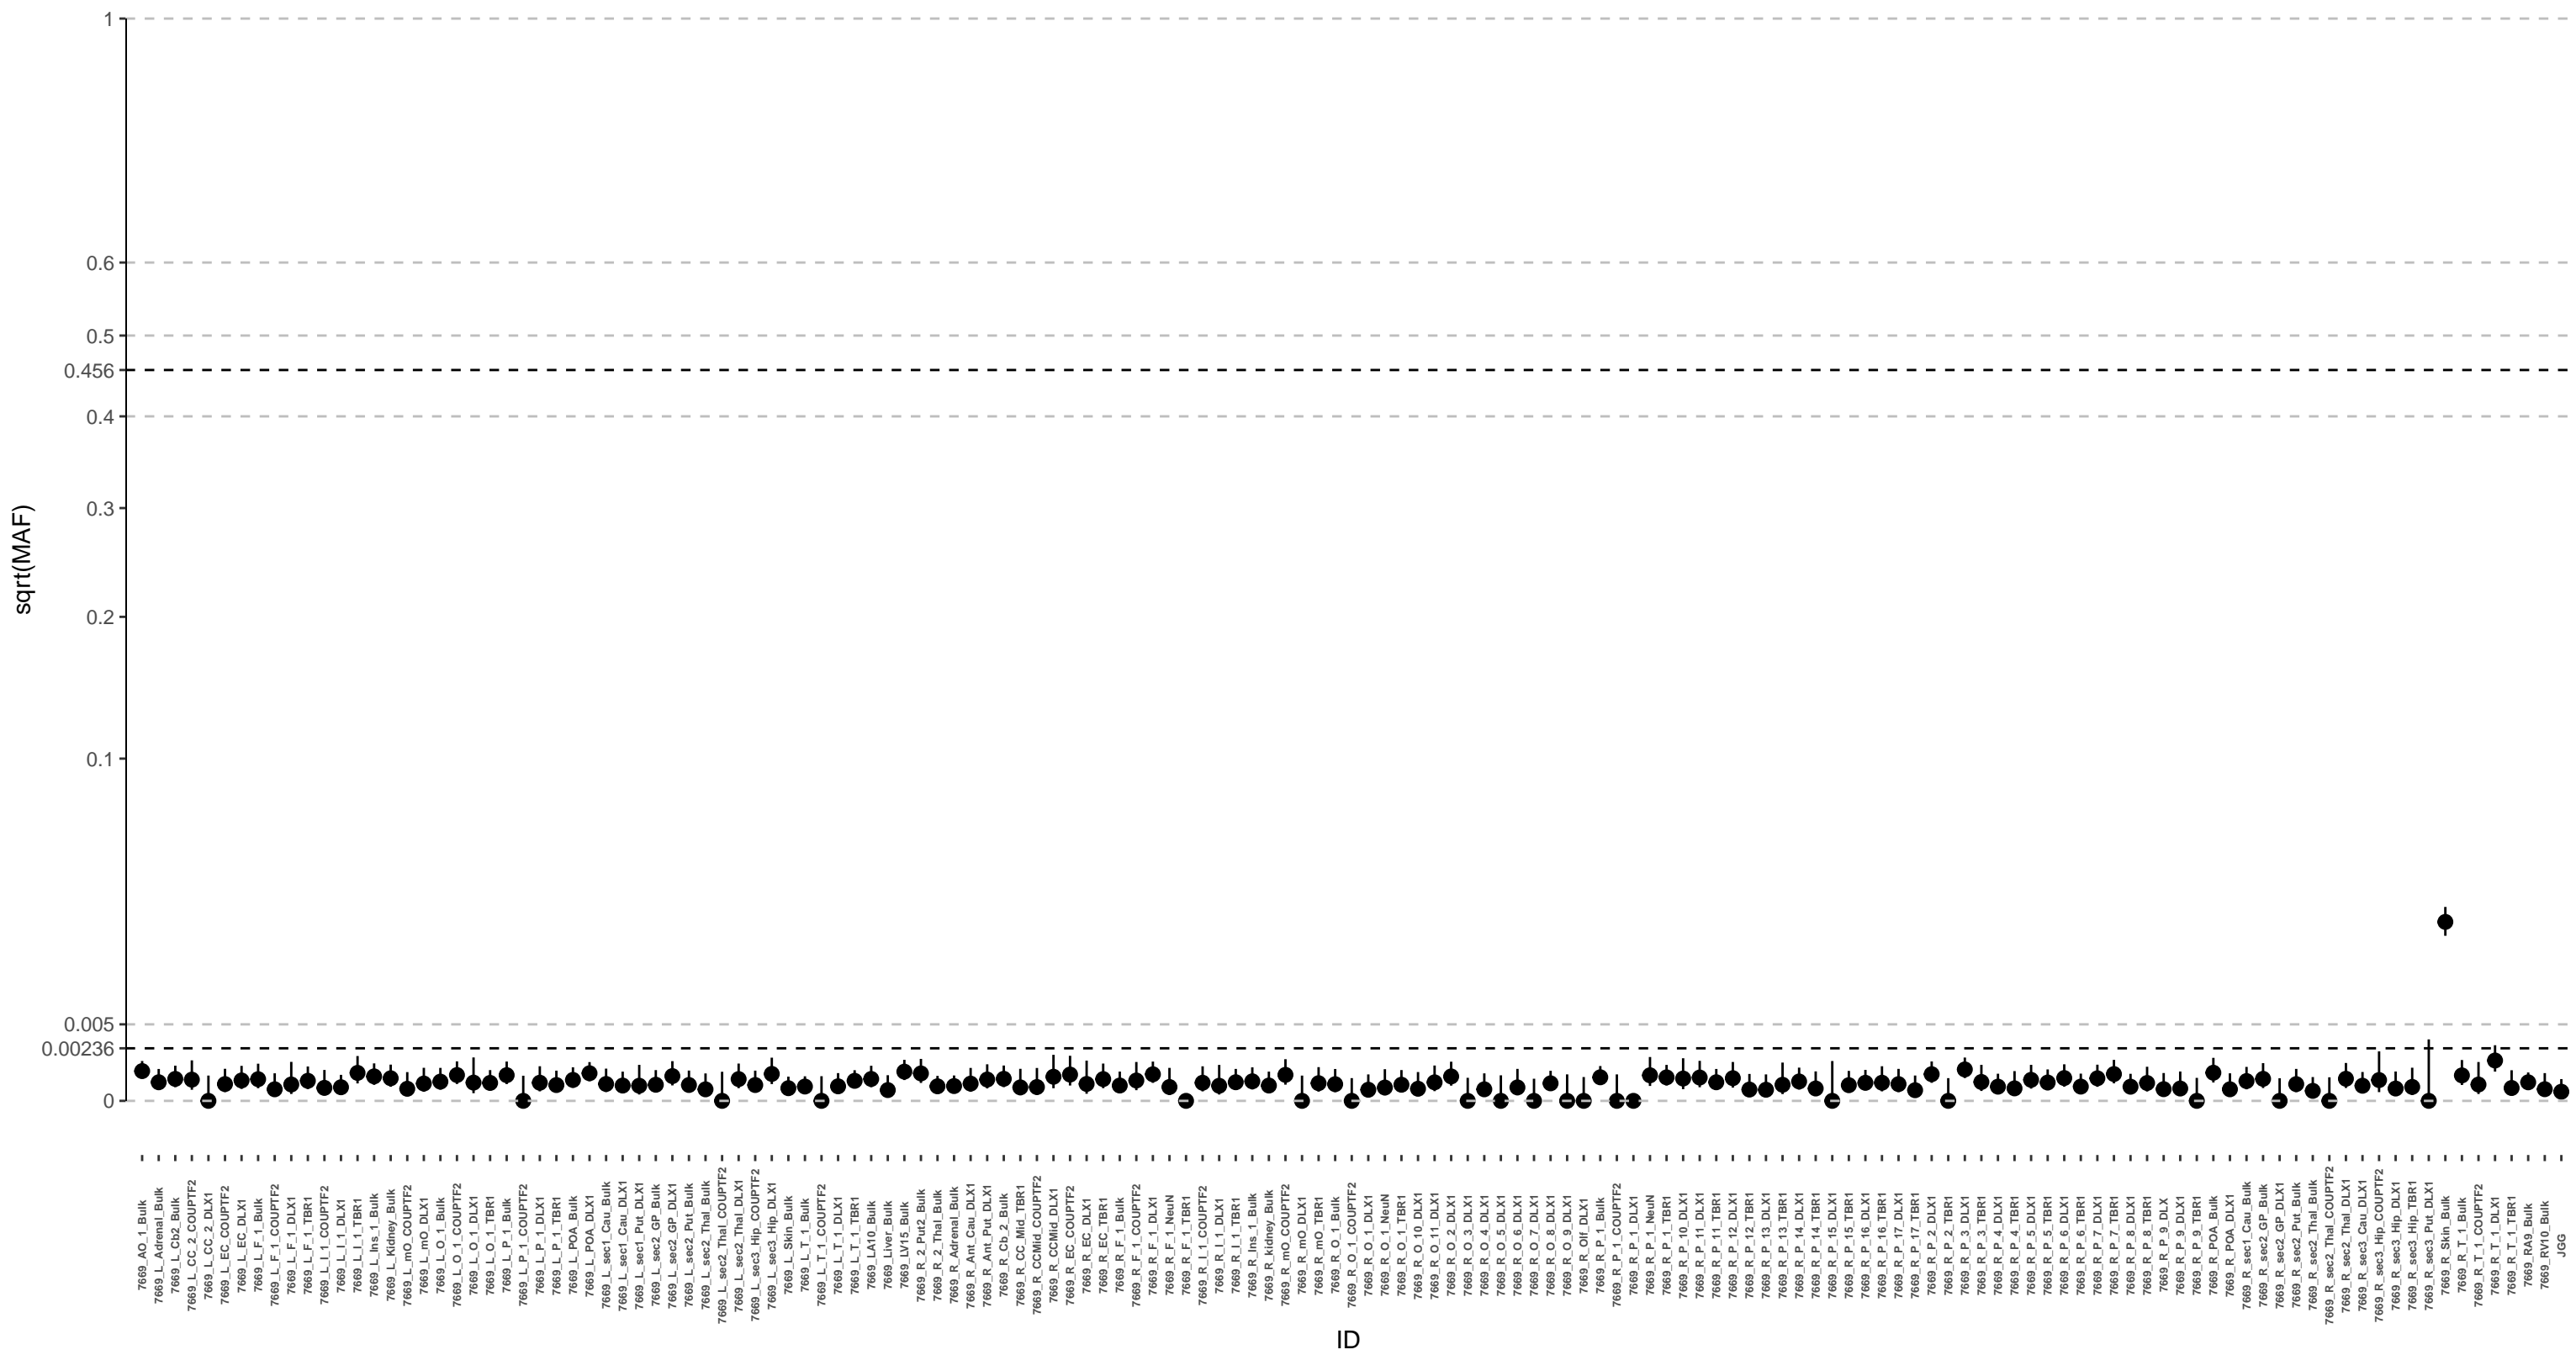

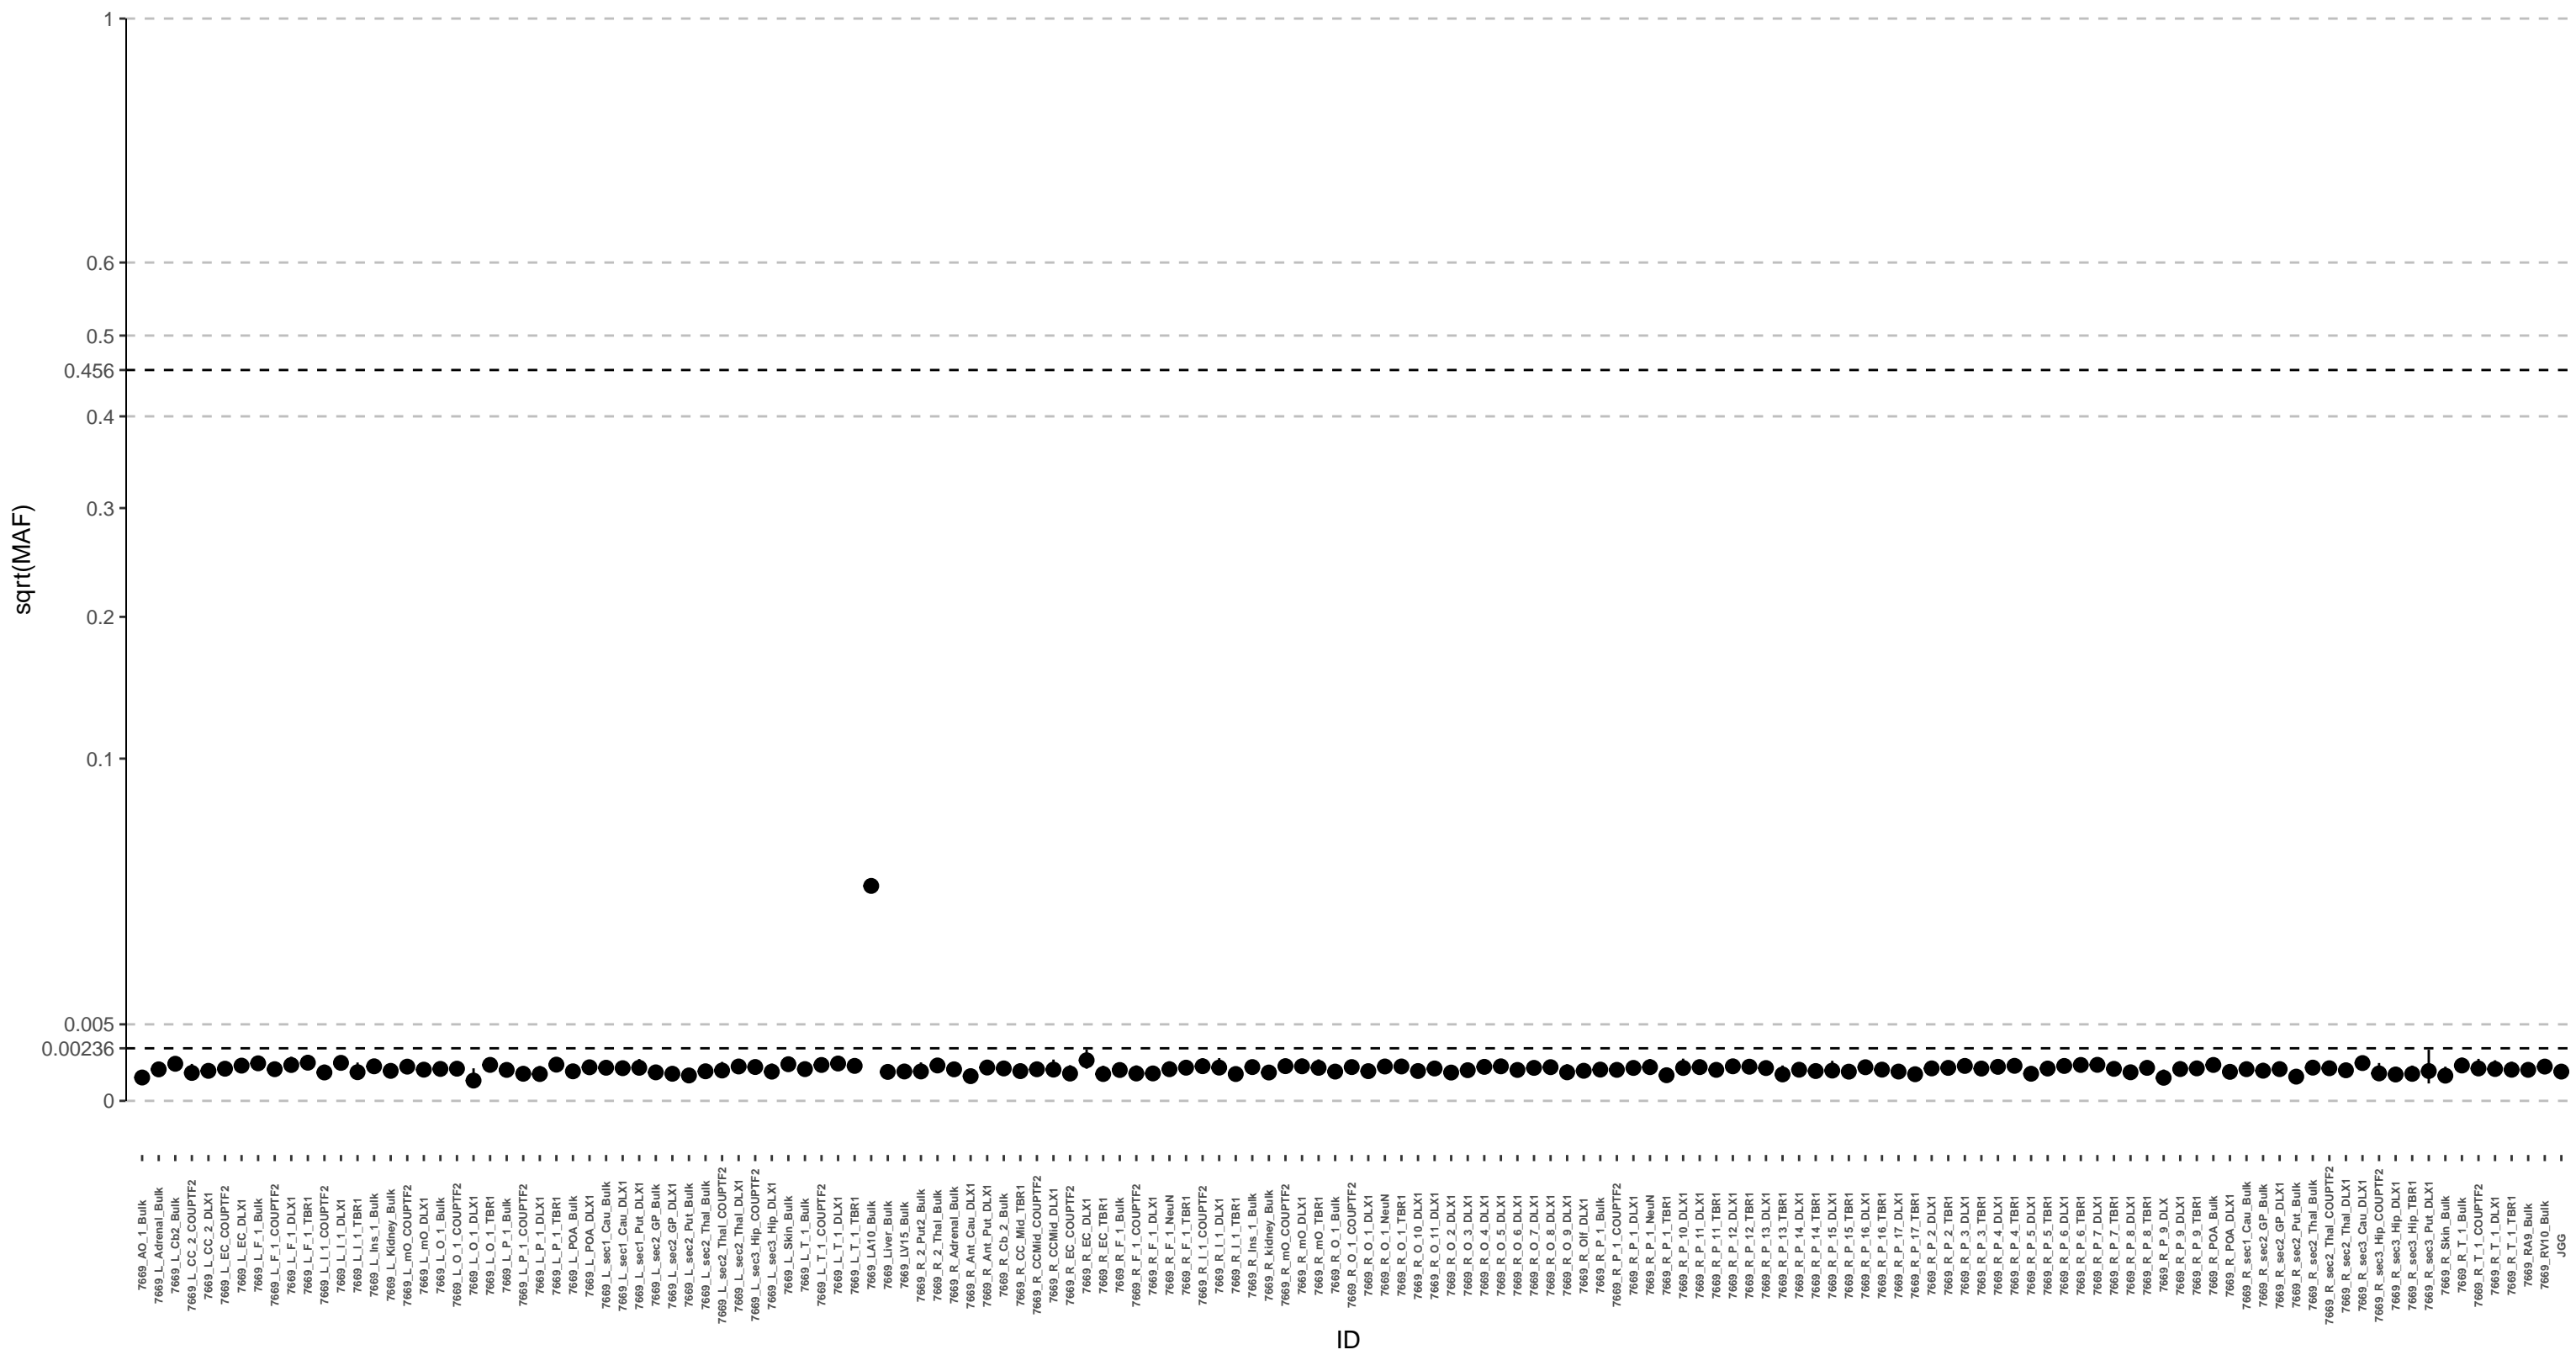

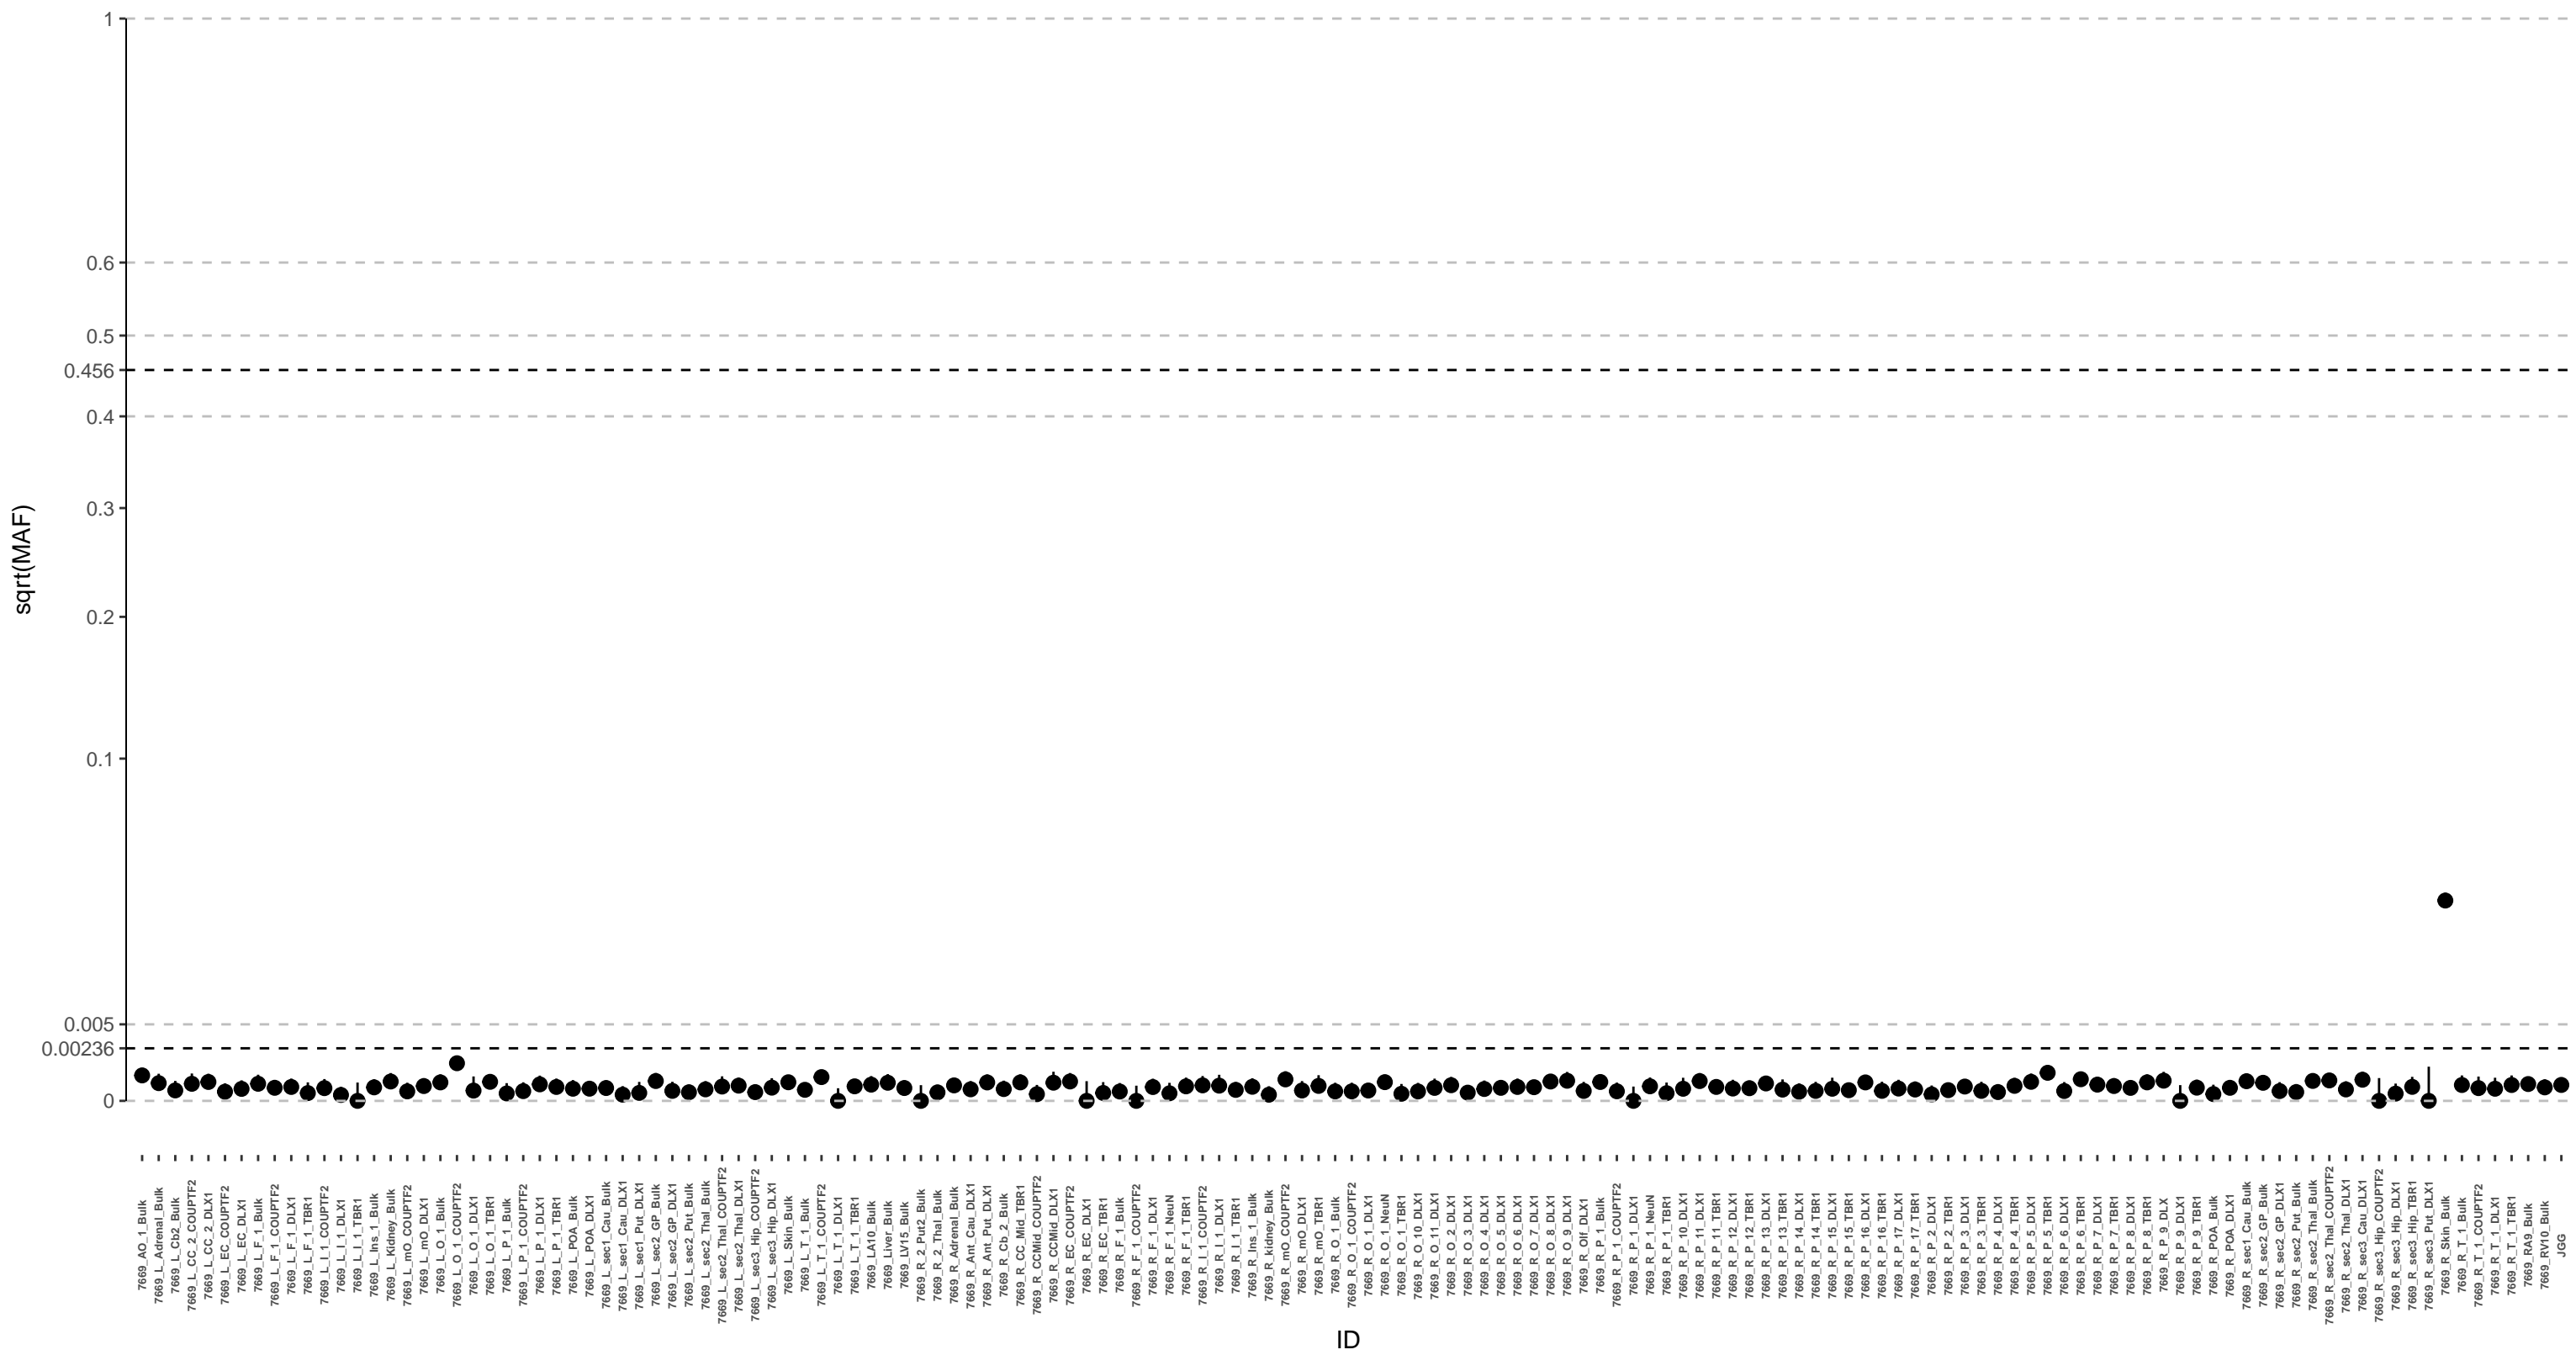

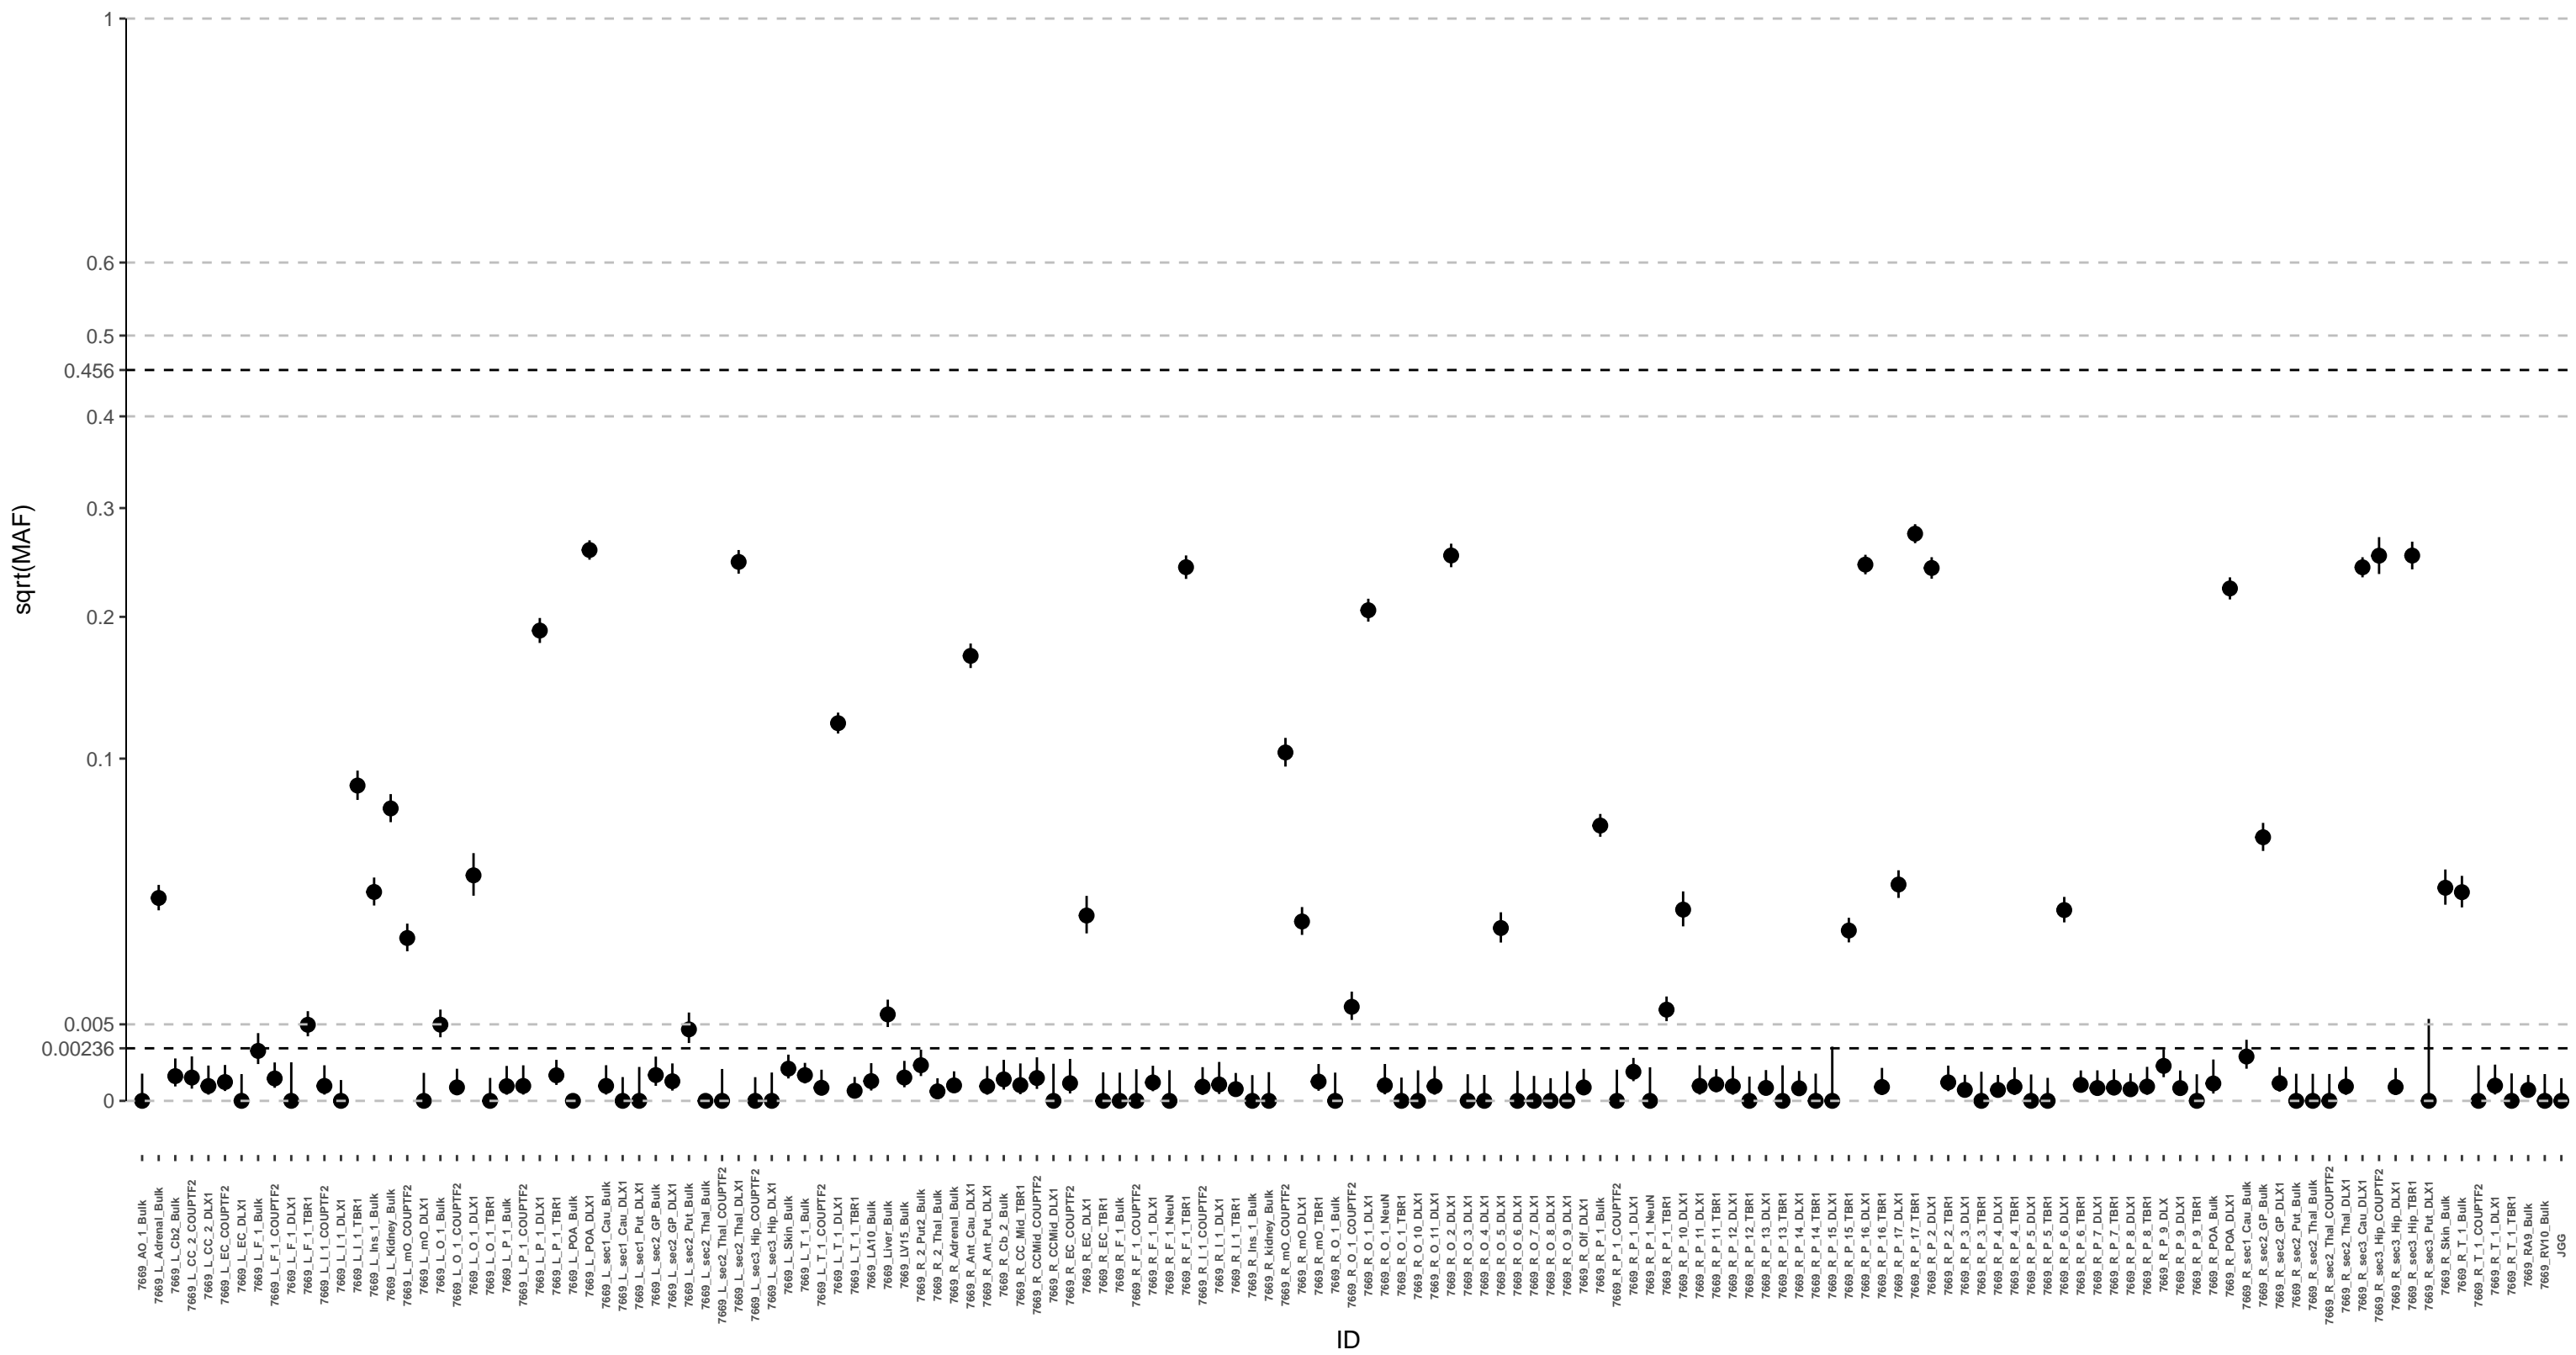

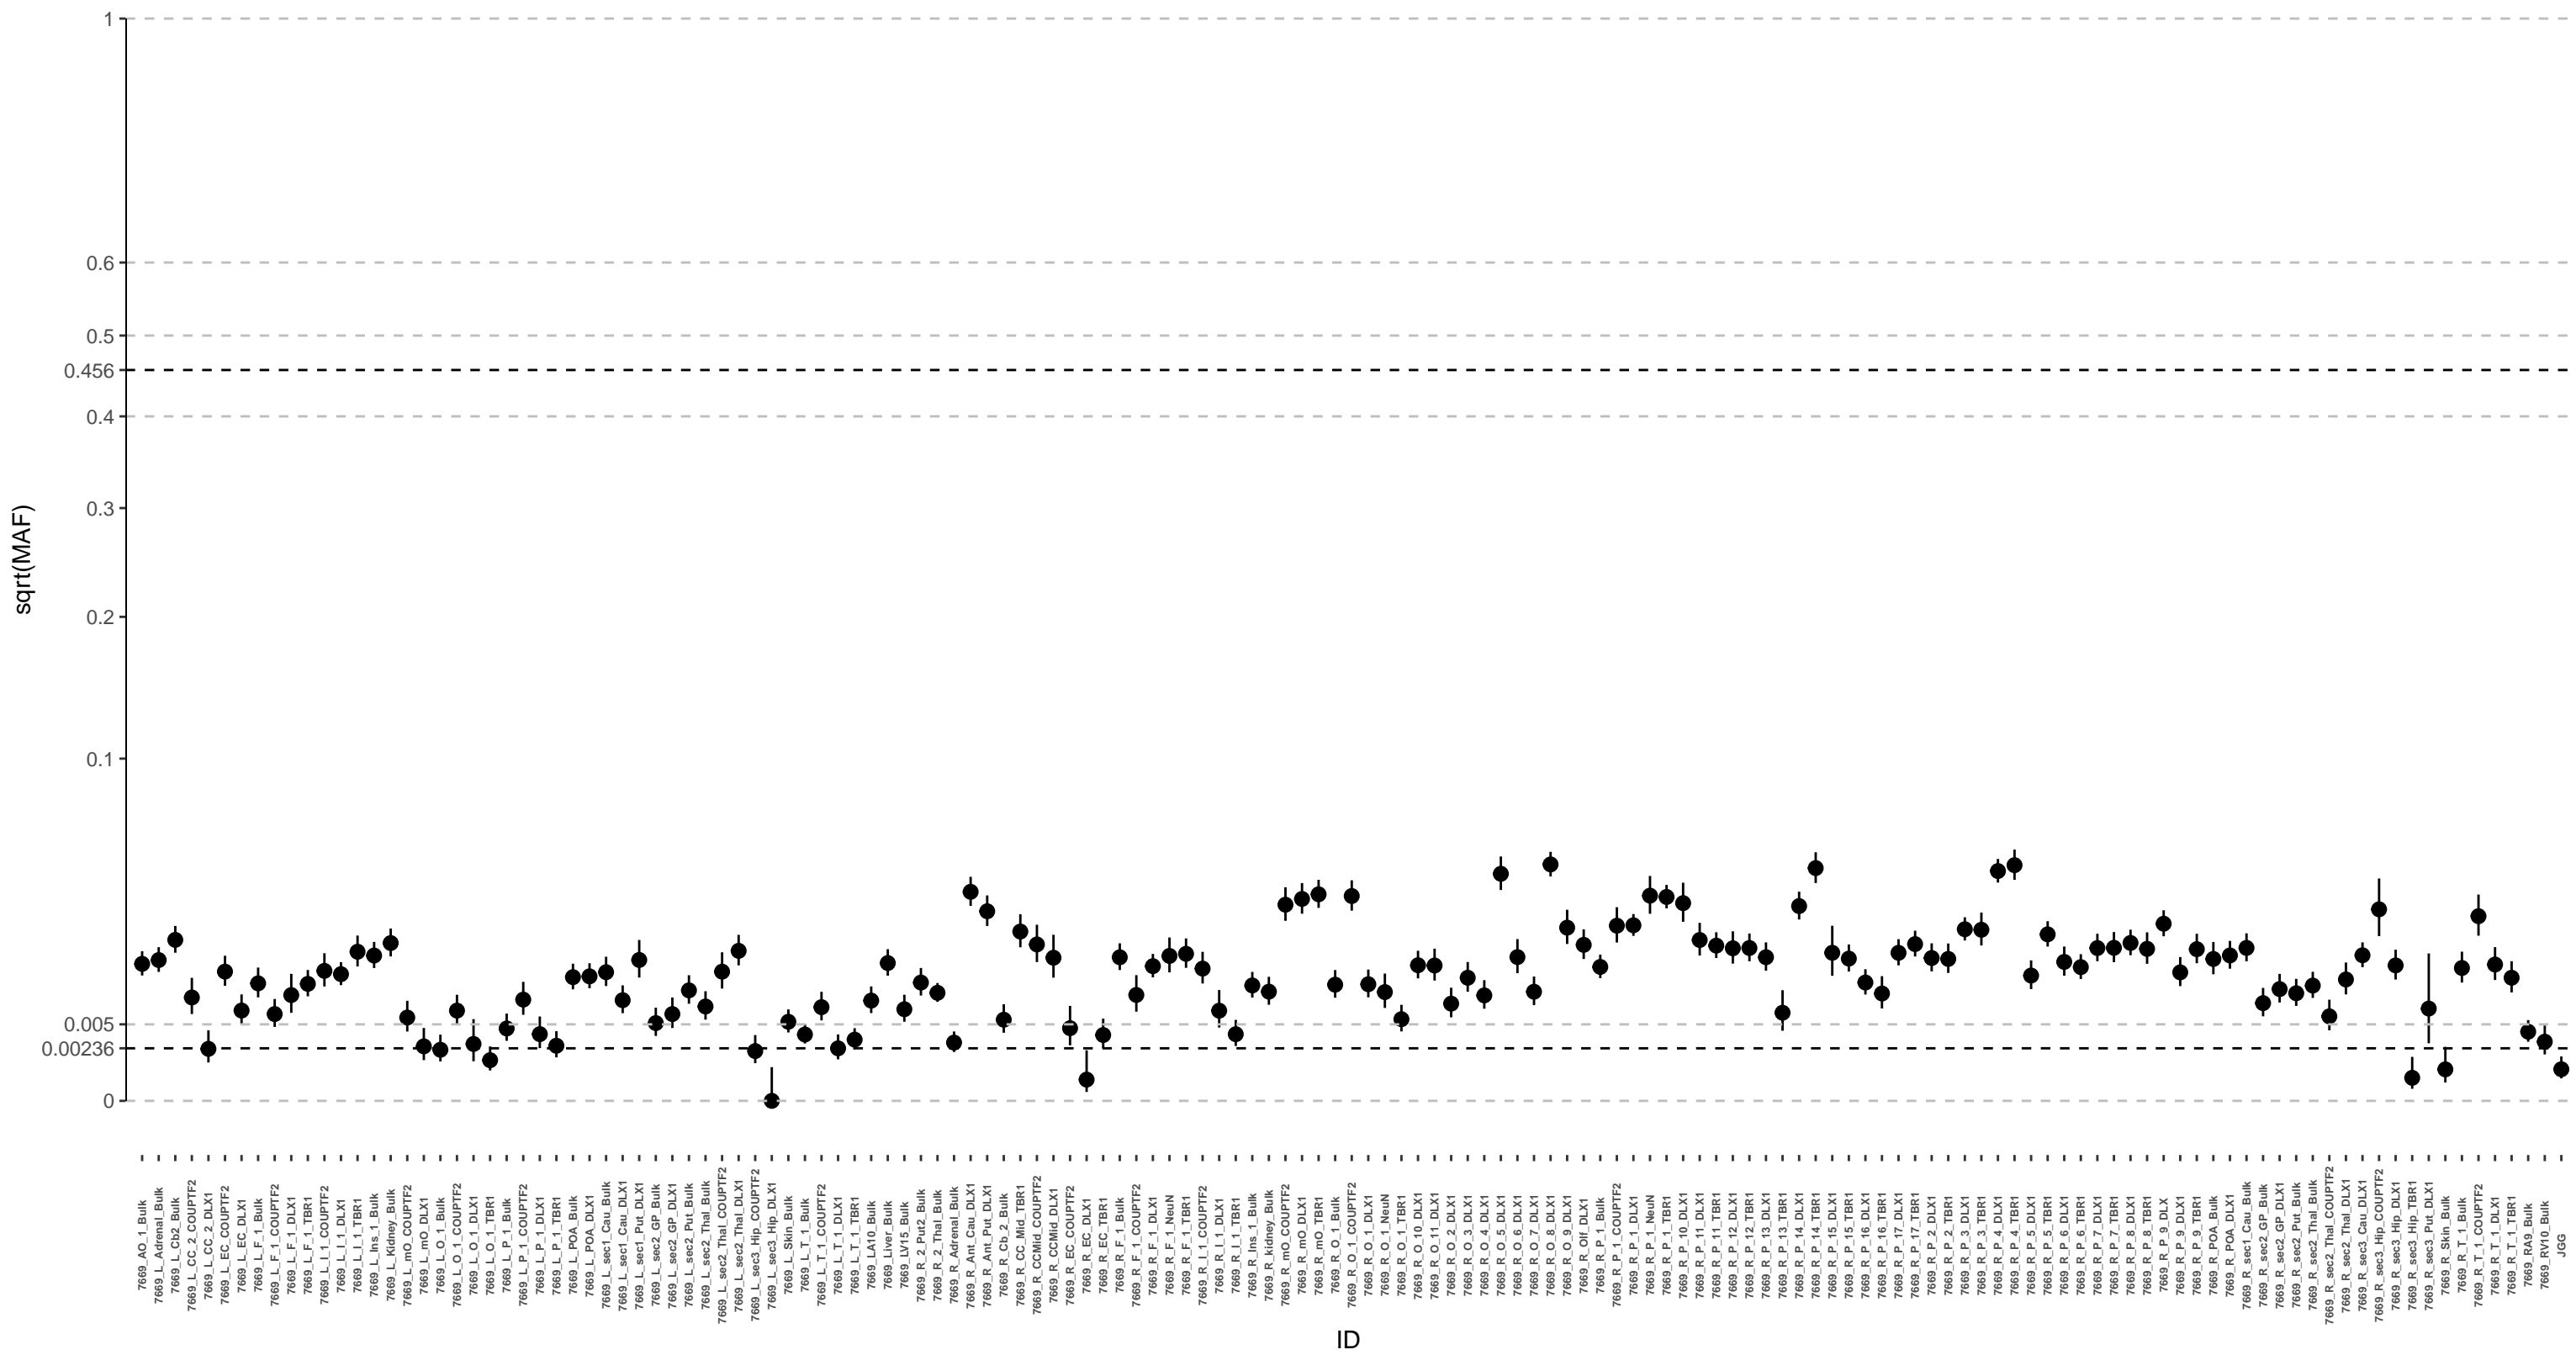

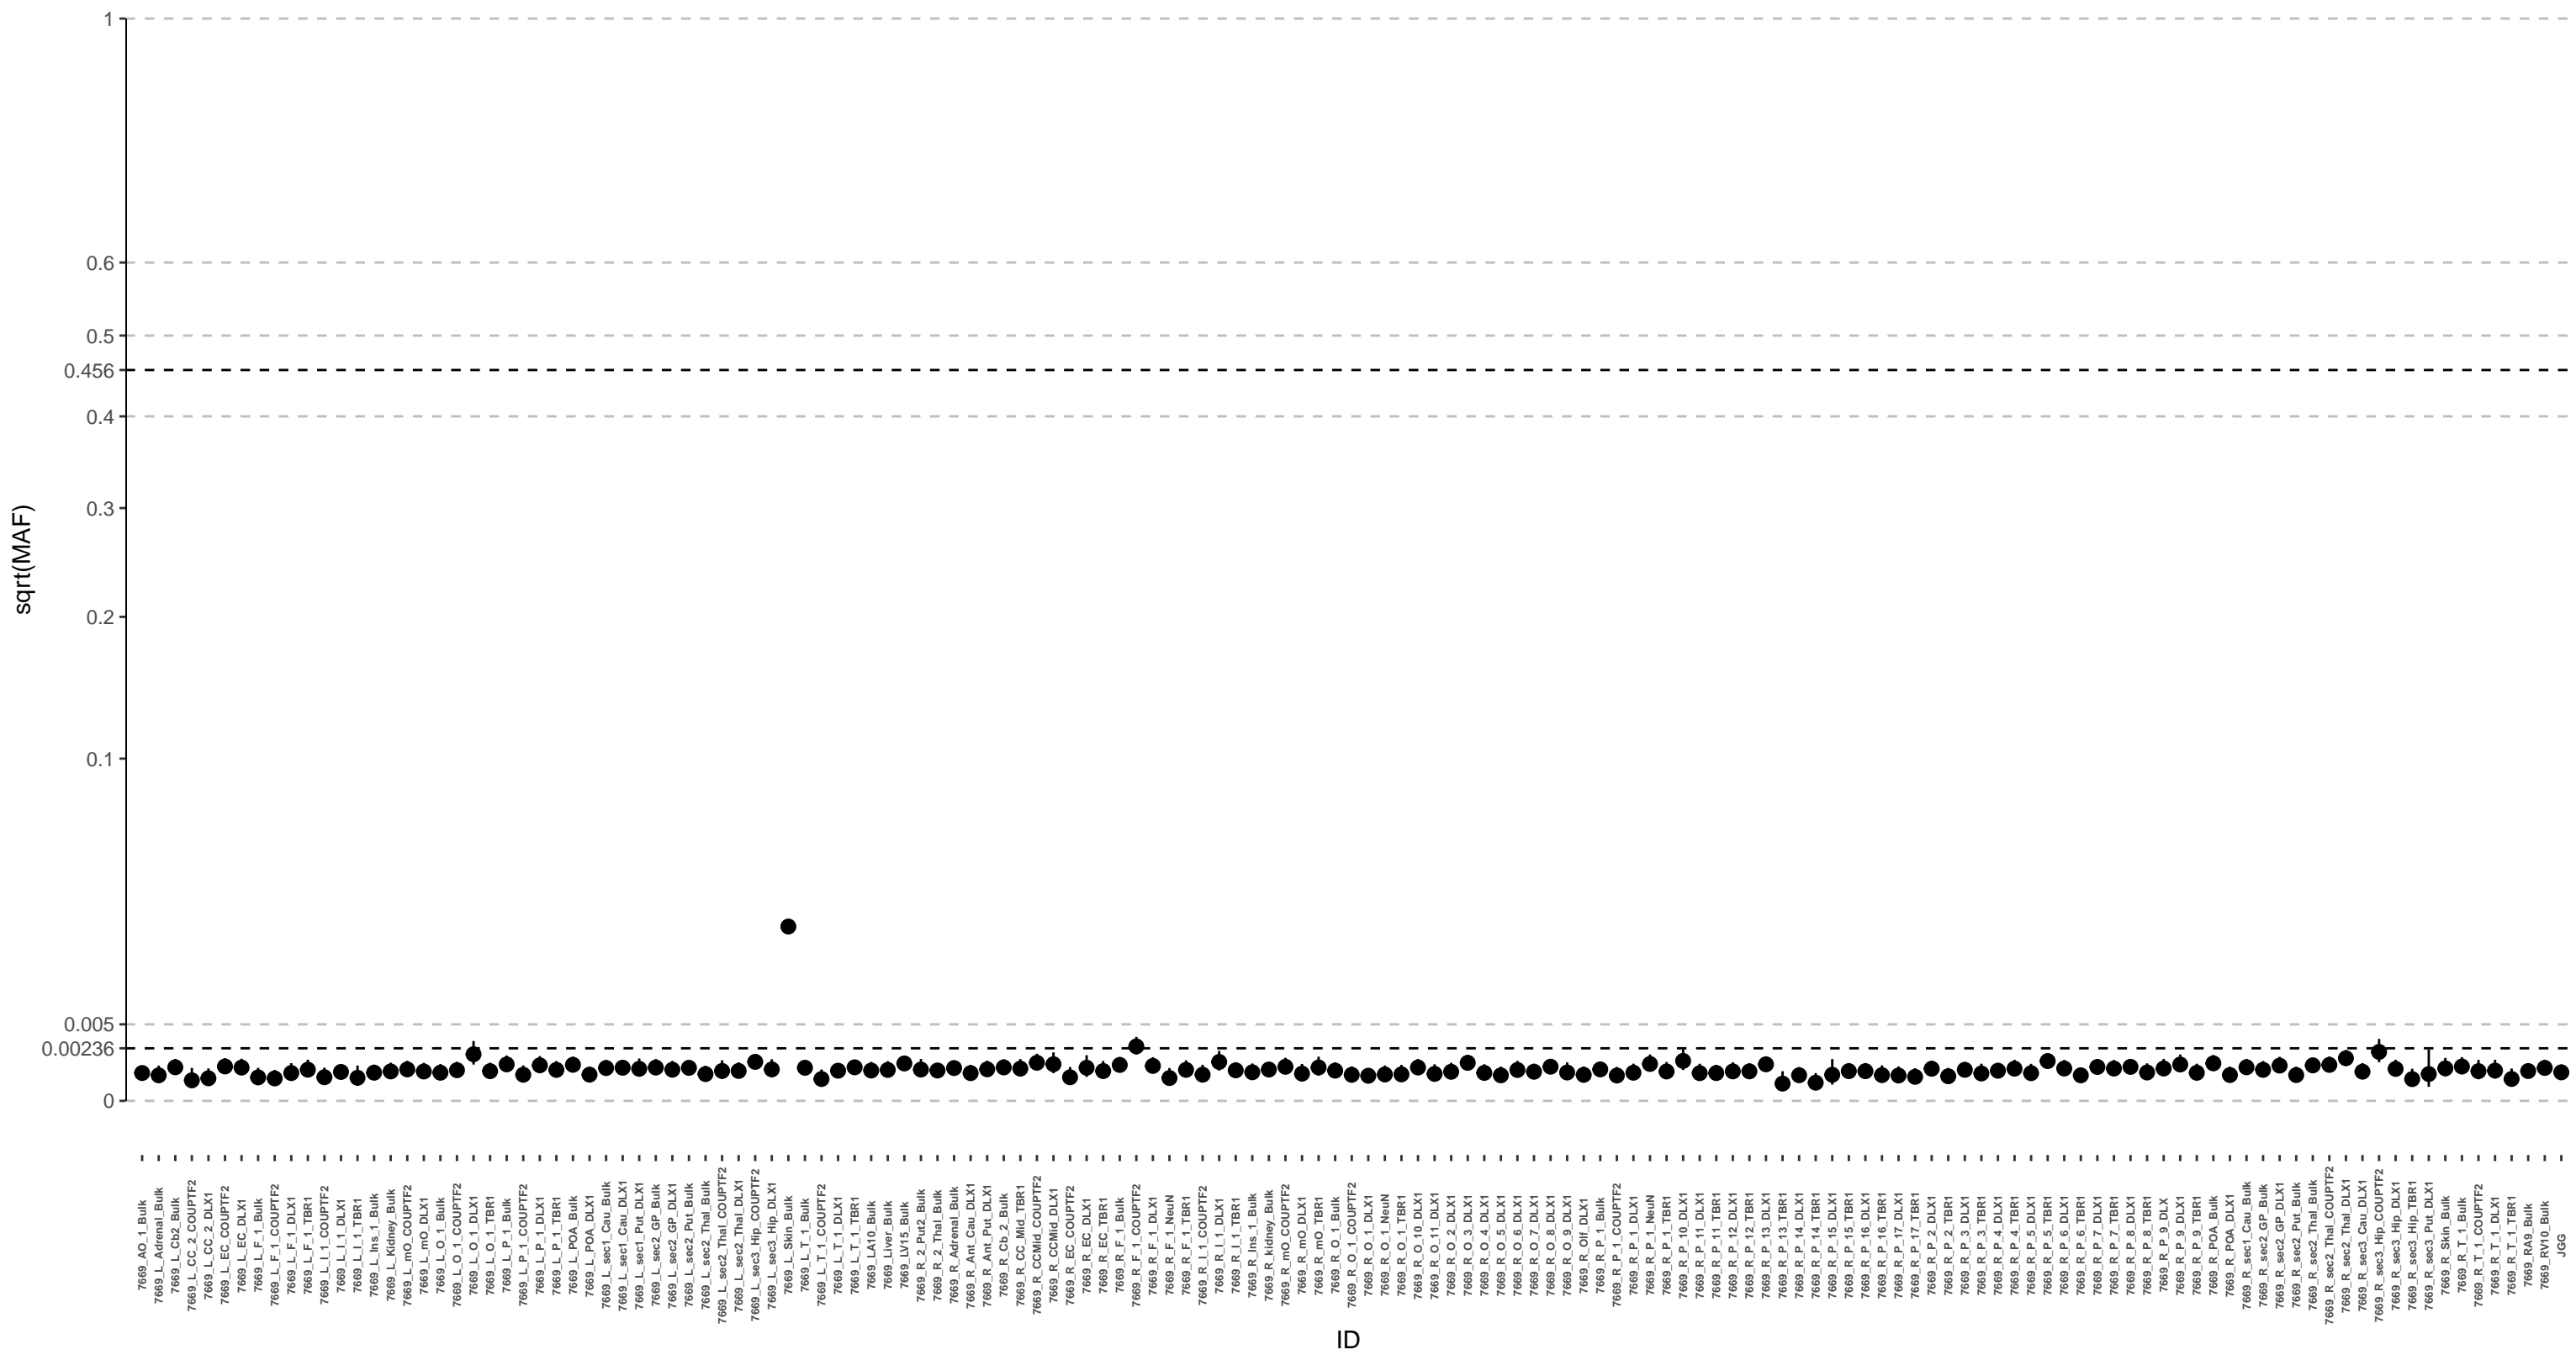

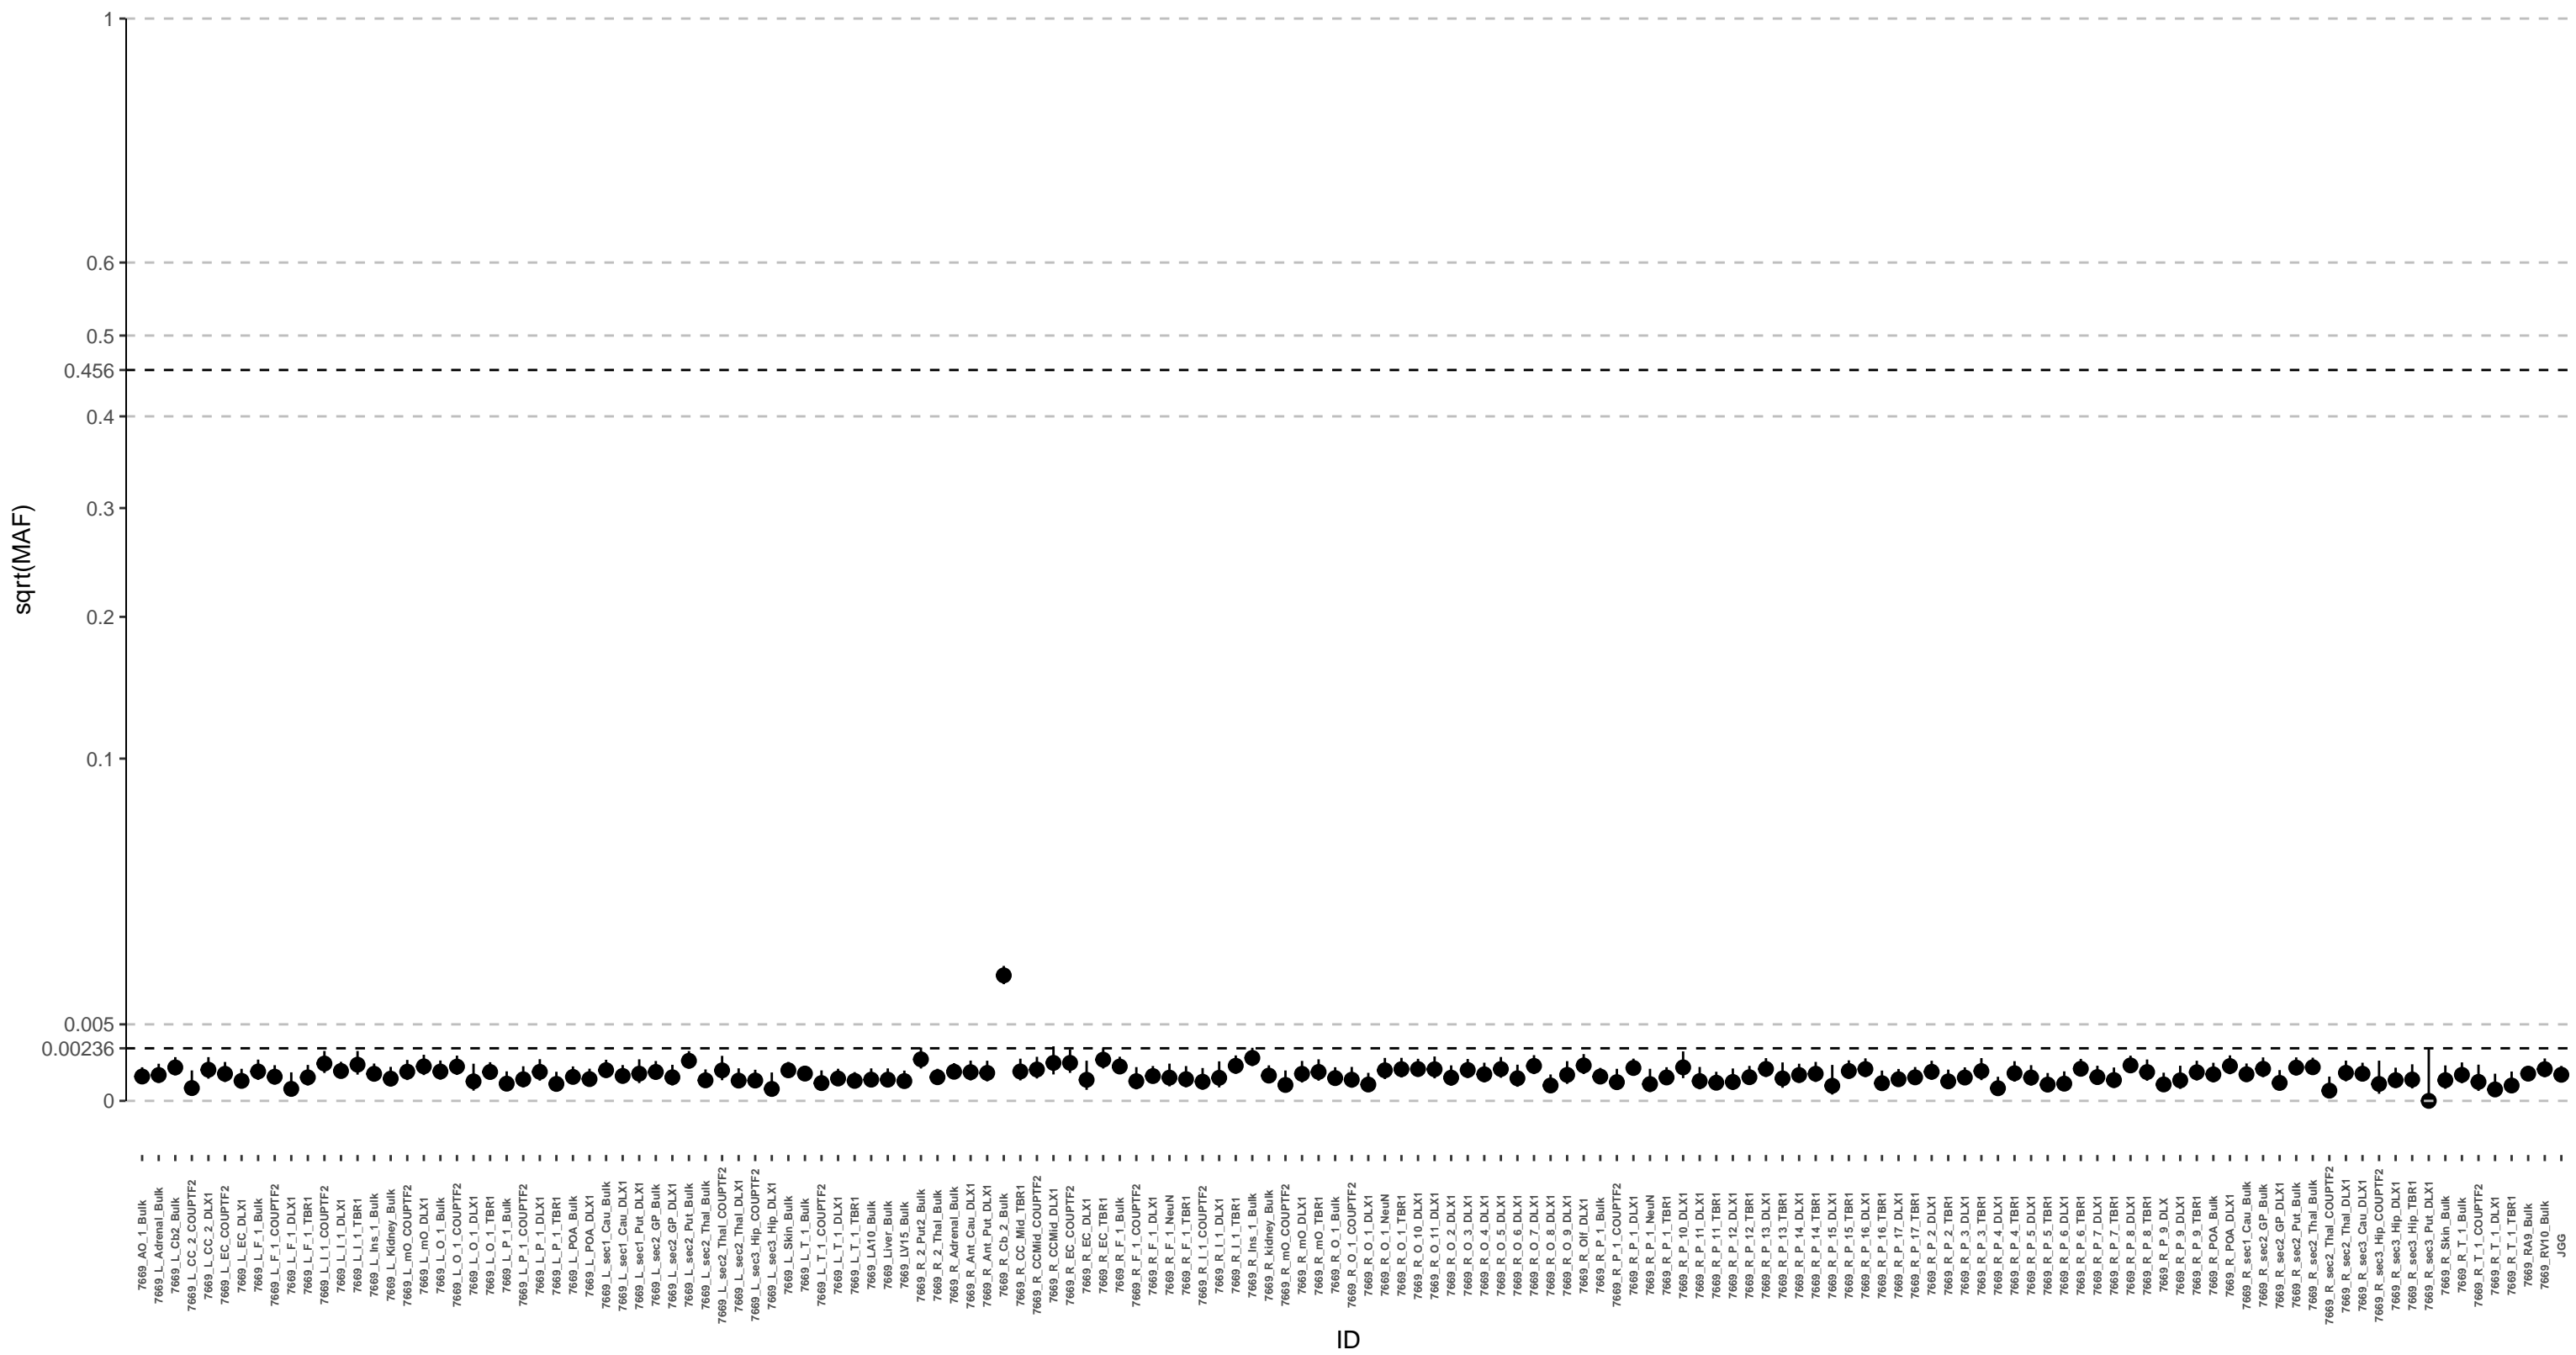



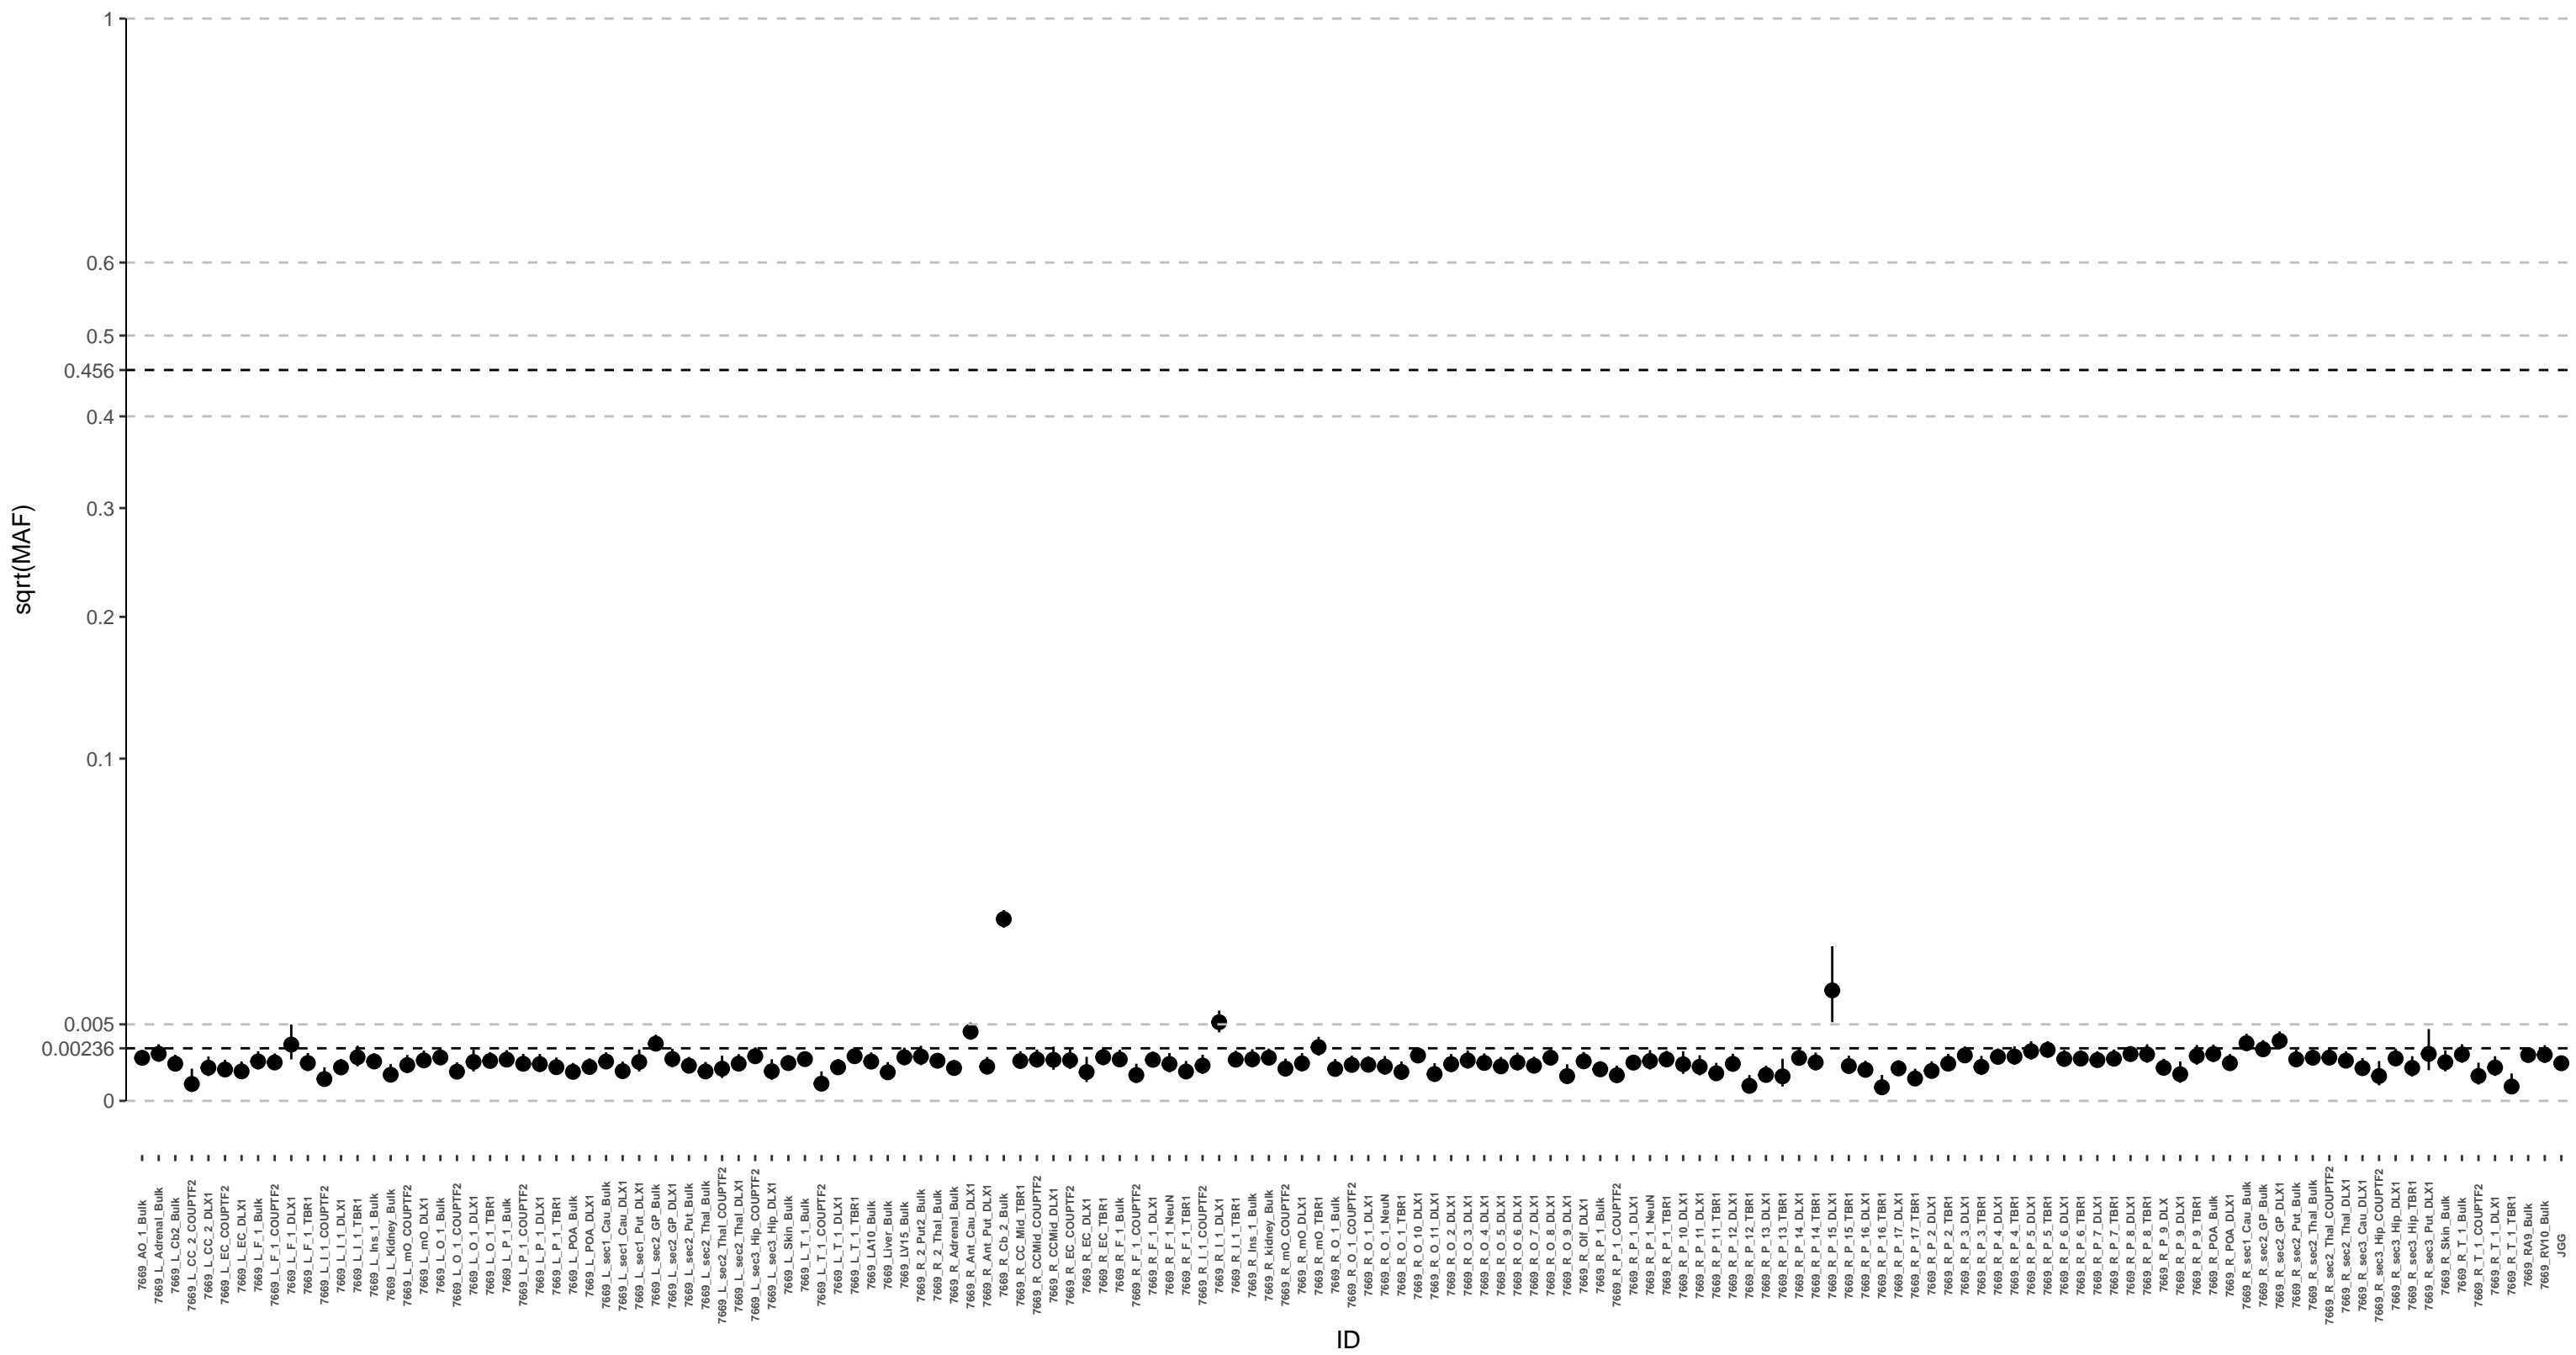

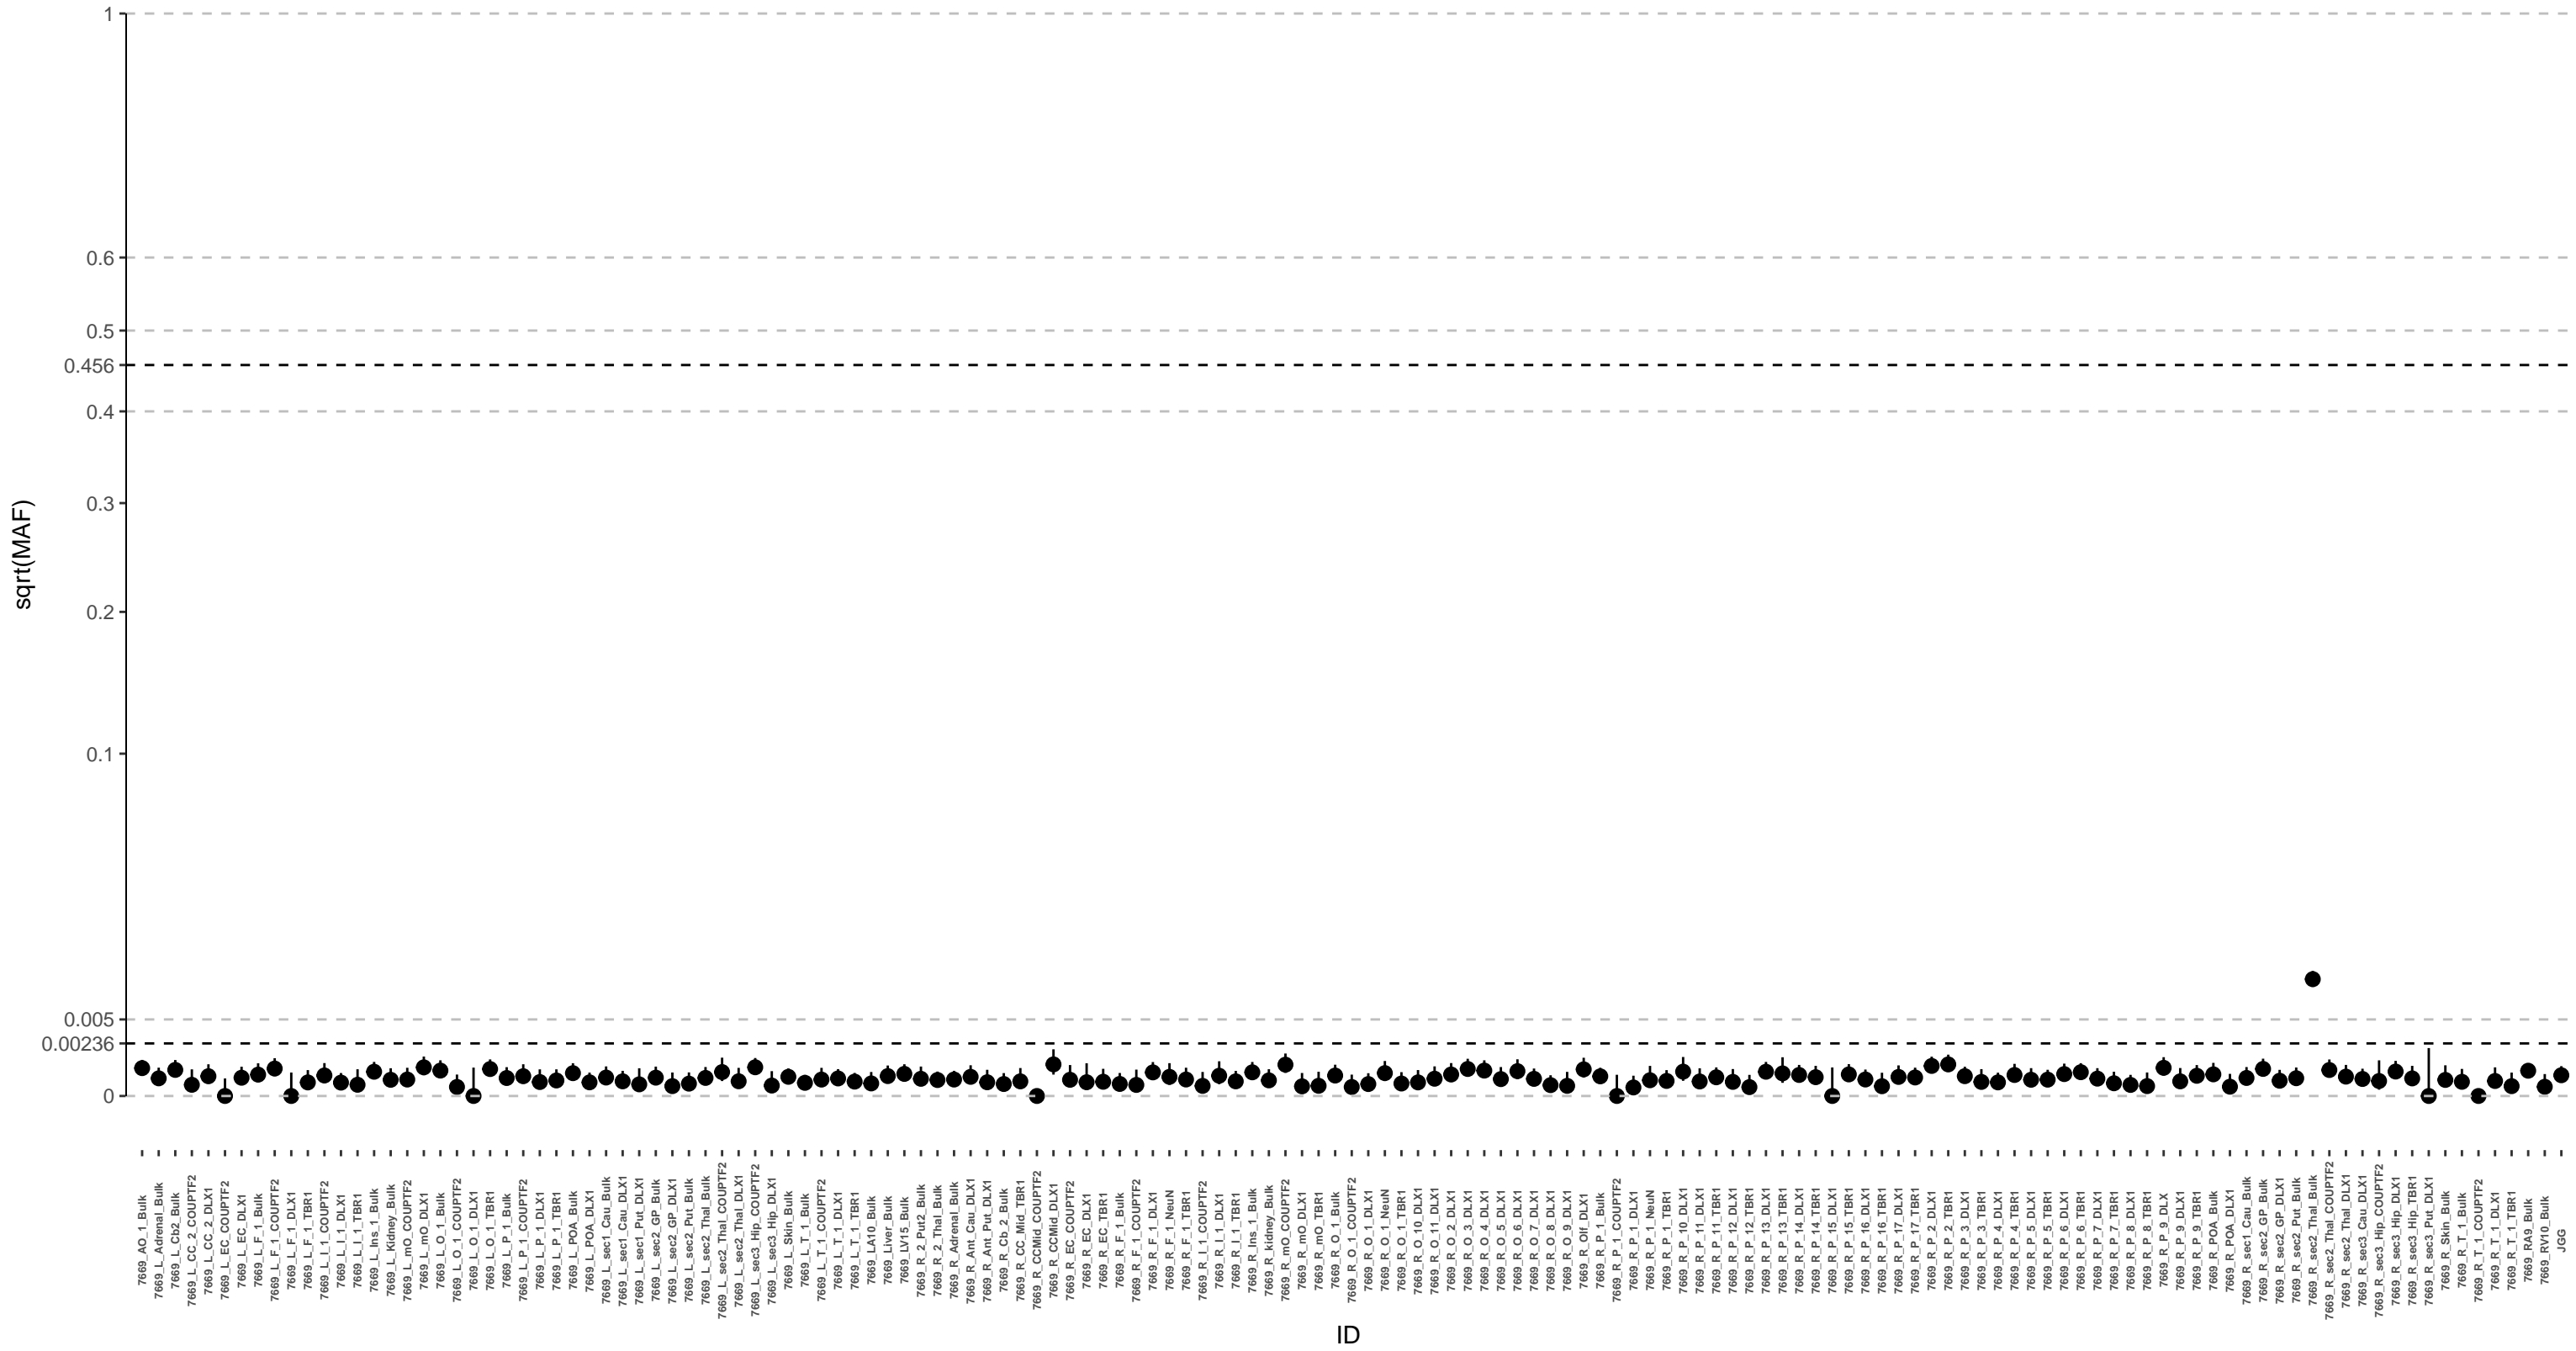

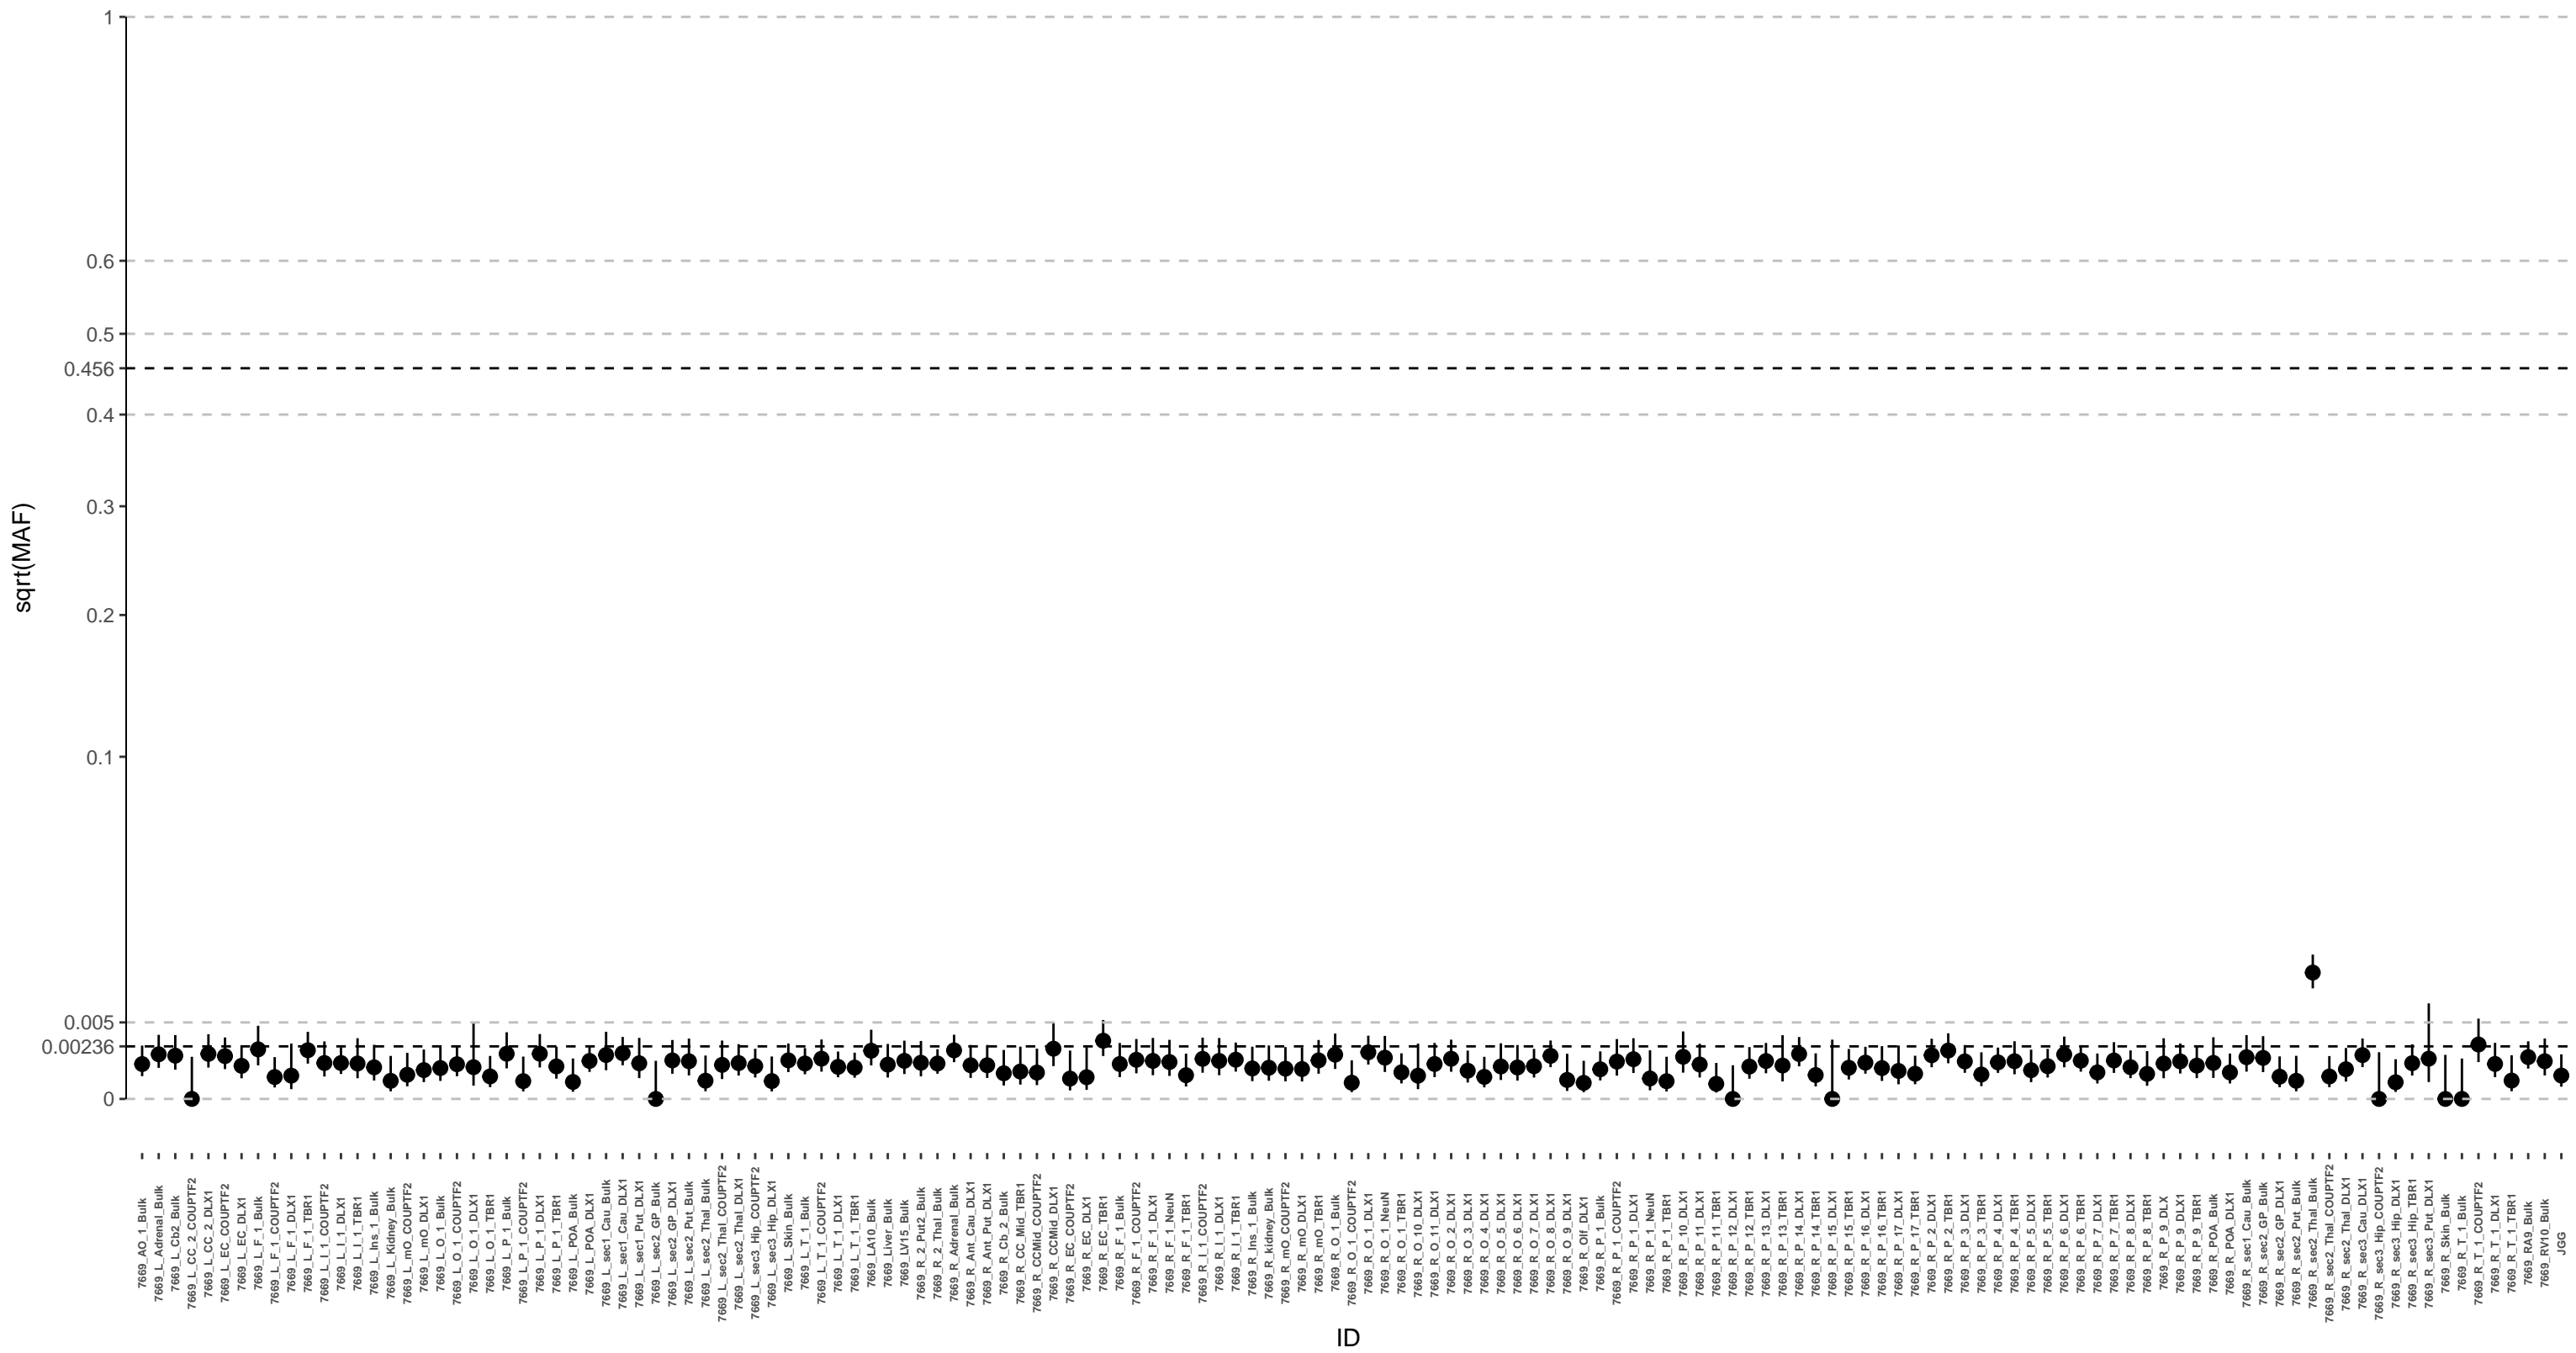

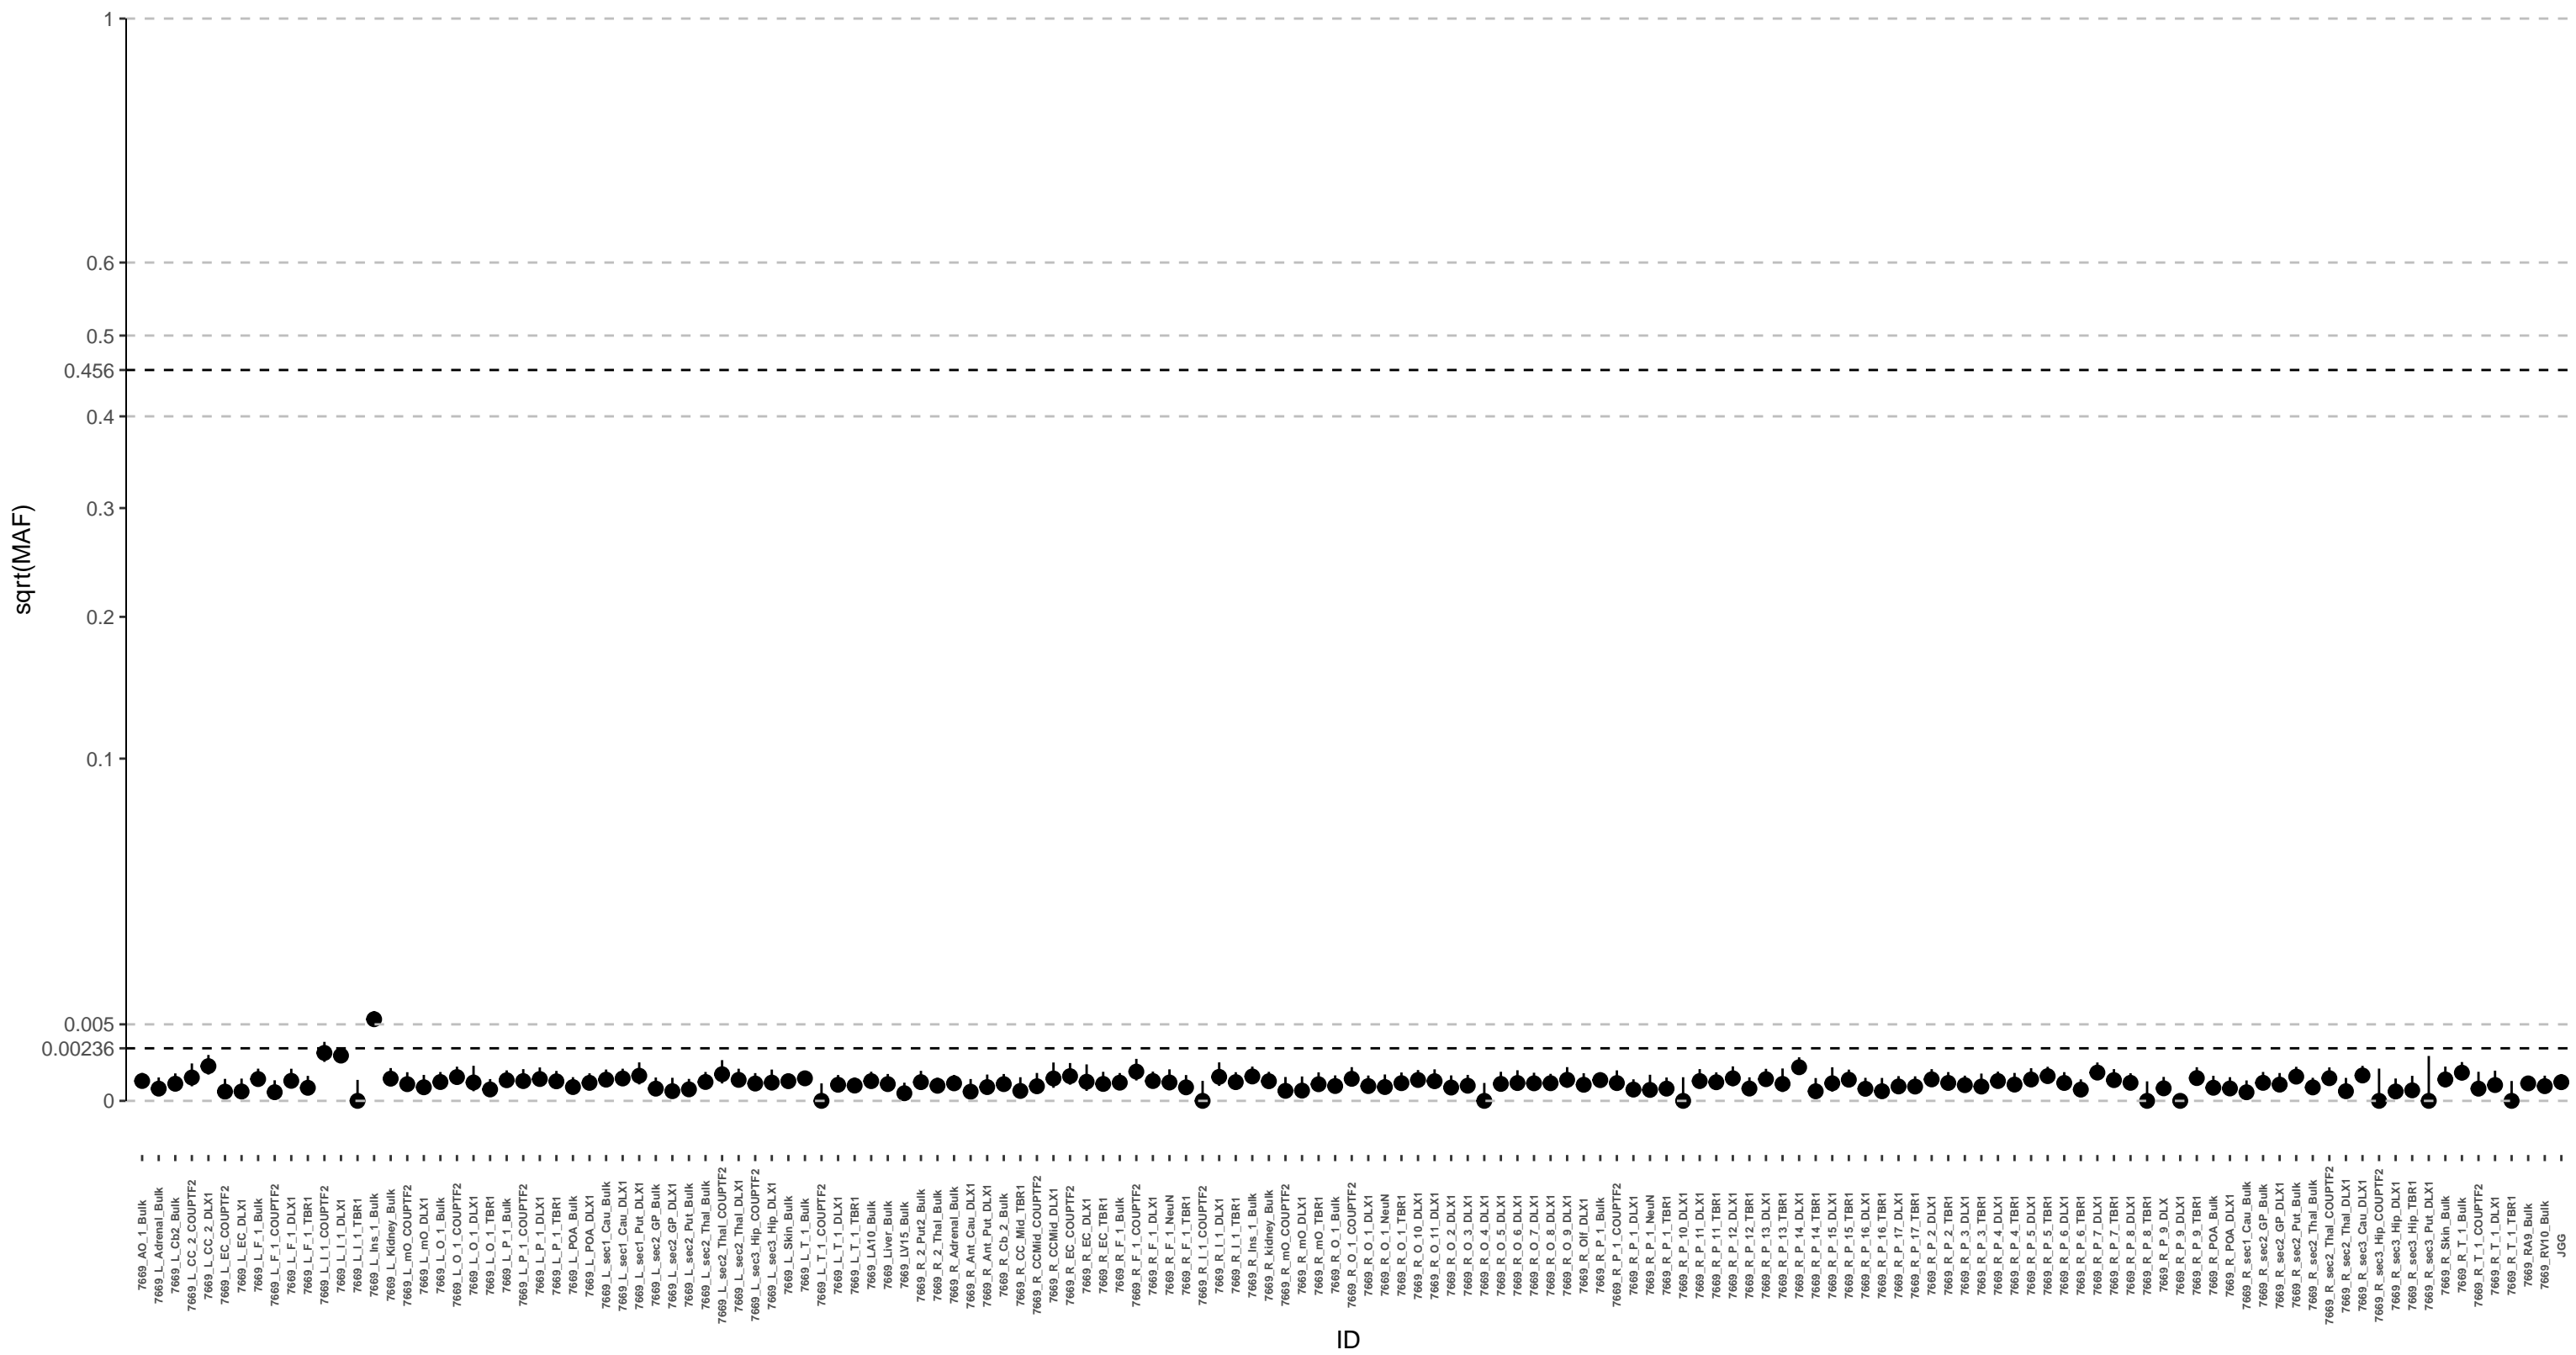

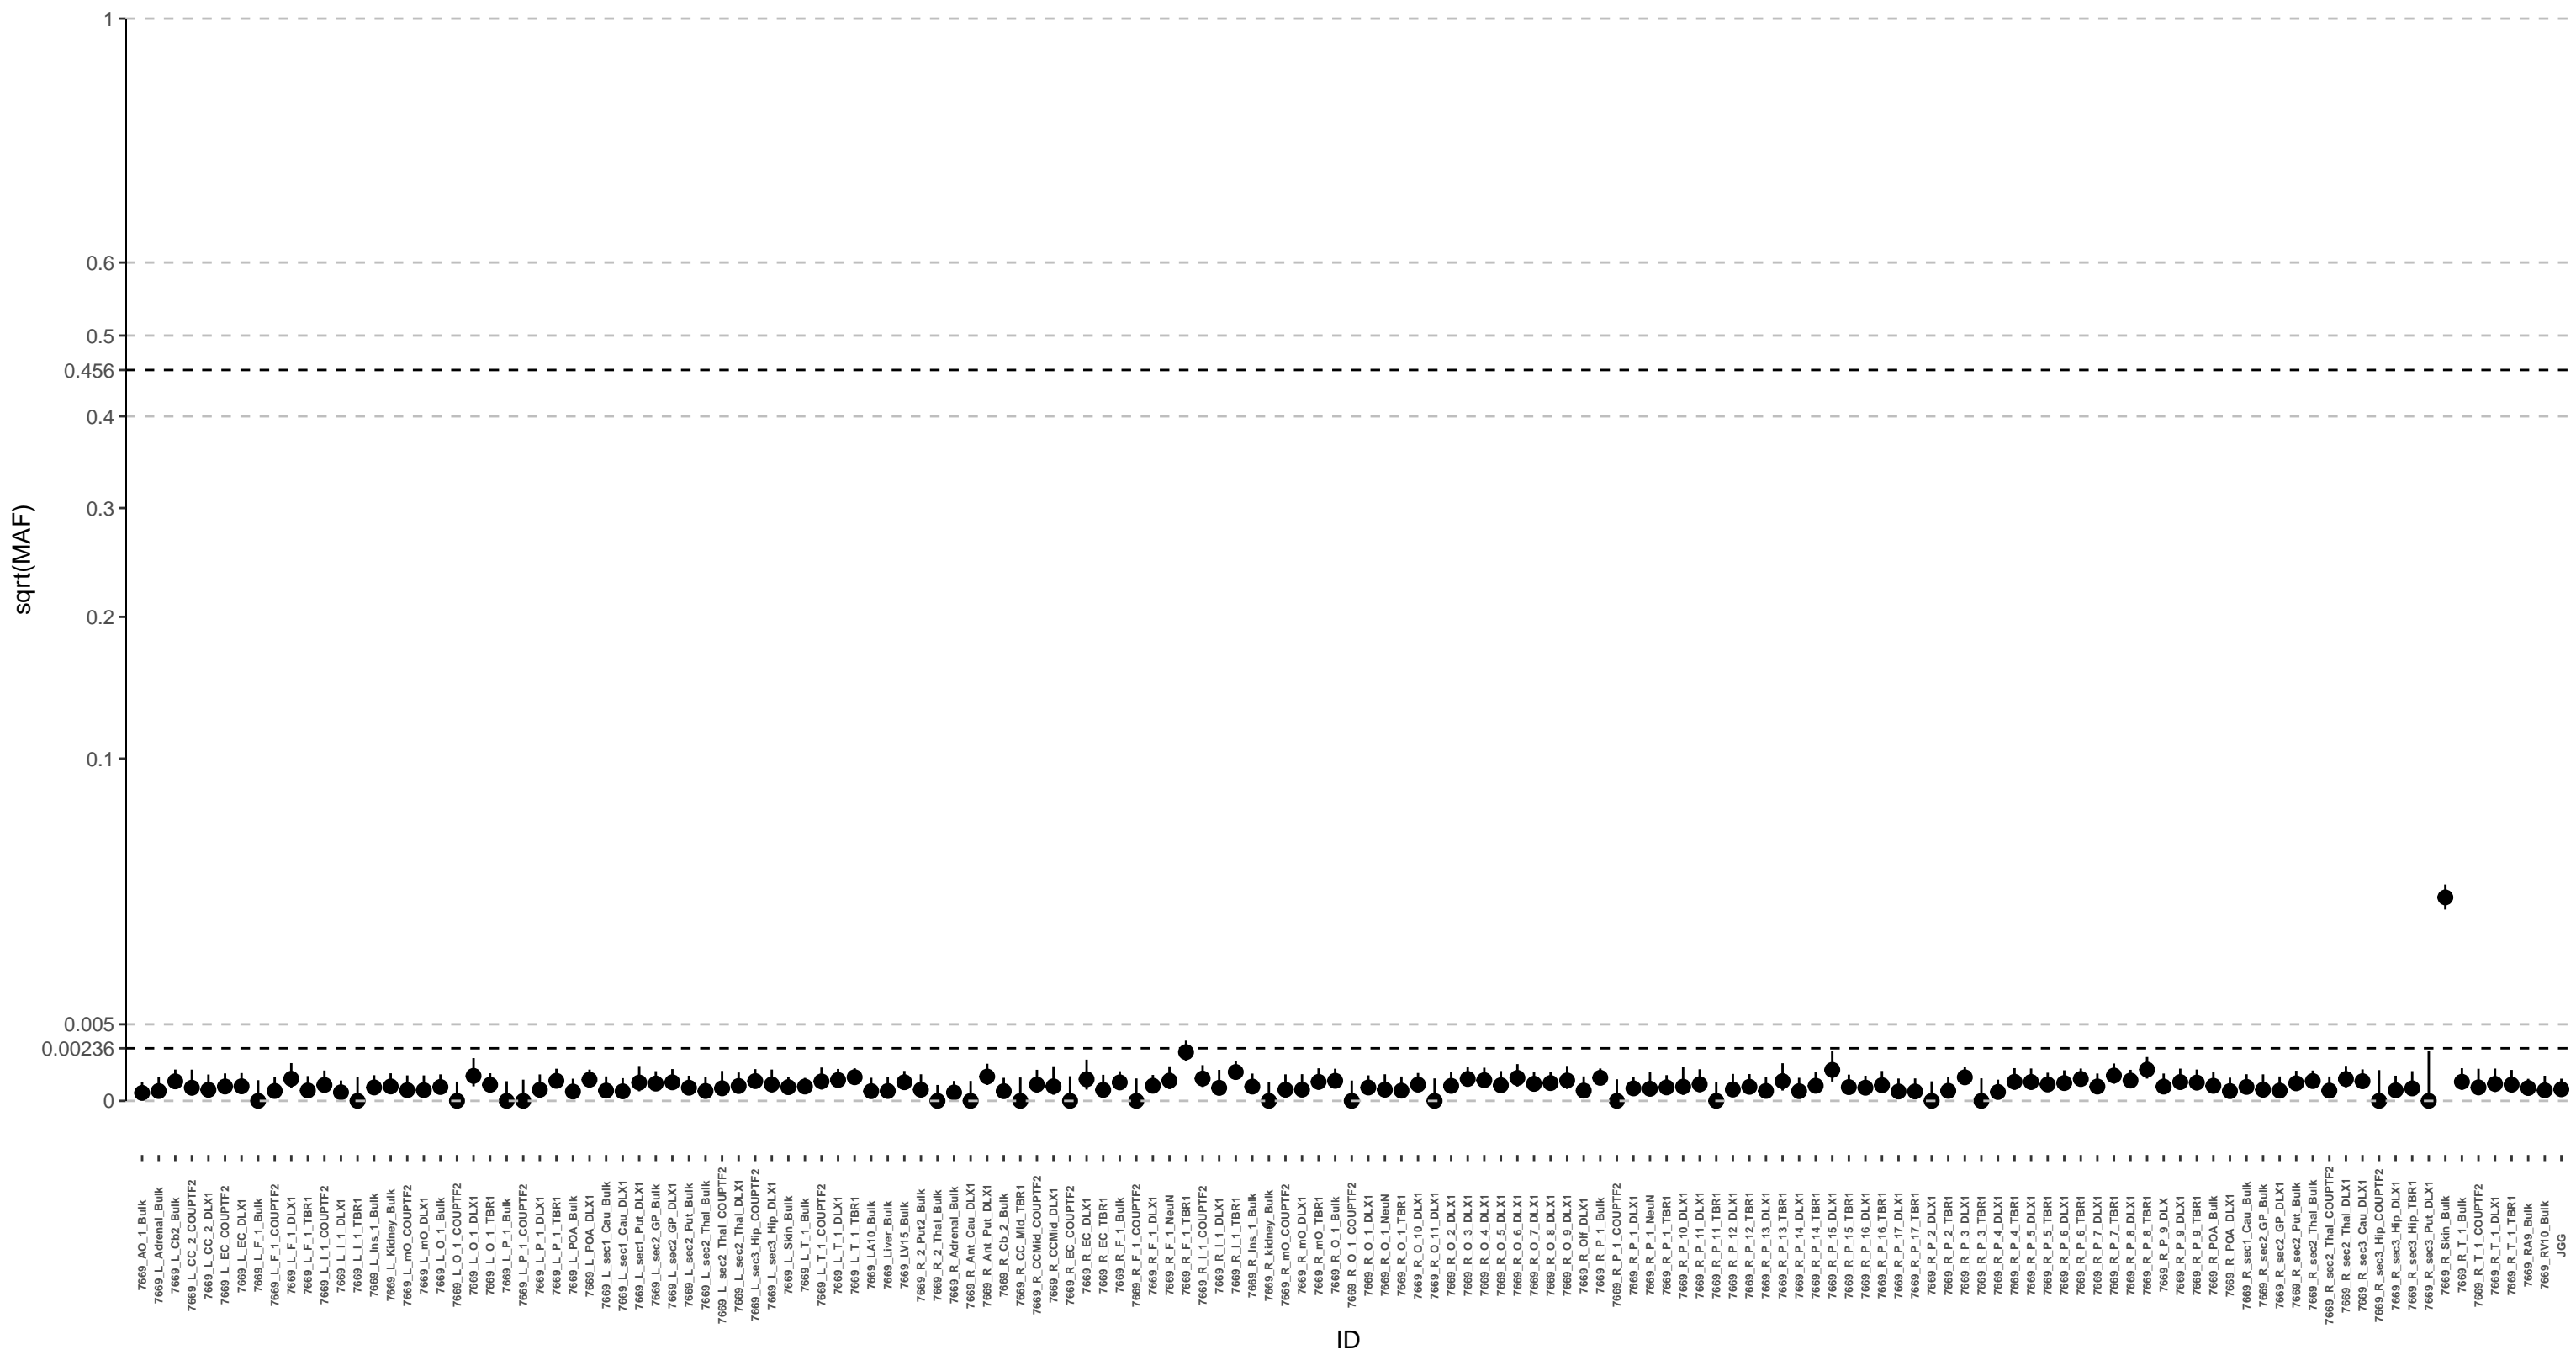

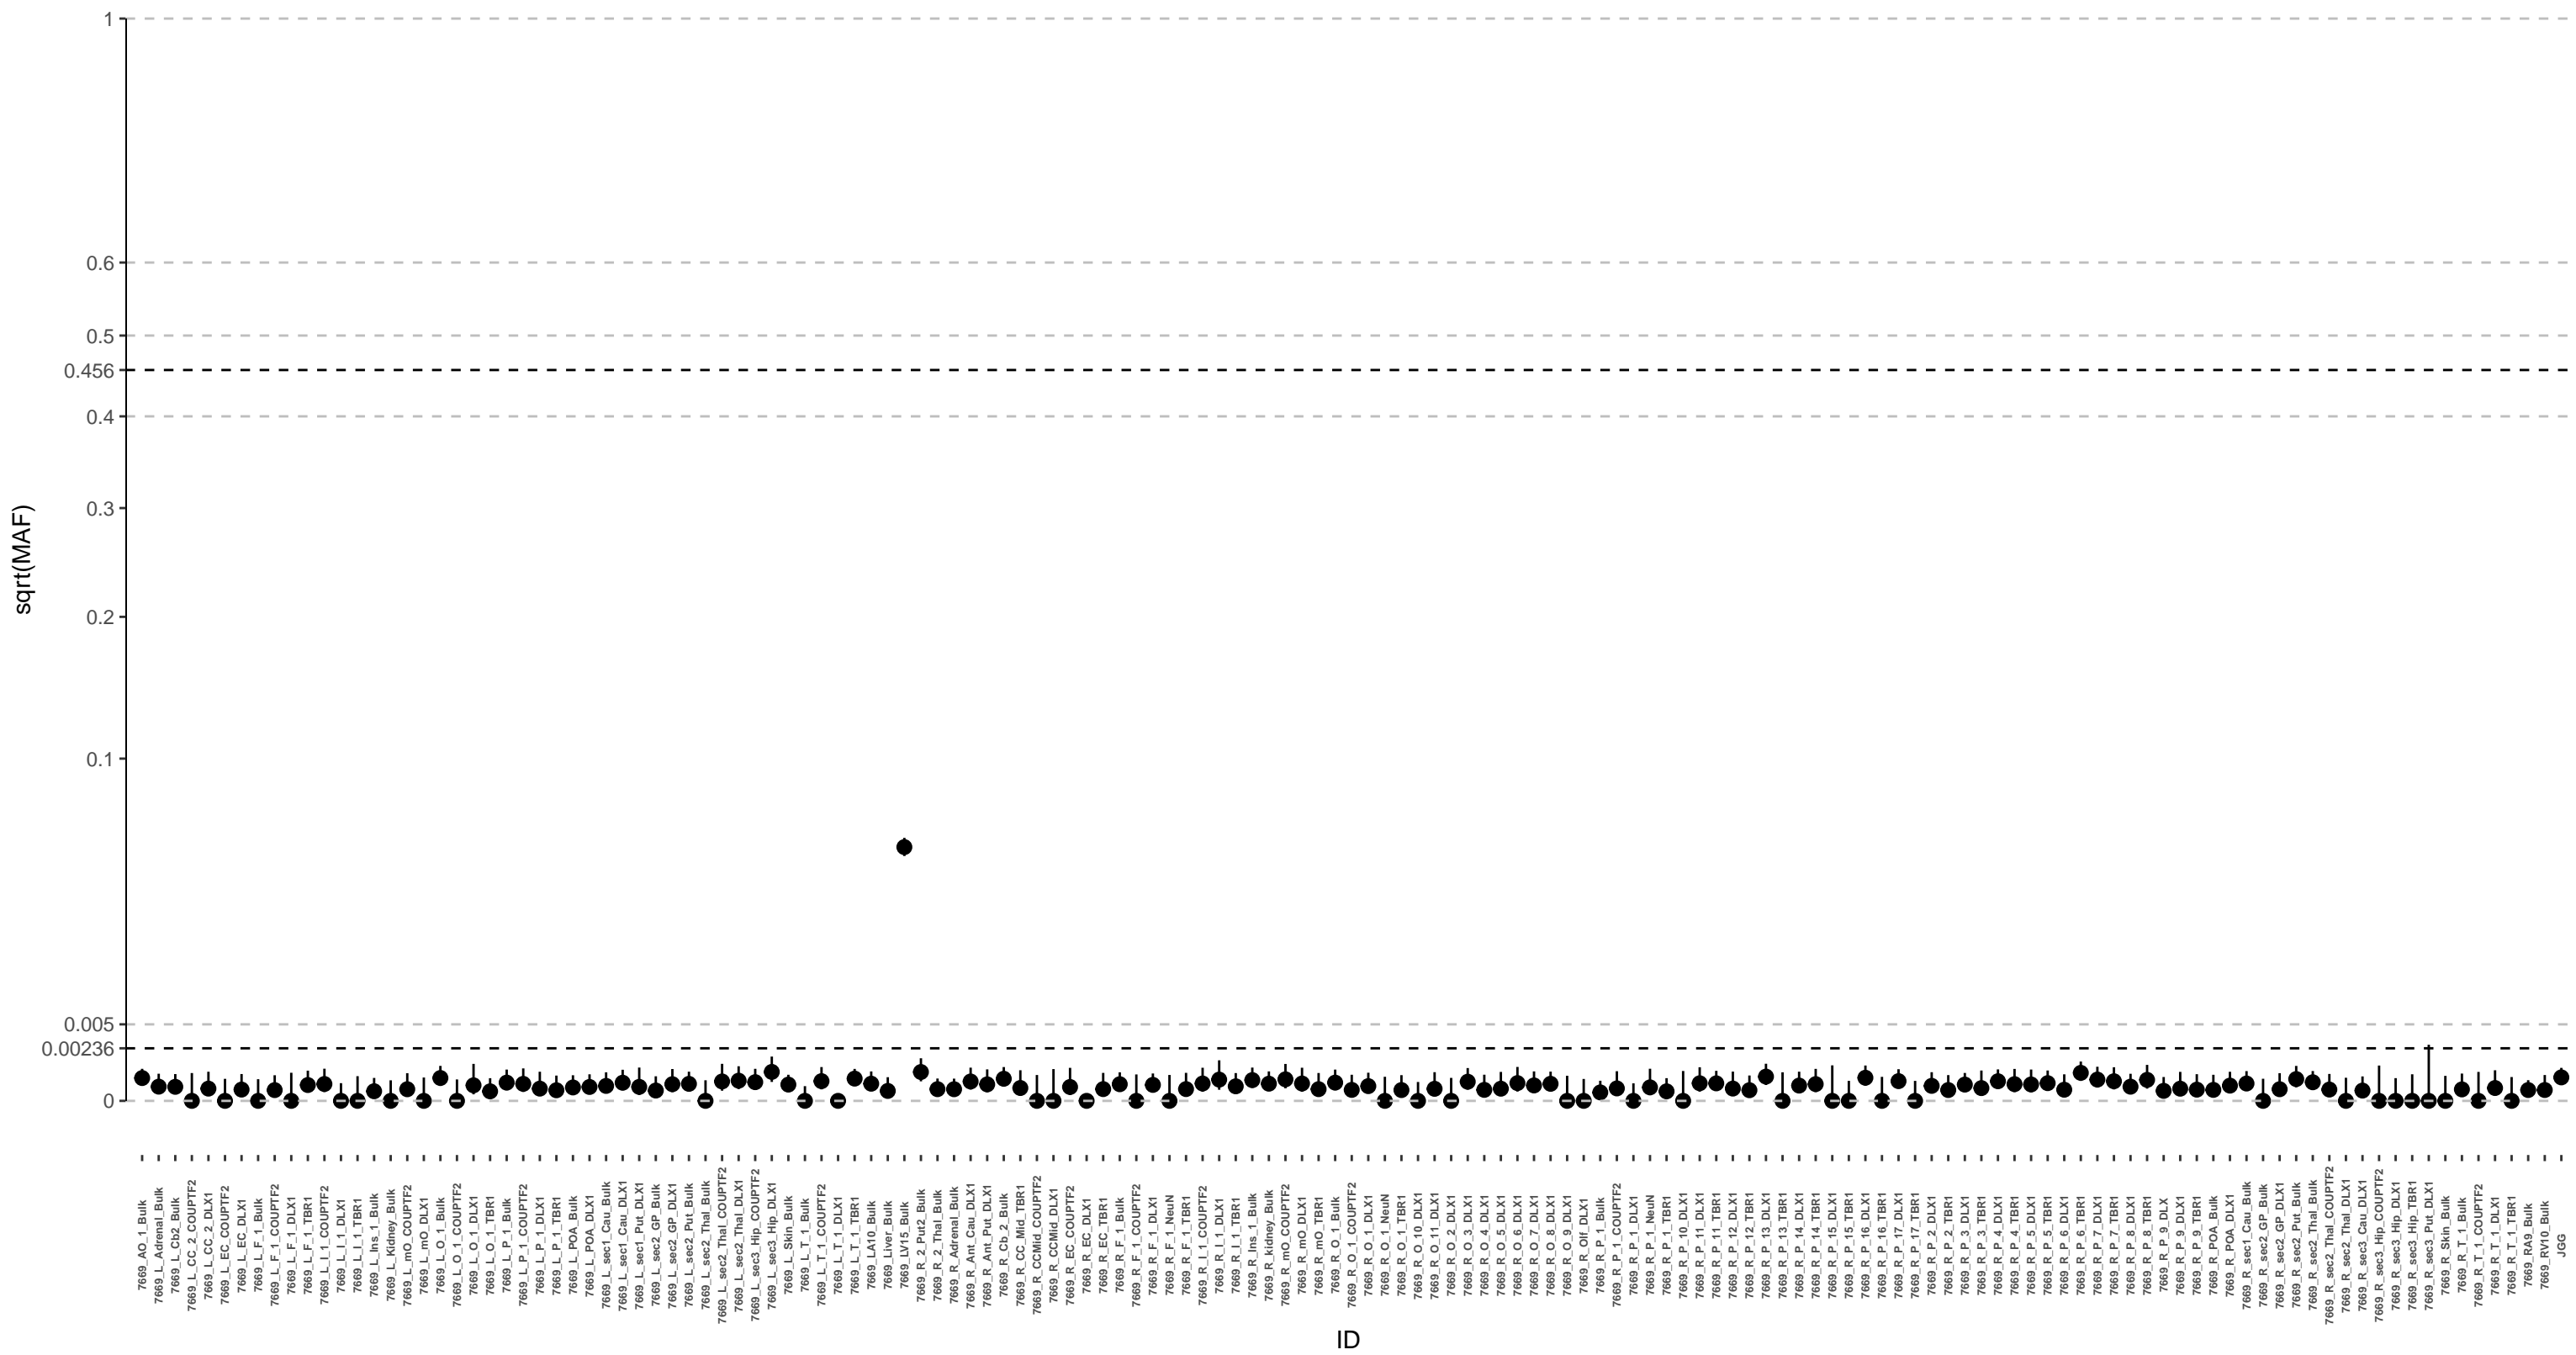

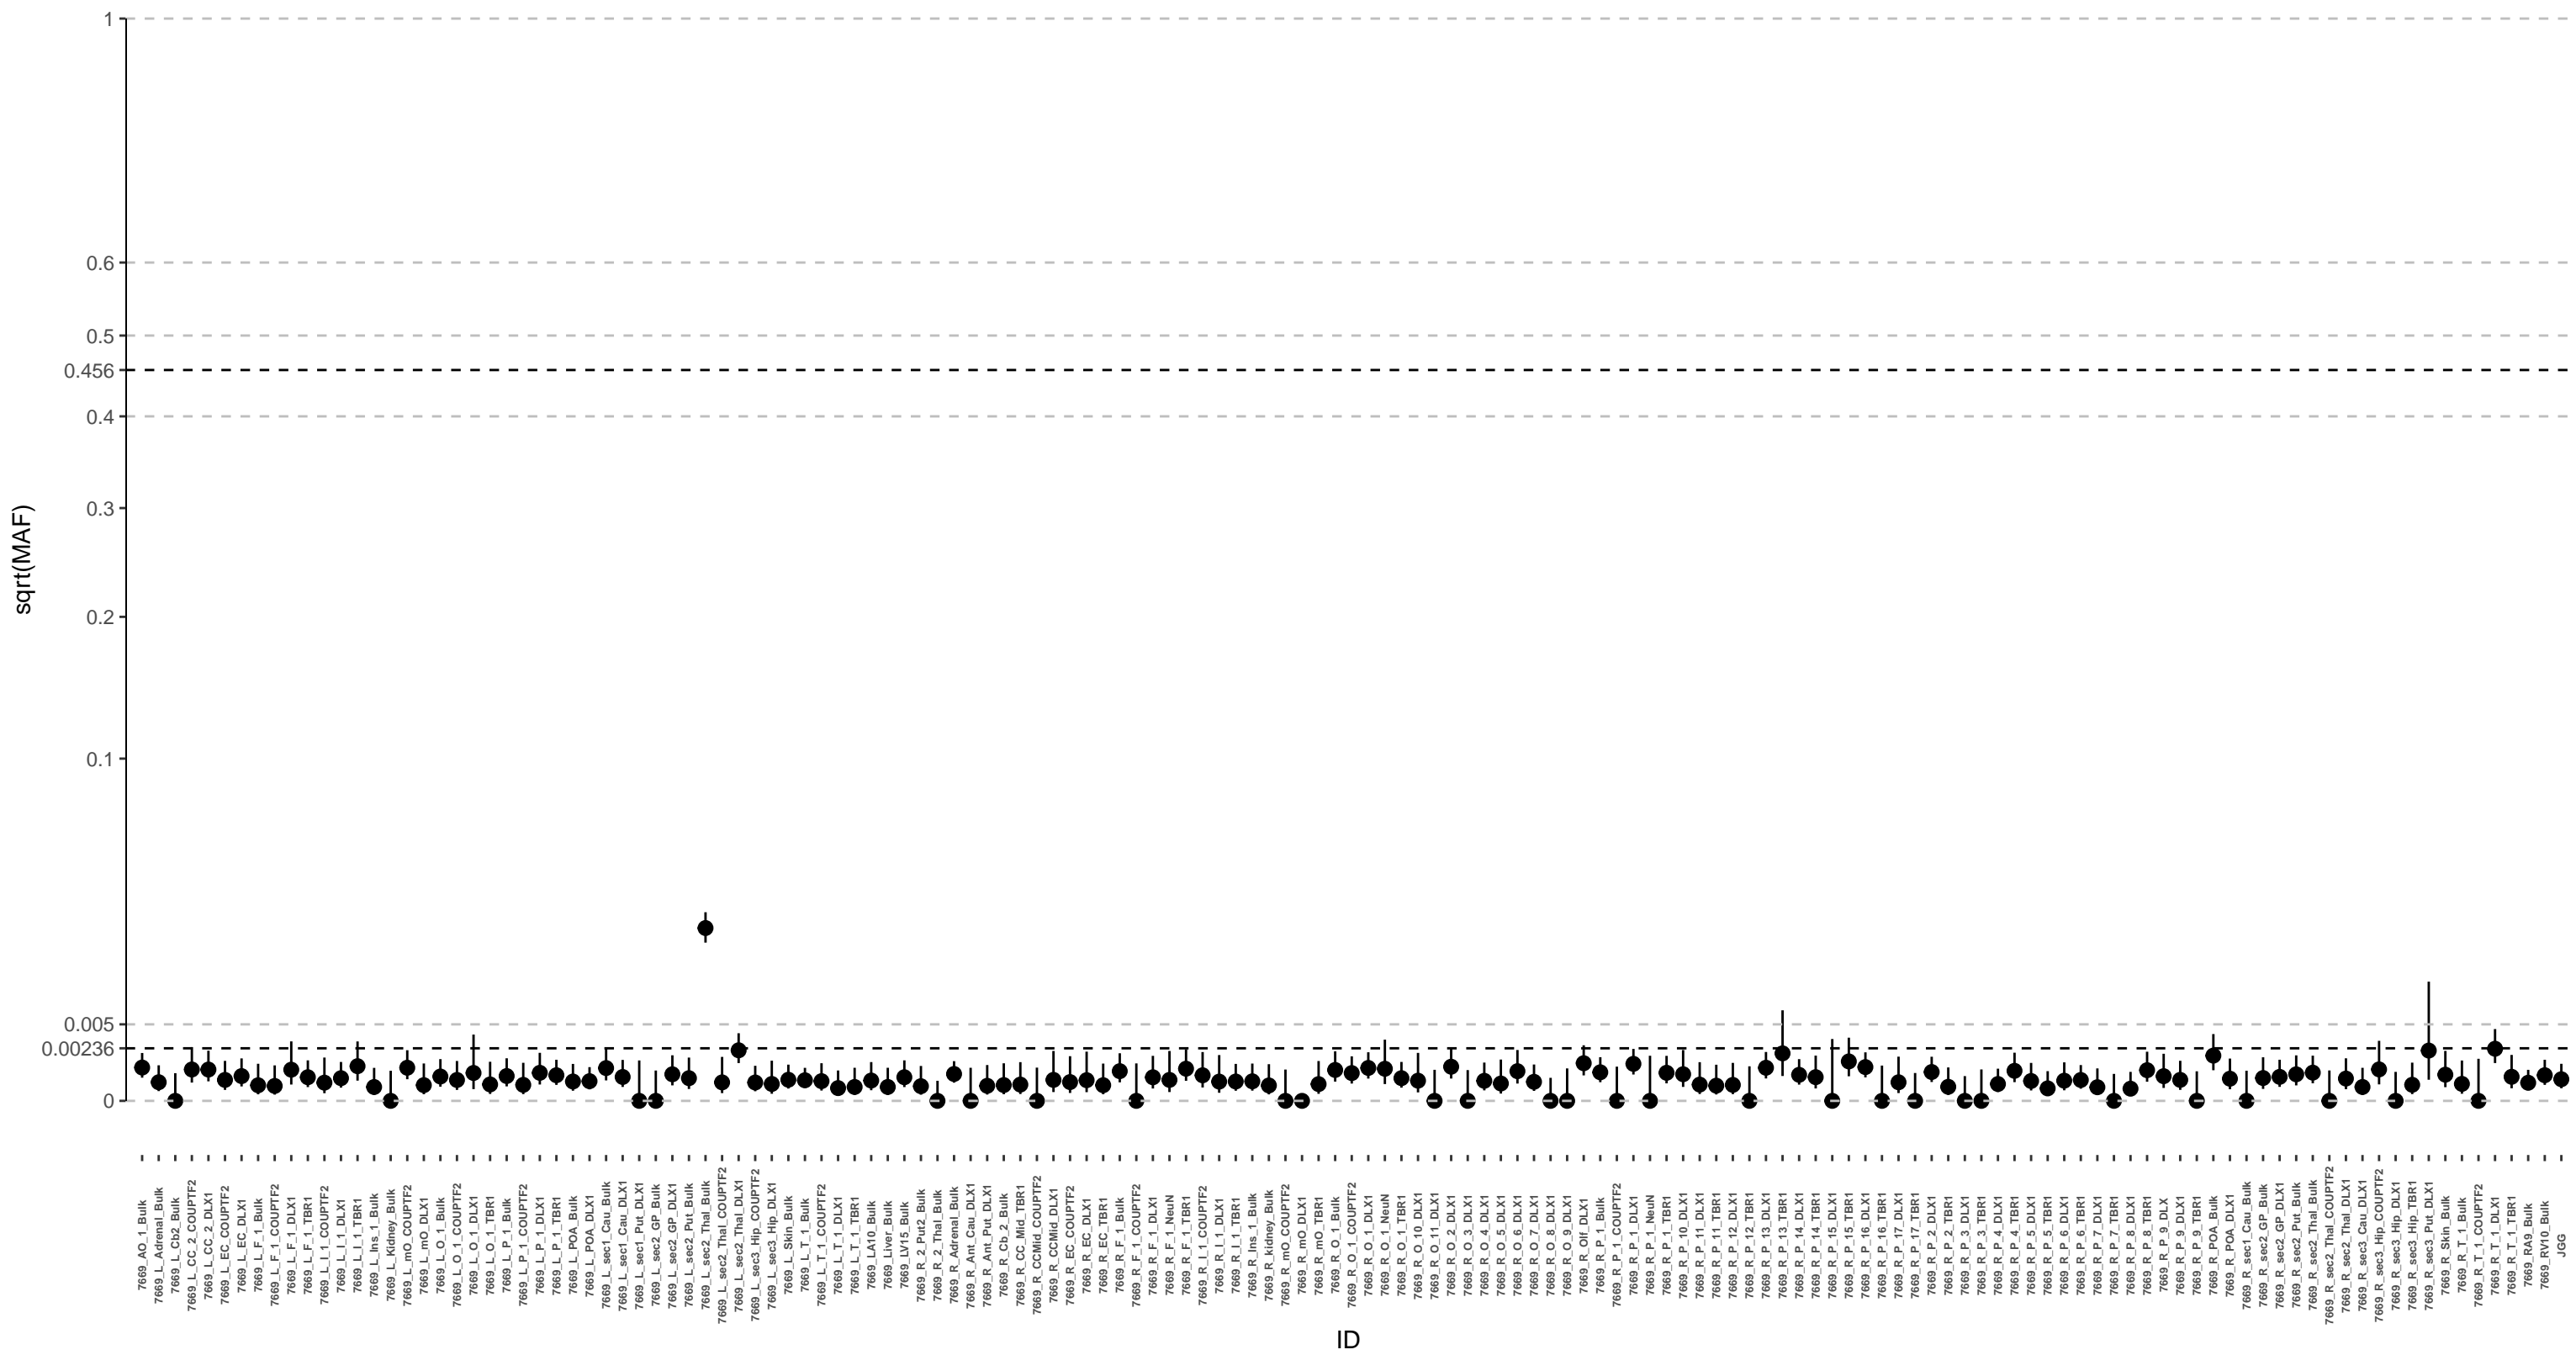

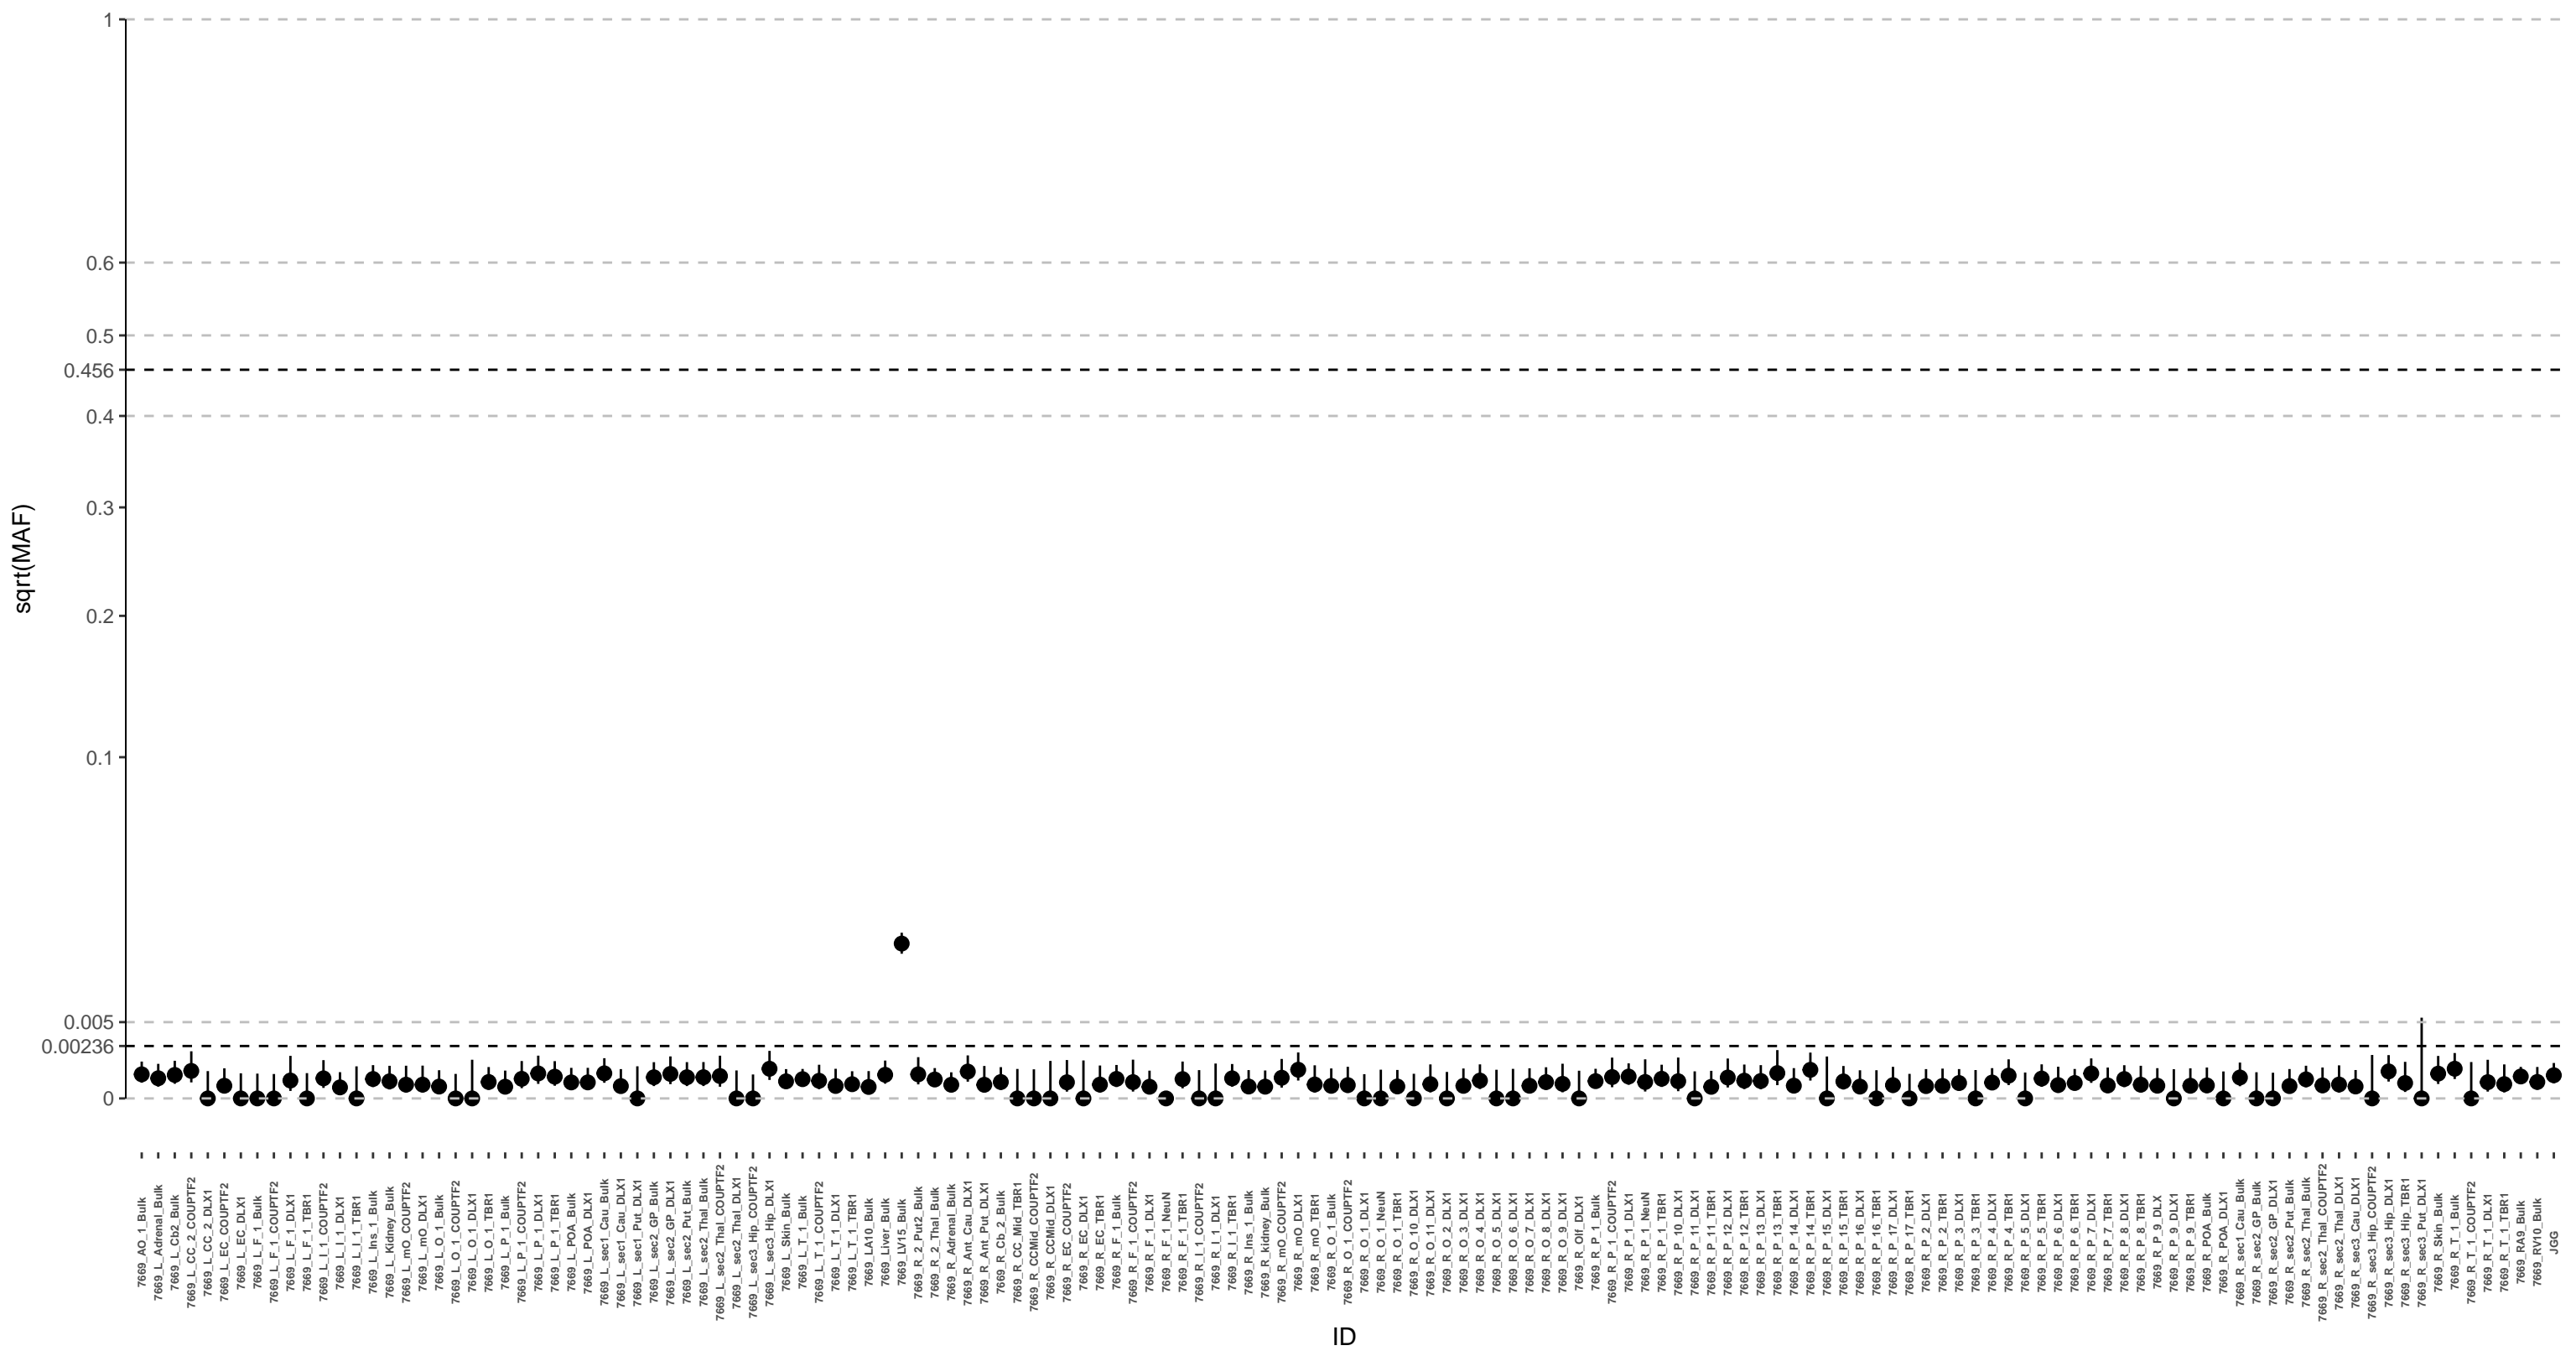



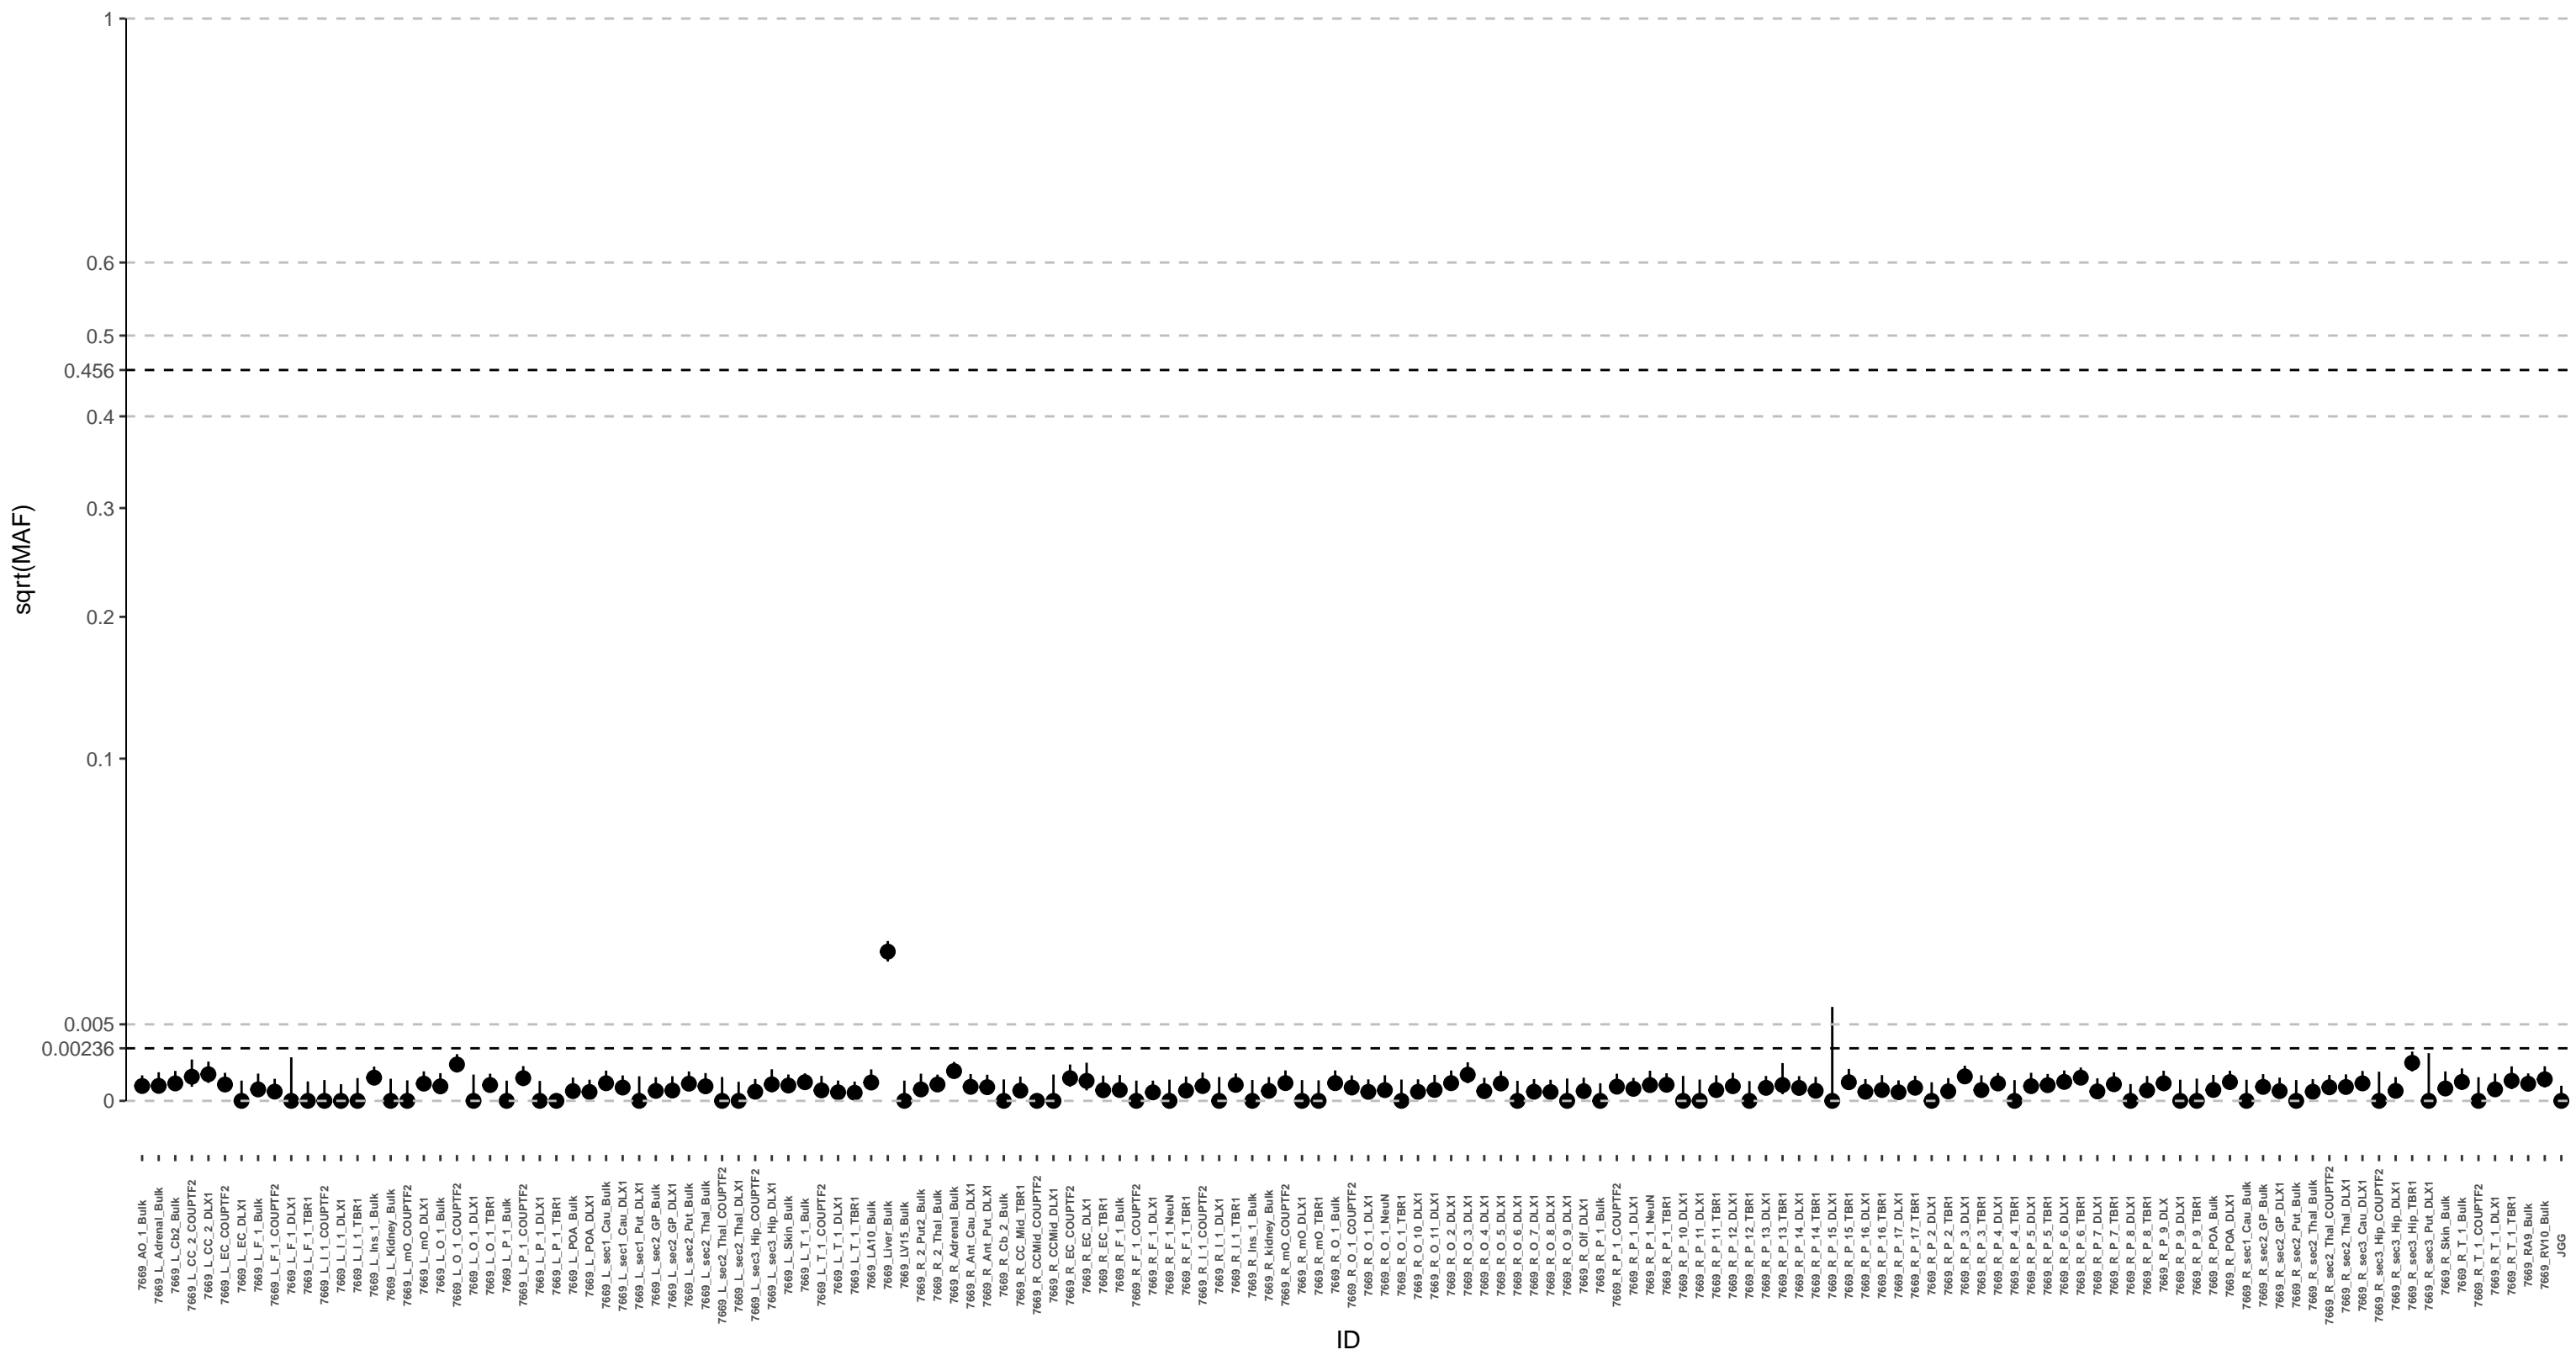

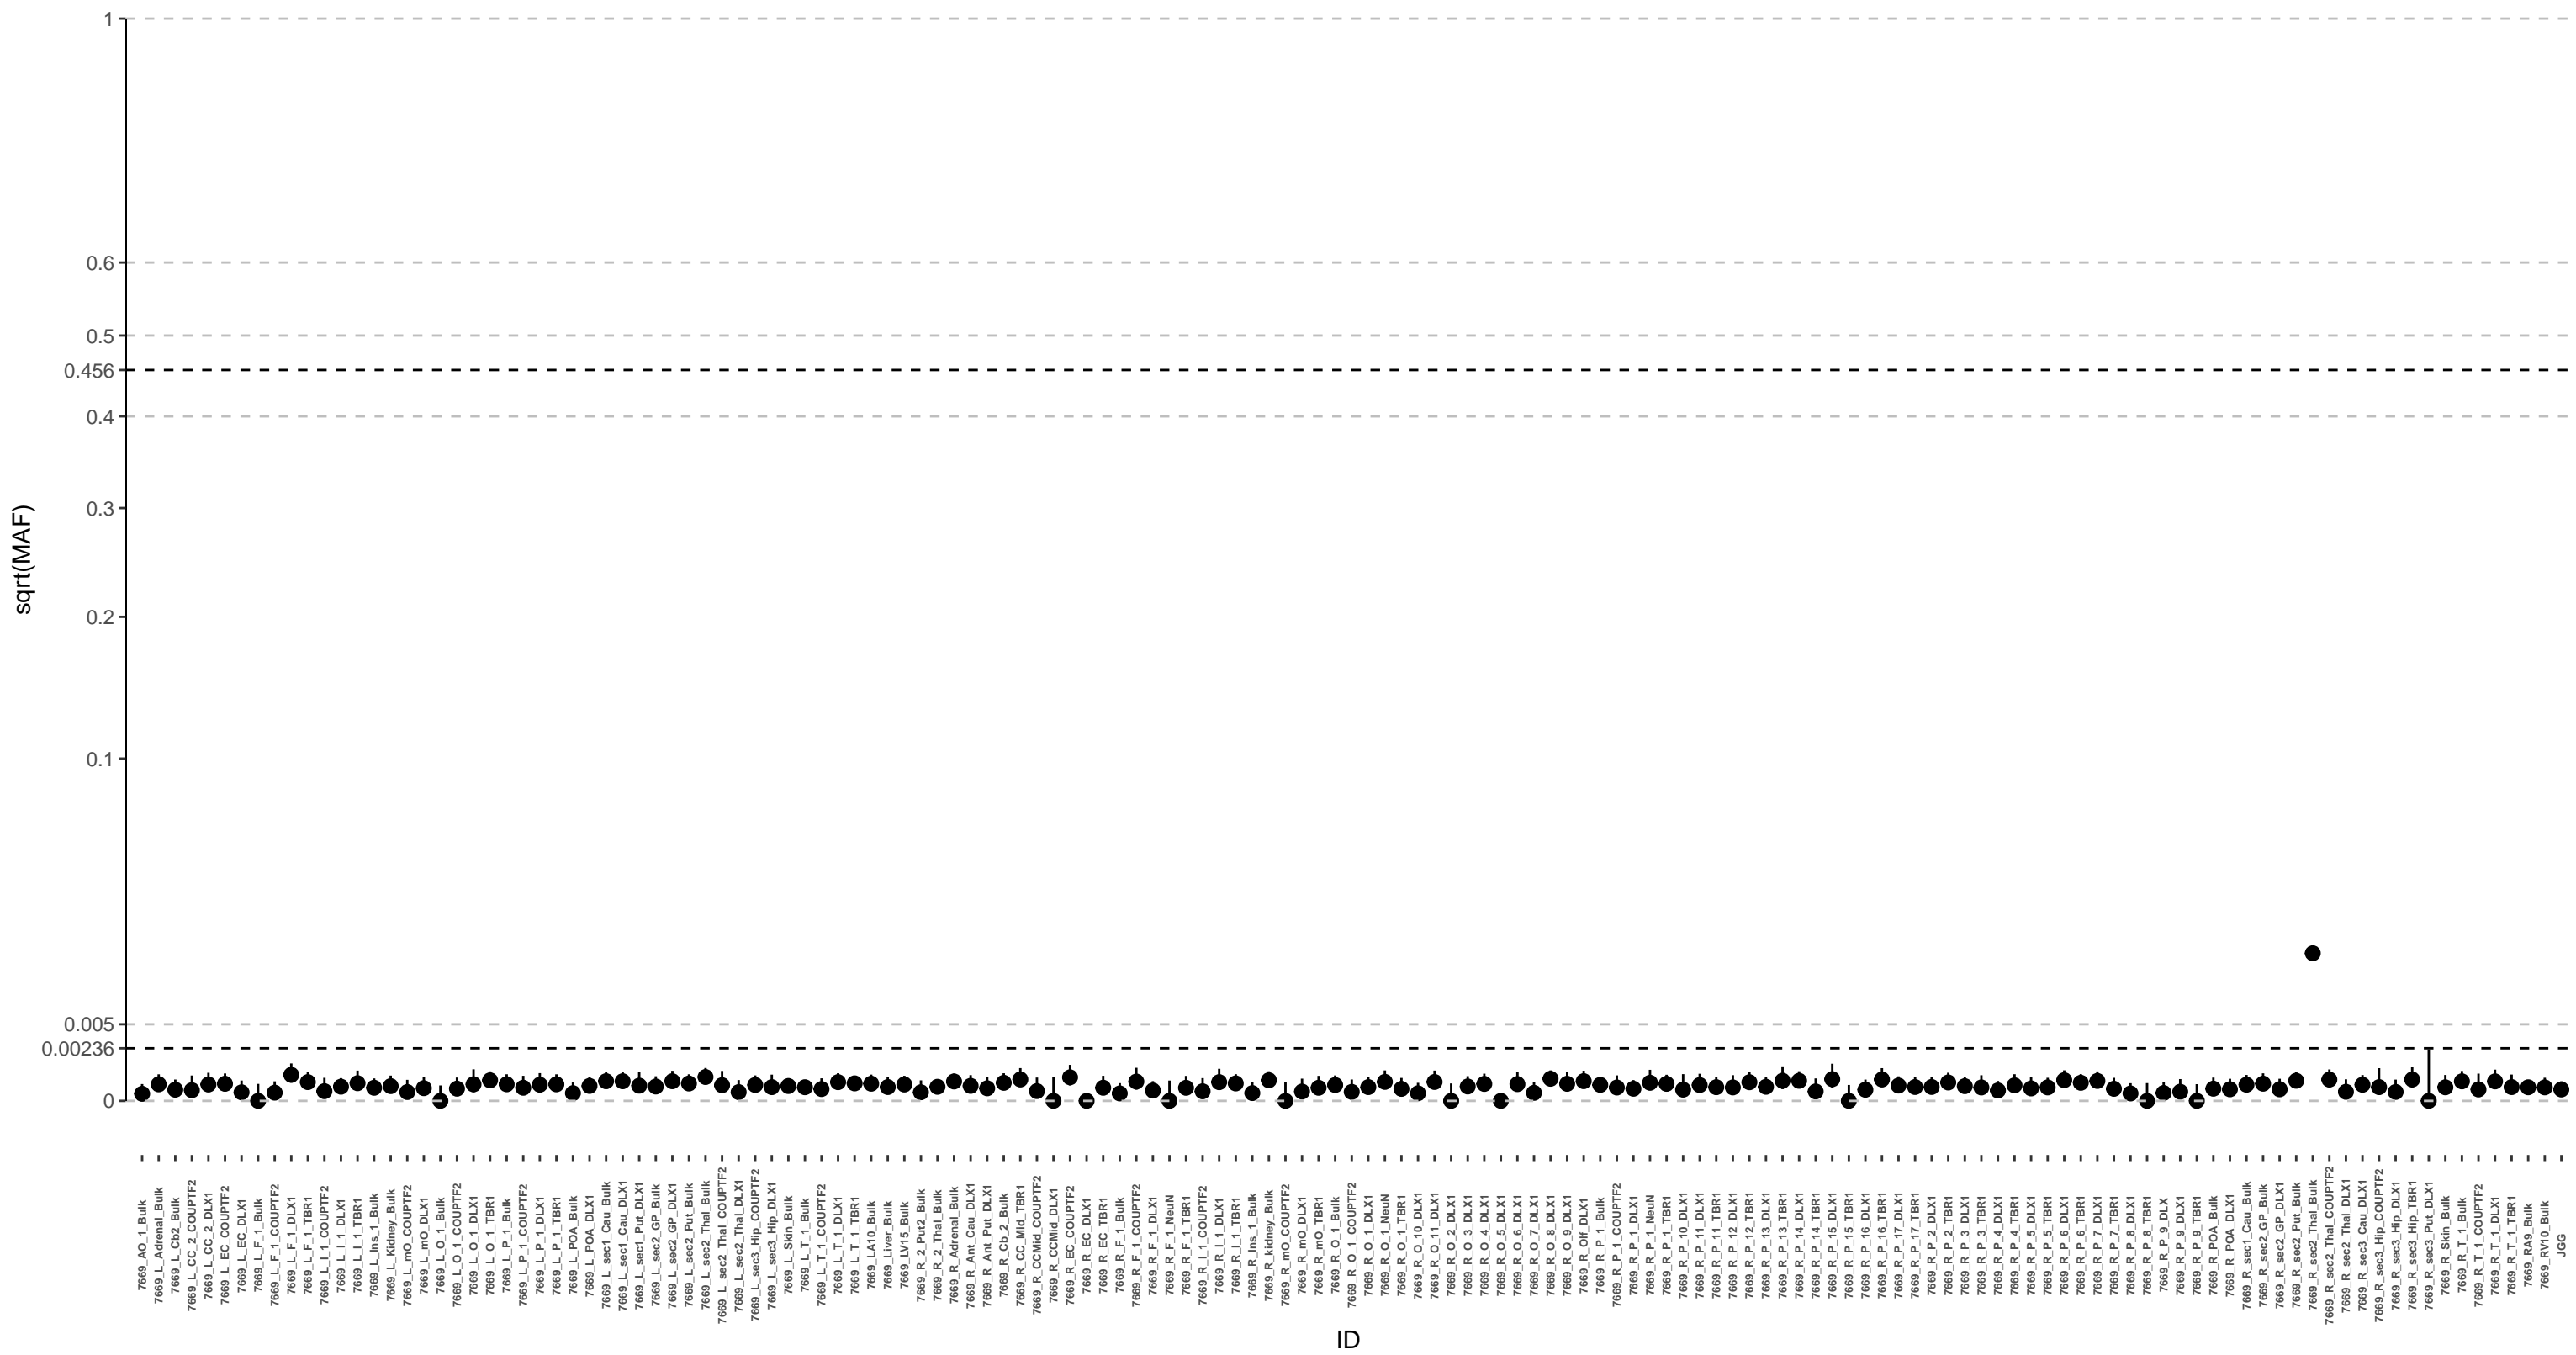

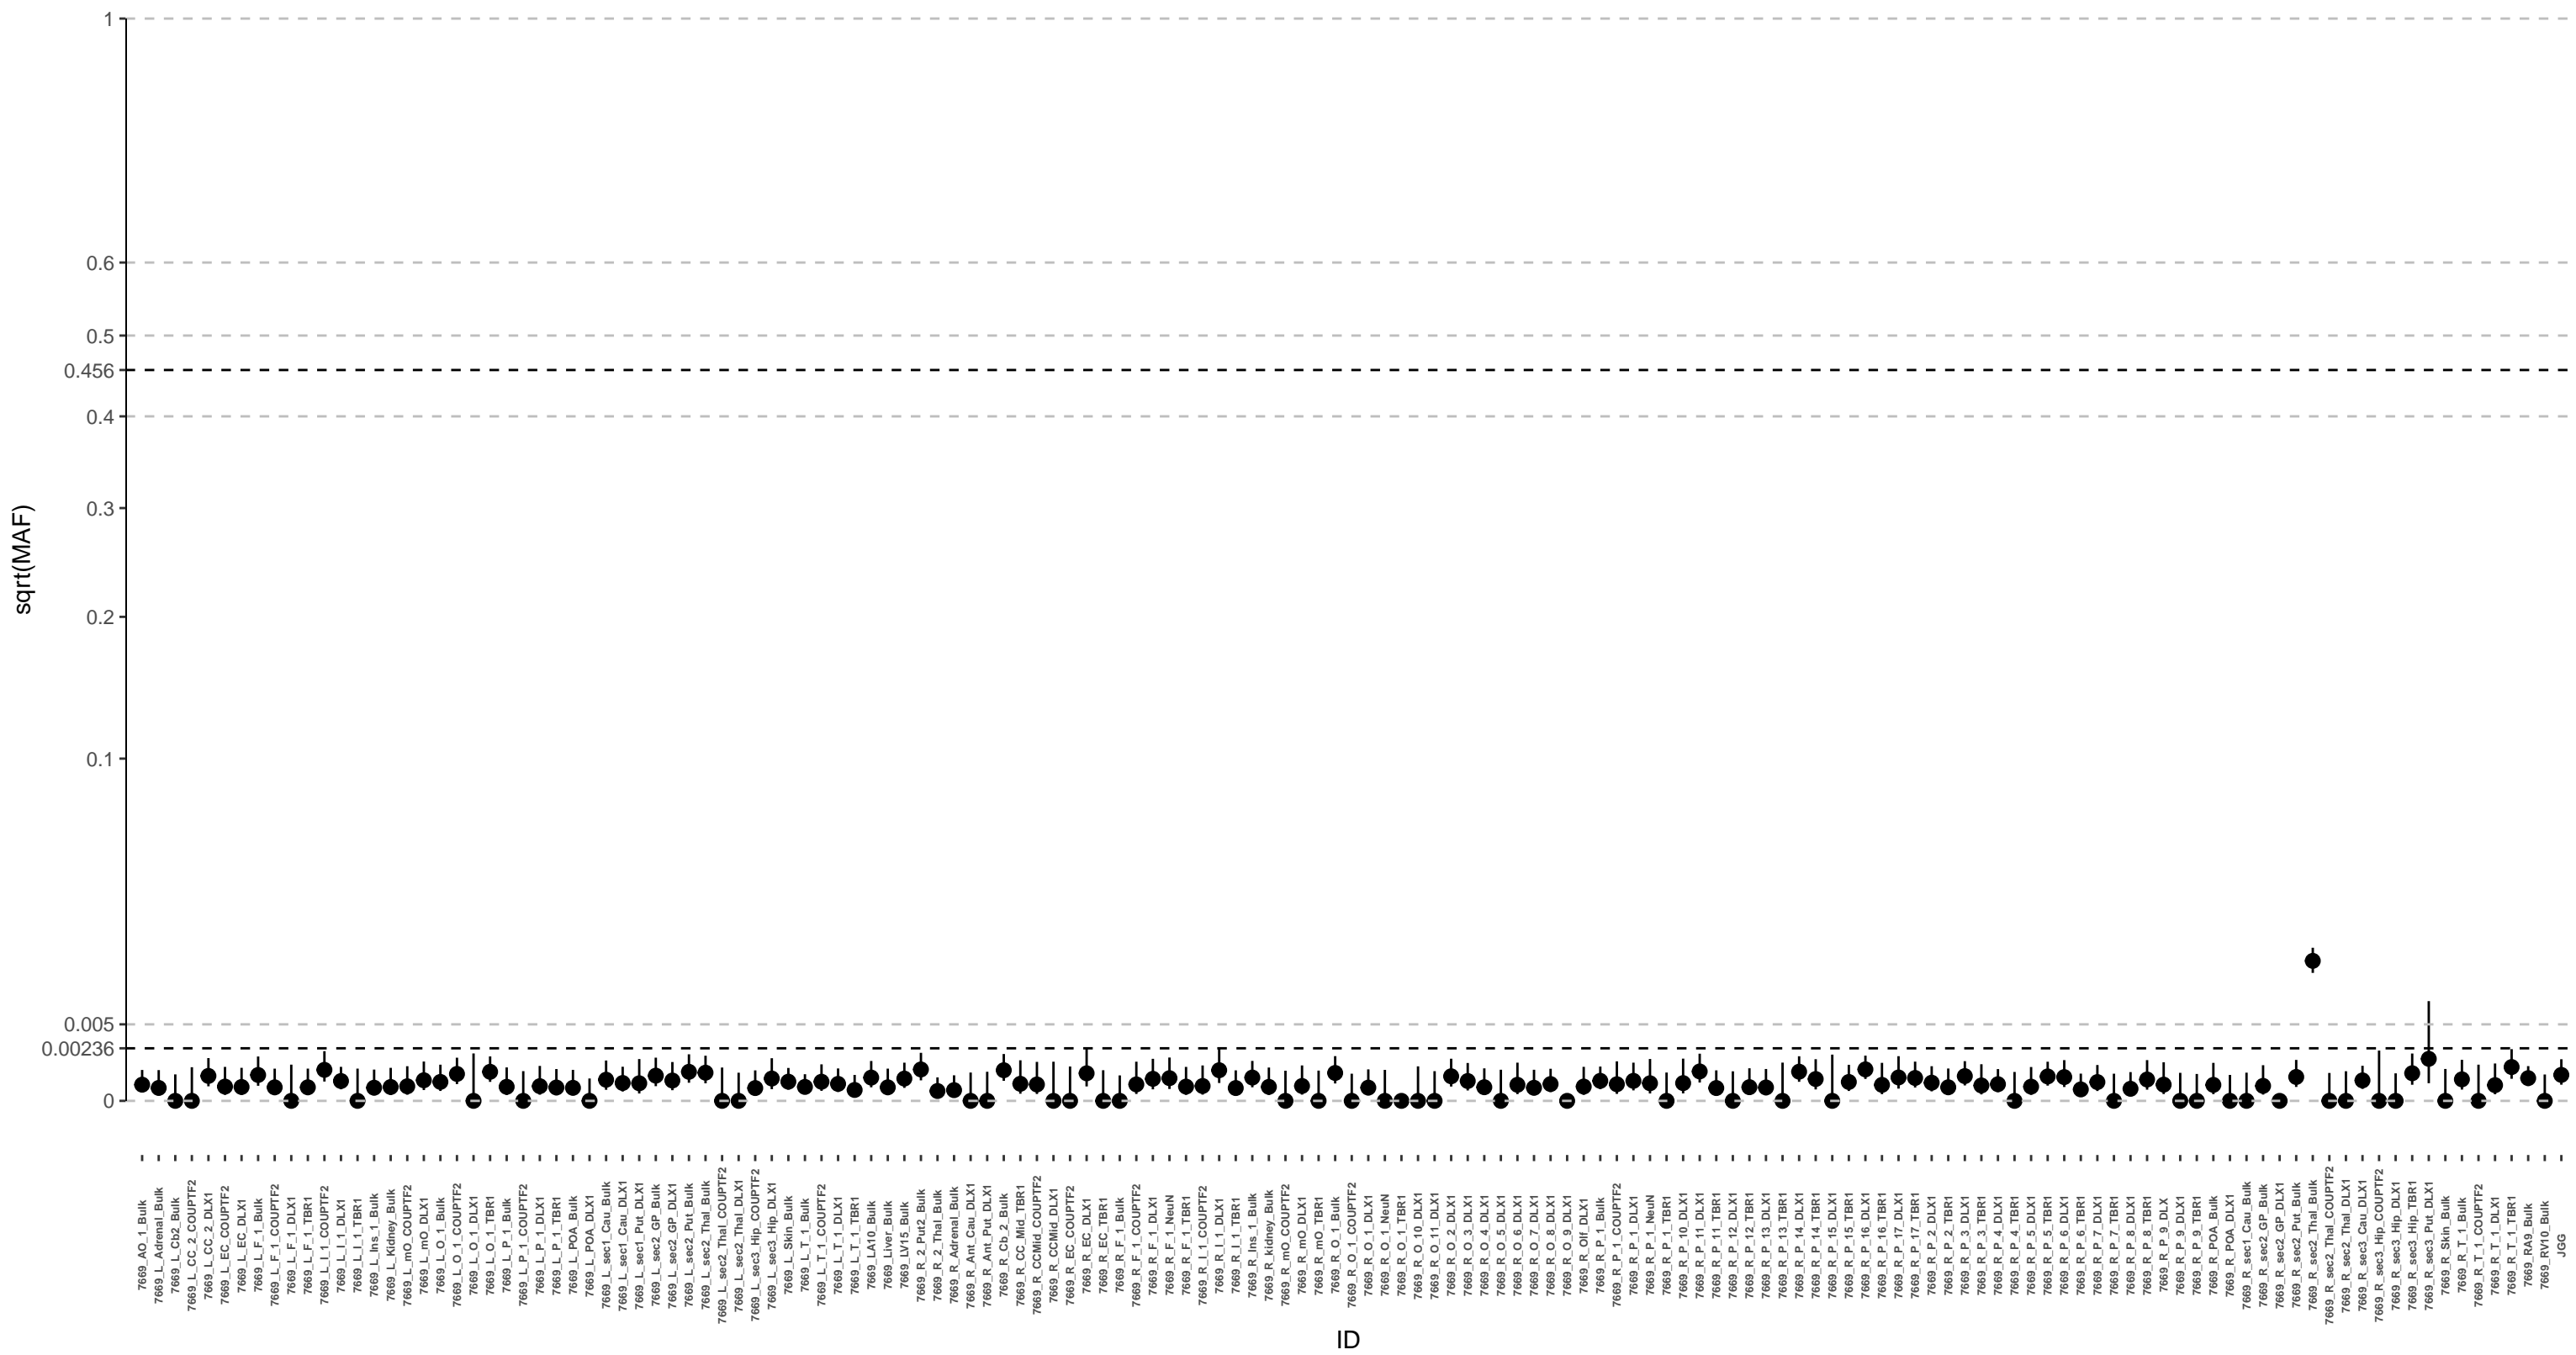

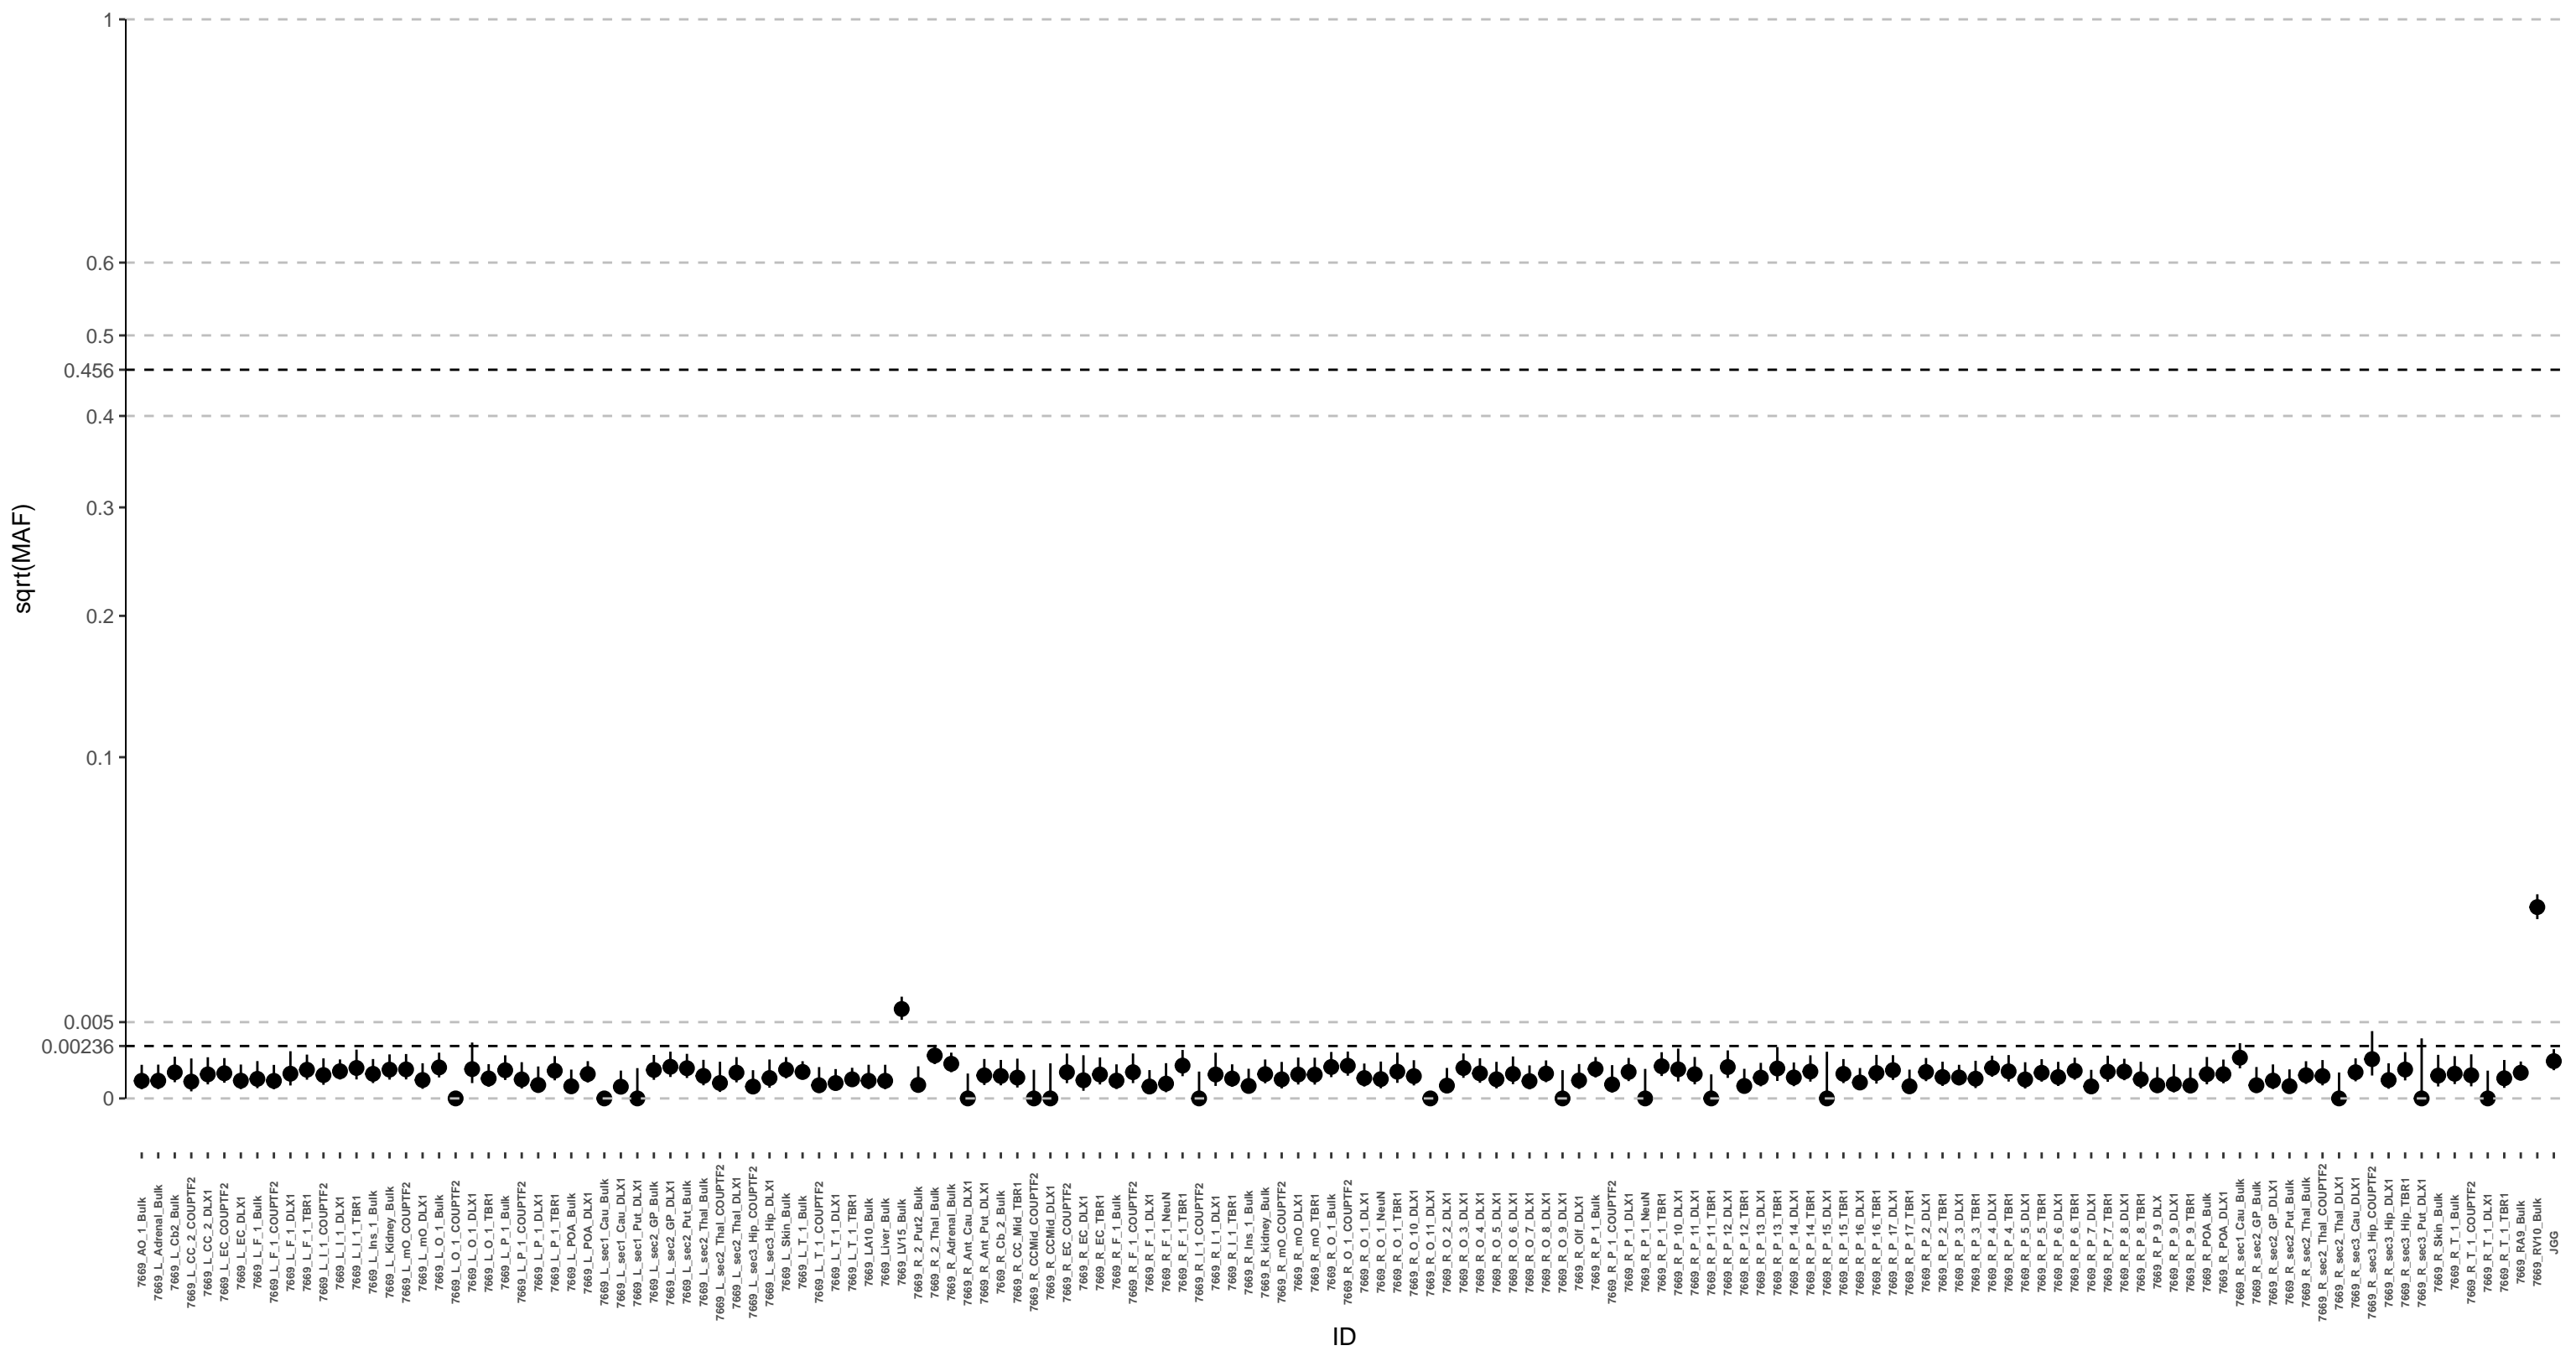

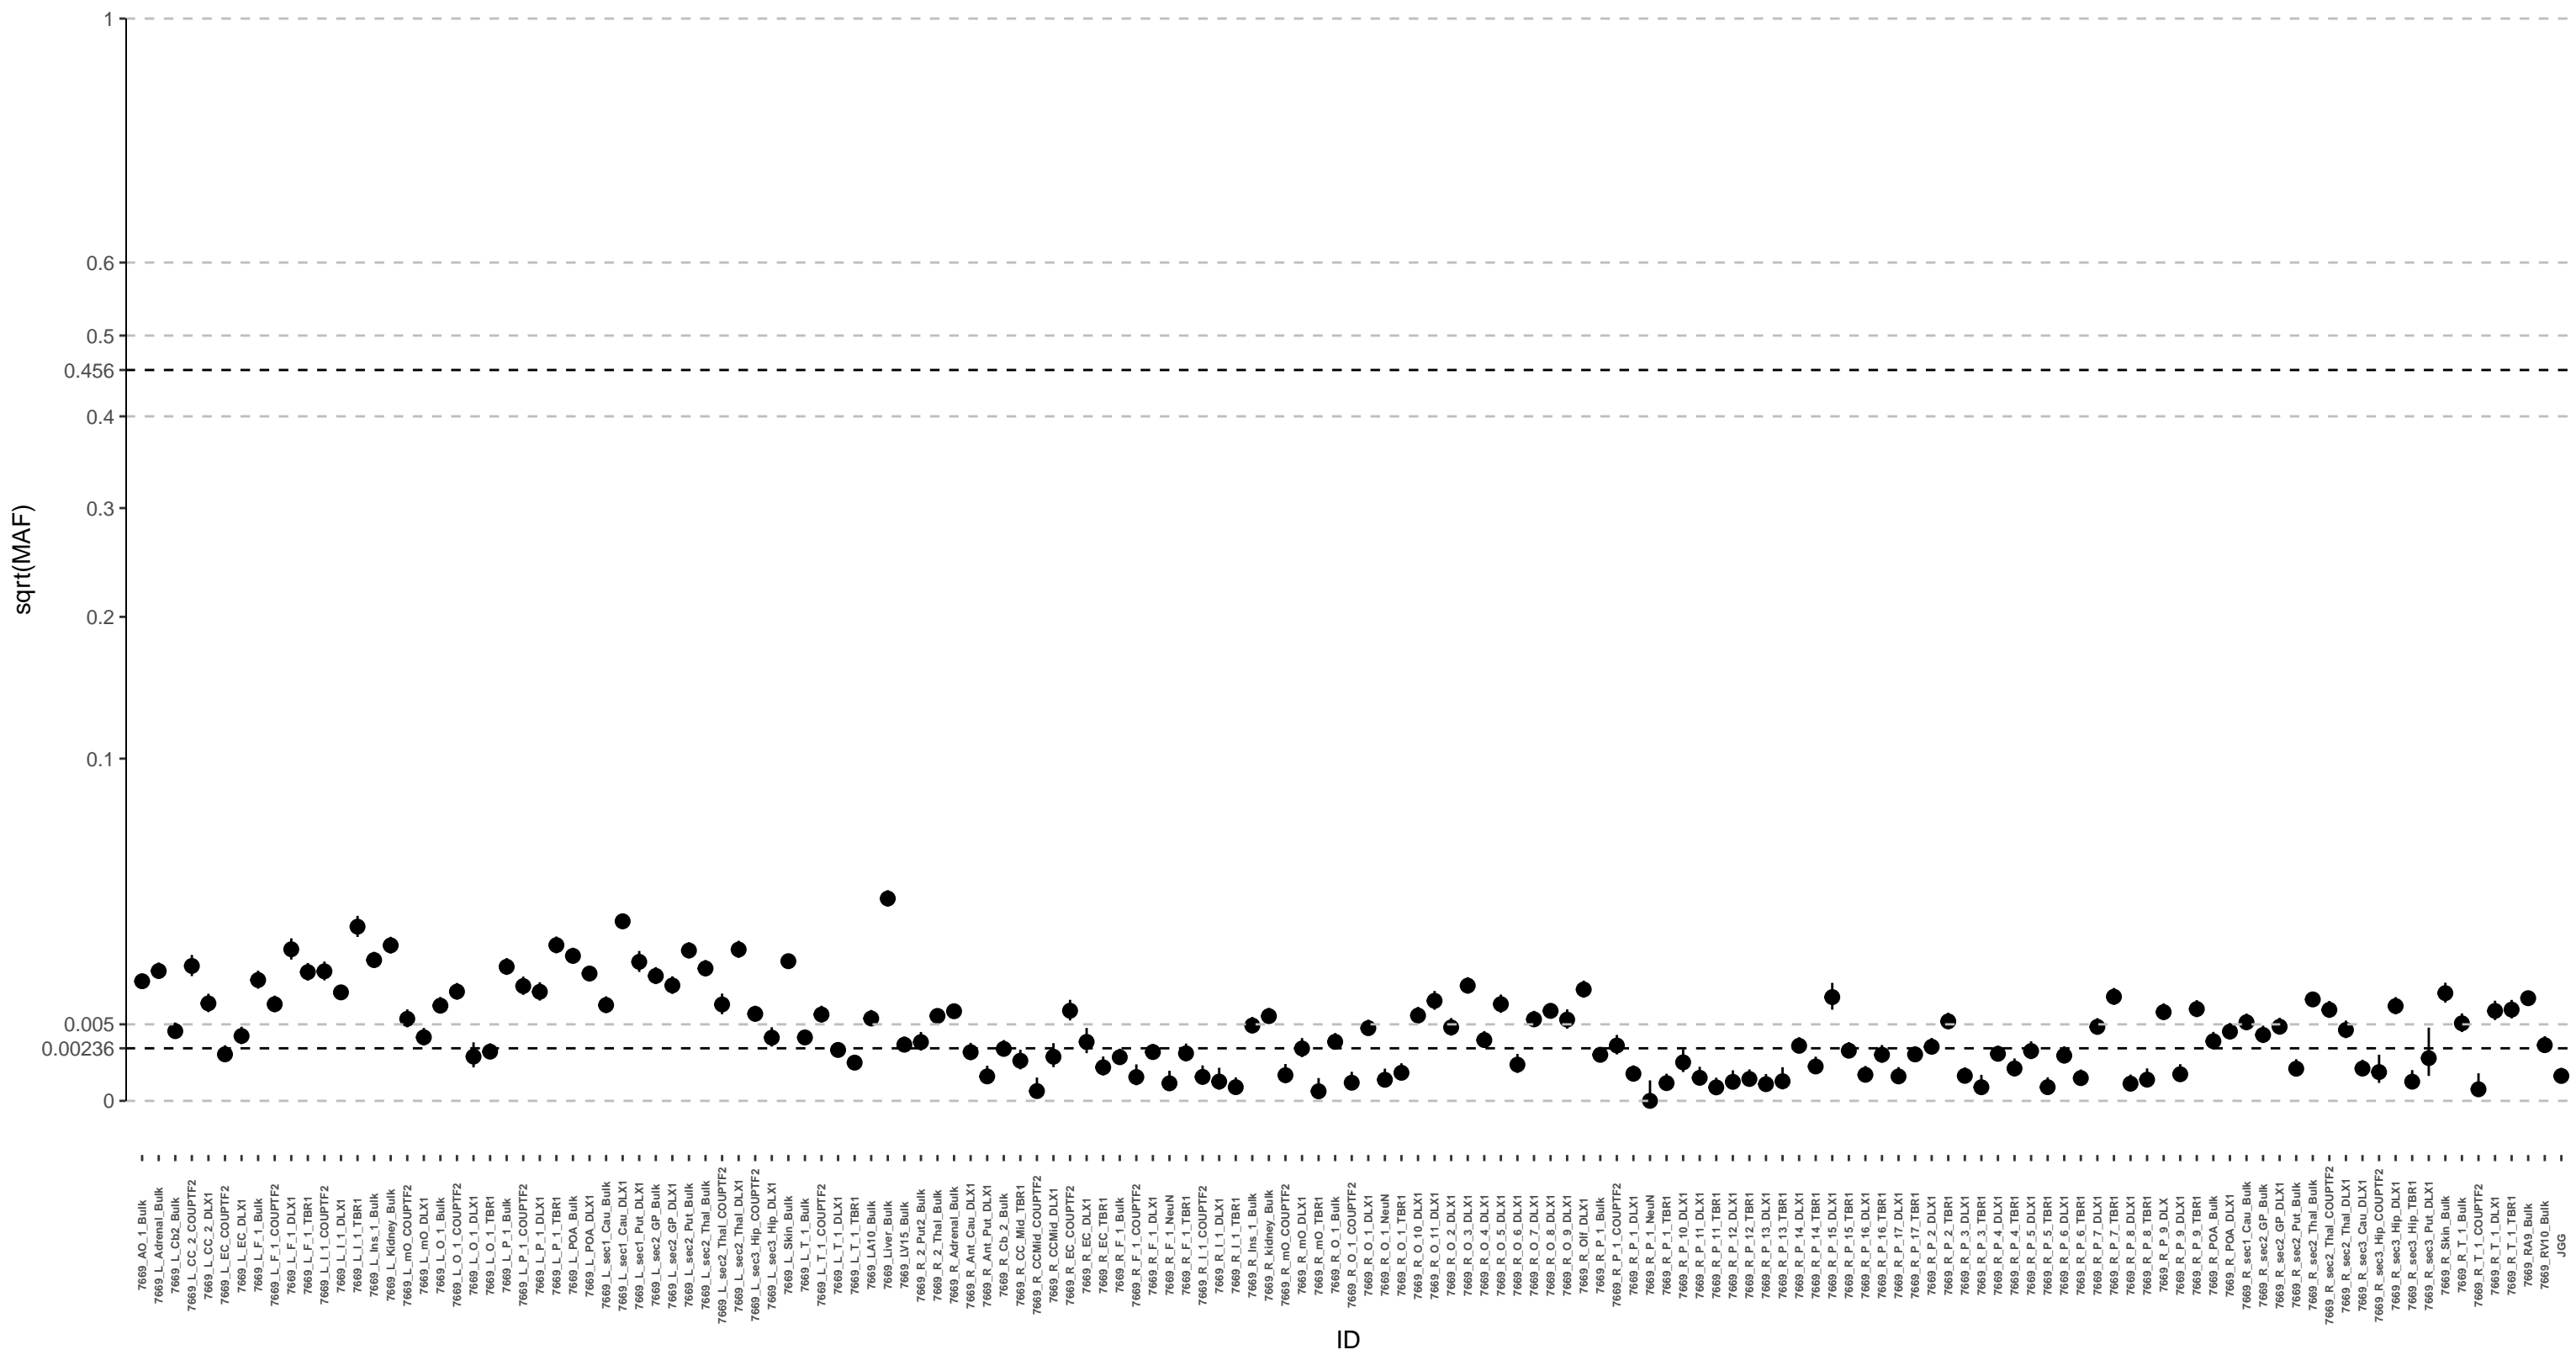

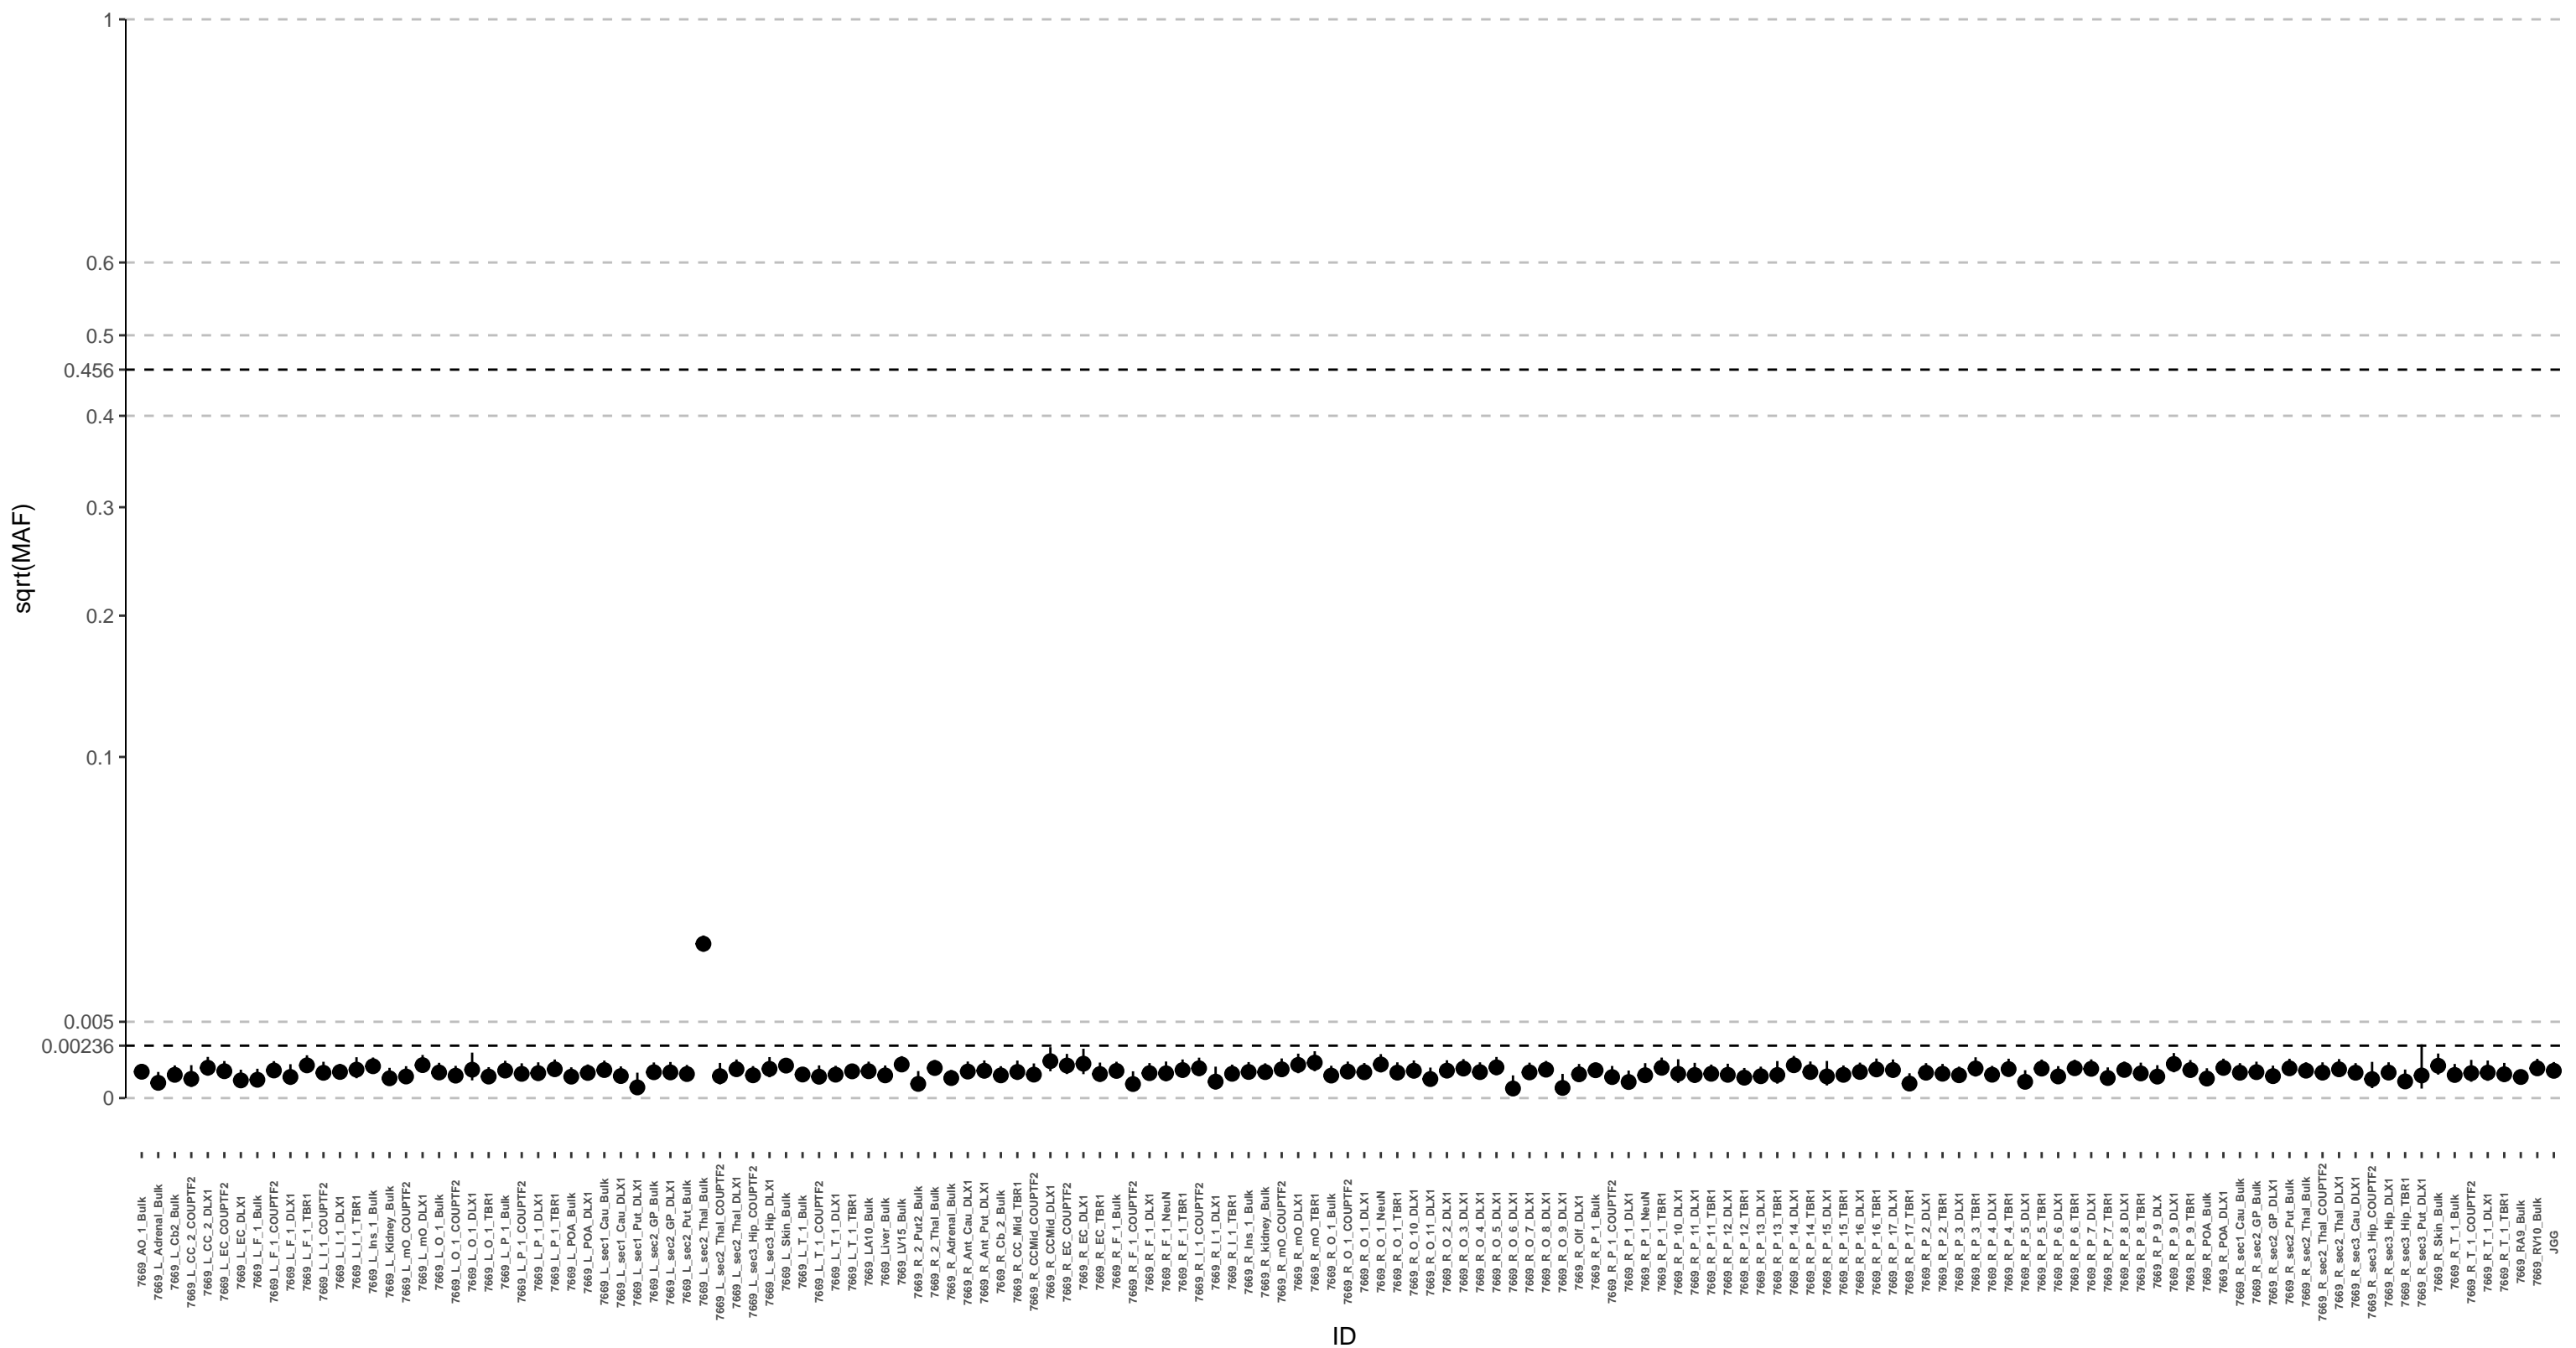

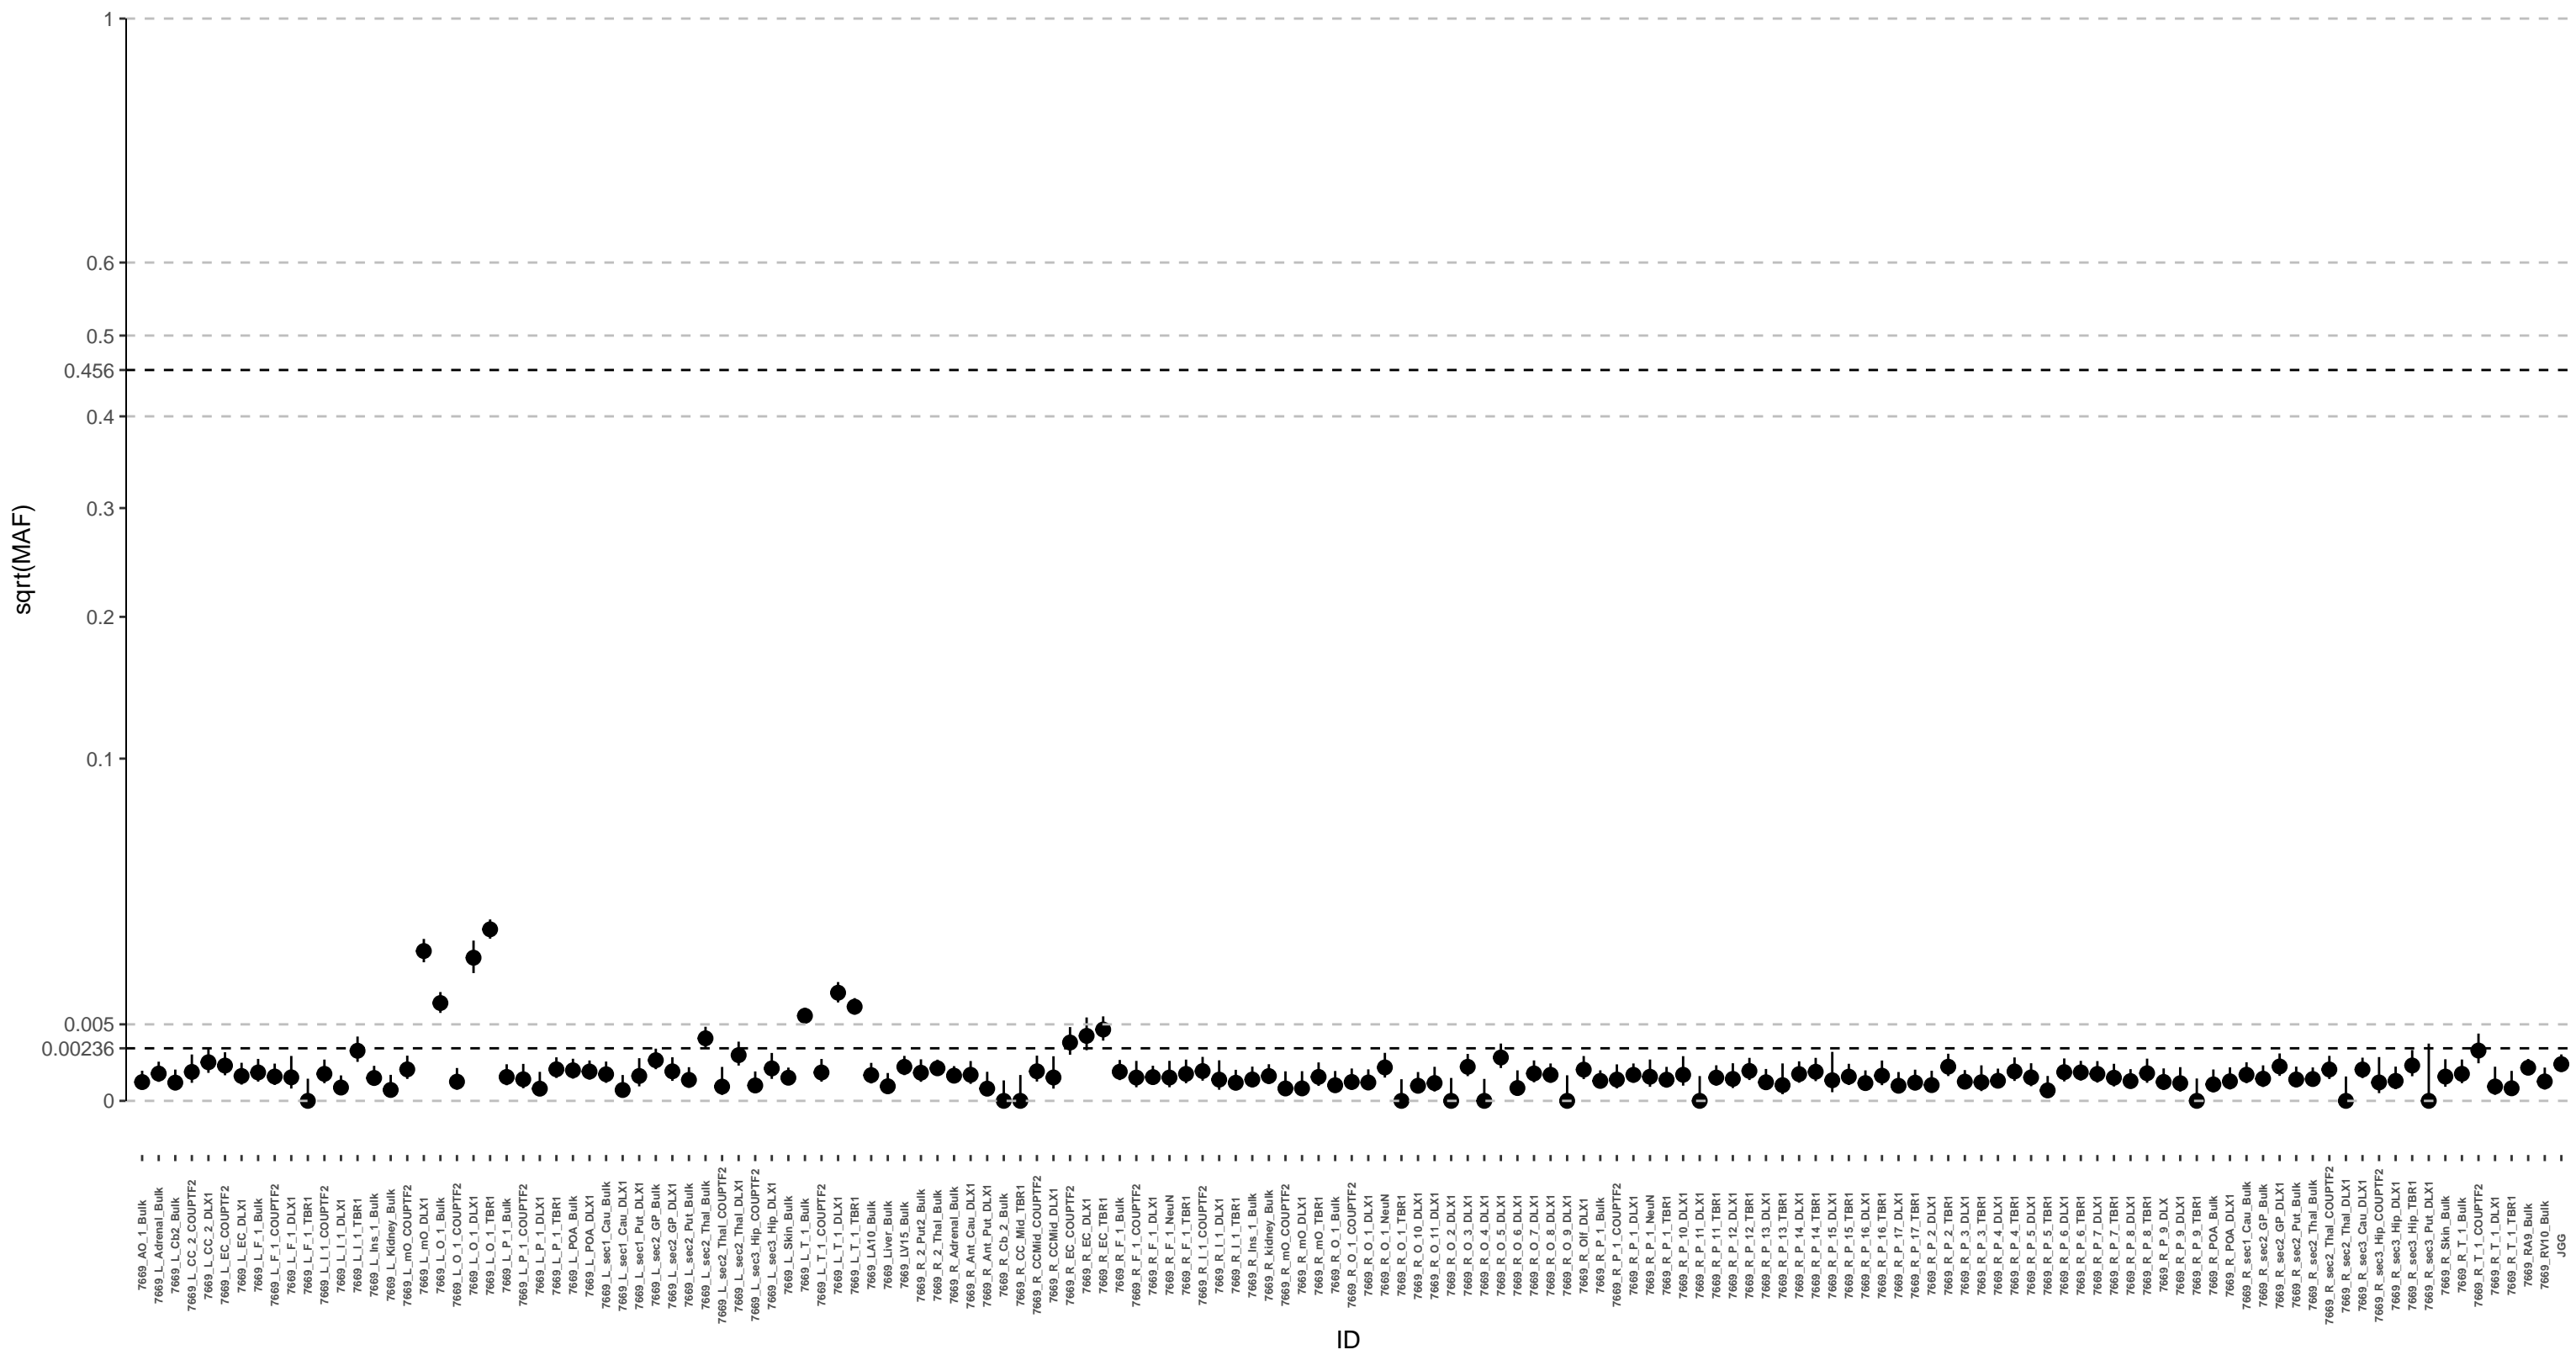

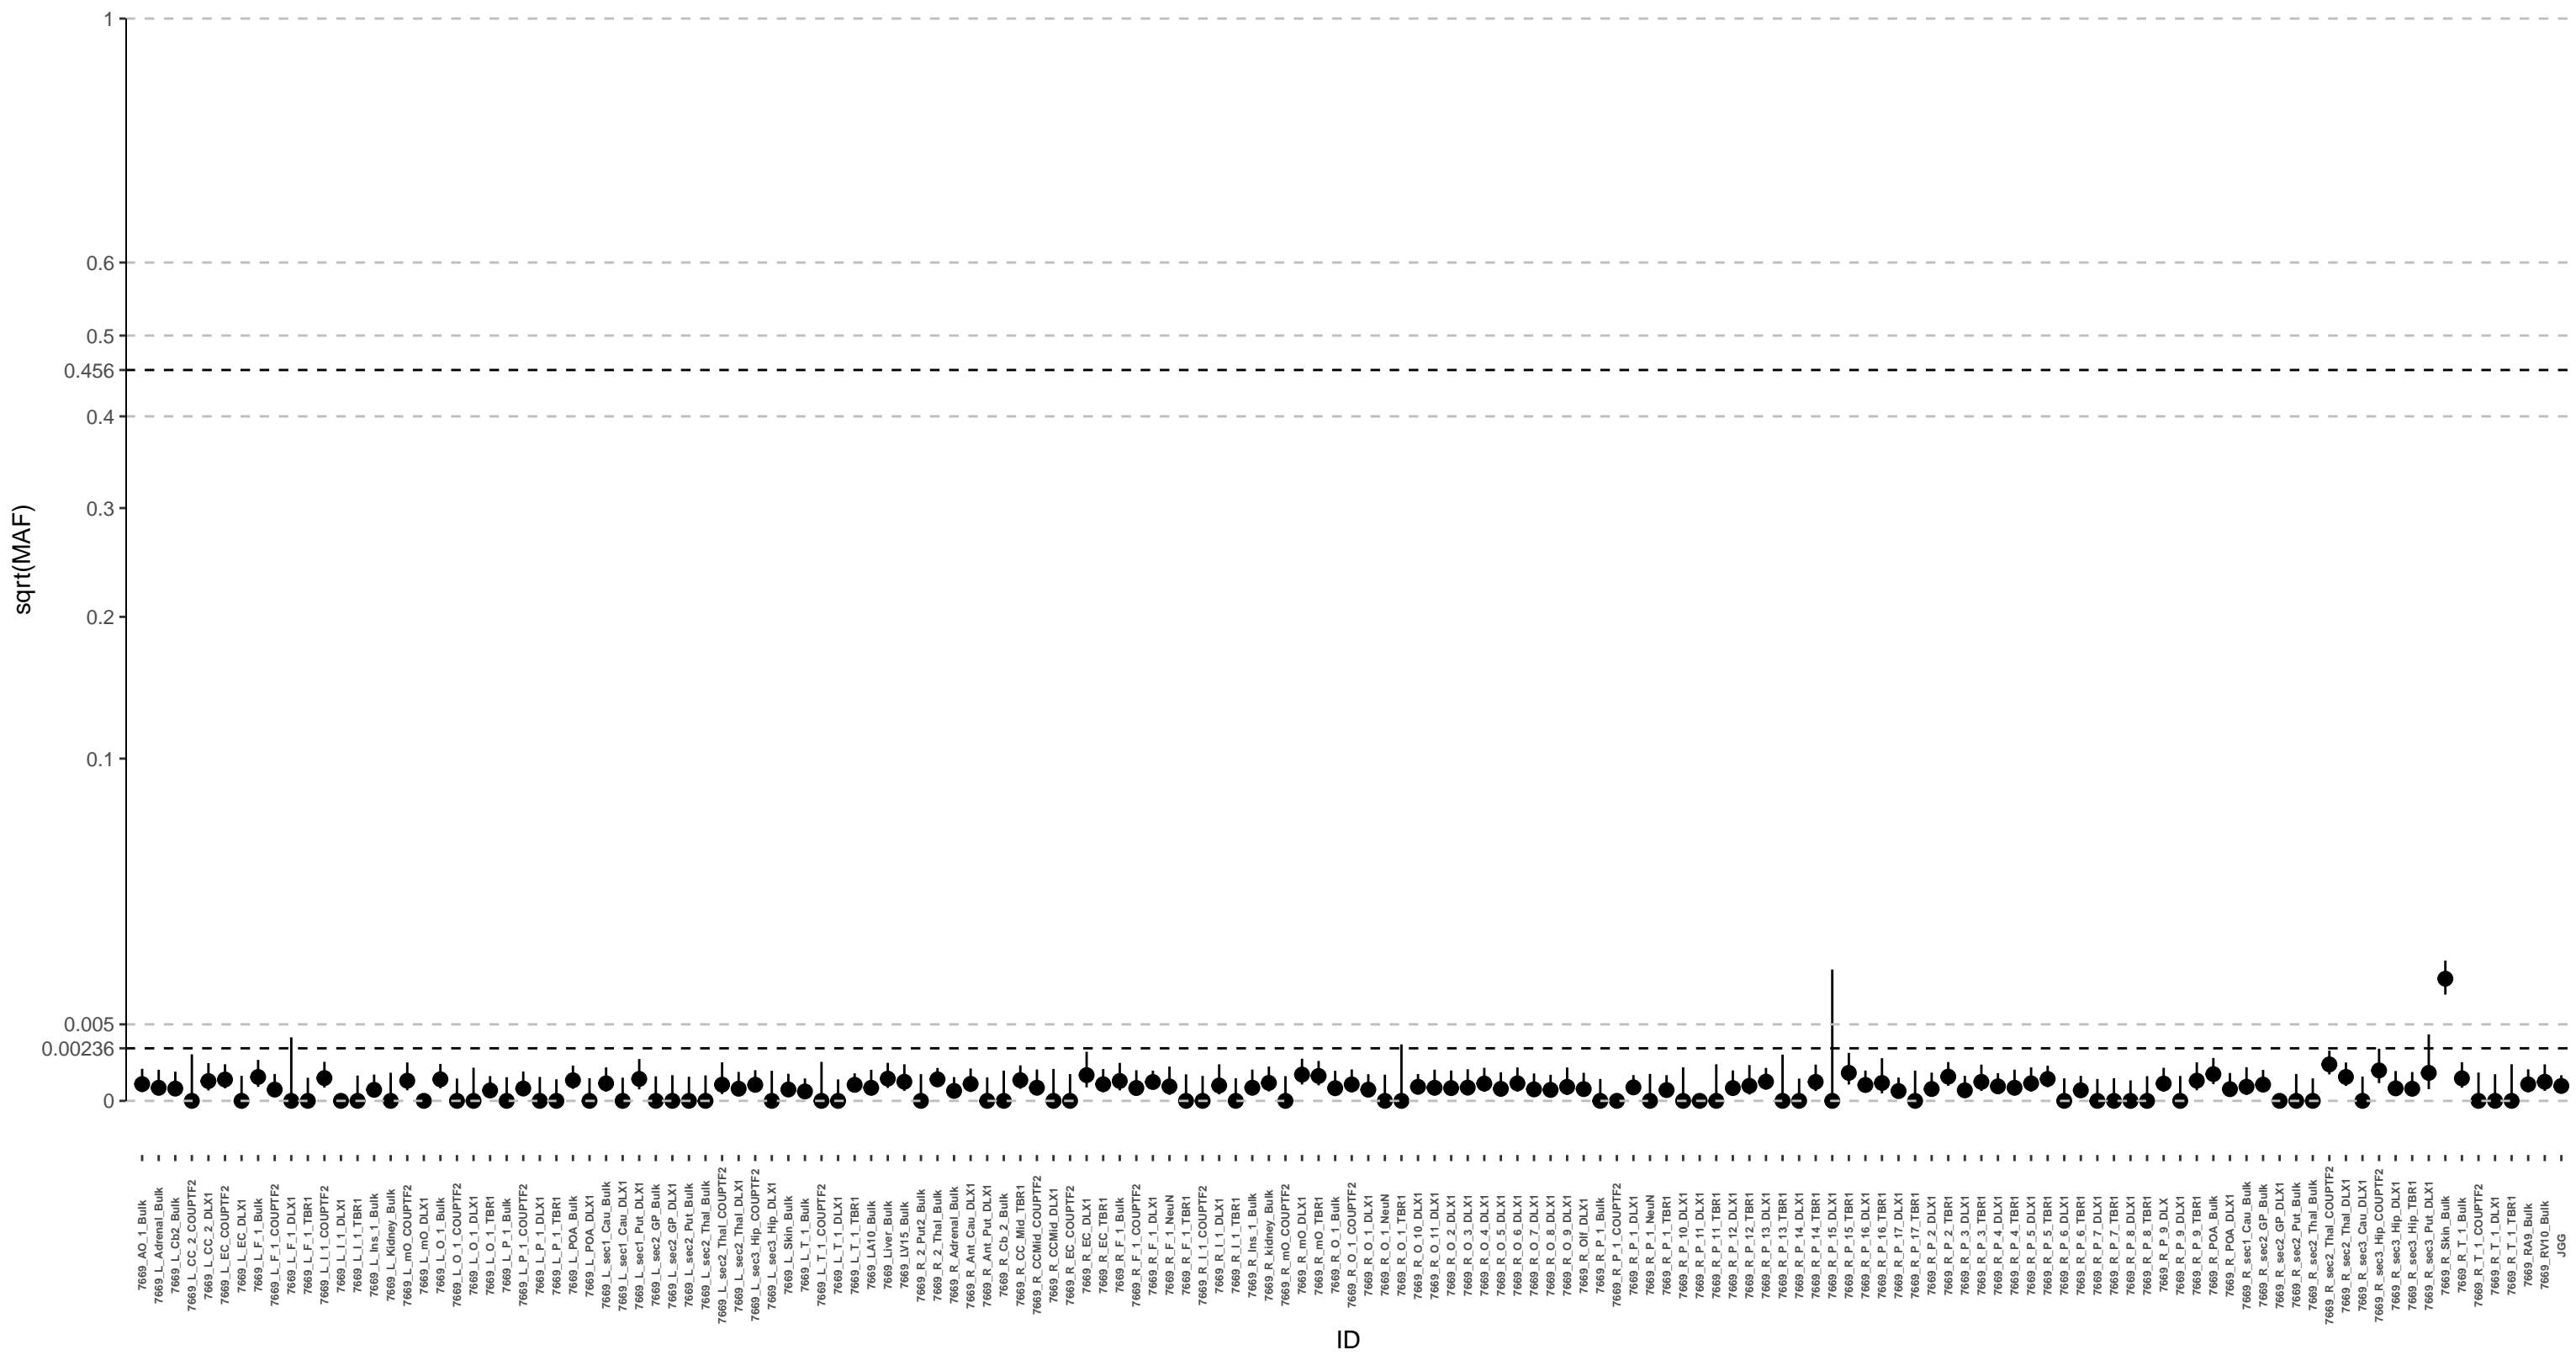



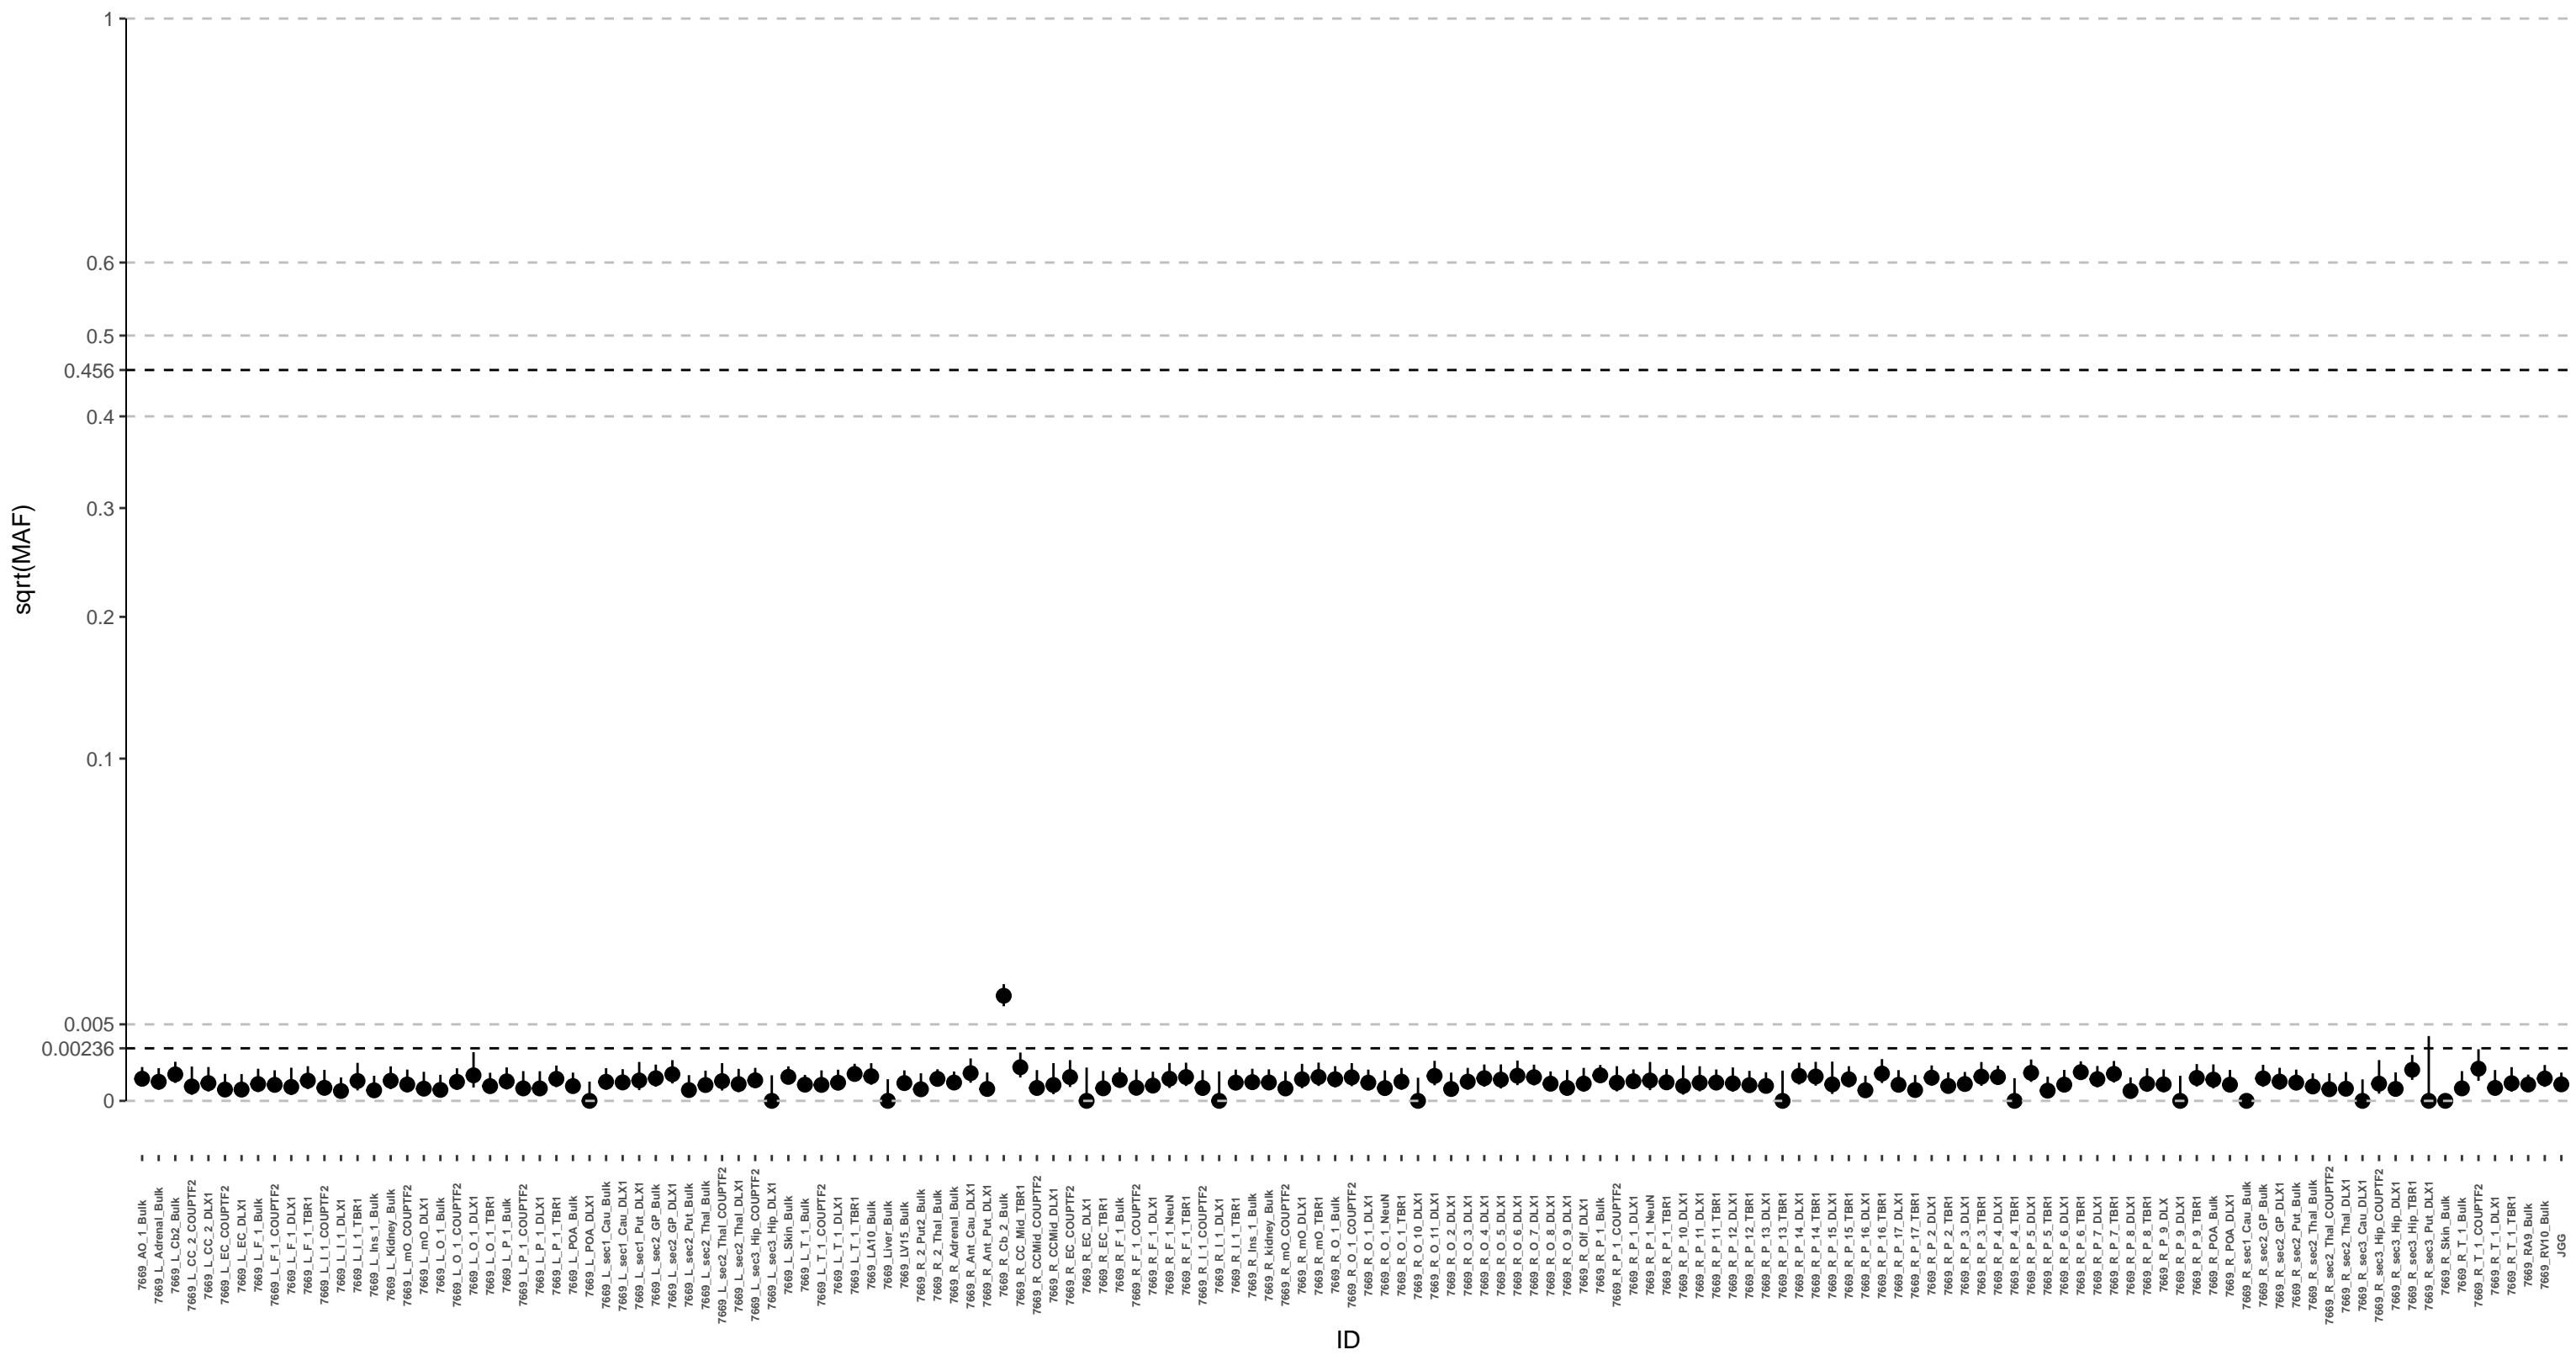

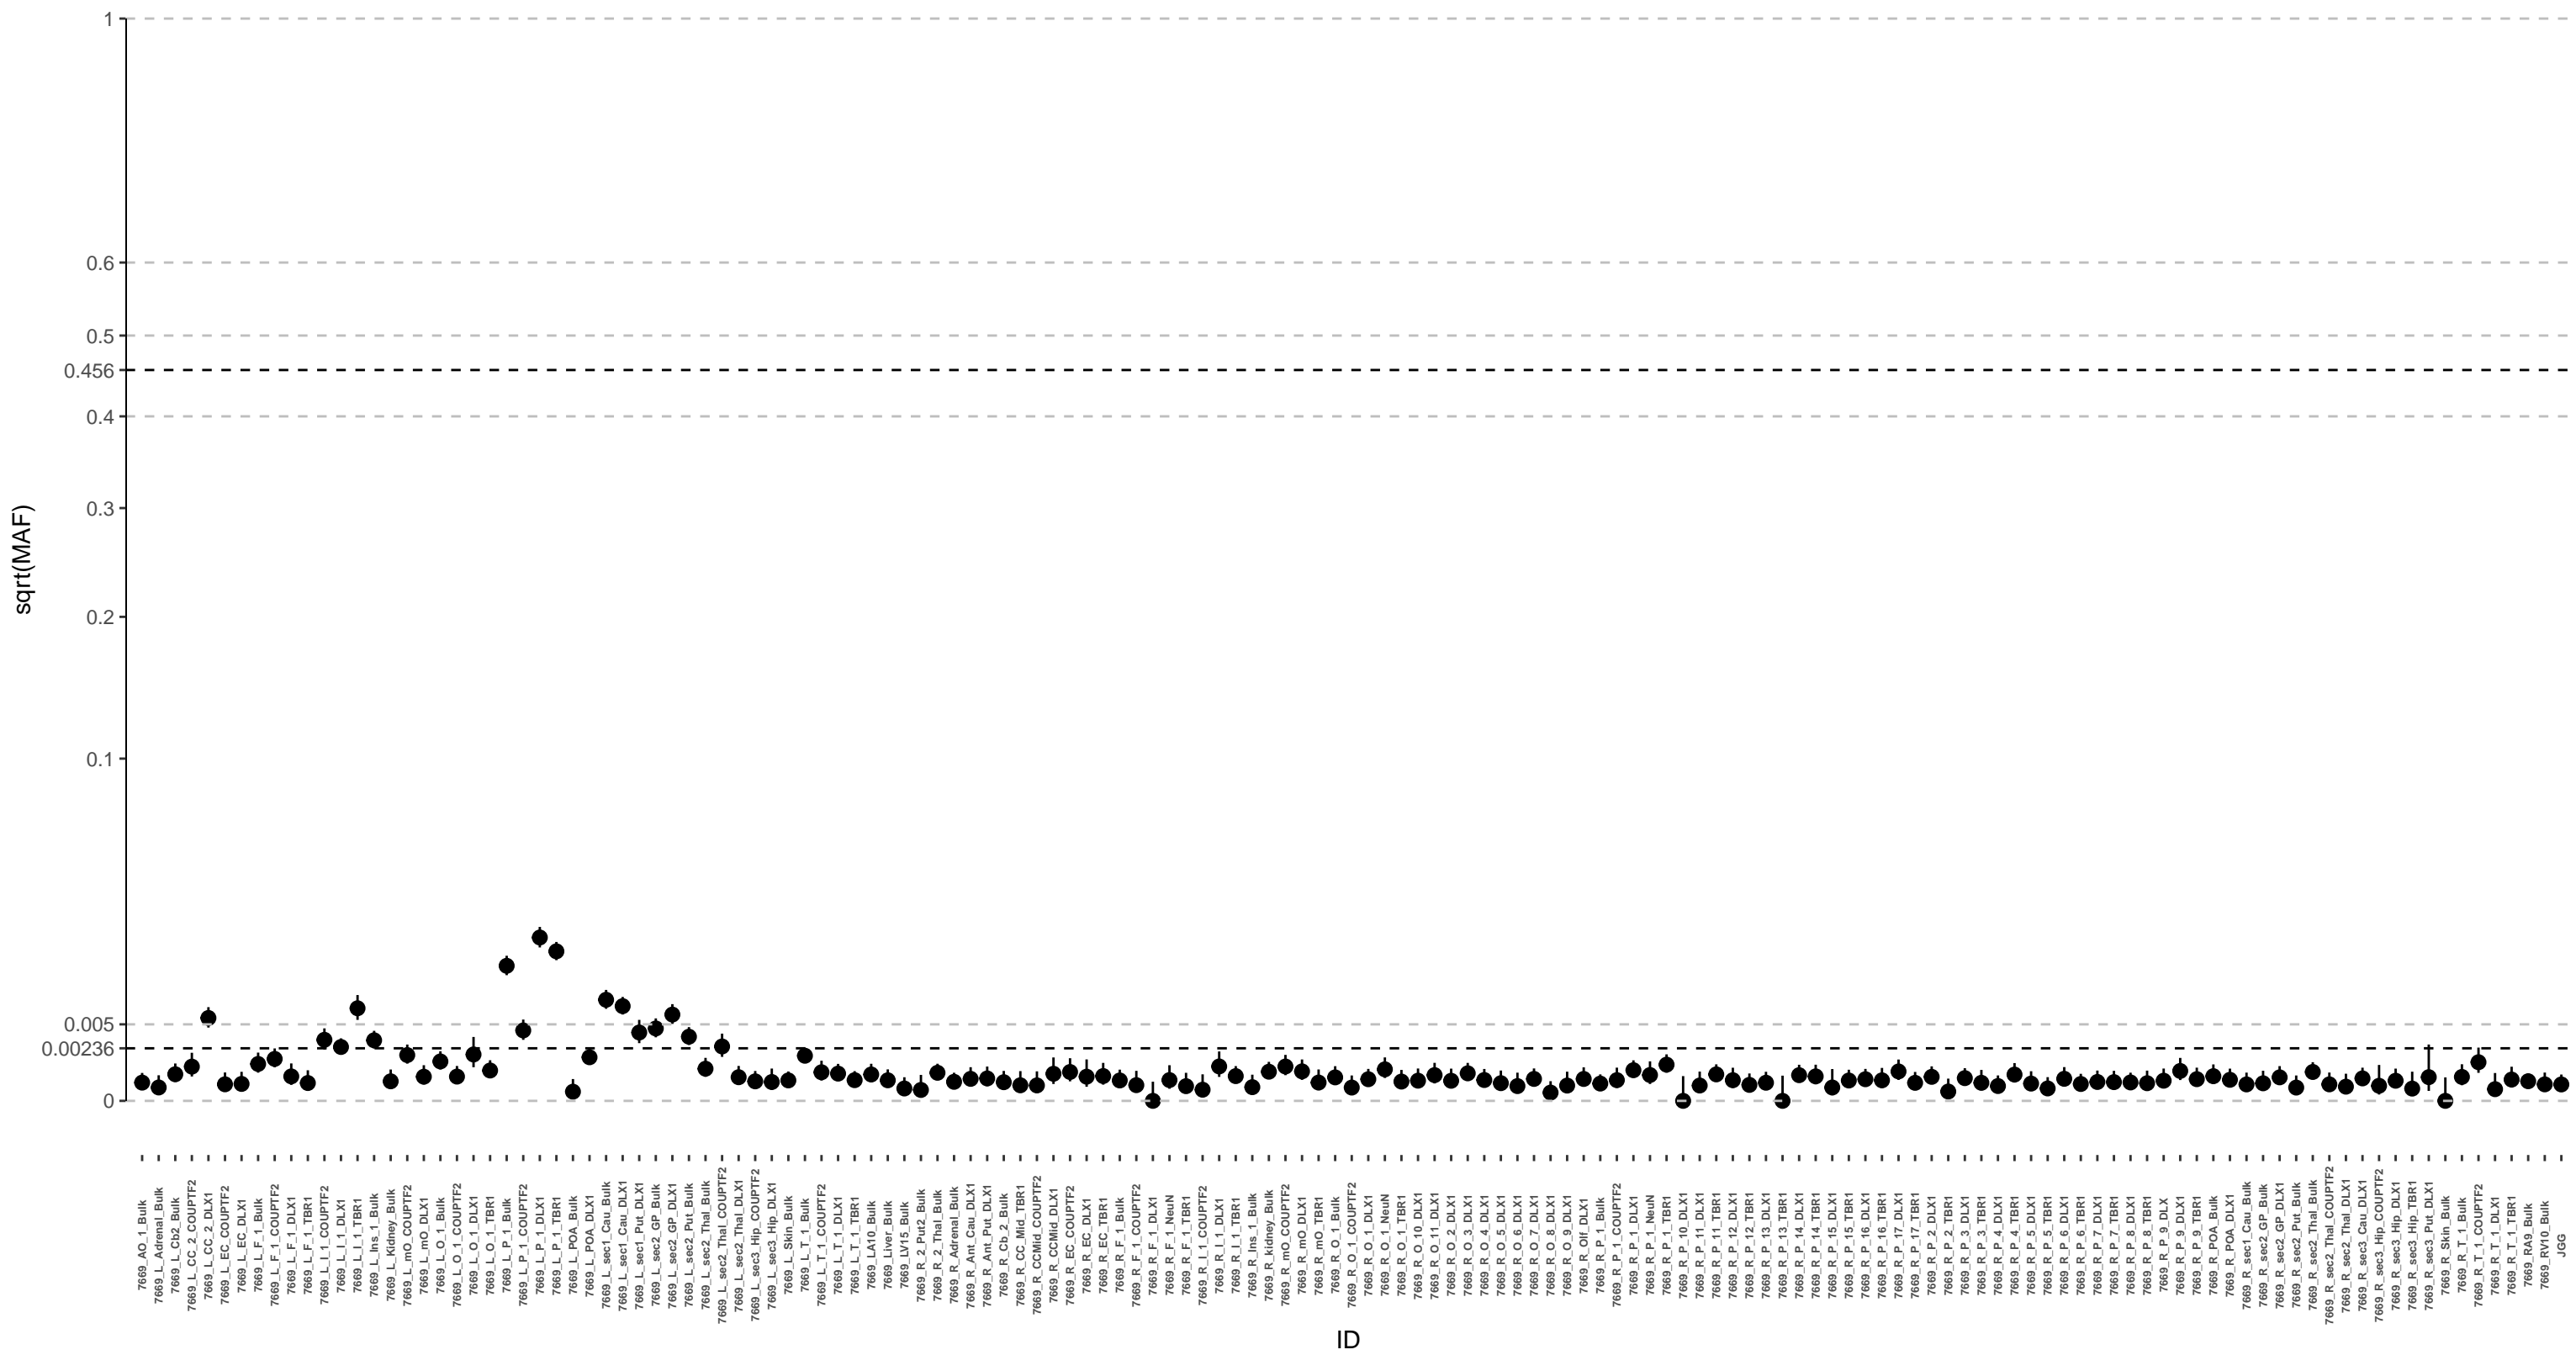

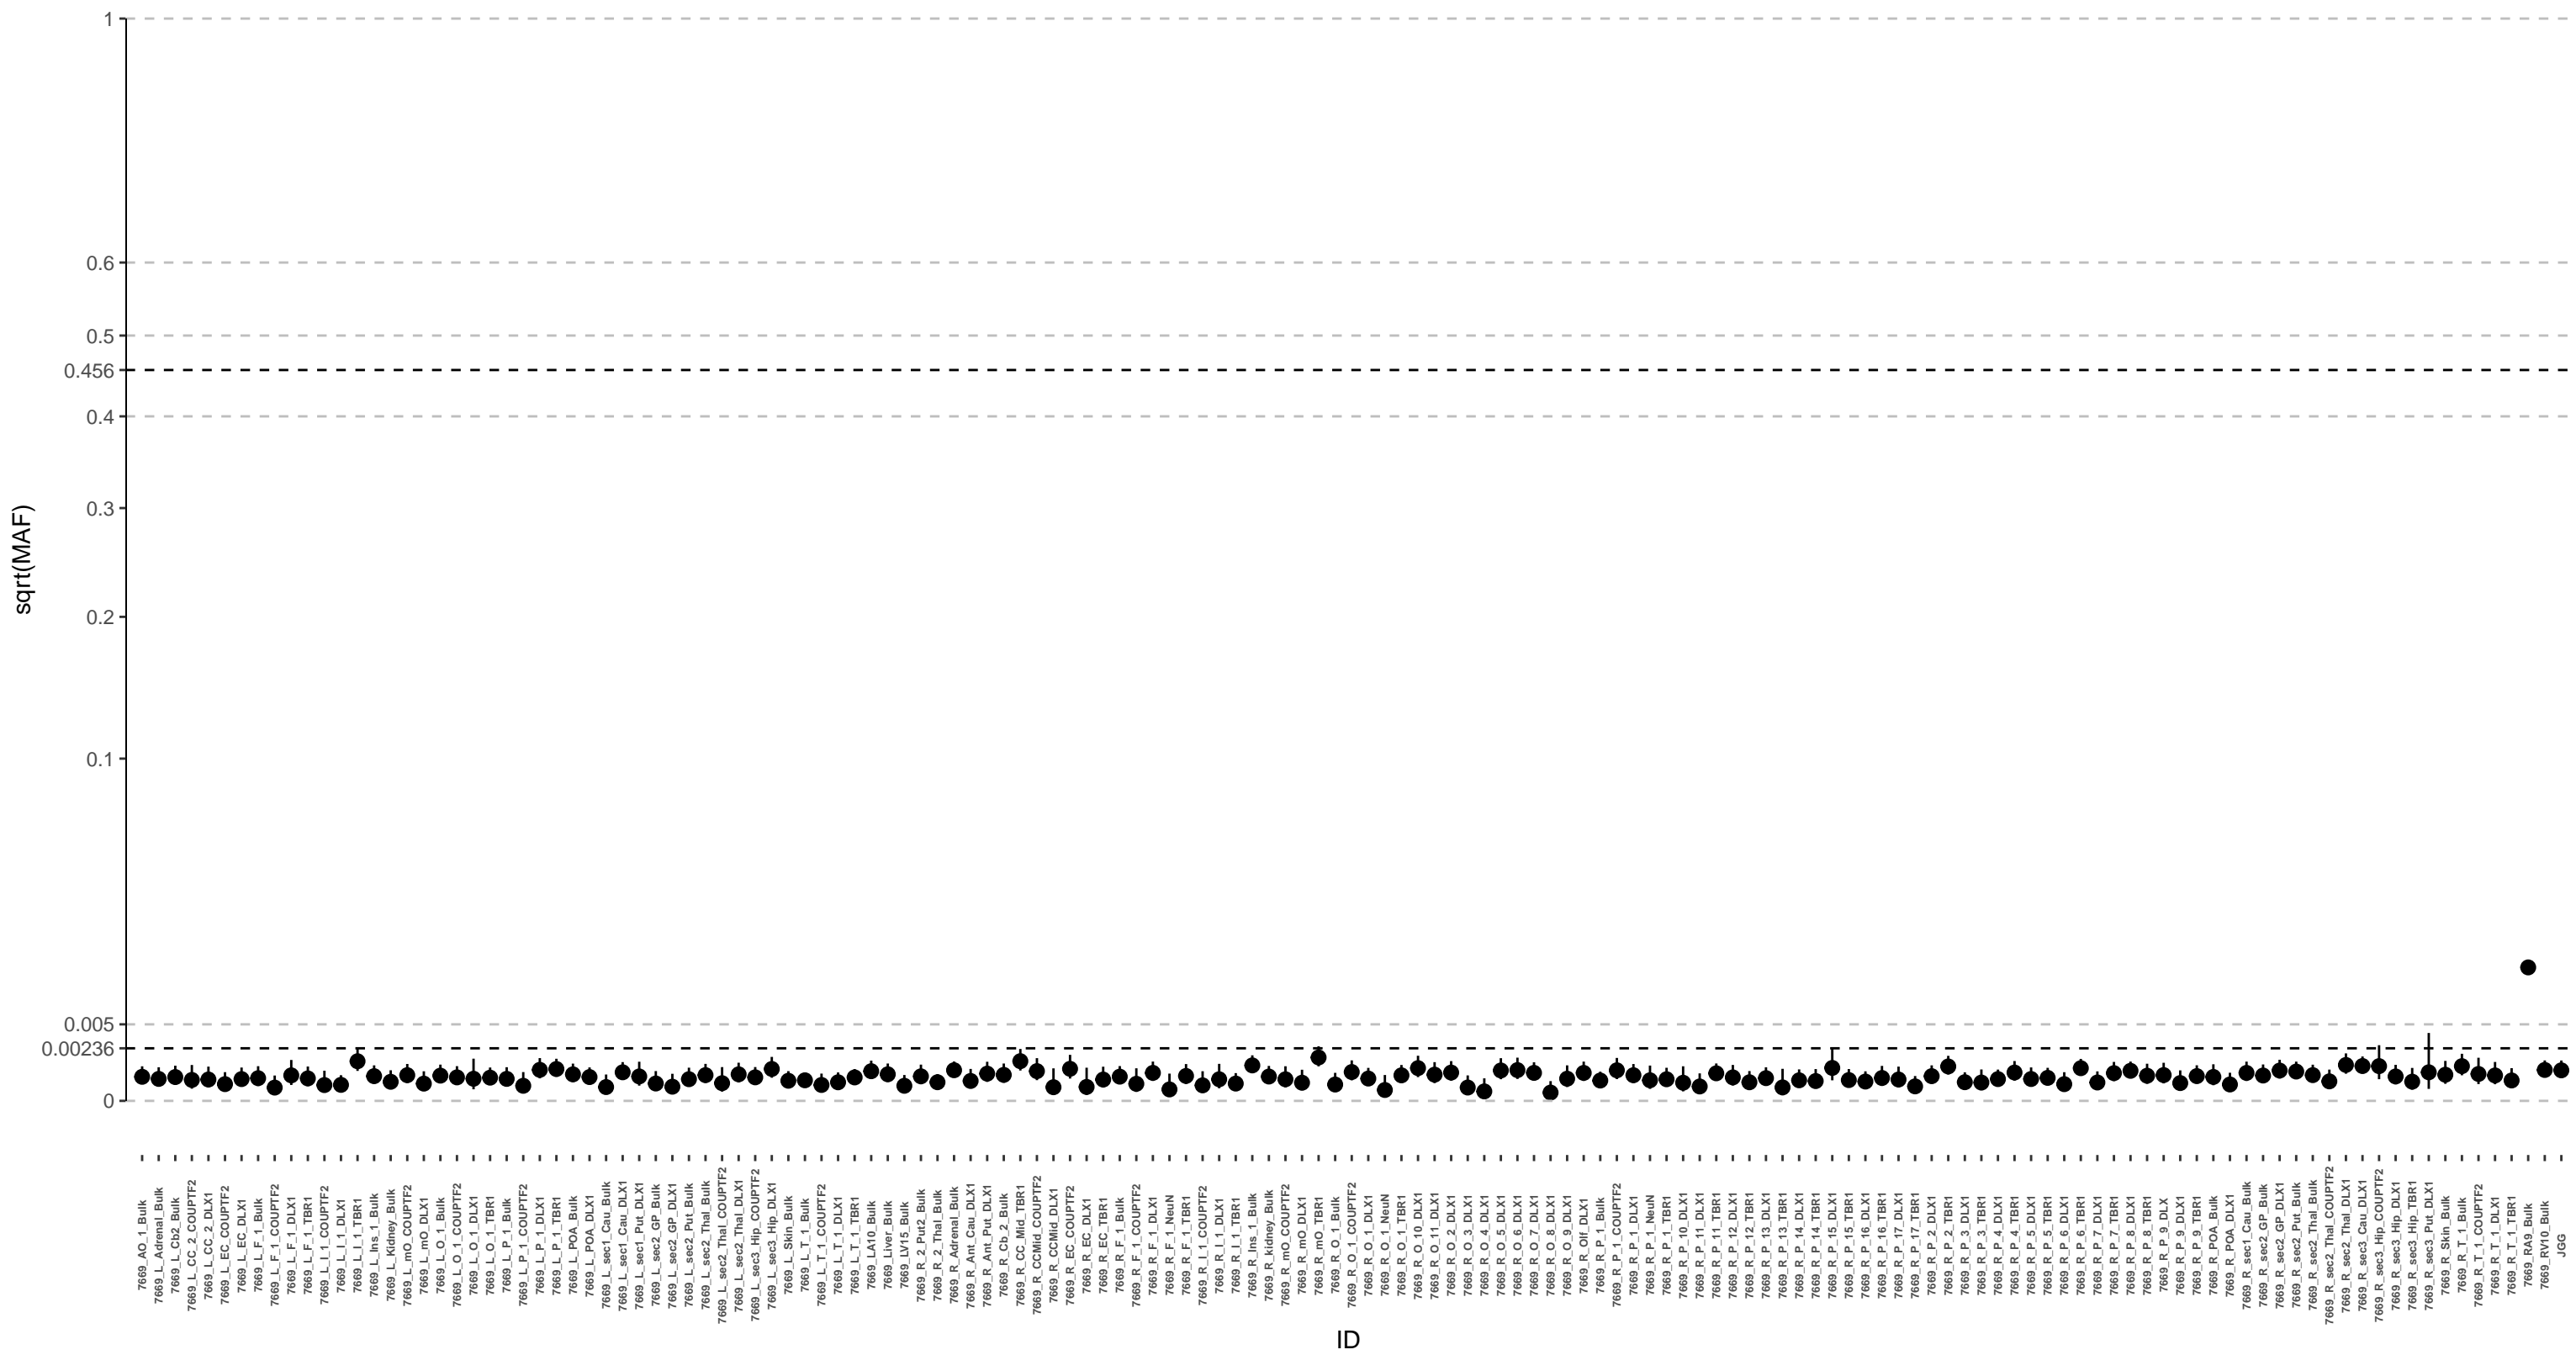

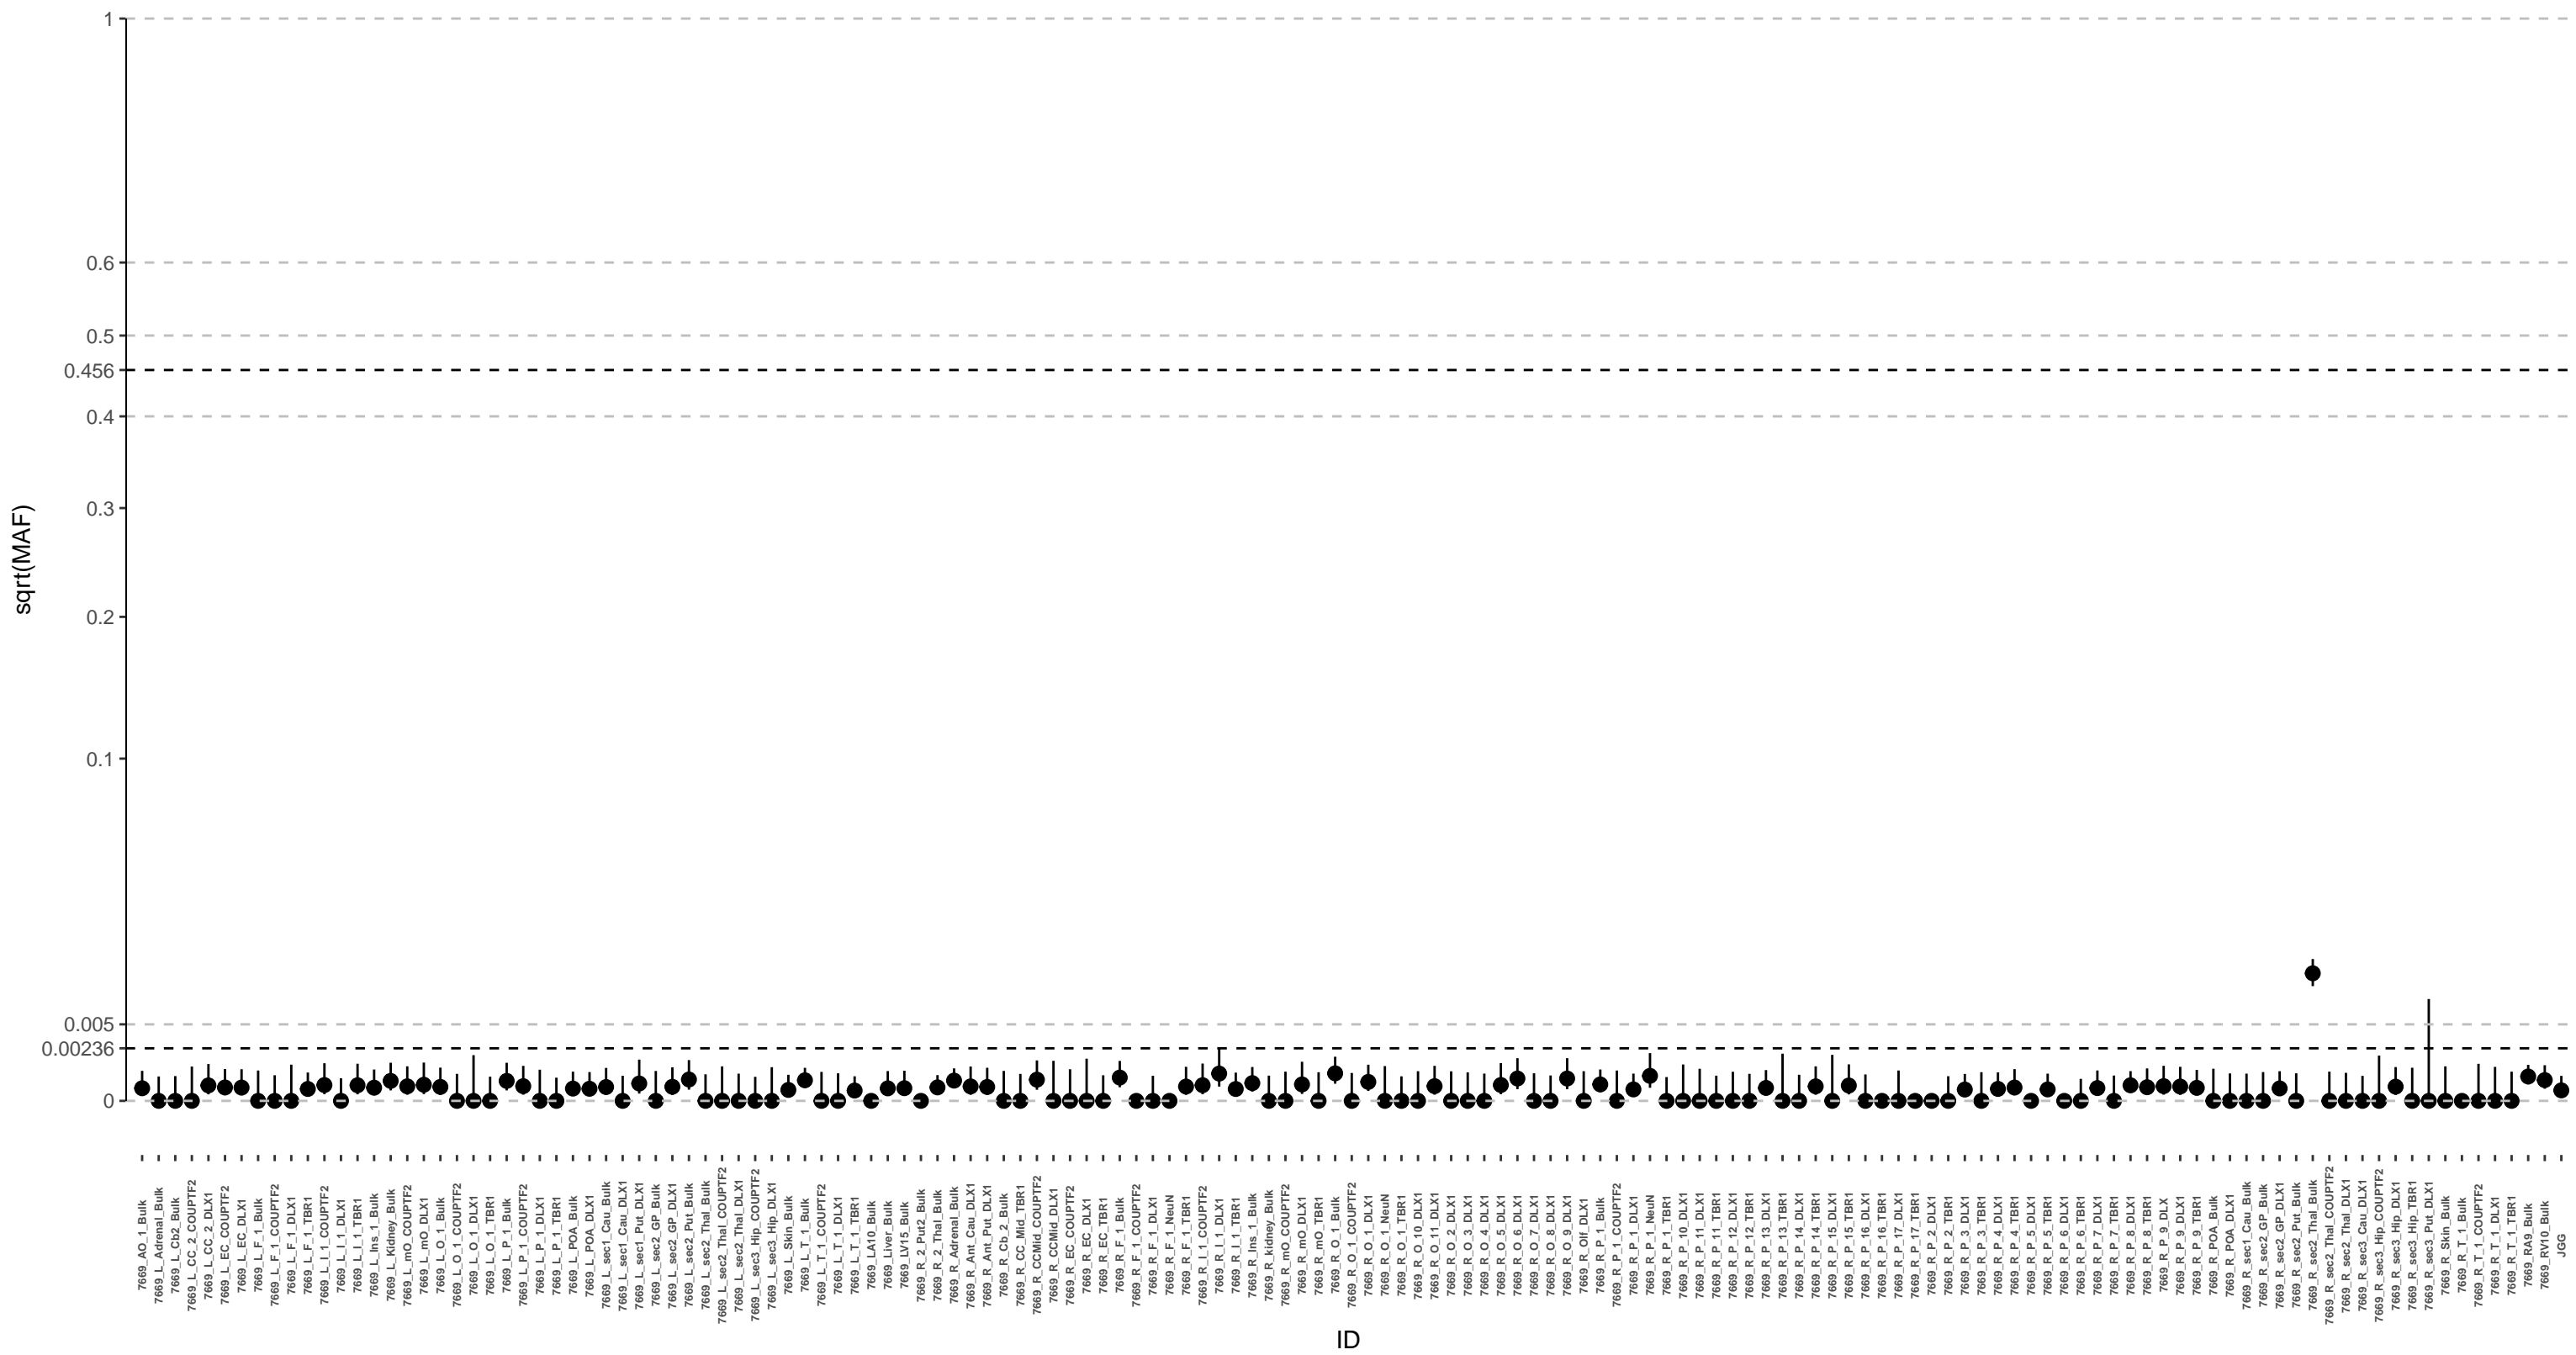

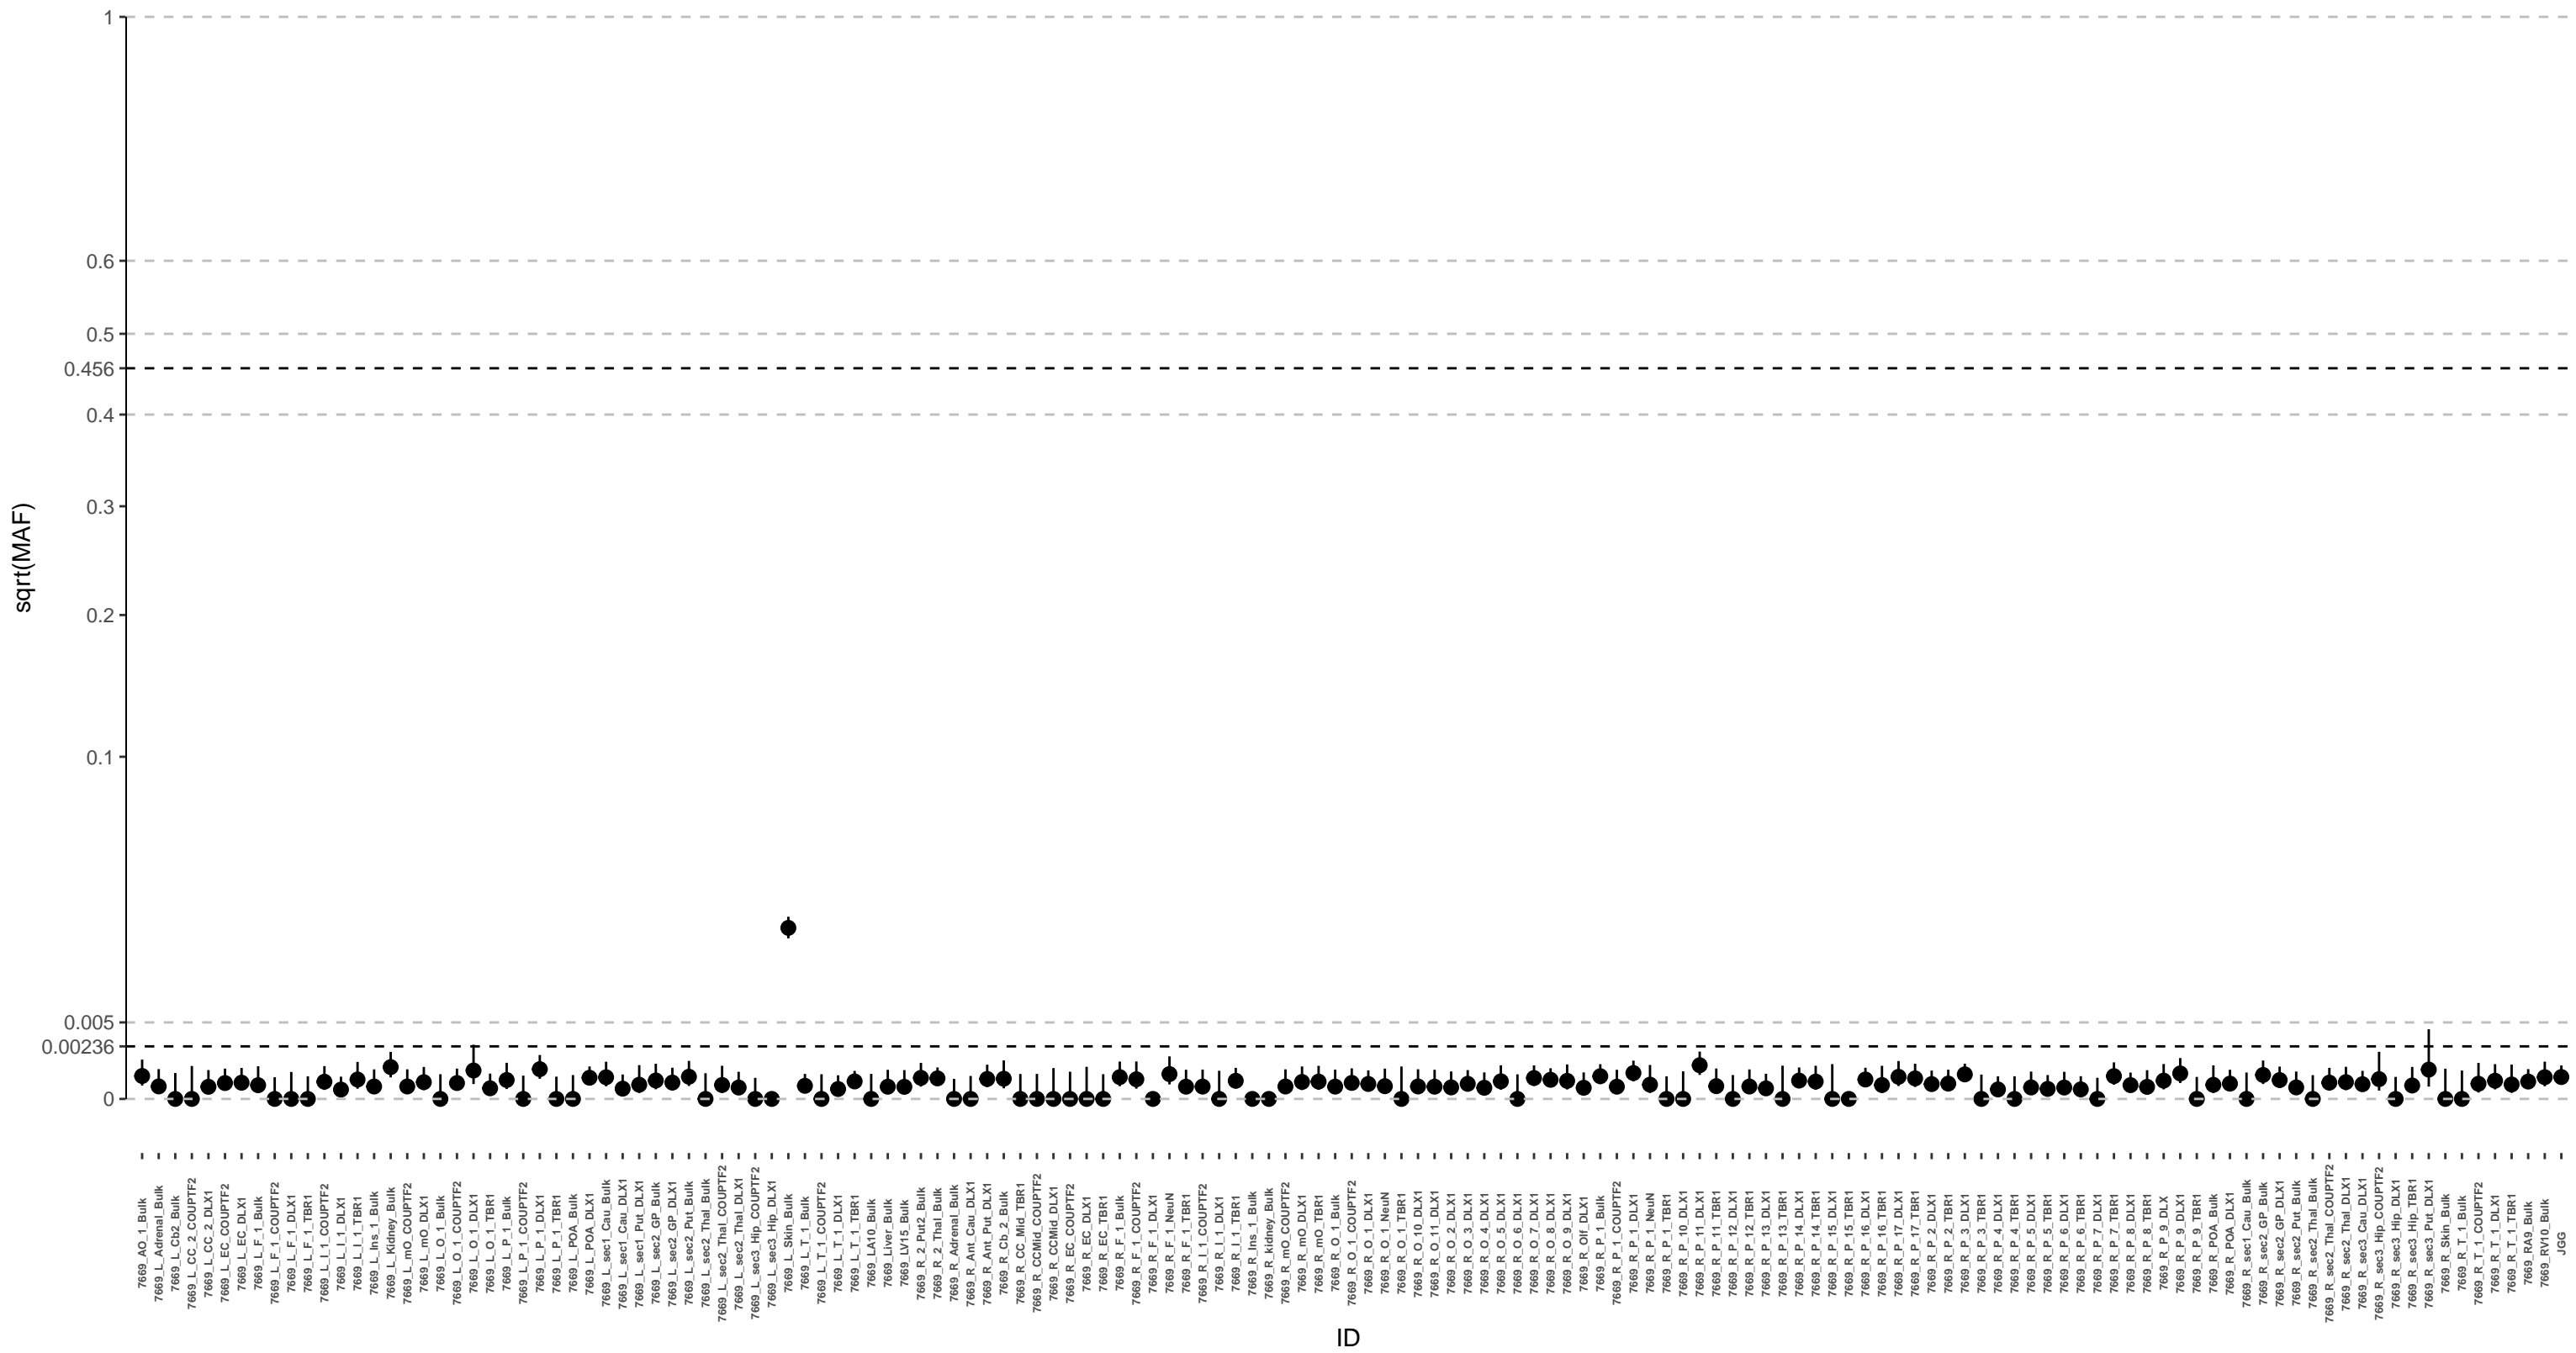

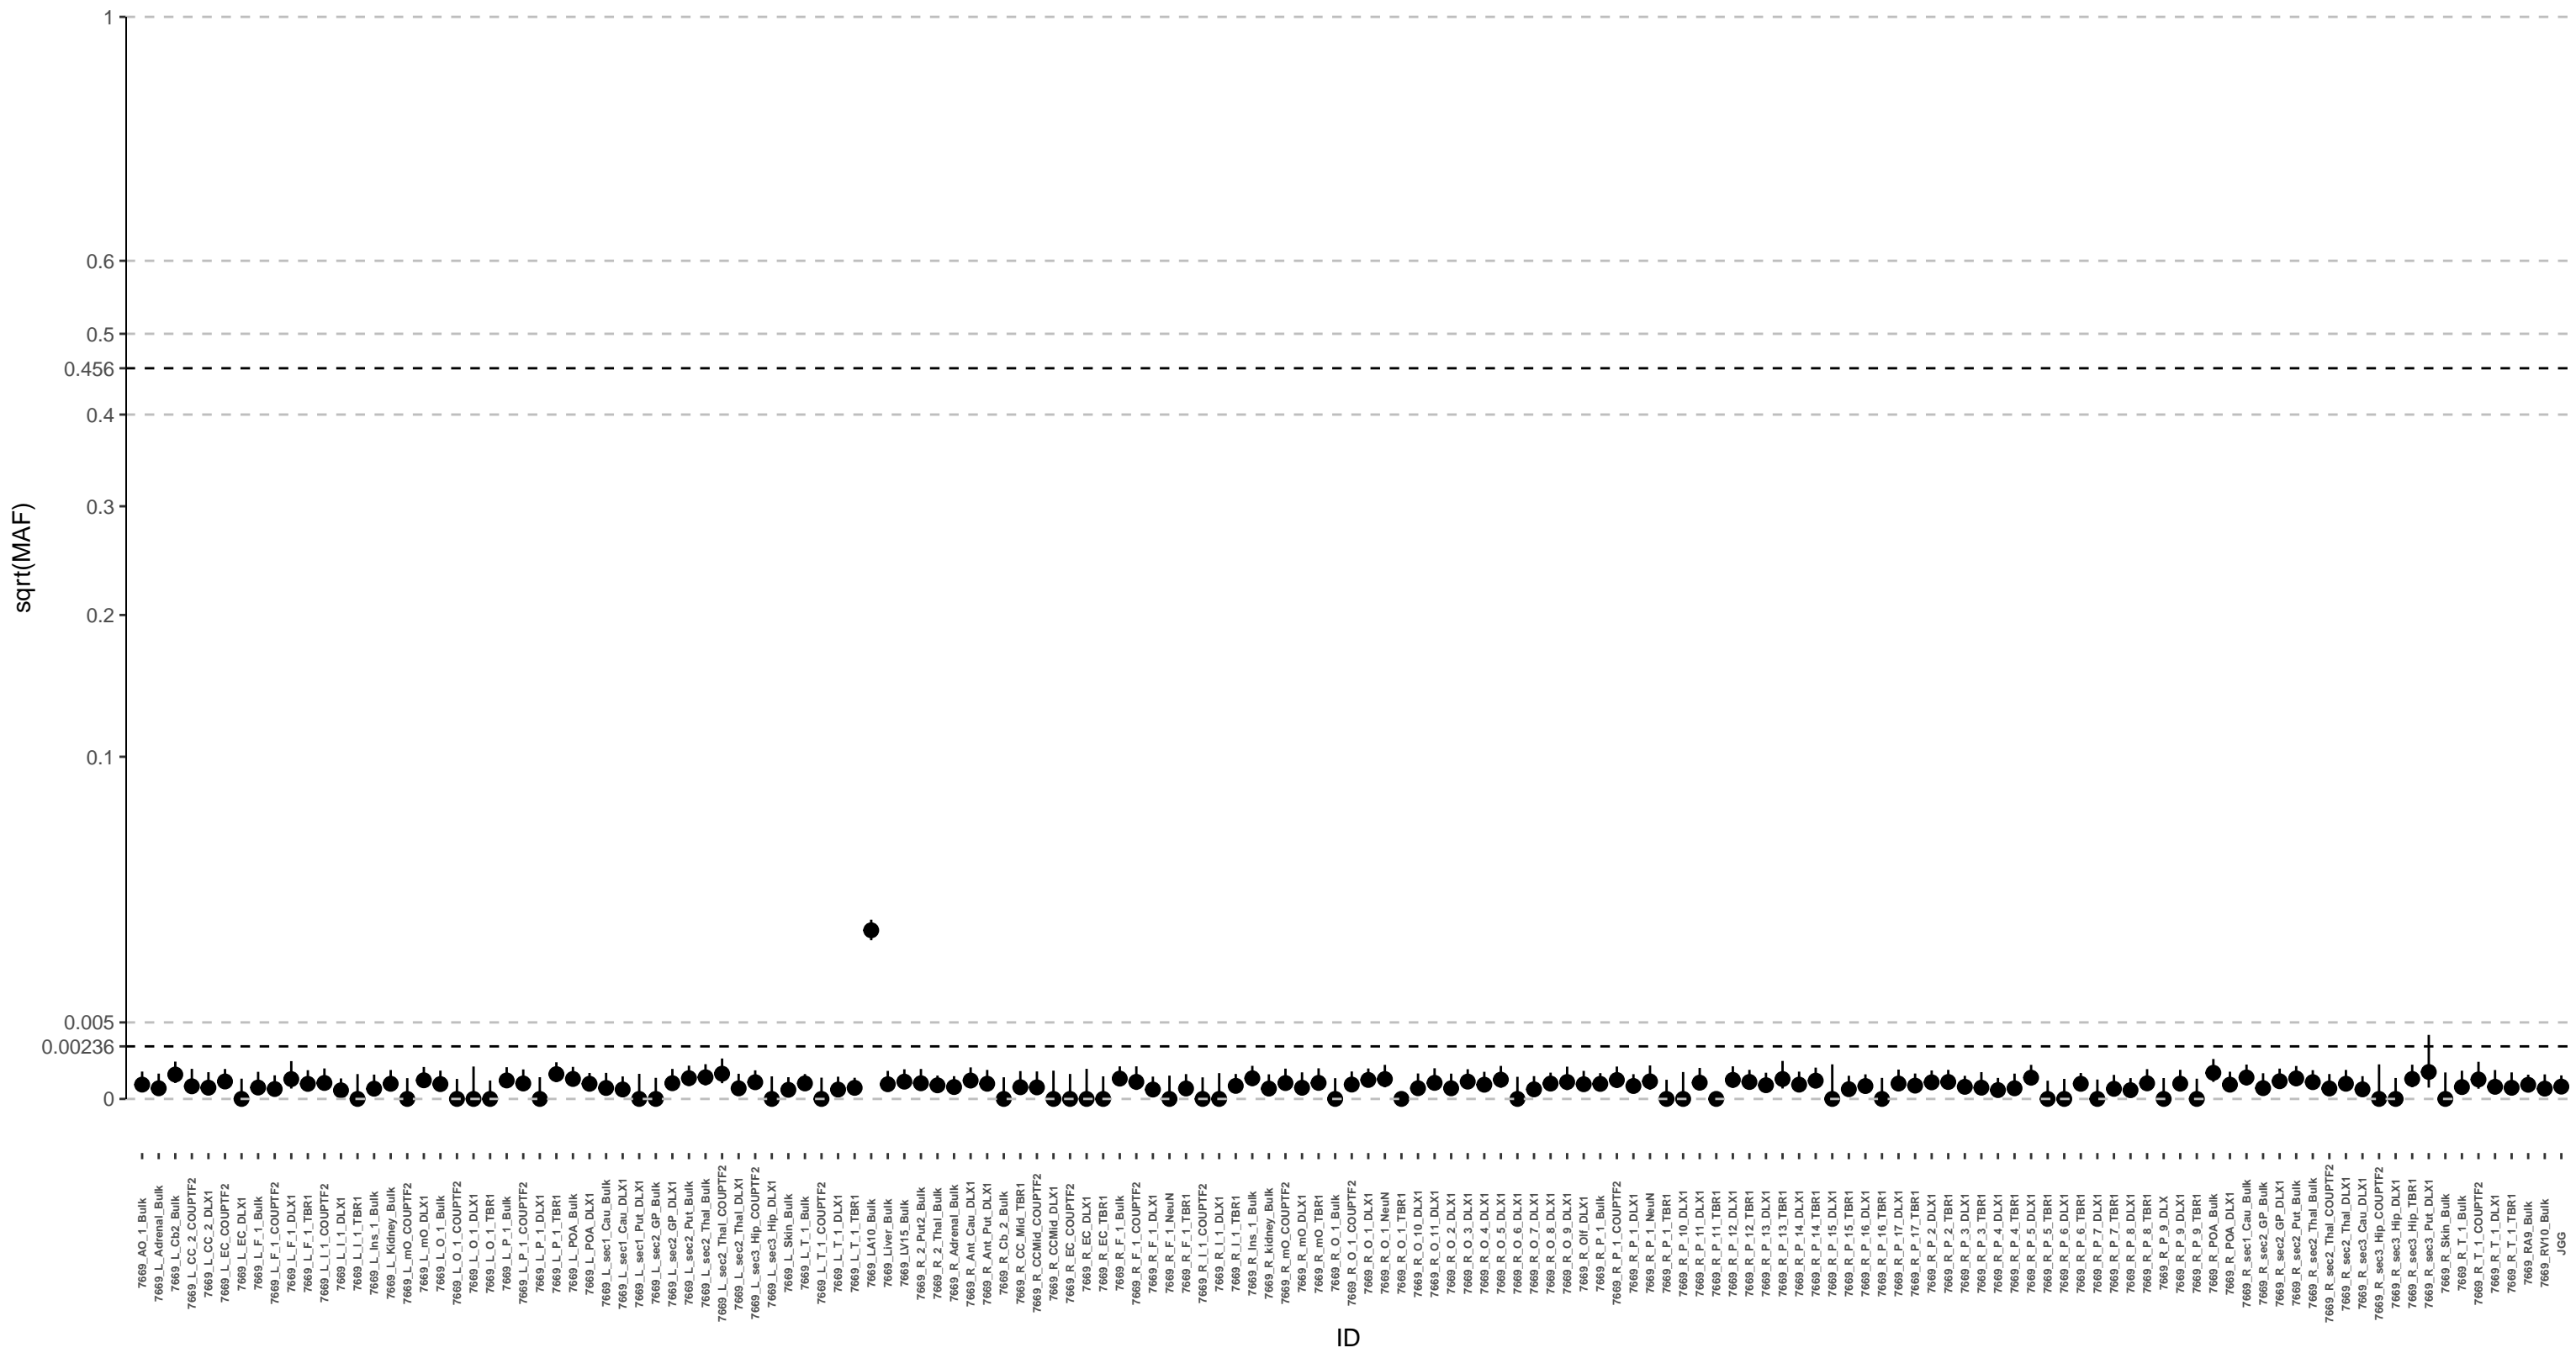

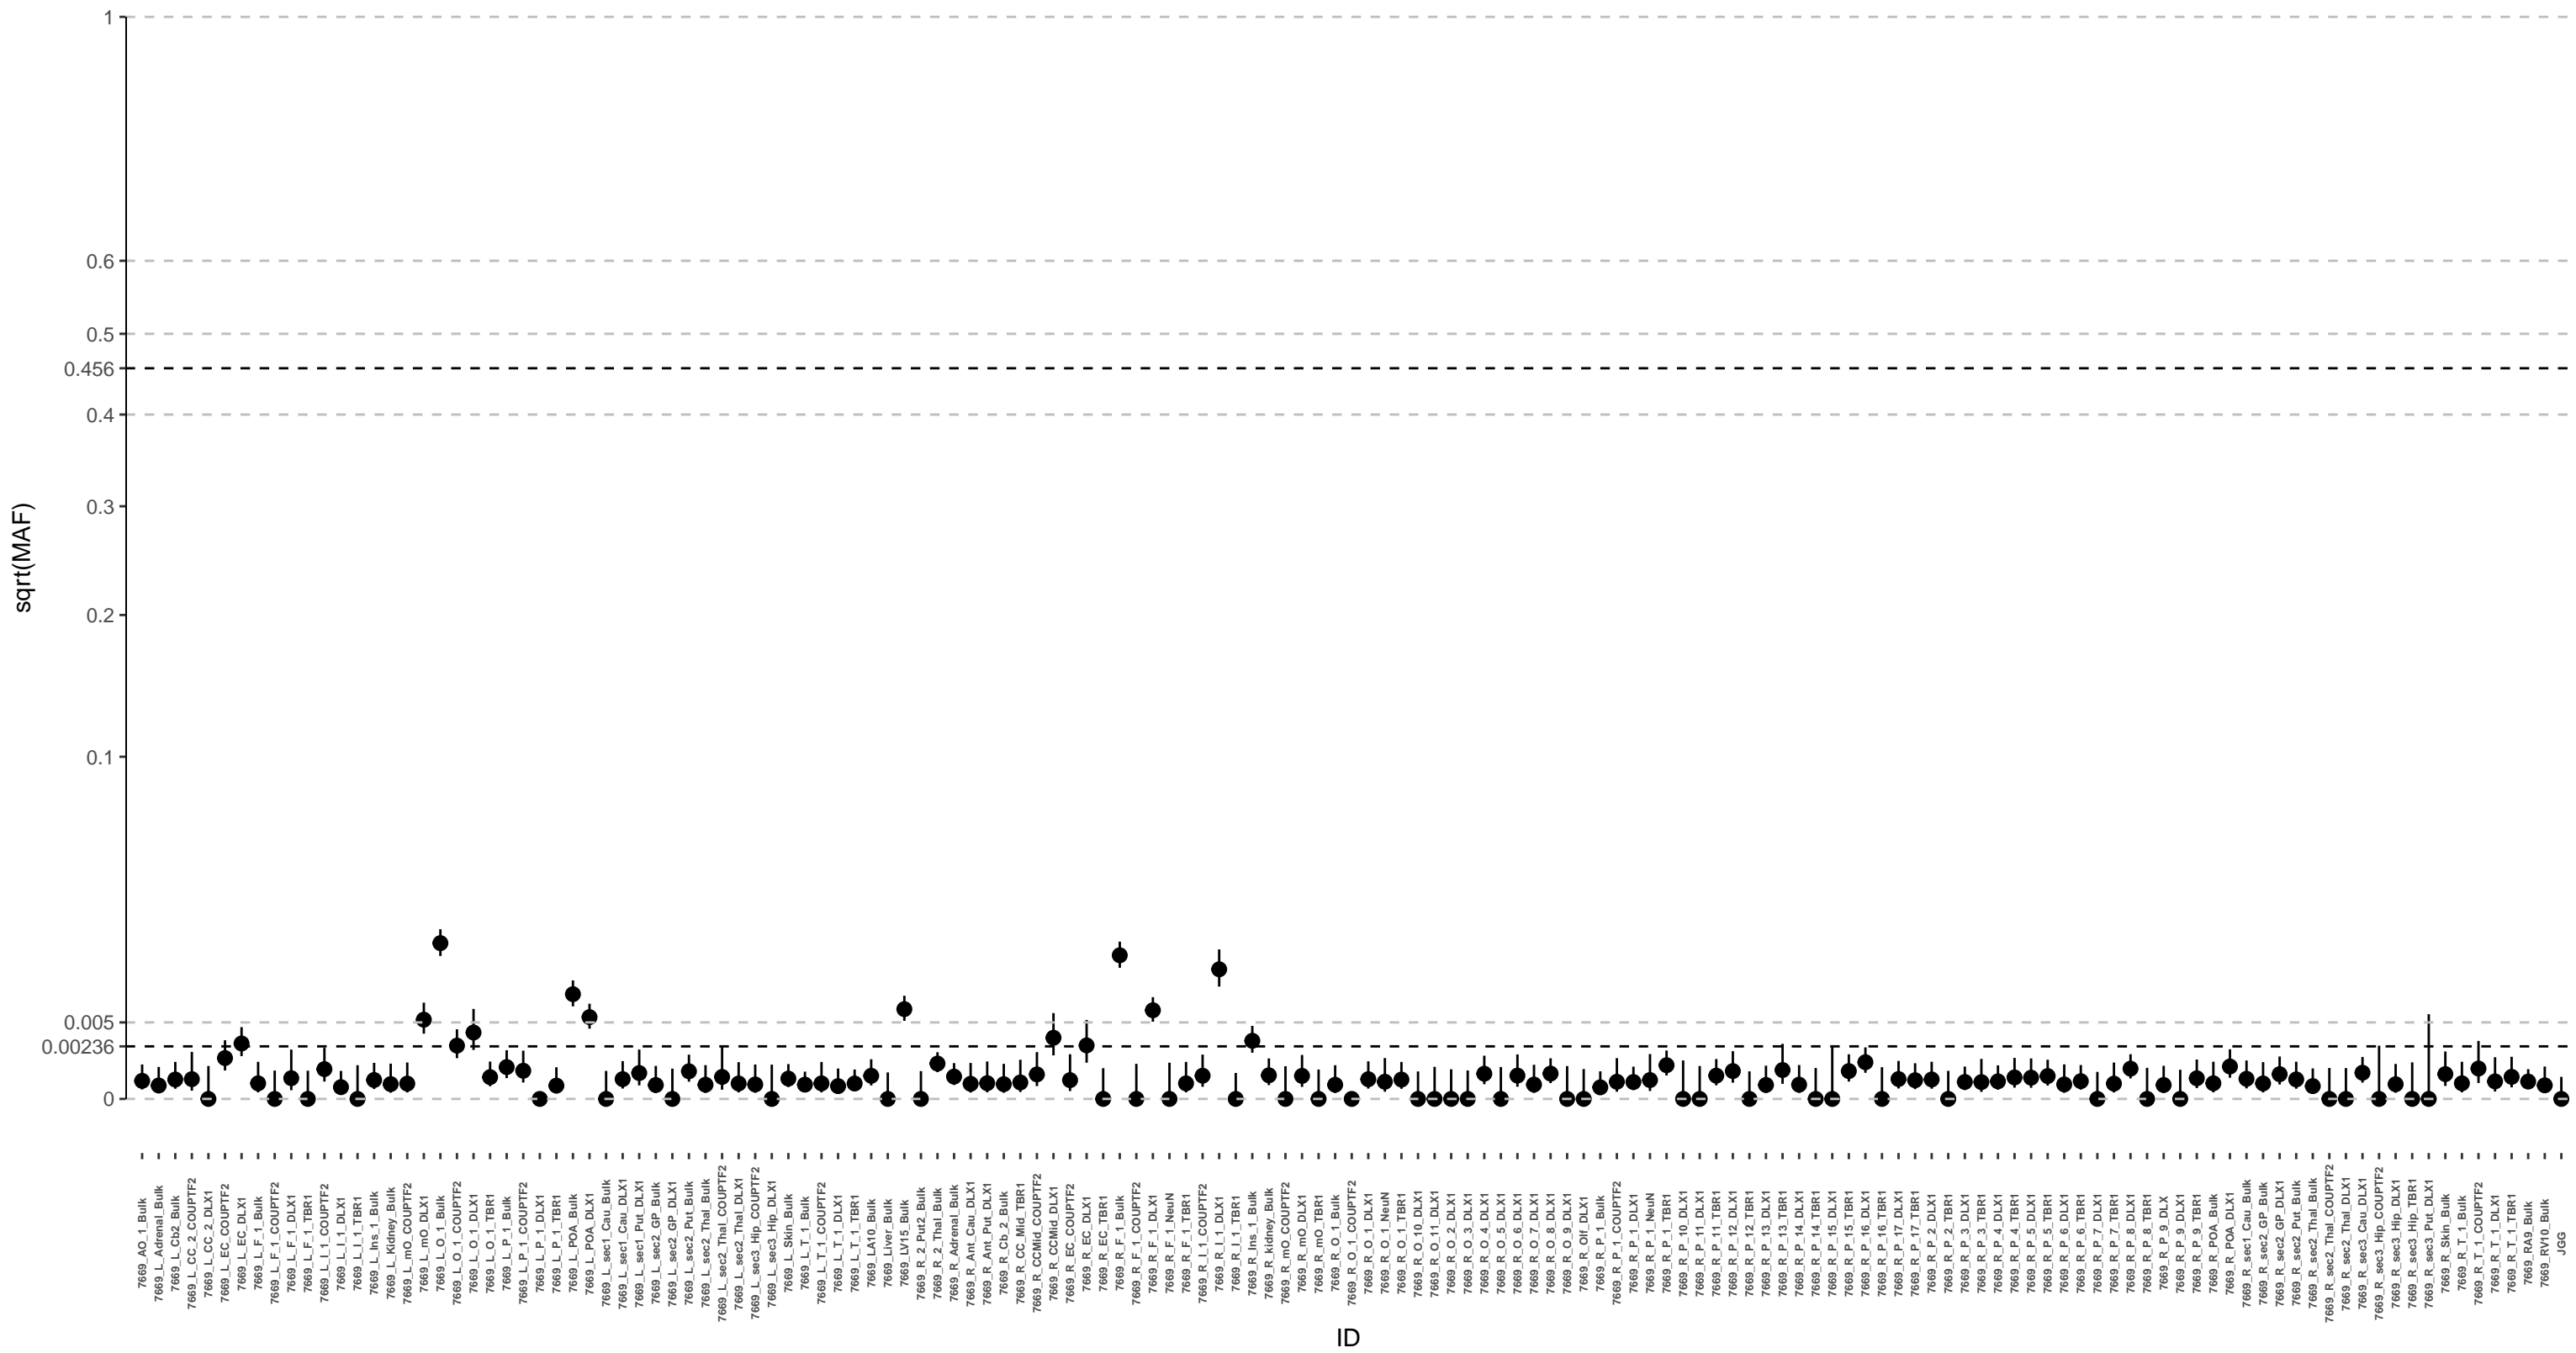

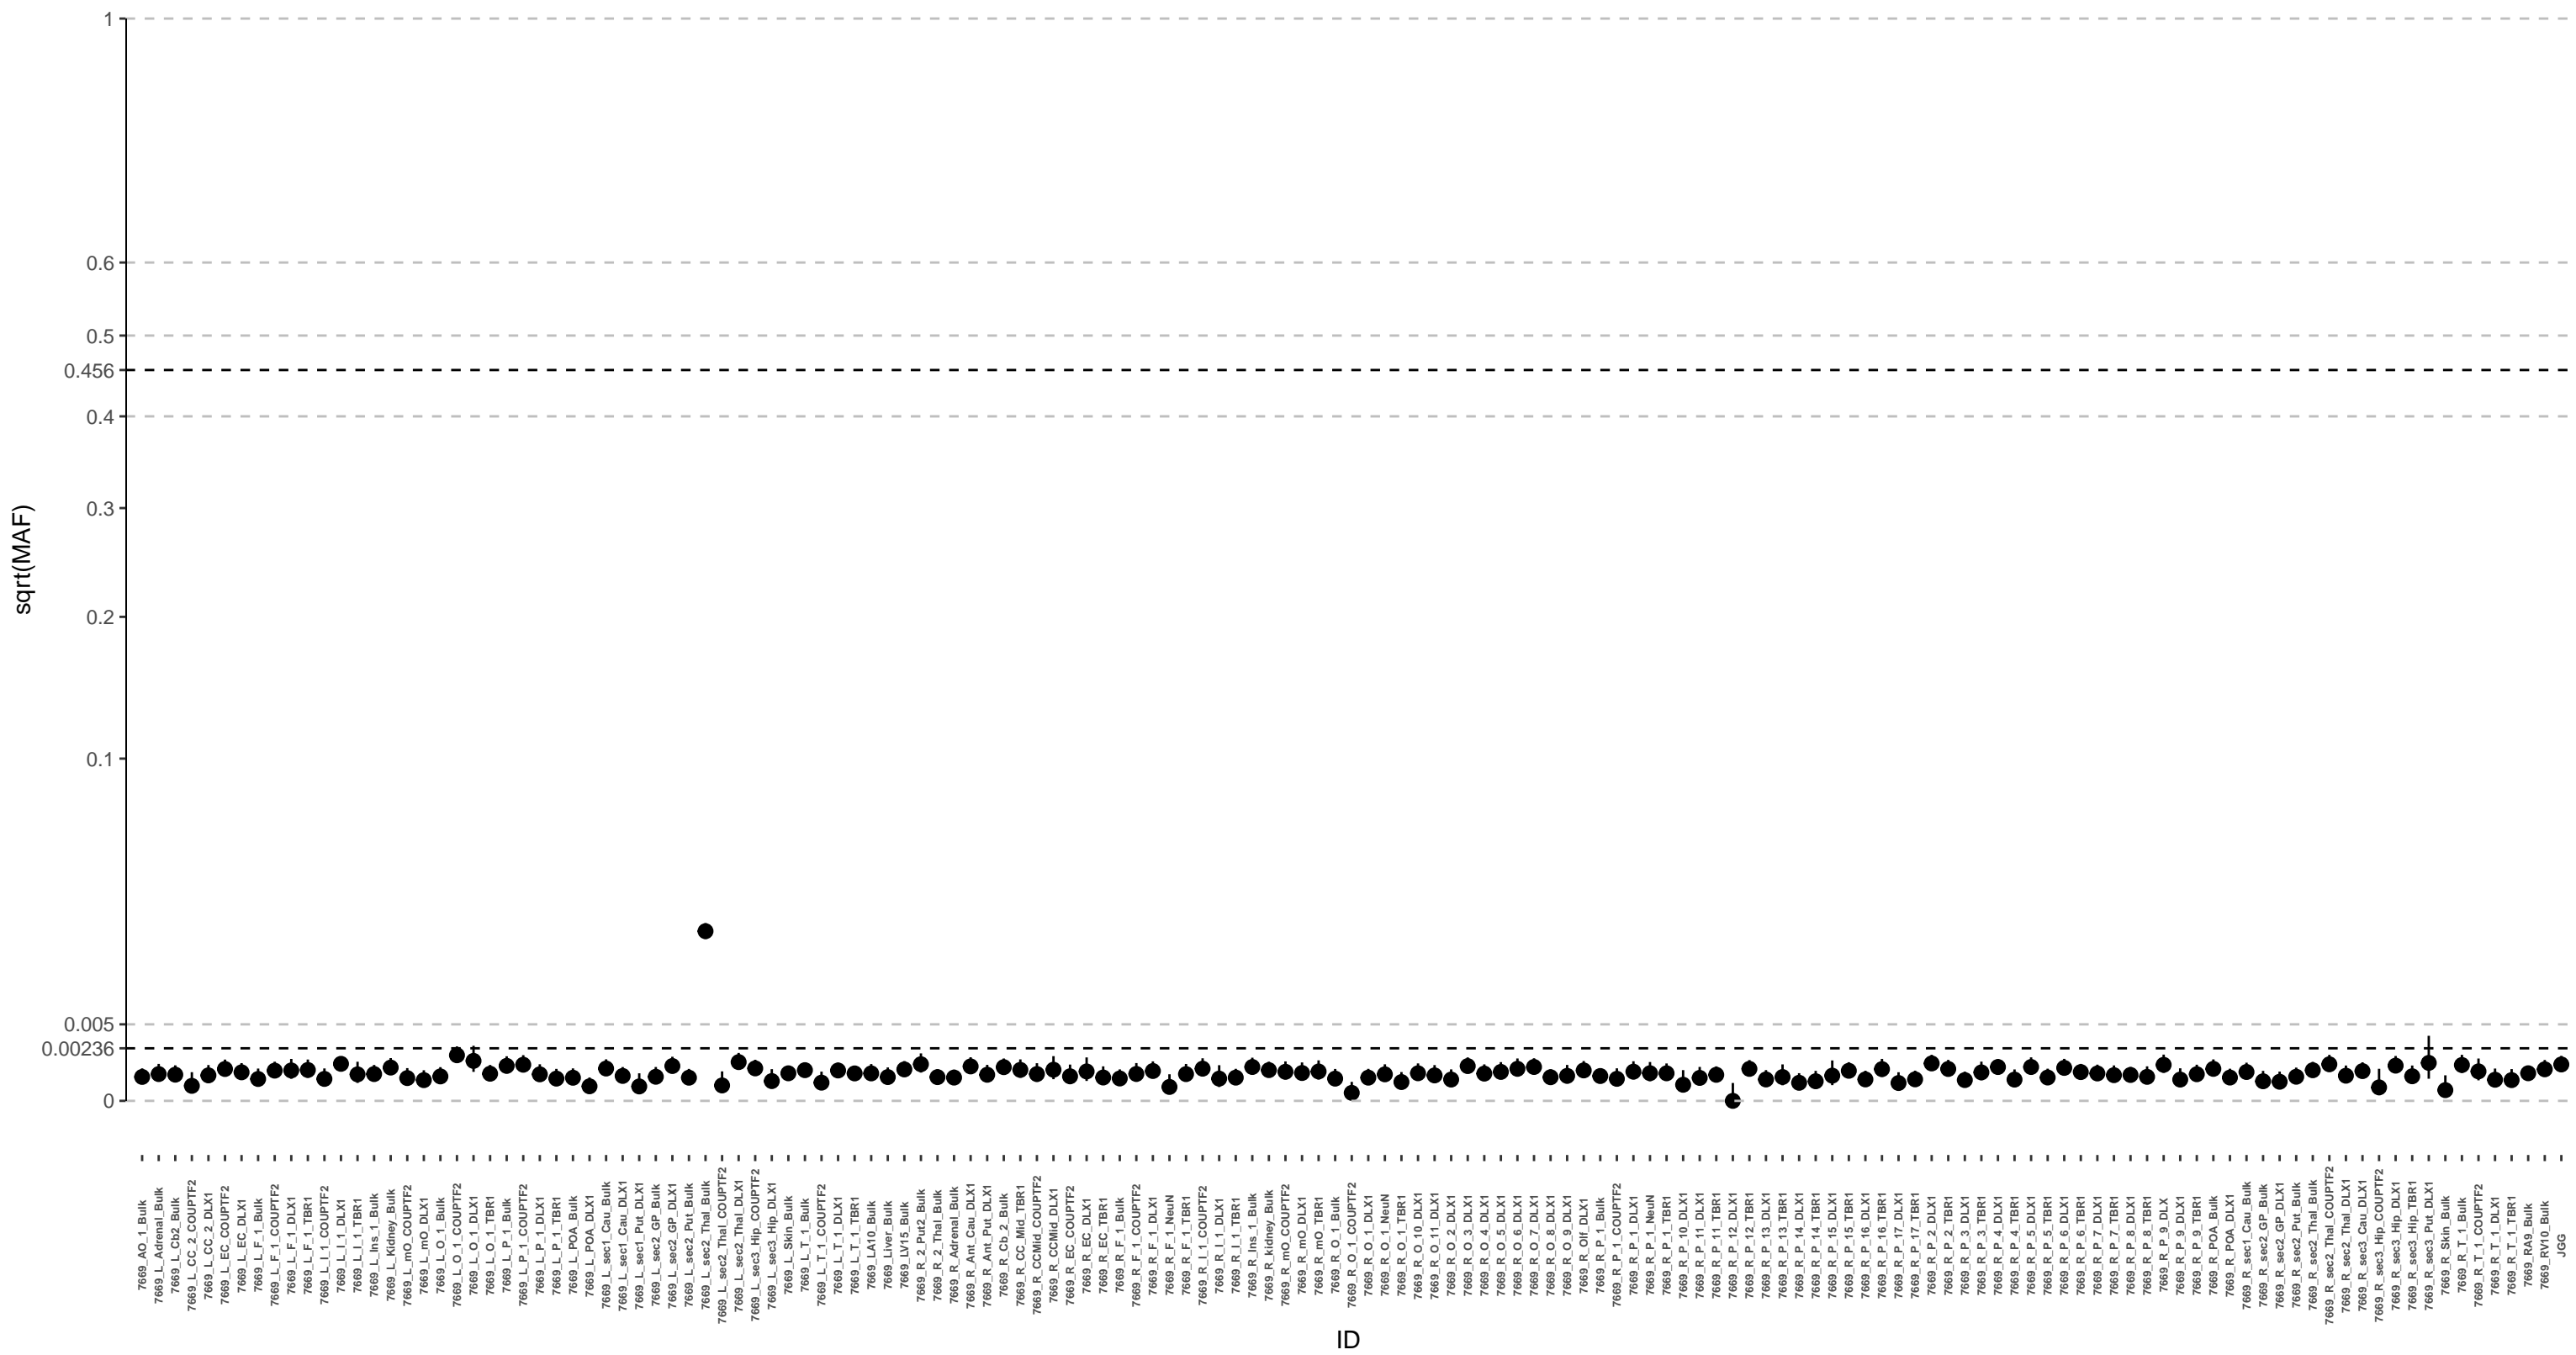



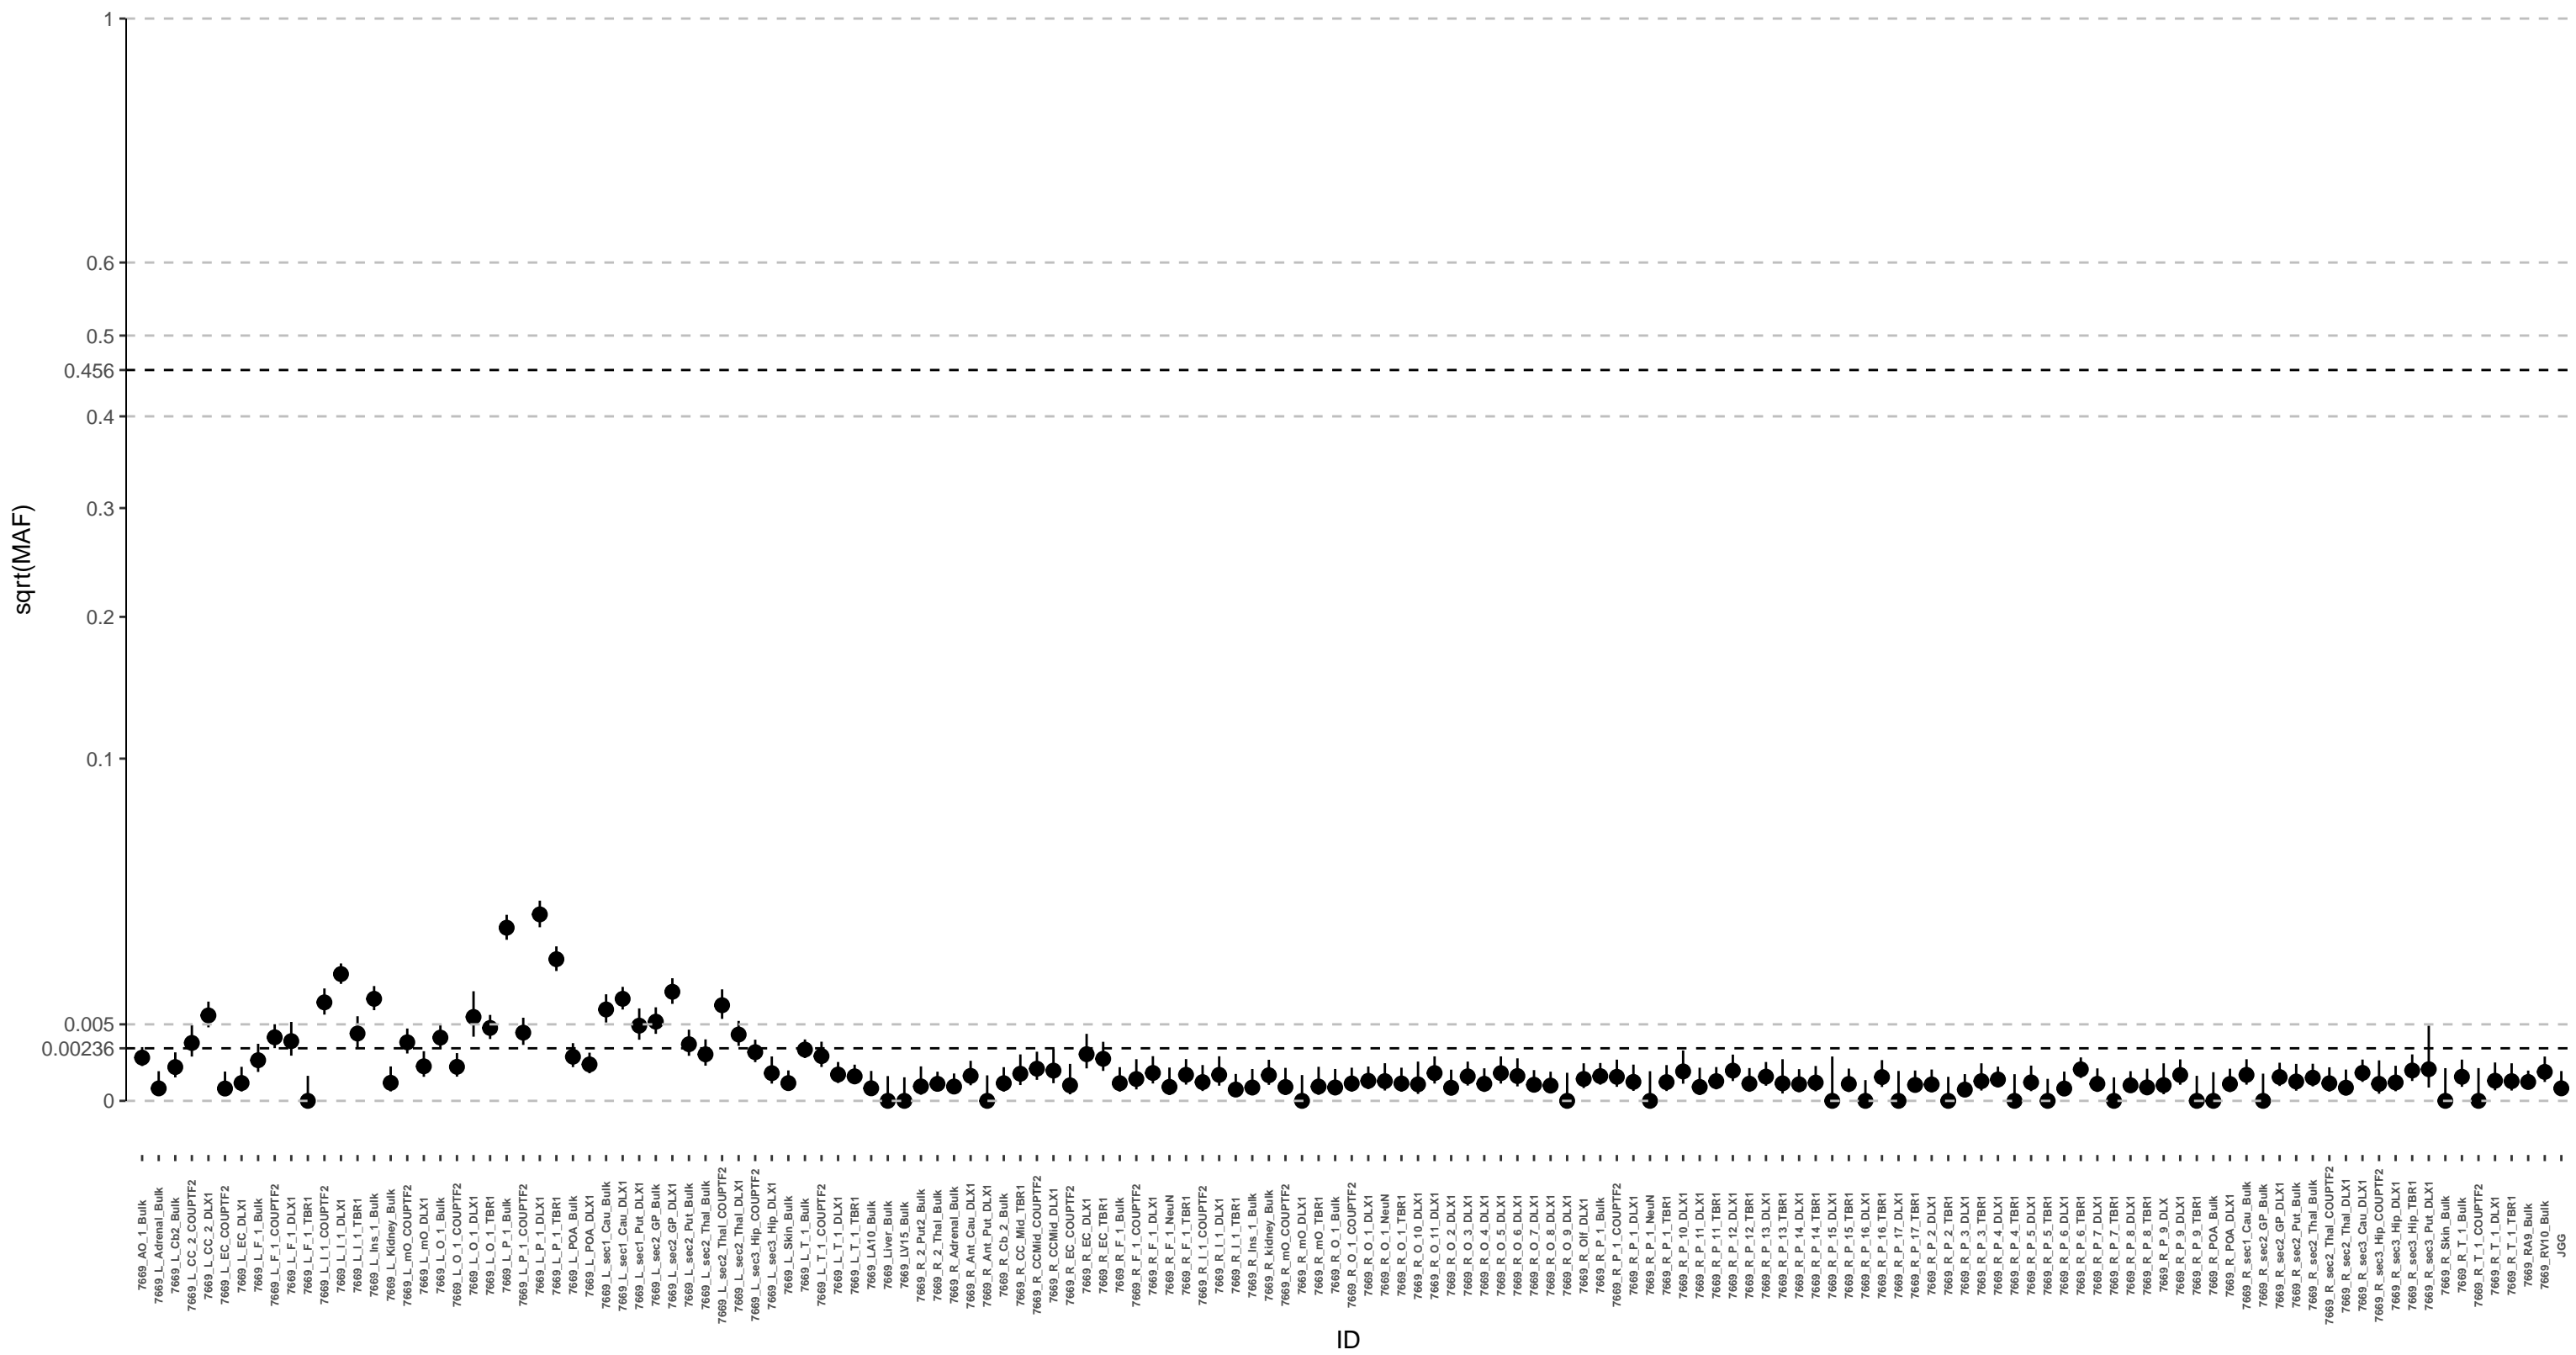

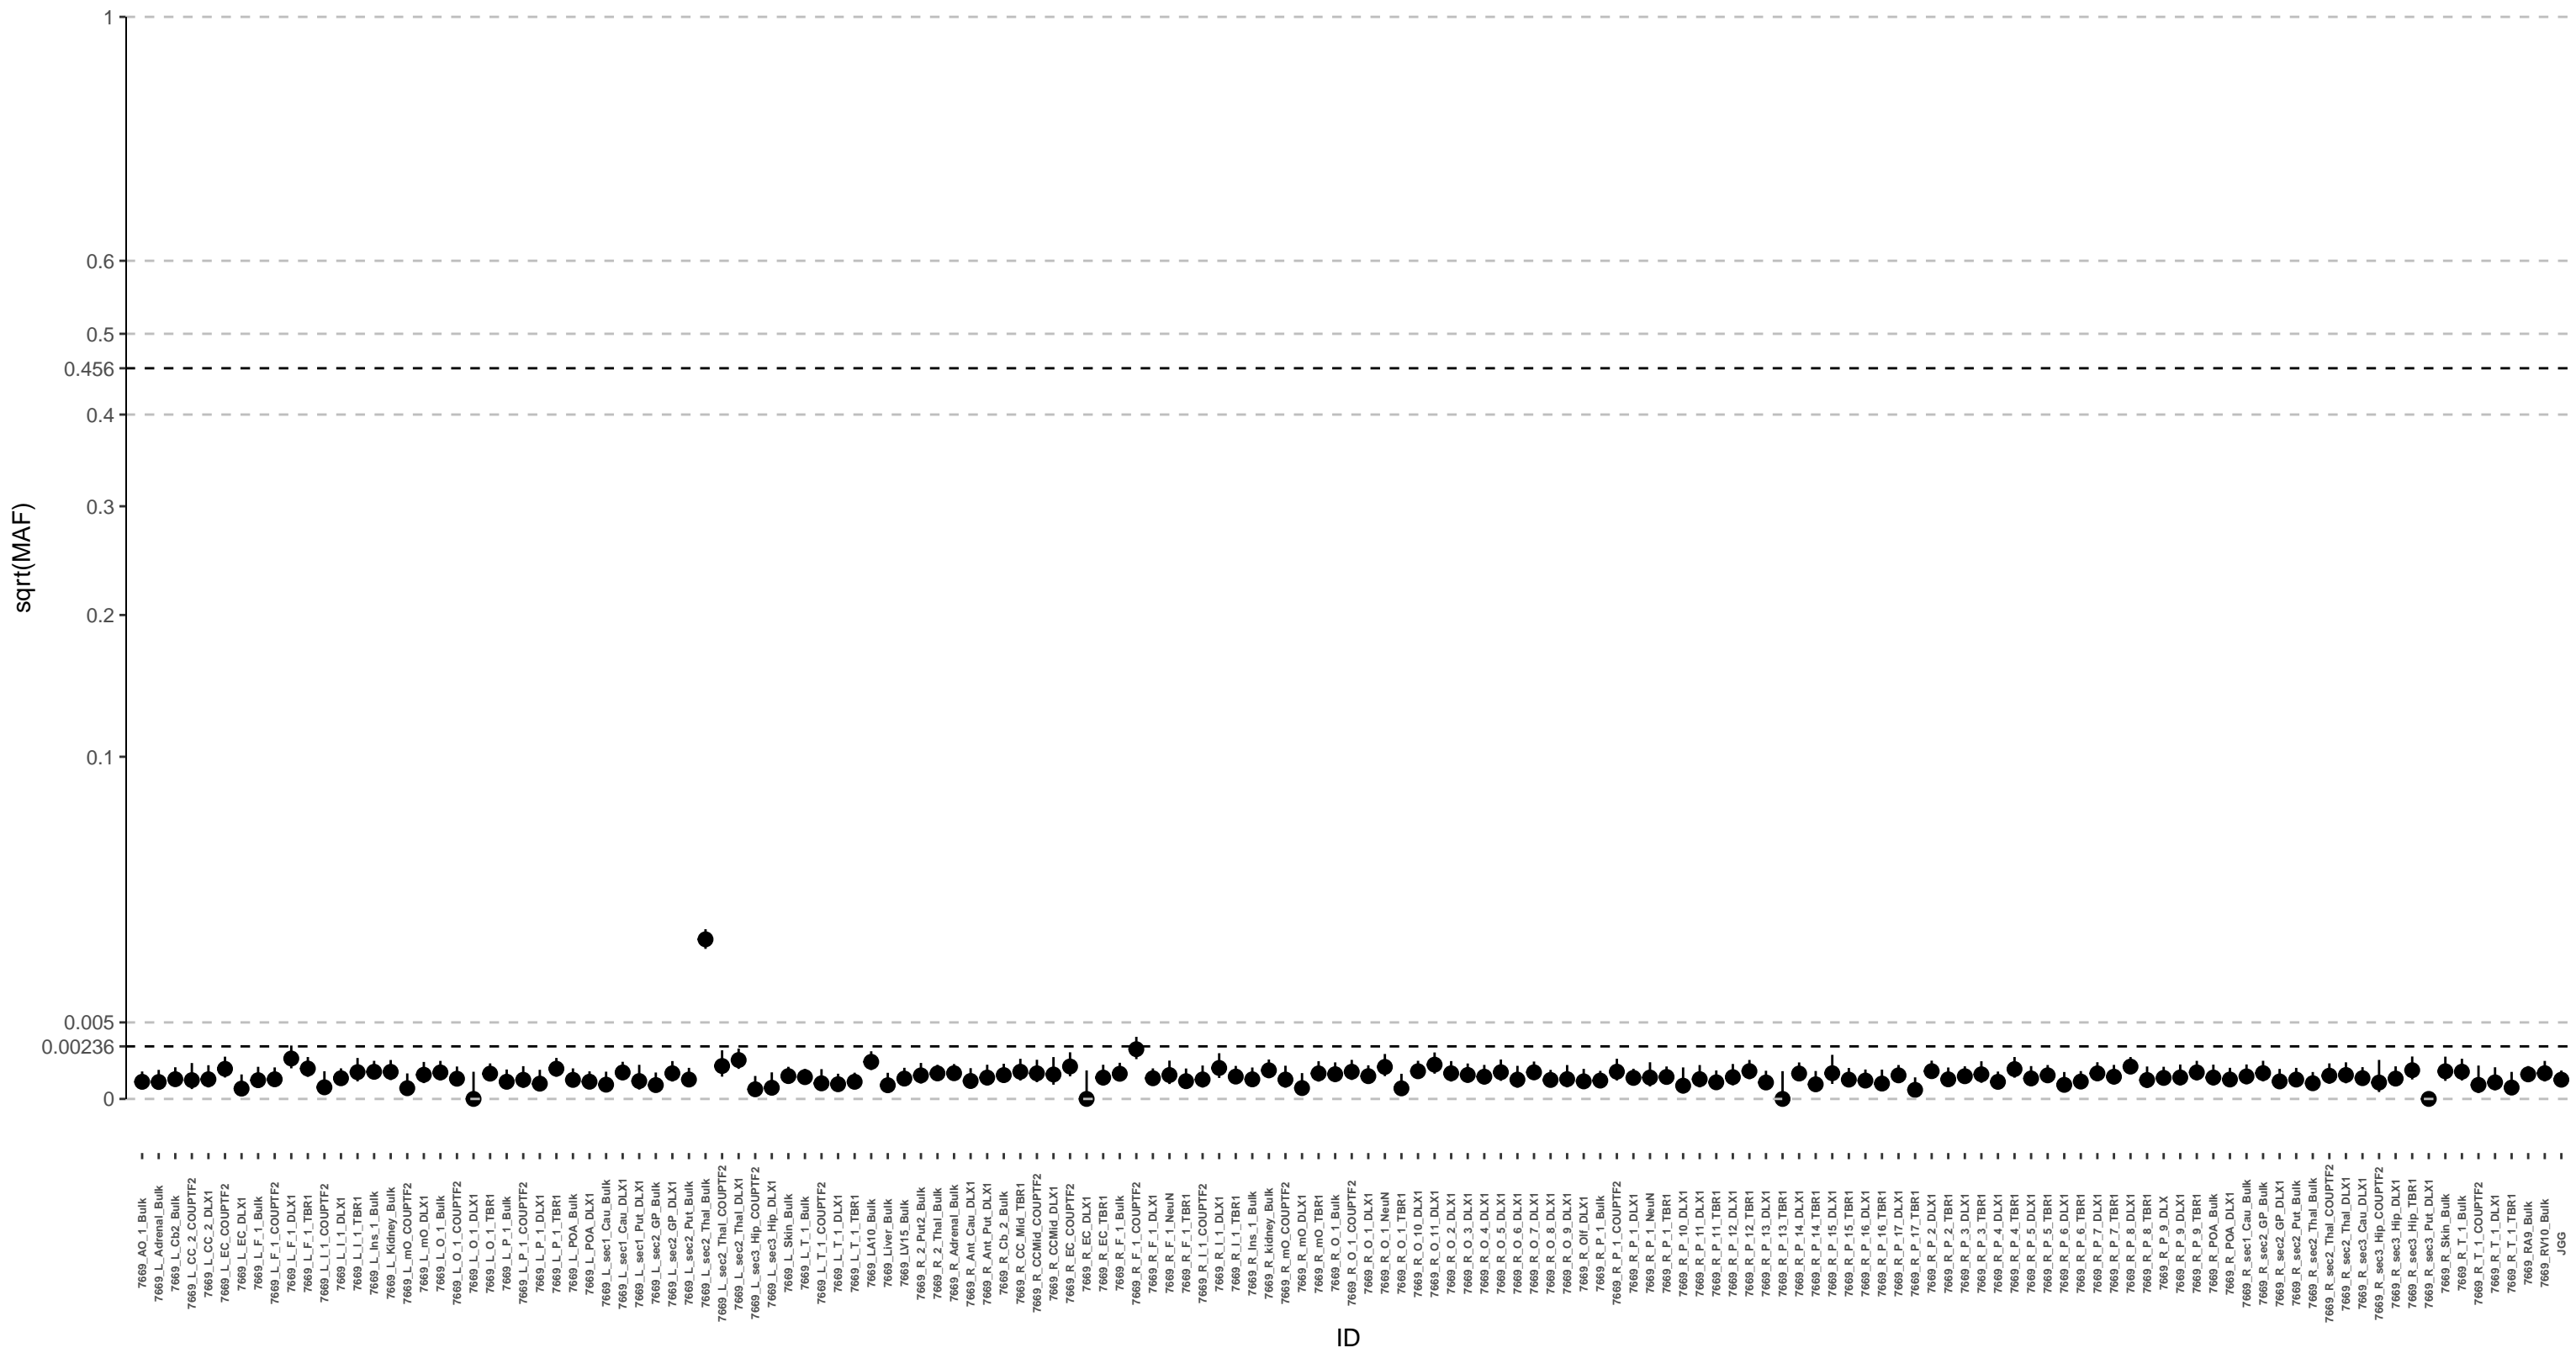

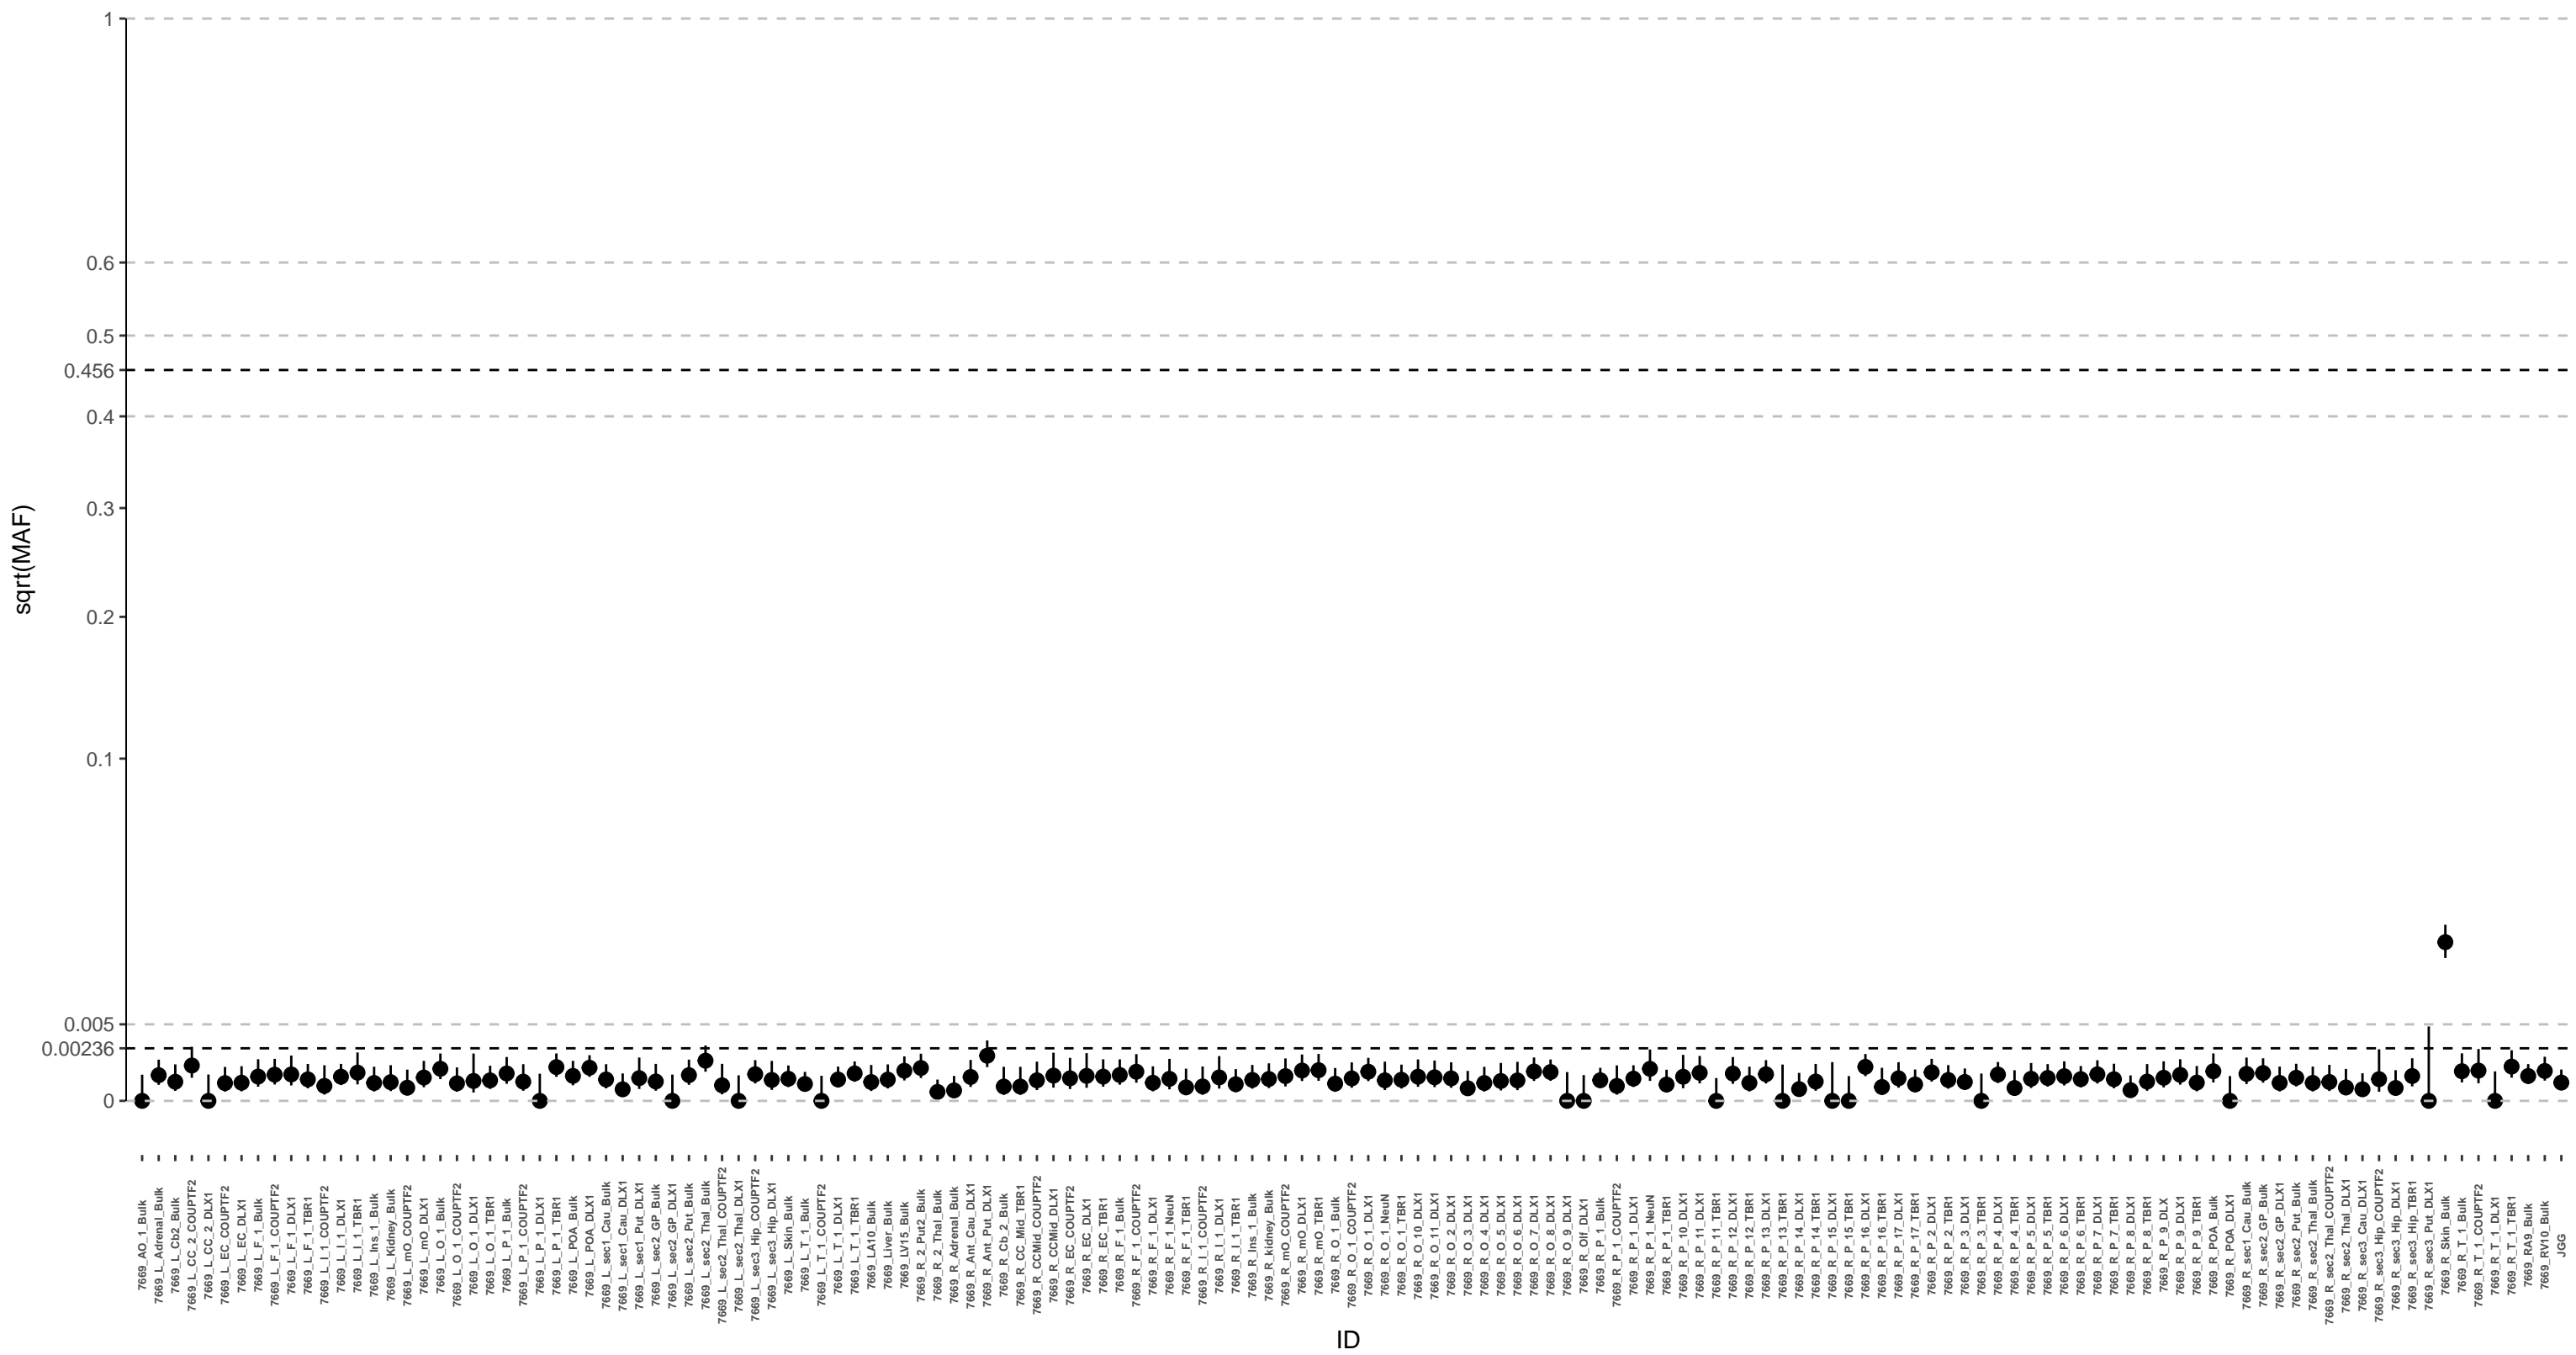

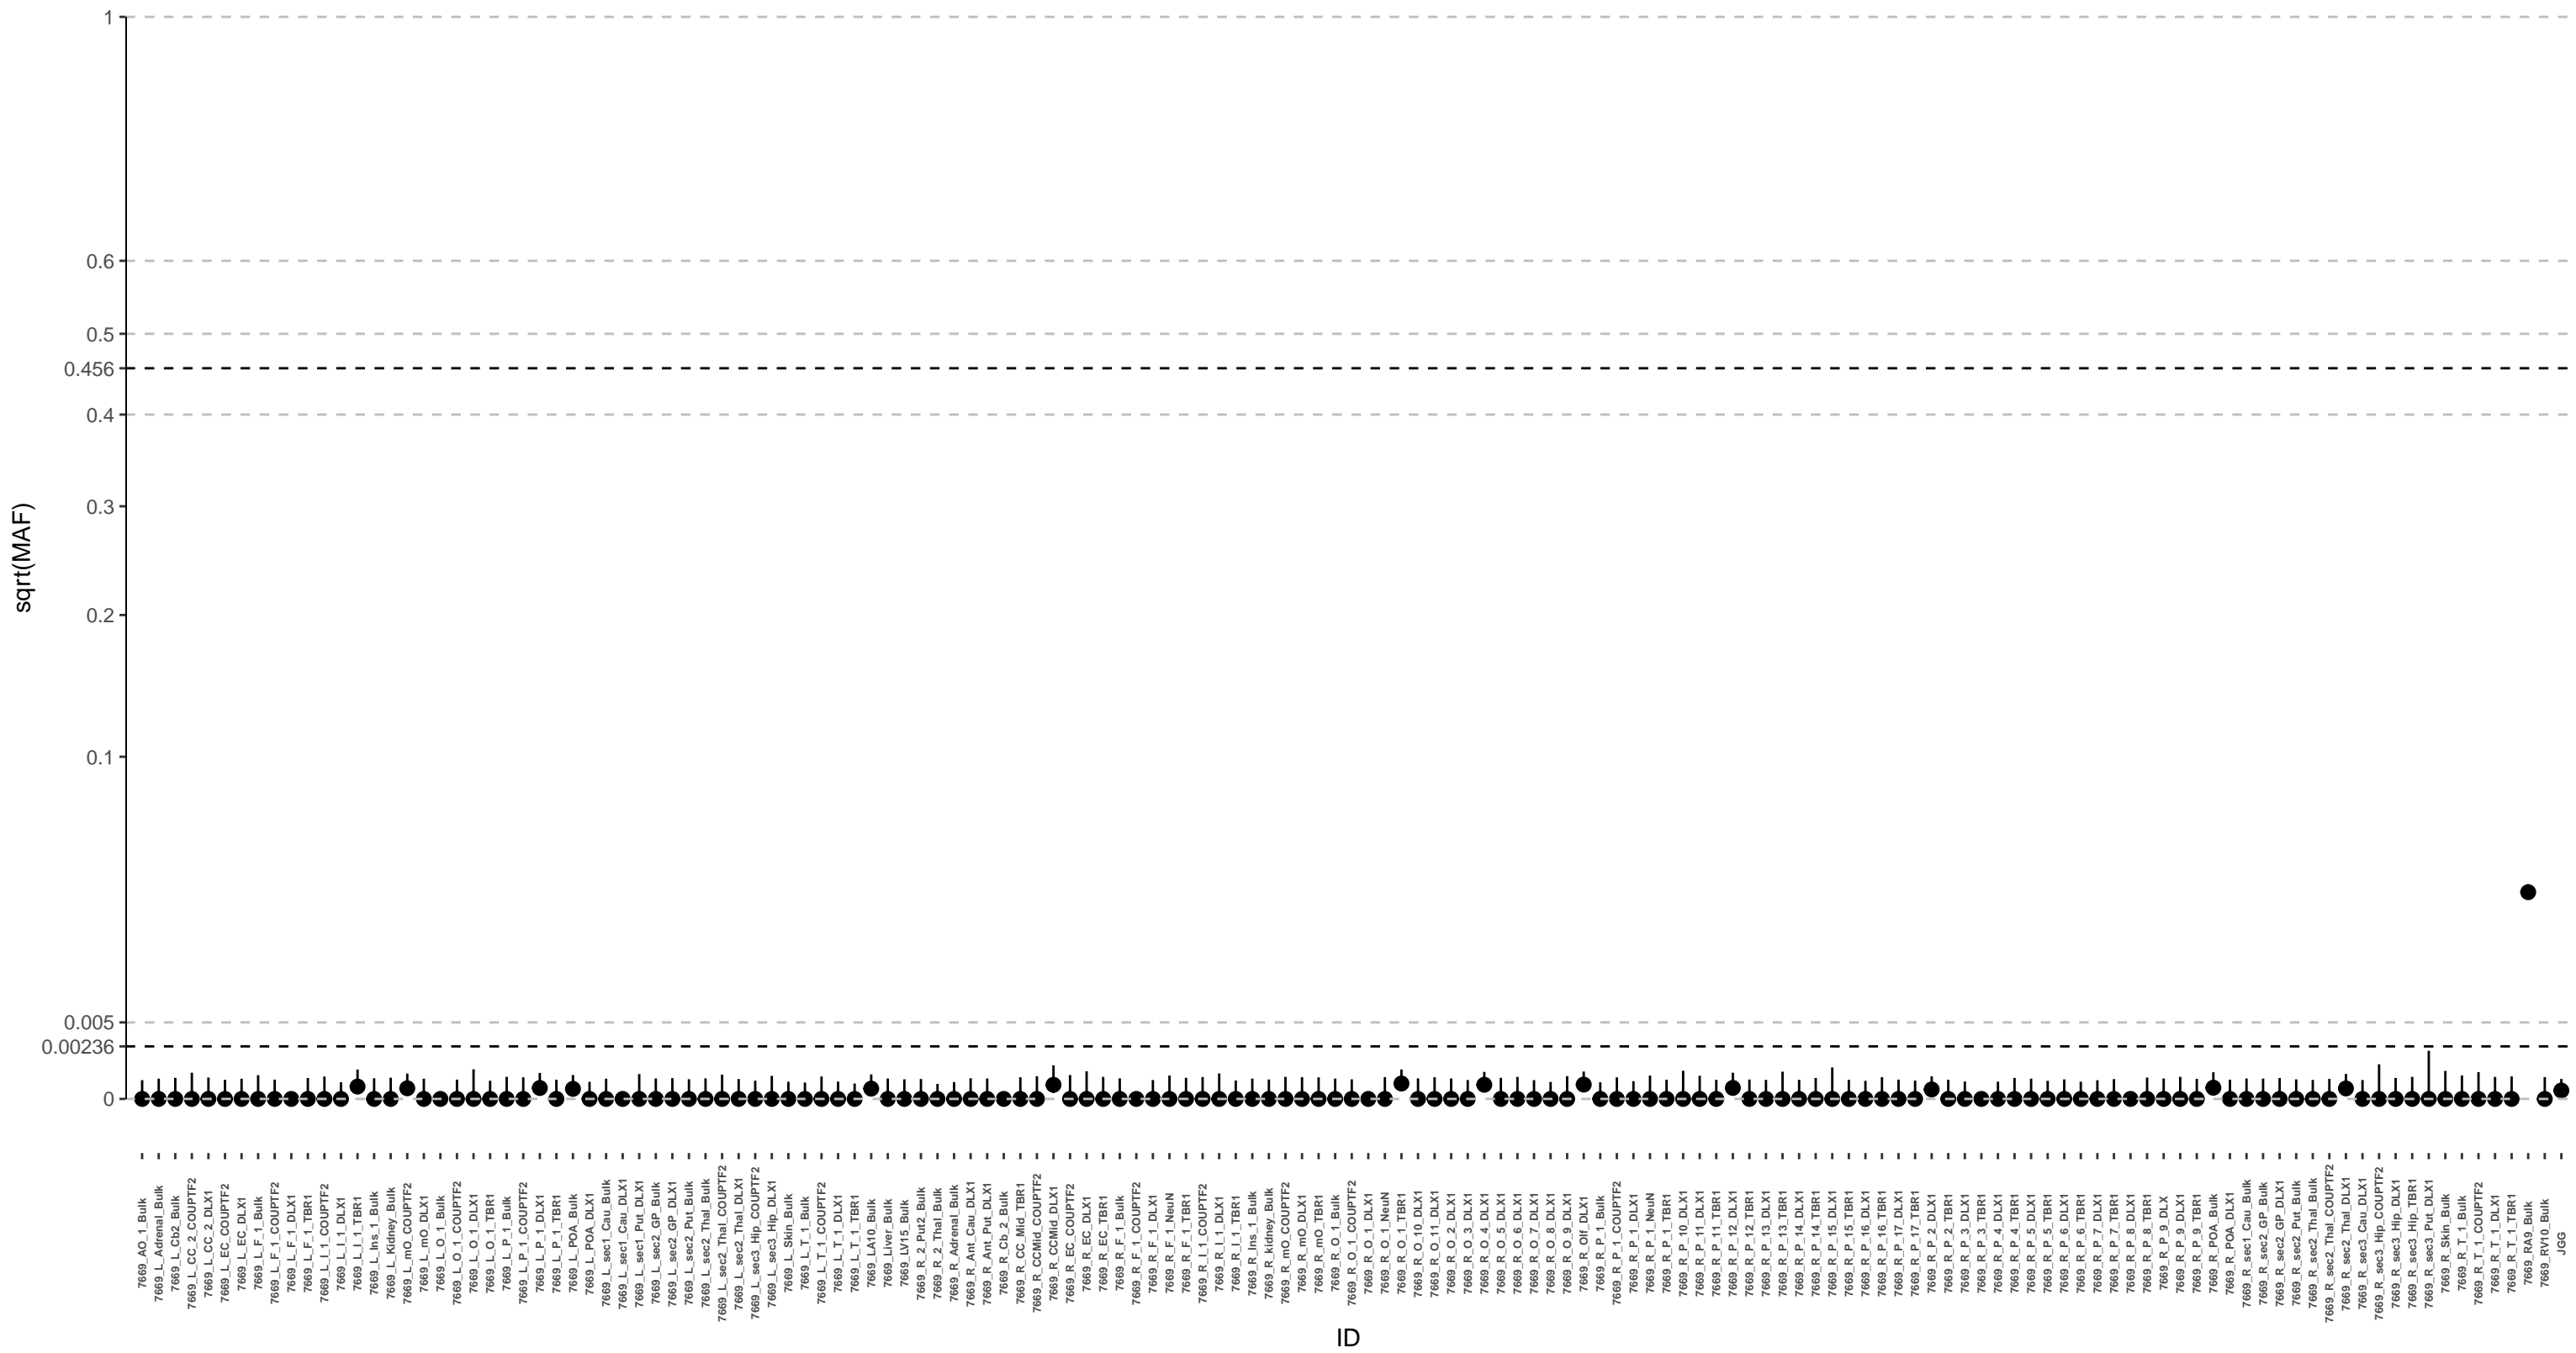

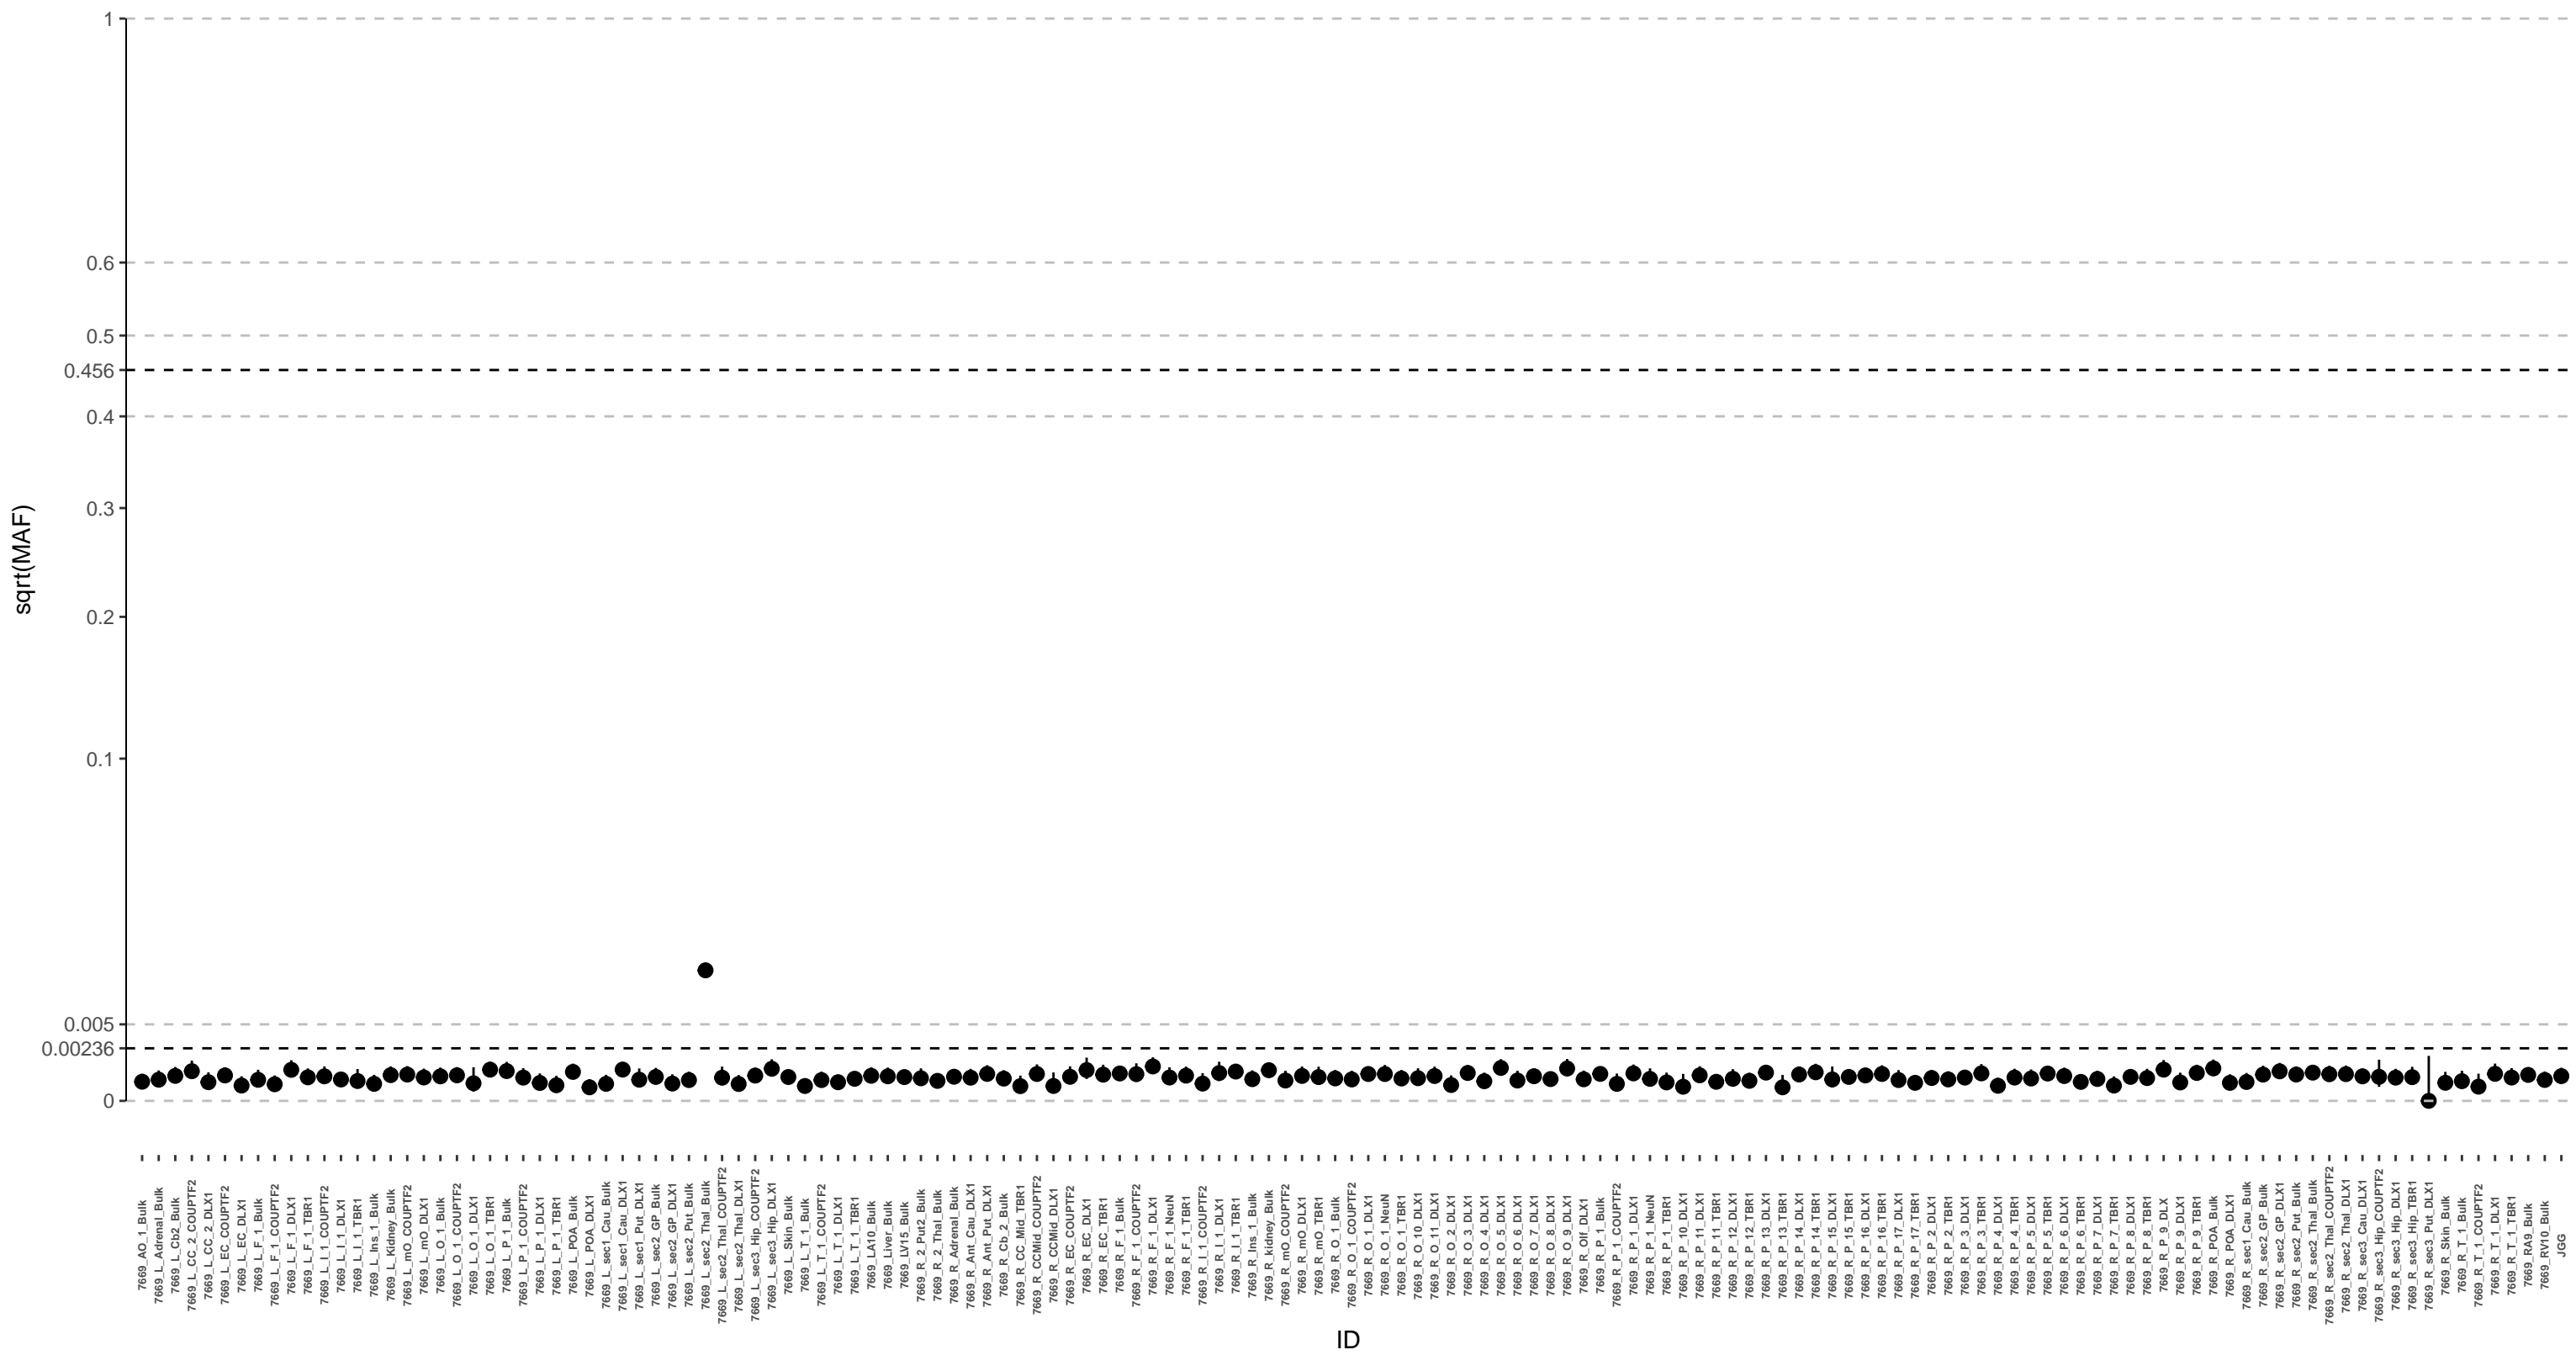

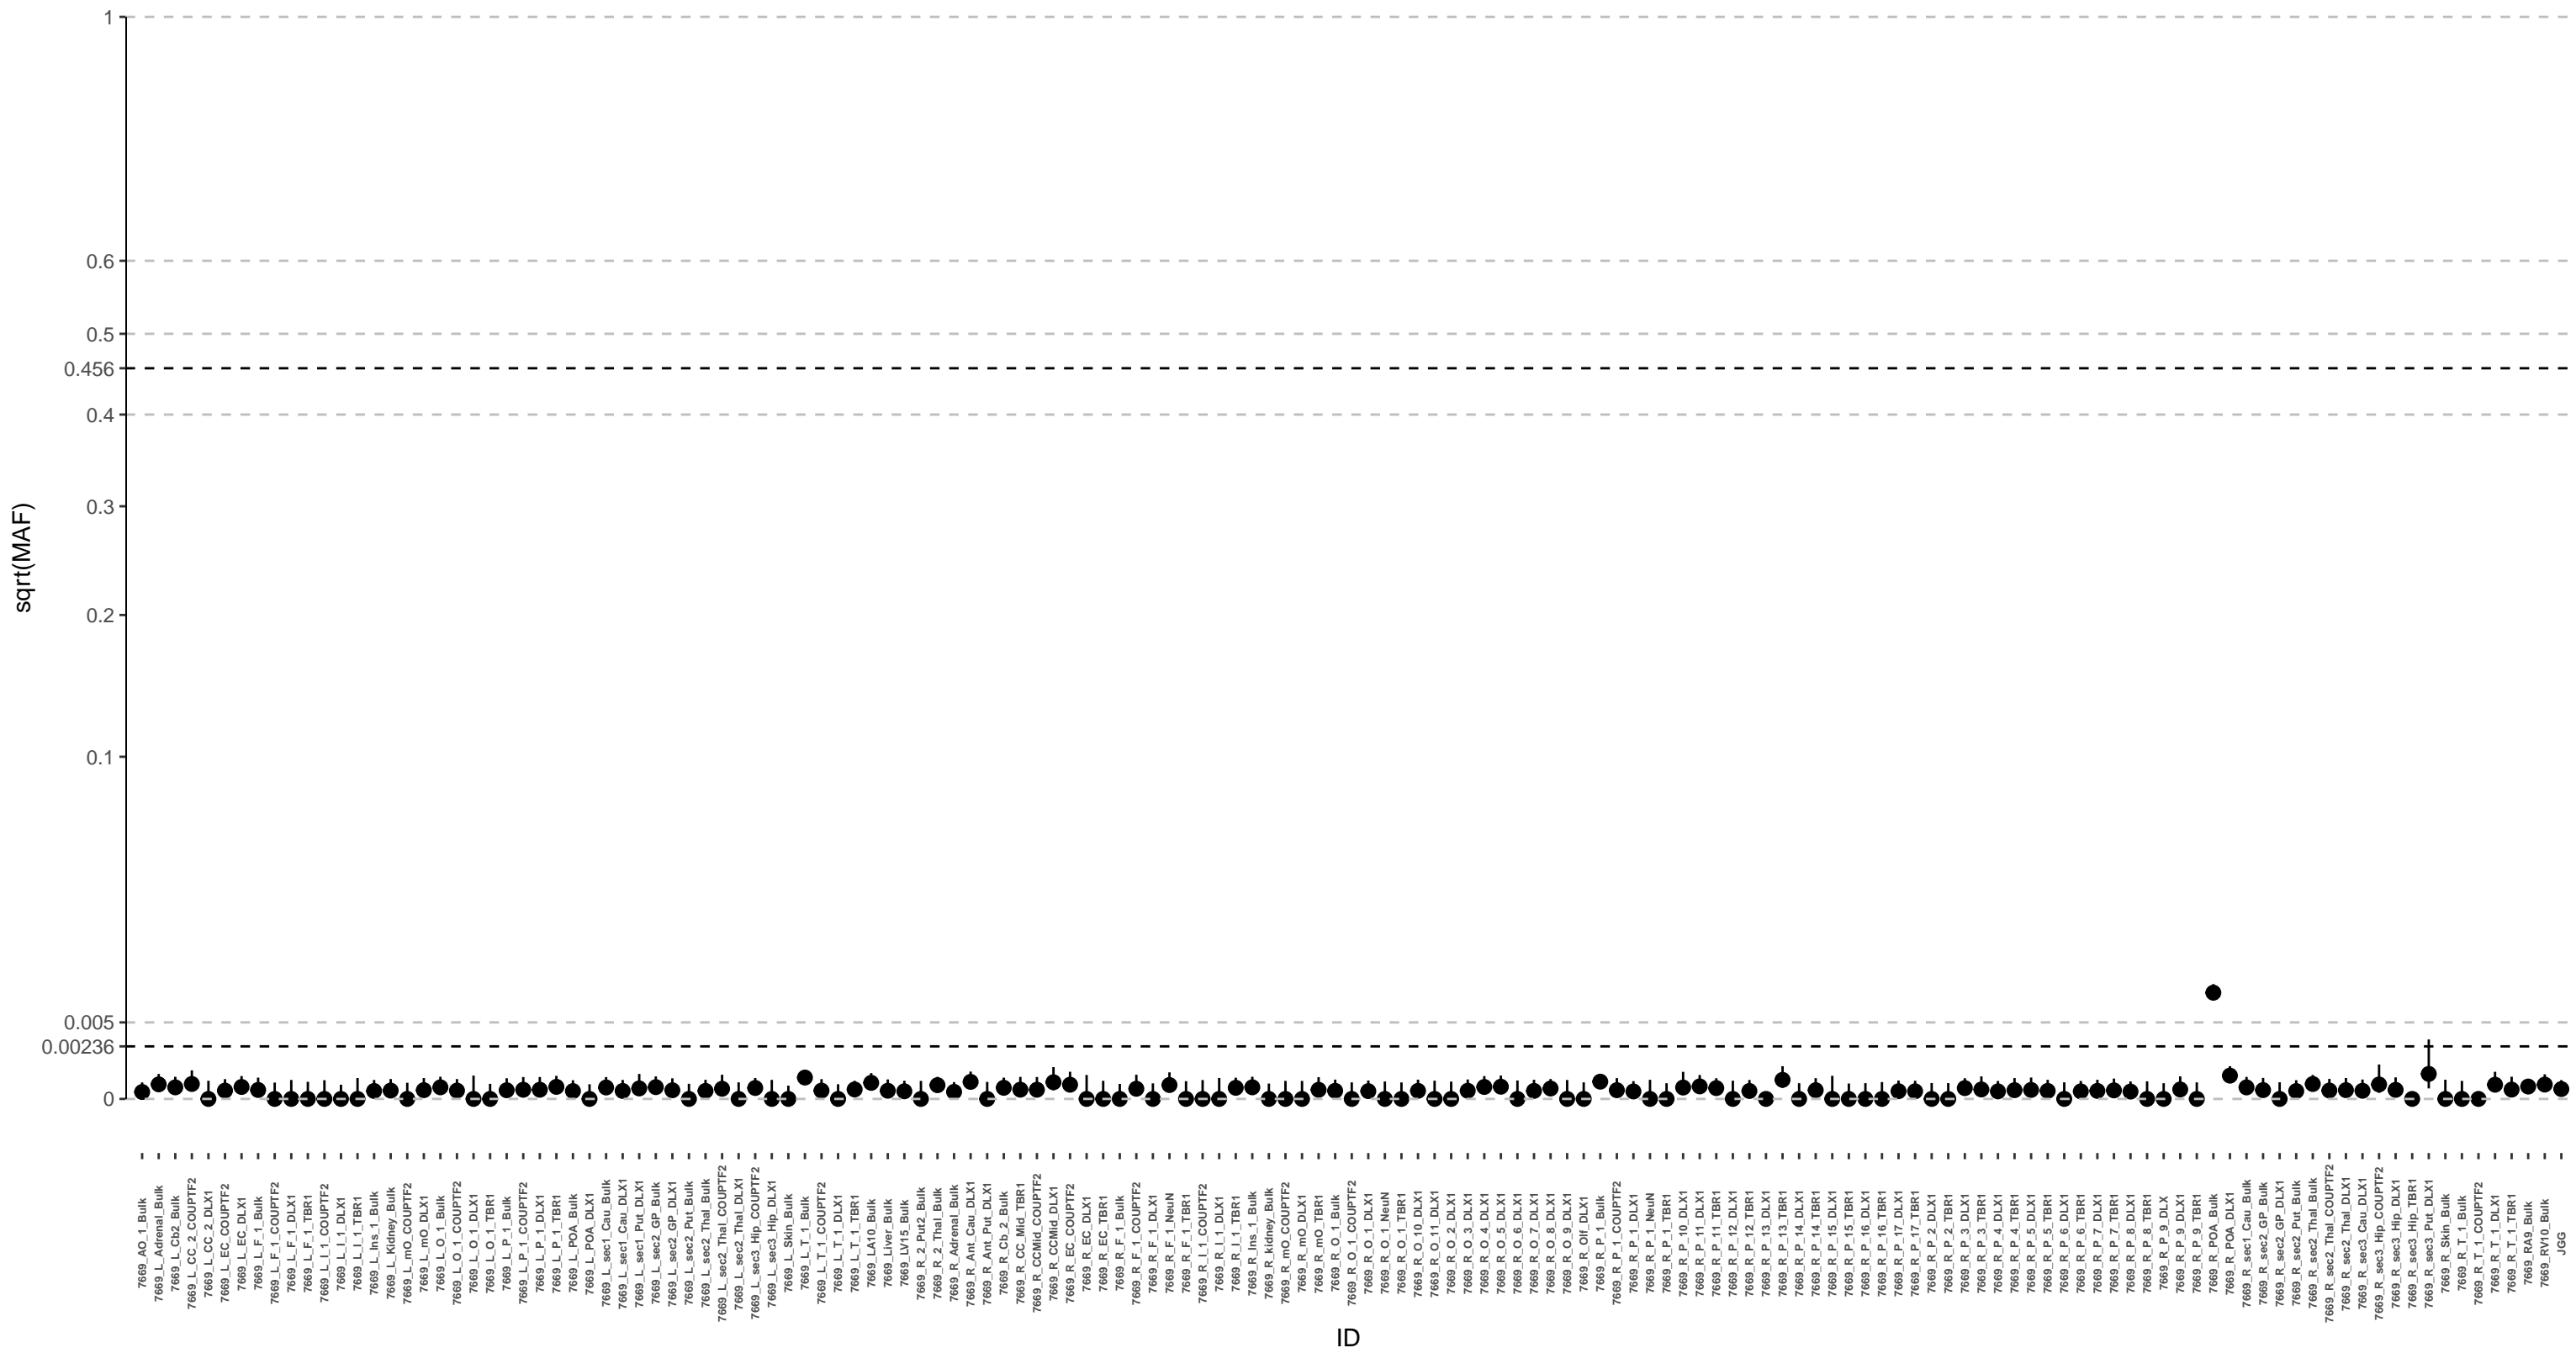

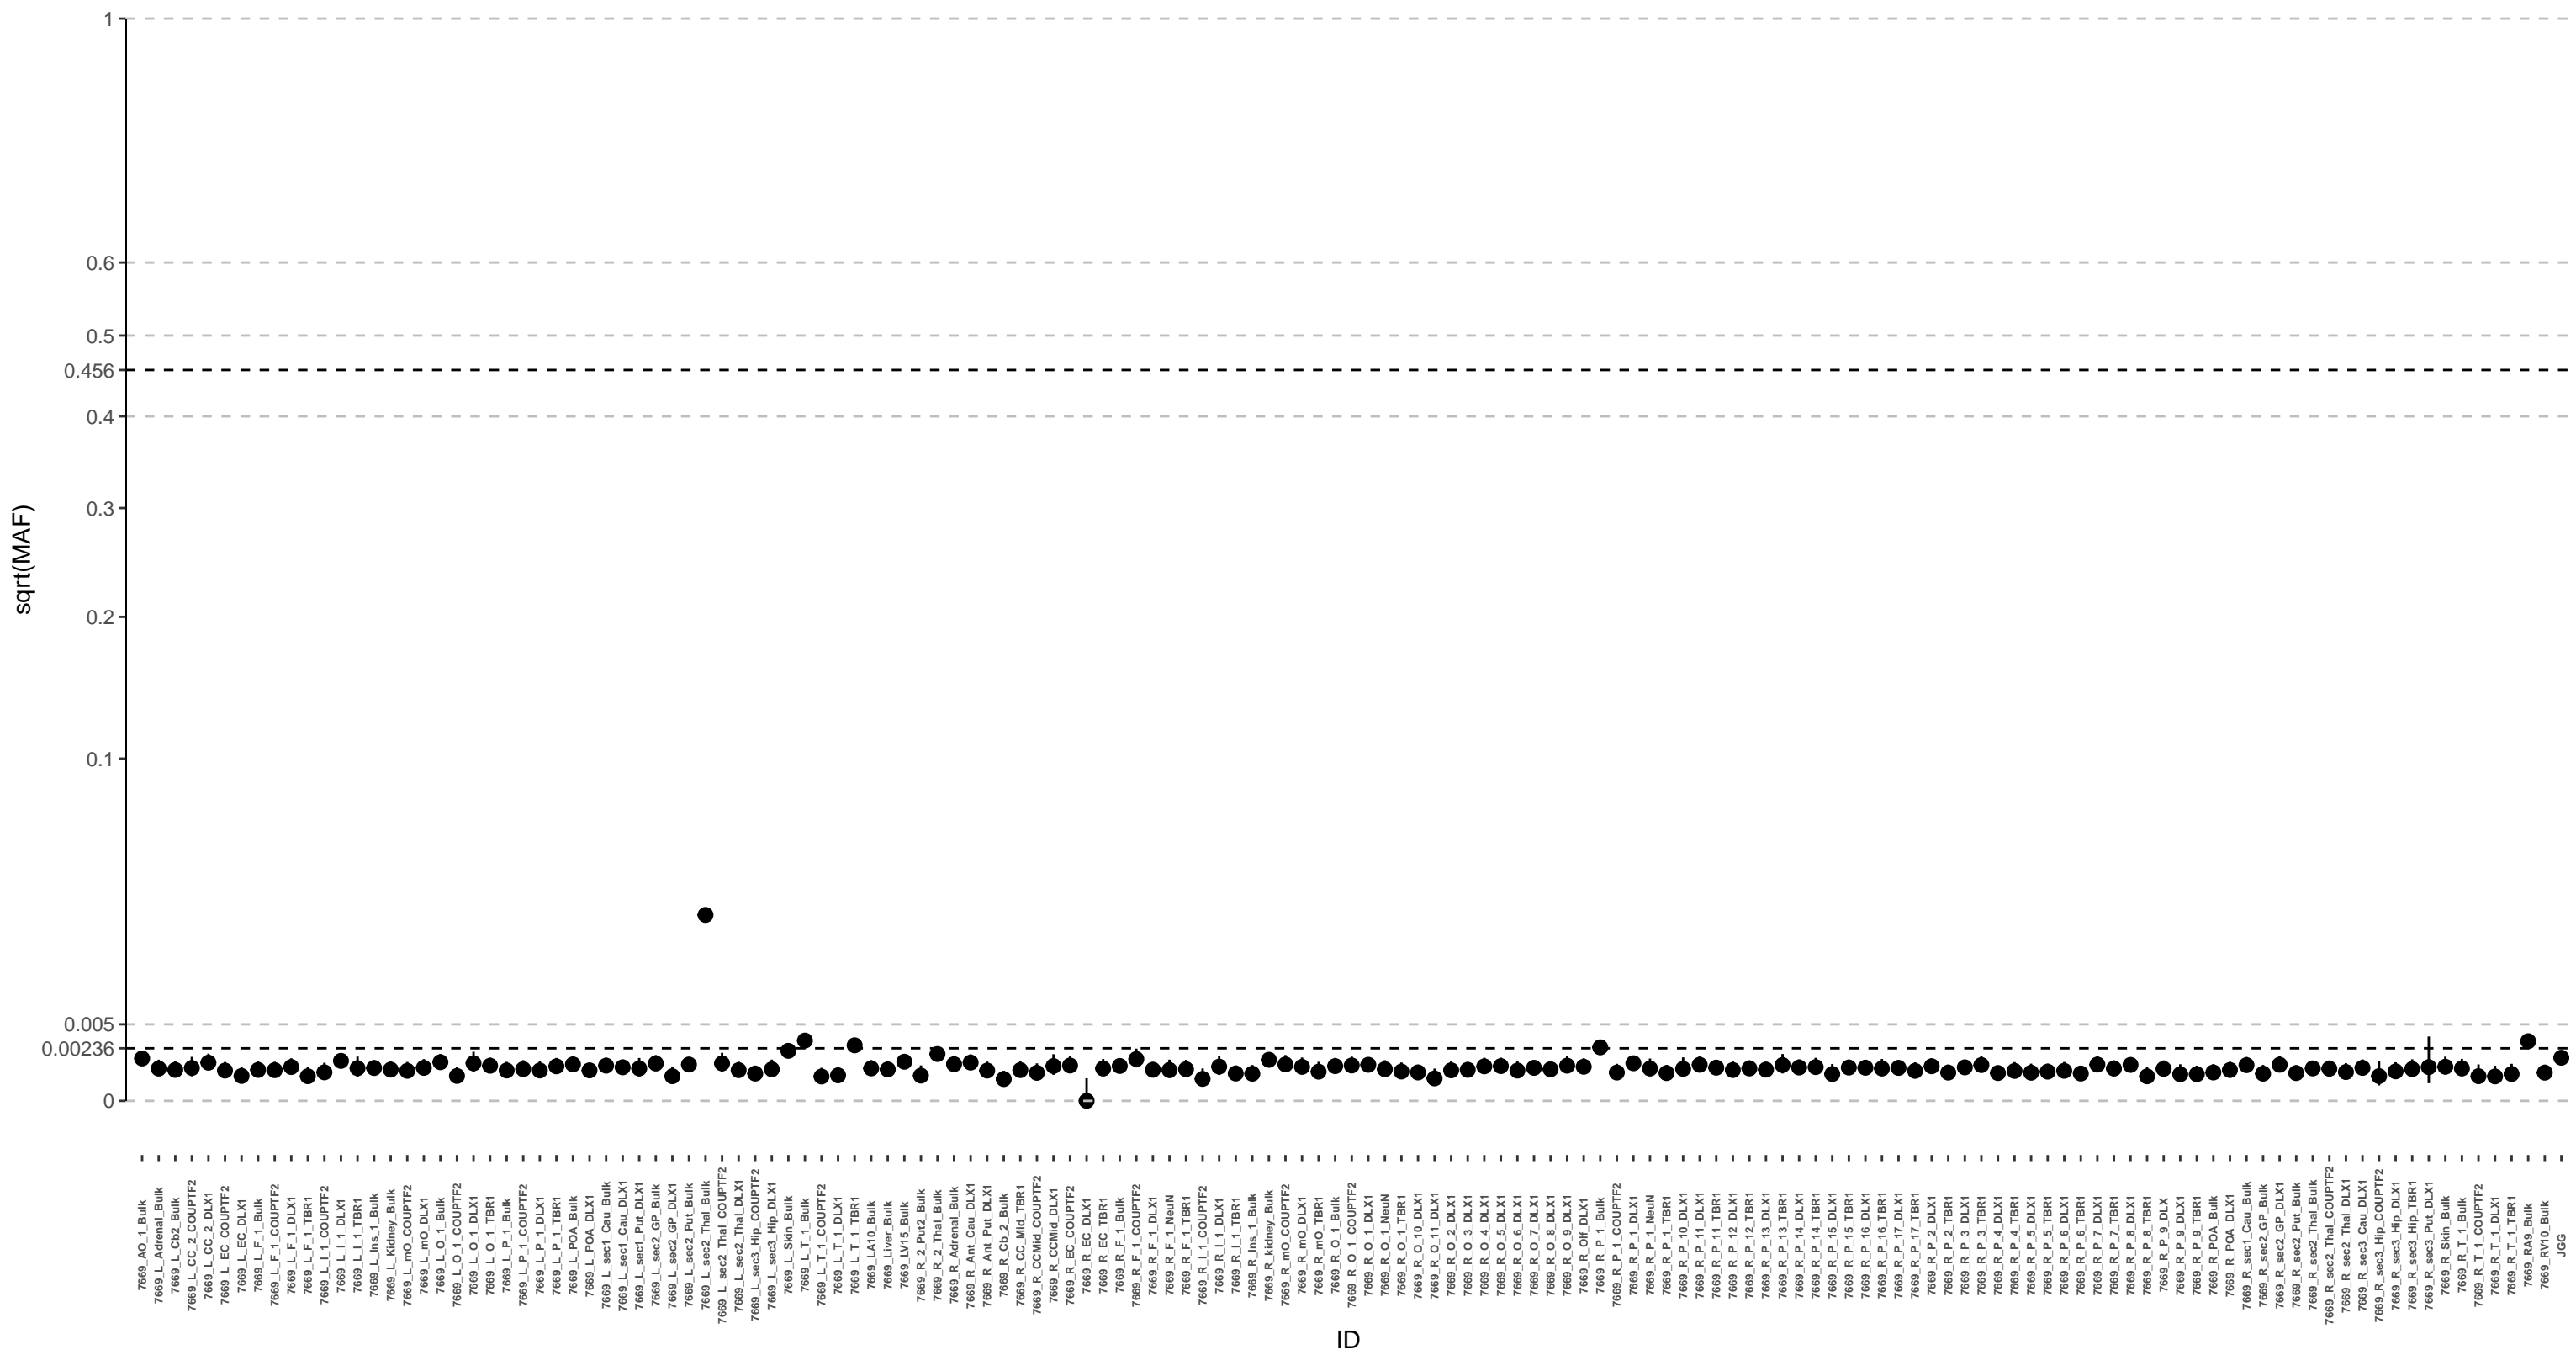

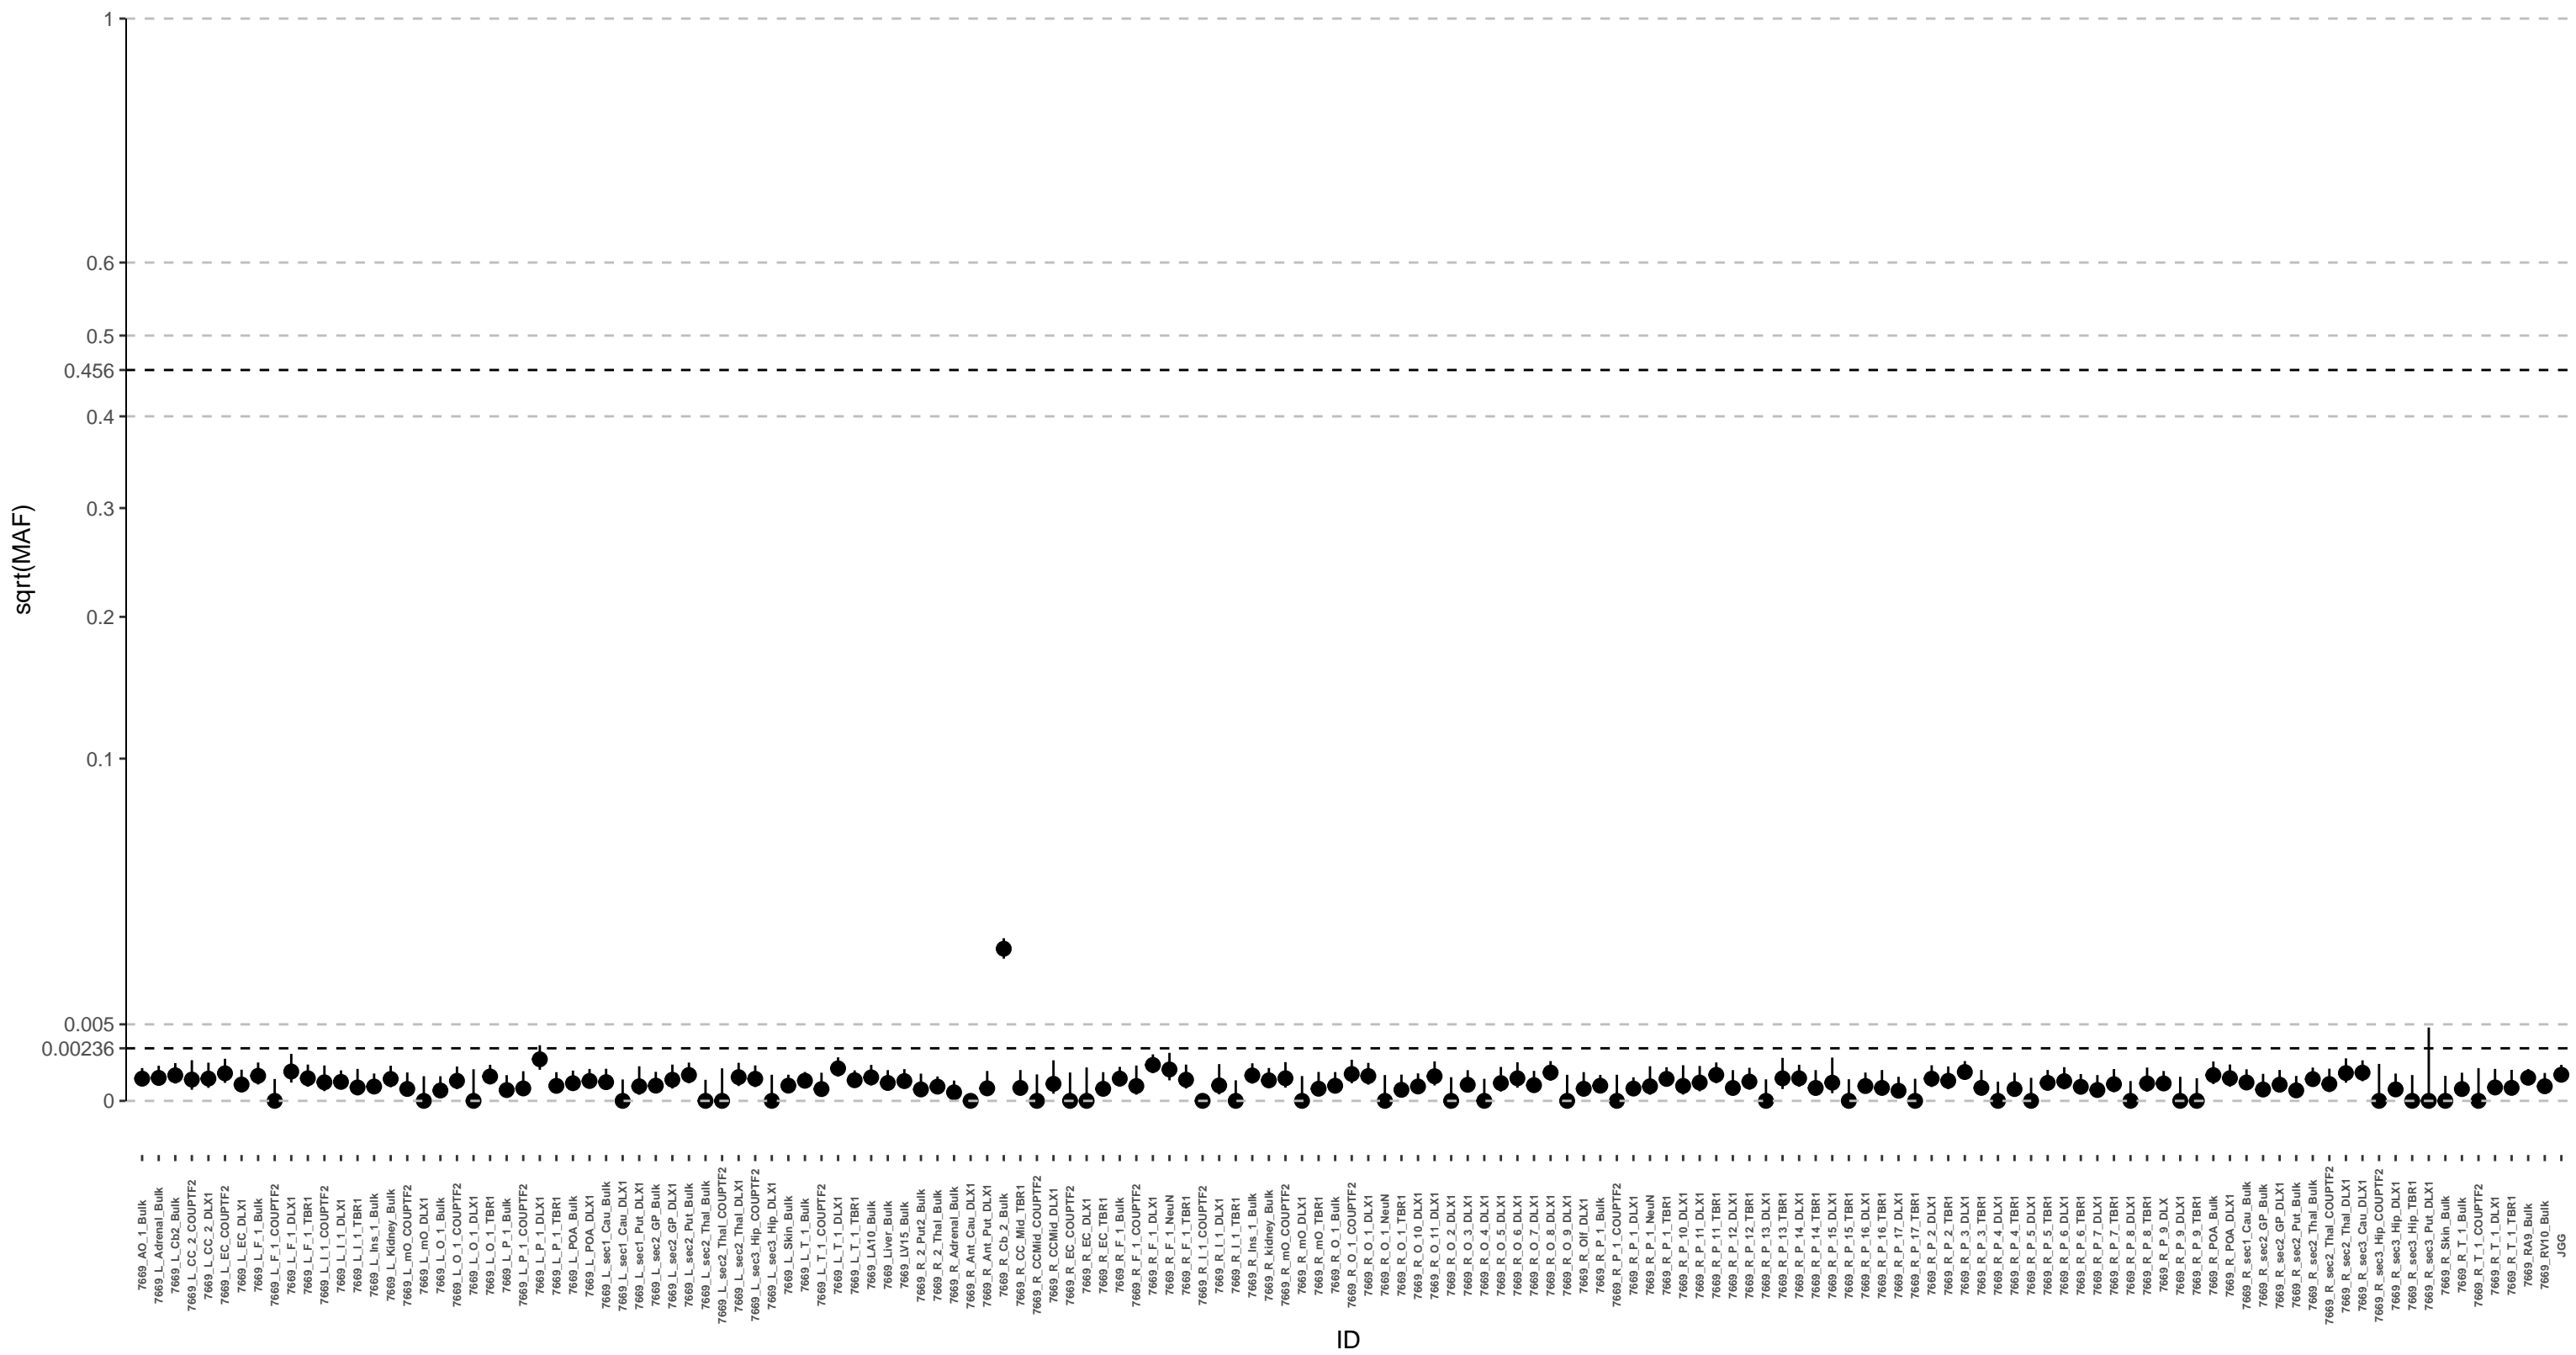



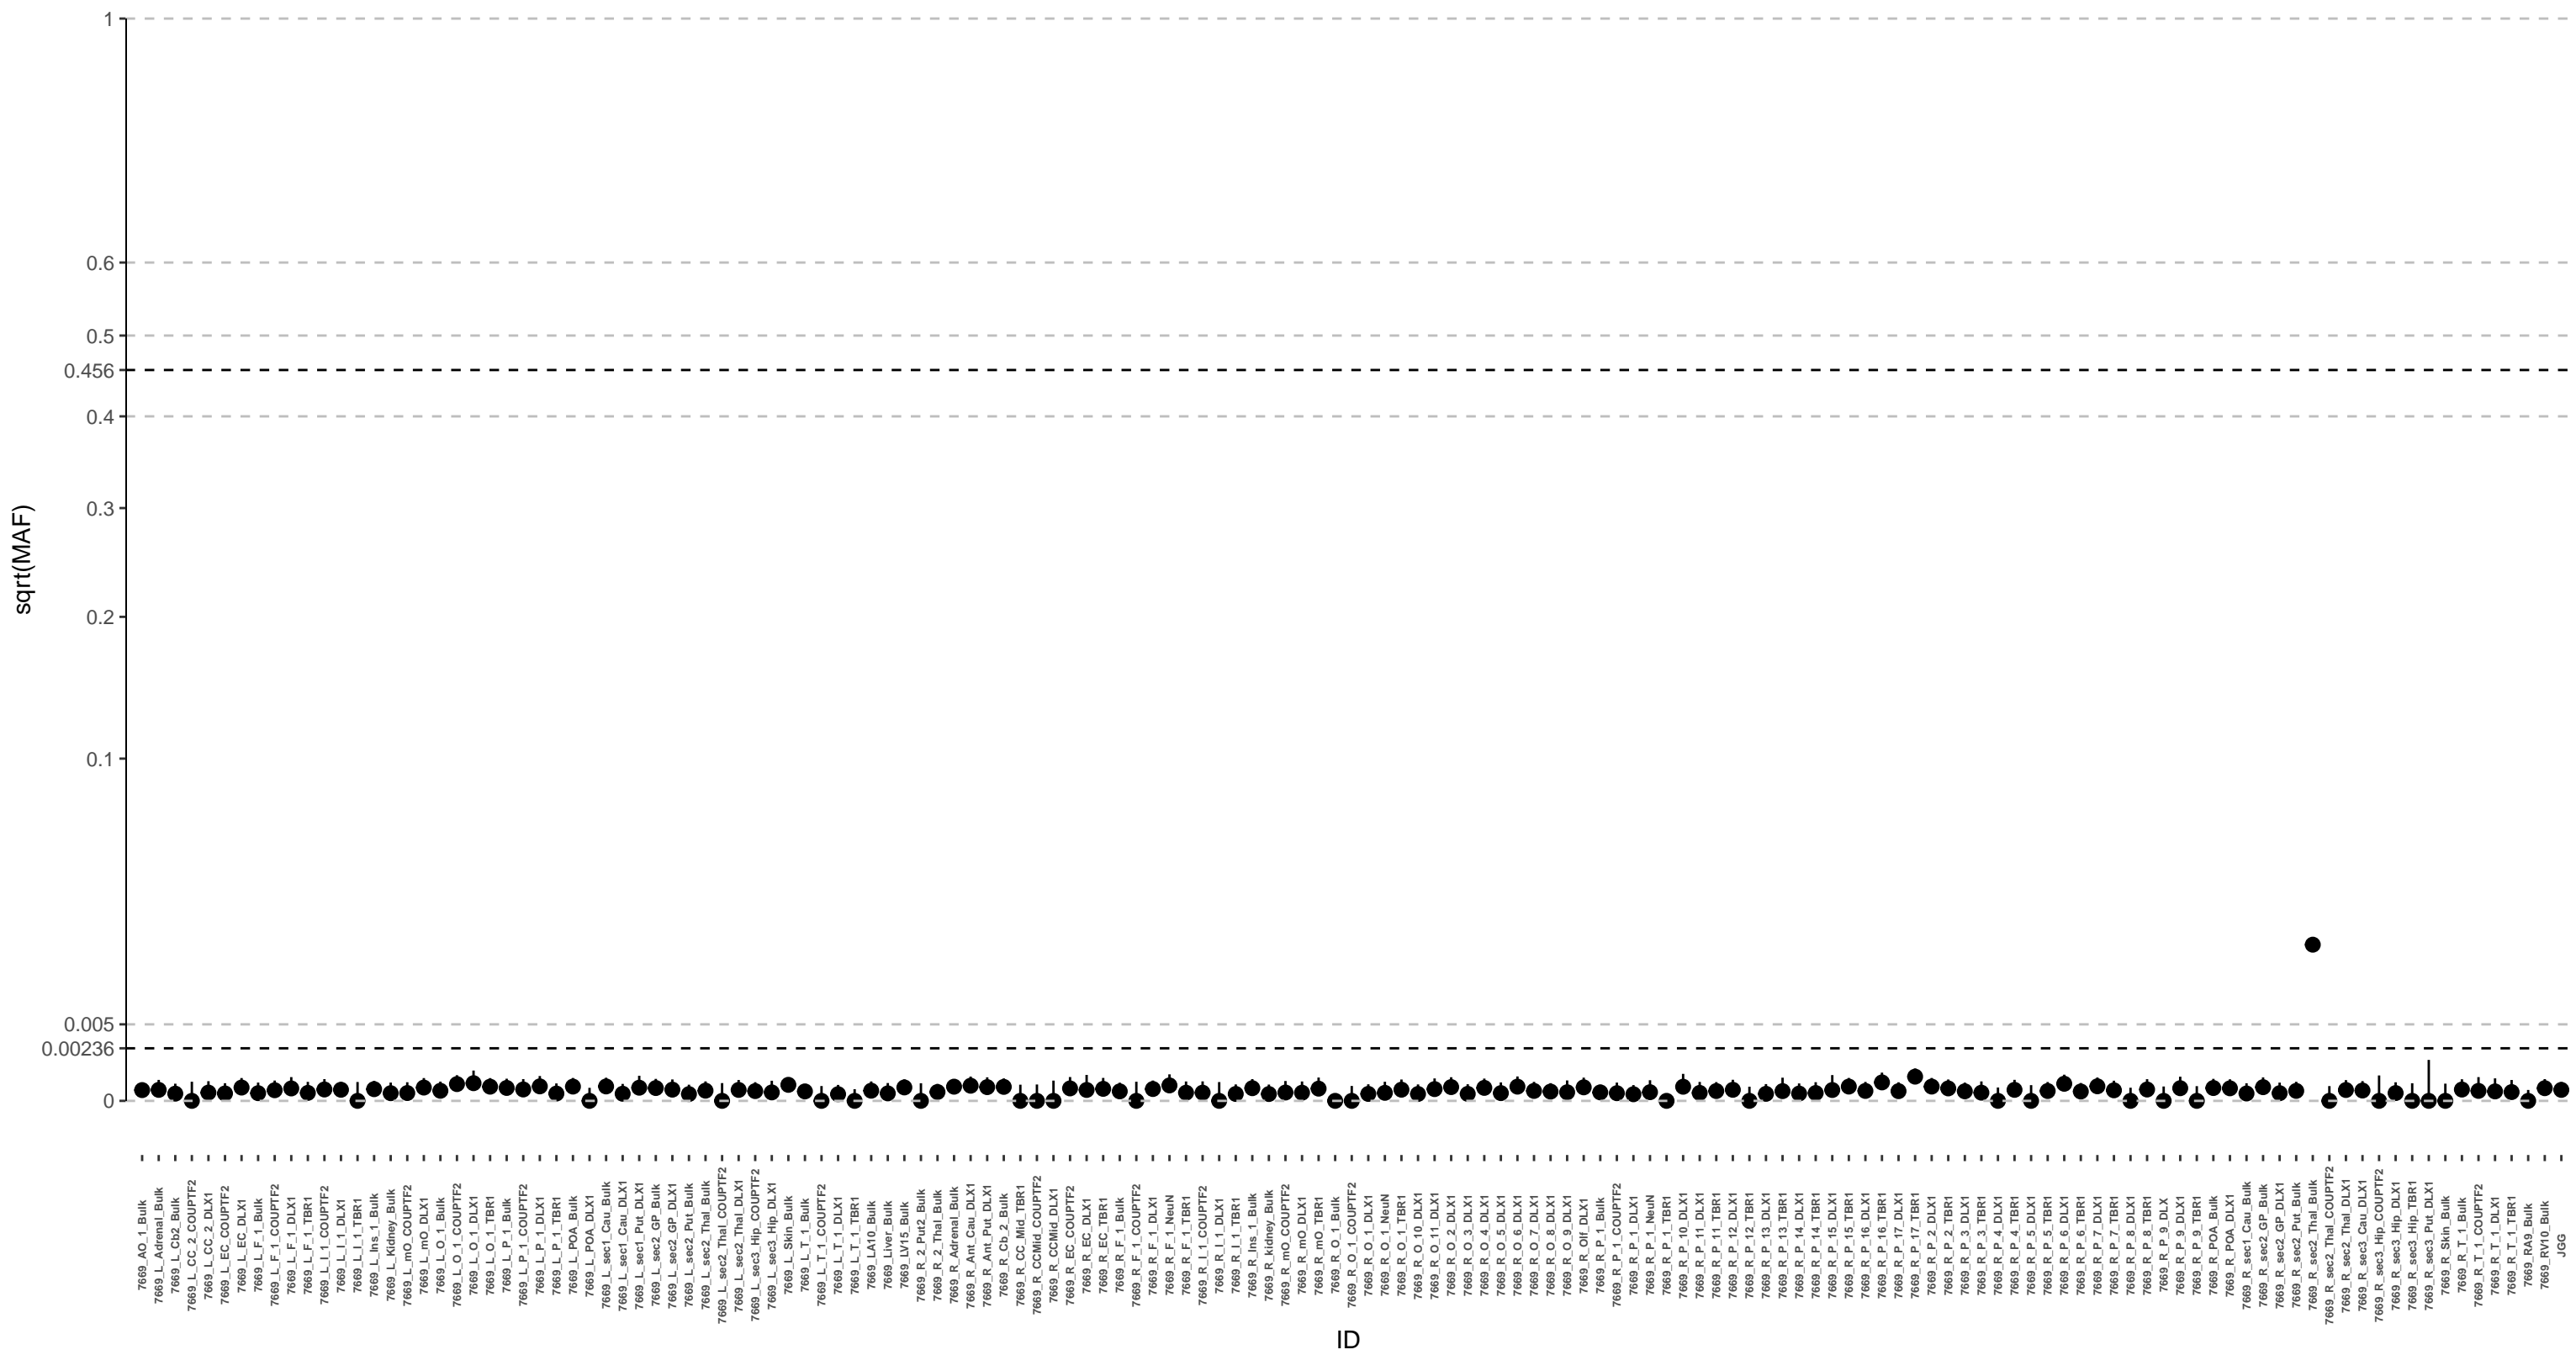

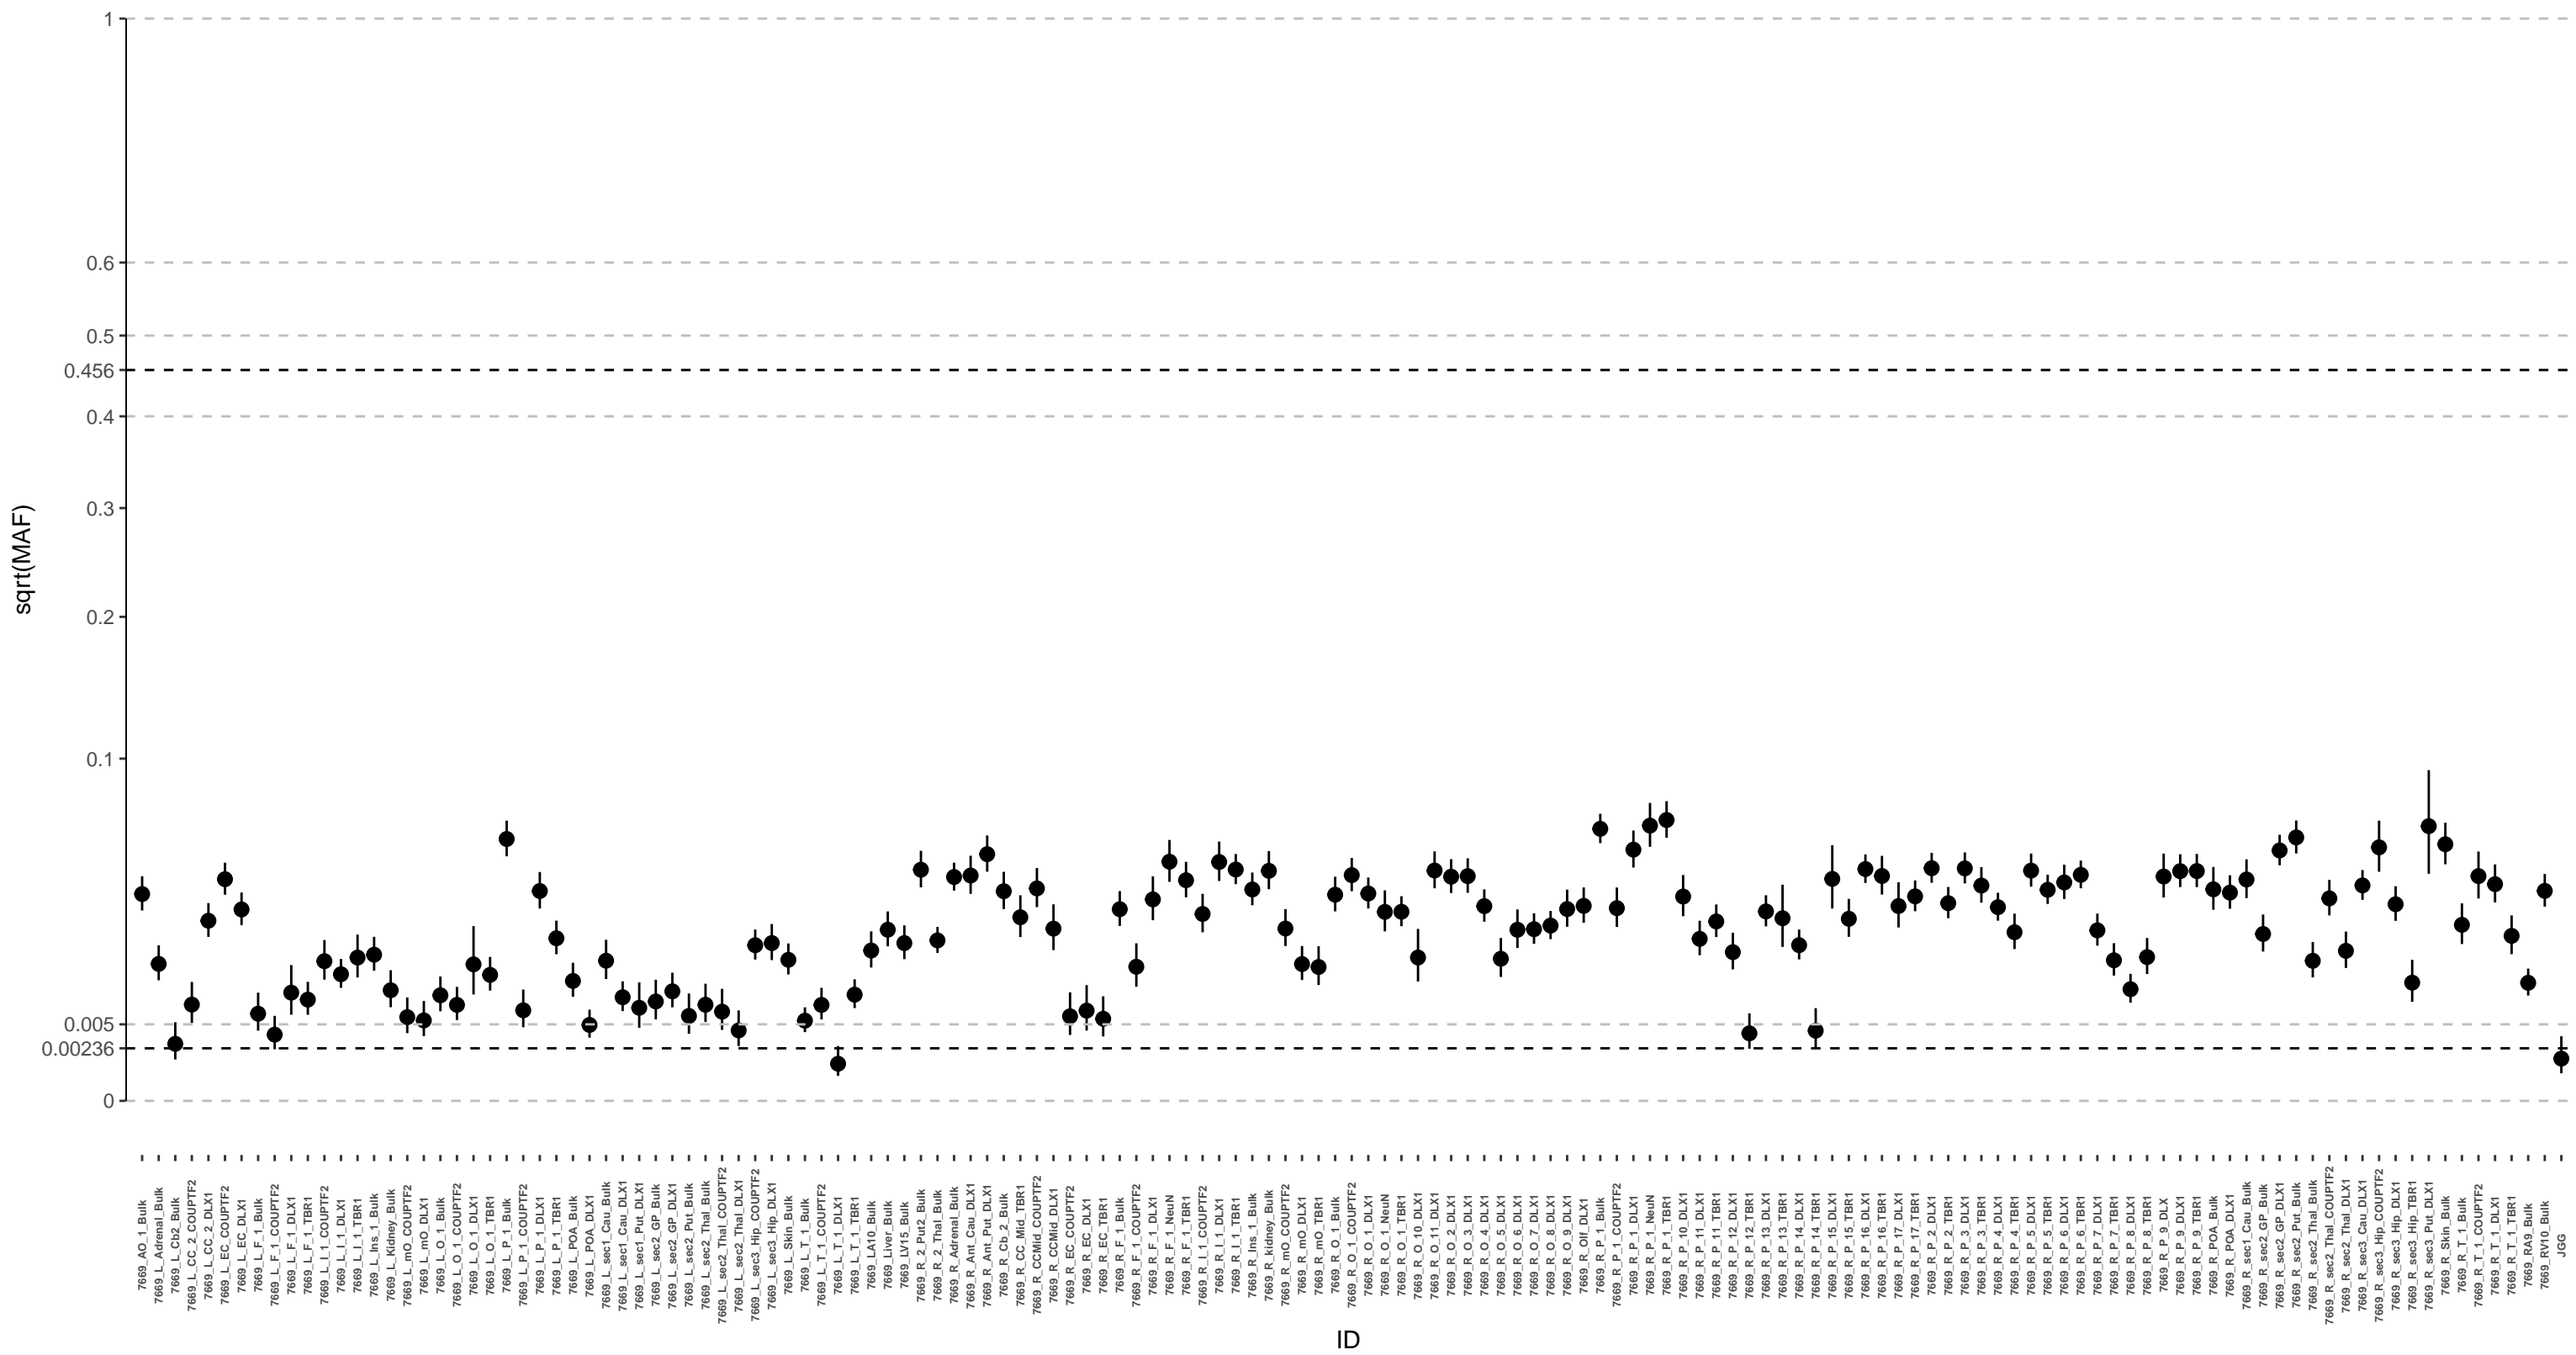

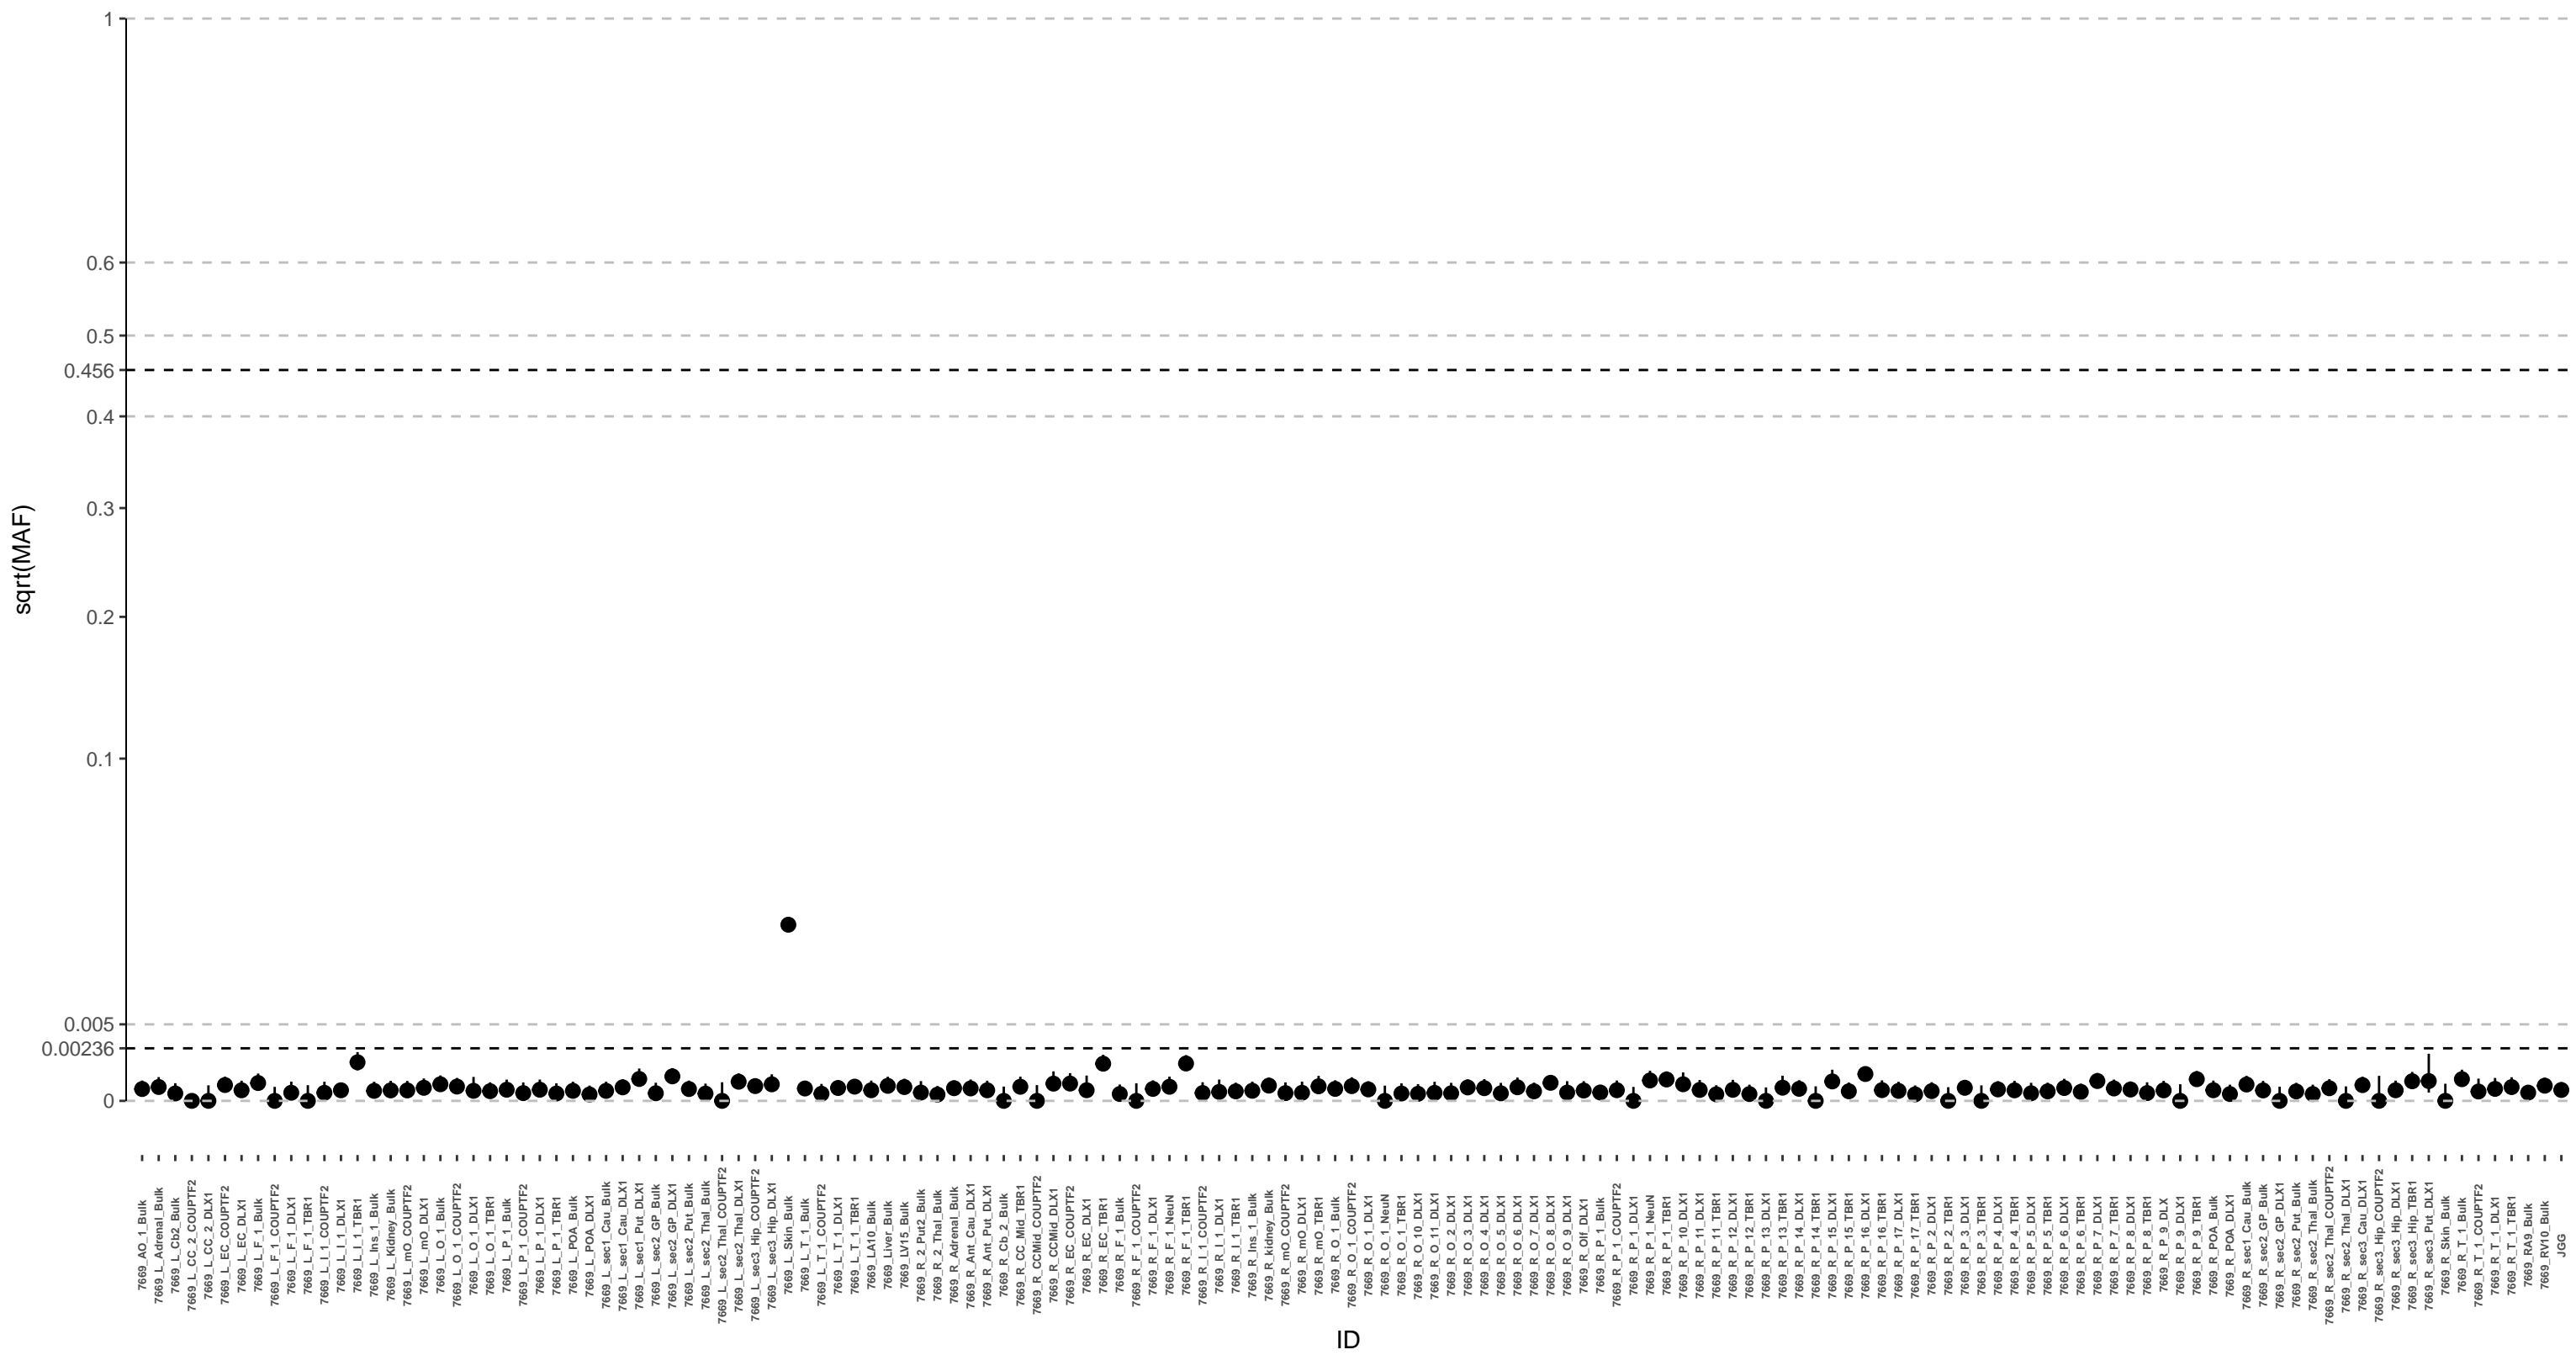

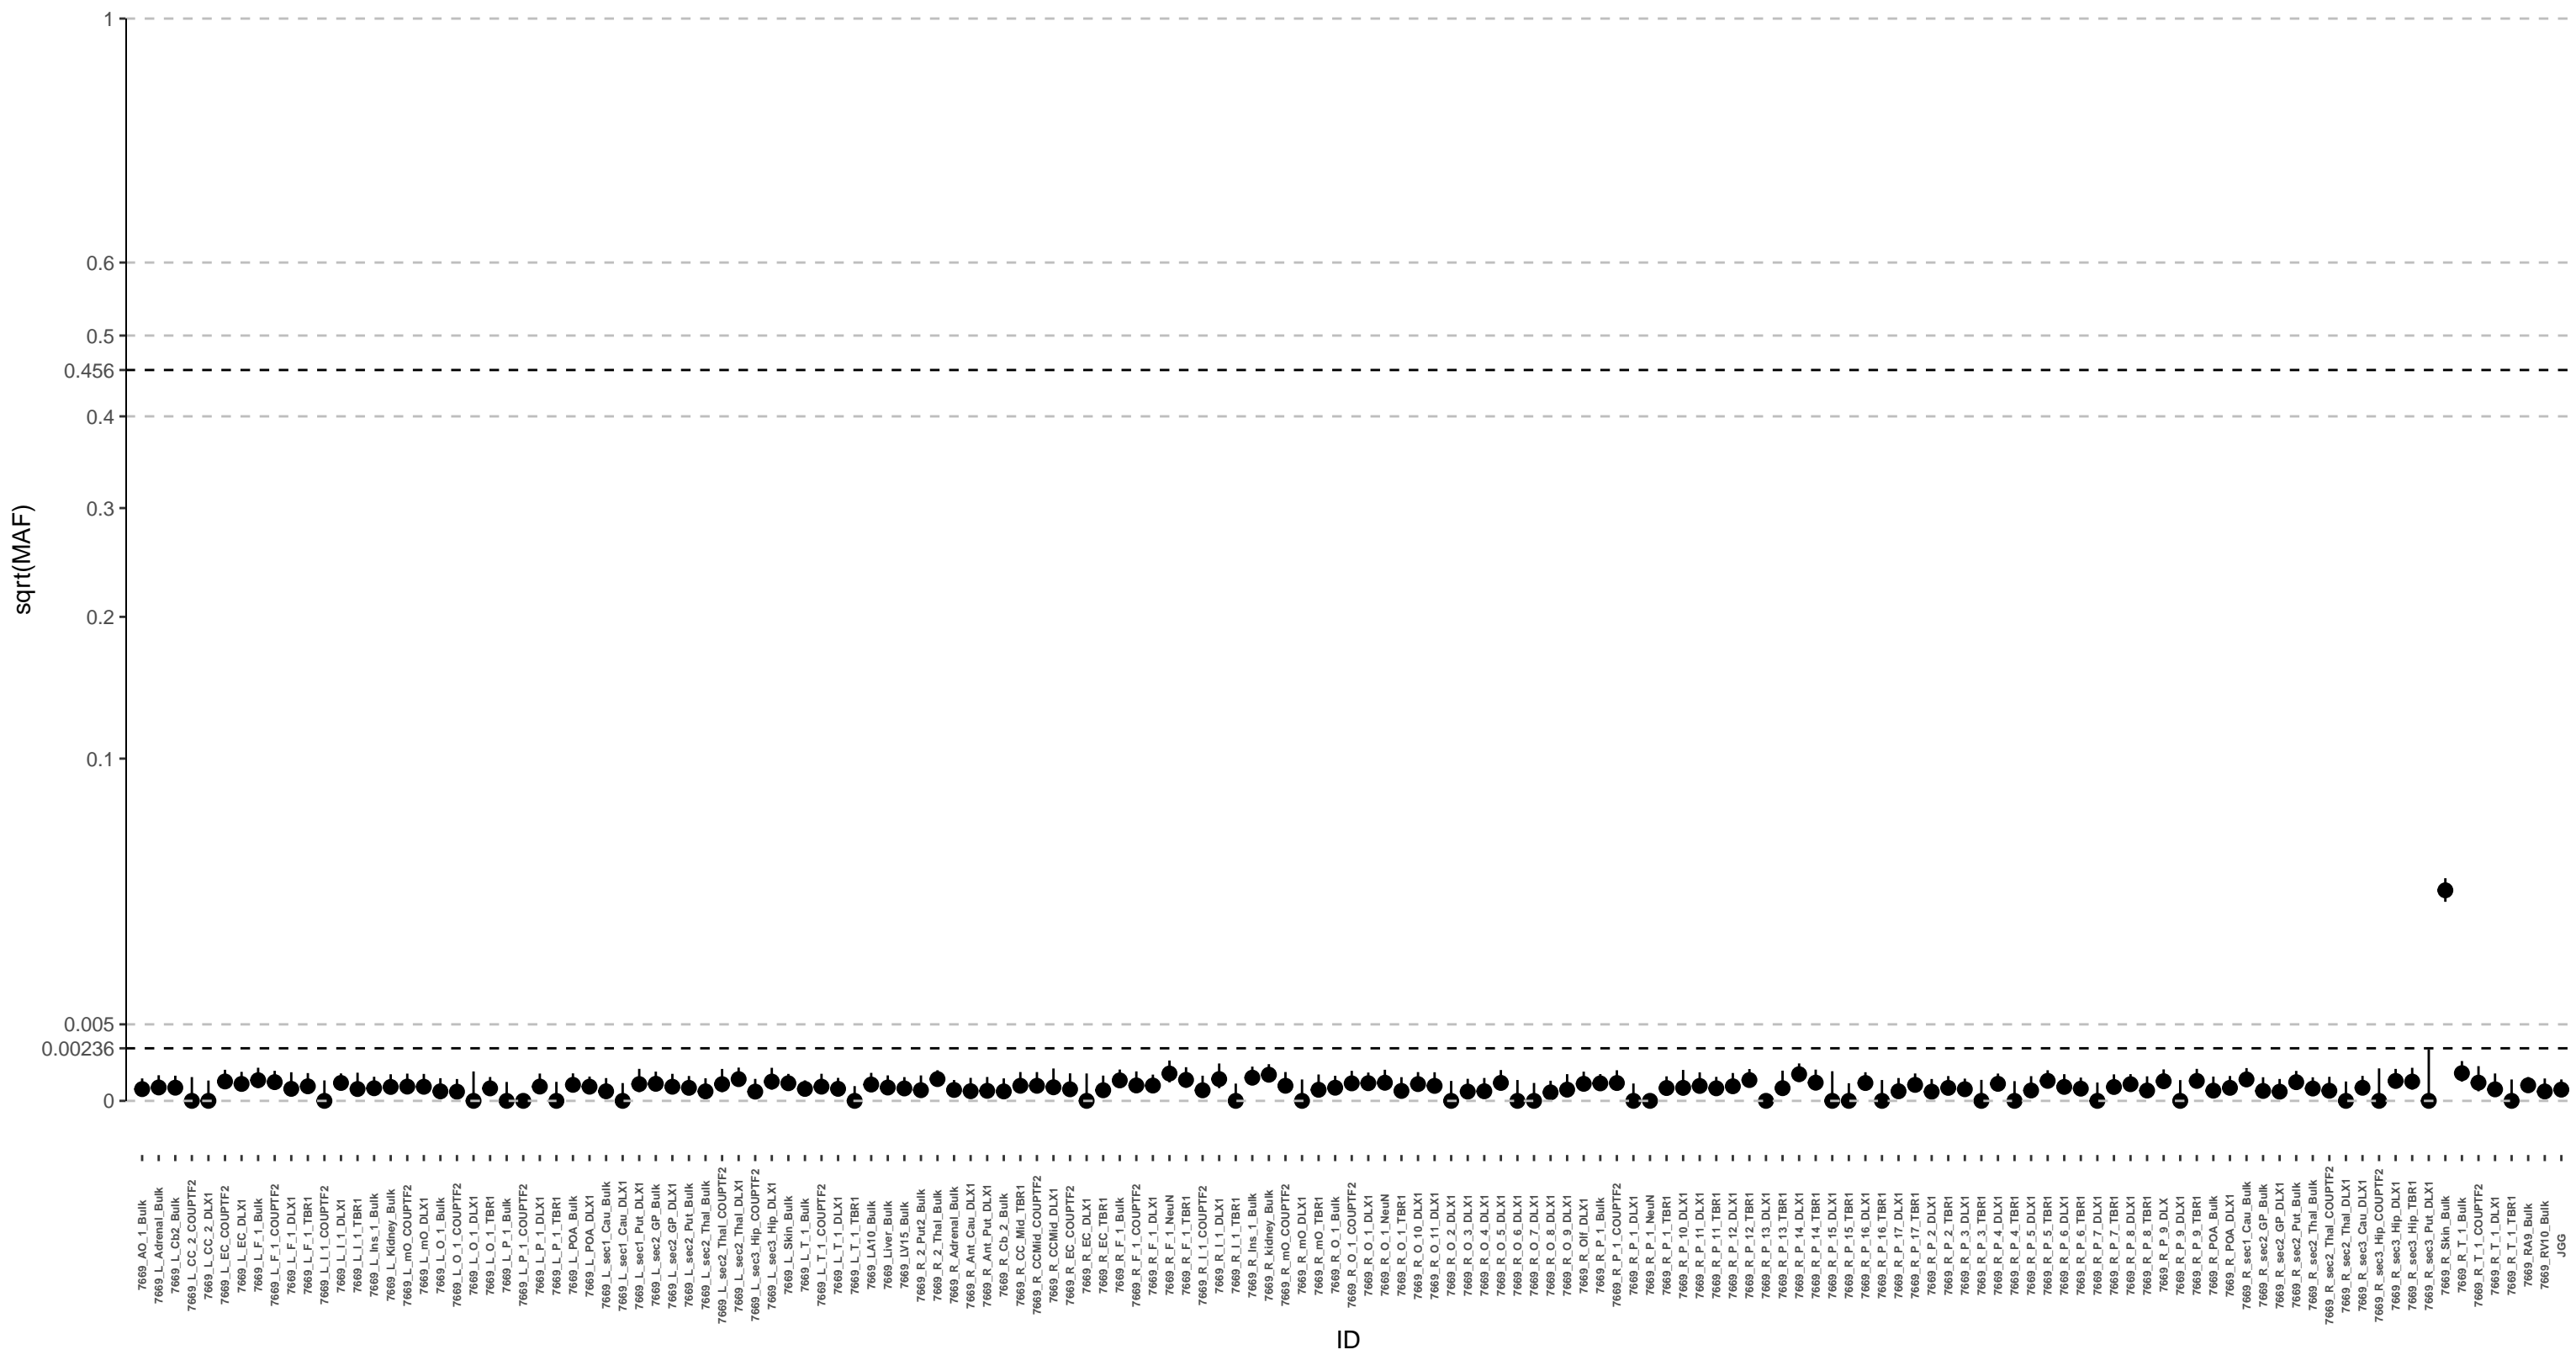

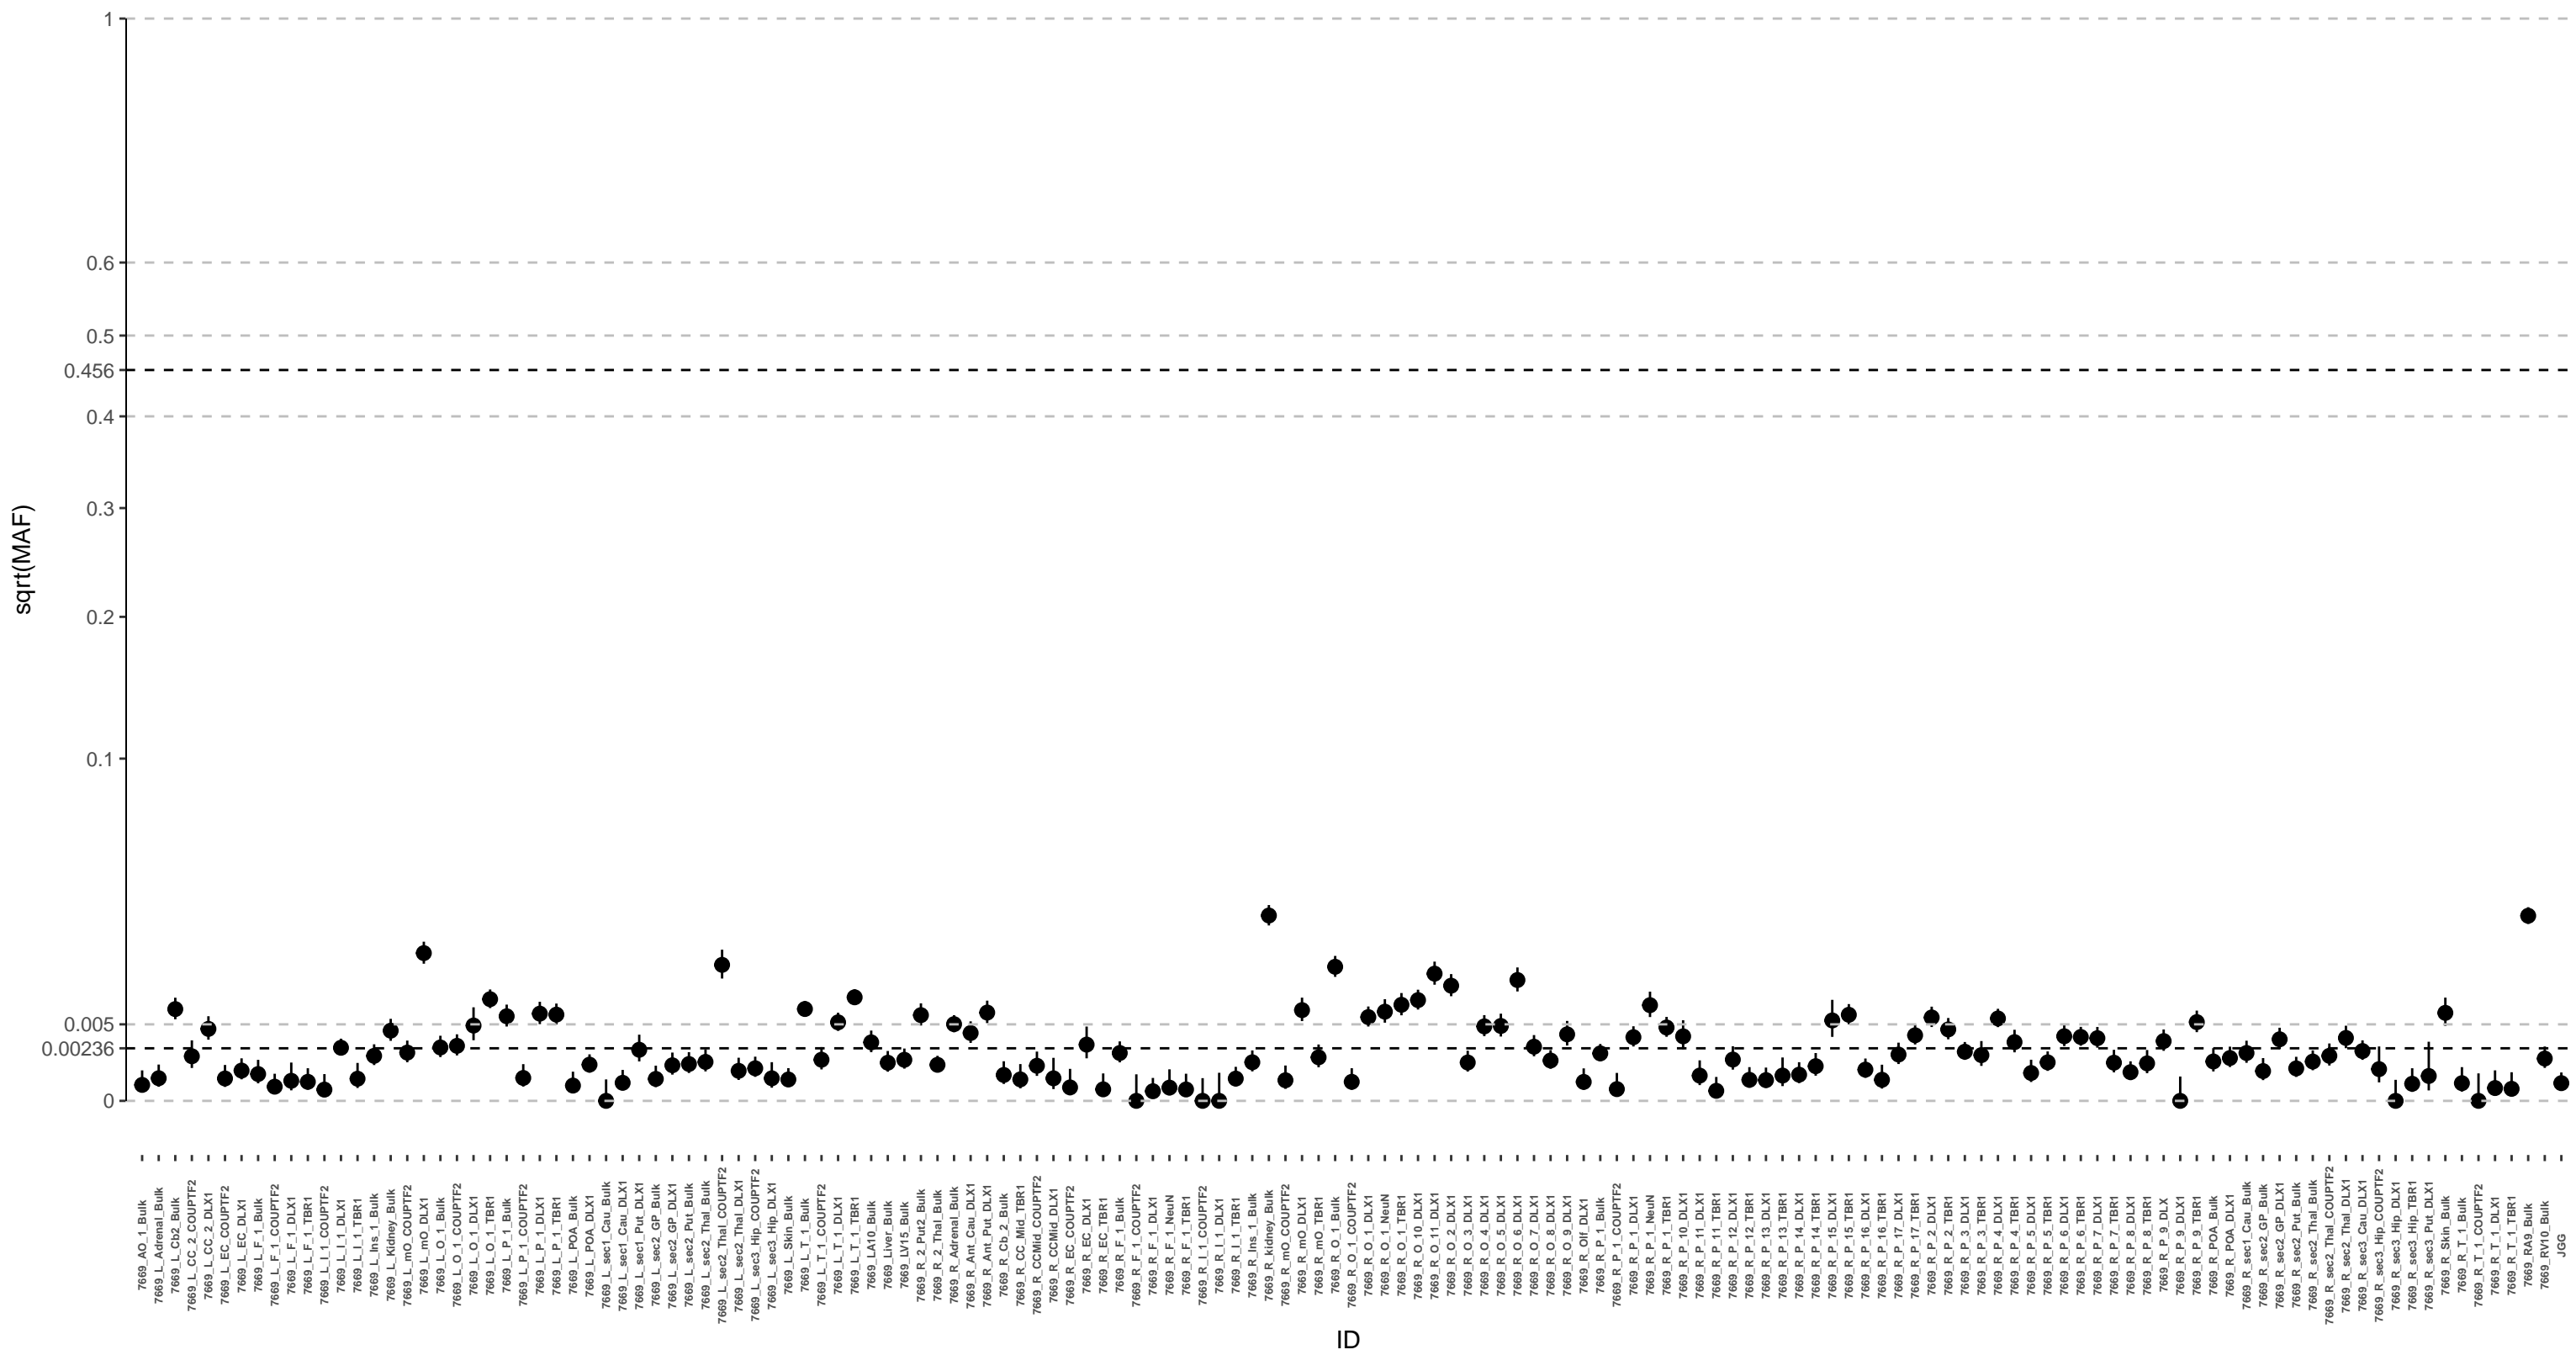

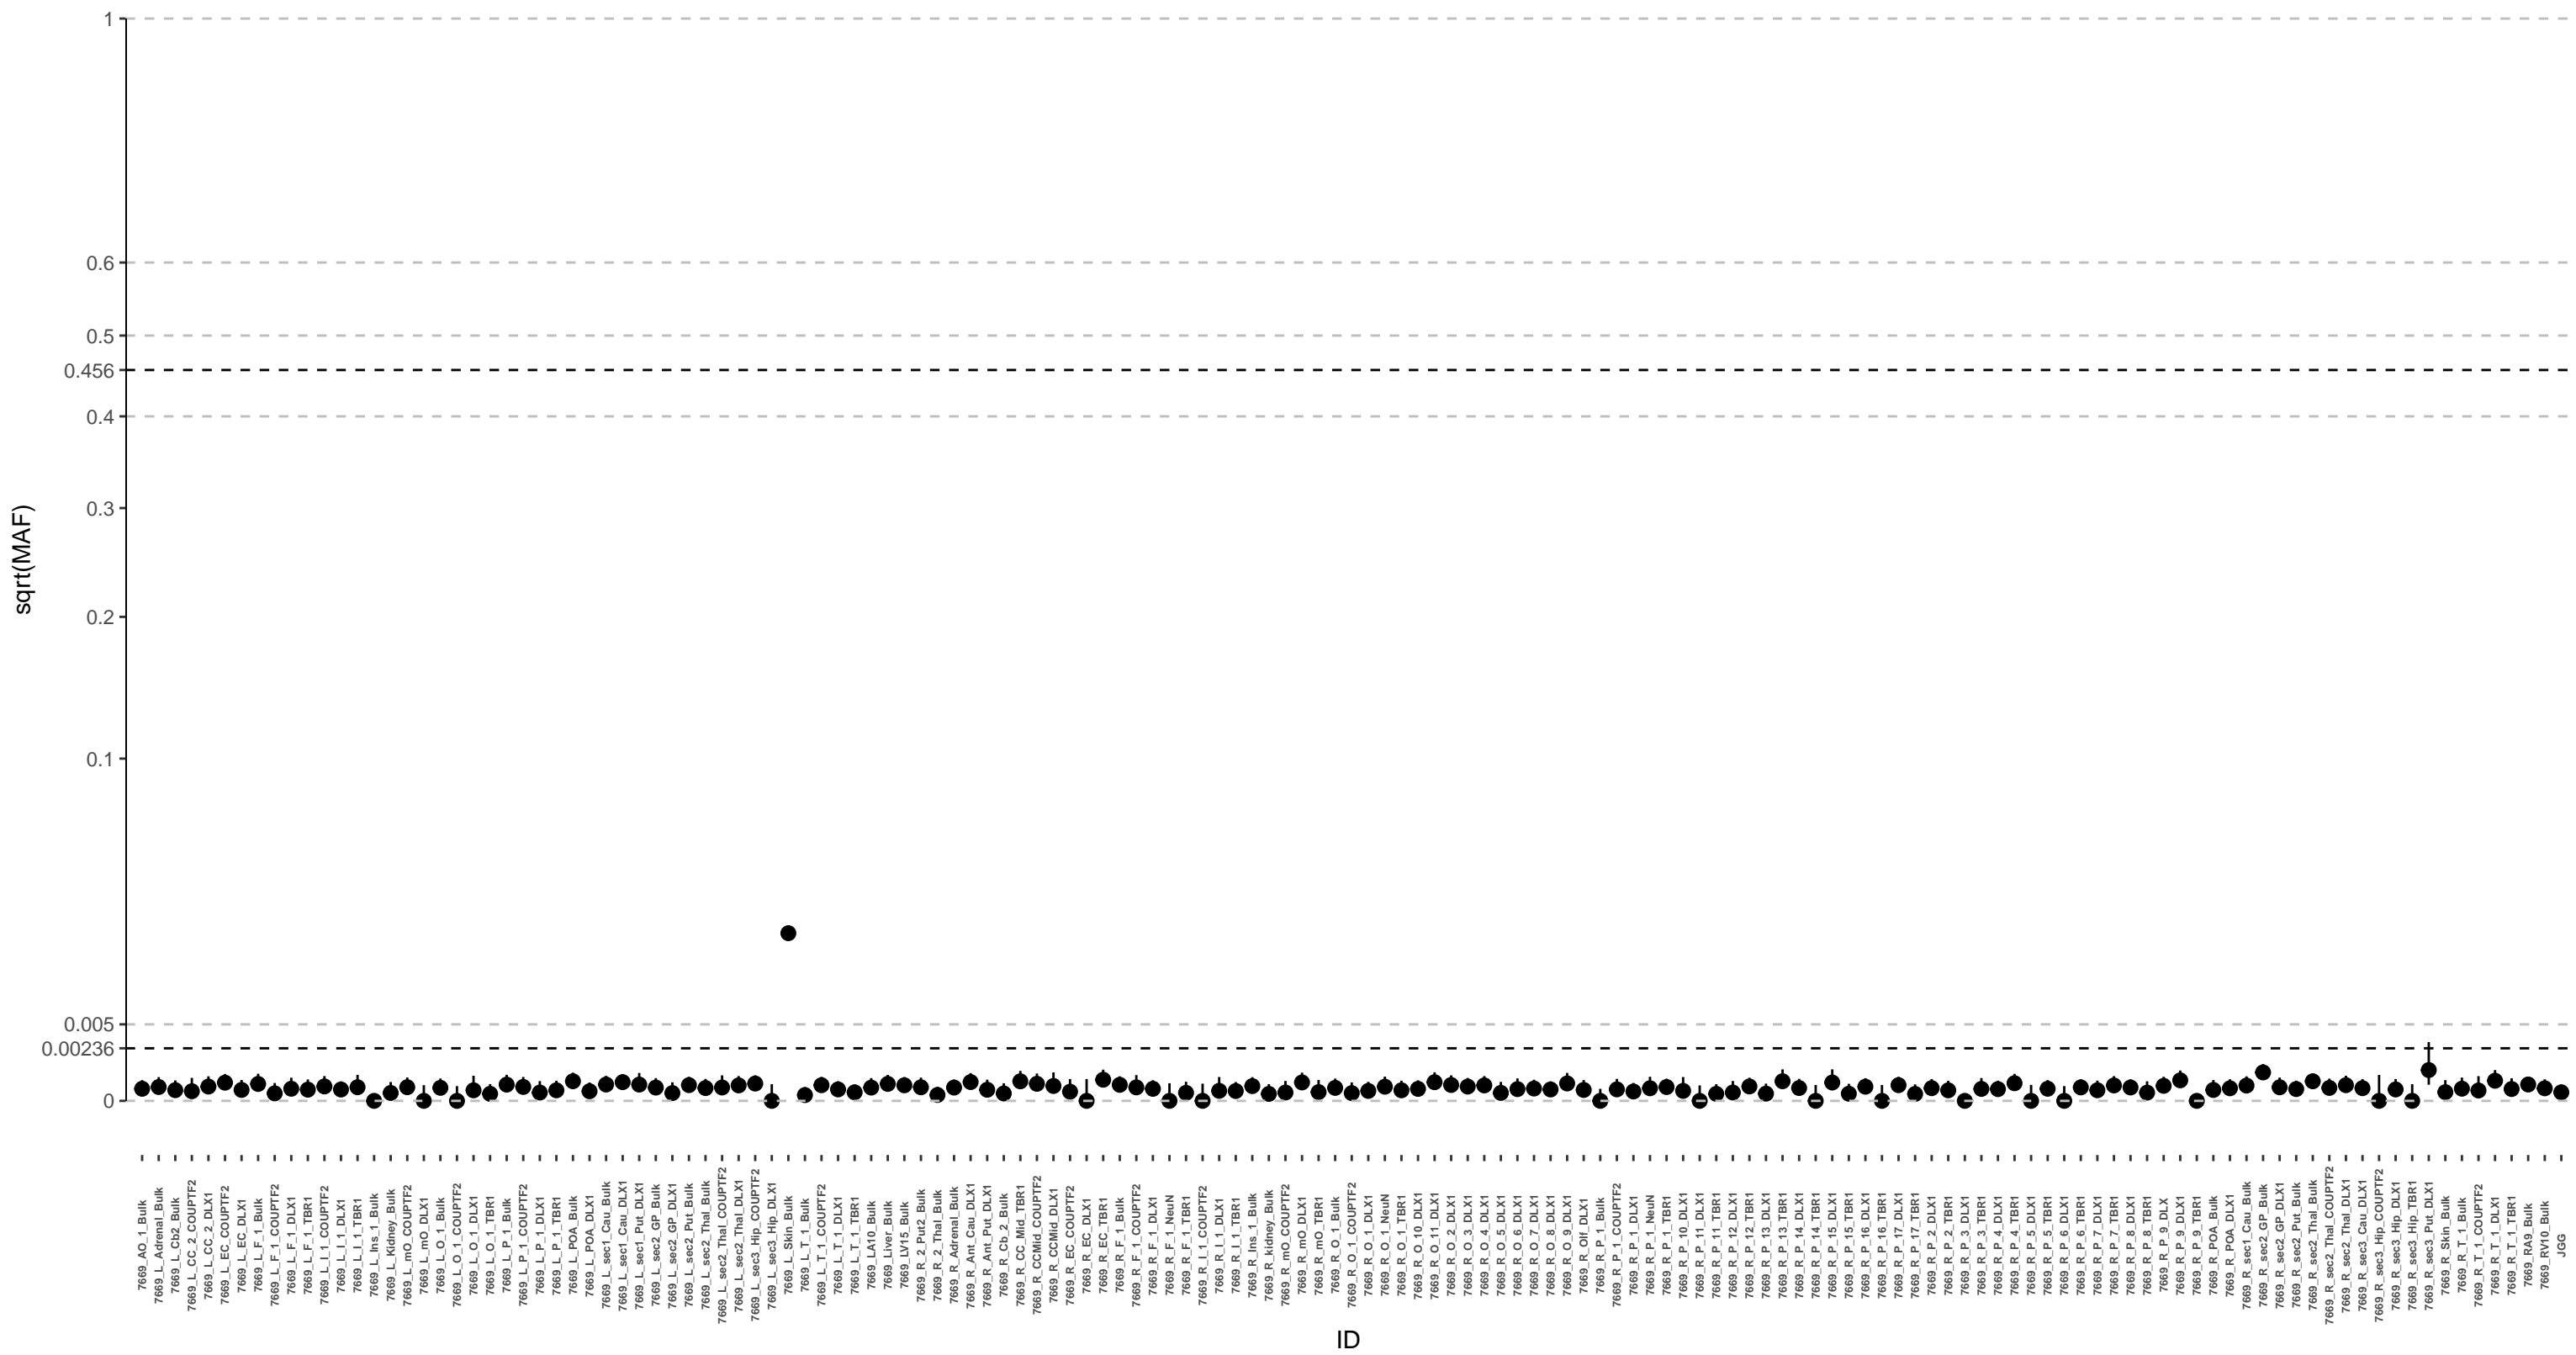

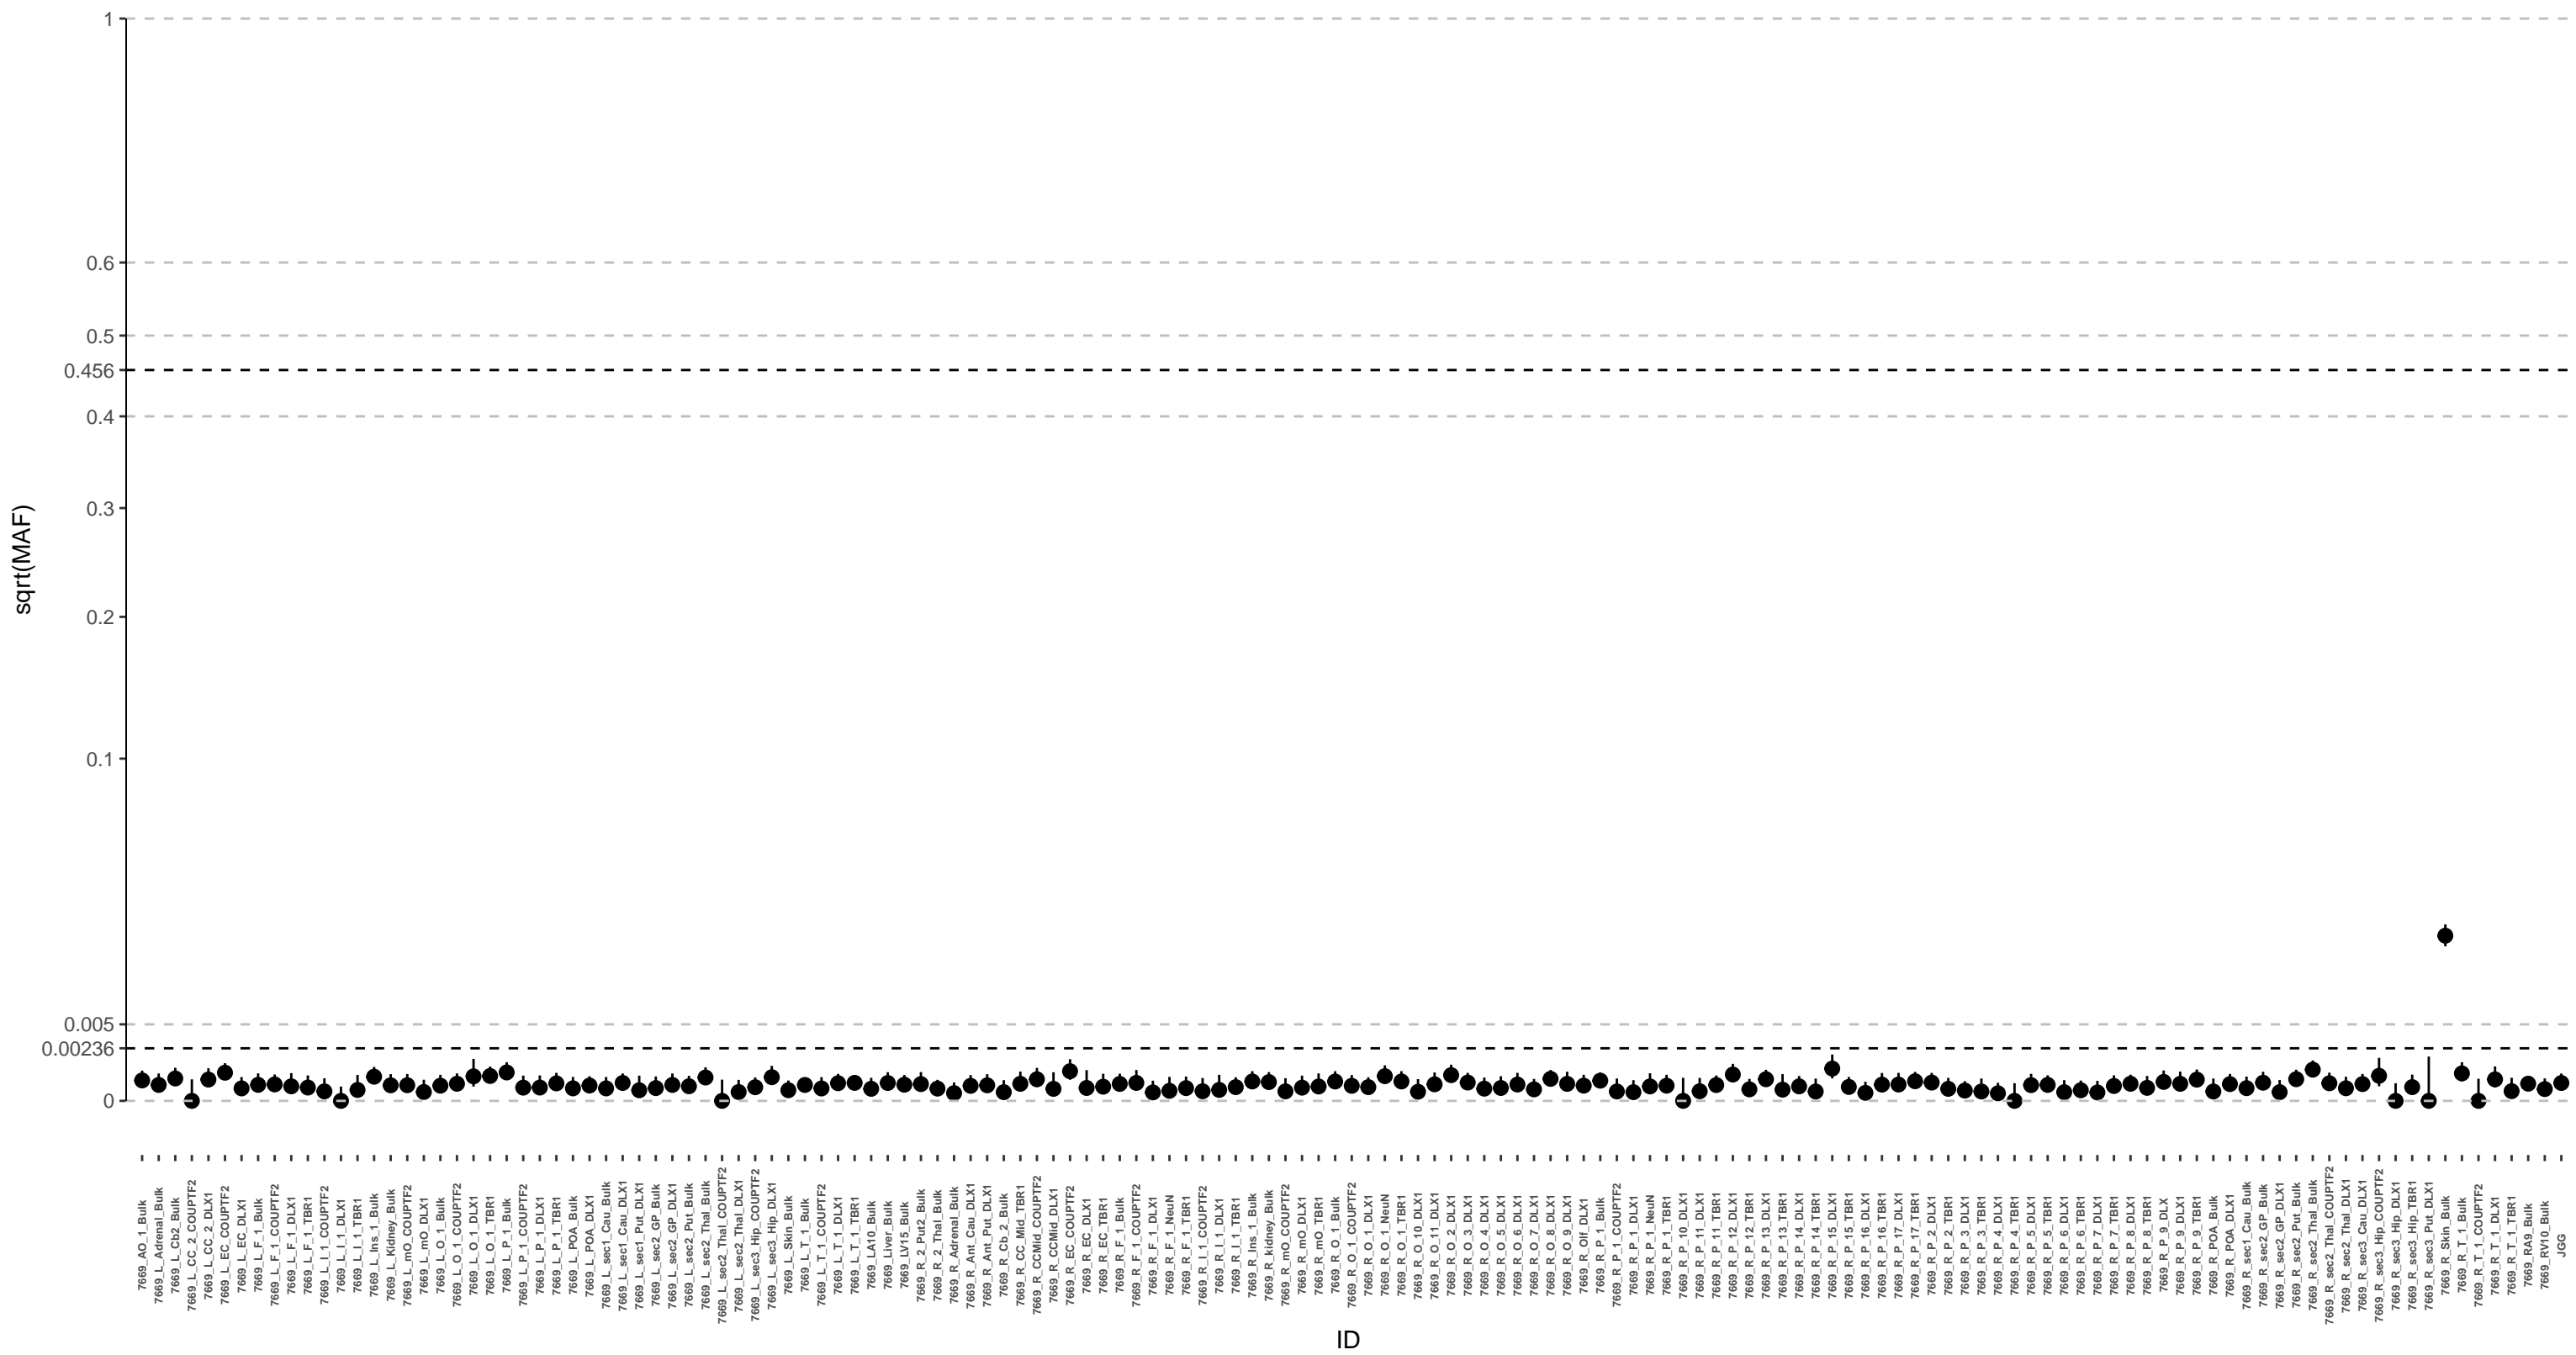

ID05 3-69001163-C-T

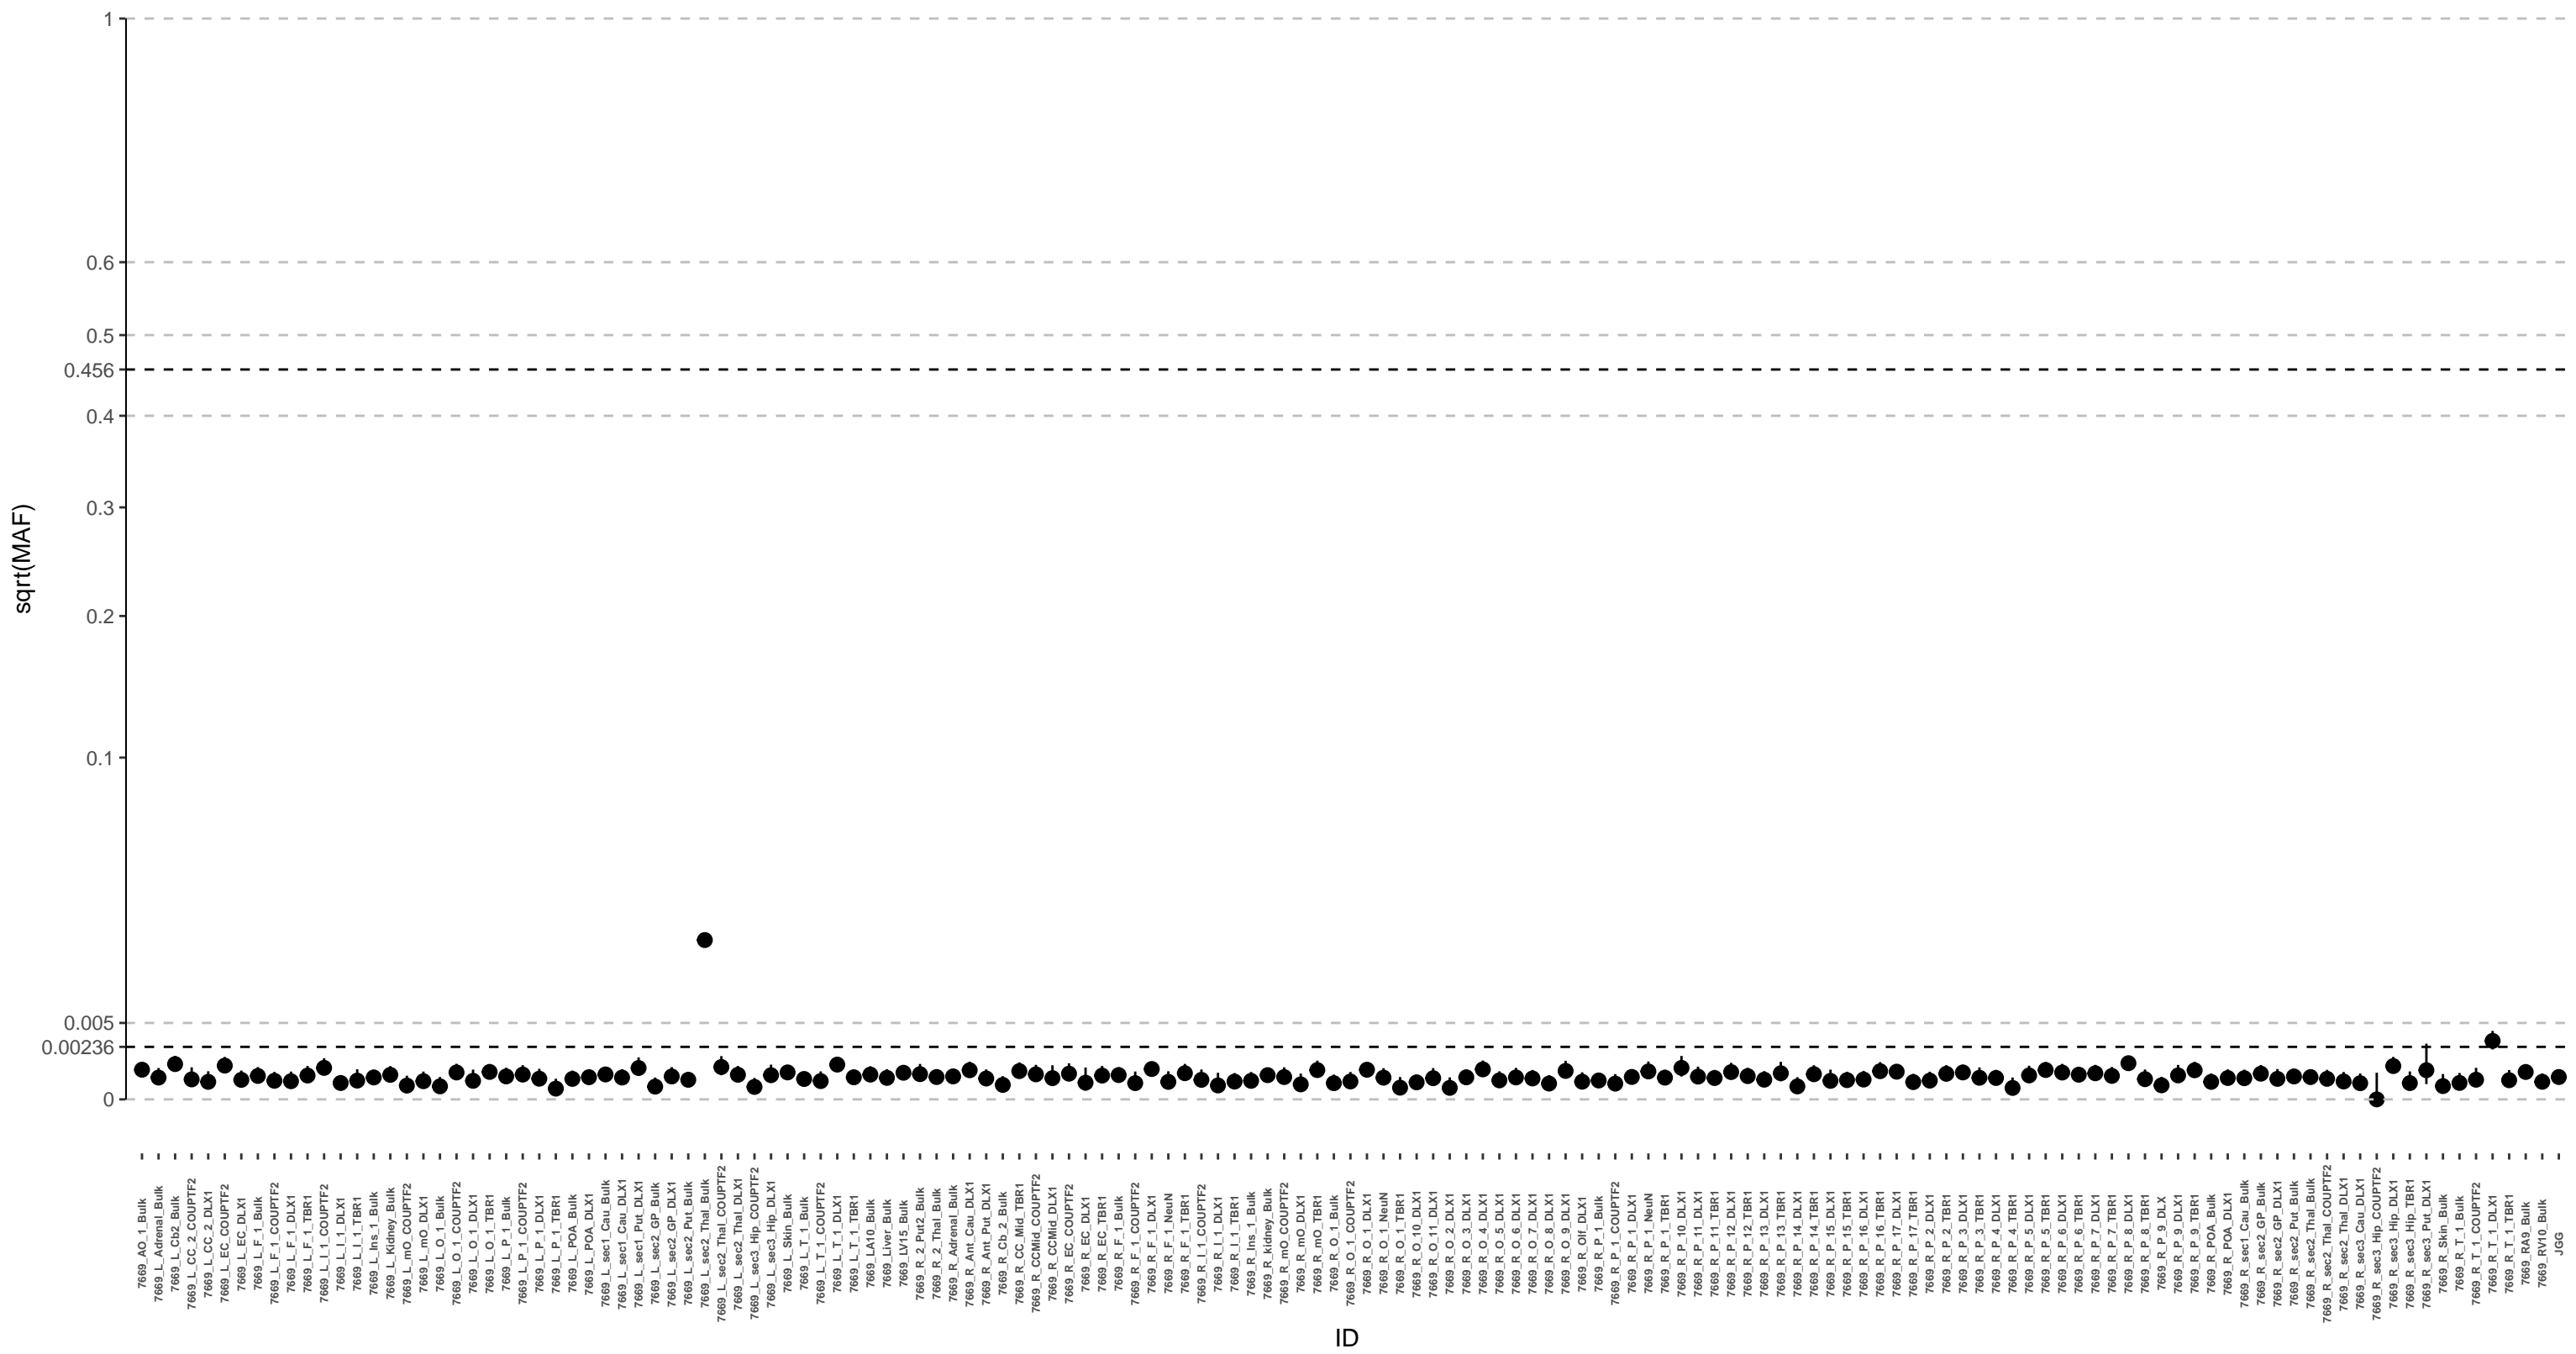



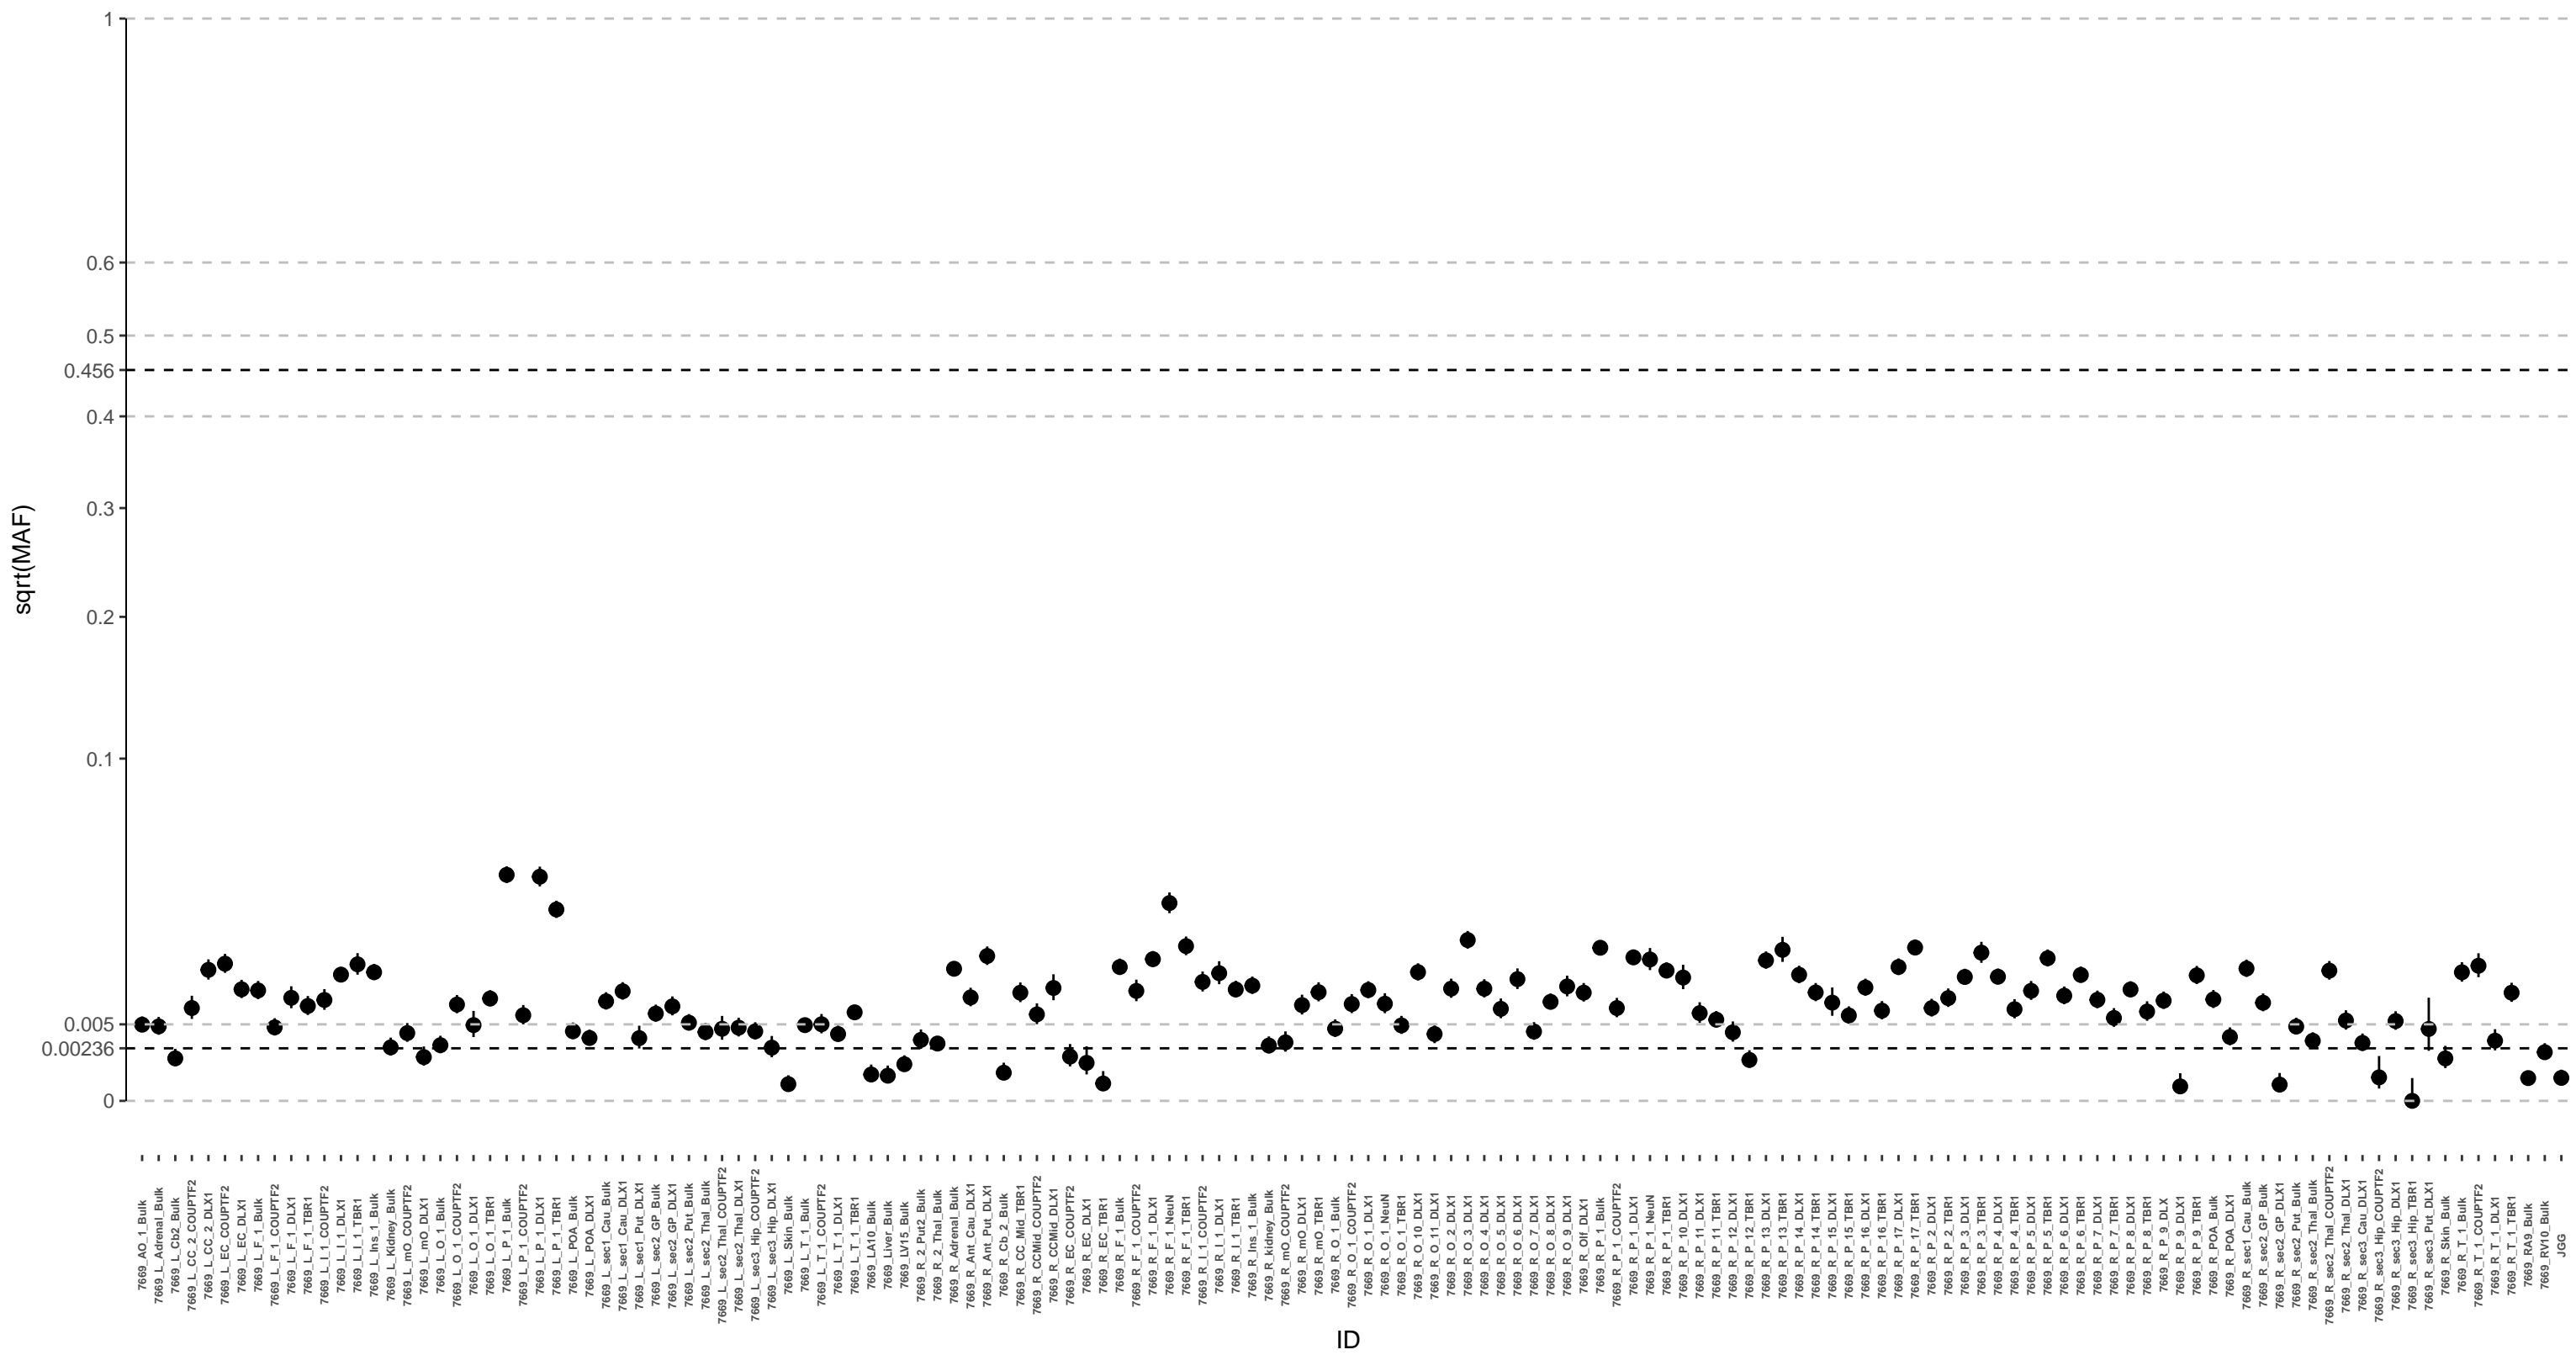

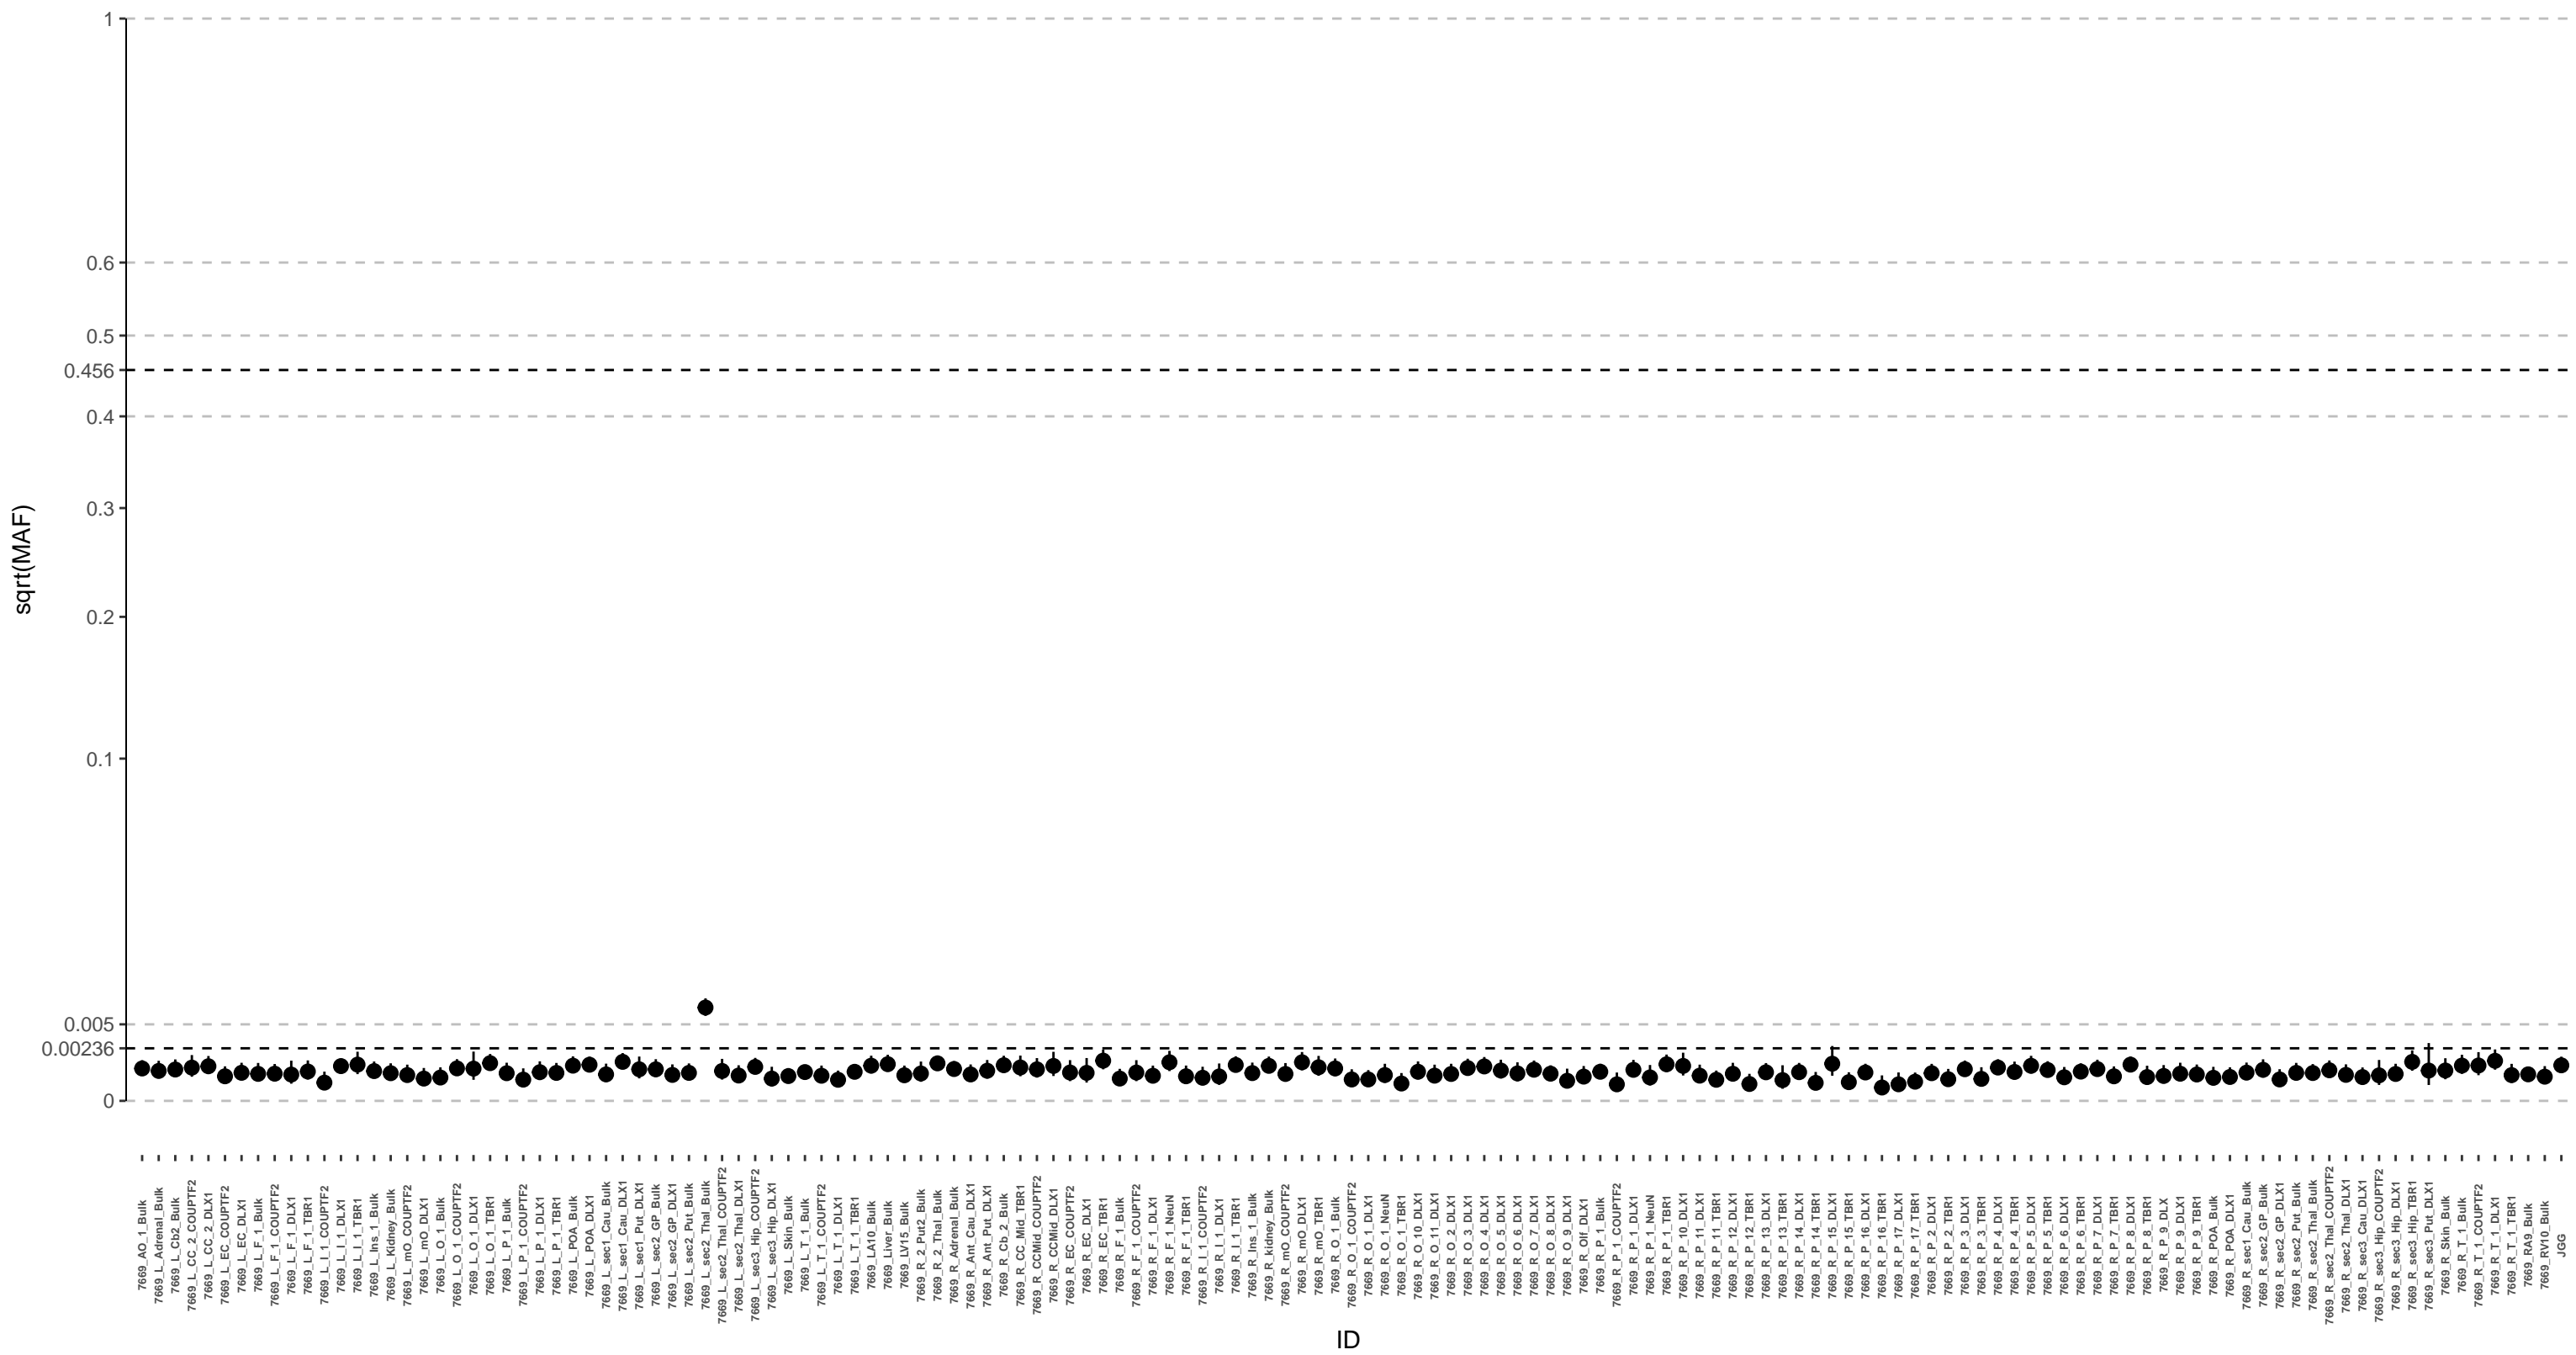

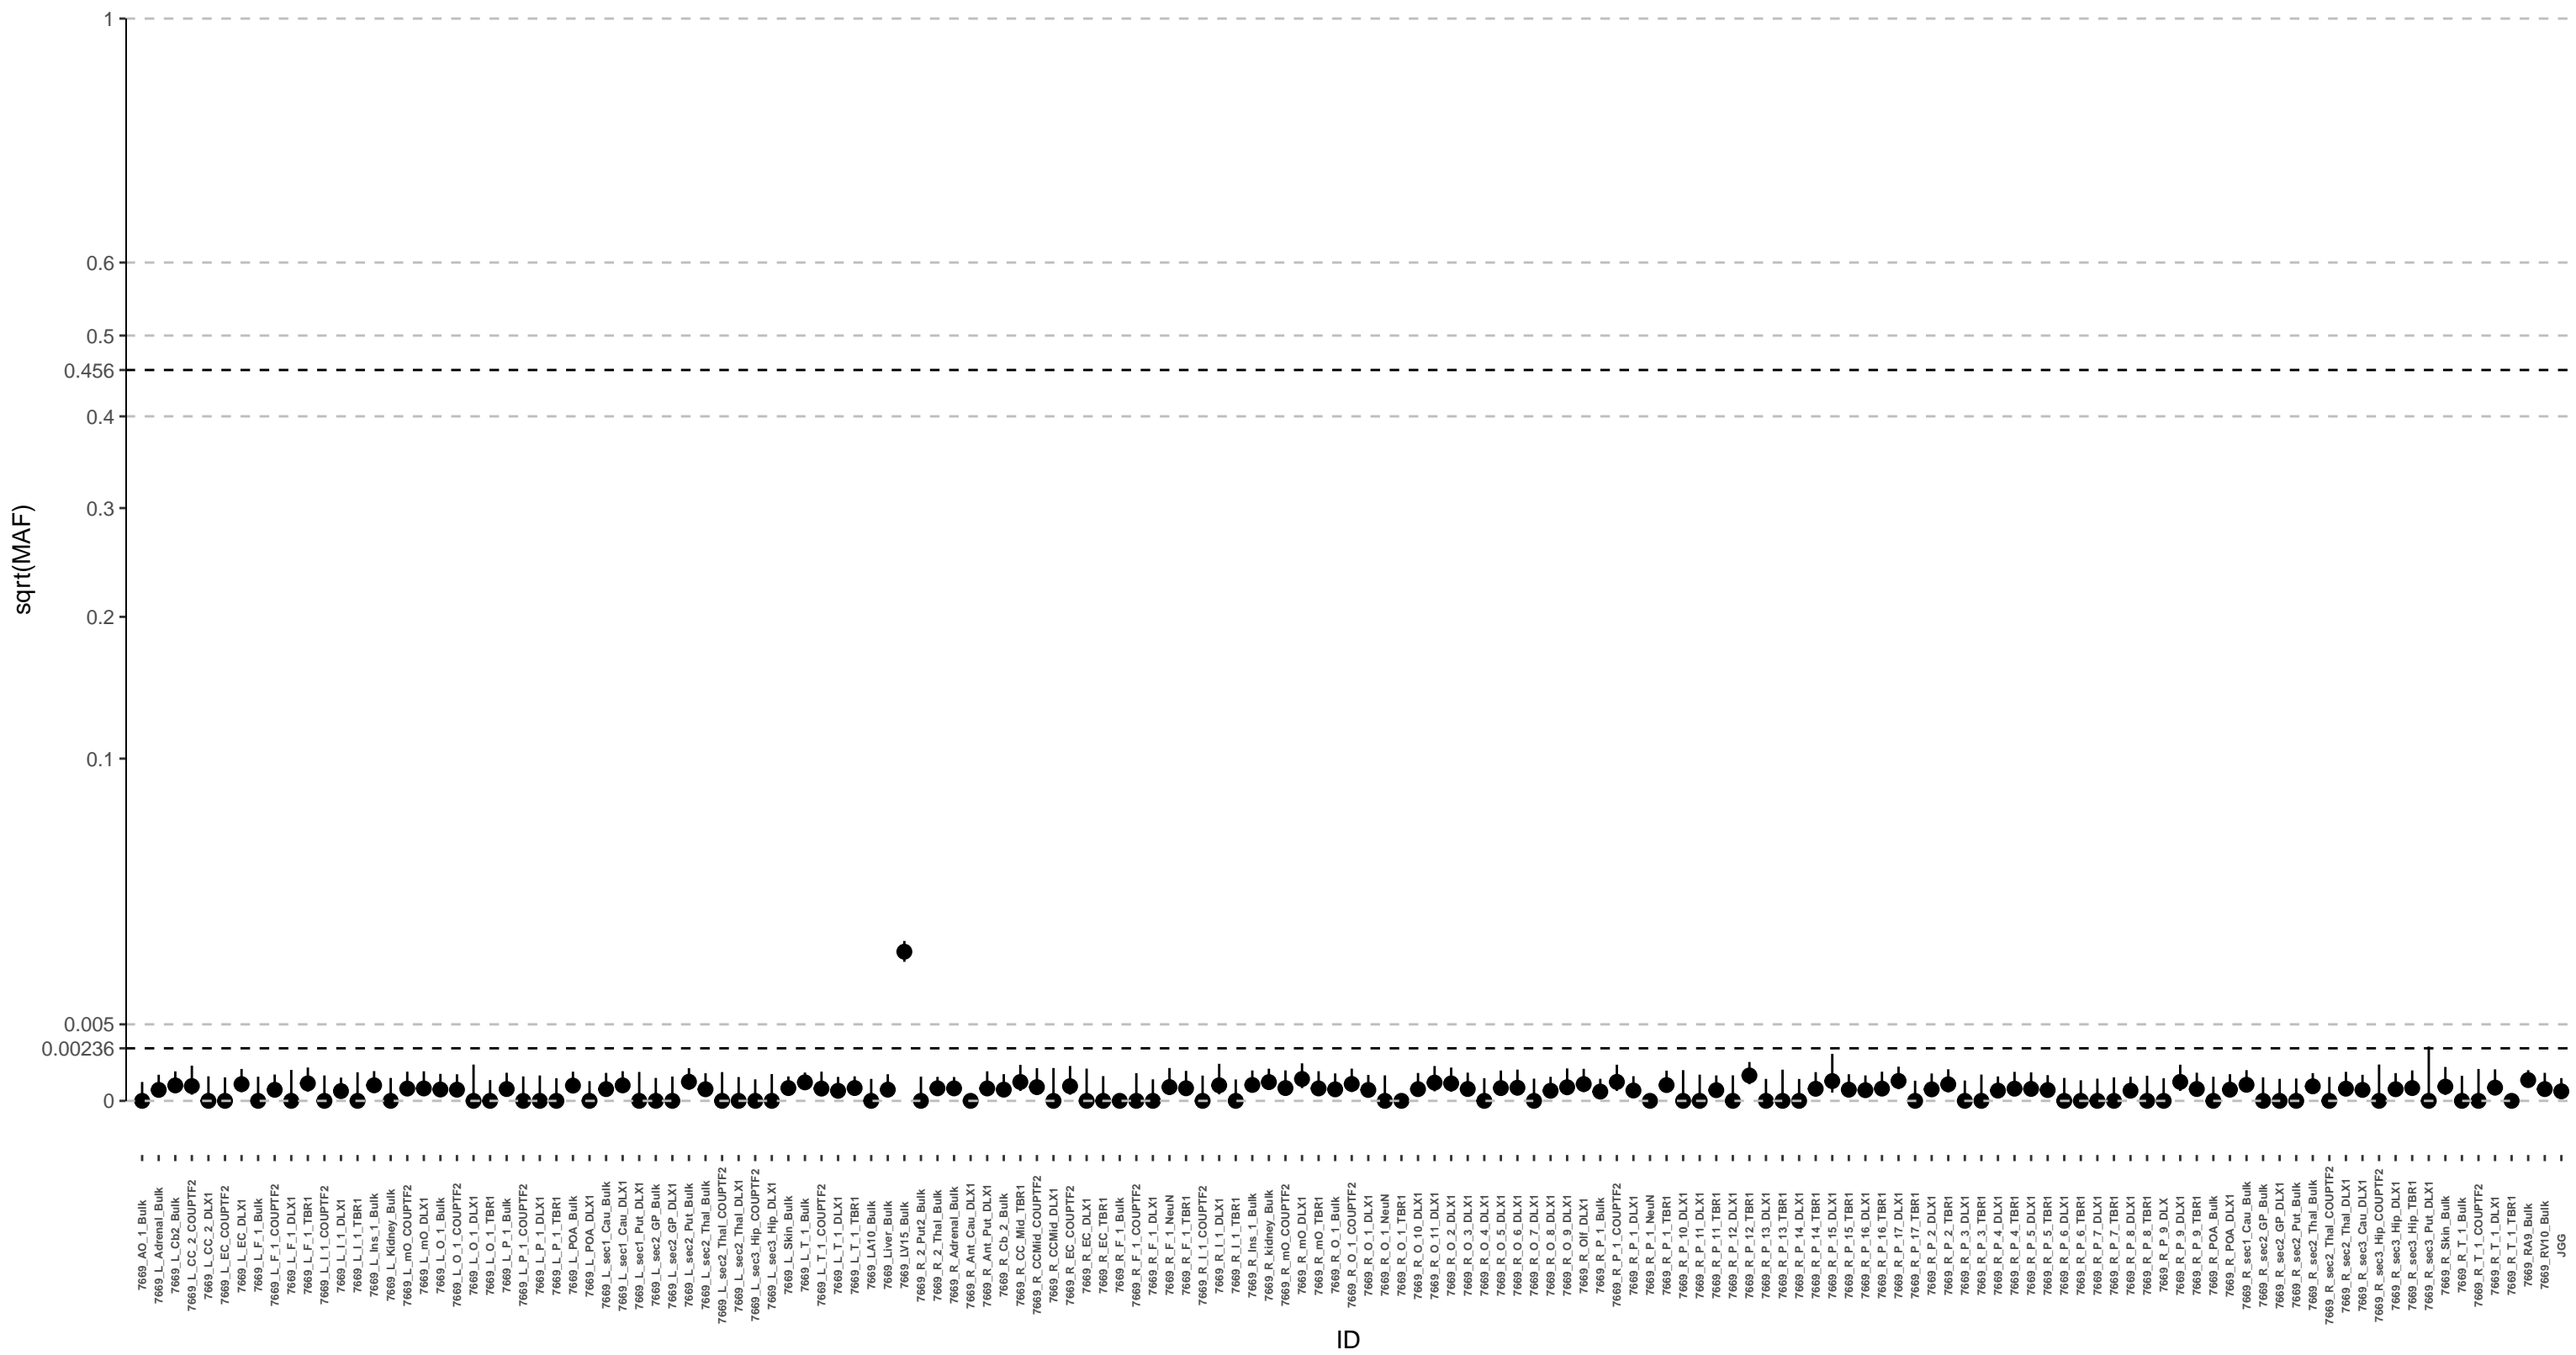

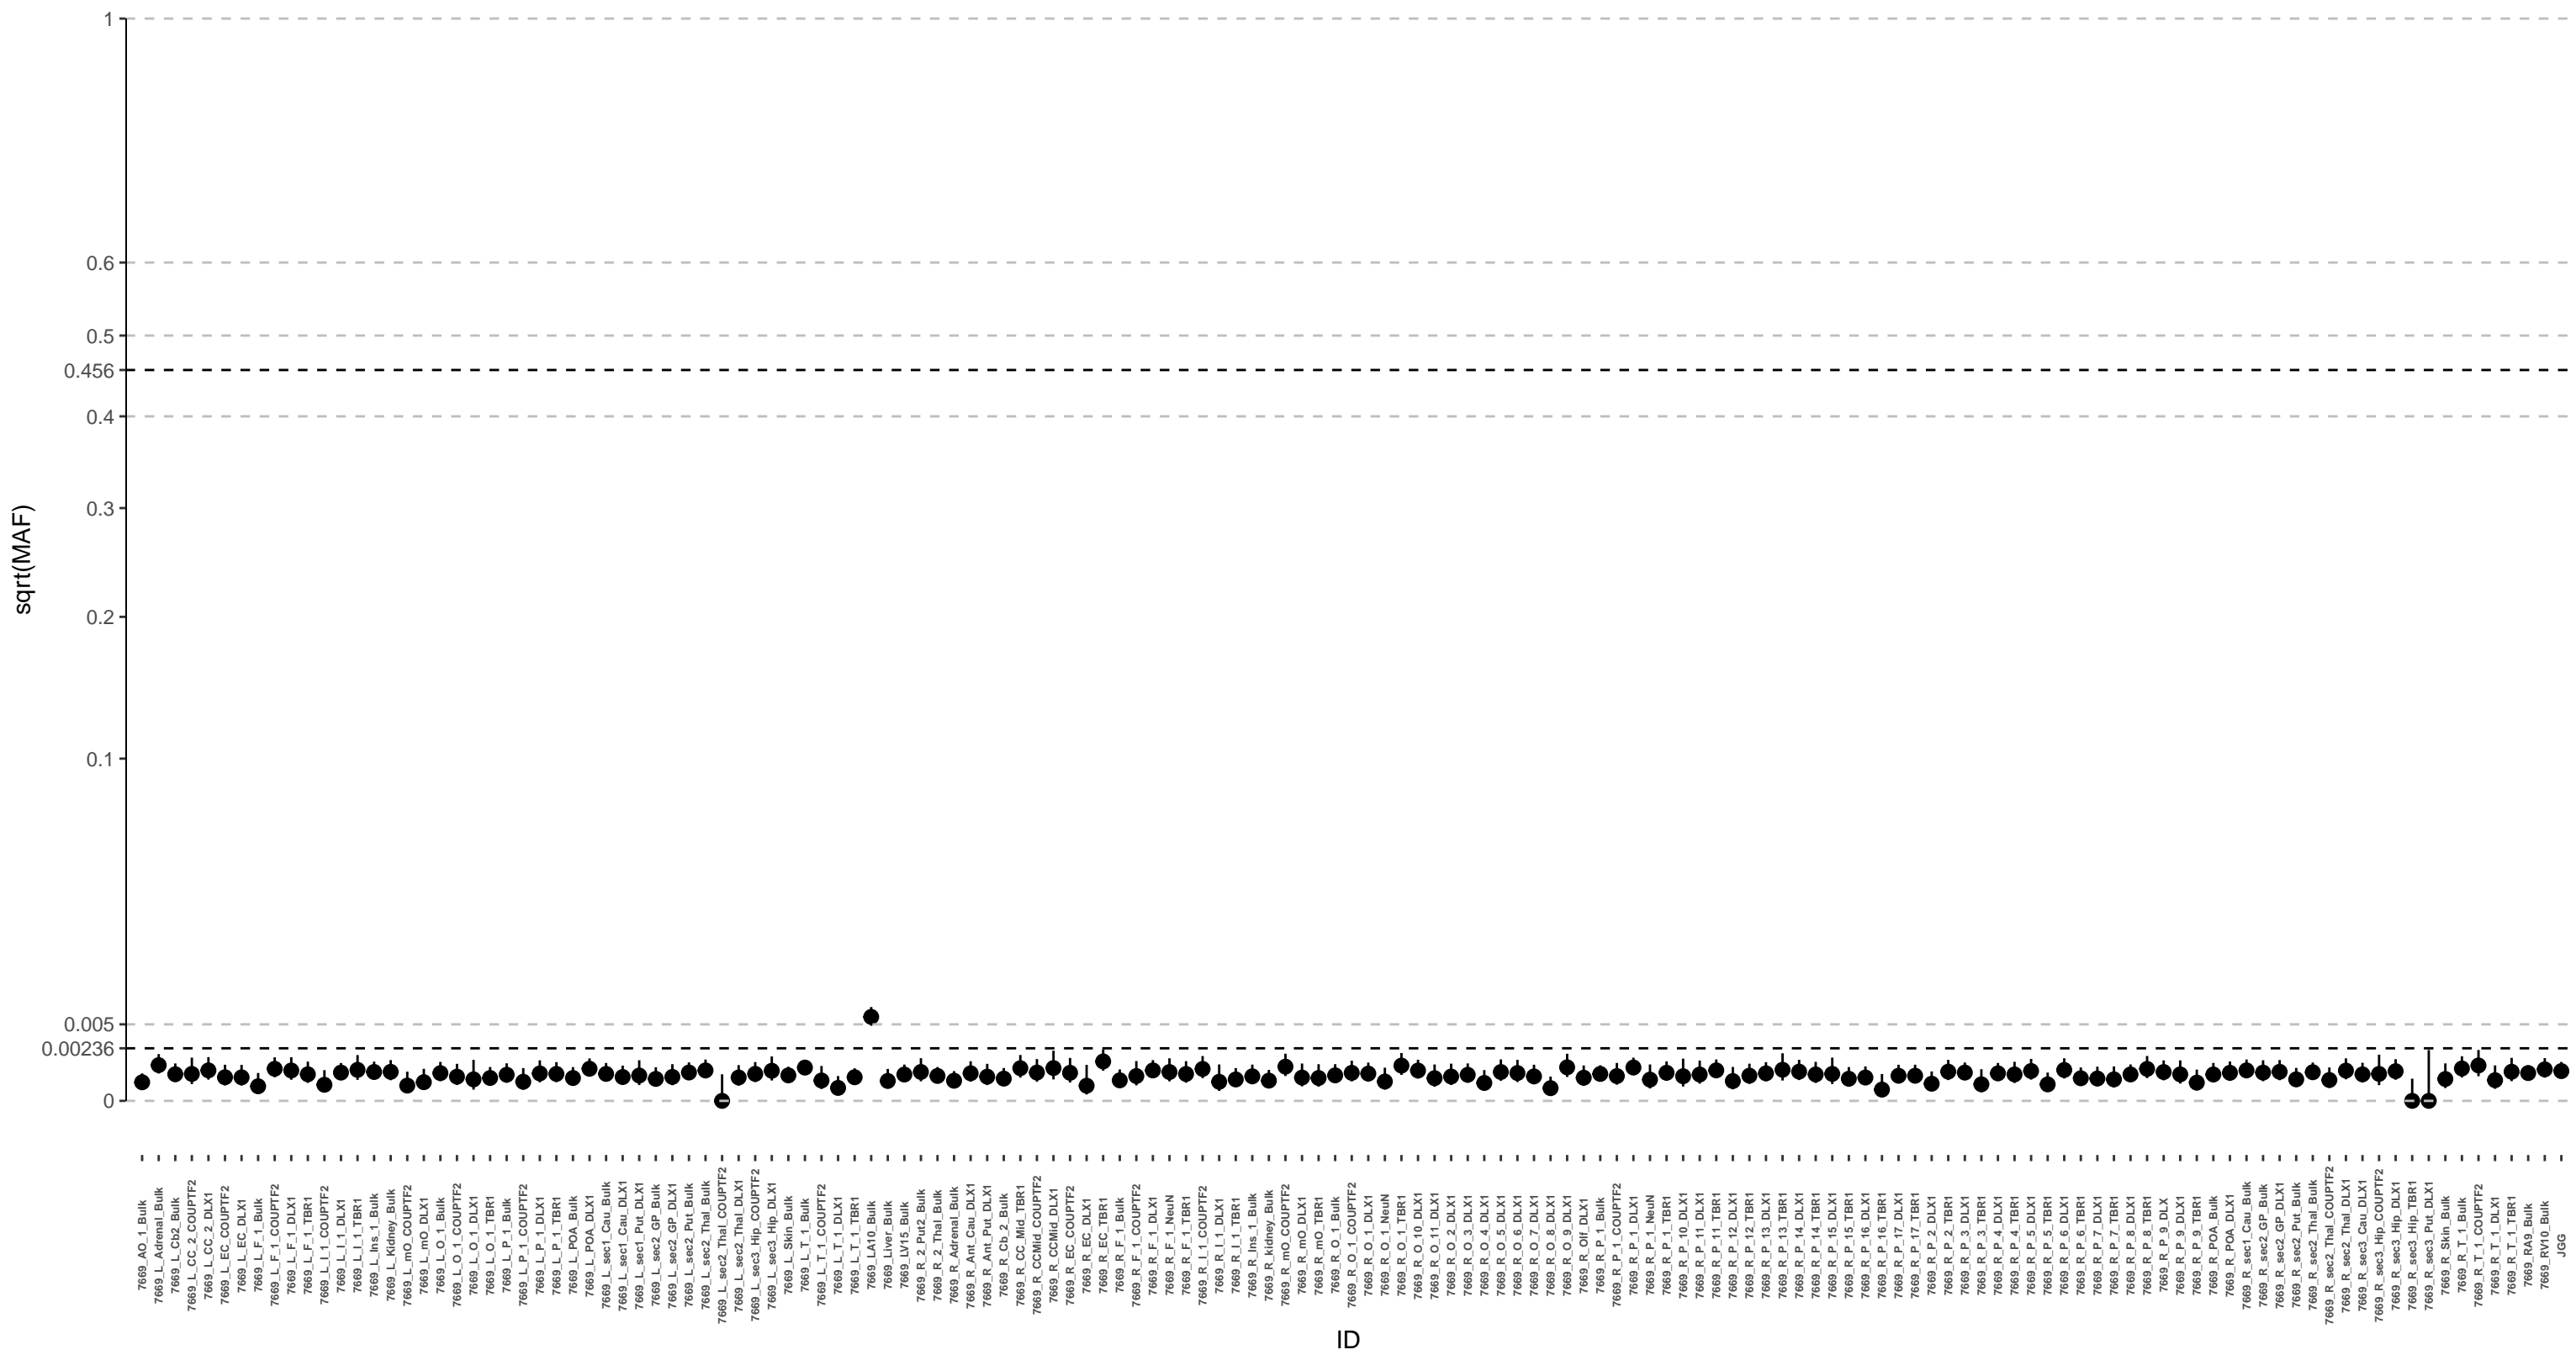

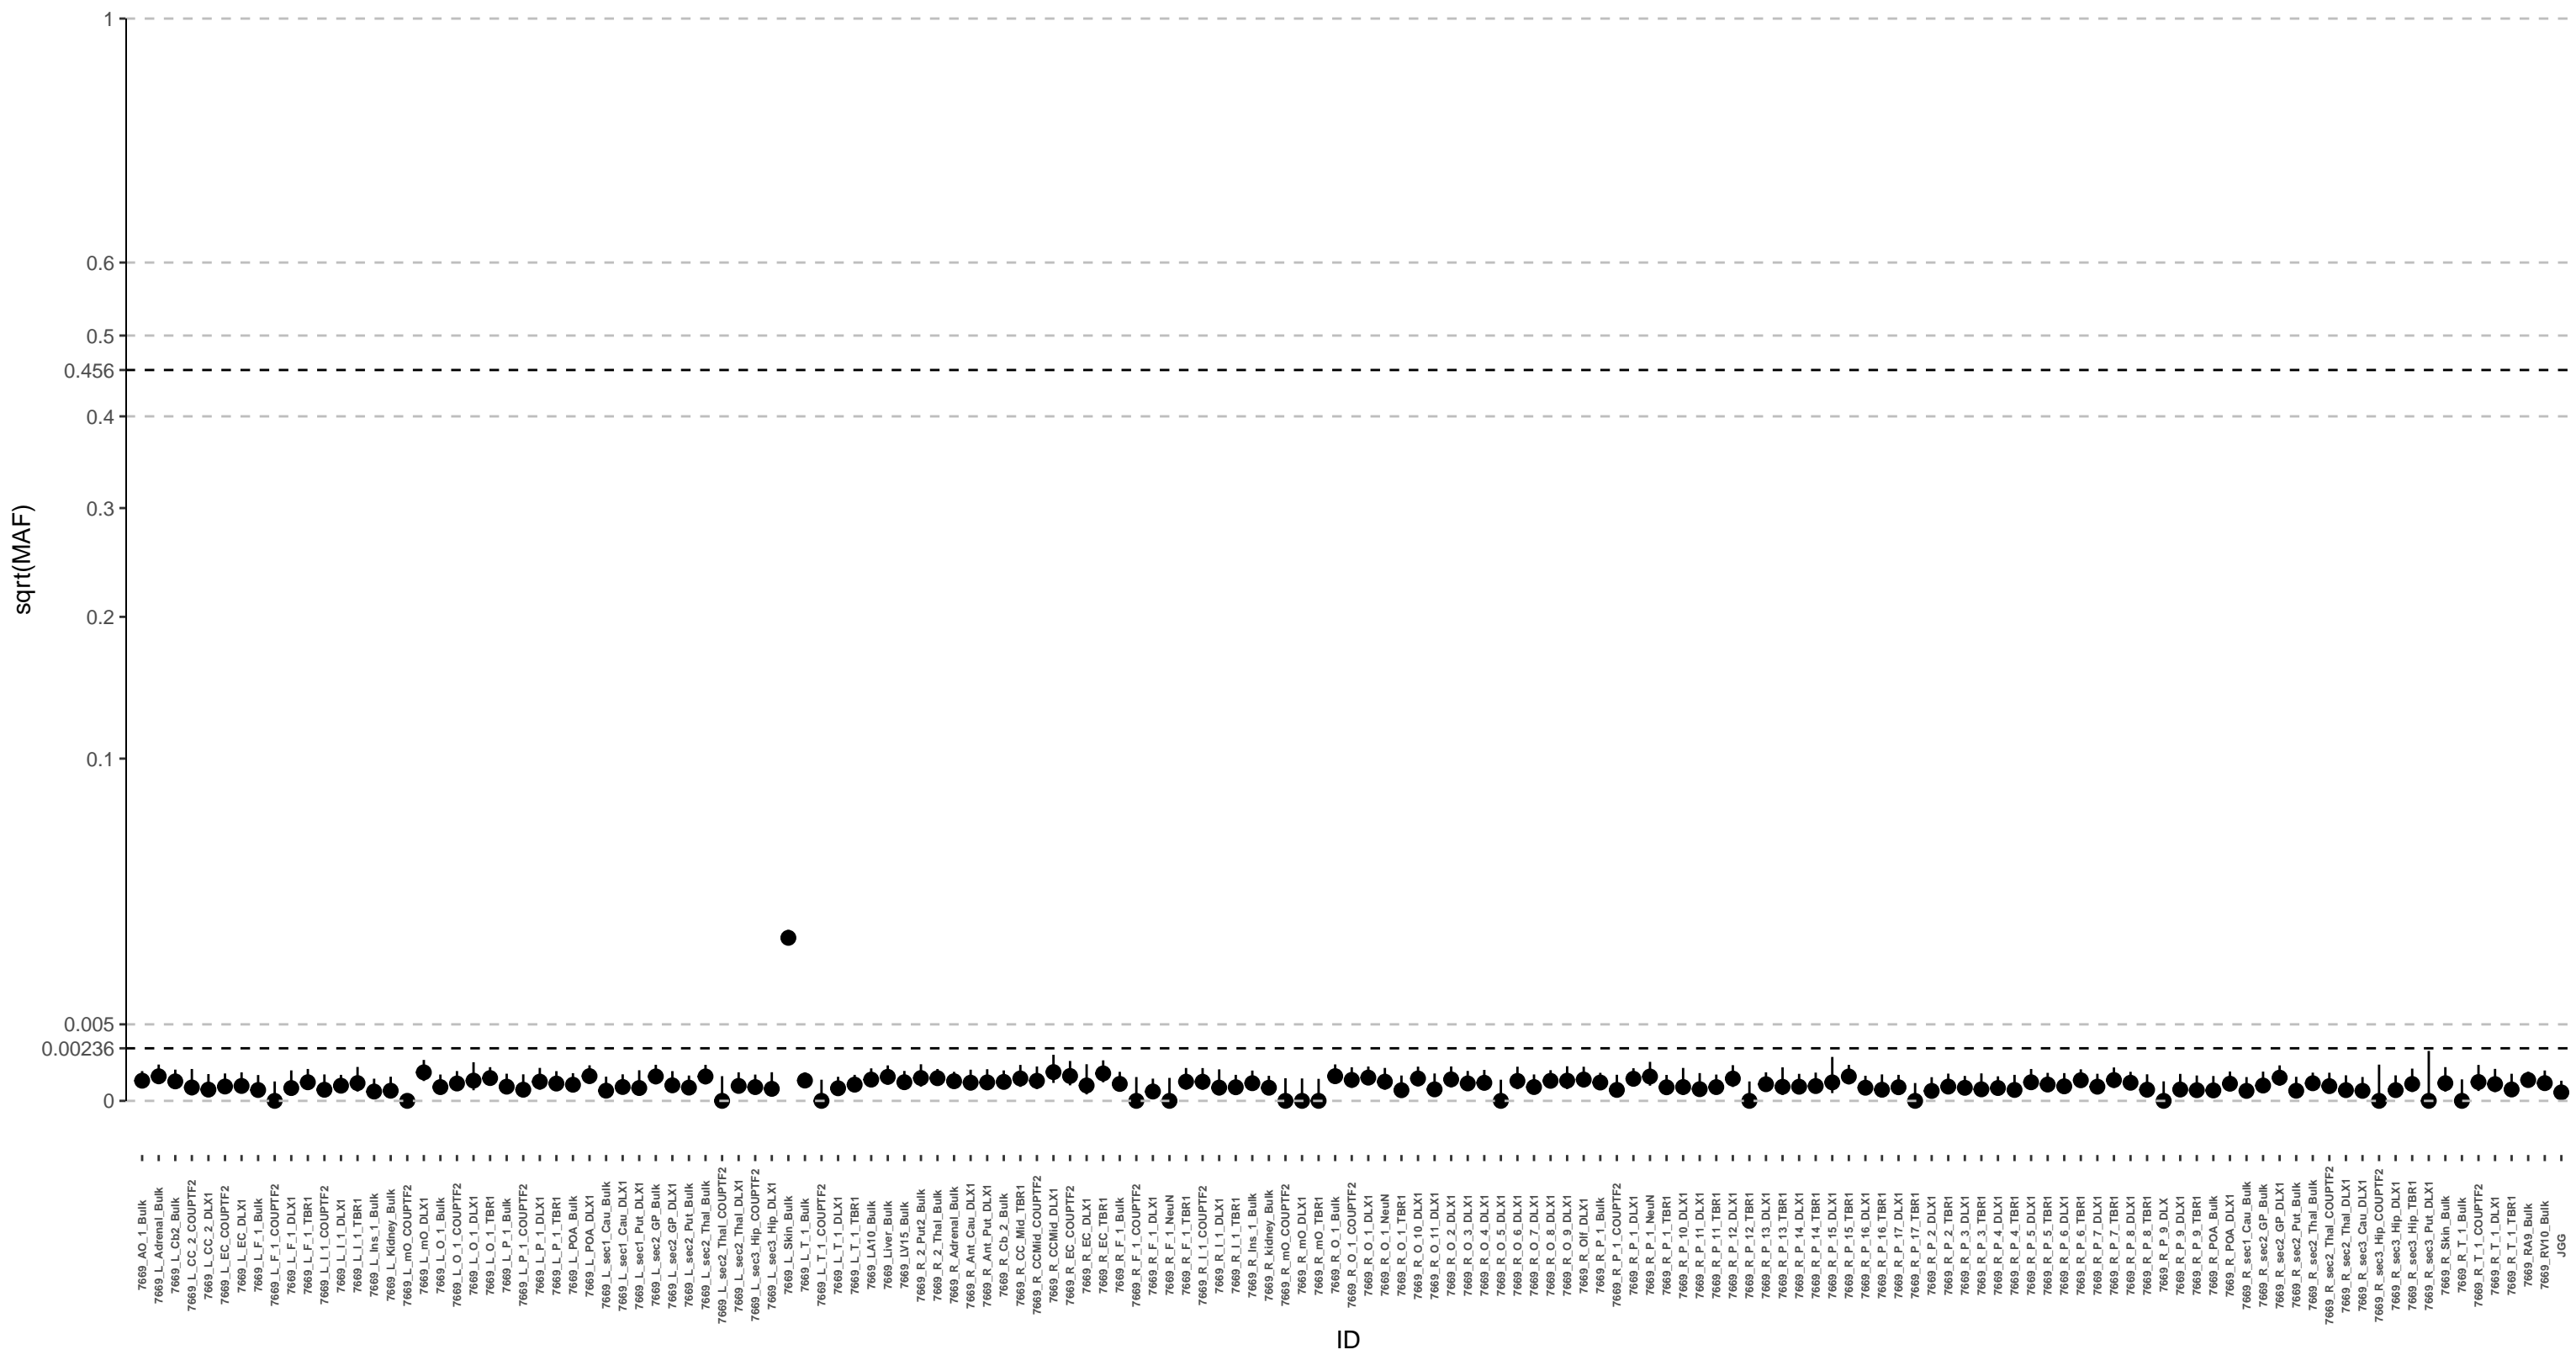

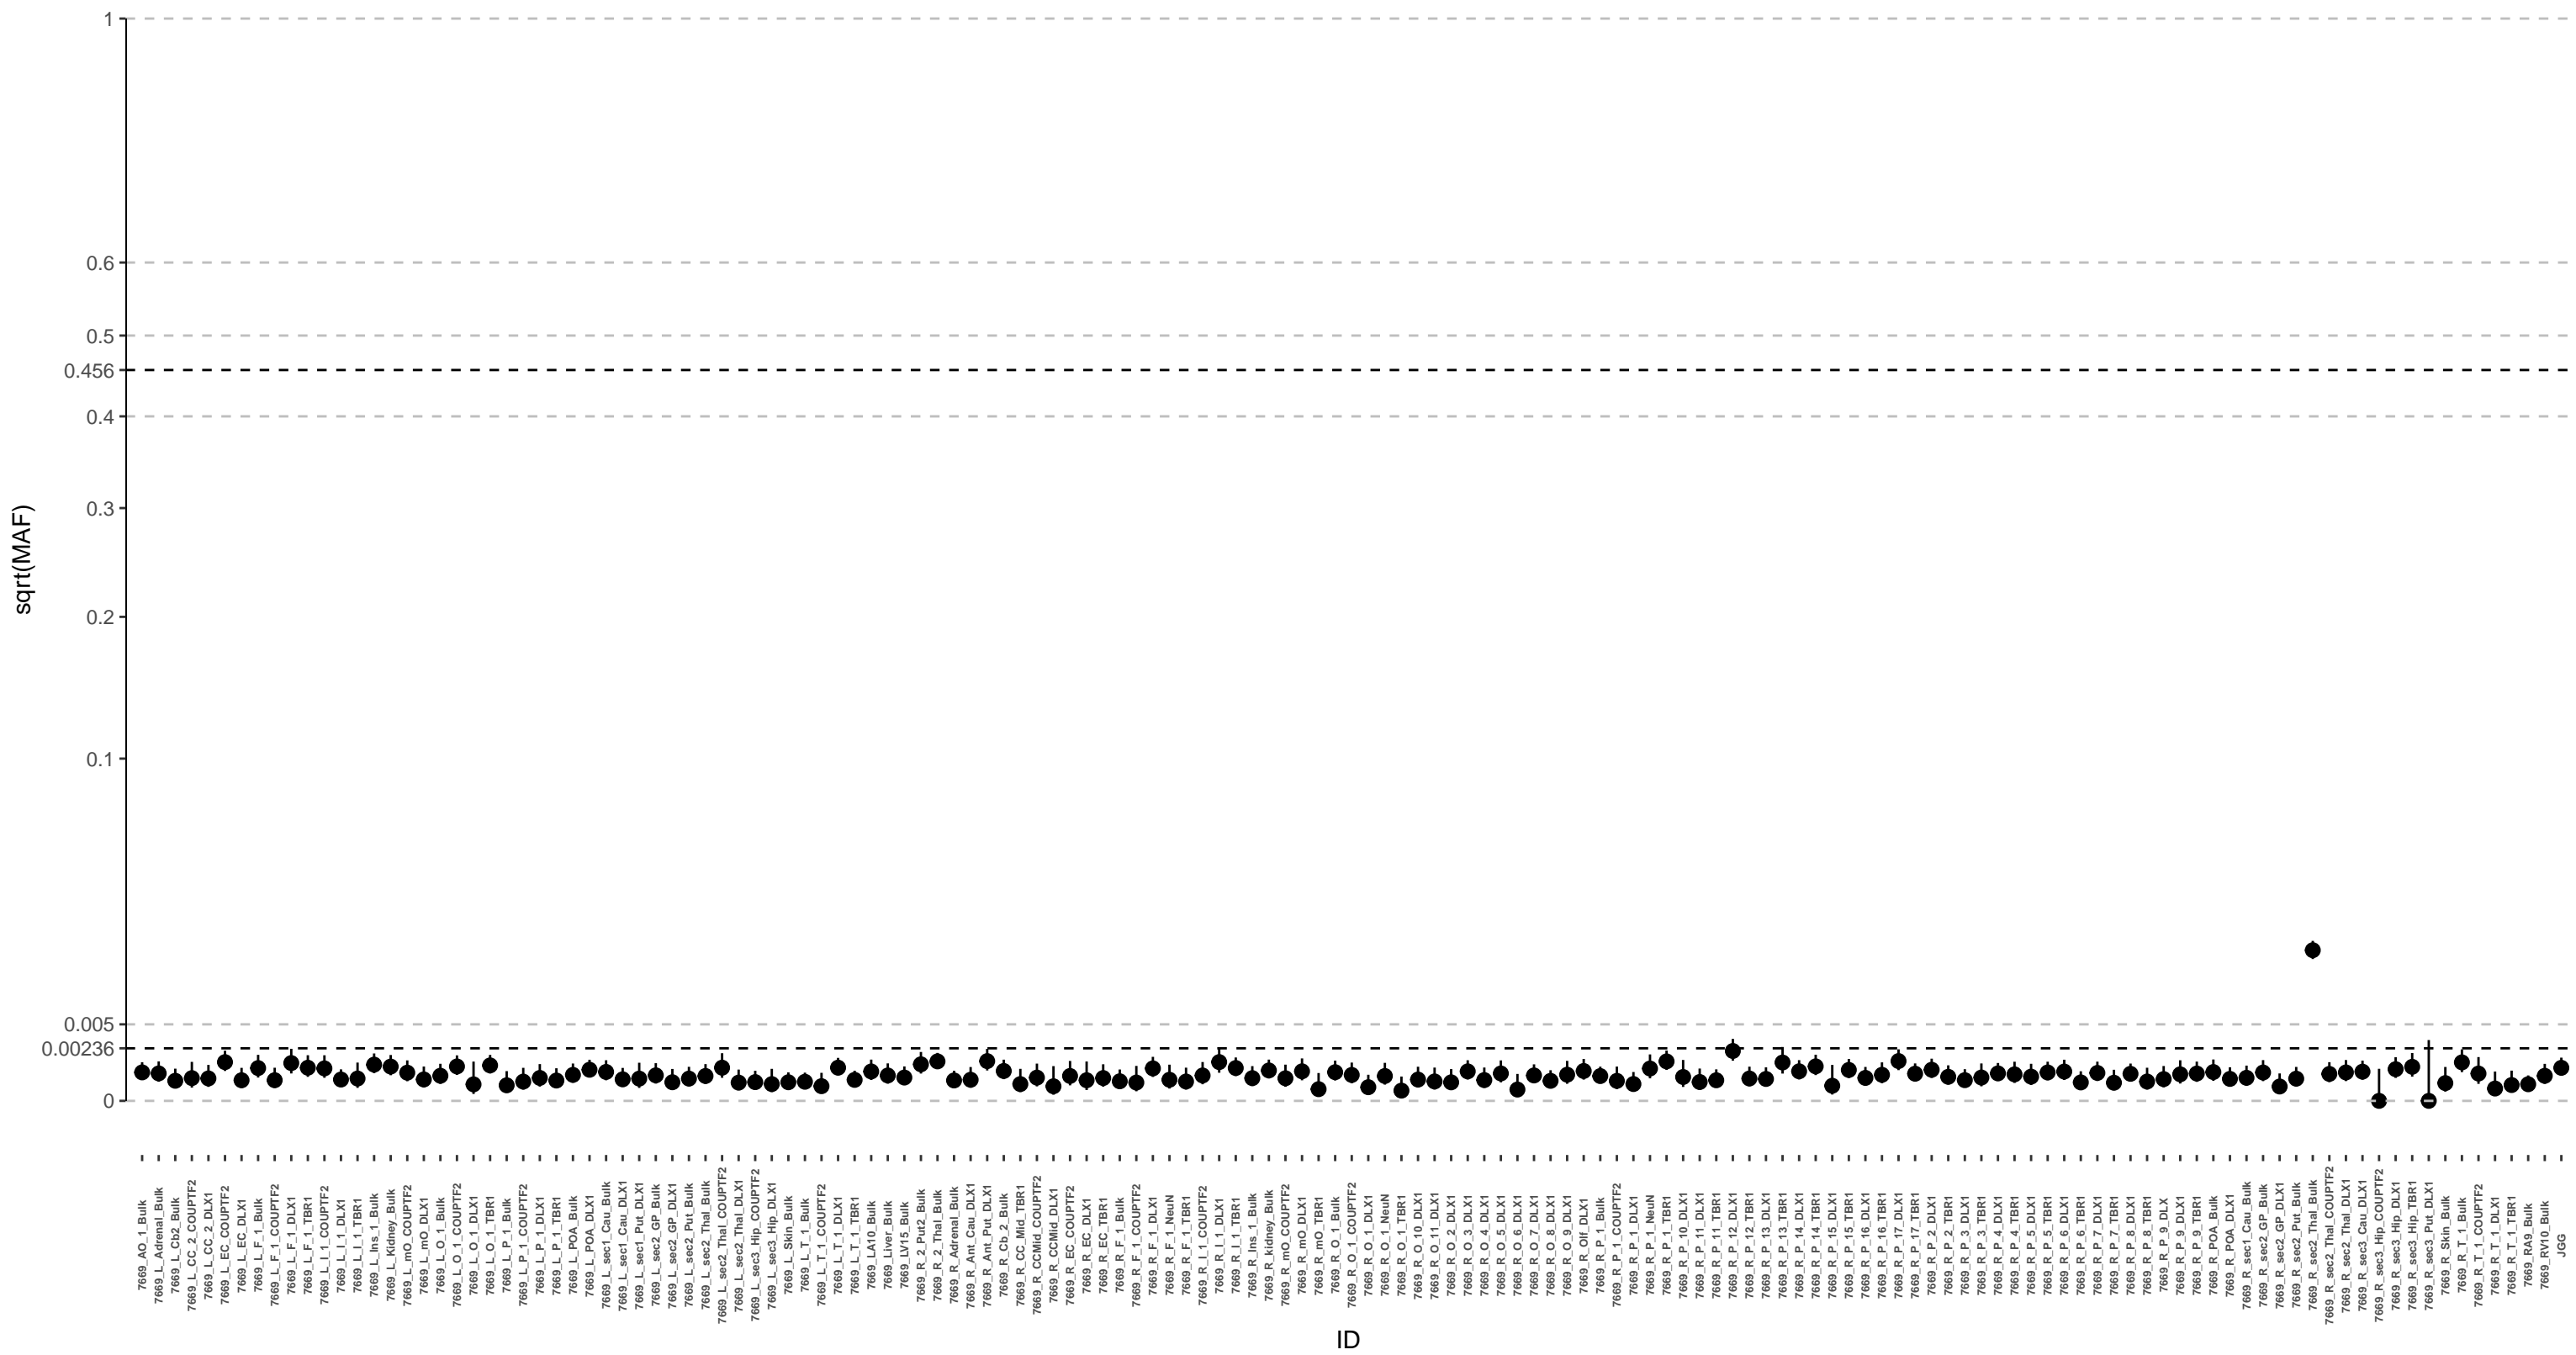

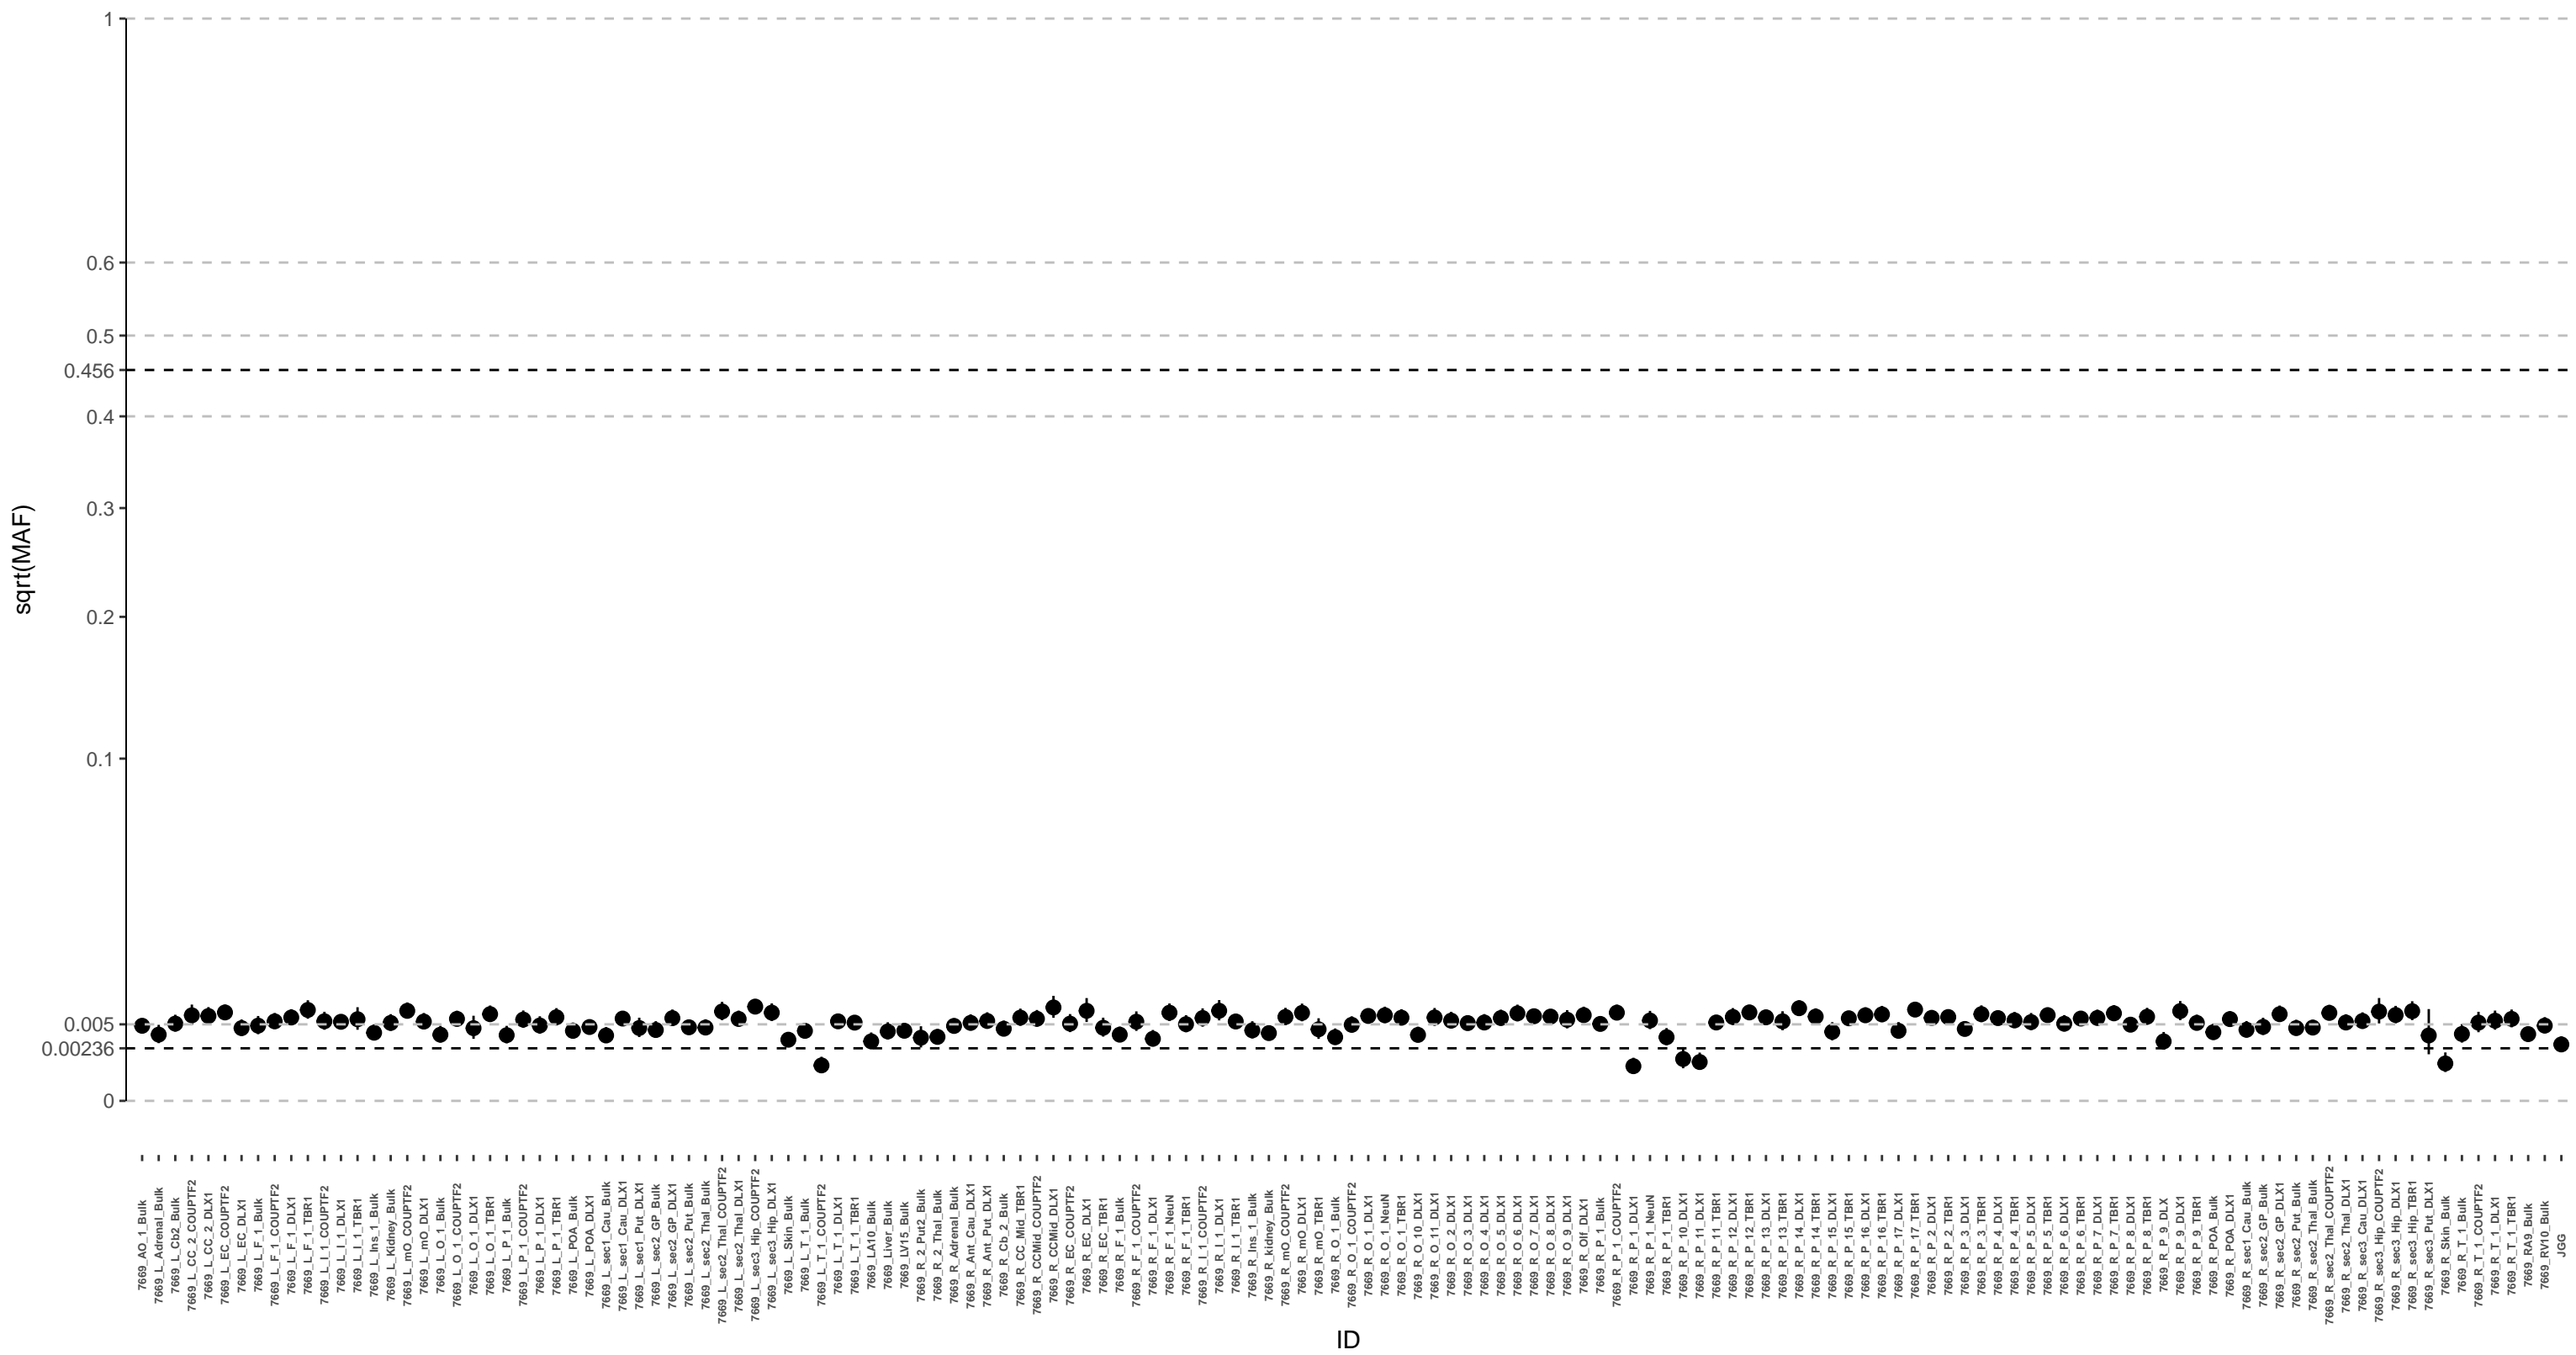

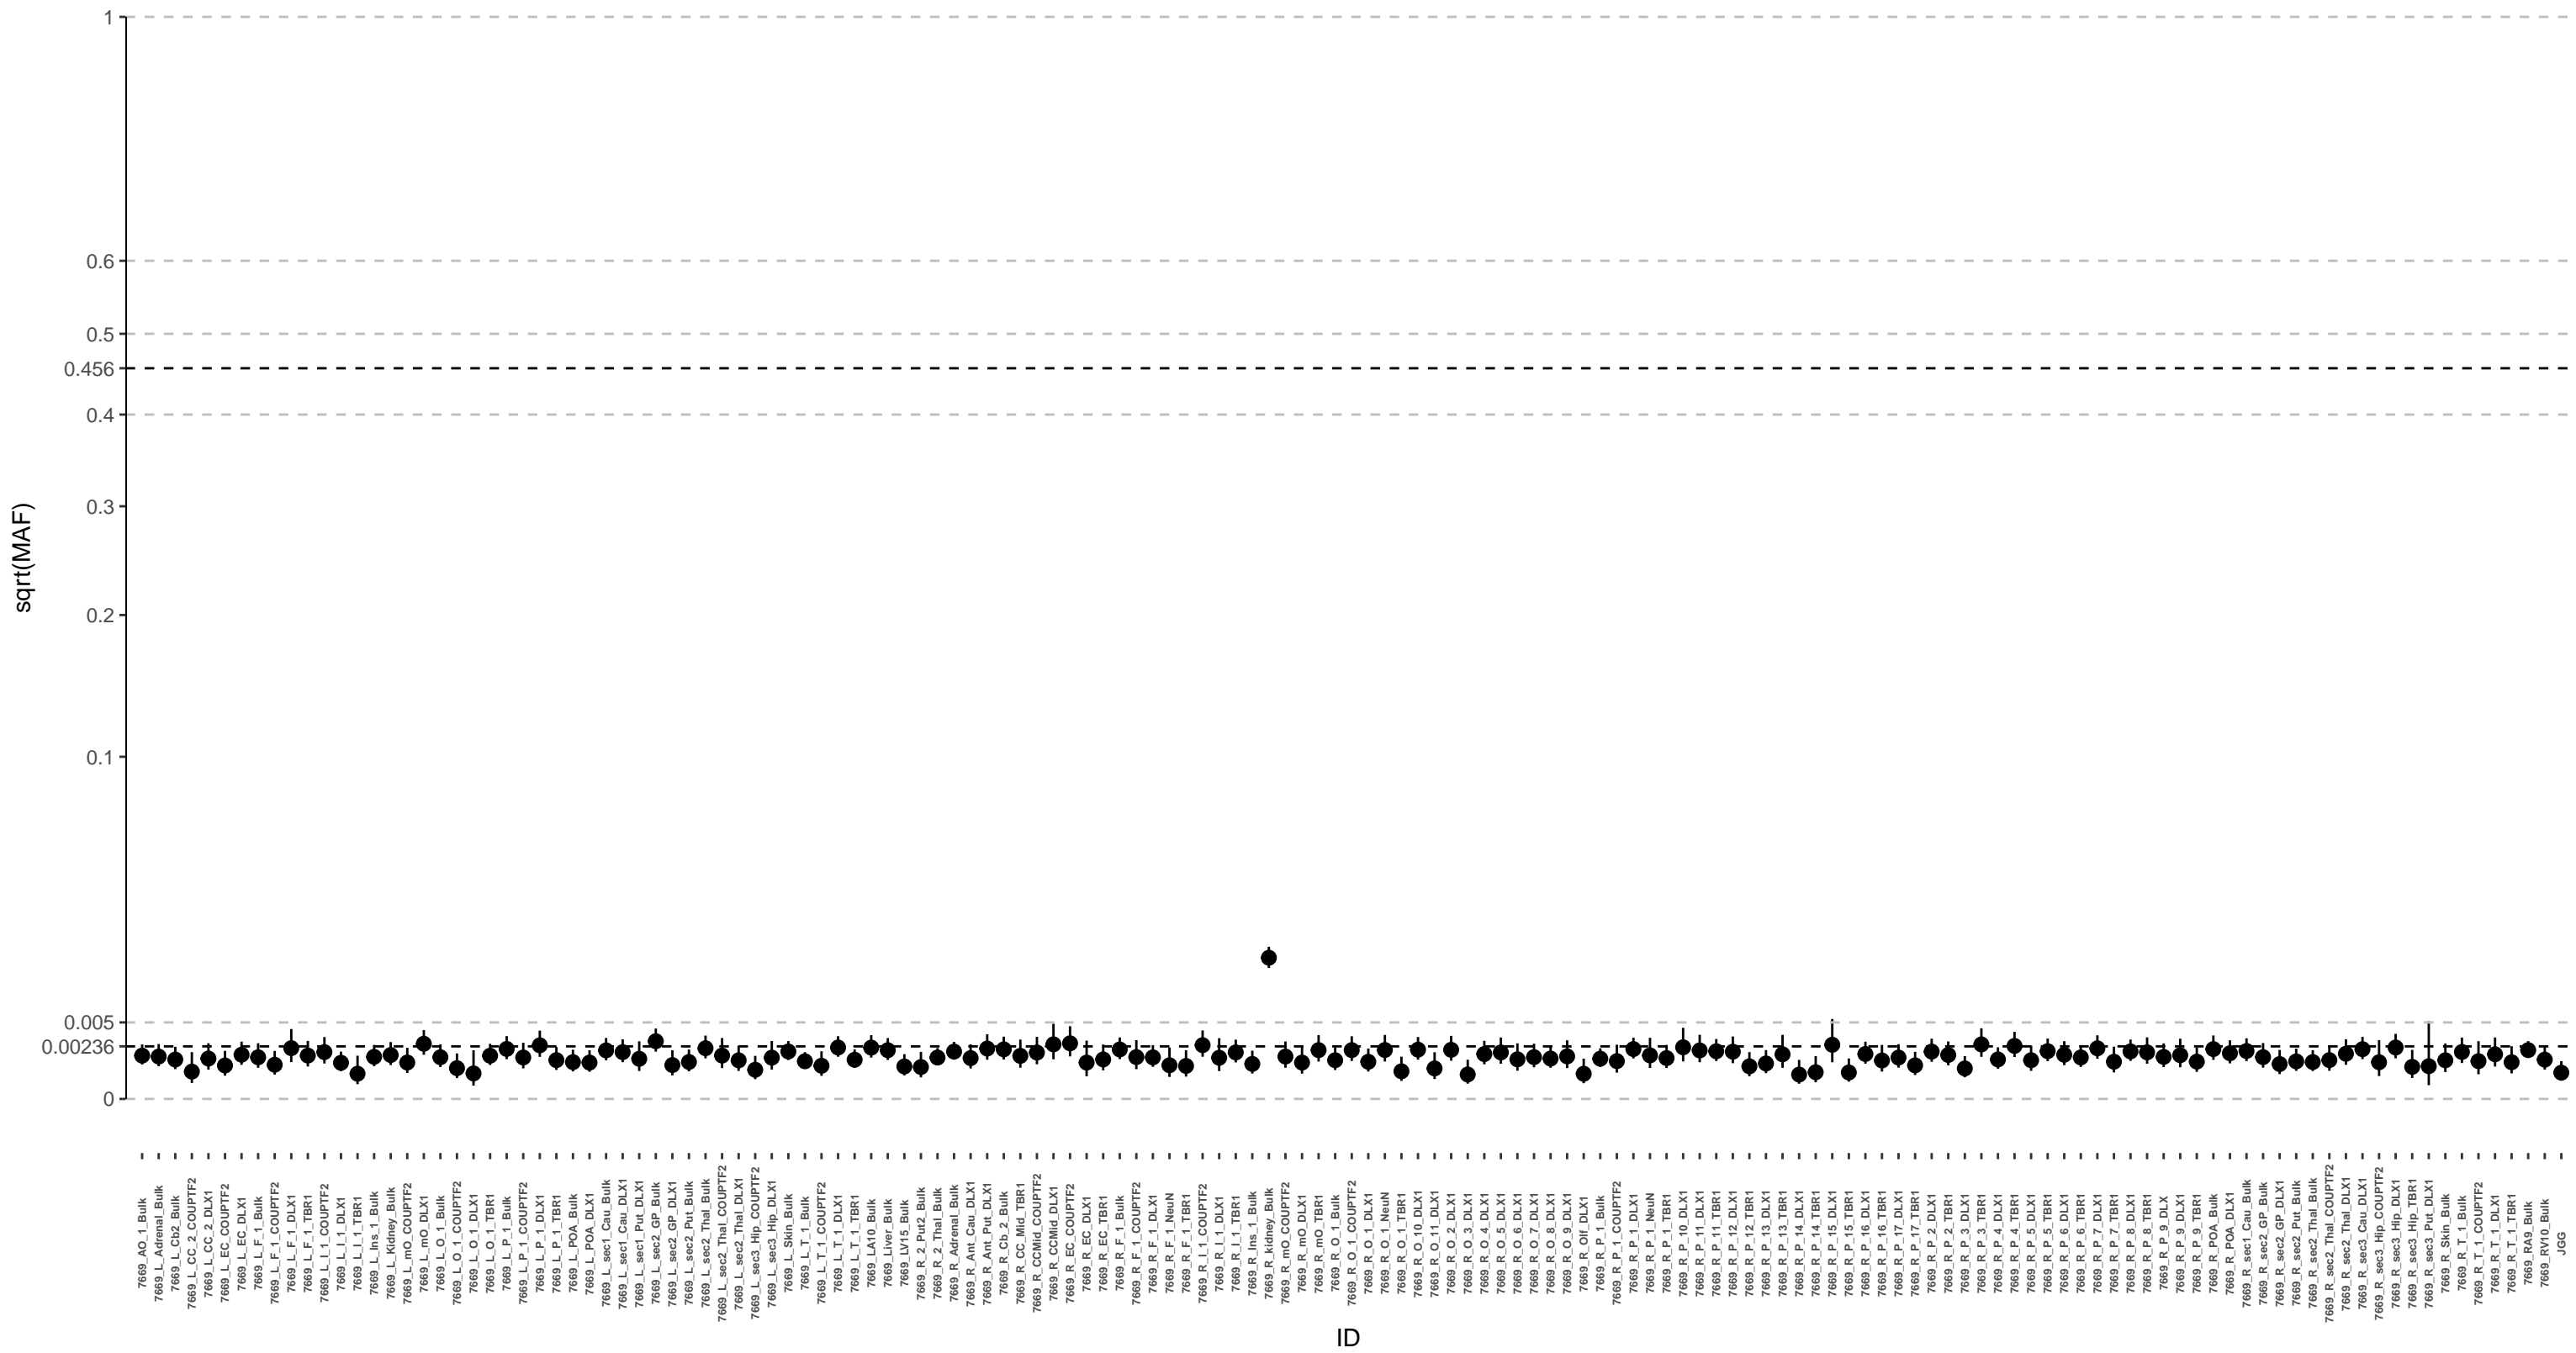



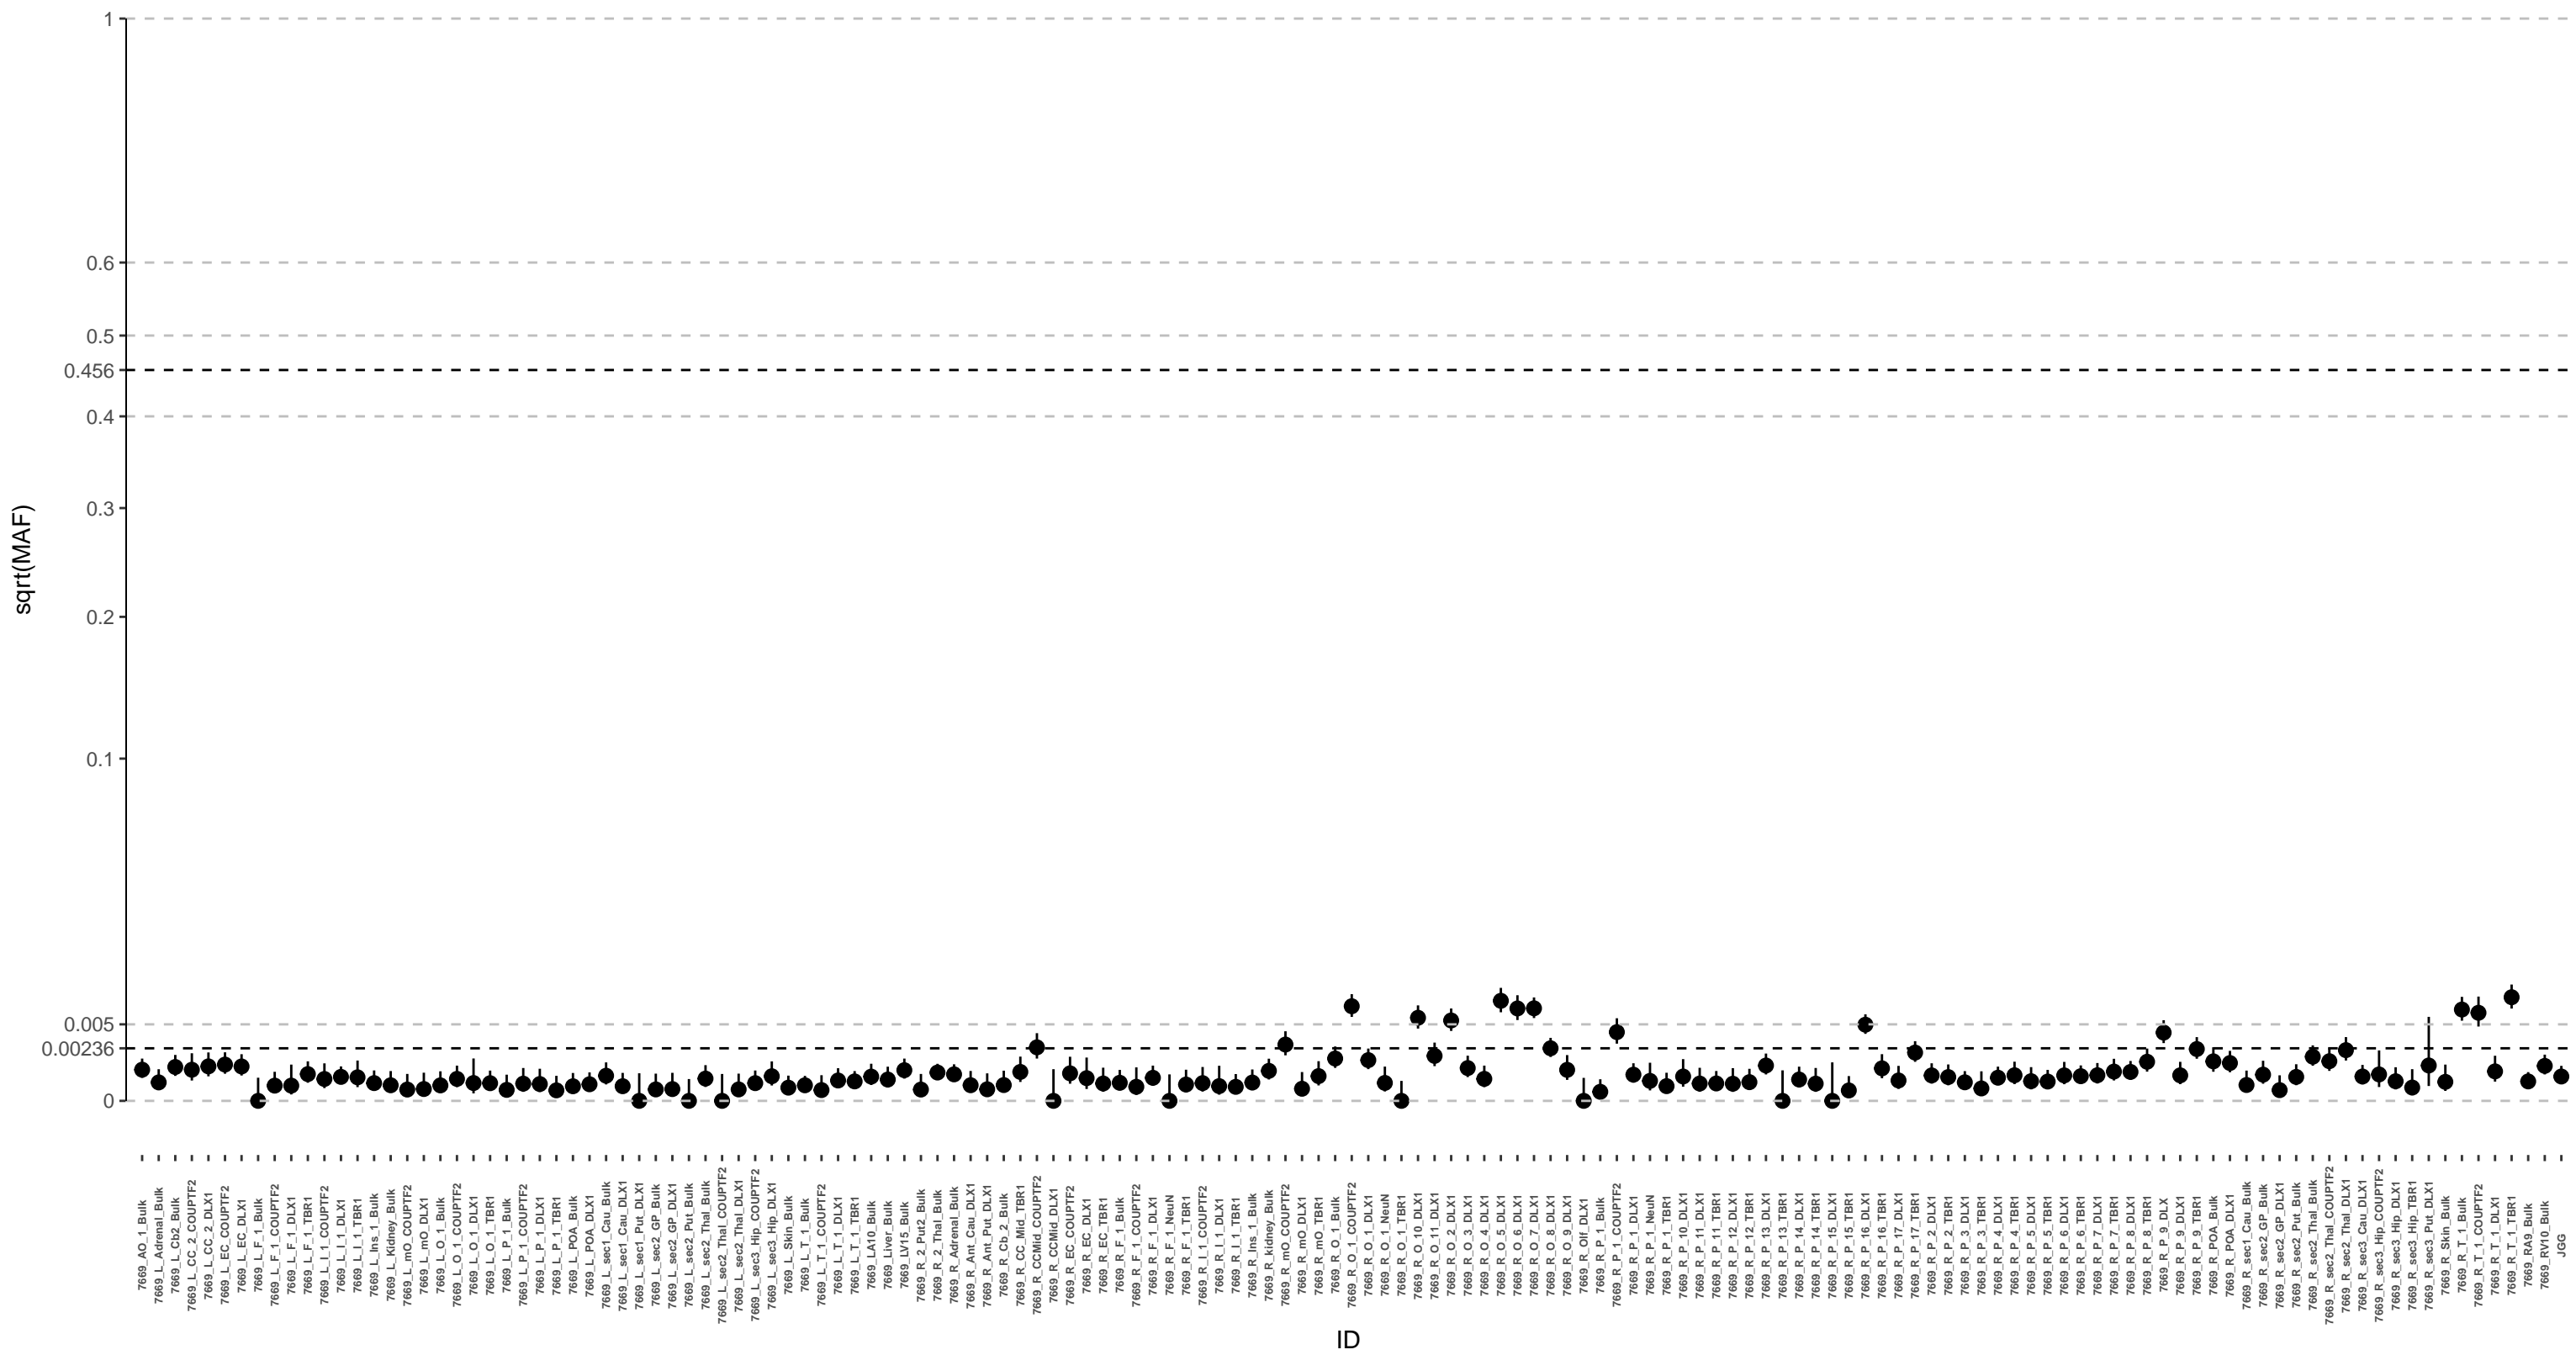

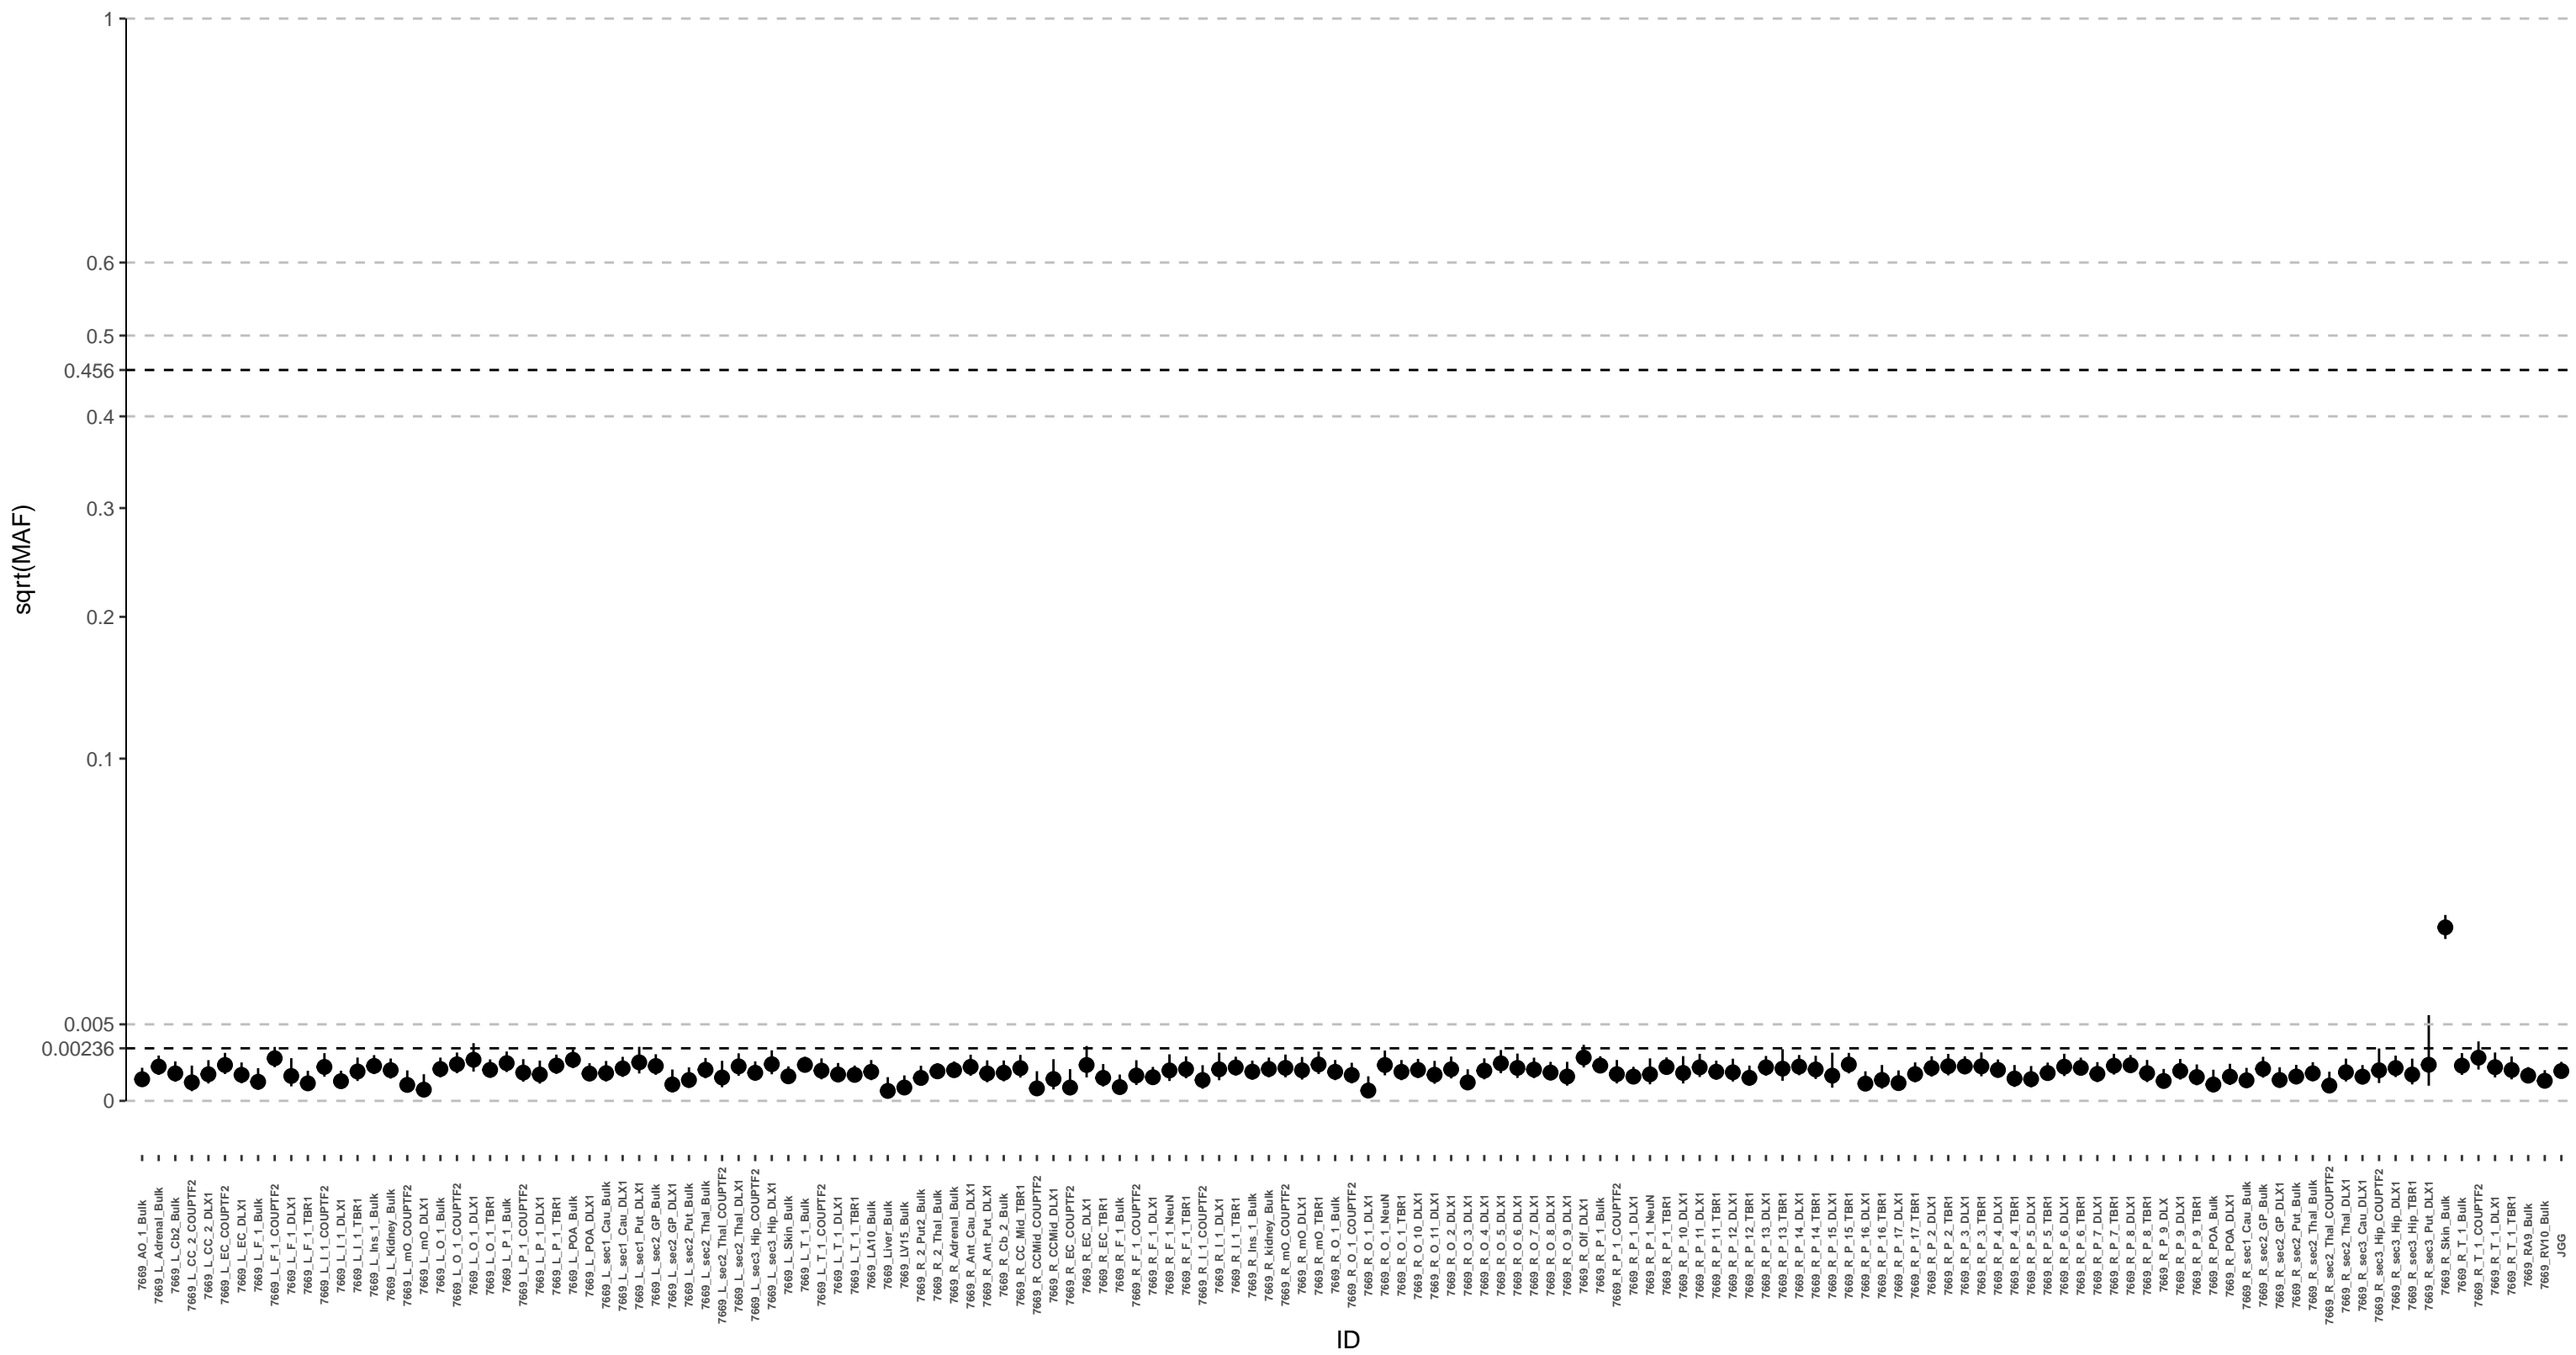

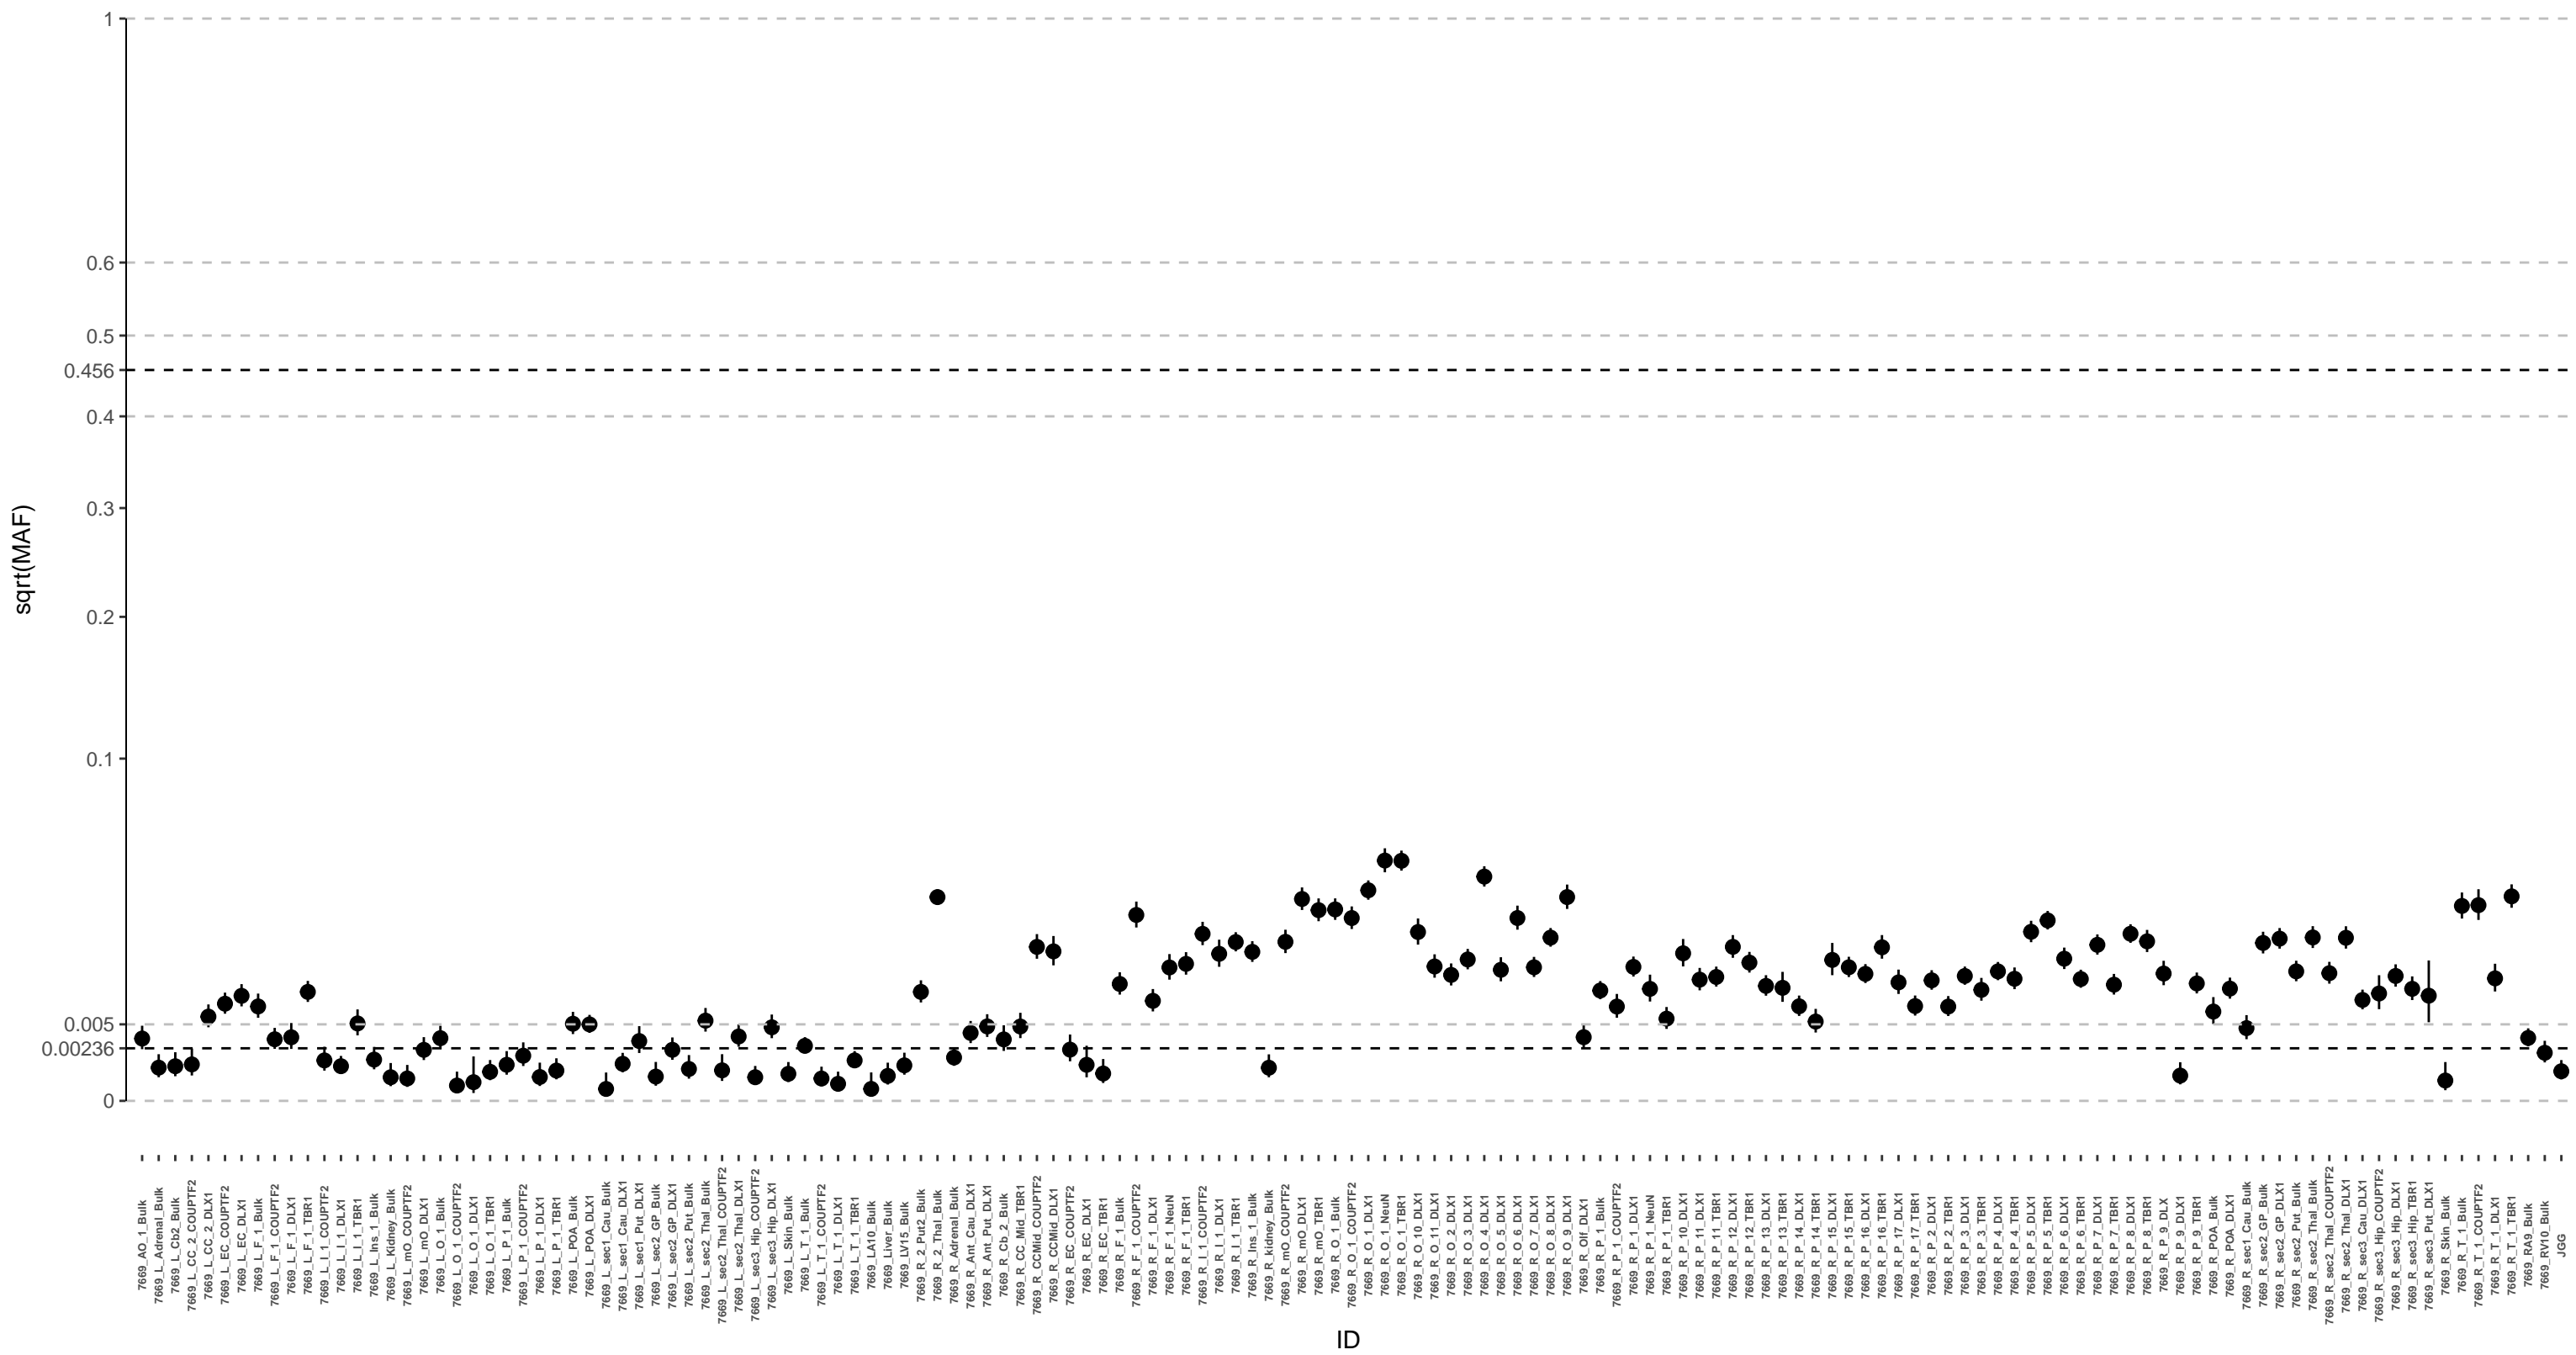

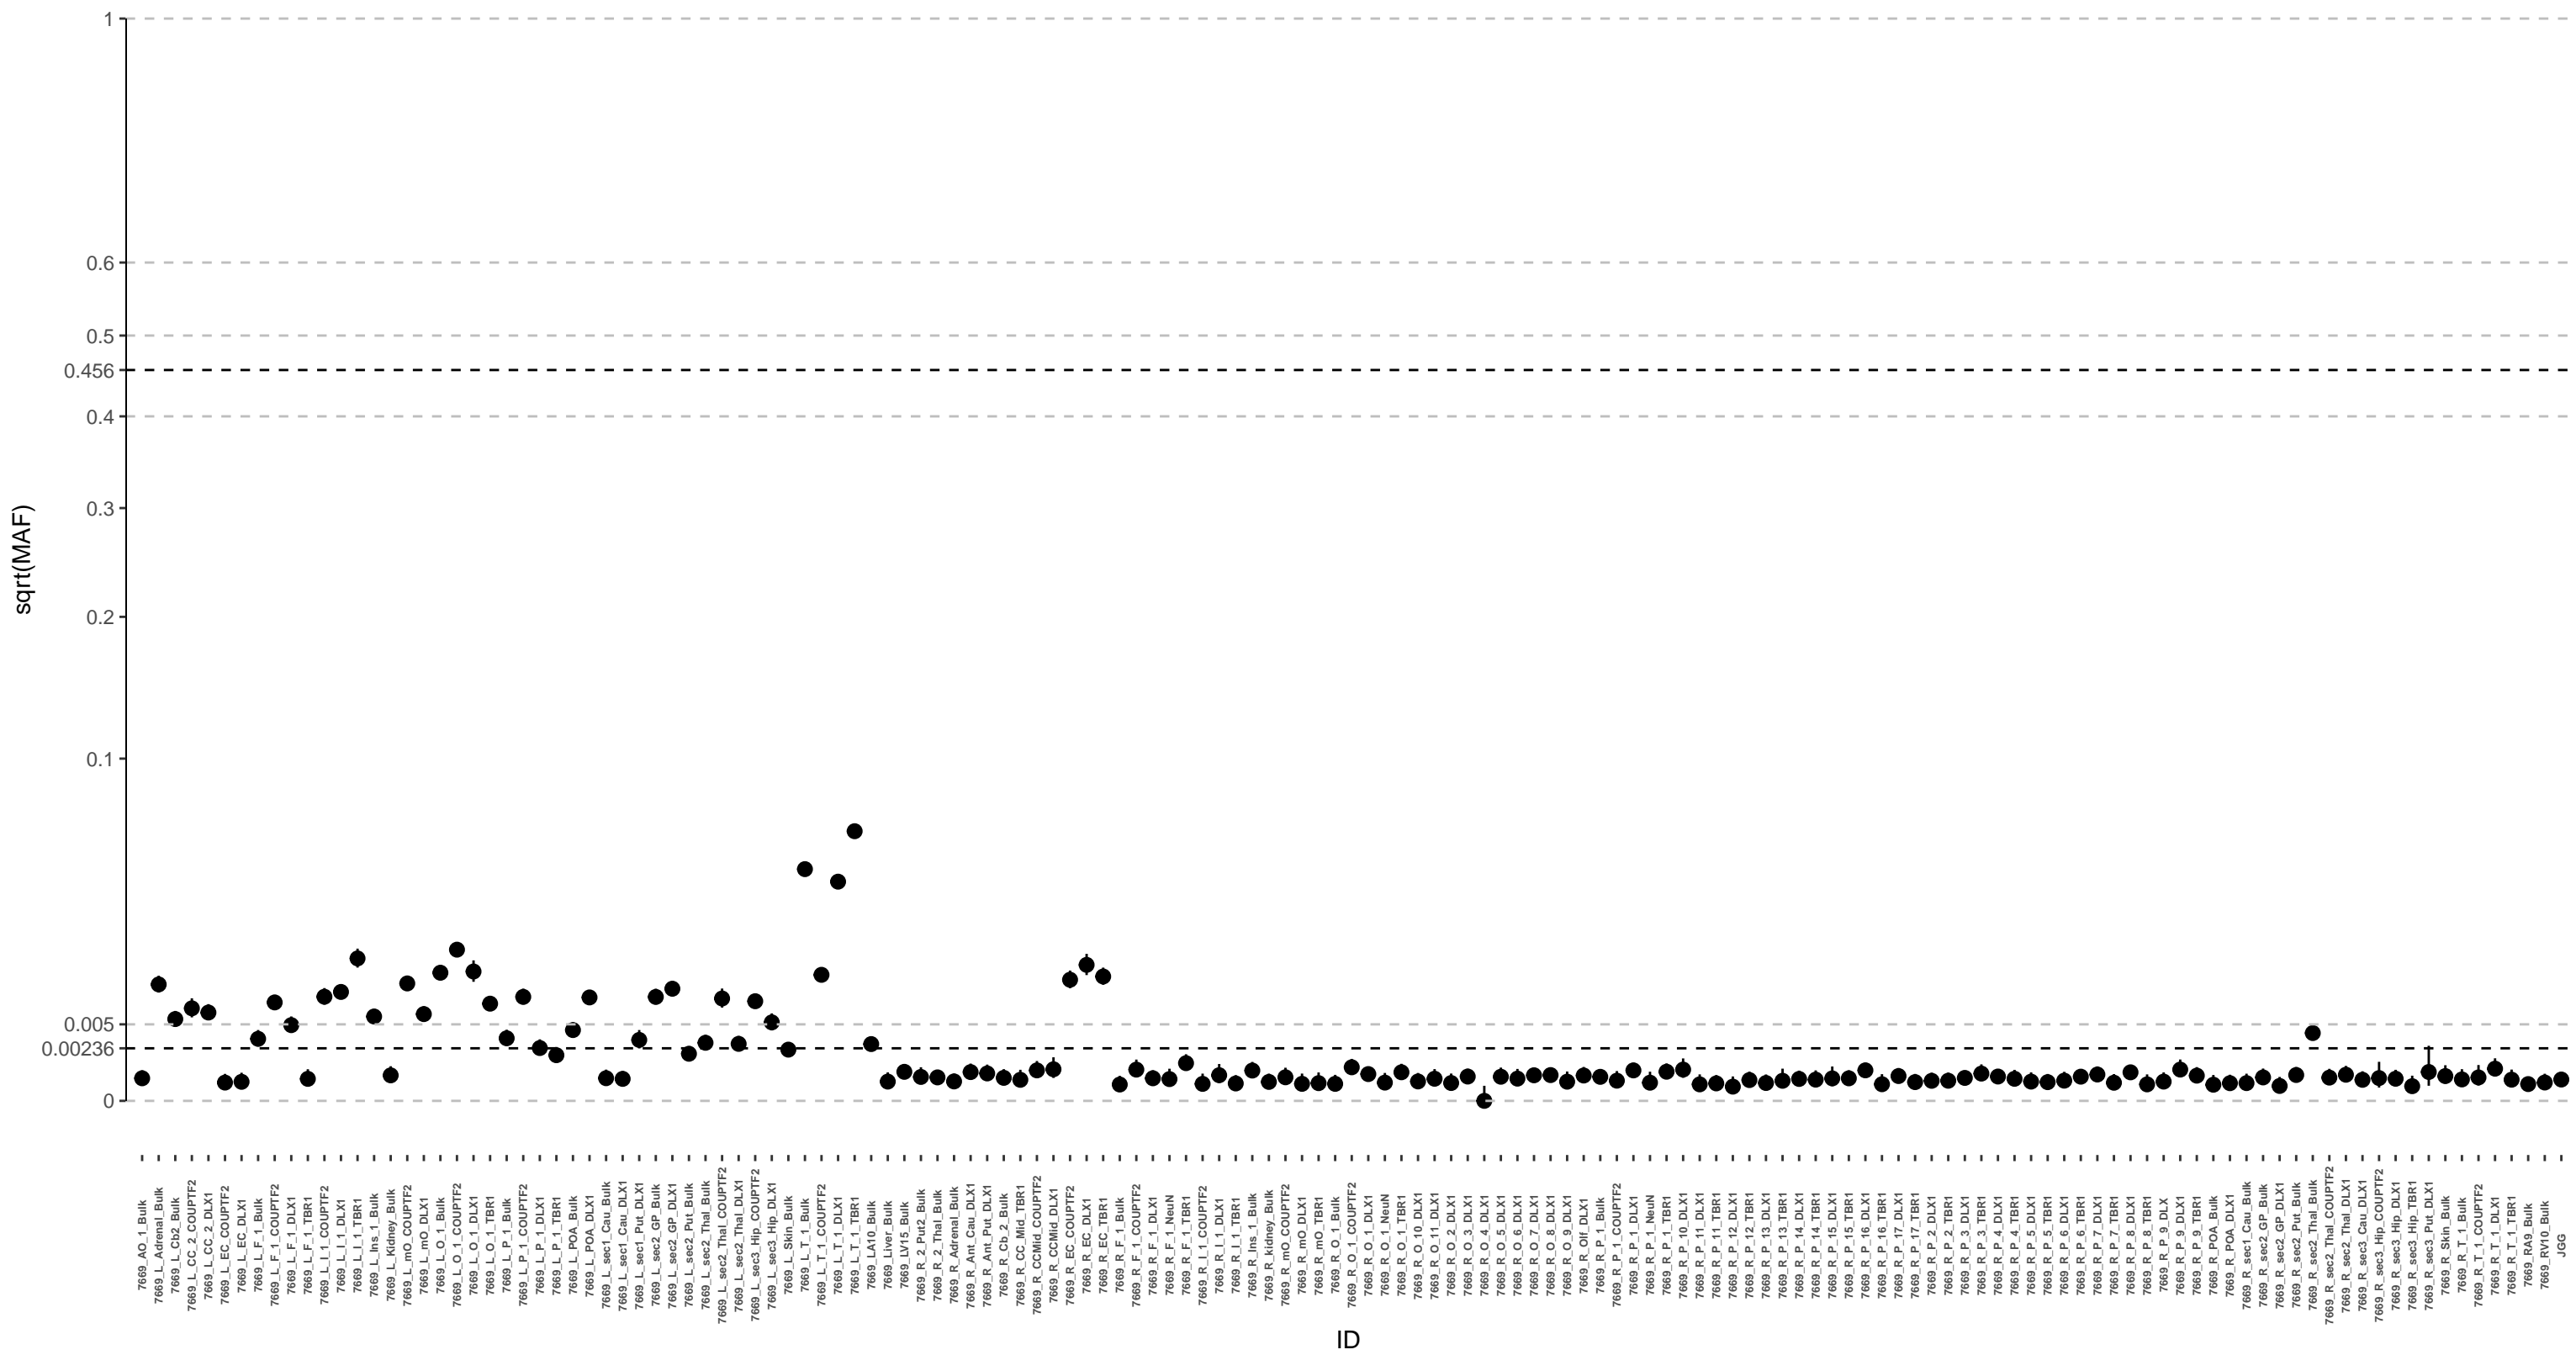

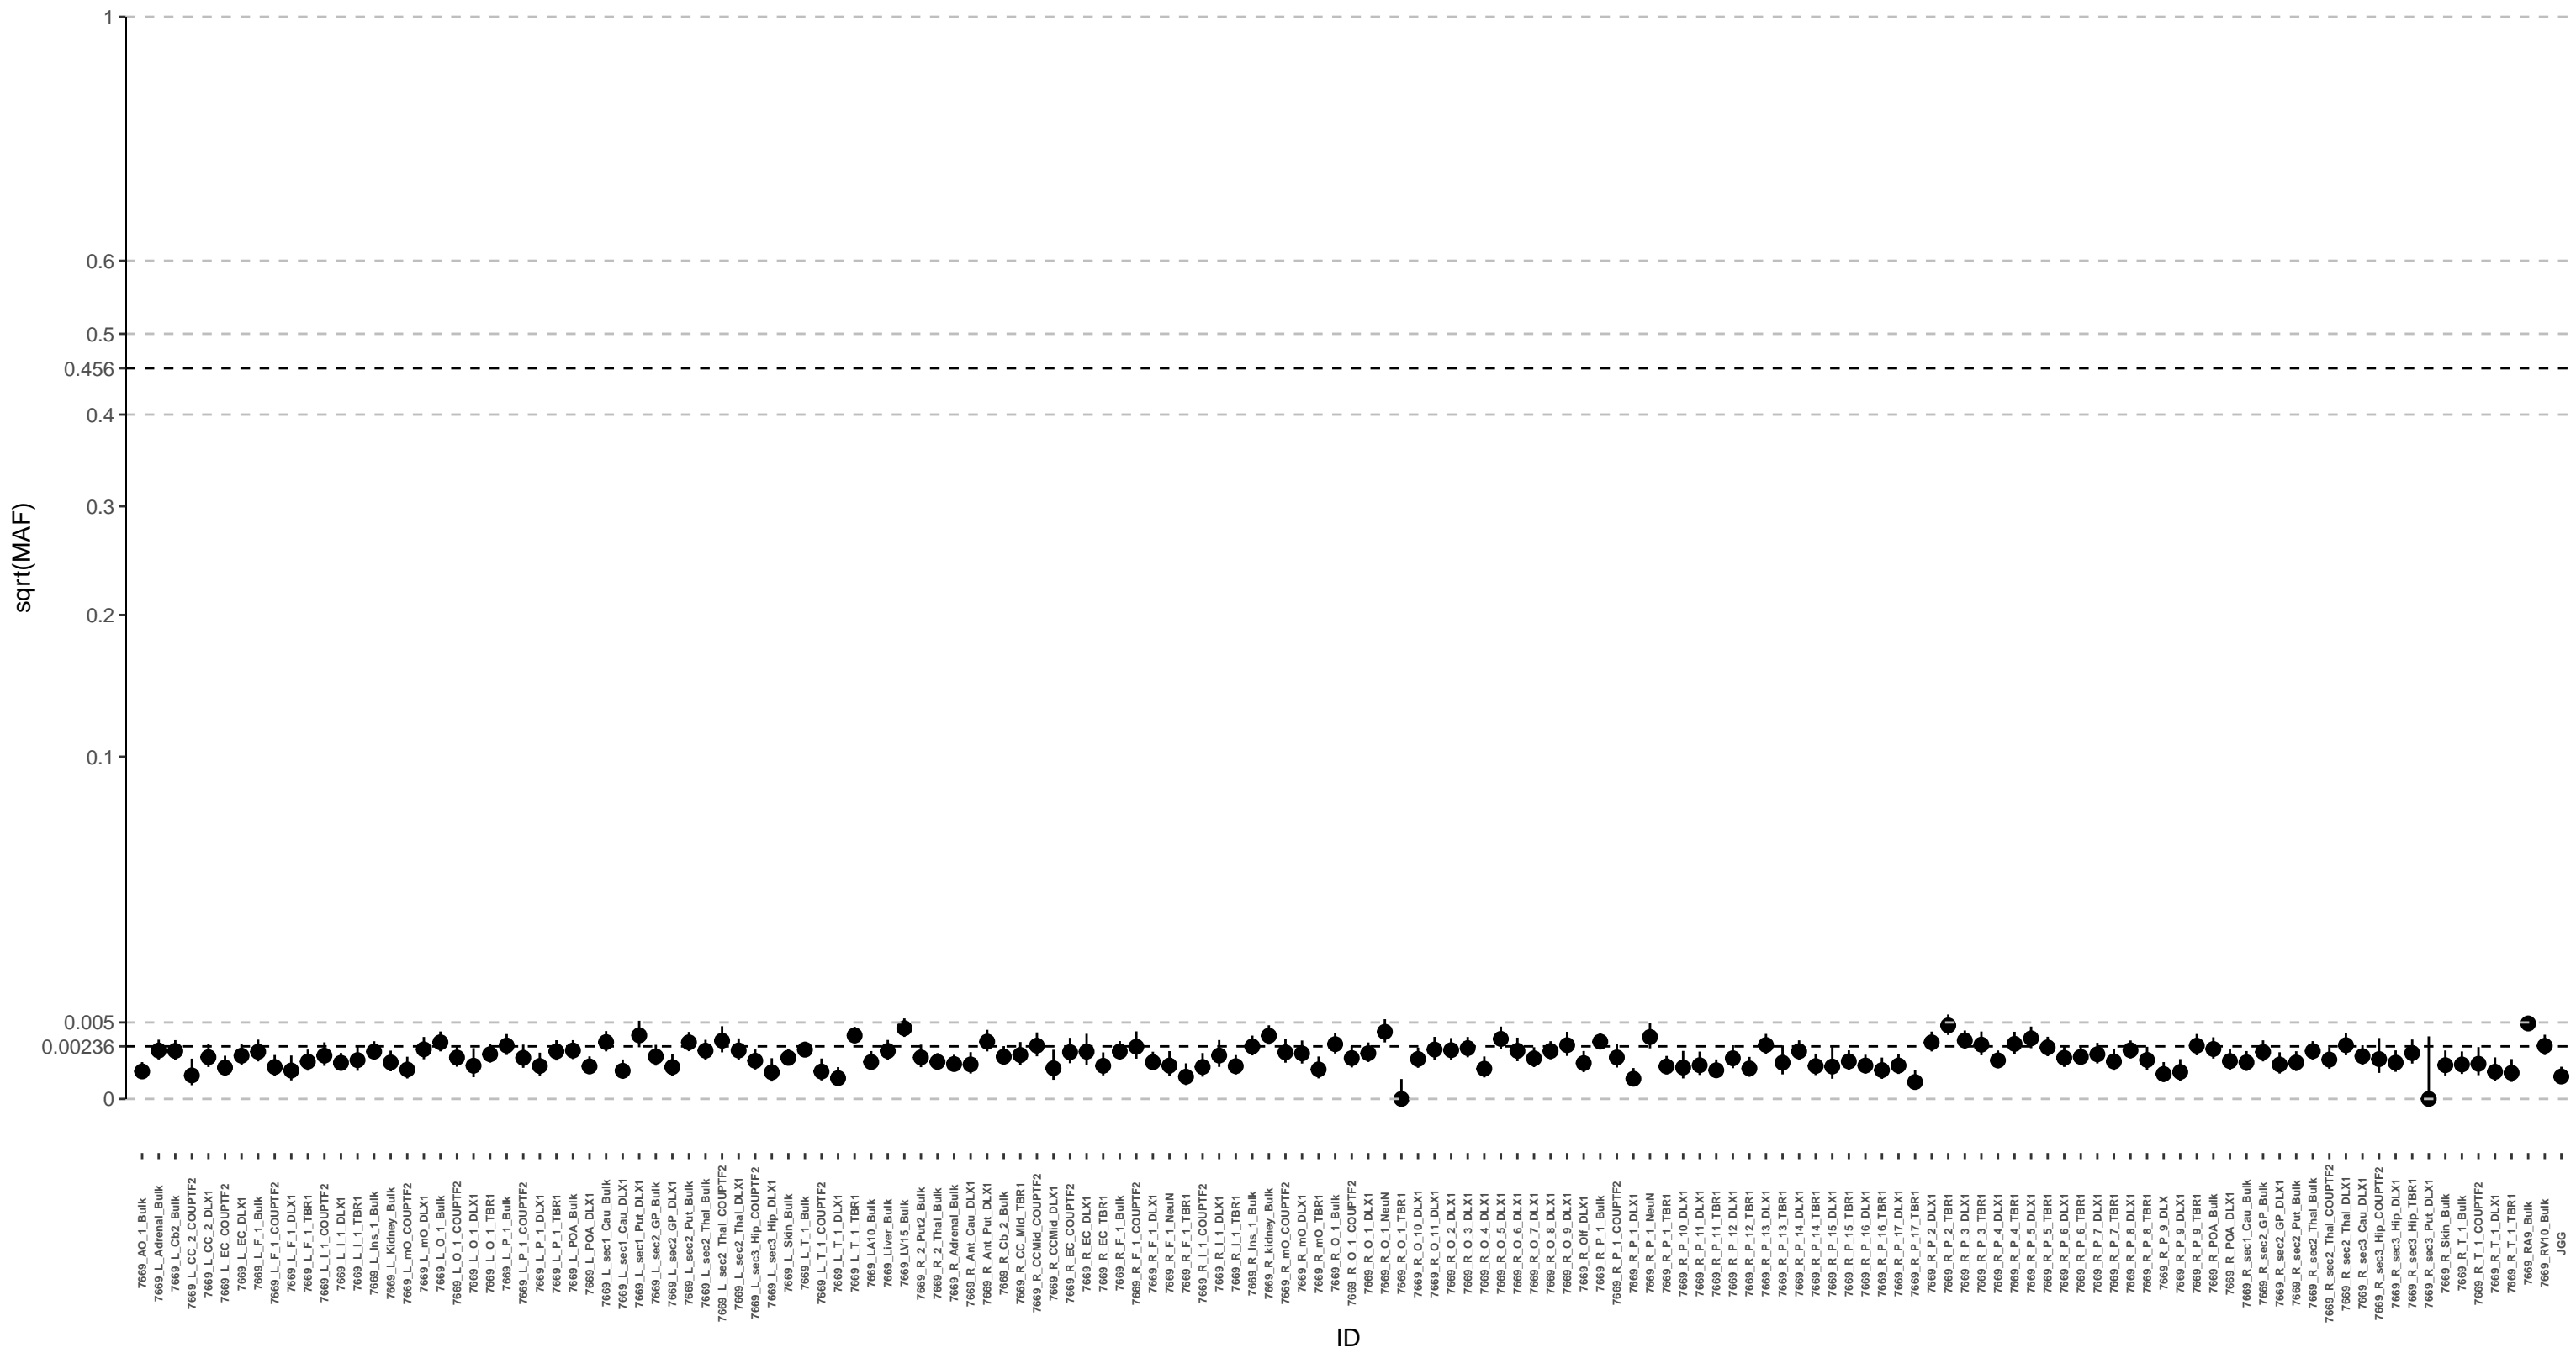

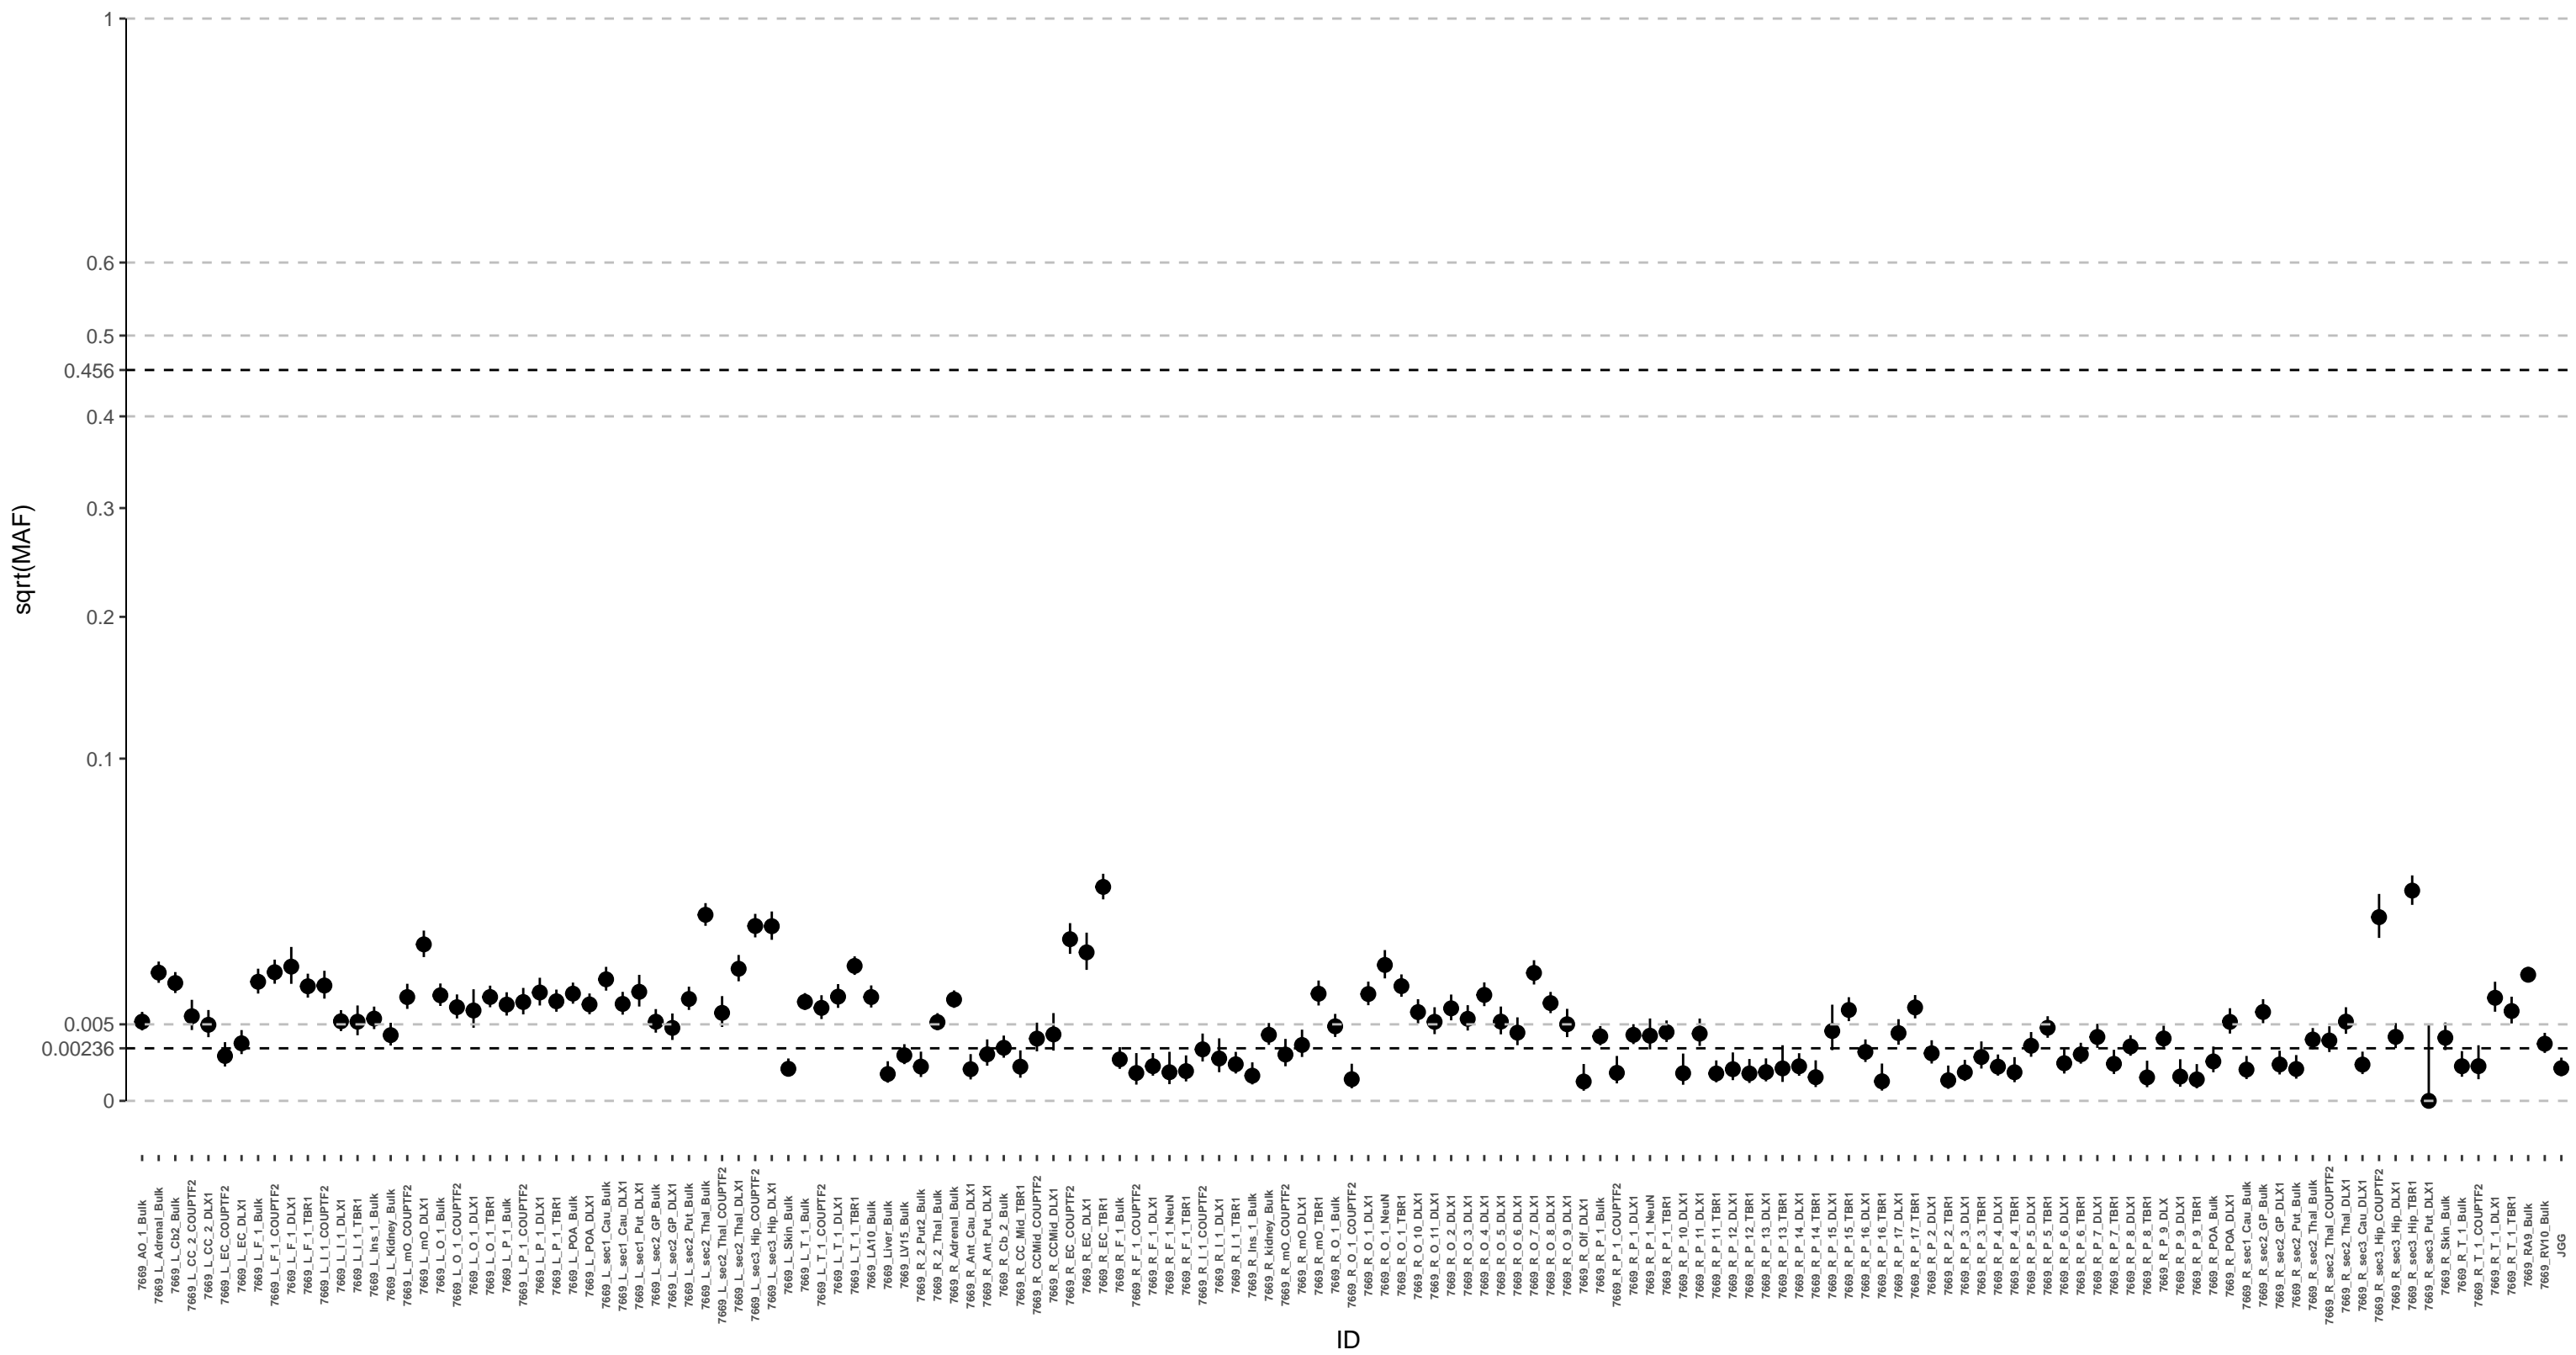

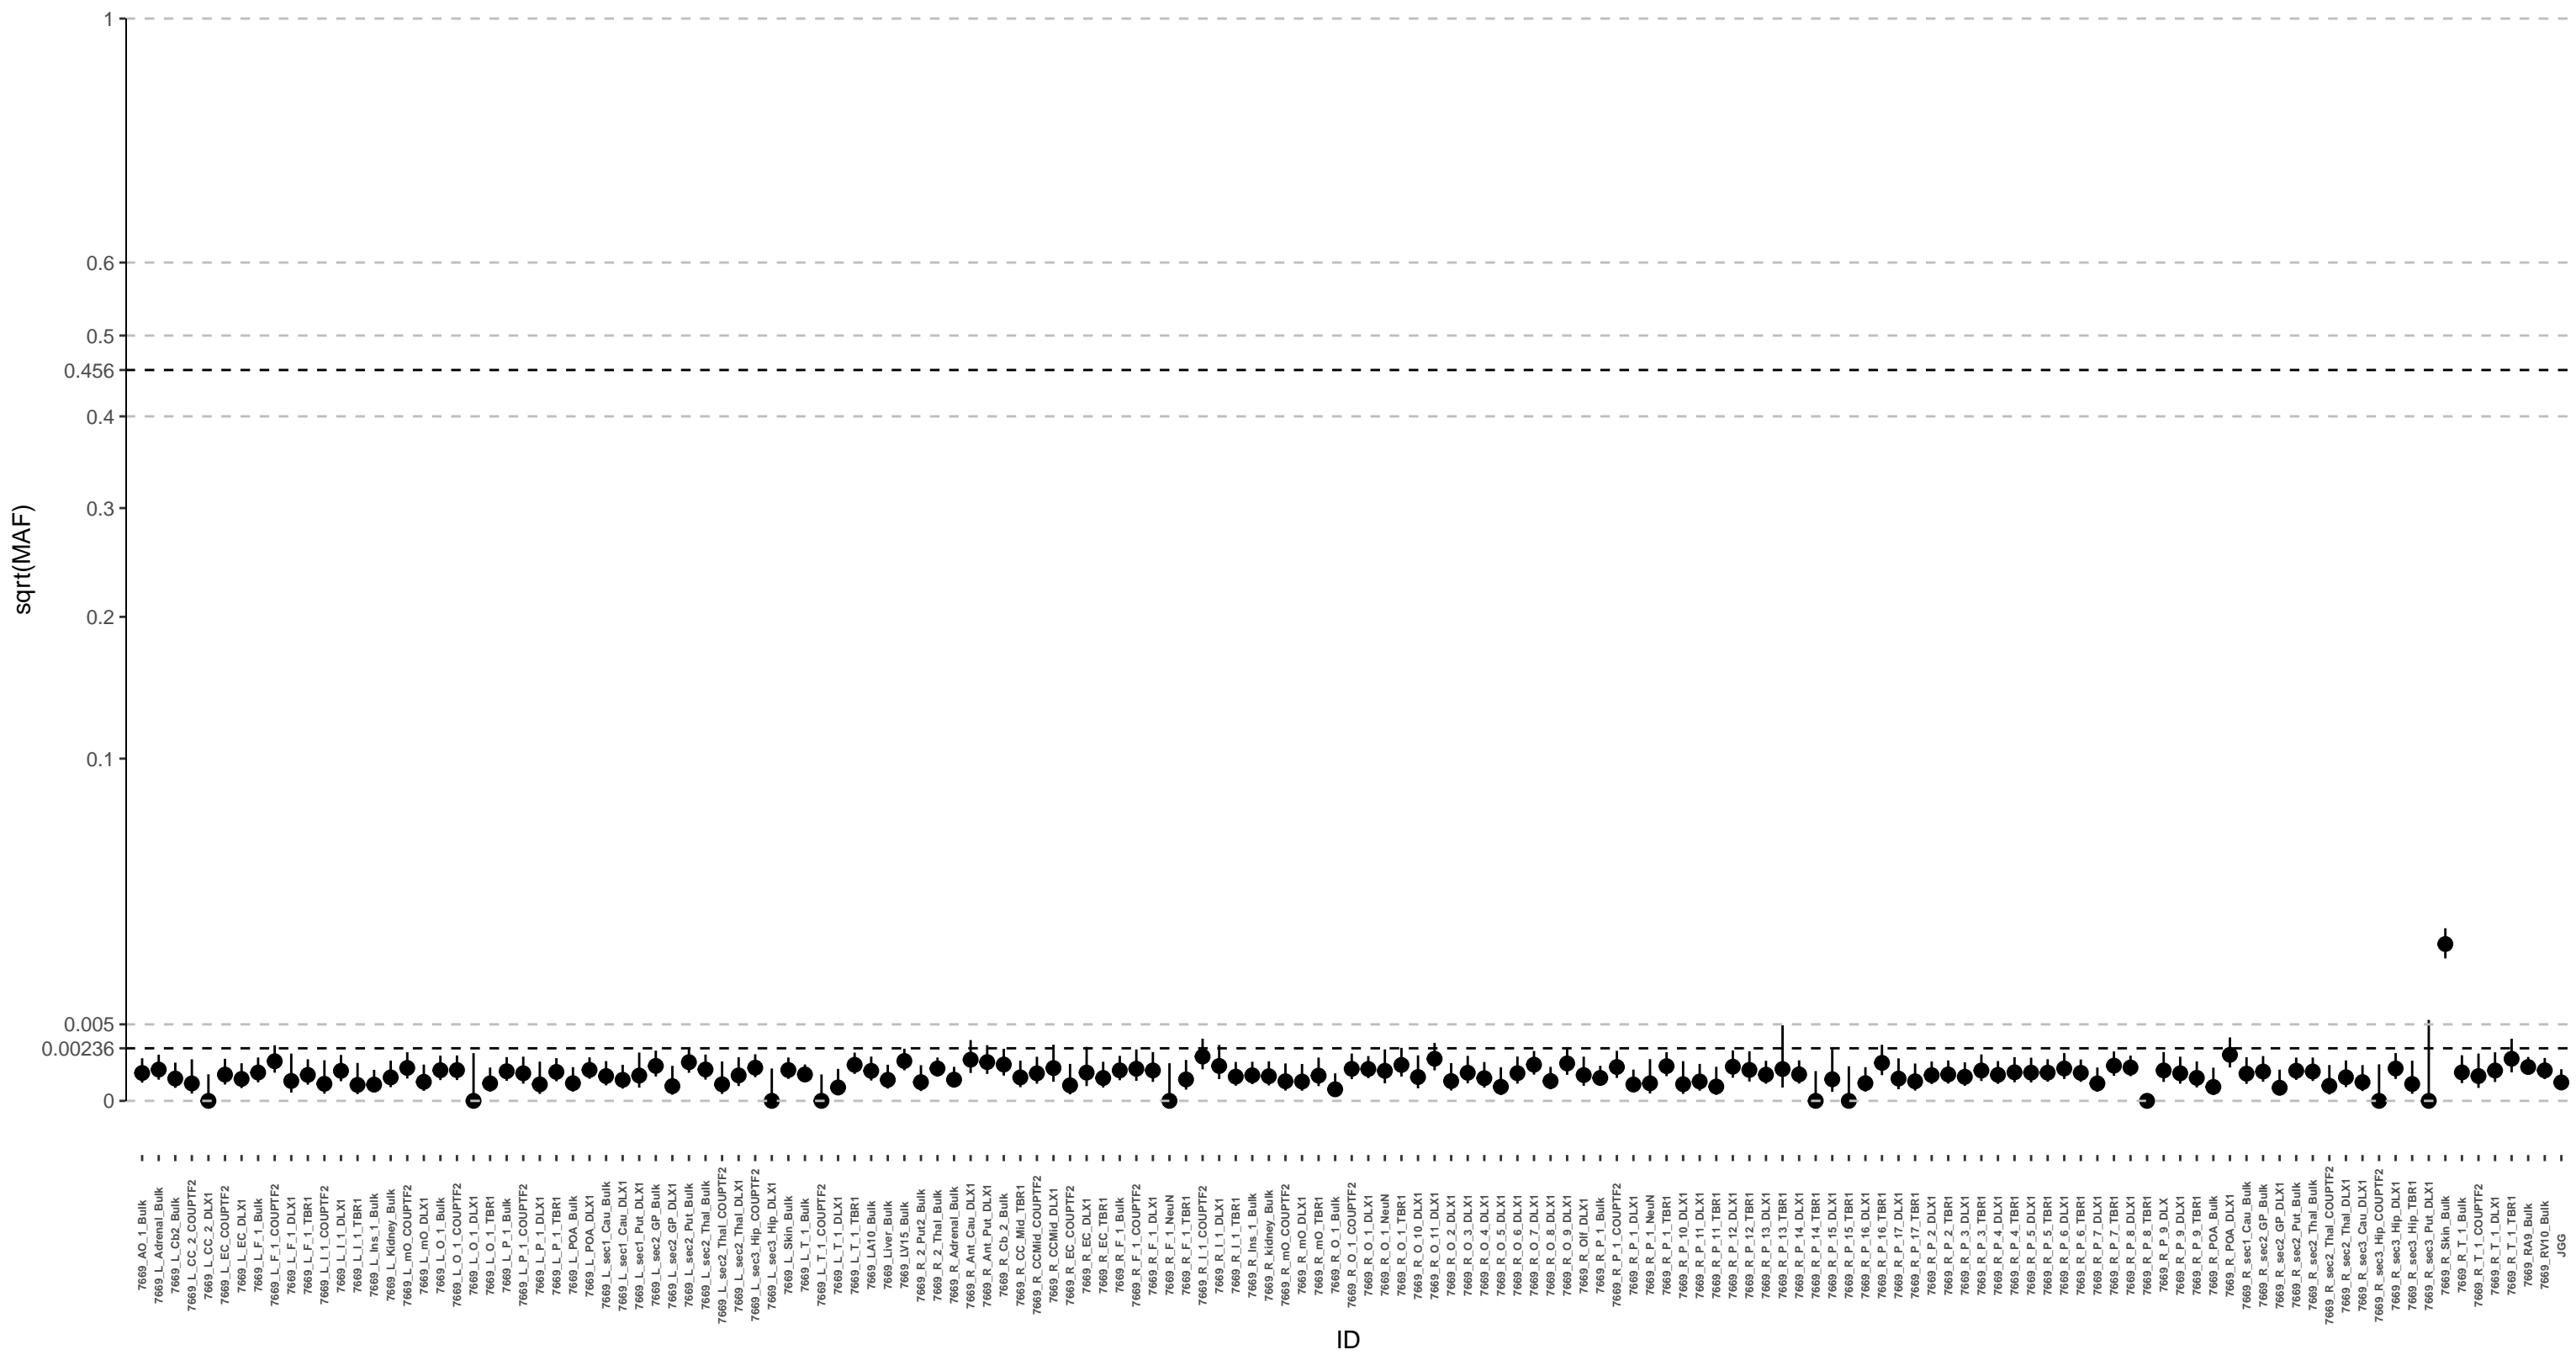

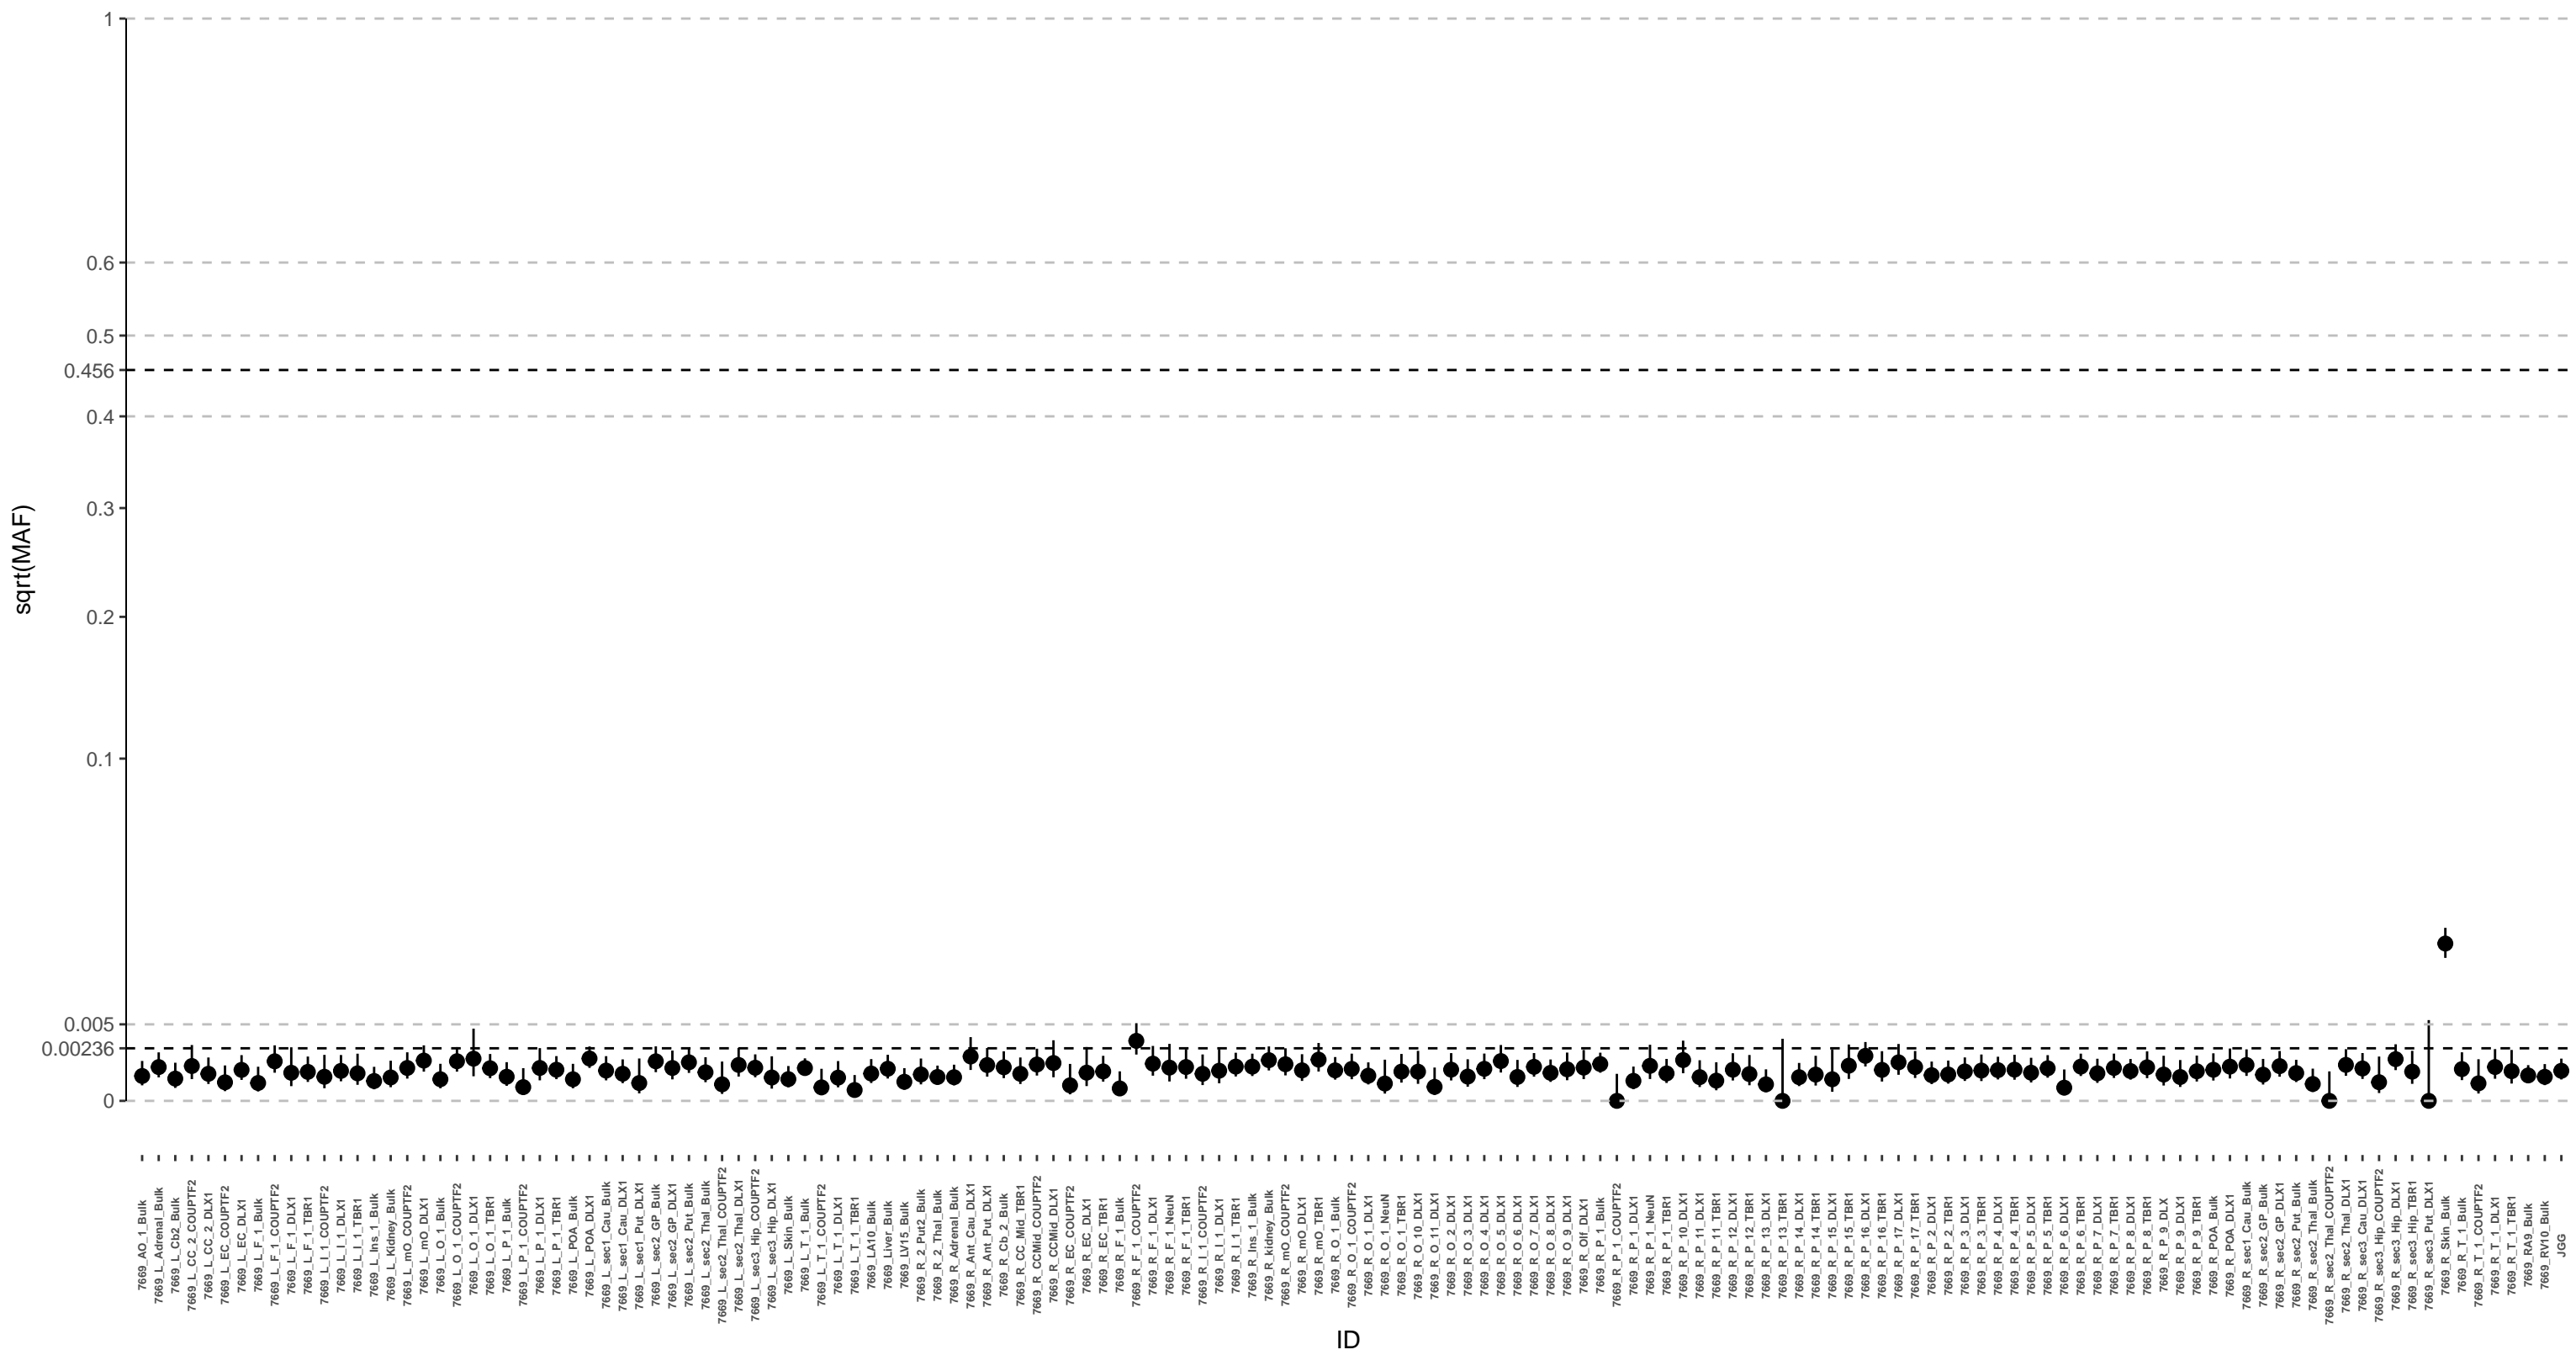



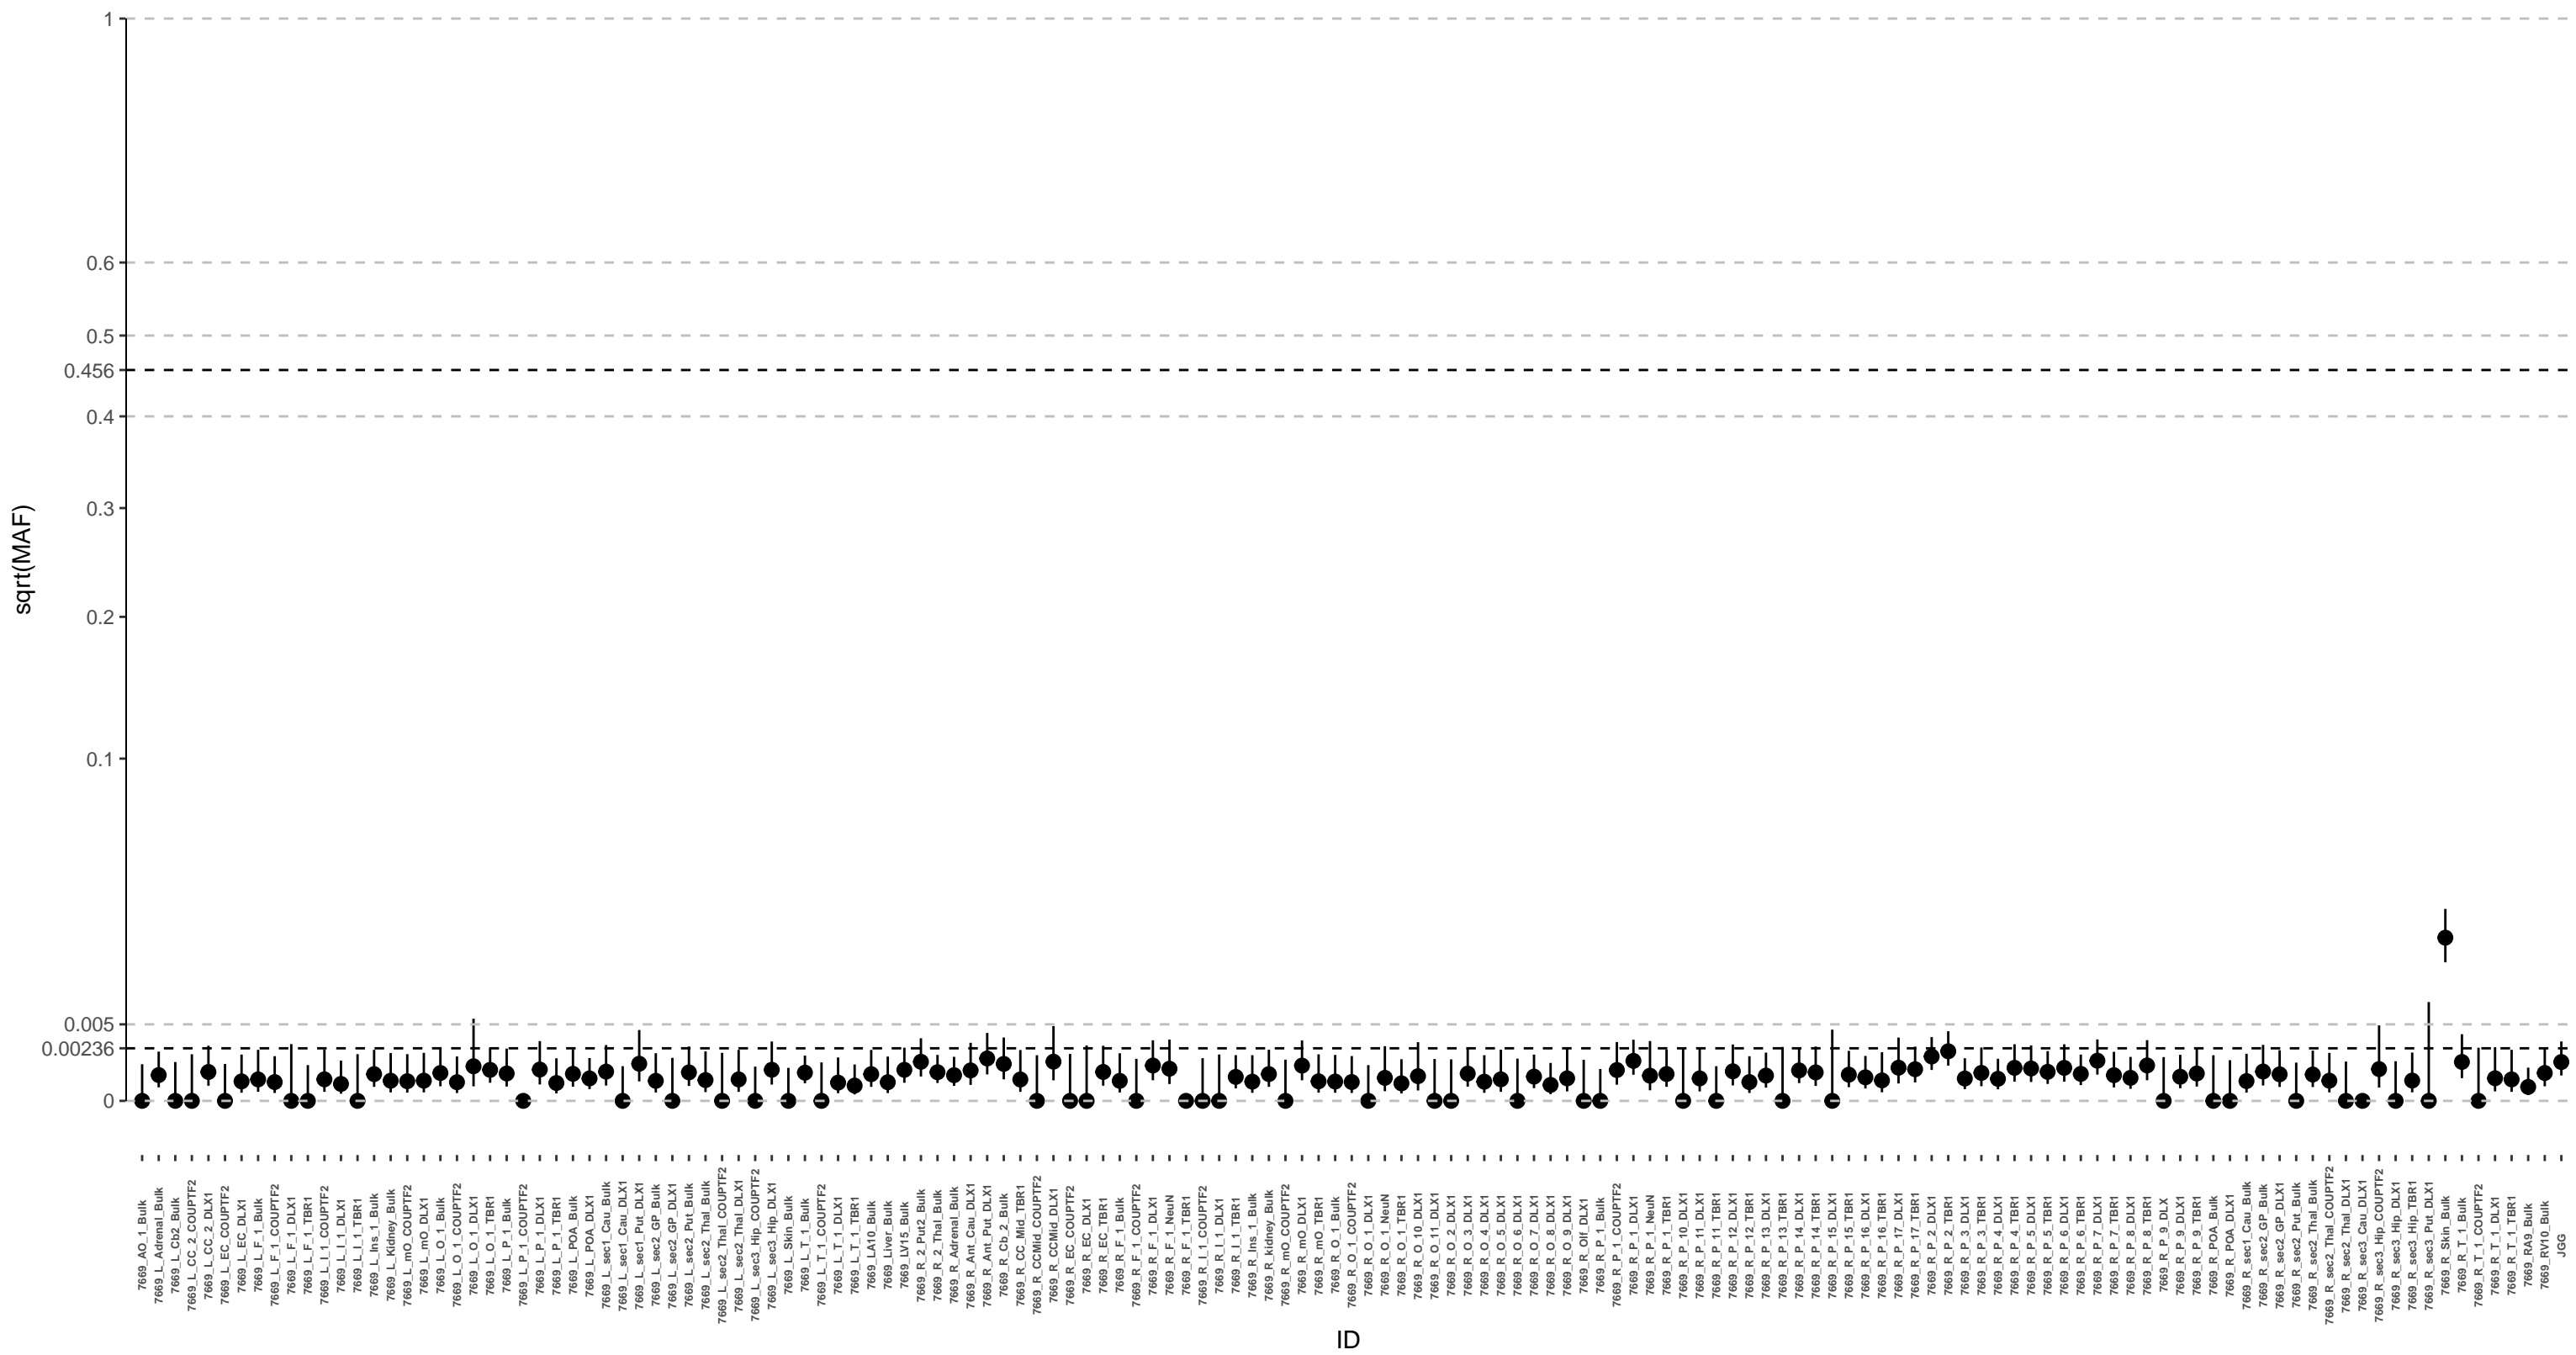

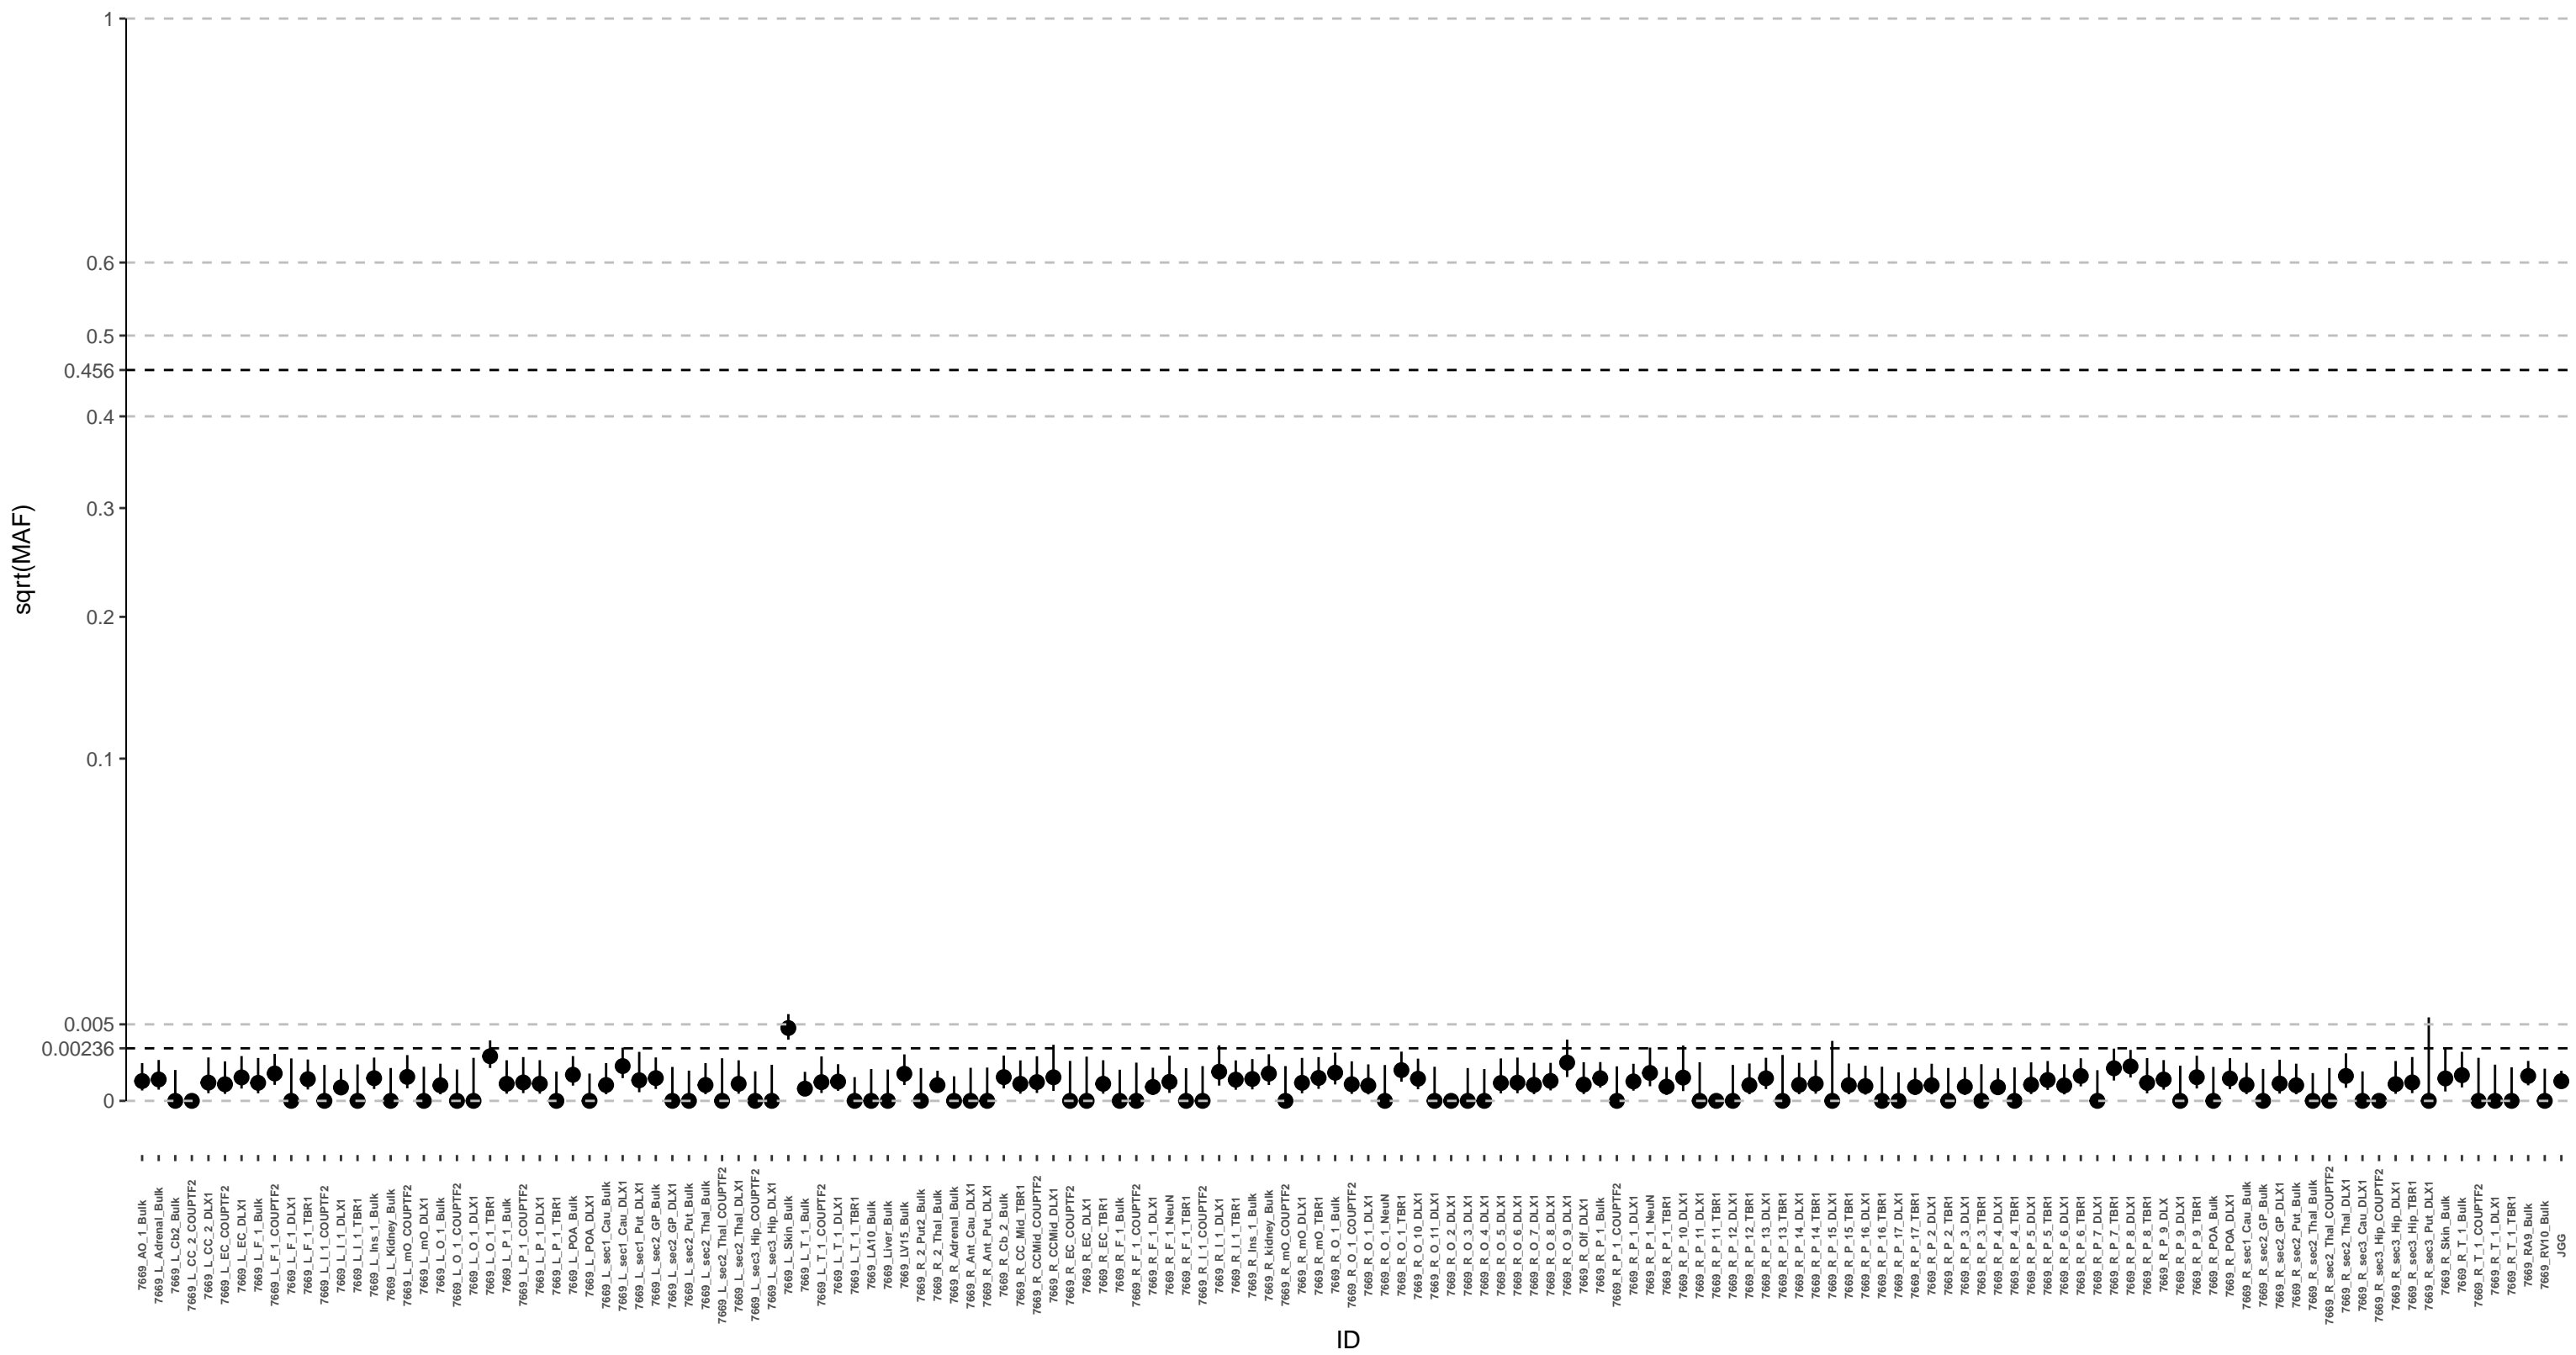

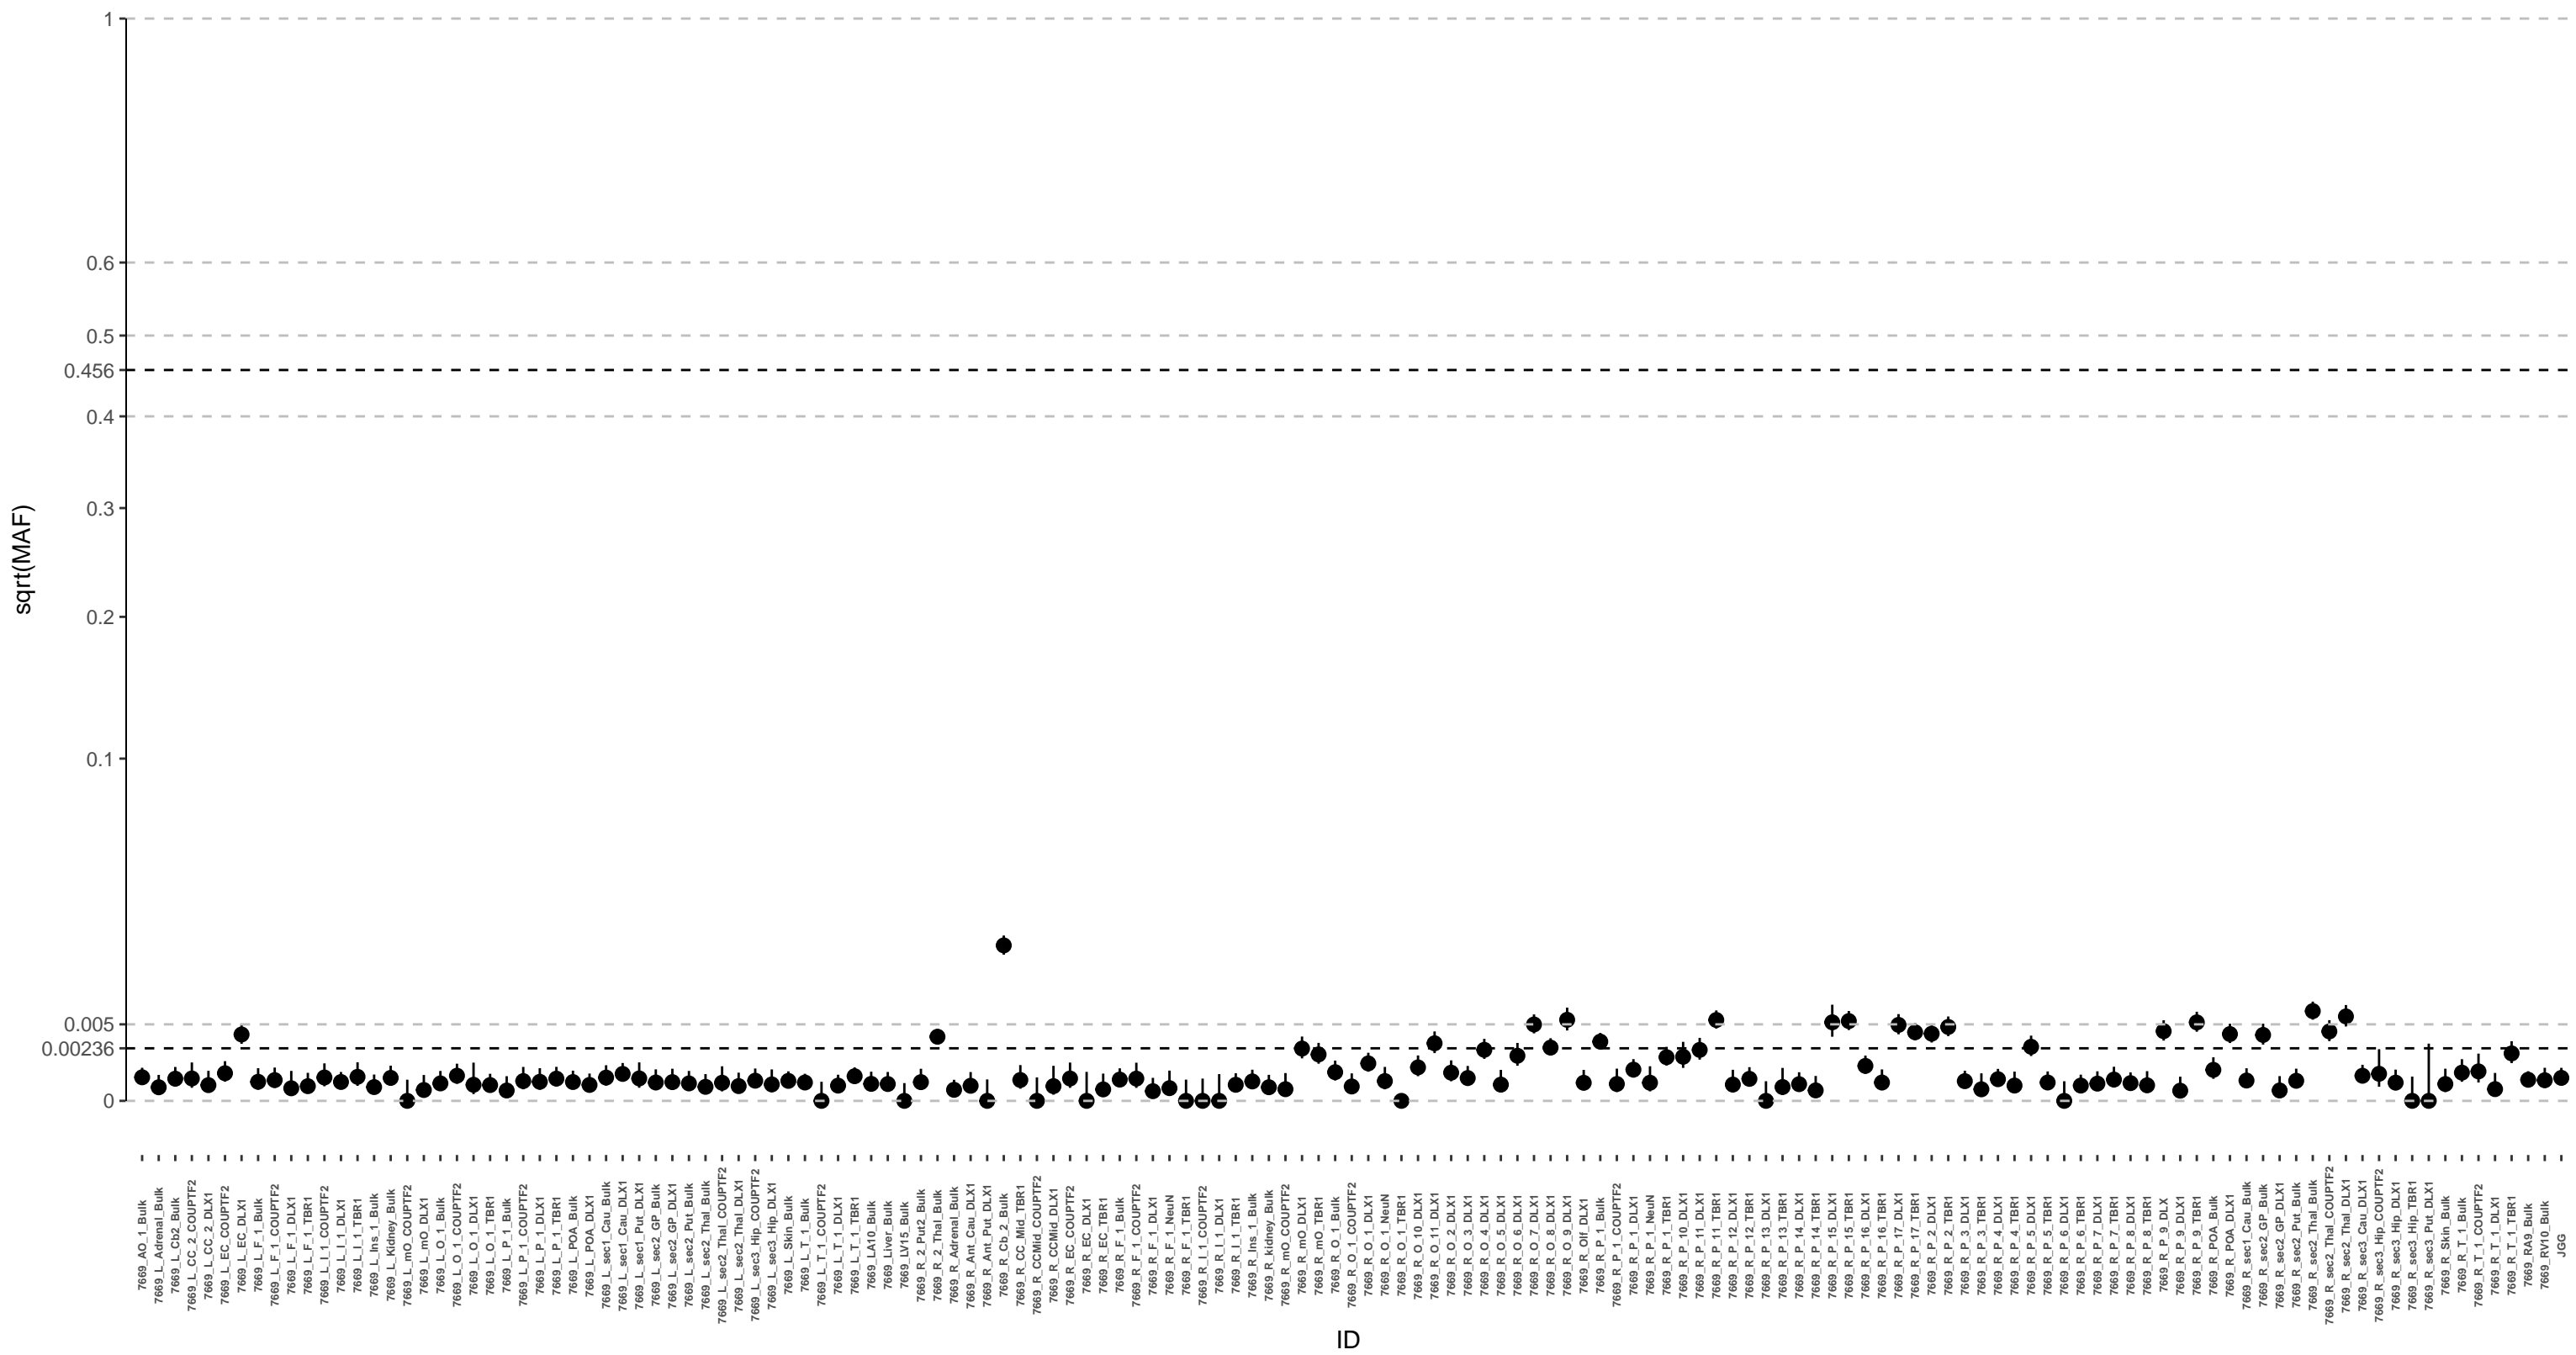

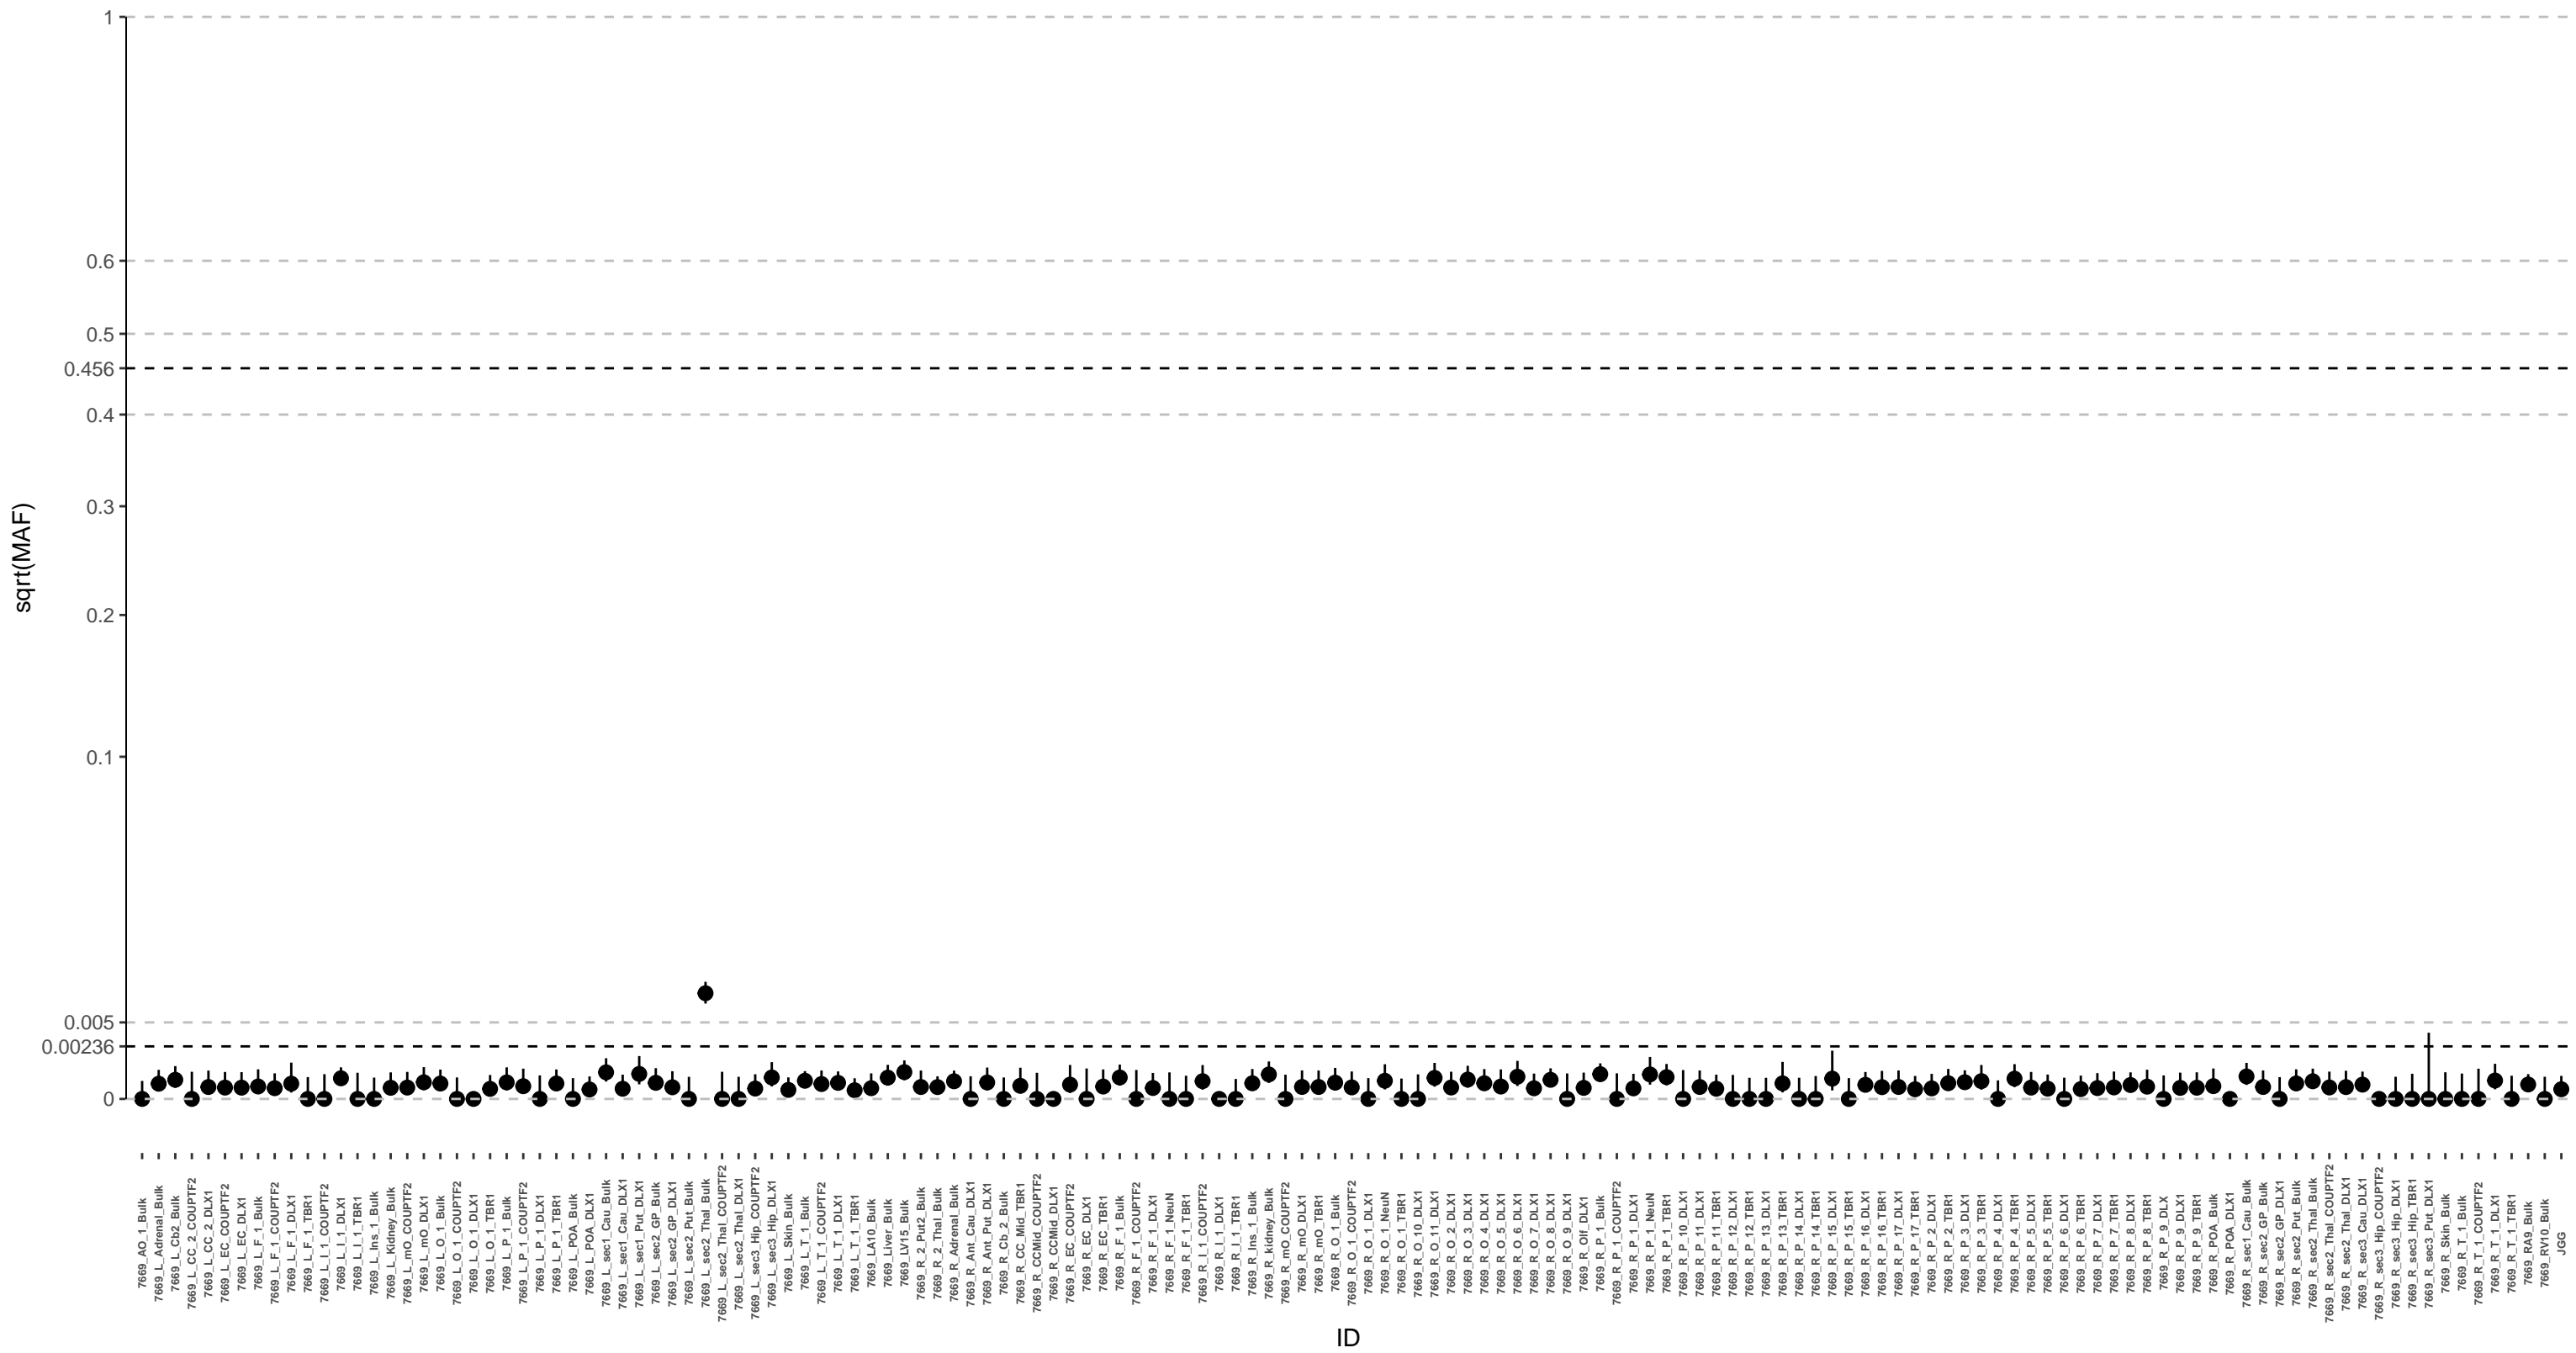

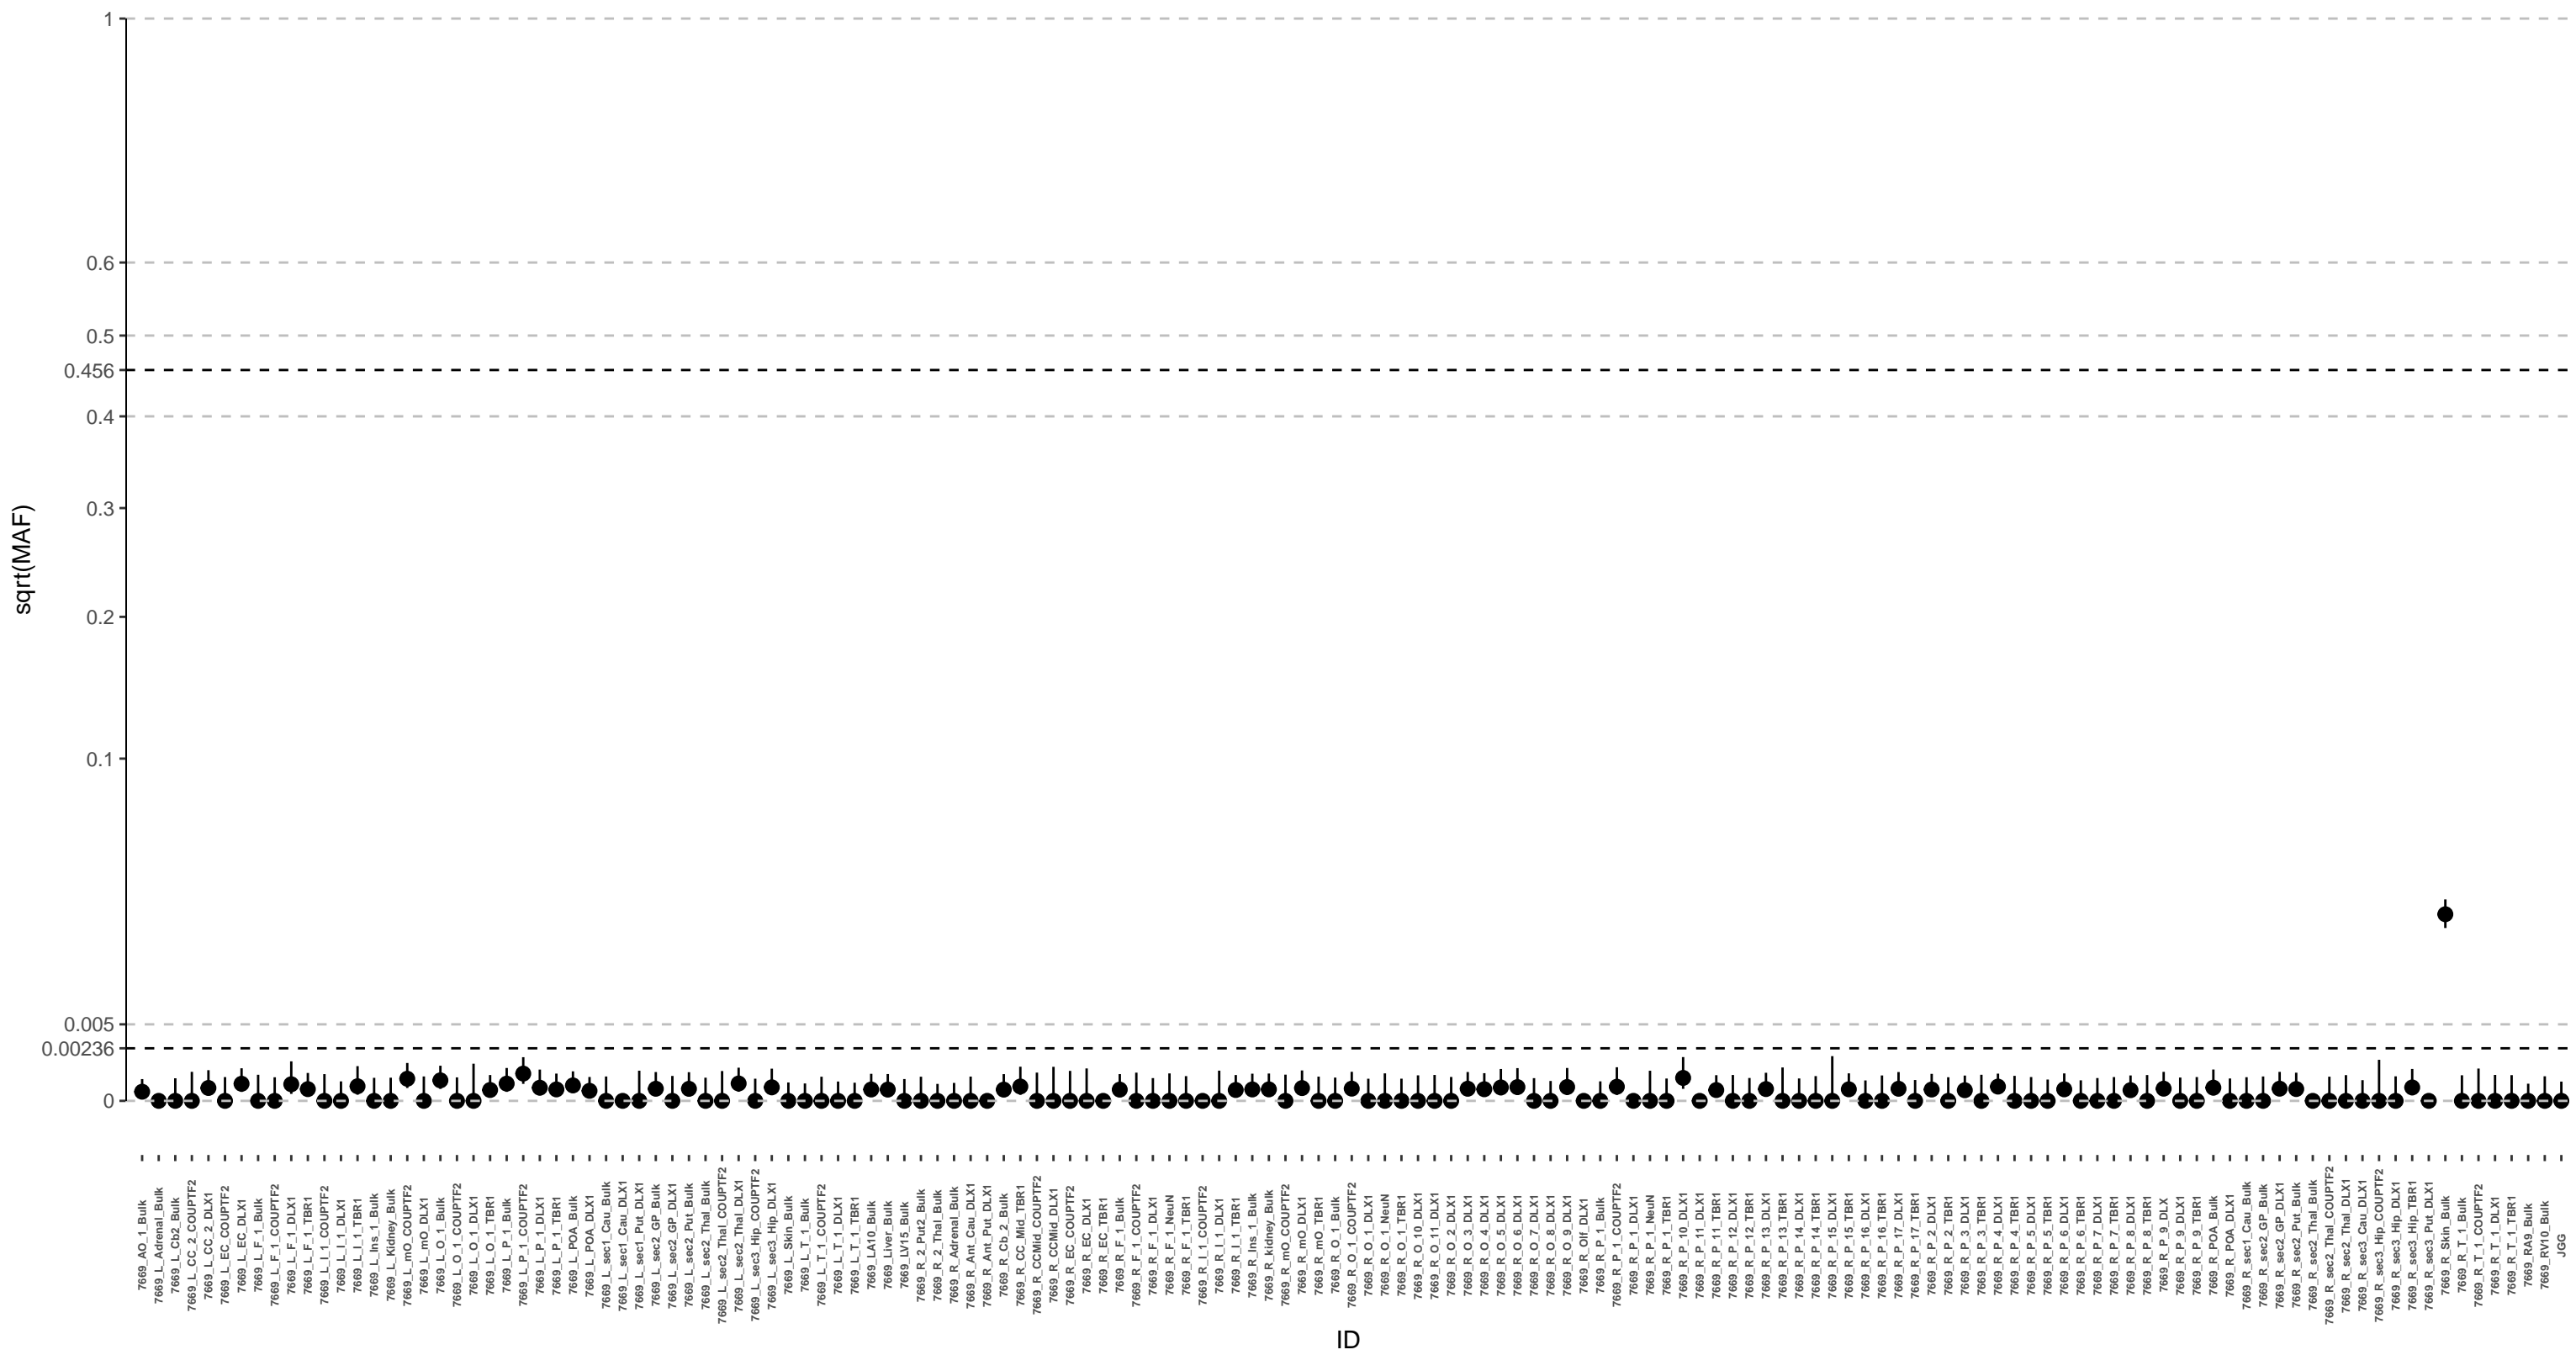

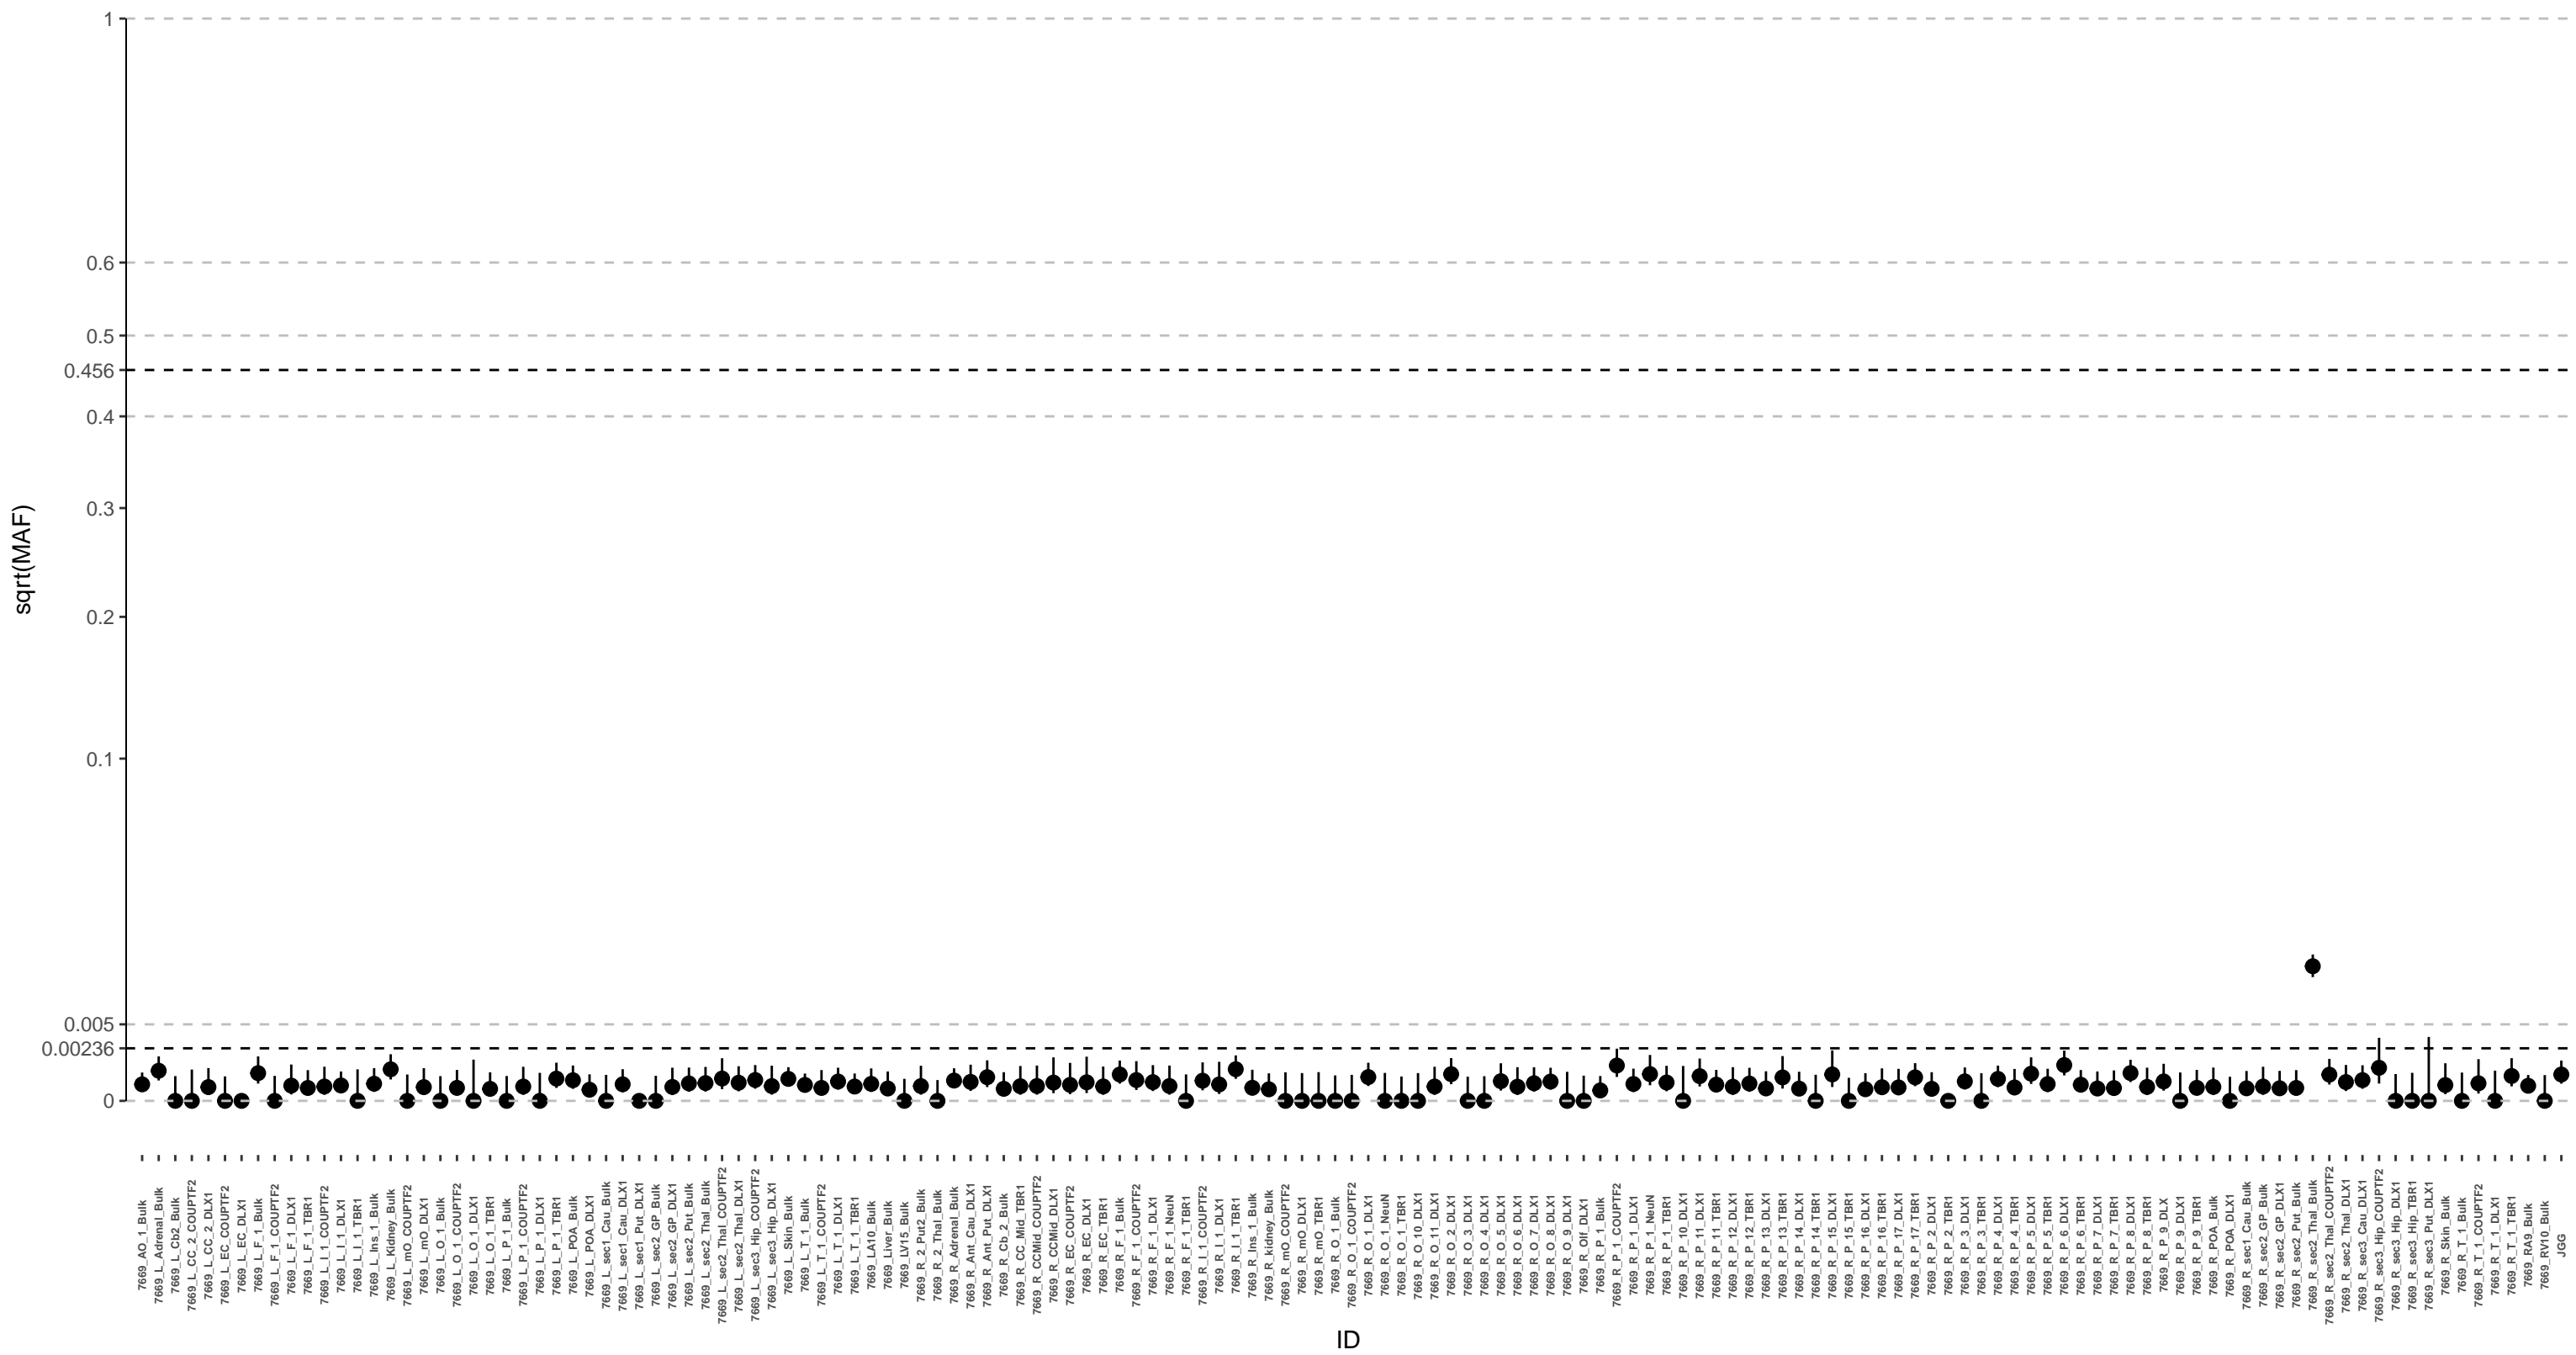

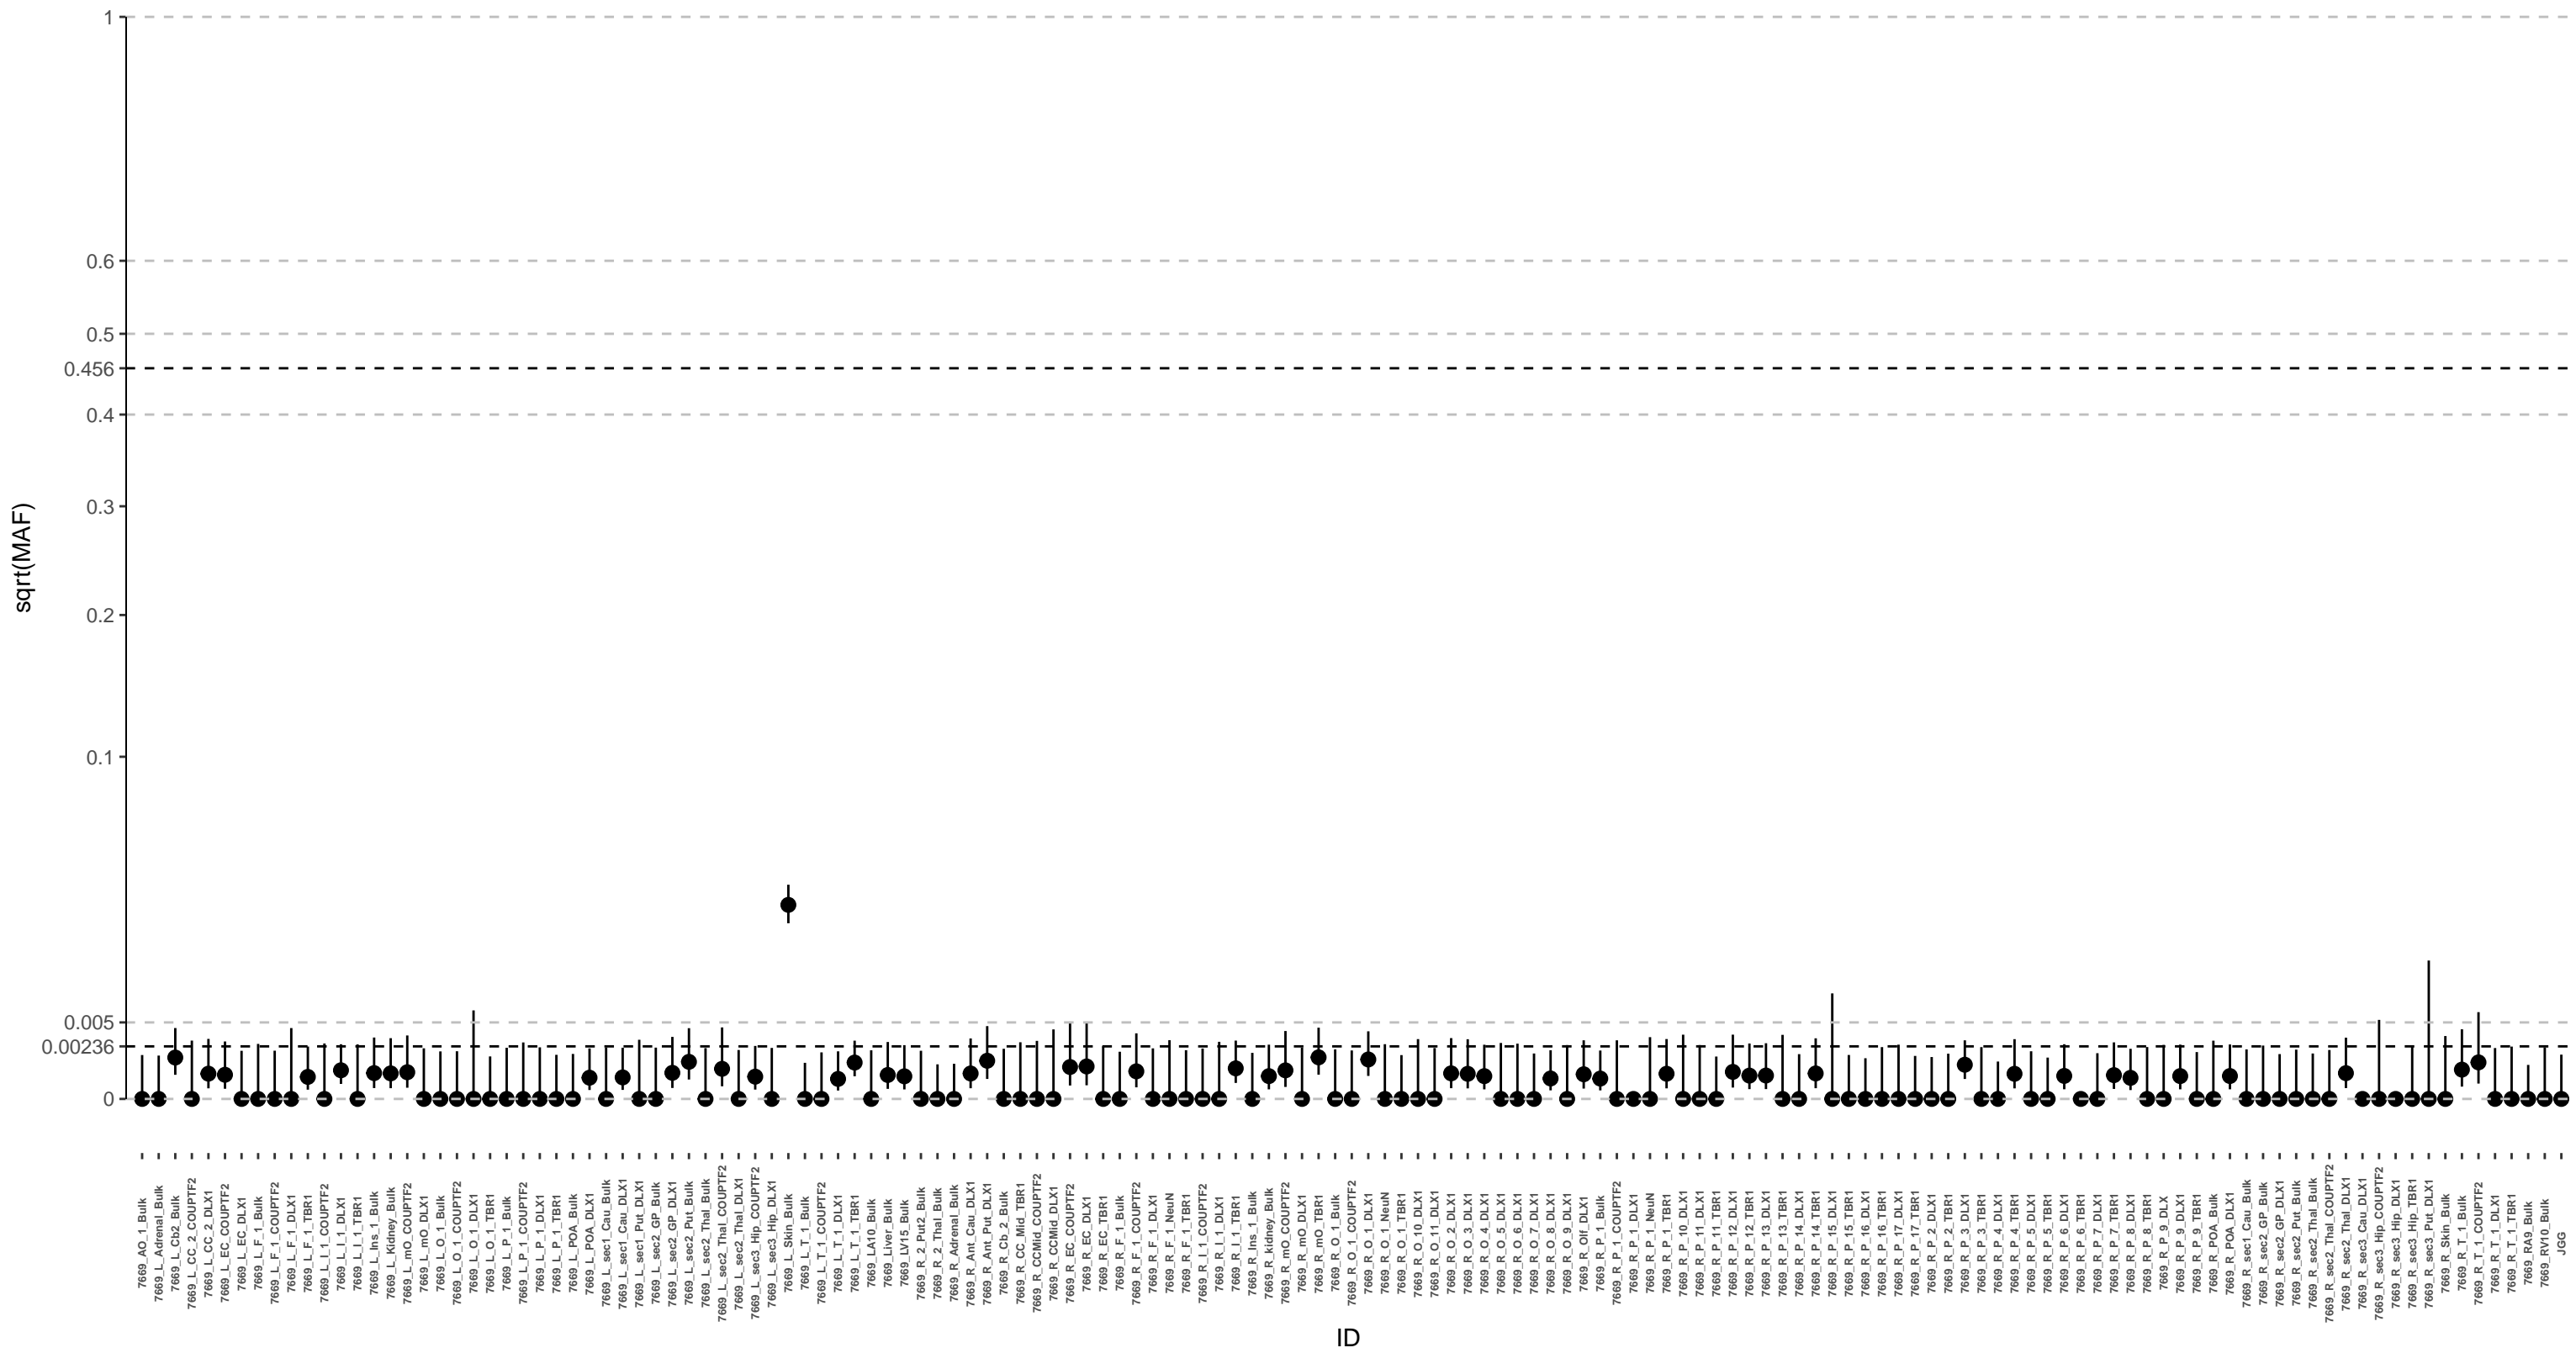

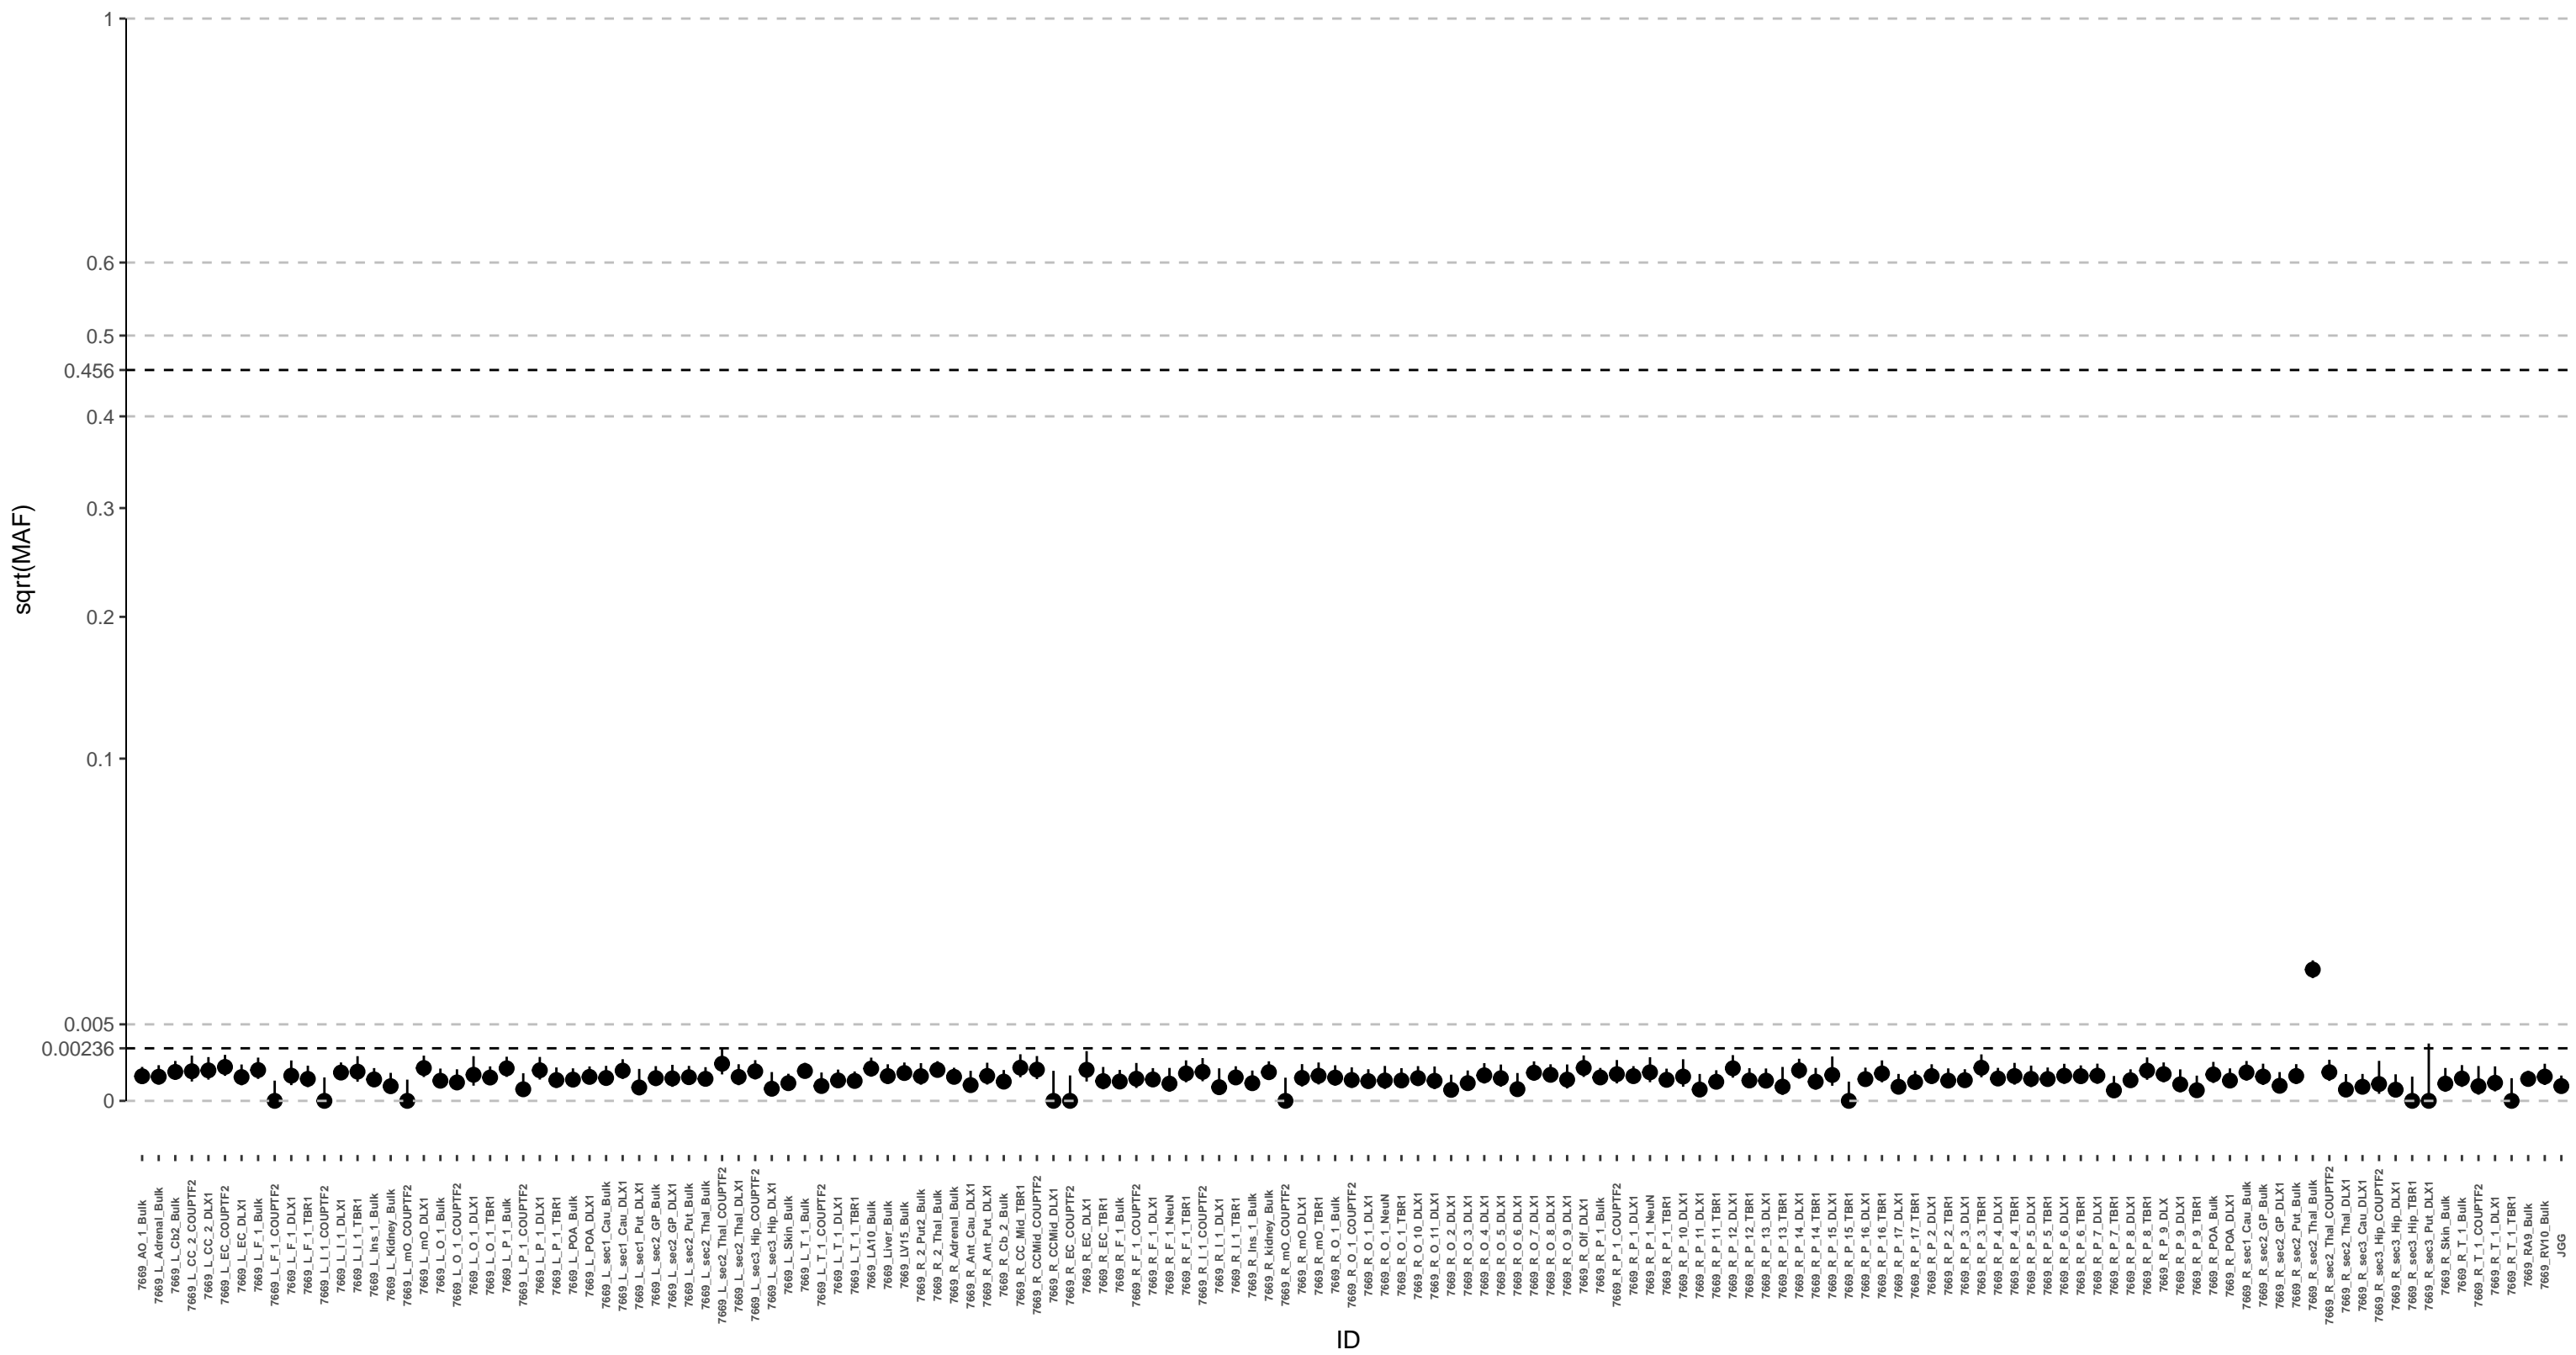



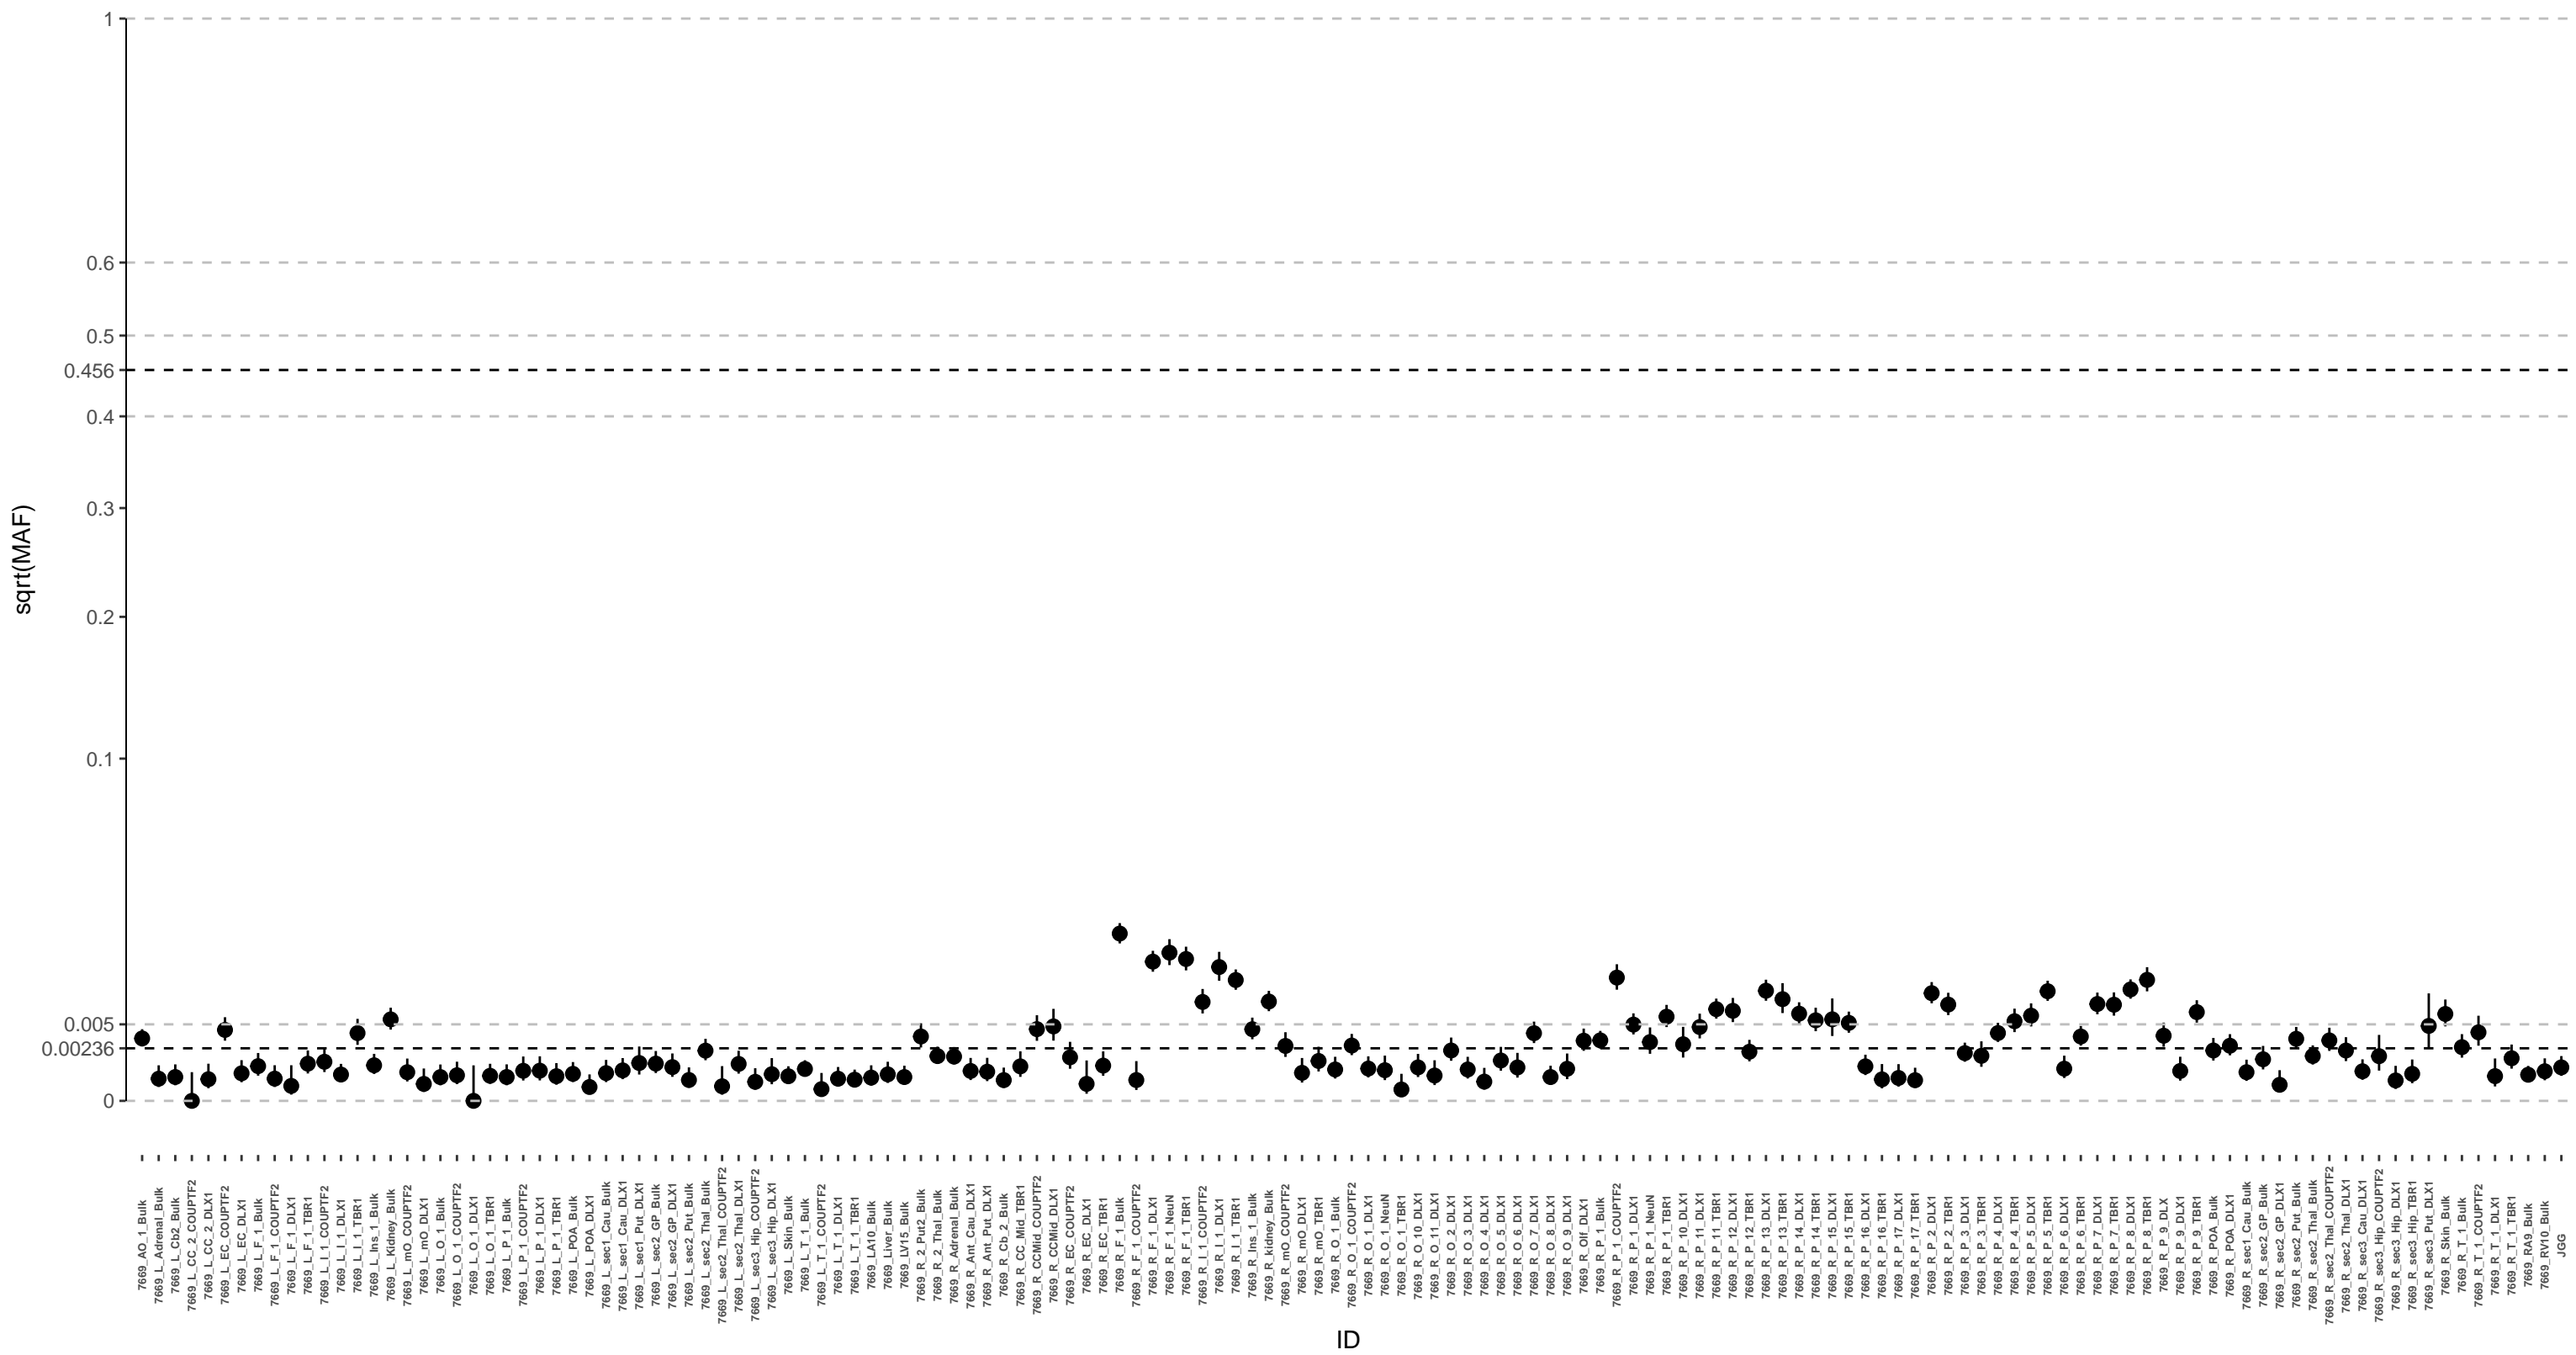

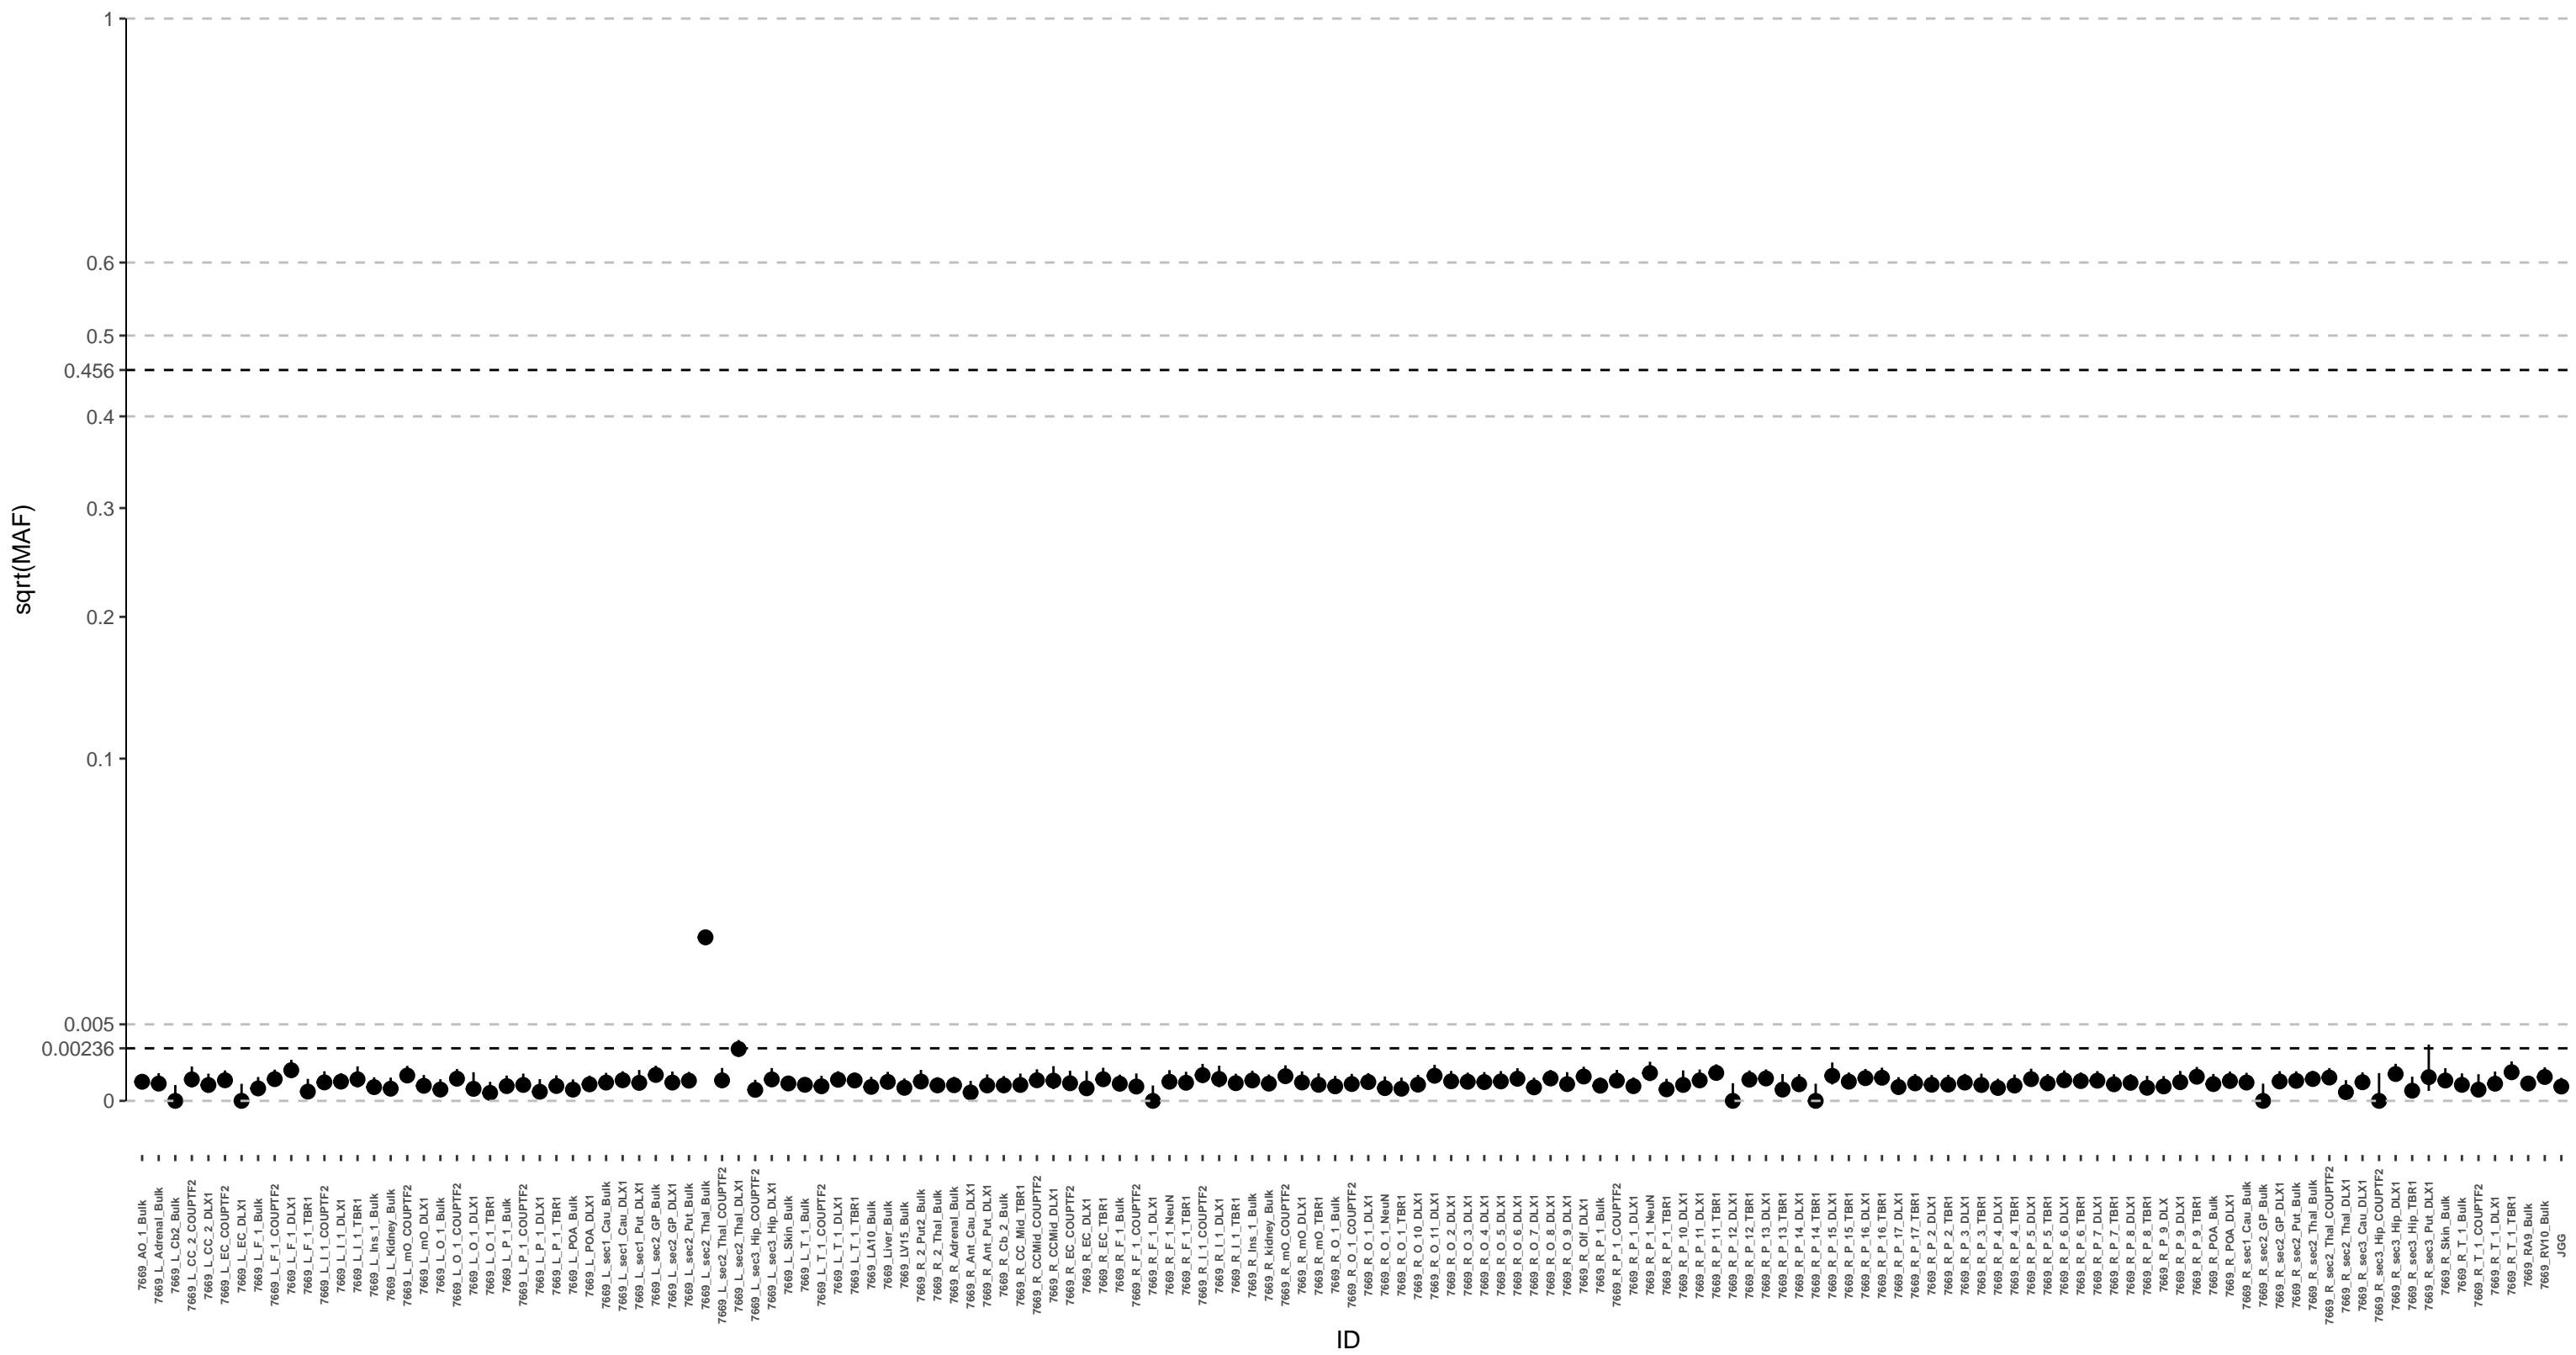

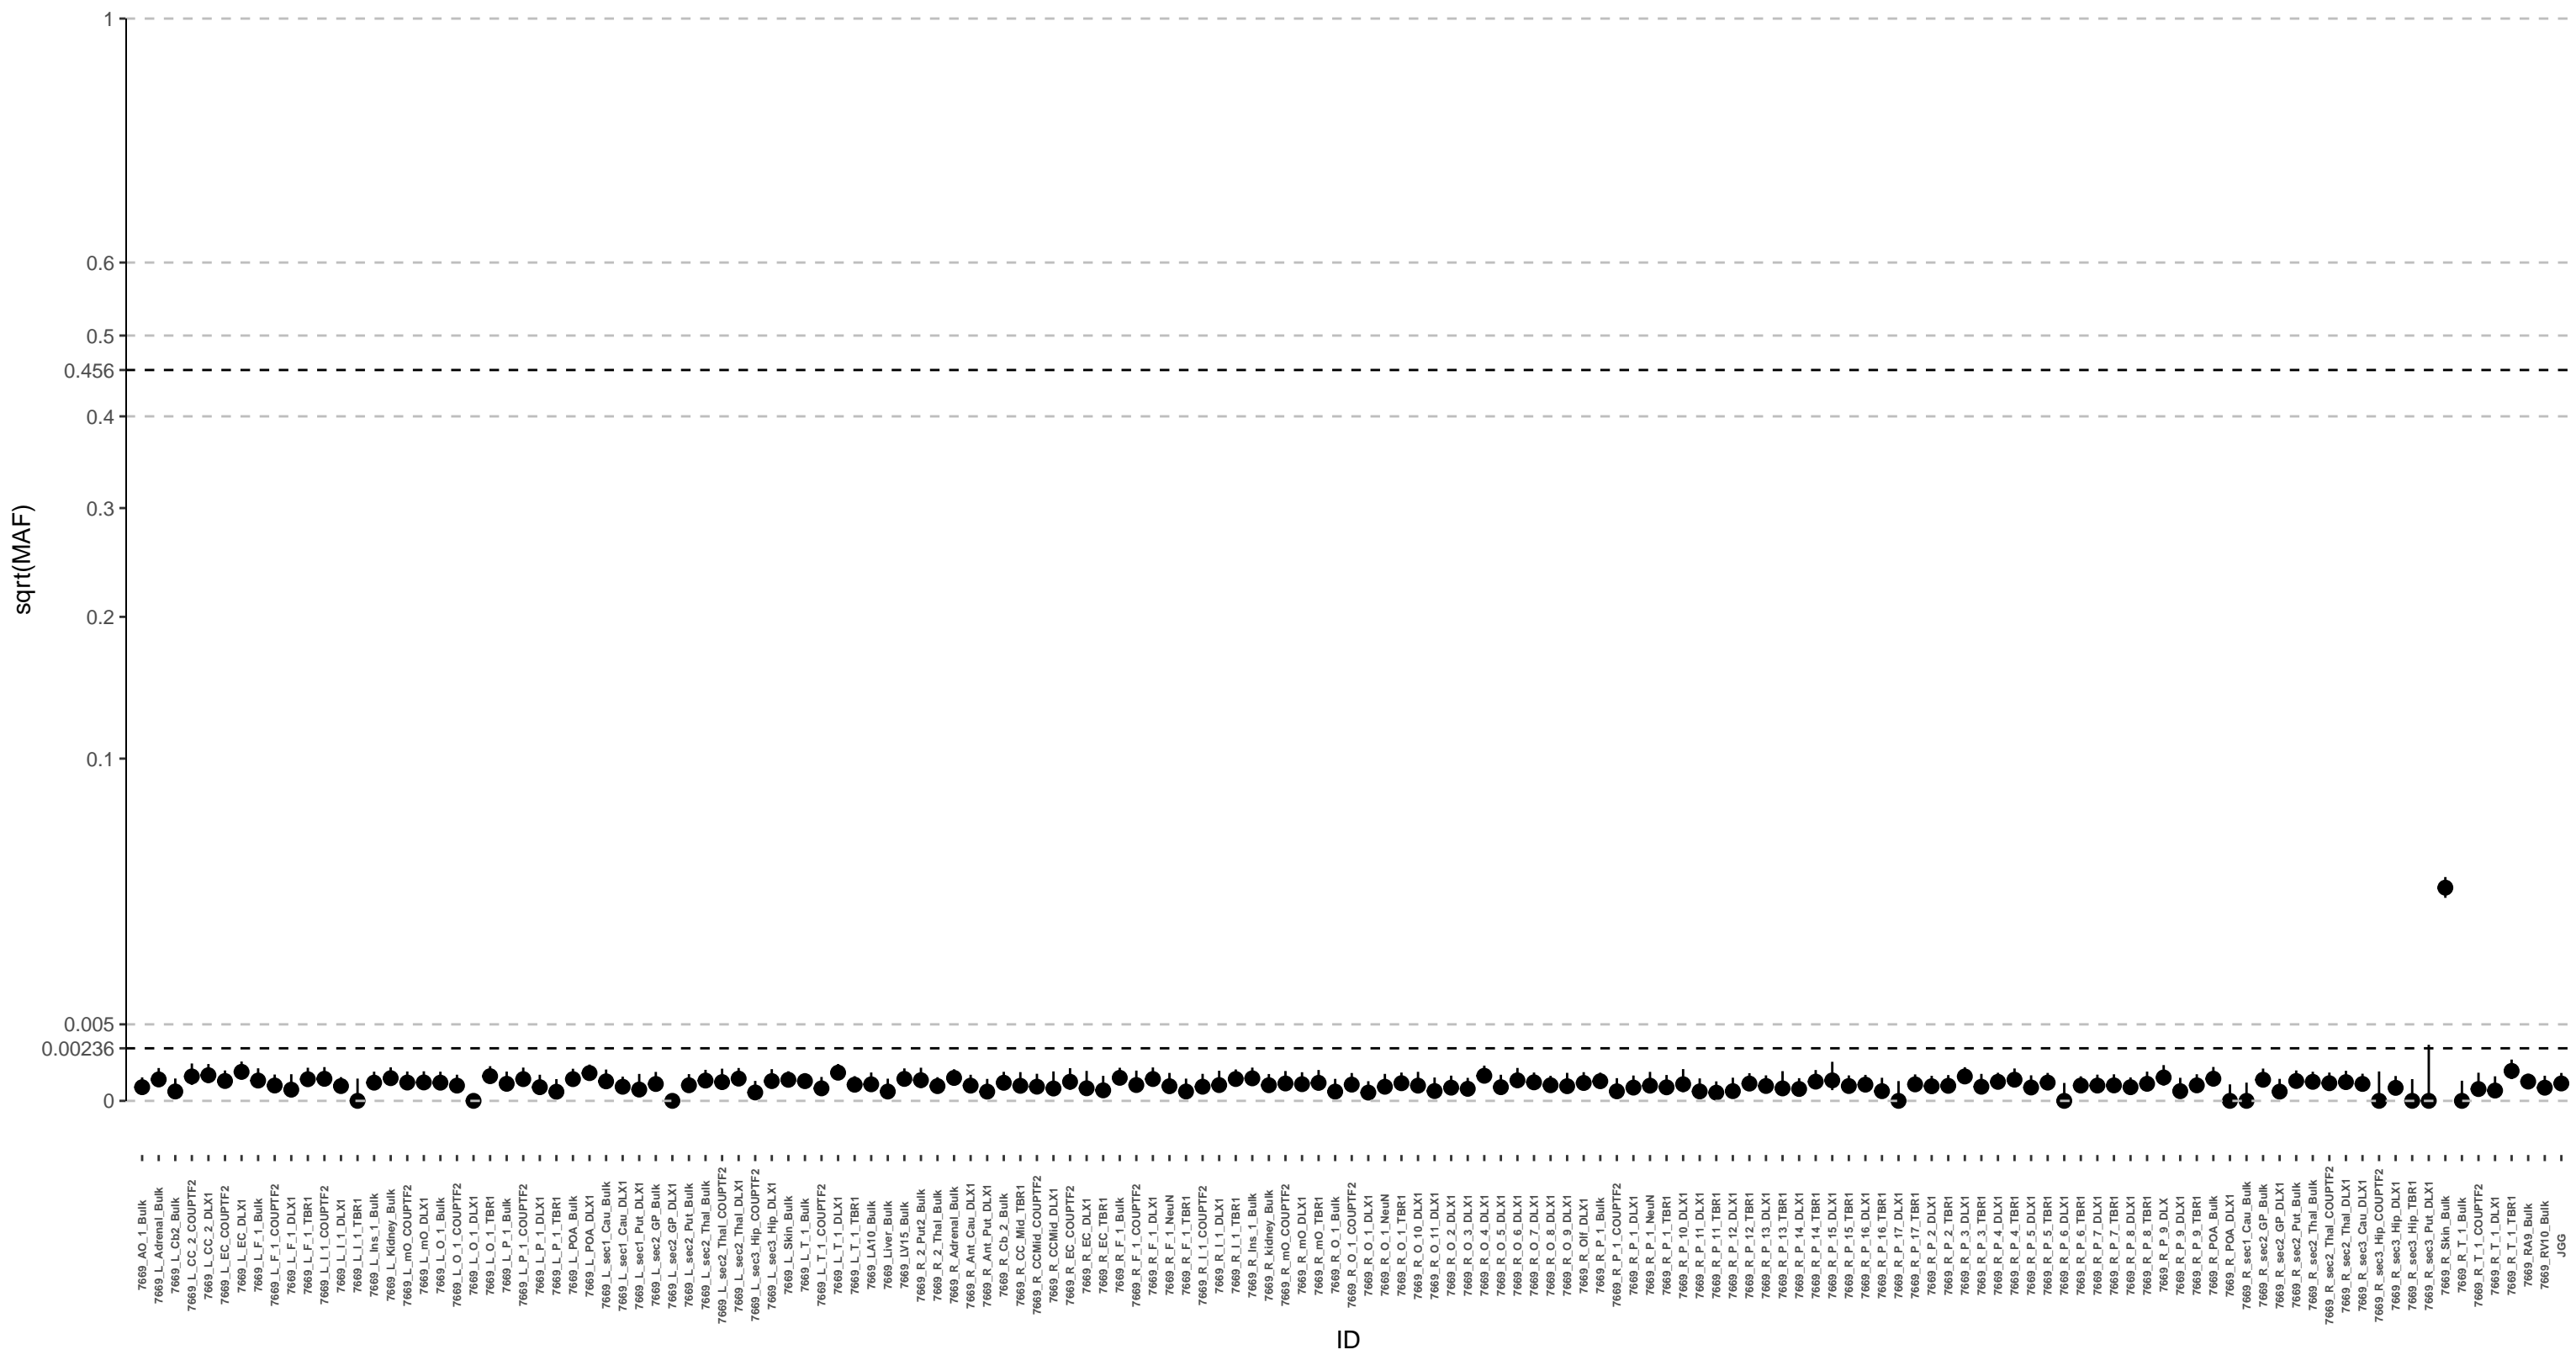

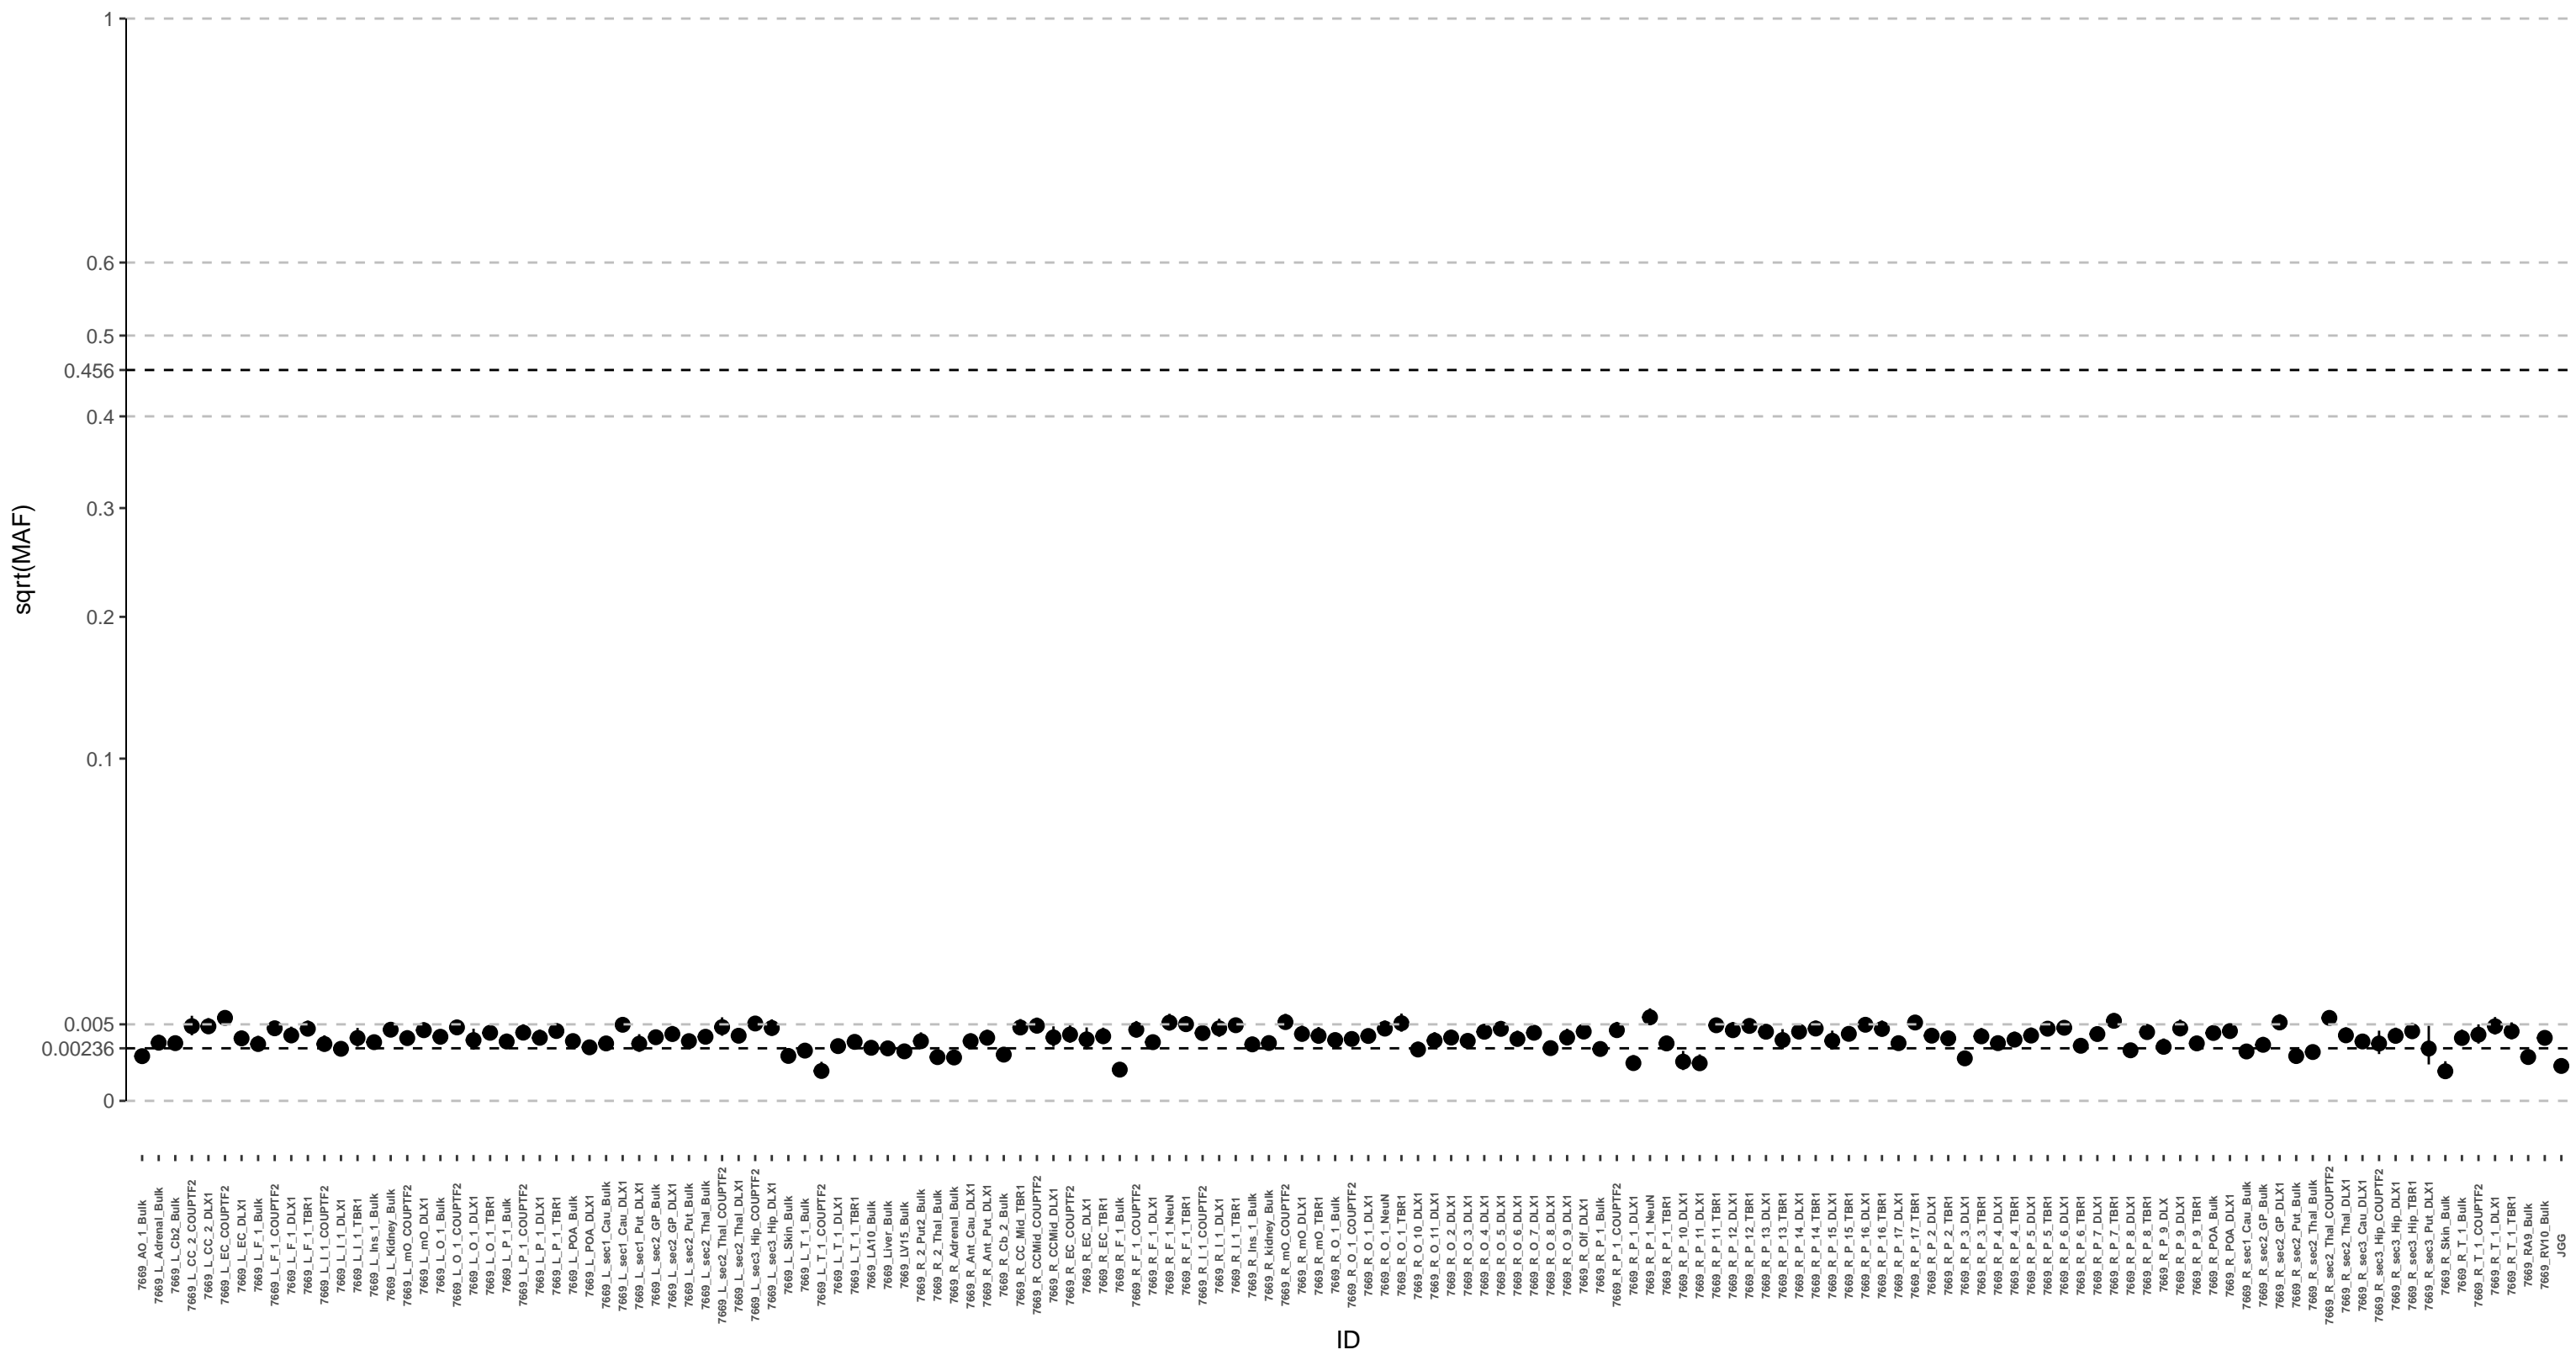

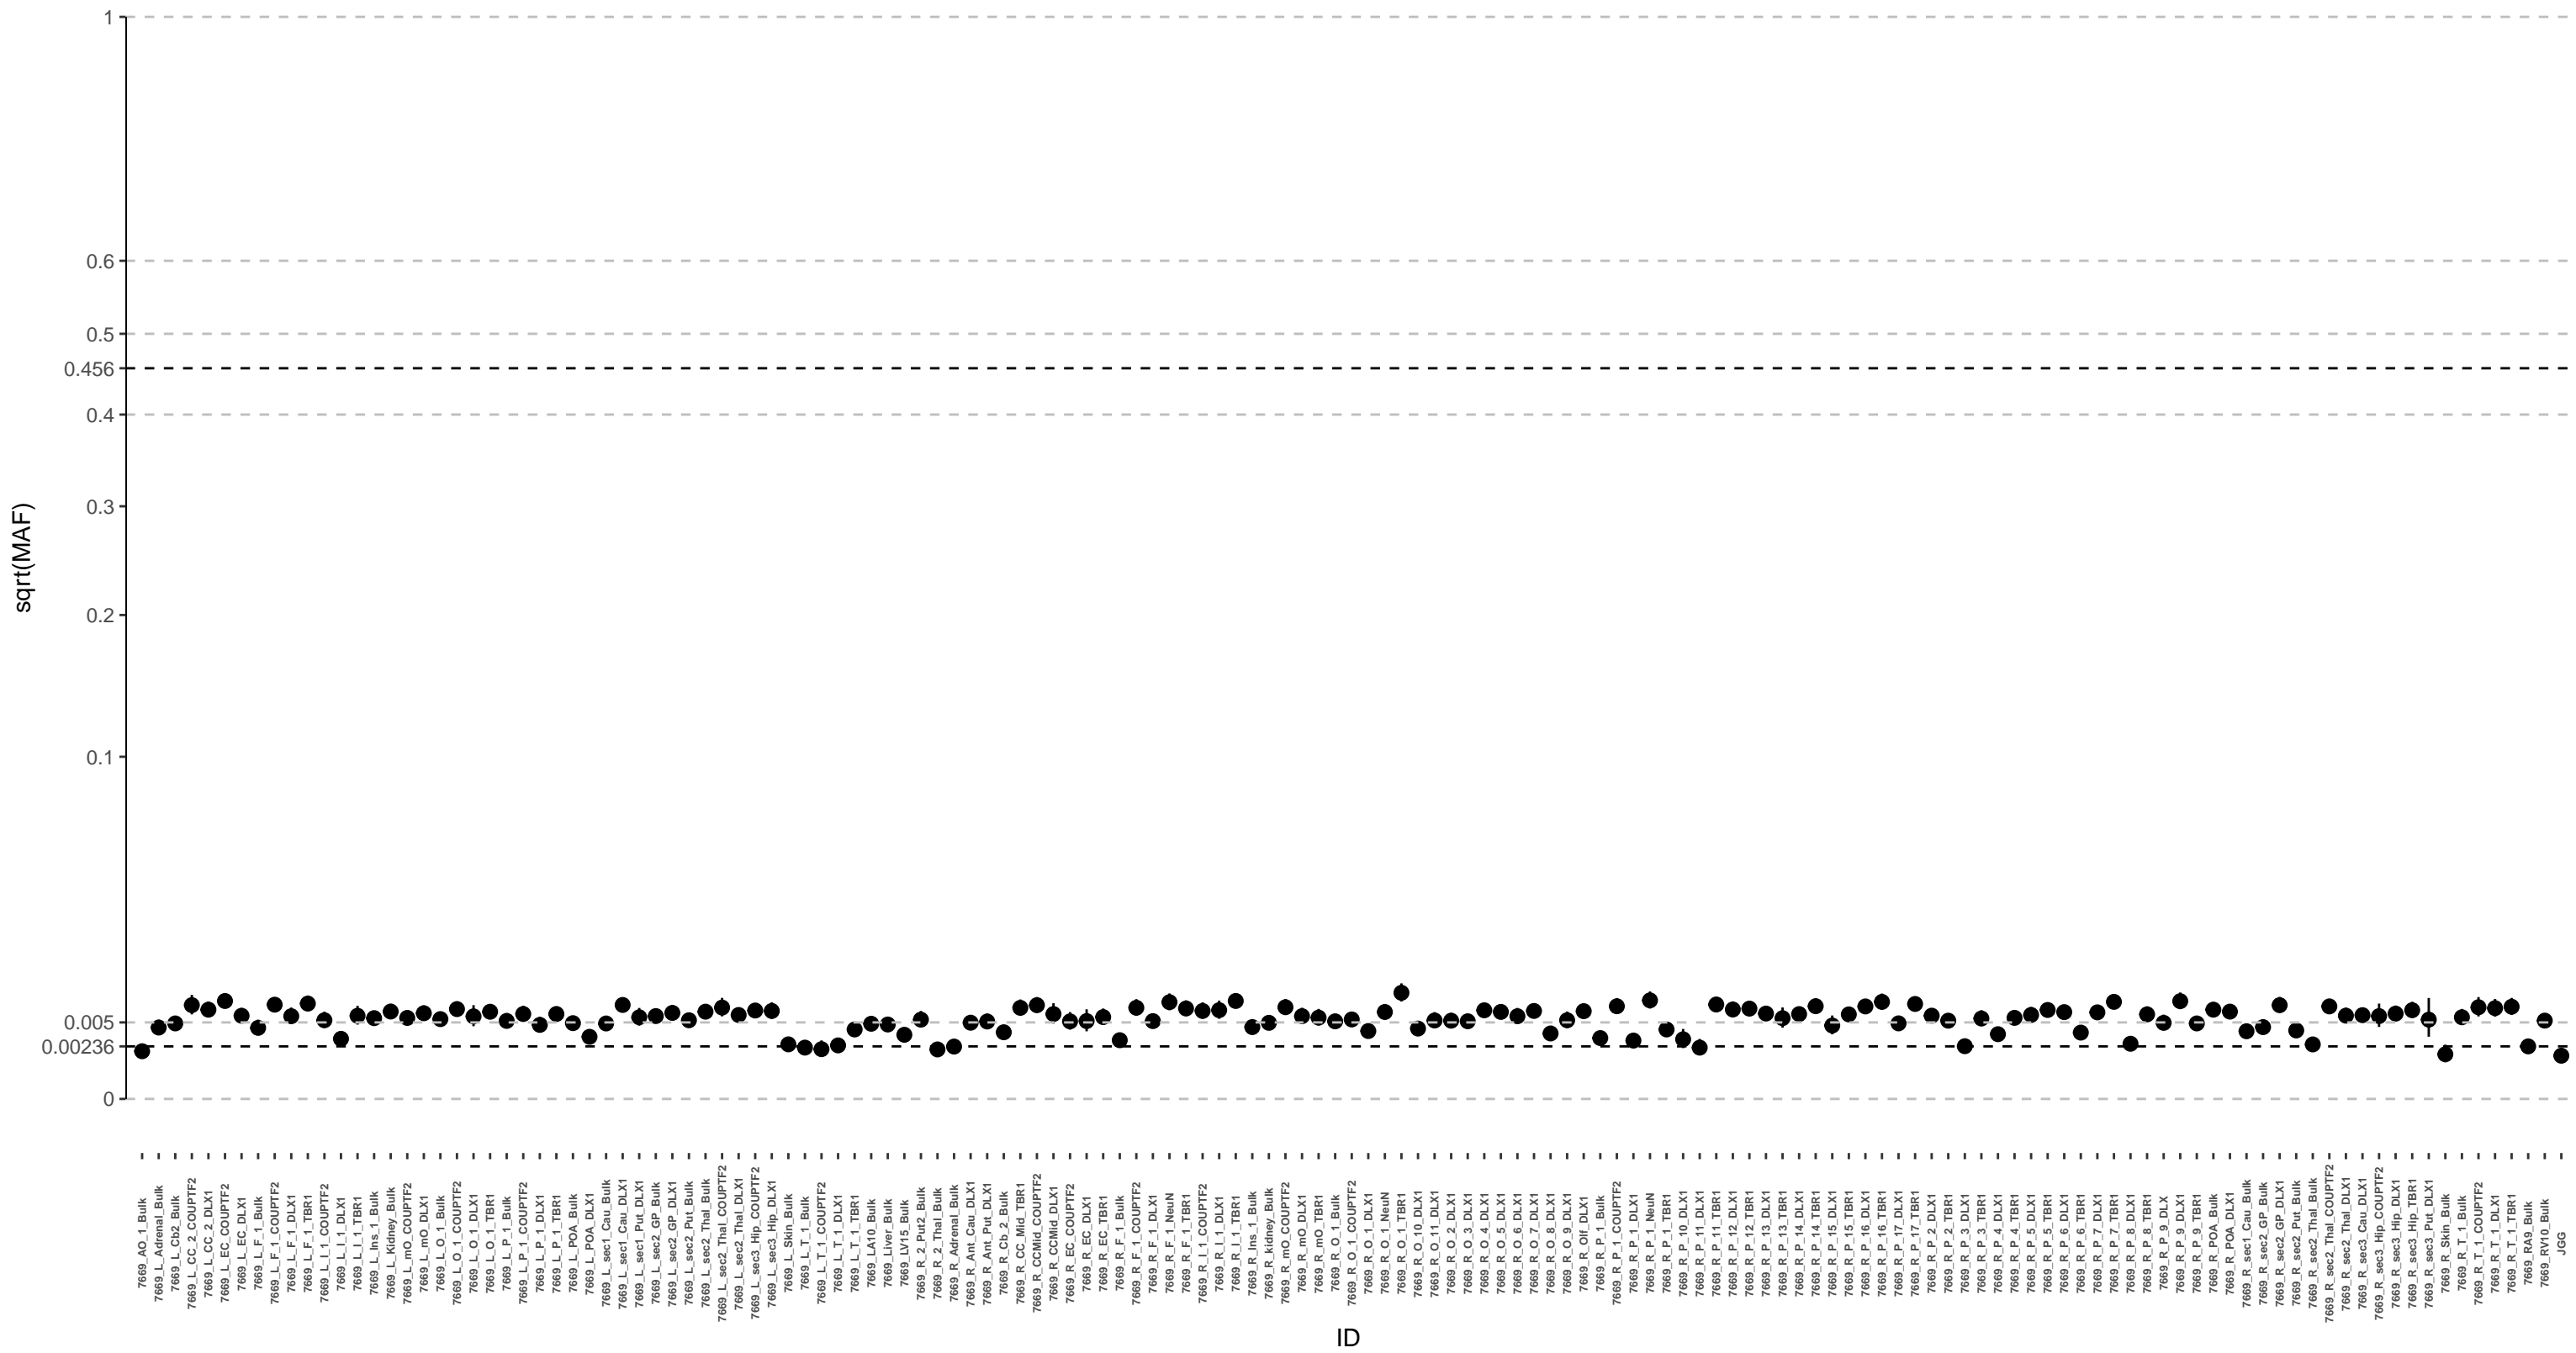

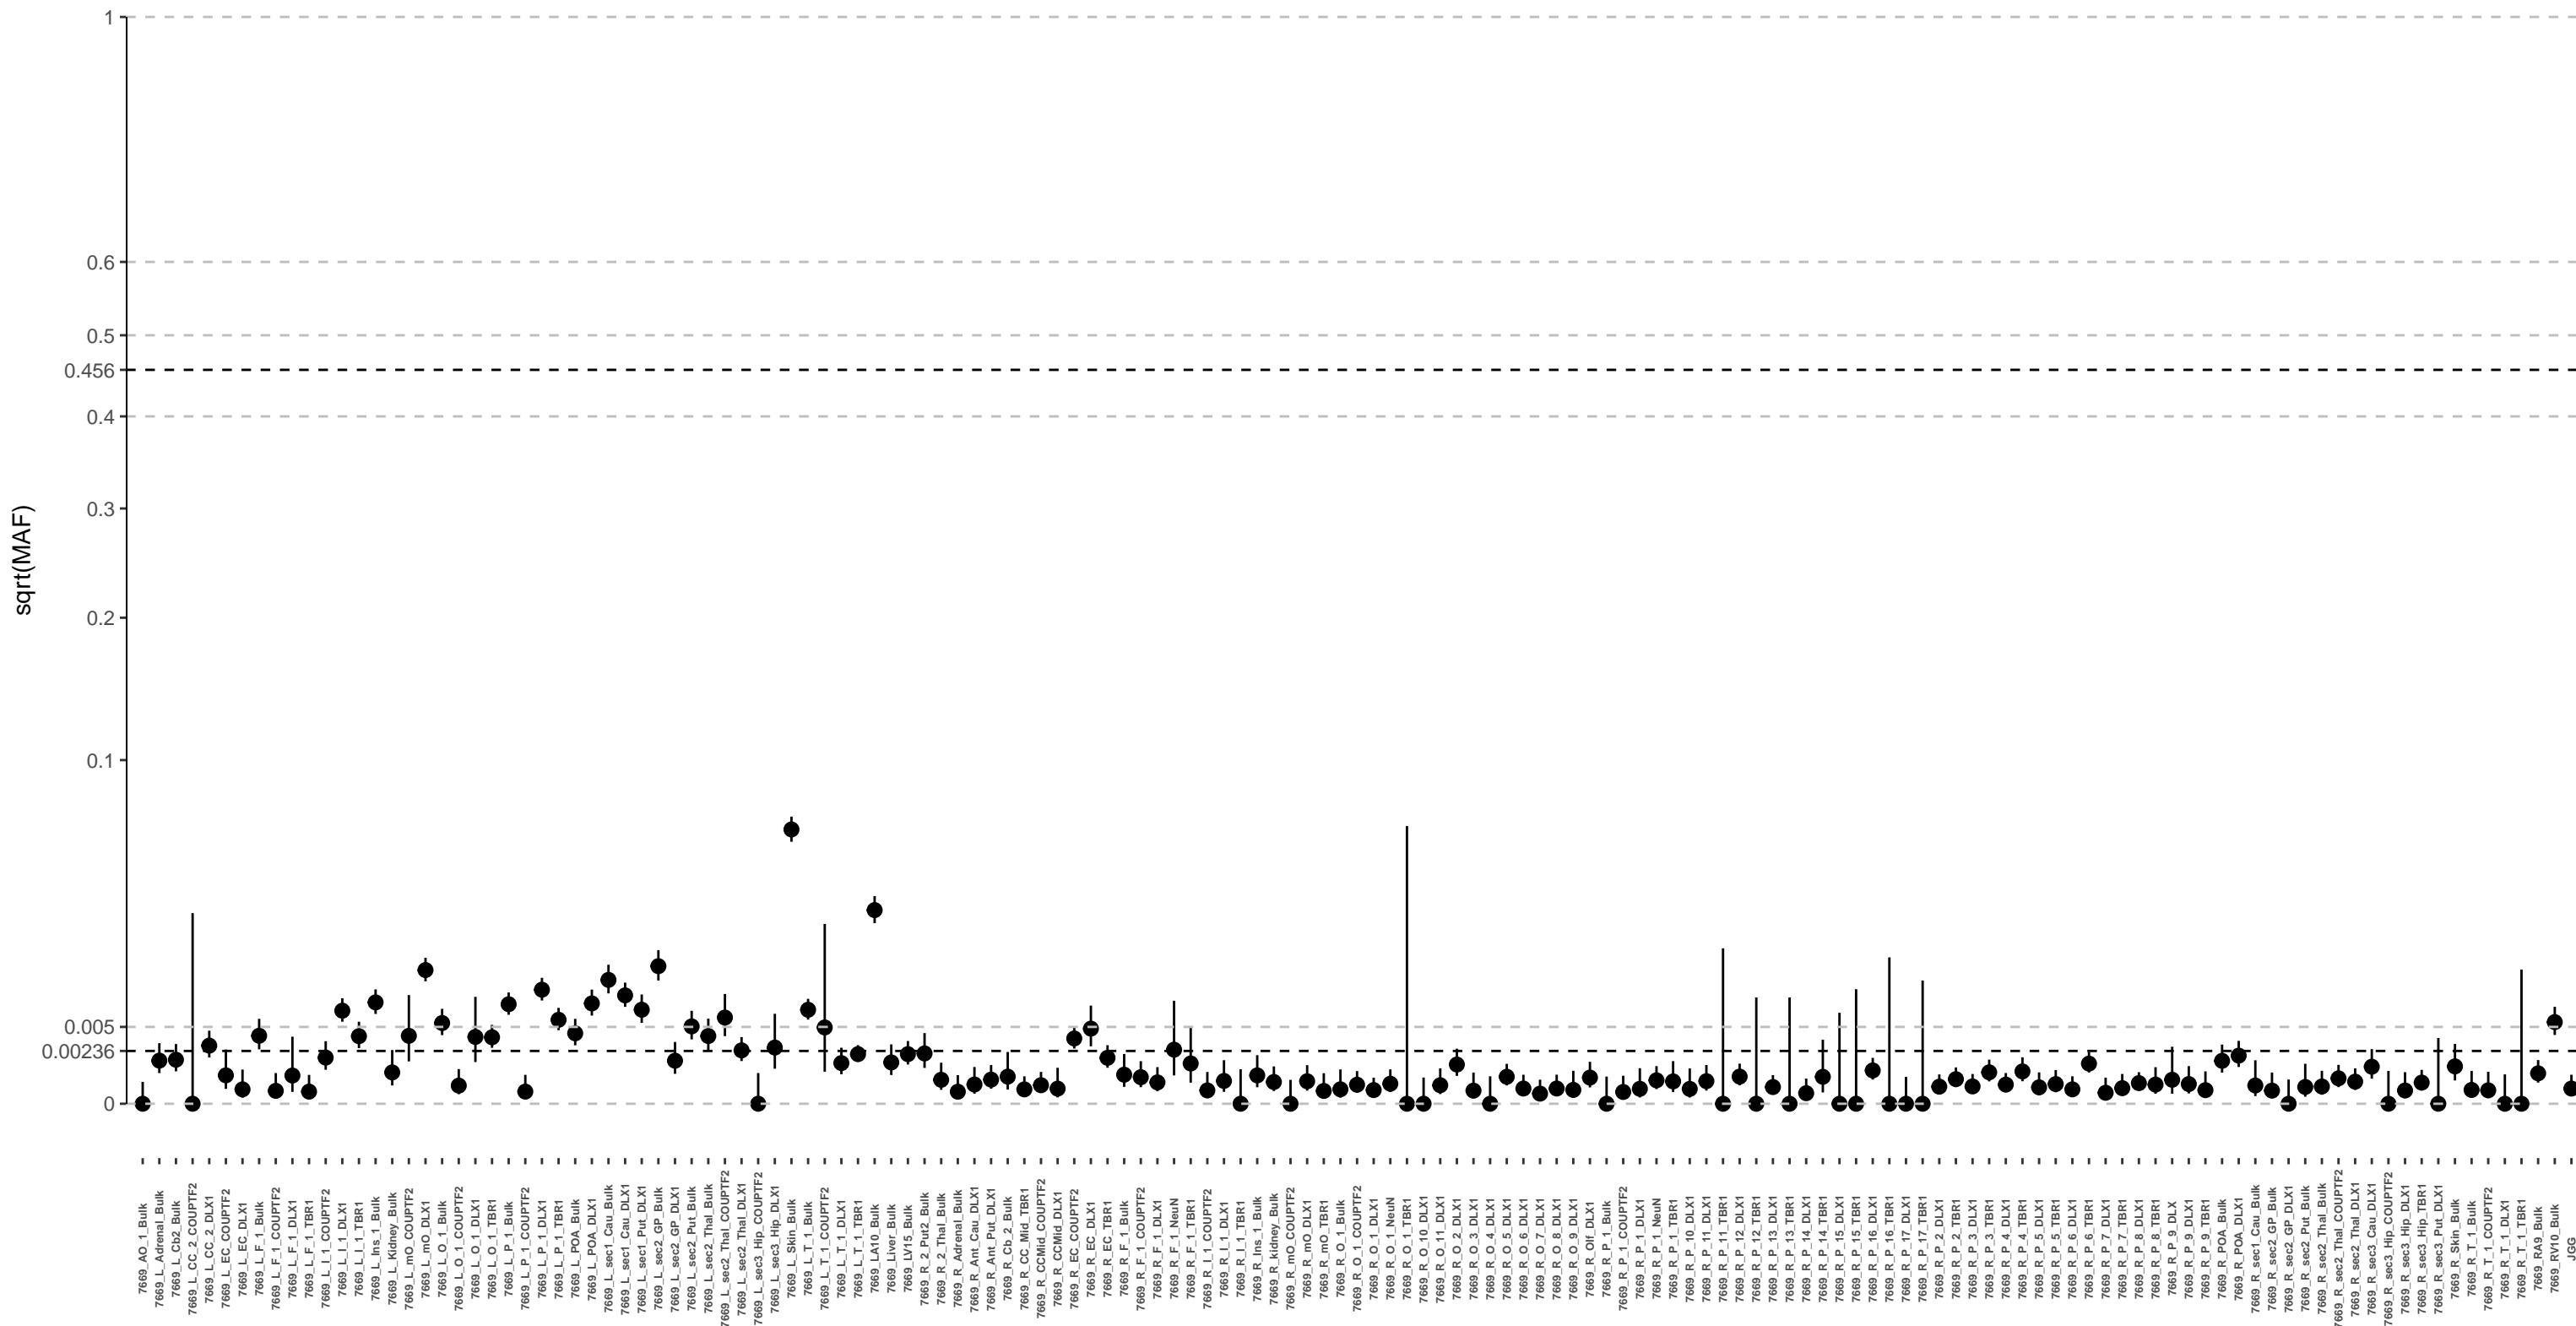

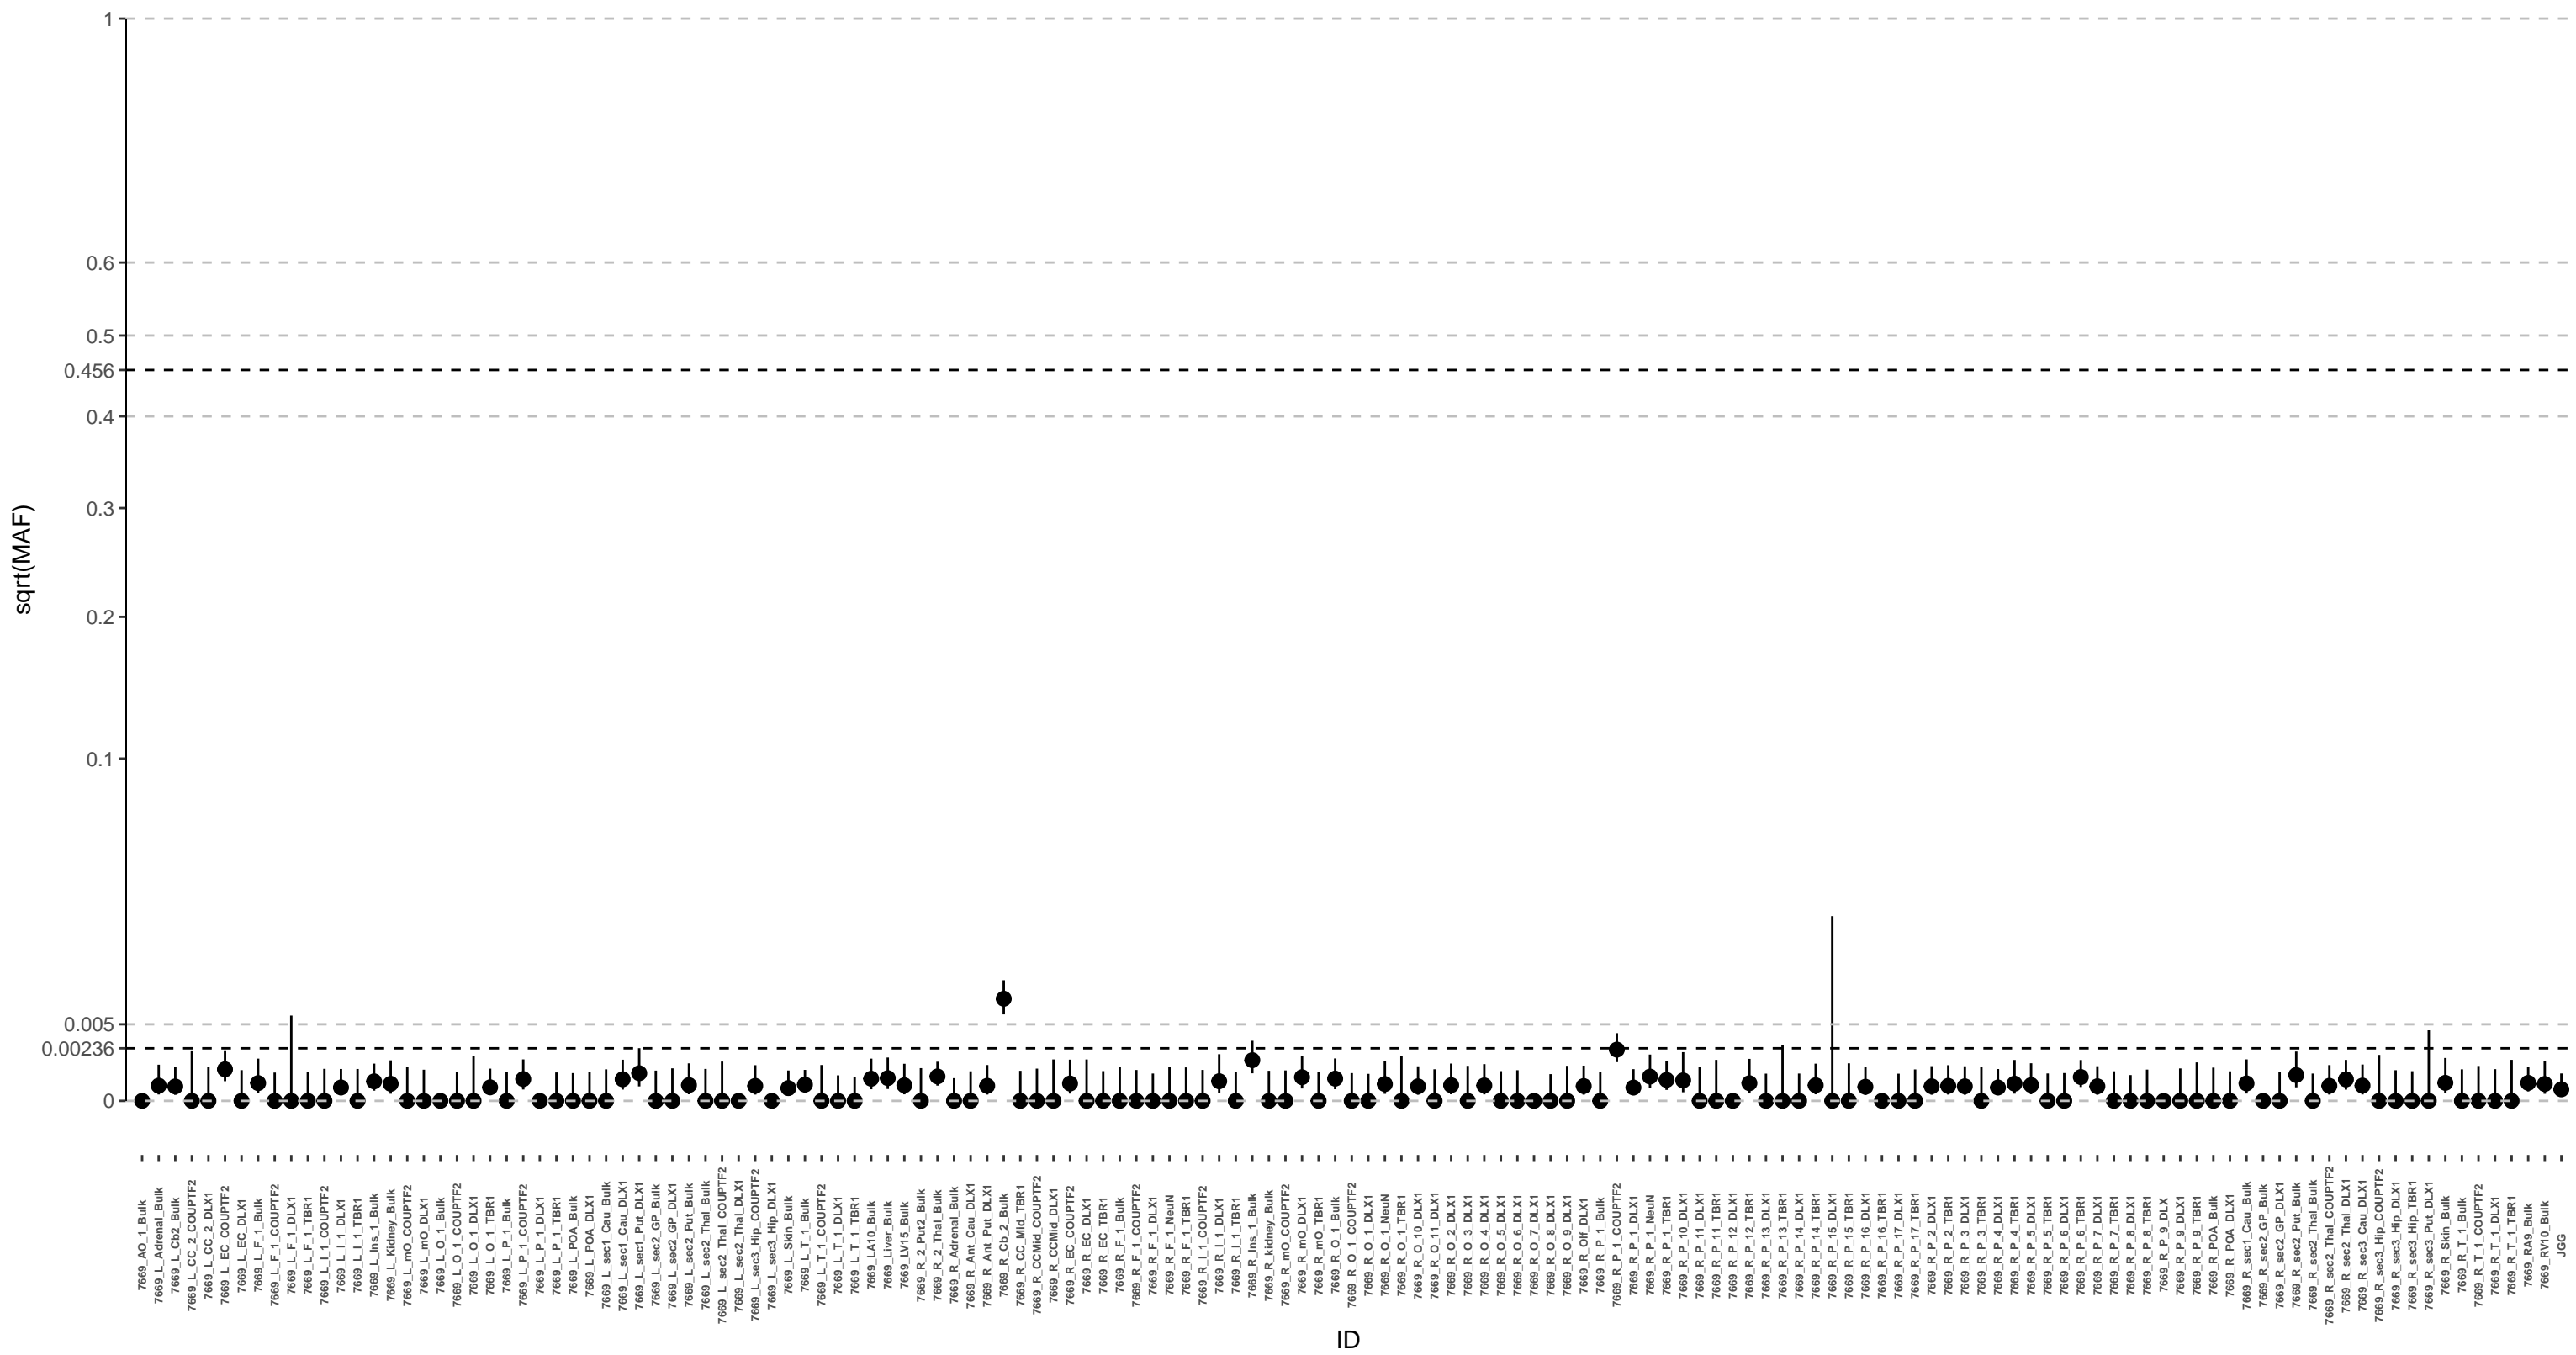

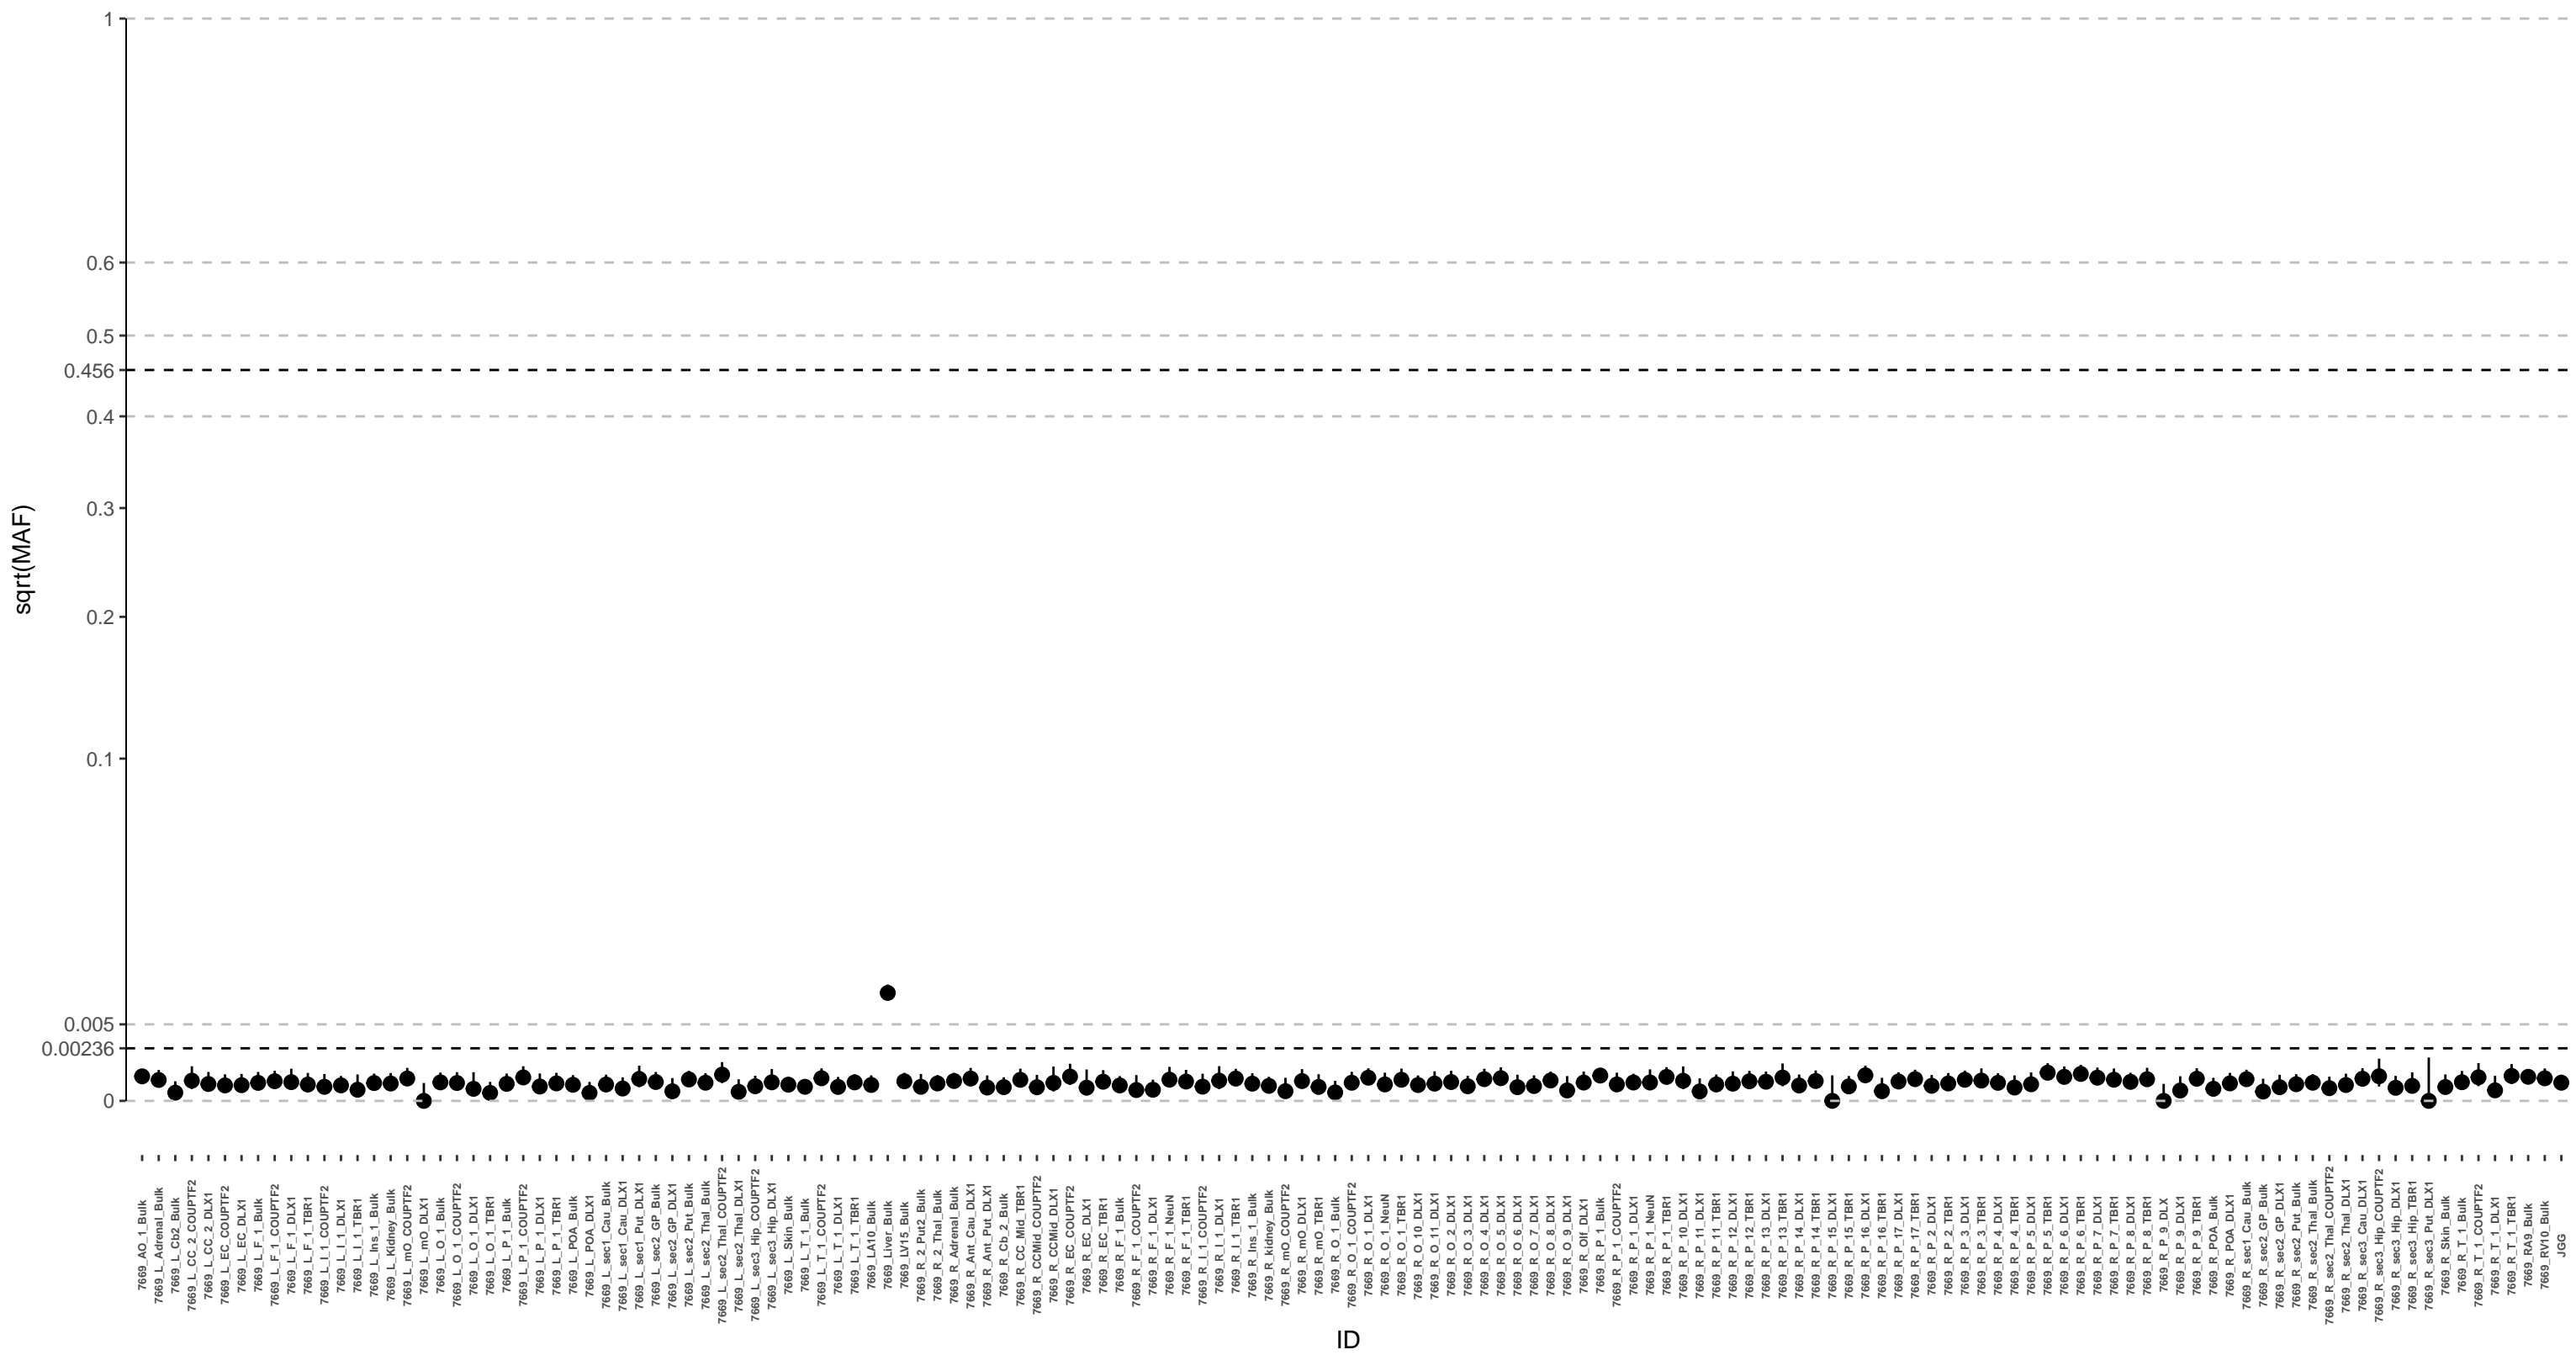



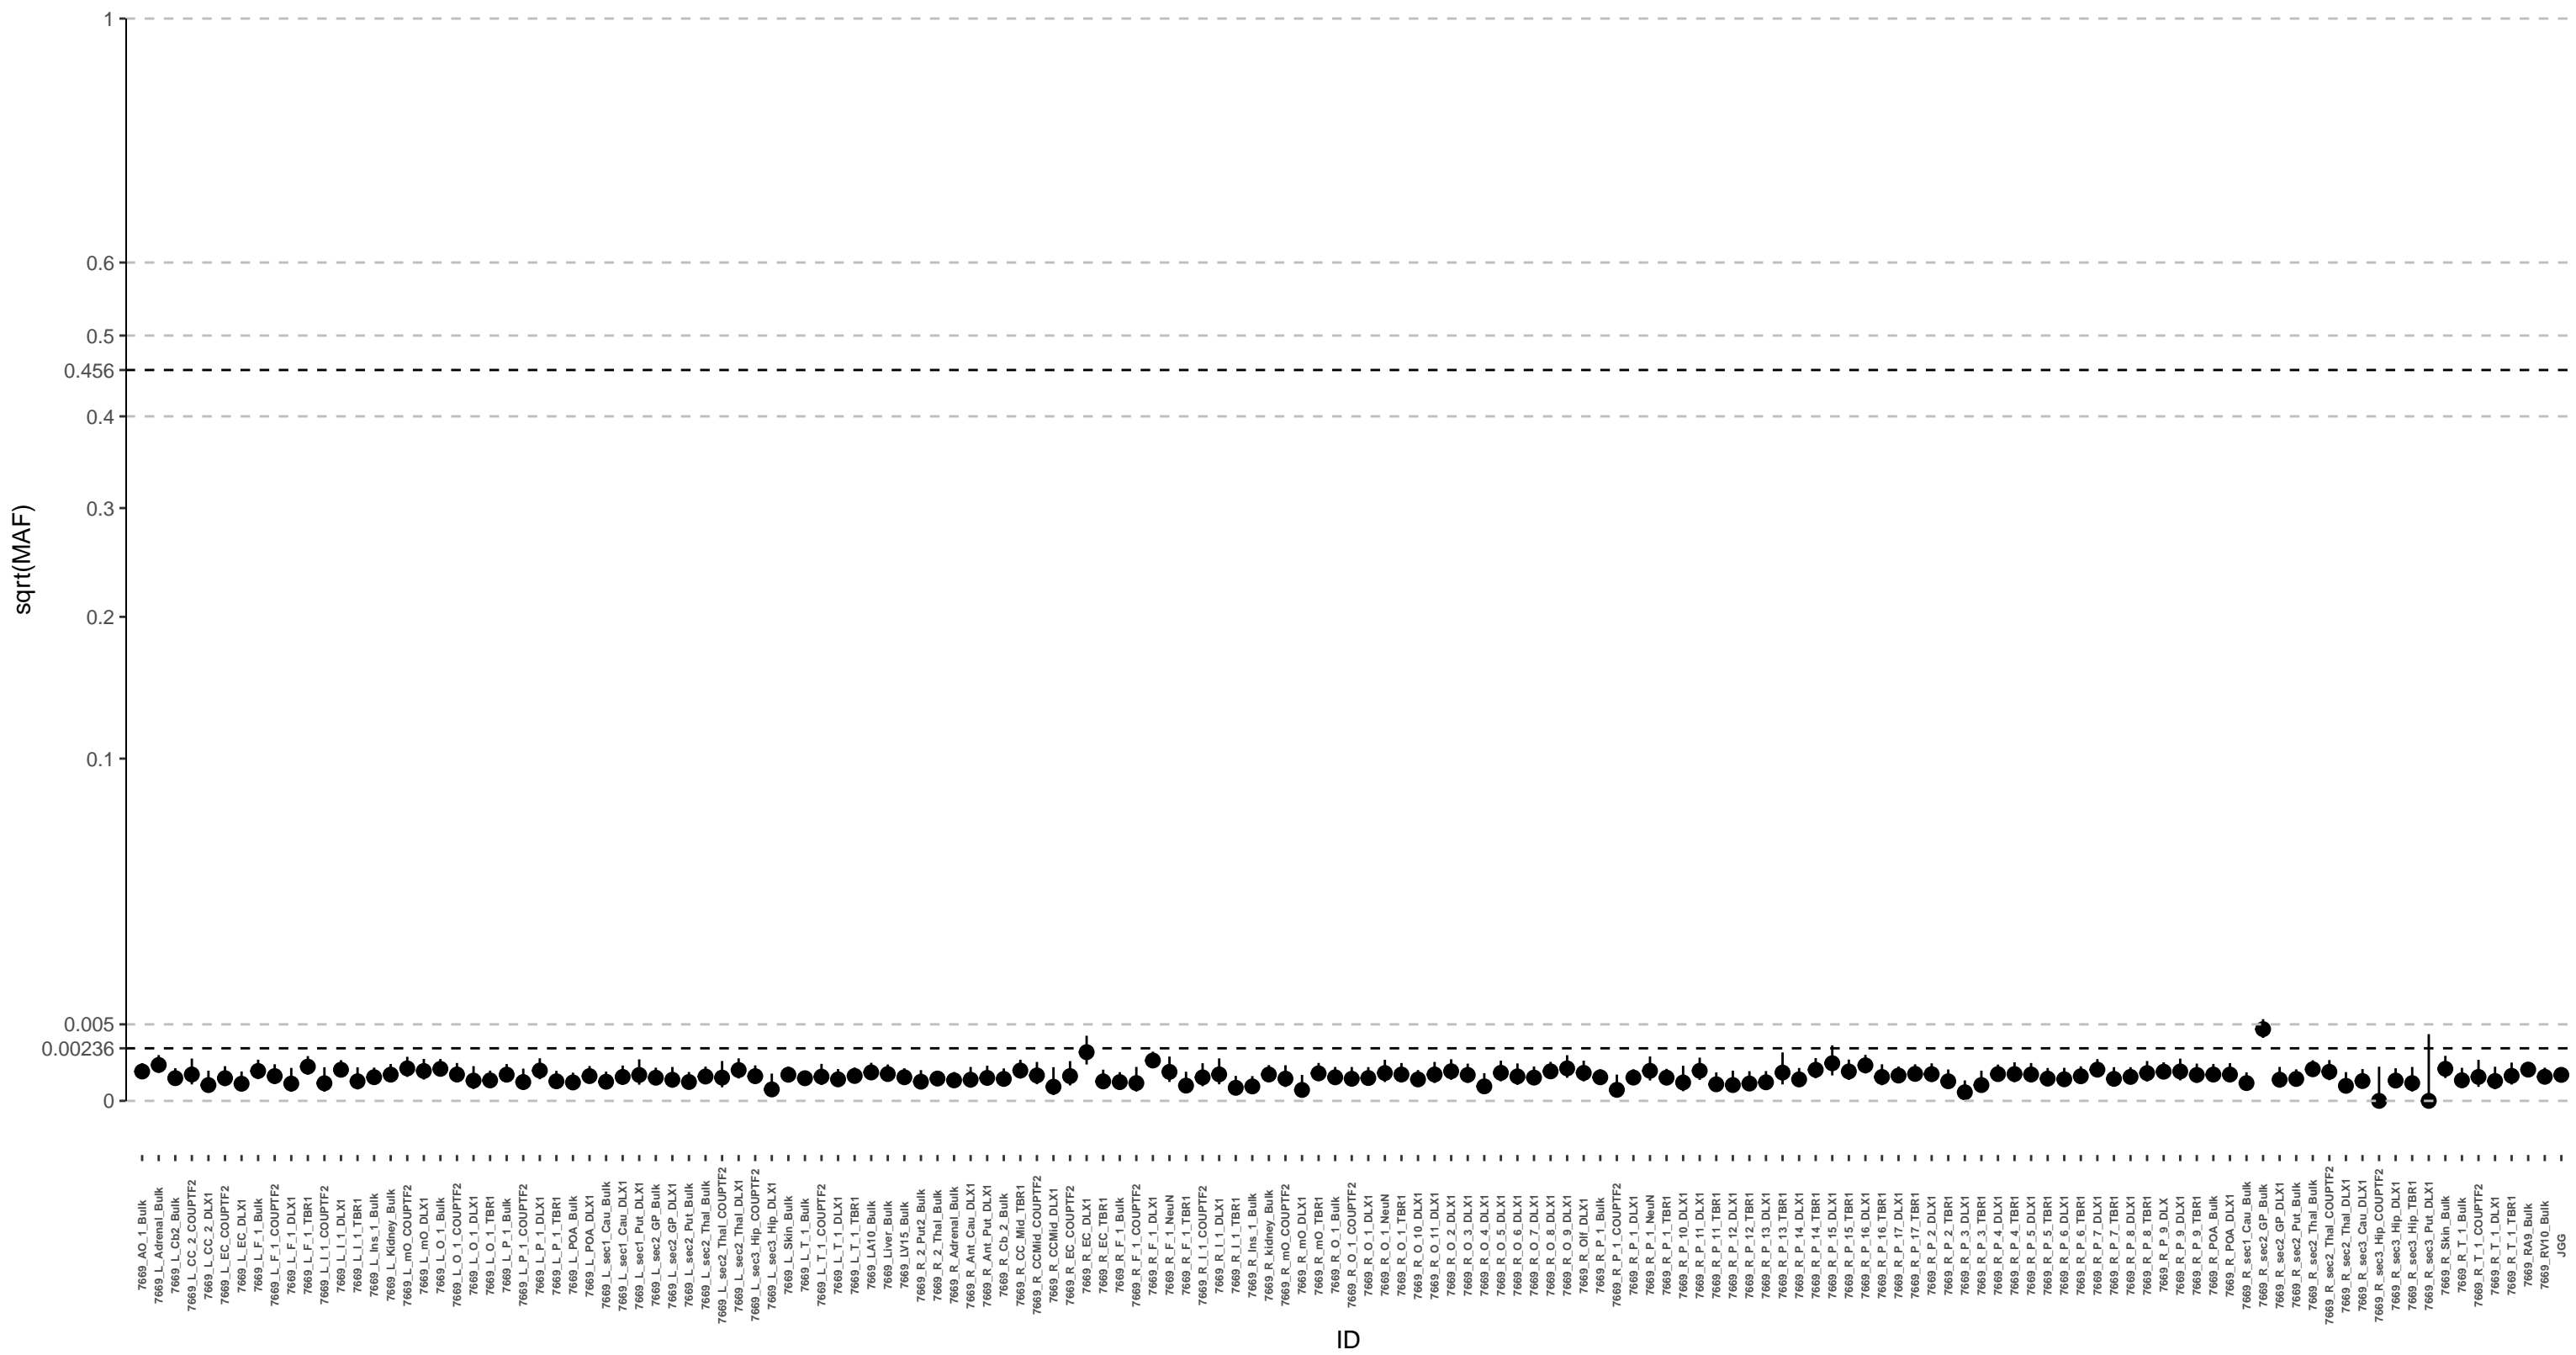

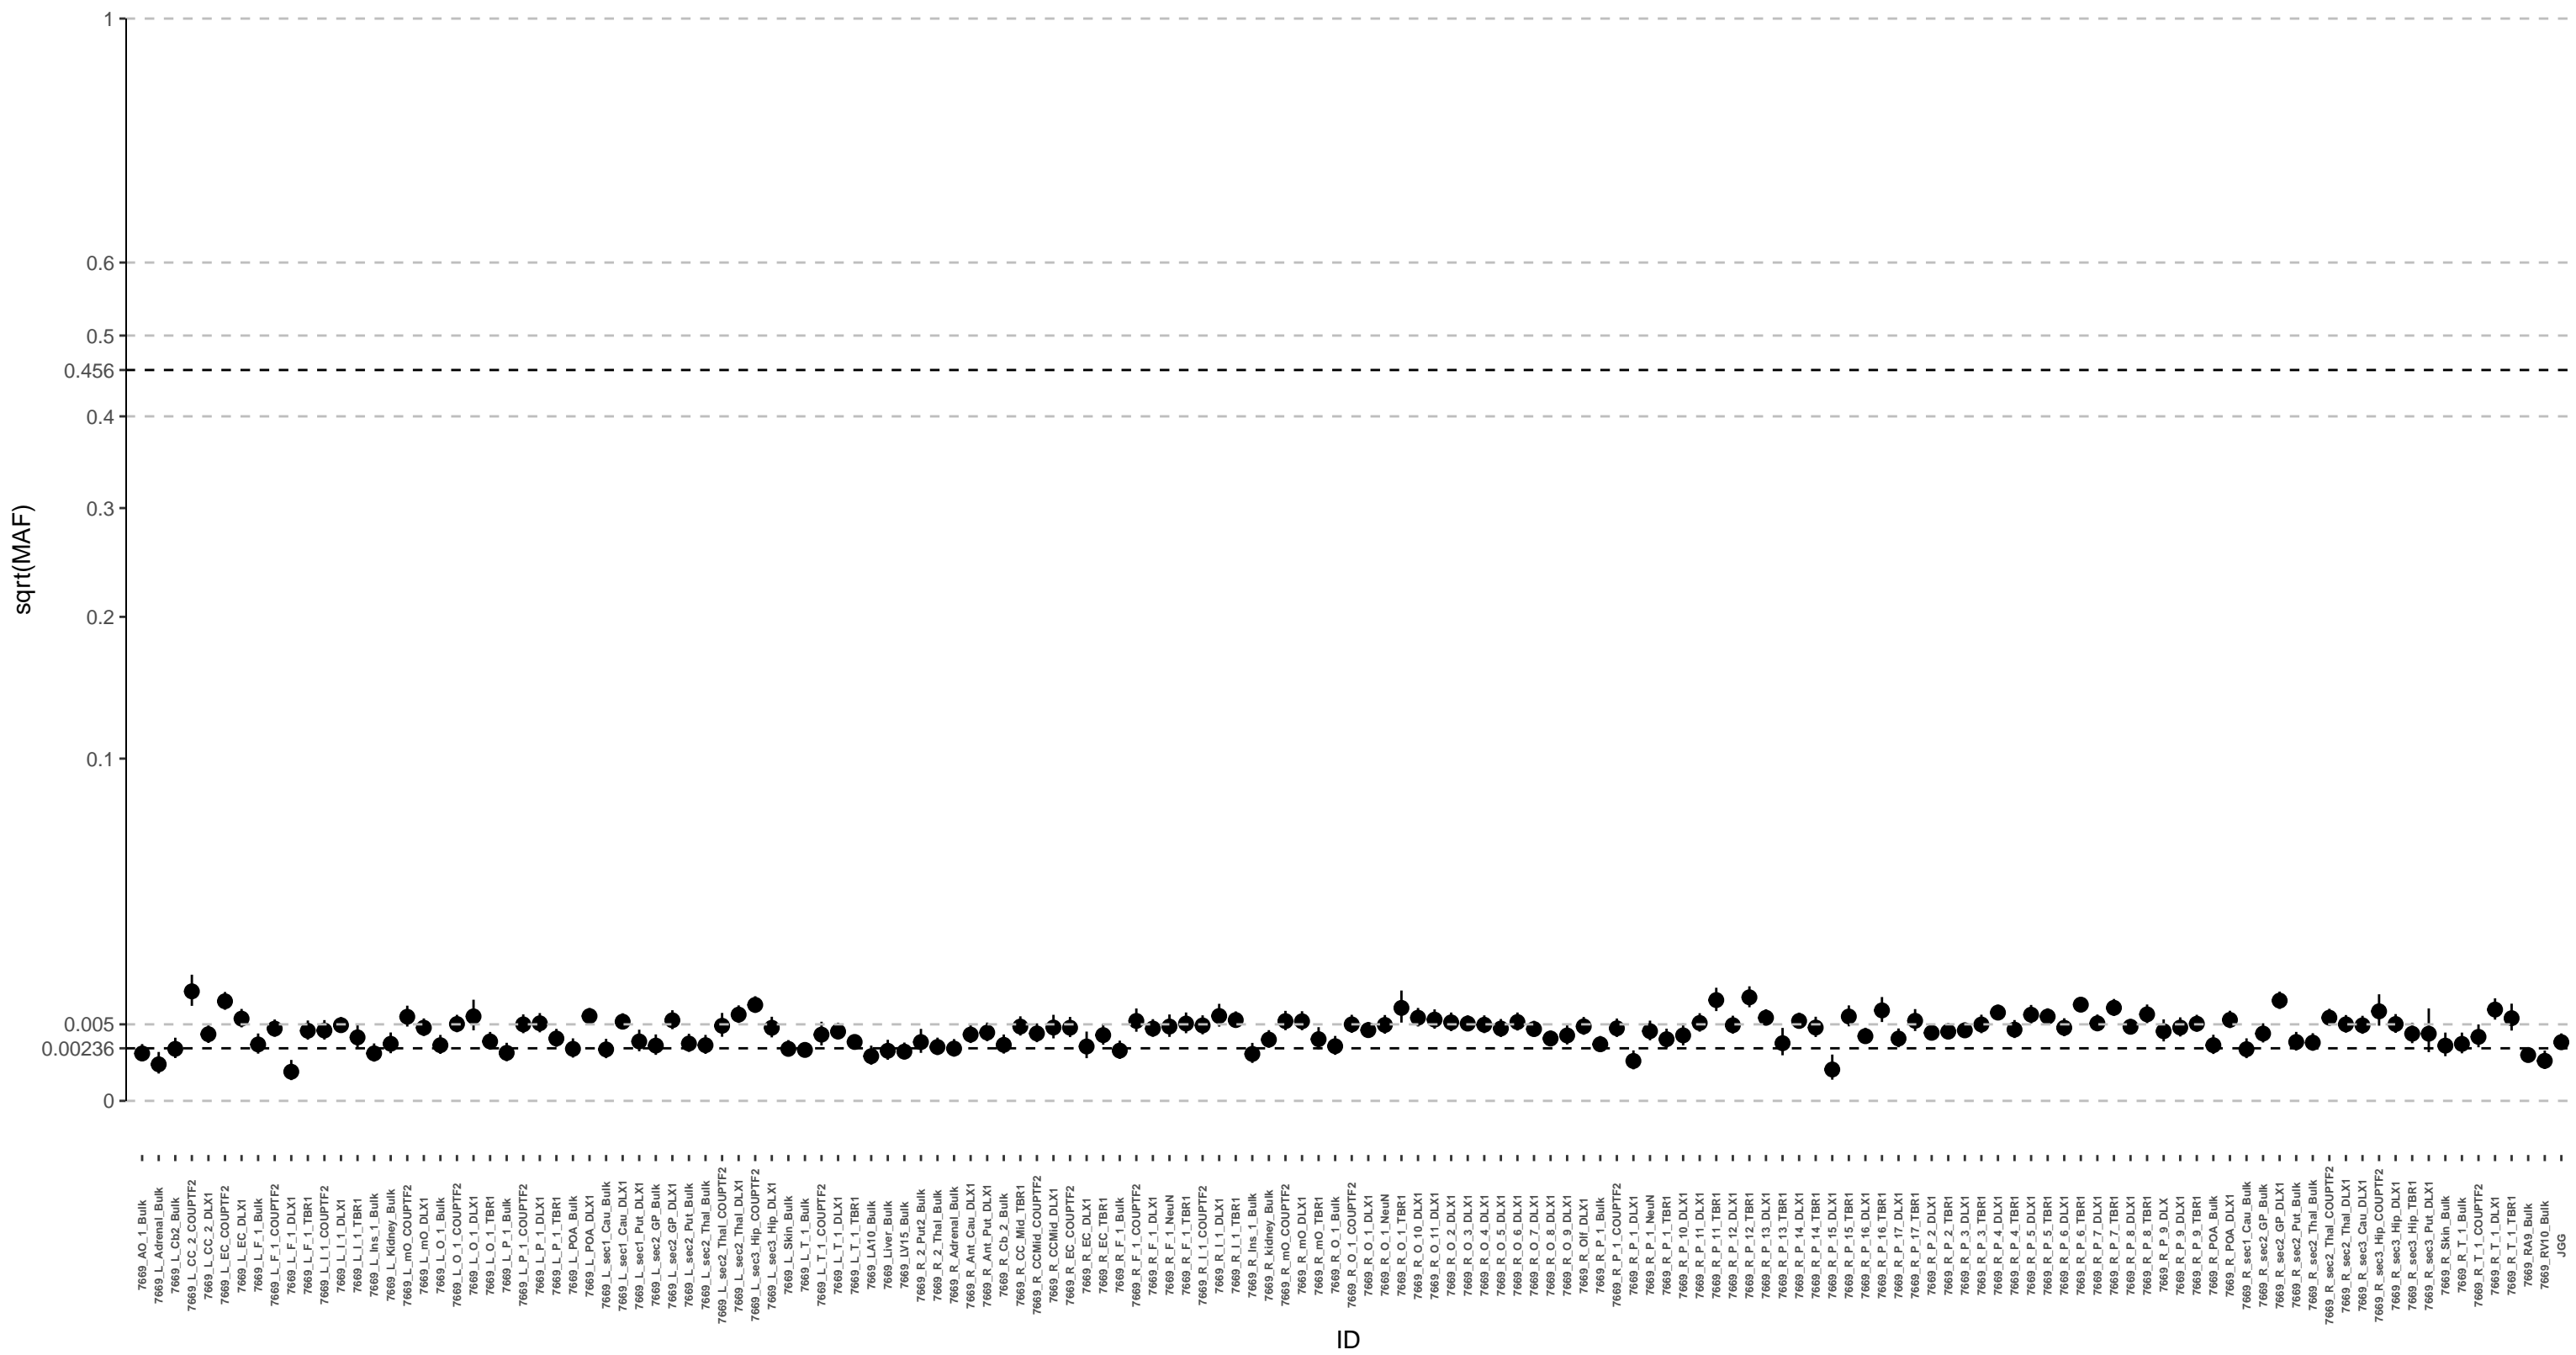

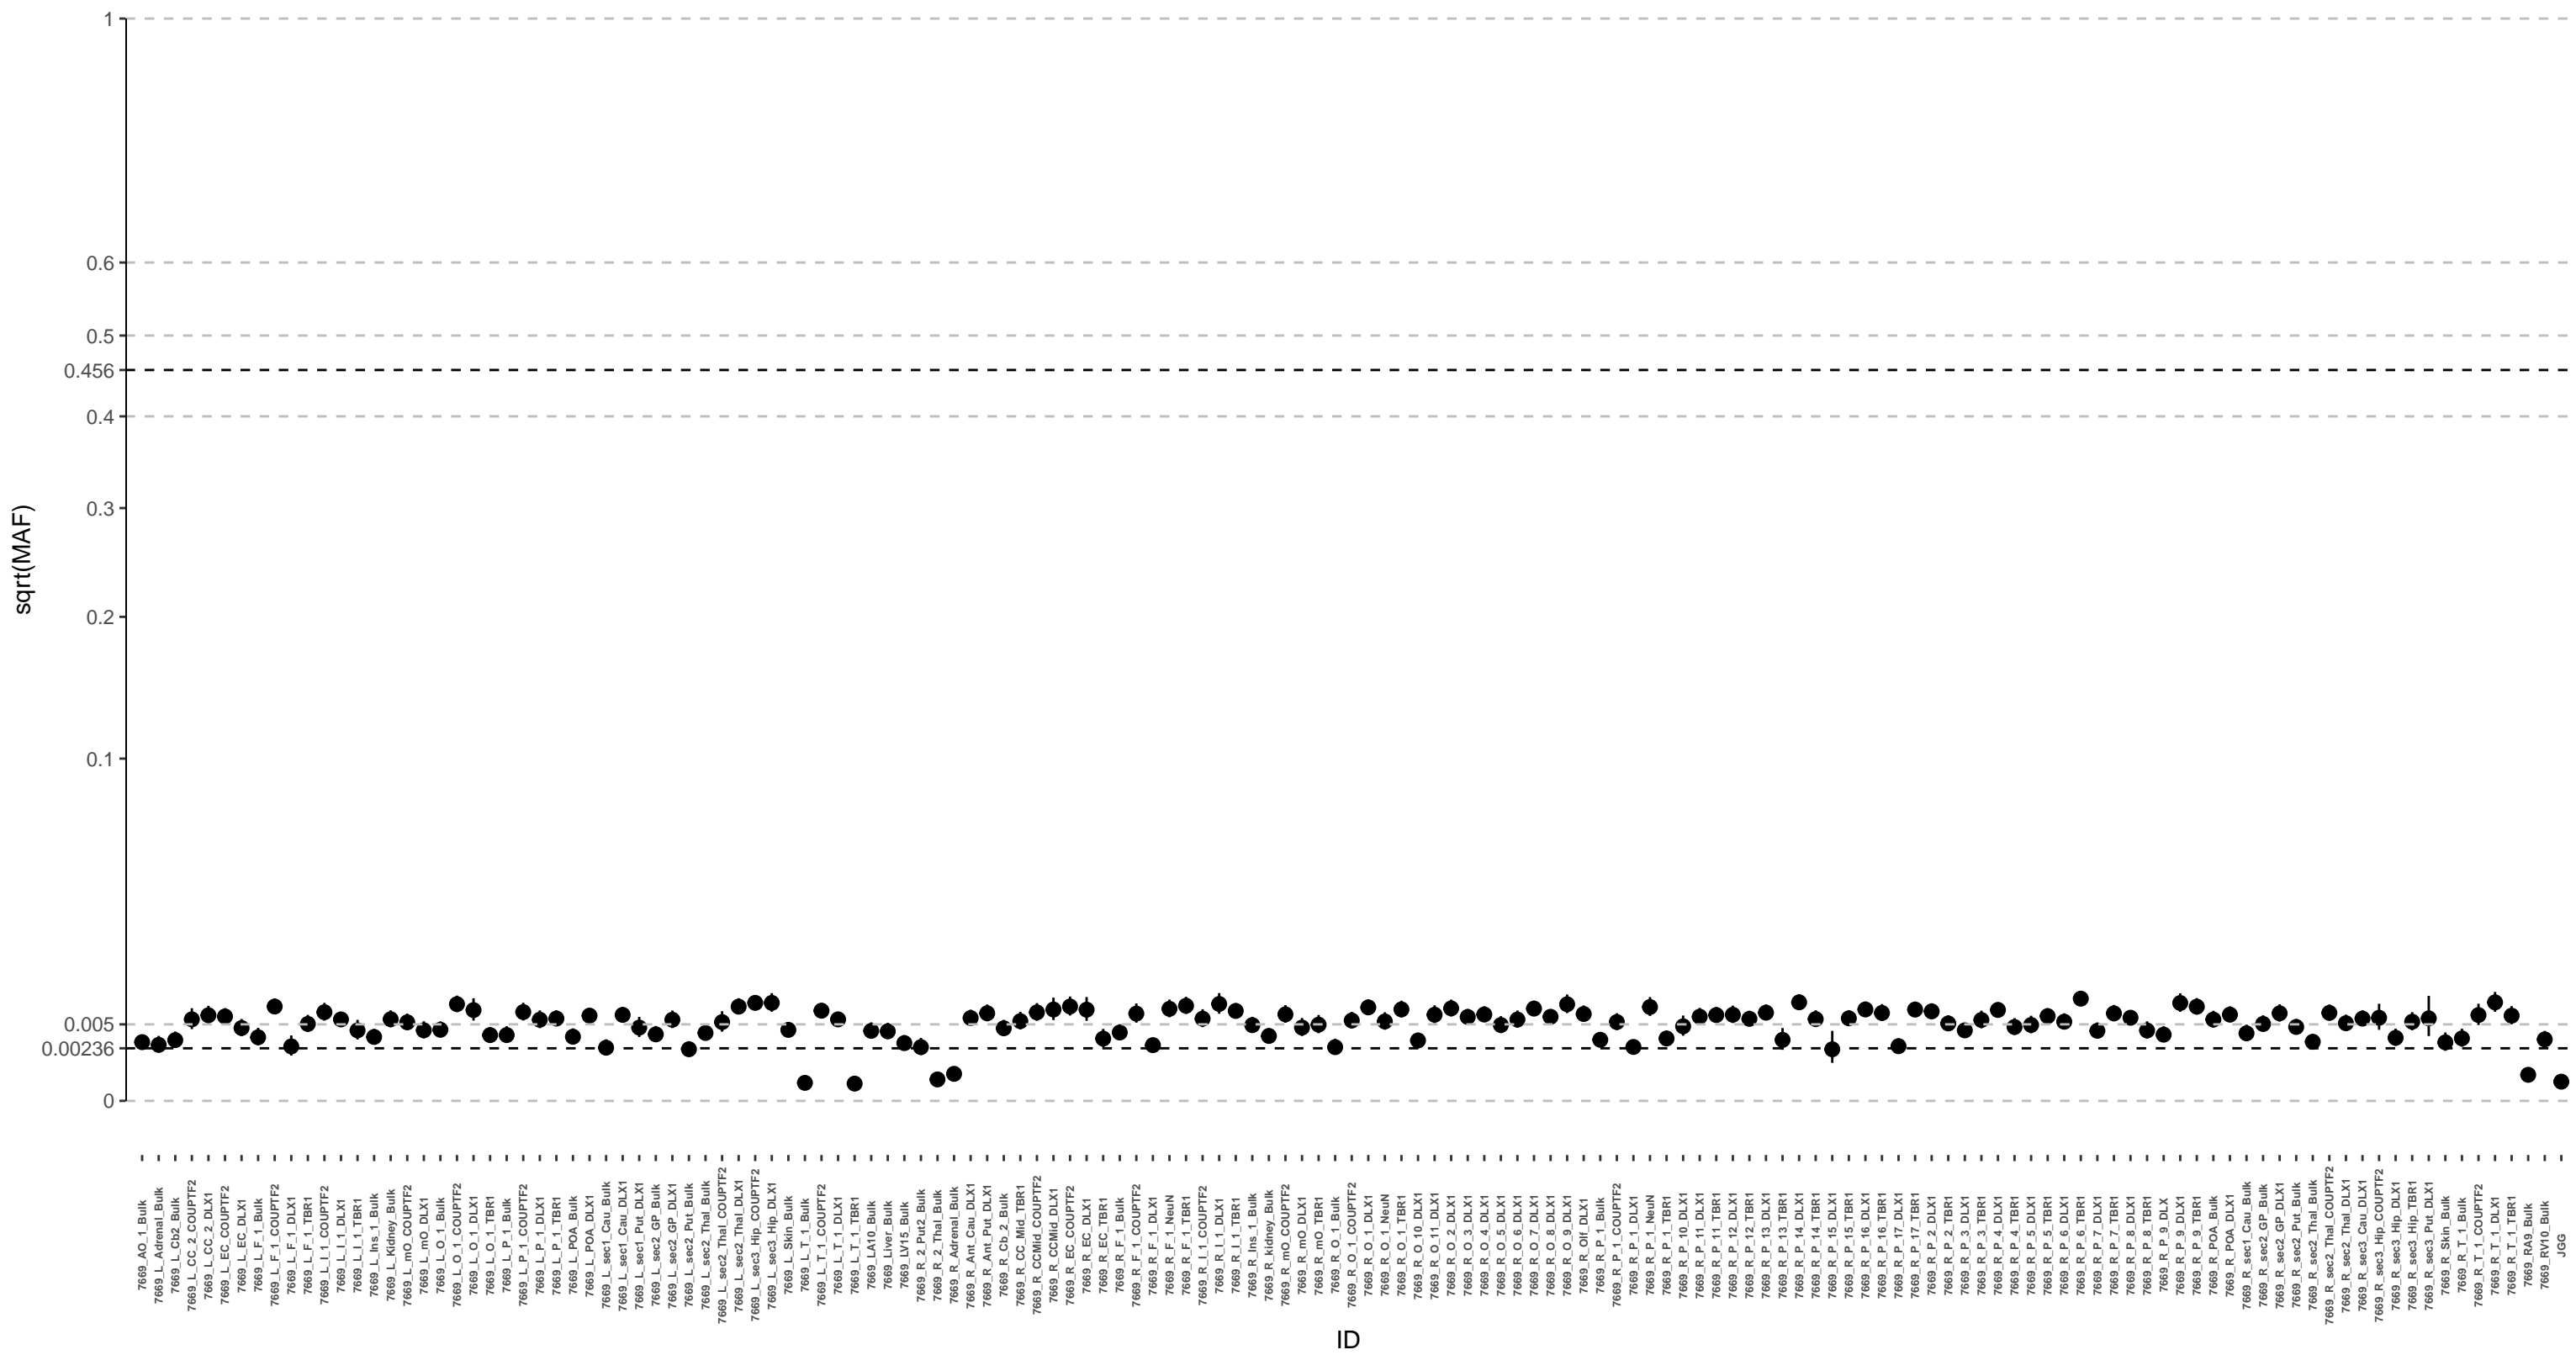

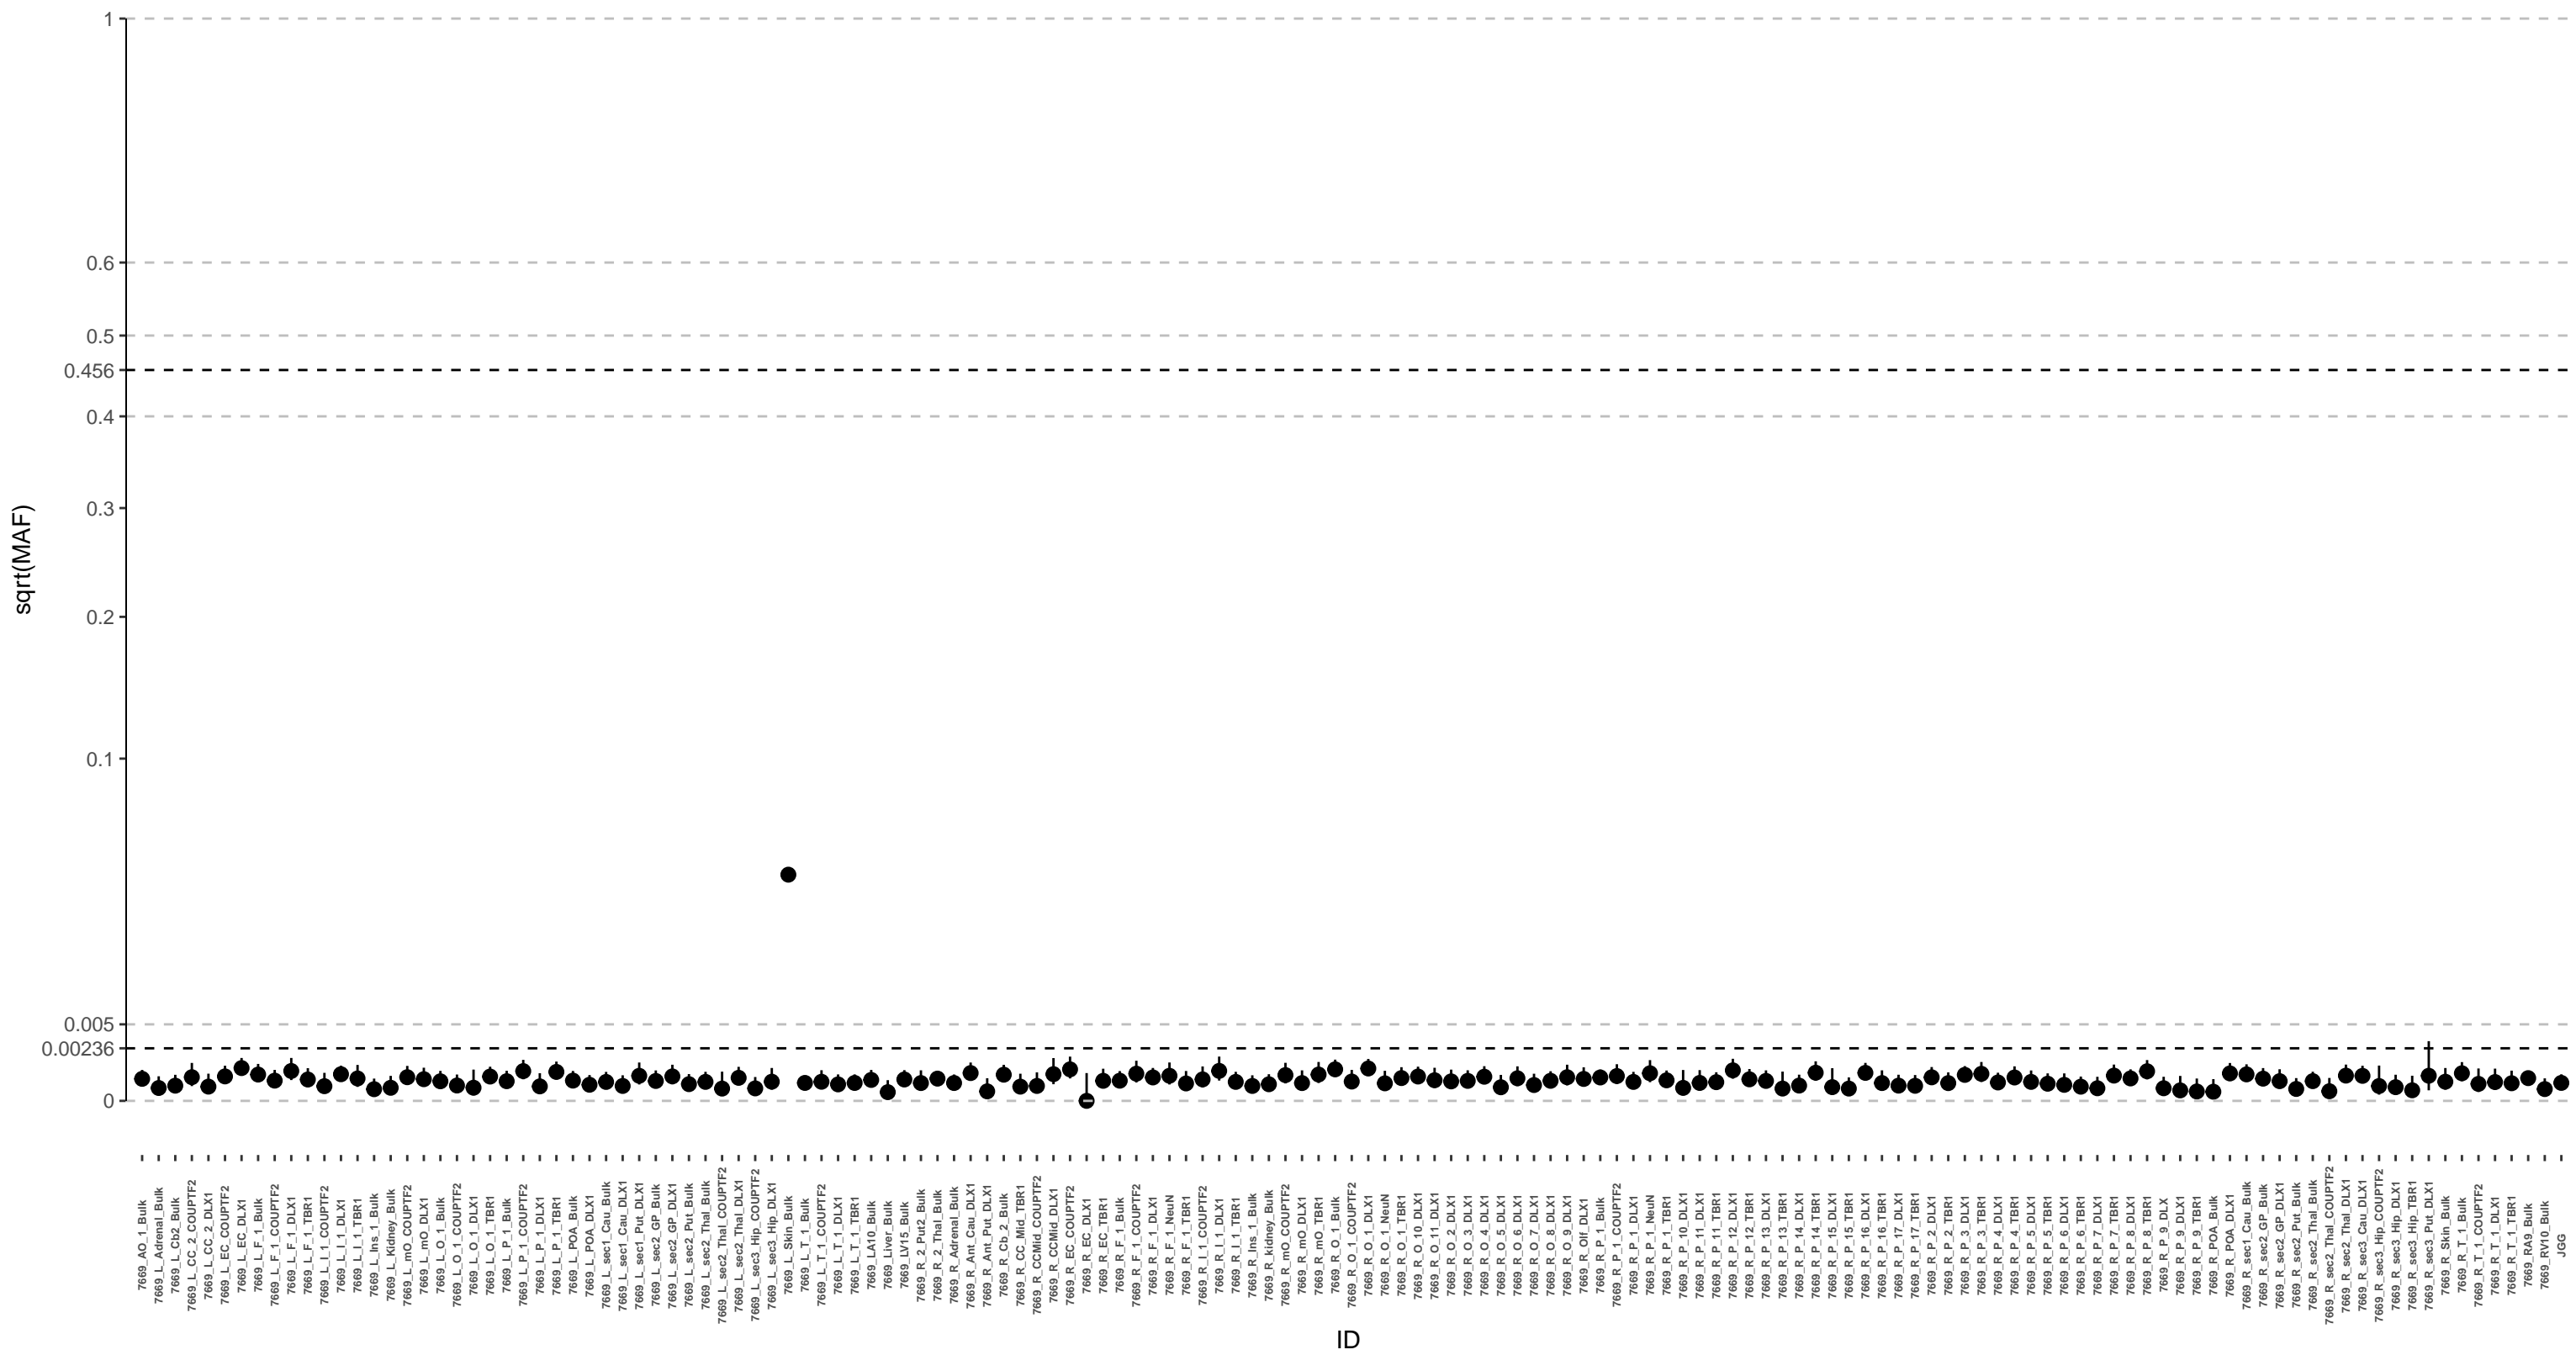

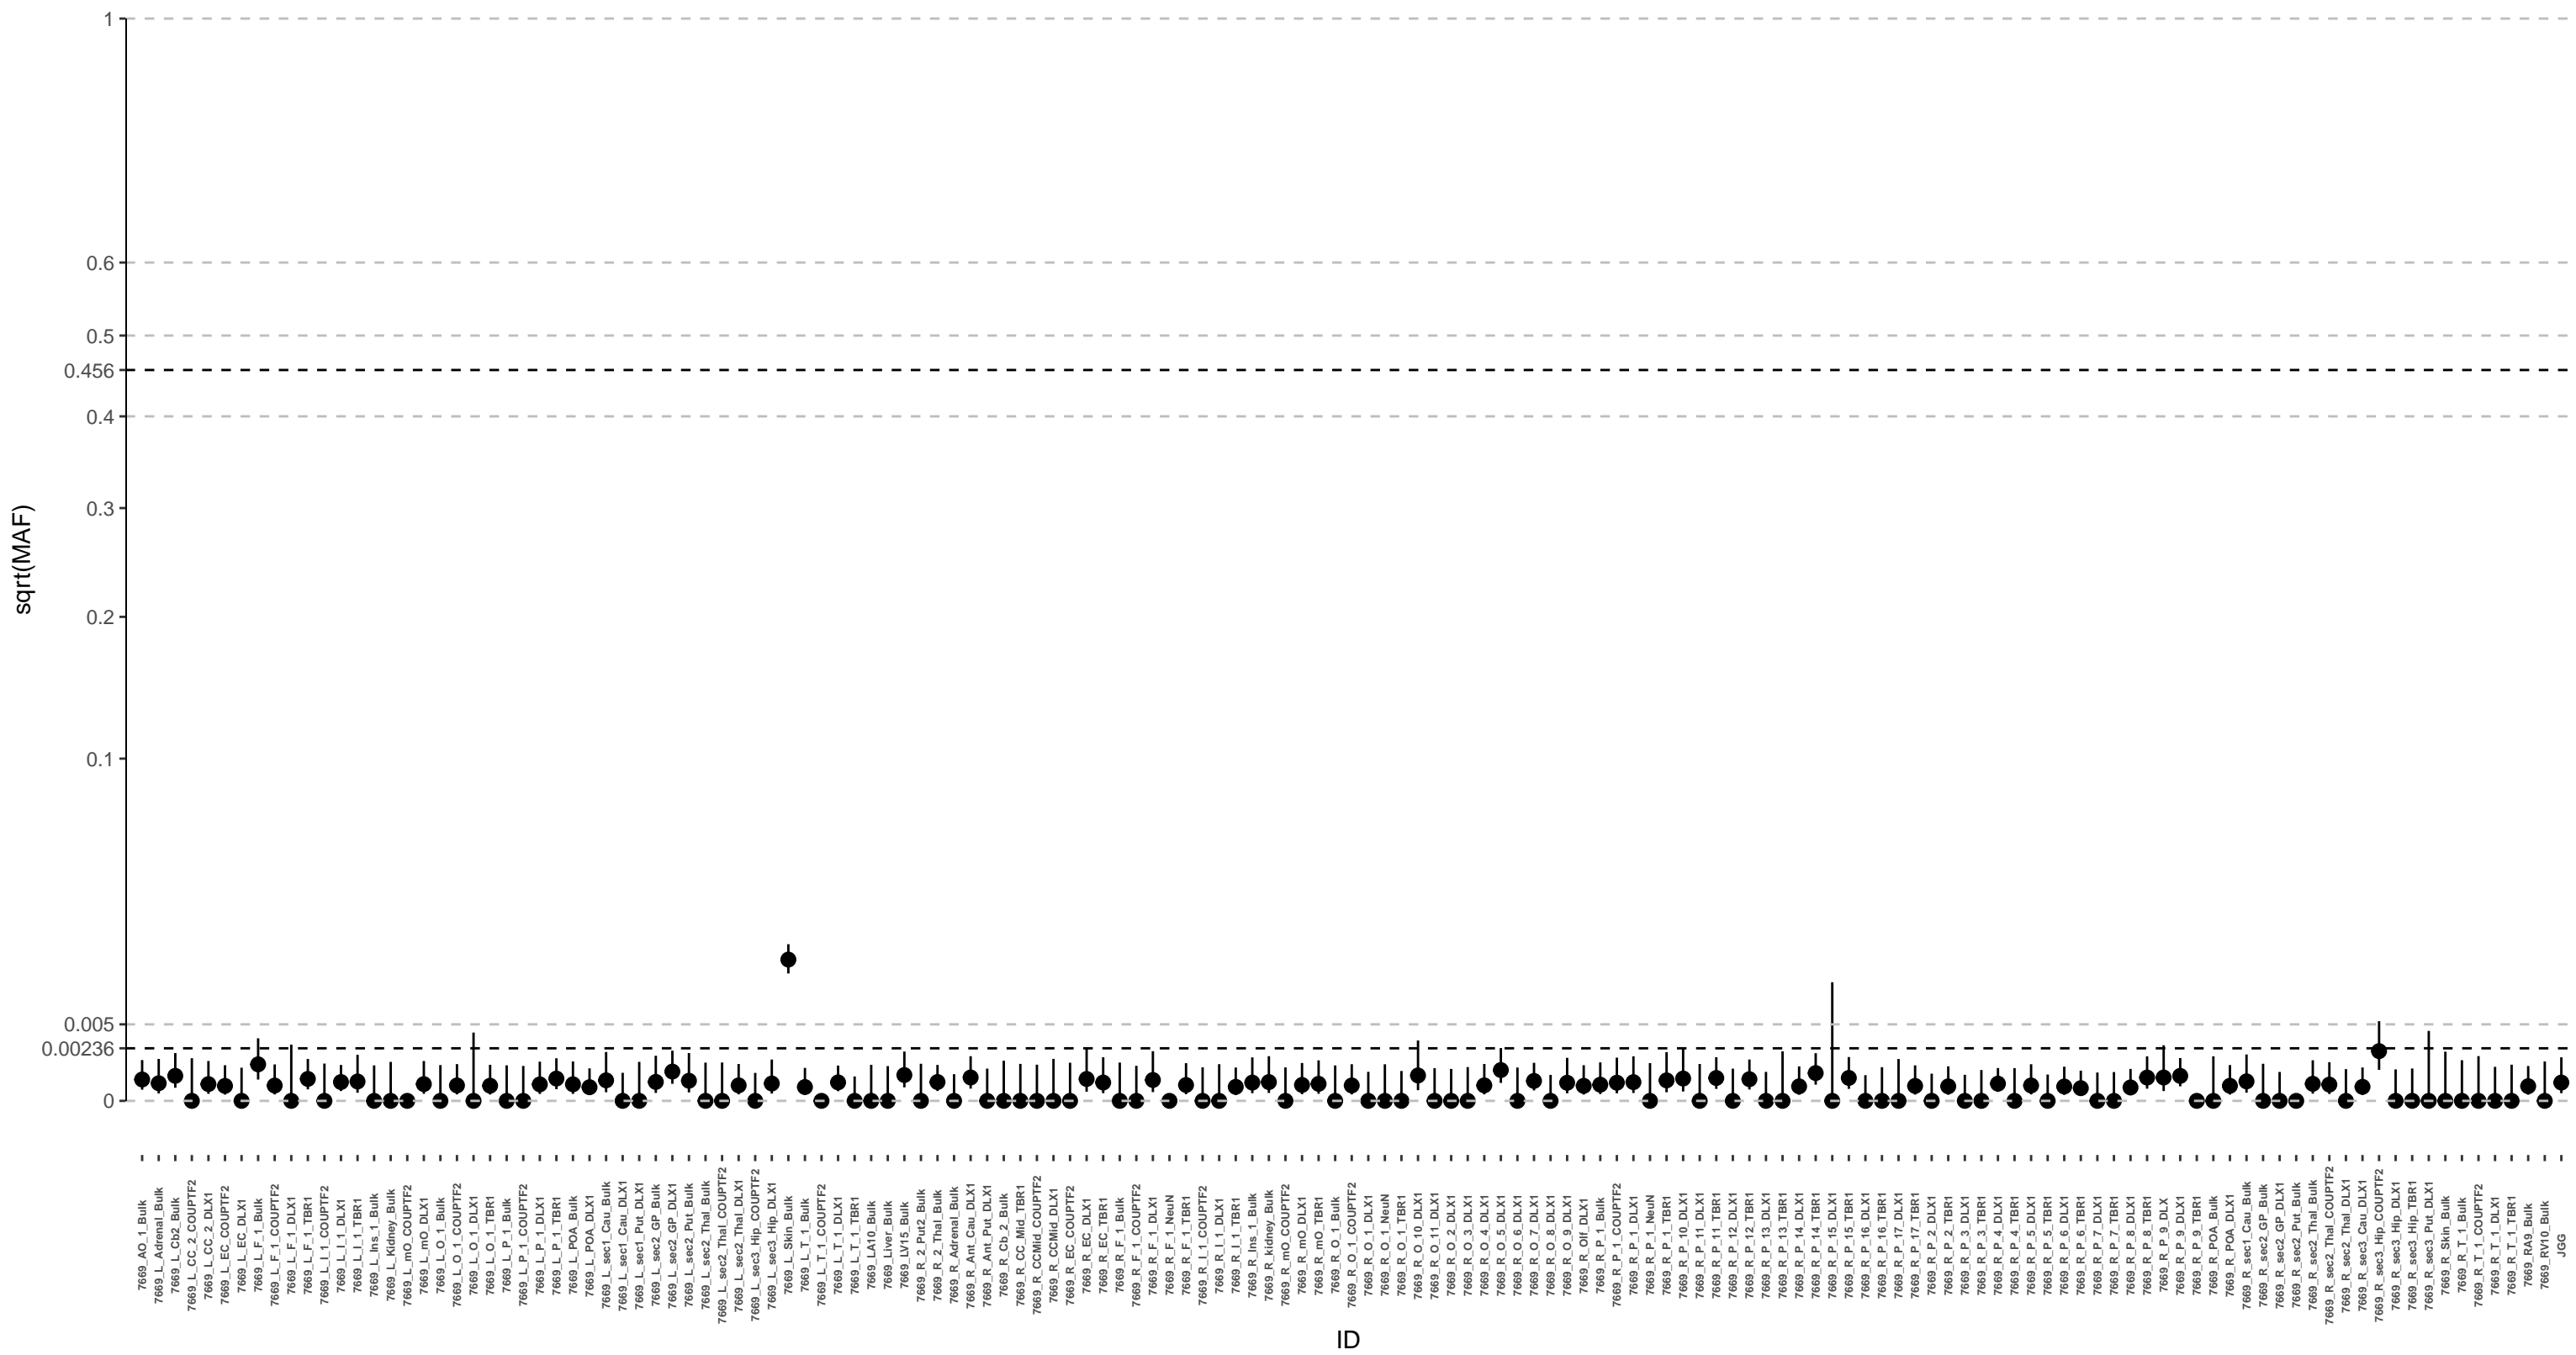

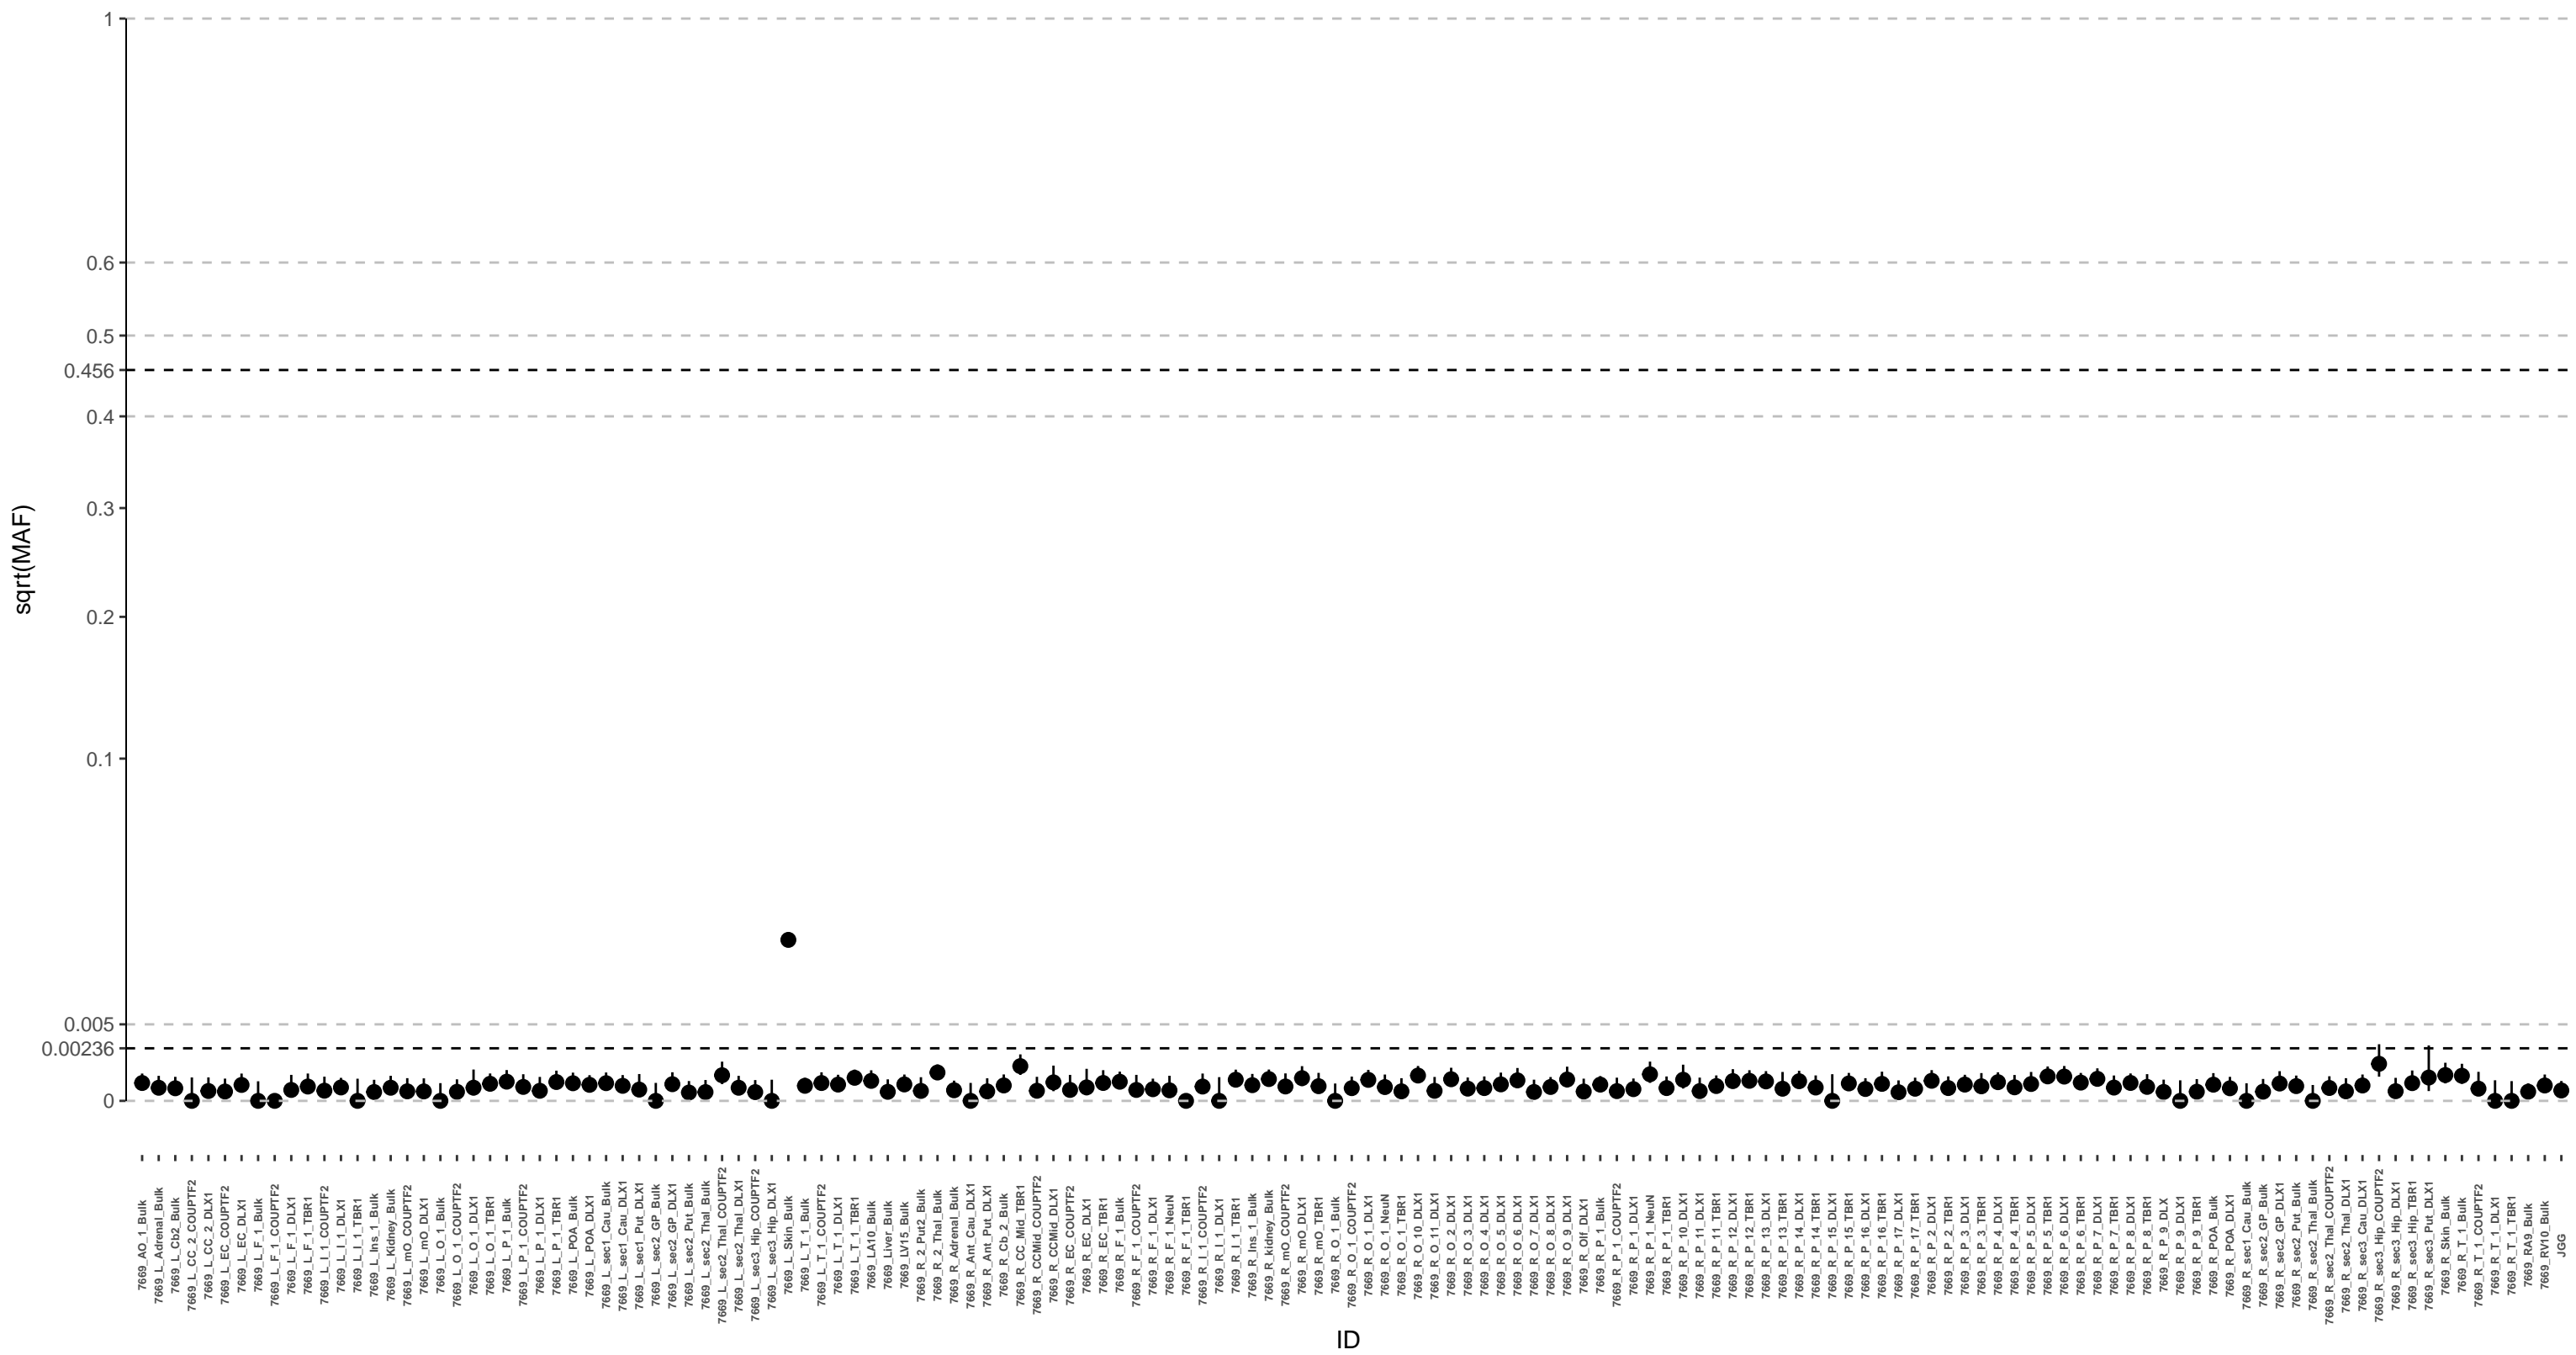

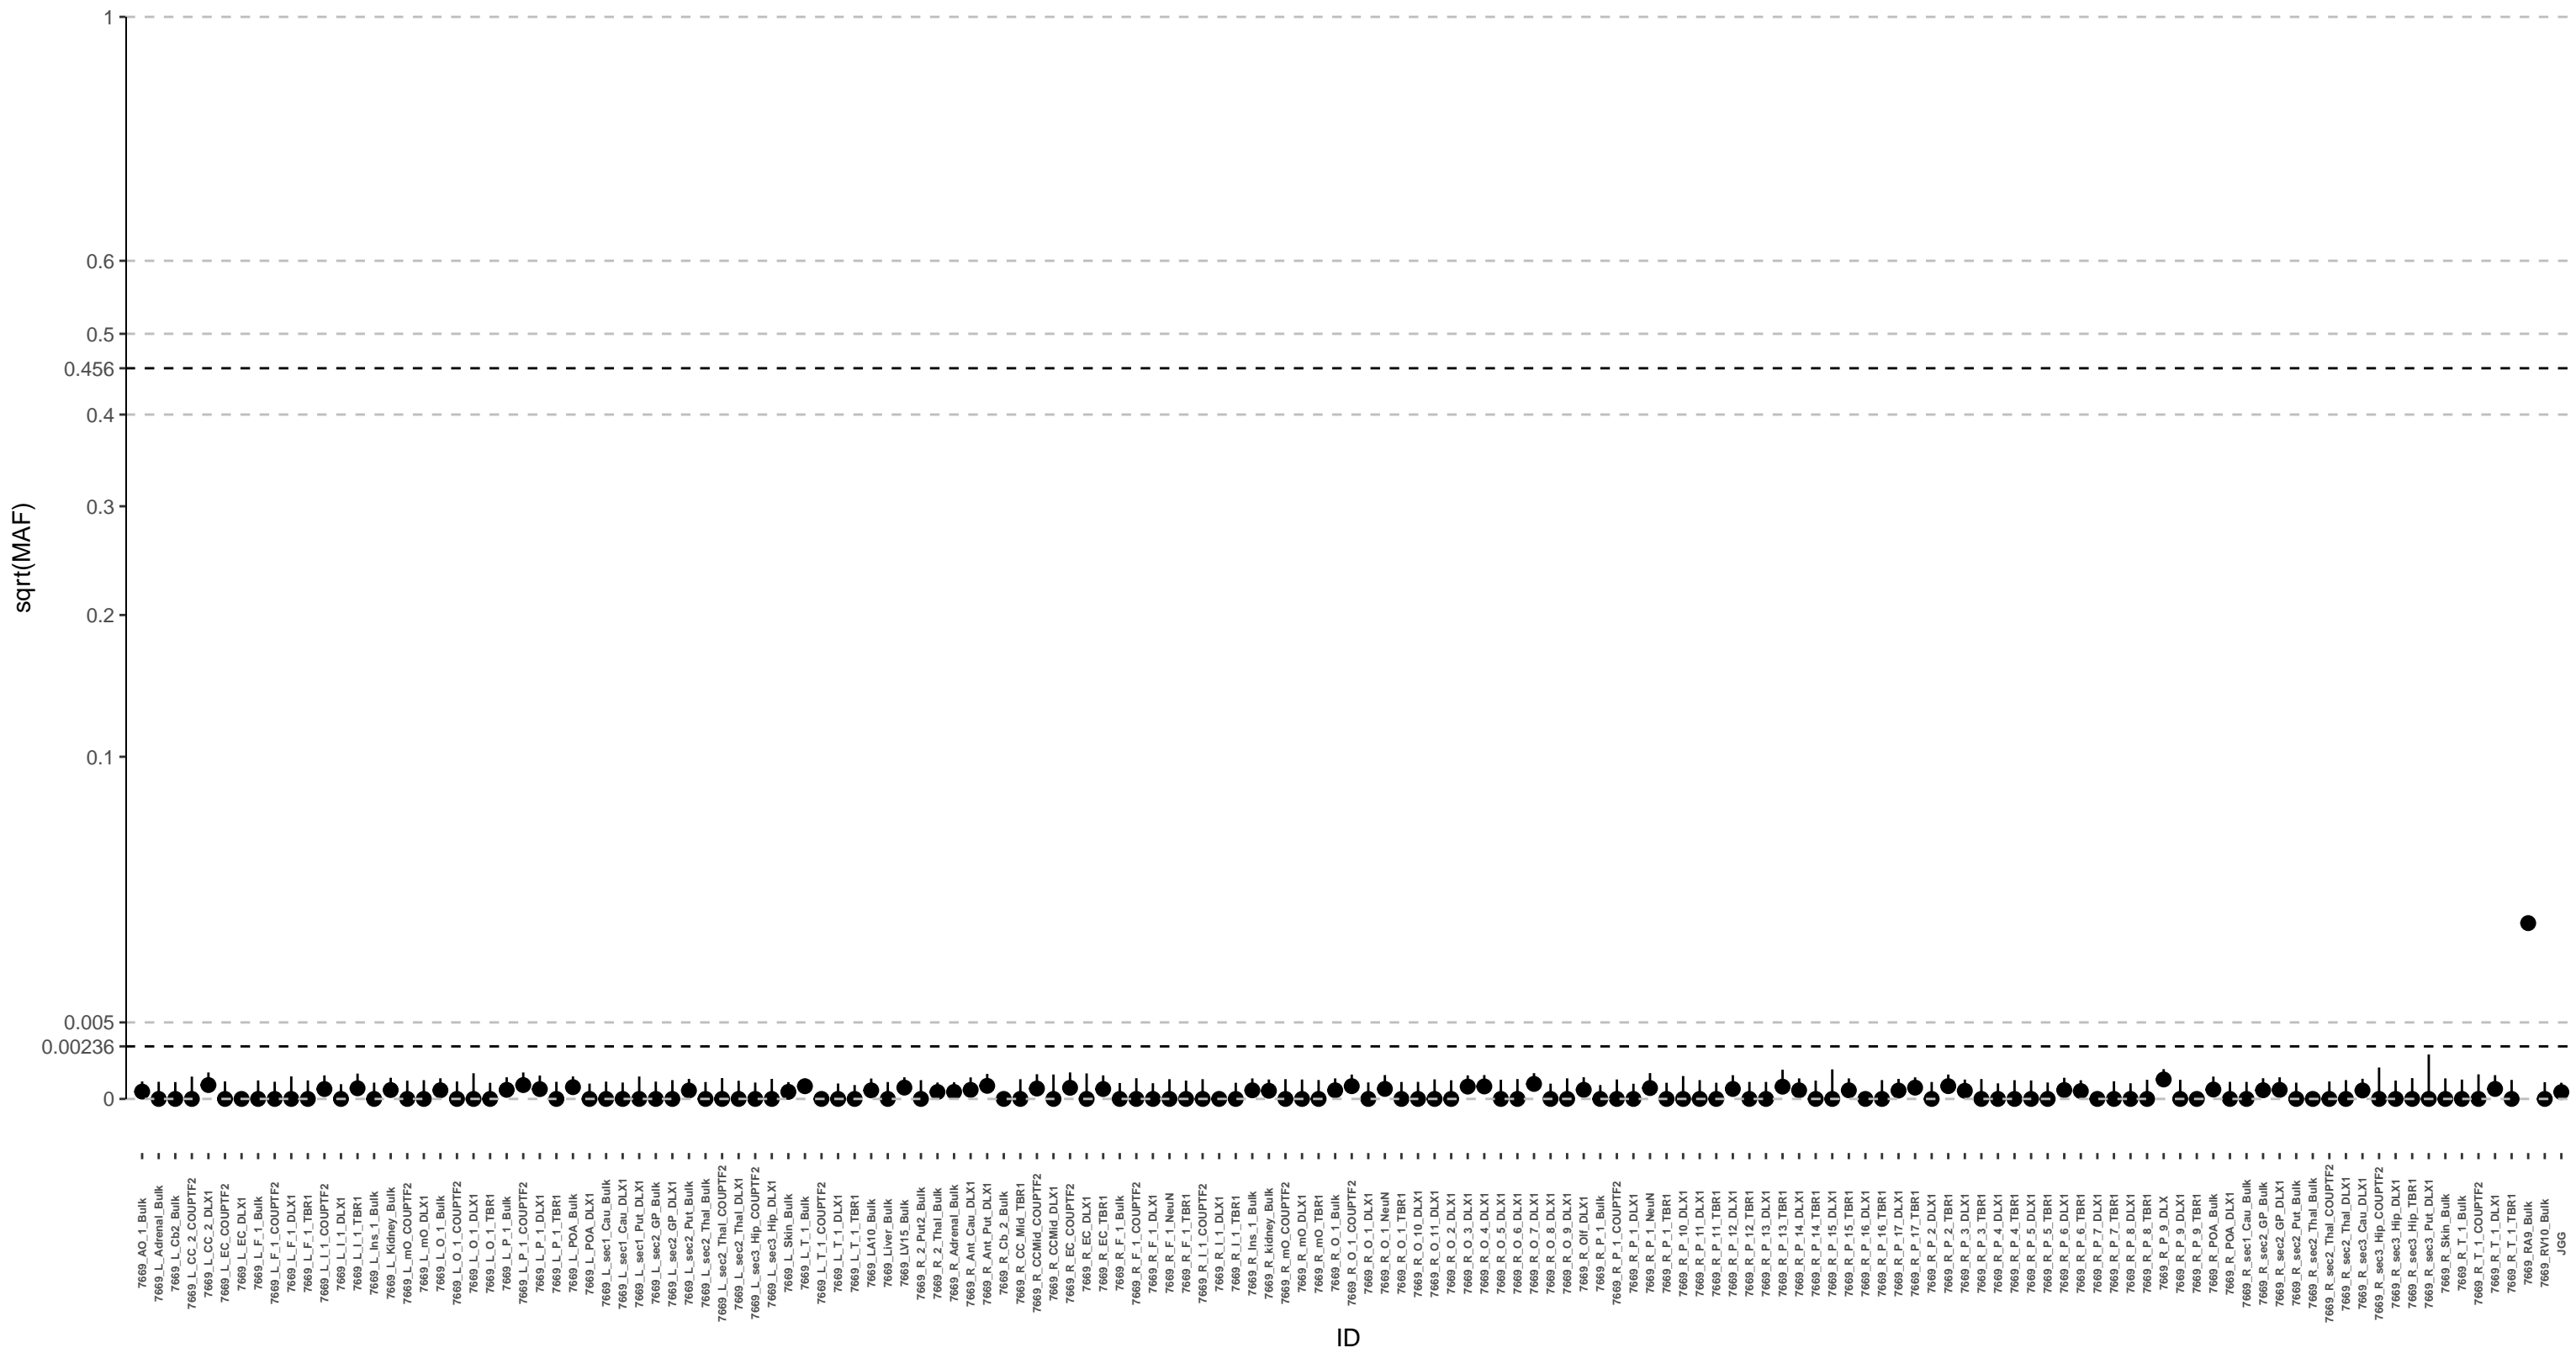

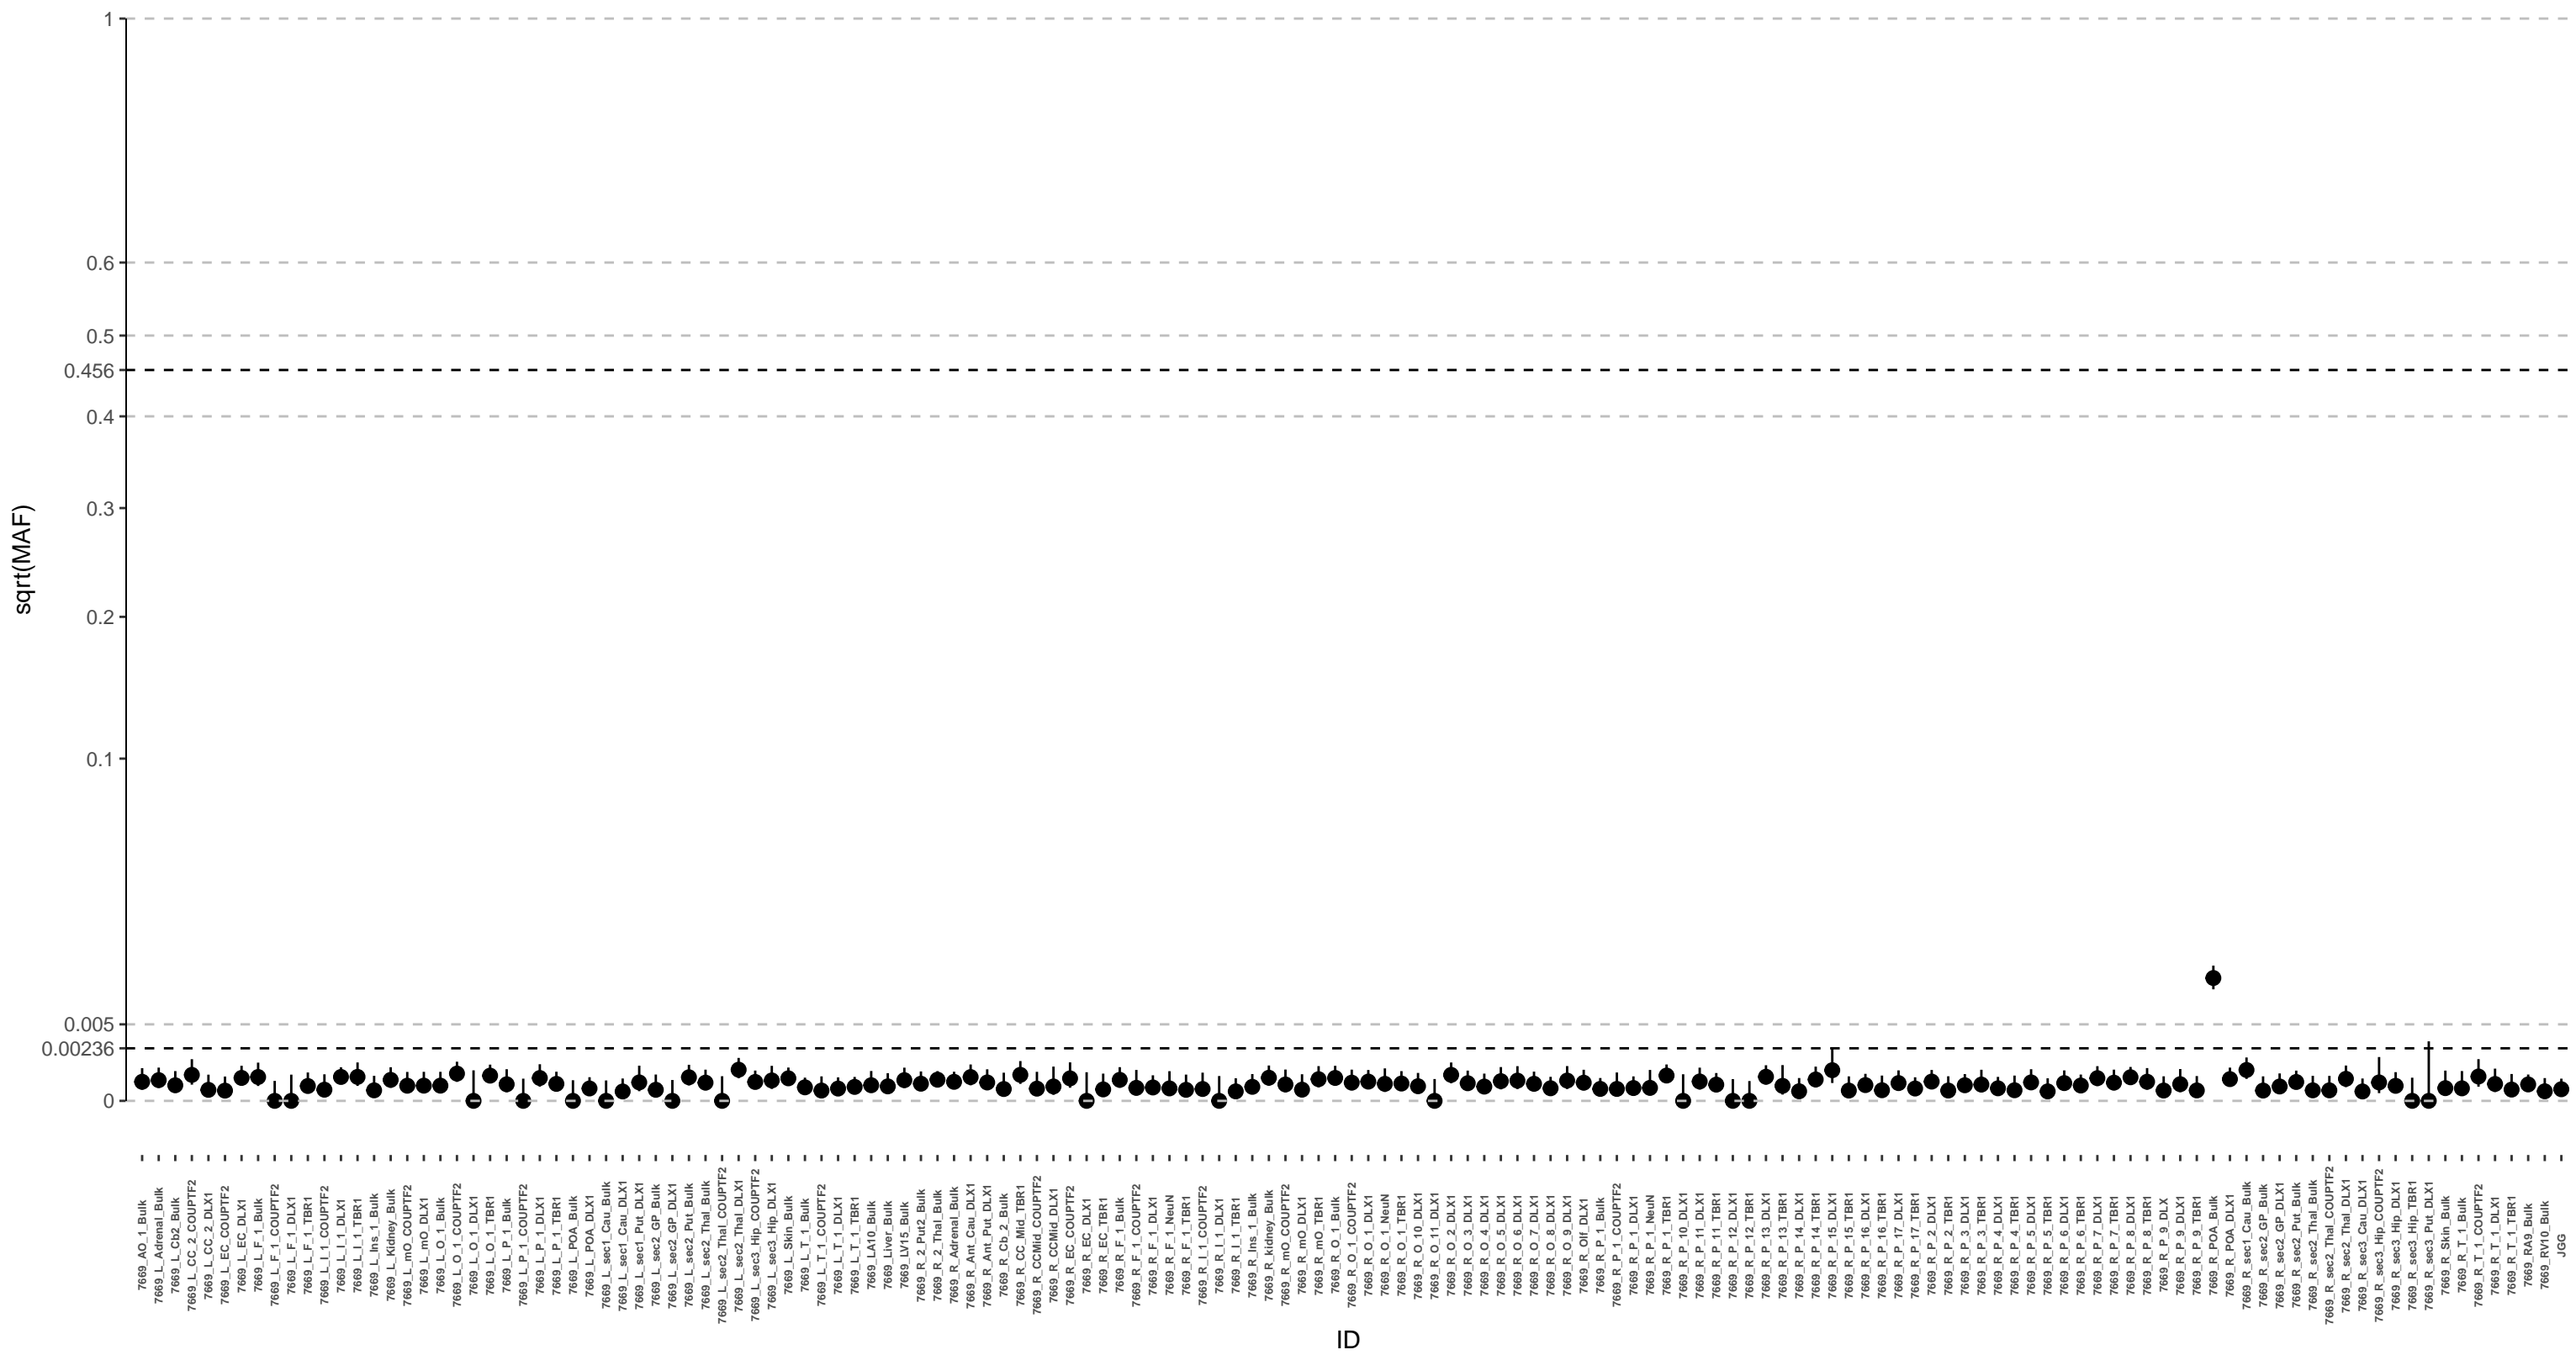



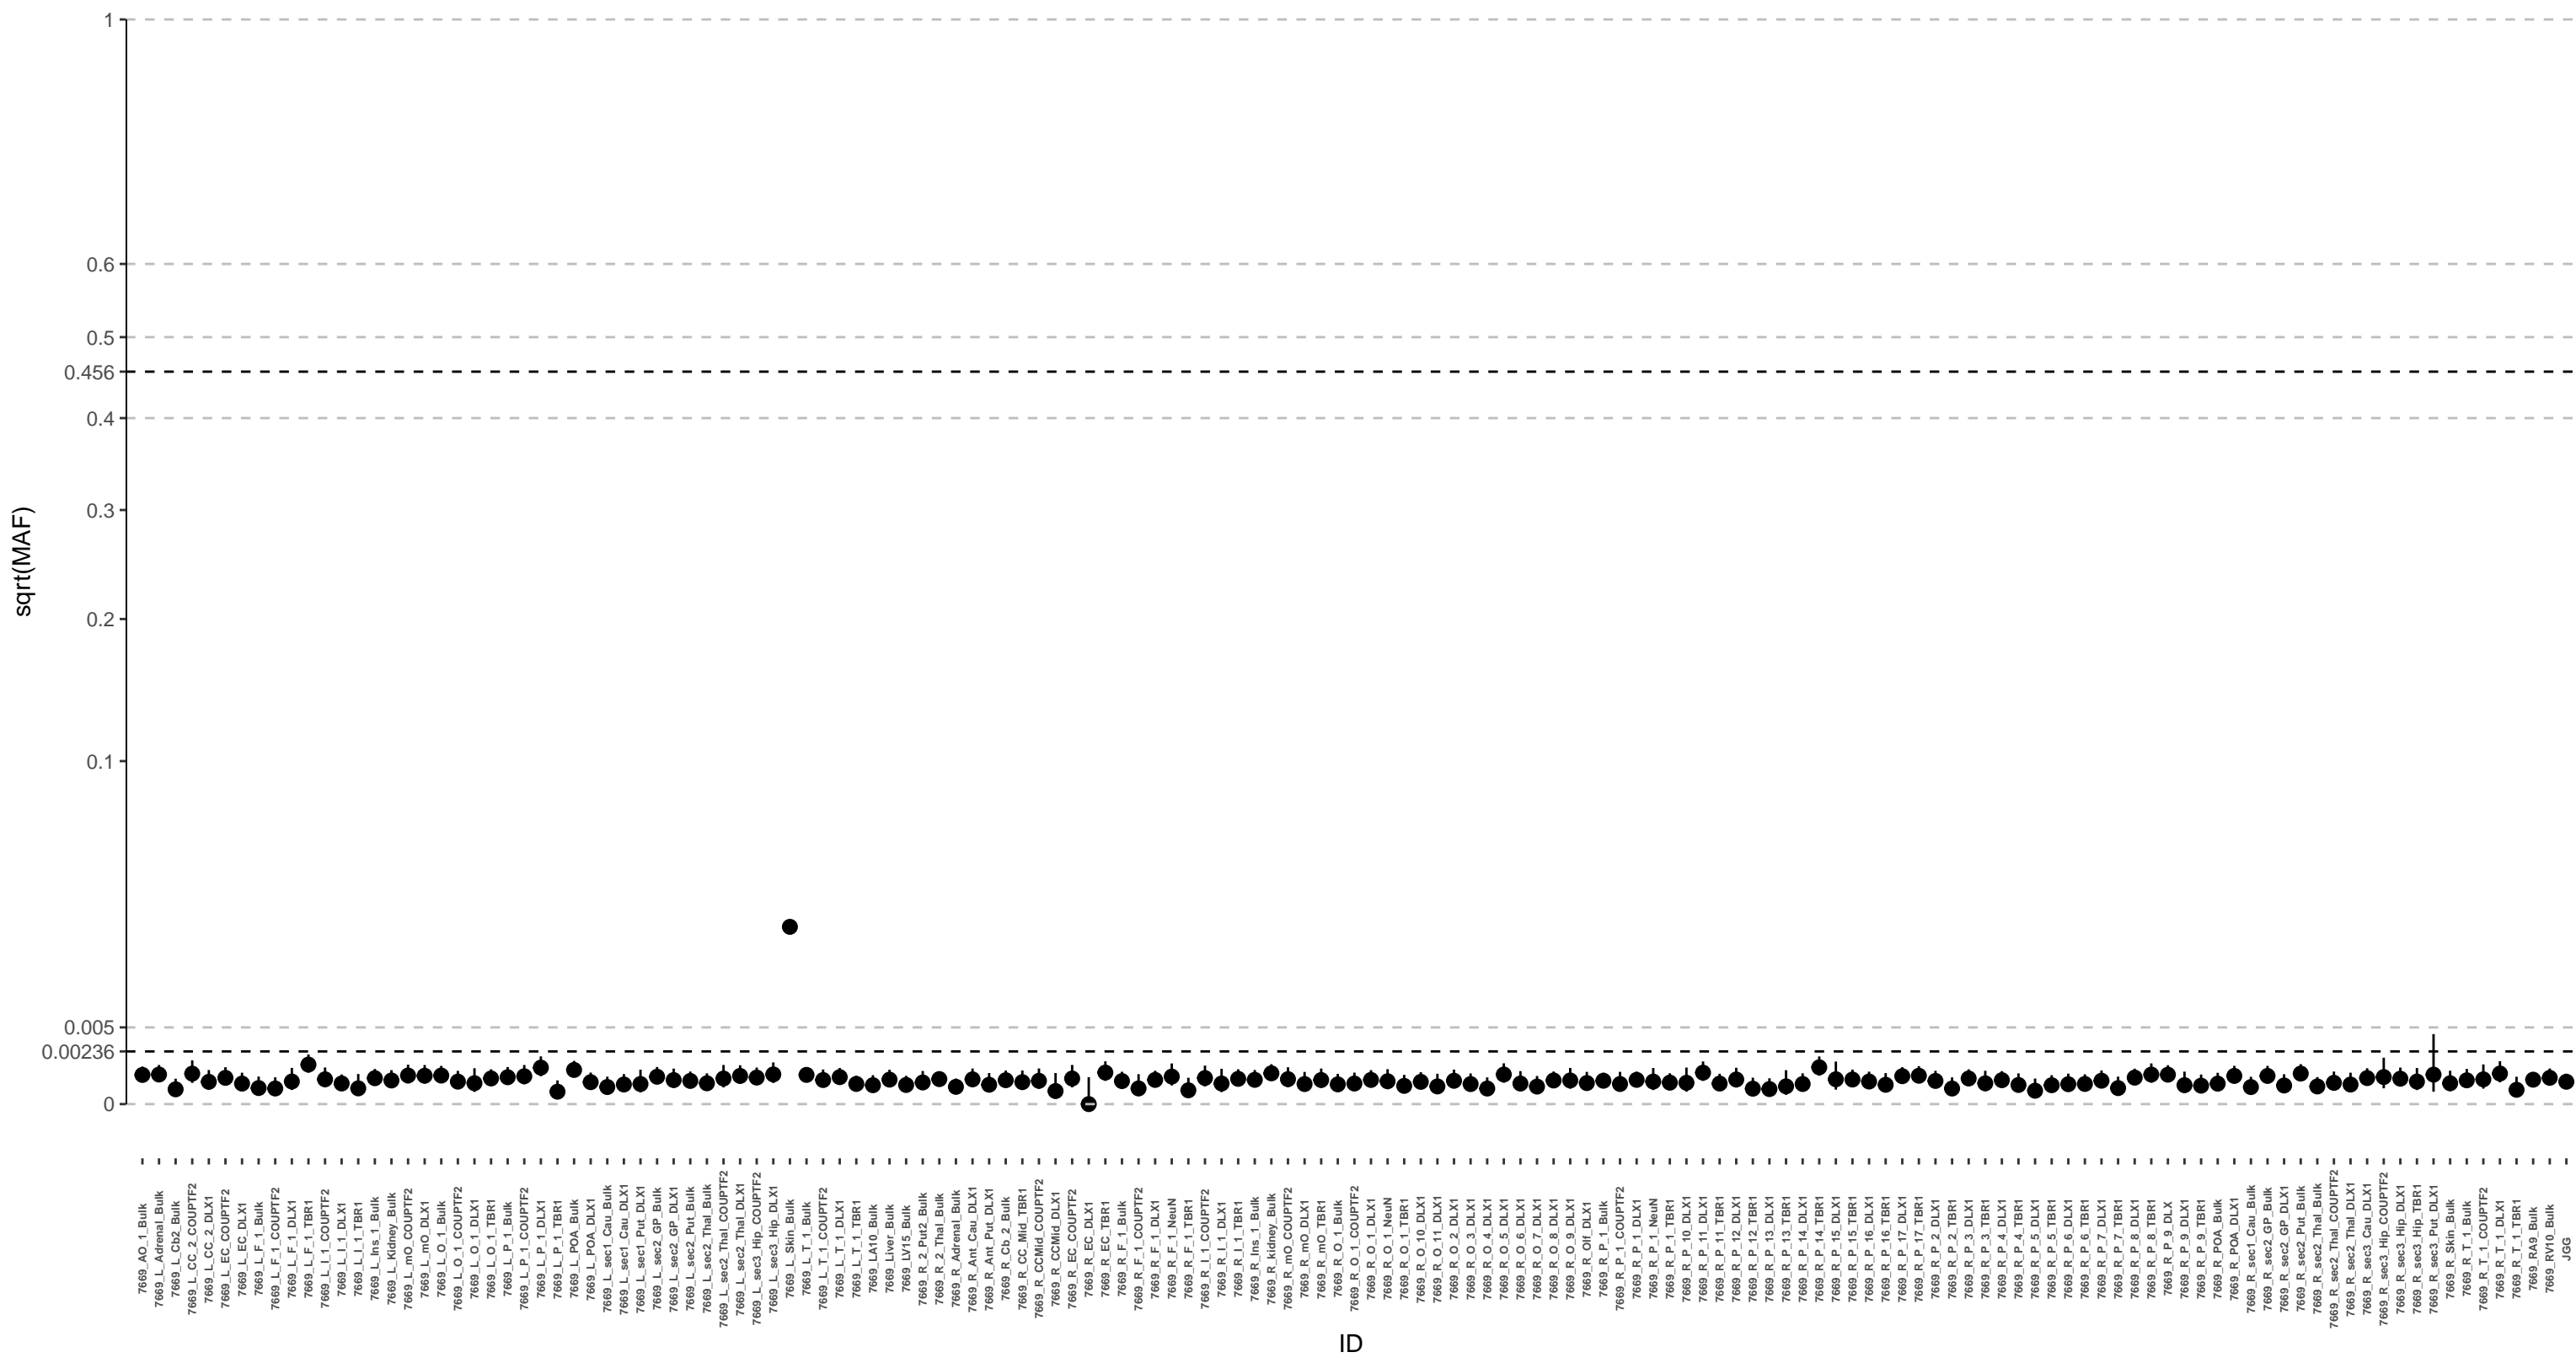

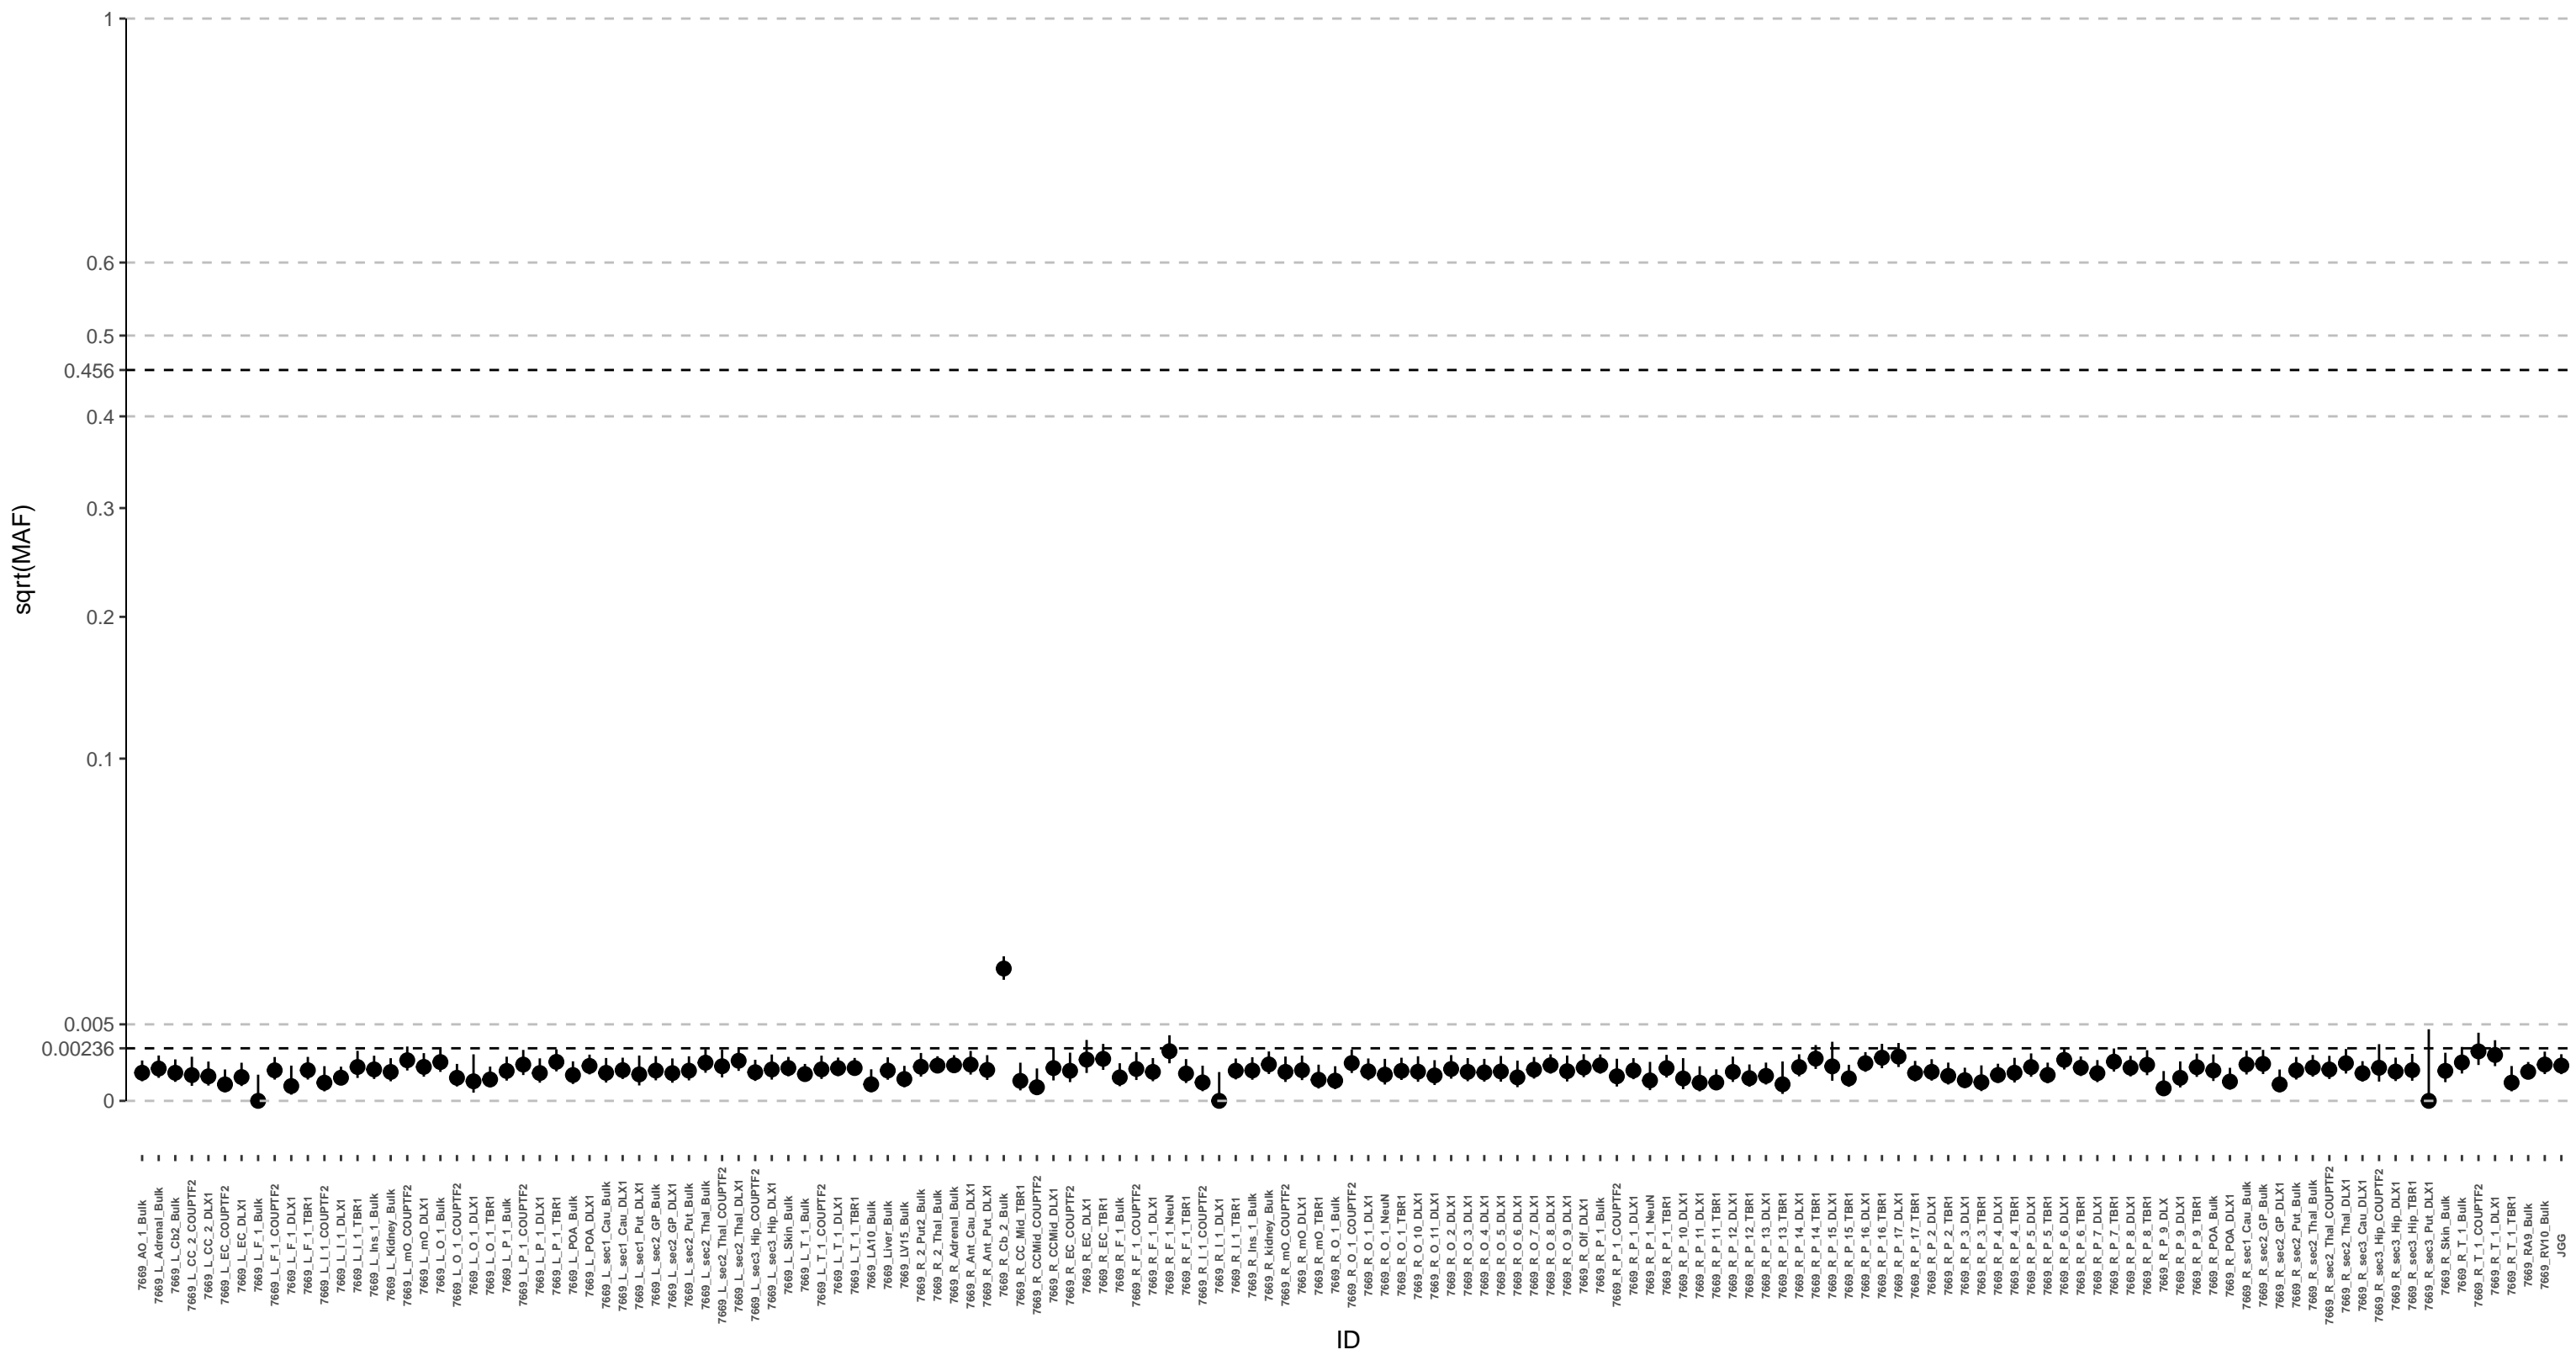

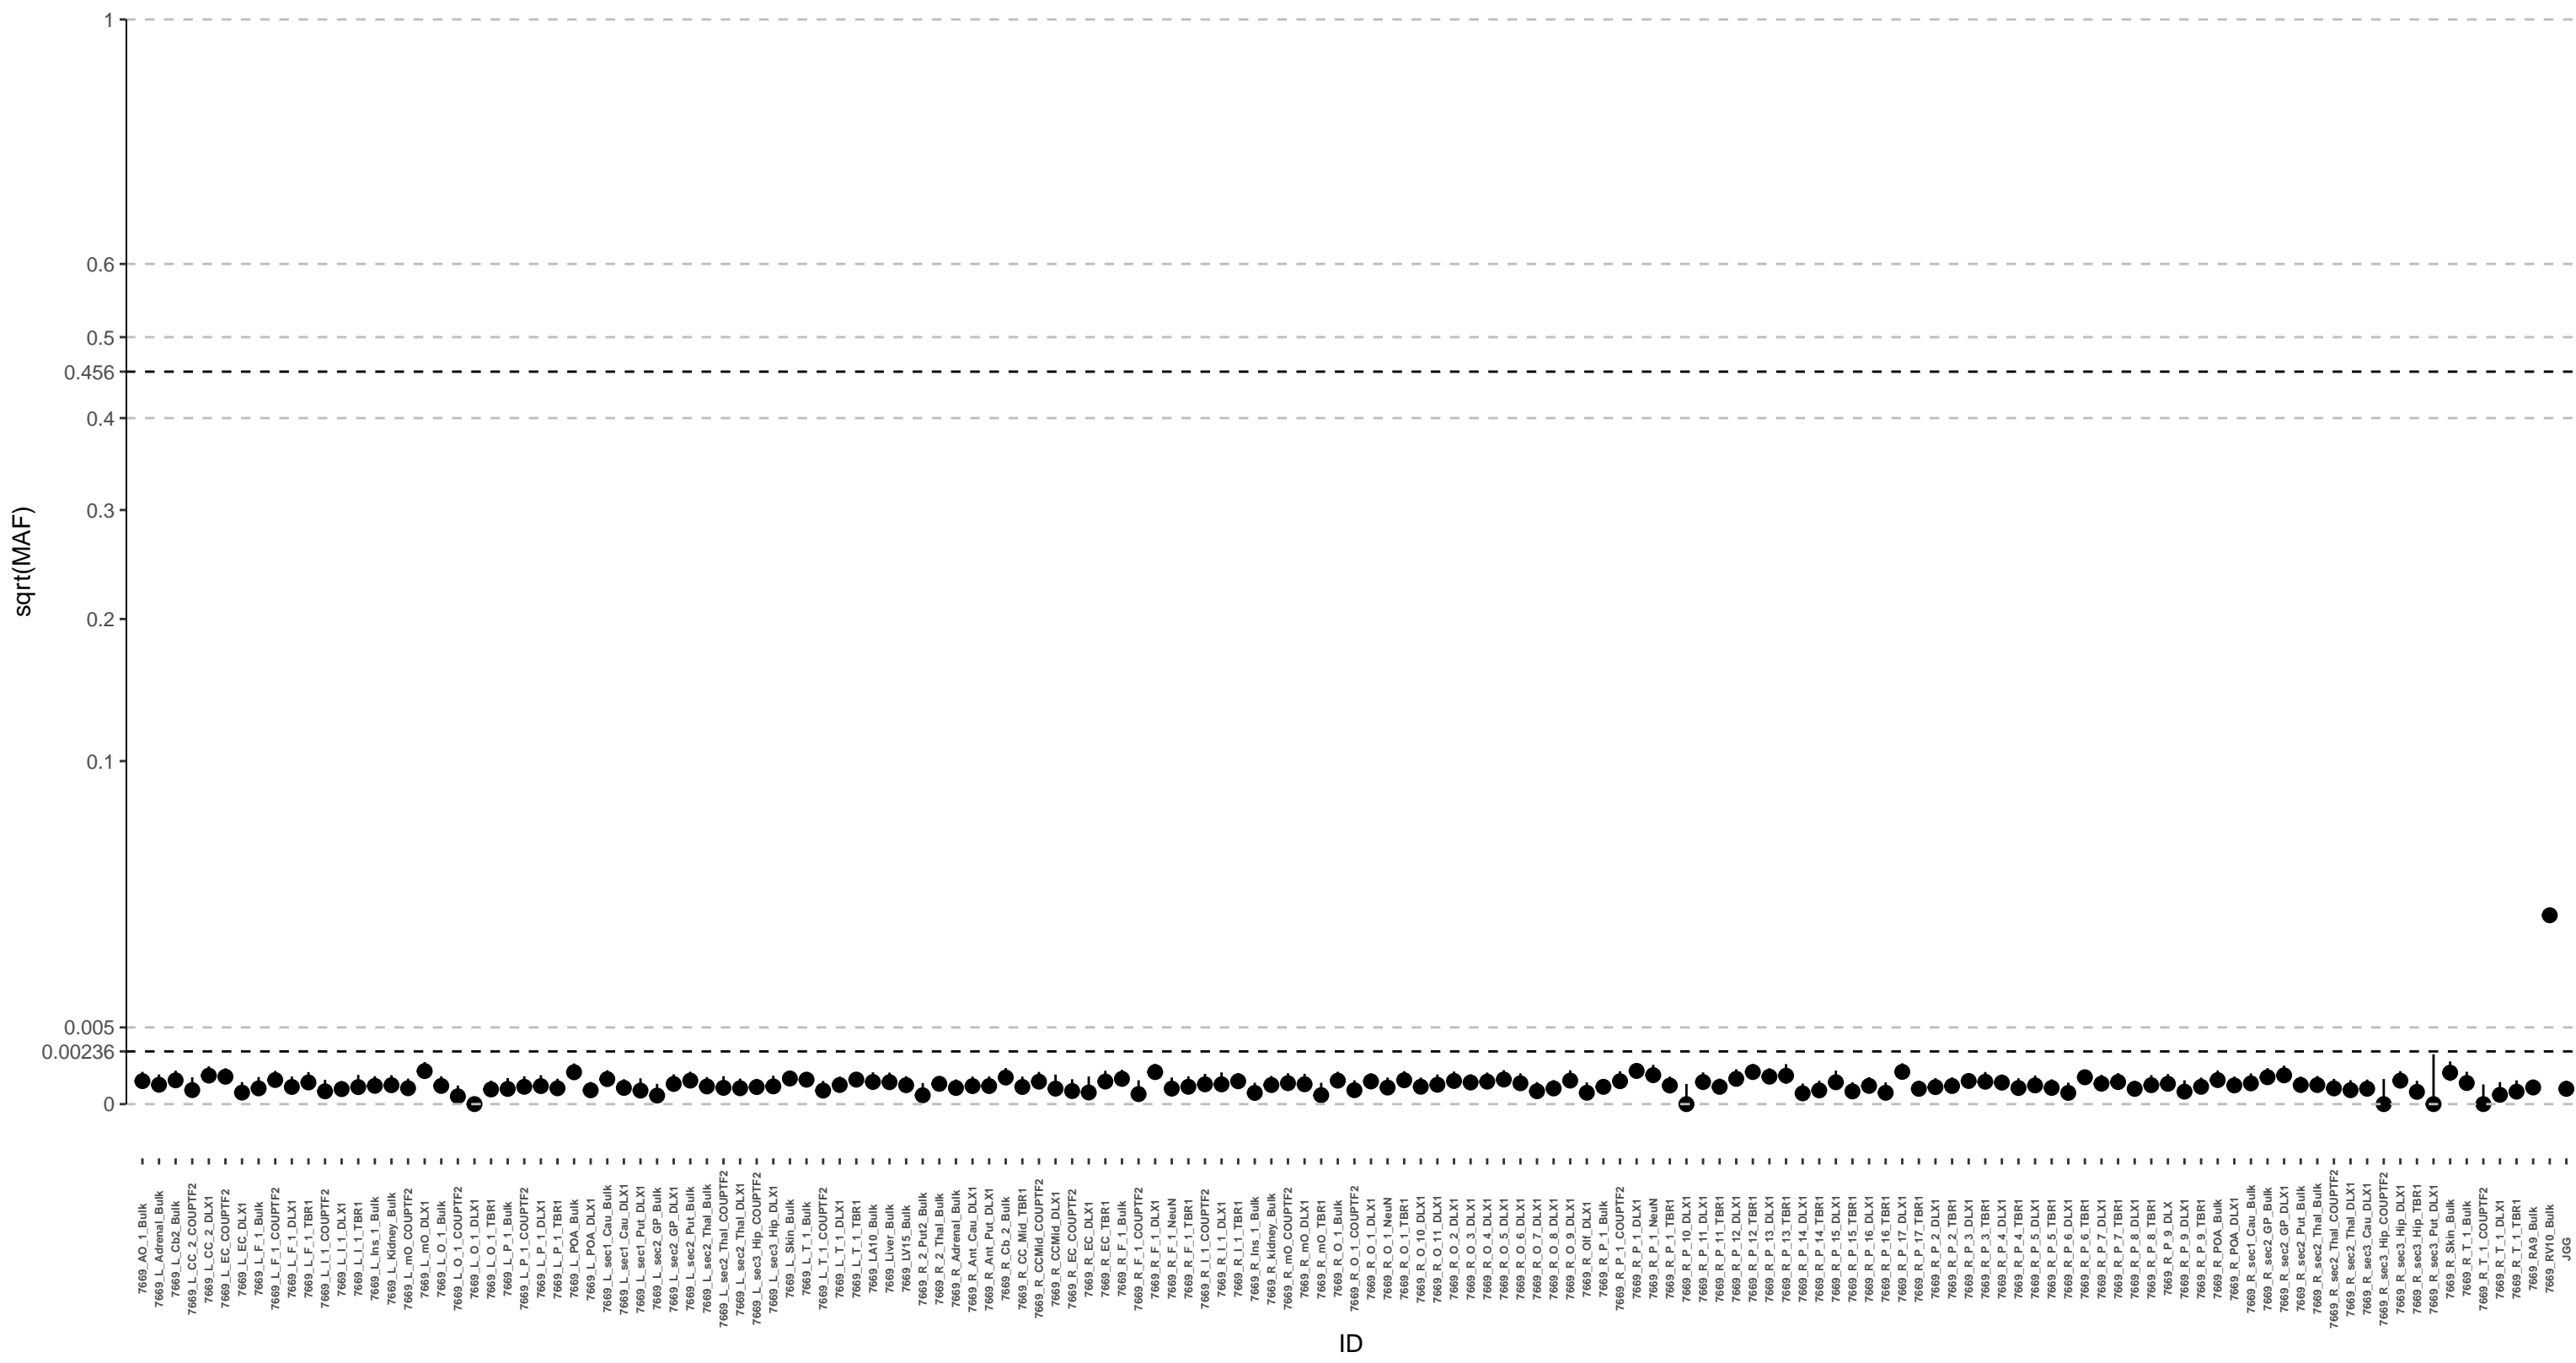

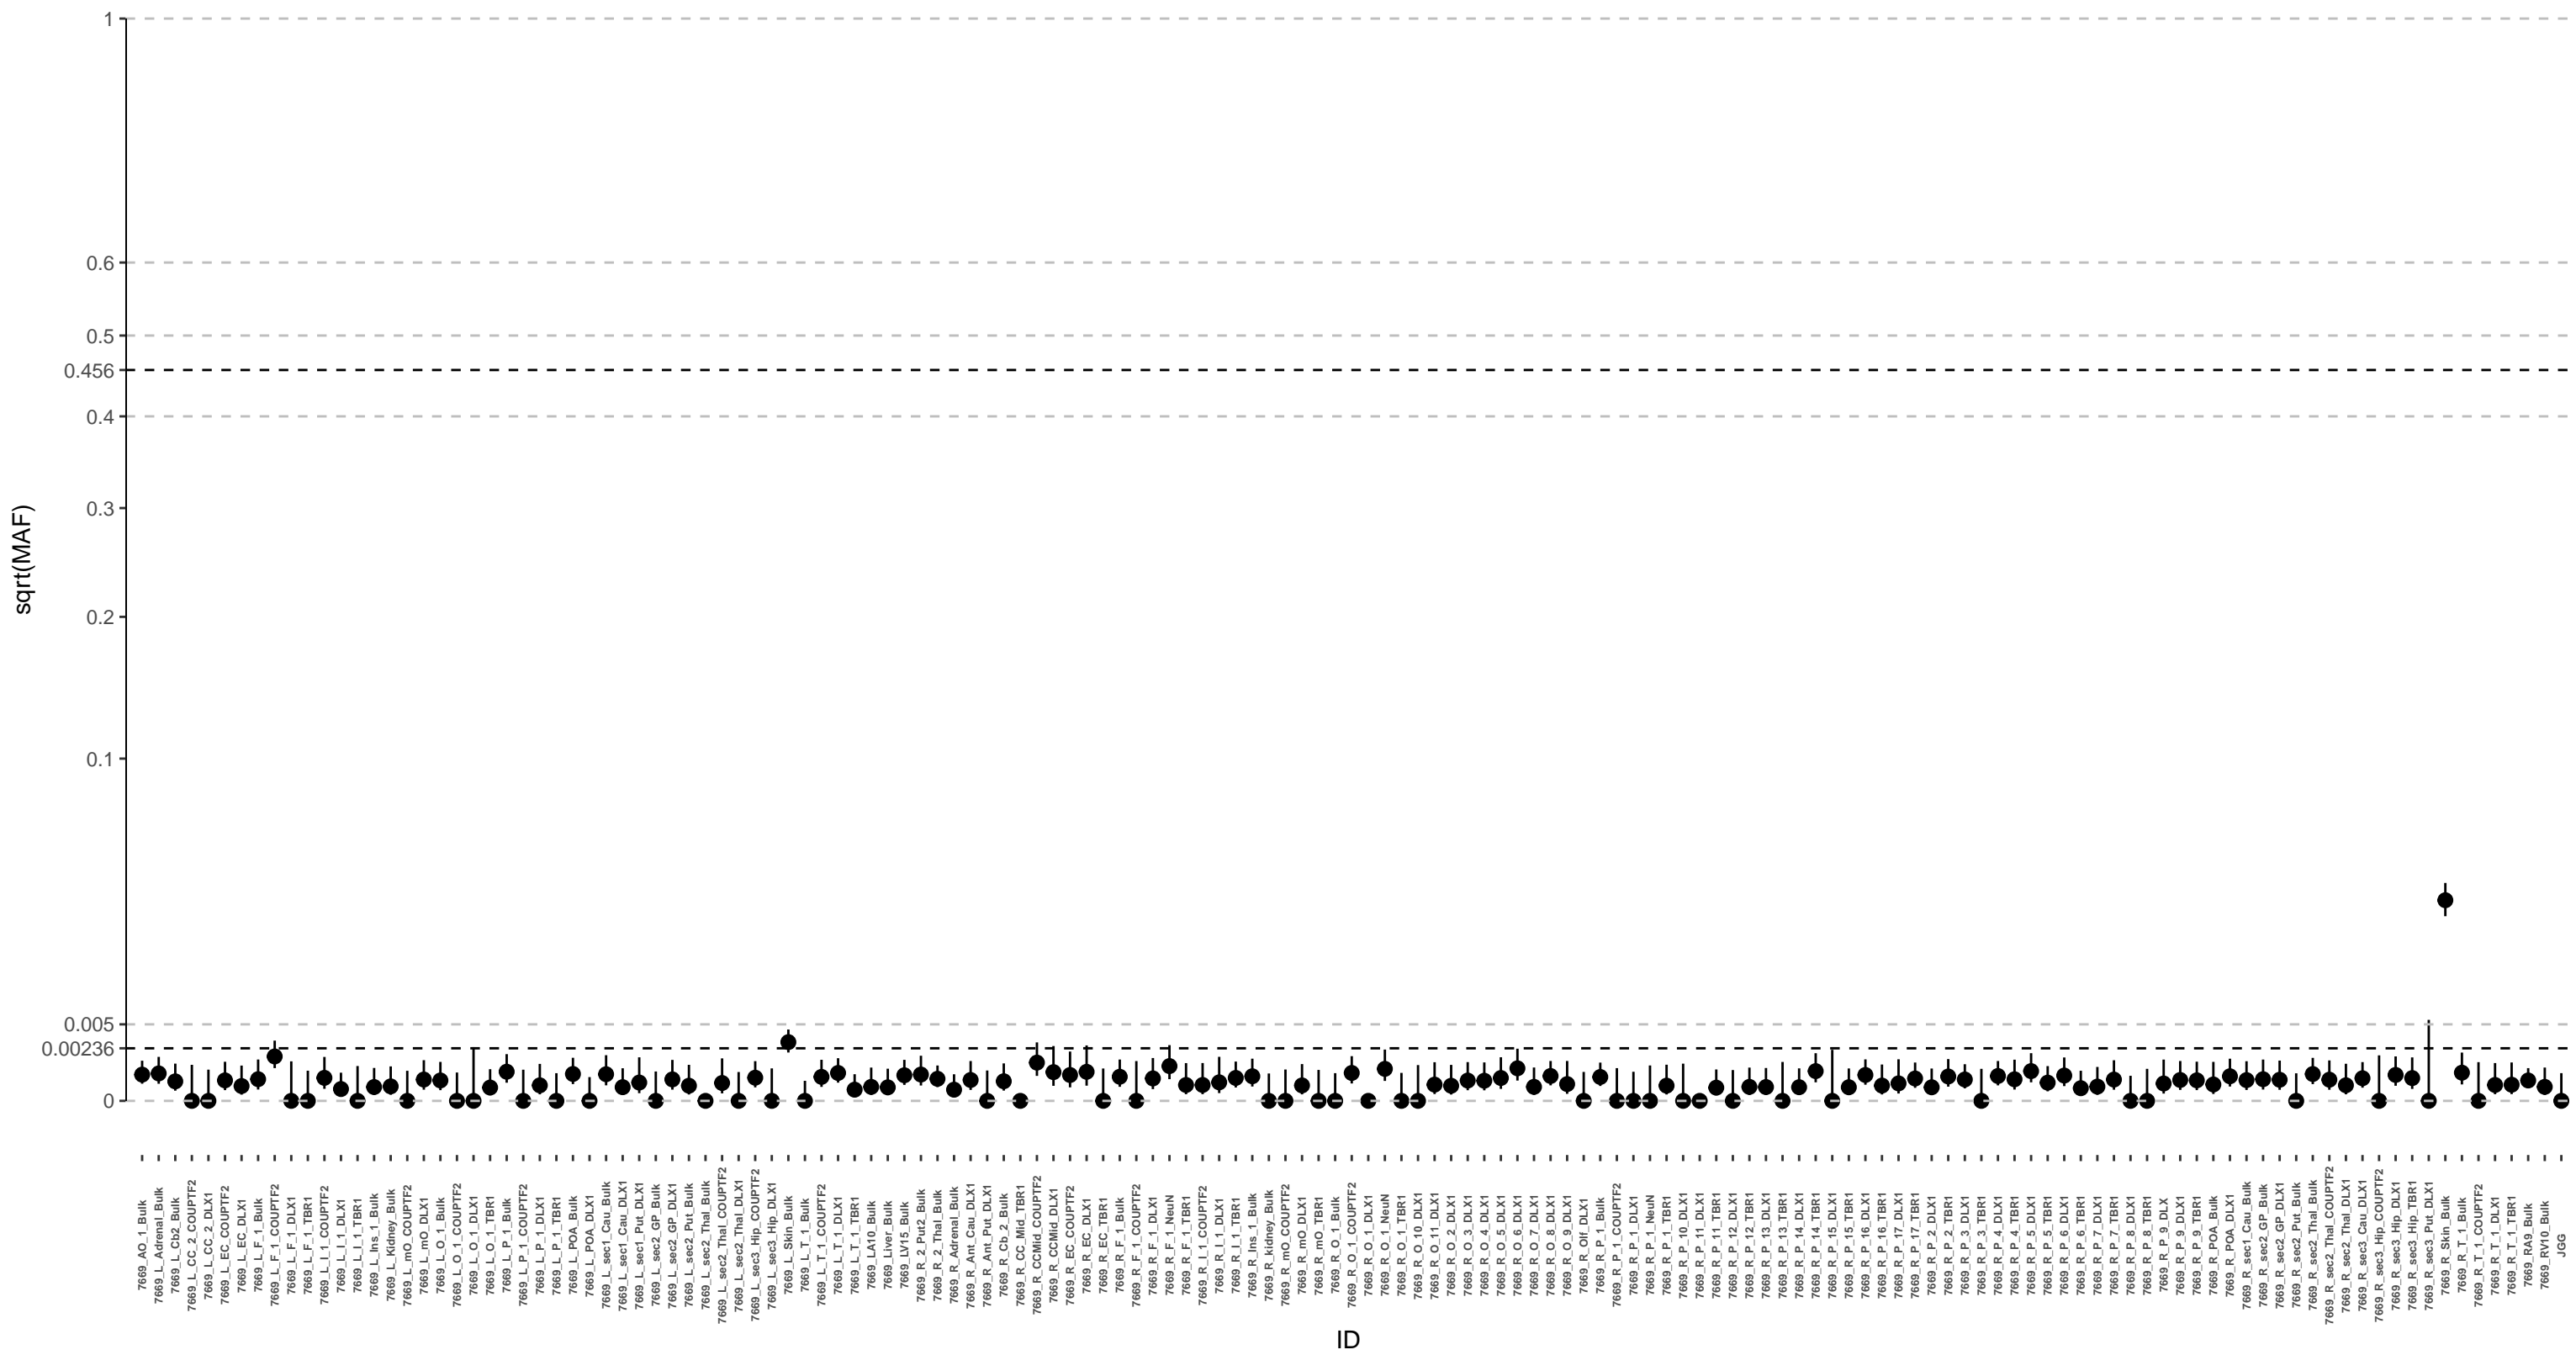

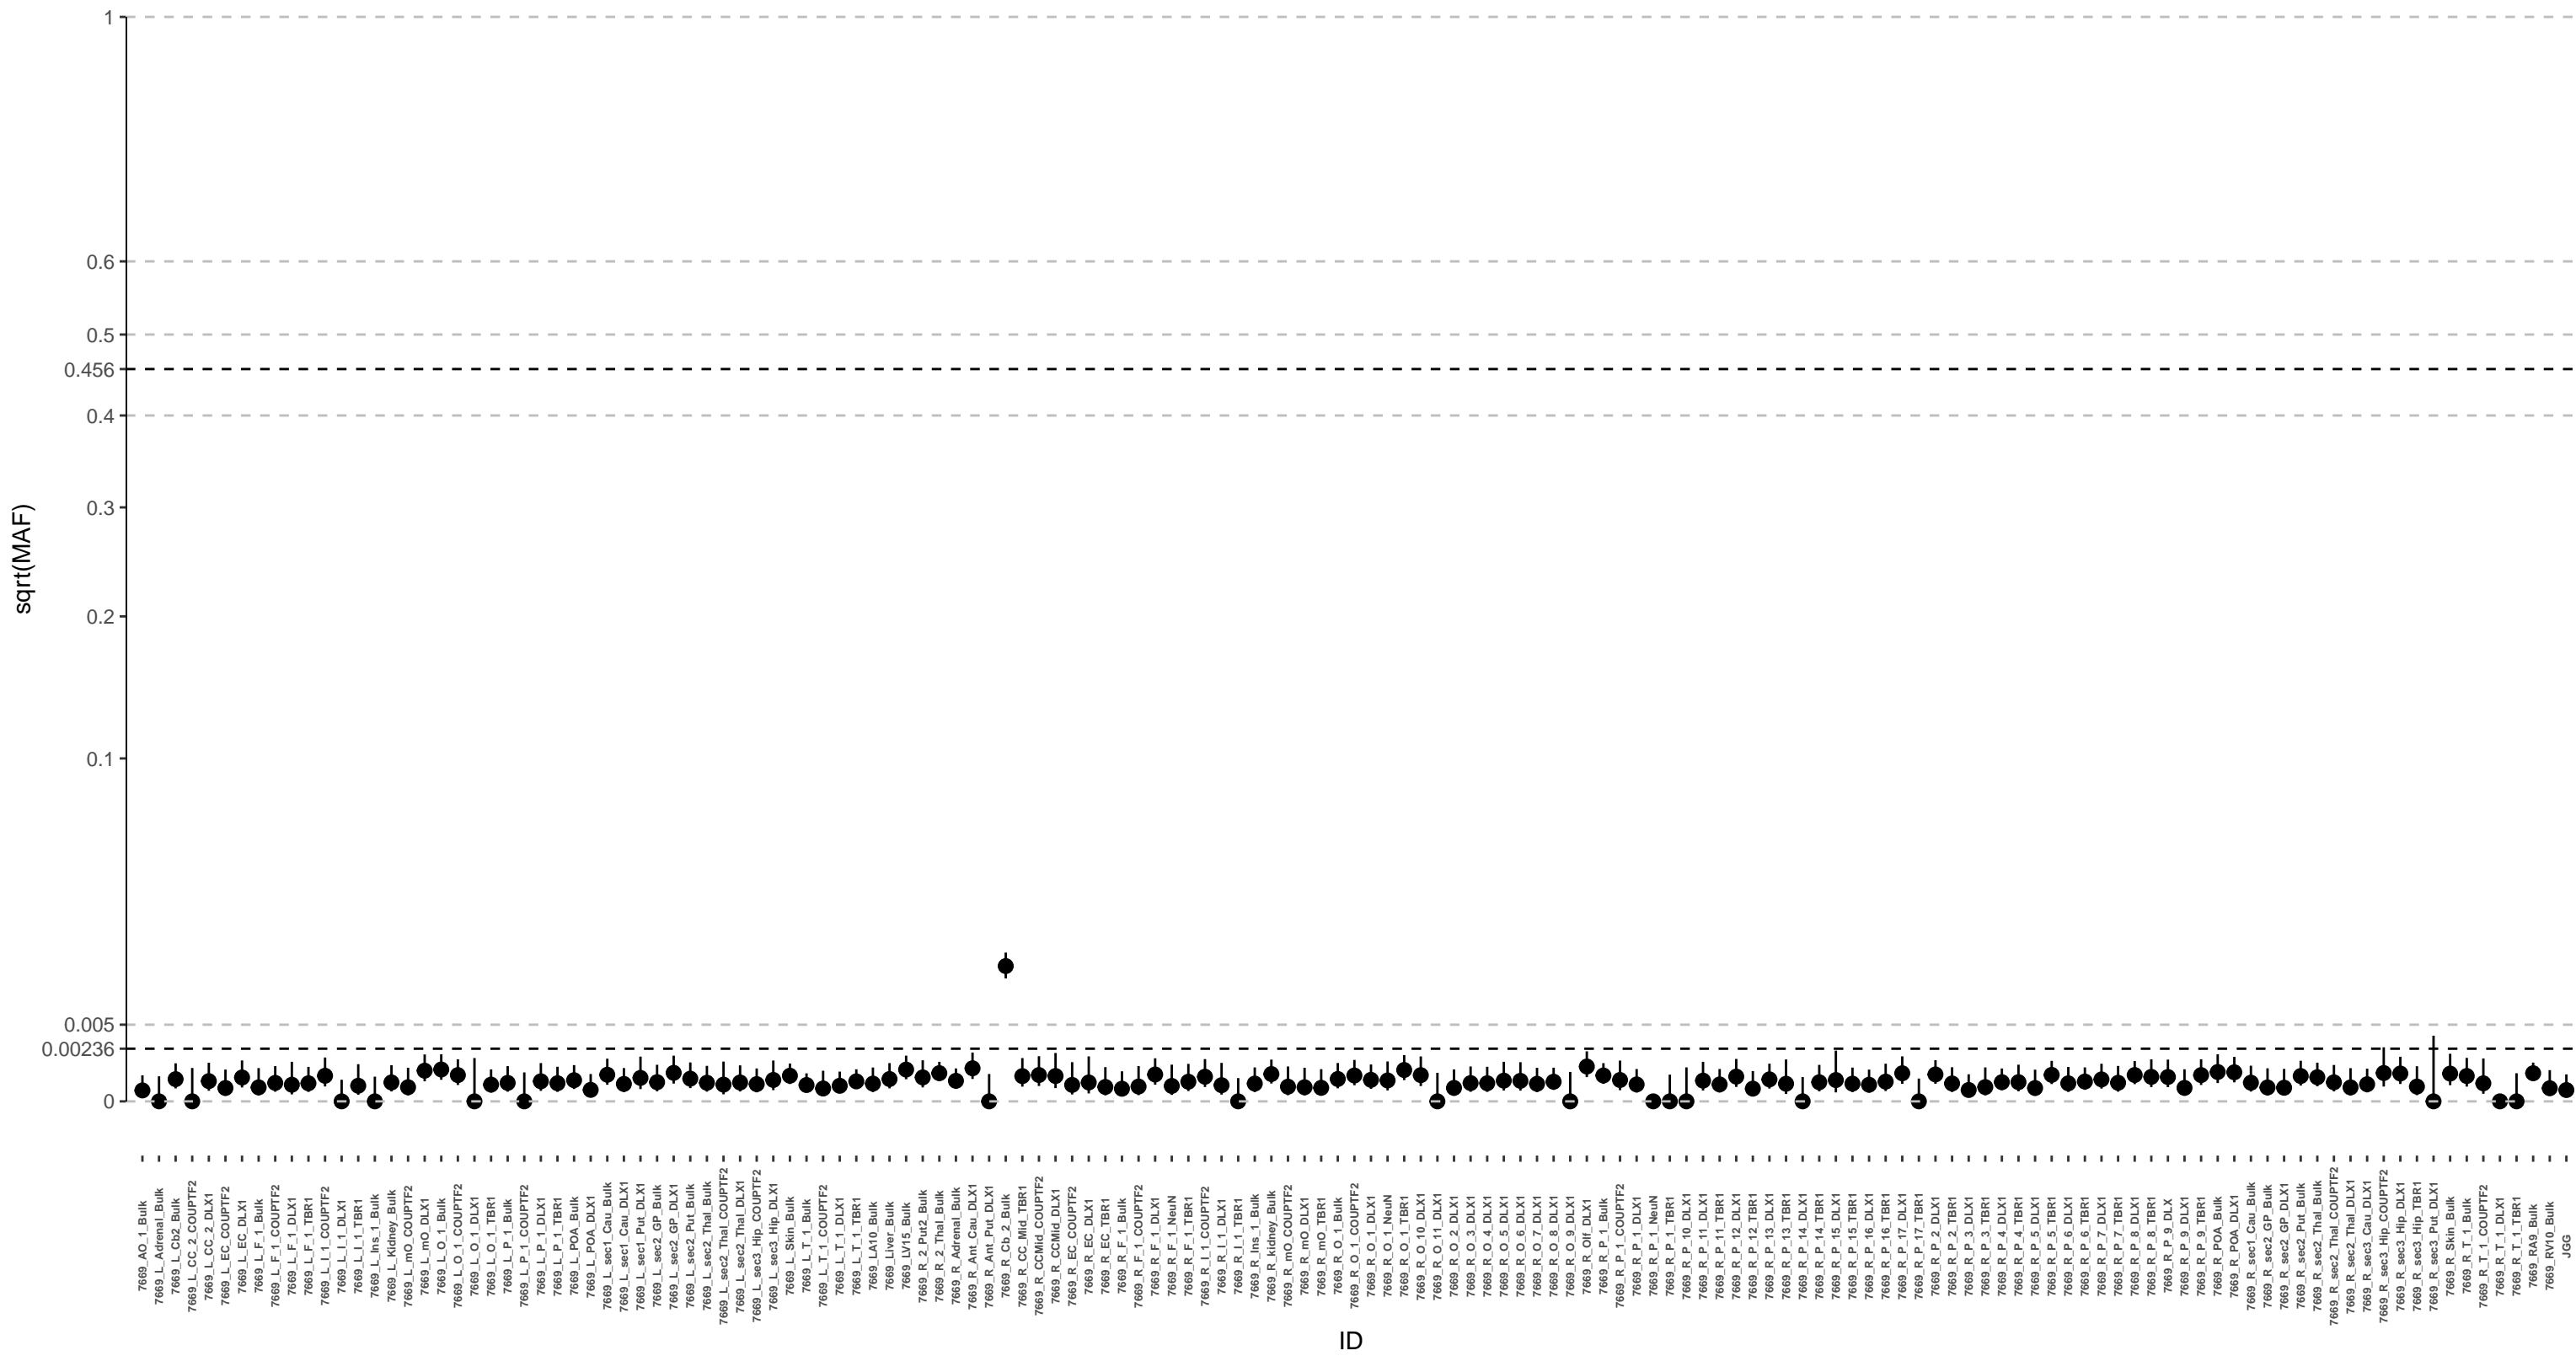

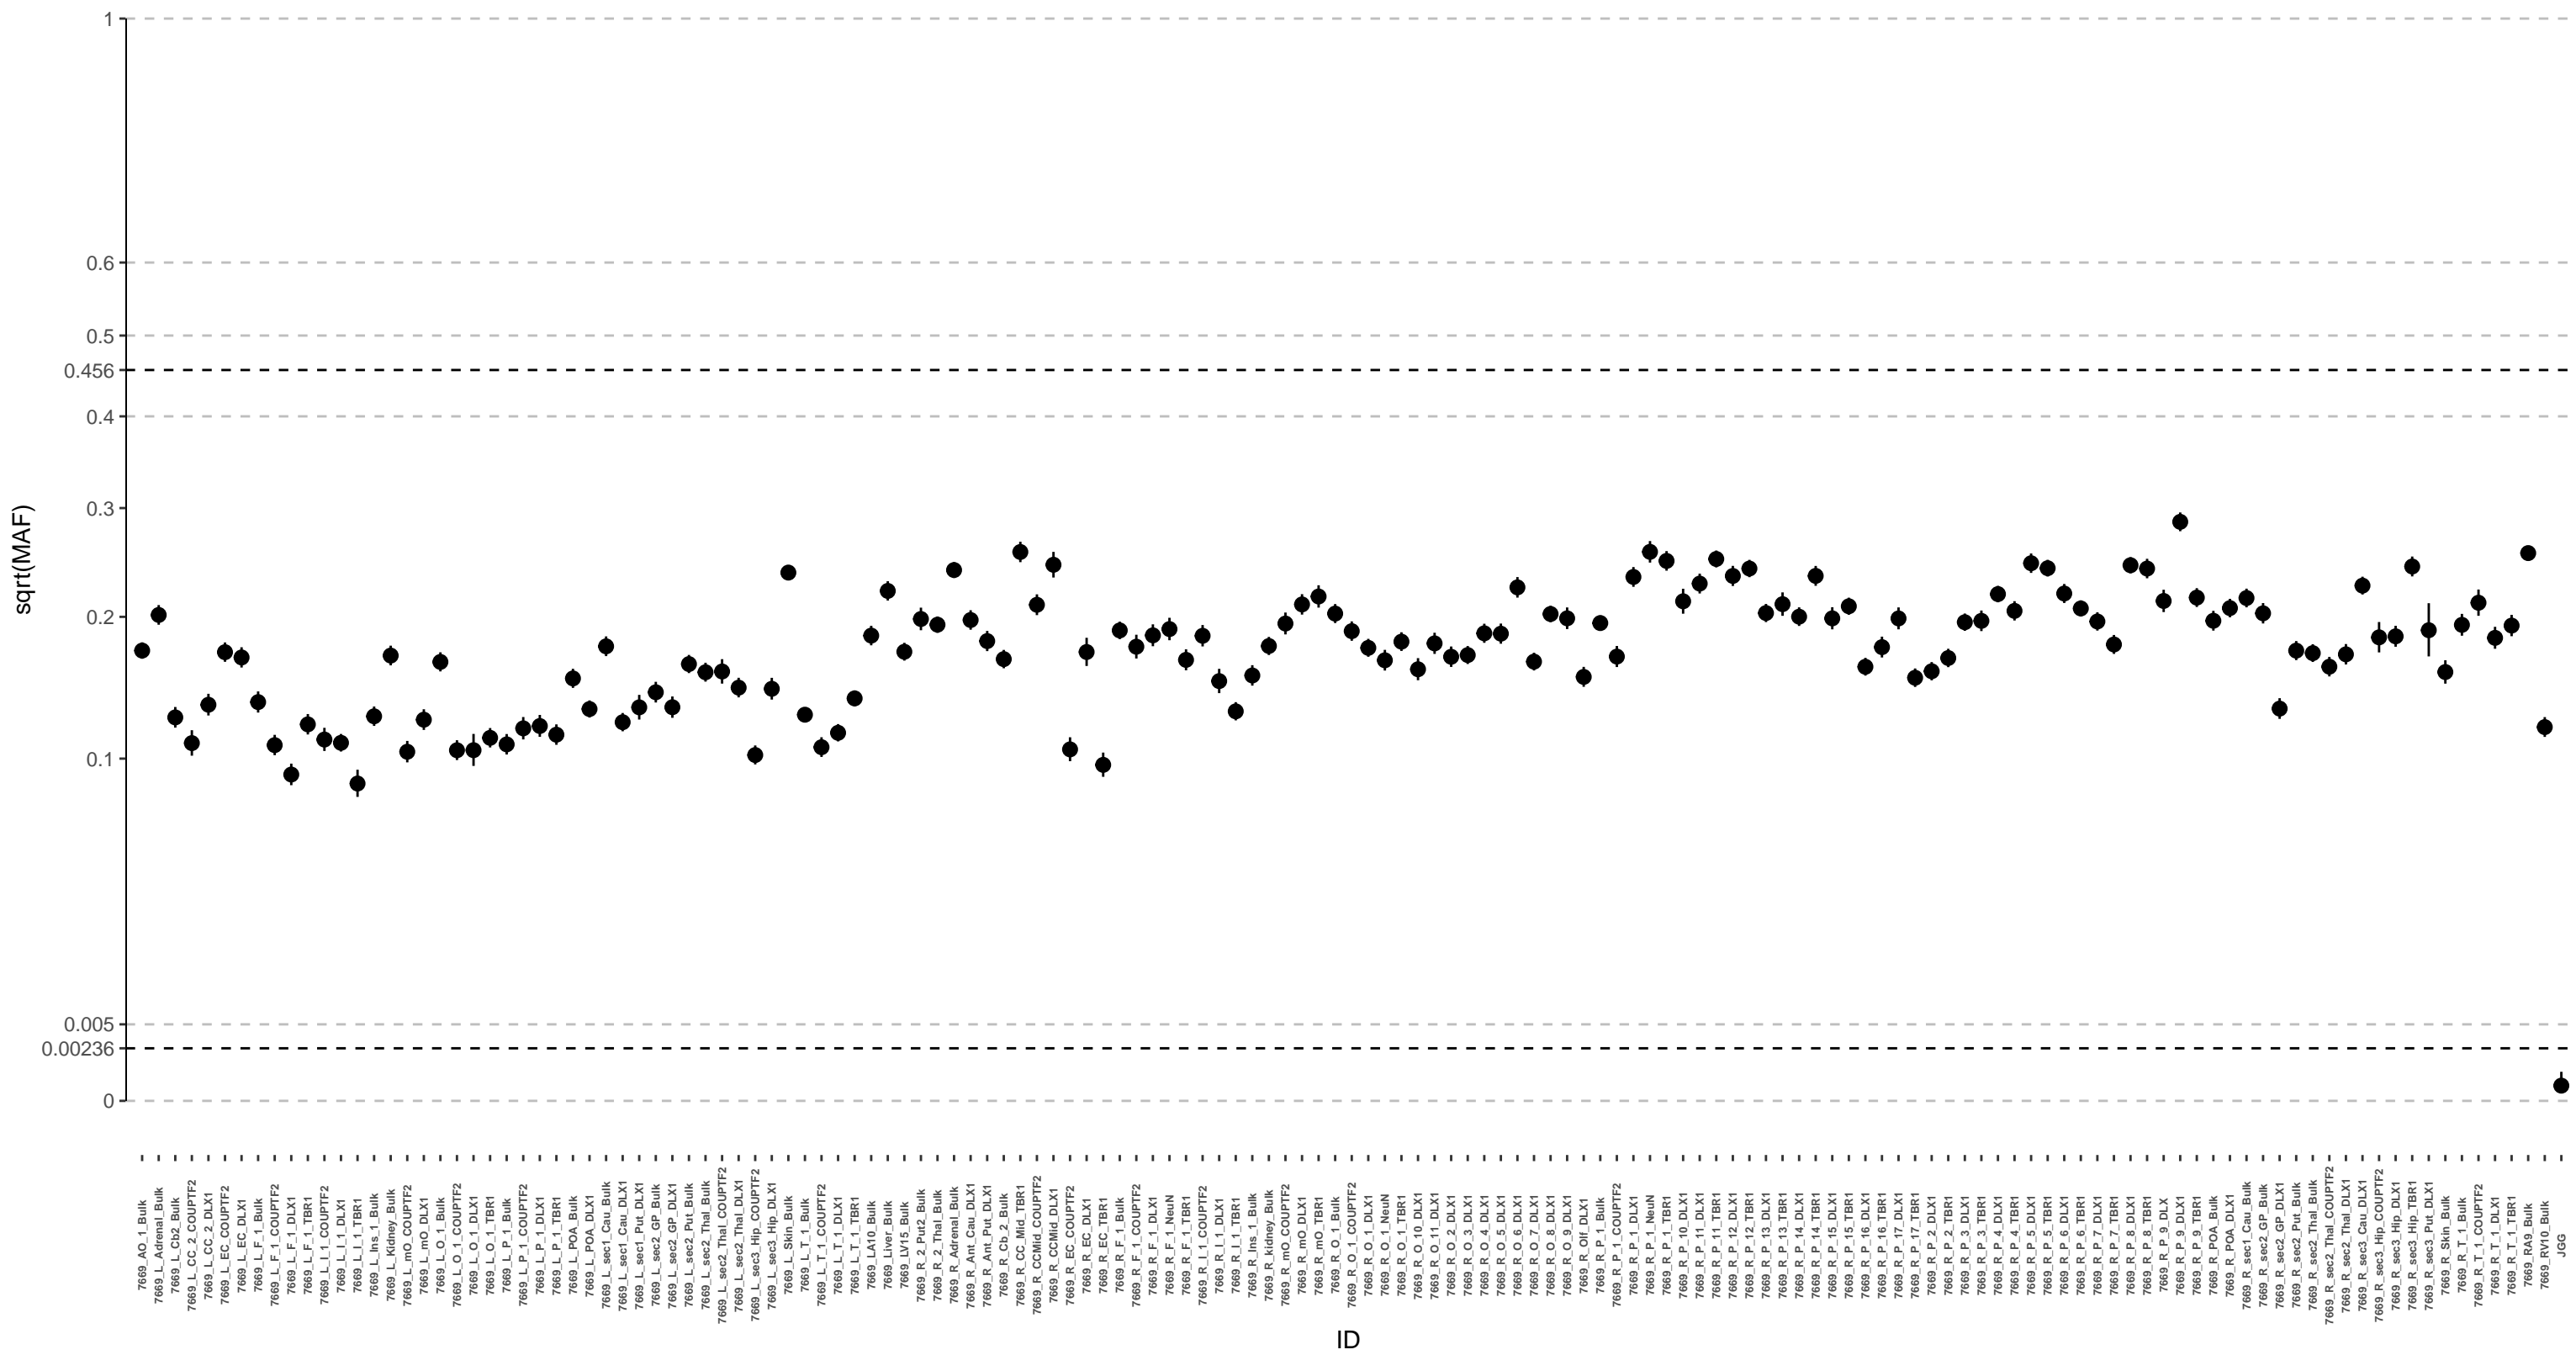

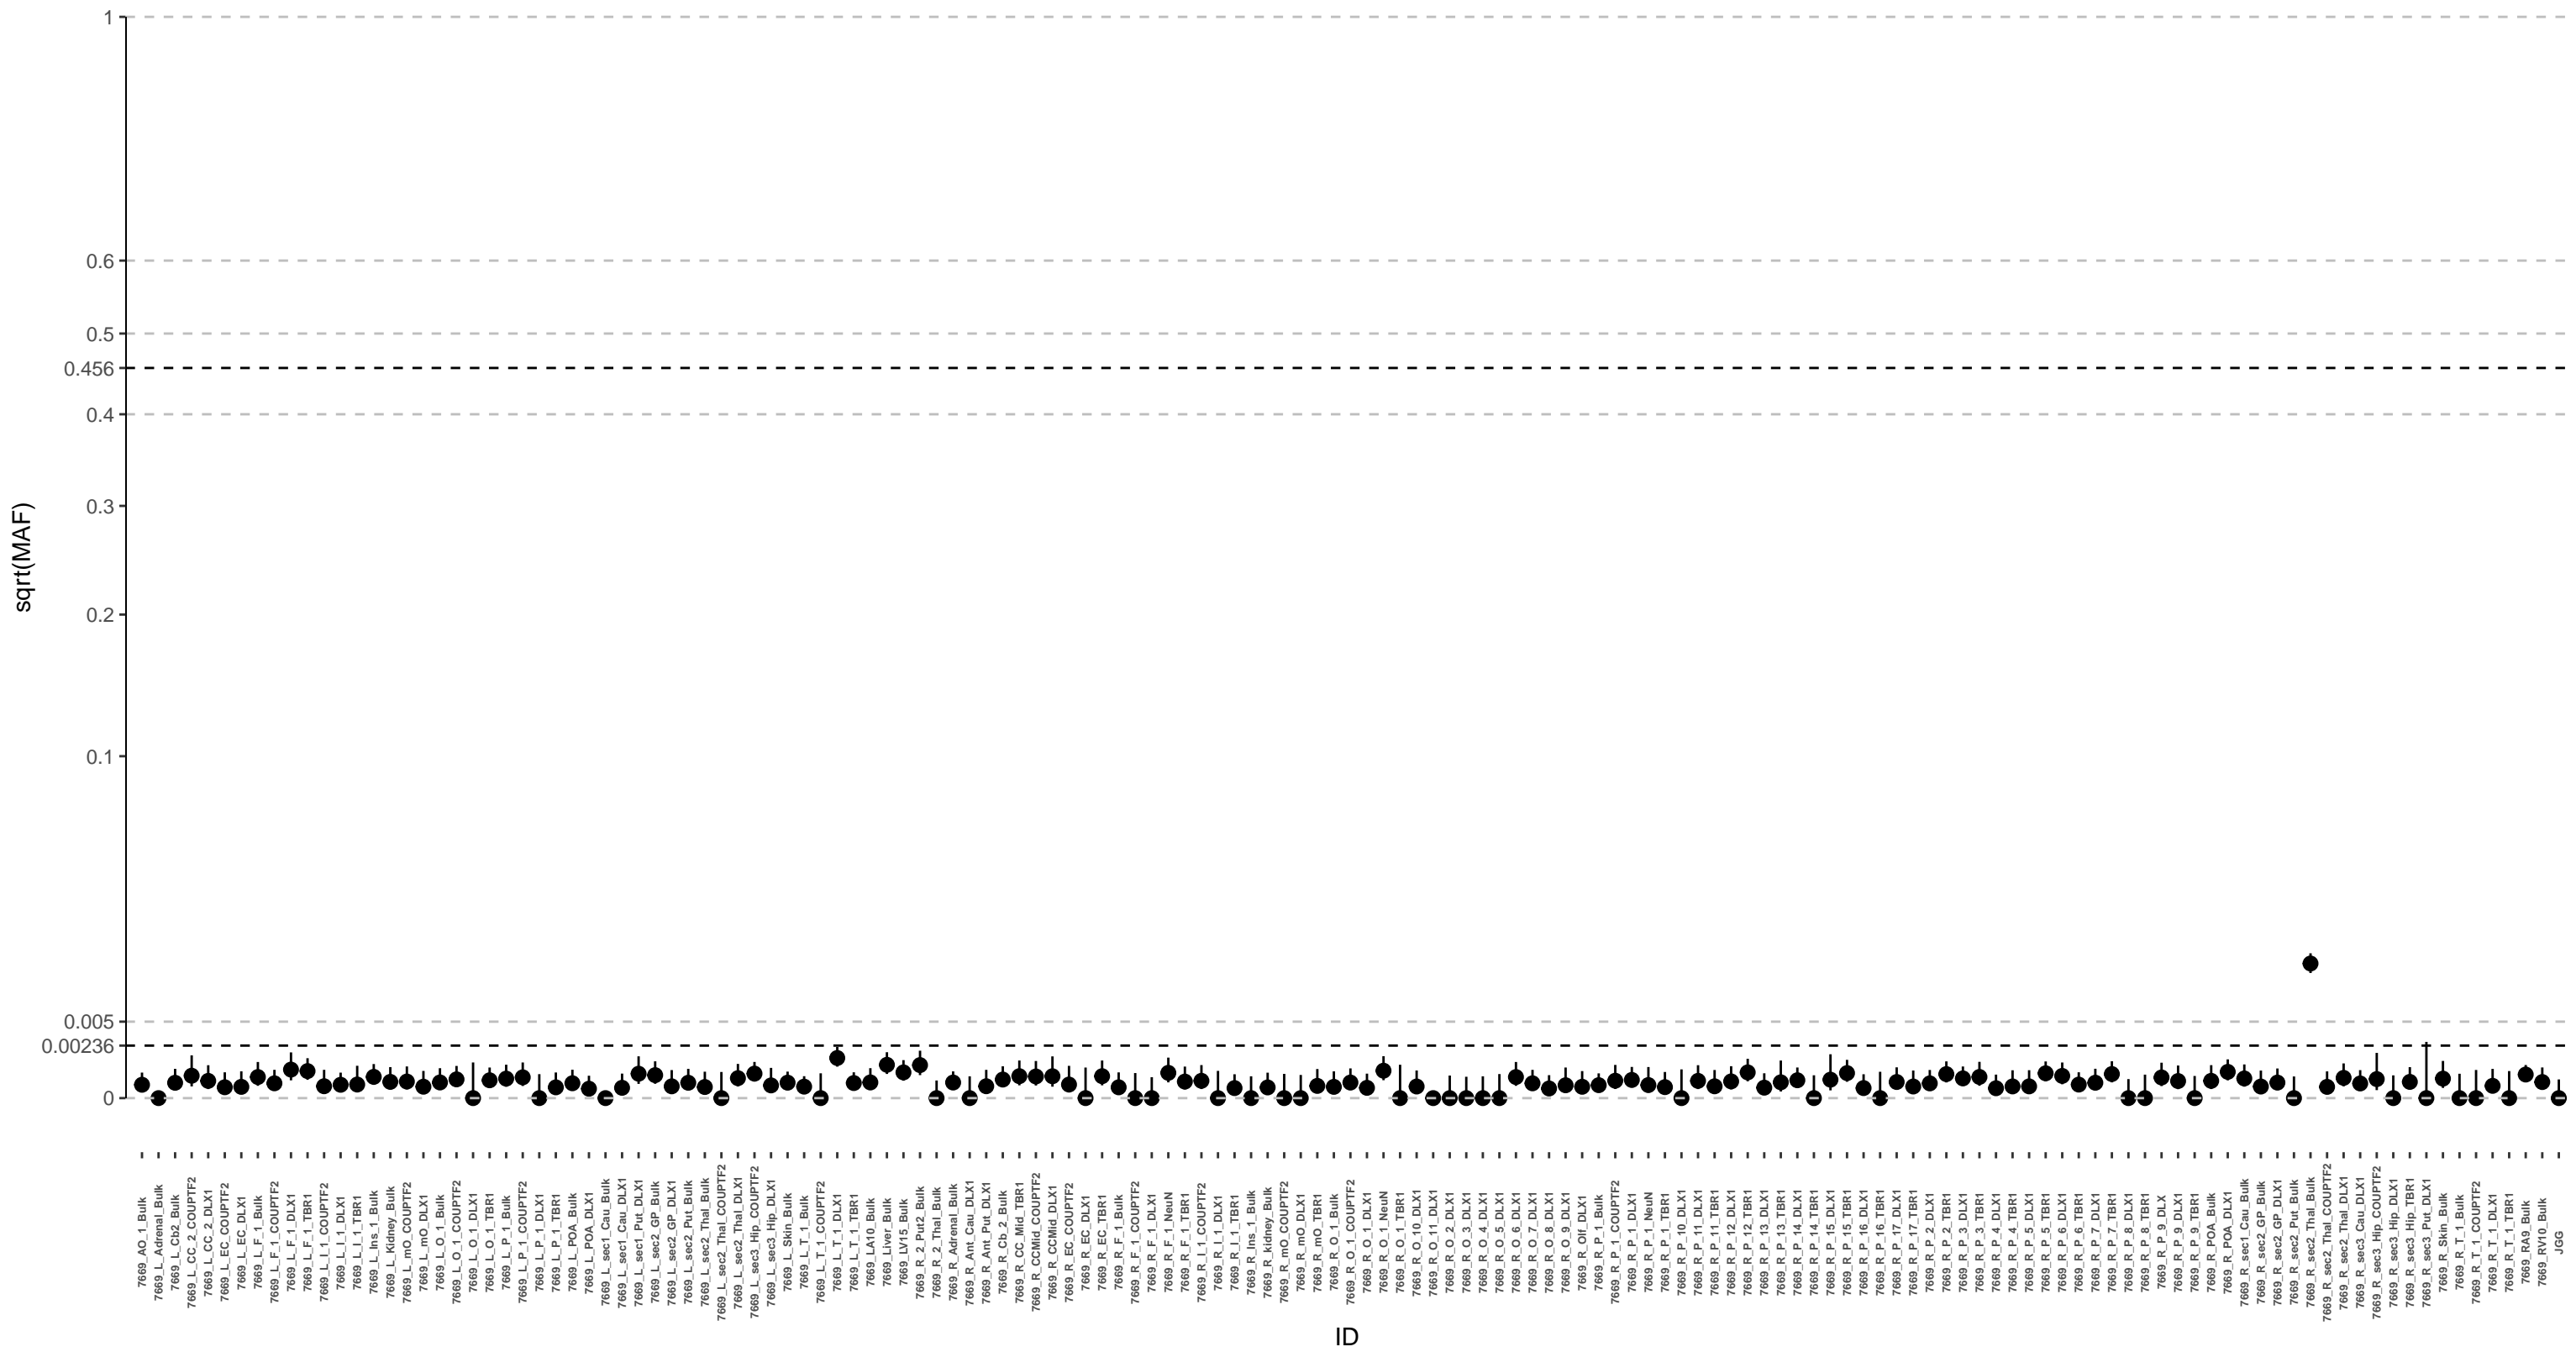

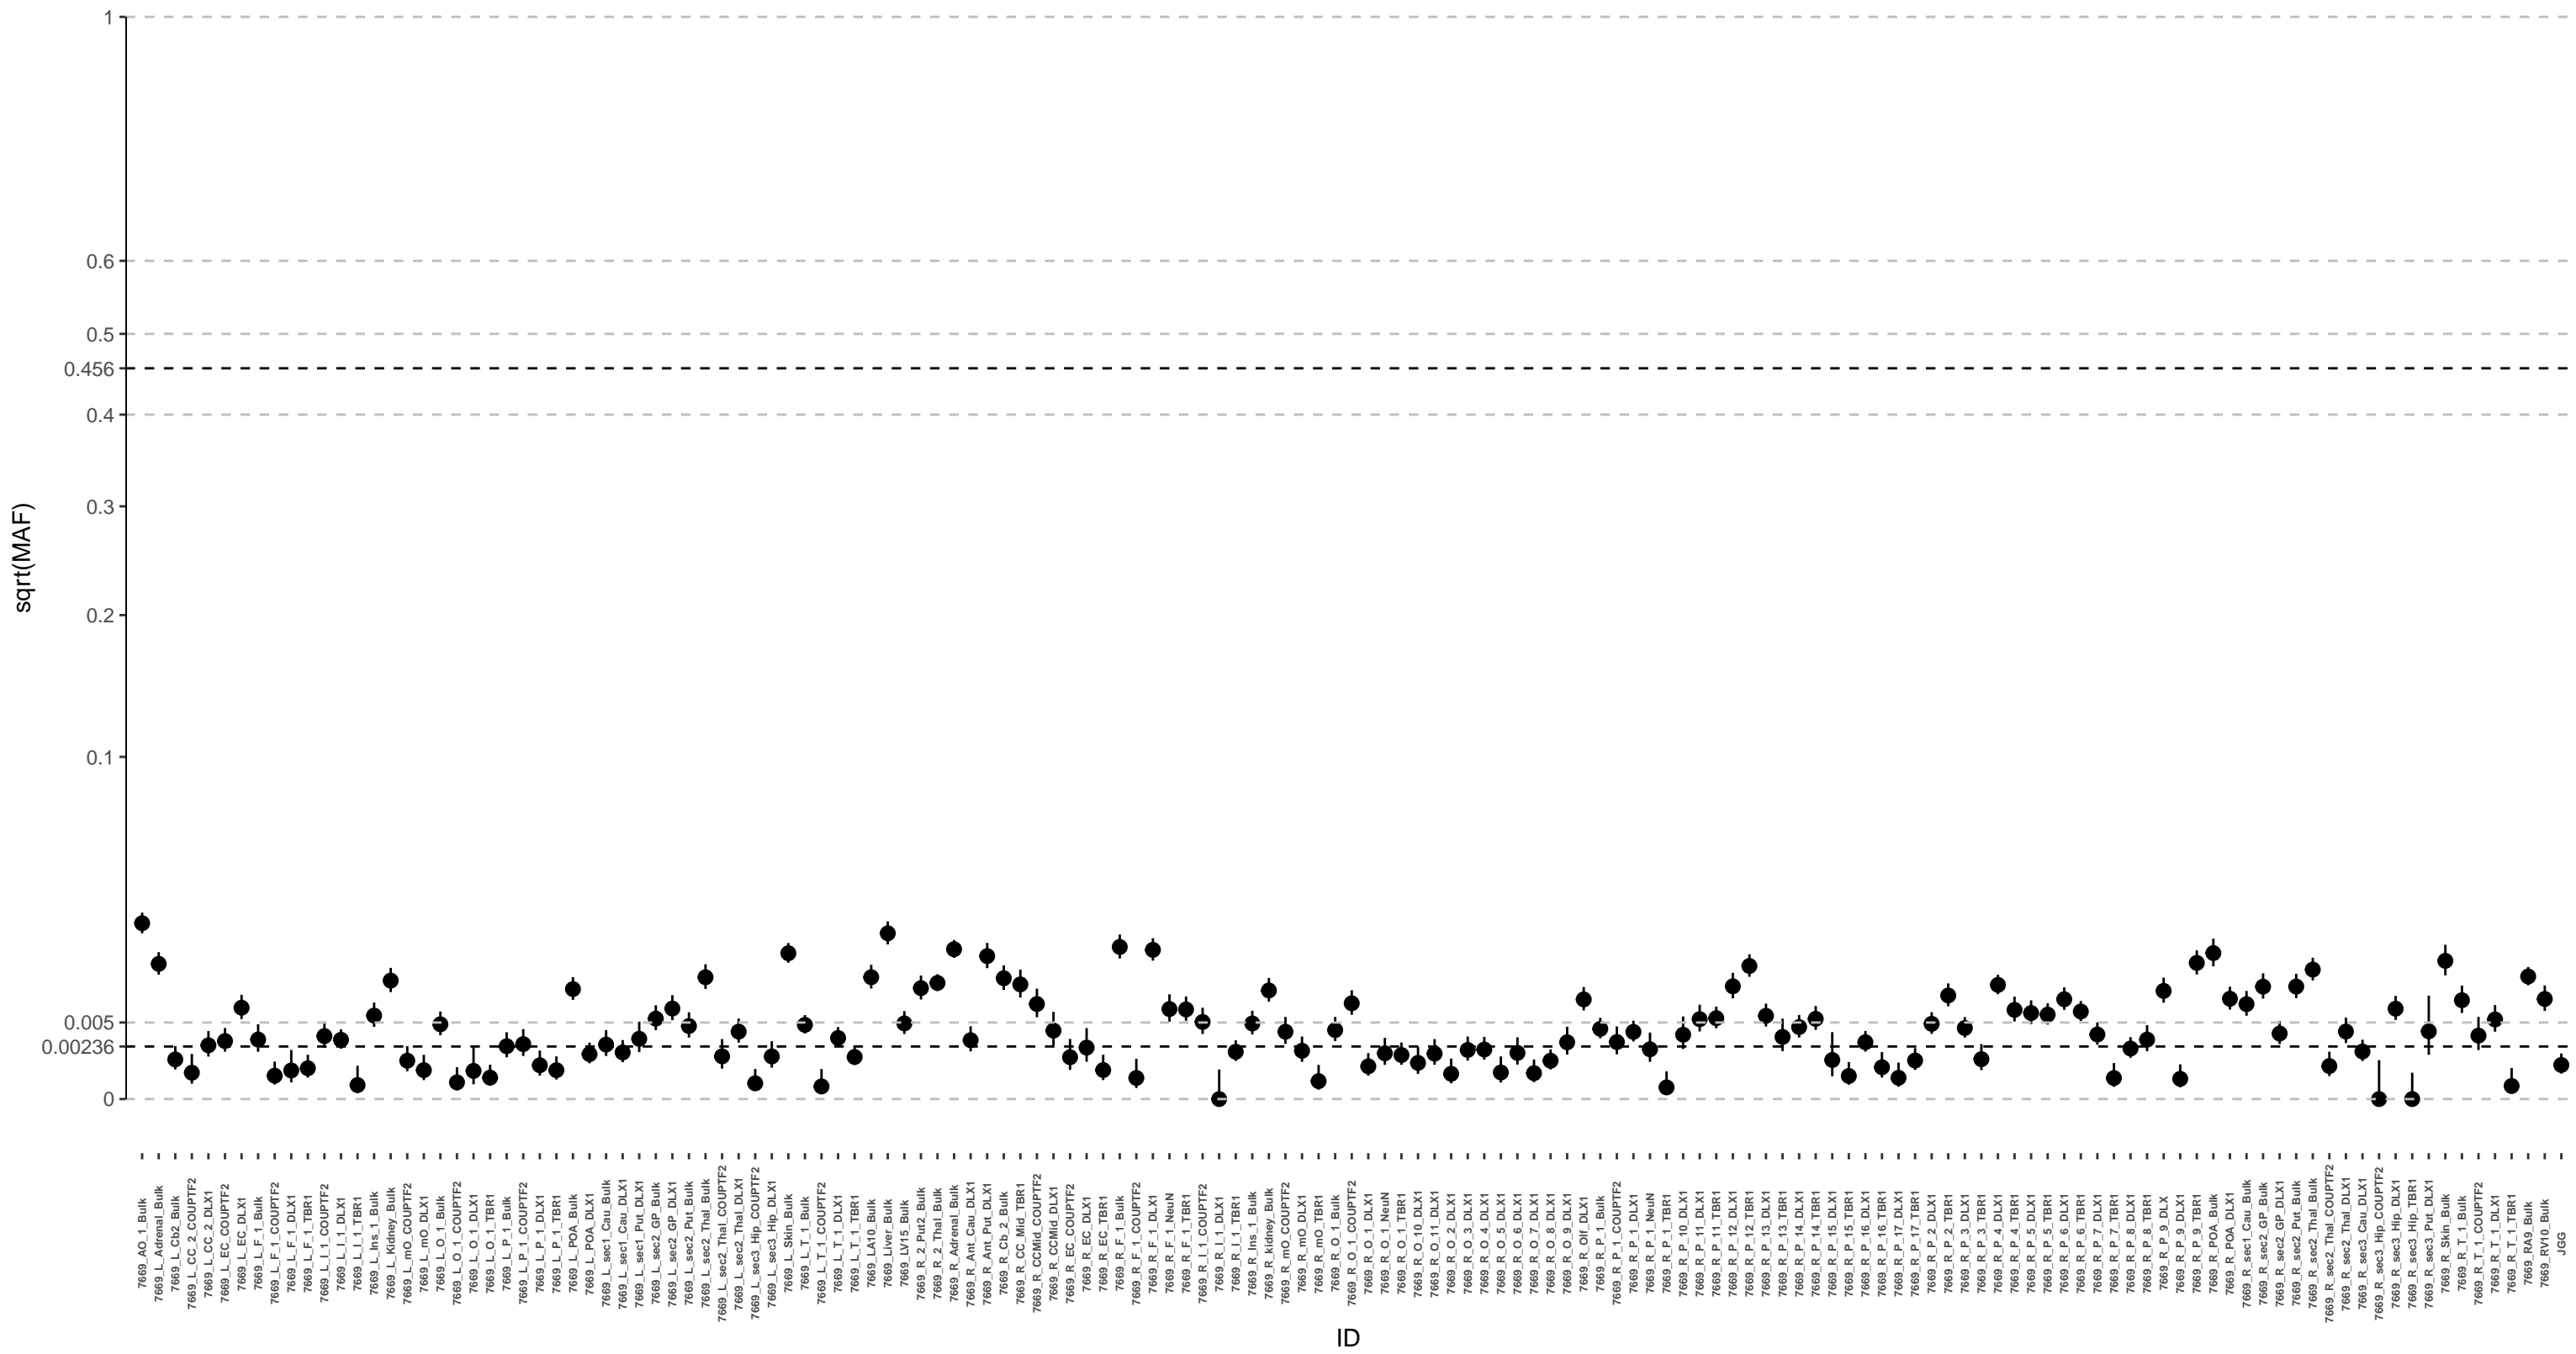



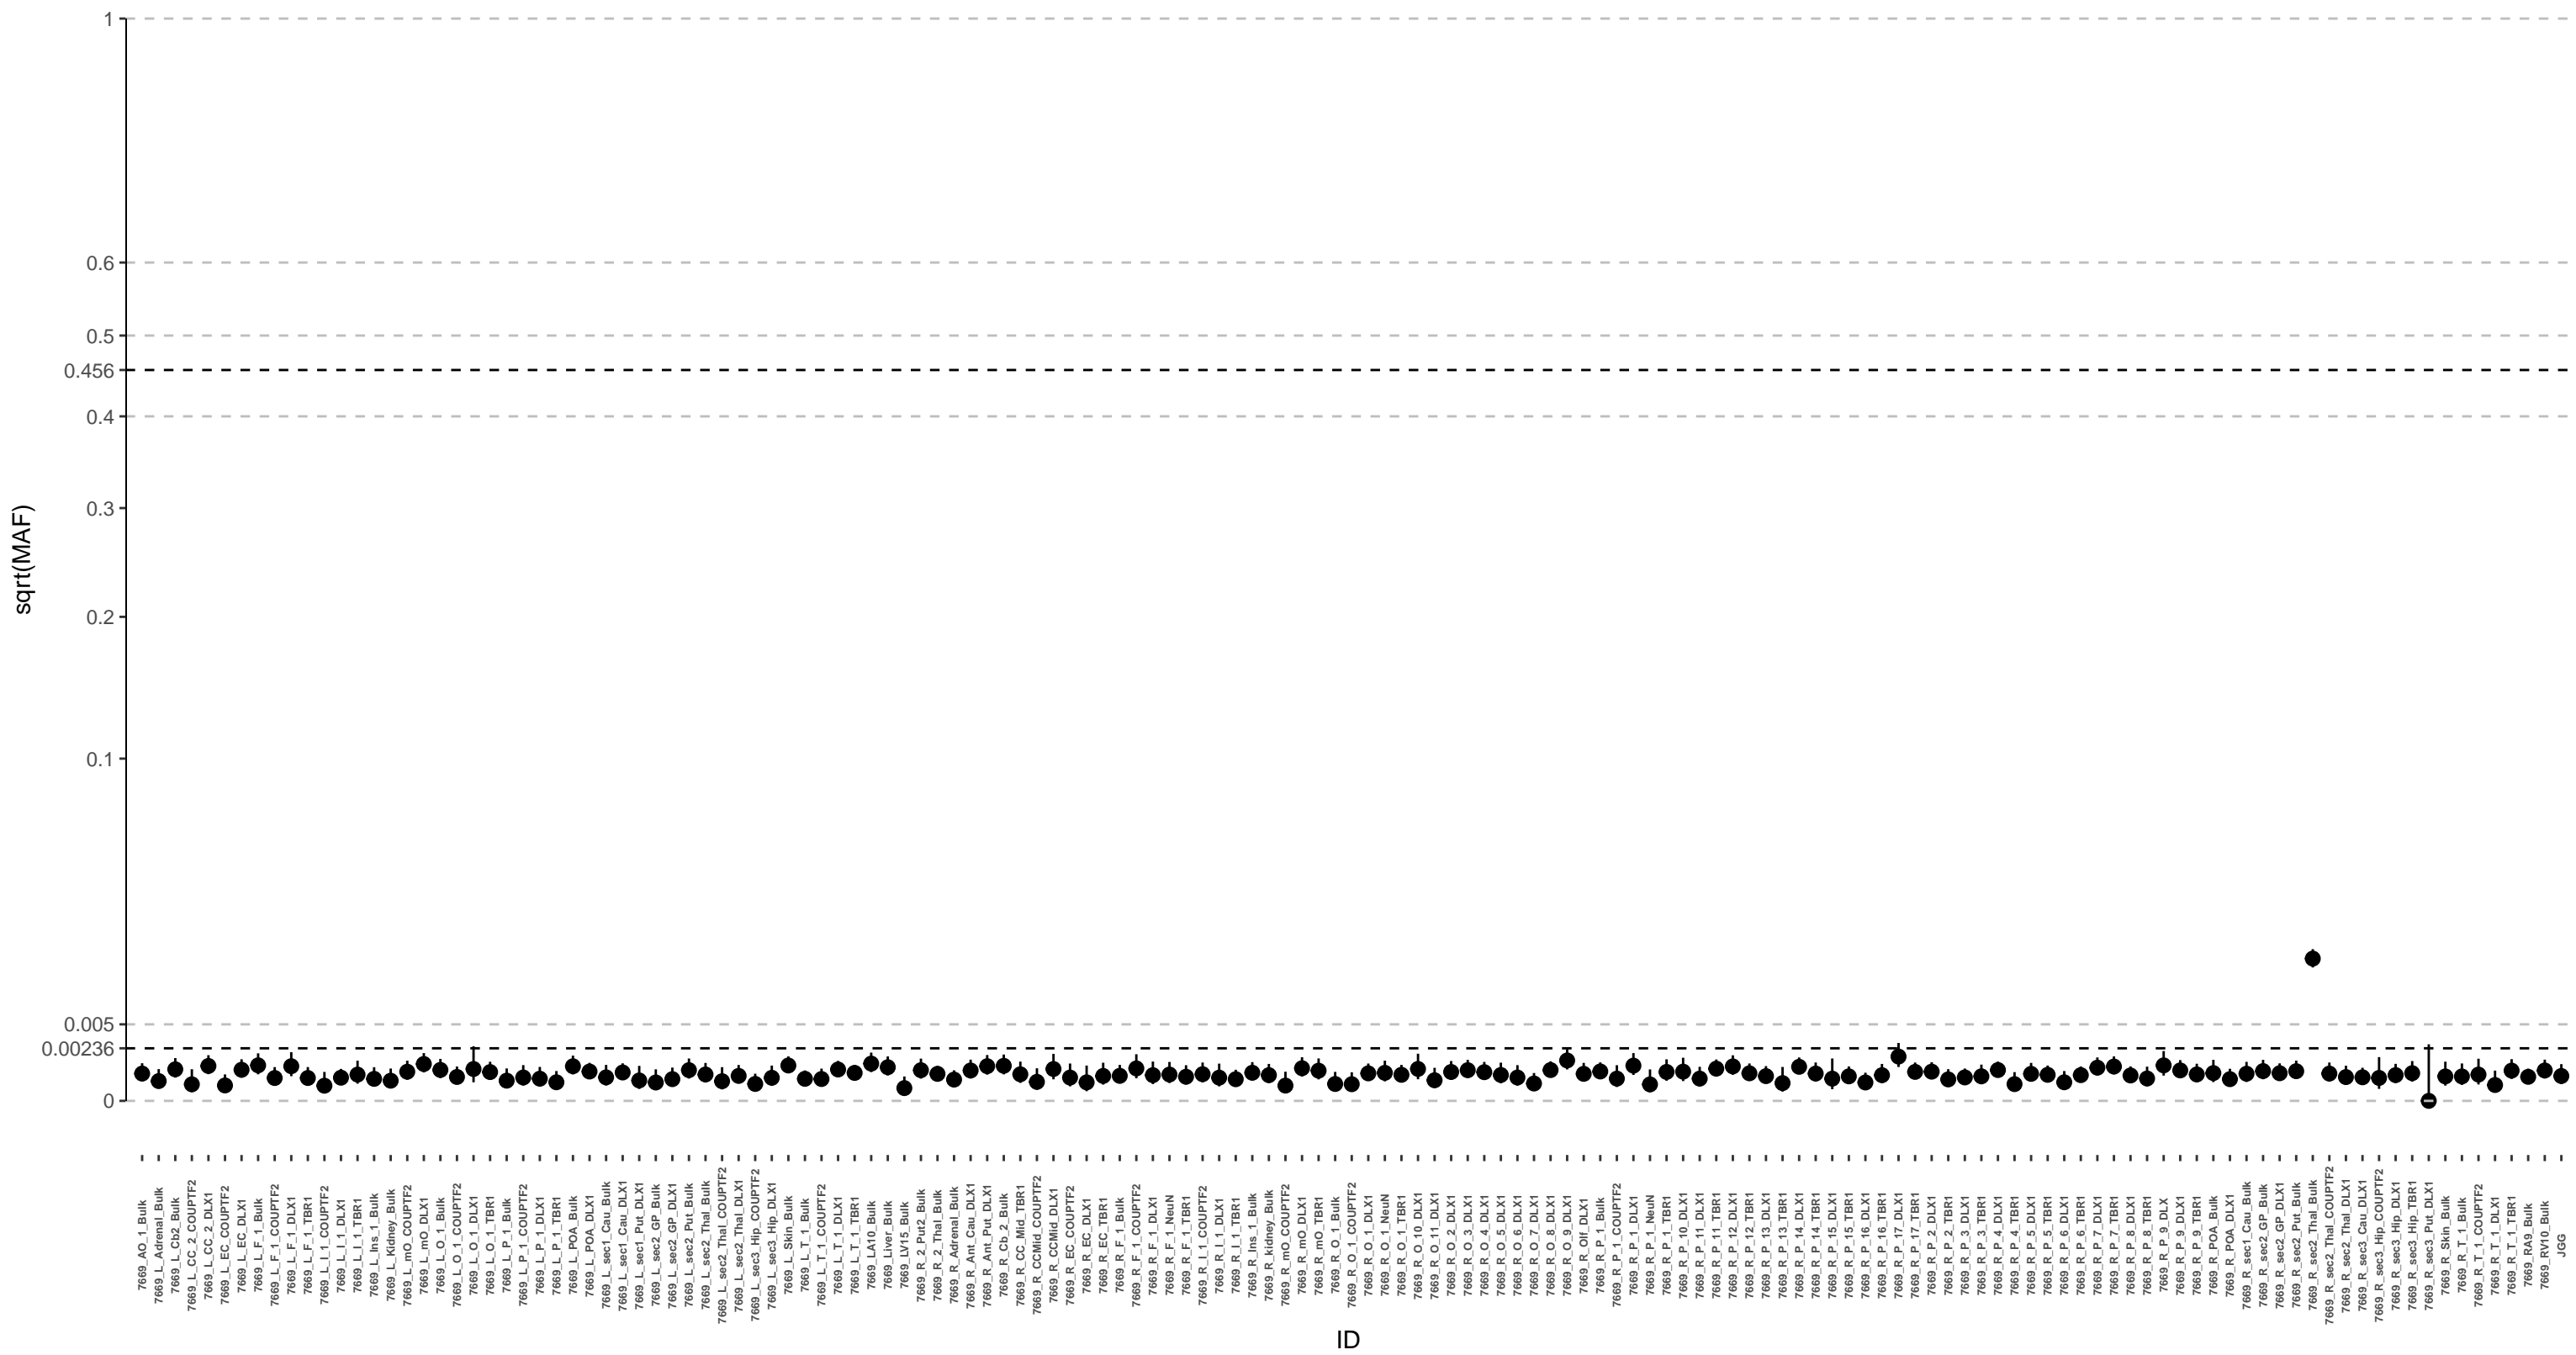

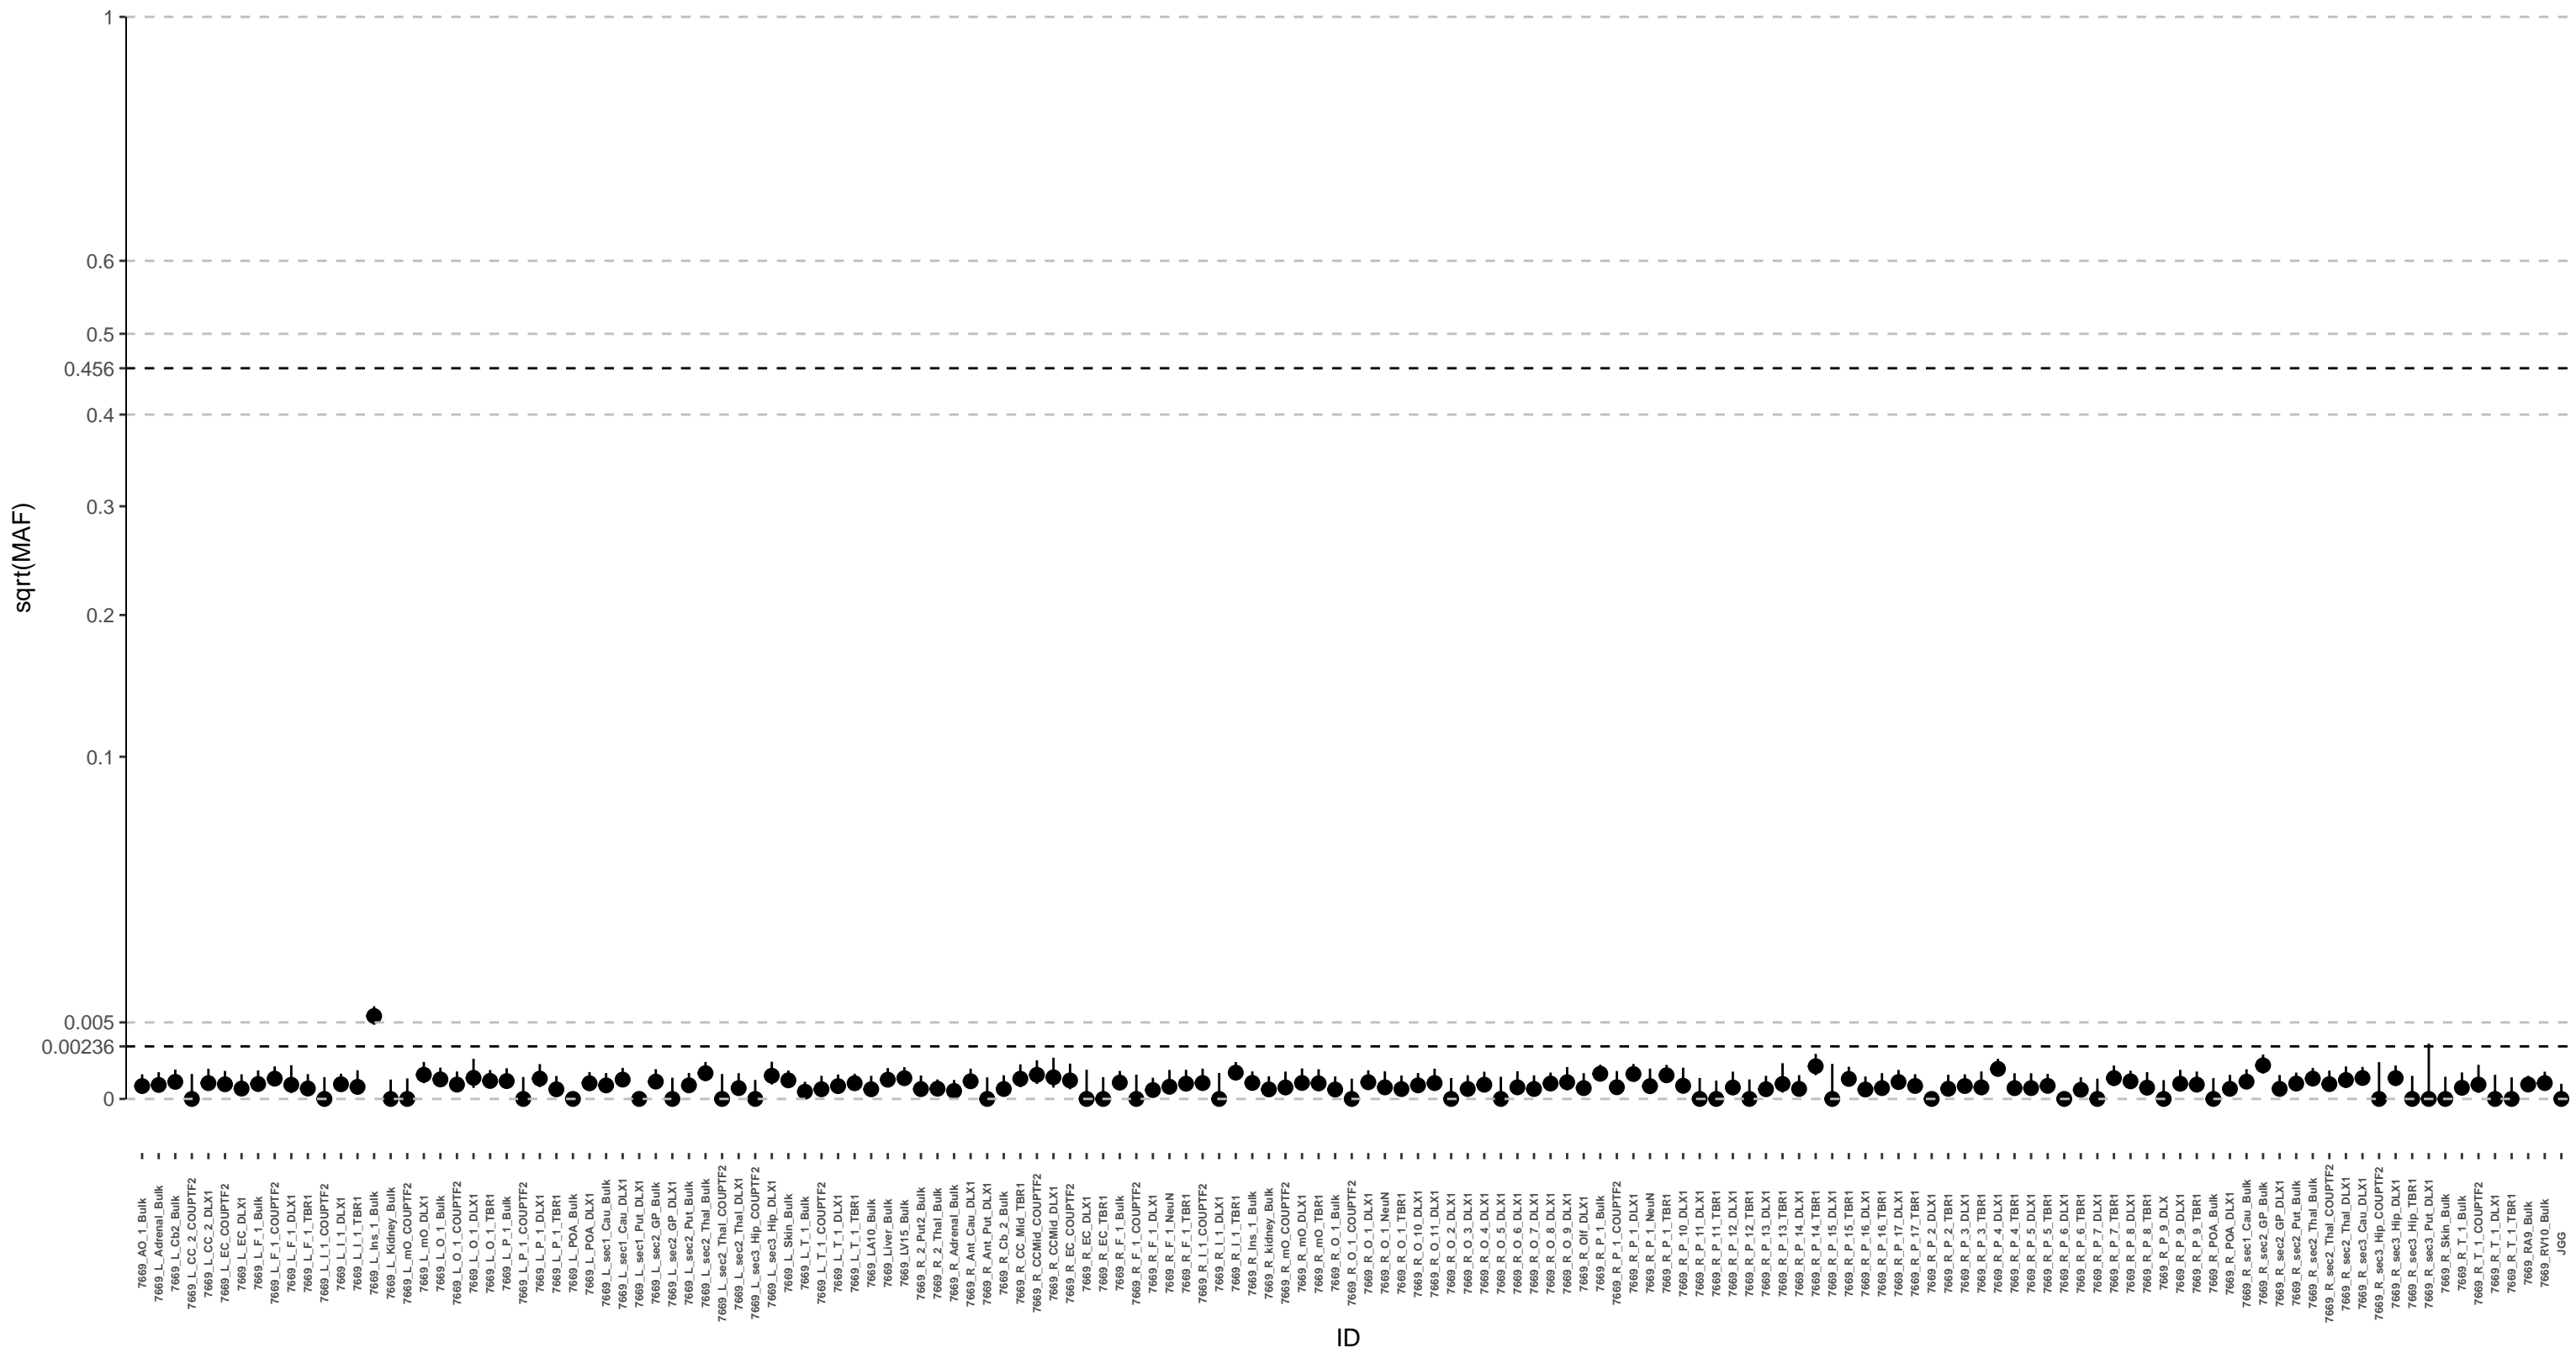

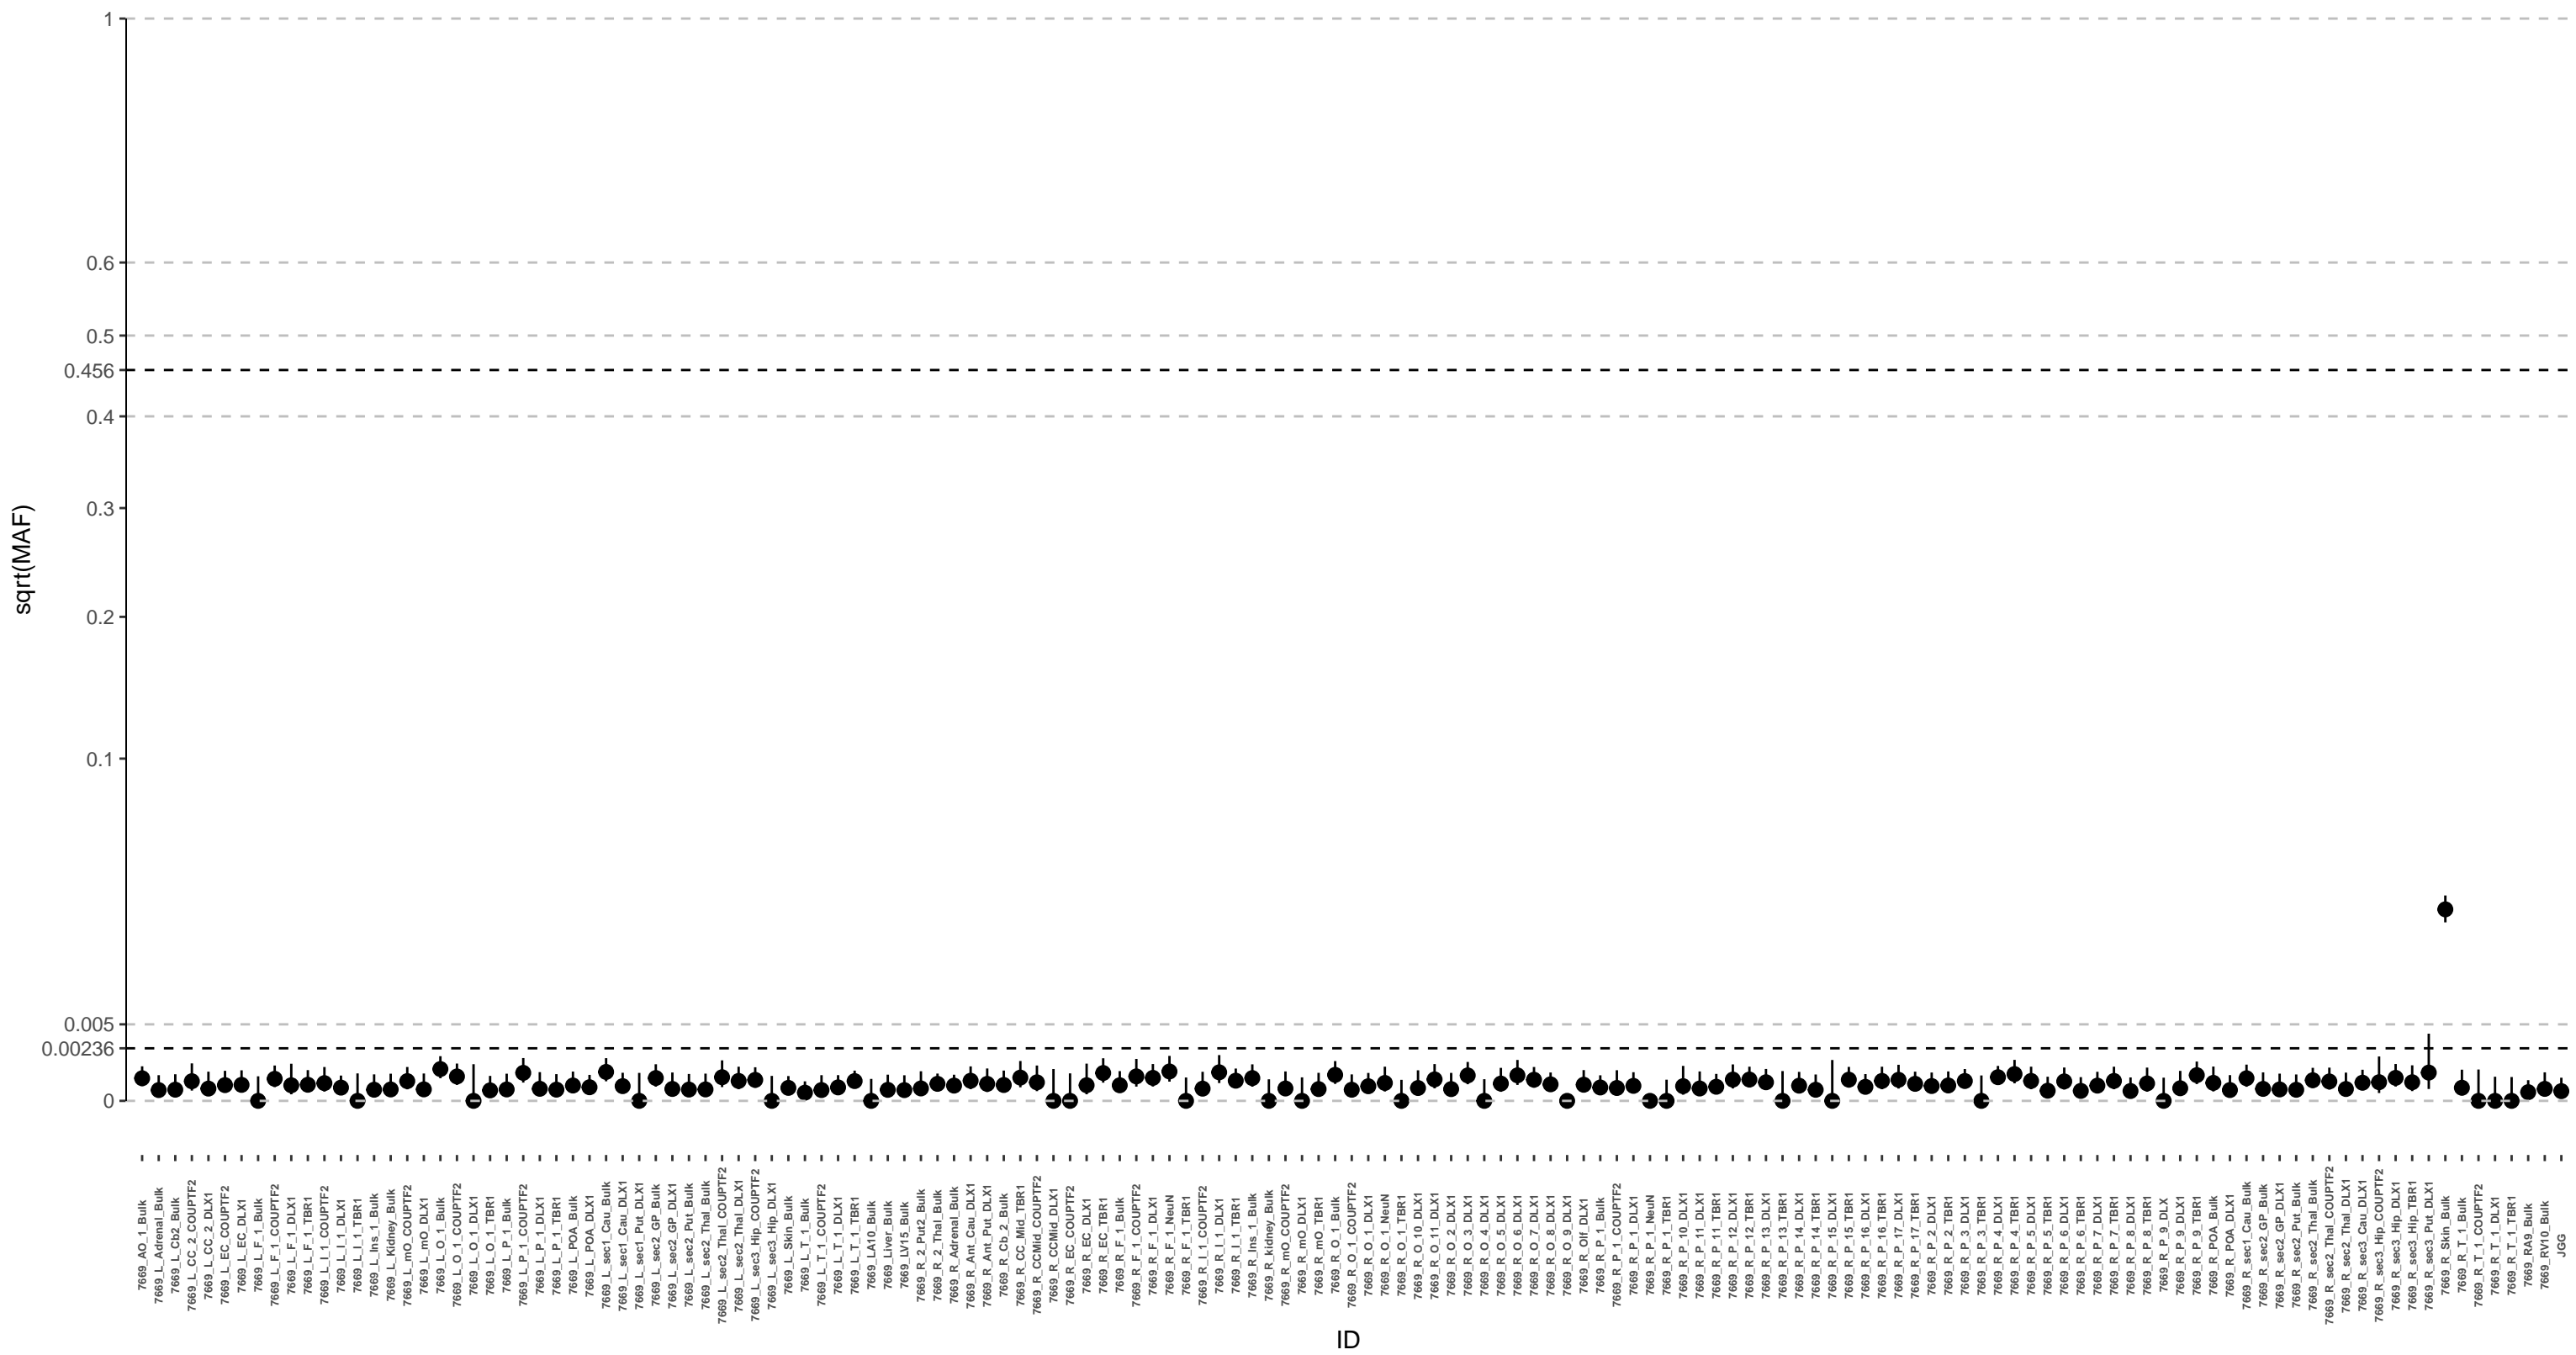

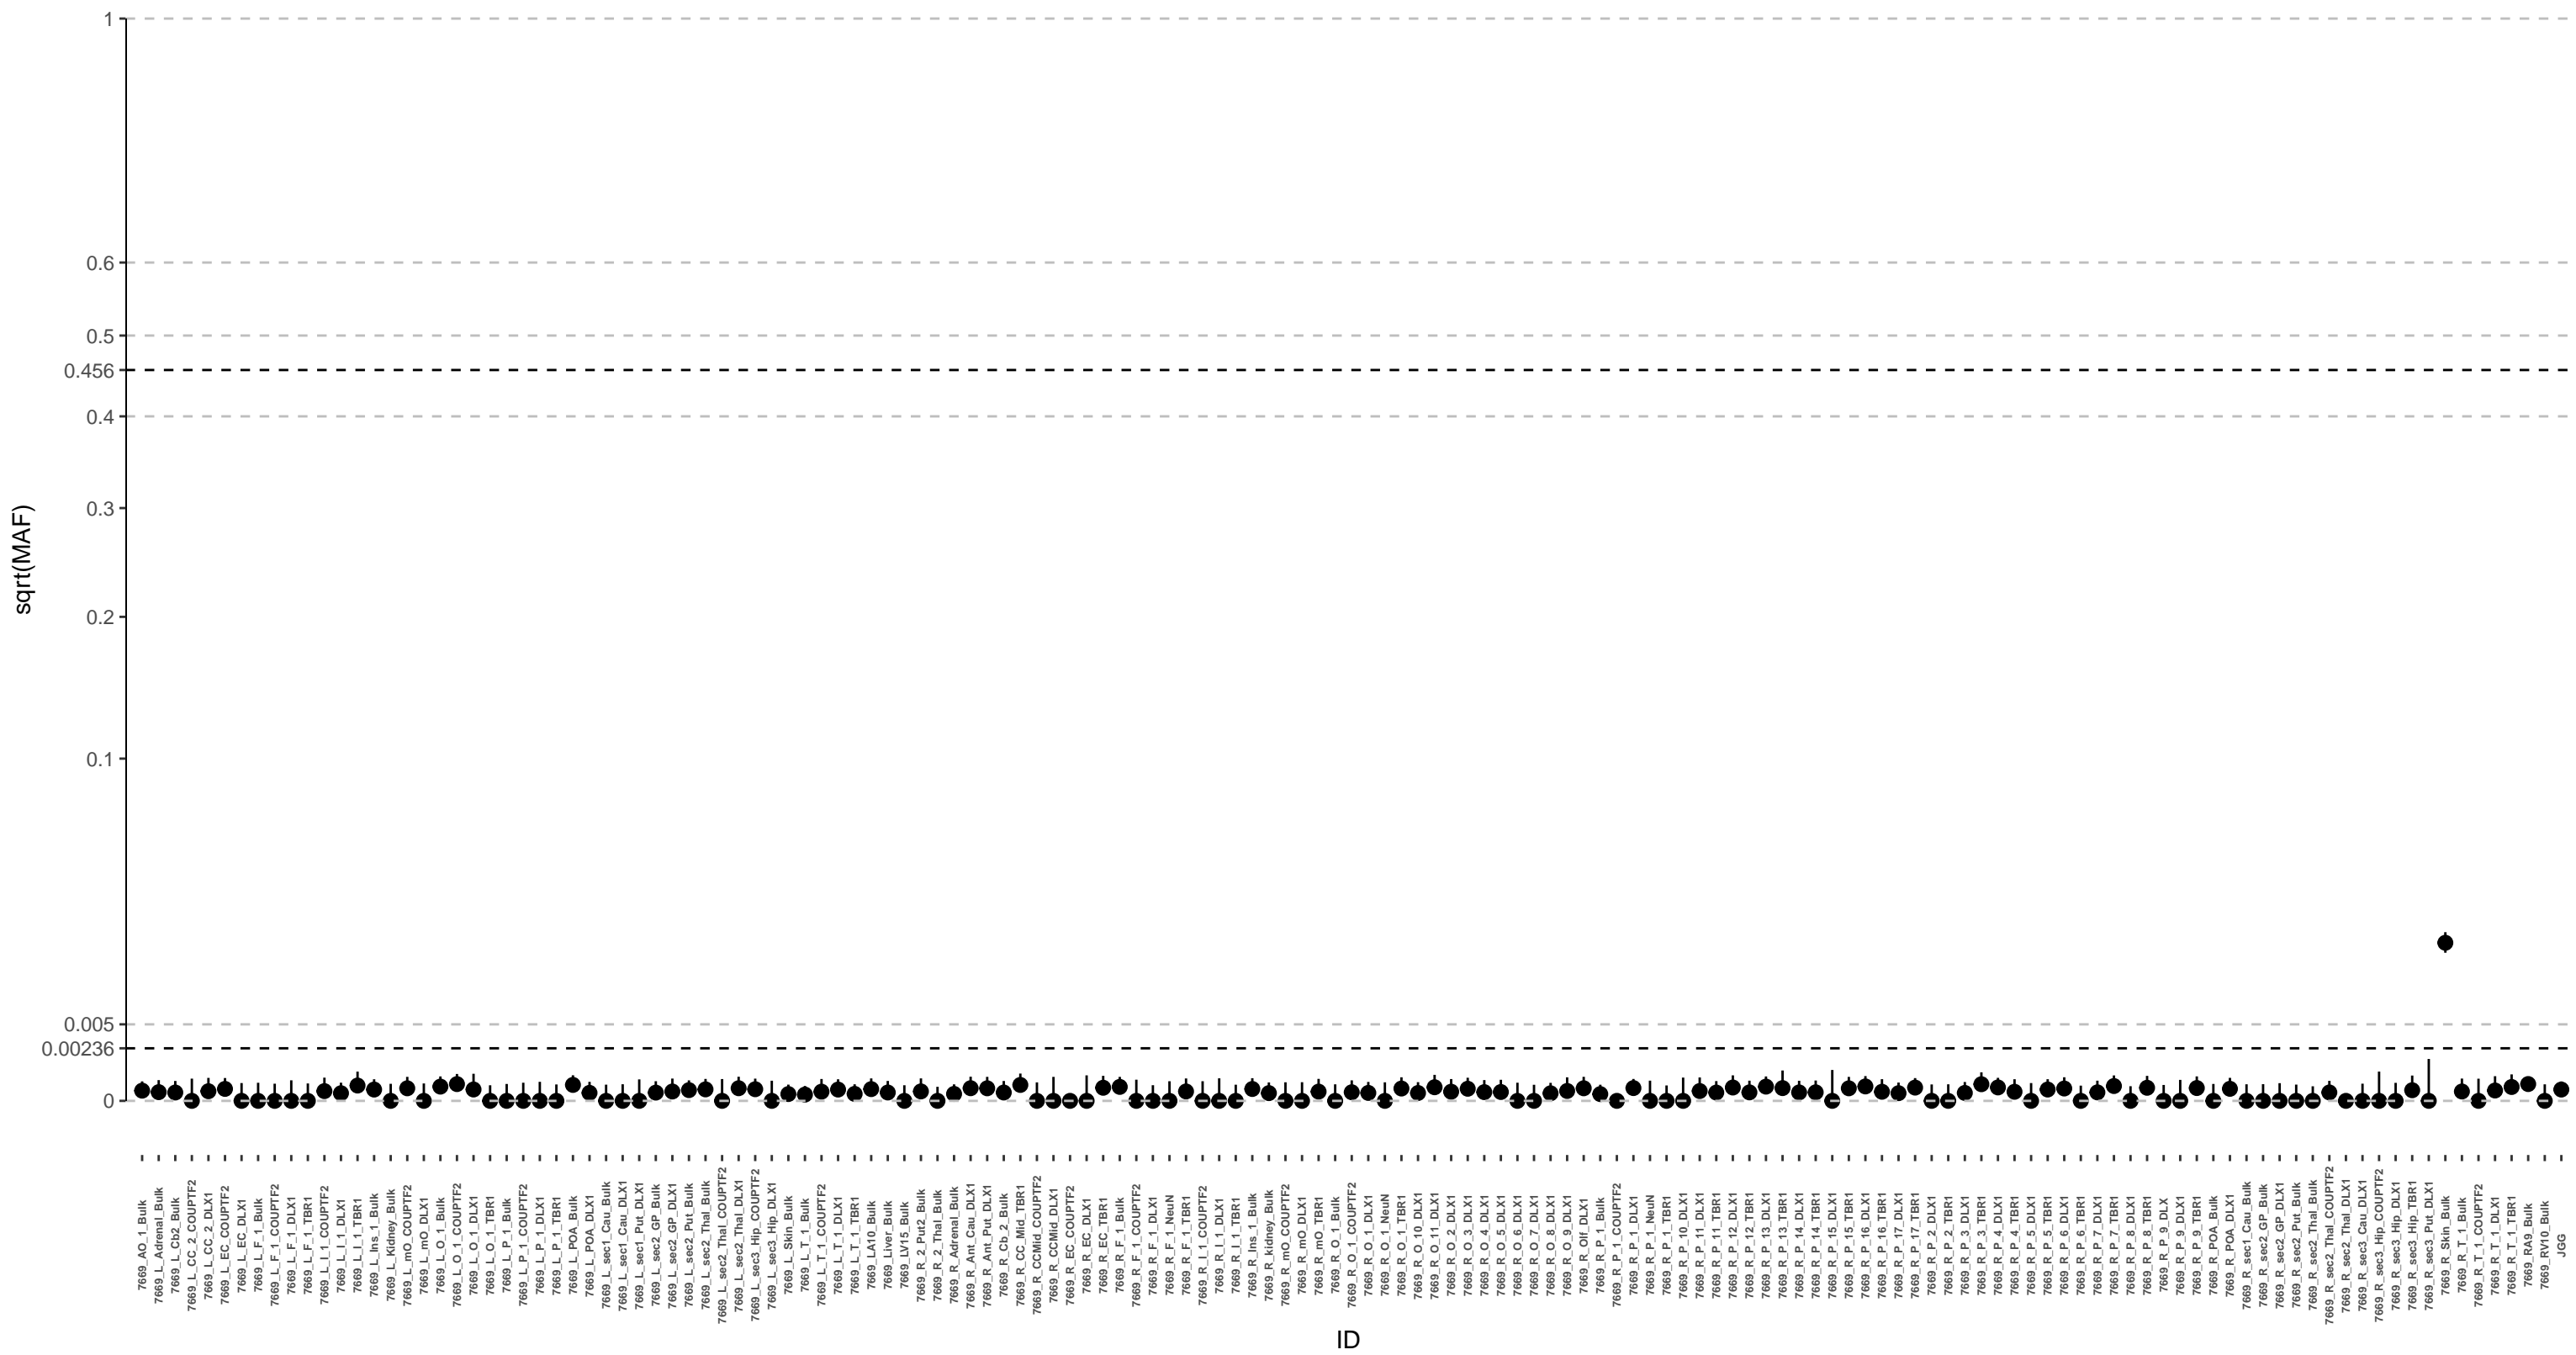

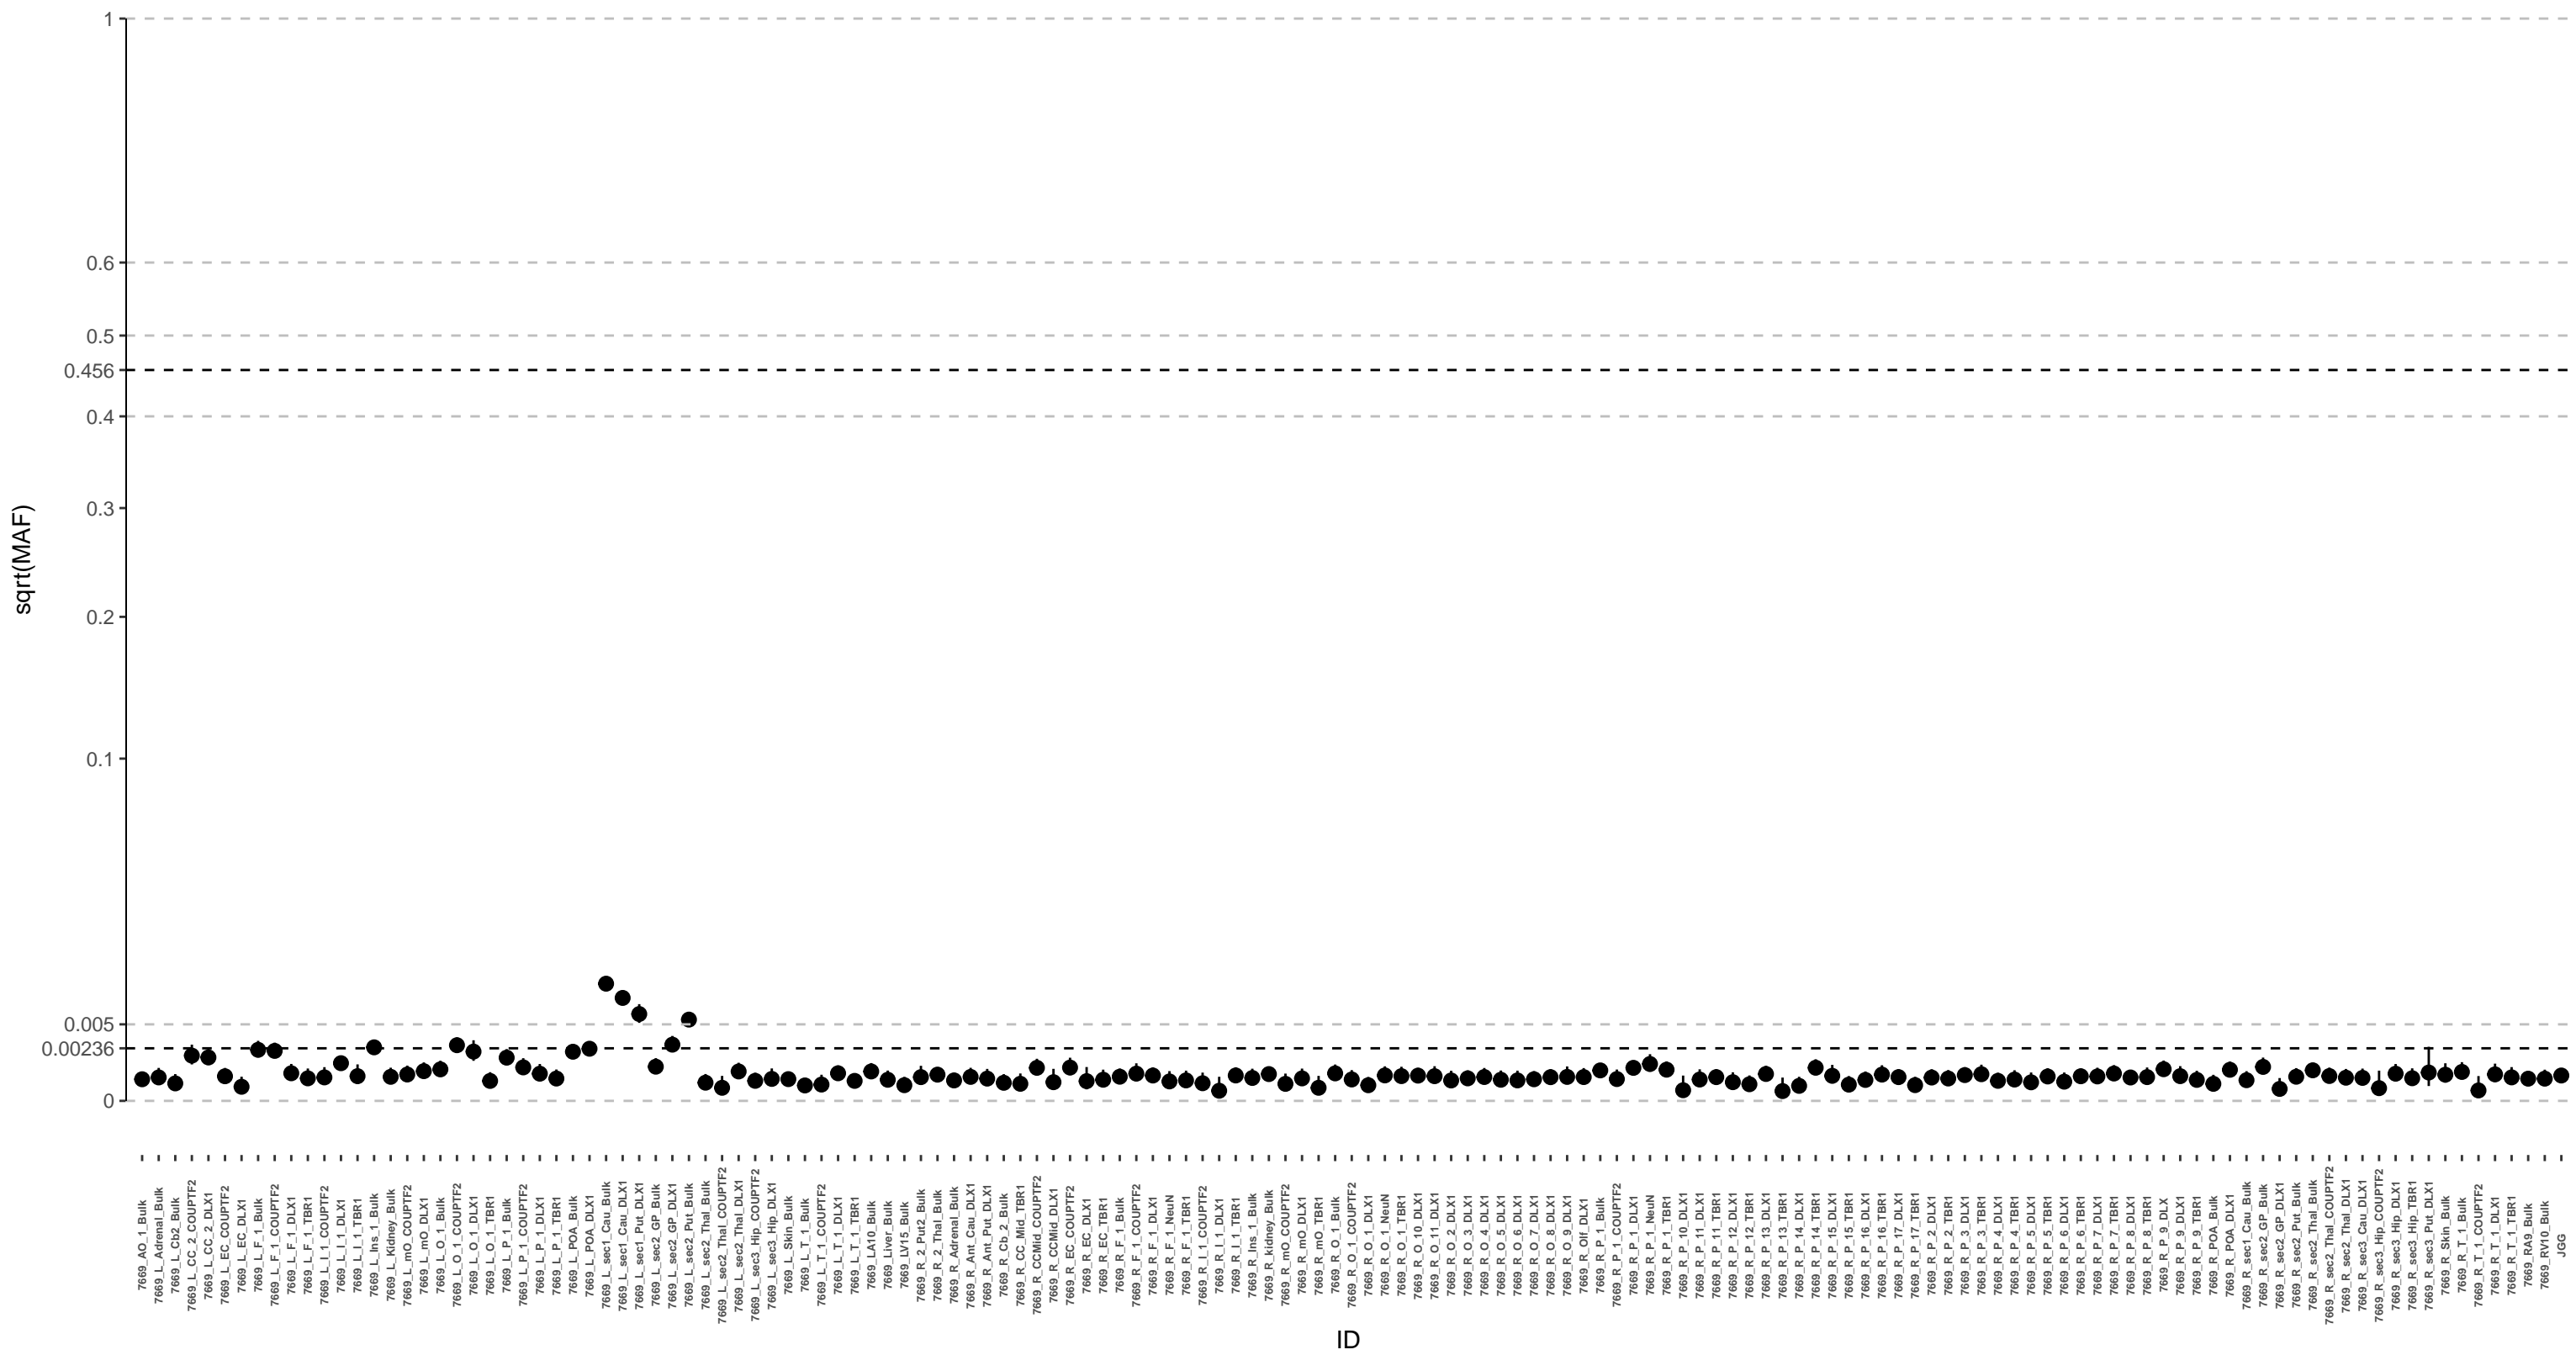

ID05 4-34586097-A-T

sqrt(MAF)

1  
0.6  
0.456  
0.4  
0.3  
0.2  
0.1  
0.005  
0.00236  
0

7669\_AO\_1\_Bulk  
7669\_L\_Adrenal\_Bulk  
7669\_L\_Cb2\_Bulk  
7669\_L\_CC\_2\_COUPTF2  
7669\_L\_CC\_2\_DLX1  
7669\_L\_EC\_COUPTF2  
7669\_L\_EC\_DLX1  
7669\_L\_F\_1\_Bulk  
7669\_L\_F\_1\_COUPTF2  
7669\_L\_F\_1\_DLX1  
7669\_L\_F\_1\_TBR1  
7669\_L\_I\_1\_COUPTF2  
7669\_L\_I\_1\_DLX1  
7669\_L\_I\_1\_TBR1  
7669\_L\_Ins\_1\_Bulk  
7669\_L\_Kidney\_Bulk  
7669\_L\_mO\_COUPTF2  
7669\_L\_mO\_DLX1  
7669\_L\_O\_1\_Bulk  
7669\_L\_O\_1\_COUPTF2  
7669\_L\_O\_1\_DLX1  
7669\_L\_O\_1\_TBR1  
7669\_L\_P\_1\_Bulk  
7669\_L\_P\_1\_COUPTF2  
7669\_L\_P\_1\_DLX1  
7669\_L\_P\_1\_TBR1  
7669\_L\_POA\_Bulk  
7669\_L\_POA\_DLX1  
7669\_L\_sec1\_Cau\_Bulk  
7669\_L\_sec1\_Cau\_DLX1  
7669\_L\_sec1\_Put\_DLX1  
7669\_L\_sec2\_GP\_Bulk  
7669\_L\_sec2\_GP\_DLX1  
7669\_L\_sec2\_Put\_Bulk  
7669\_L\_sec2\_Thal\_Bulk  
7669\_L\_sec2\_Thal\_COUPTF2  
7669\_L\_sec2\_Thal\_DLX1  
7669\_L\_sec3\_Hip\_COUPTF2  
7669\_L\_sec3\_Hip\_DLX1  
7669\_L\_Skin\_Bulk  
7669\_L\_T\_1\_Bulk  
7669\_L\_T\_1\_COUPTF2  
7669\_L\_T\_1\_DLX1  
7669\_L\_T\_1\_TBR1  
7669\_LA10\_Bulk  
7669\_Liver\_Bulk  
7669\_LV15\_Bulk  
7669\_R\_2\_Put2\_Bulk  
7669\_R\_2\_Thal\_Bulk  
7669\_R\_Adrenal\_Bulk  
7669\_R\_Ant\_Cau\_DLX1  
7669\_R\_Ant\_Put\_DLX1  
7669\_R\_Cb\_2\_Bulk  
7669\_R\_CC\_Mid\_TBR1  
7669\_R\_CC\_Mid\_COUPTF2  
7669\_R\_CCMid\_DLX1  
7669\_R\_EC\_COUPTF2  
7669\_R\_EC\_DLX1  
7669\_R\_EC\_TBR1  
7669\_R\_F\_1\_Bulk  
7669\_R\_F\_1\_COUPTF2  
7669\_R\_F\_1\_DLX1  
7669\_R\_F\_1\_NeuN  
7669\_R\_F\_1\_TBR1  
7669\_R\_I\_1\_COUPTF2  
7669\_R\_I\_1\_DLX1  
7669\_R\_I\_1\_TBR1  
7669\_R\_Ins\_1\_Bulk  
7669\_R\_Kidney\_Bulk  
7669\_R\_mO\_COUPTF2  
7669\_R\_mO\_DLX1  
7669\_R\_mO\_TBR1  
7669\_R\_O\_1\_Bulk  
7669\_R\_O\_1\_COUPTF2  
7669\_R\_O\_1\_DLX1  
7669\_R\_O\_1\_NeuN  
7669\_R\_O\_1\_TBR1  
7669\_R\_O\_10\_DLX1  
7669\_R\_O\_11\_DLX1  
7669\_R\_O\_2\_DLX1  
7669\_R\_O\_3\_DLX1  
7669\_R\_O\_4\_DLX1  
7669\_R\_O\_5\_DLX1  
7669\_R\_O\_6\_DLX1  
7669\_R\_O\_7\_DLX1  
7669\_R\_O\_8\_DLX1  
7669\_R\_O\_9\_DLX1  
7669\_R\_Olf\_DLX1  
7669\_R\_P\_1\_Bulk  
7669\_R\_P\_1\_COUPTF2  
7669\_R\_P\_1\_DLX1  
7669\_R\_P\_1\_NeuN  
7669\_R\_P\_1\_TBR1  
7669\_R\_P\_10\_DLX1  
7669\_R\_P\_11\_DLX1  
7669\_R\_P\_11\_TBR1  
7669\_R\_P\_12\_DLX1  
7669\_R\_P\_12\_TBR1  
7669\_R\_P\_13\_DLX1  
7669\_R\_P\_13\_TBR1  
7669\_R\_P\_14\_DLX1  
7669\_R\_P\_14\_TBR1  
7669\_R\_P\_15\_DLX1  
7669\_R\_P\_15\_TBR1  
7669\_R\_P\_16\_DLX1  
7669\_R\_P\_16\_TBR1  
7669\_R\_P\_17\_DLX1  
7669\_R\_P\_17\_TBR1  
7669\_R\_P\_2\_DLX1  
7669\_R\_P\_2\_TBR1  
7669\_R\_P\_3\_DLX1  
7669\_R\_P\_3\_TBR1  
7669\_R\_P\_4\_DLX1  
7669\_R\_P\_4\_TBR1  
7669\_R\_P\_5\_DLX1  
7669\_R\_P\_5\_TBR1  
7669\_R\_P\_6\_DLX1  
7669\_R\_P\_6\_TBR1  
7669\_R\_P\_7\_DLX1  
7669\_R\_P\_7\_TBR1  
7669\_R\_P\_8\_DLX1  
7669\_R\_P\_8\_TBR1  
7669\_R\_P\_9\_DLX  
7669\_R\_P\_9\_DLX1  
7669\_R\_P\_9\_TBR1  
7669\_R\_POA\_Bulk  
7669\_R\_POA\_DLX1  
7669\_R\_sec1\_Cau\_Bulk  
7669\_R\_sec2\_GP\_Bulk  
7669\_R\_sec2\_GP\_DLX1  
7669\_R\_sec2\_Put\_Bulk  
7669\_R\_sec2\_Thal\_Bulk  
7669\_R\_sec2\_Thal\_COUPTF2  
7669\_R\_sec2\_Thal\_DLX1  
7669\_R\_sec3\_Cau\_DLX1  
7669\_R\_sec3\_Hip\_COUPTF2  
7669\_R\_sec3\_Hip\_DLX1  
7669\_R\_sec3\_Hip\_TBR1  
7669\_R\_Skin\_Bulk  
7669\_R\_T\_1\_Bulk  
7669\_R\_T\_1\_COUPTF2  
7669\_R\_T\_1\_DLX1  
7669\_R\_T\_1\_TBR1  
7669\_RA9\_Bulk  
7669\_RV10\_Bulk  
JGG

ID

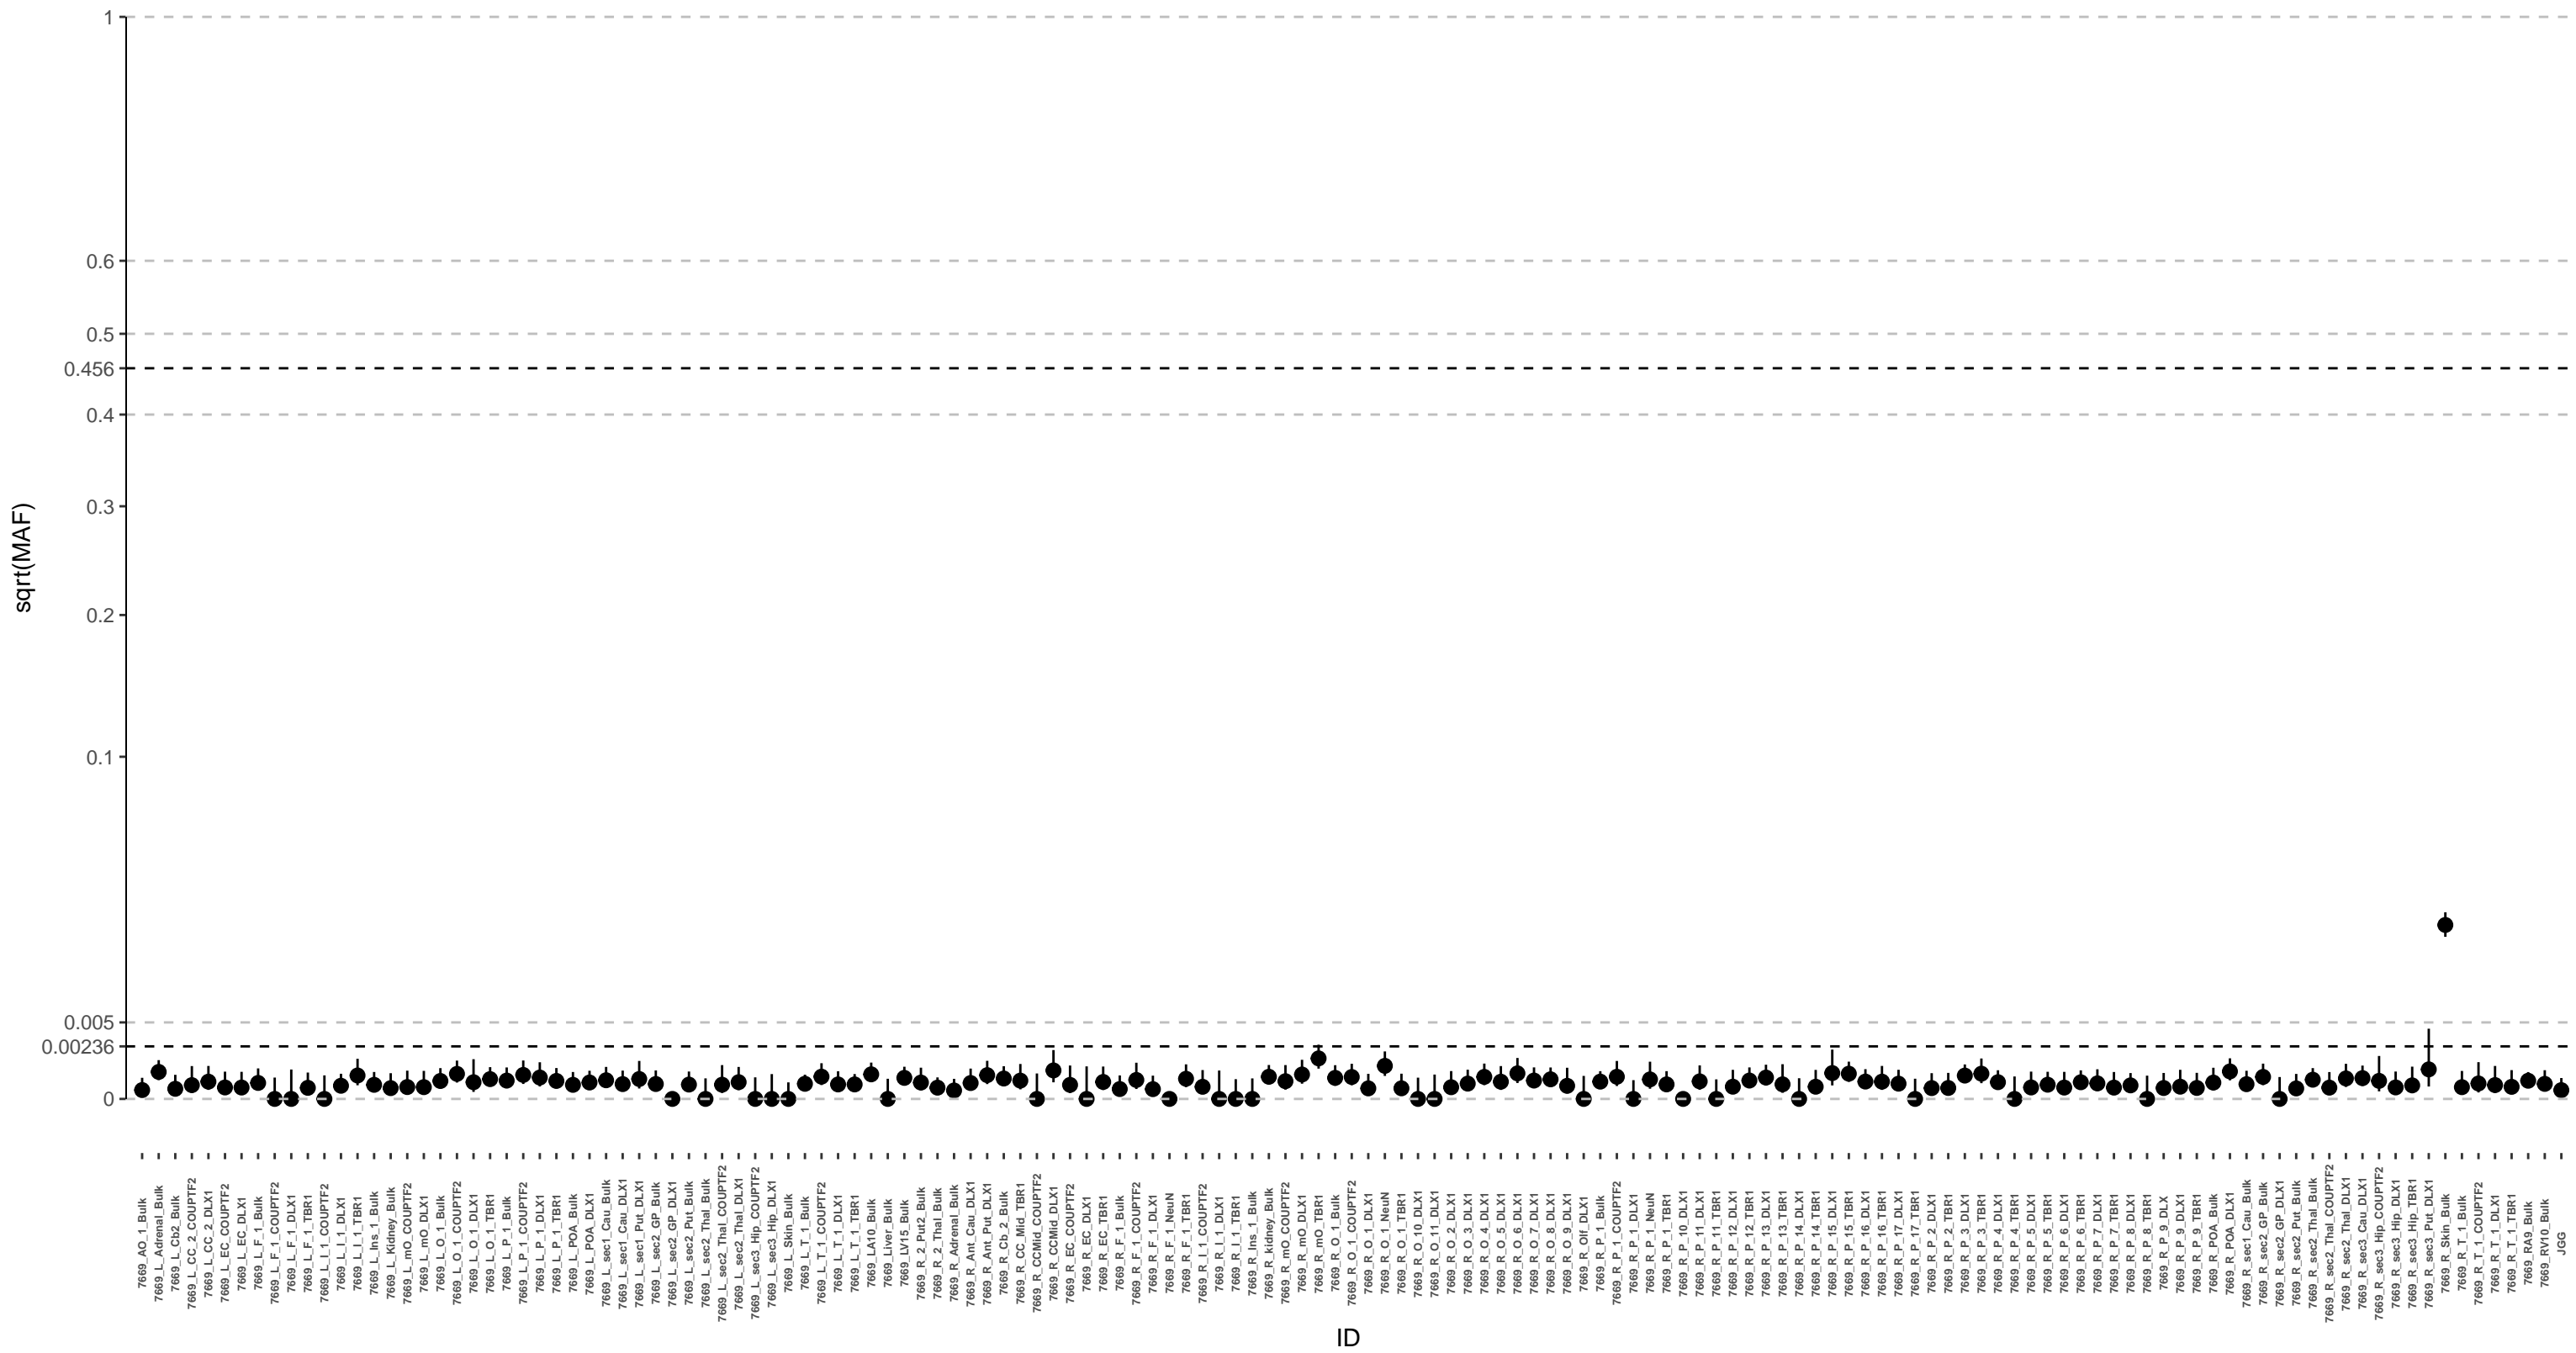

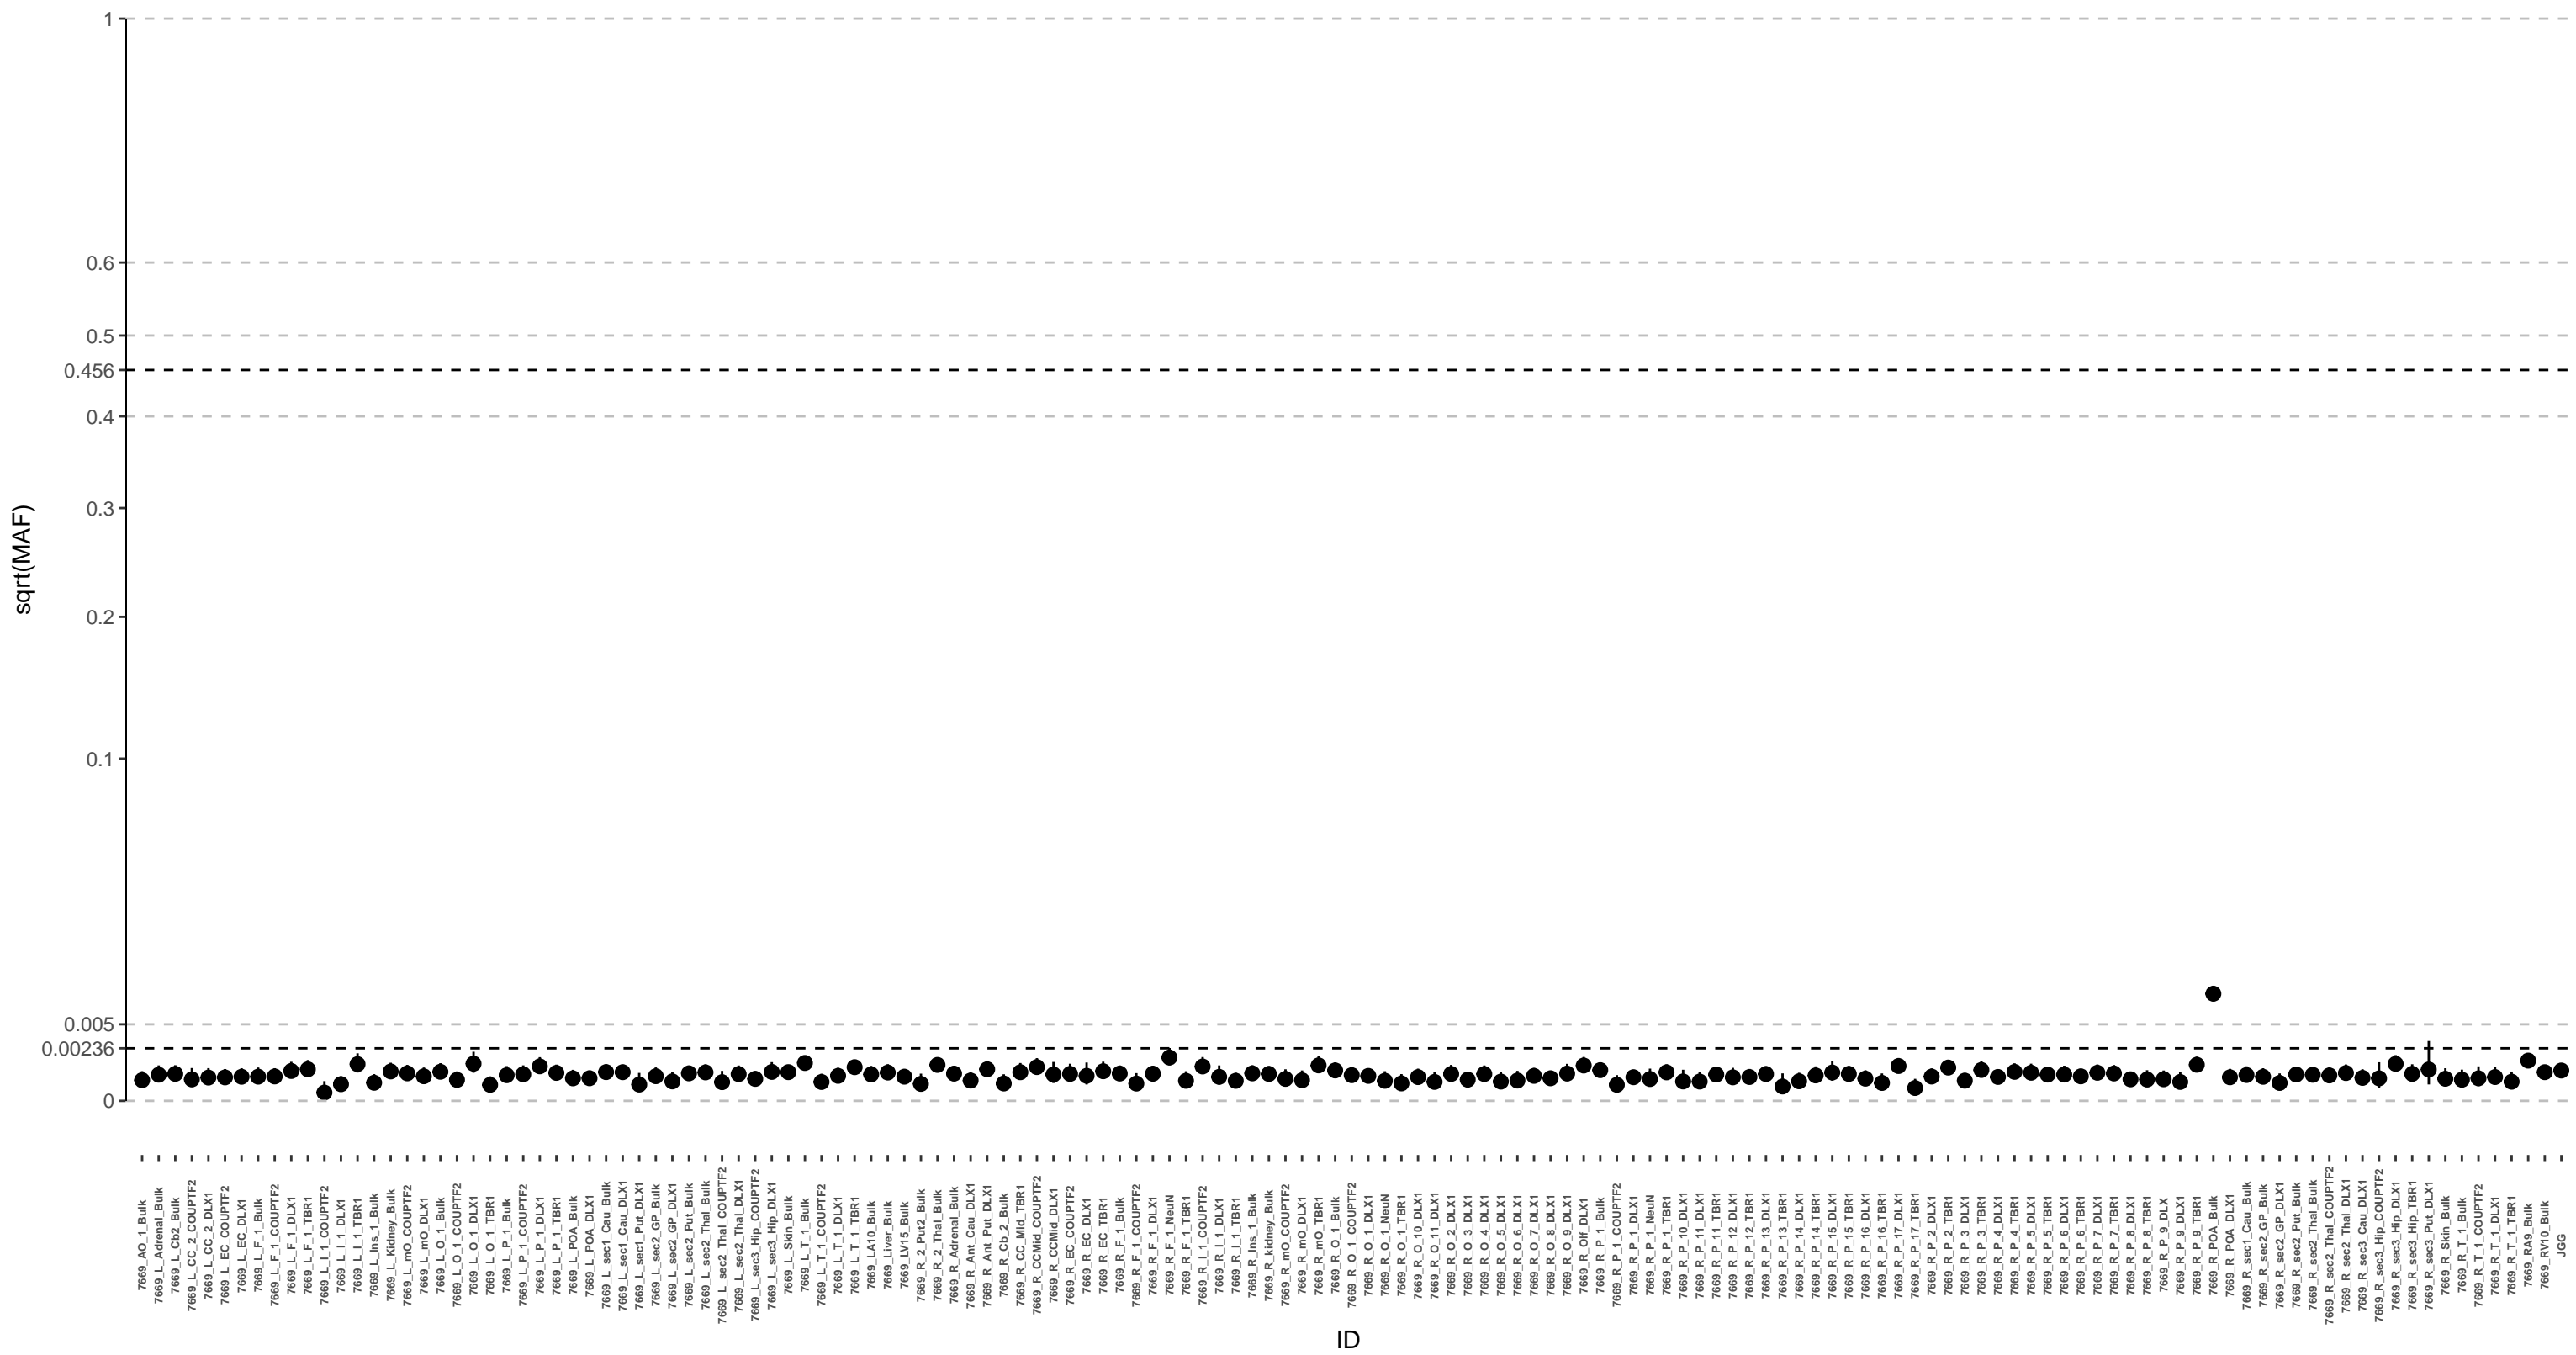



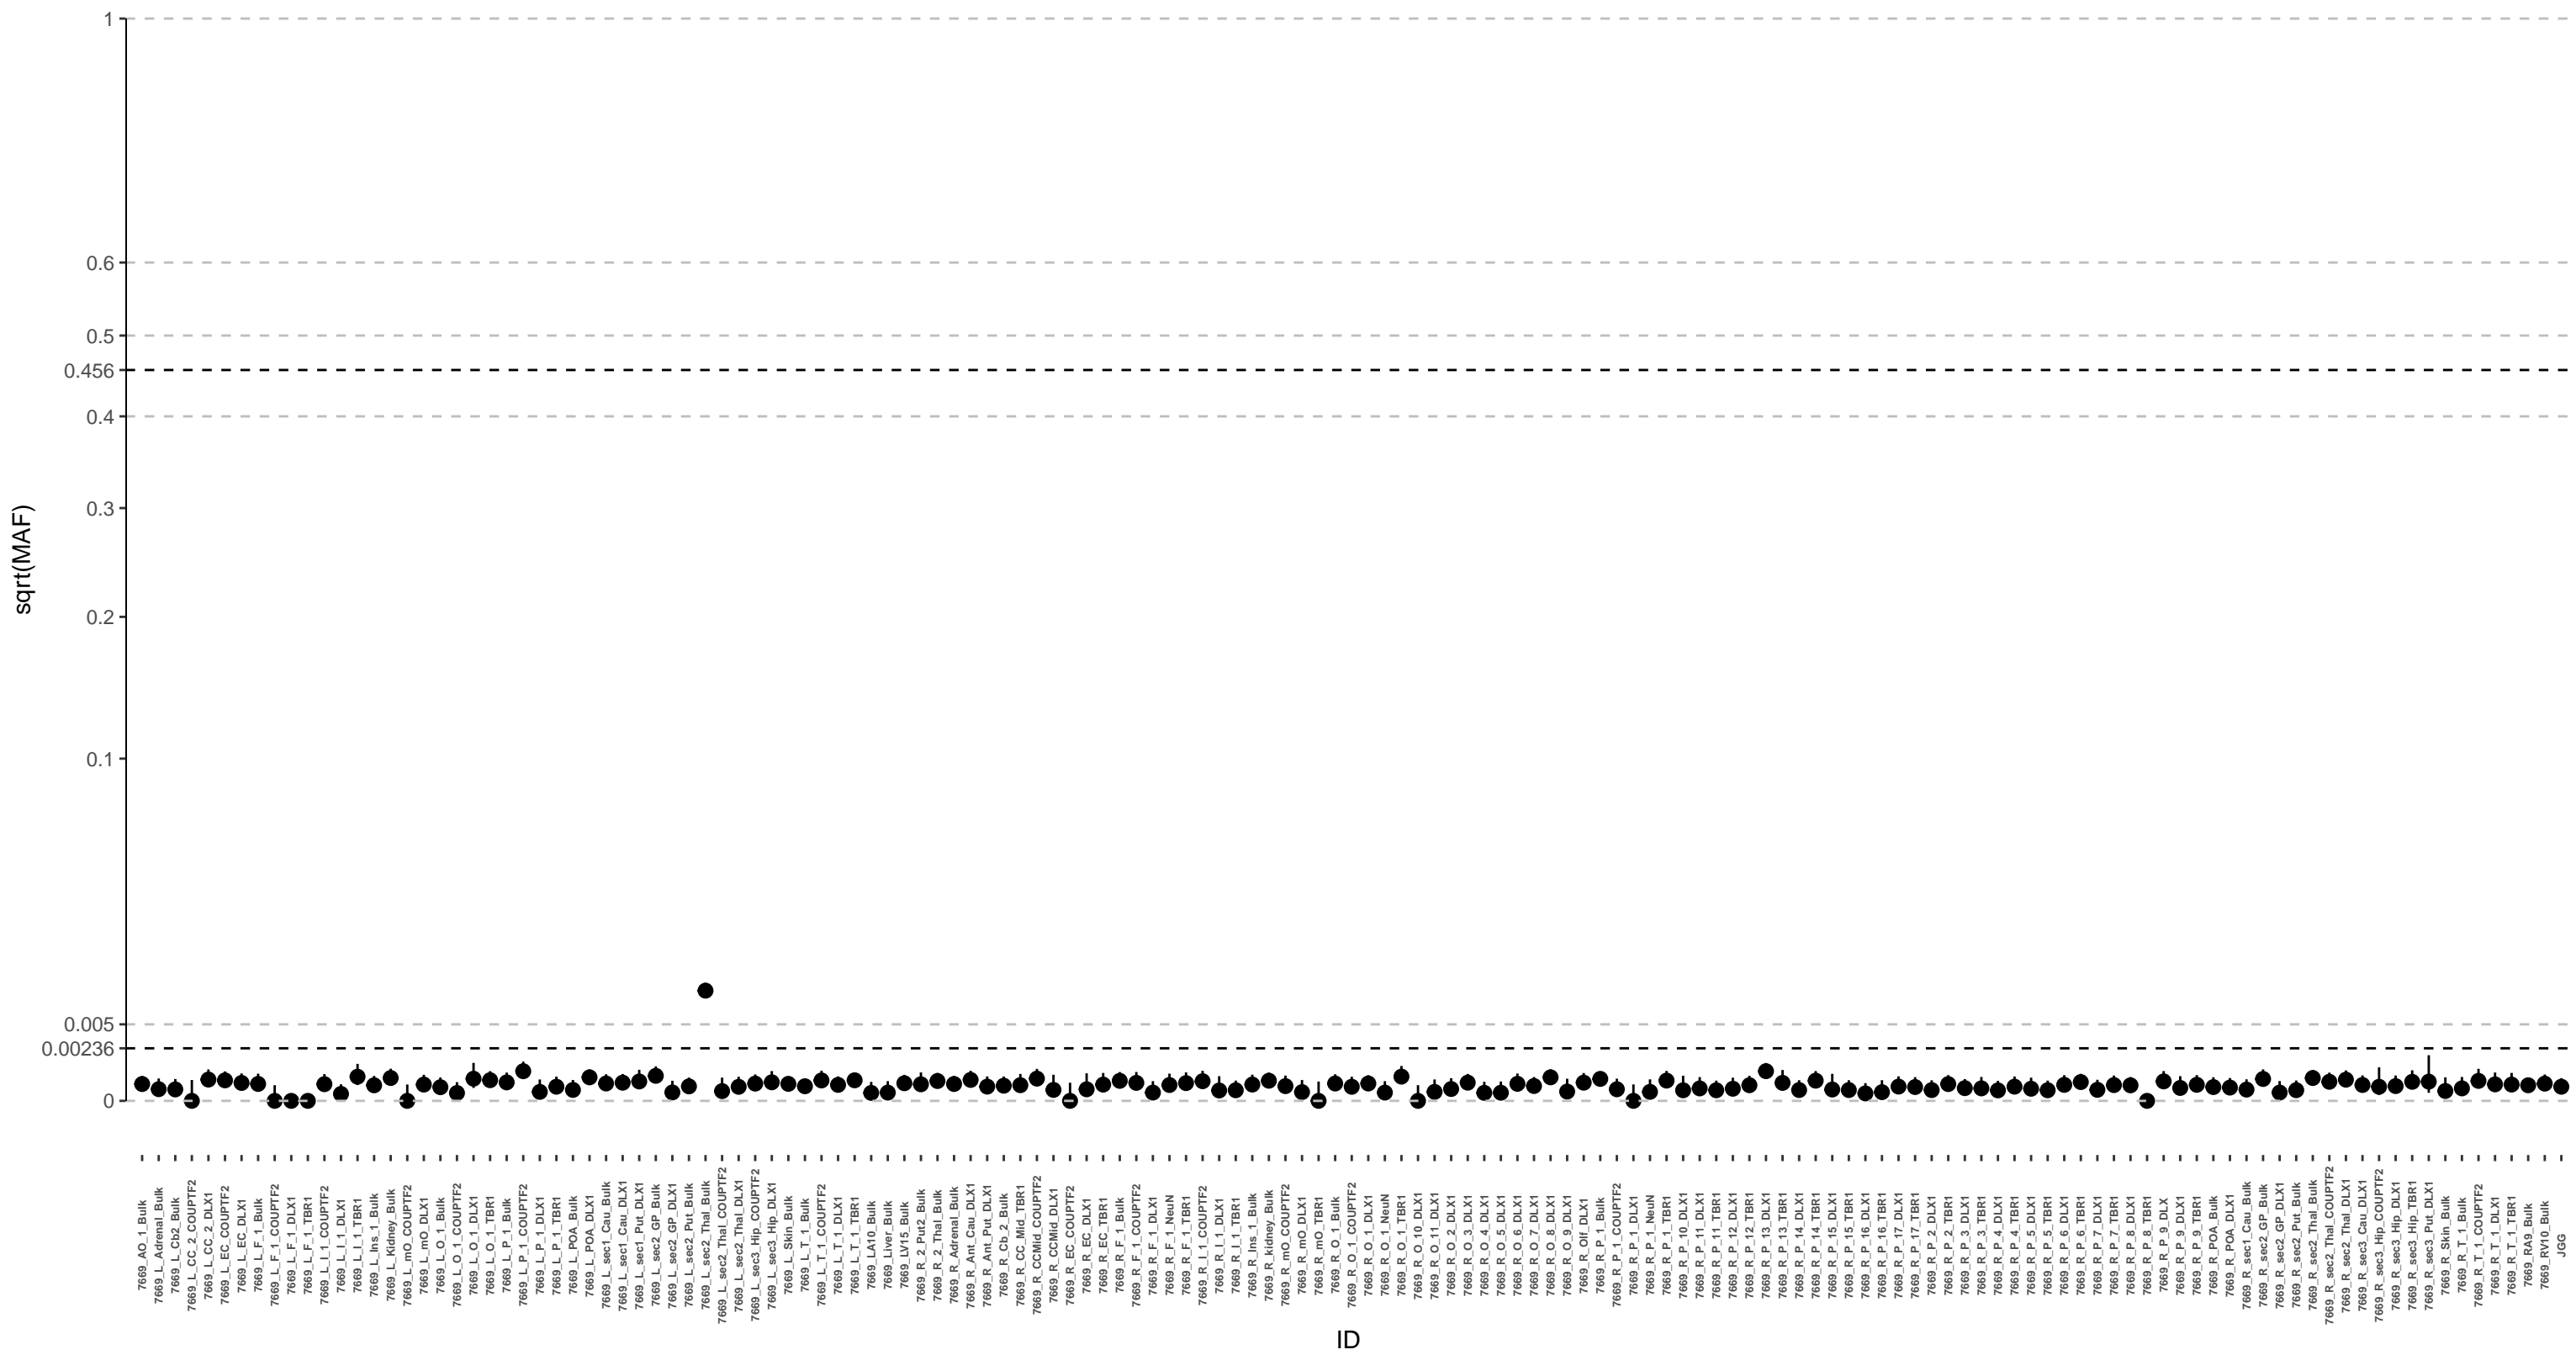

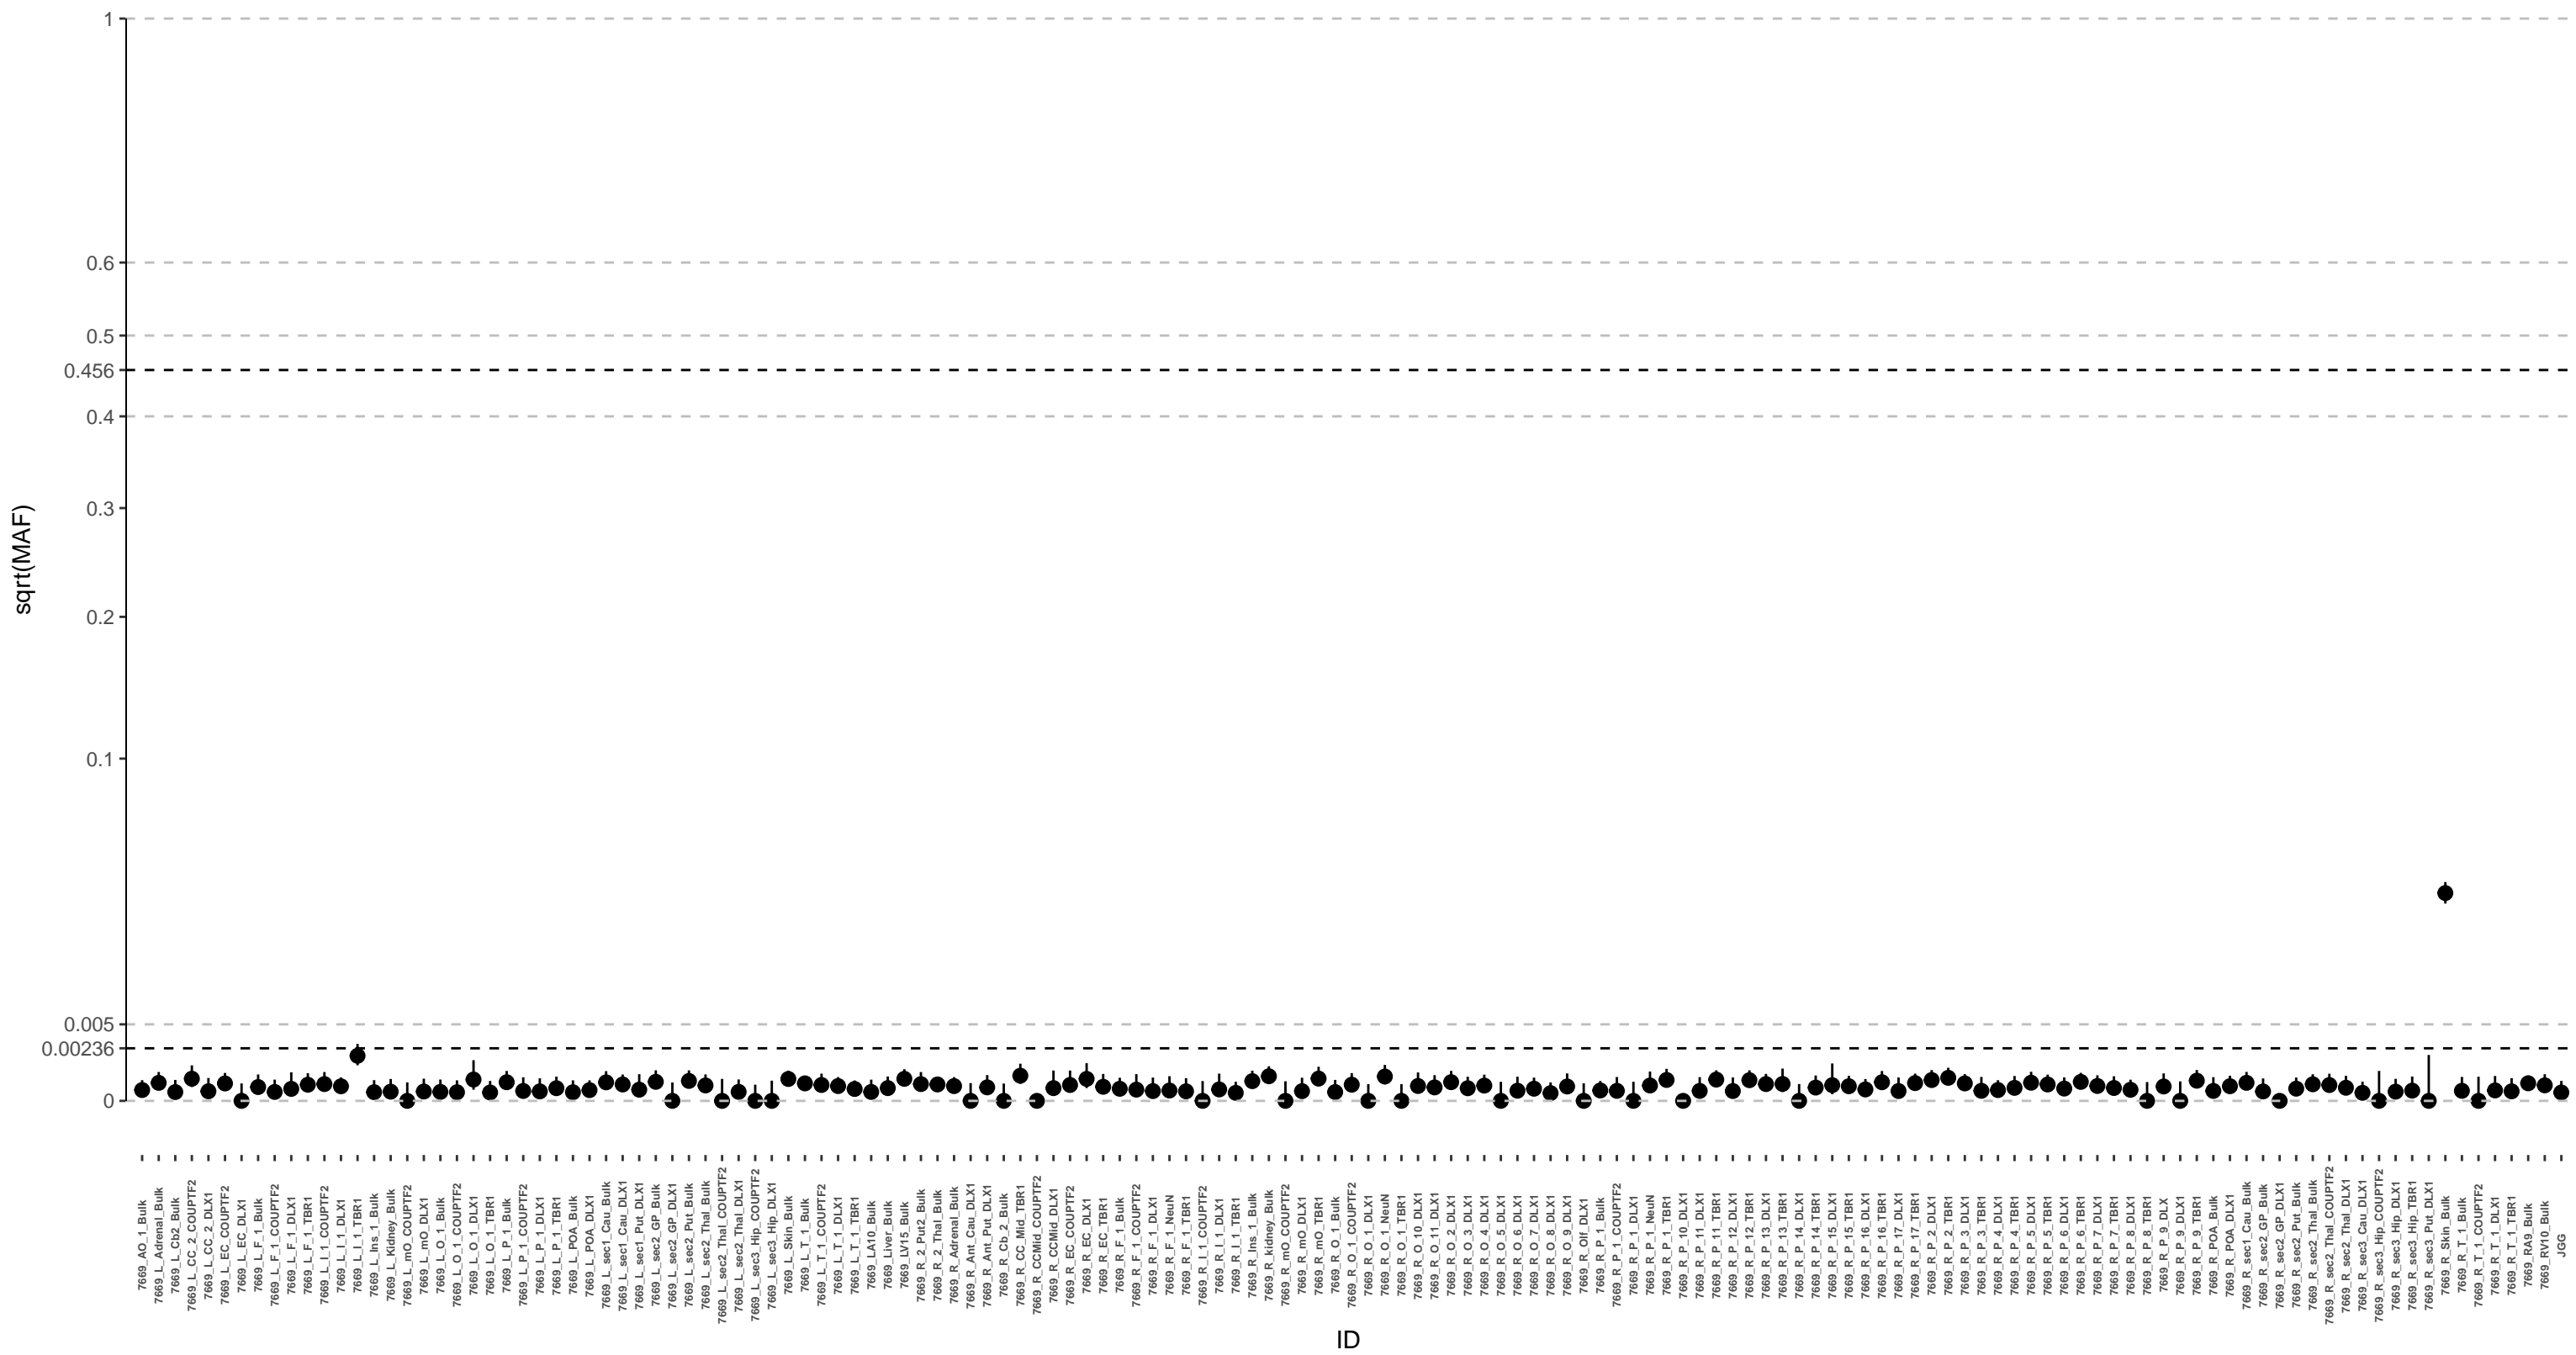

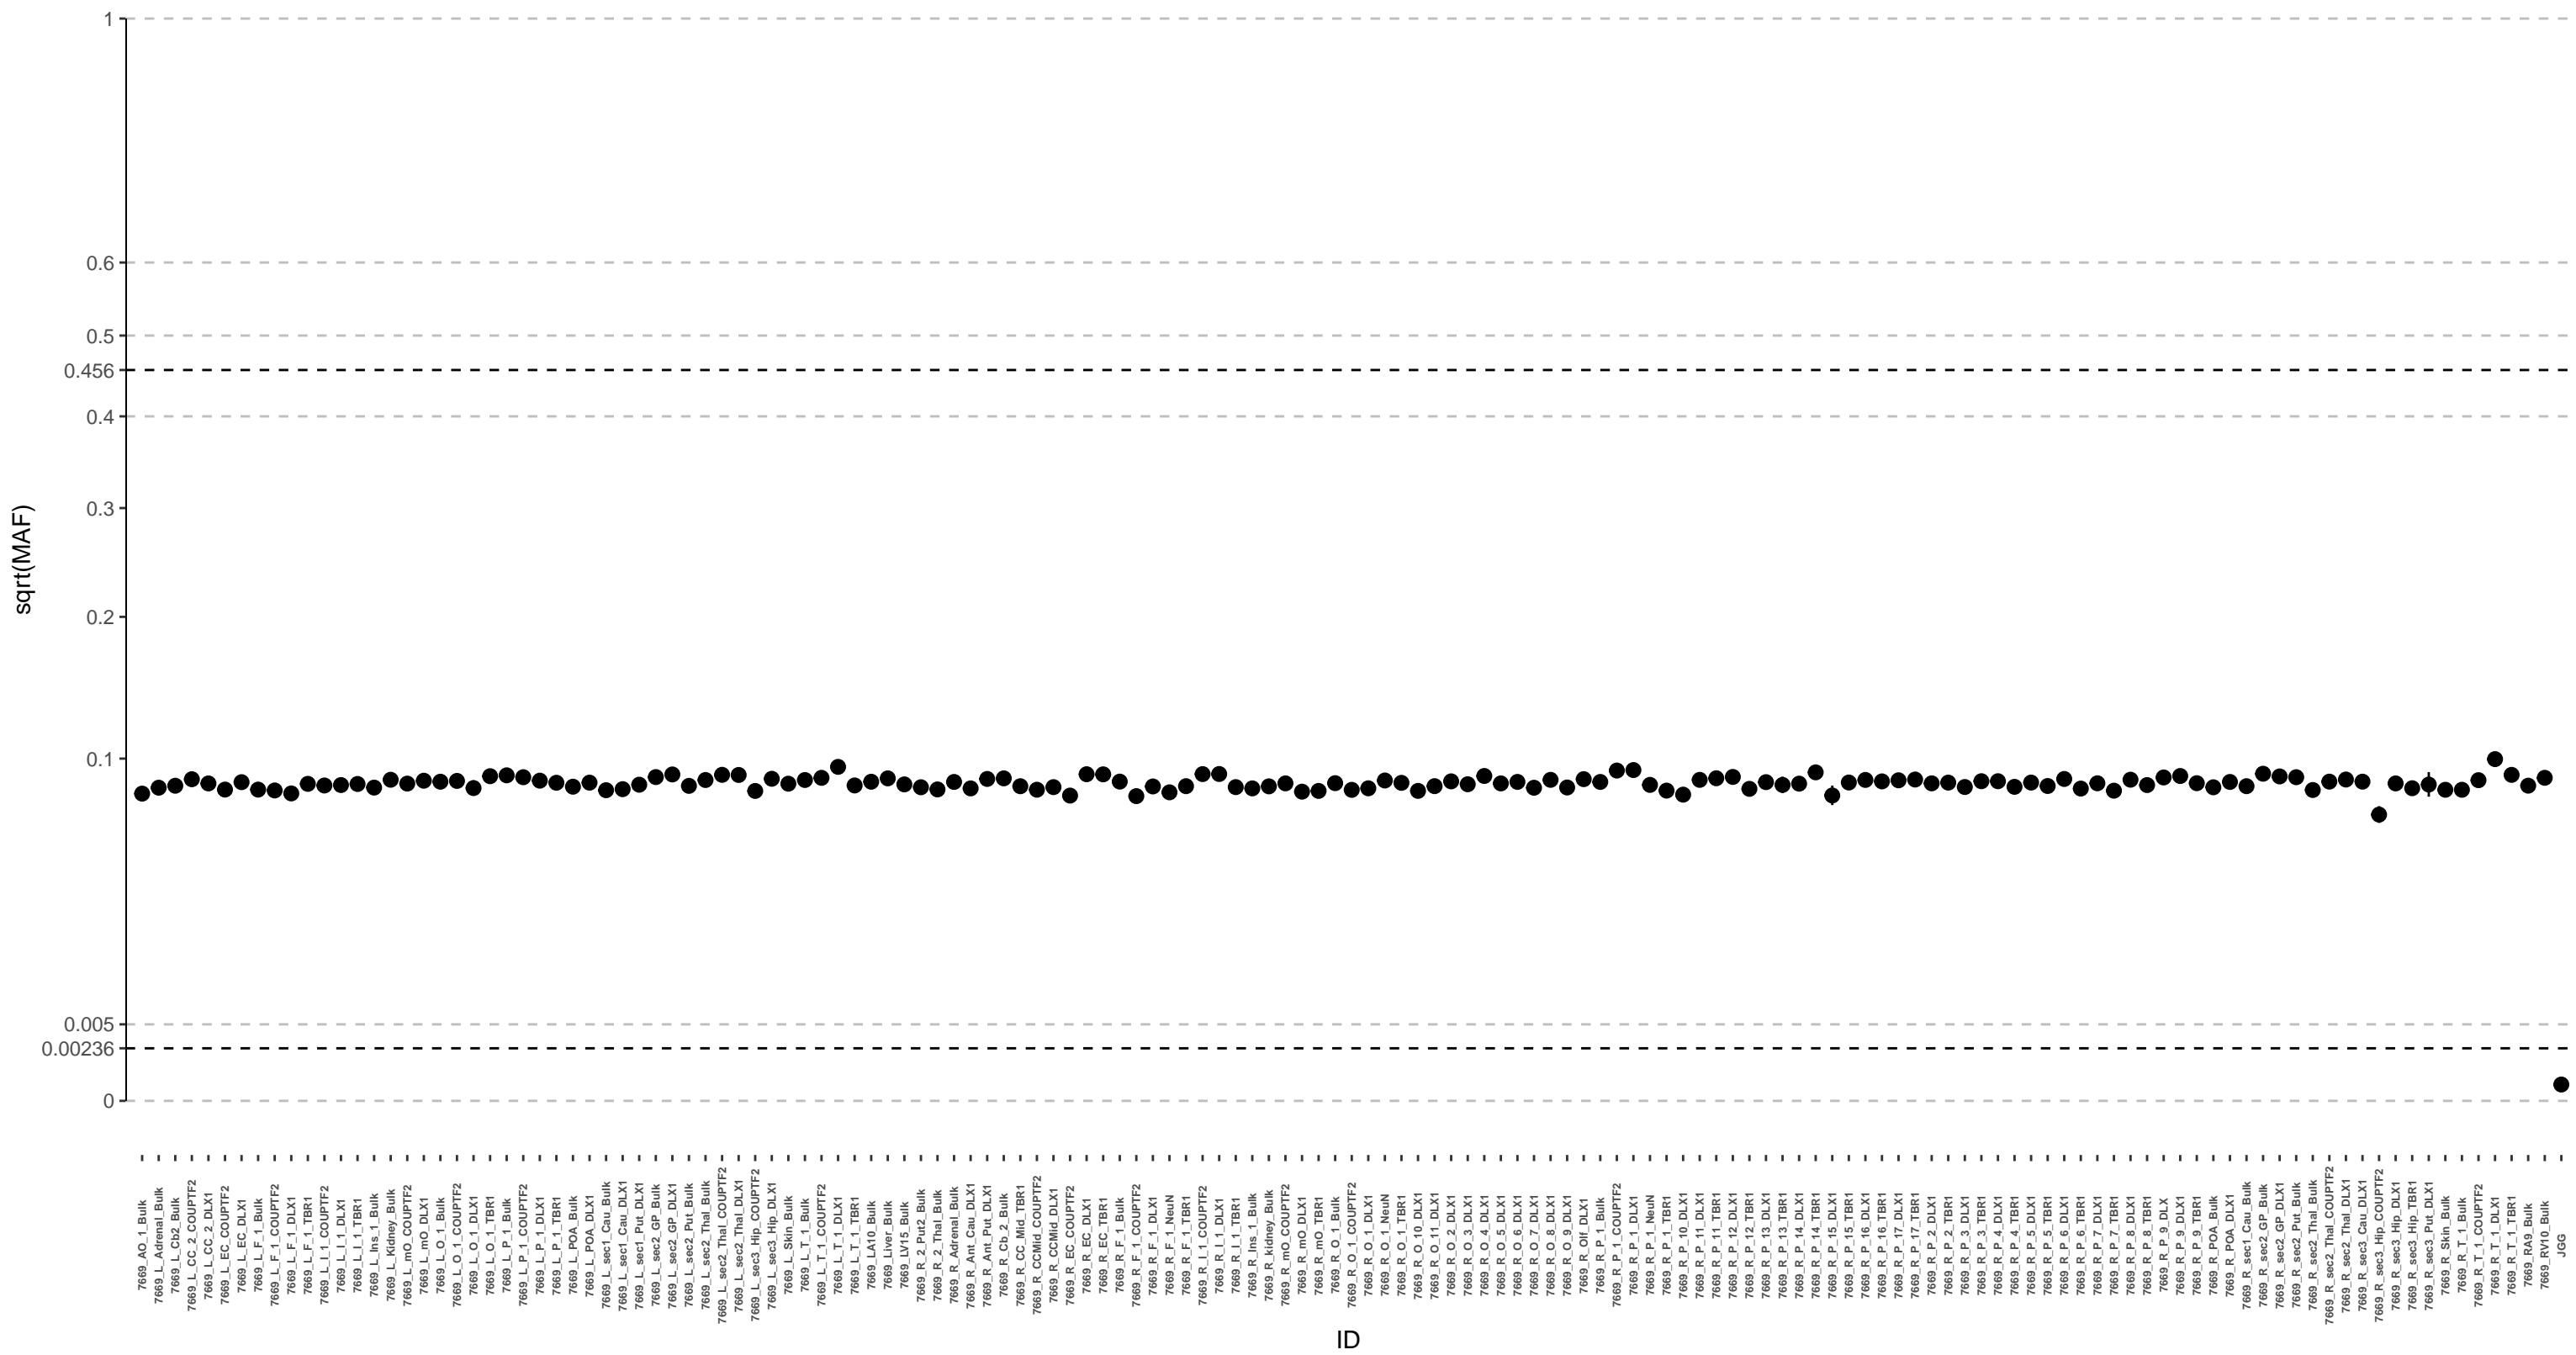

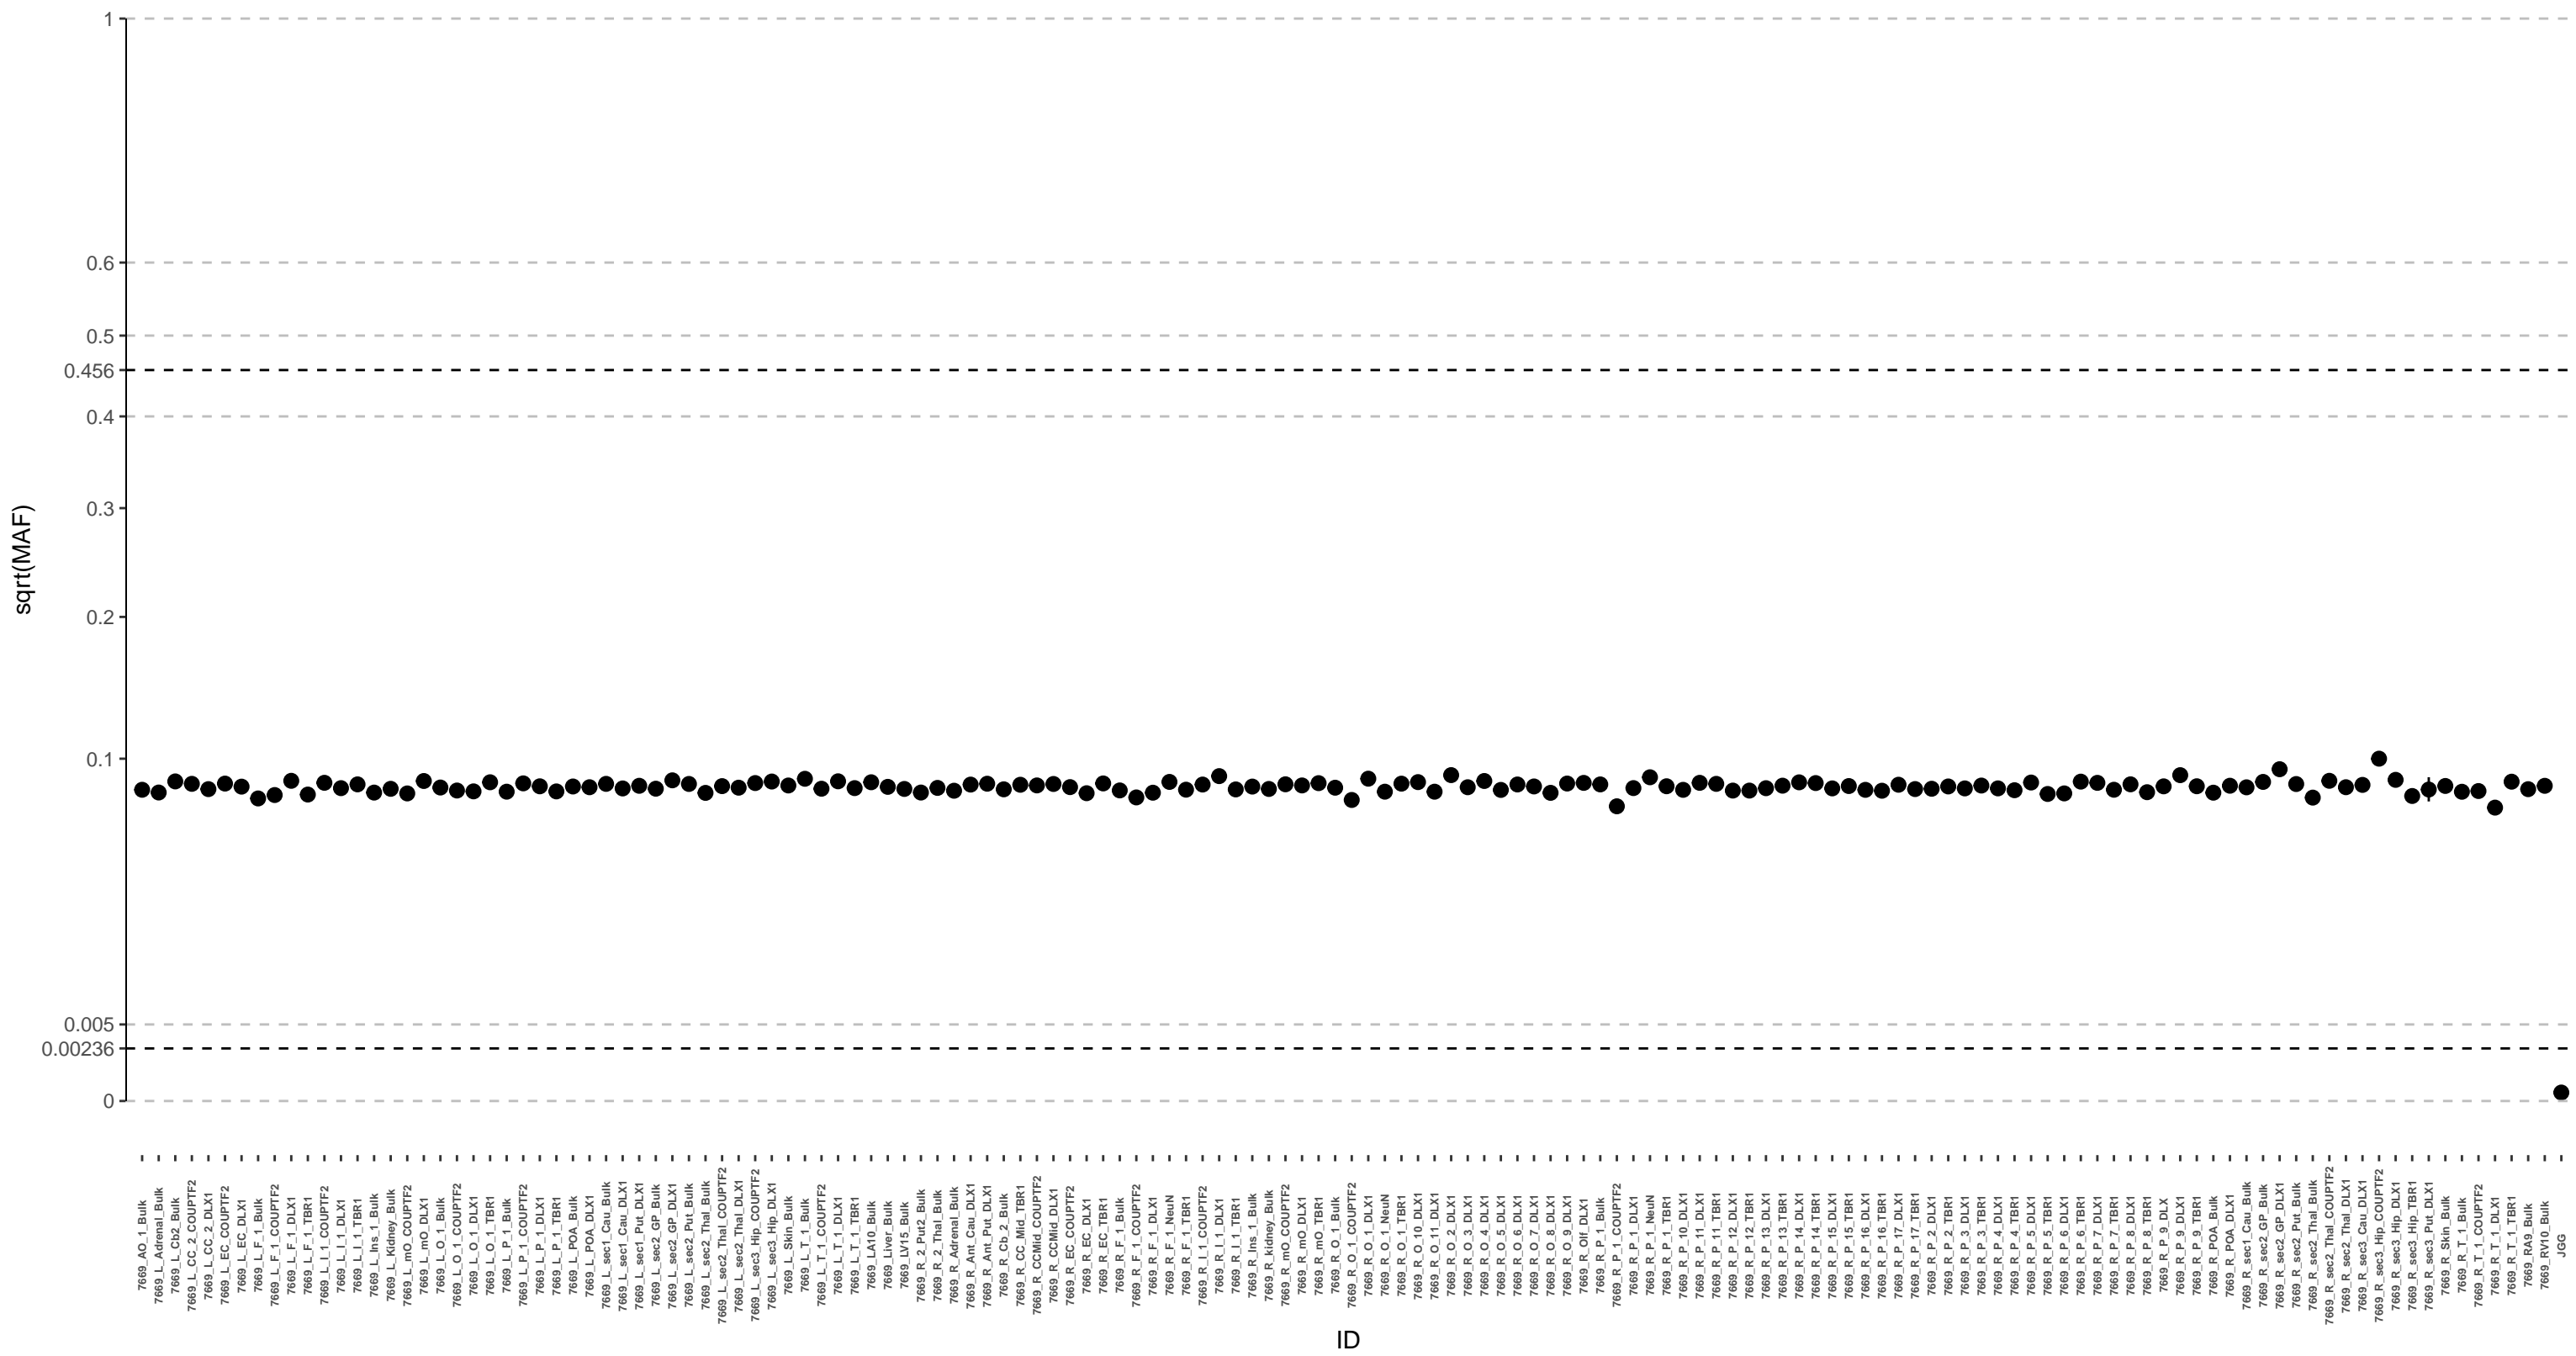

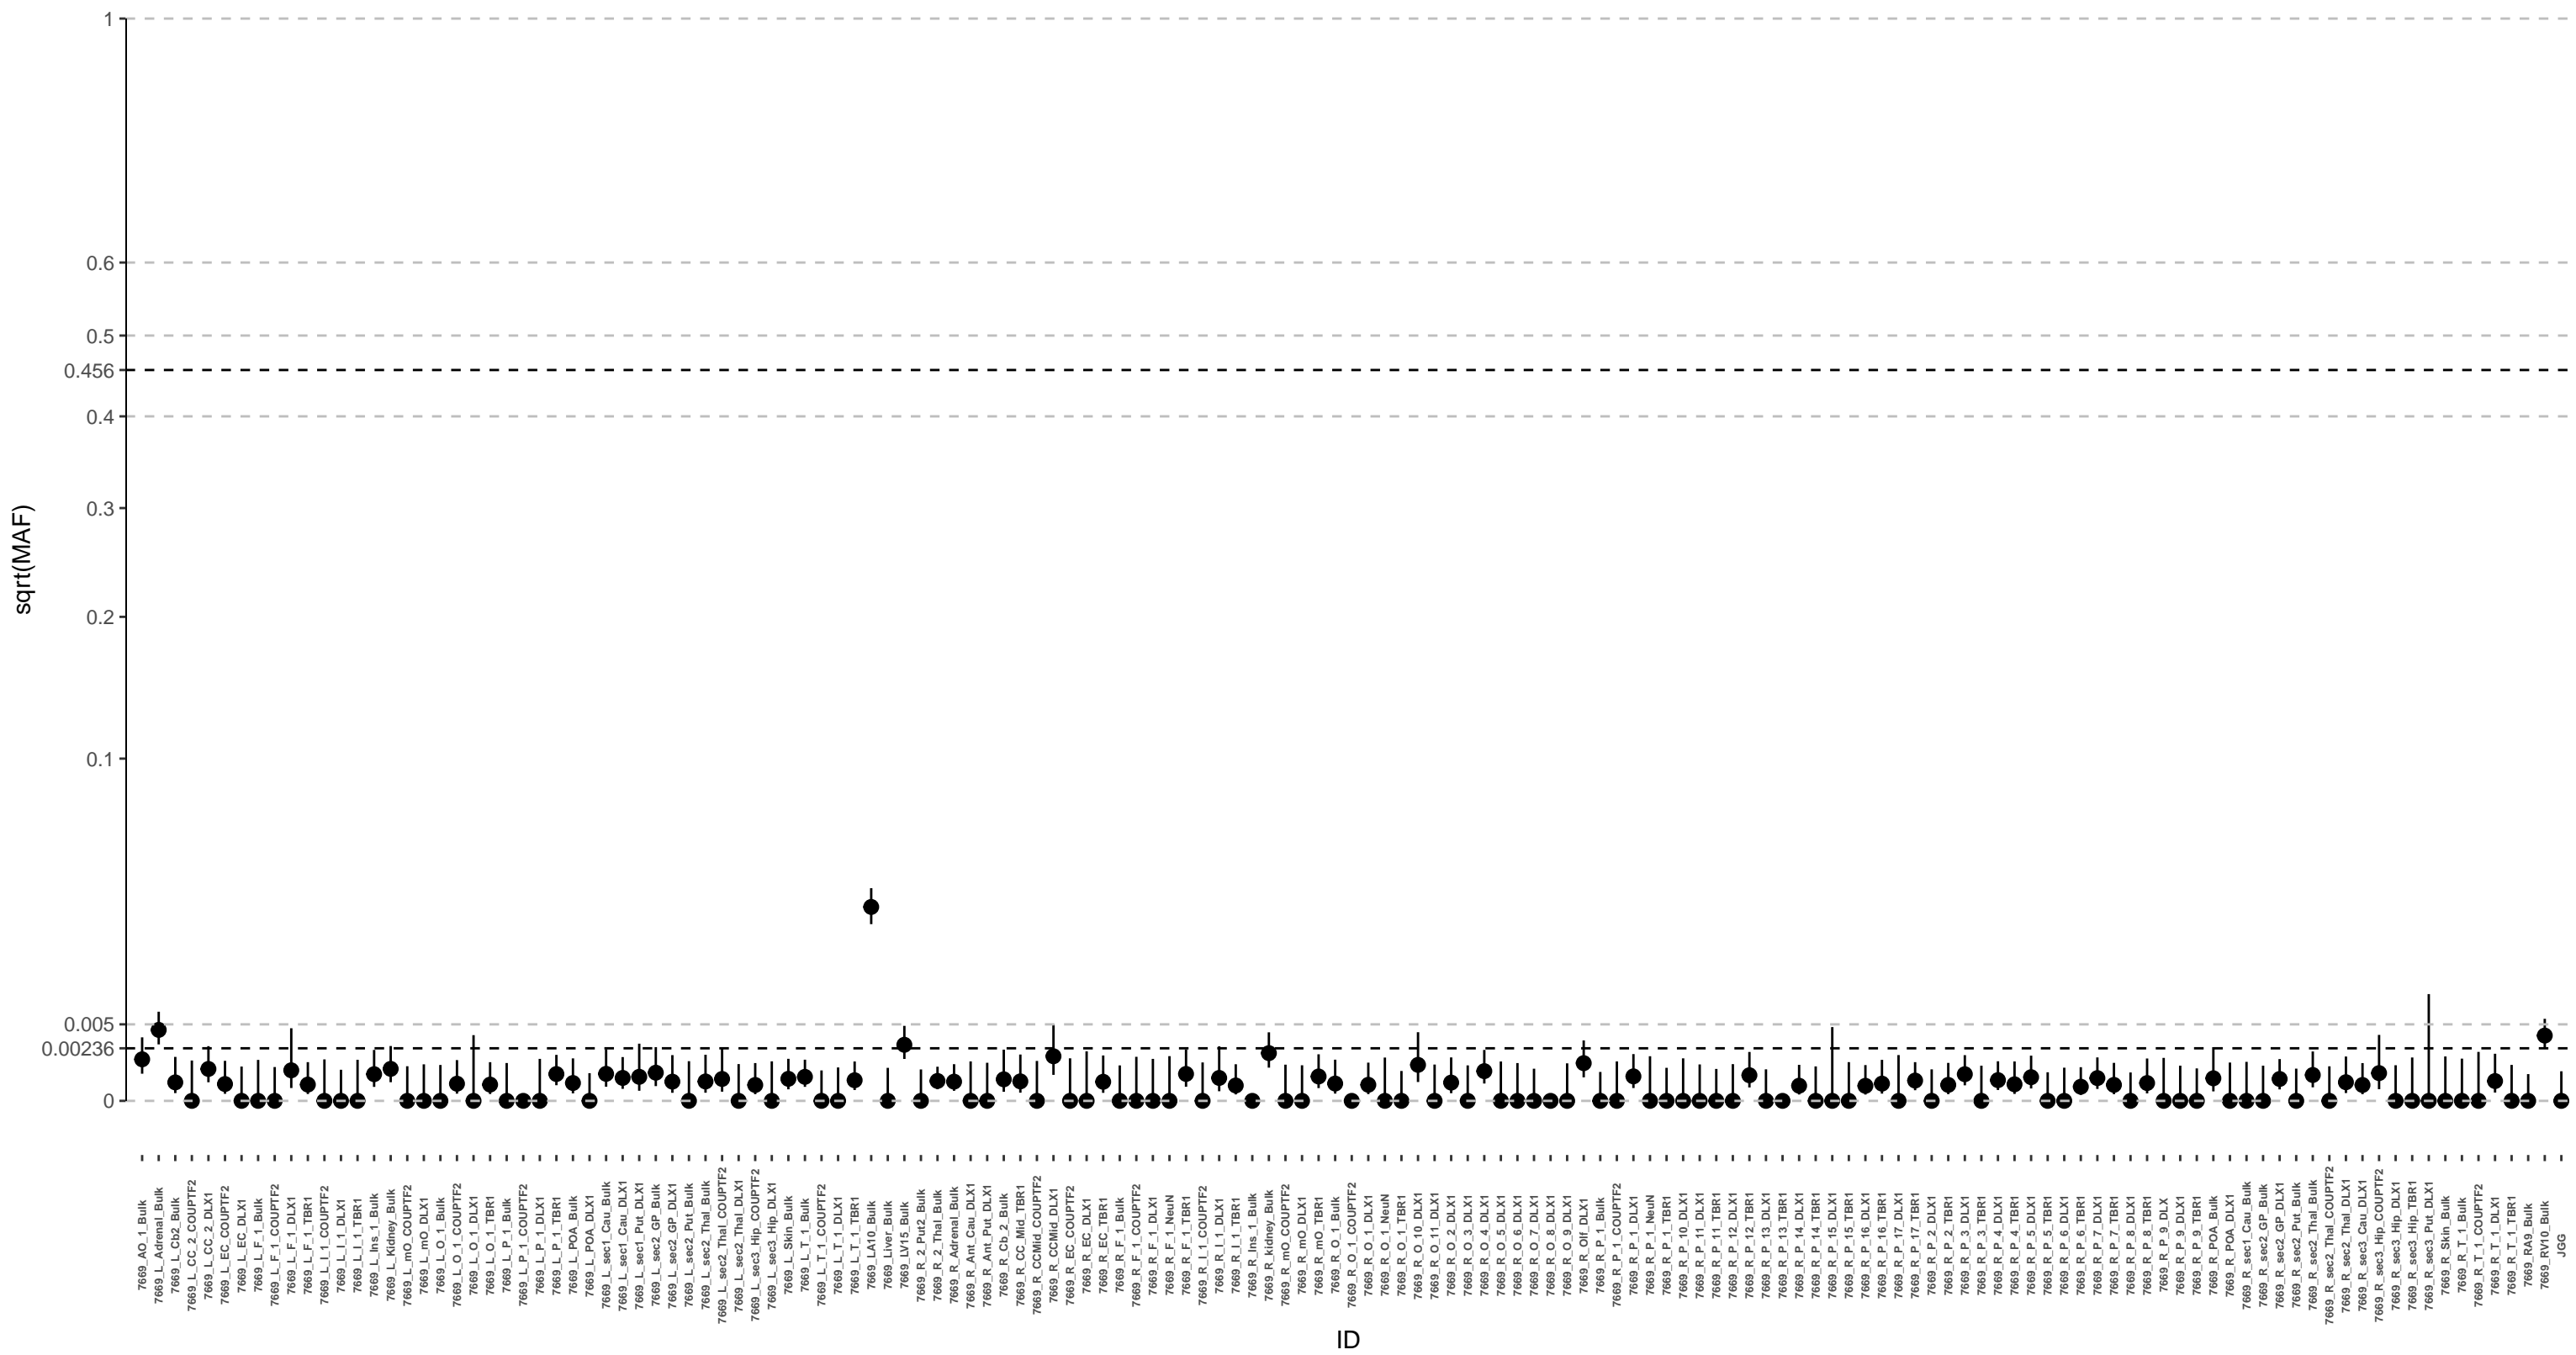

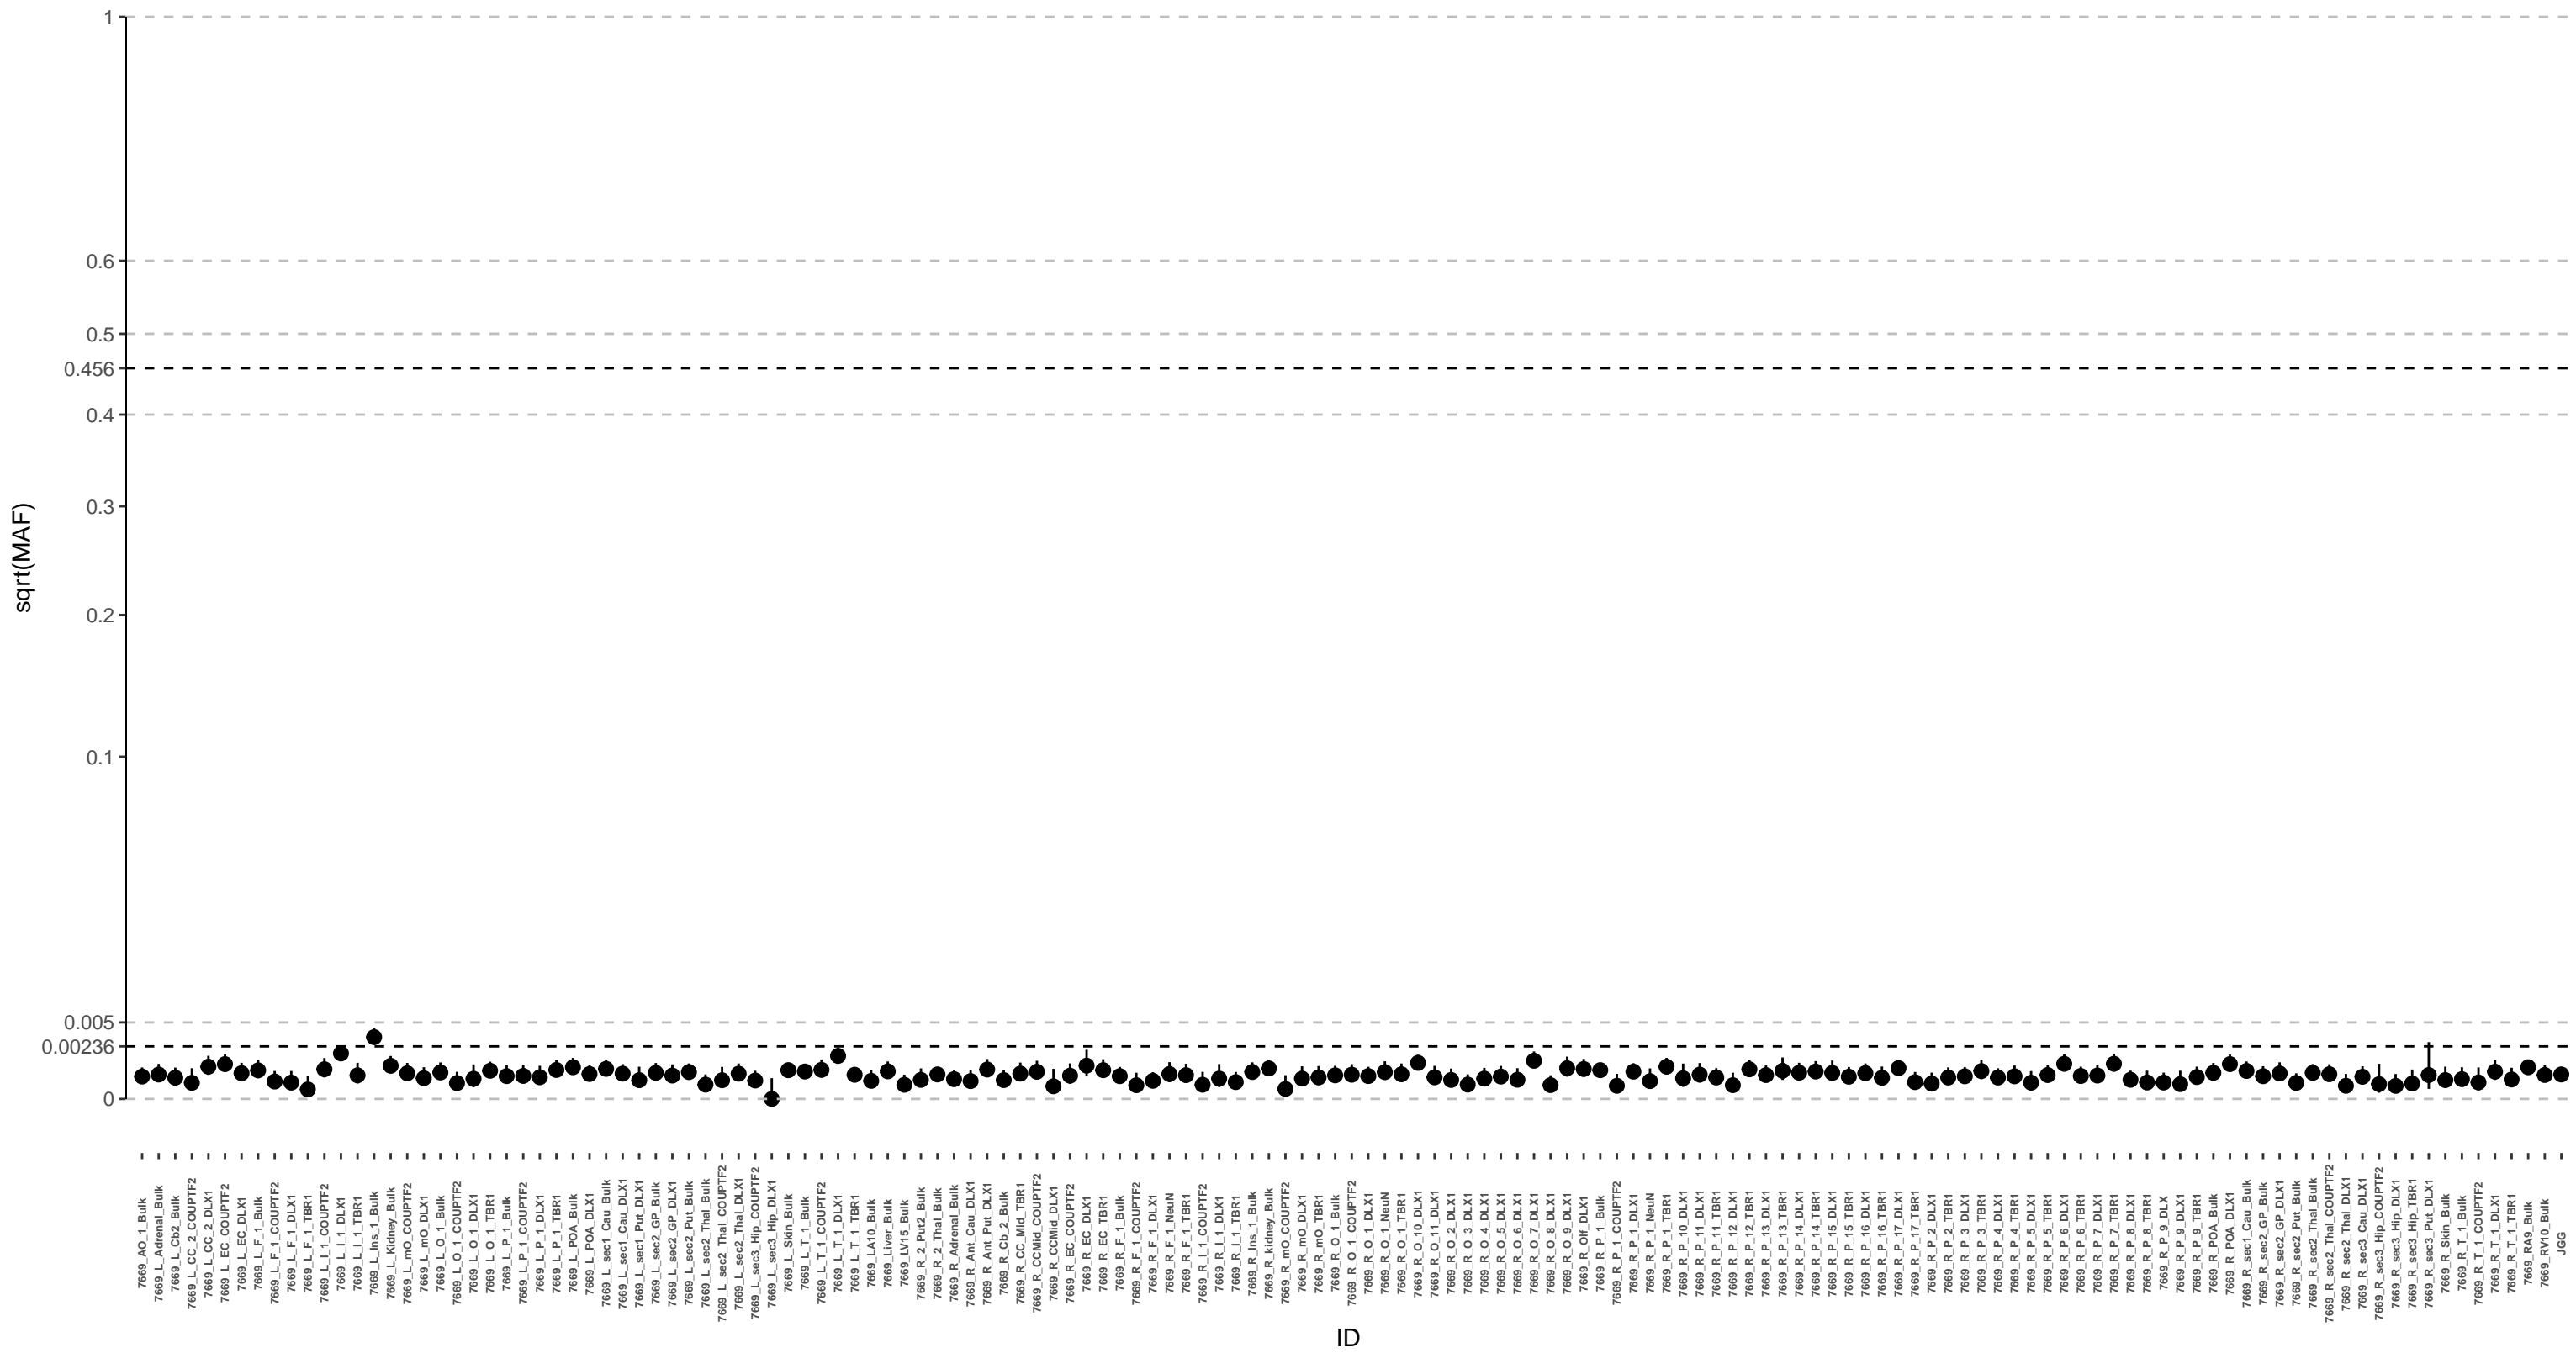

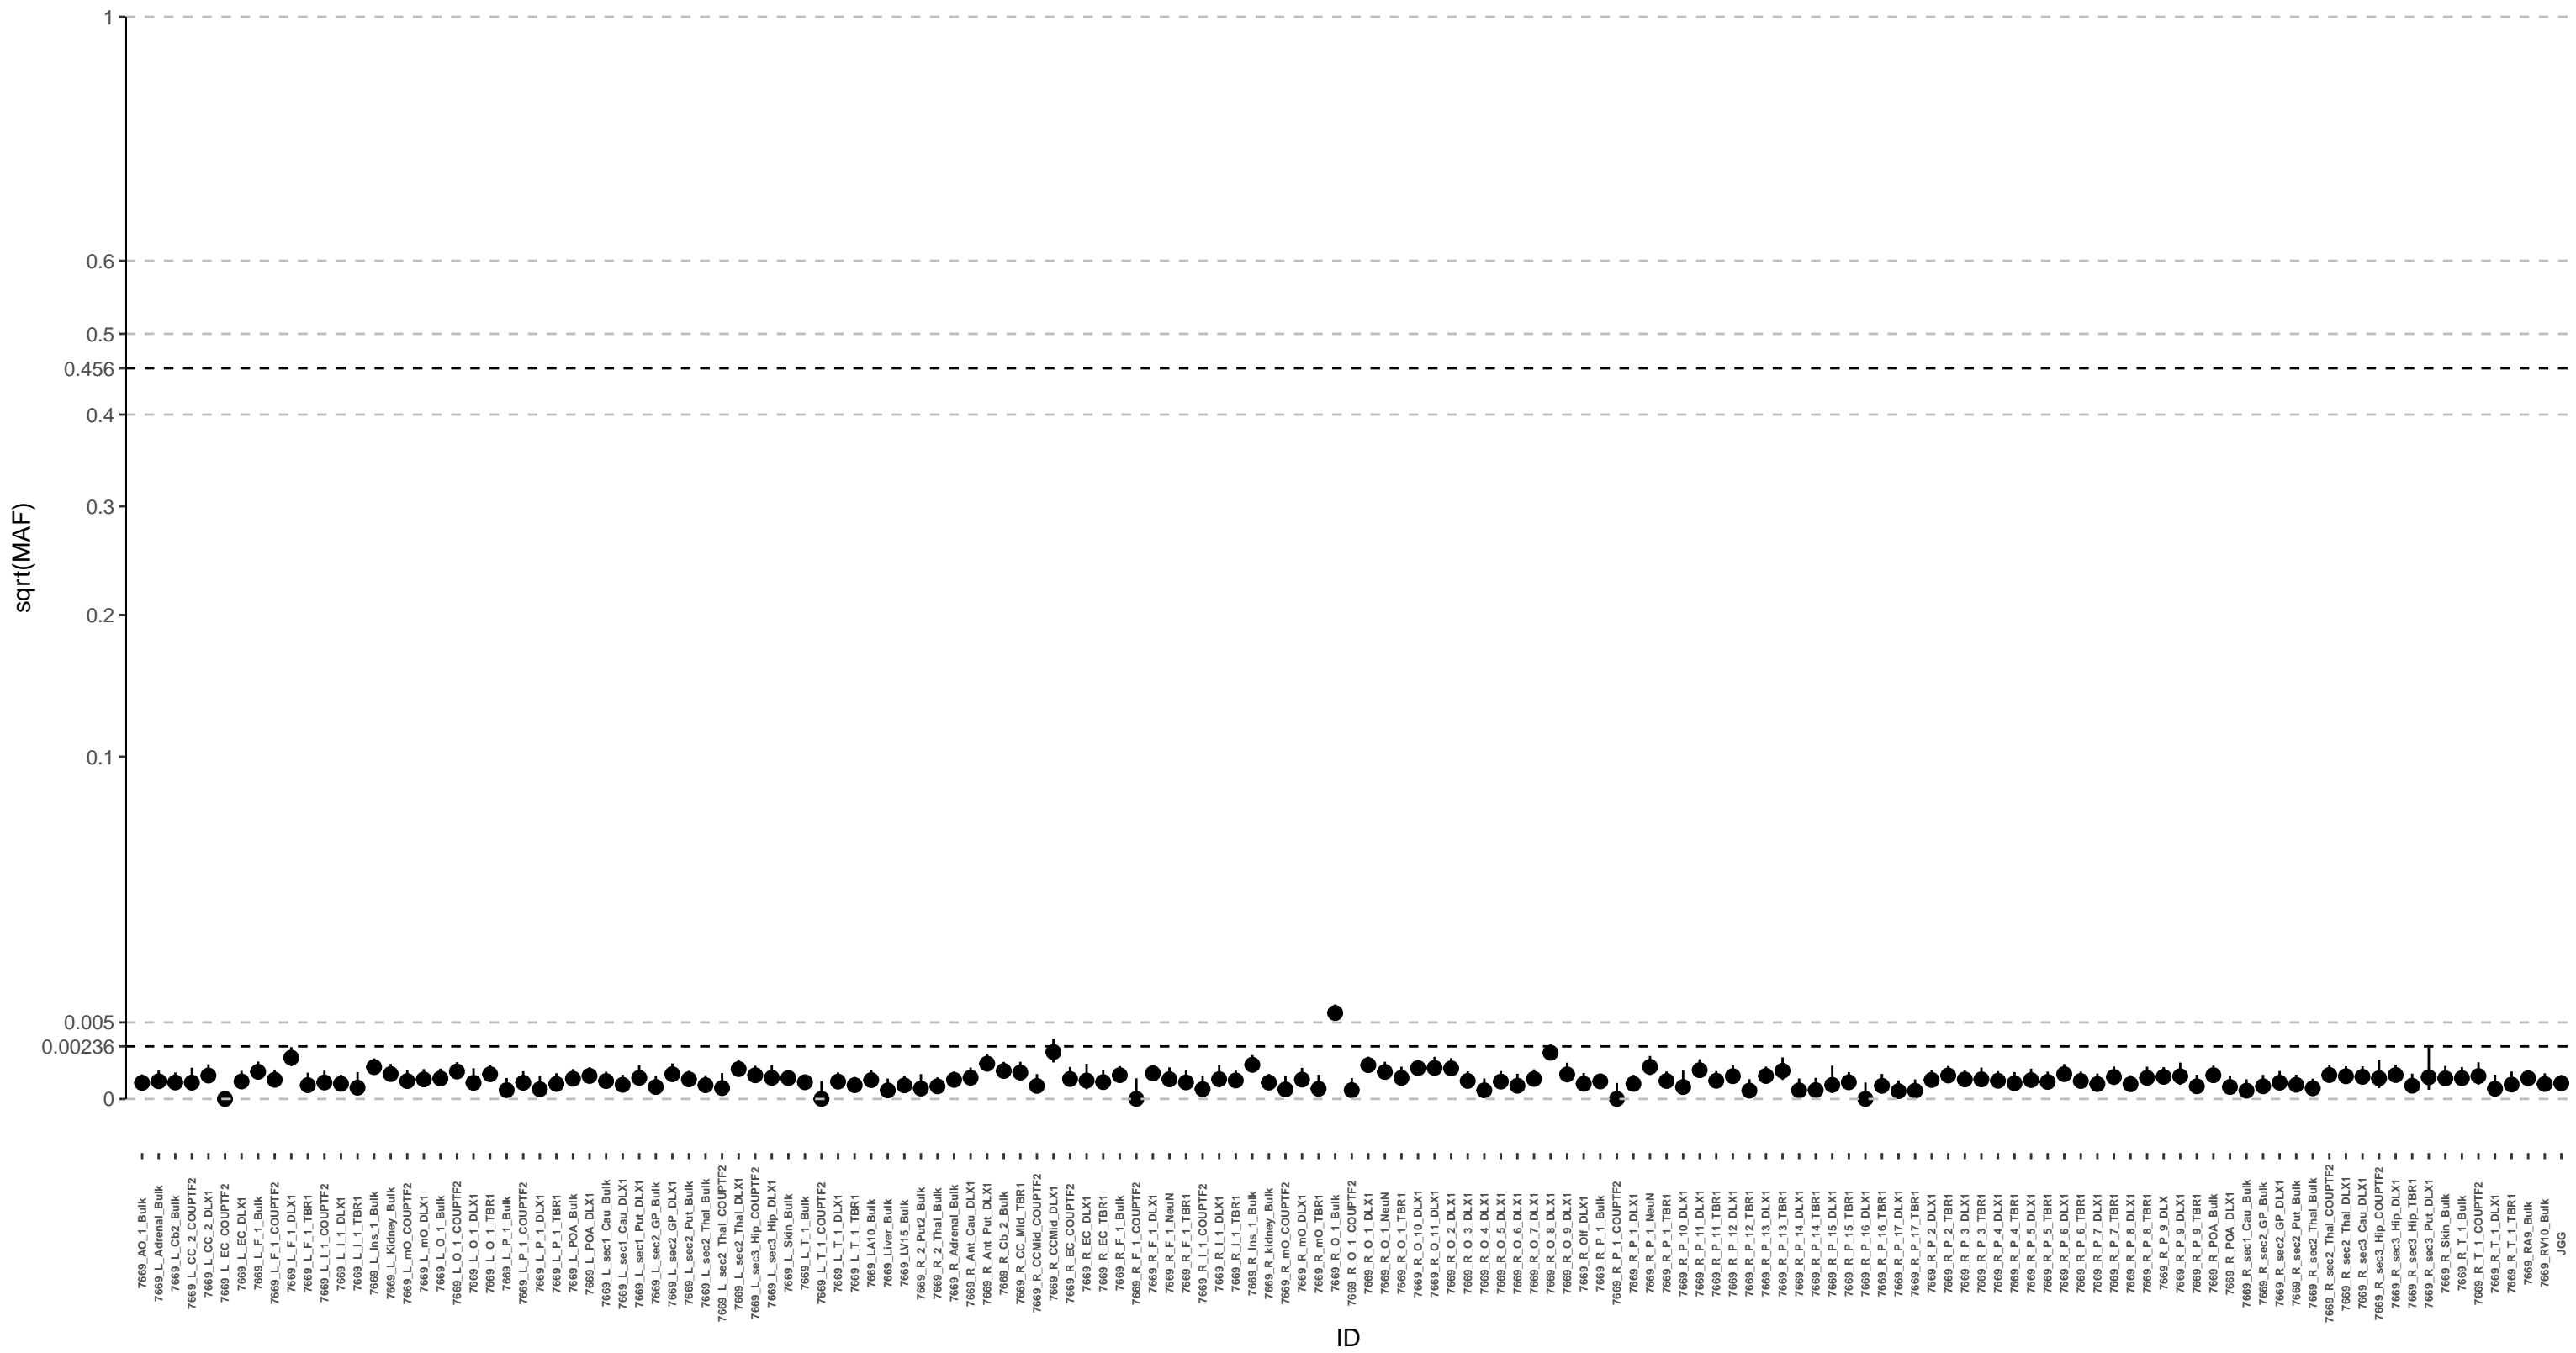

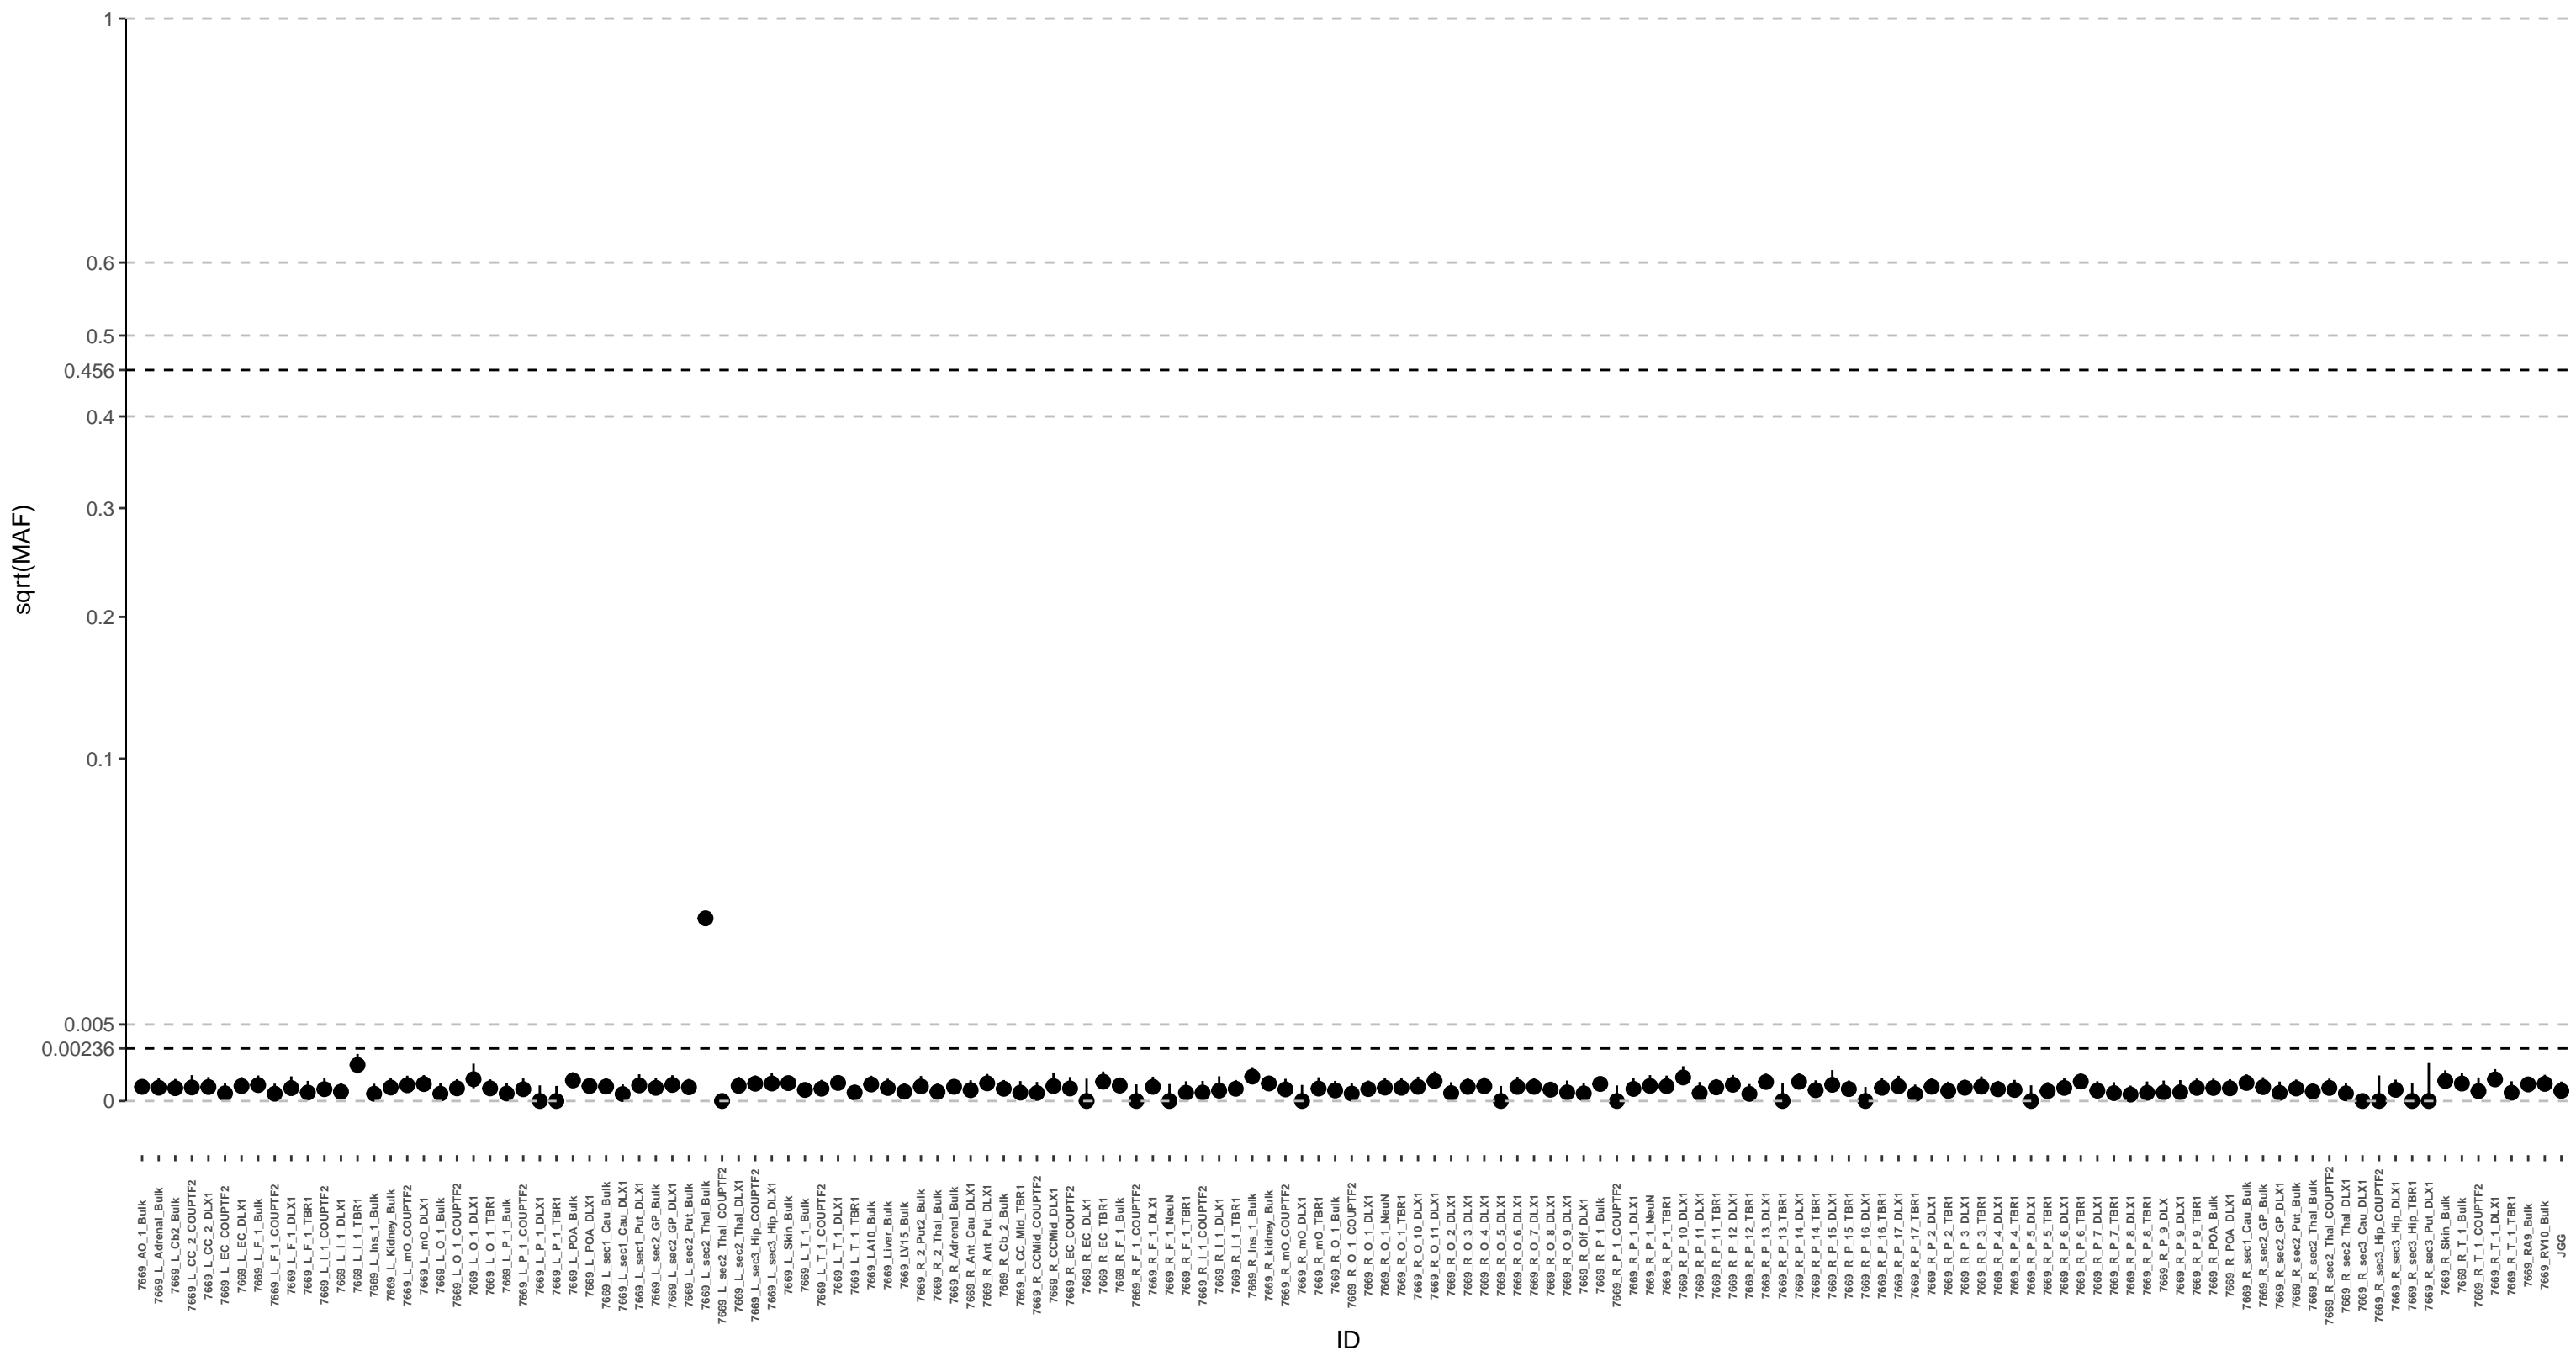



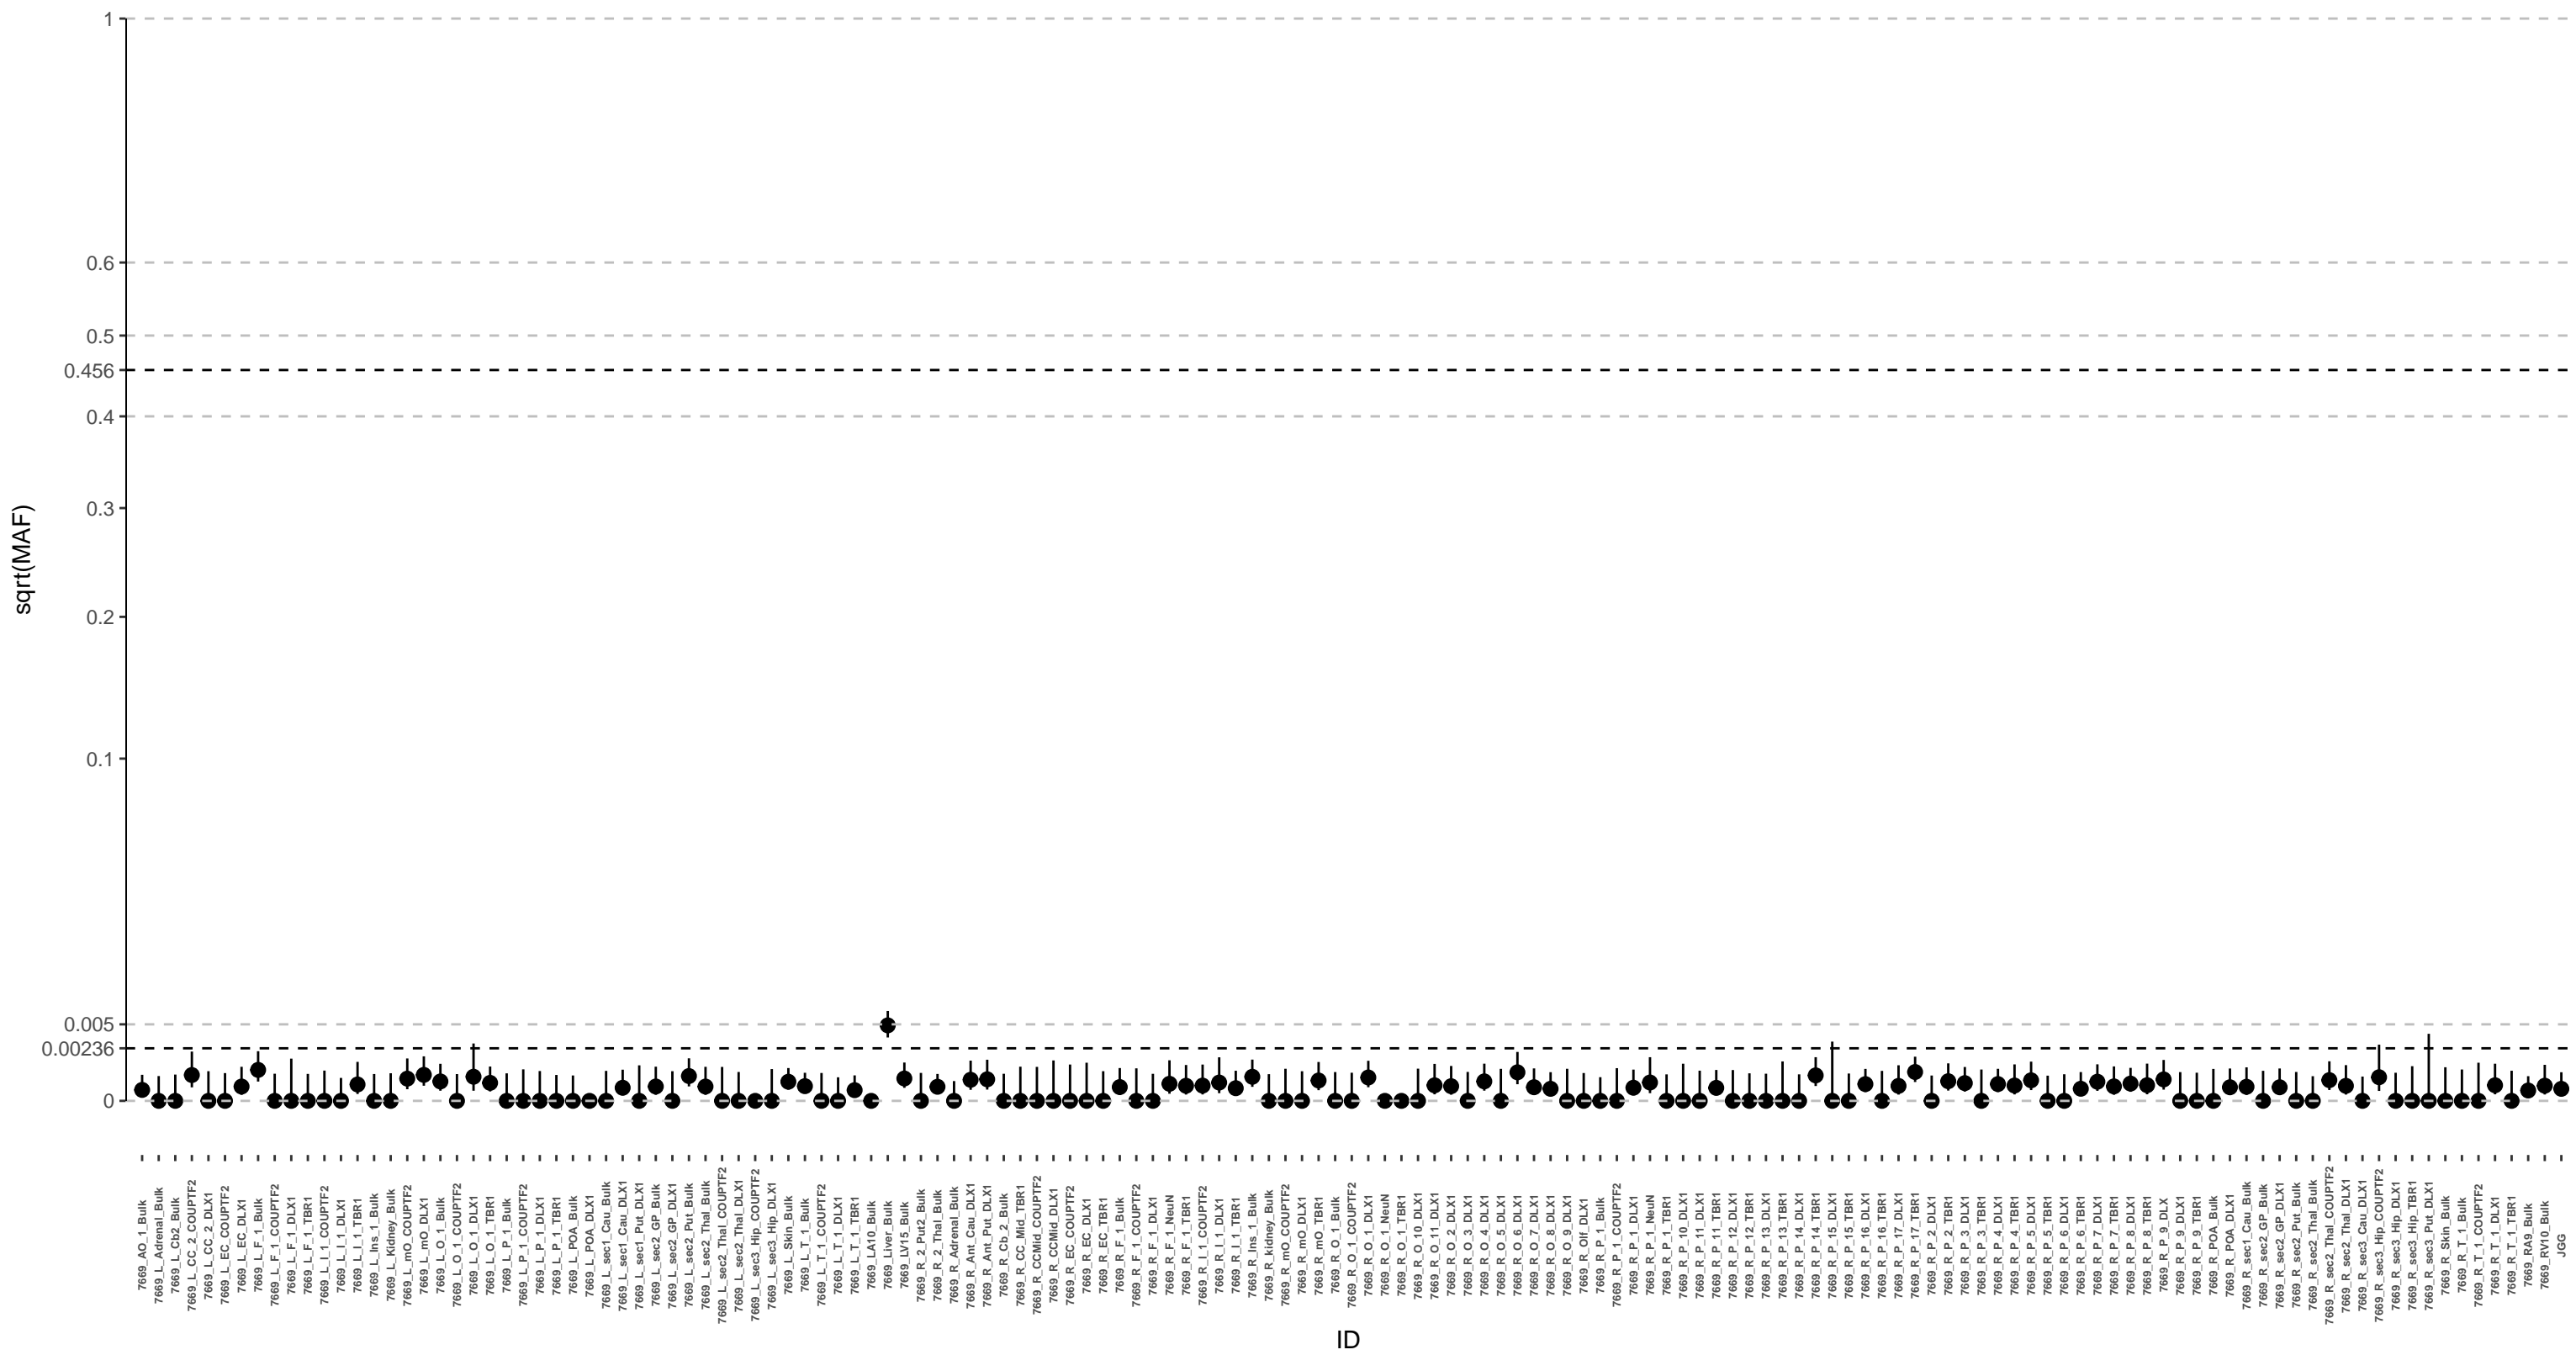

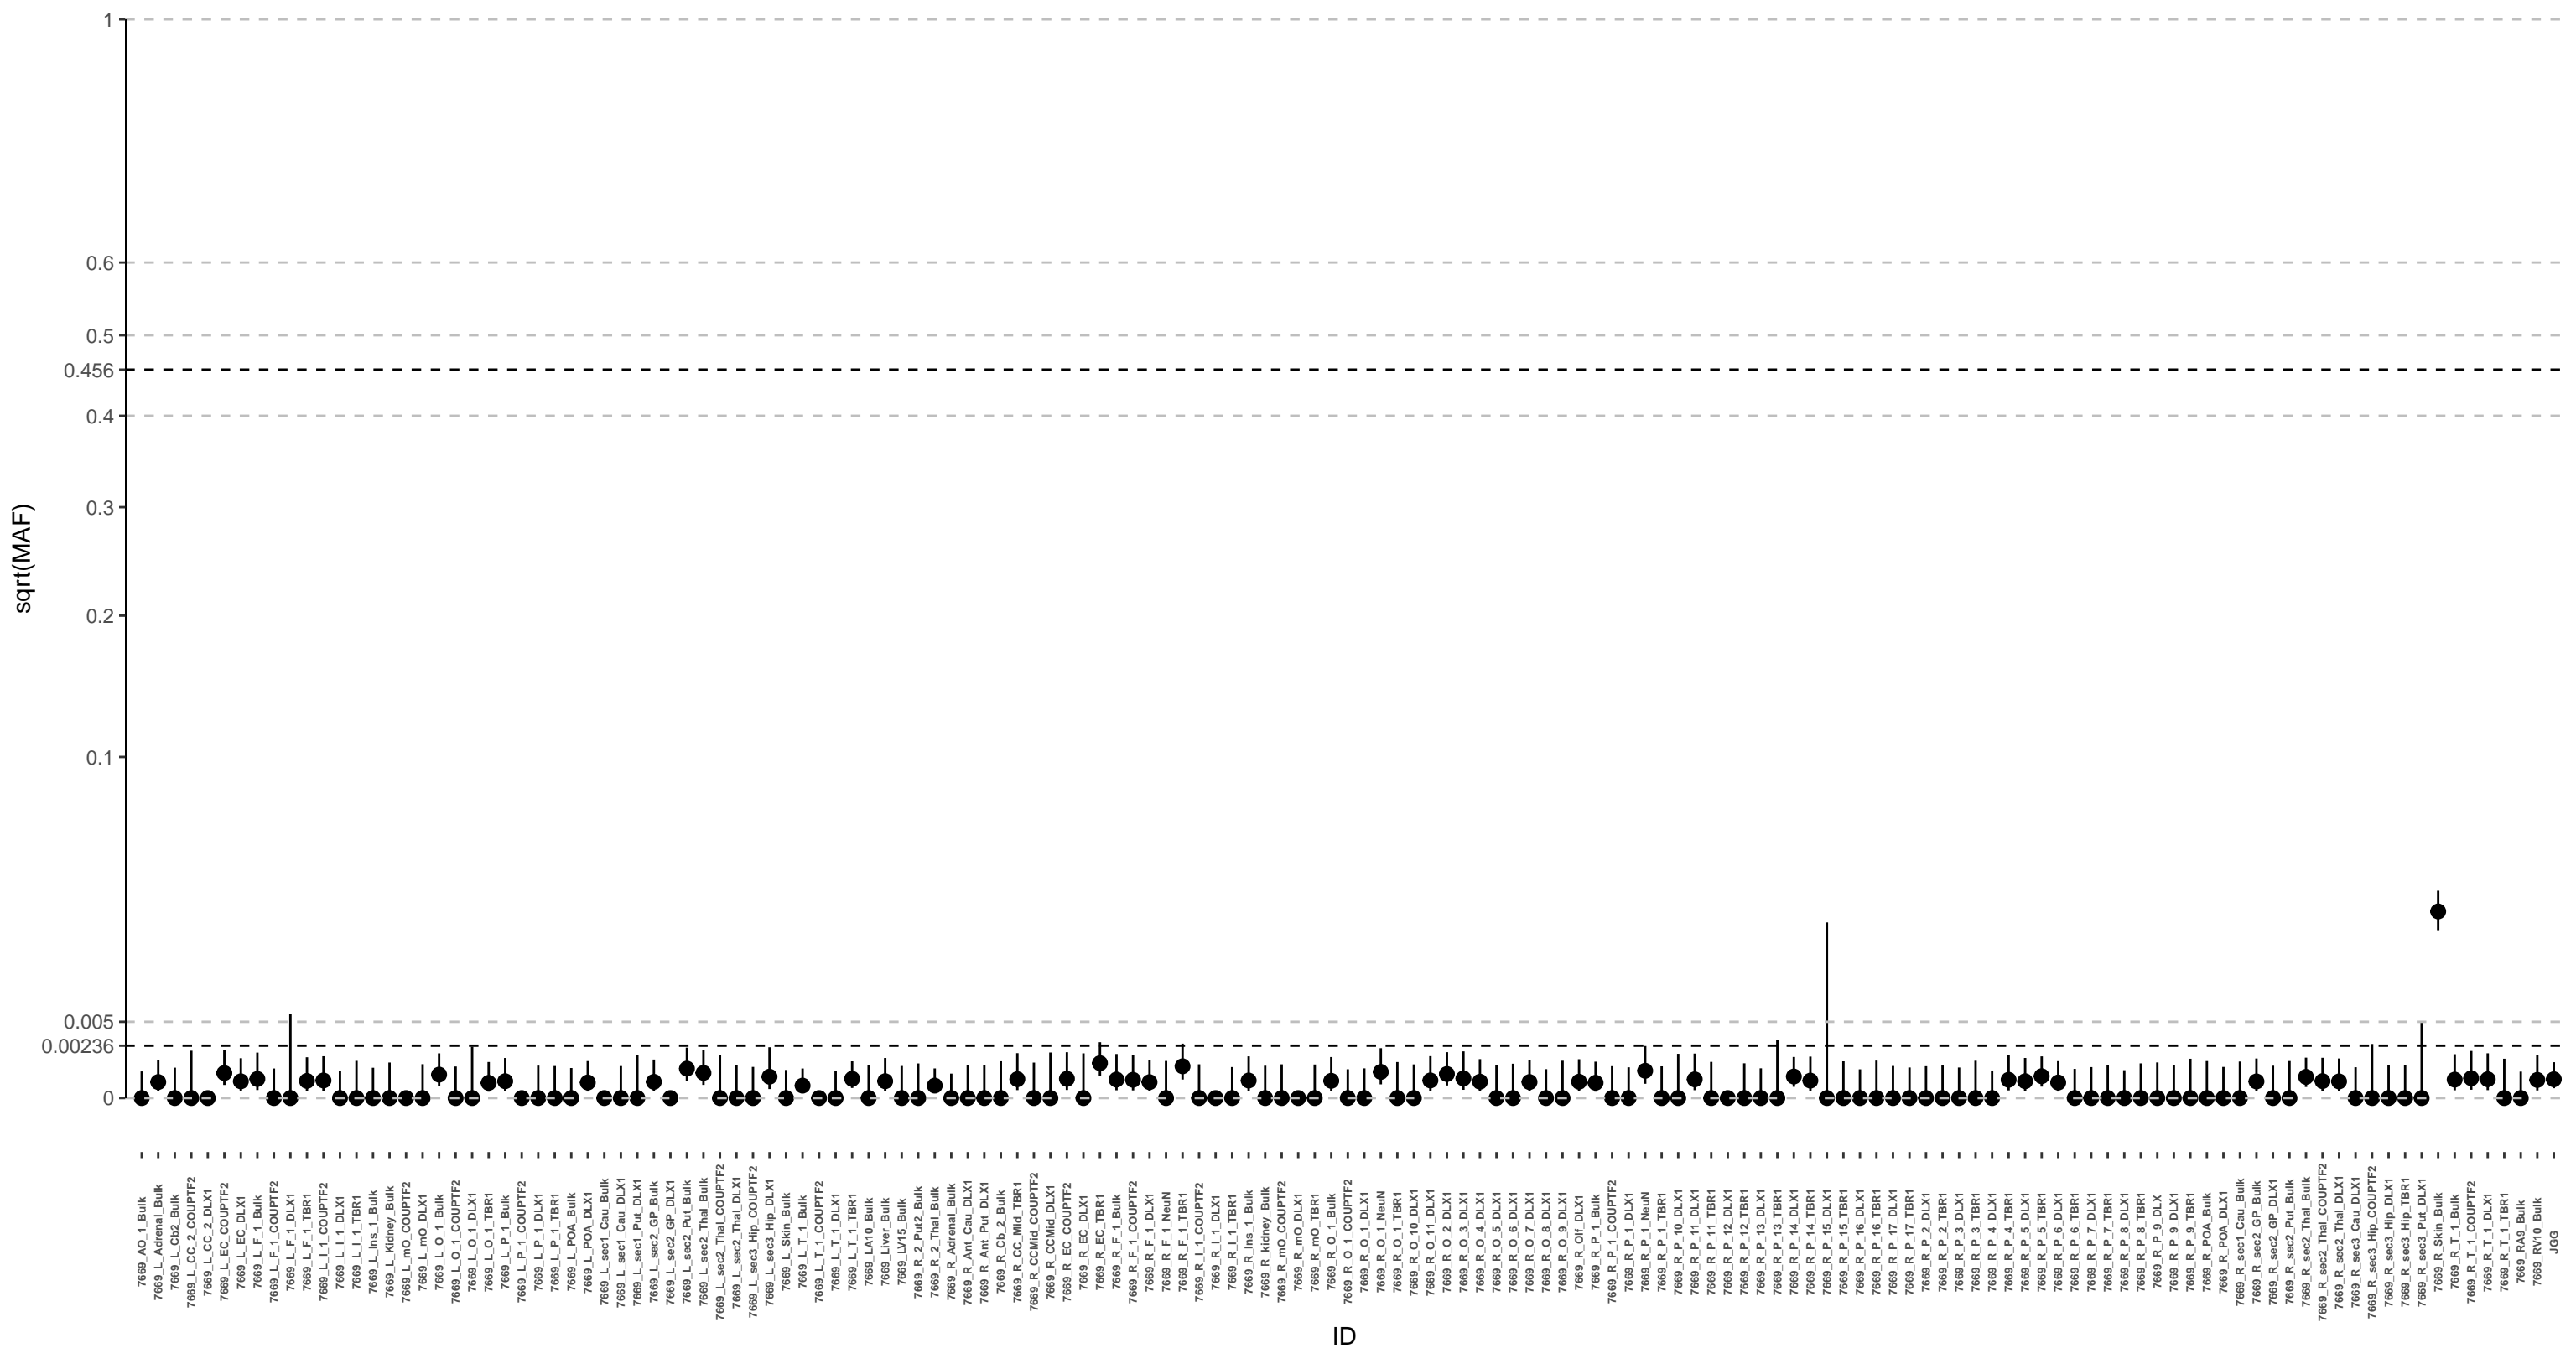

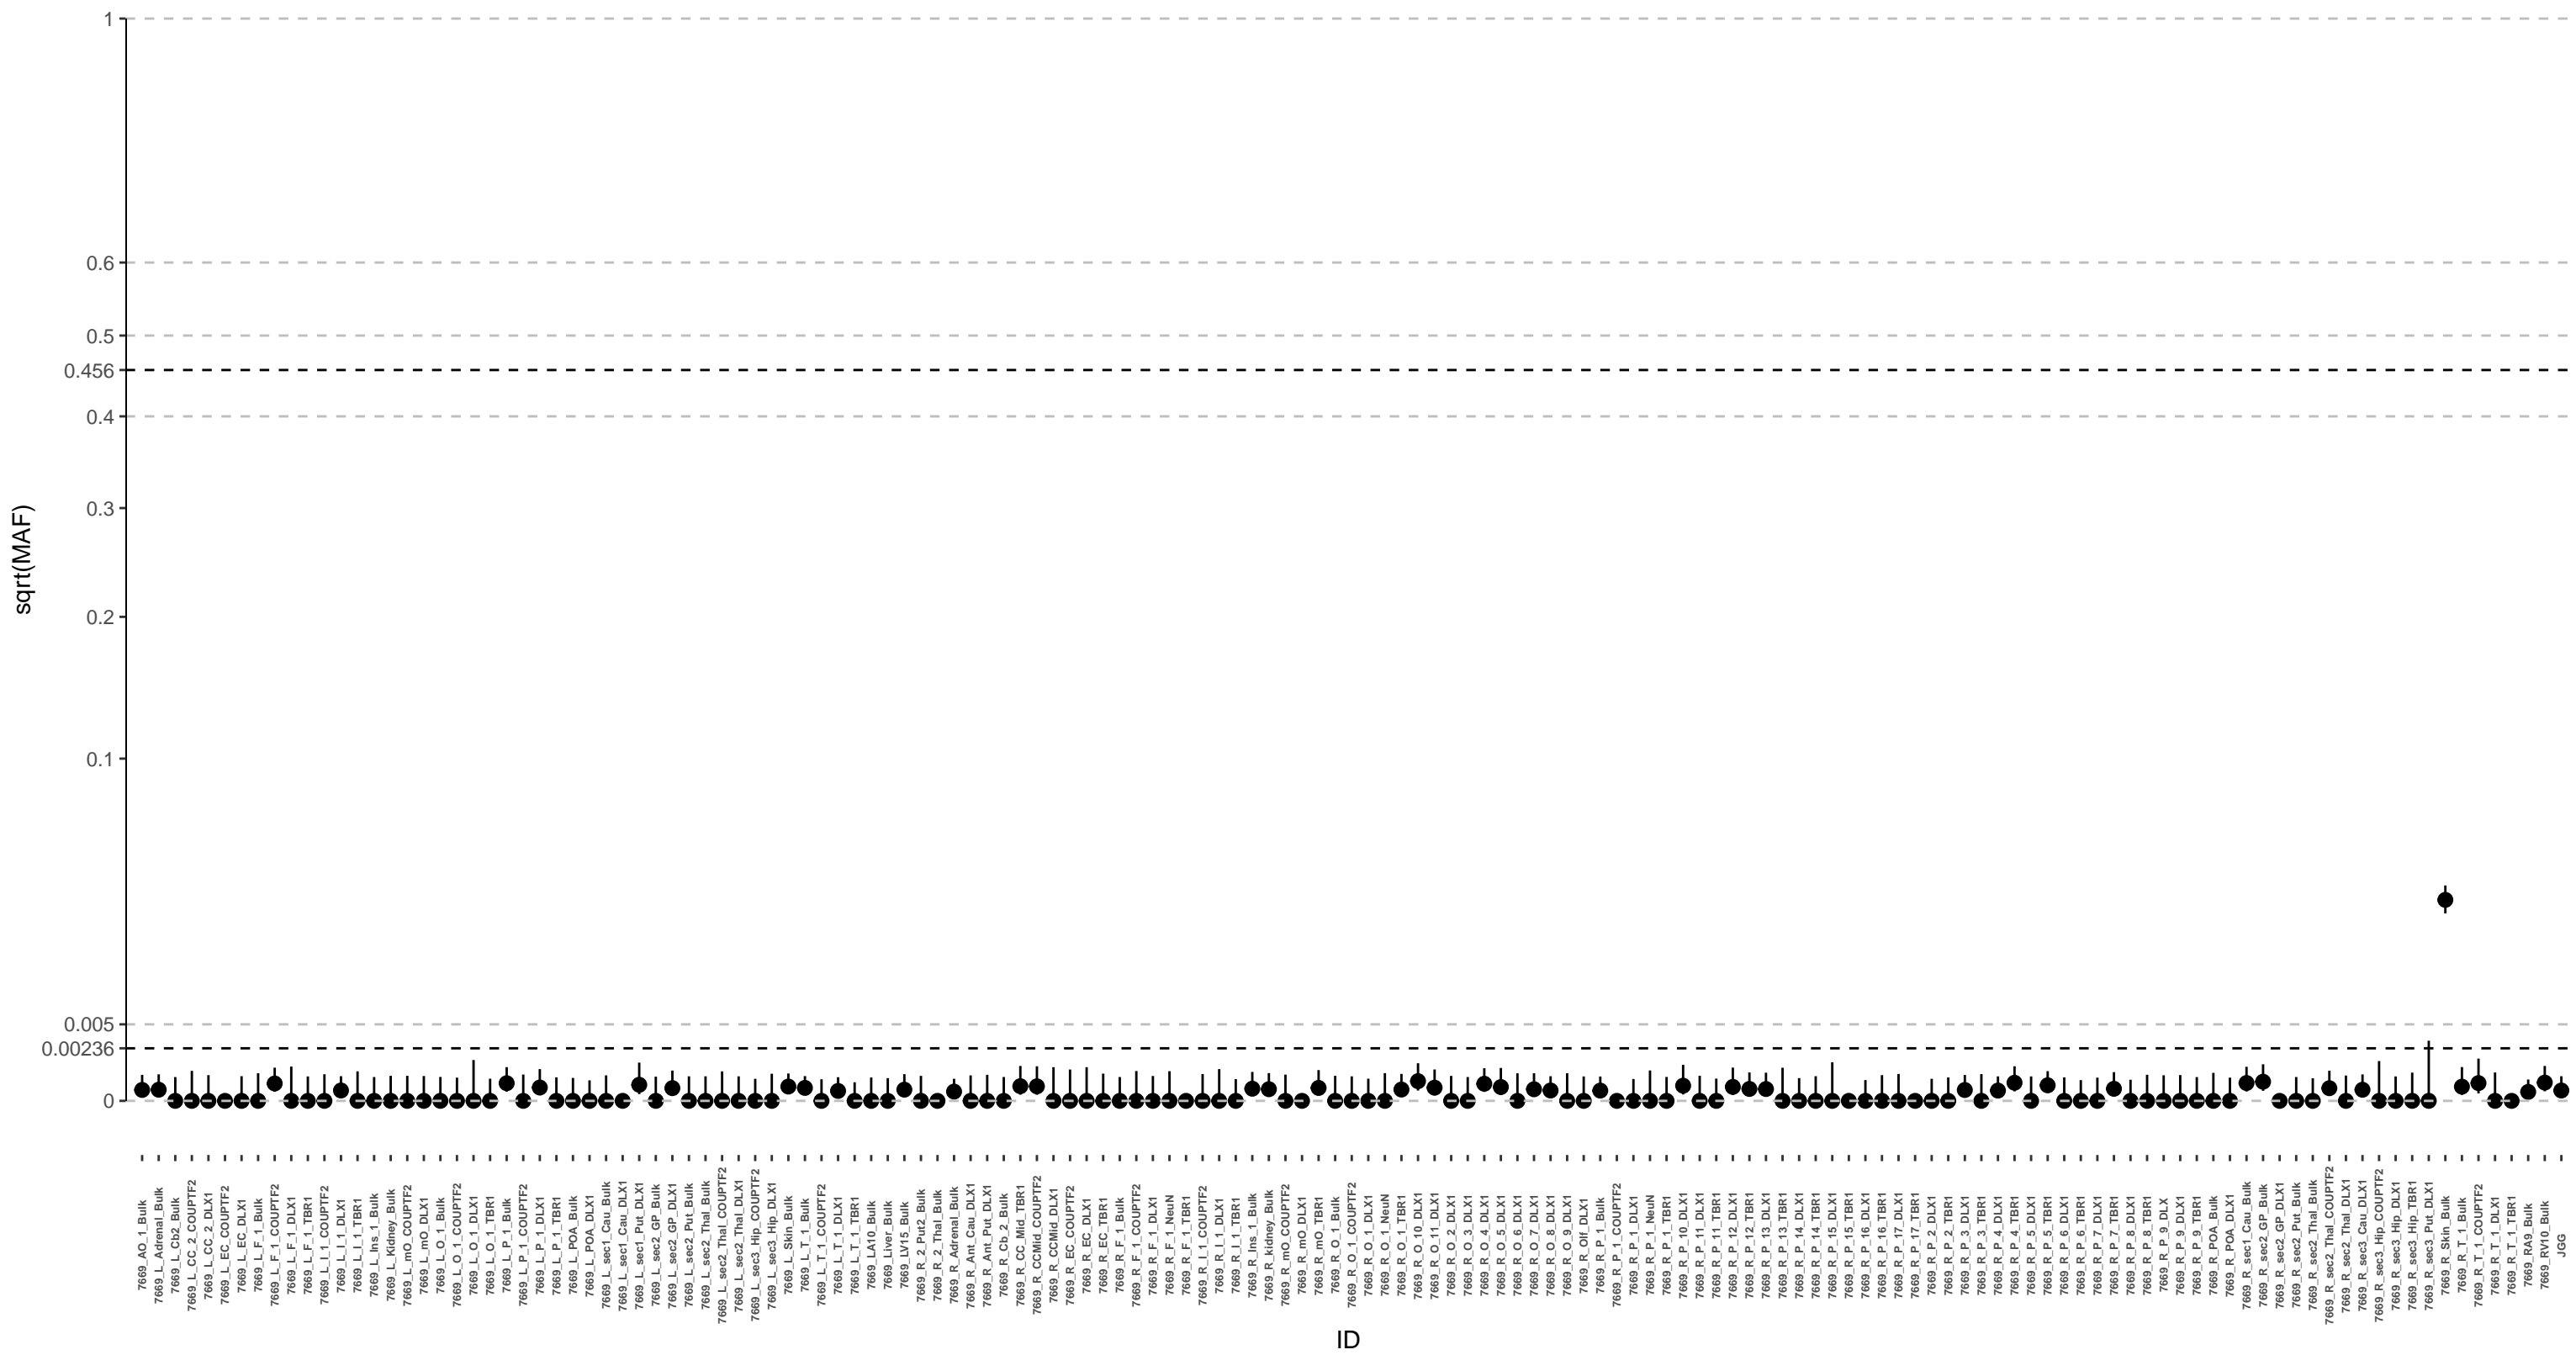

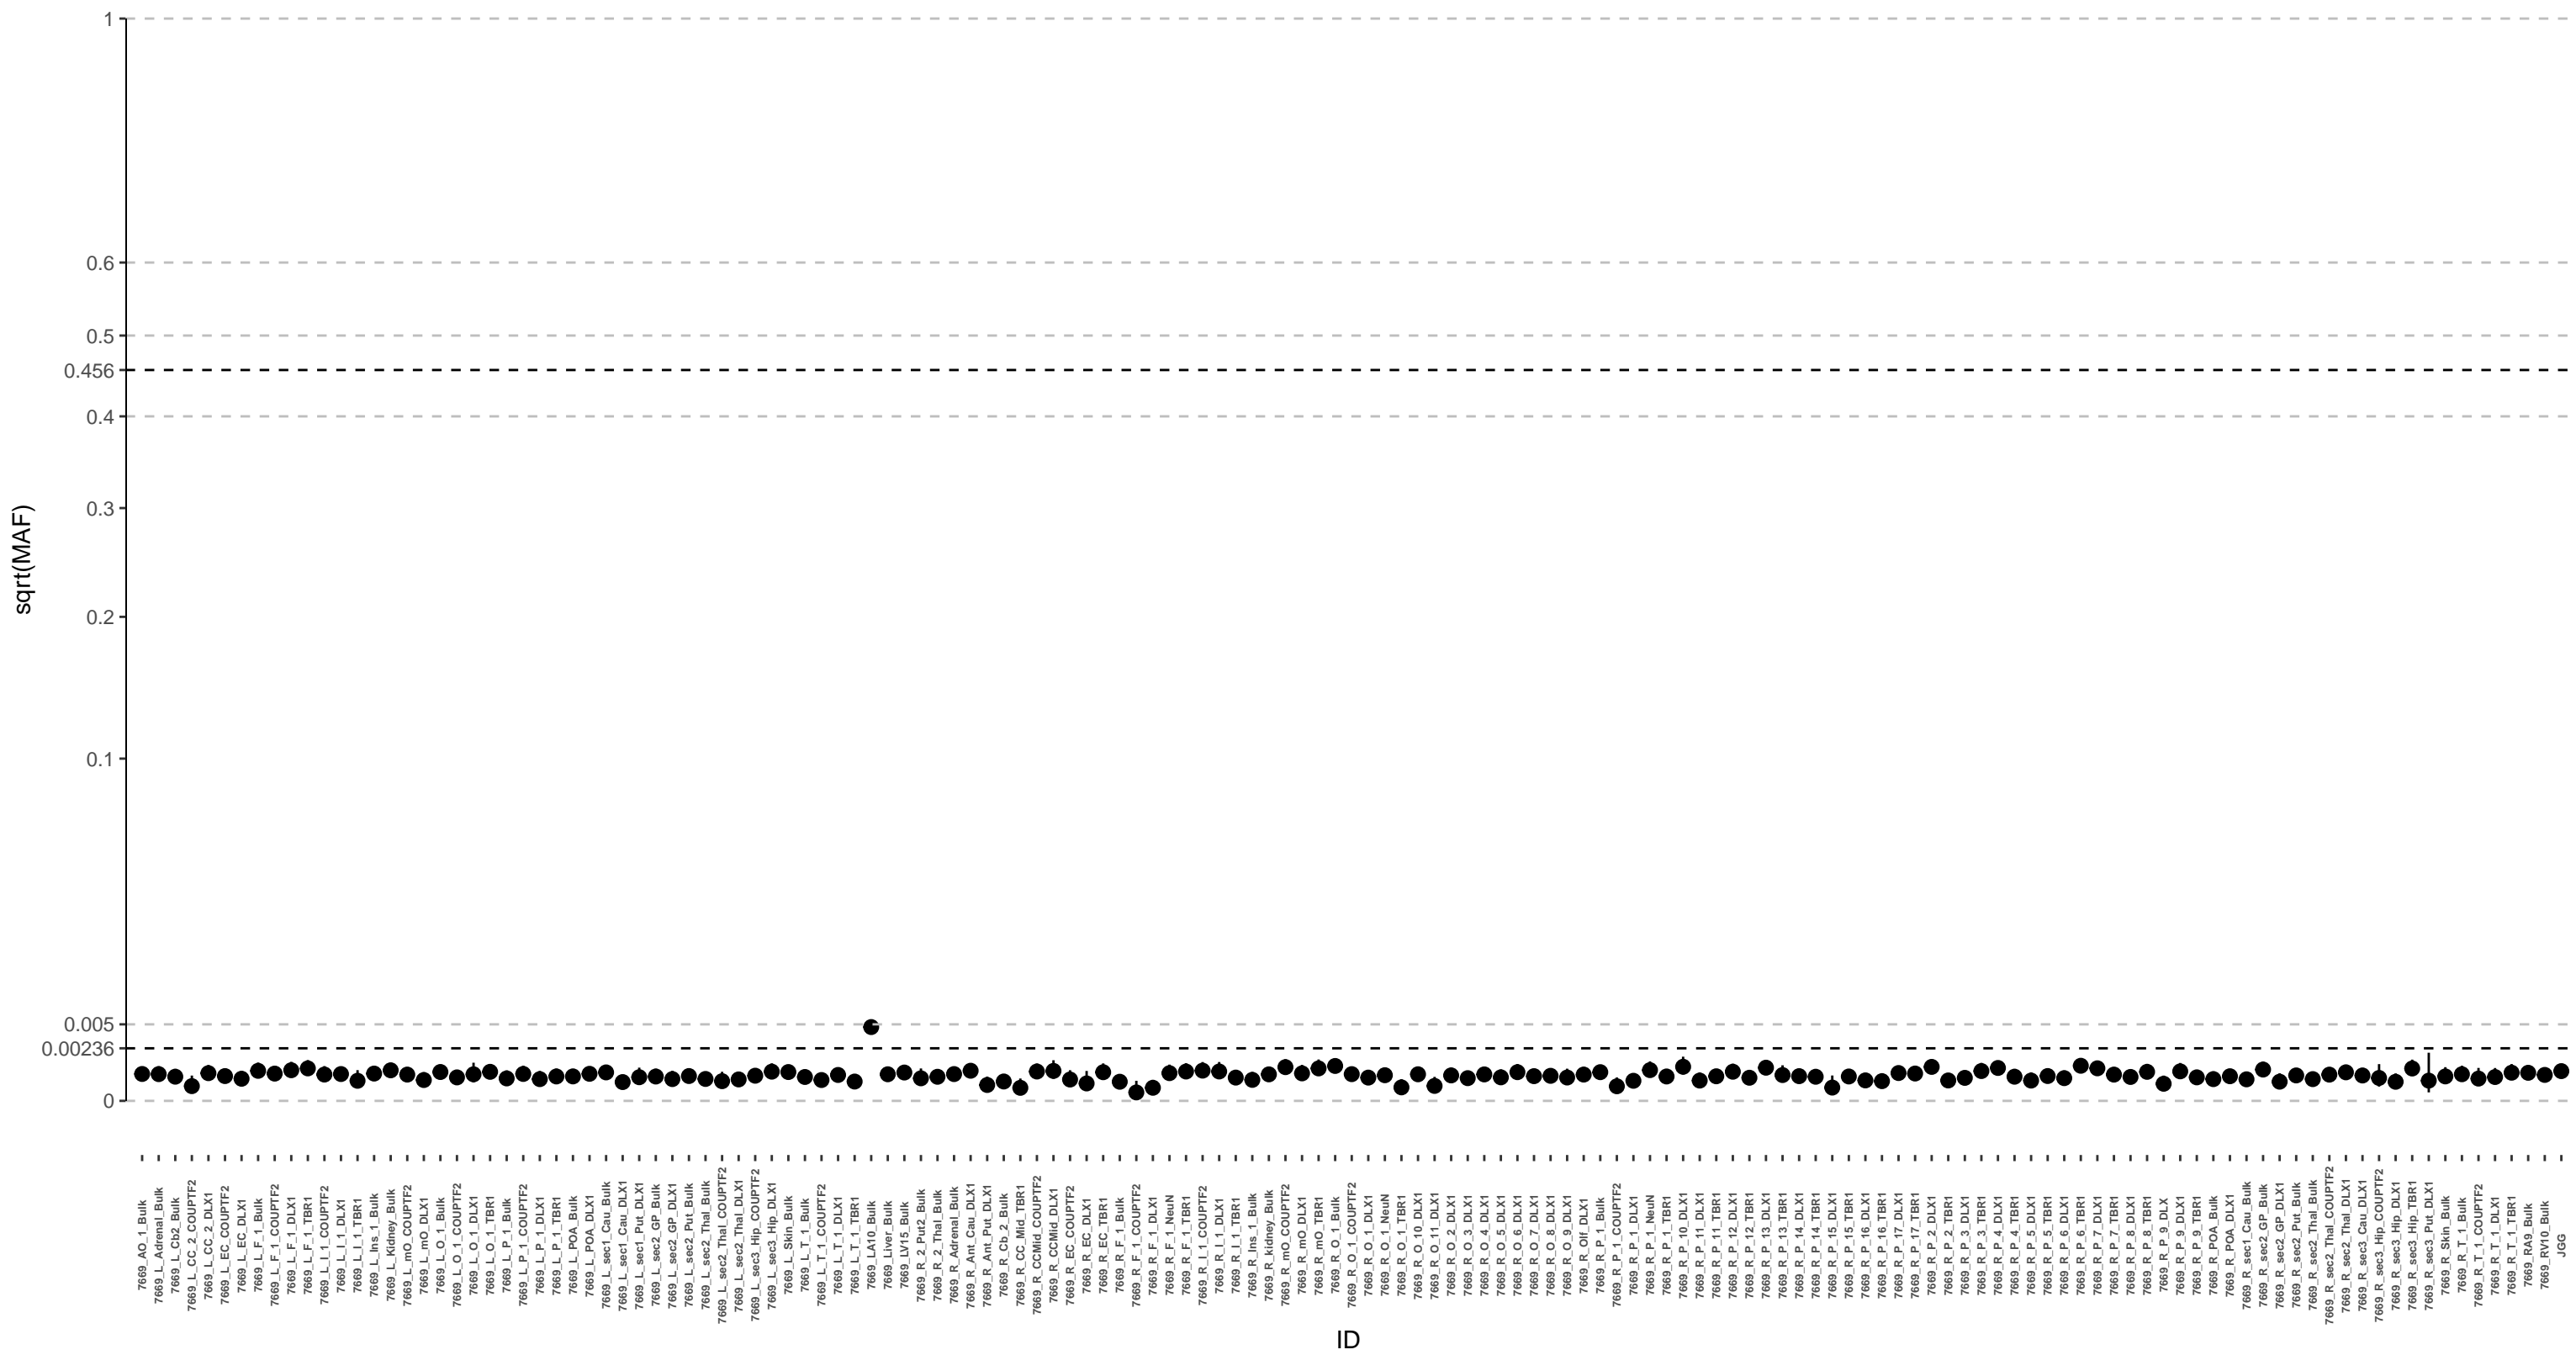

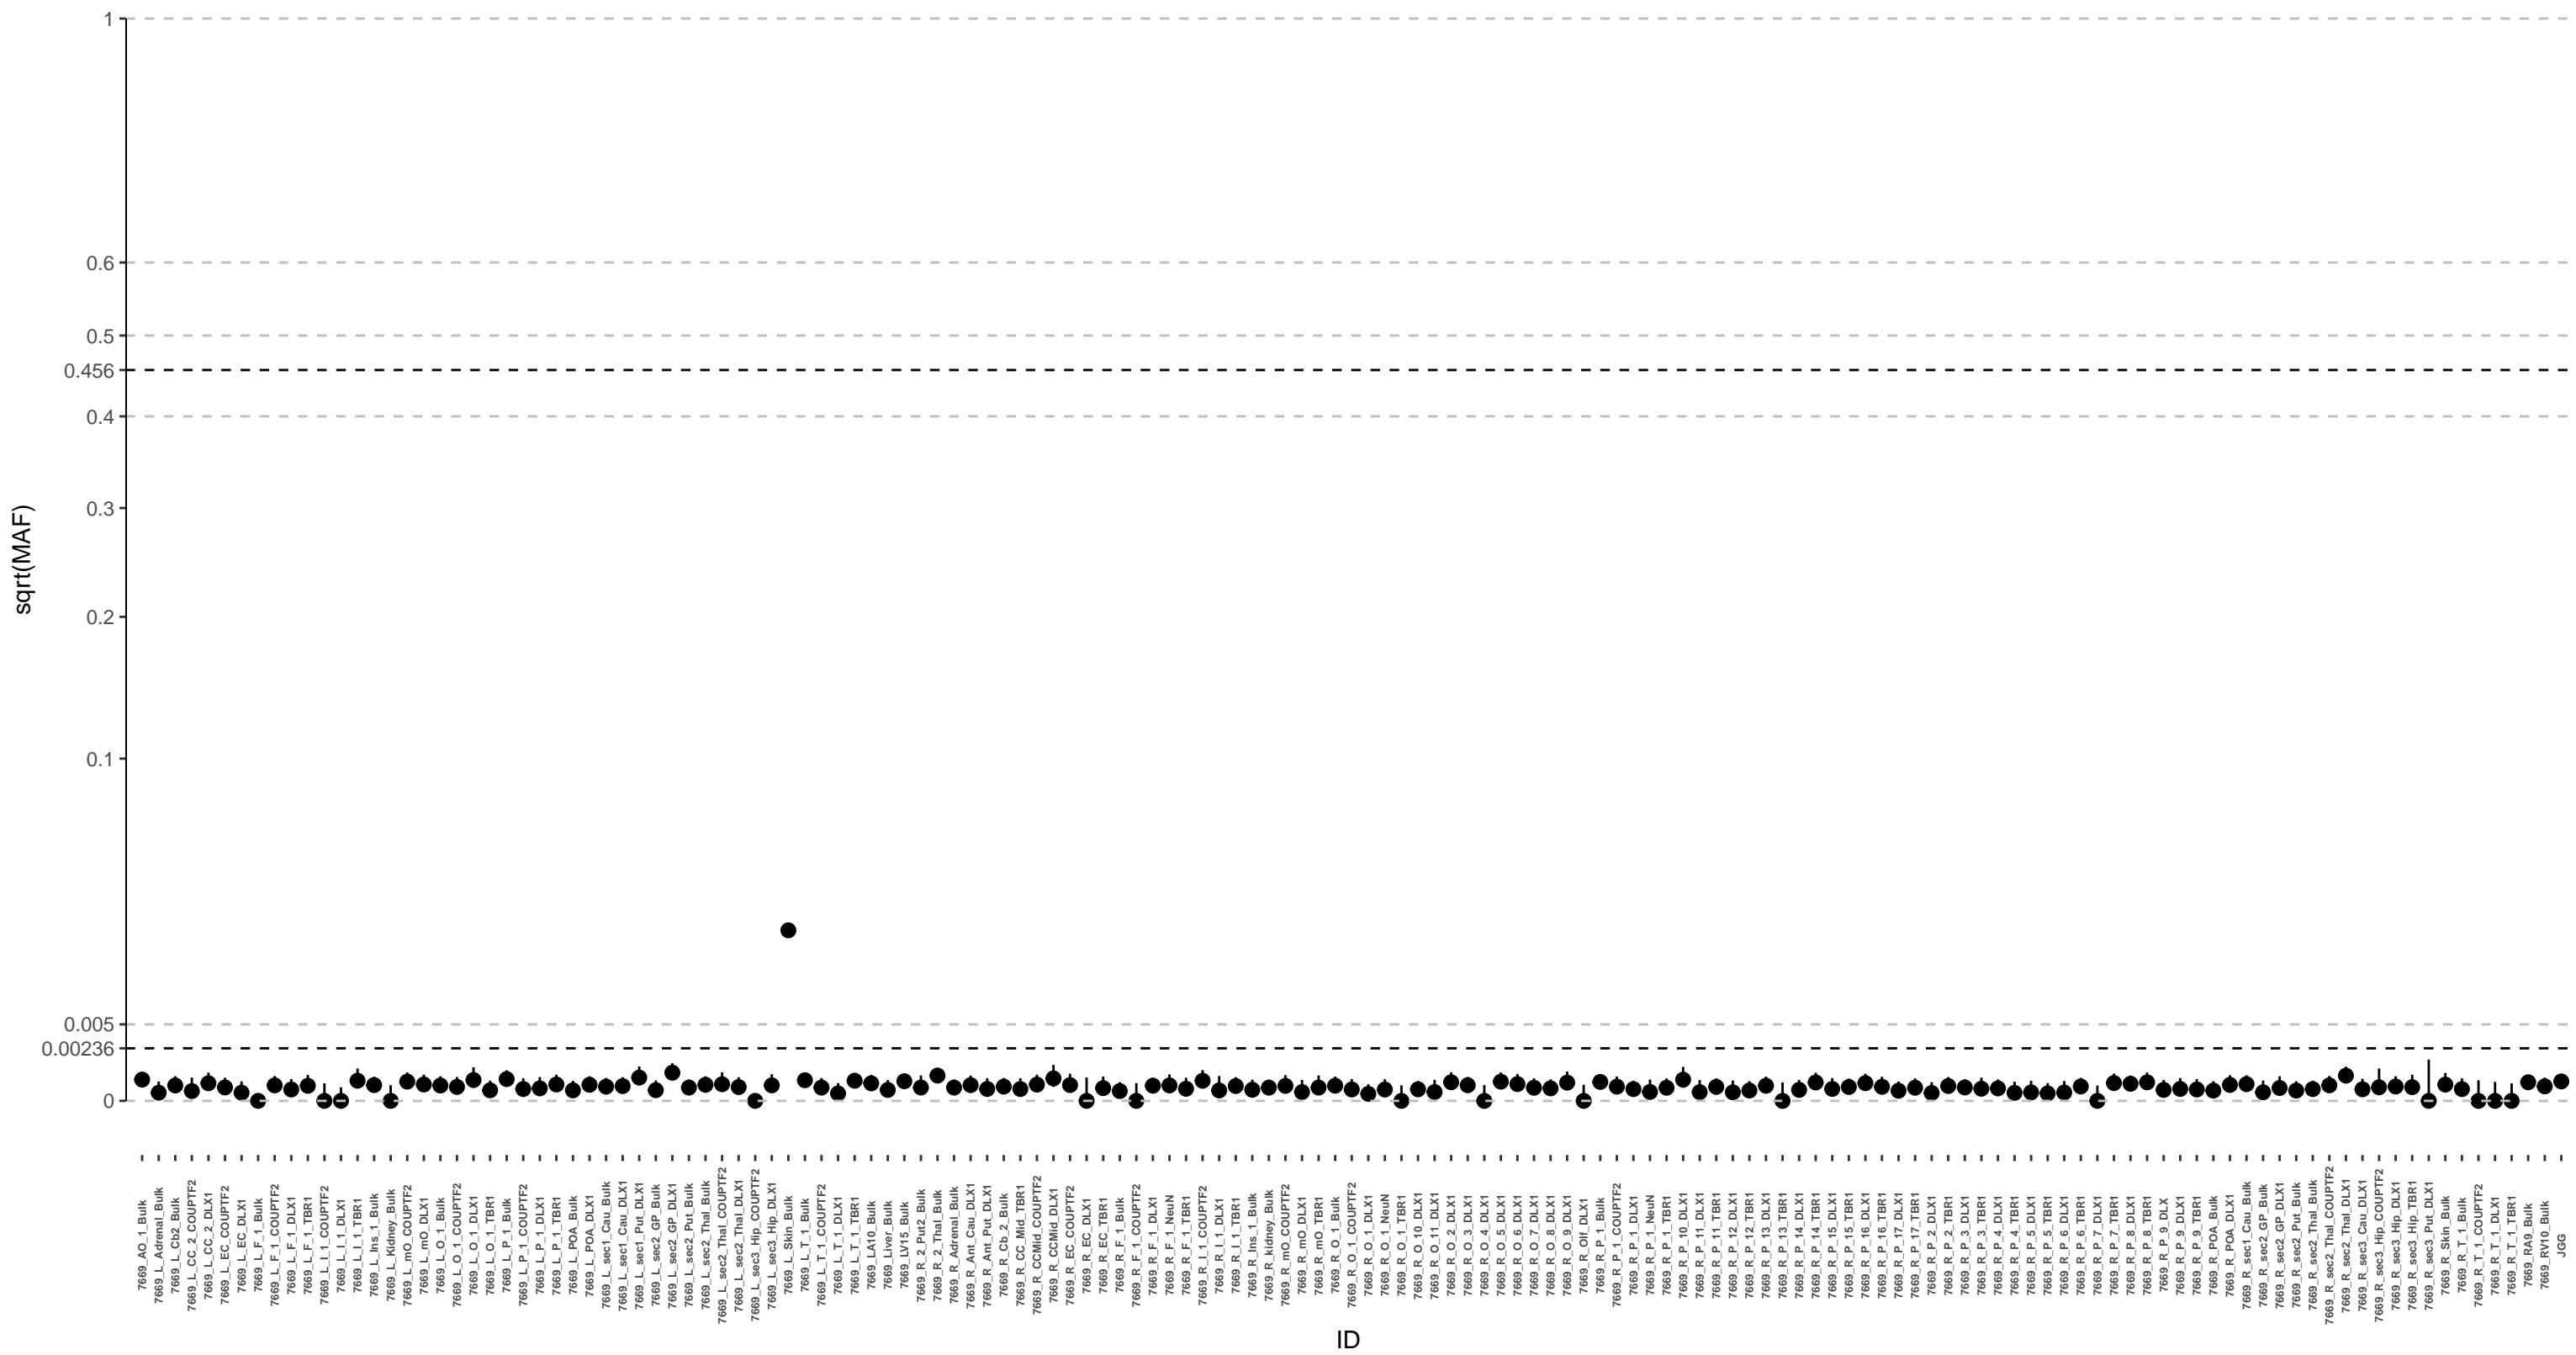

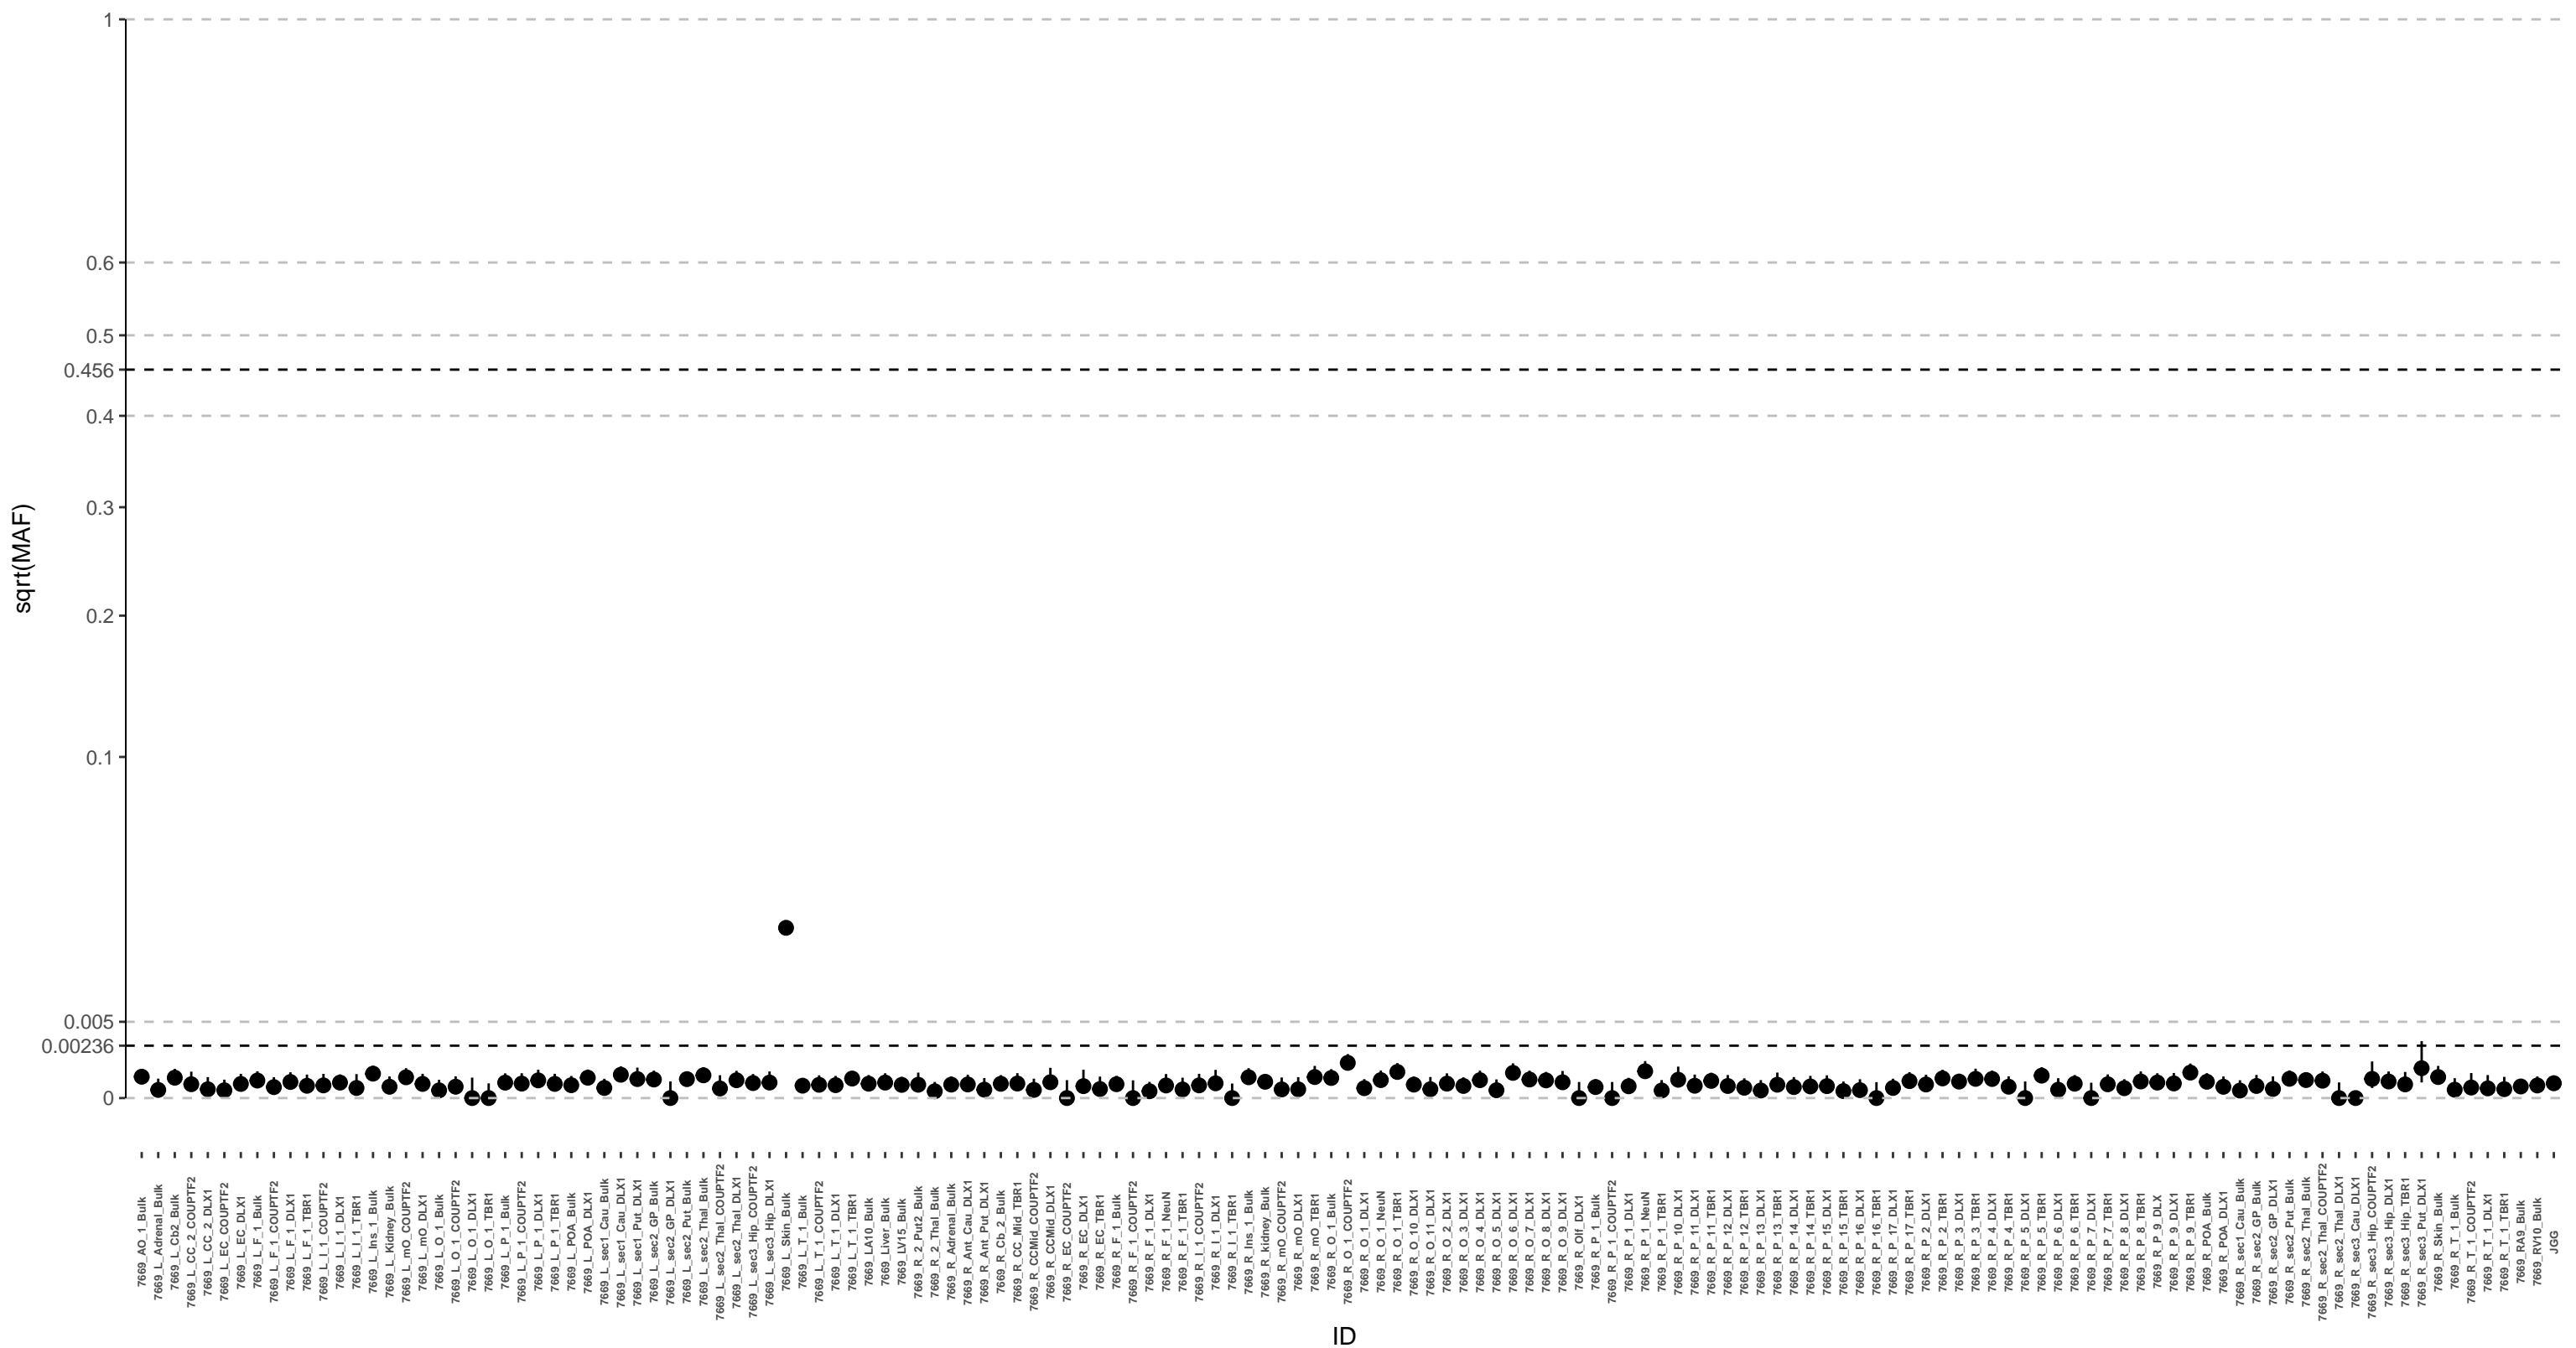

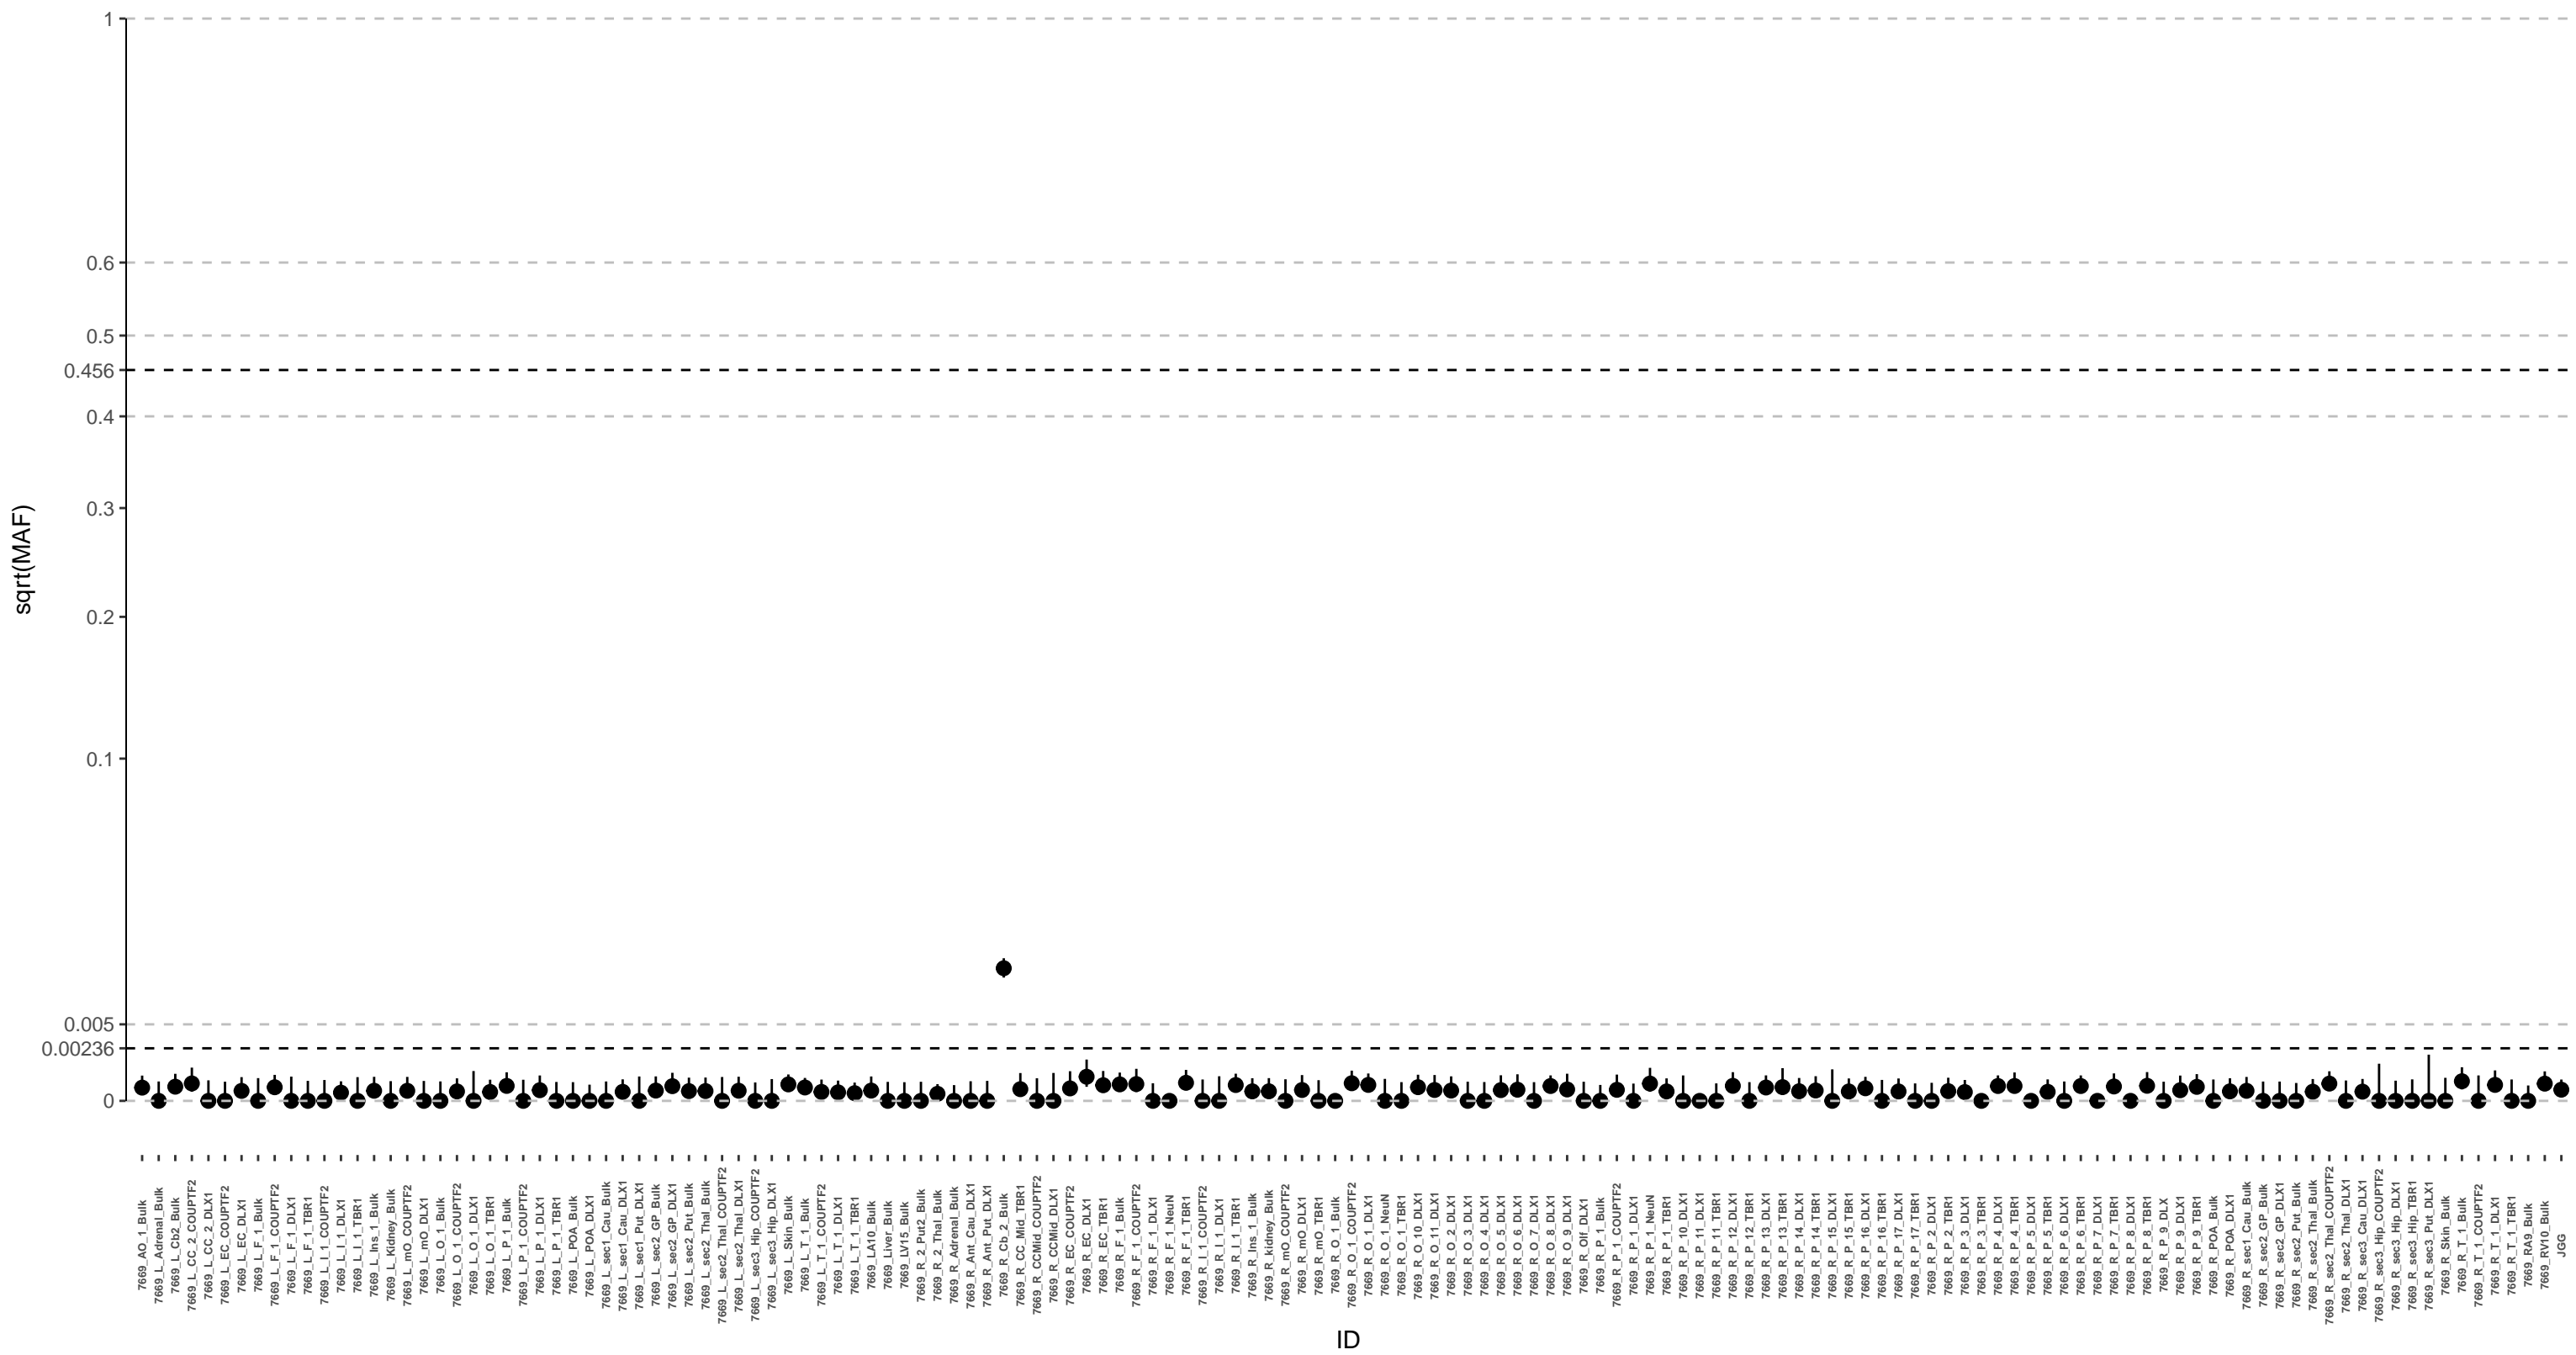

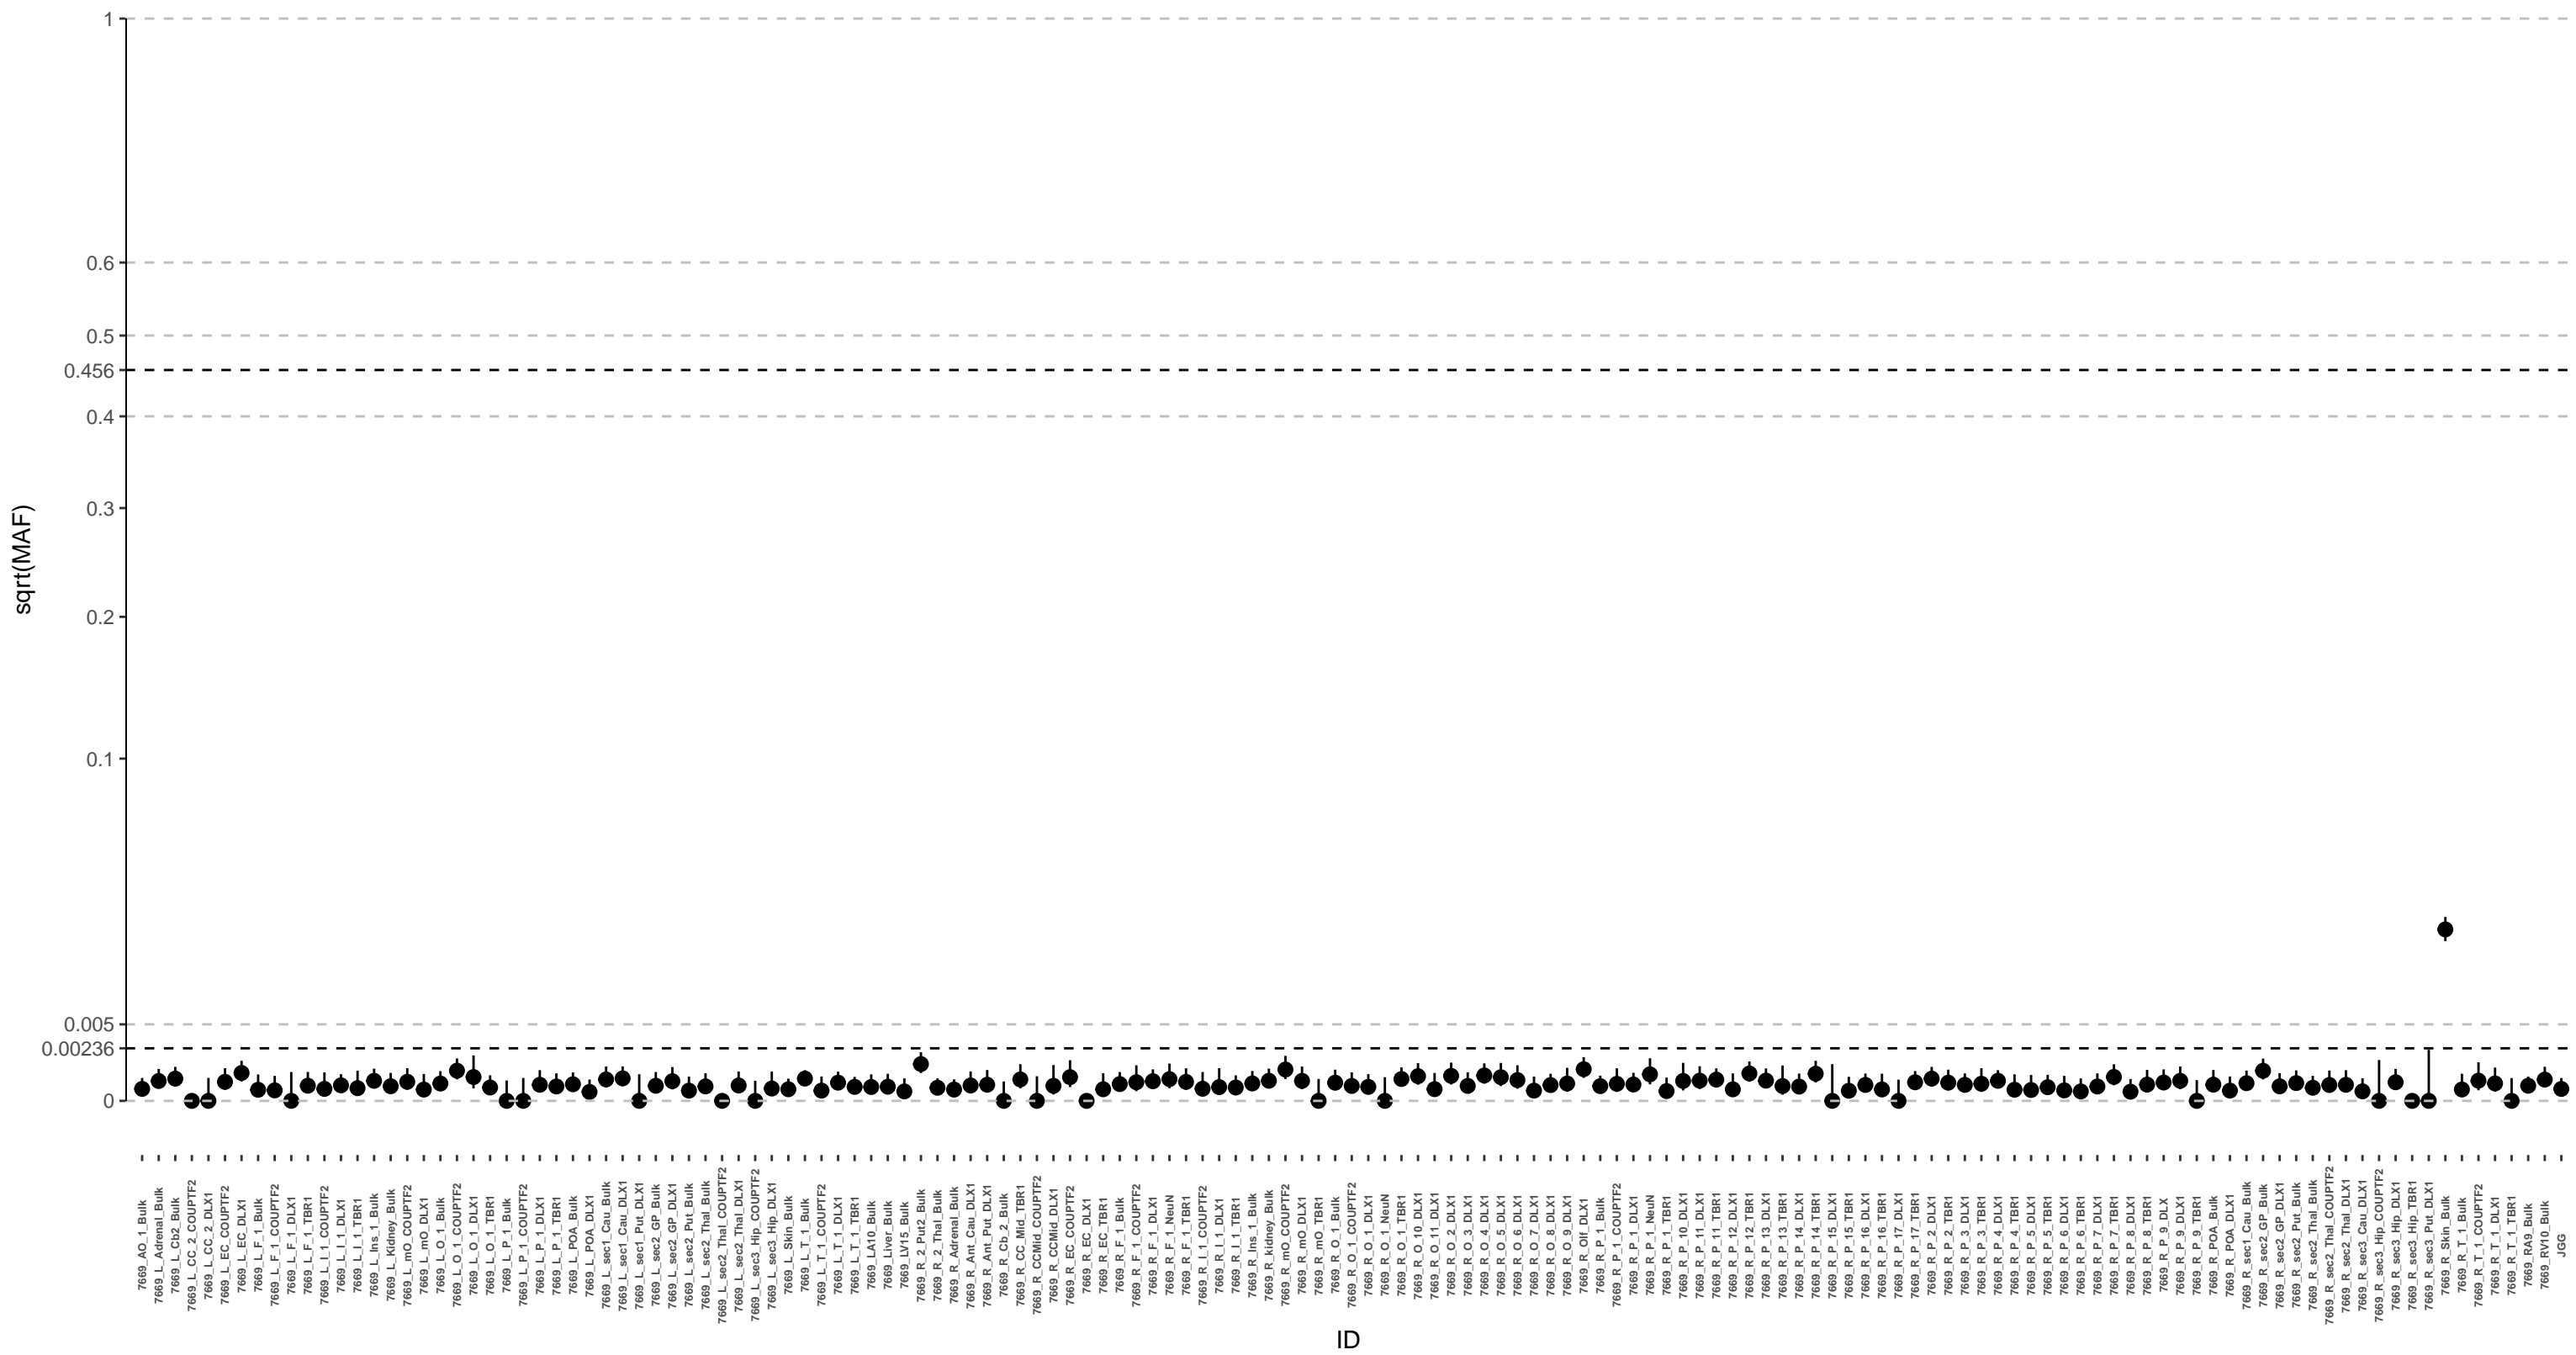



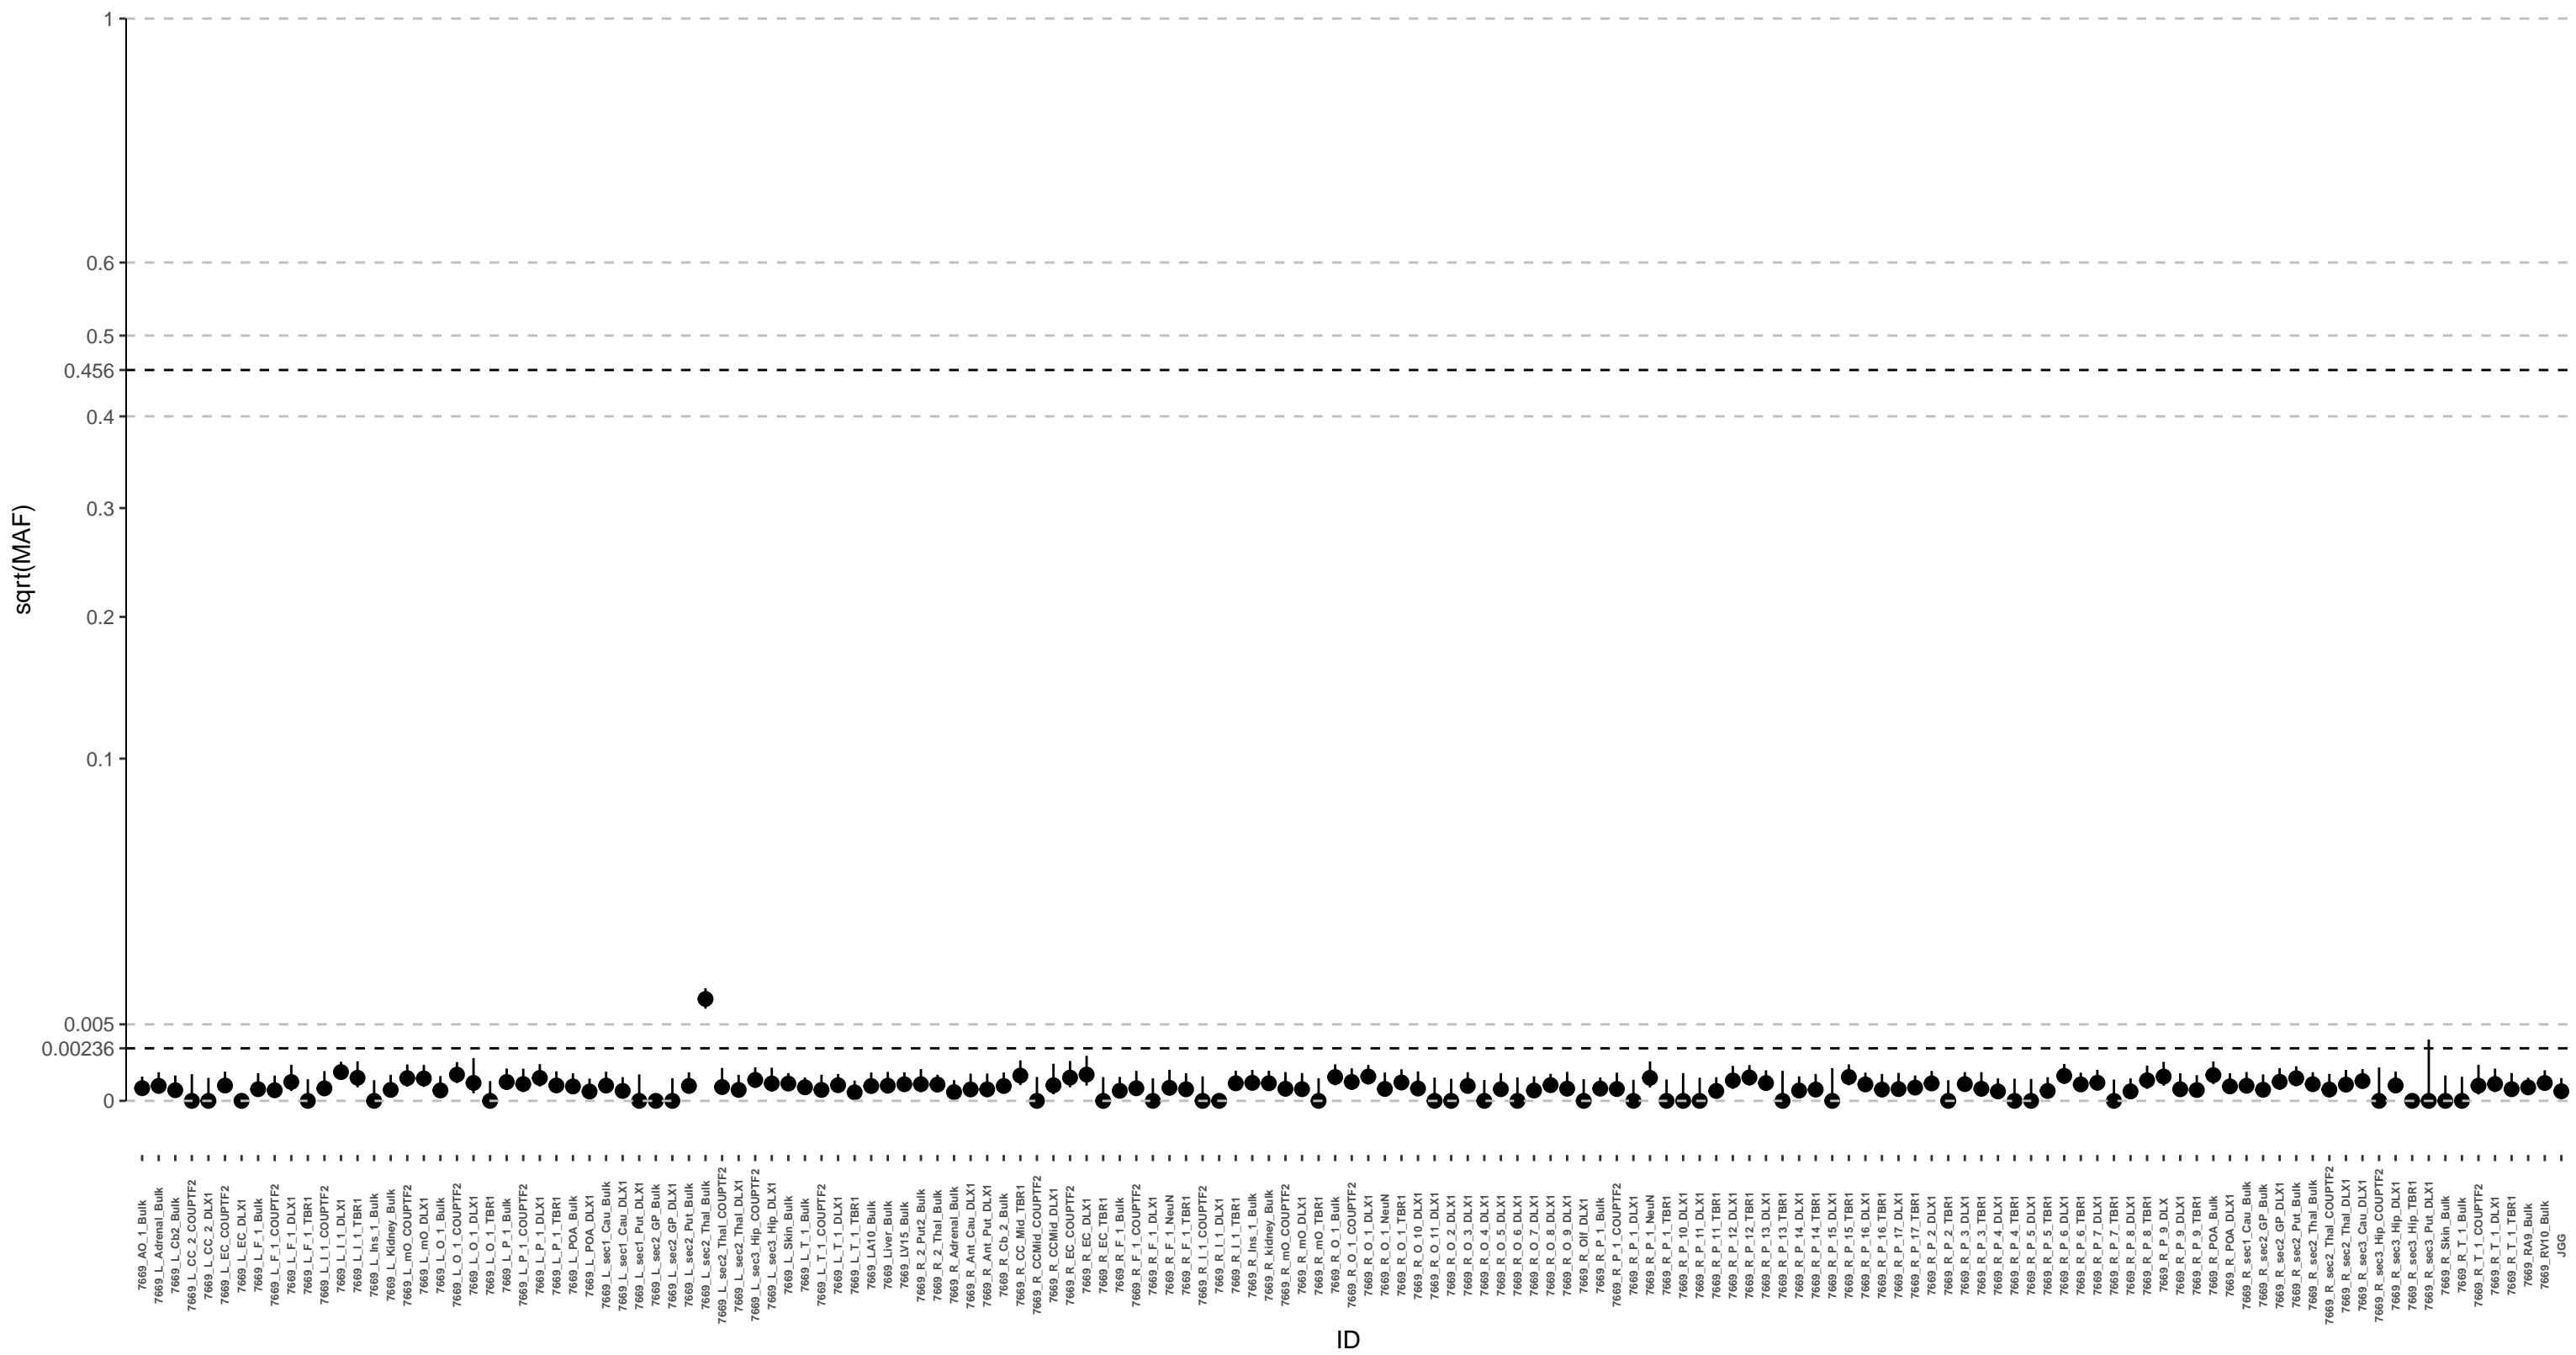

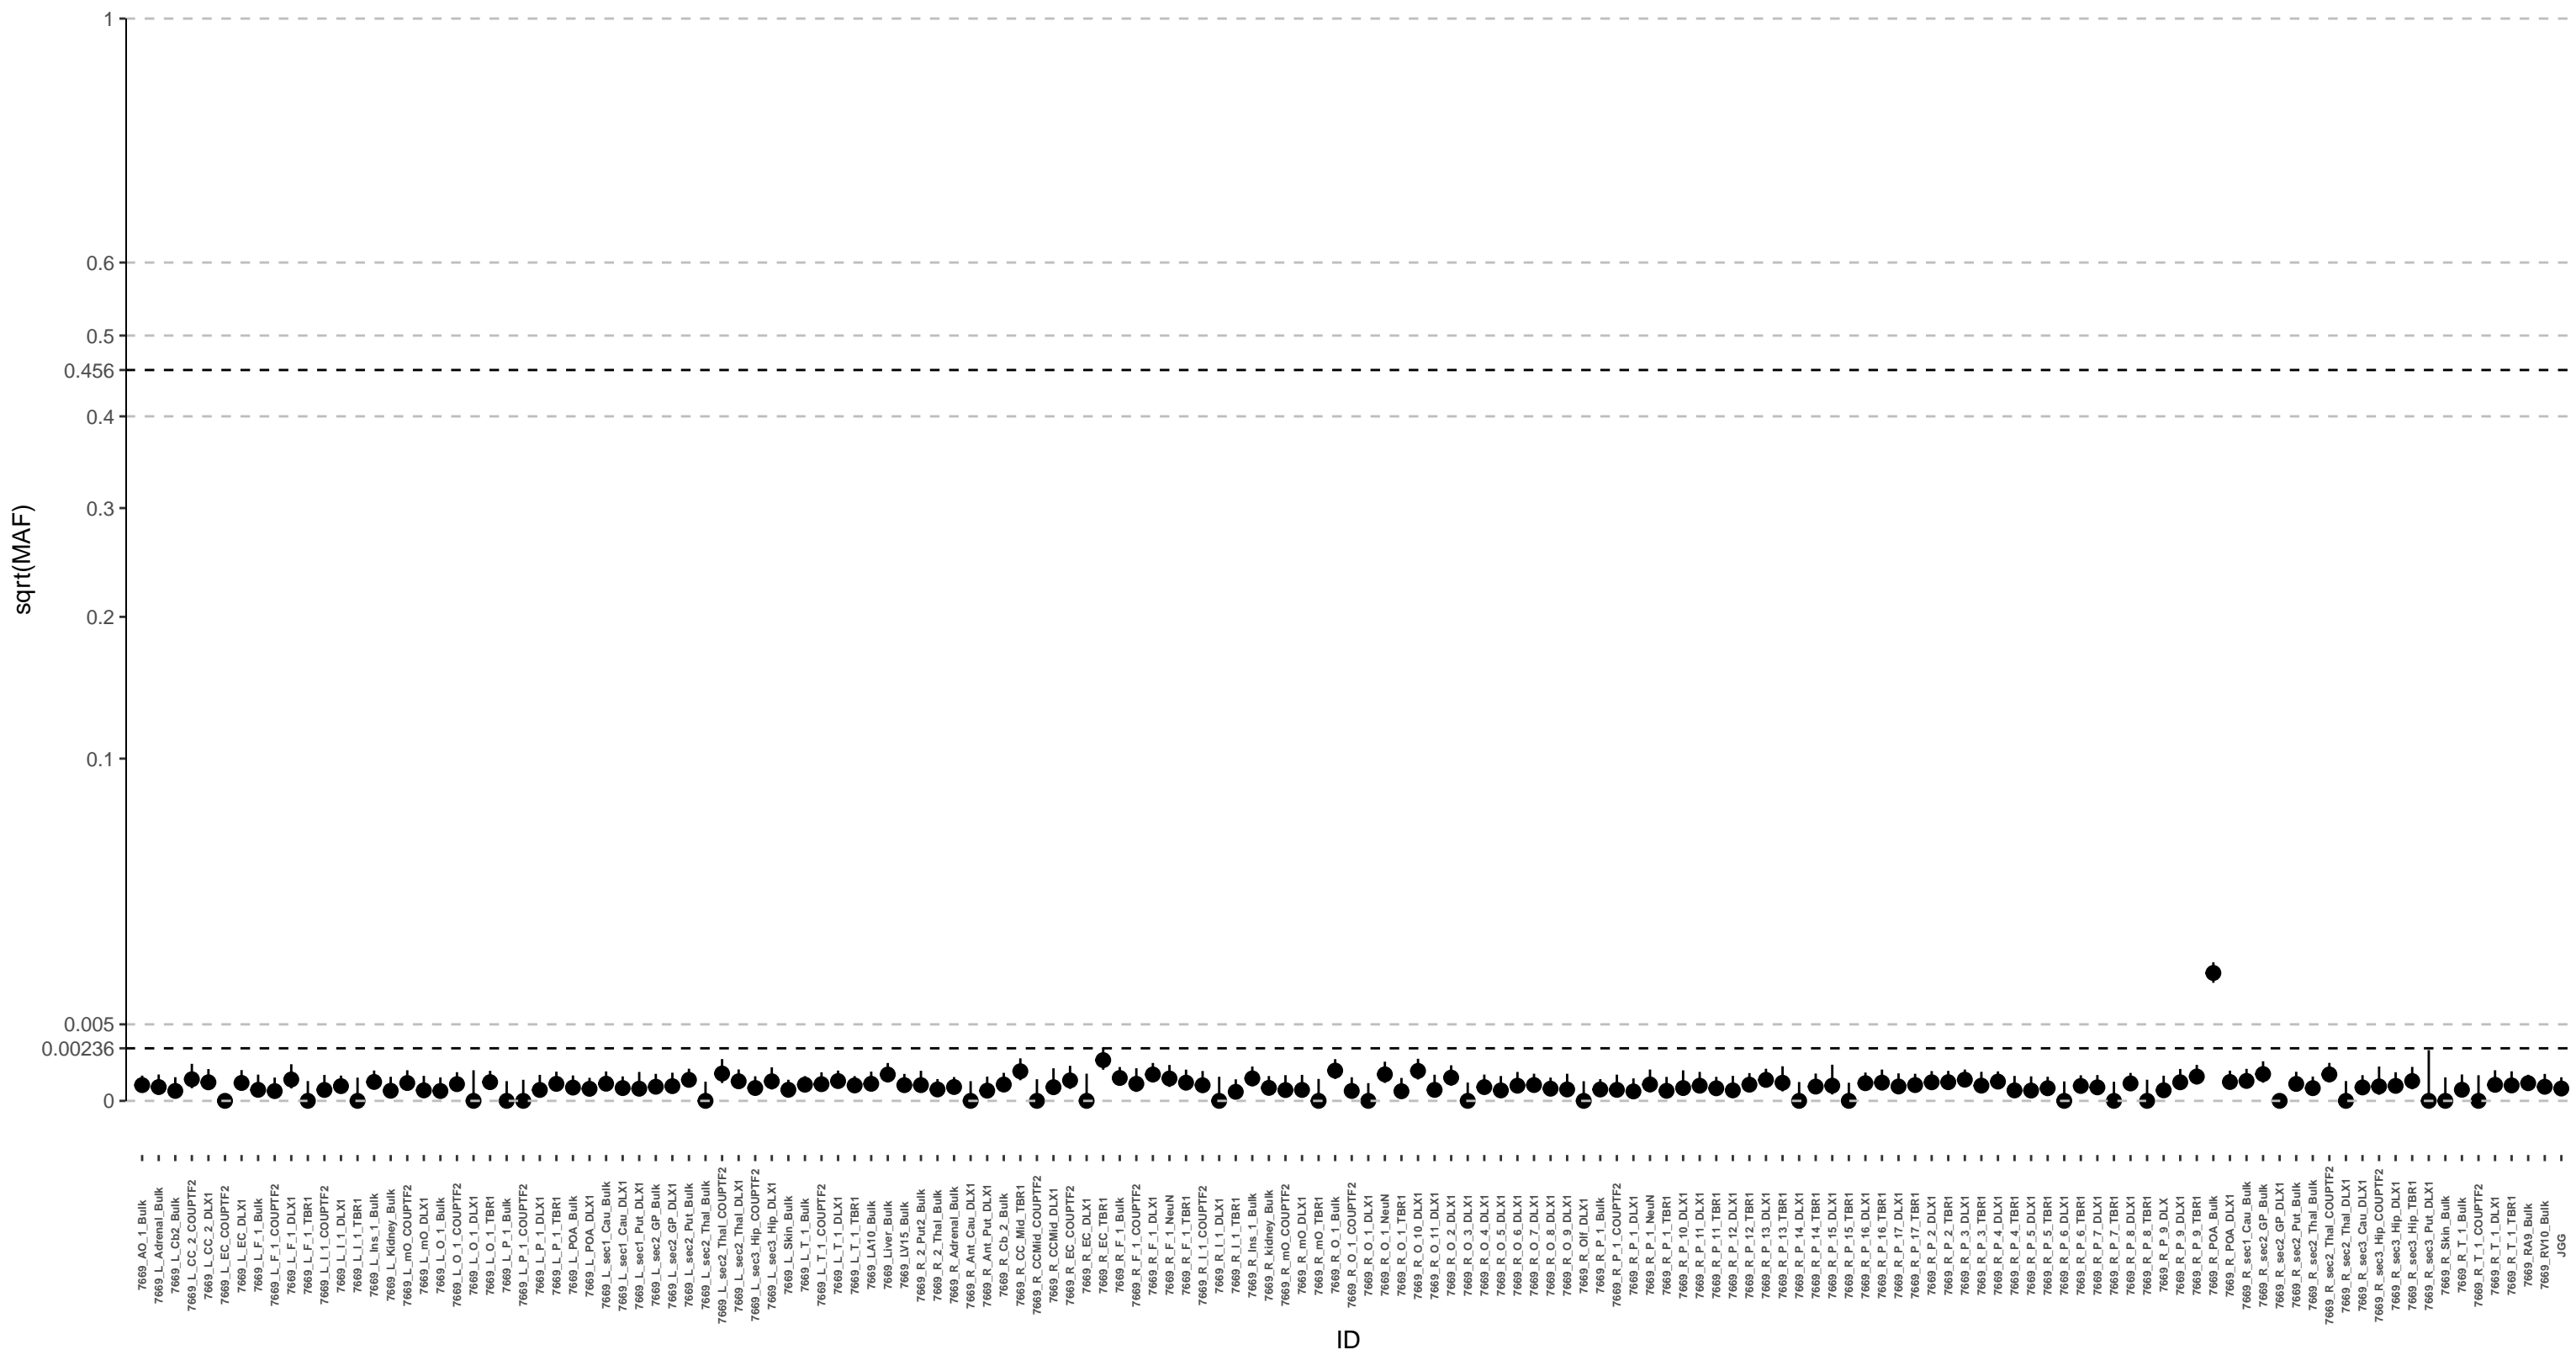

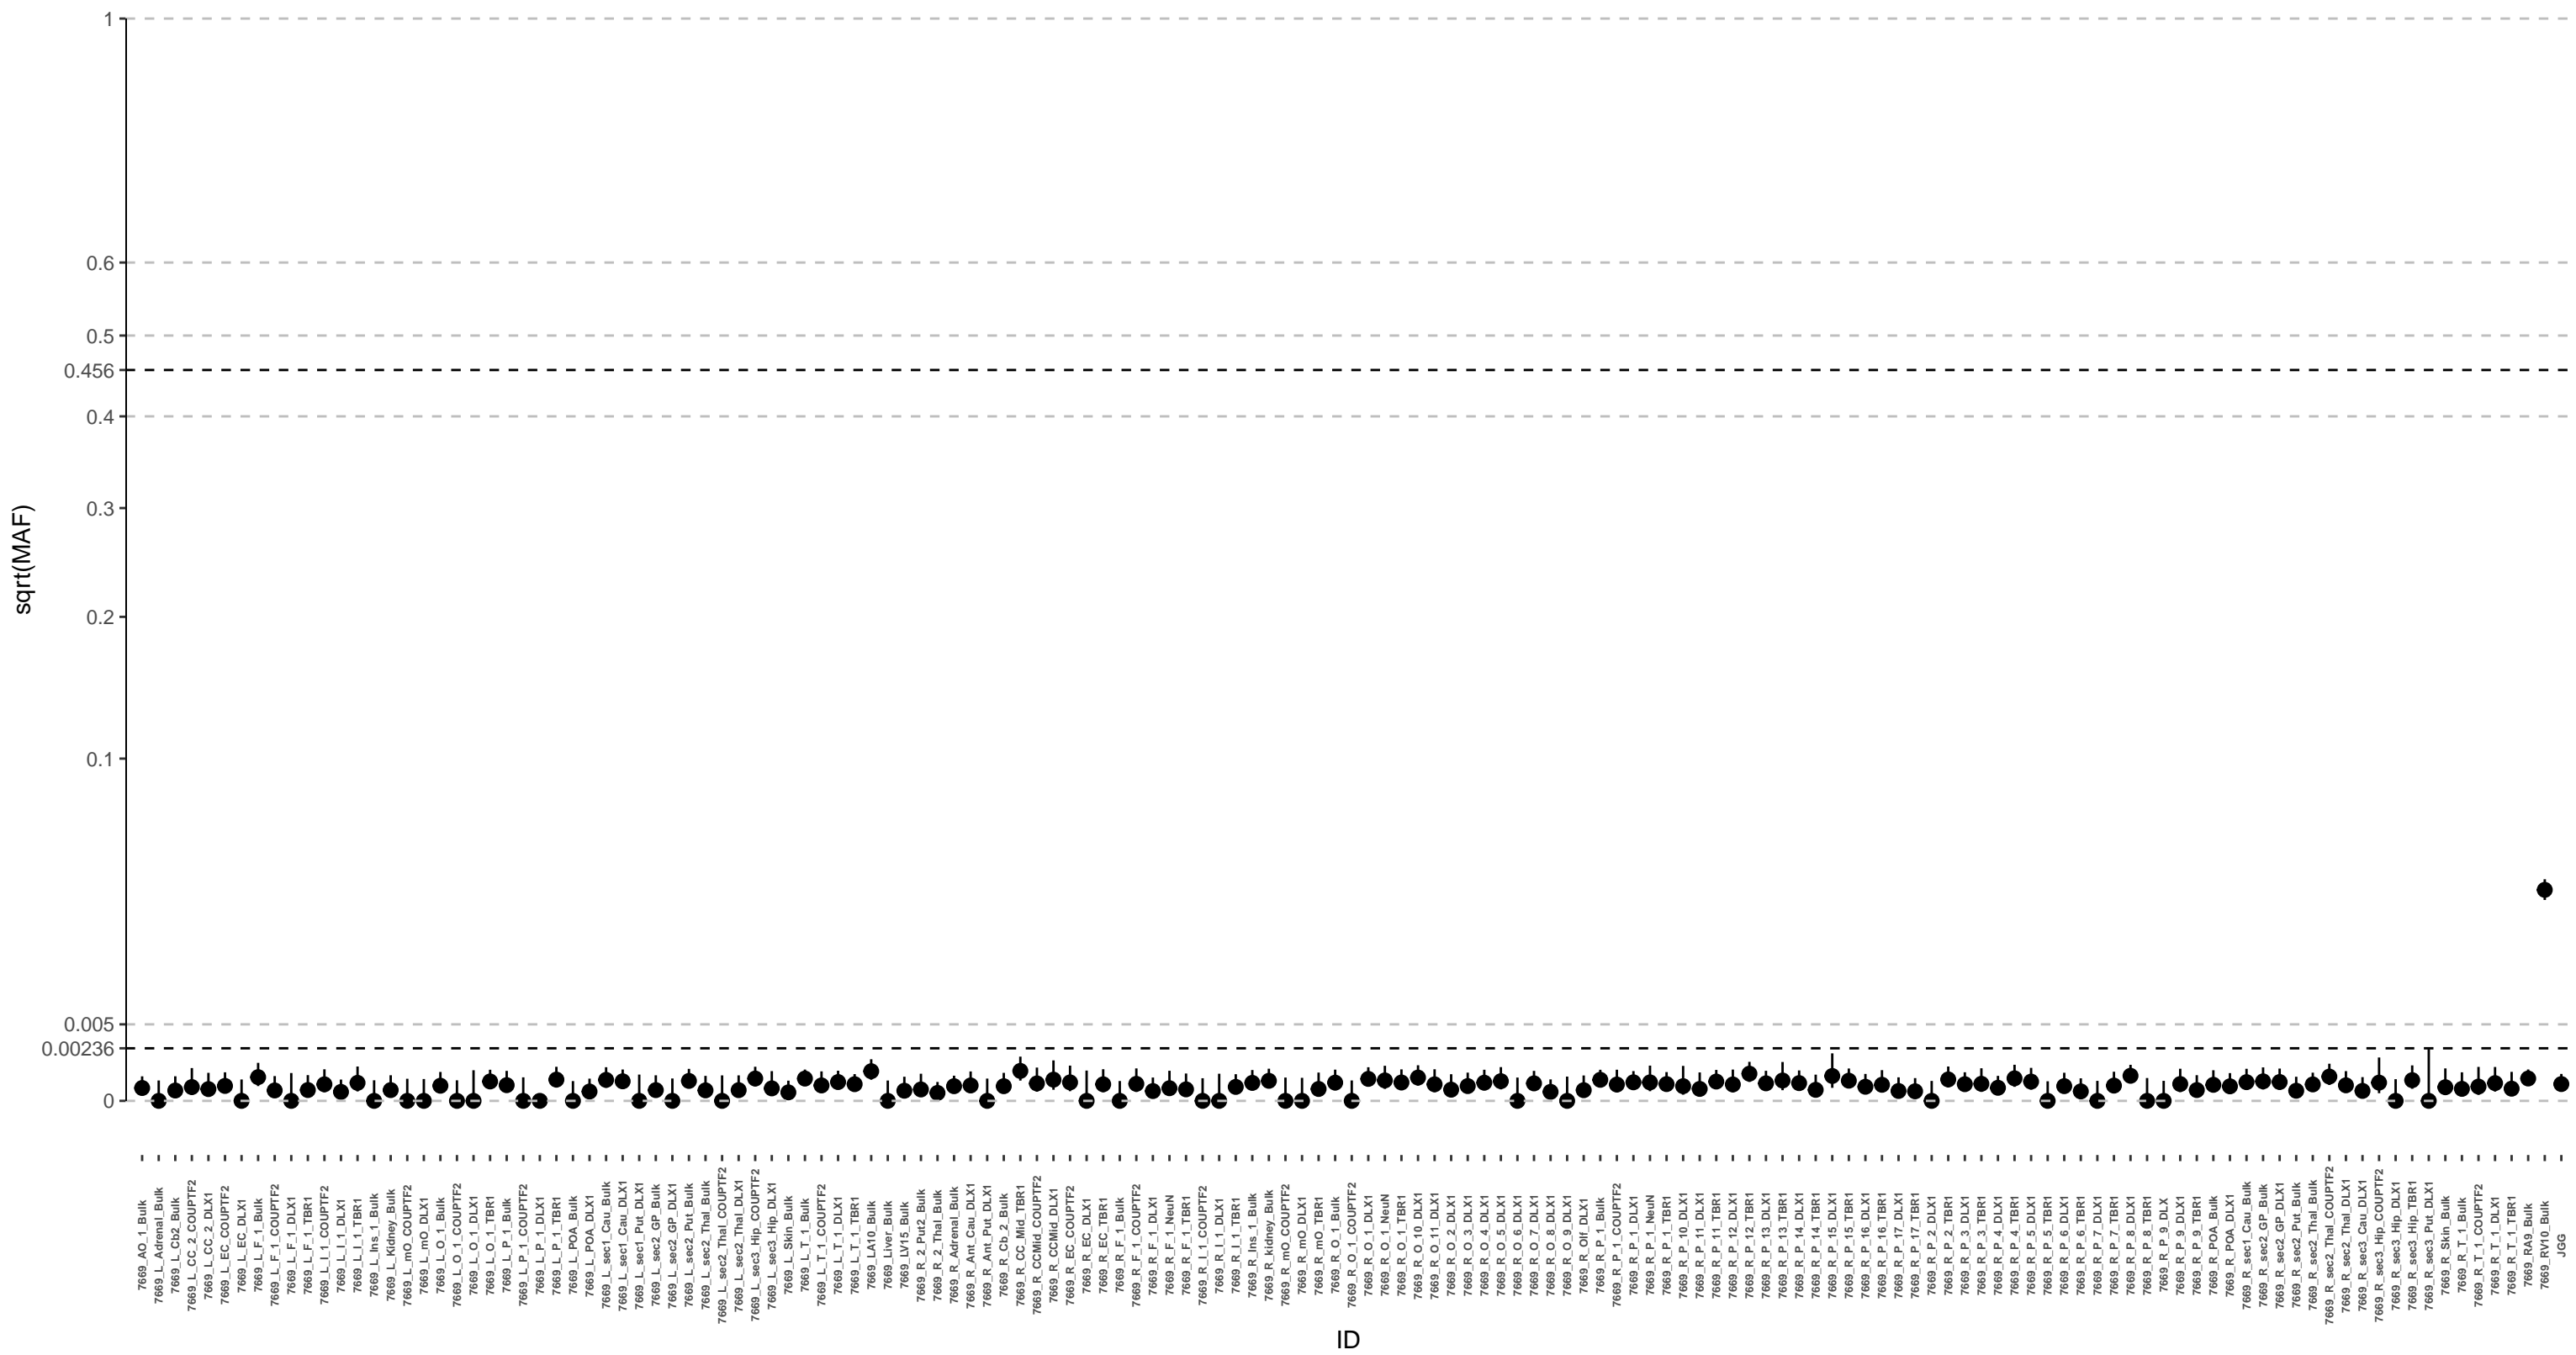

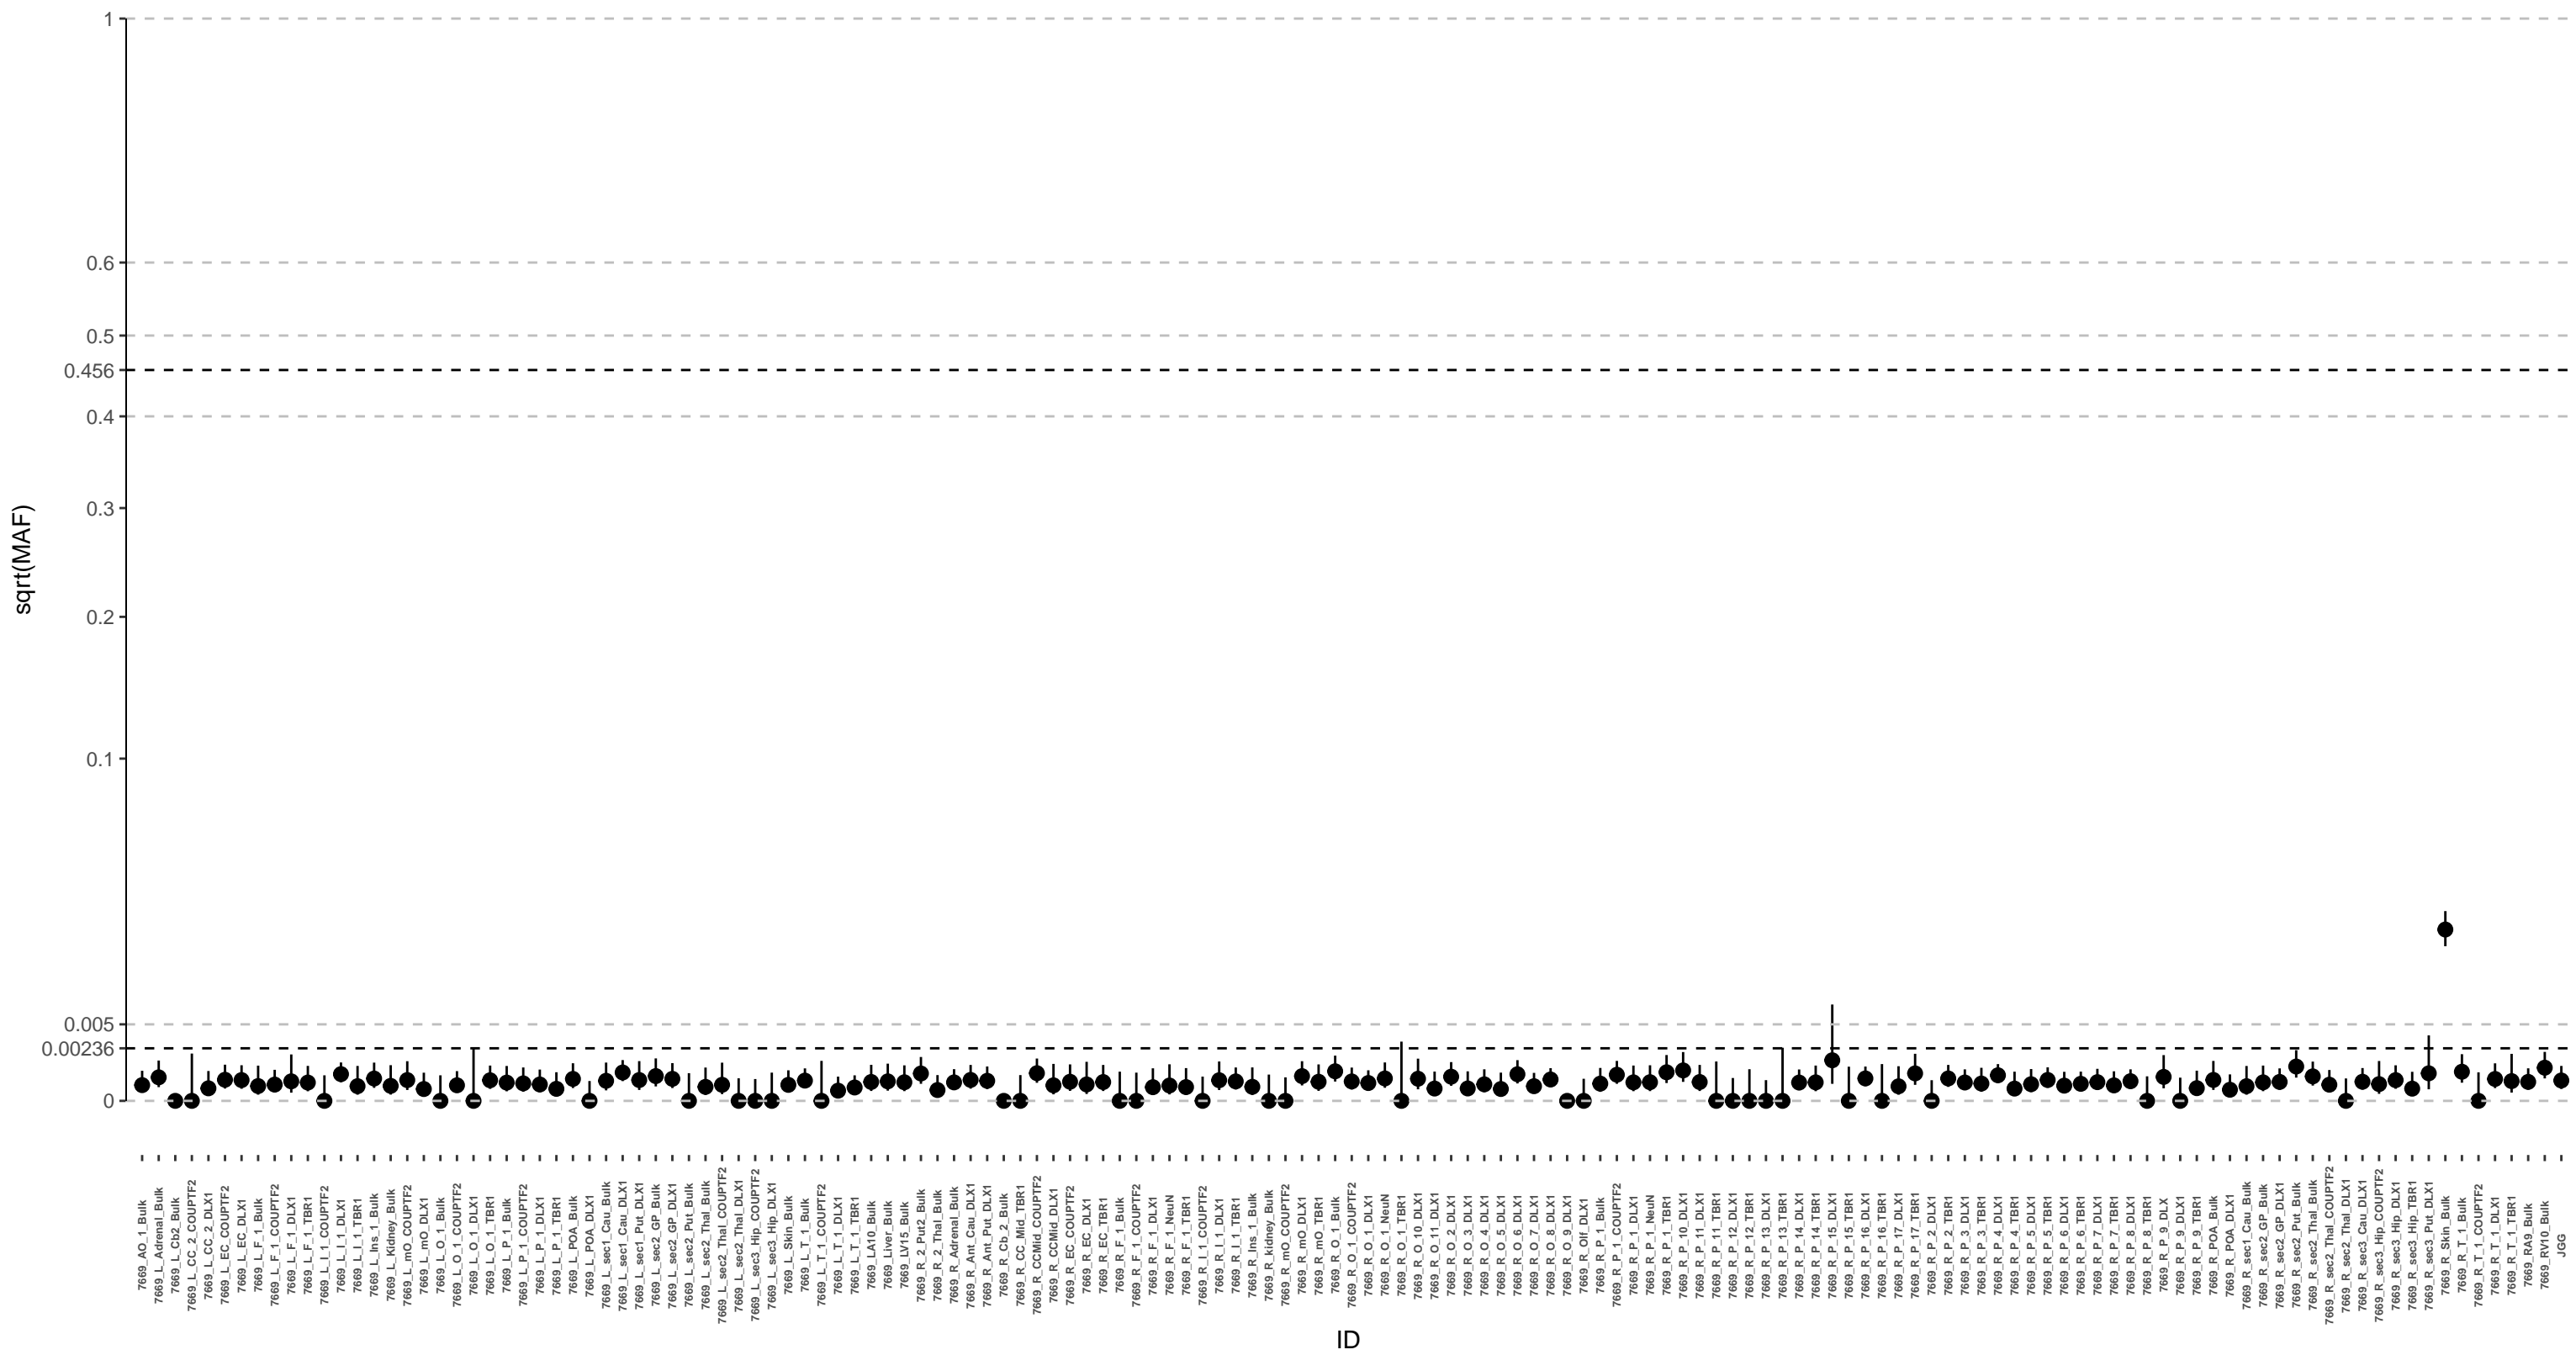

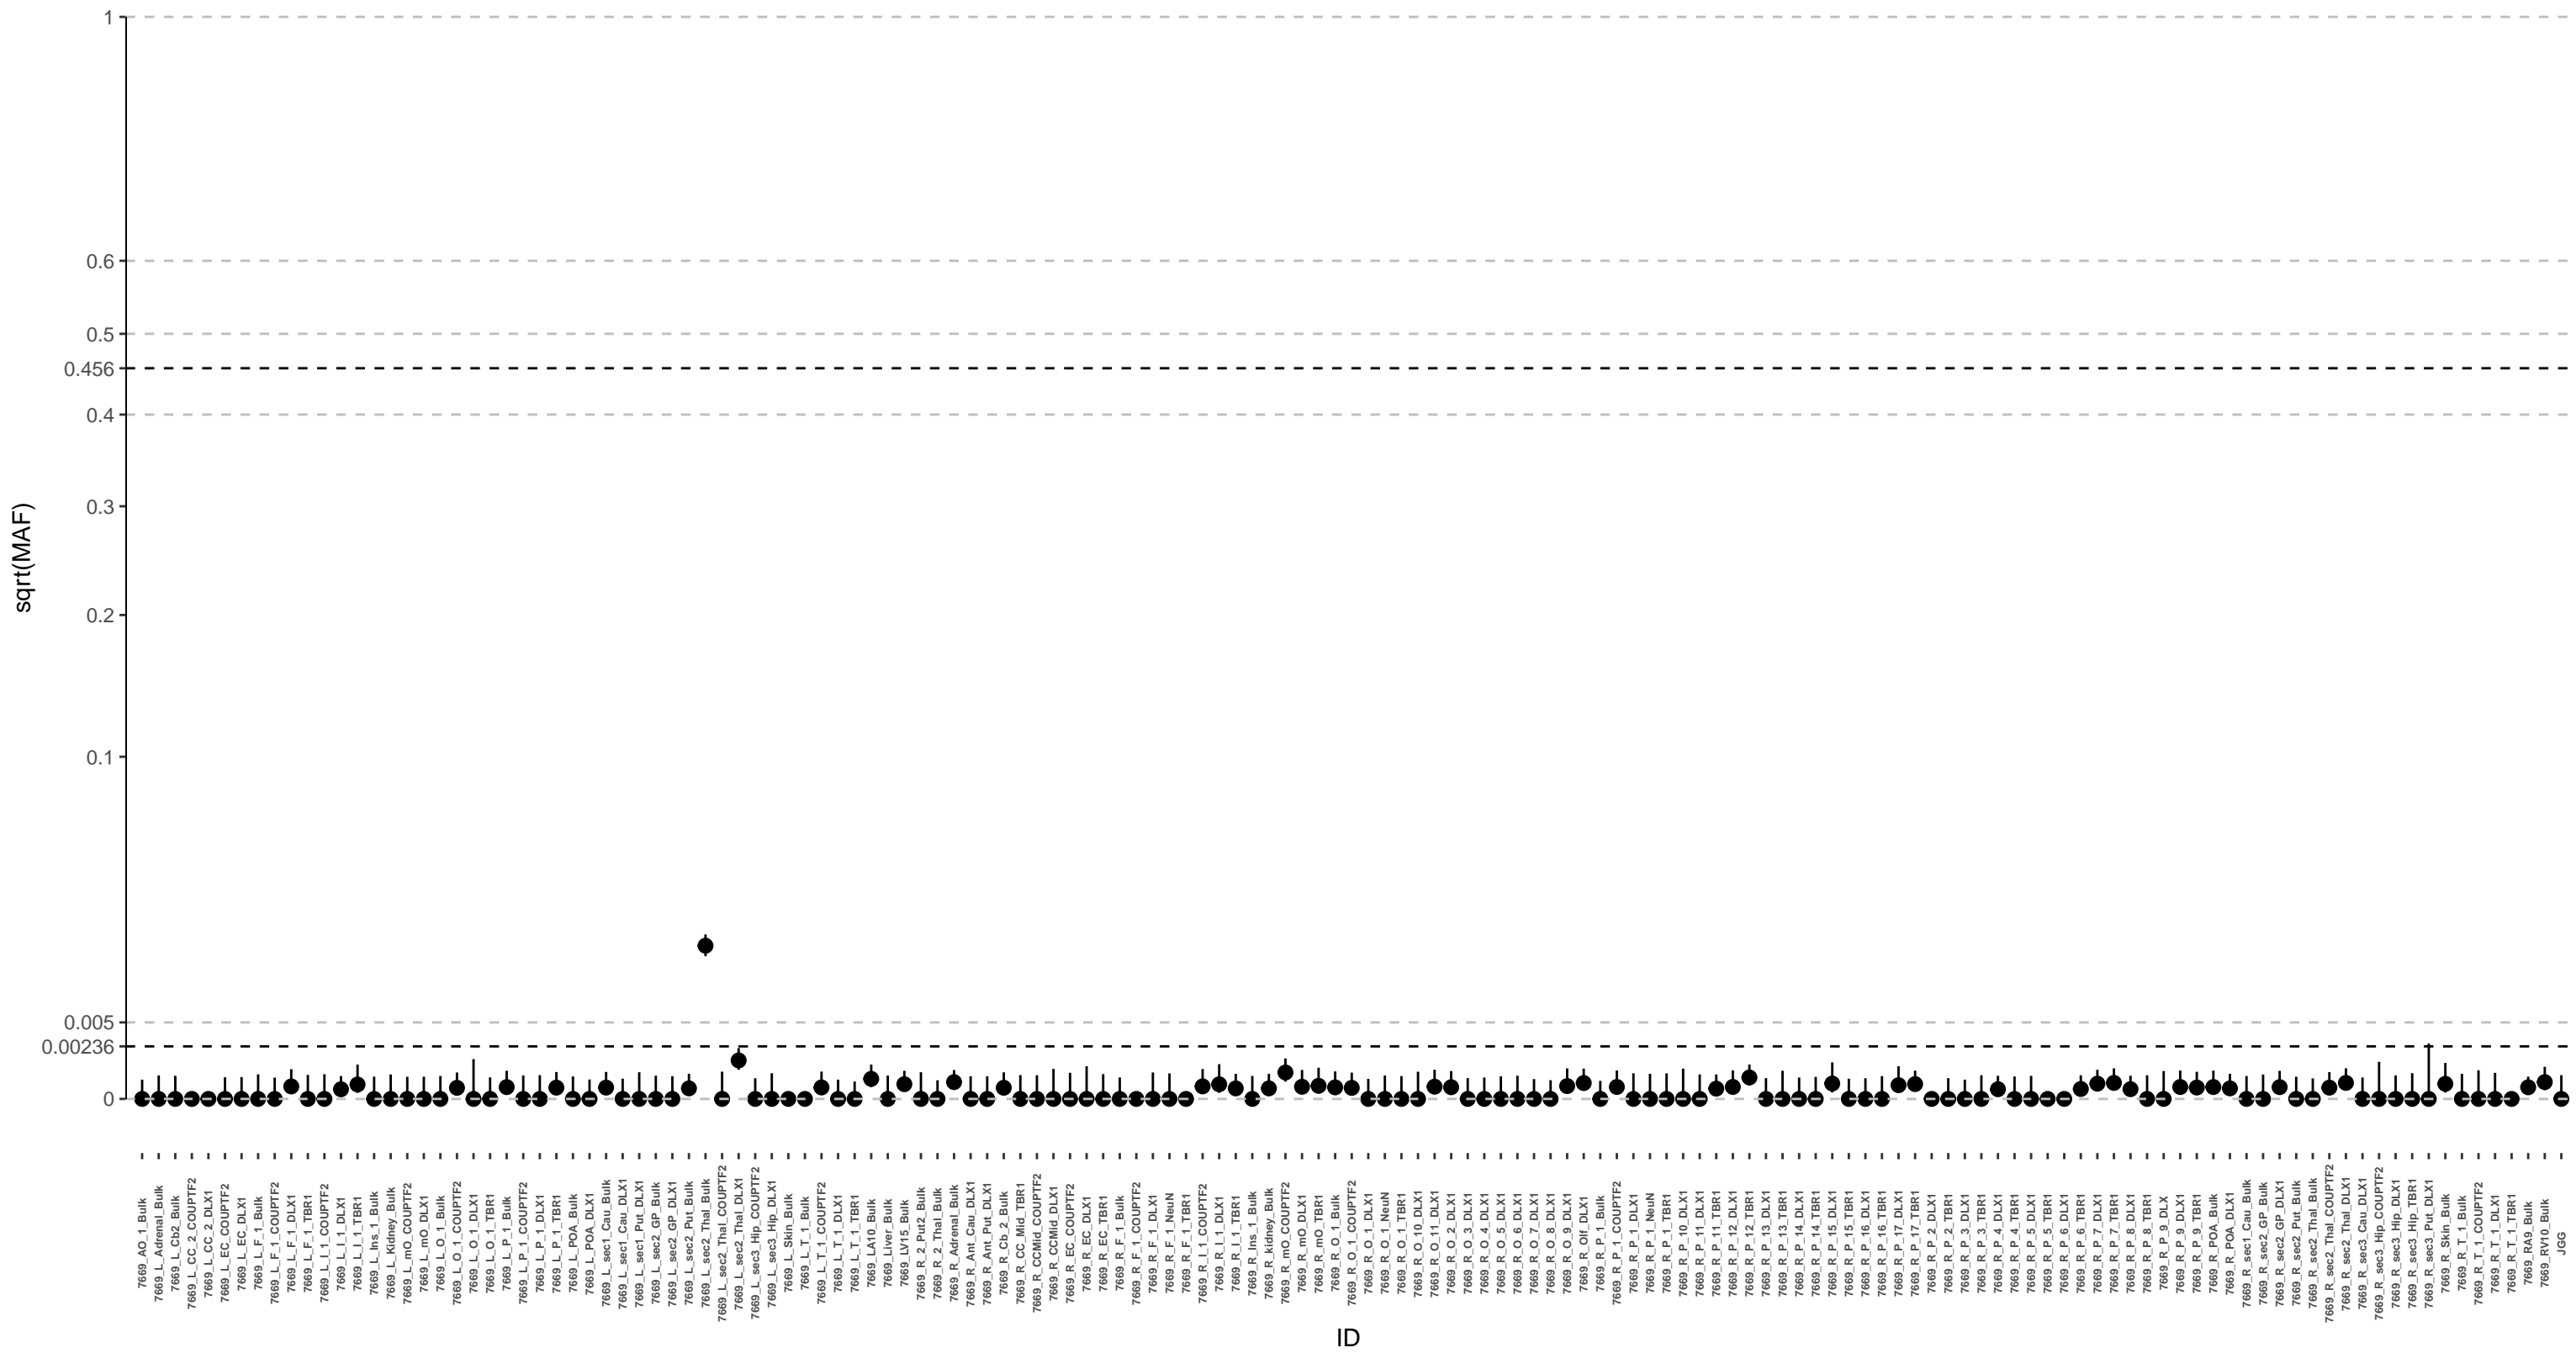

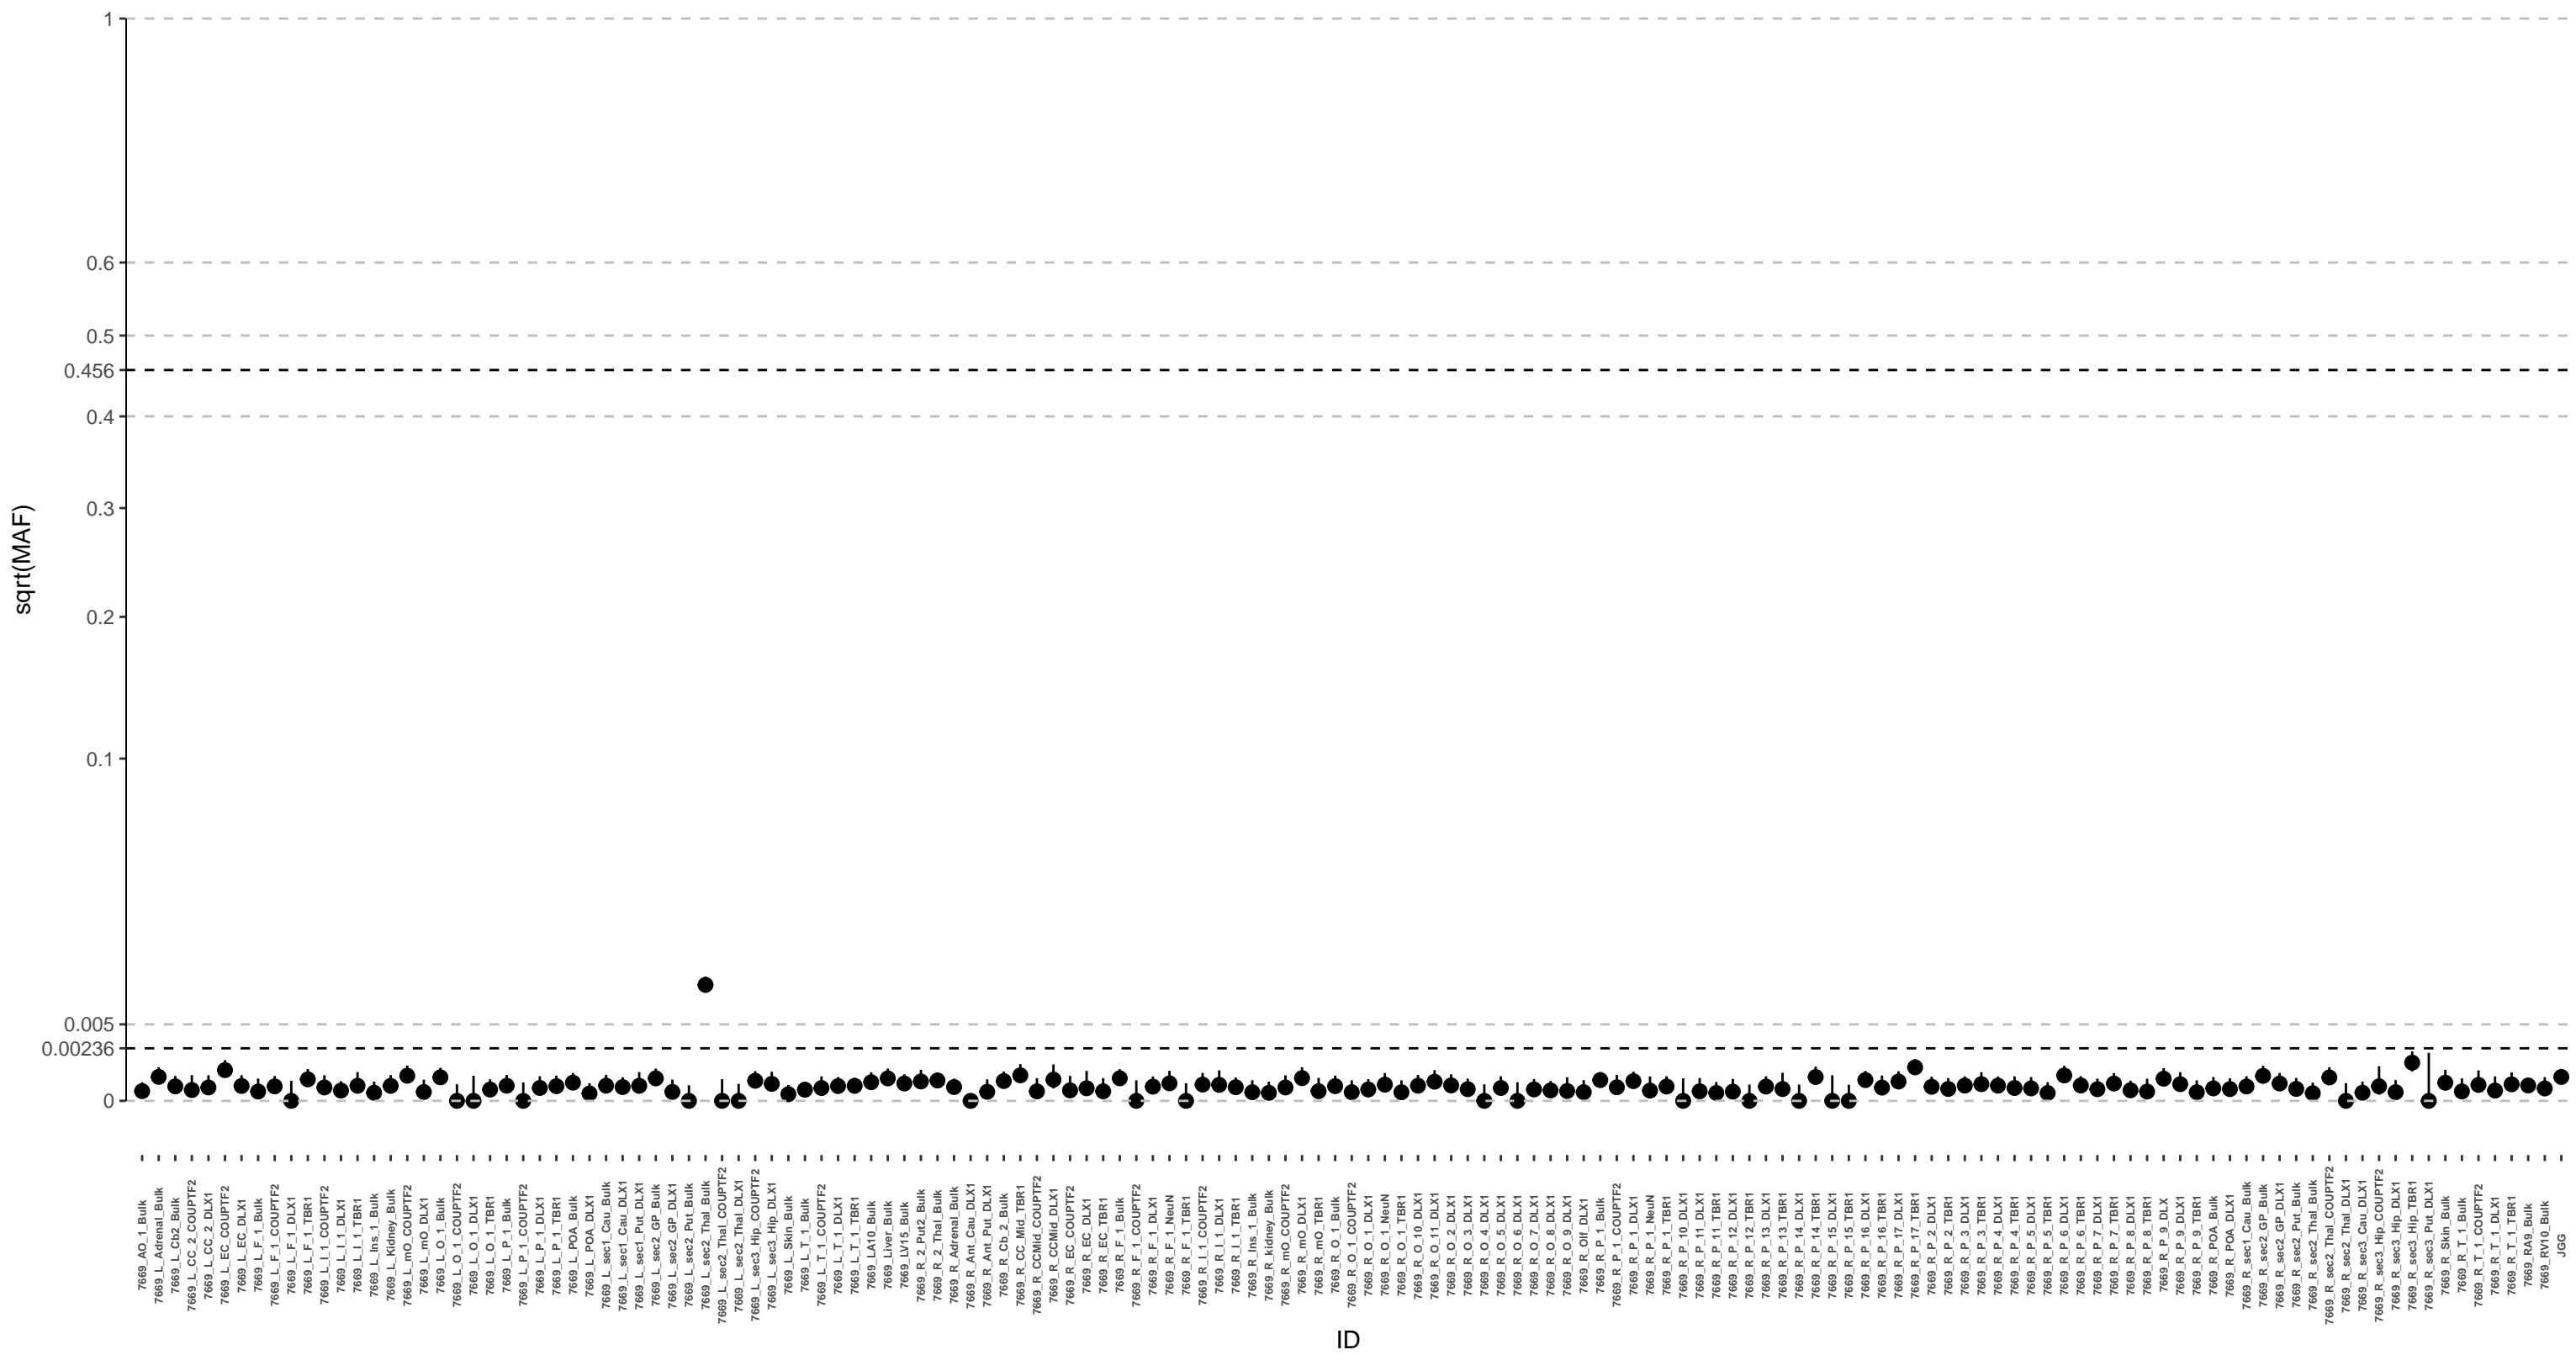

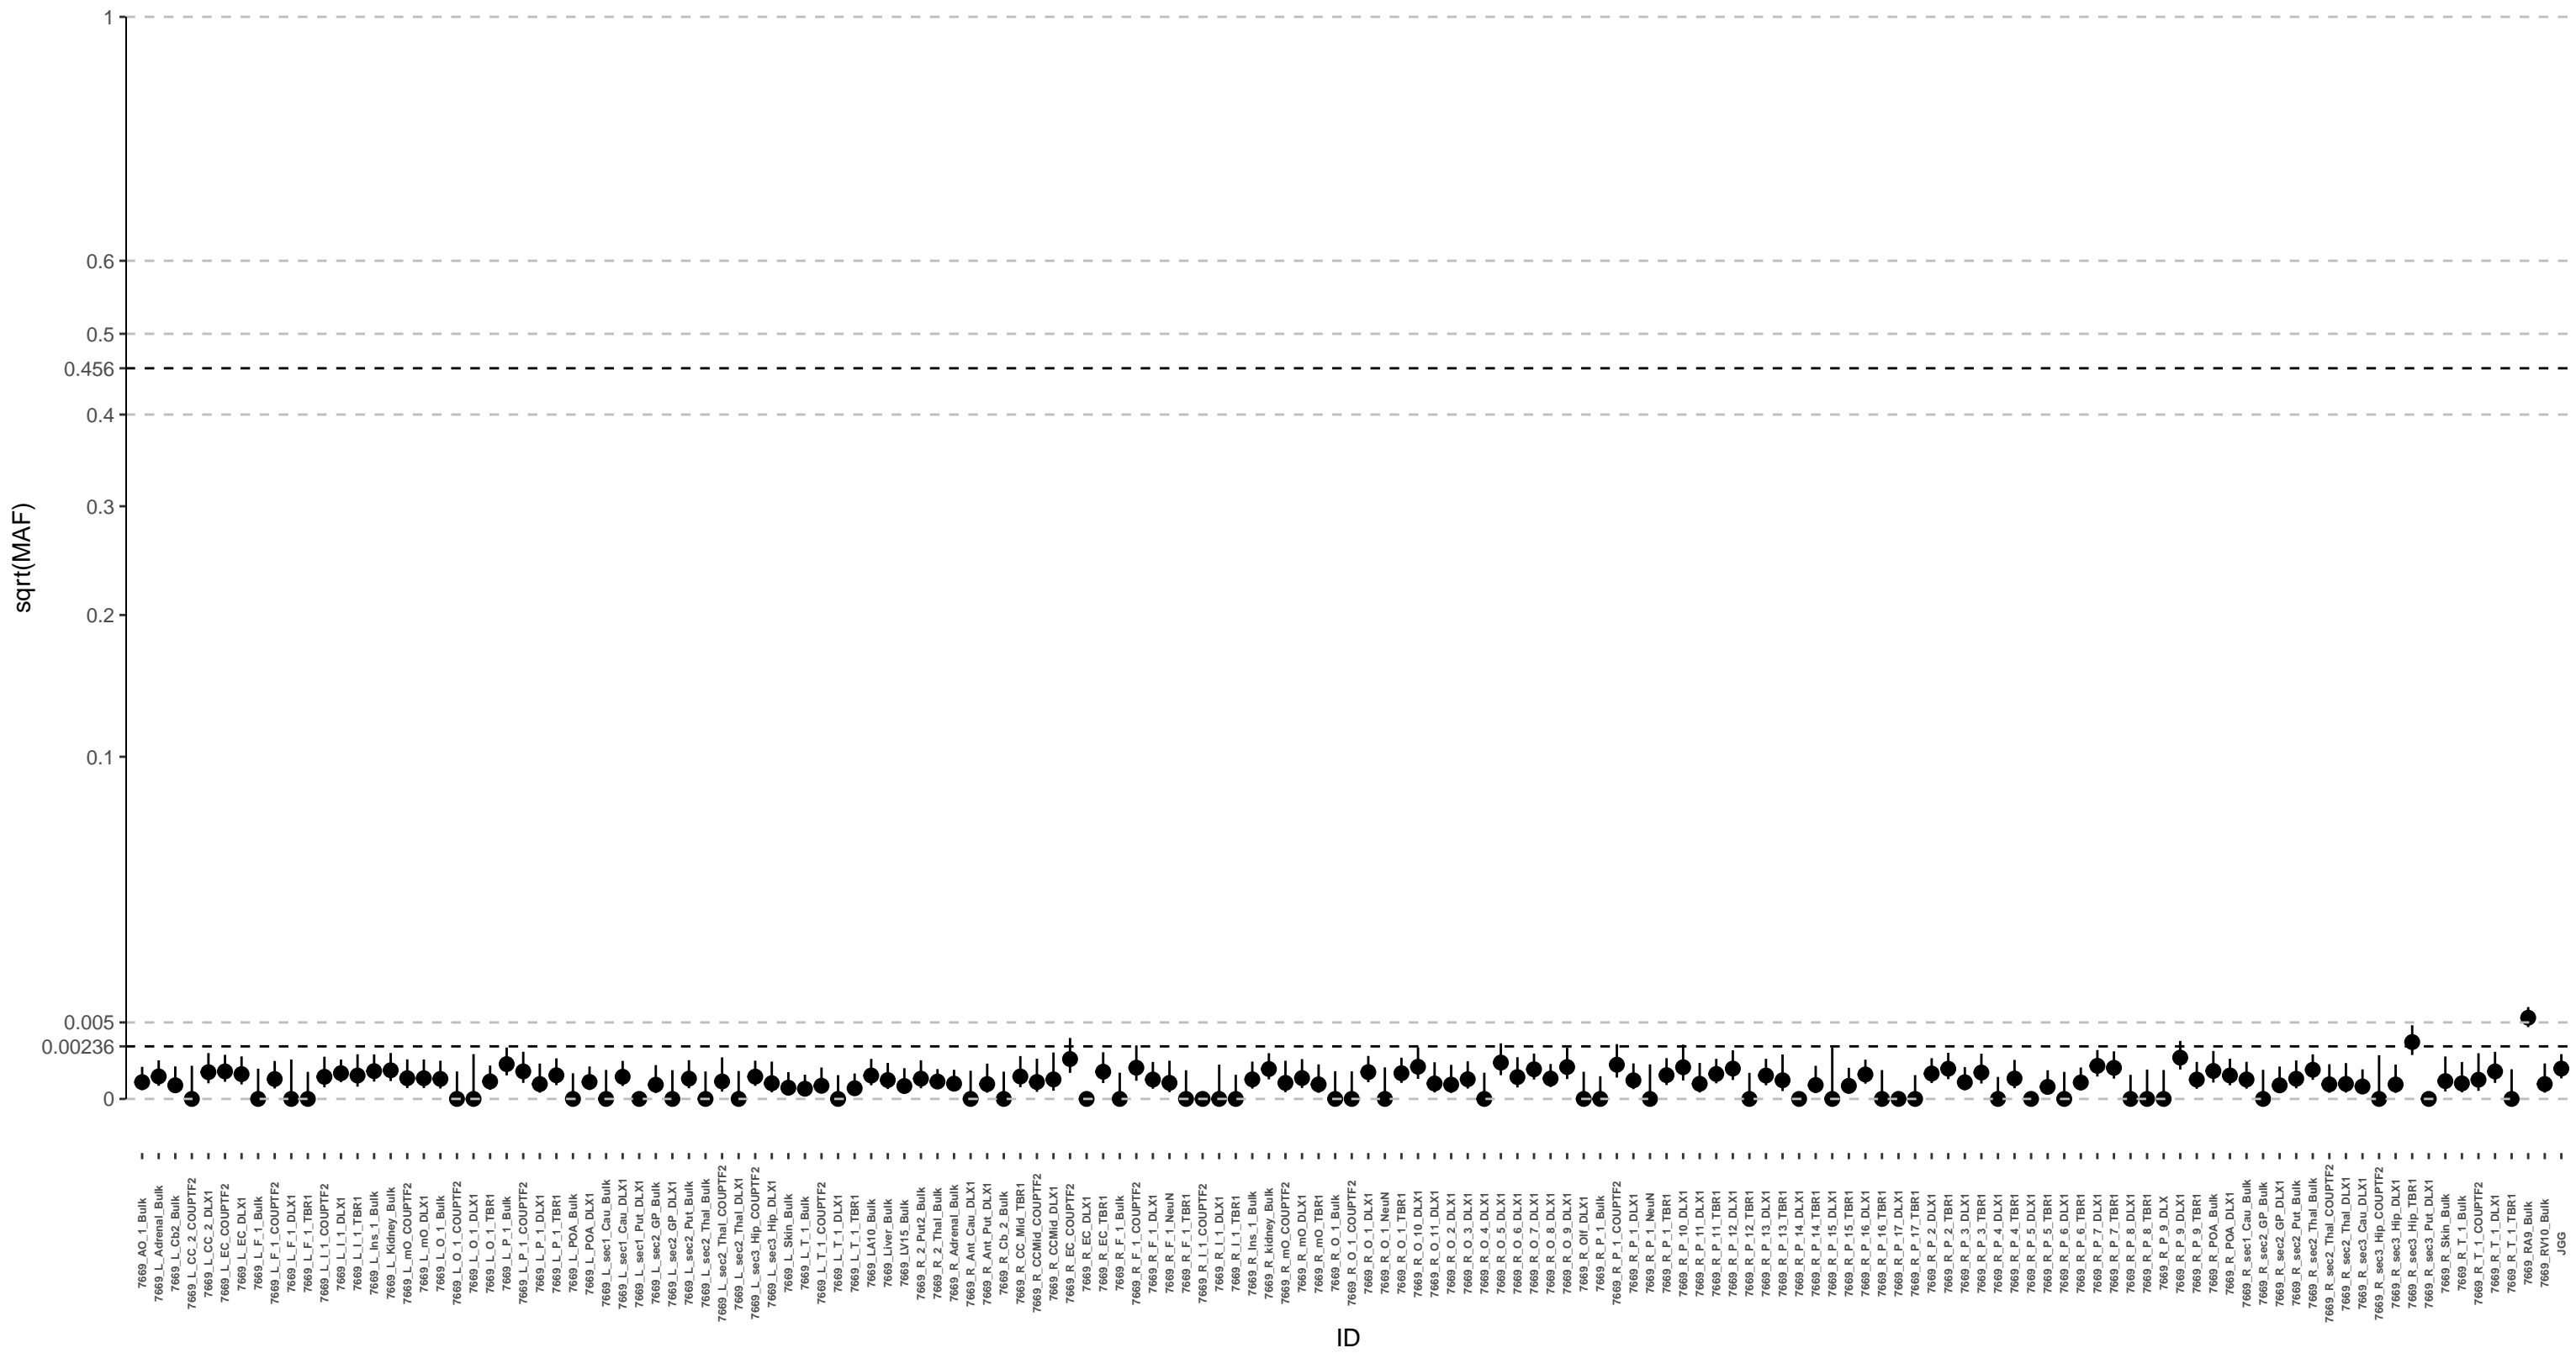

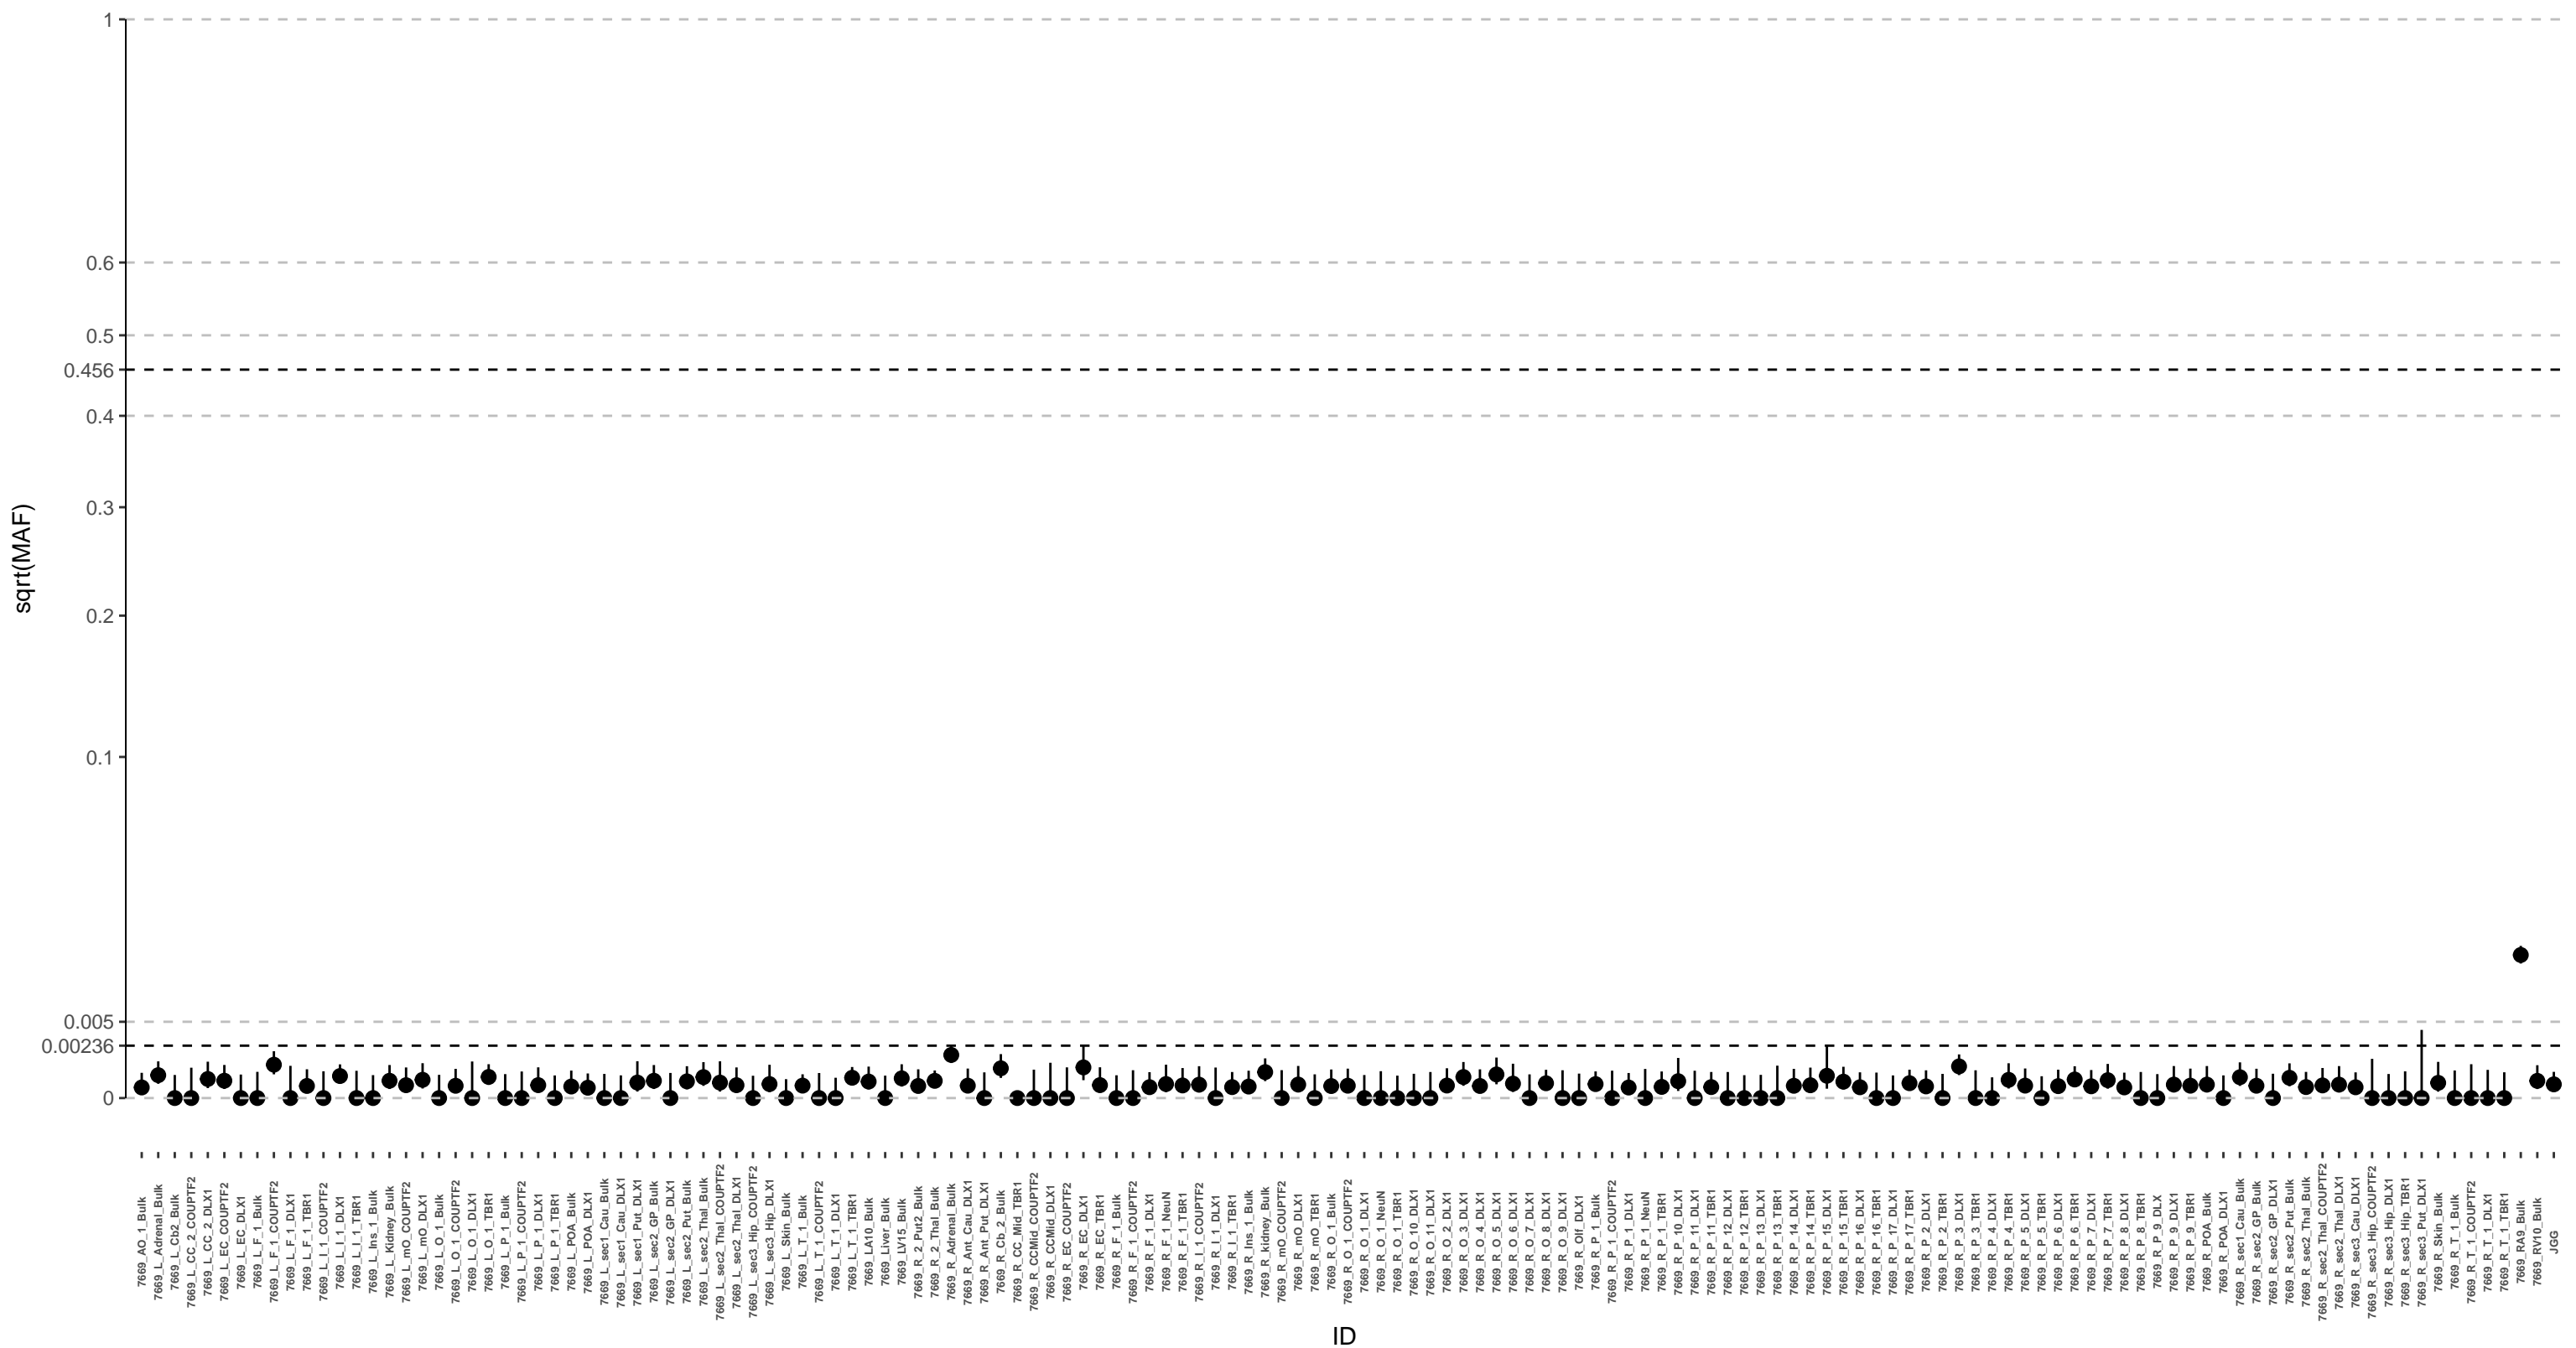



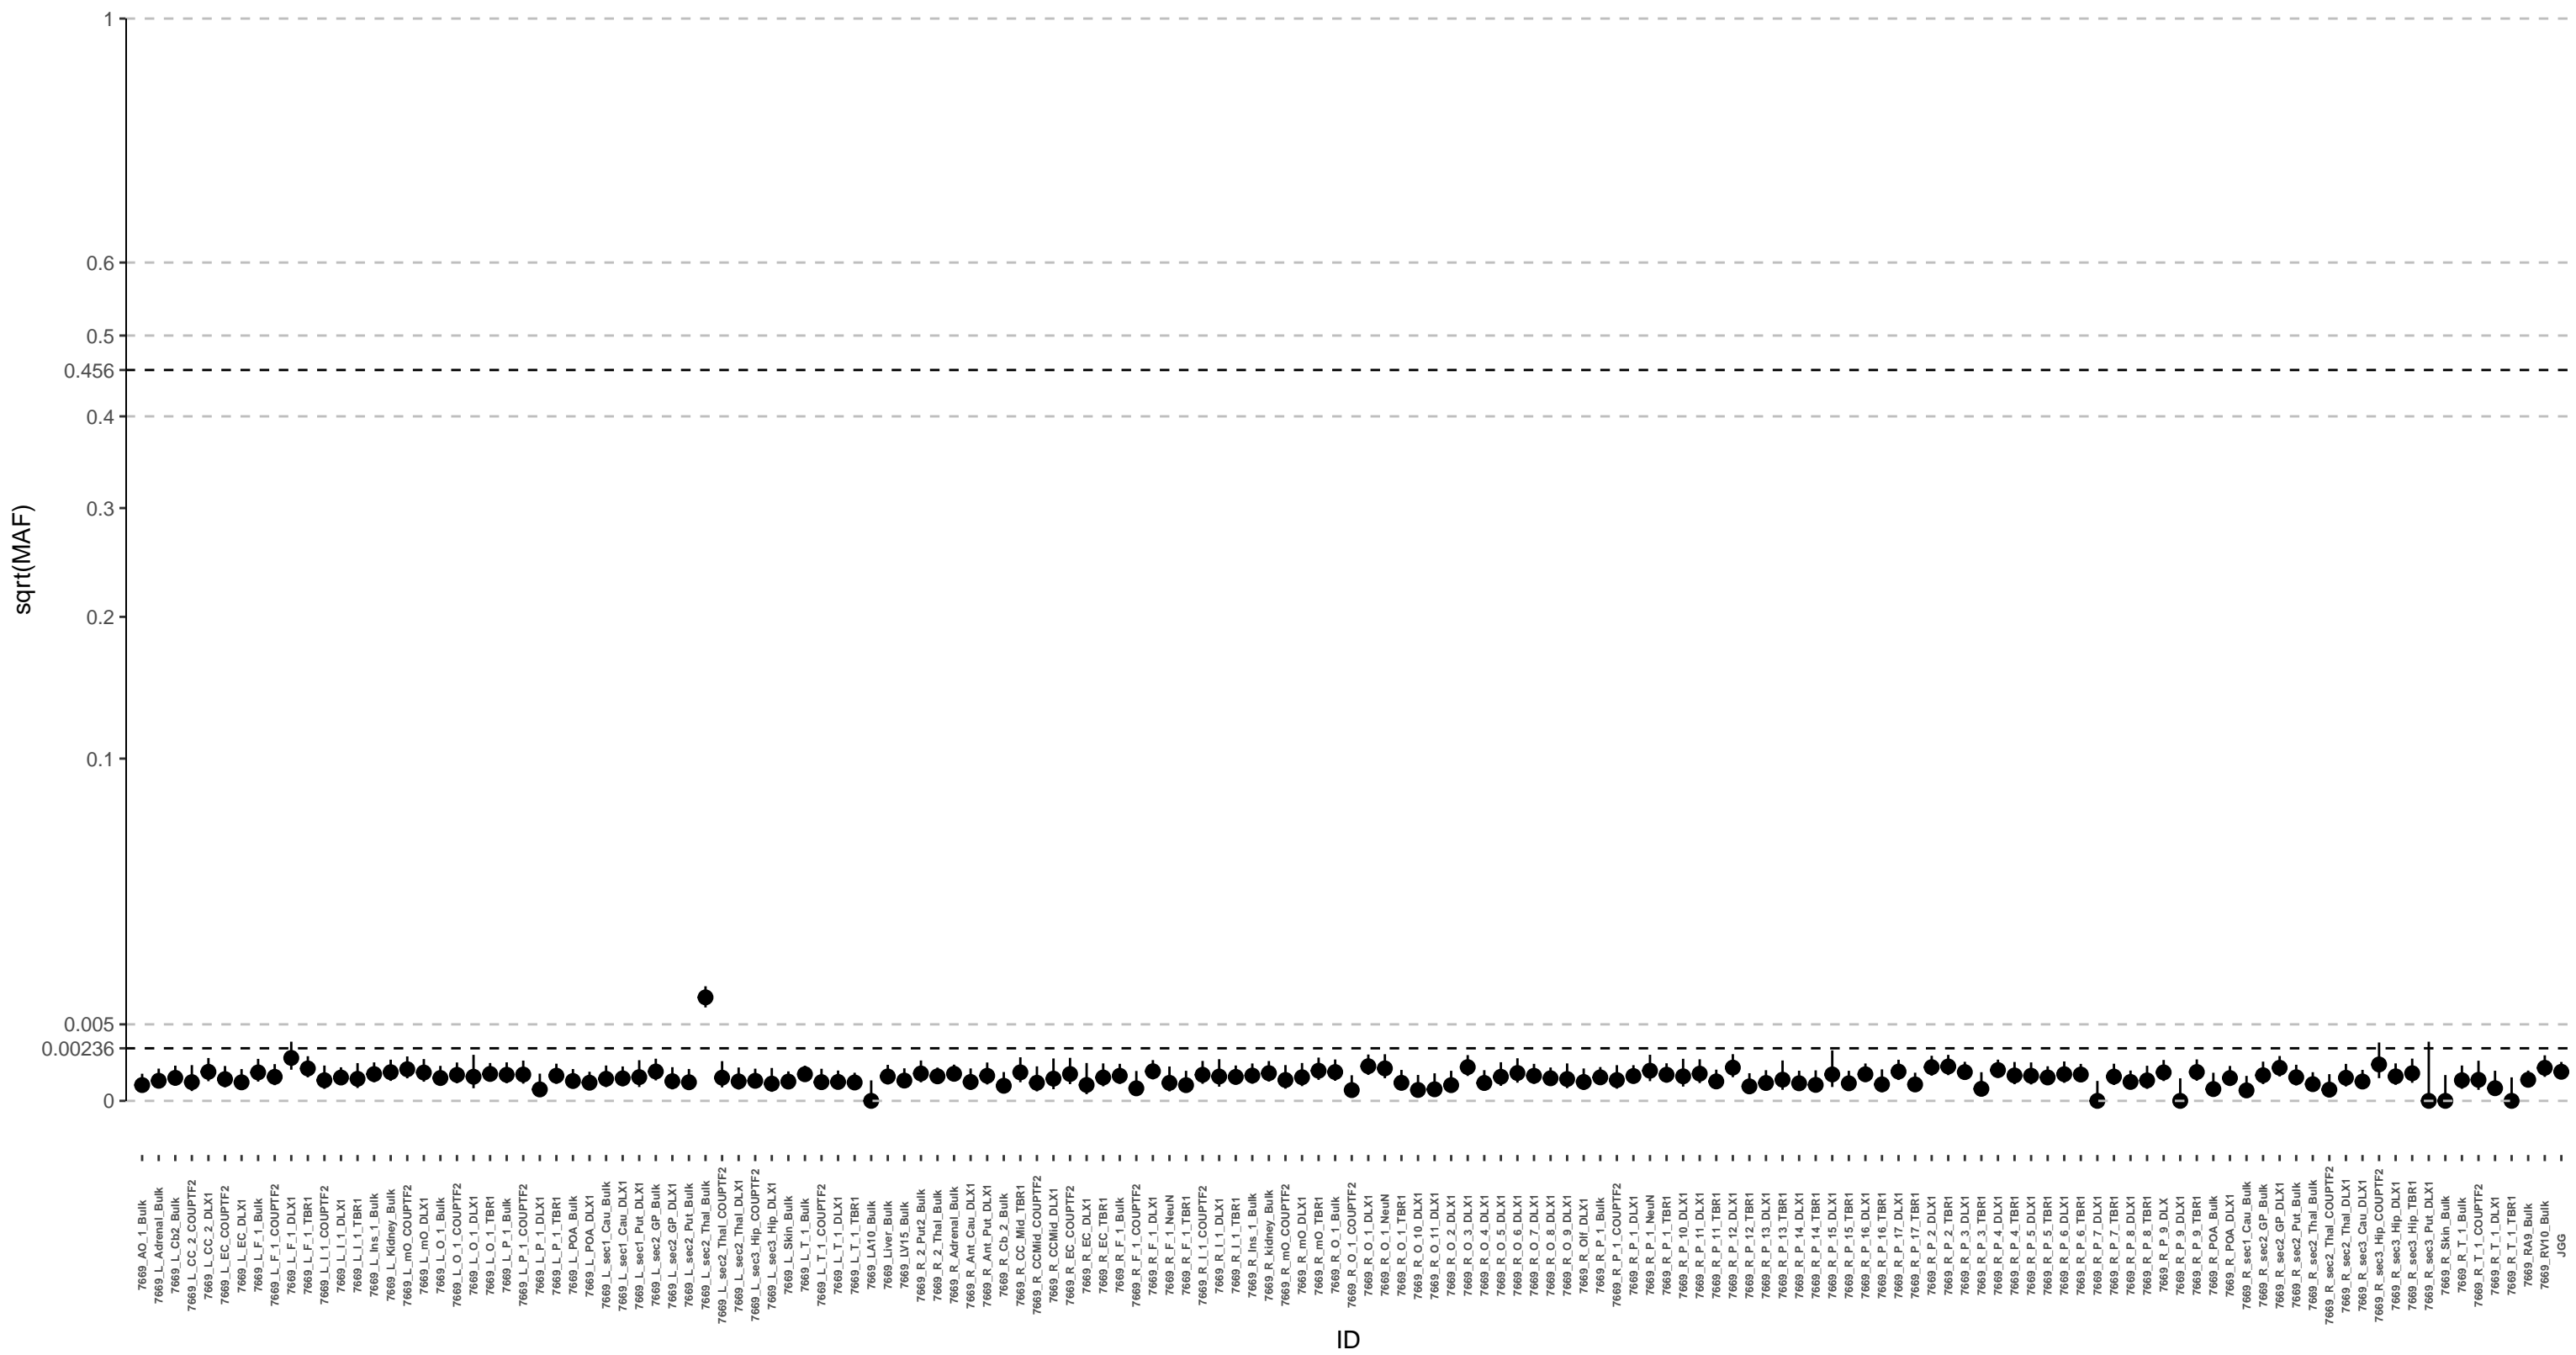

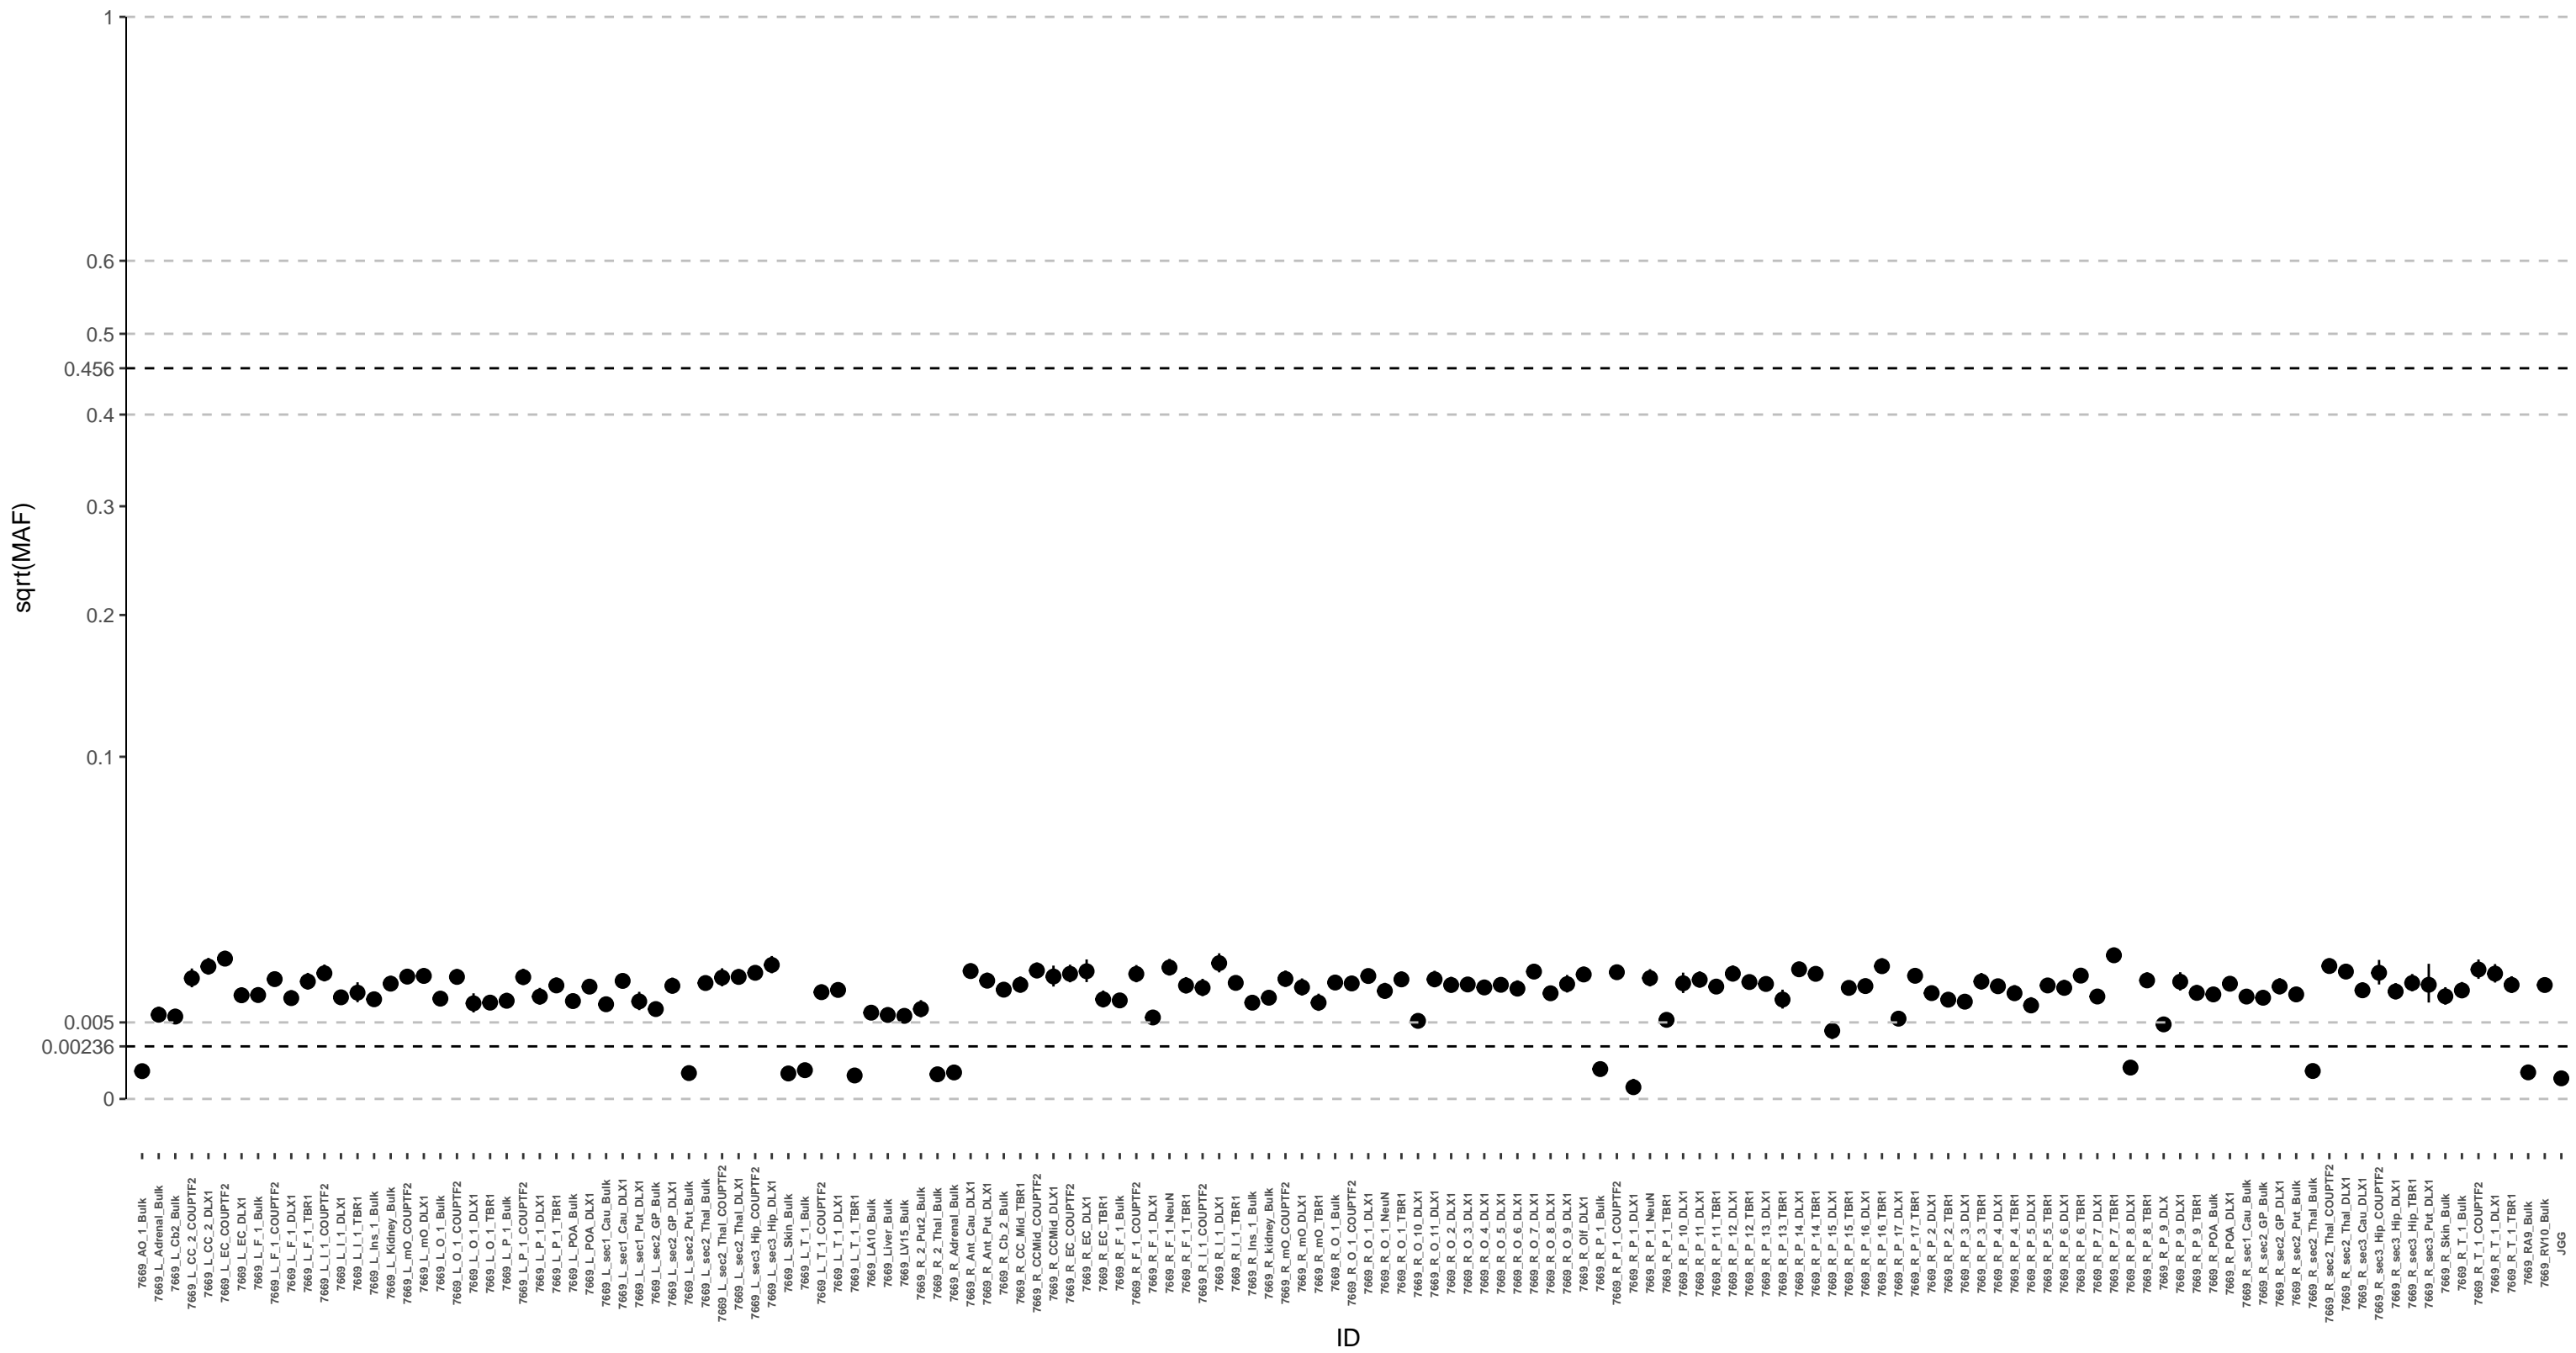

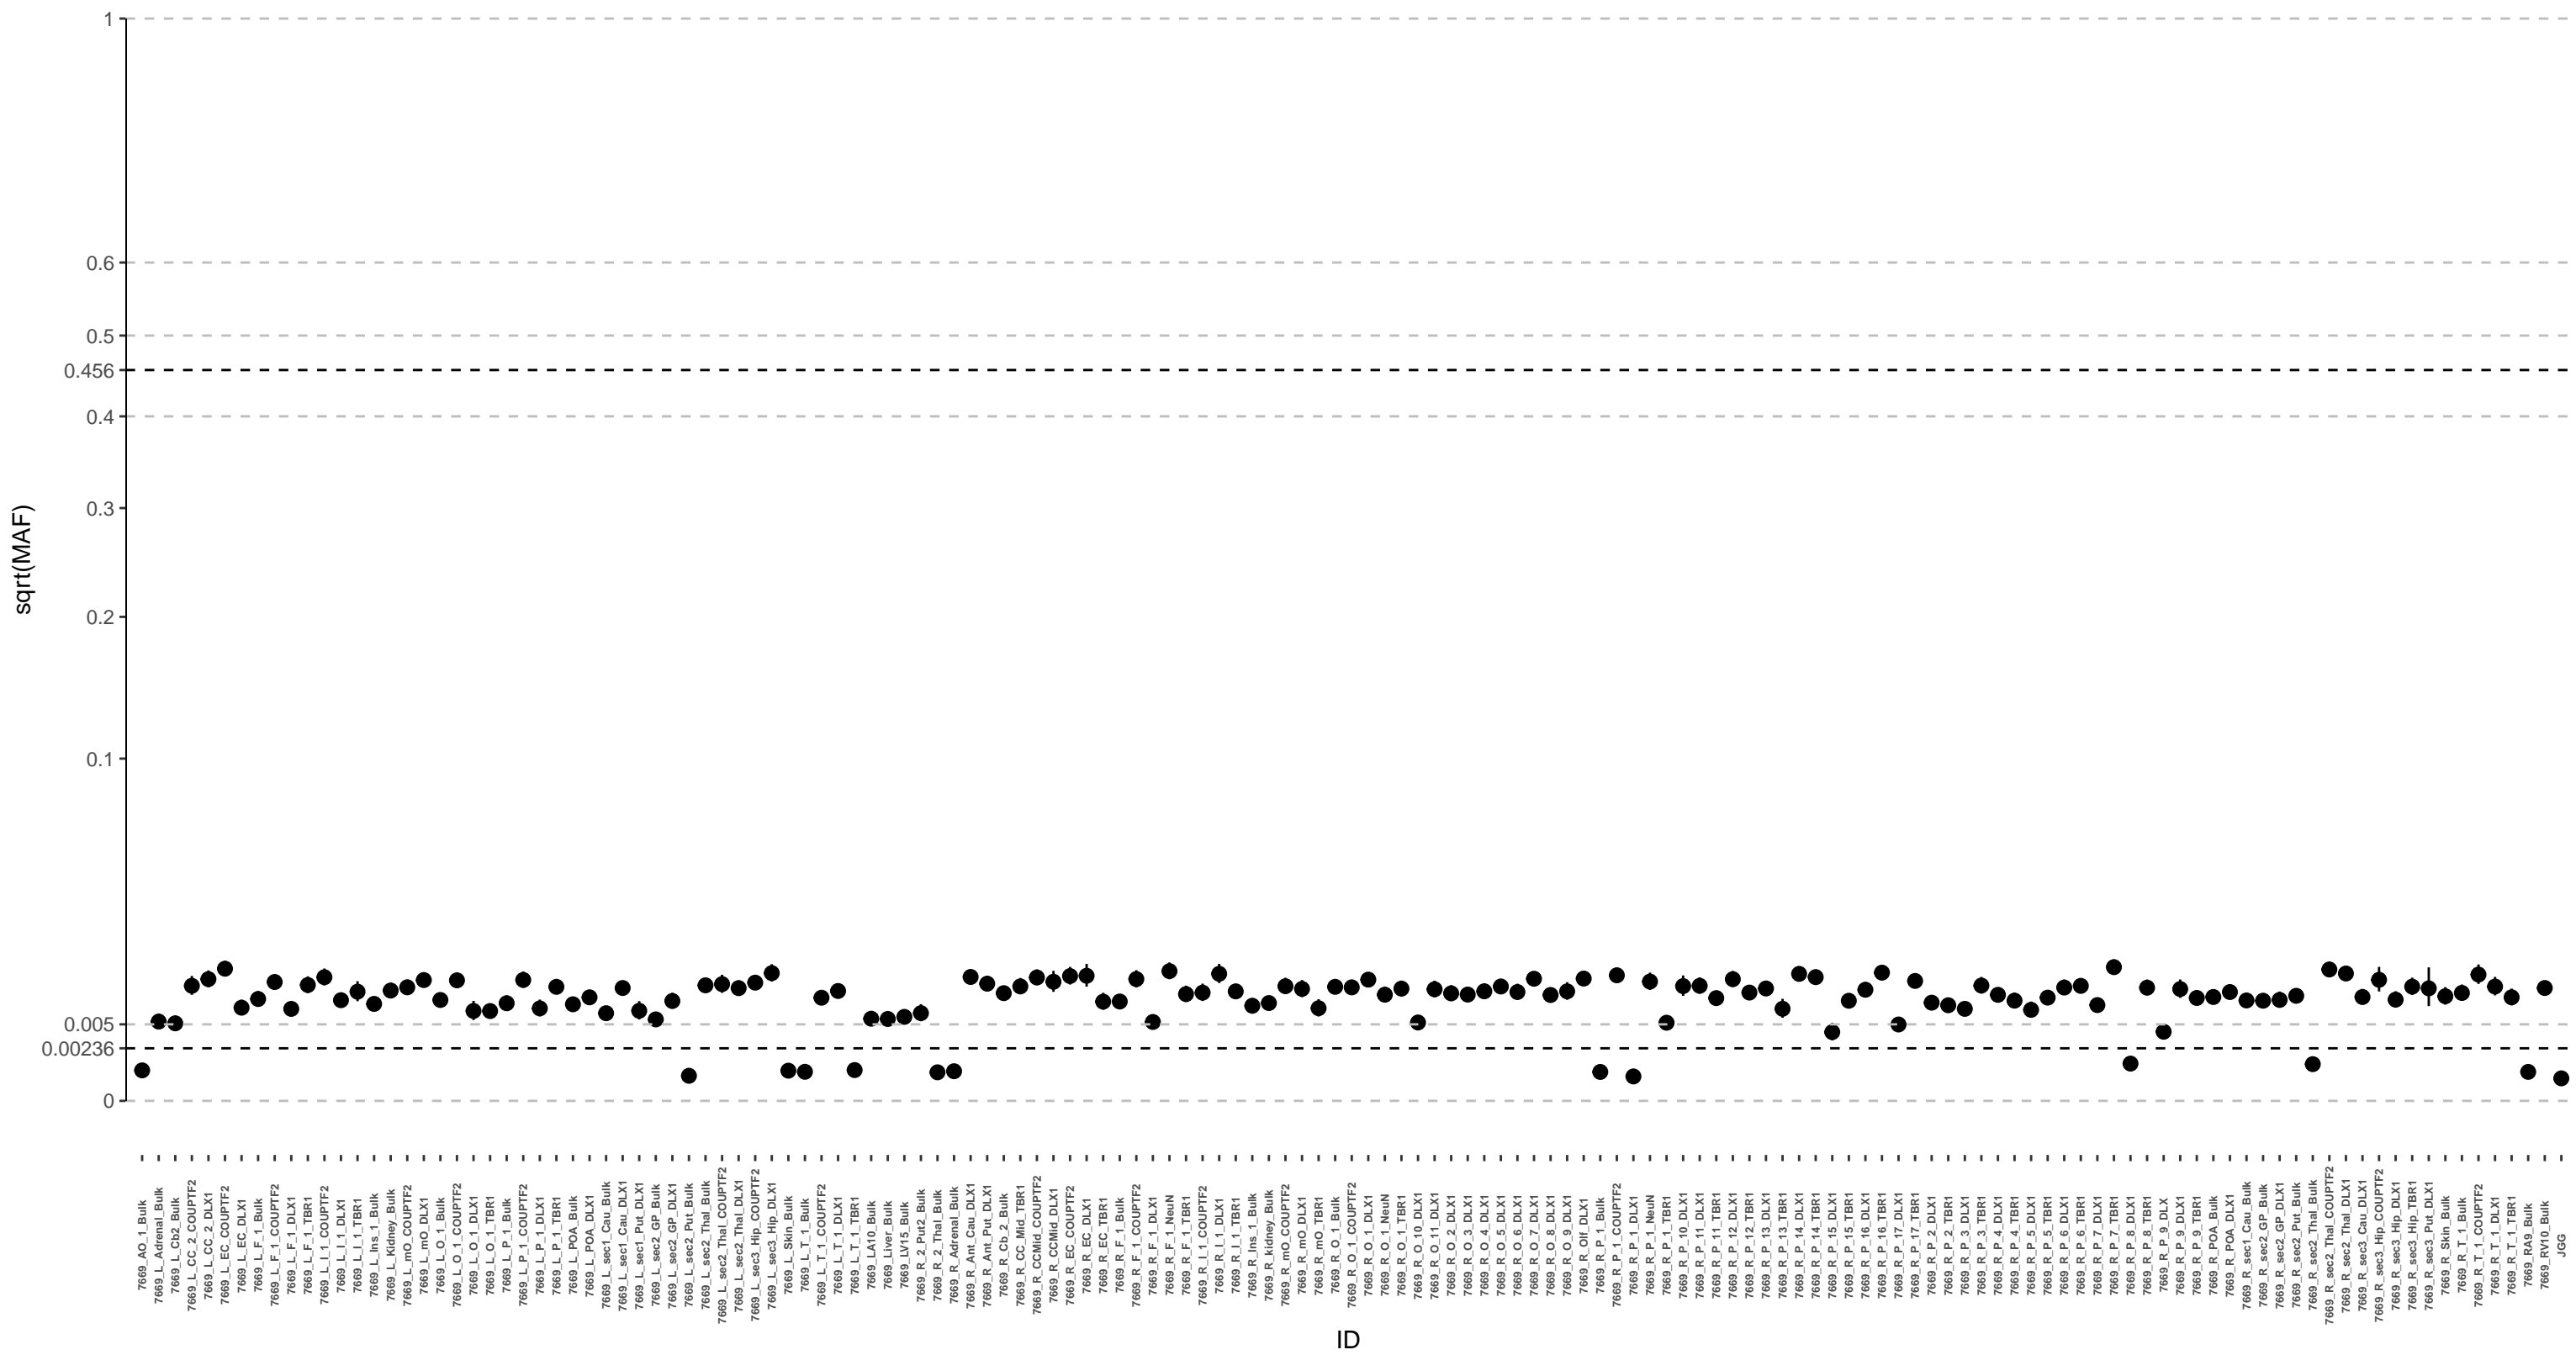

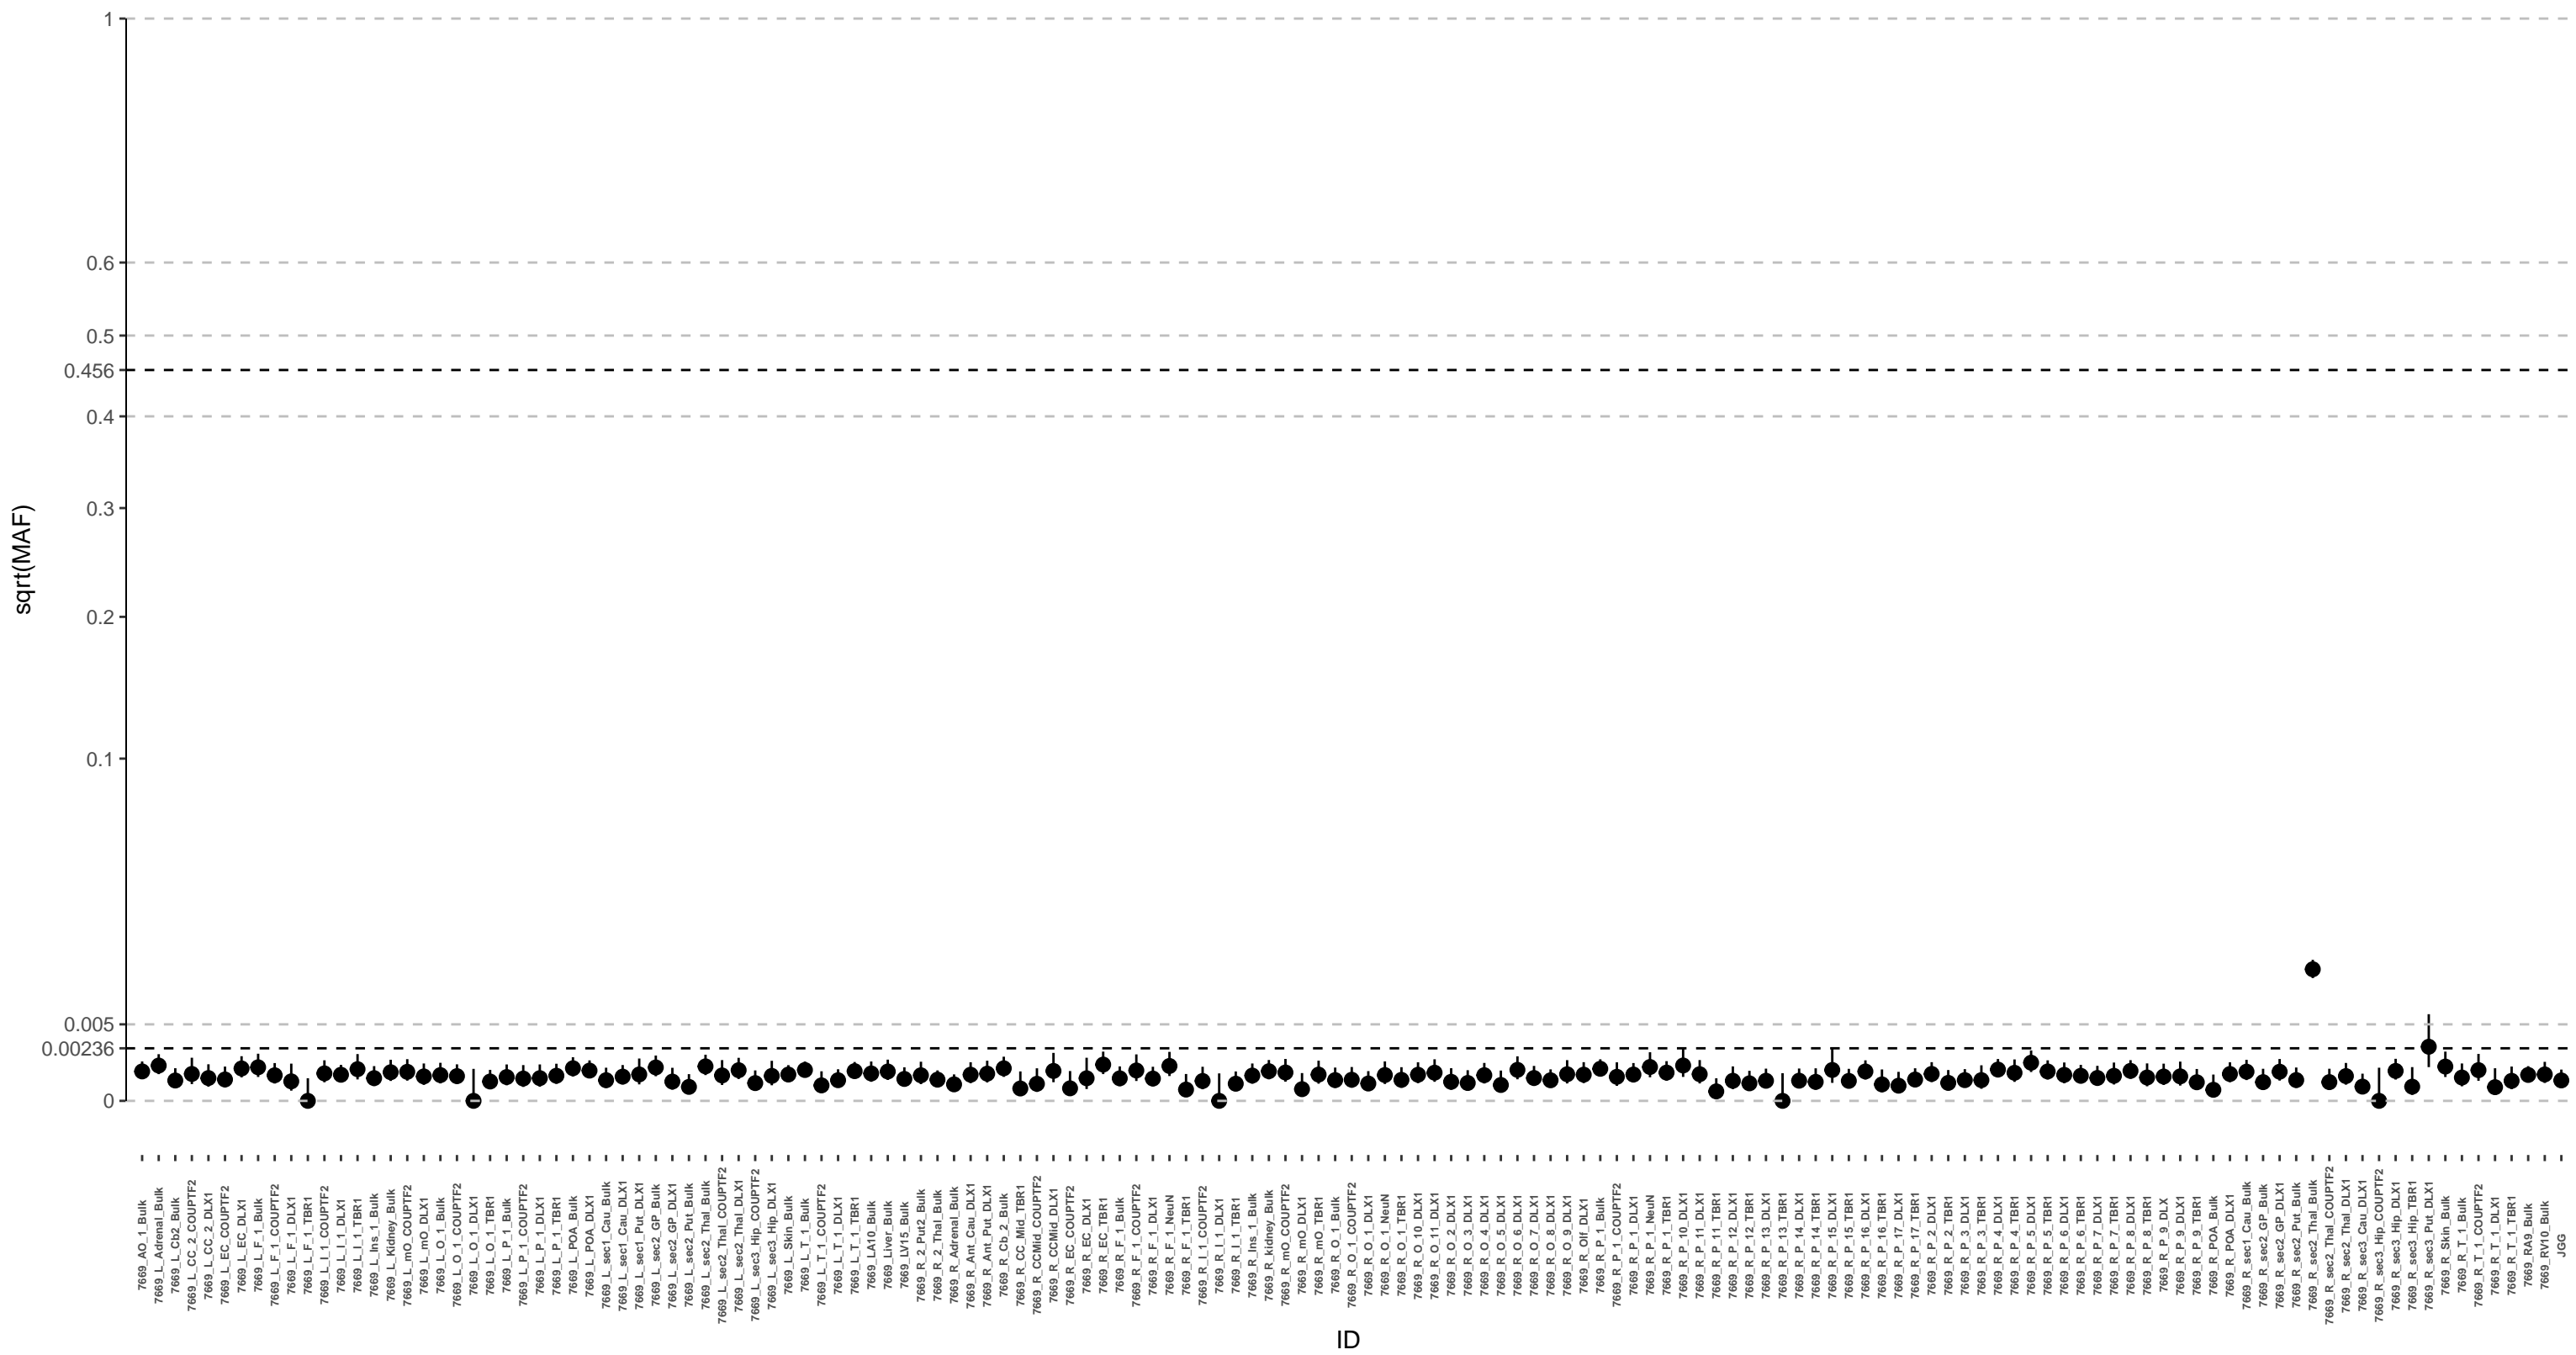

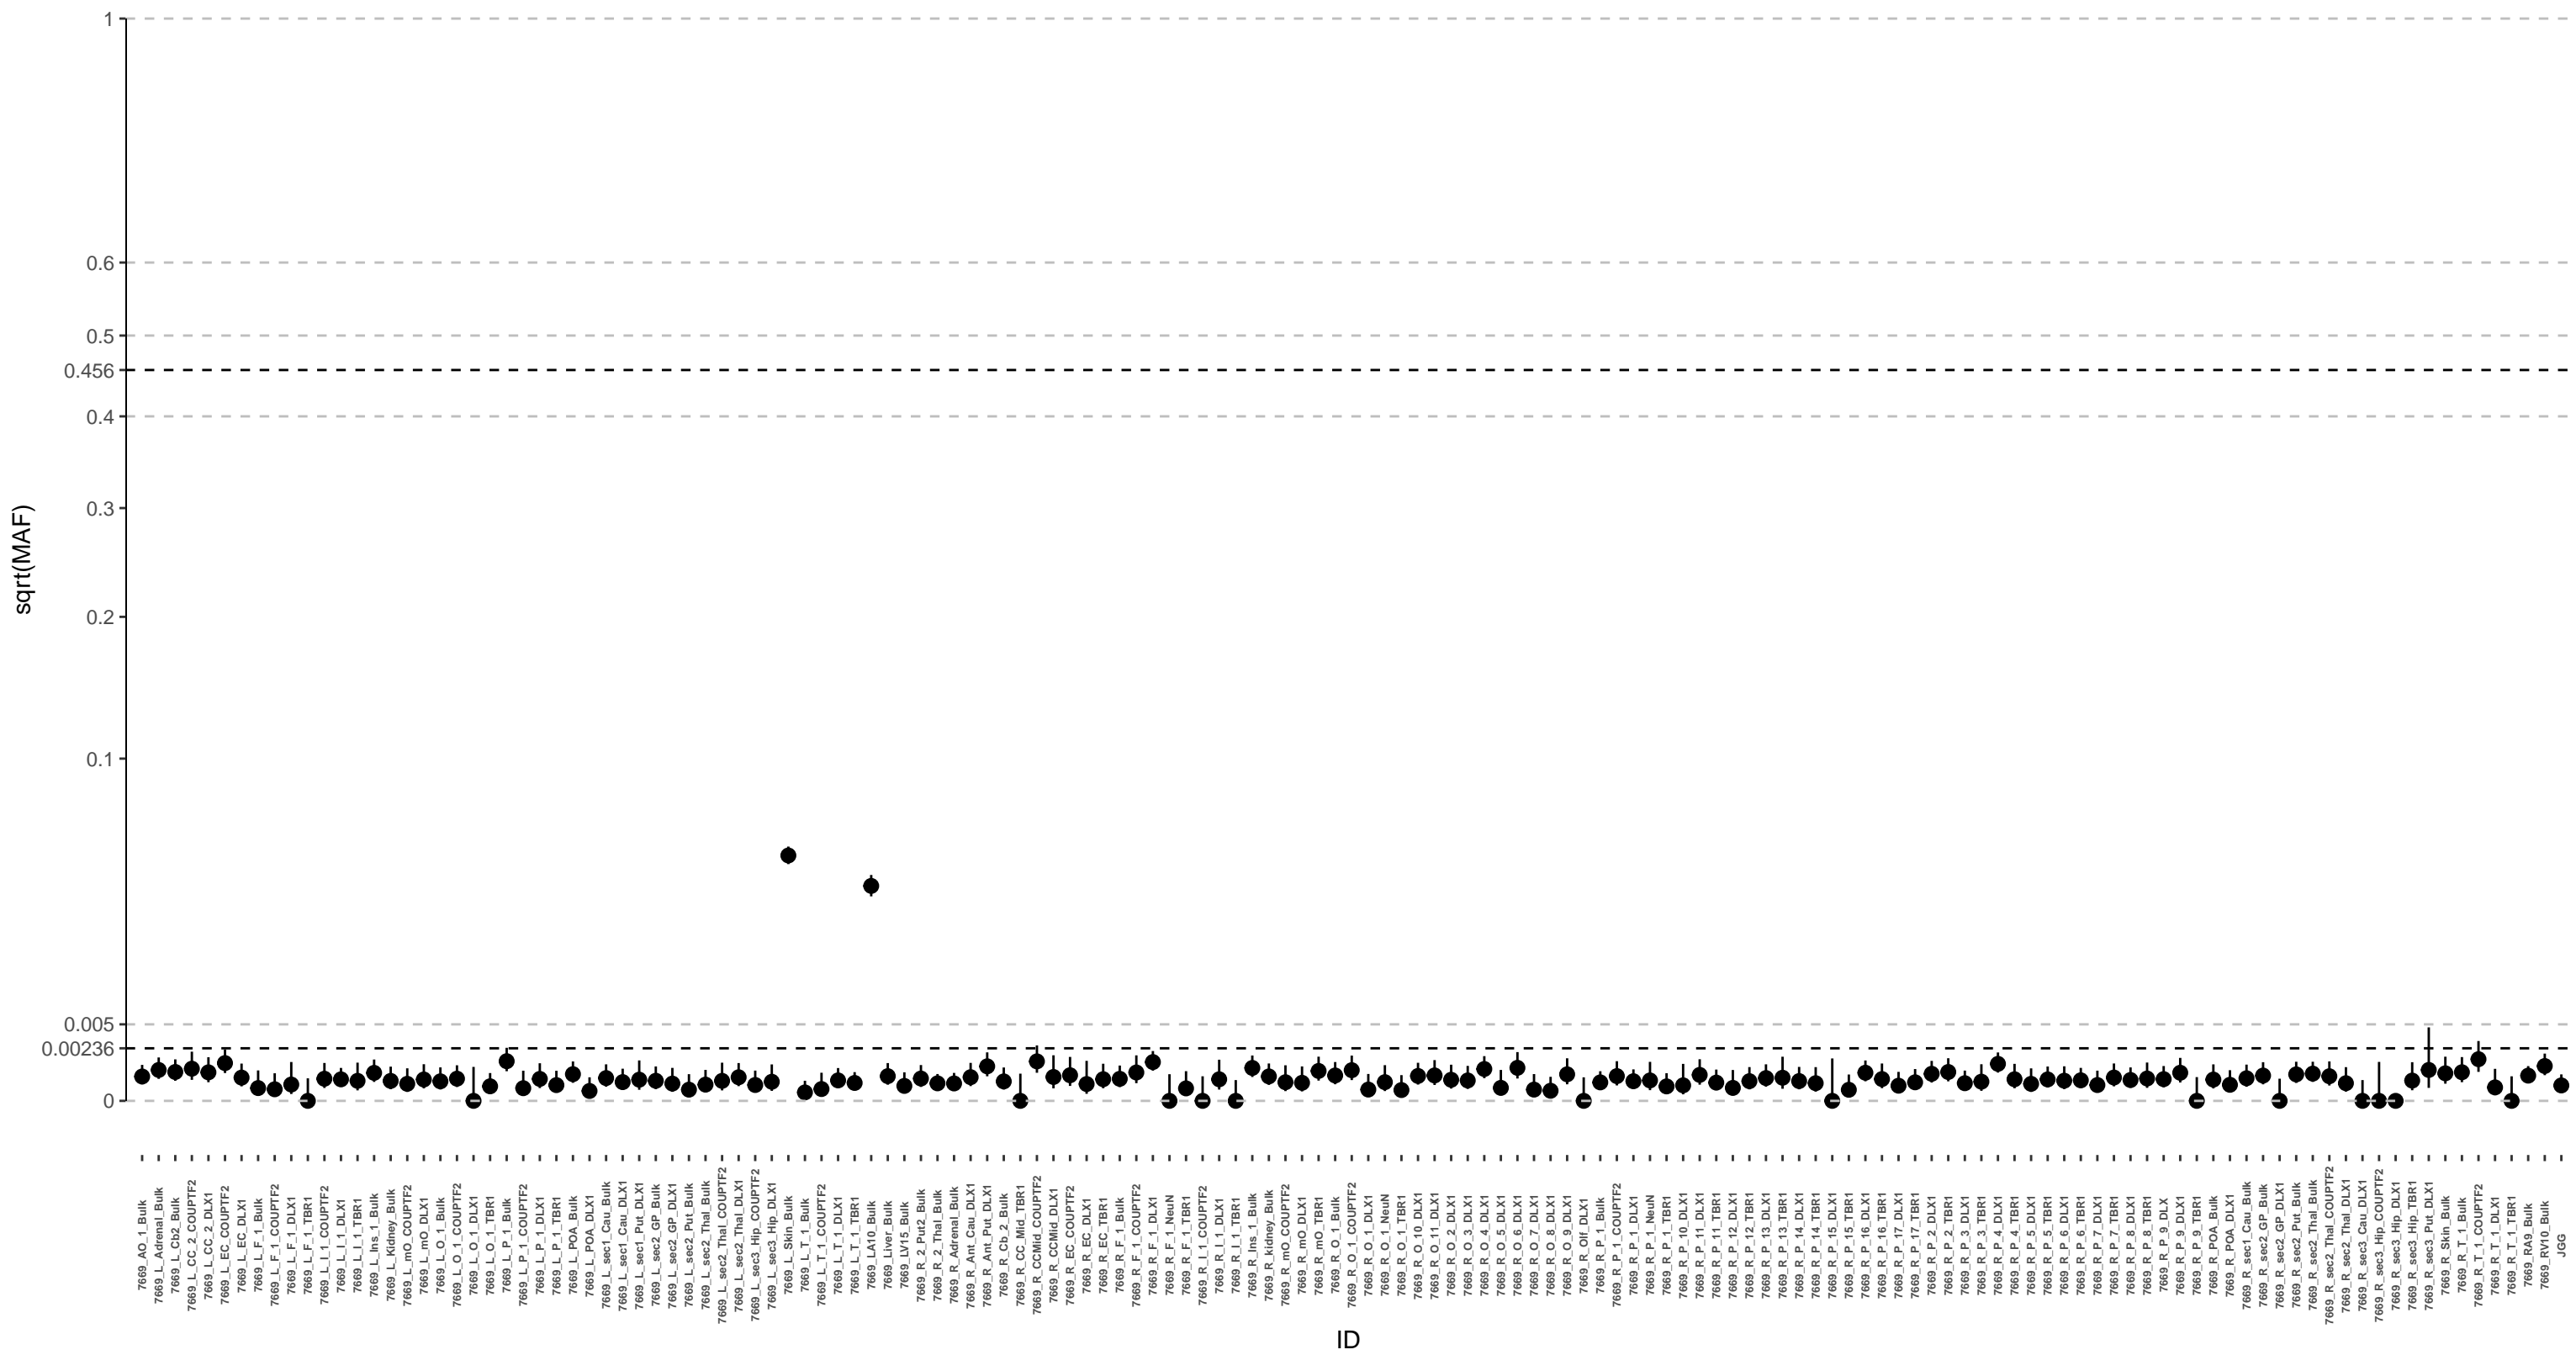

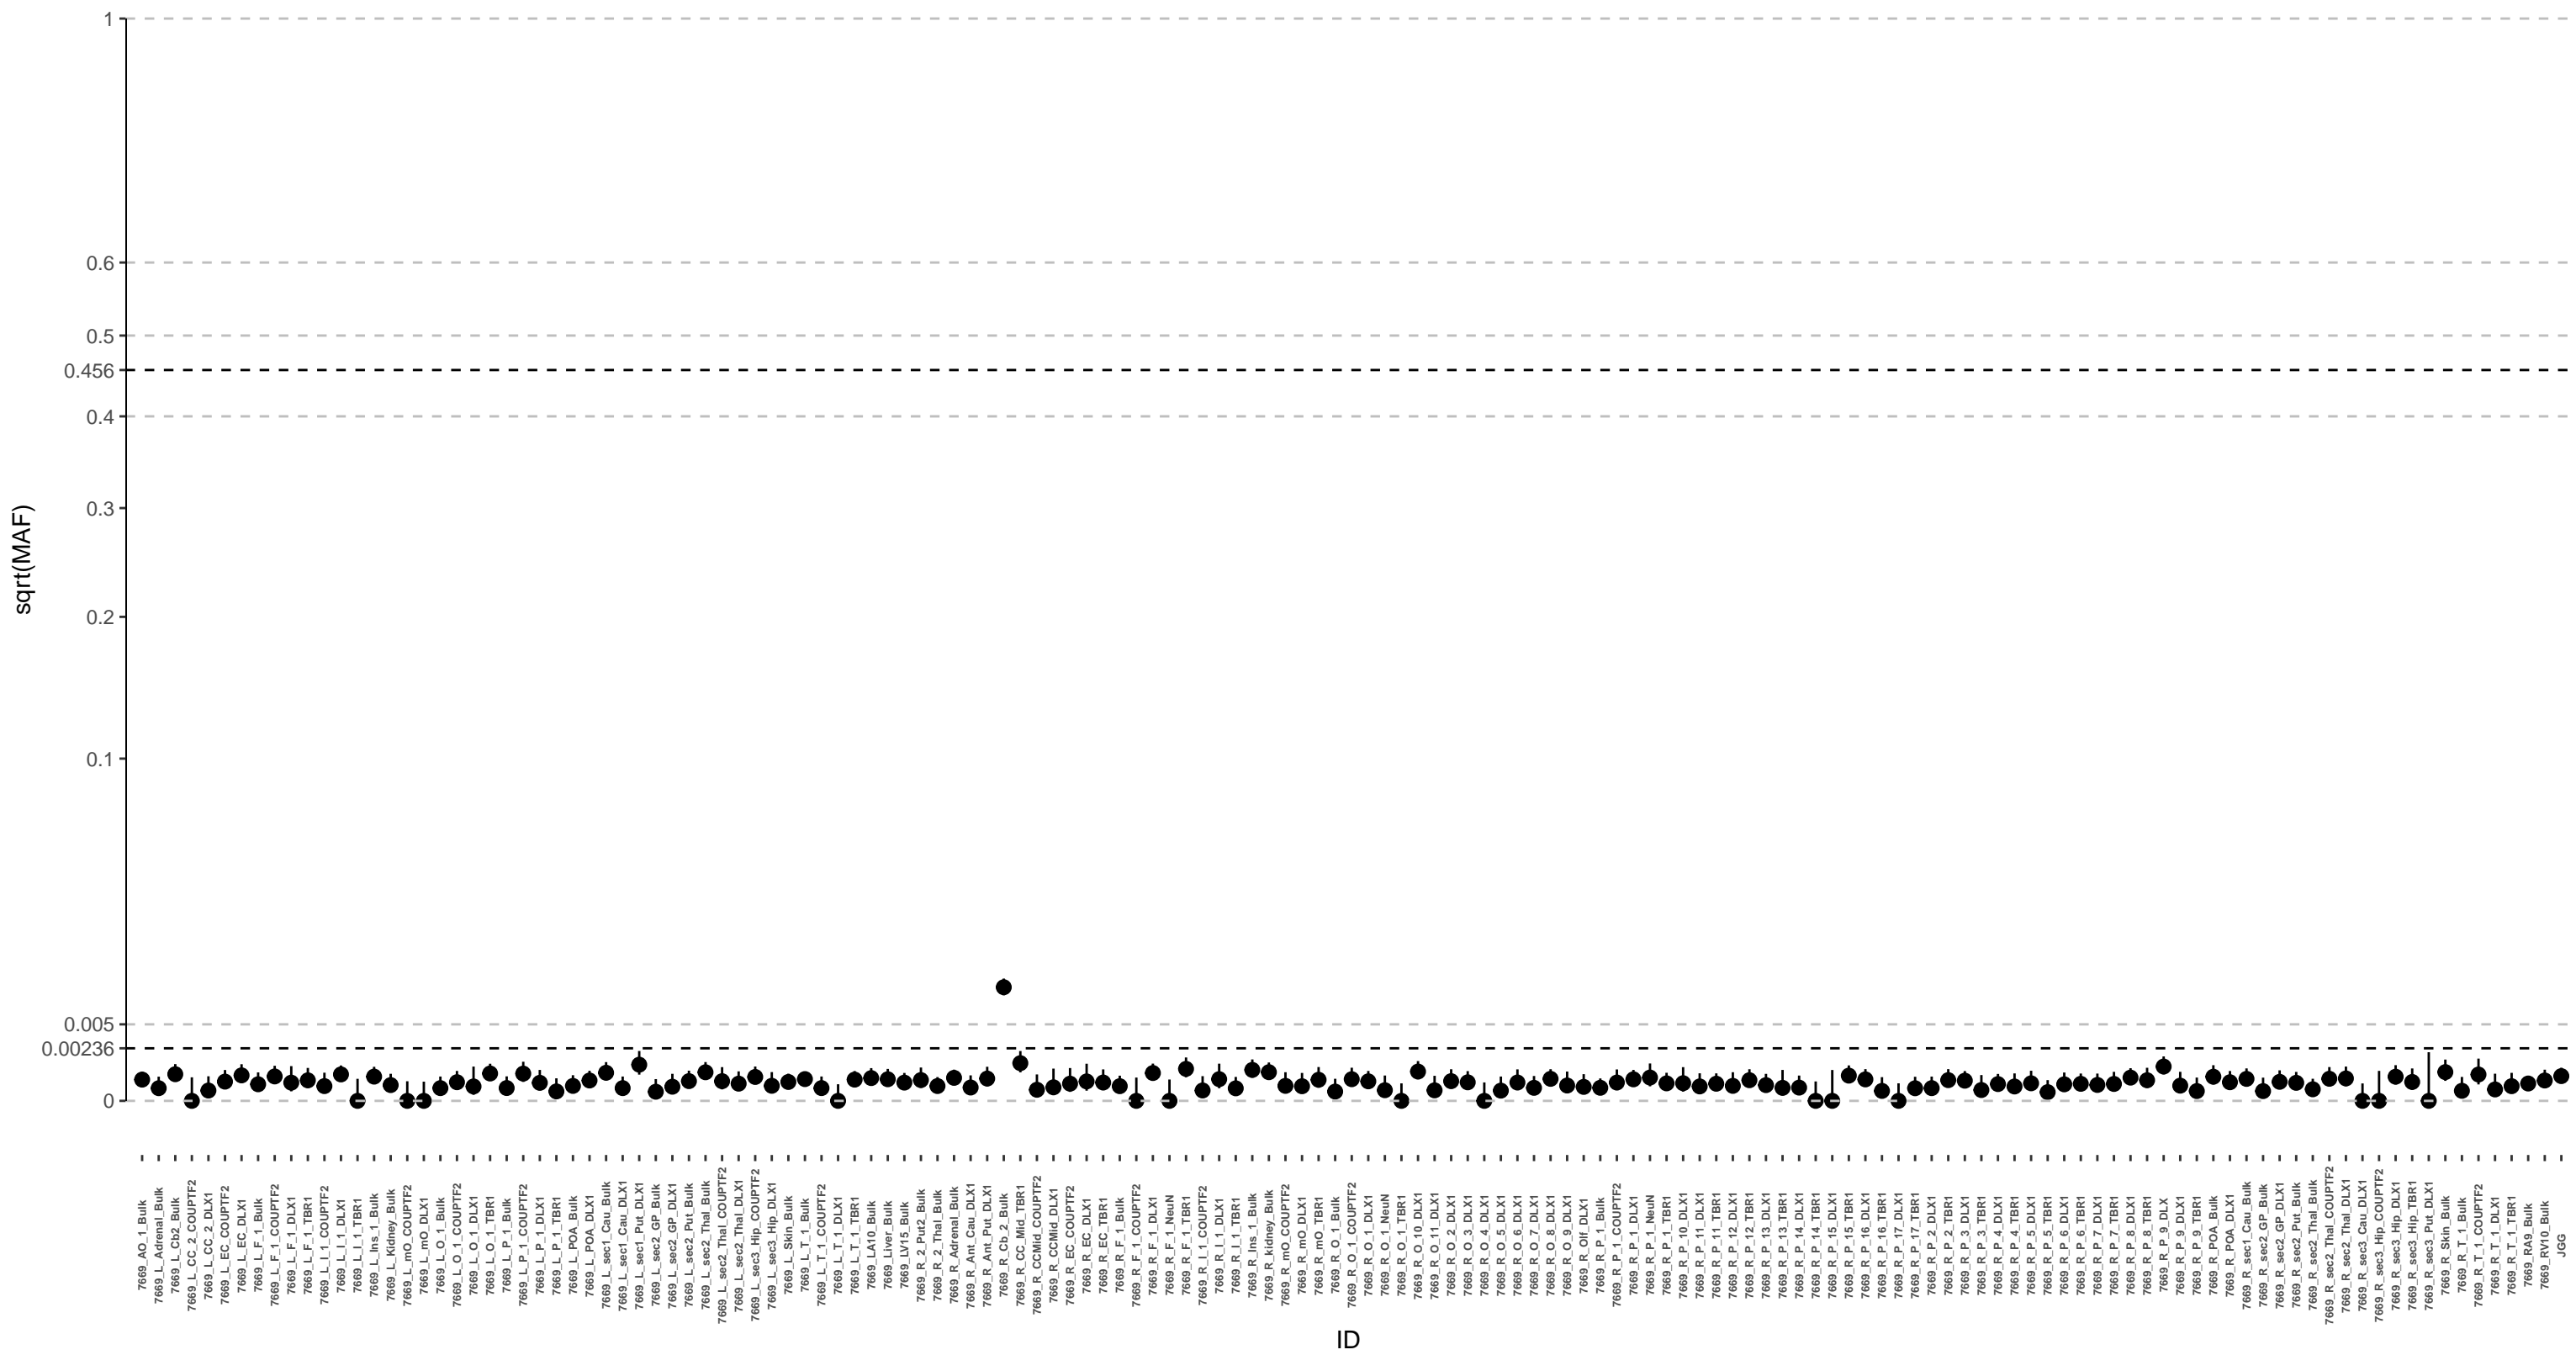

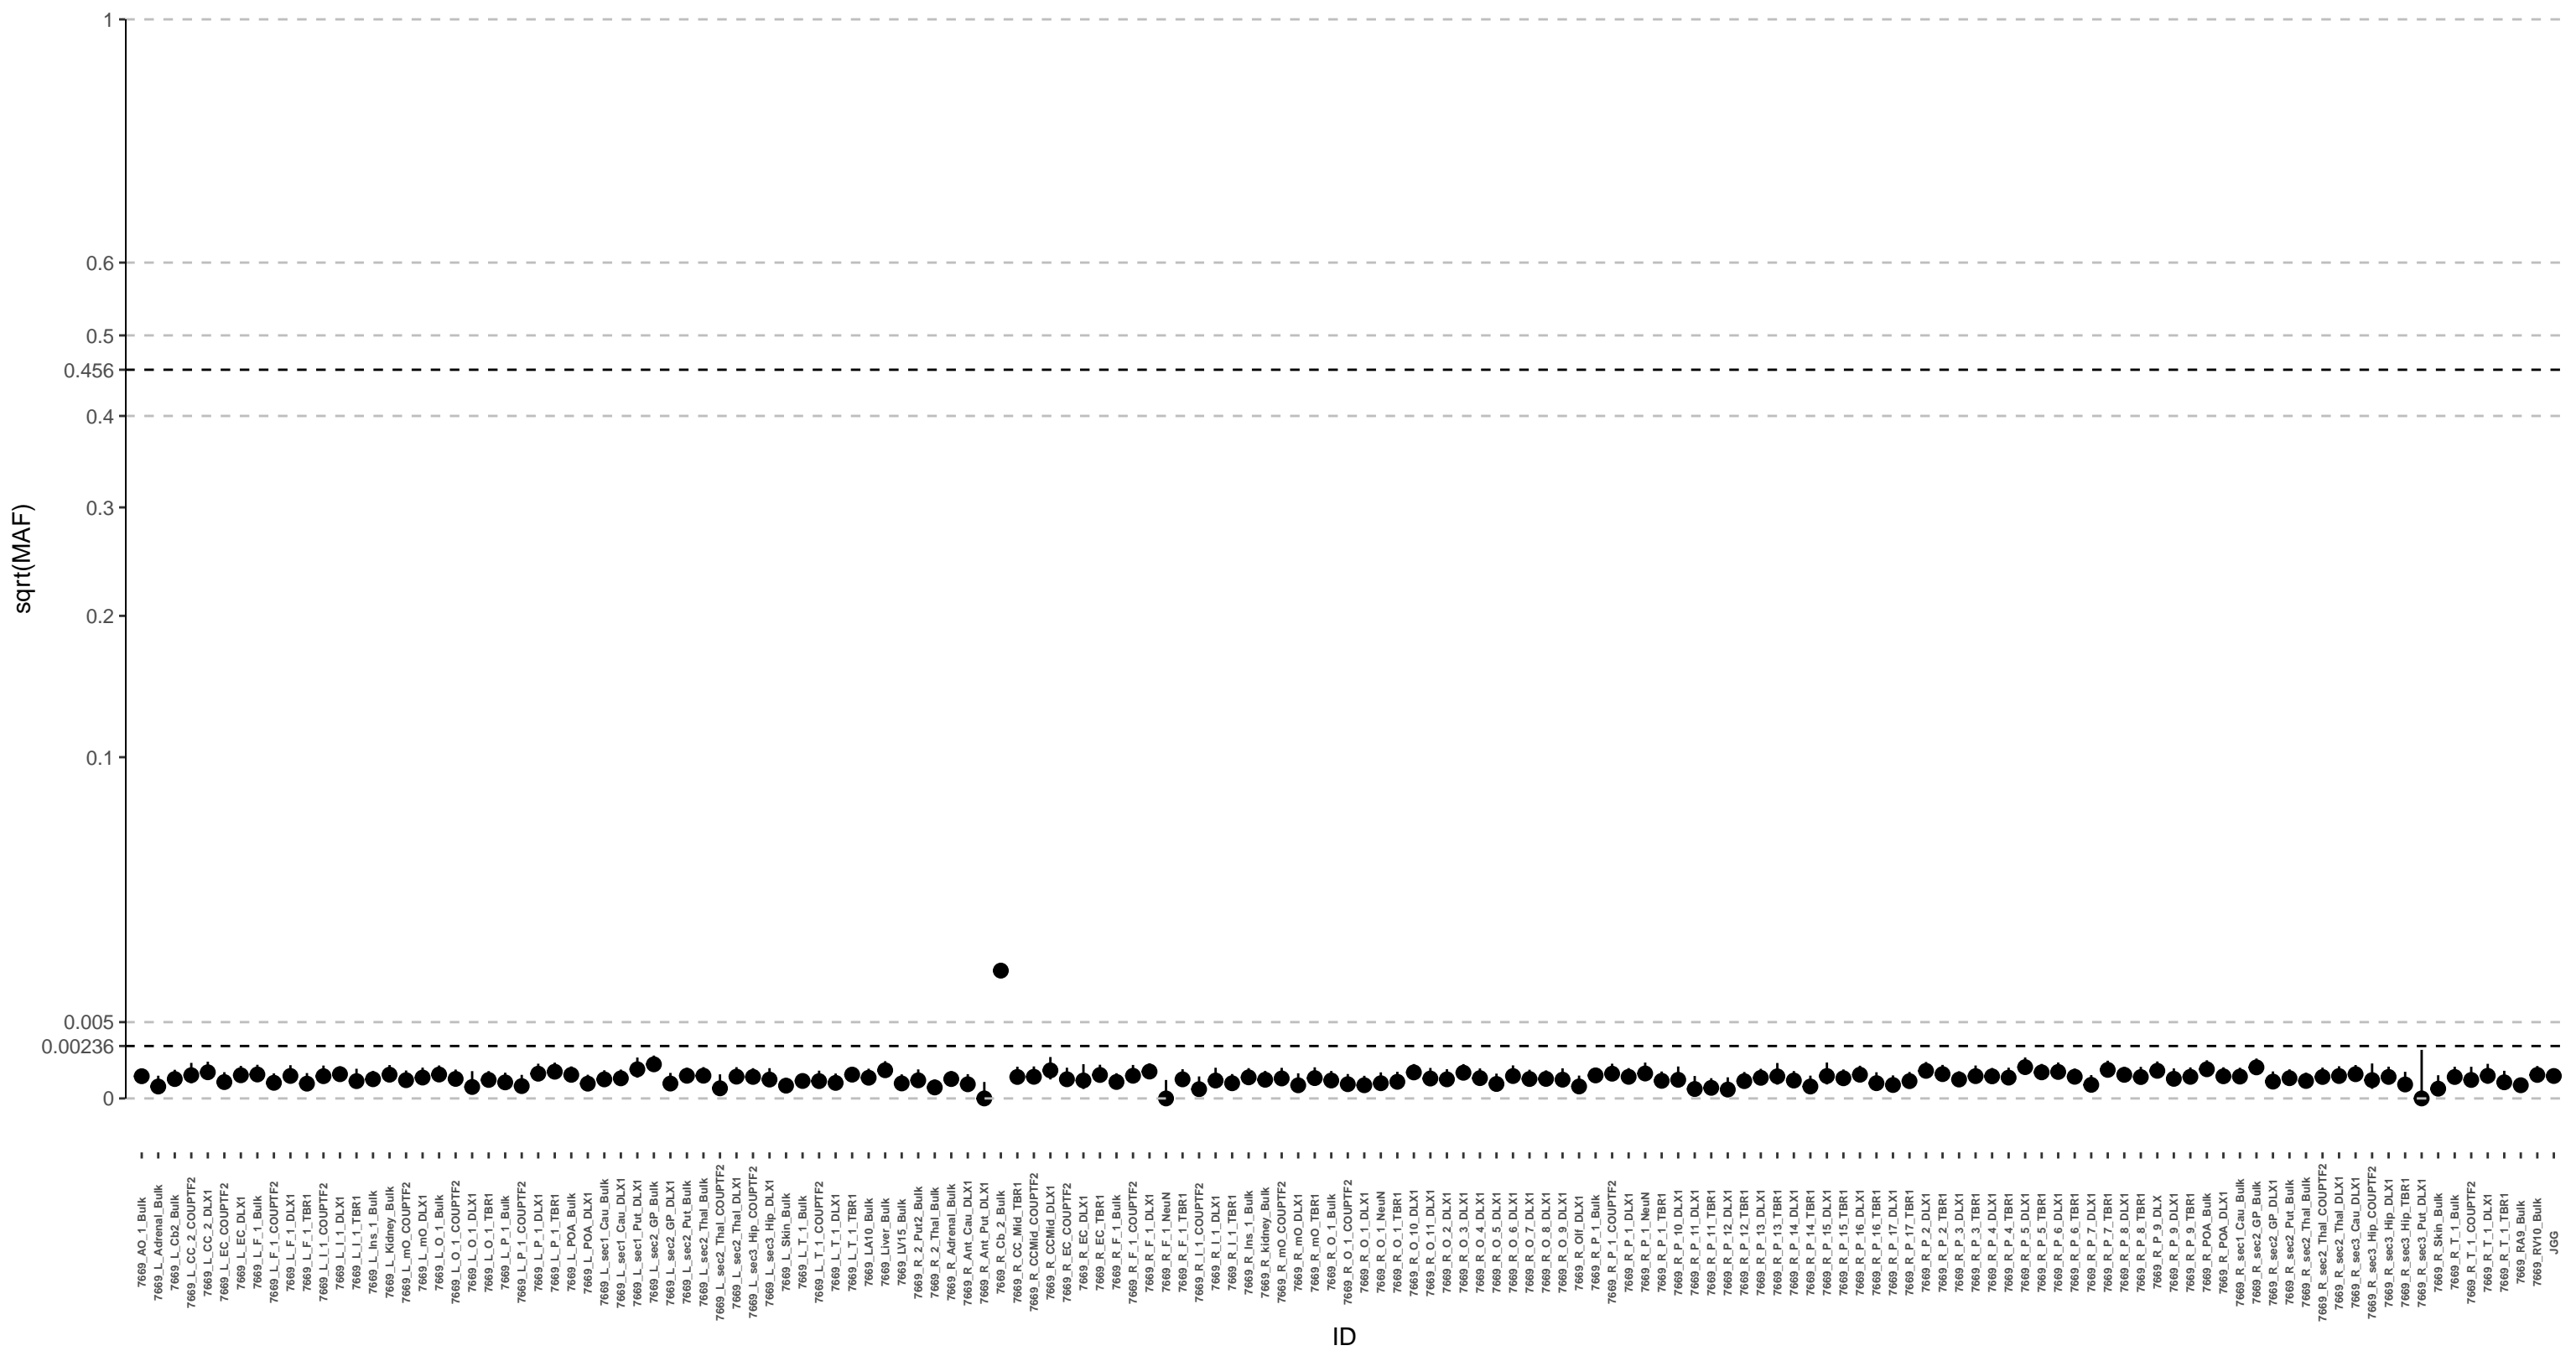

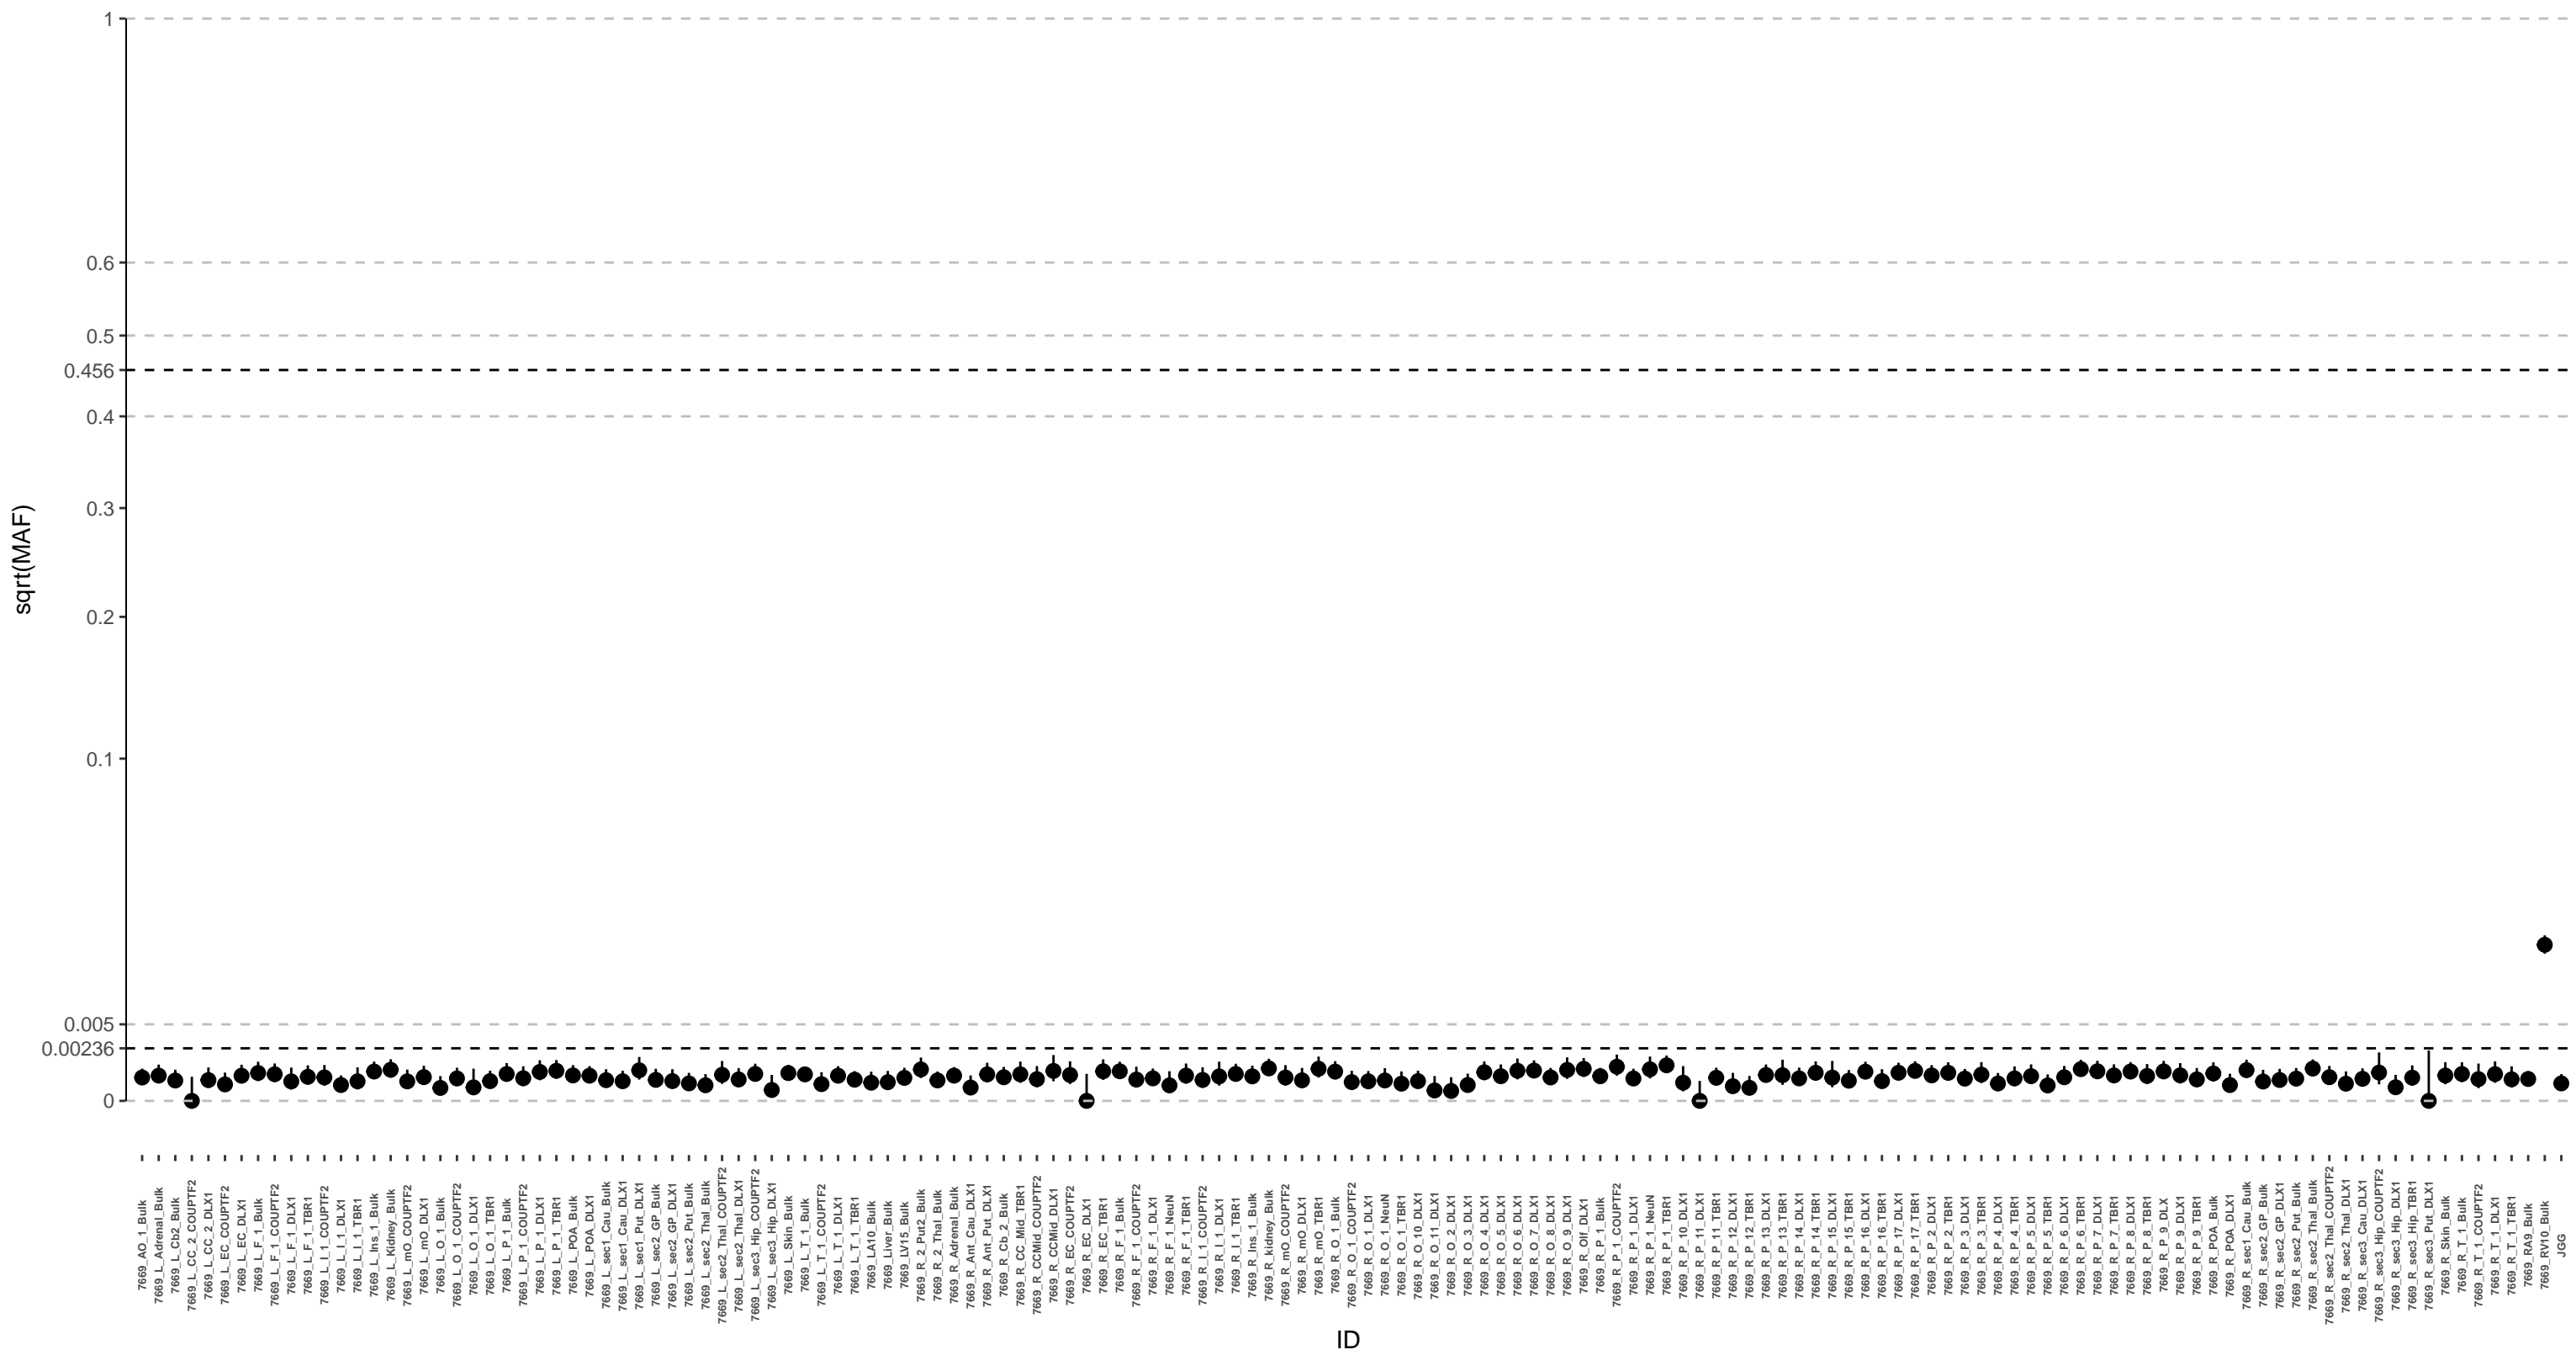



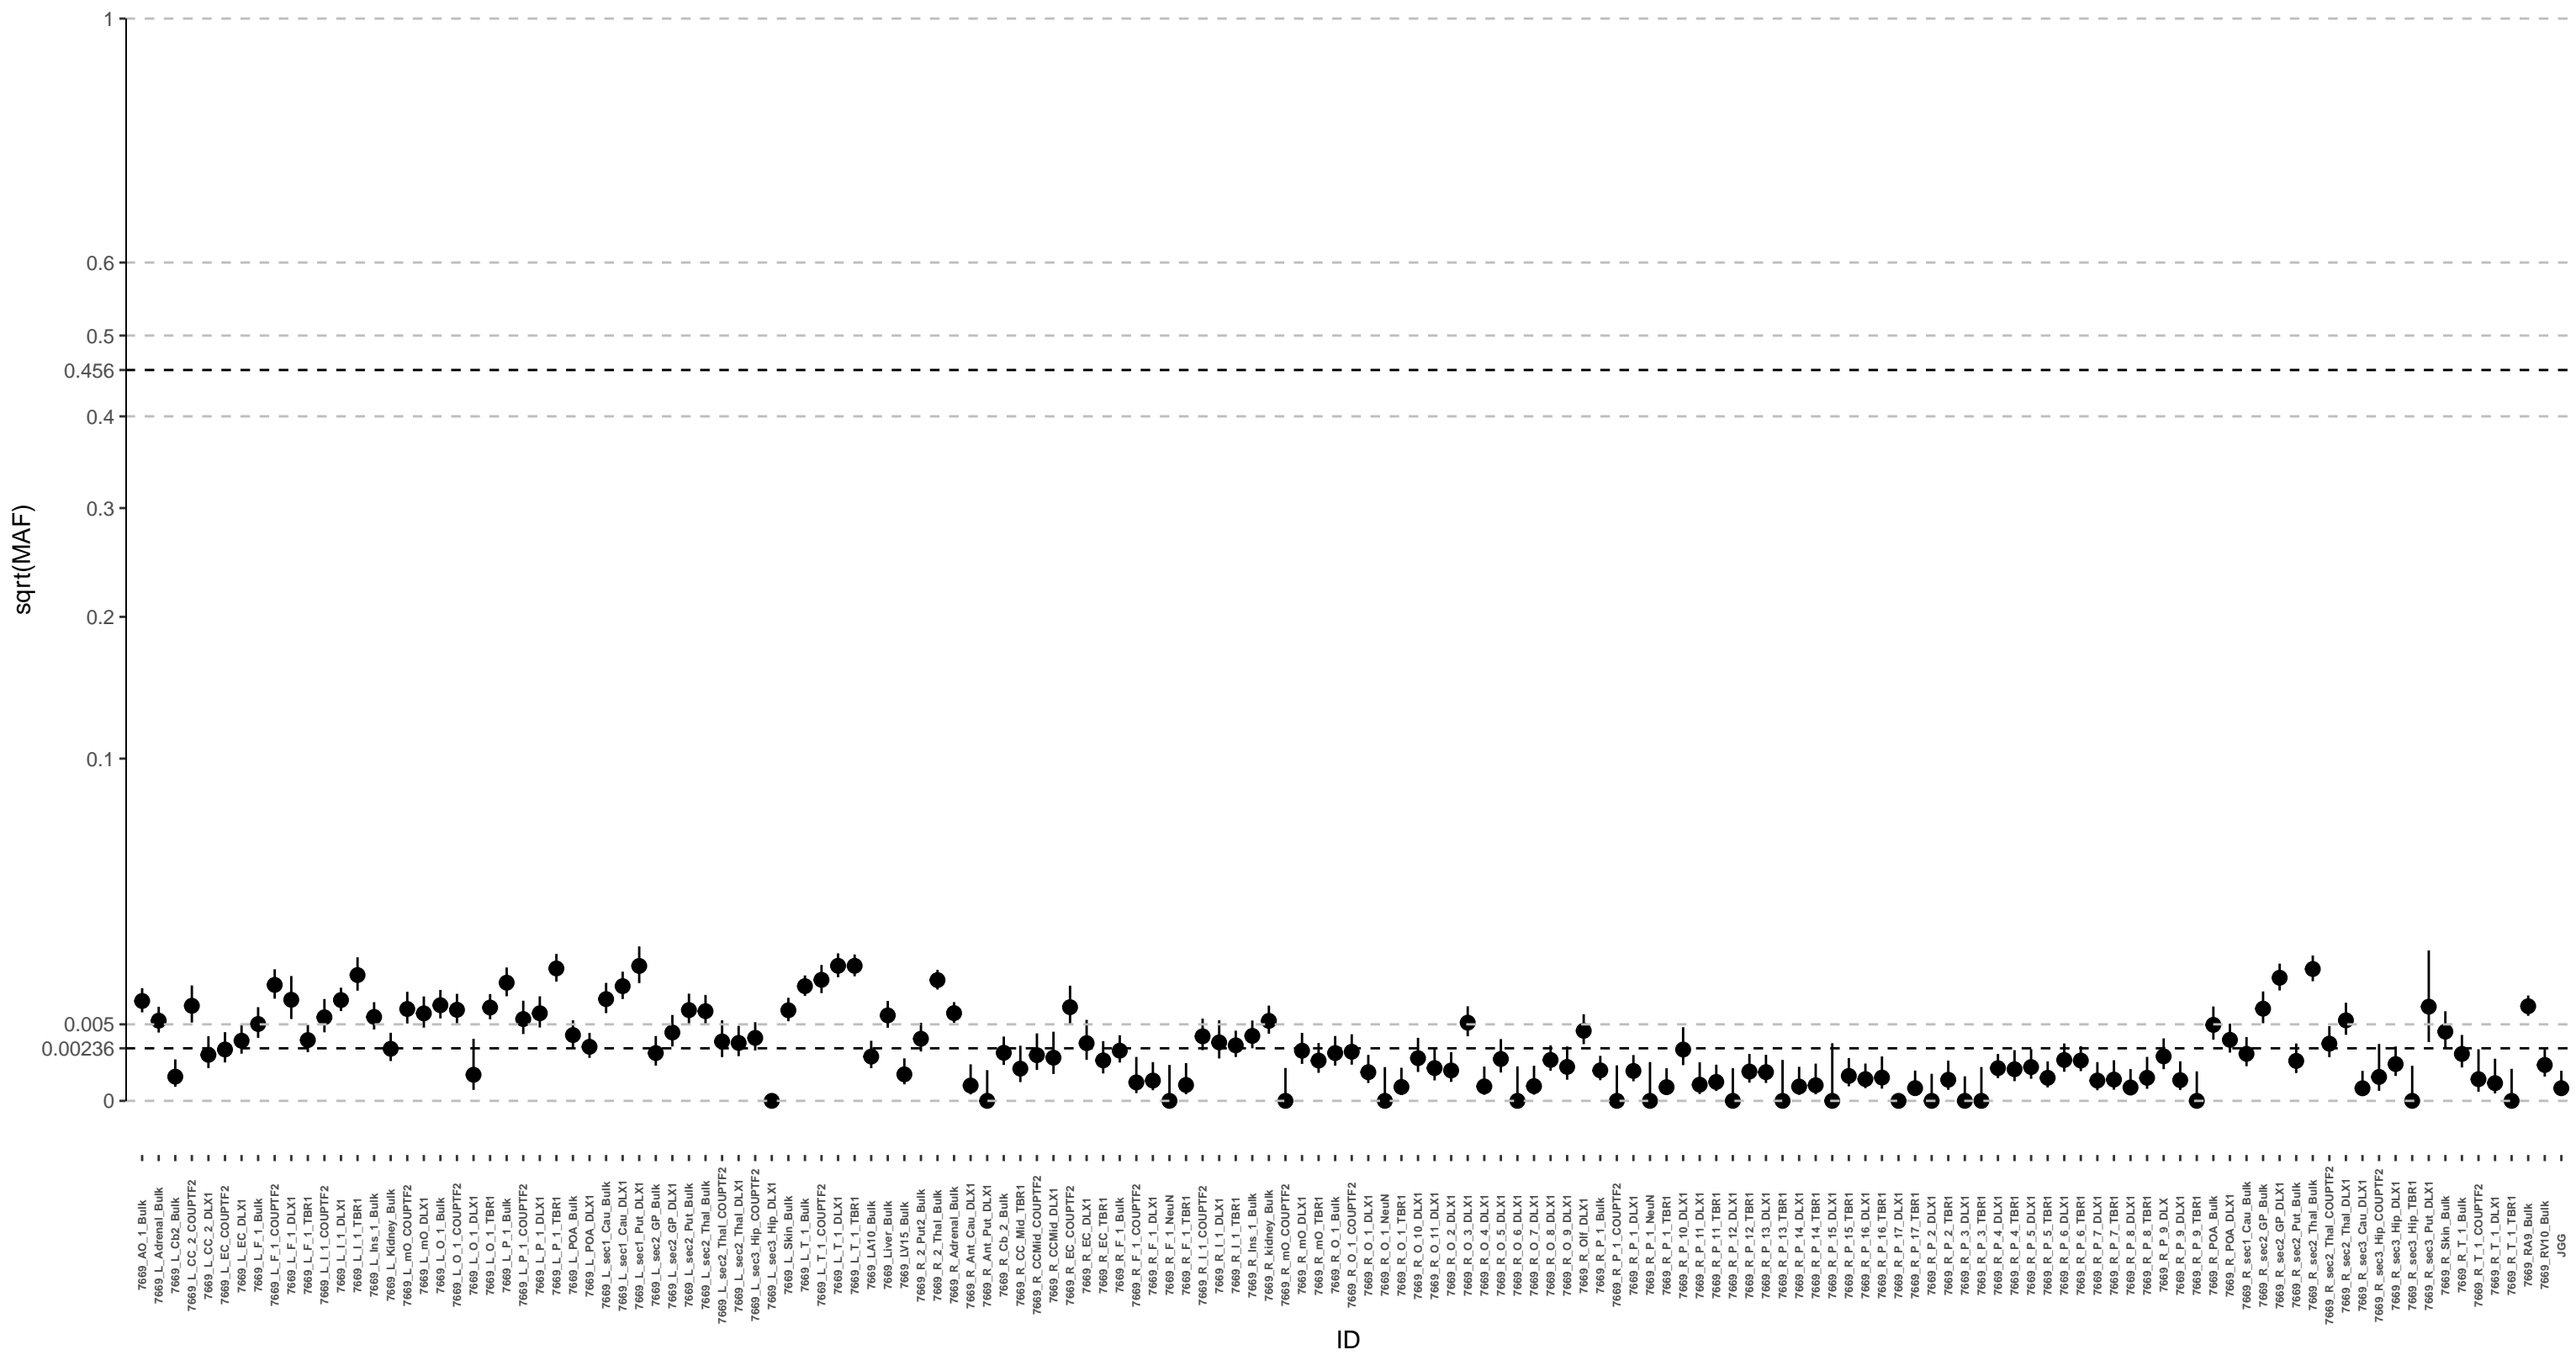

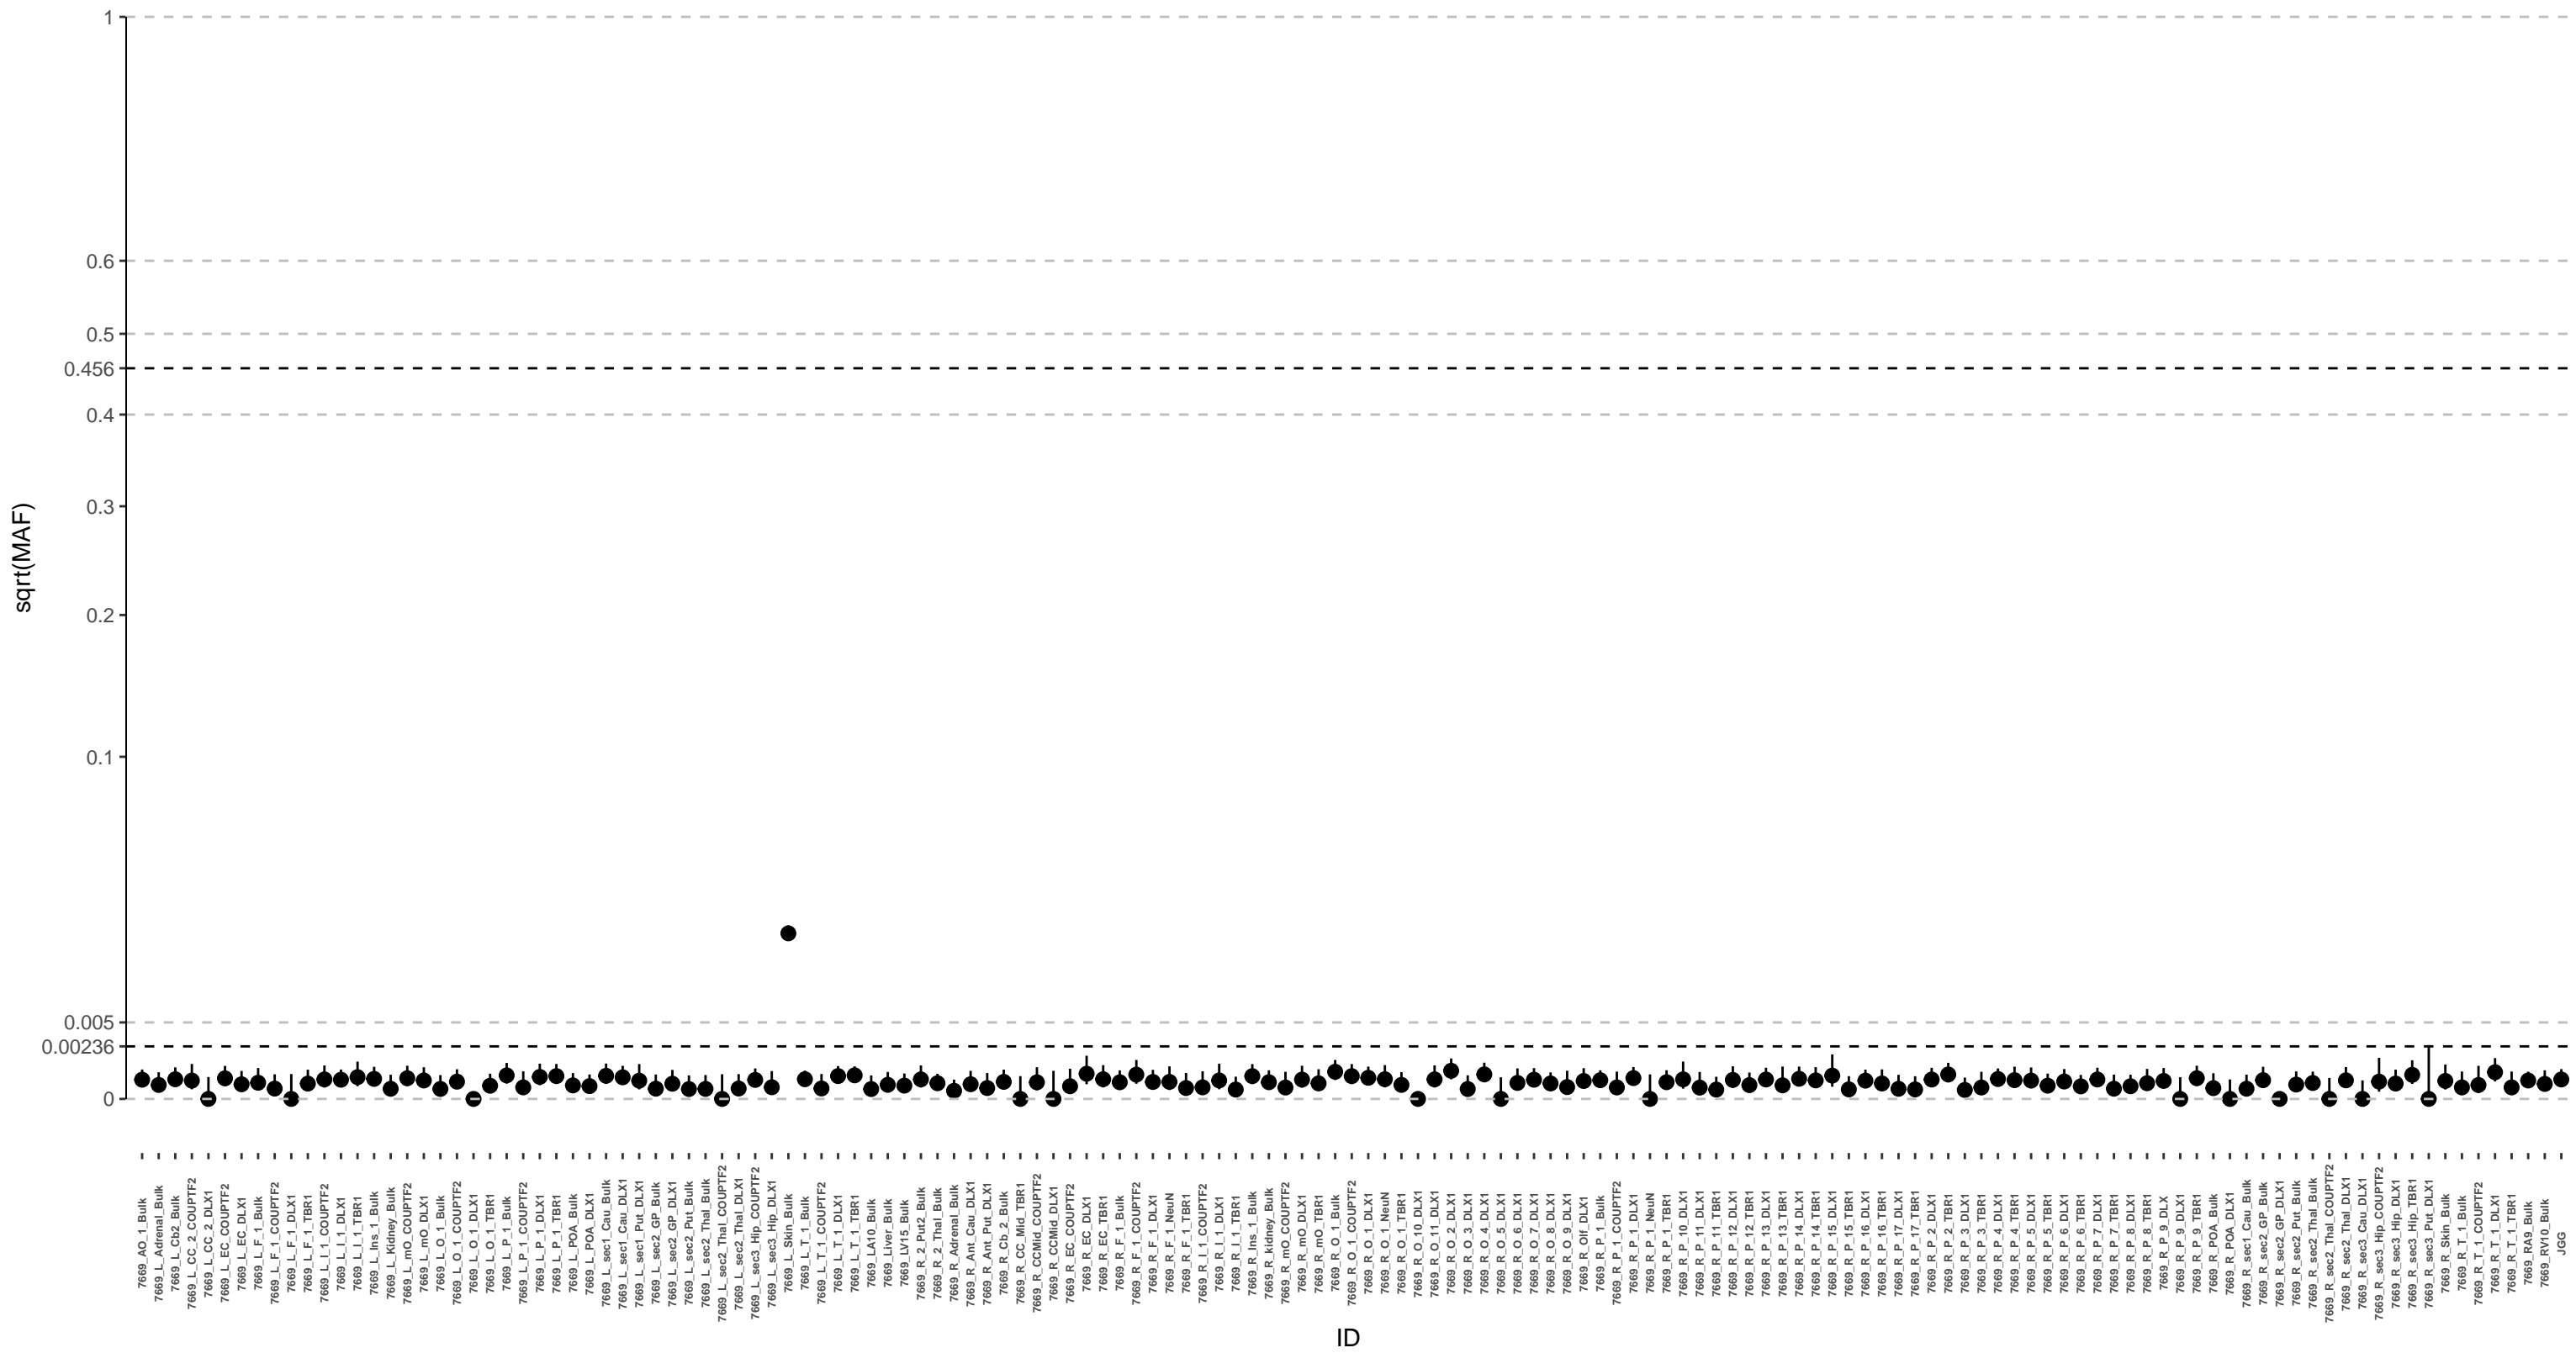

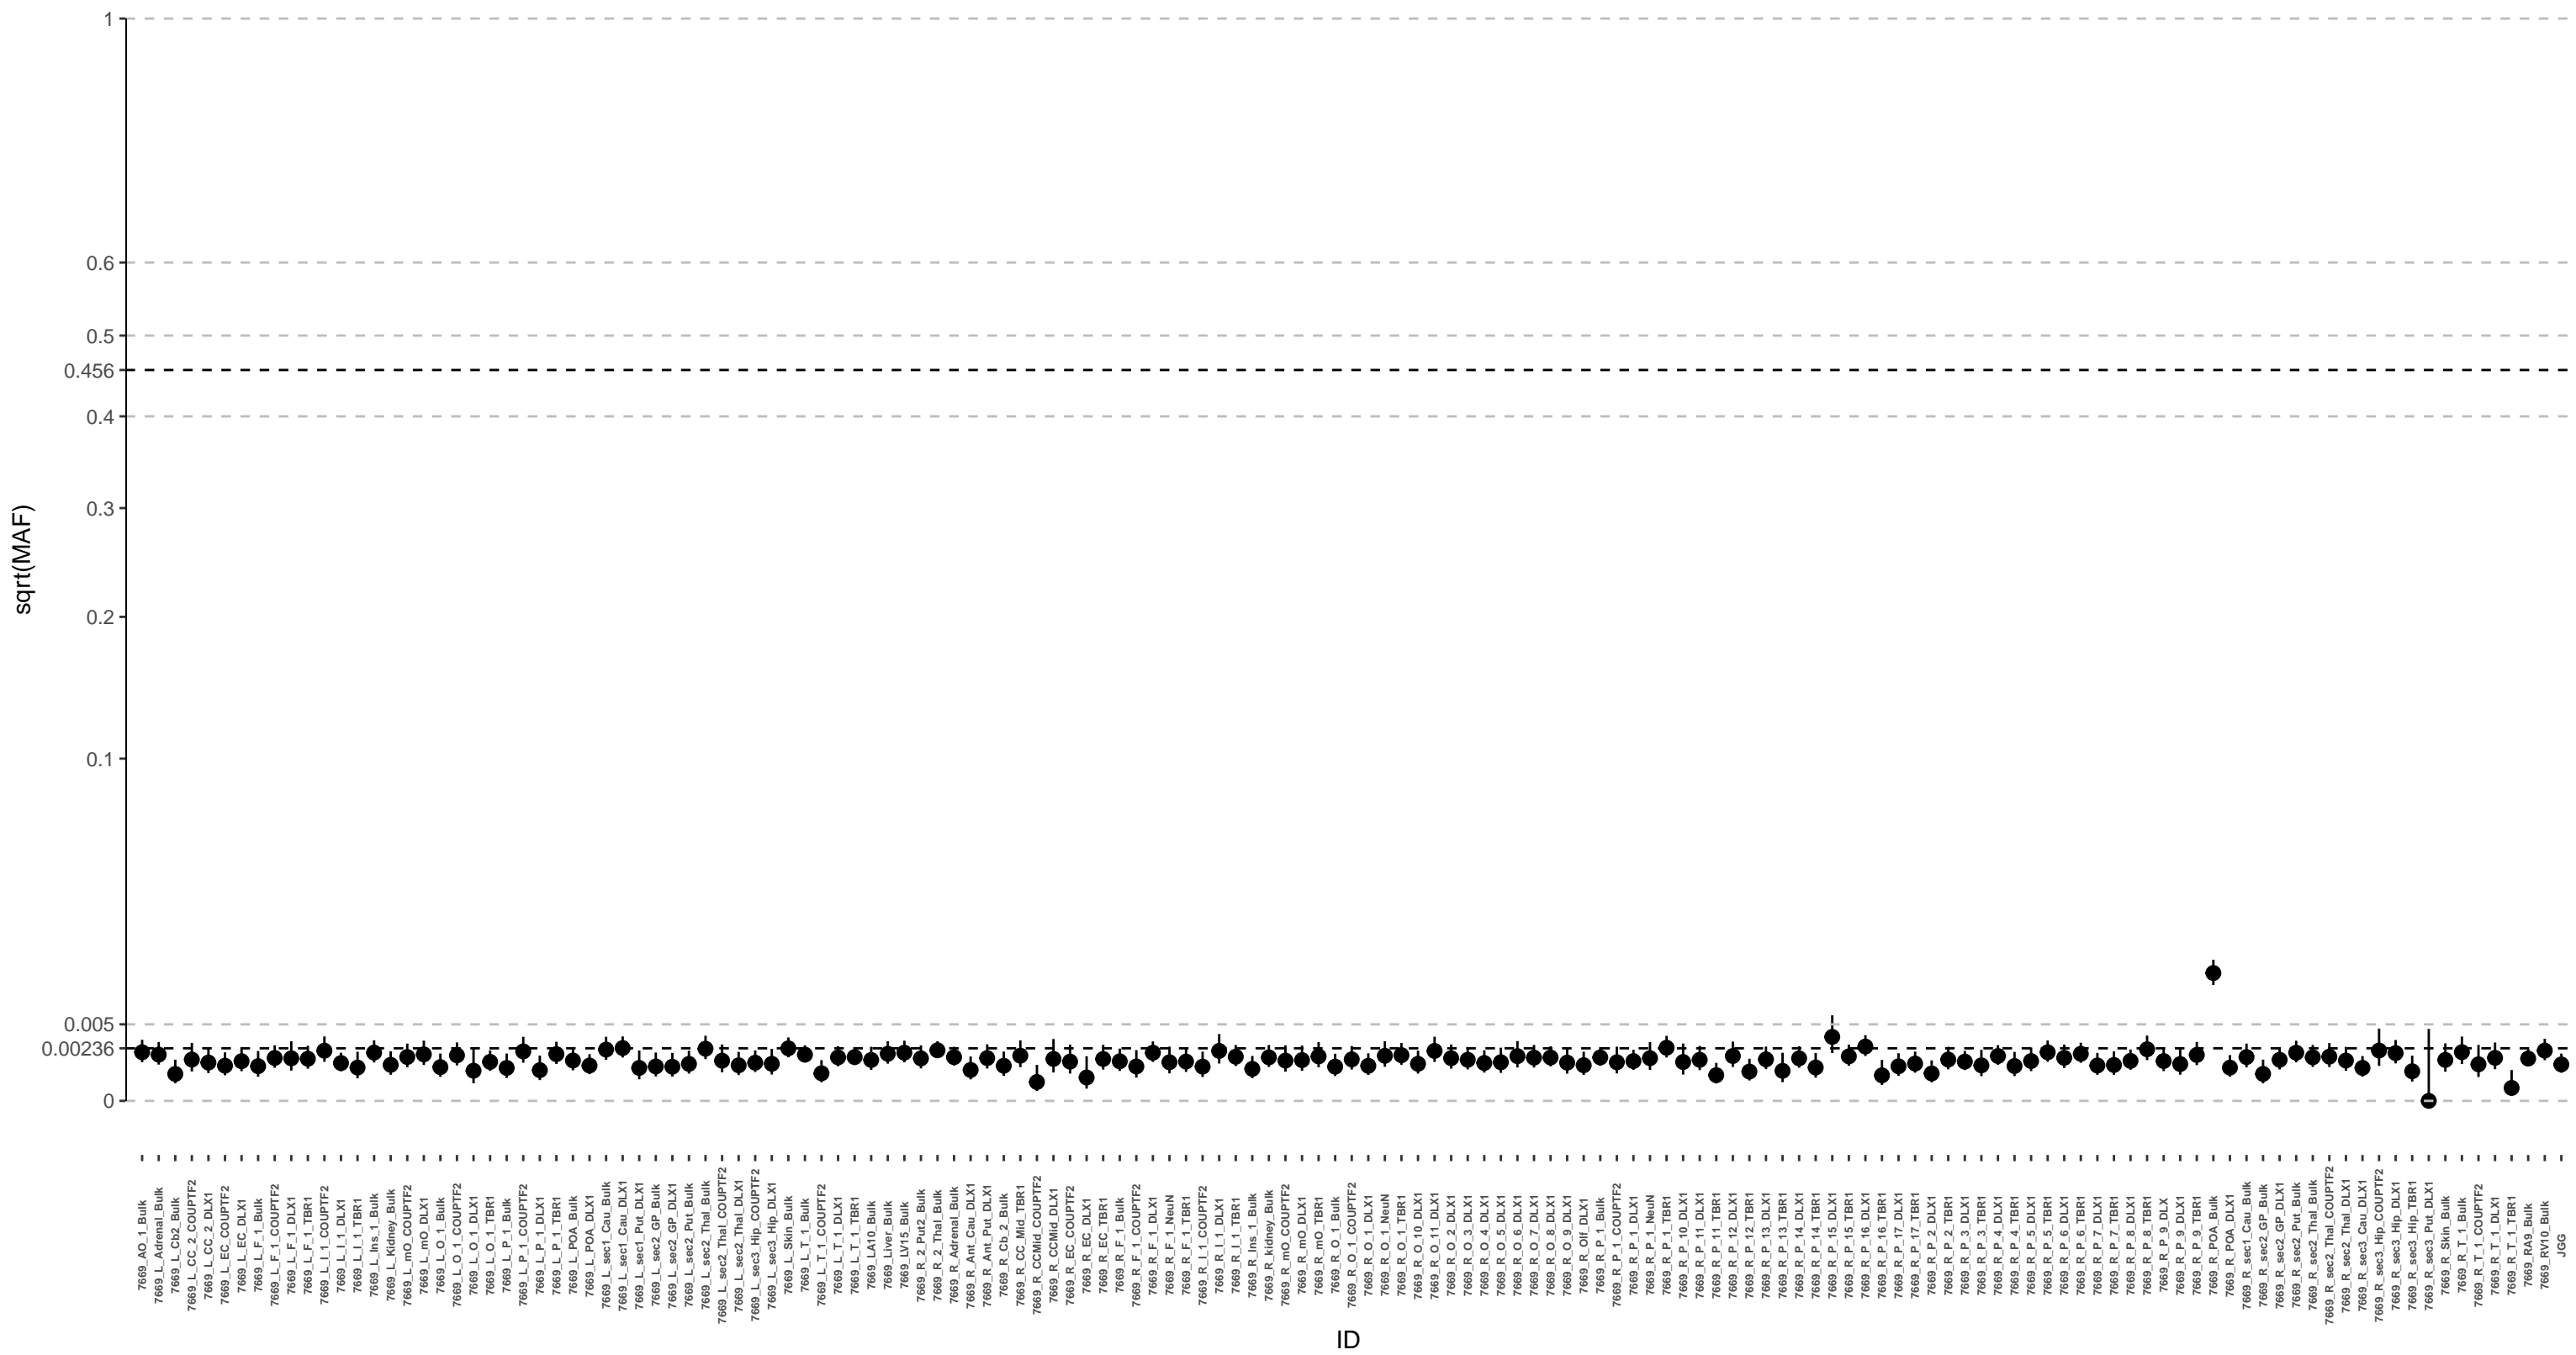

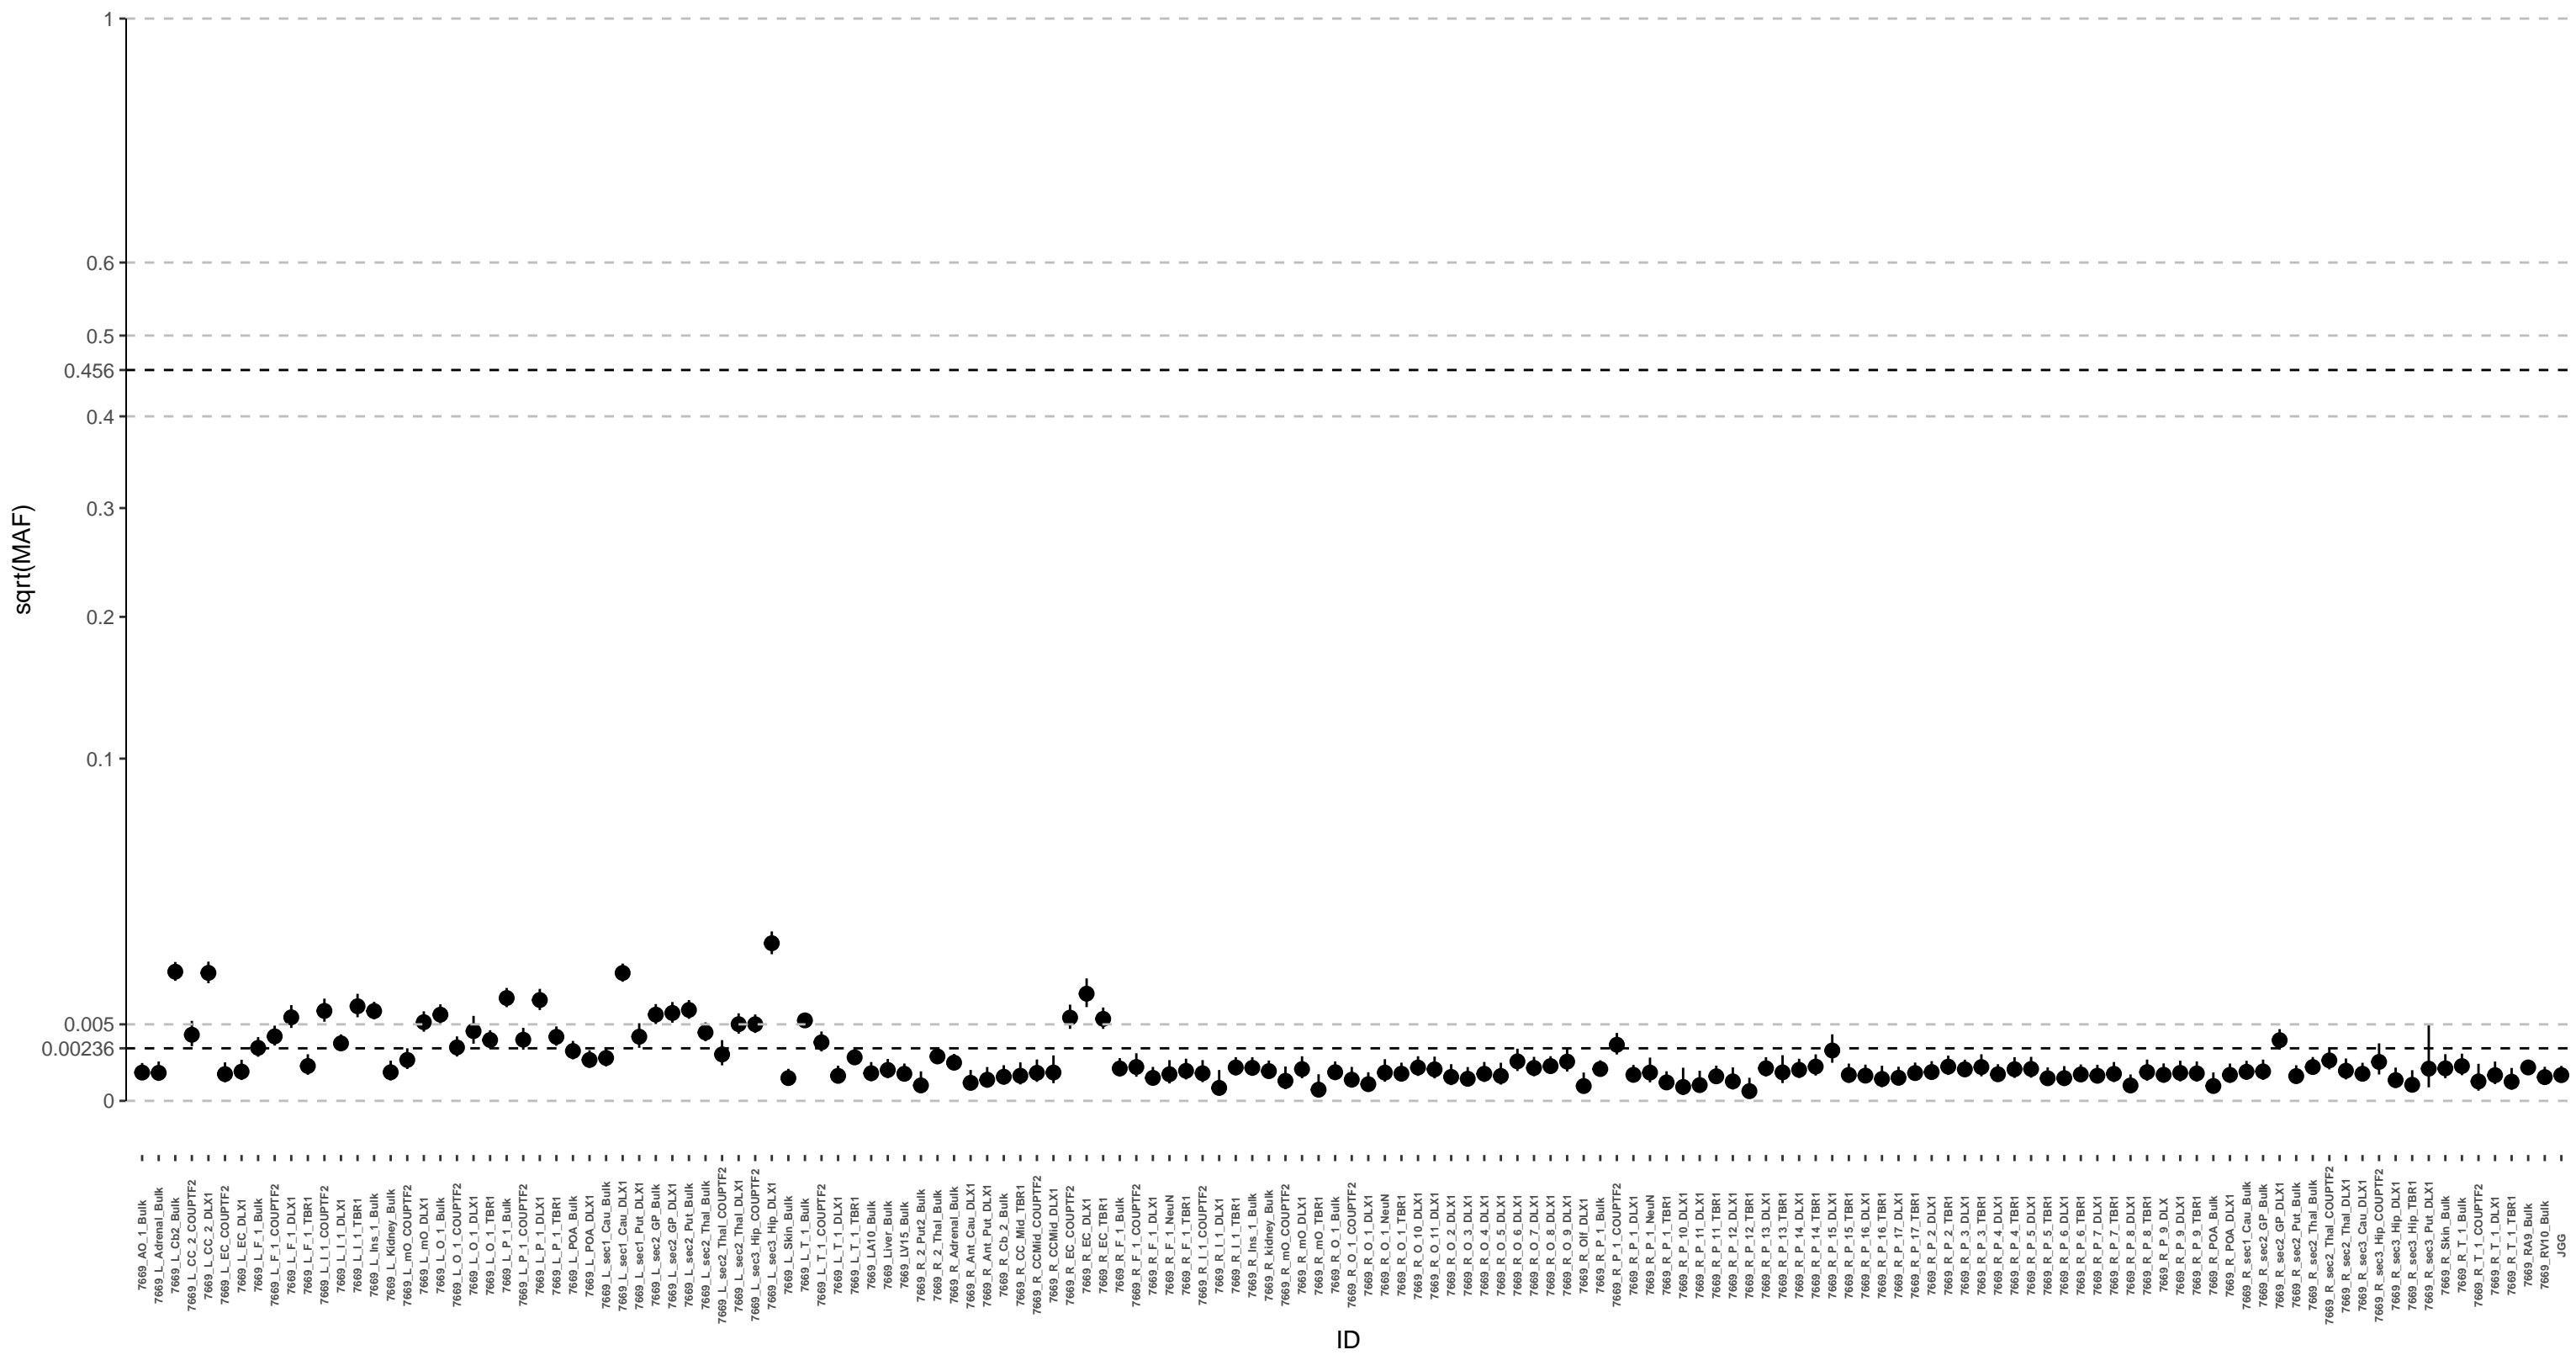

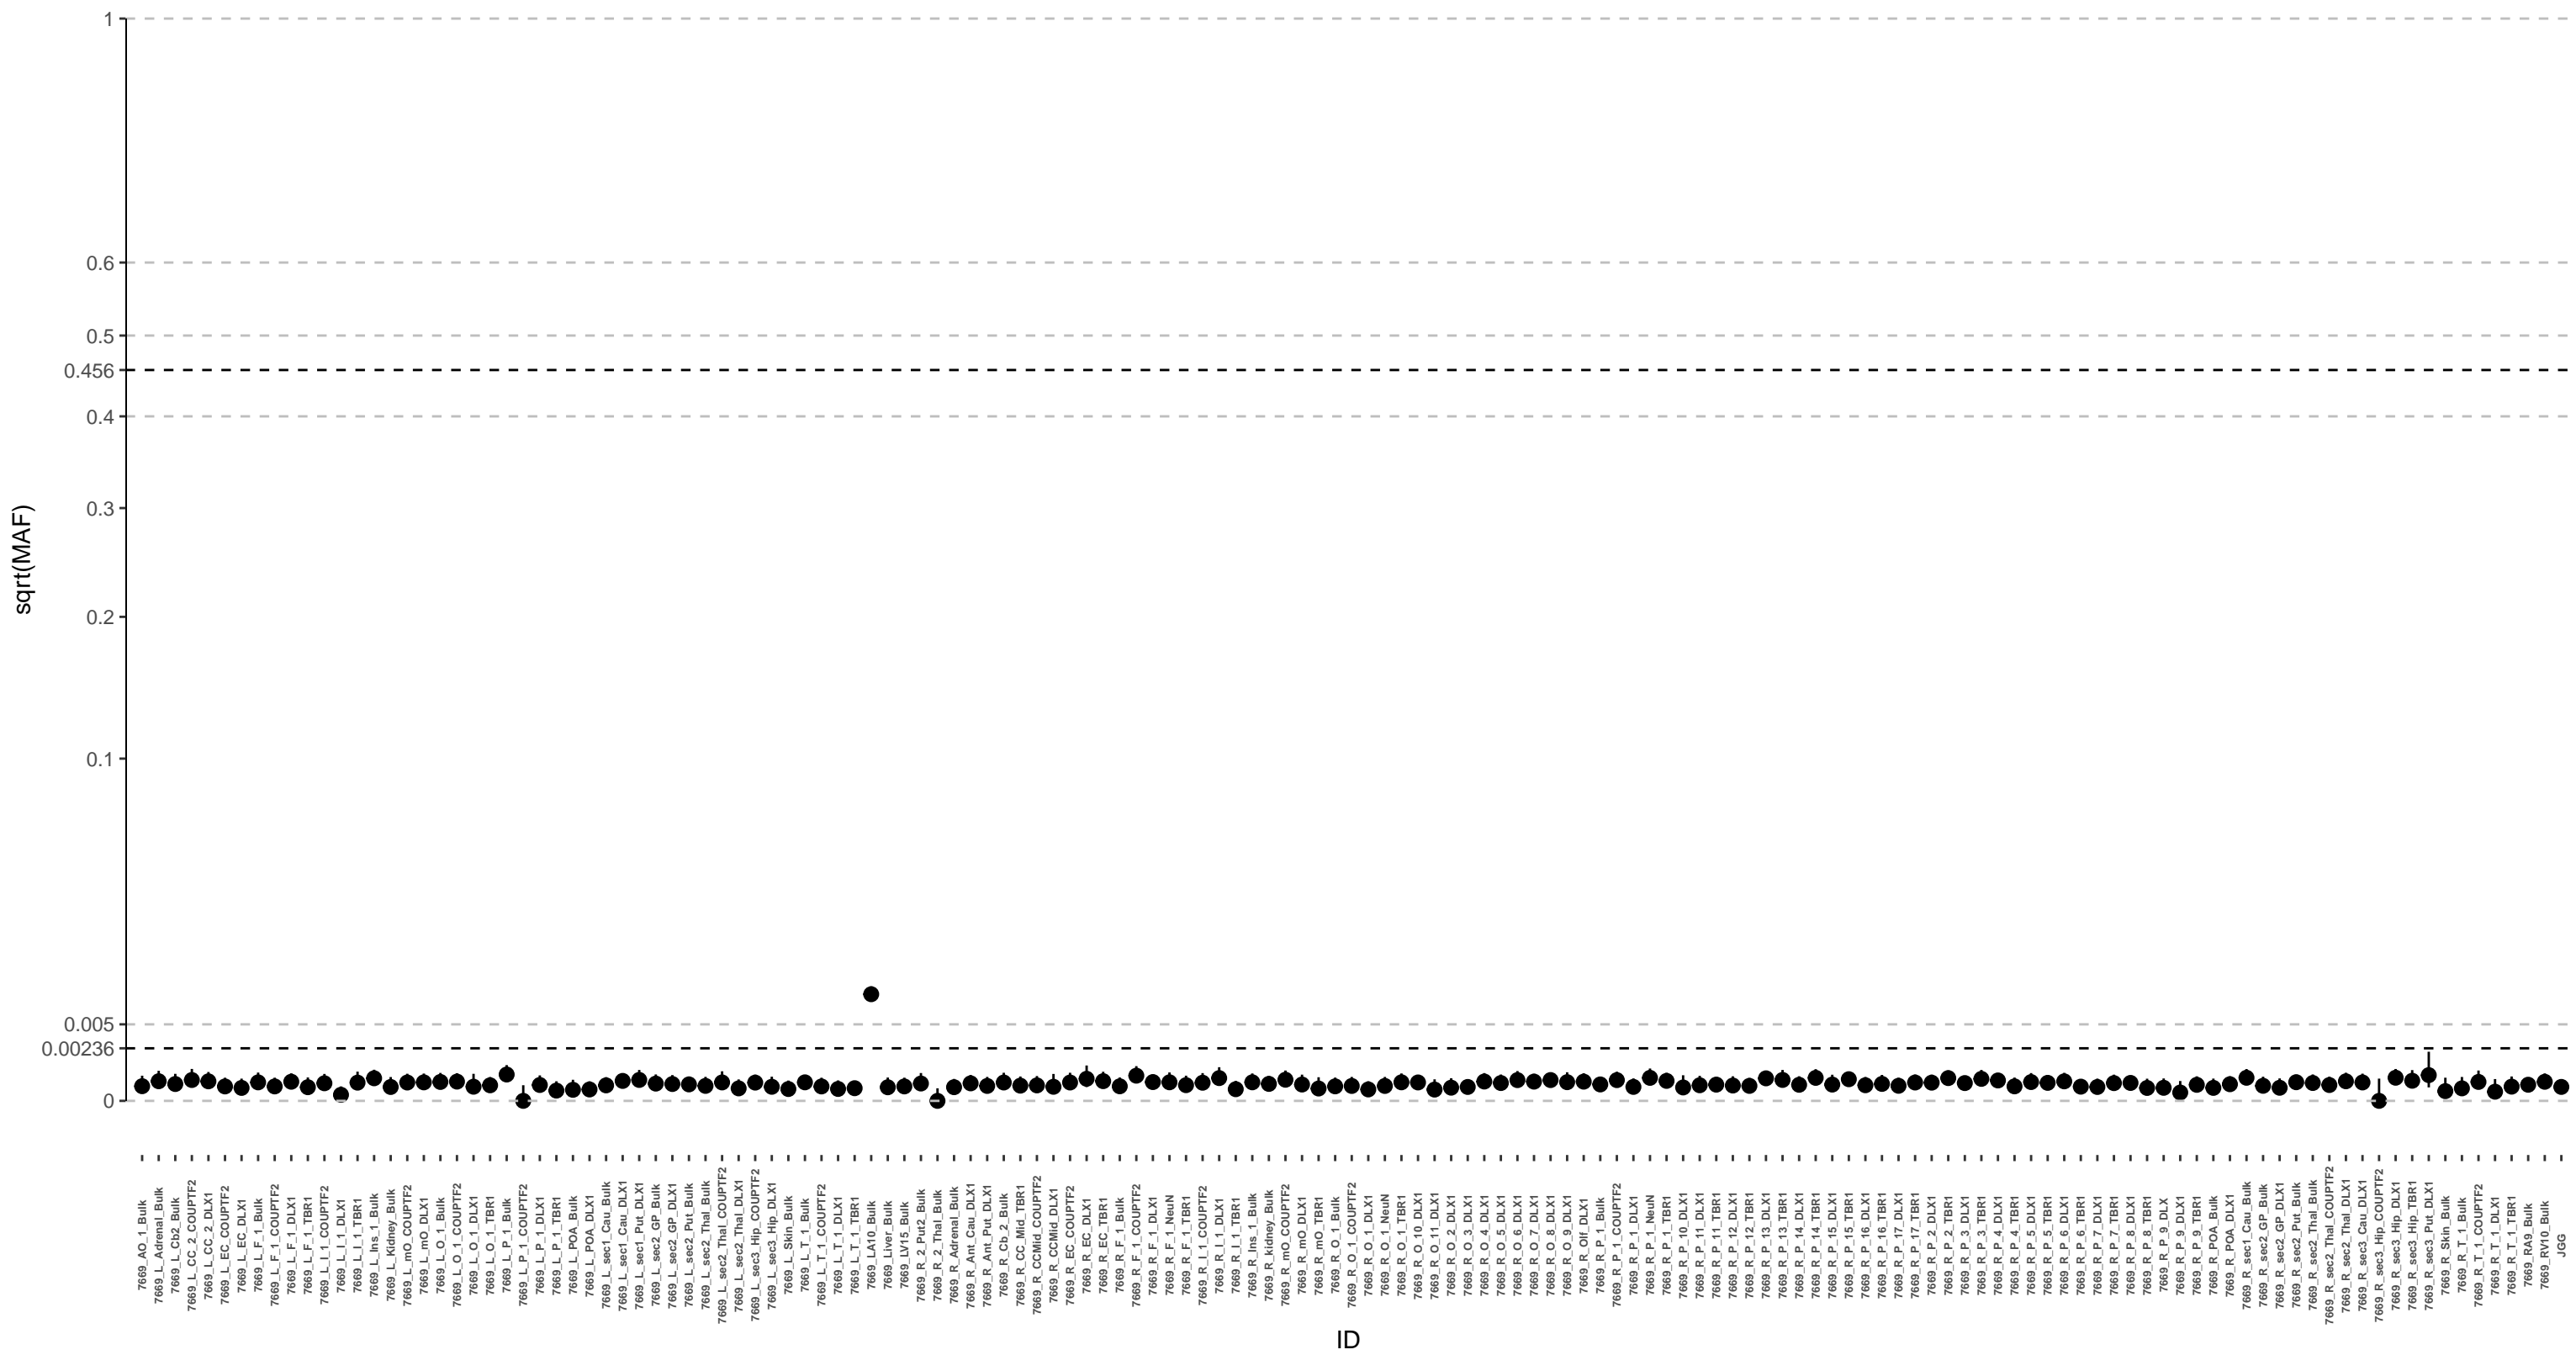

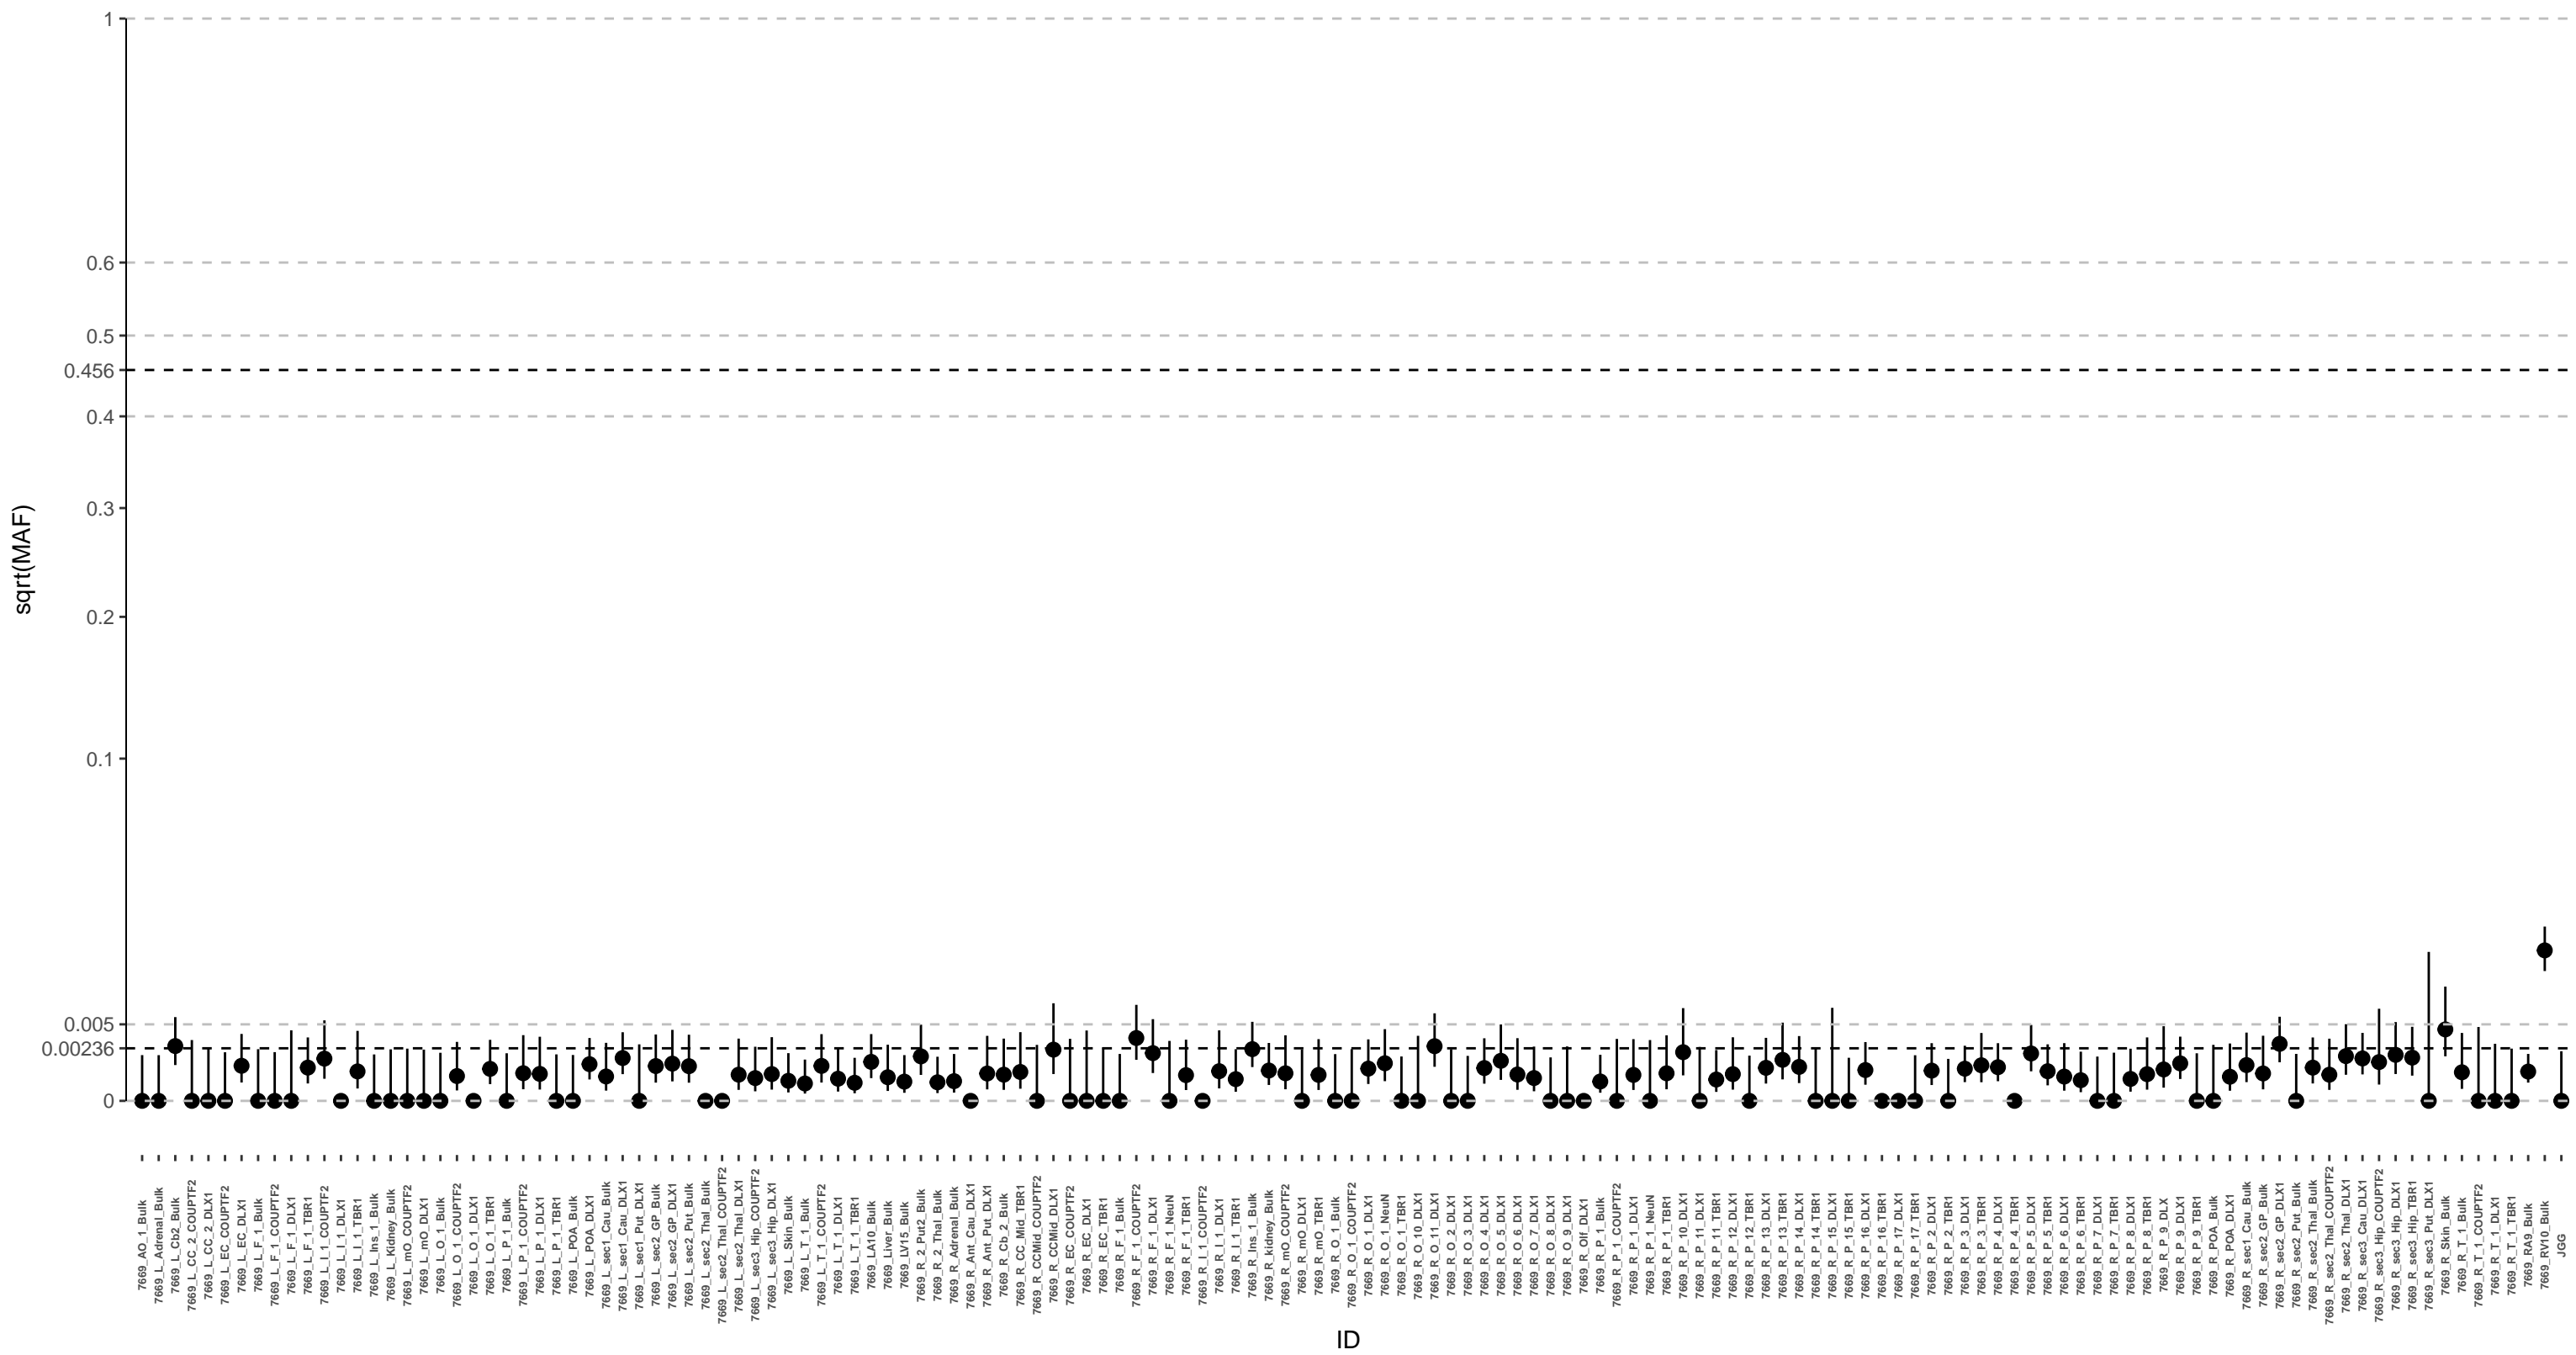

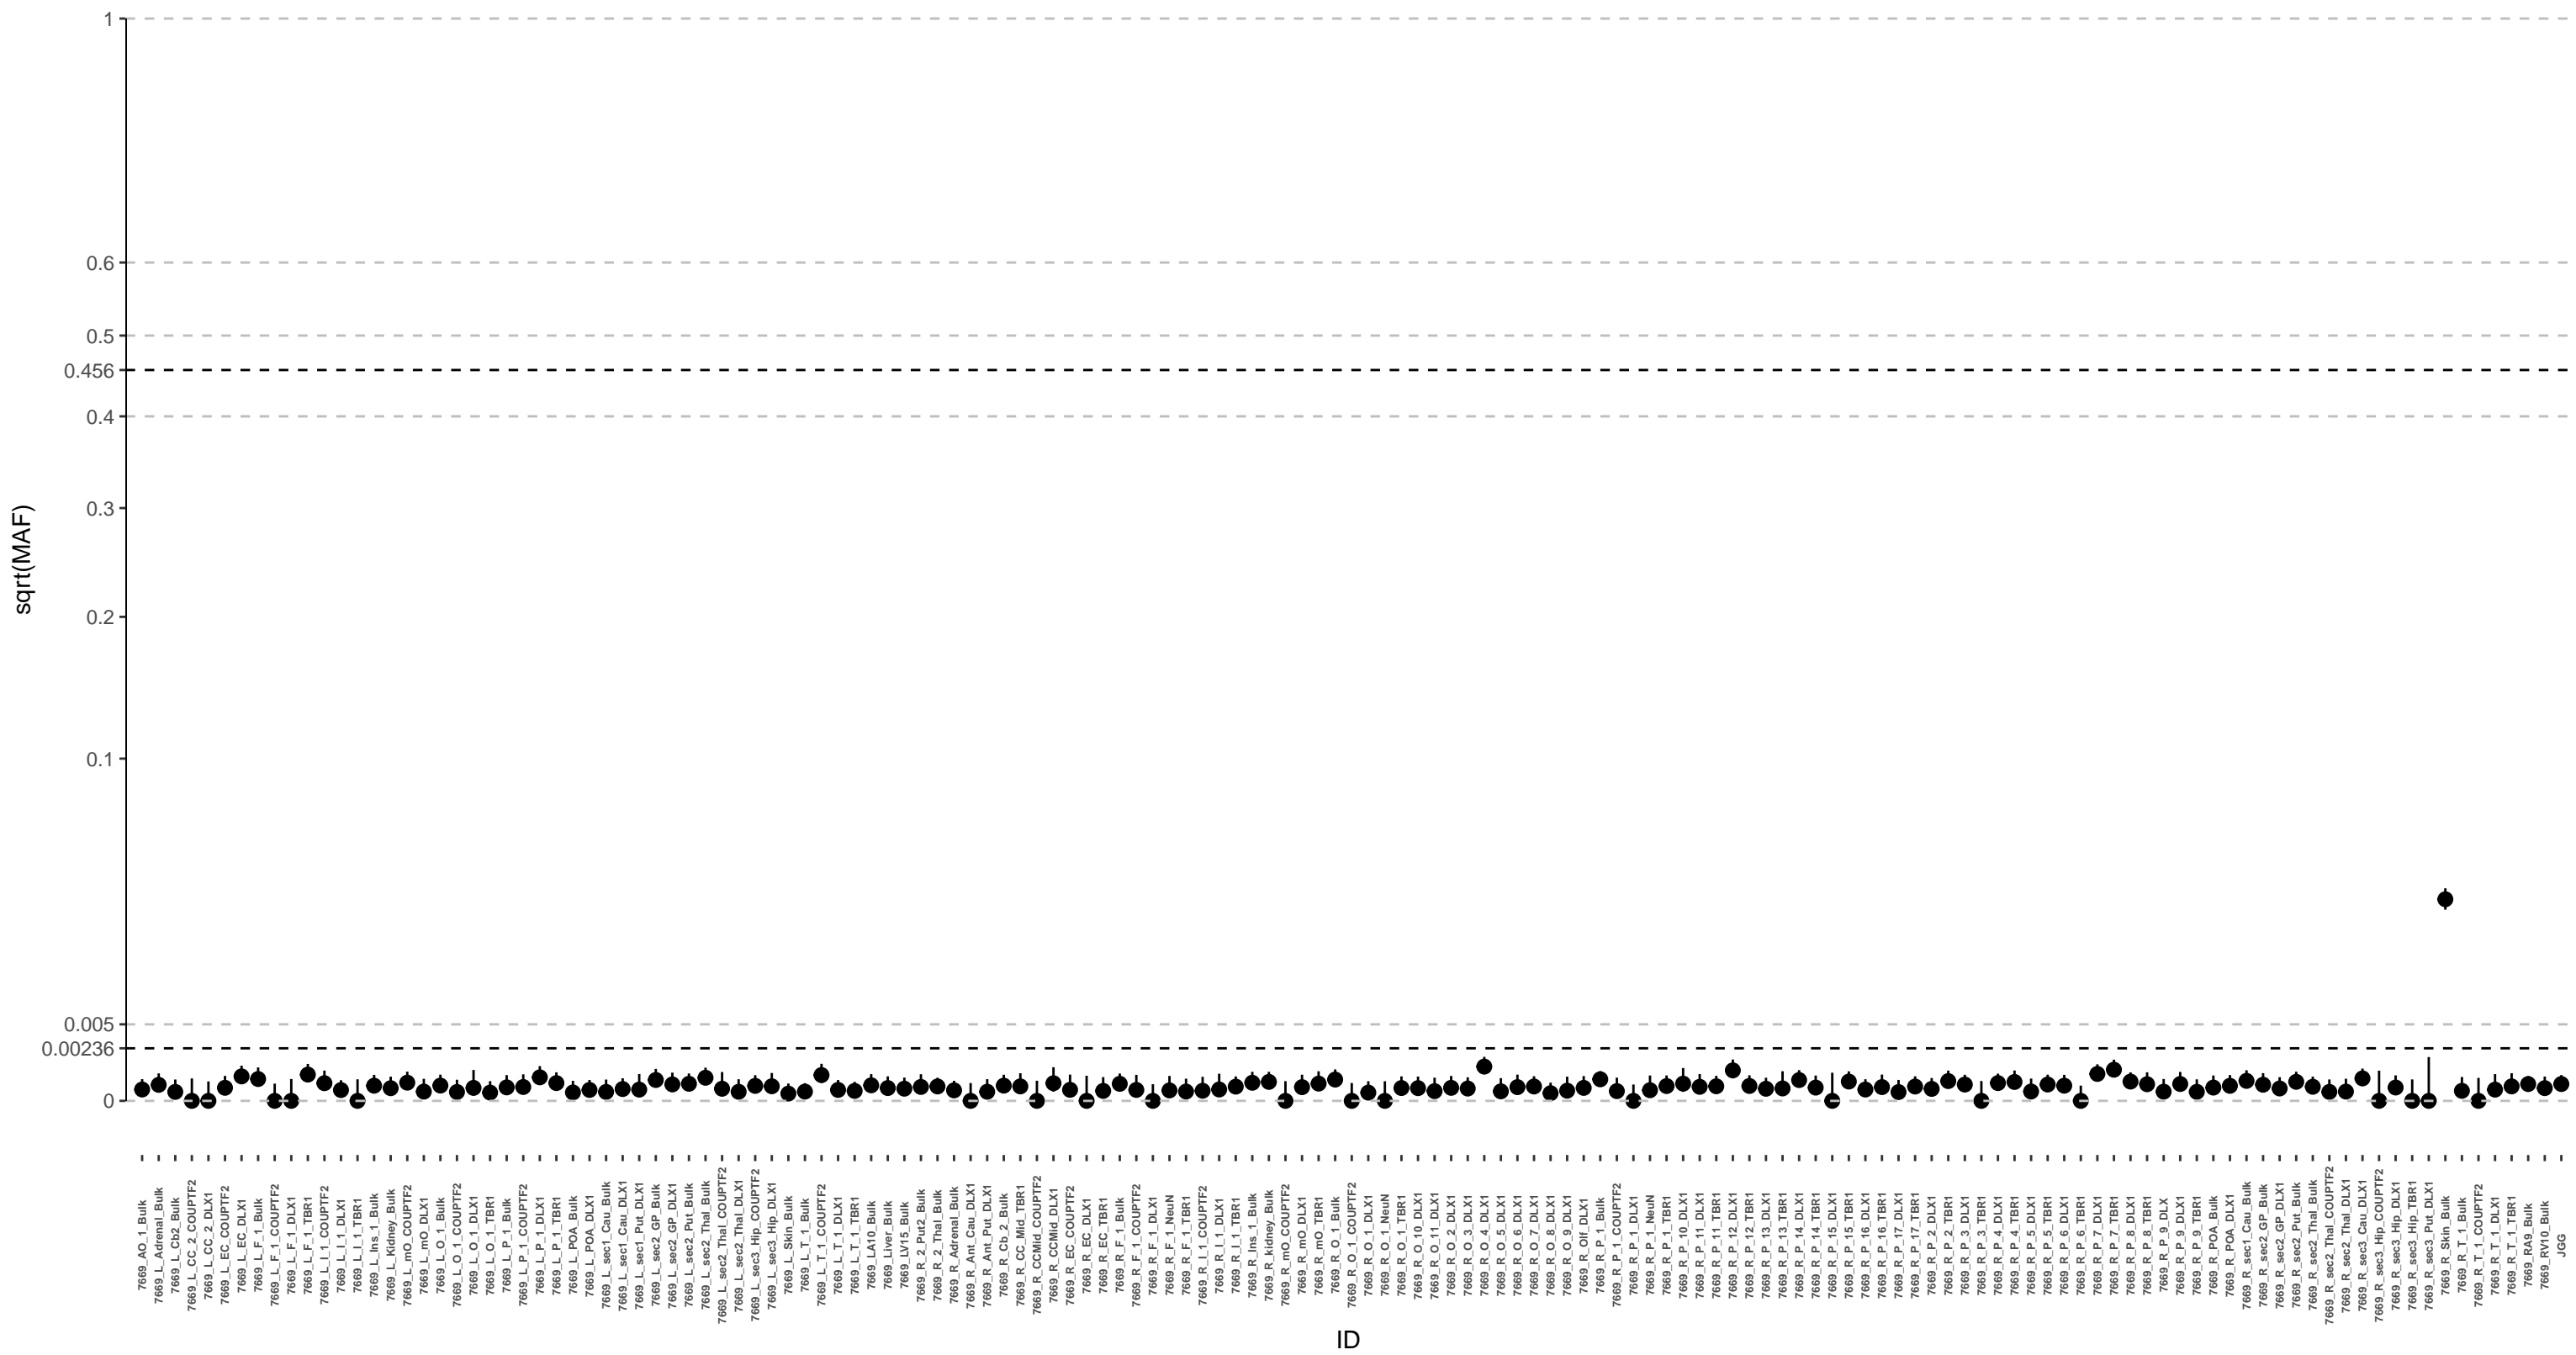

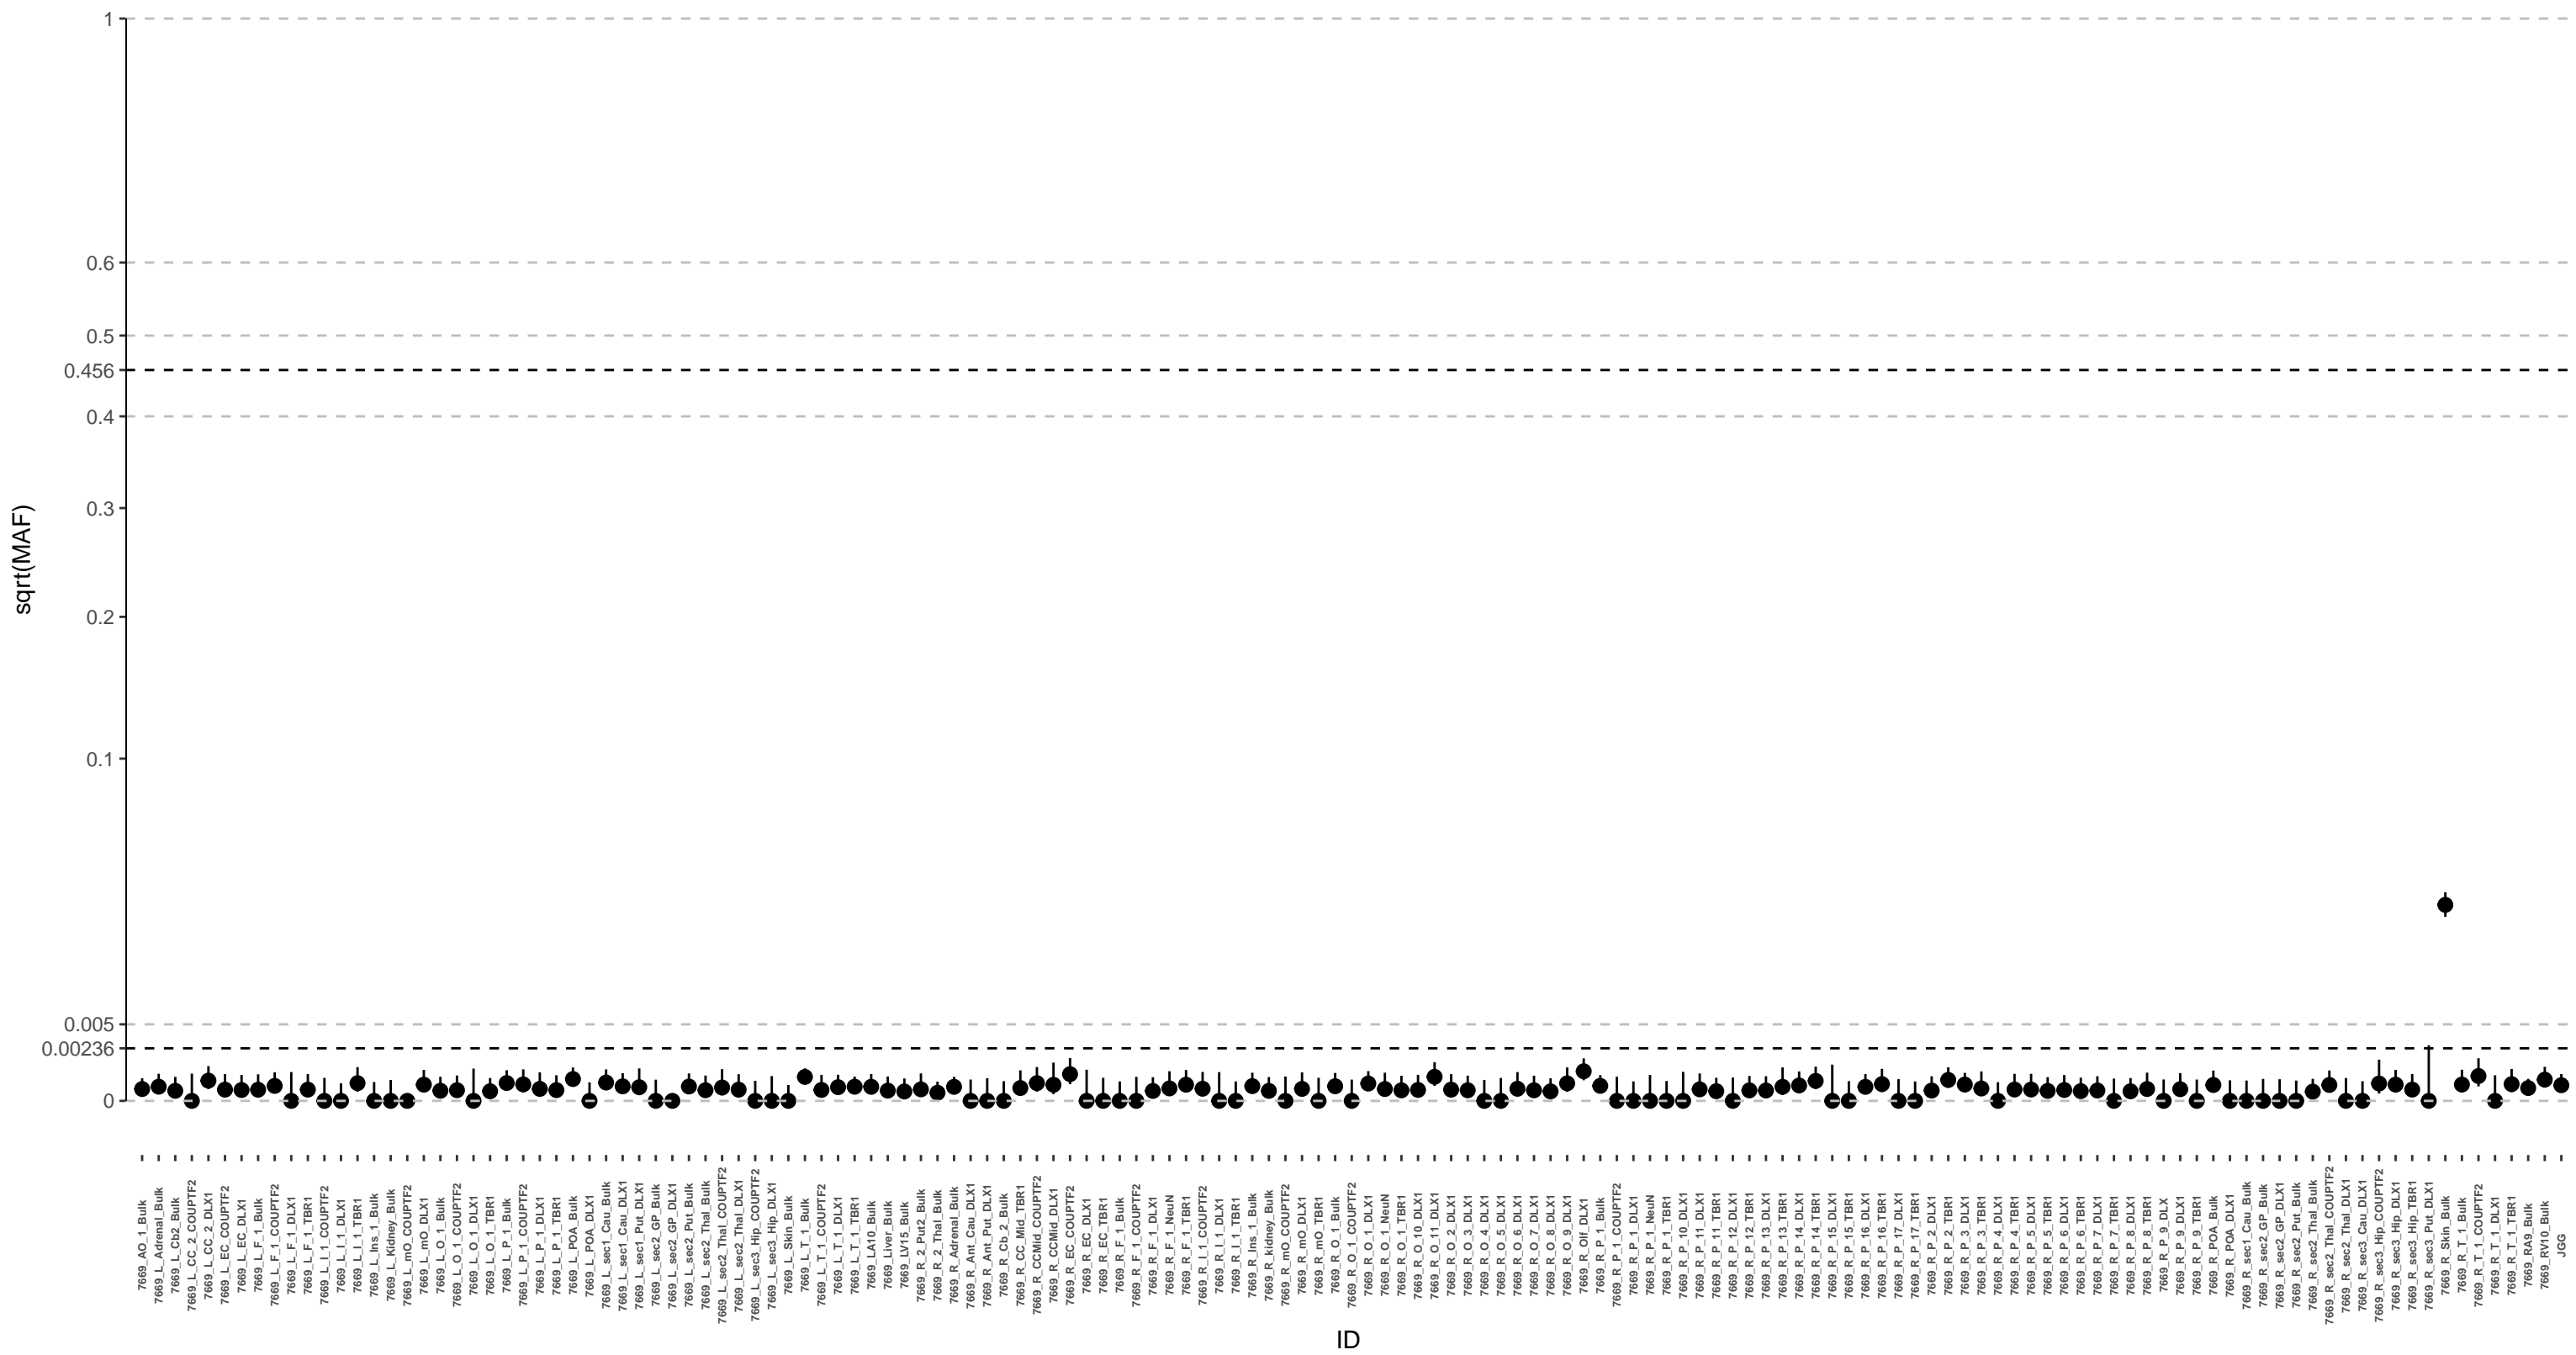



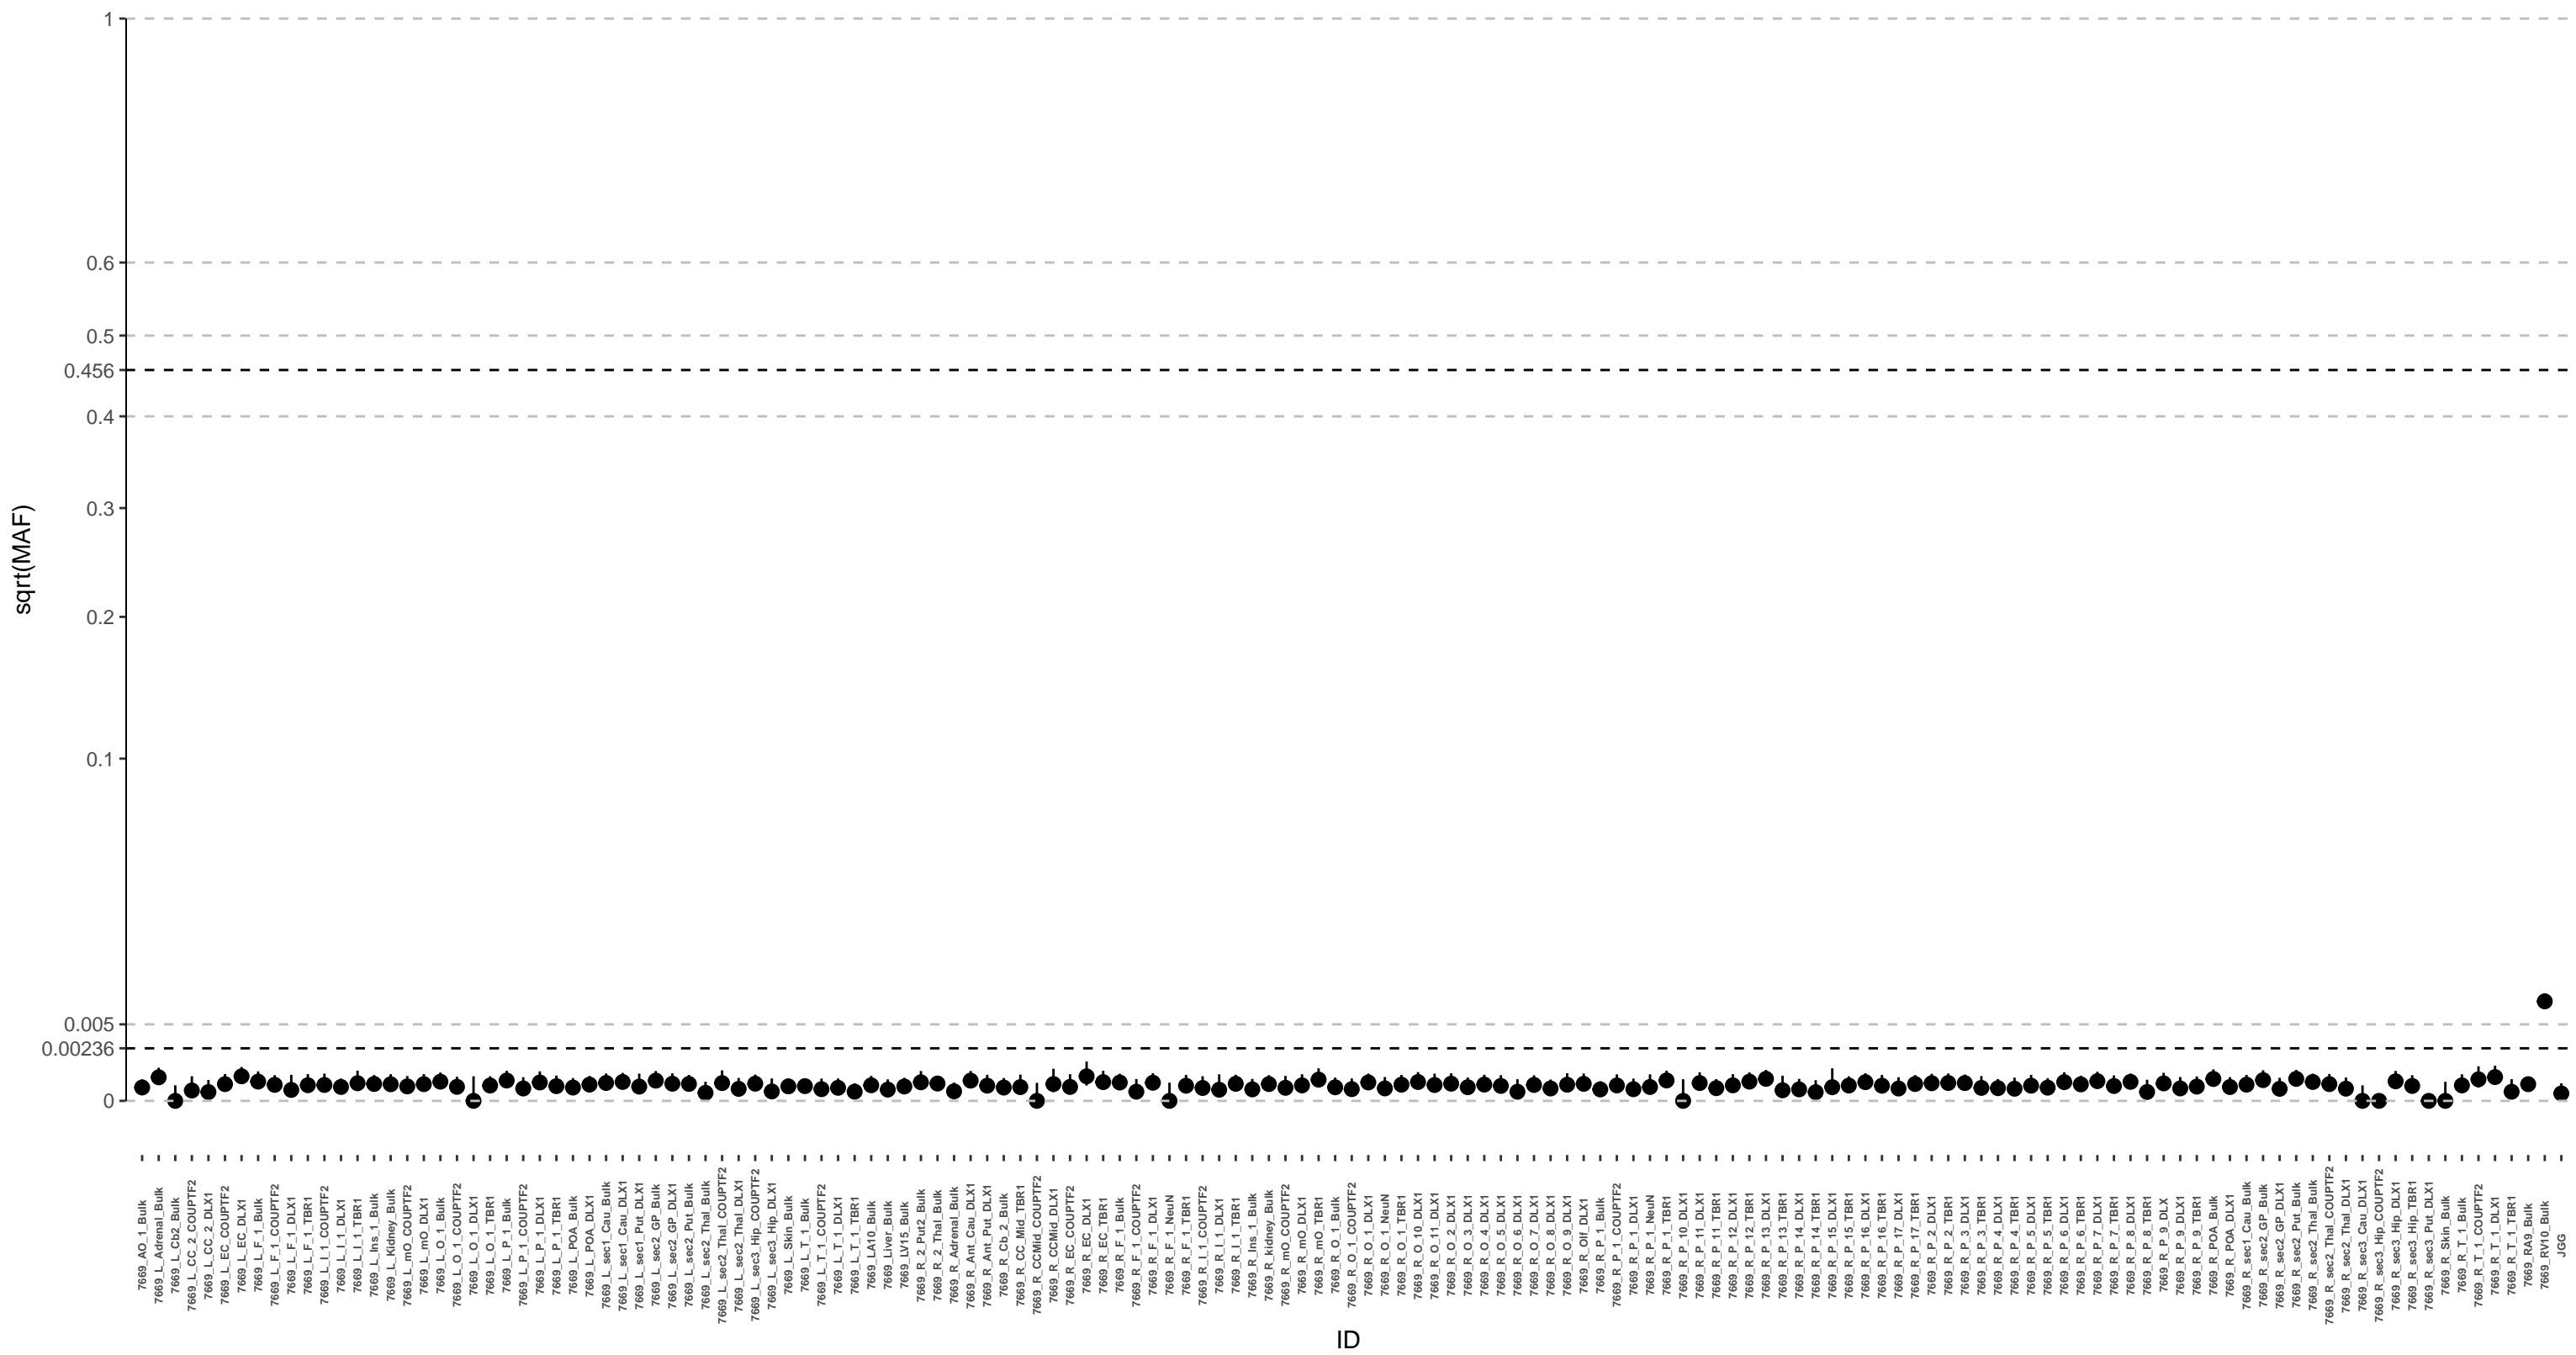

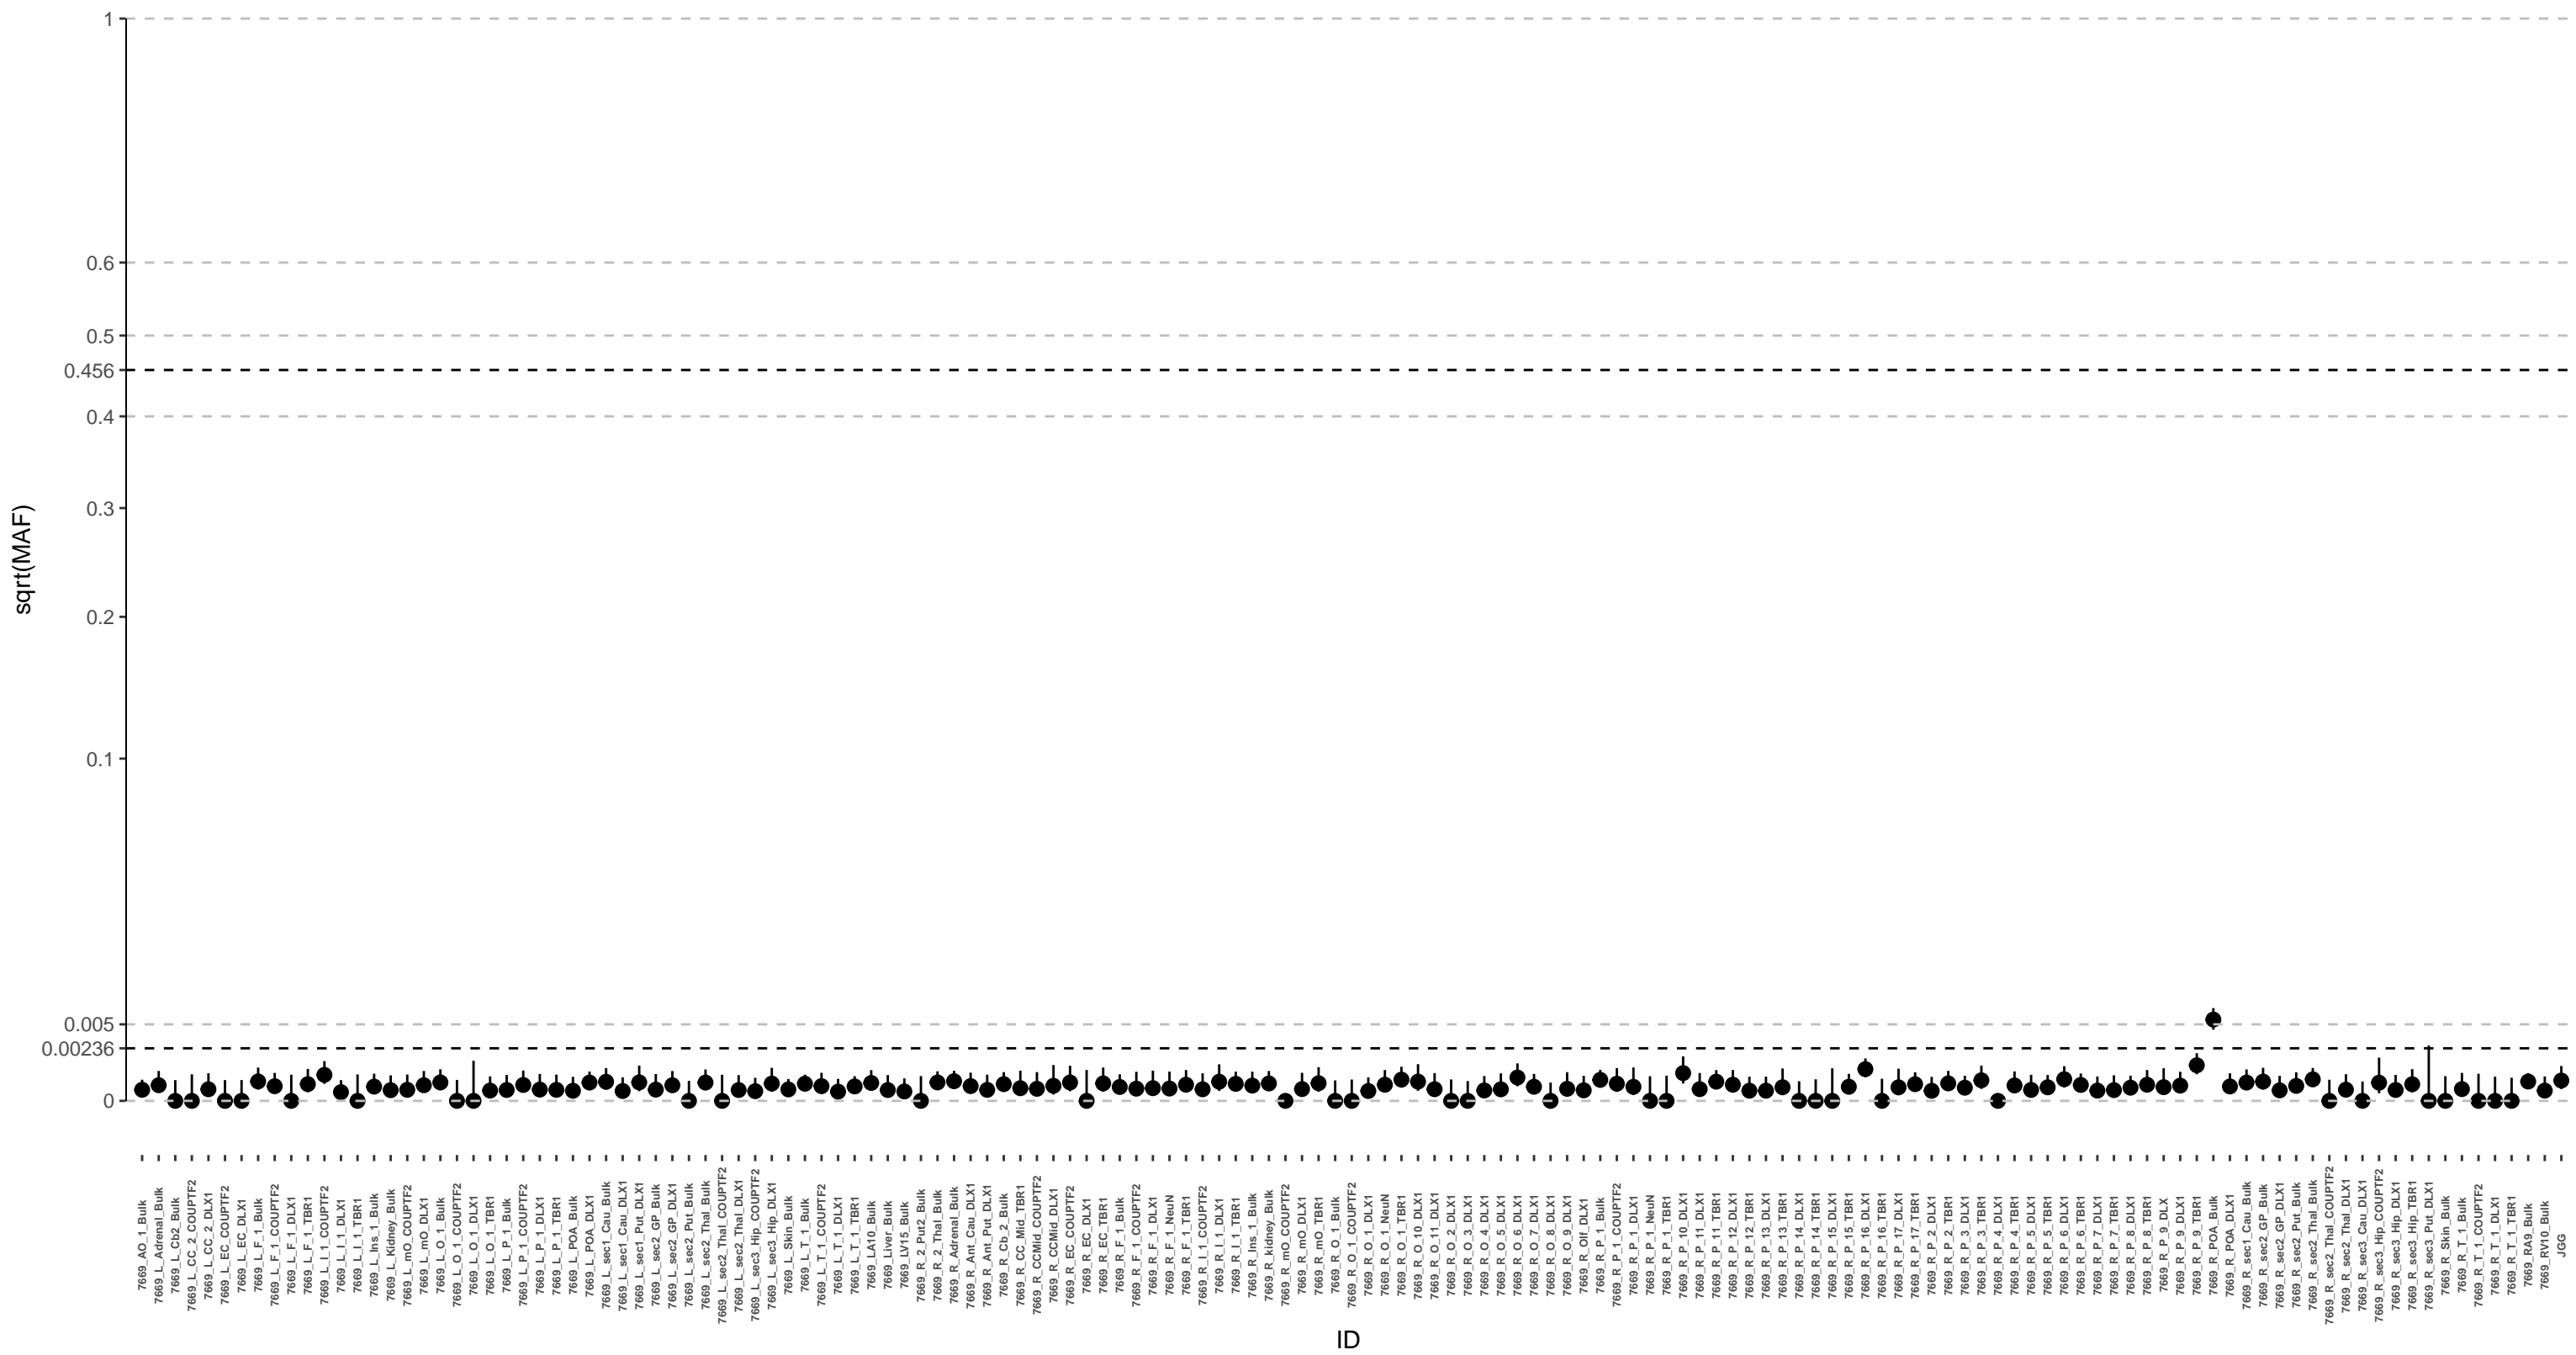

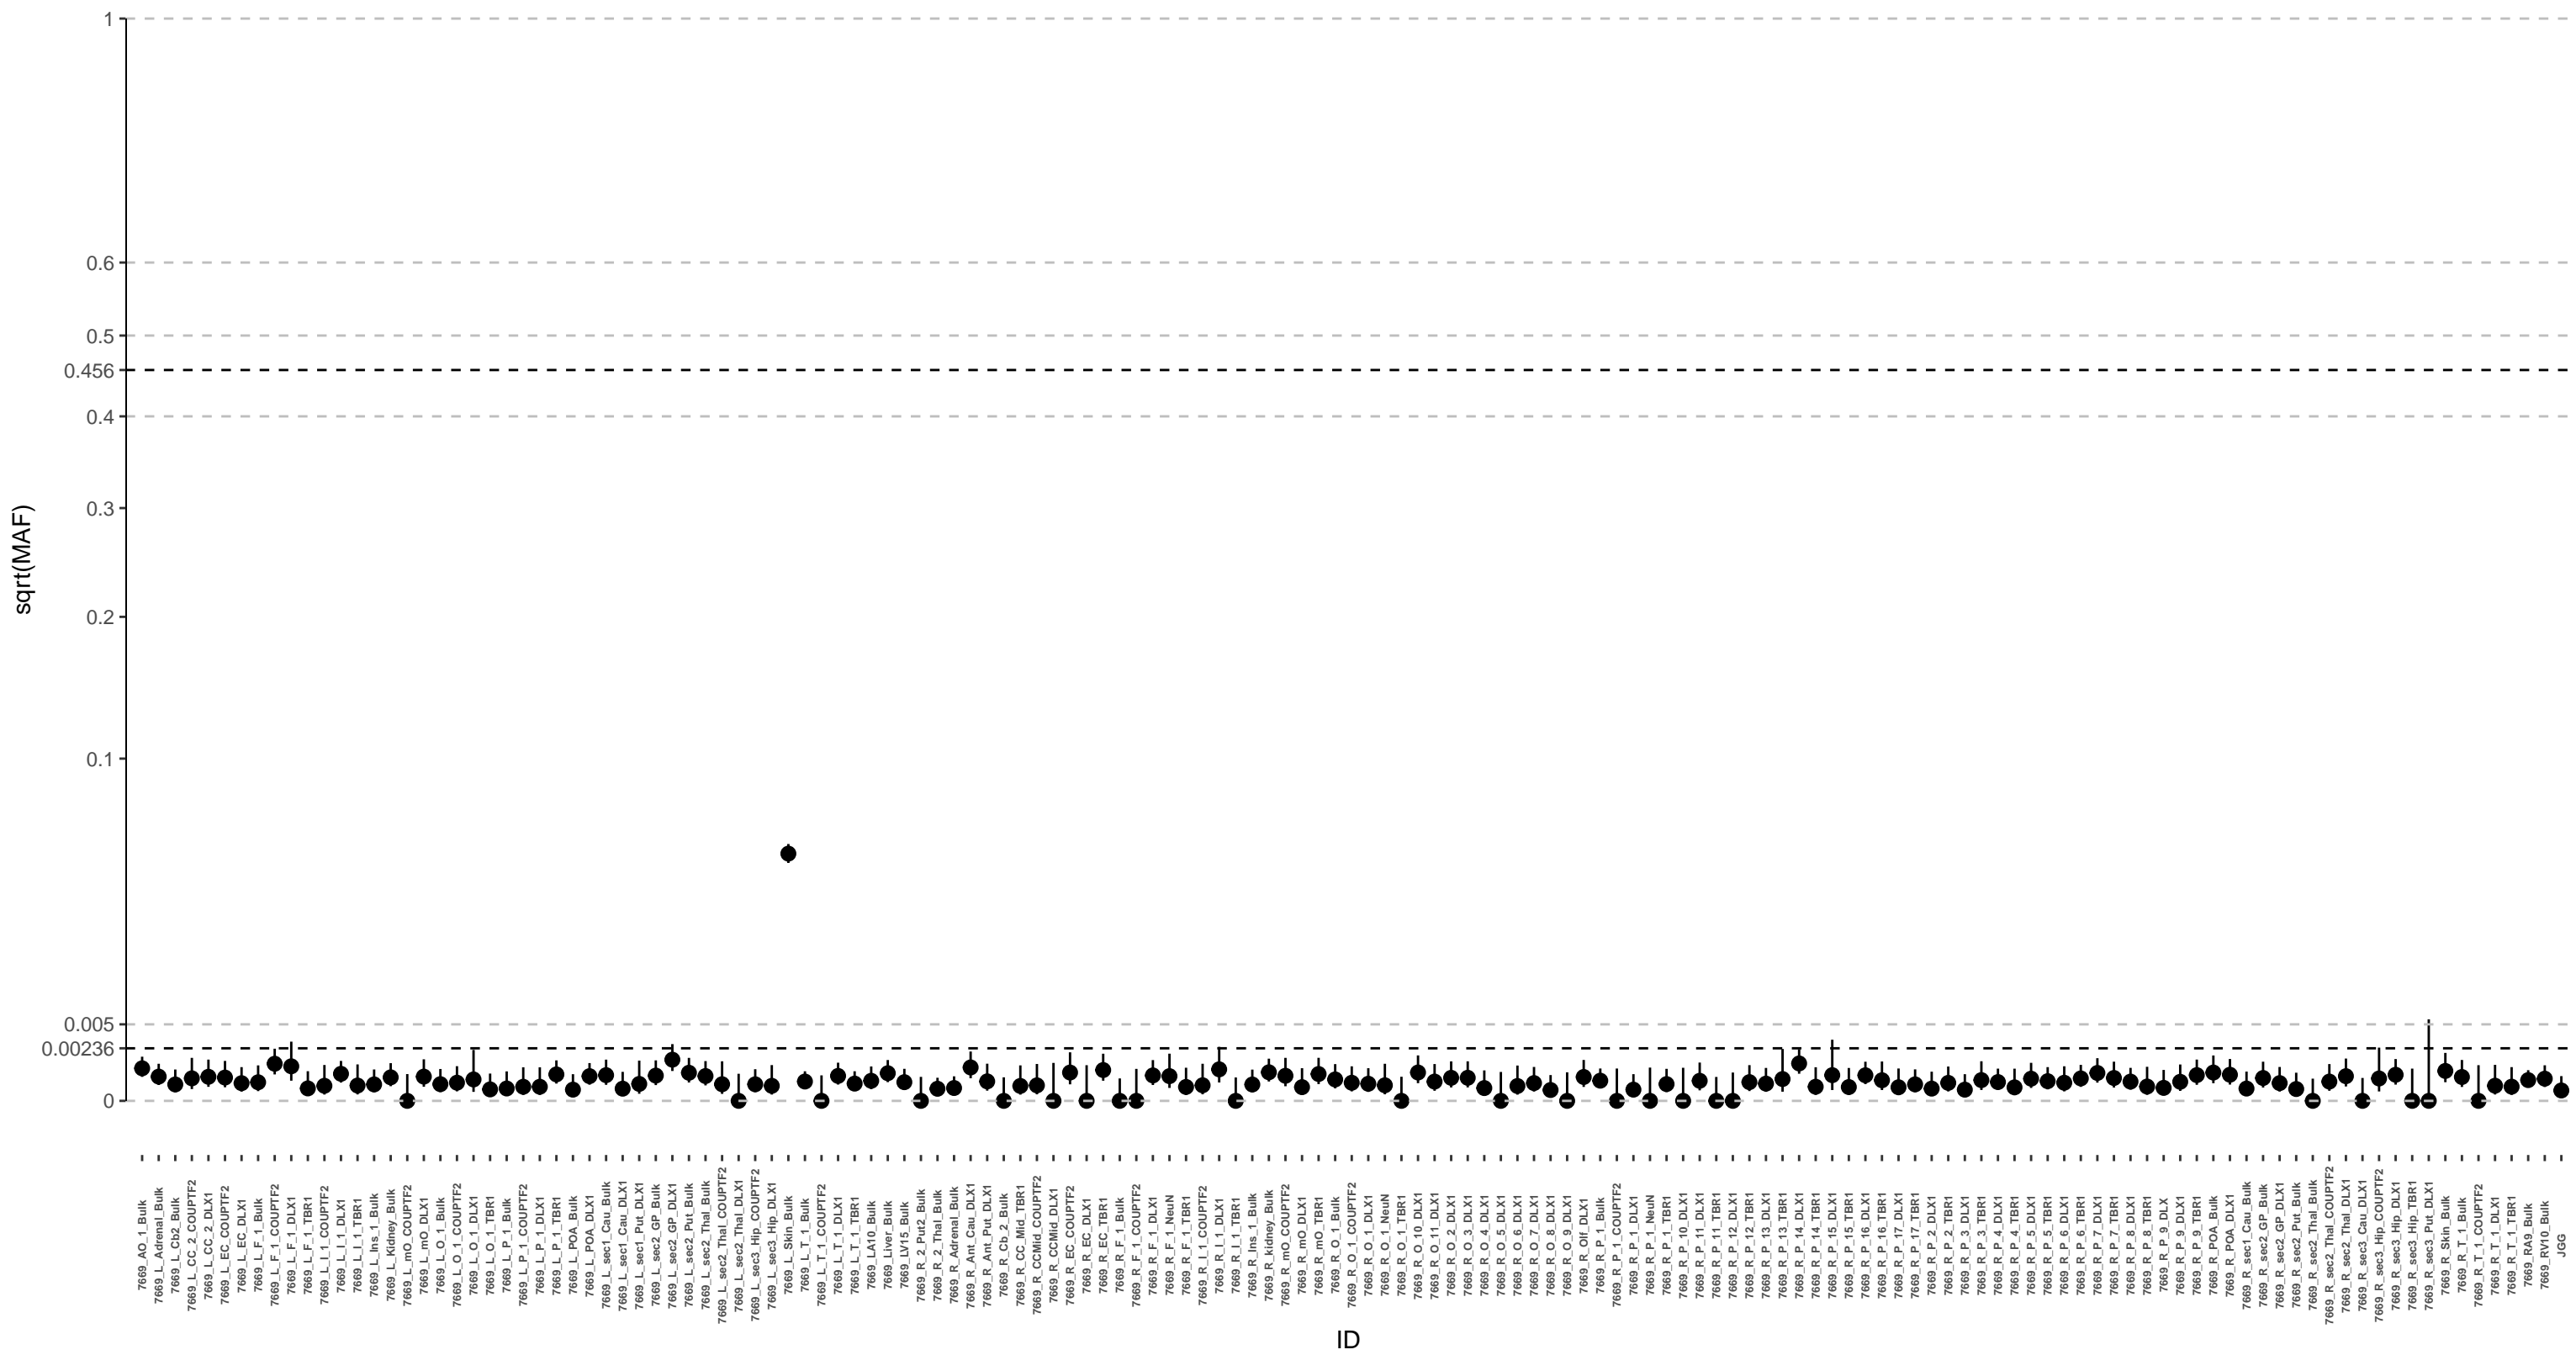

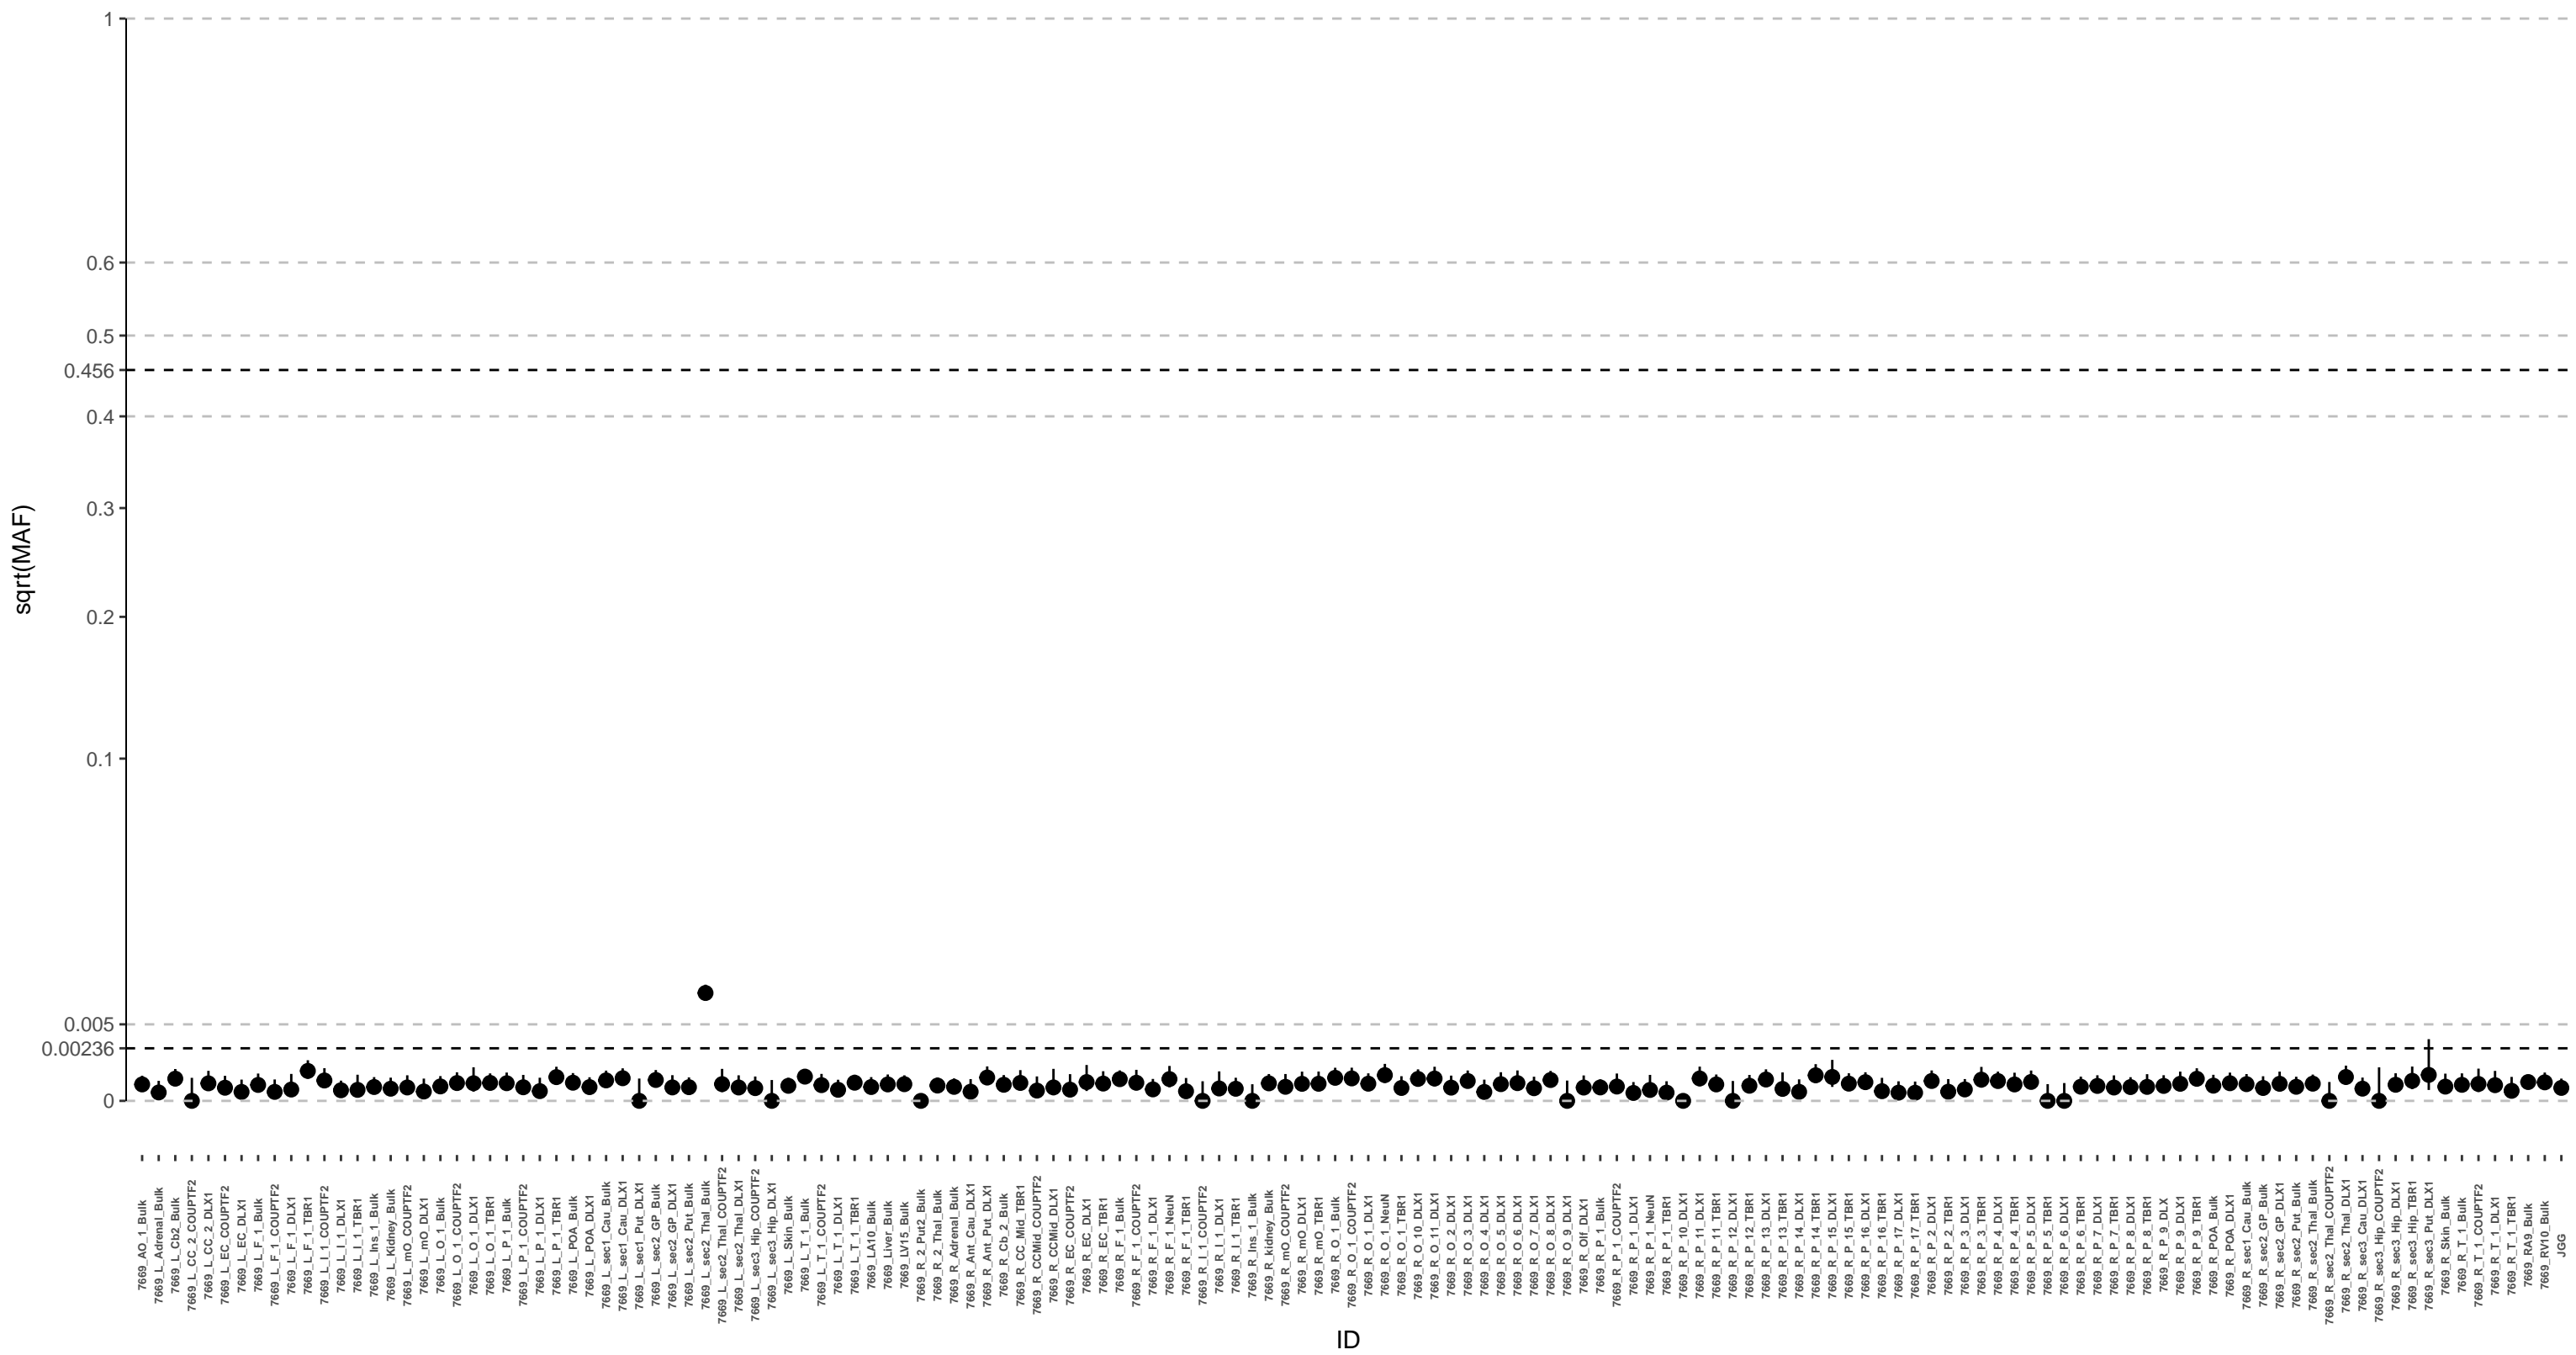

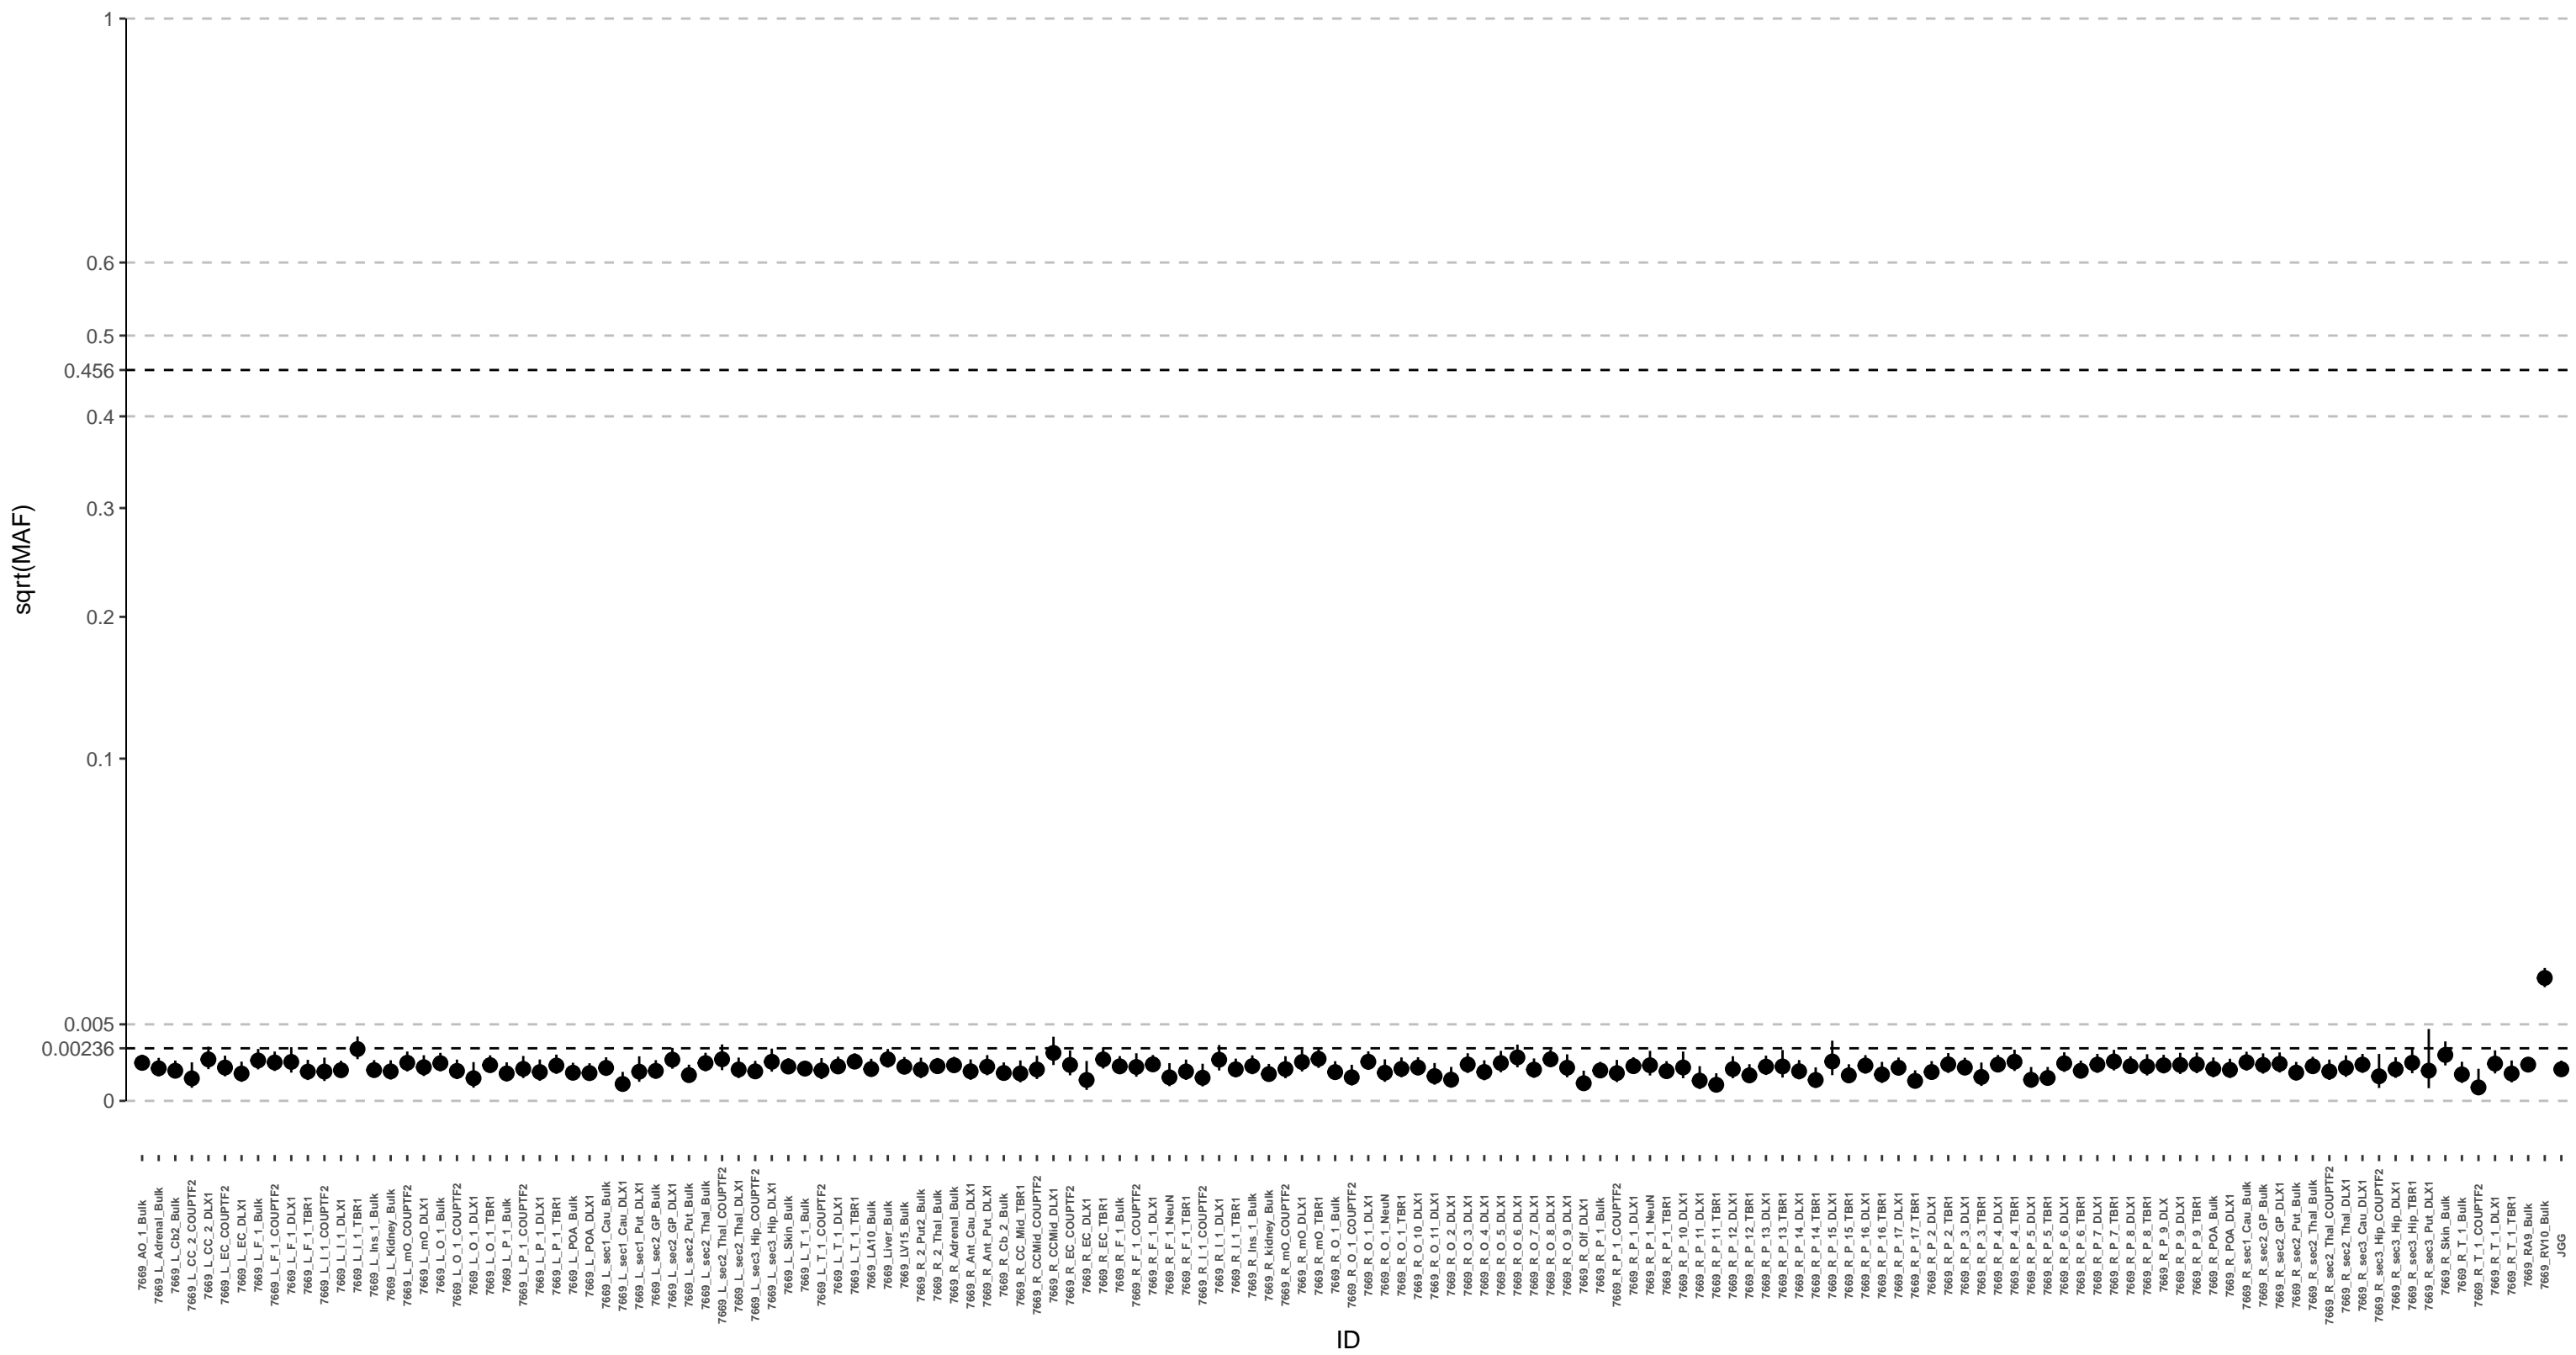

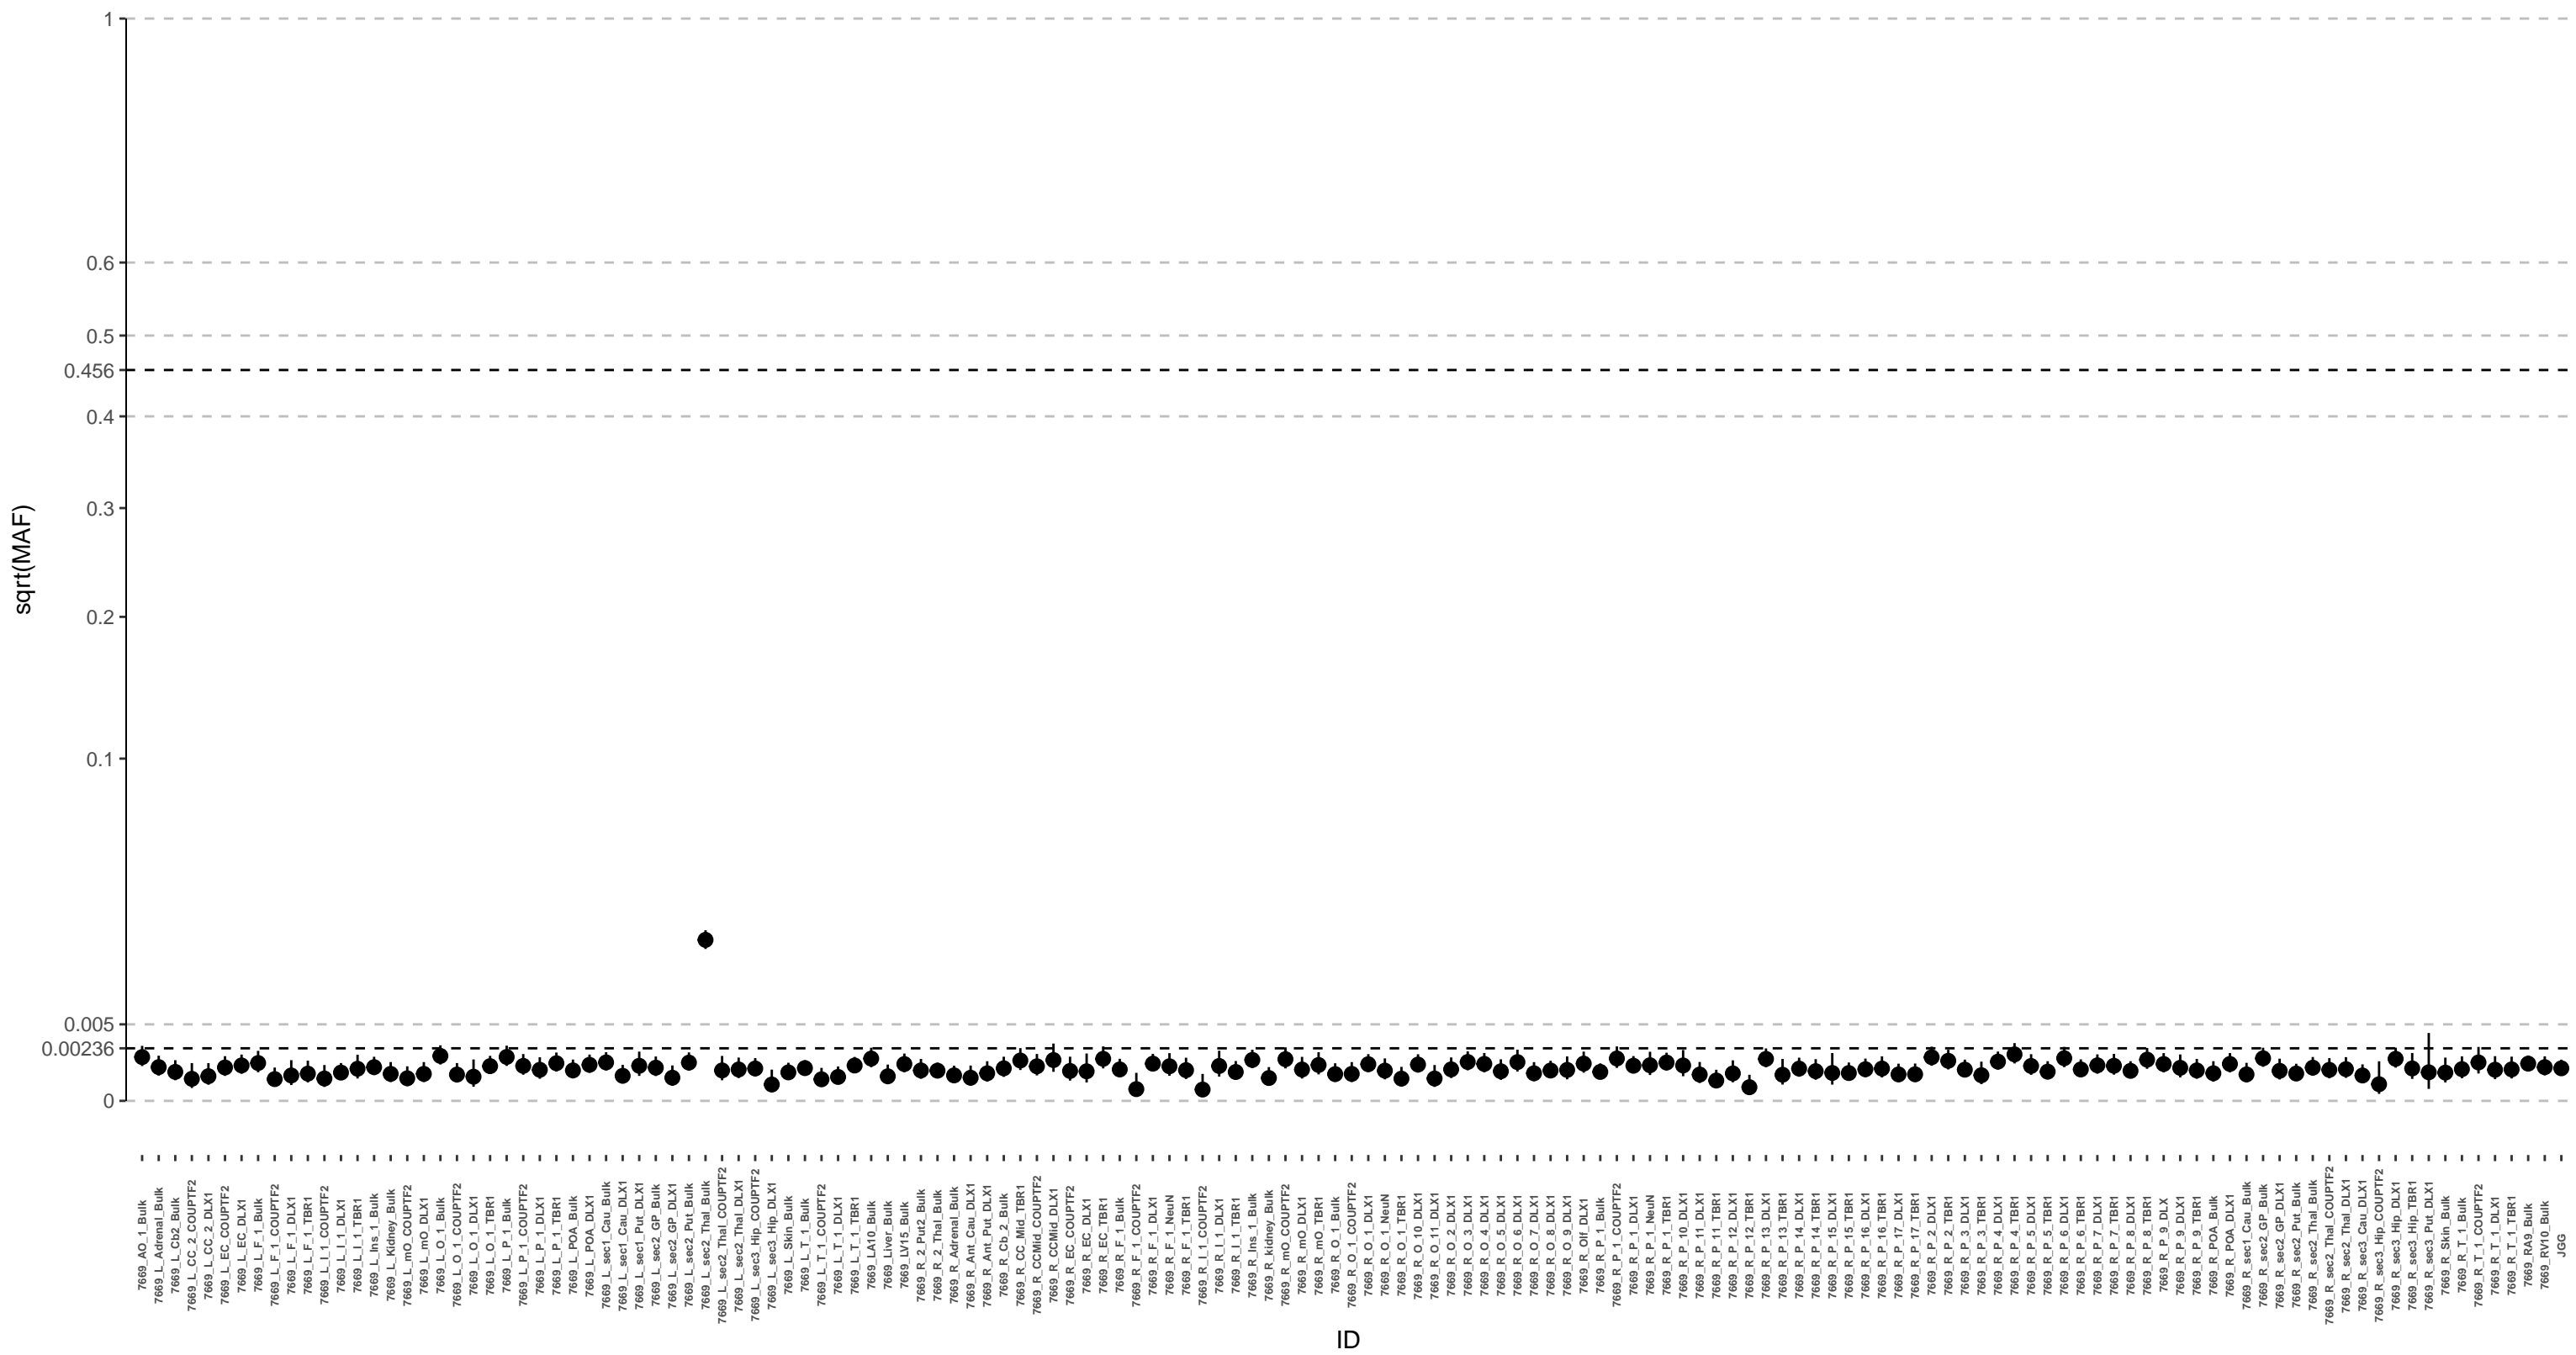

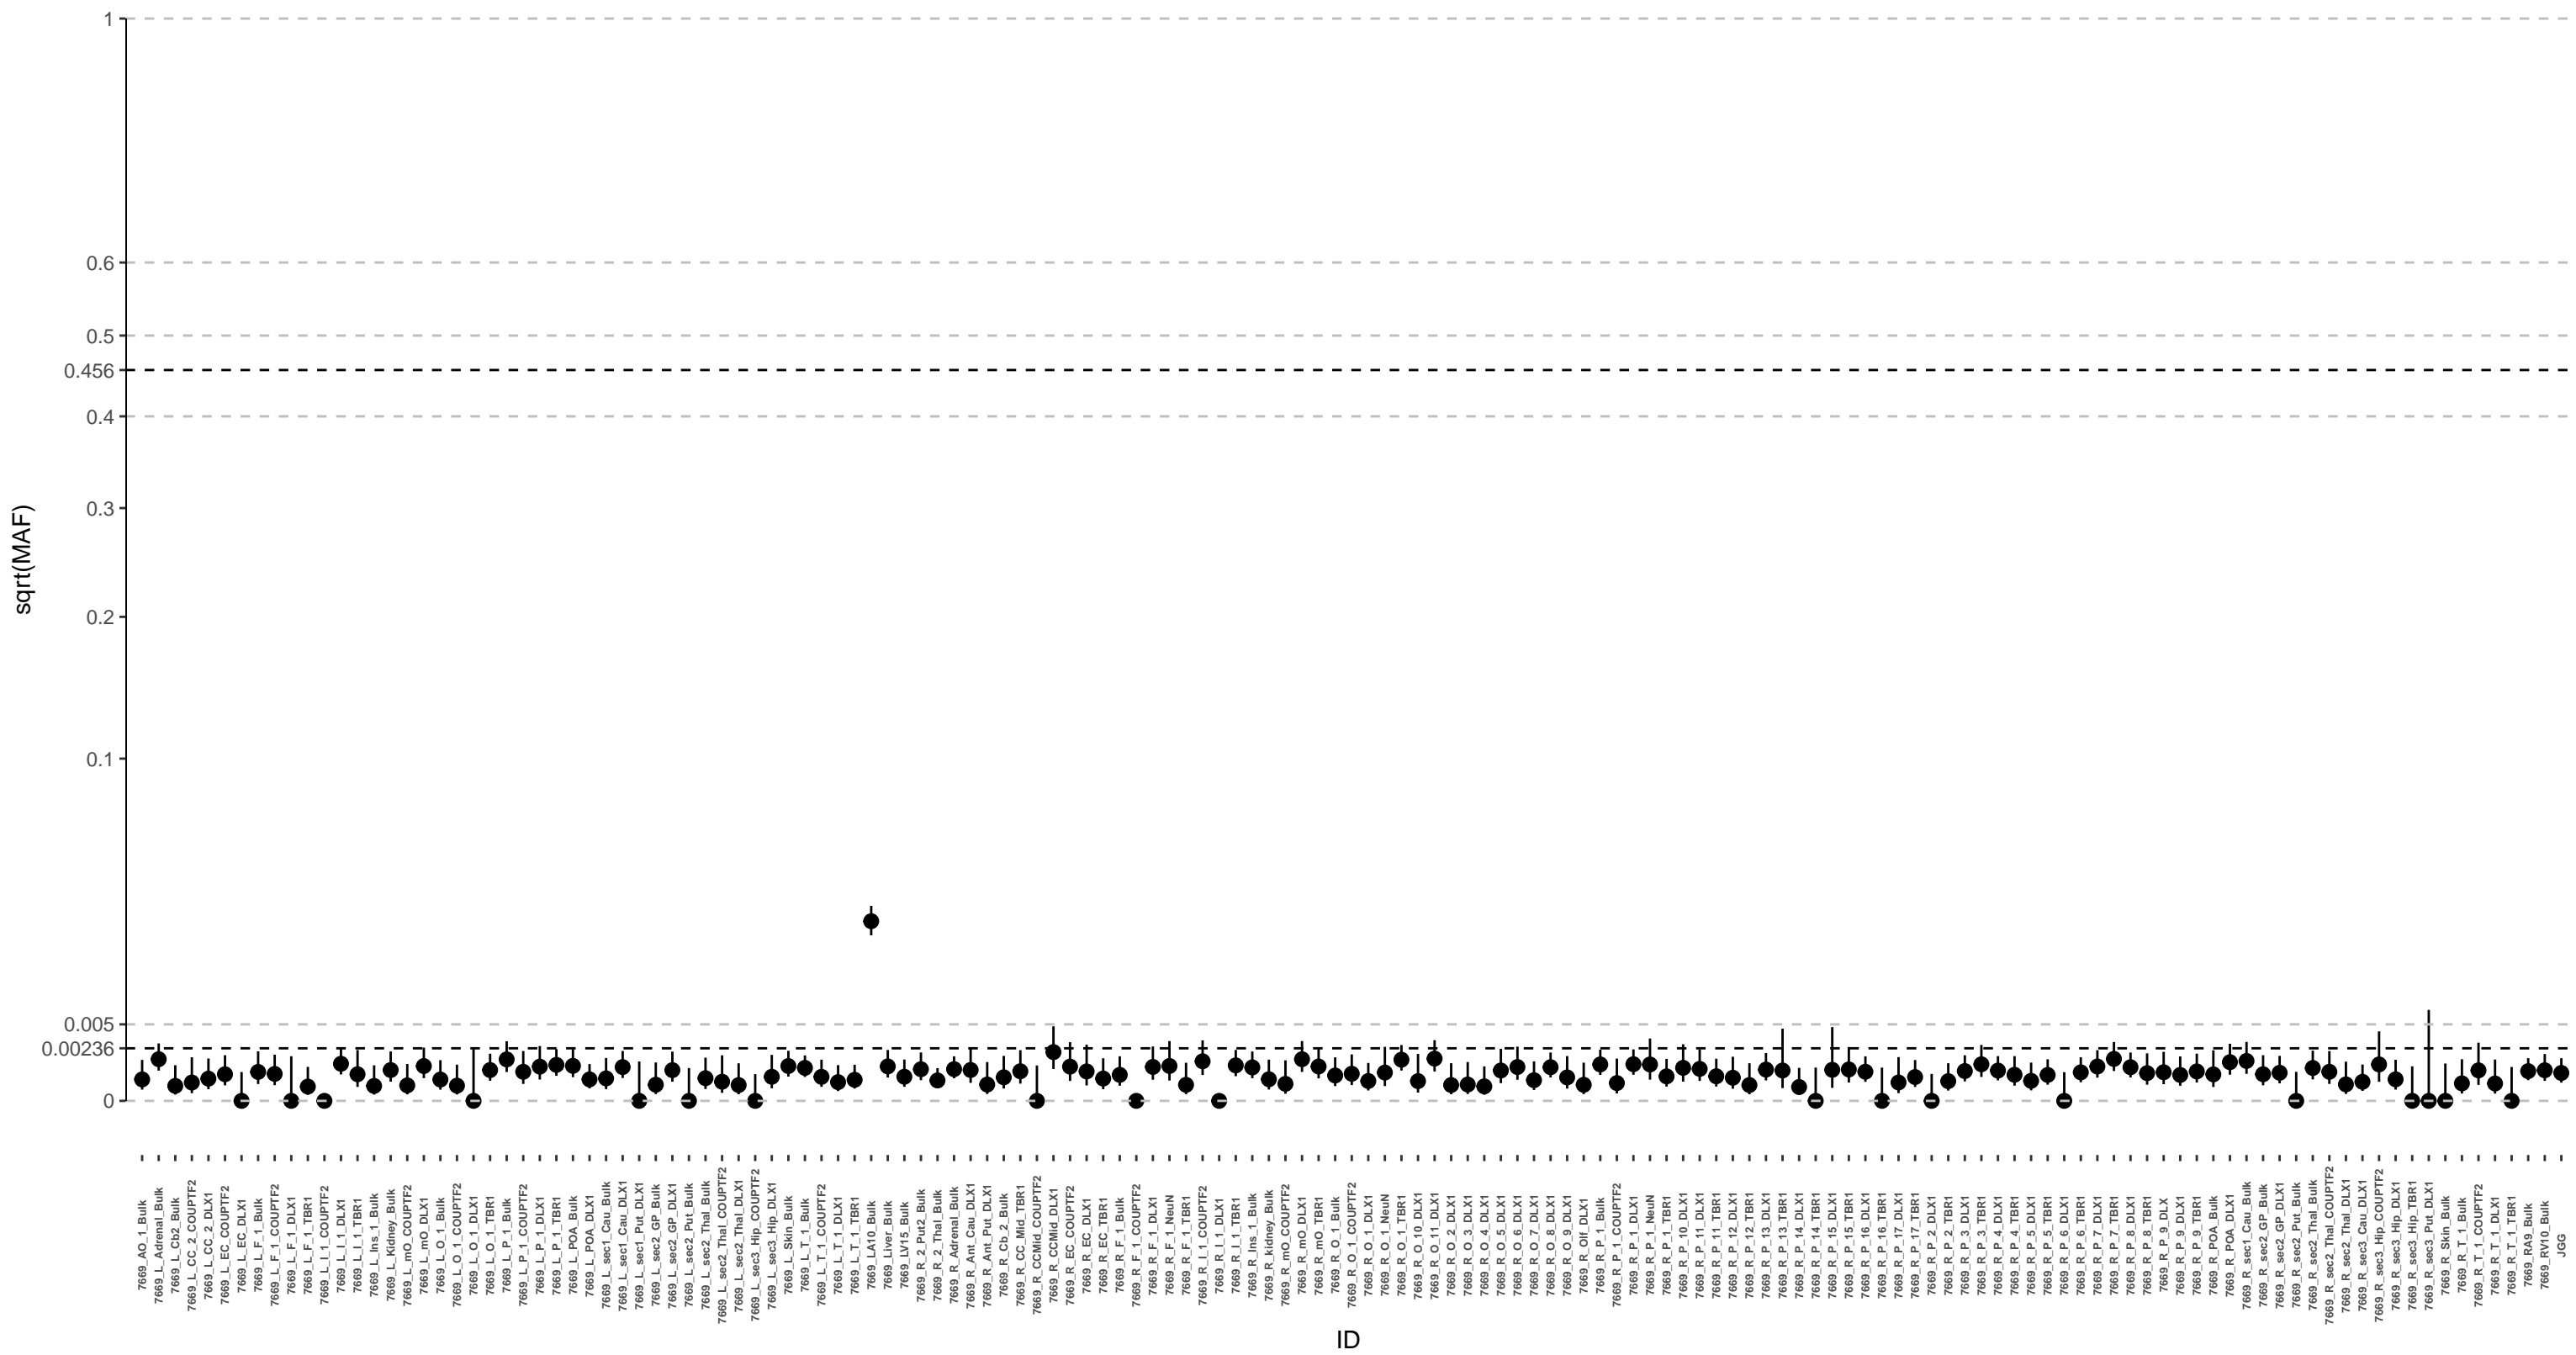

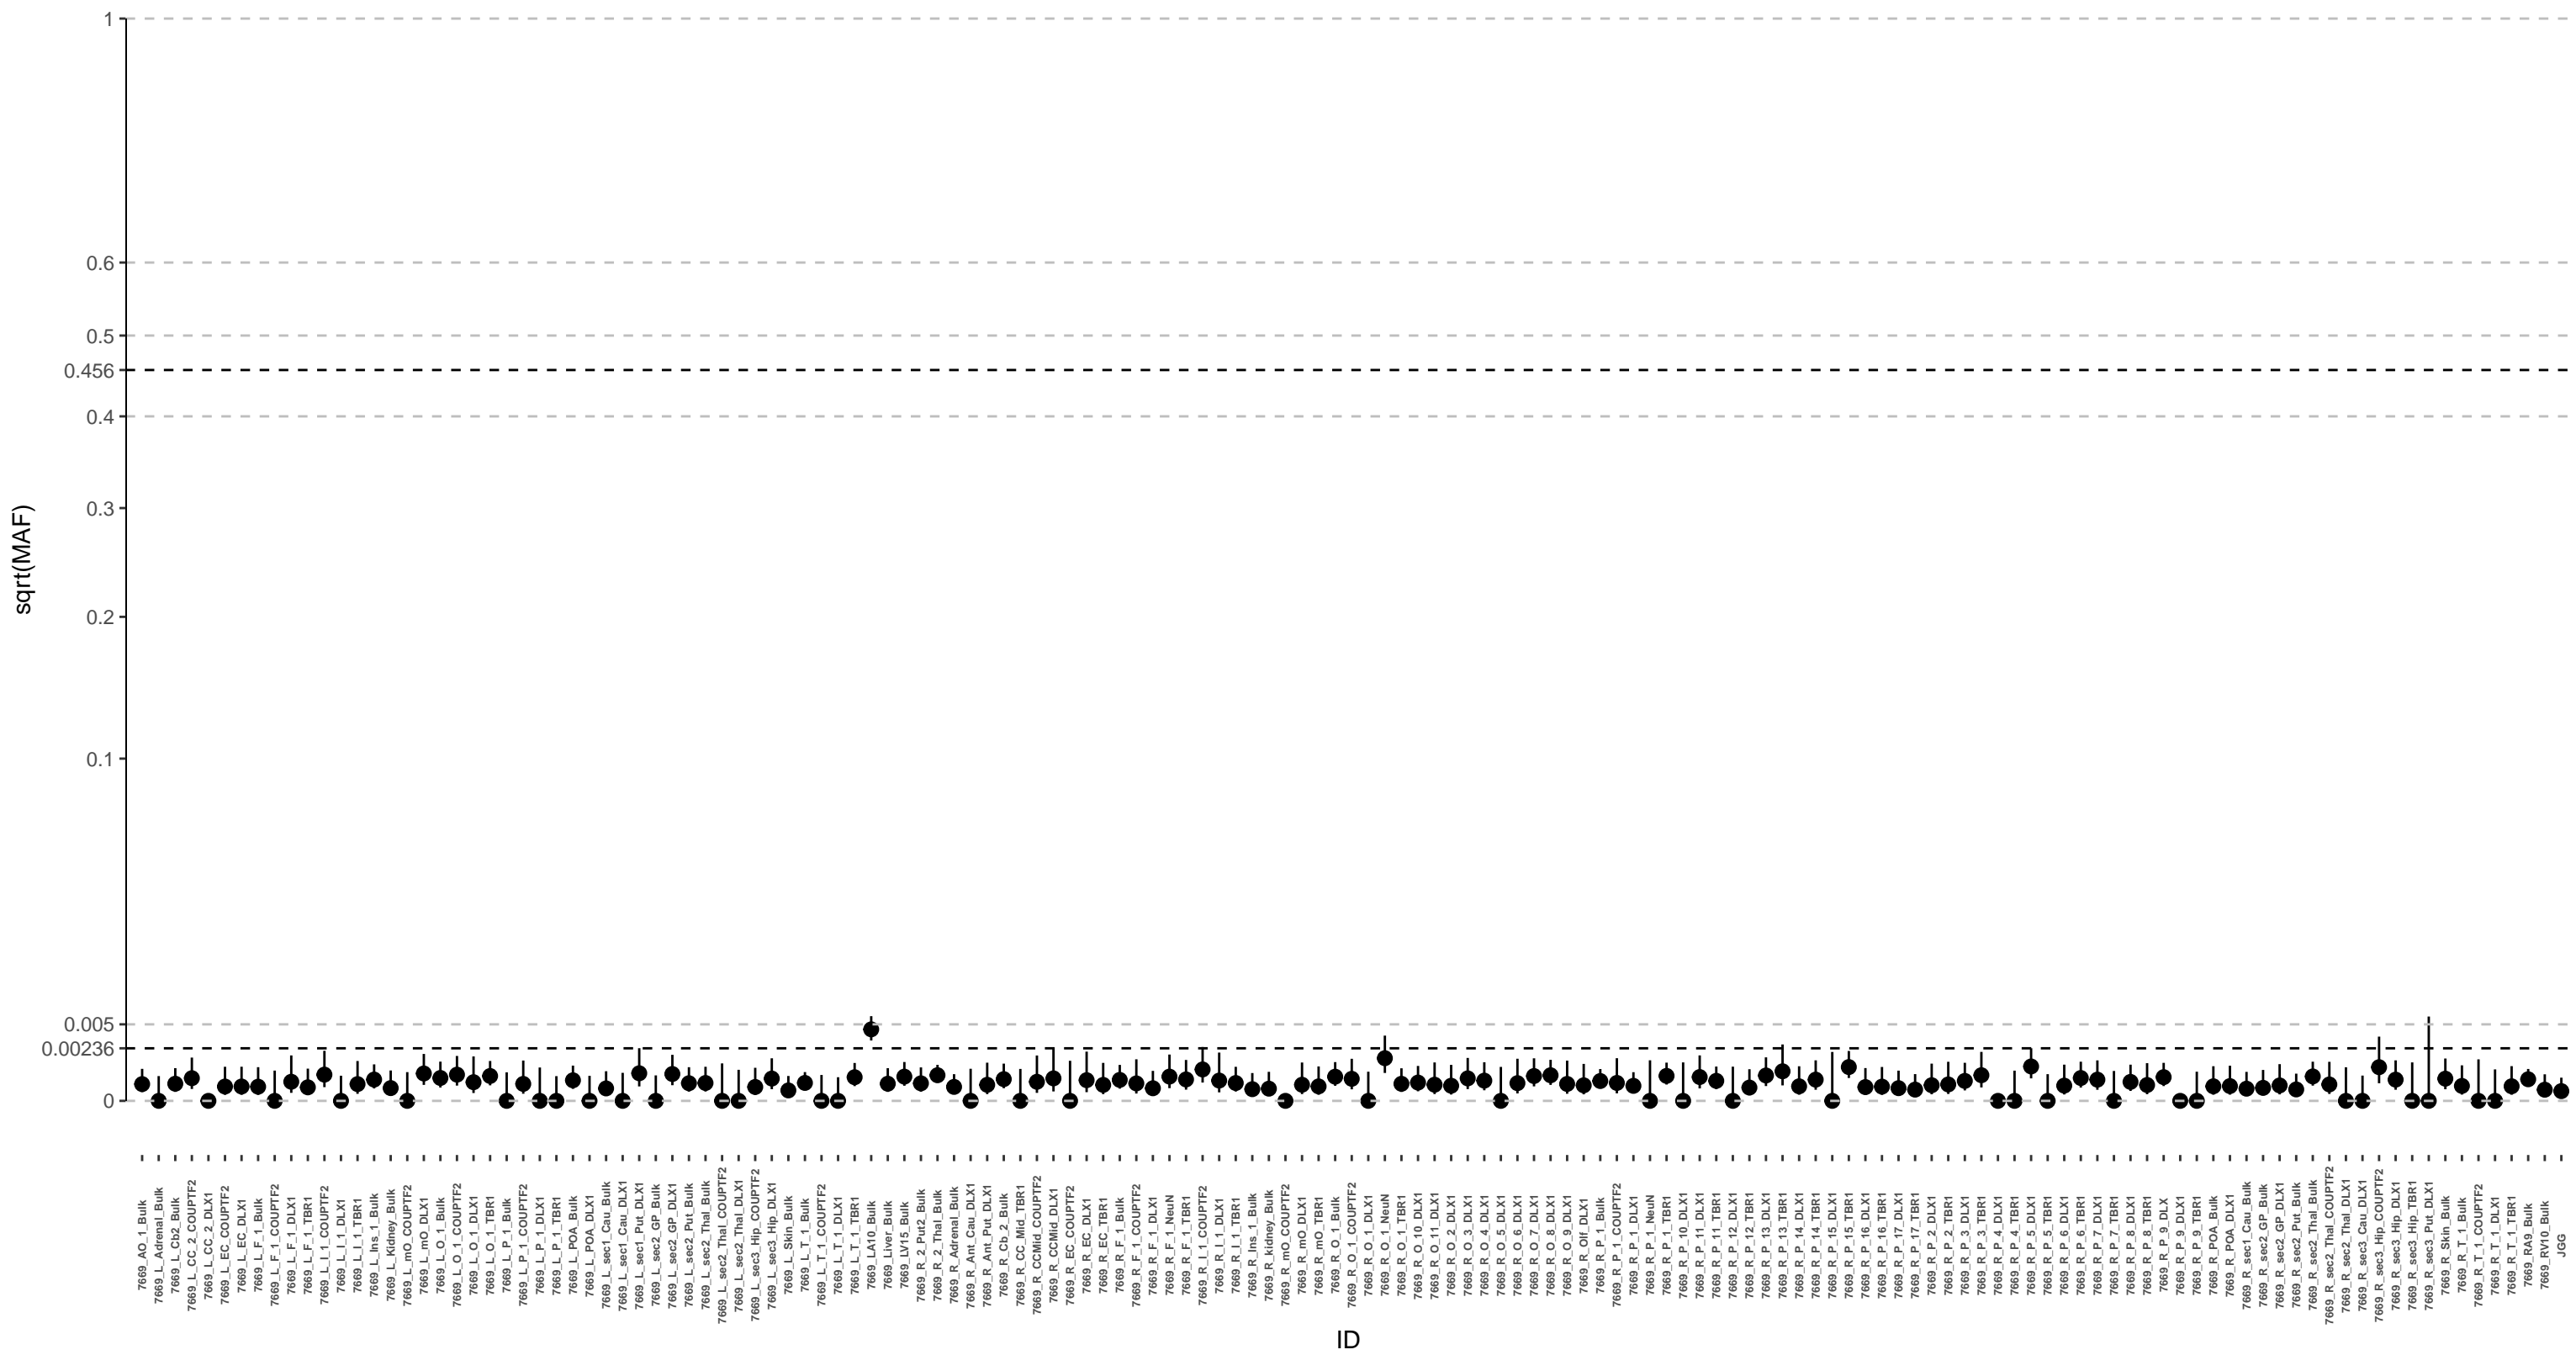



ID05 5-26502402-A-G

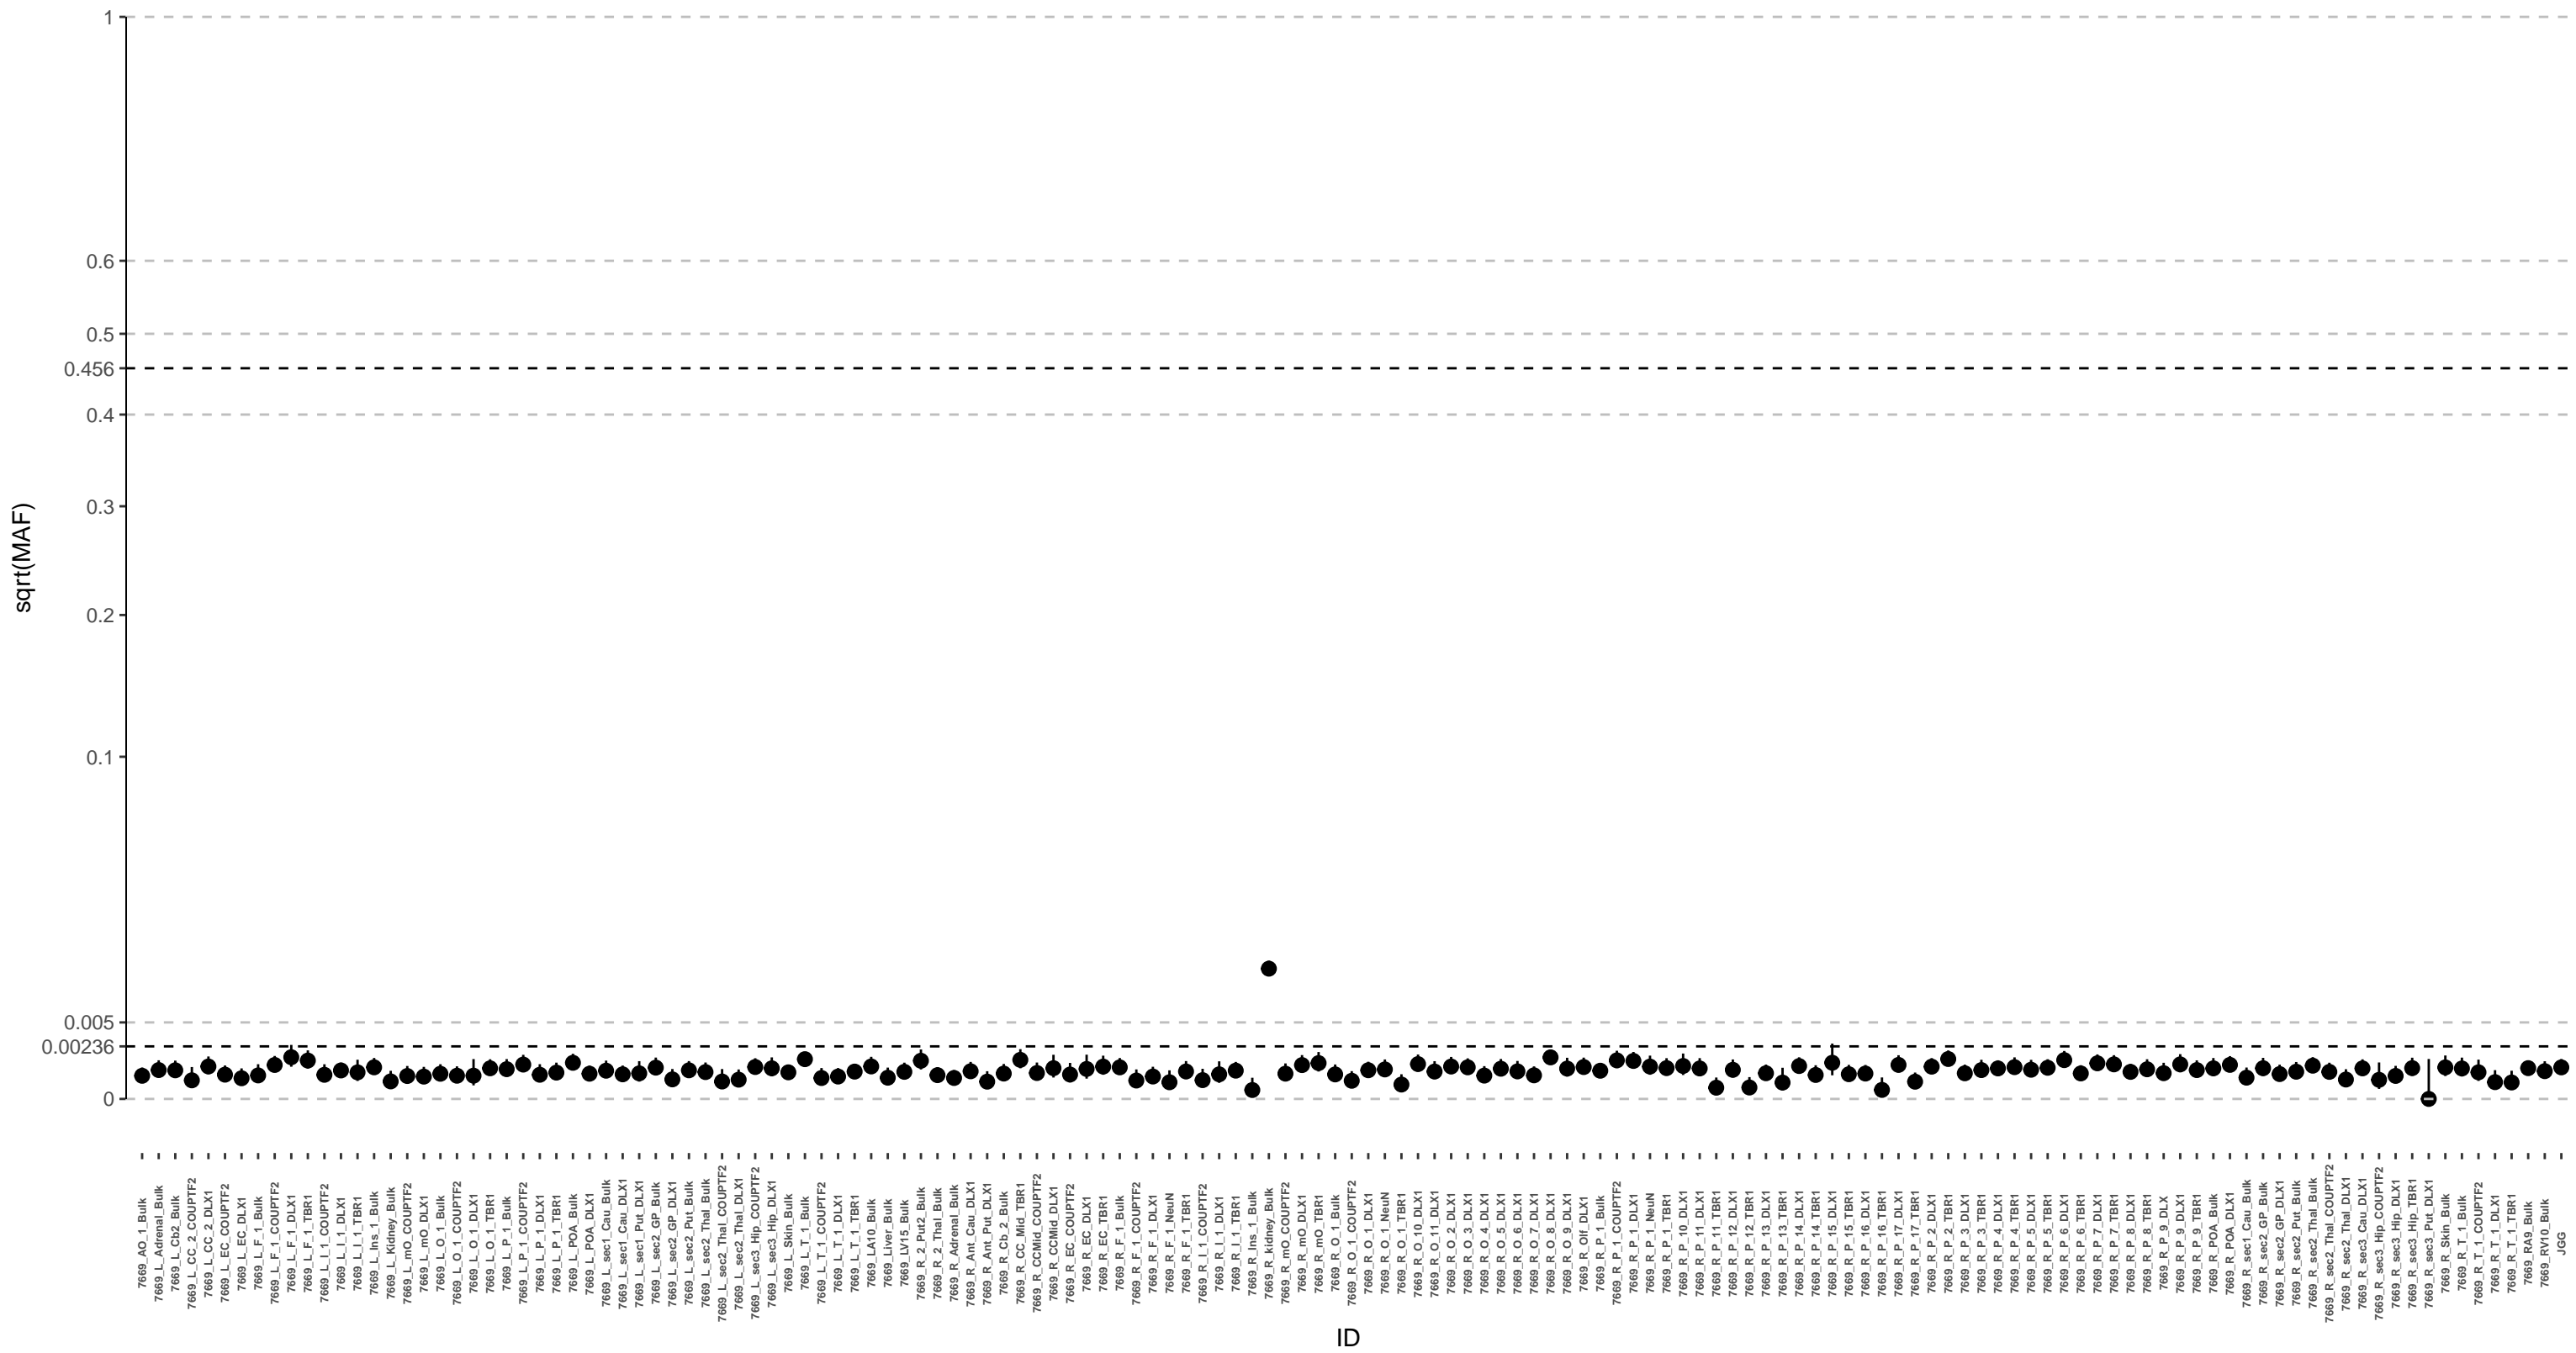

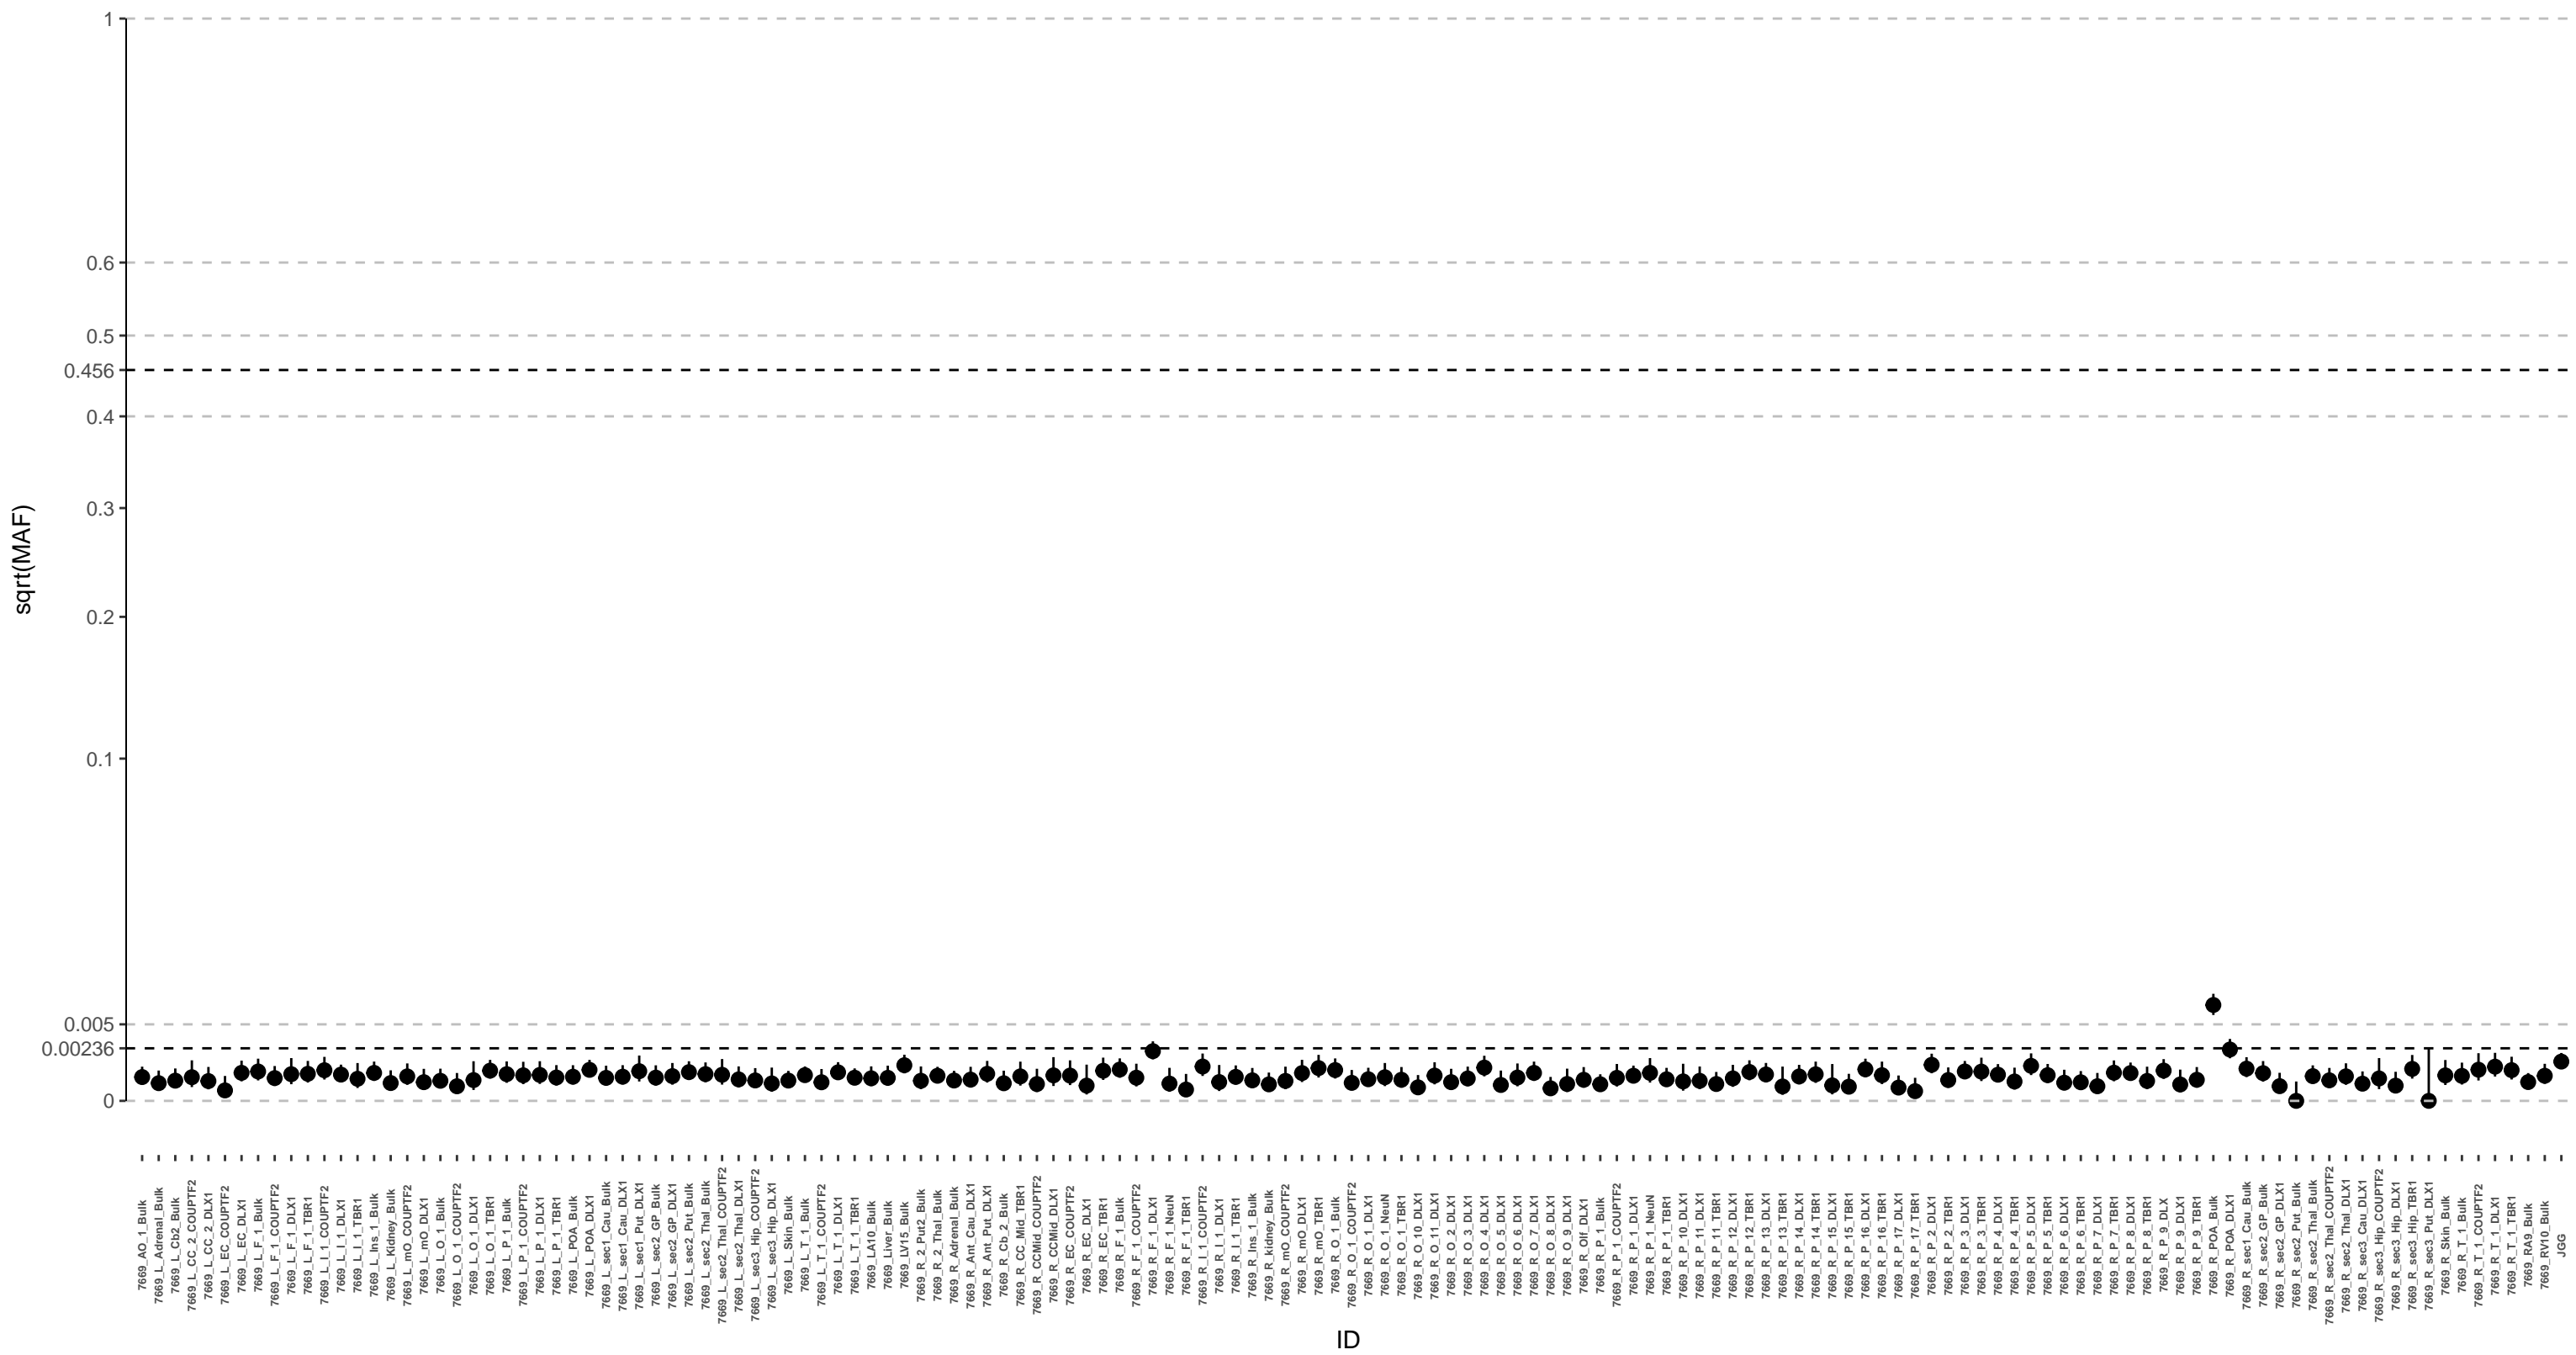

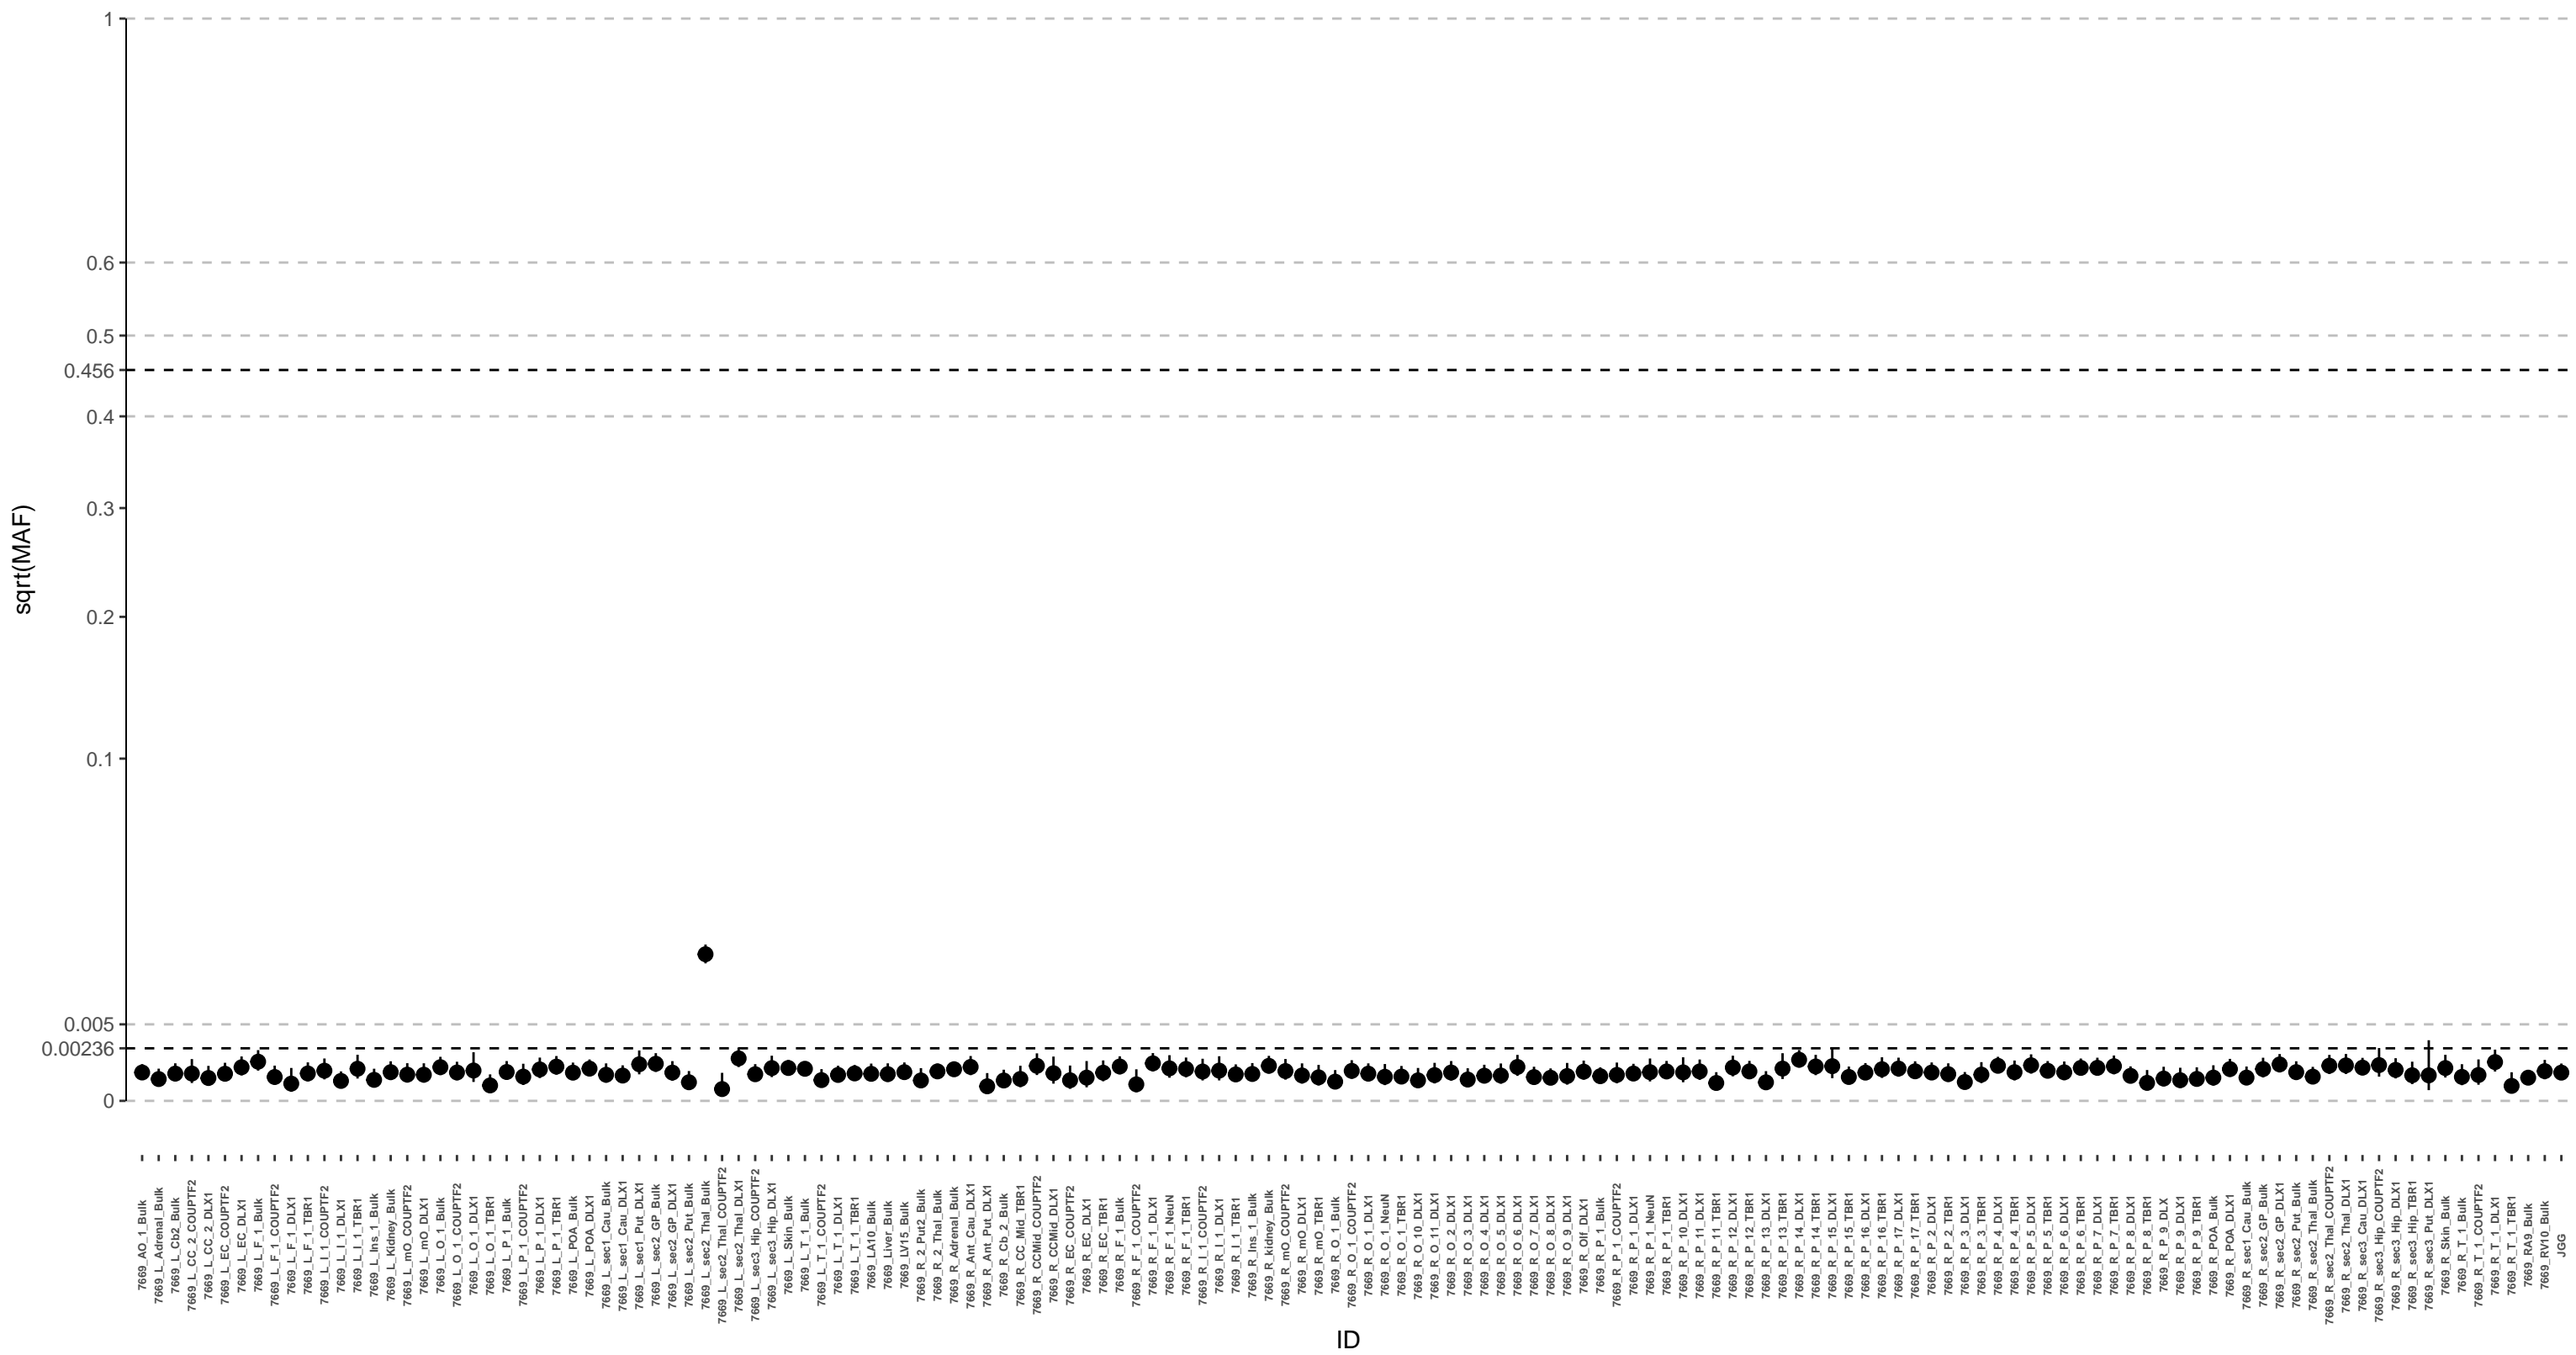

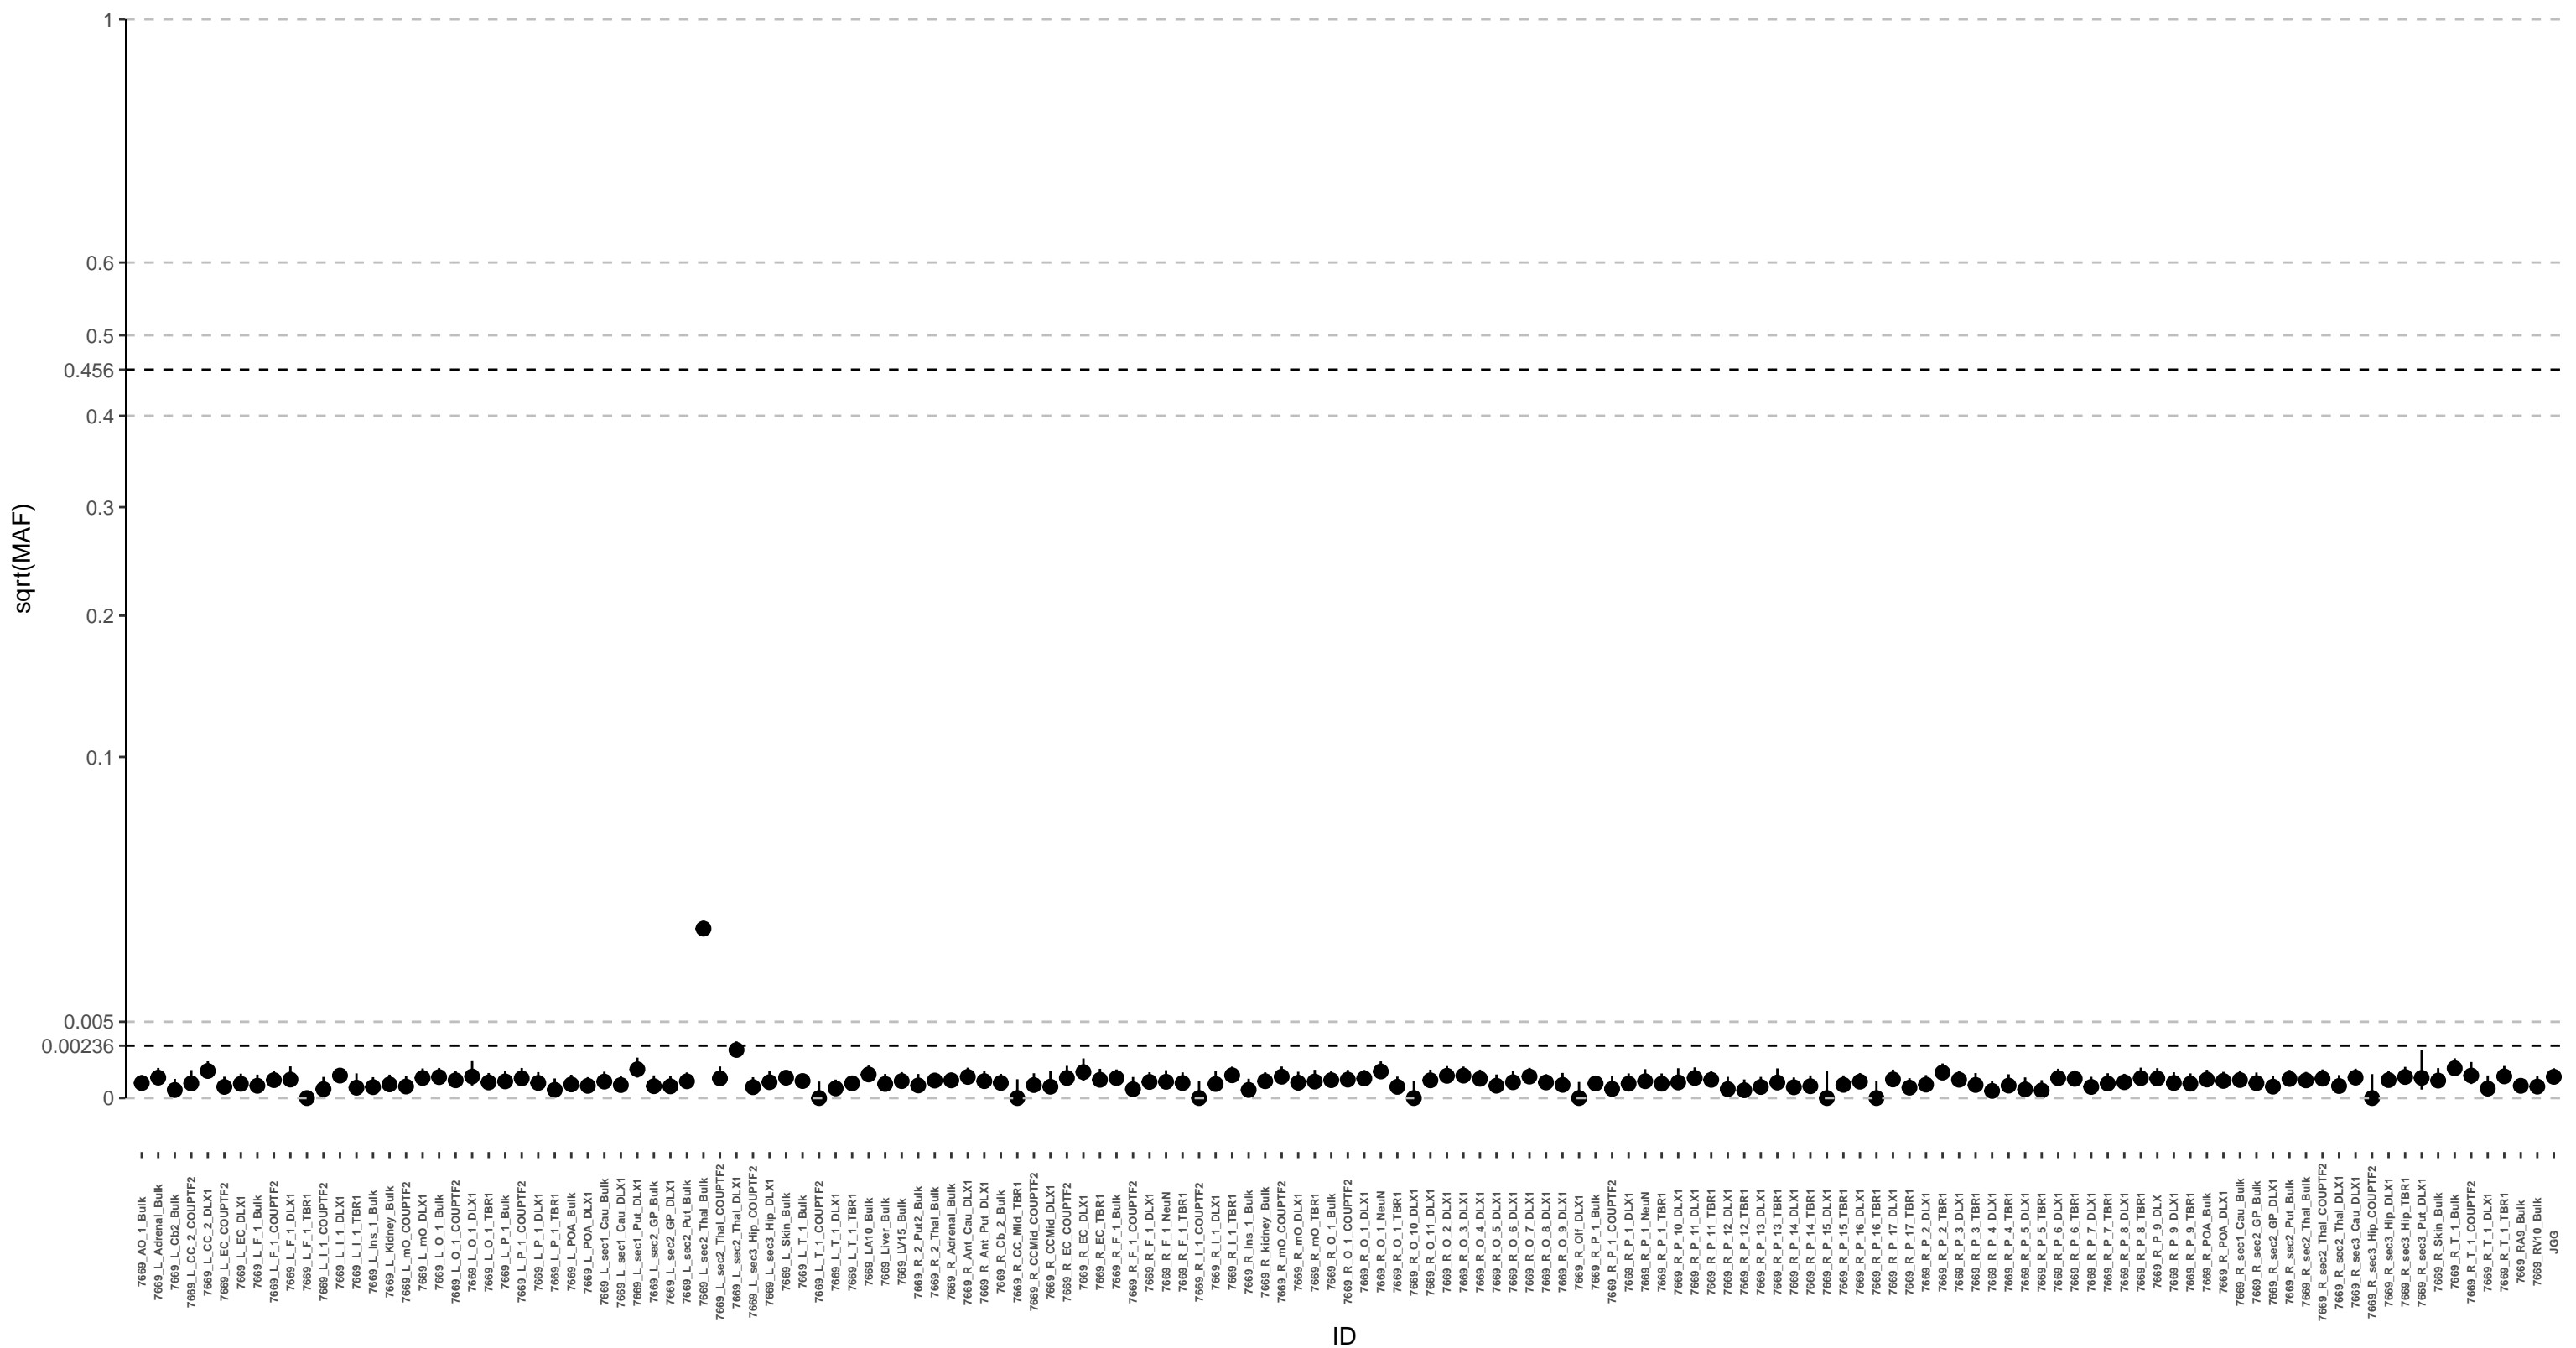

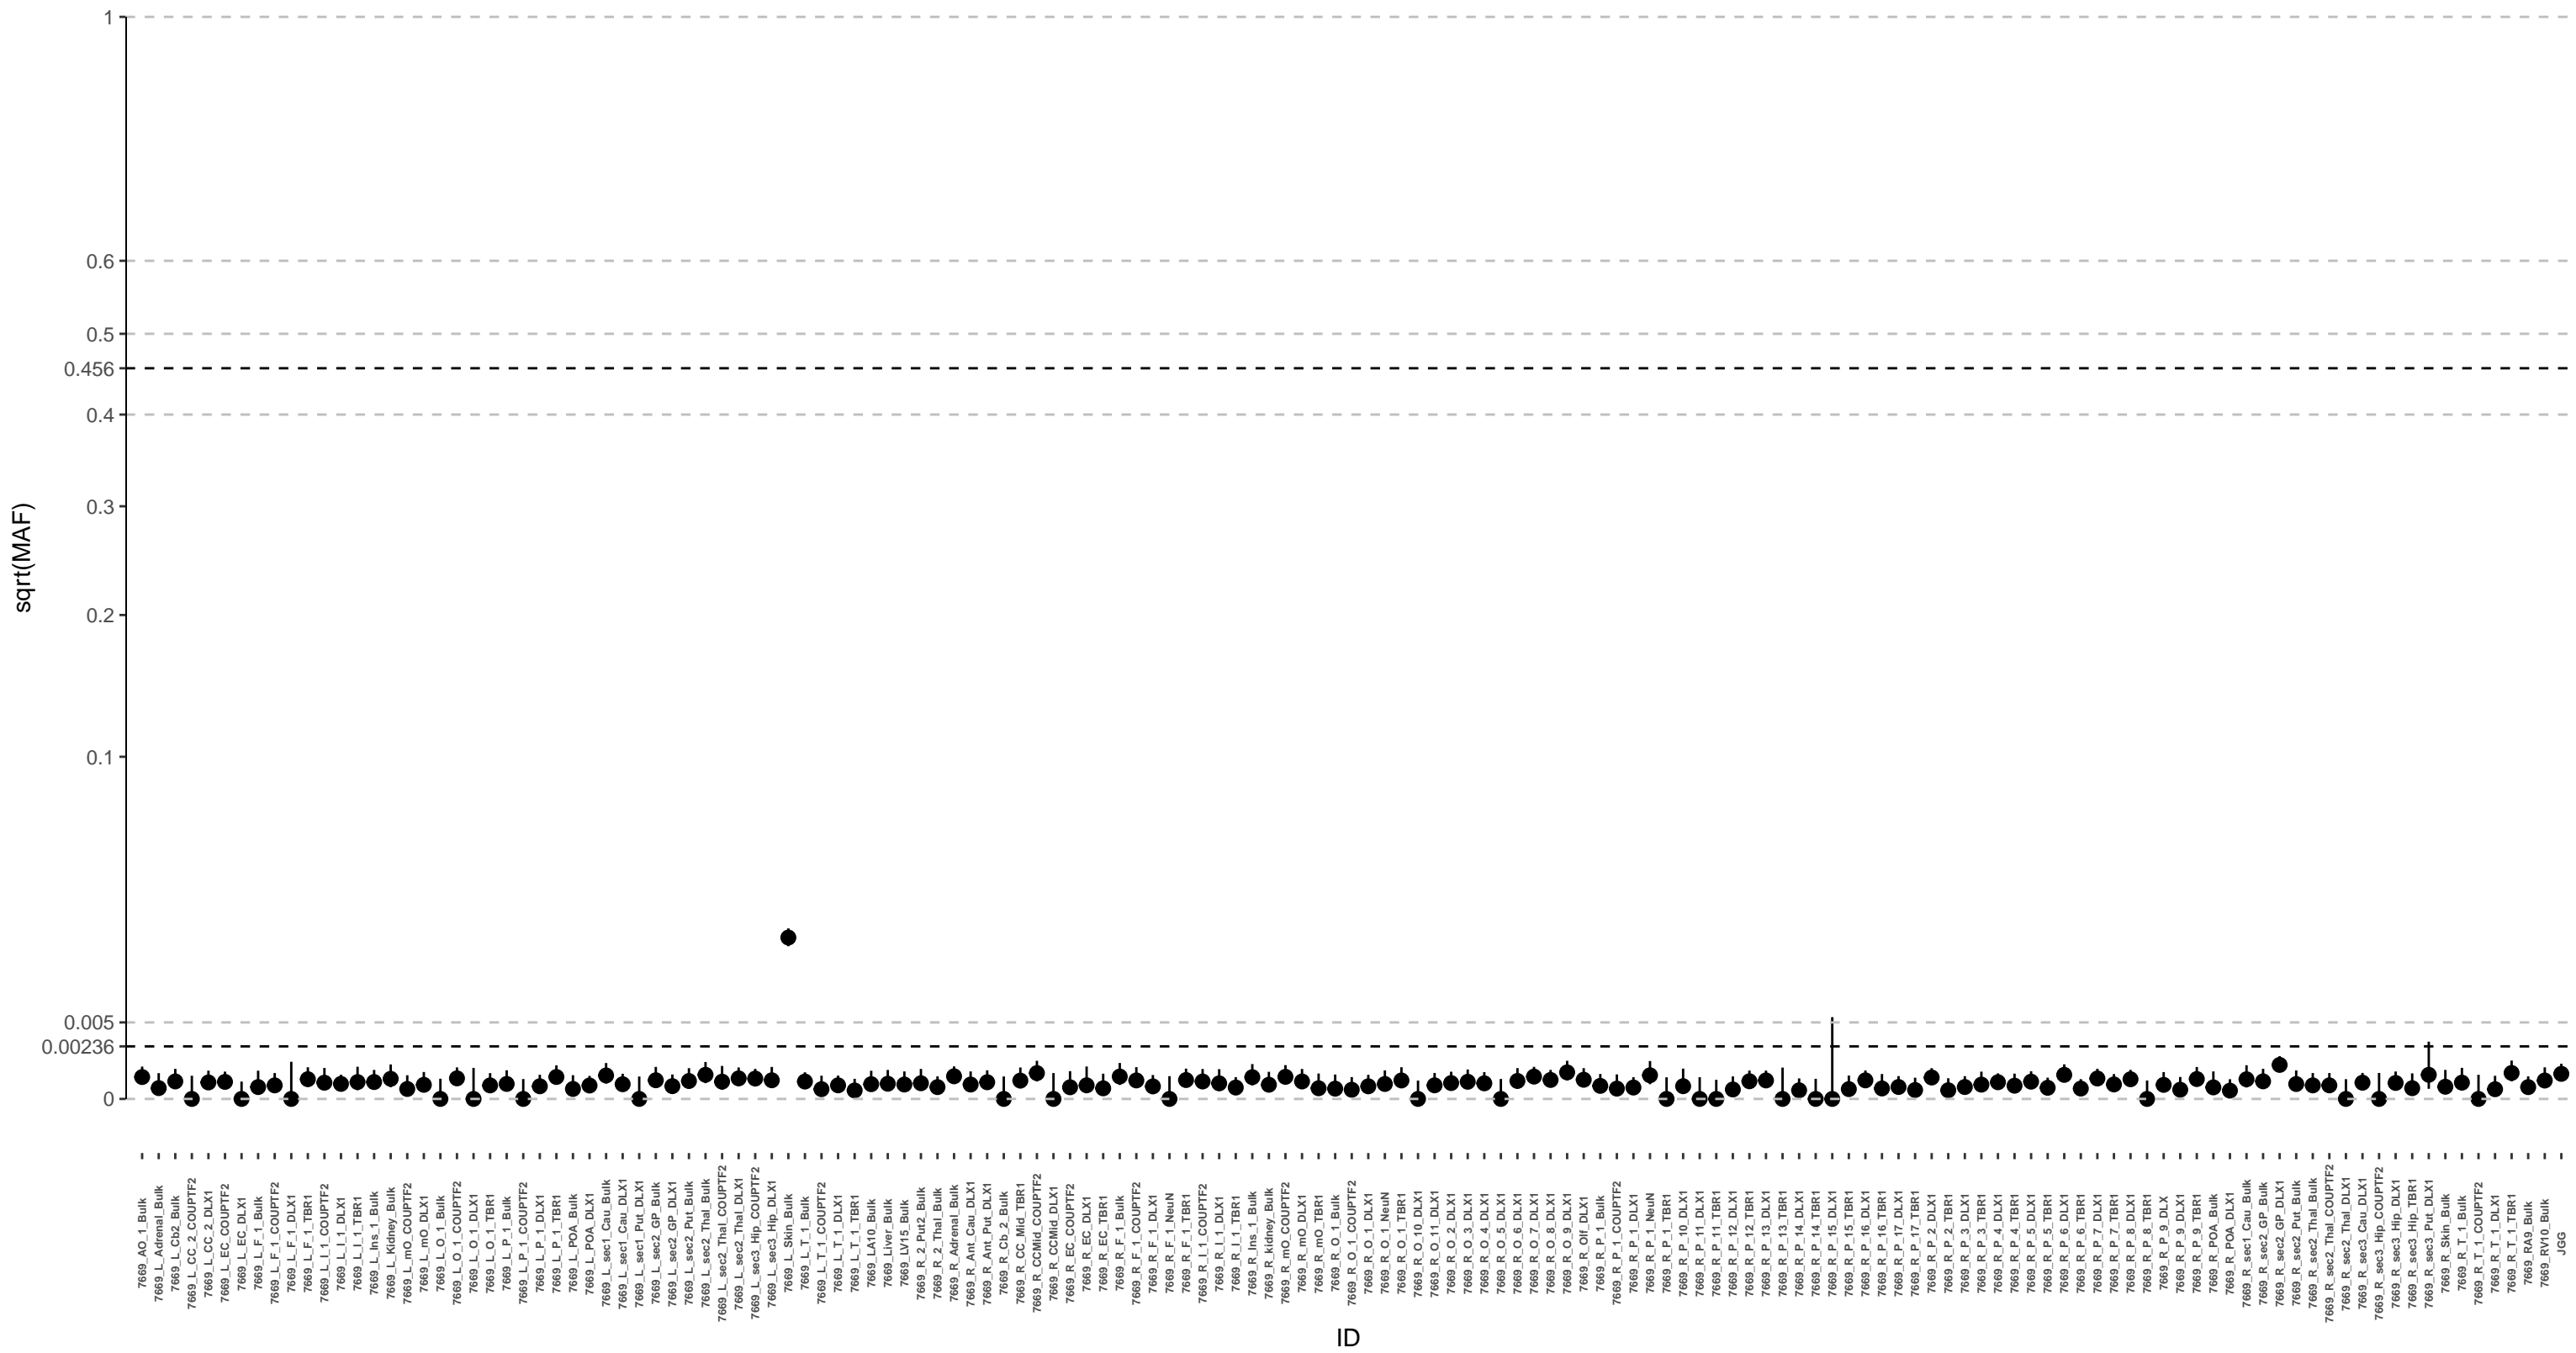

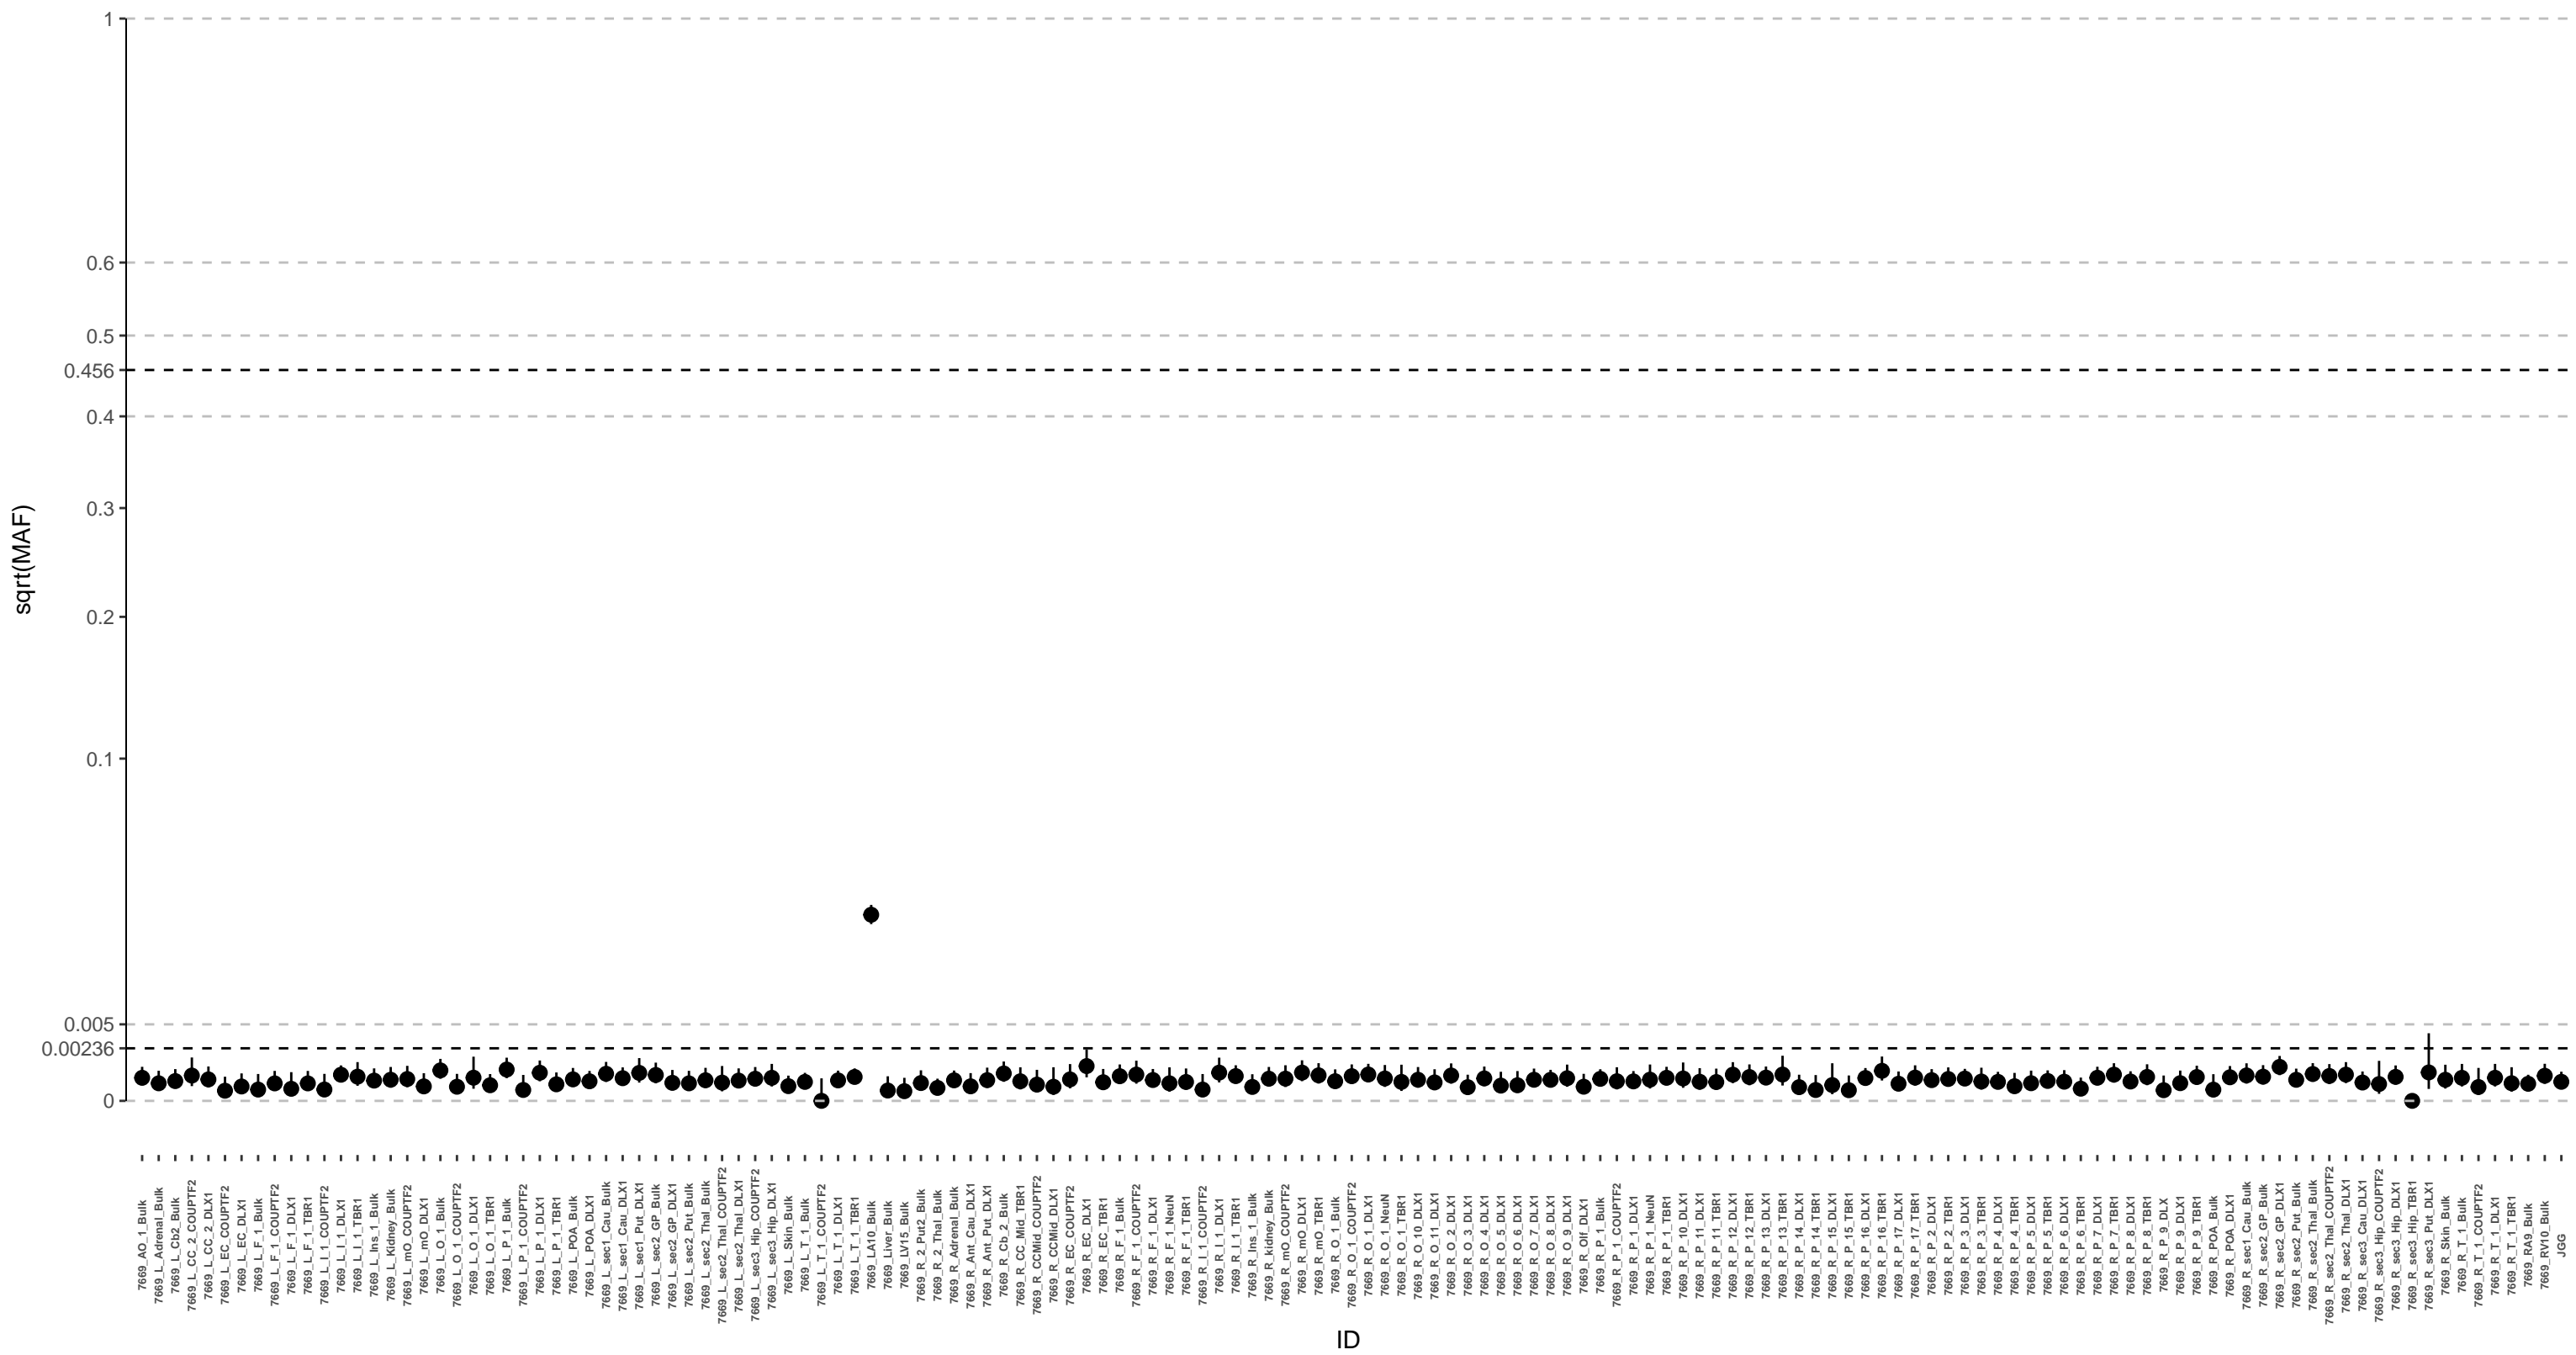

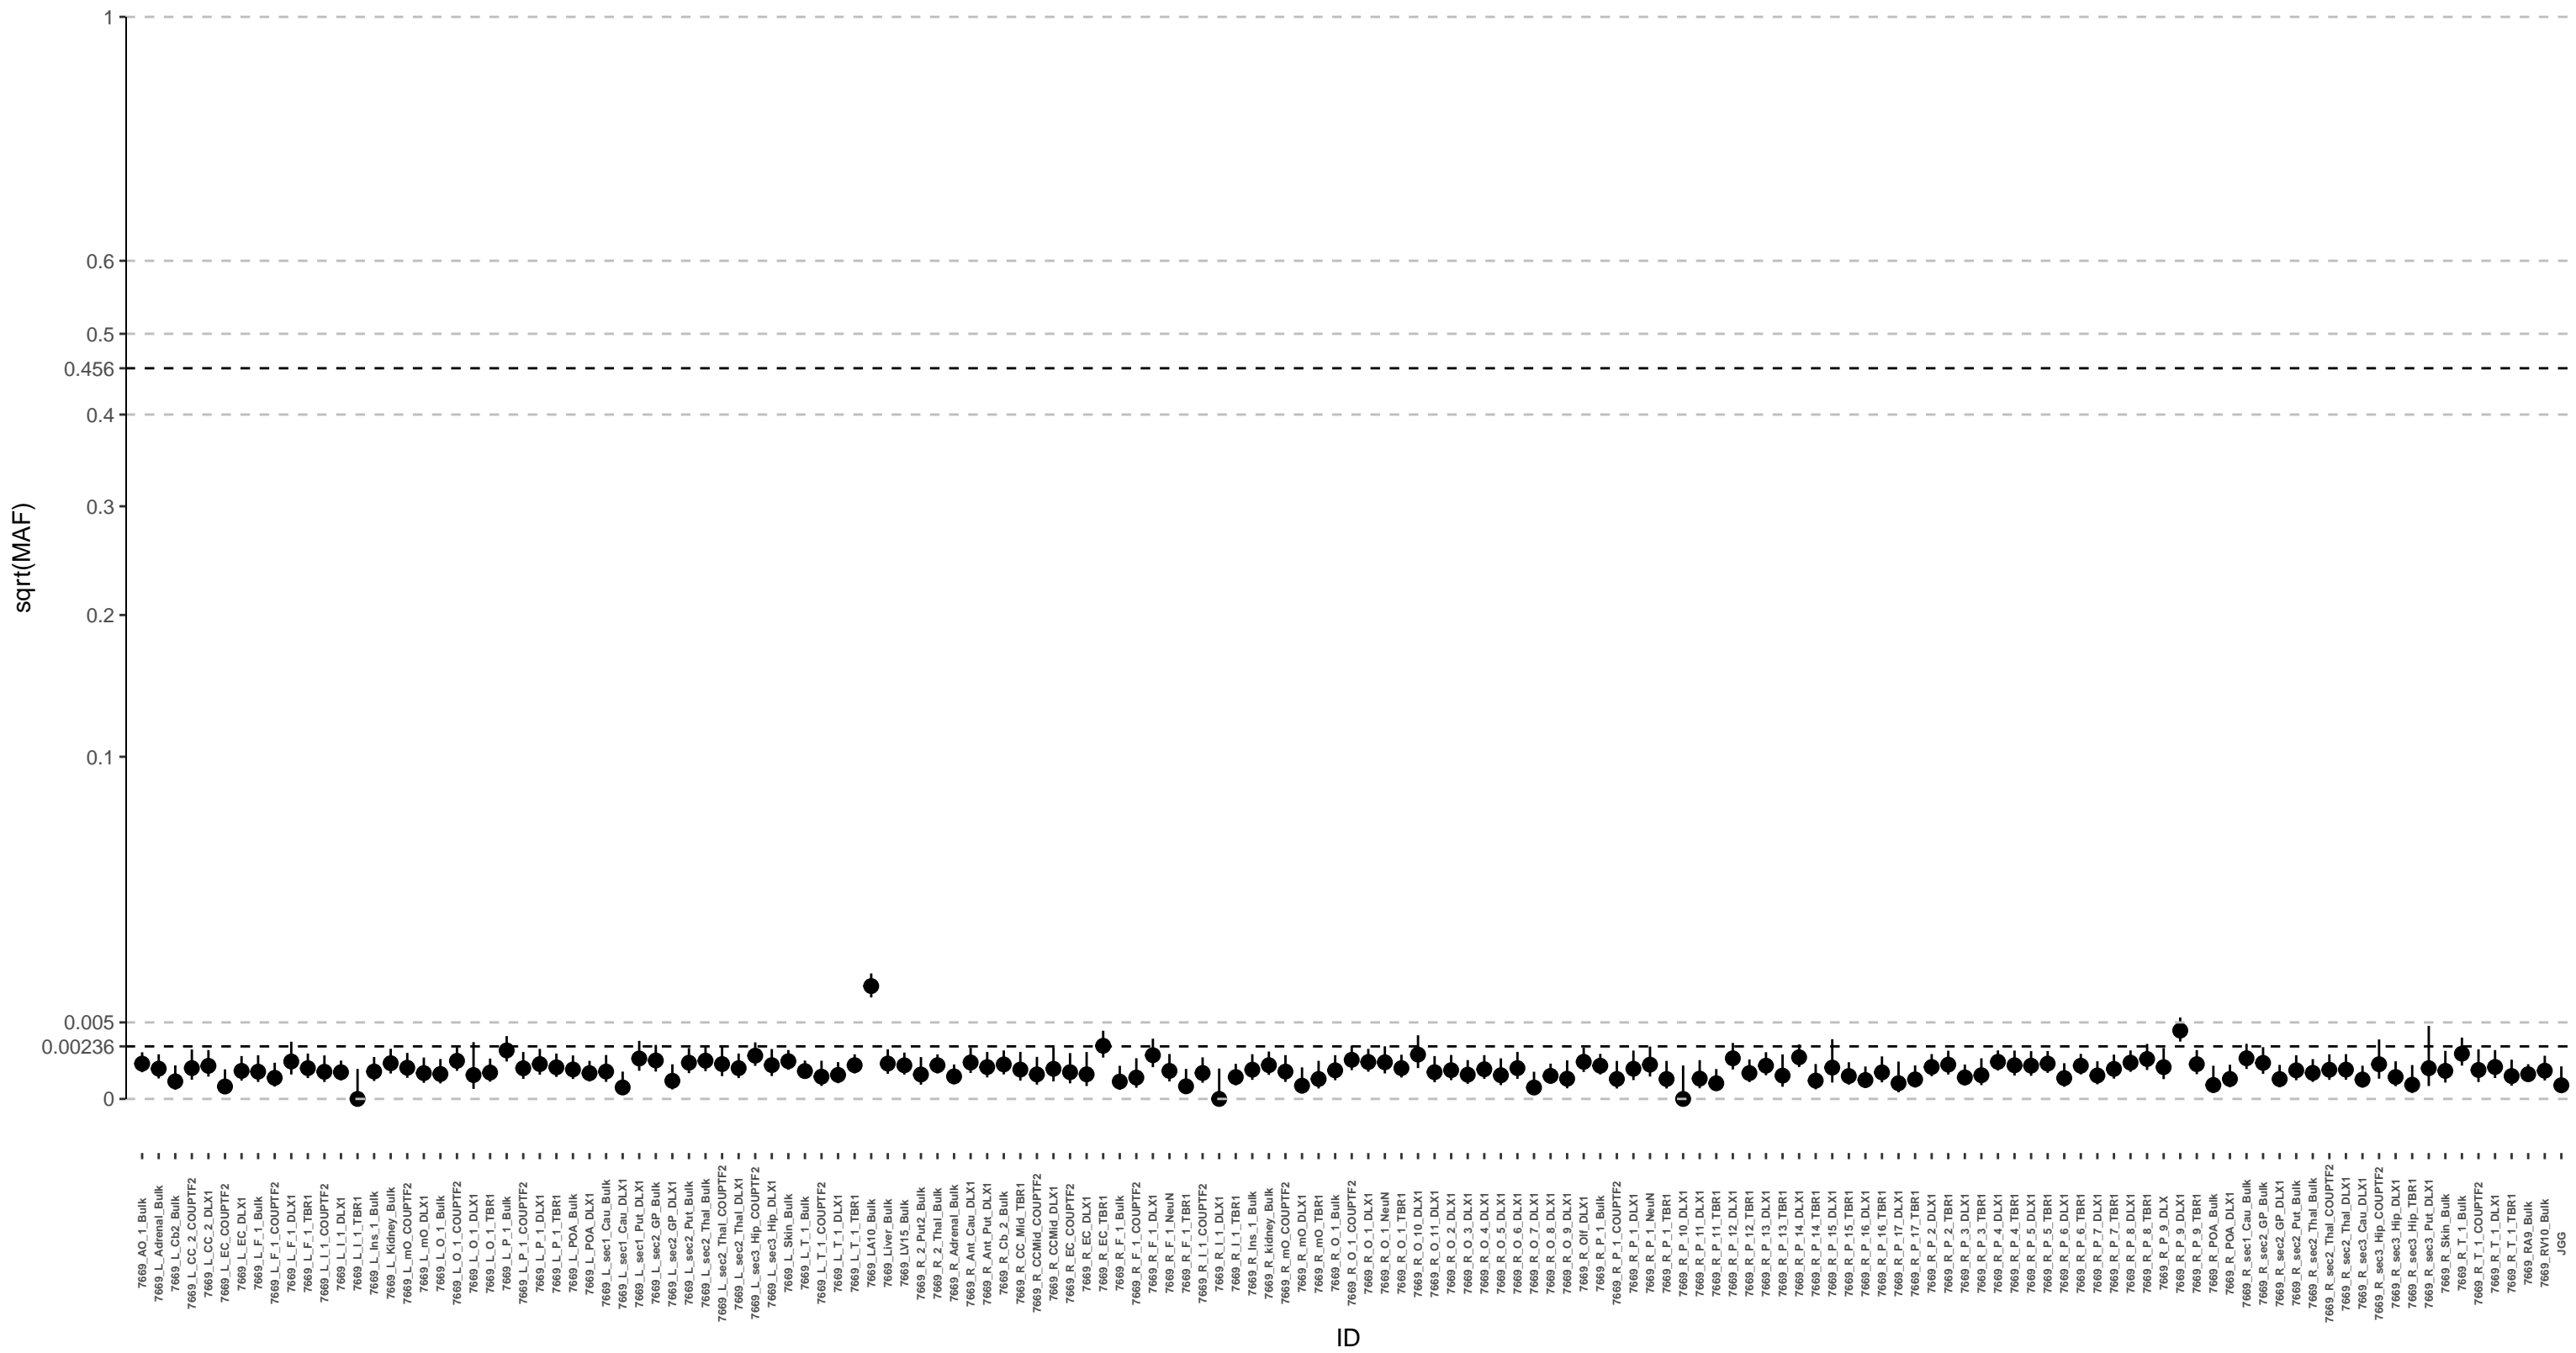

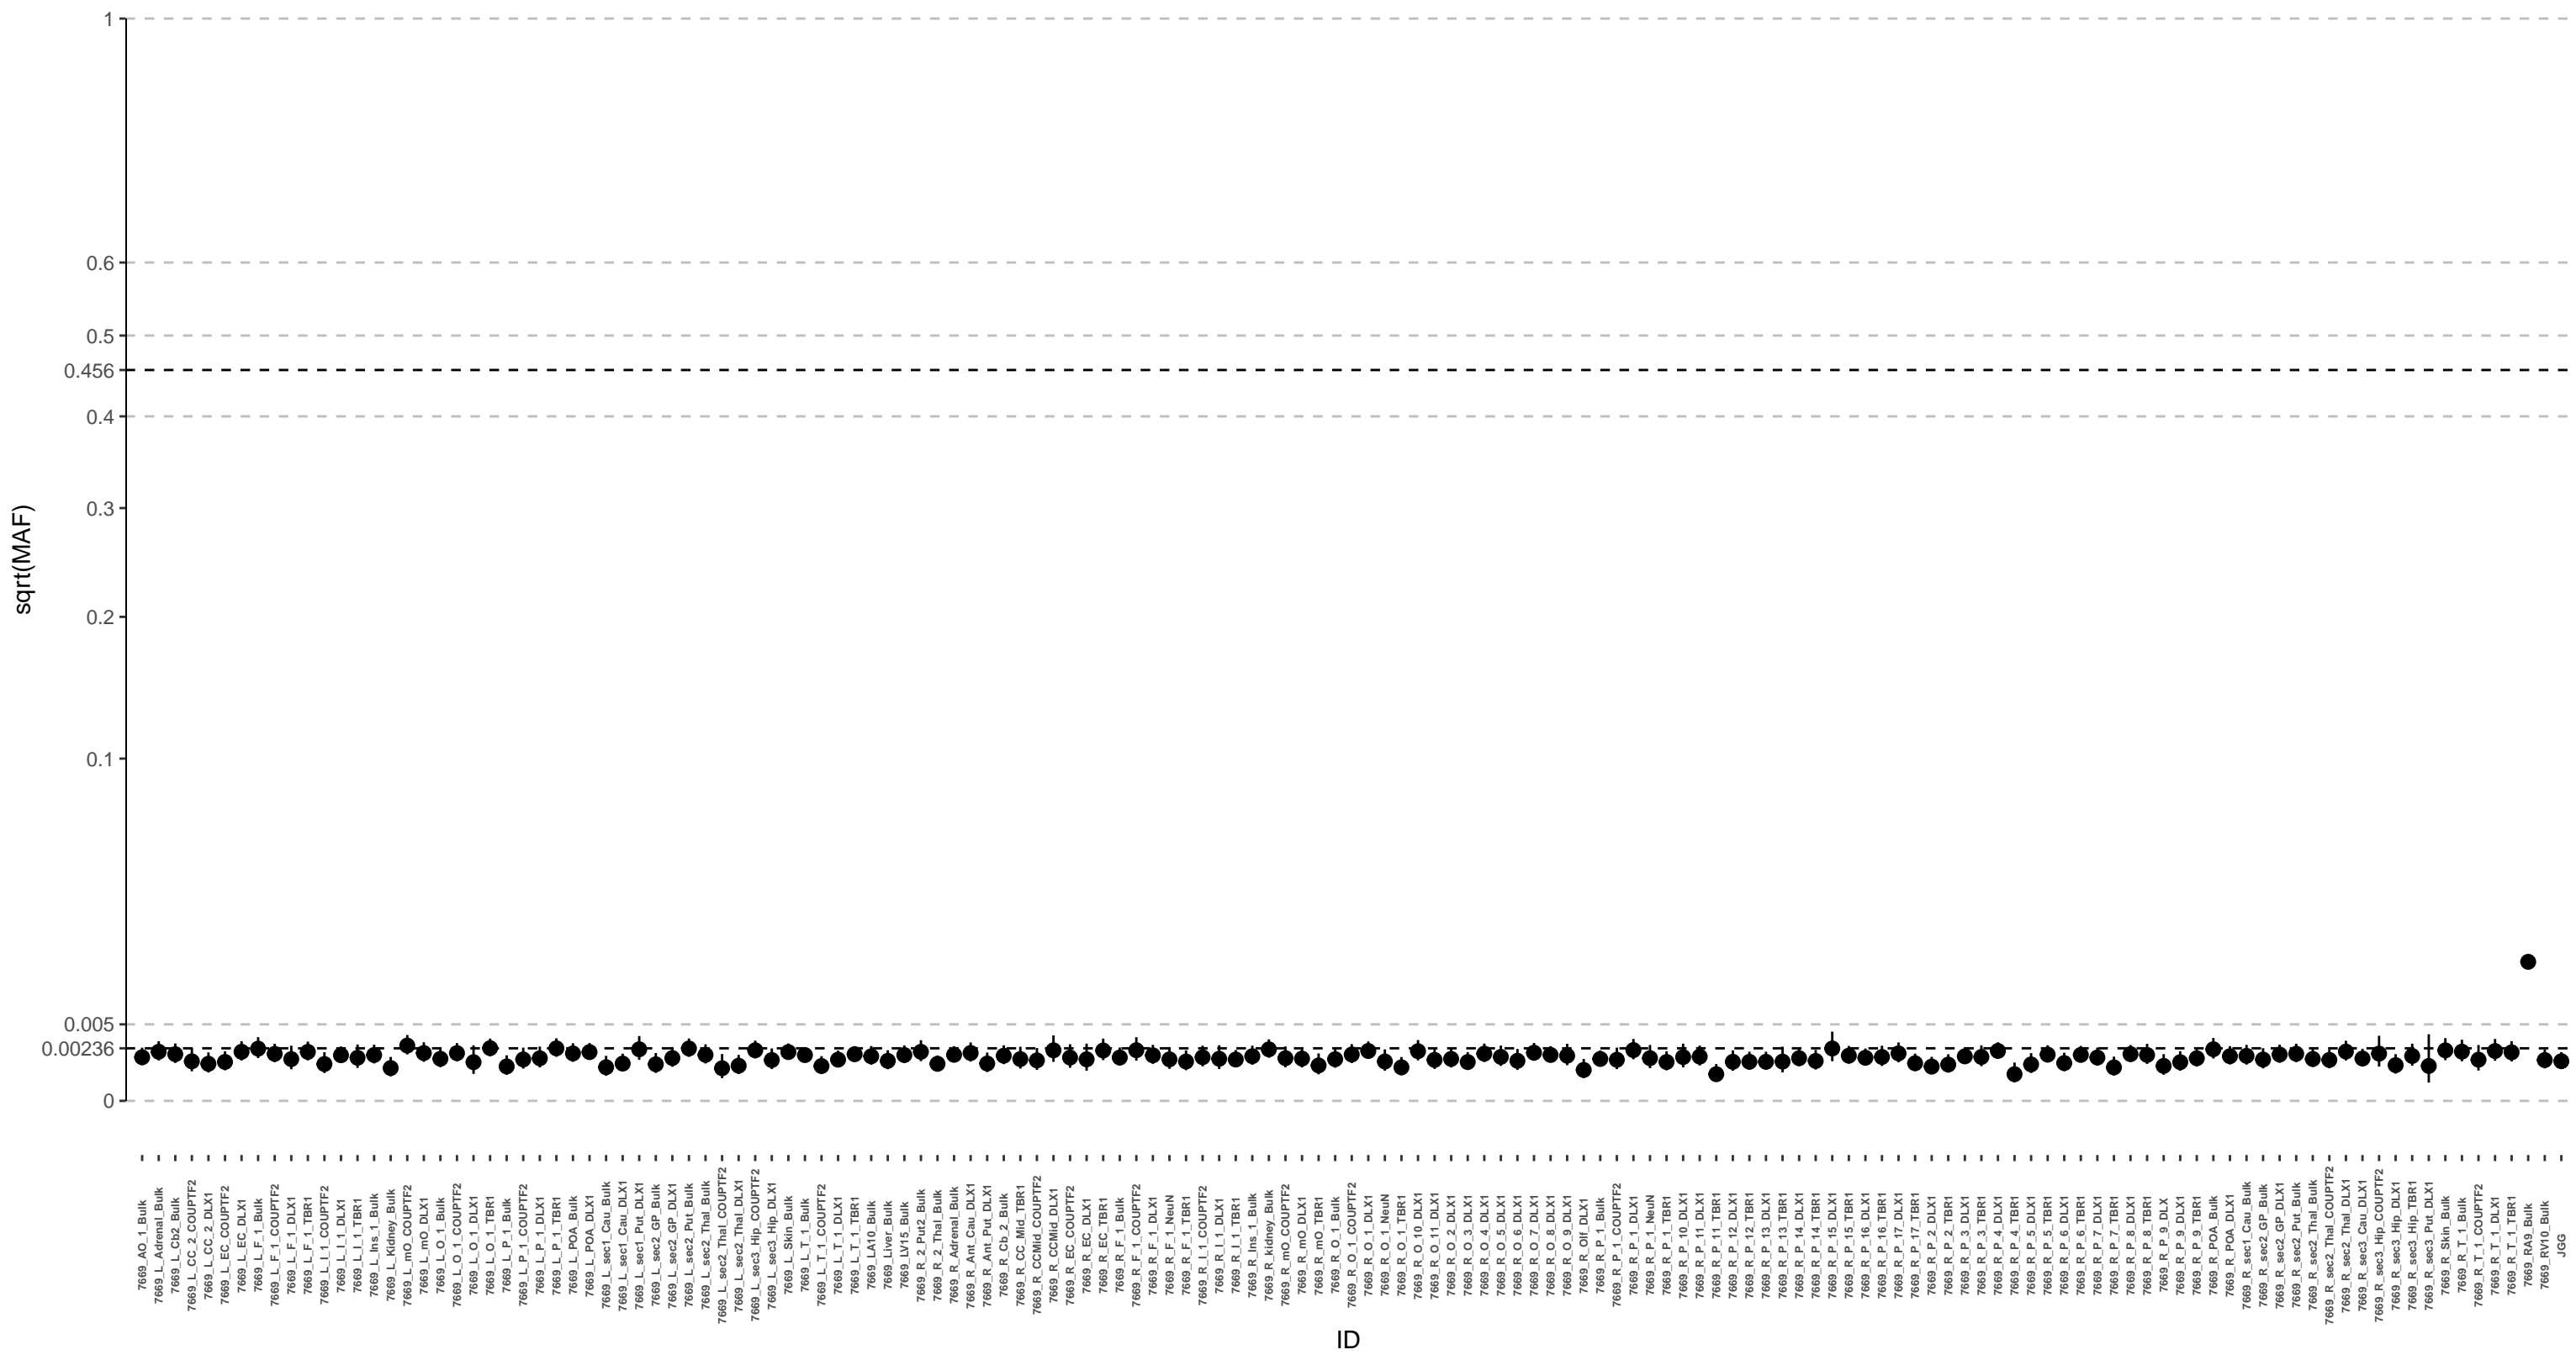



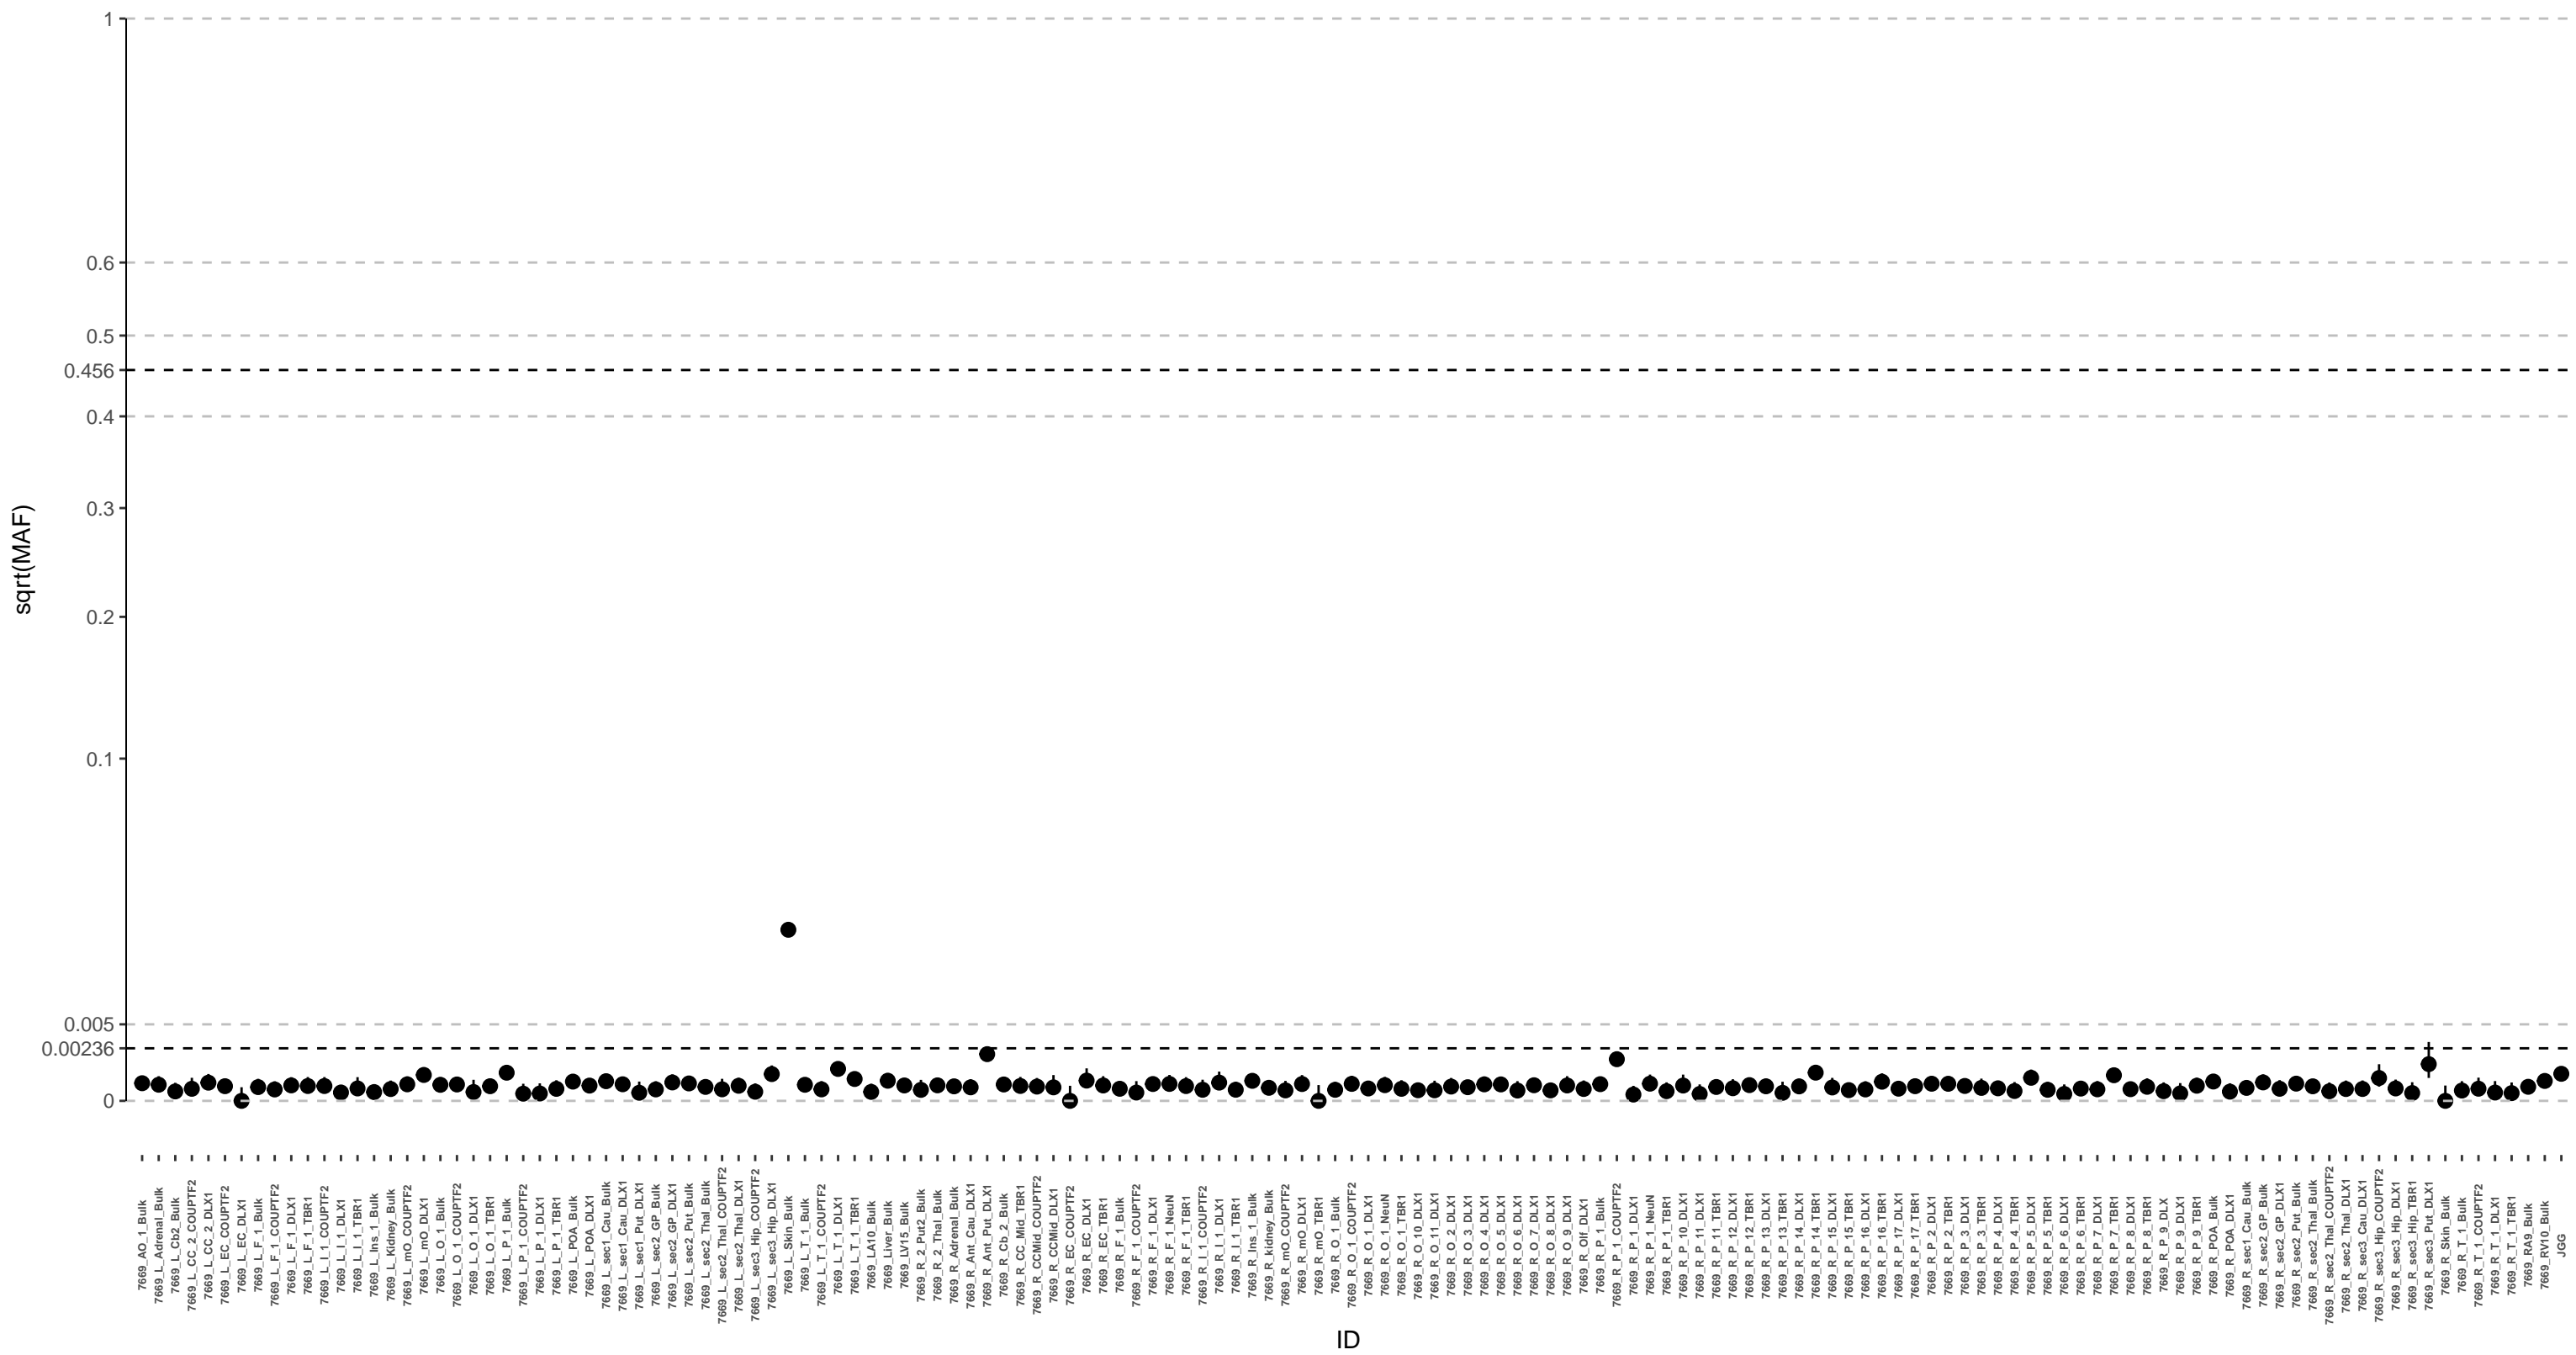

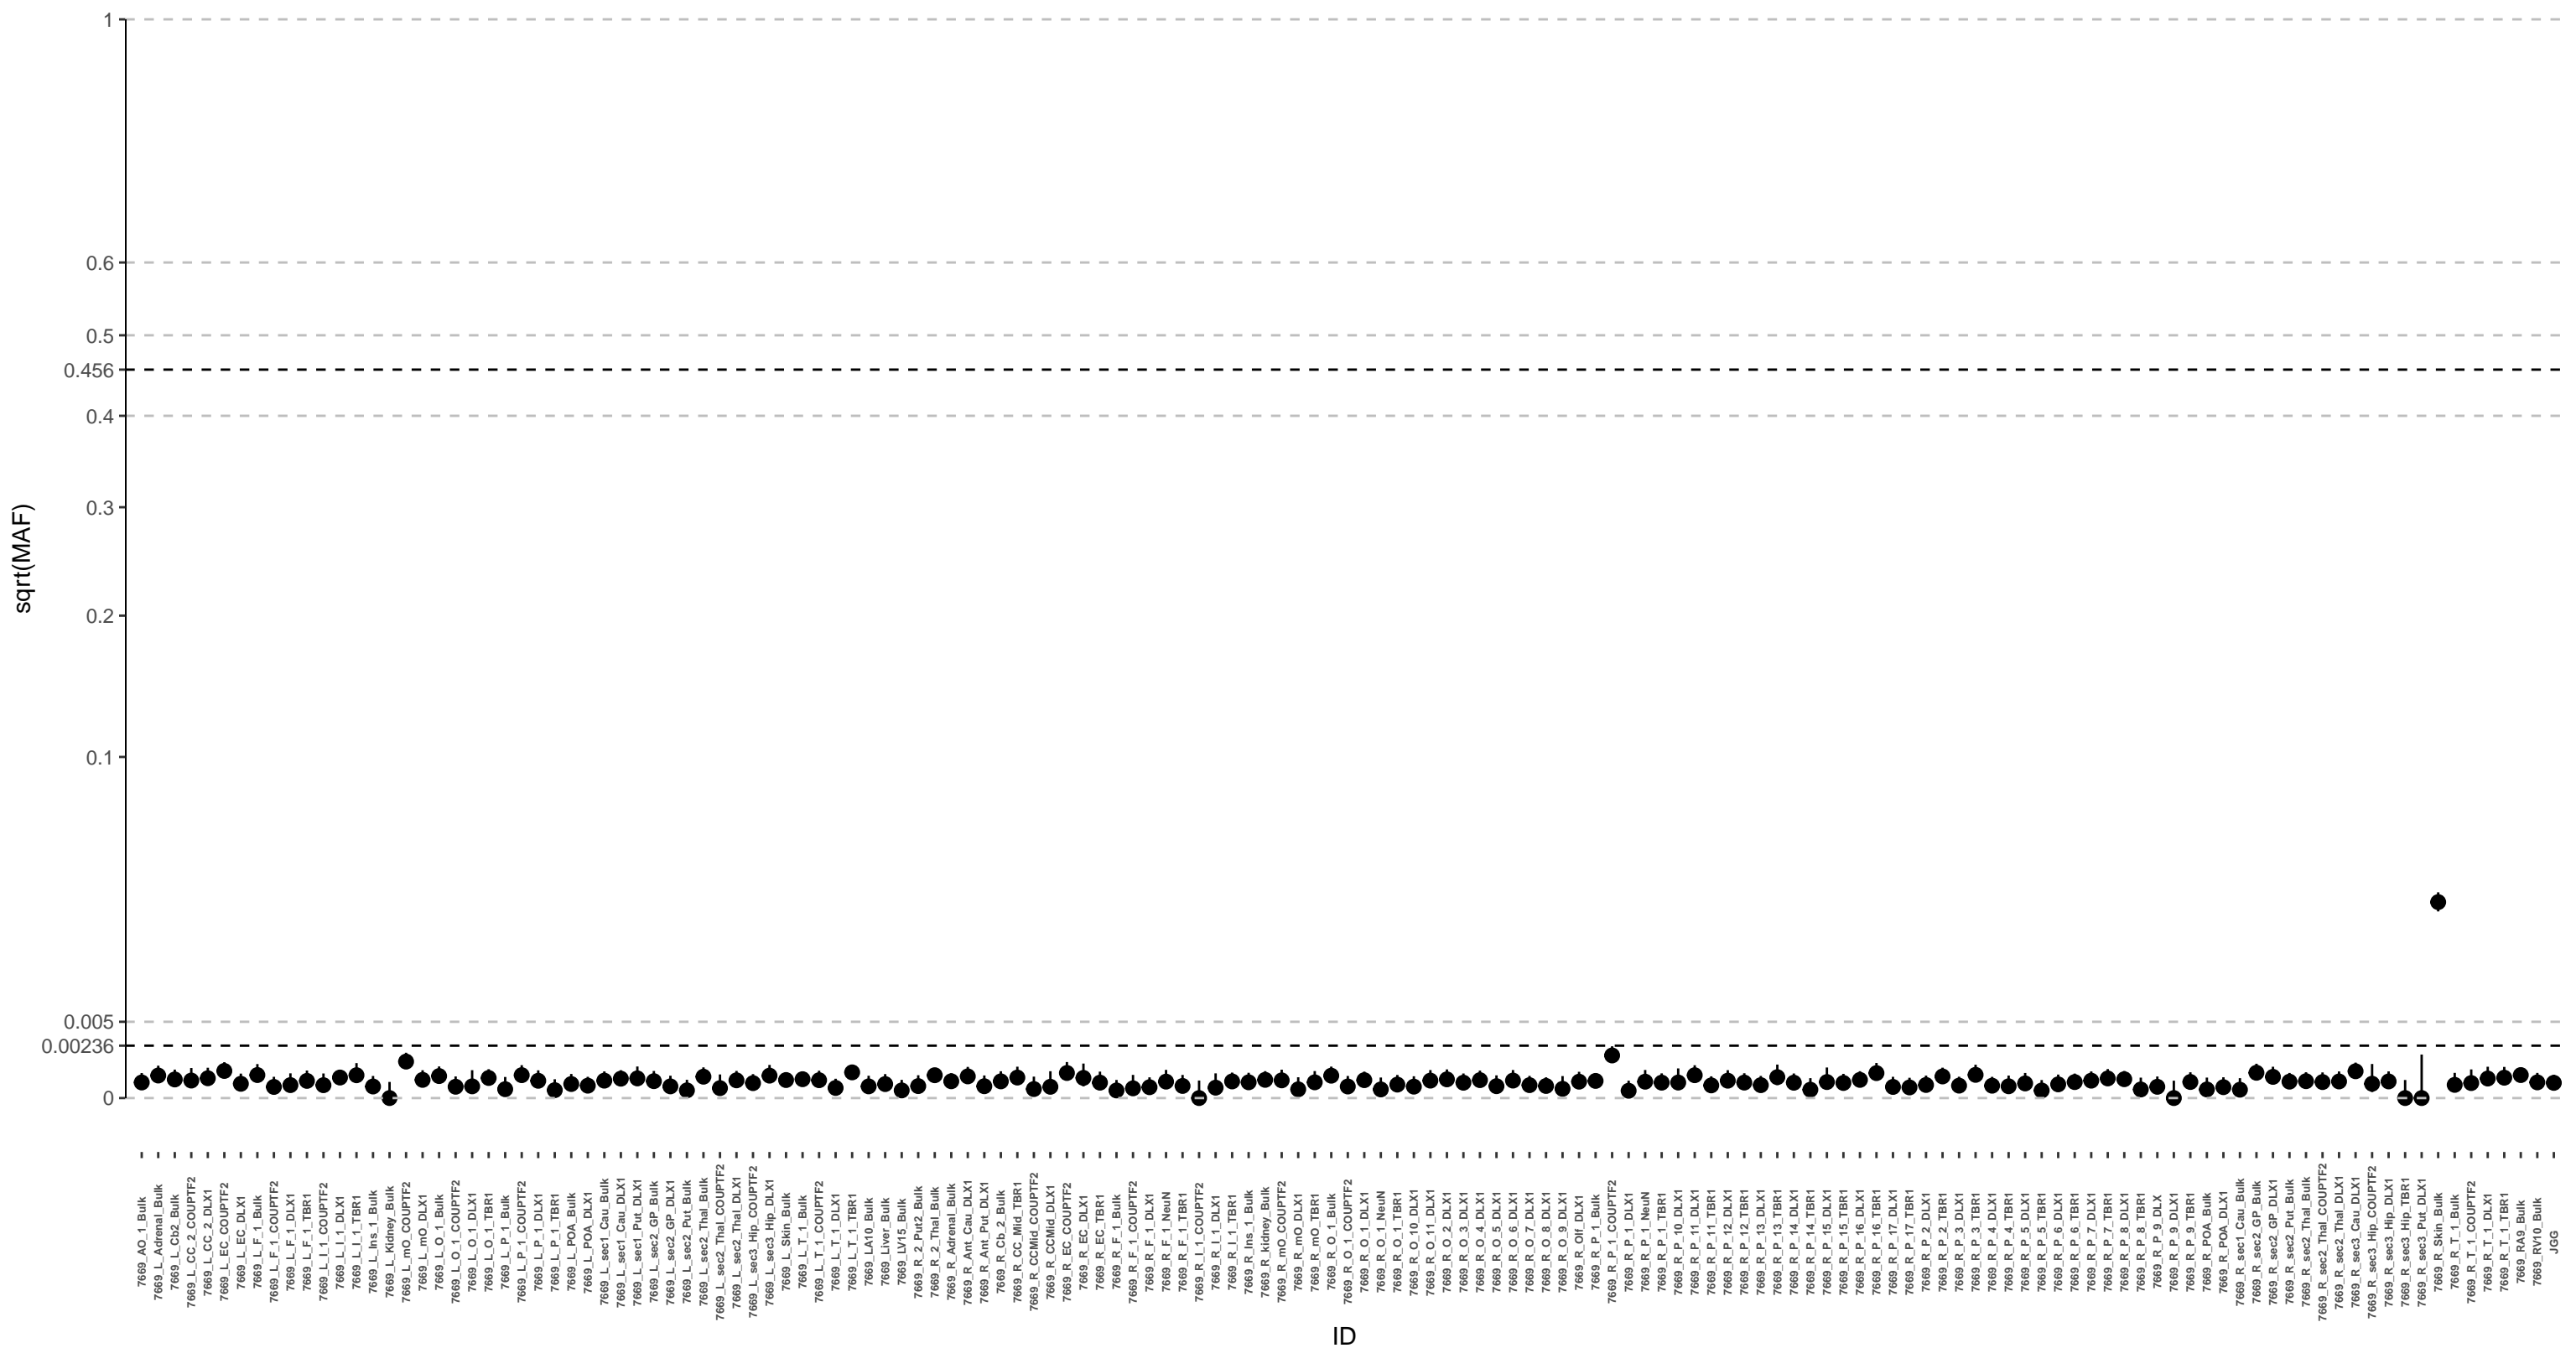

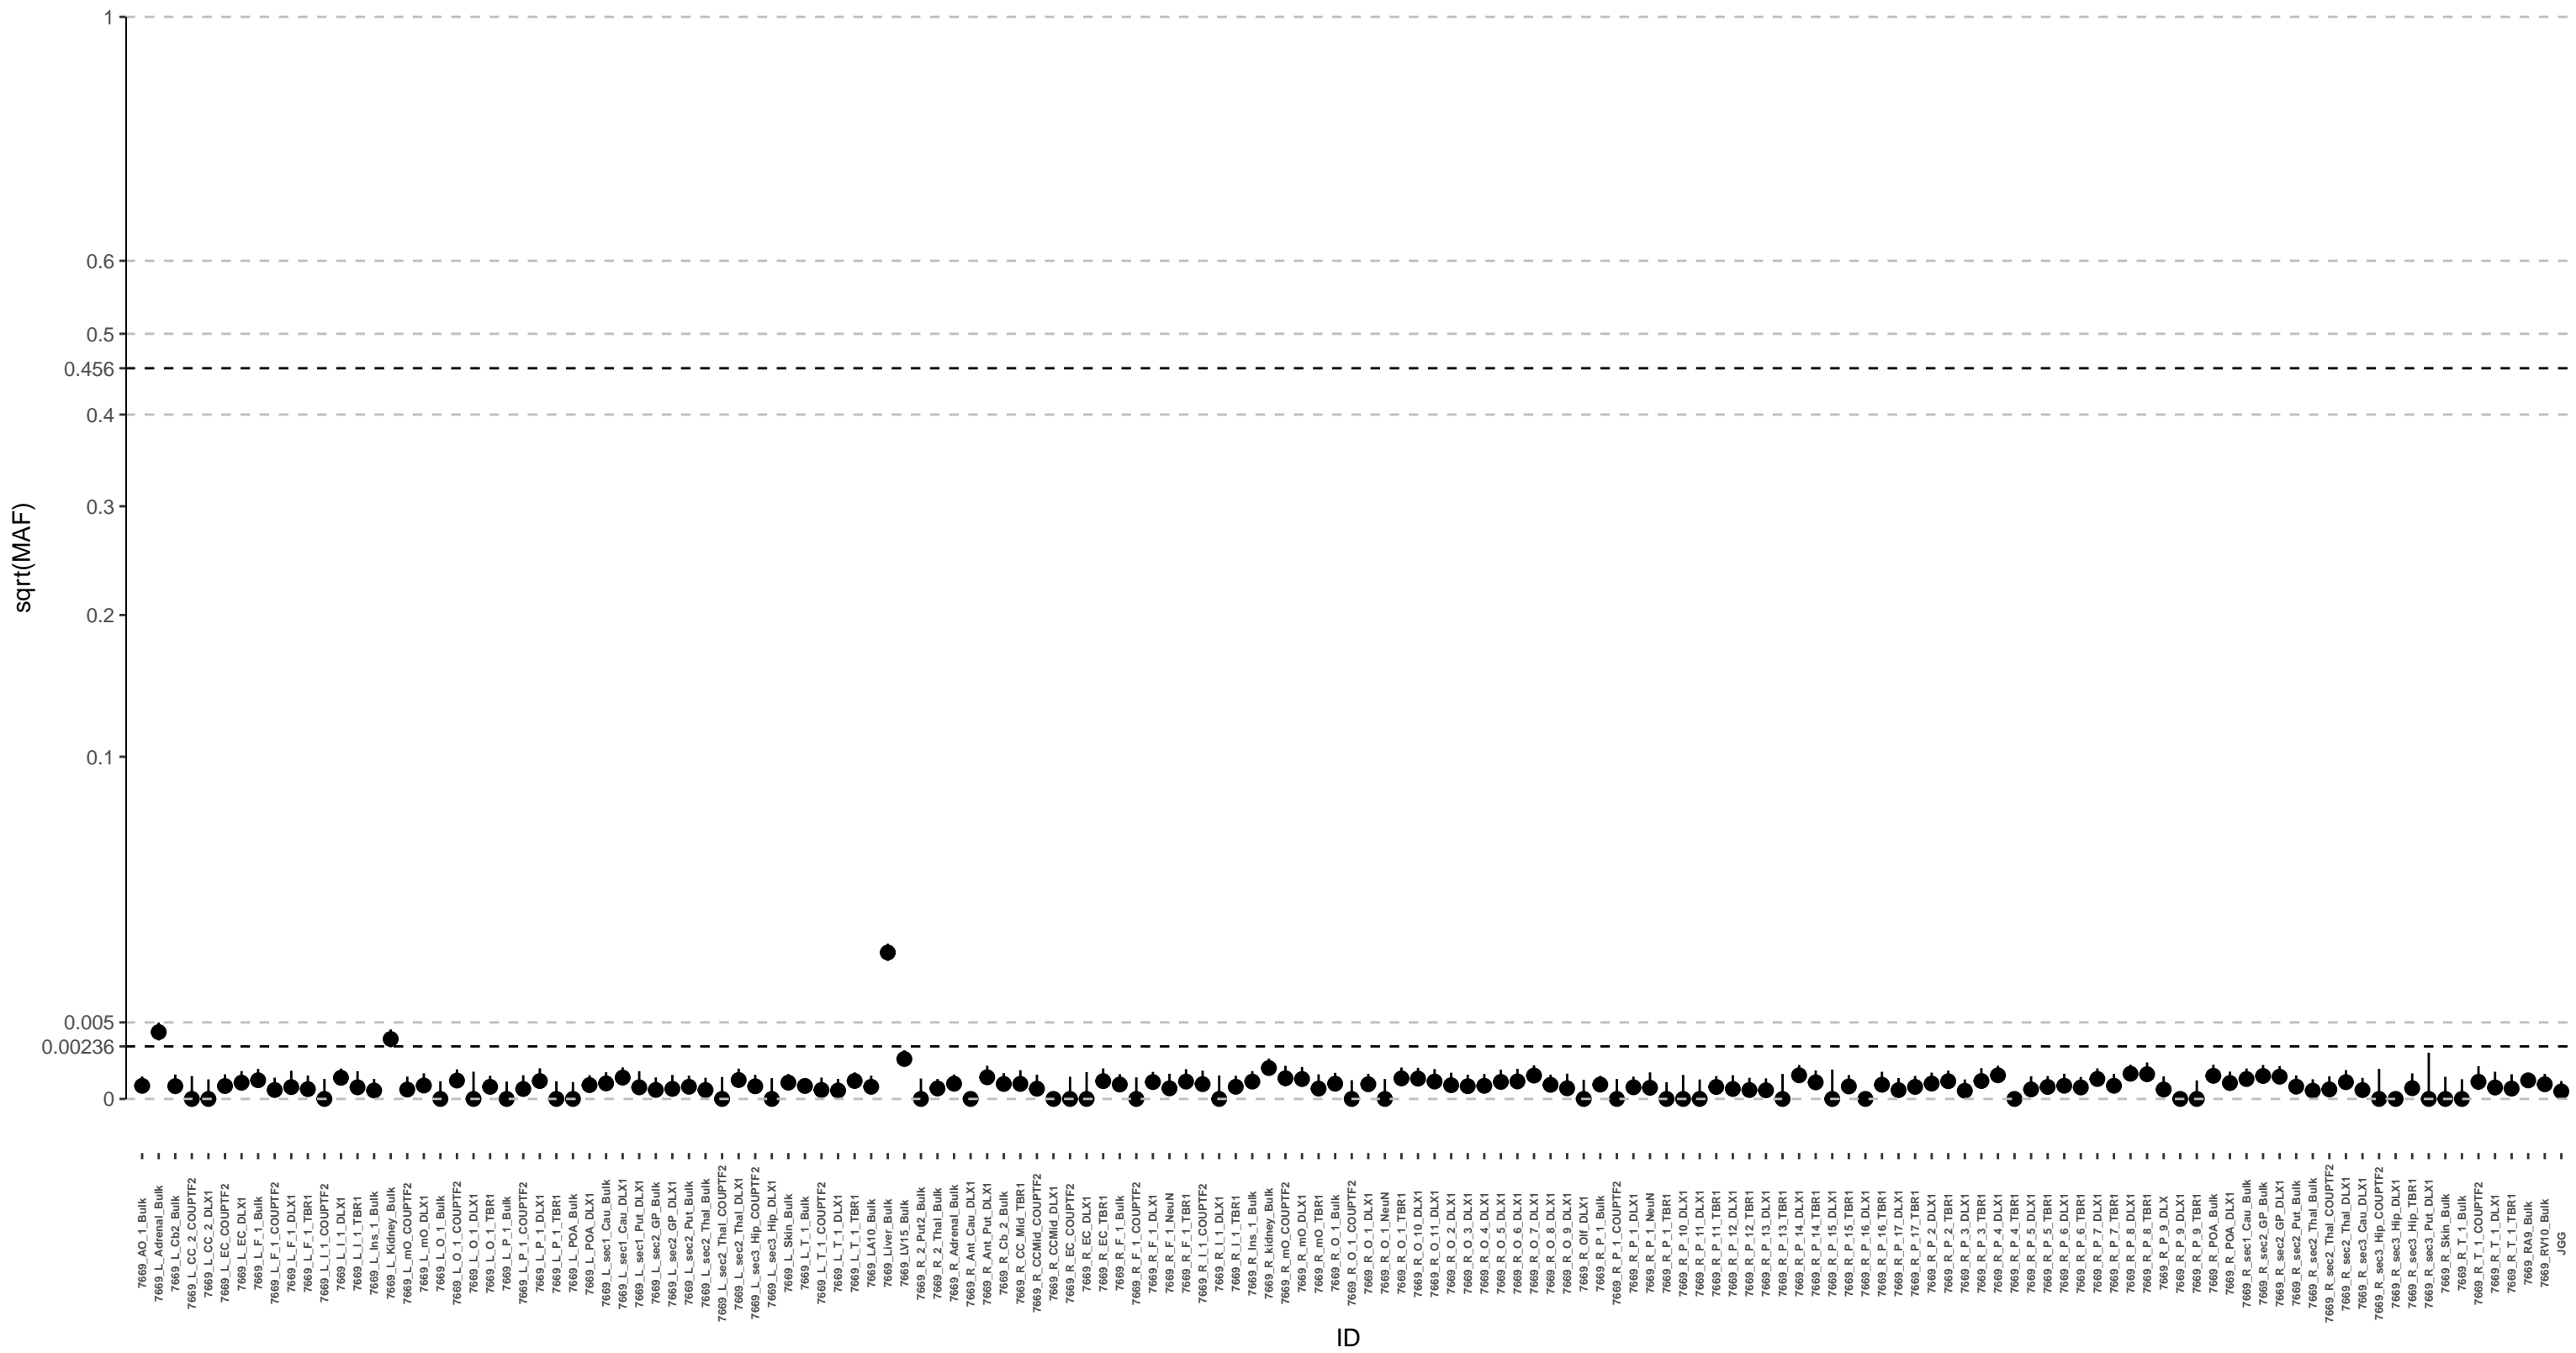

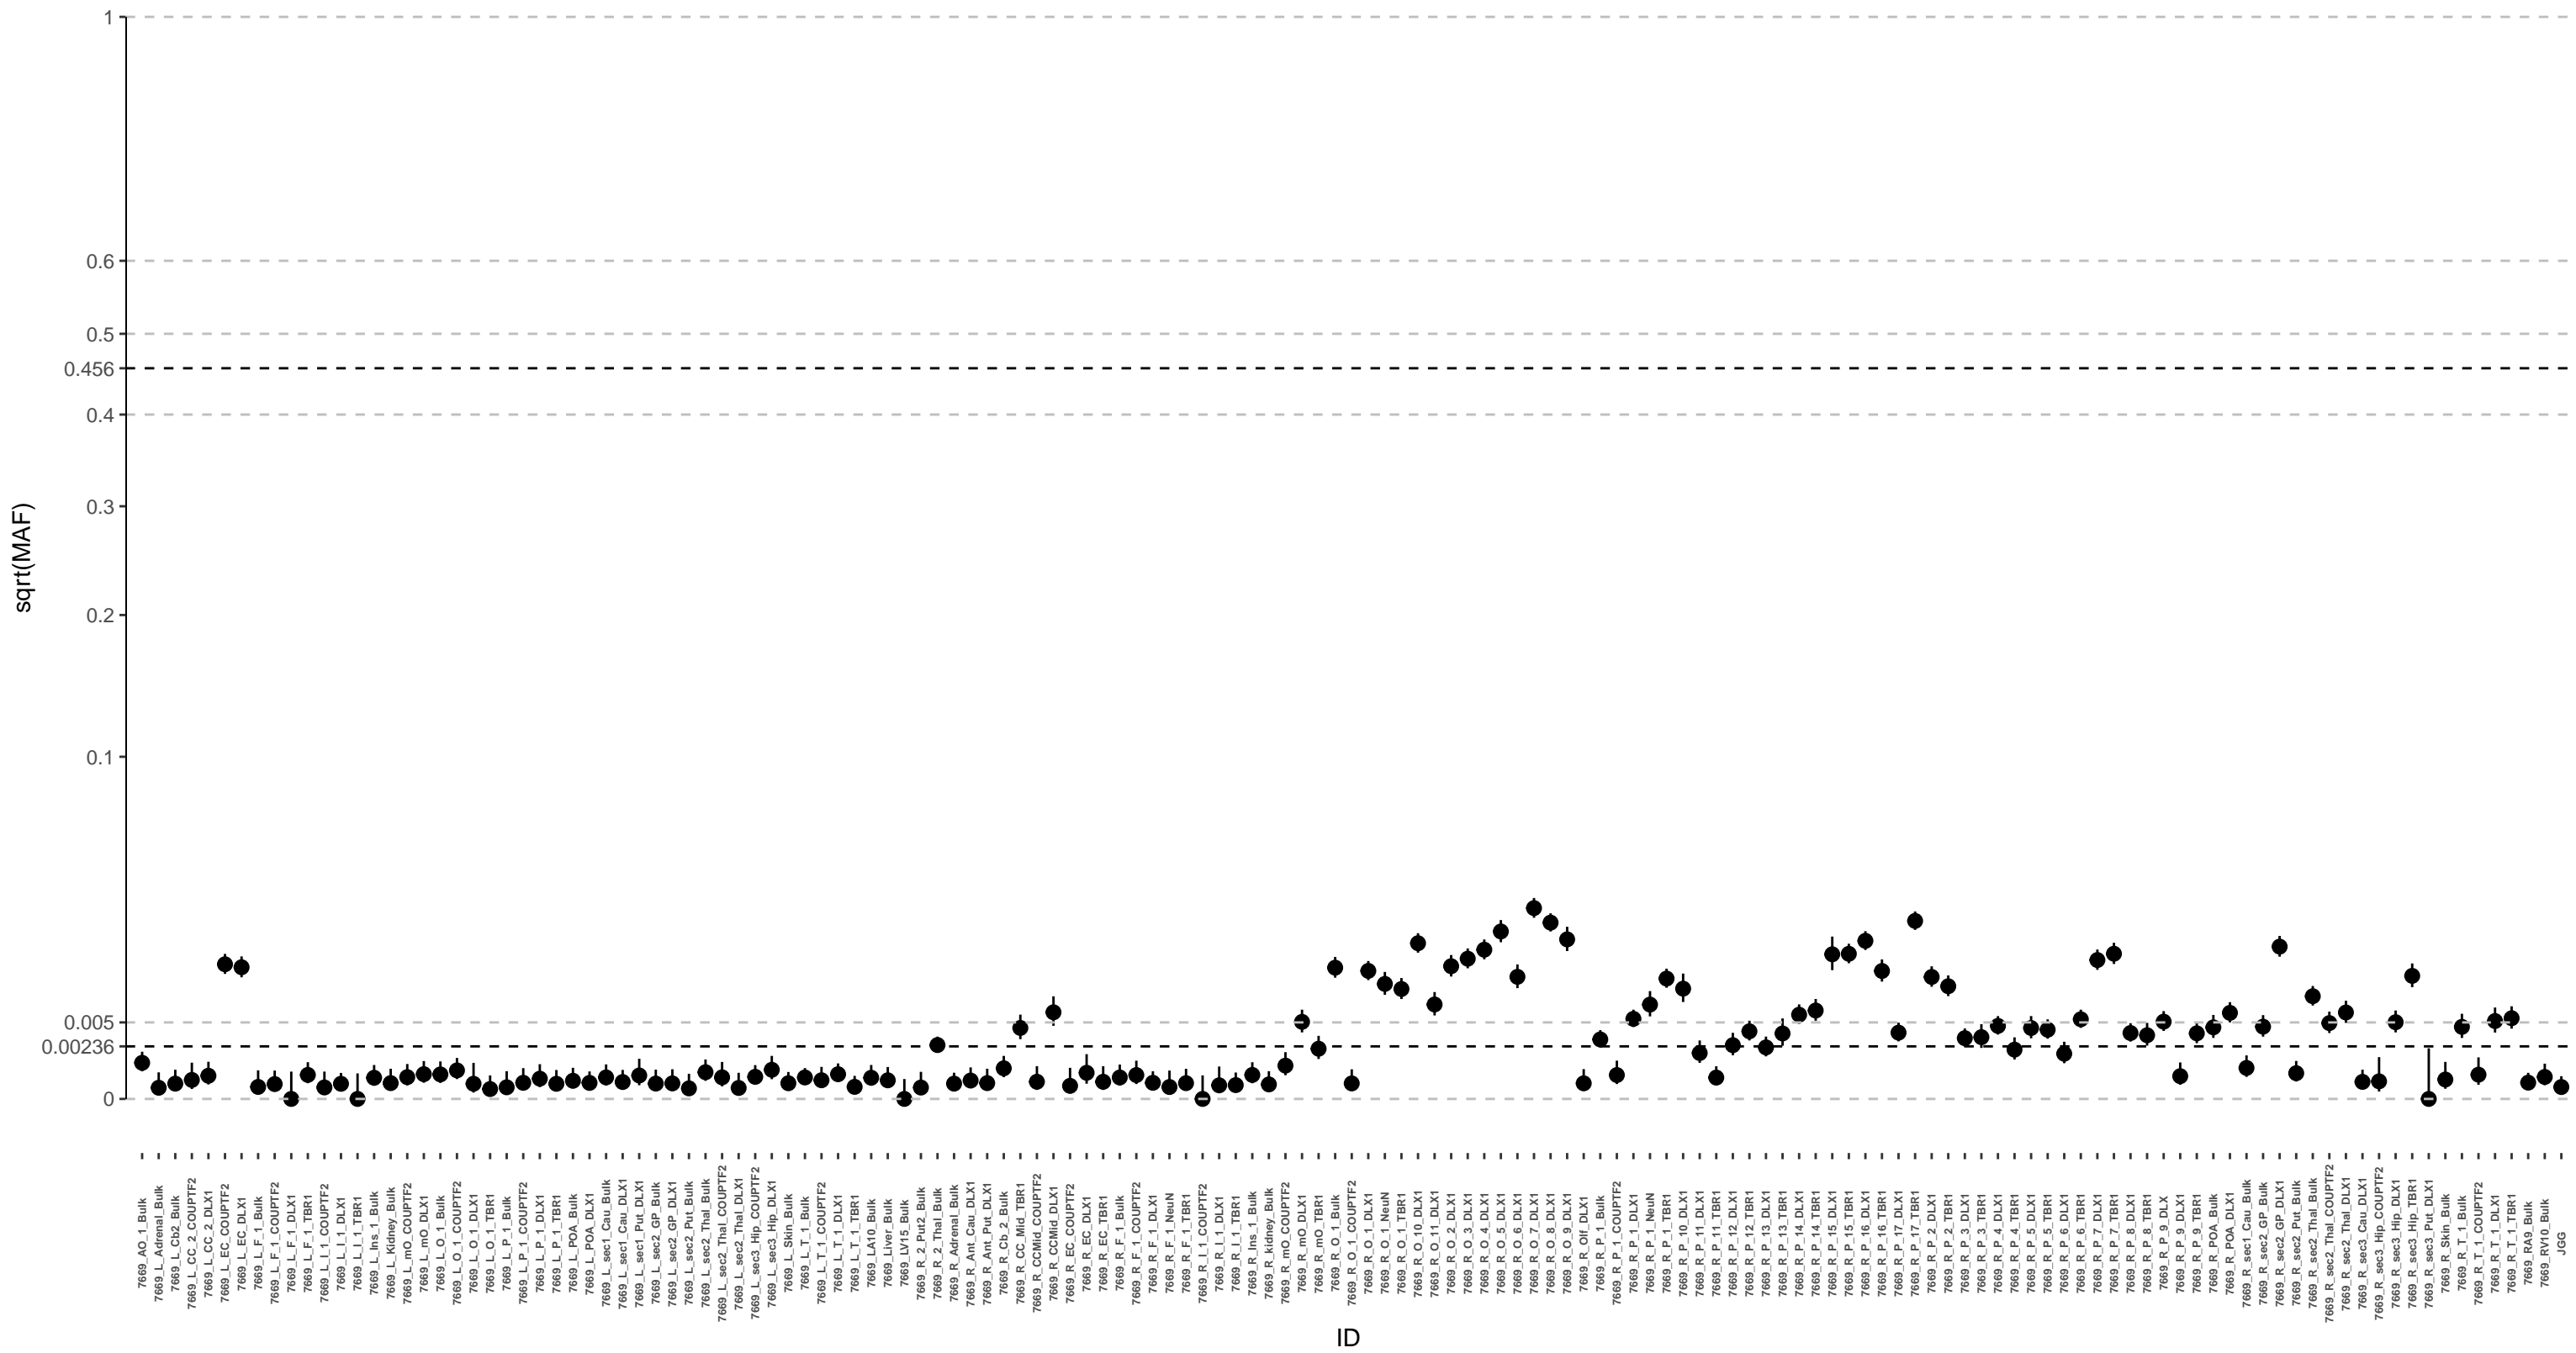

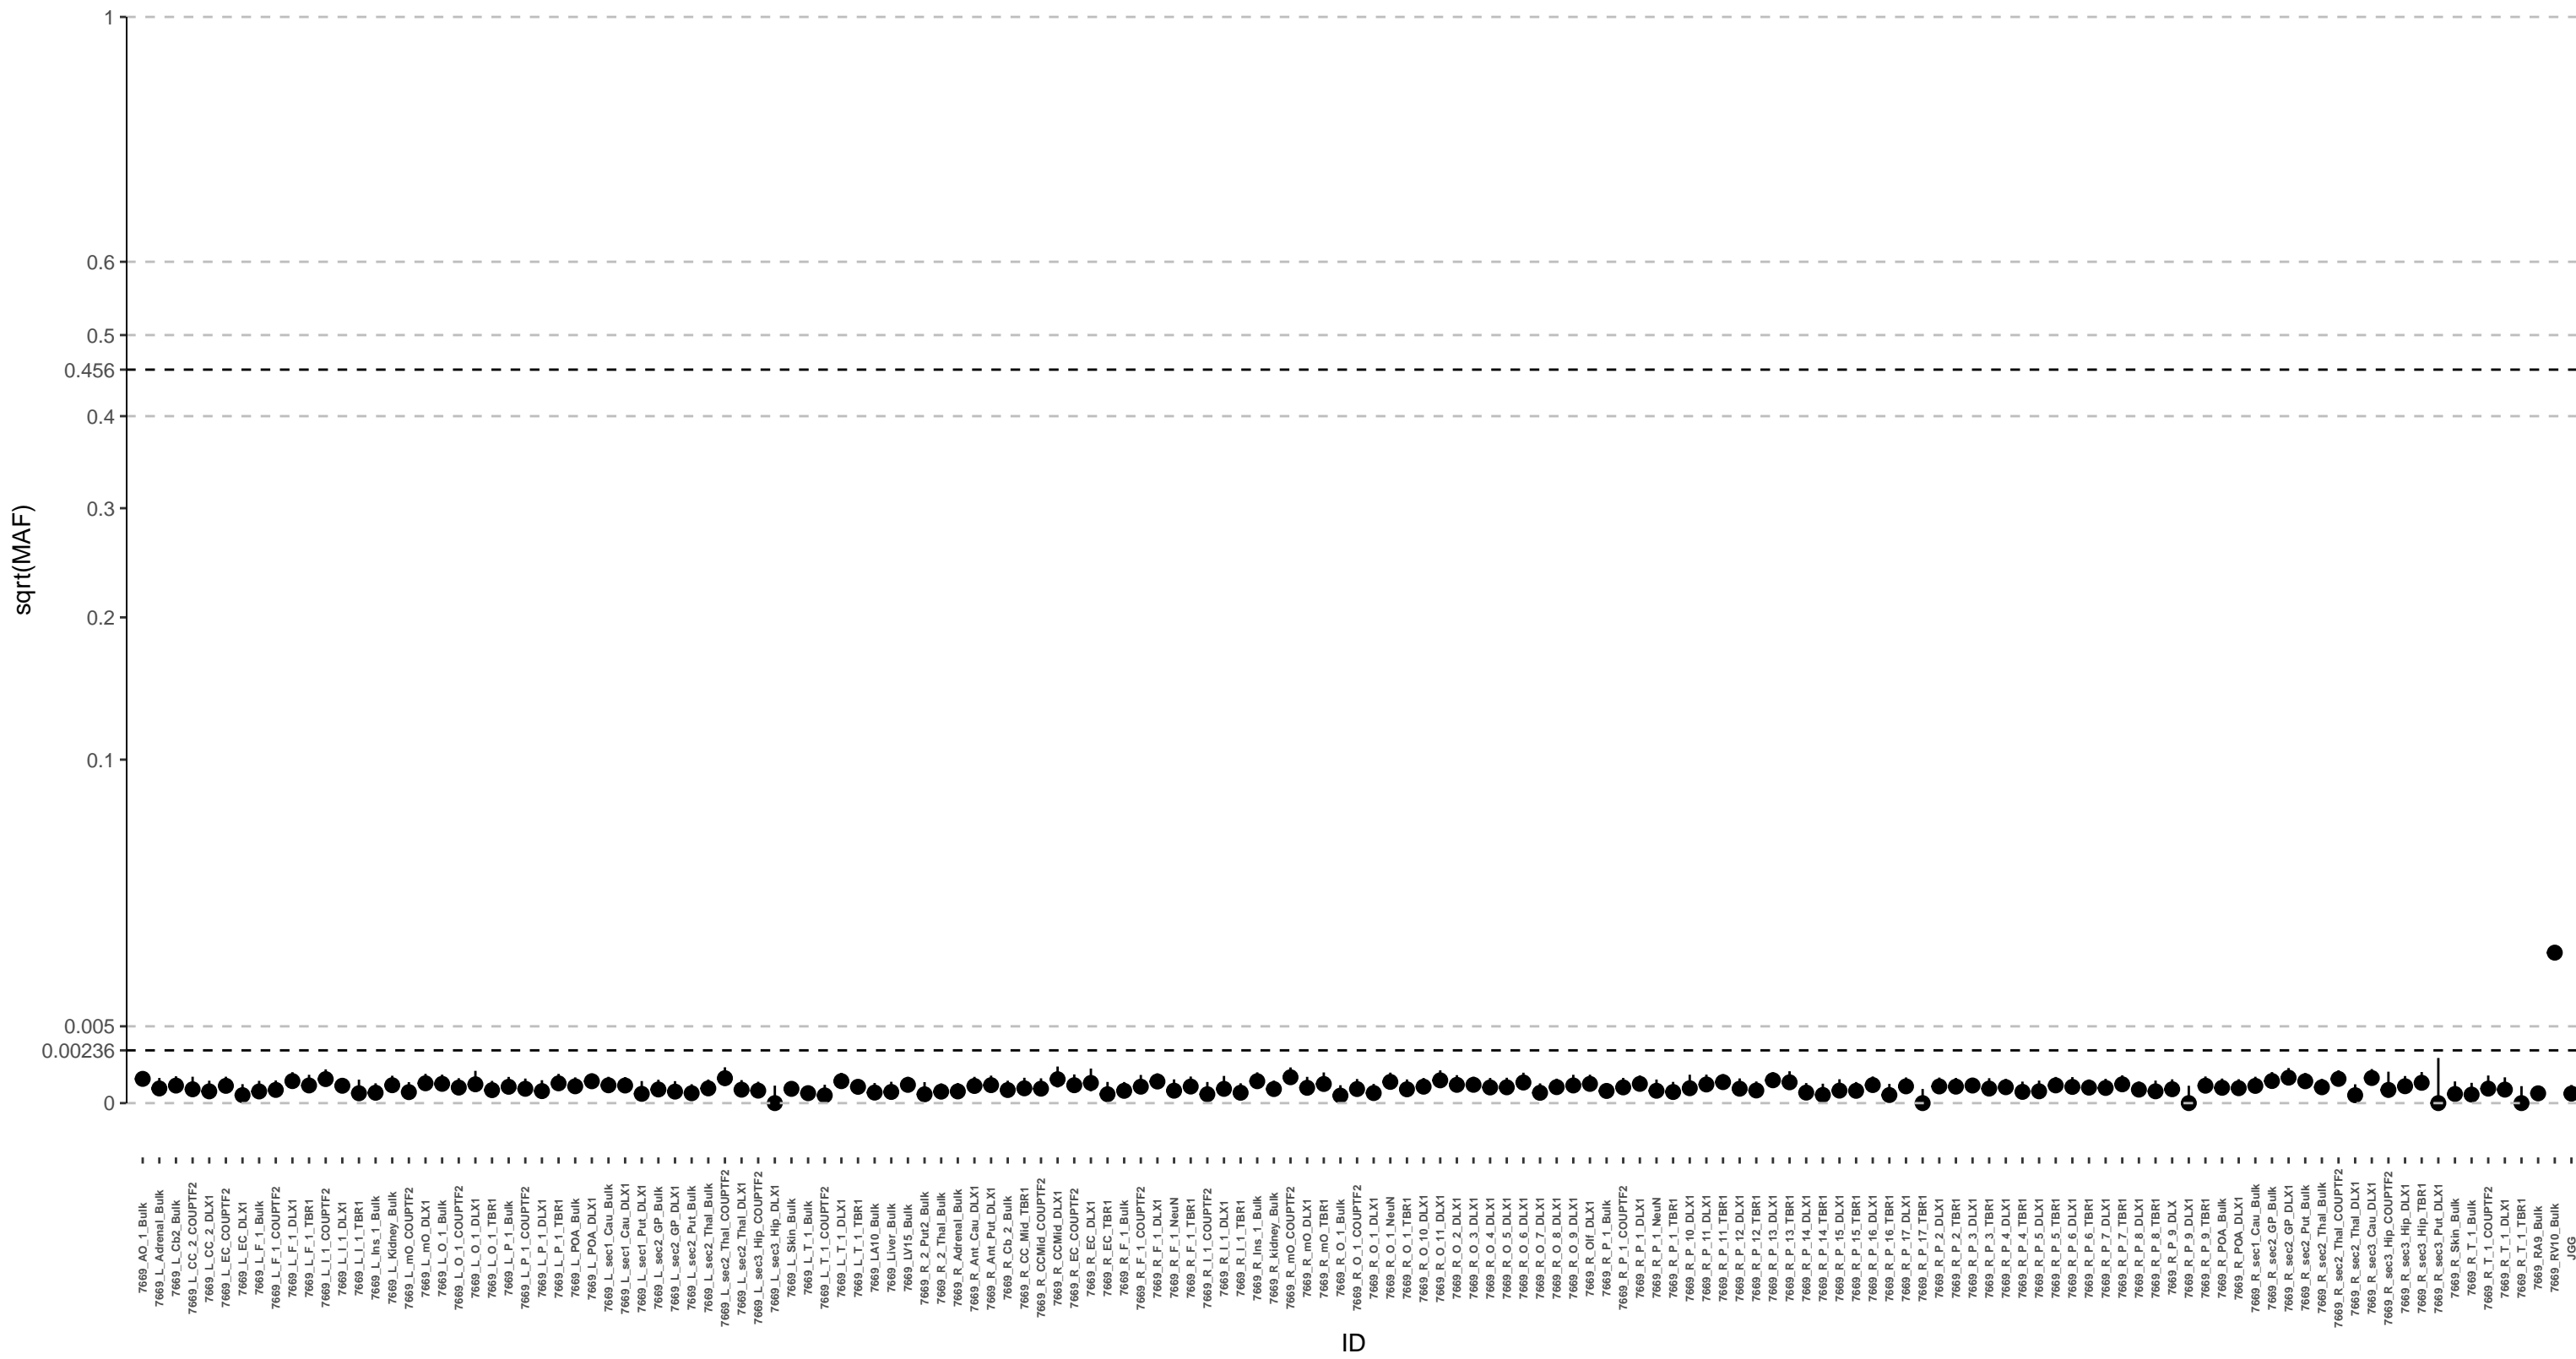

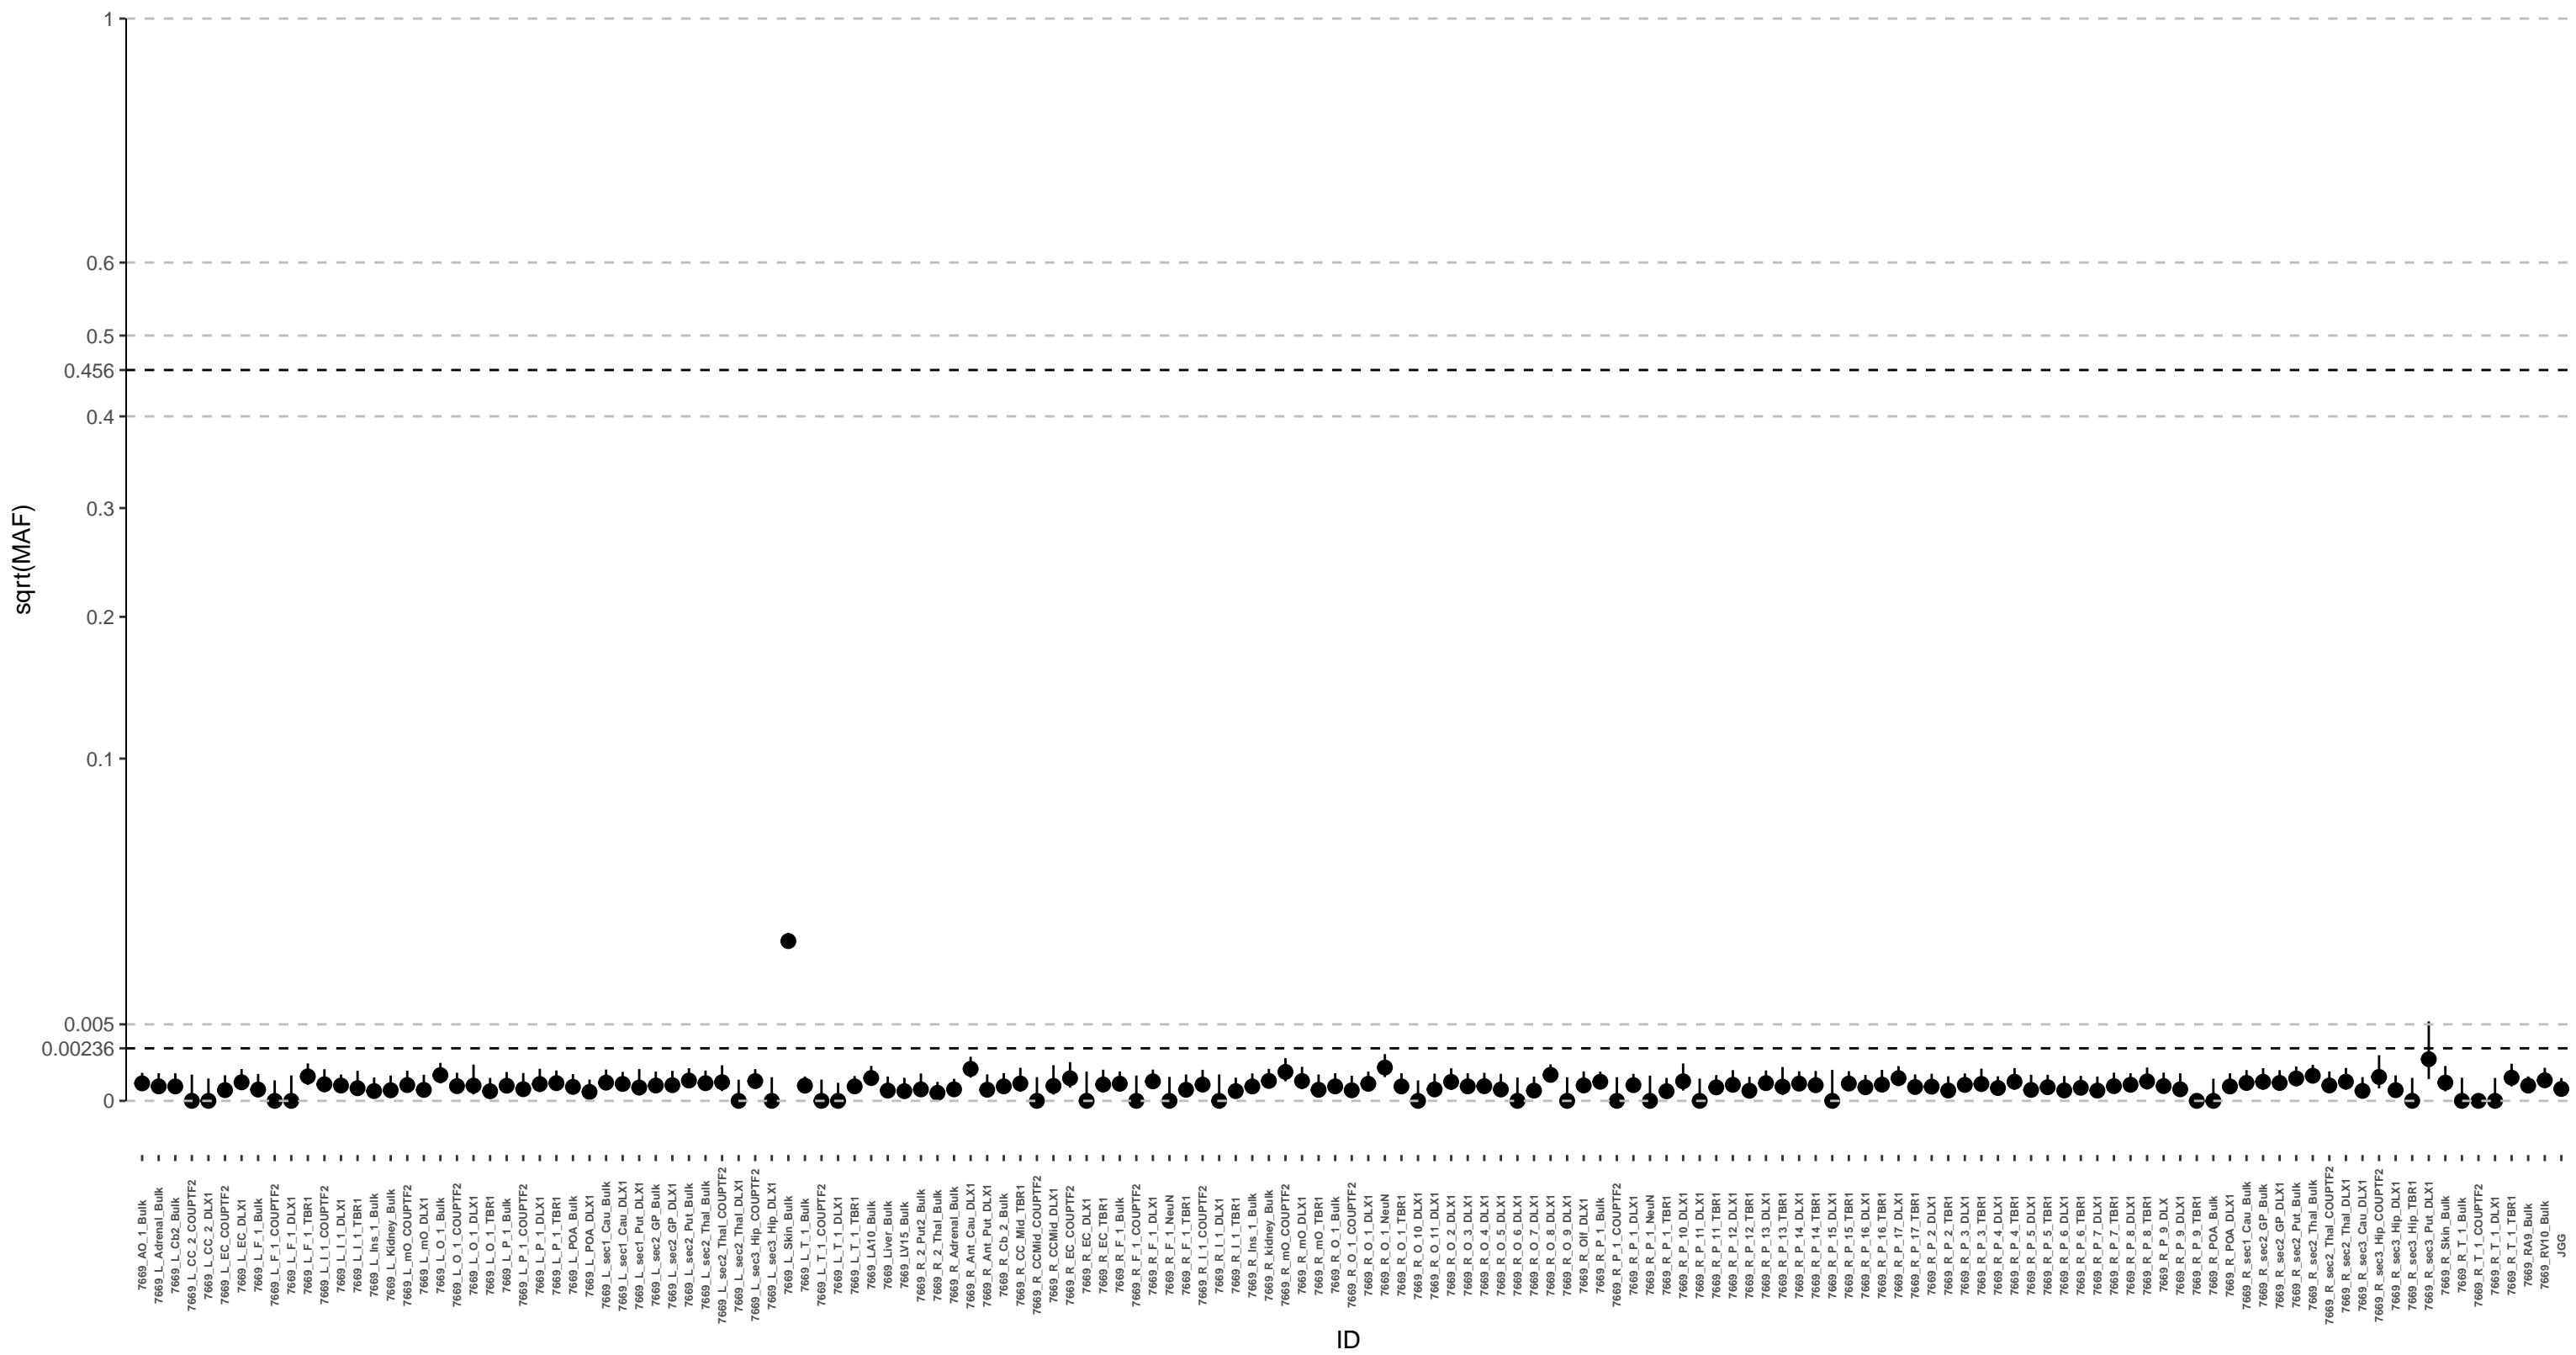

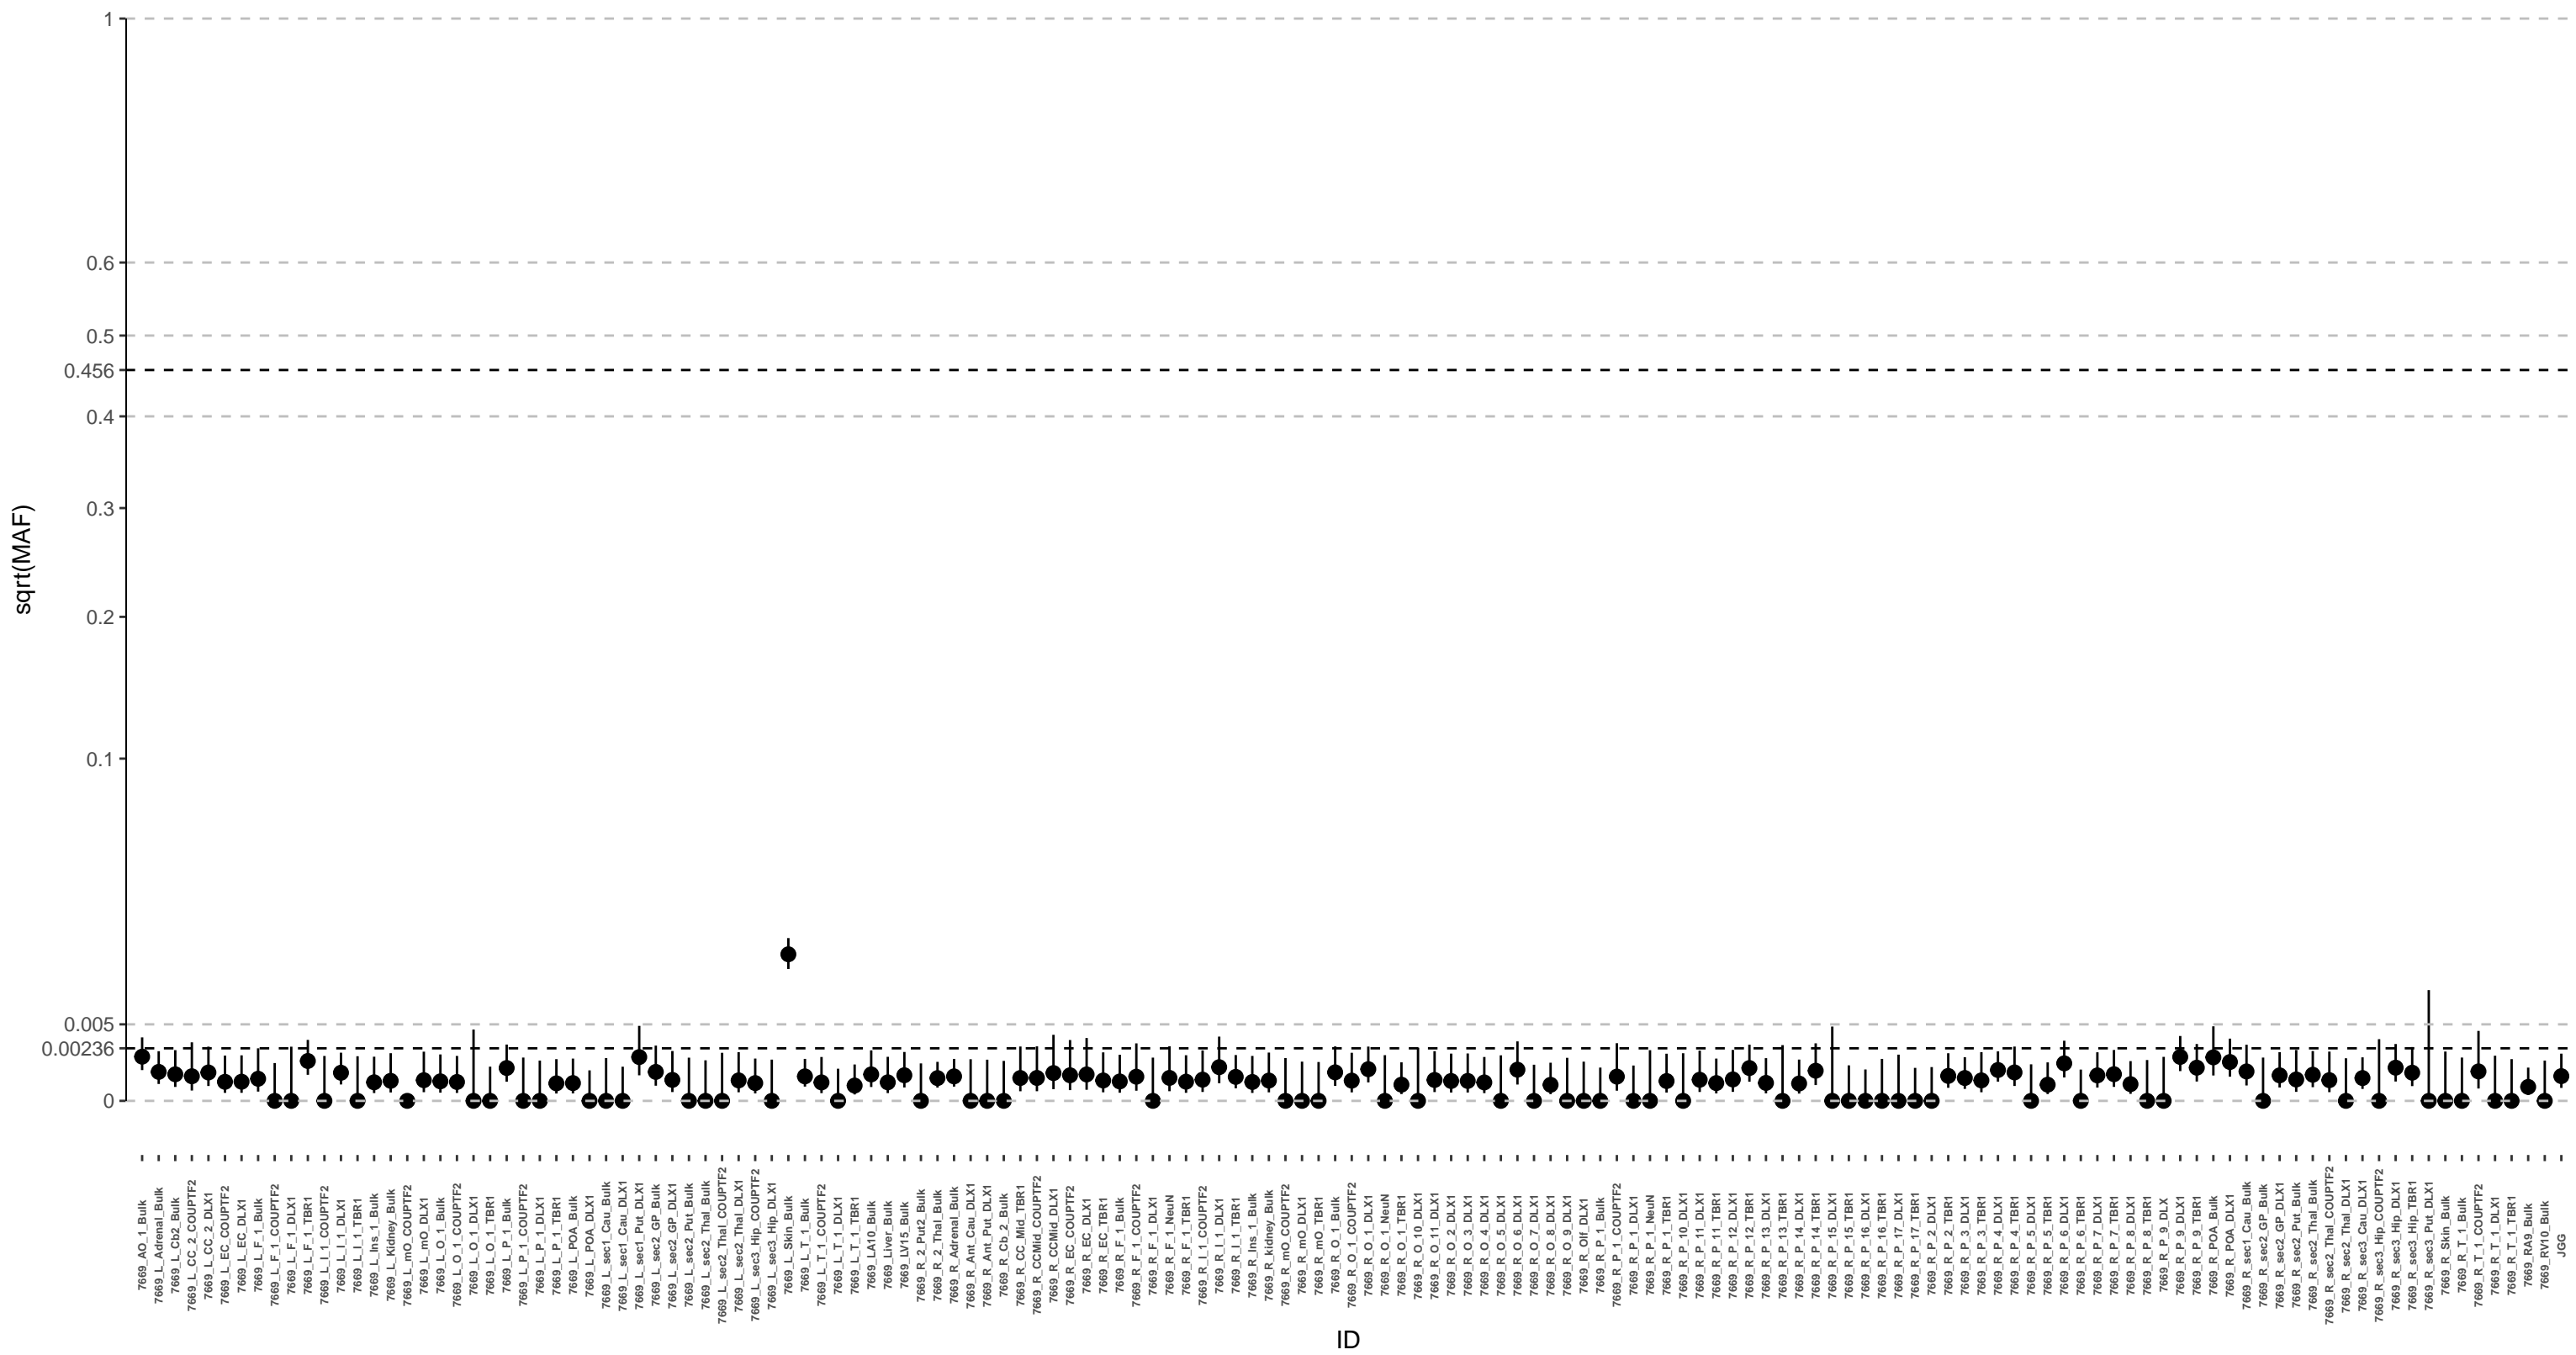

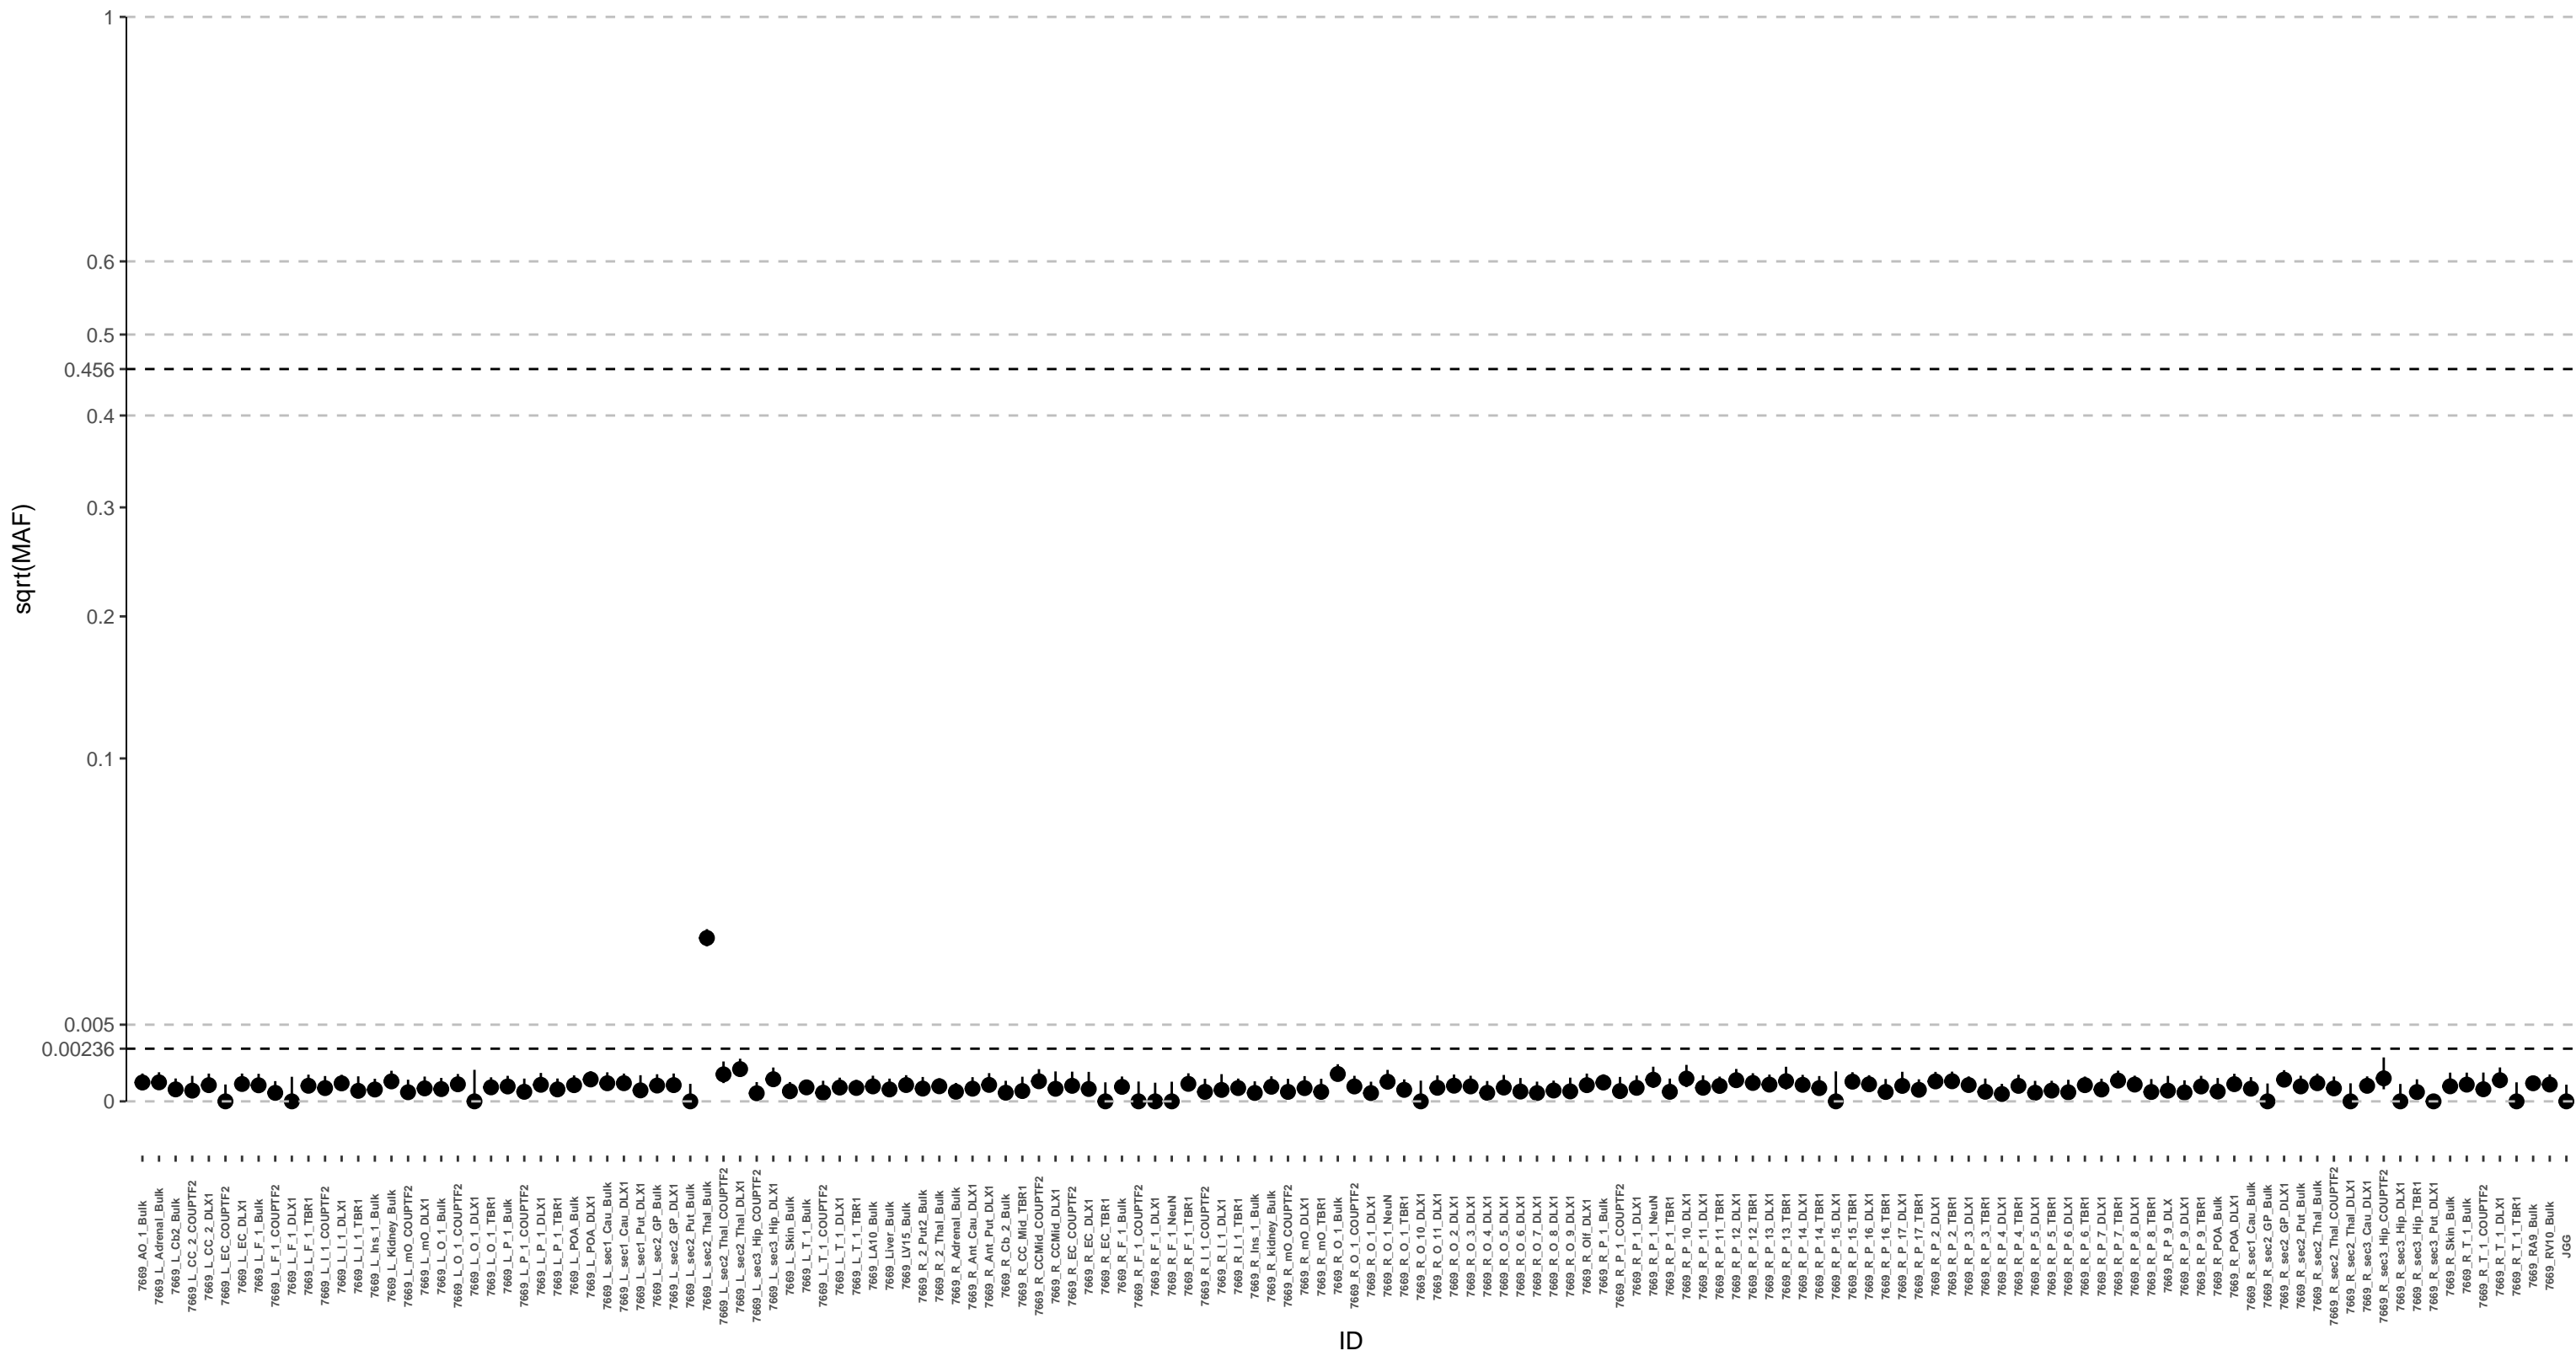



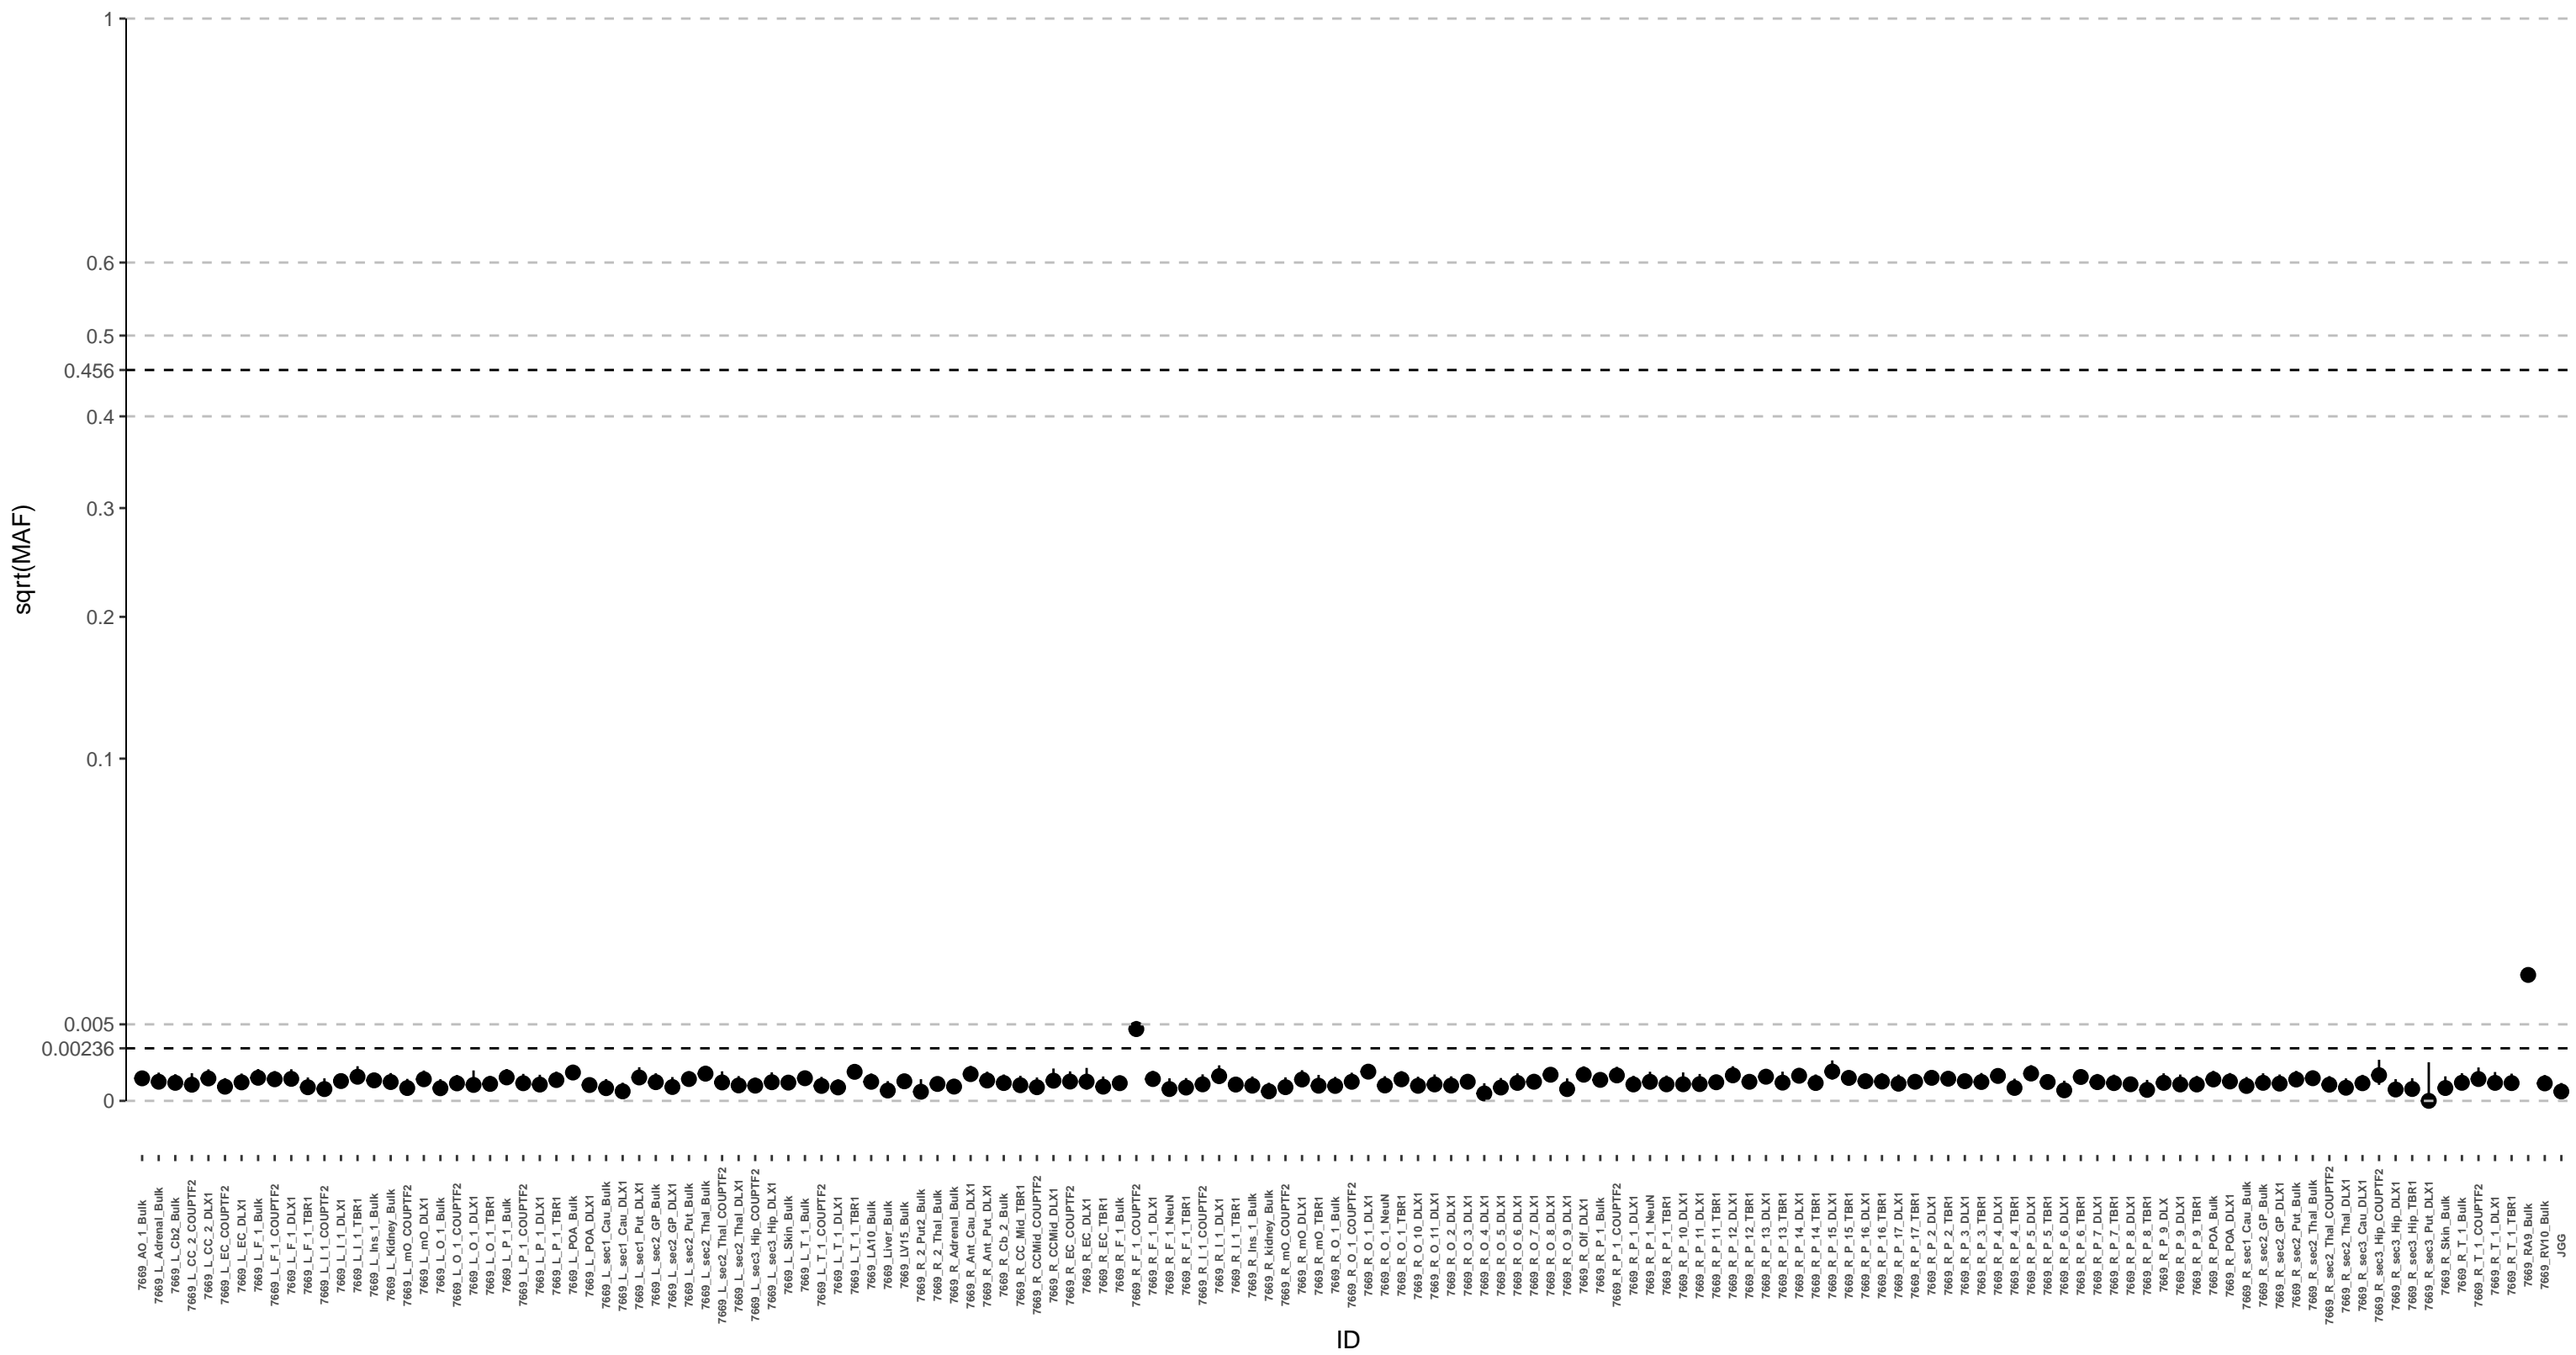

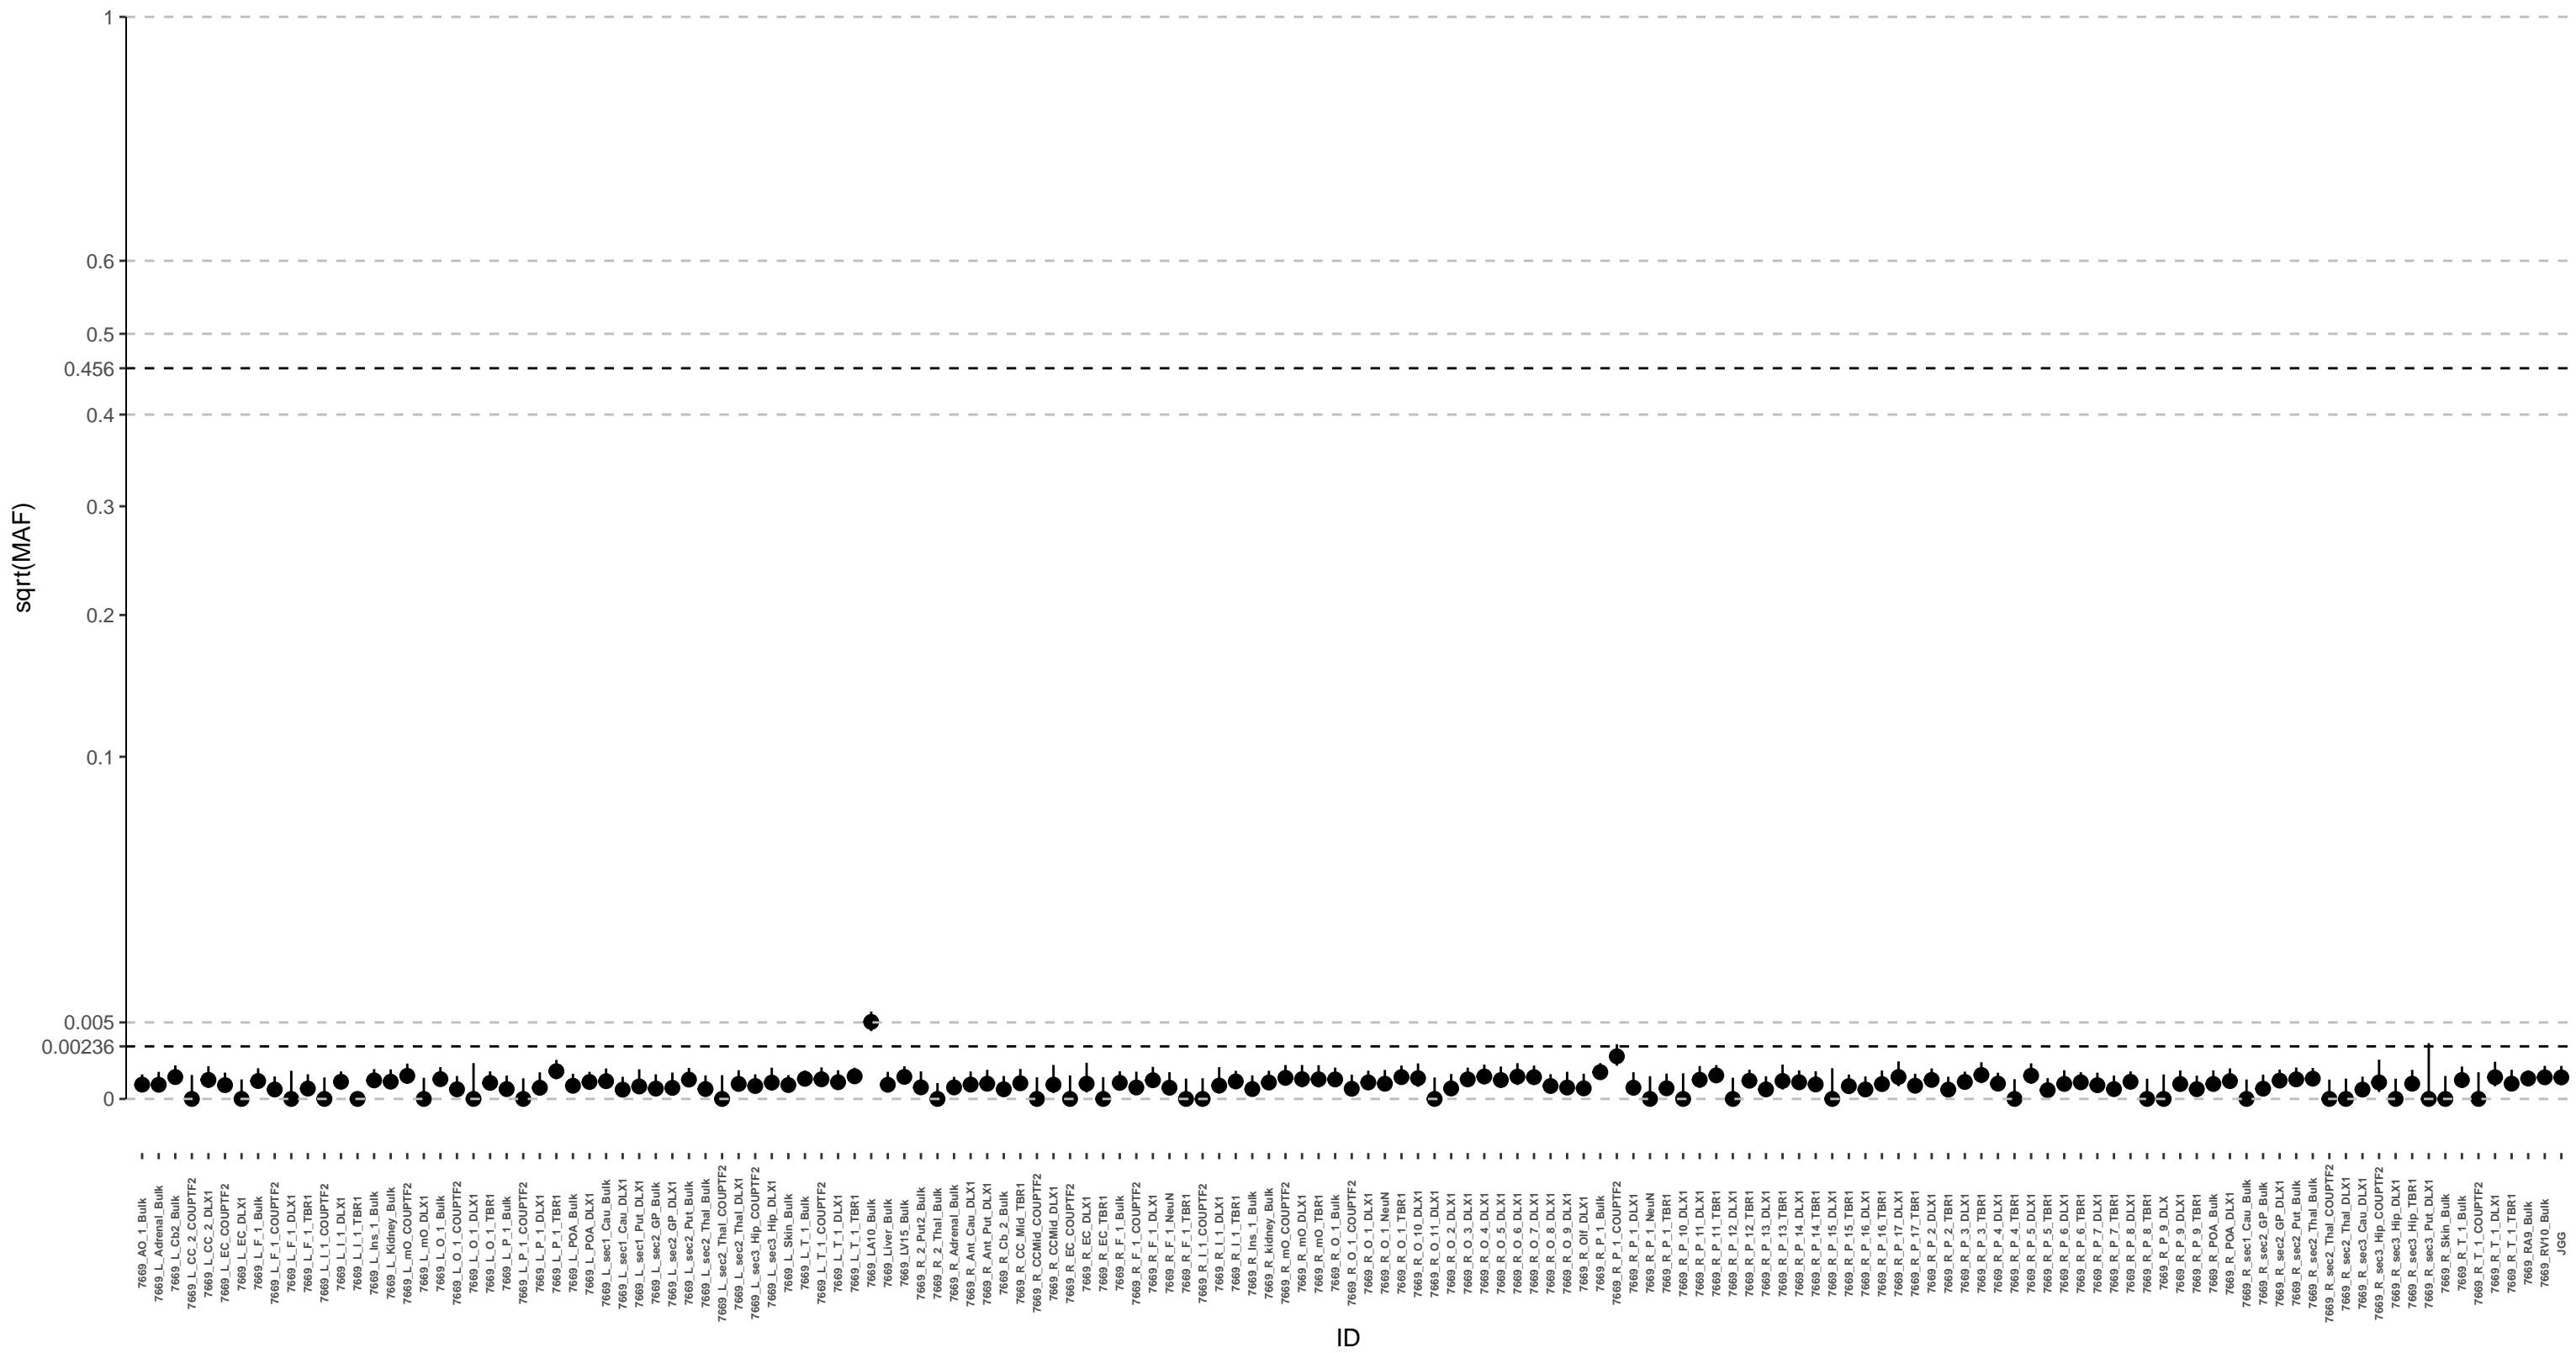

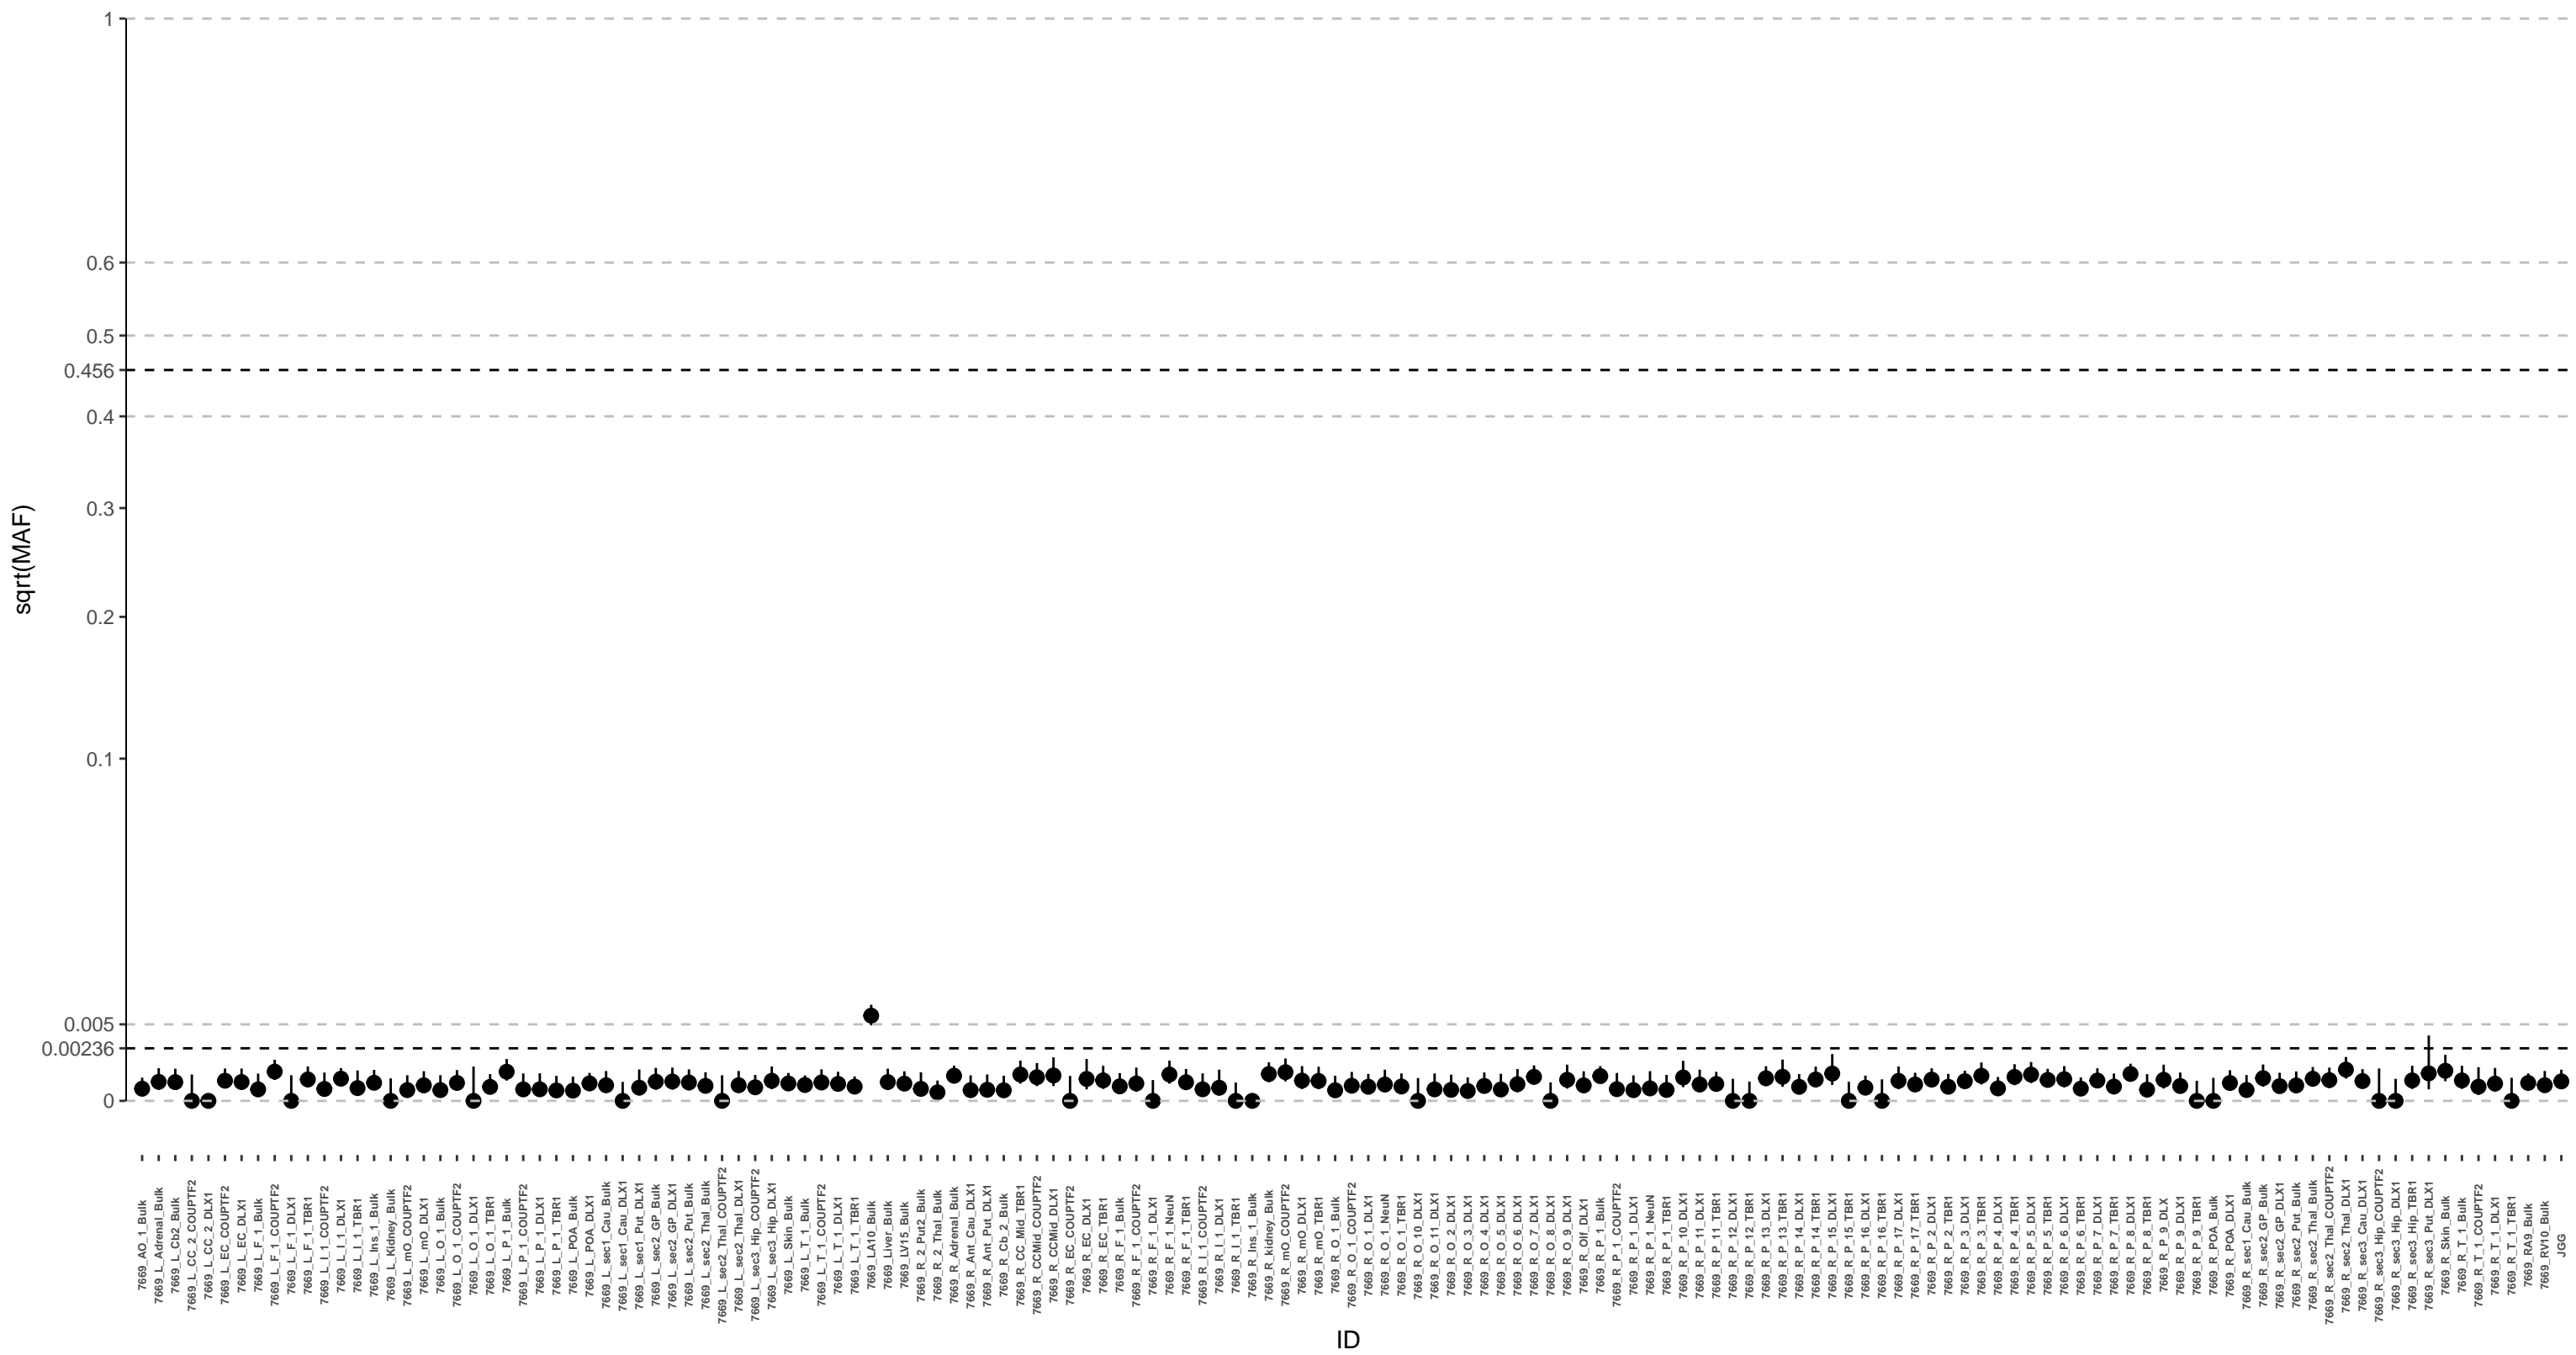

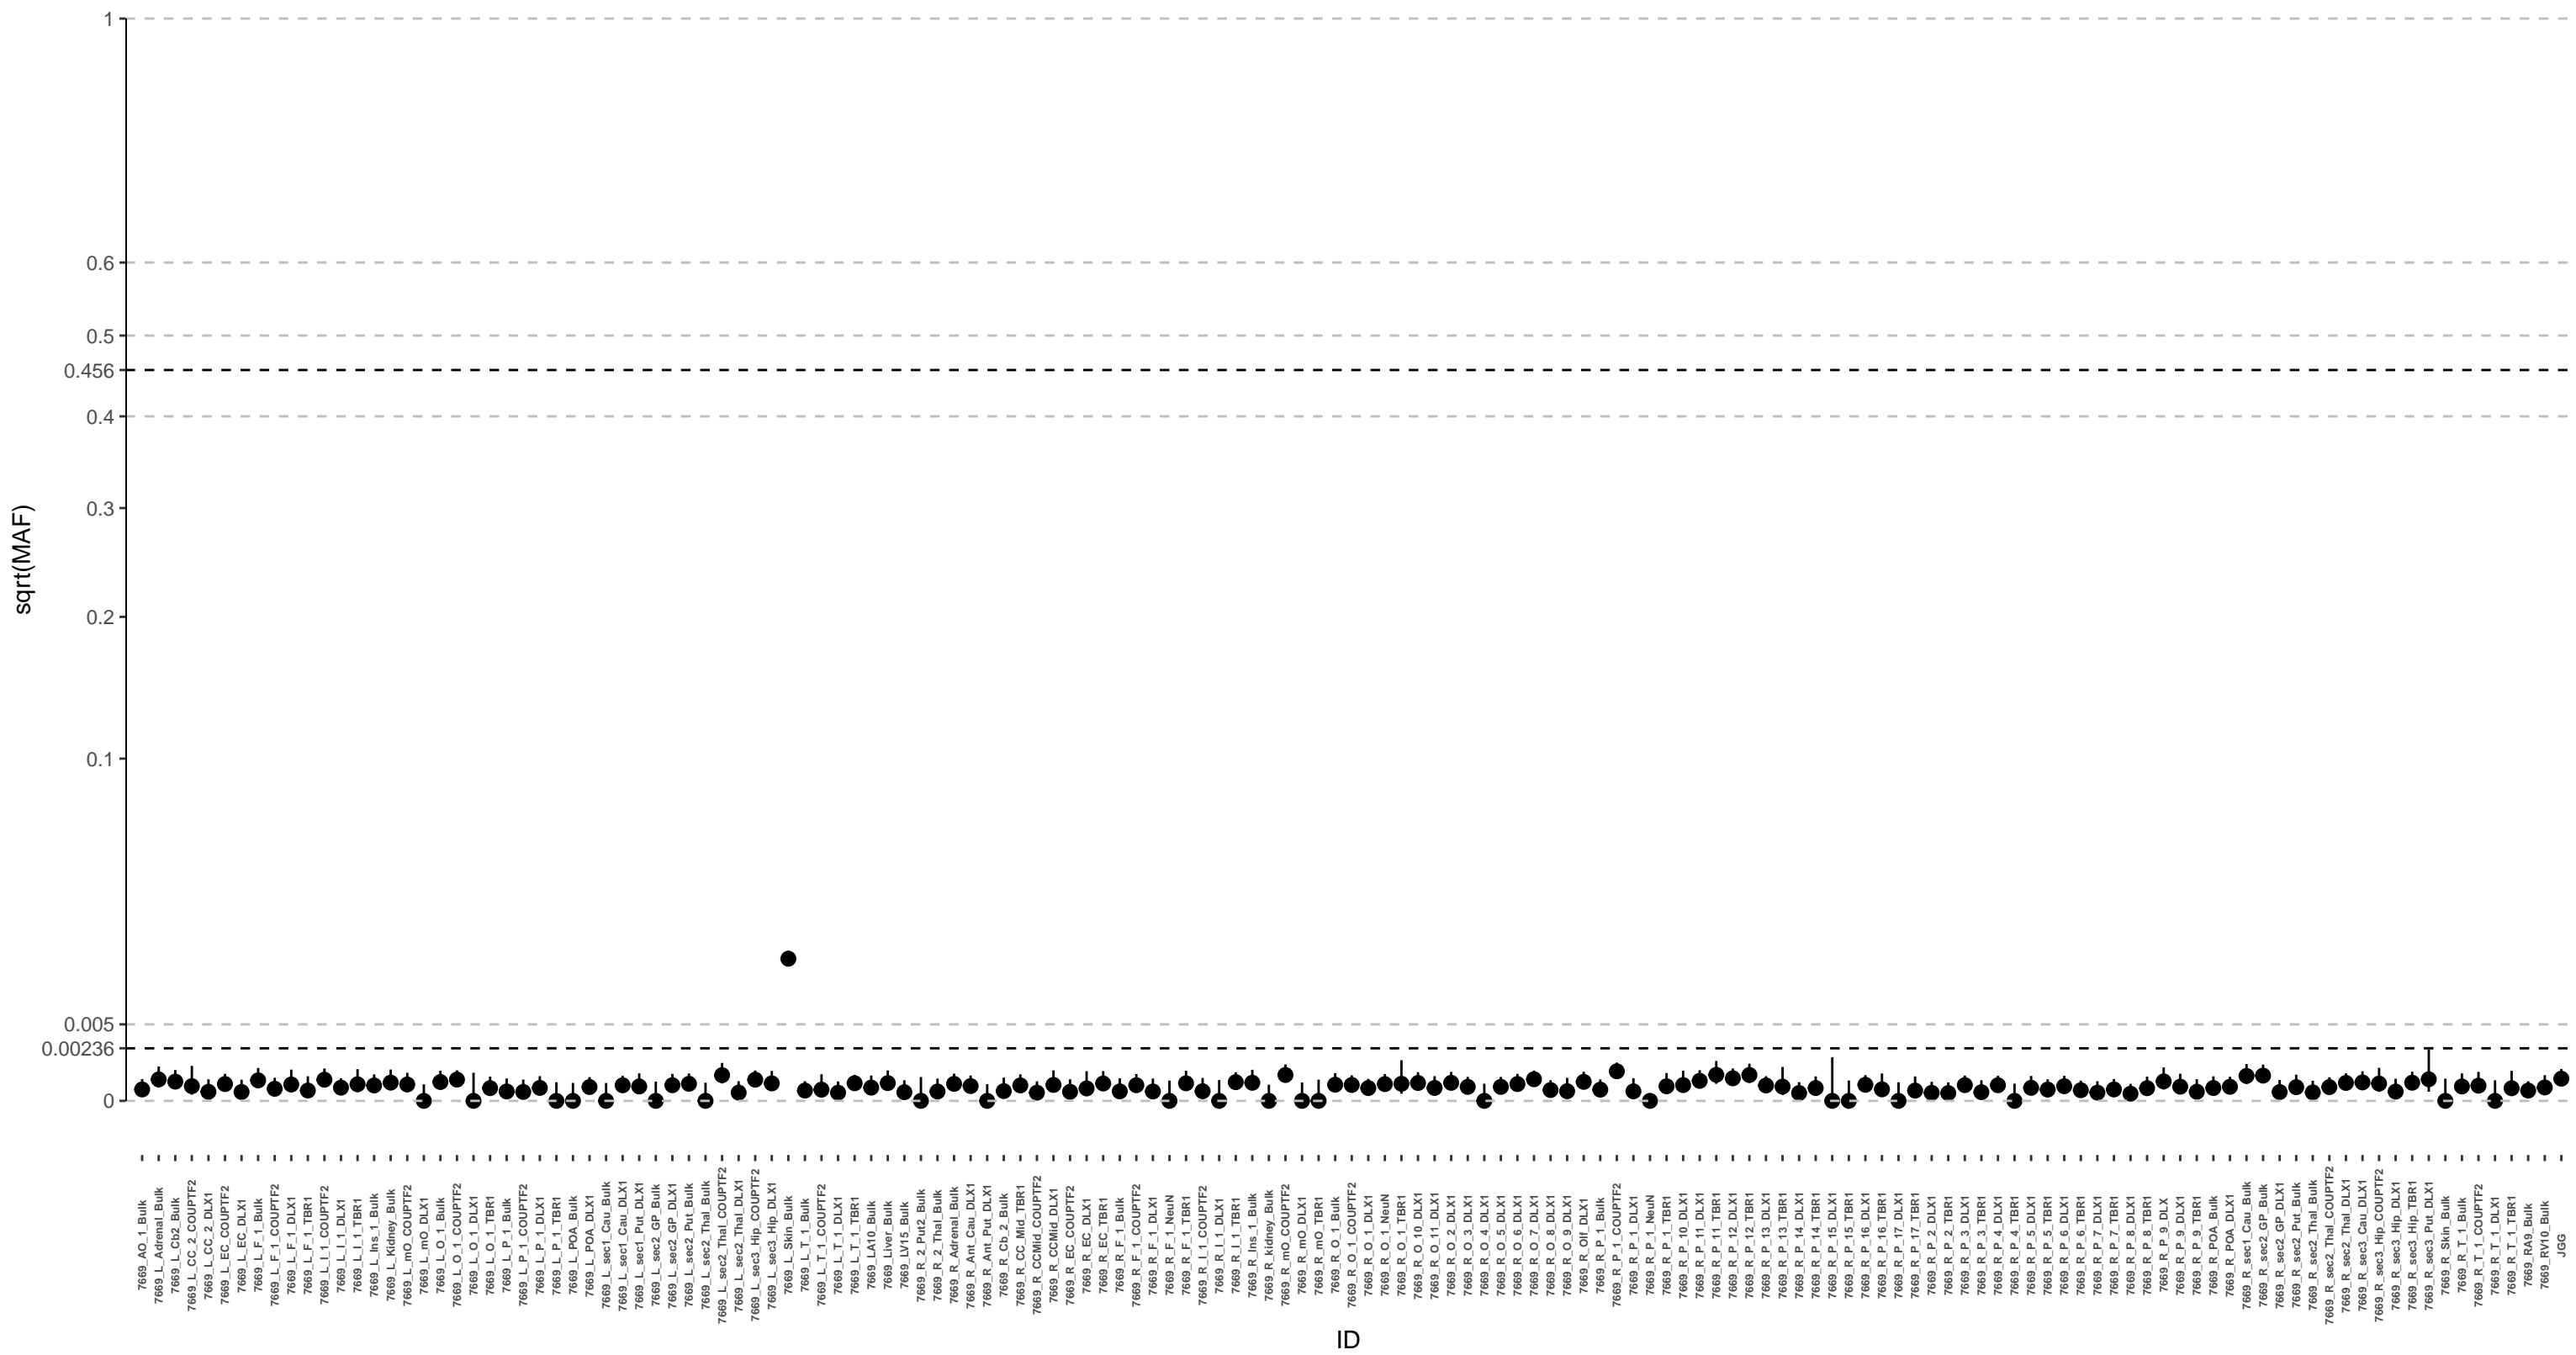

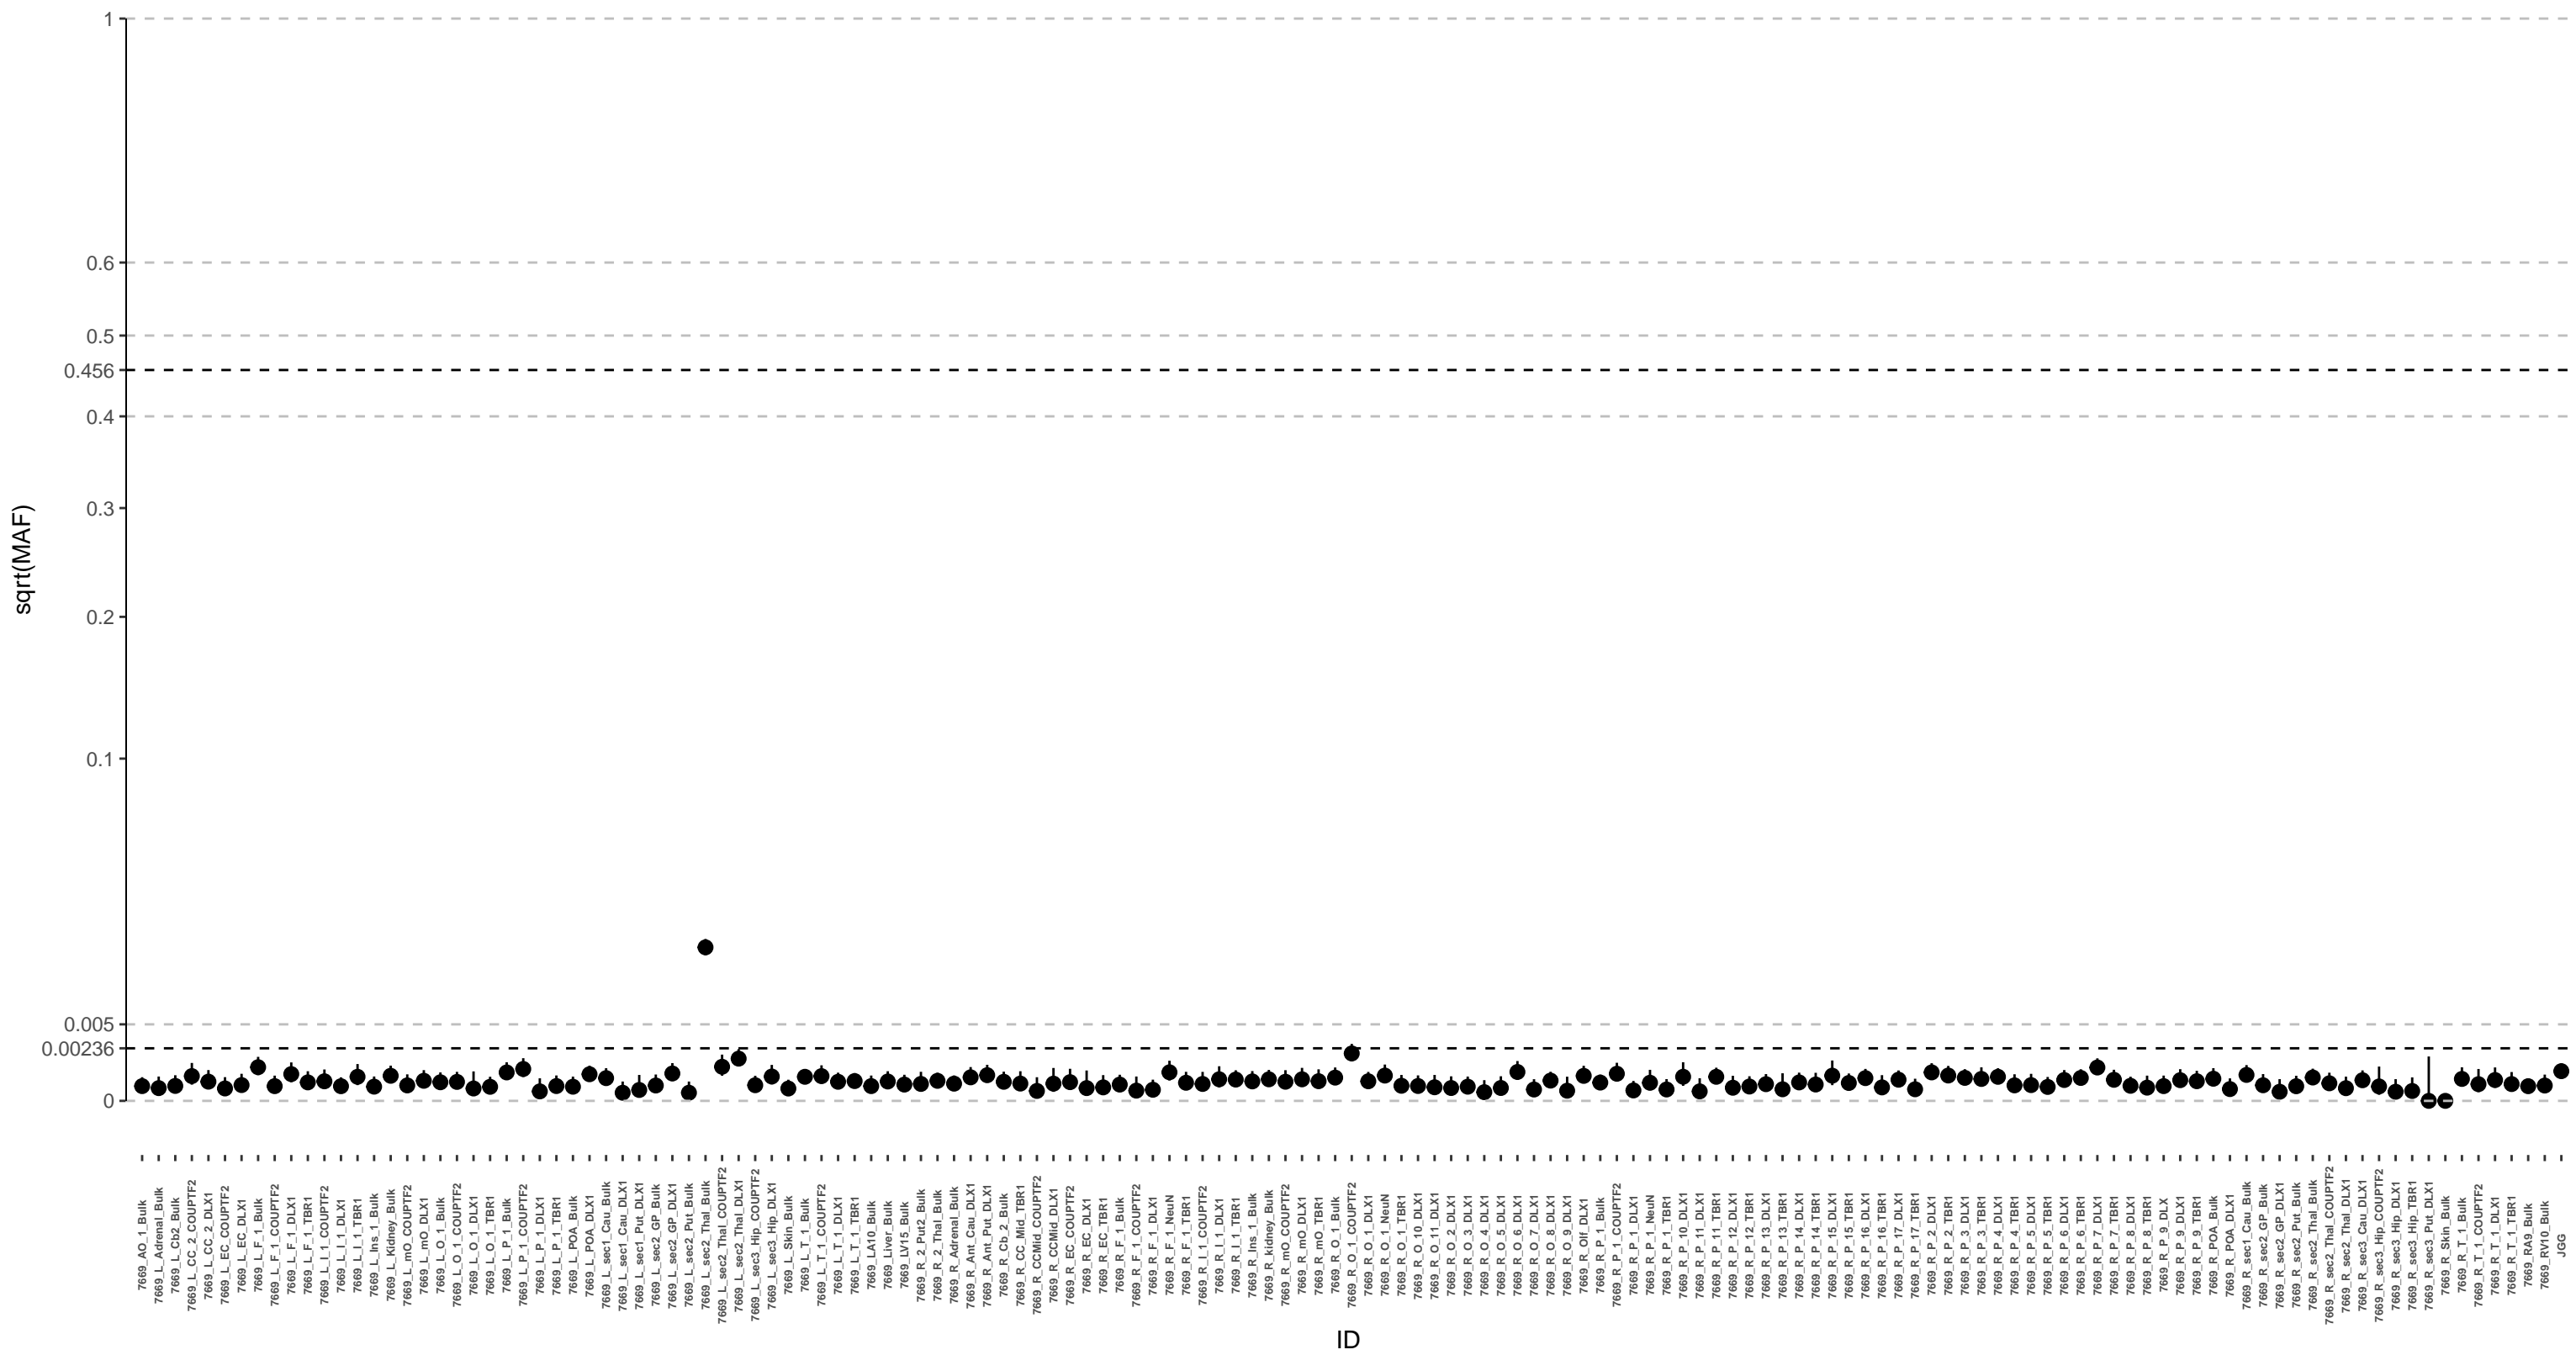

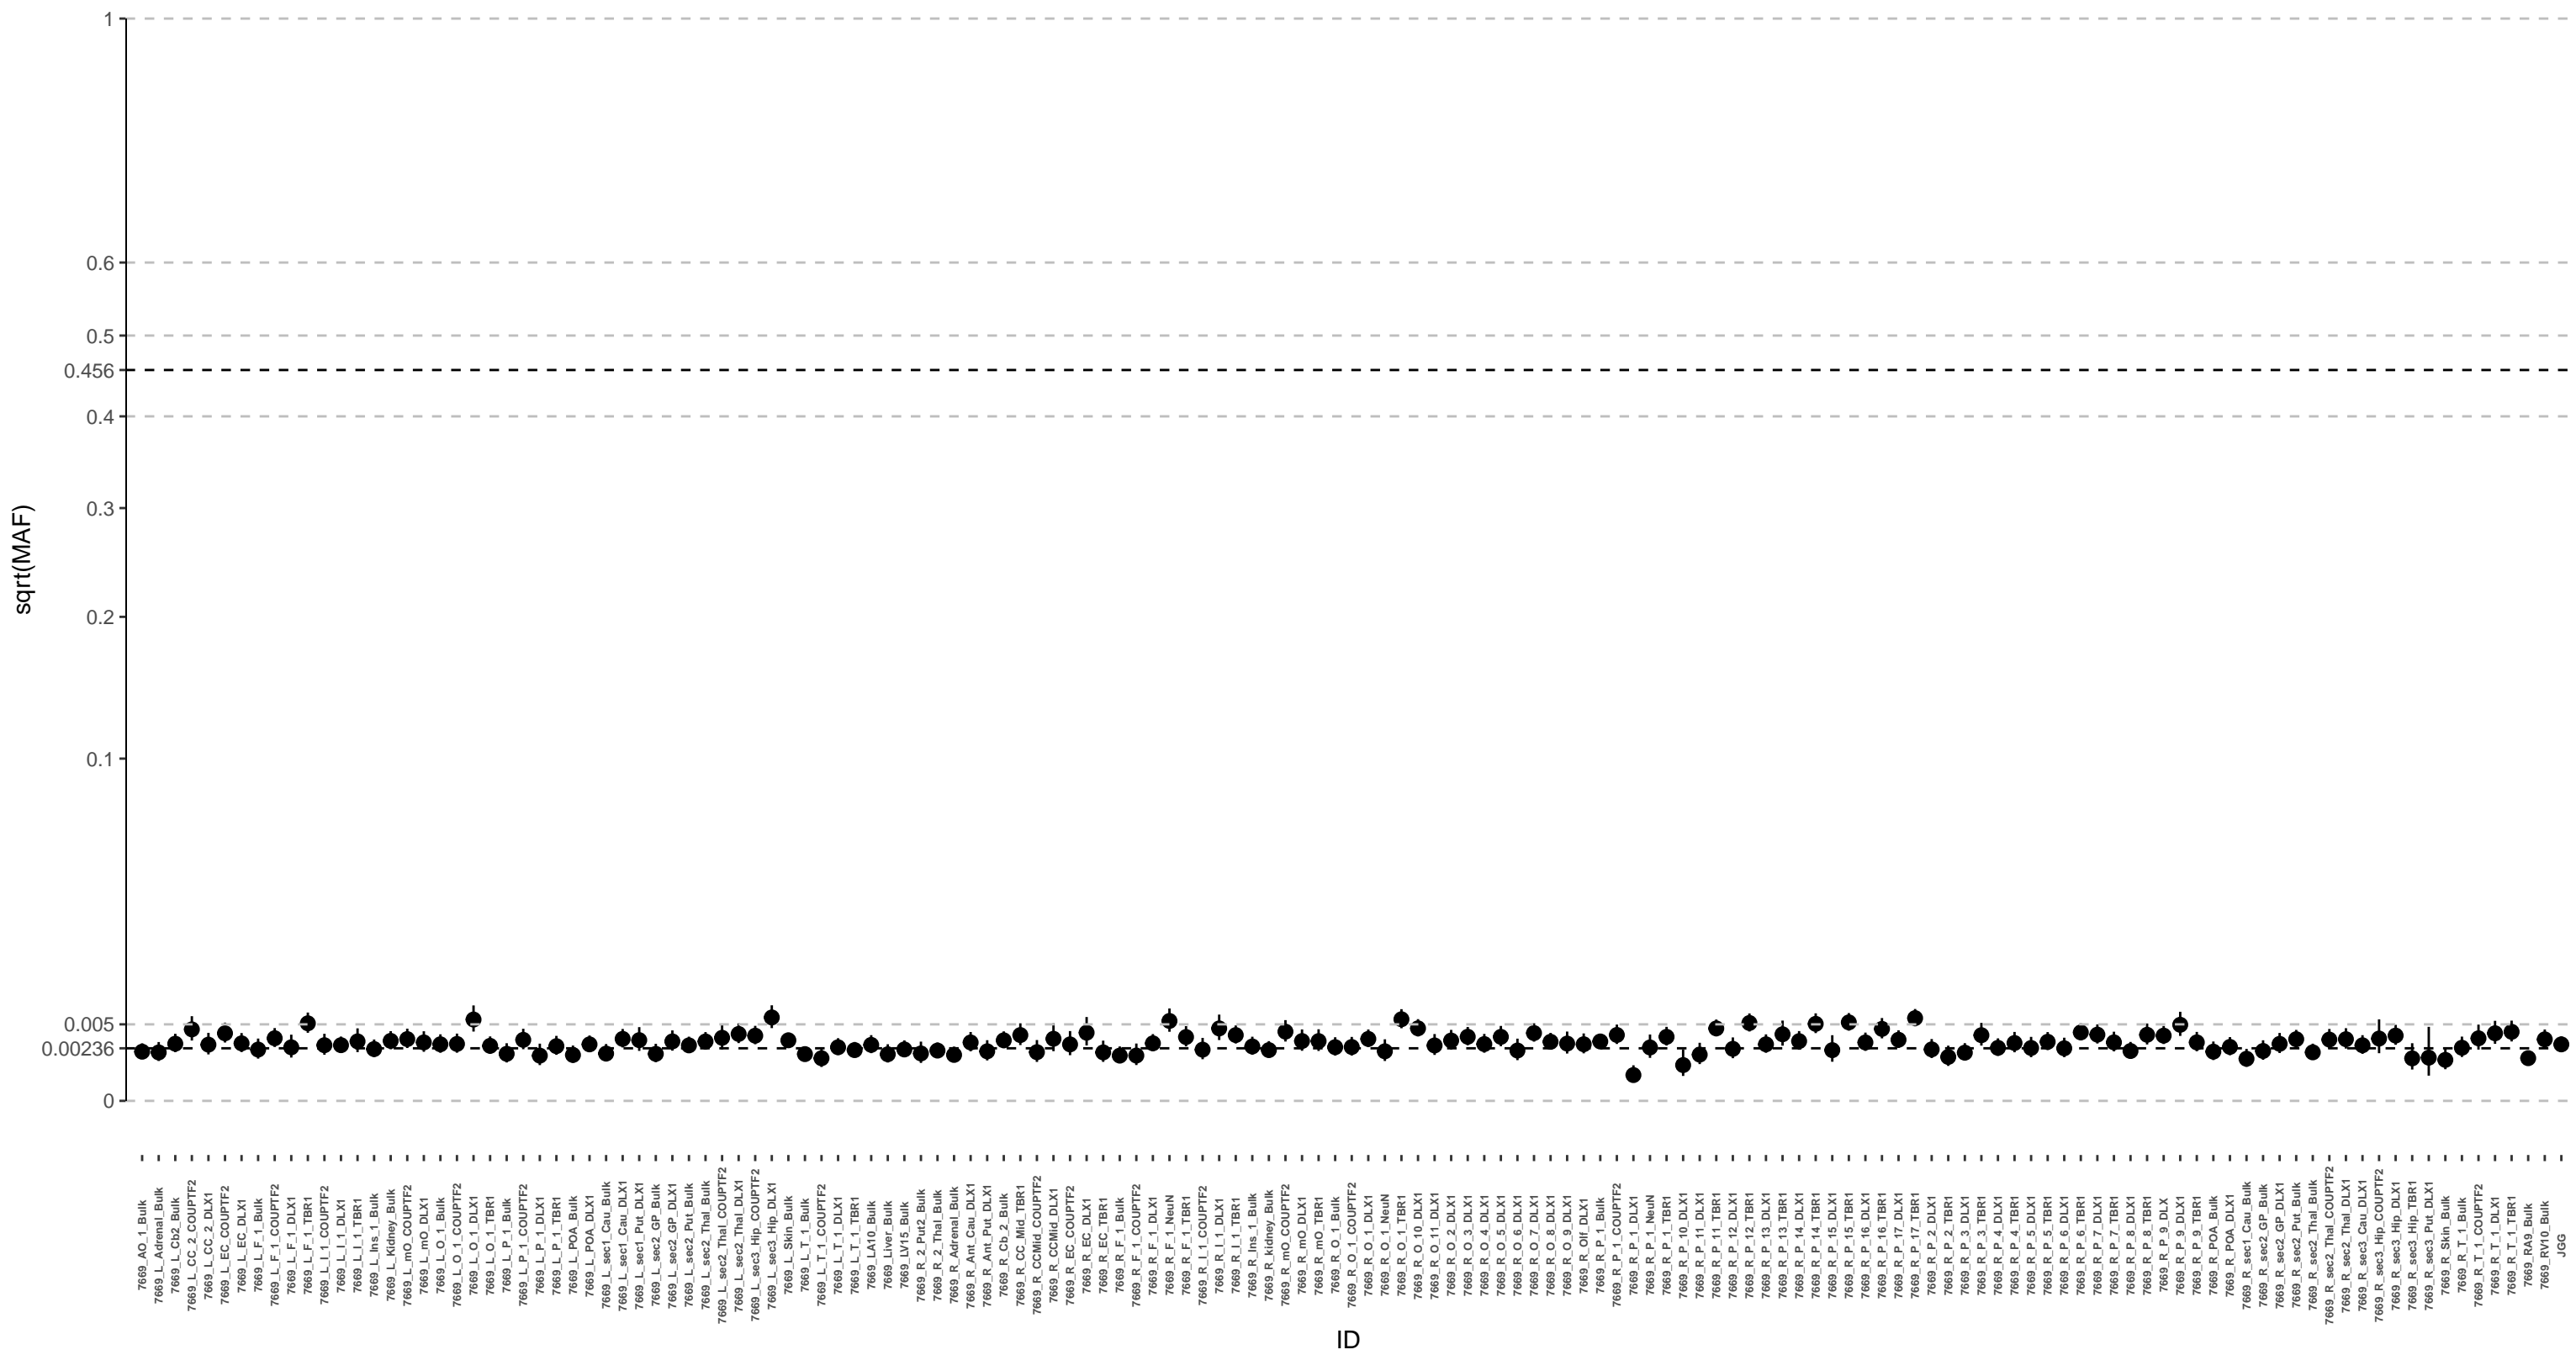

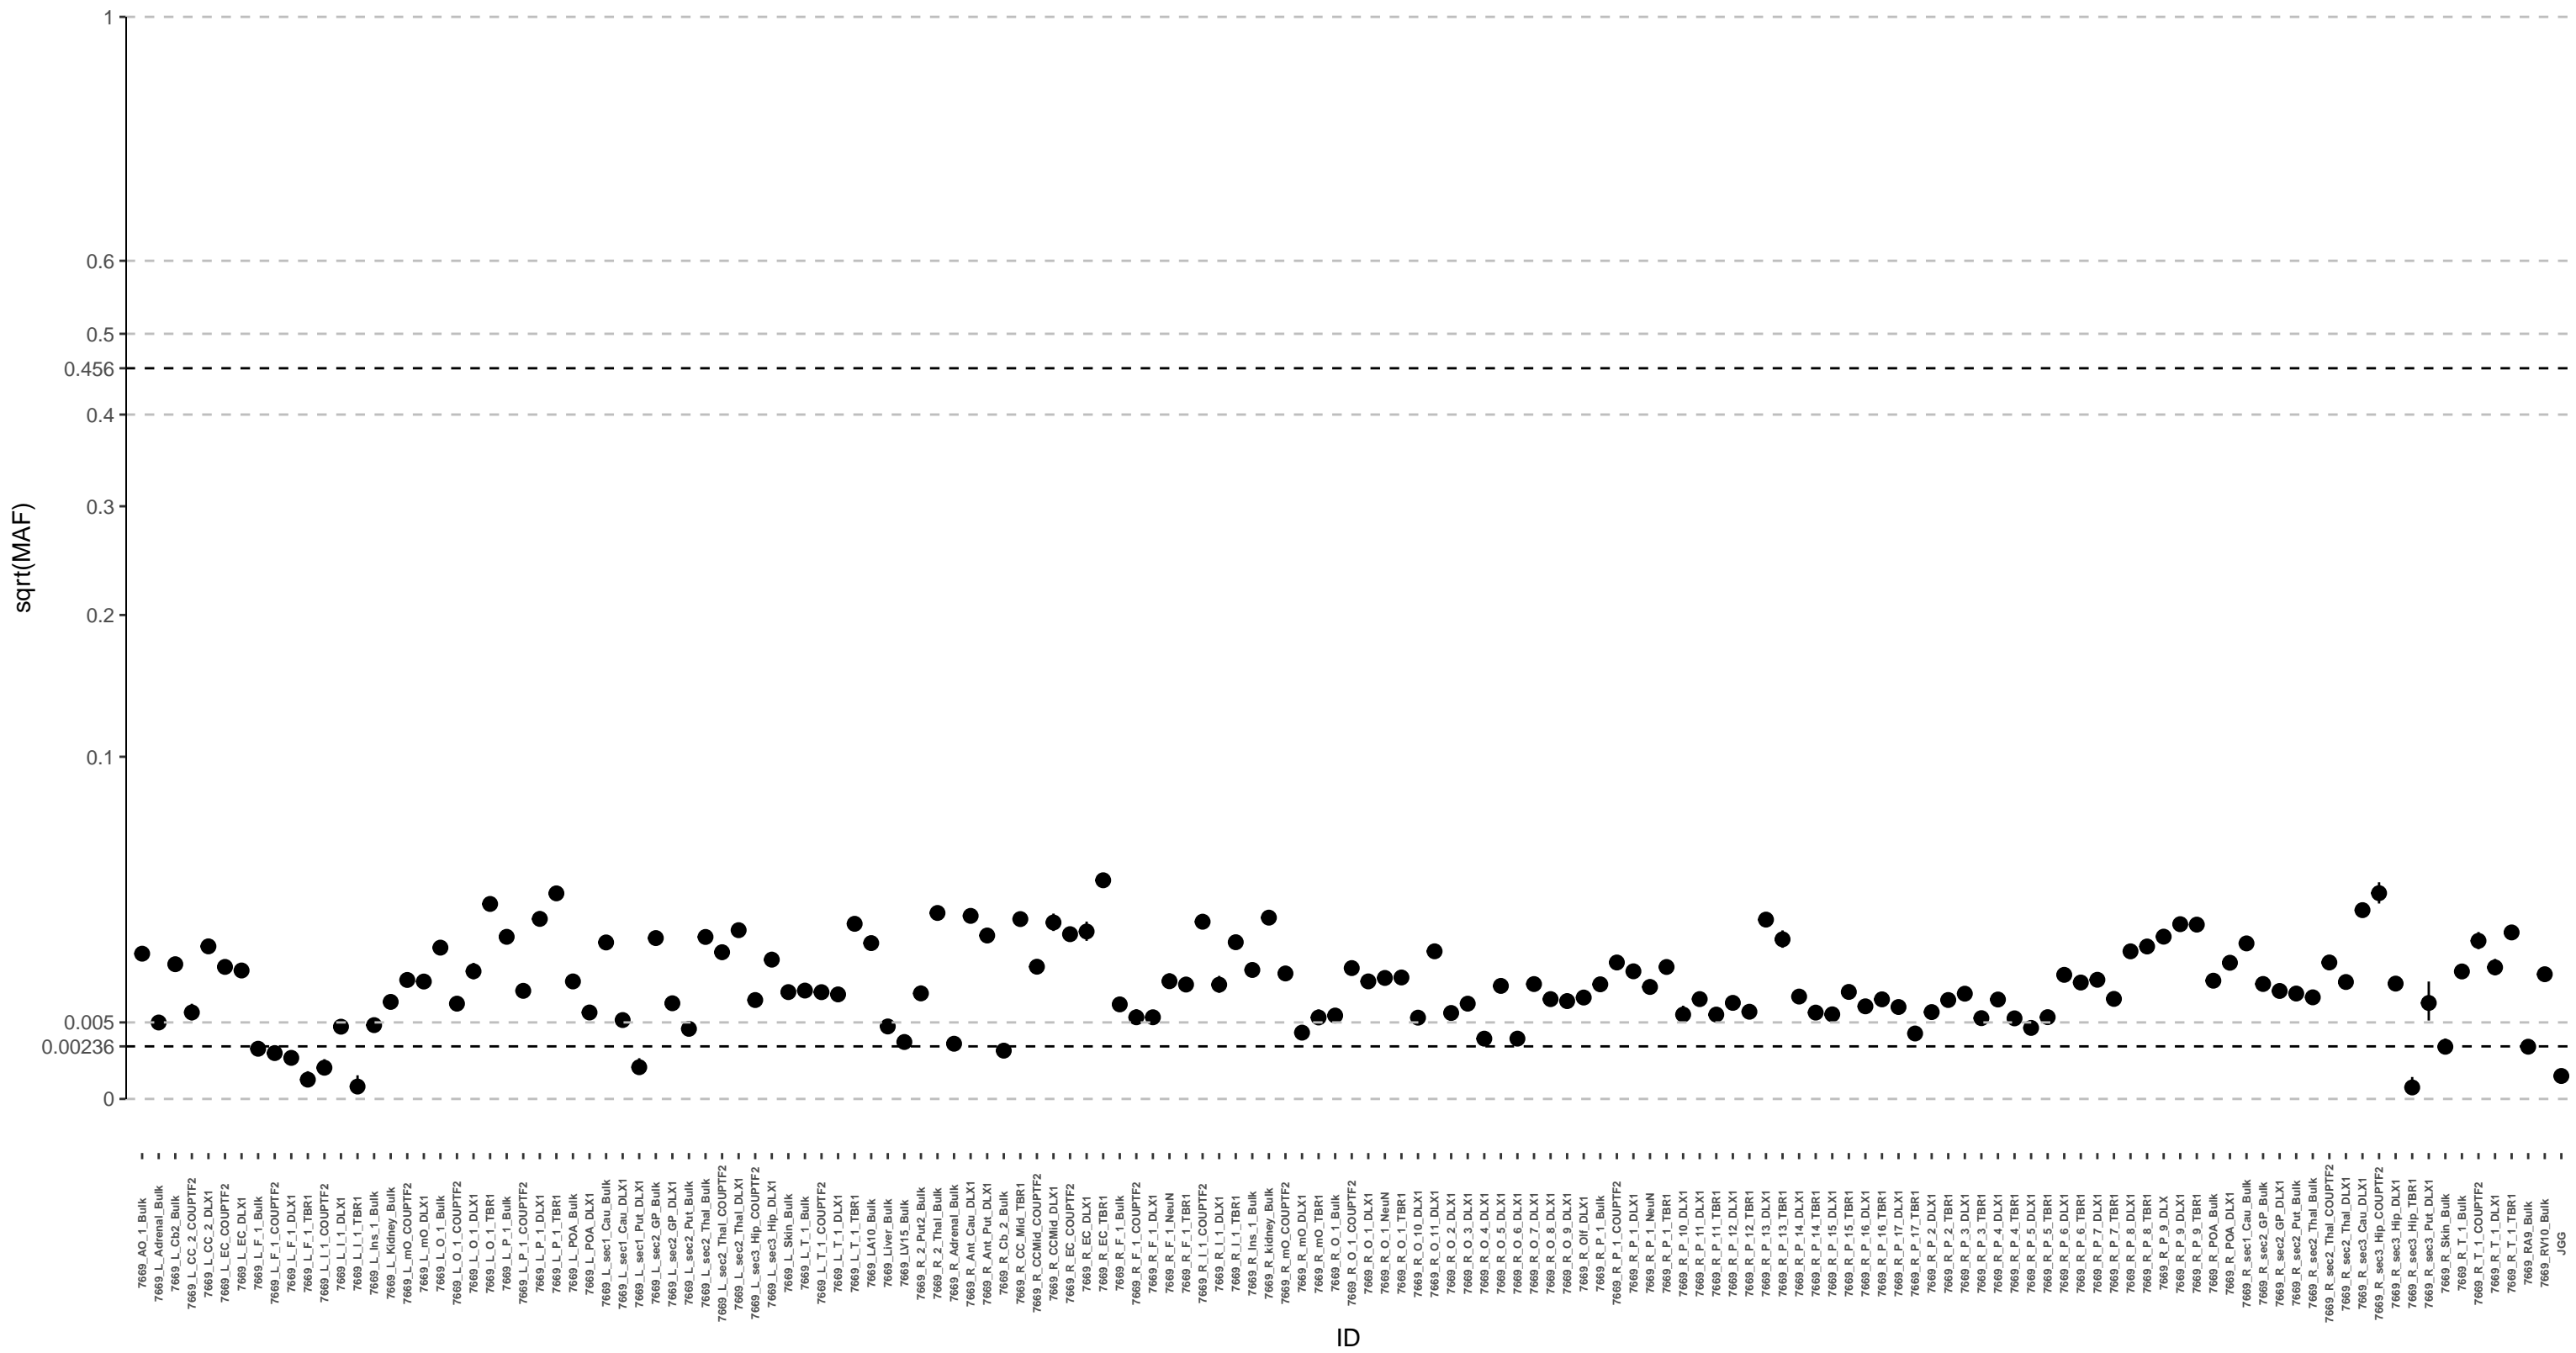

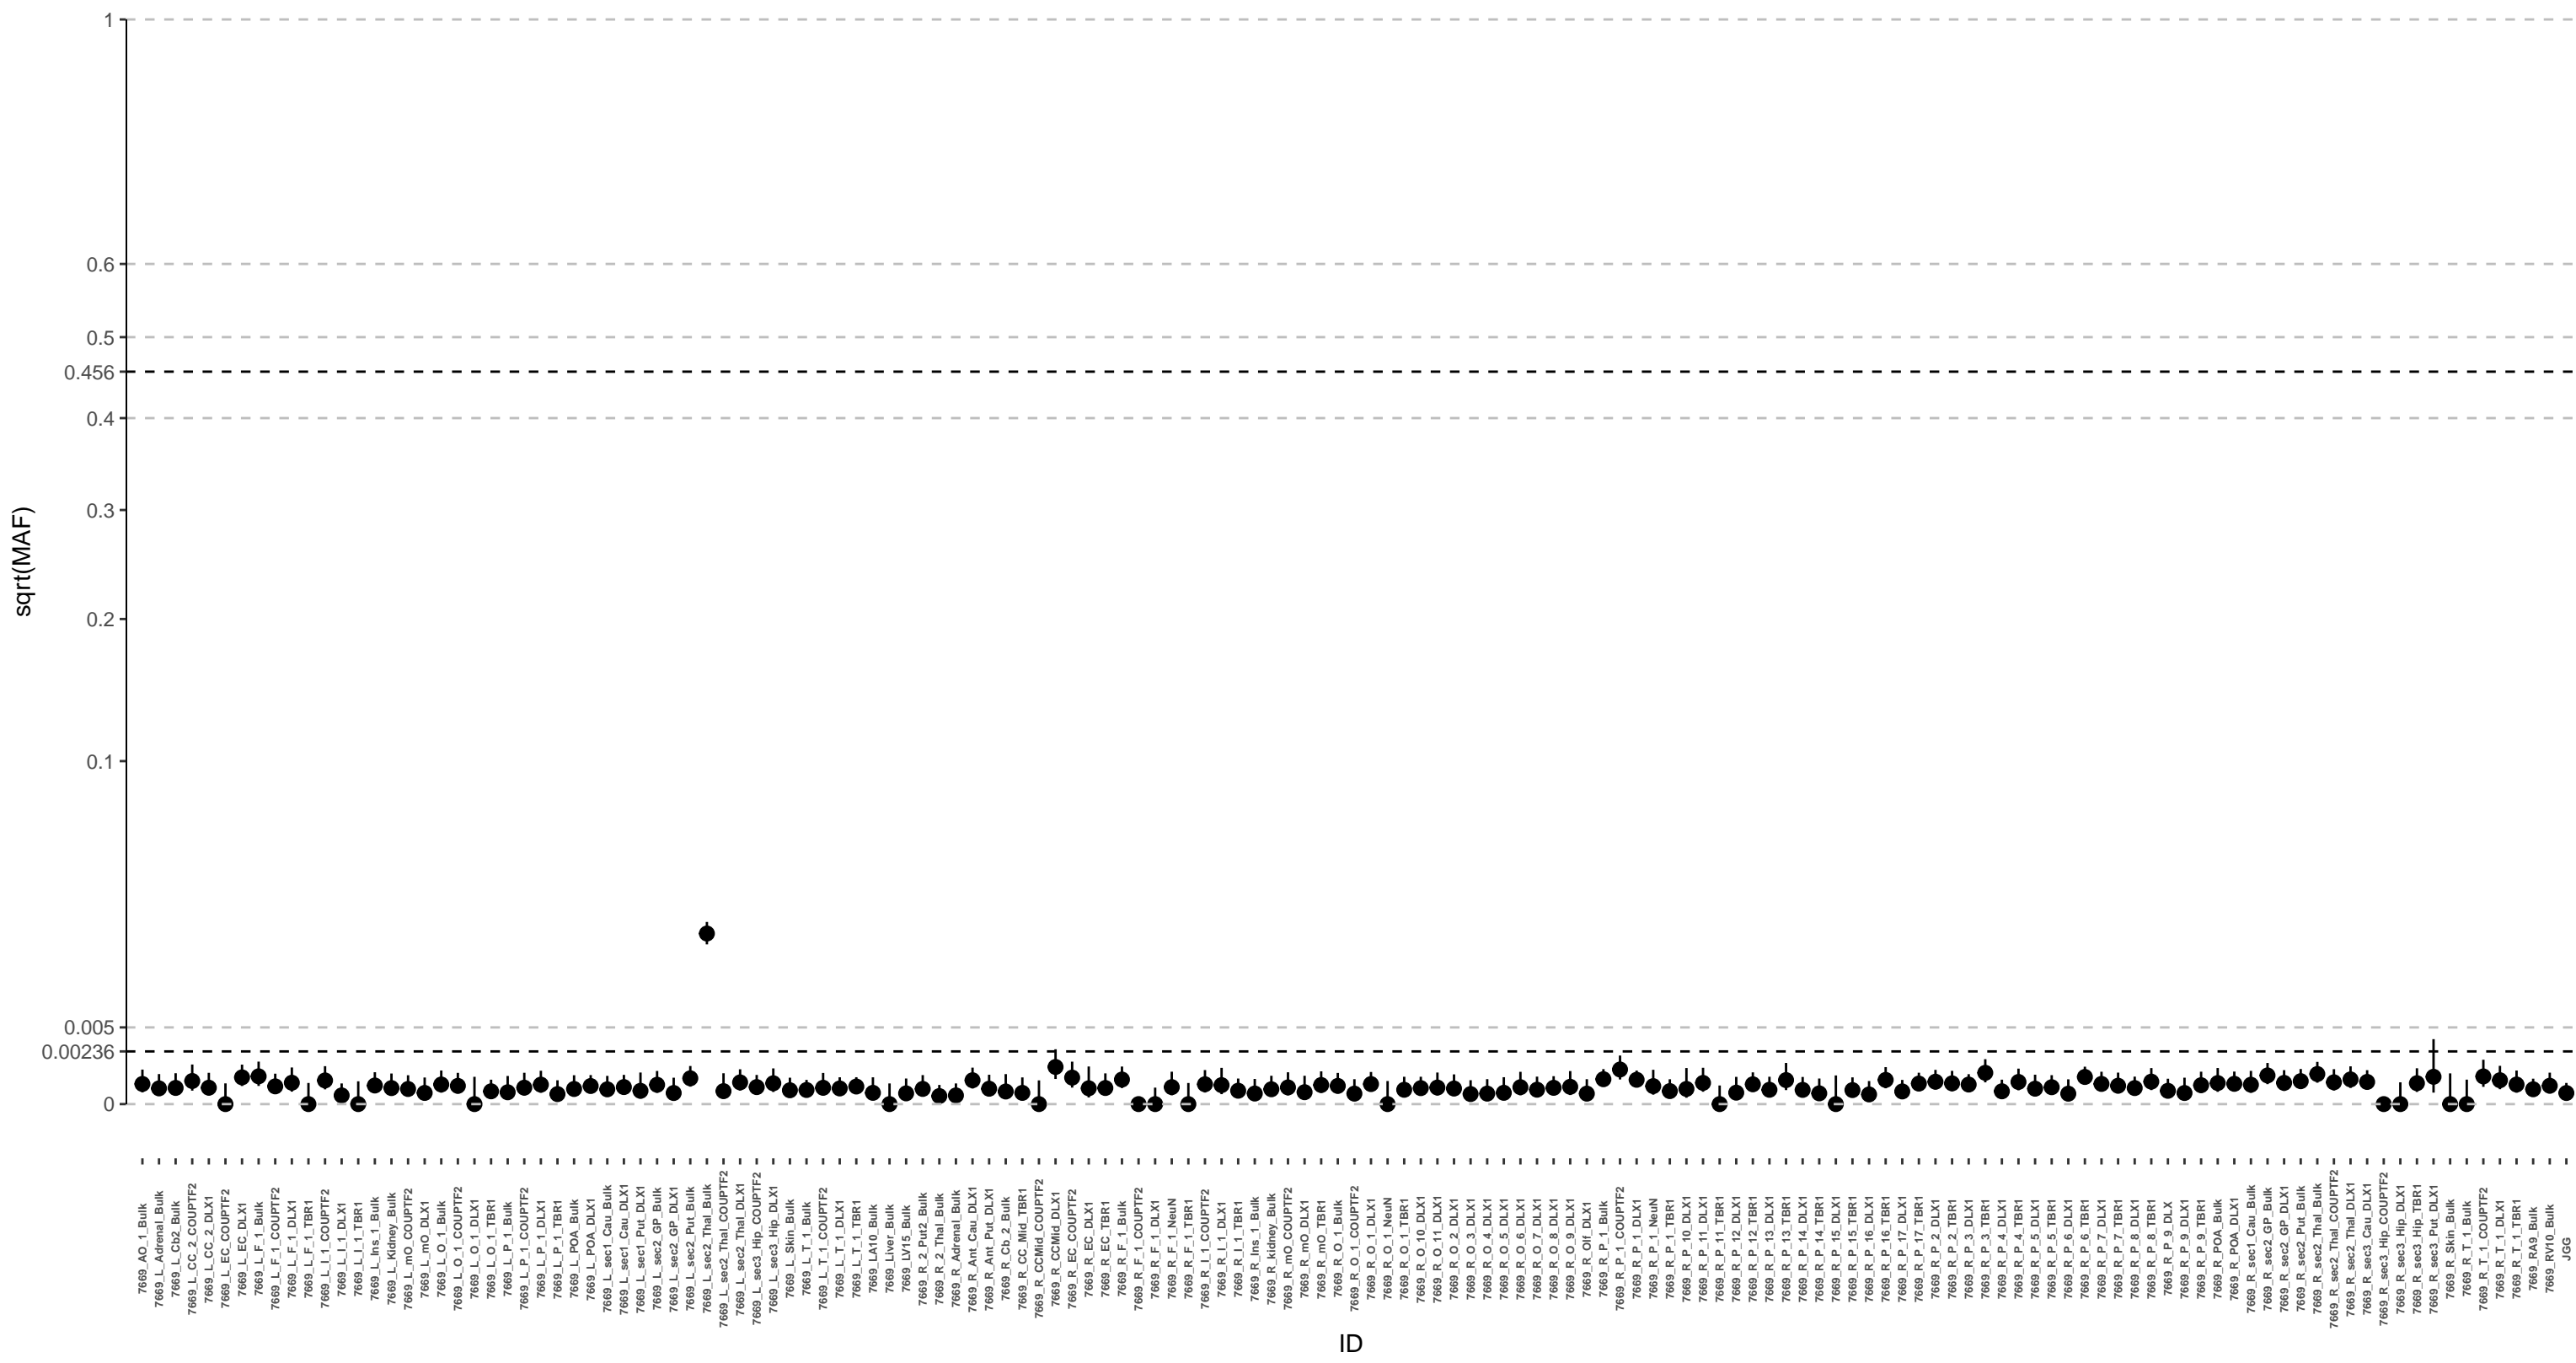



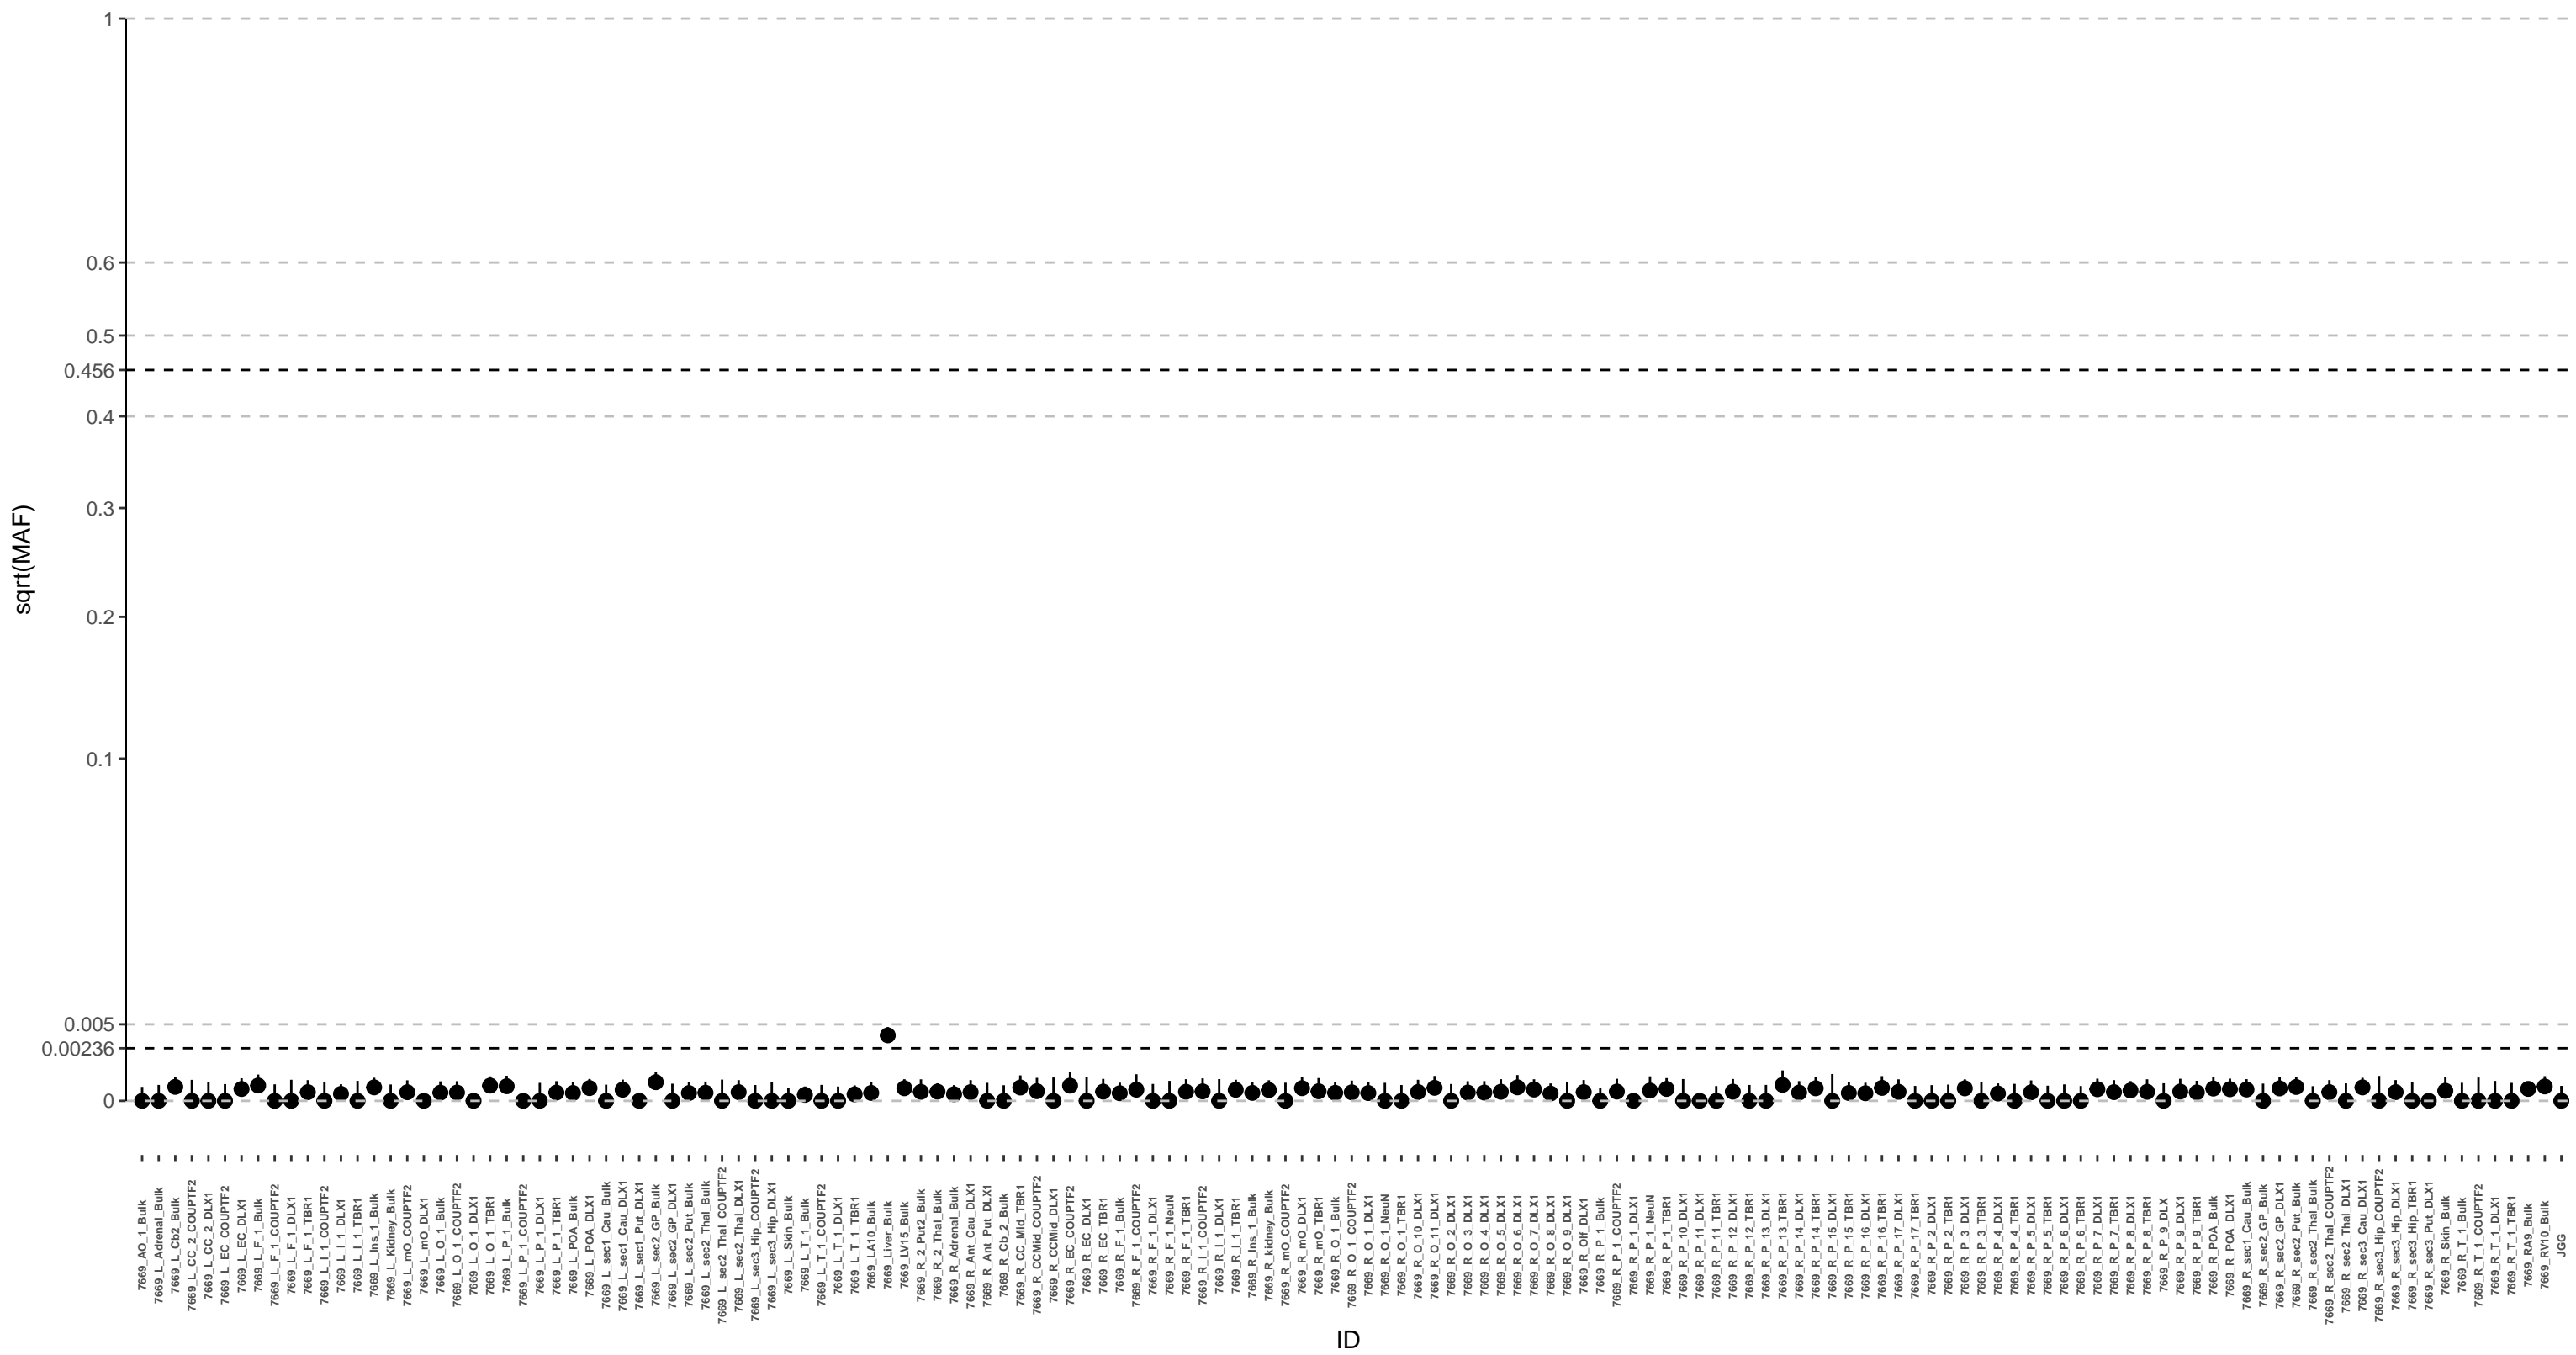

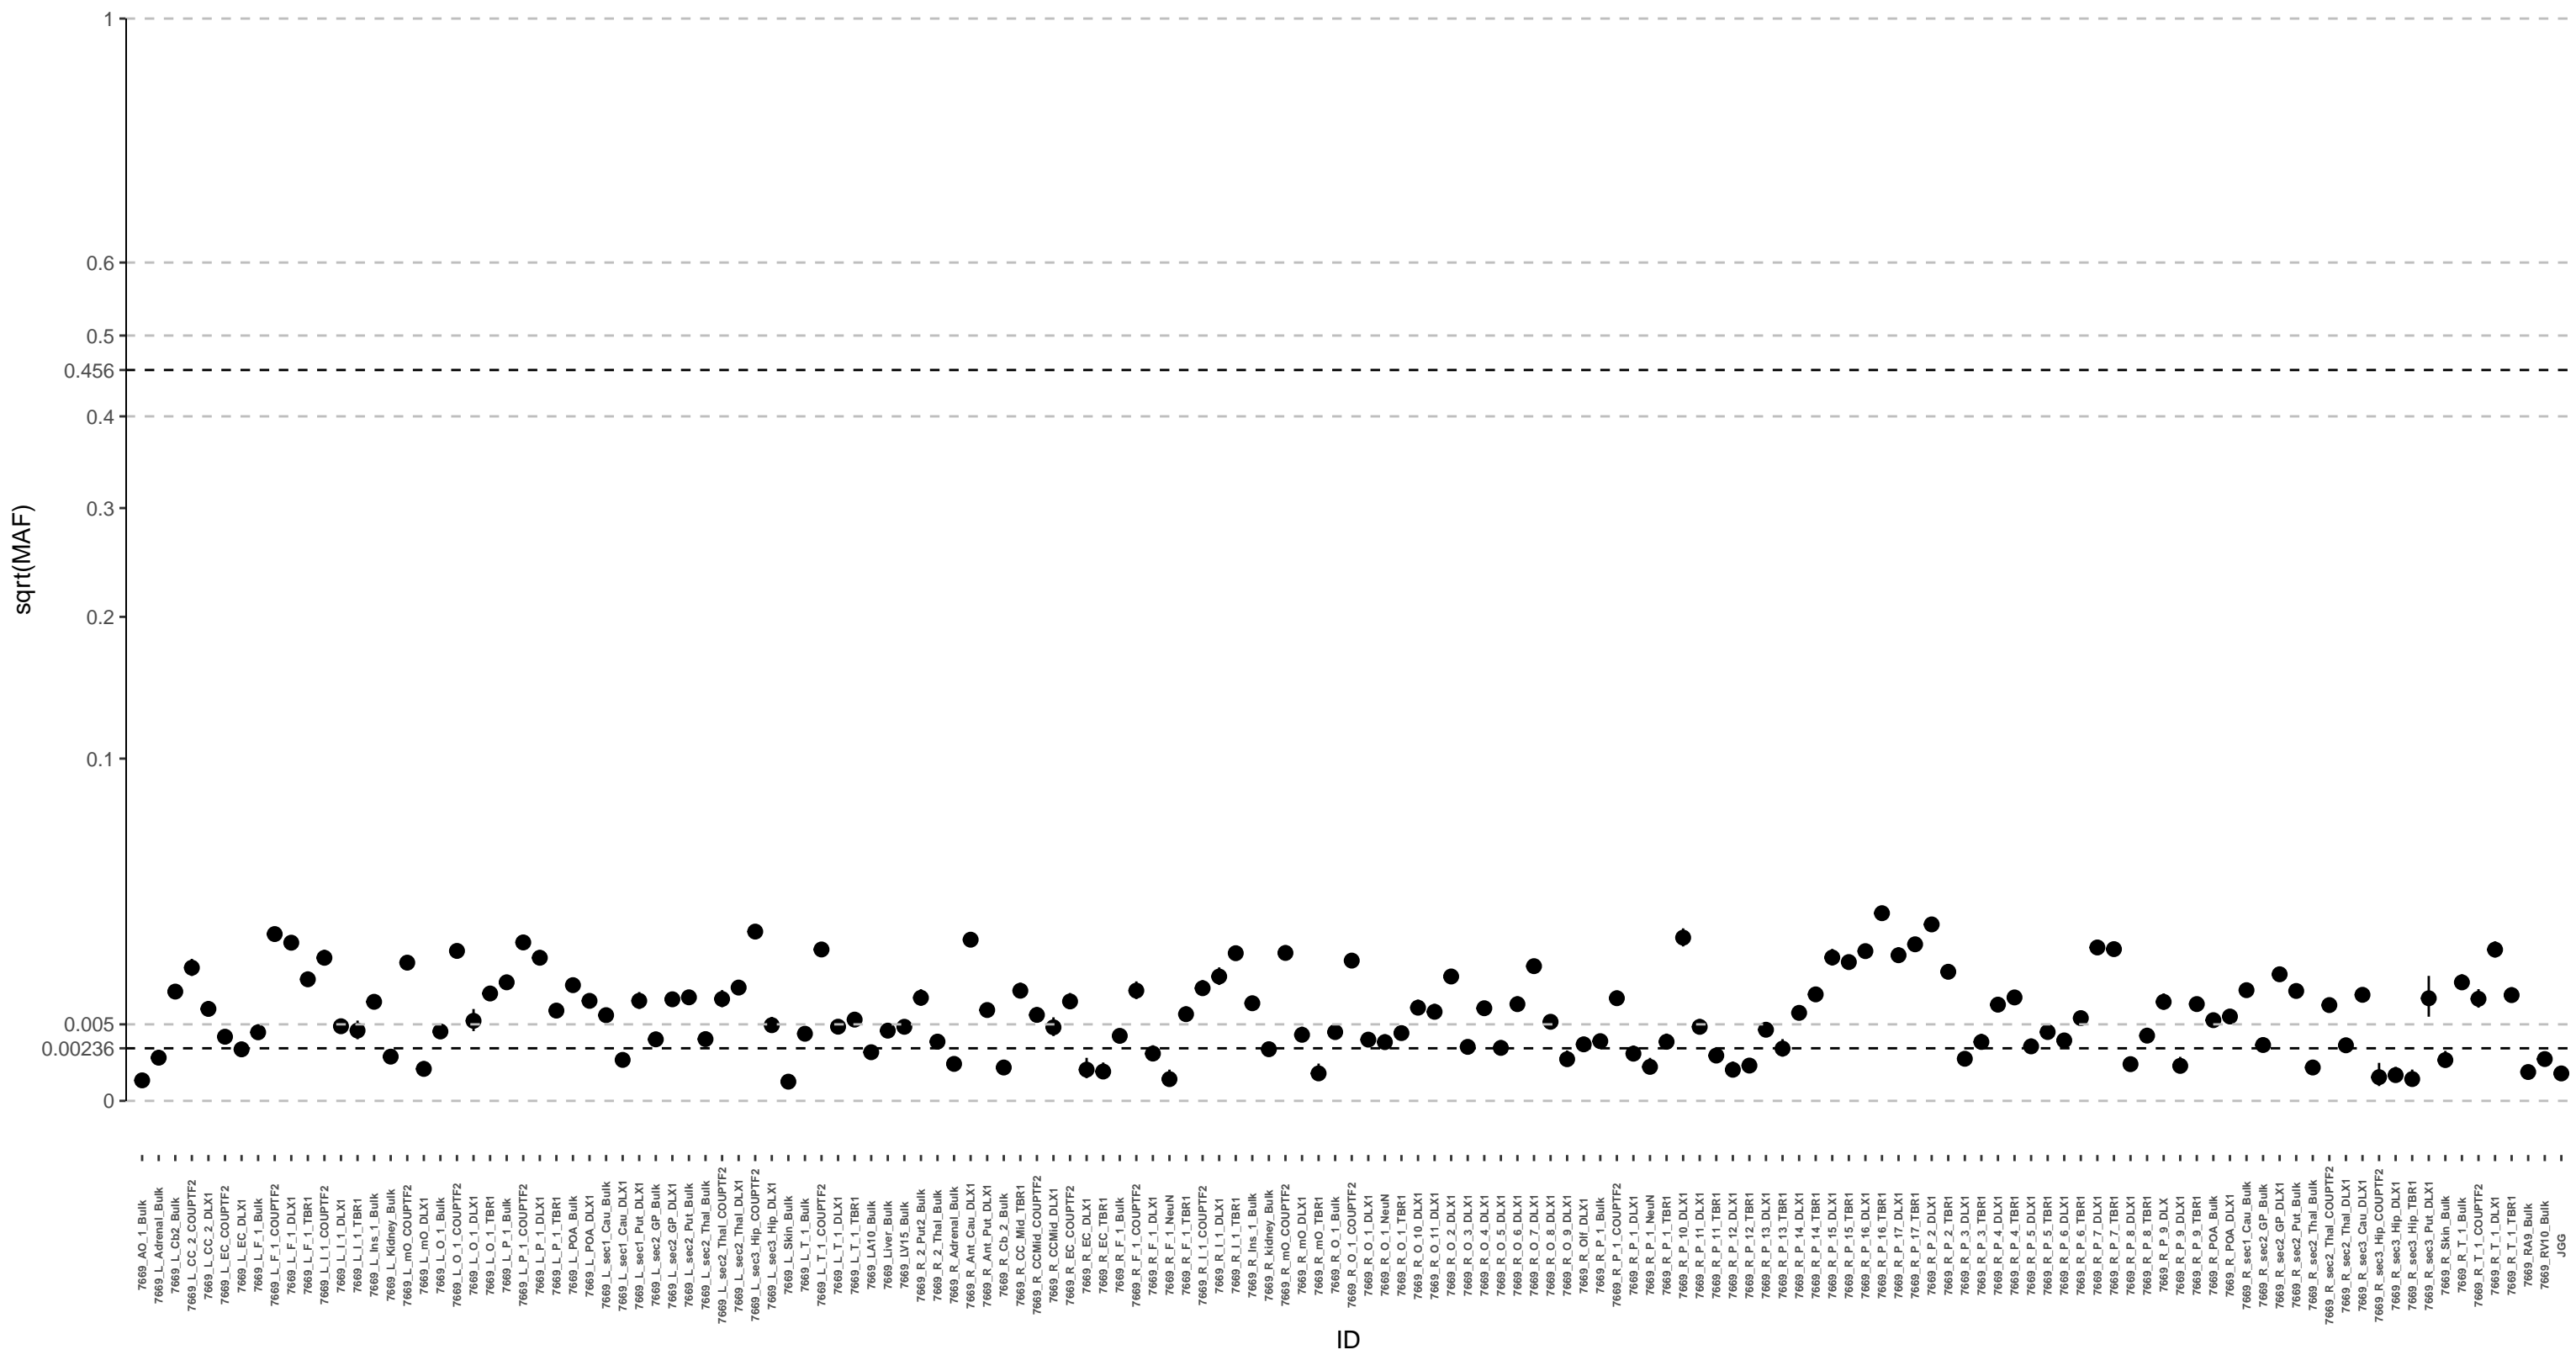

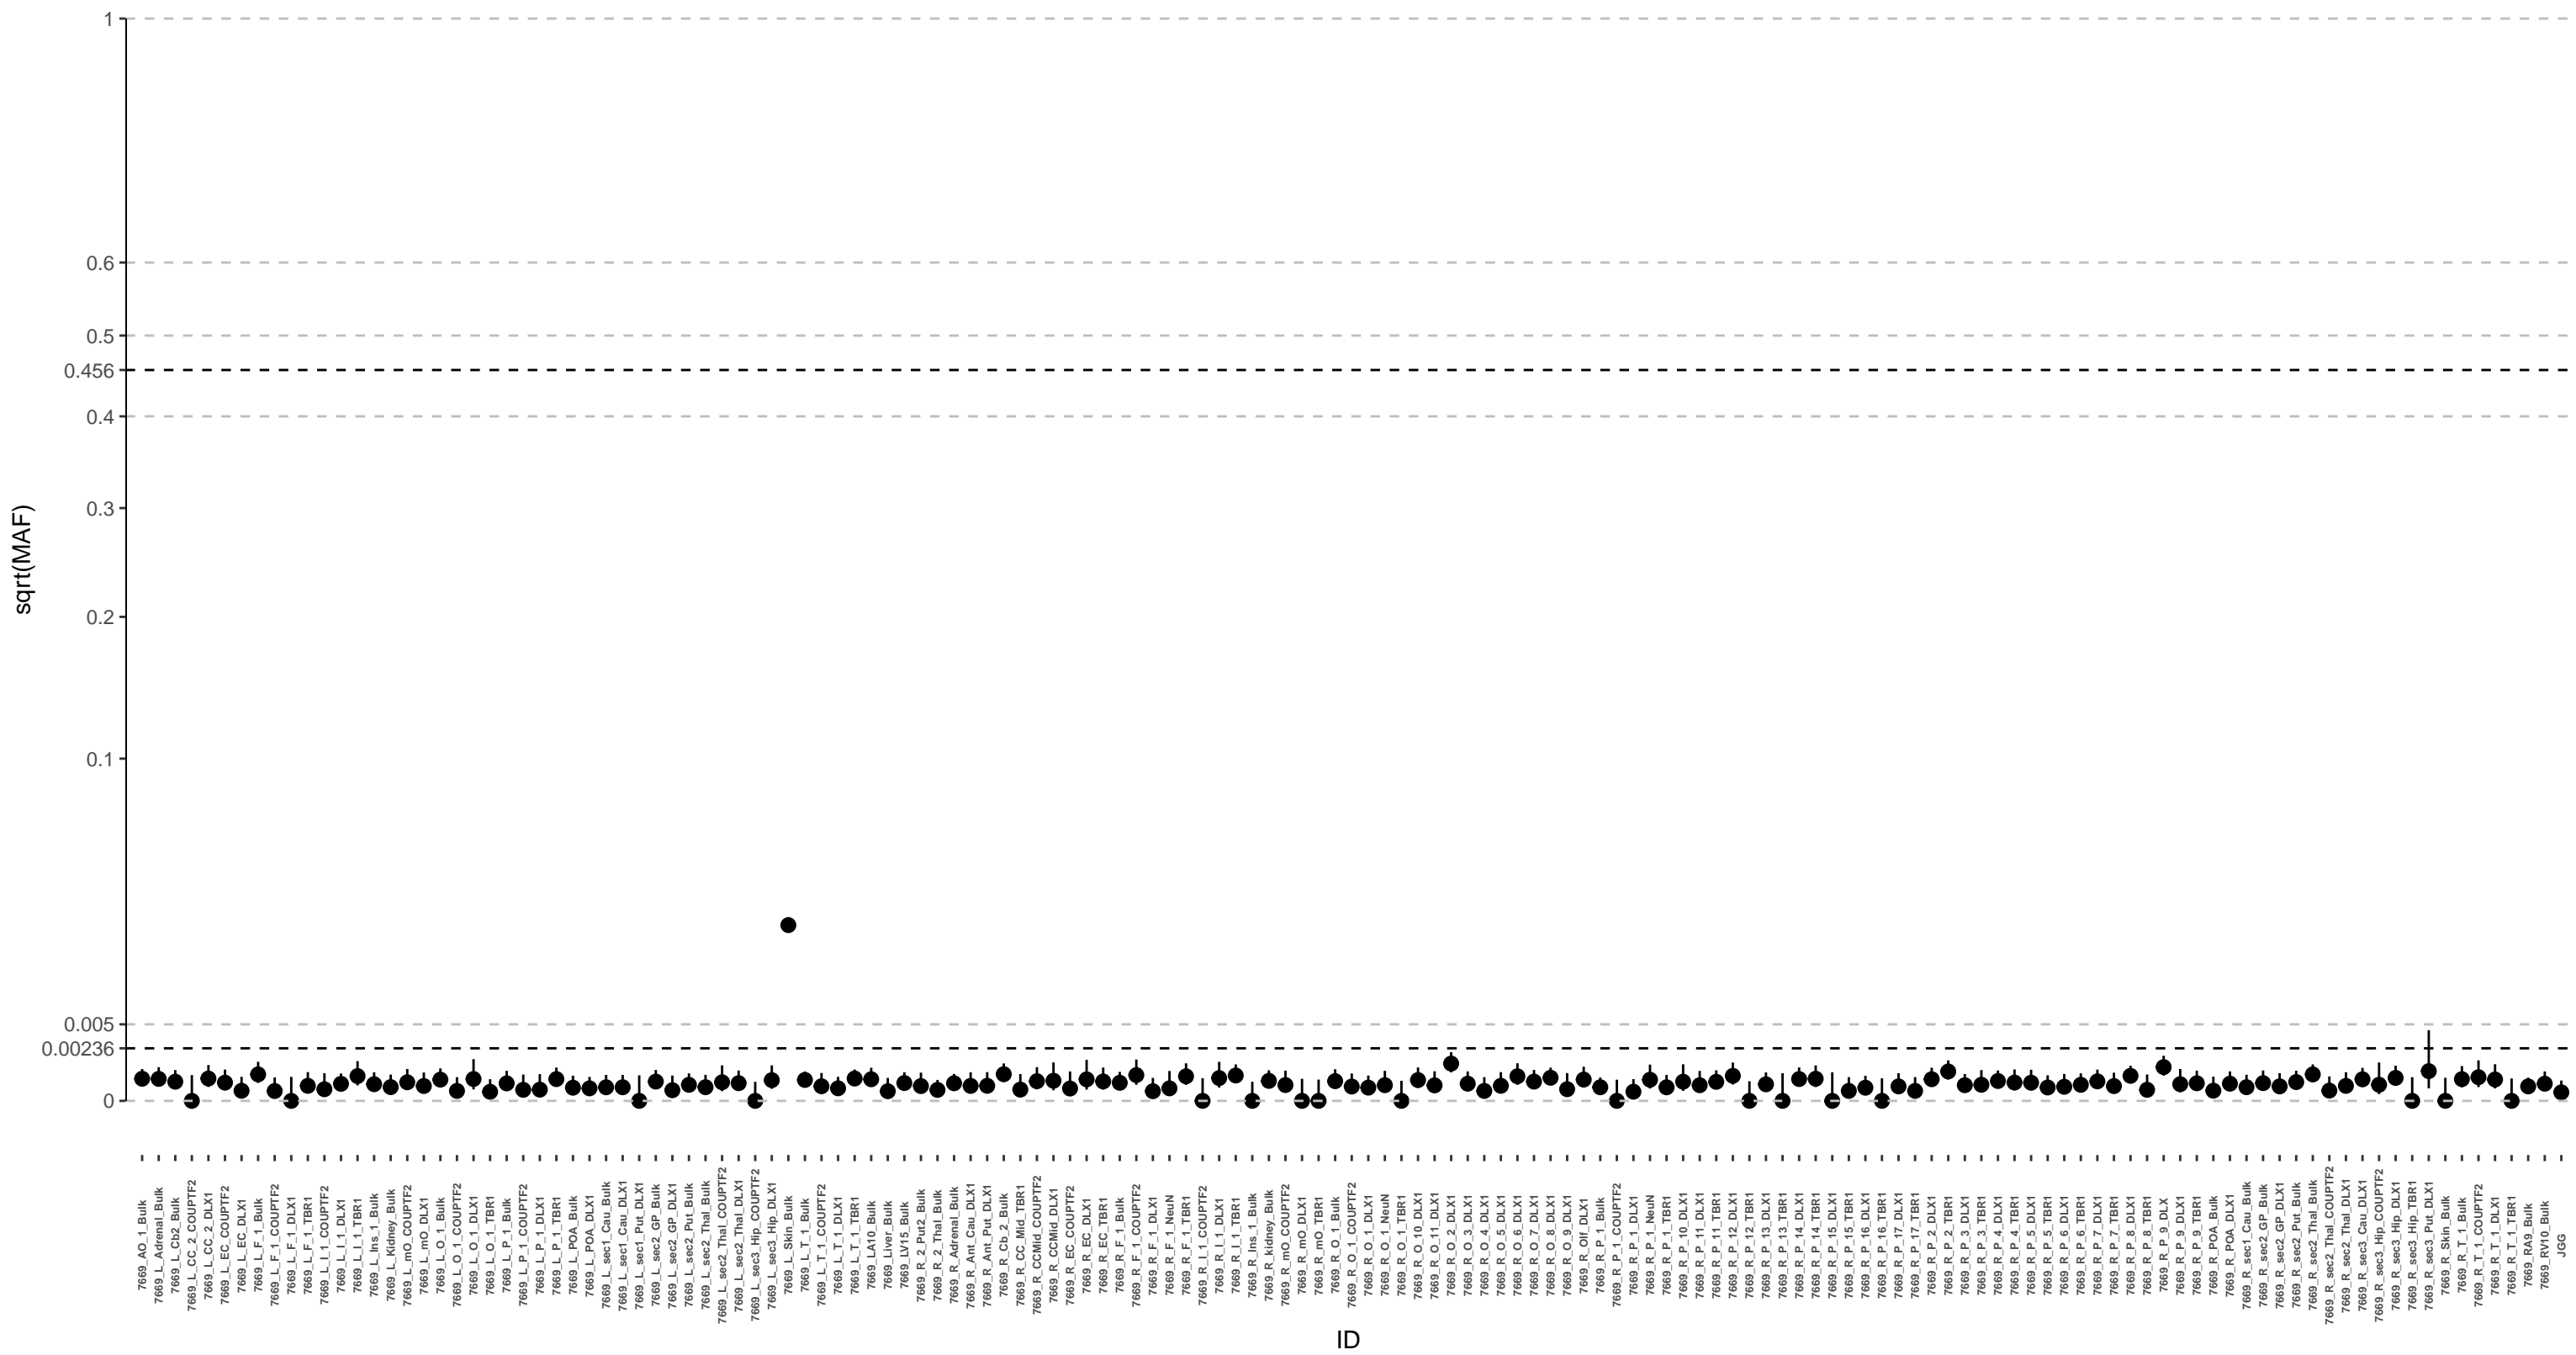

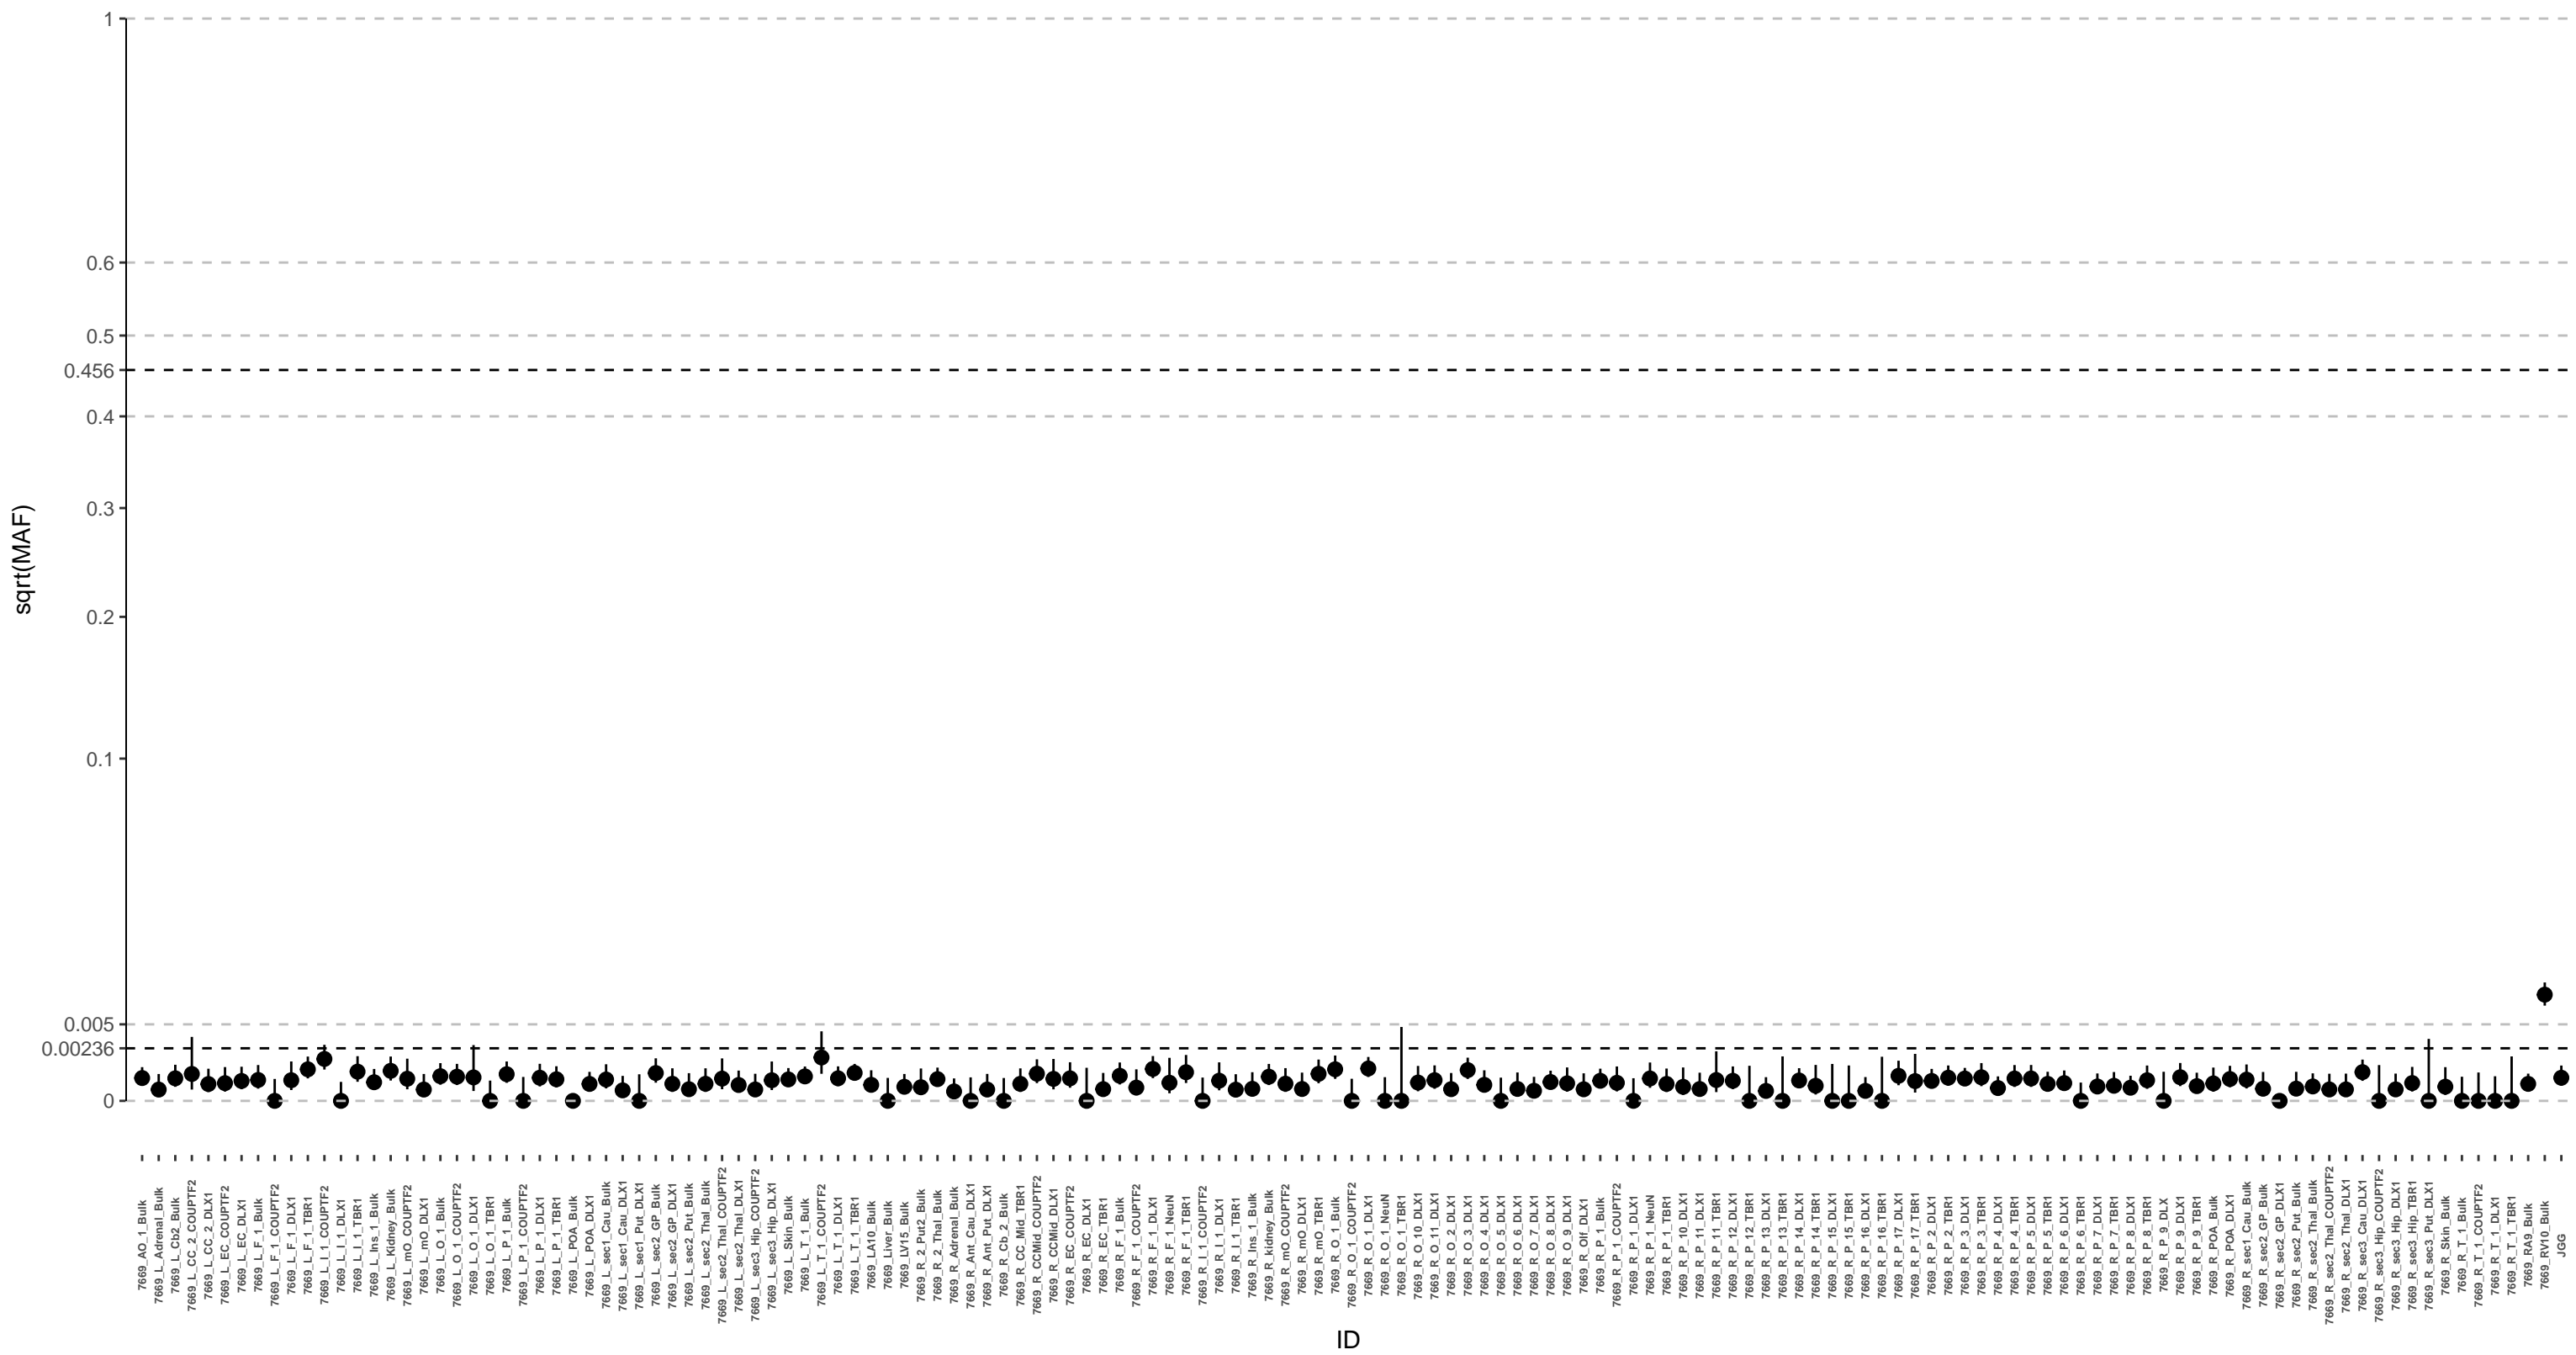

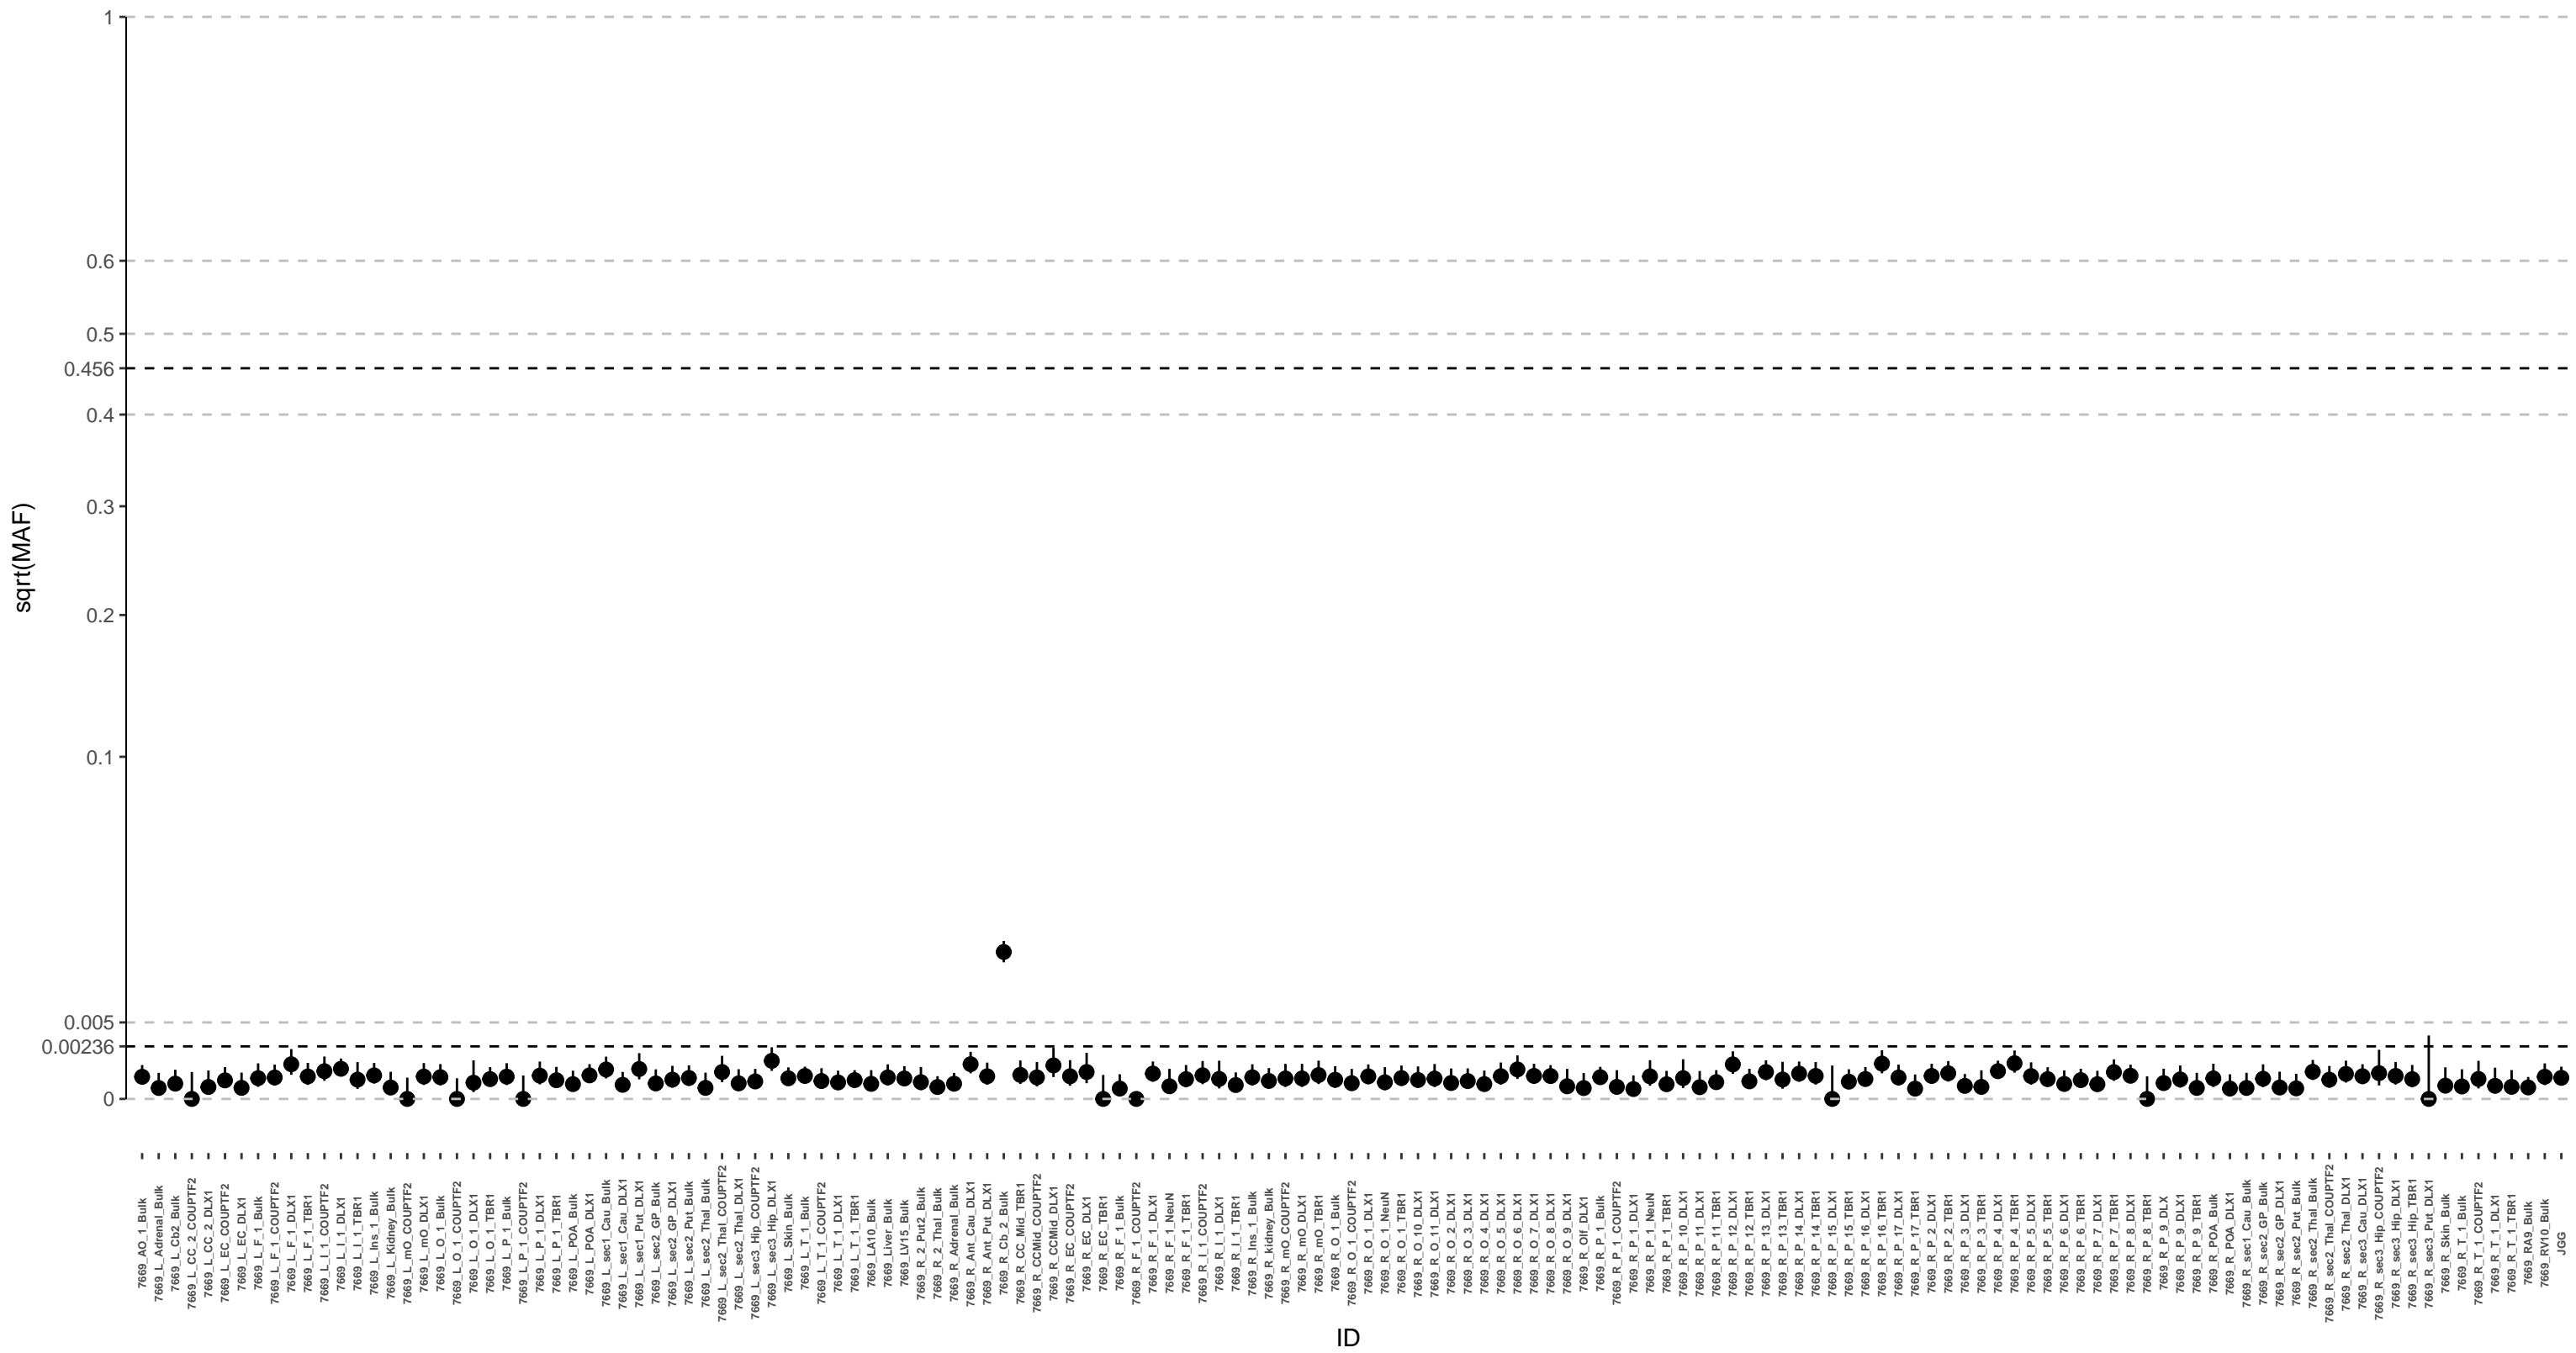

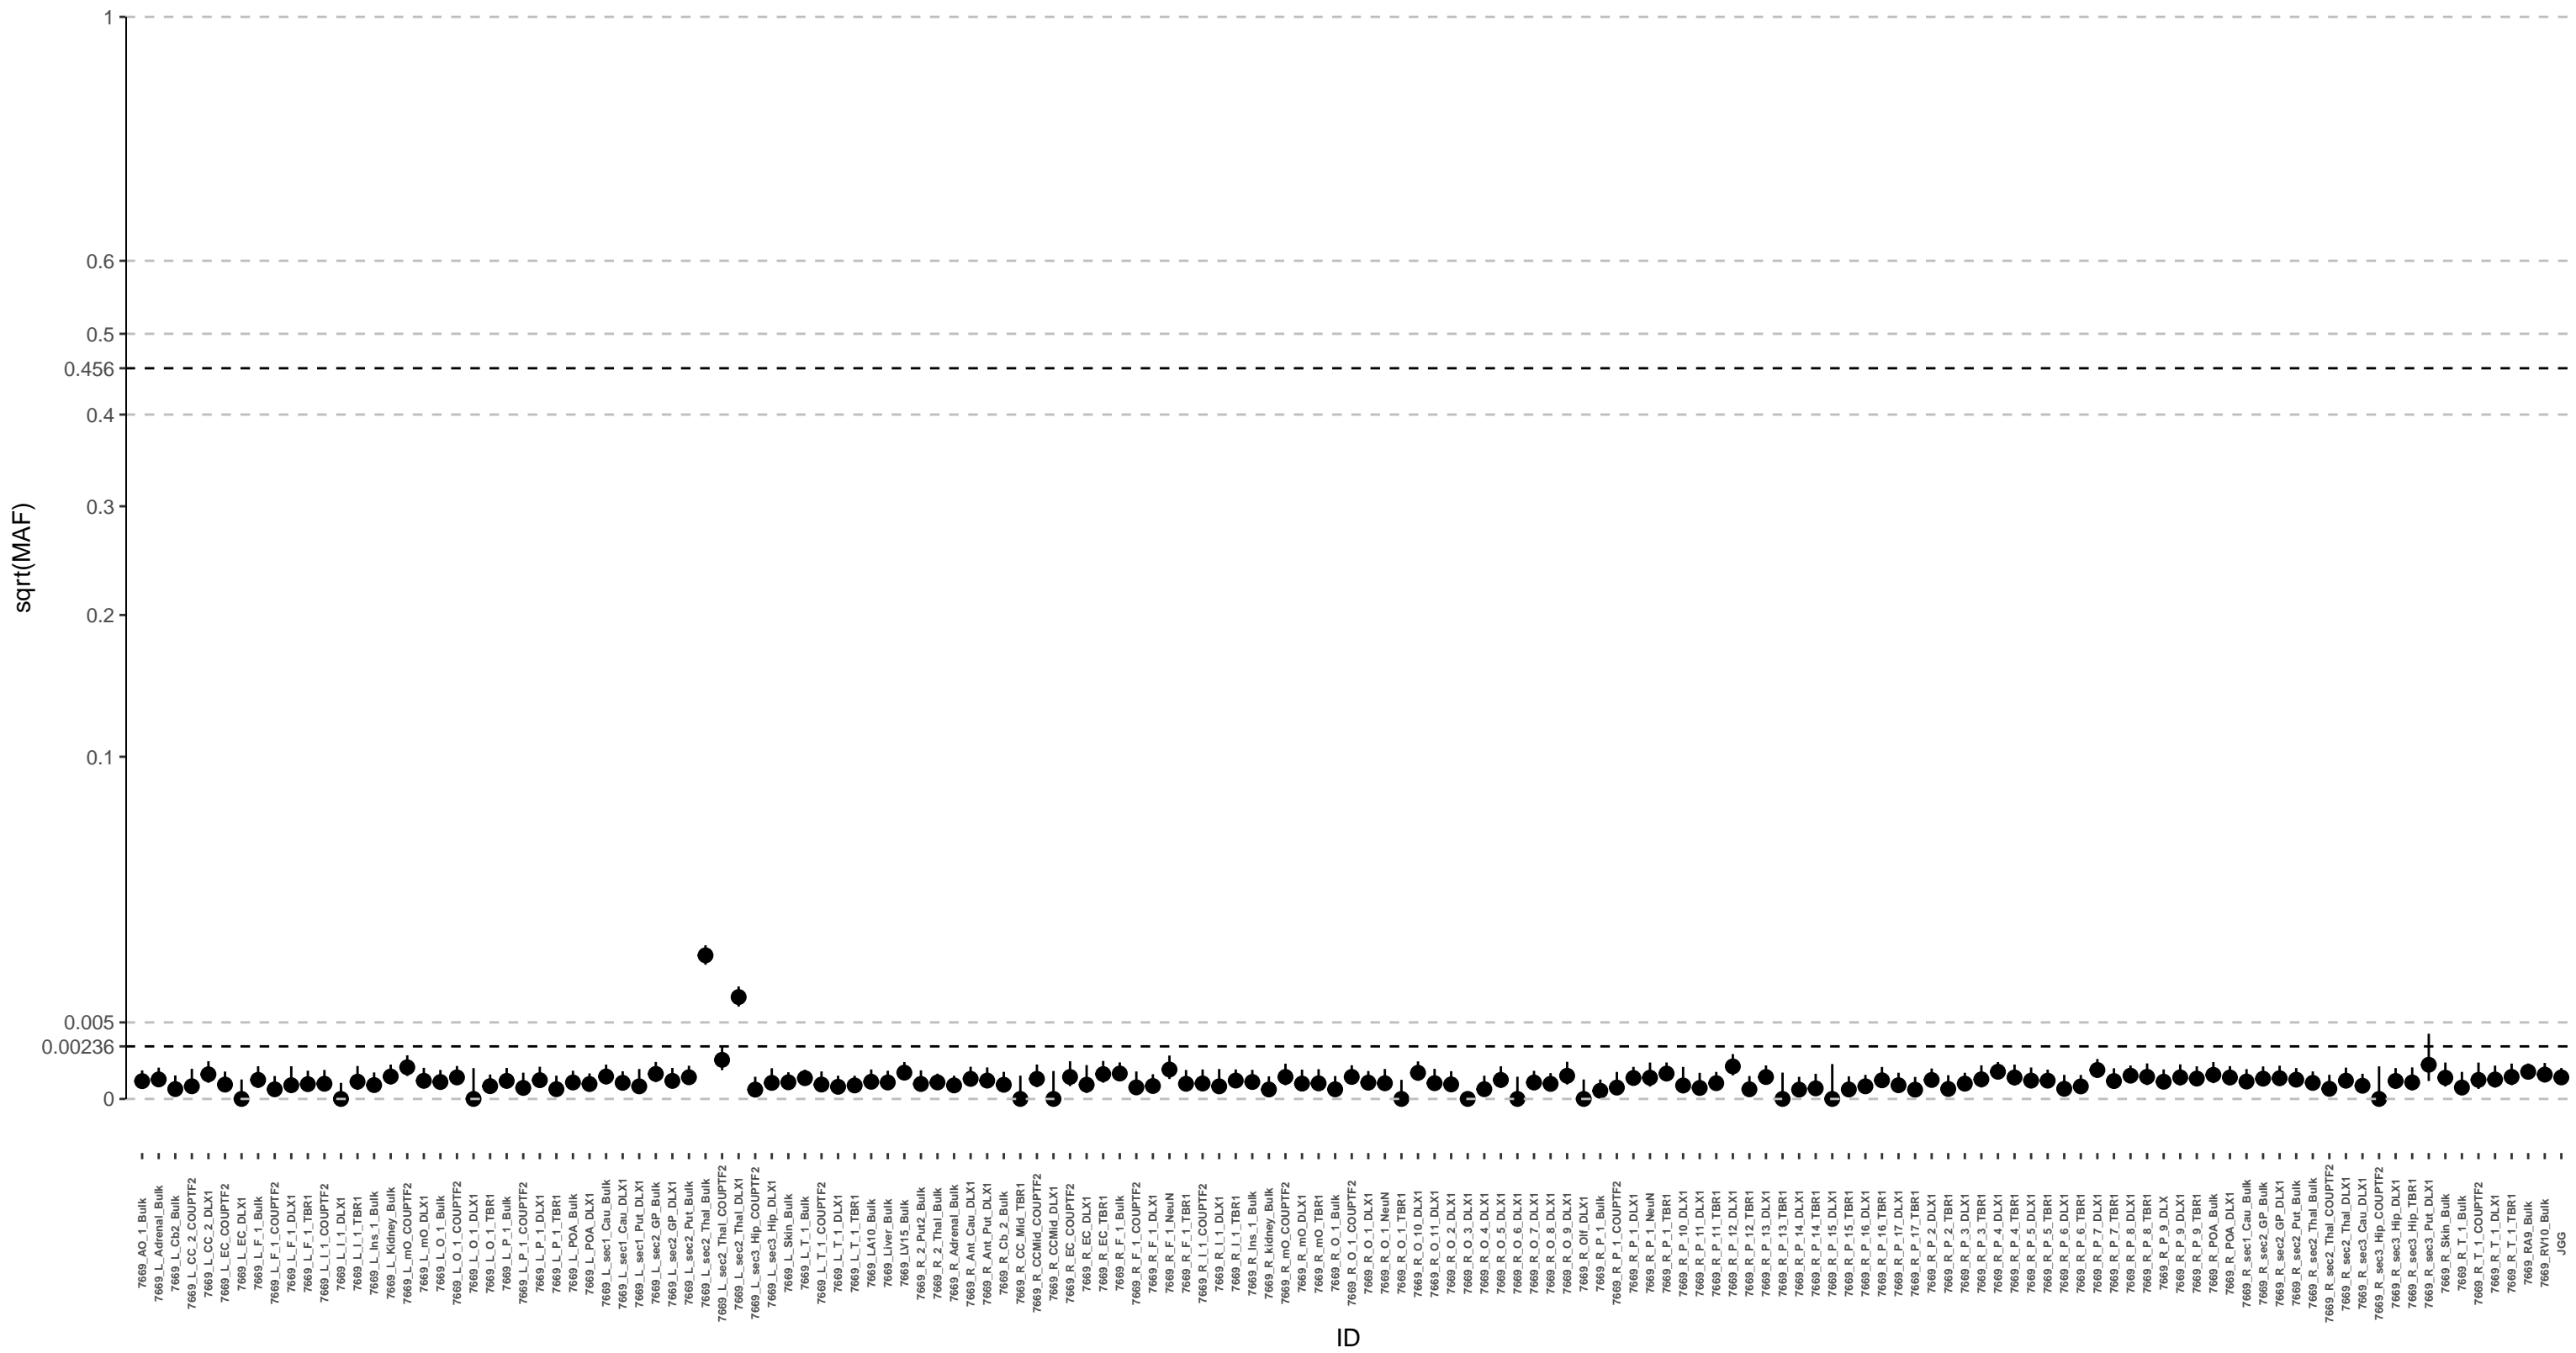

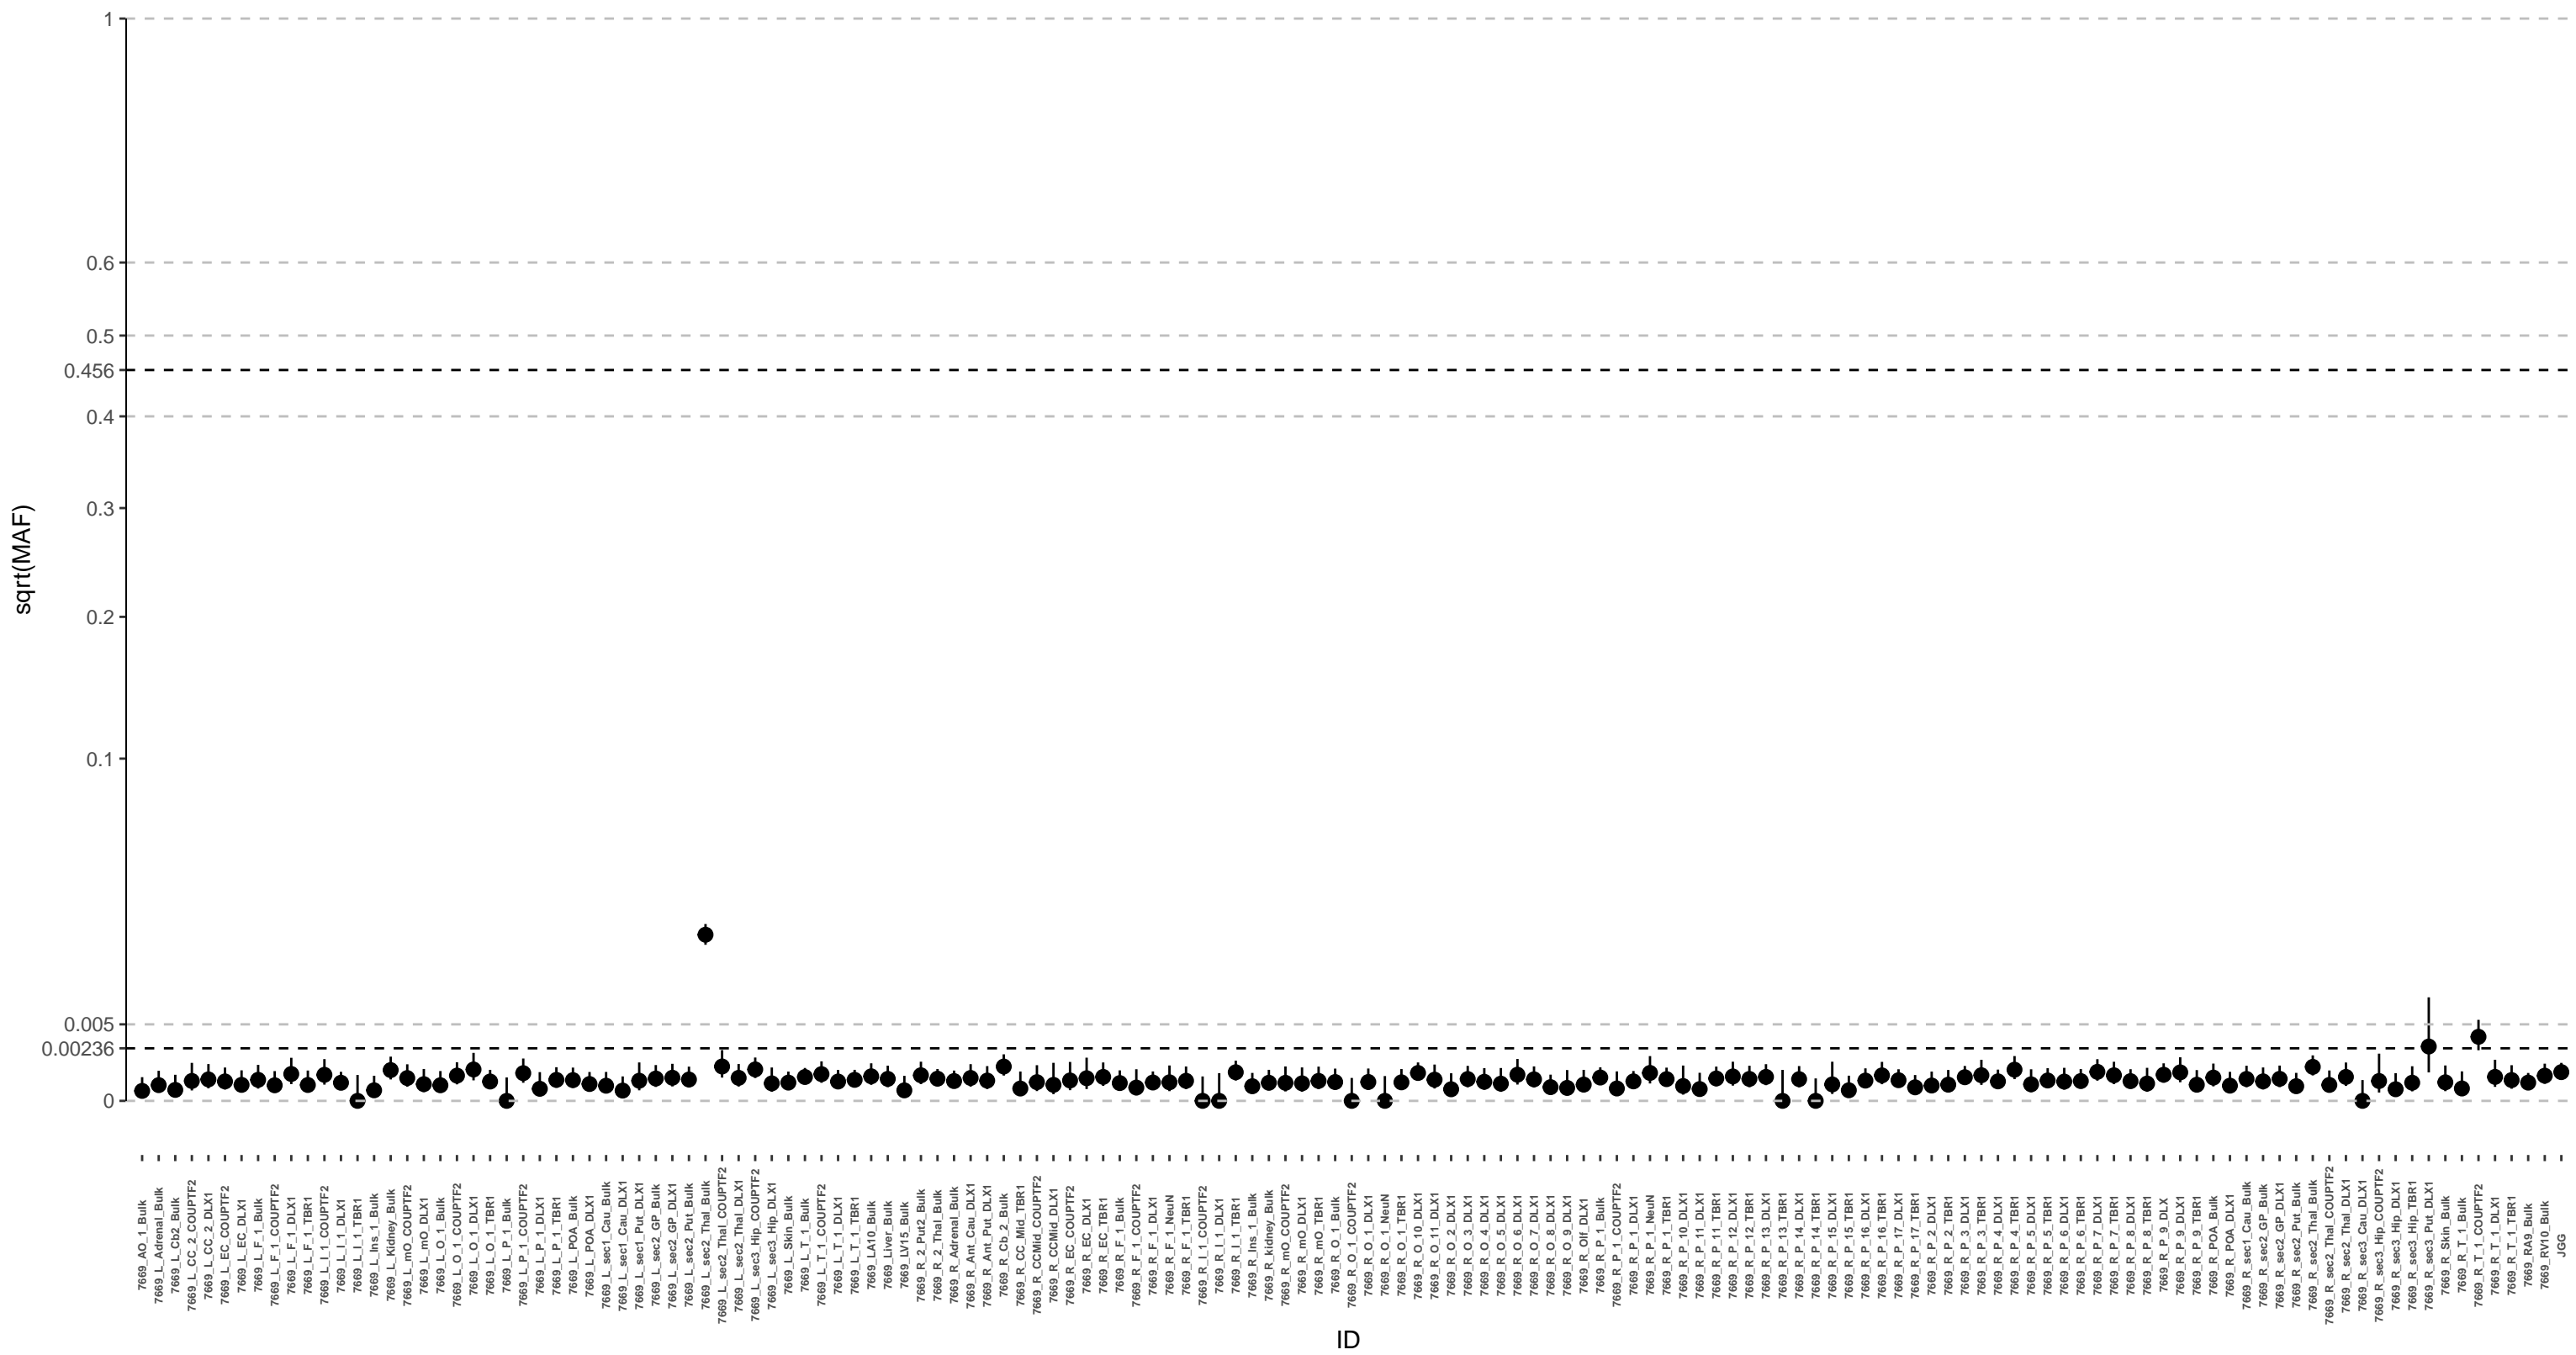

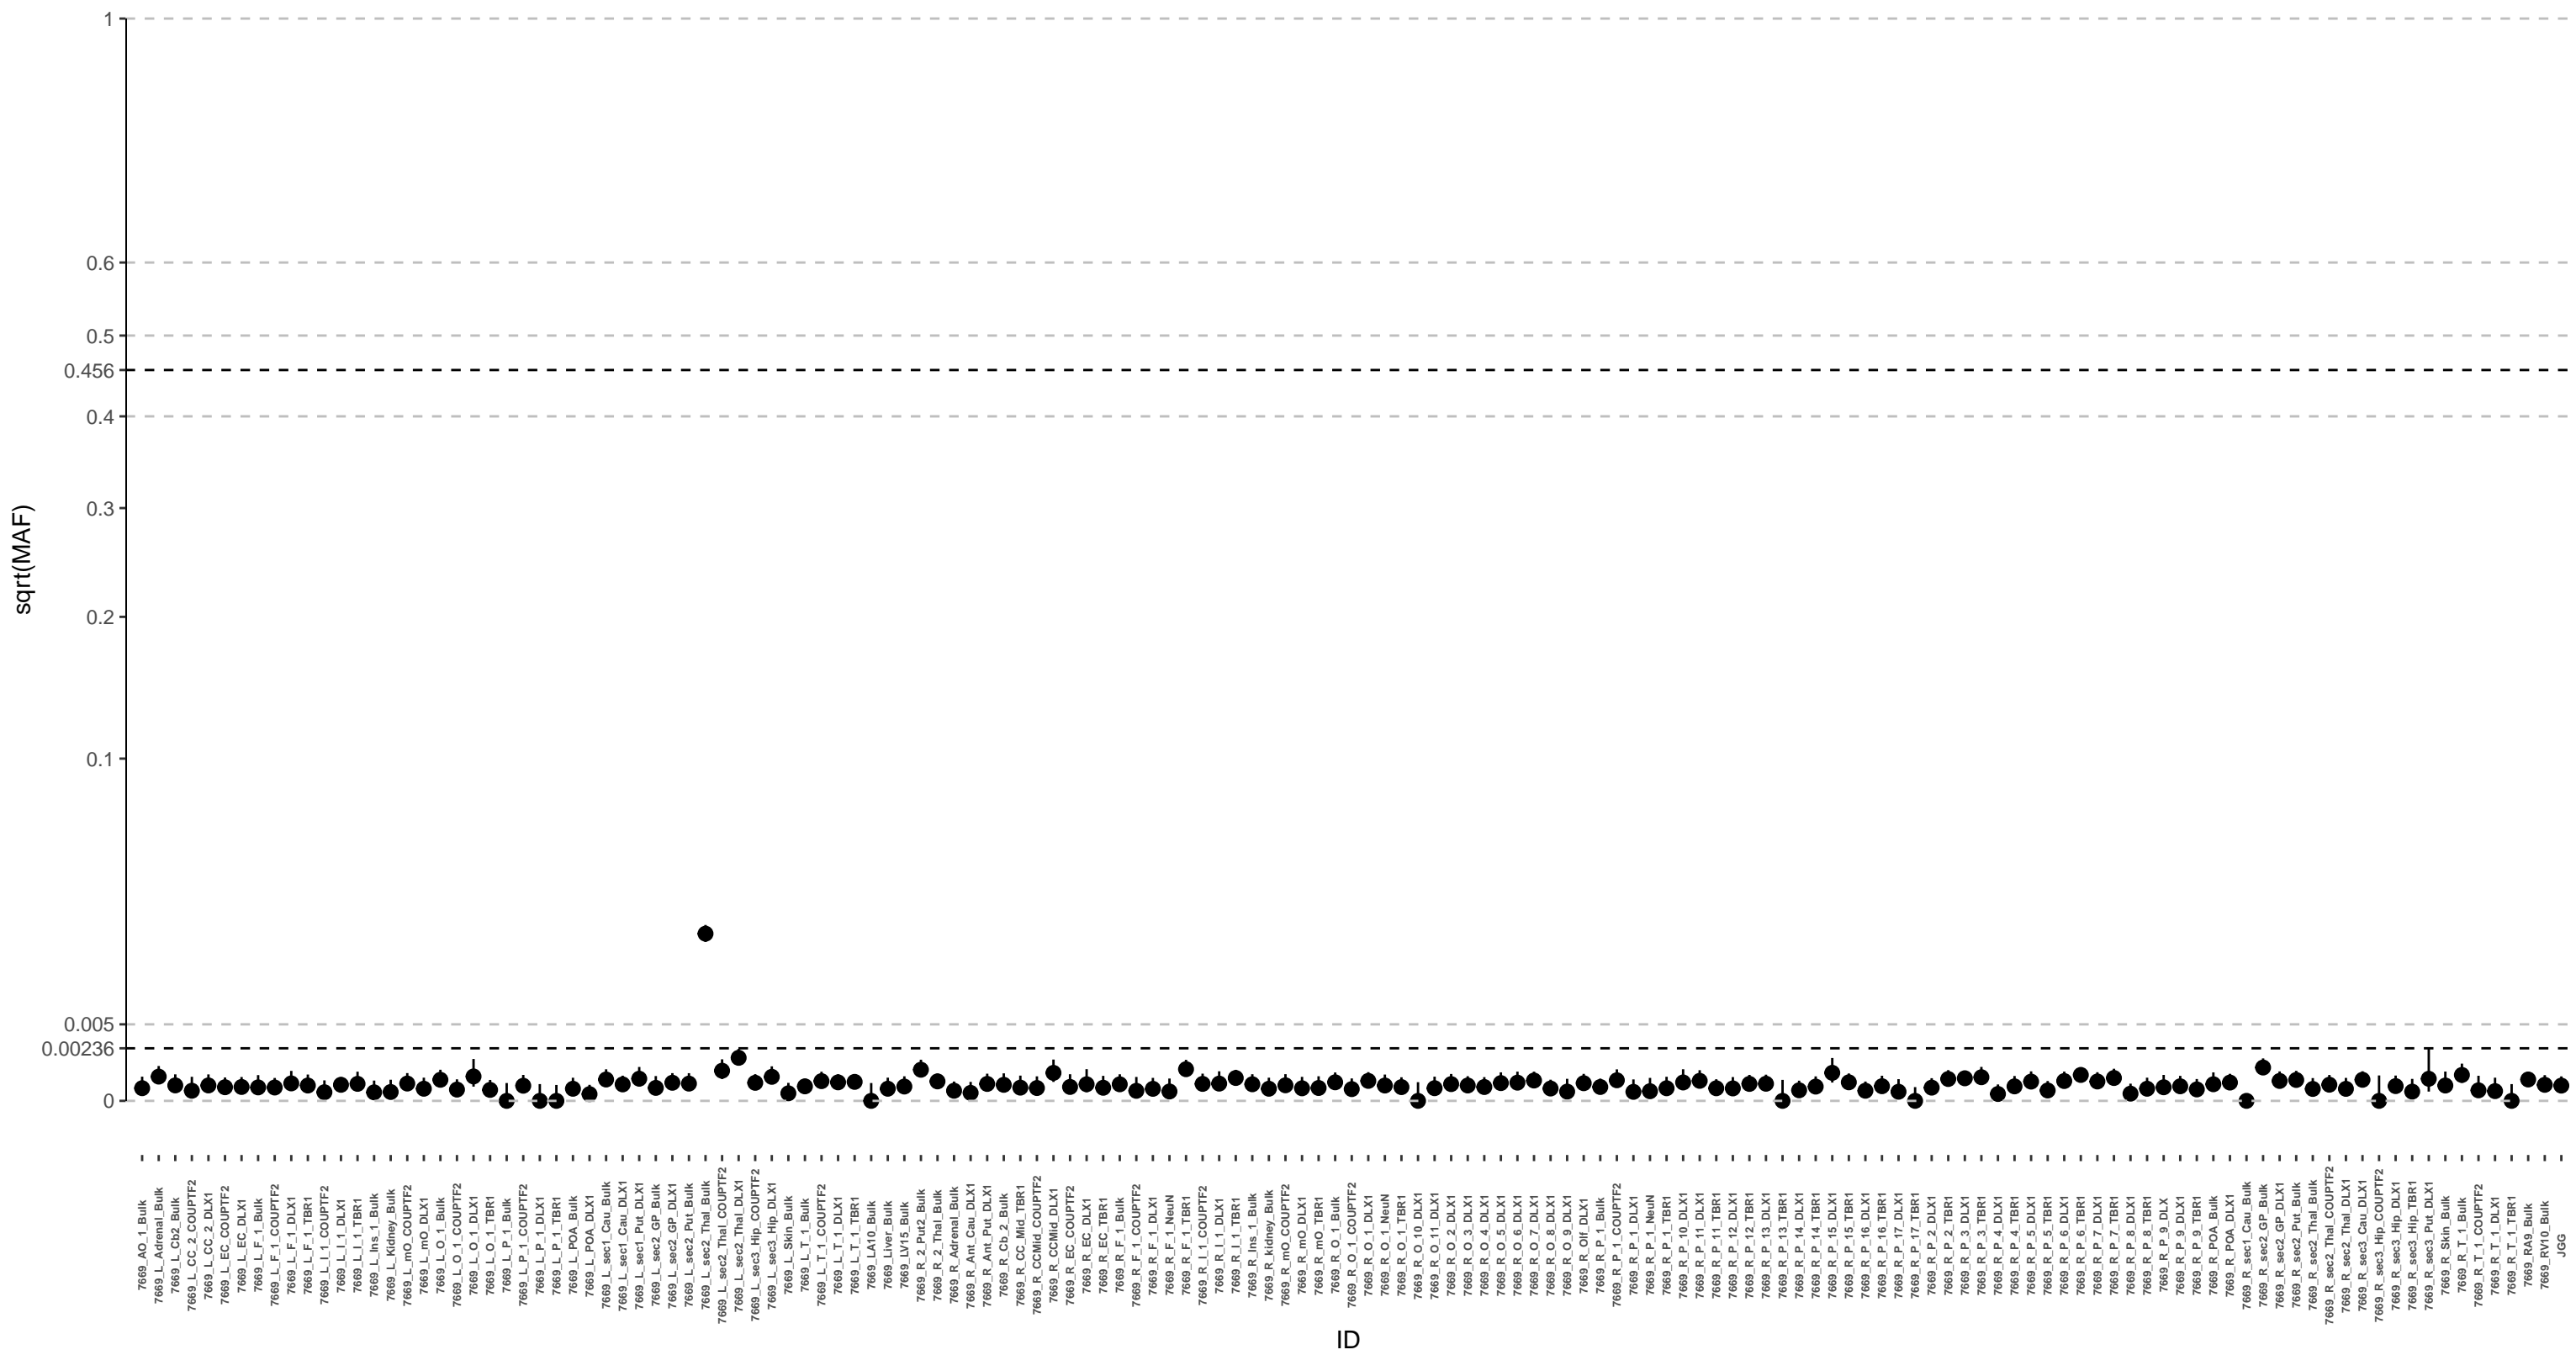



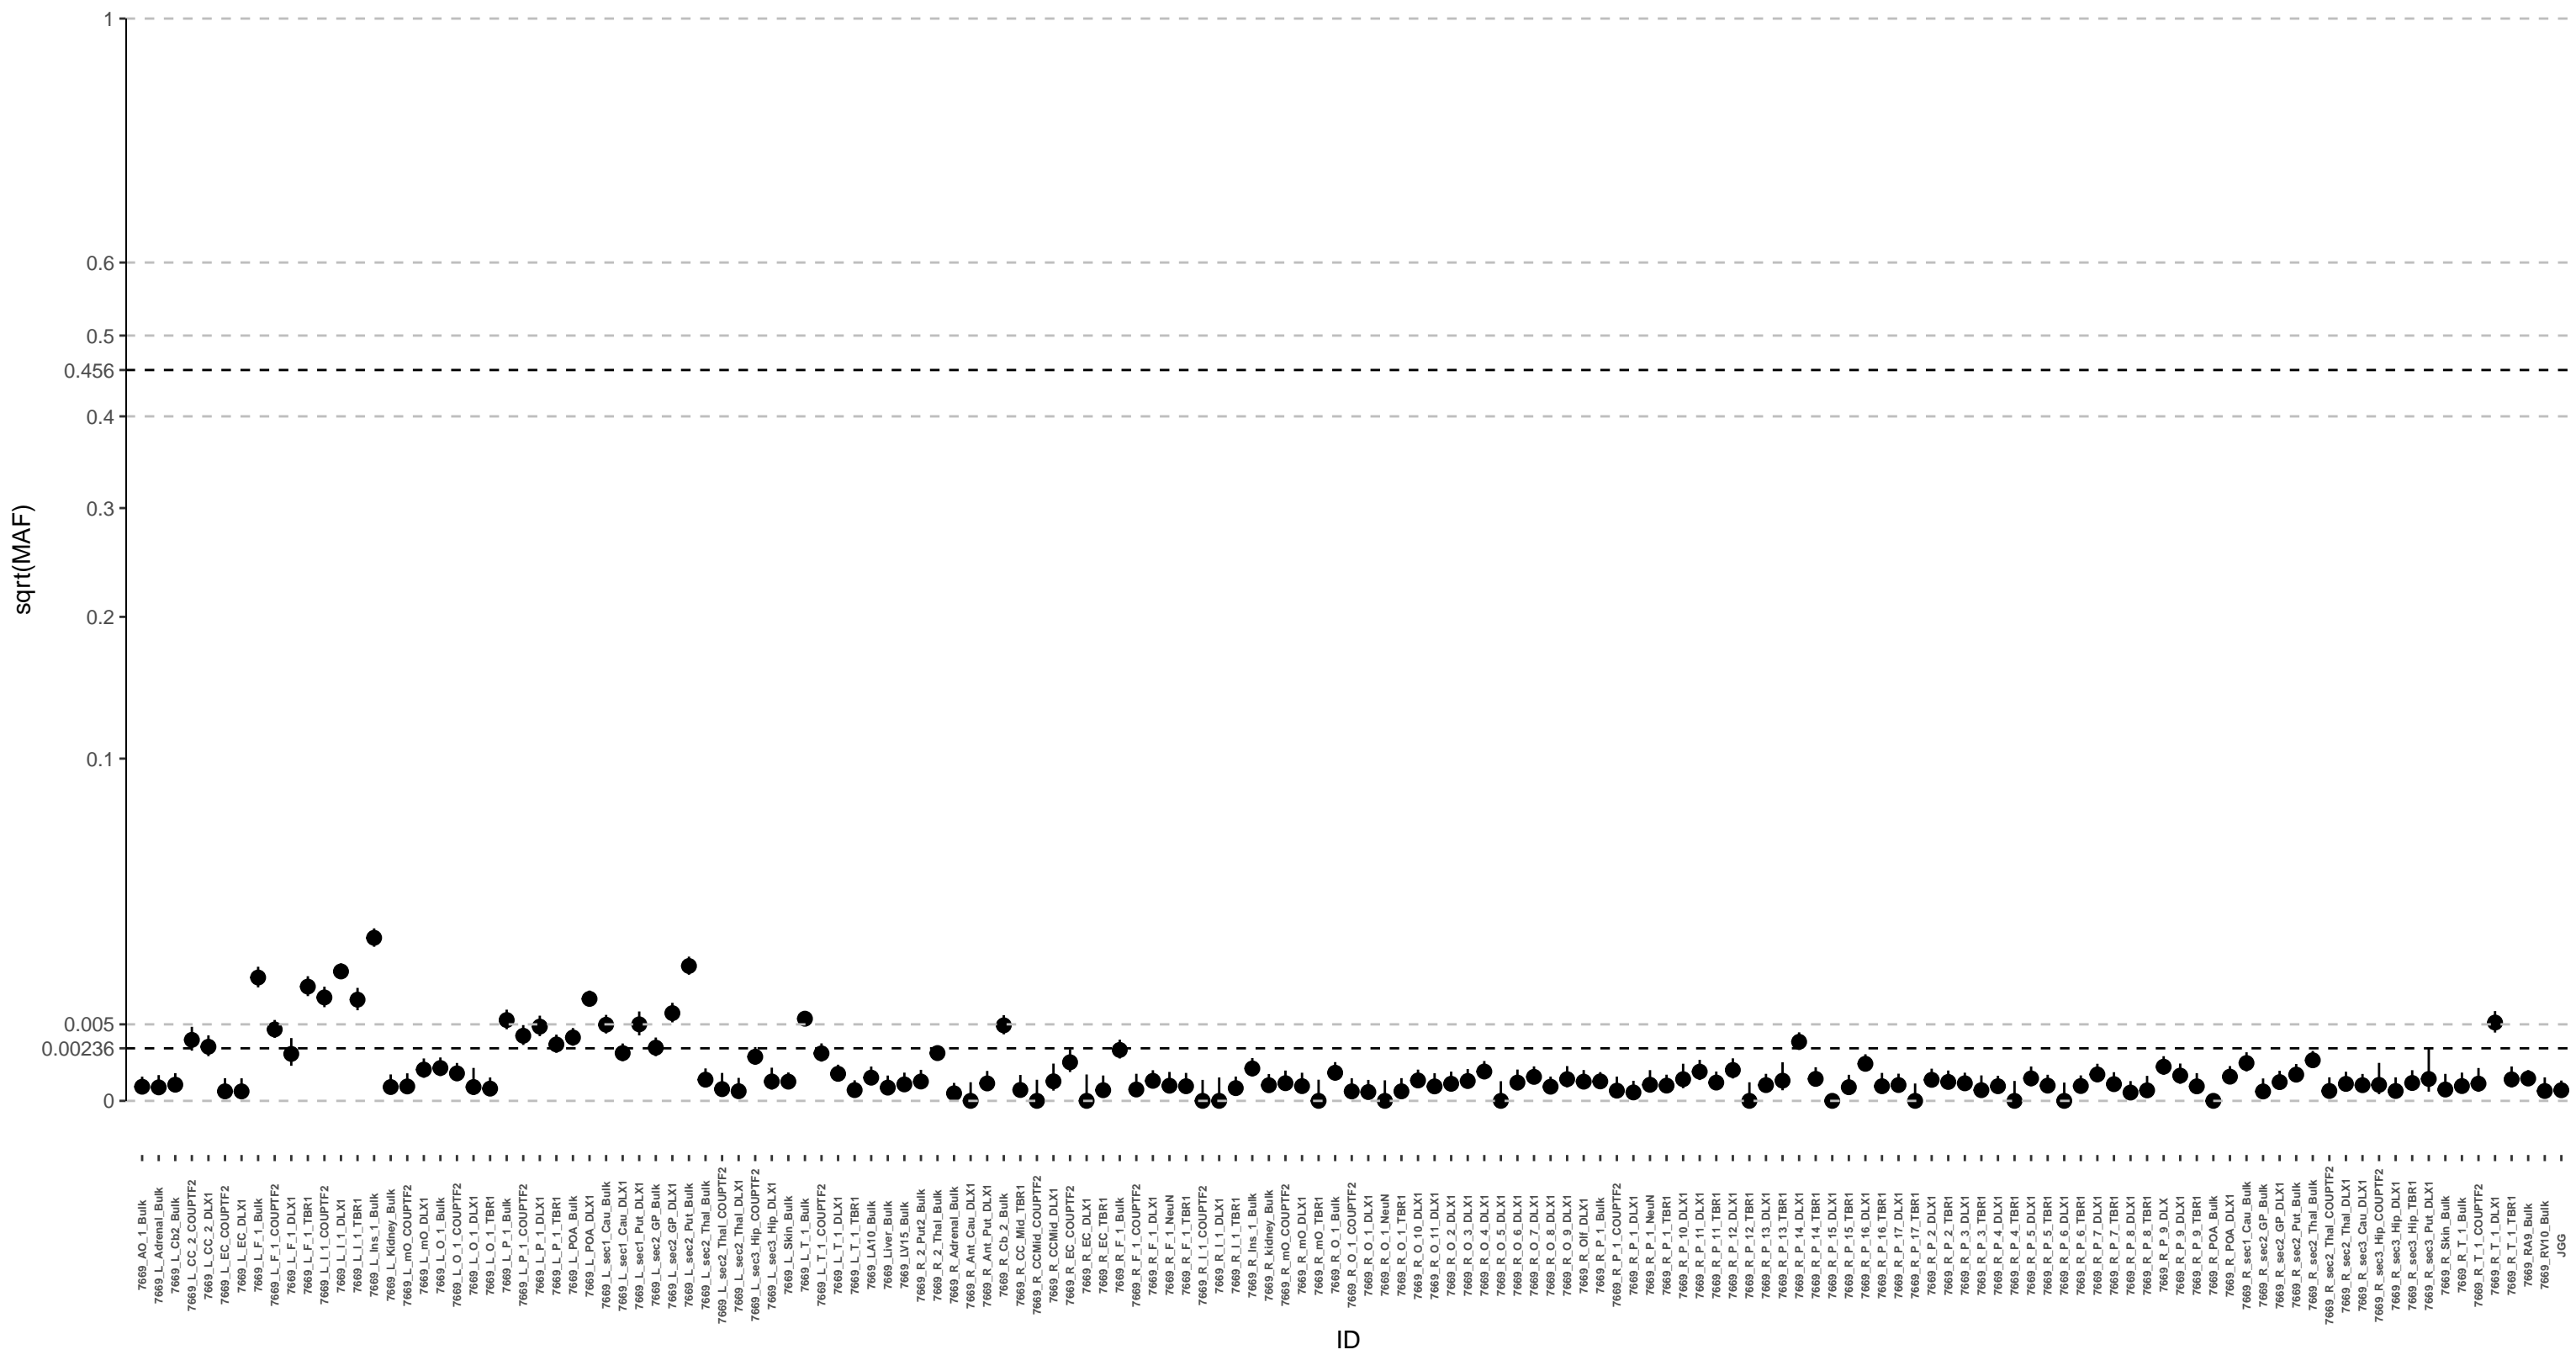

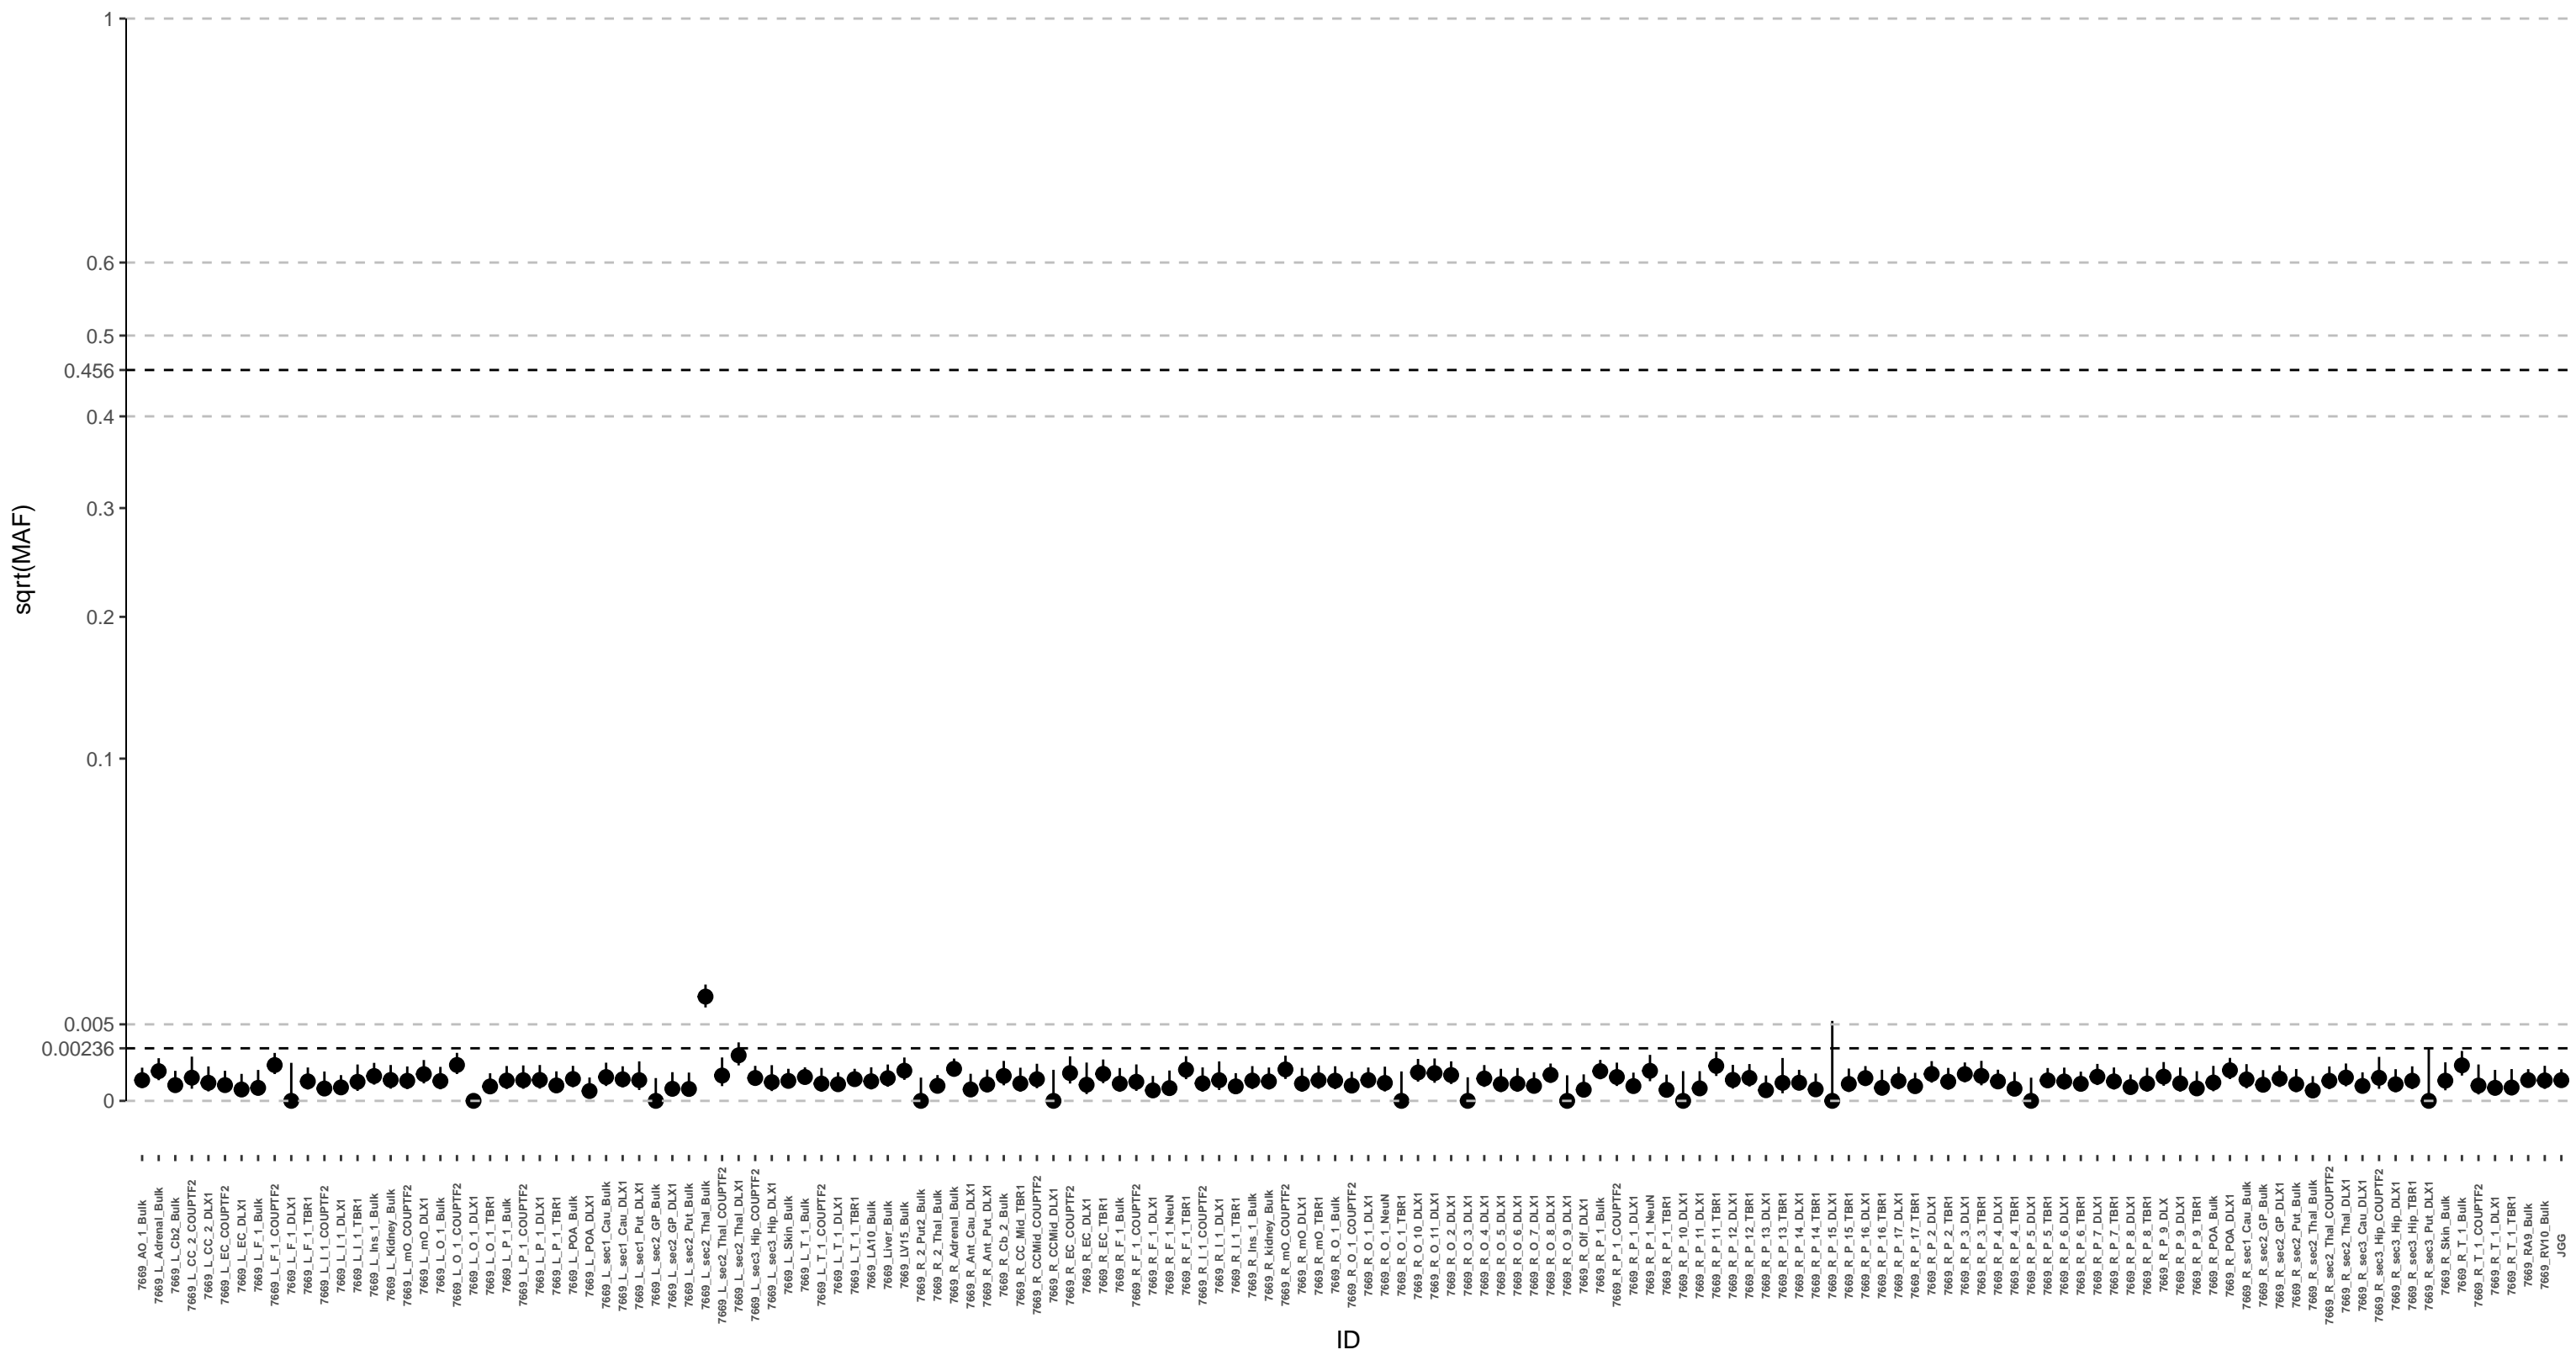

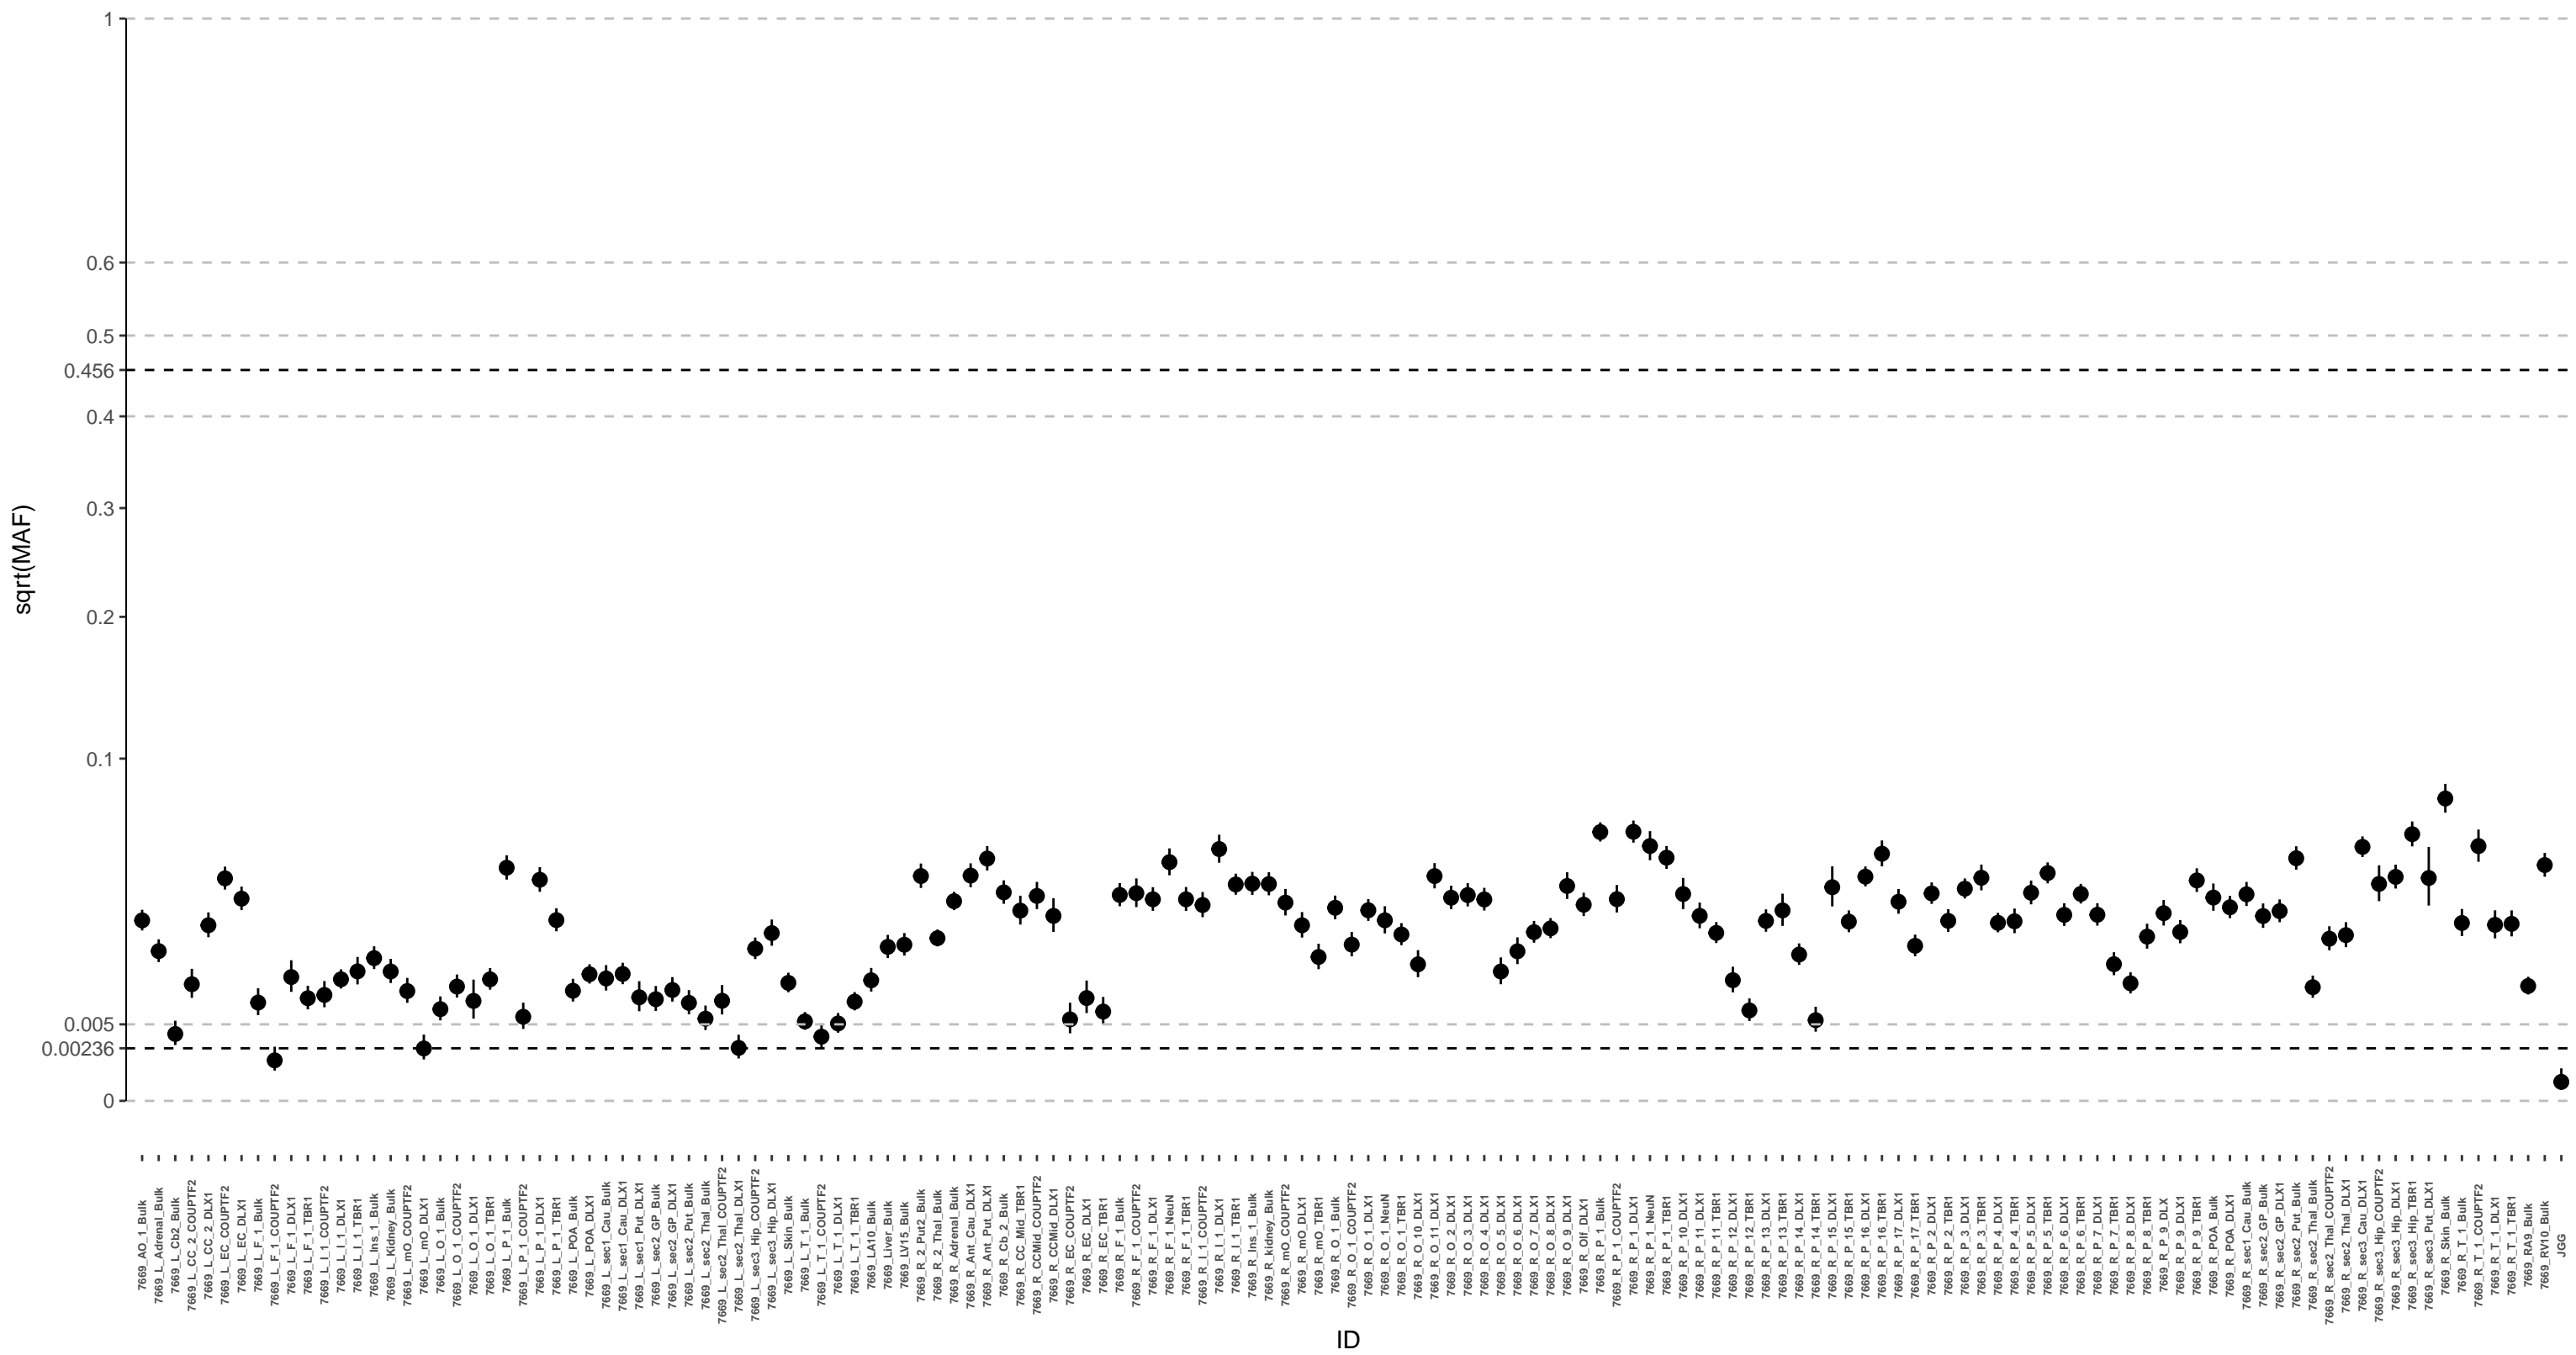

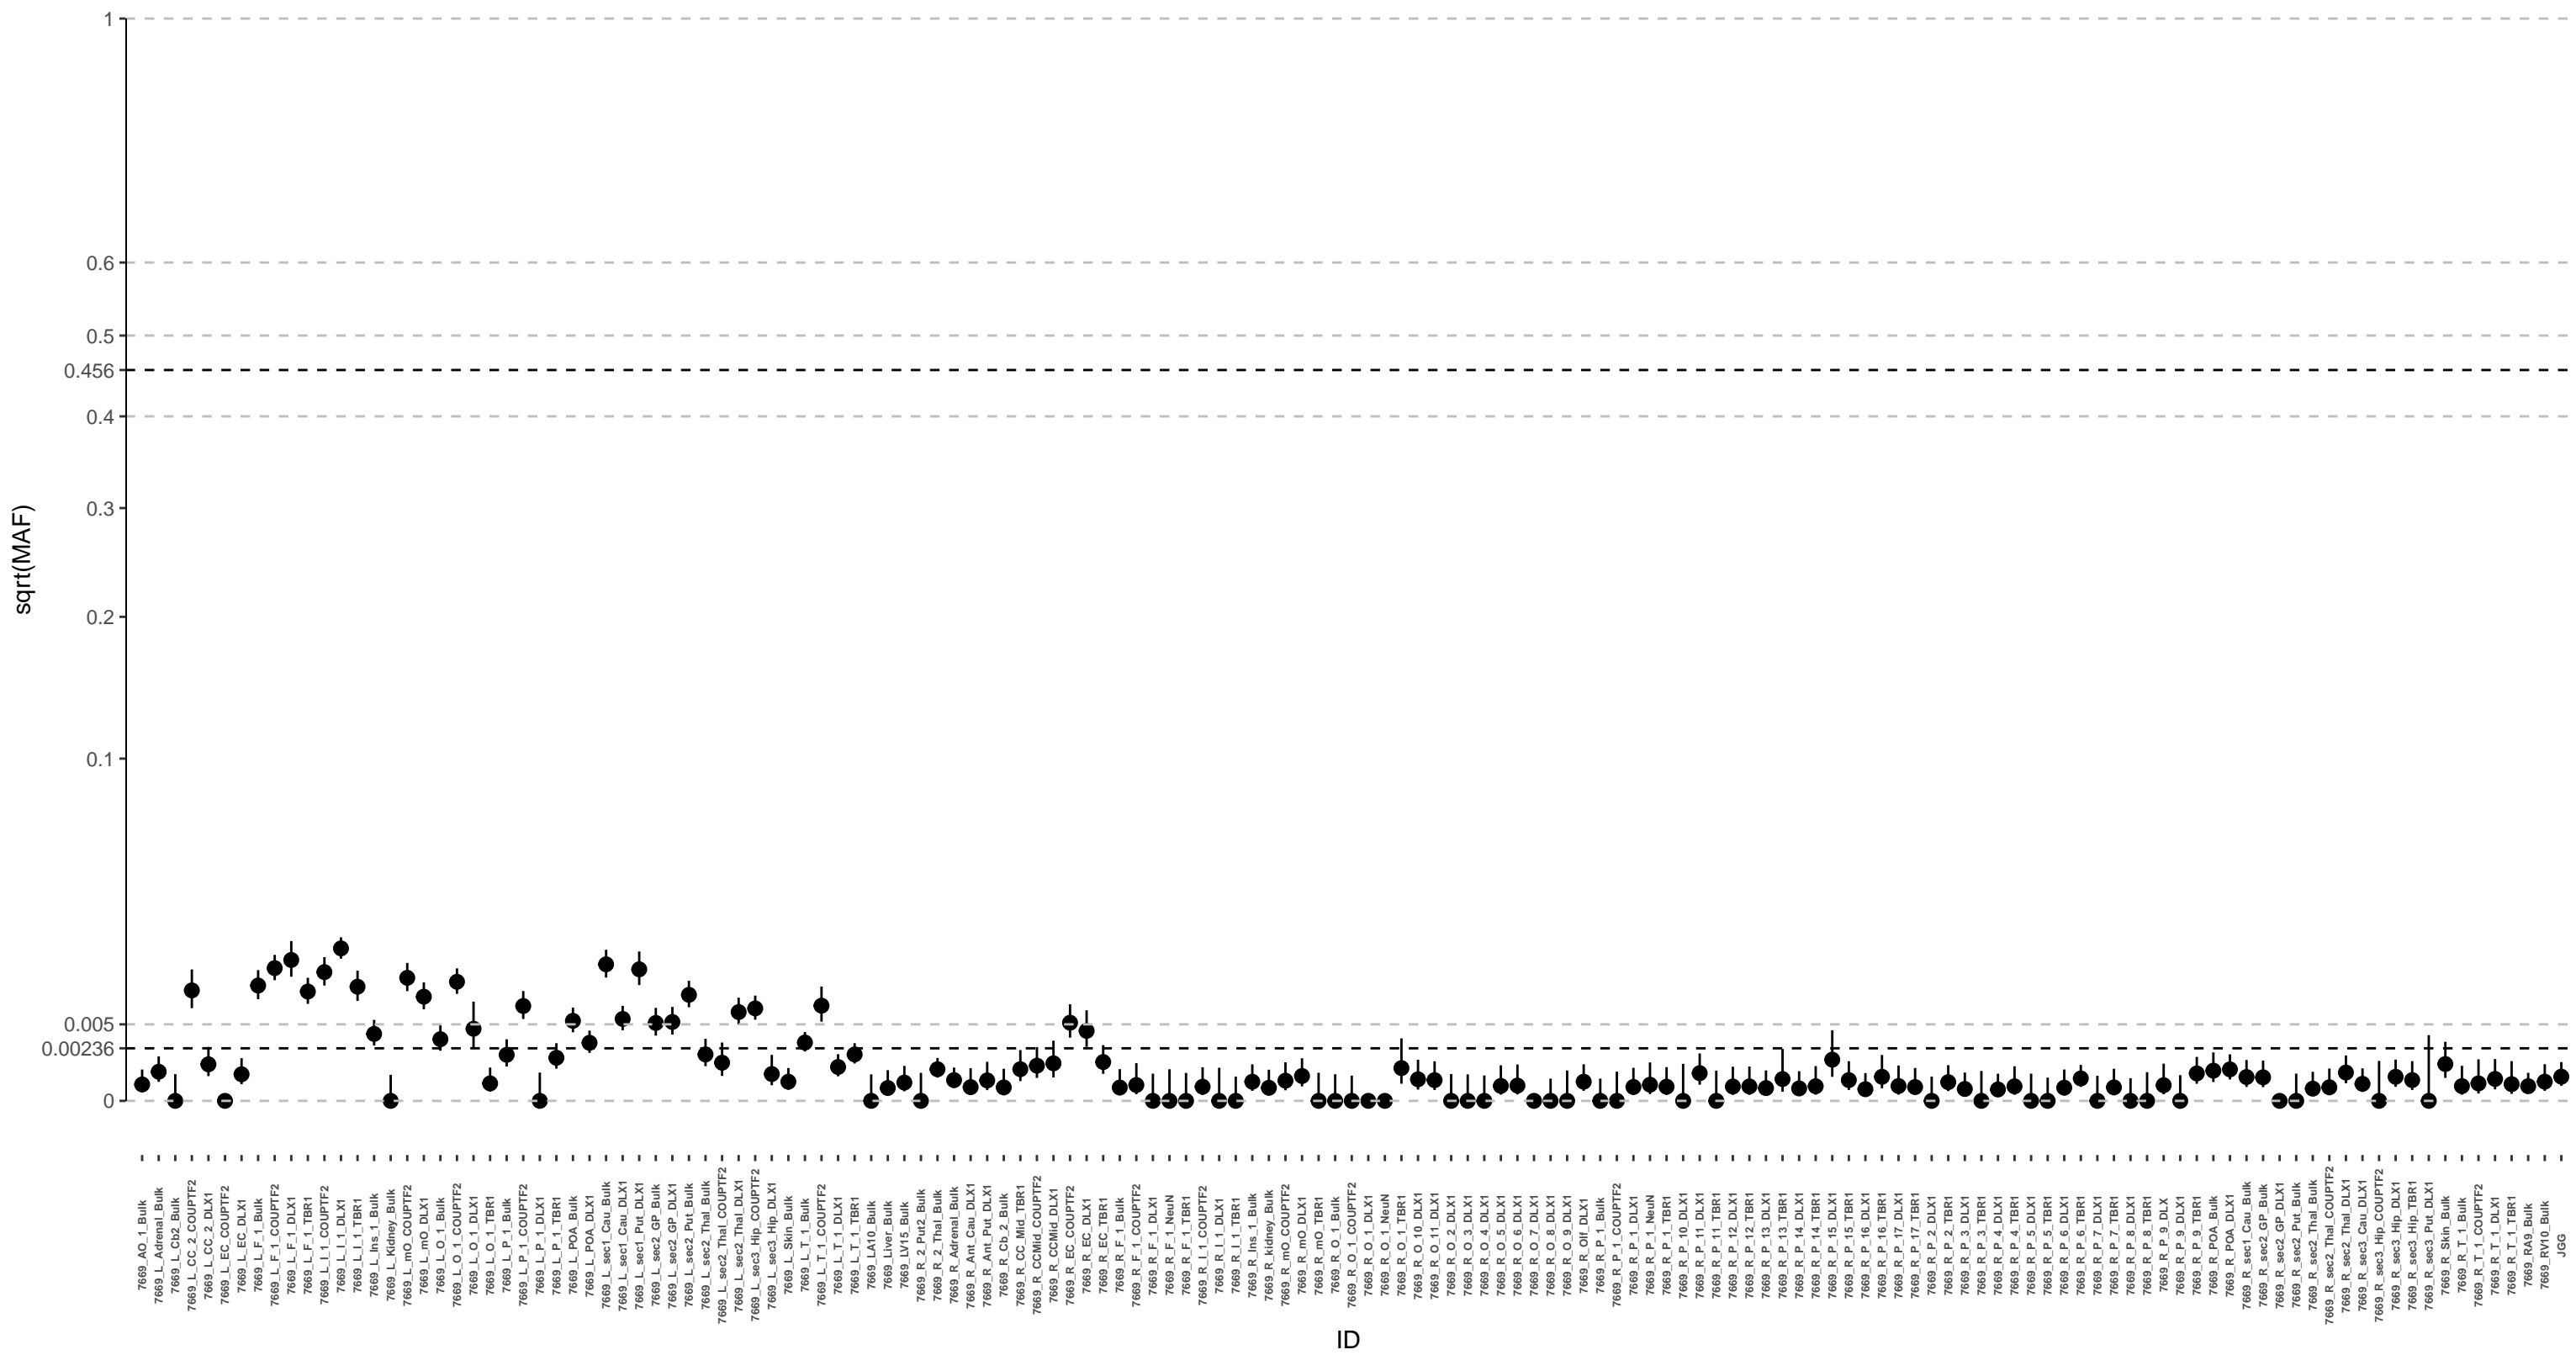

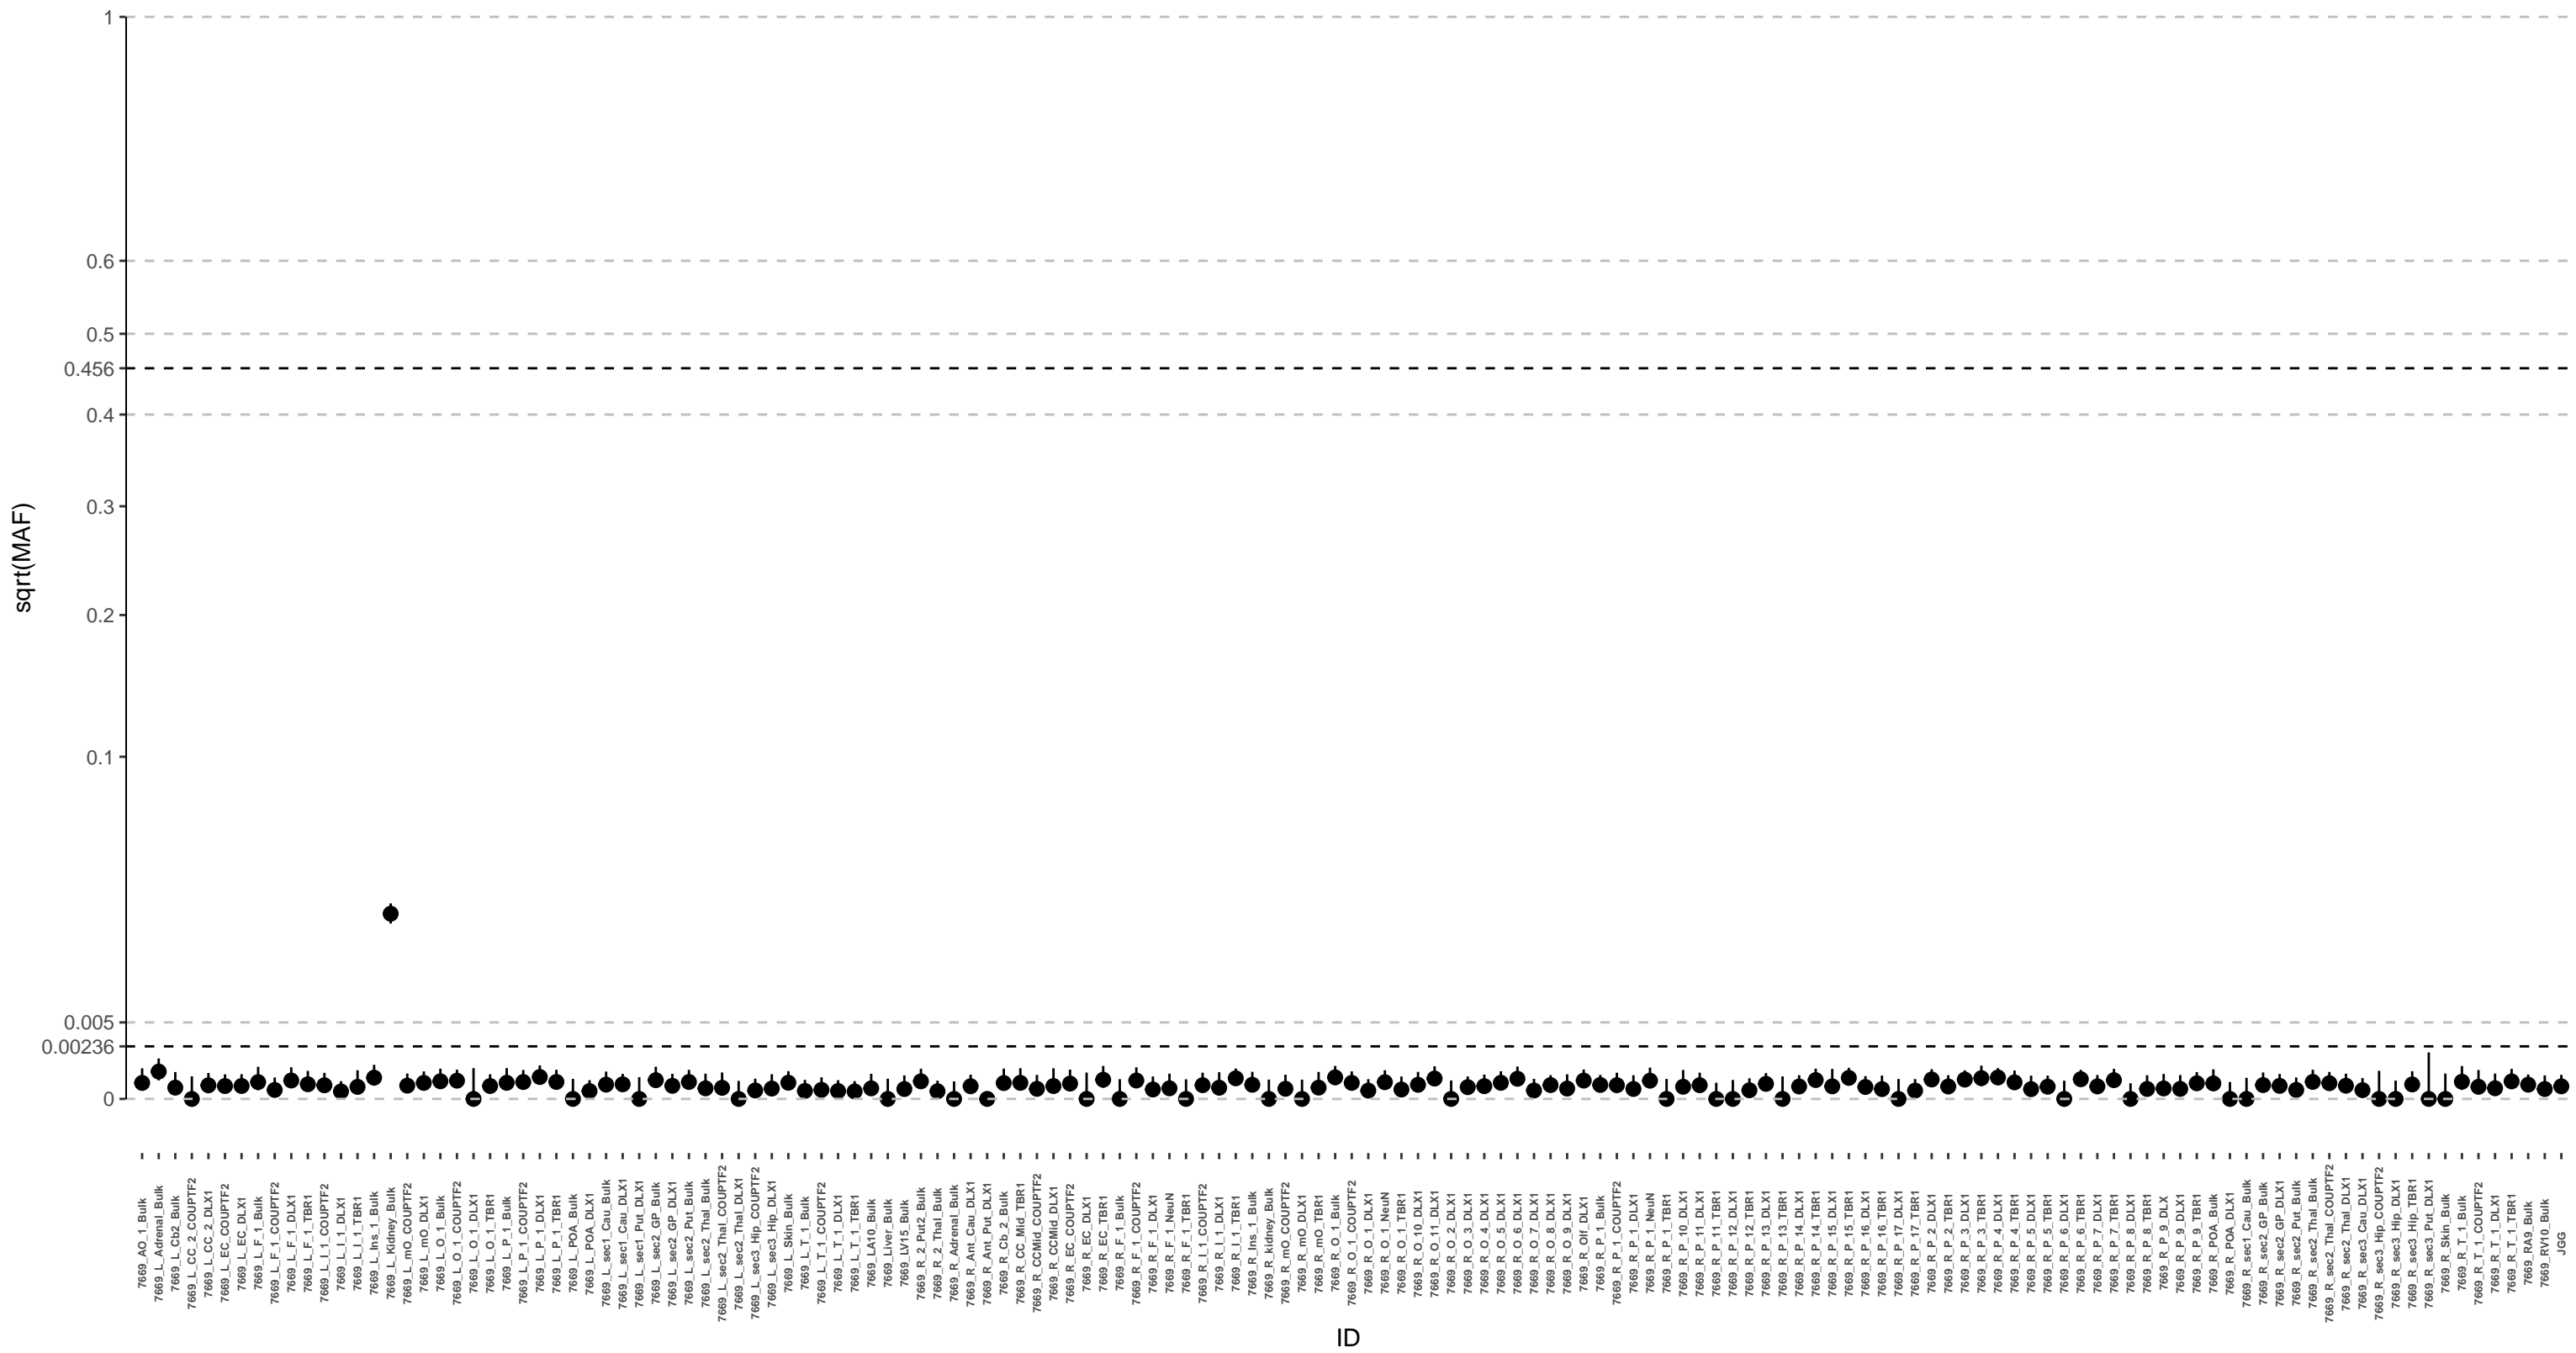

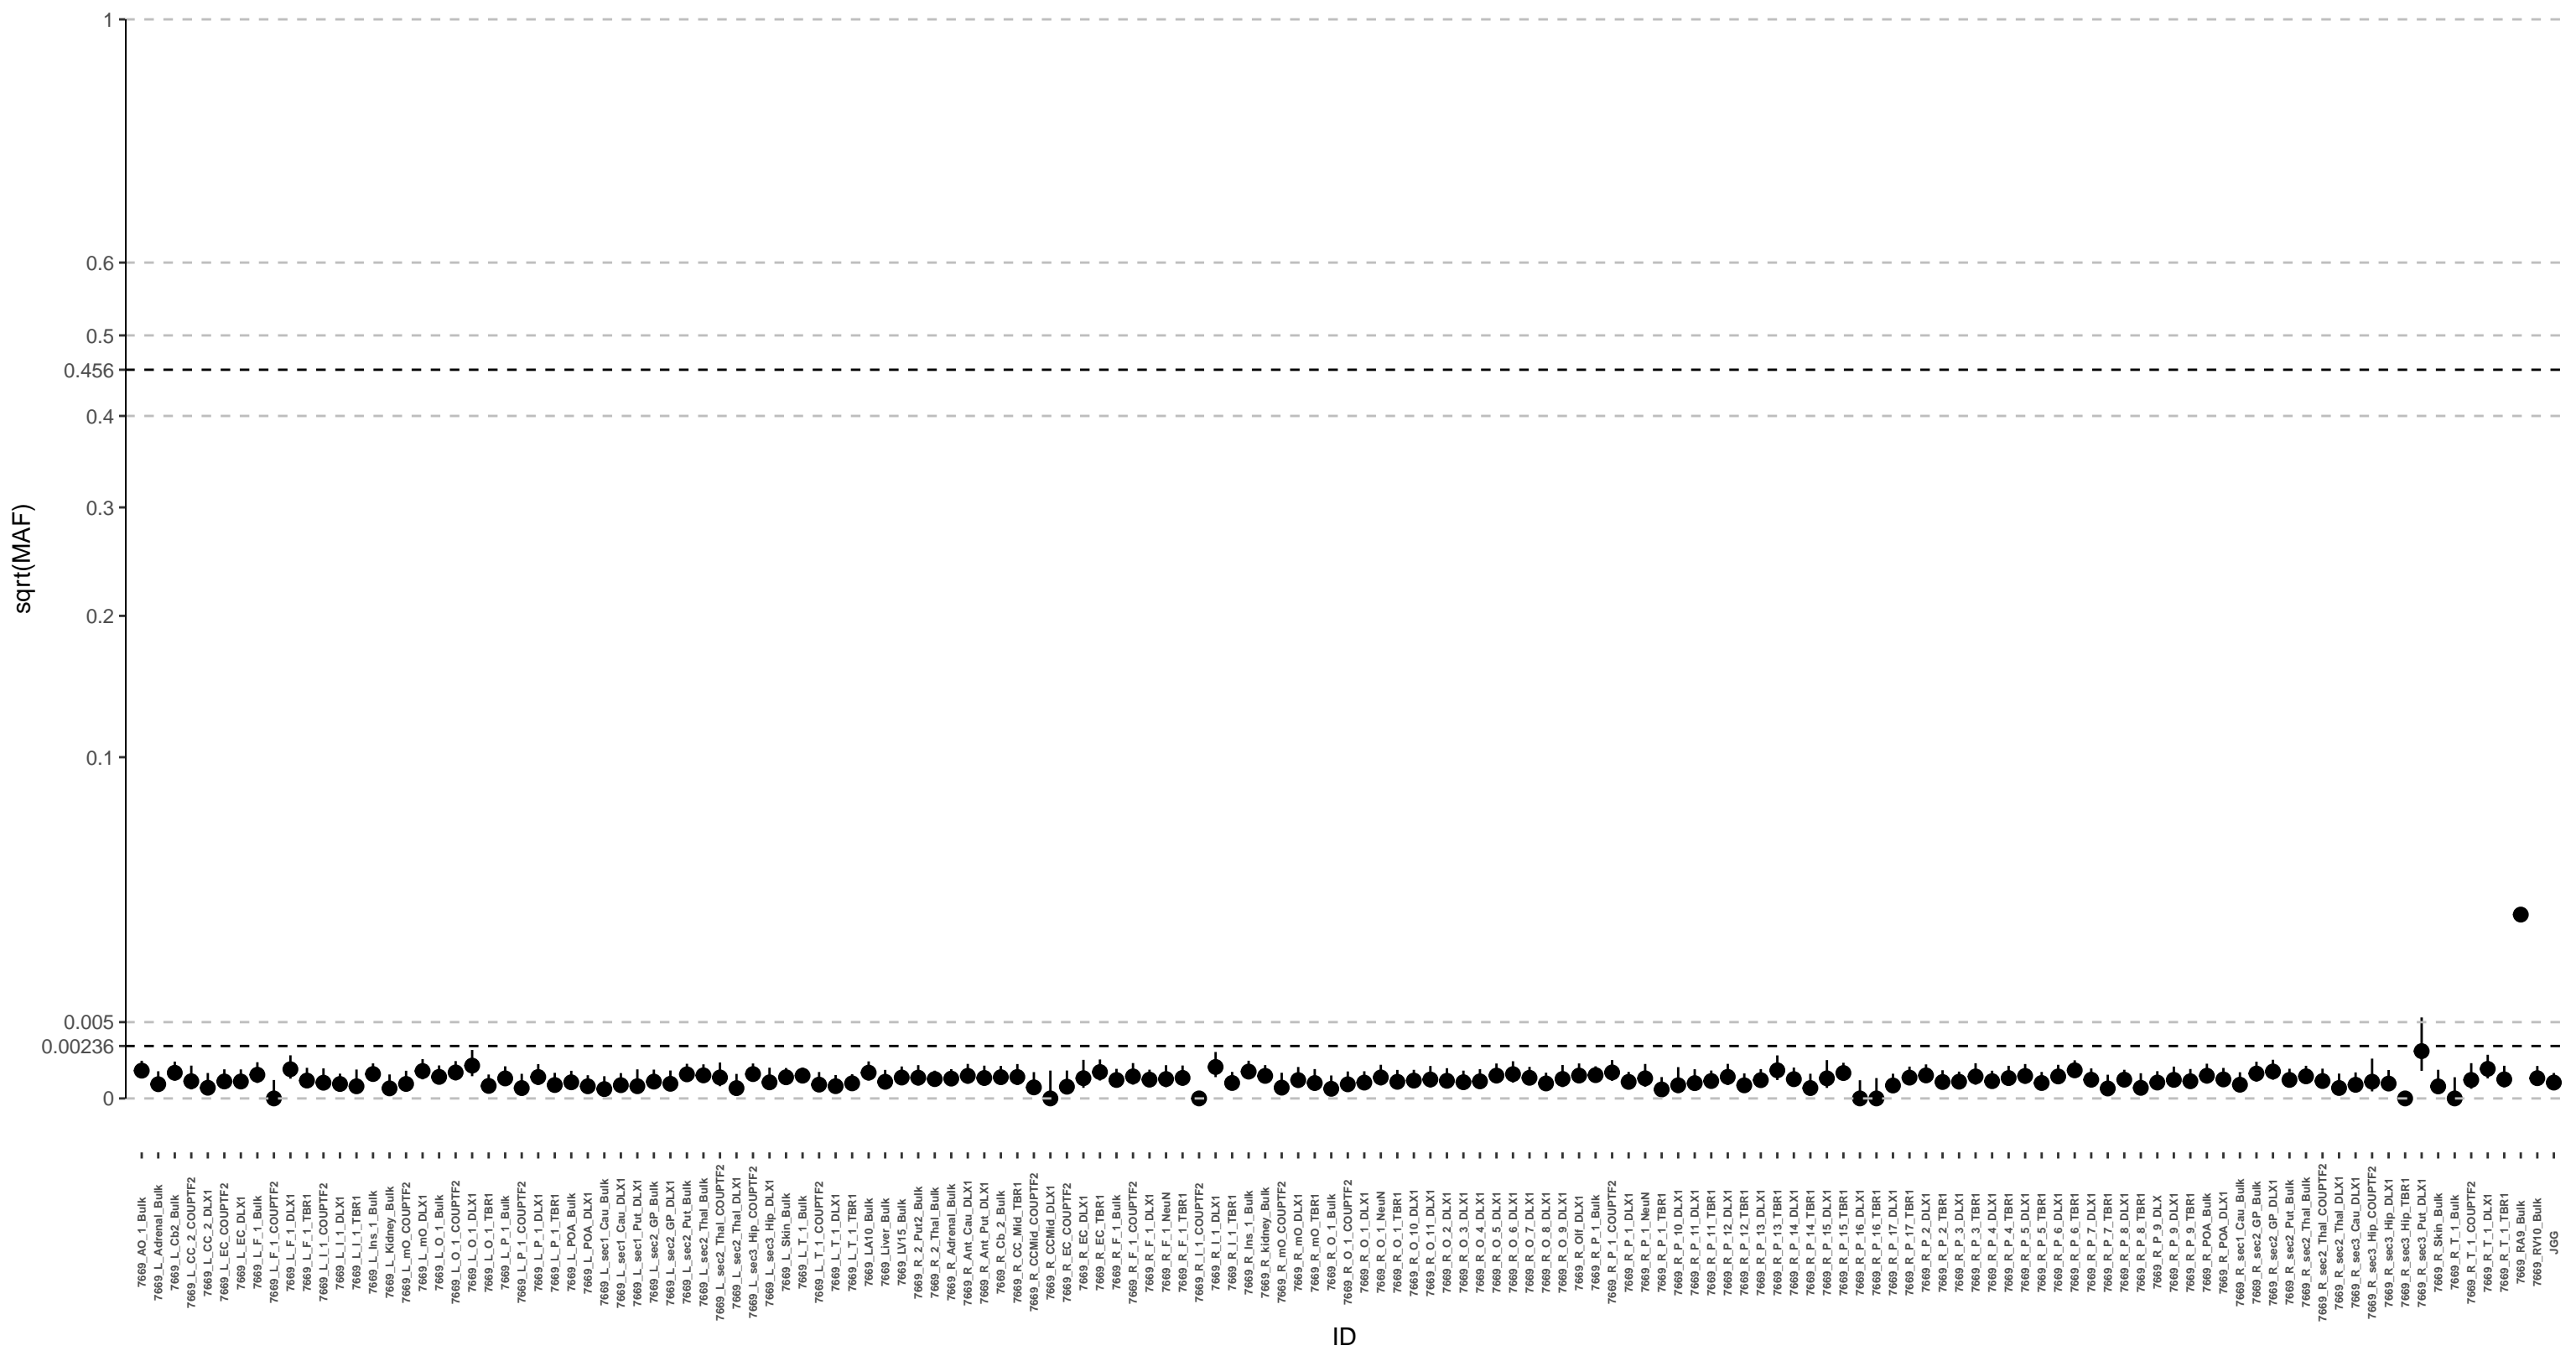

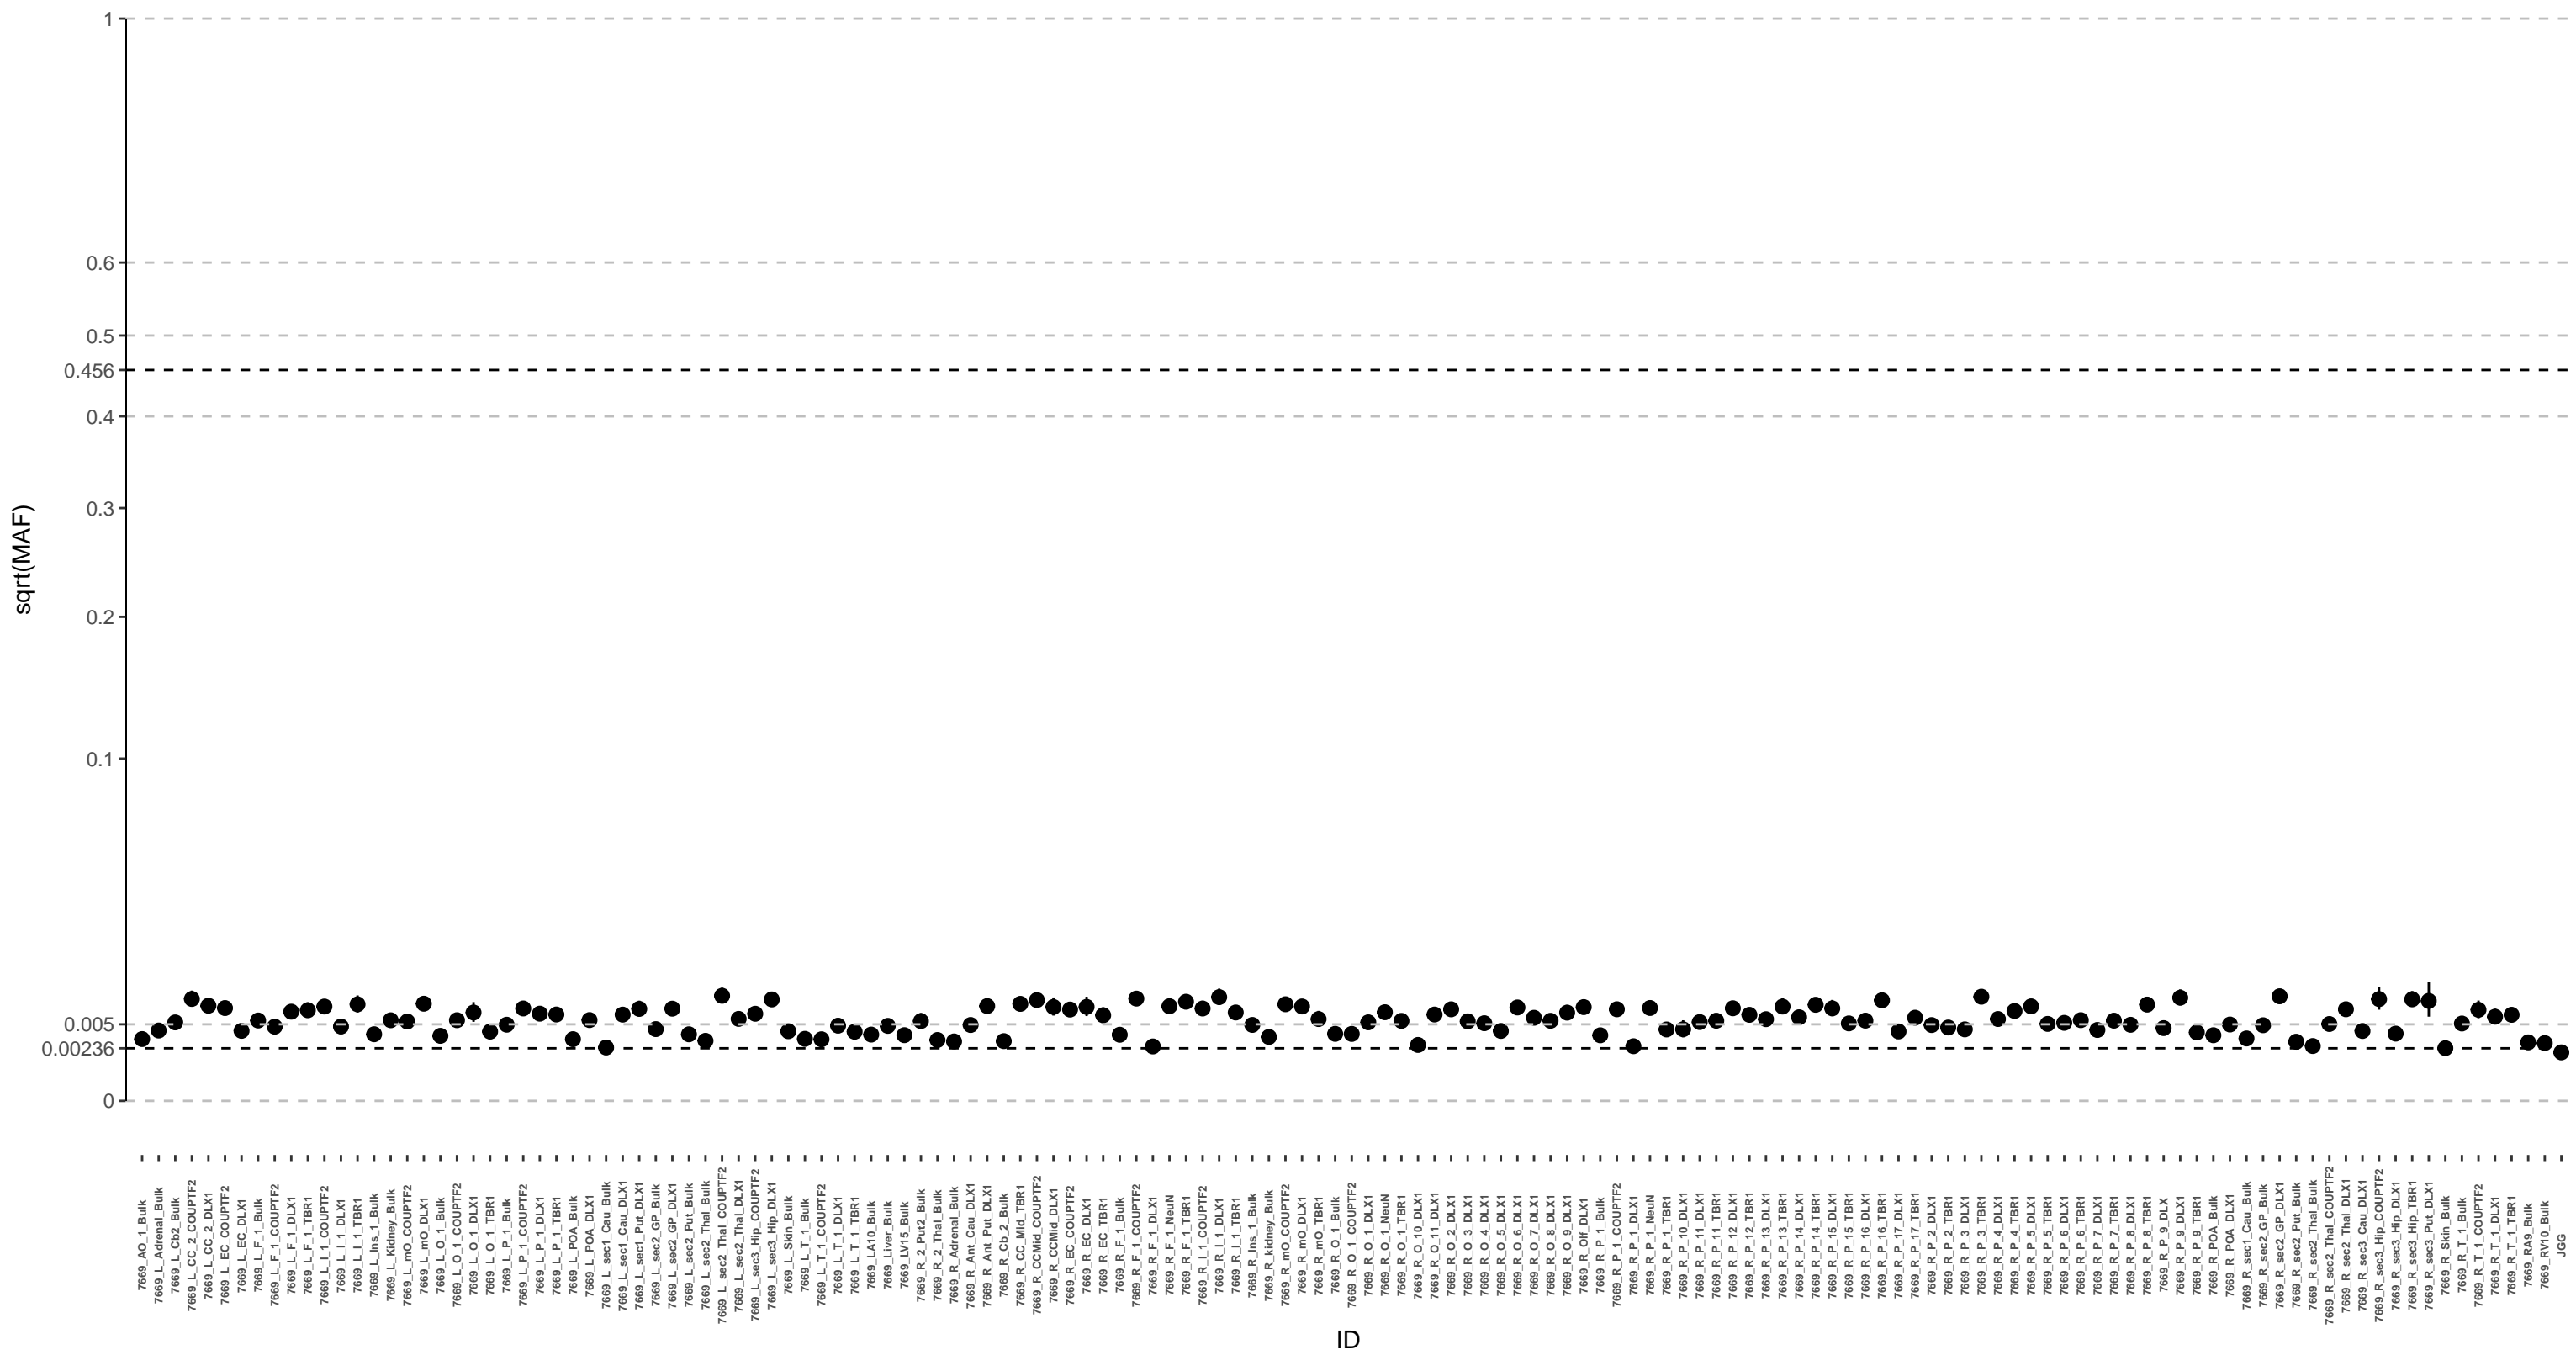

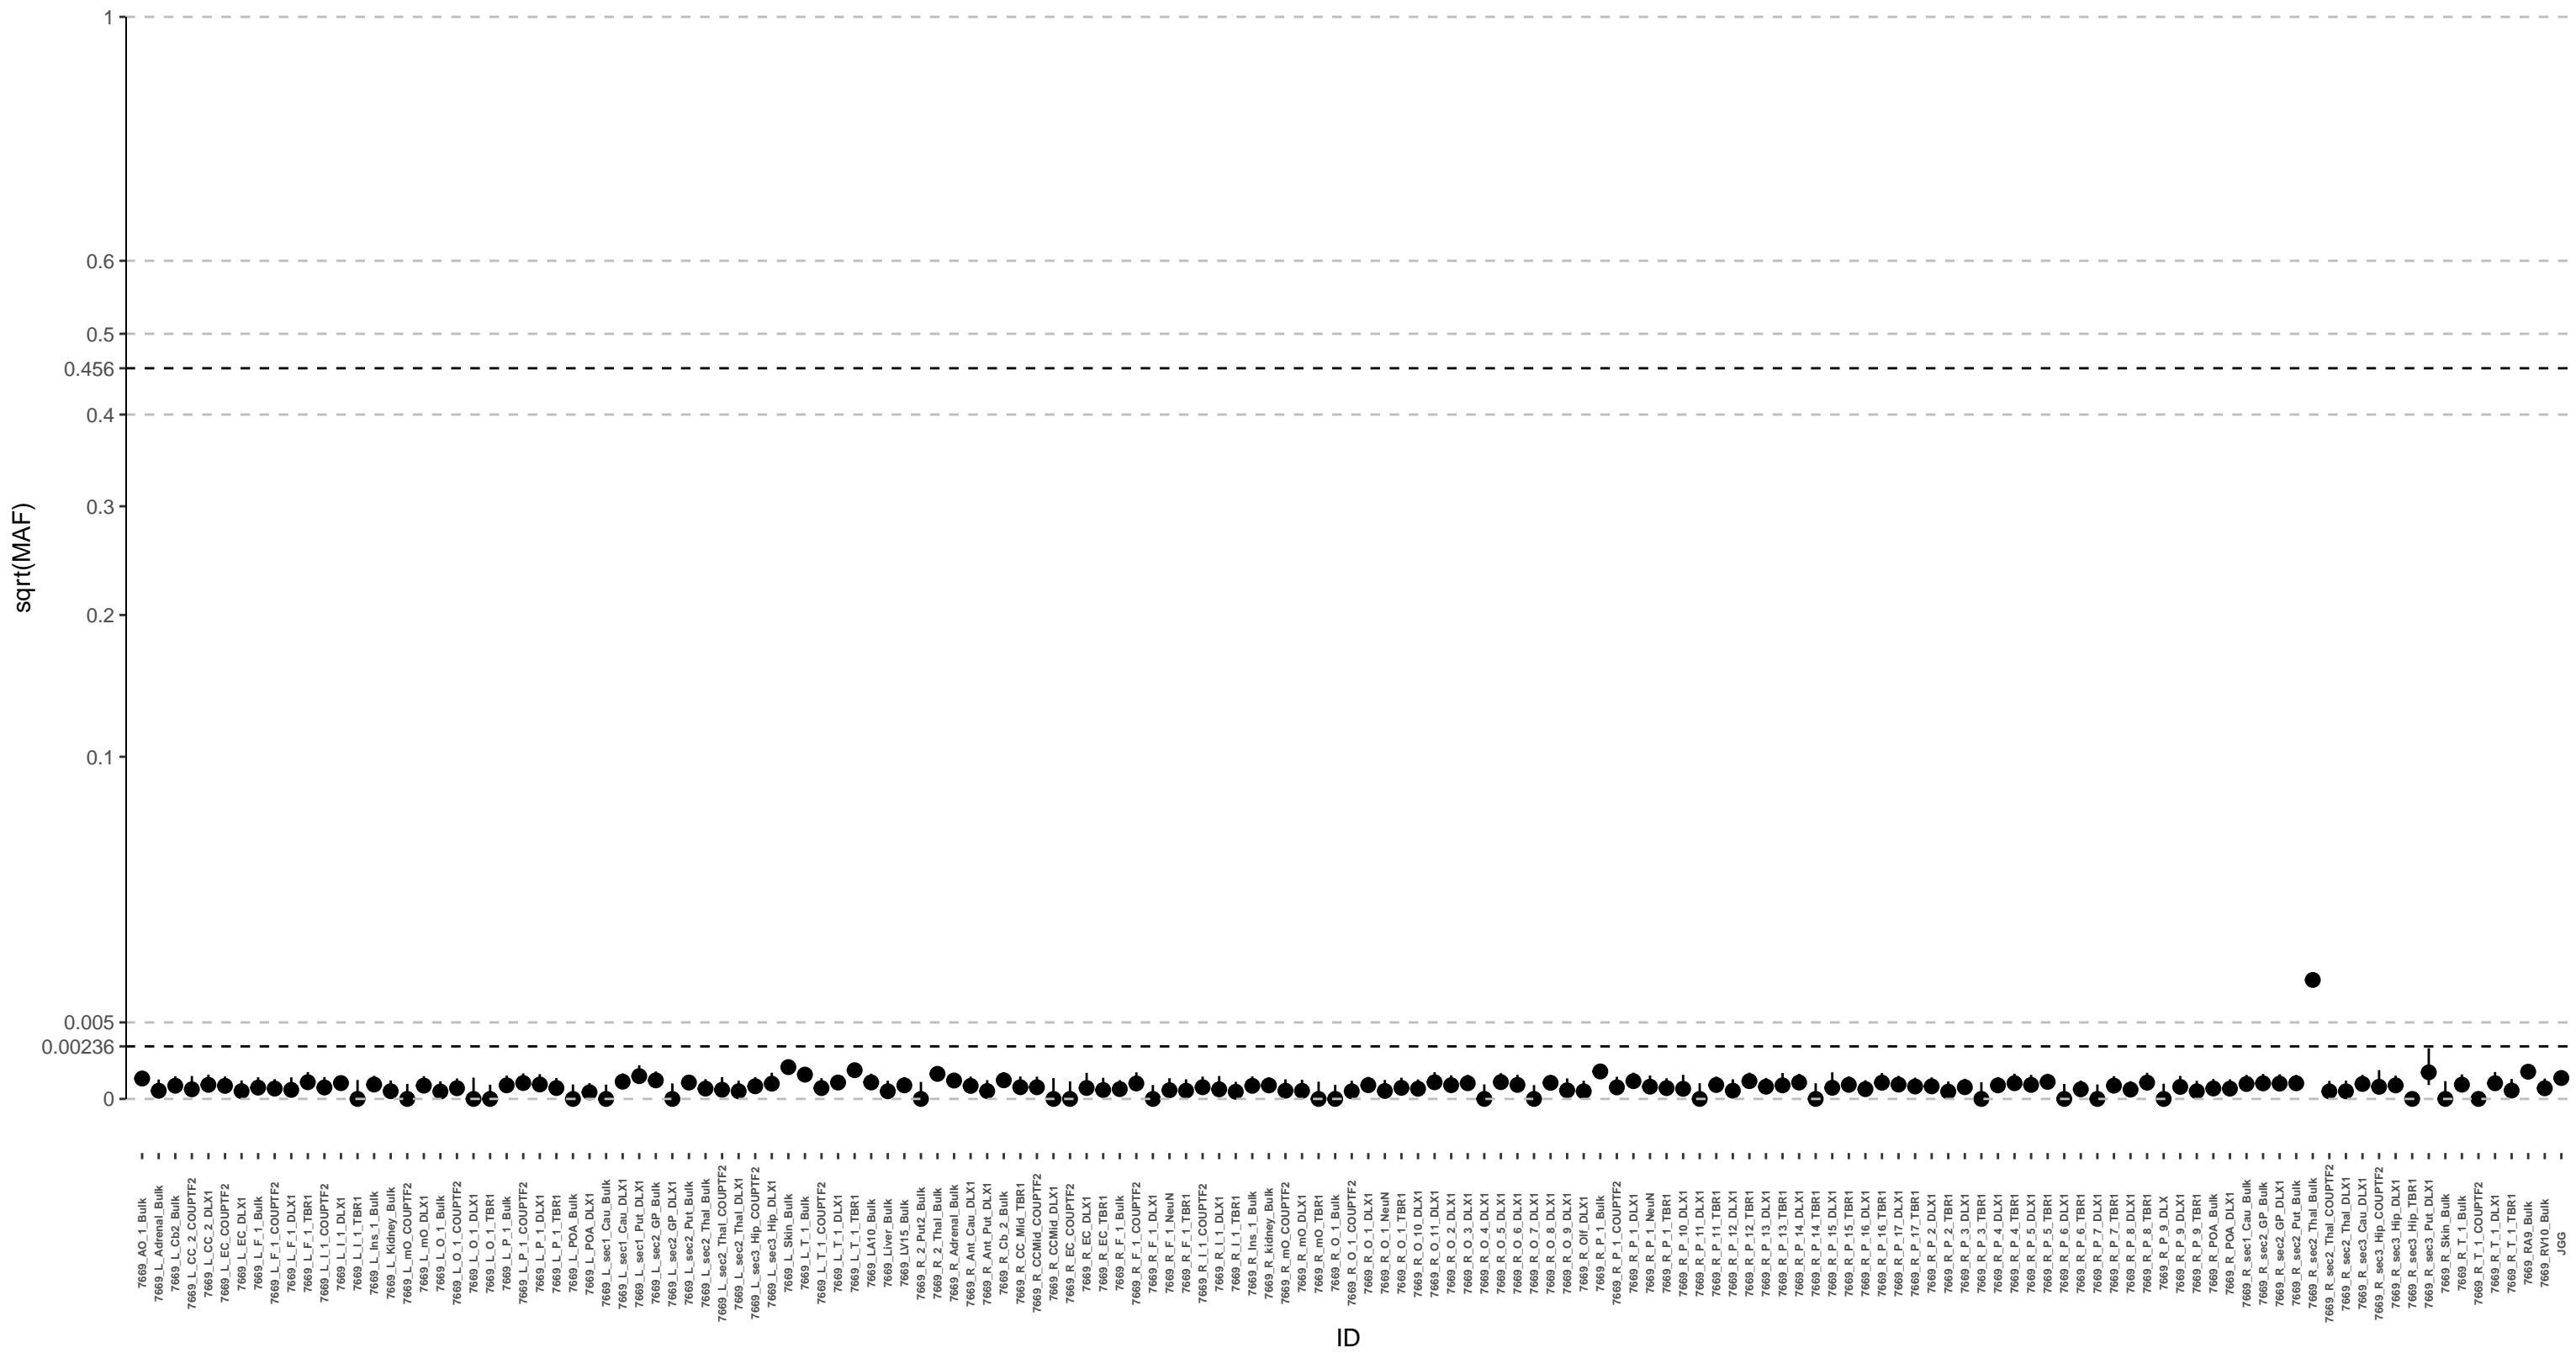



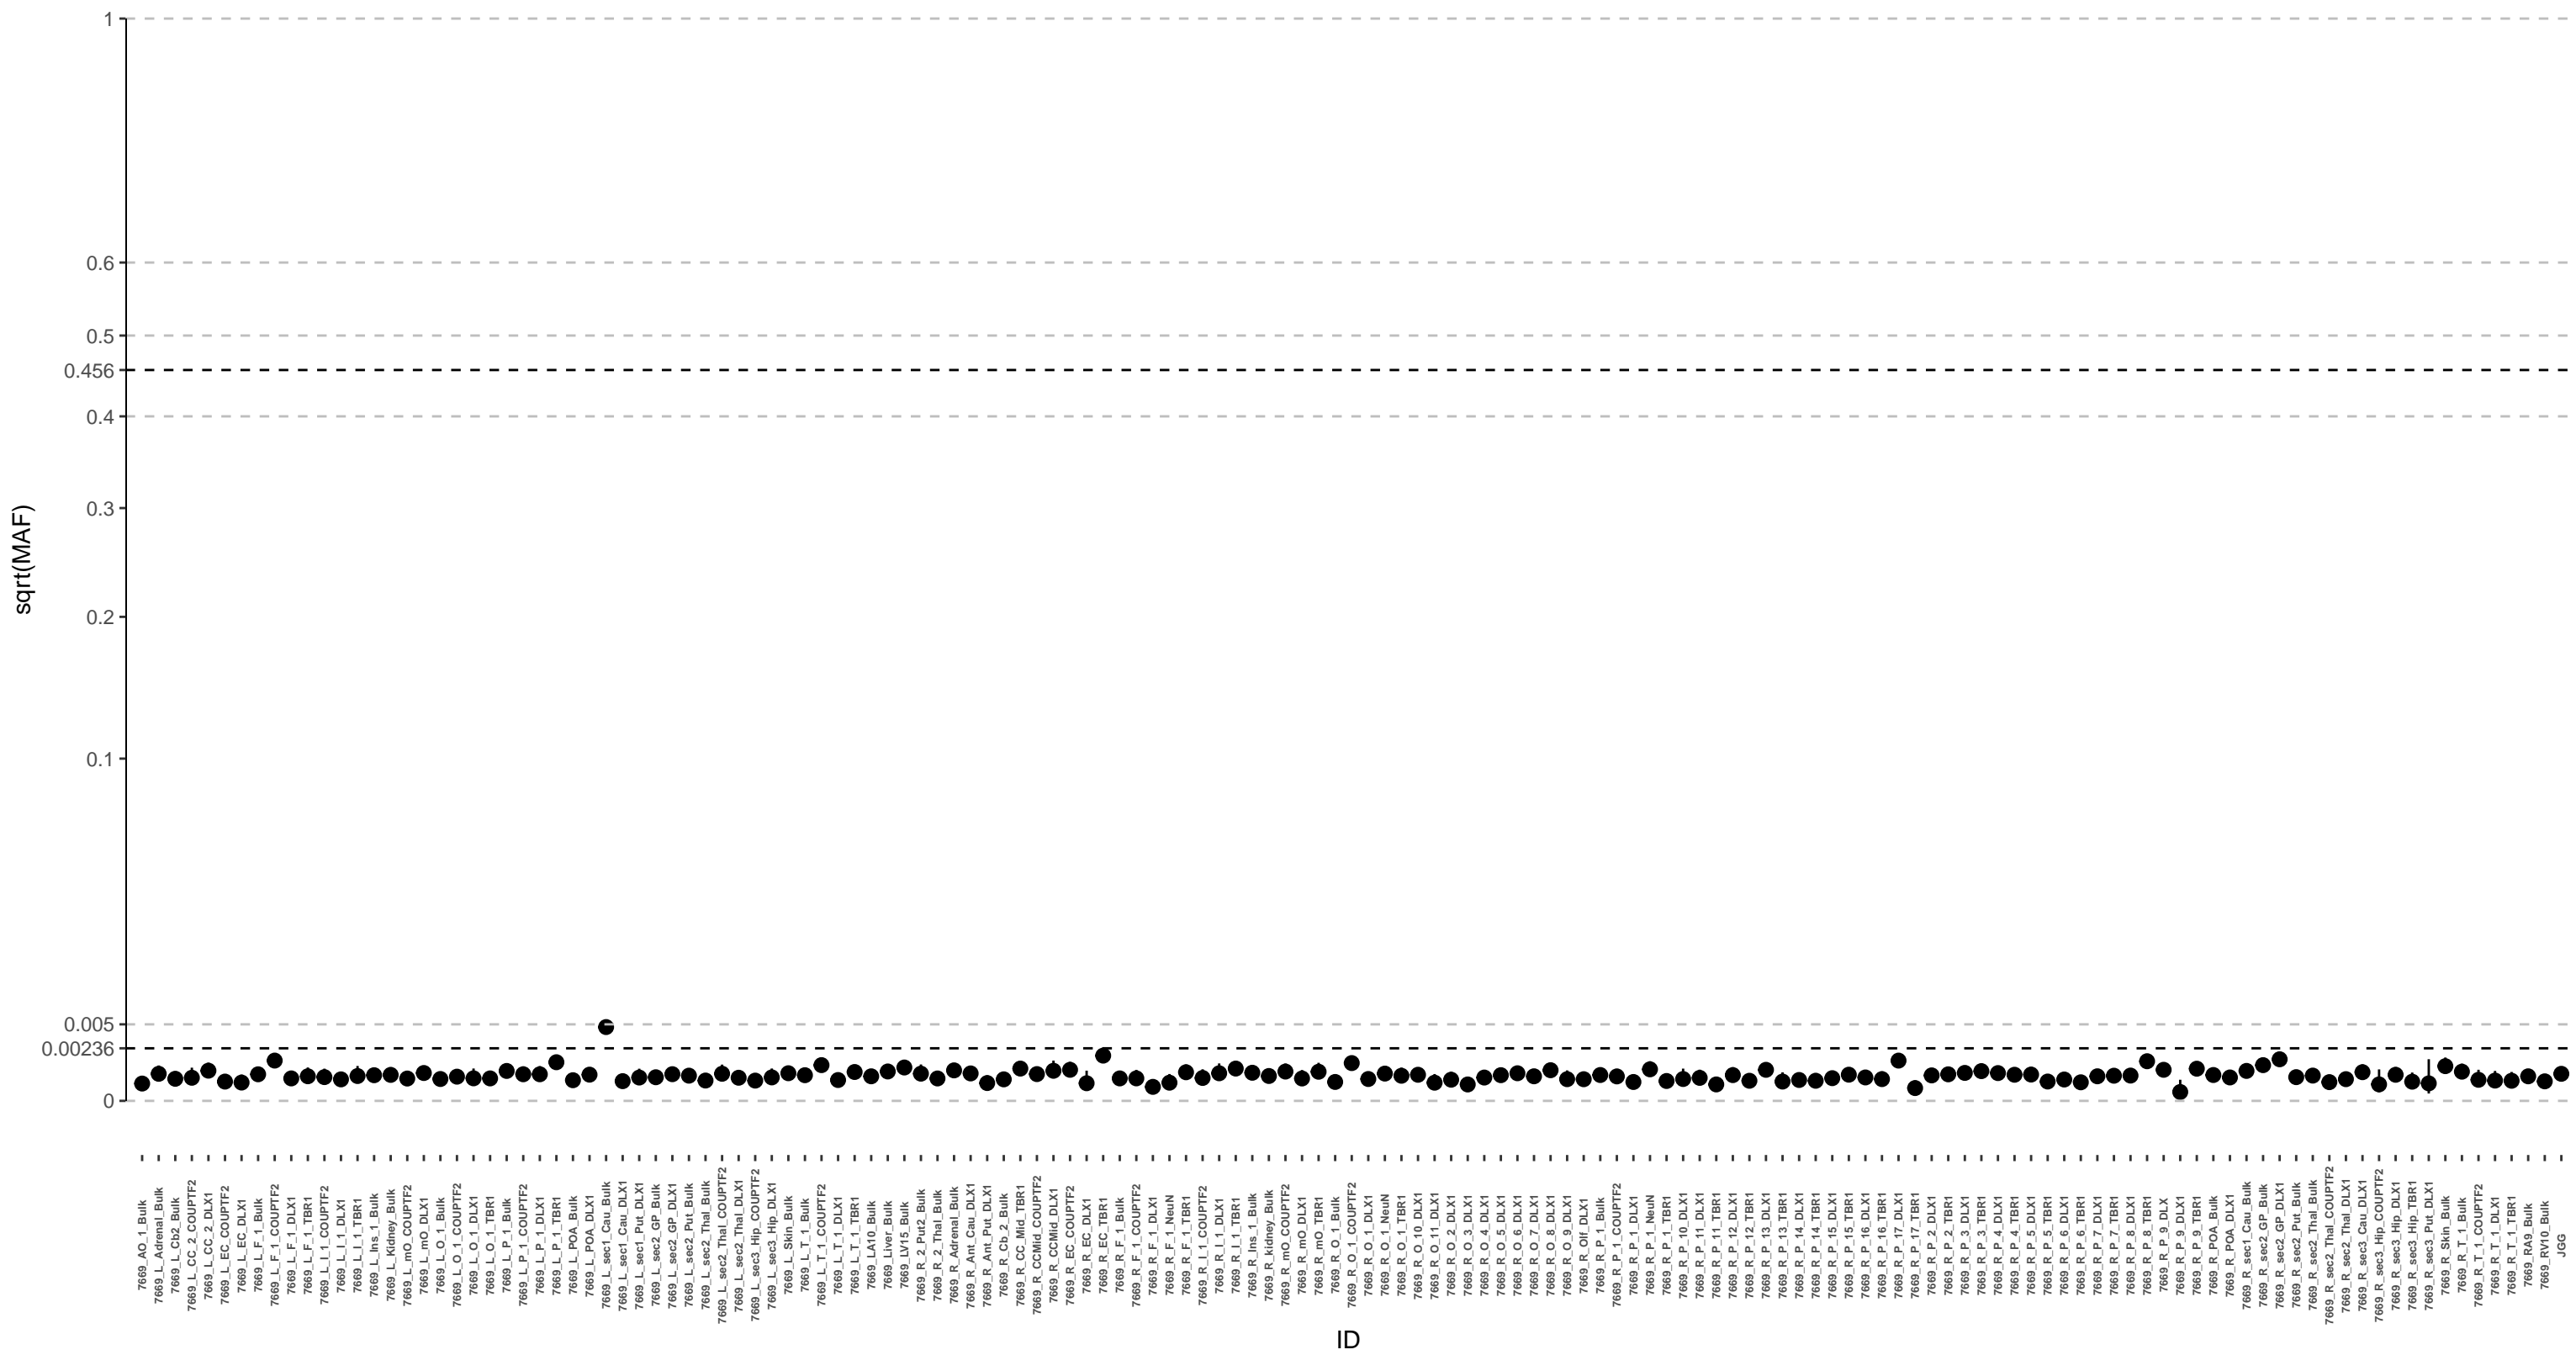

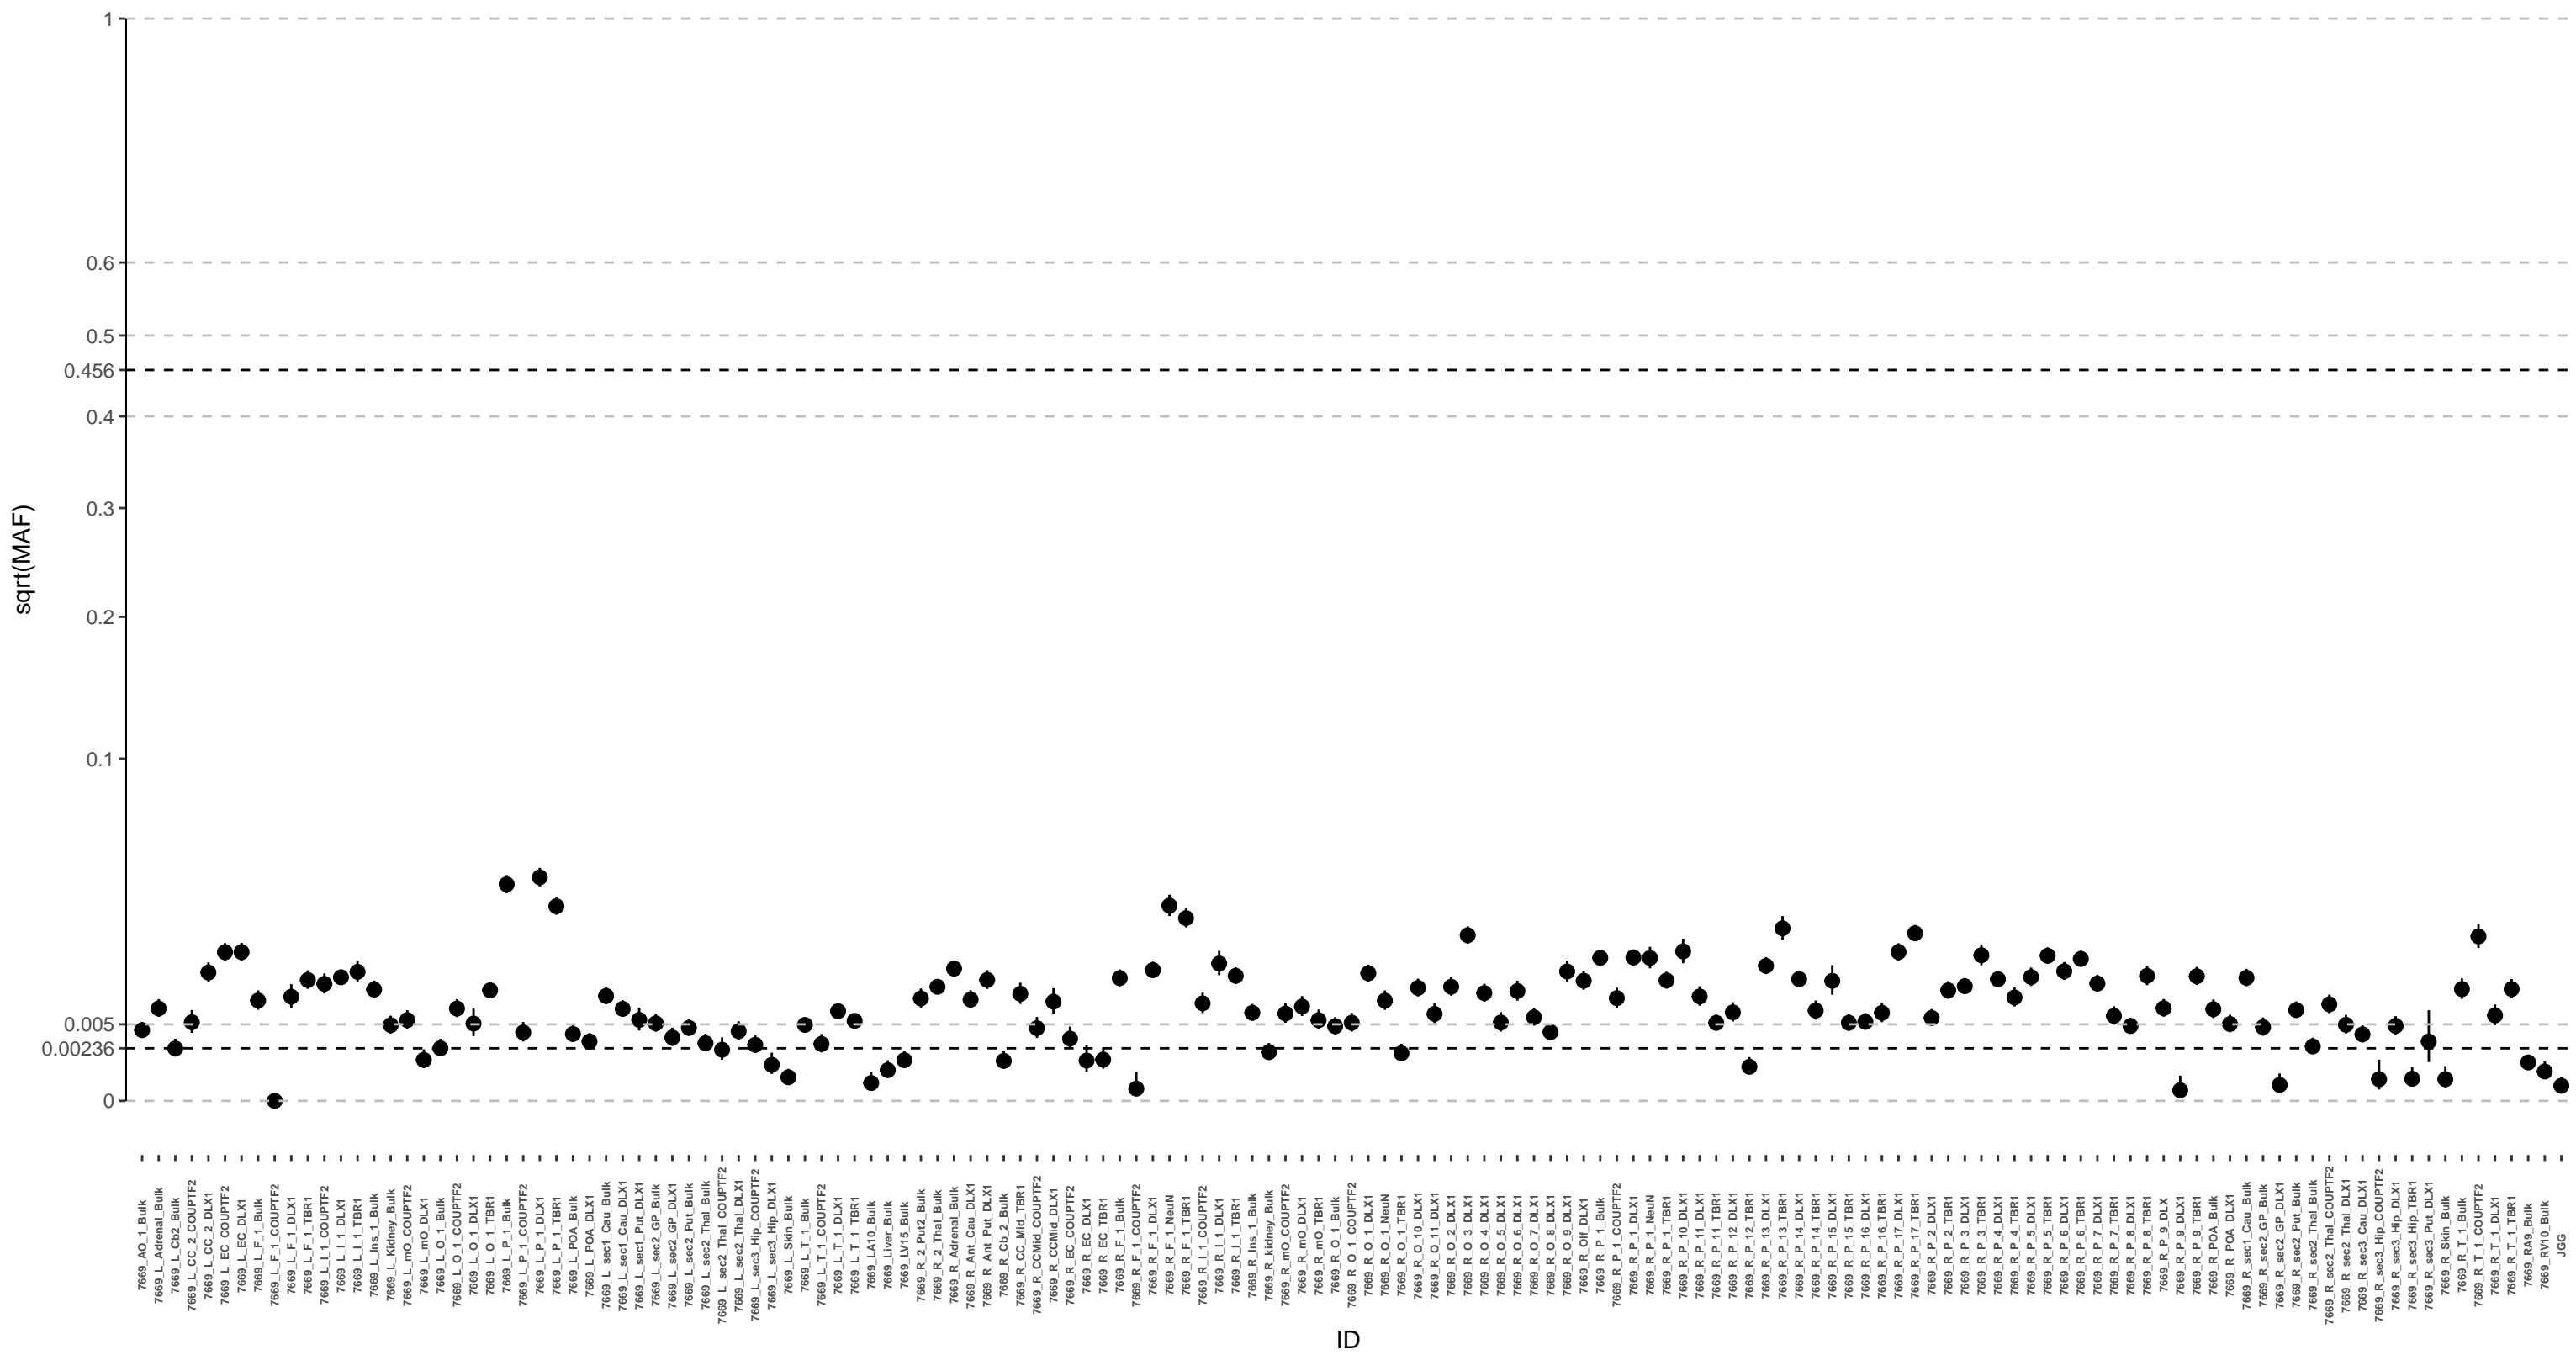

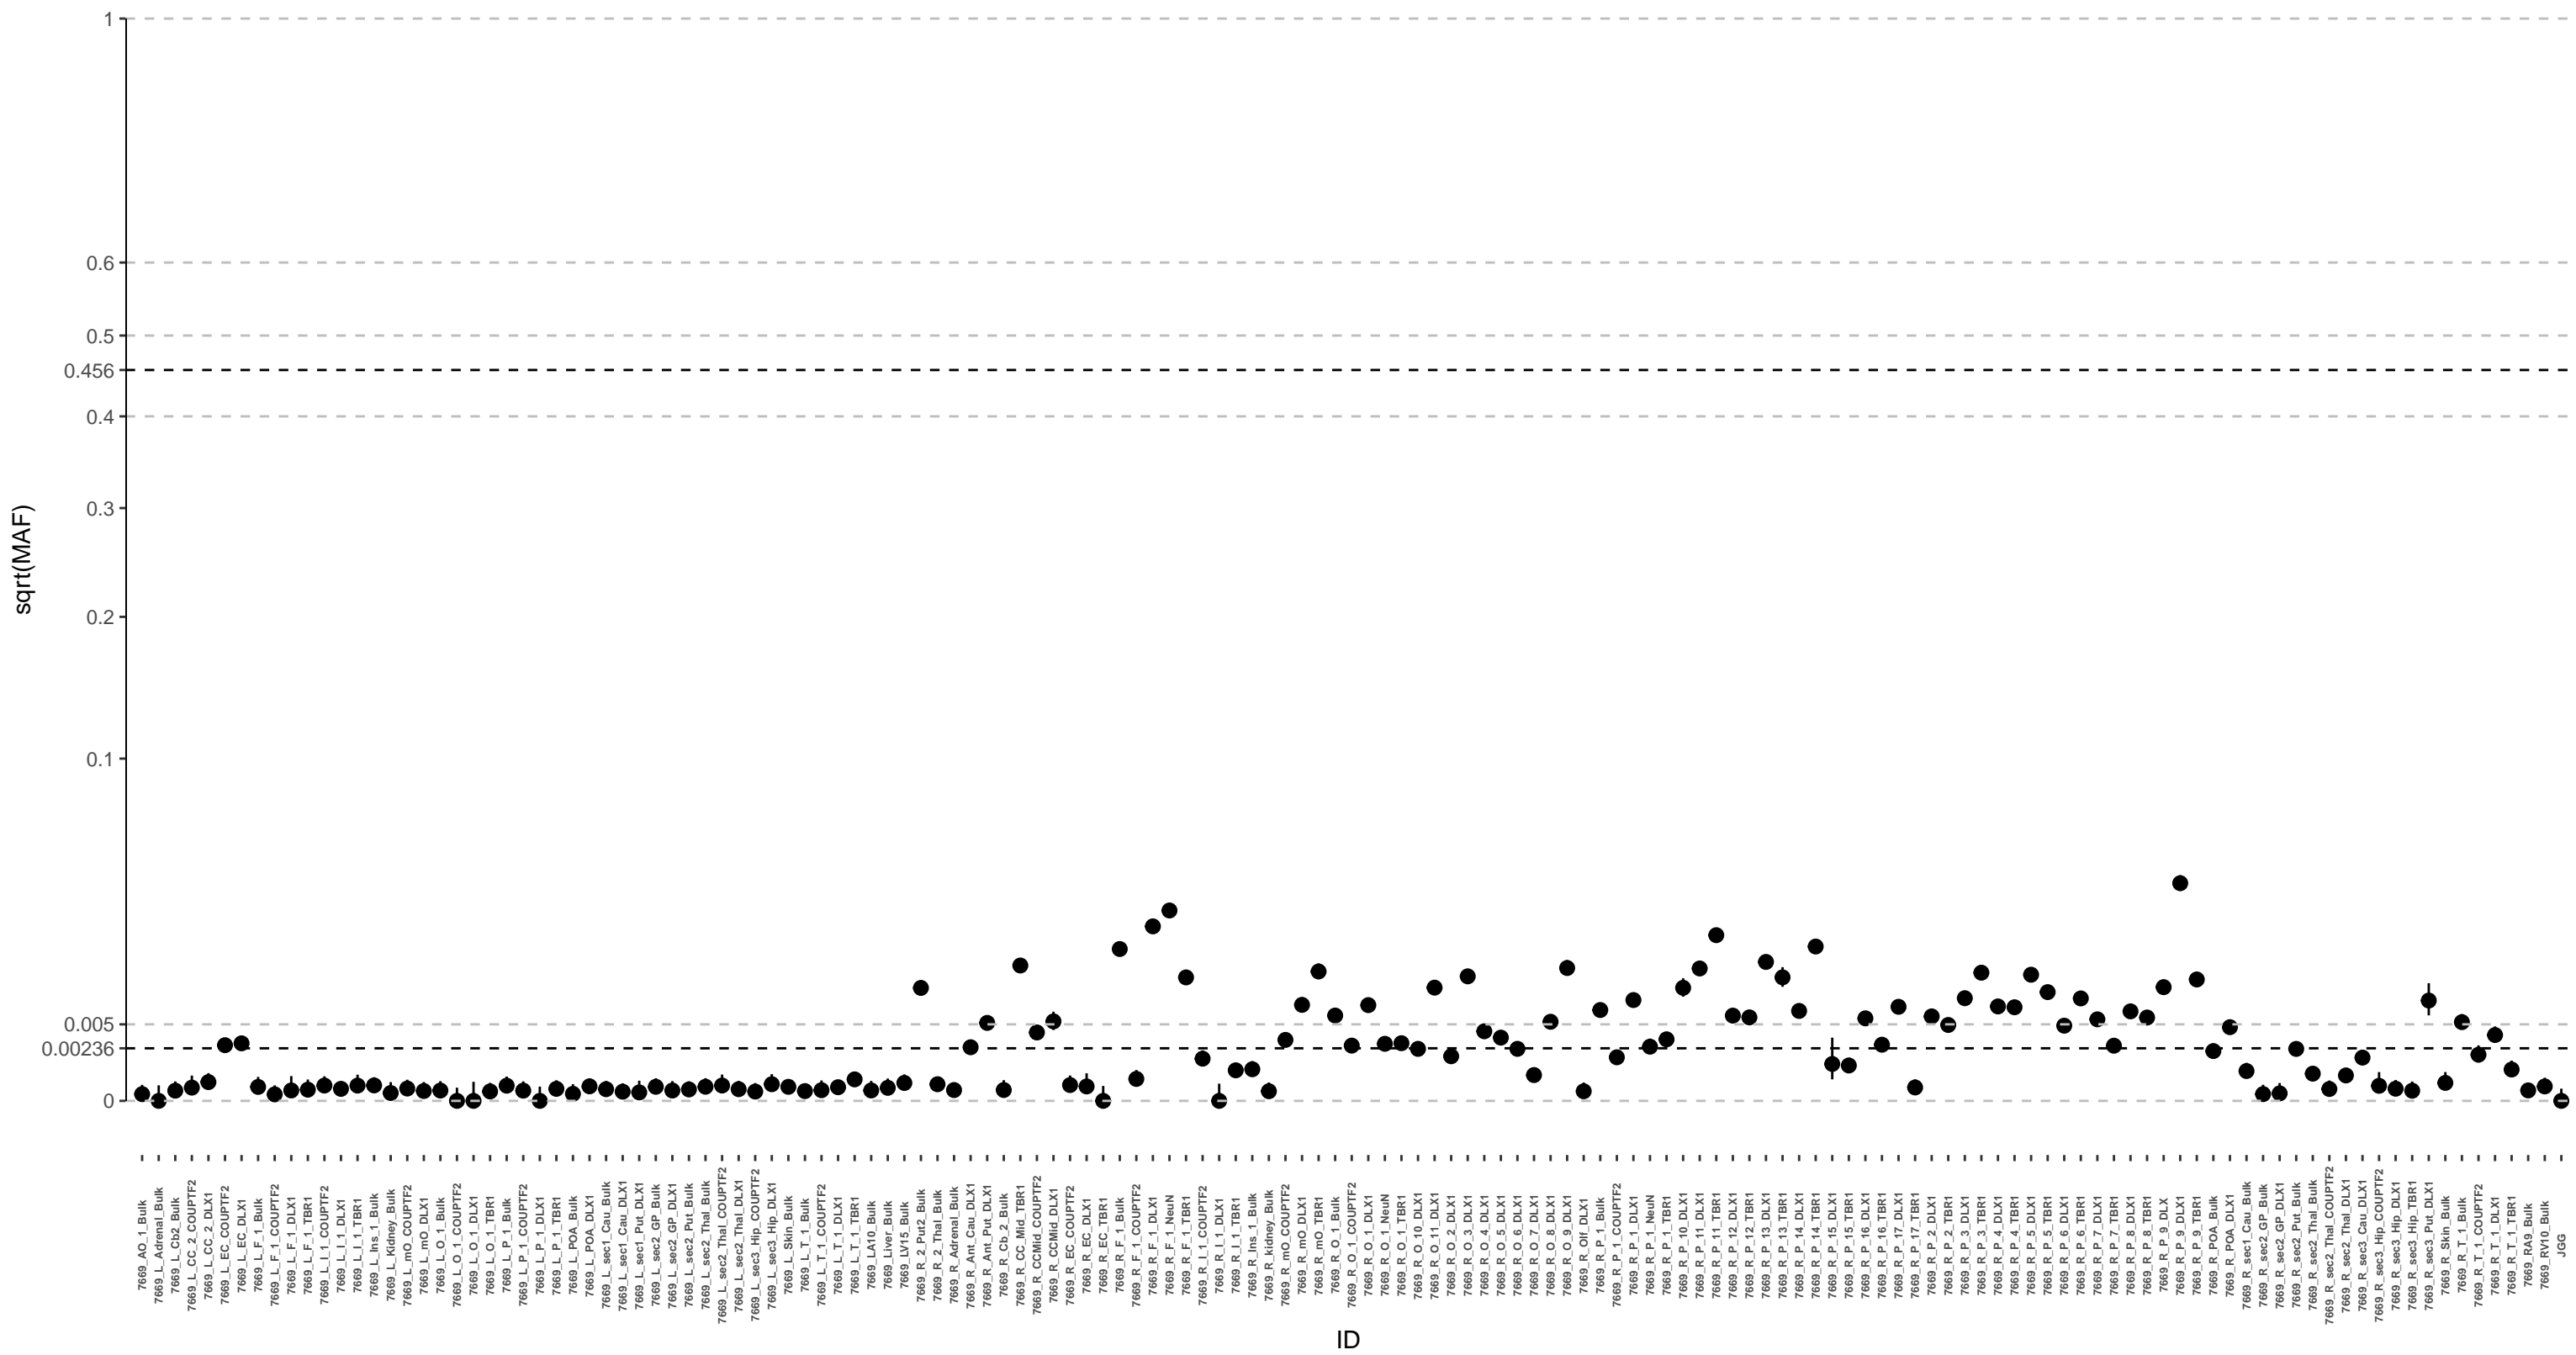

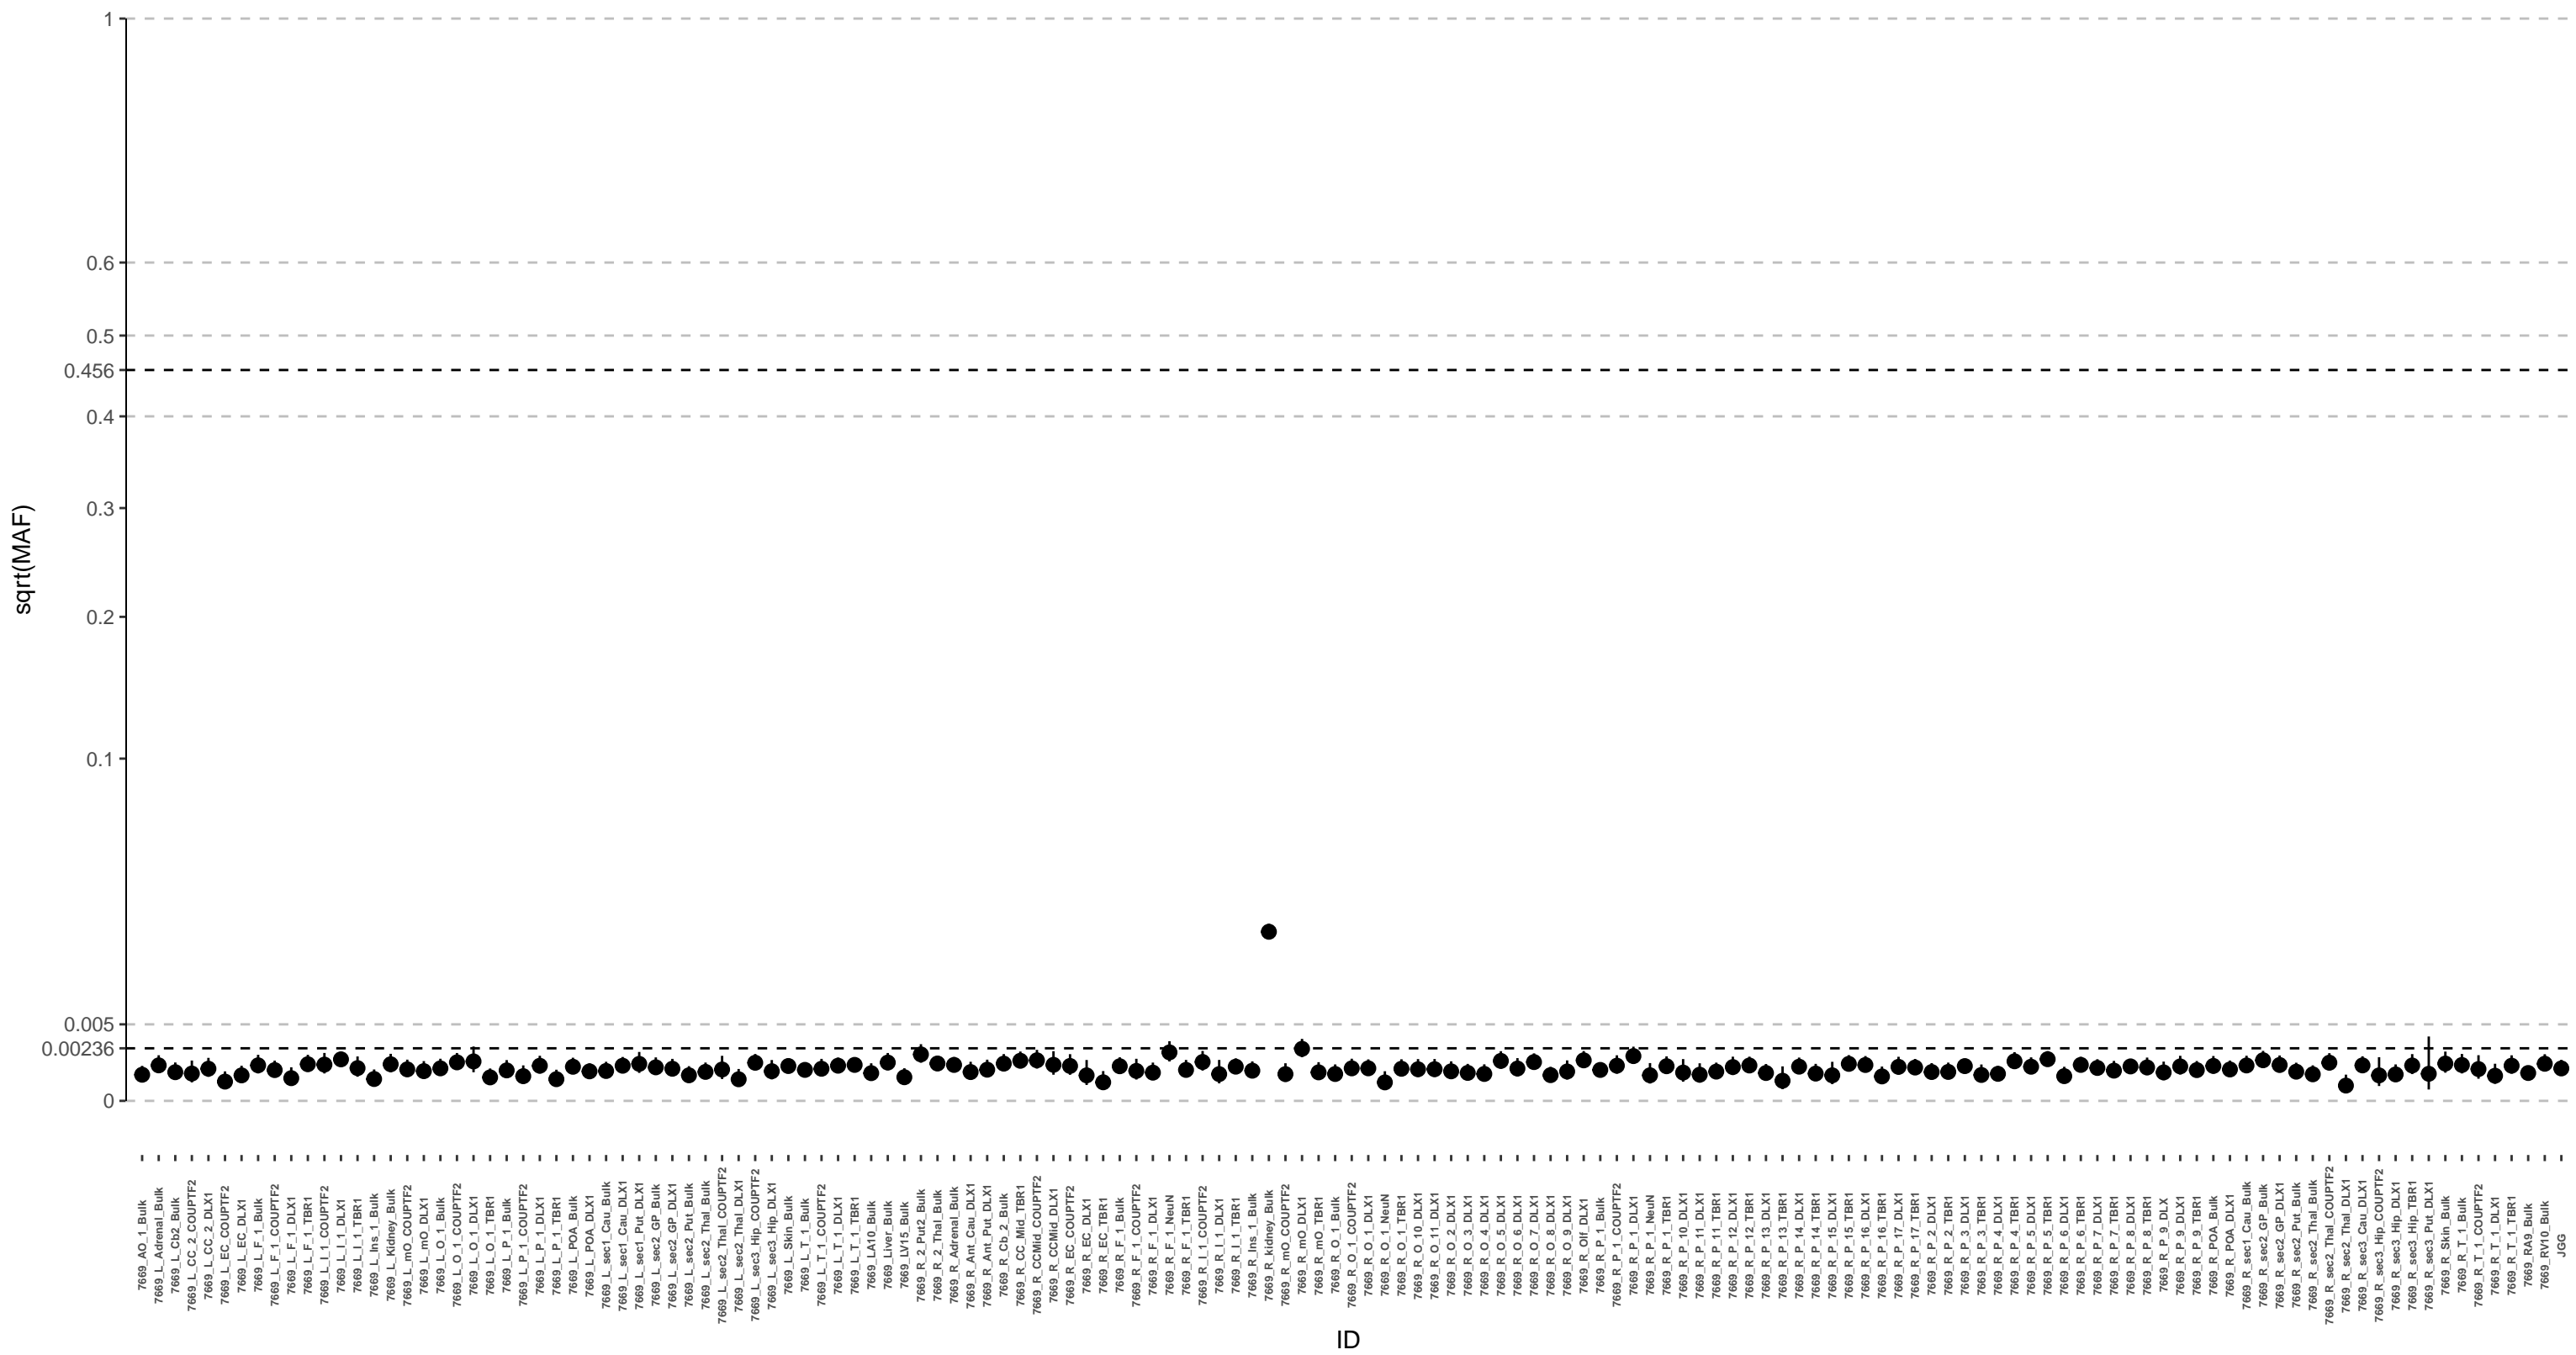

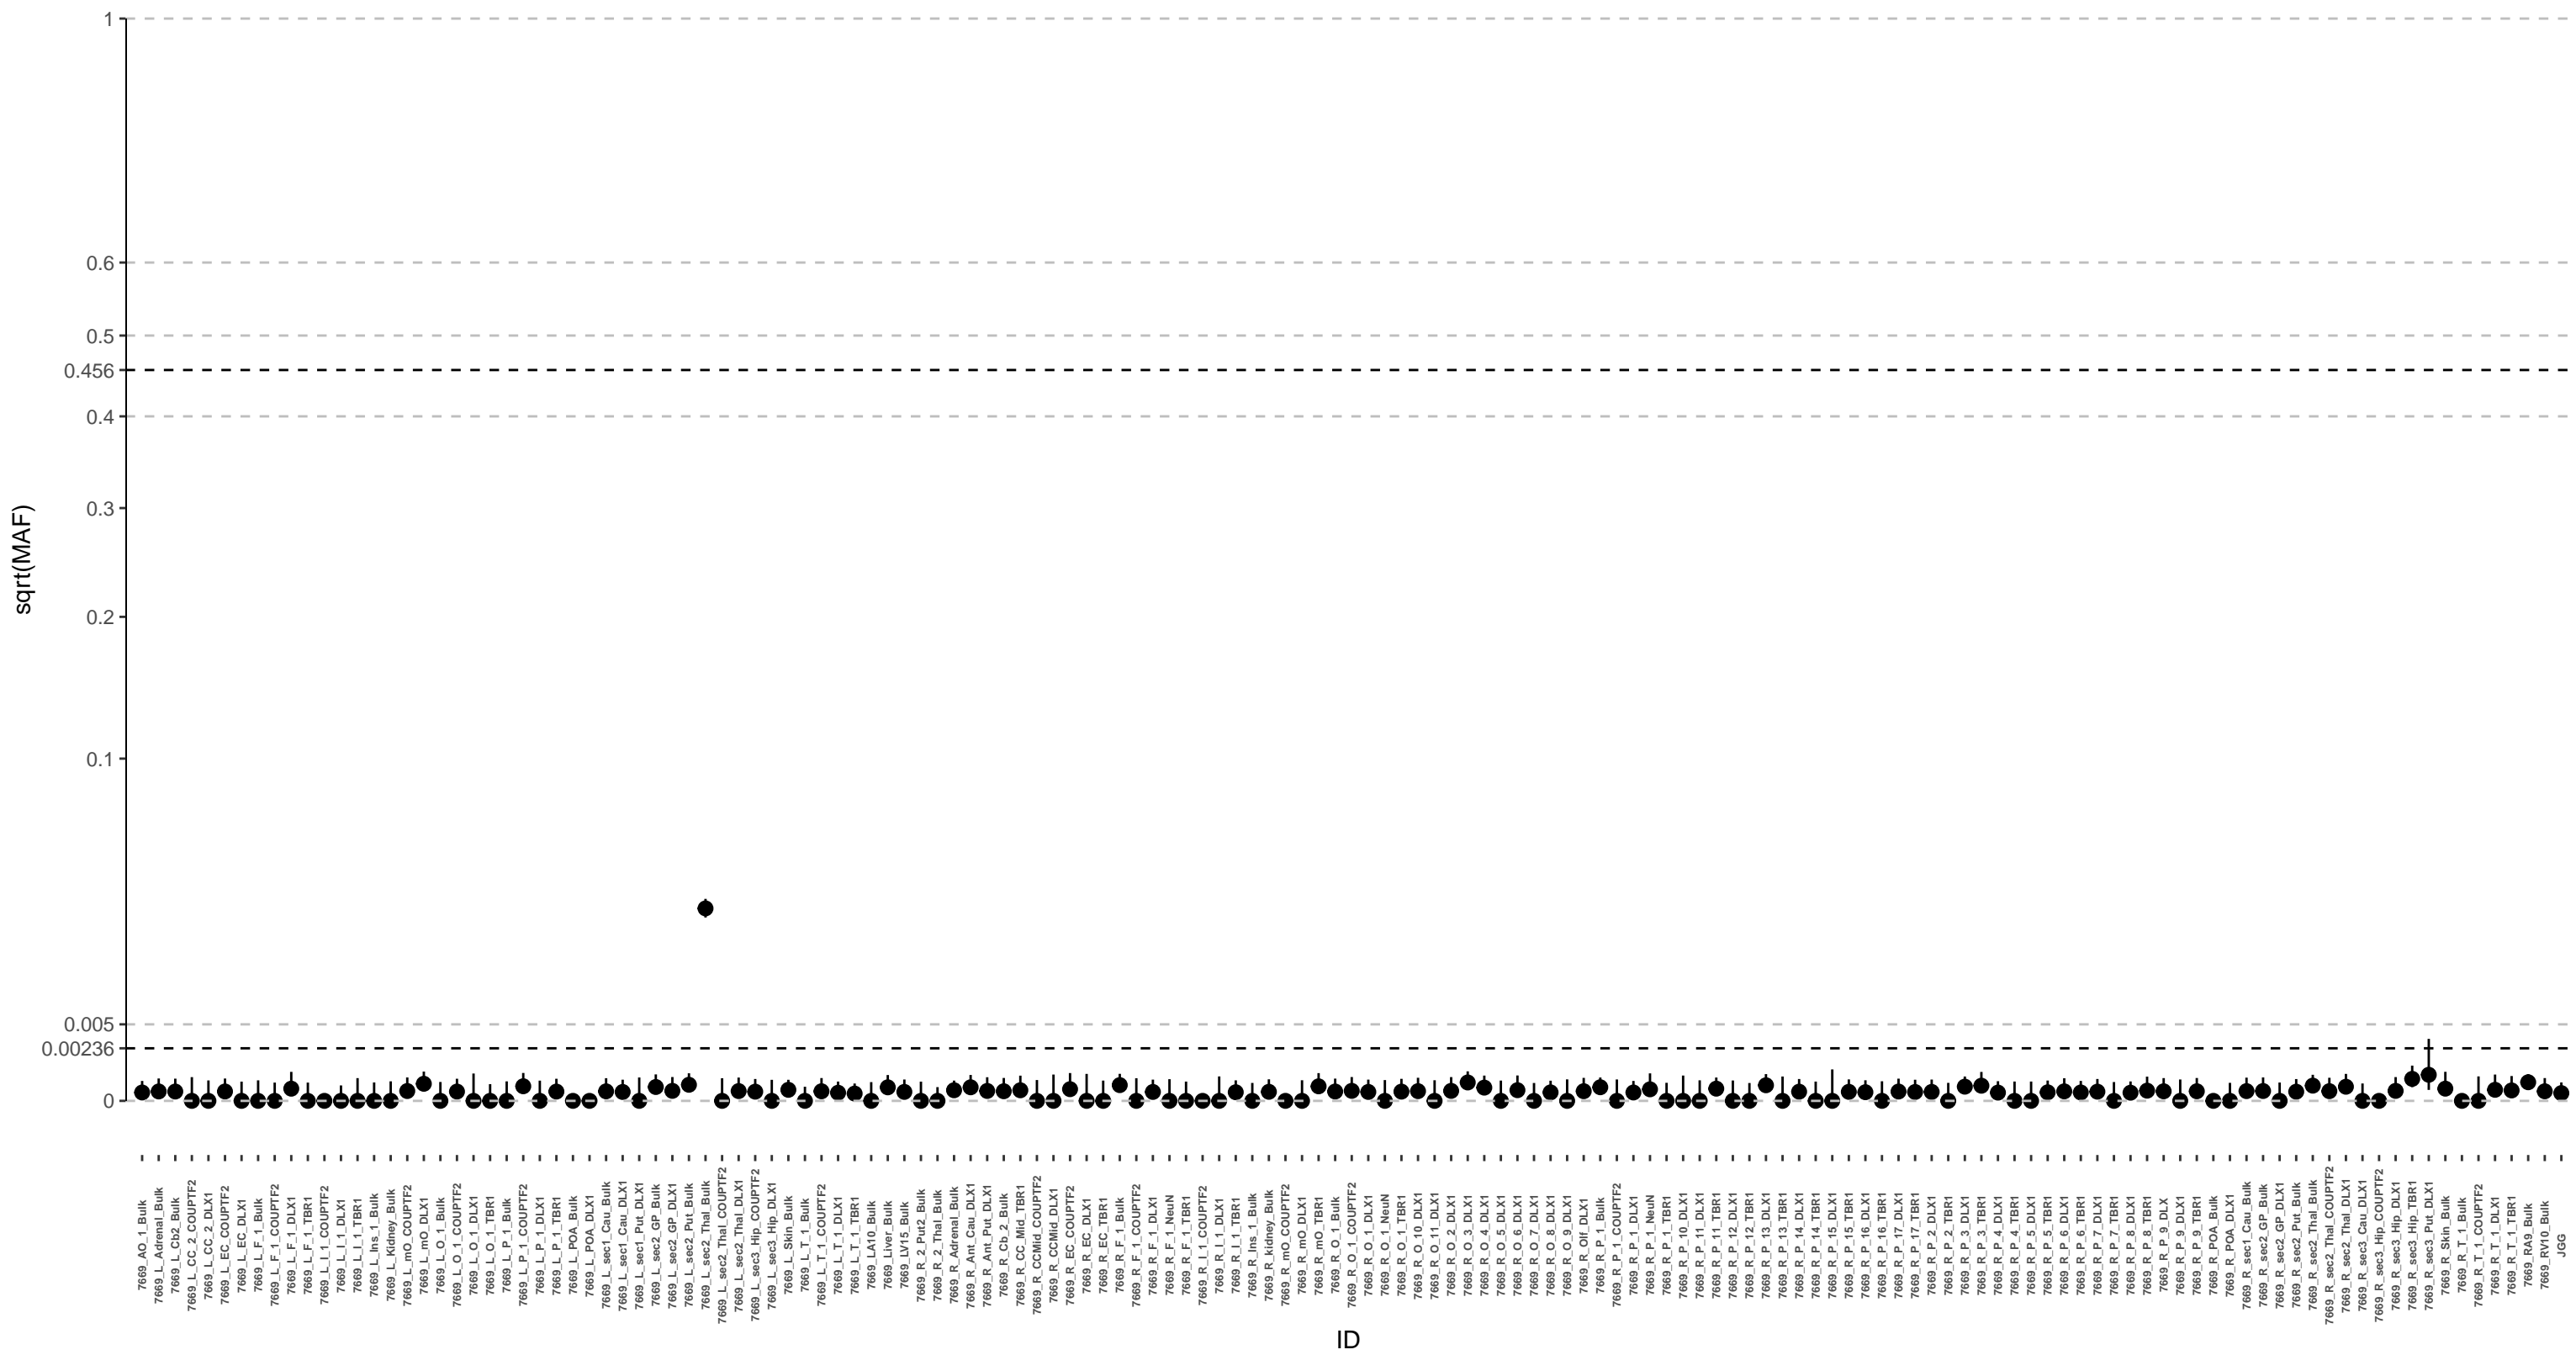

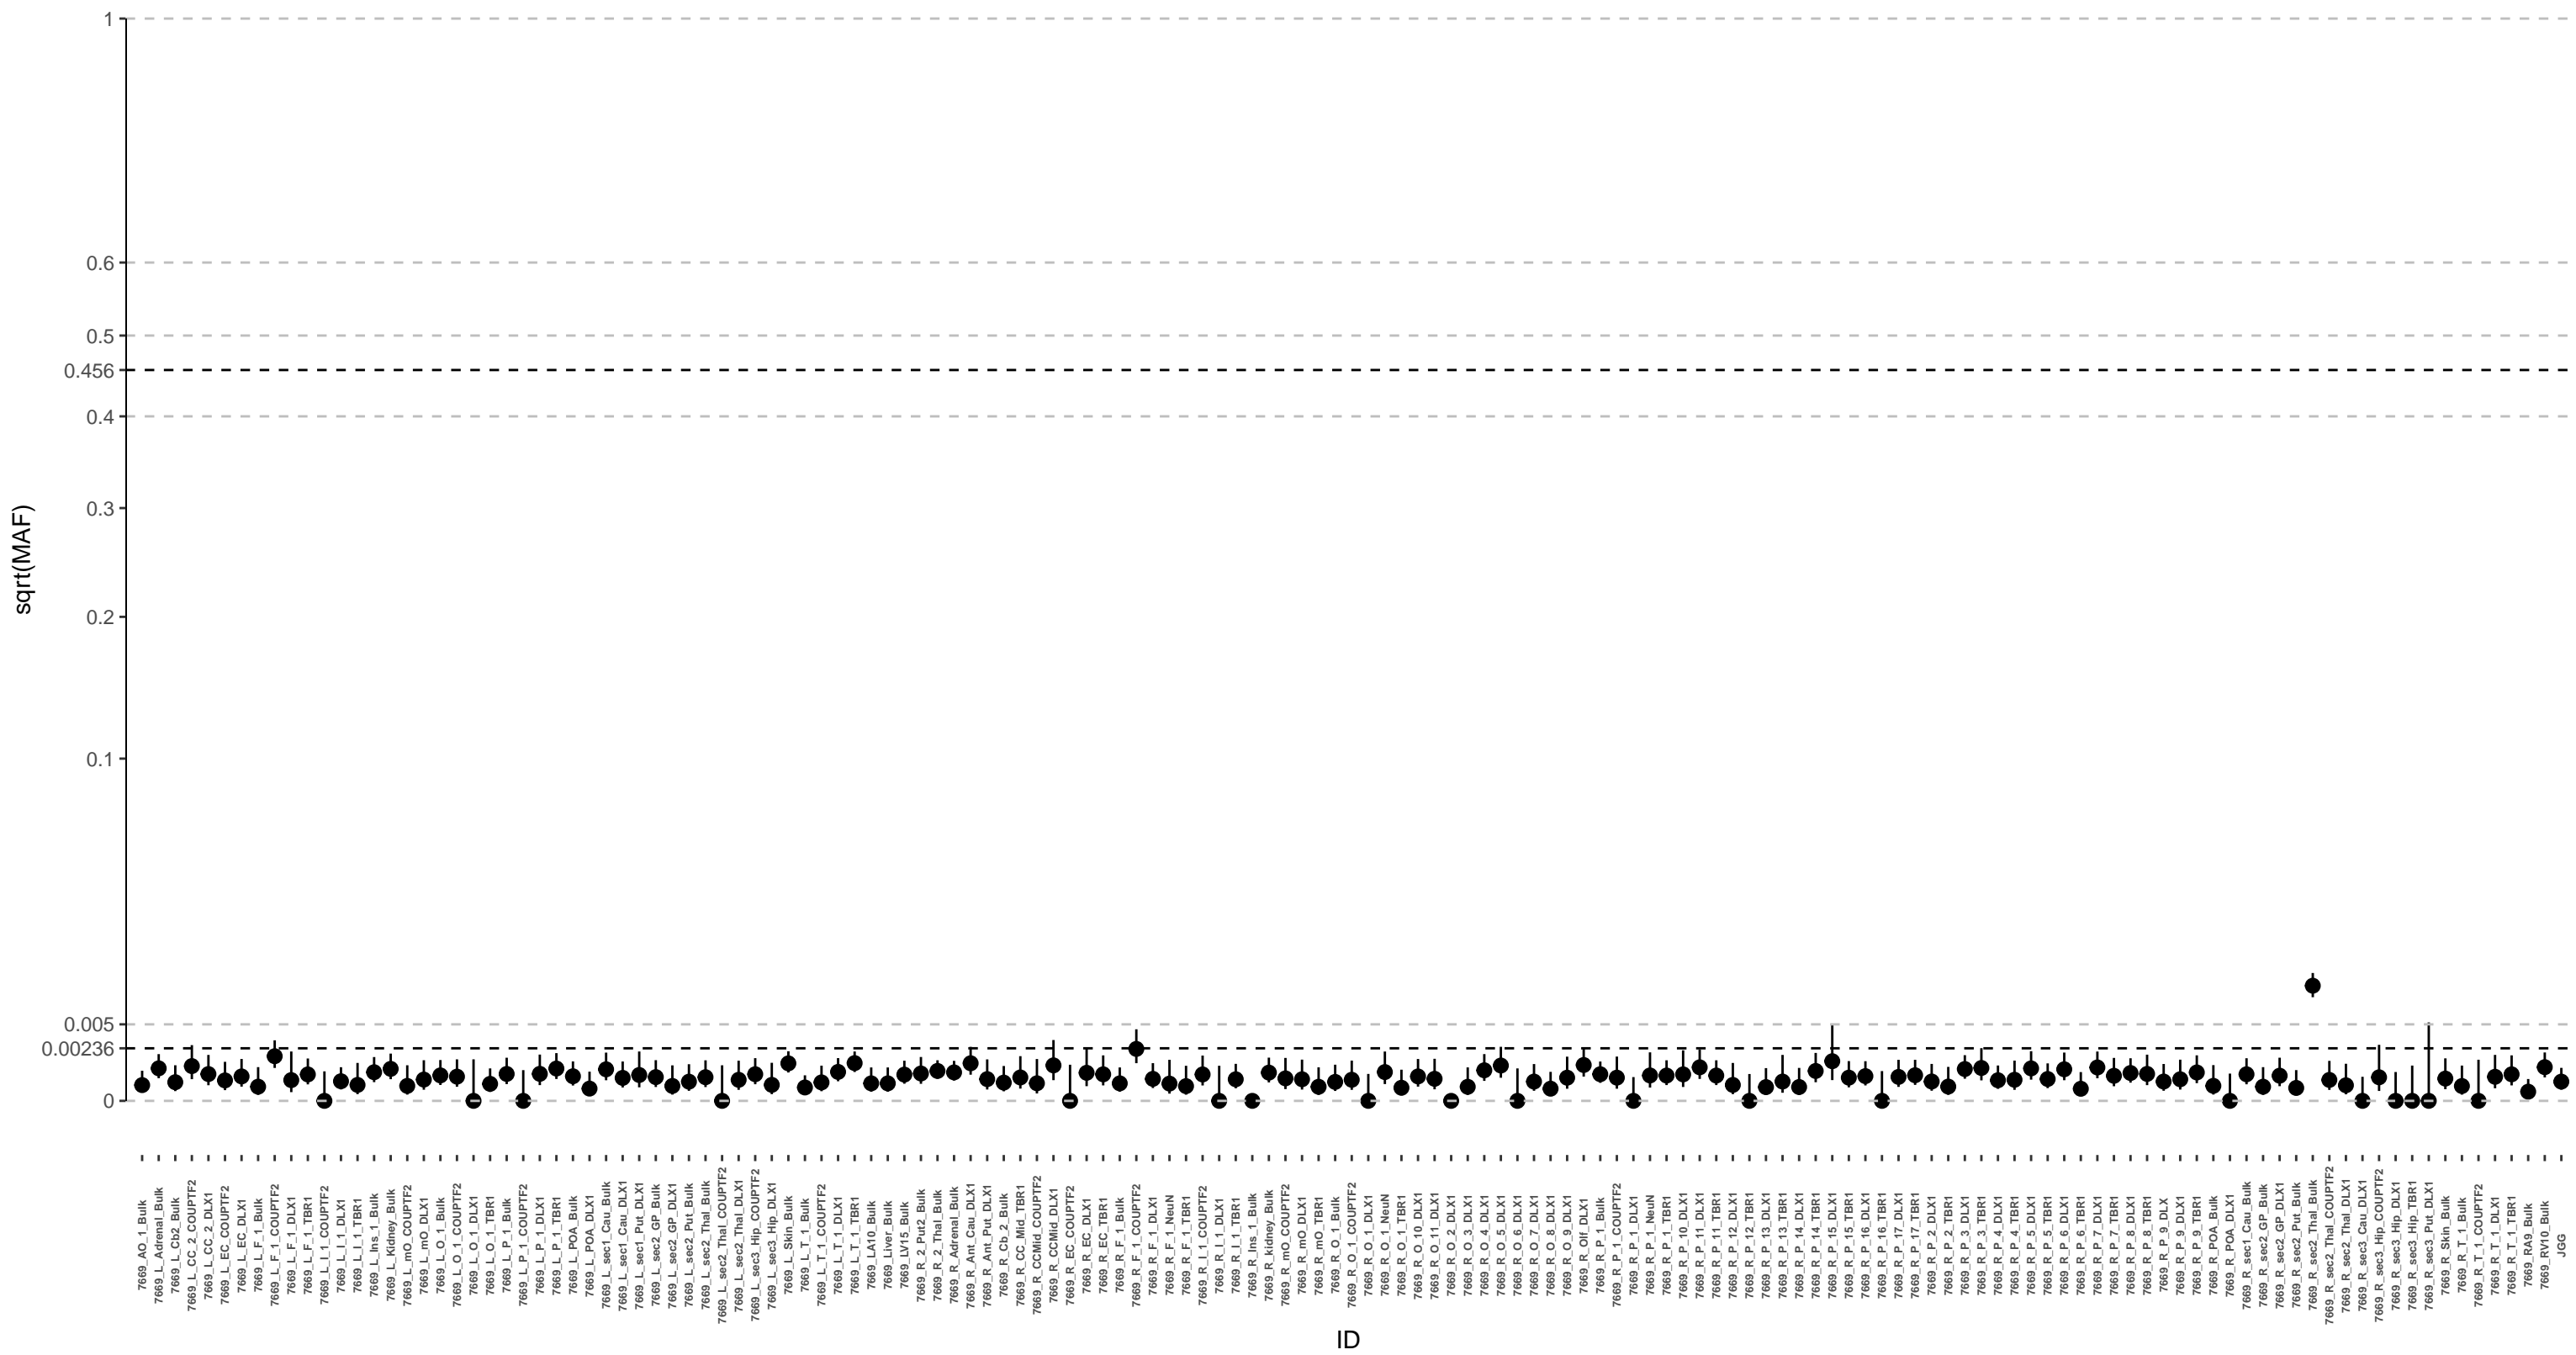

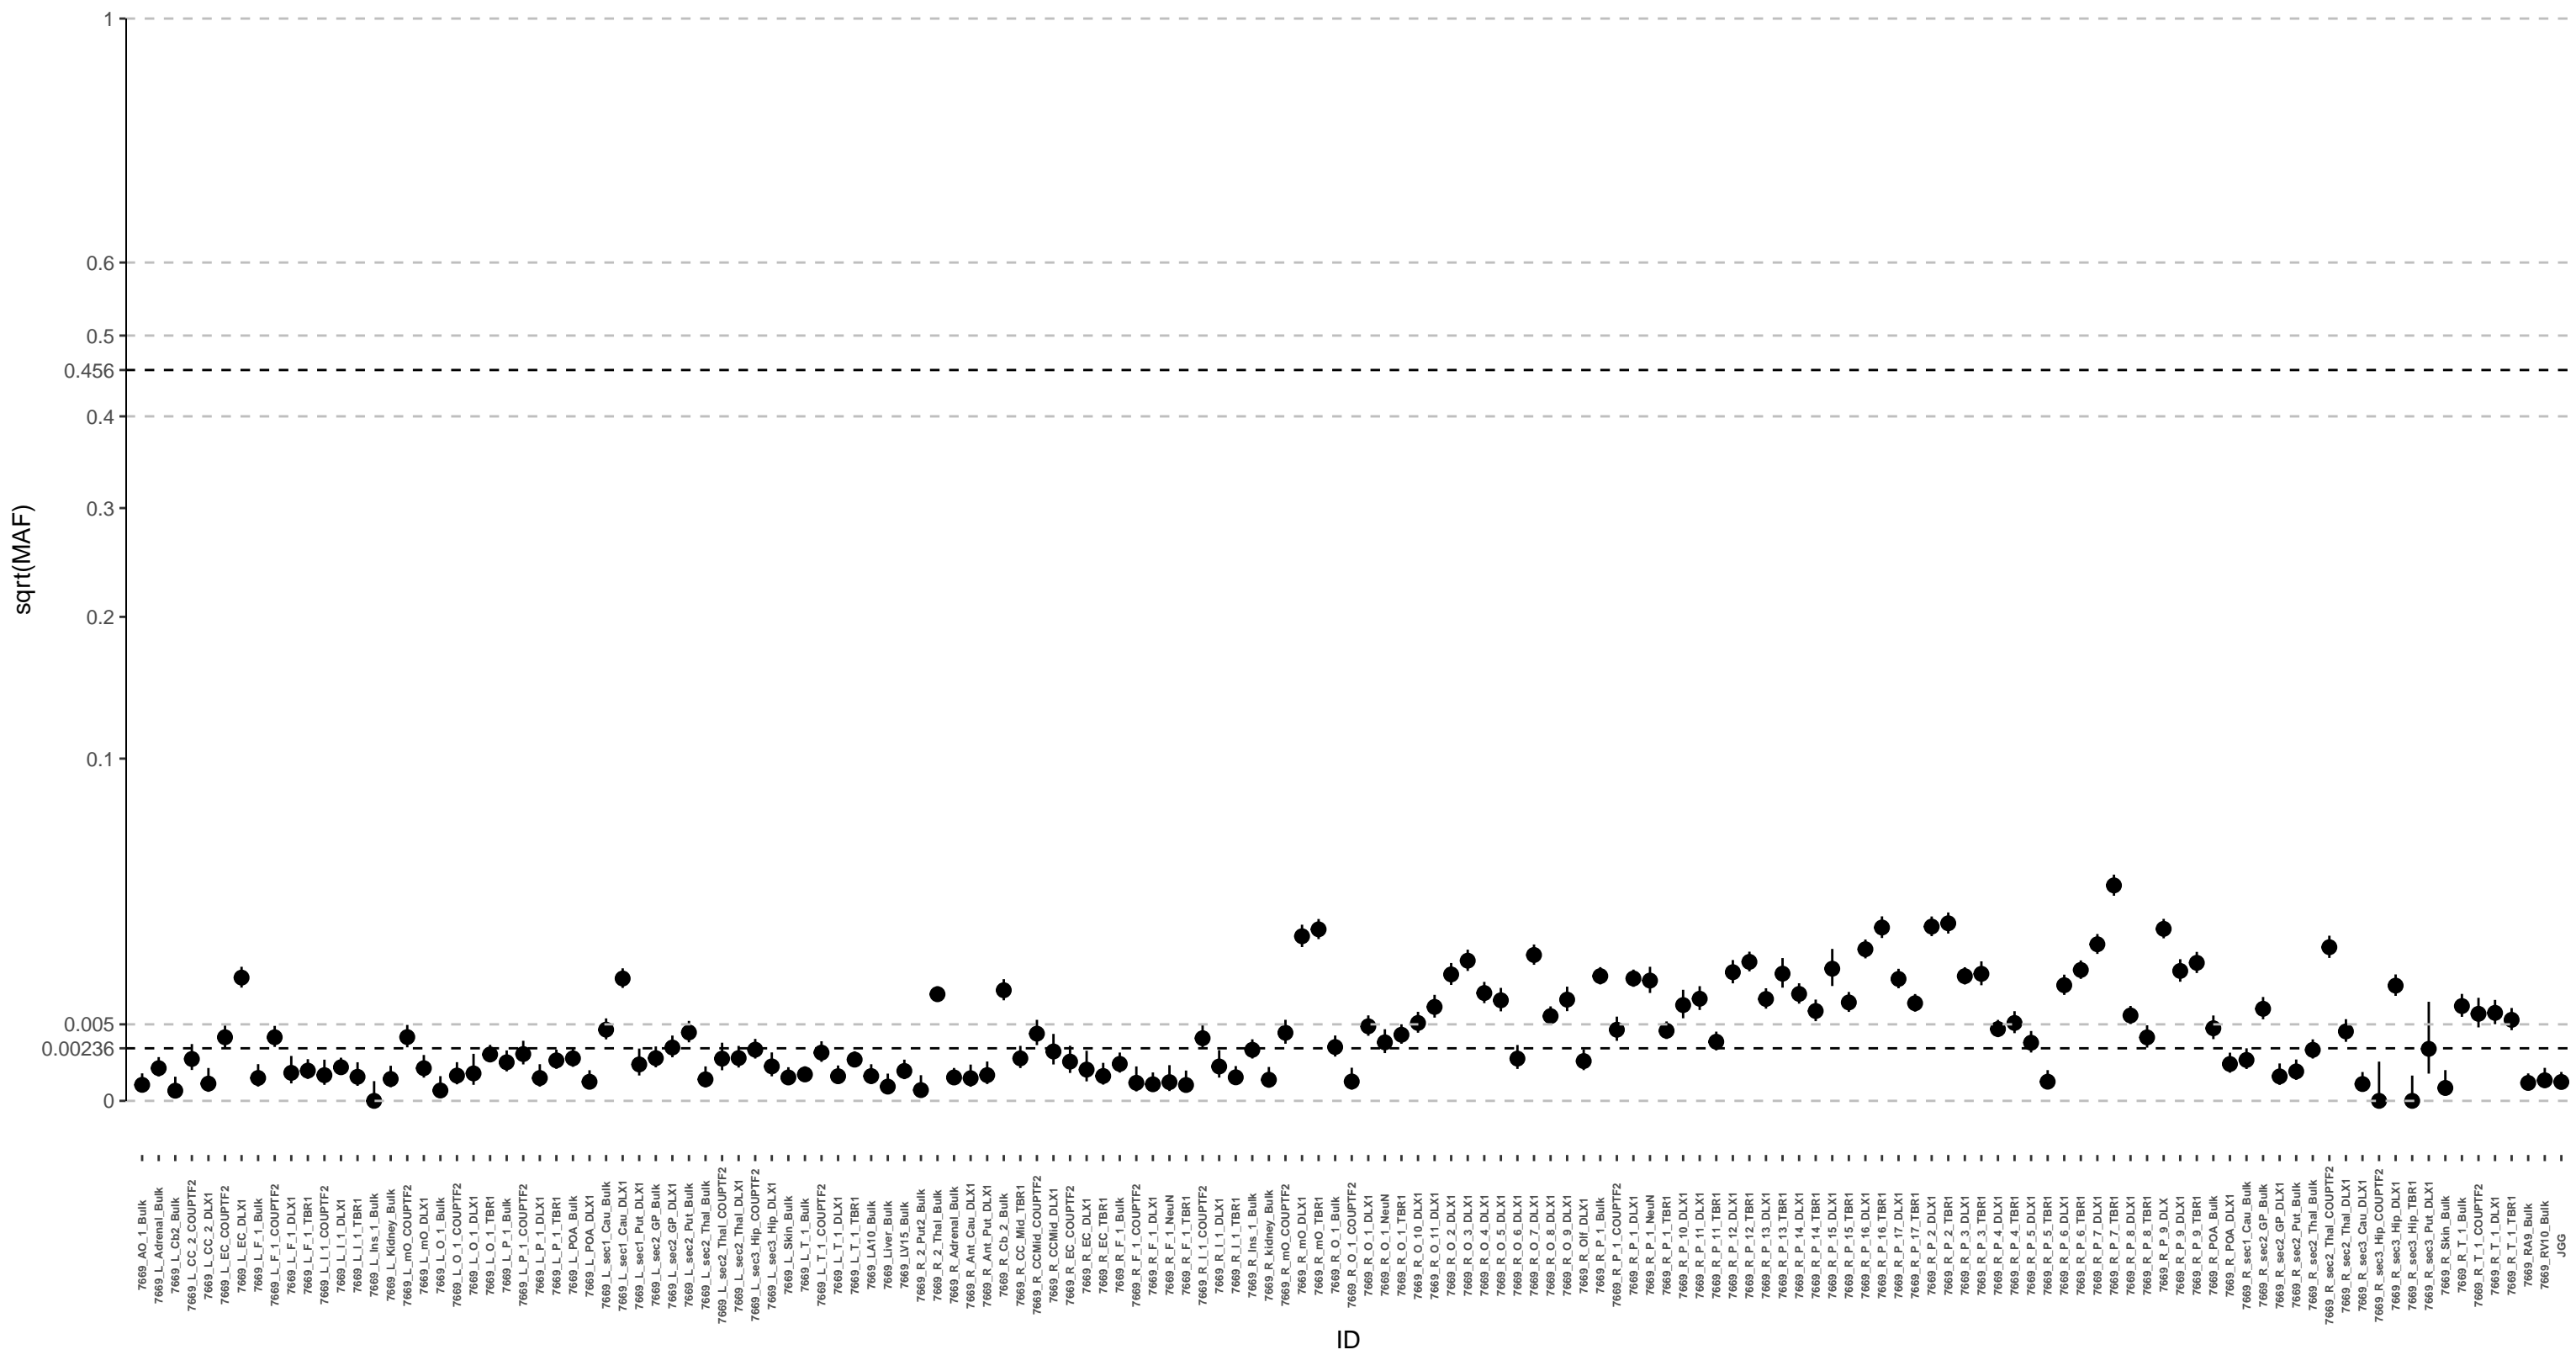

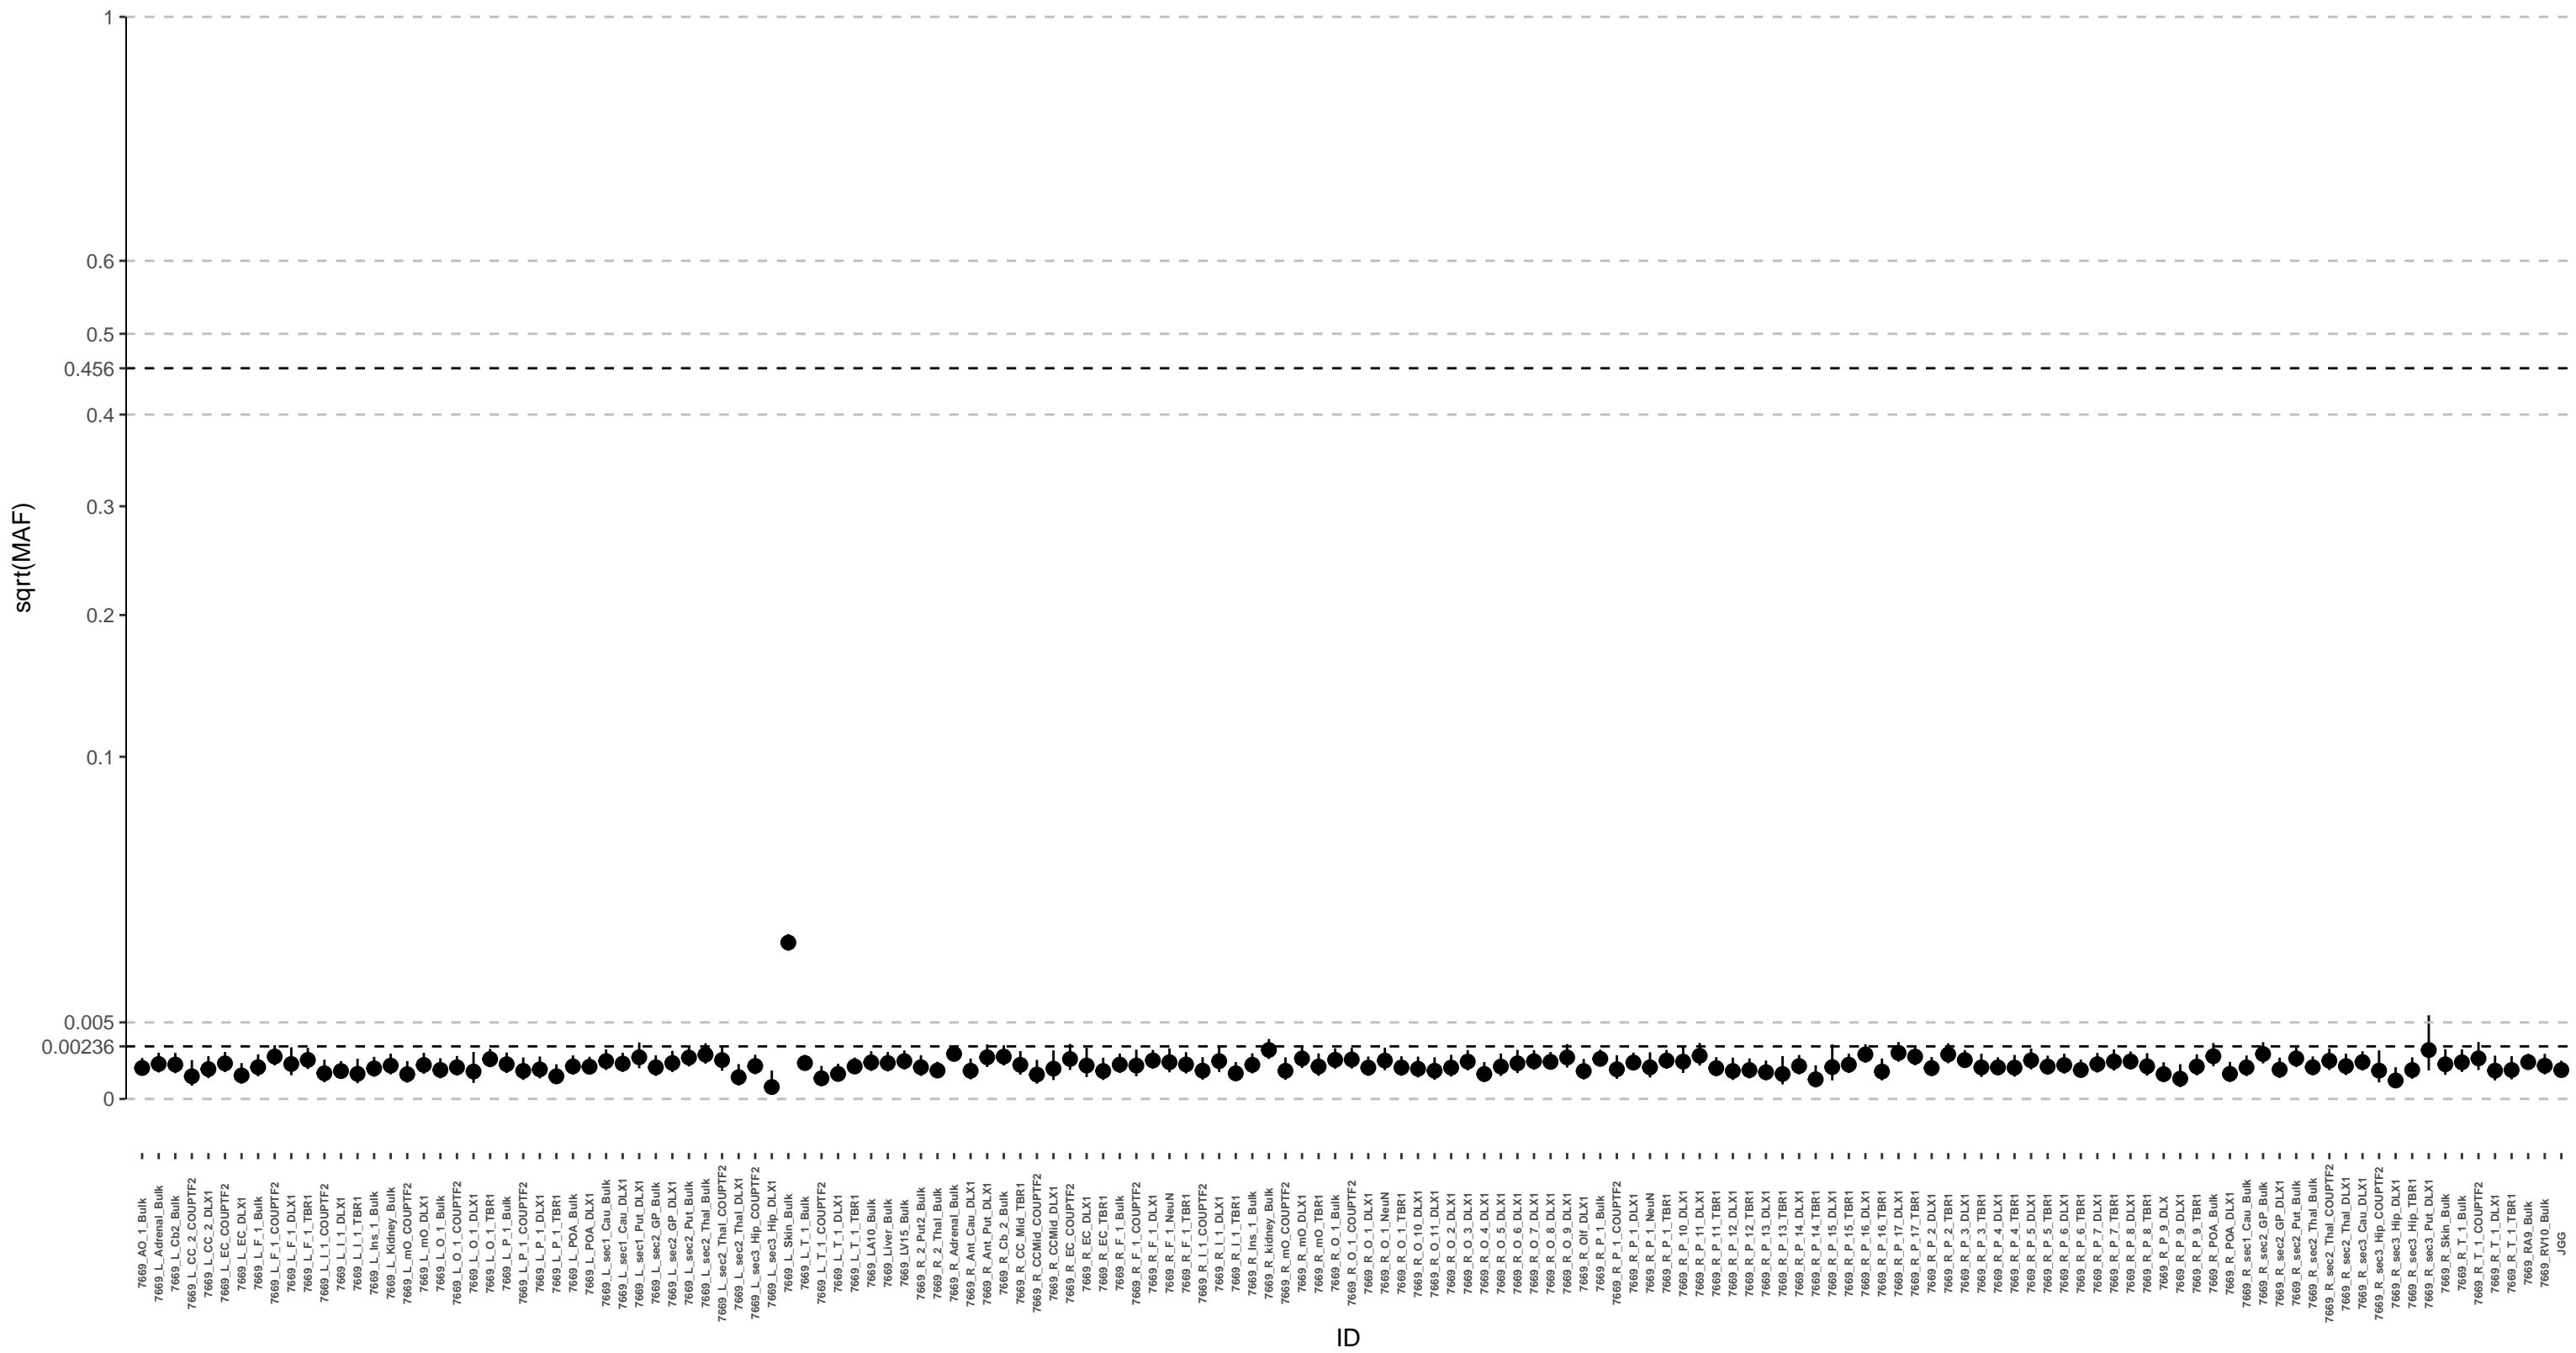



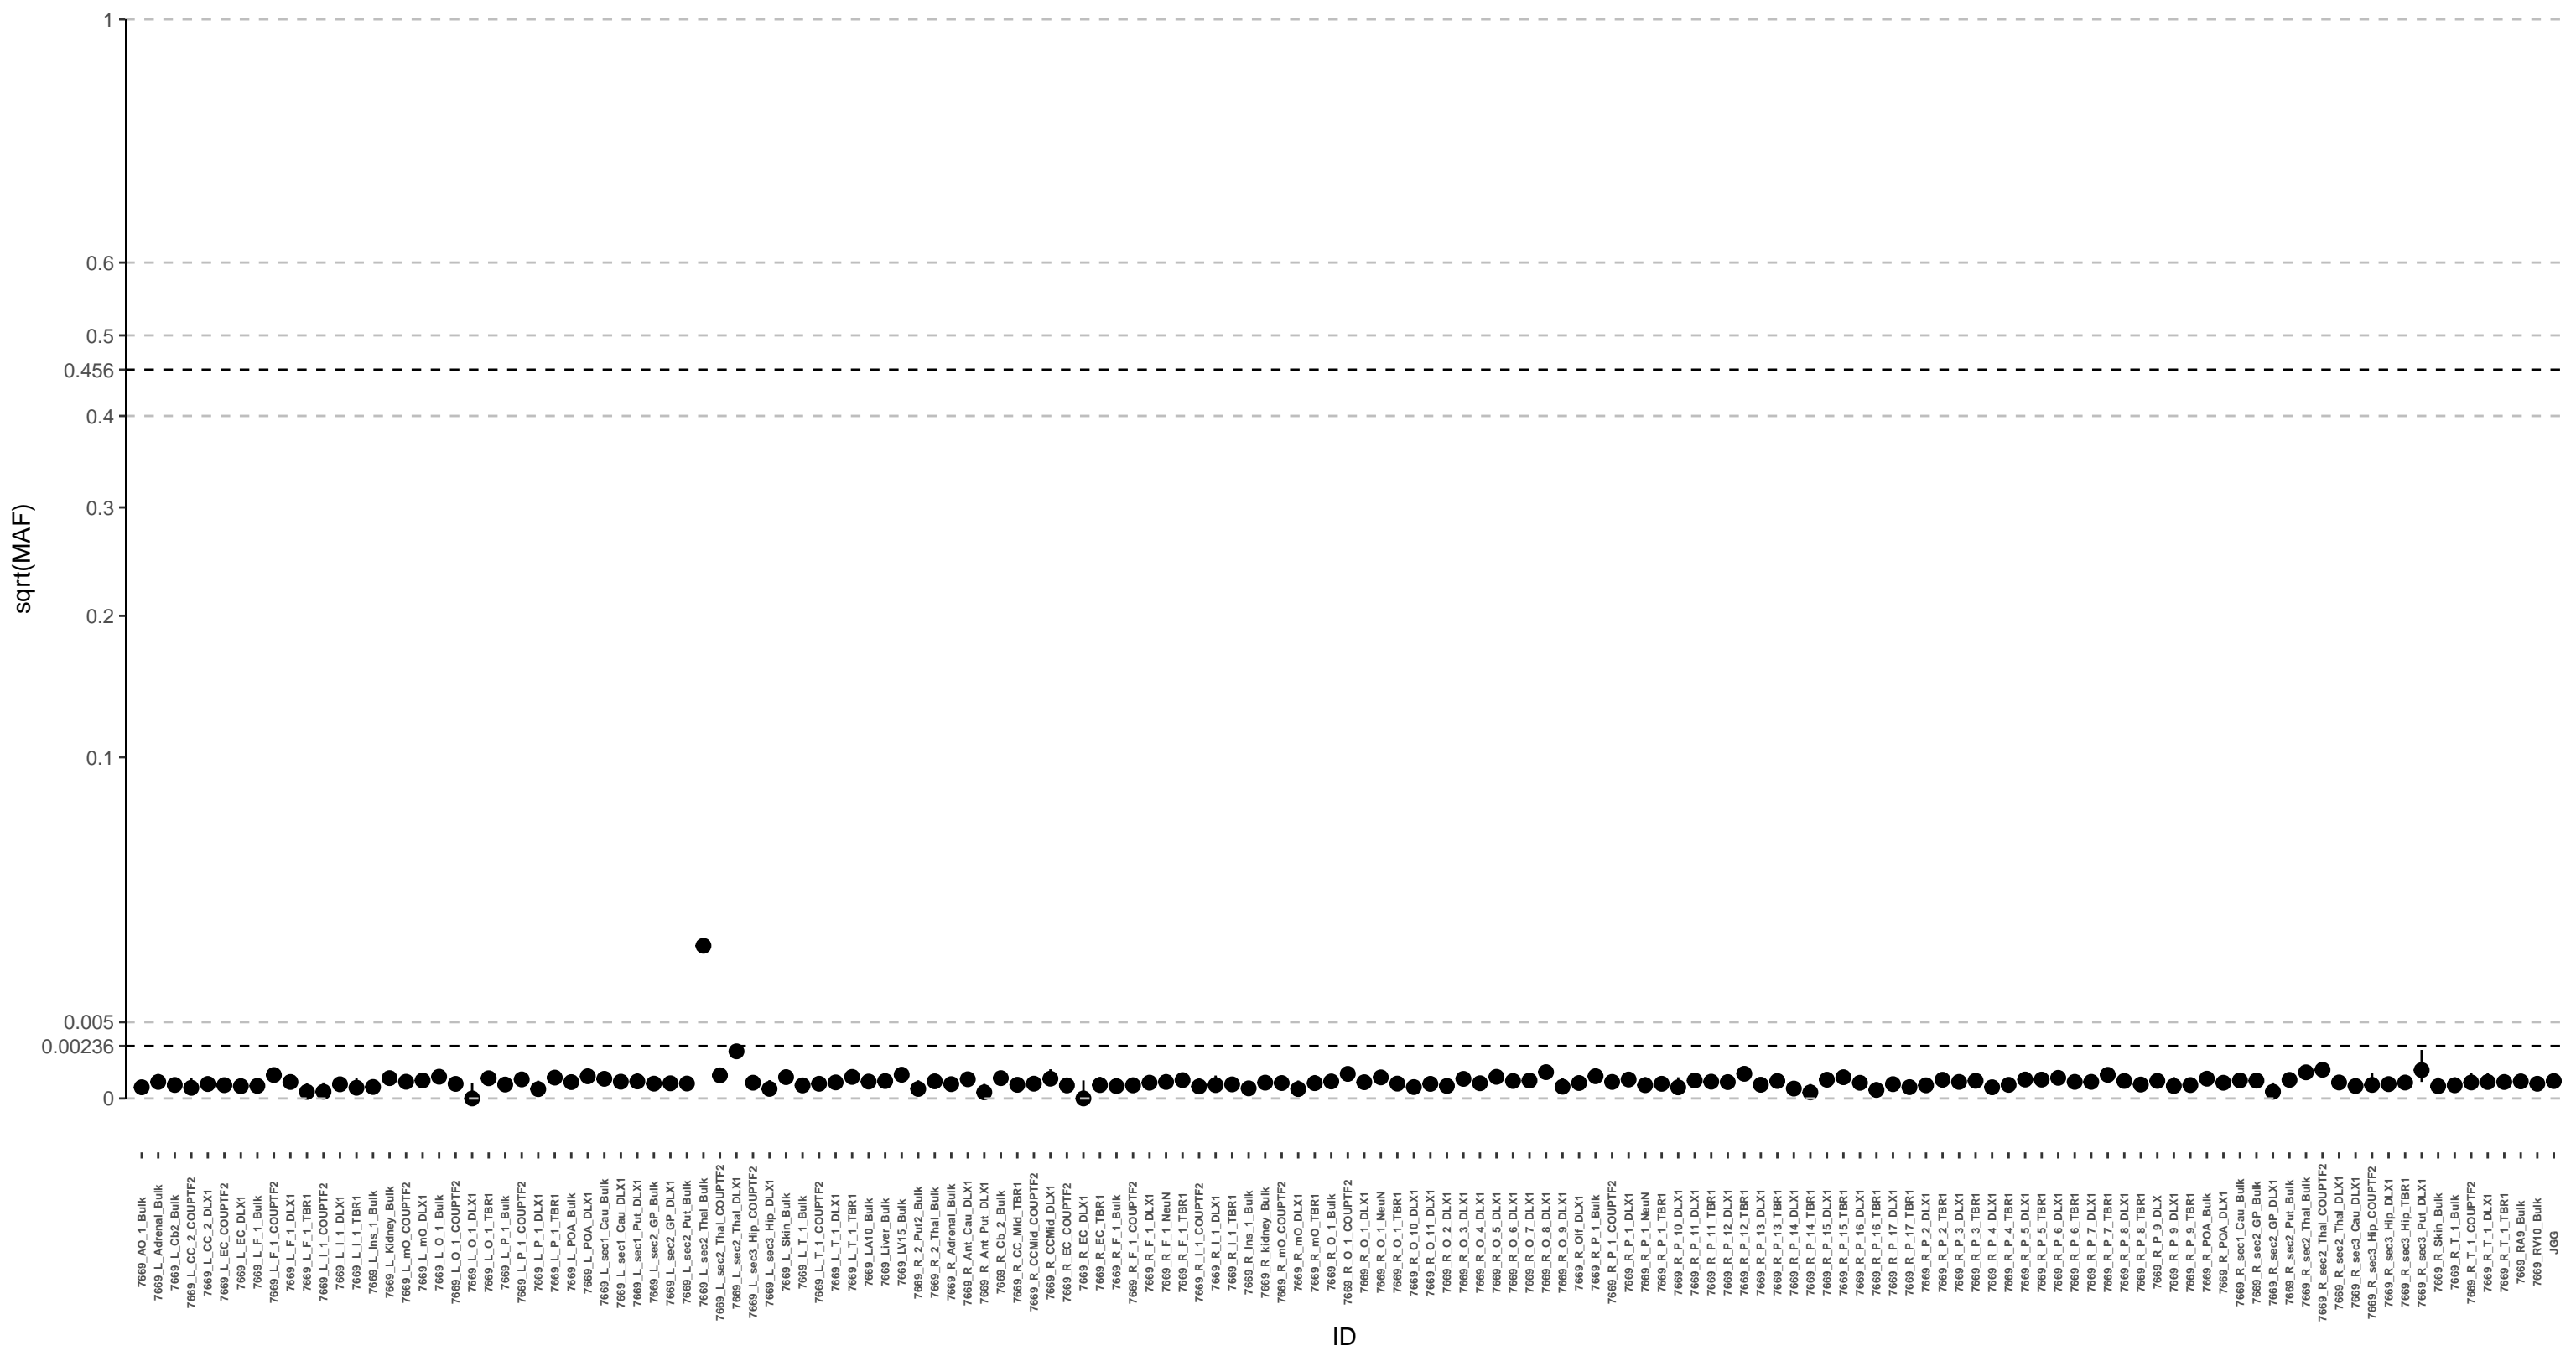

# ID05 6-18819400-C-T

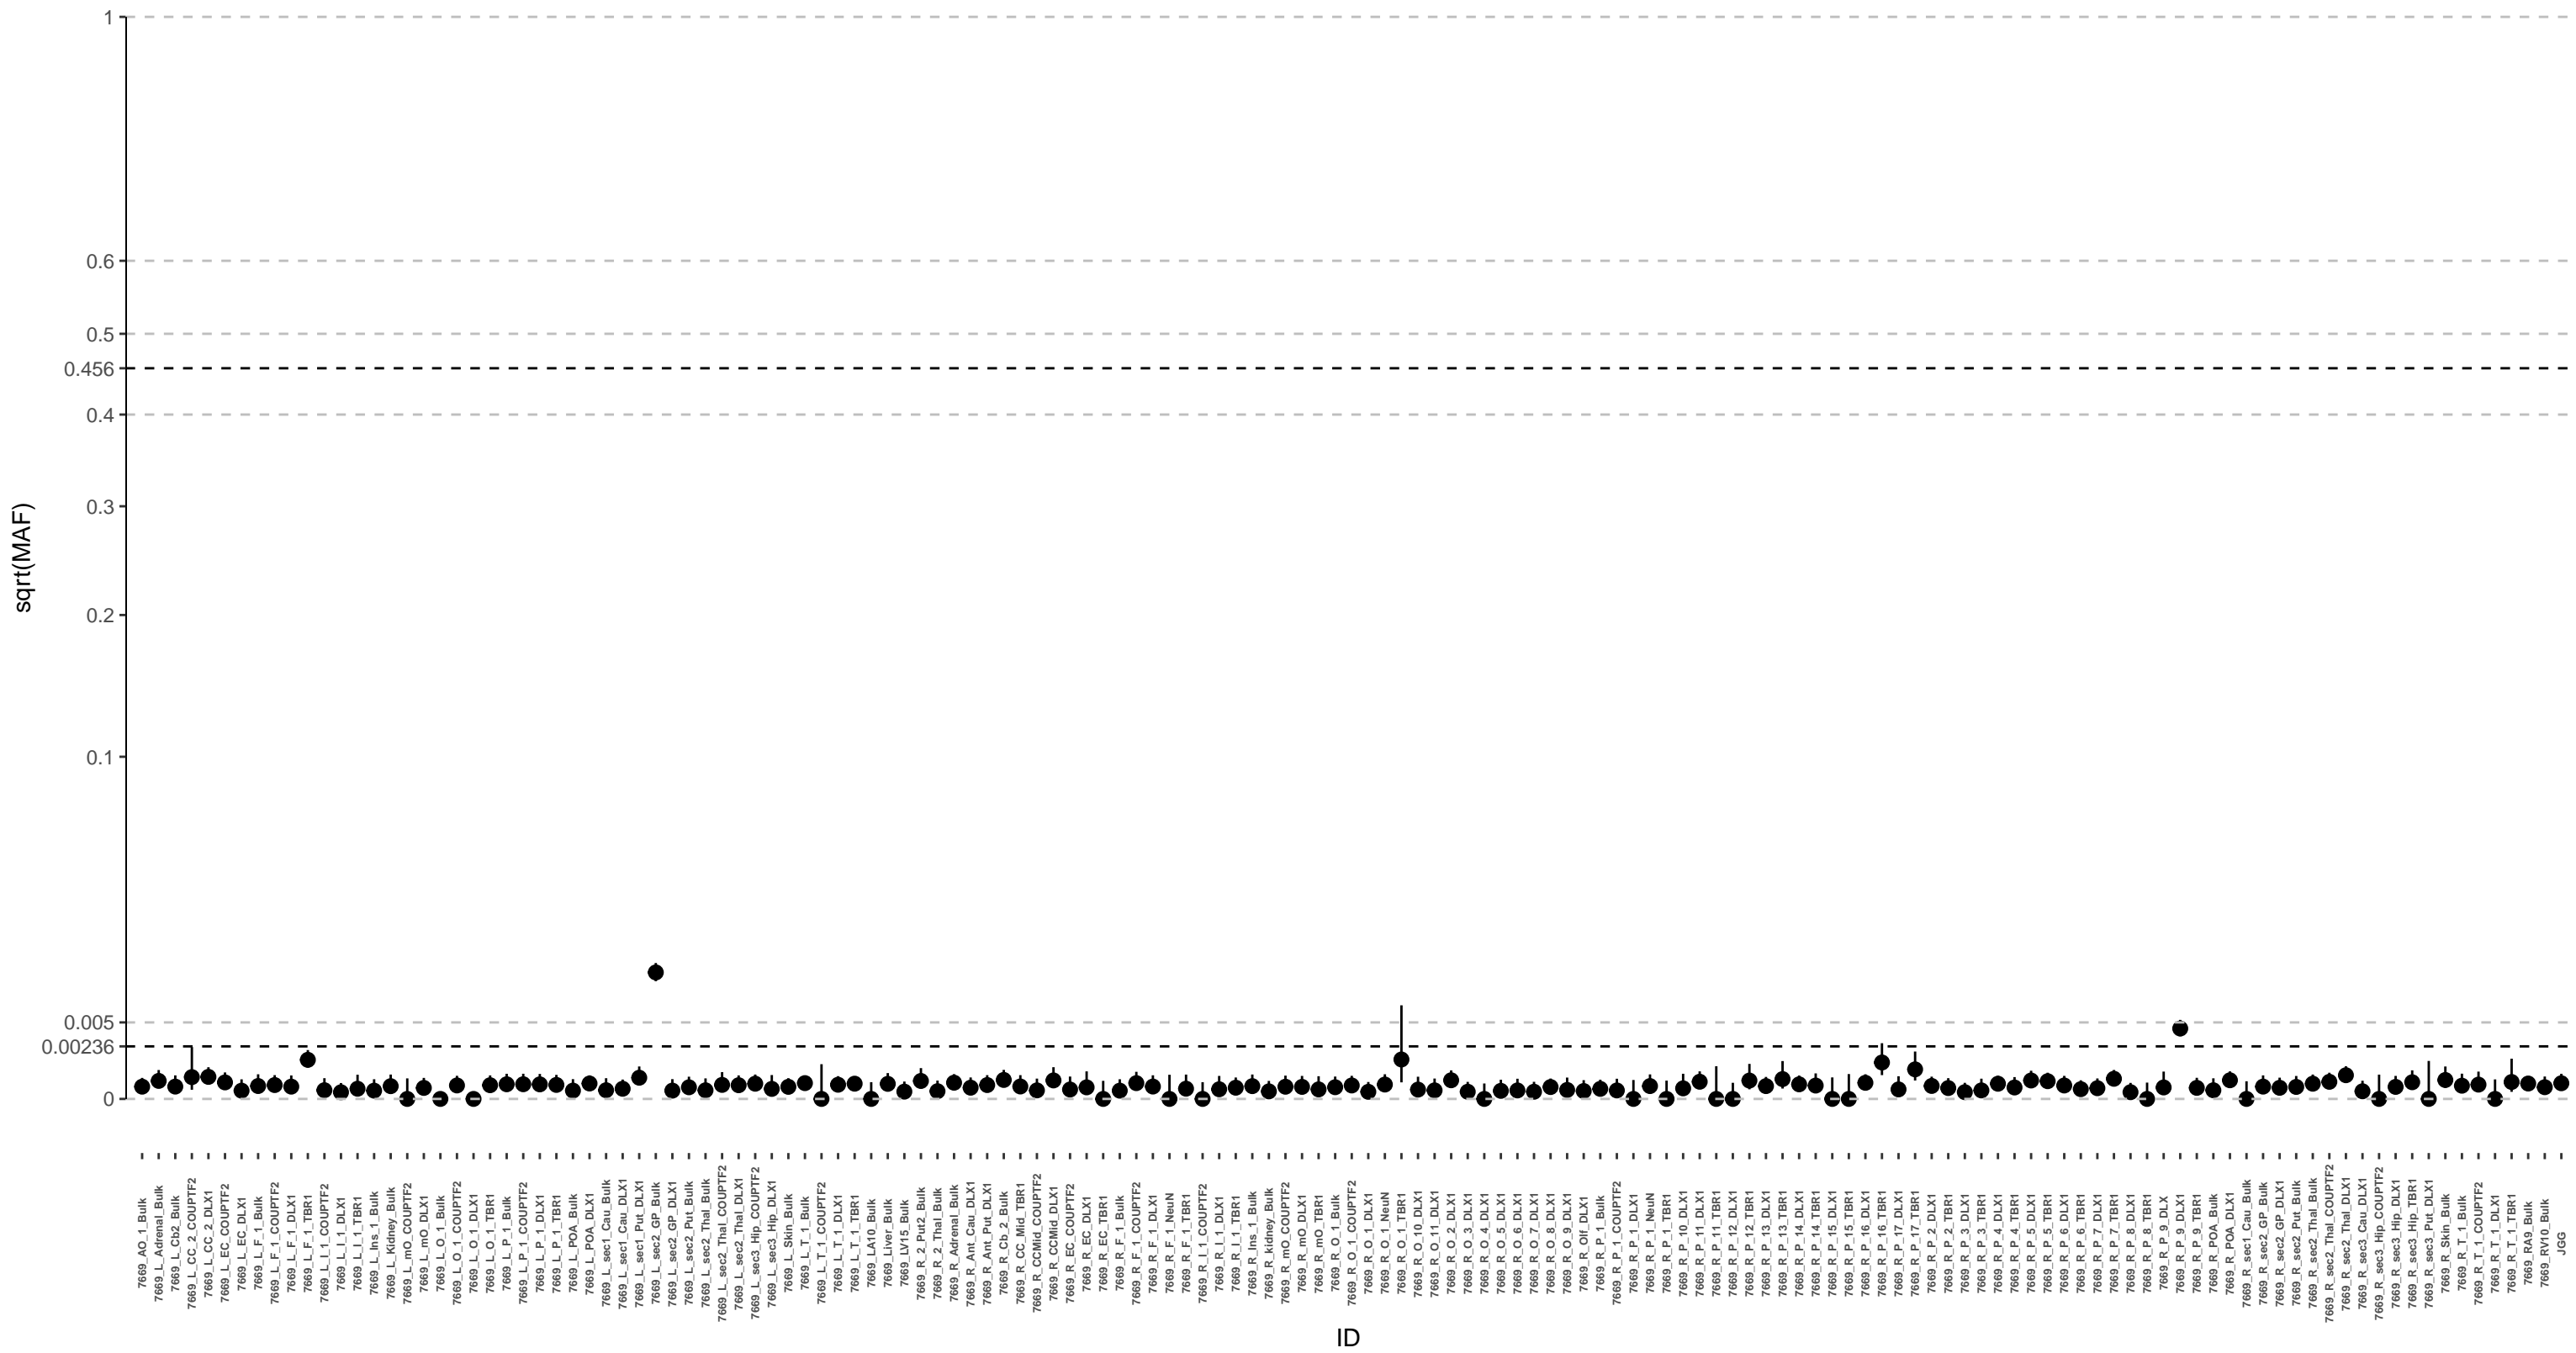

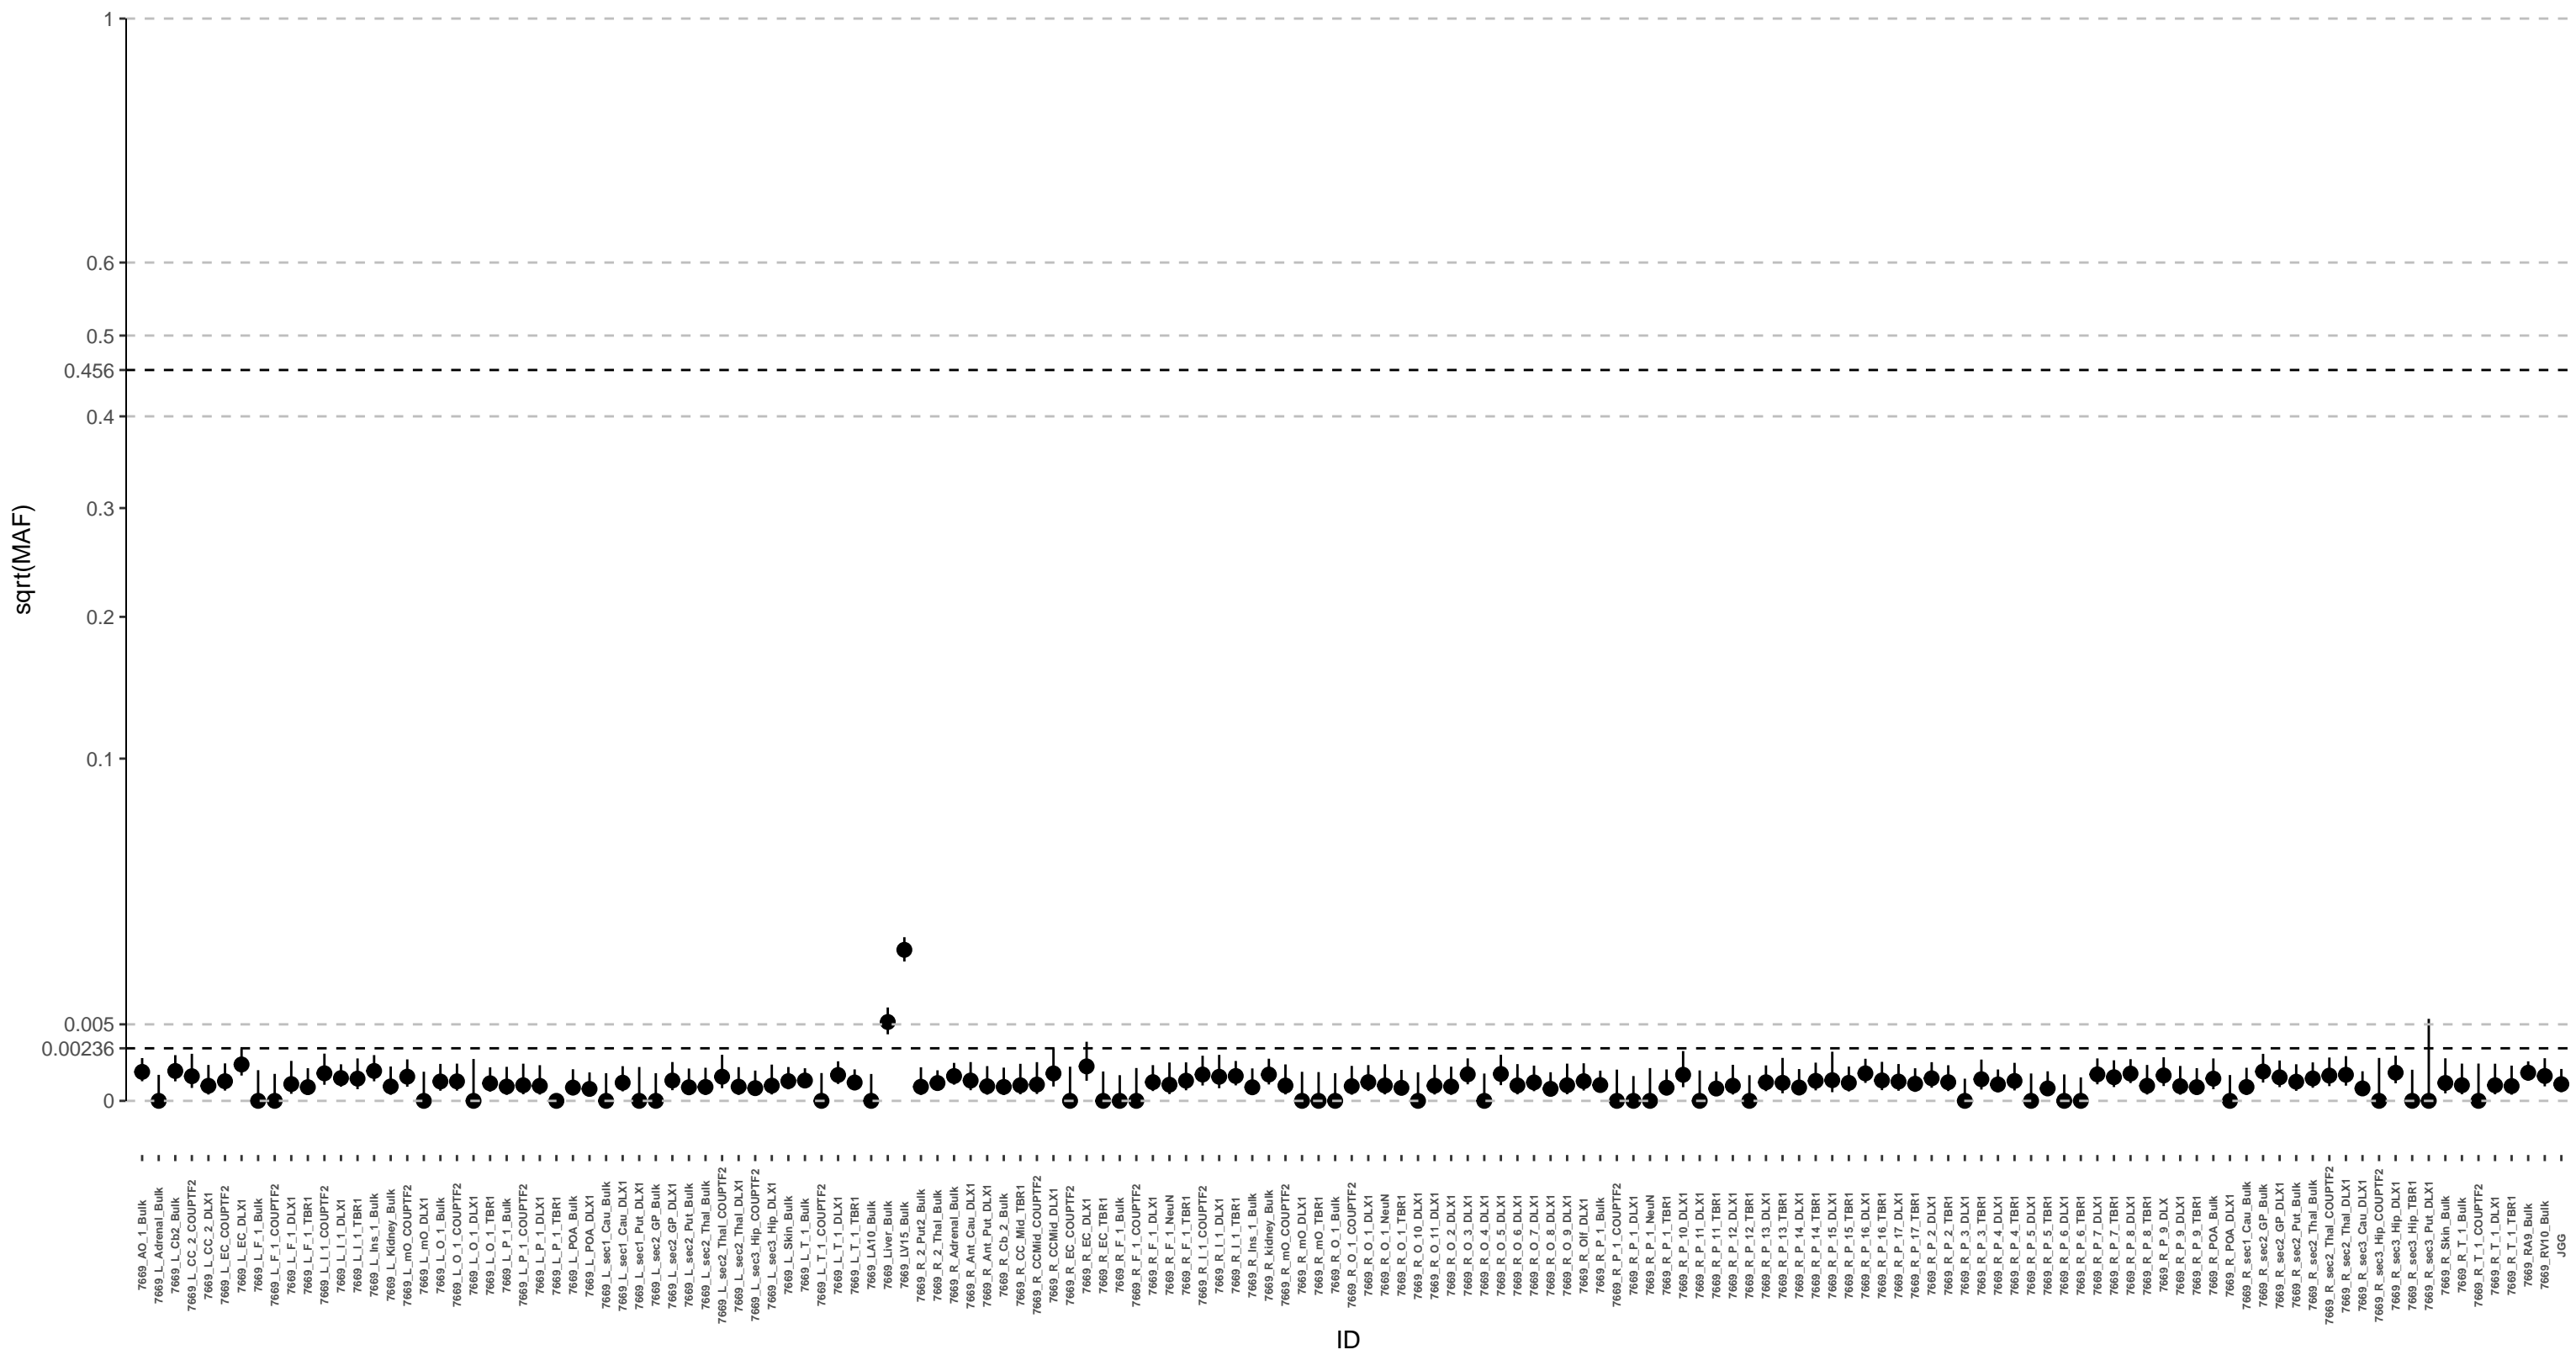

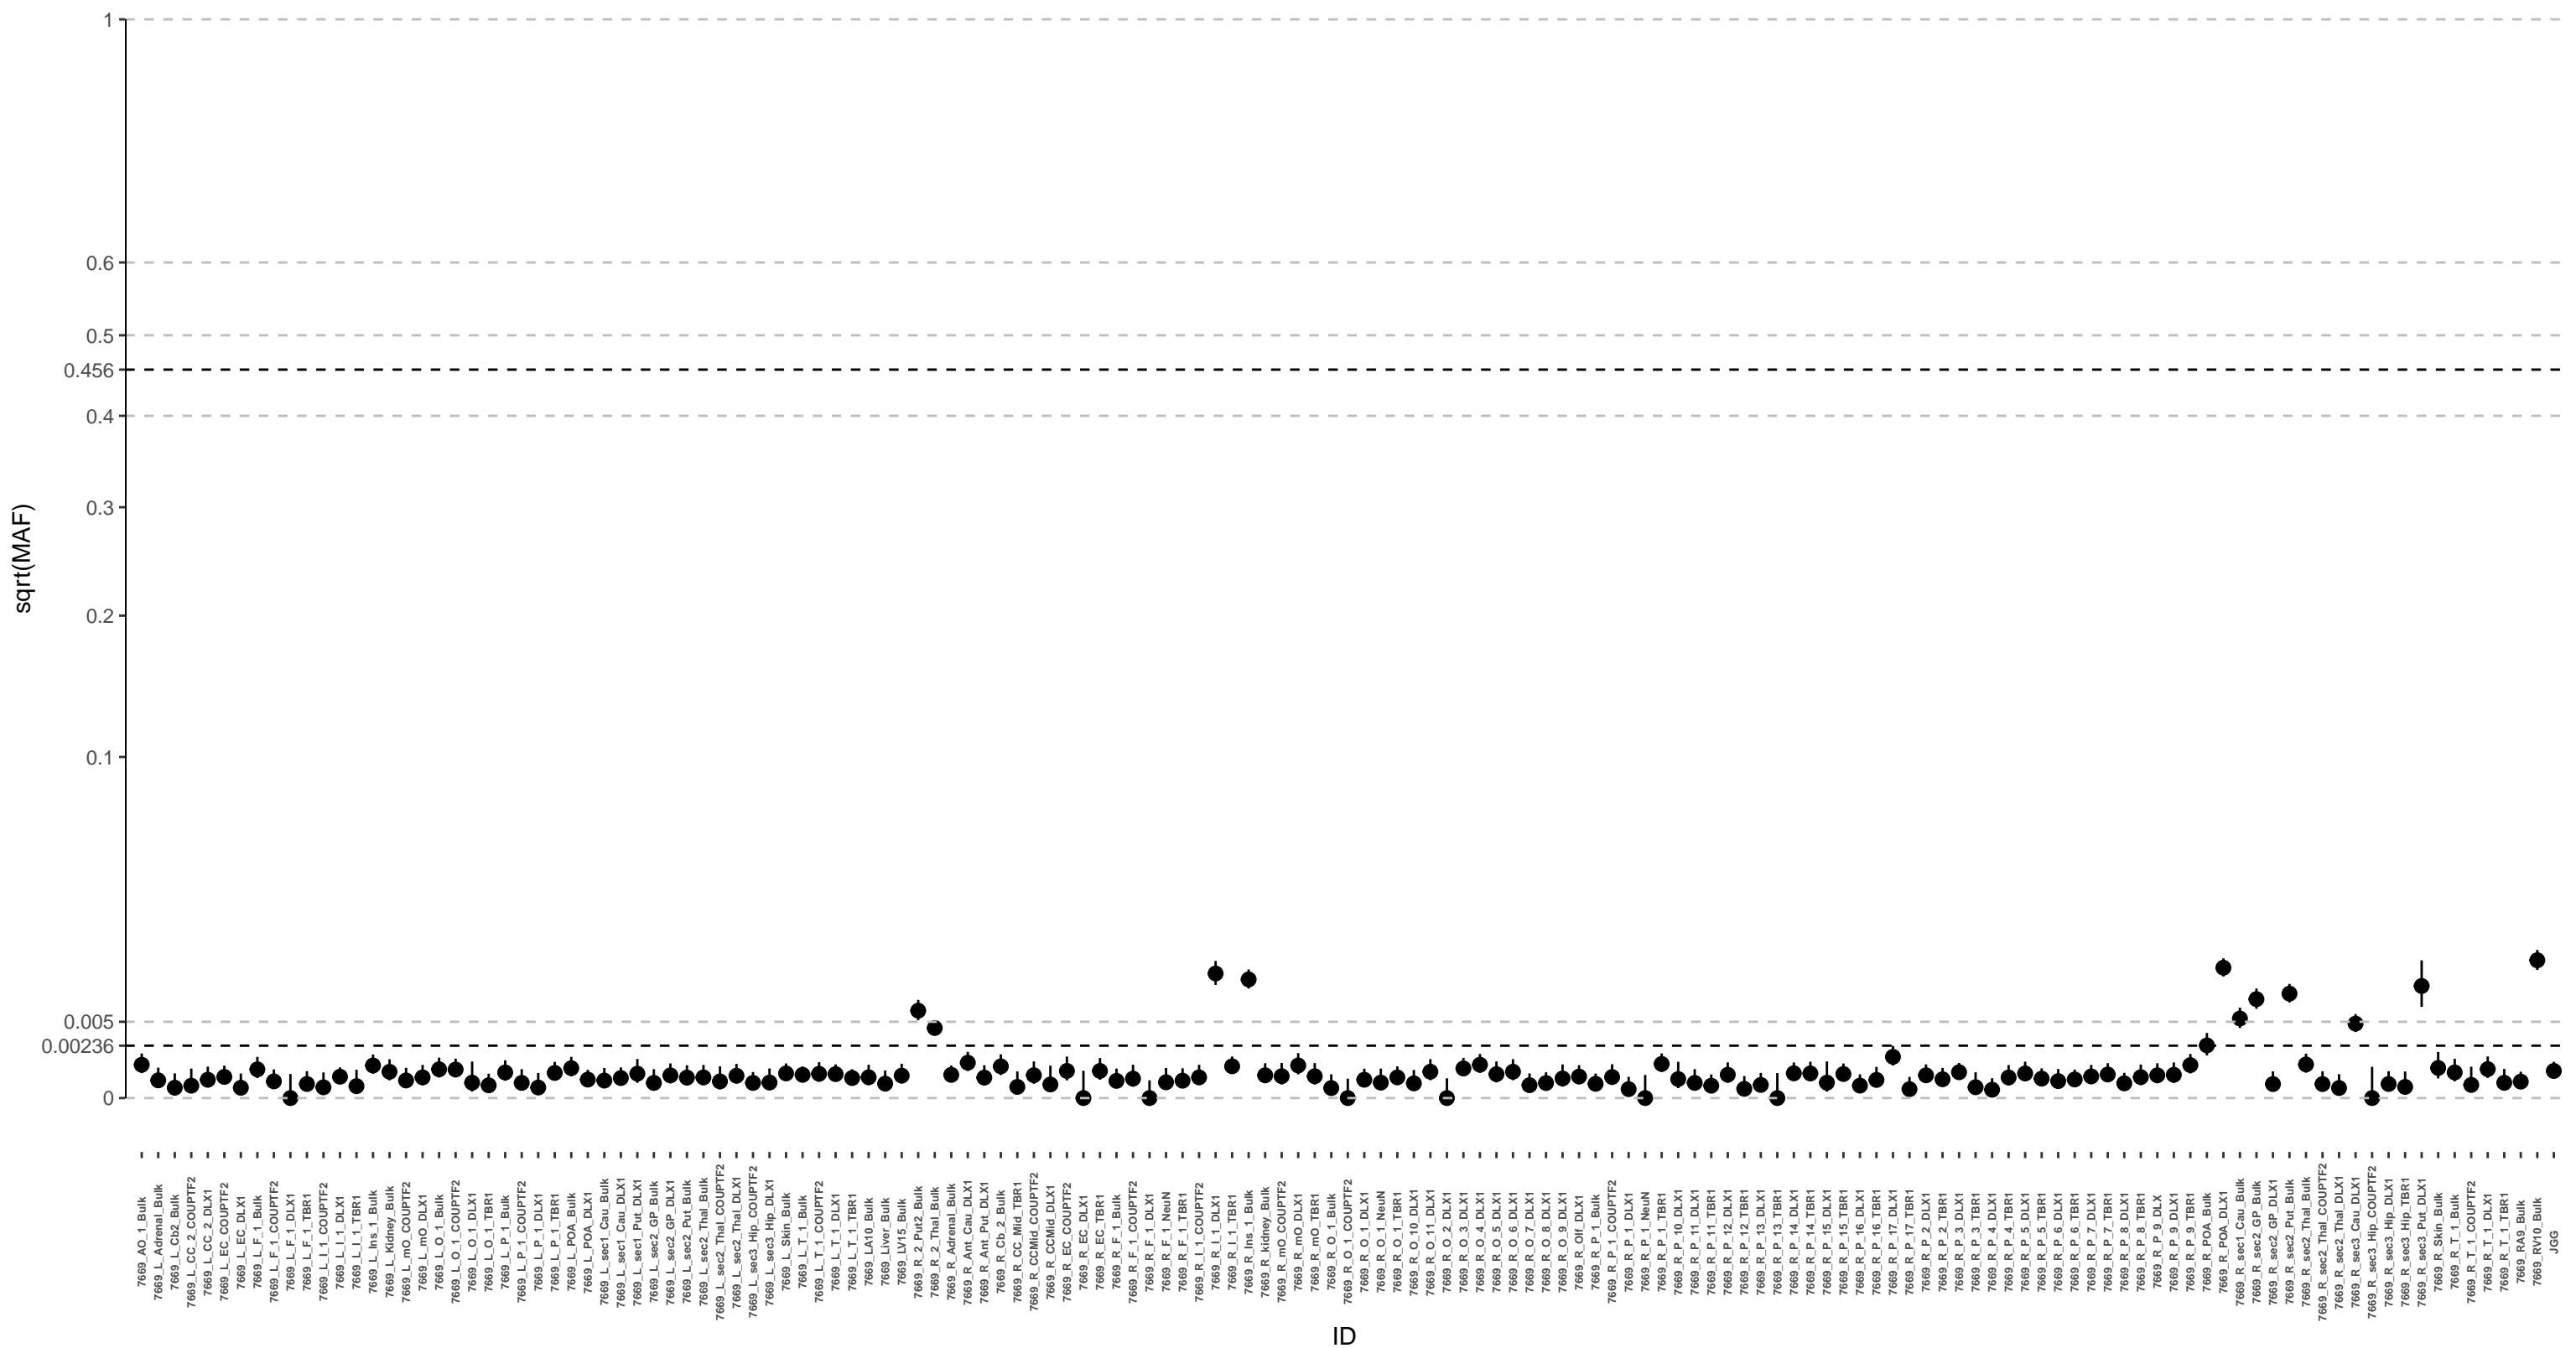

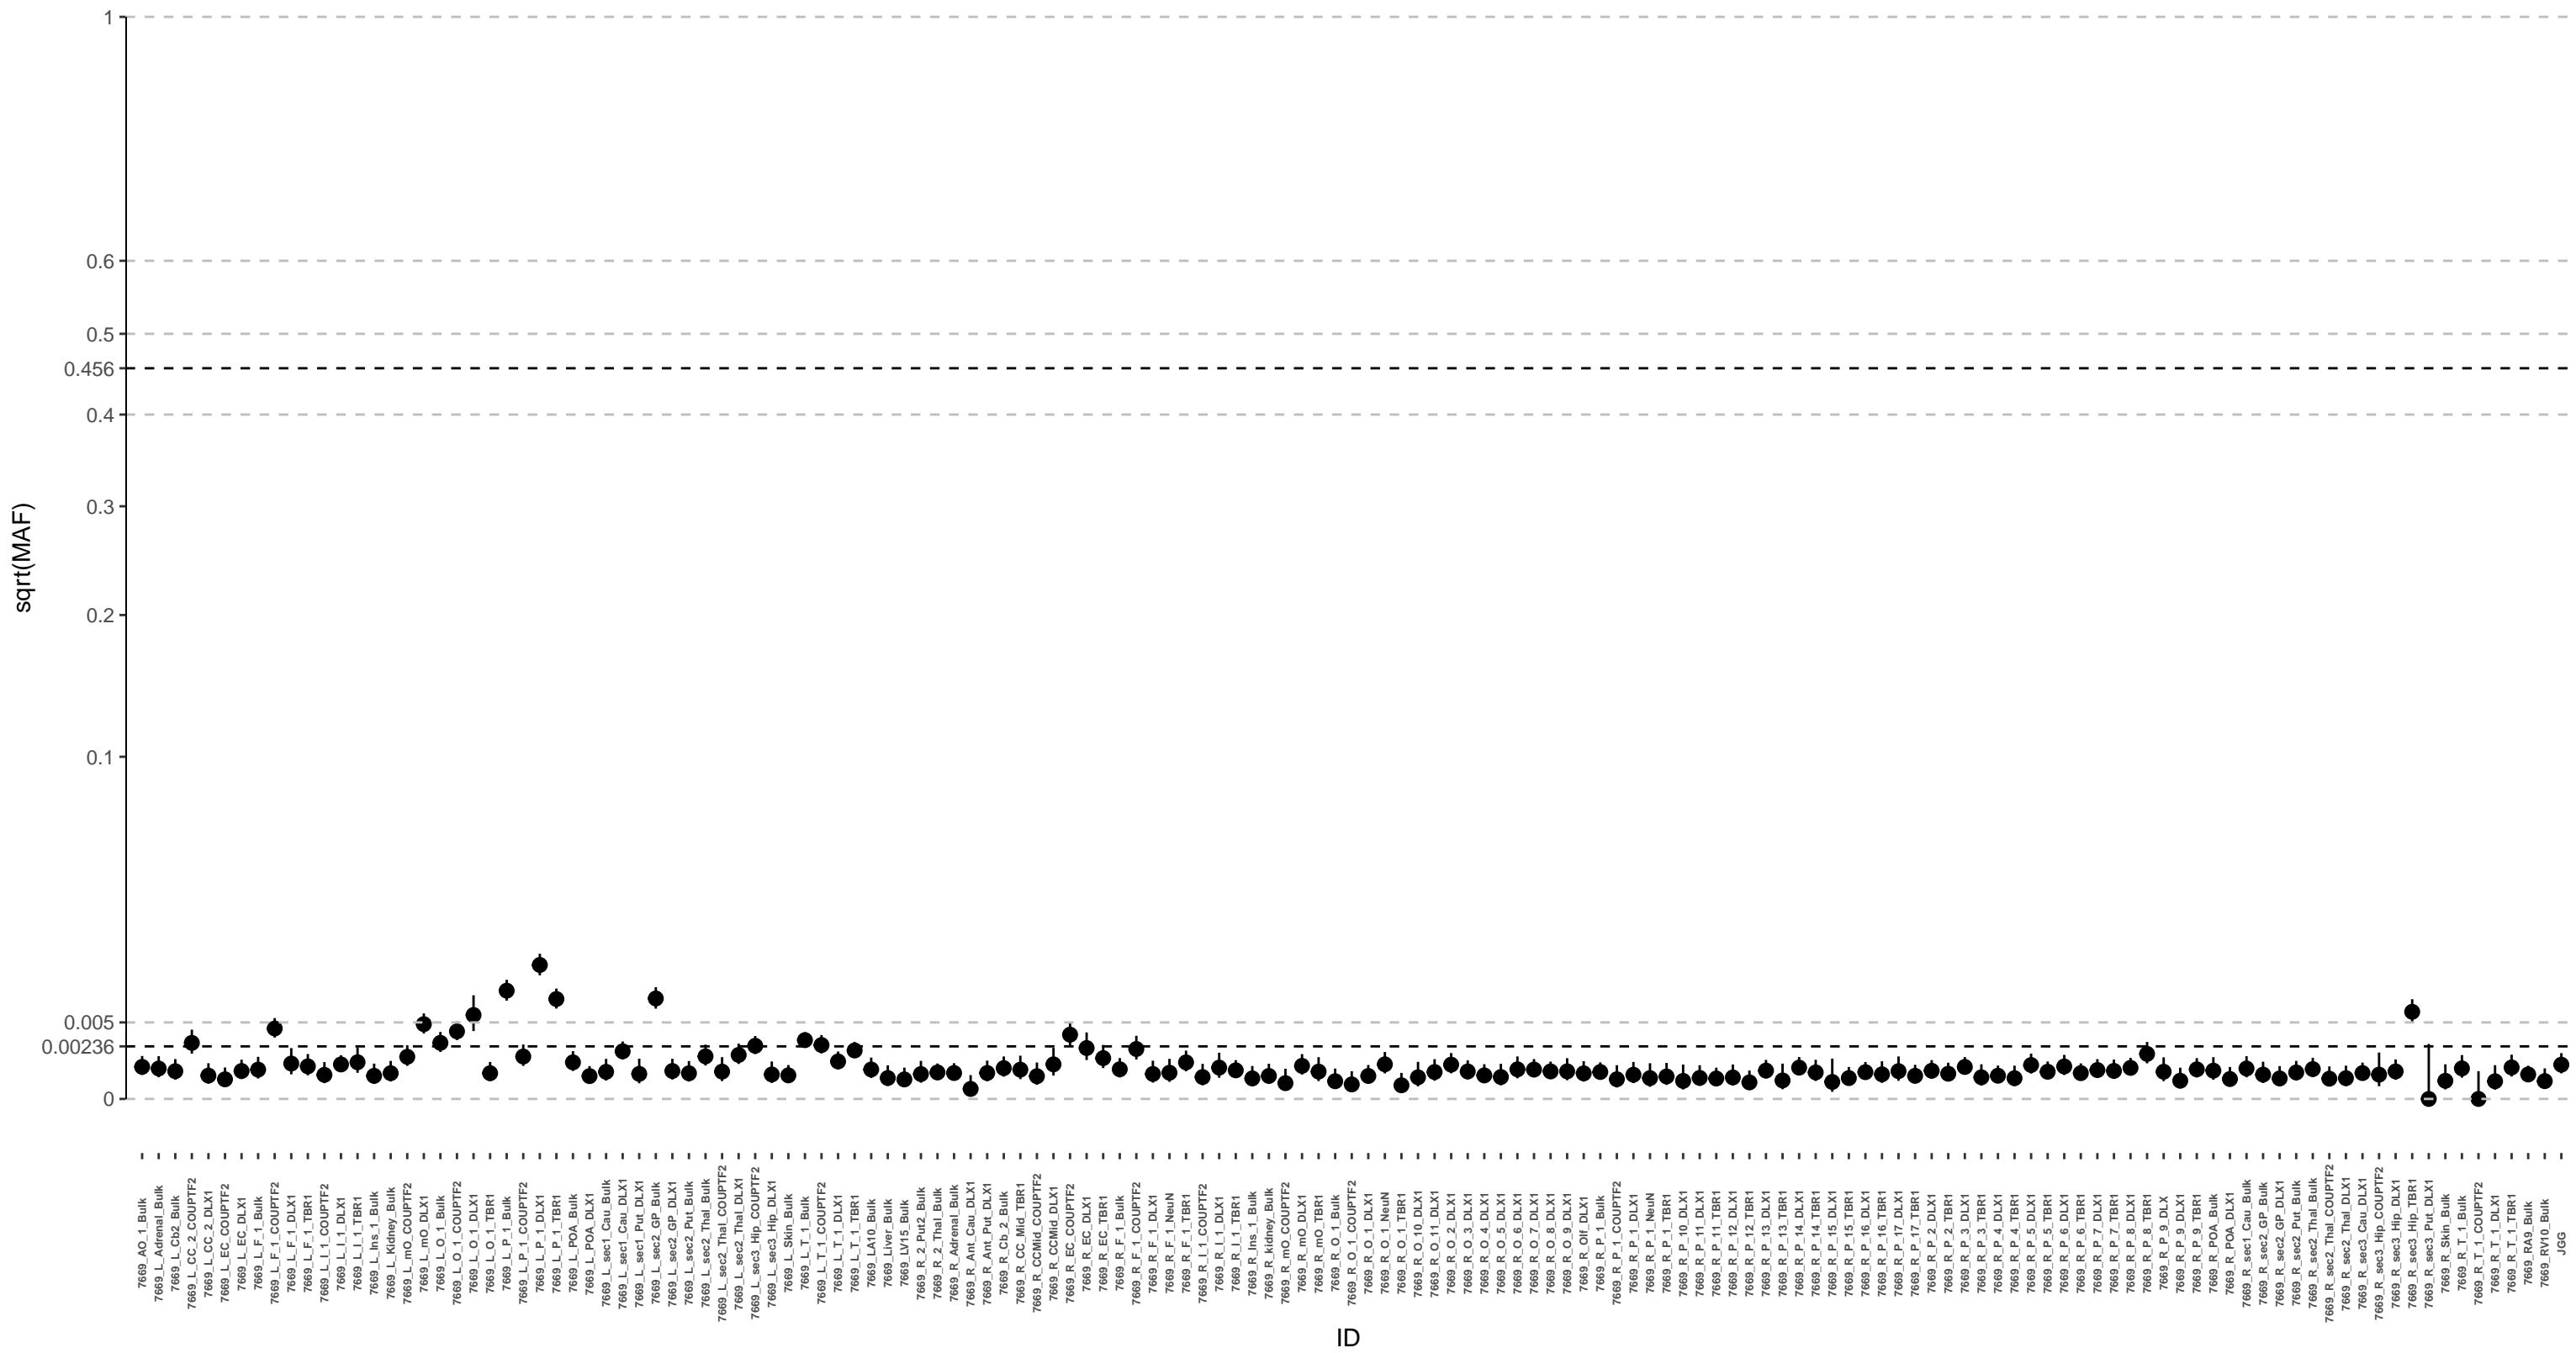

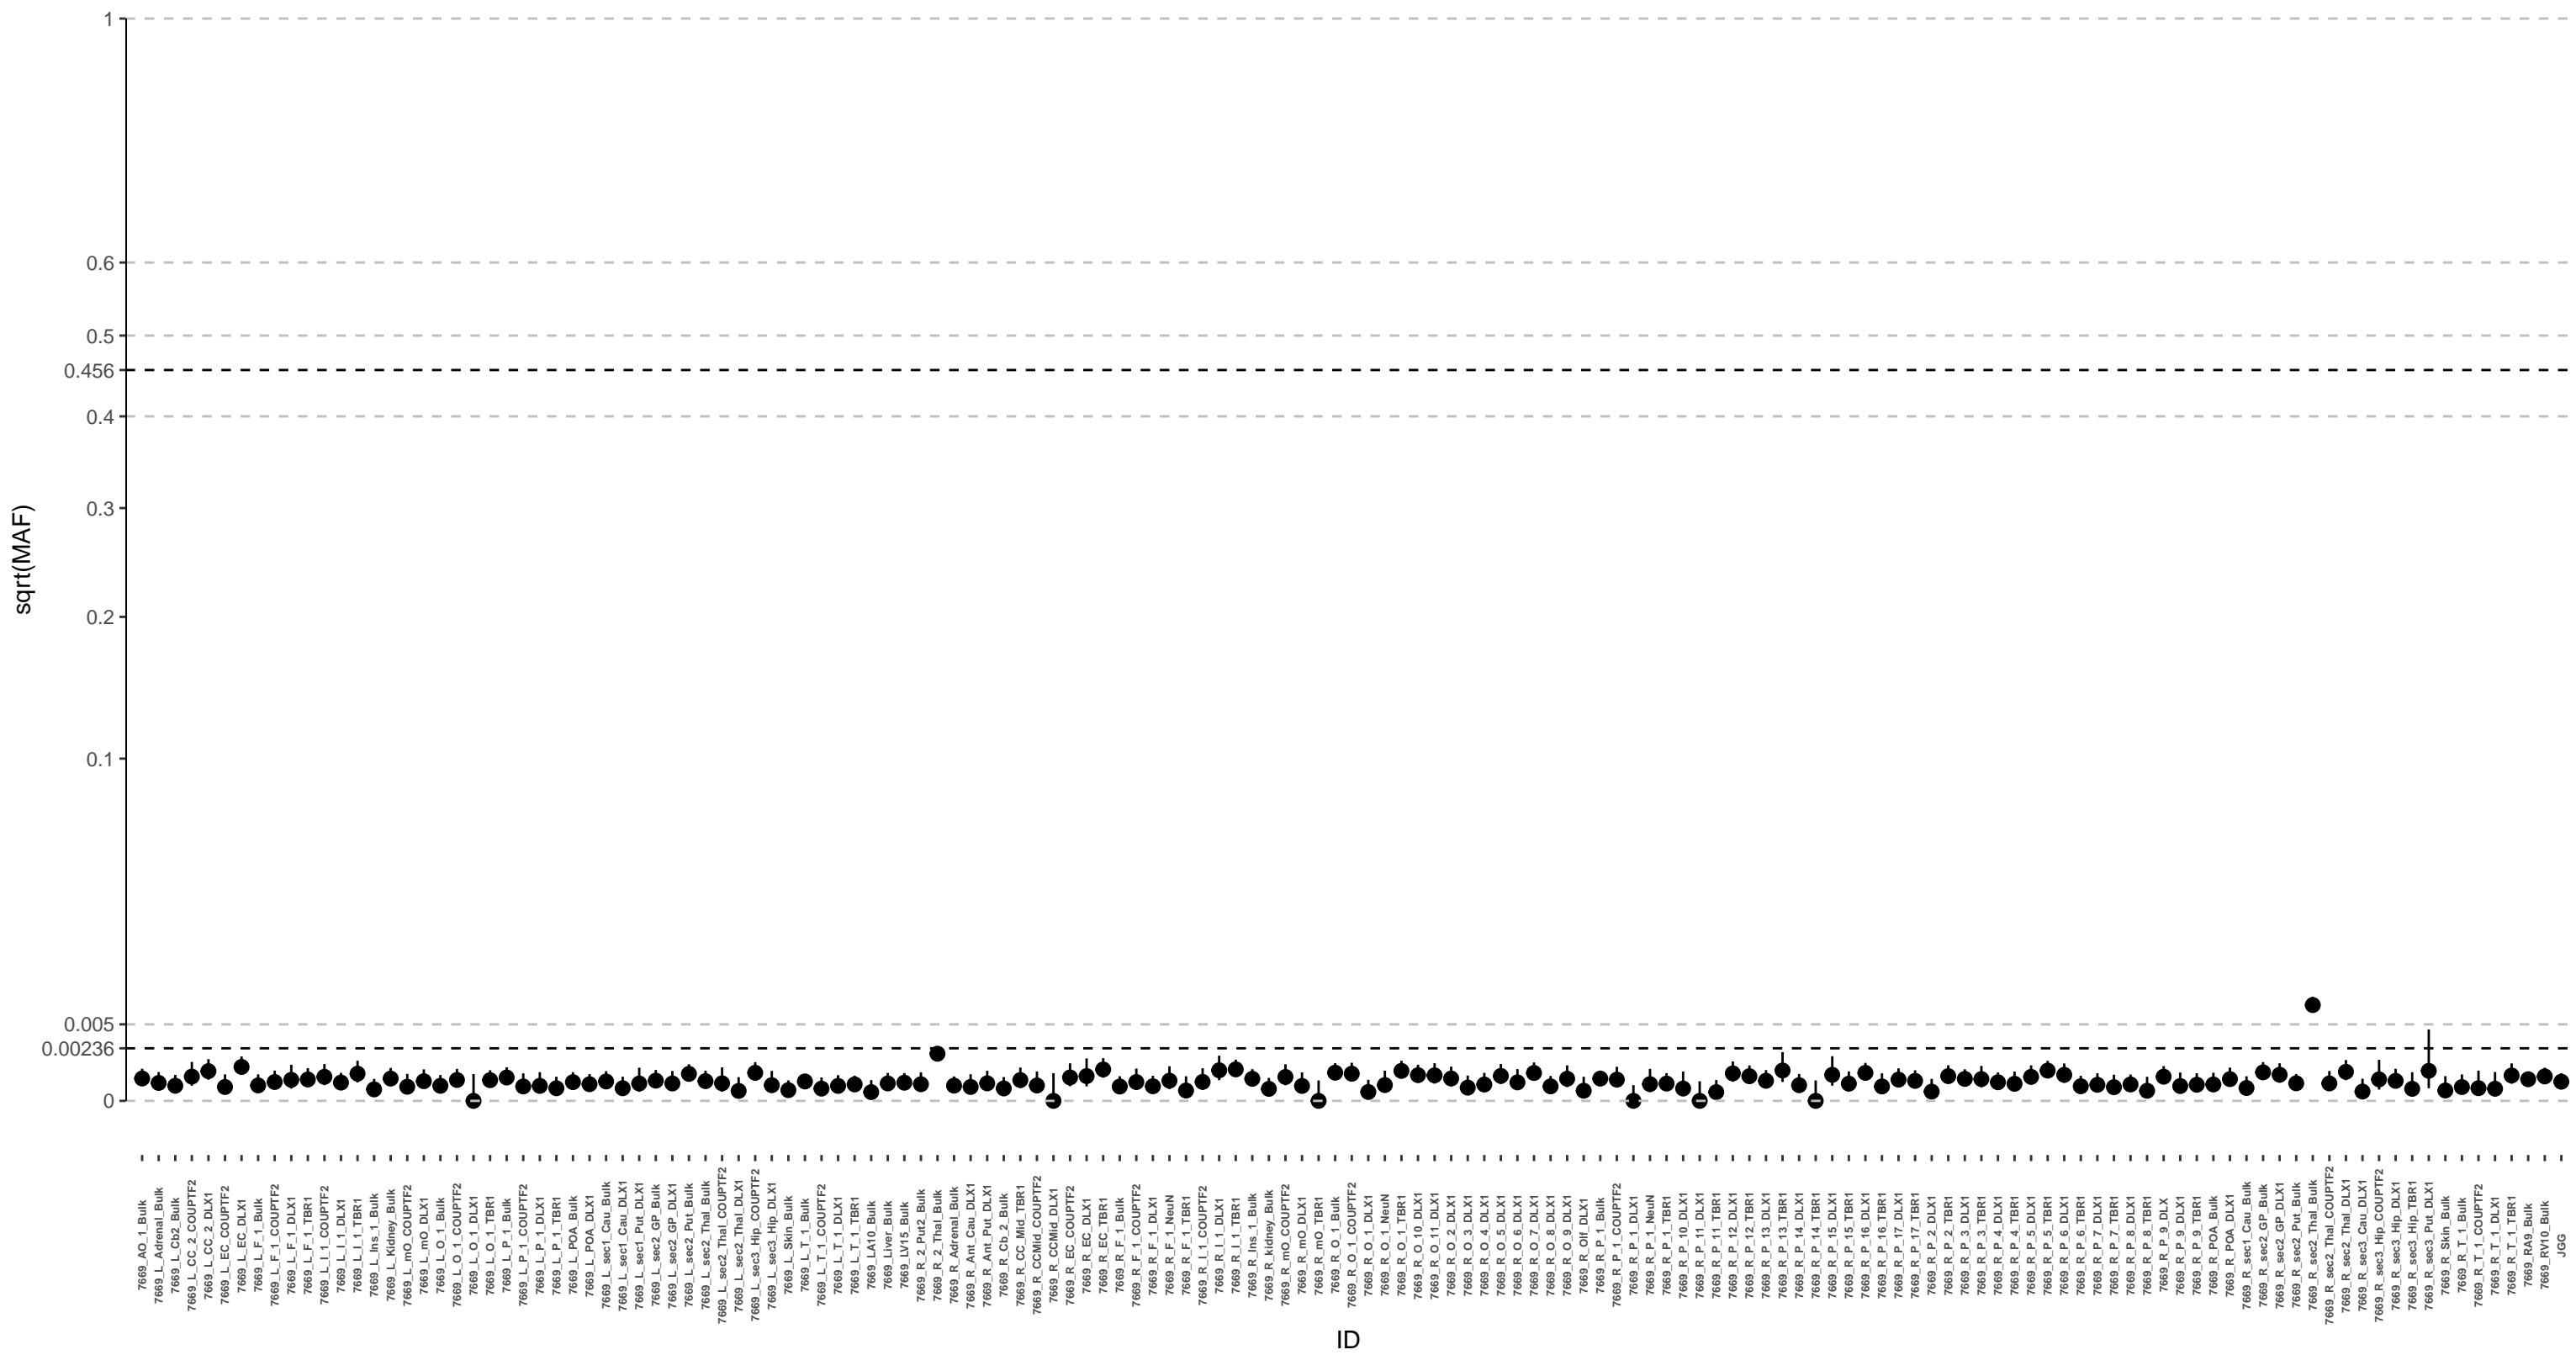

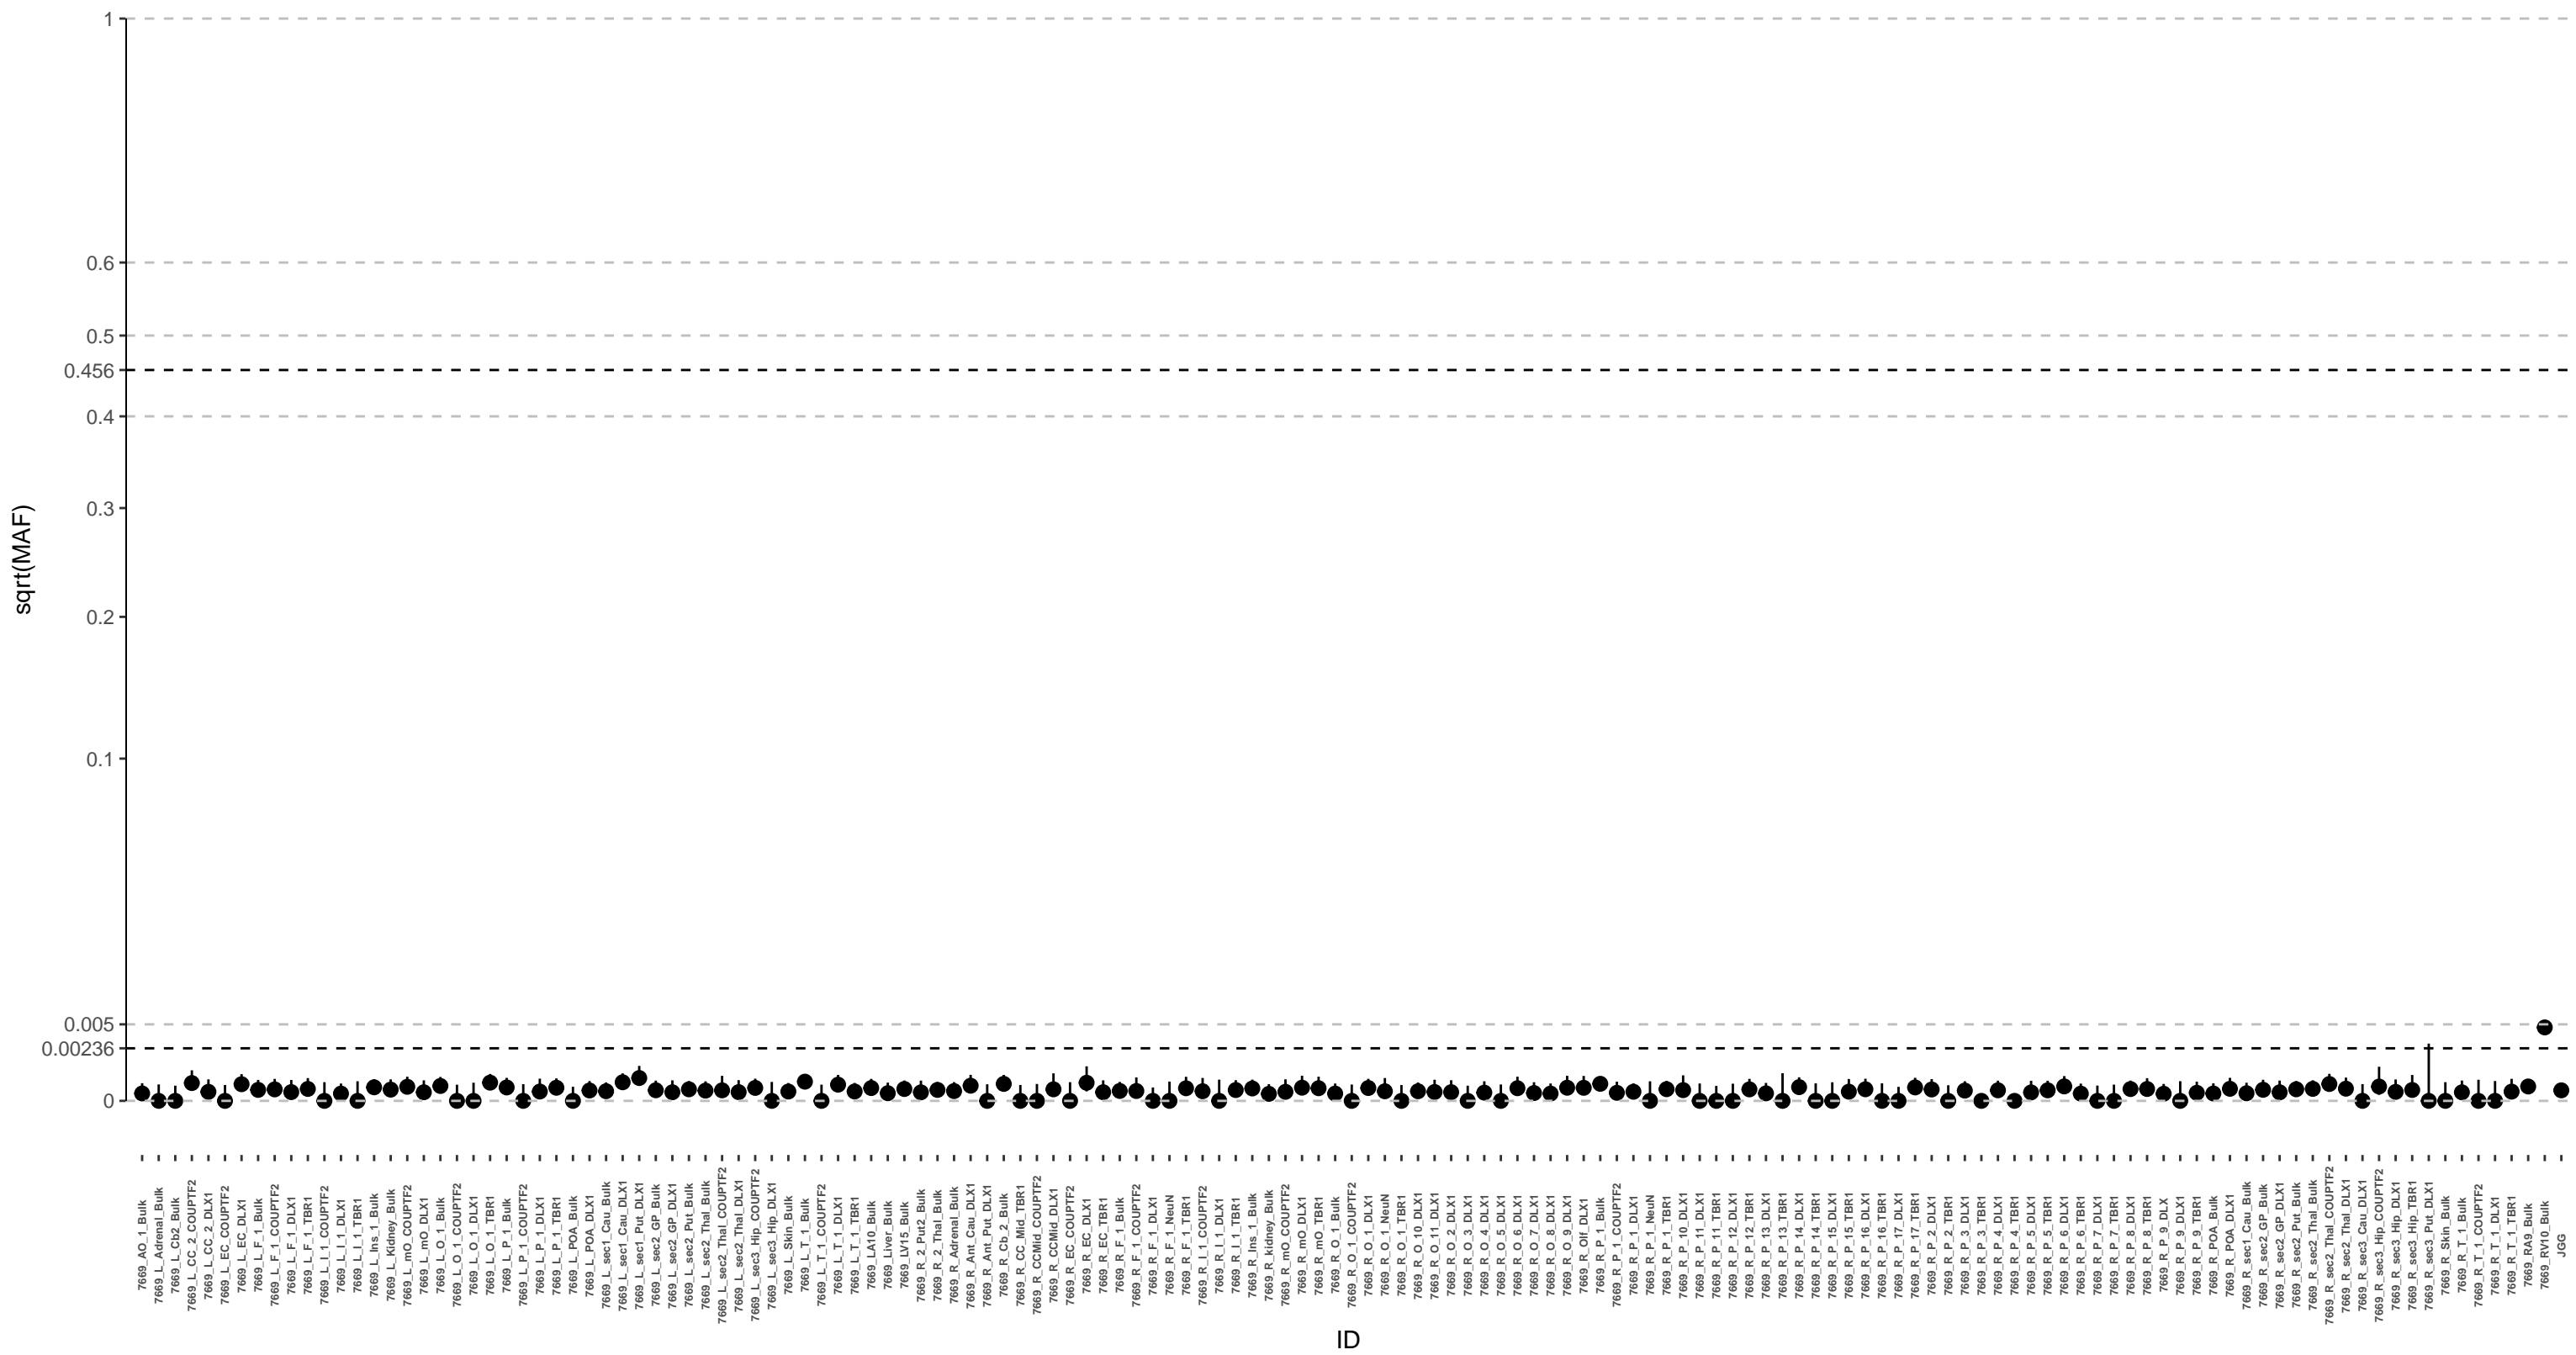

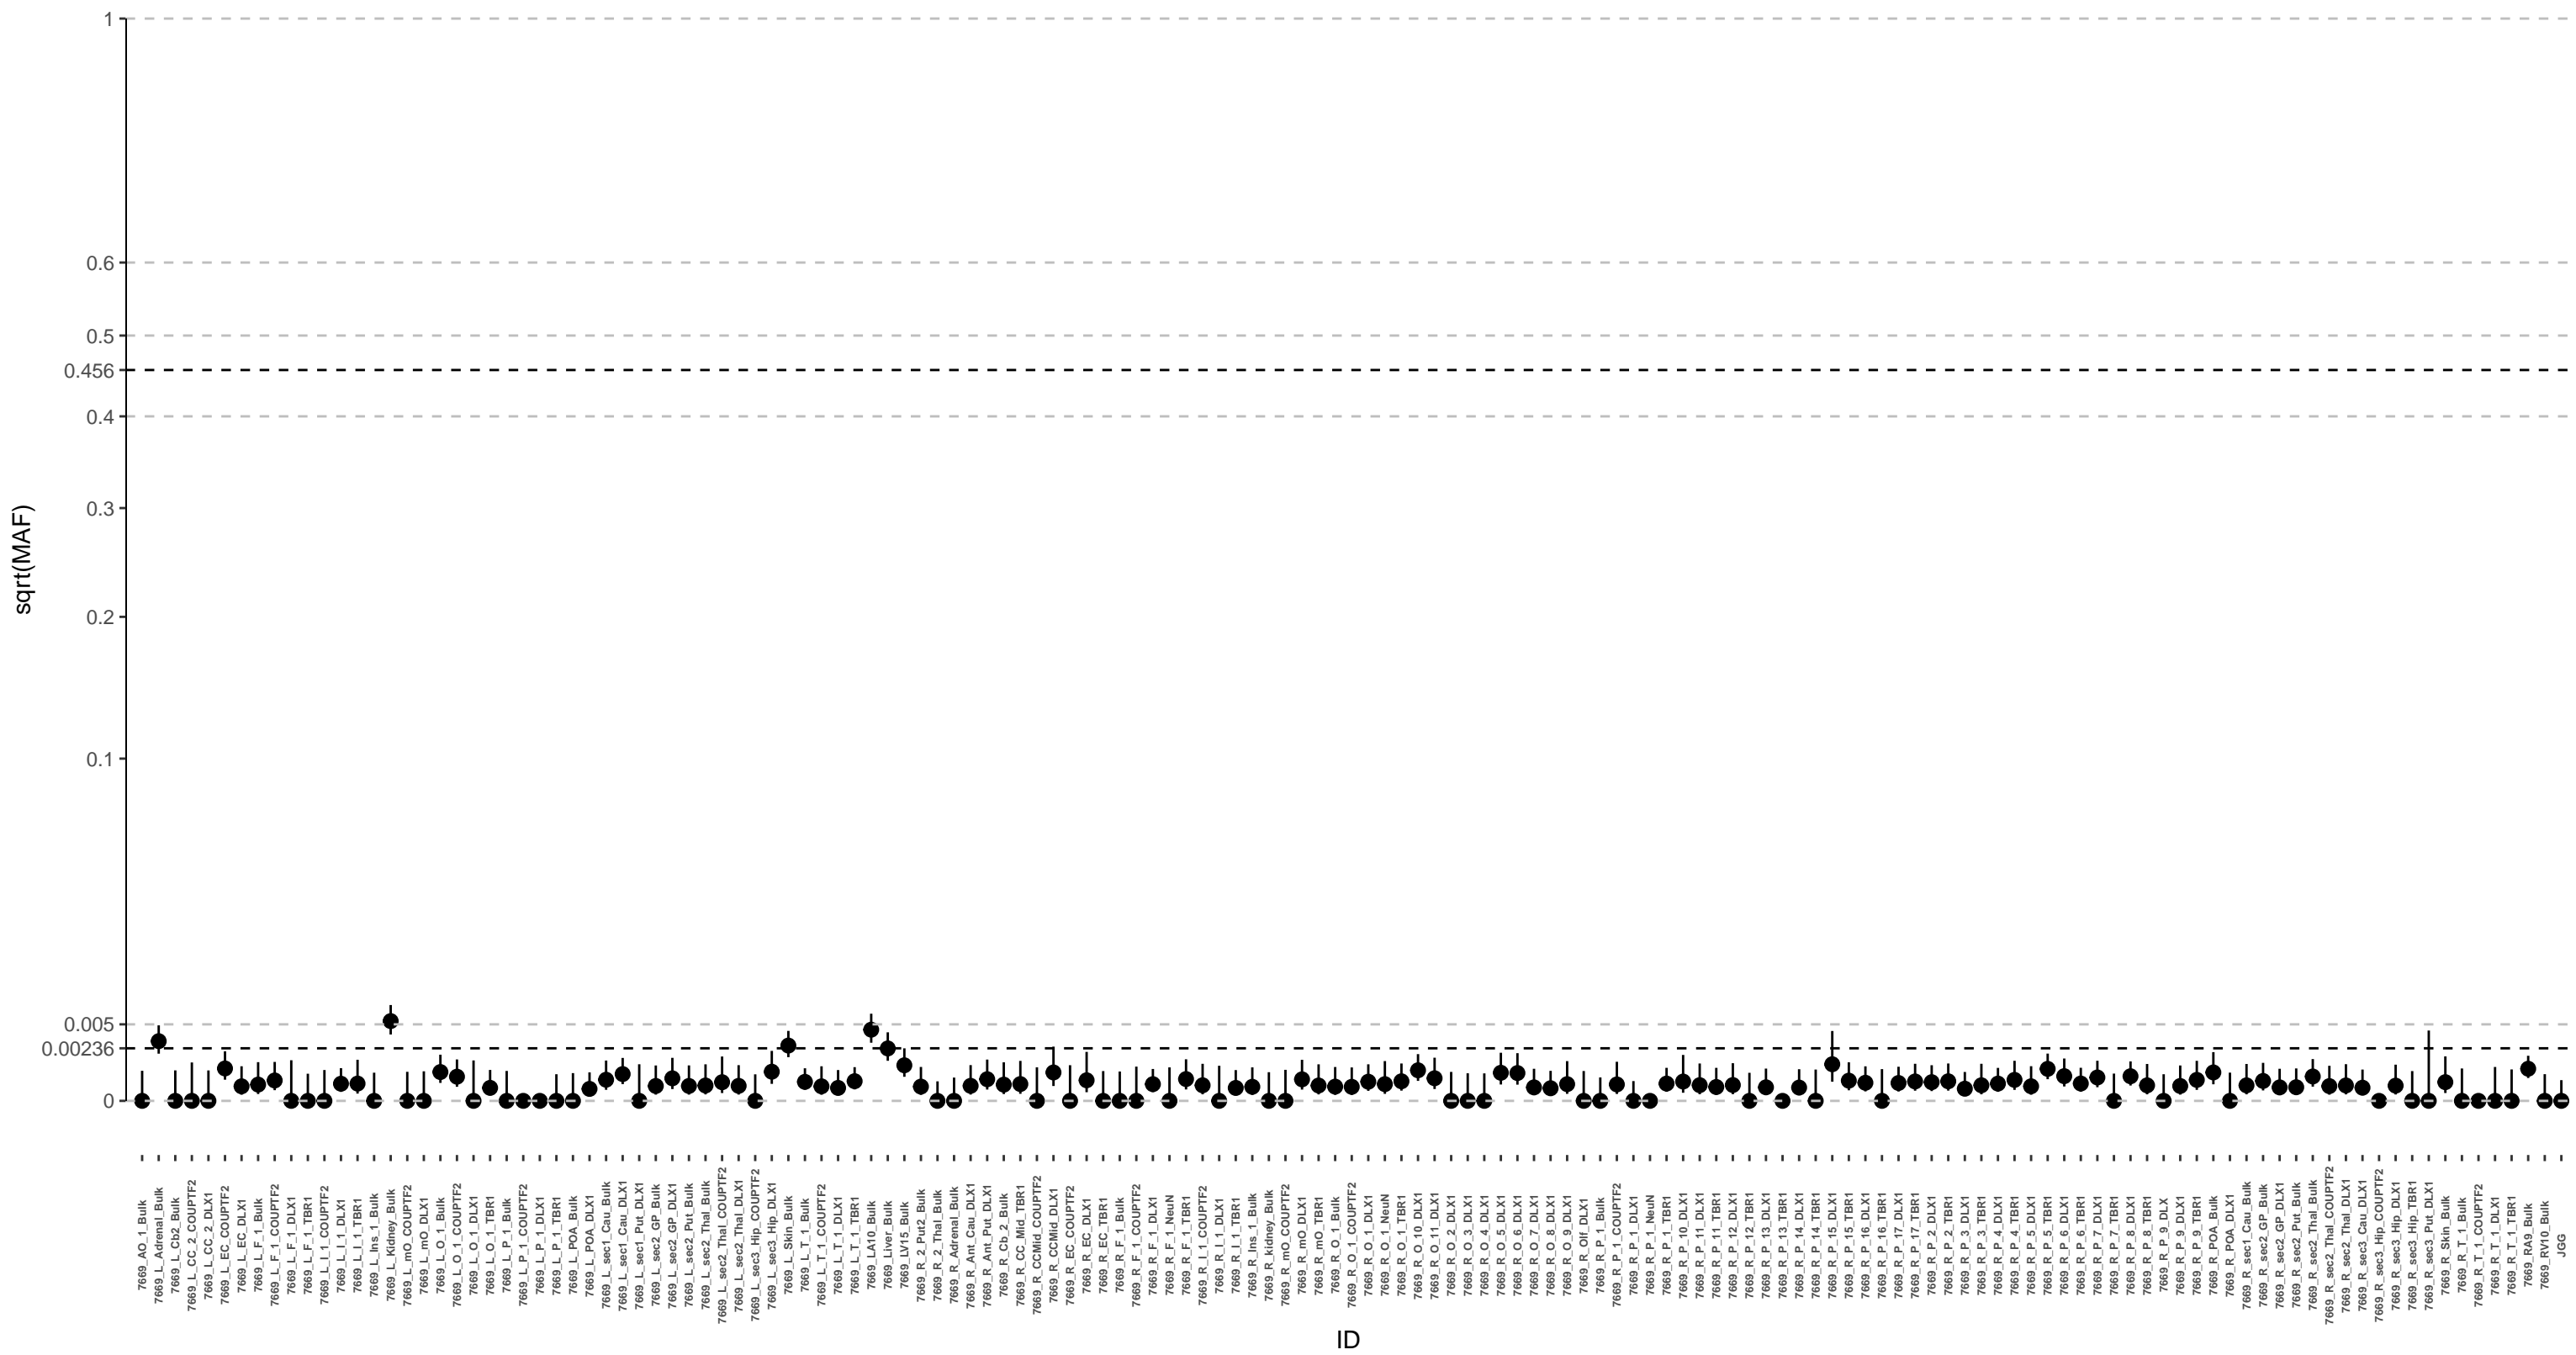



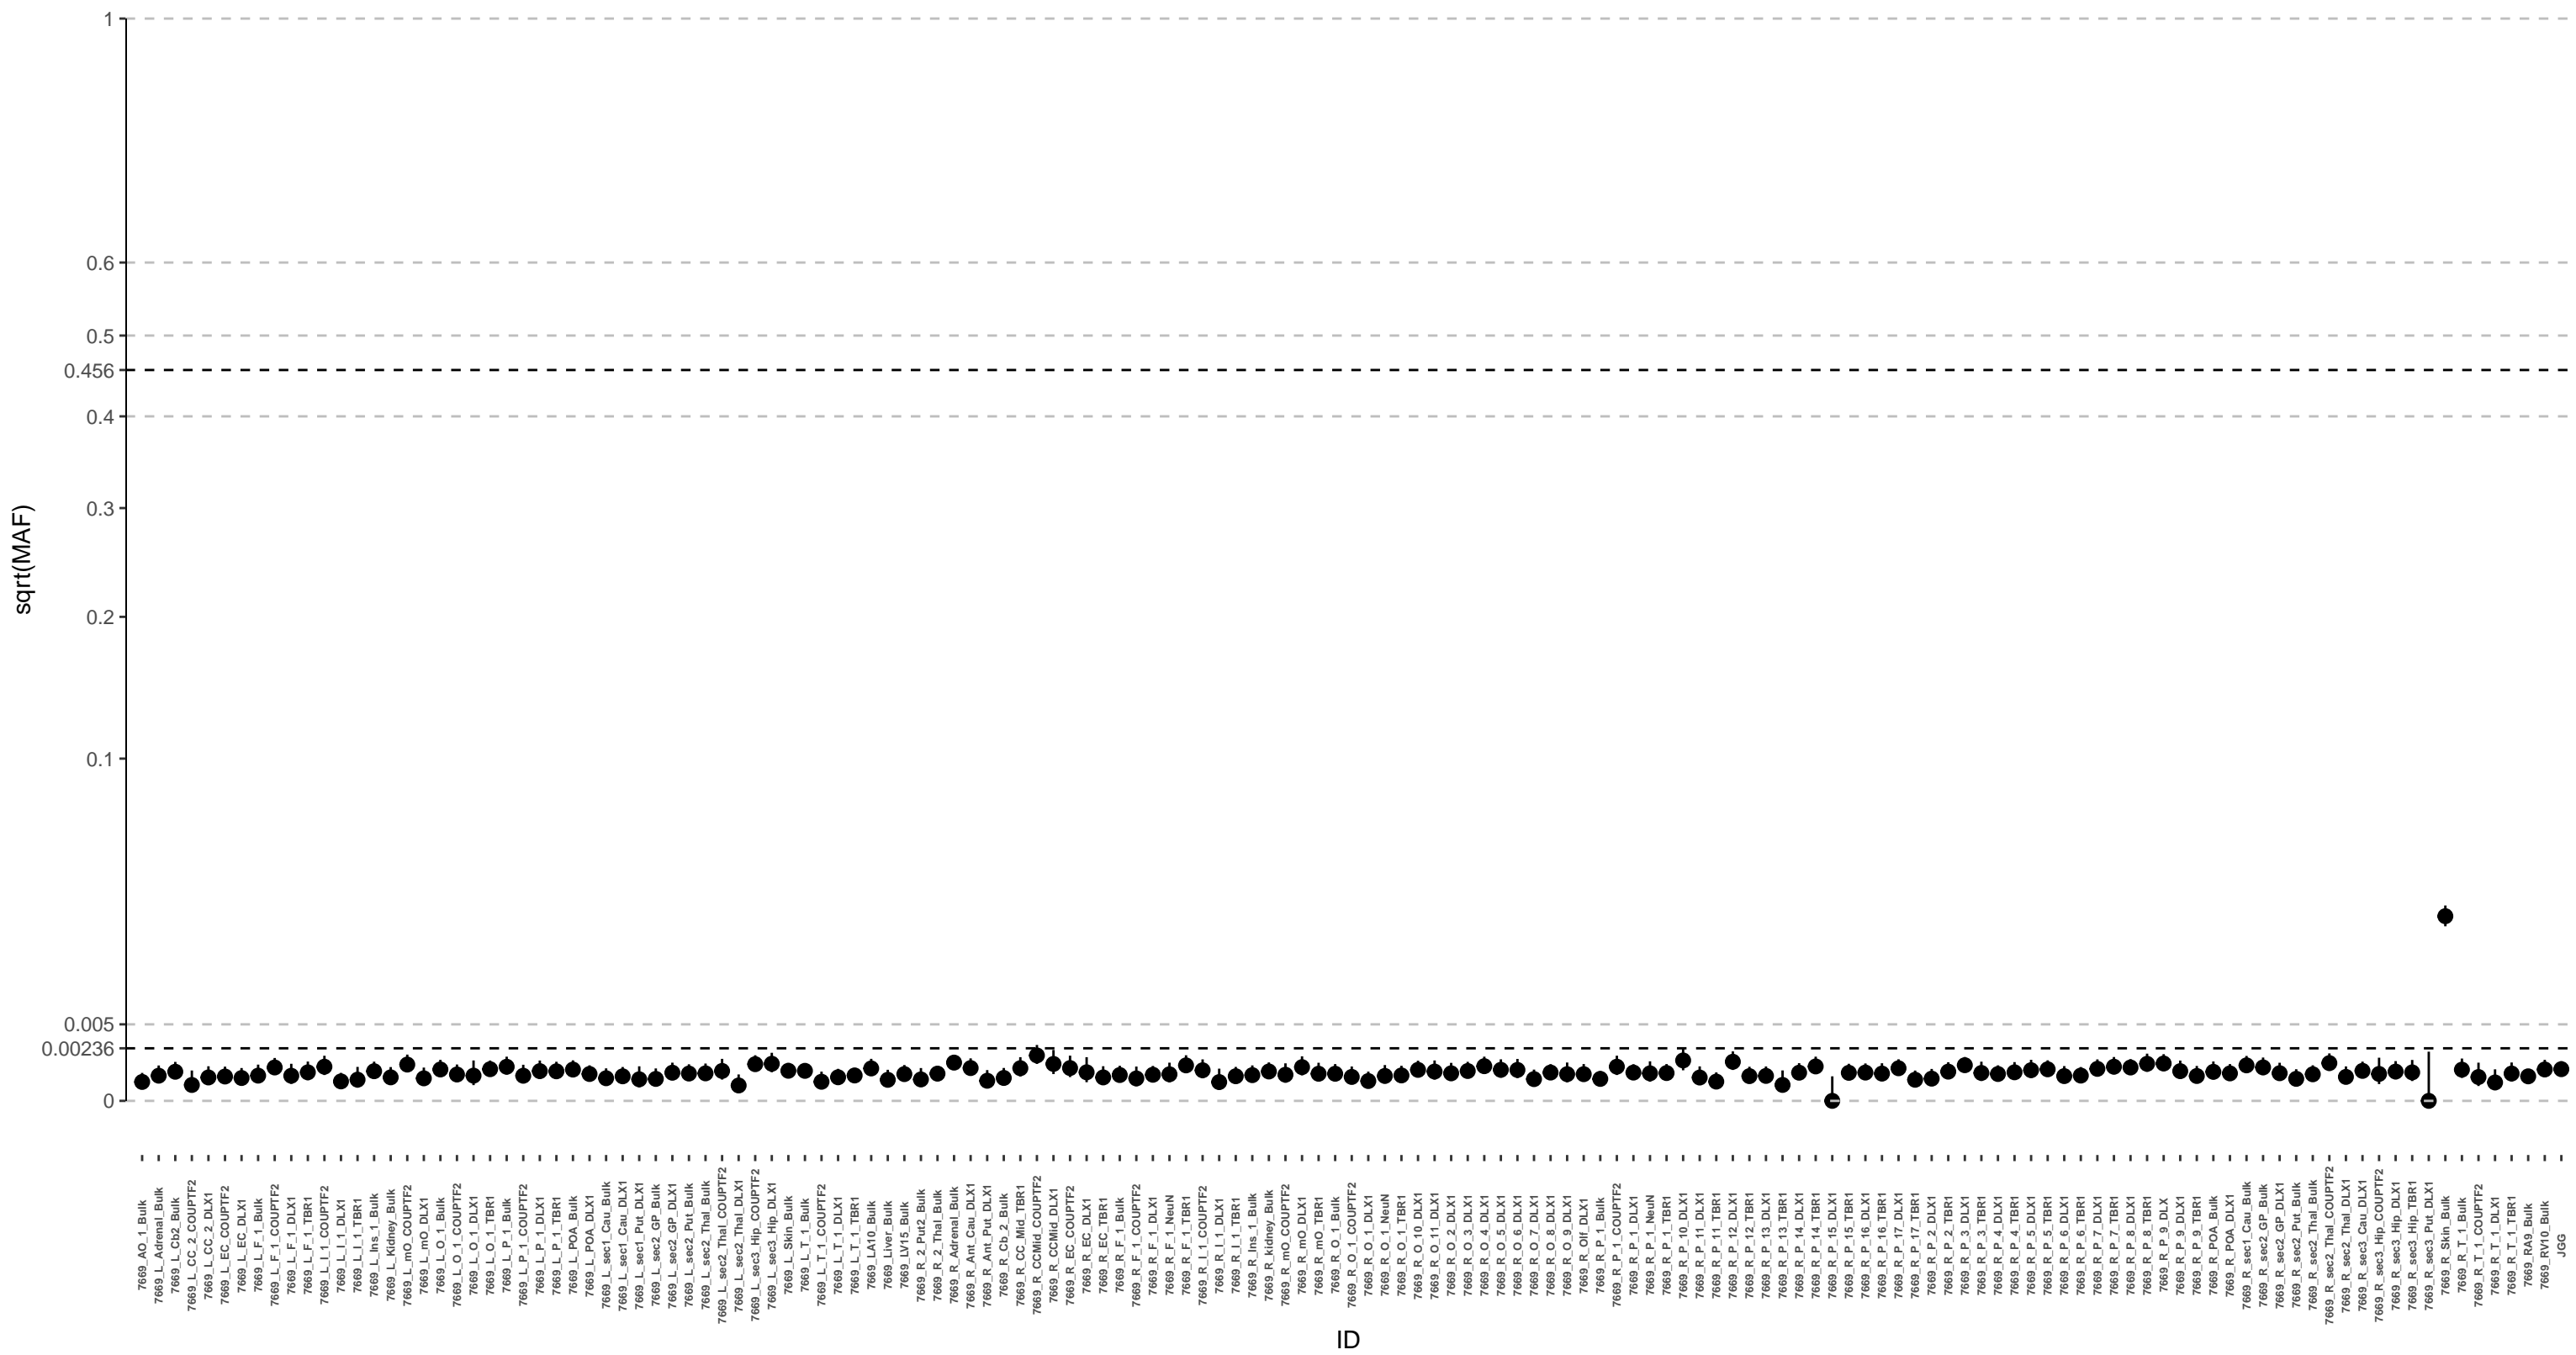

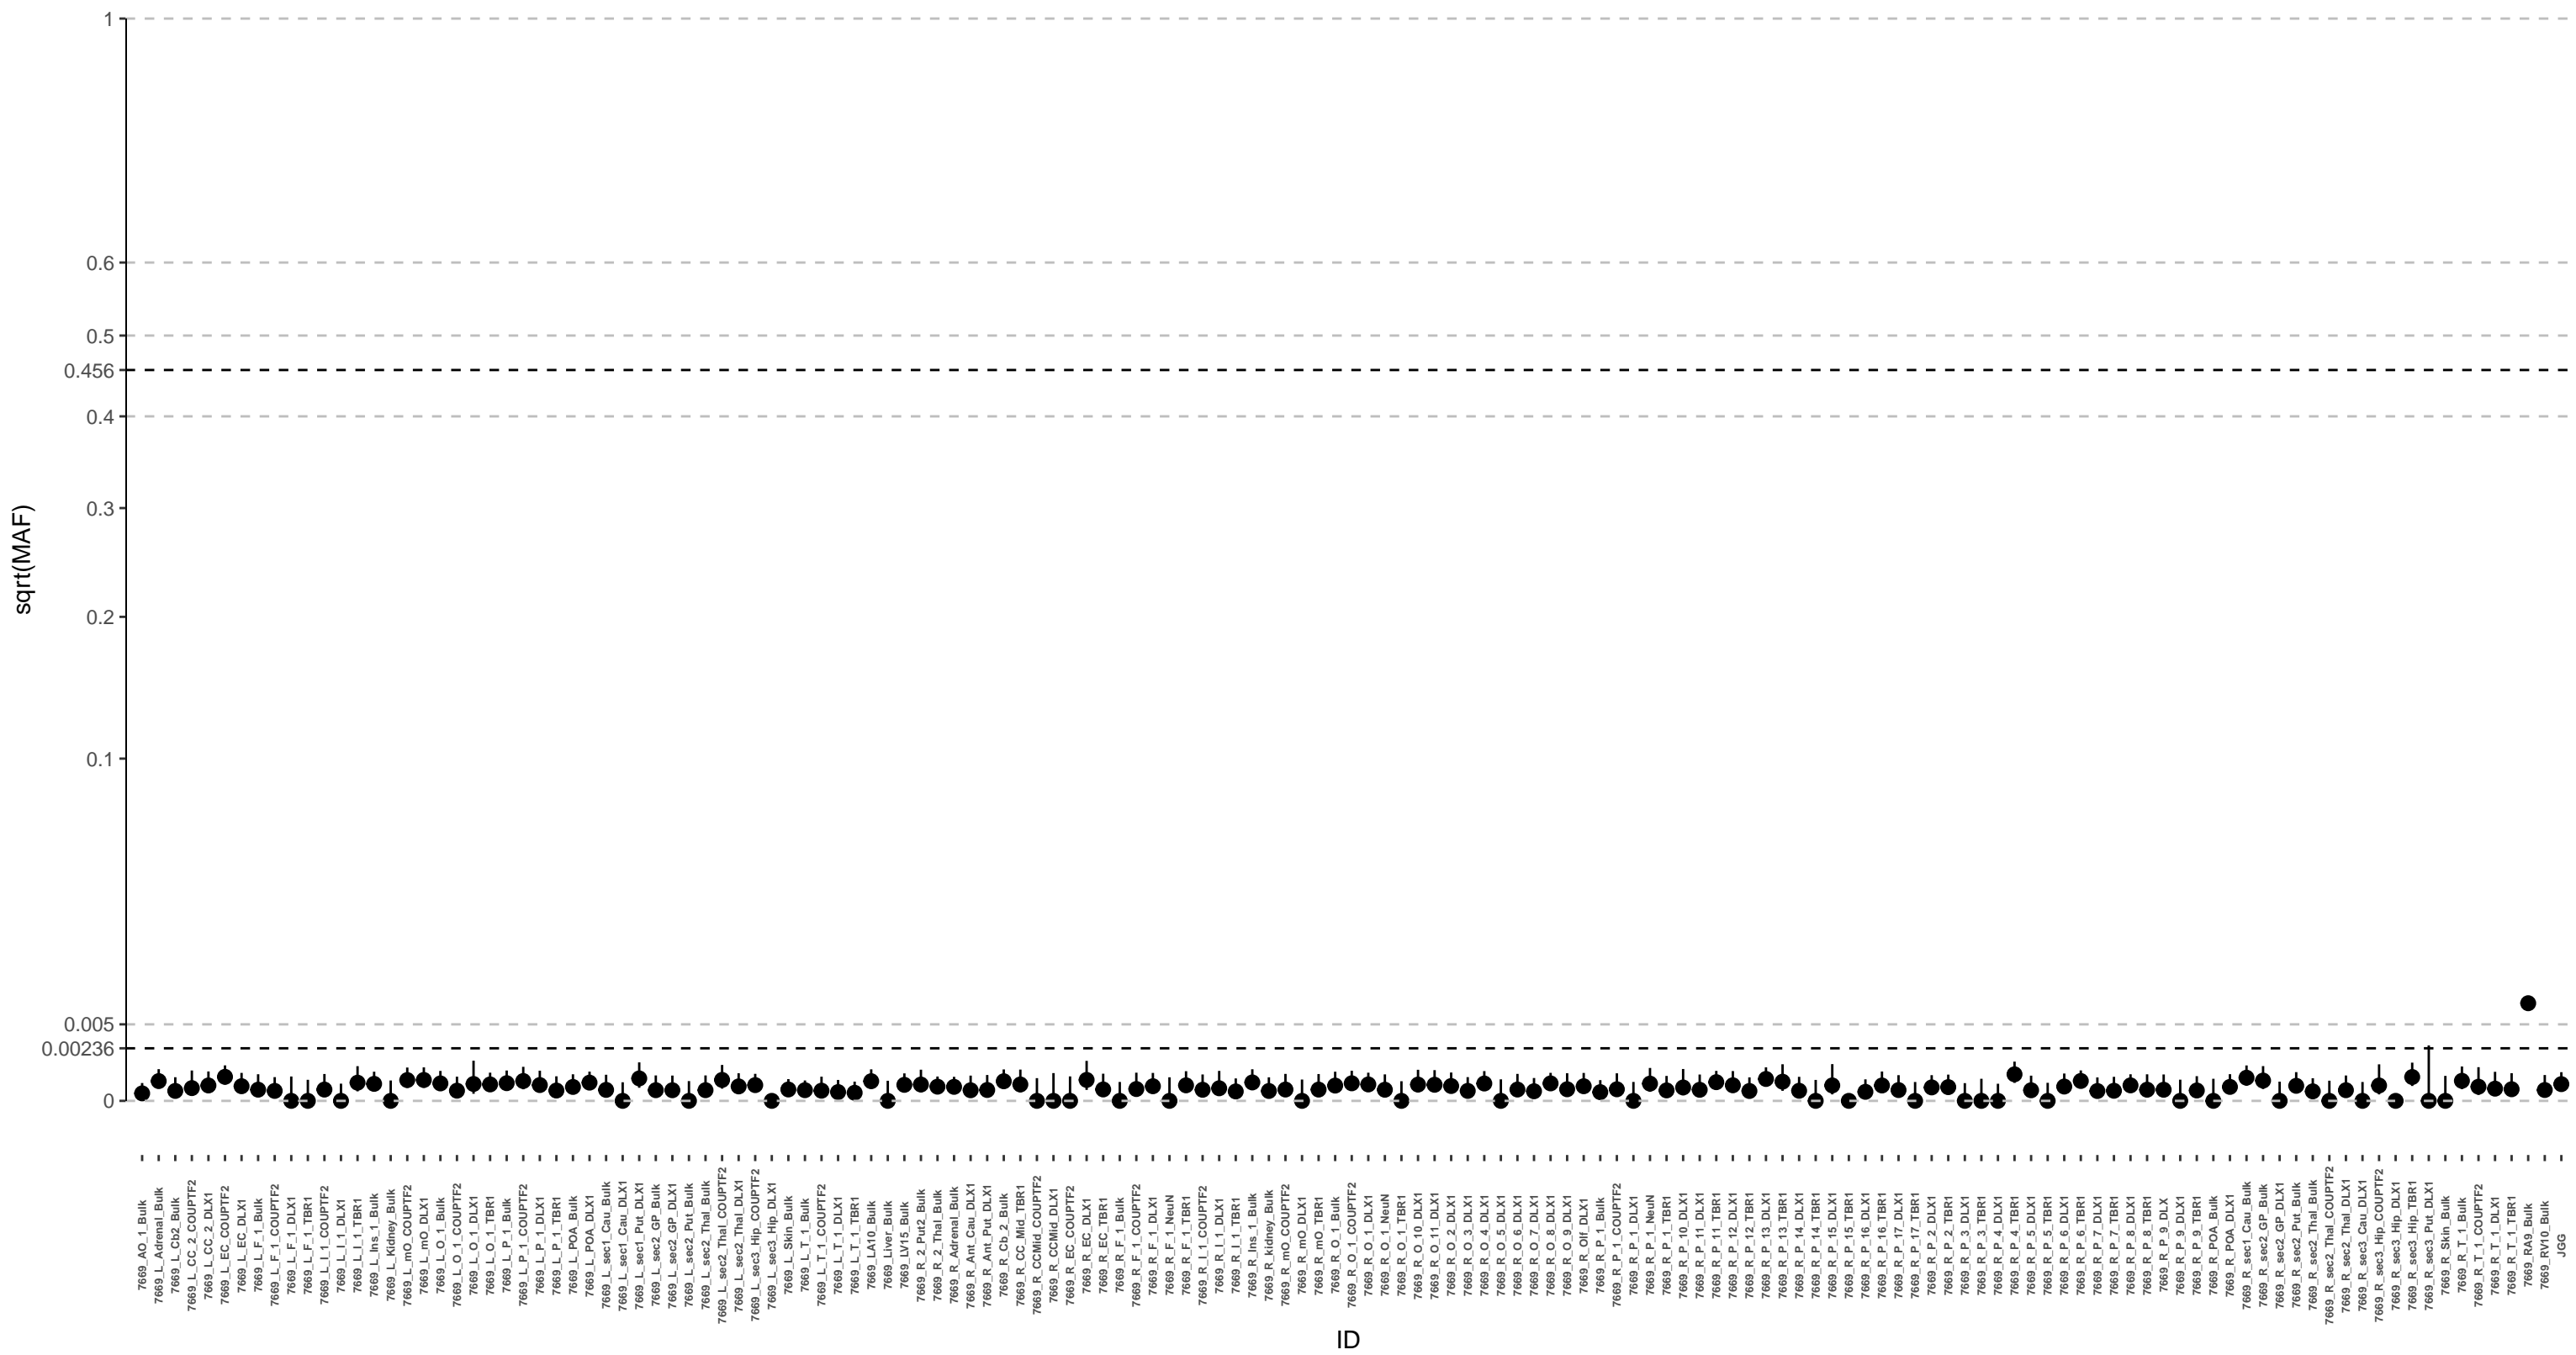

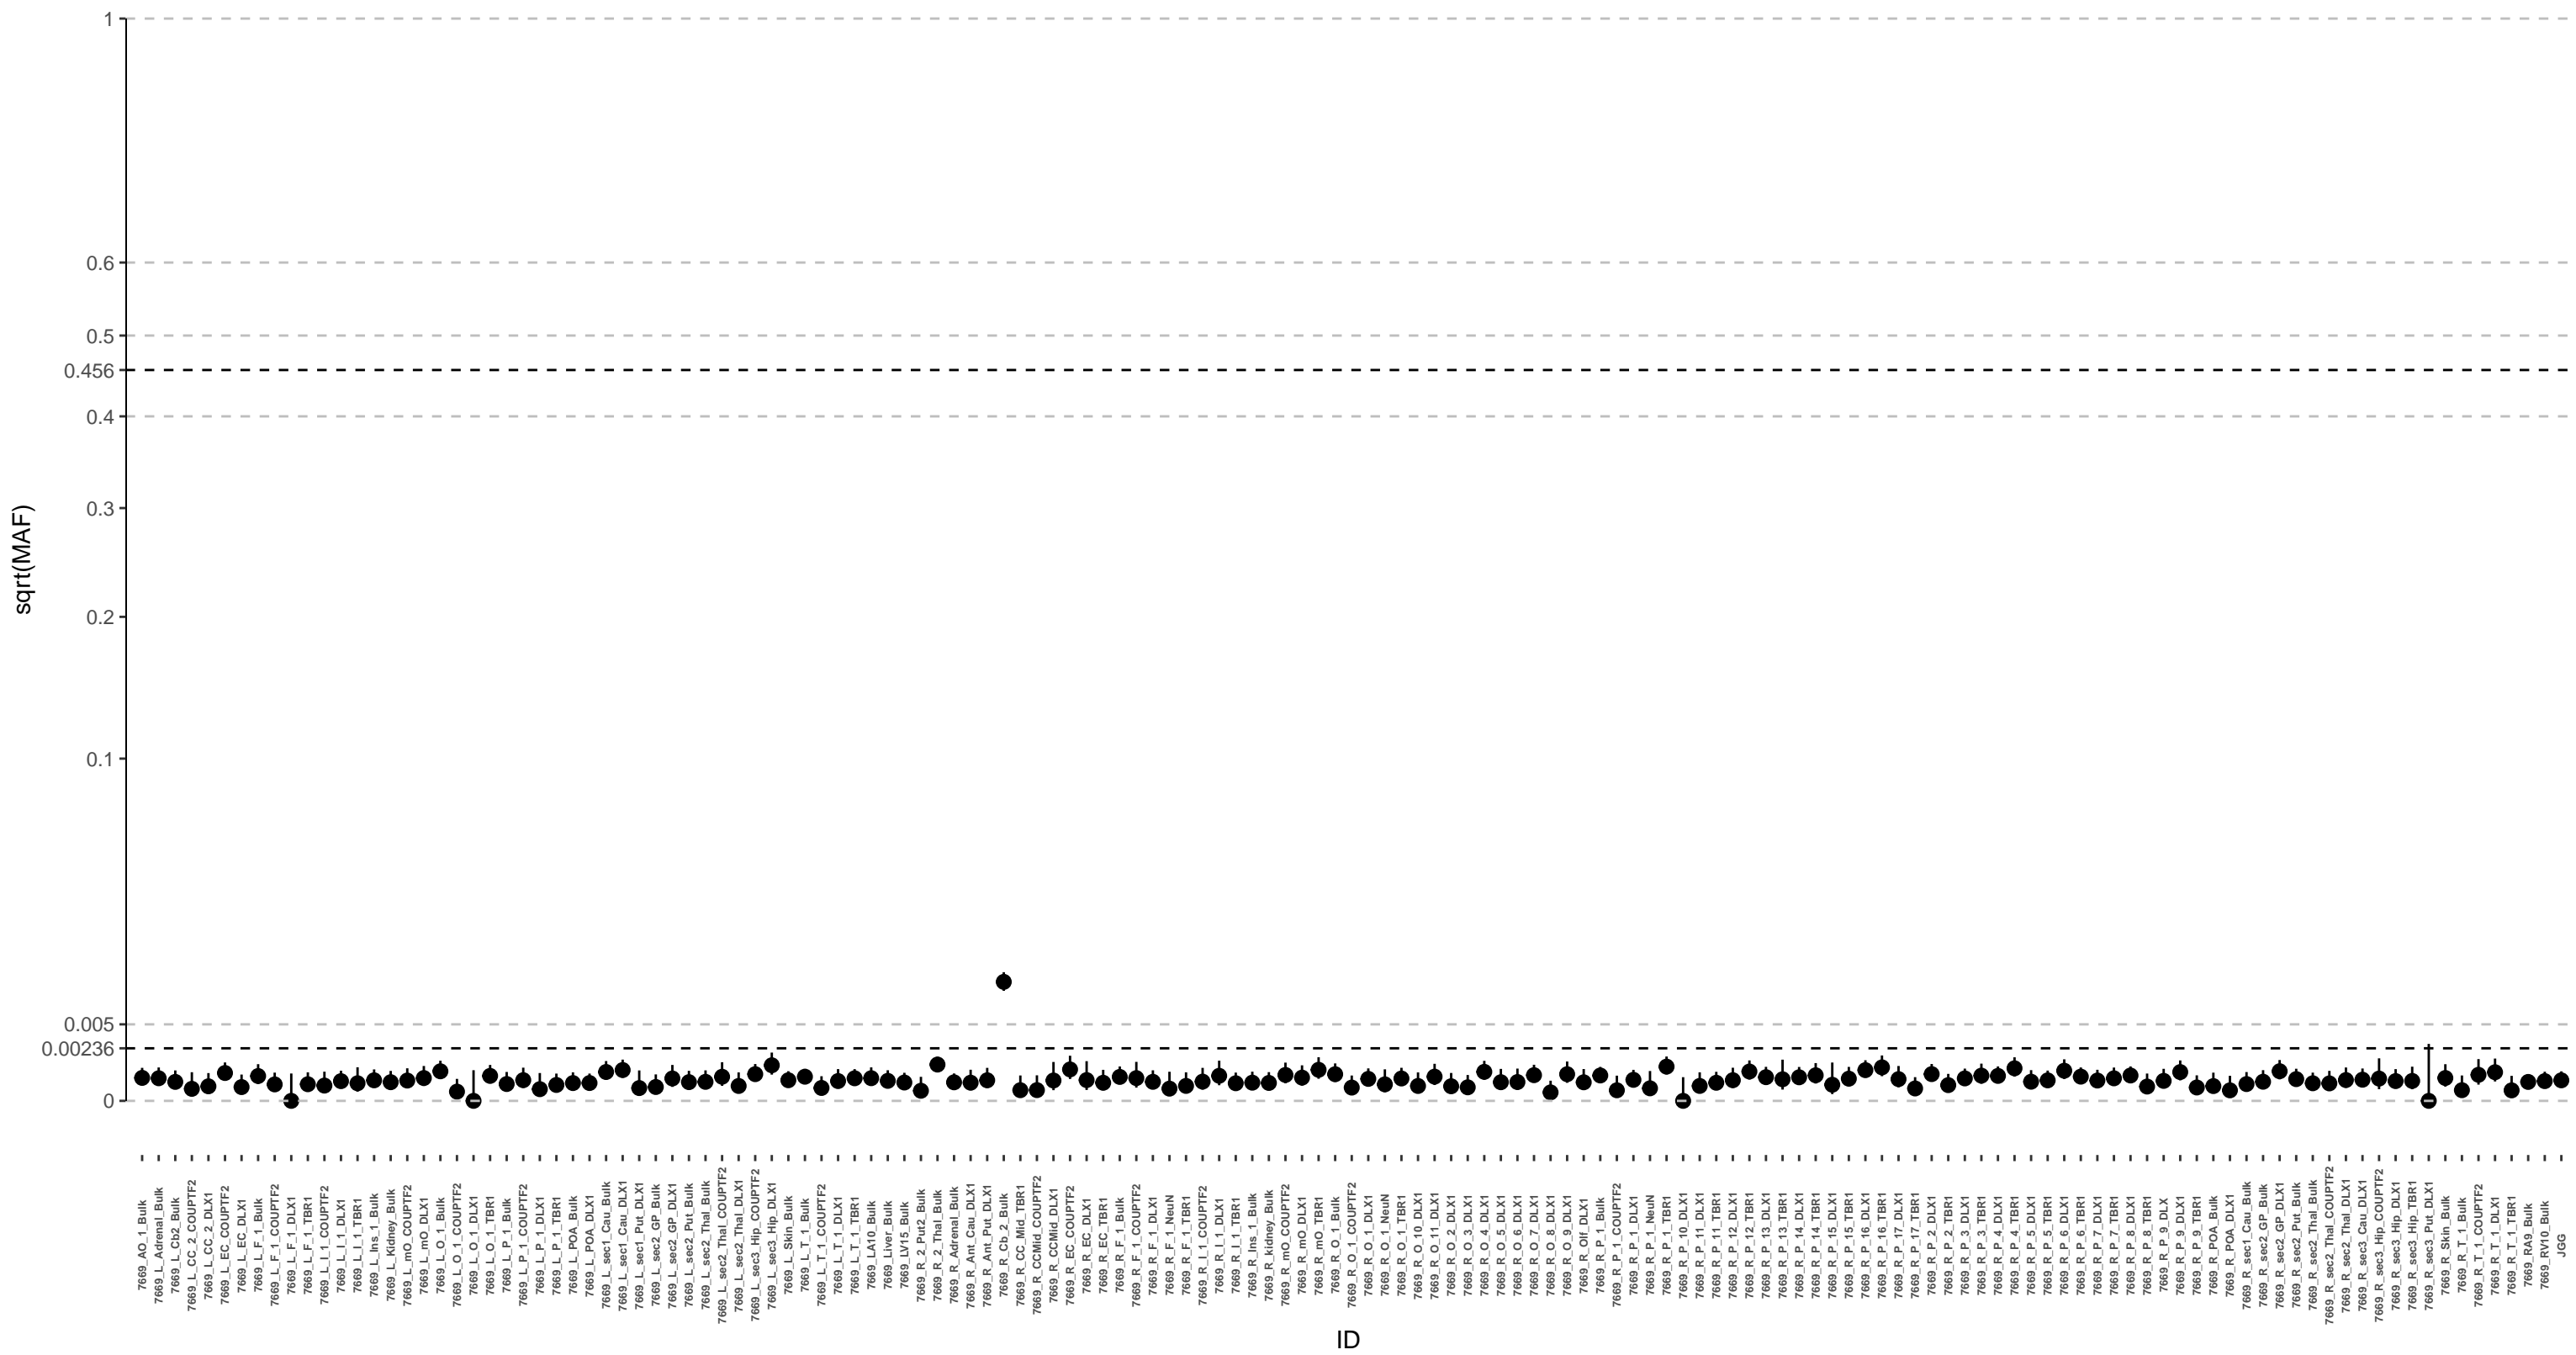

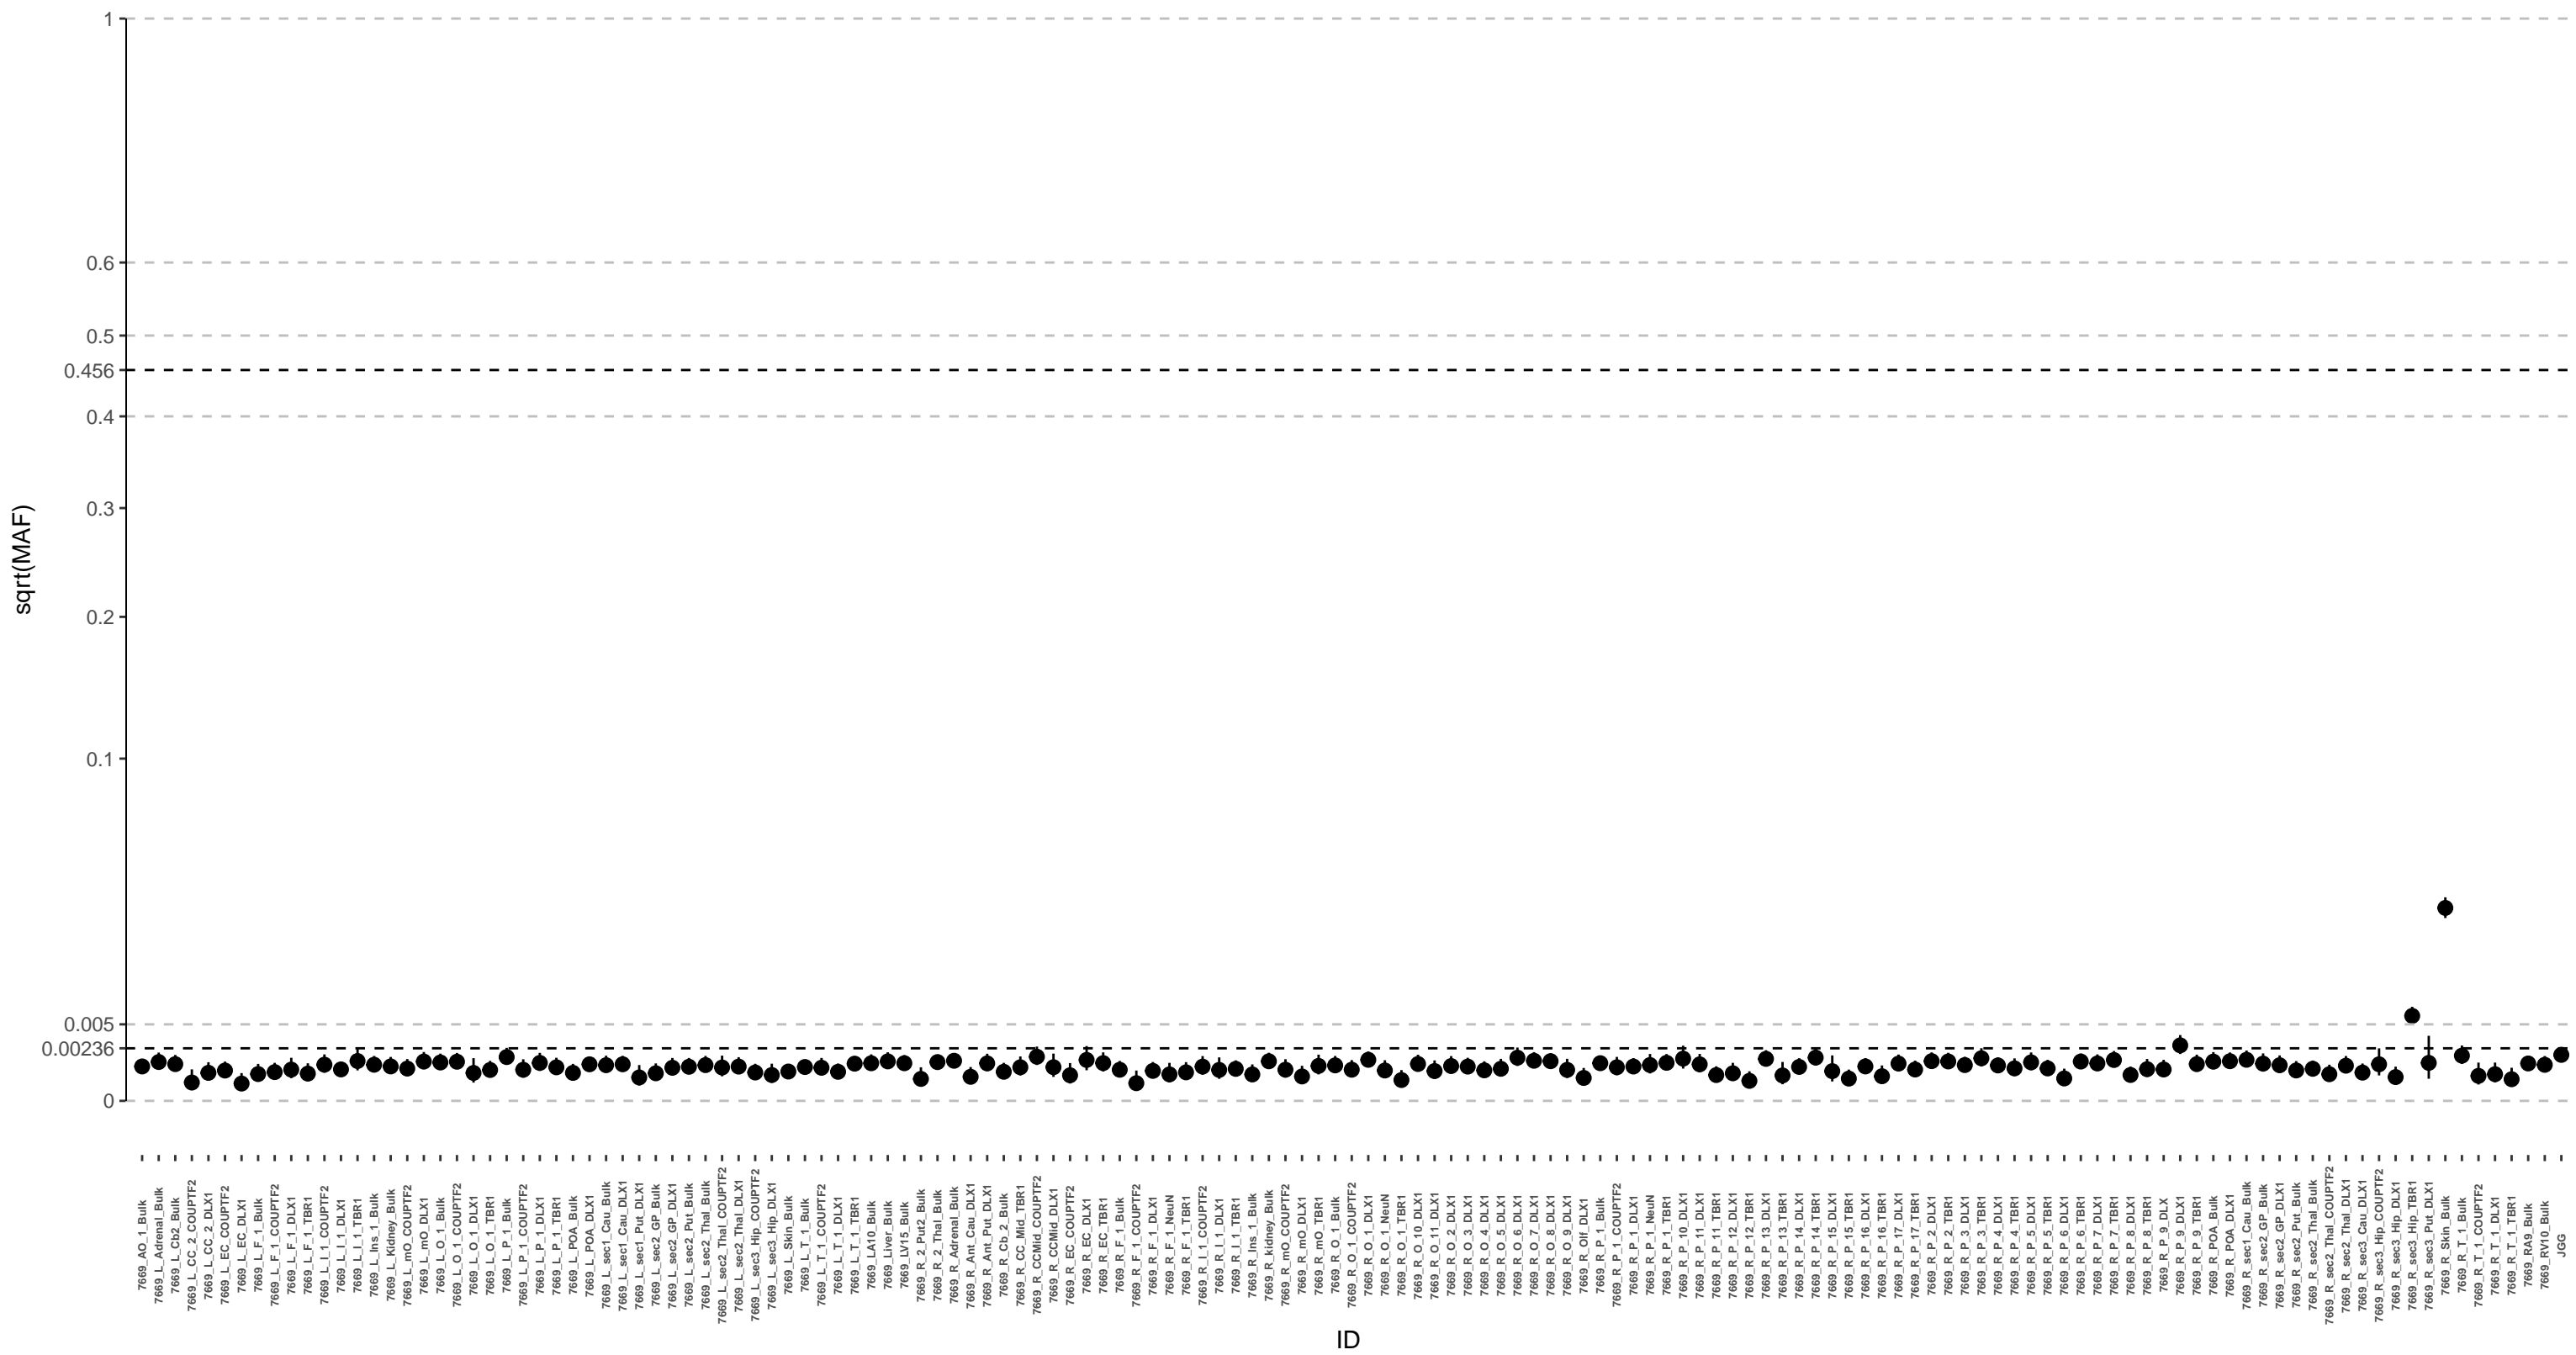

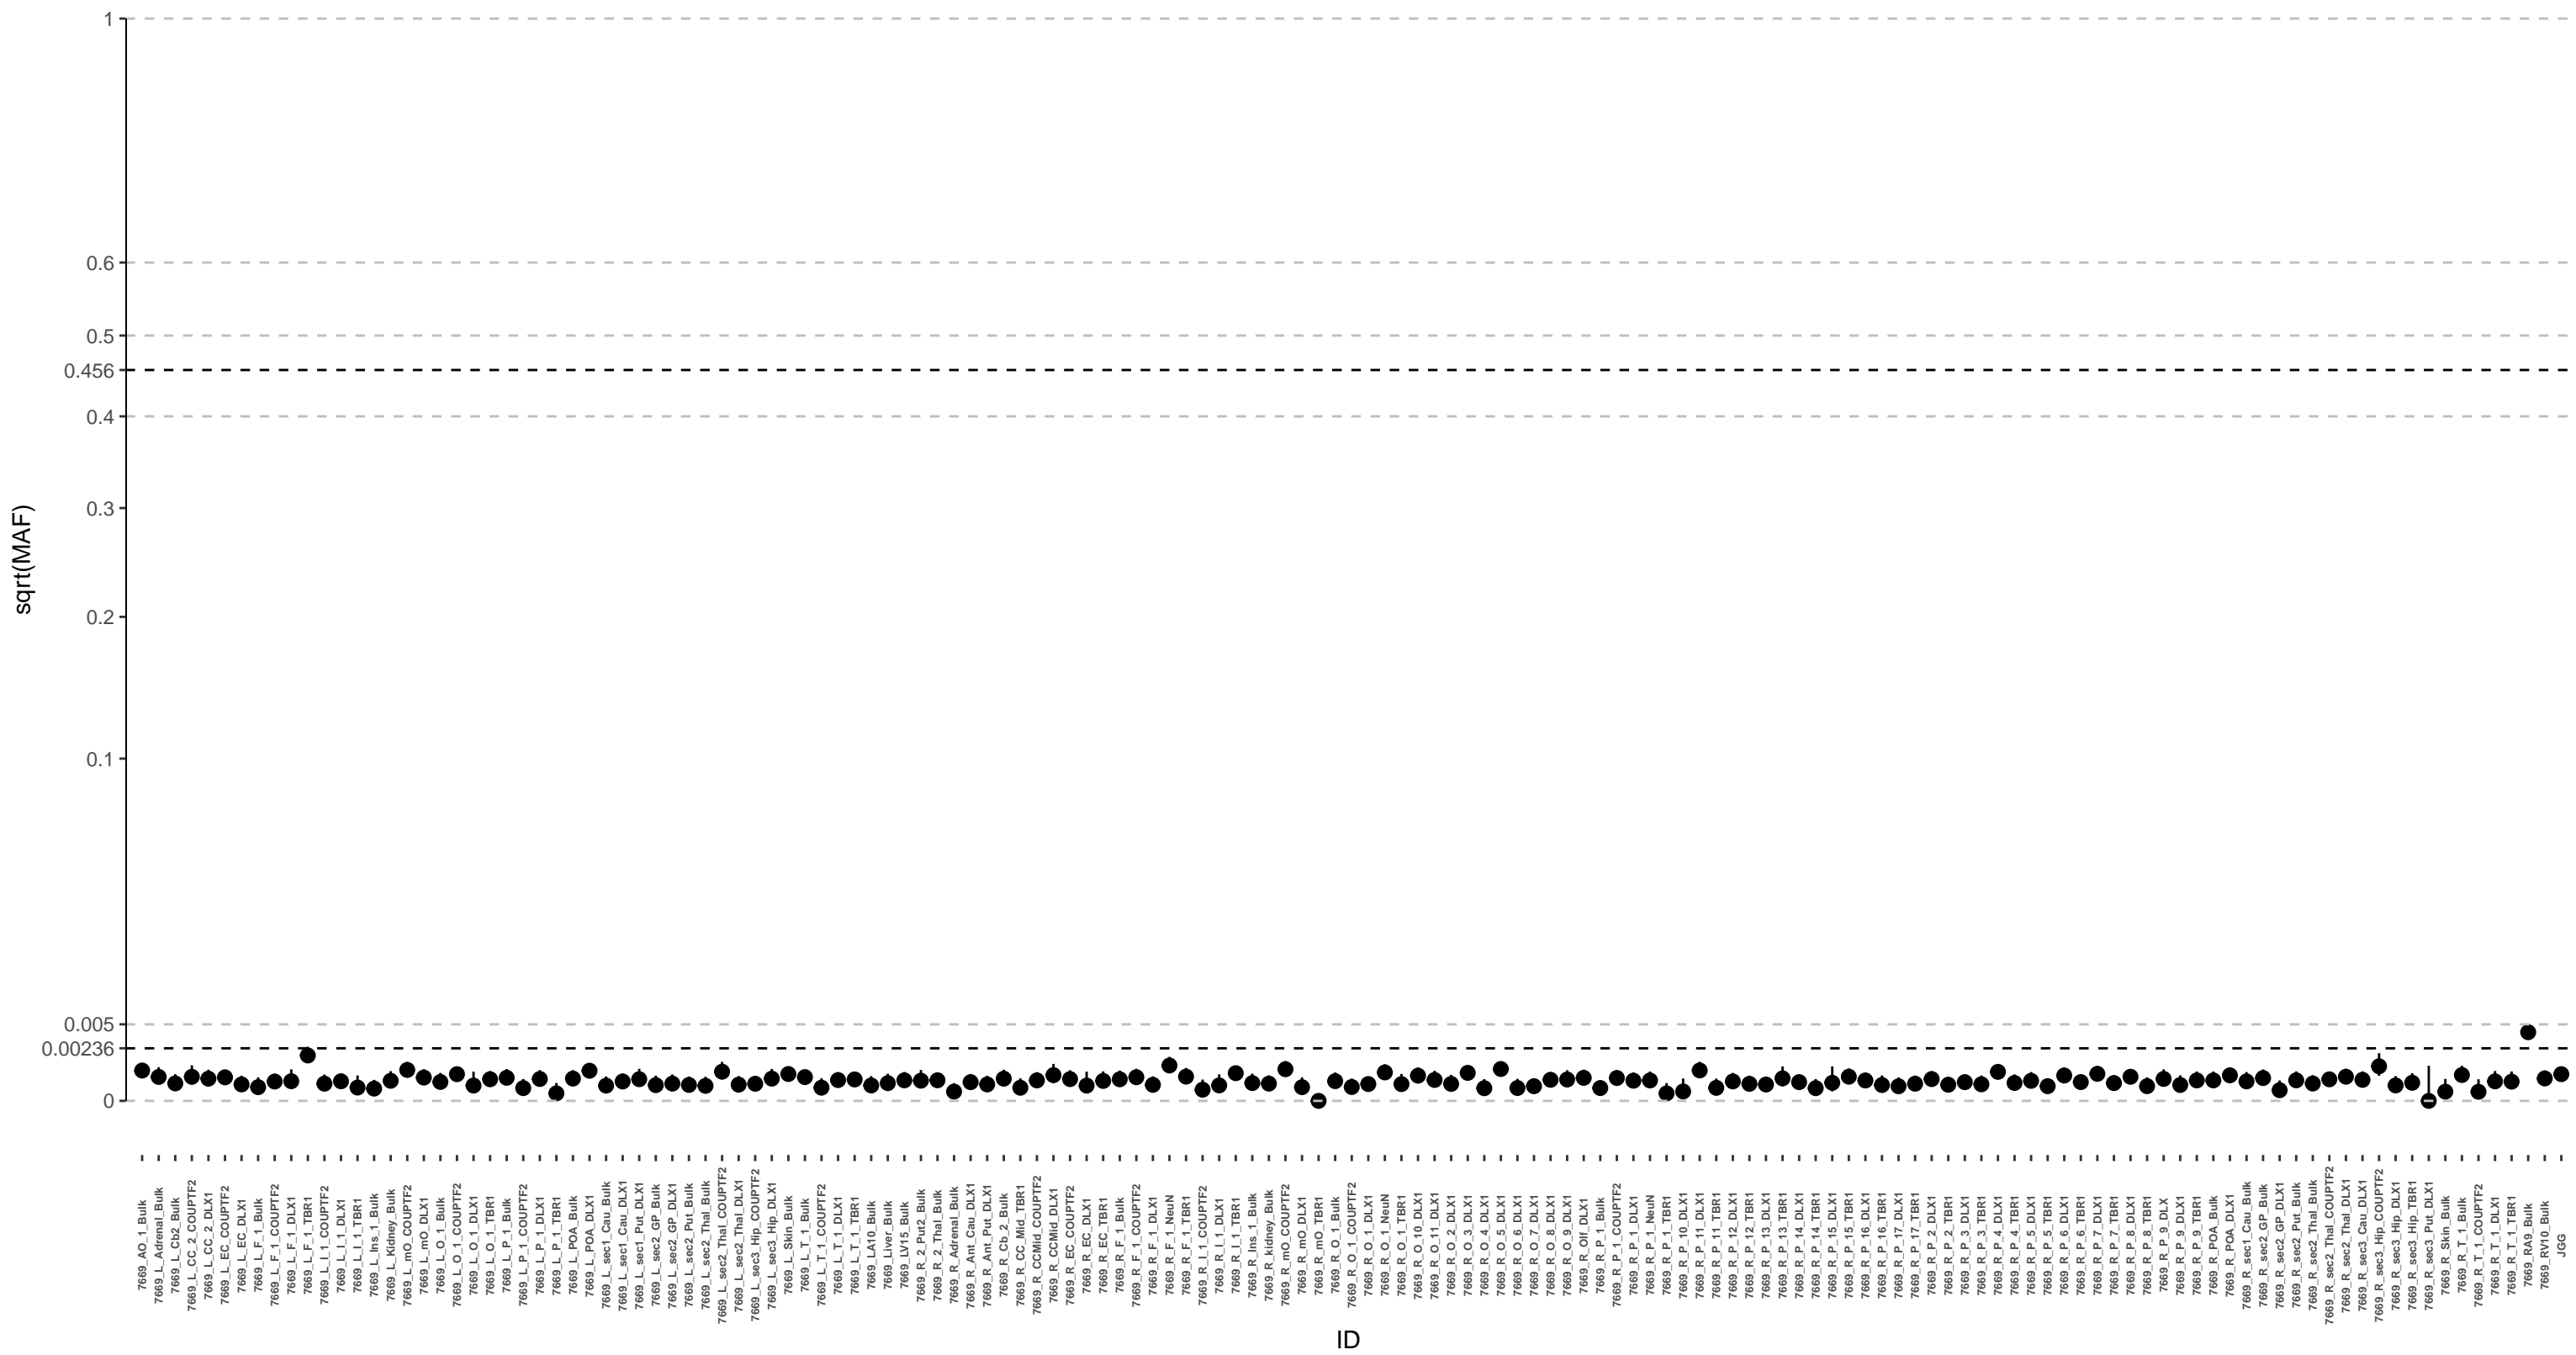

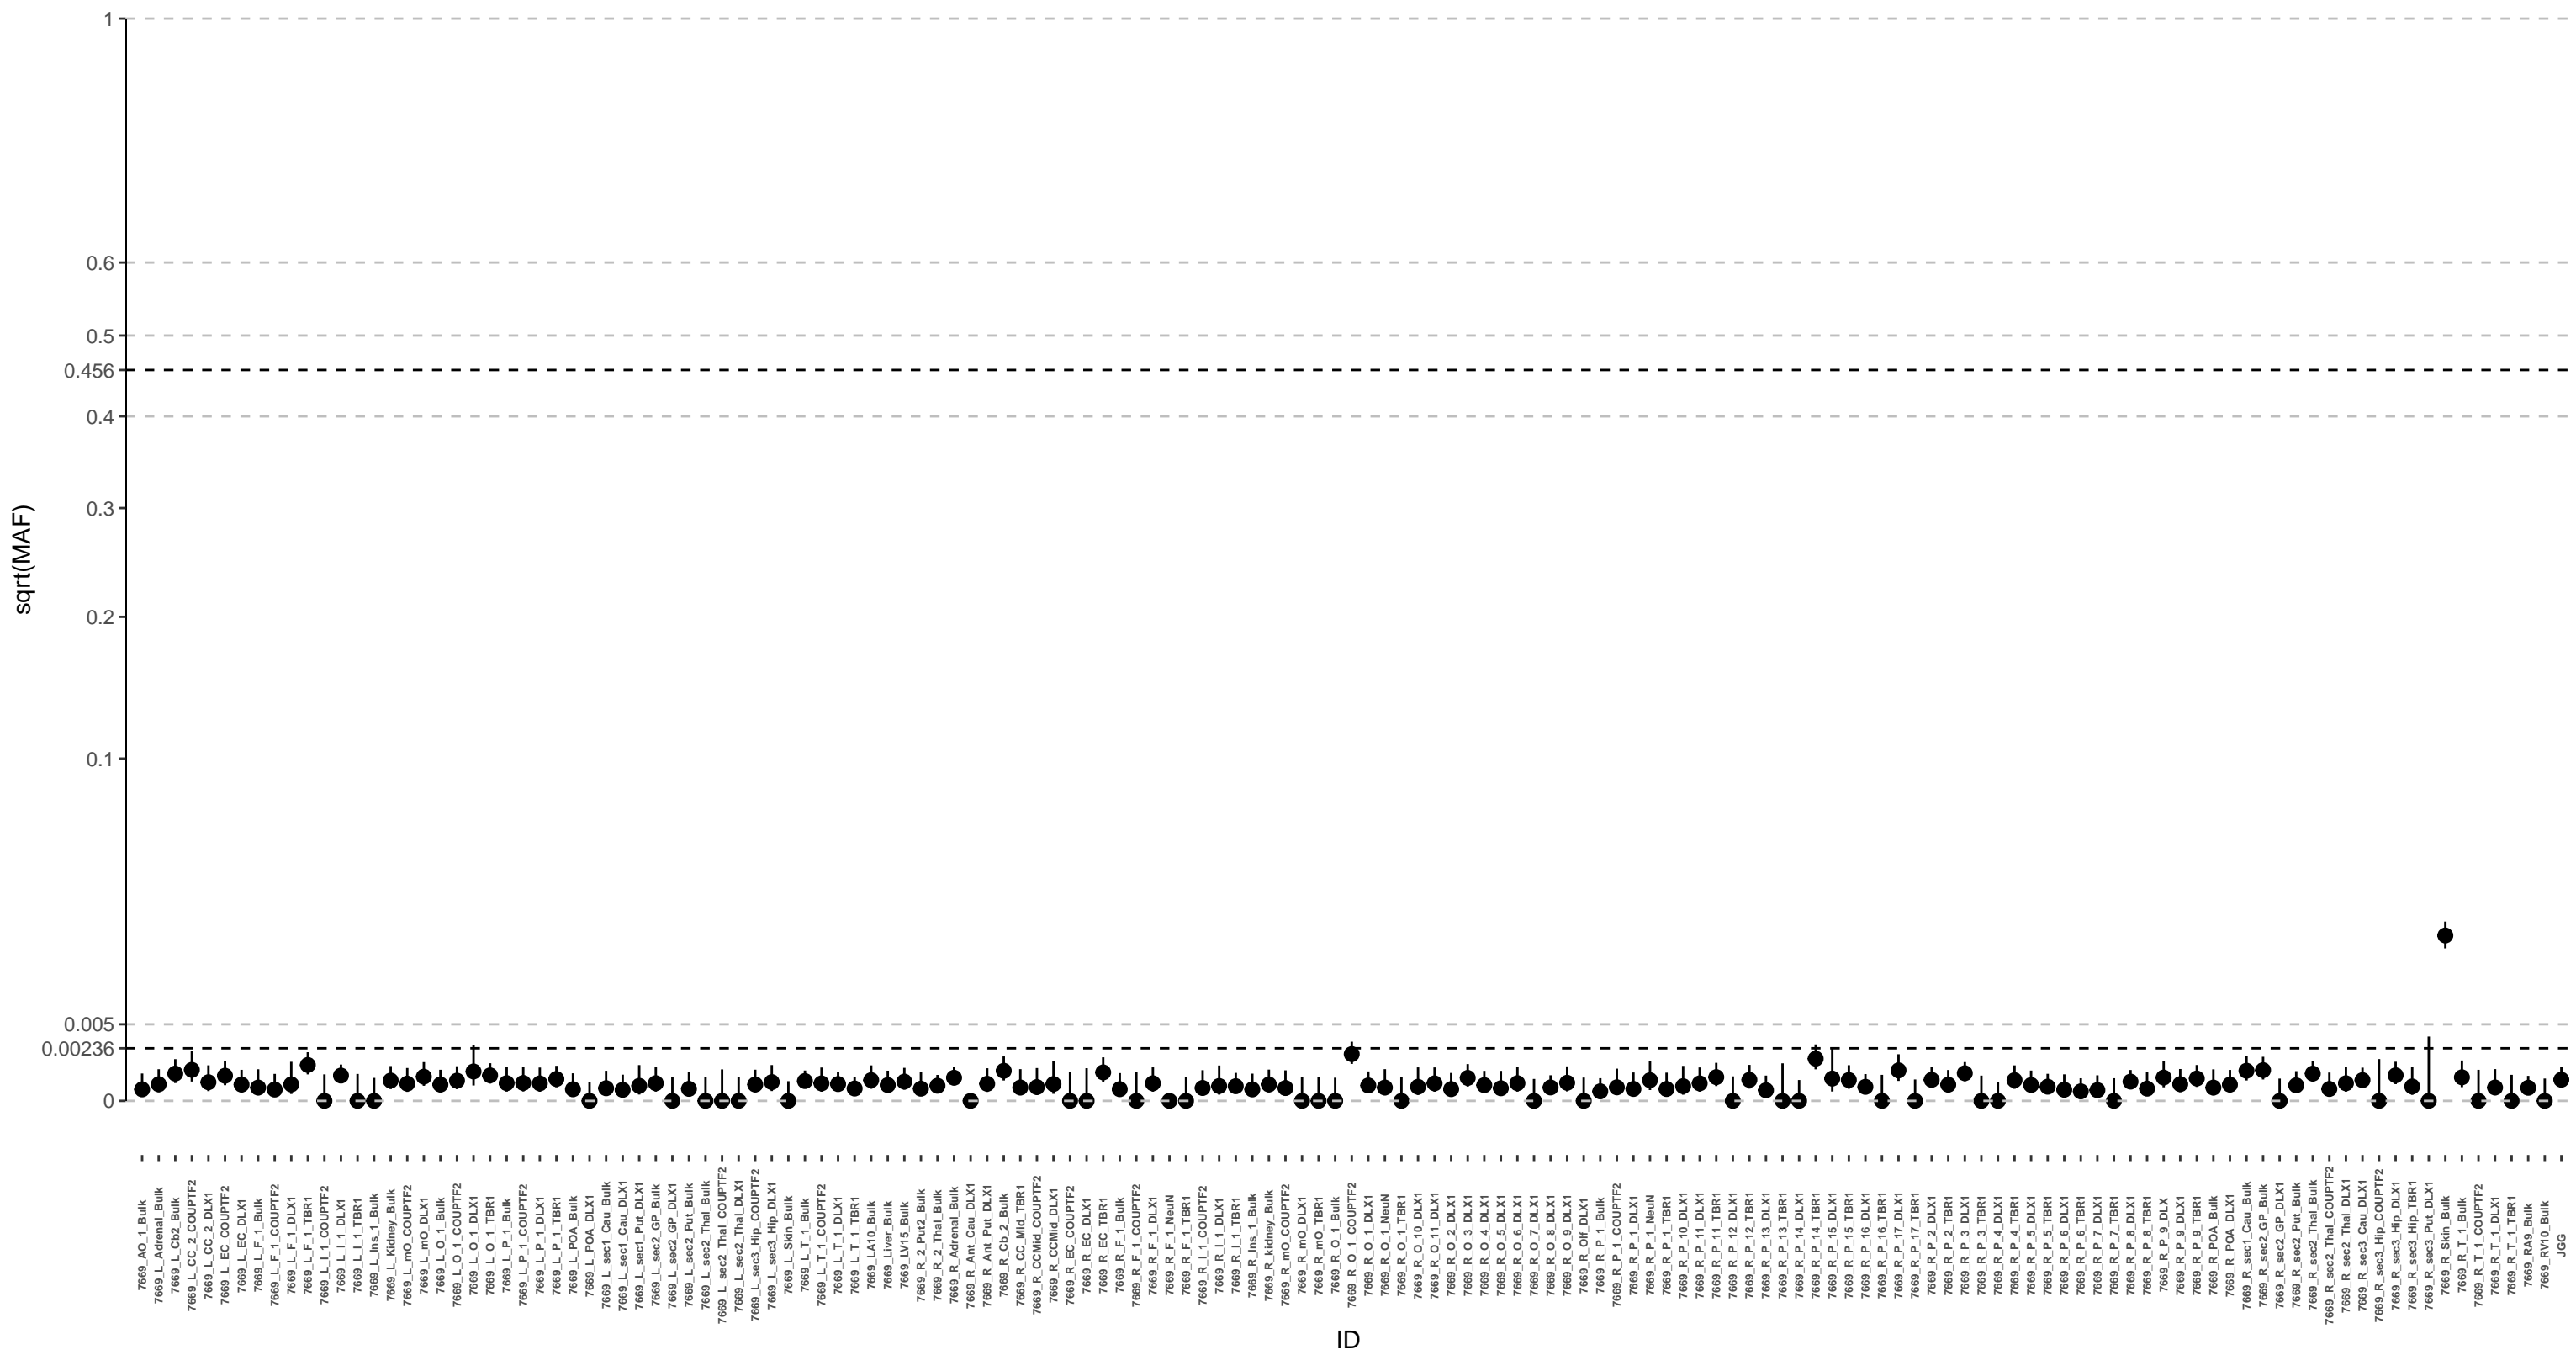

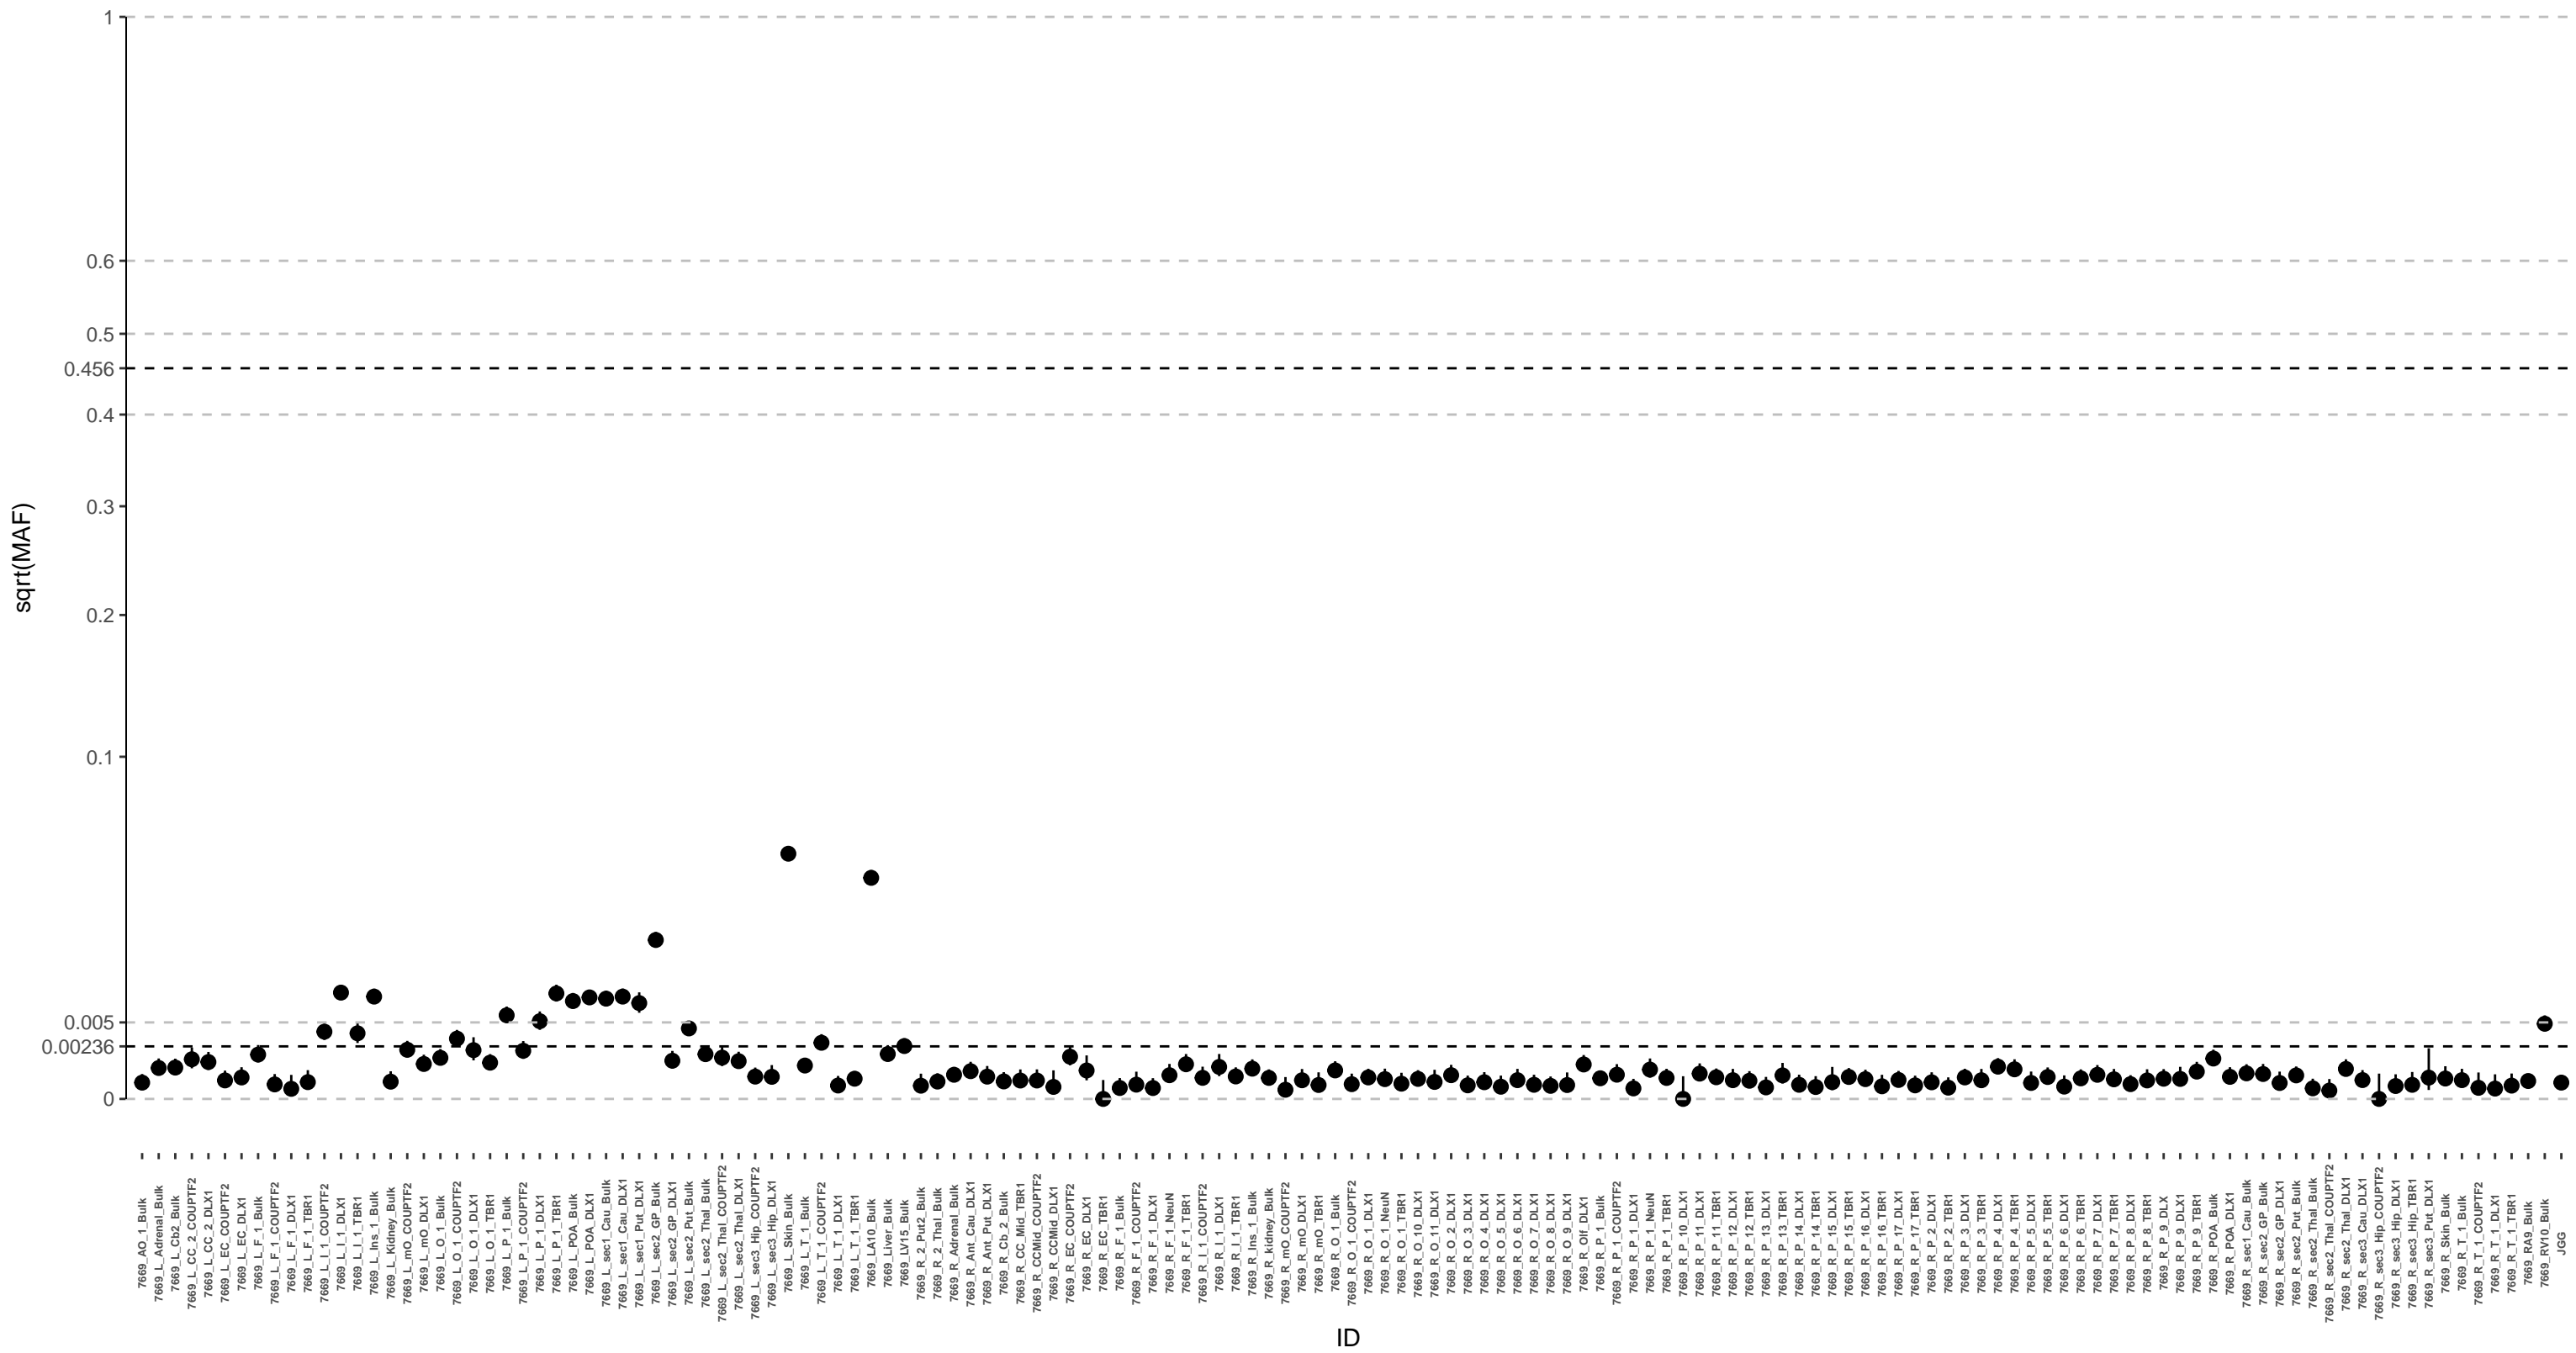

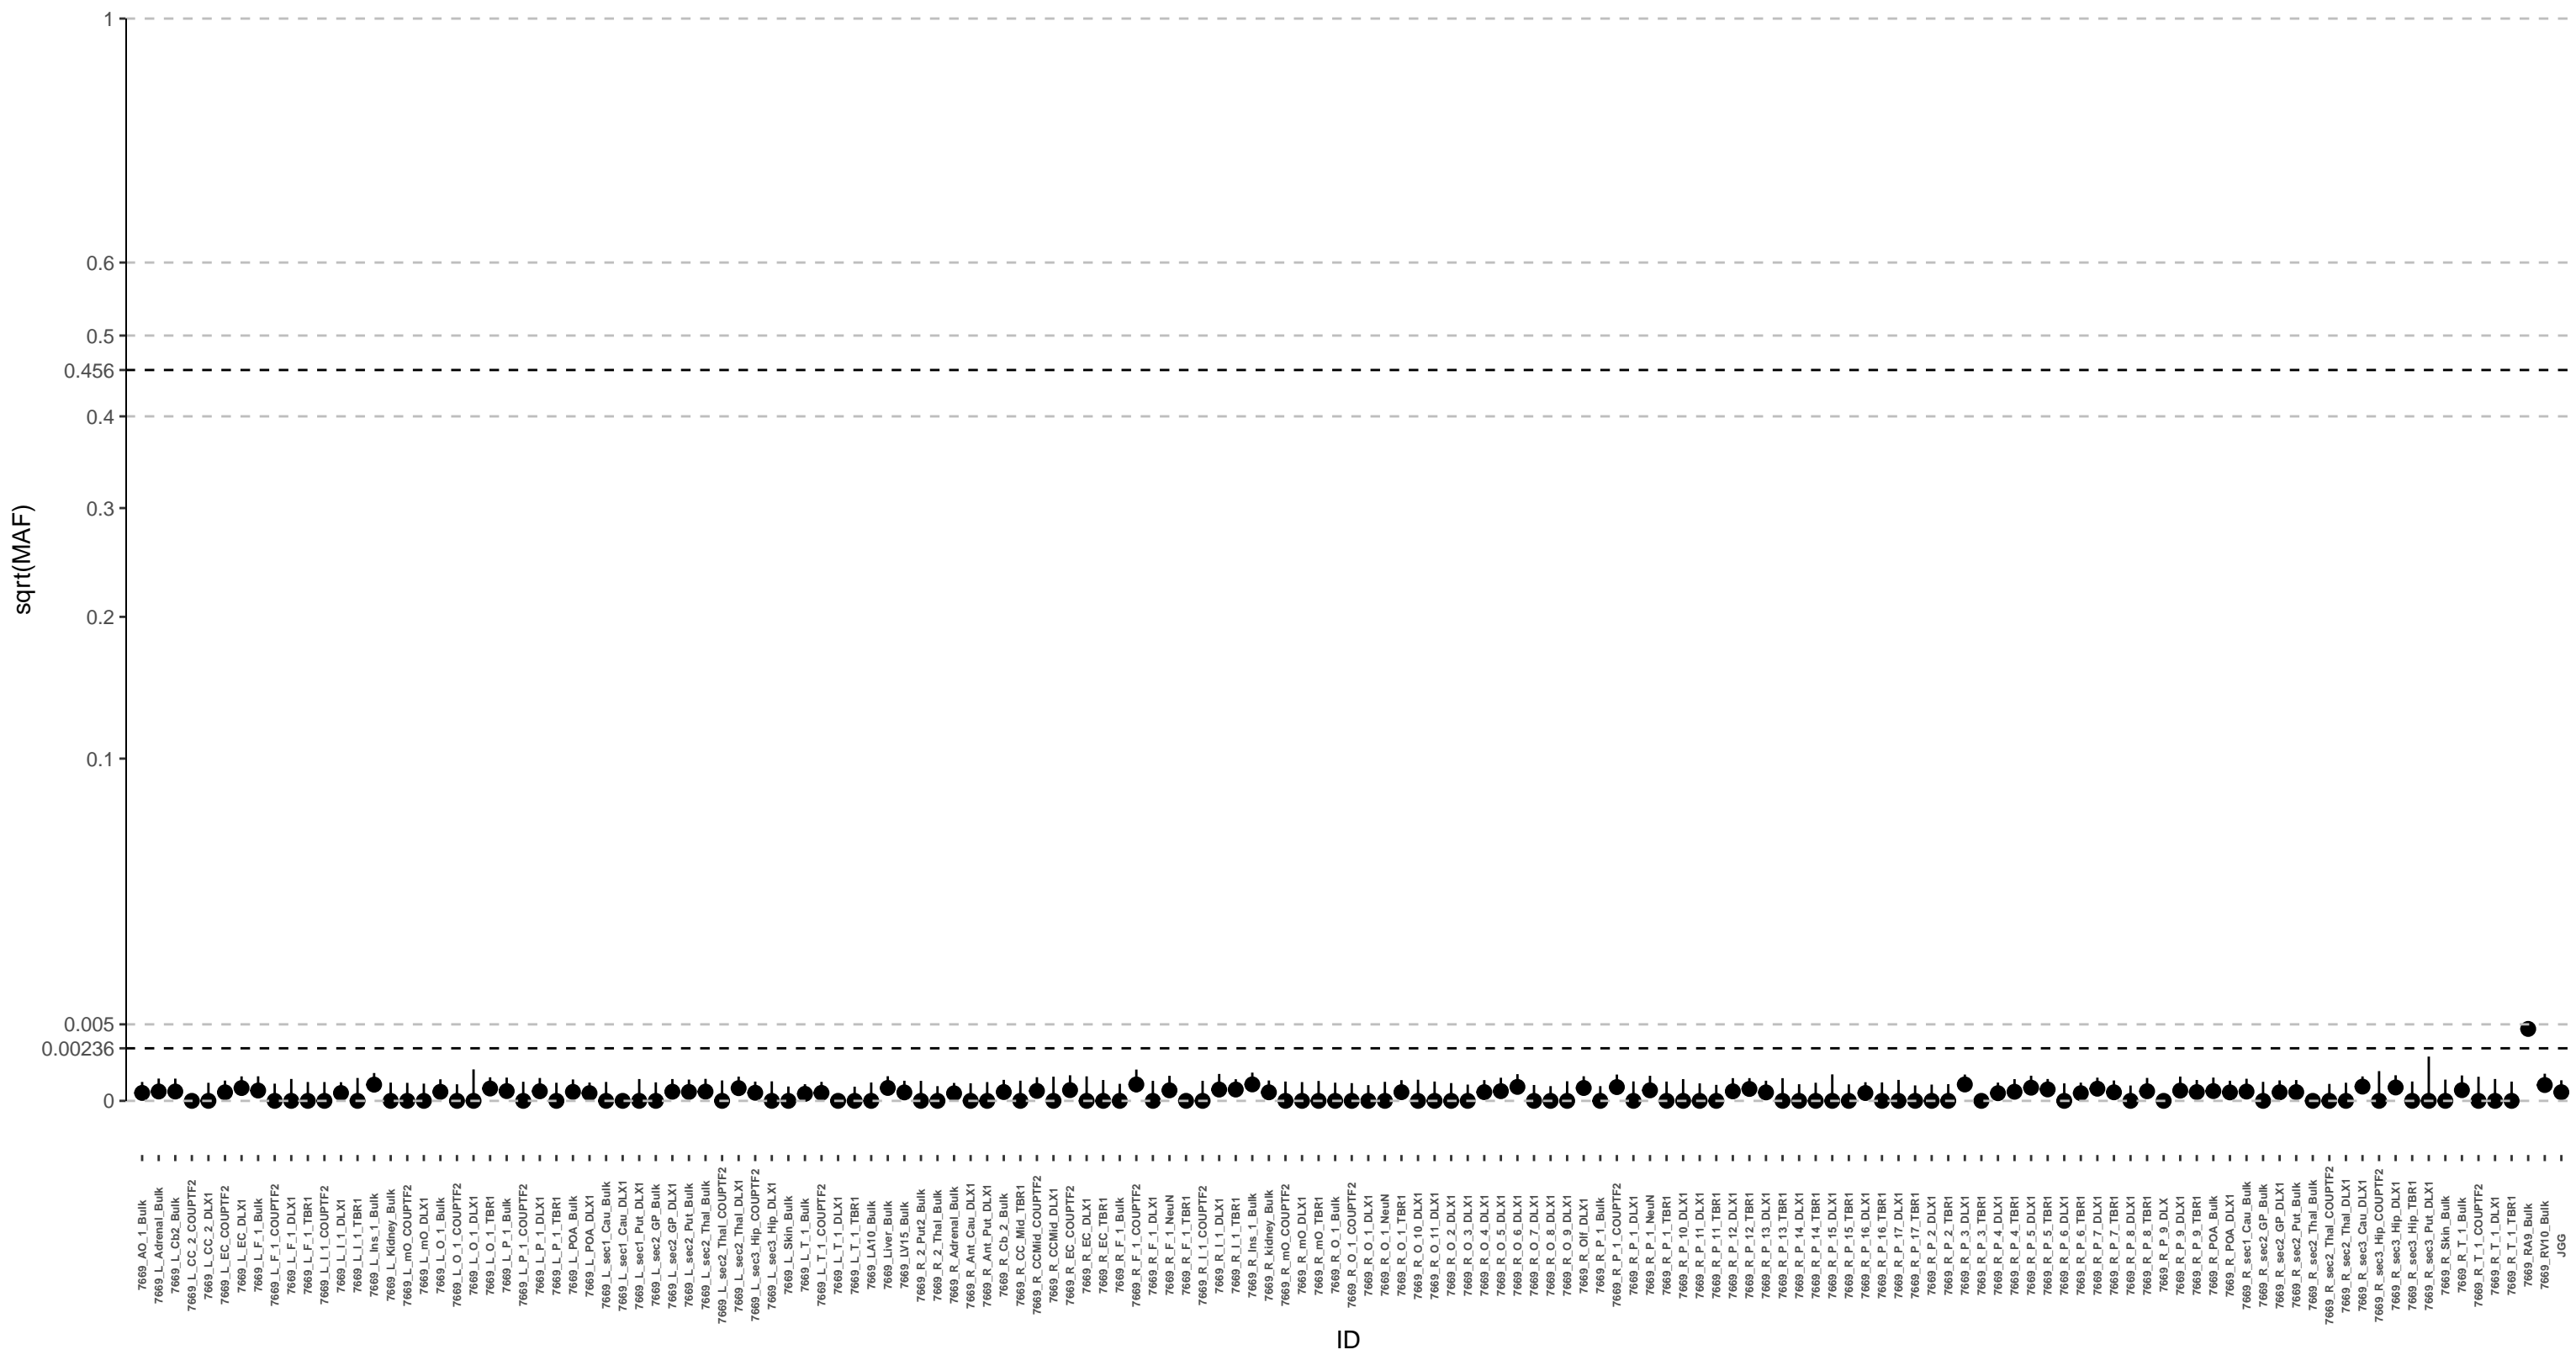



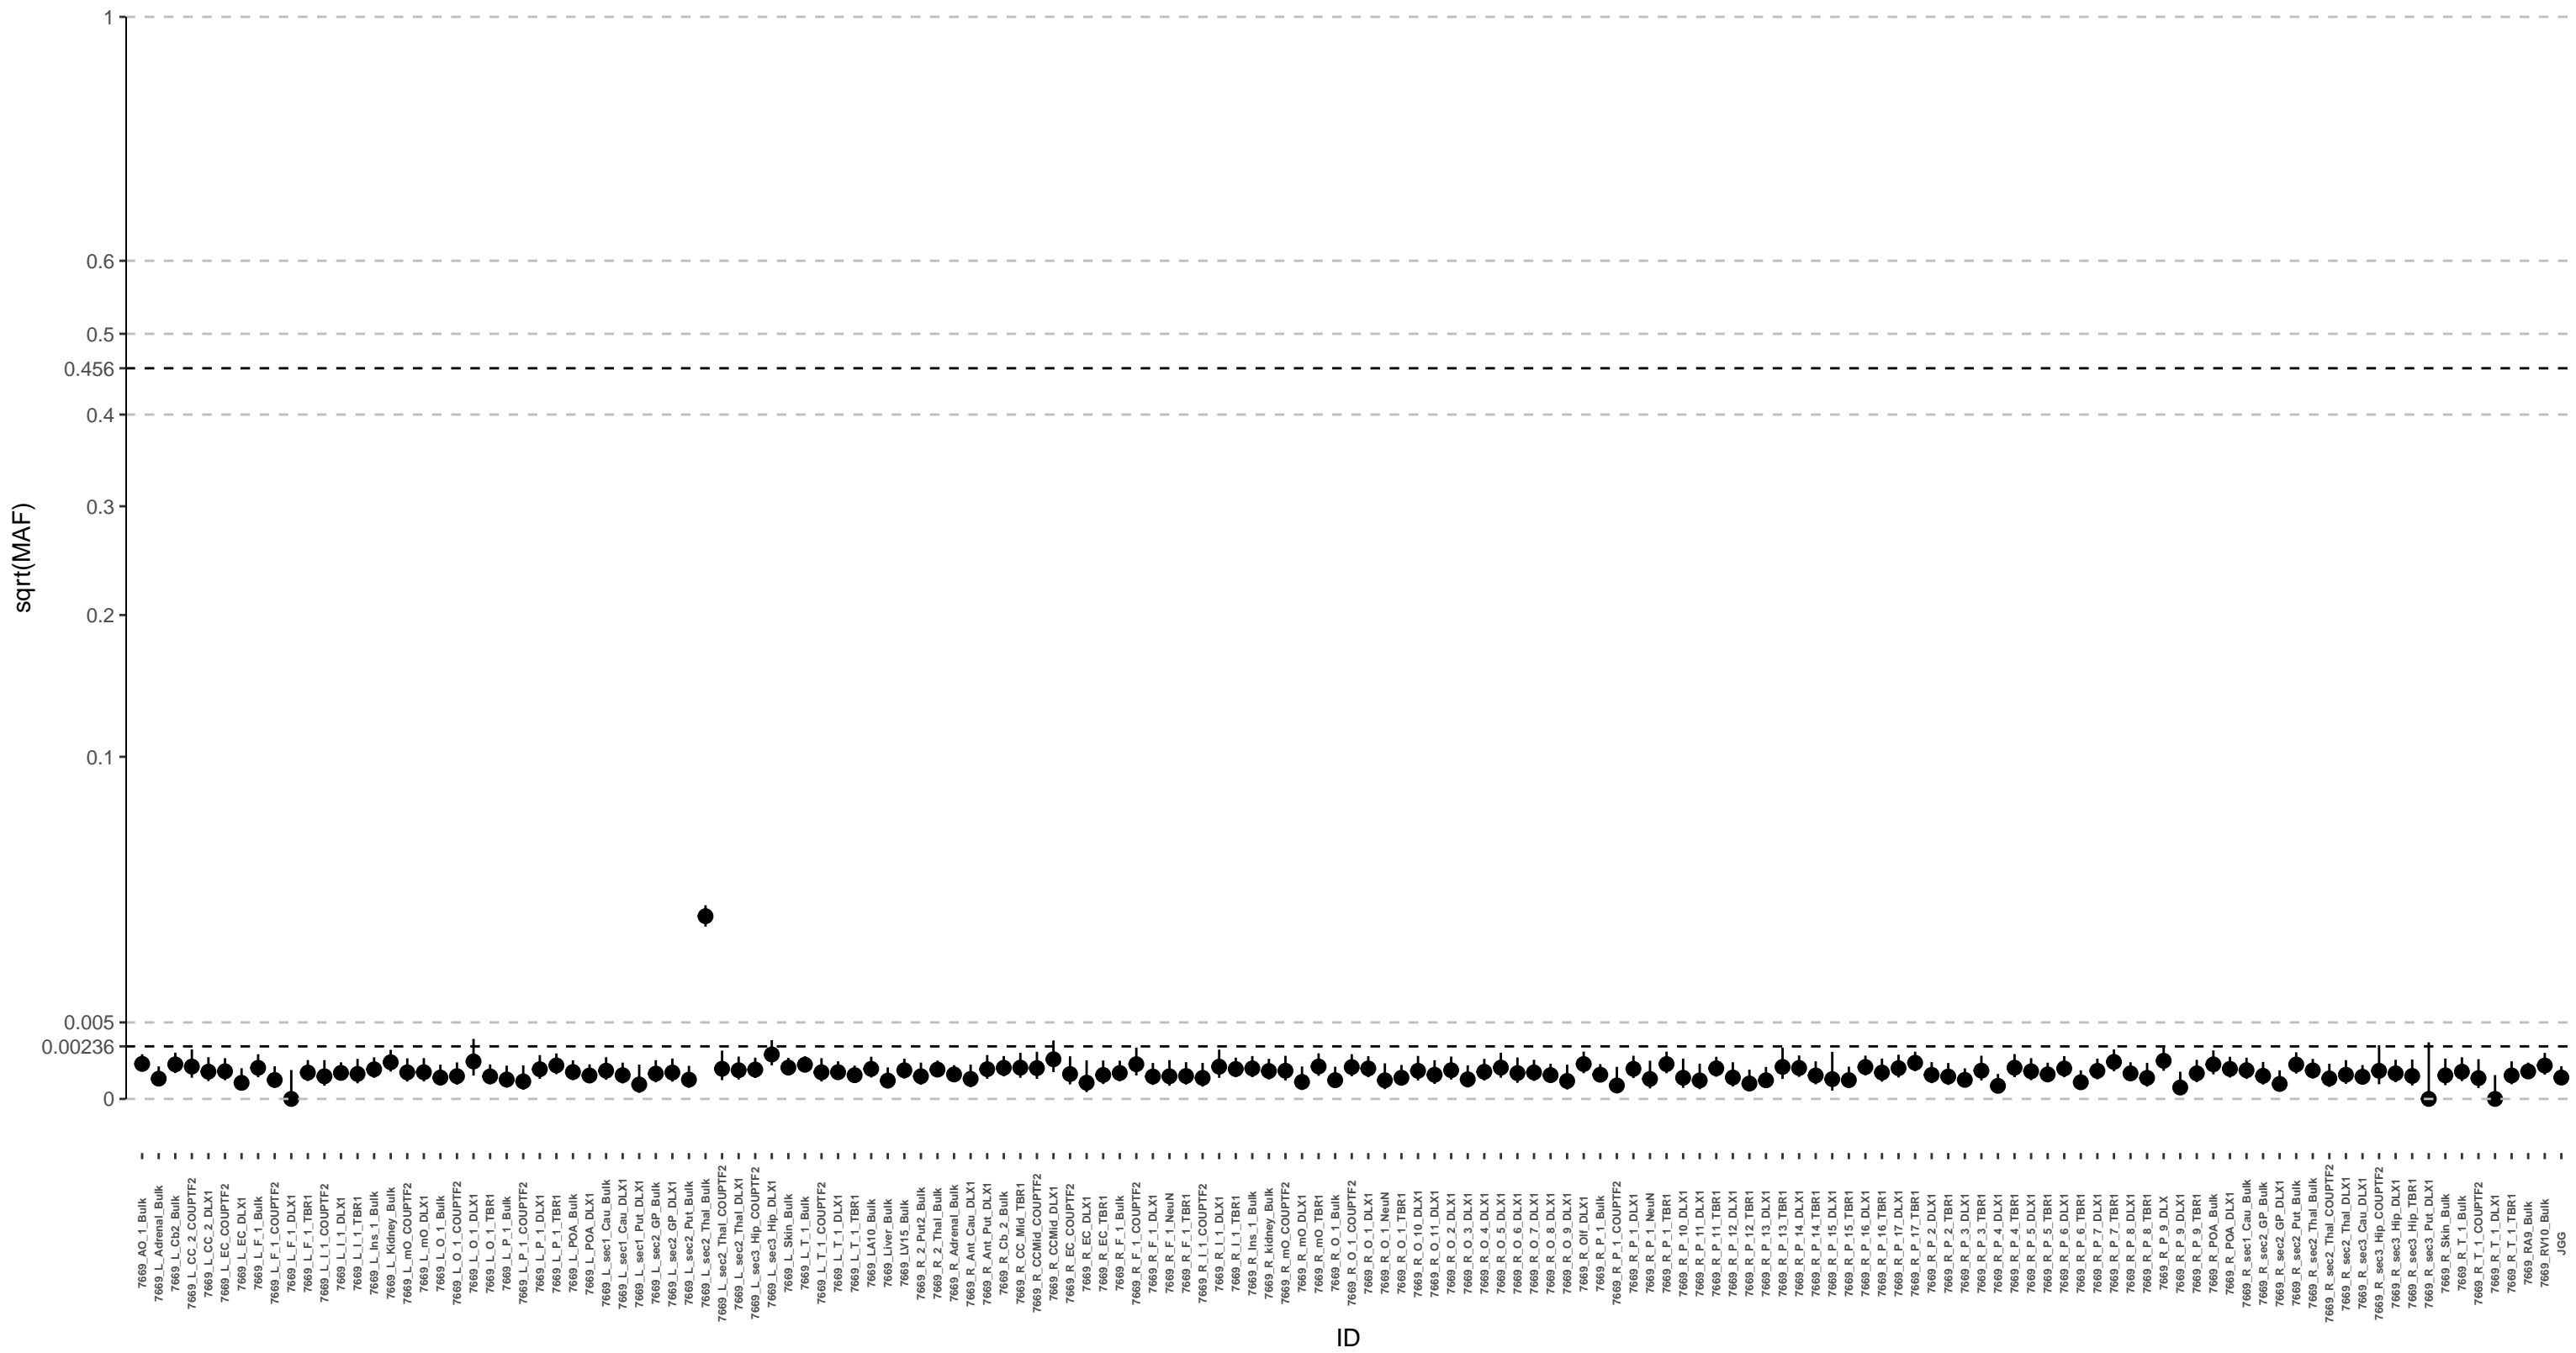

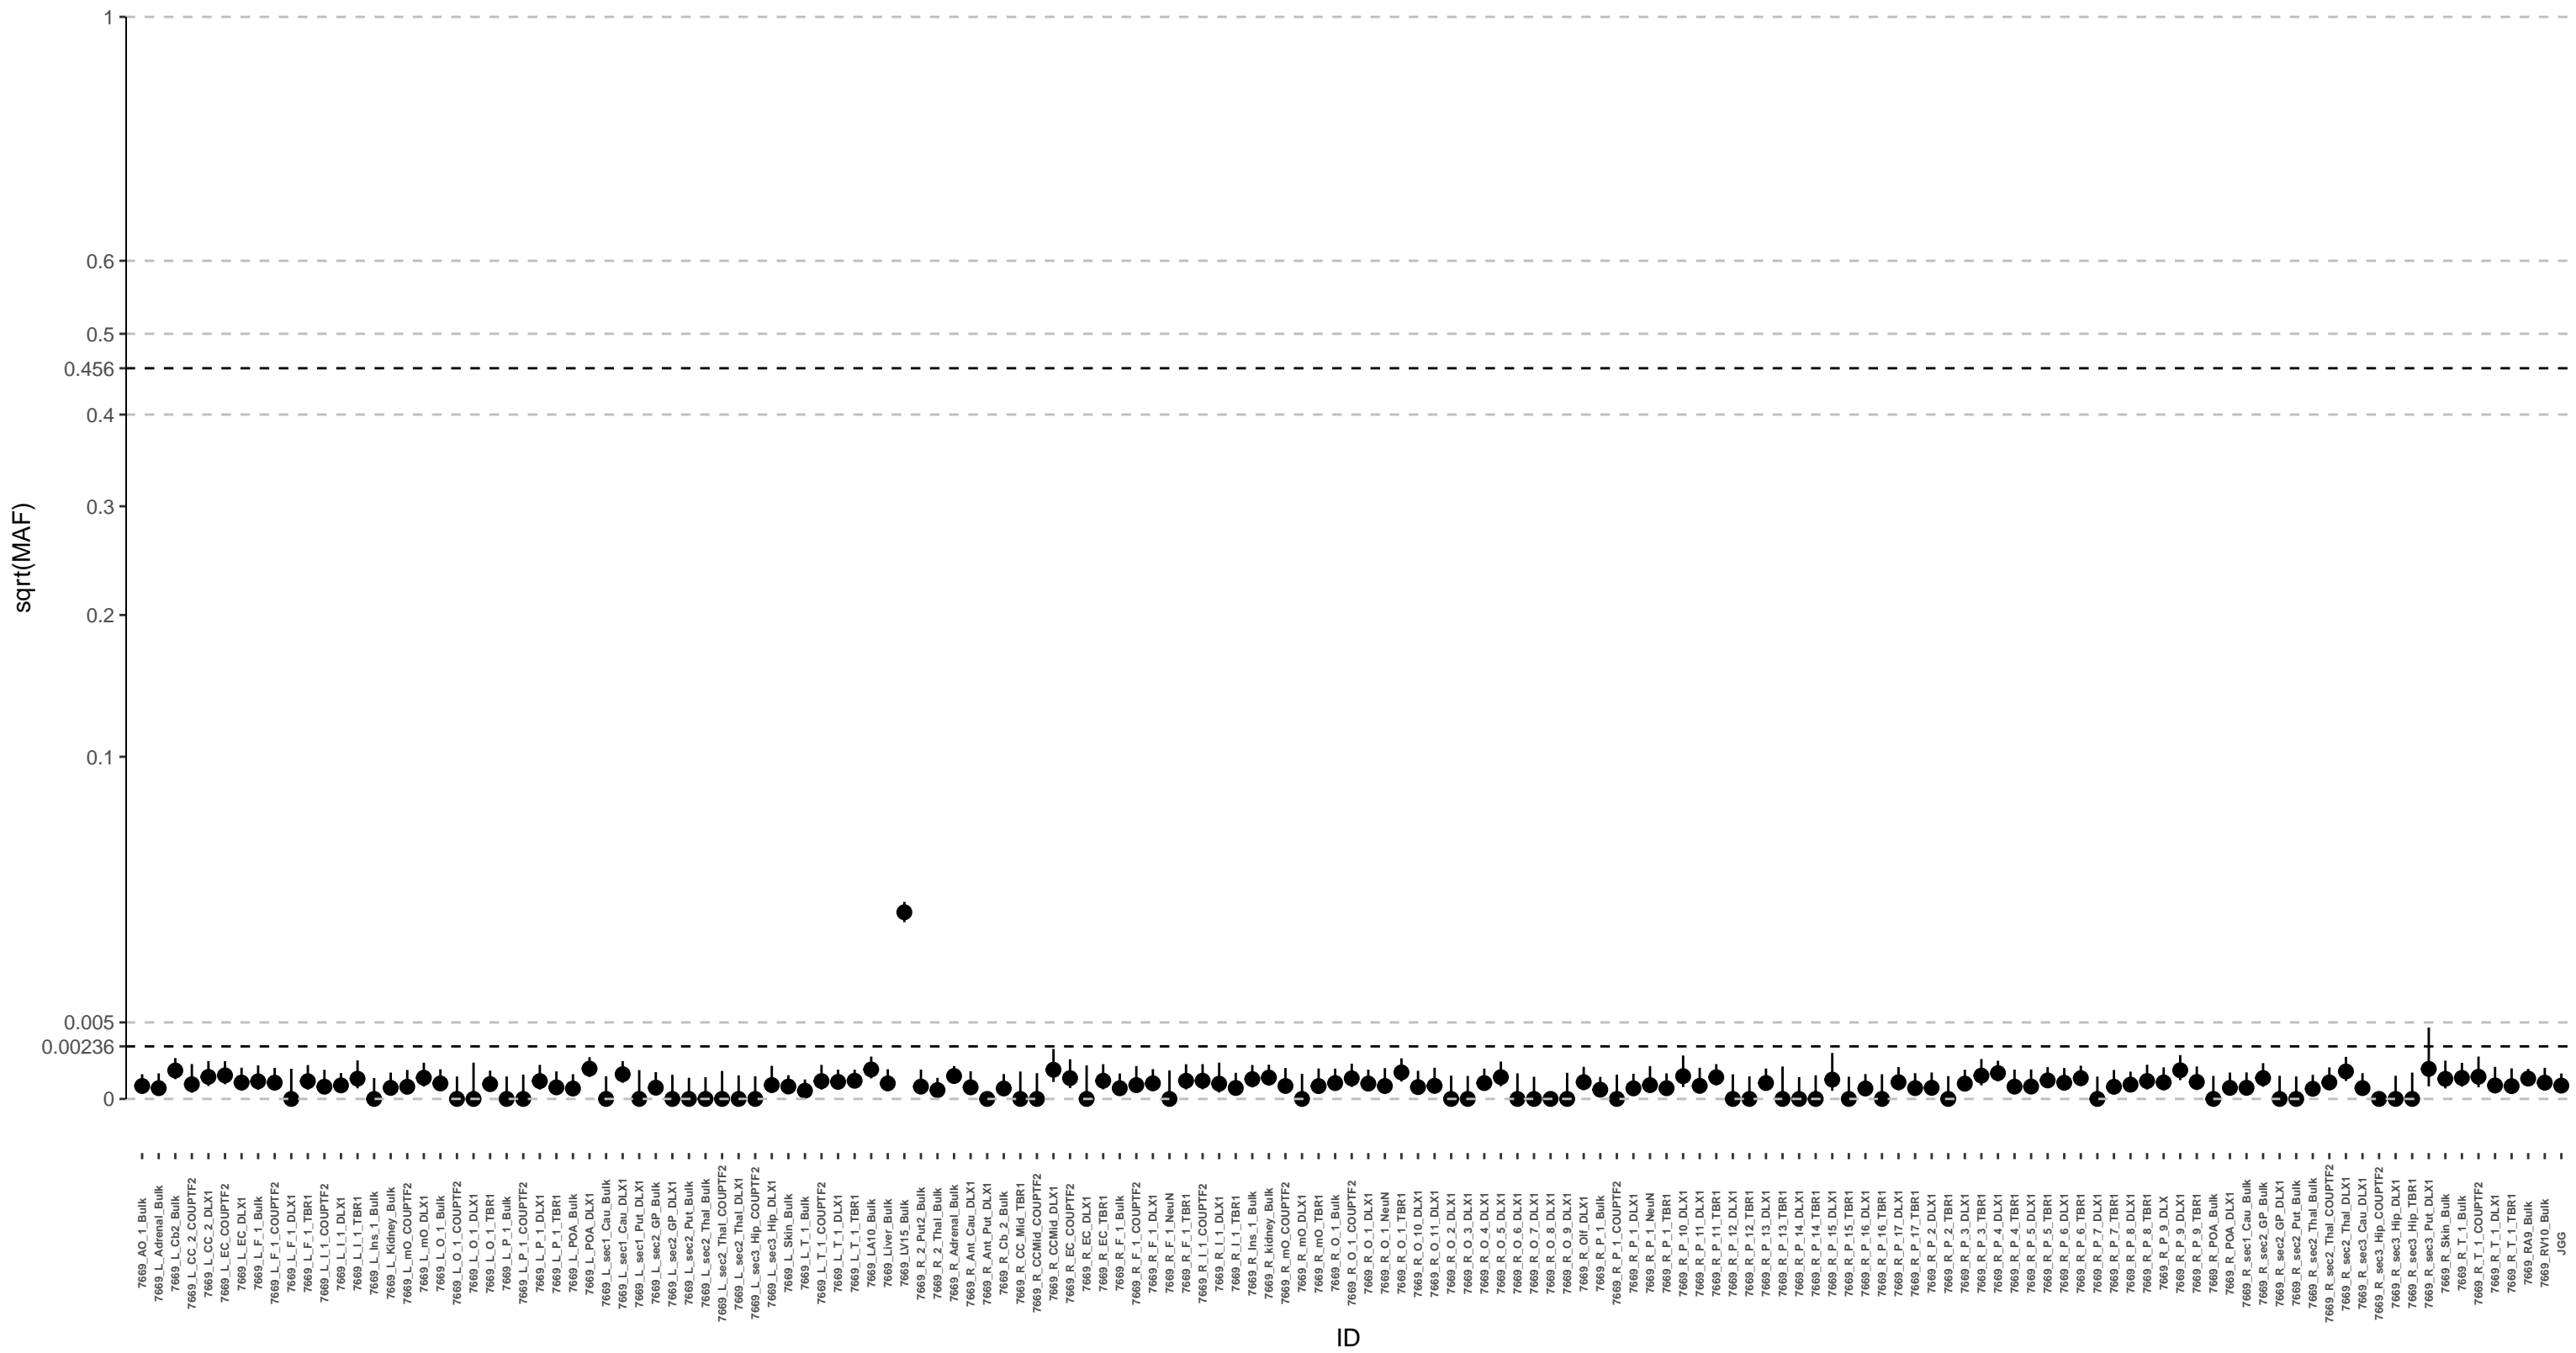

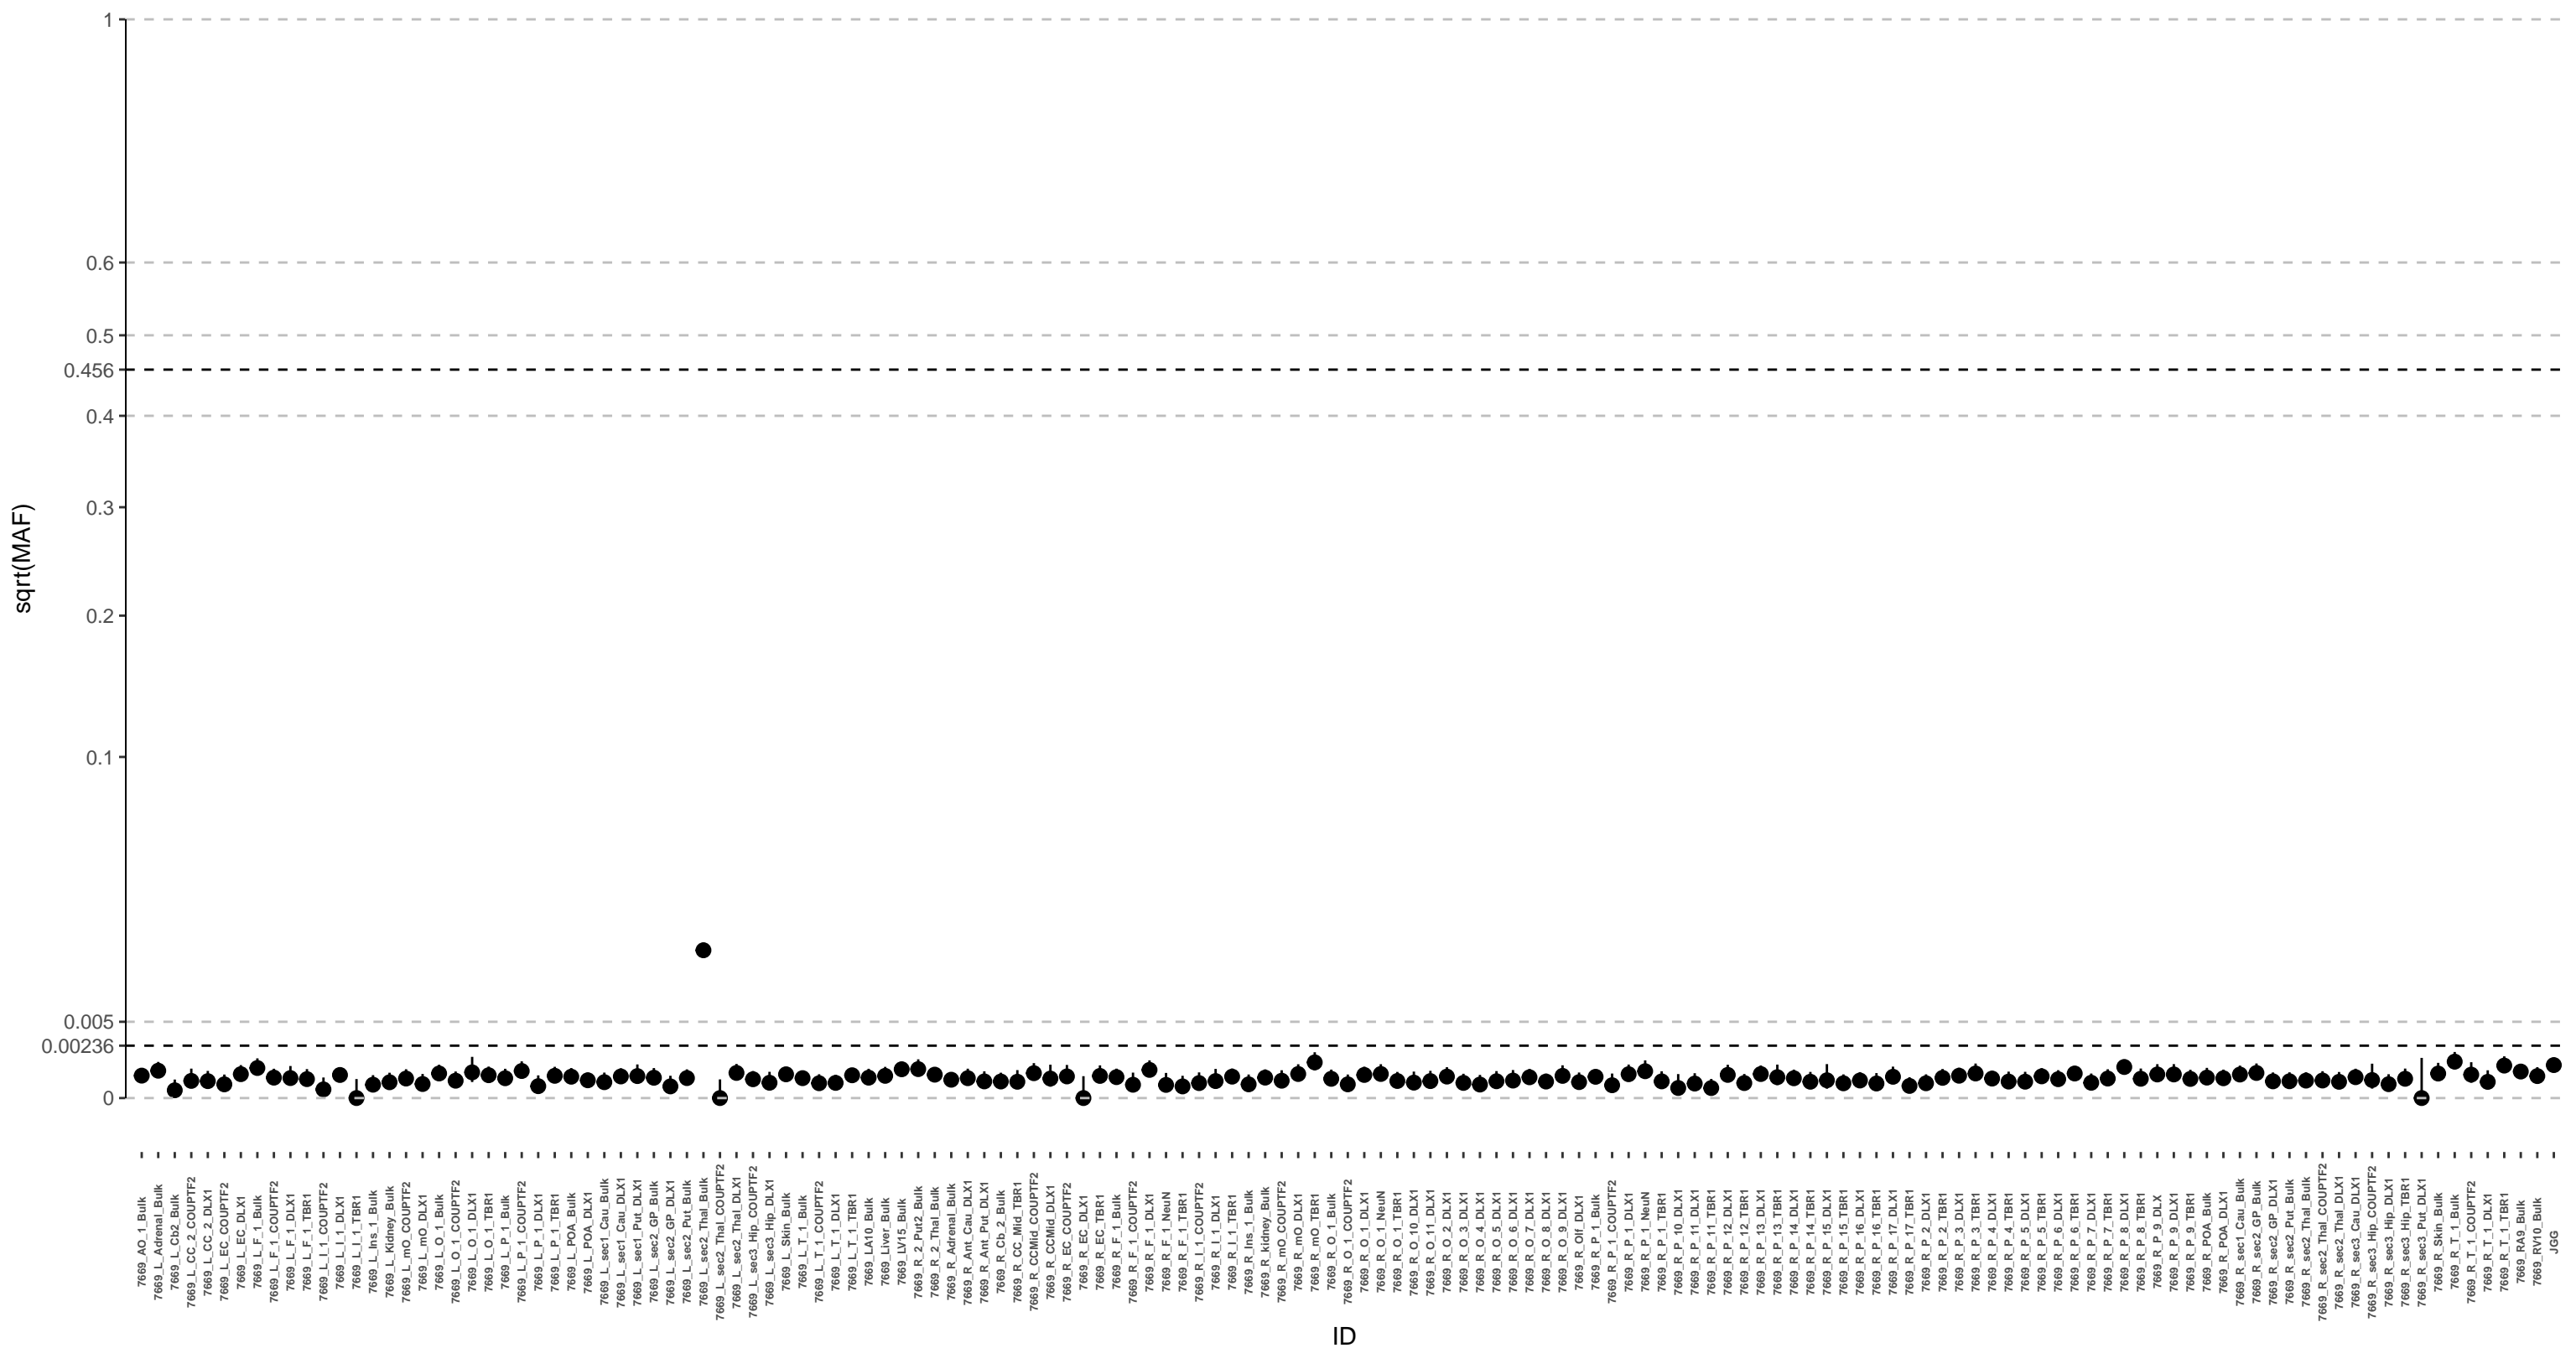

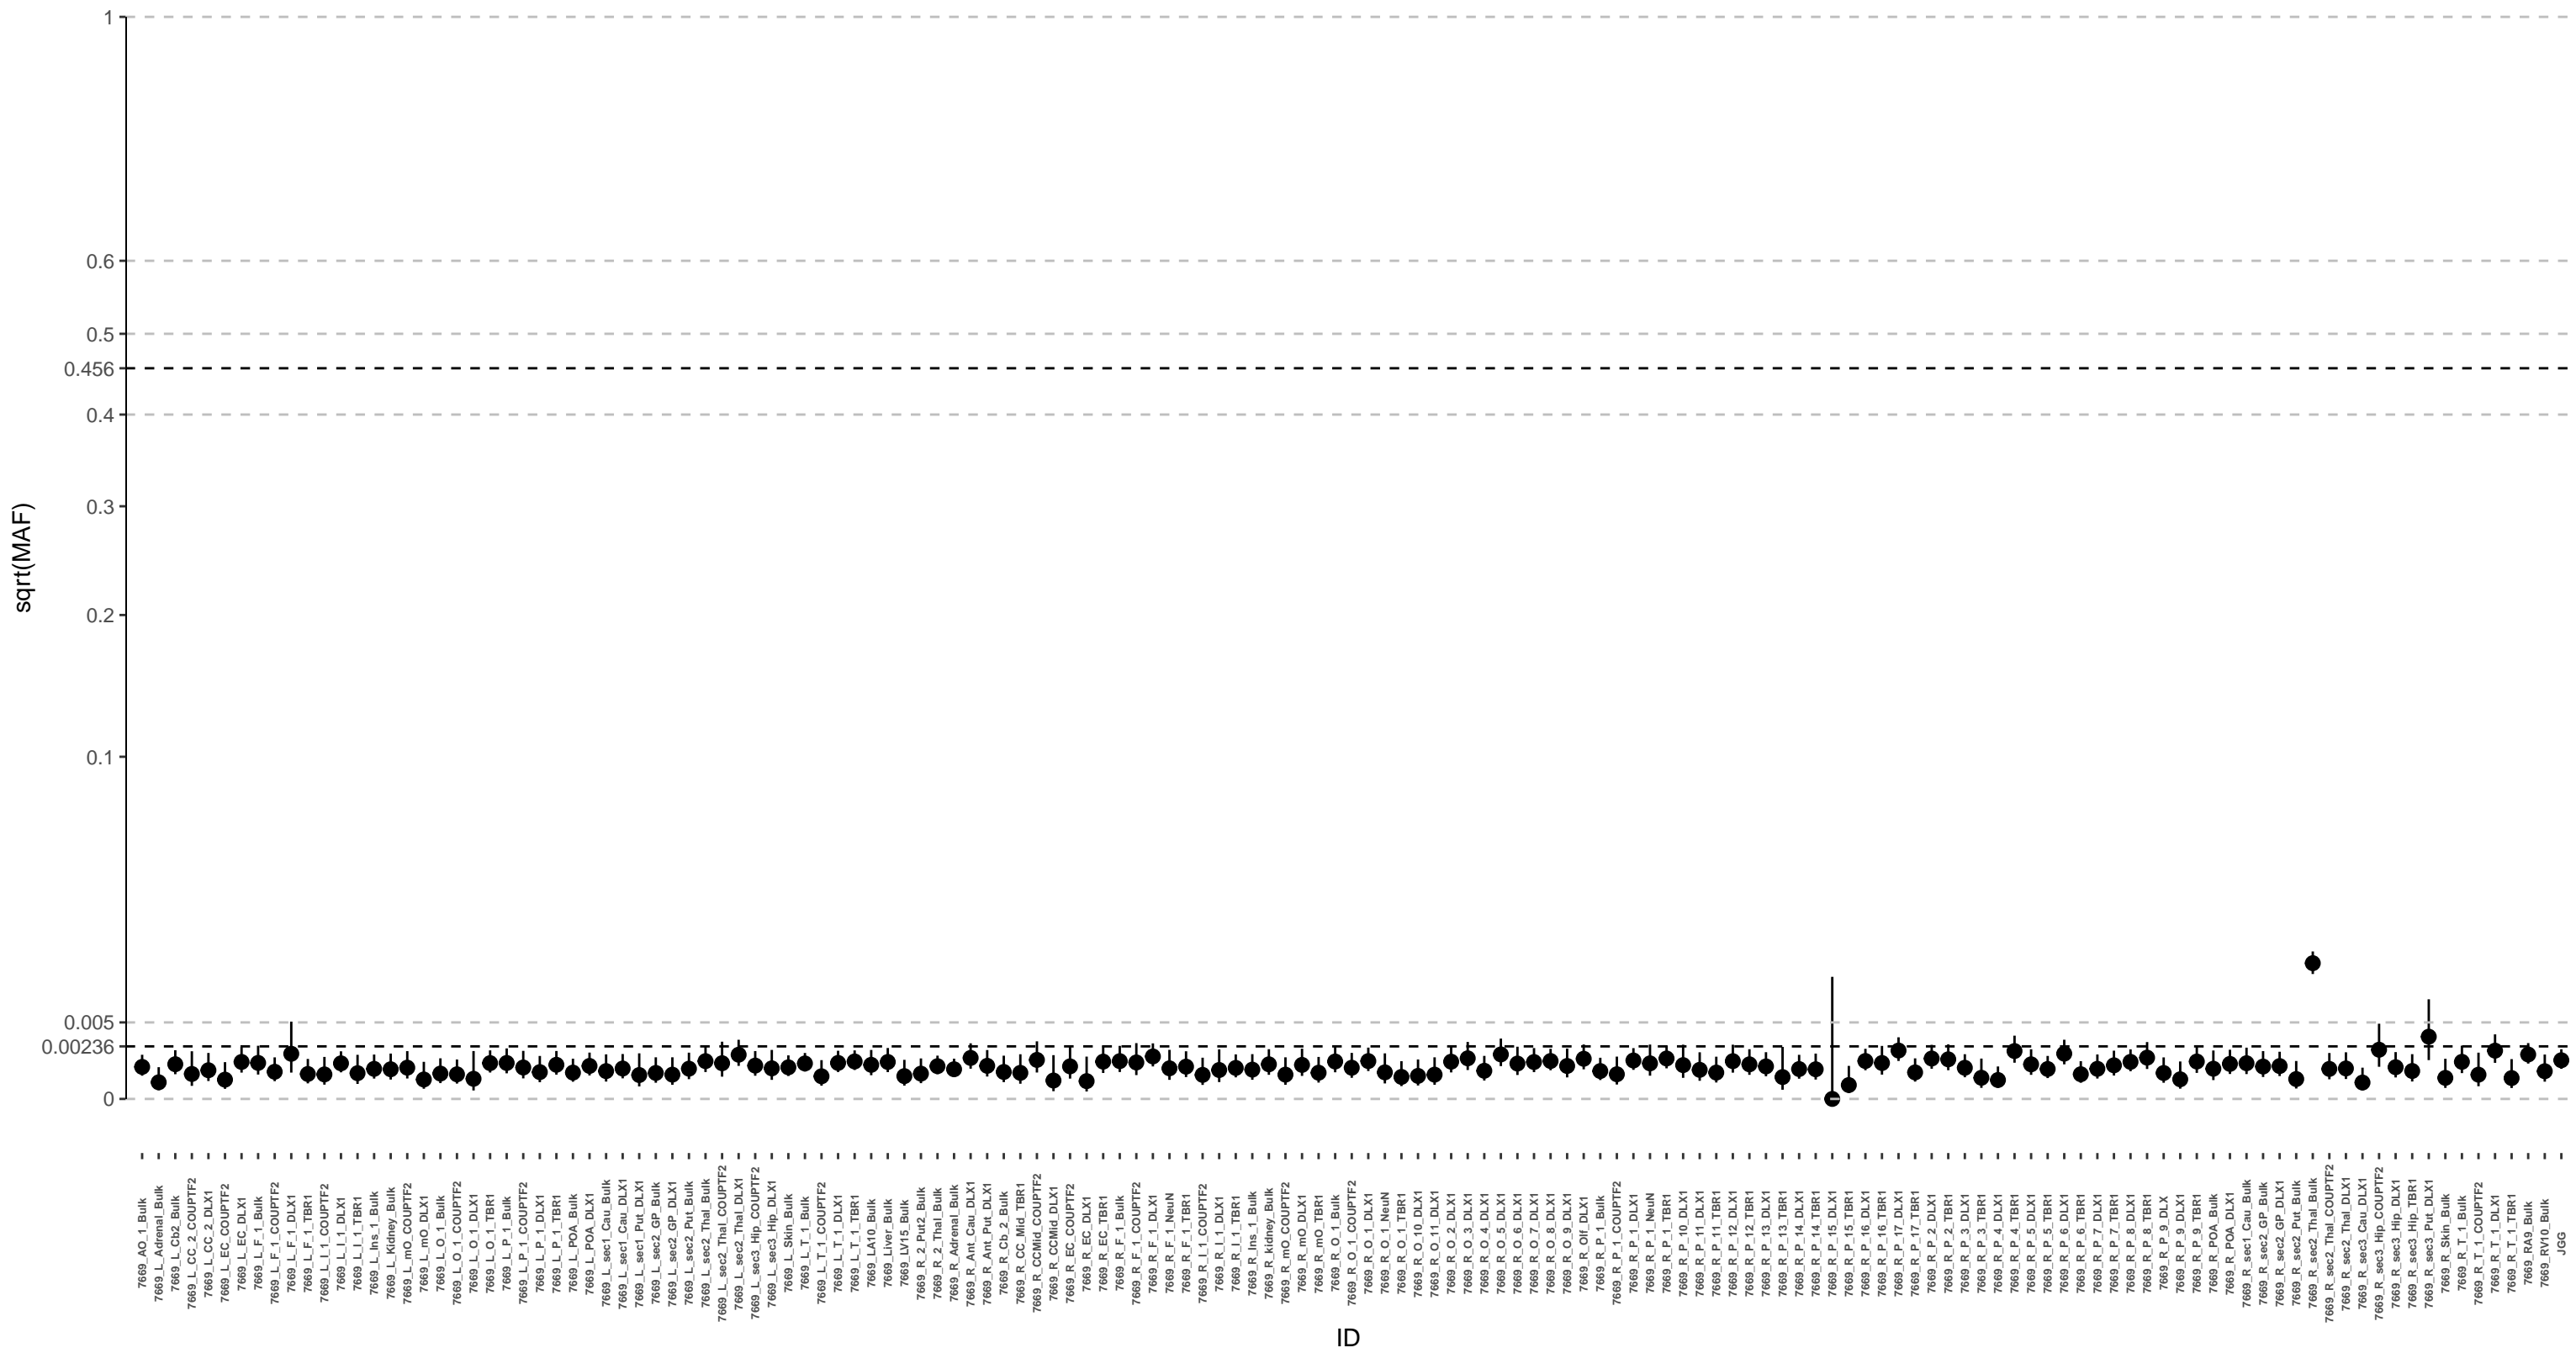

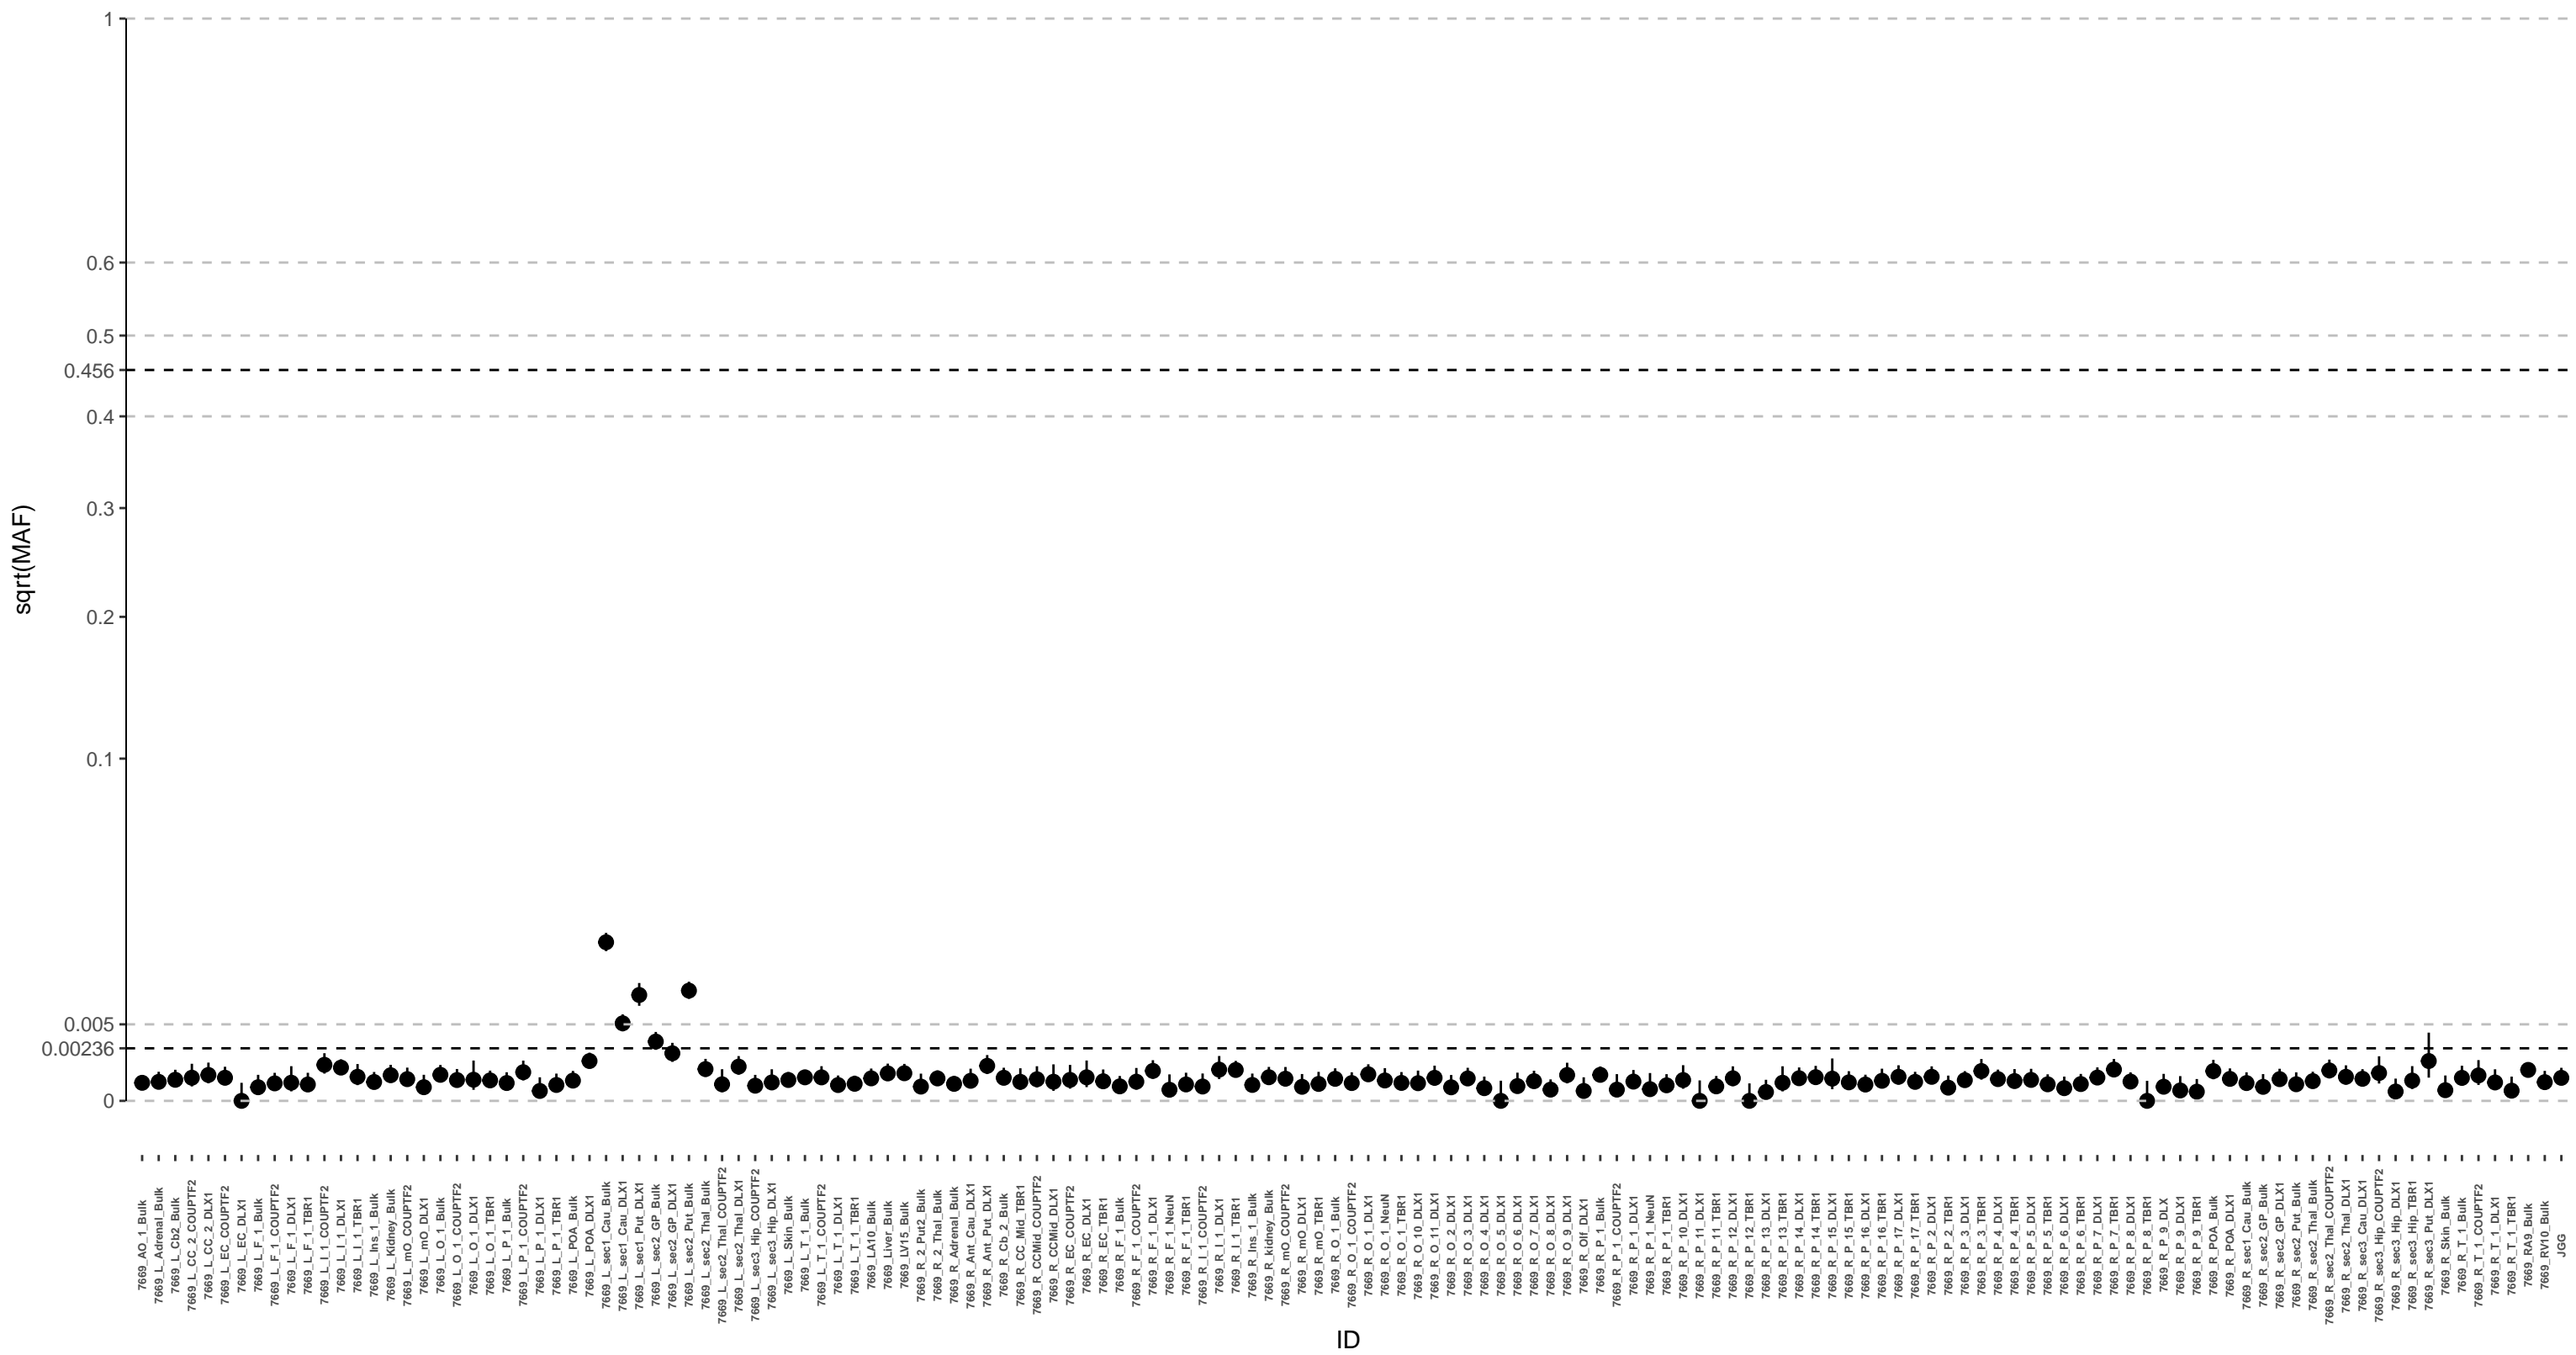

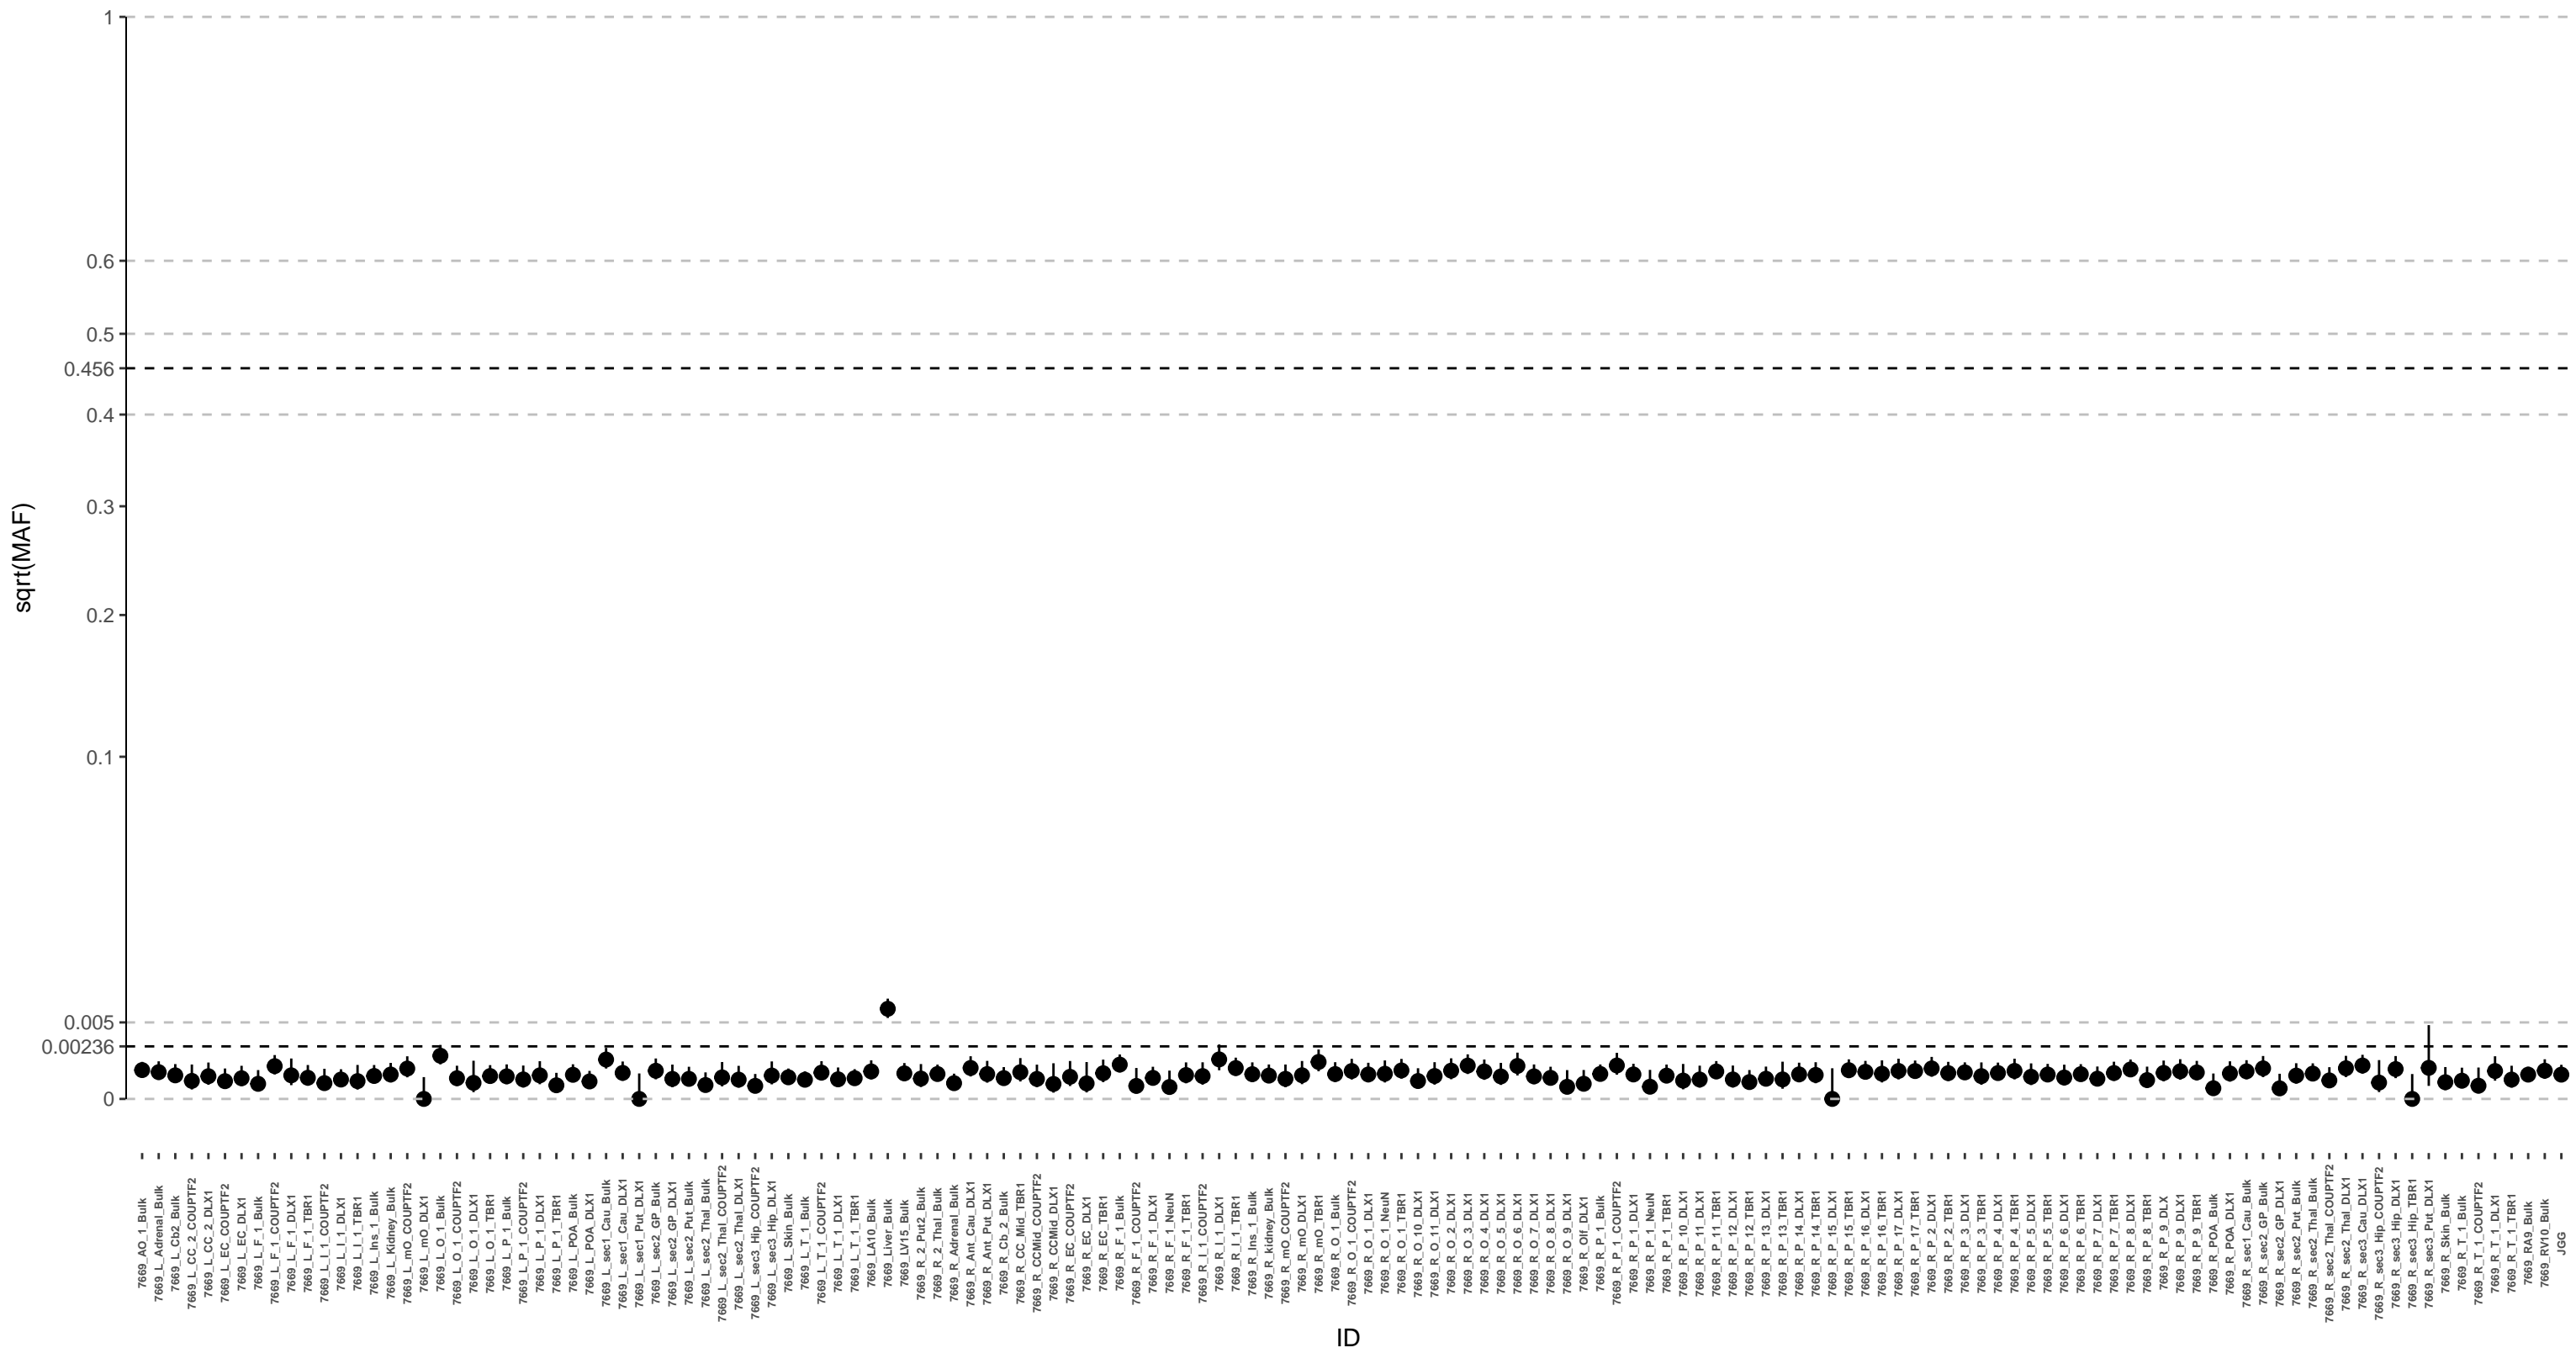

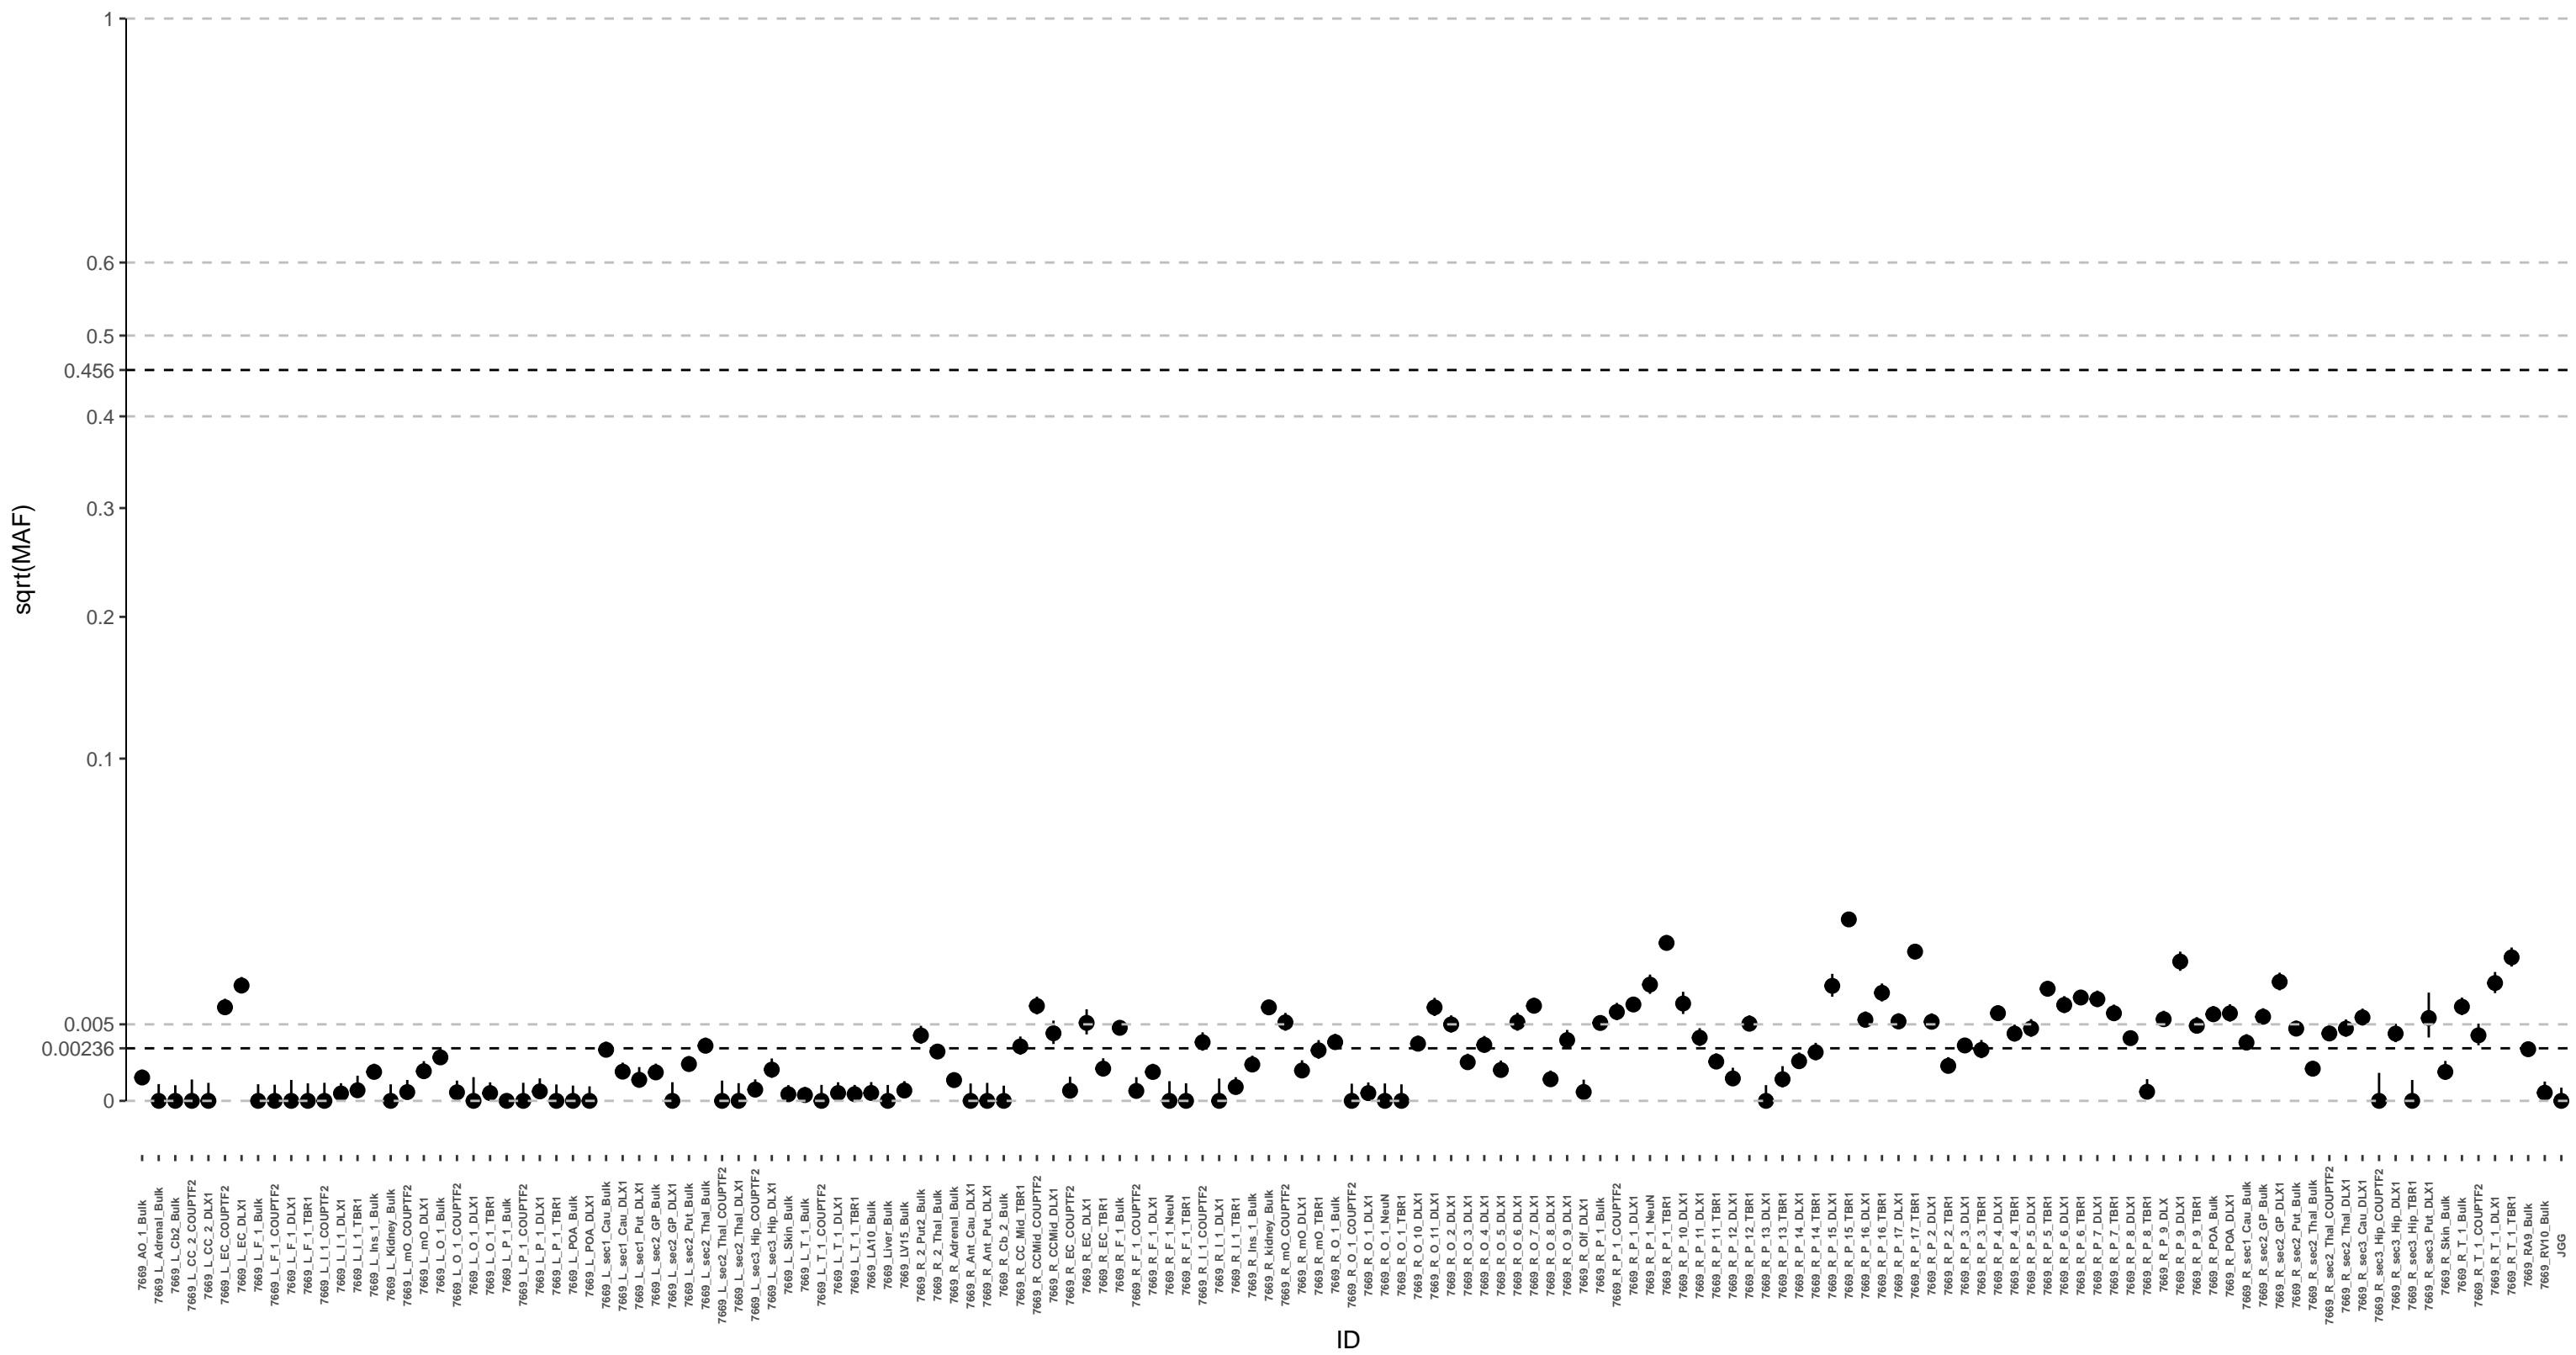

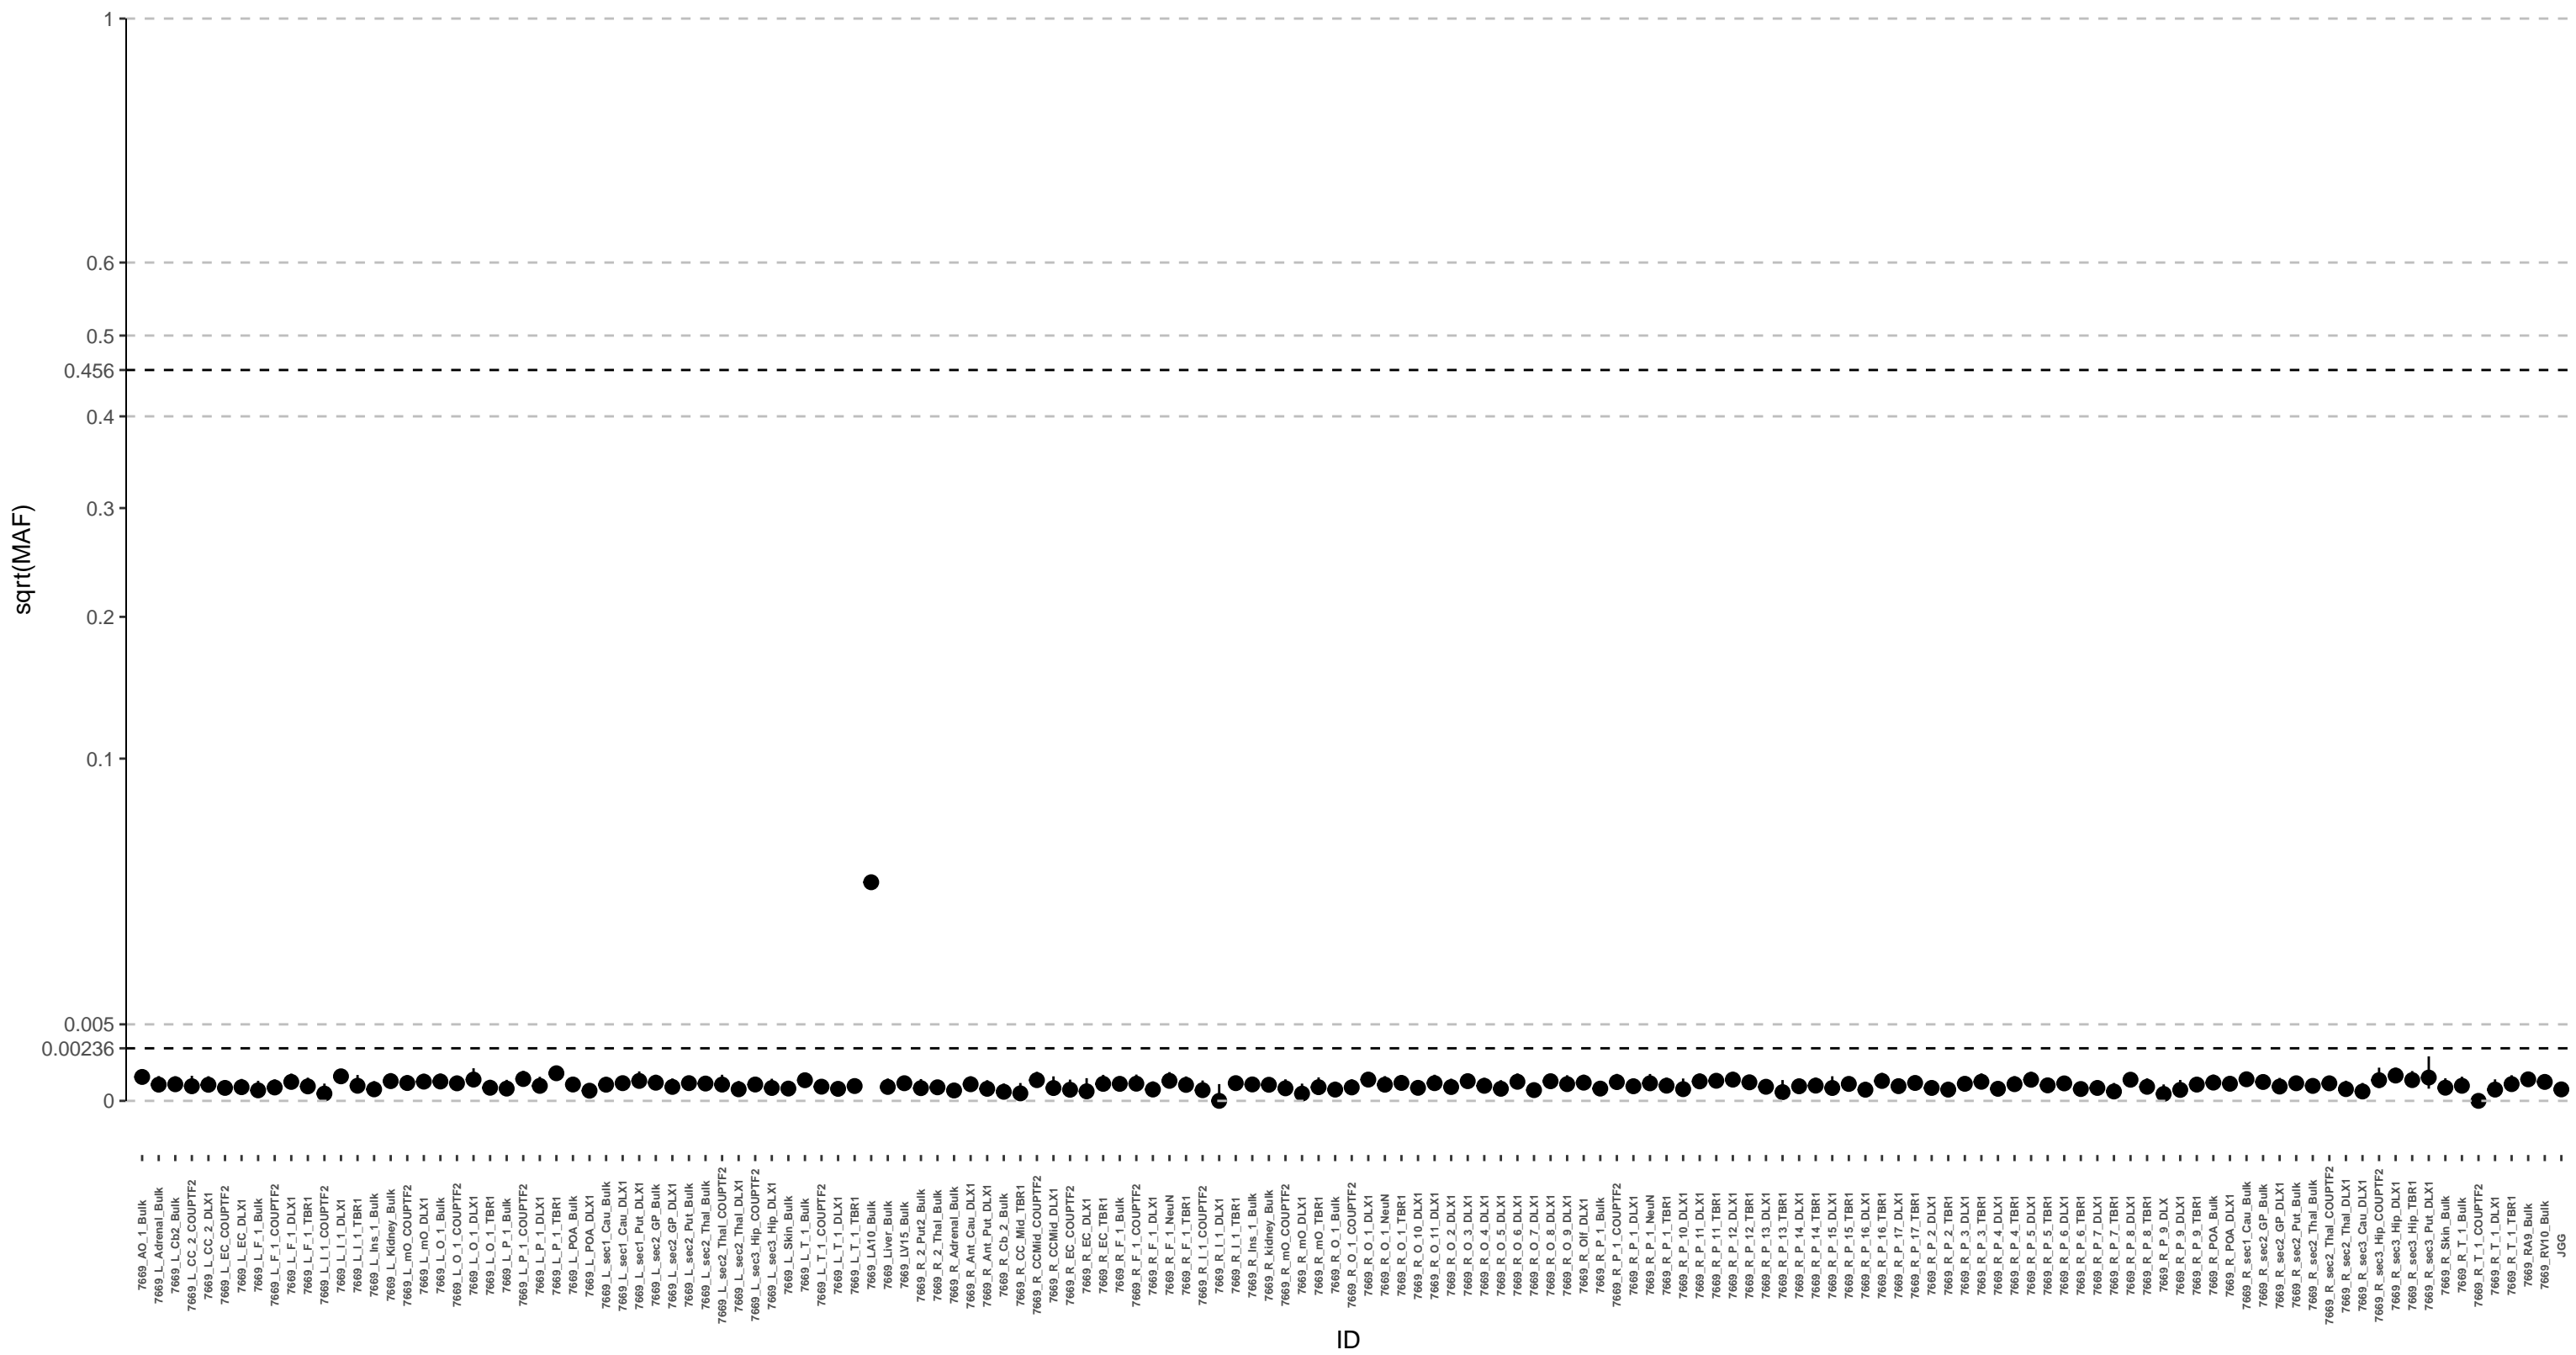



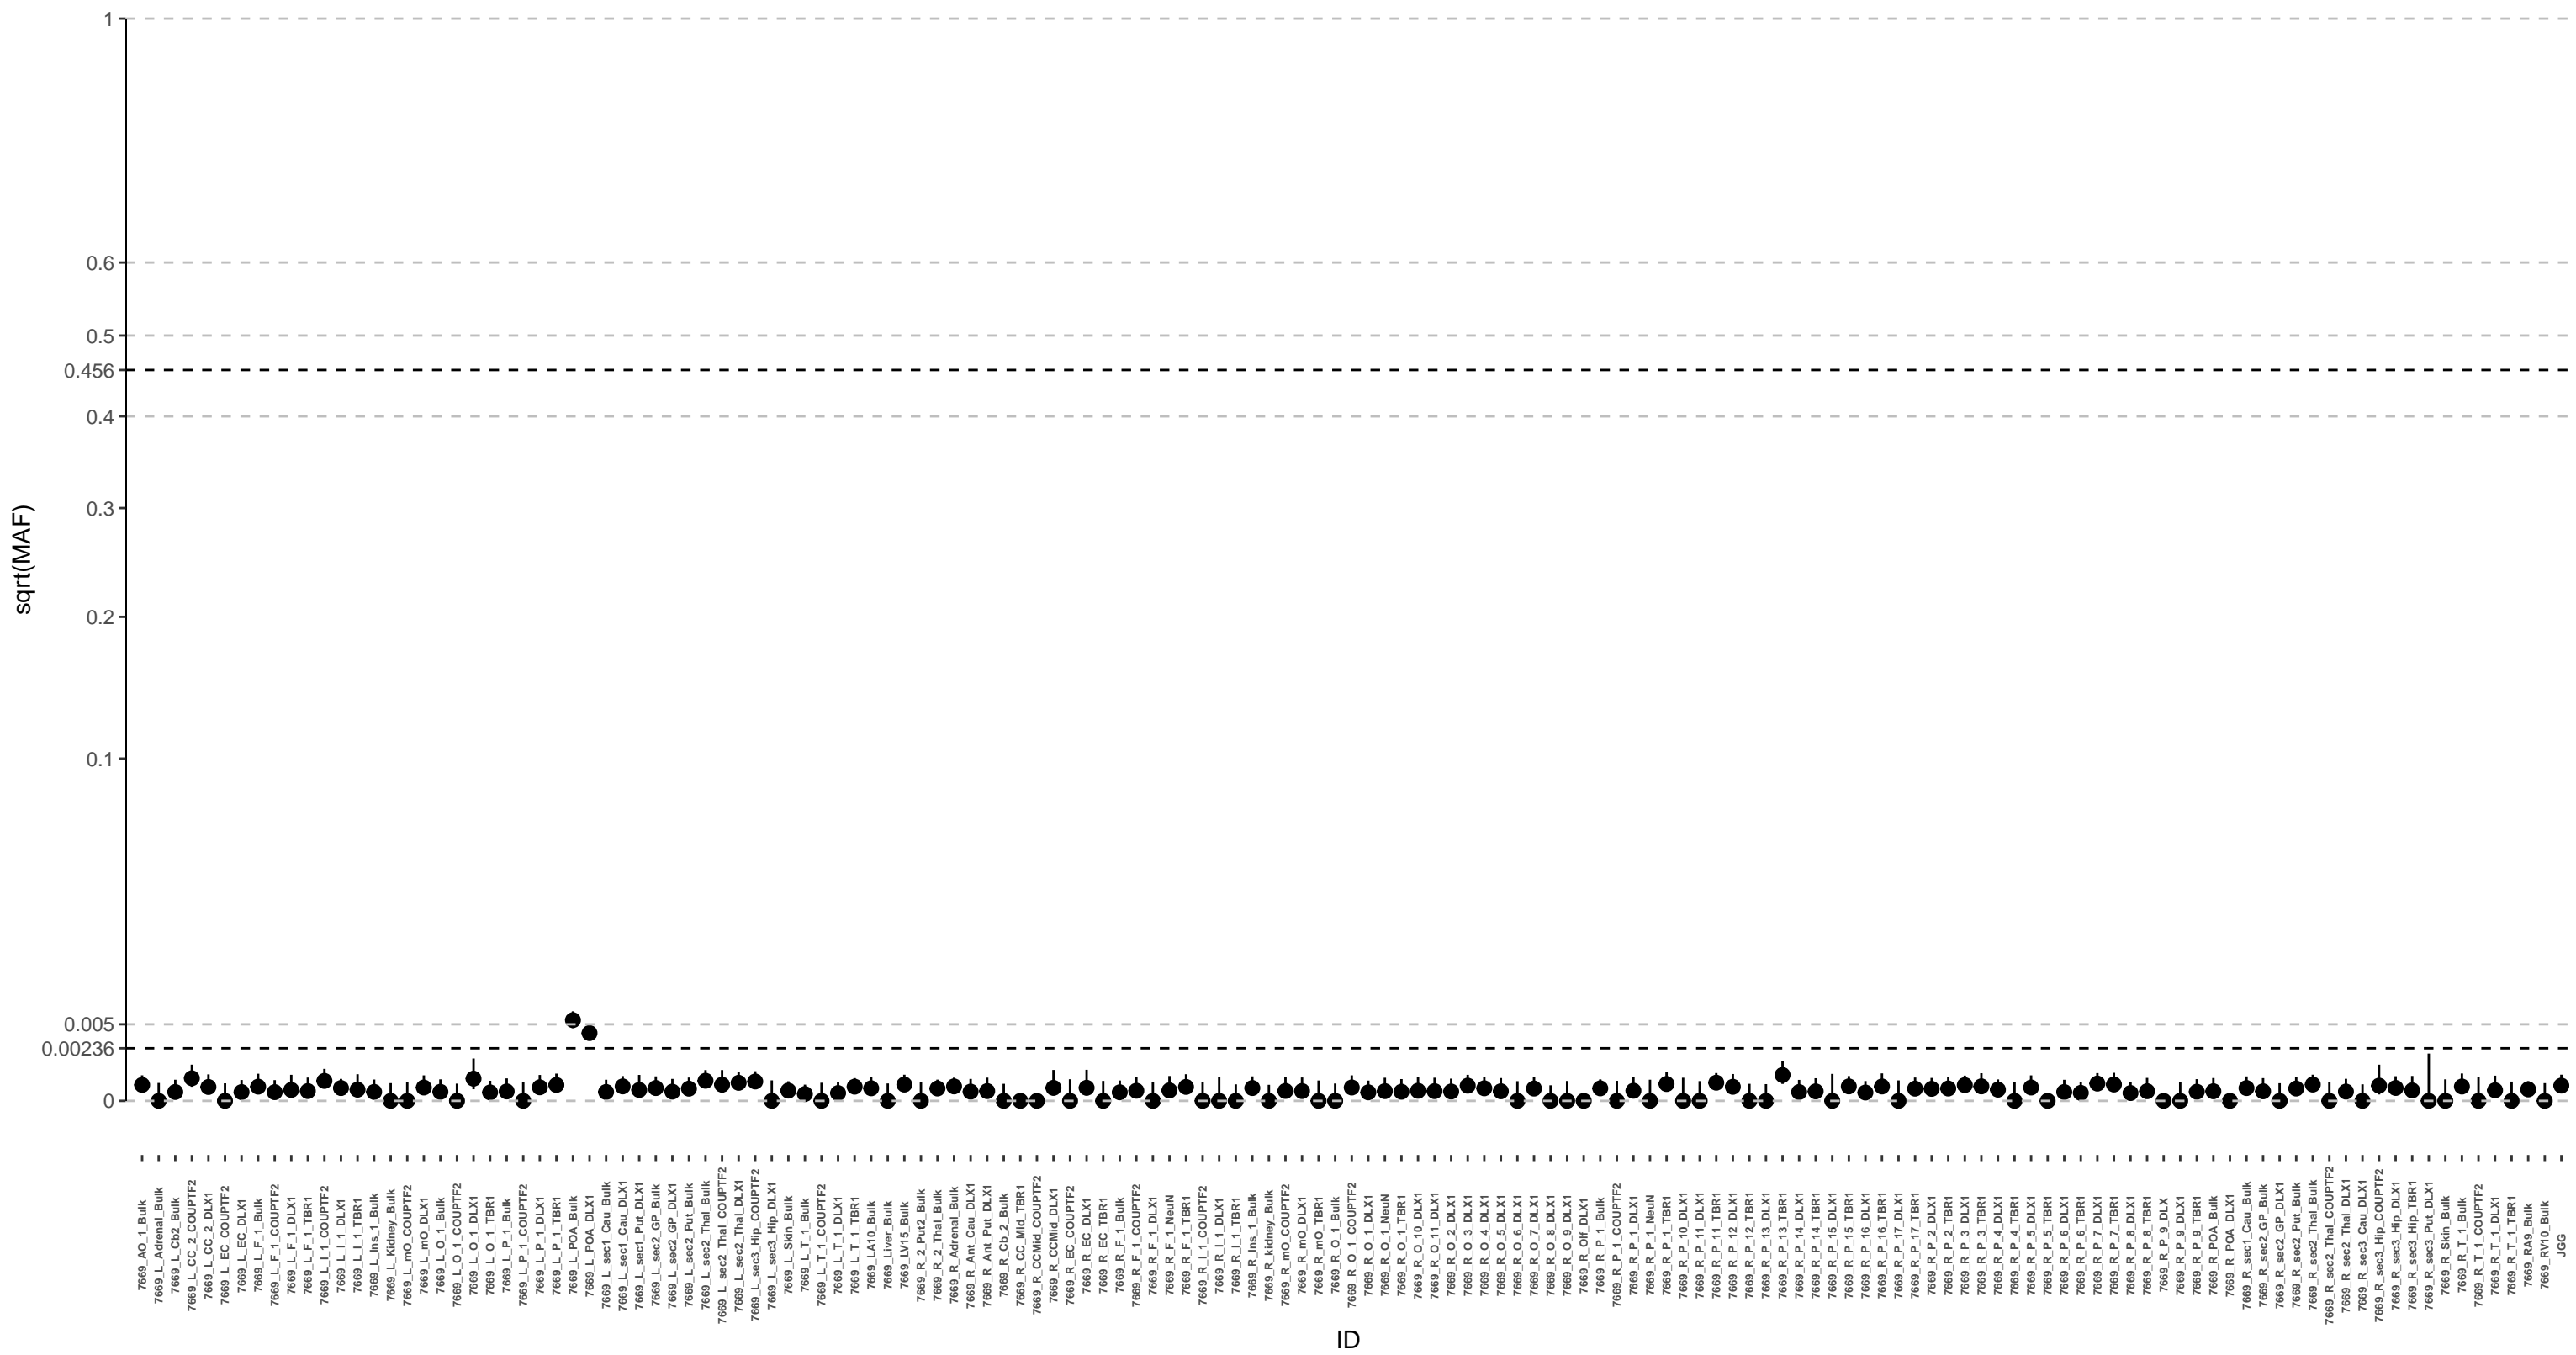

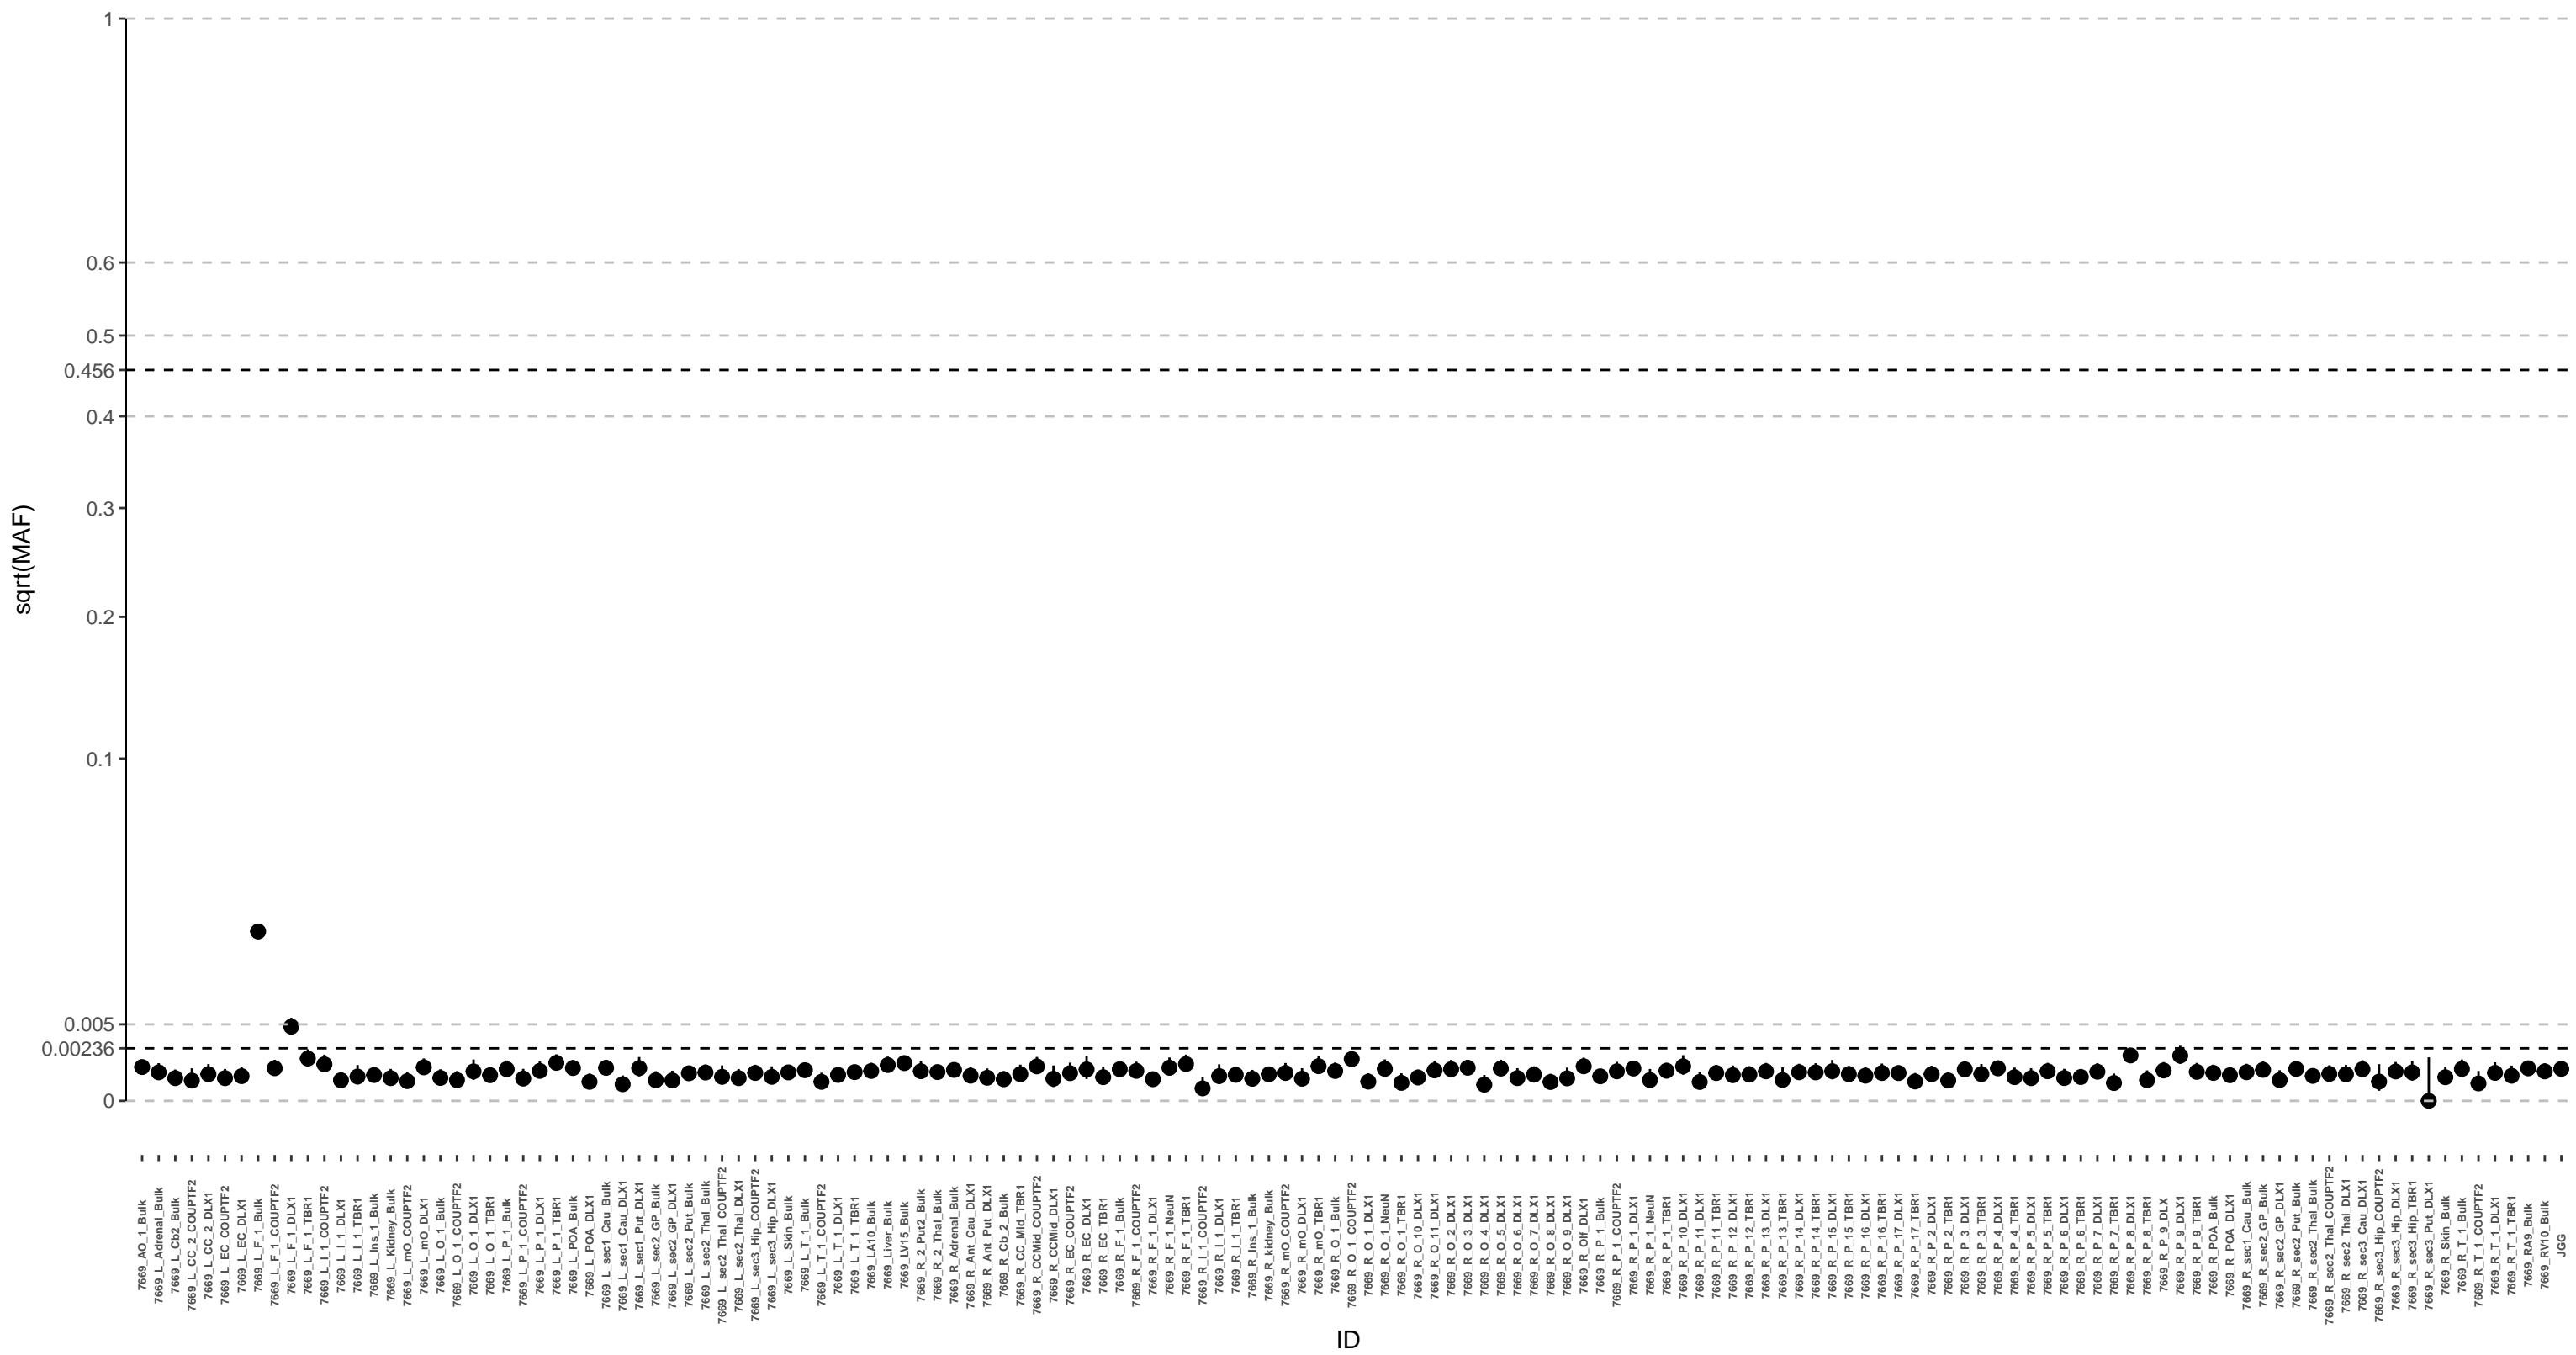

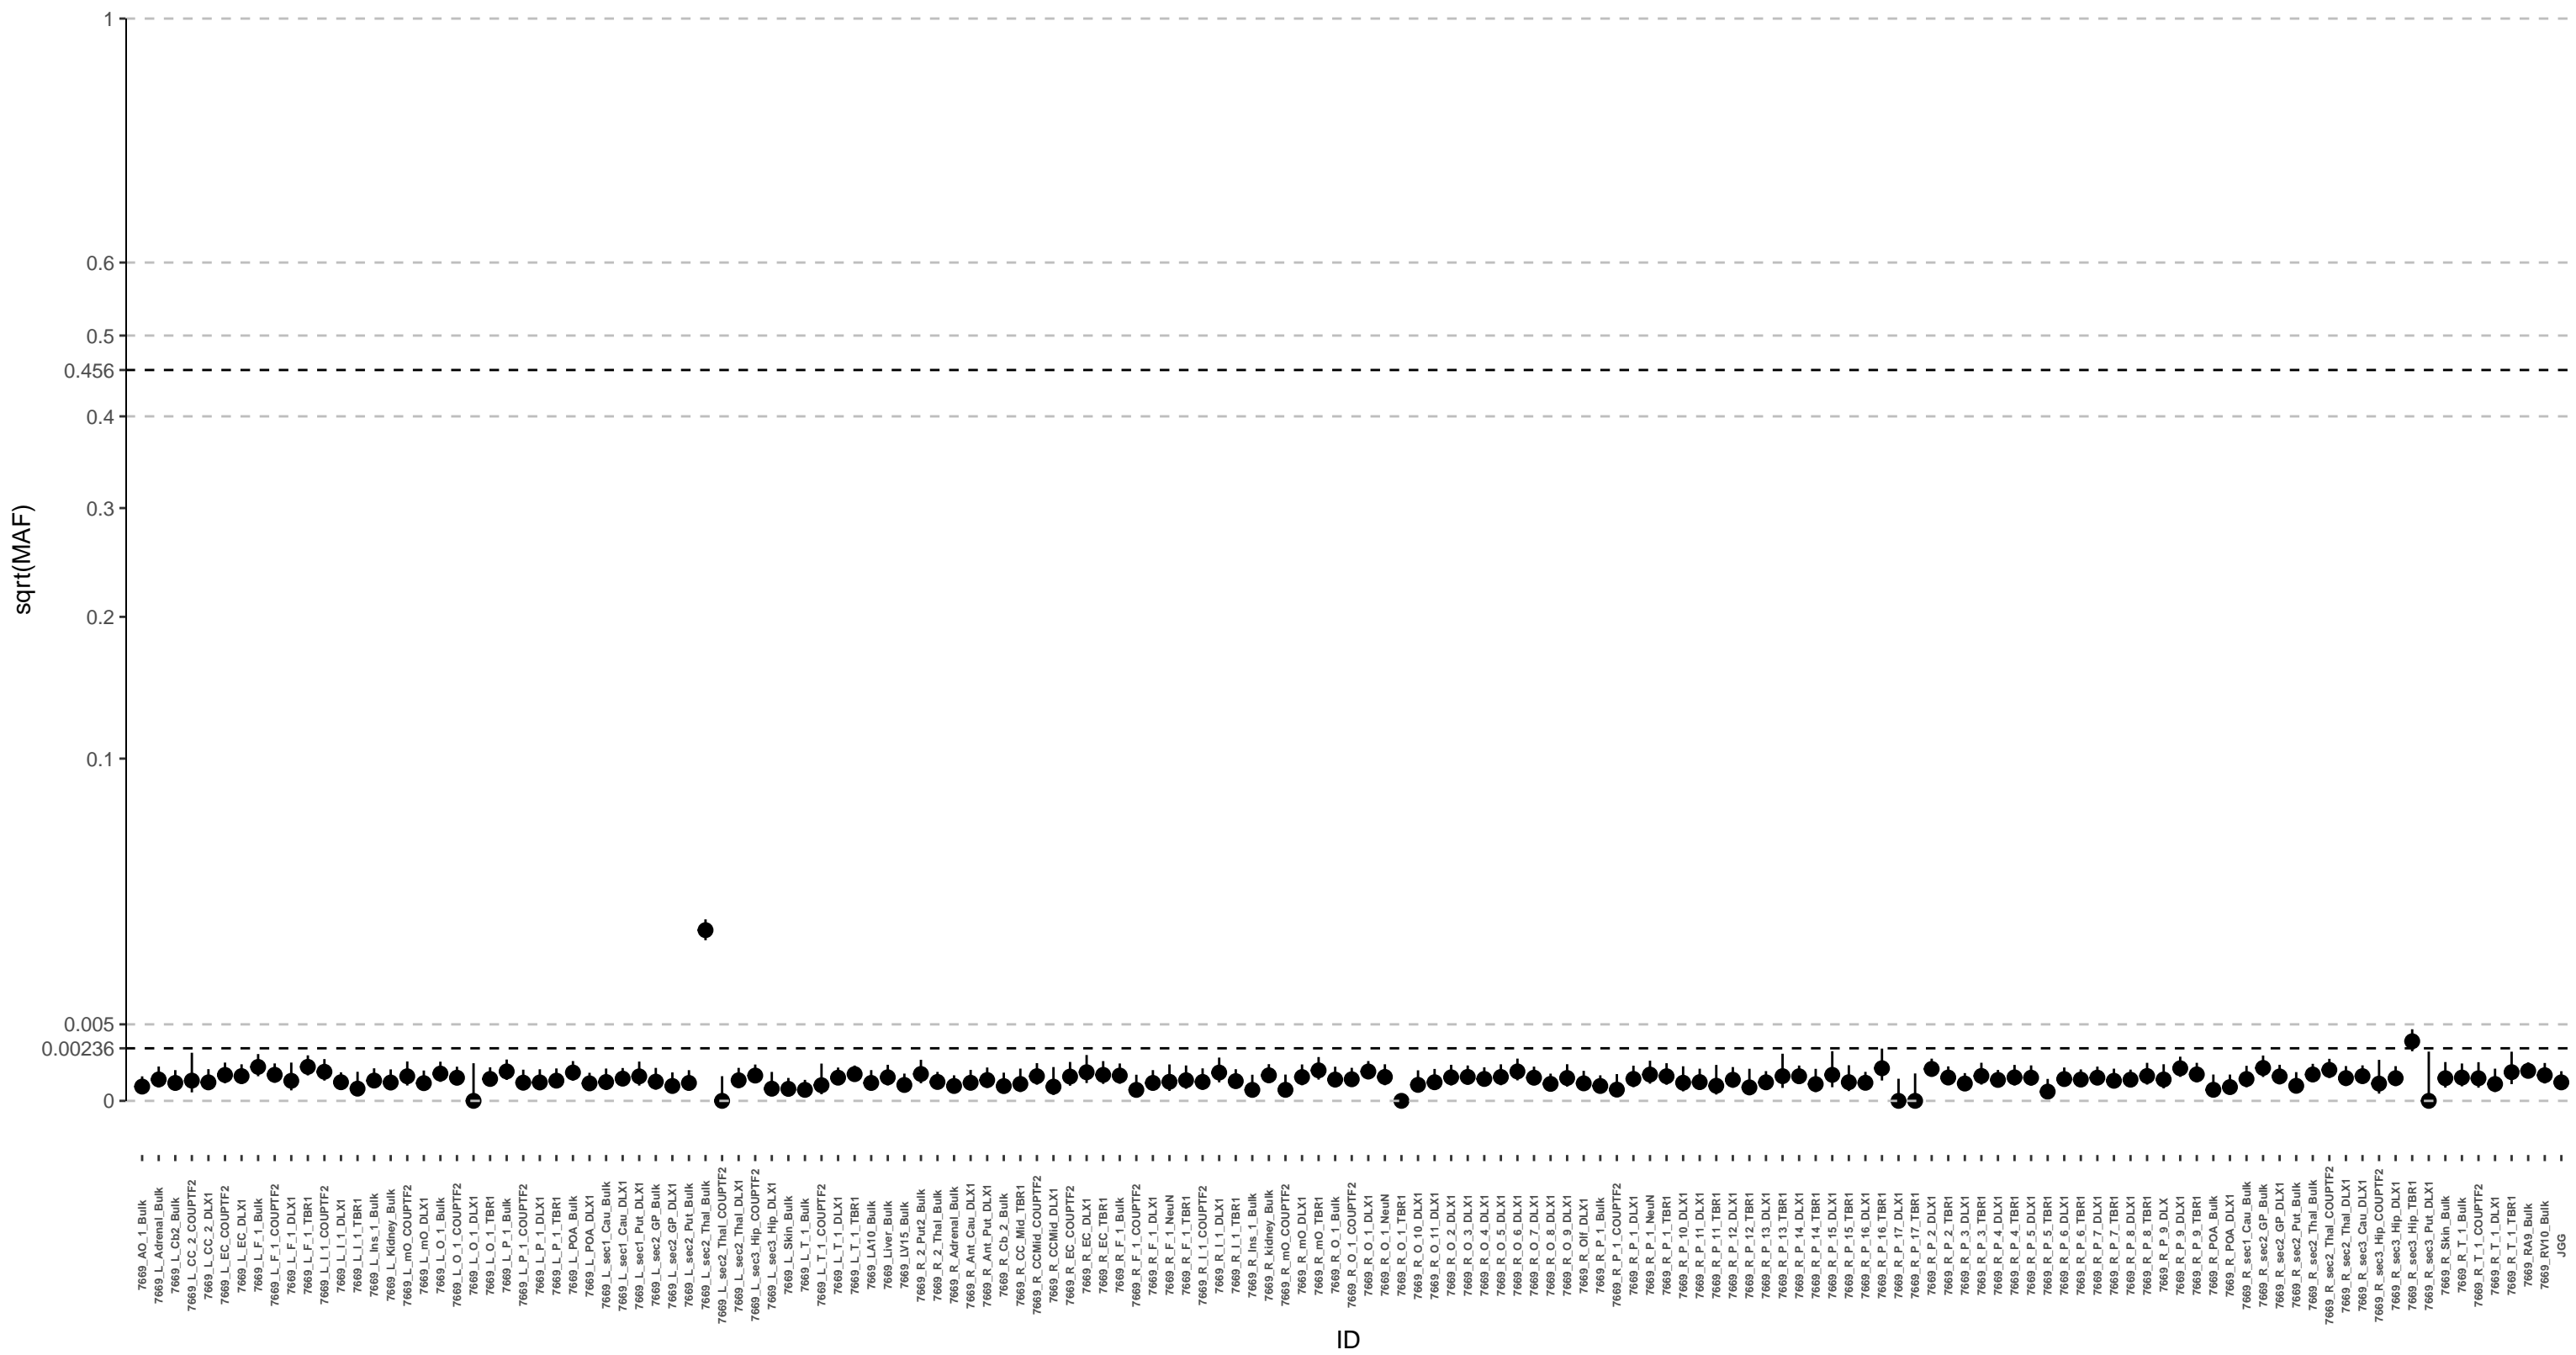

ID05 7-134512508-G-T

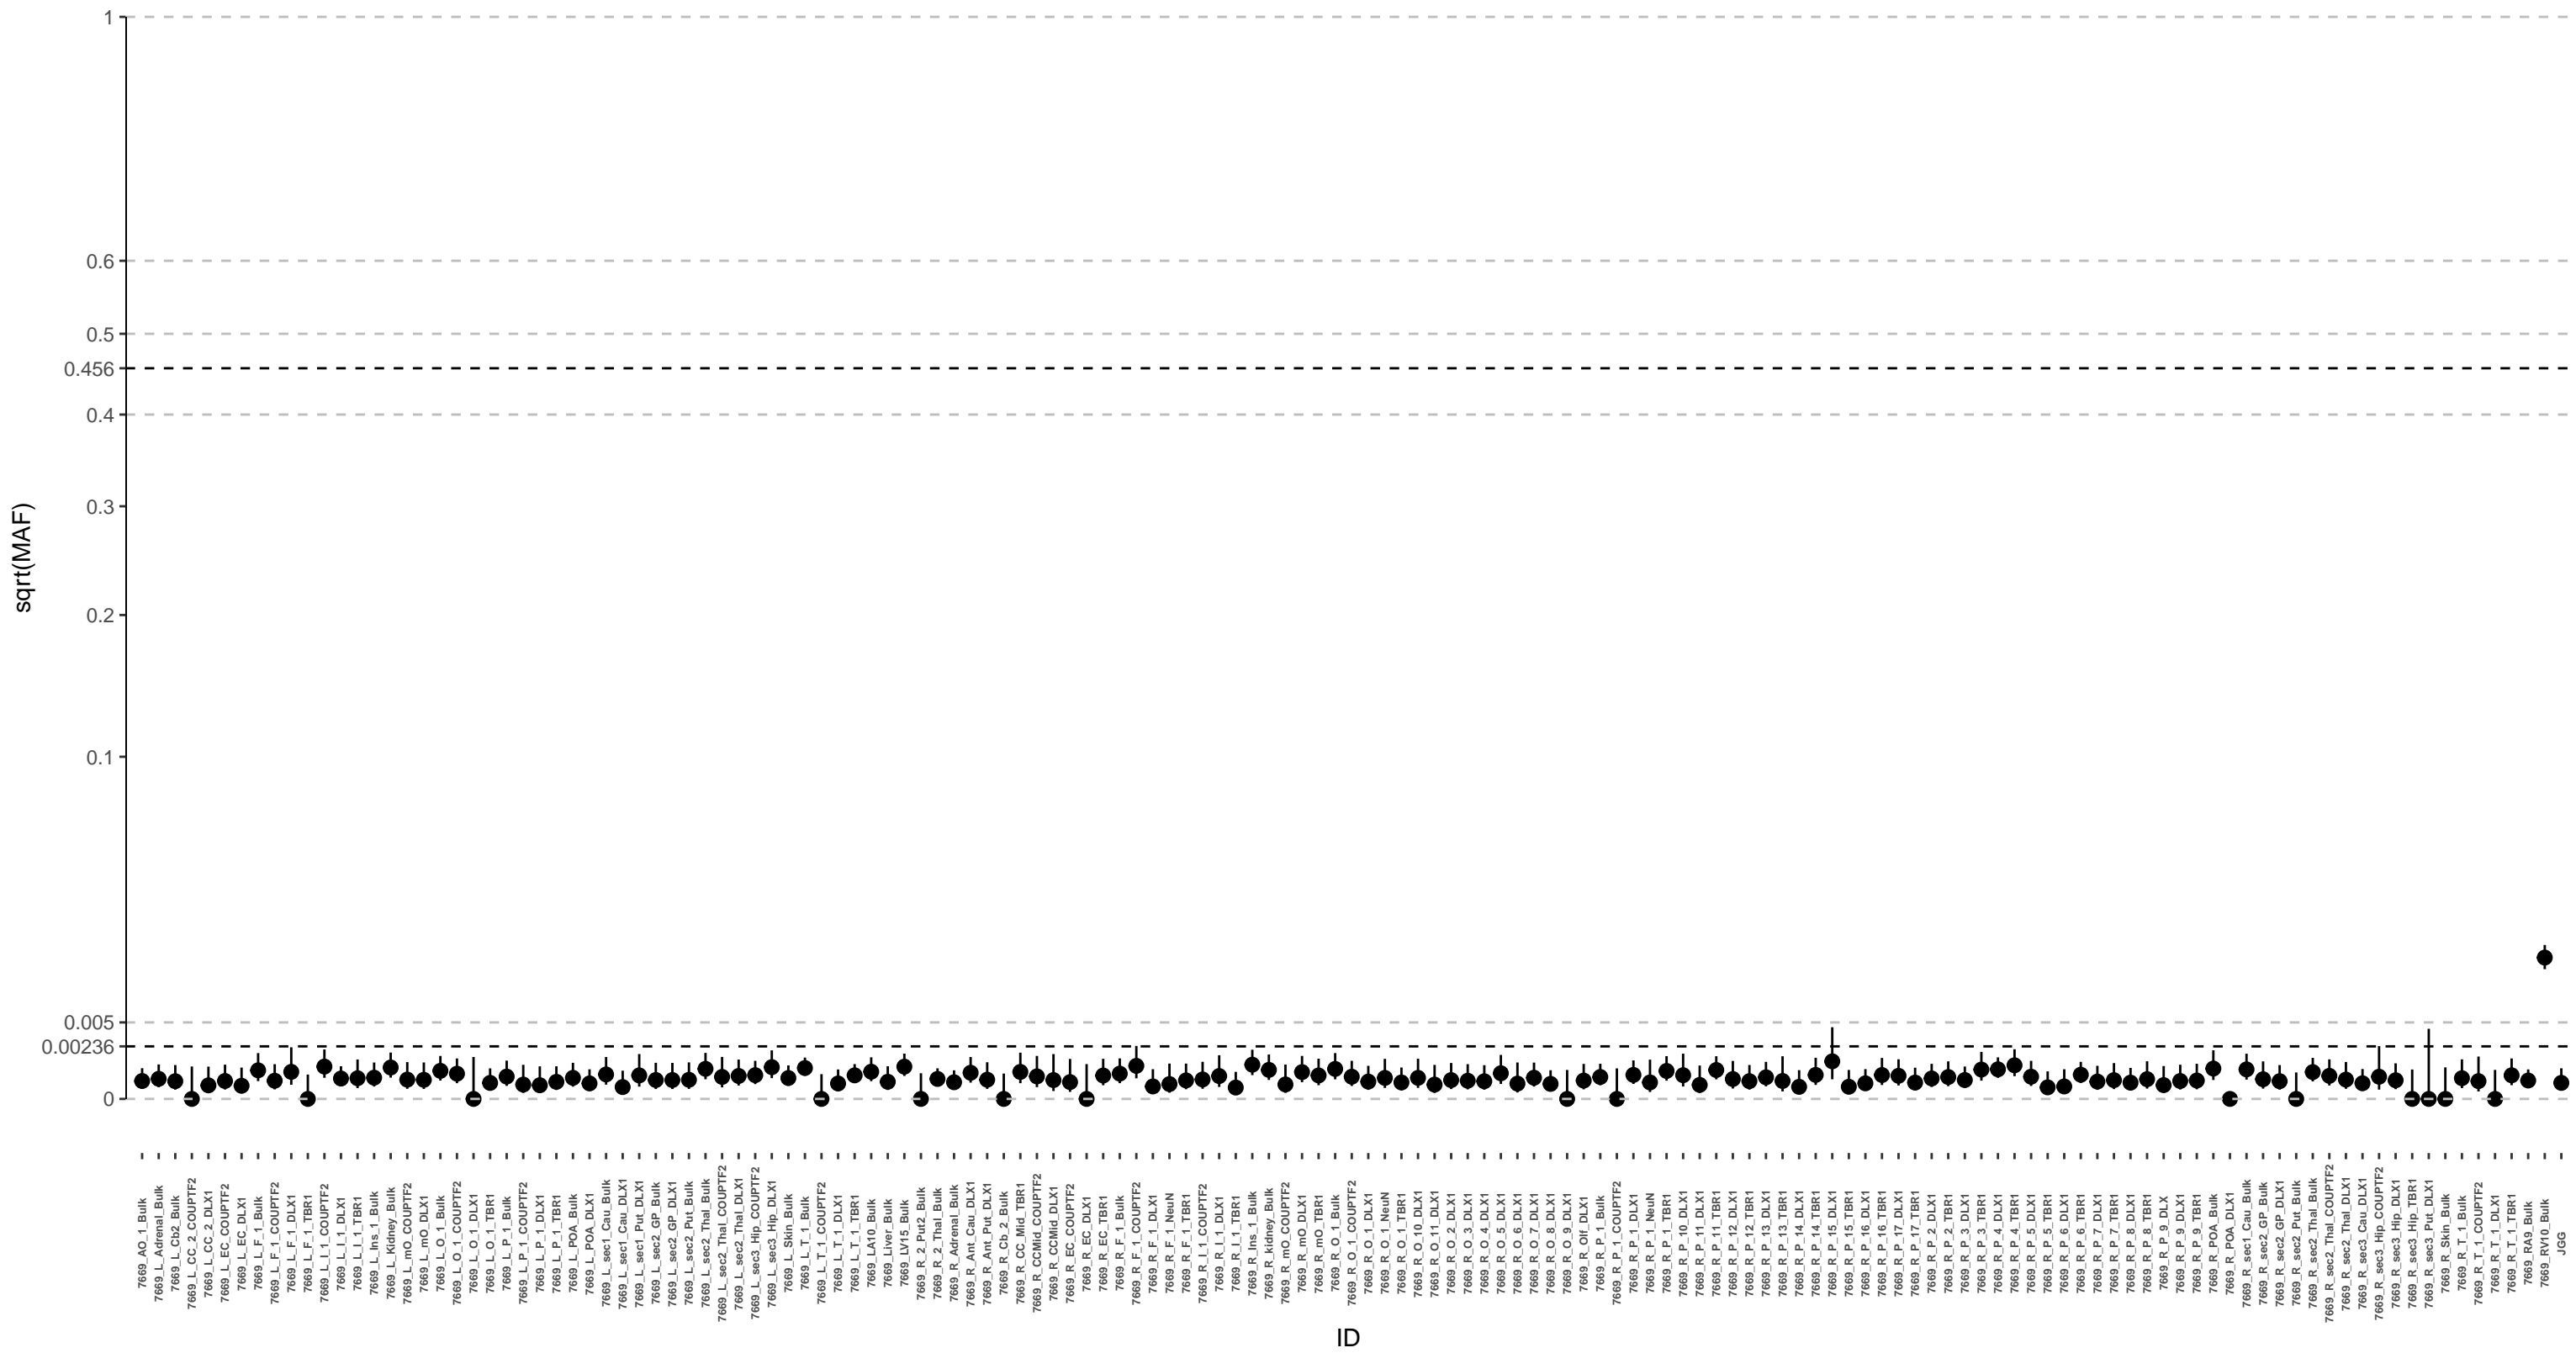

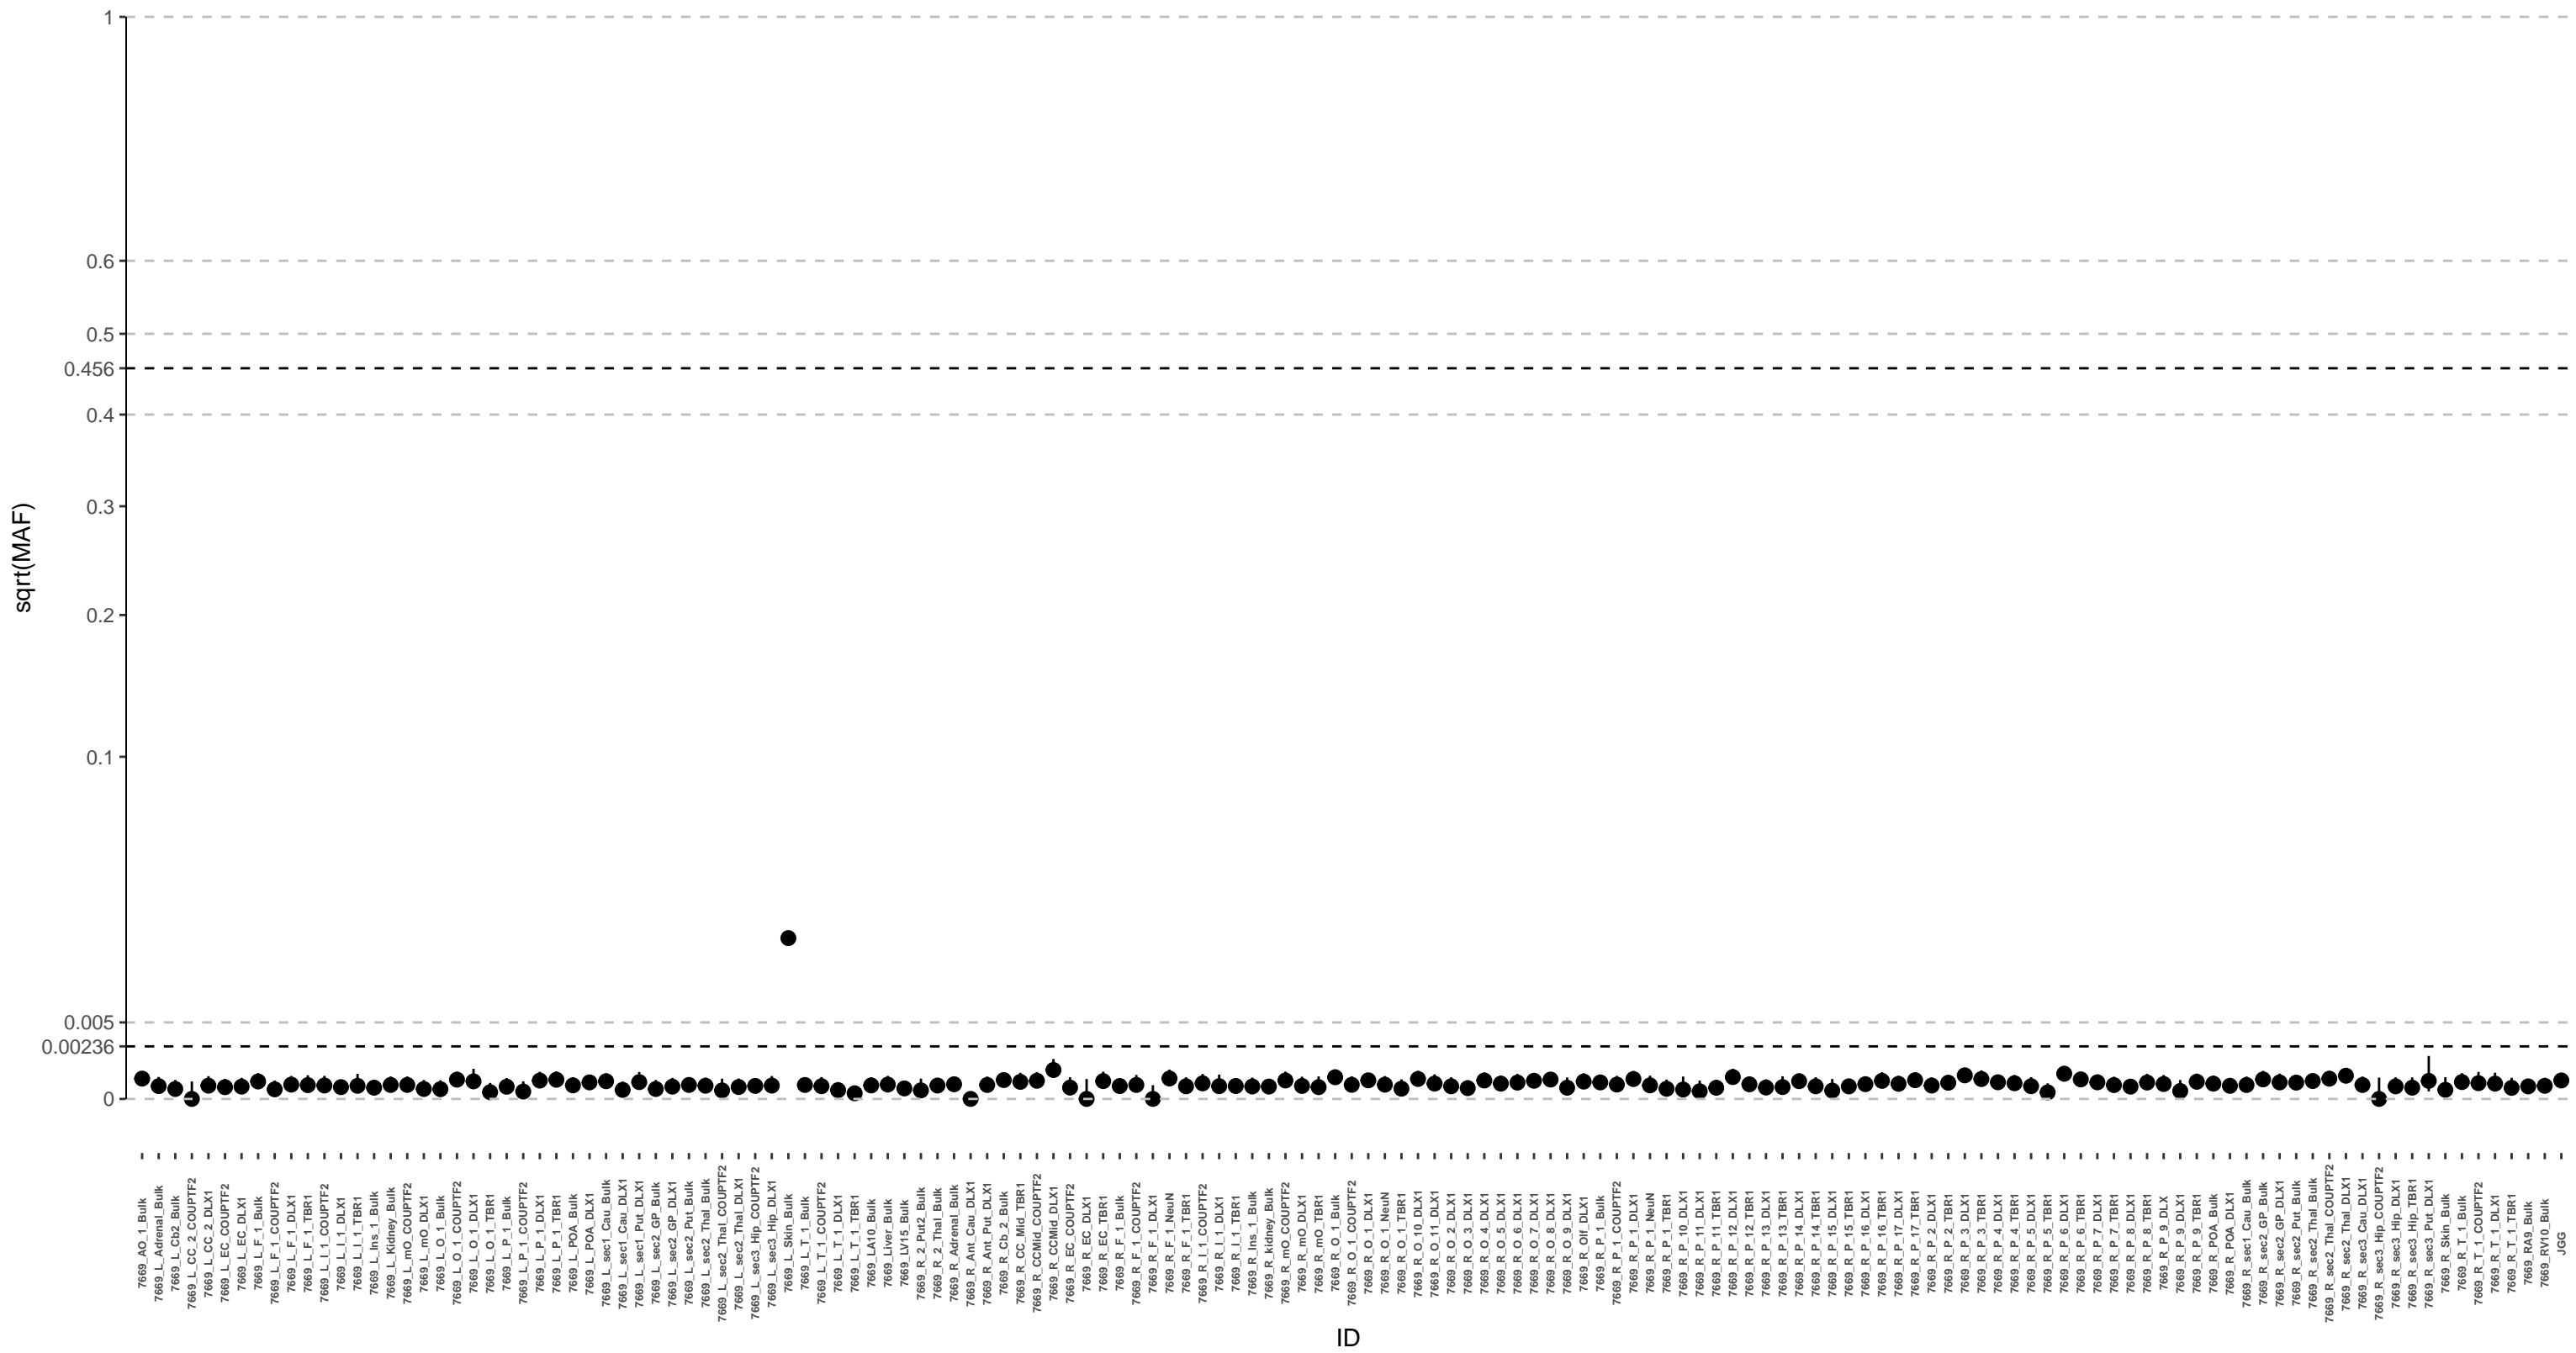

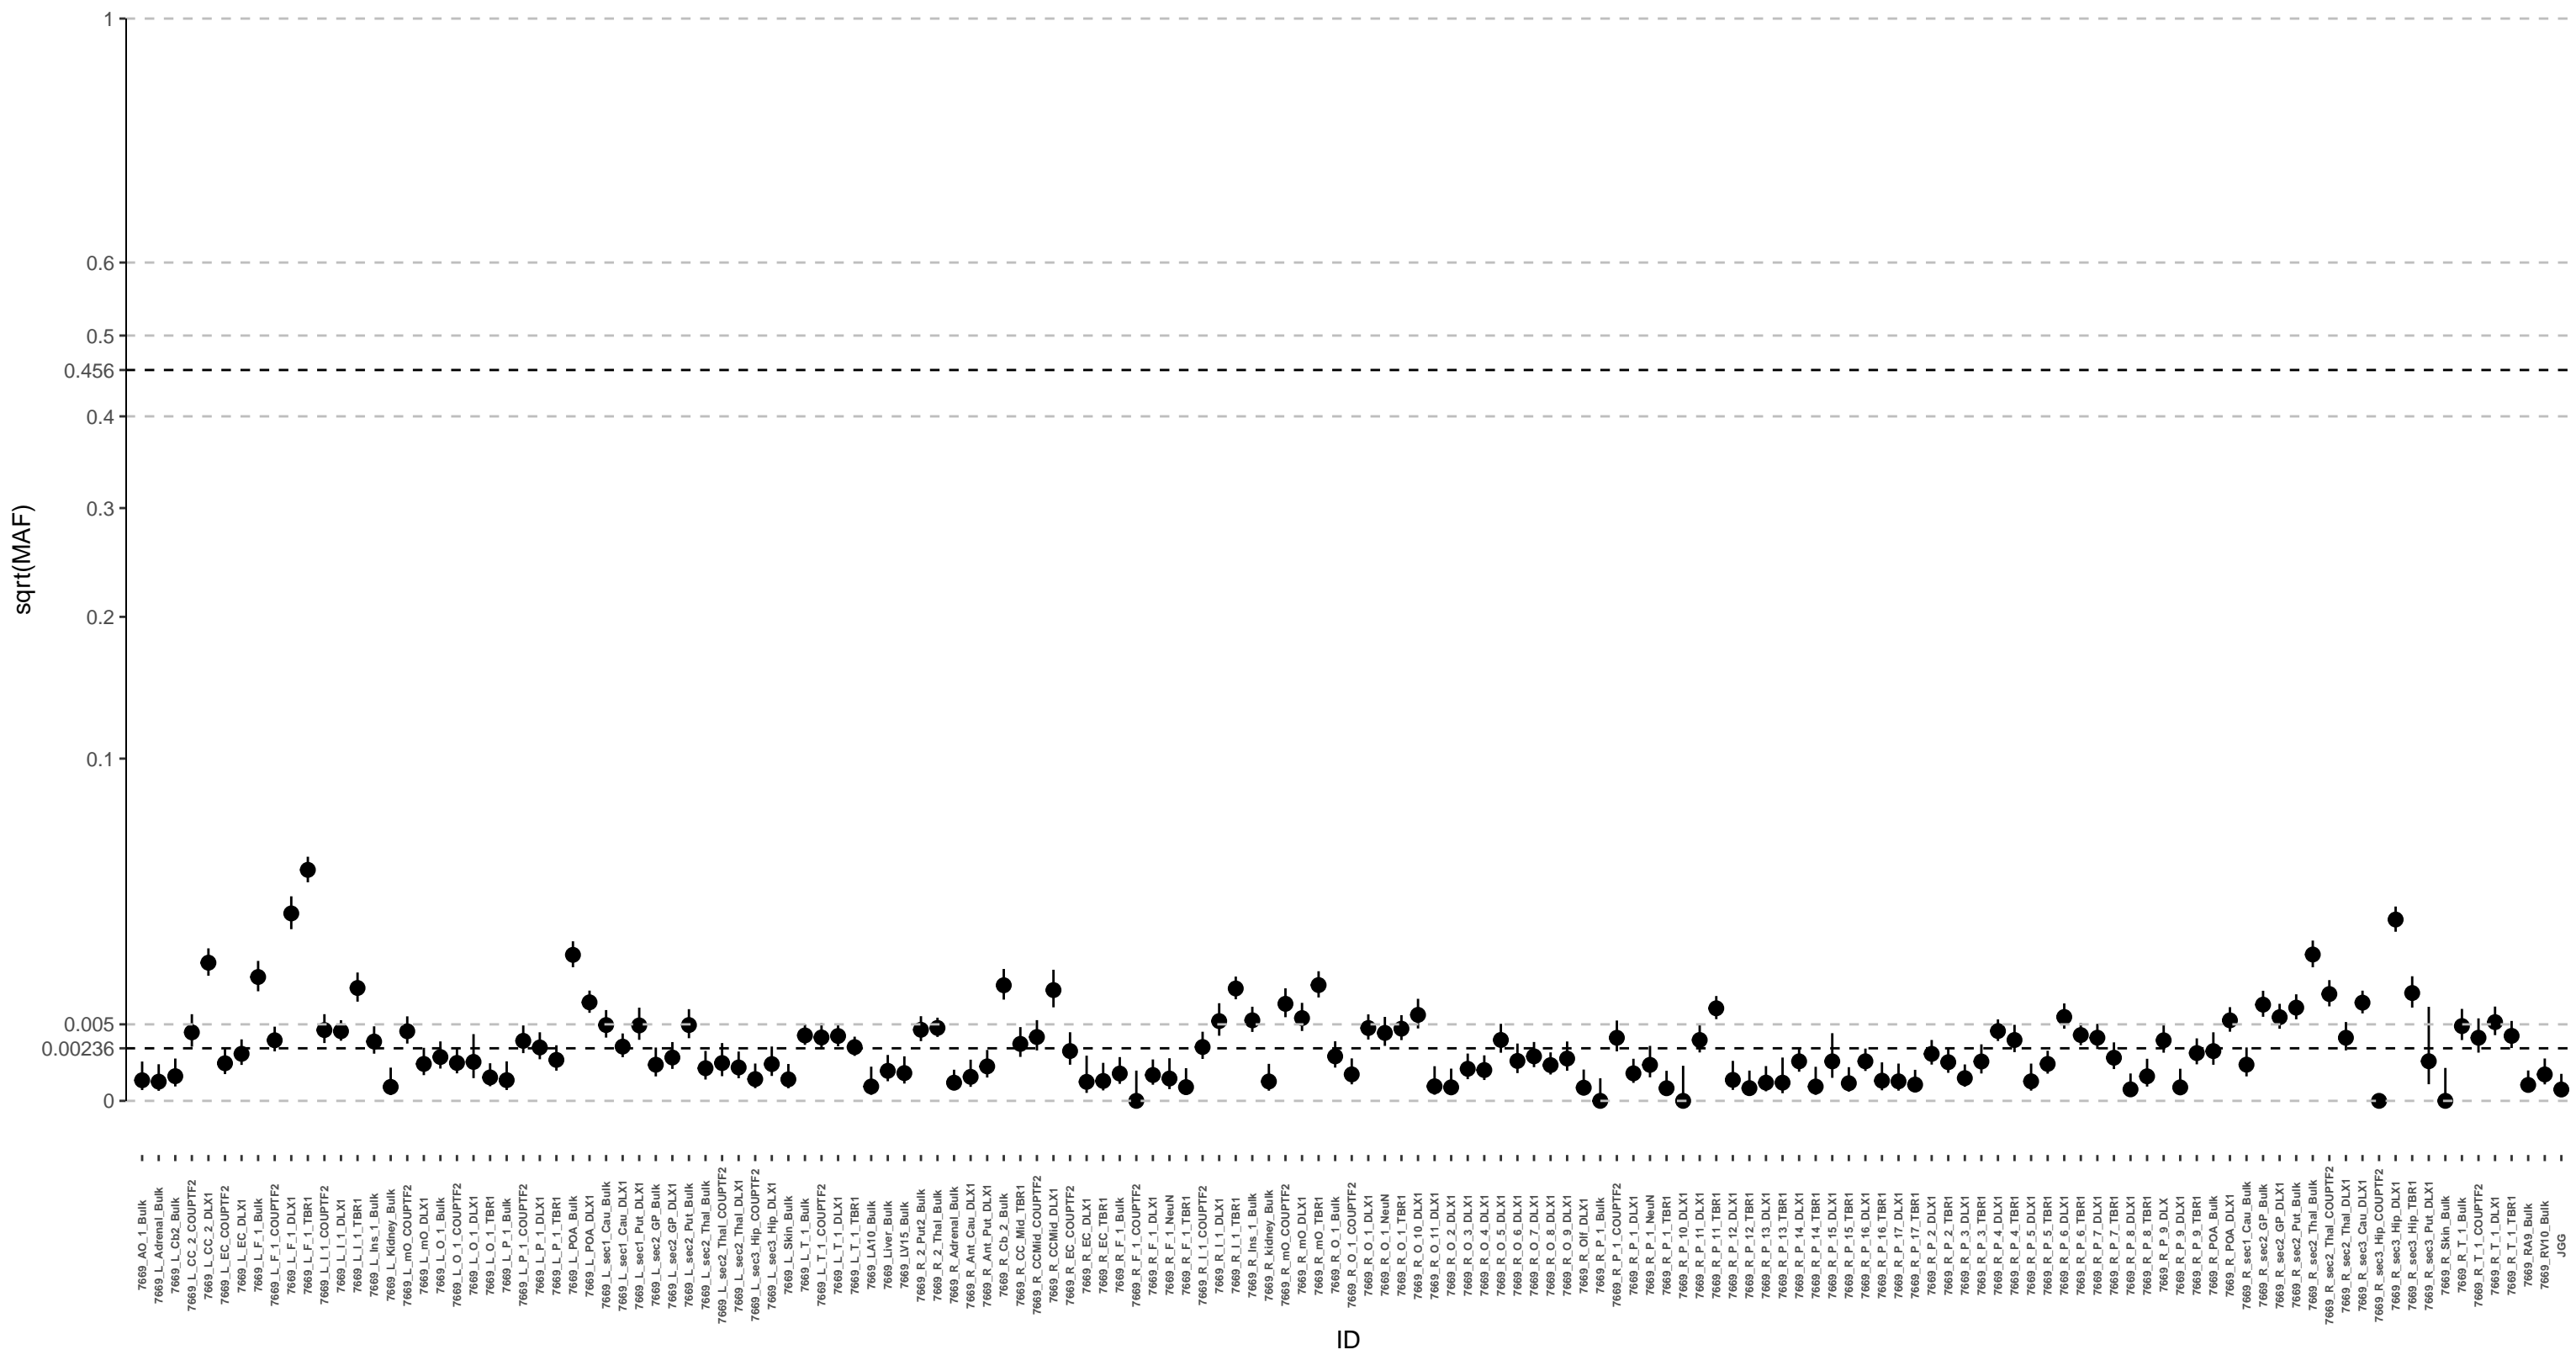

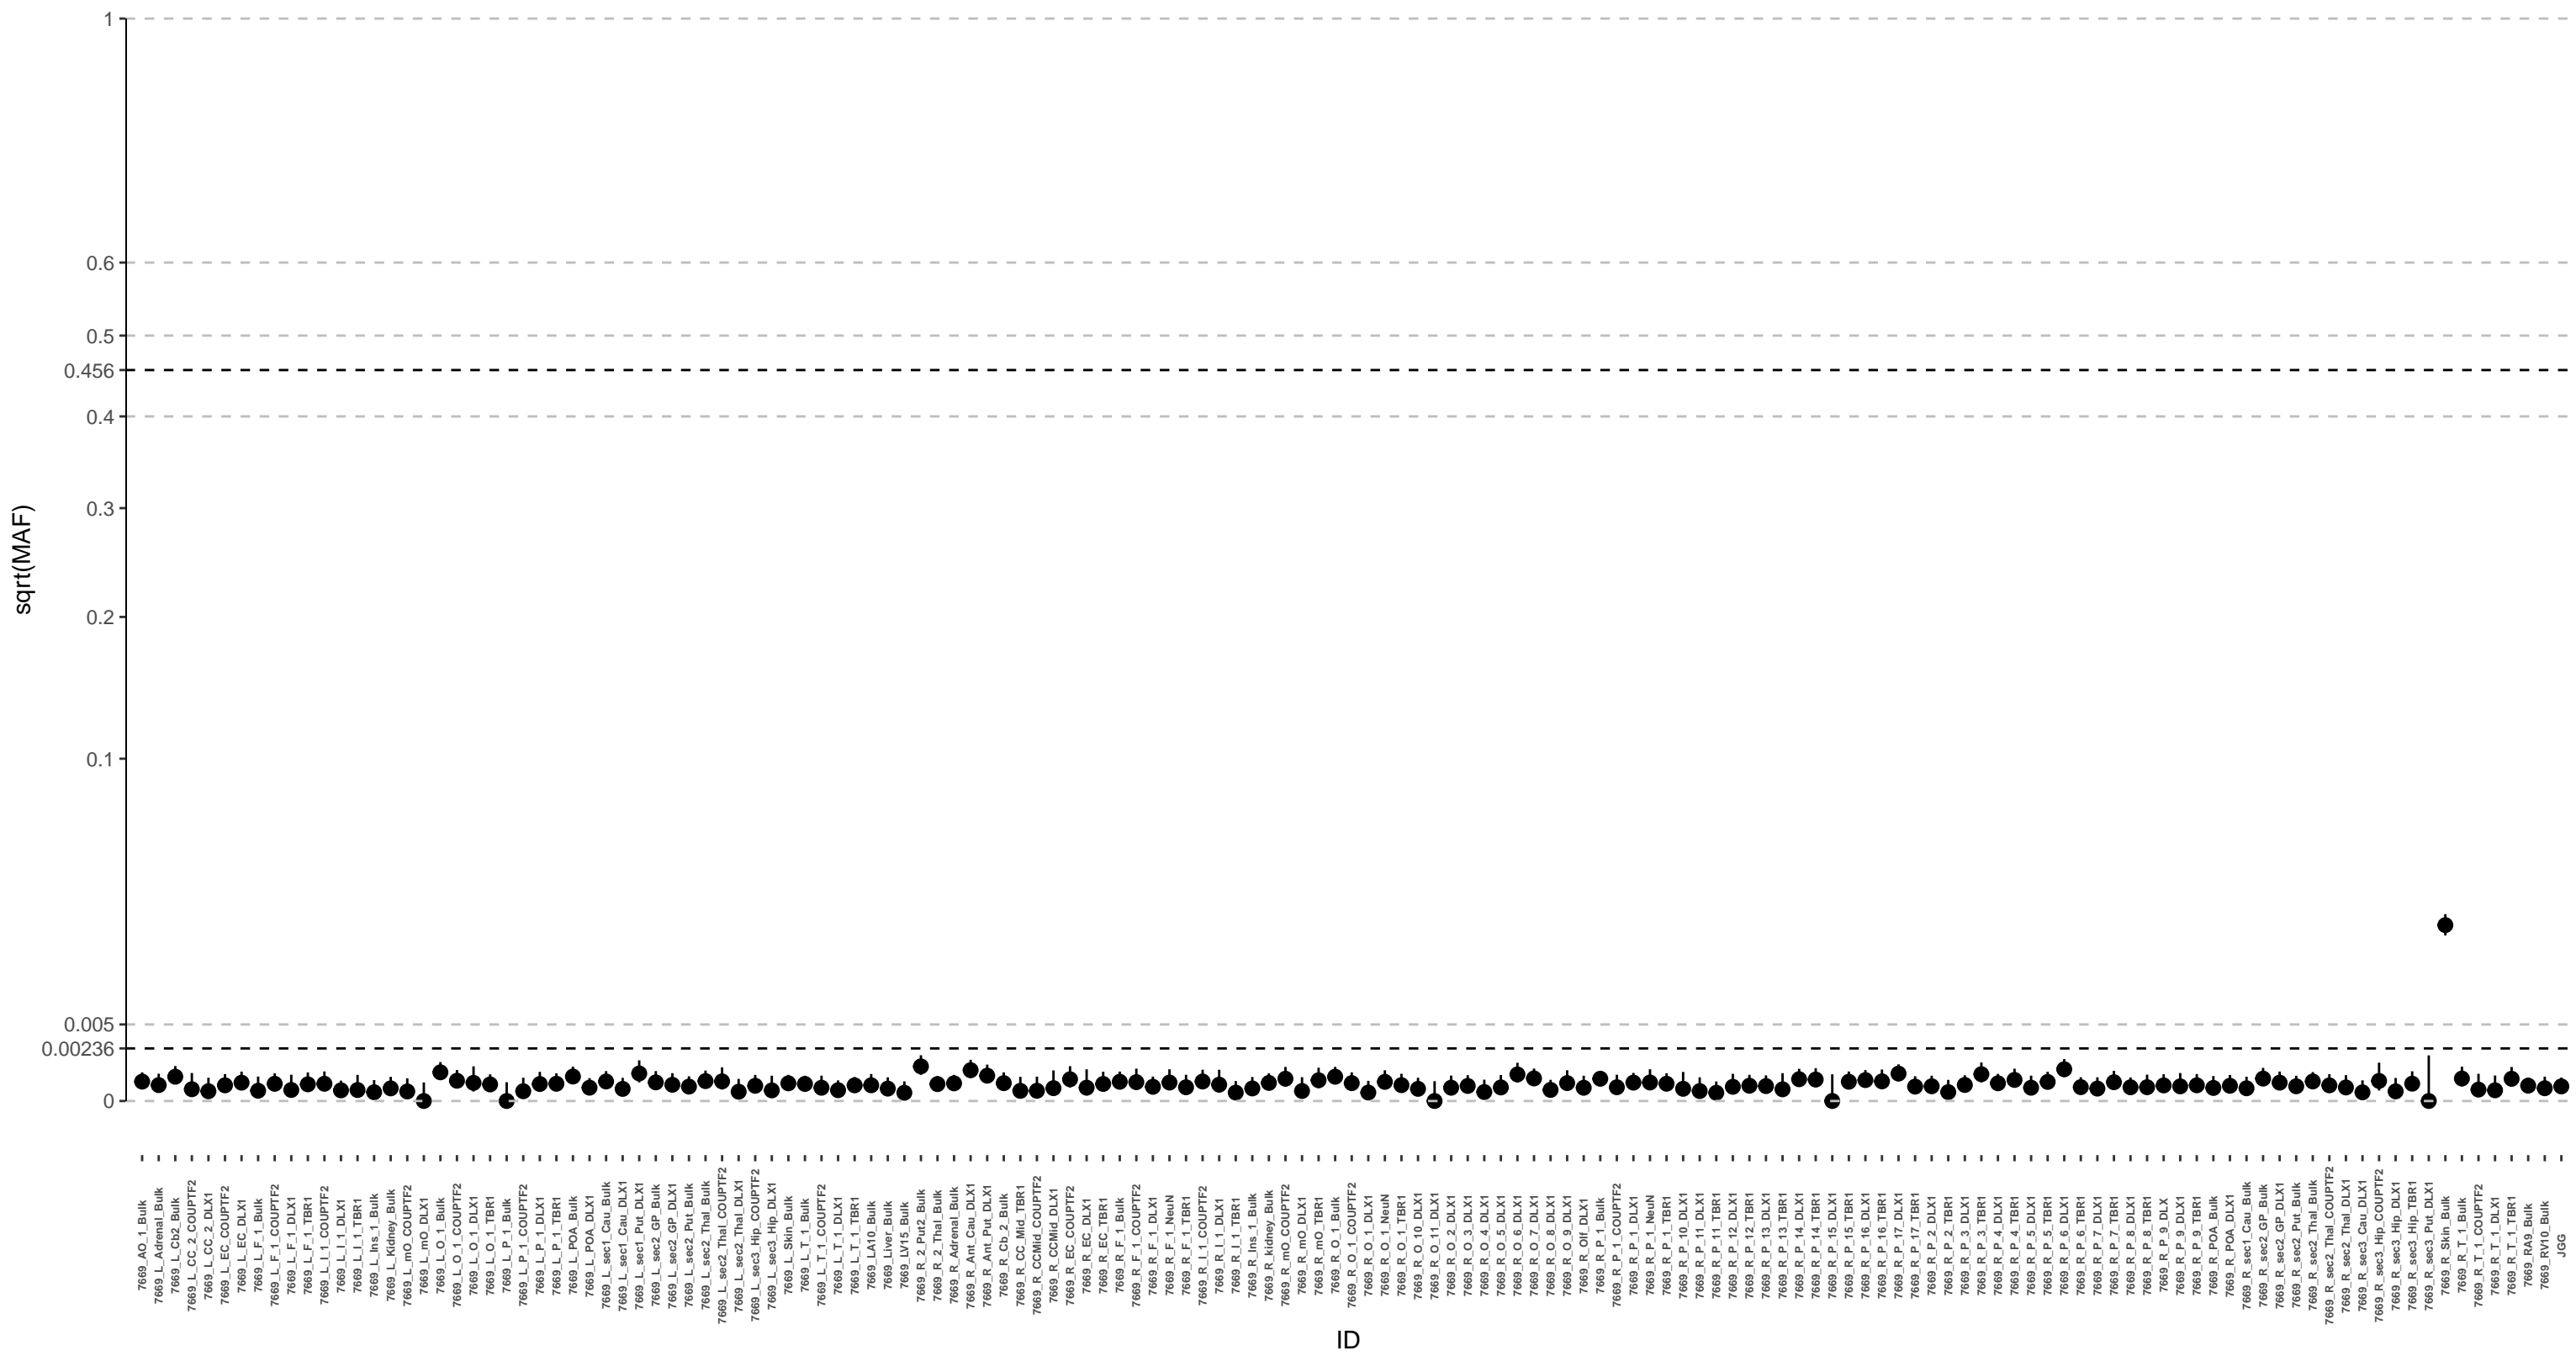

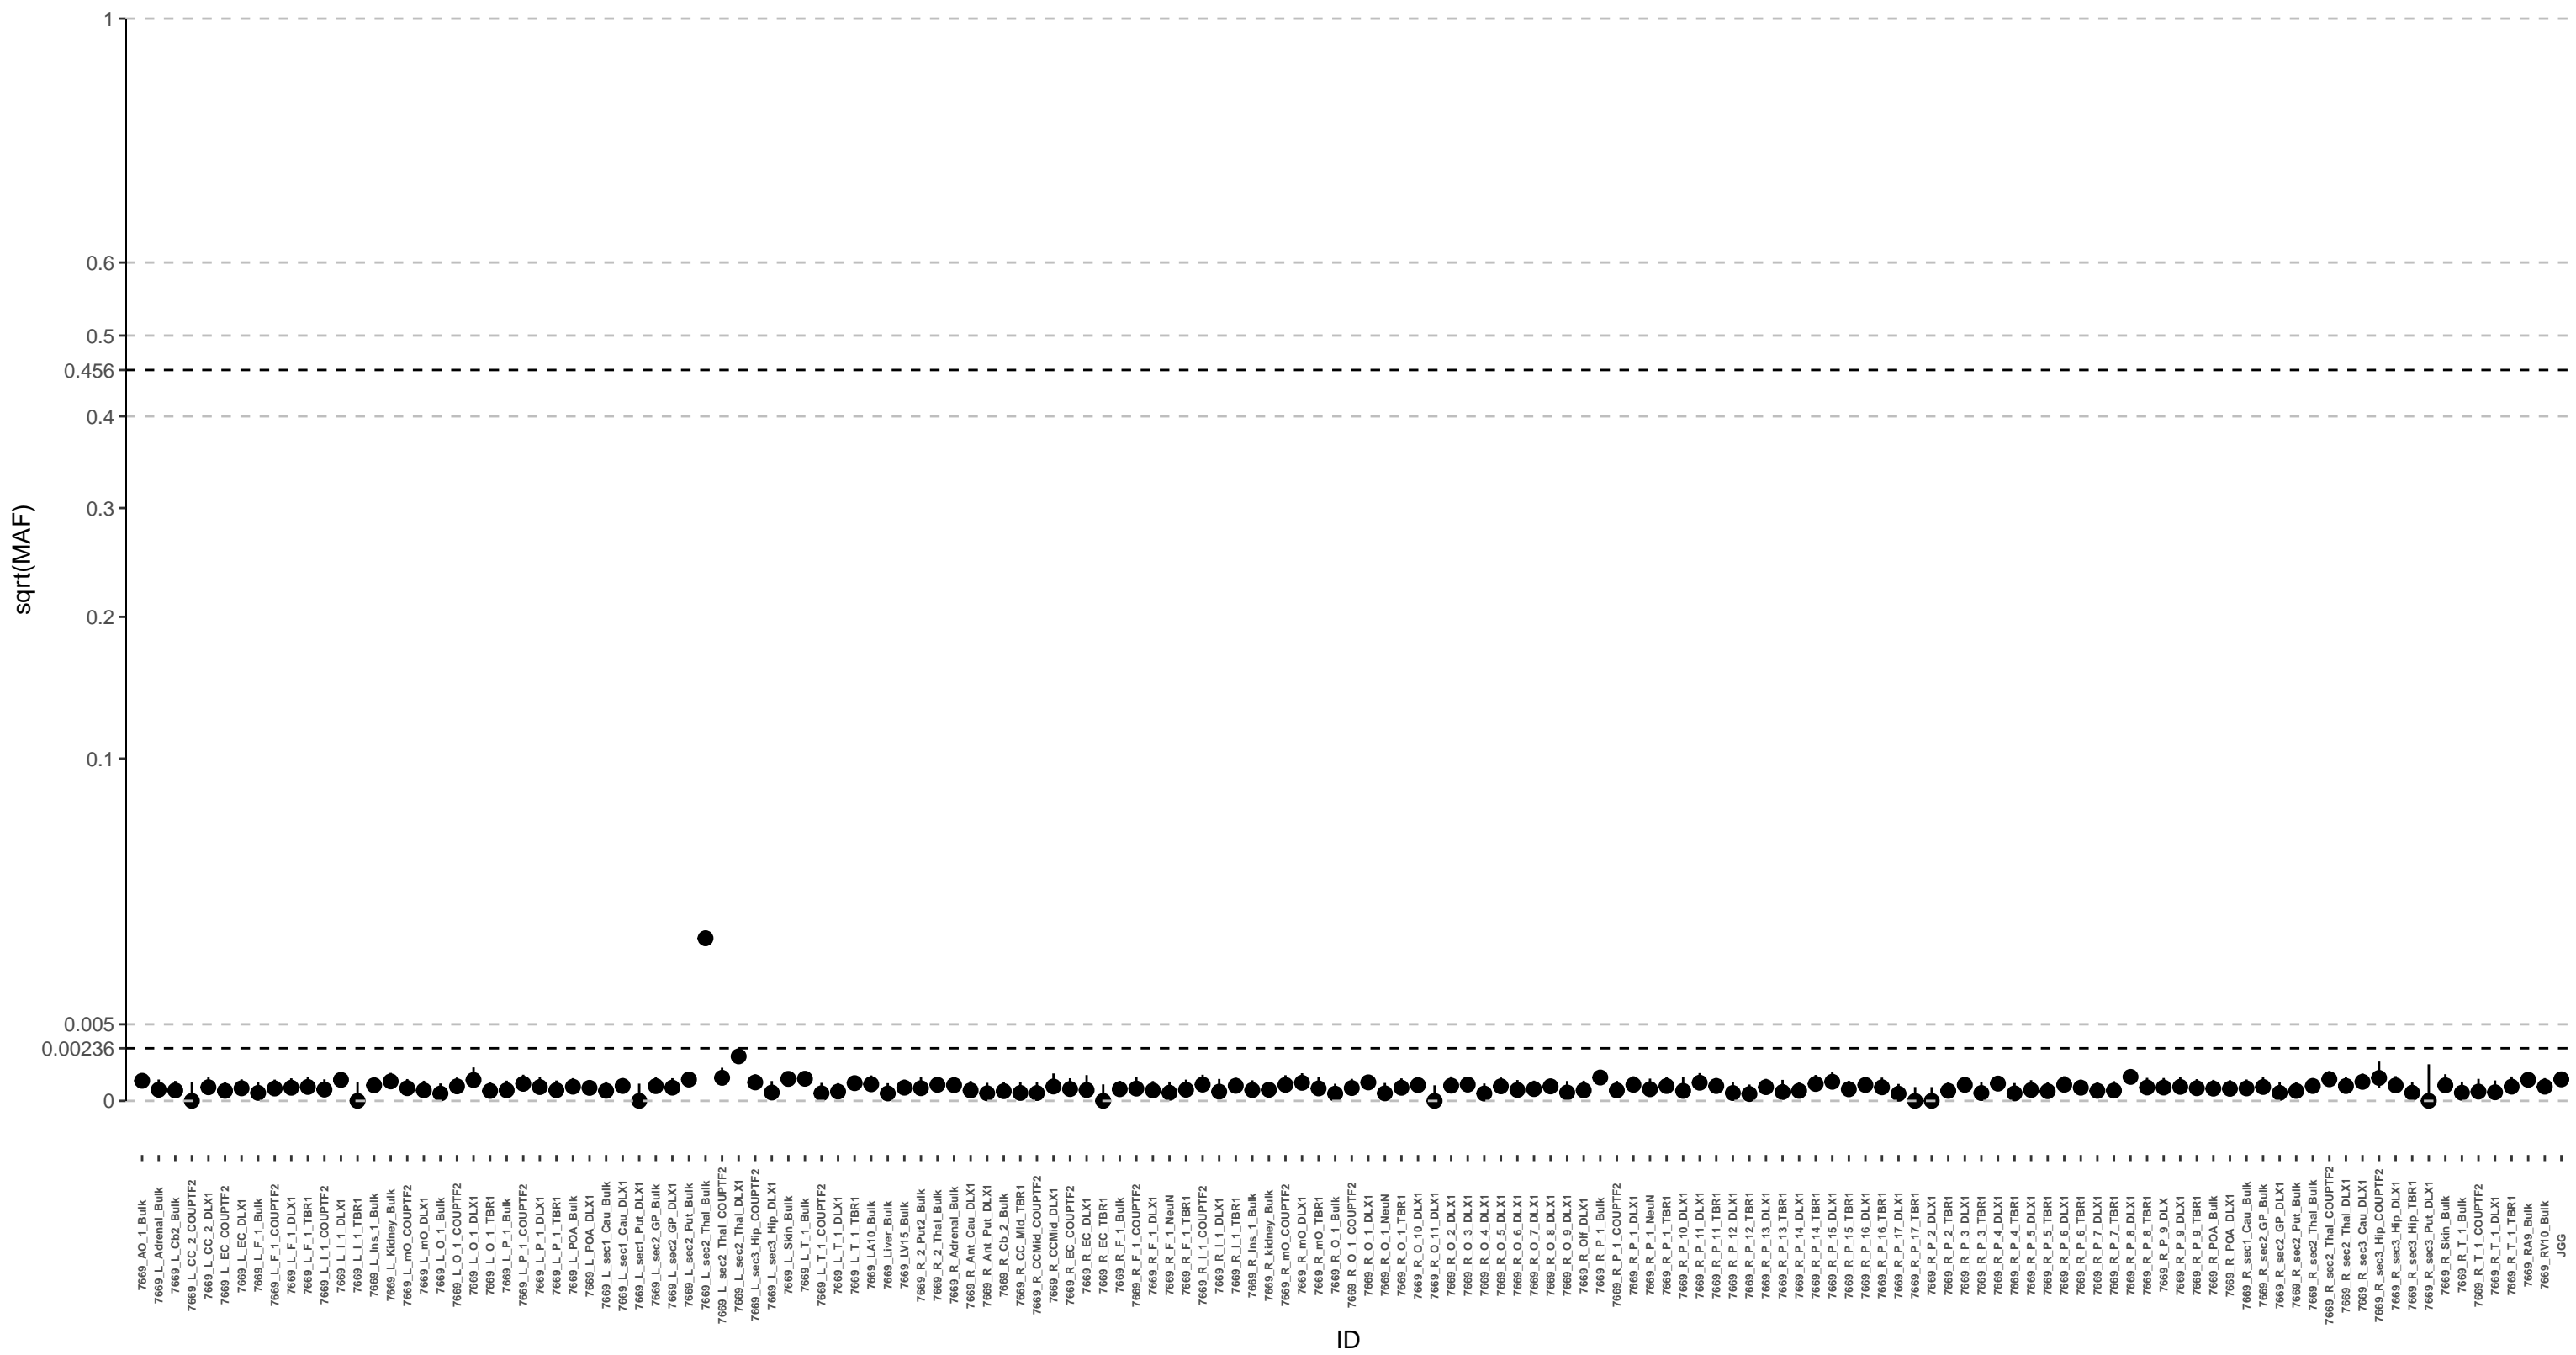



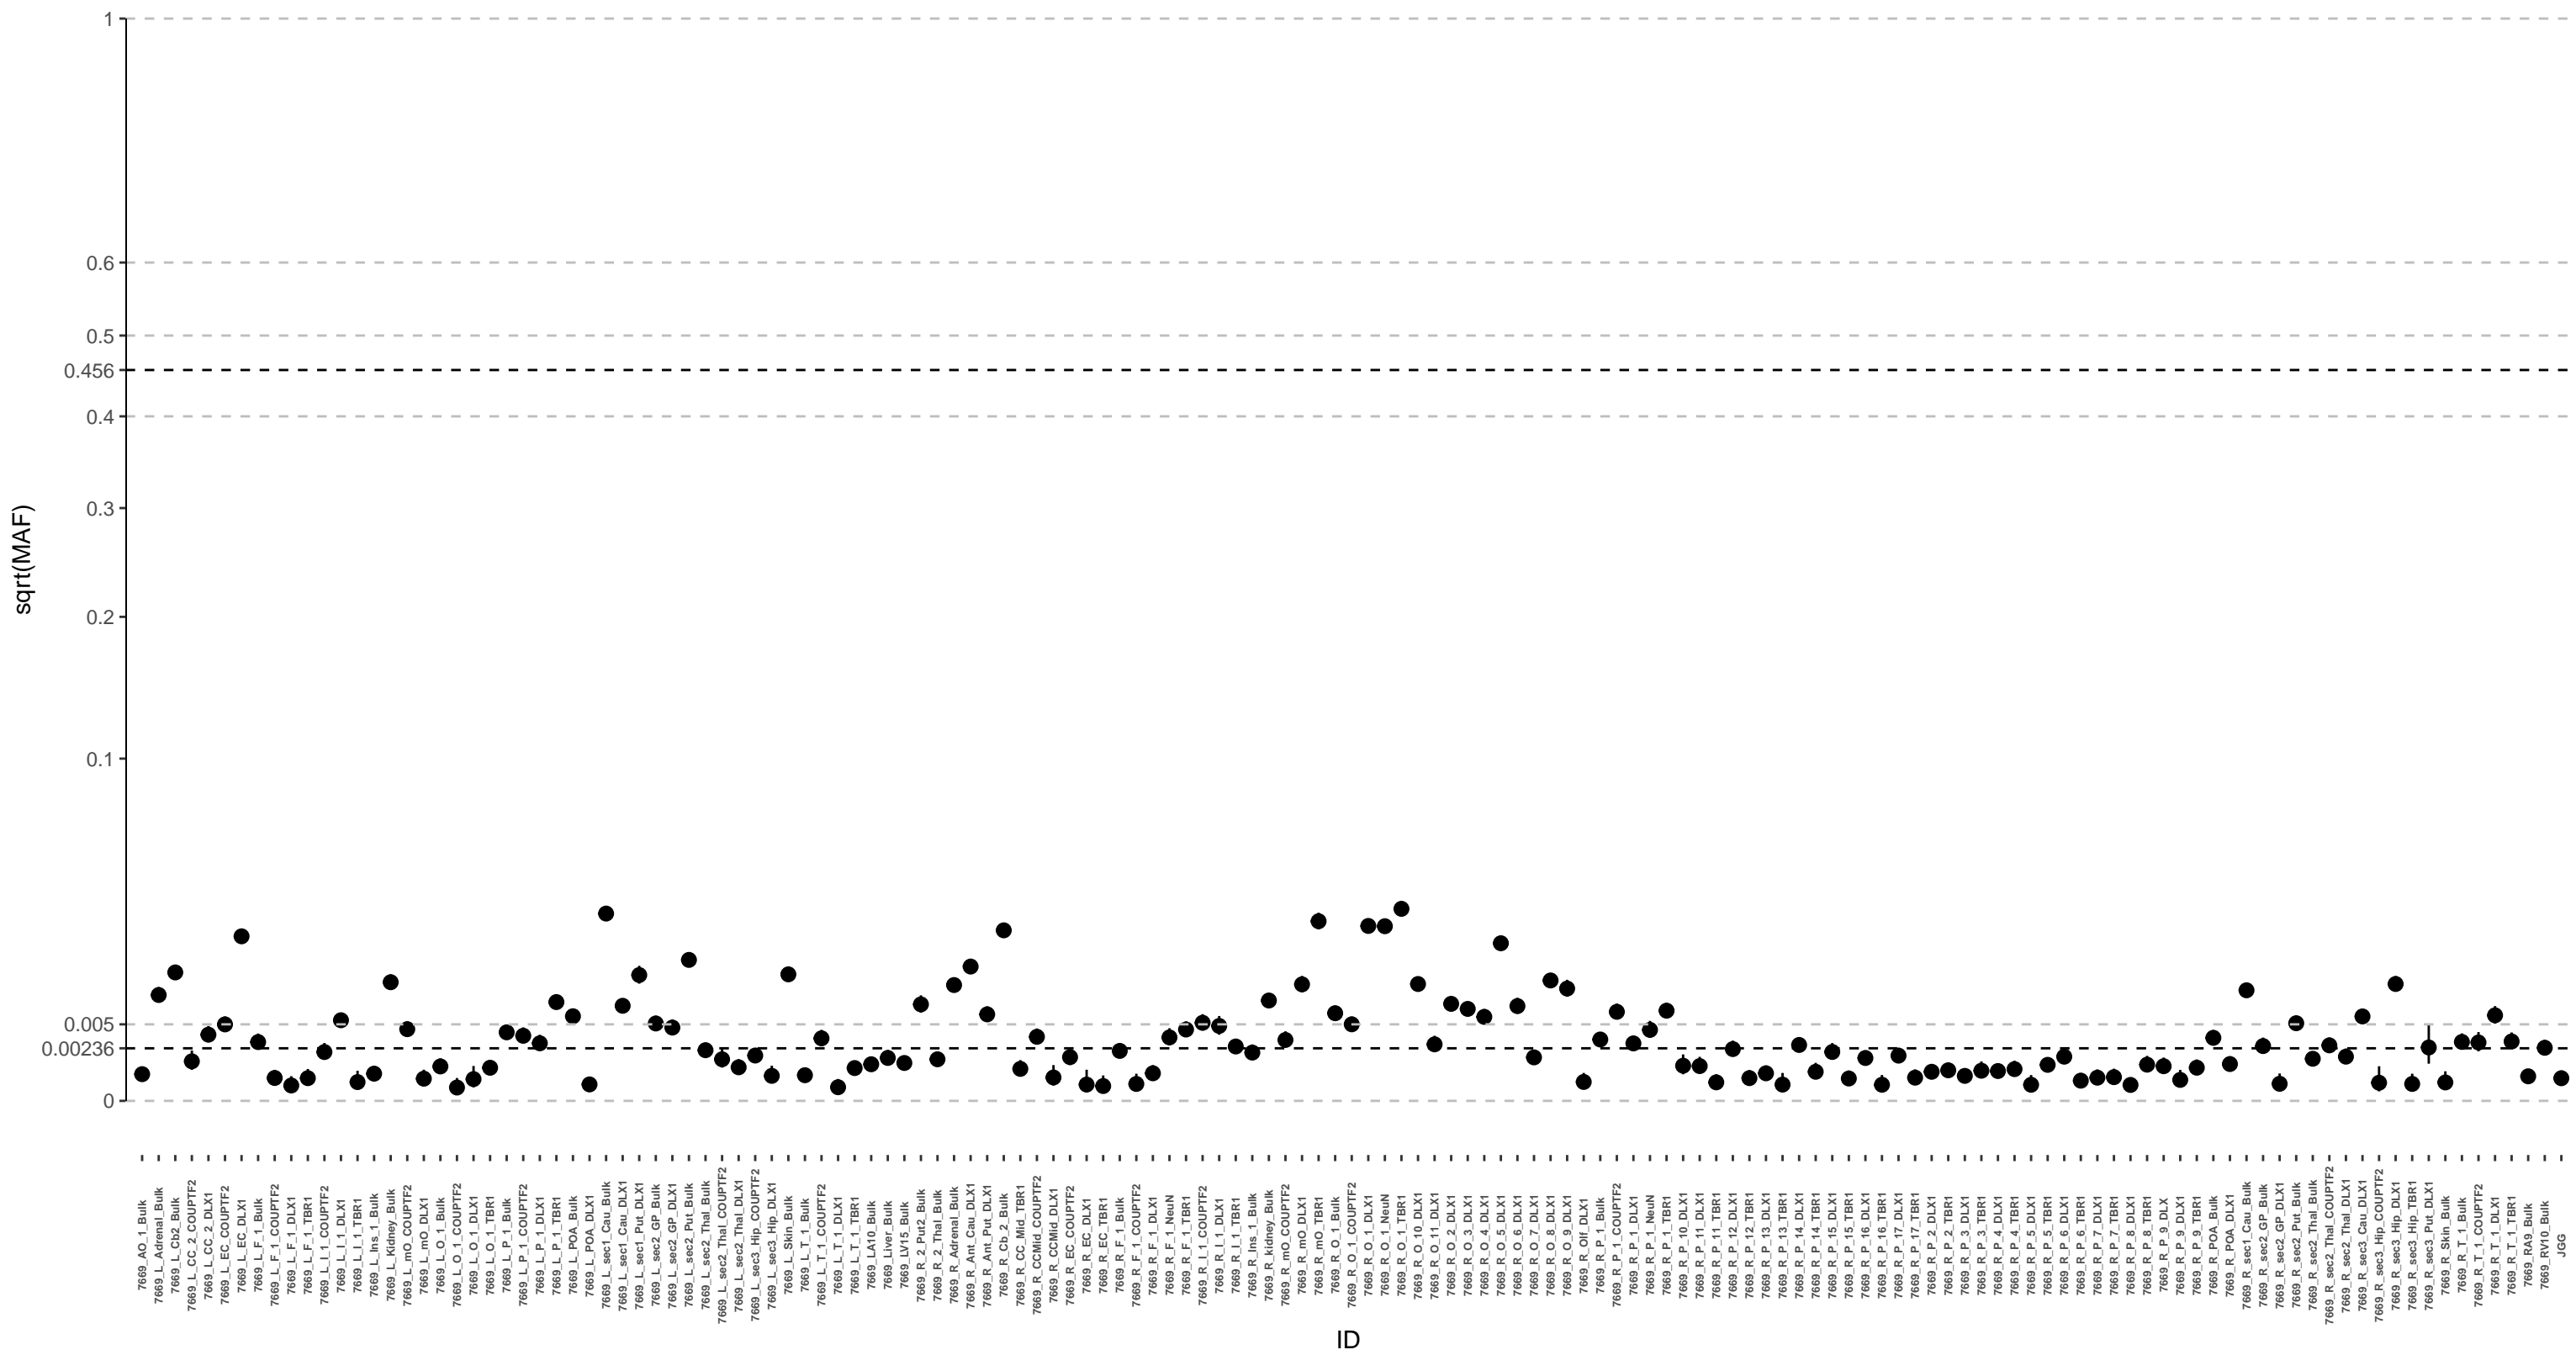

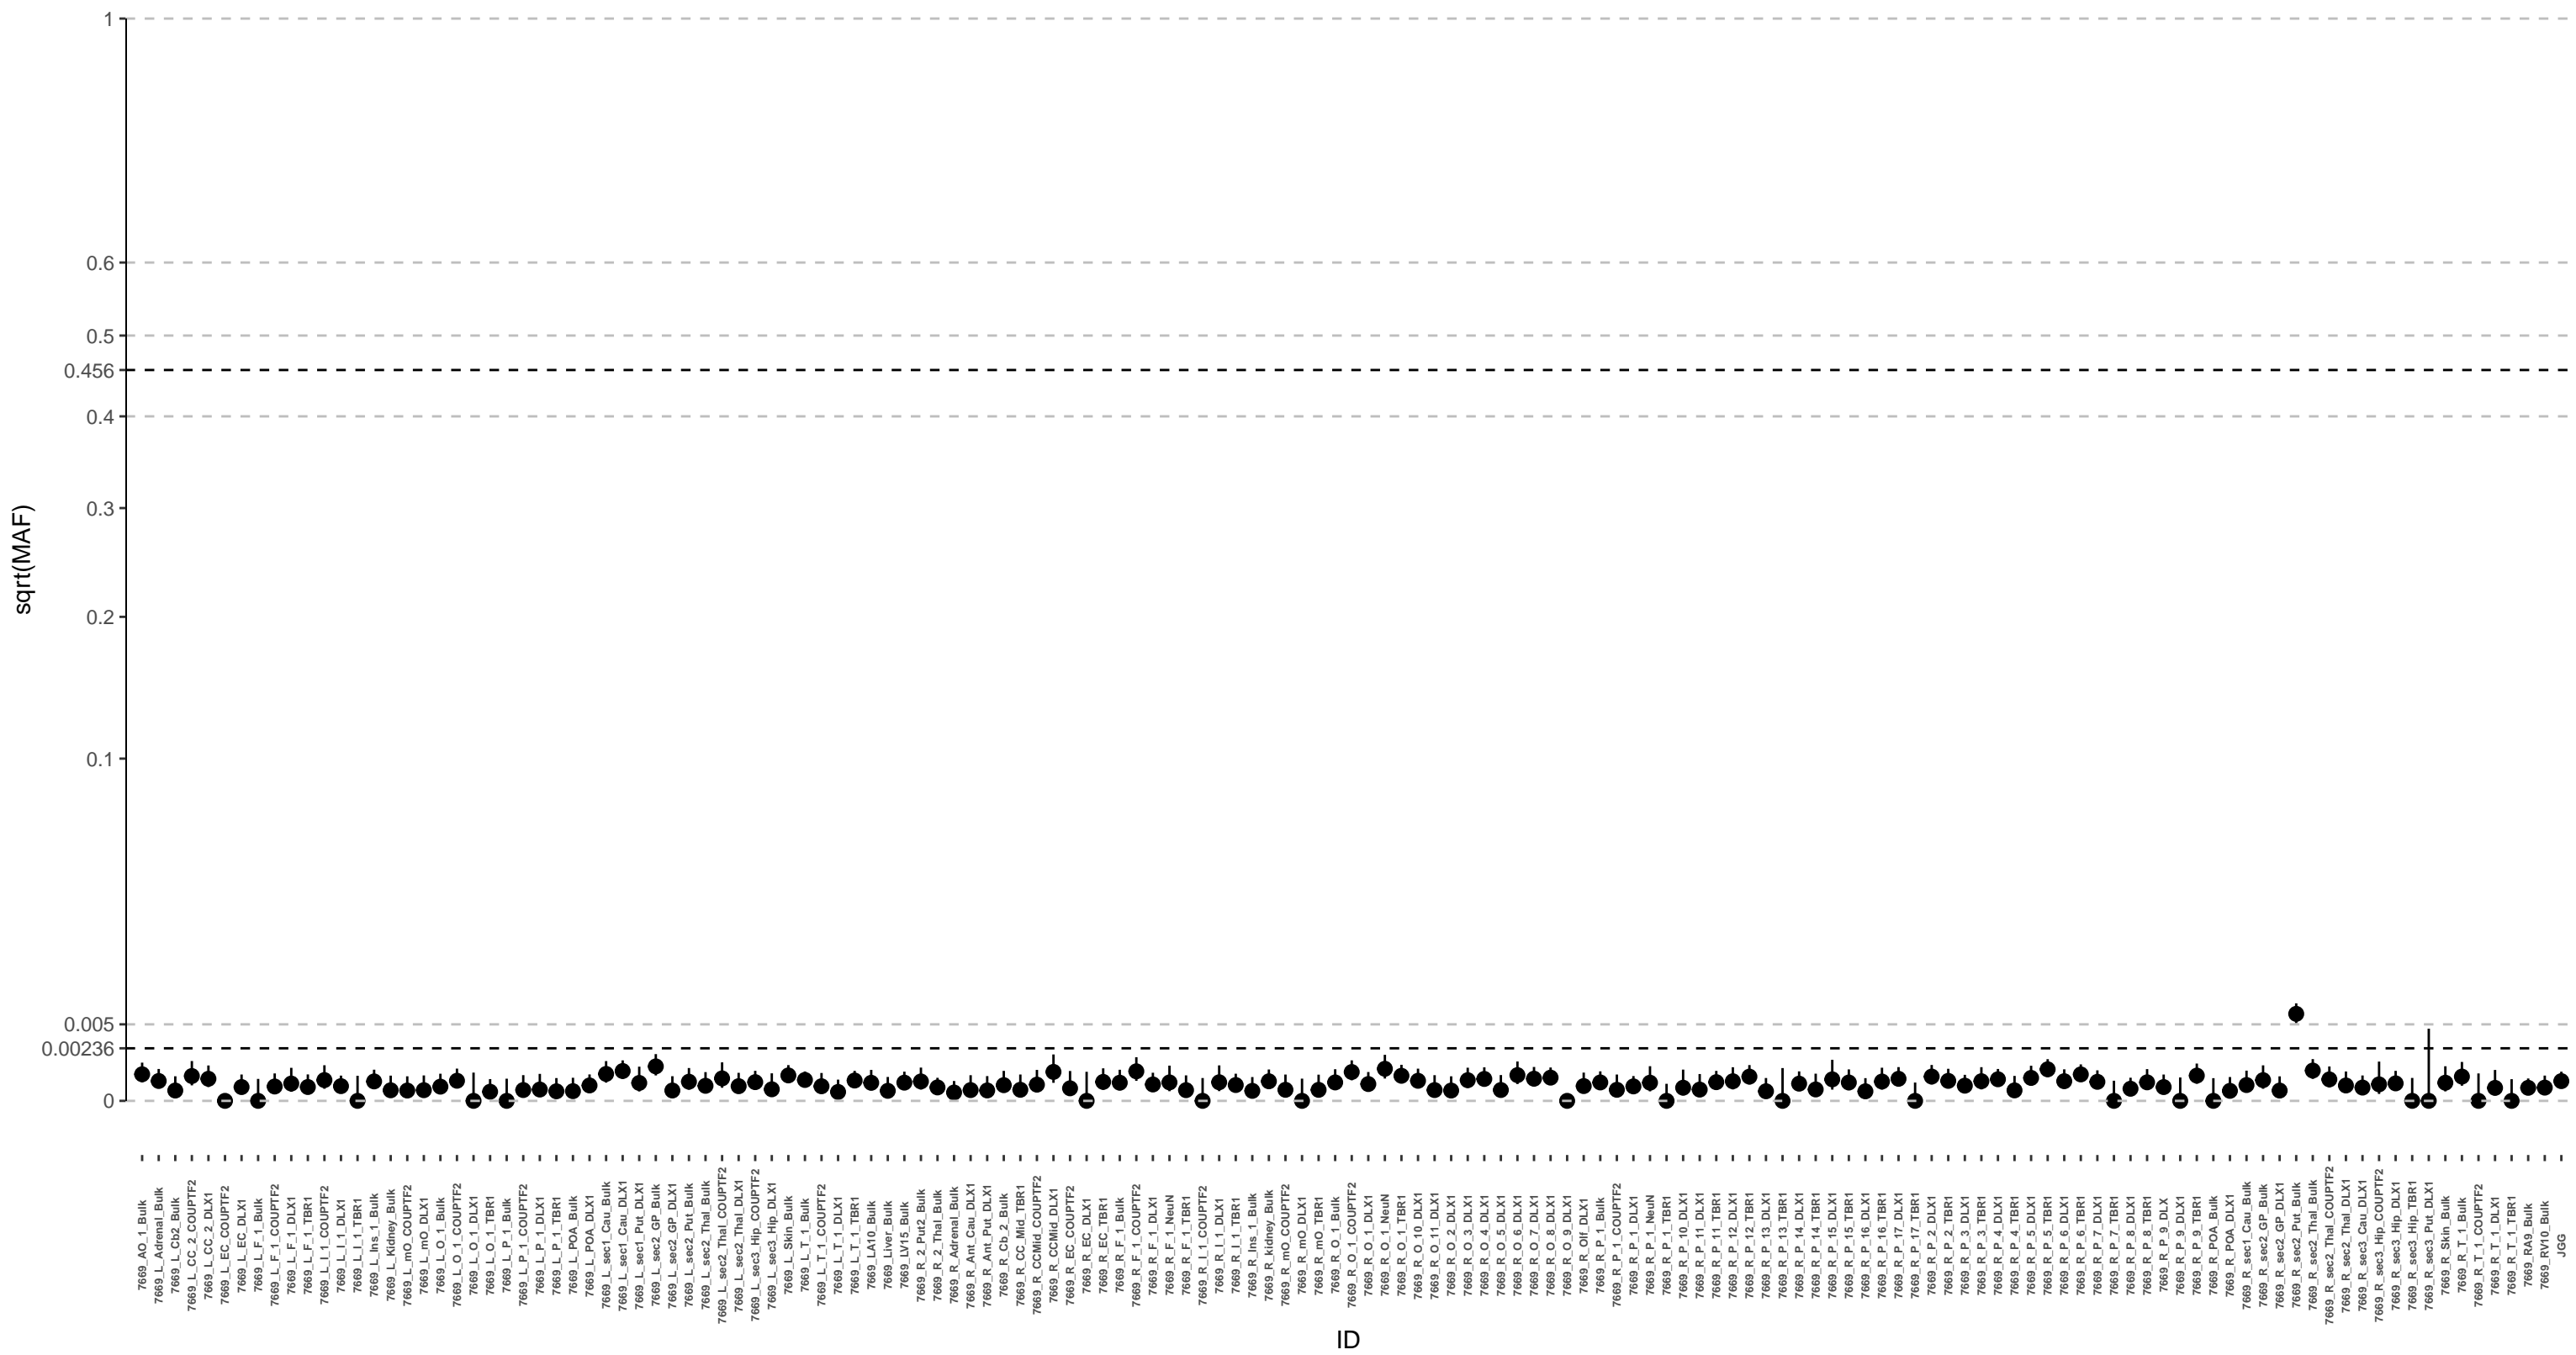

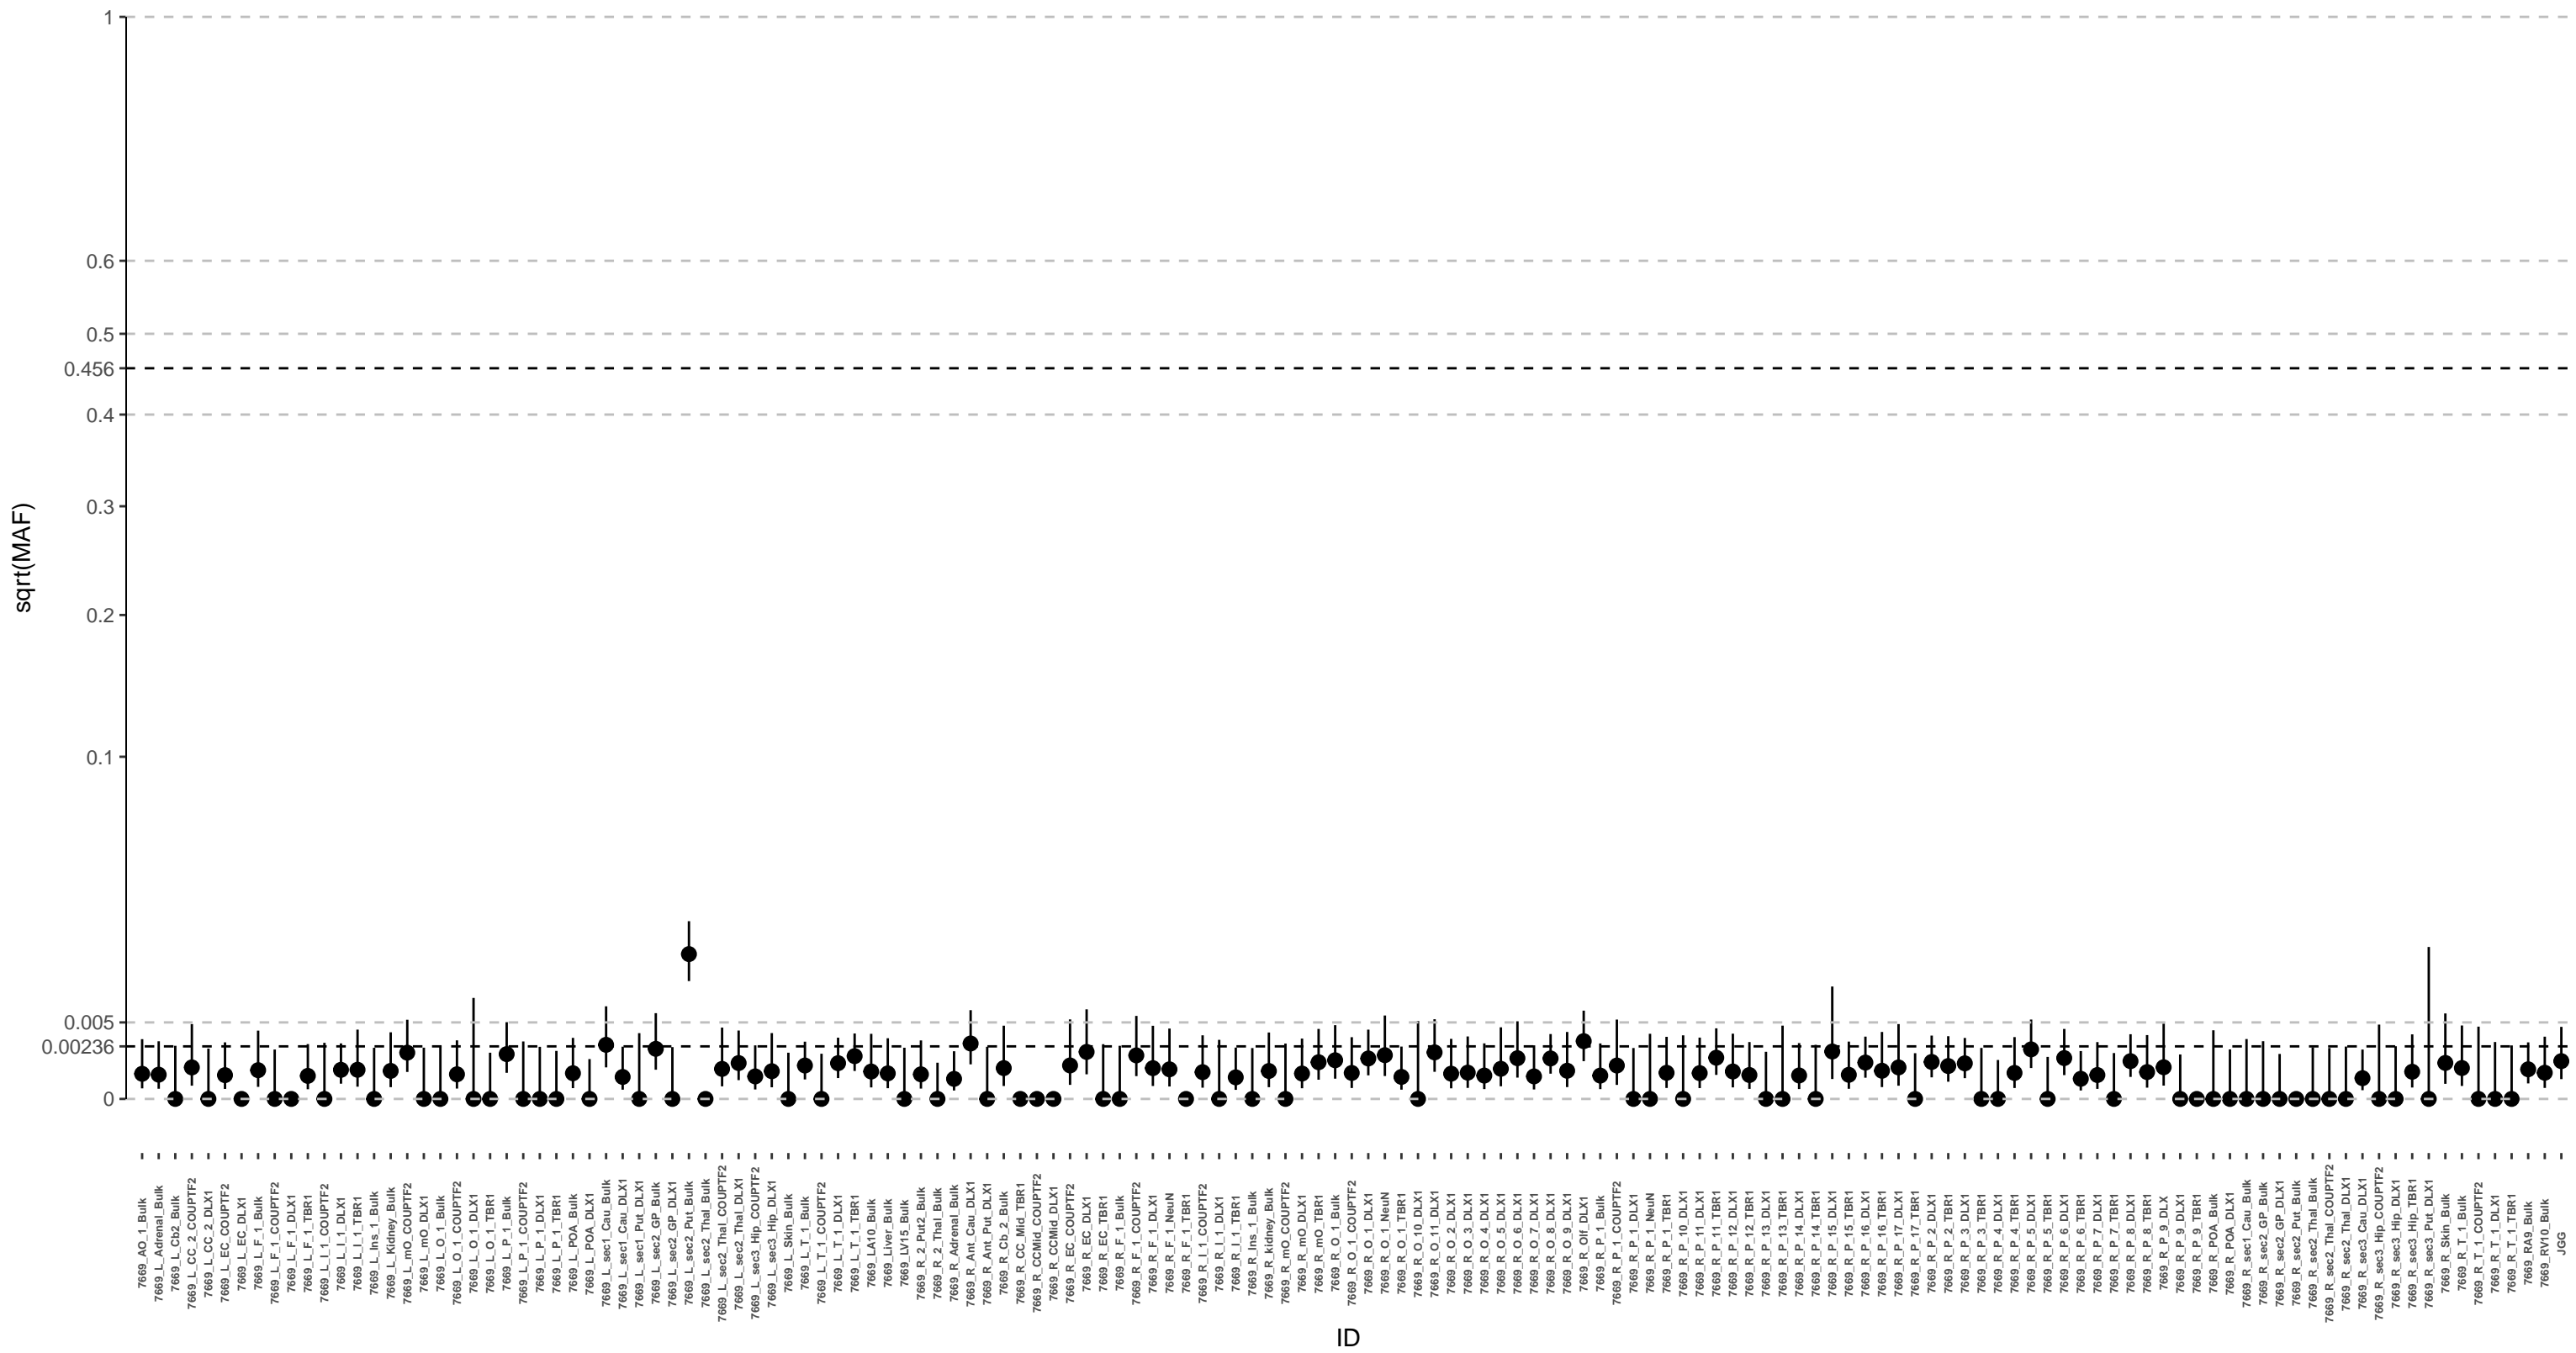

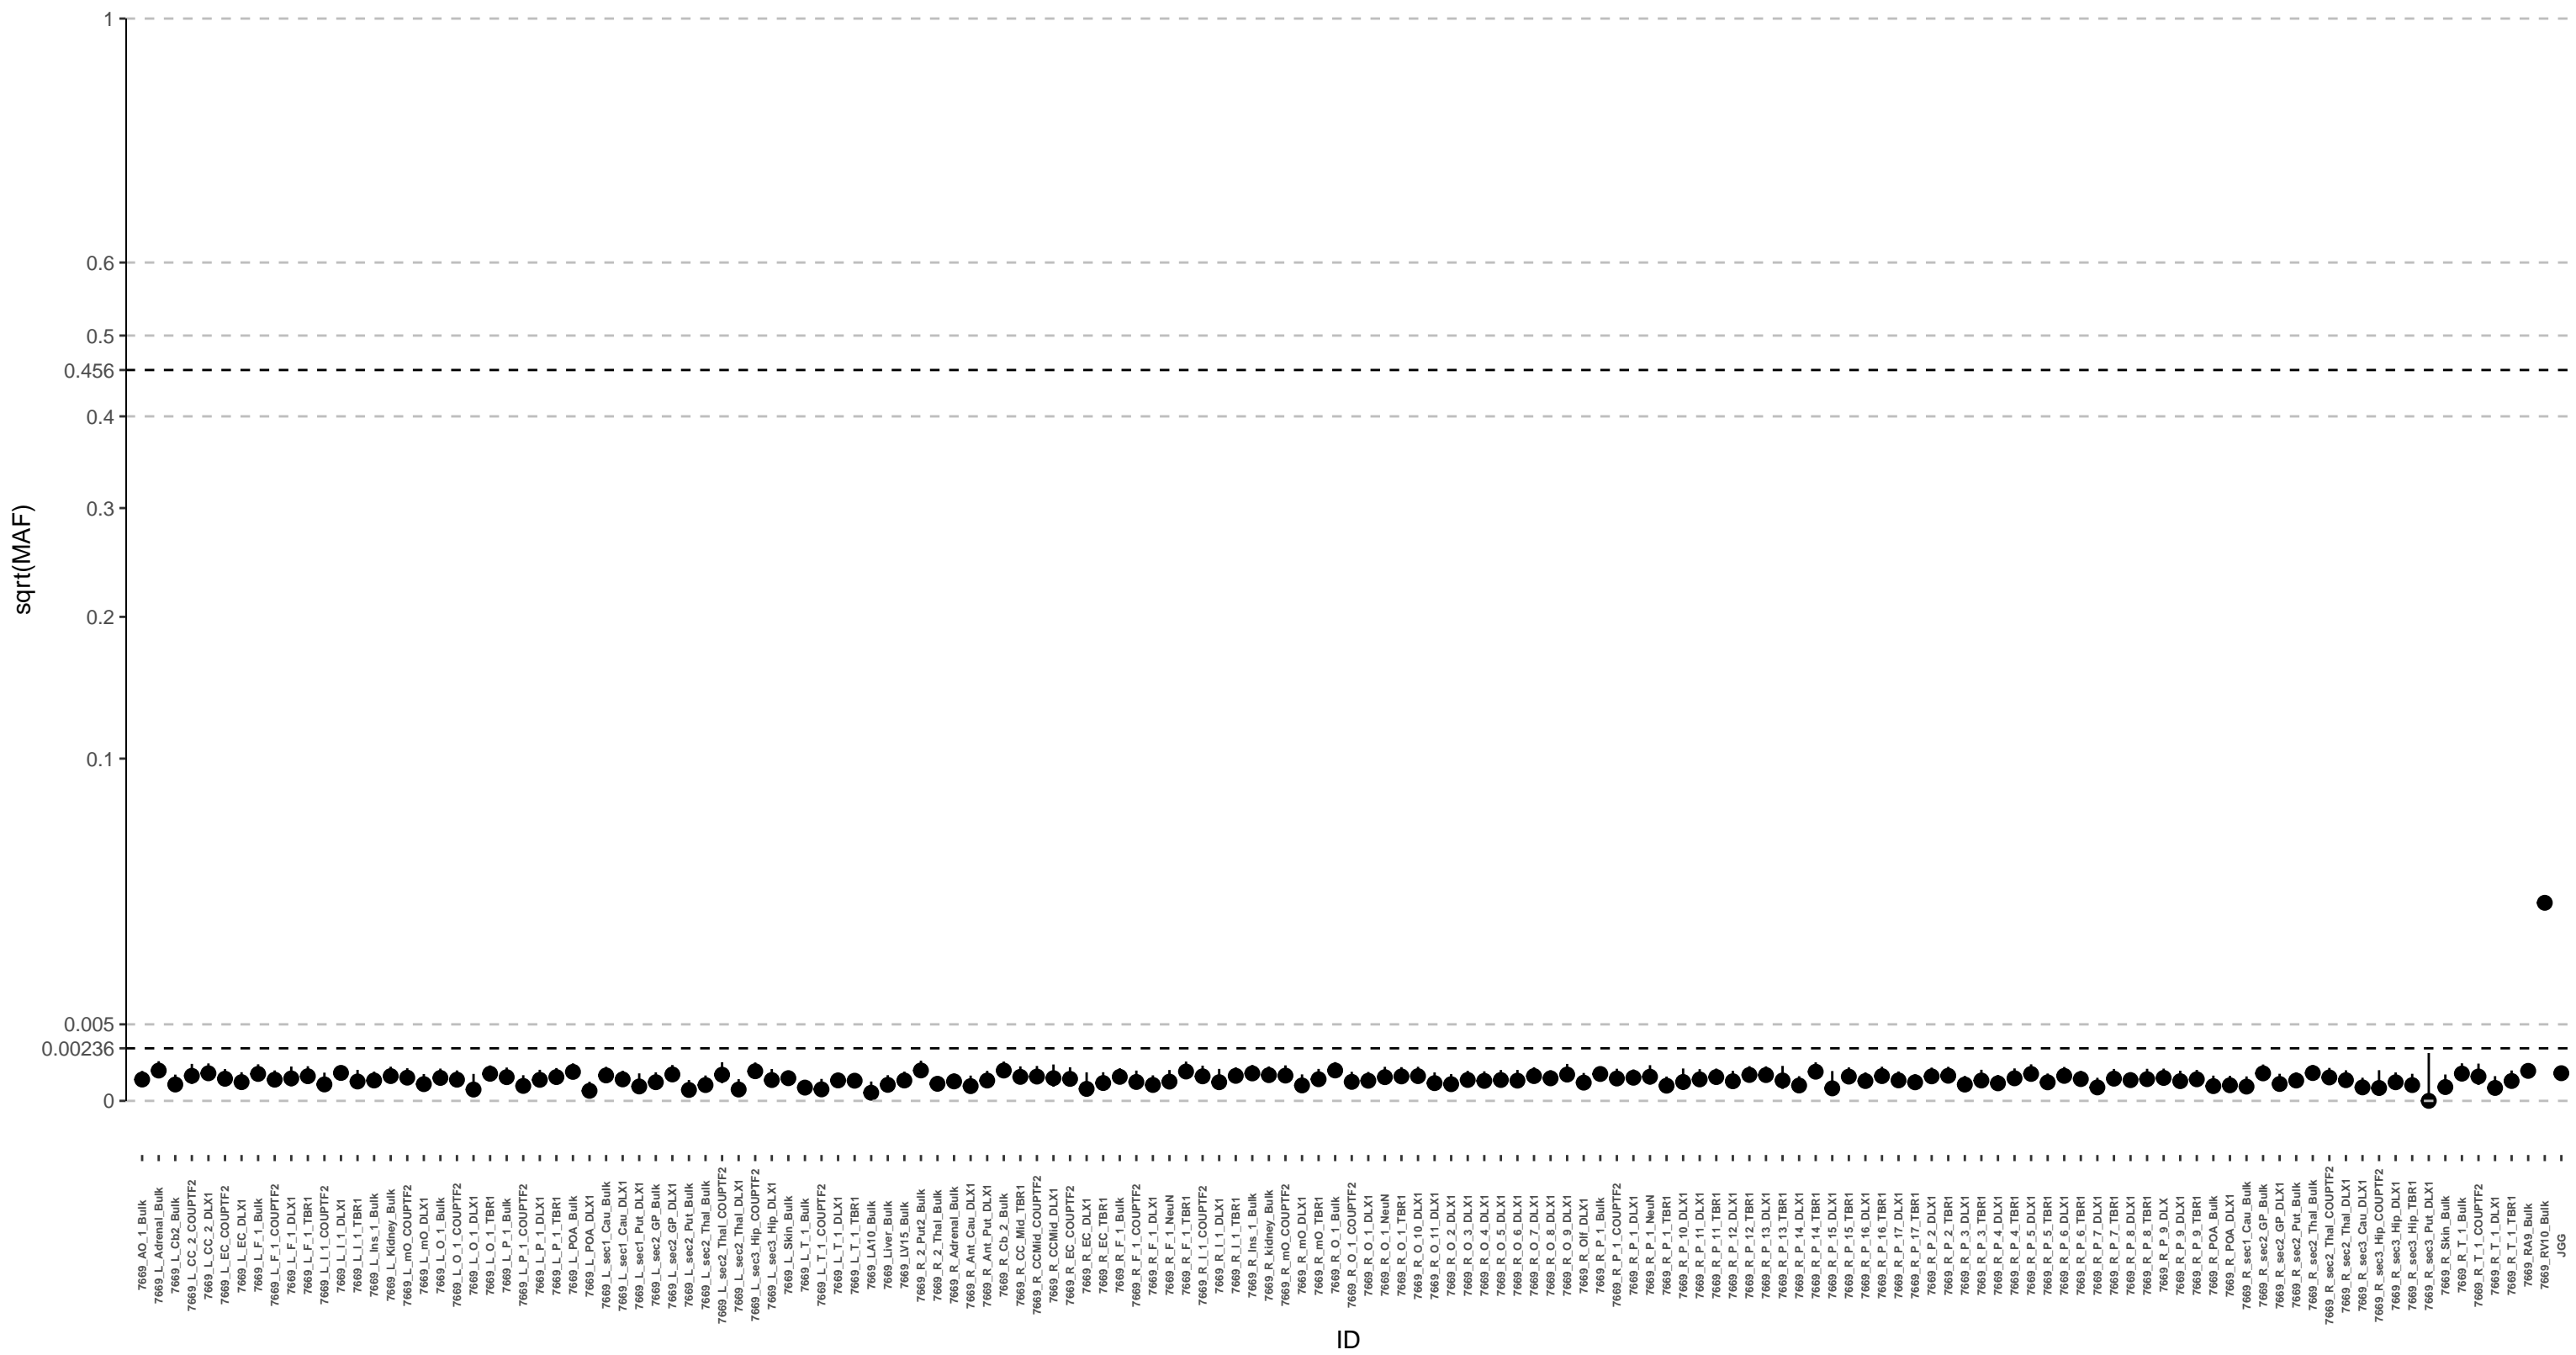

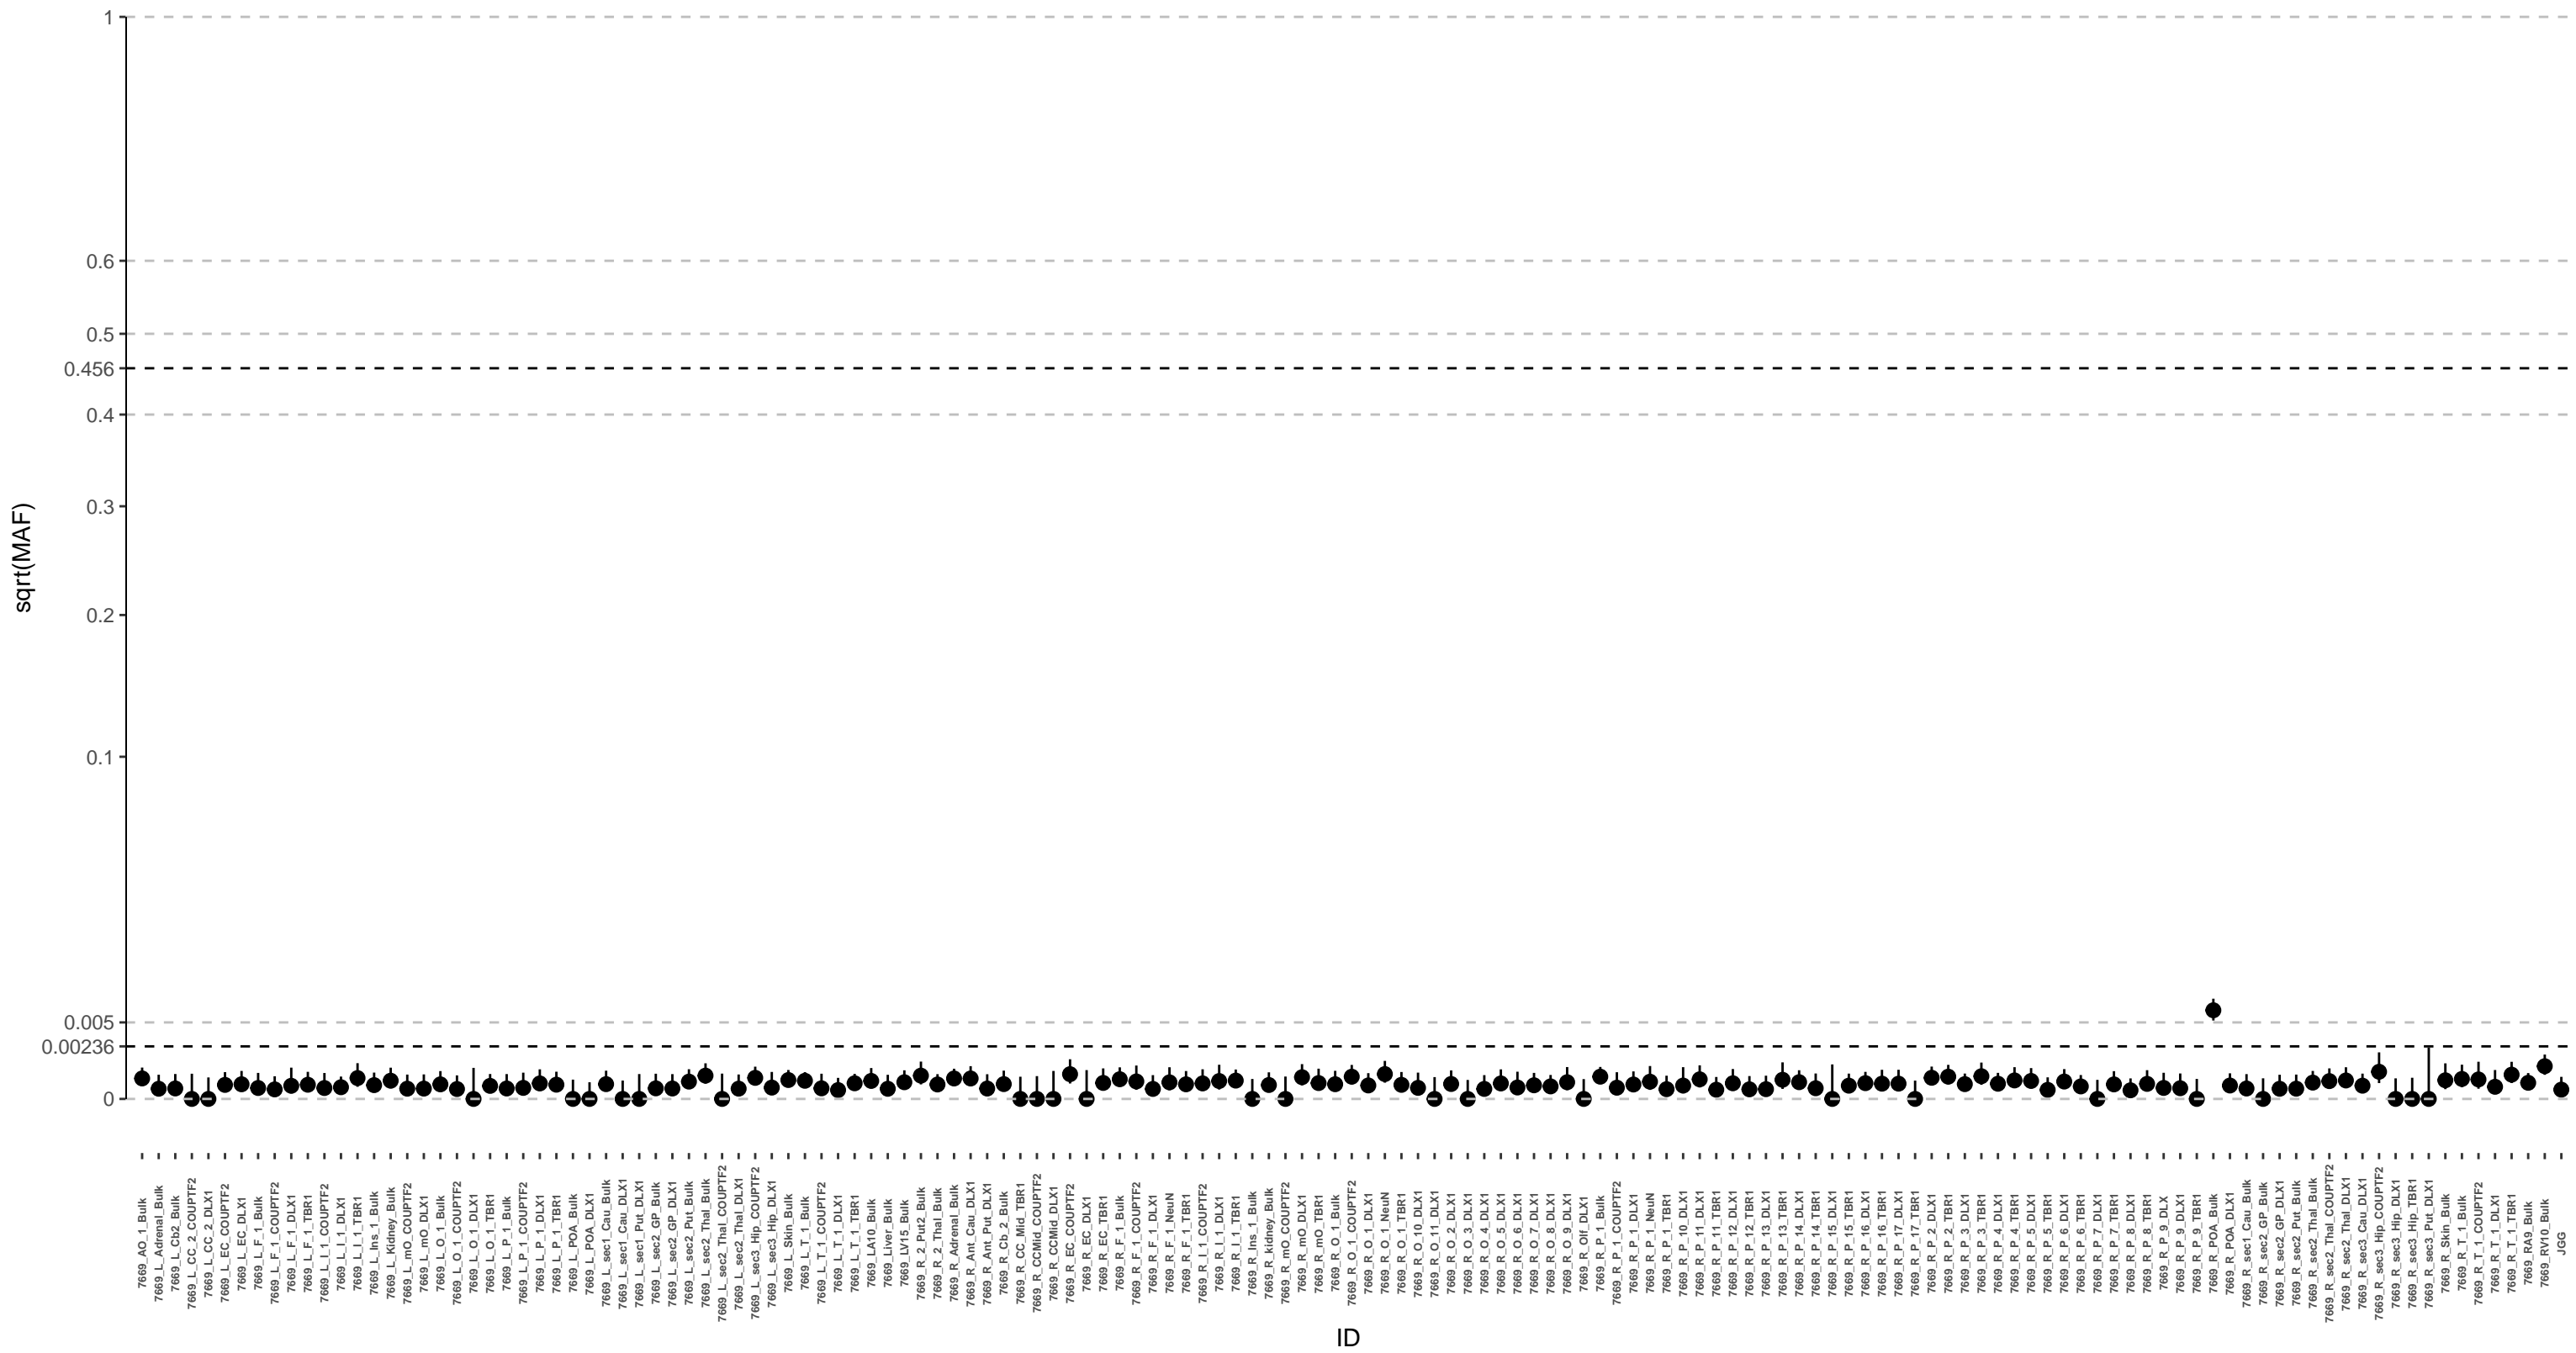

# ID05 7-19648848-A-G

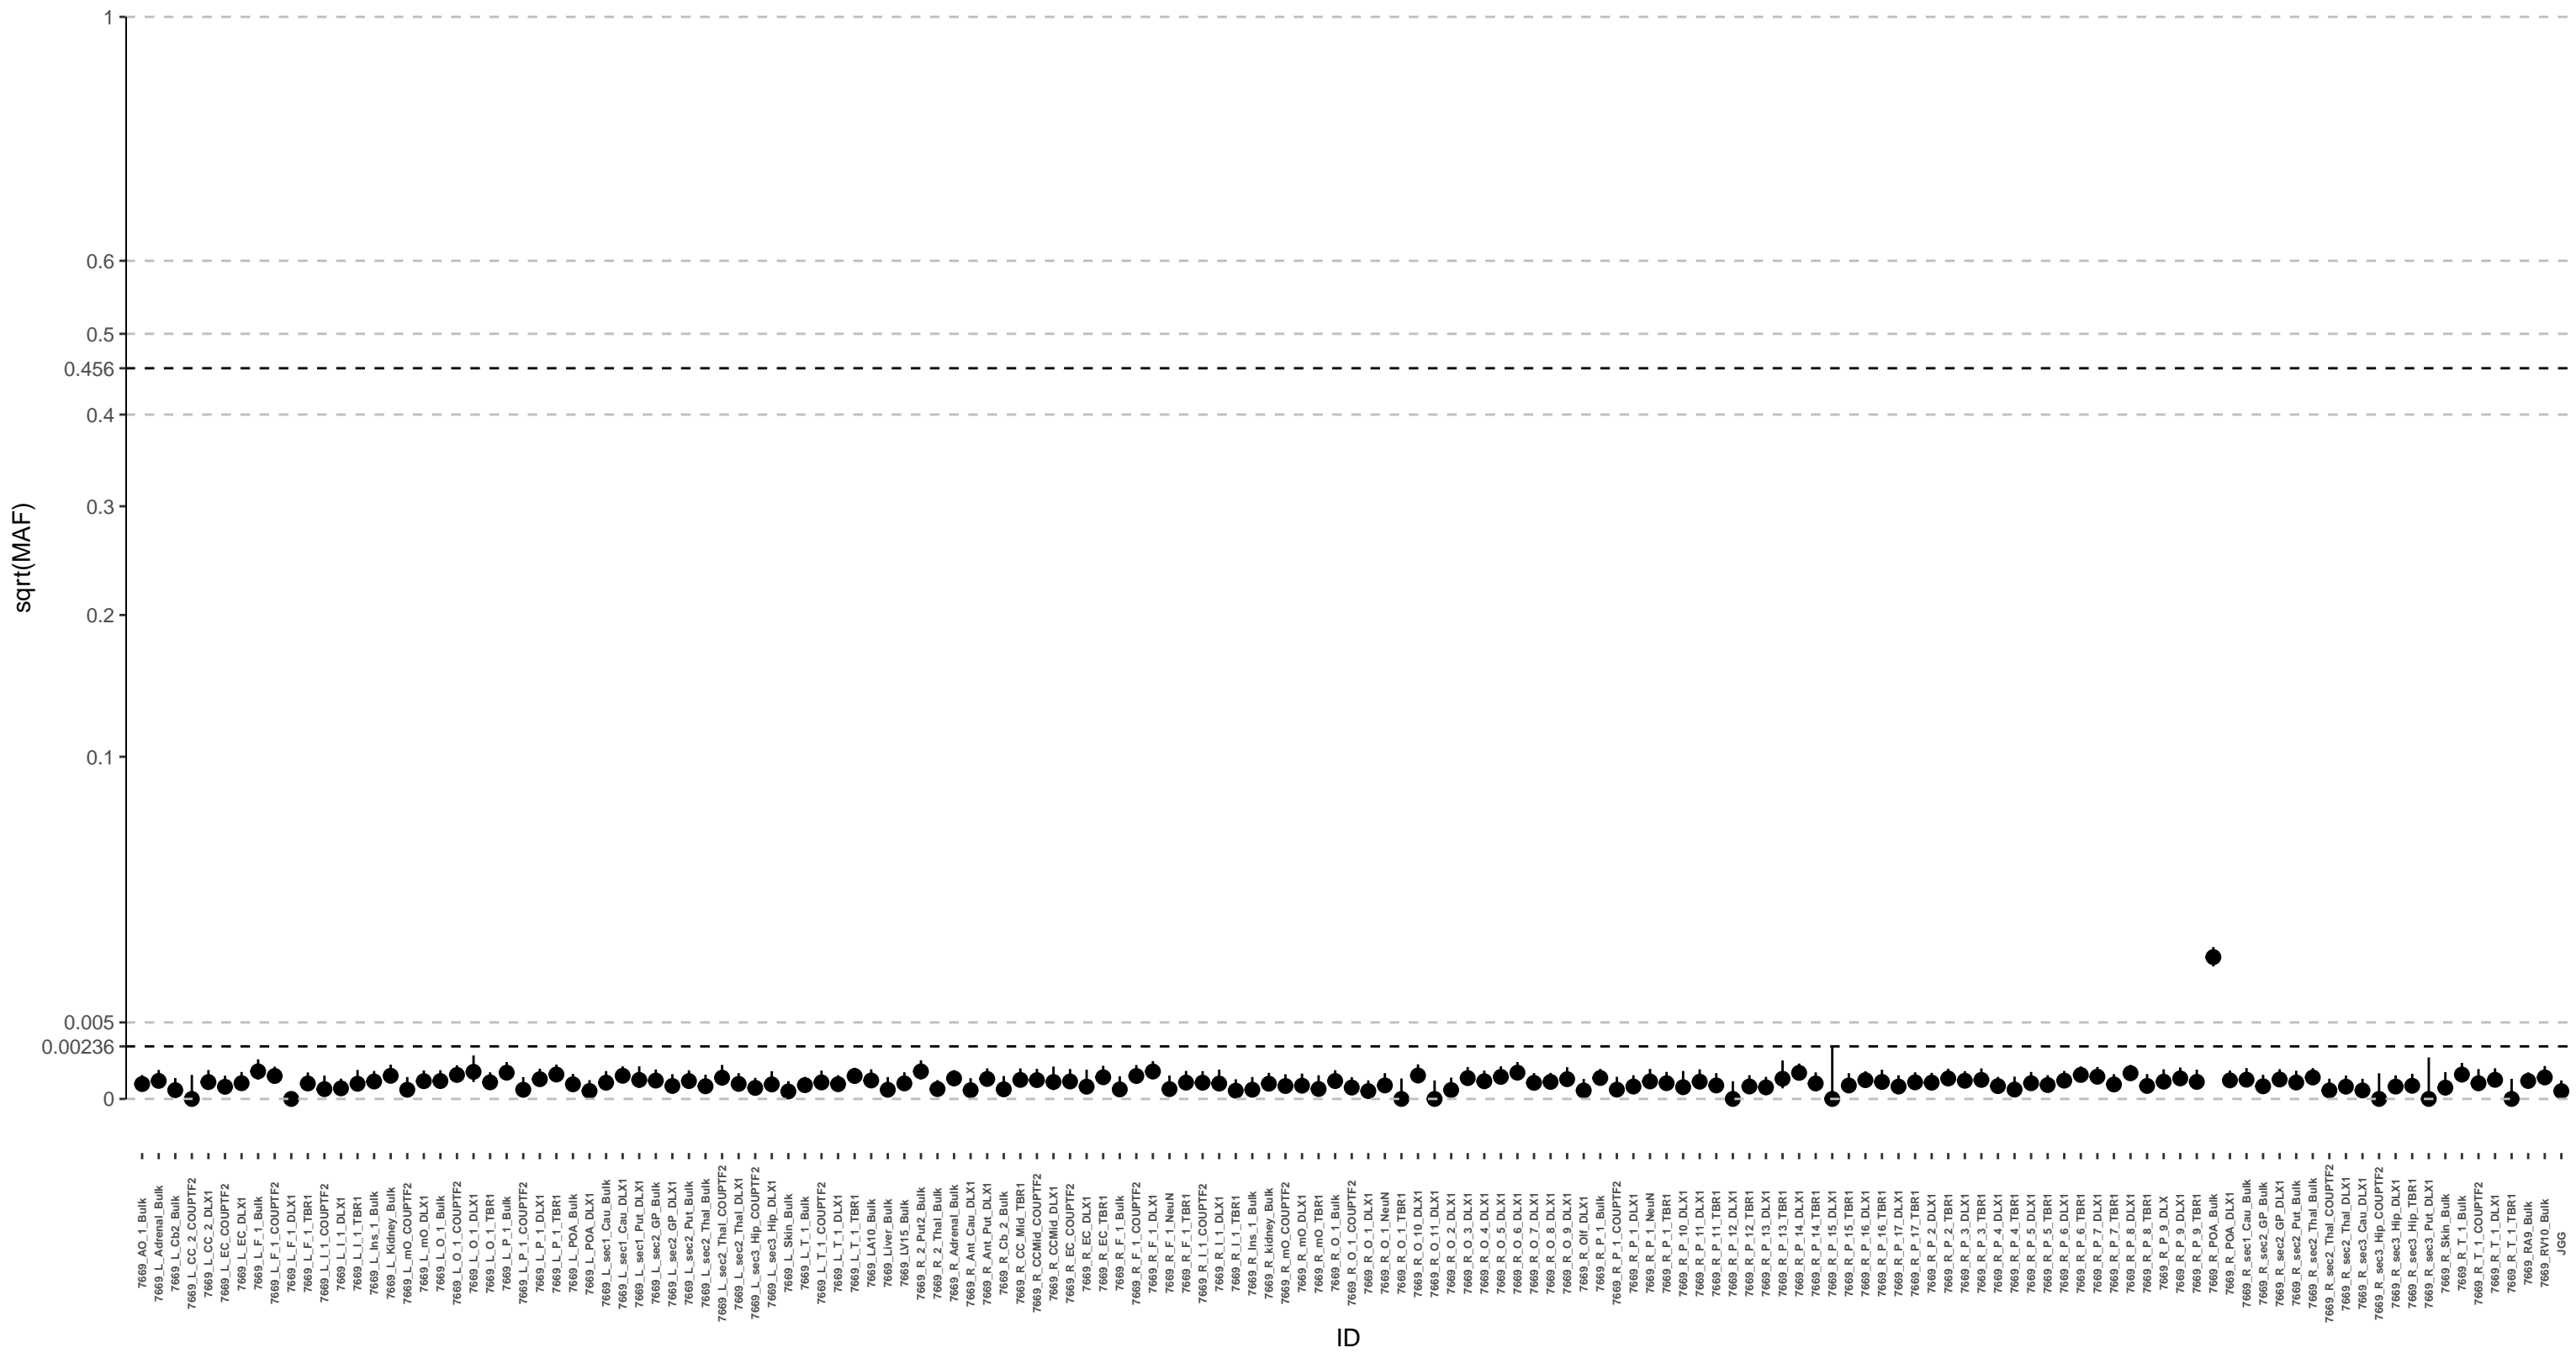

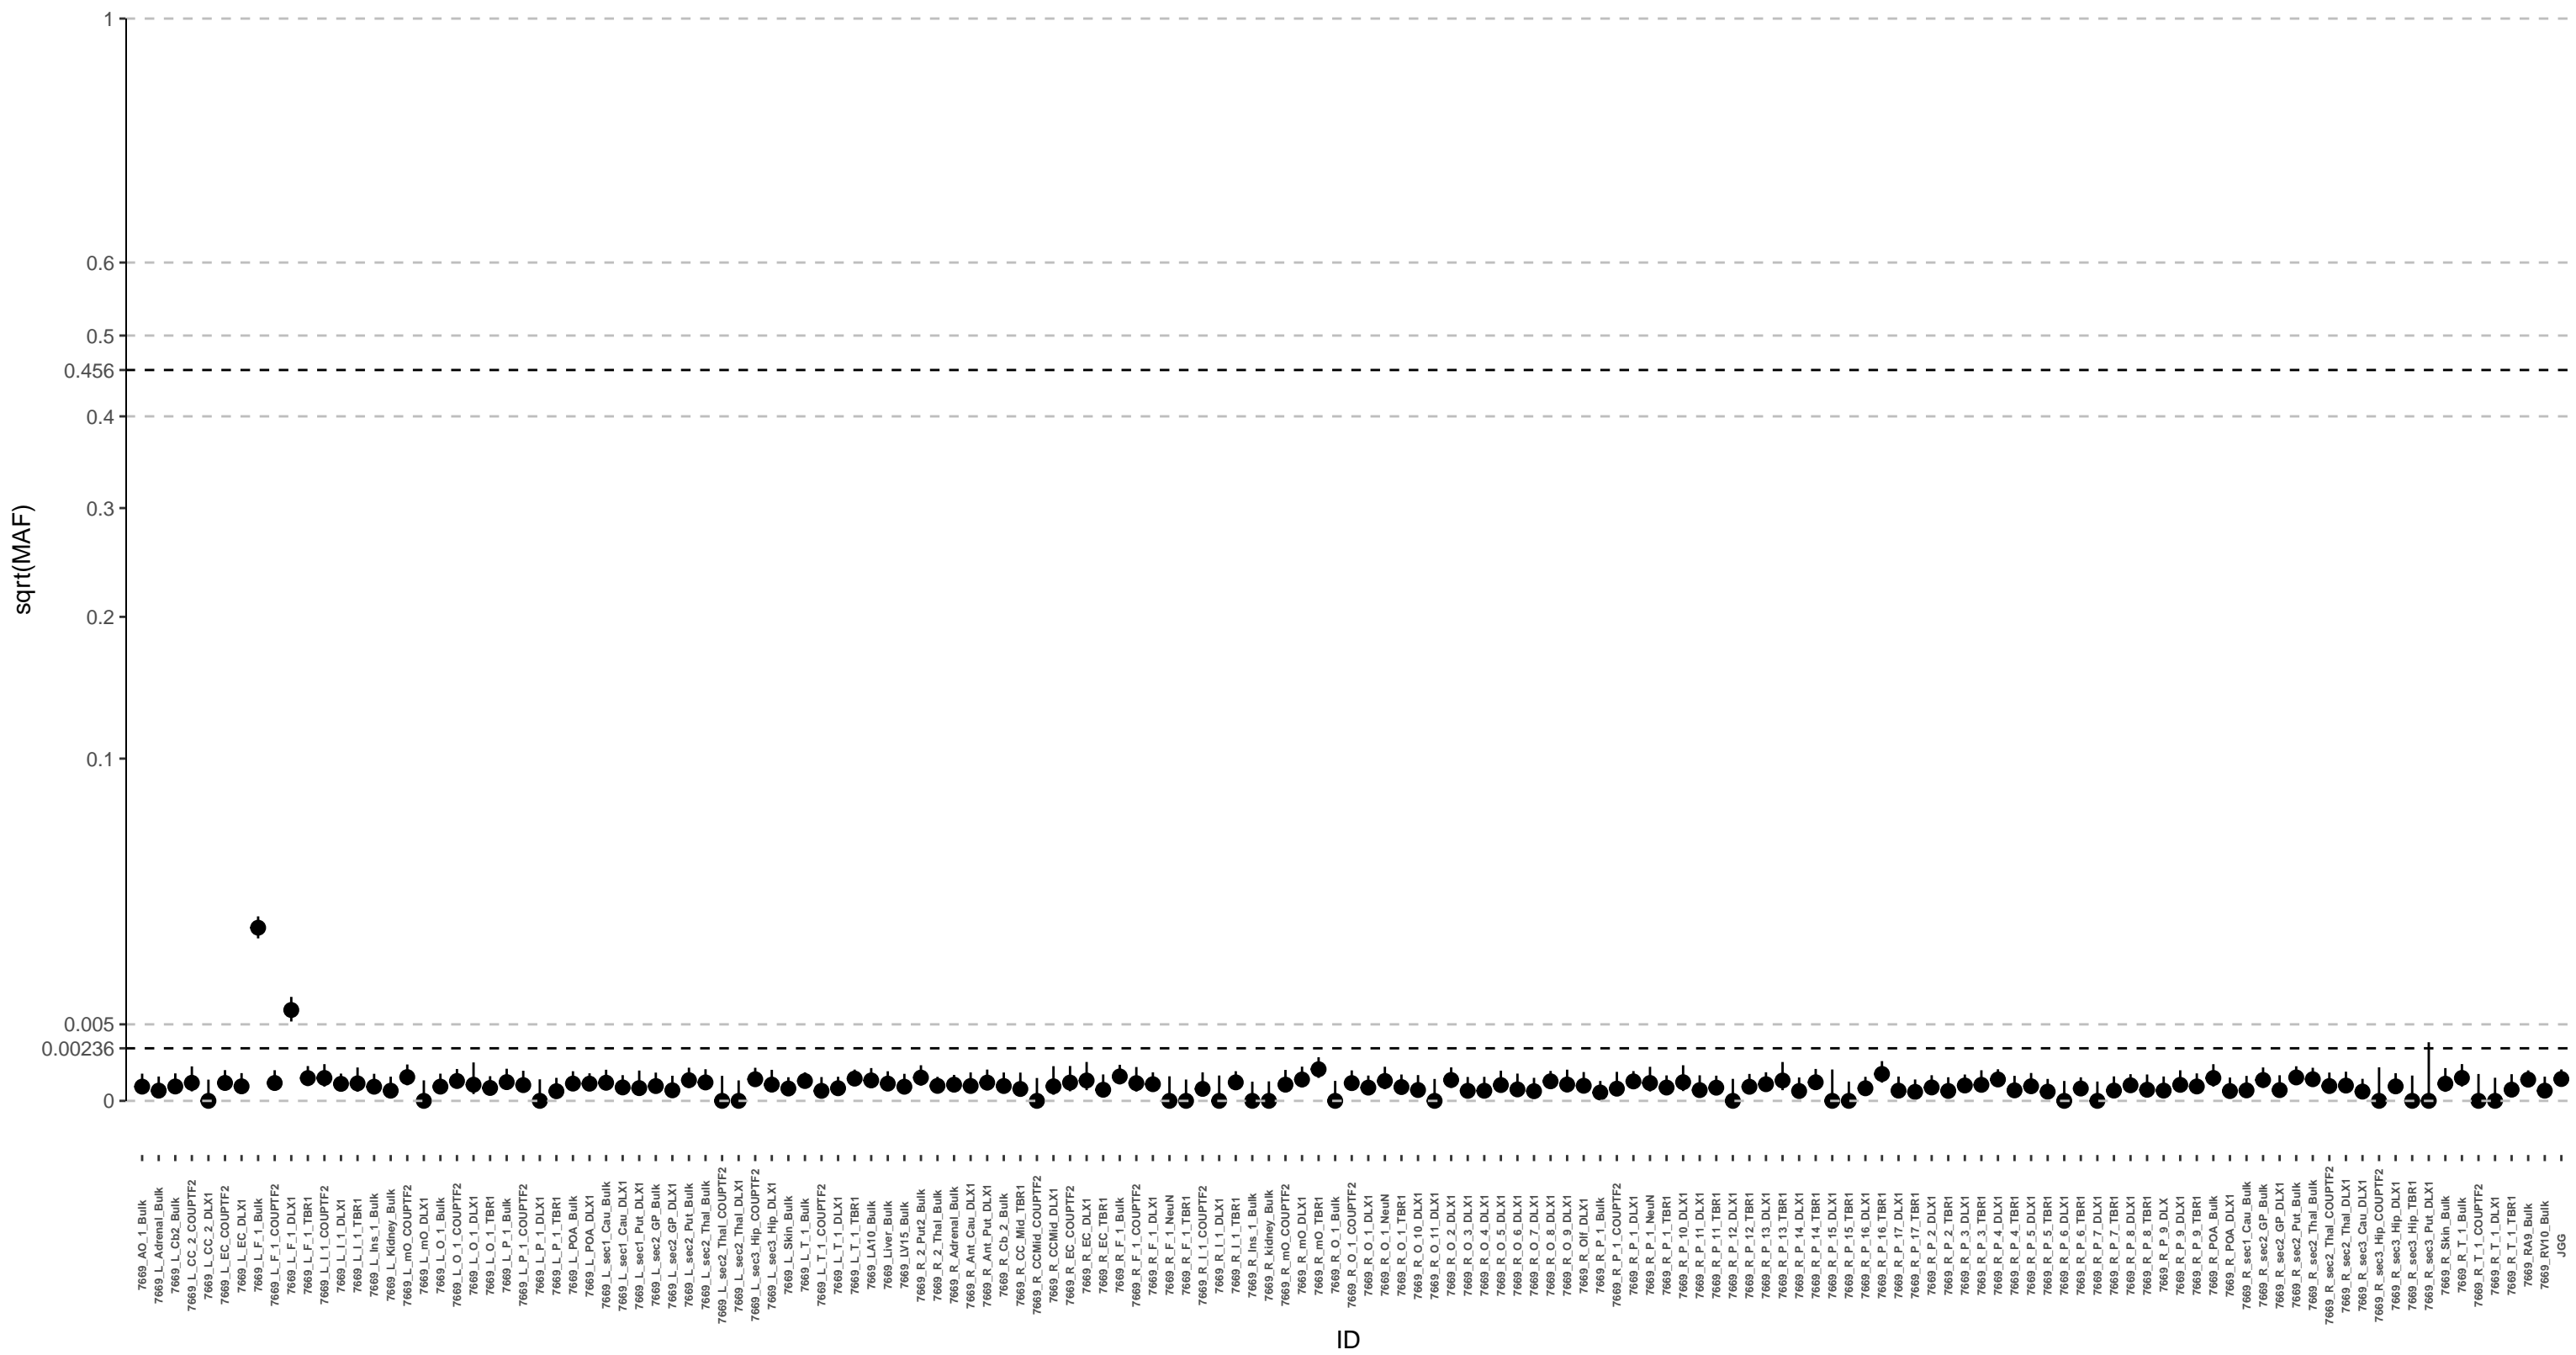

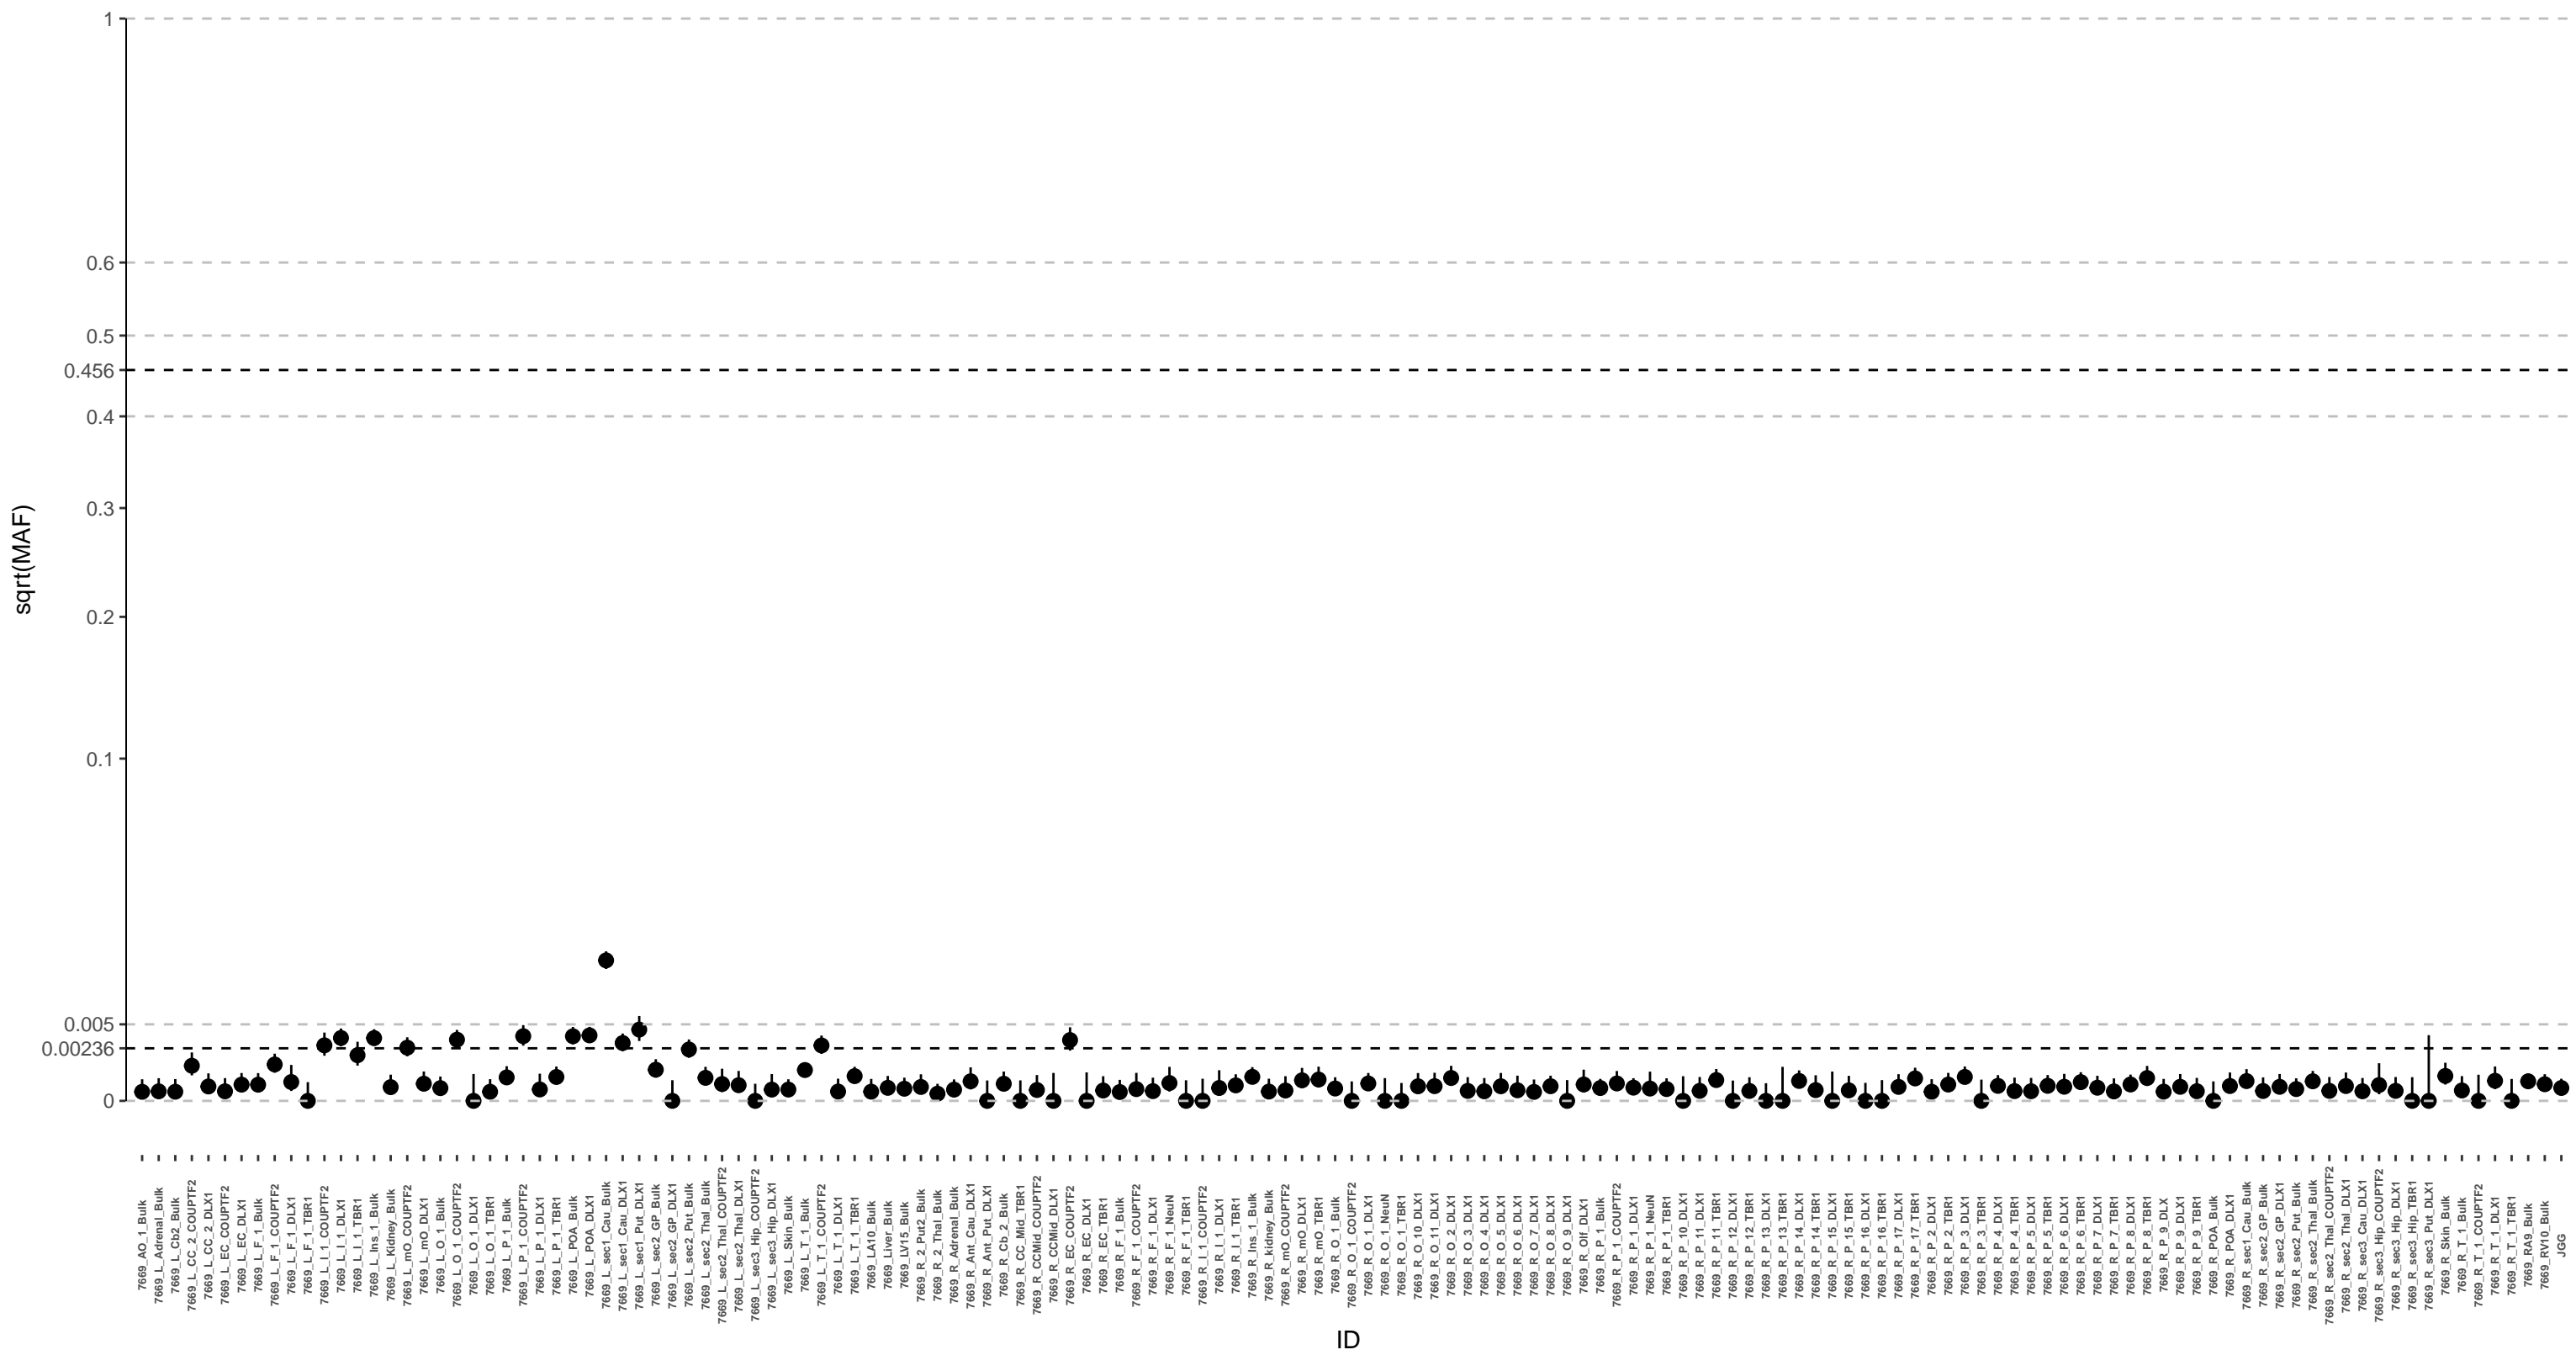



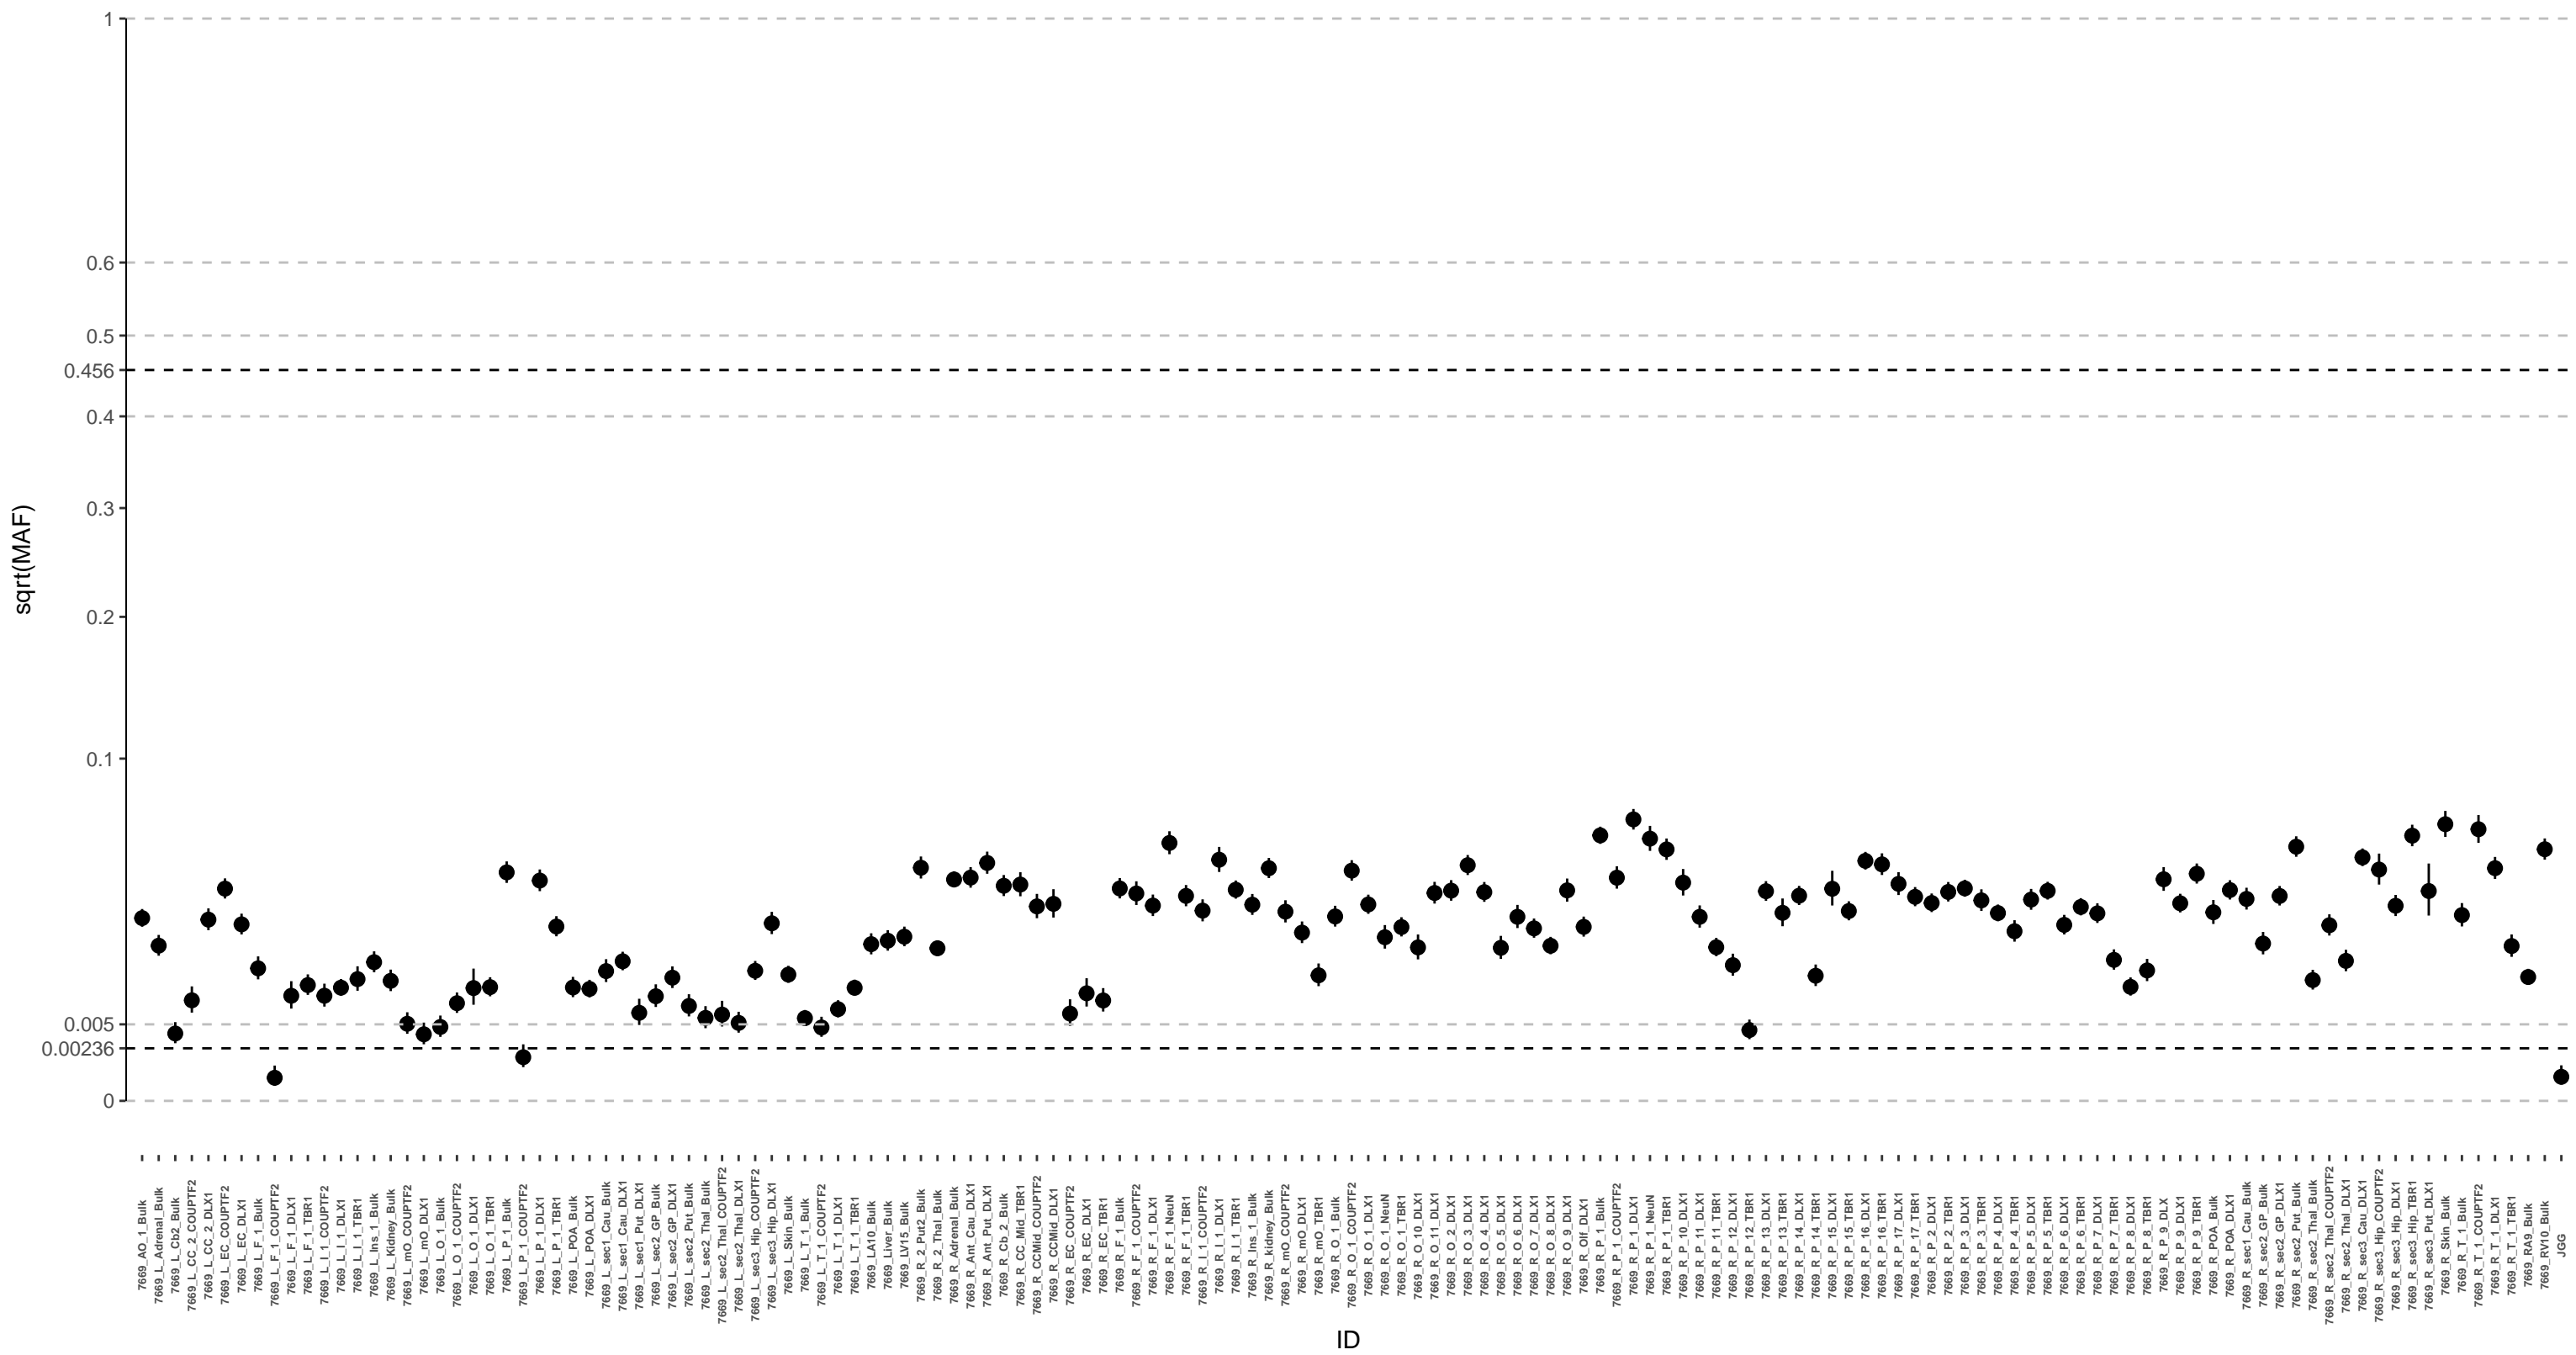

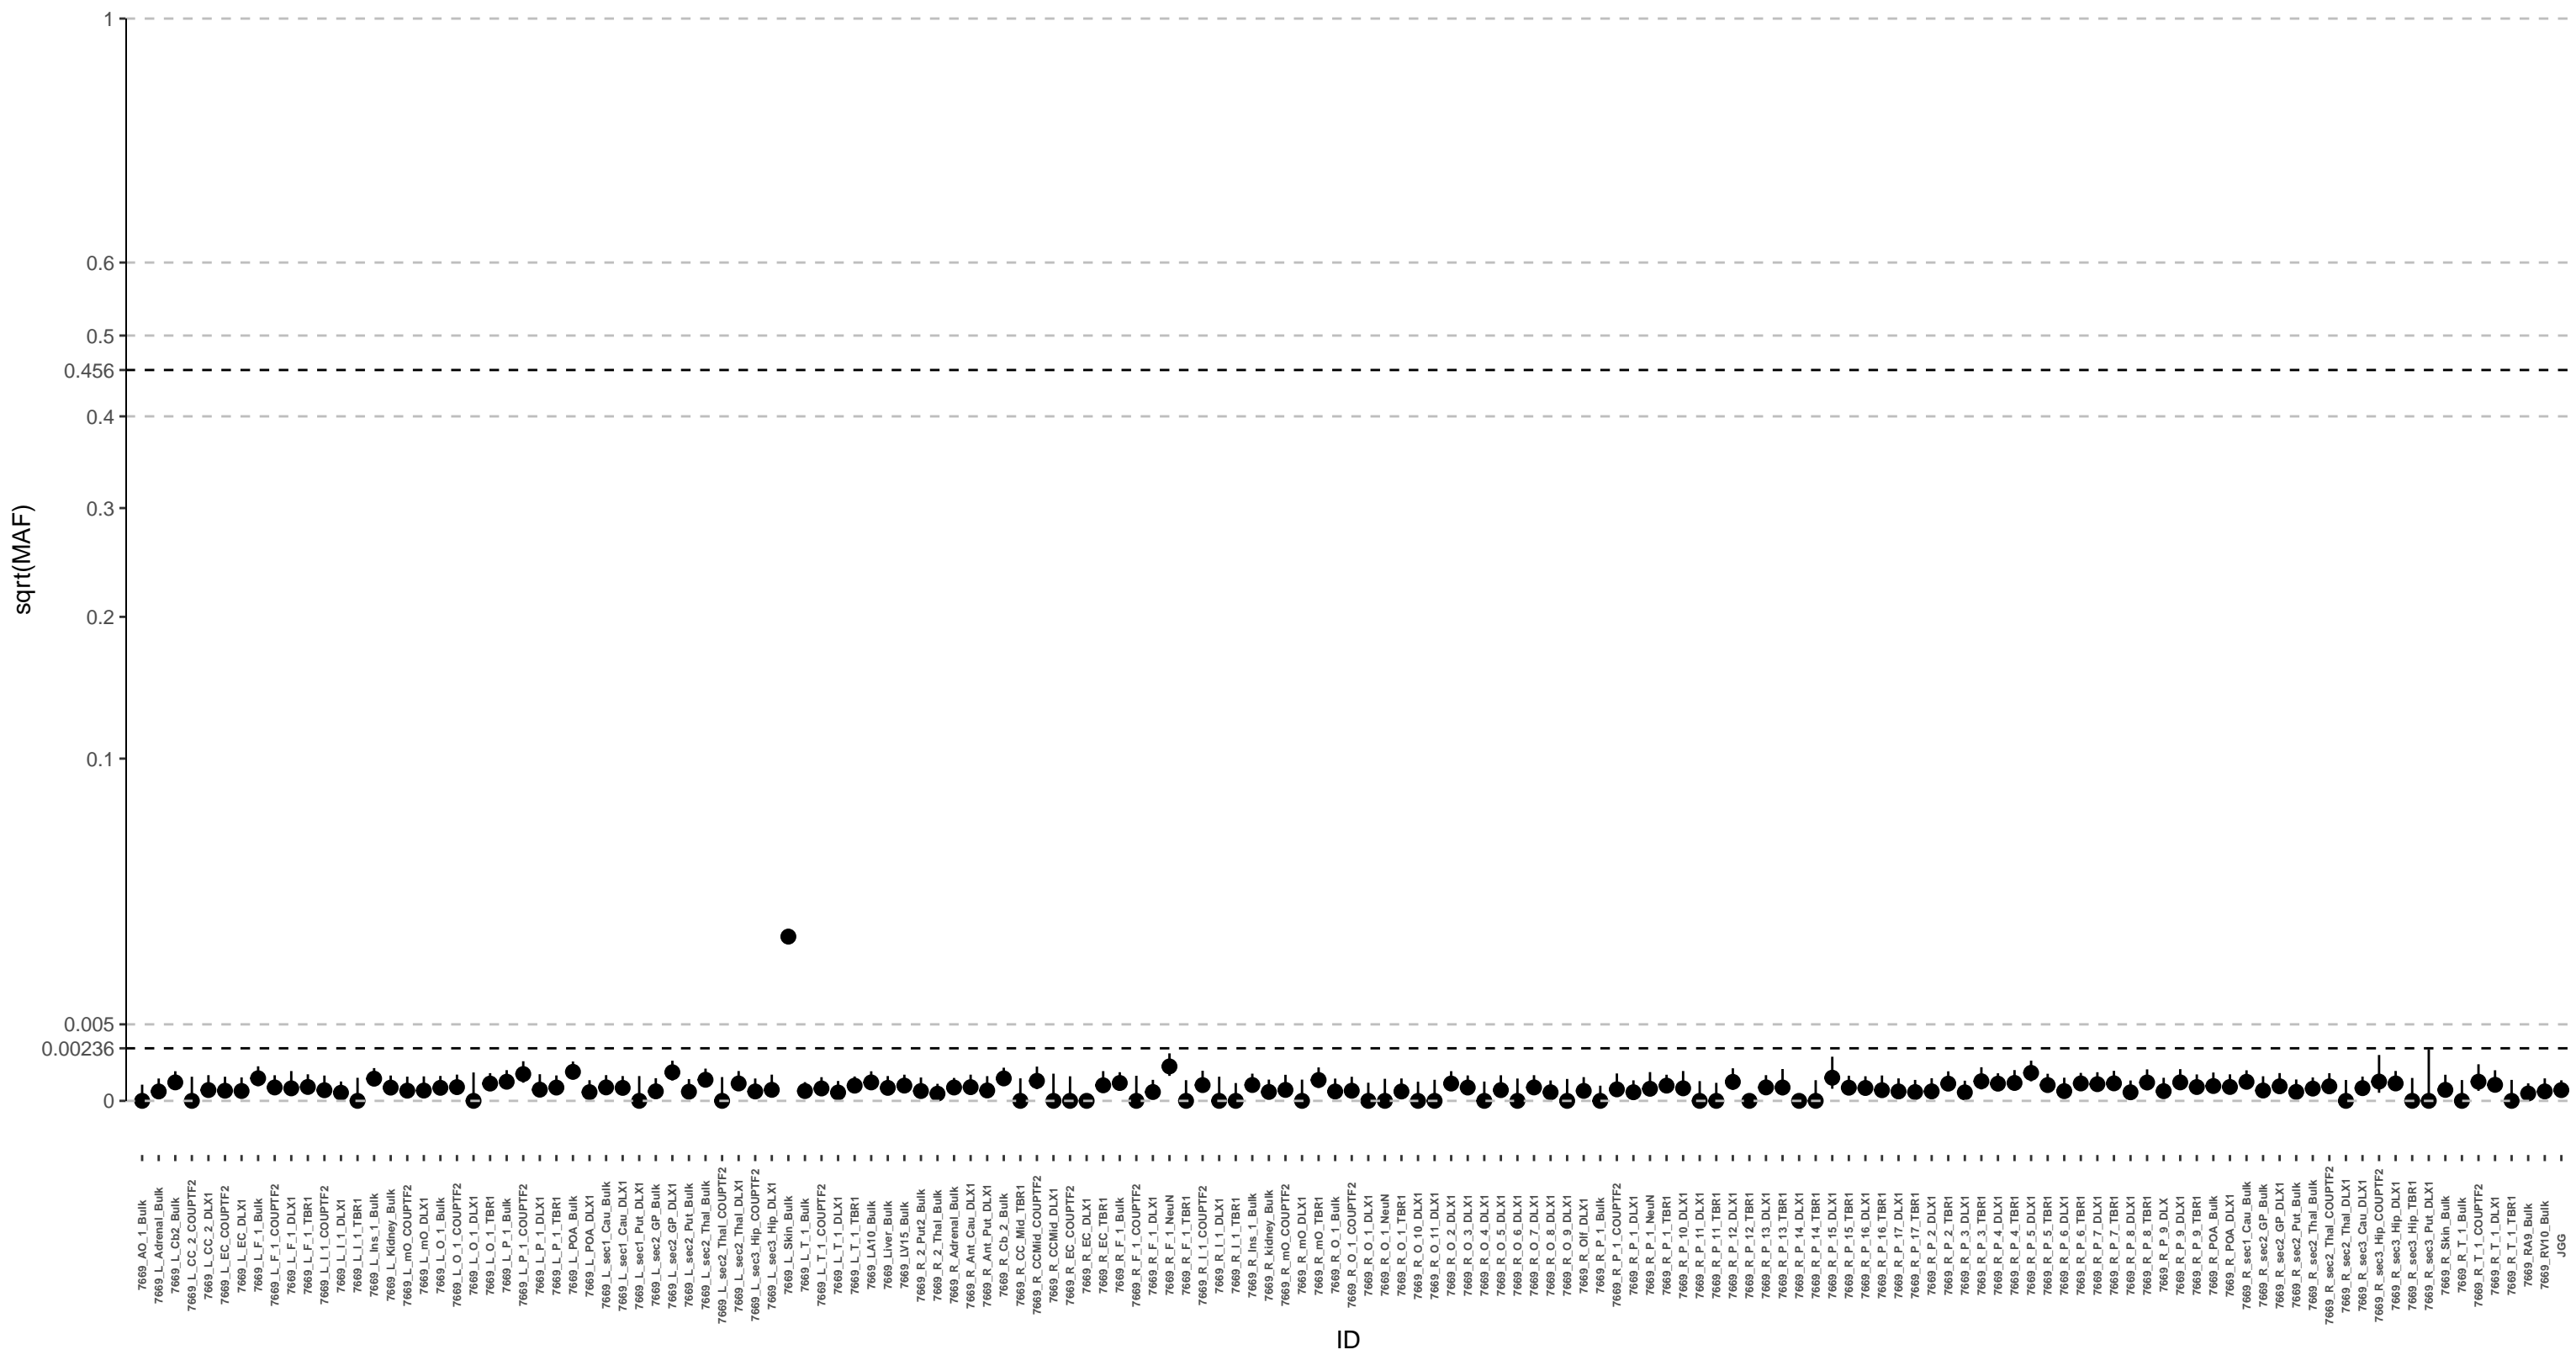

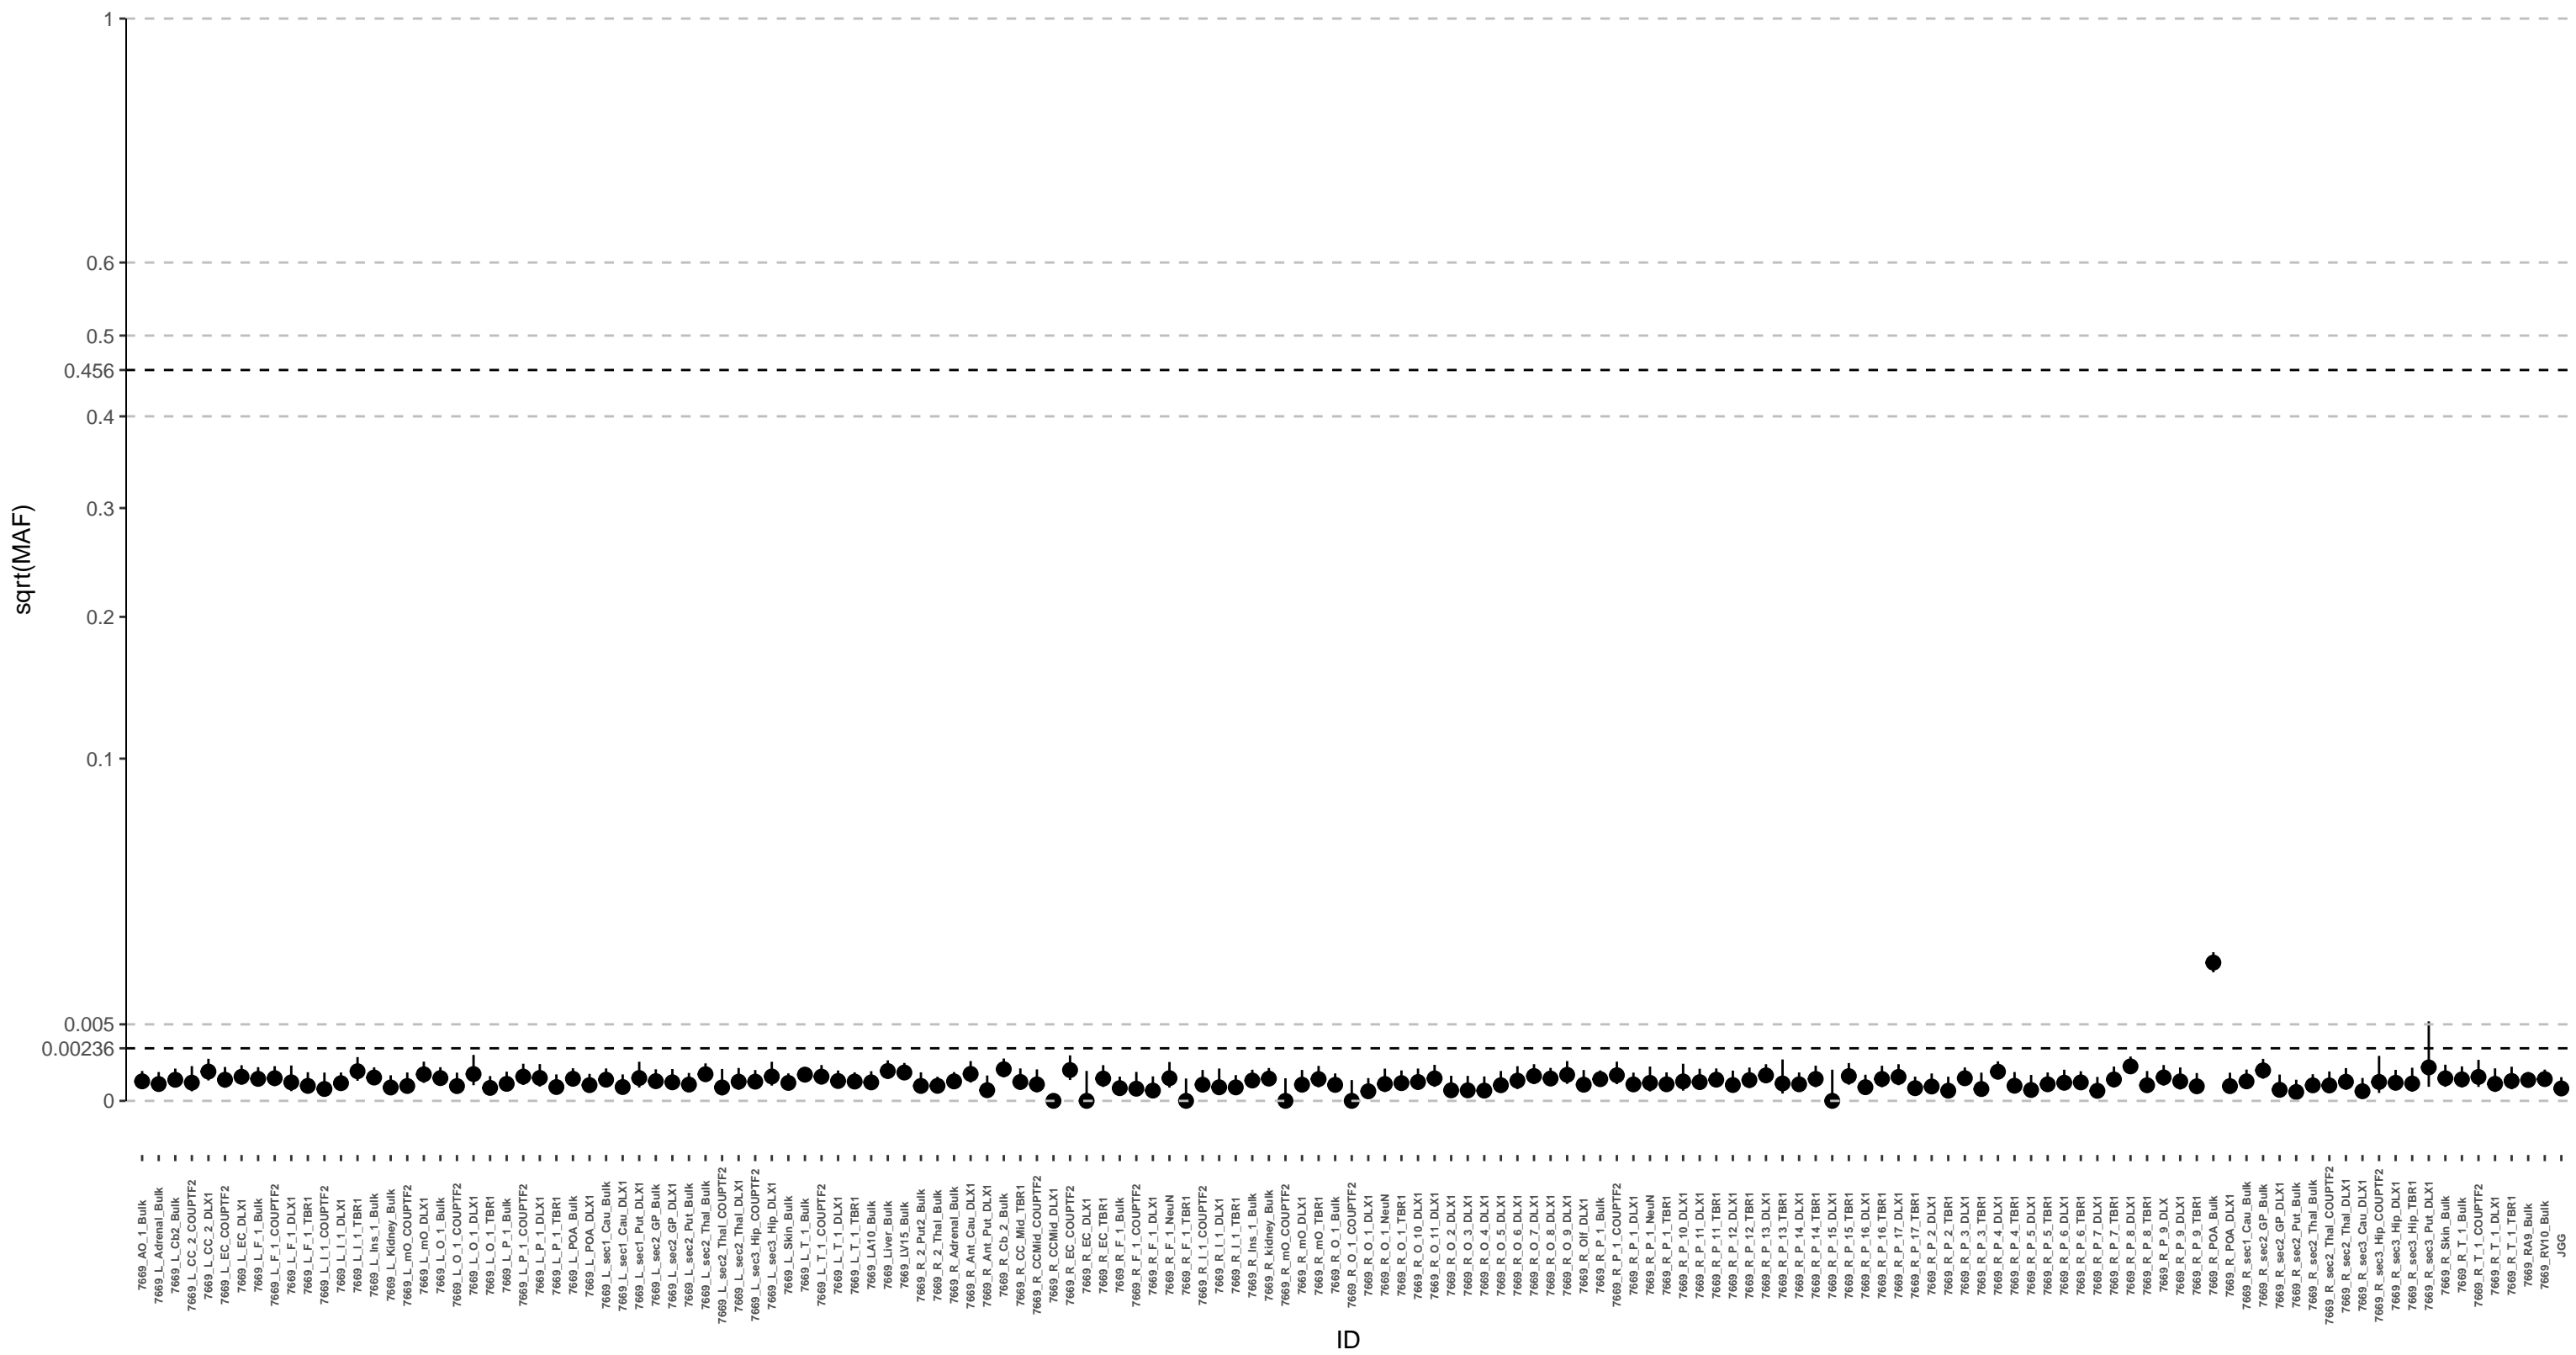

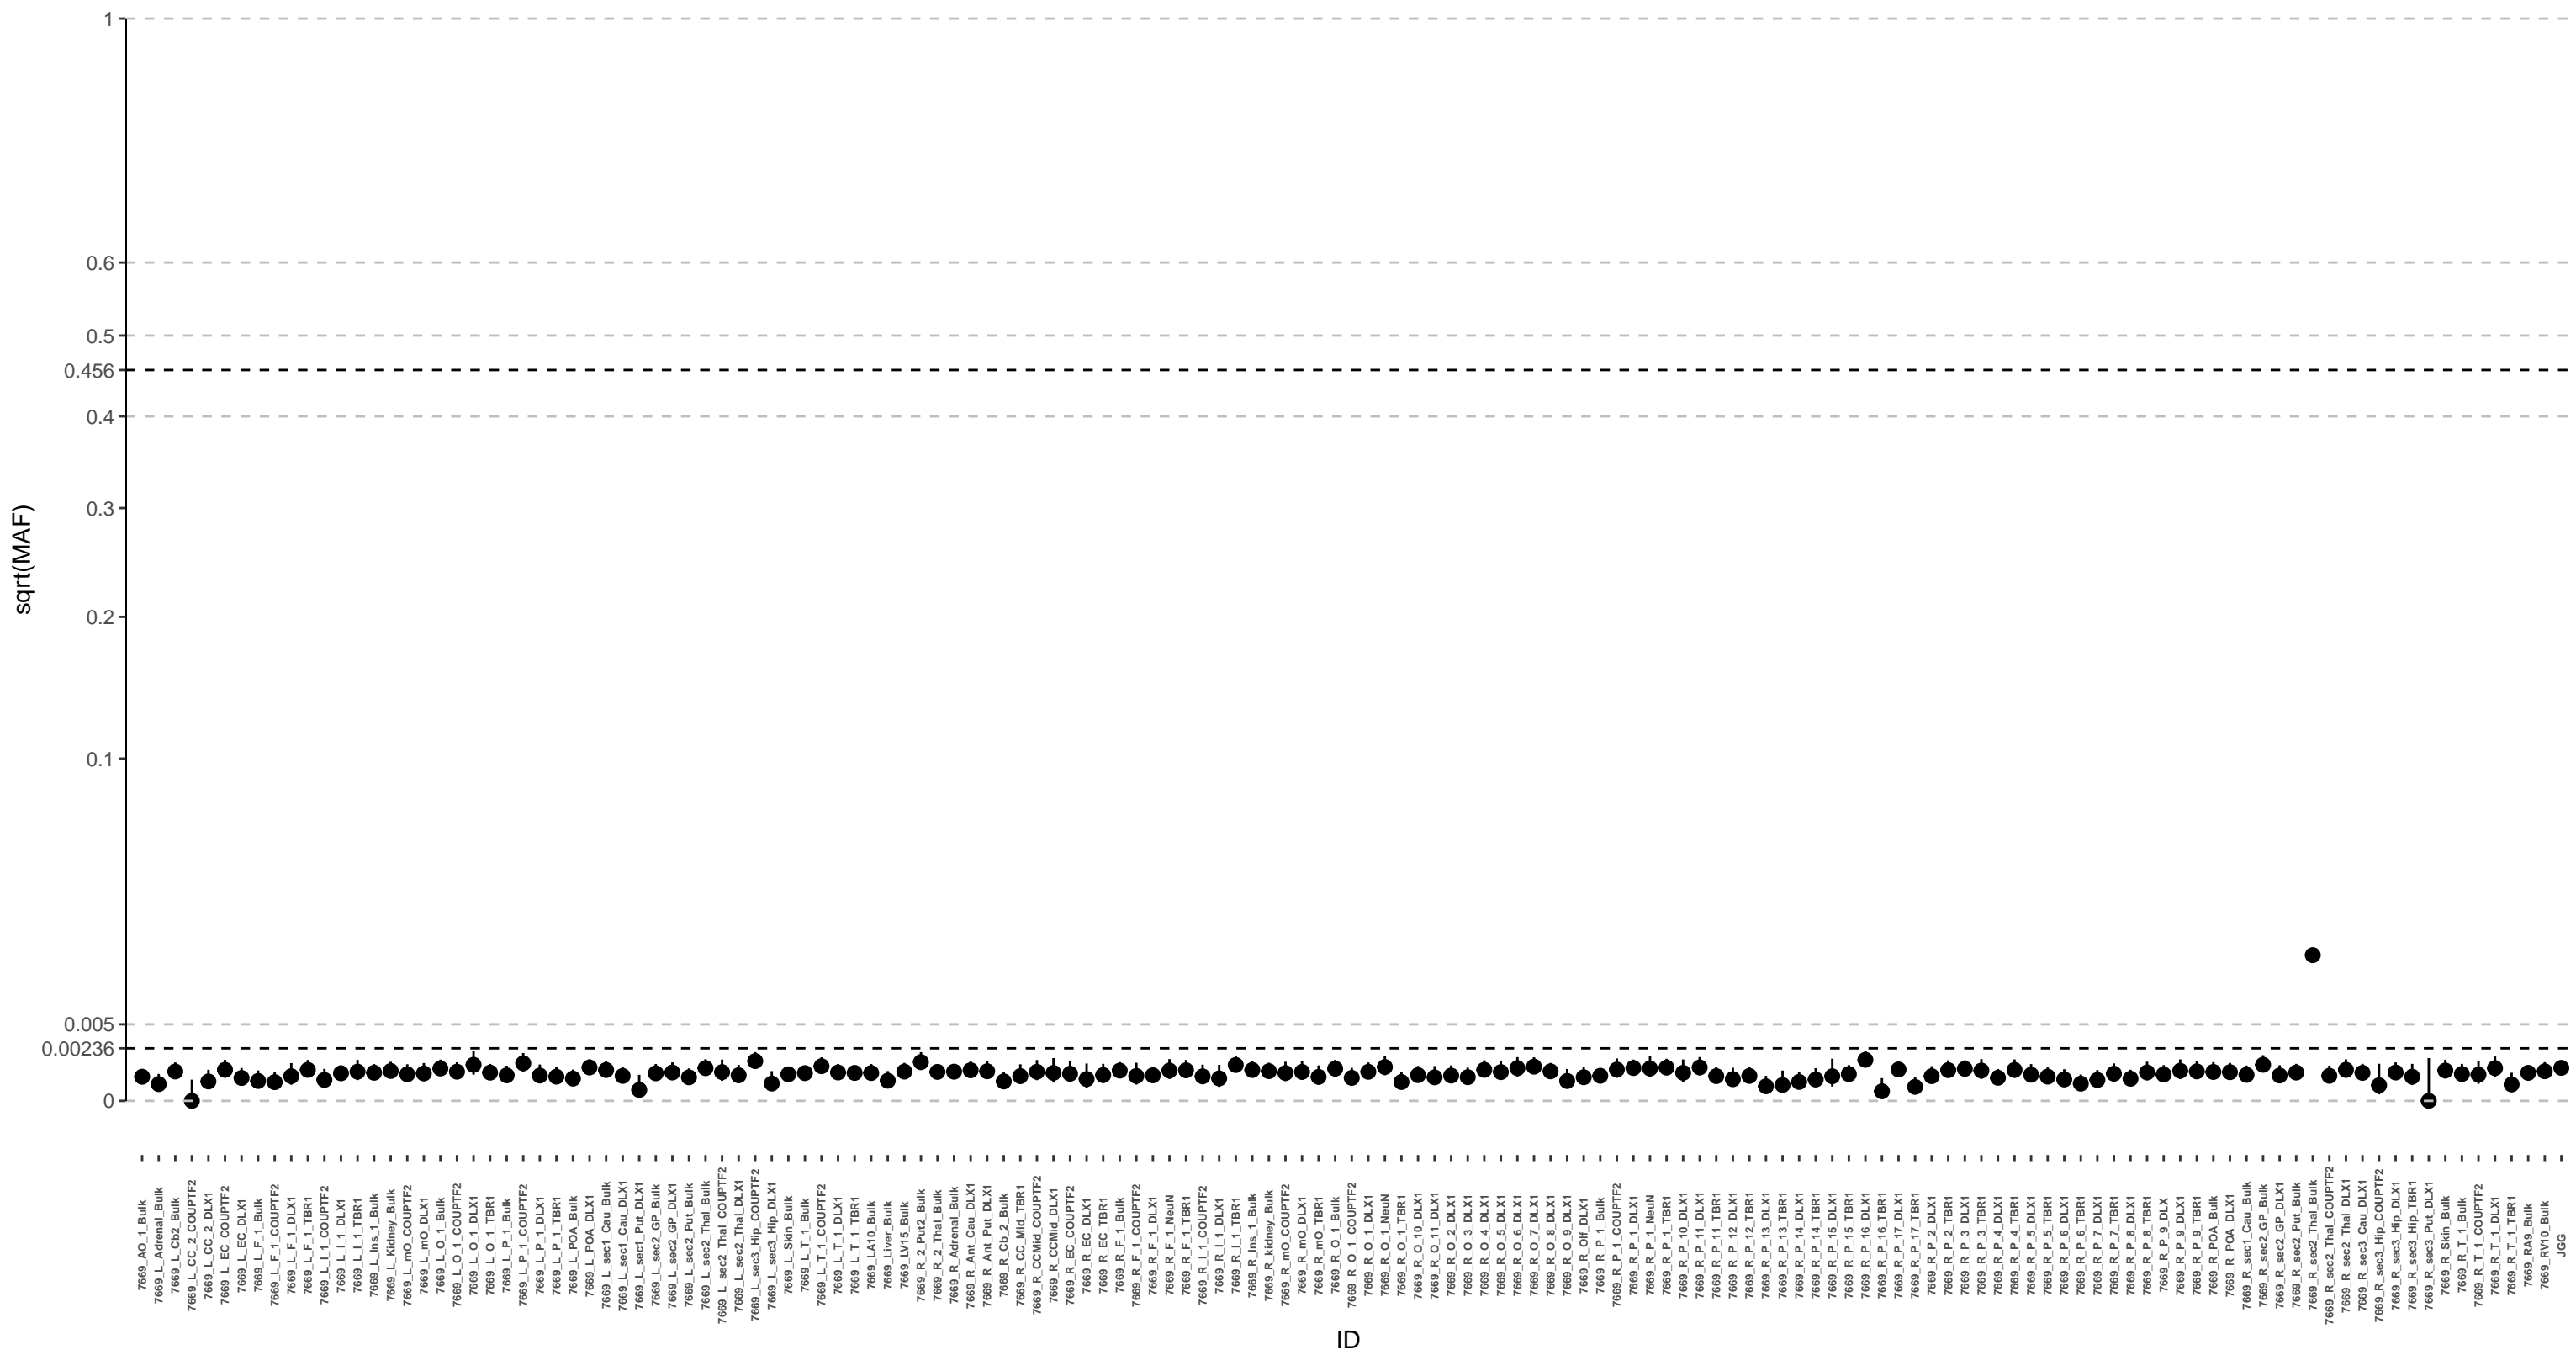

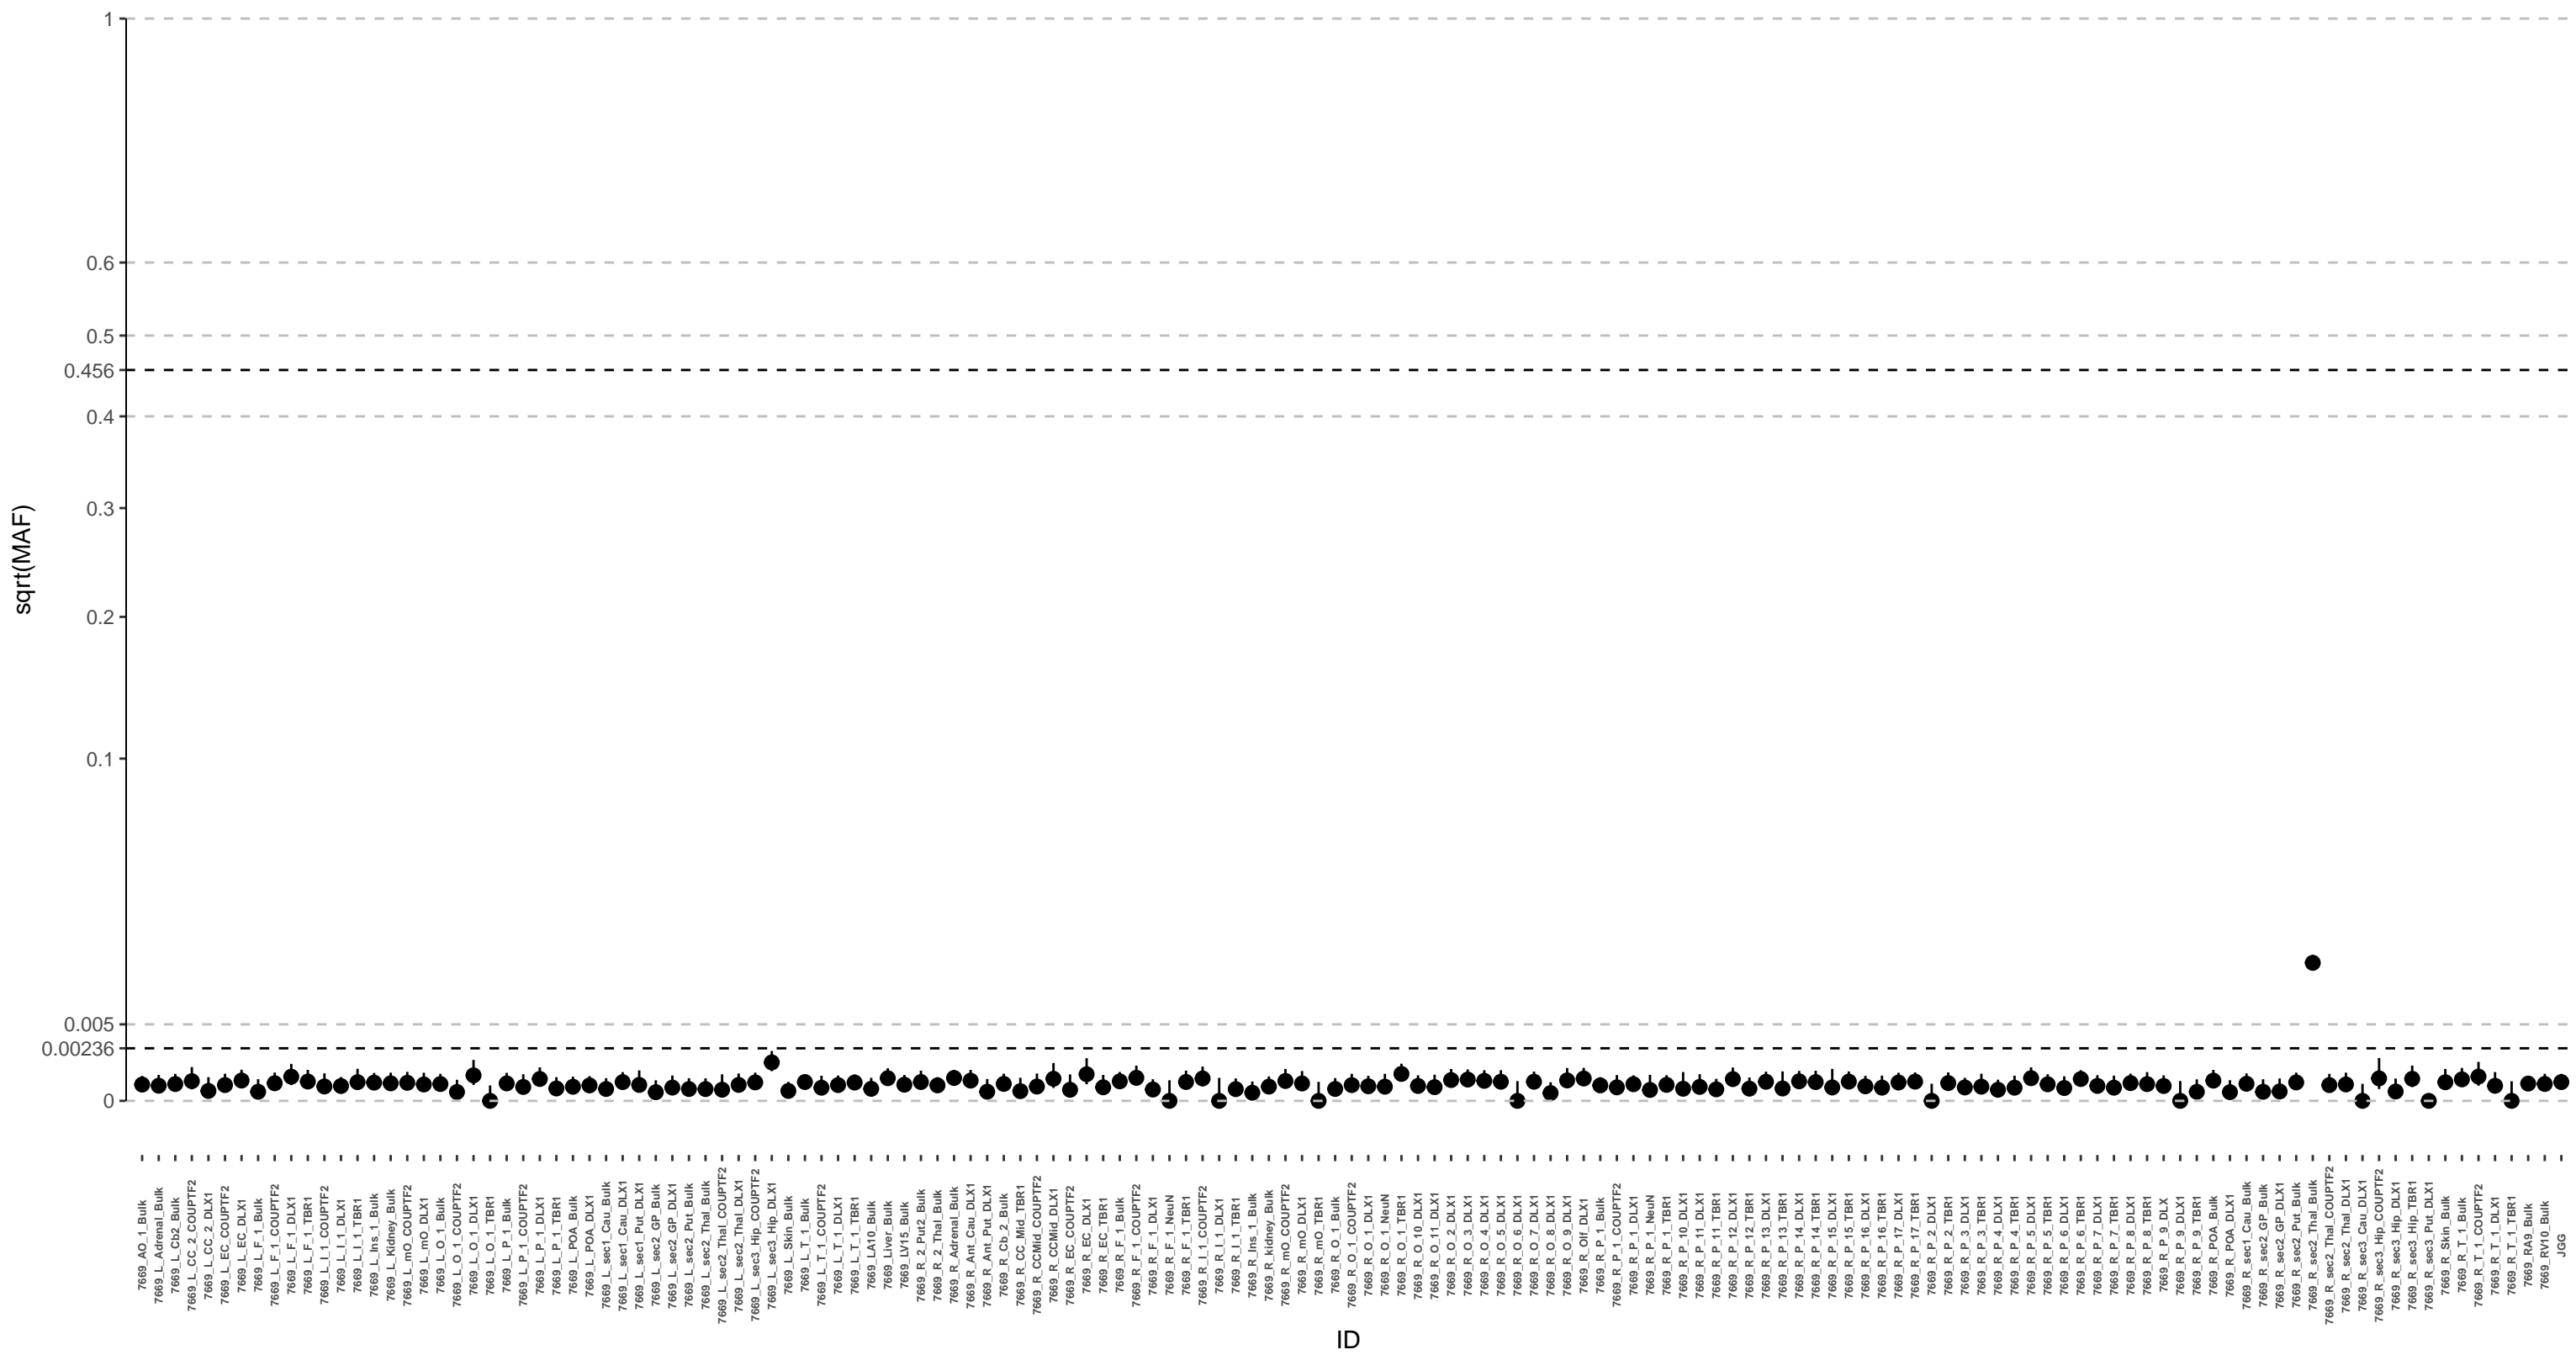

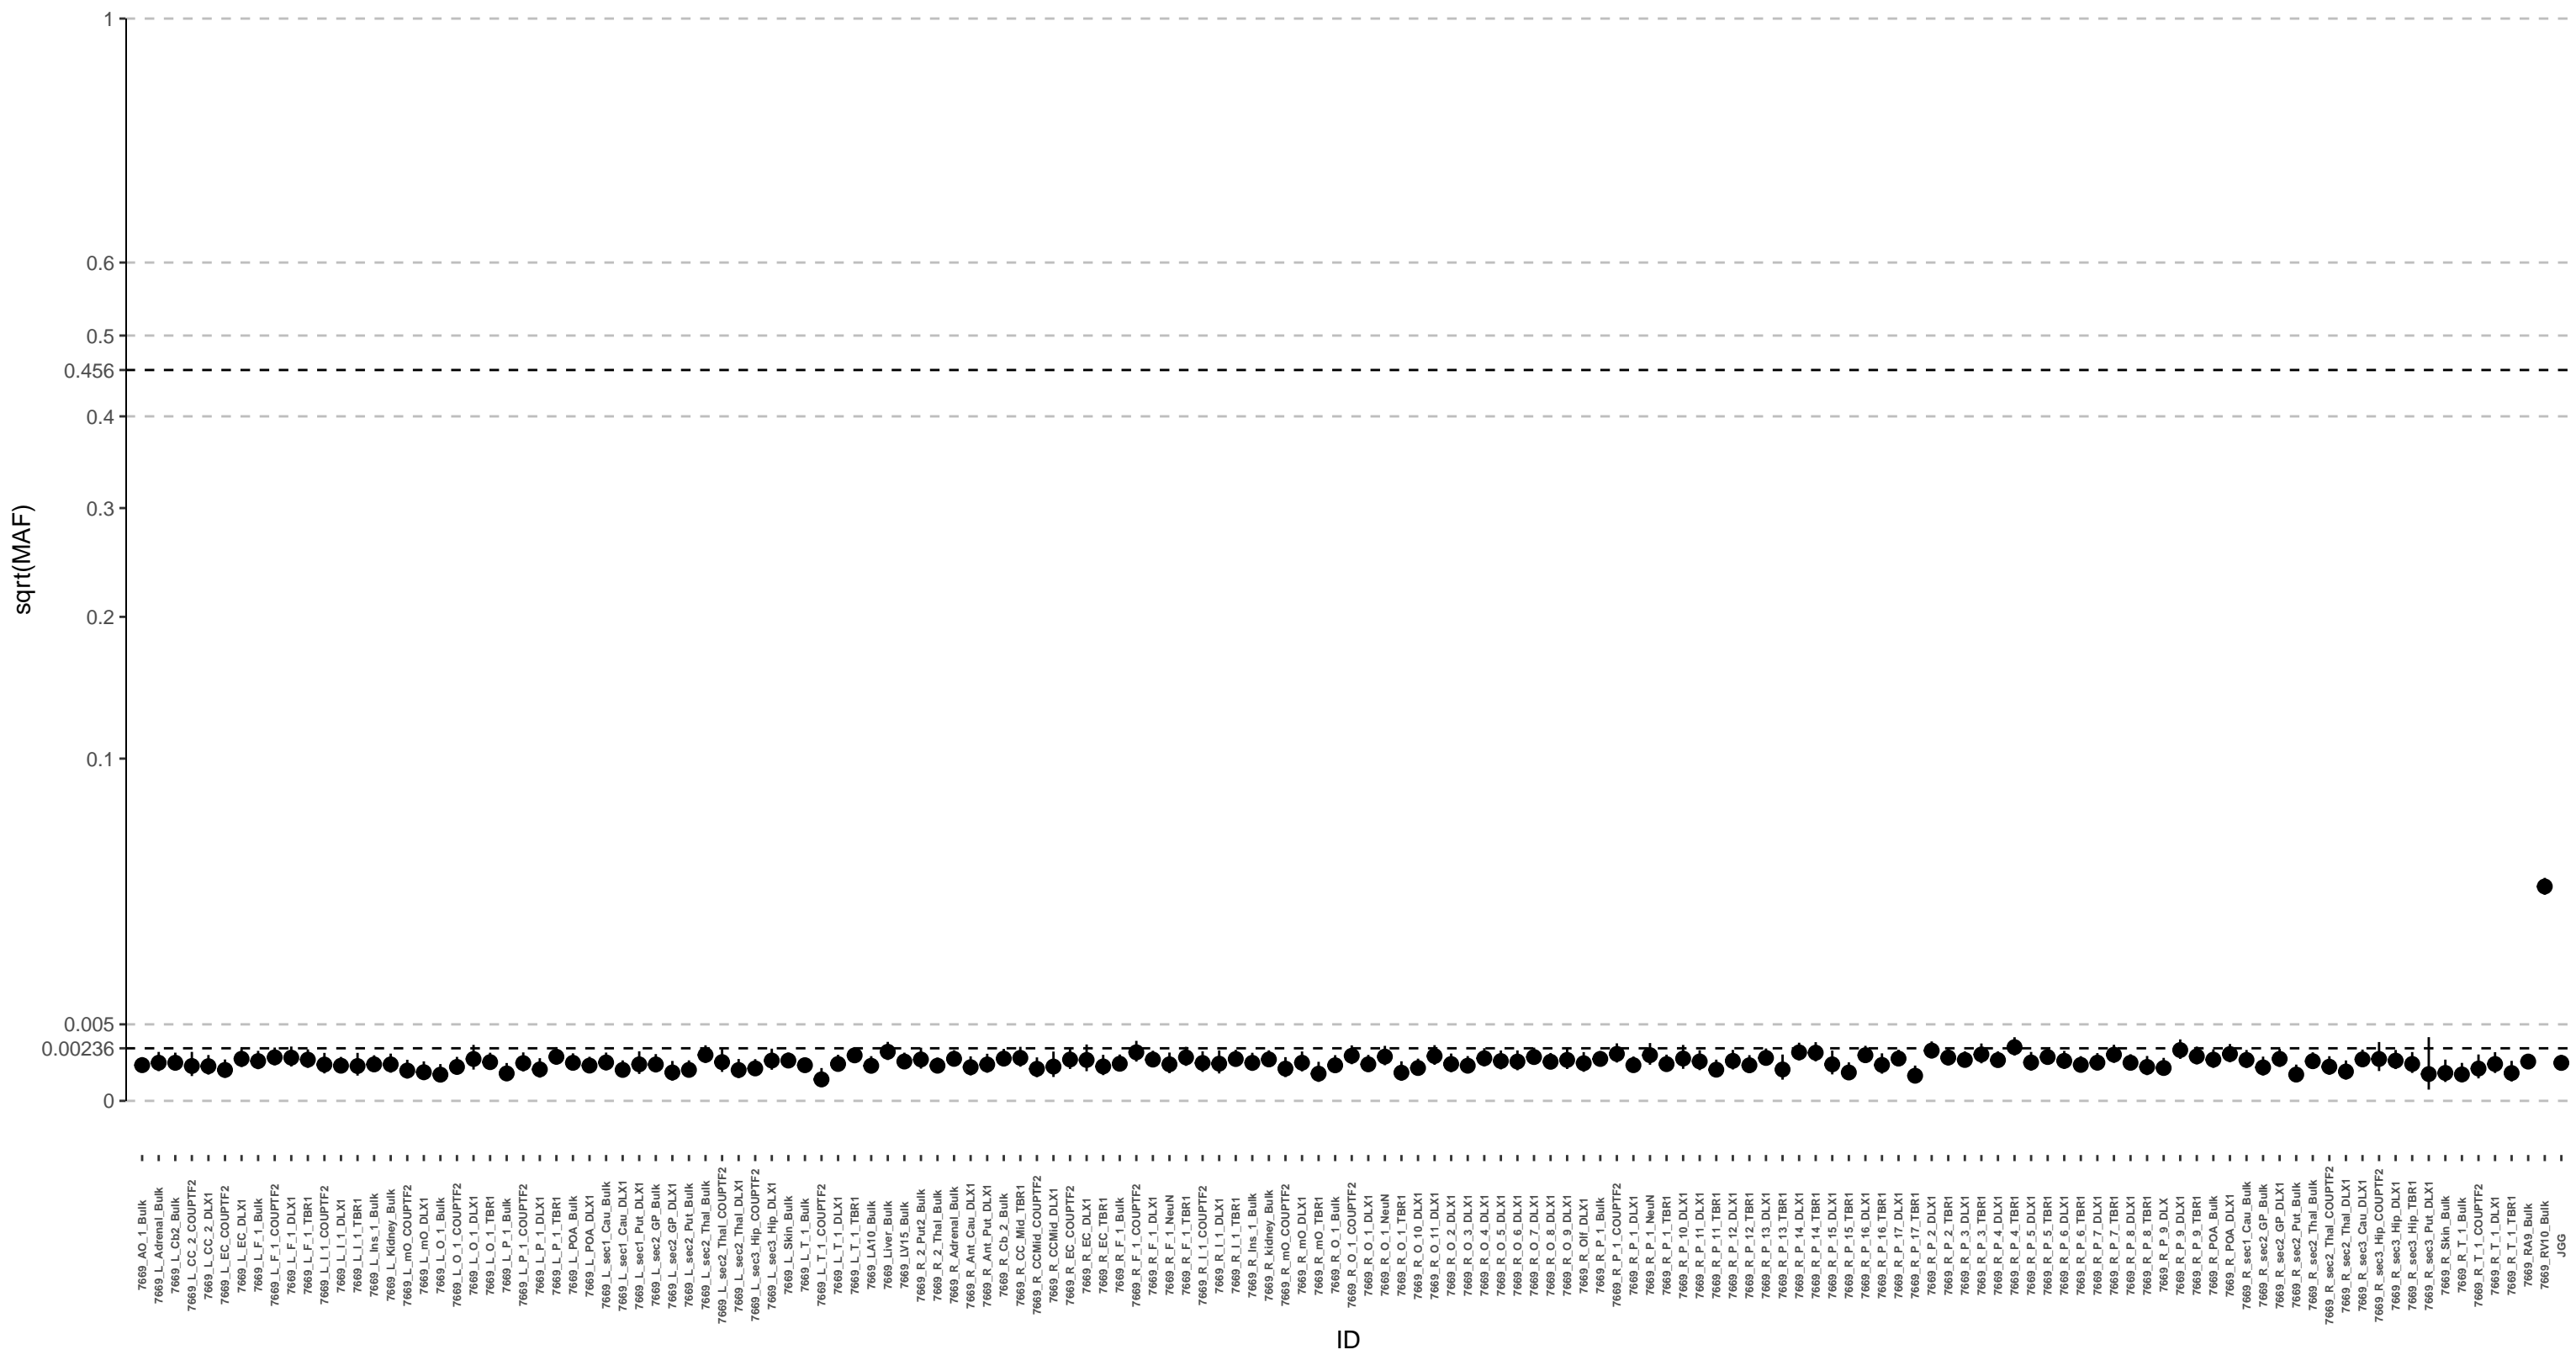

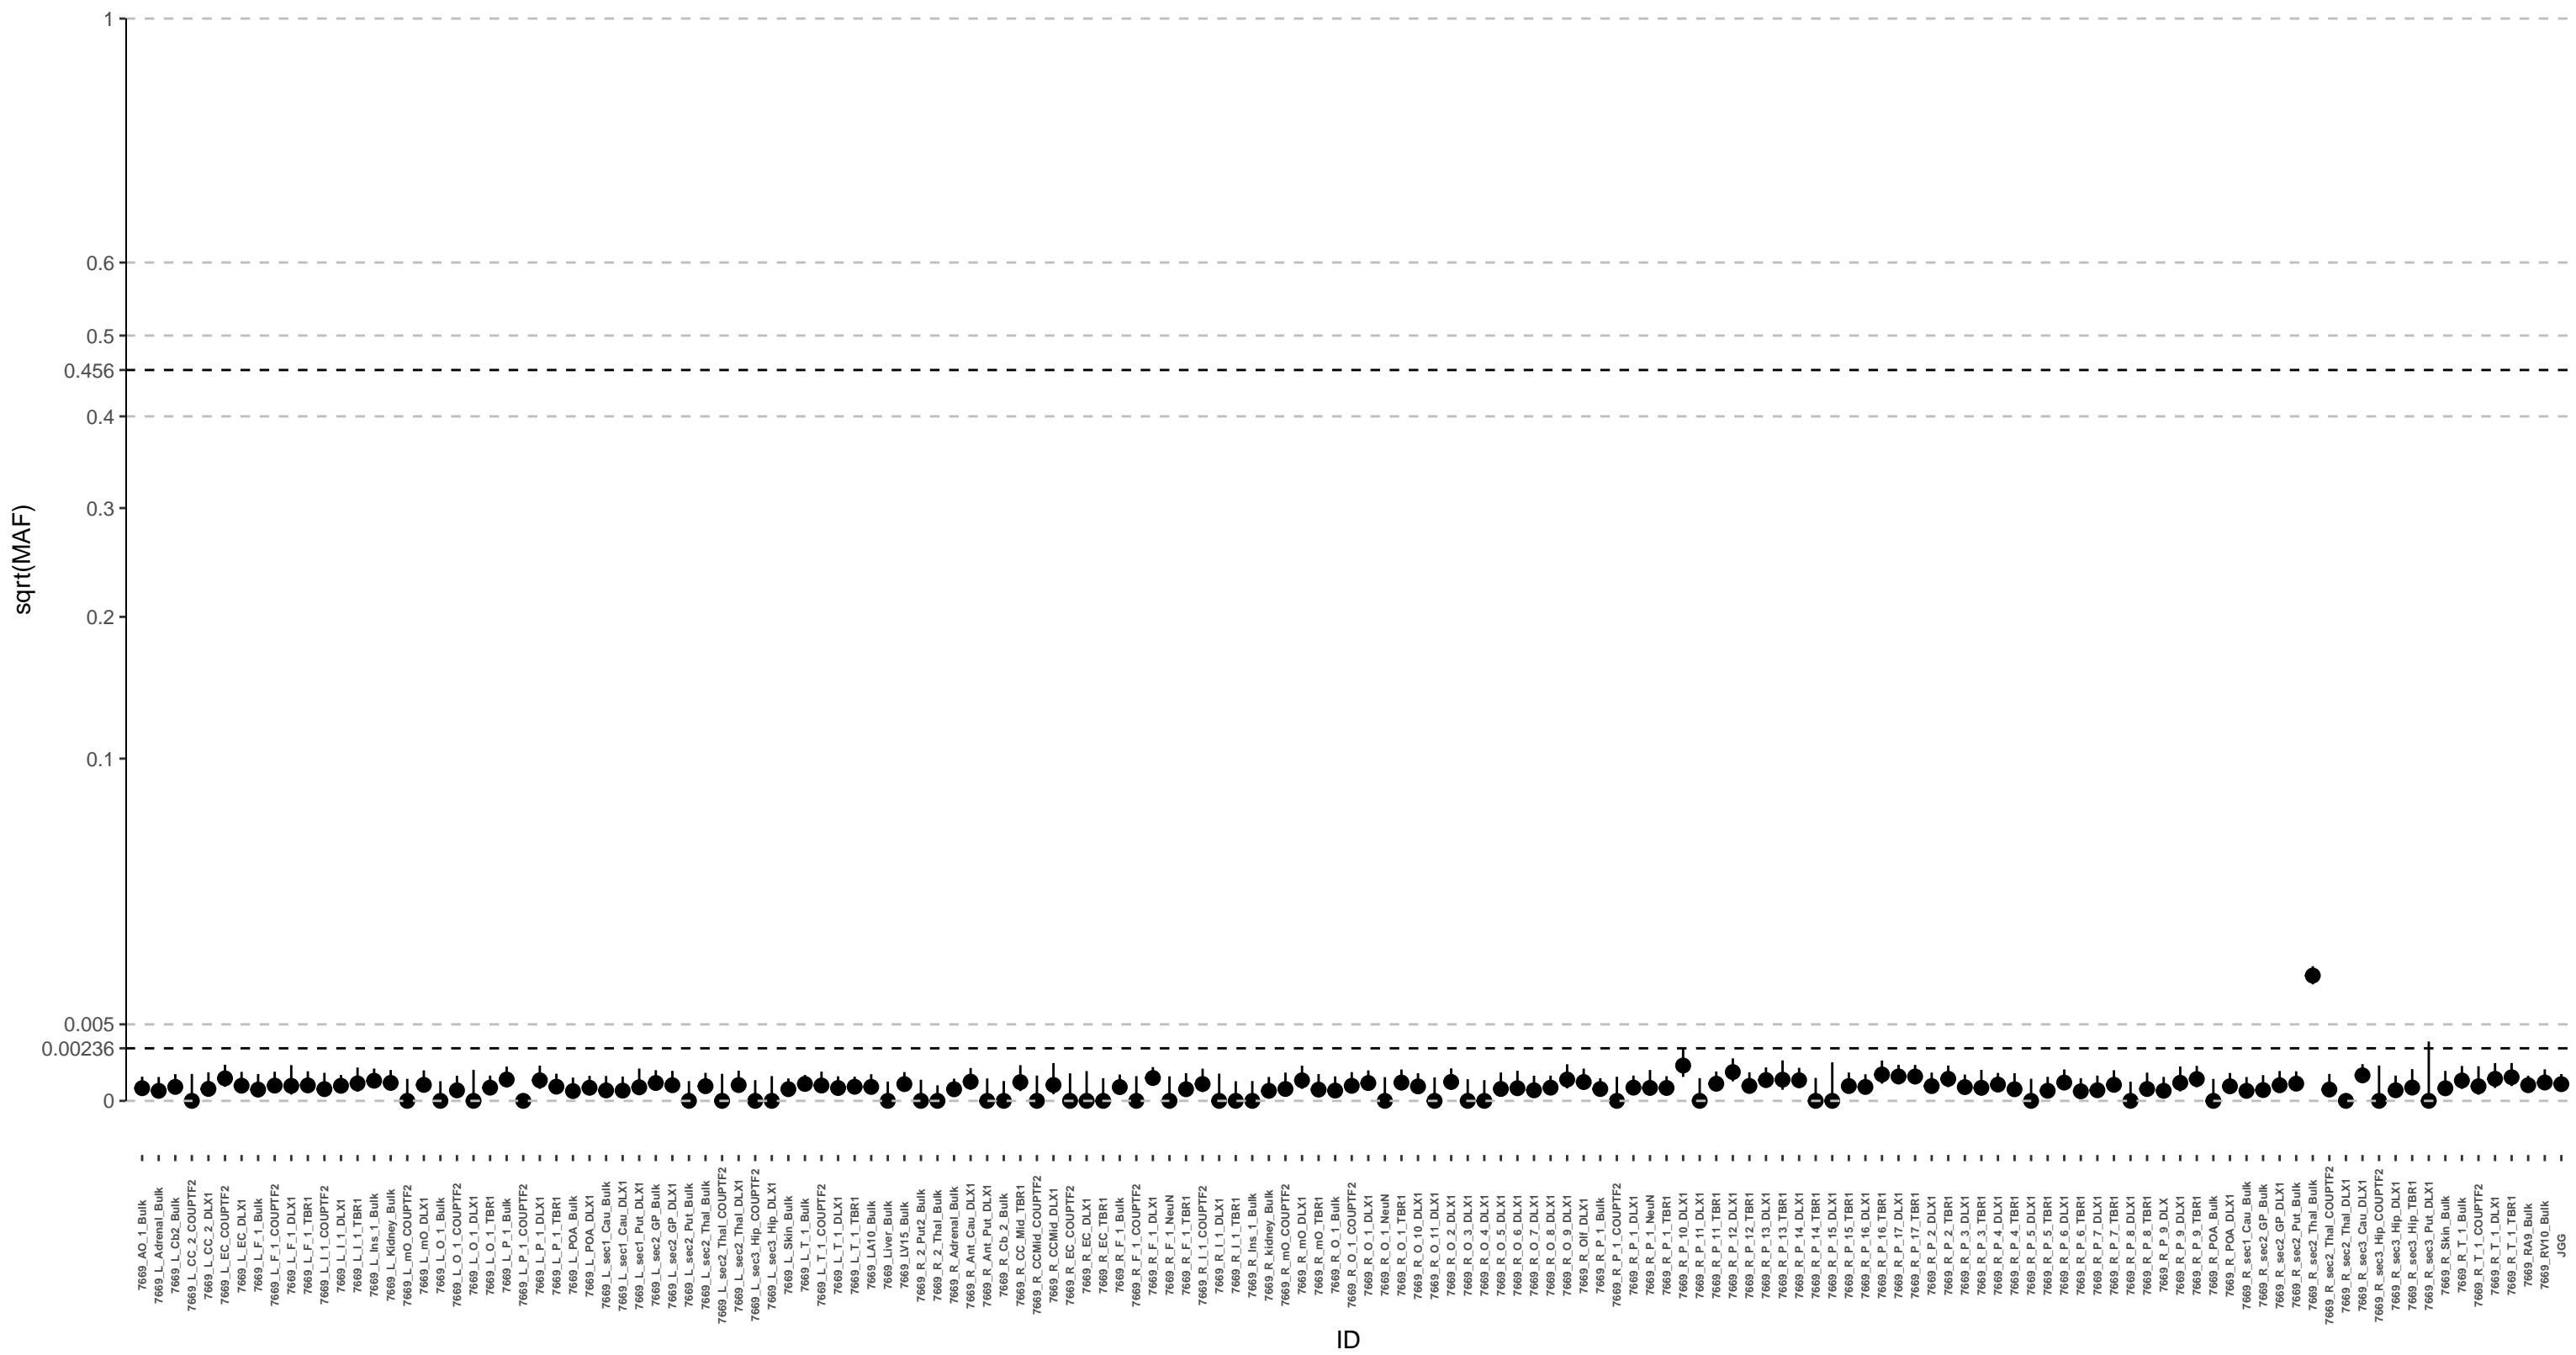

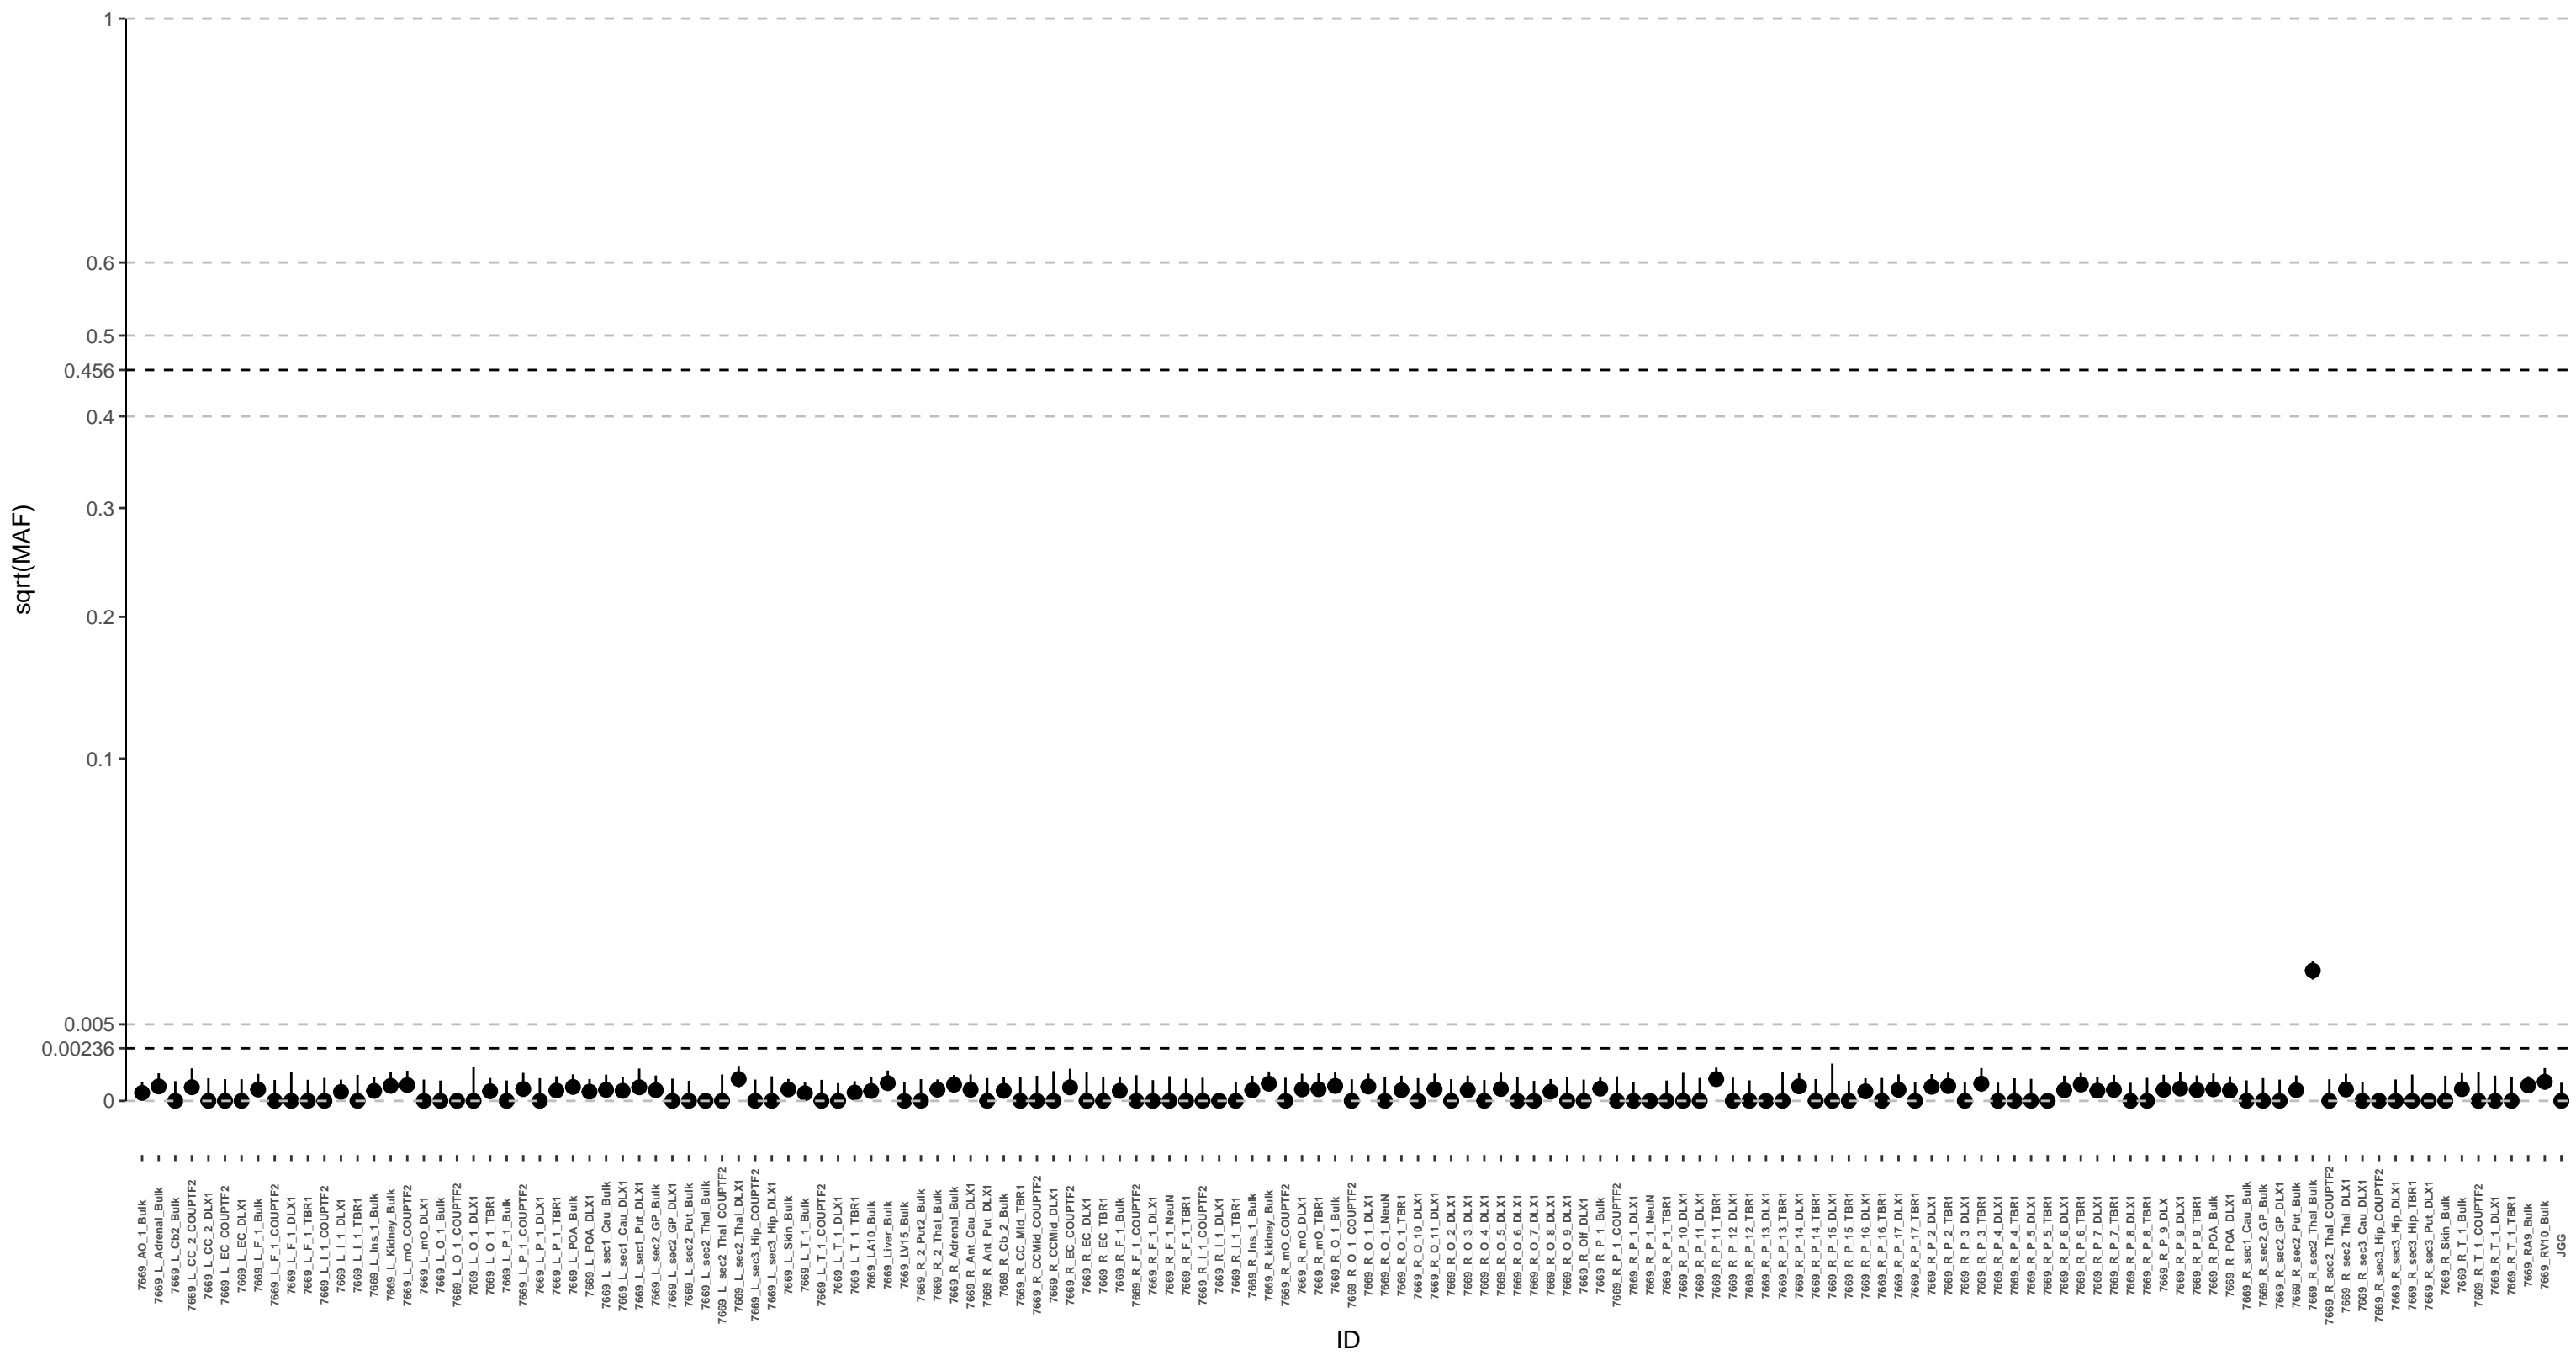



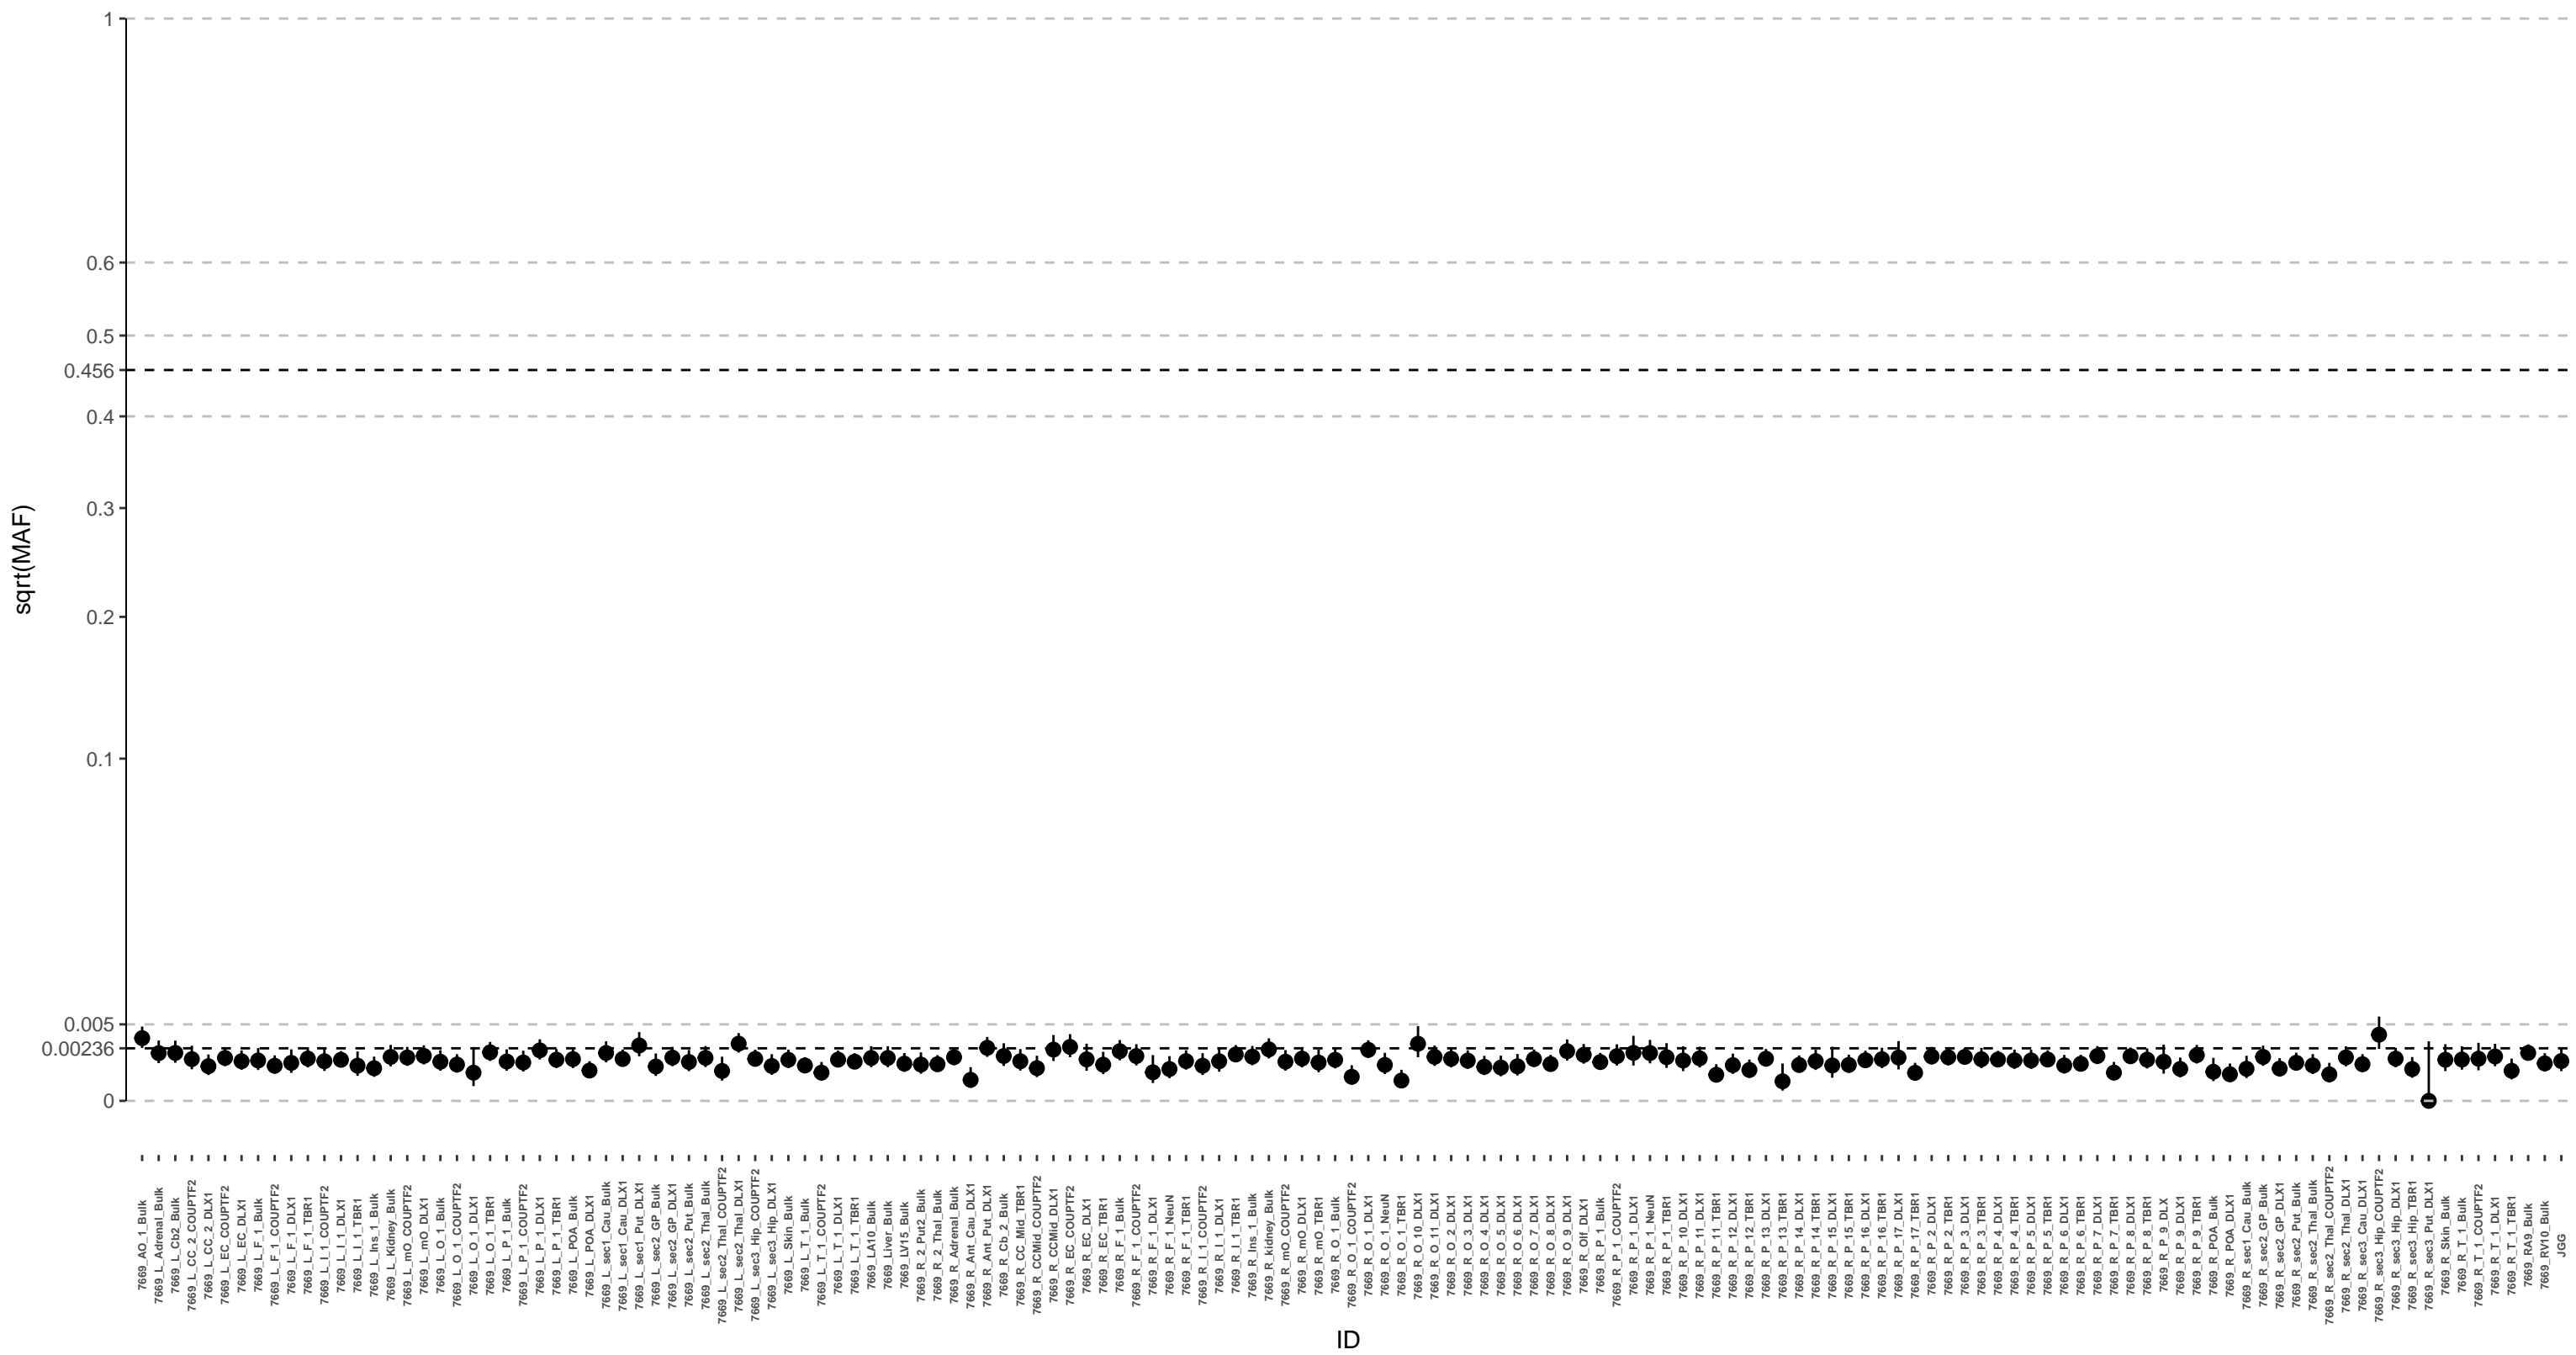

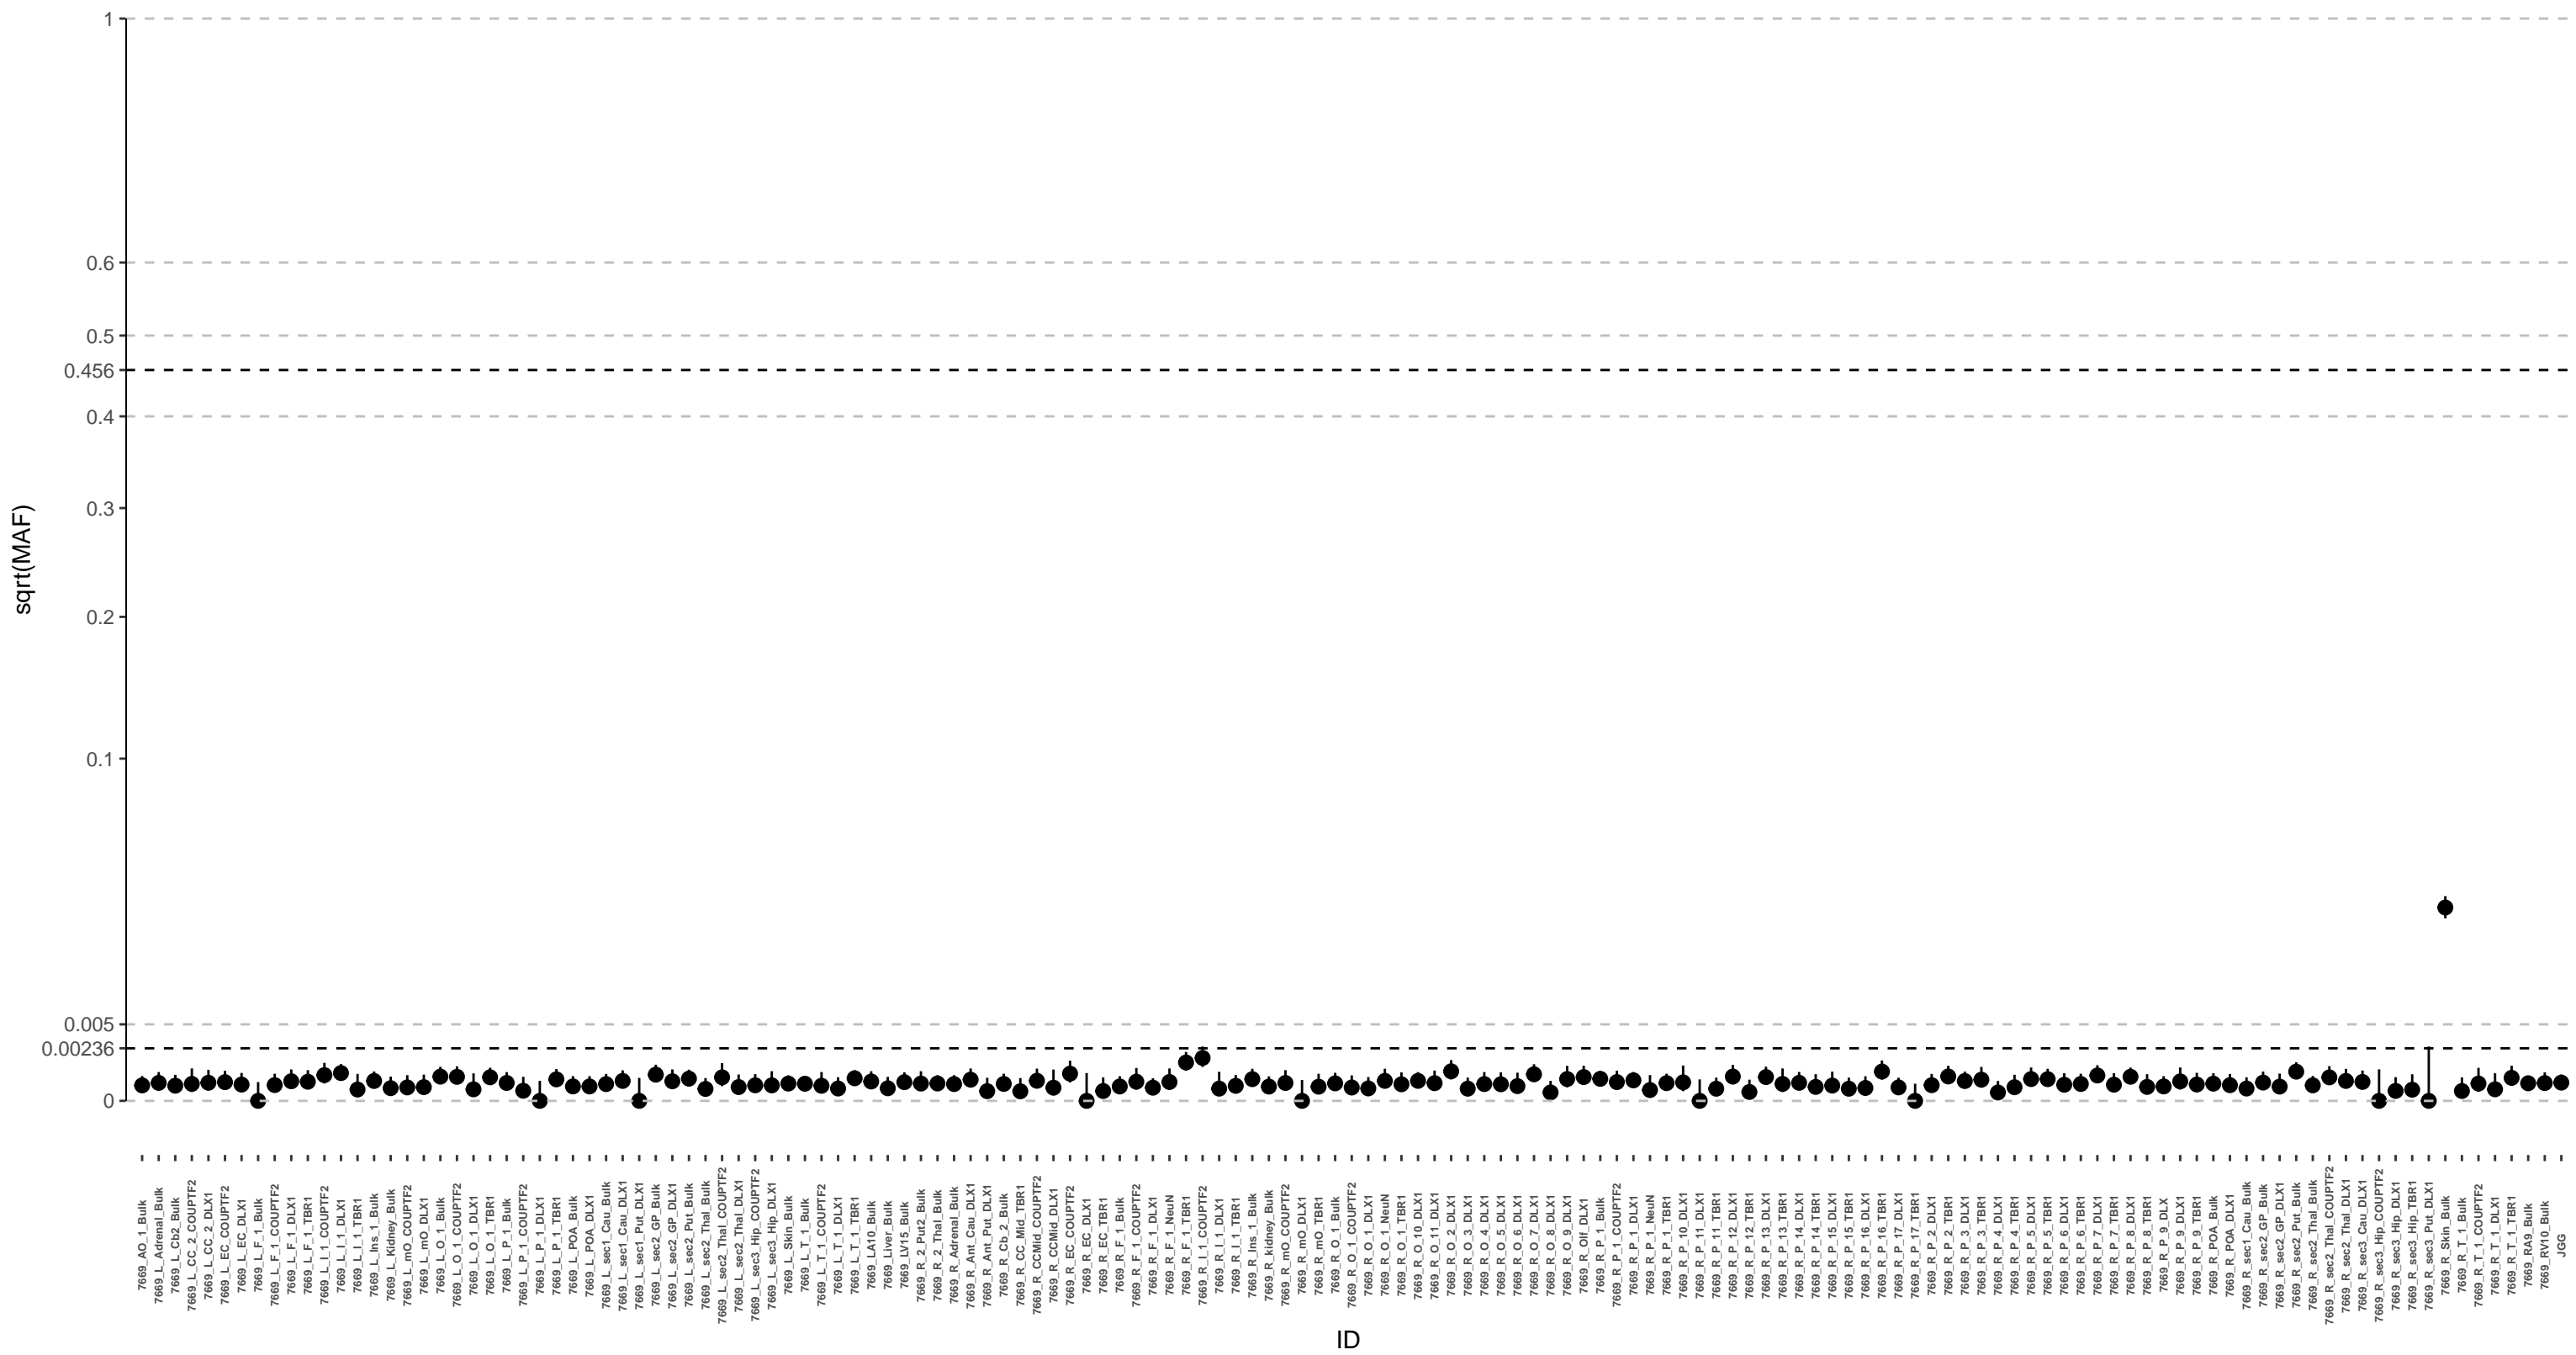

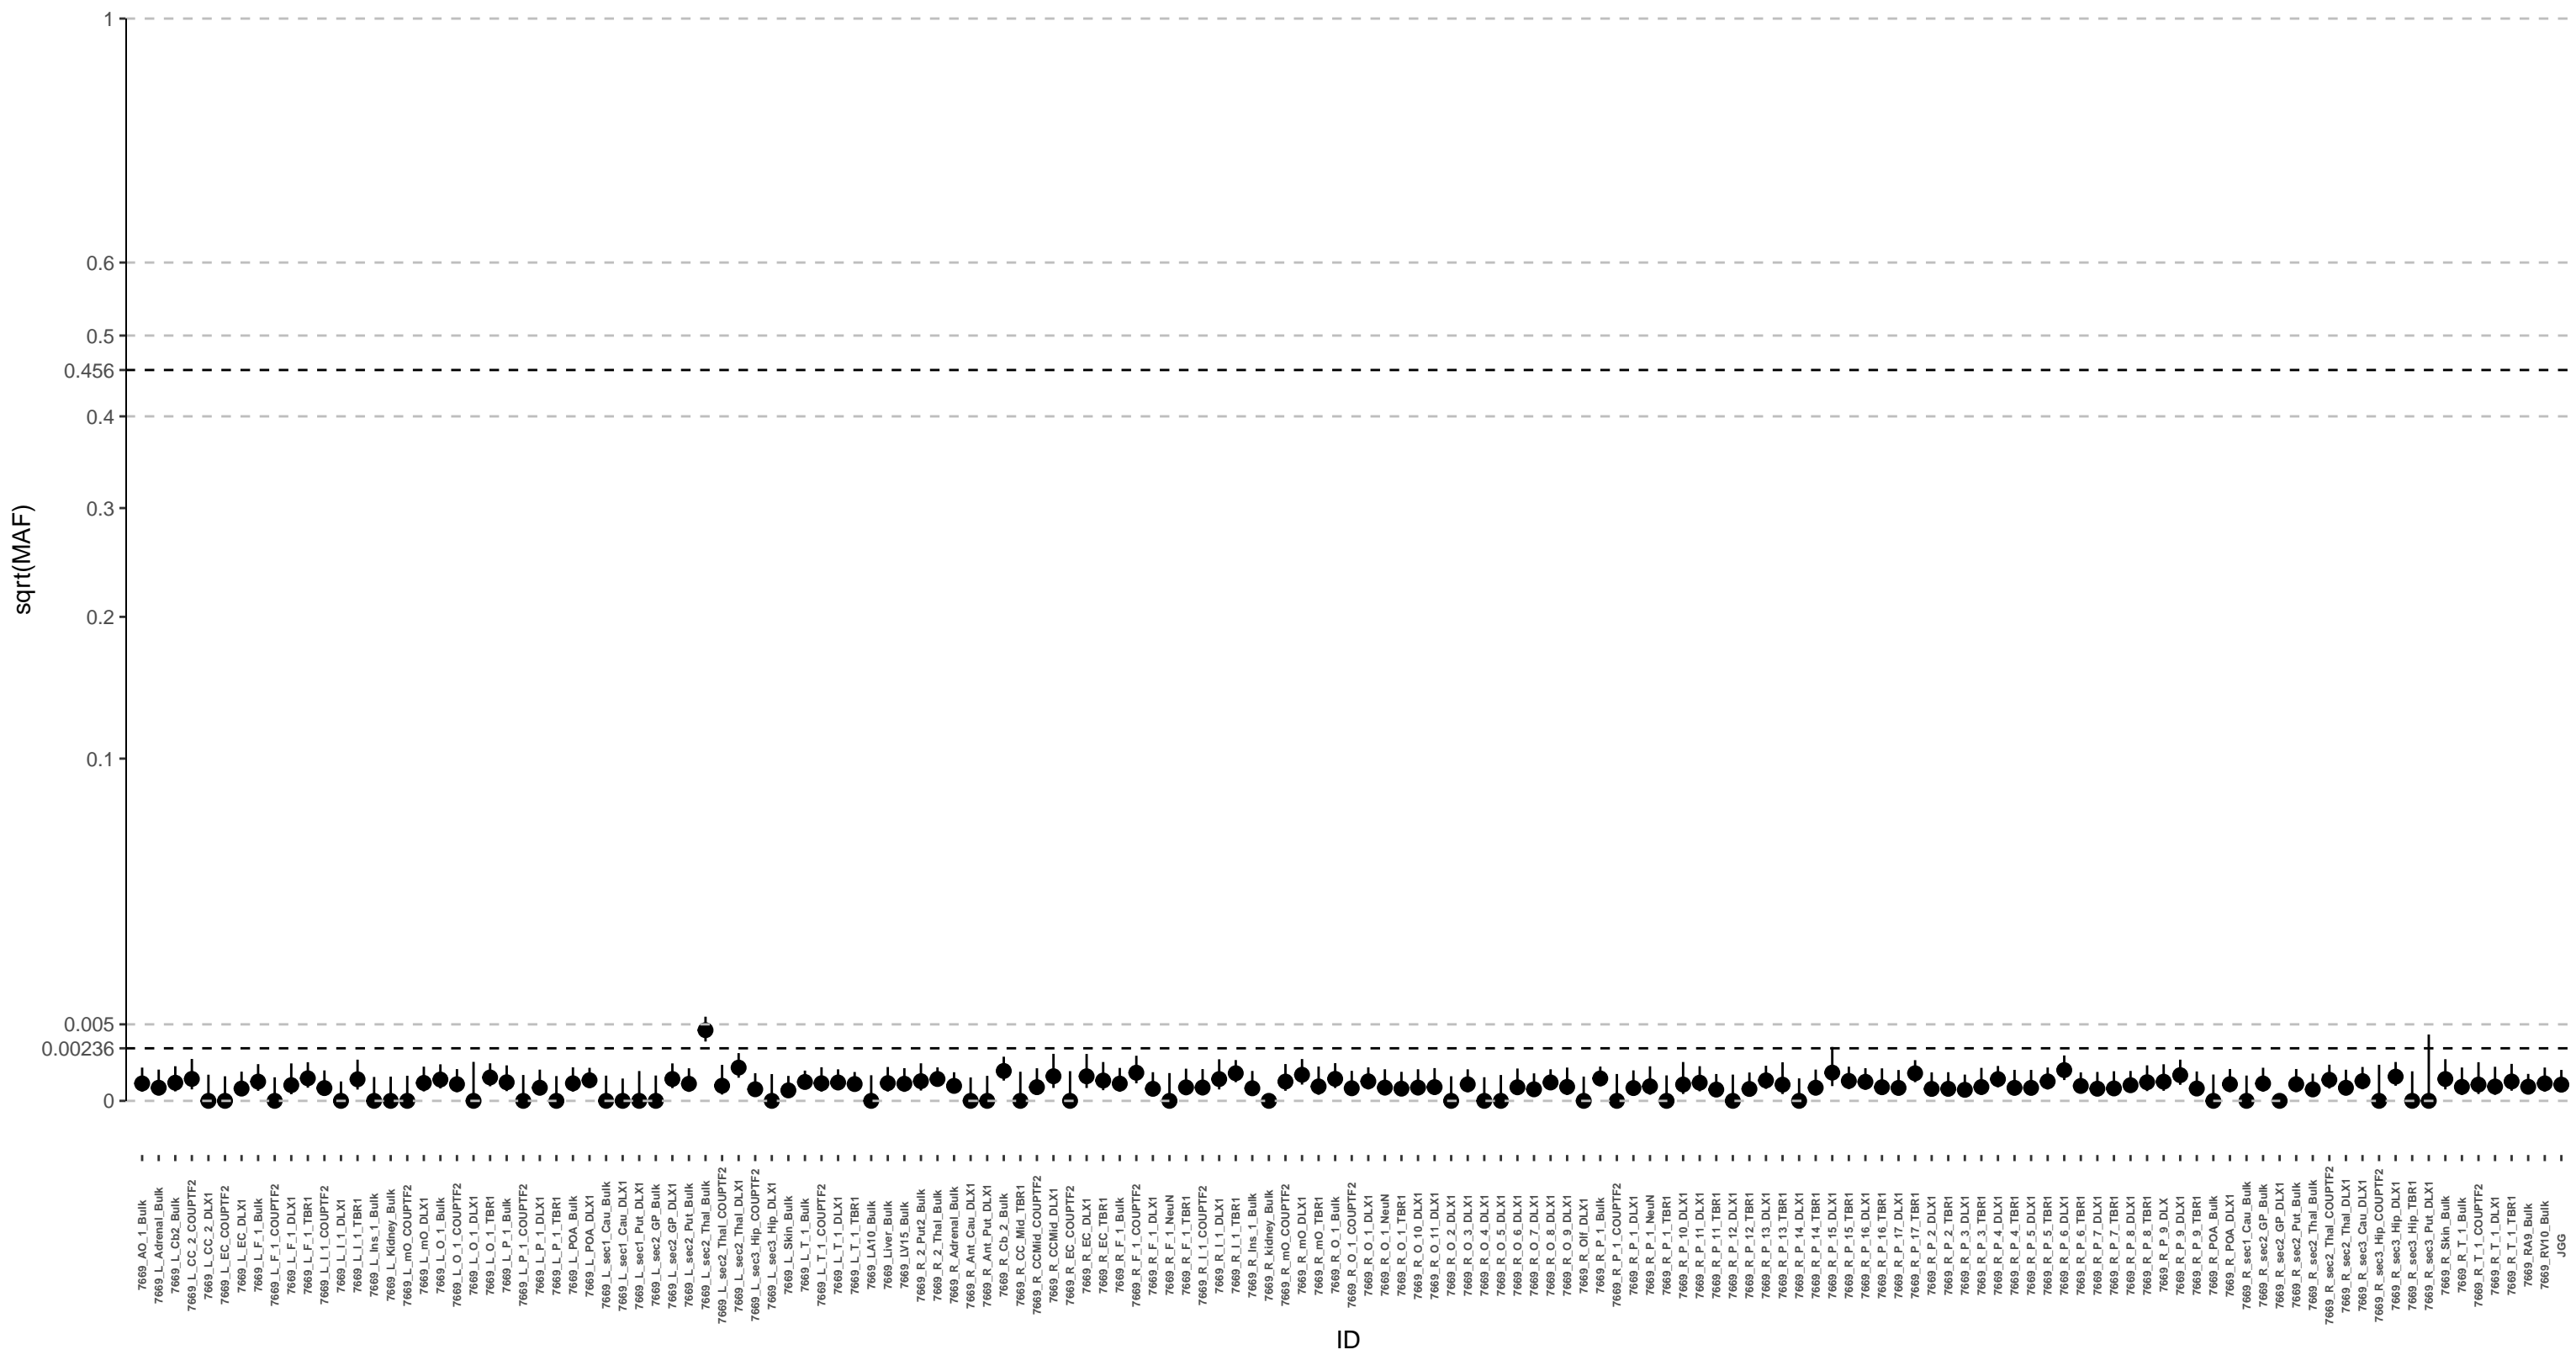

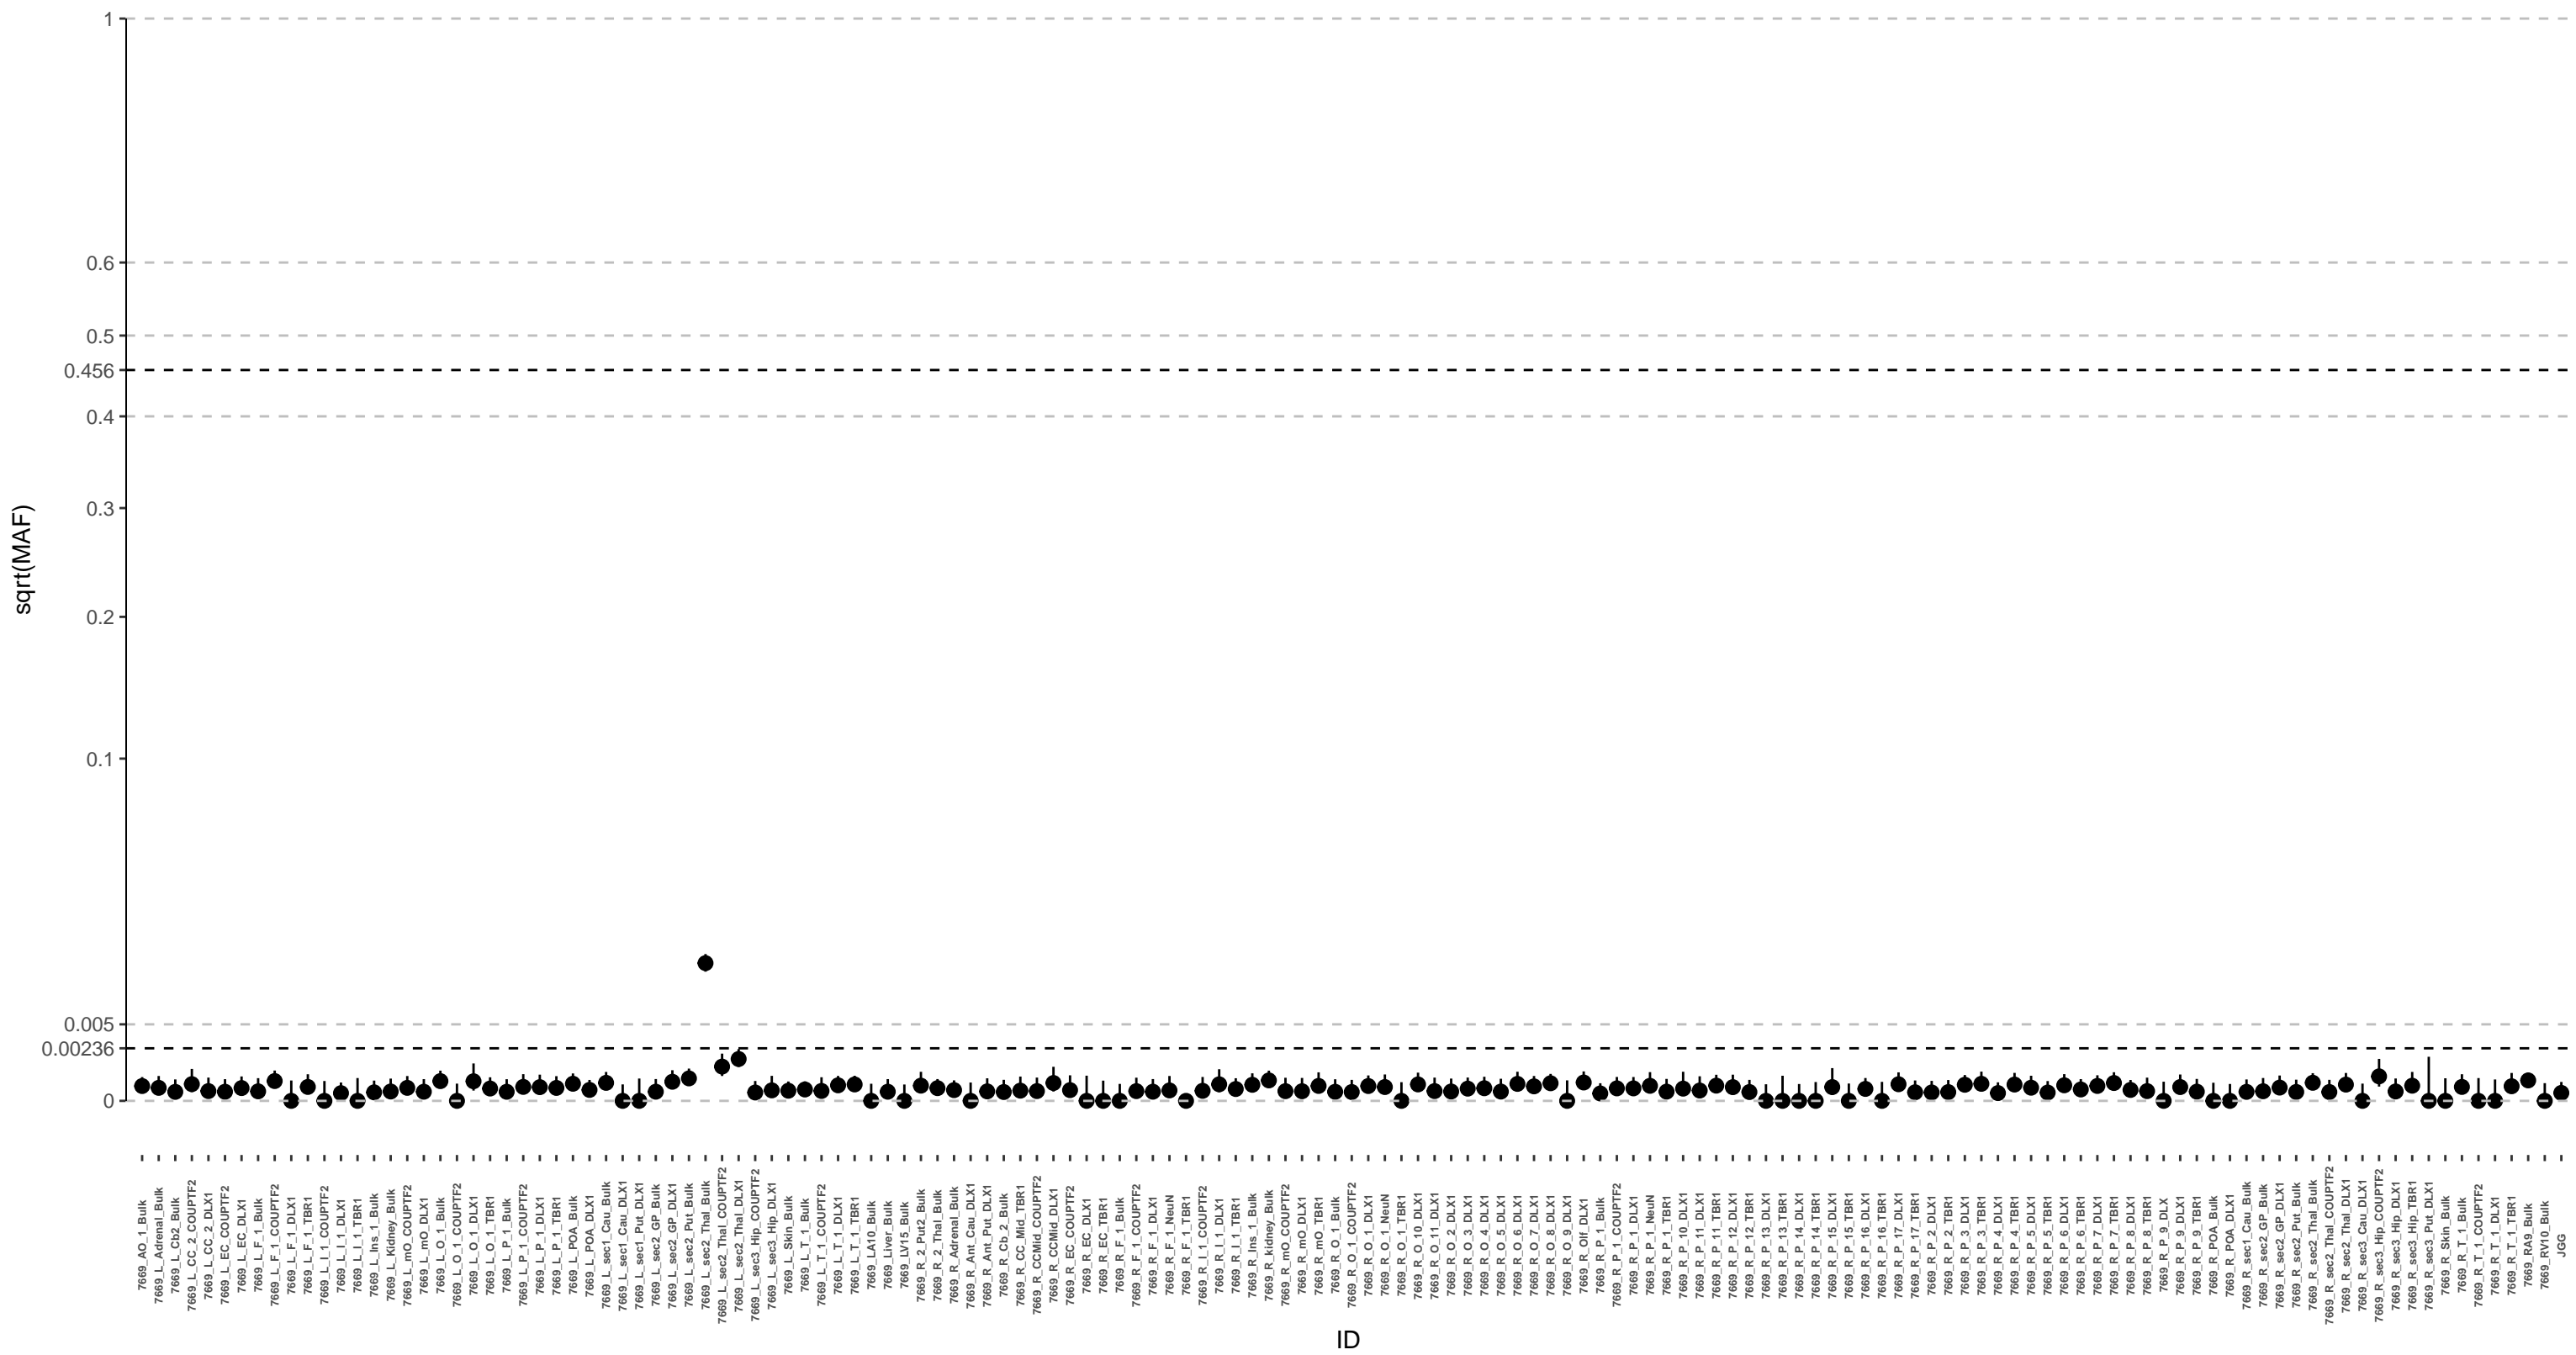

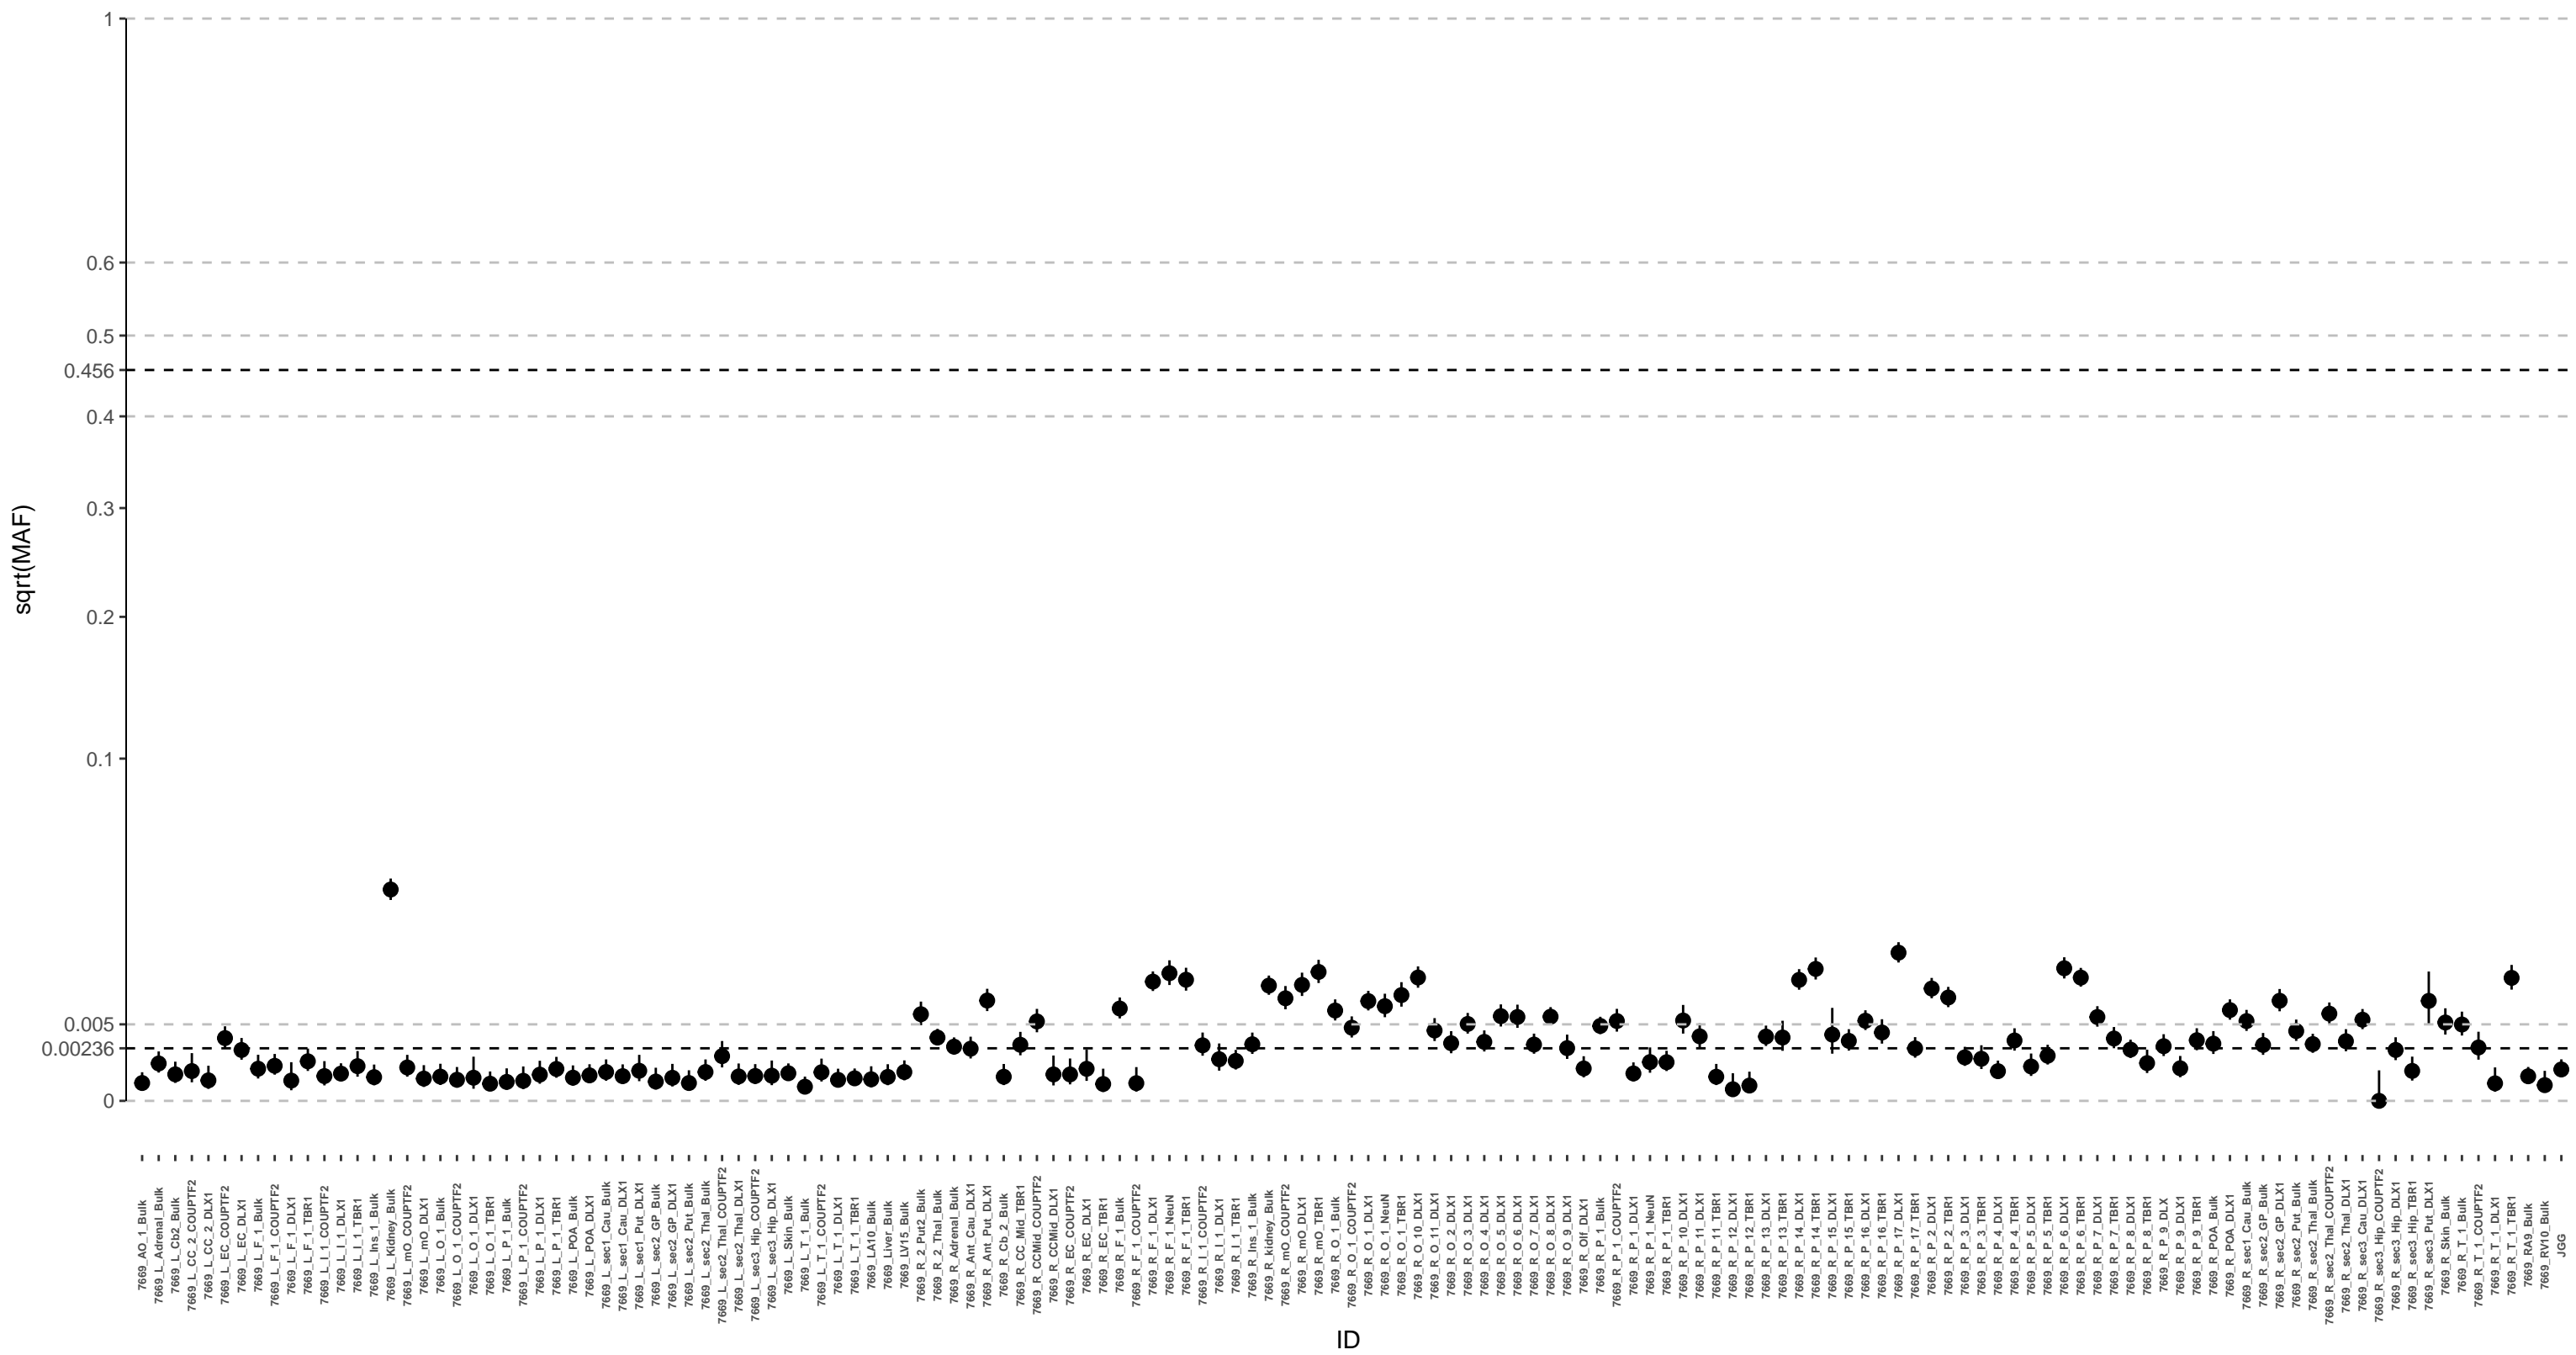

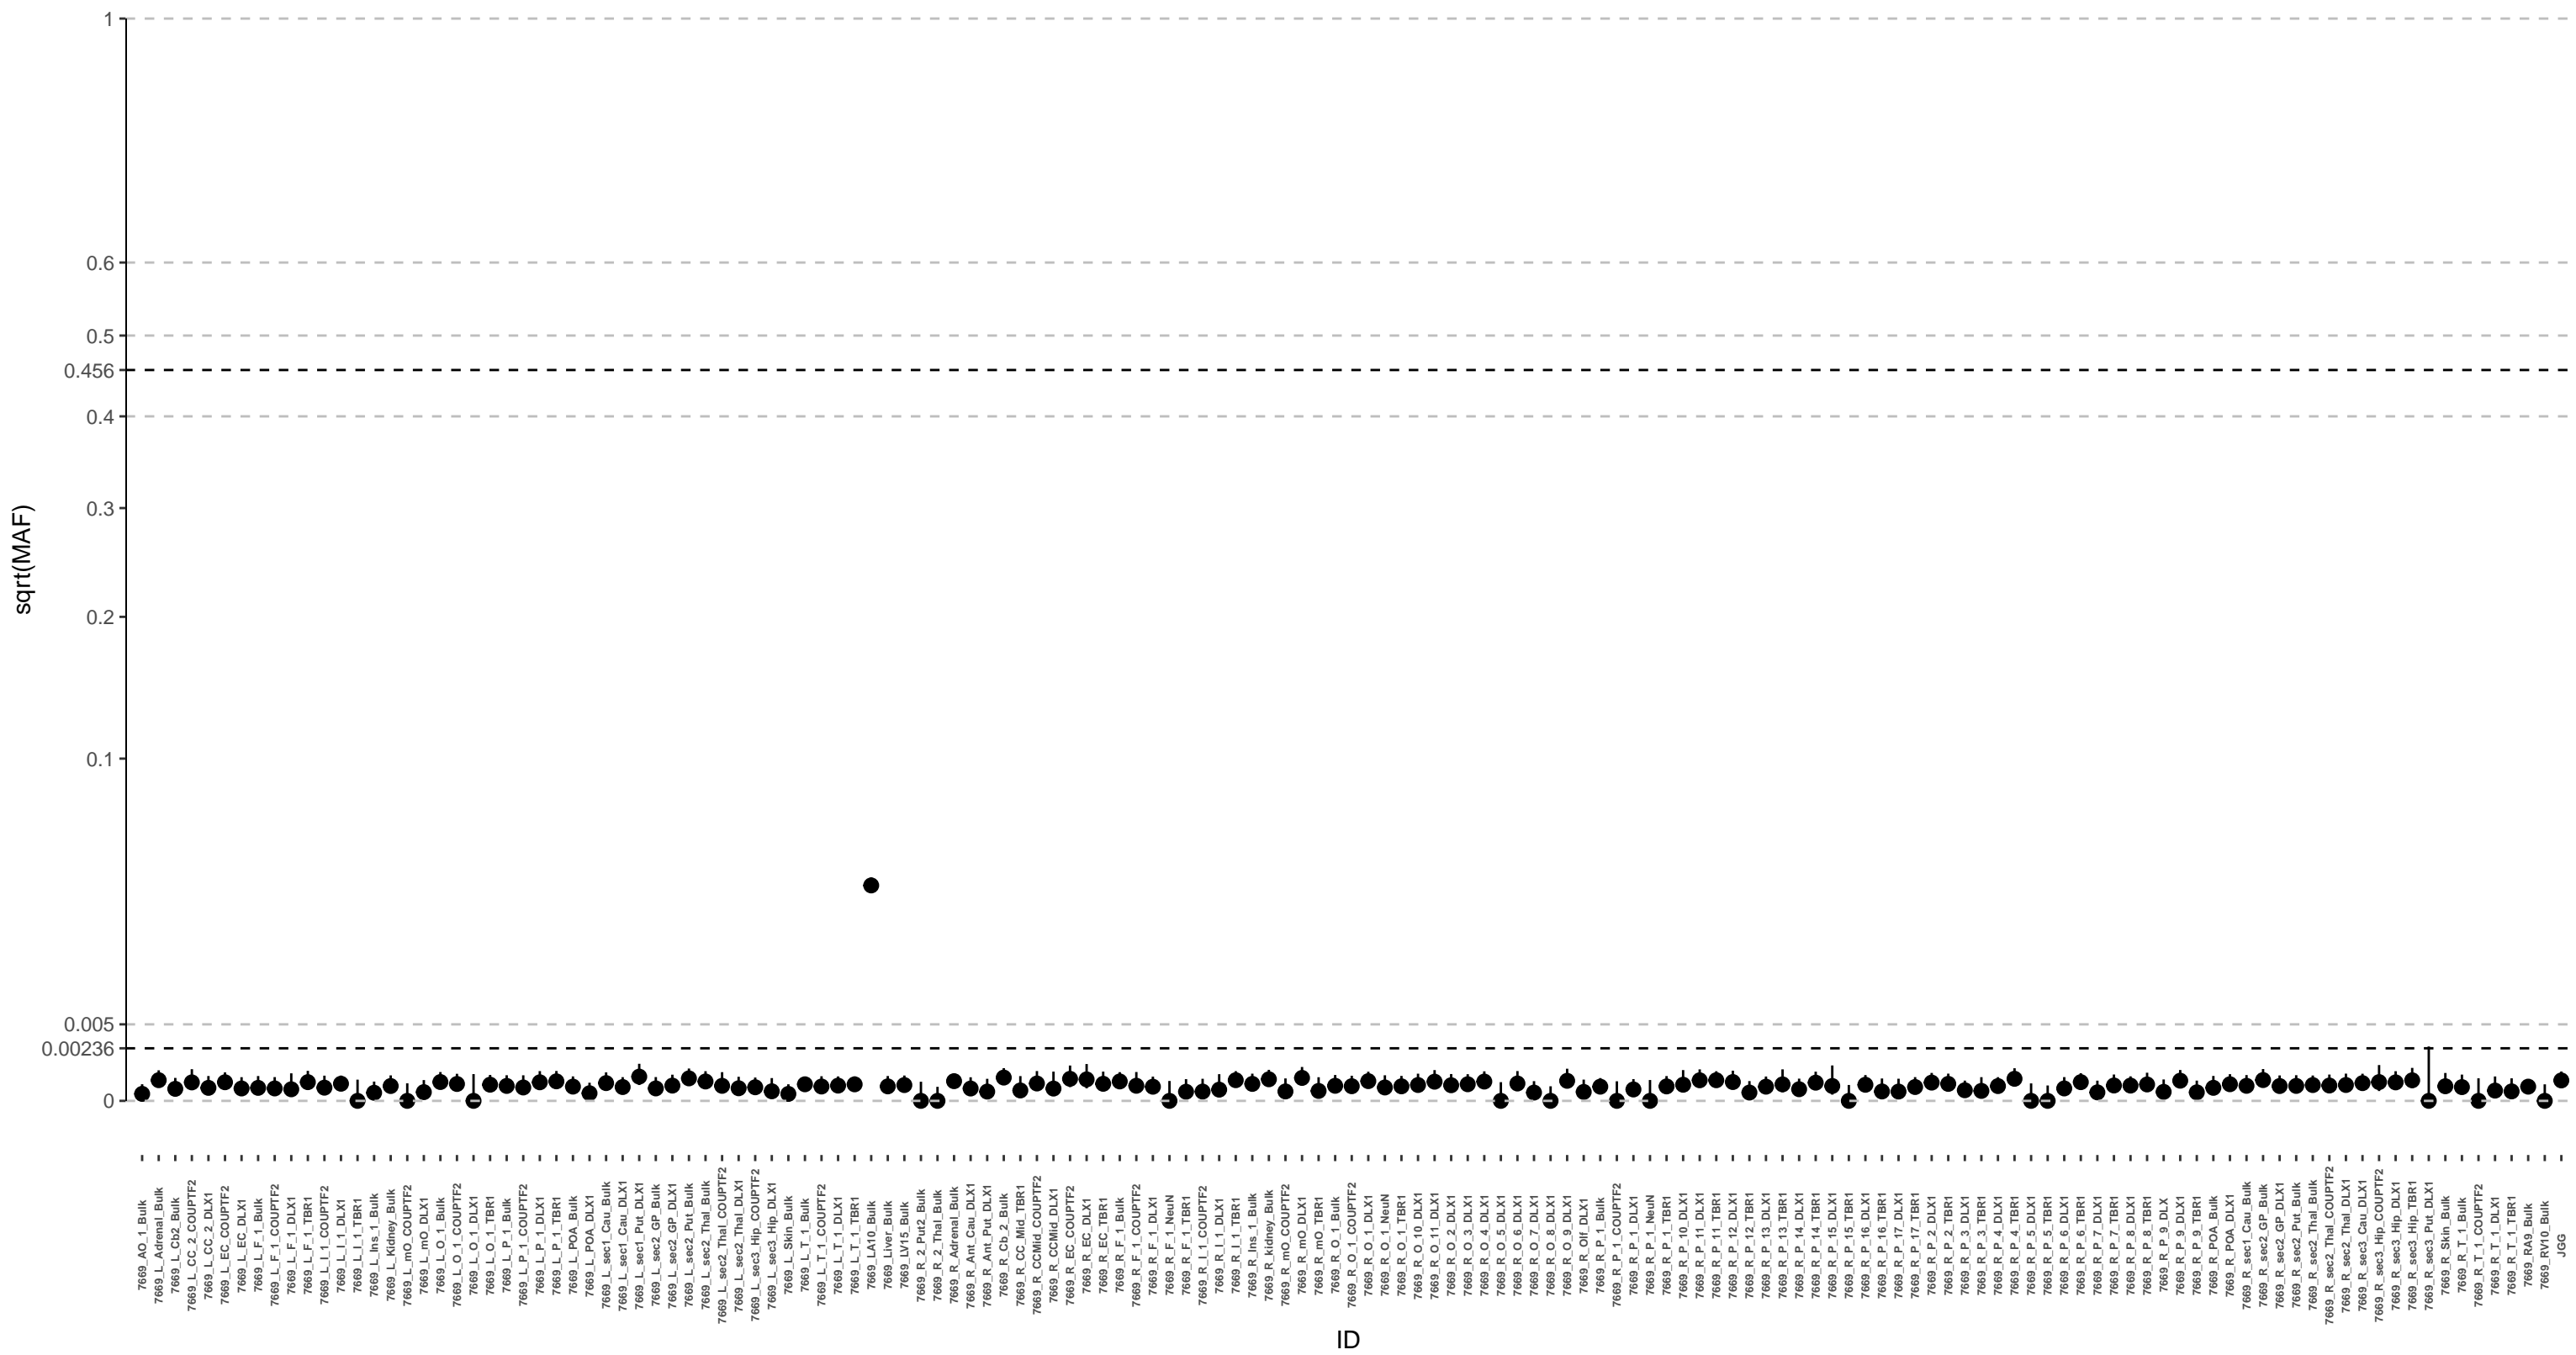

ID05 7-98311420-C-T

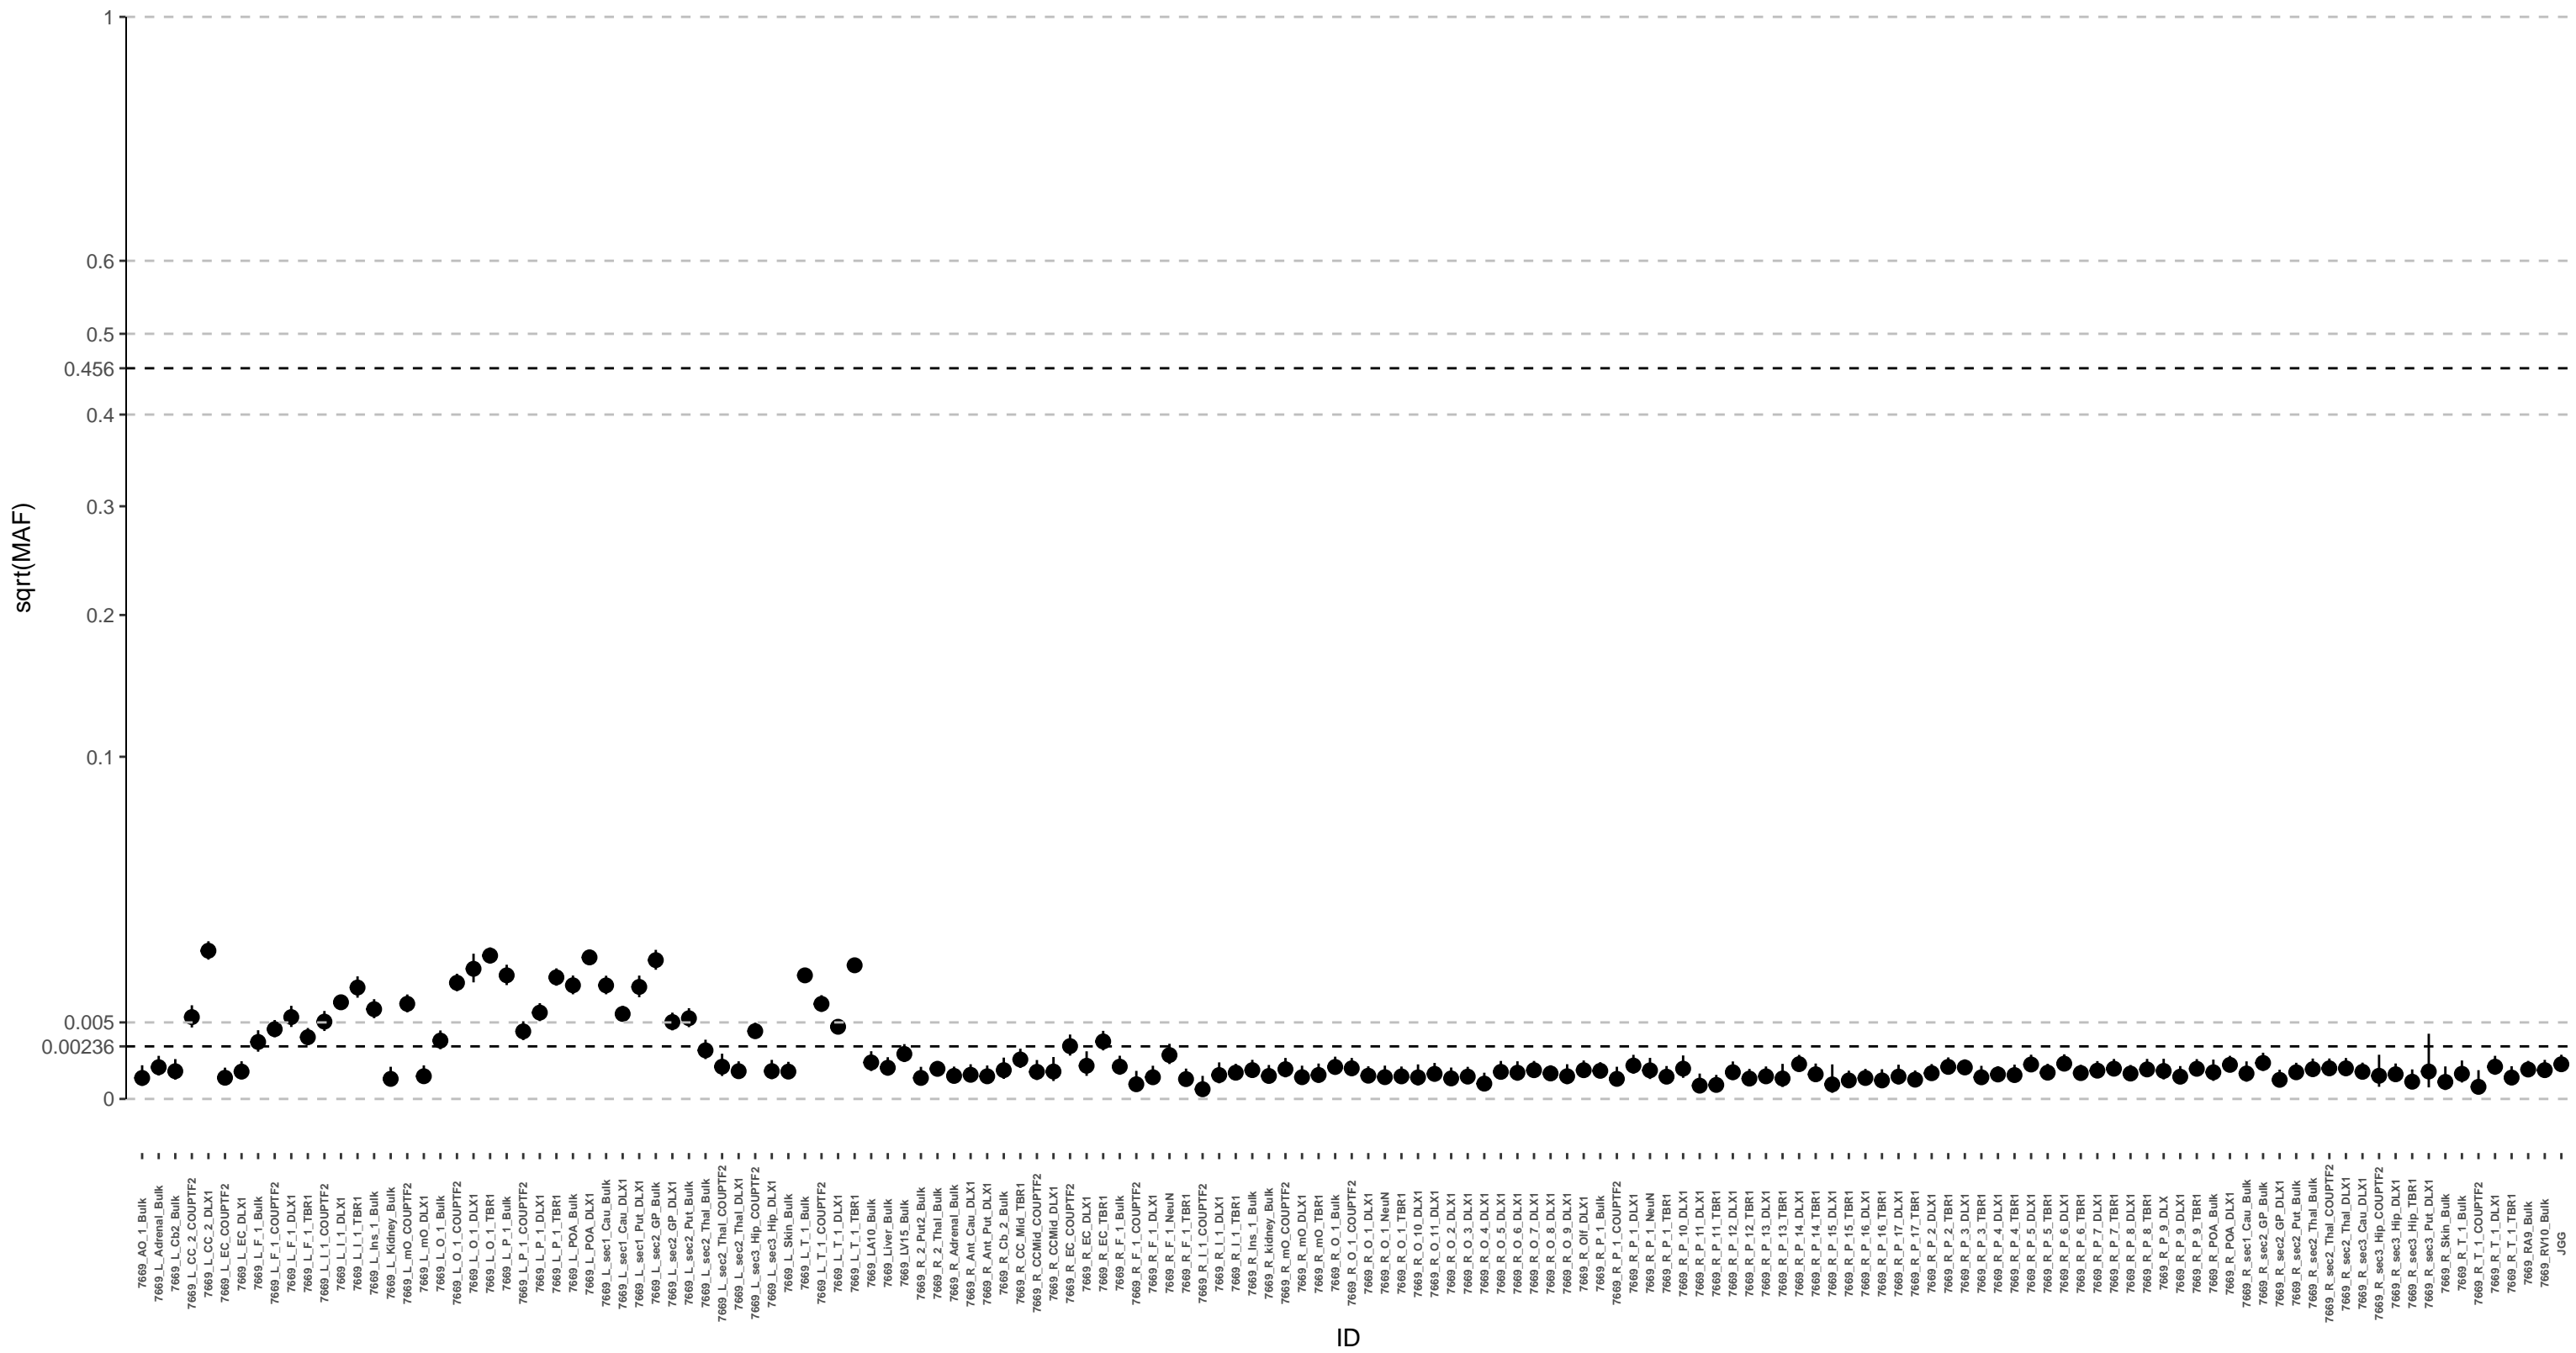

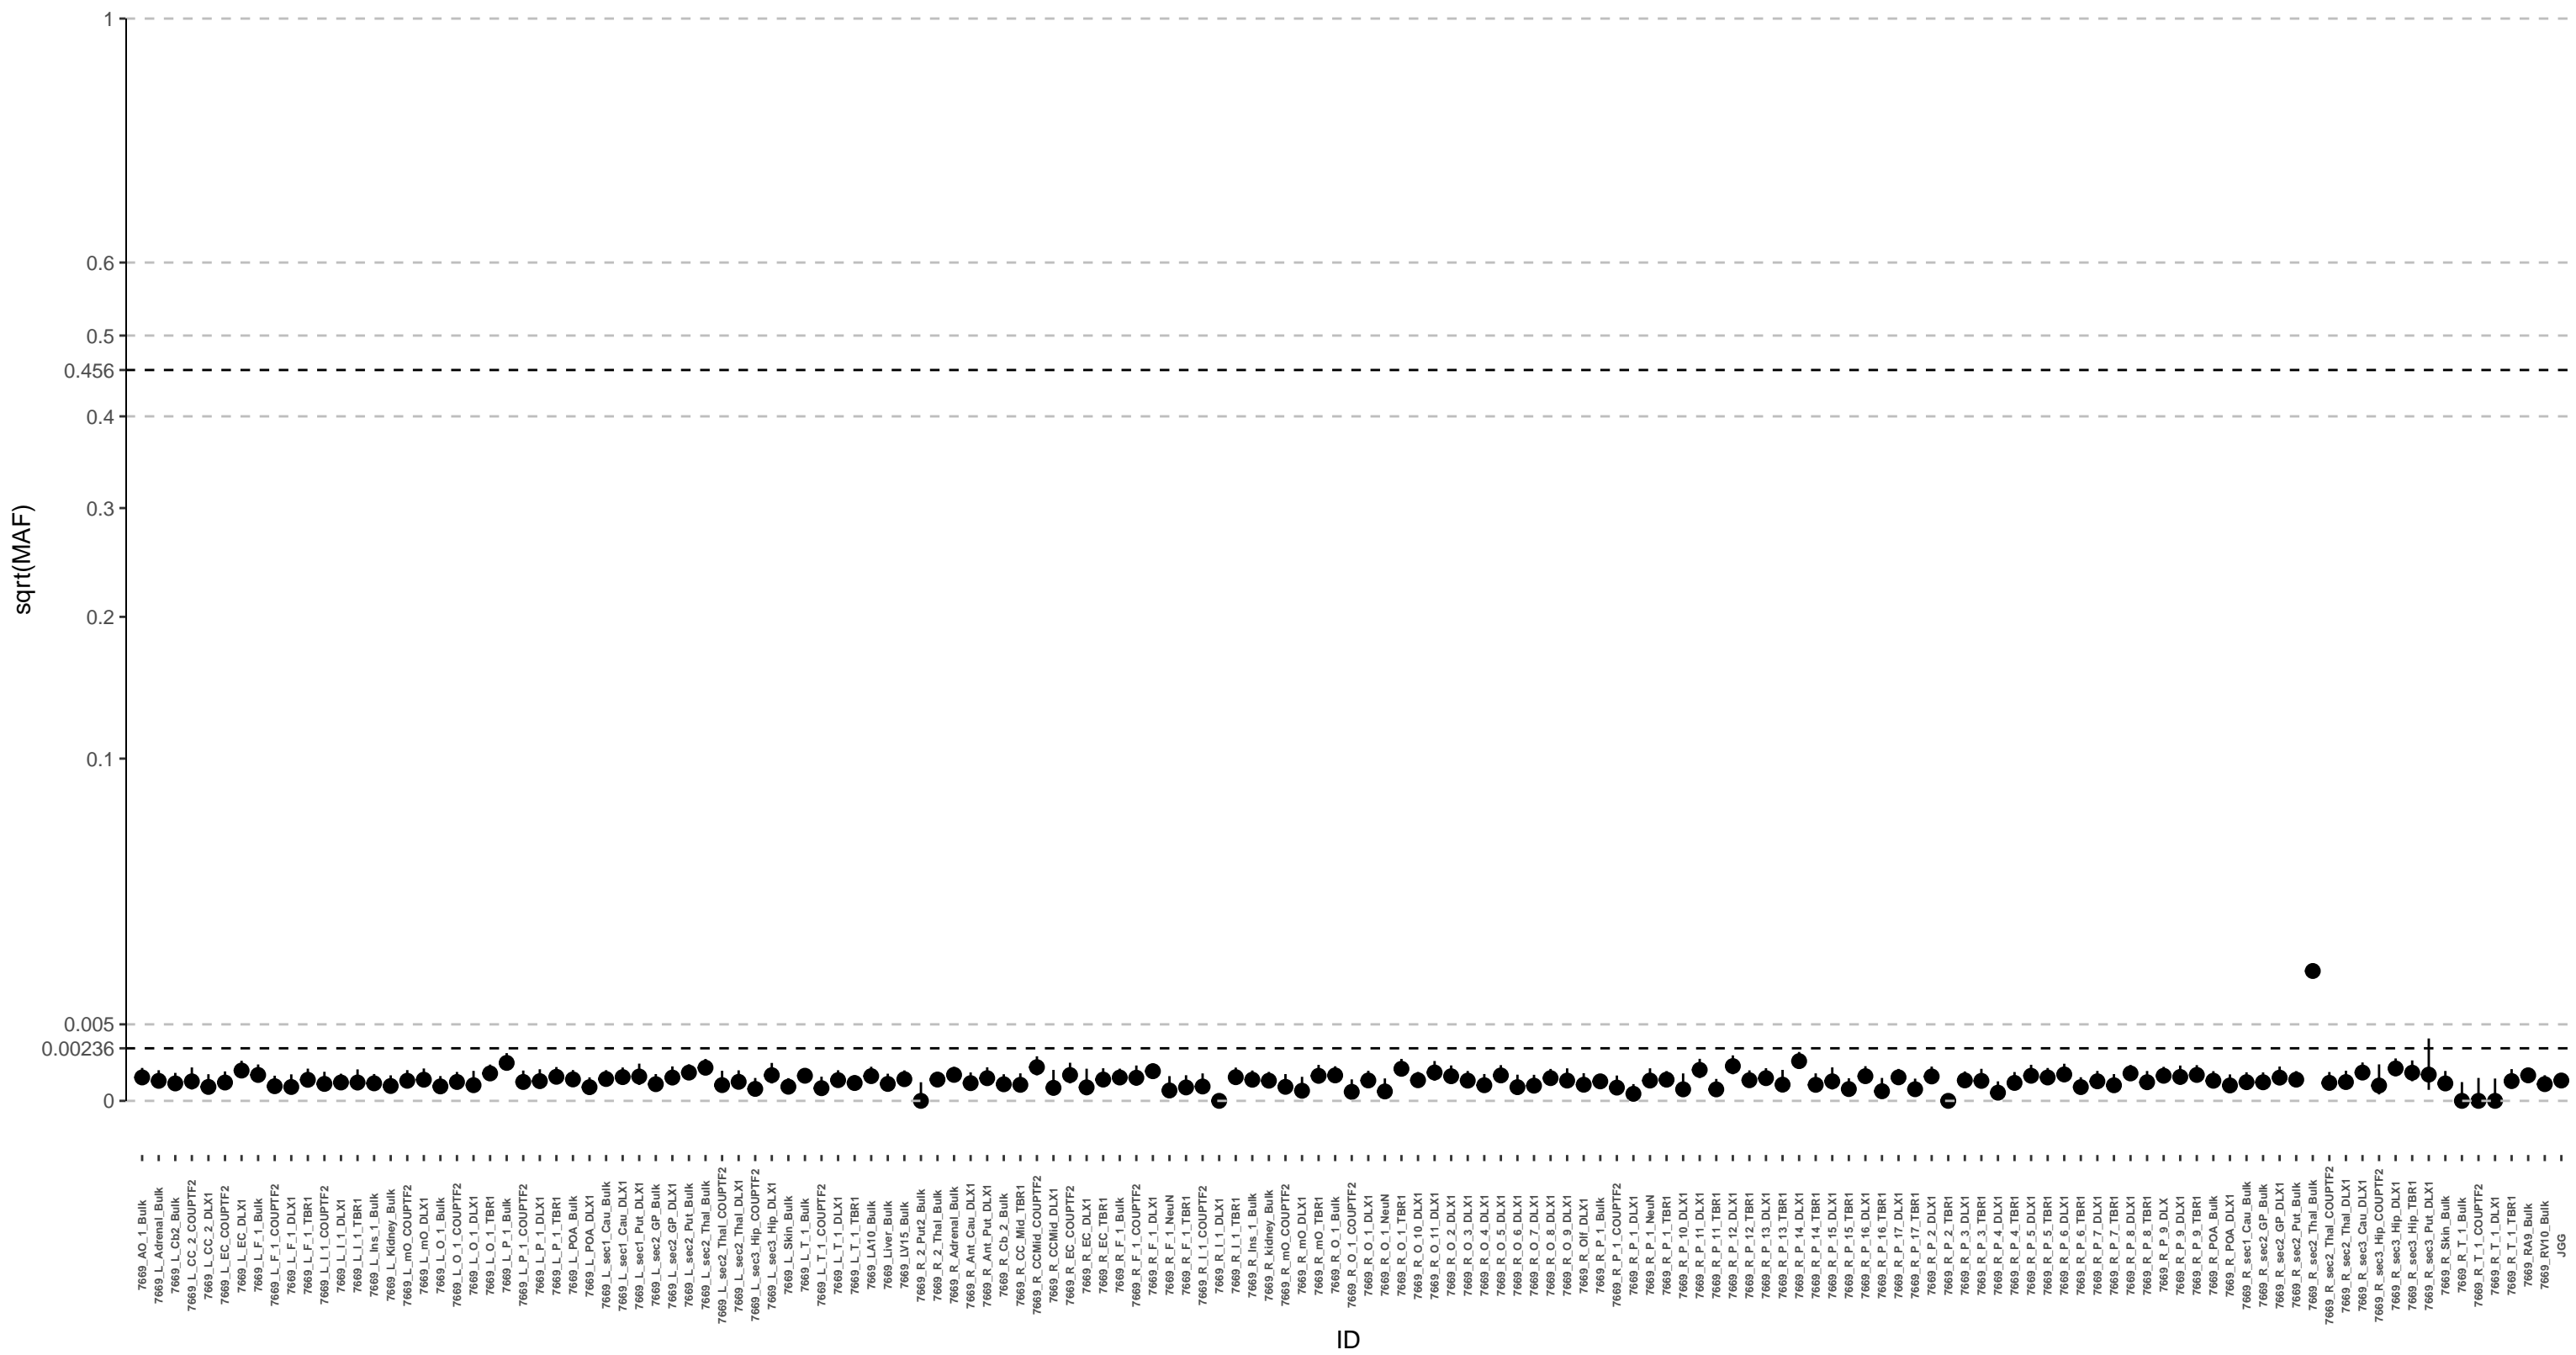



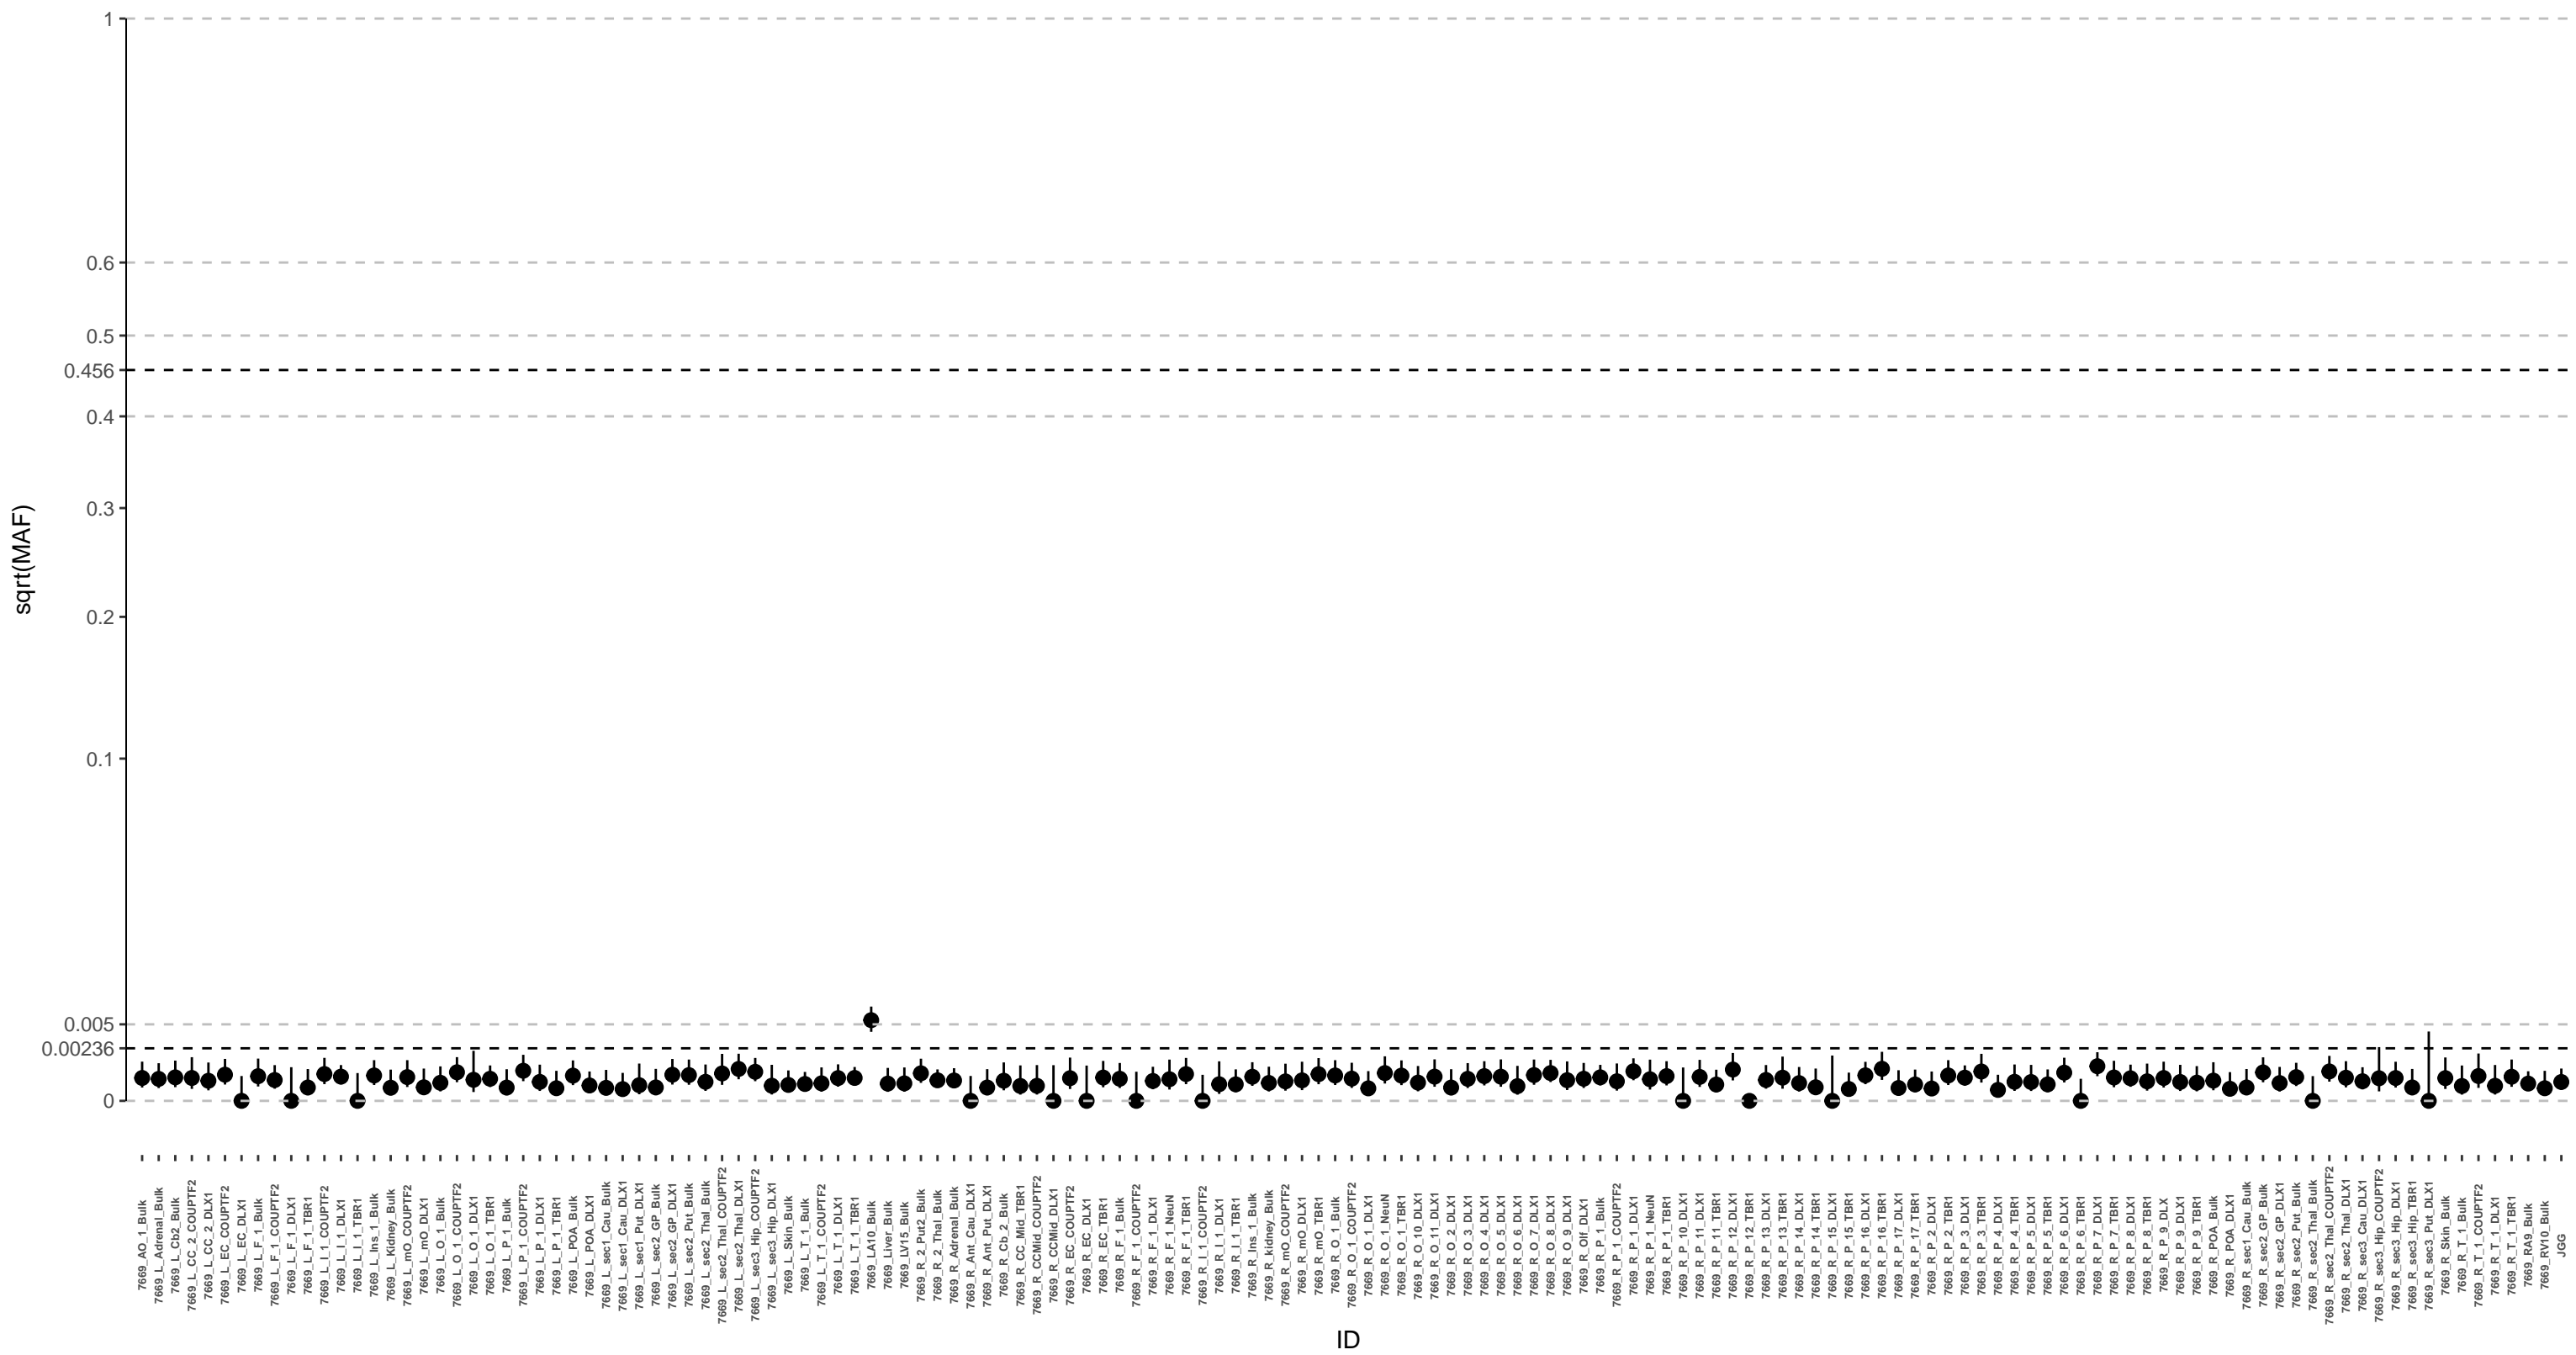

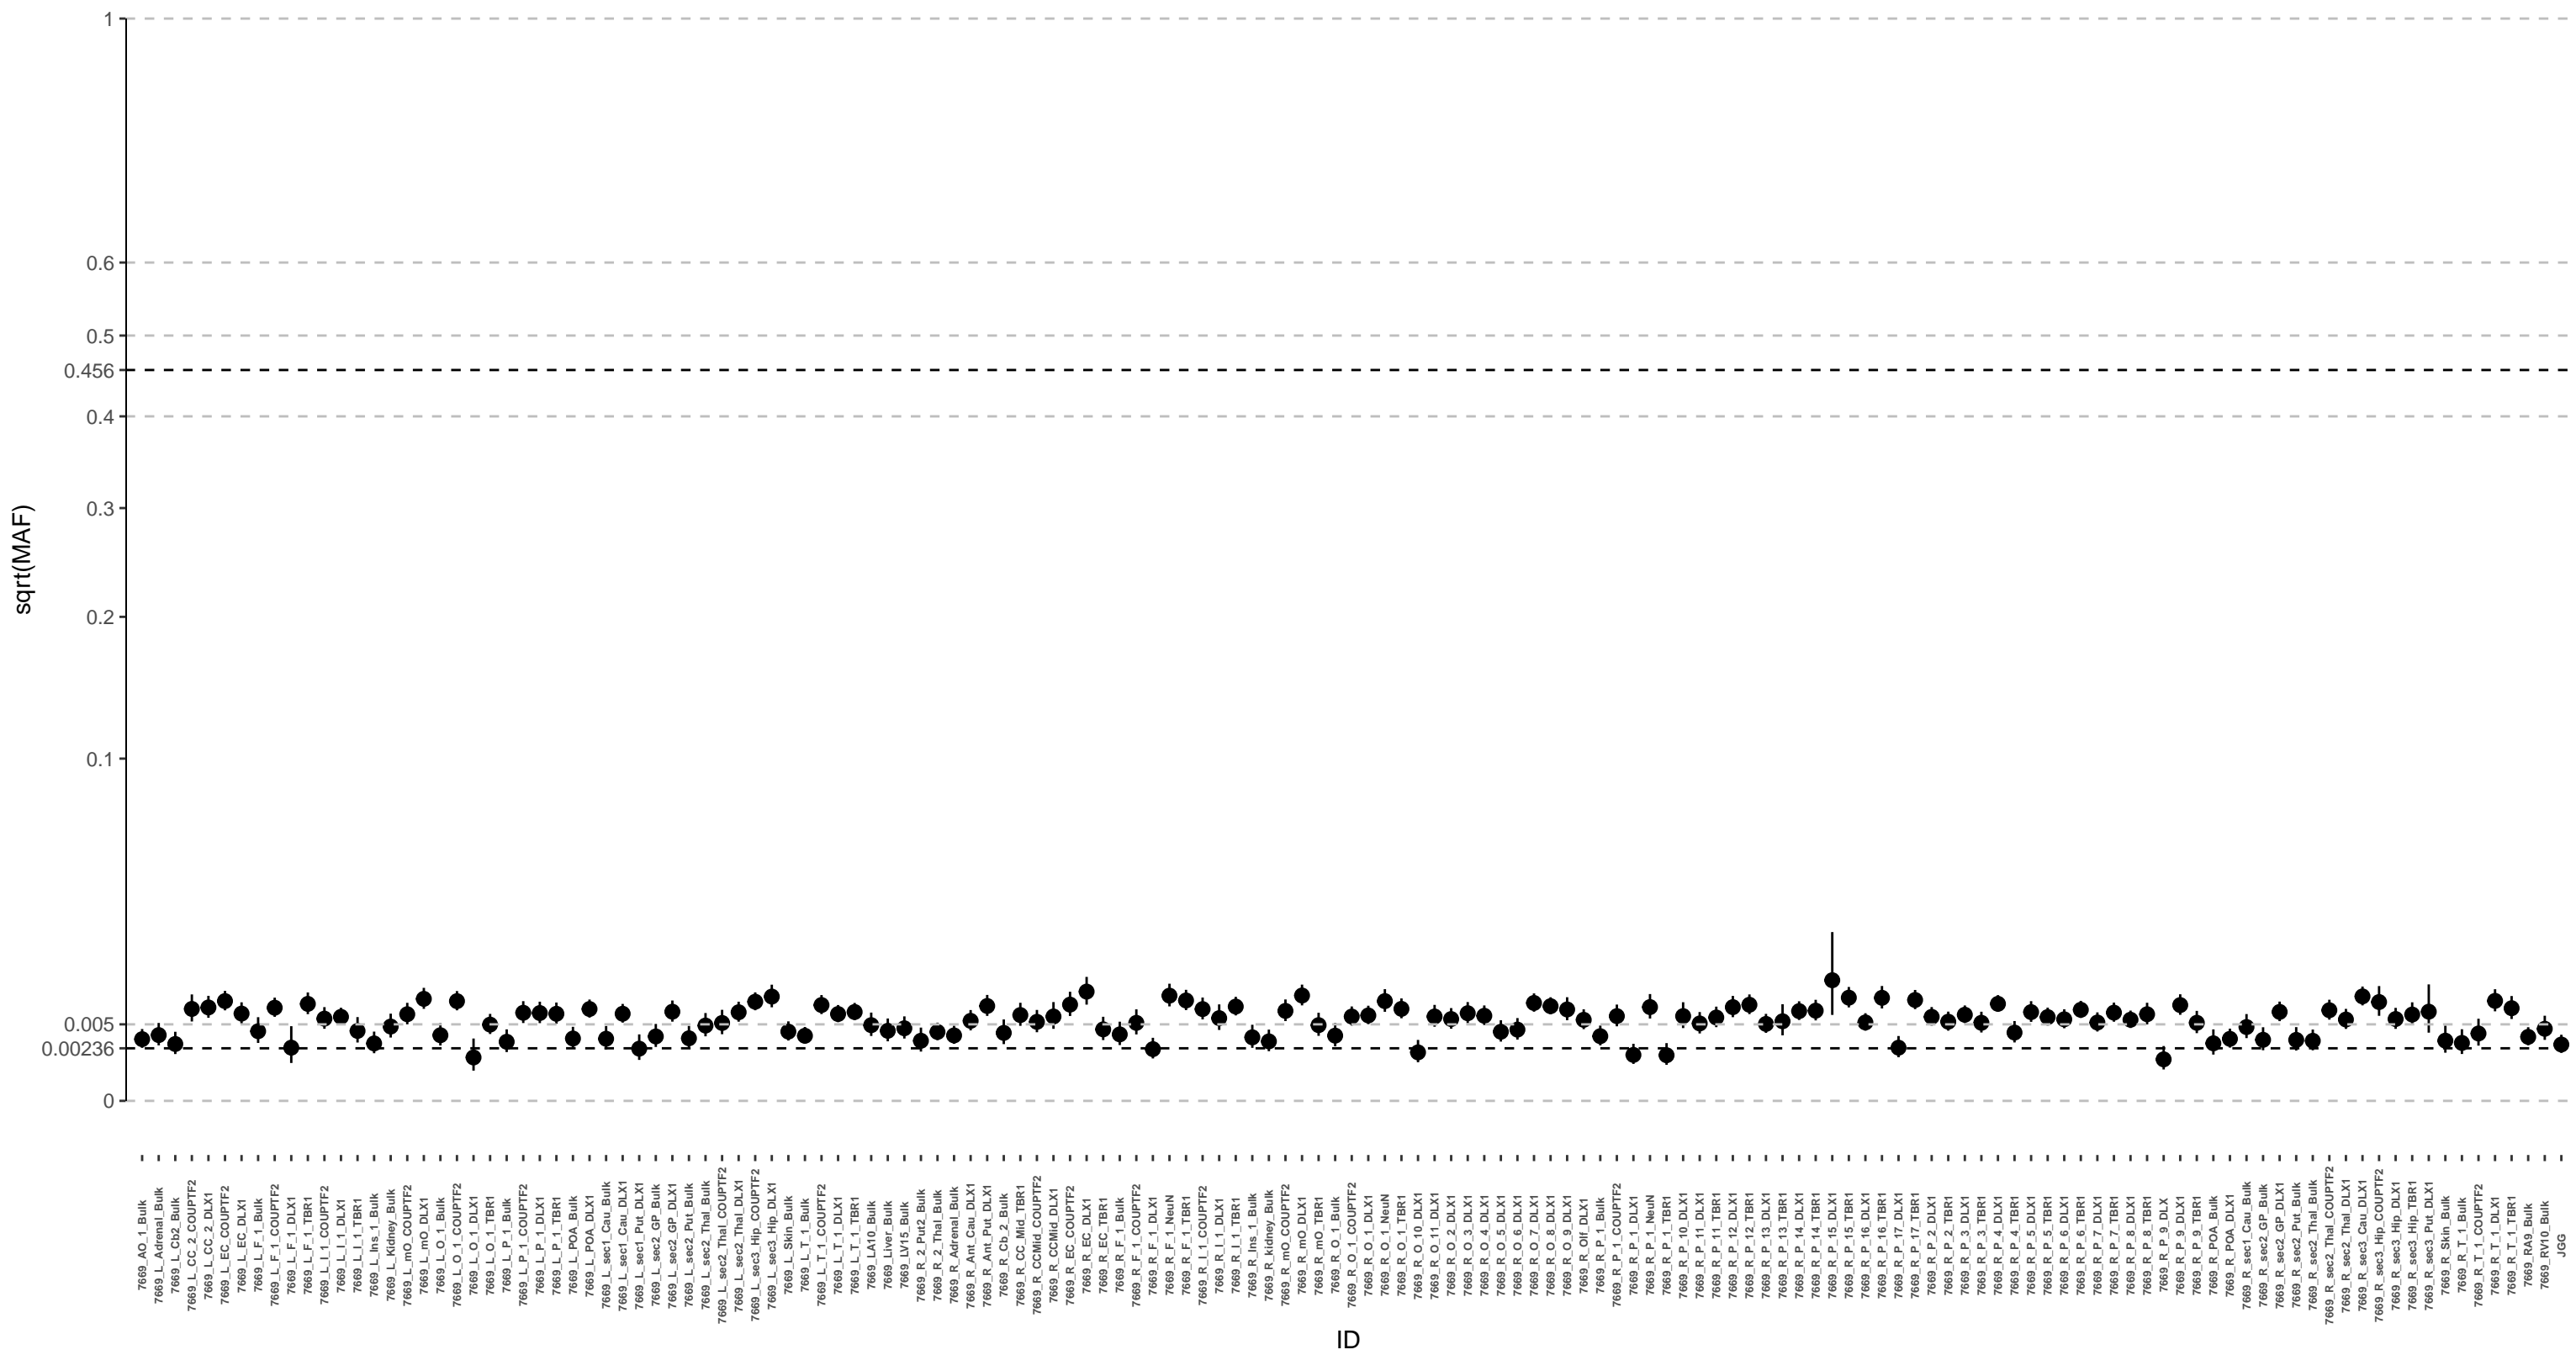

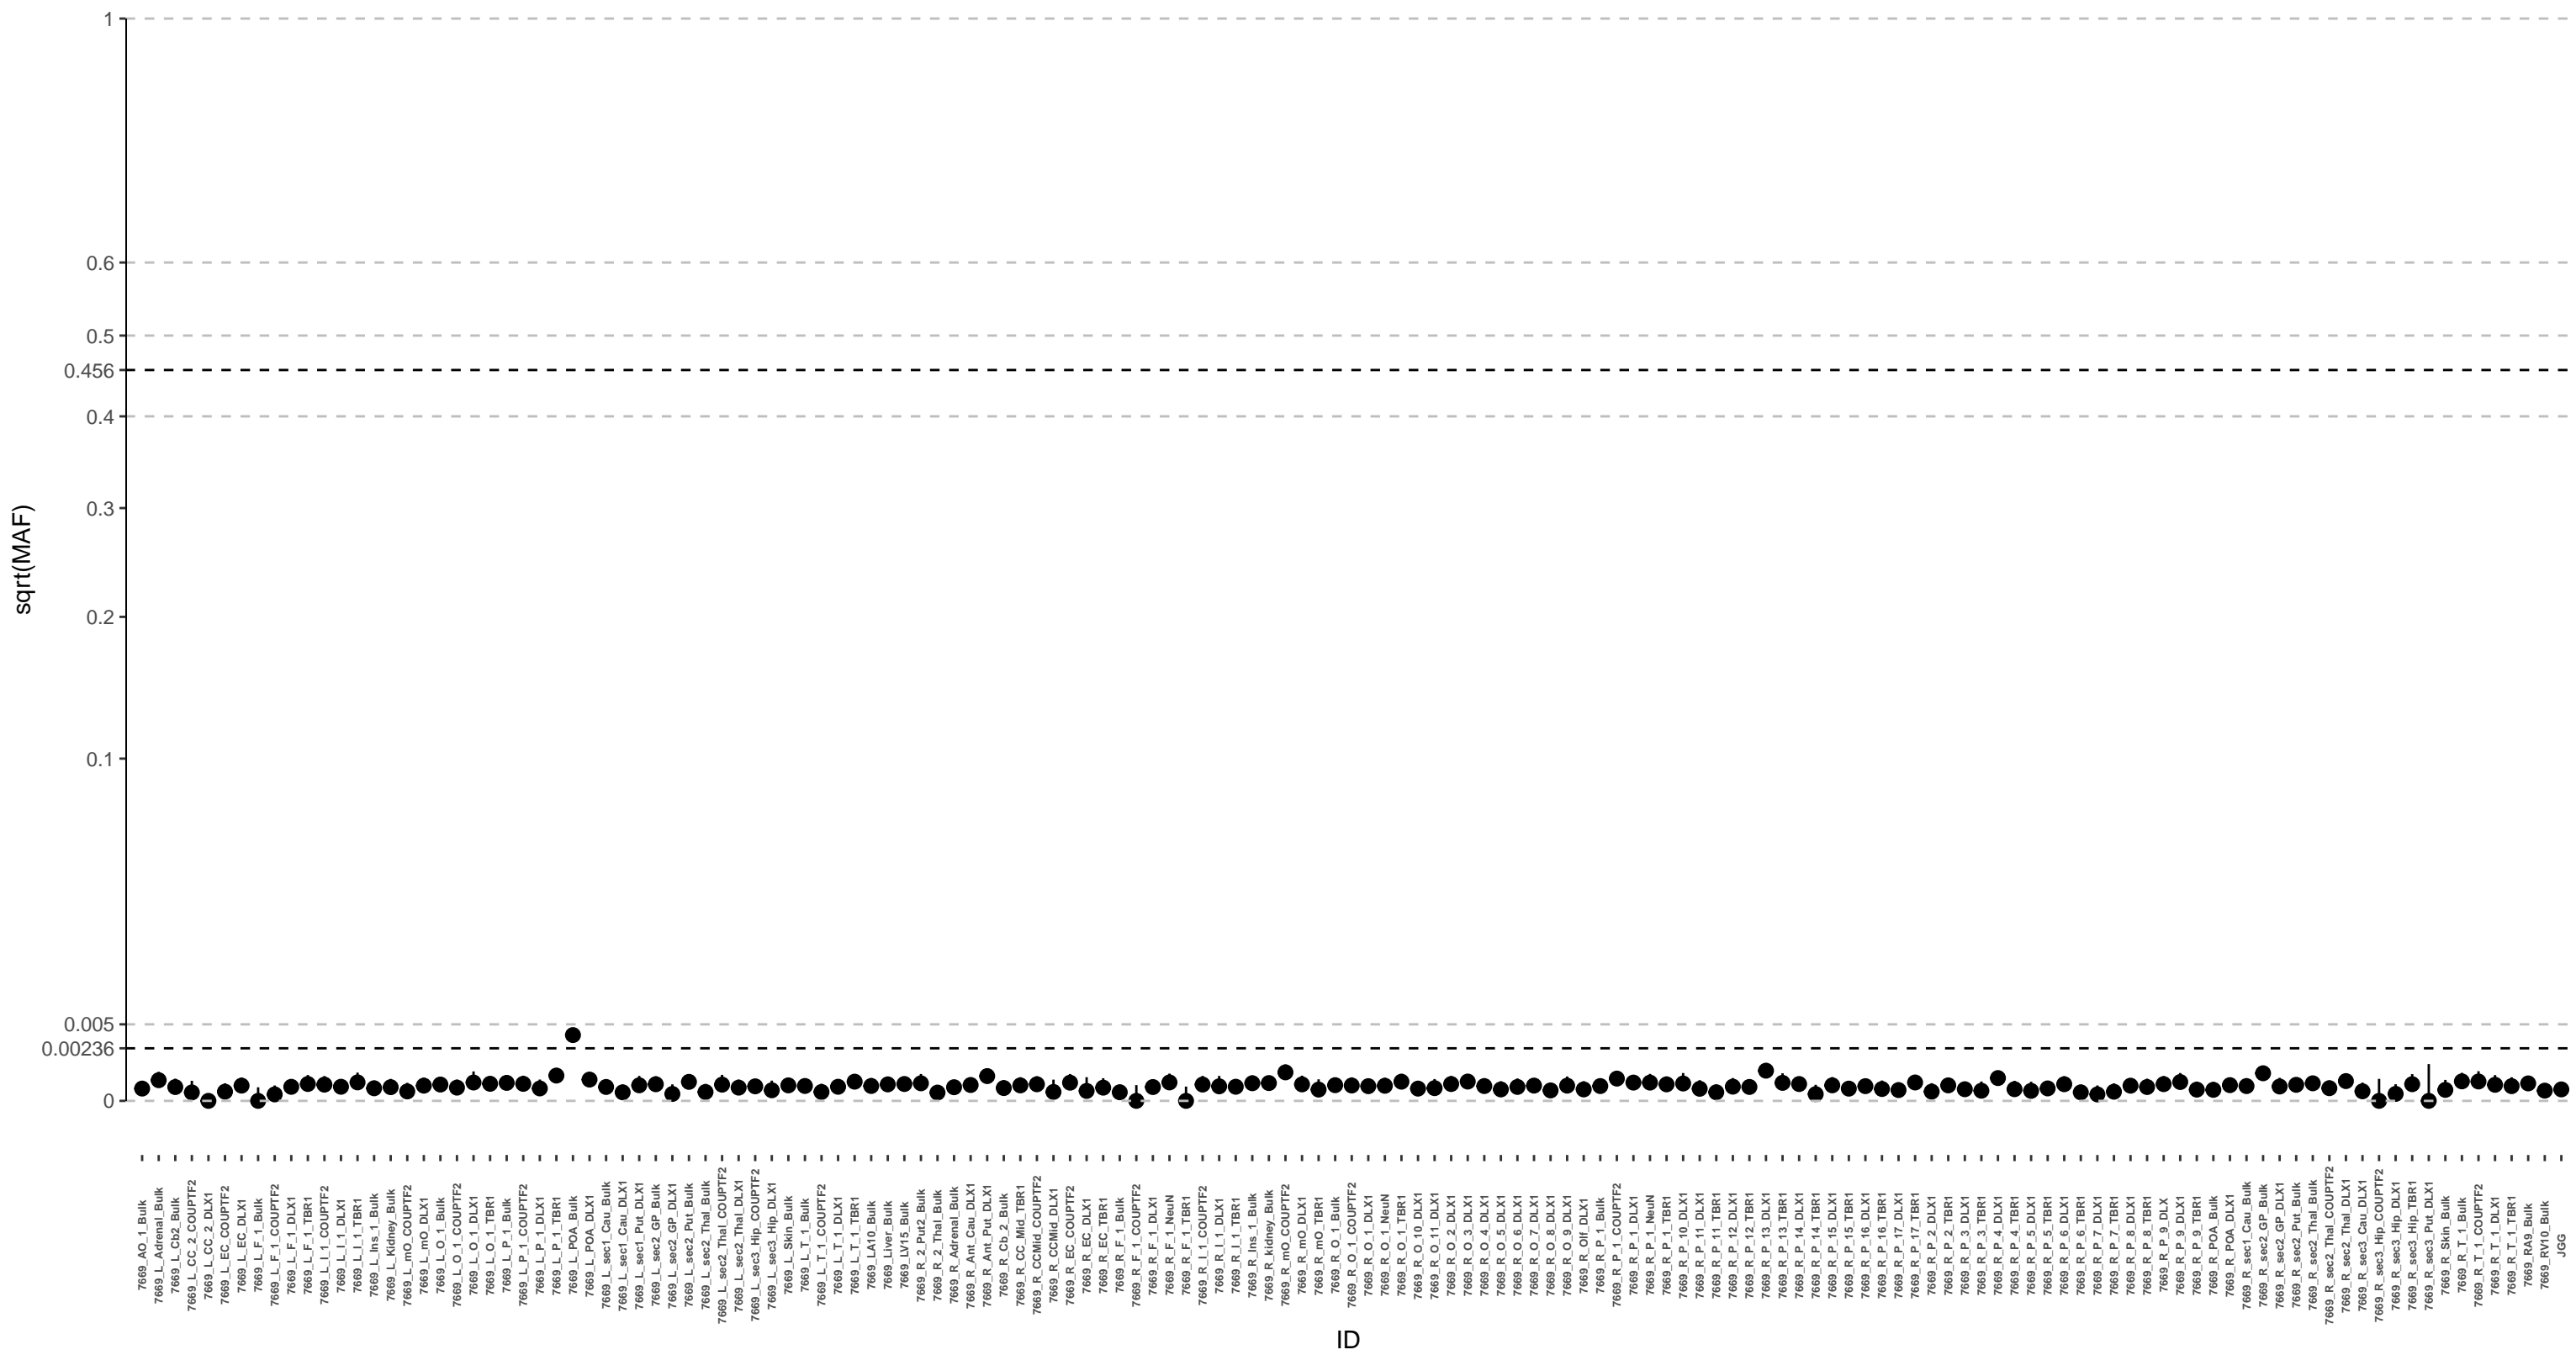

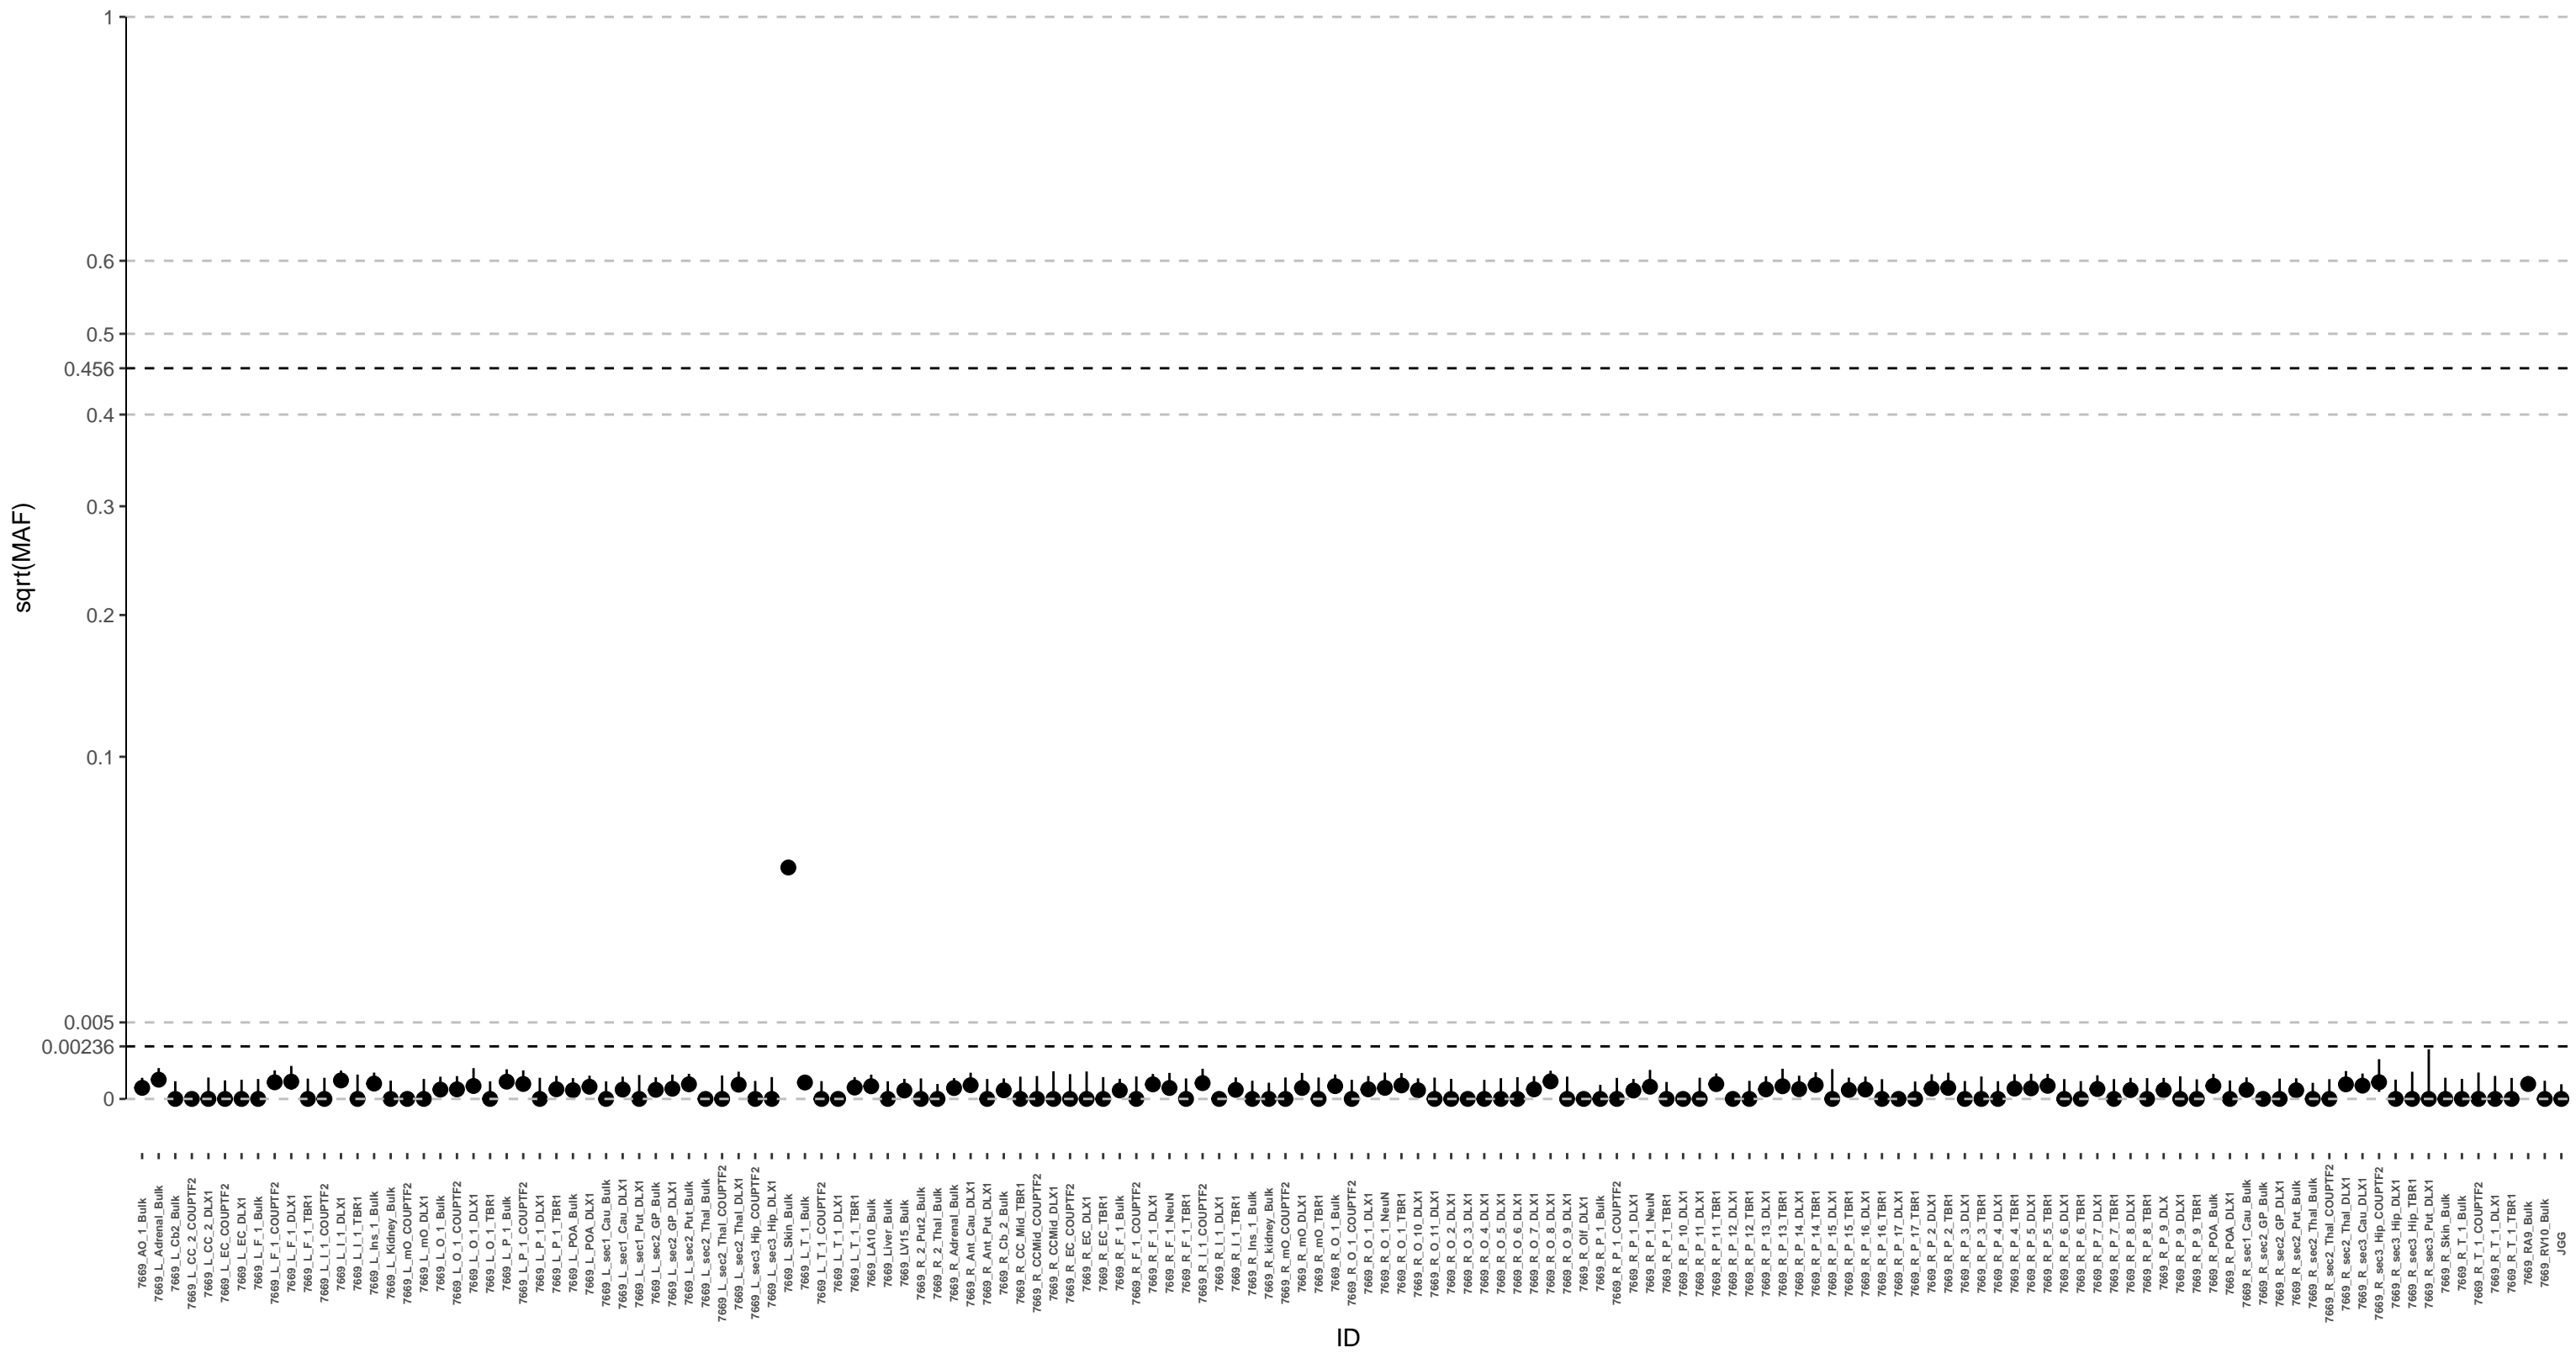

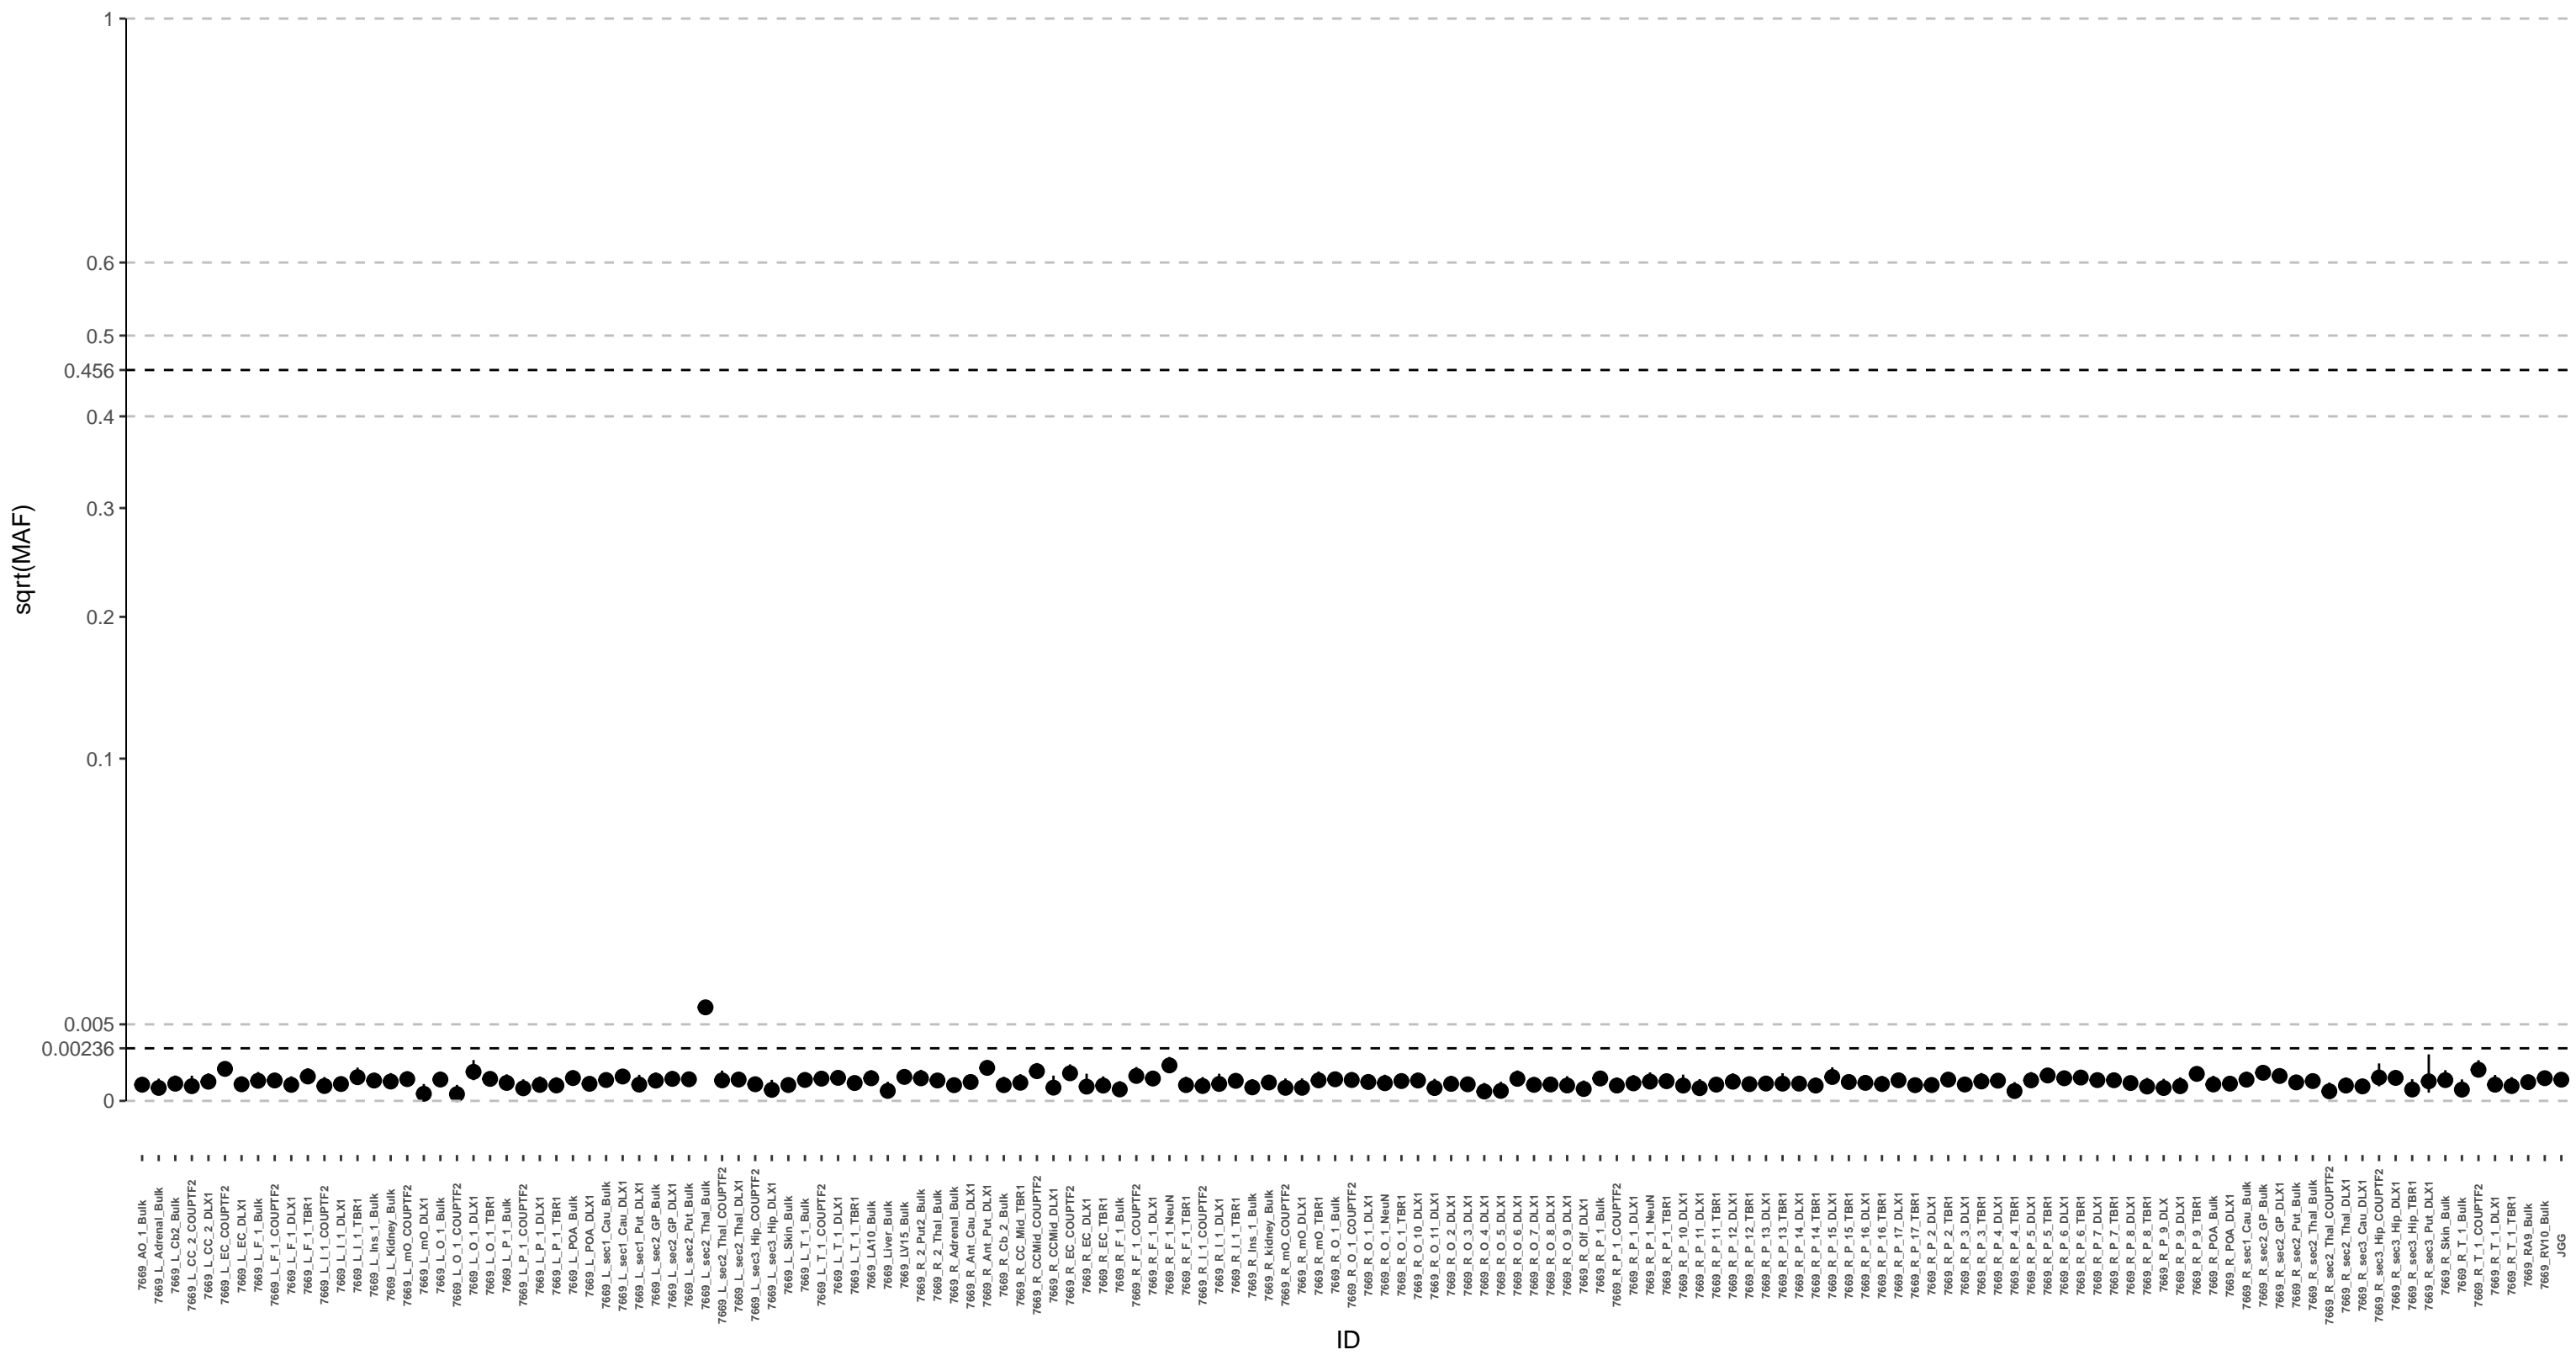

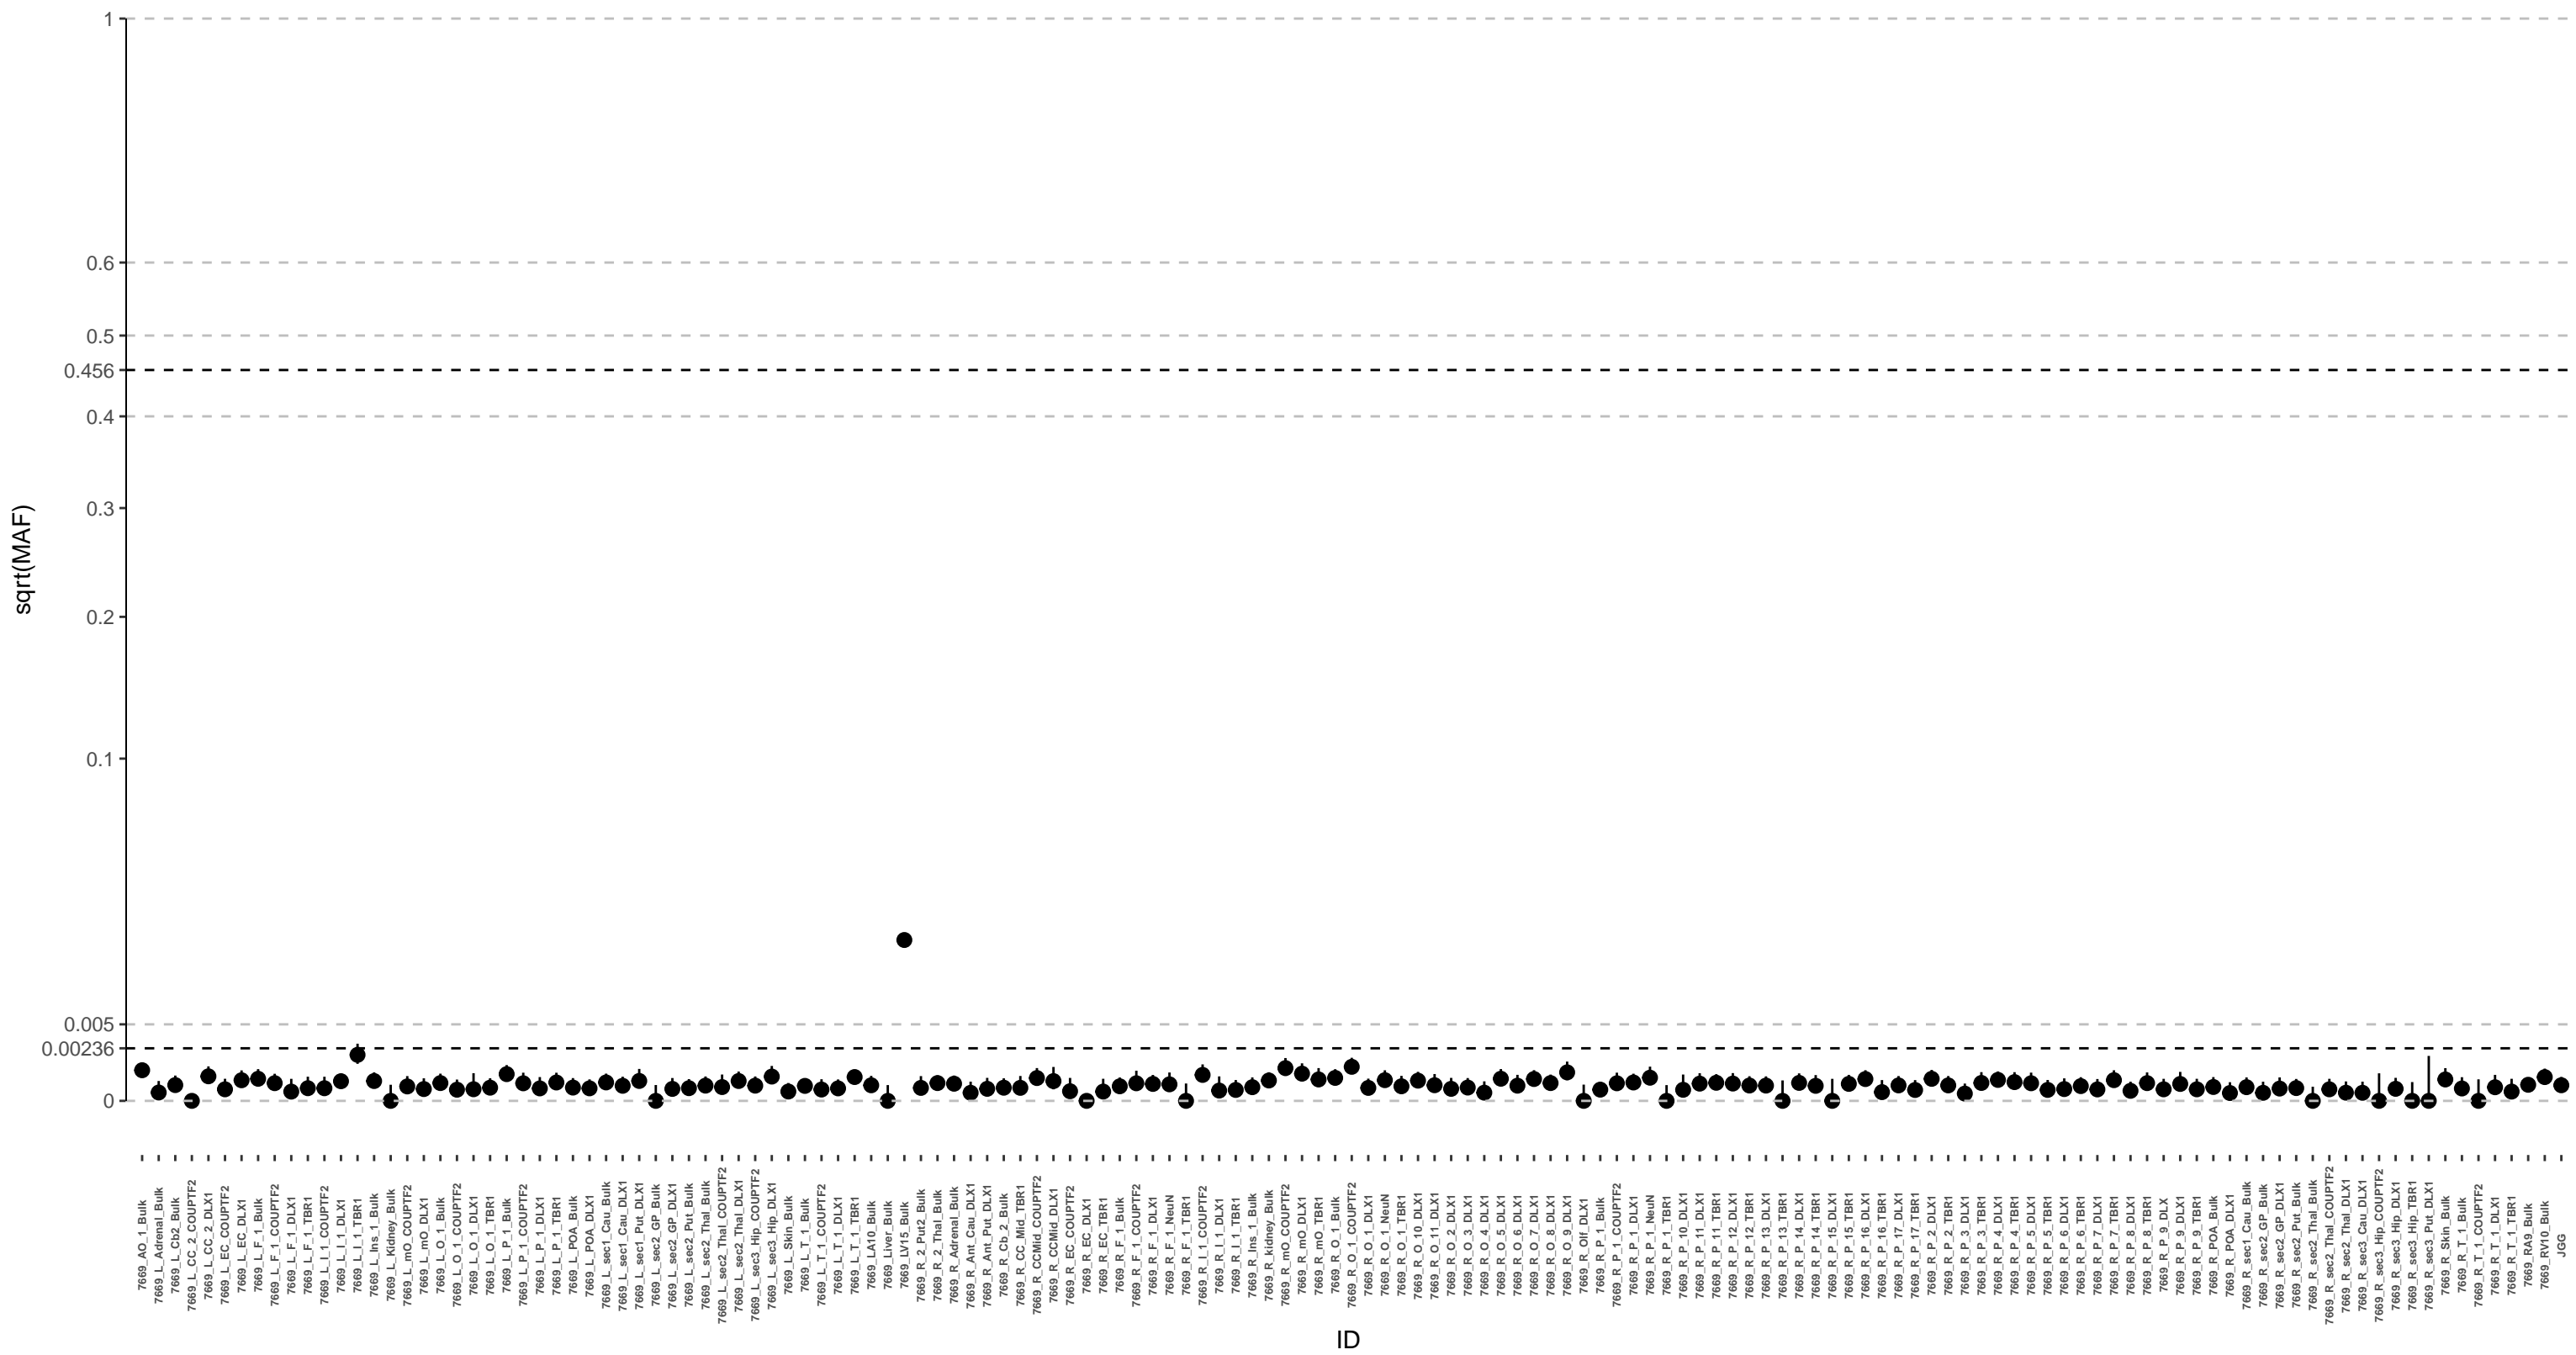

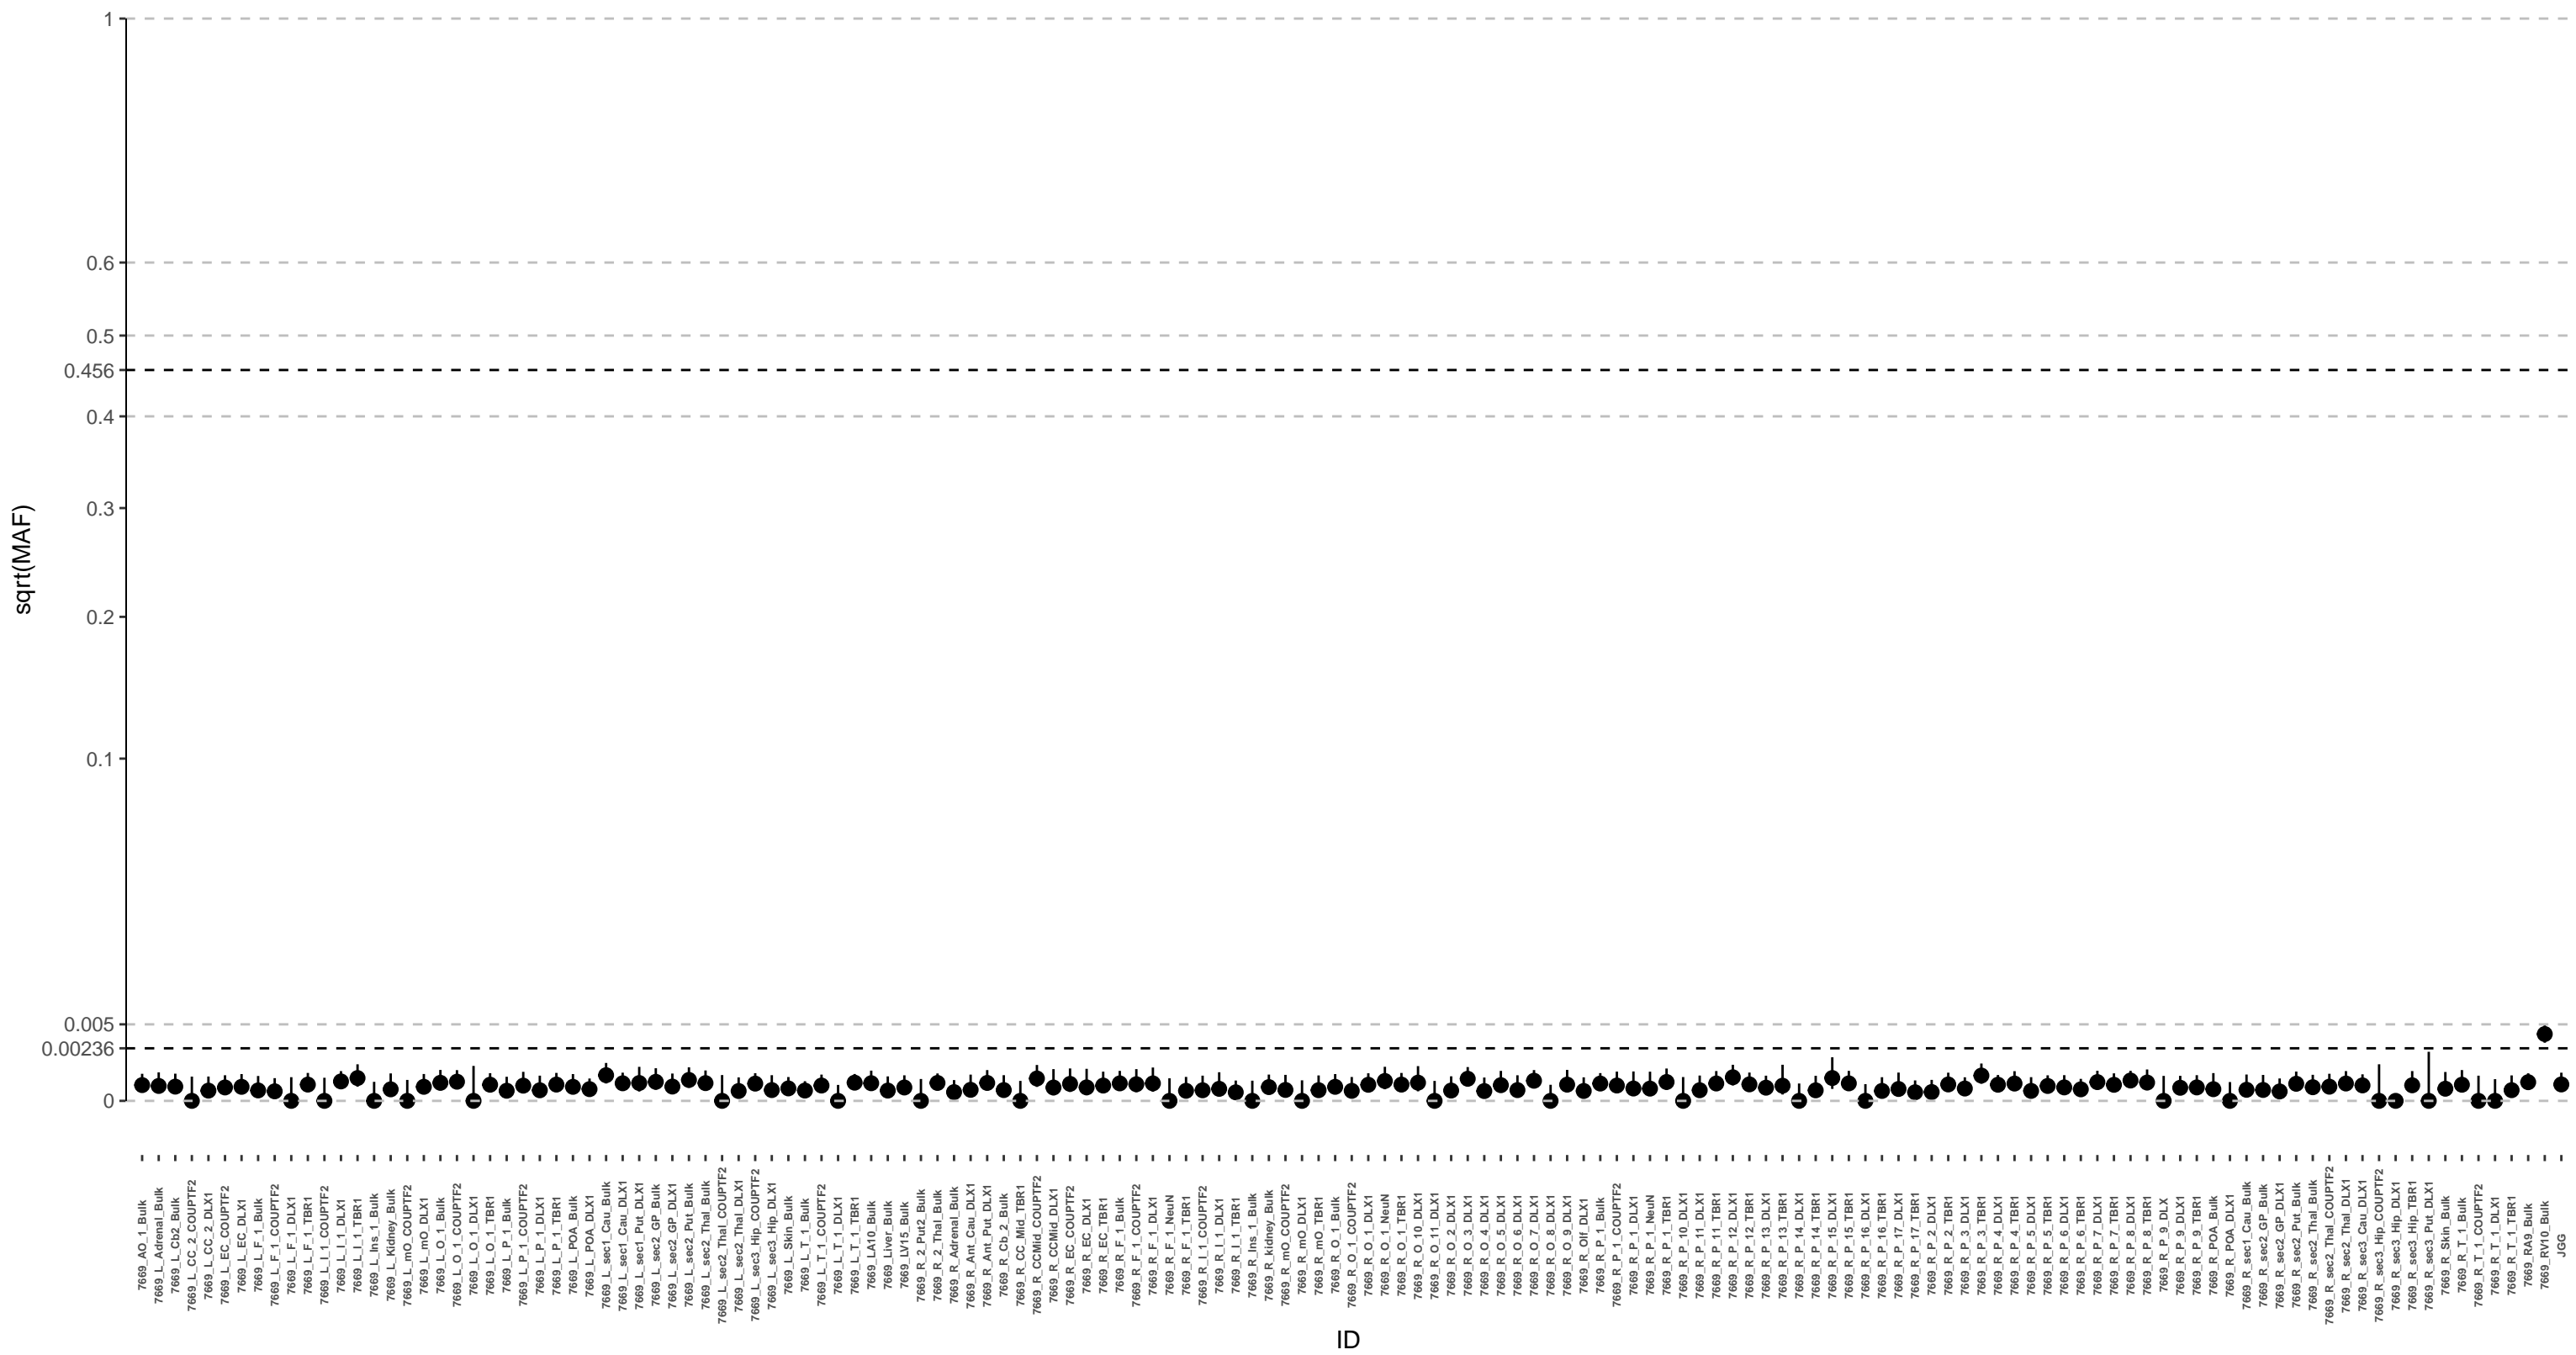

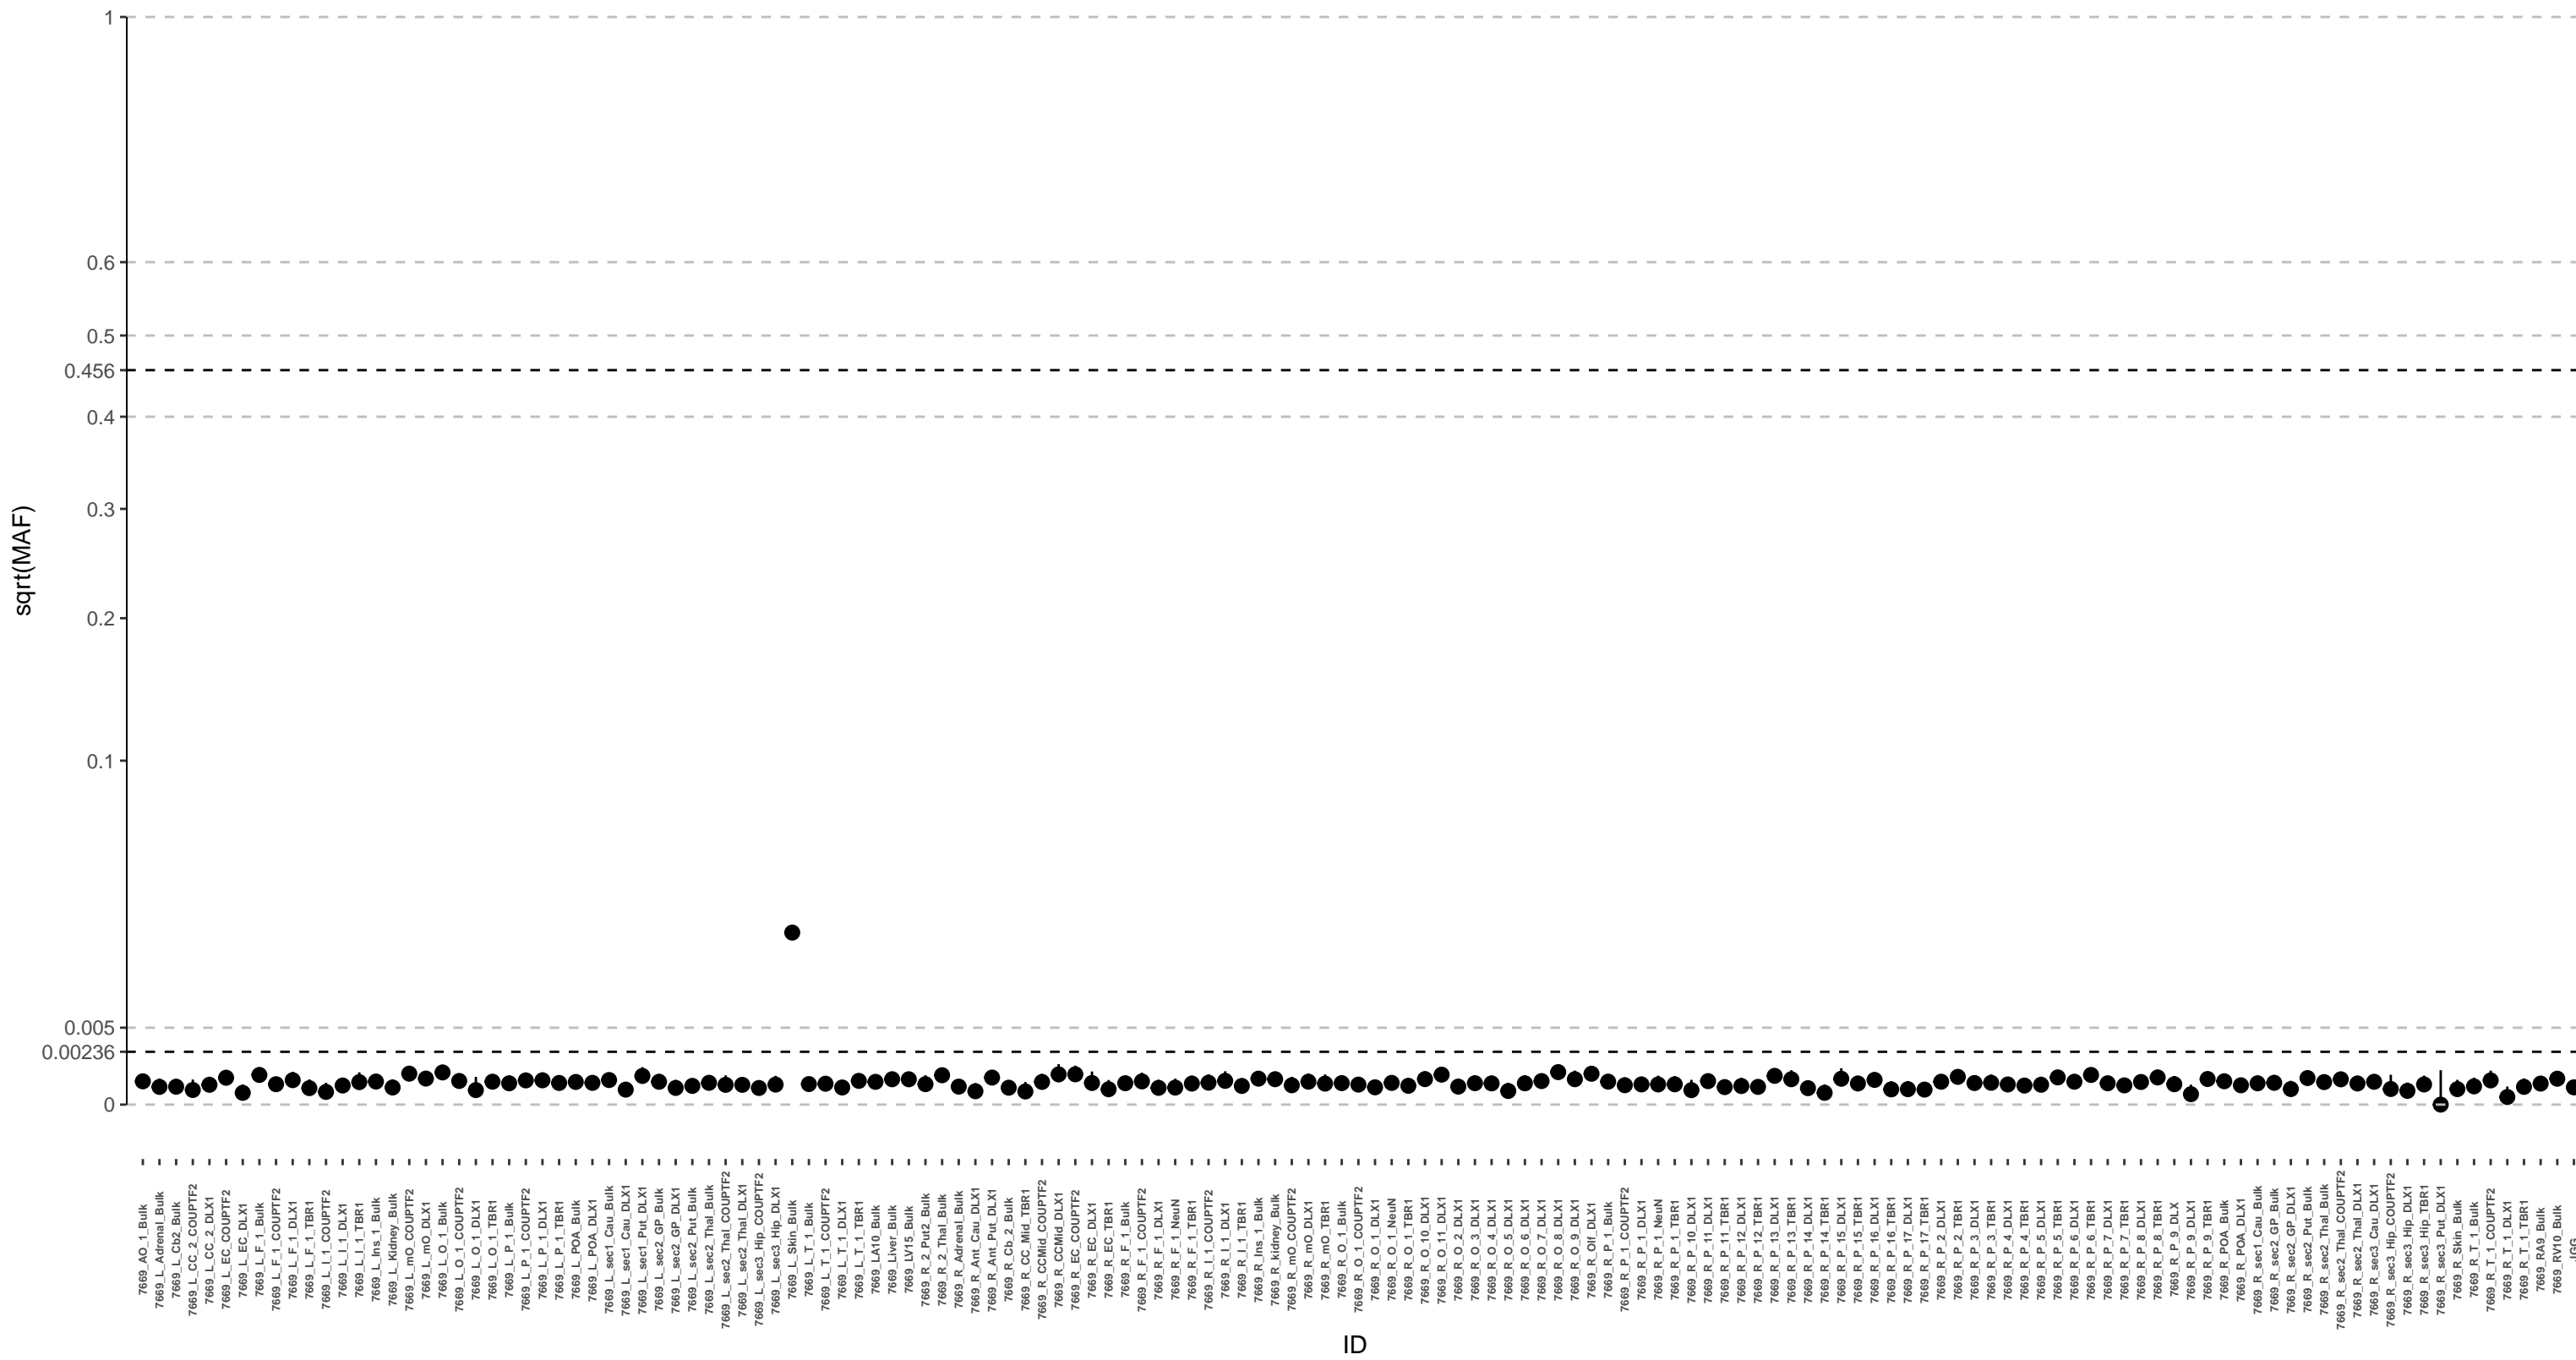



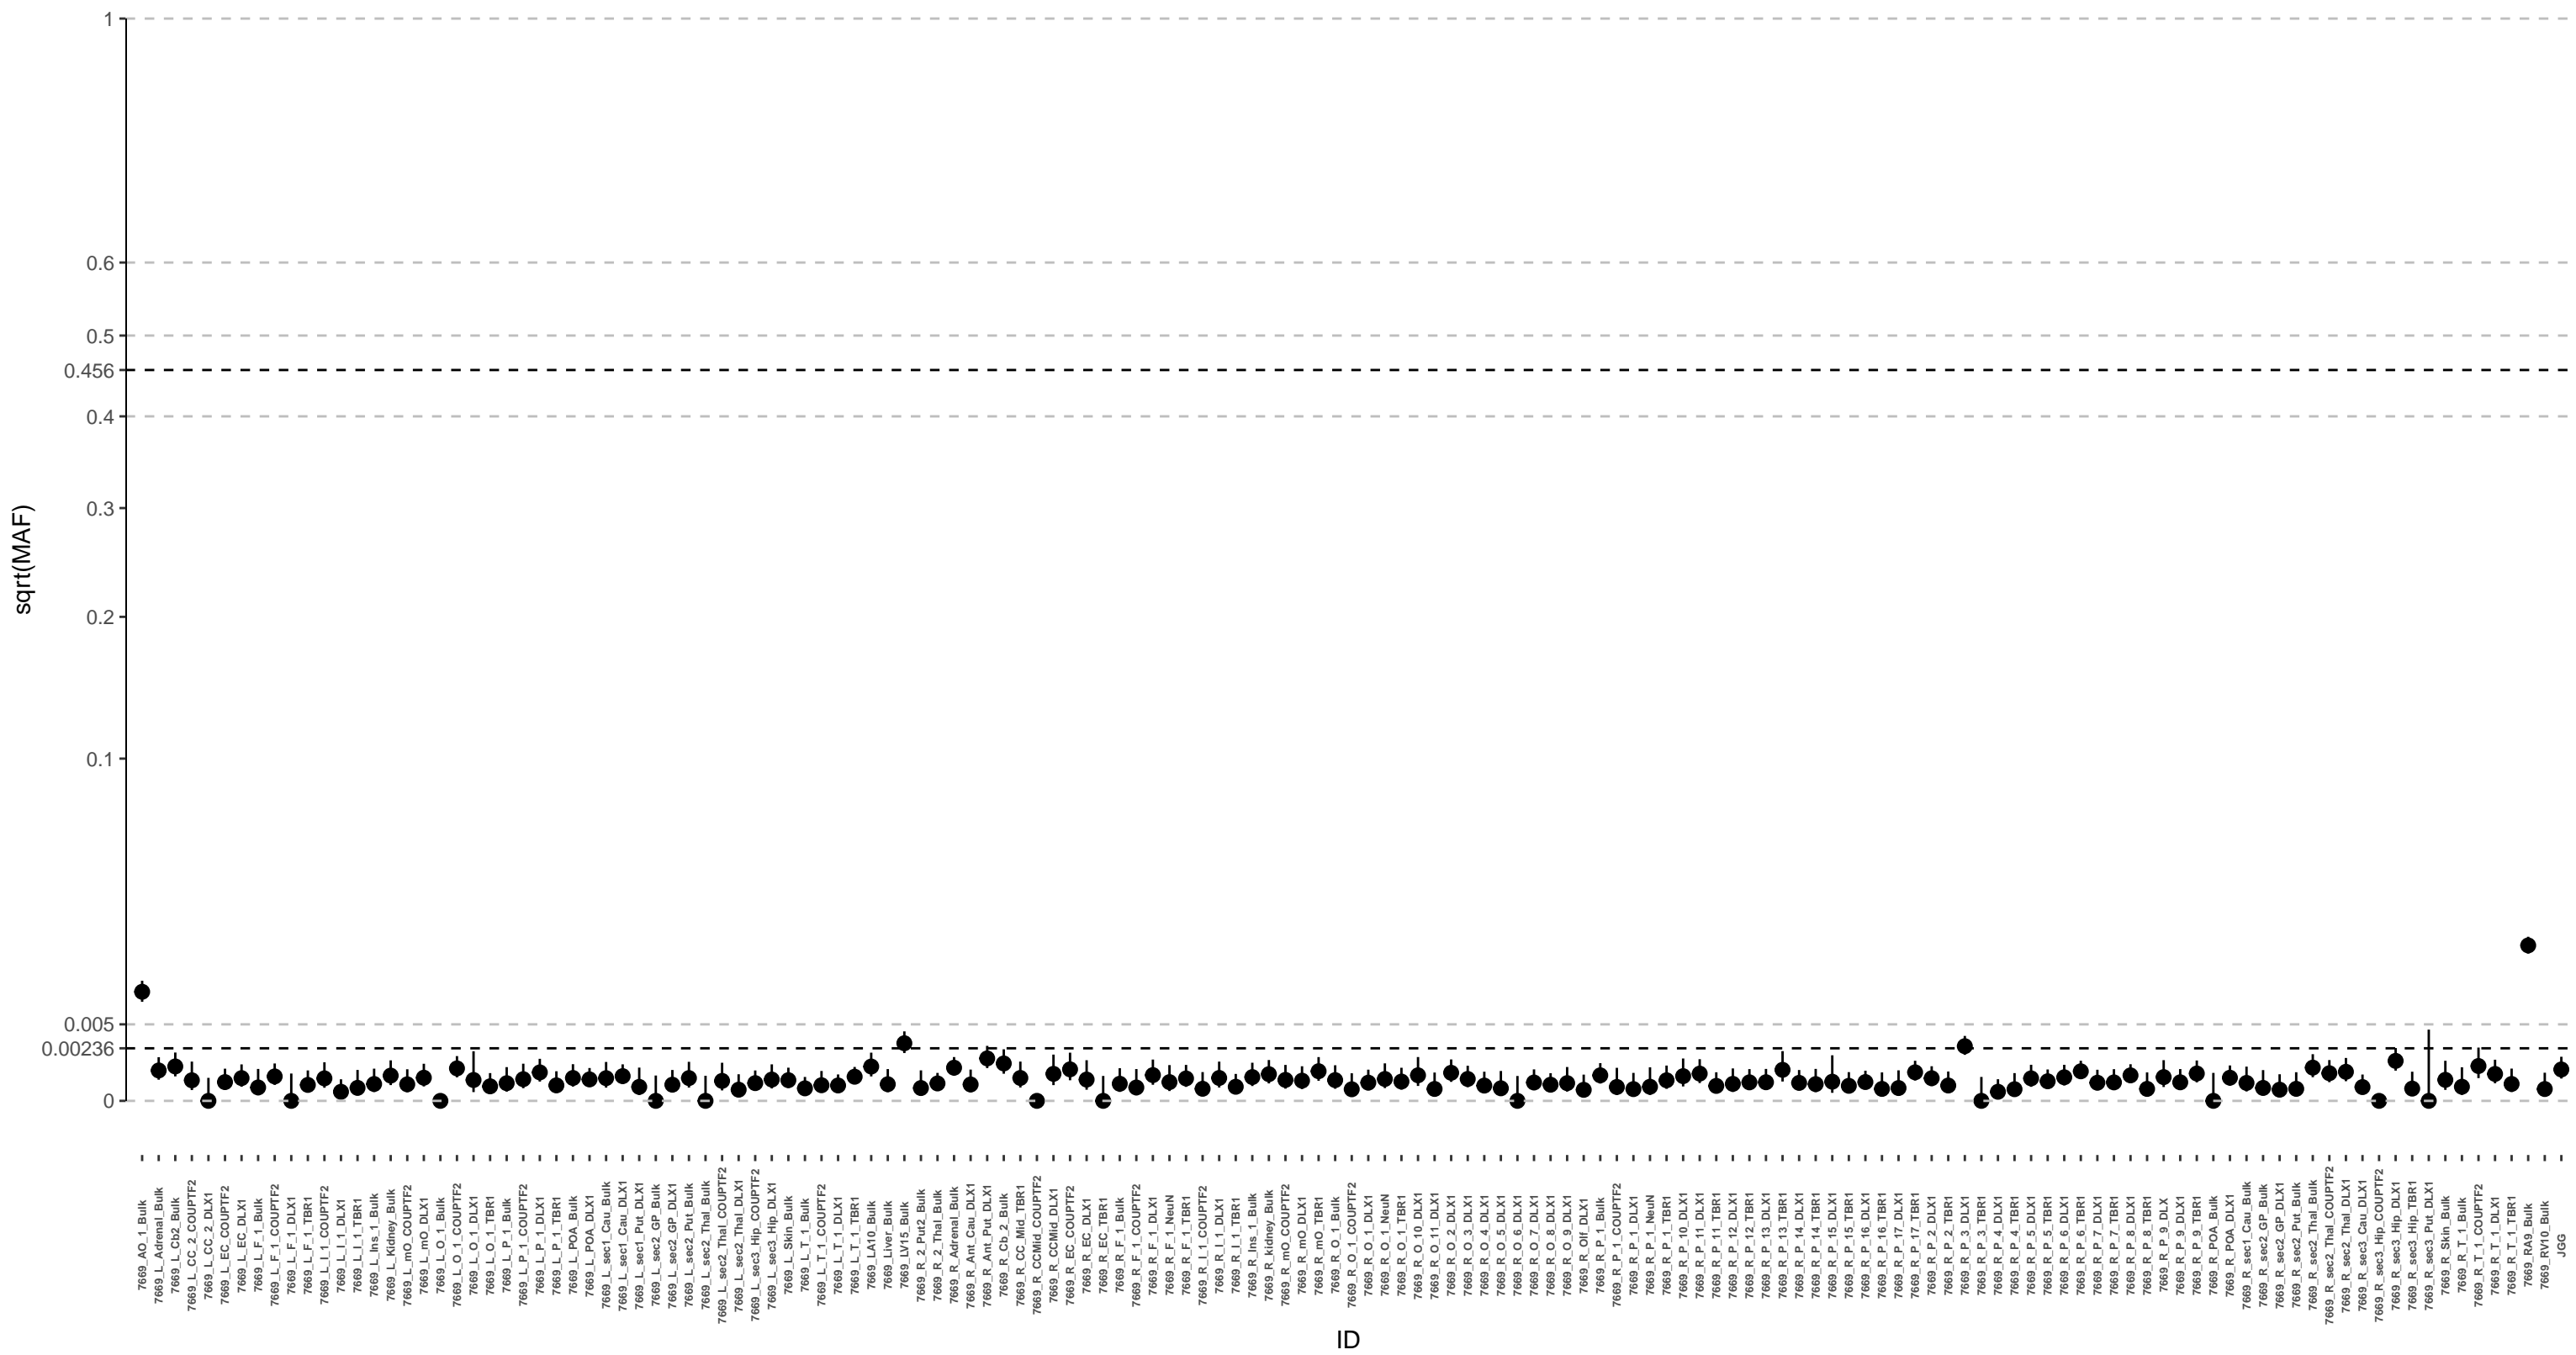

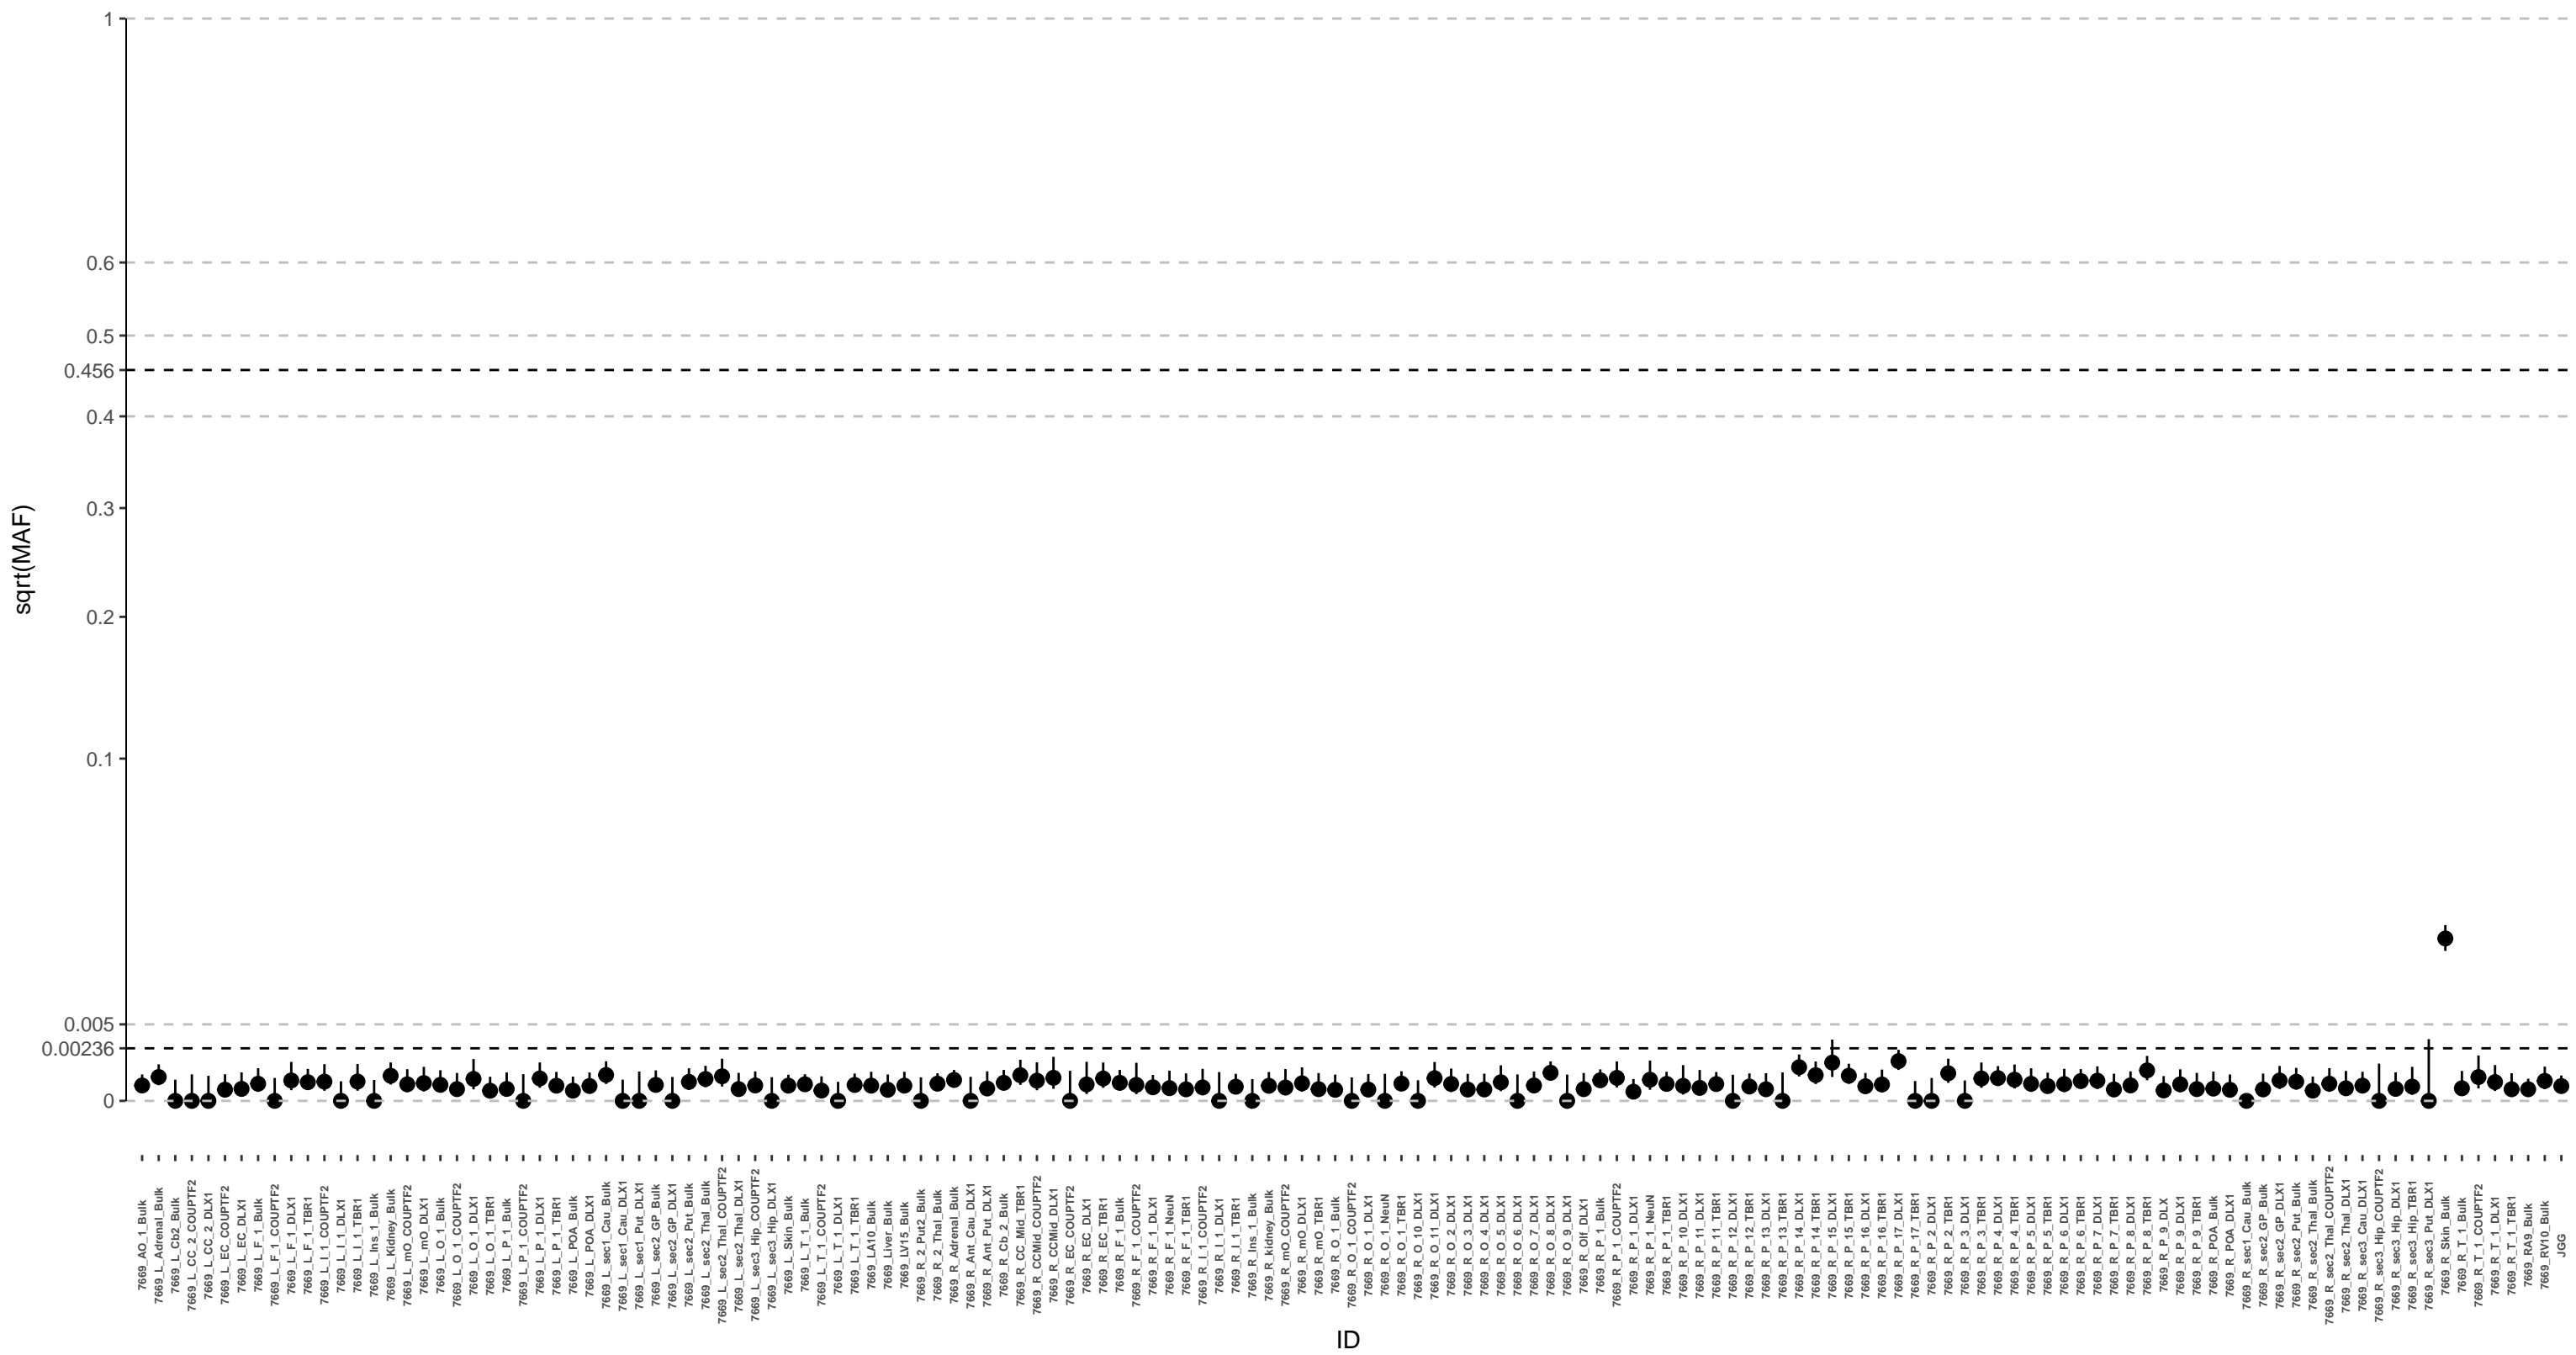

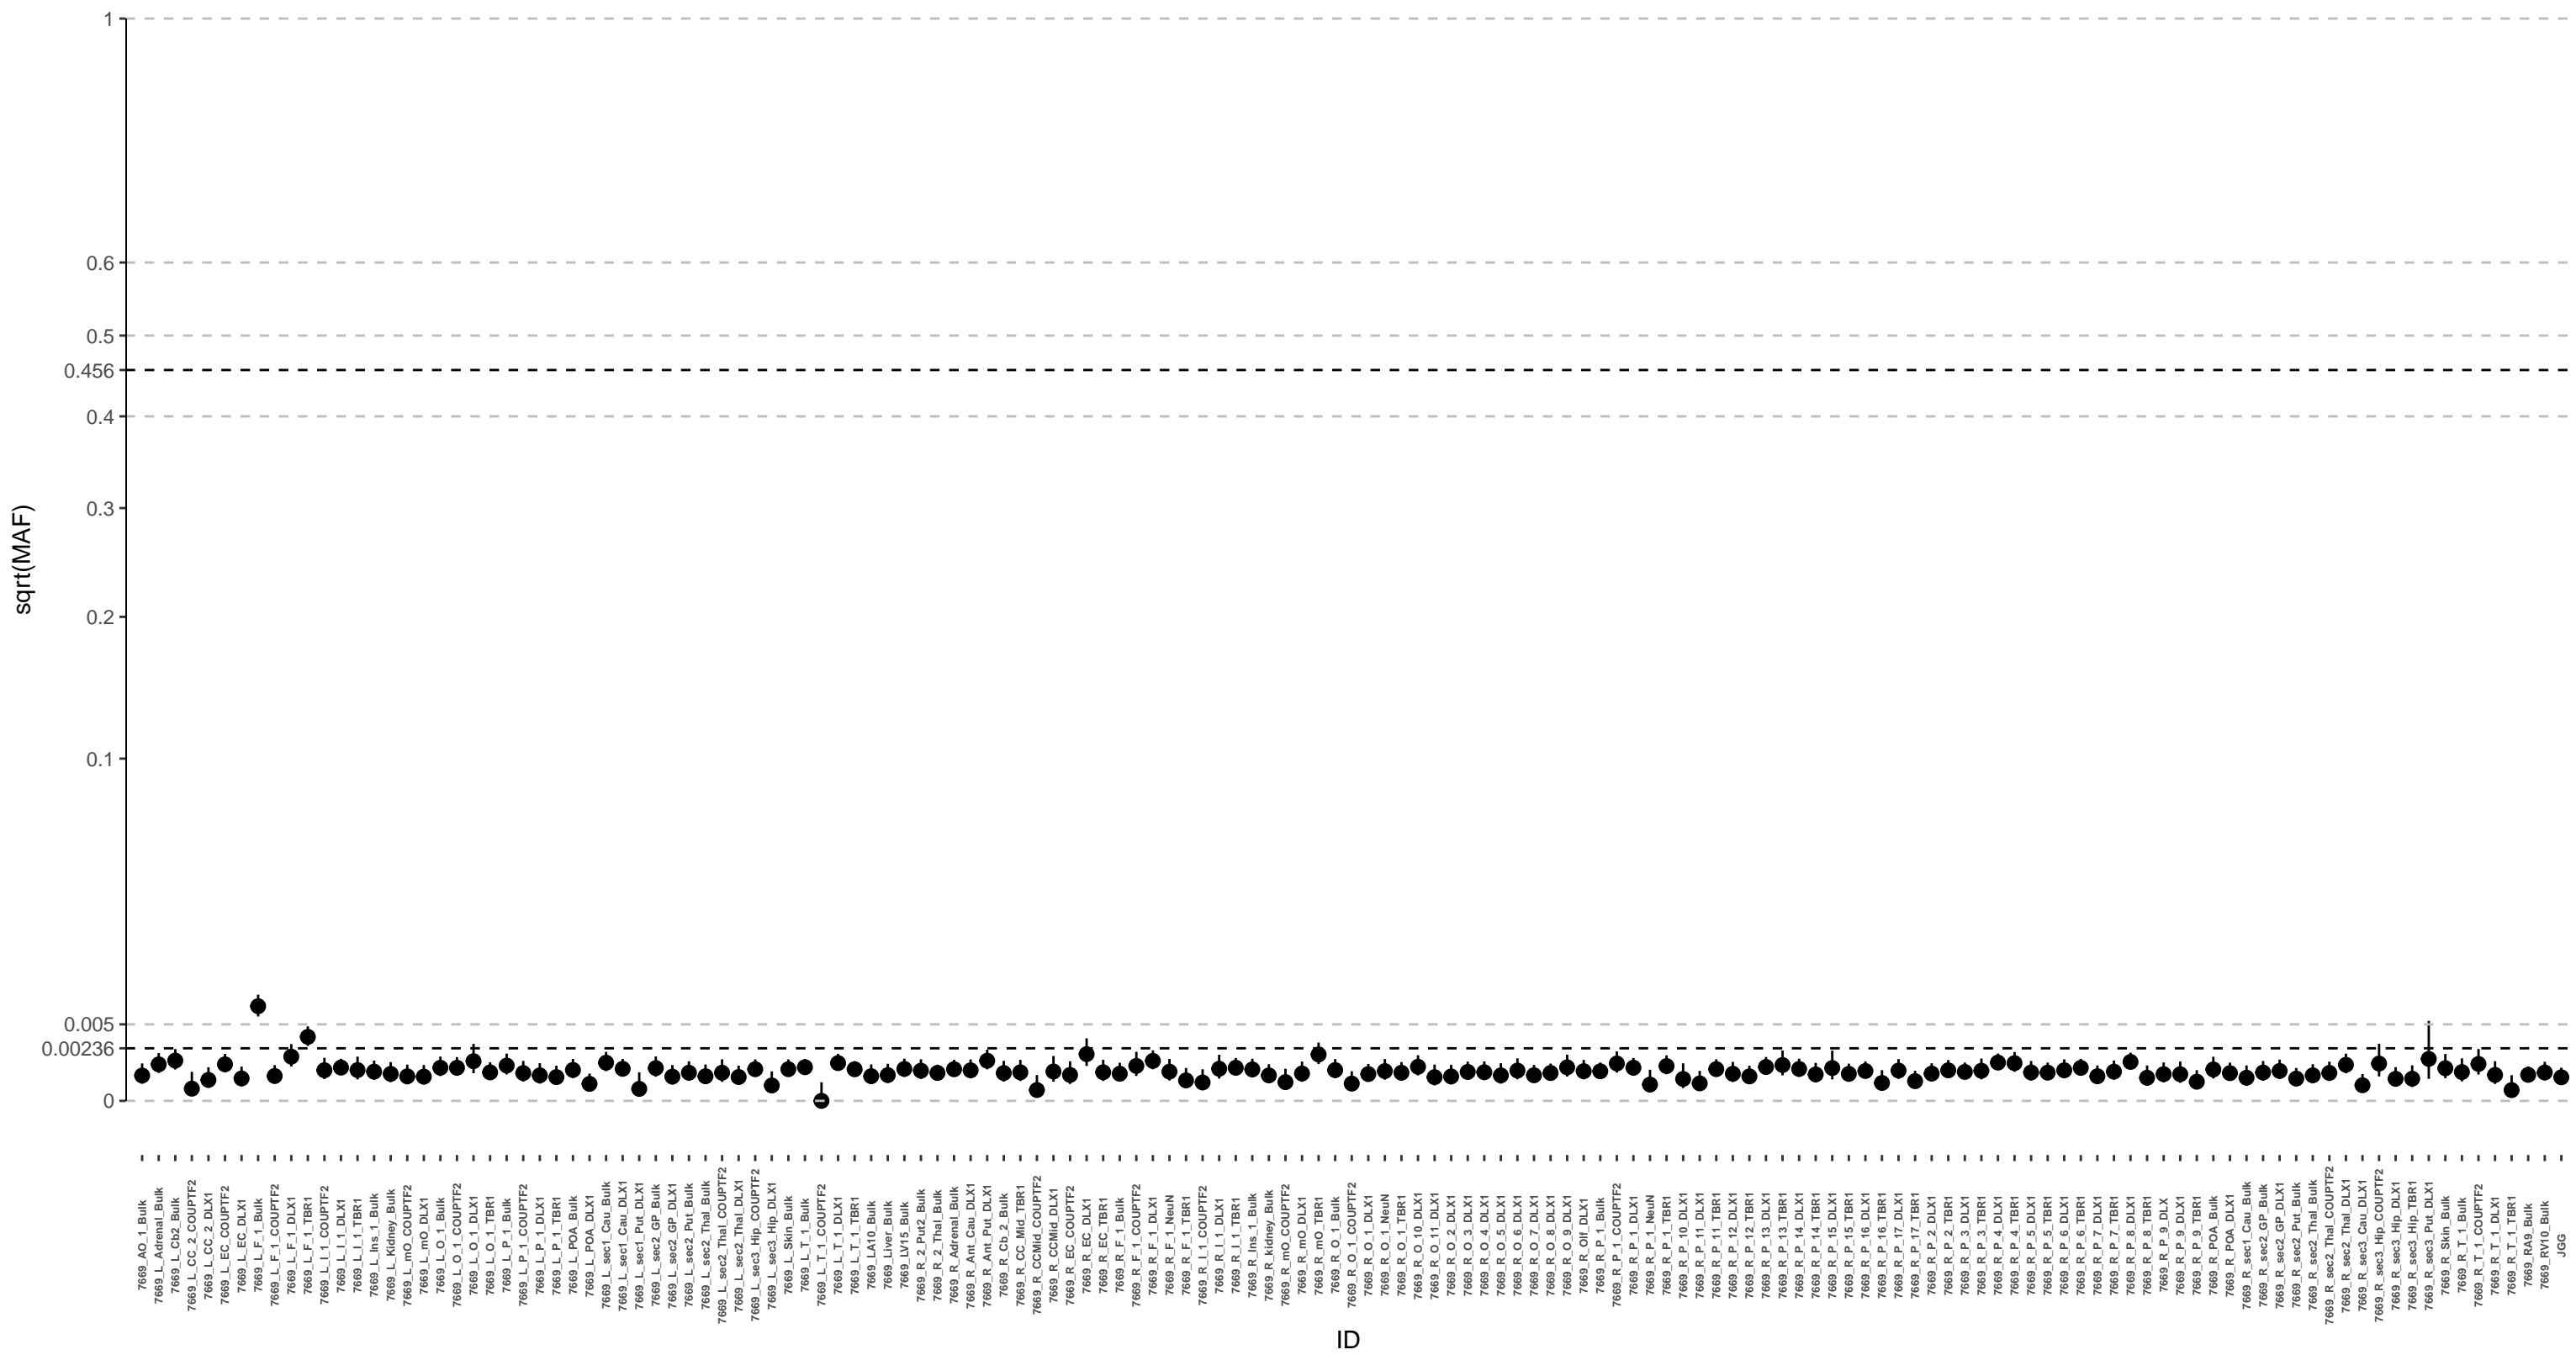

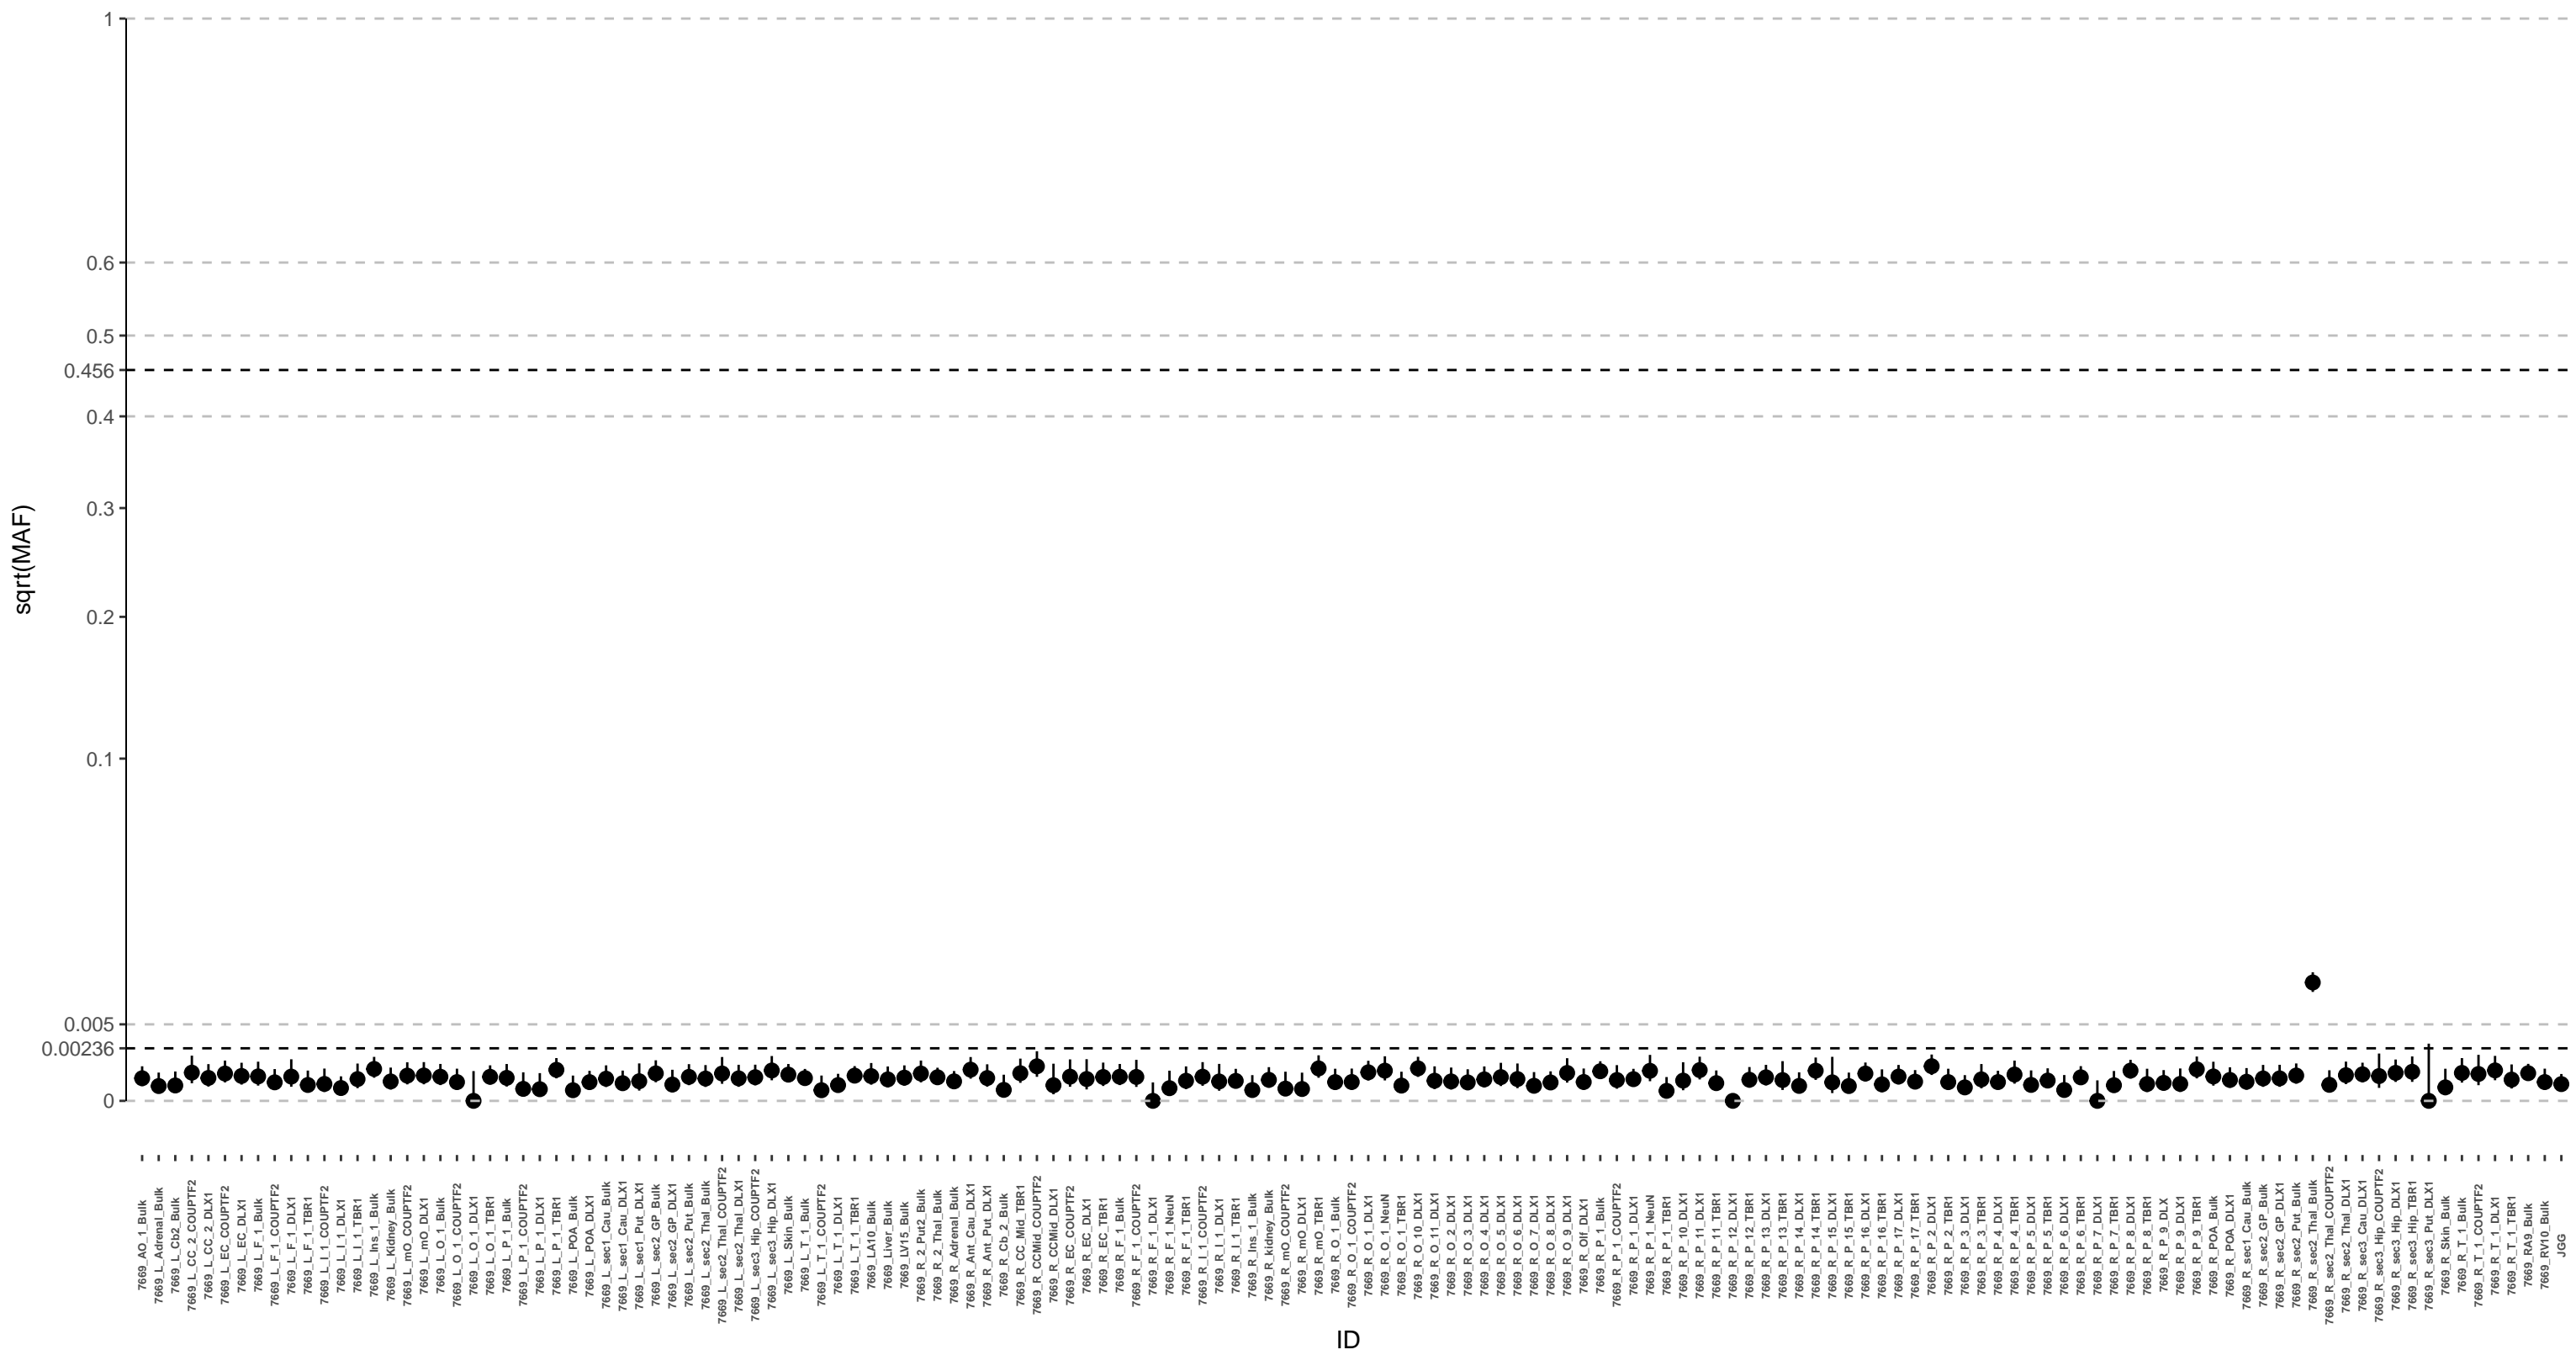

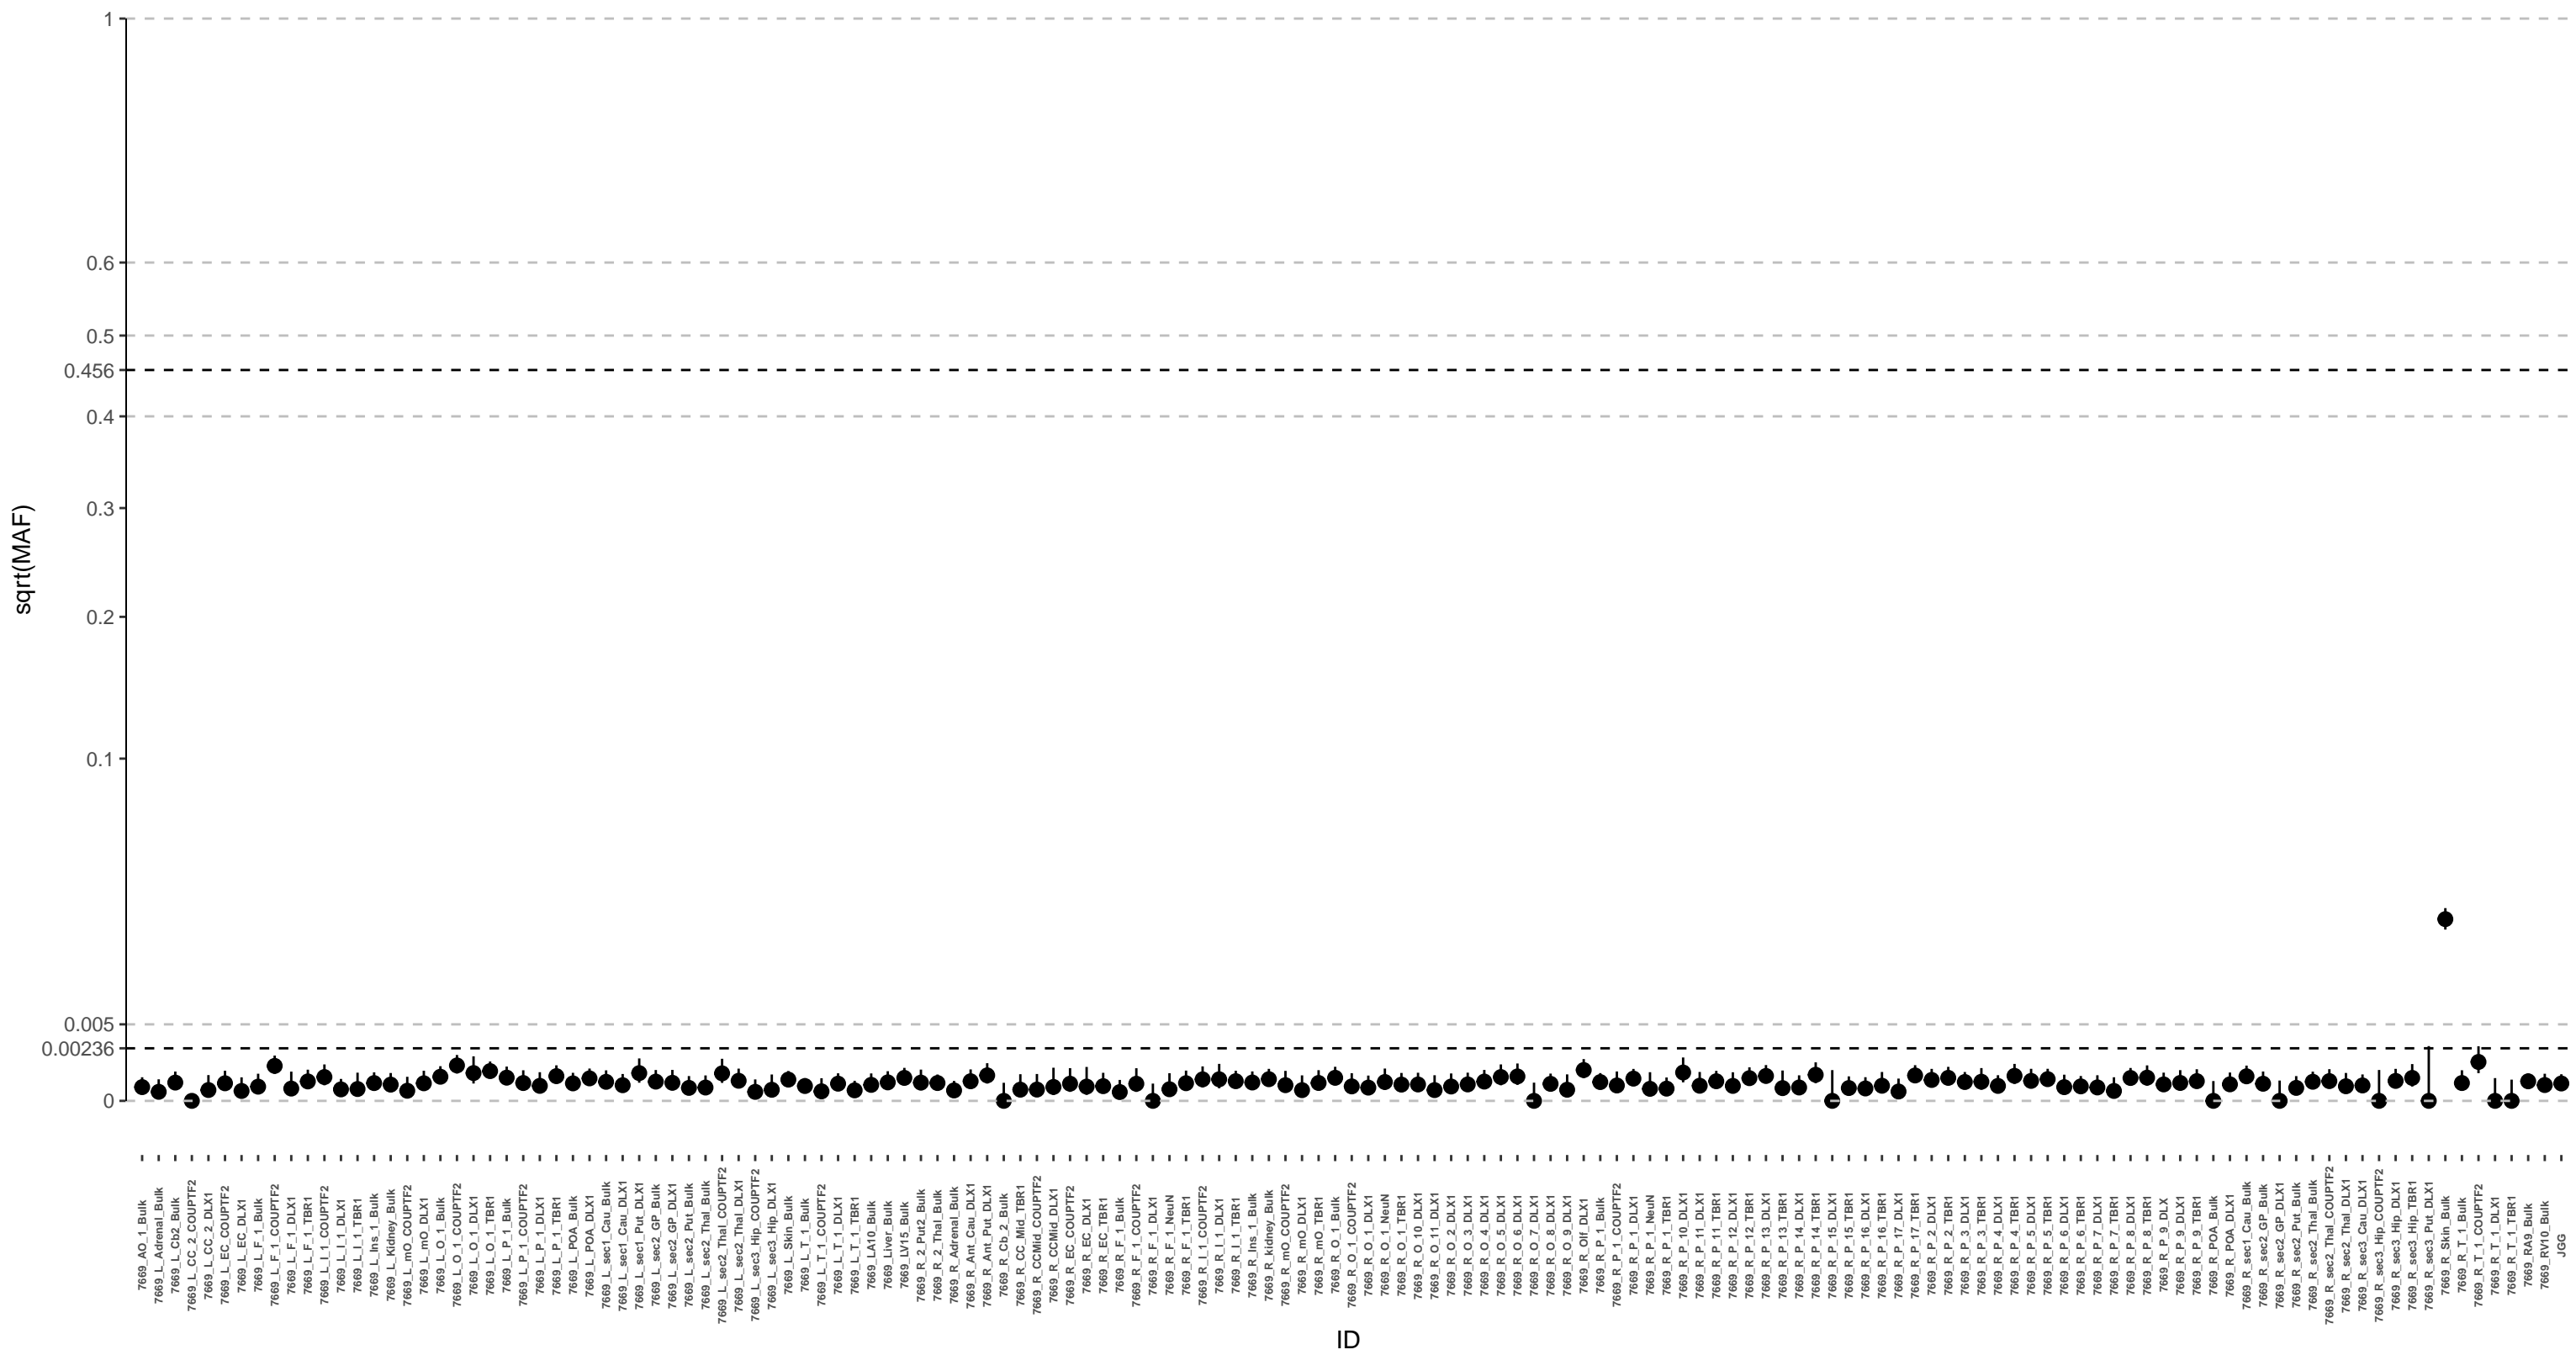

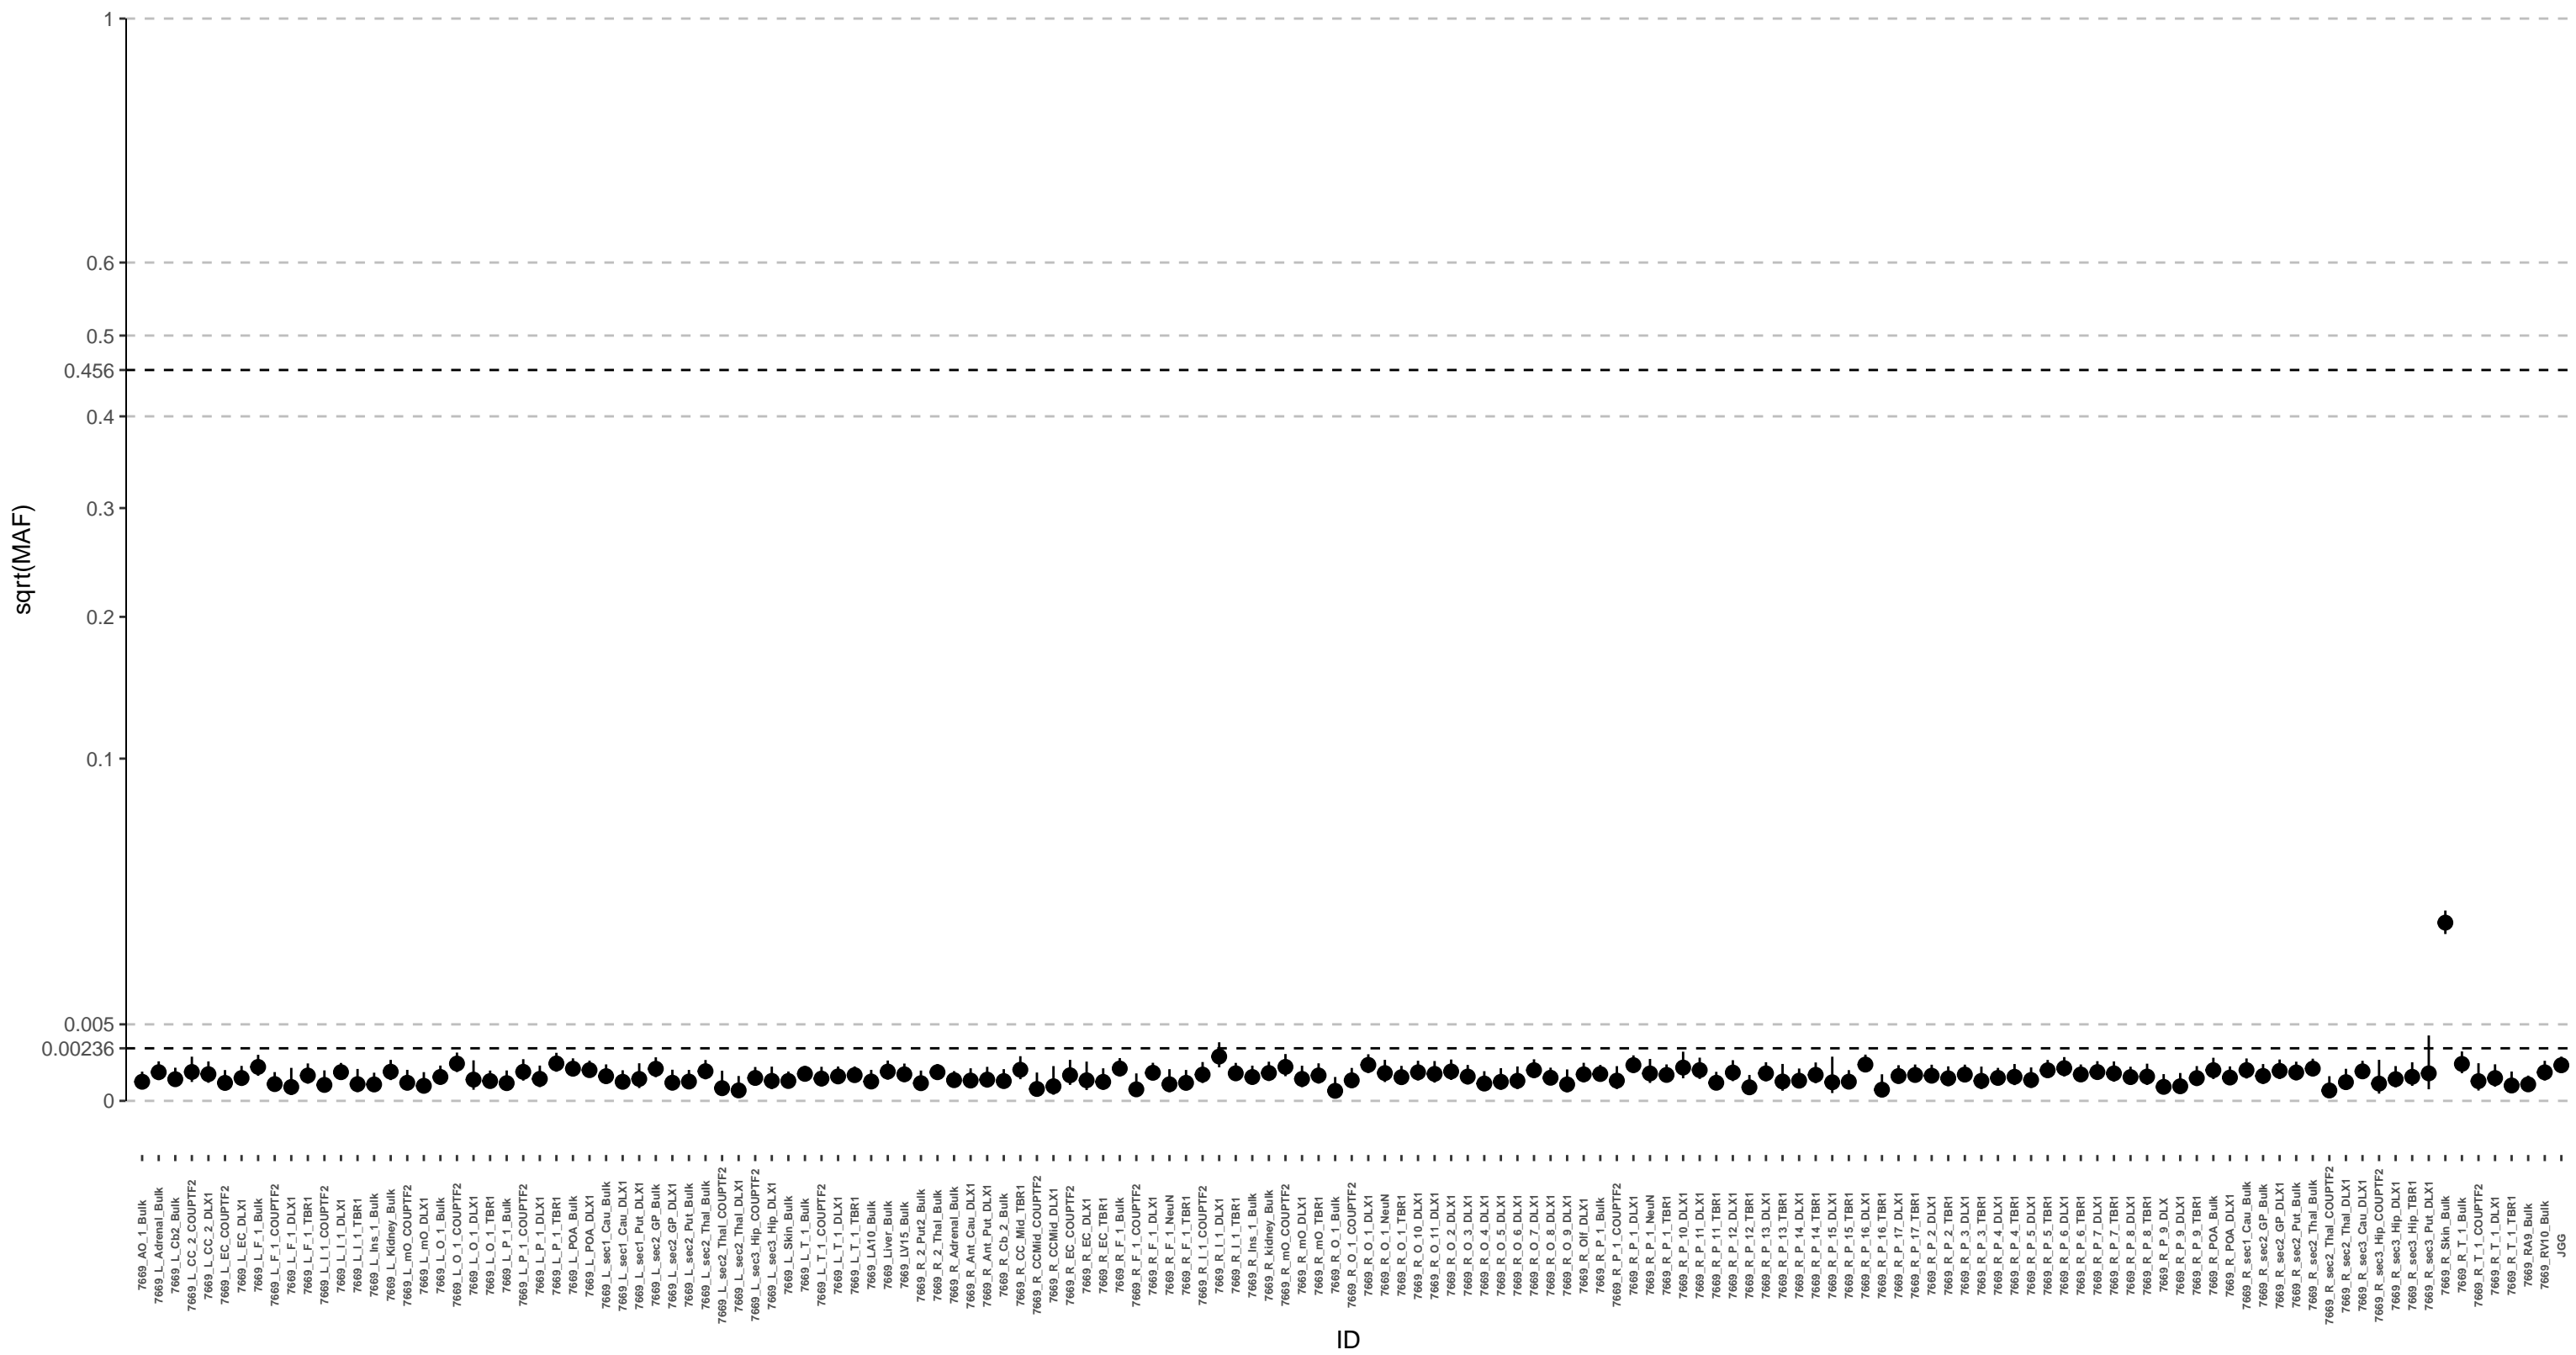

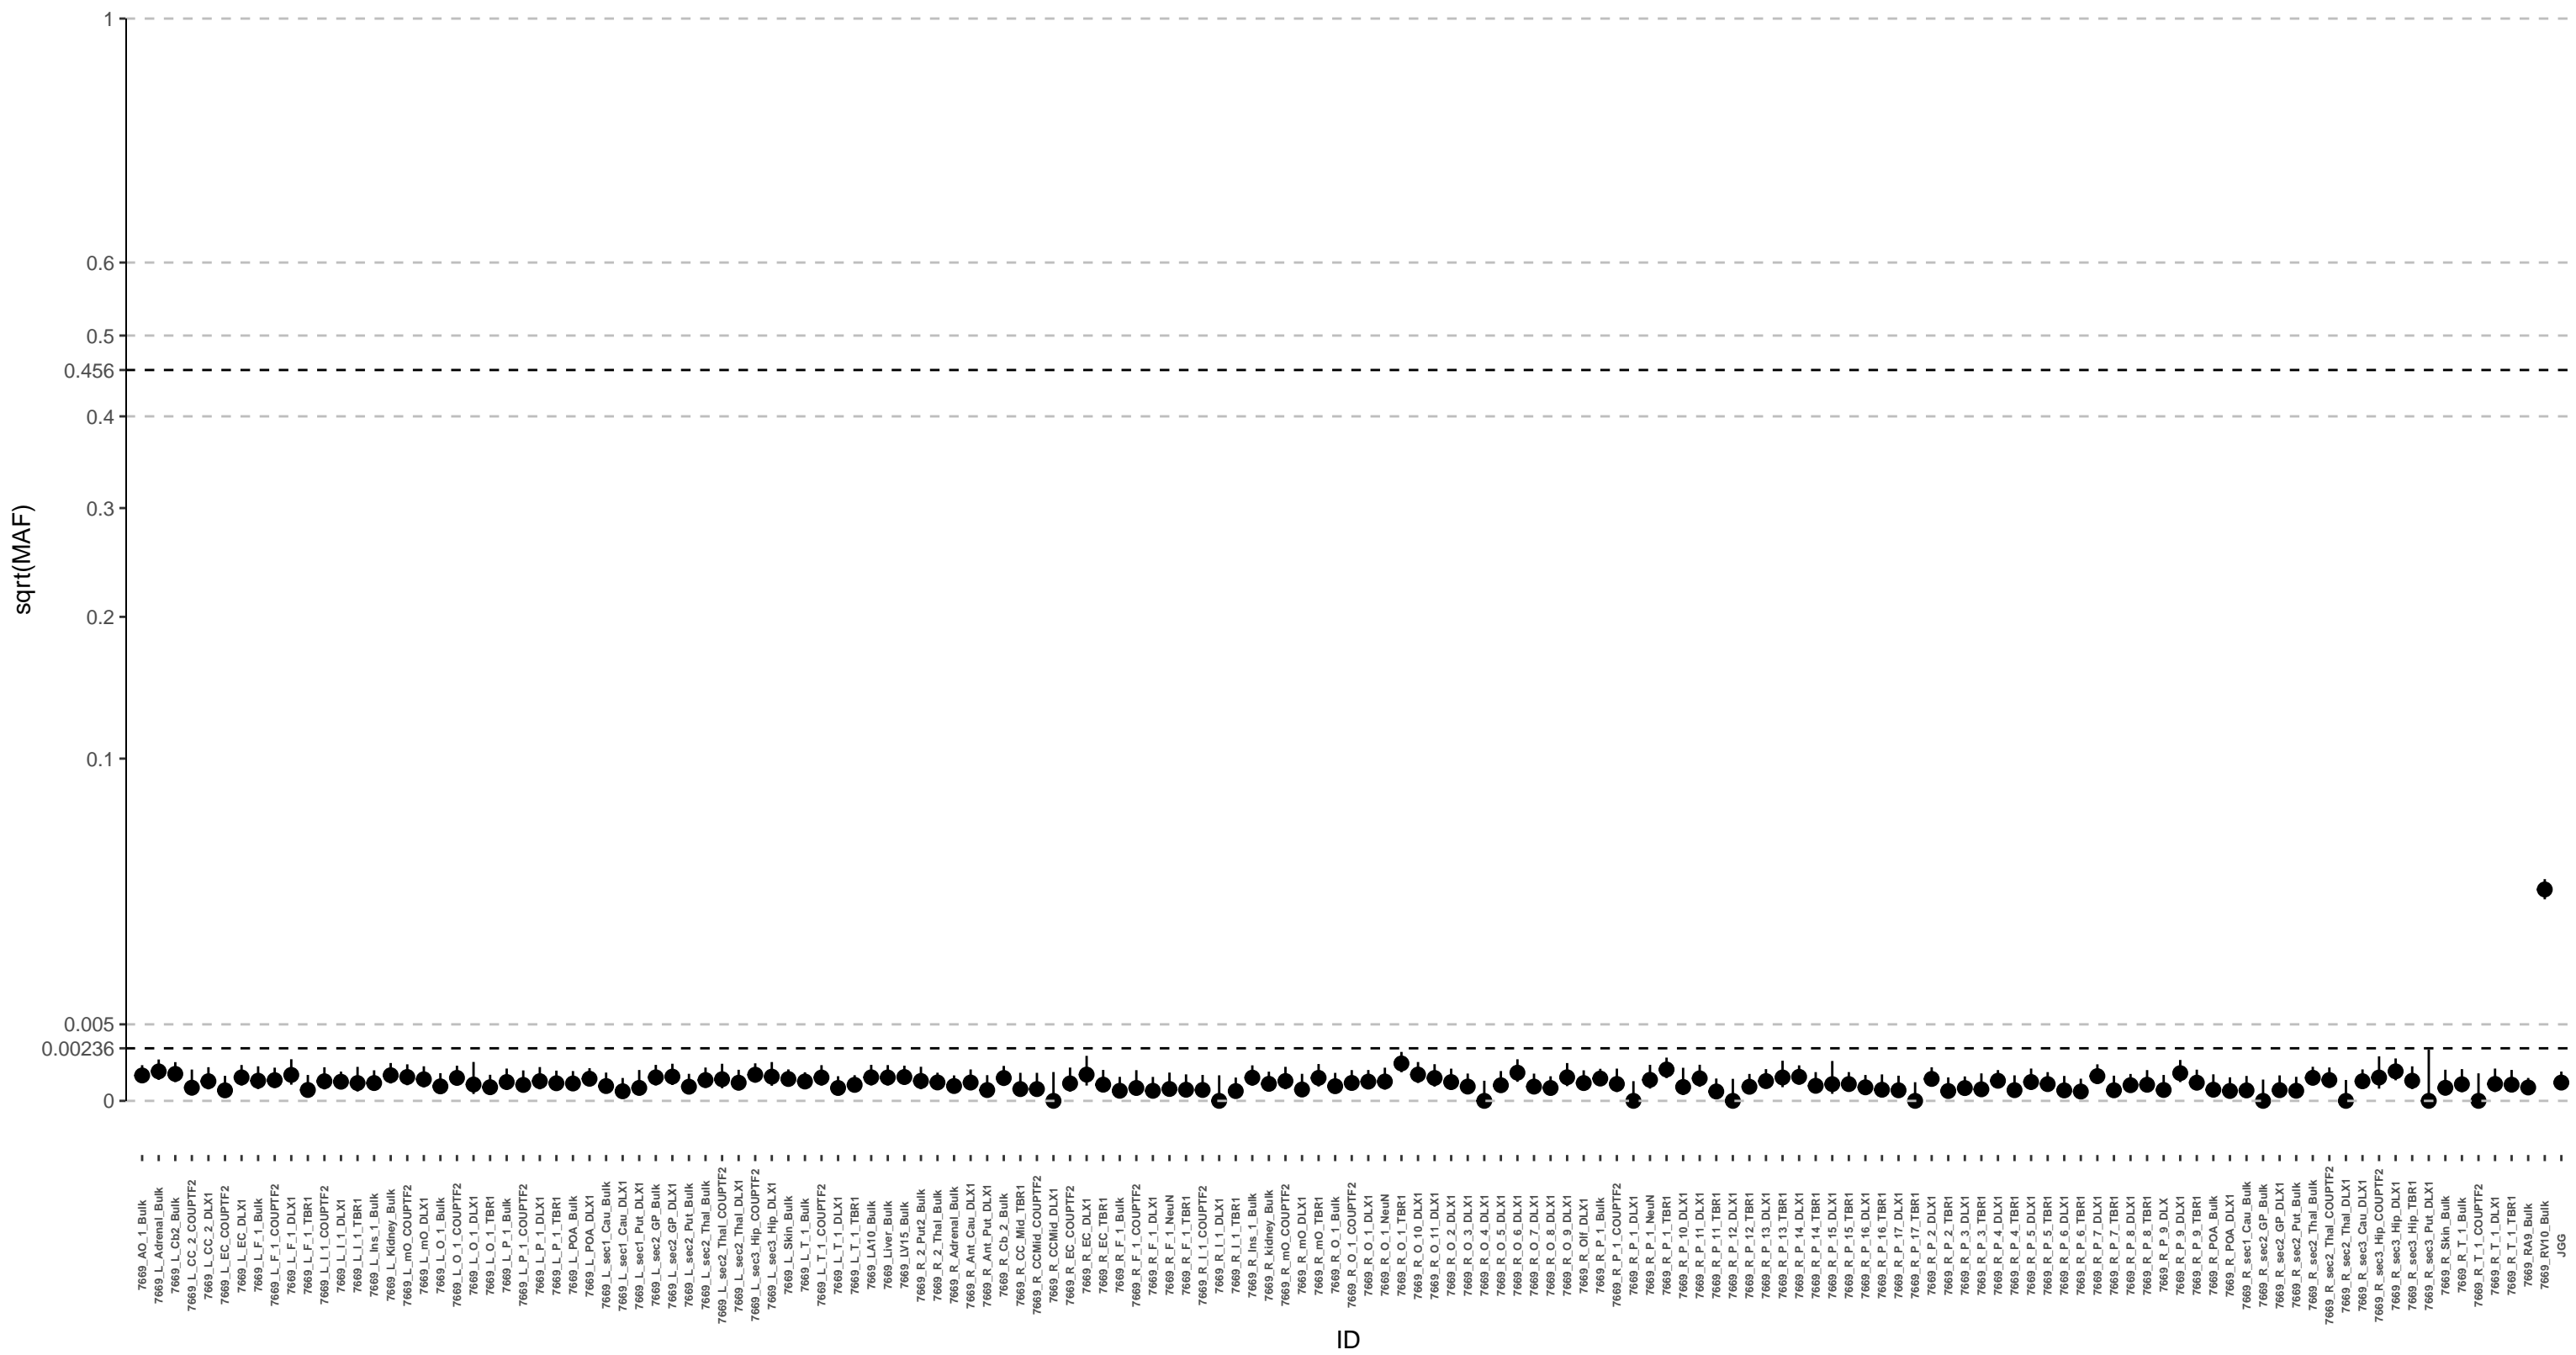

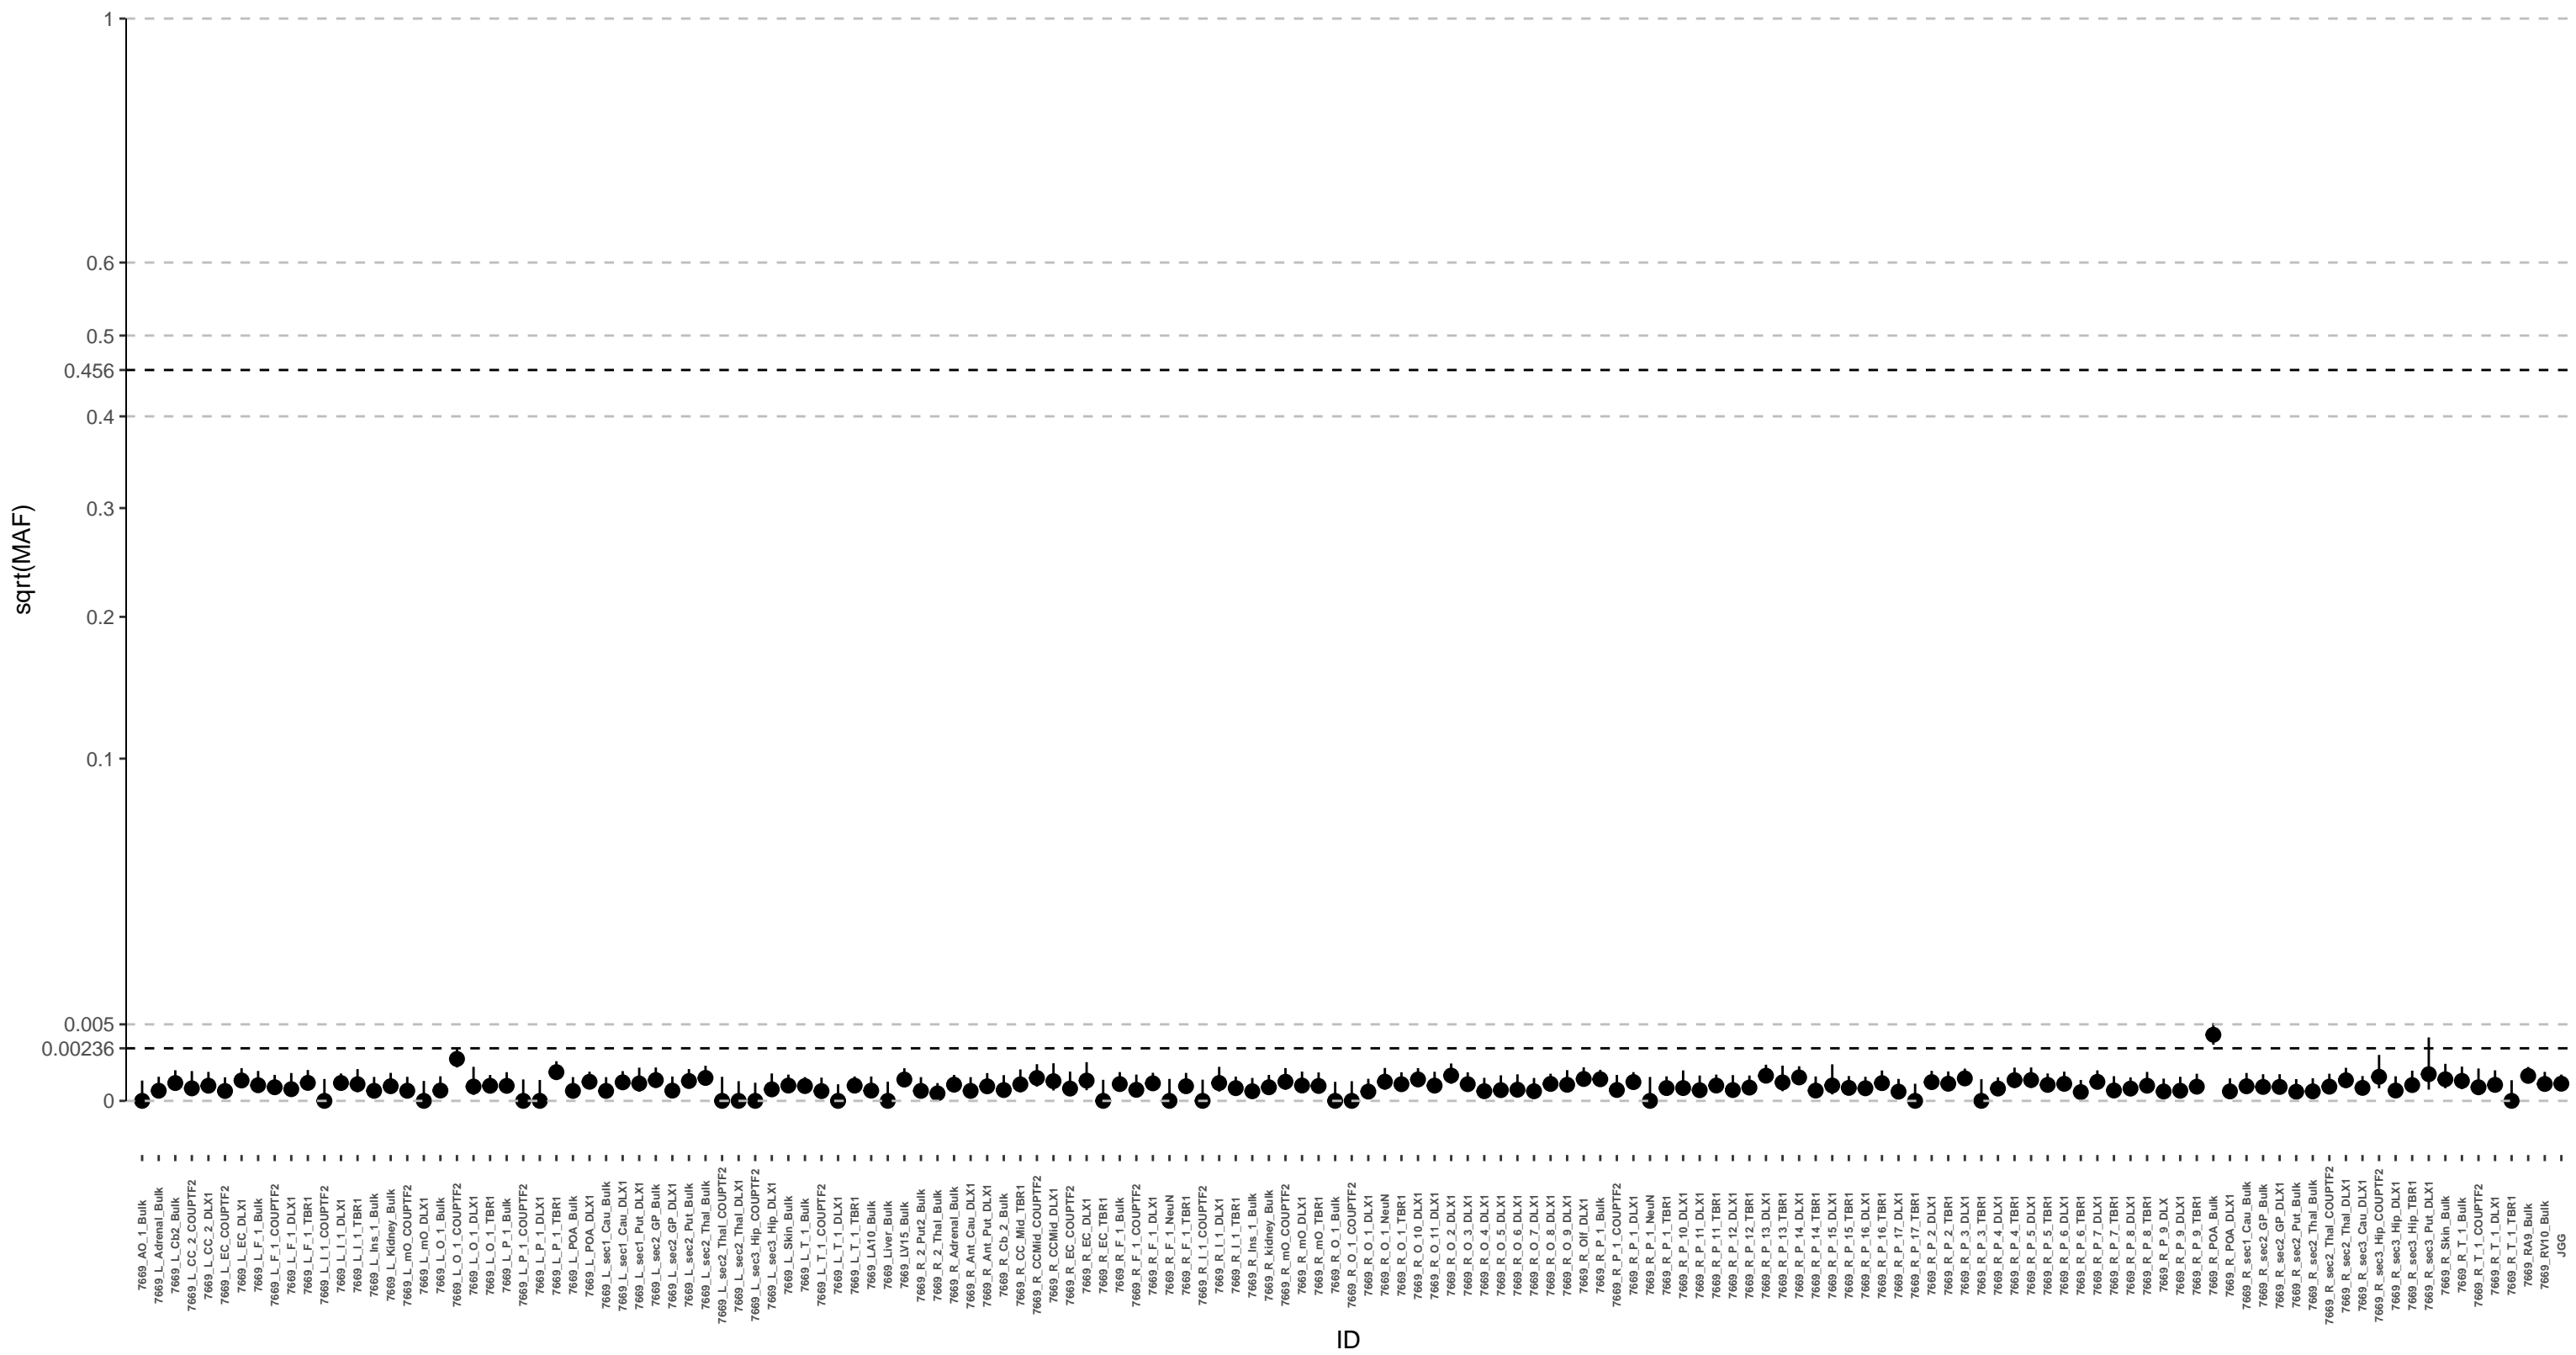



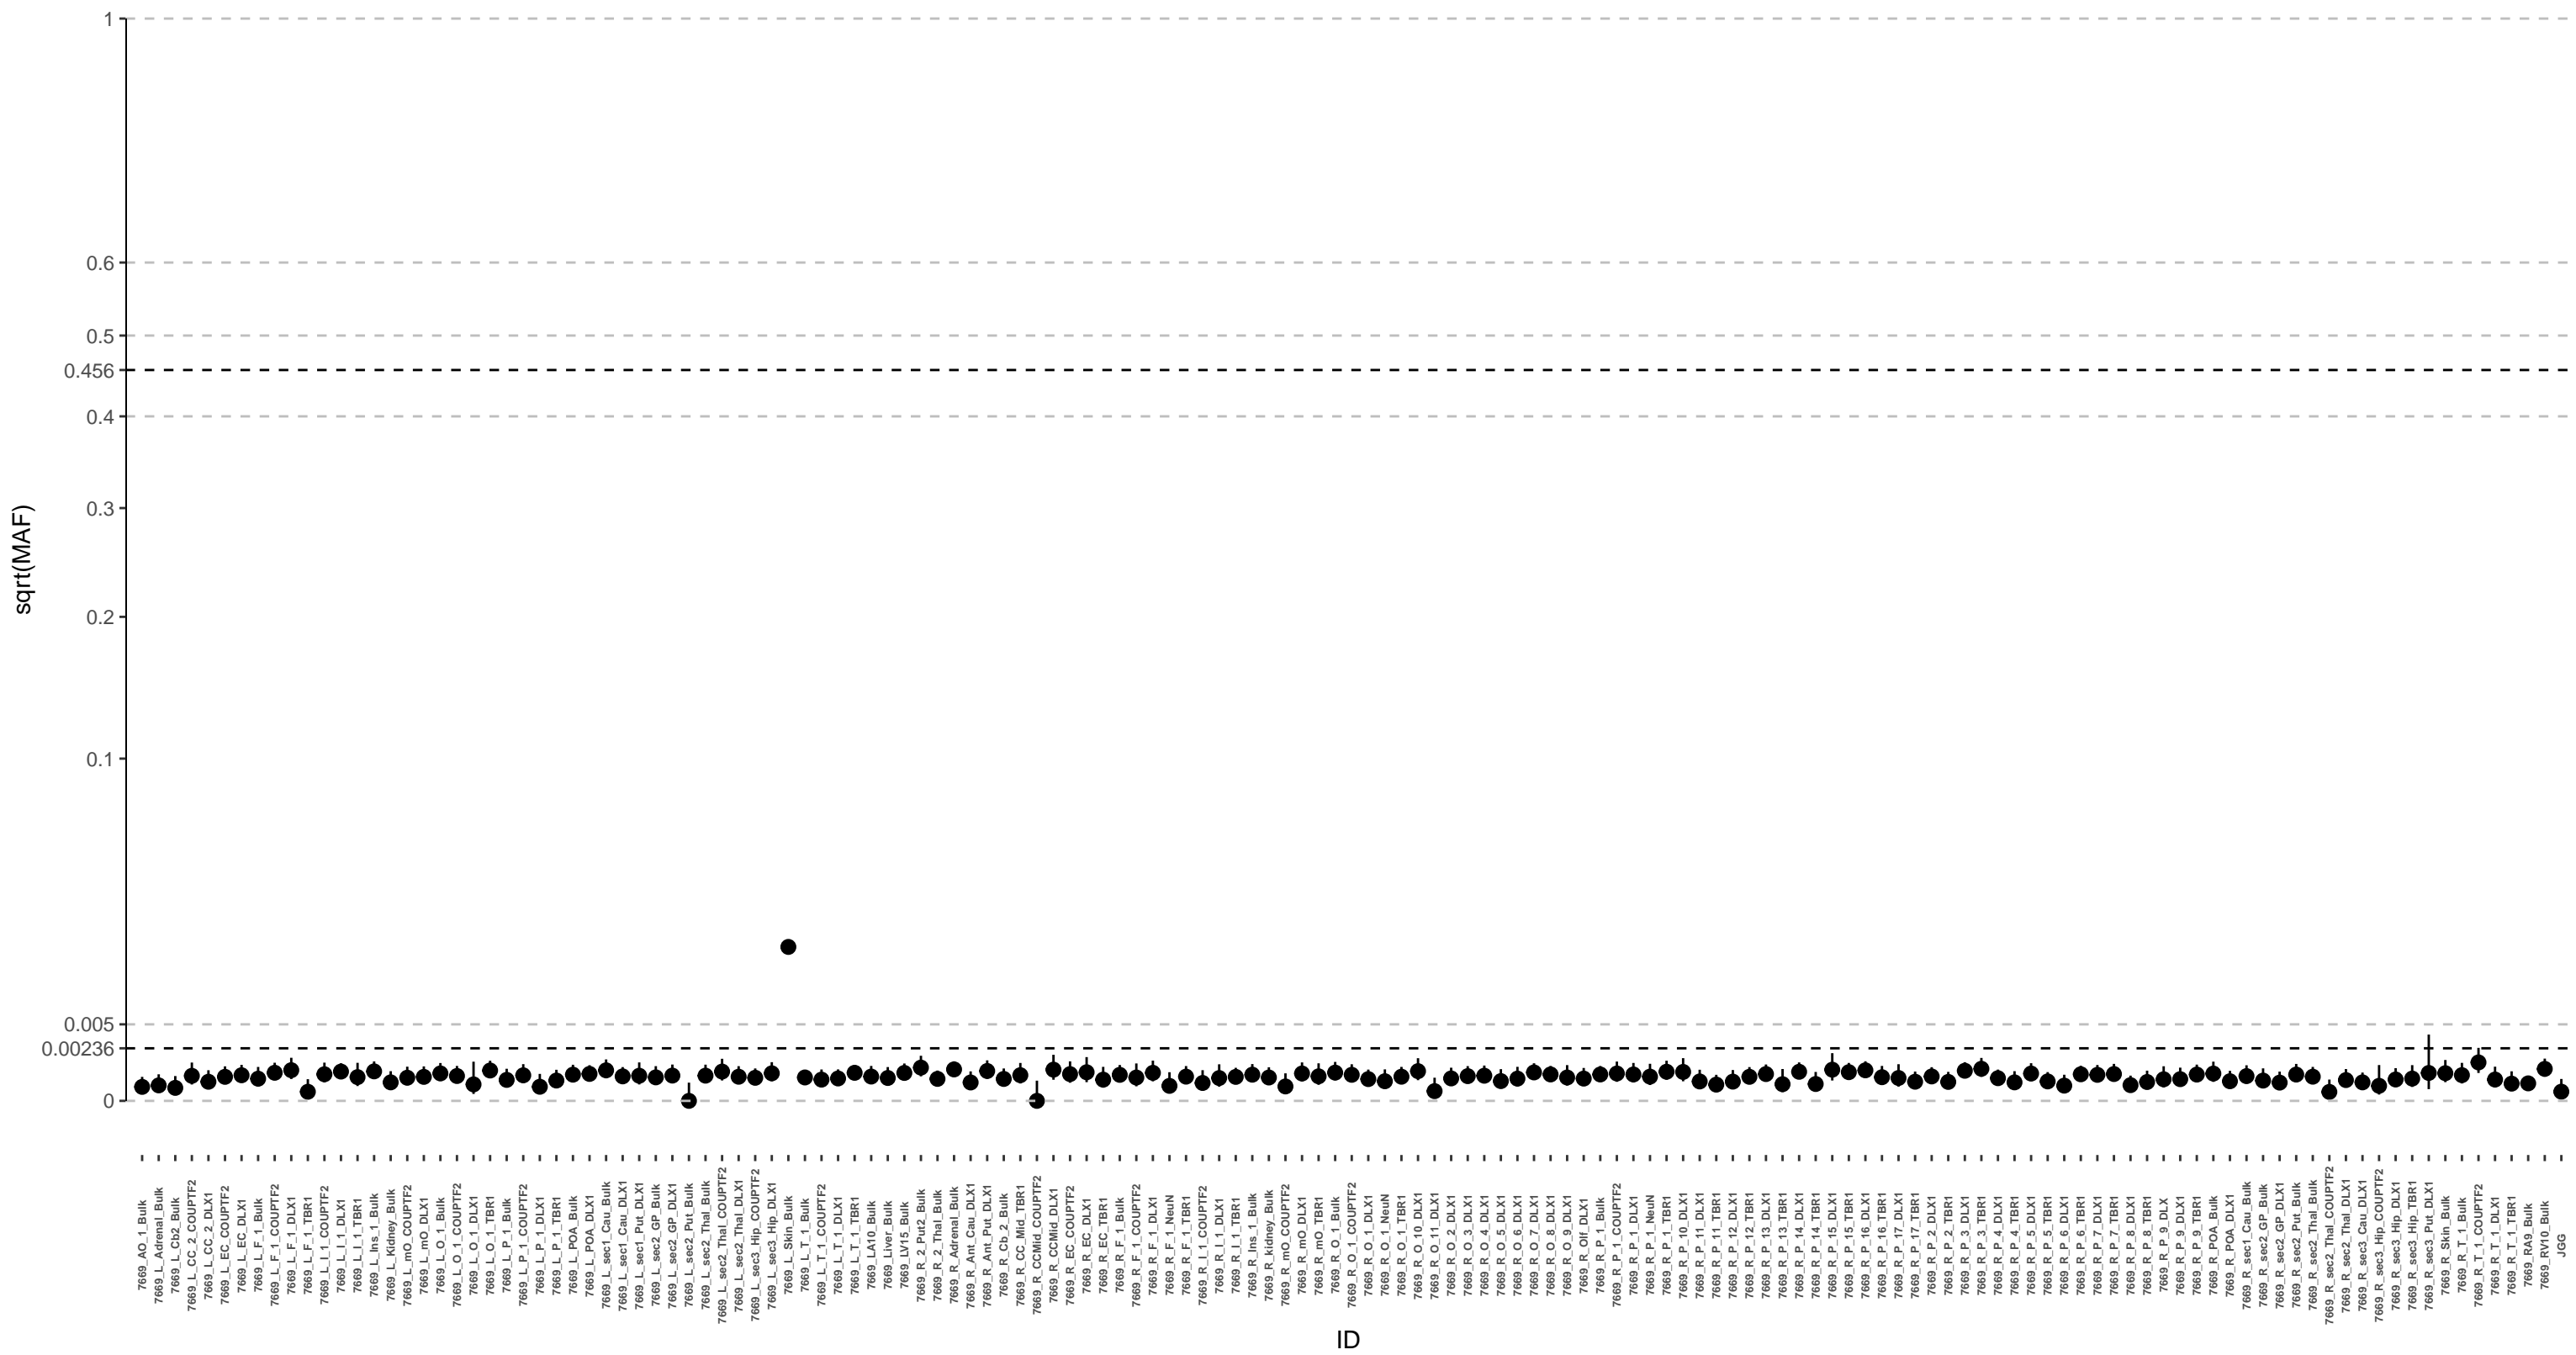

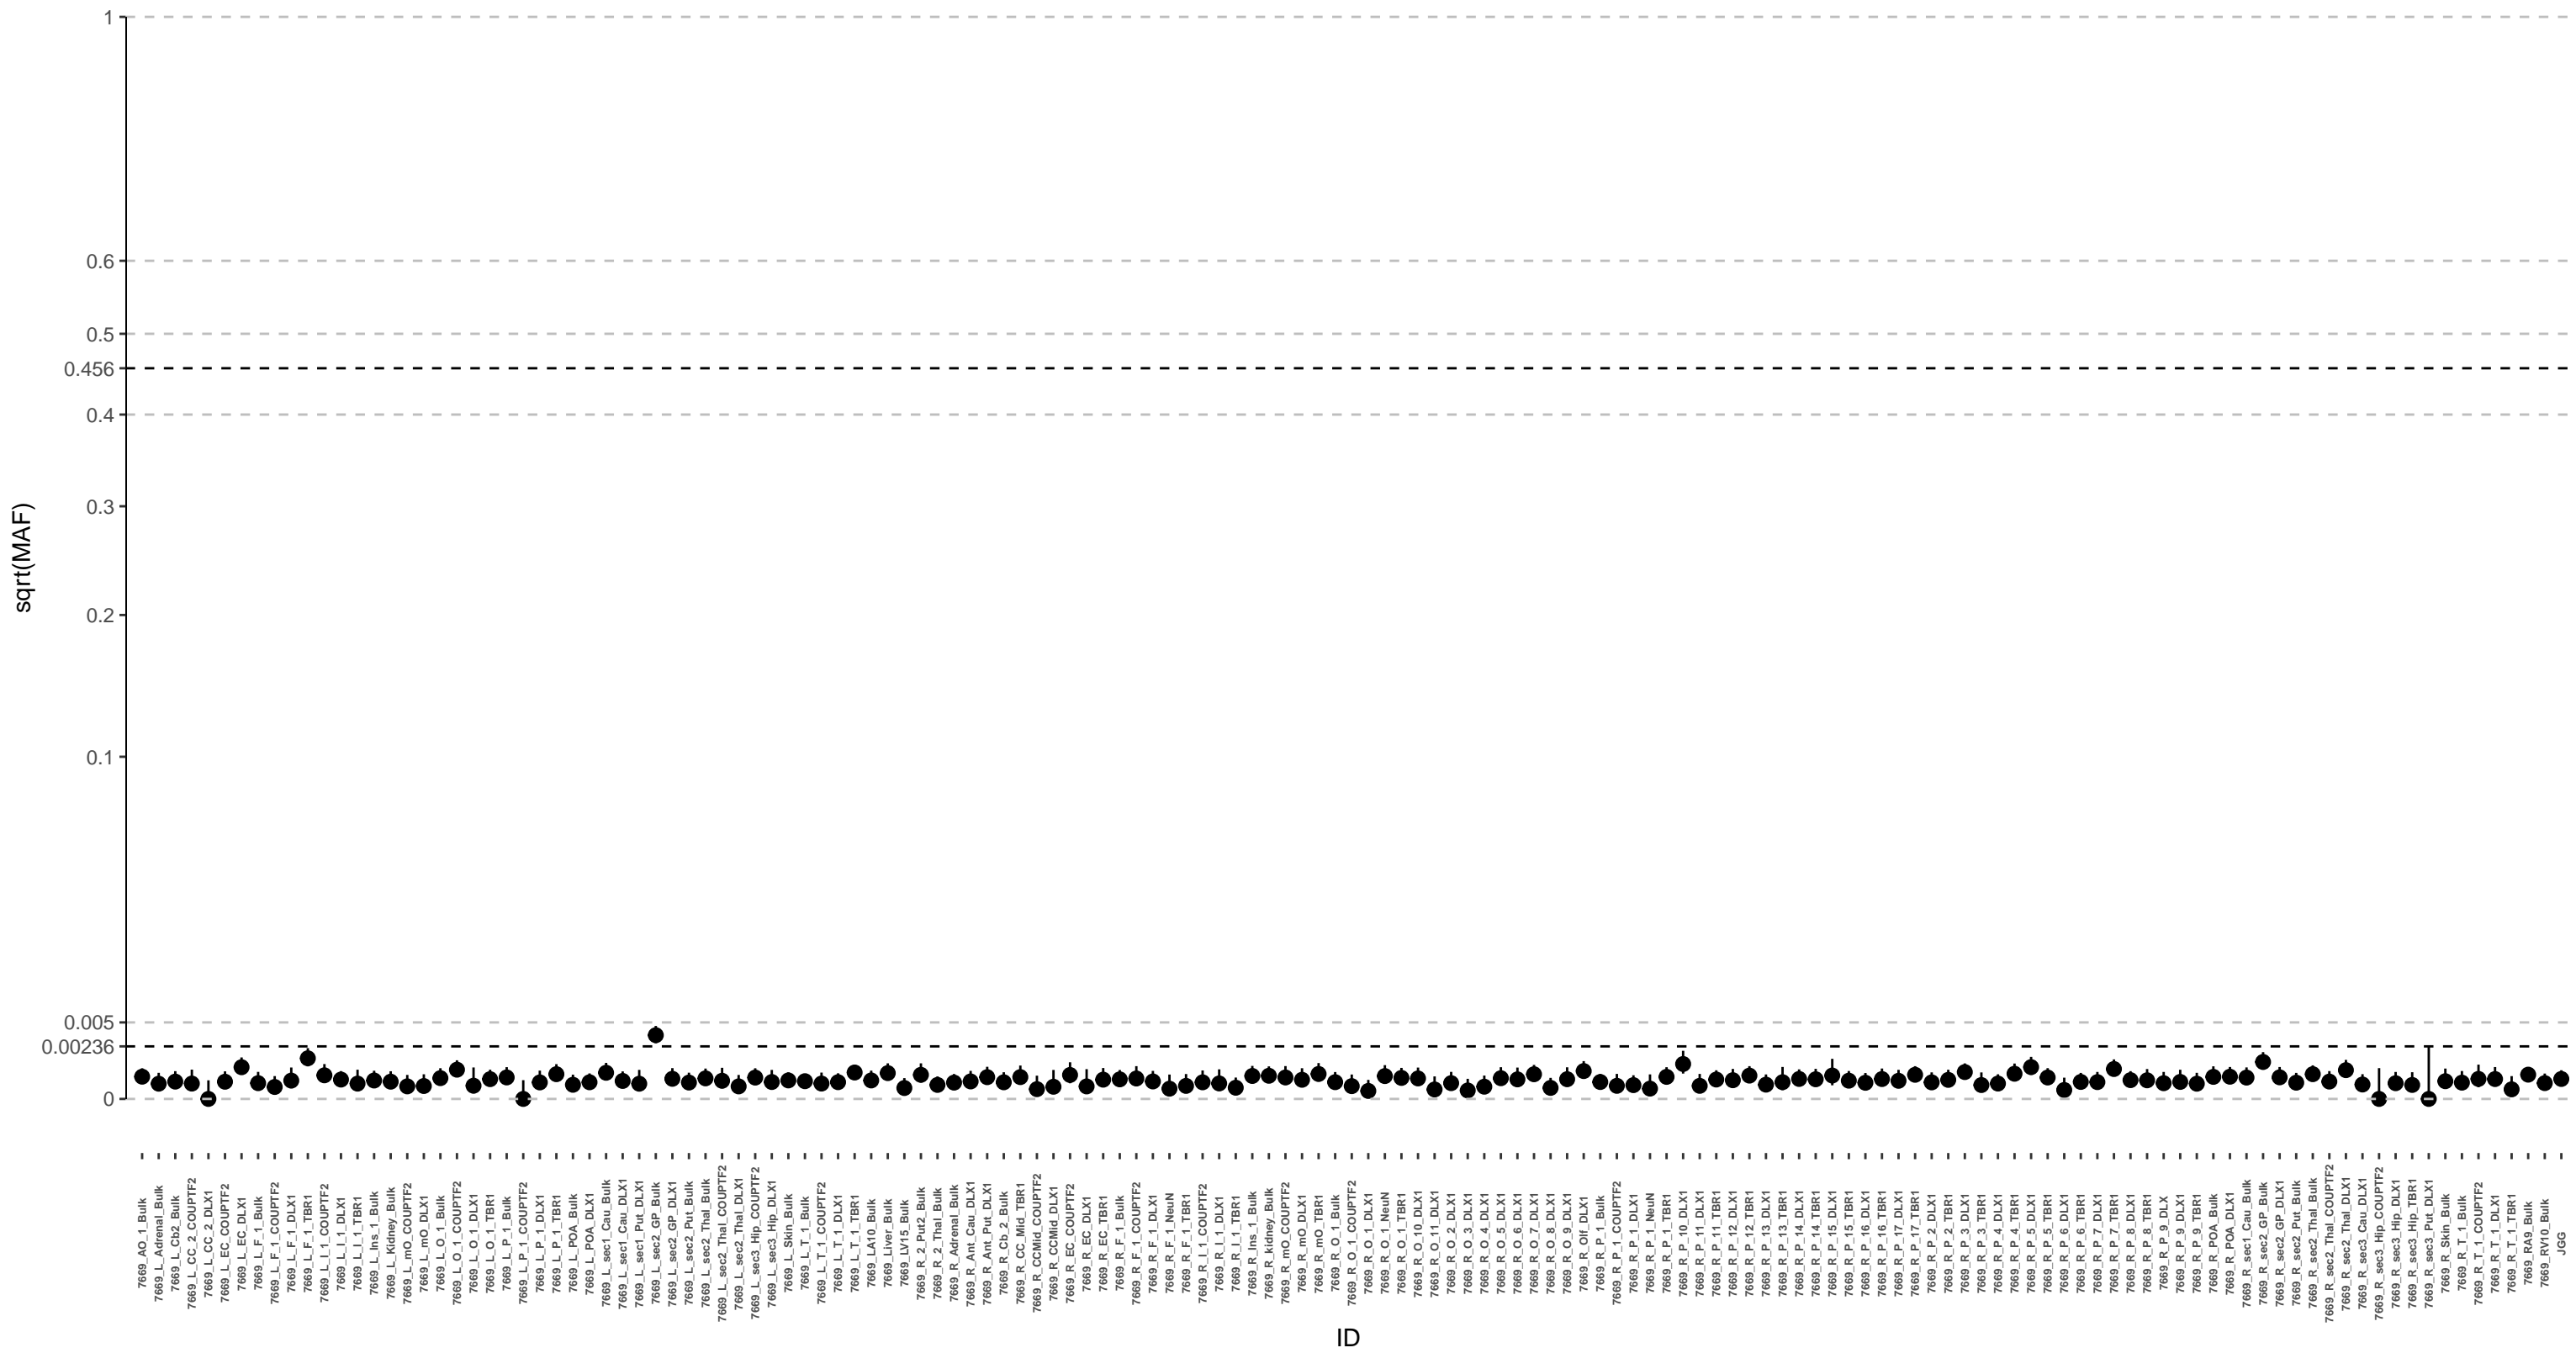

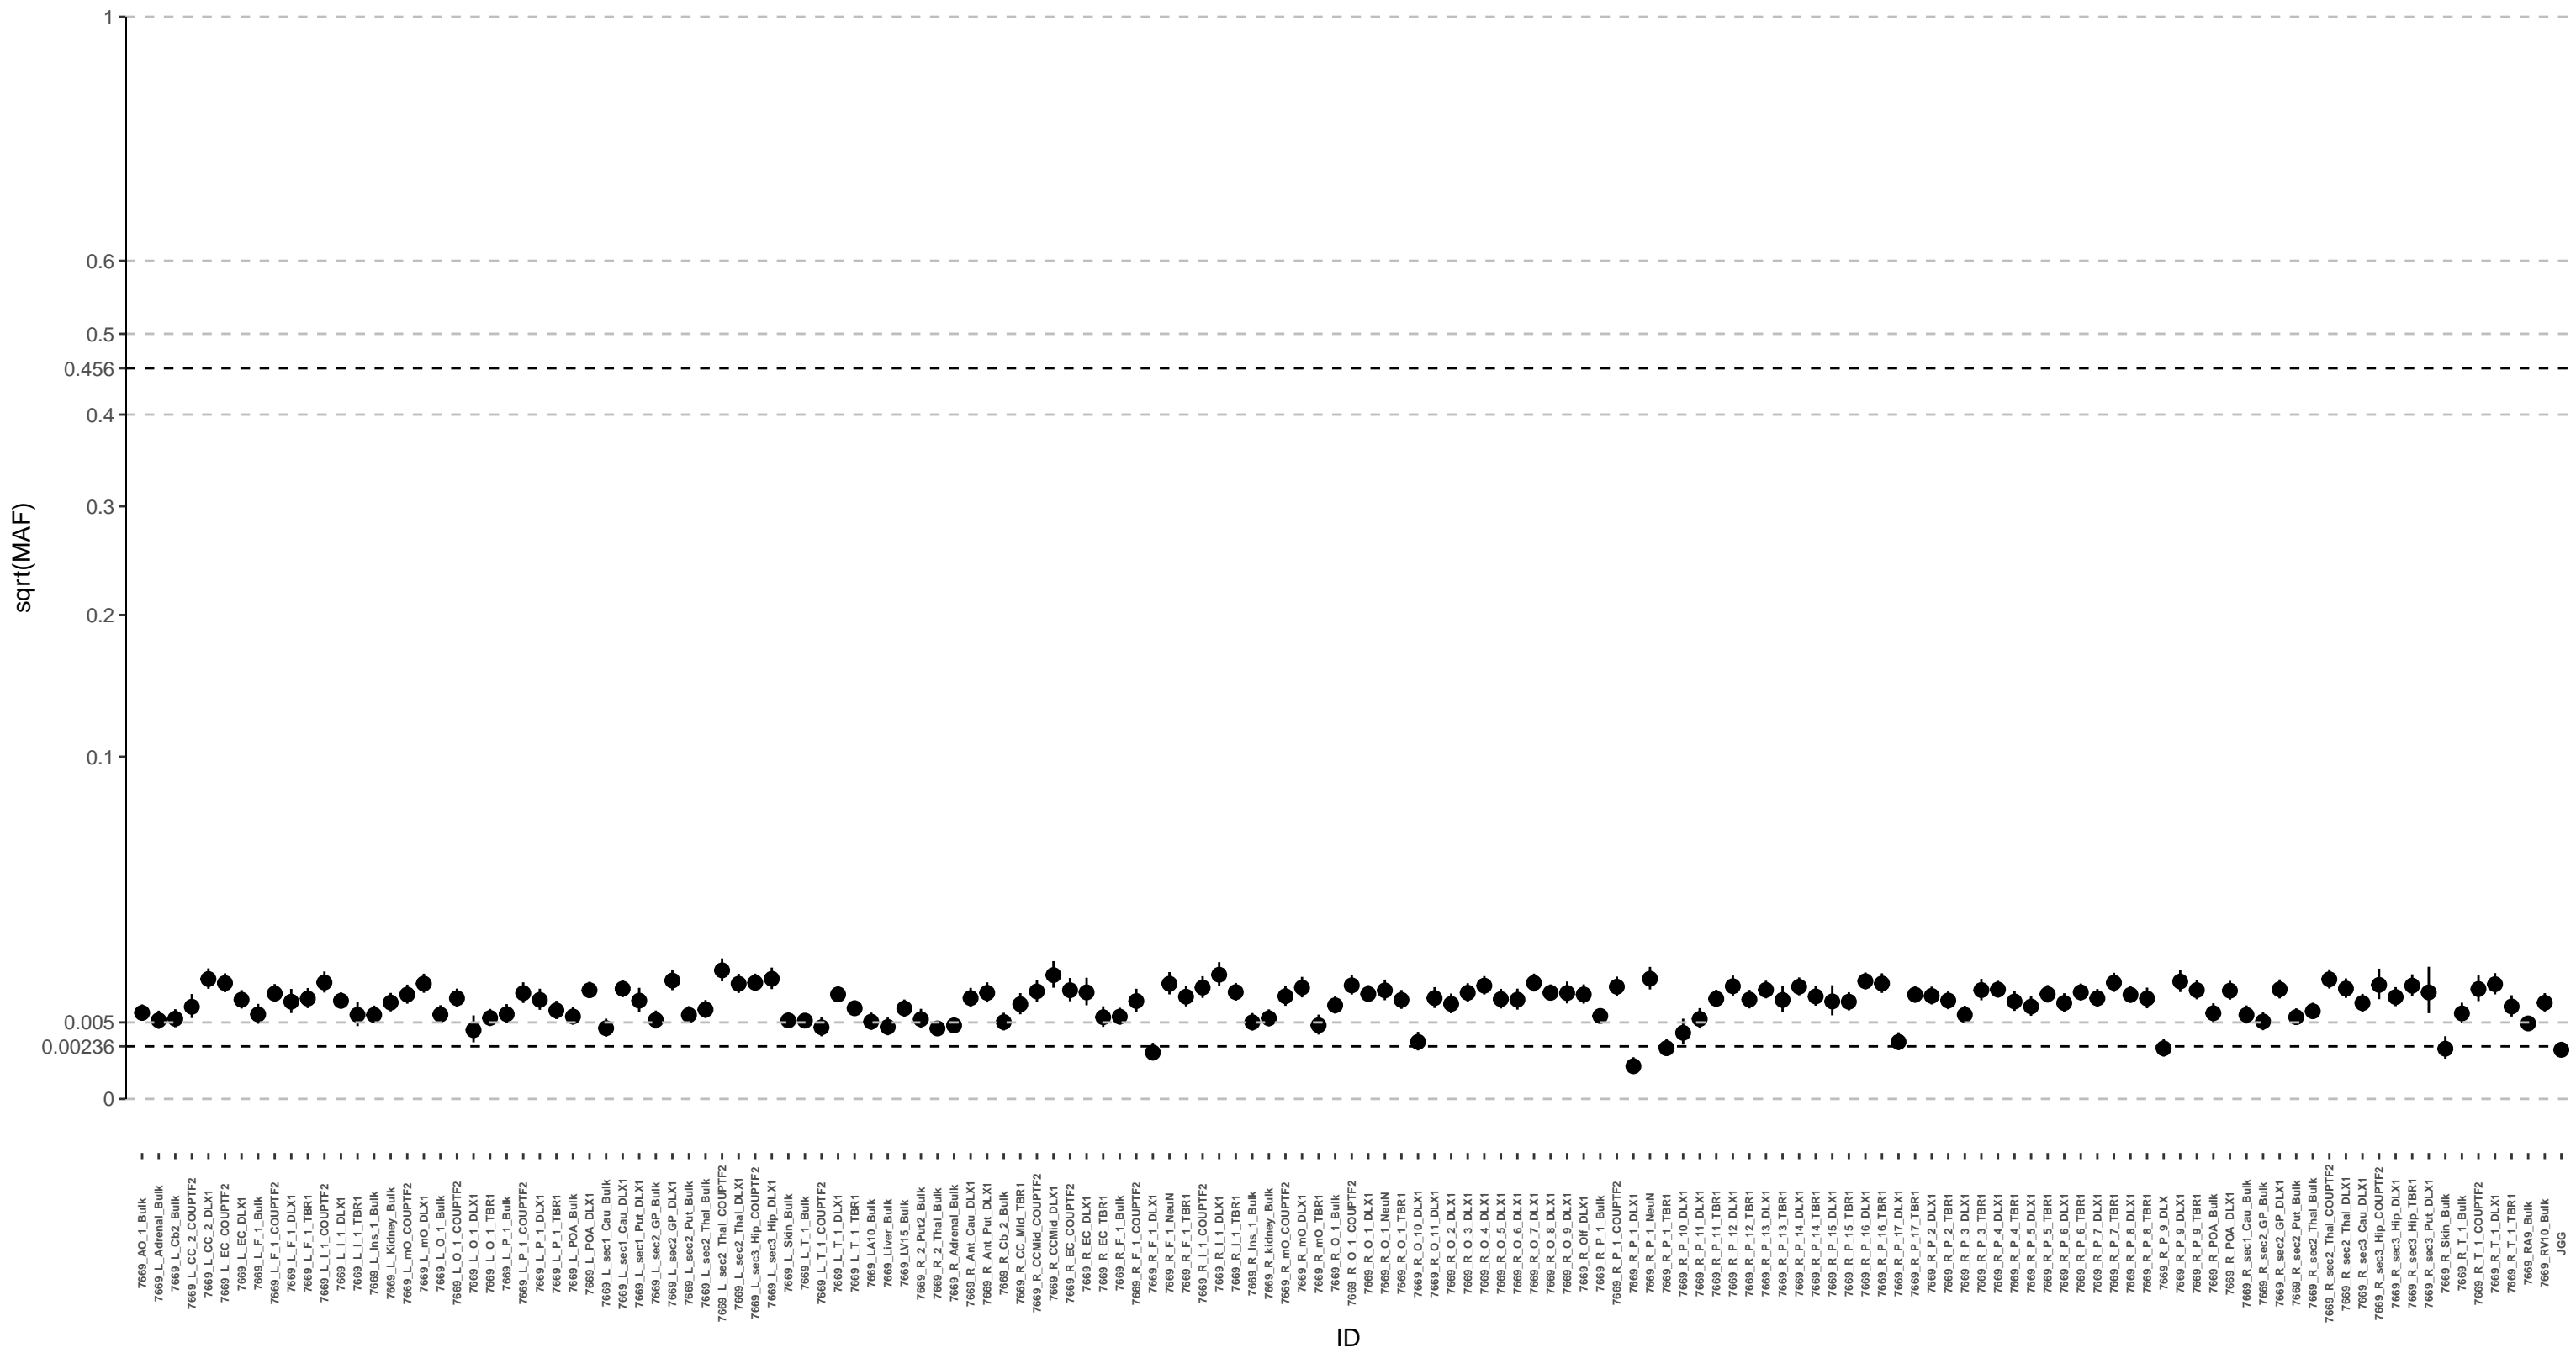

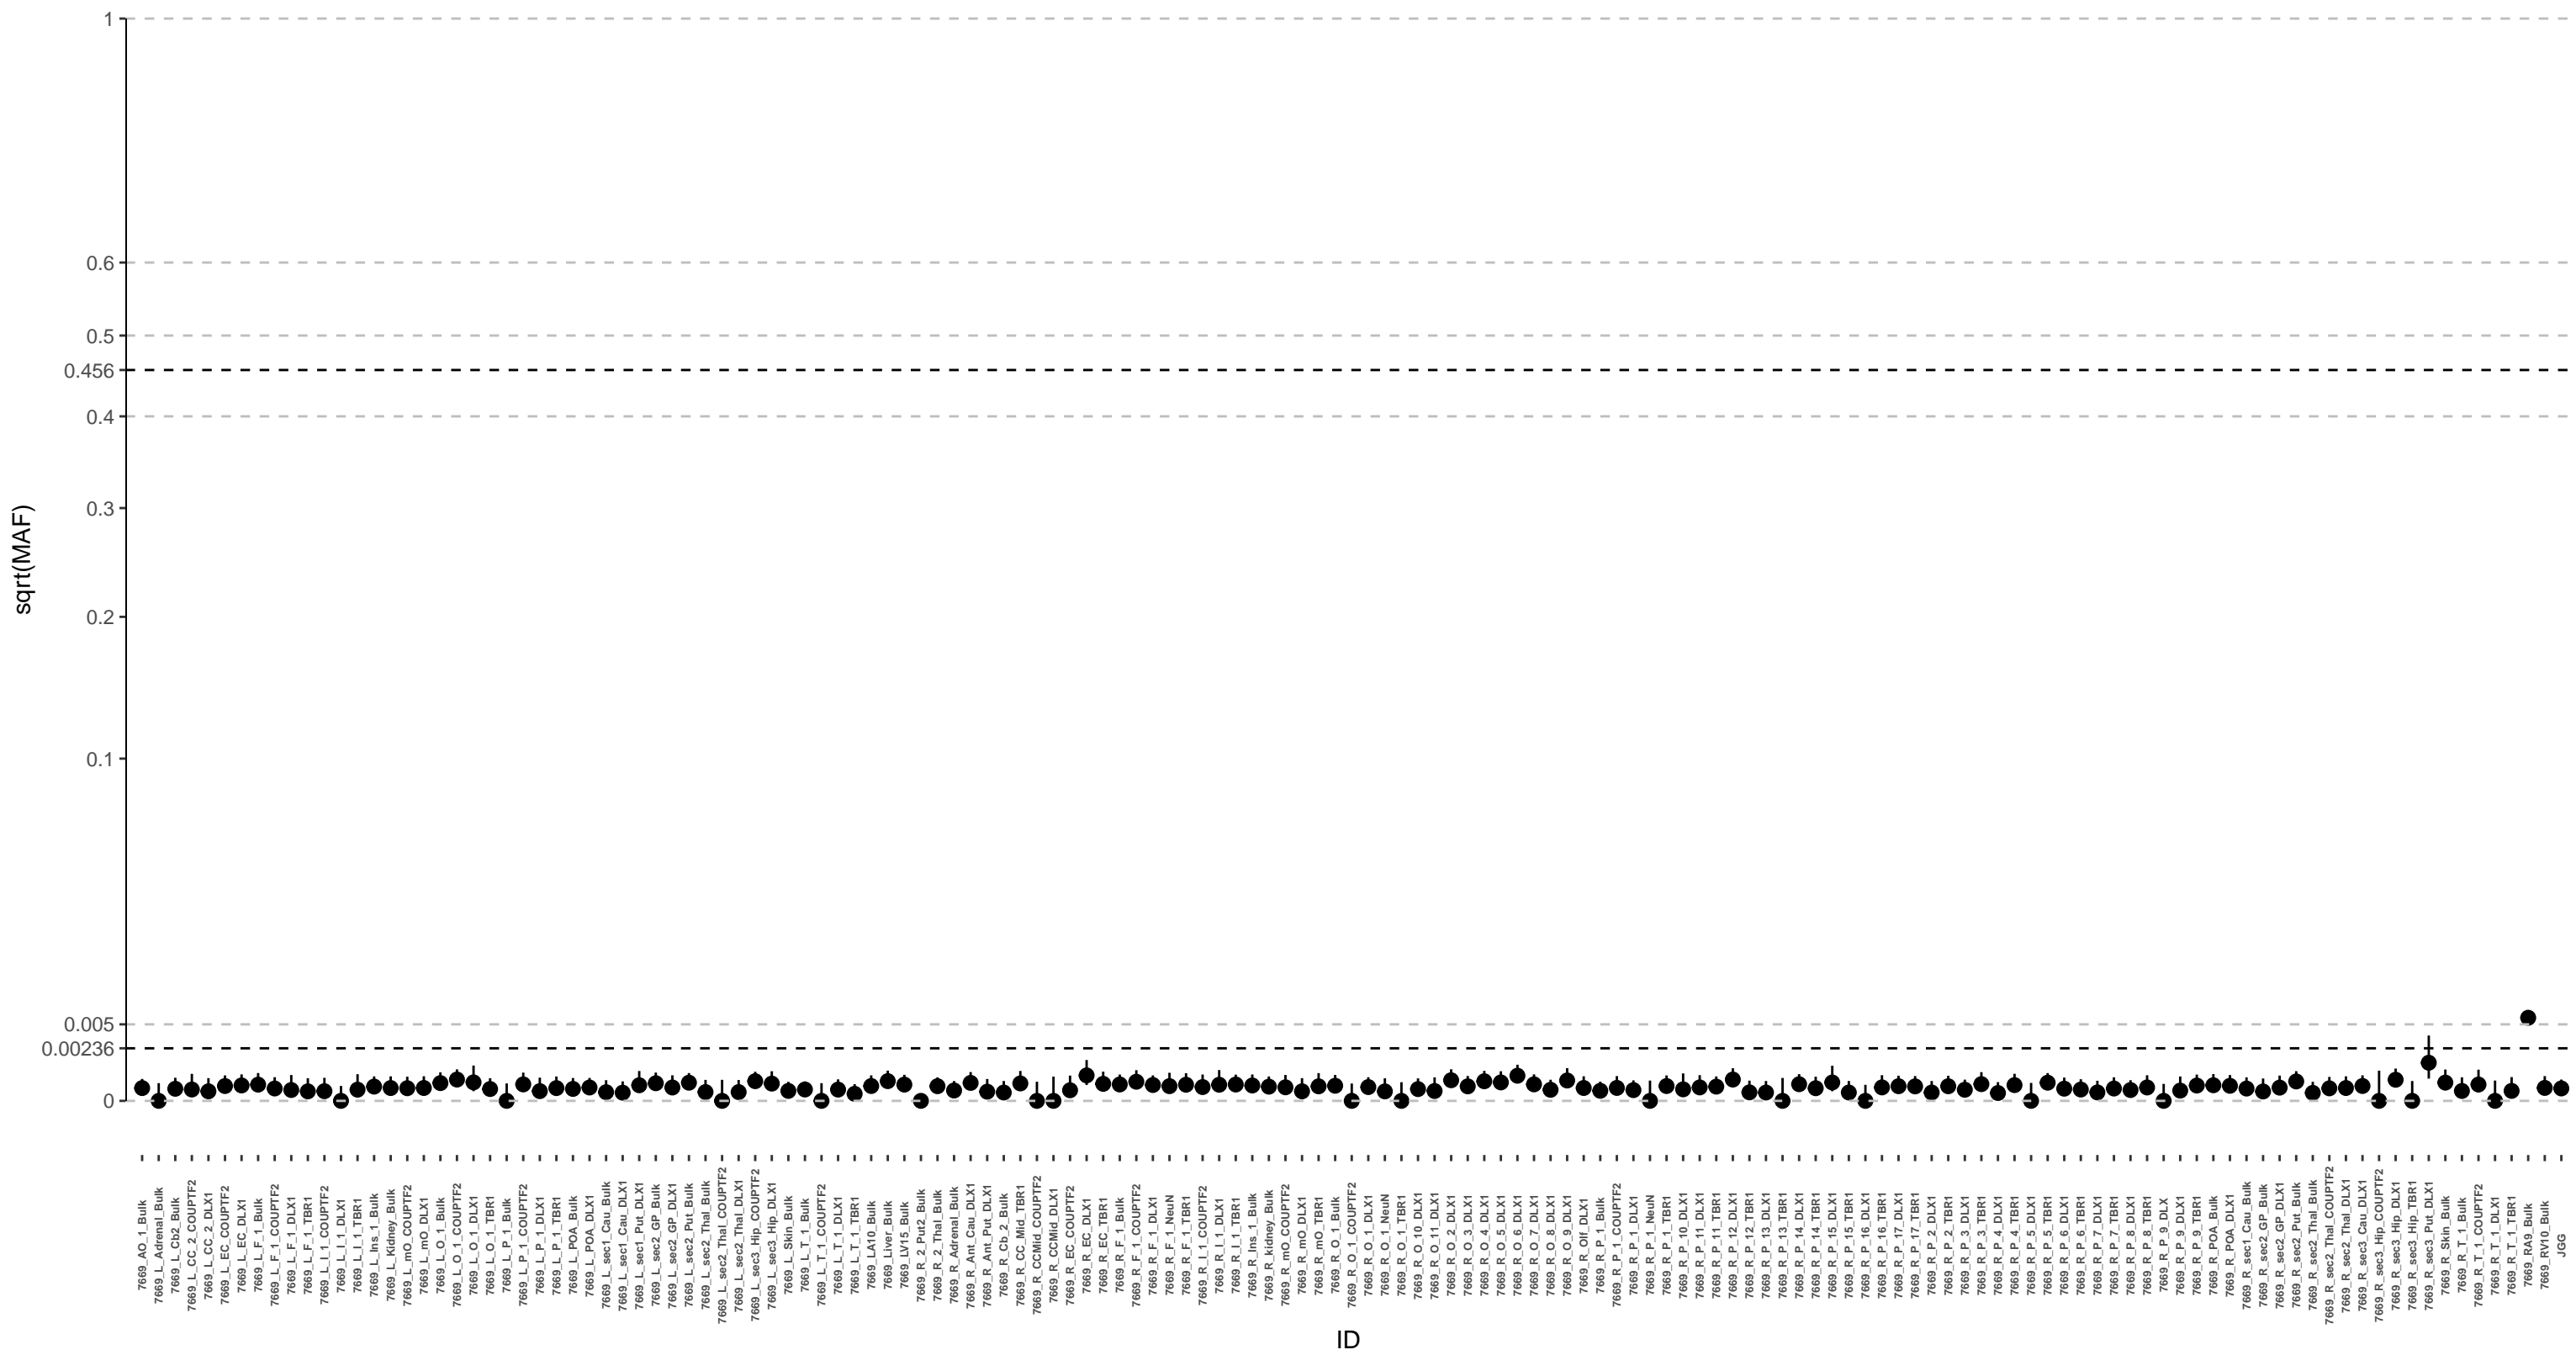

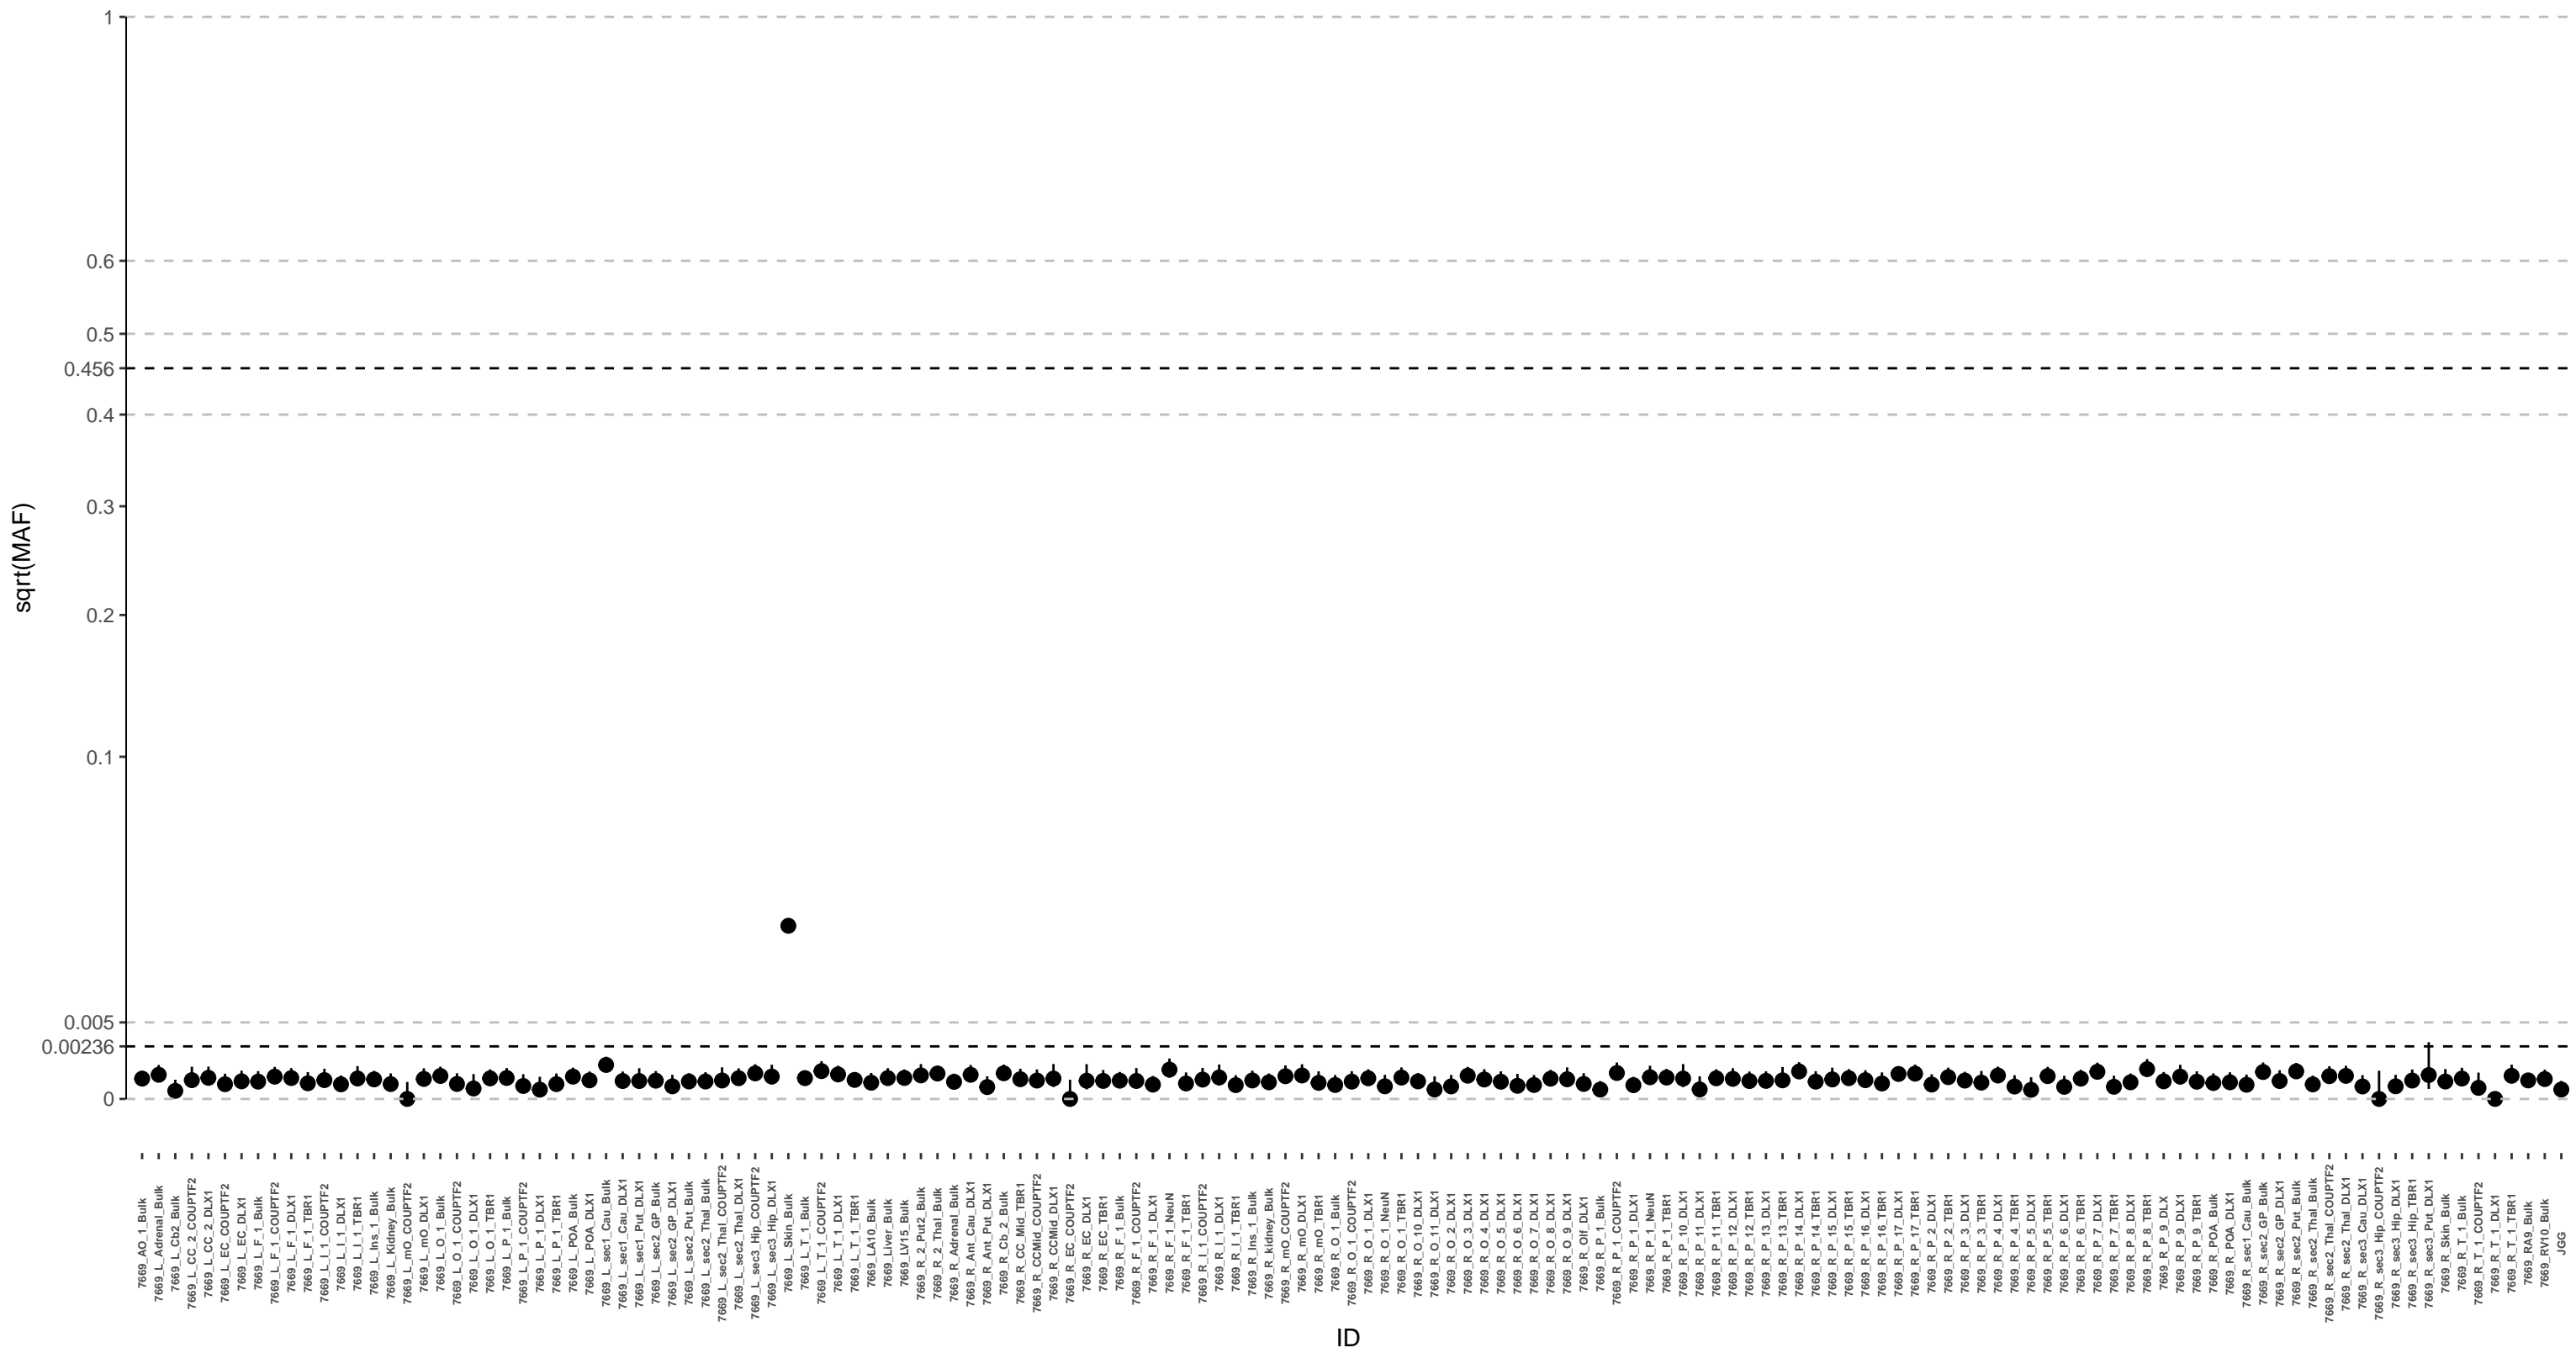

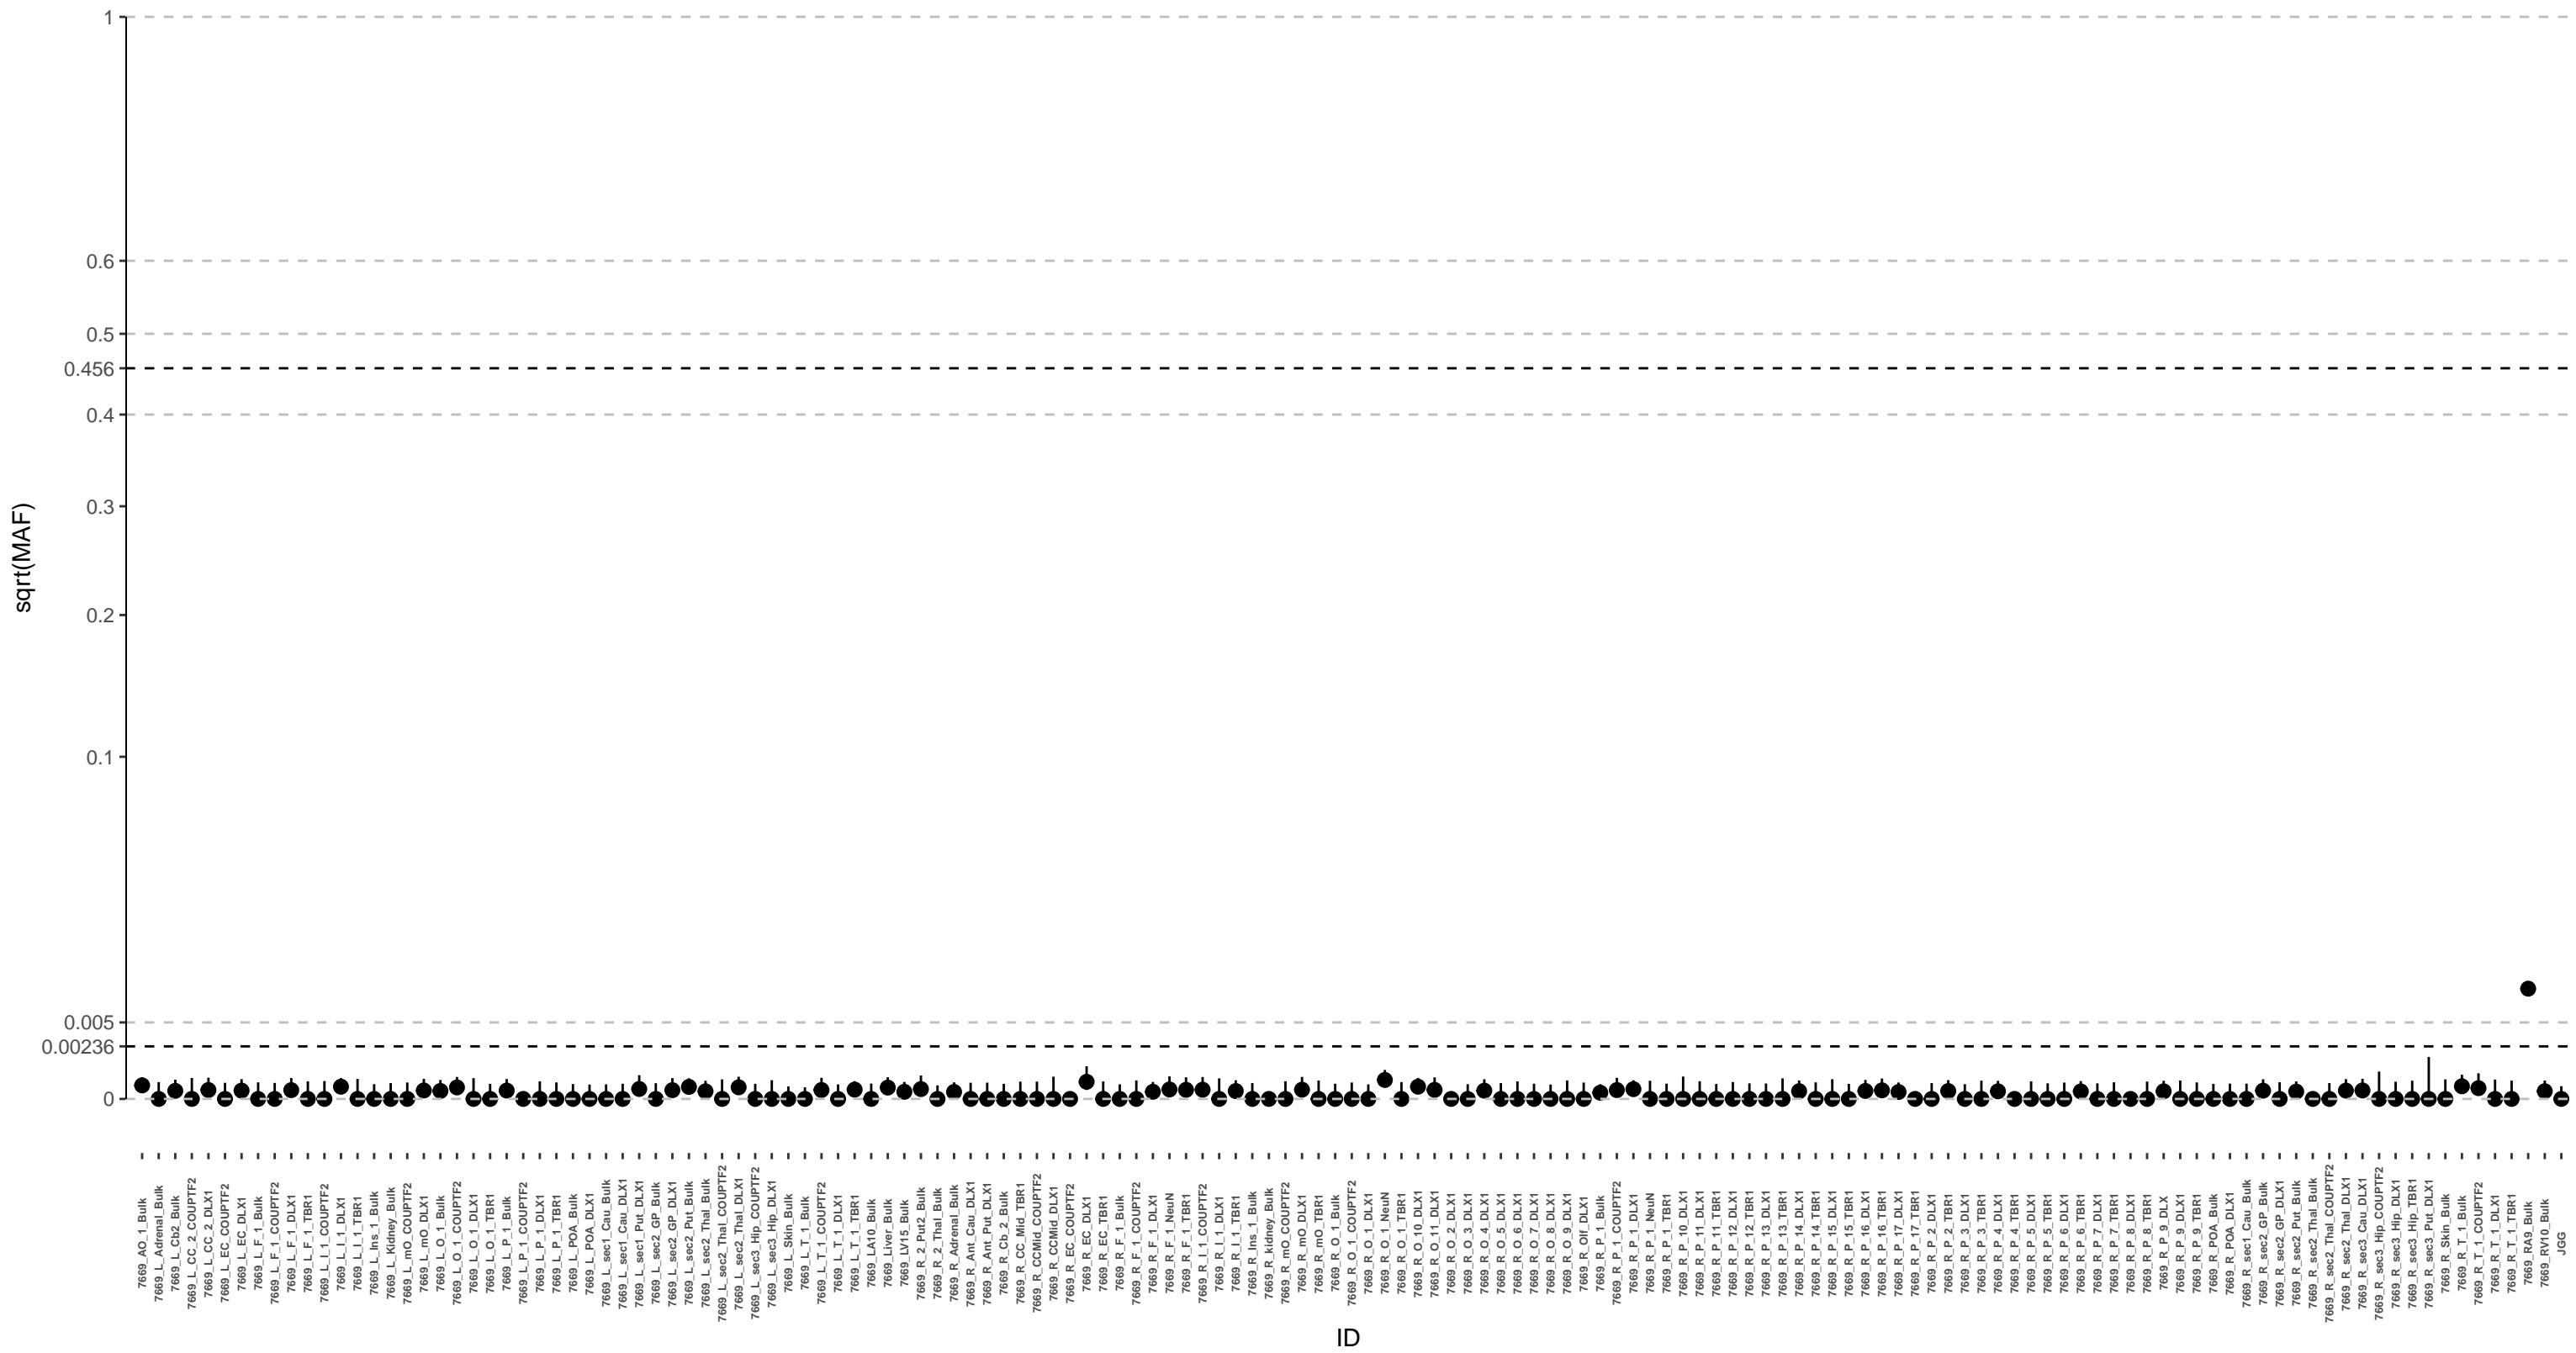

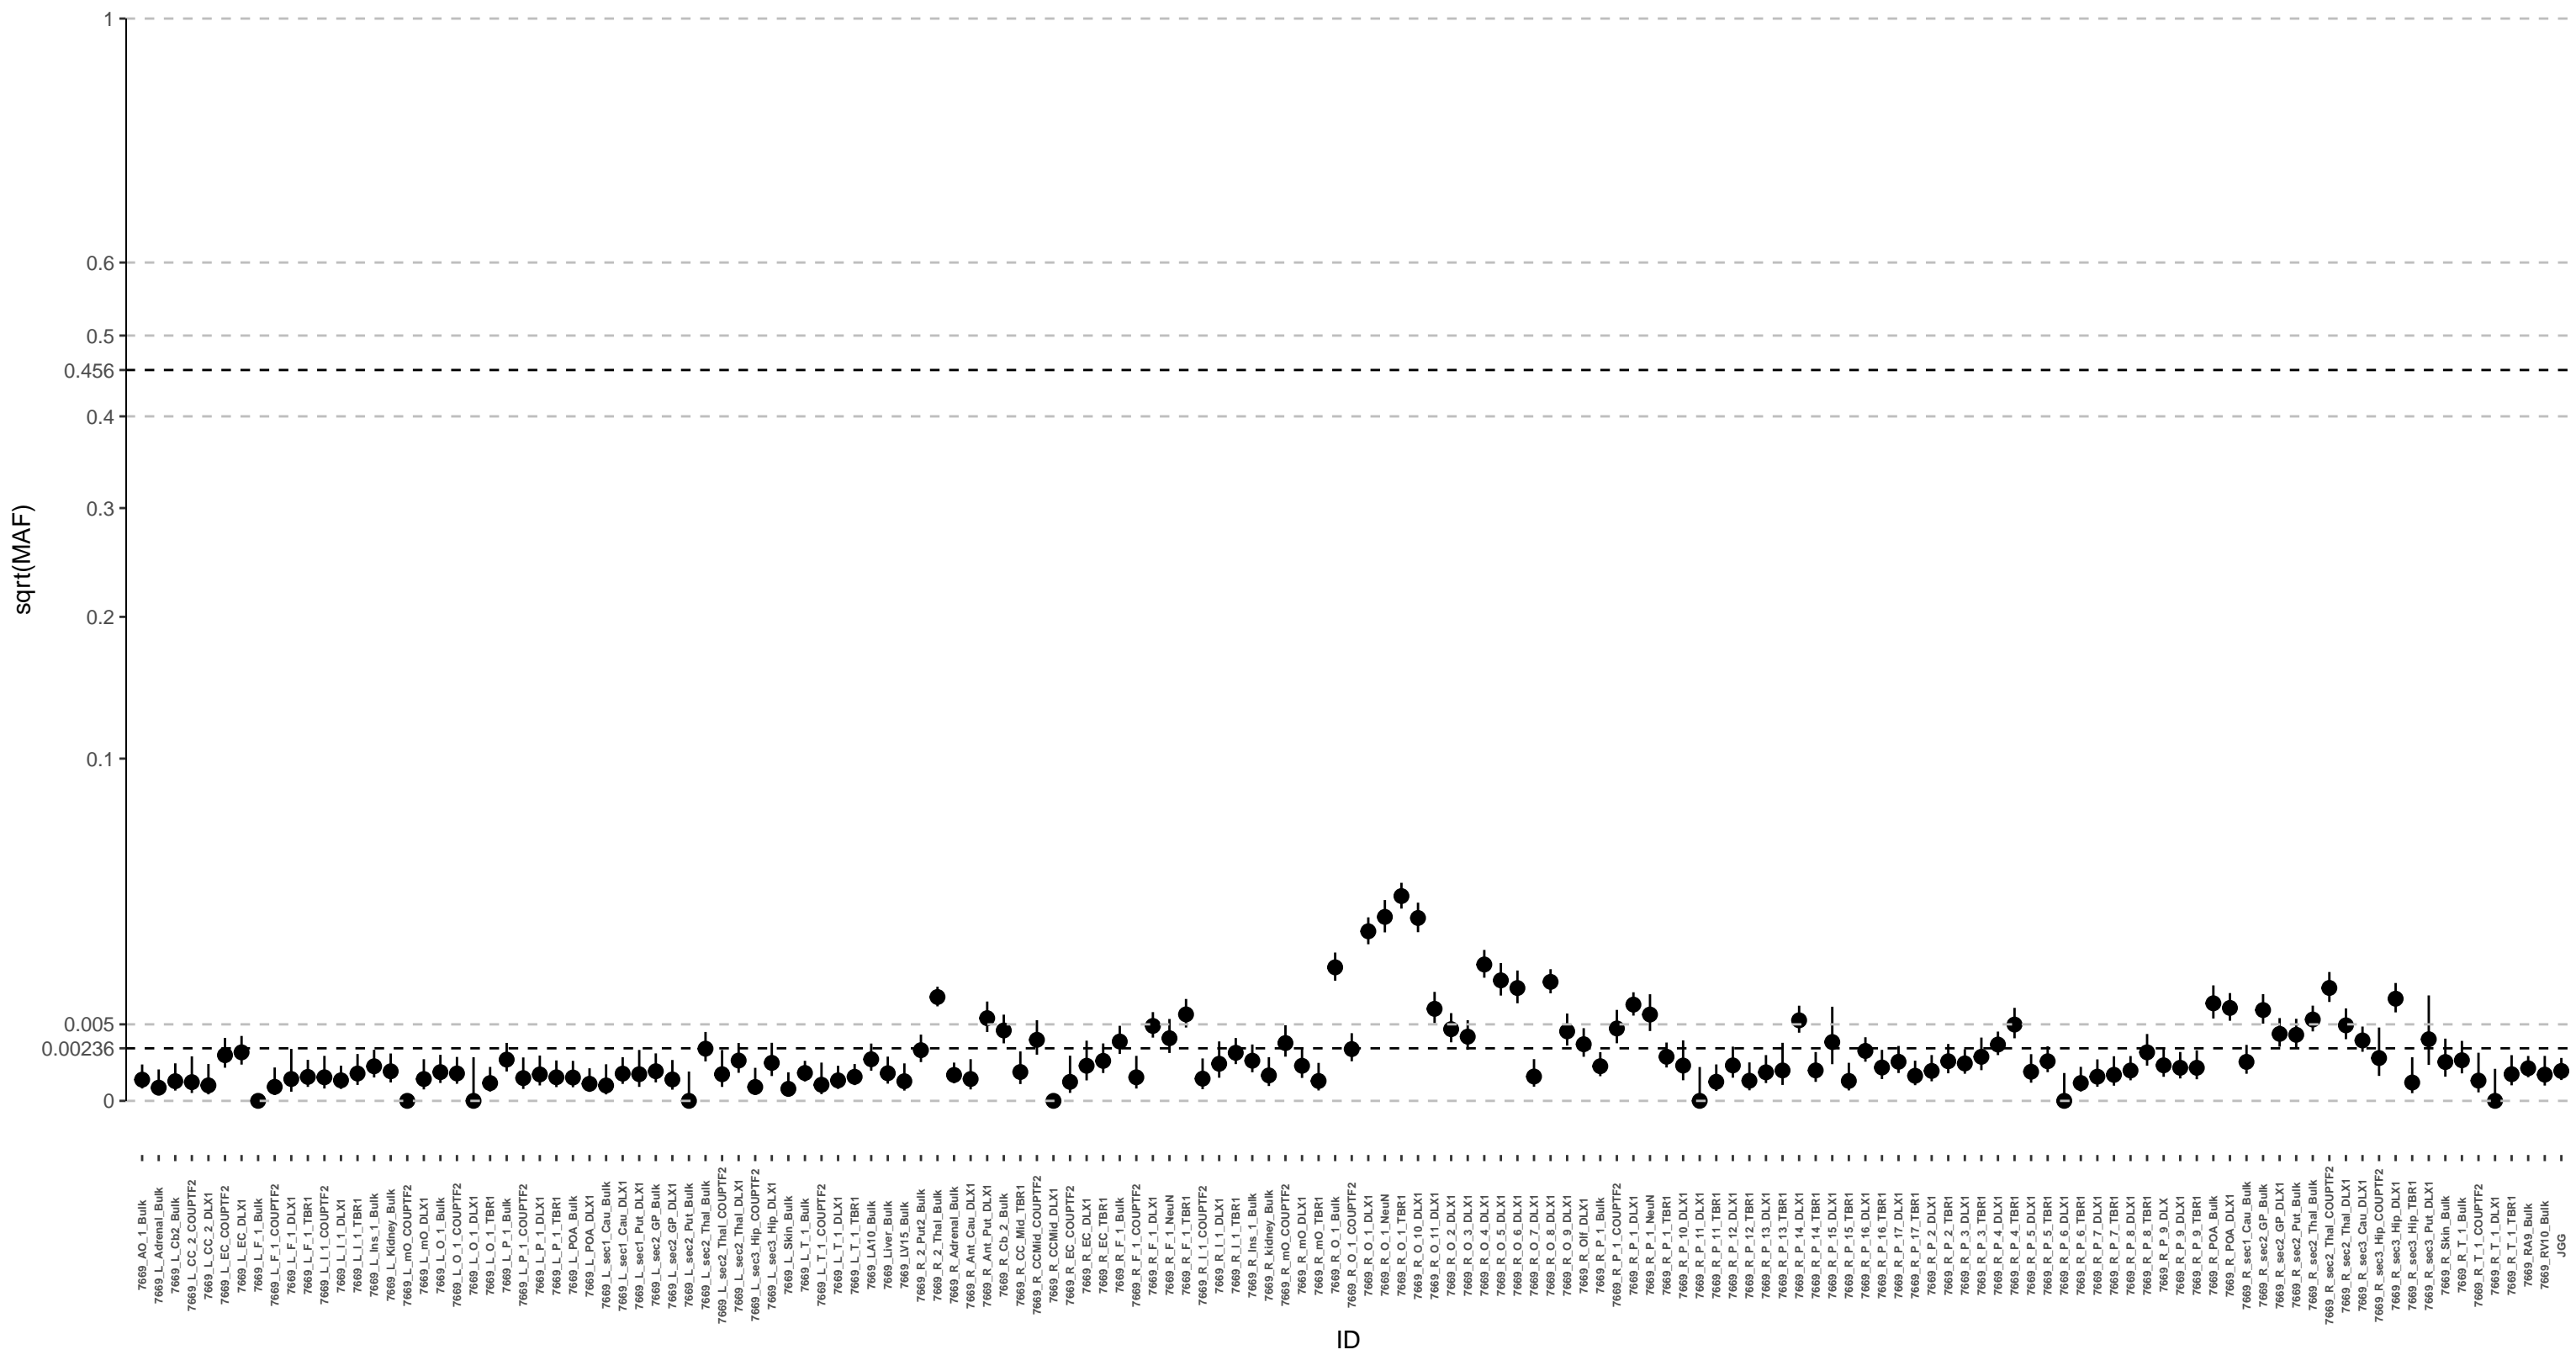

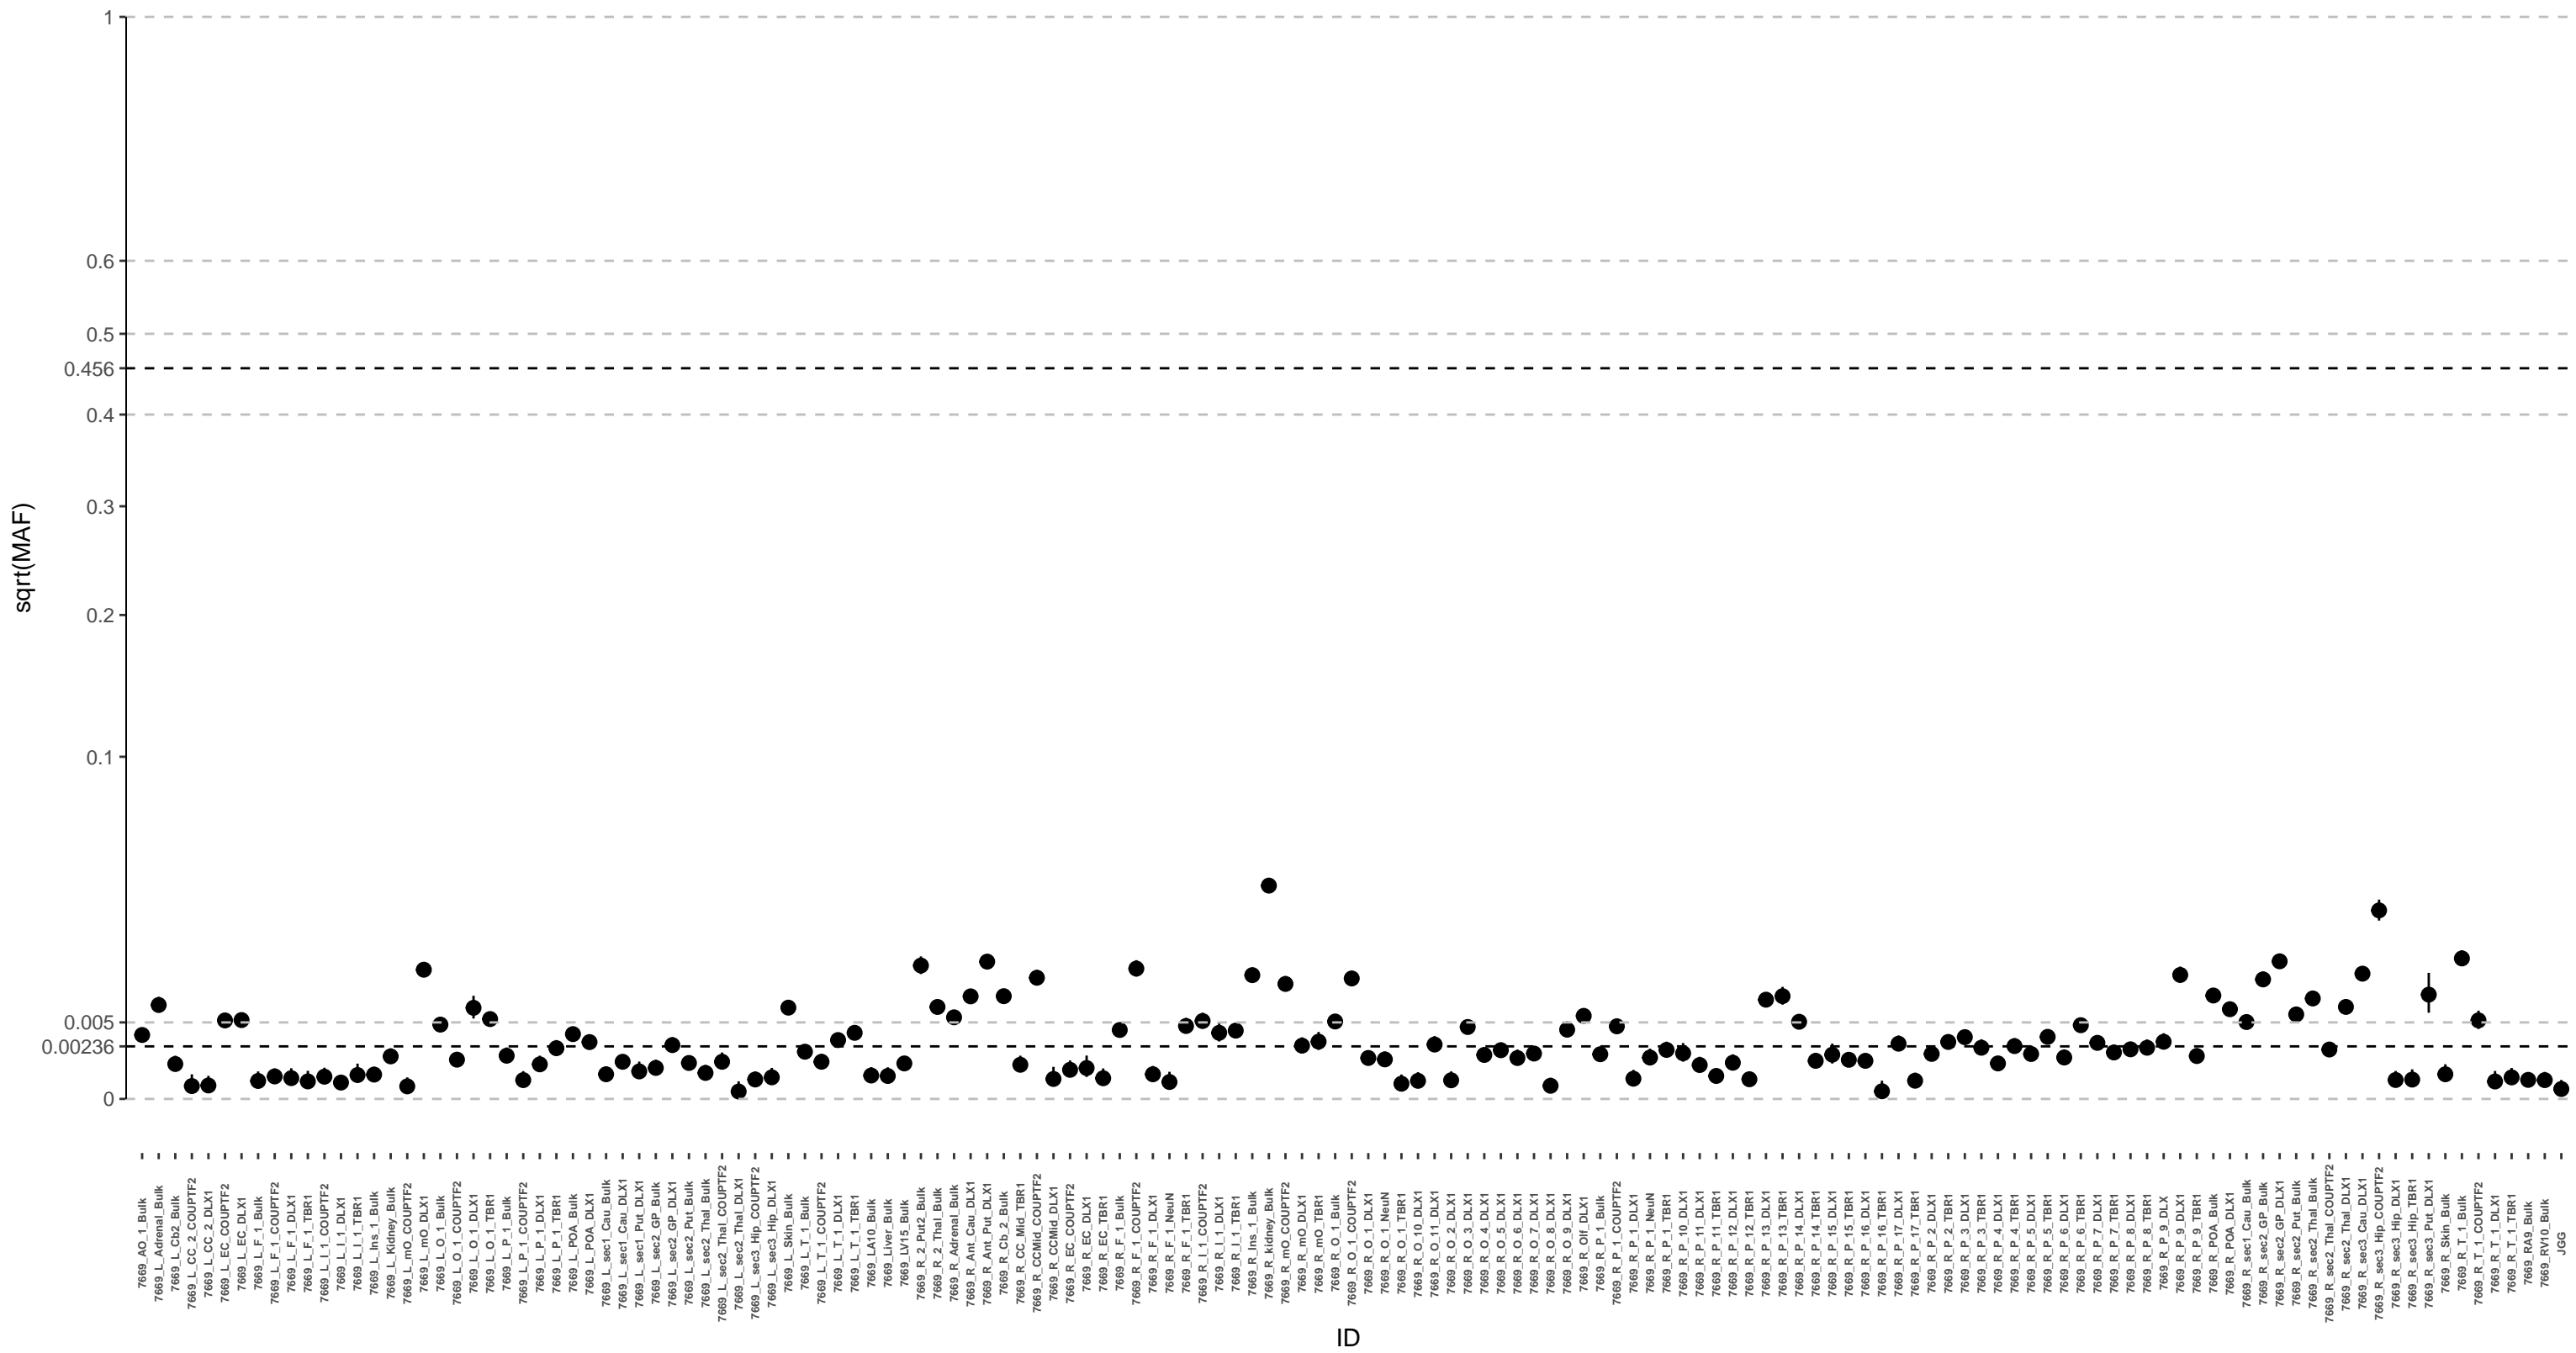



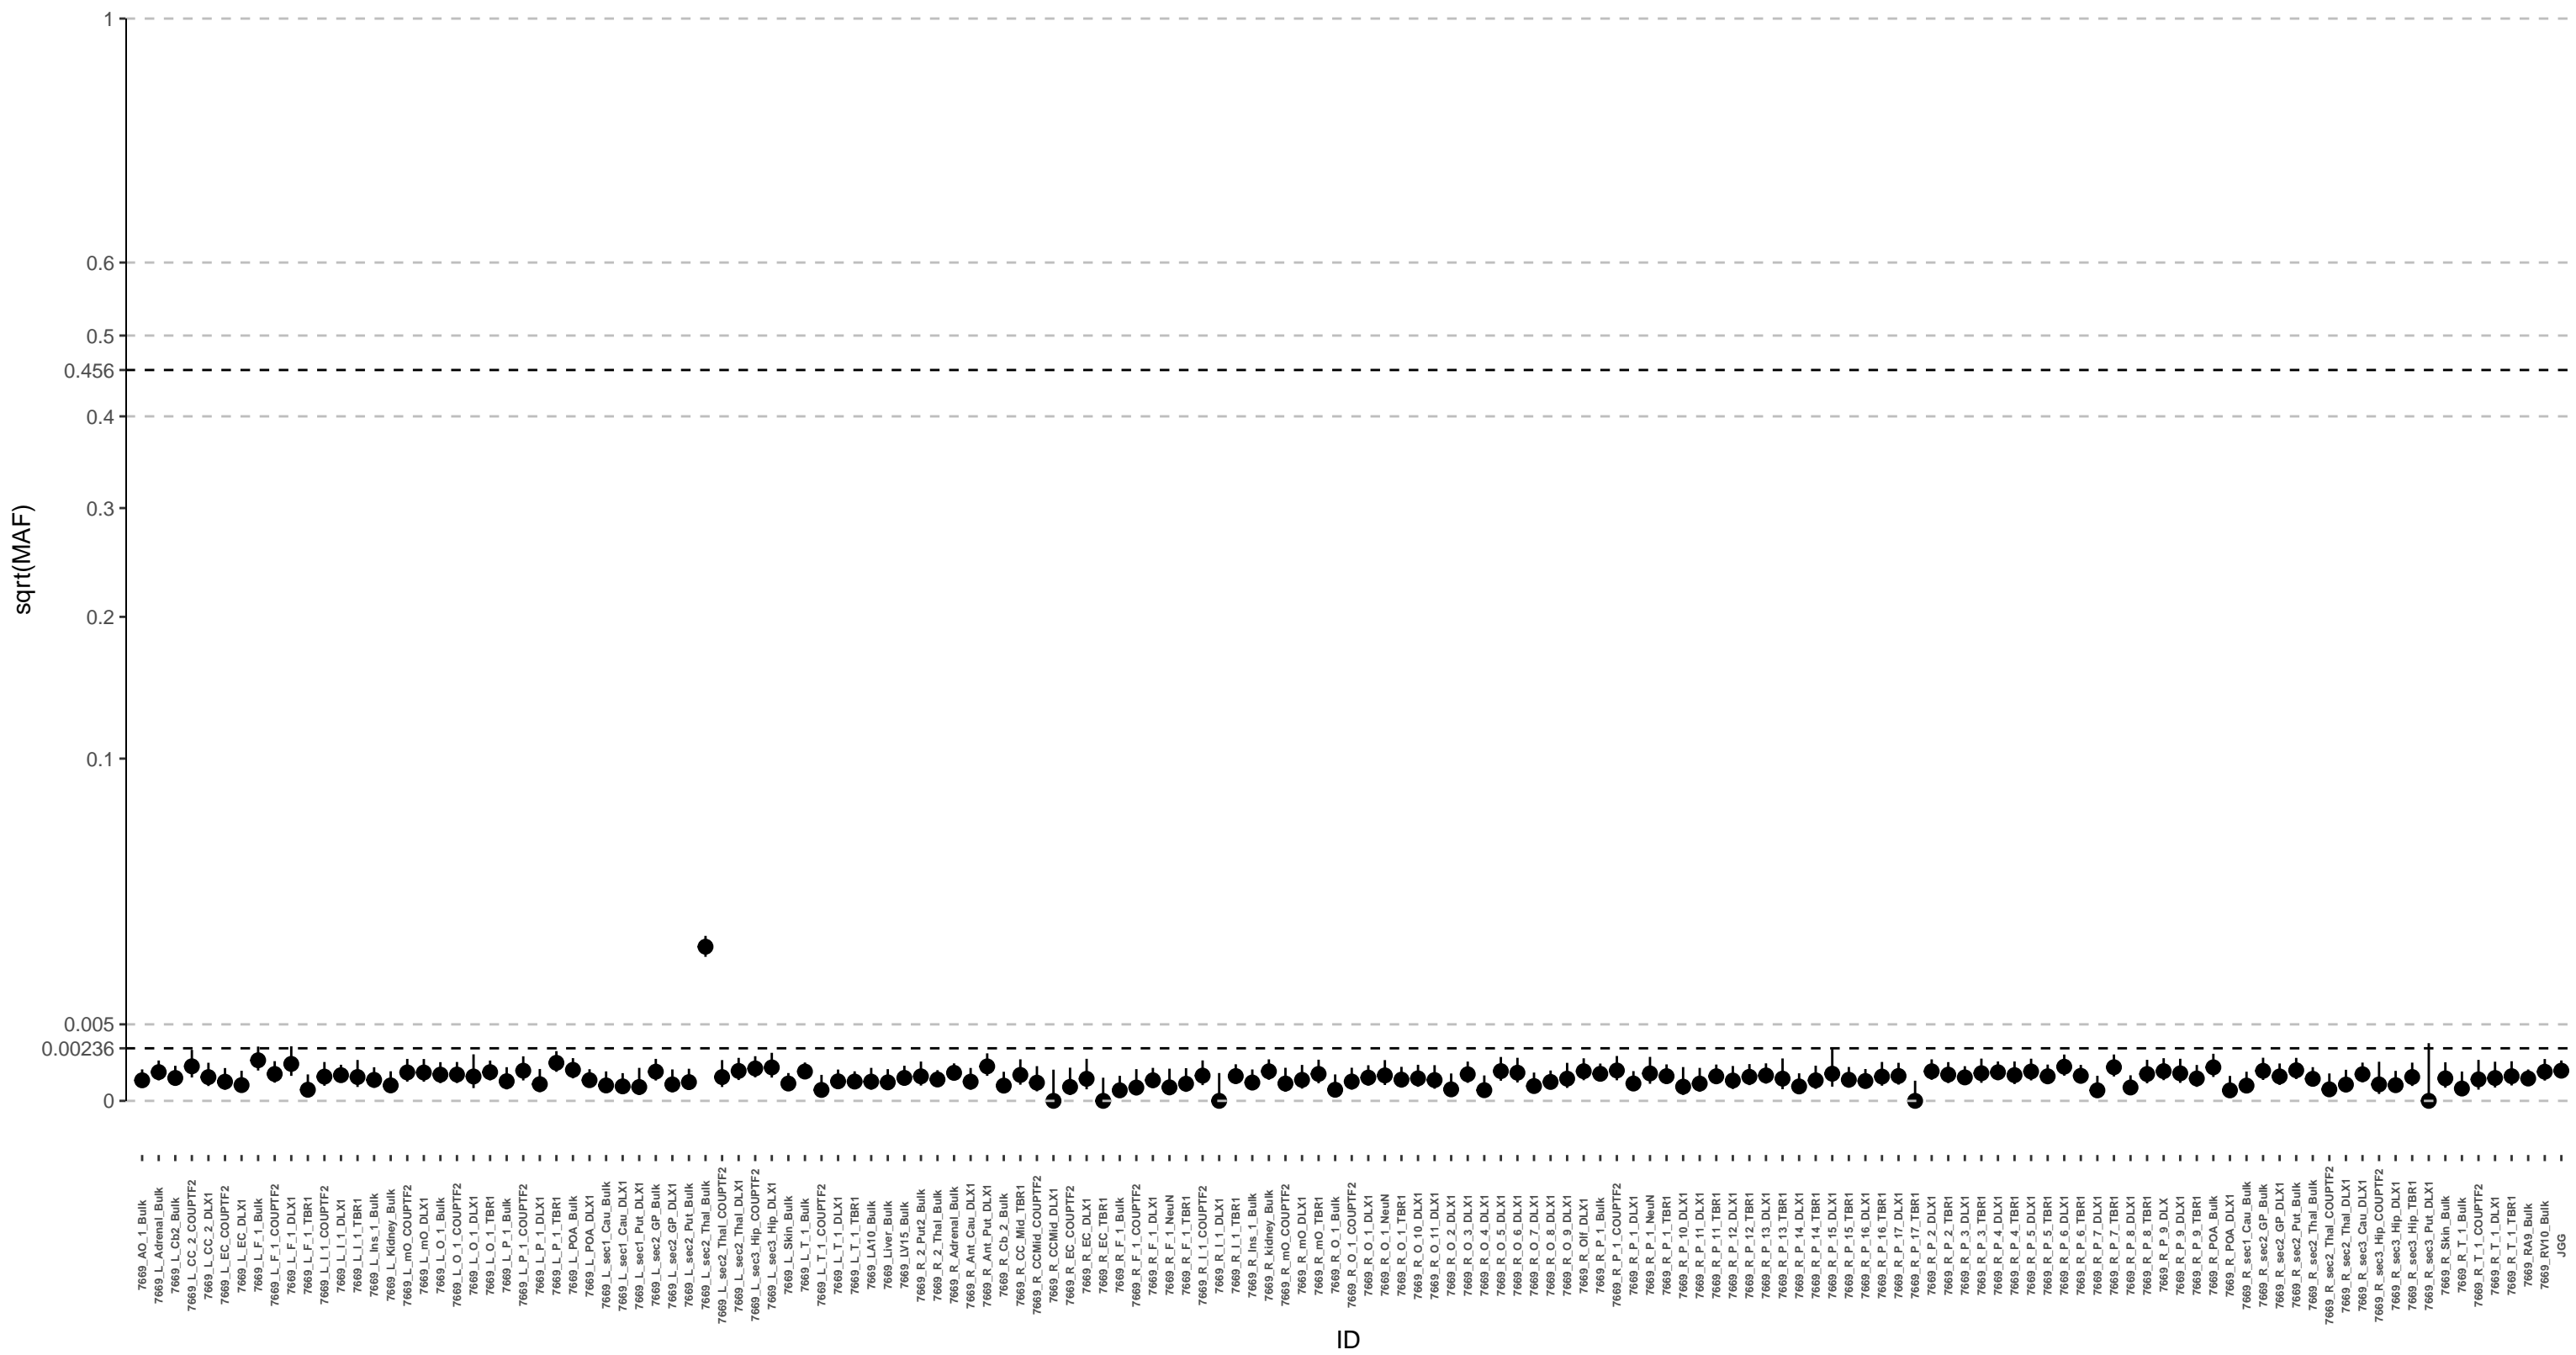

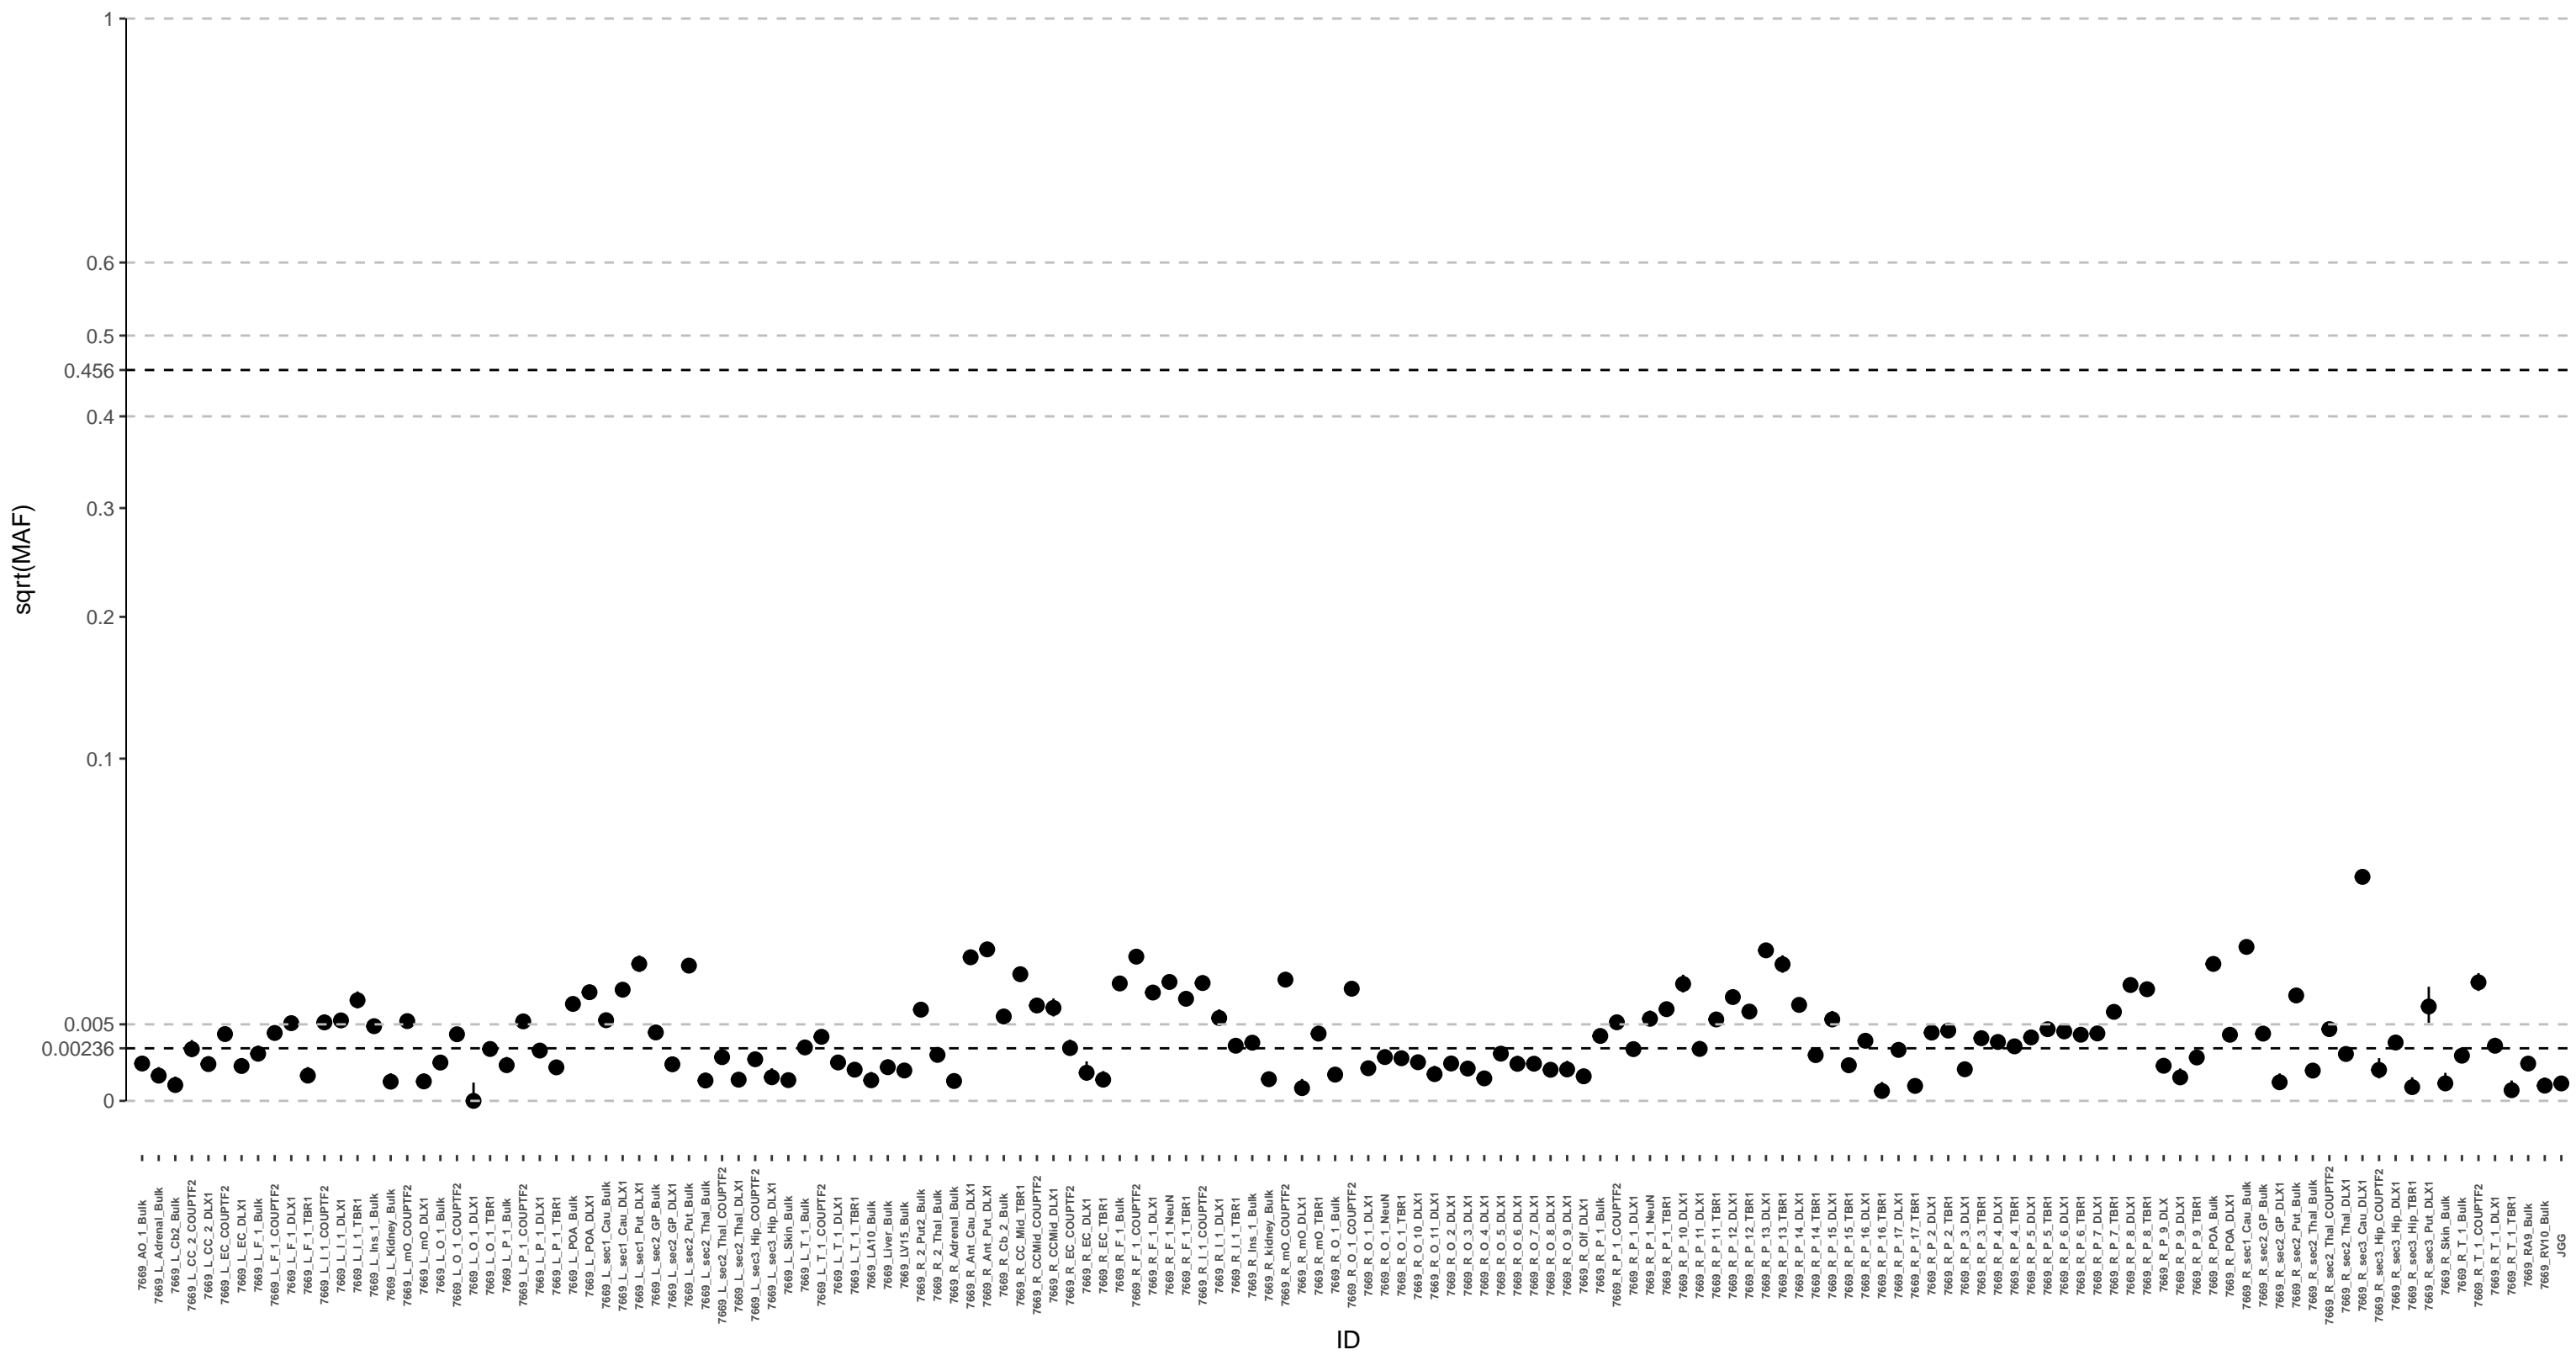

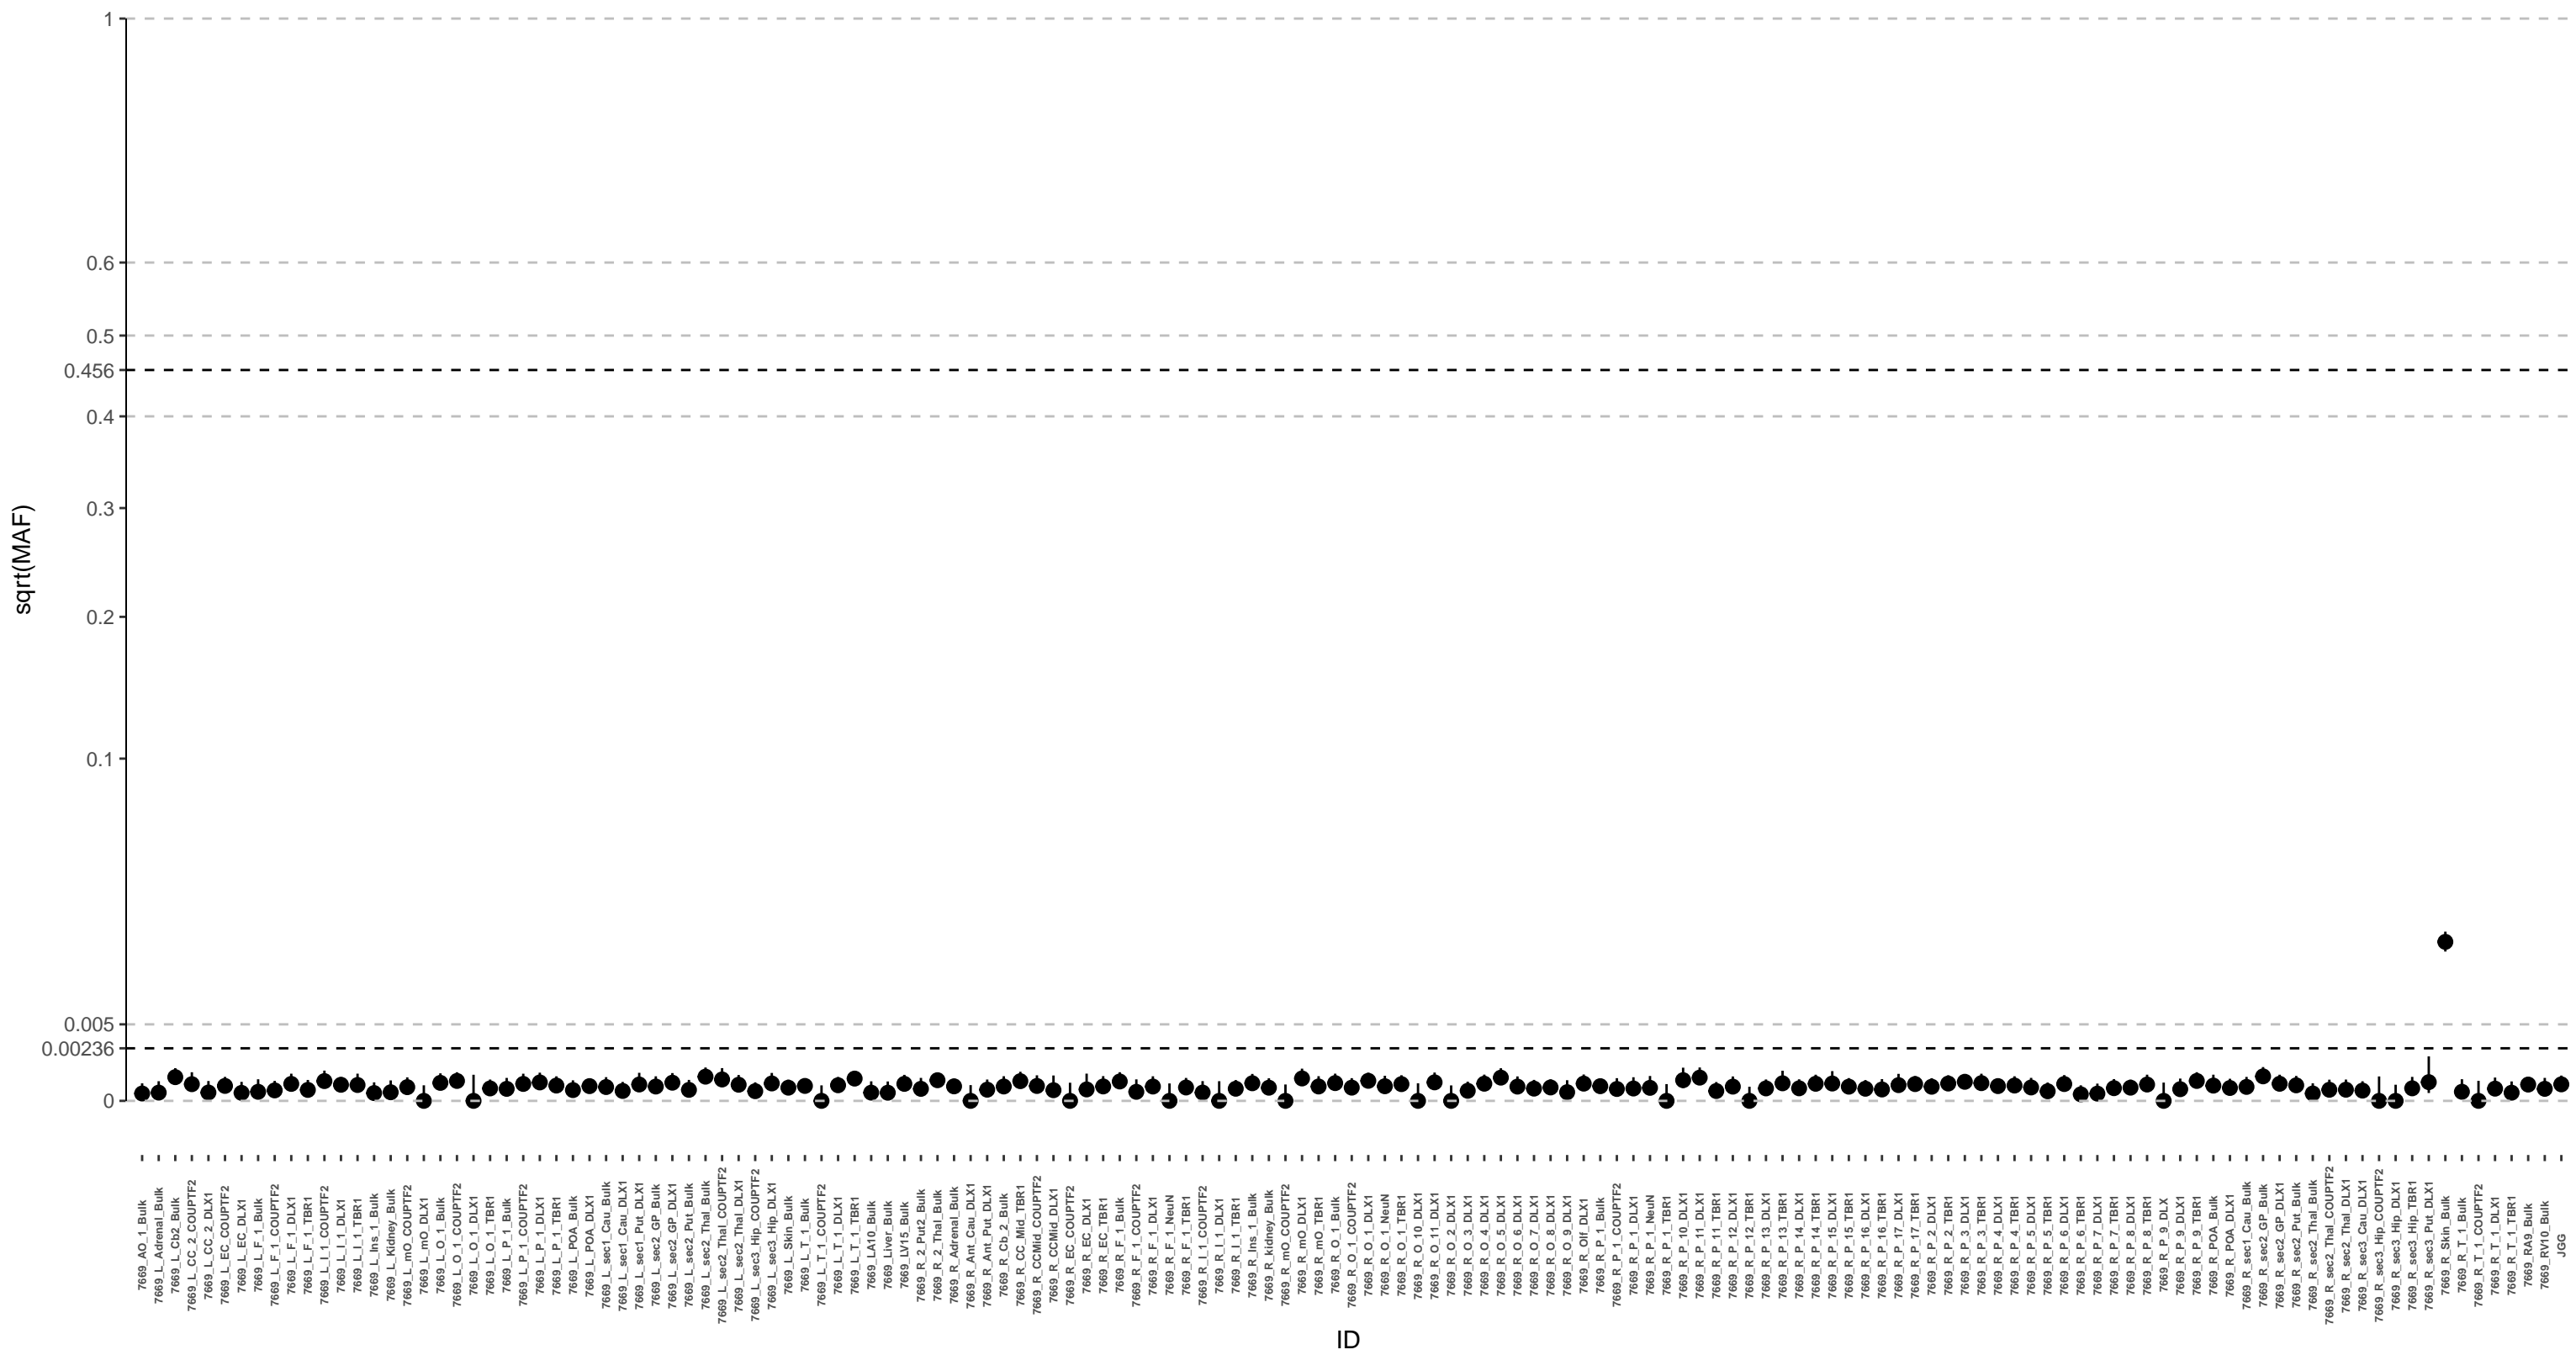

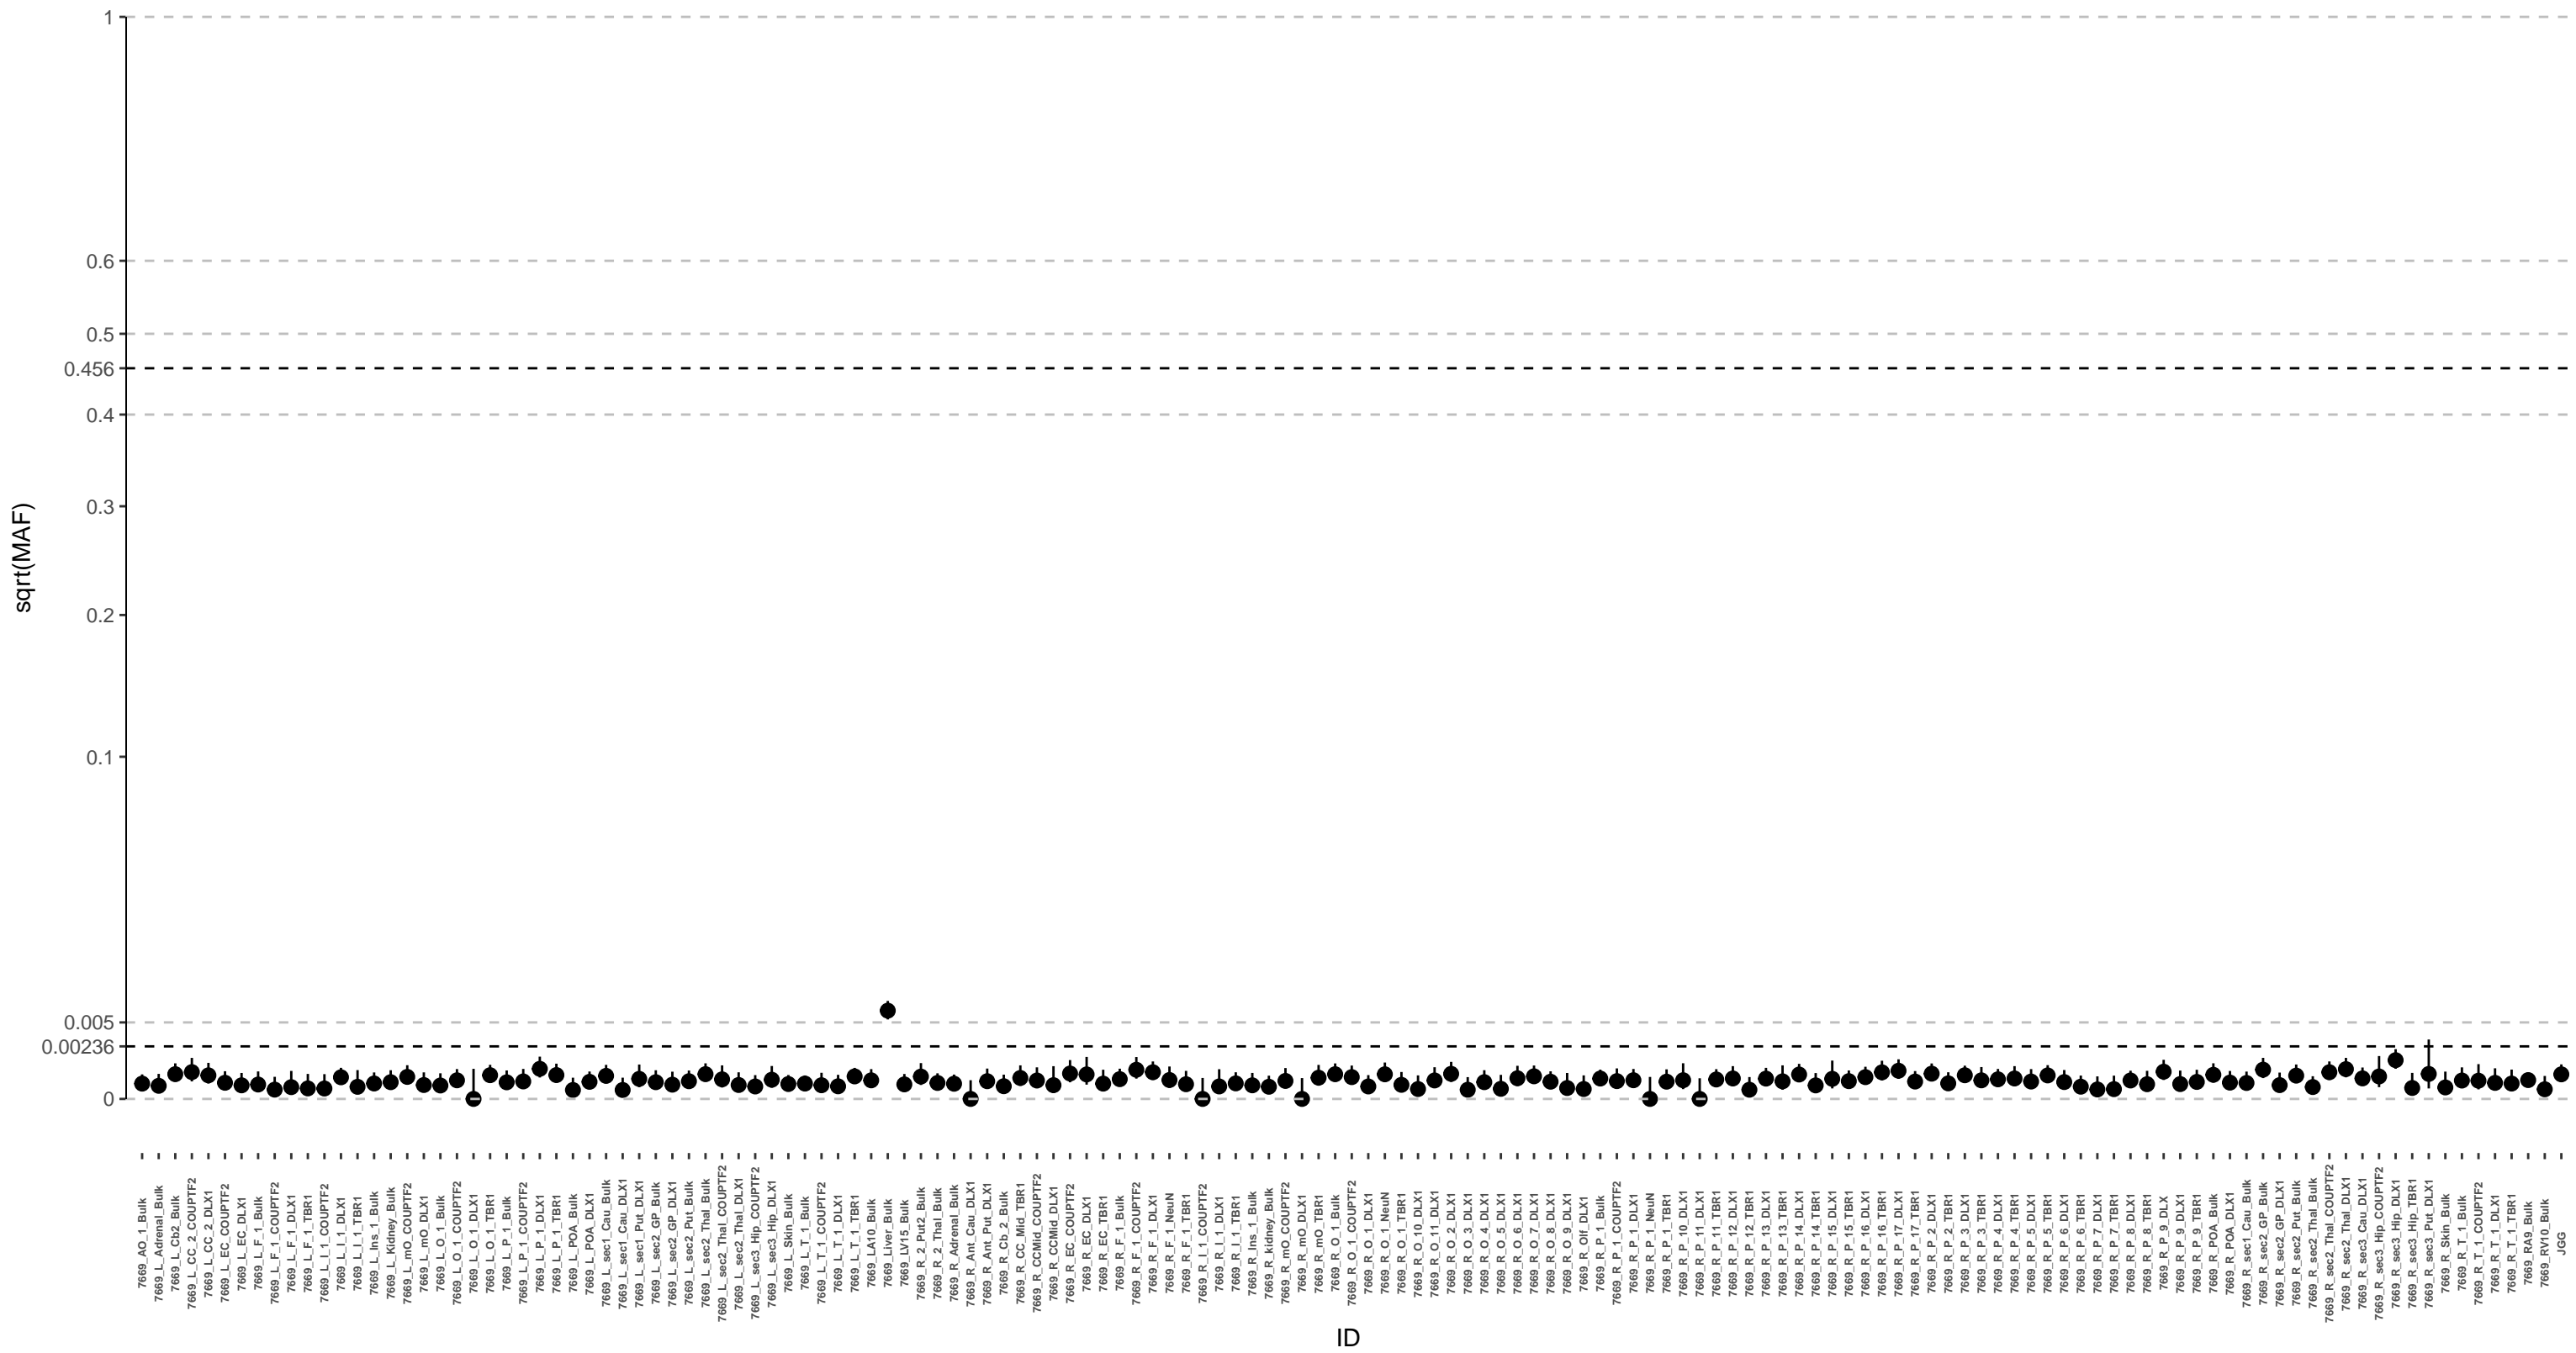

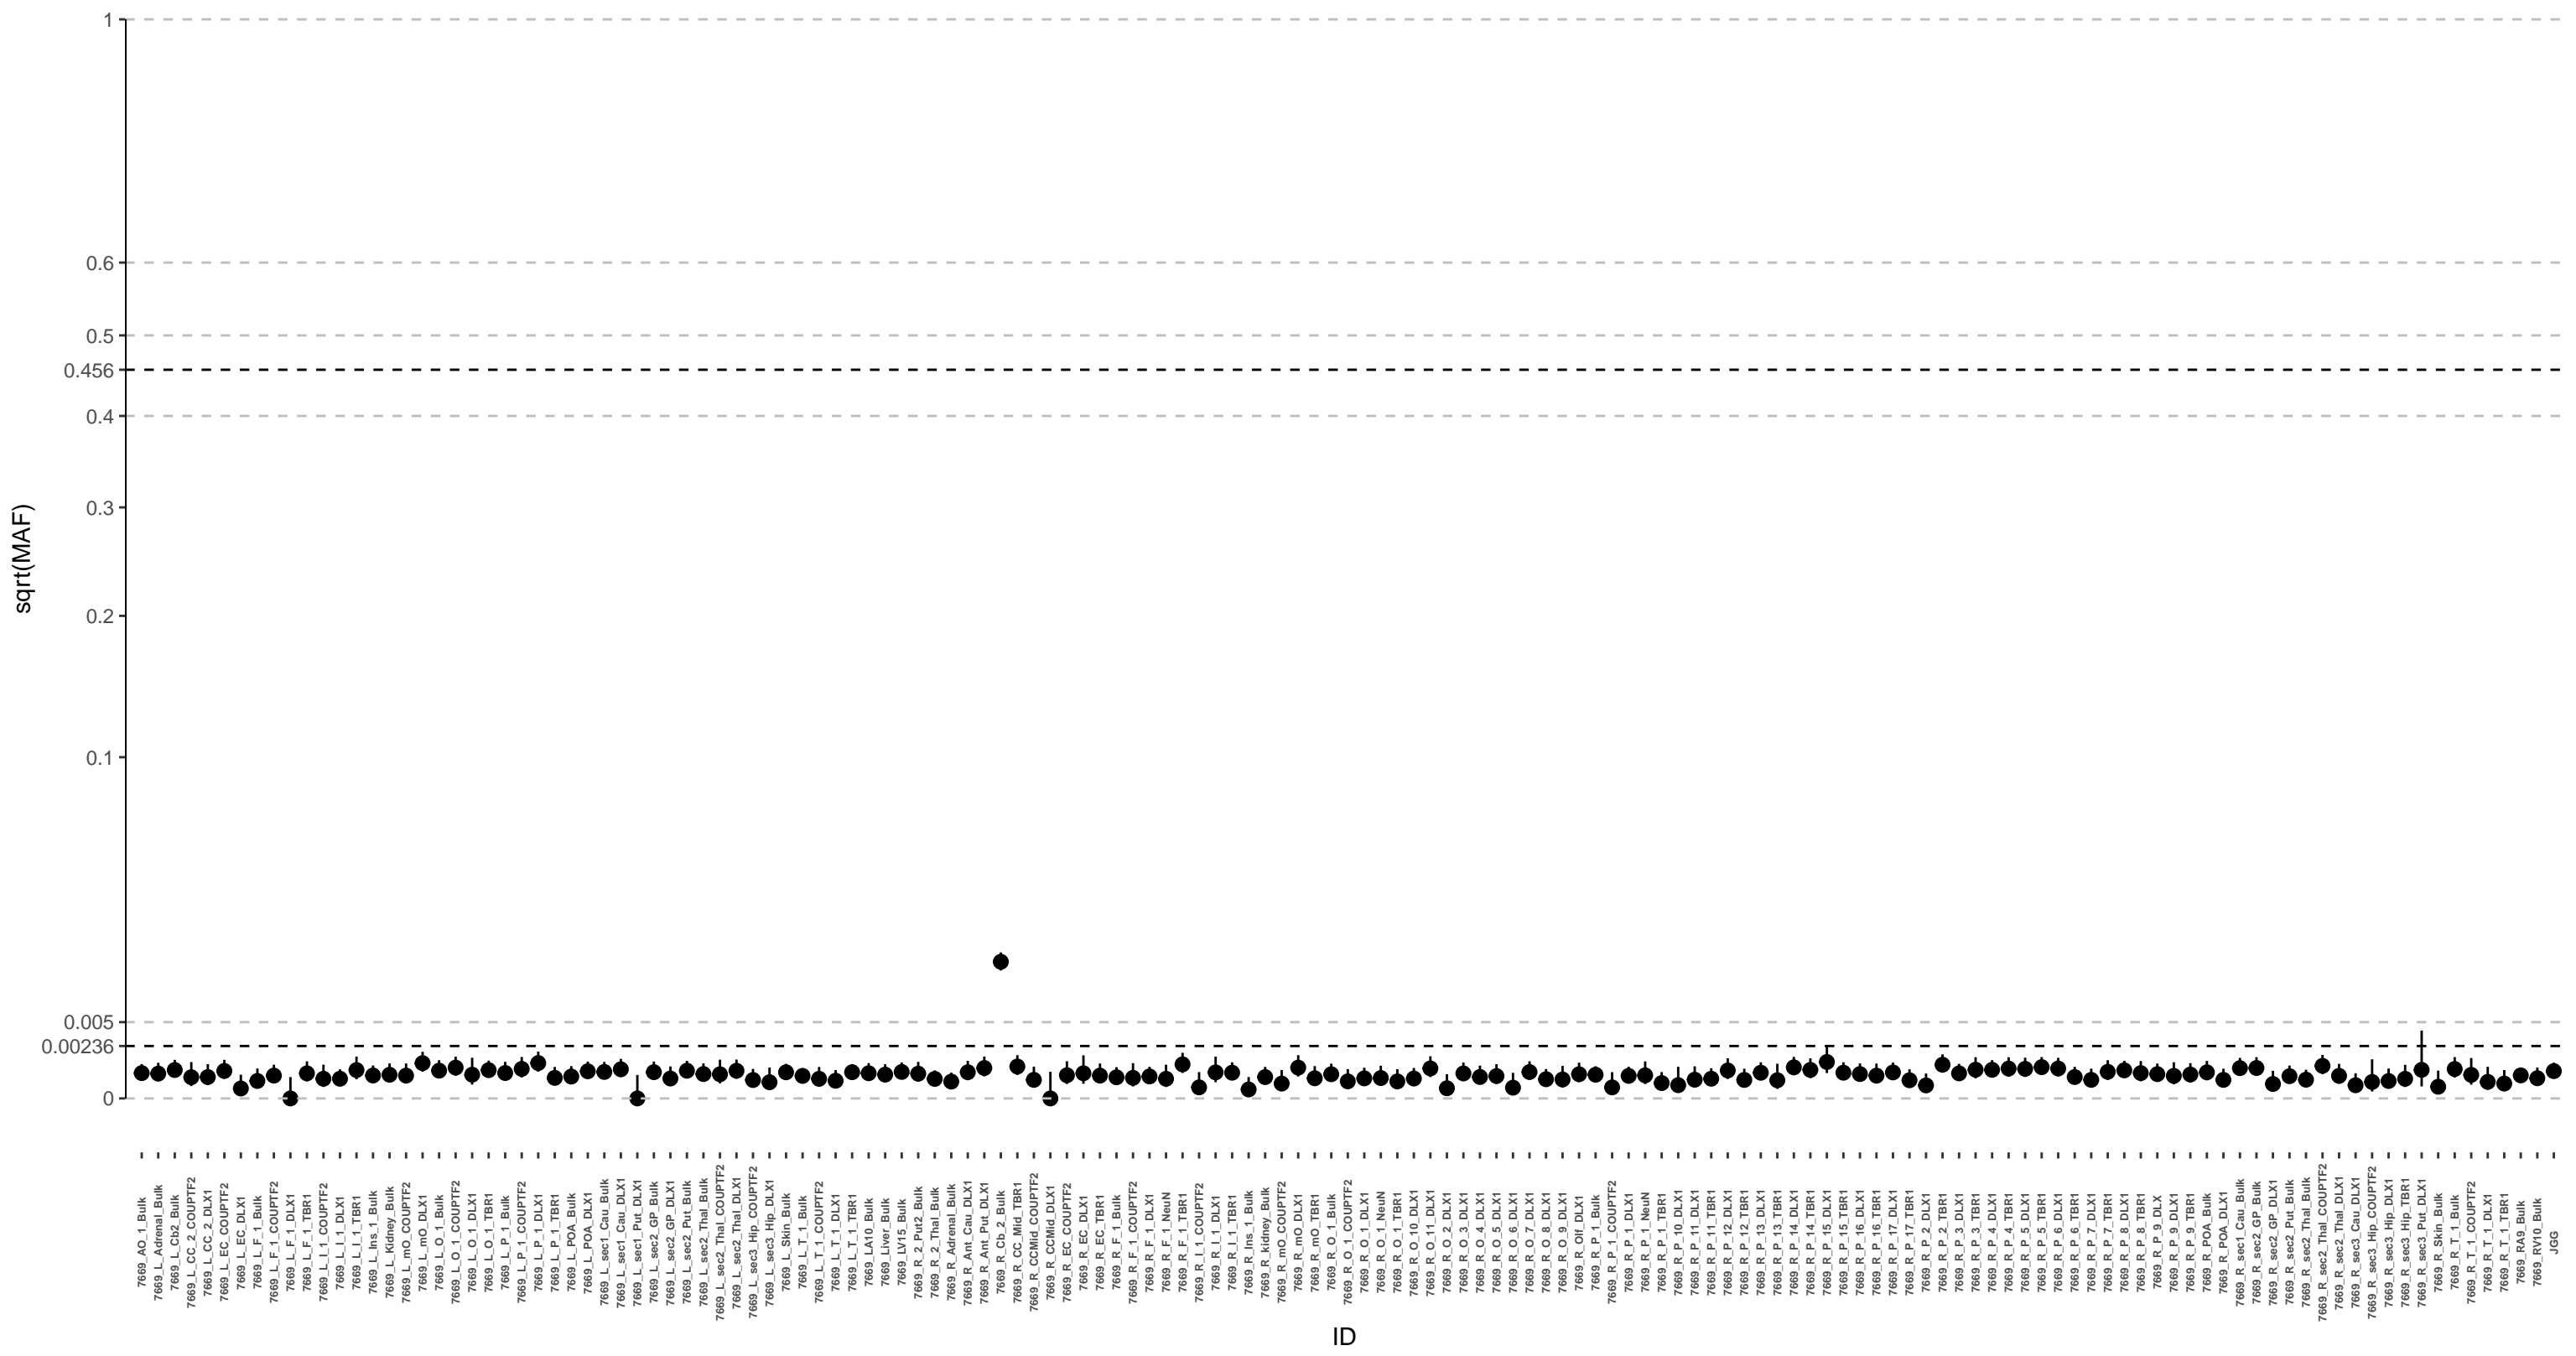

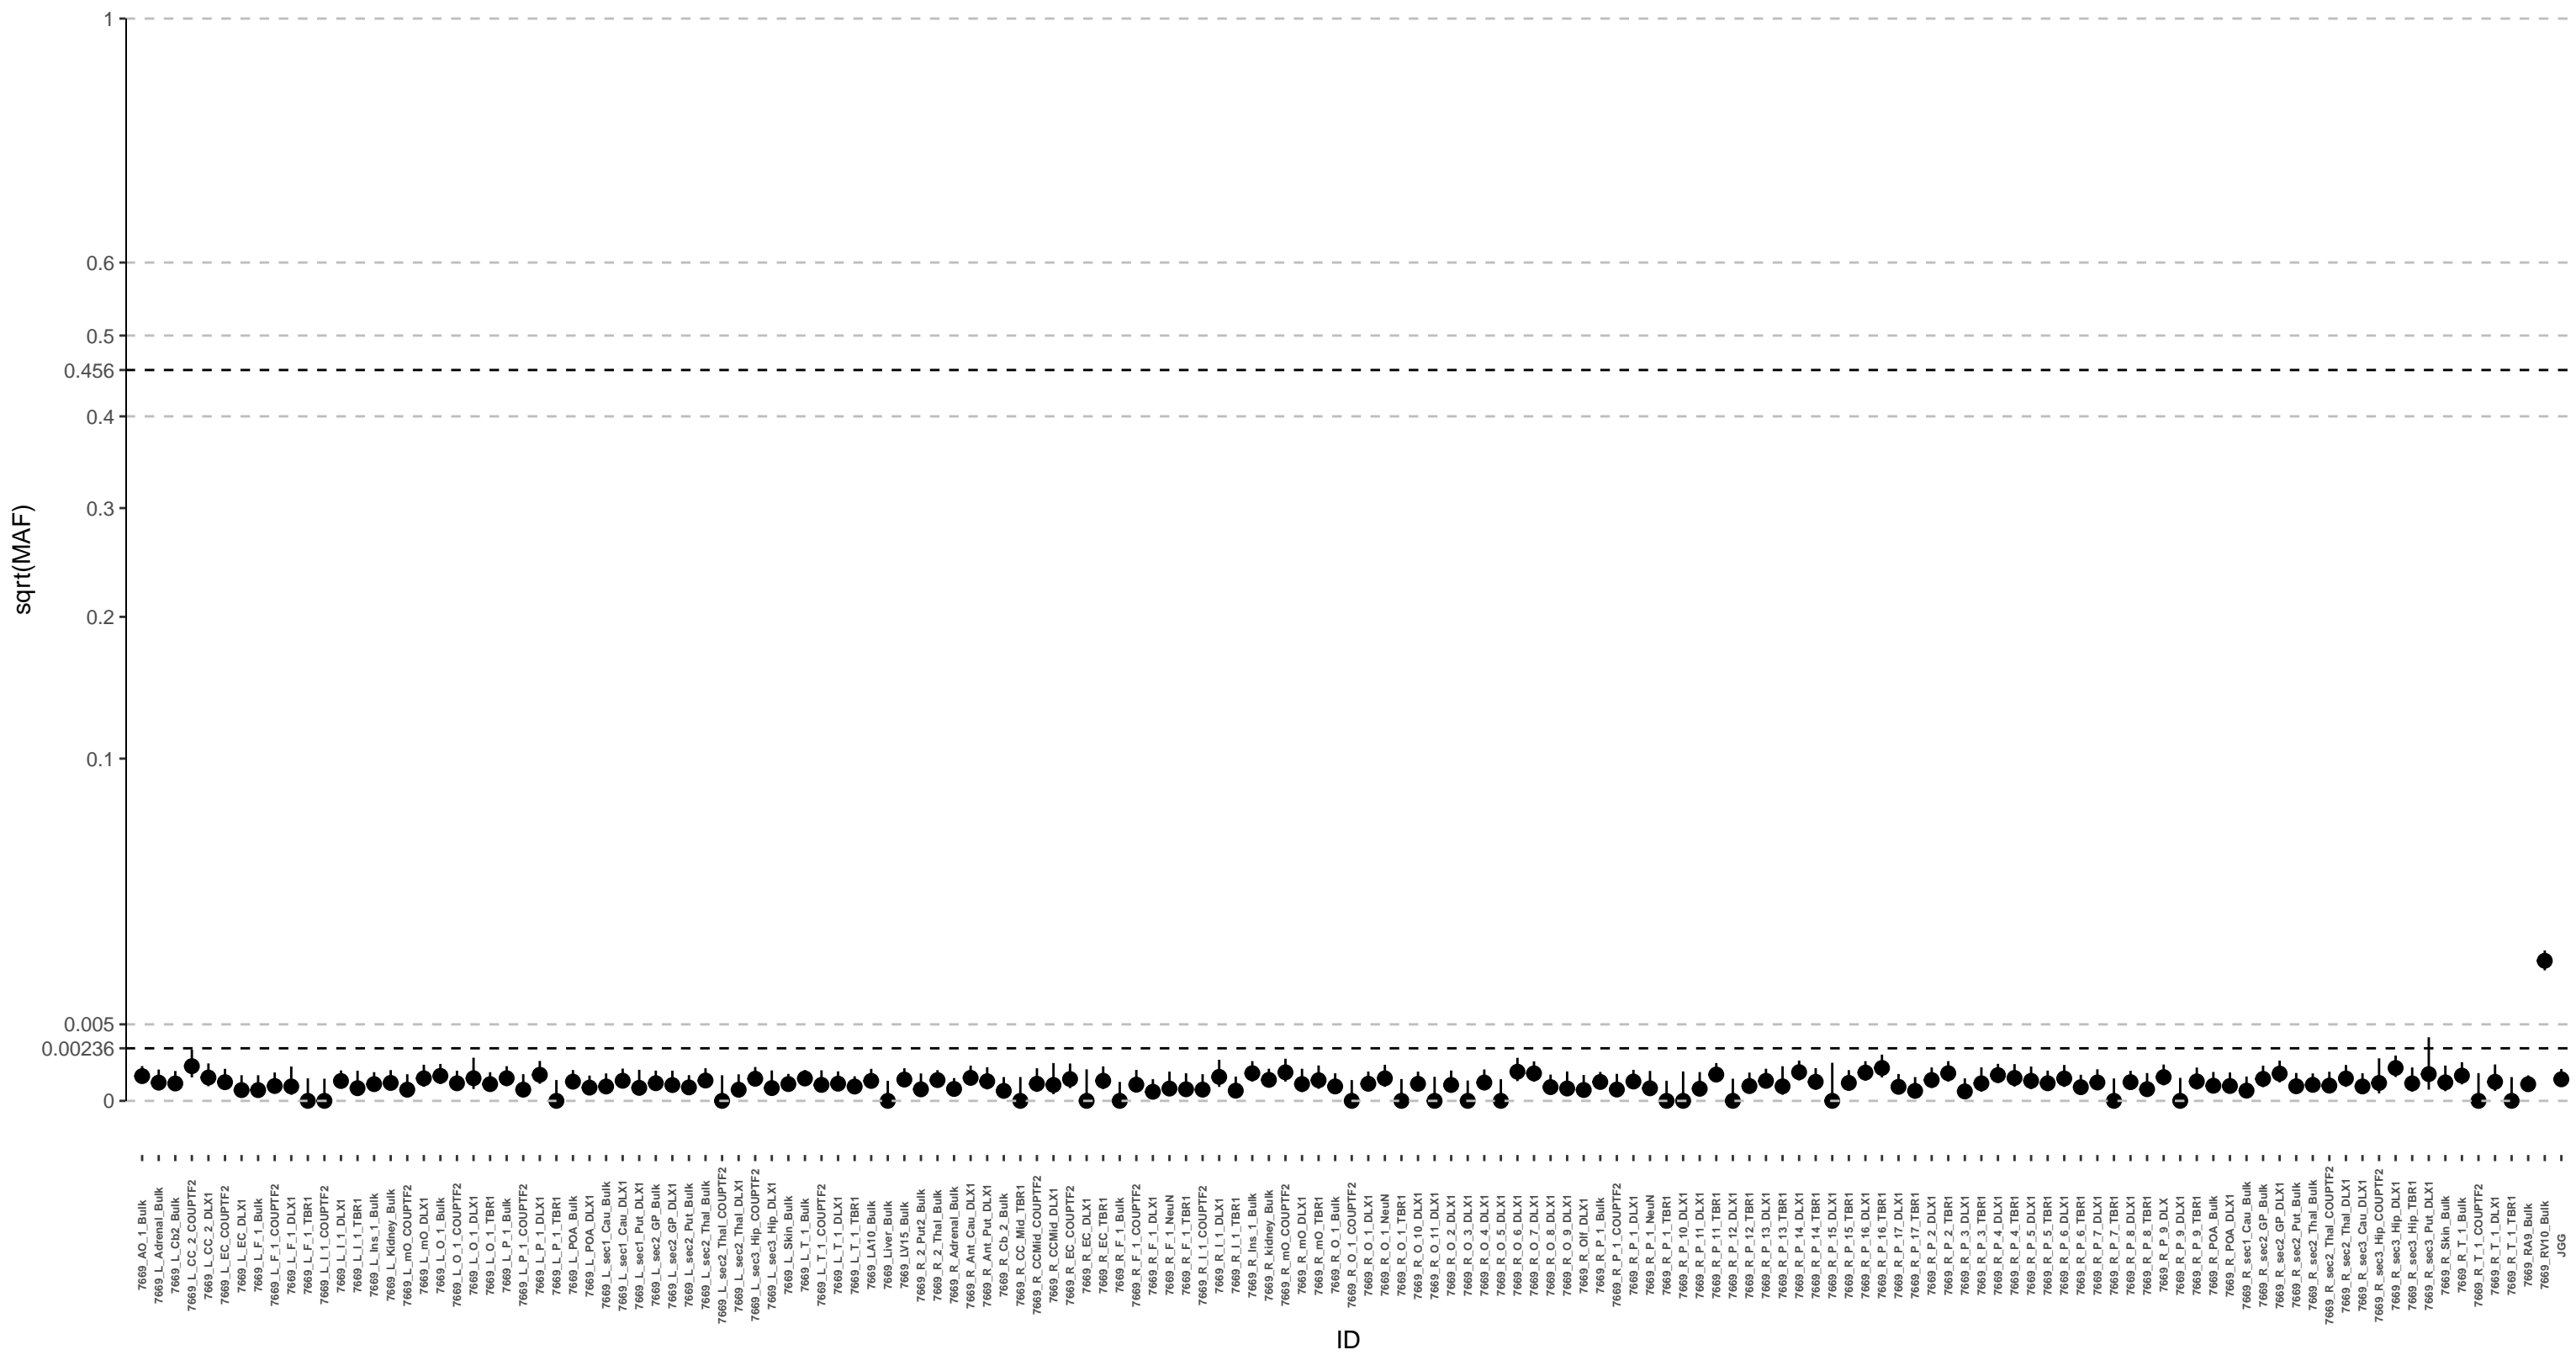

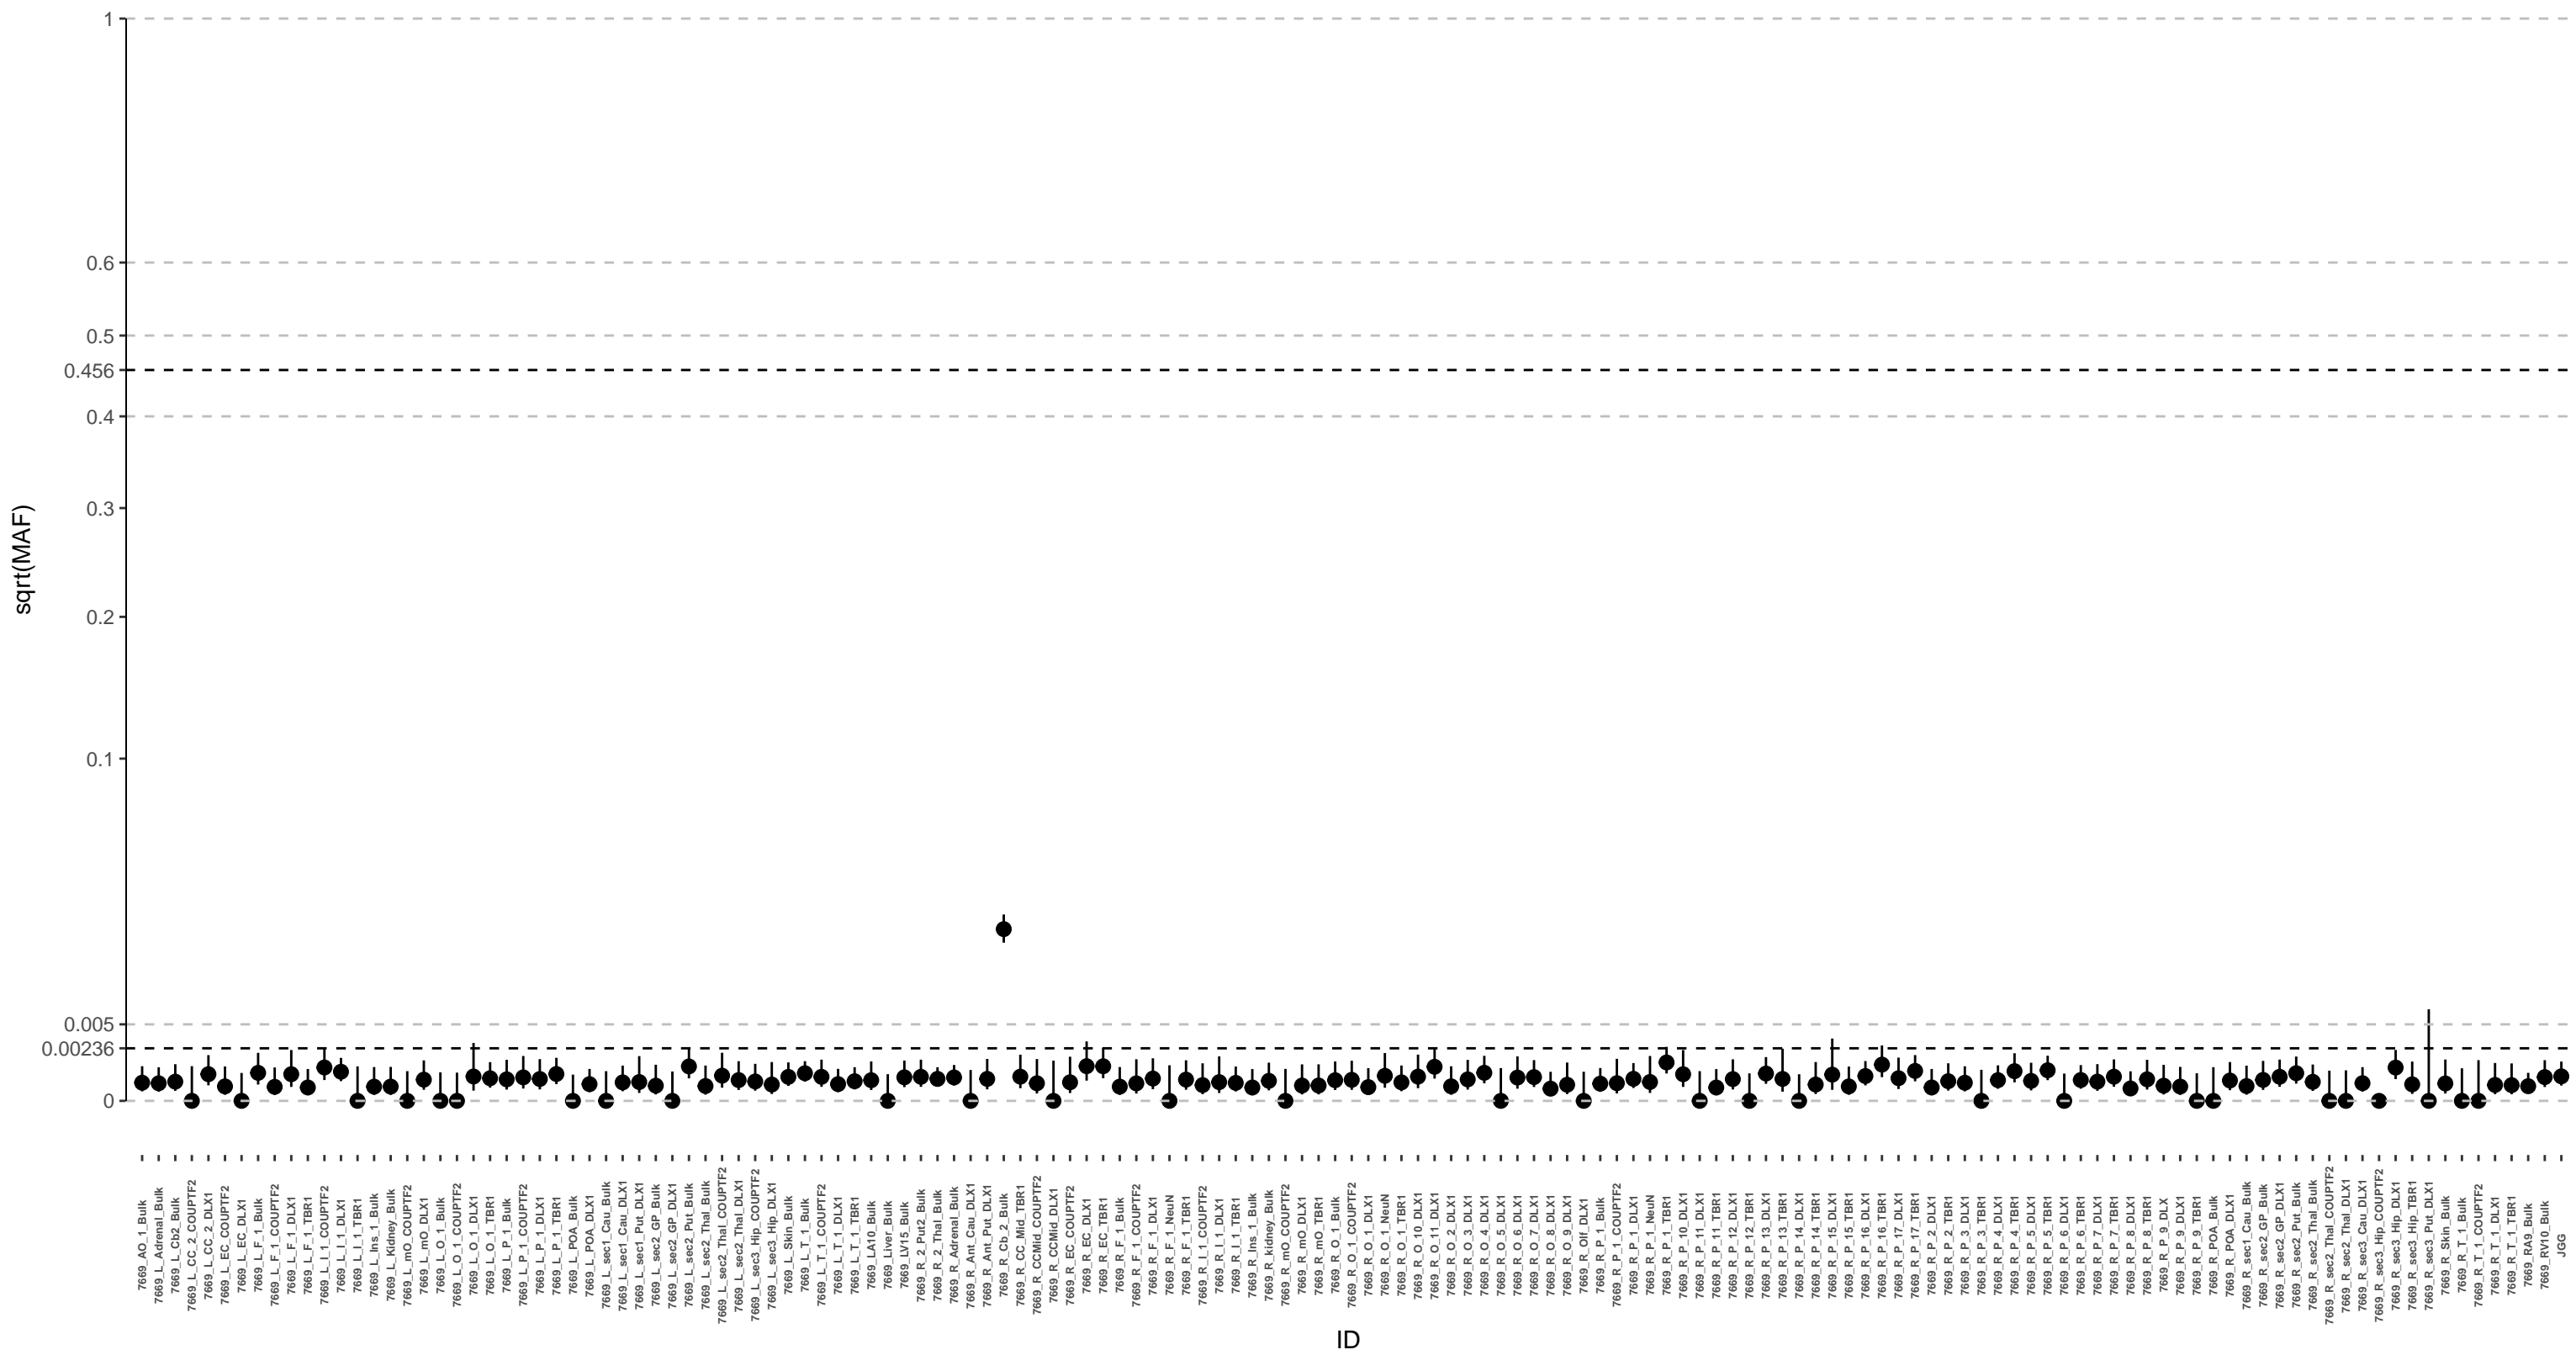

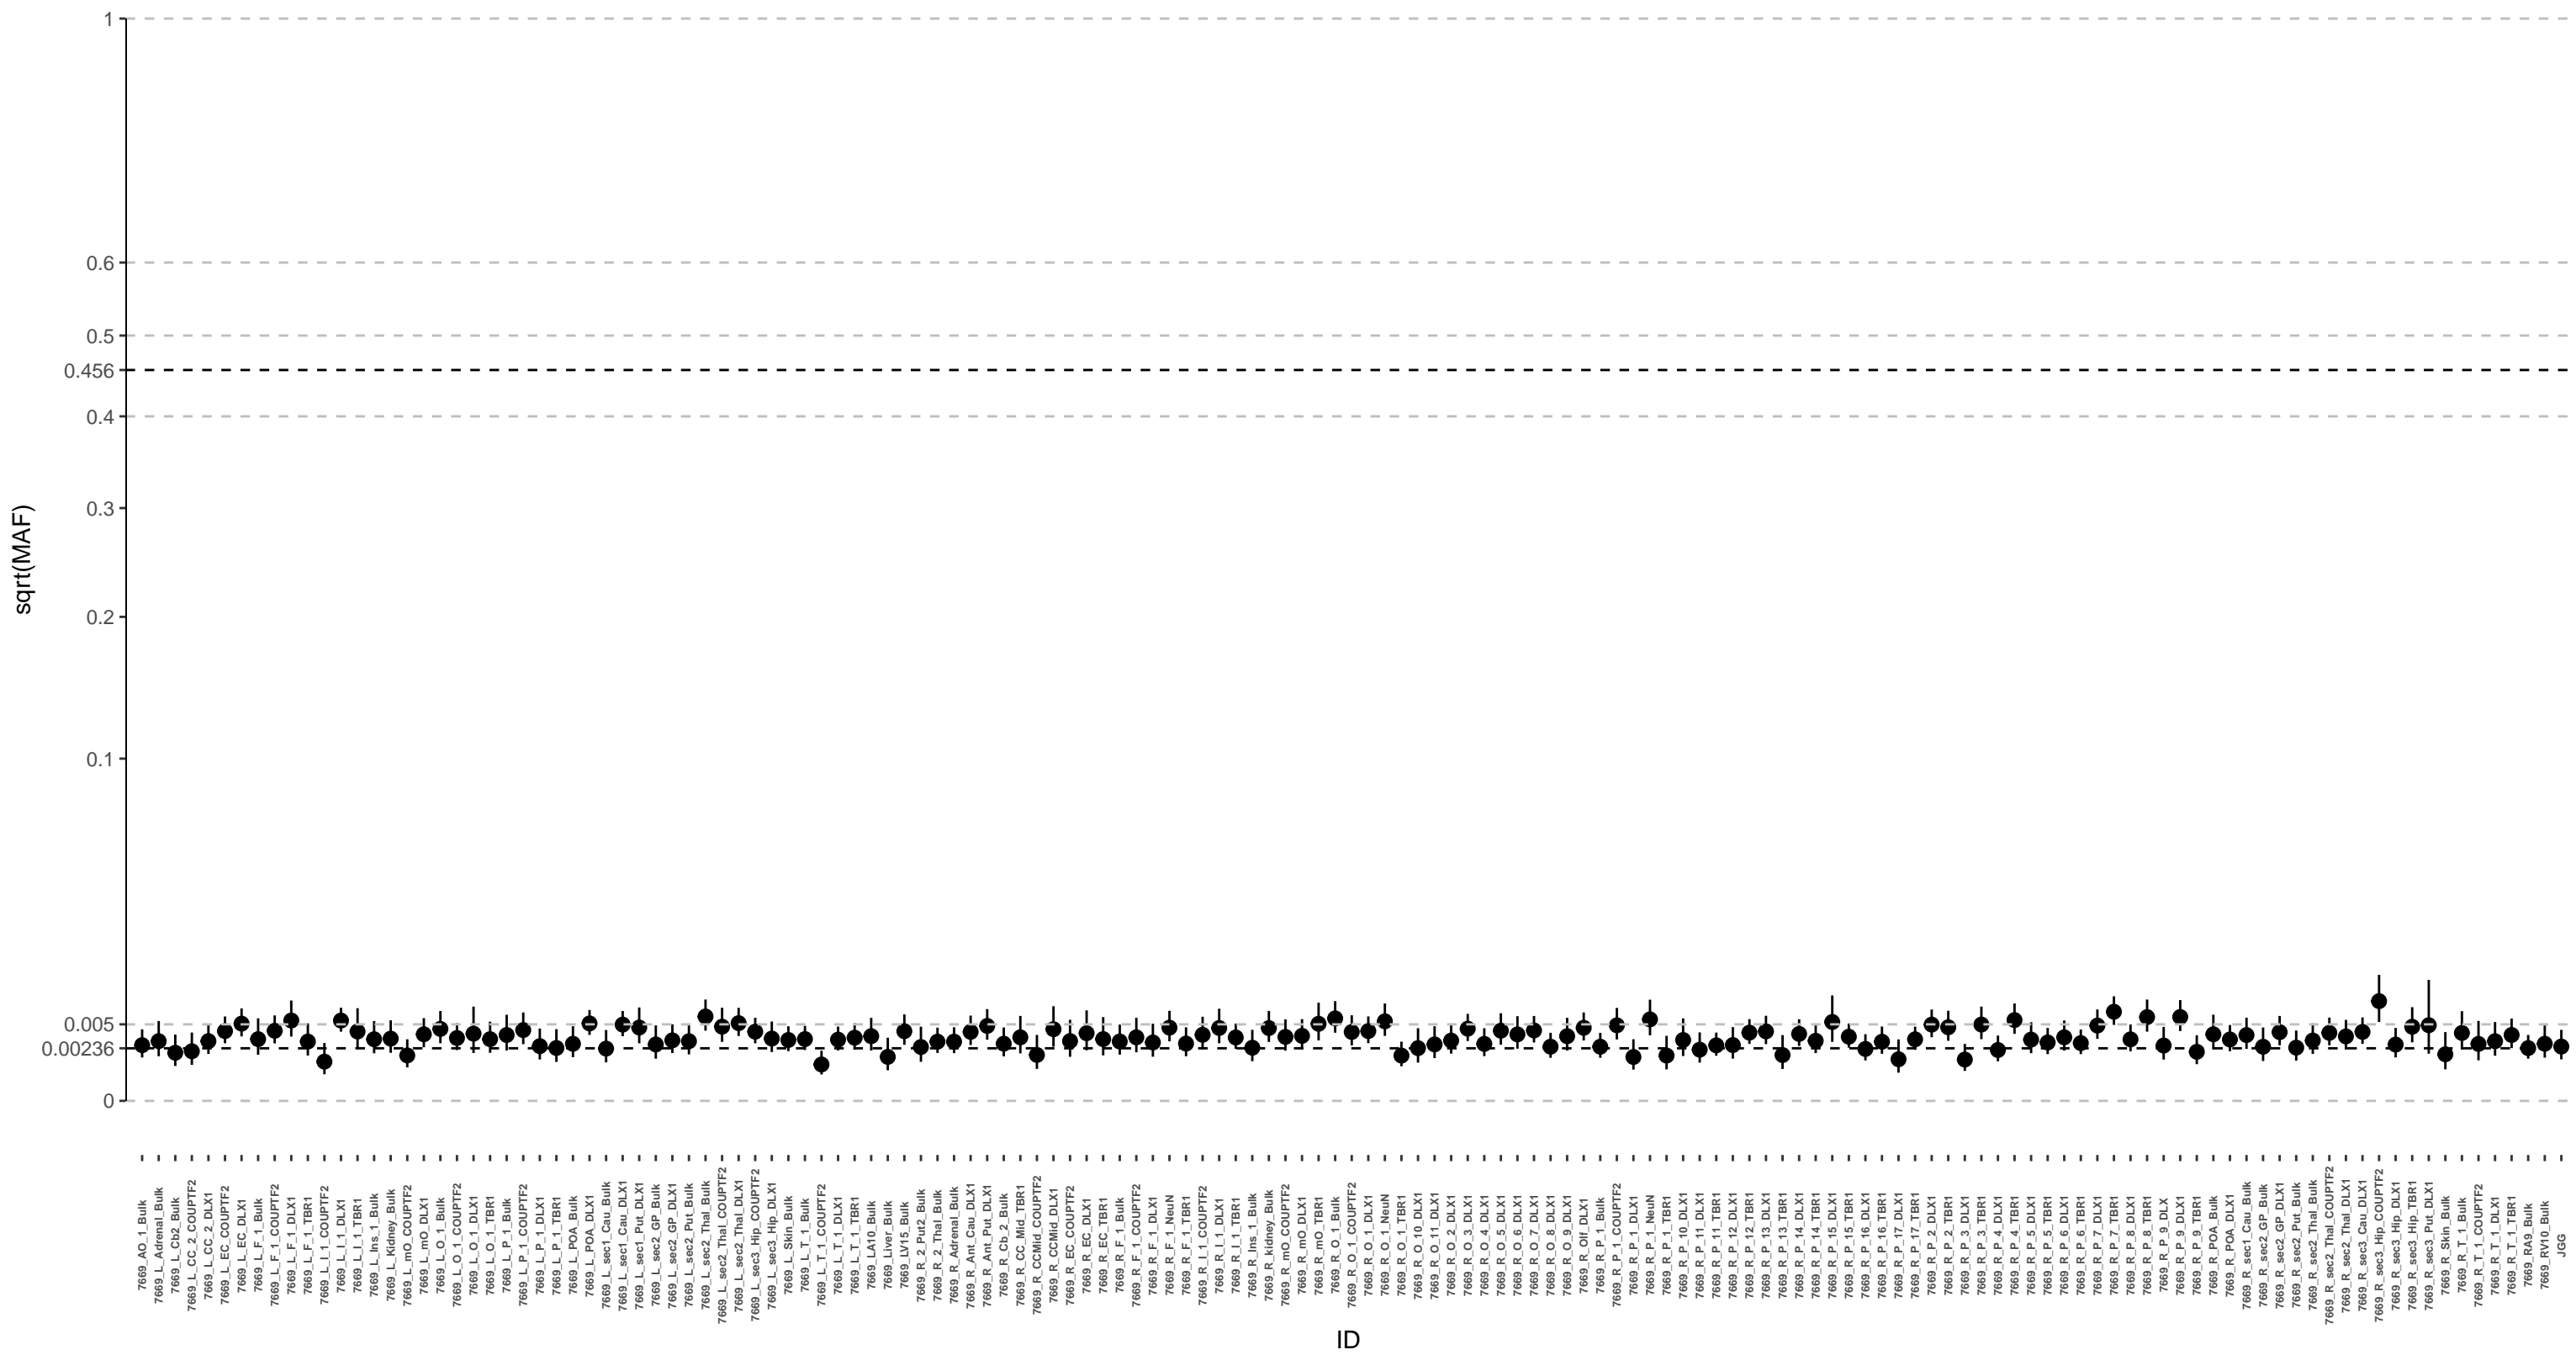



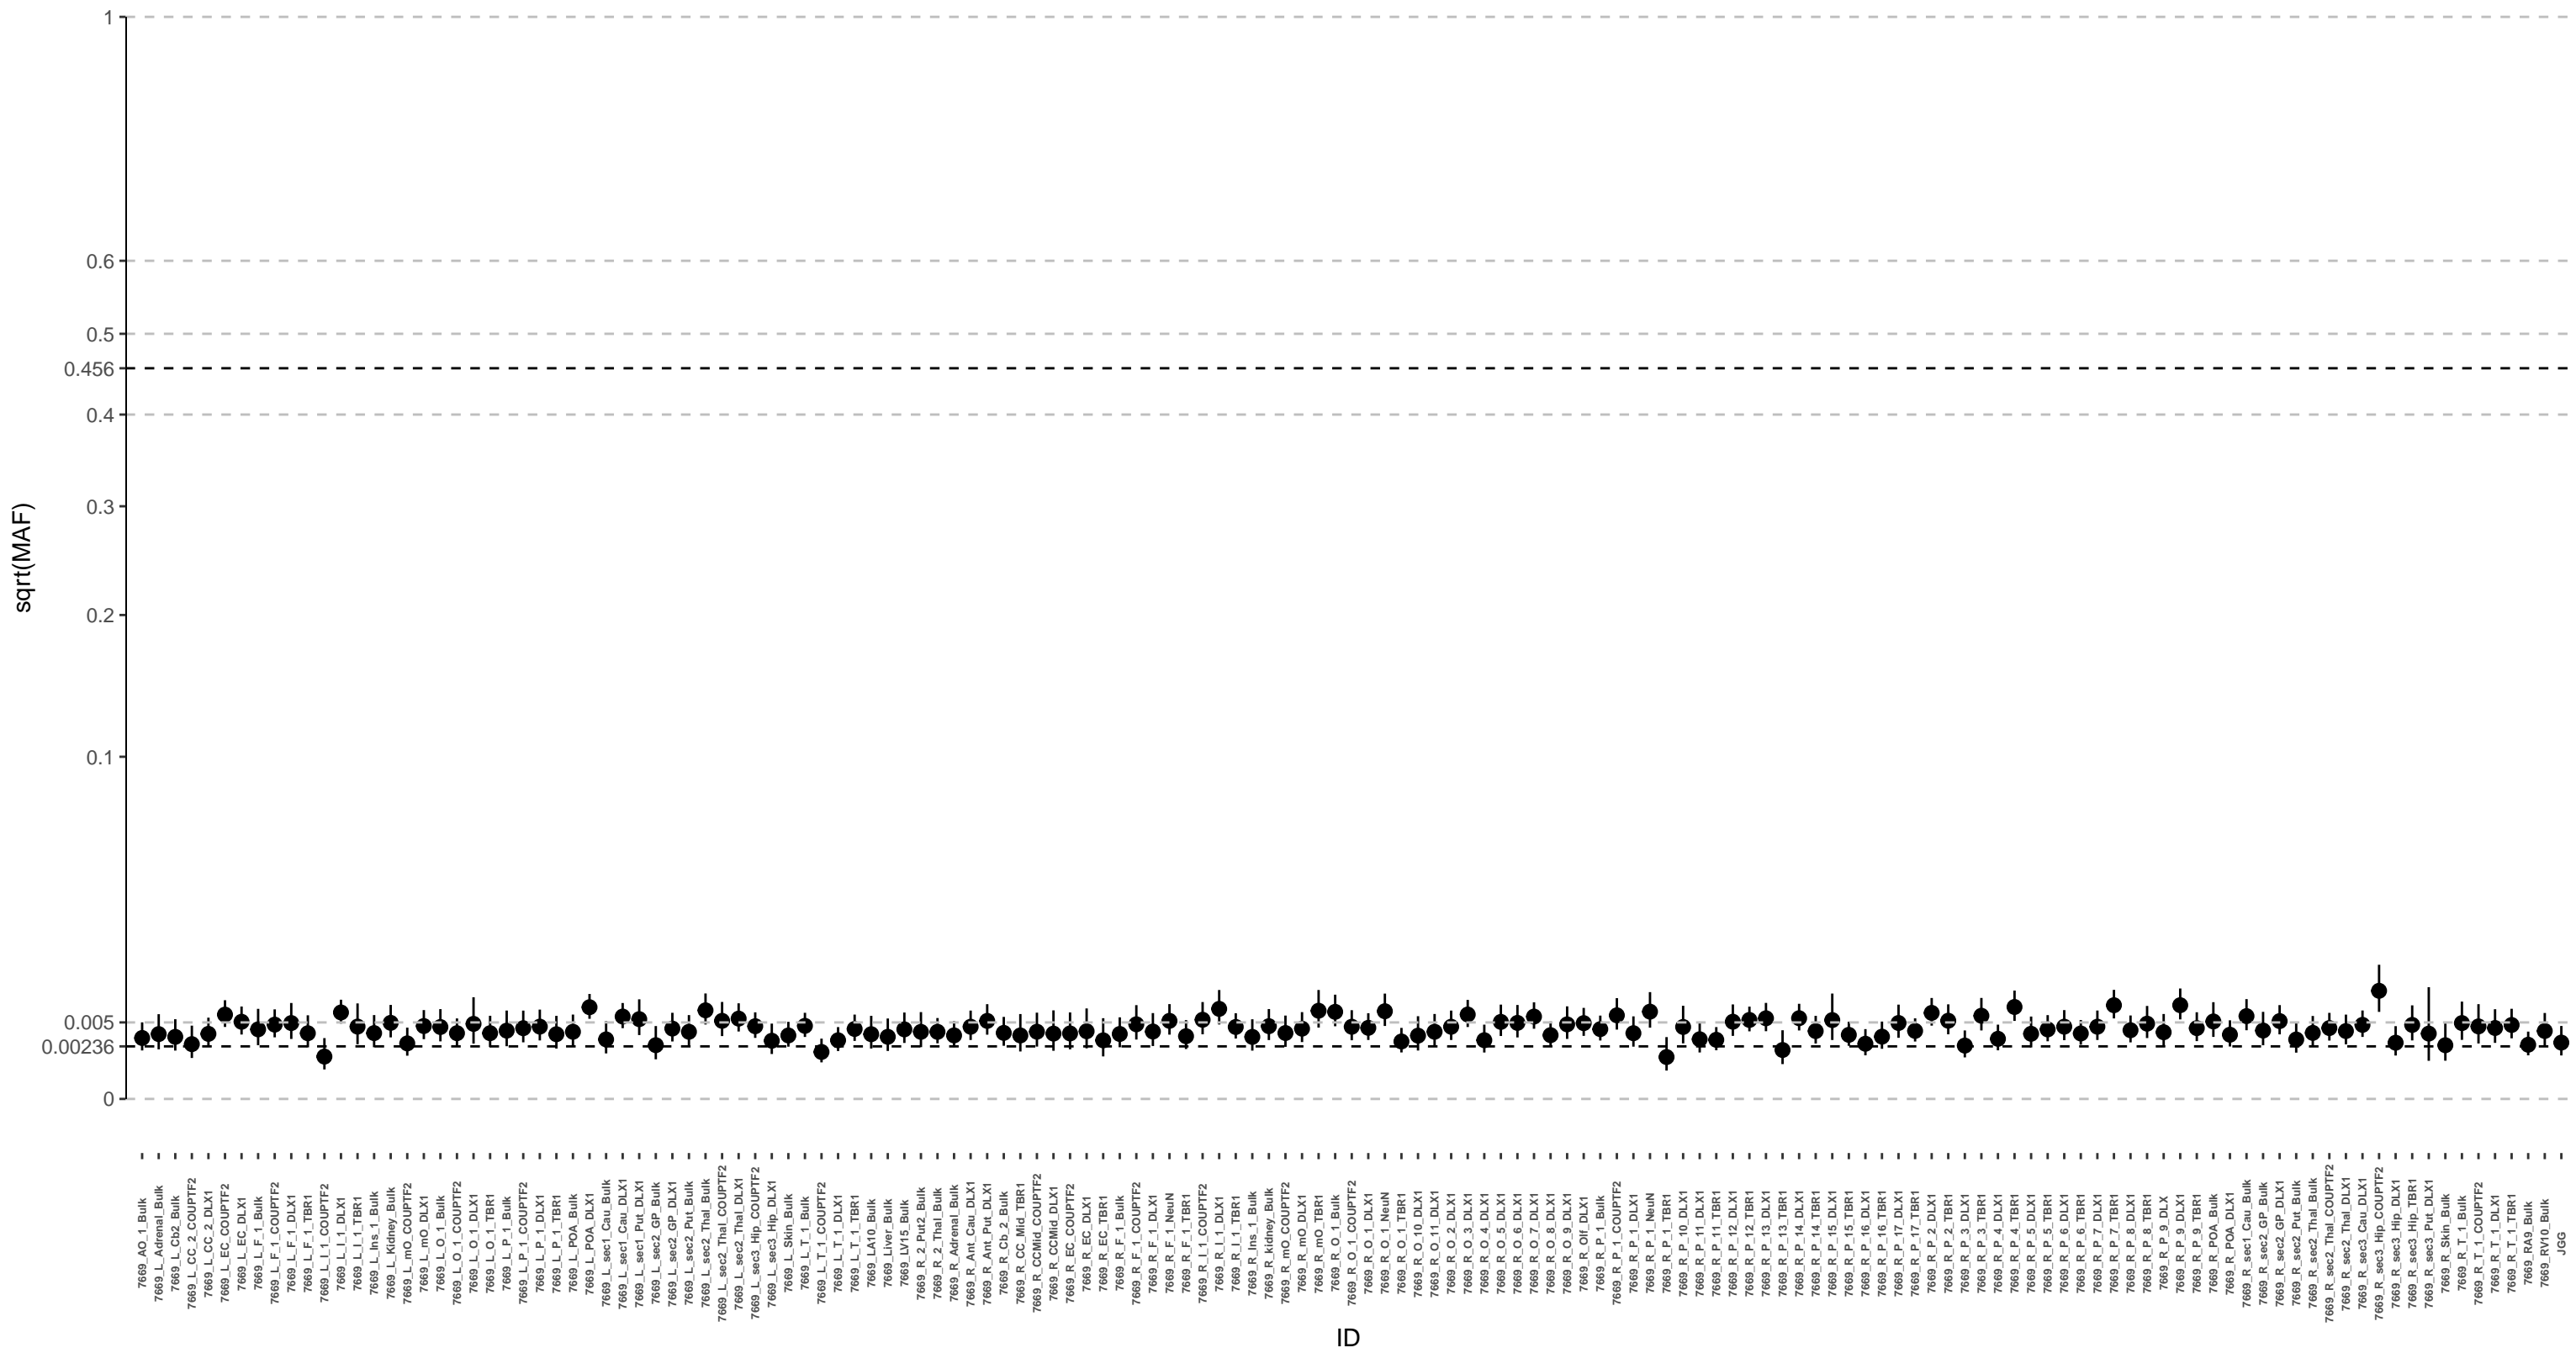

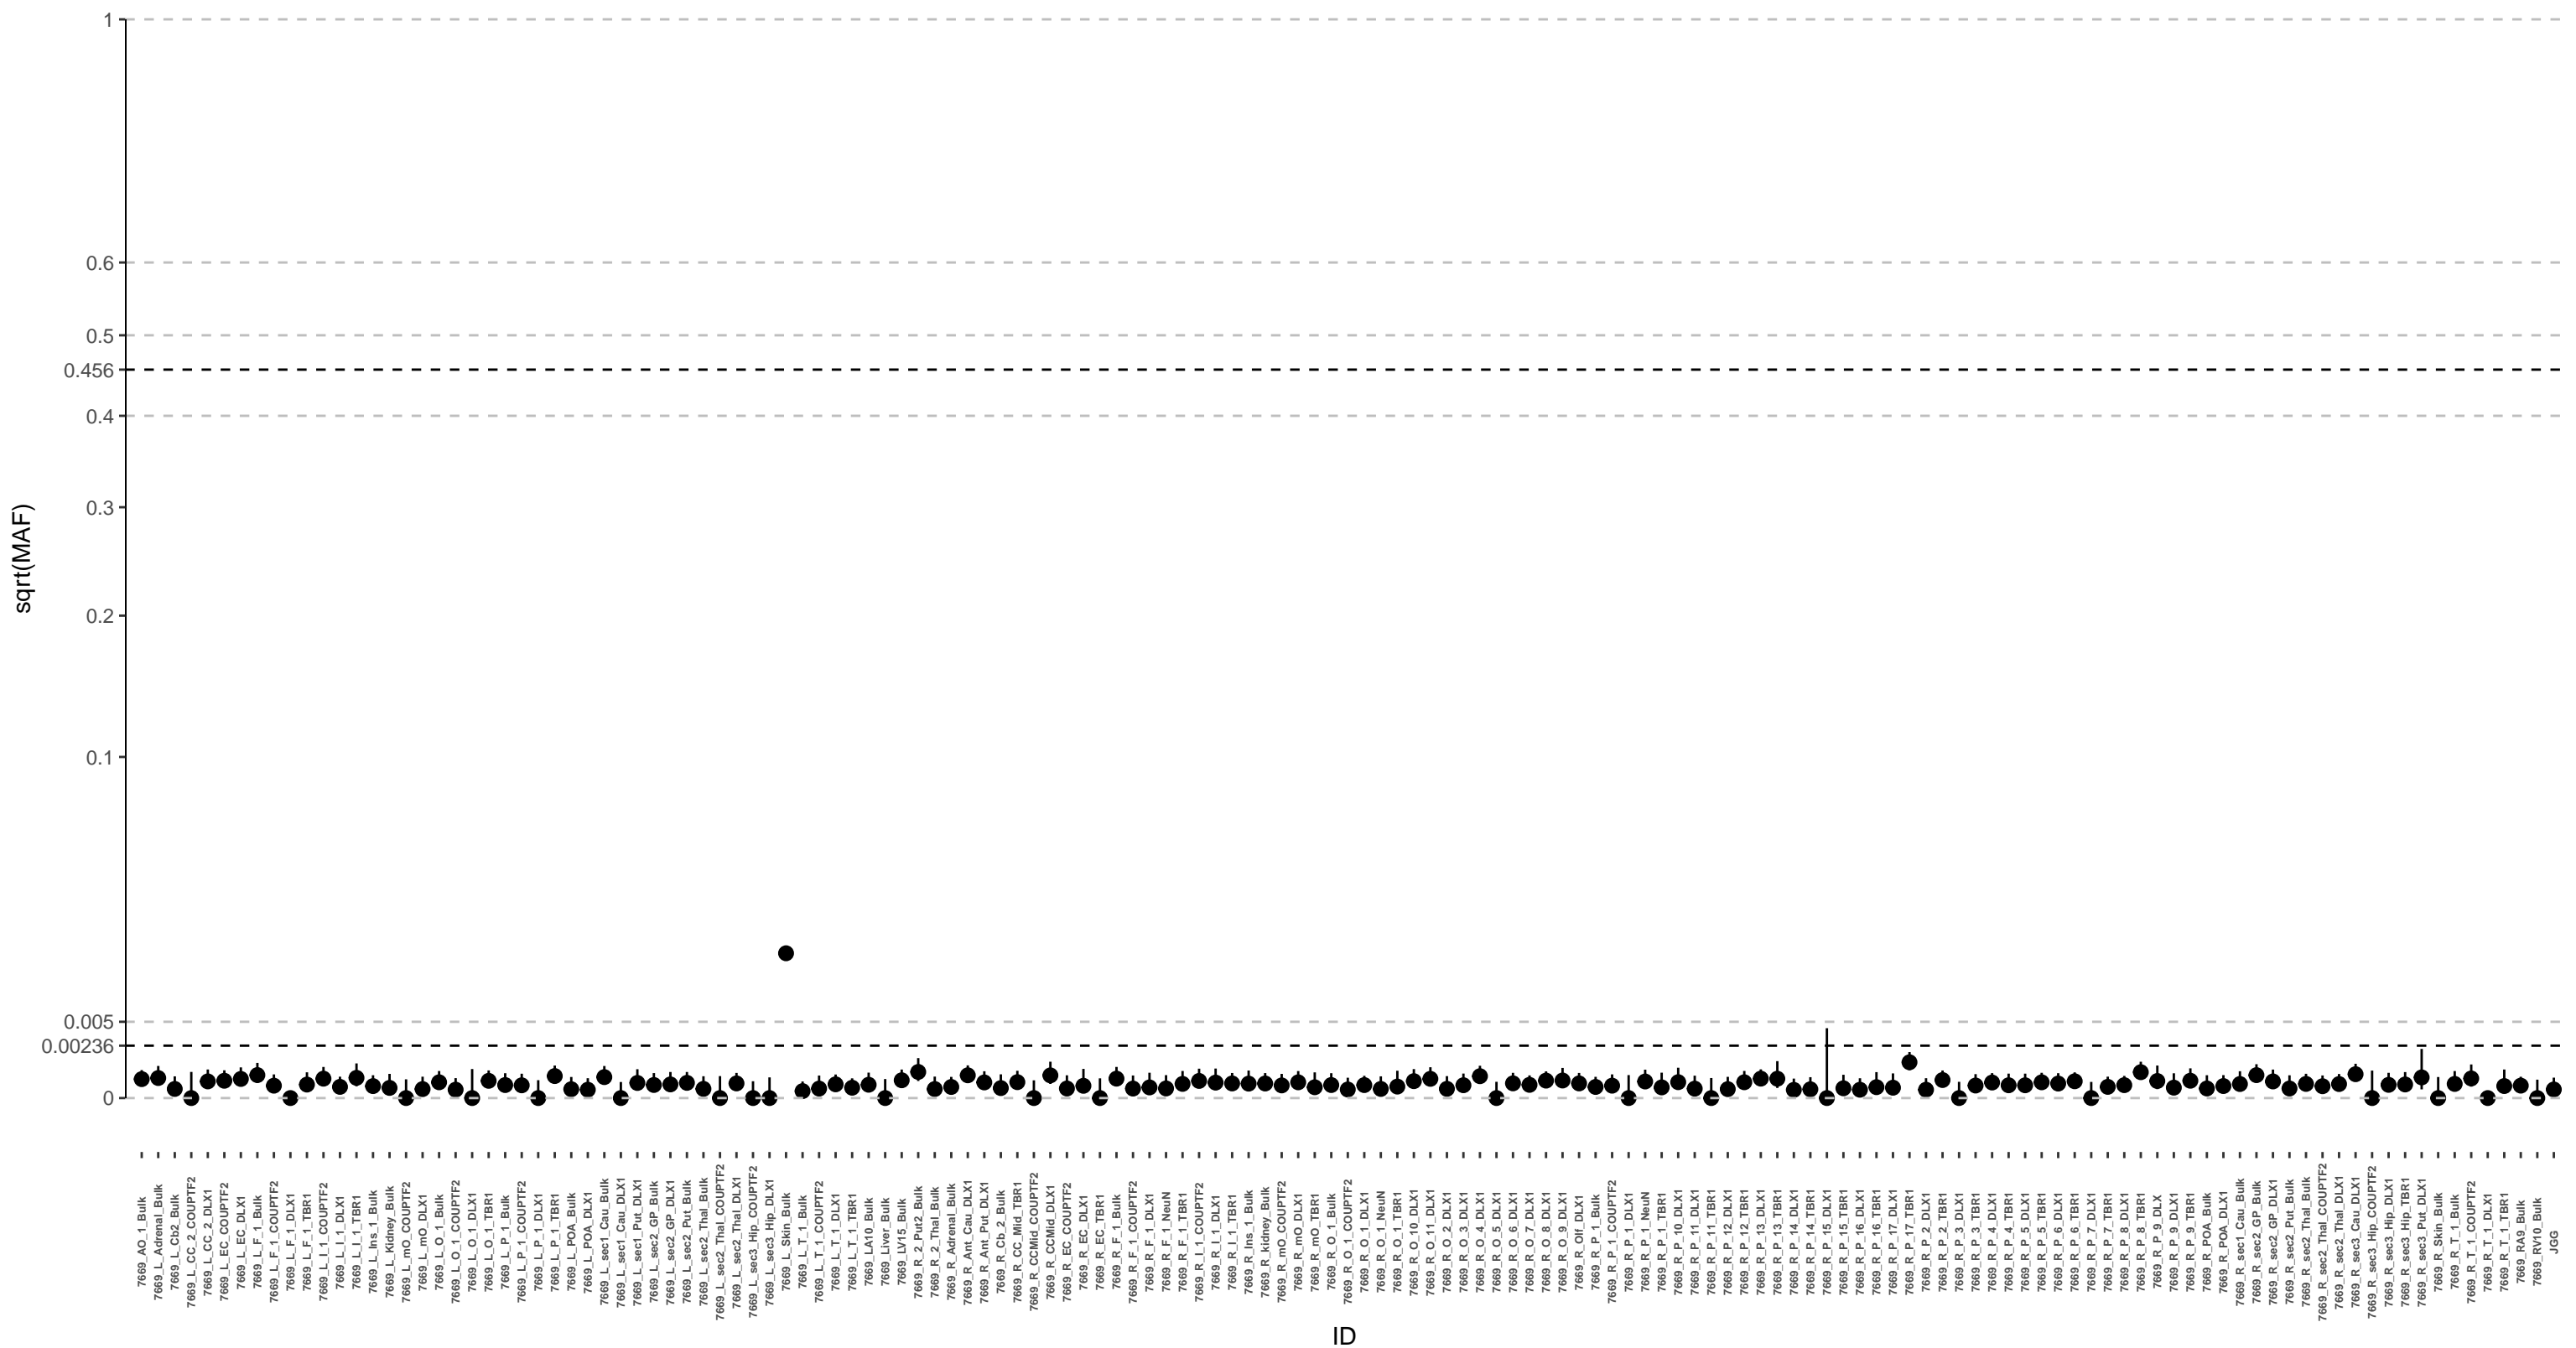

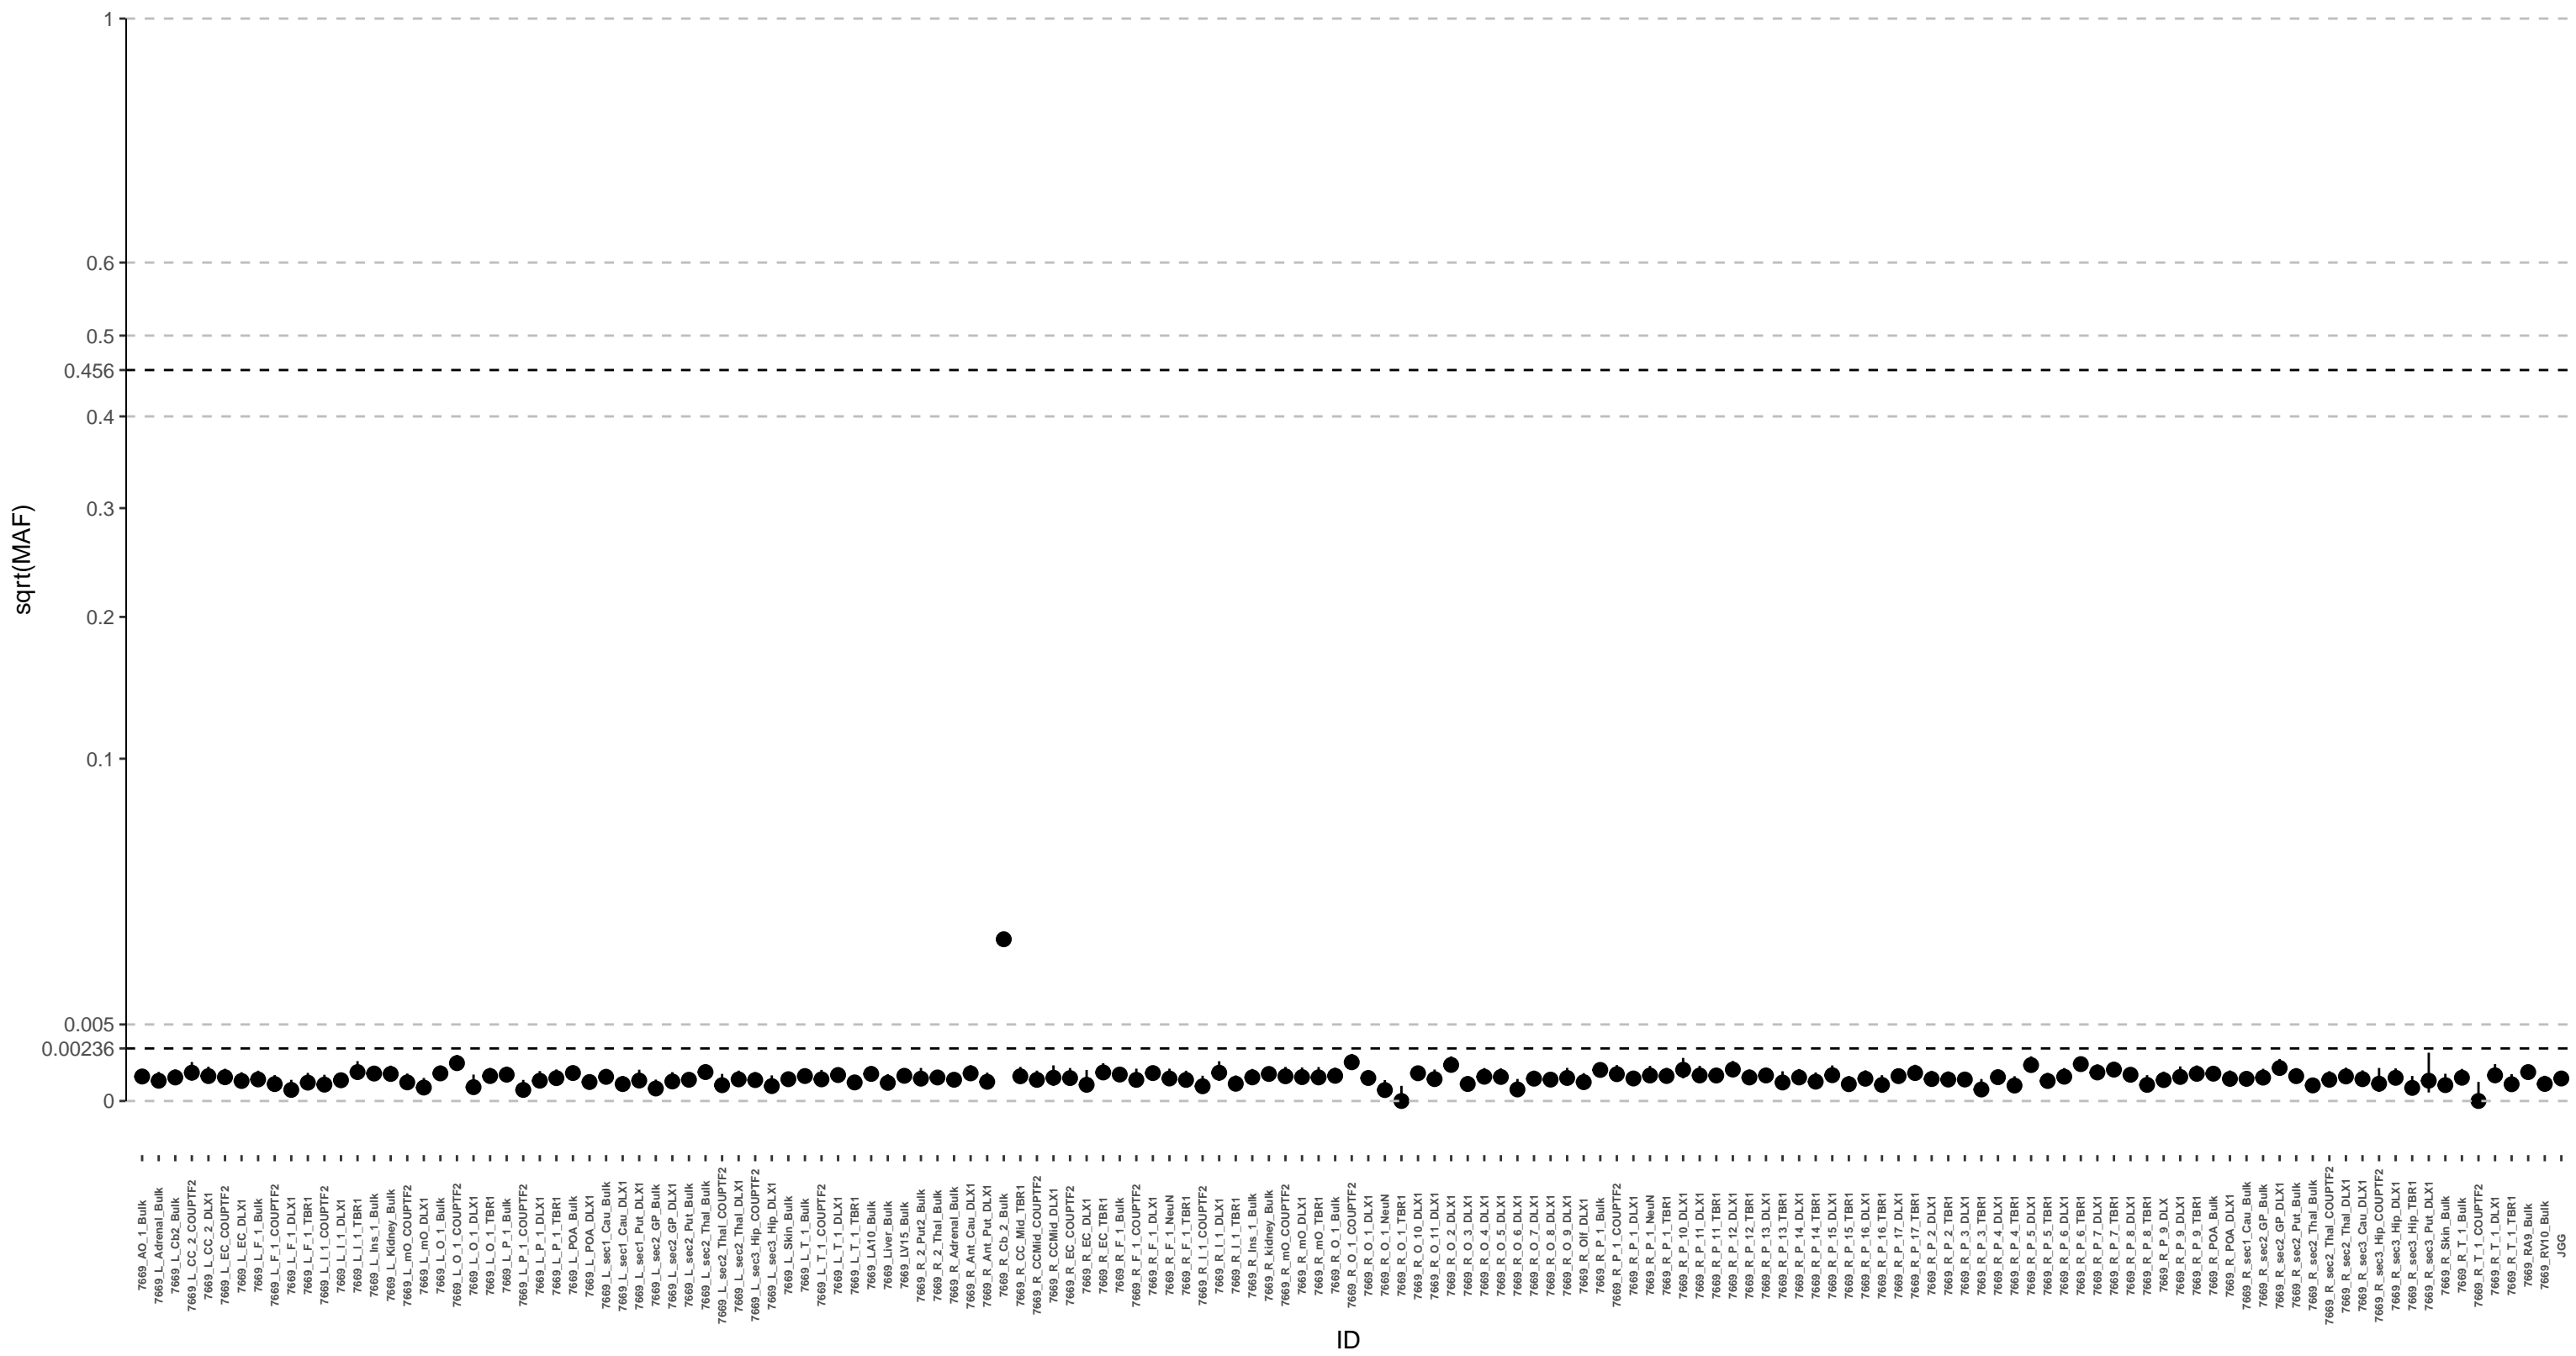

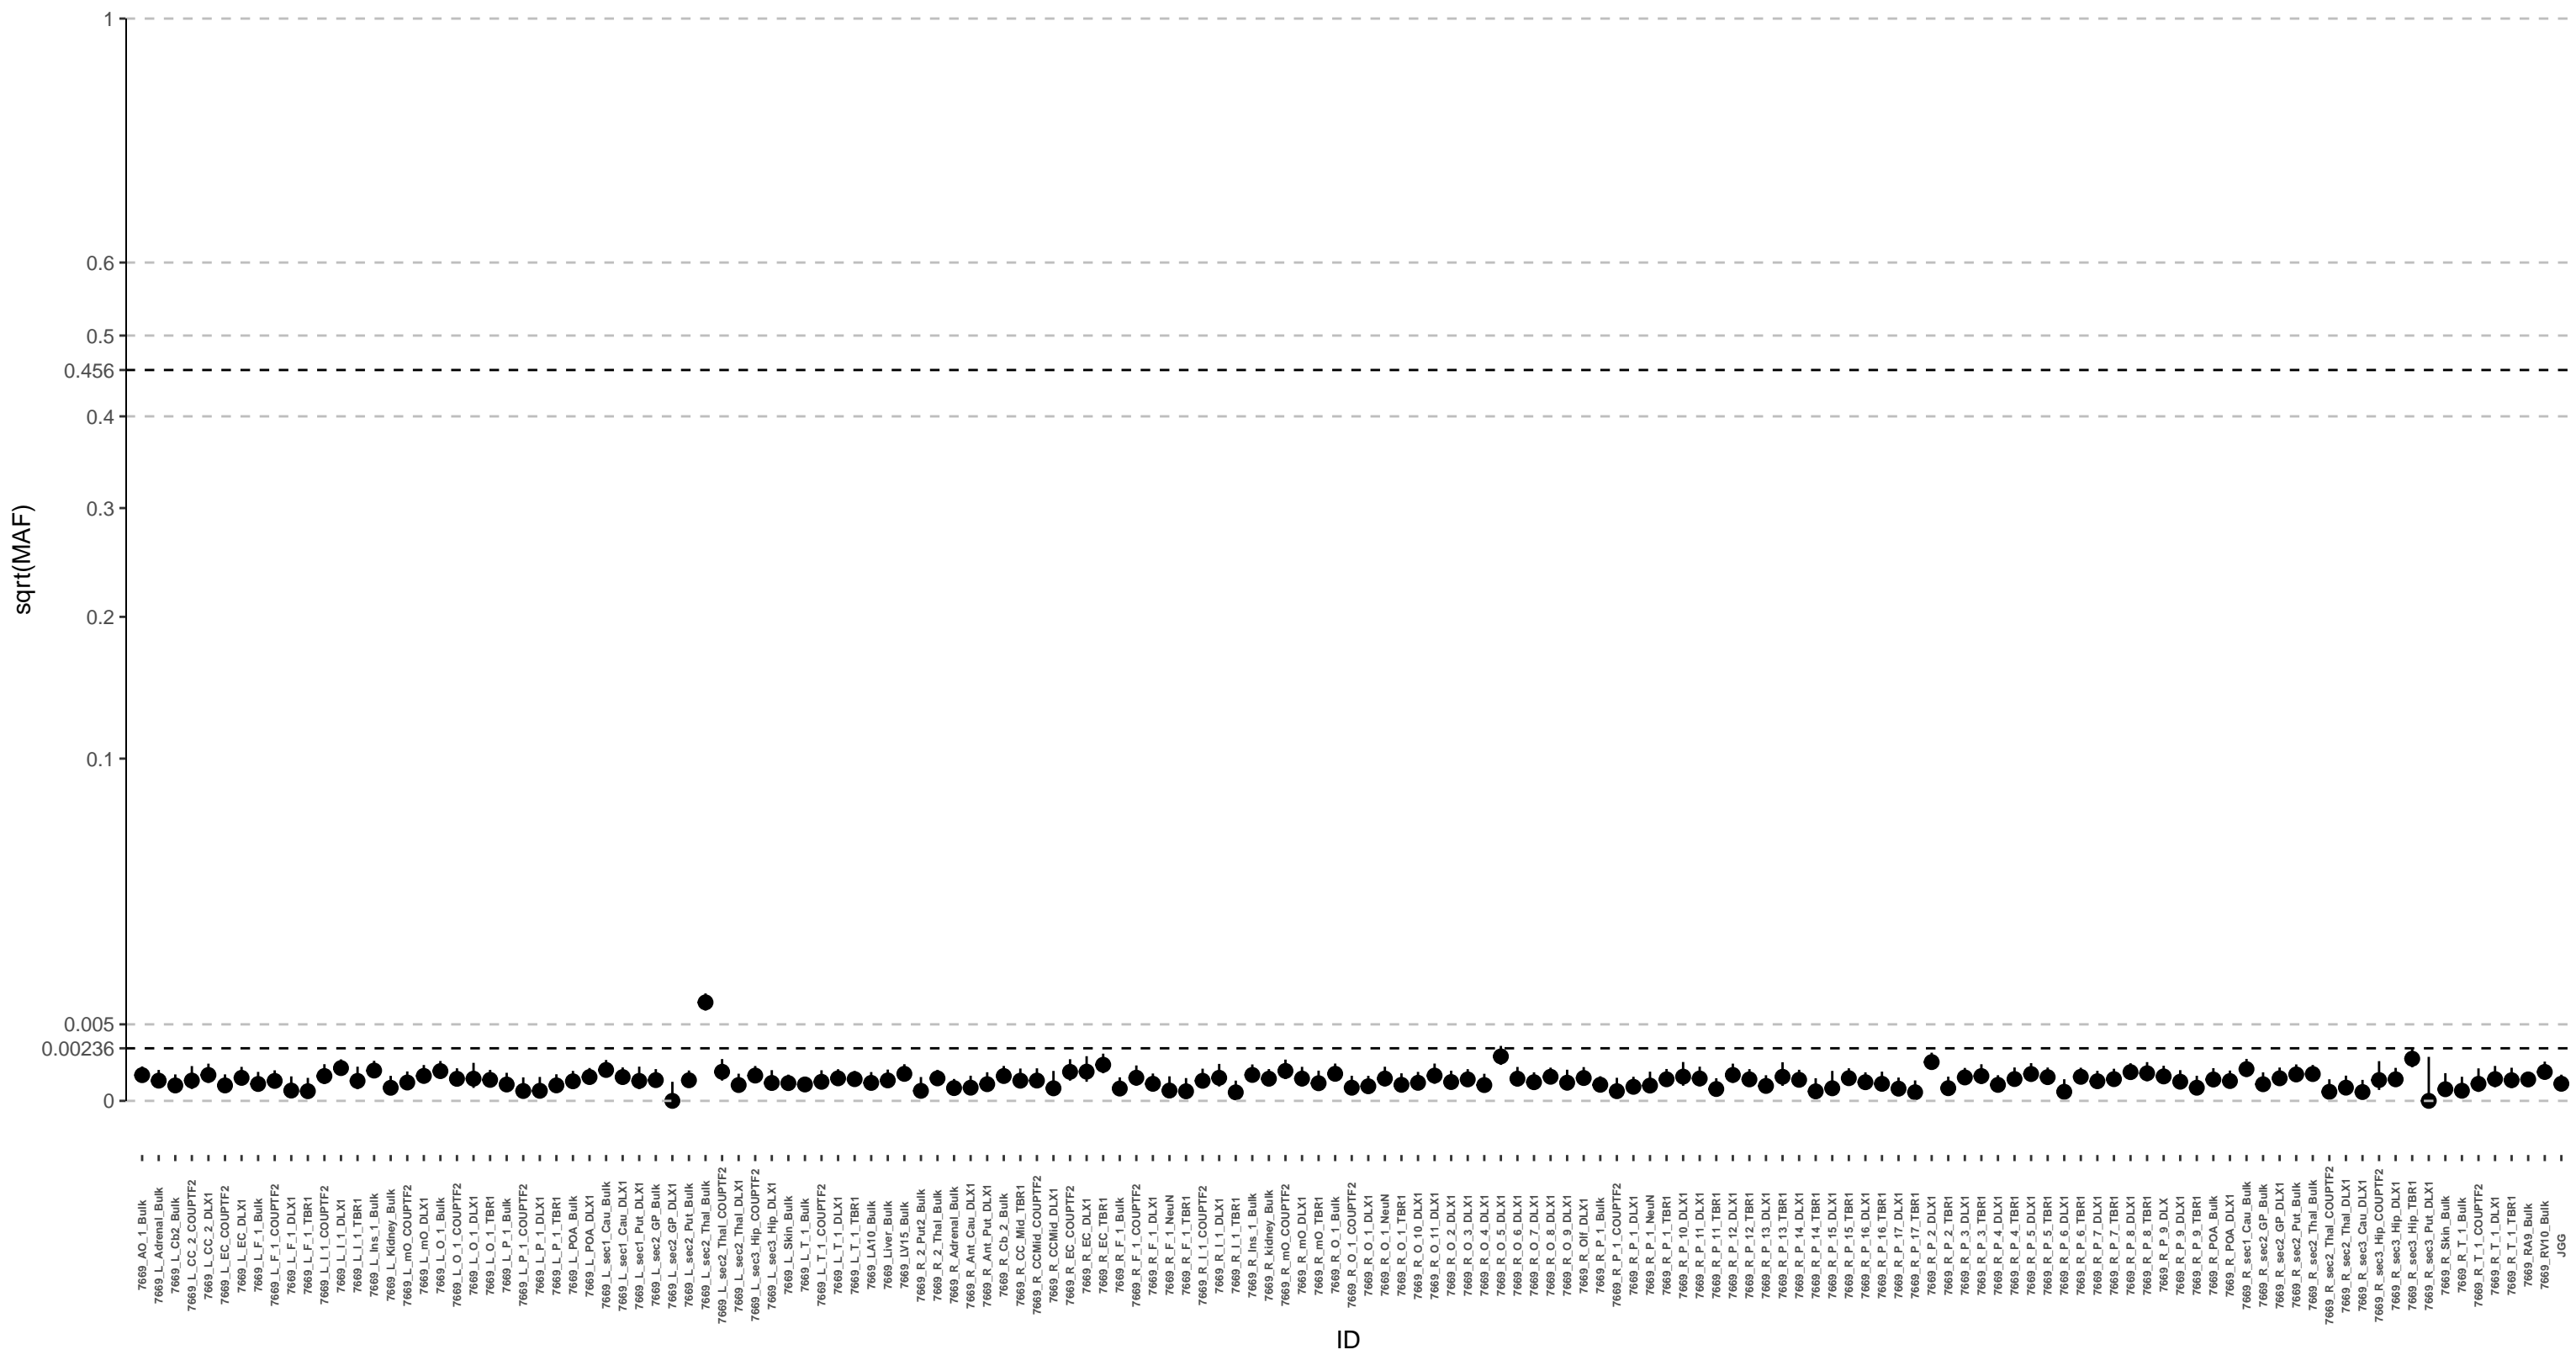

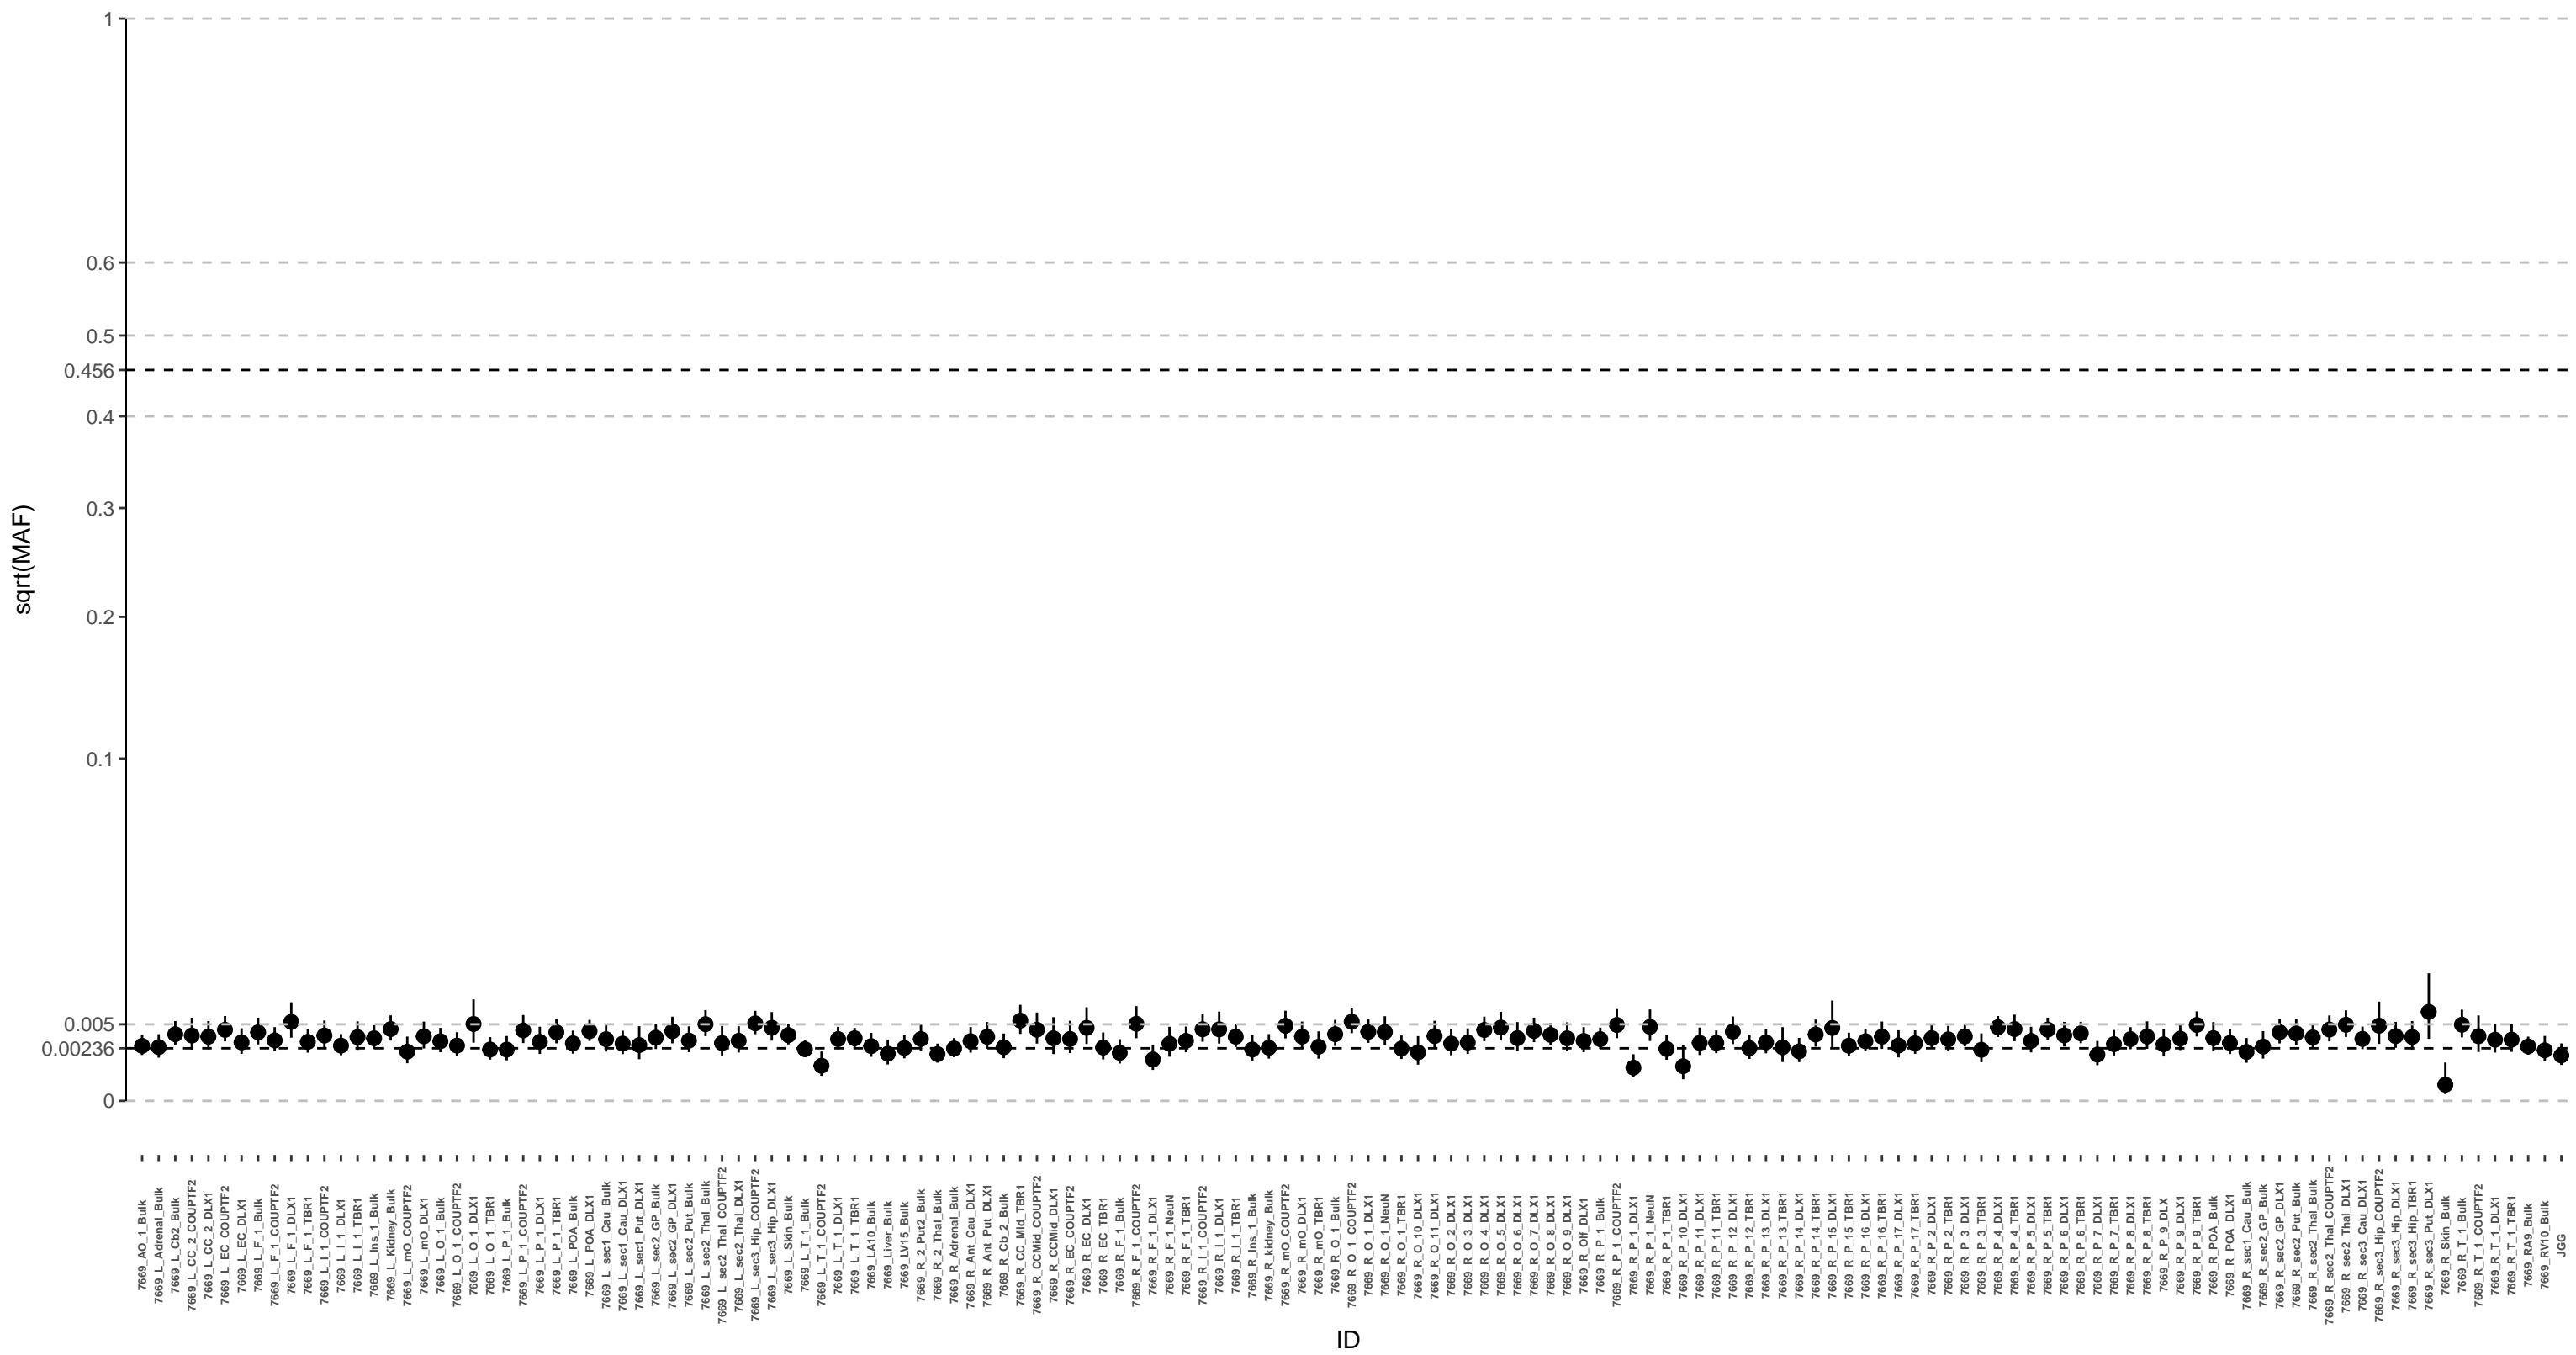

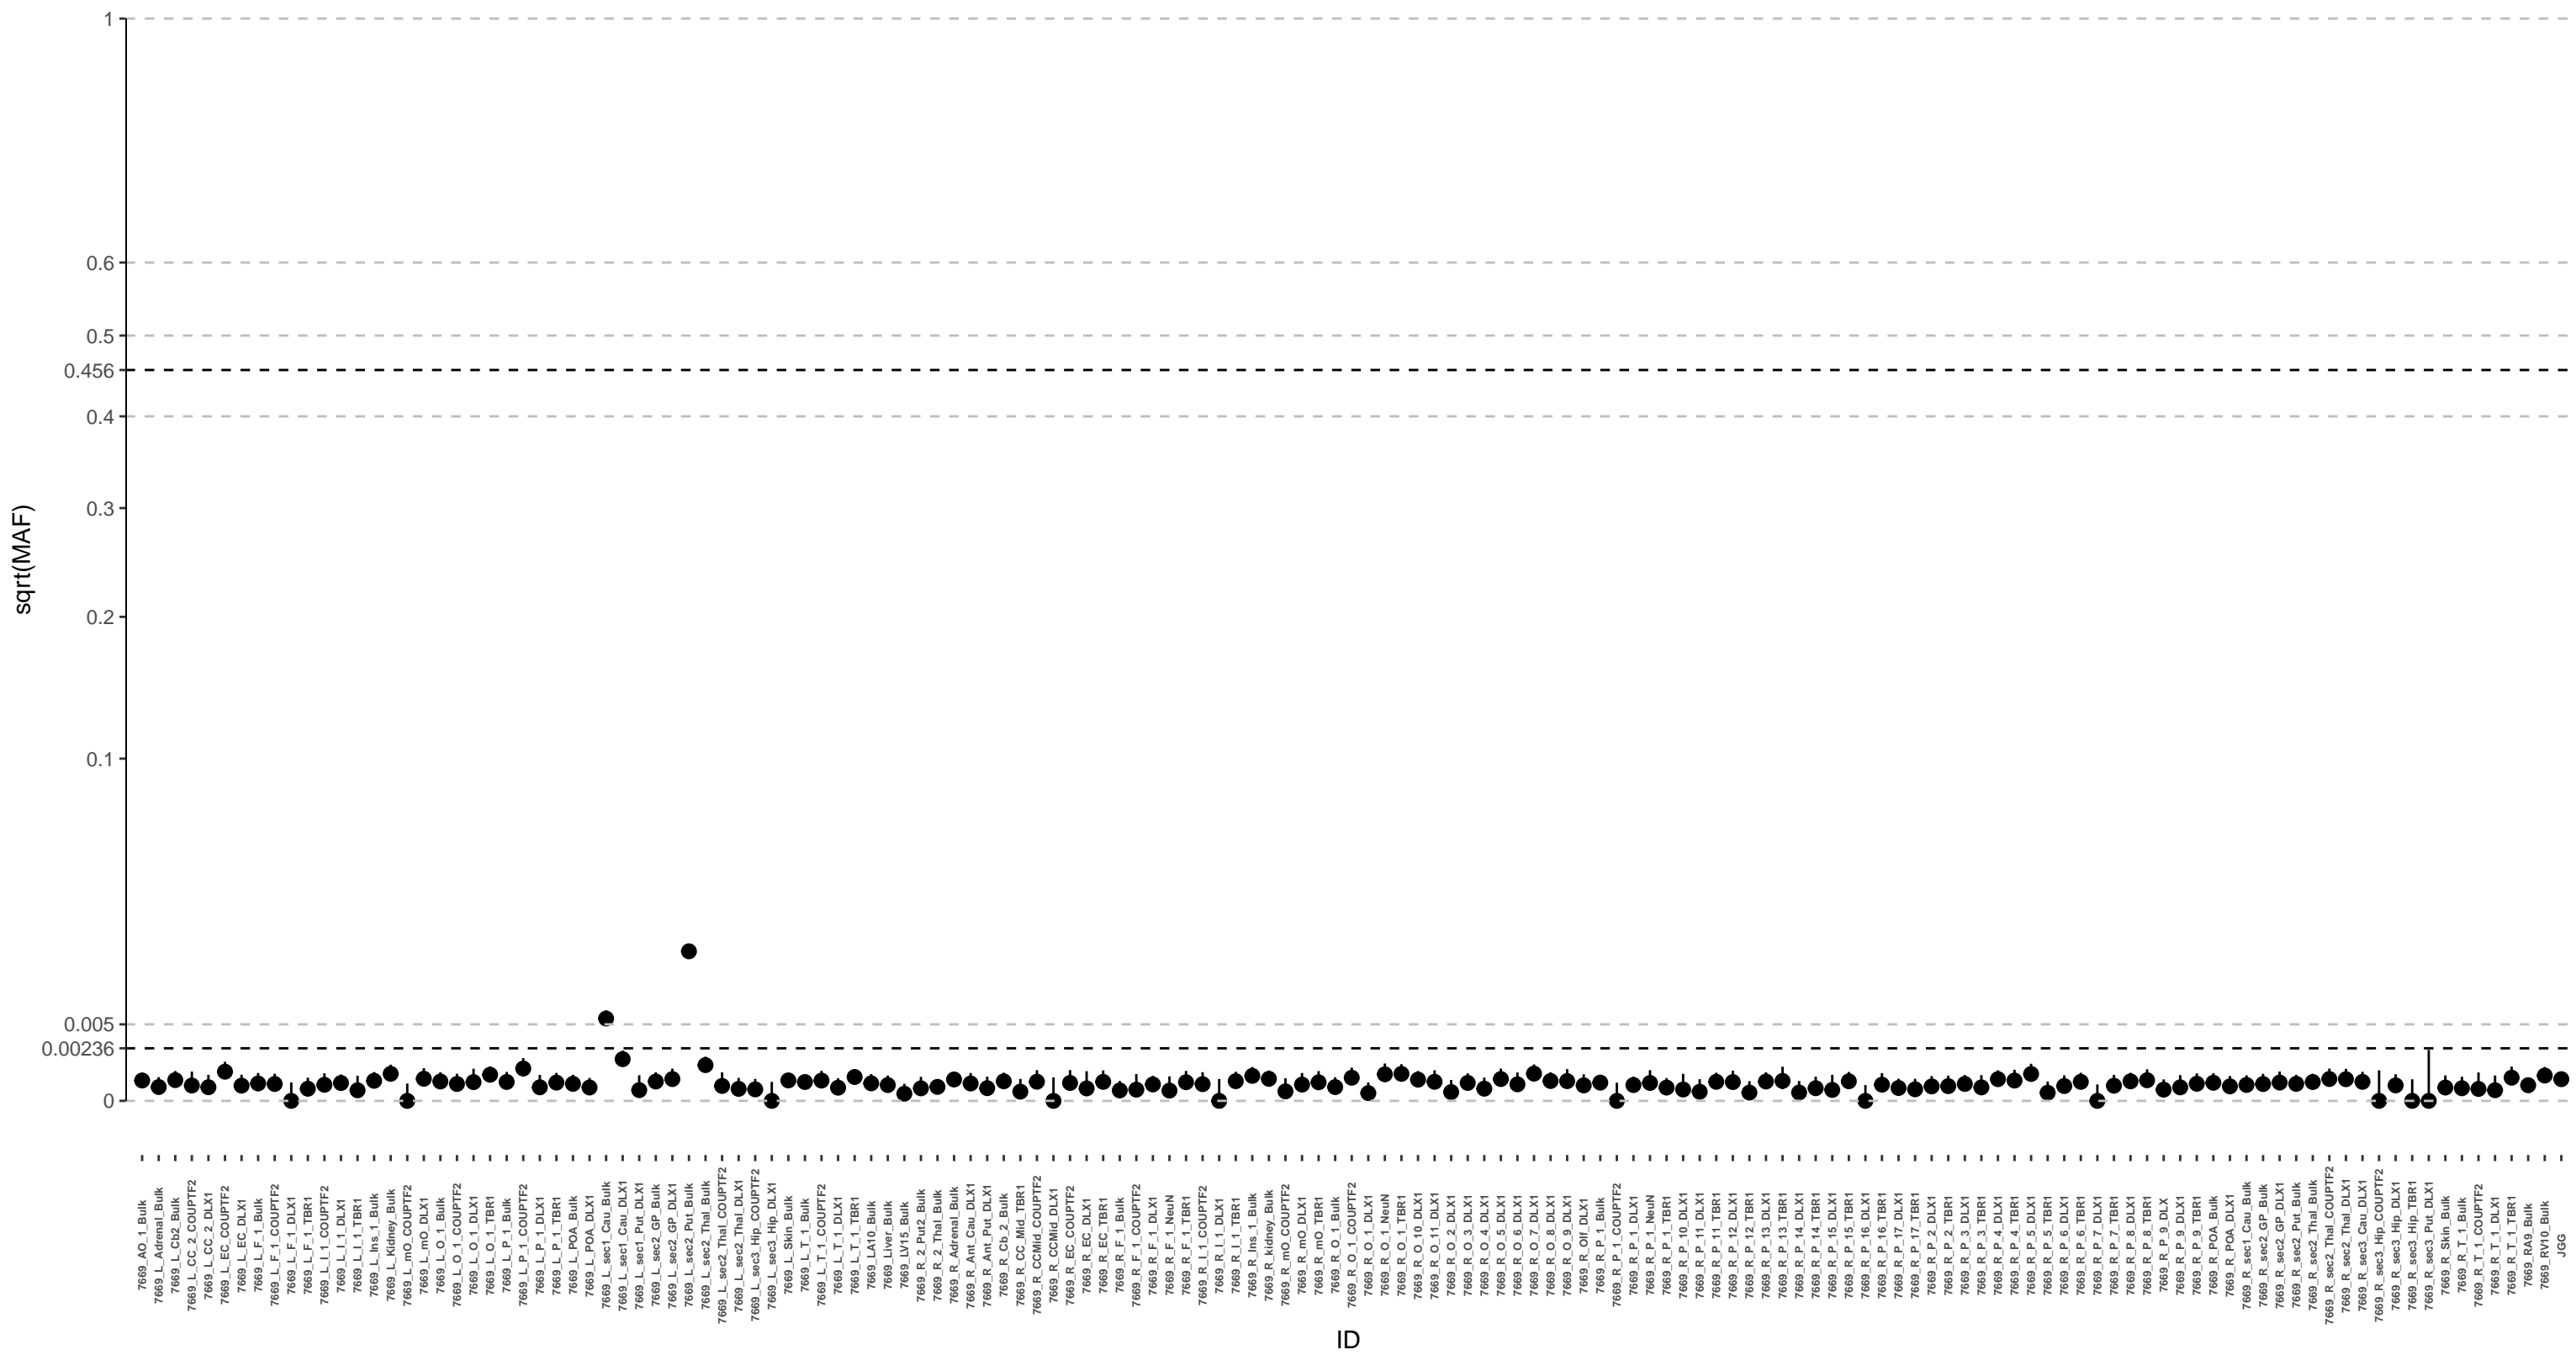

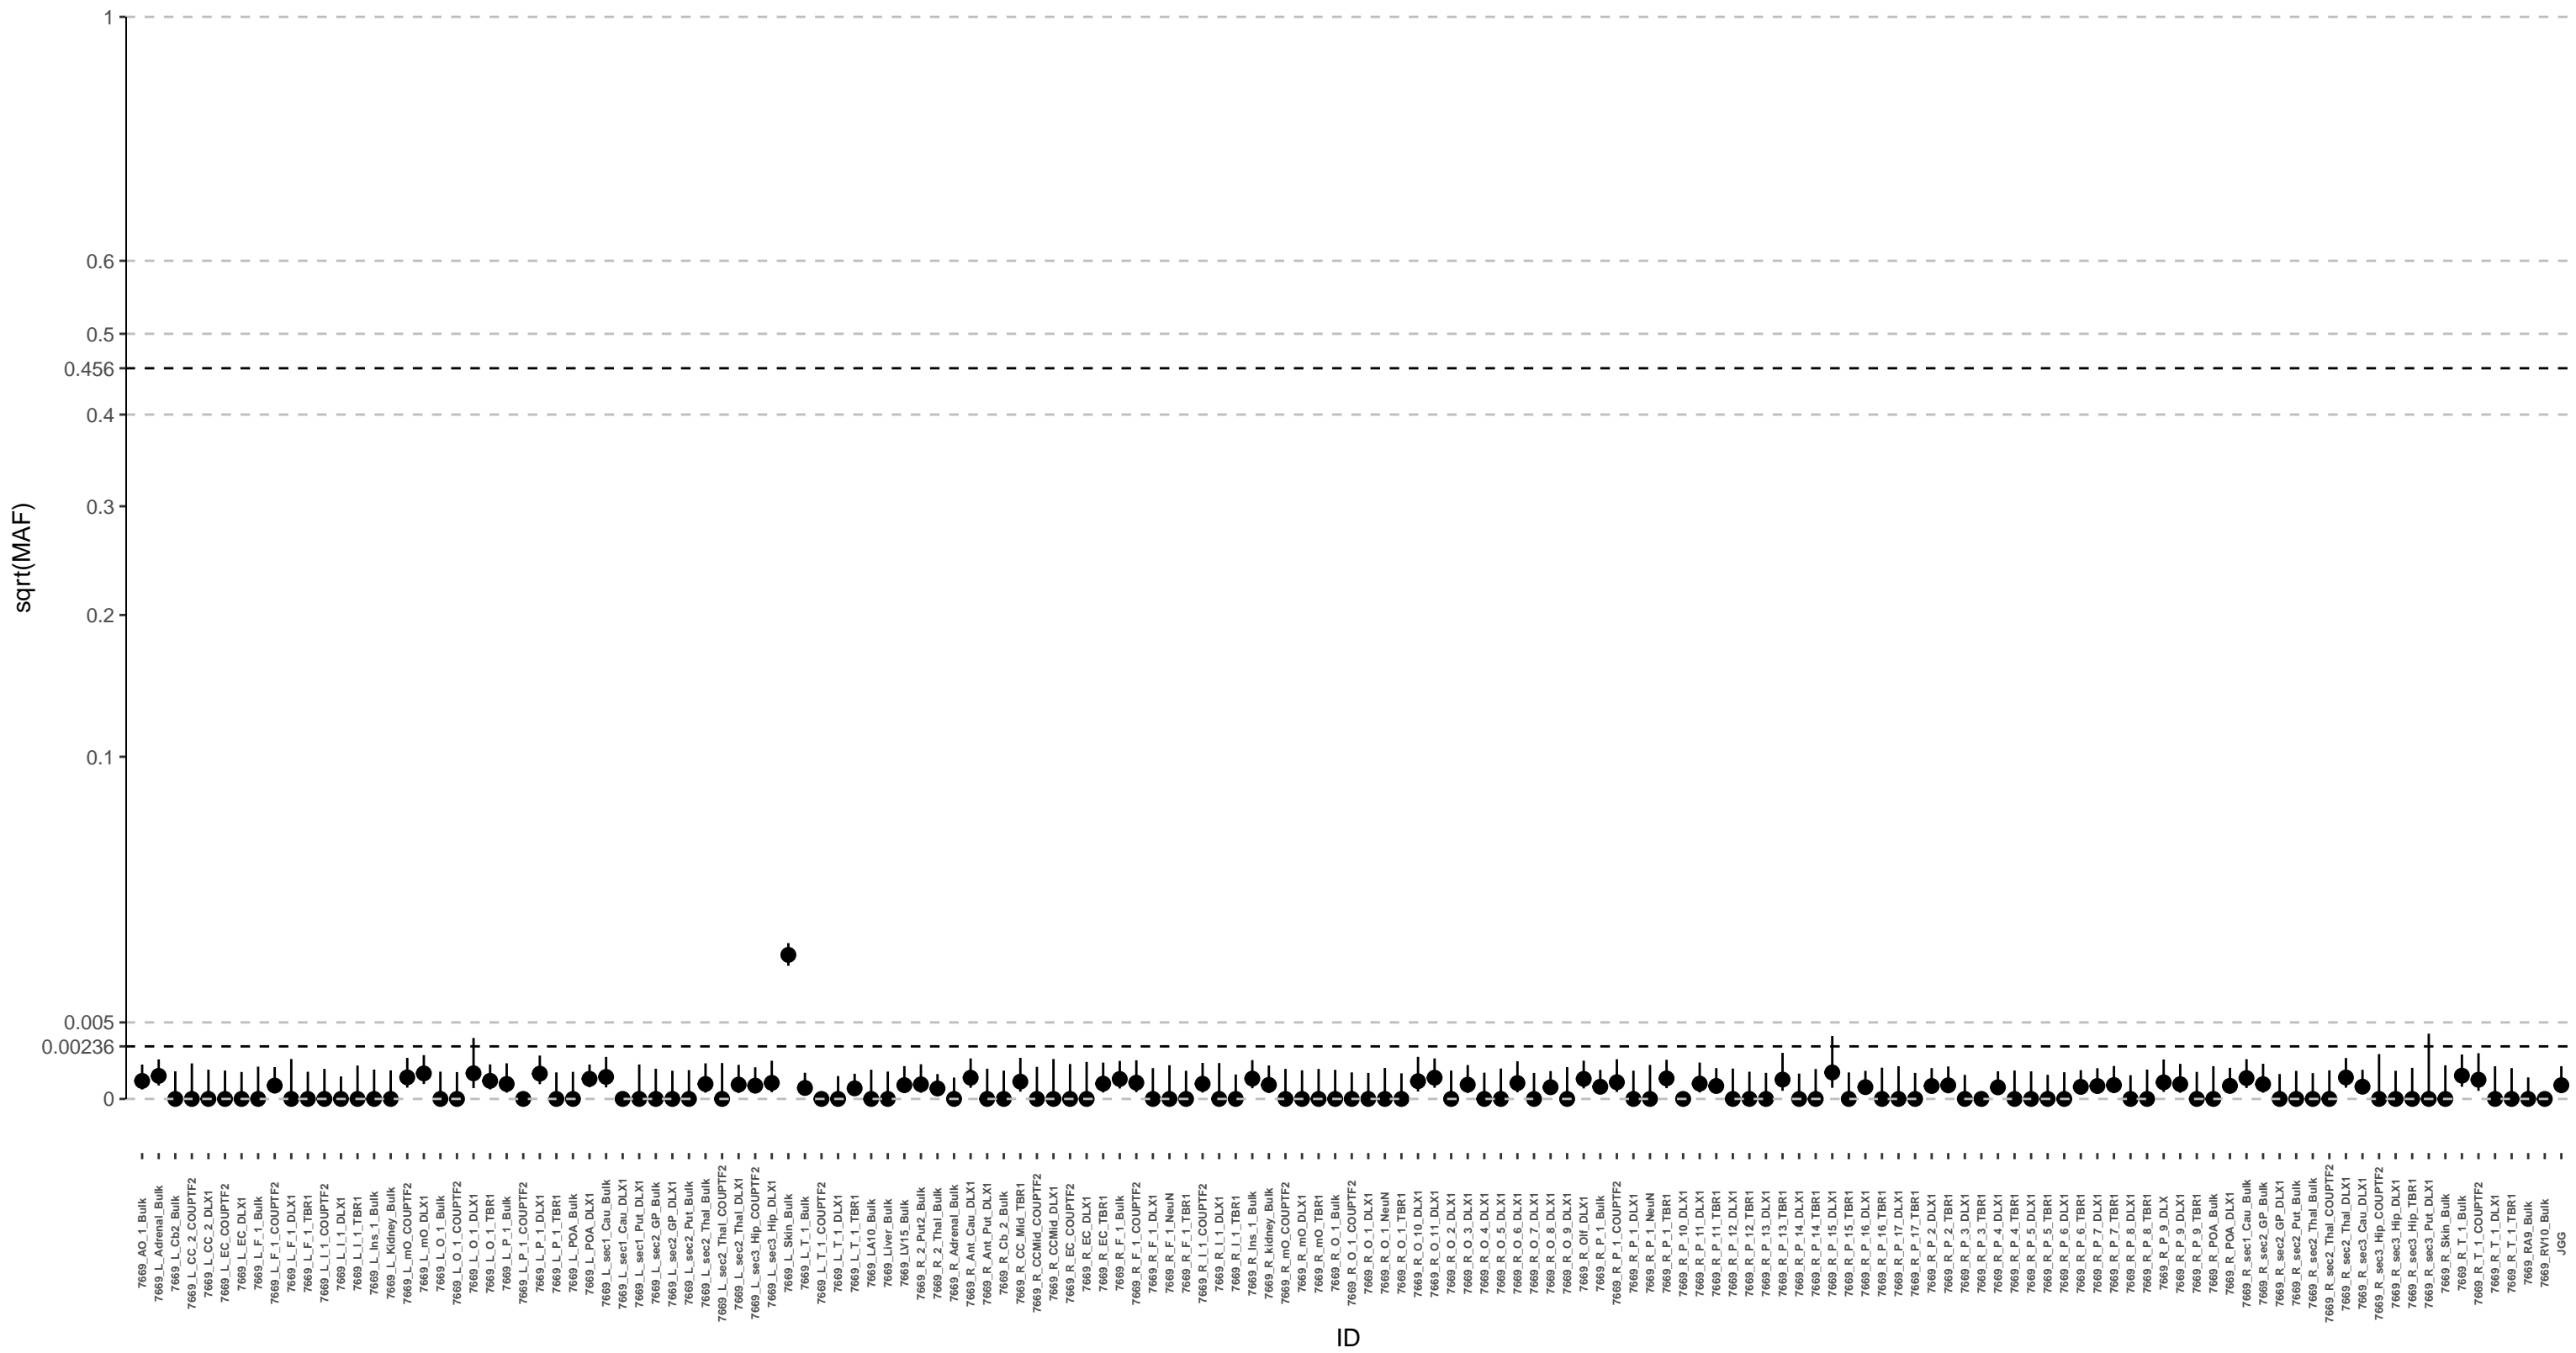

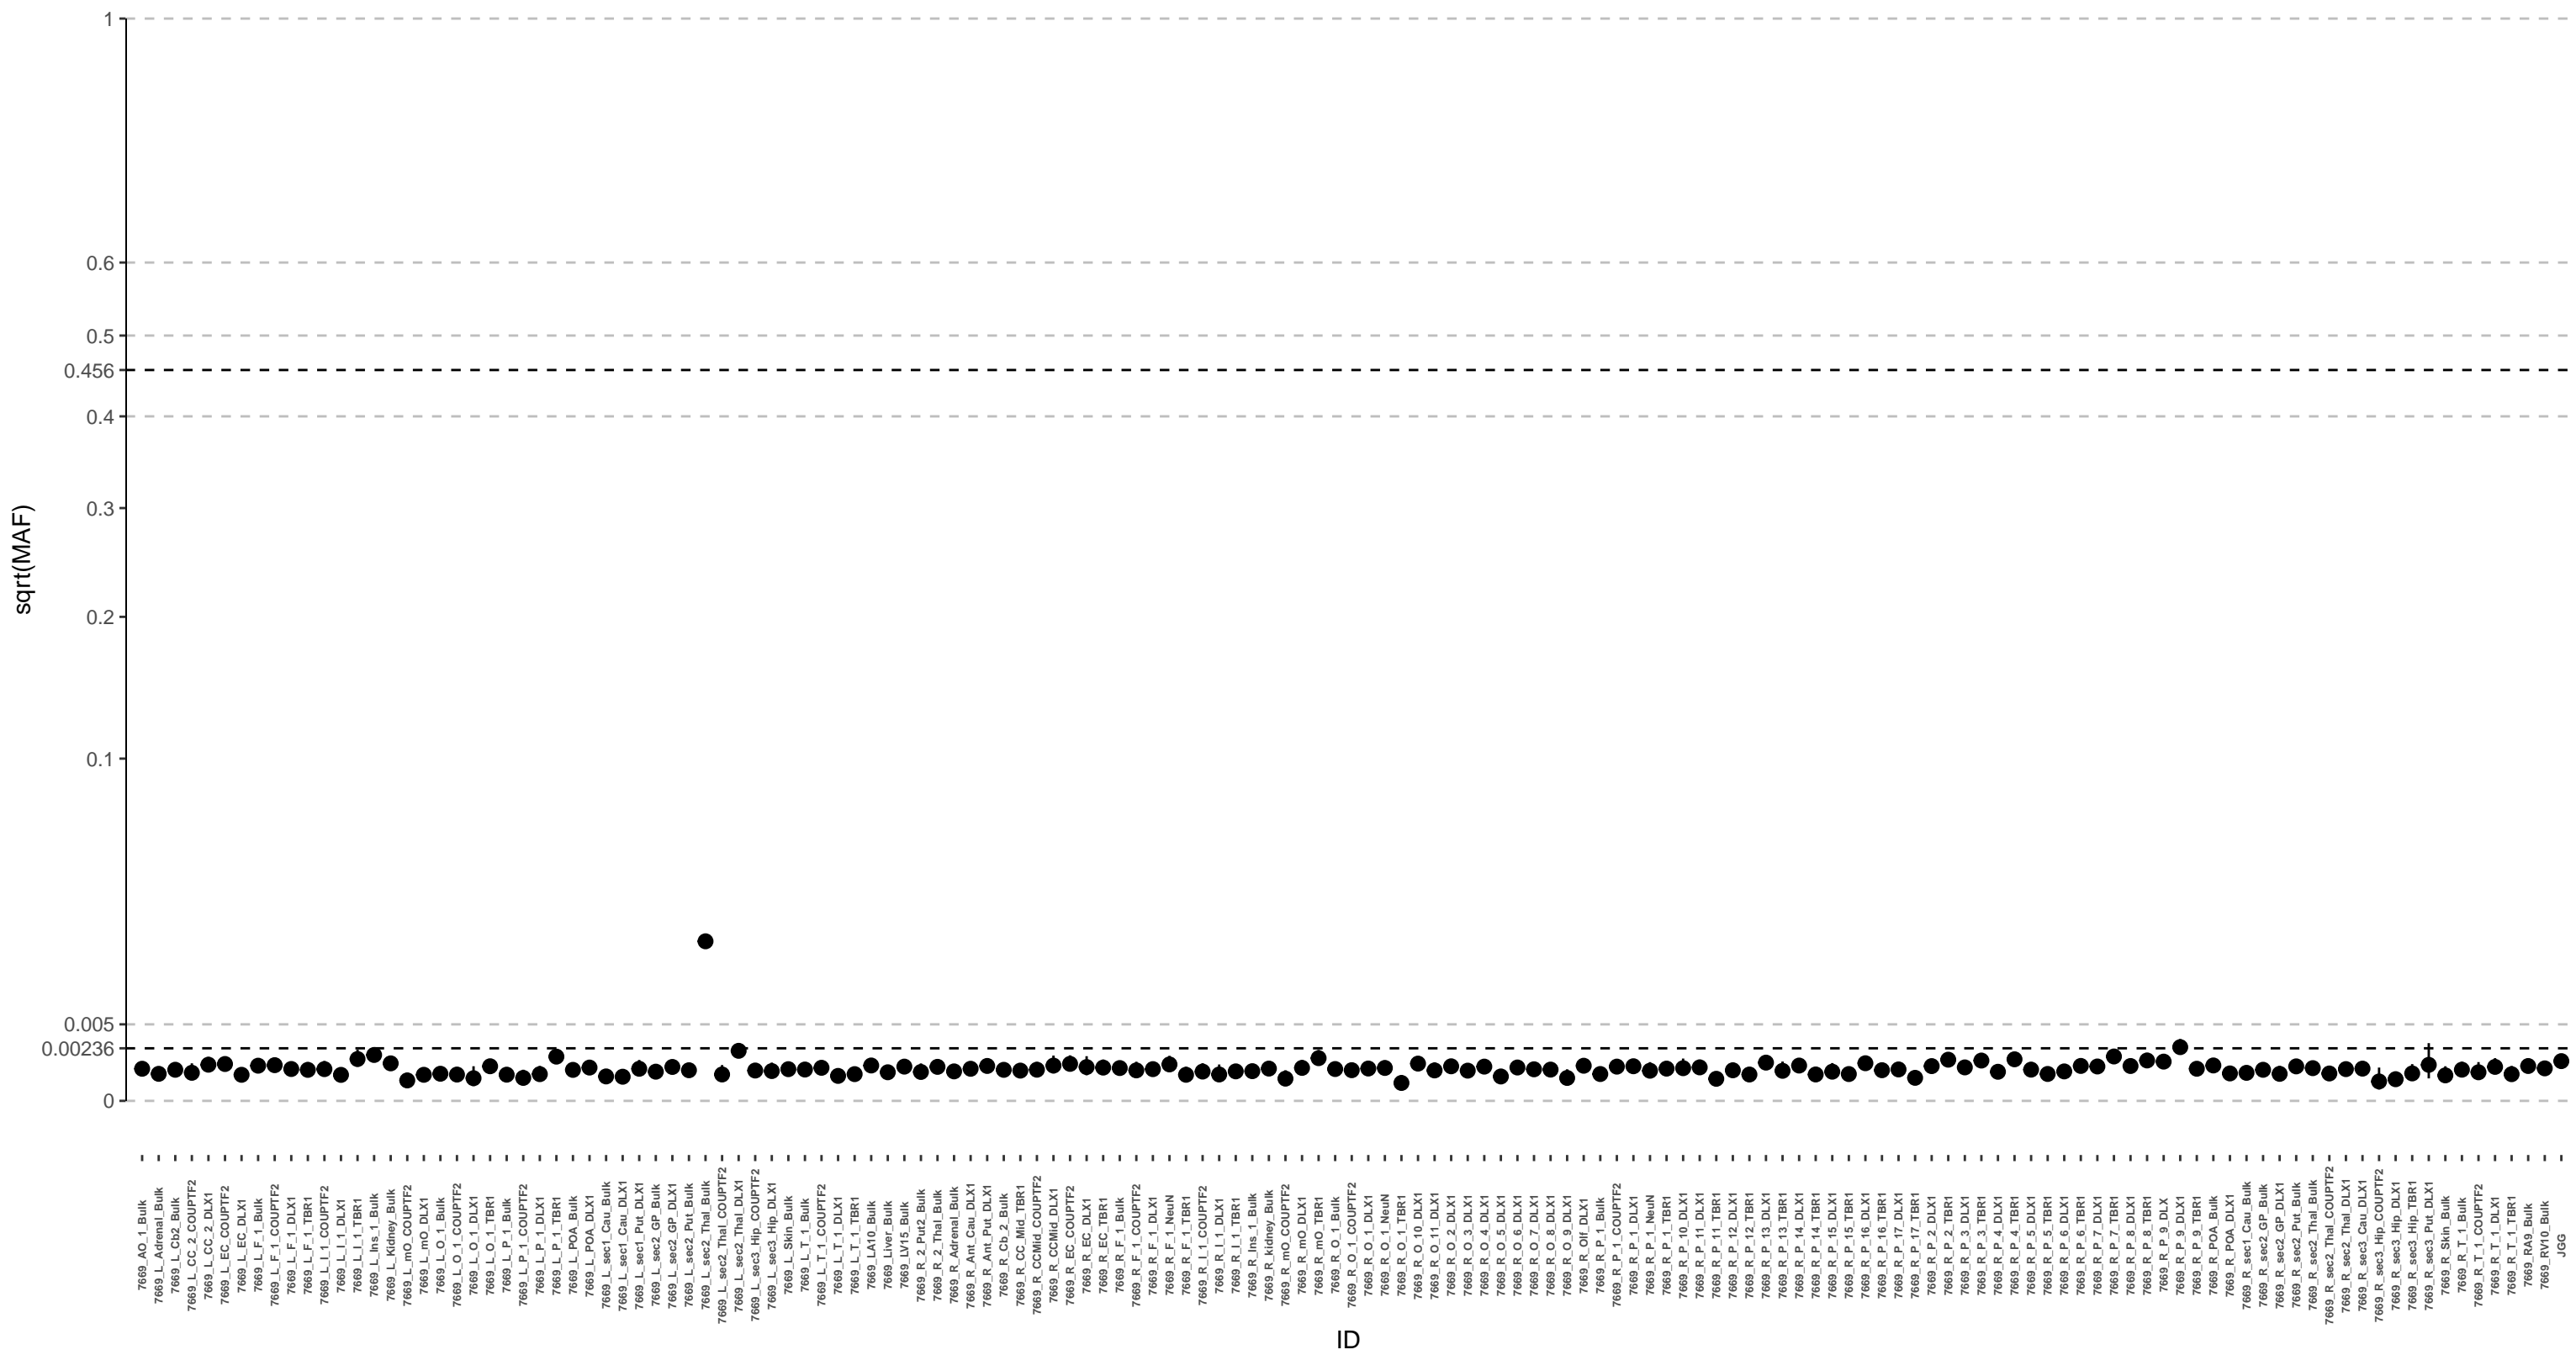



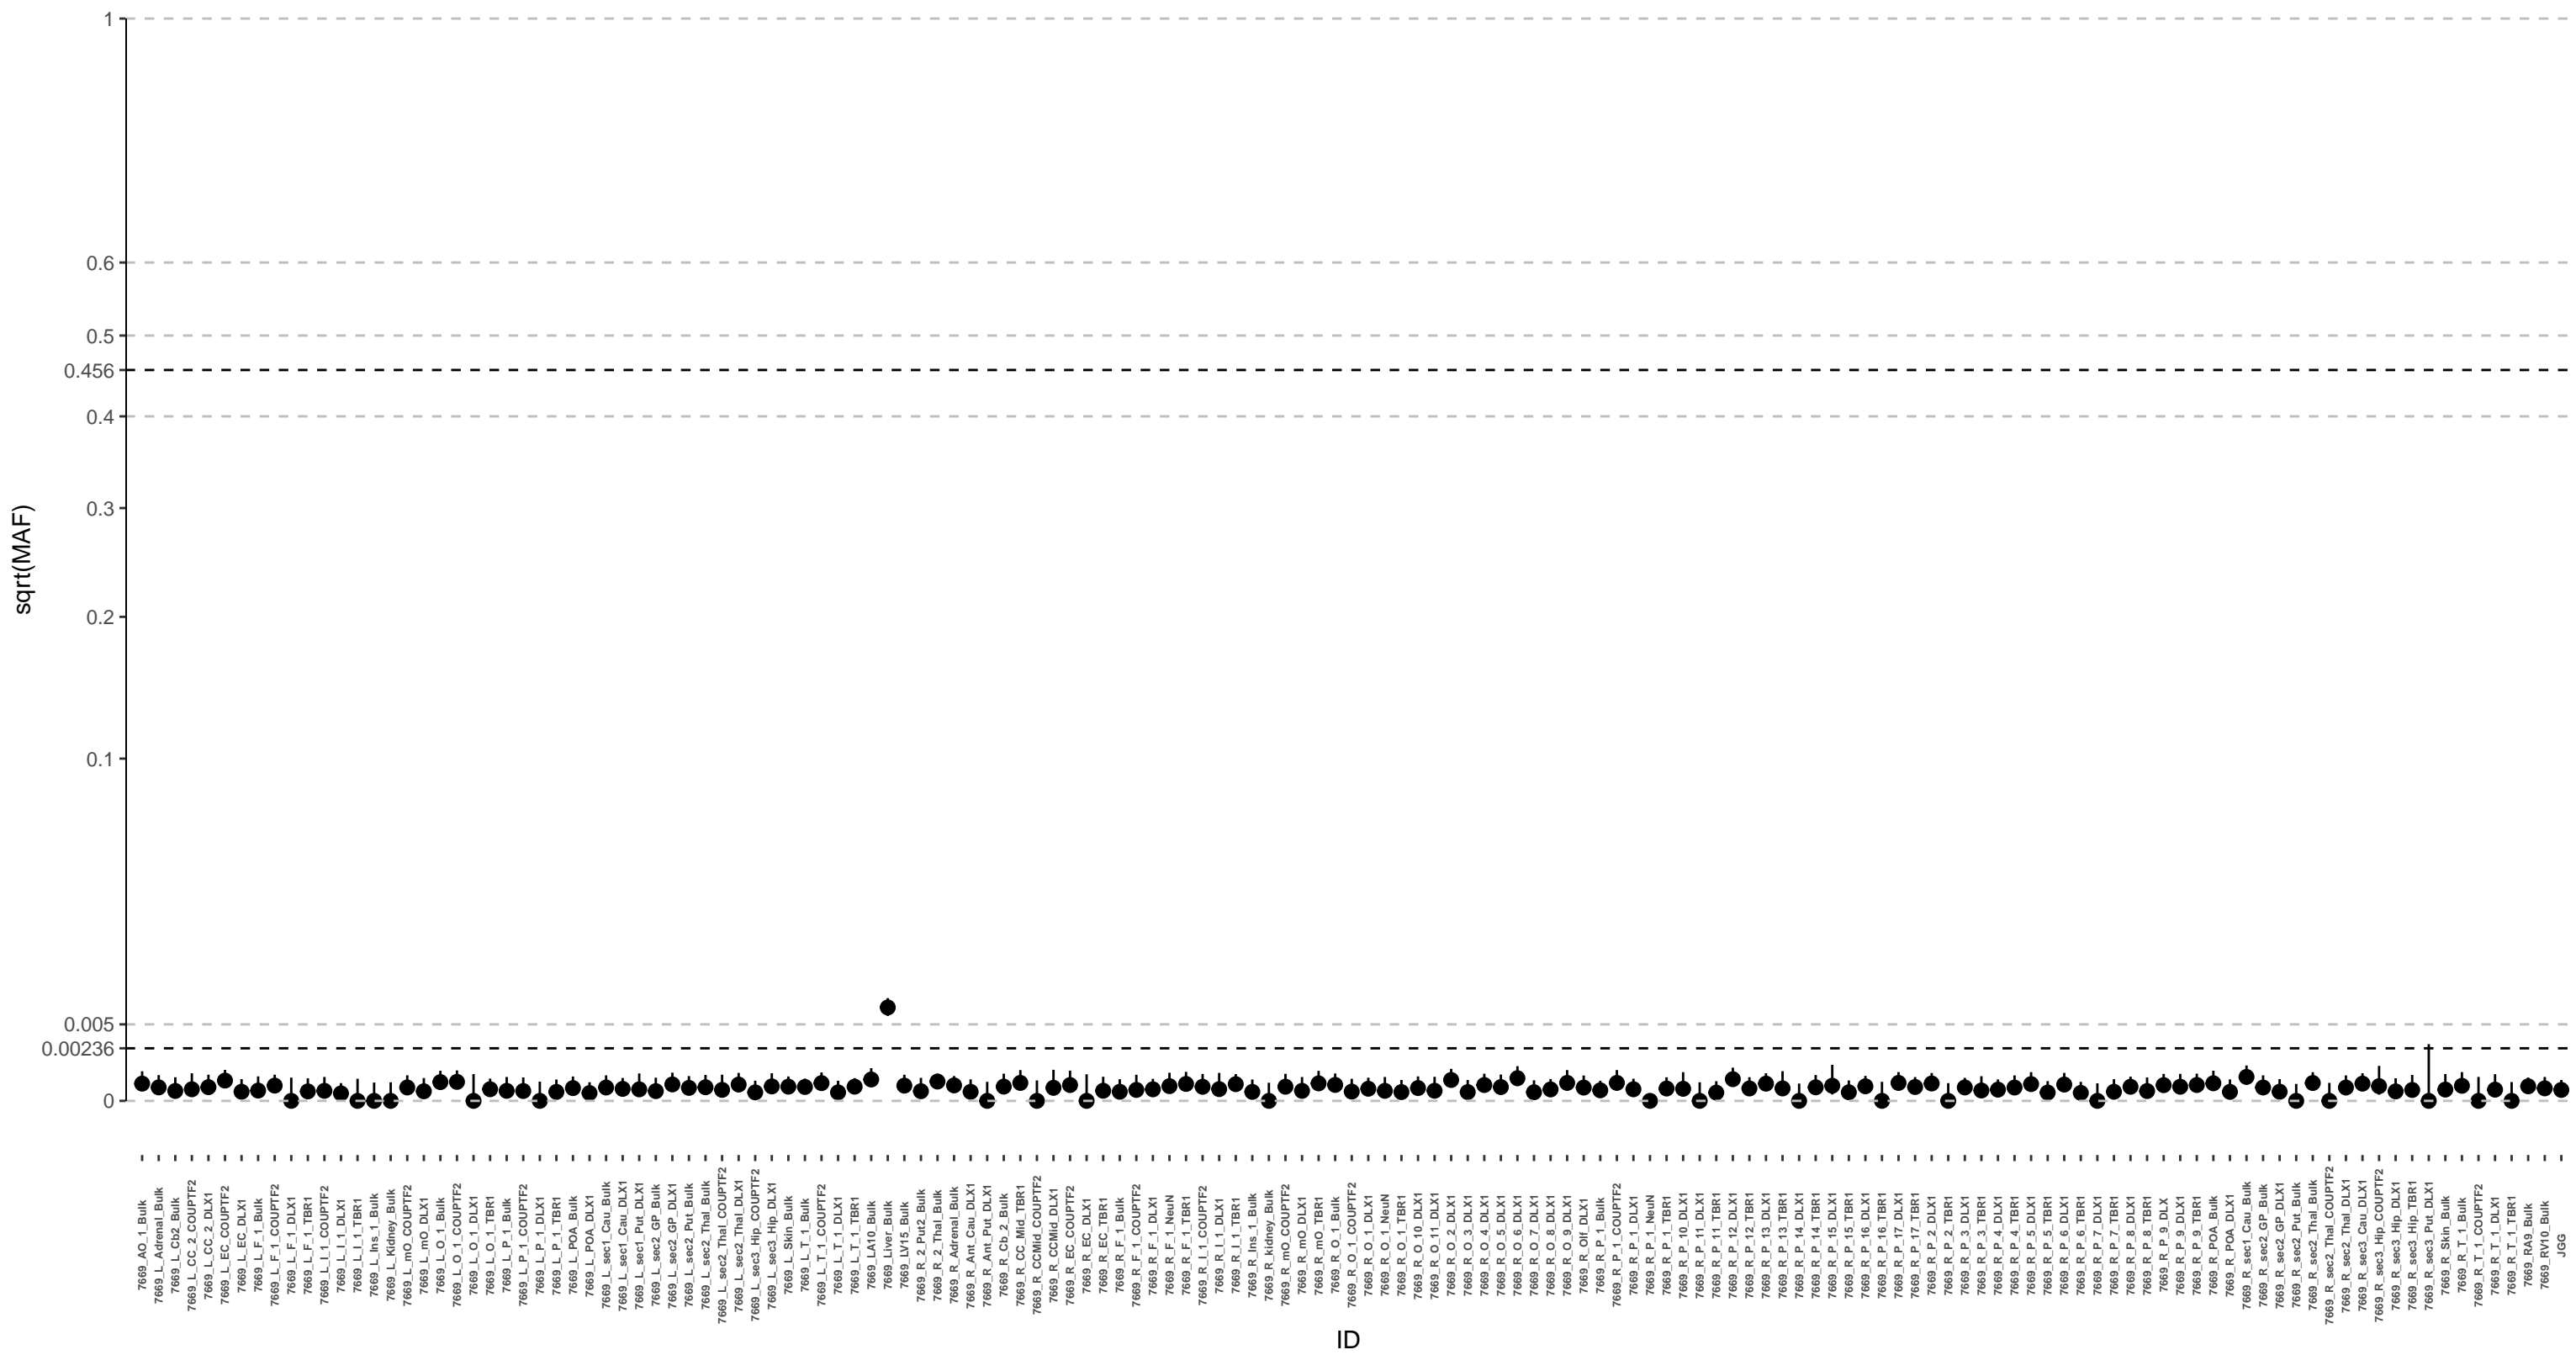

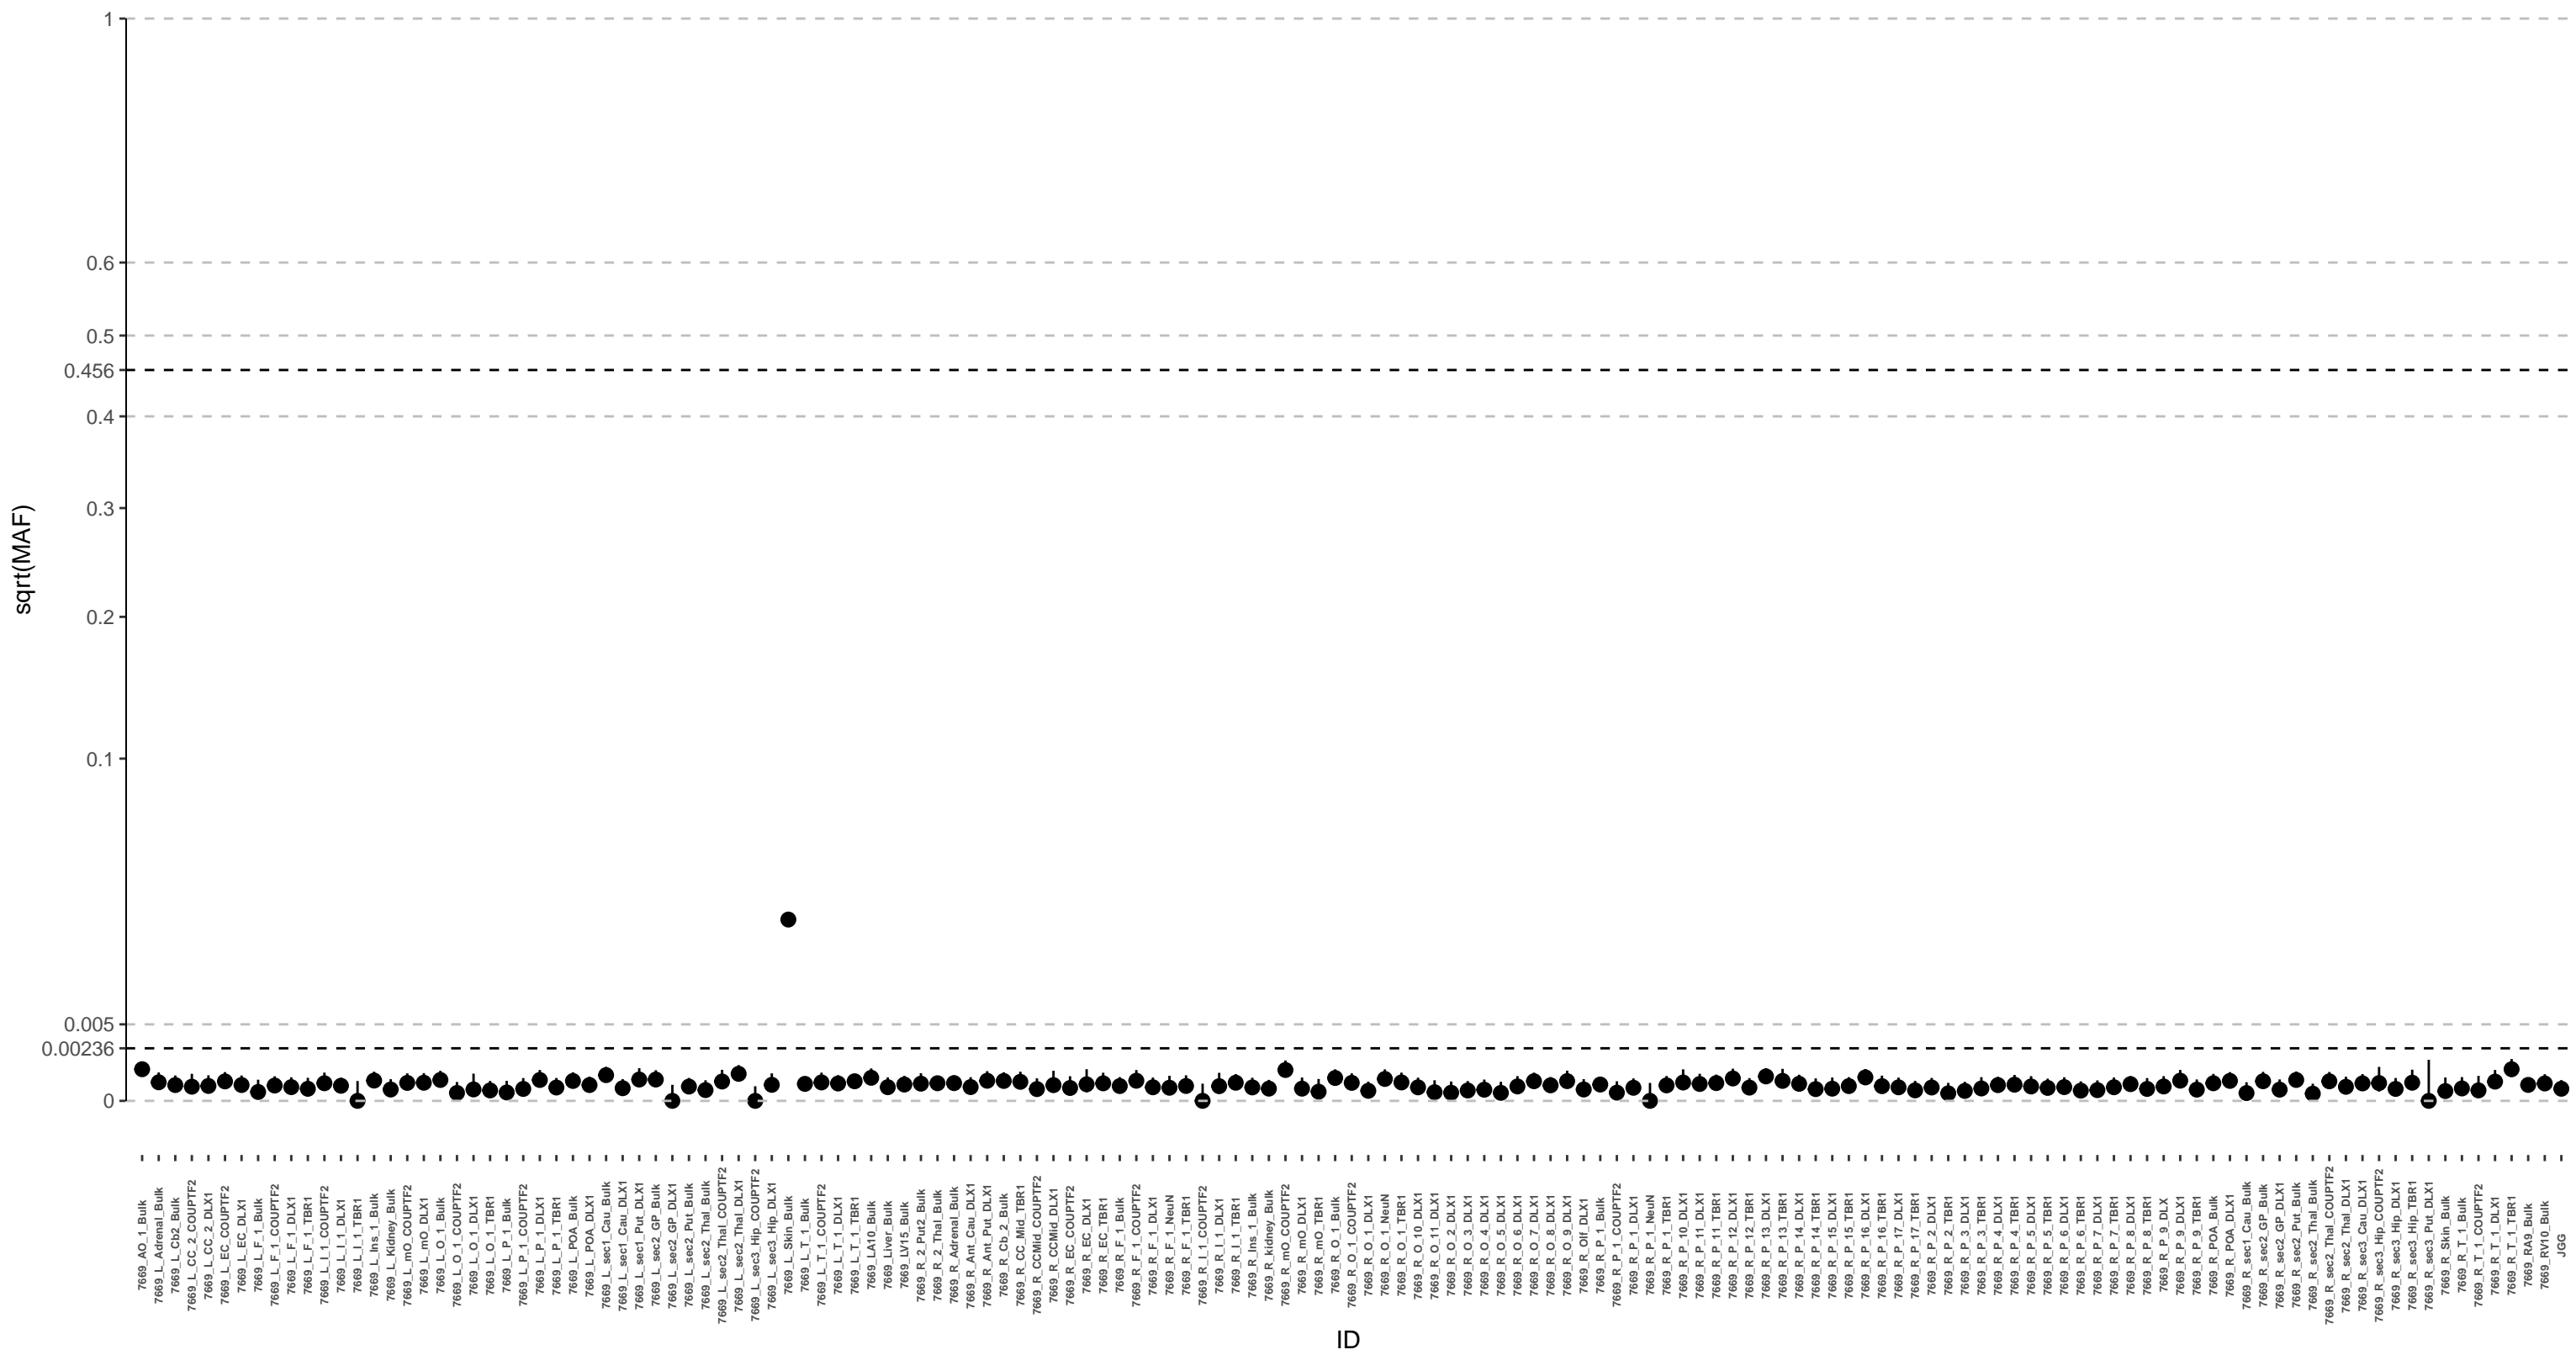

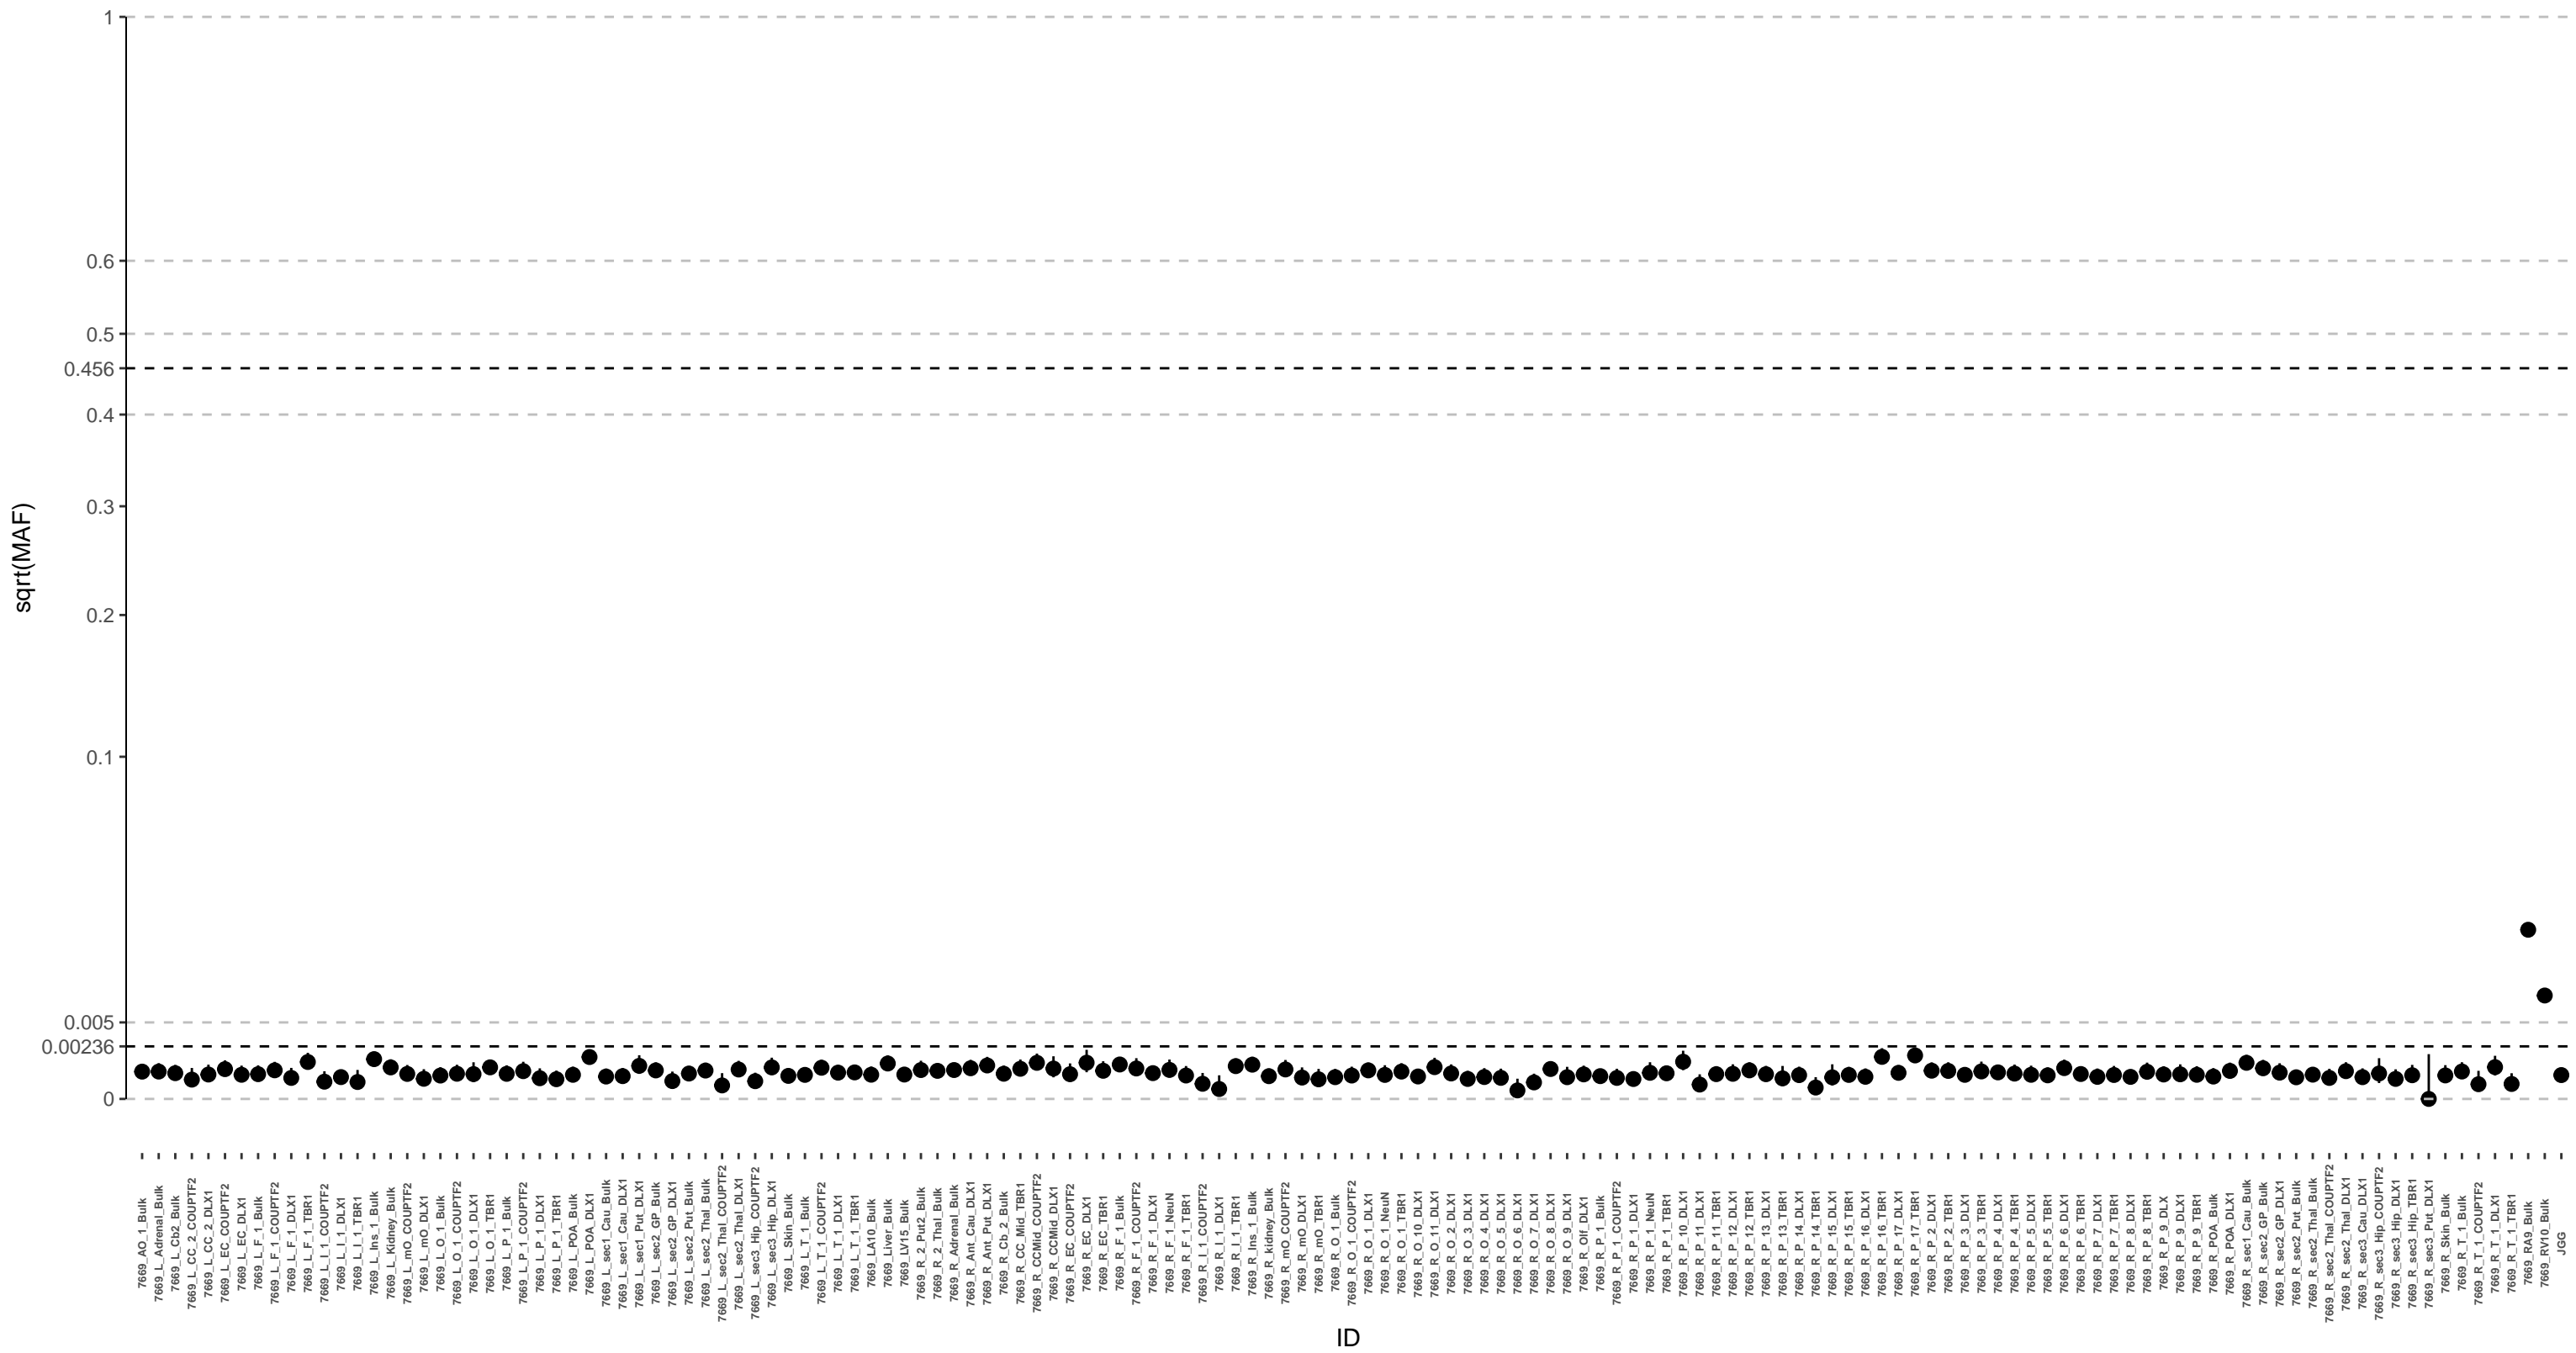

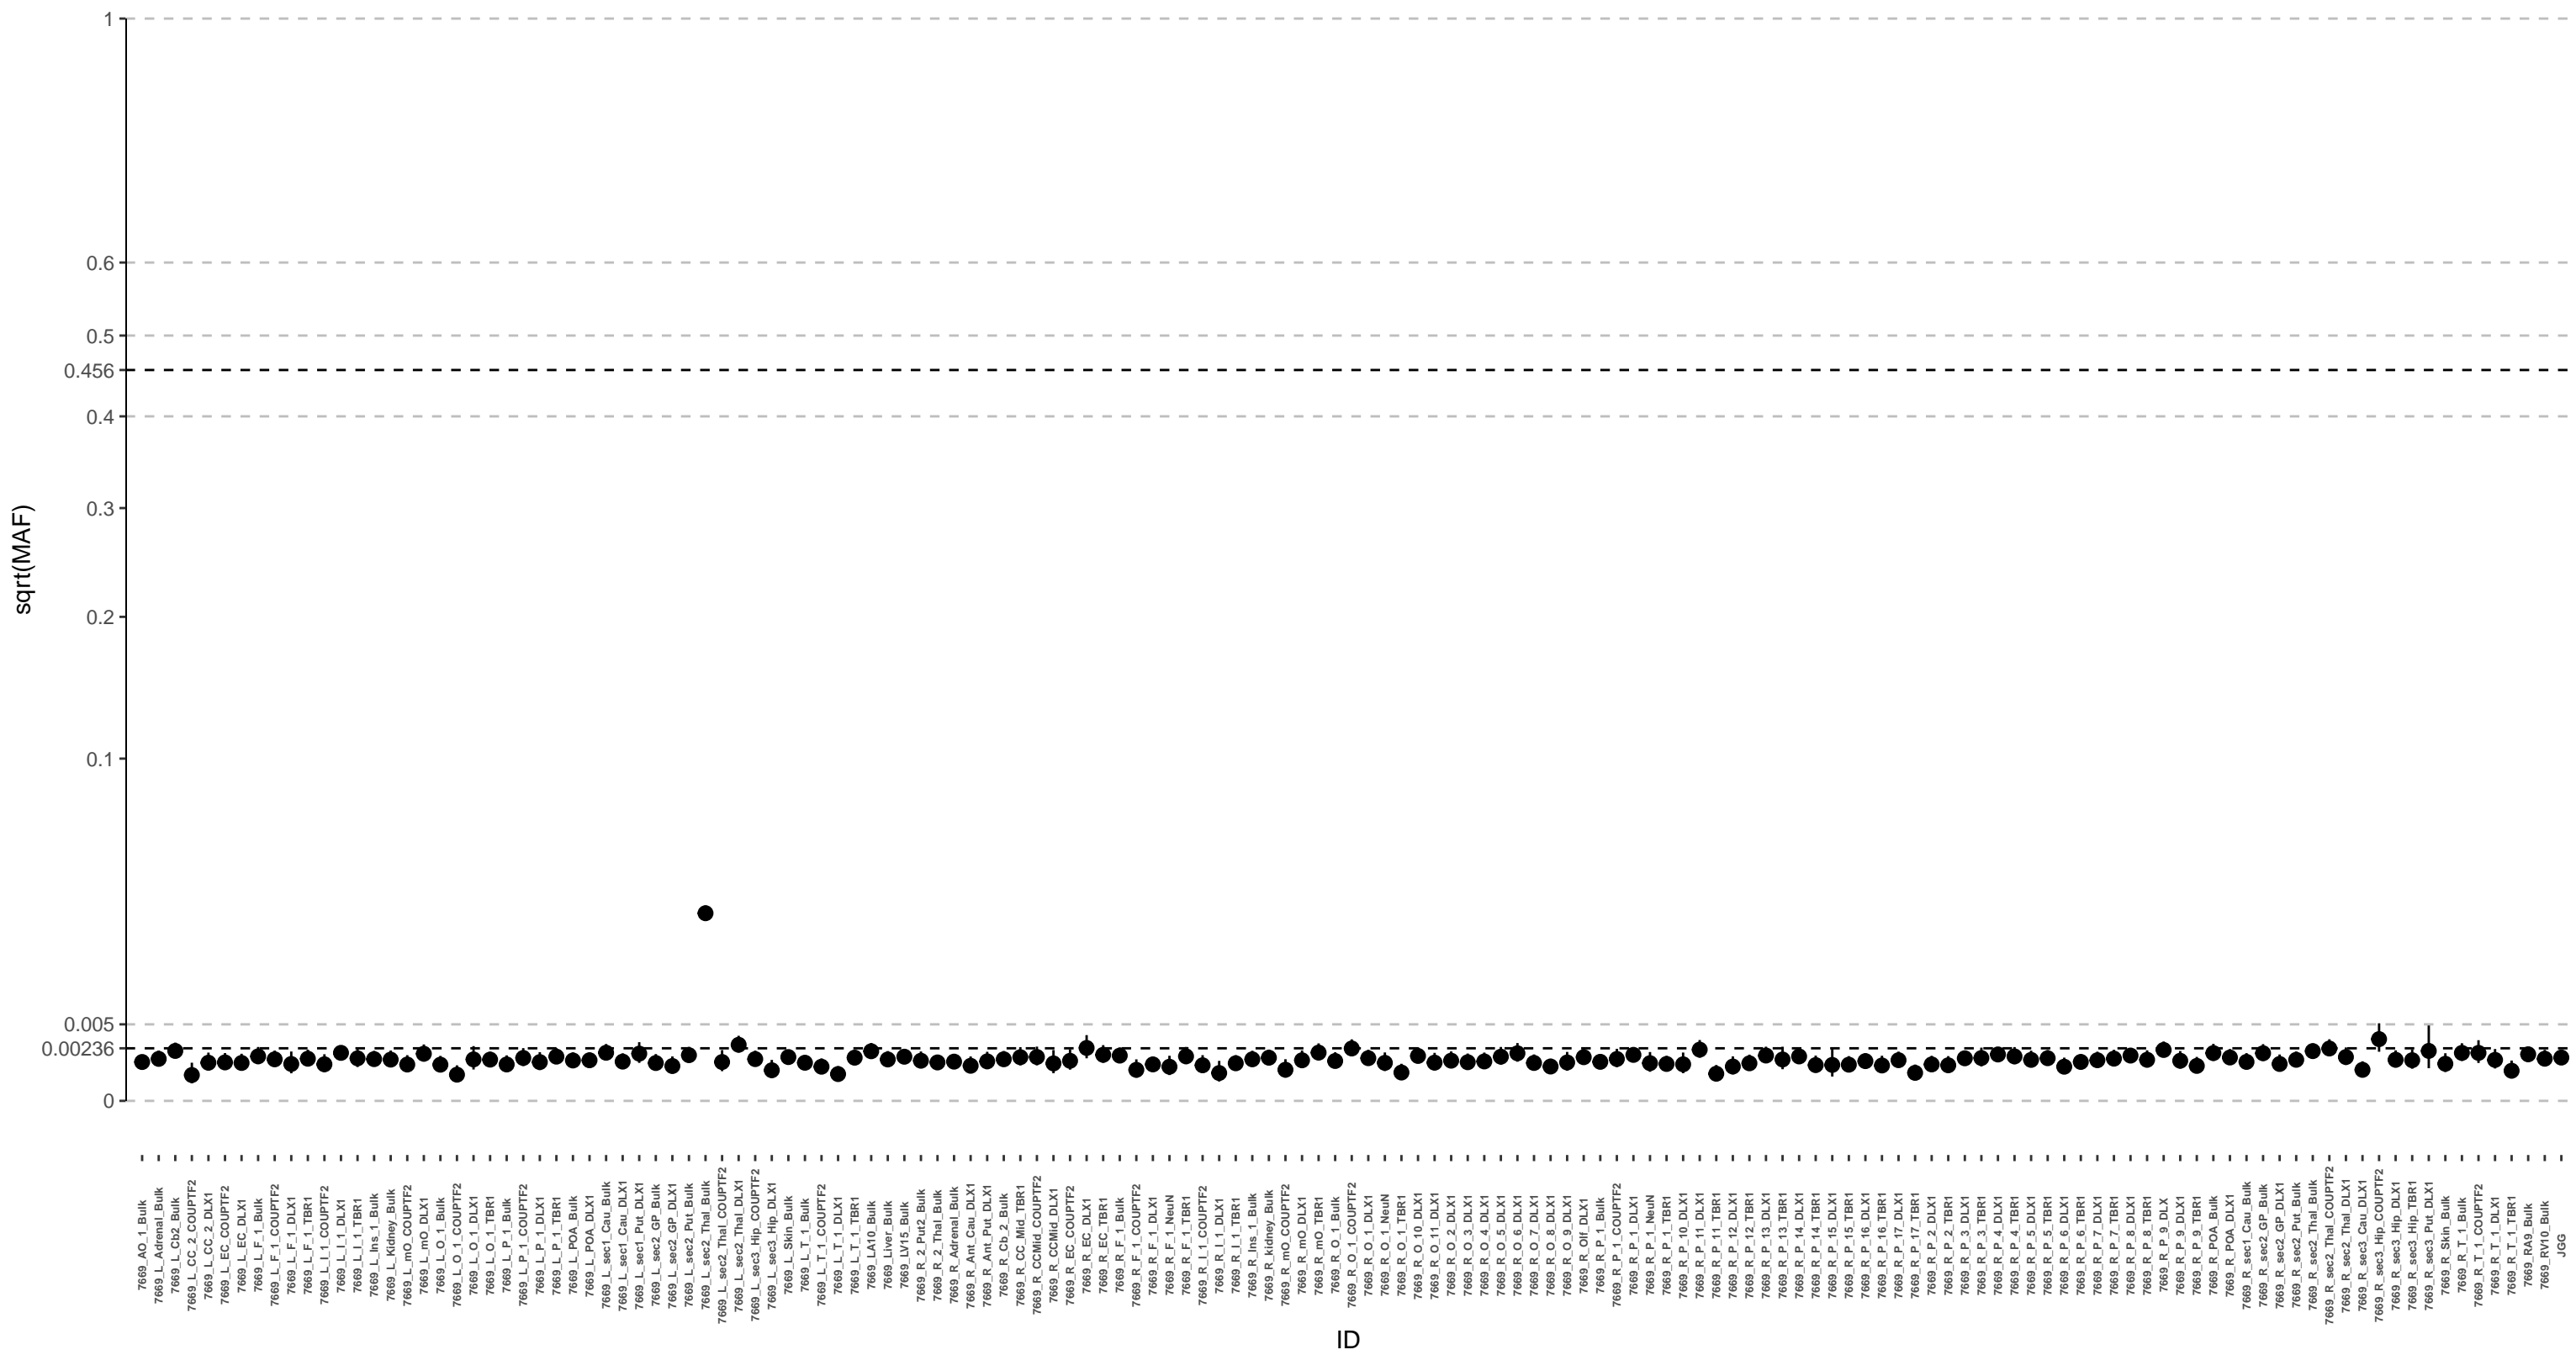

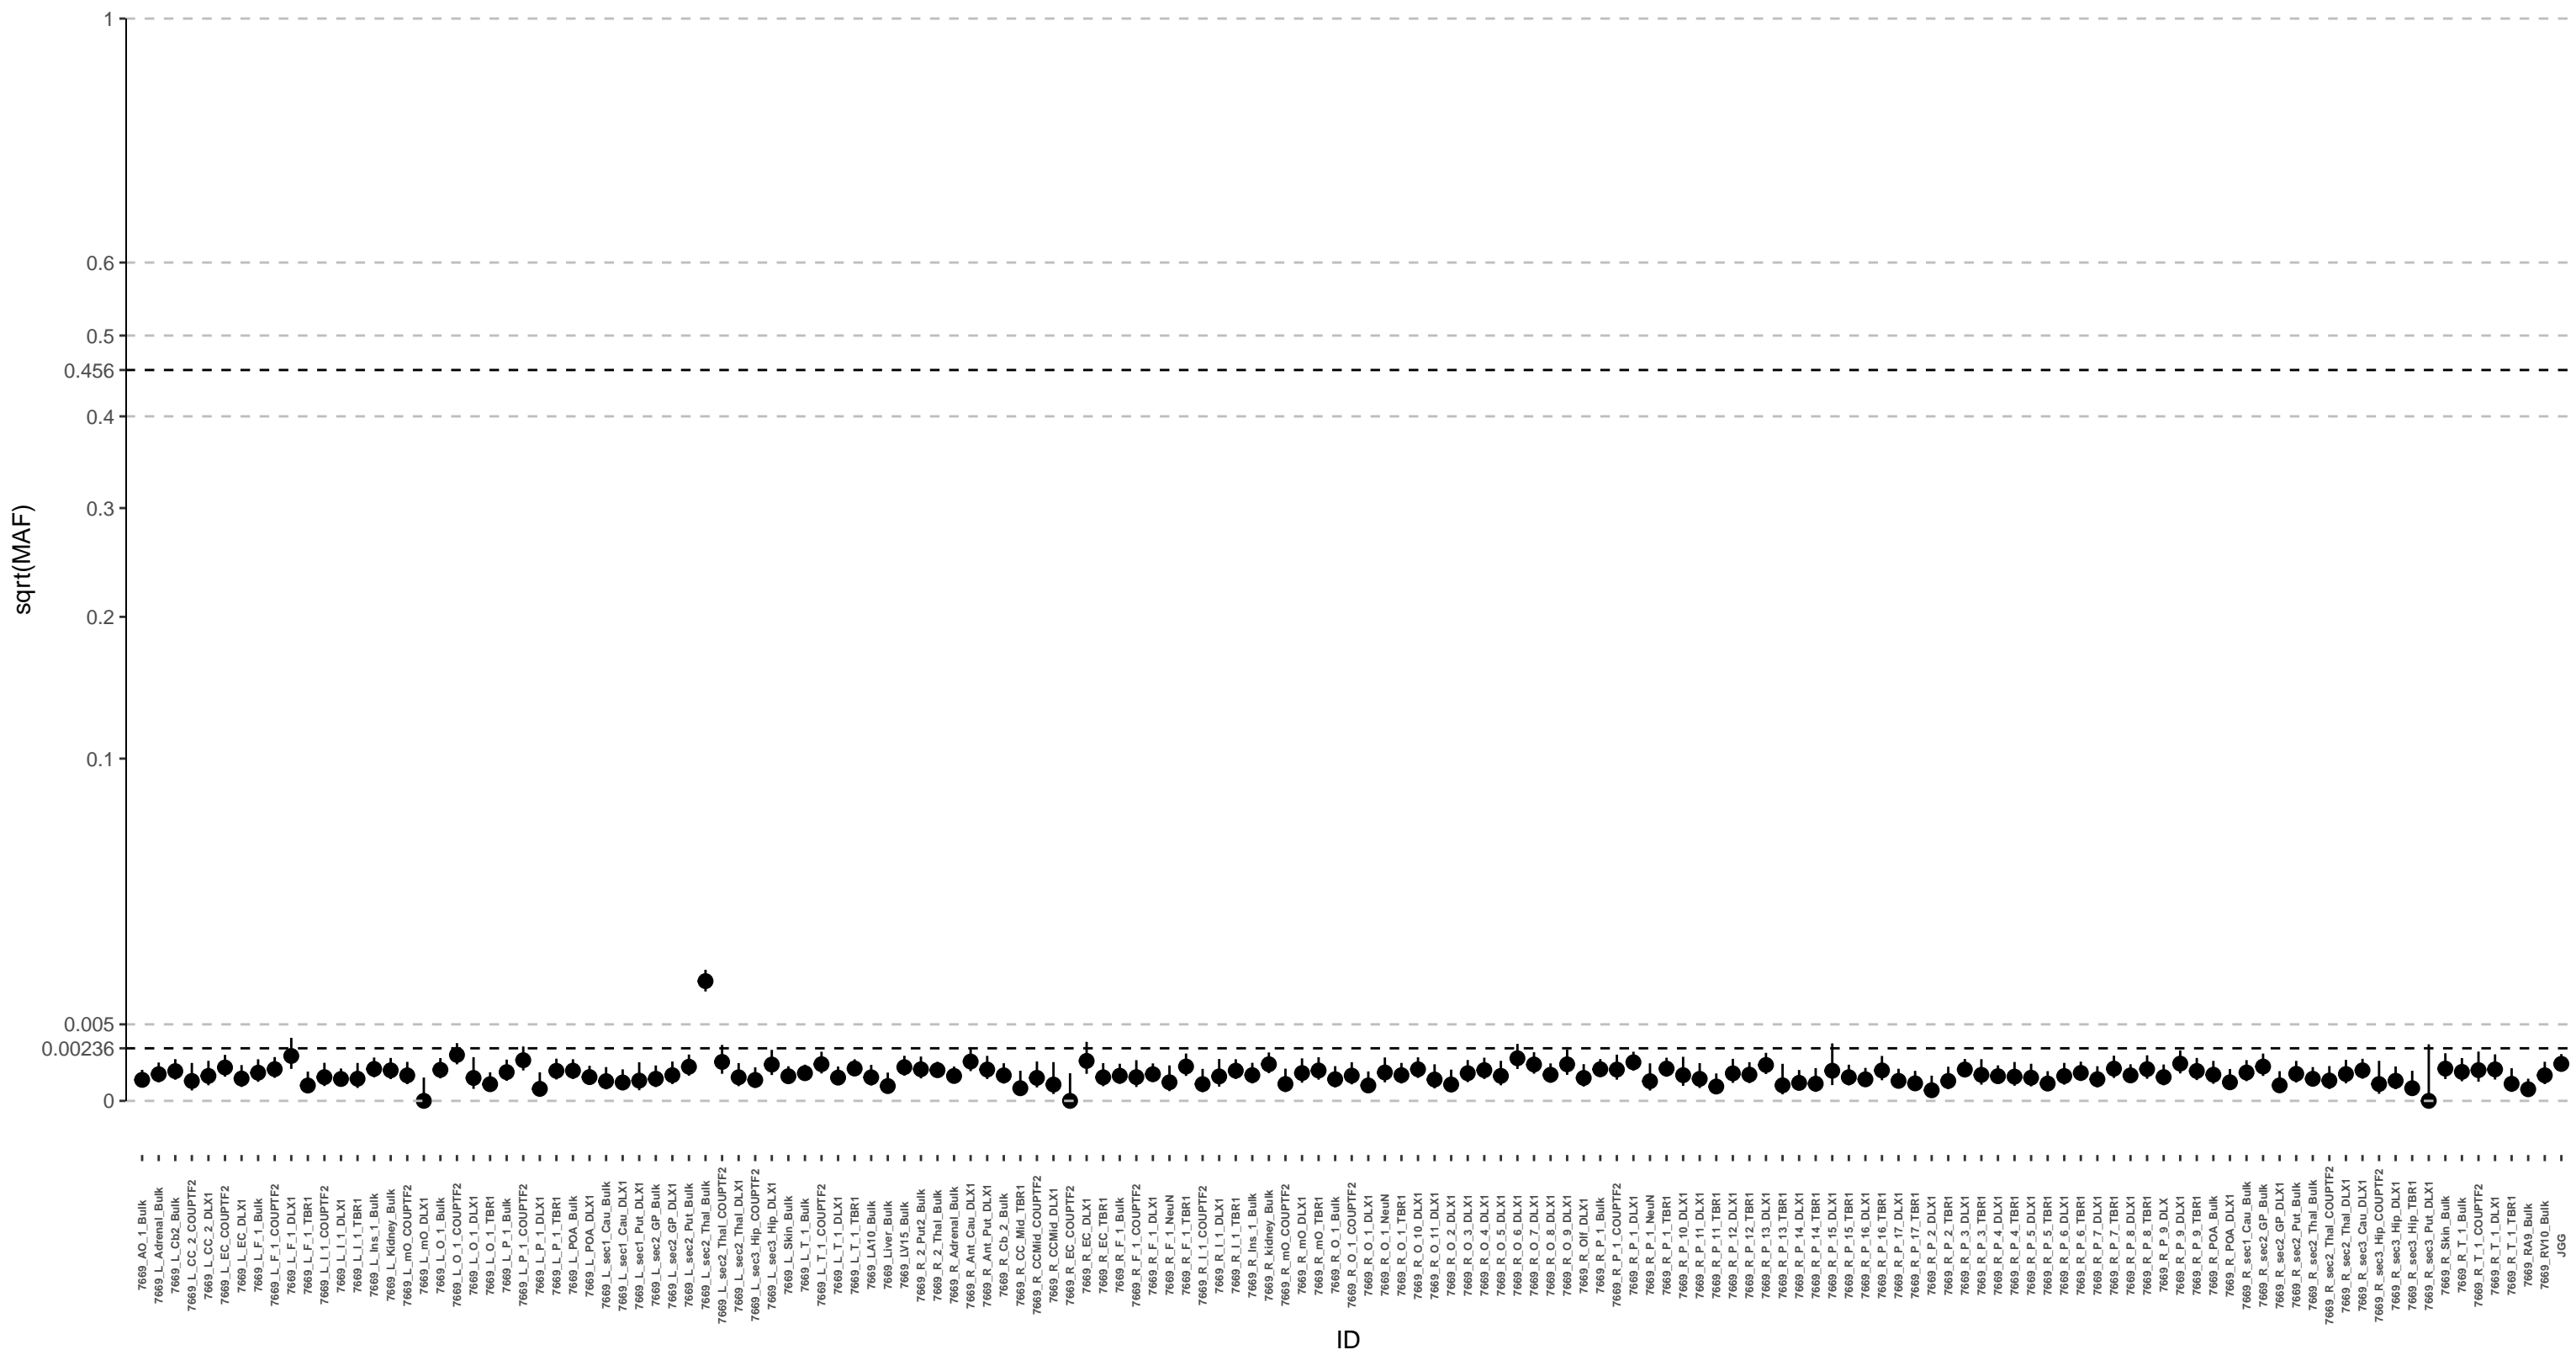

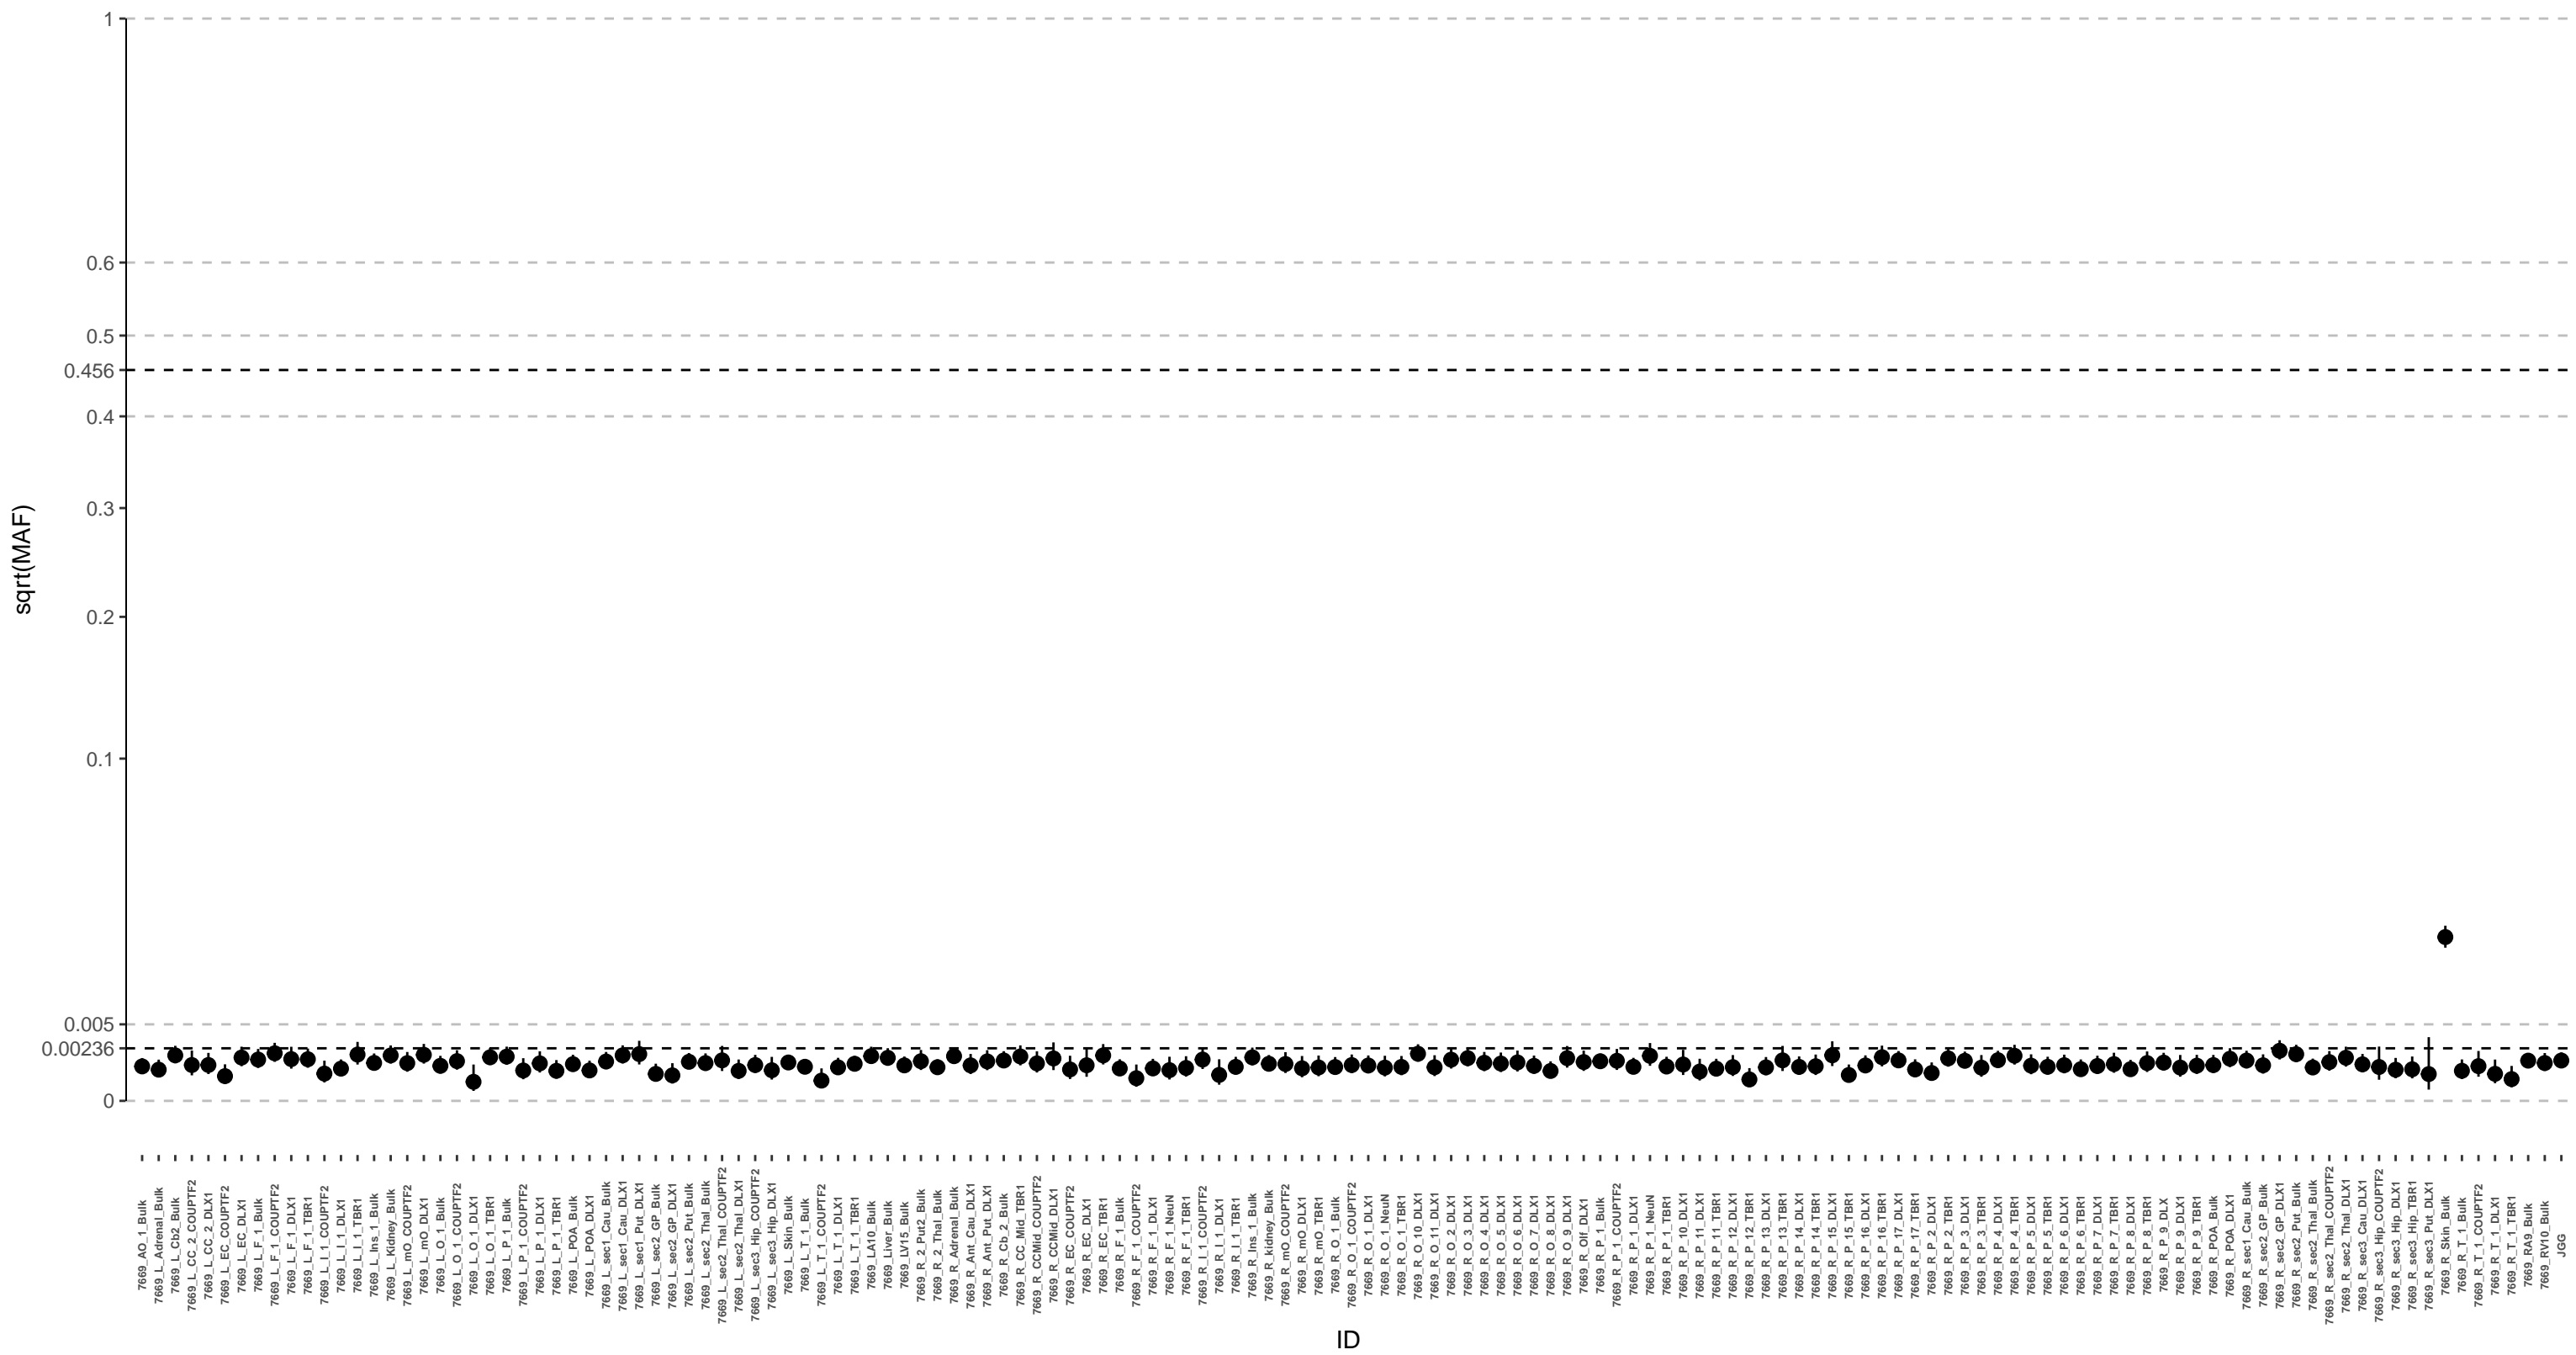

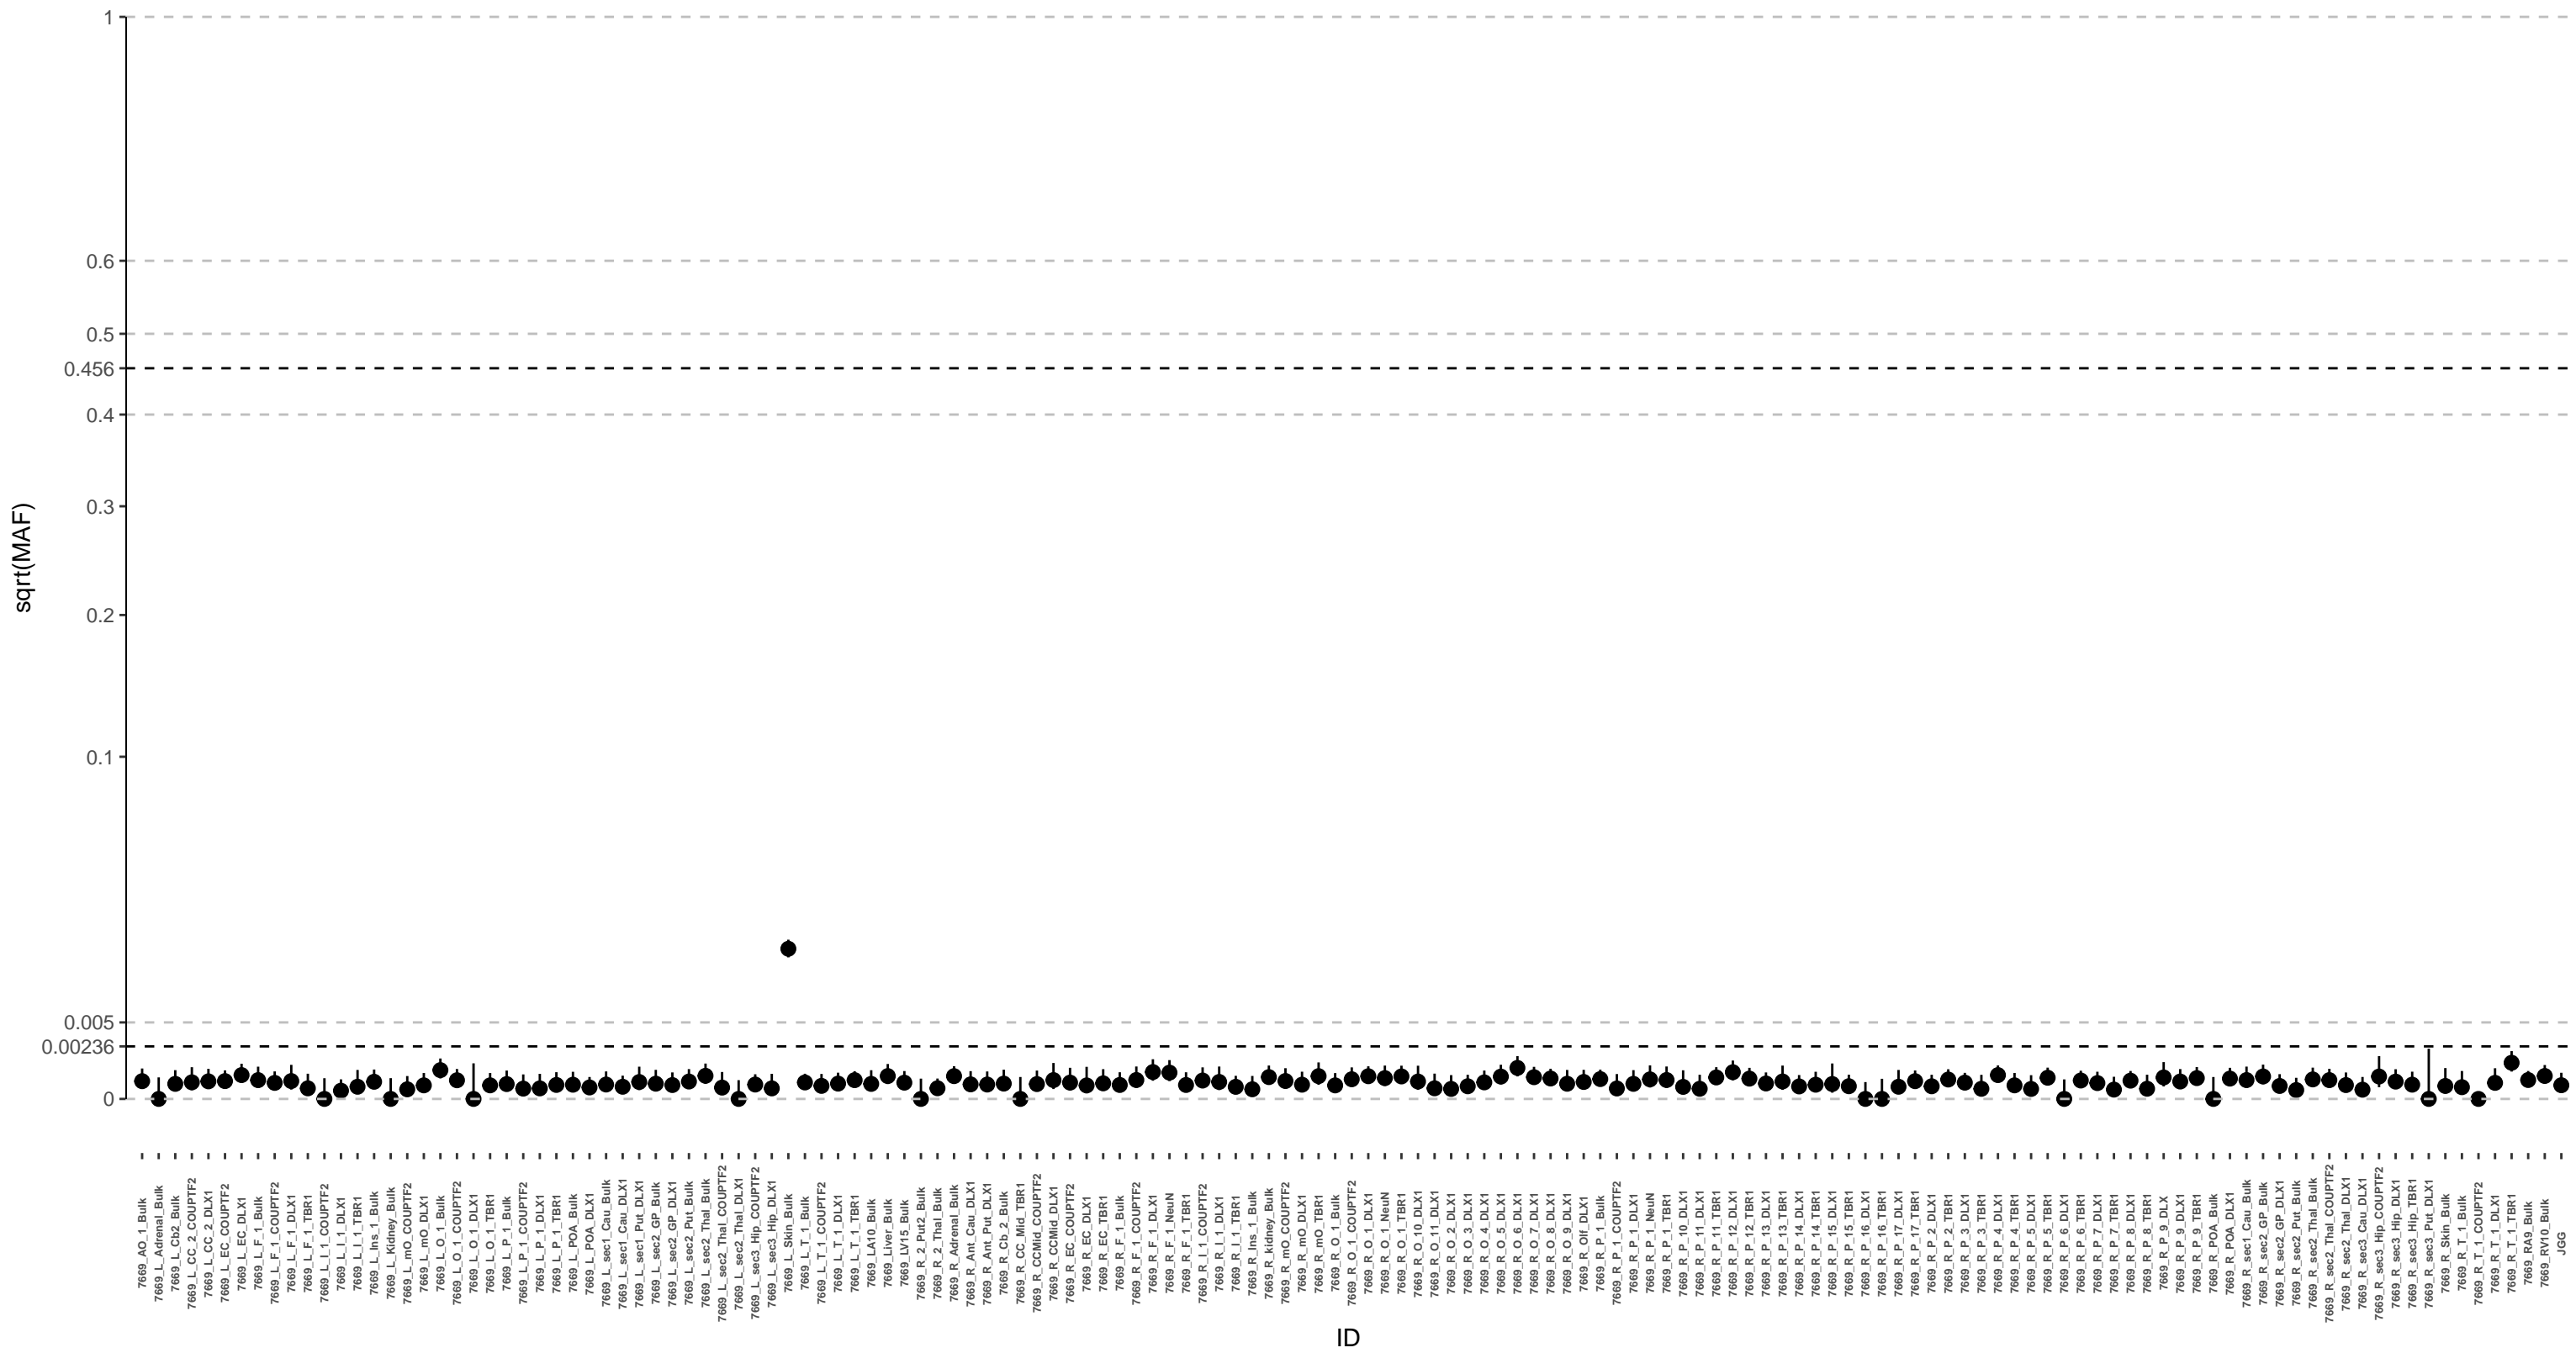

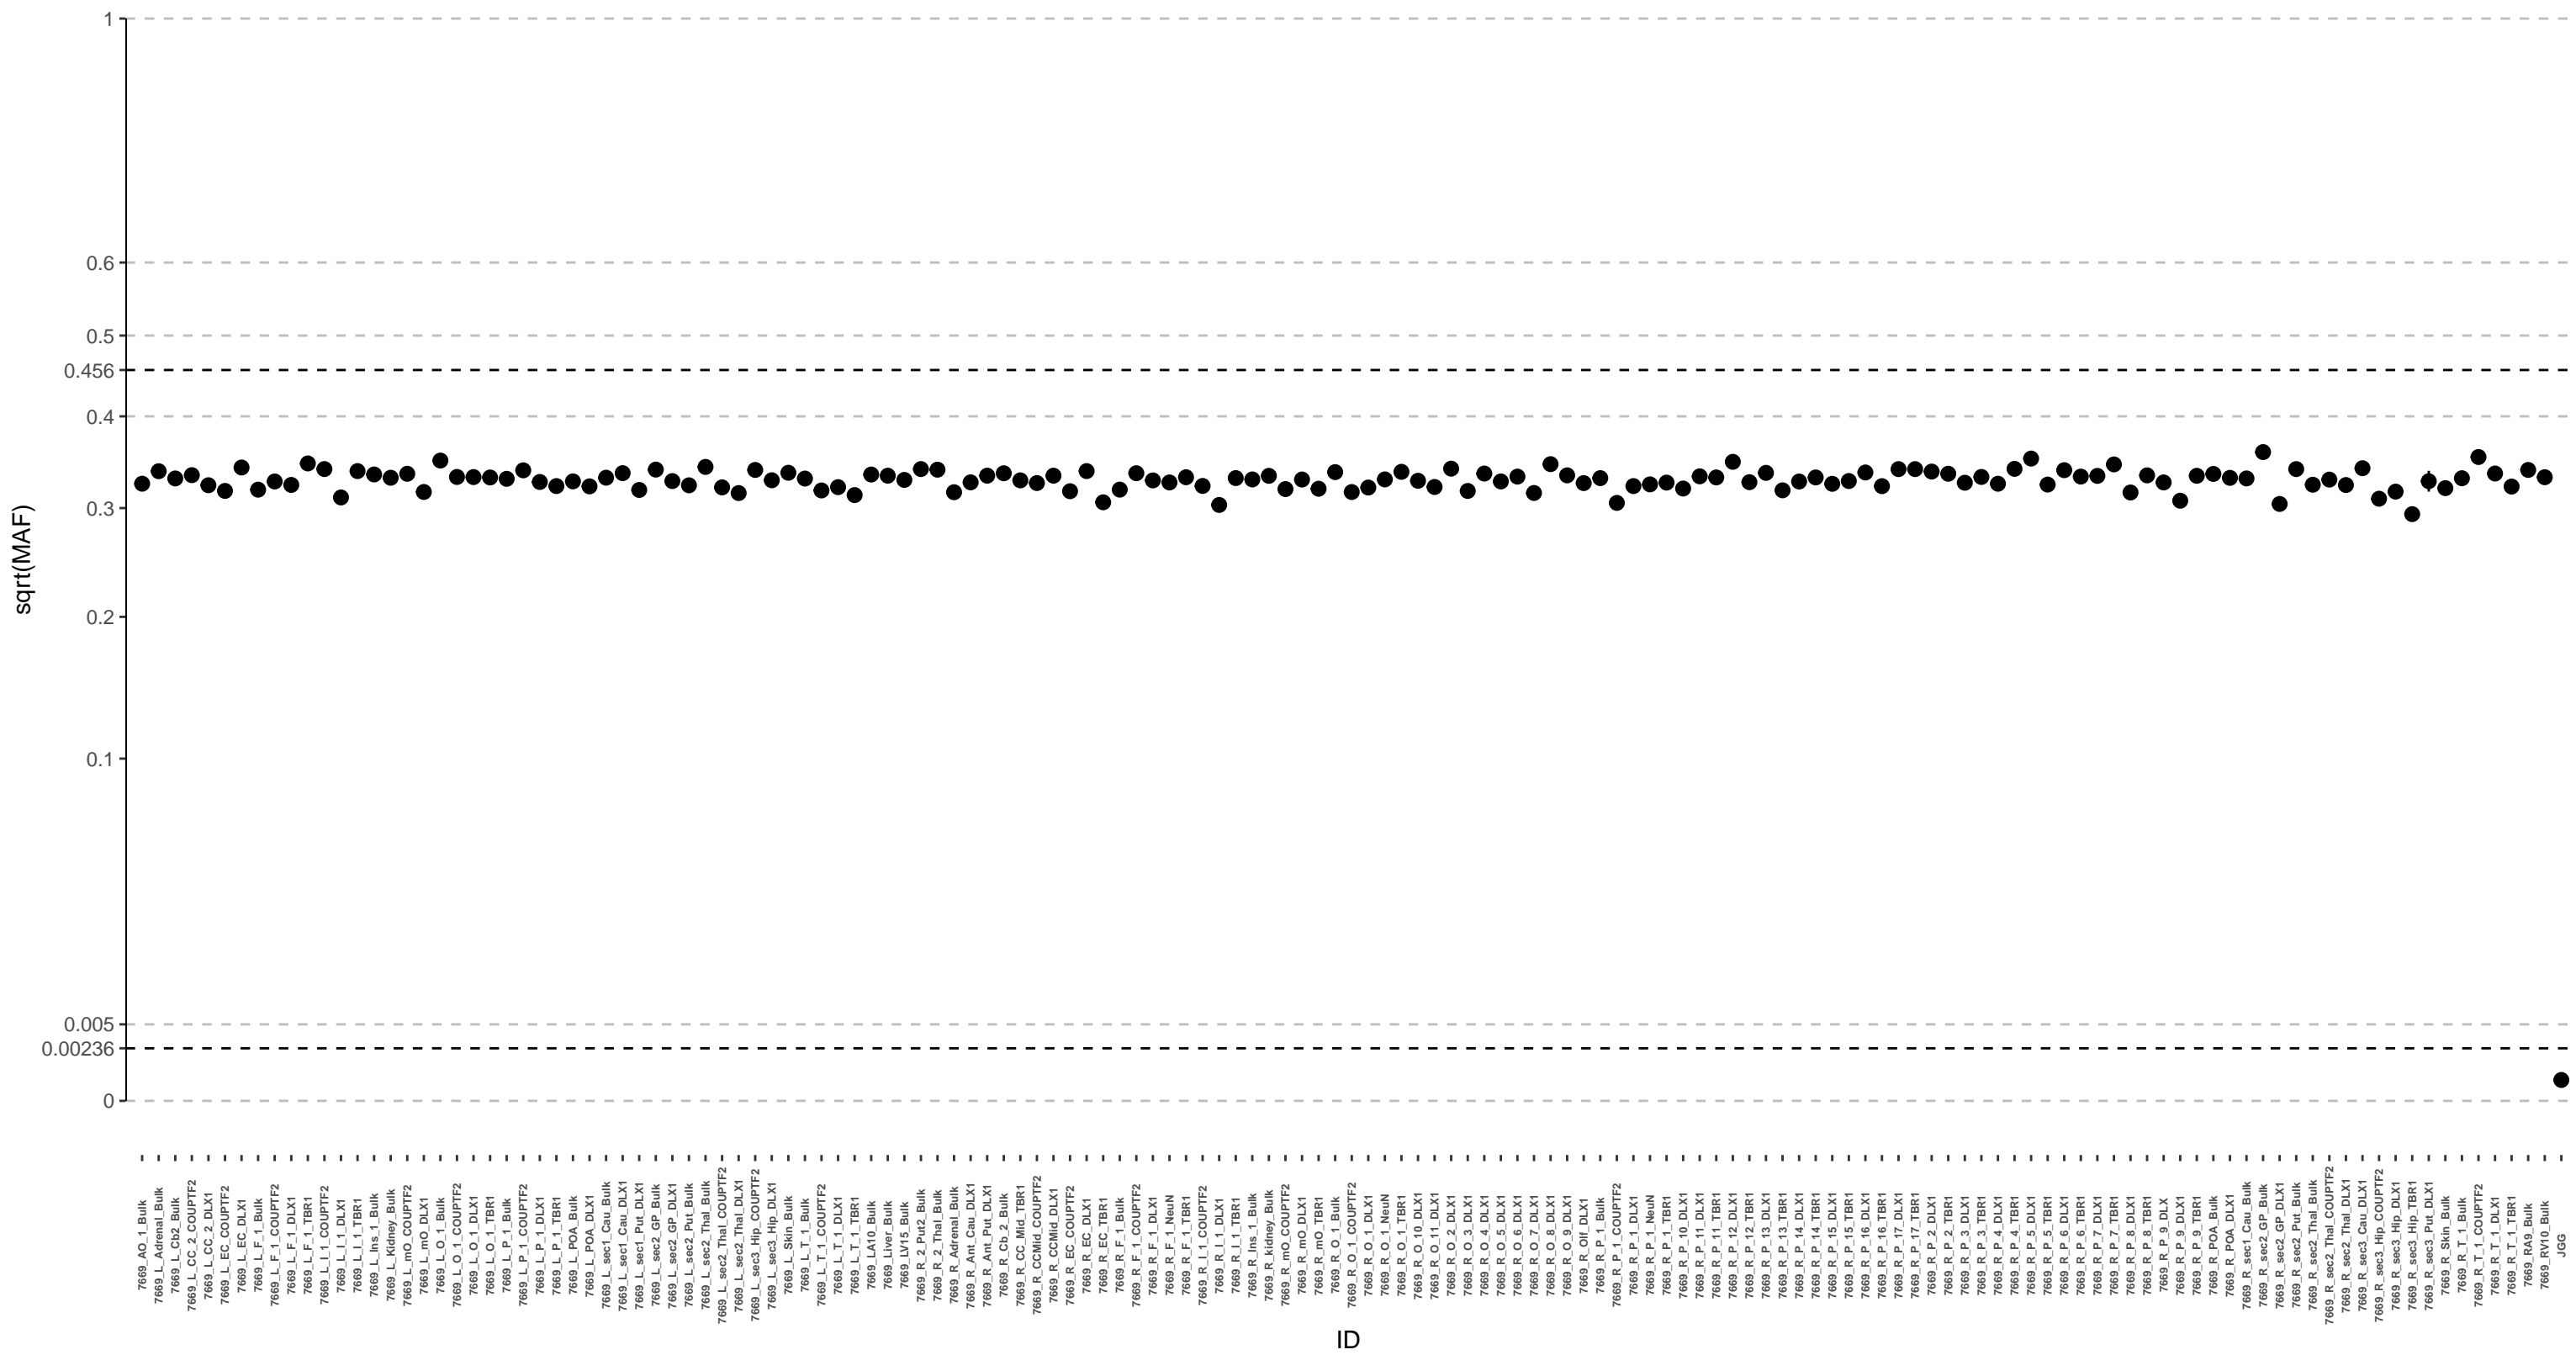



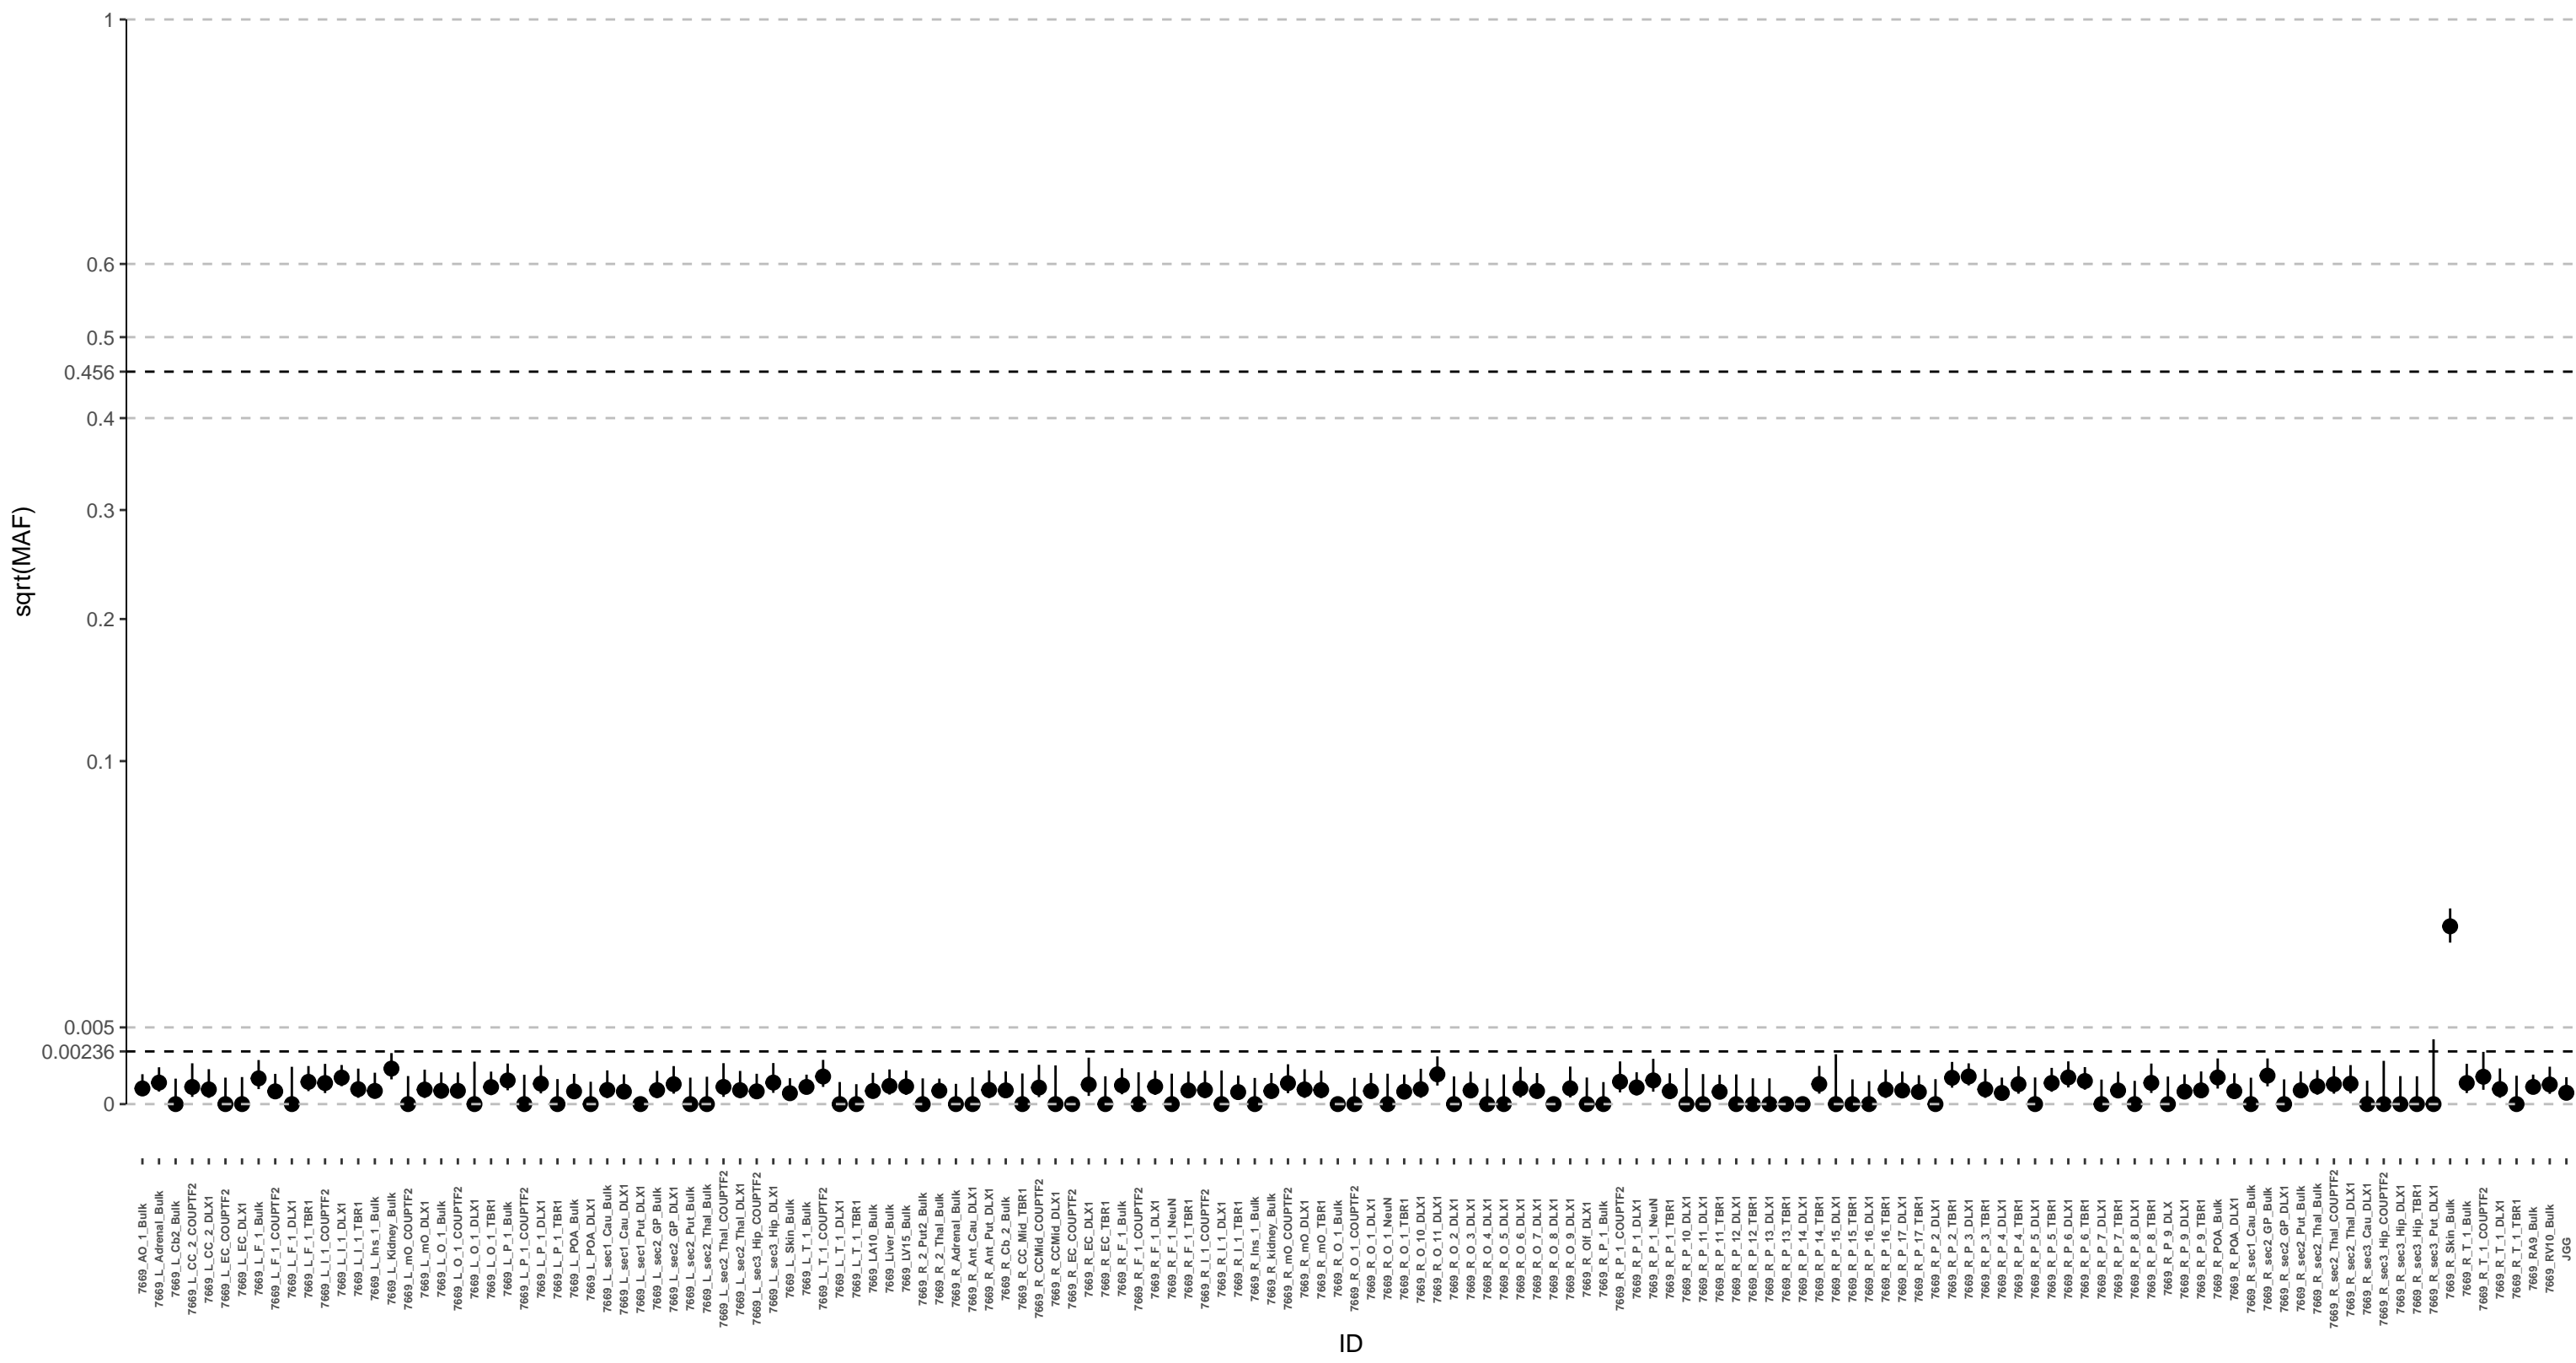

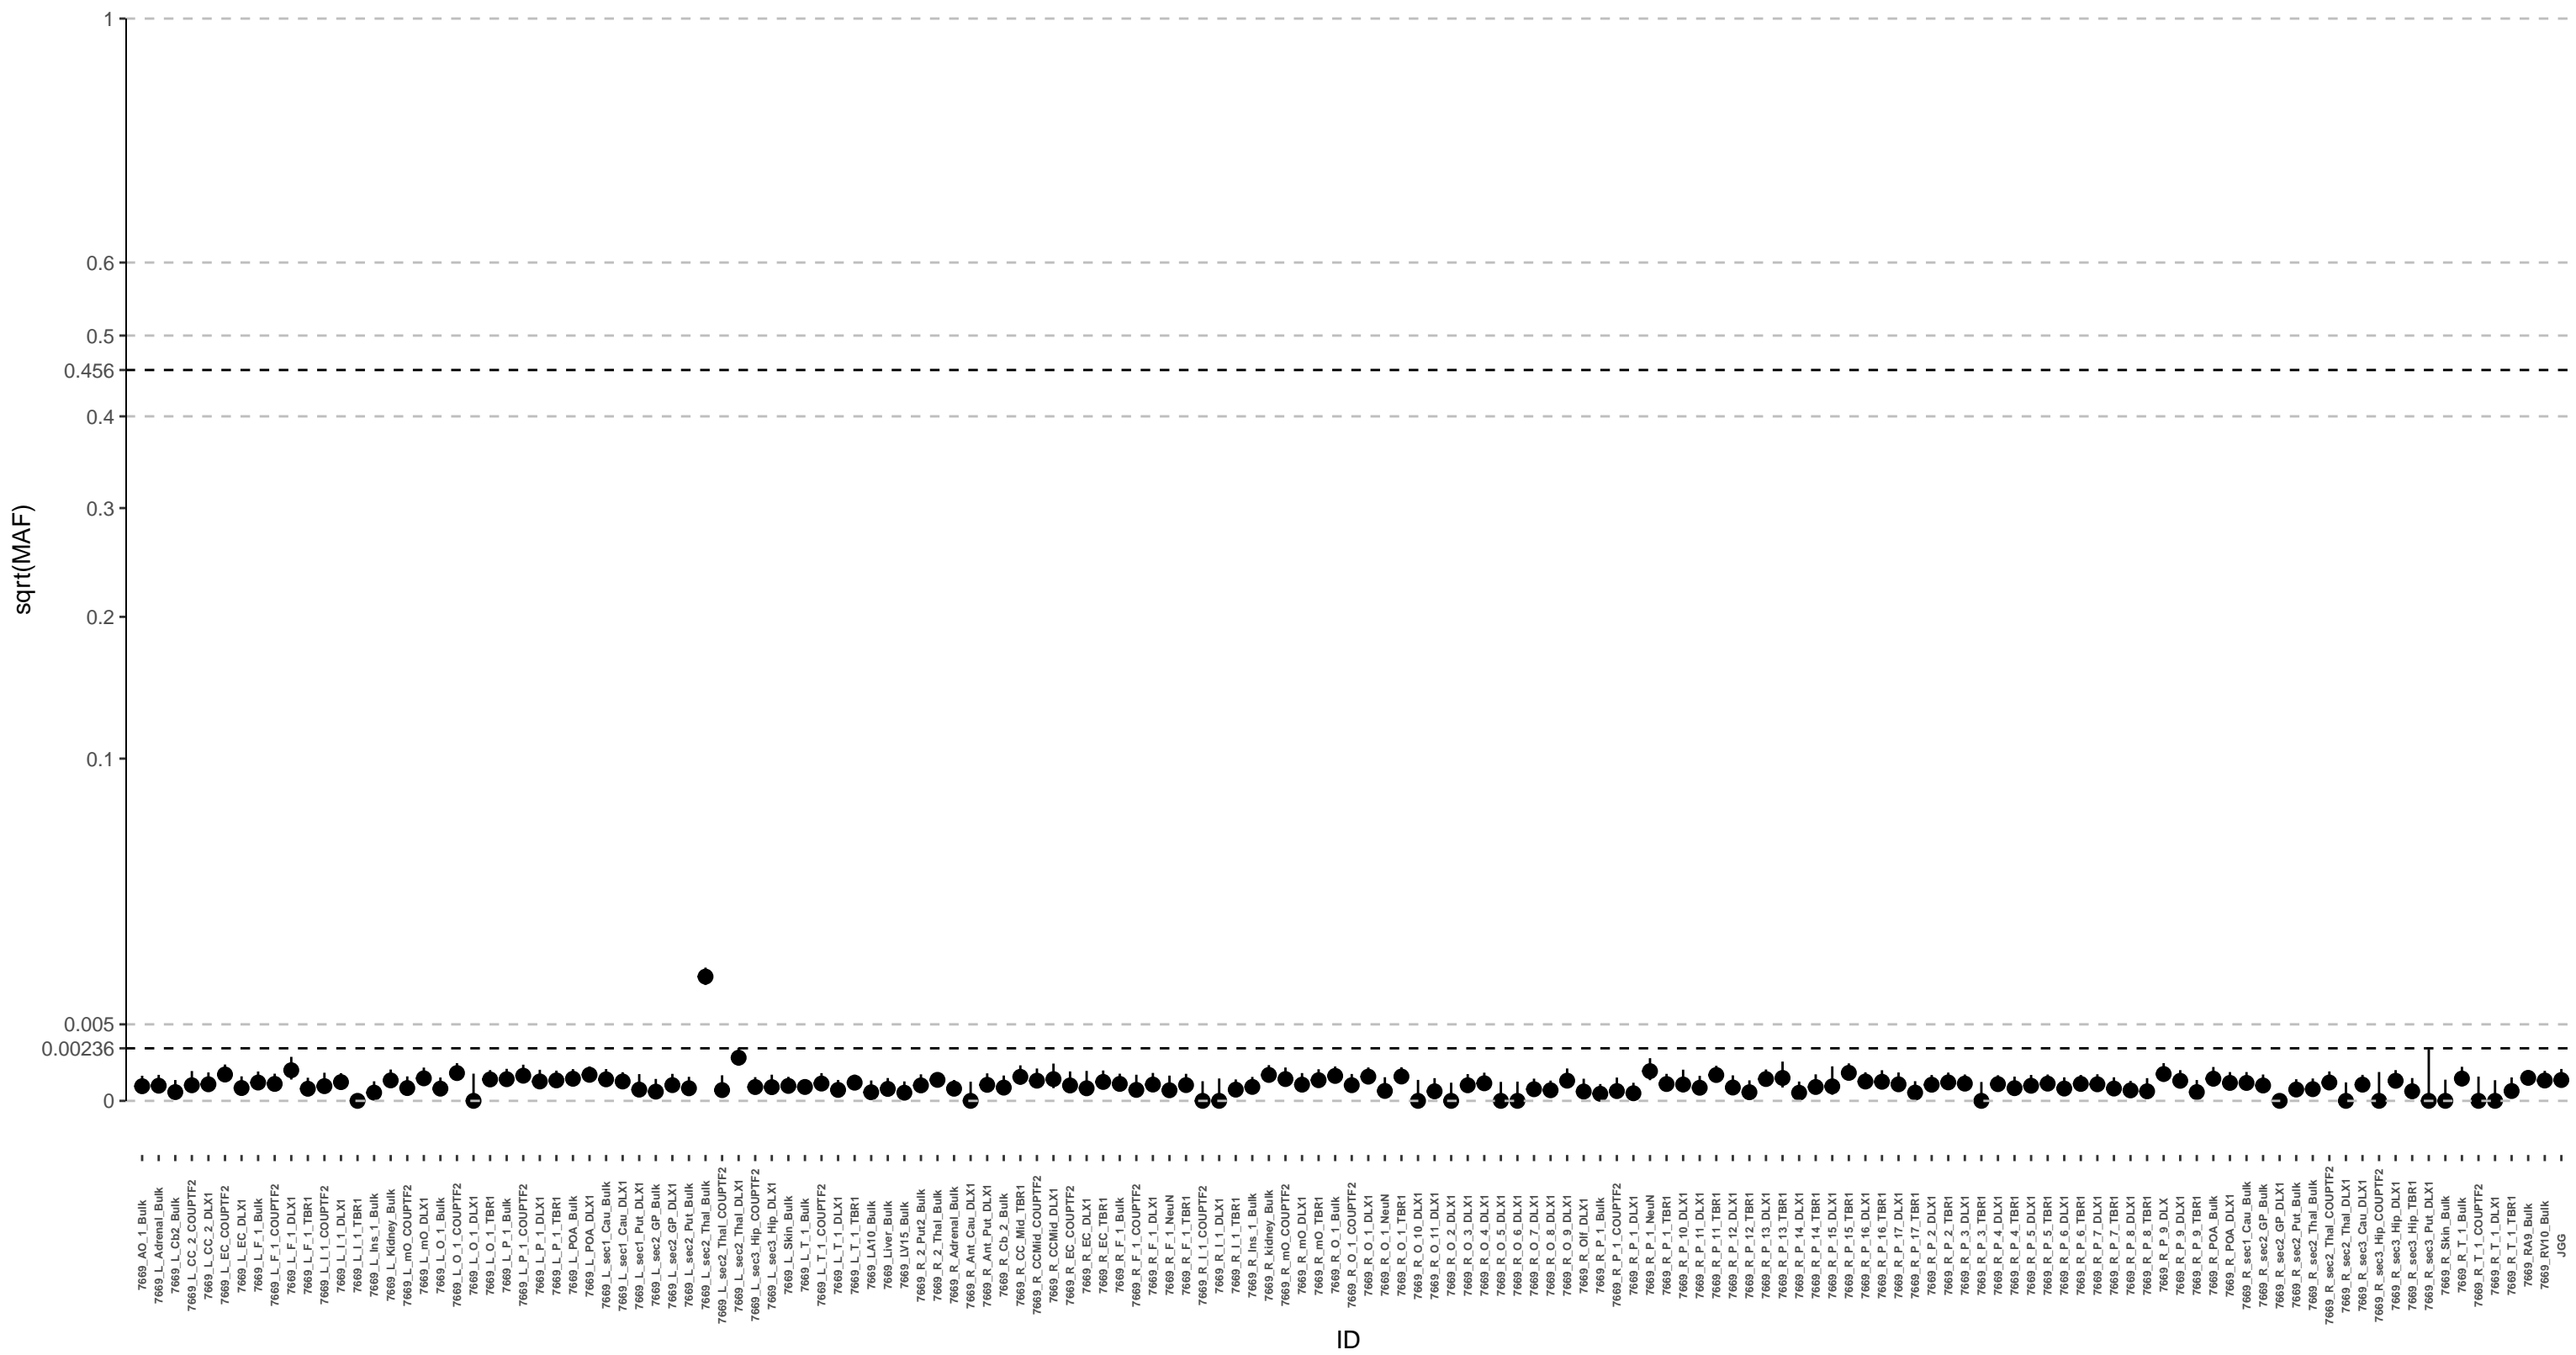

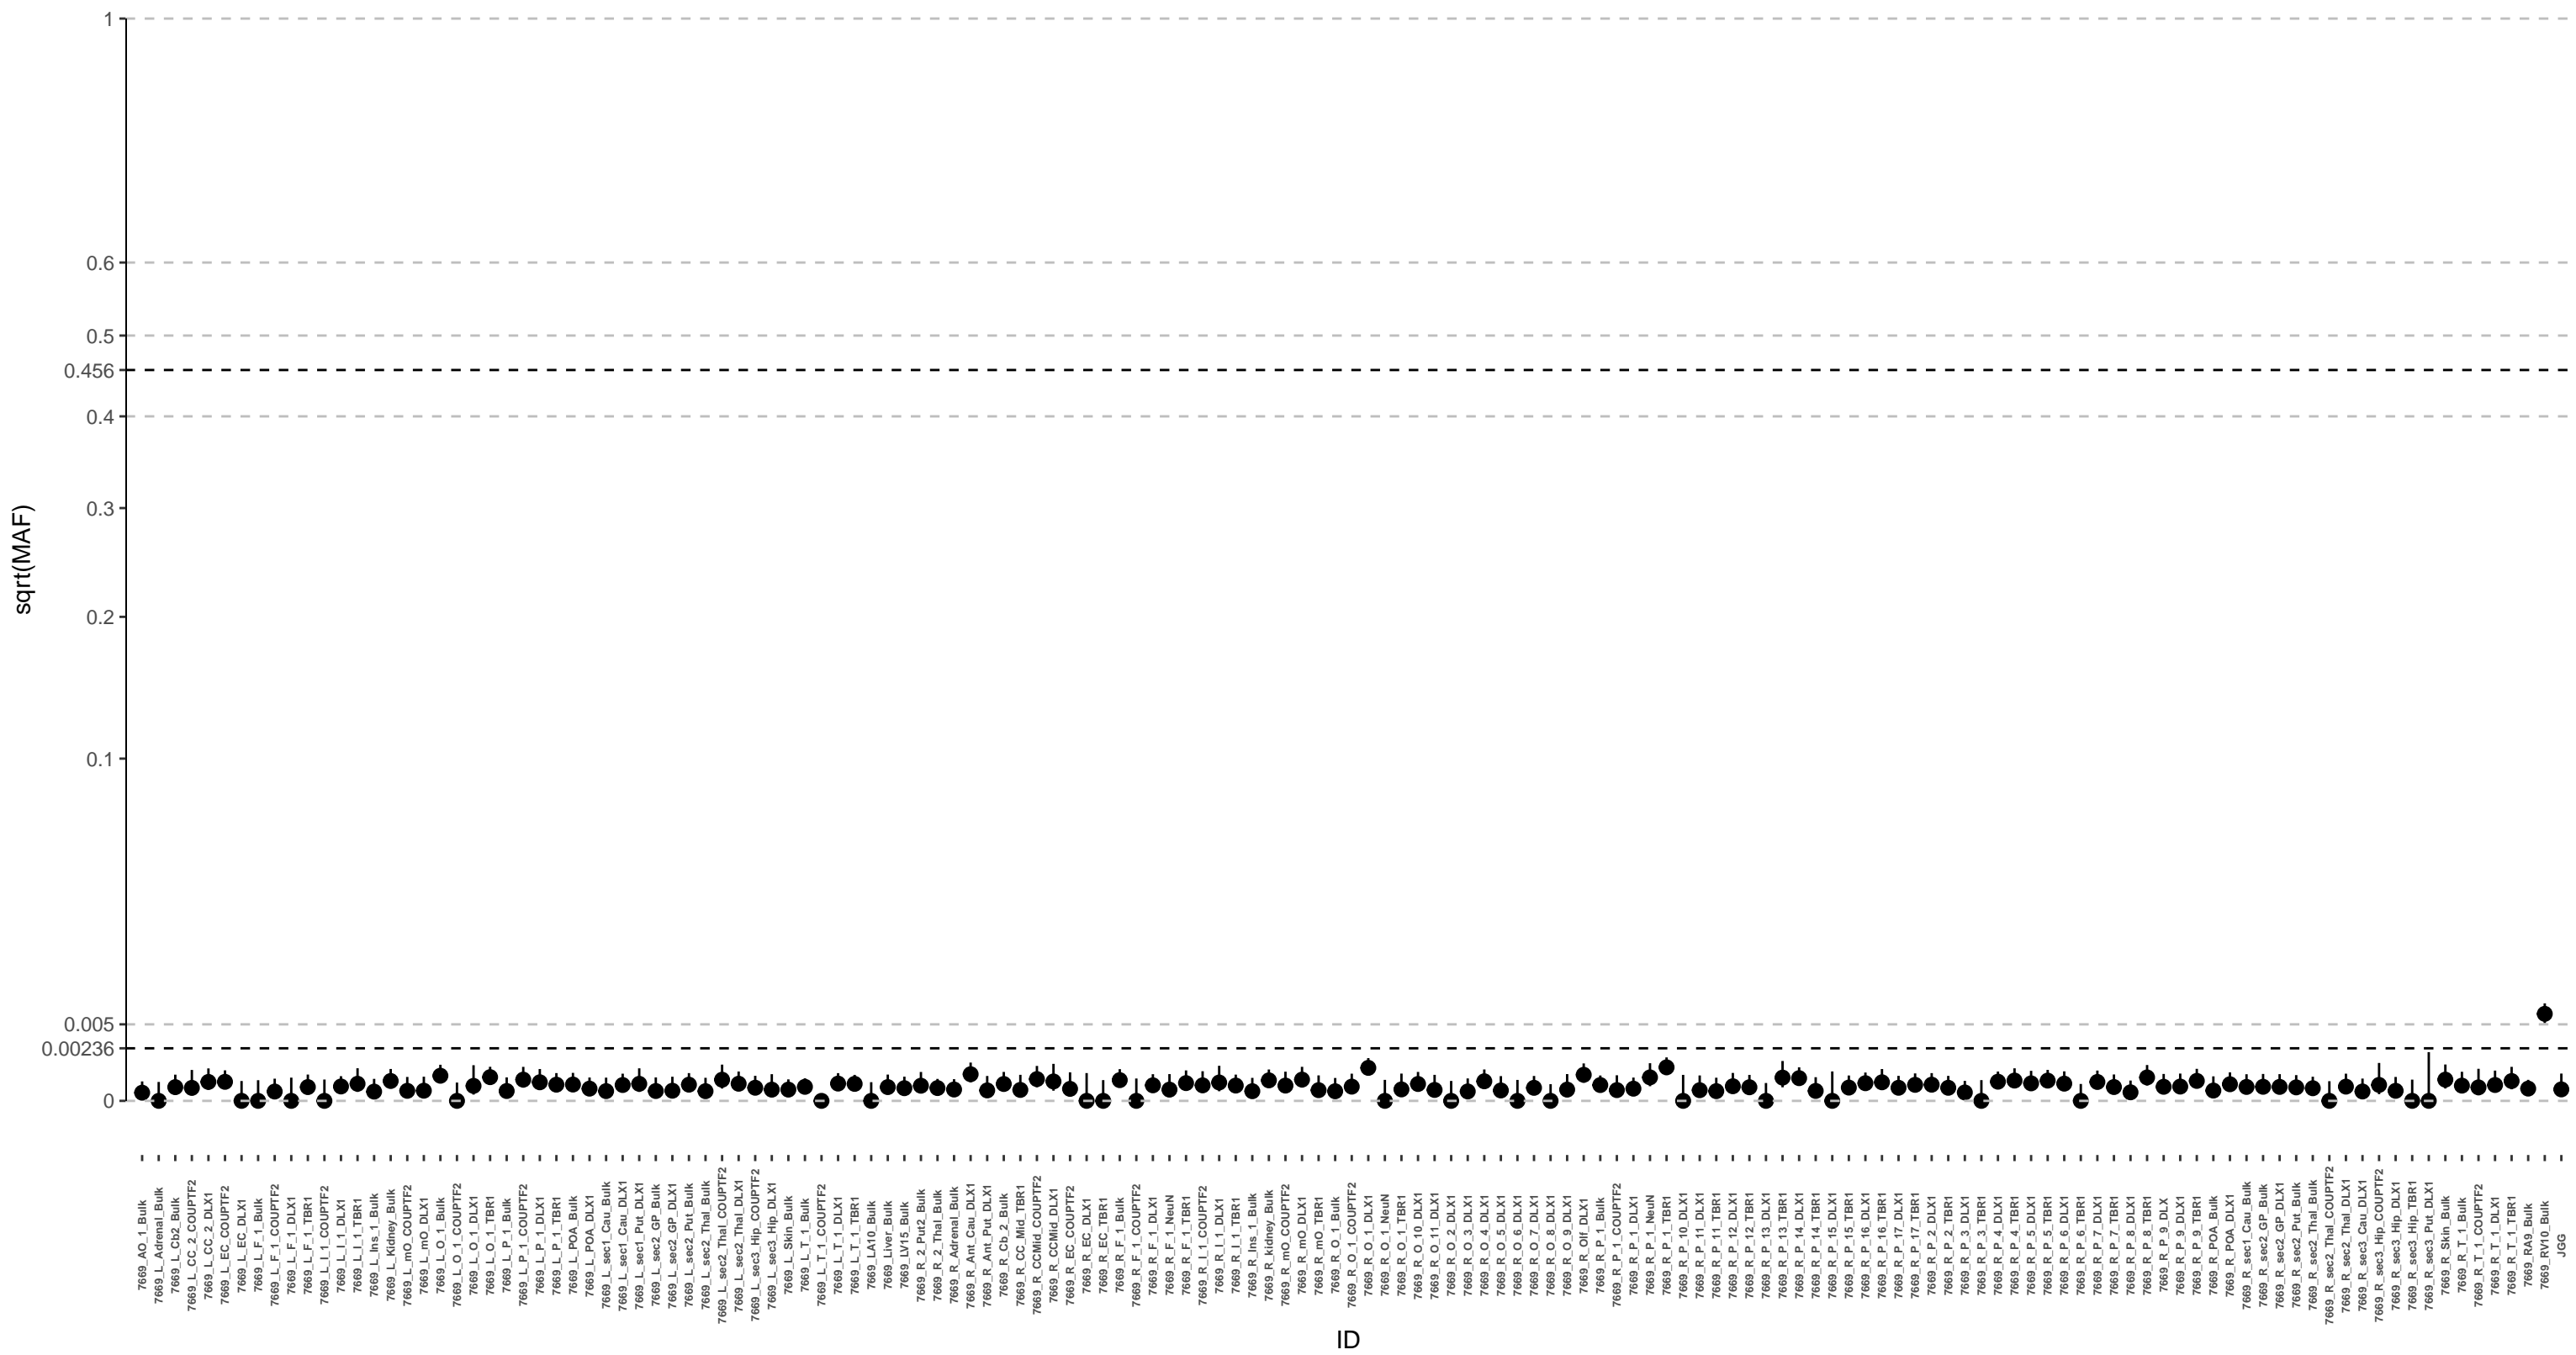

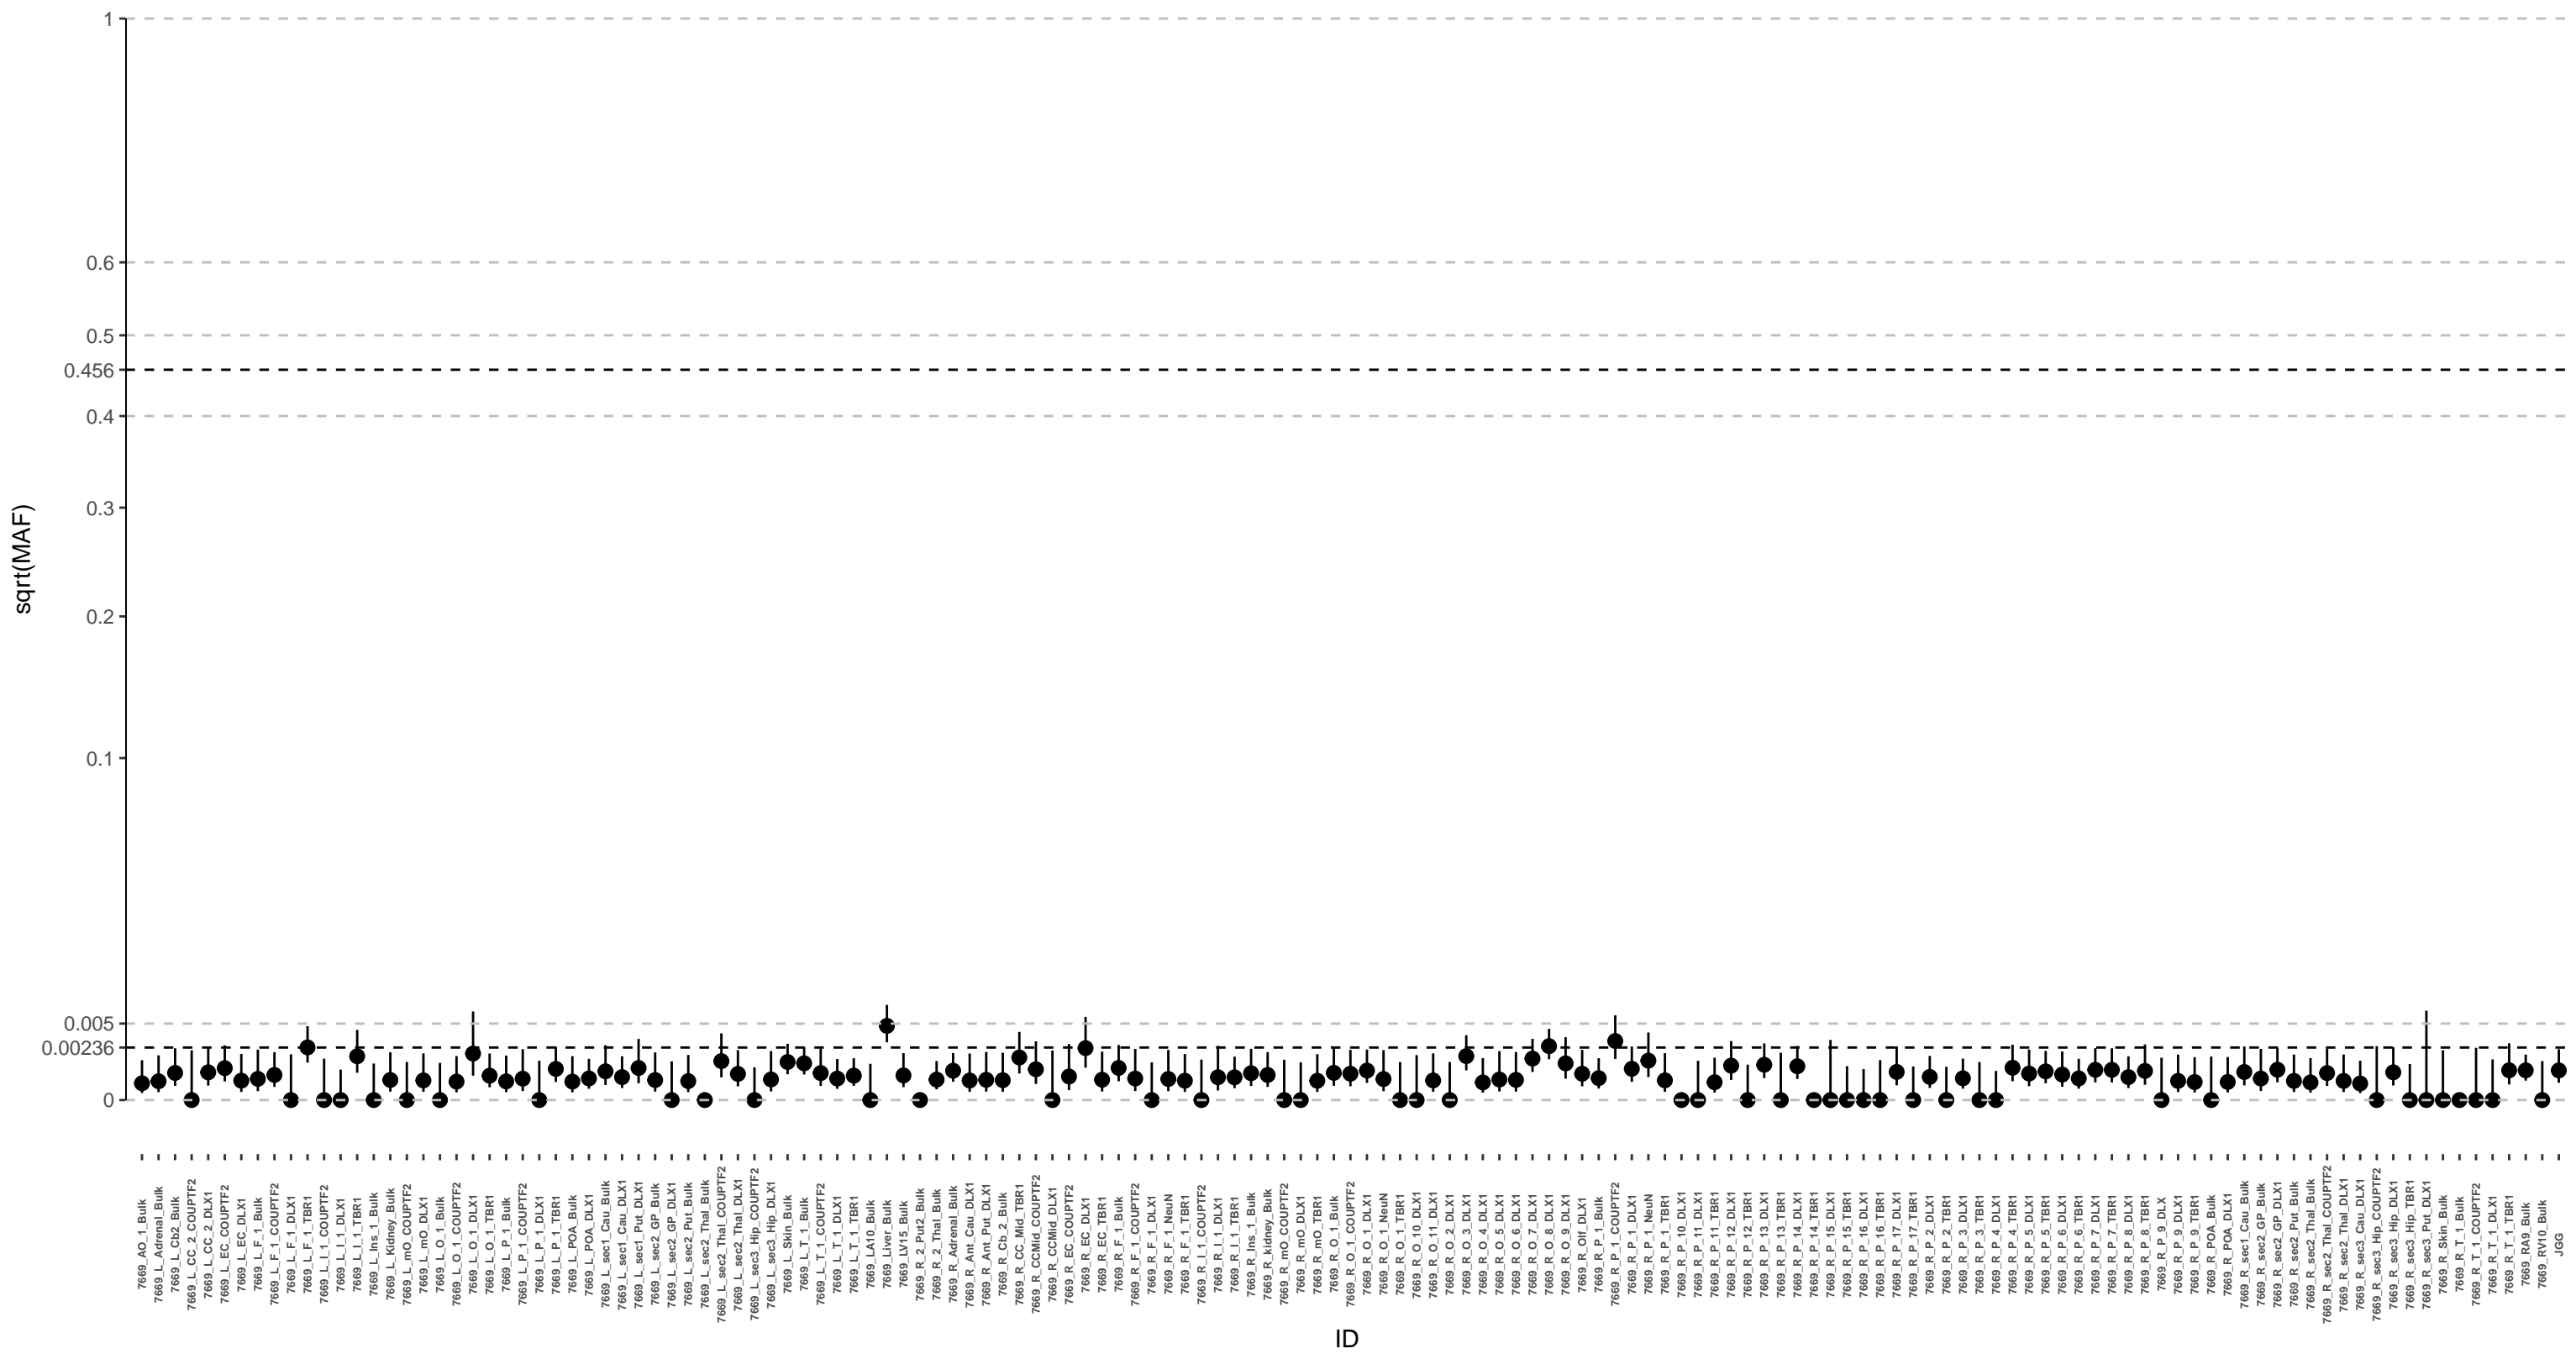

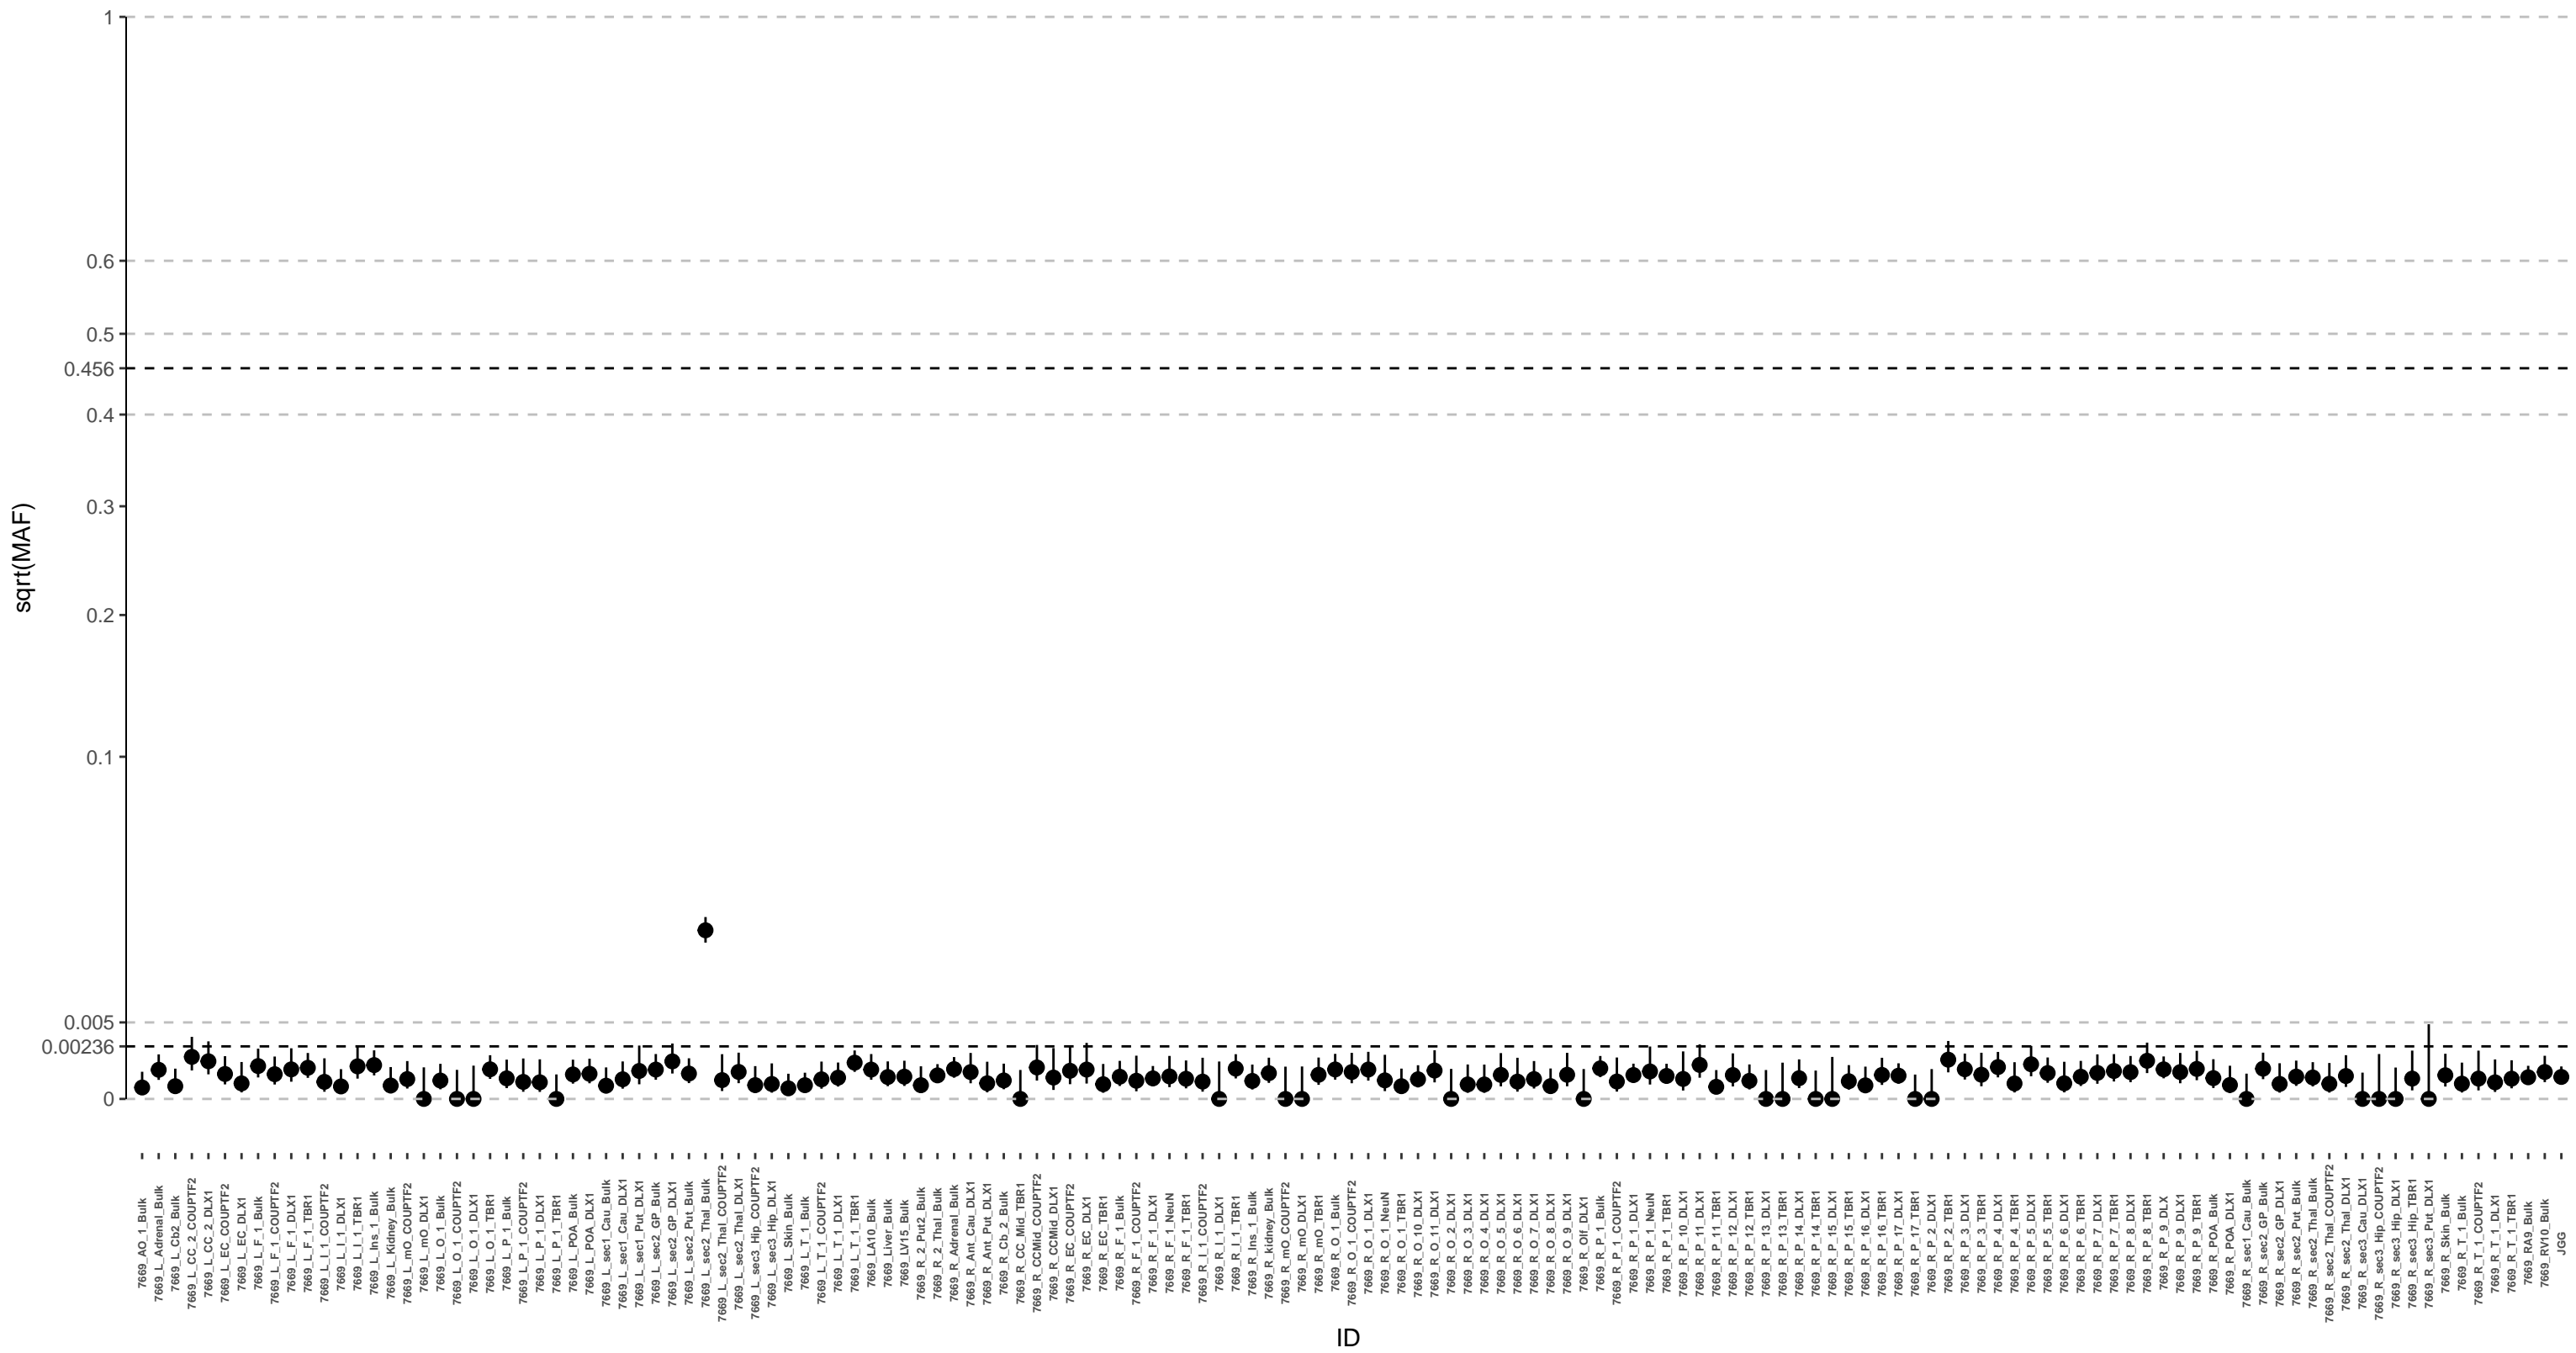

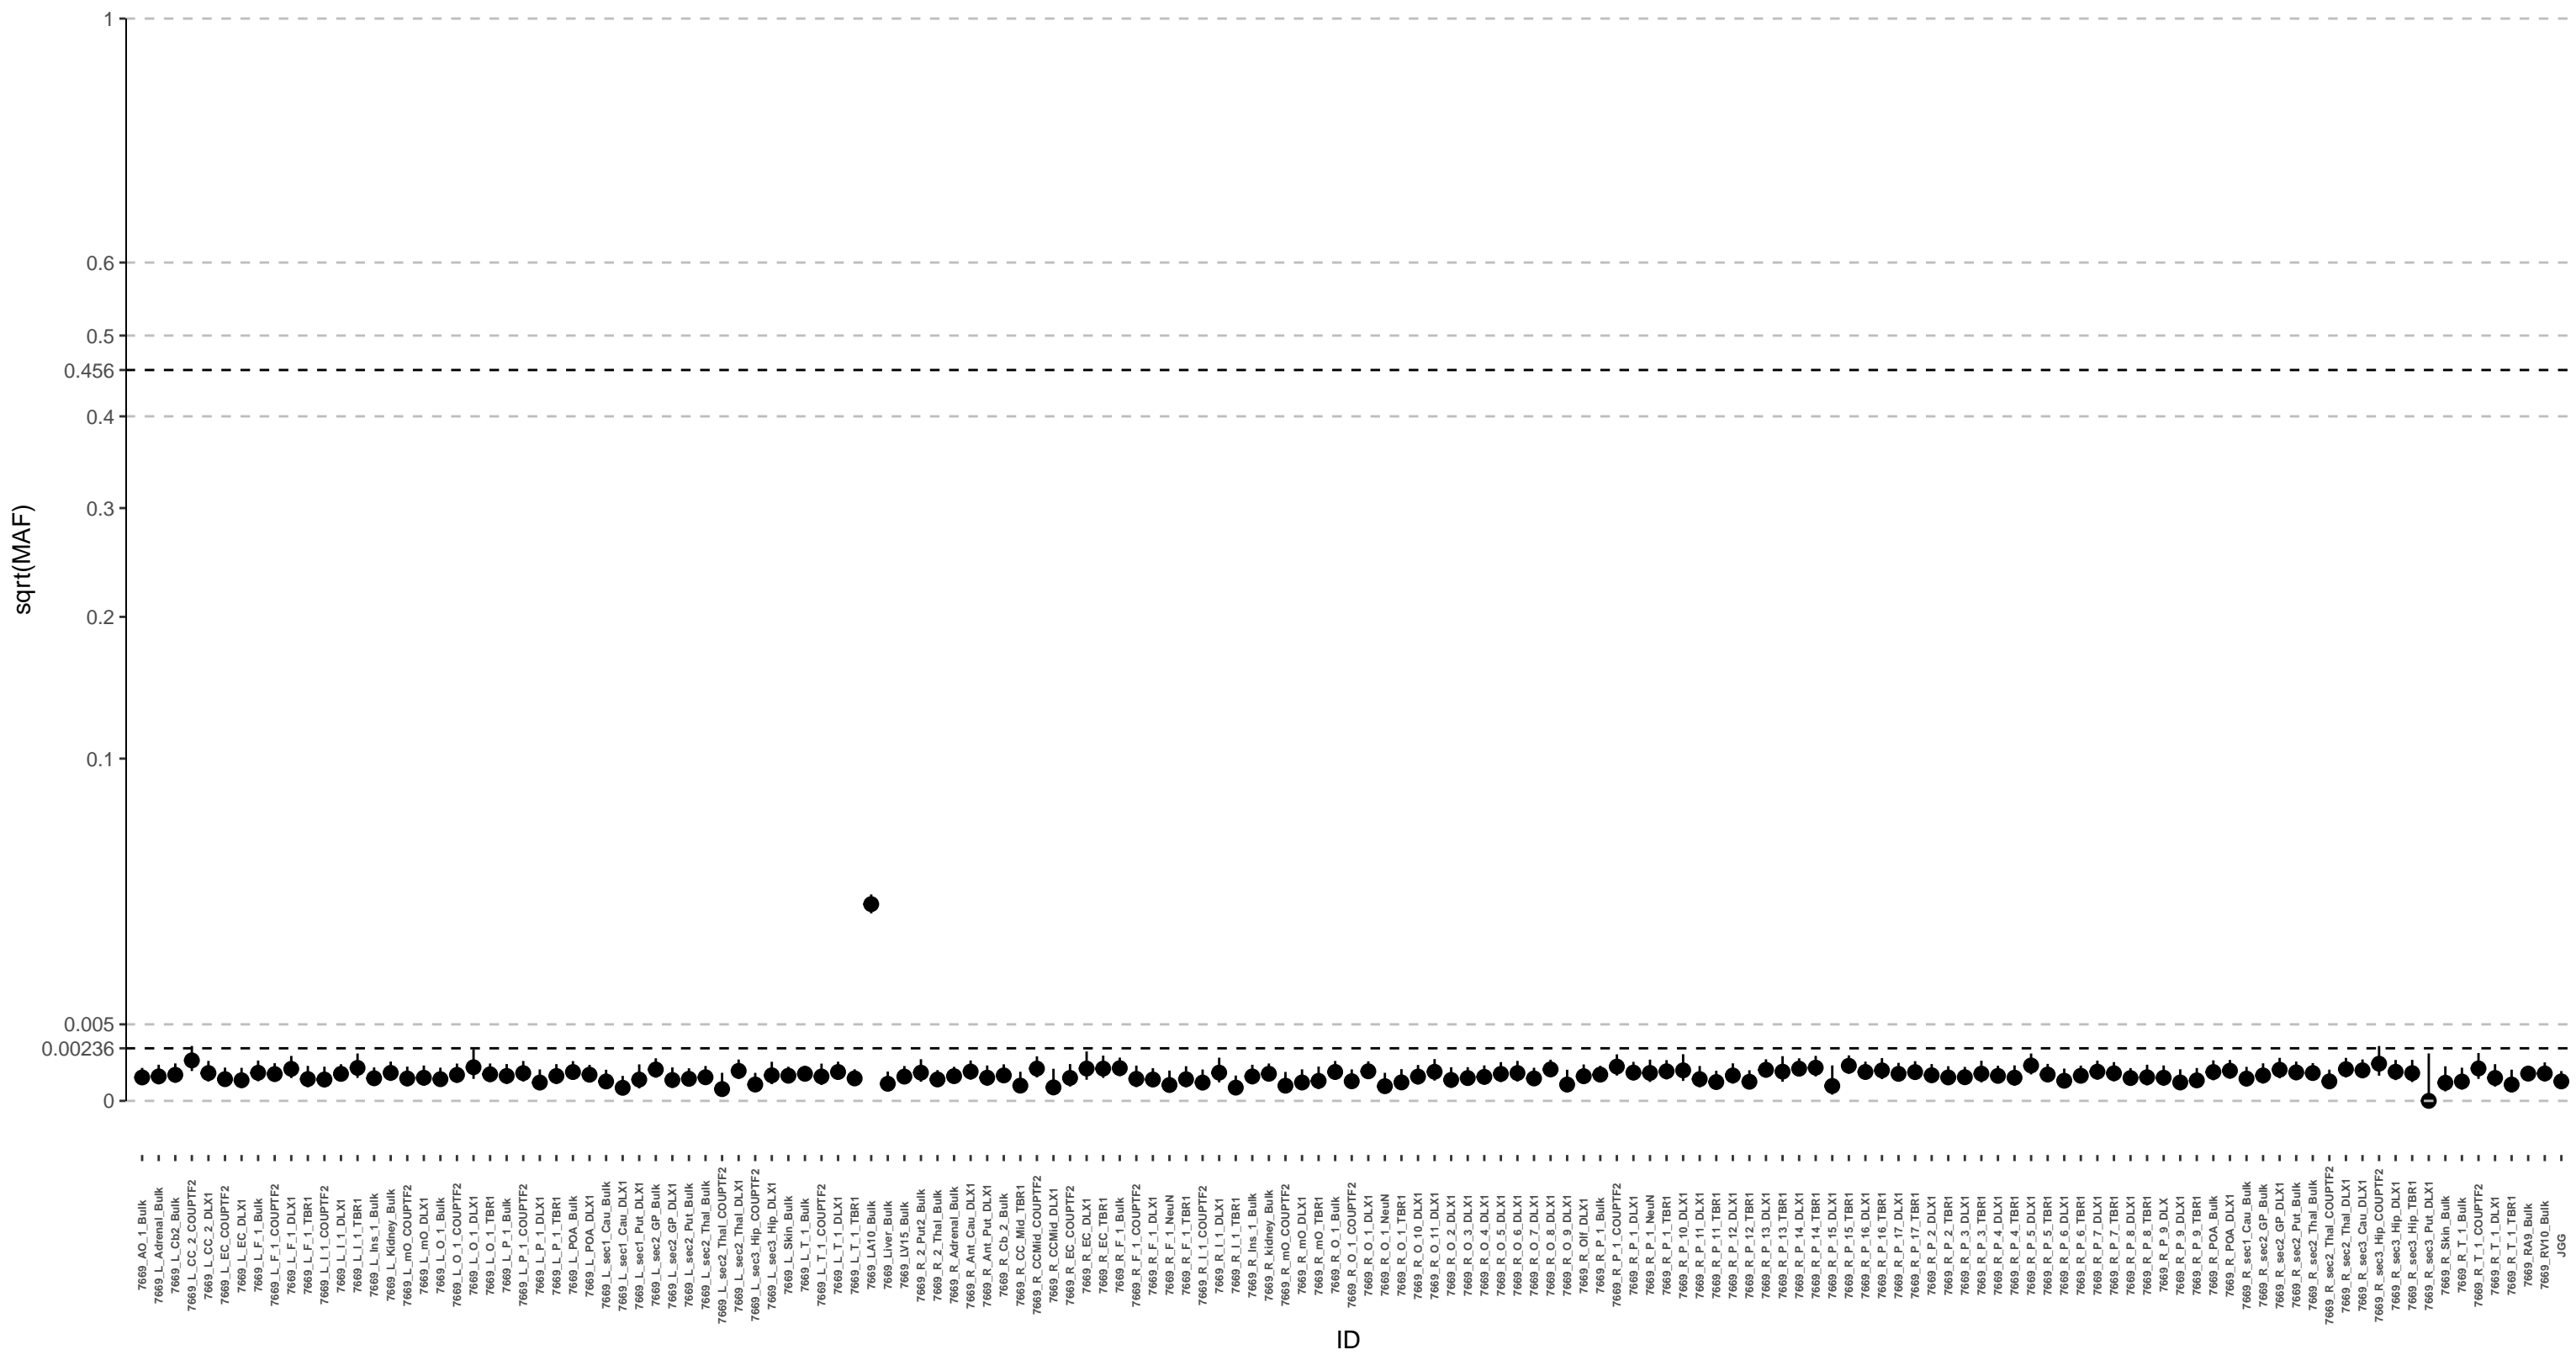

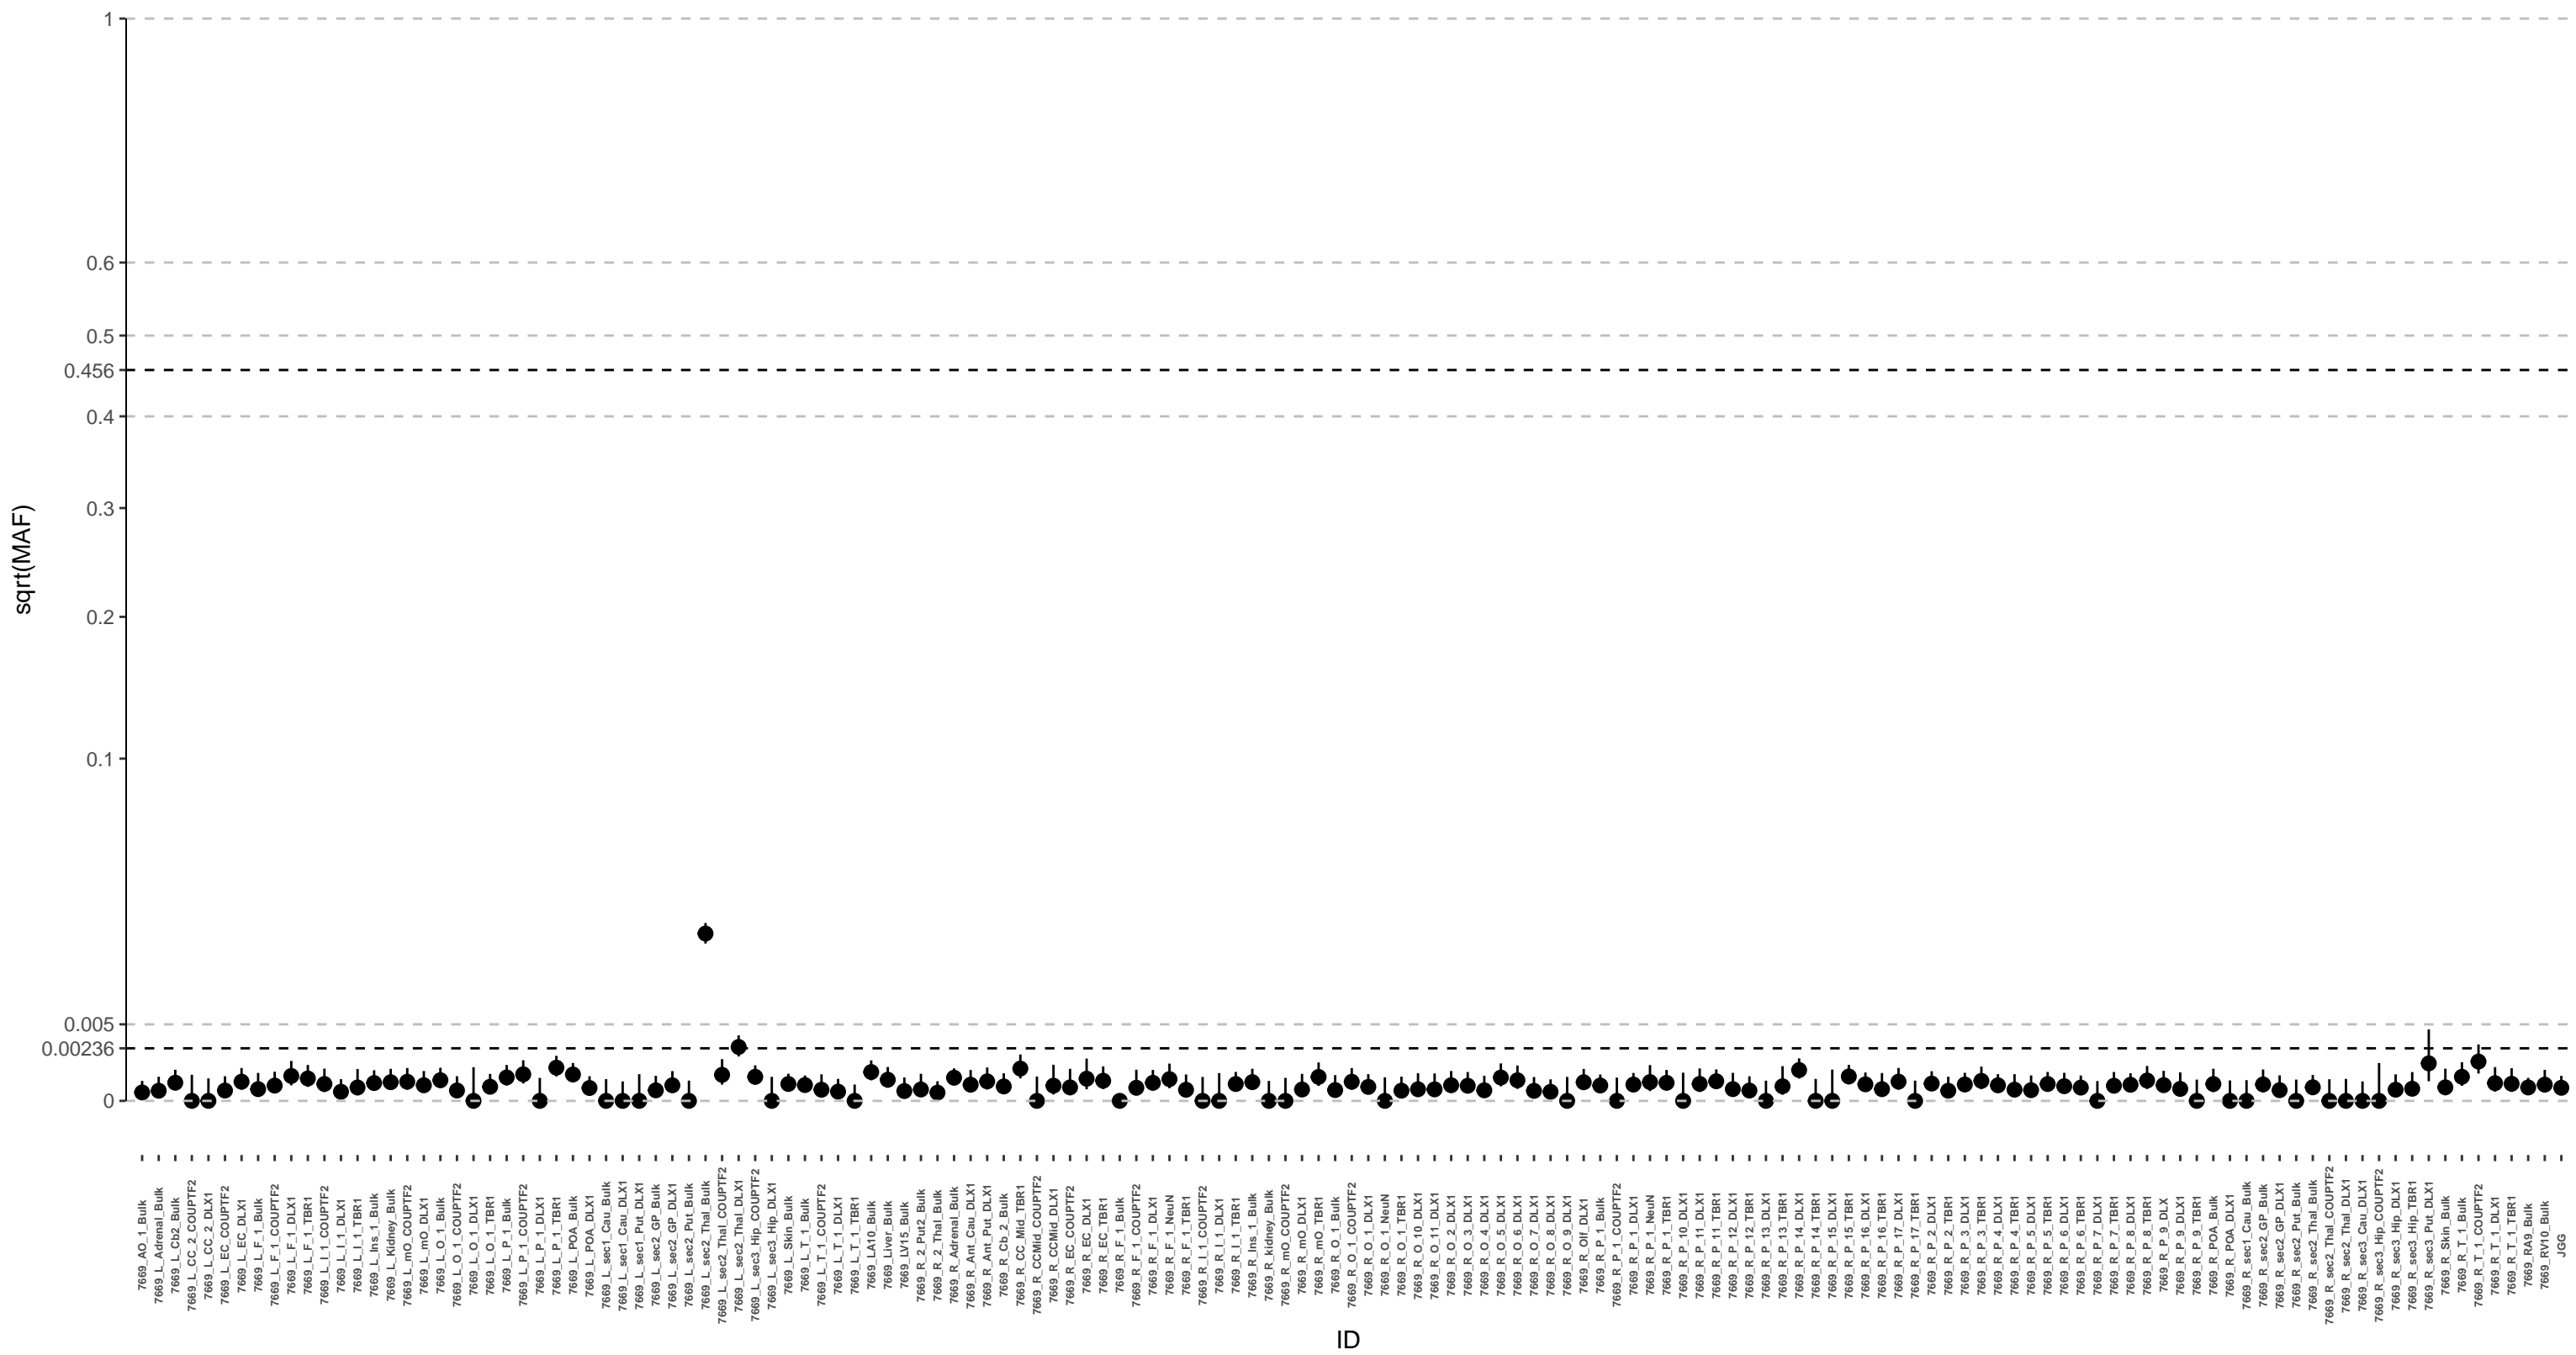

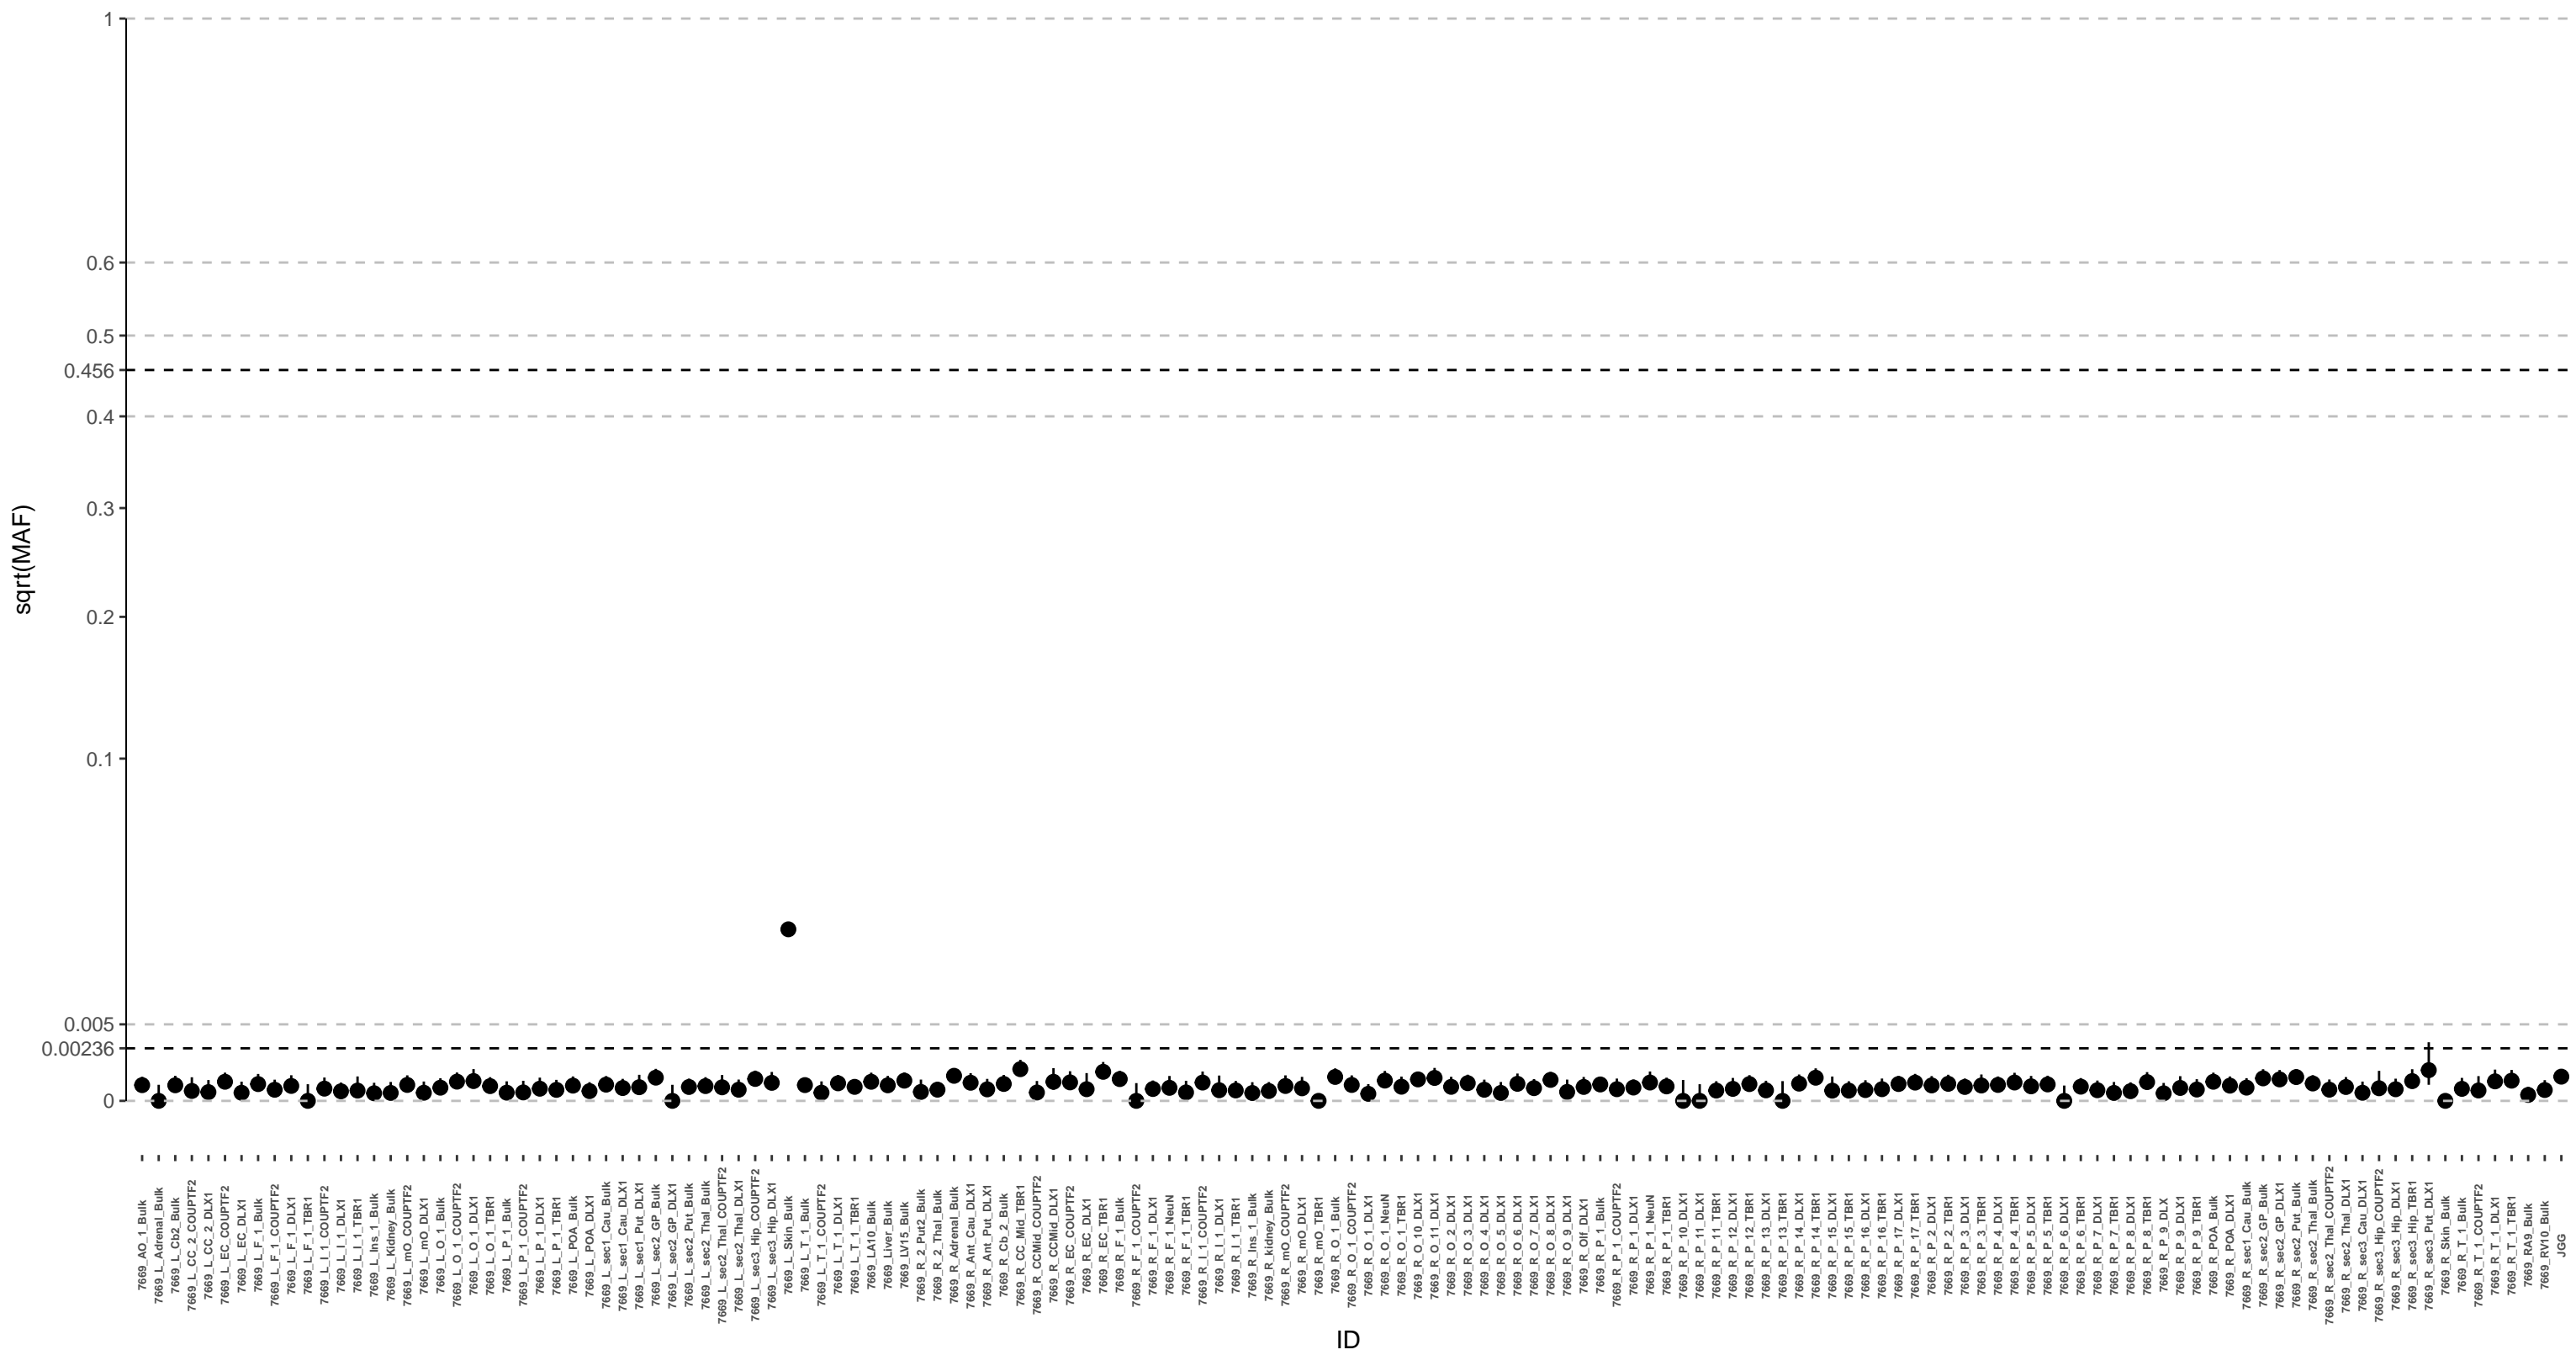



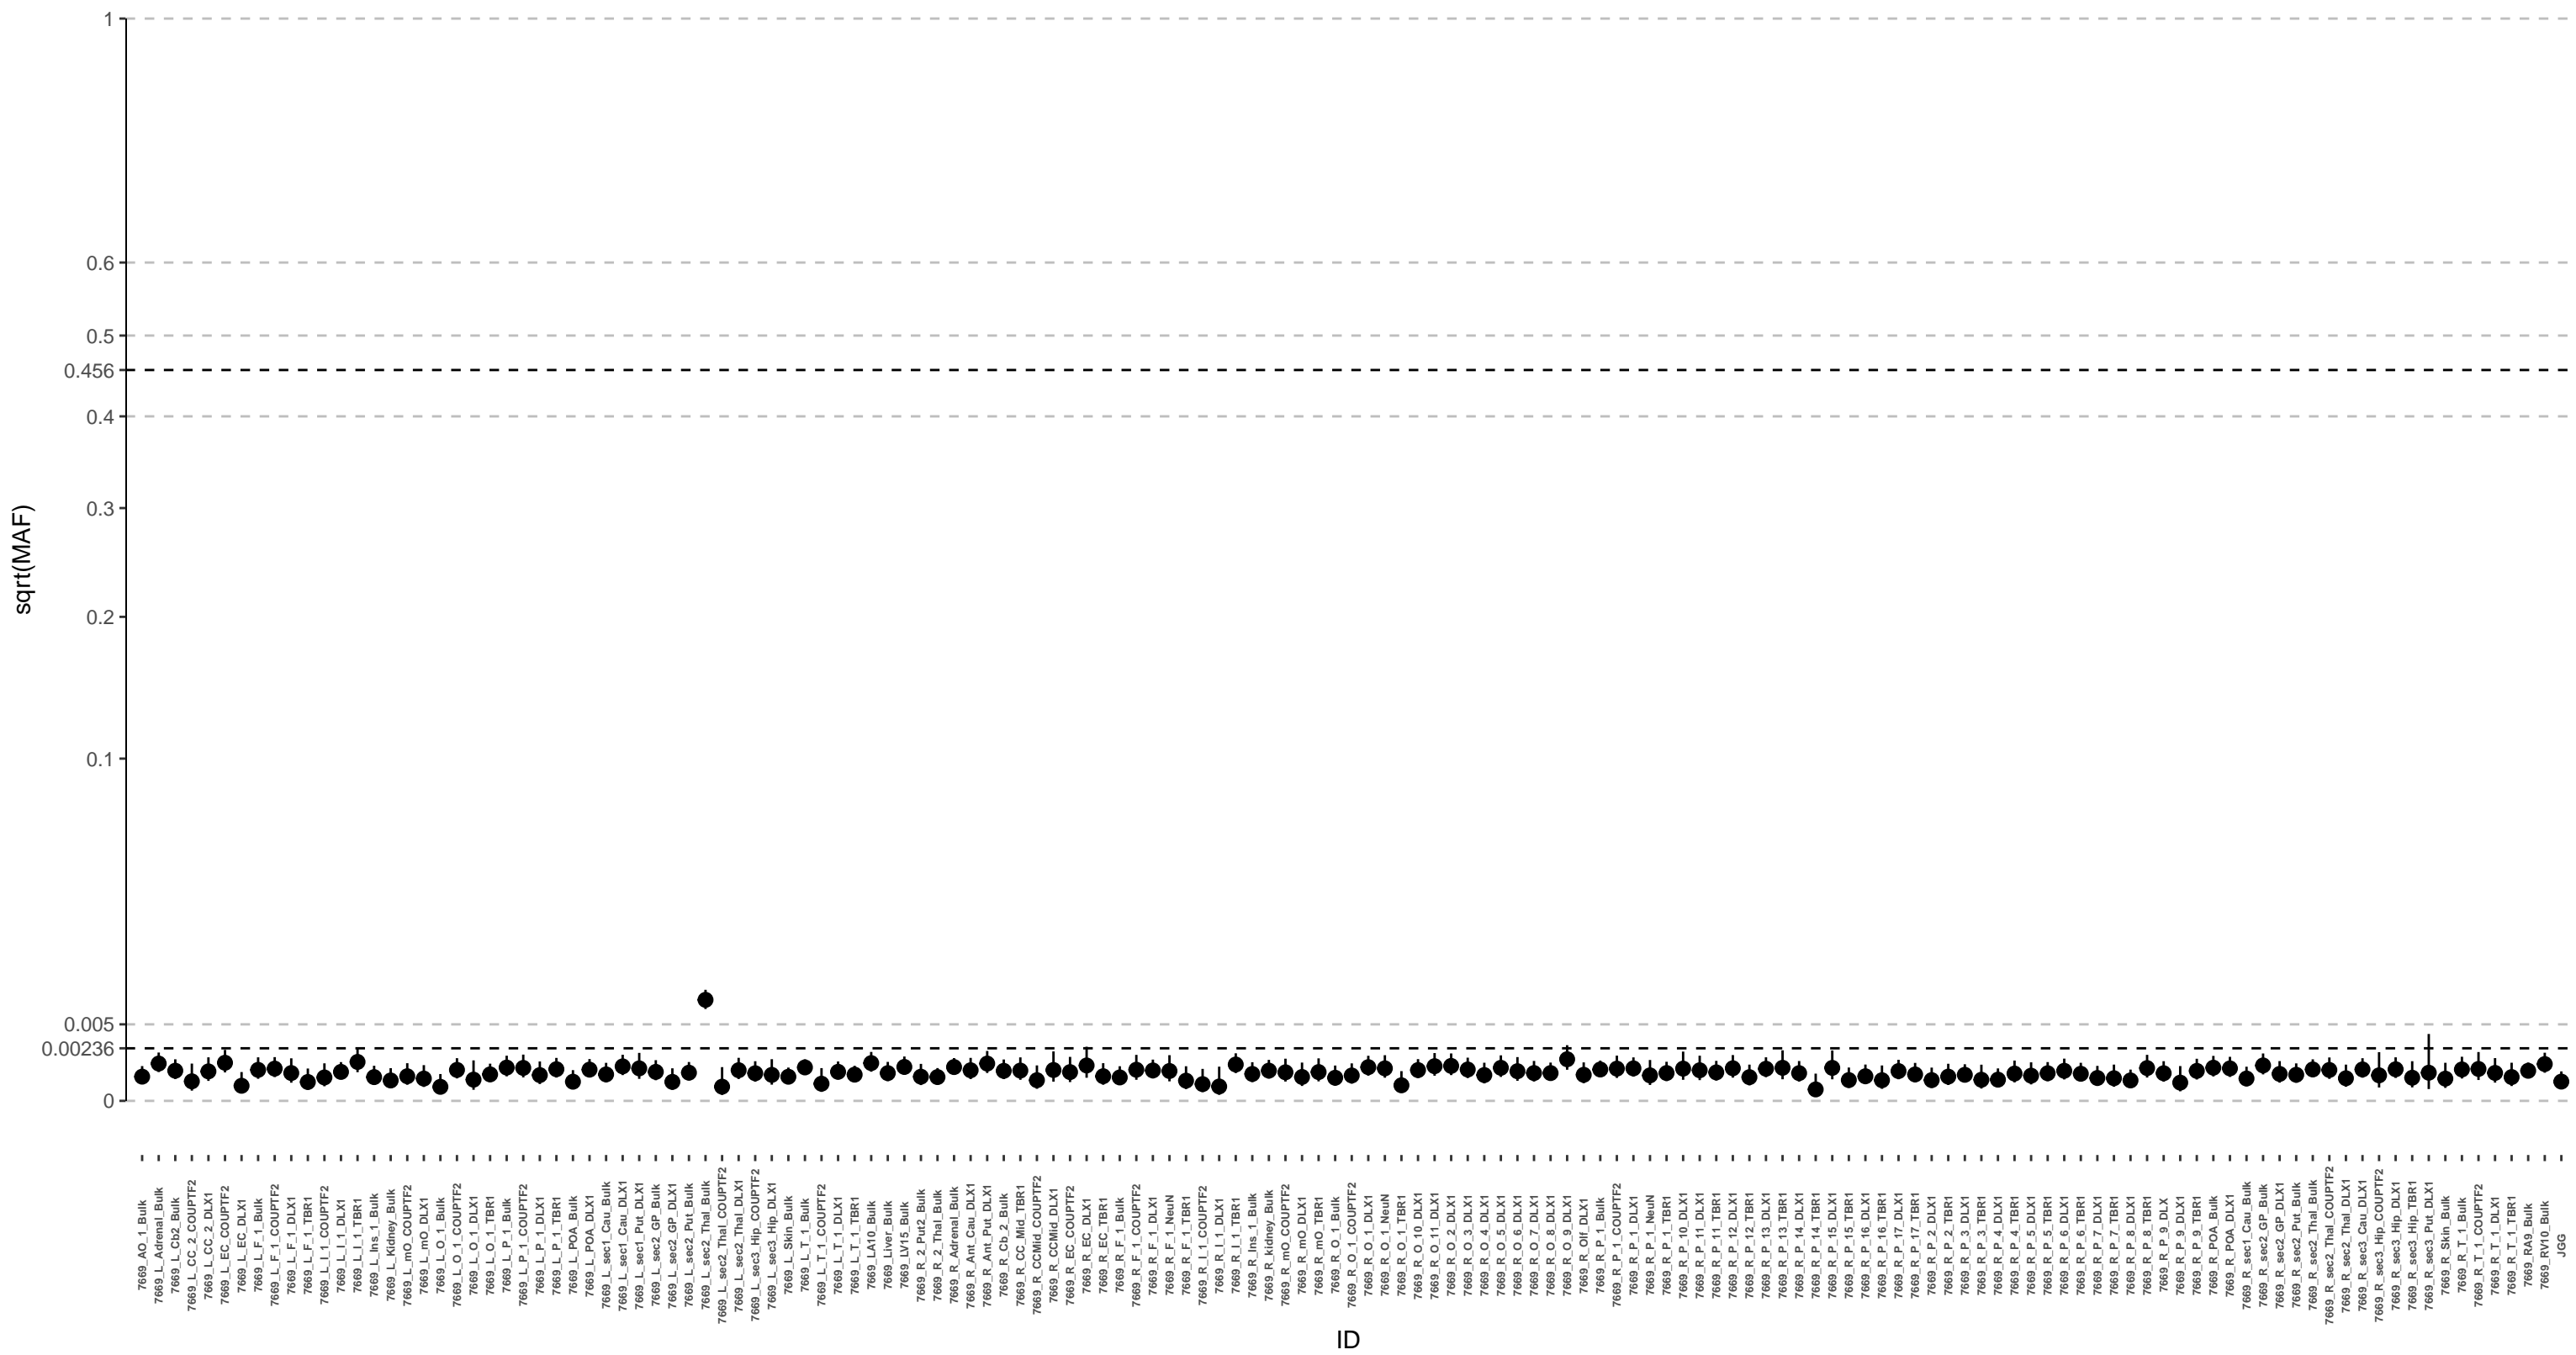

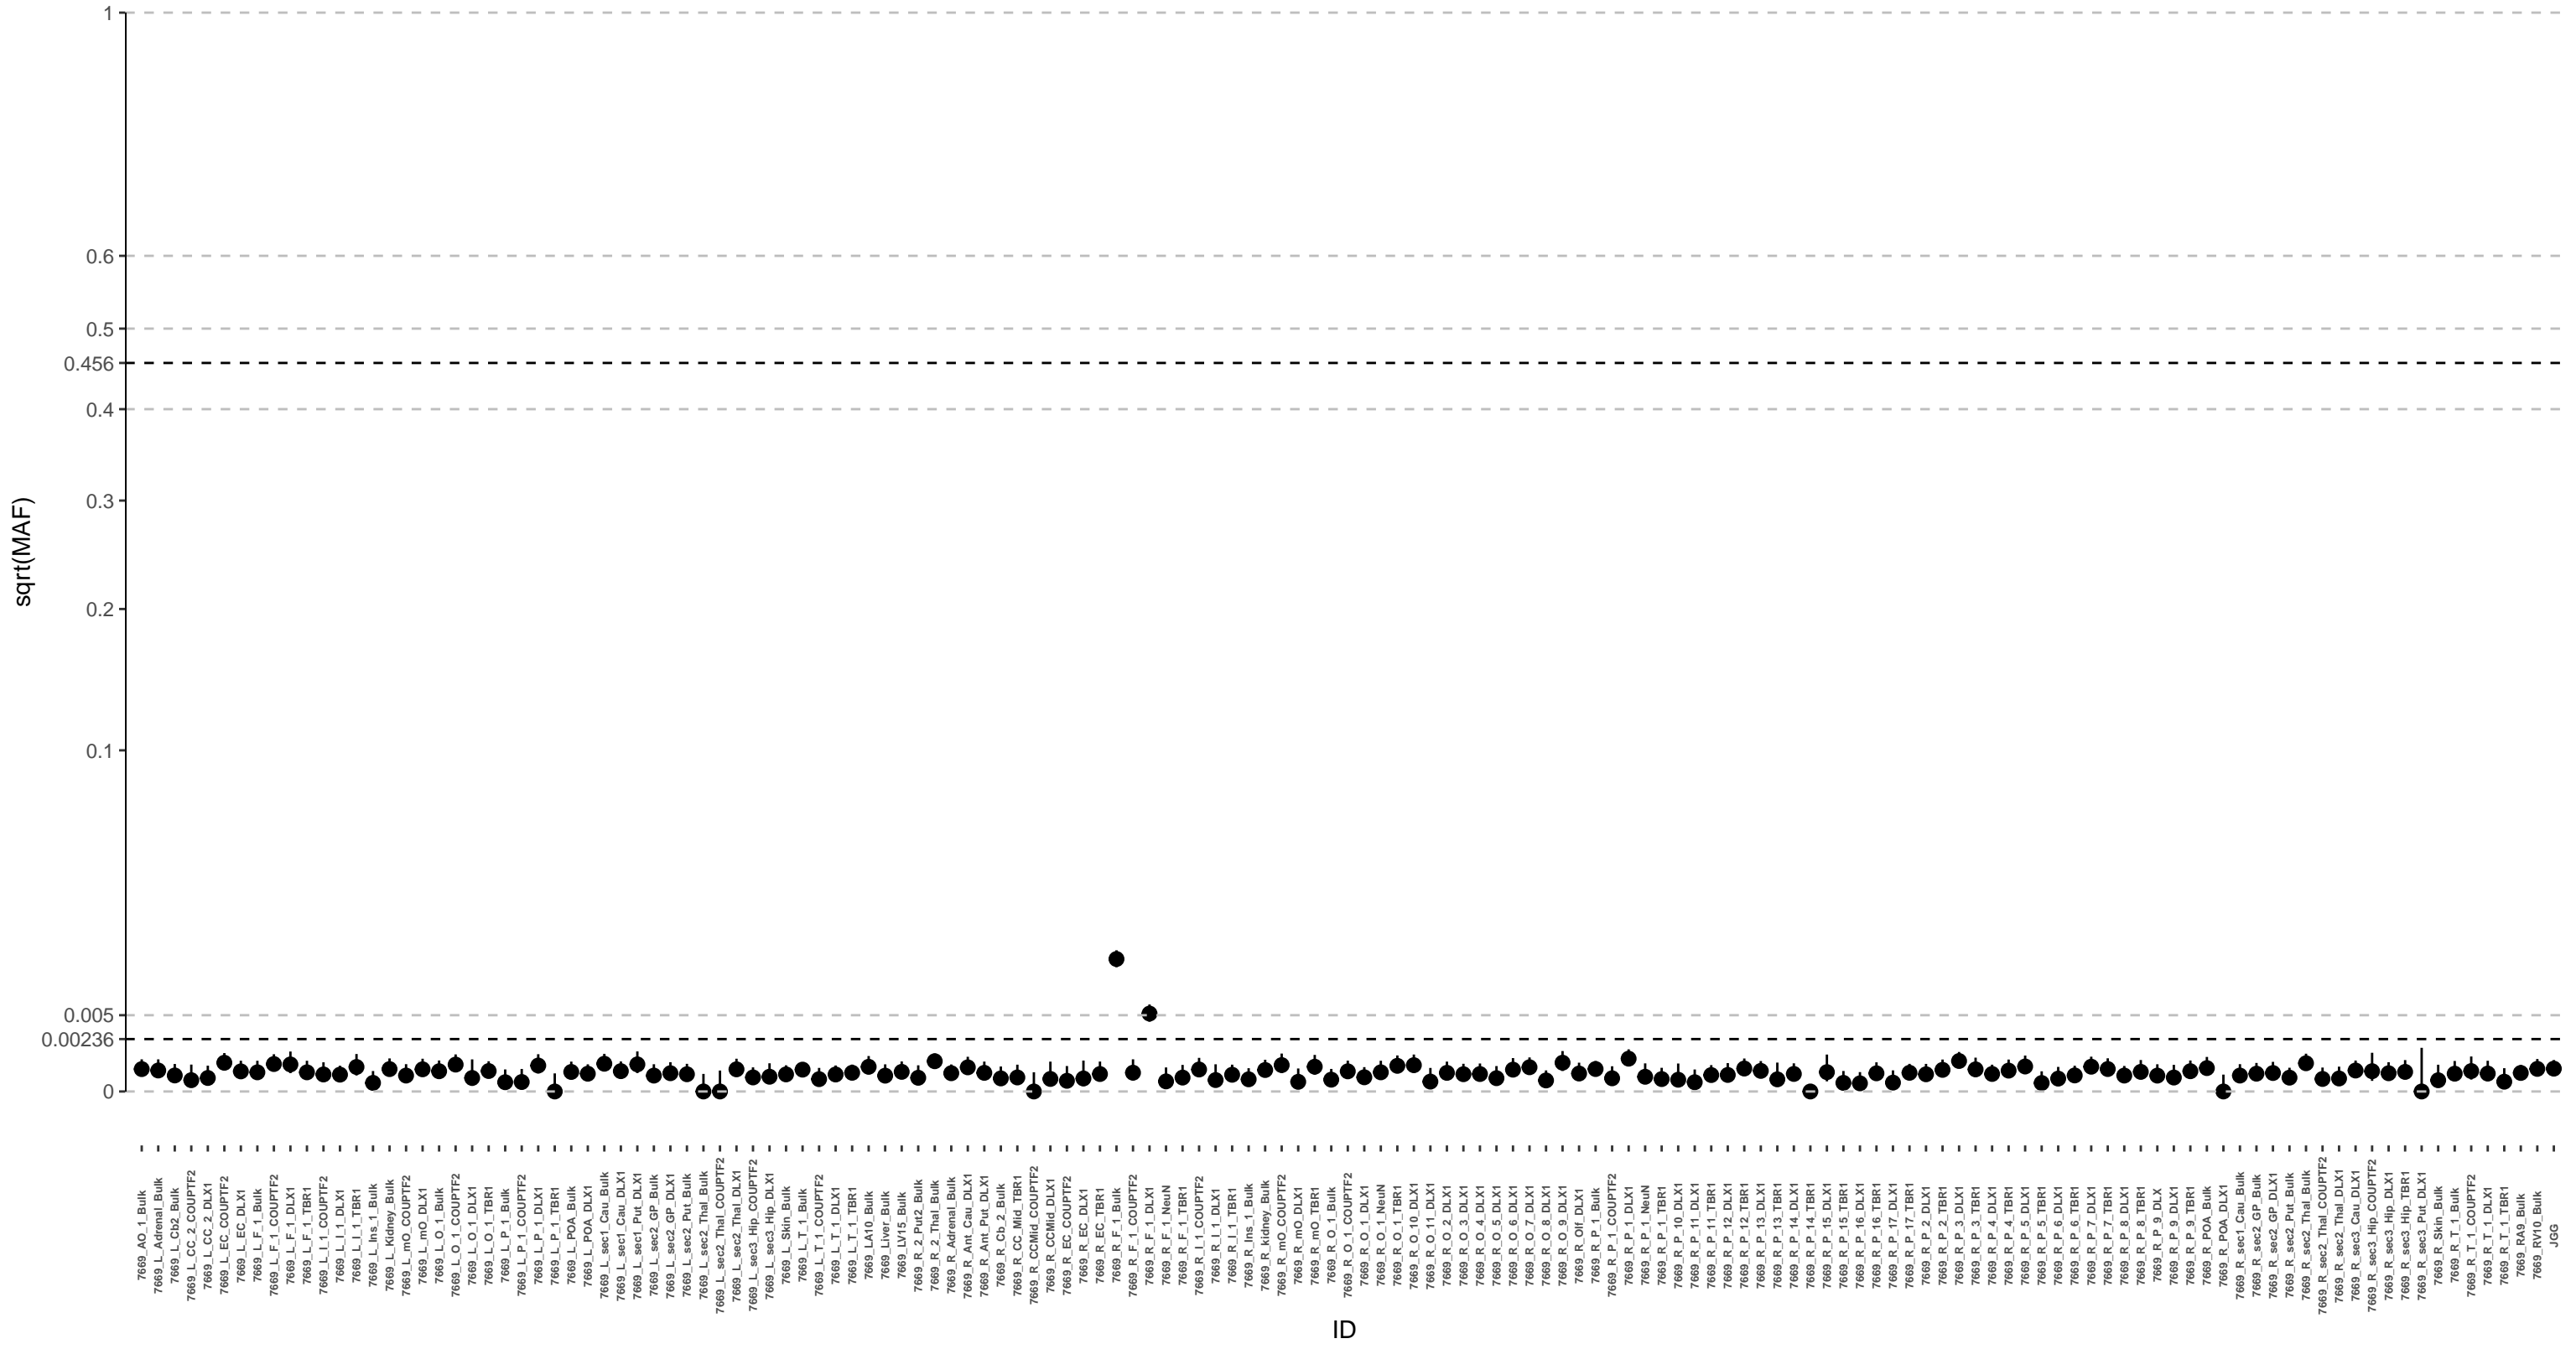

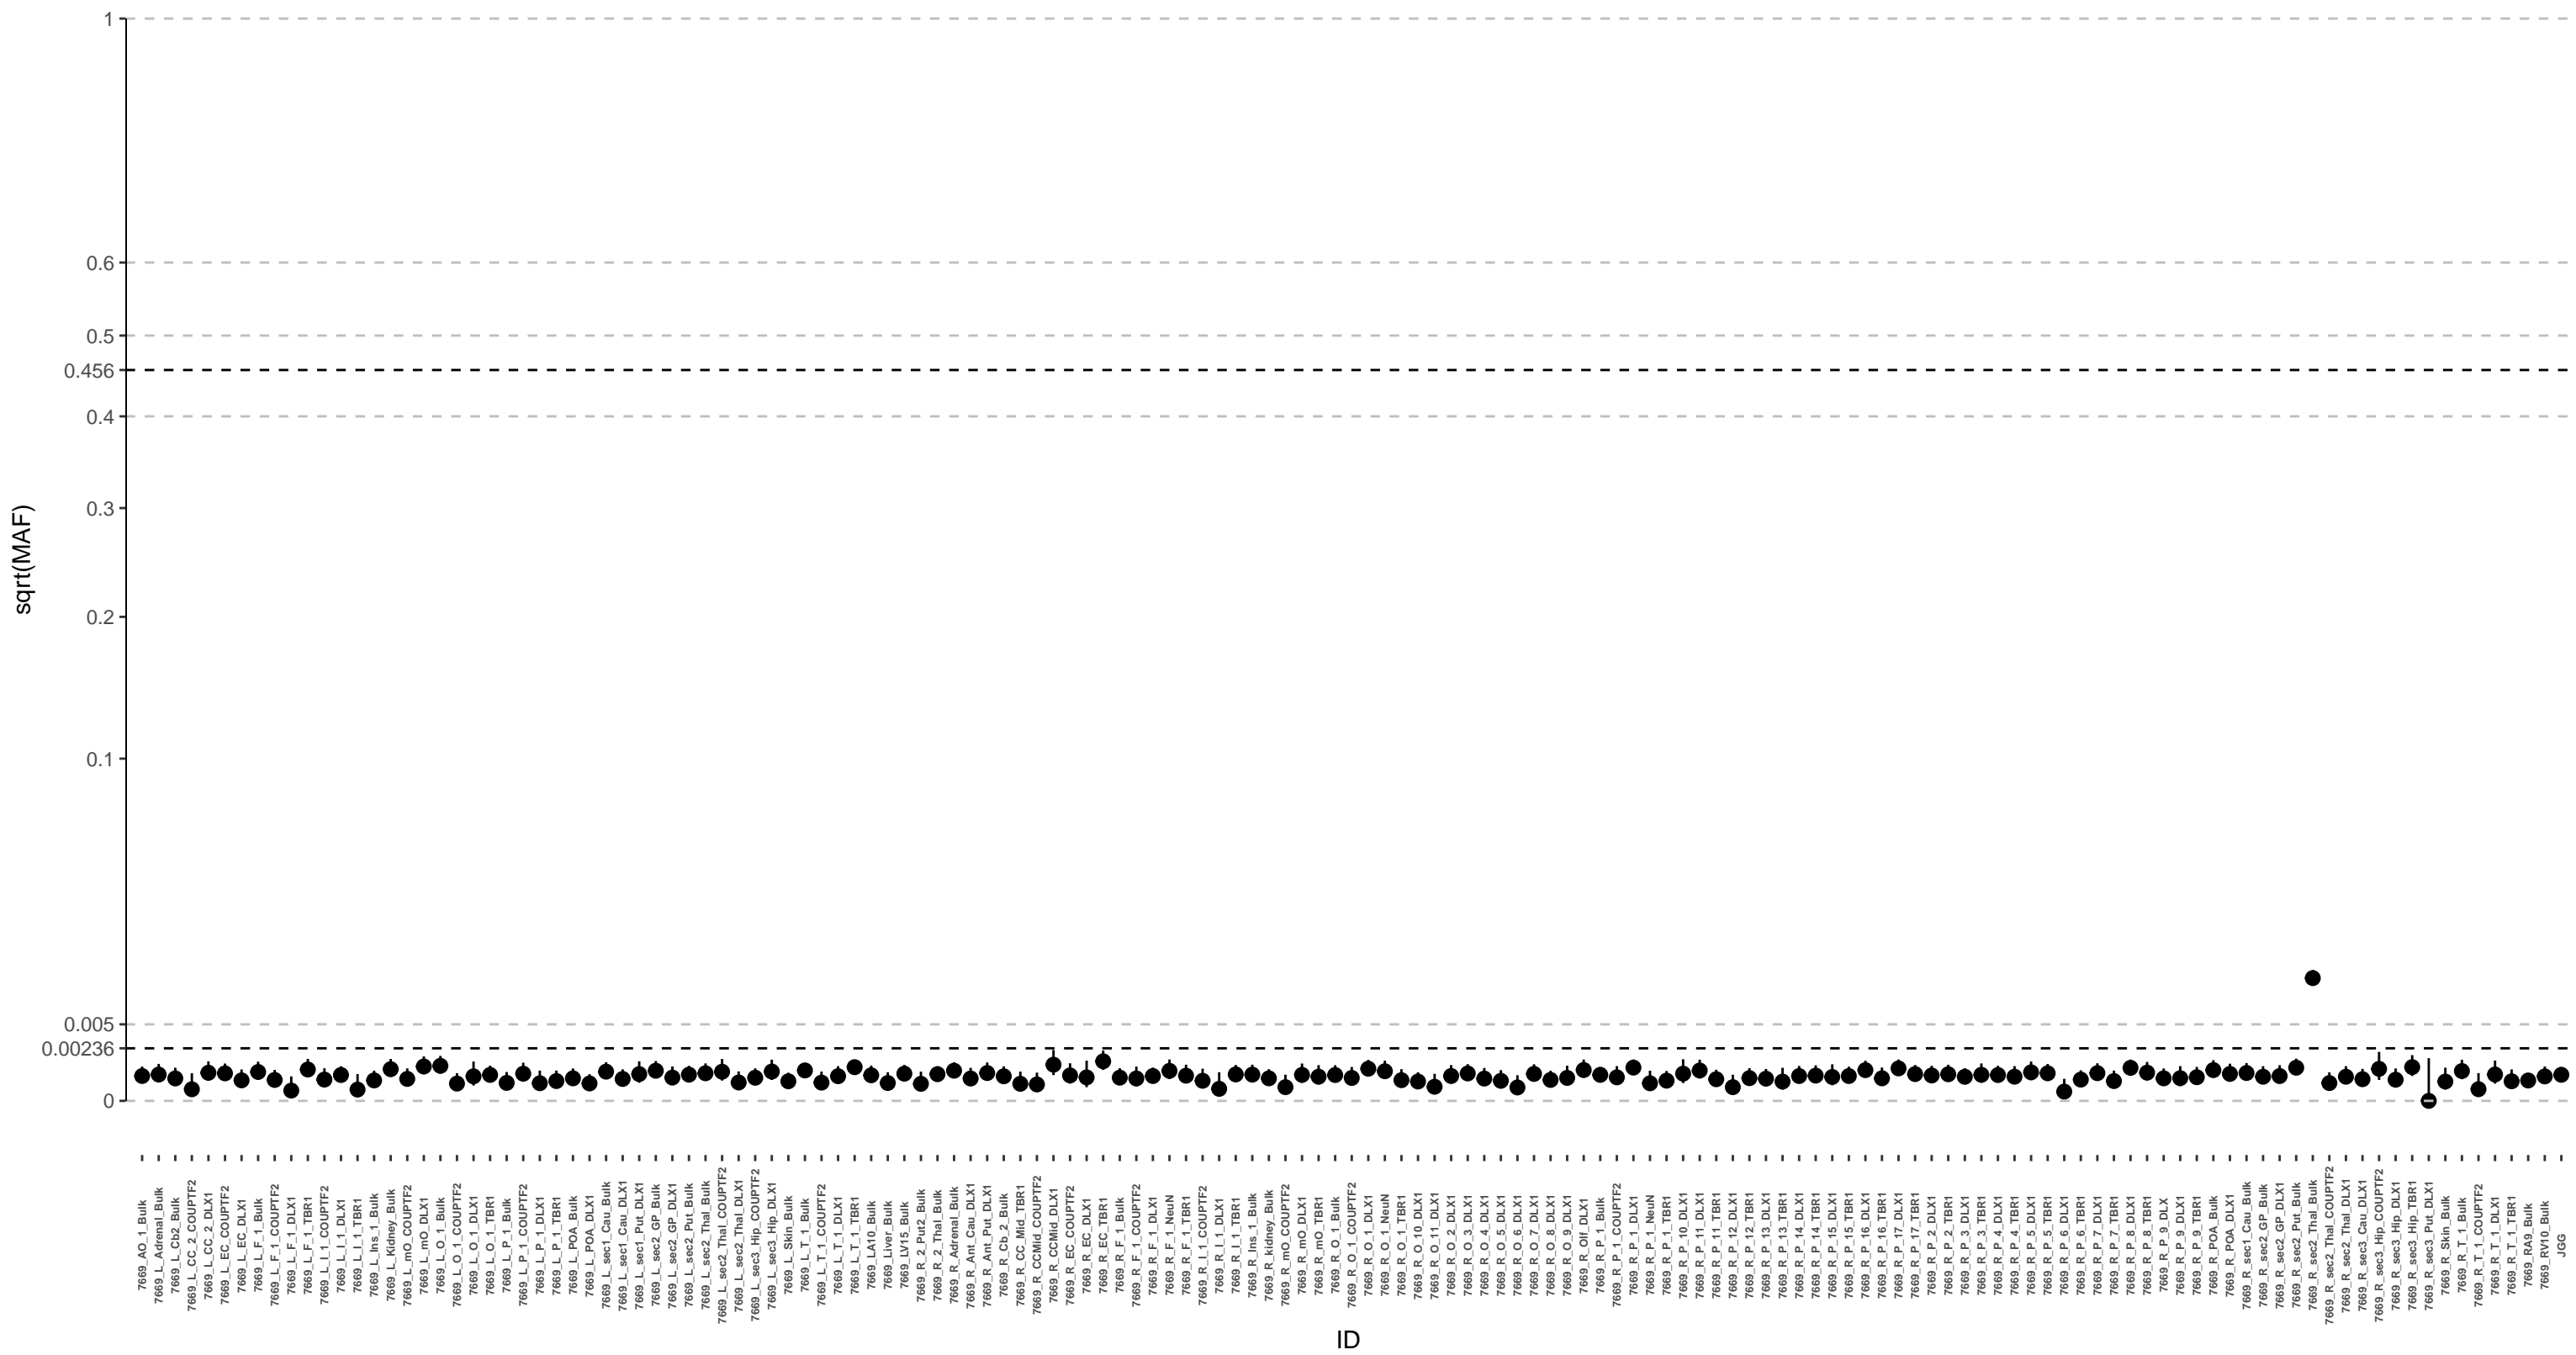

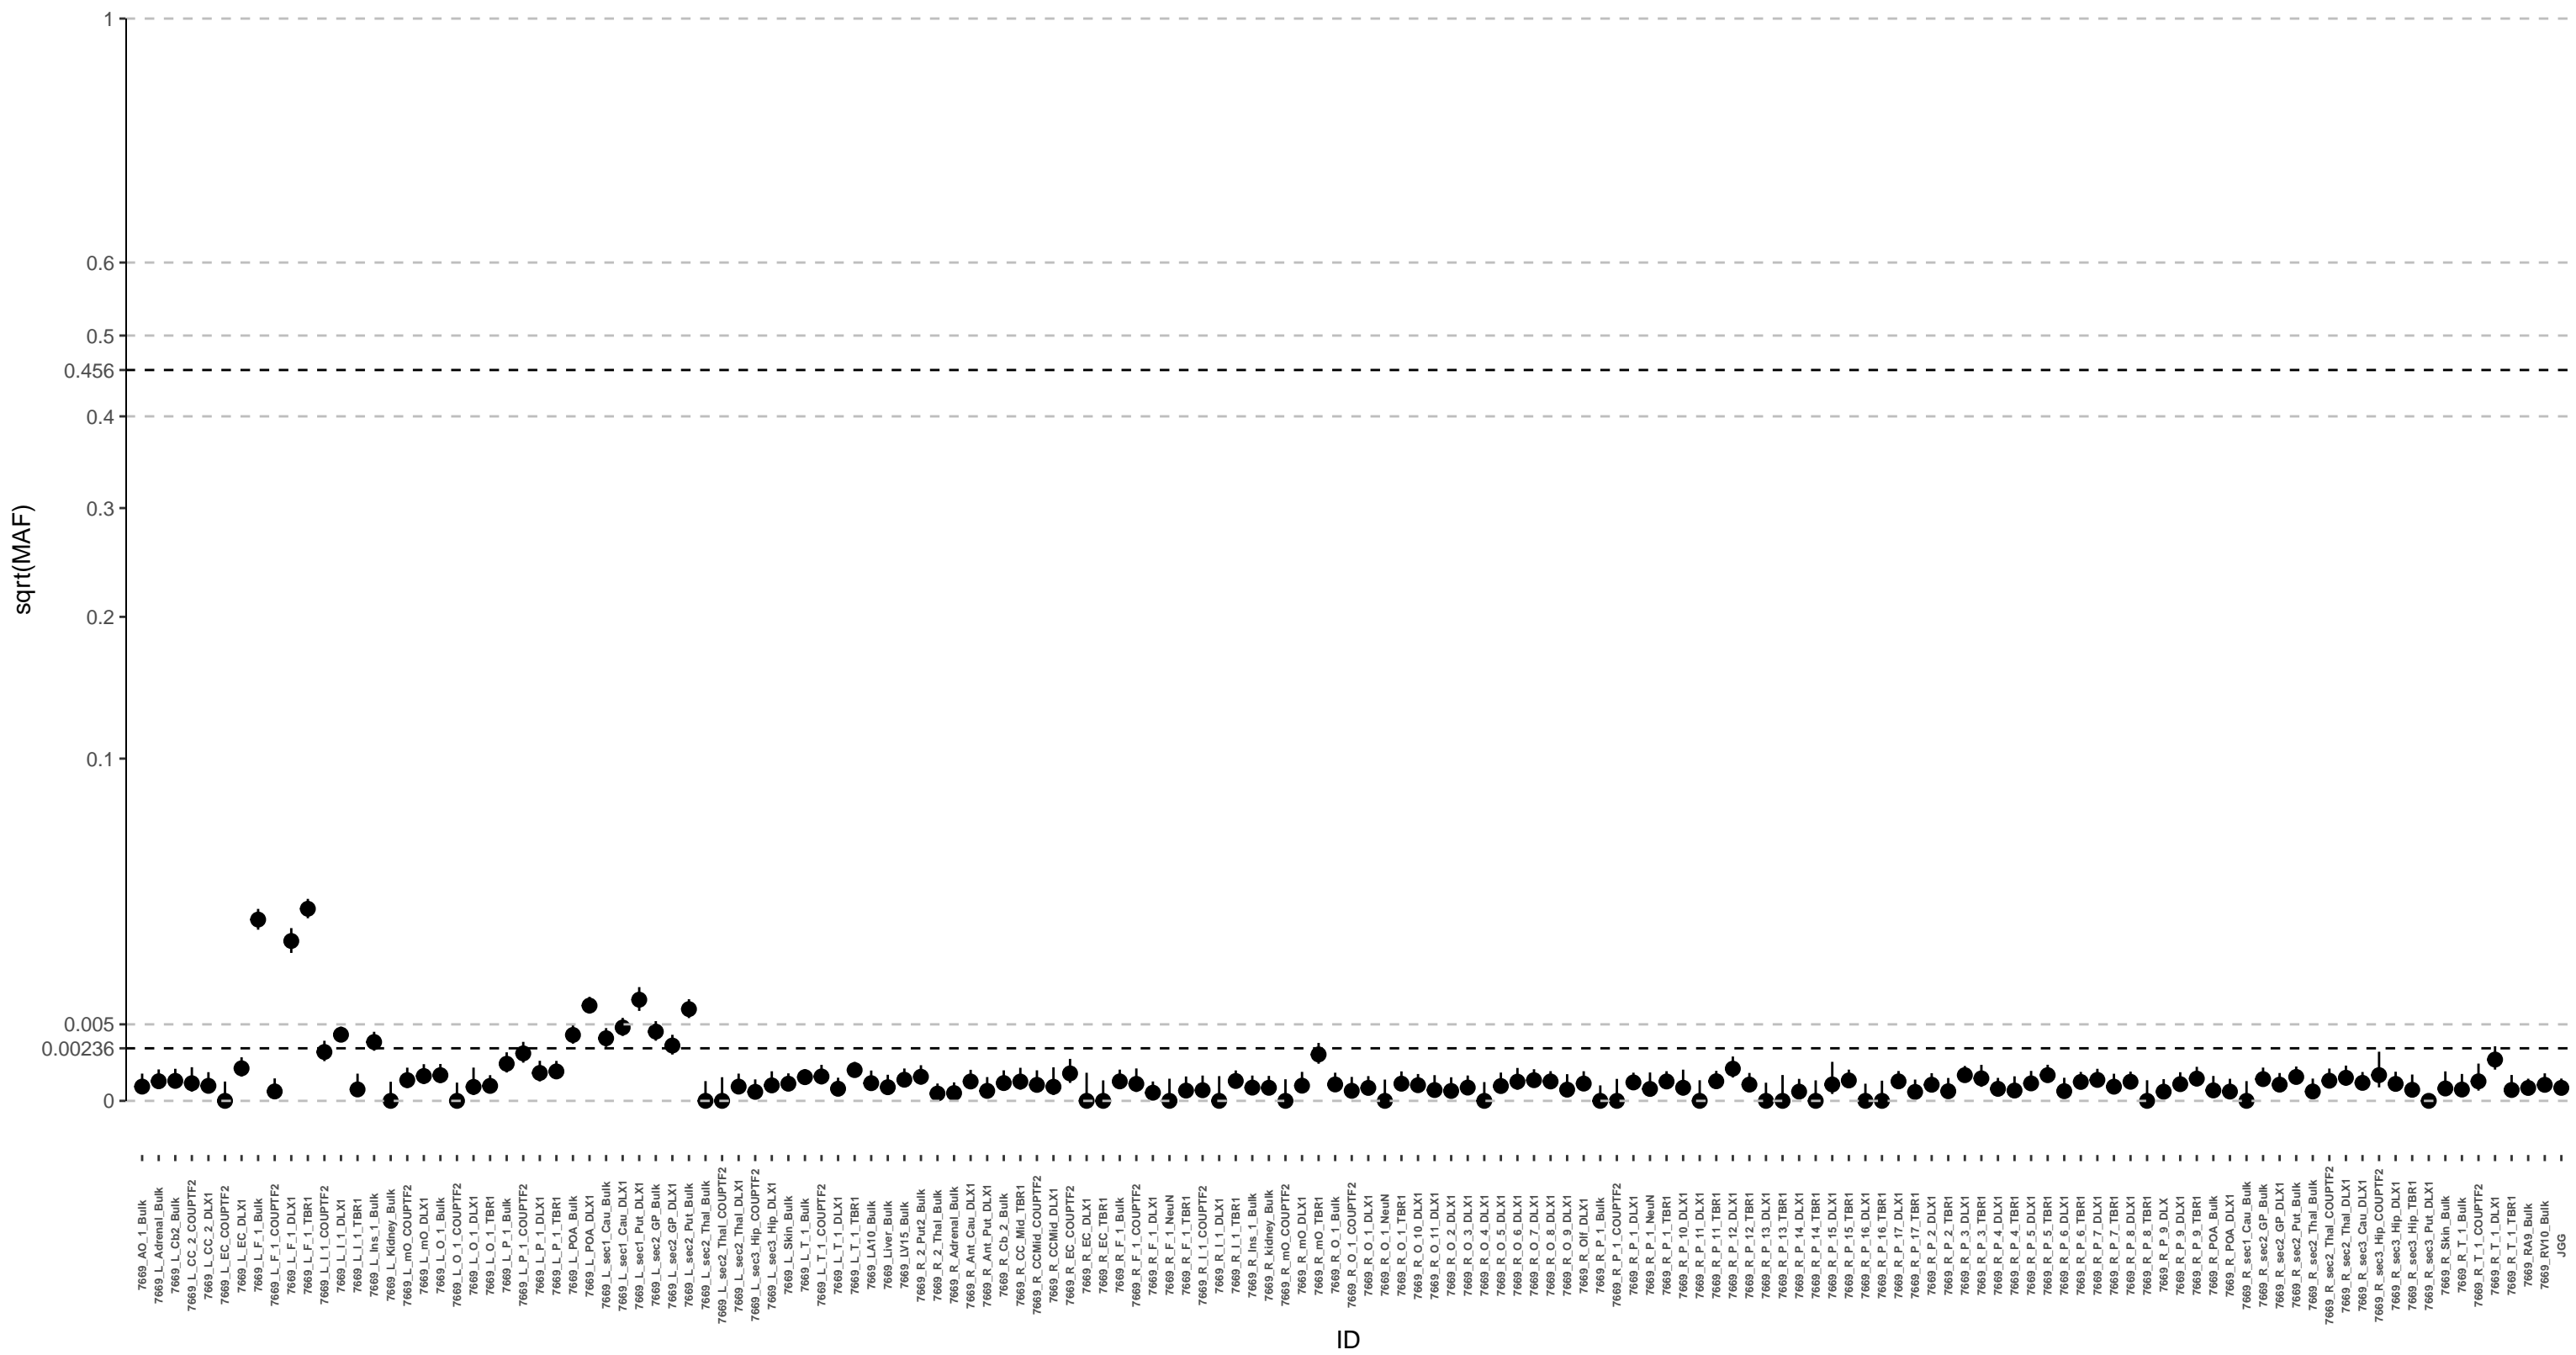

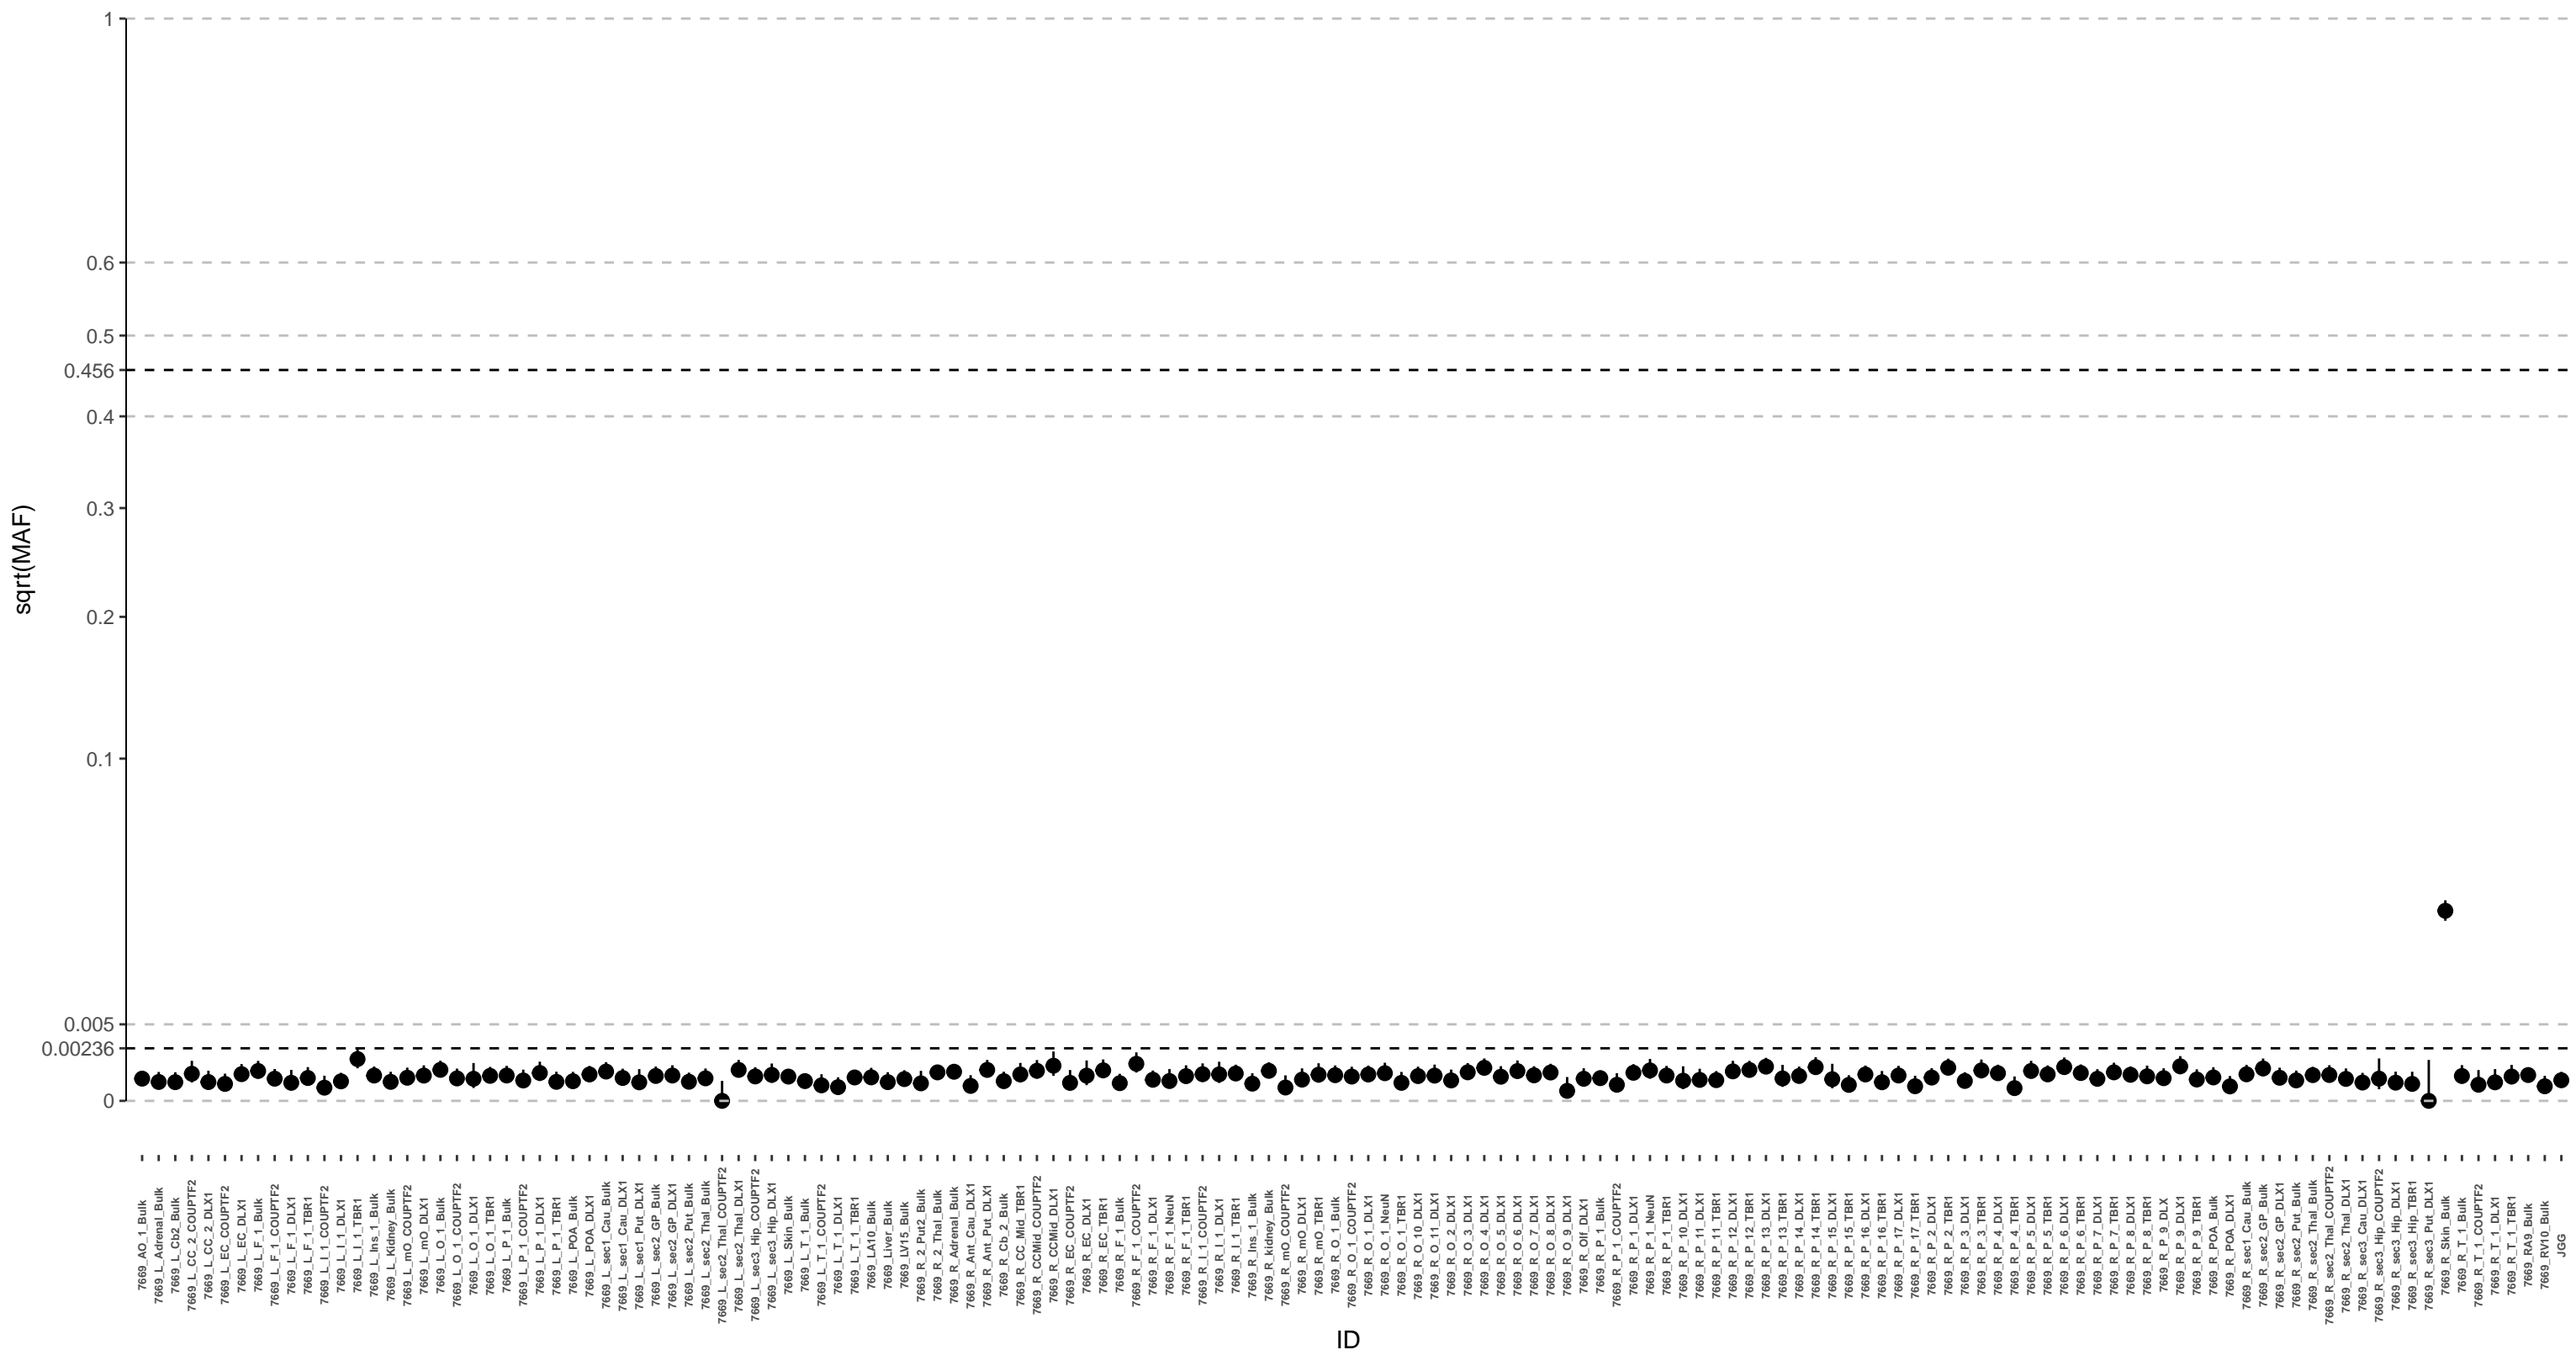

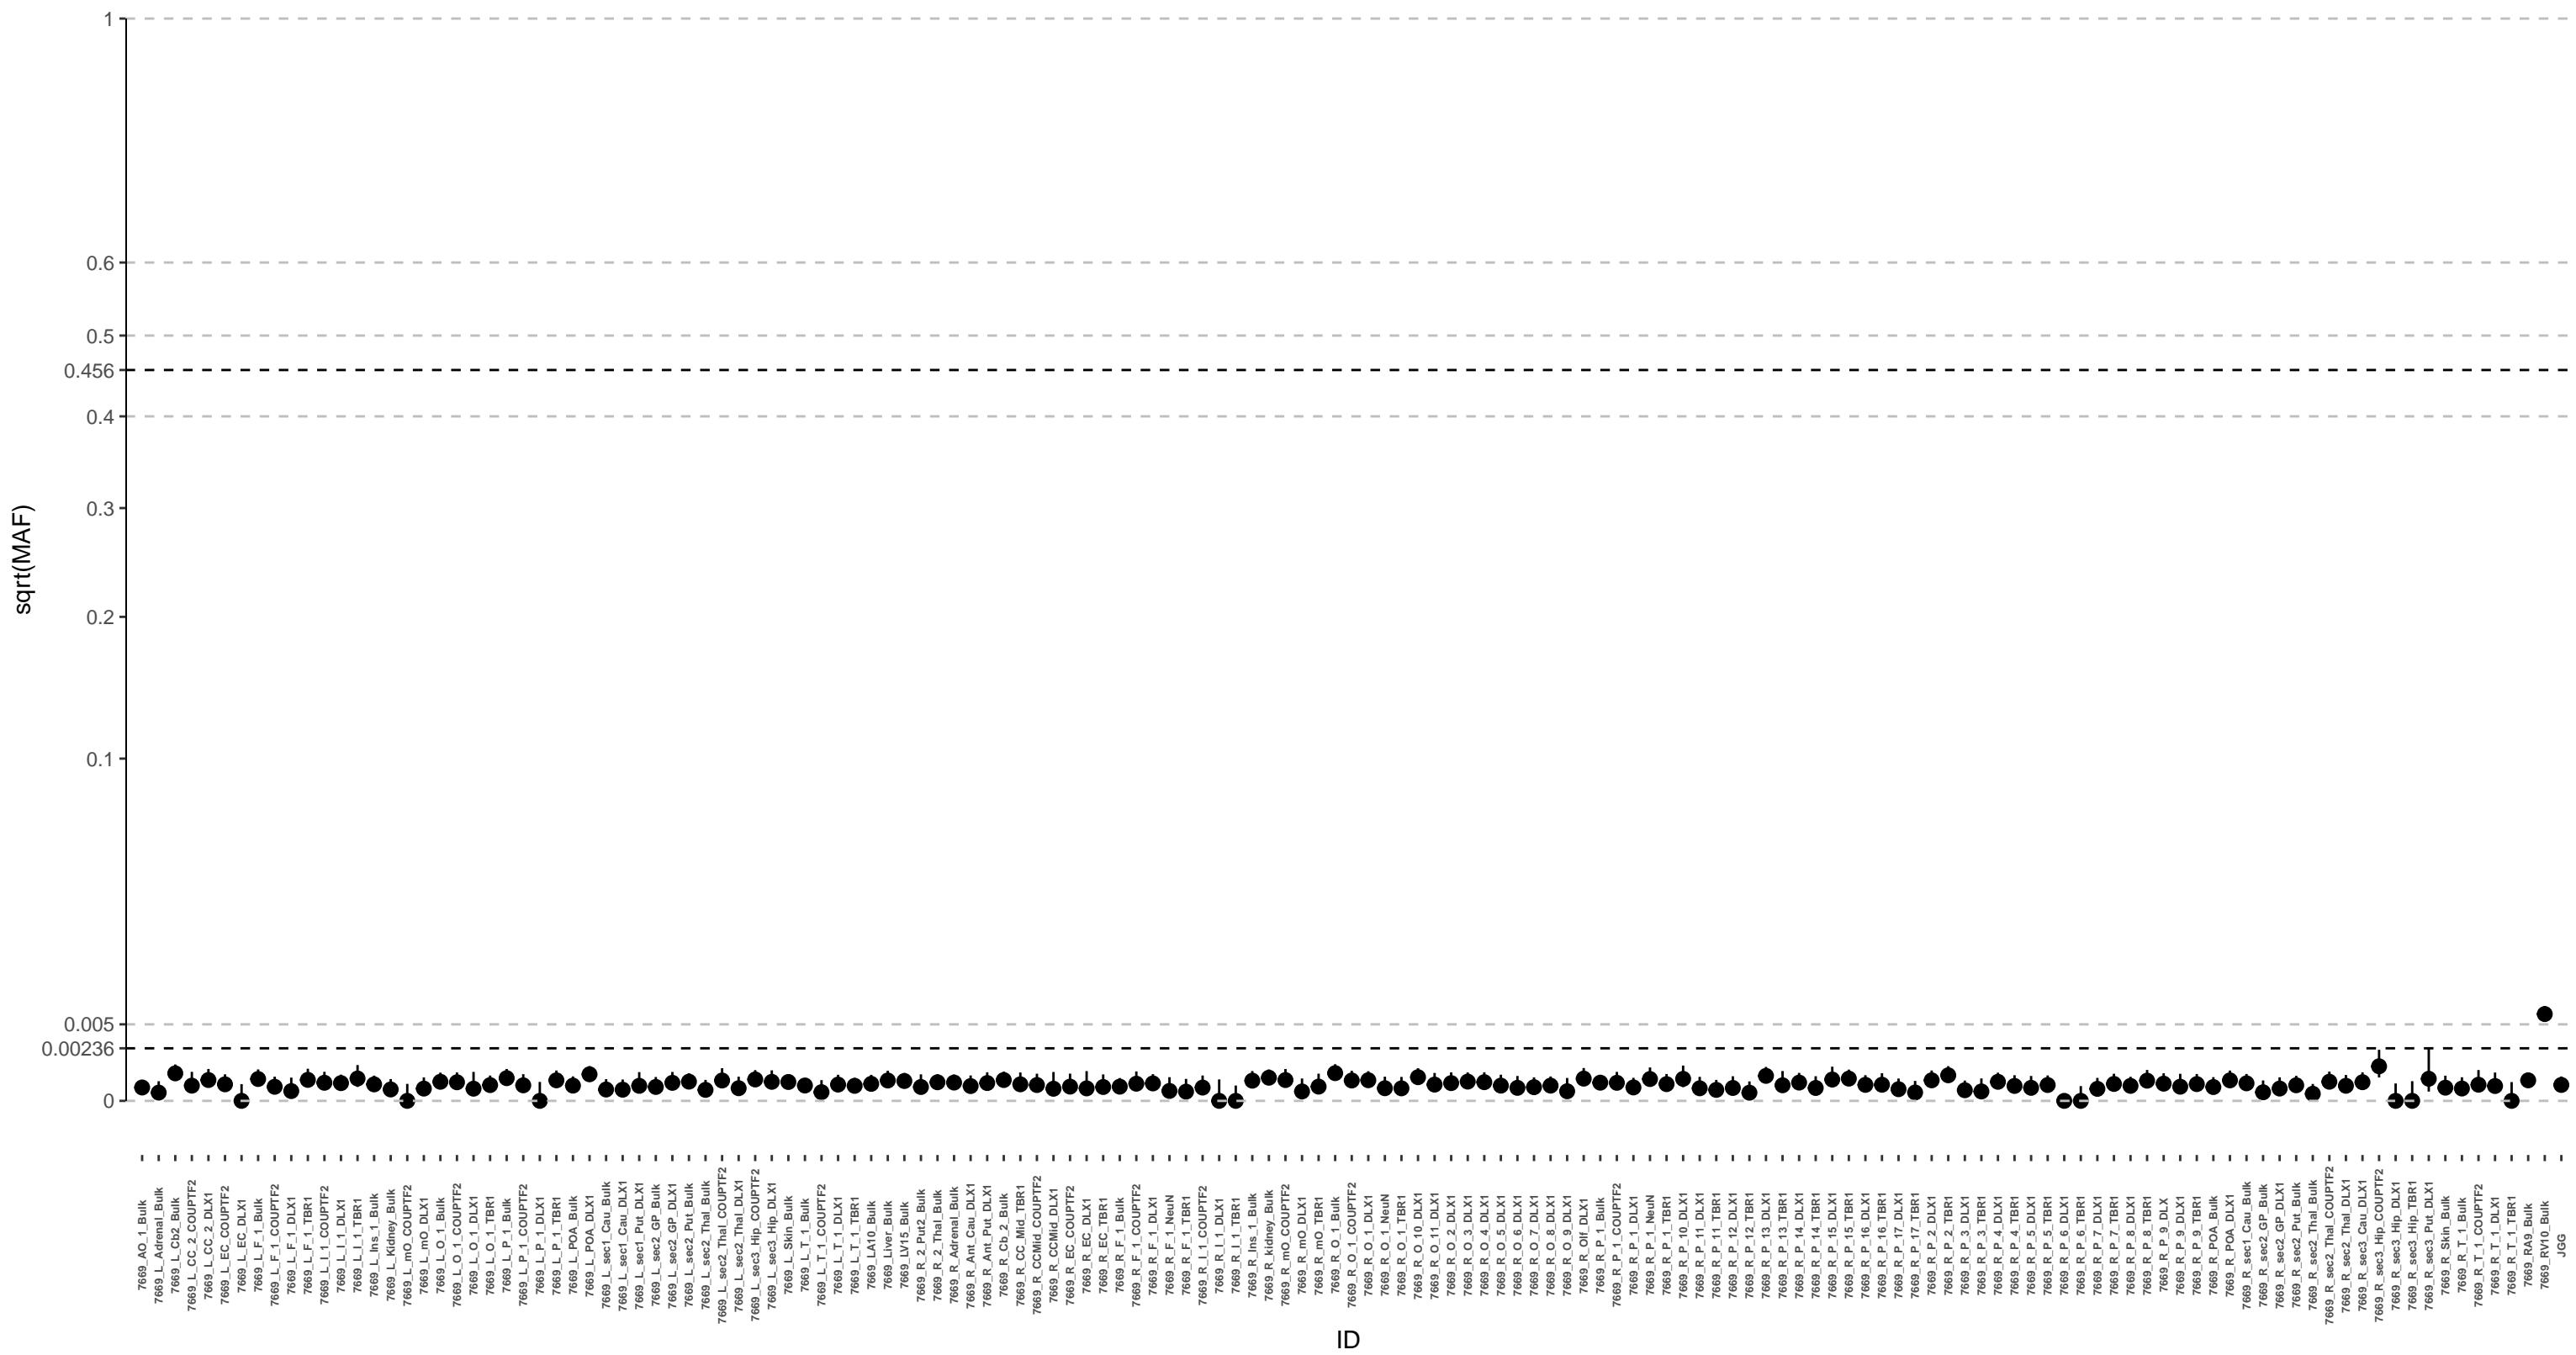

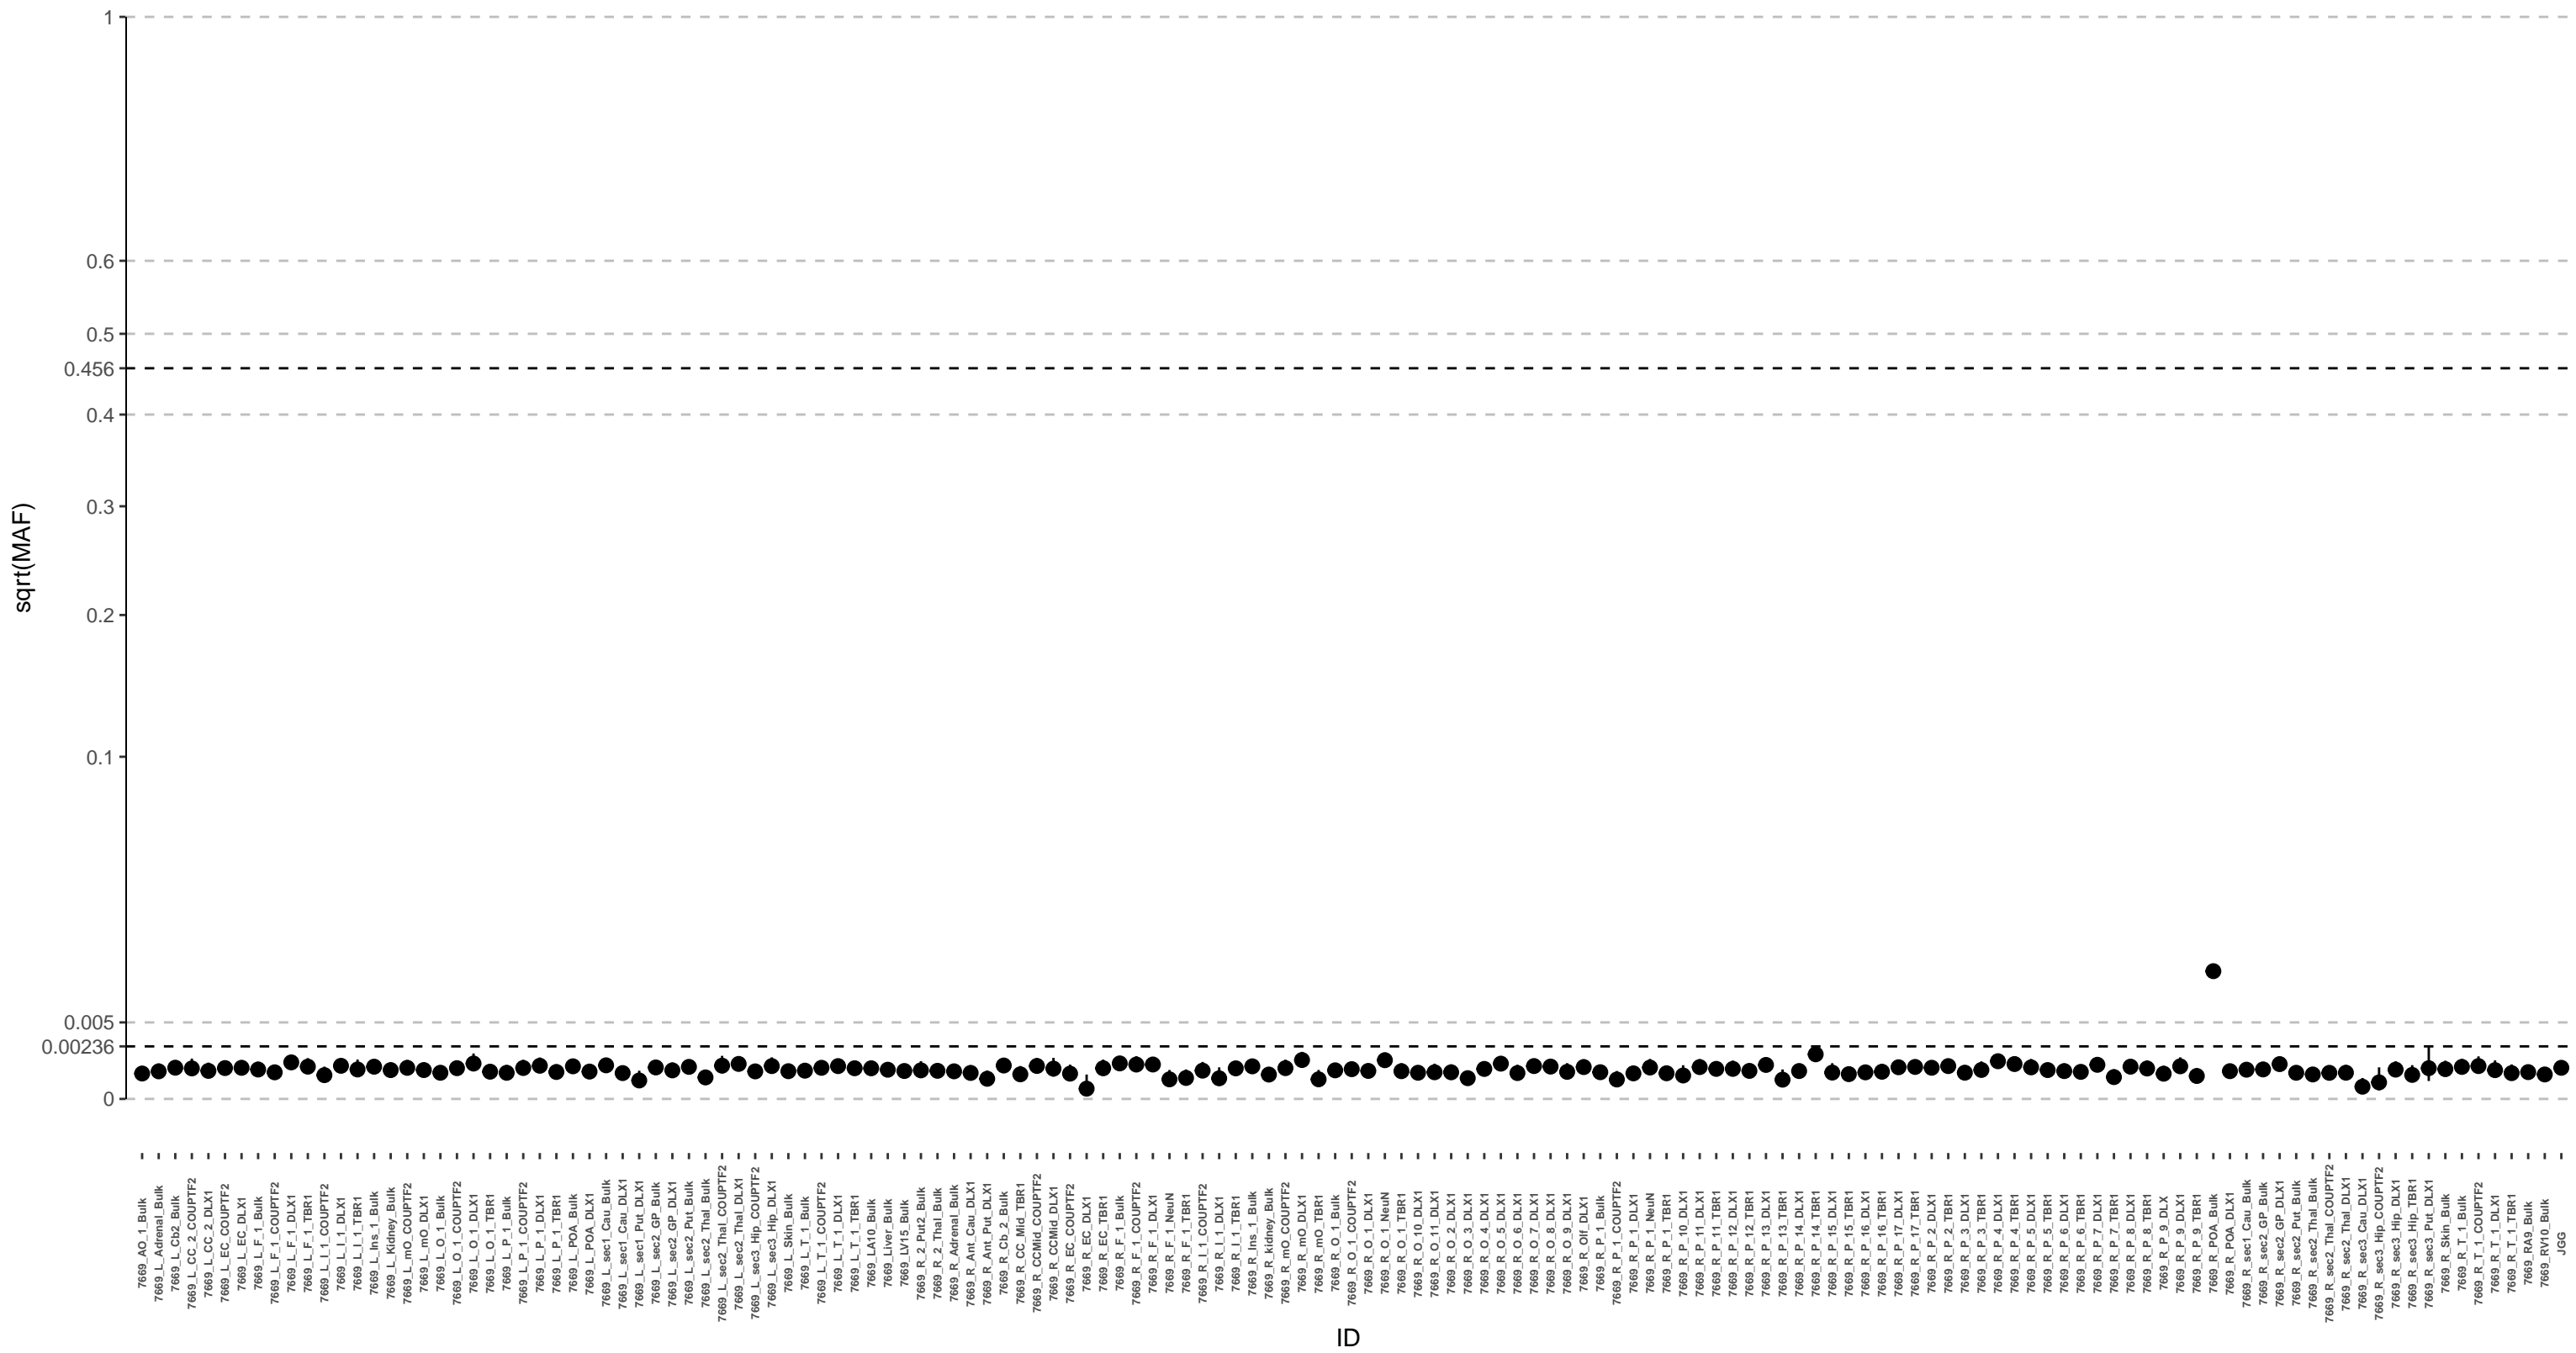

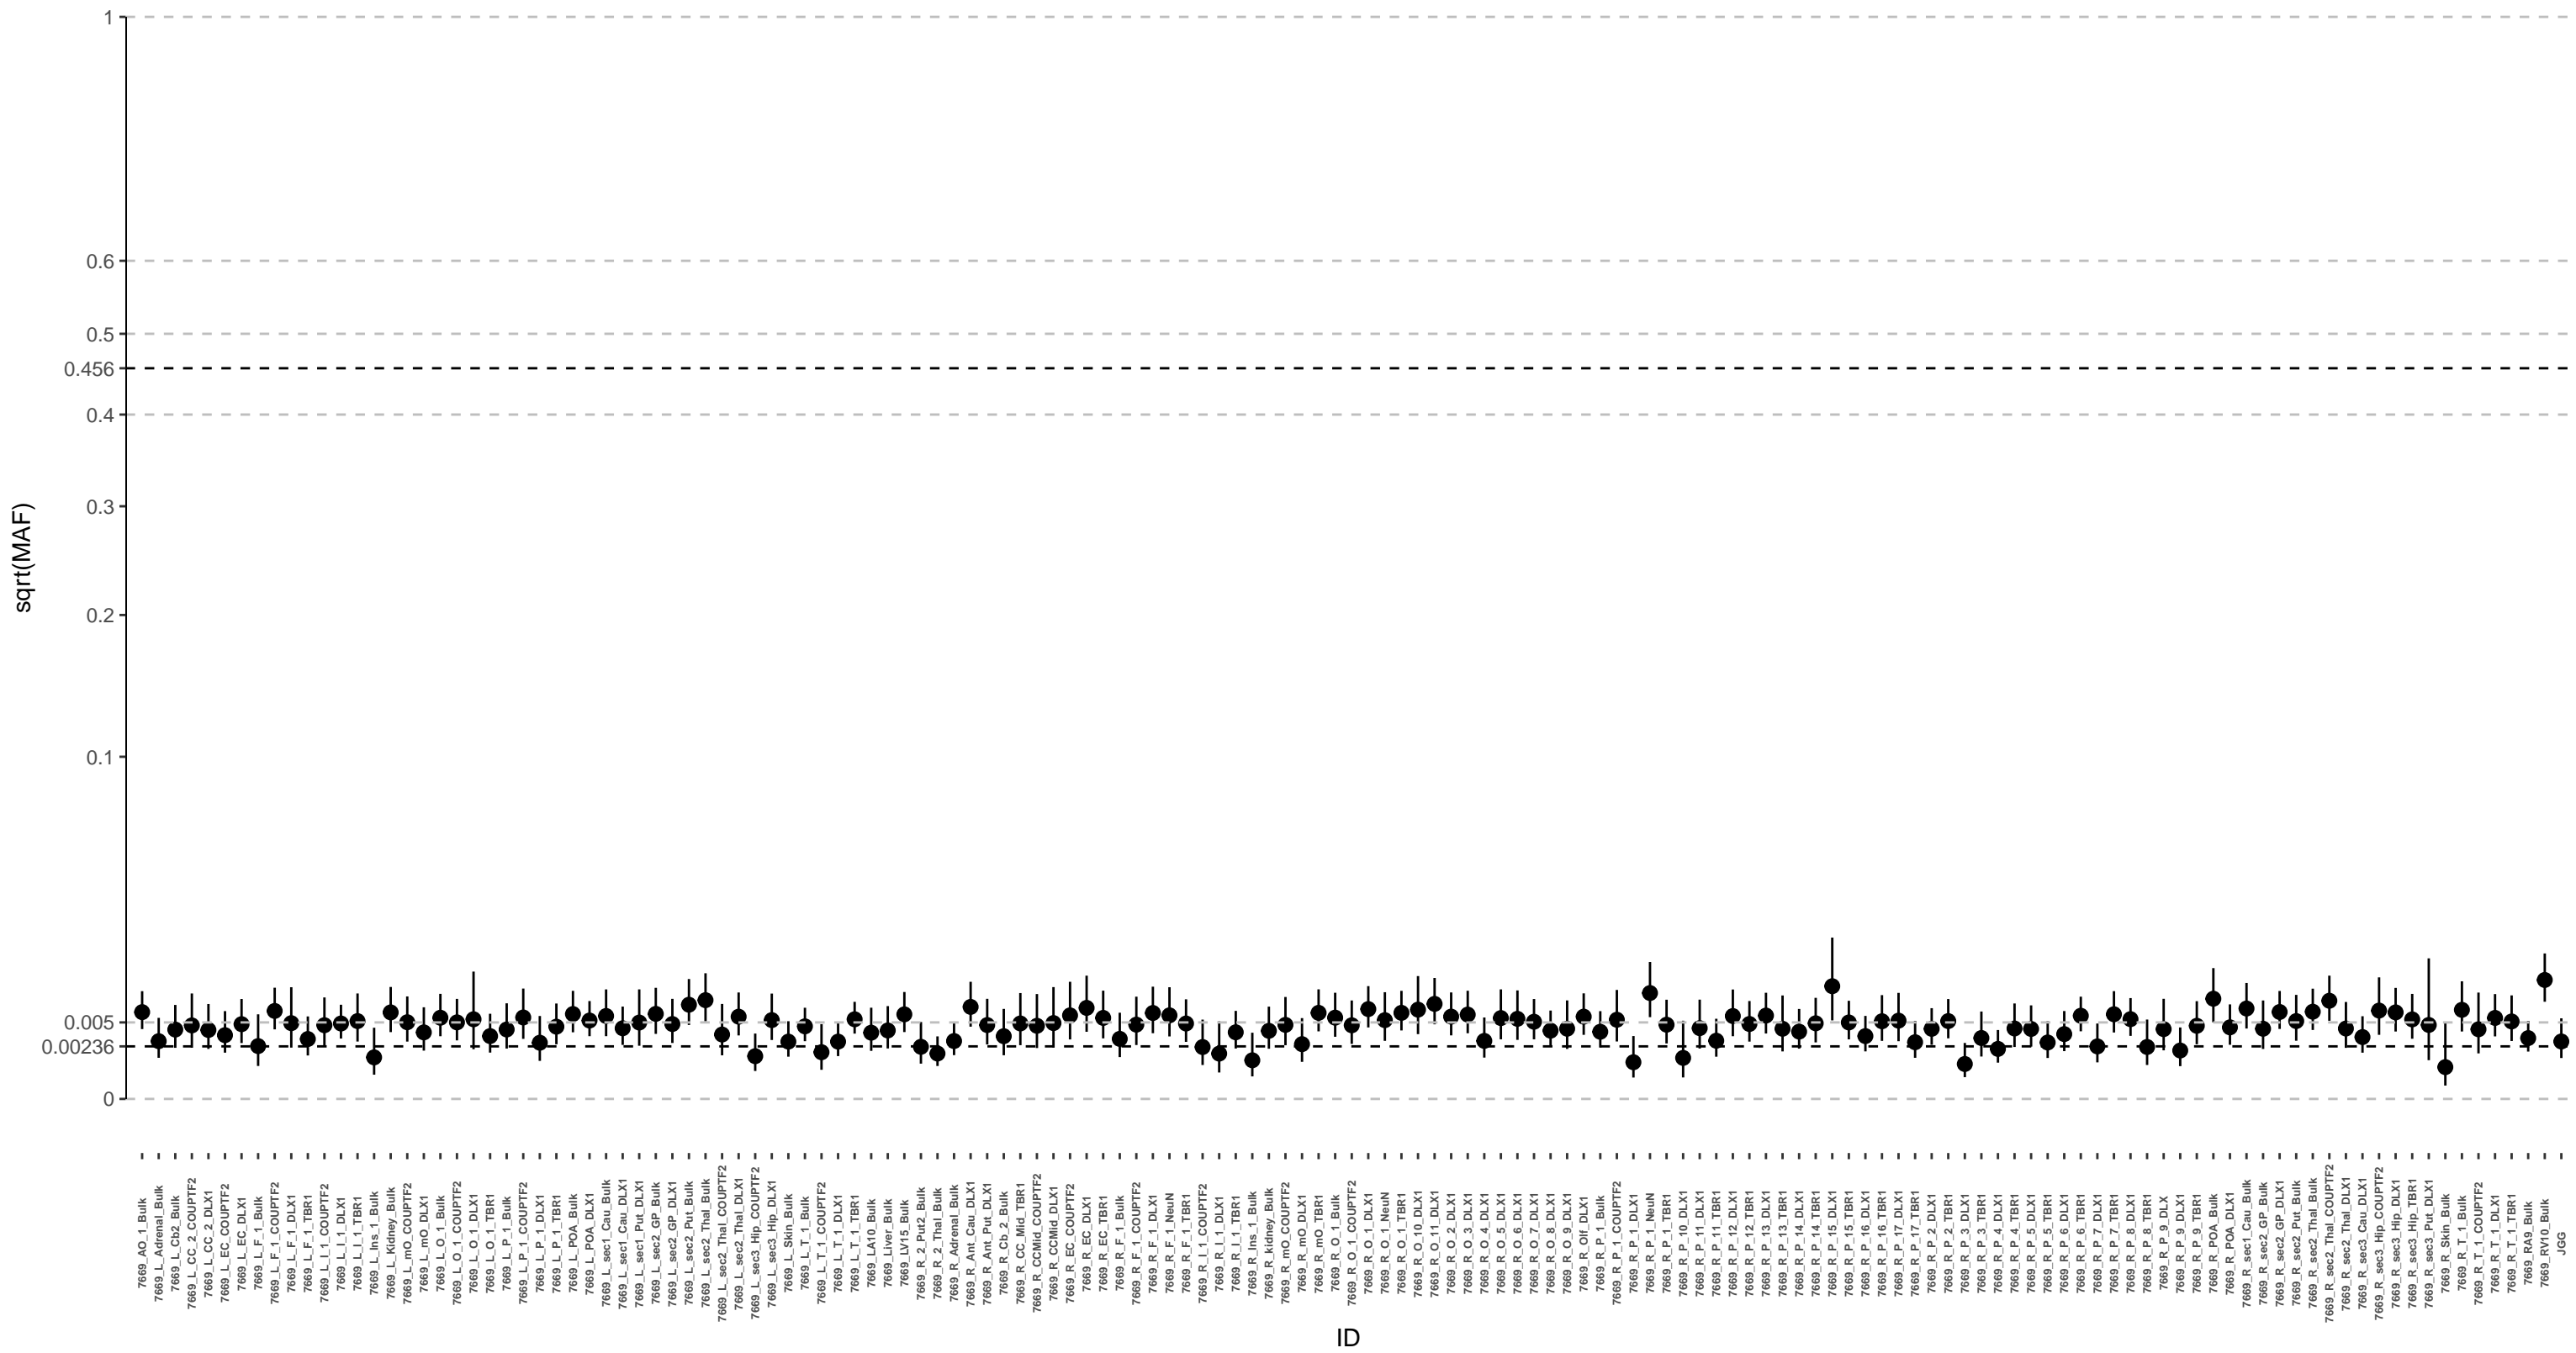



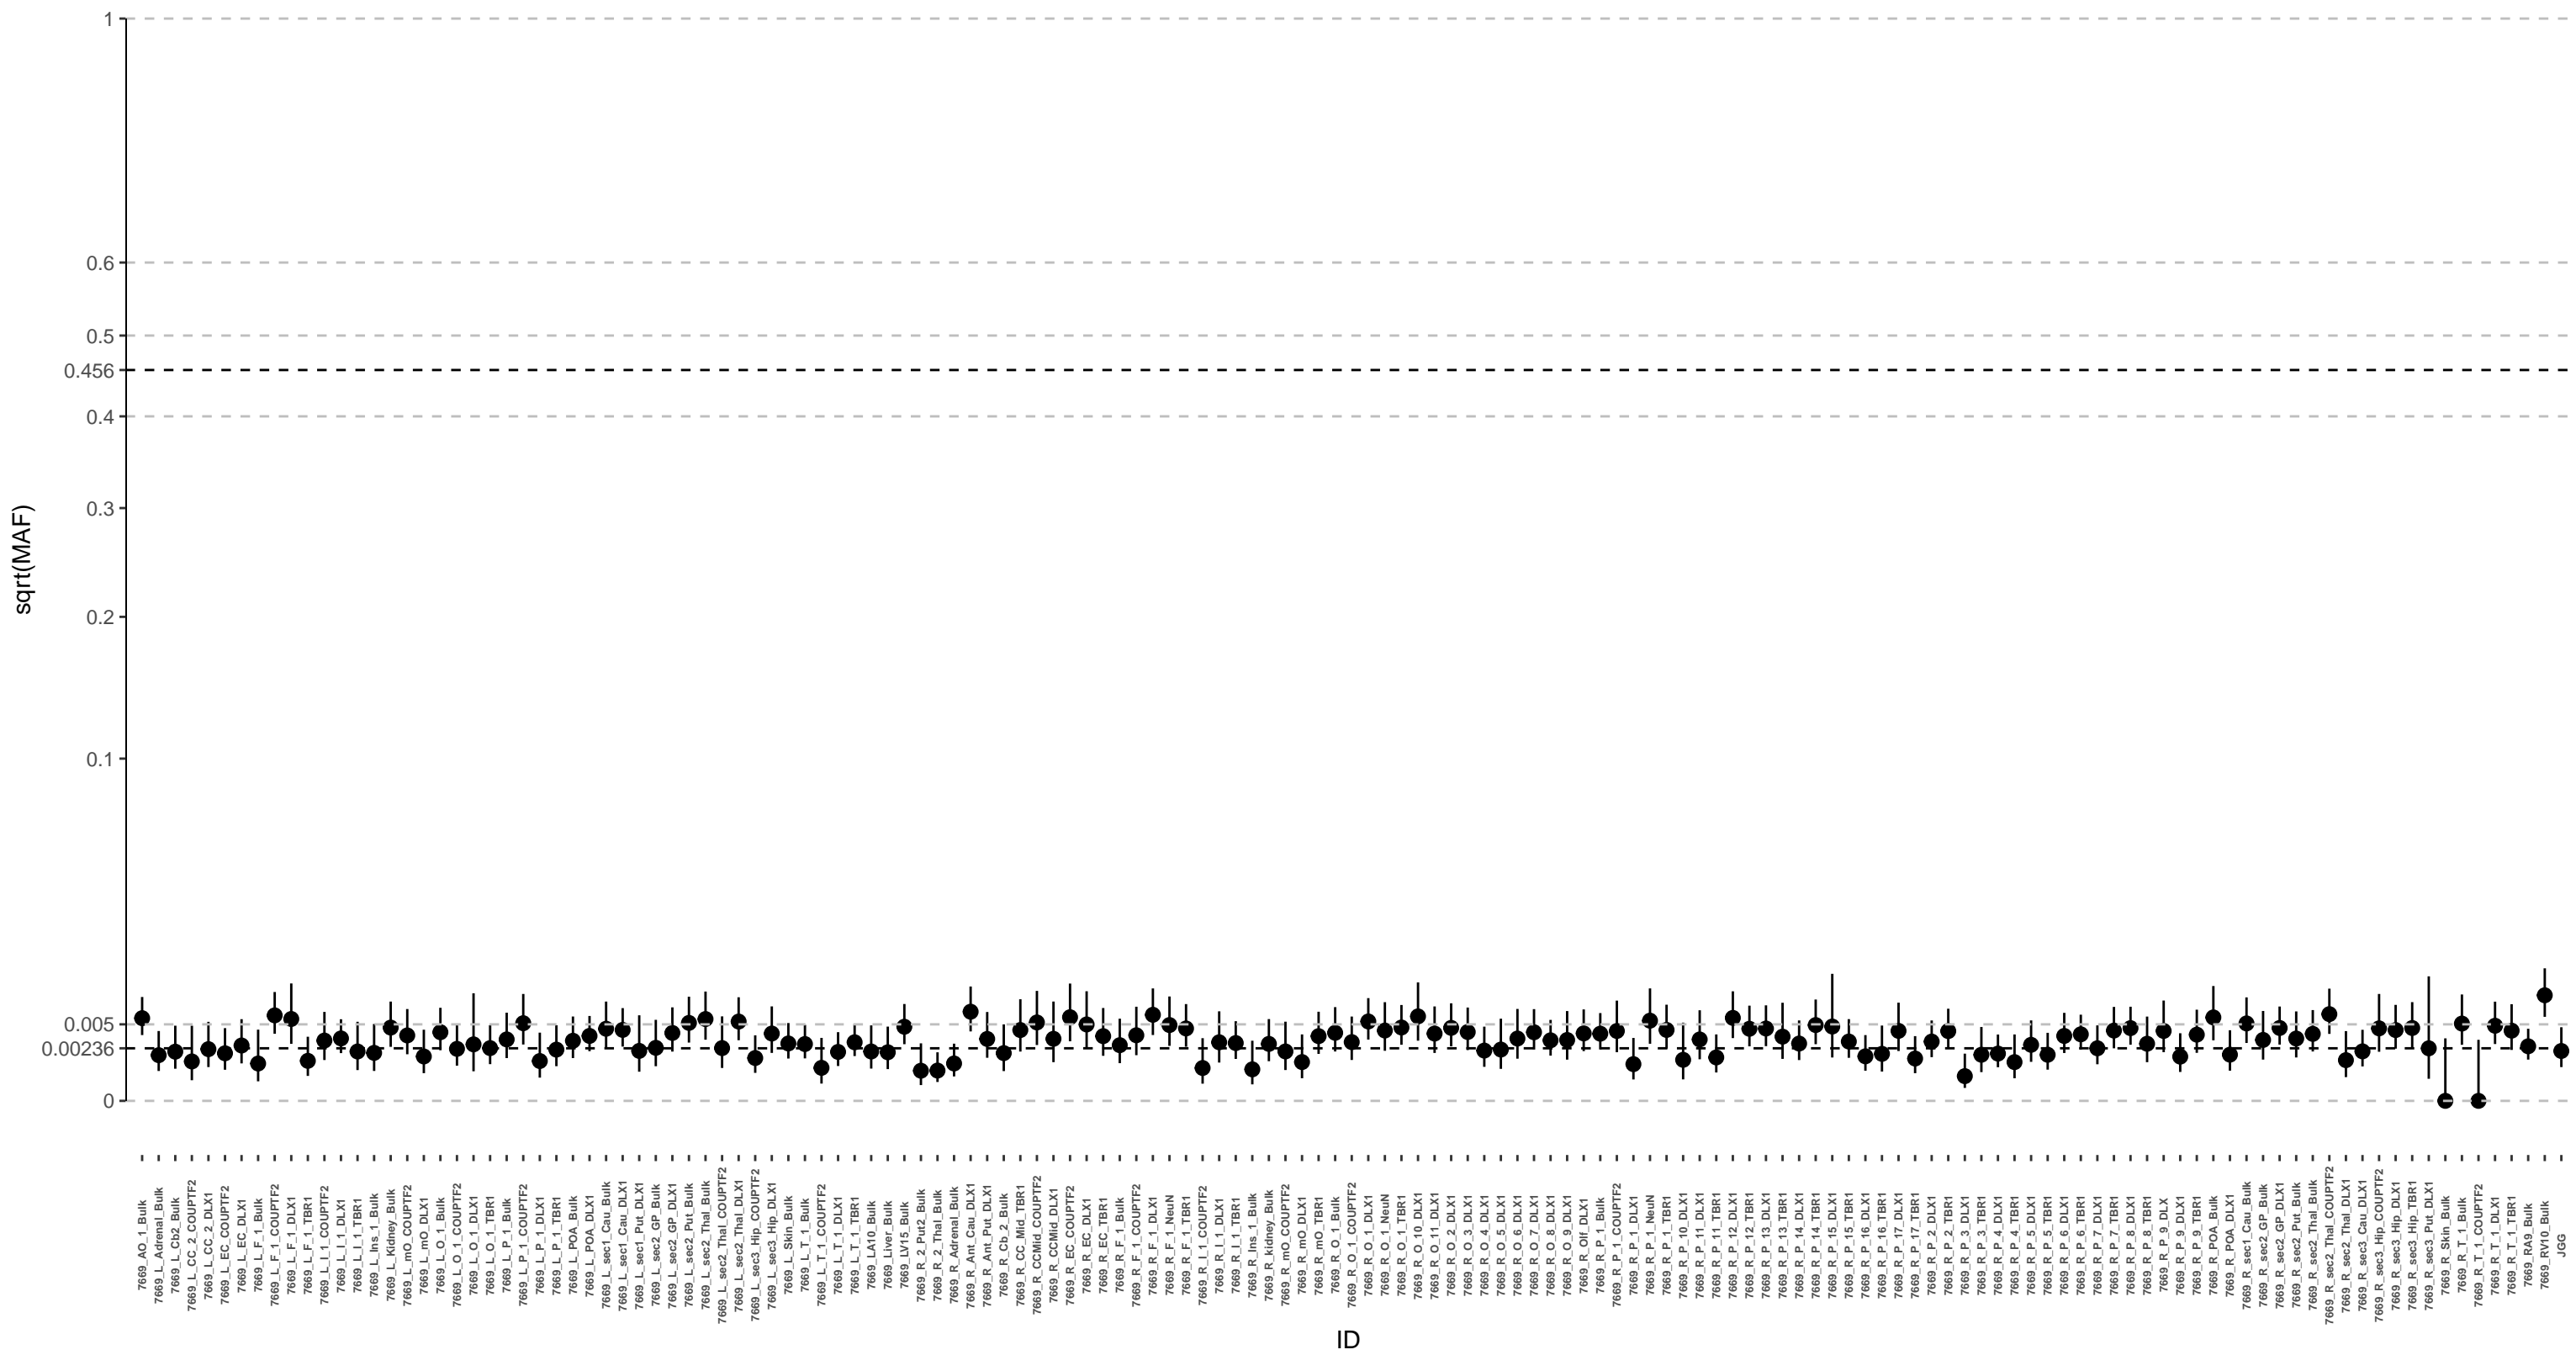

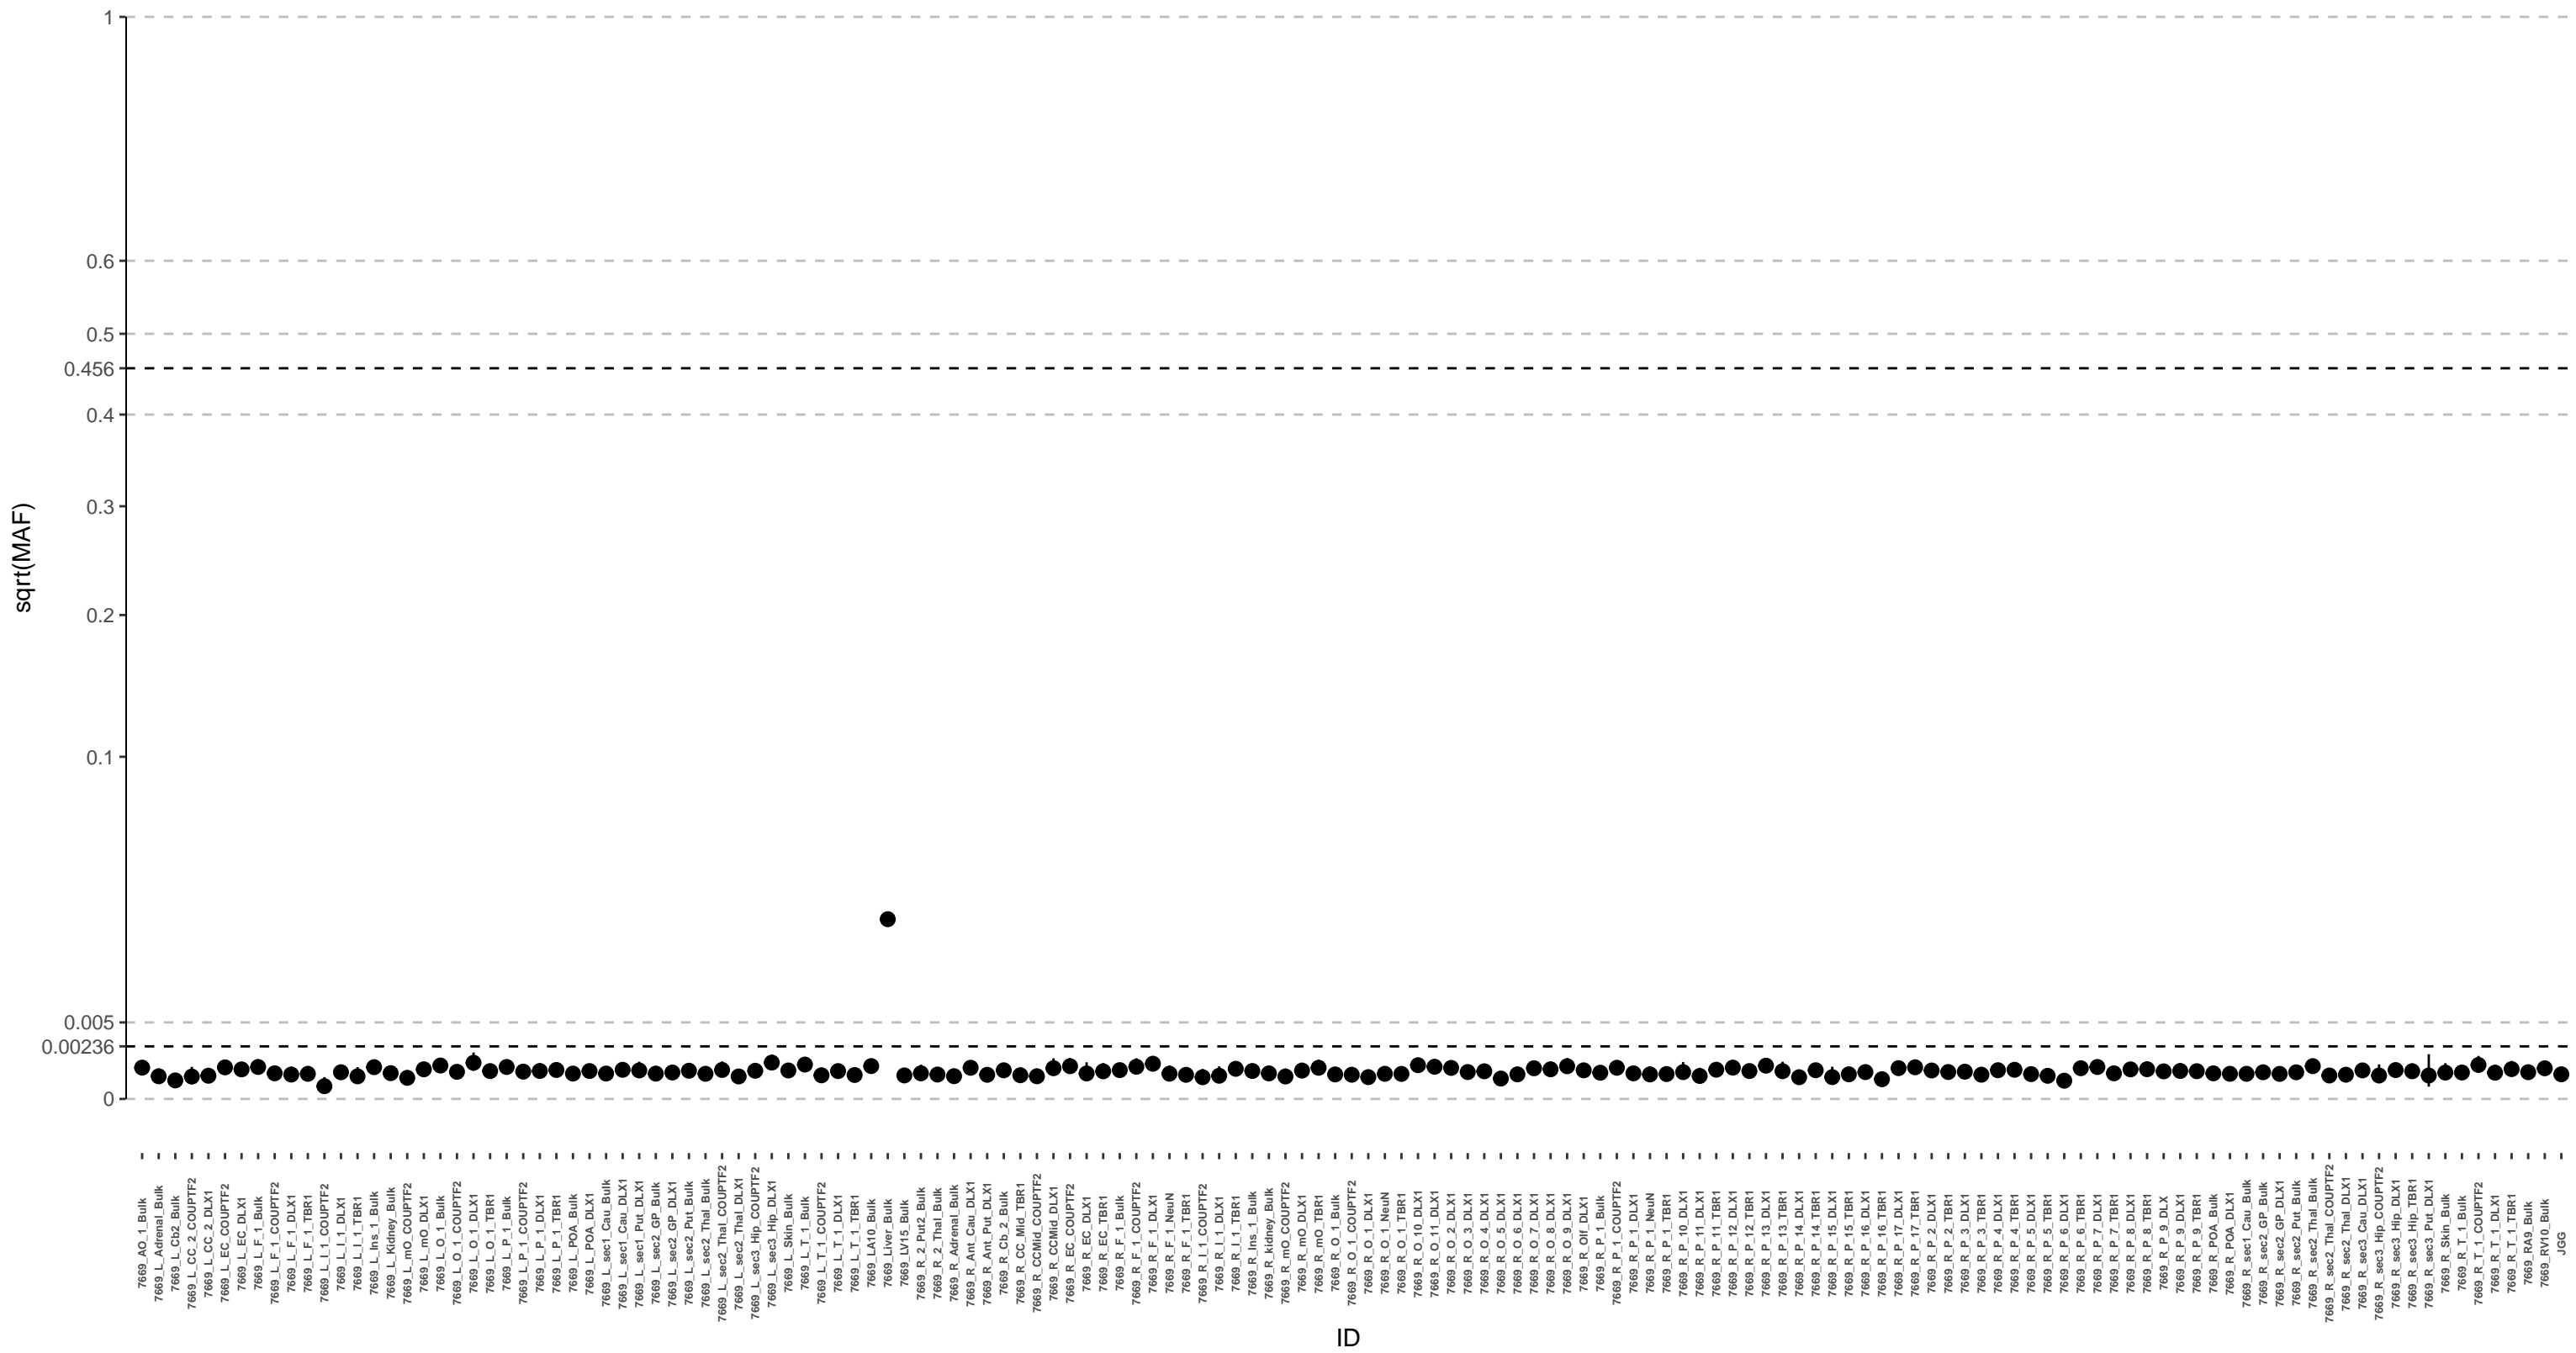

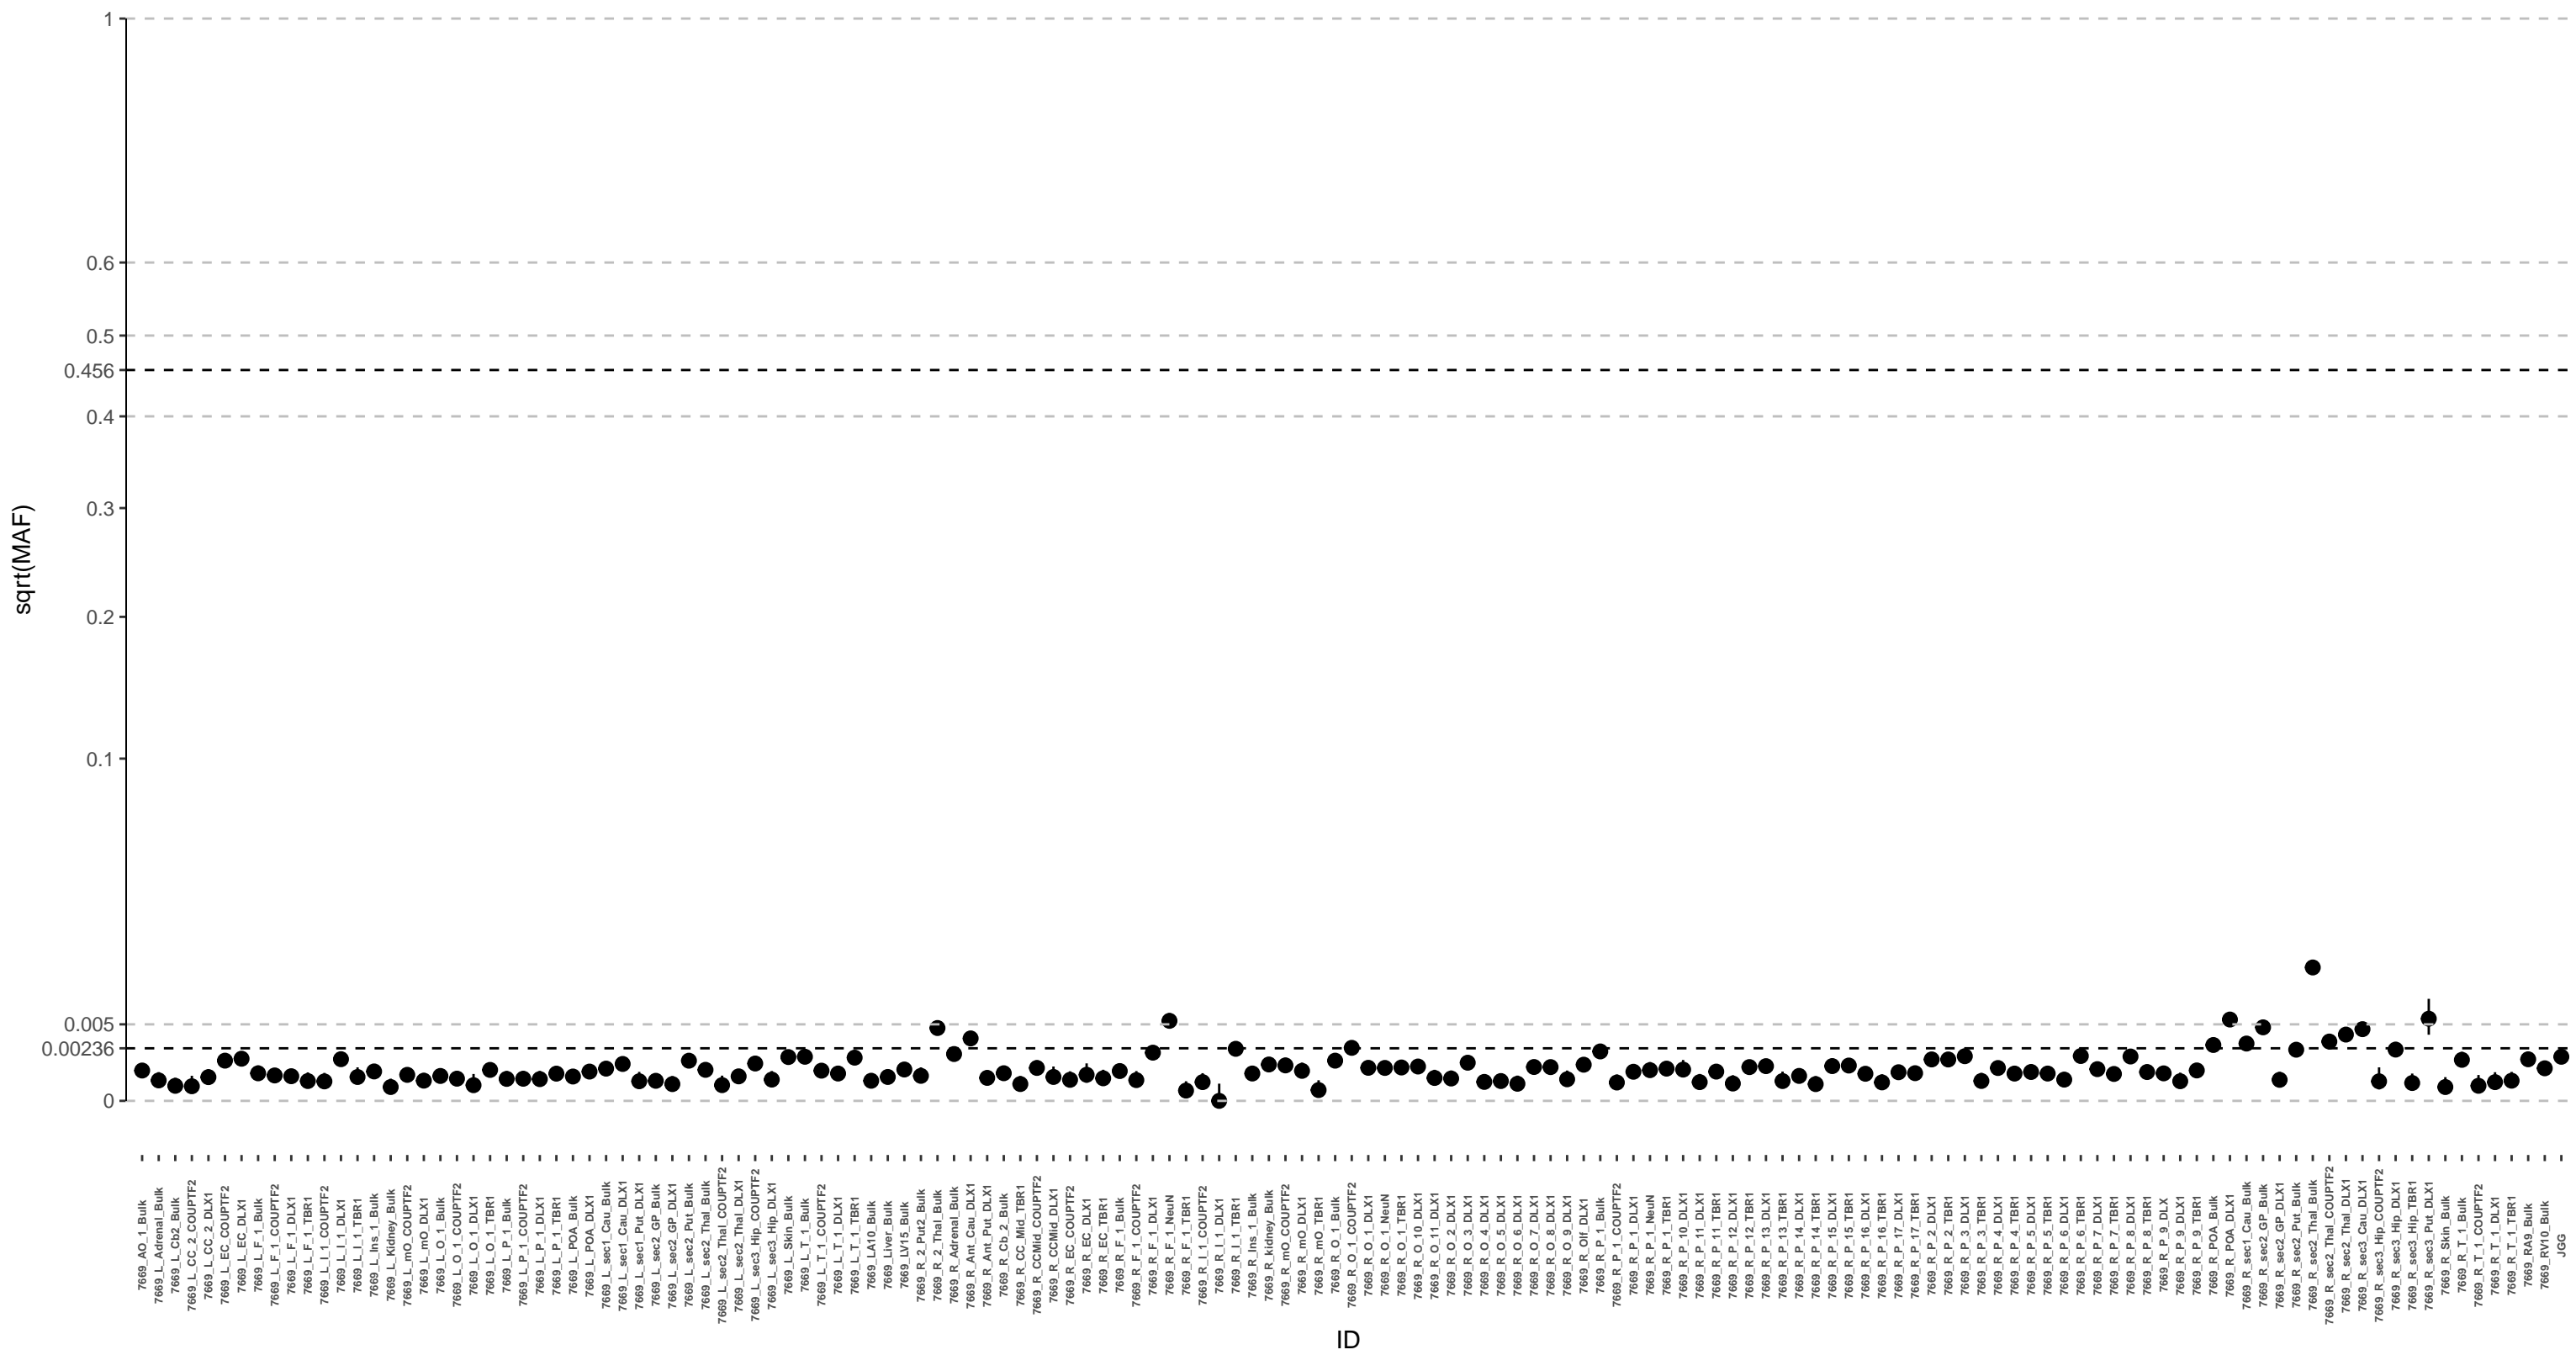

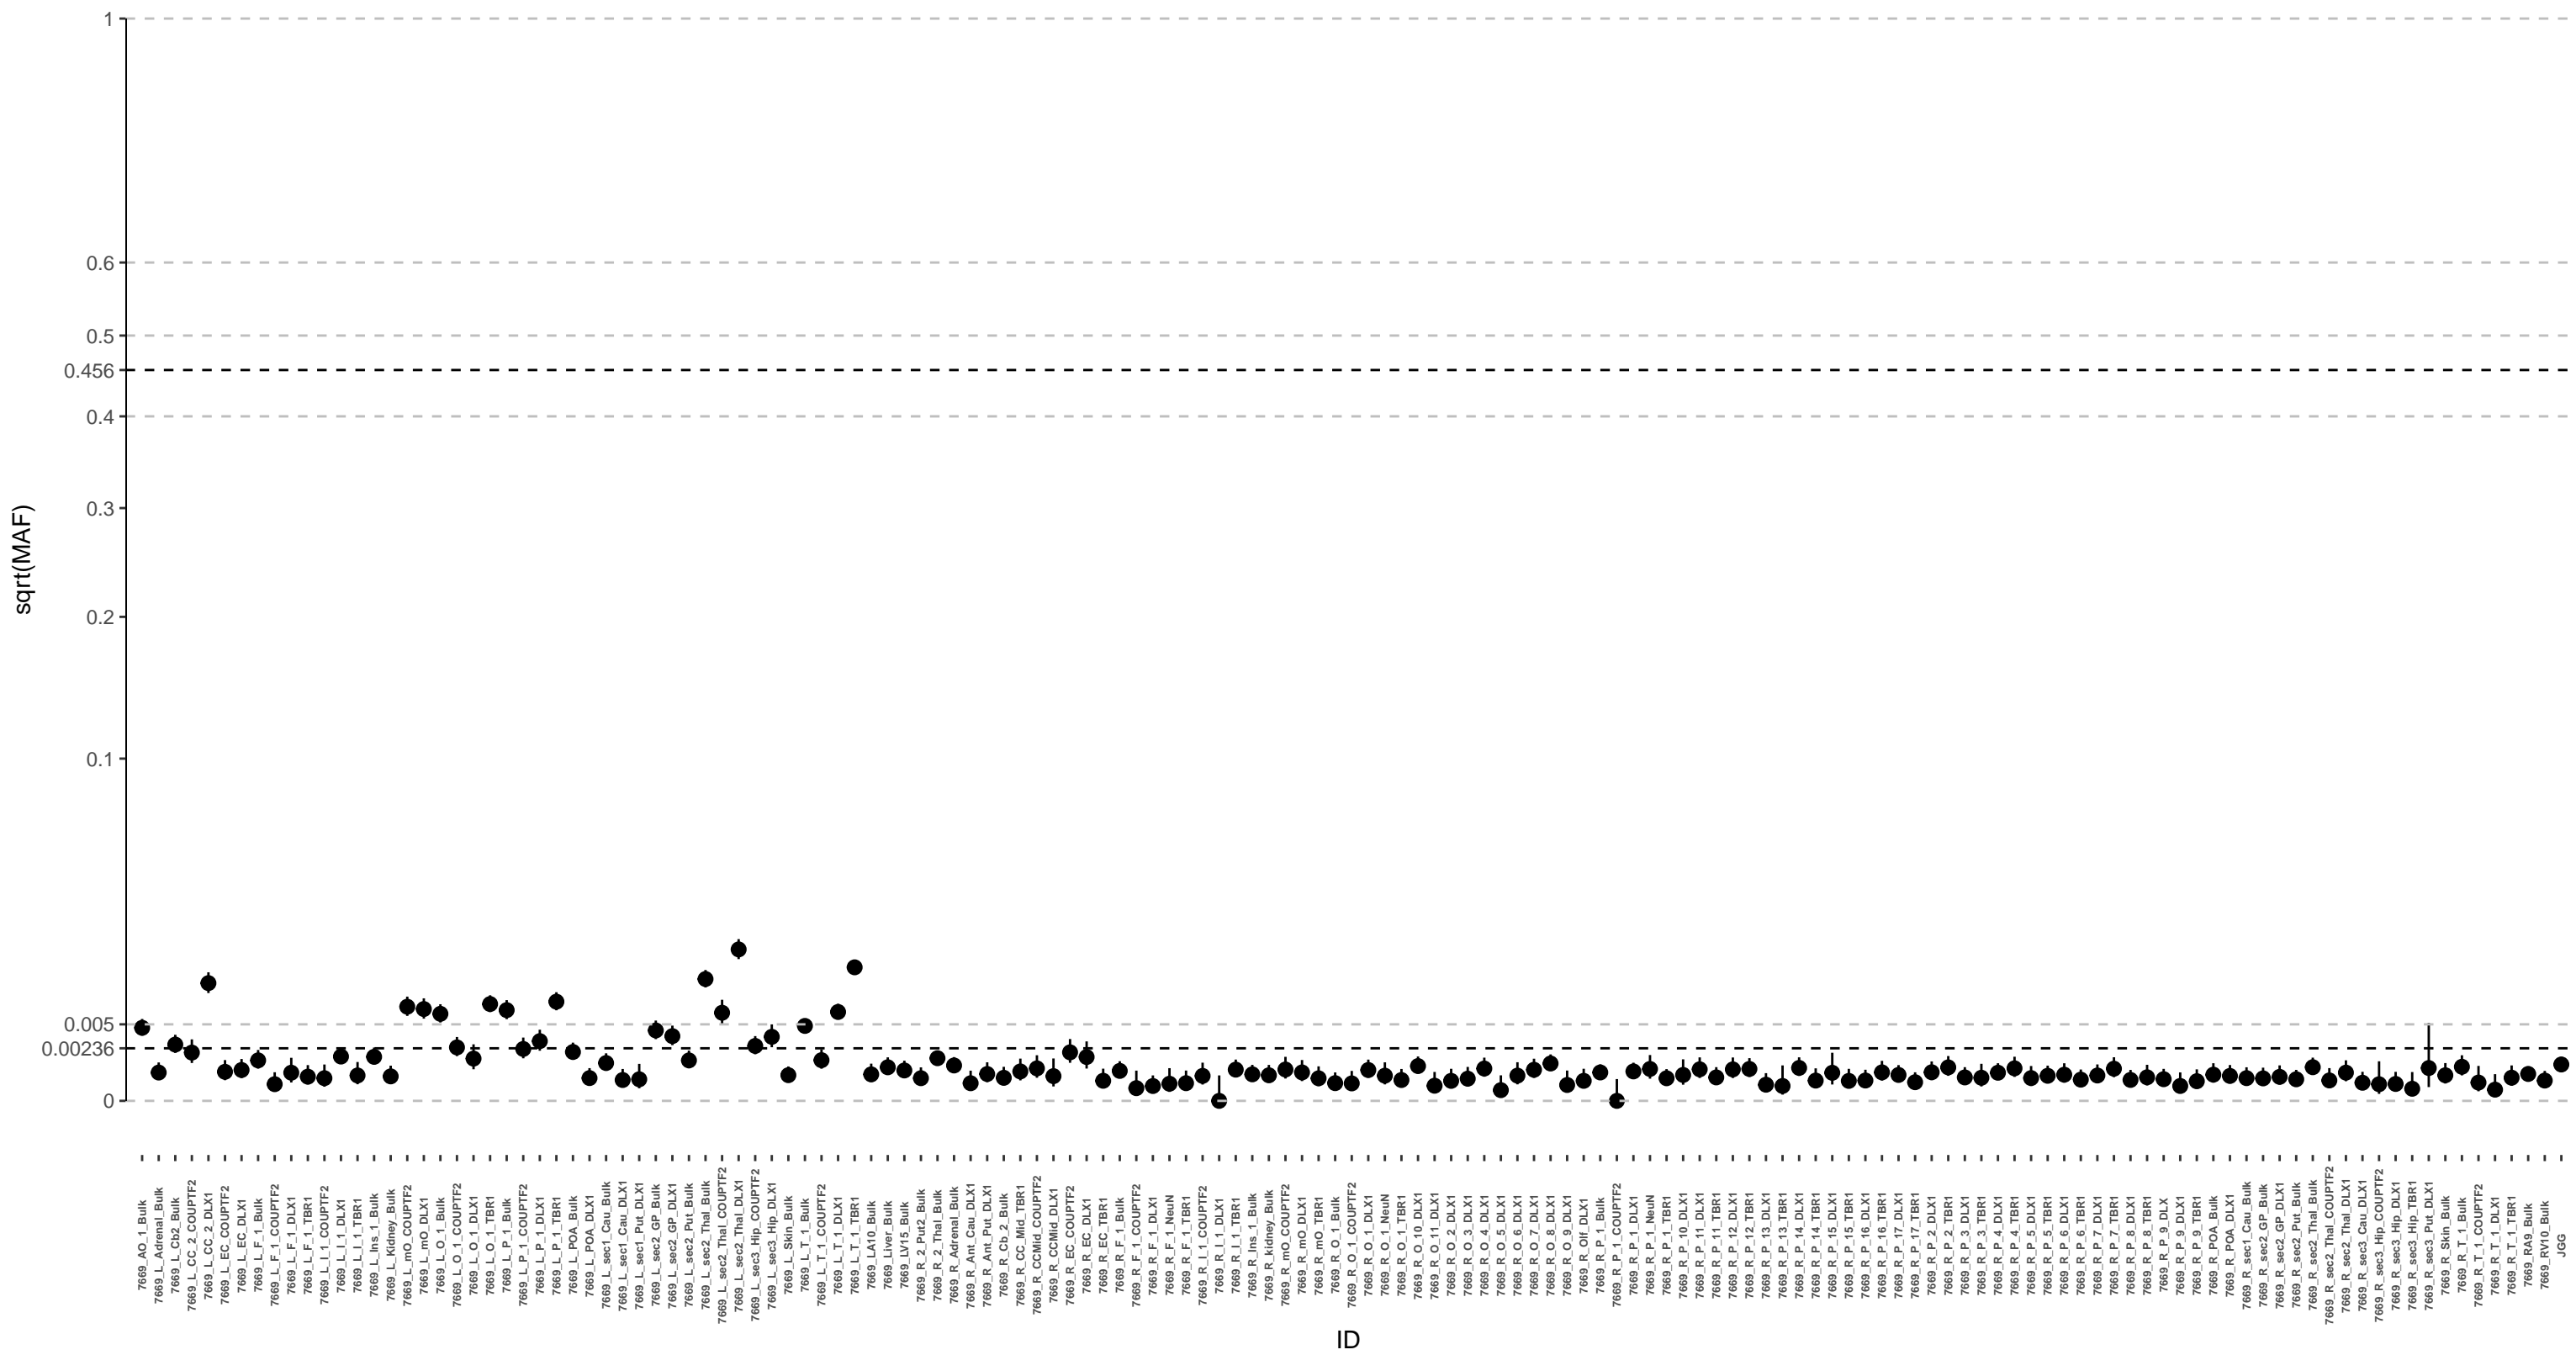

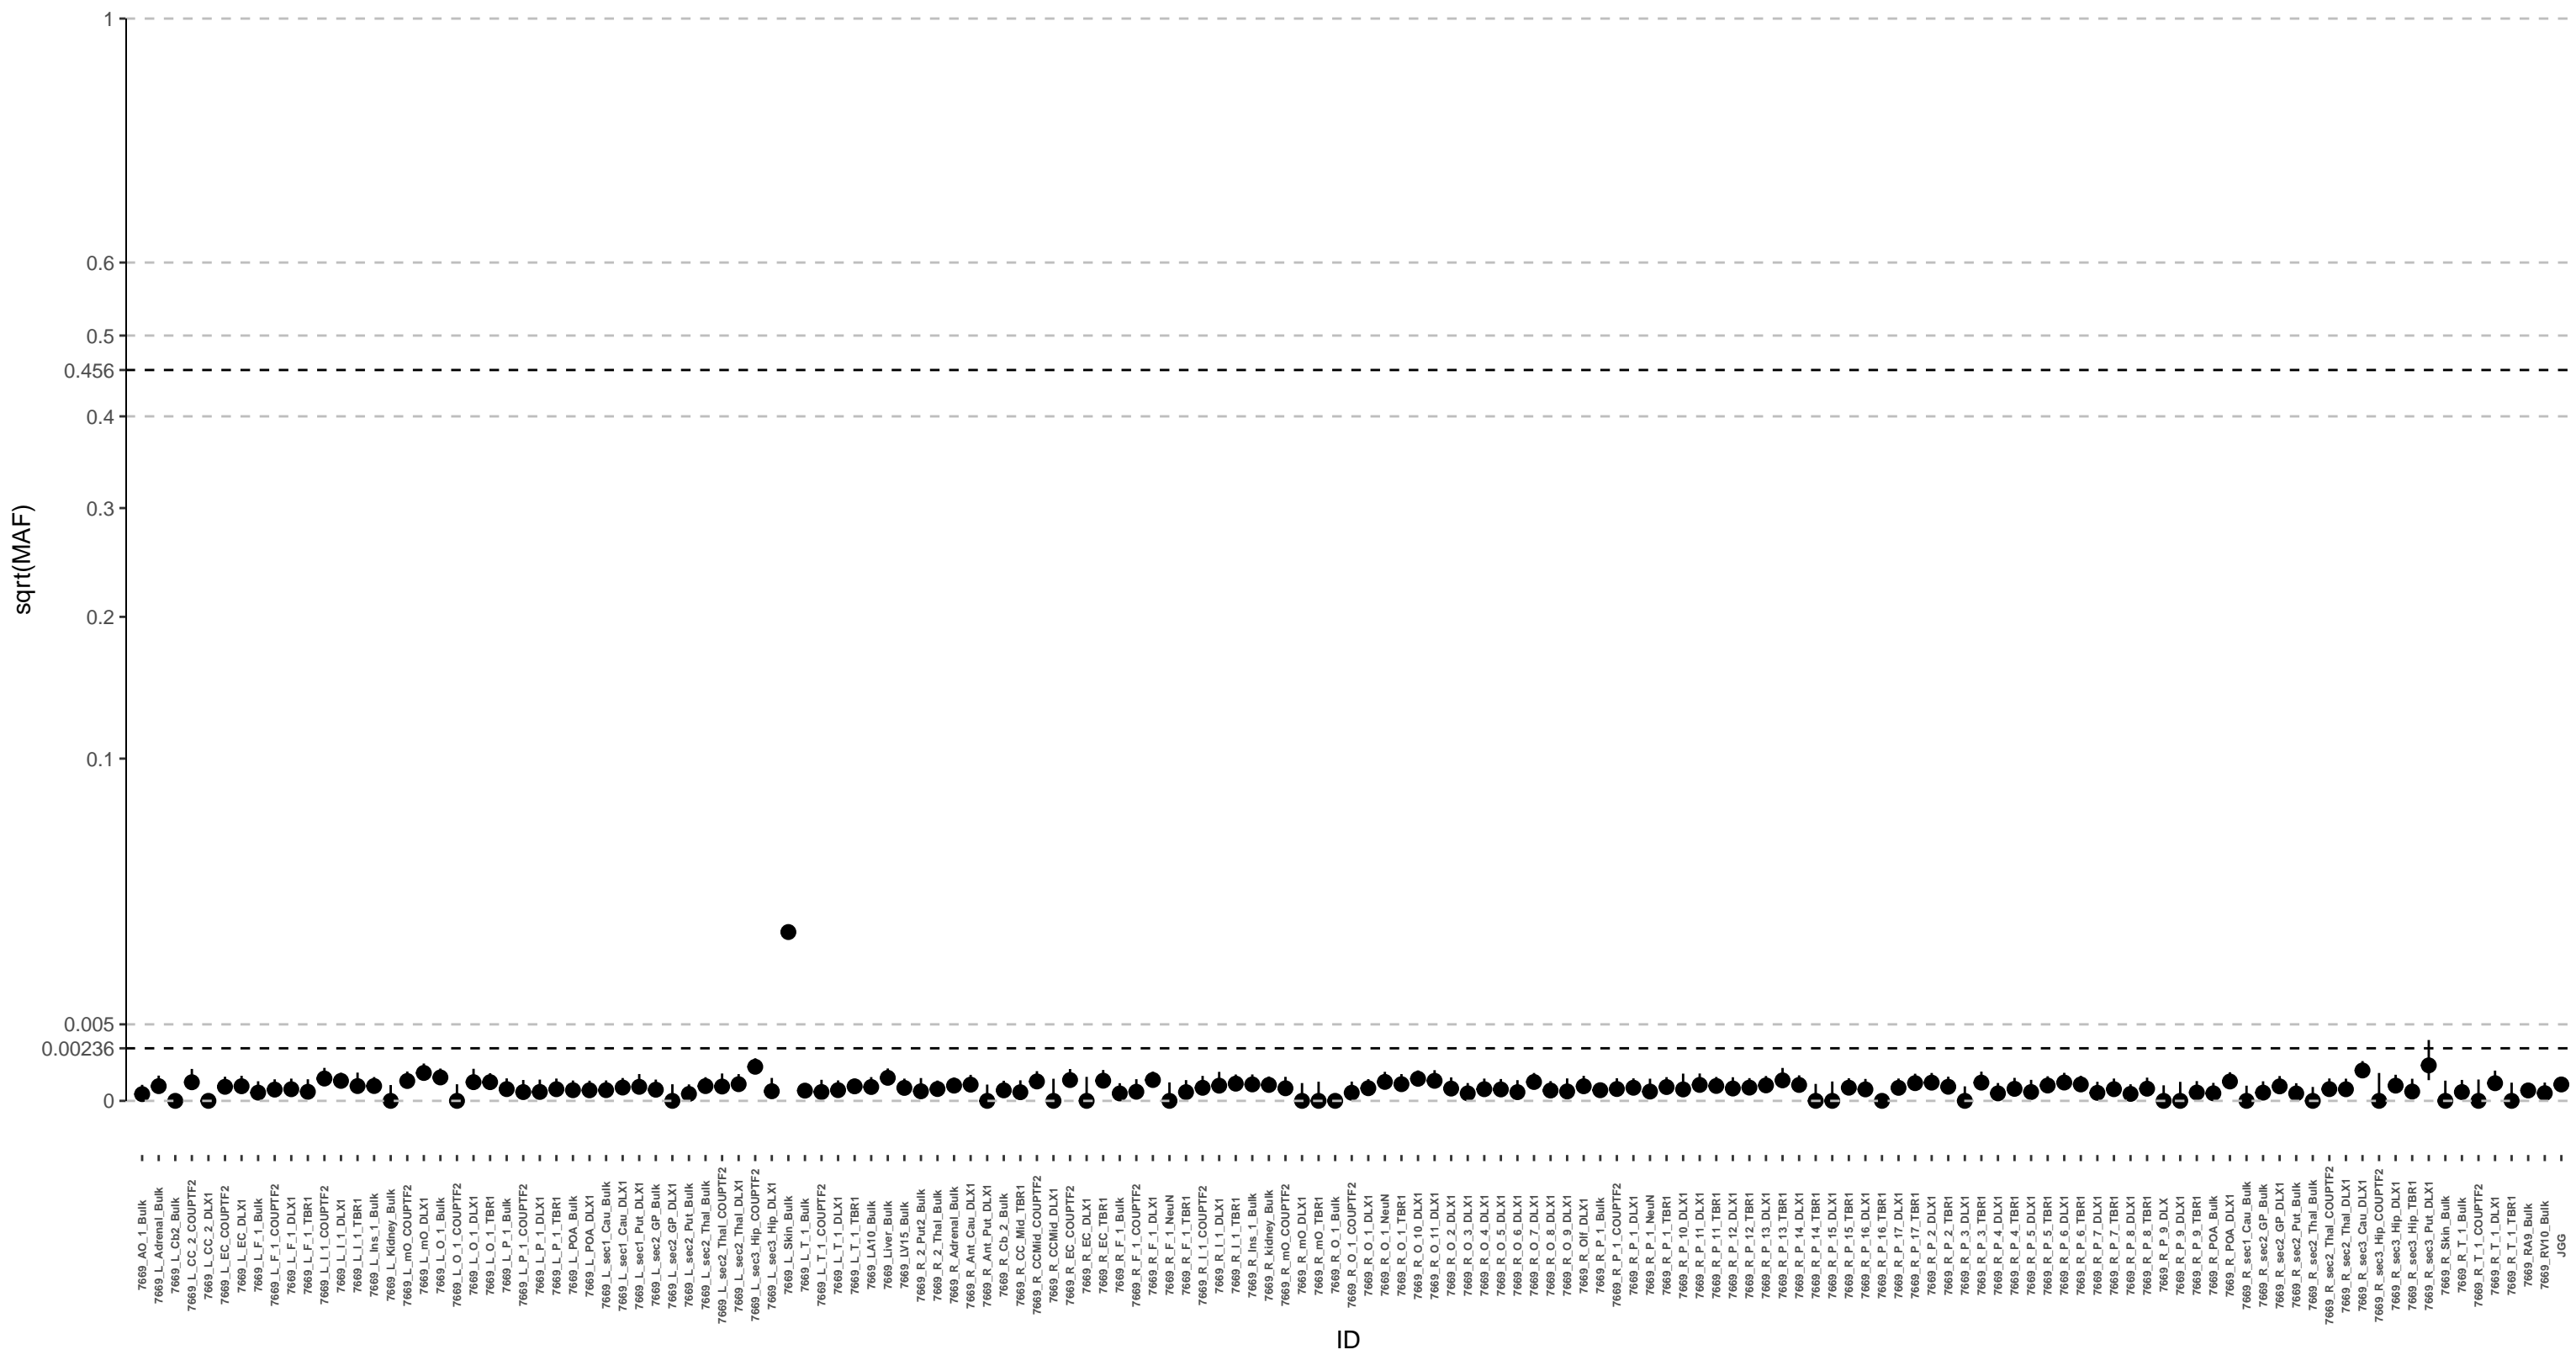

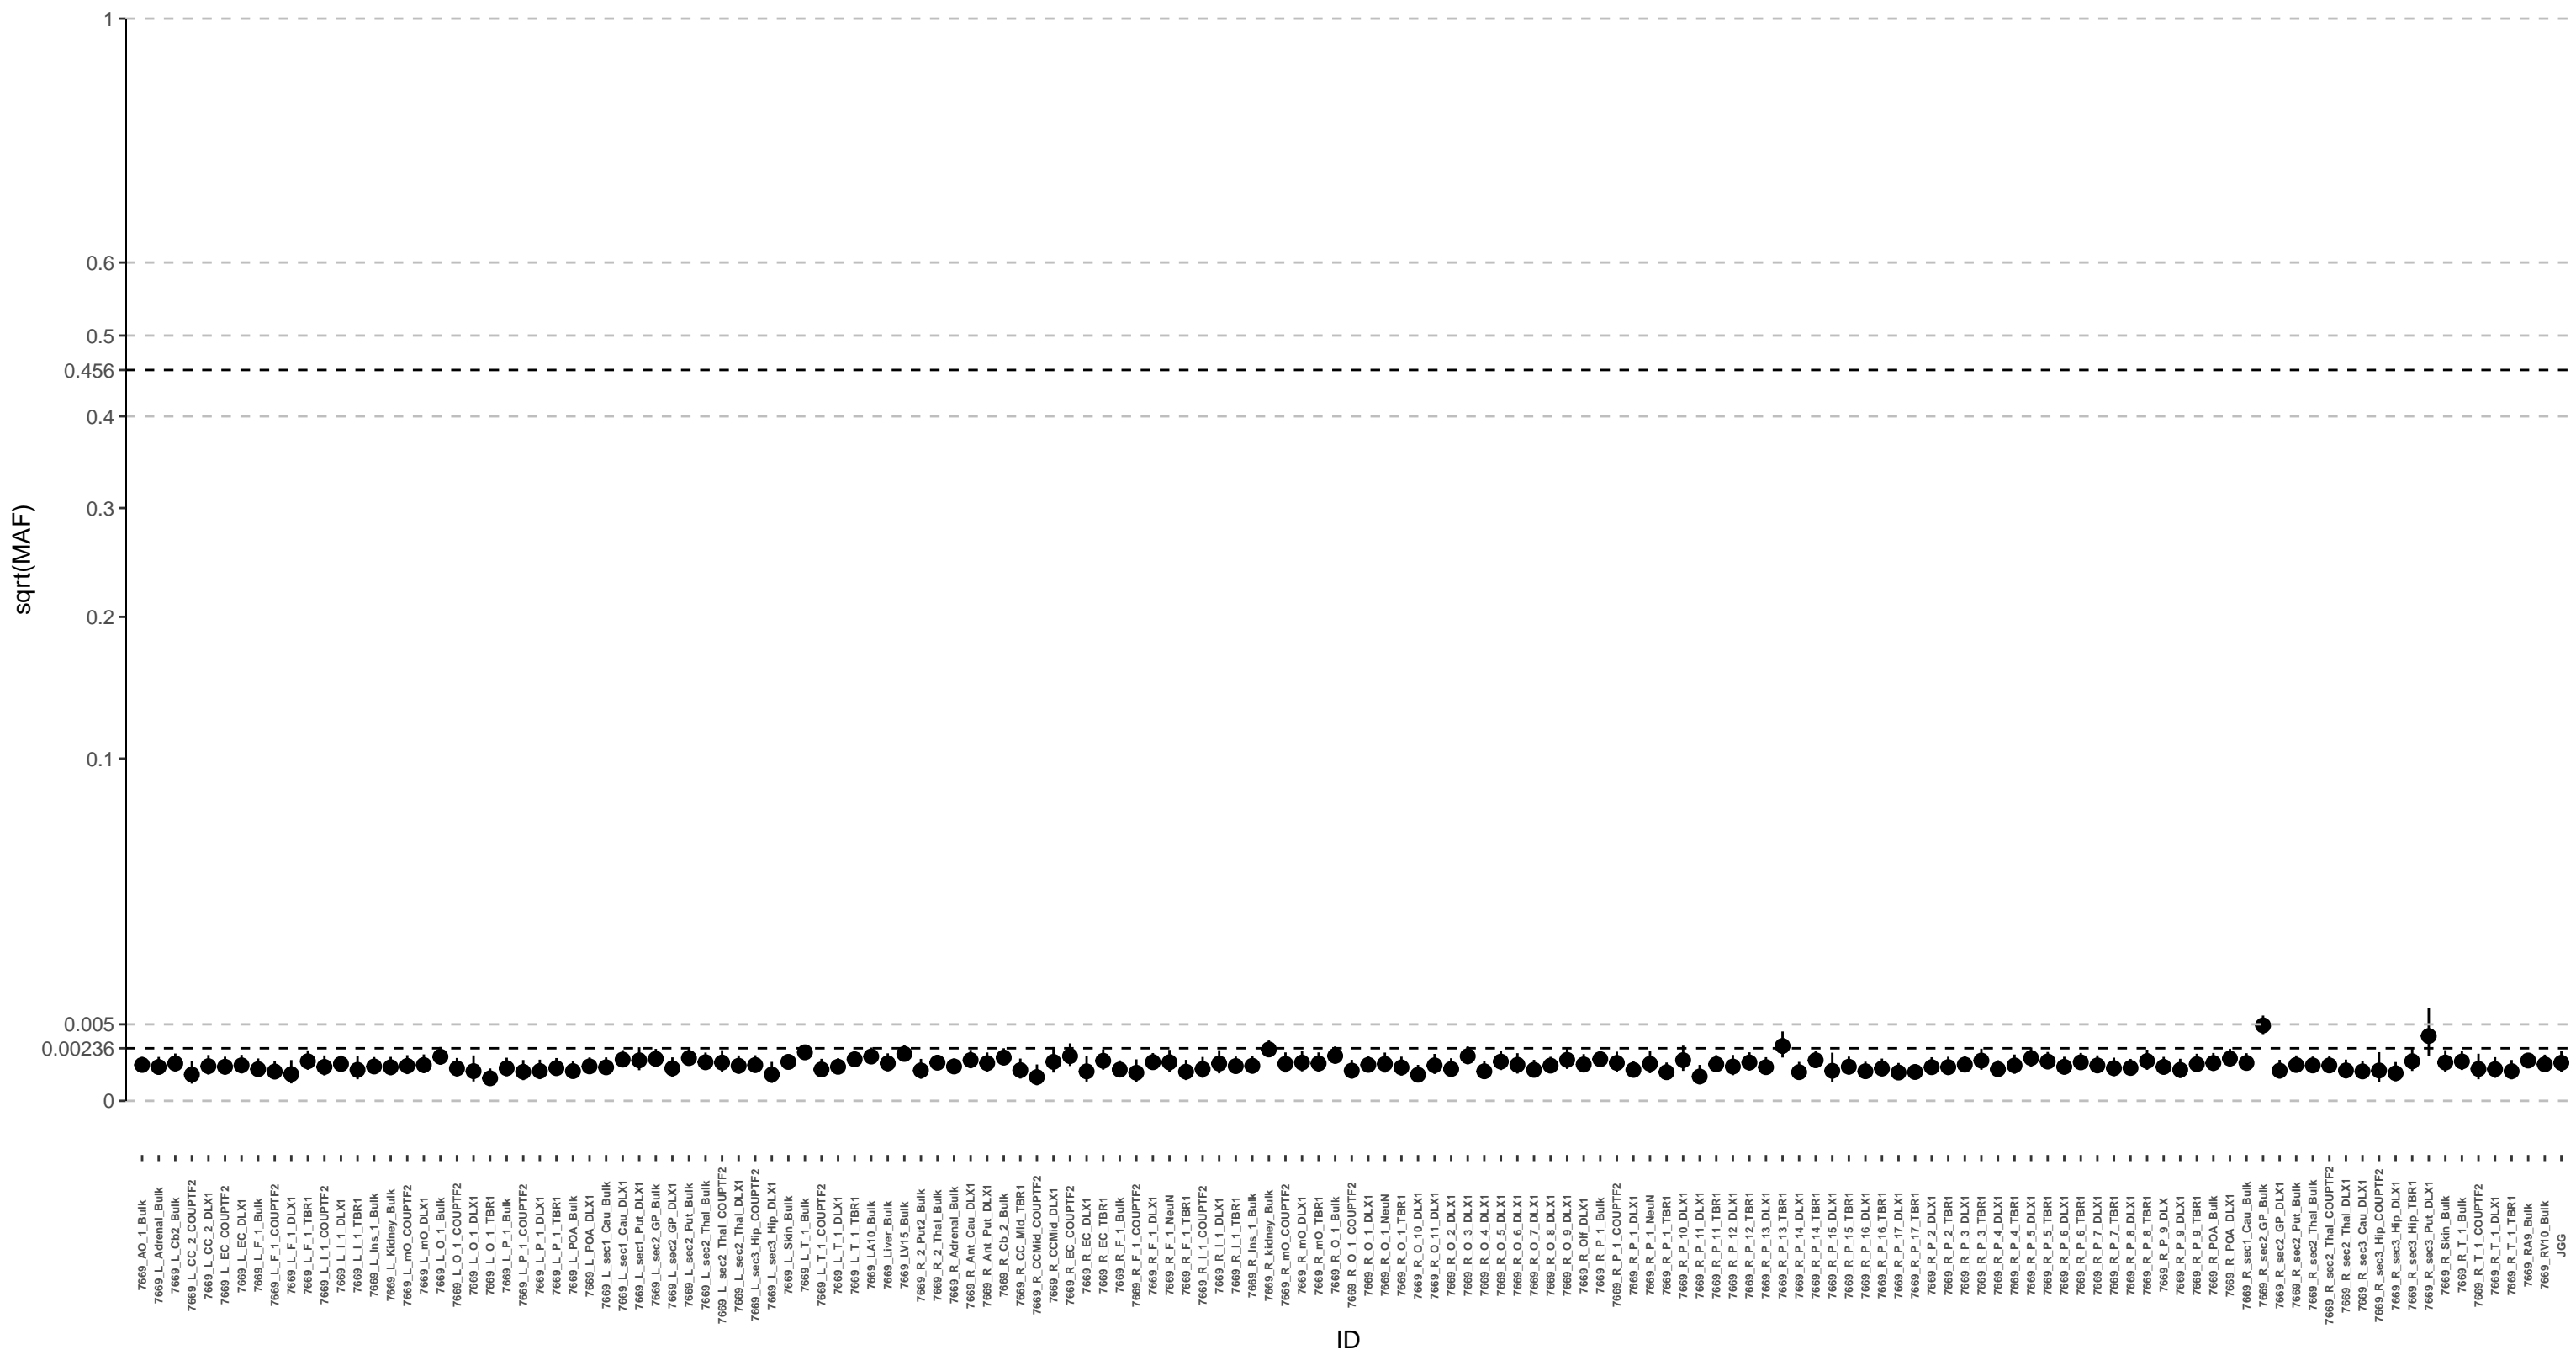

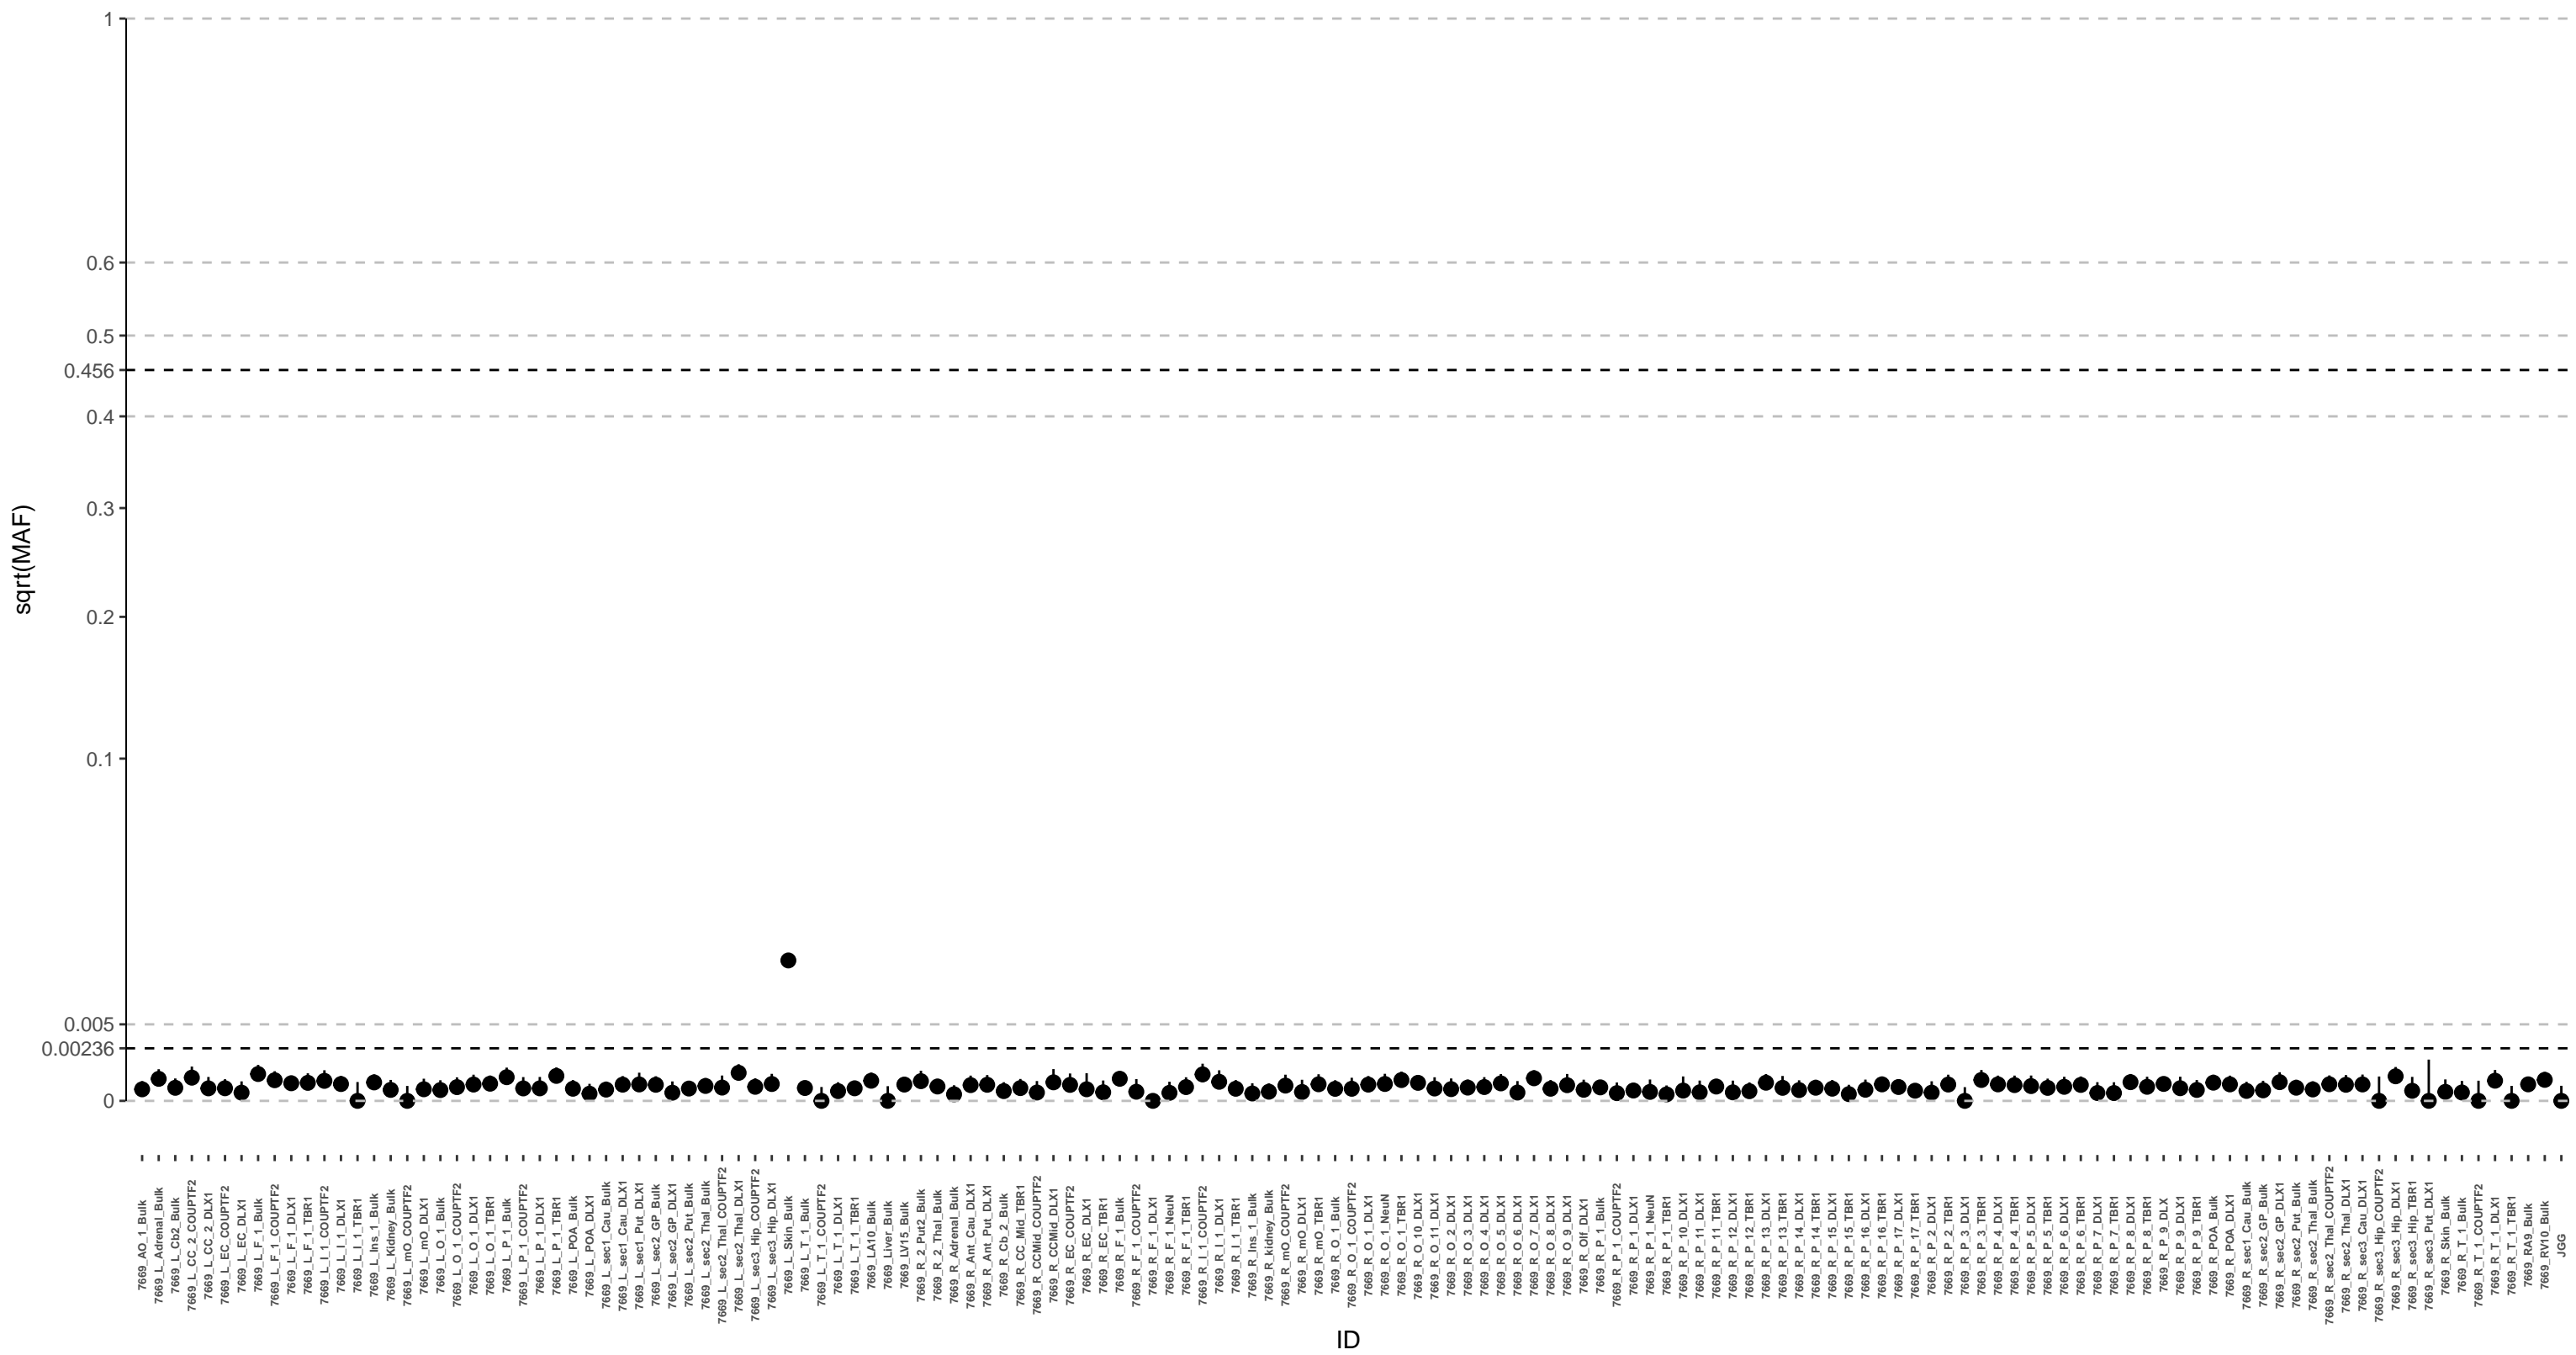

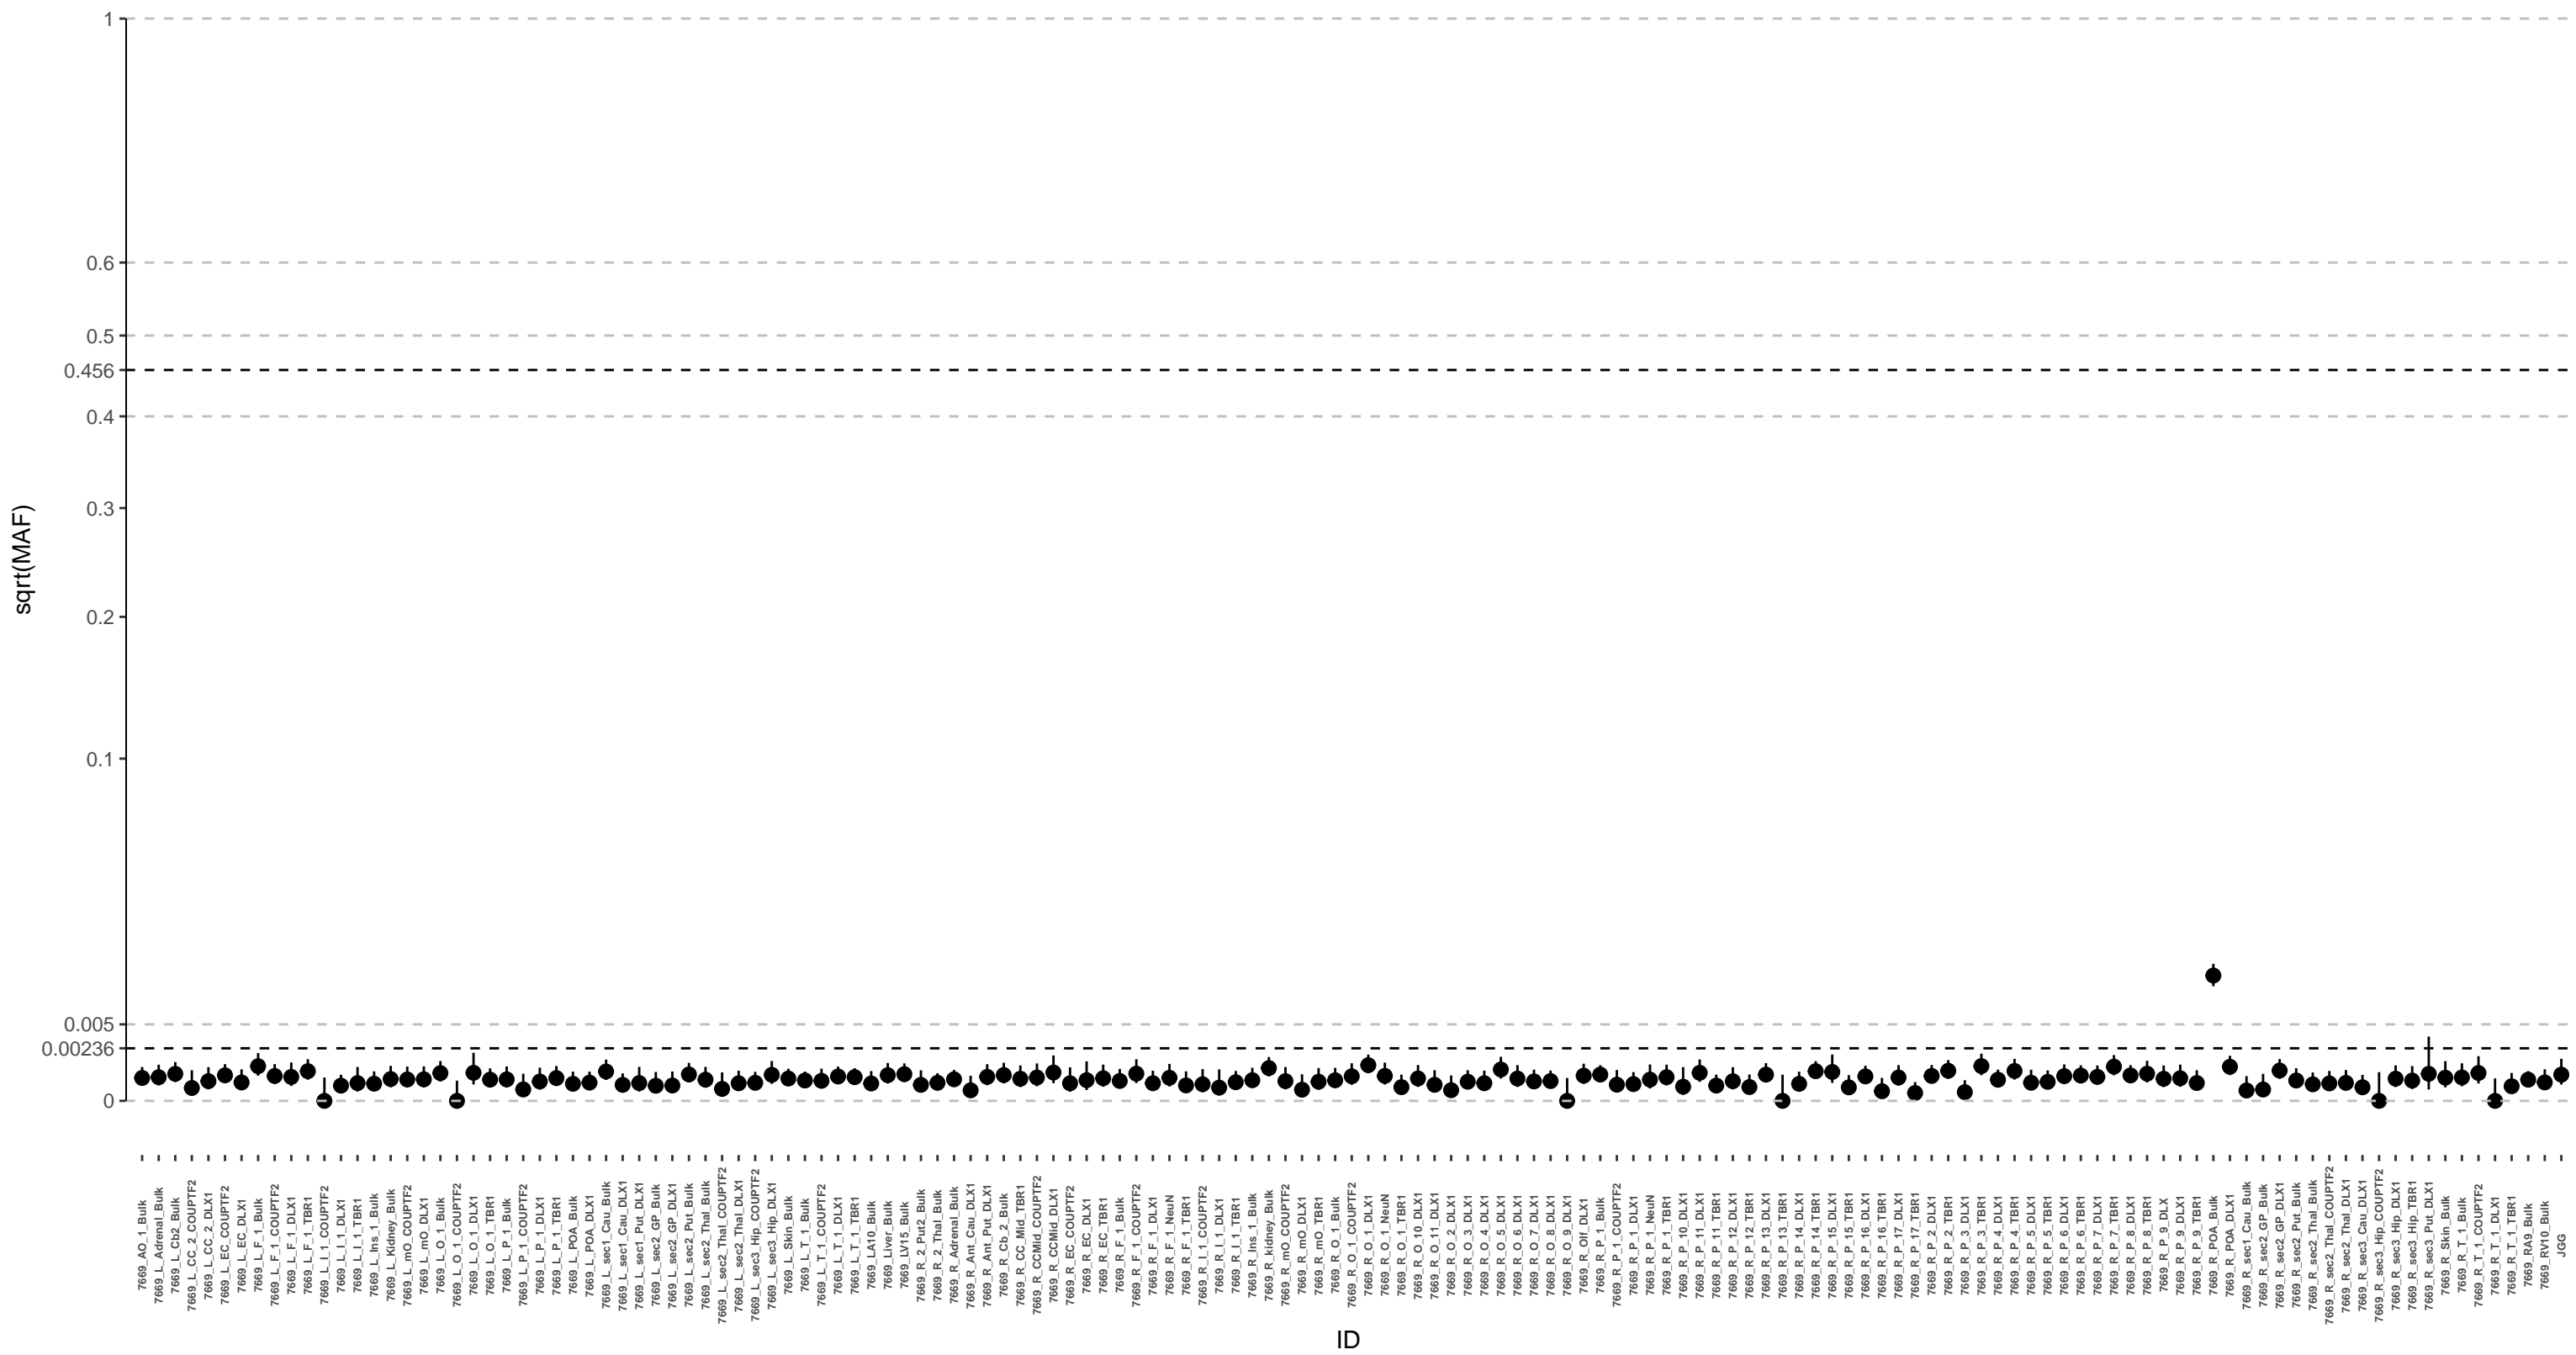



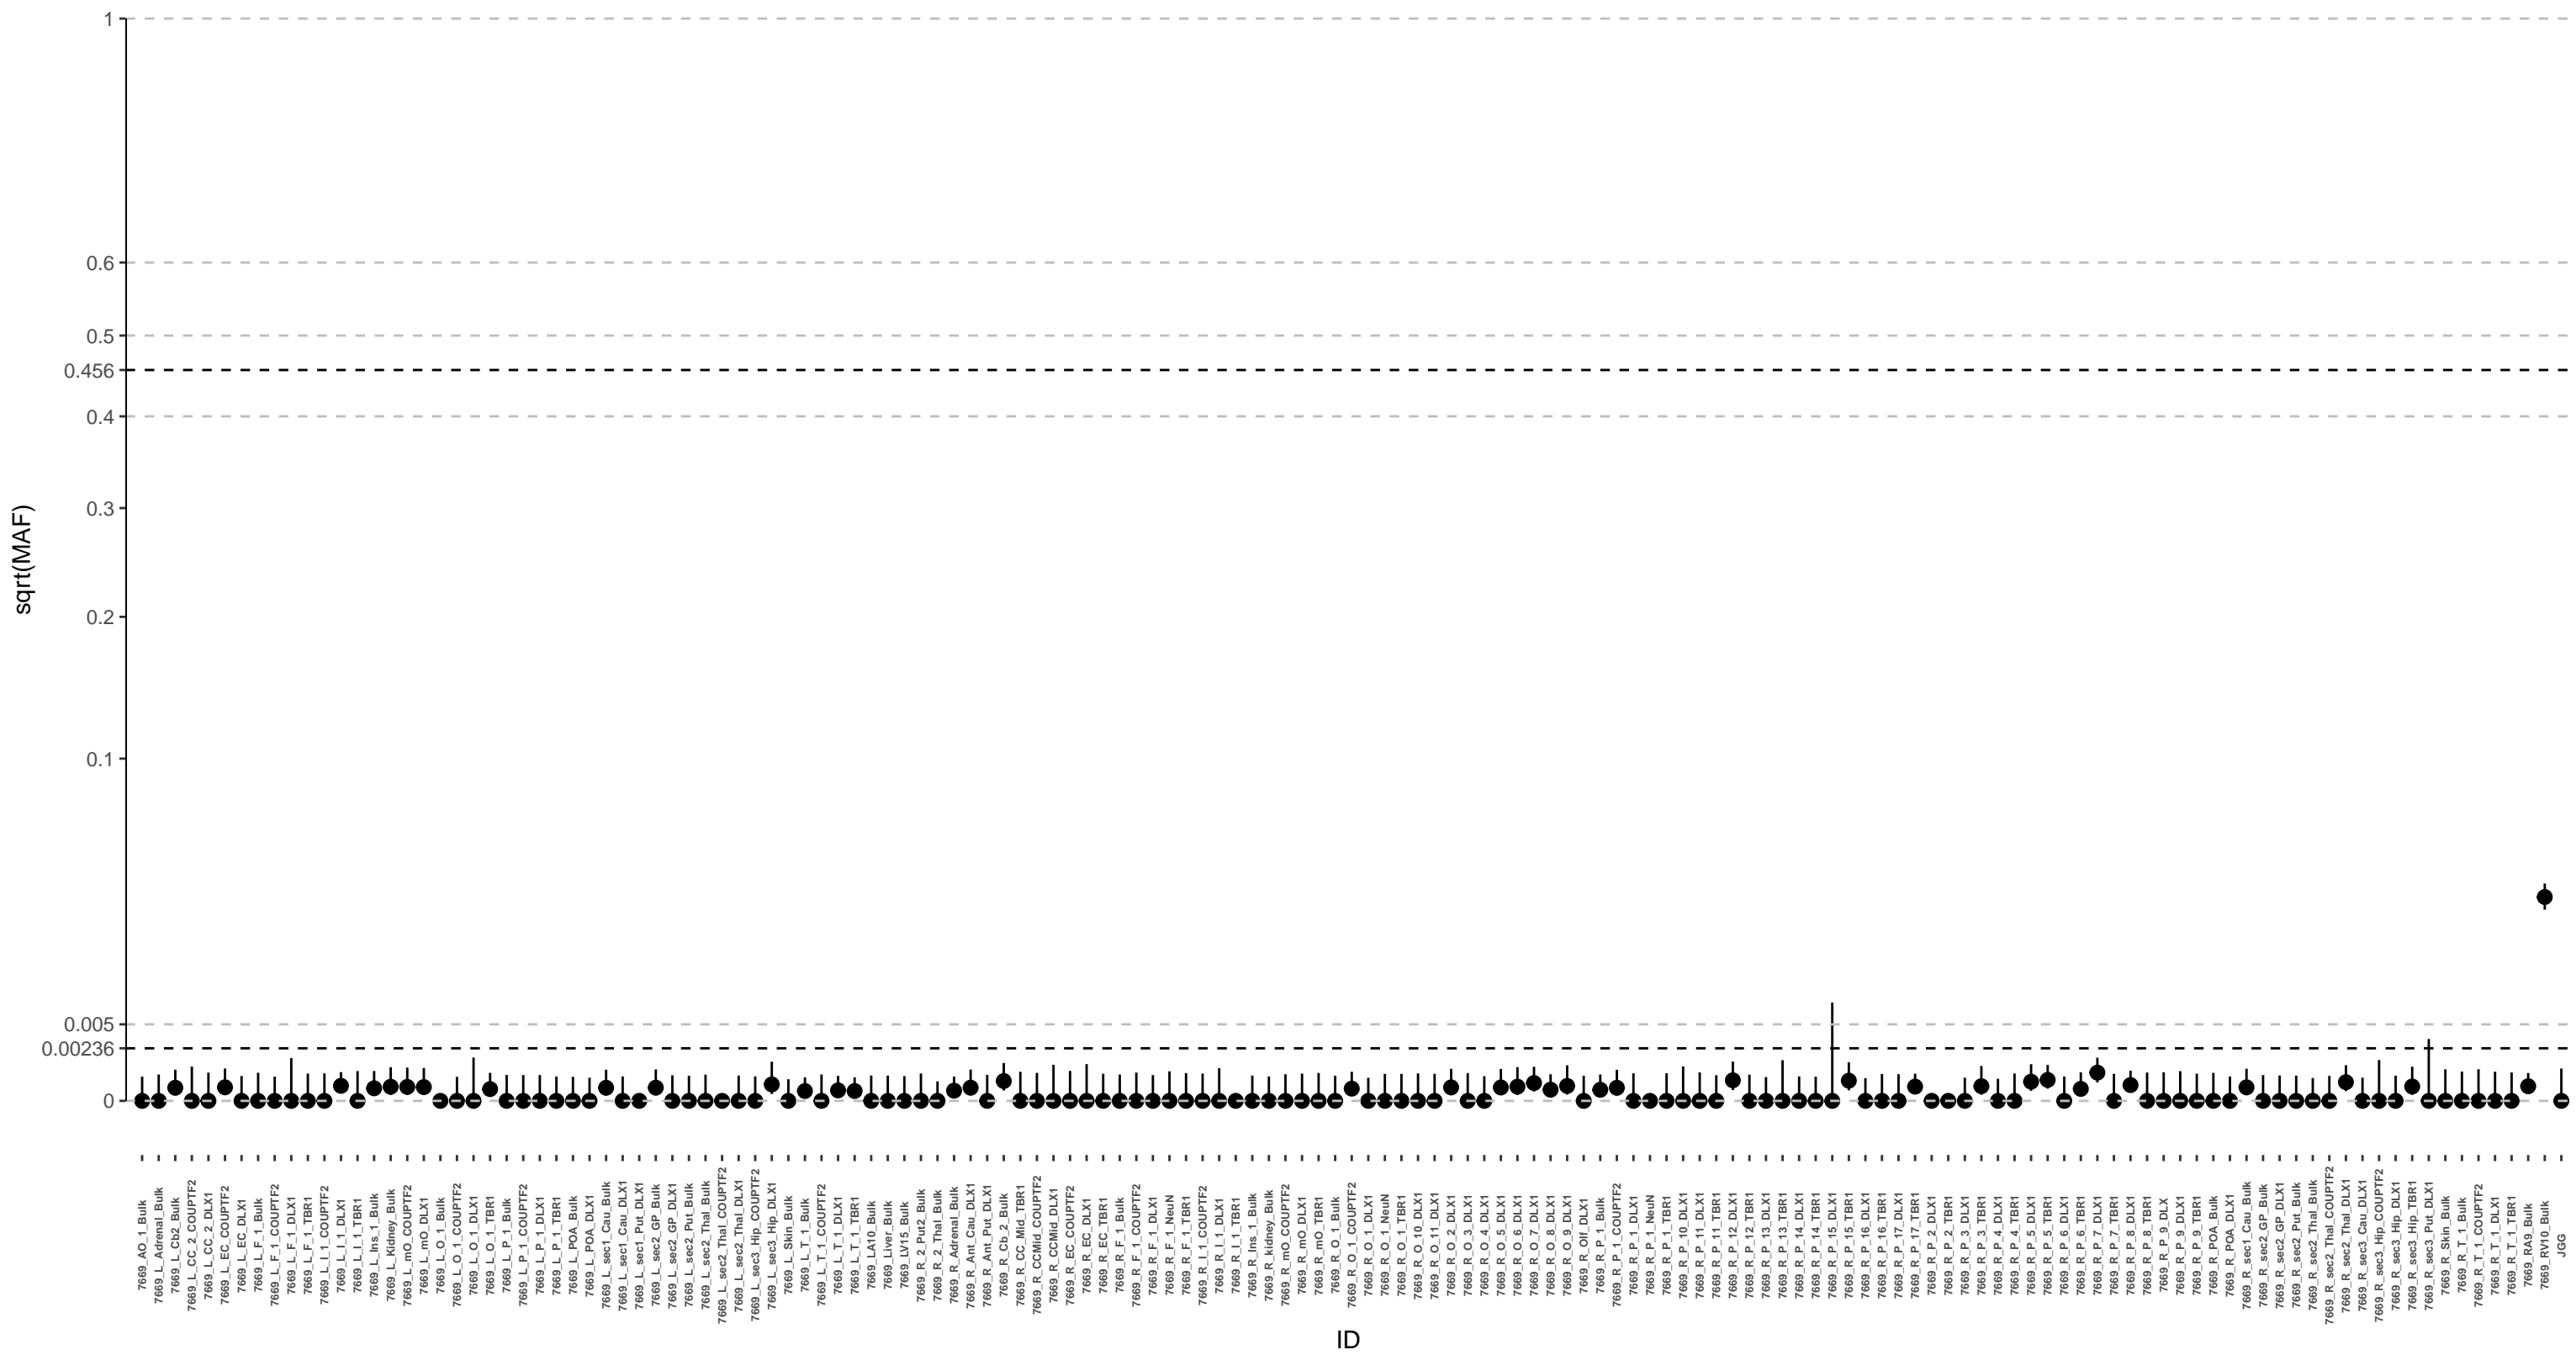

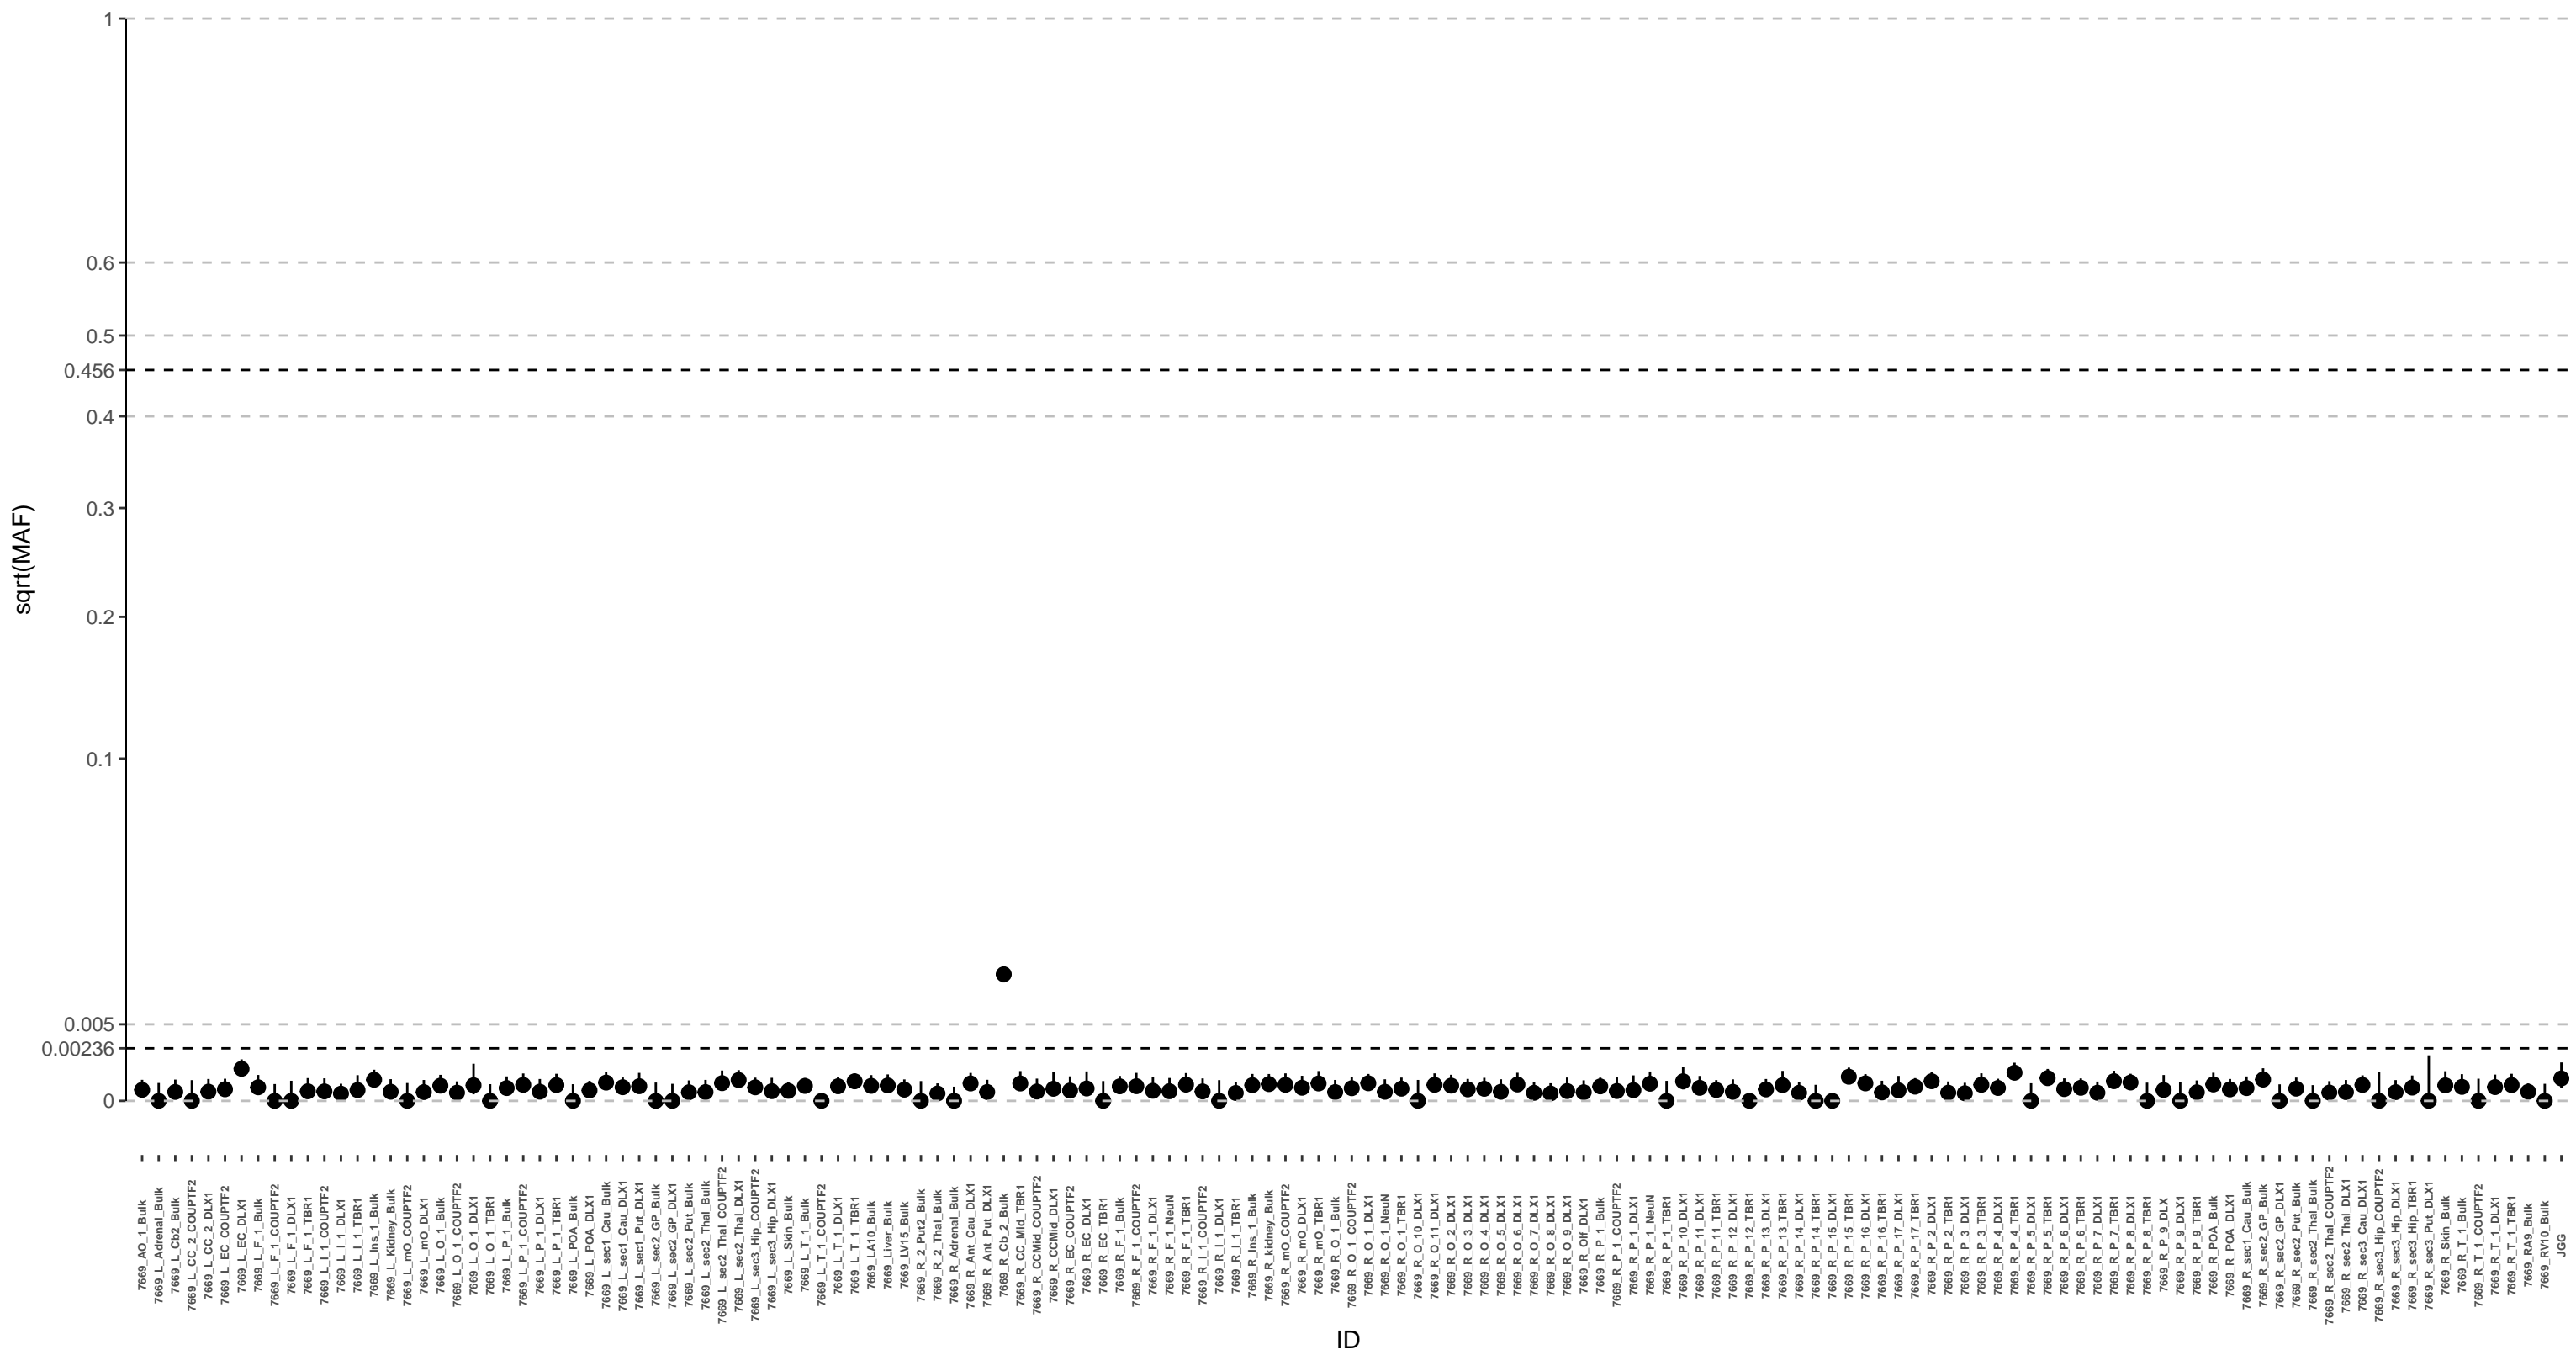

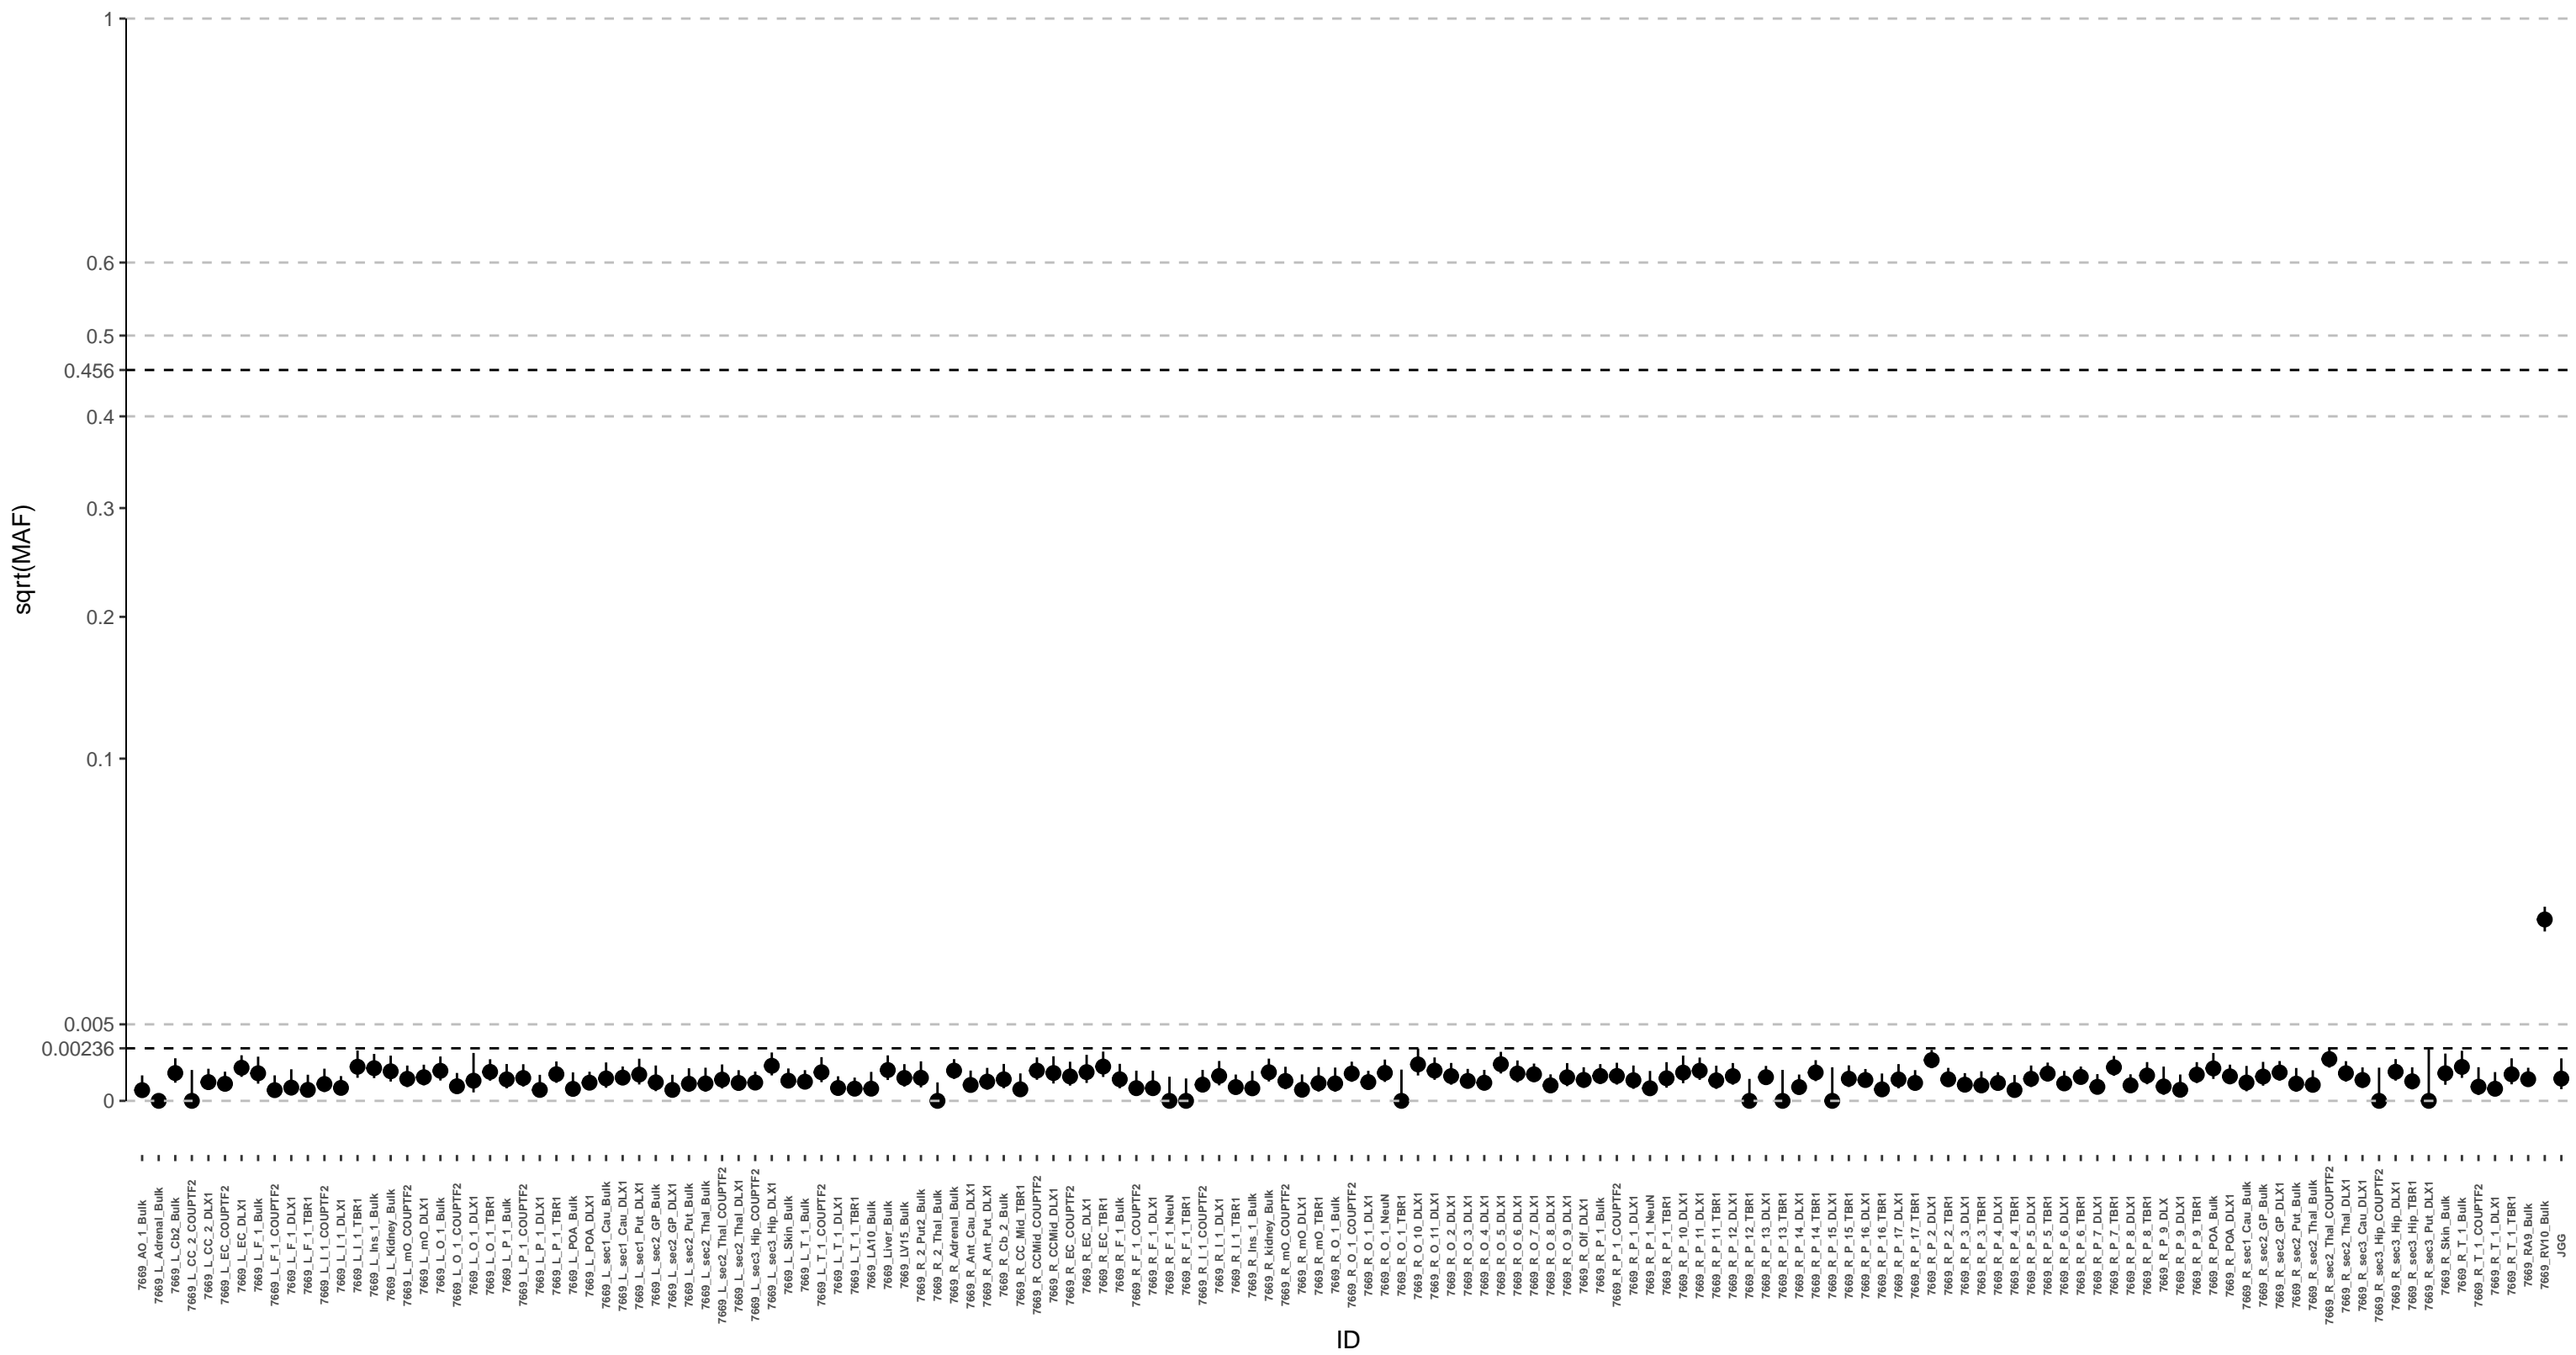

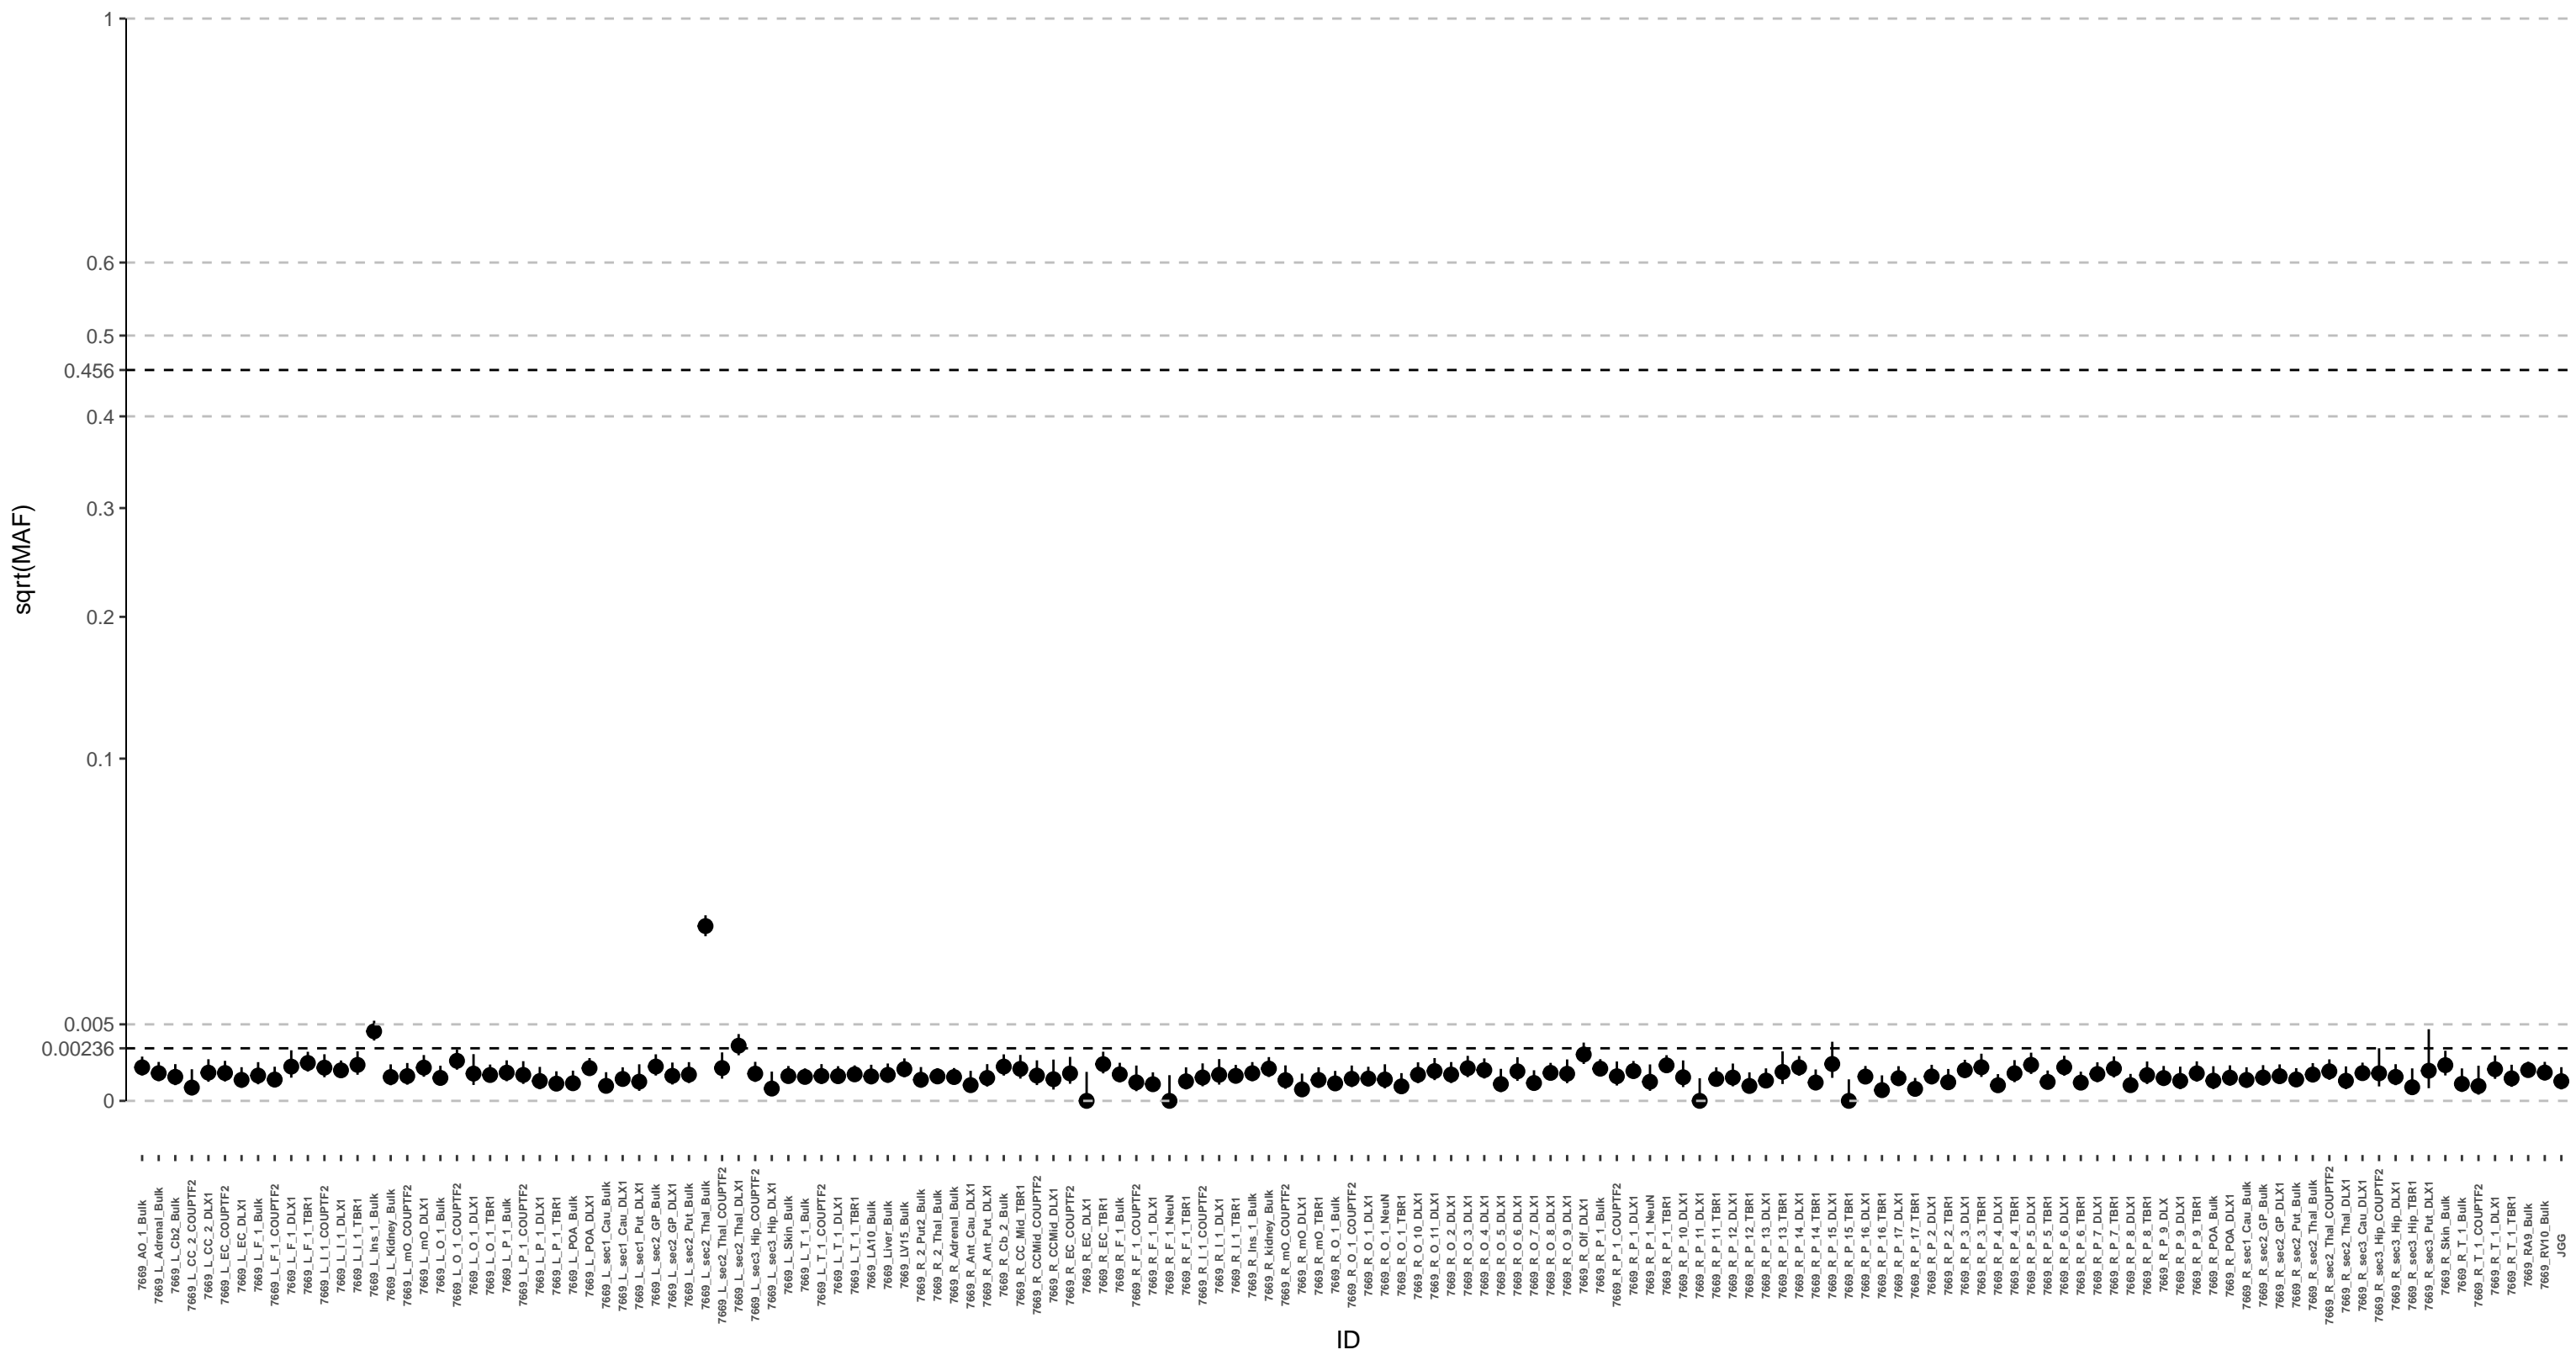

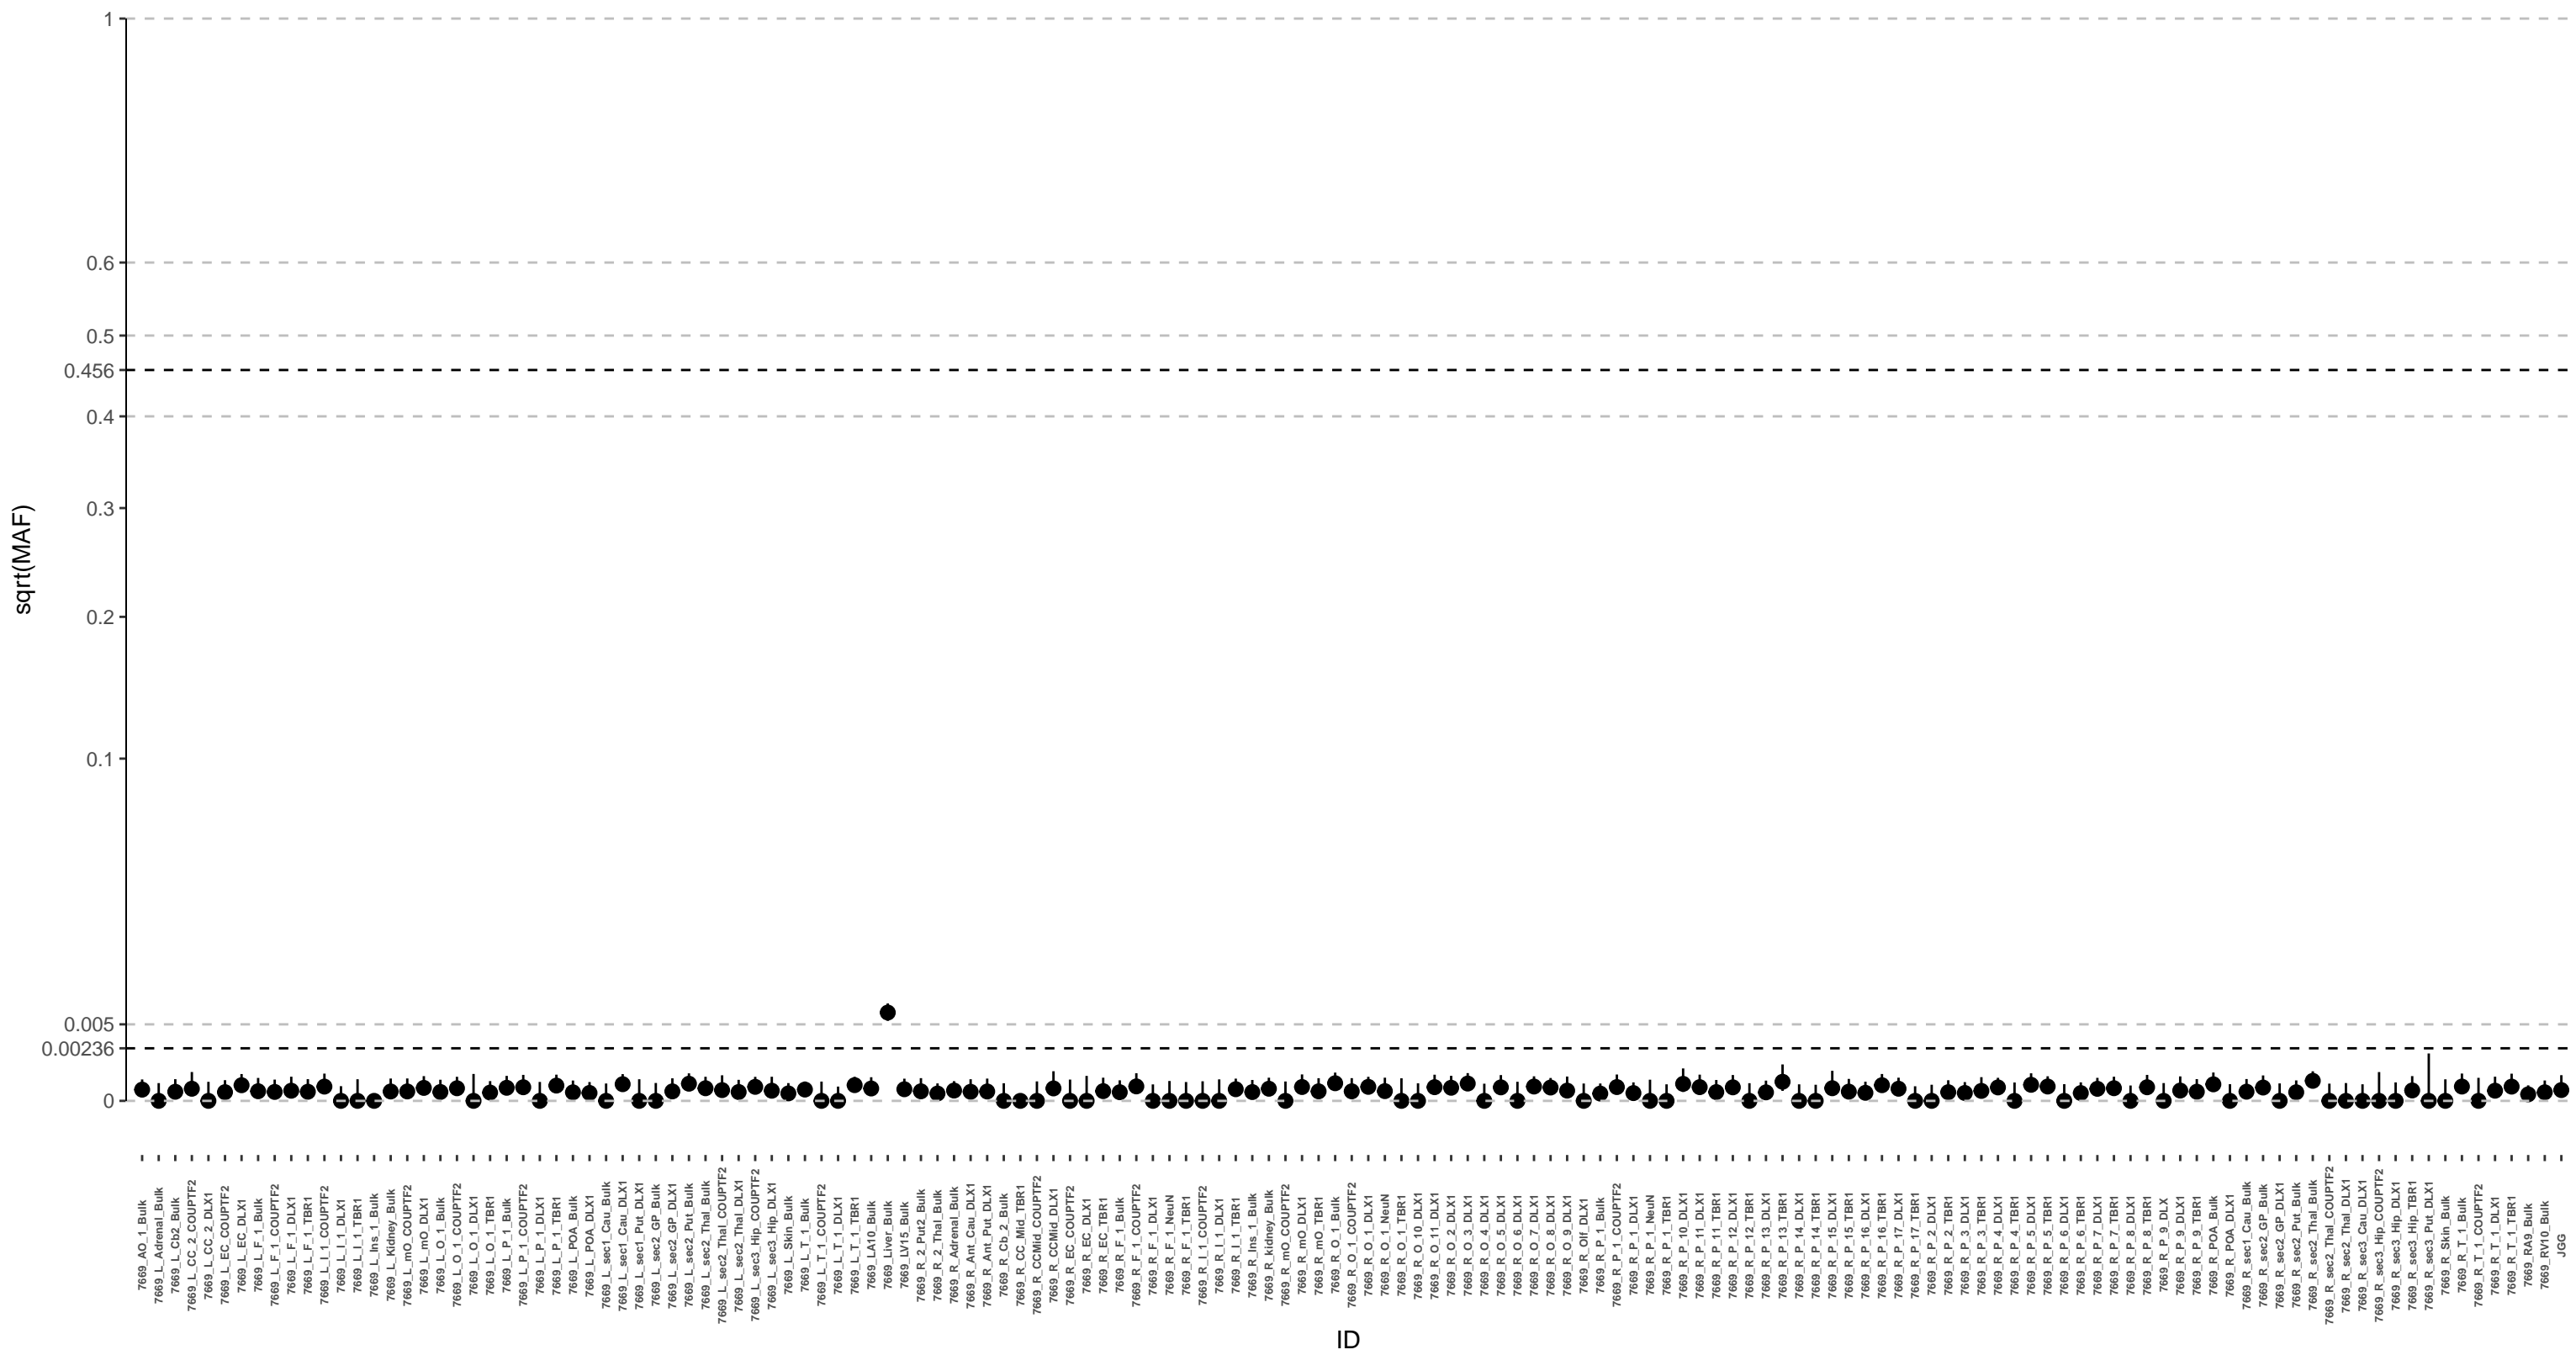

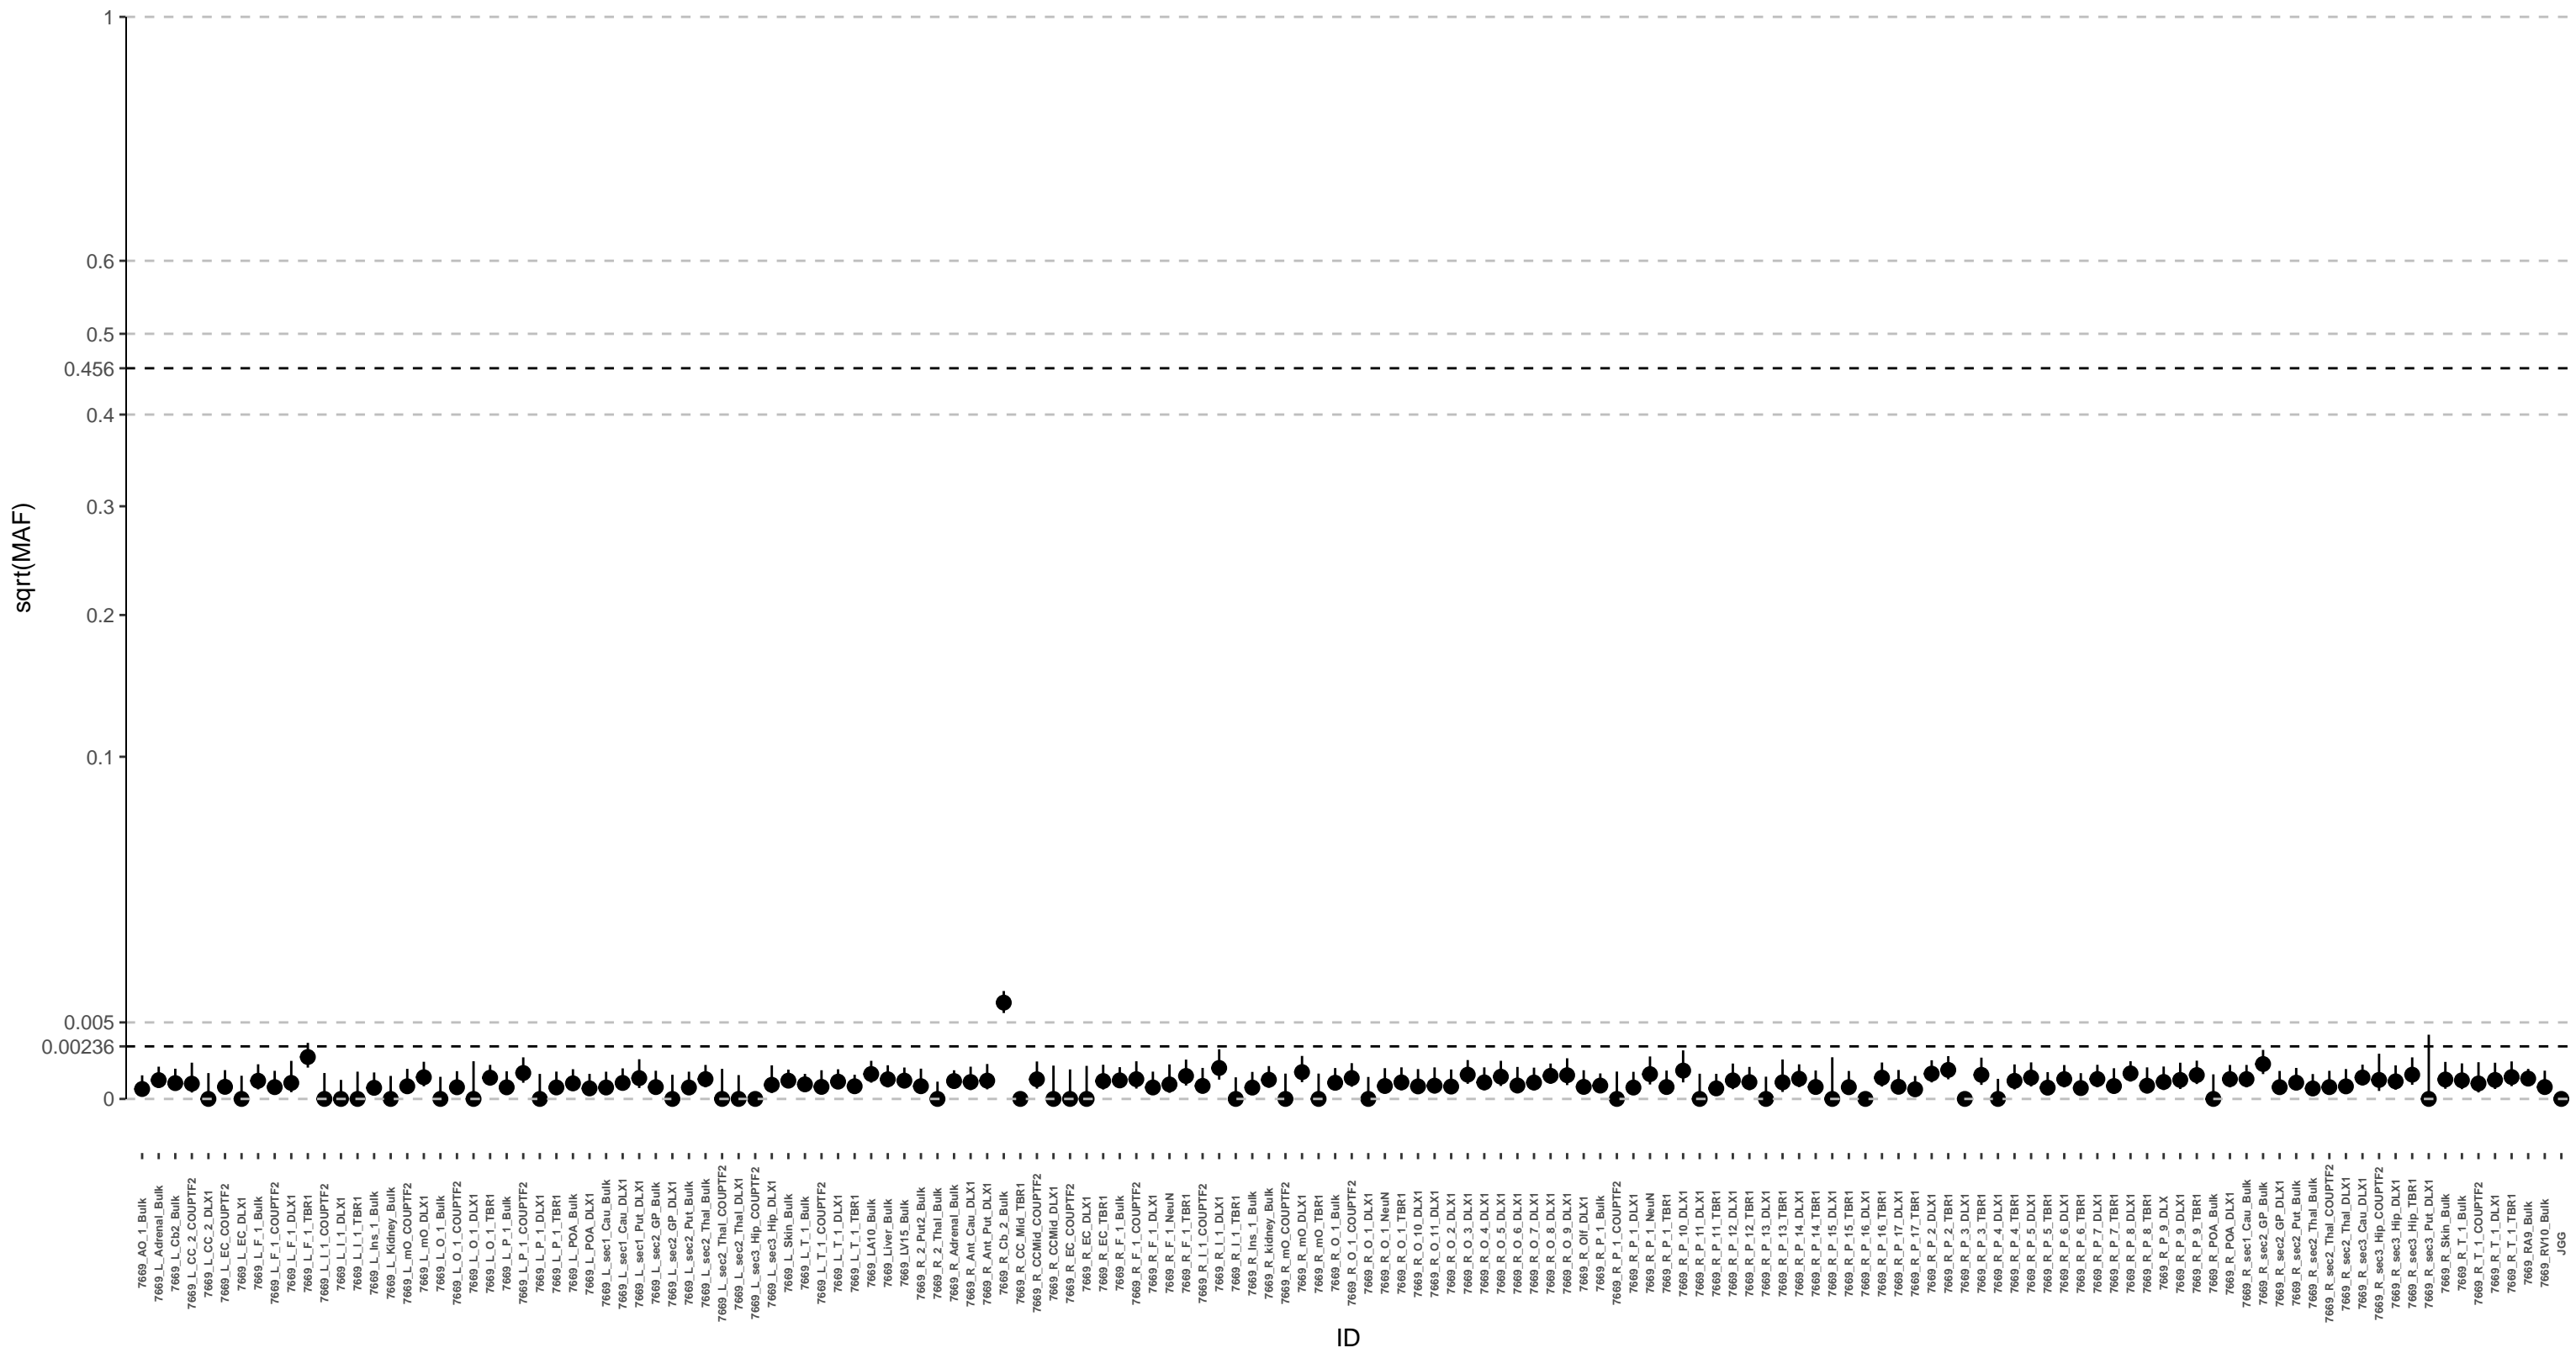

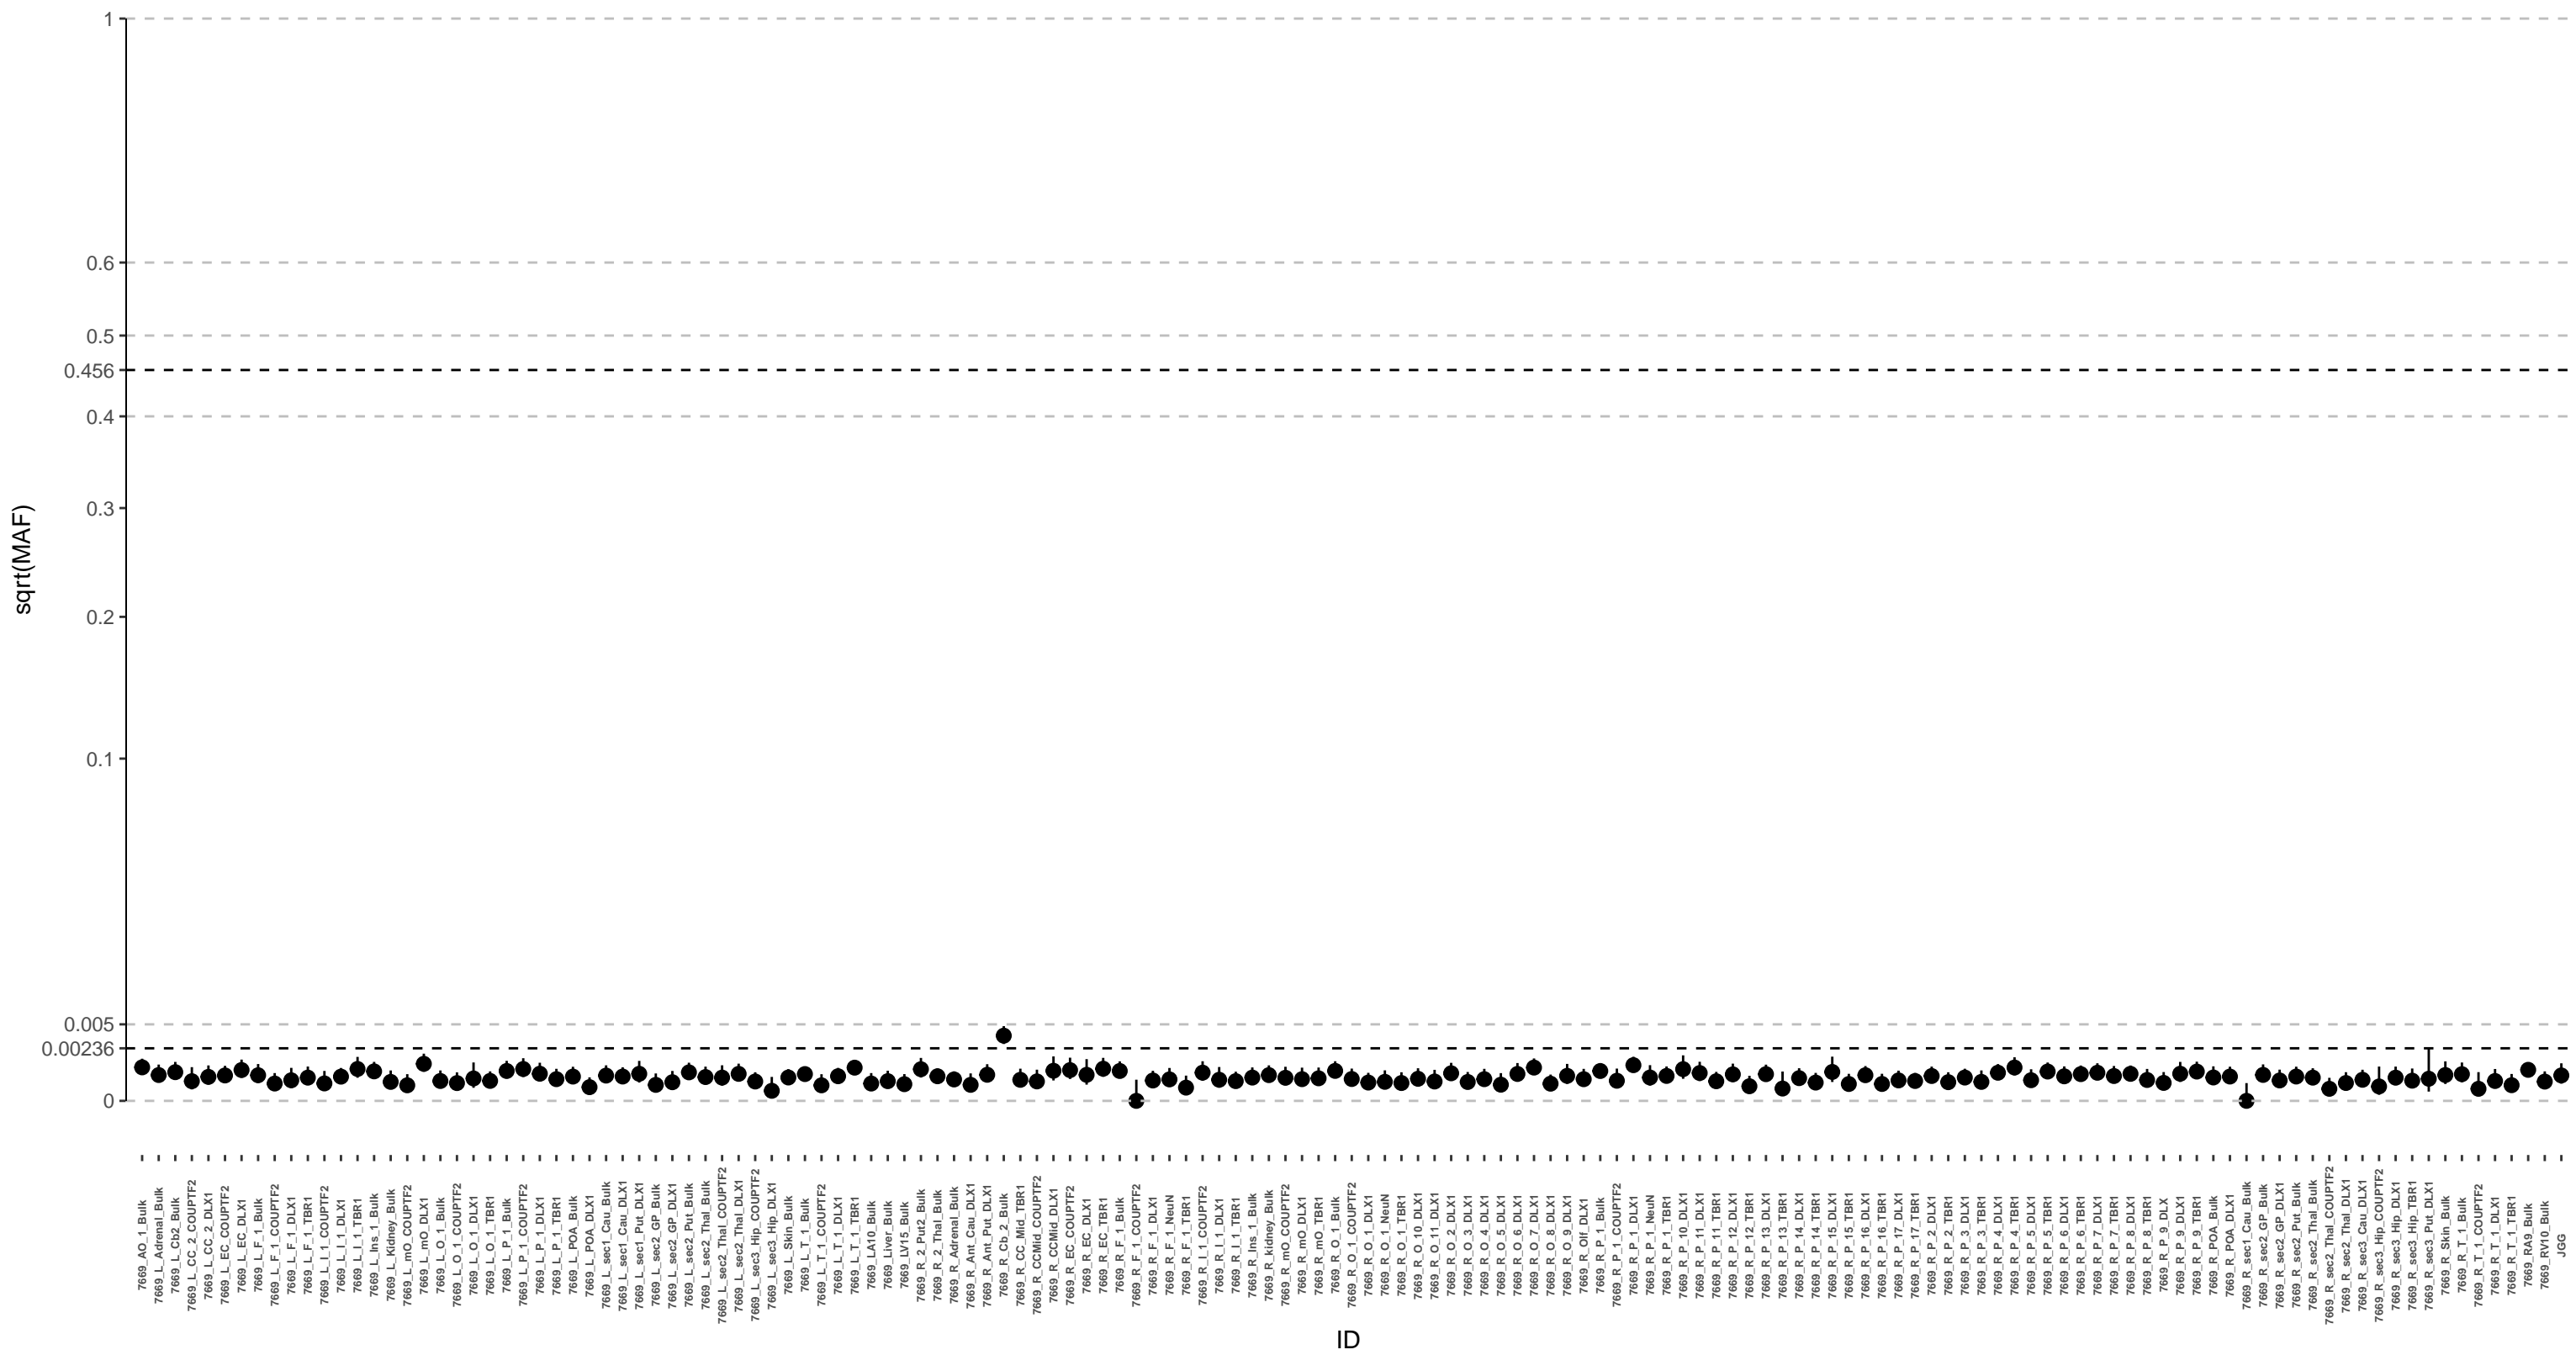

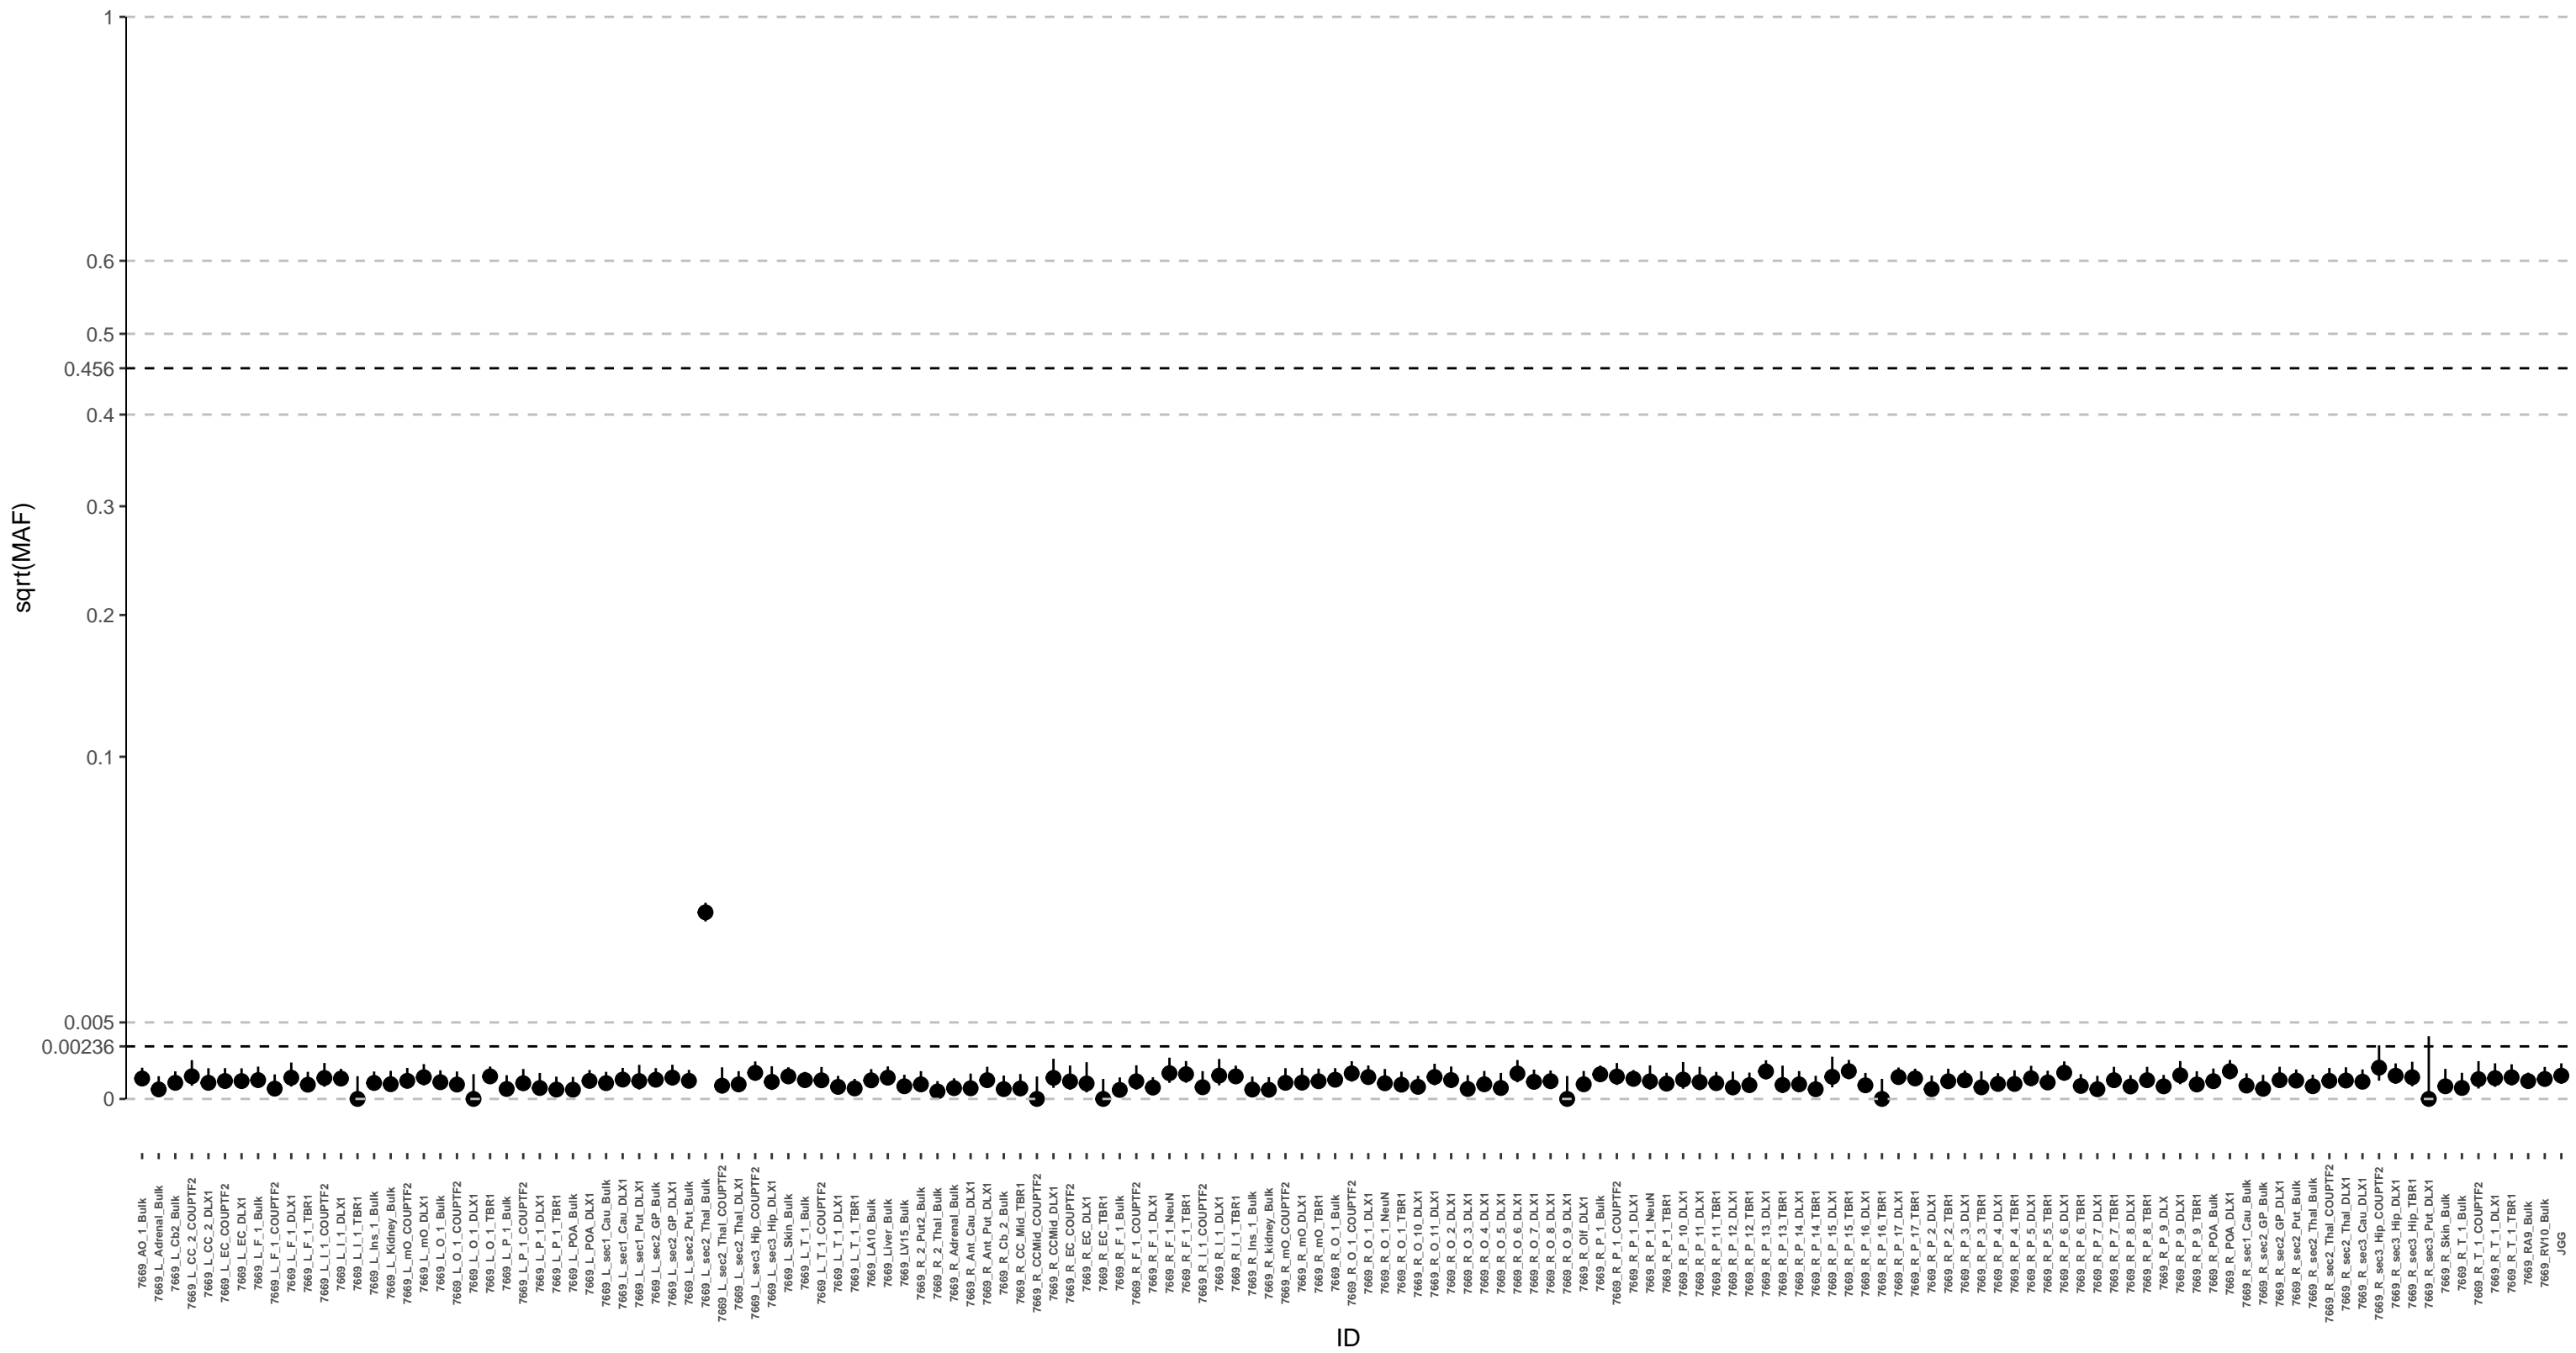



ID05 X-141738997-A-G

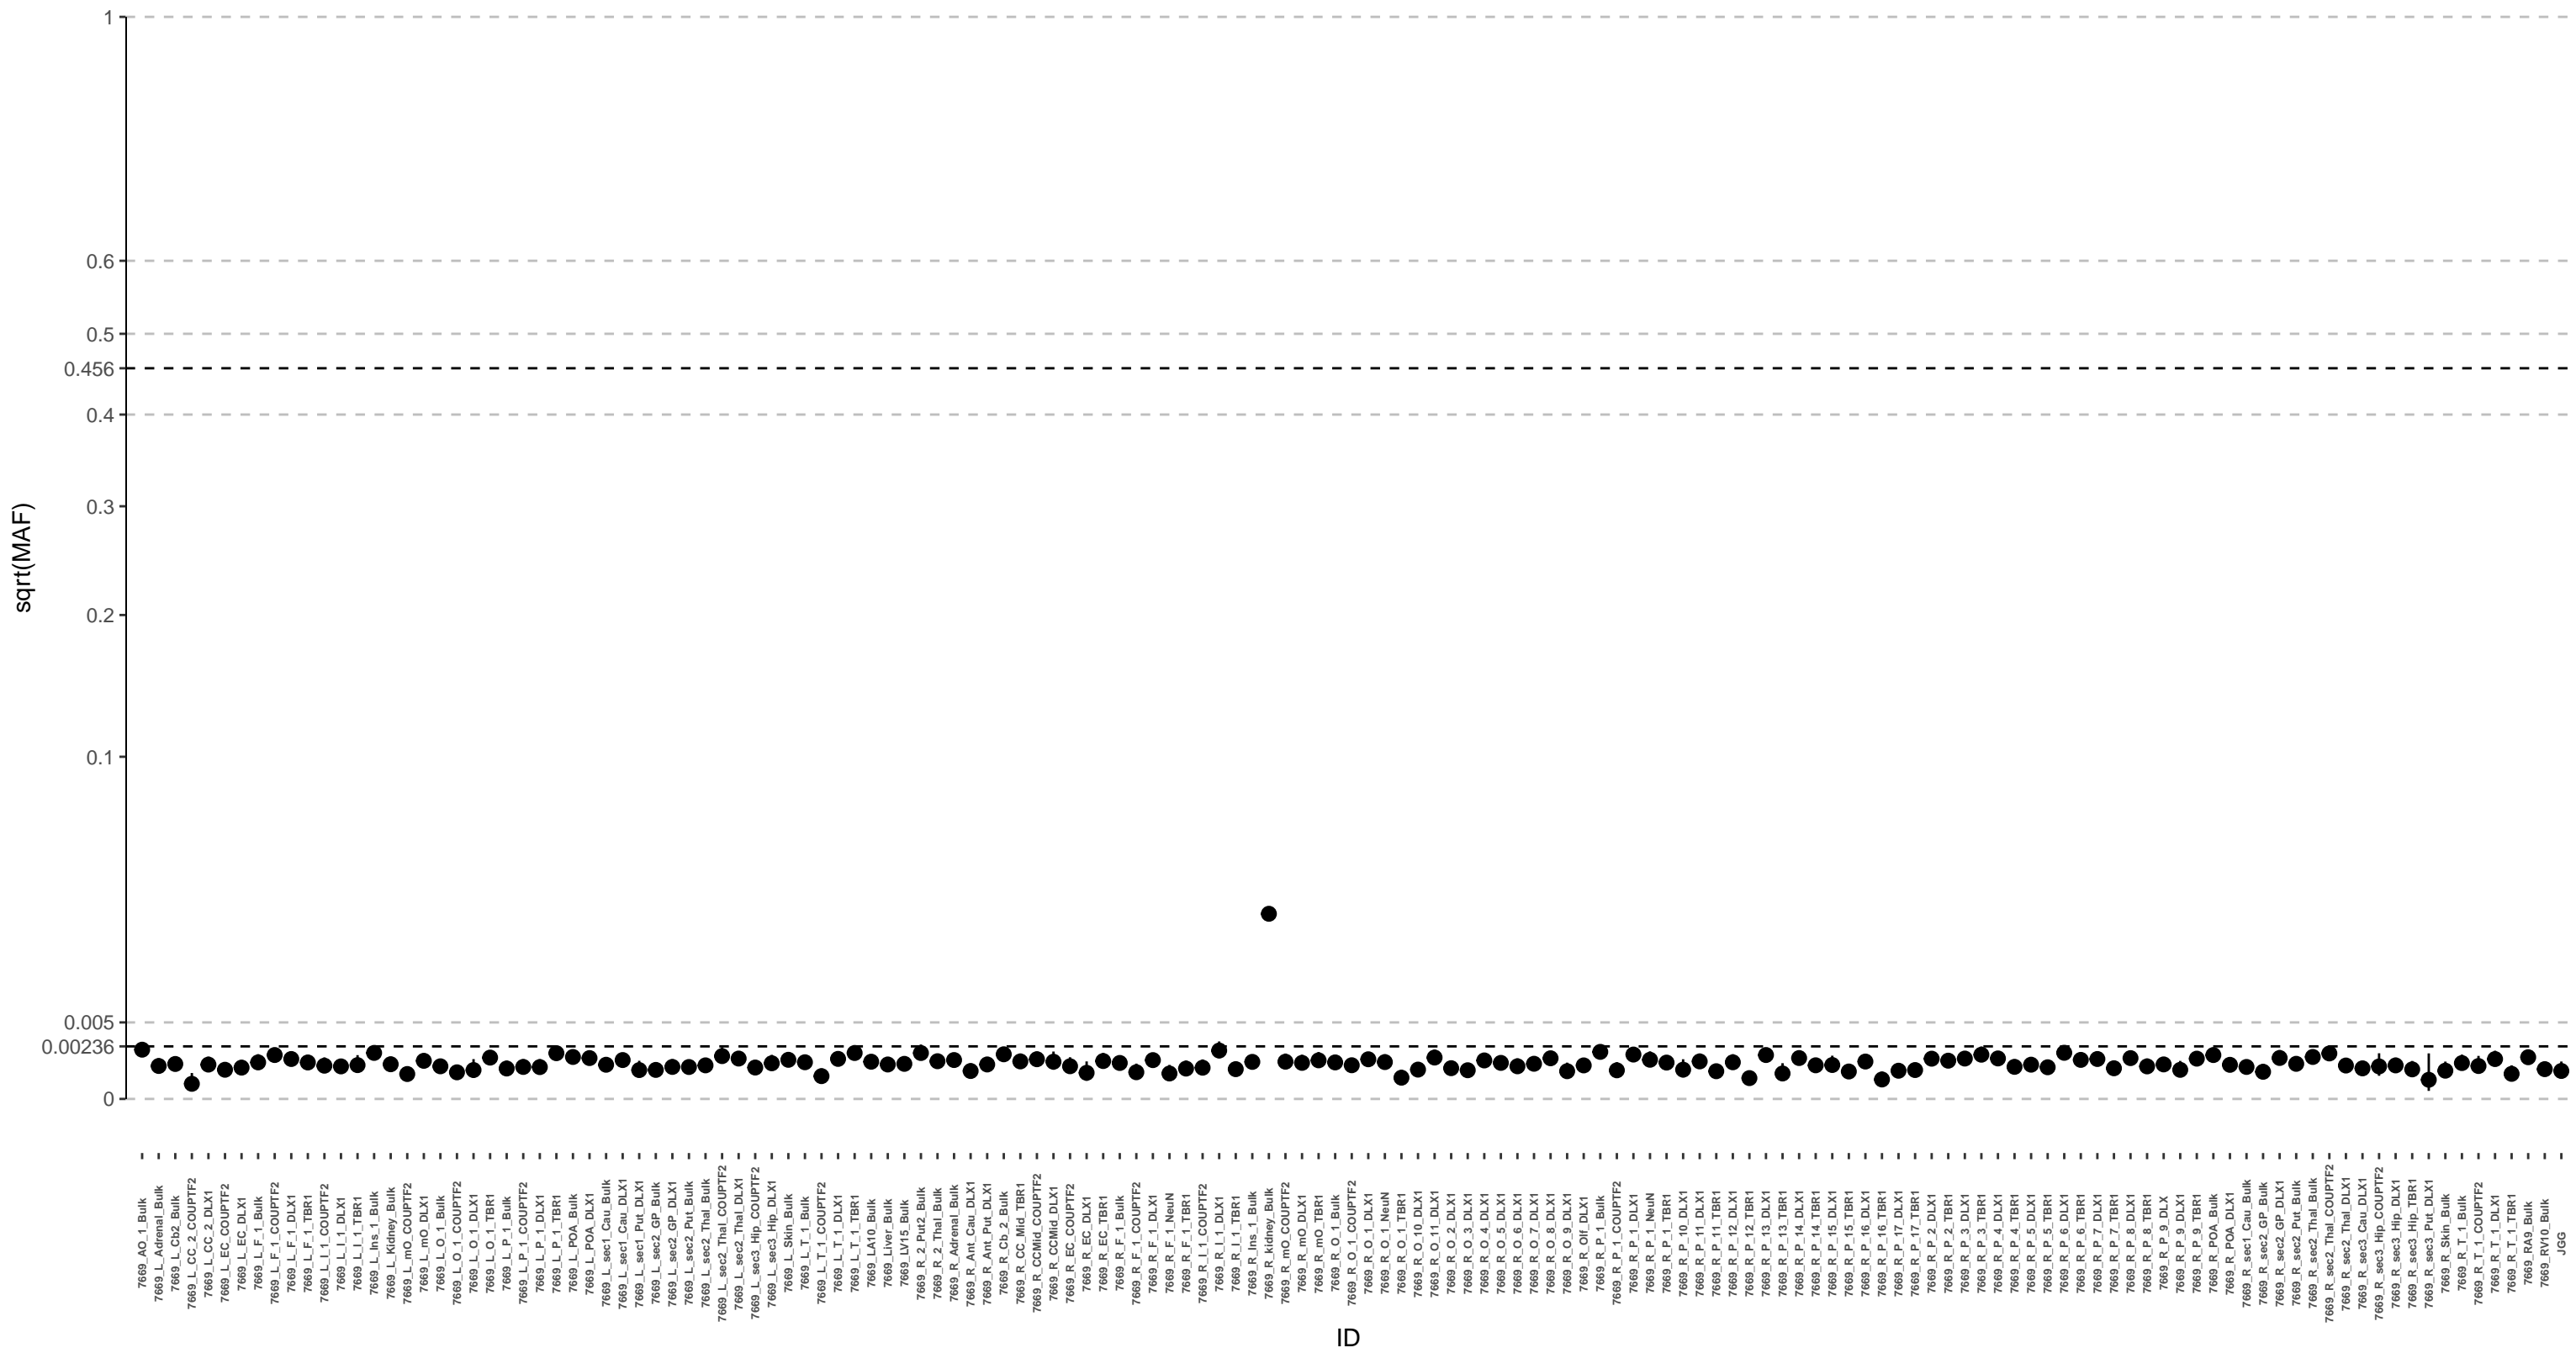

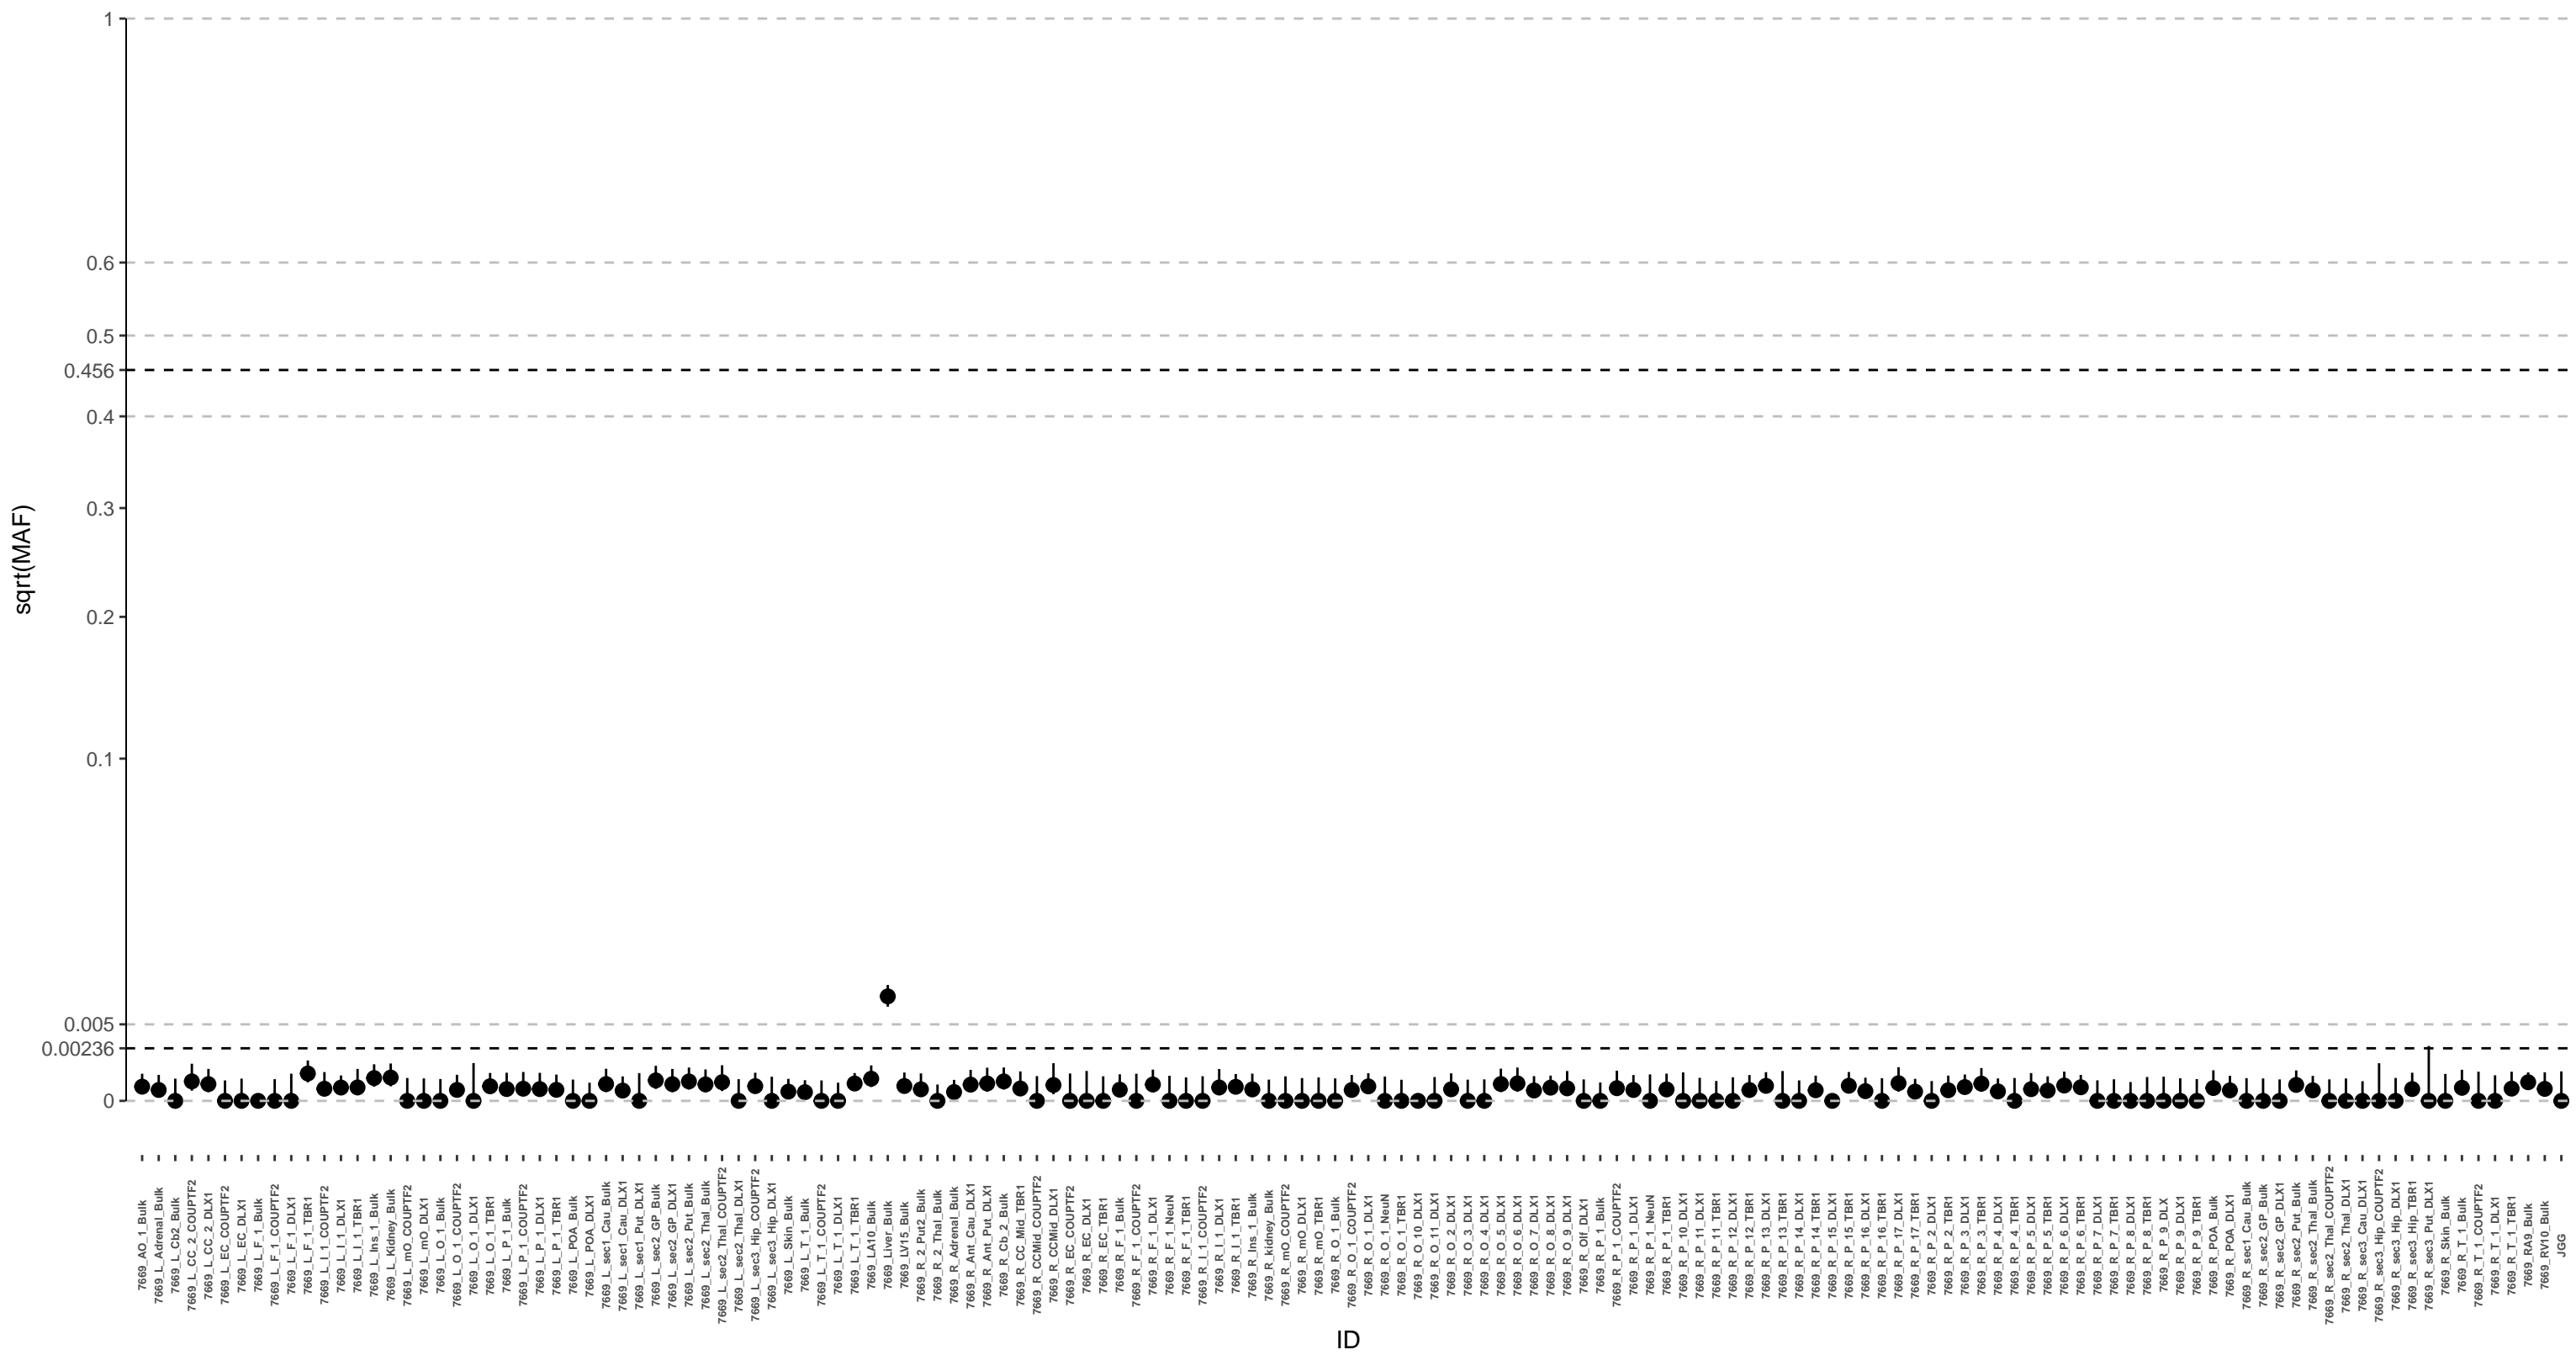

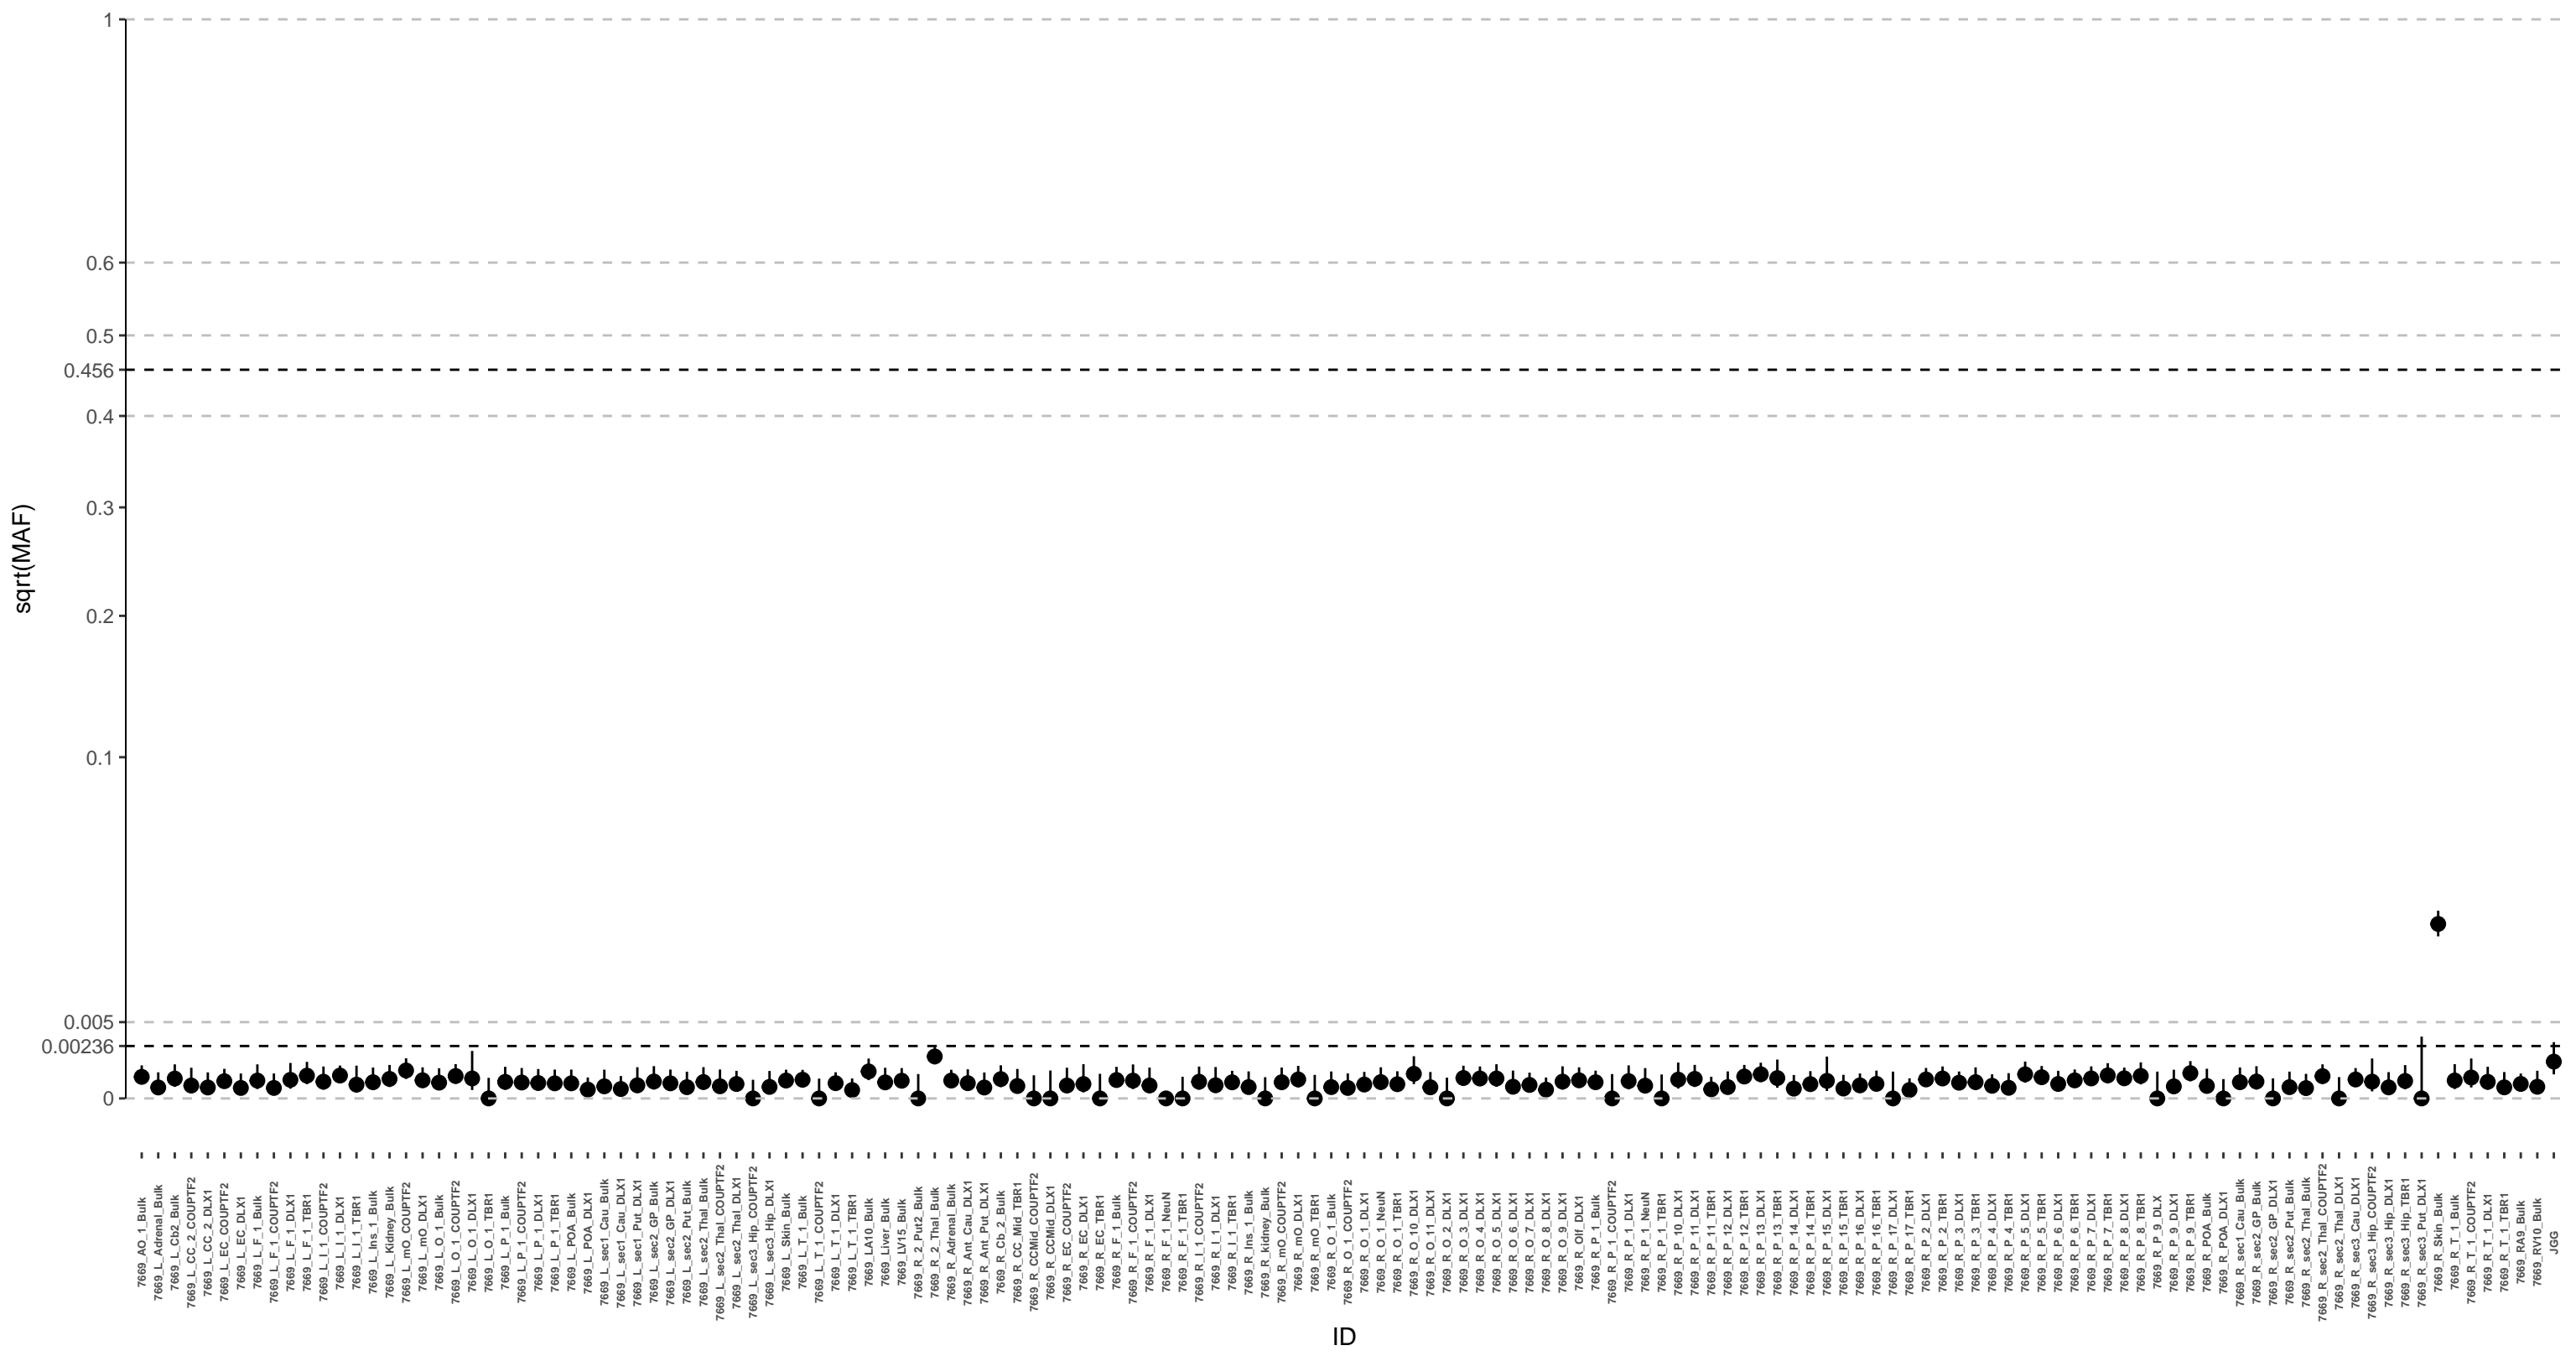

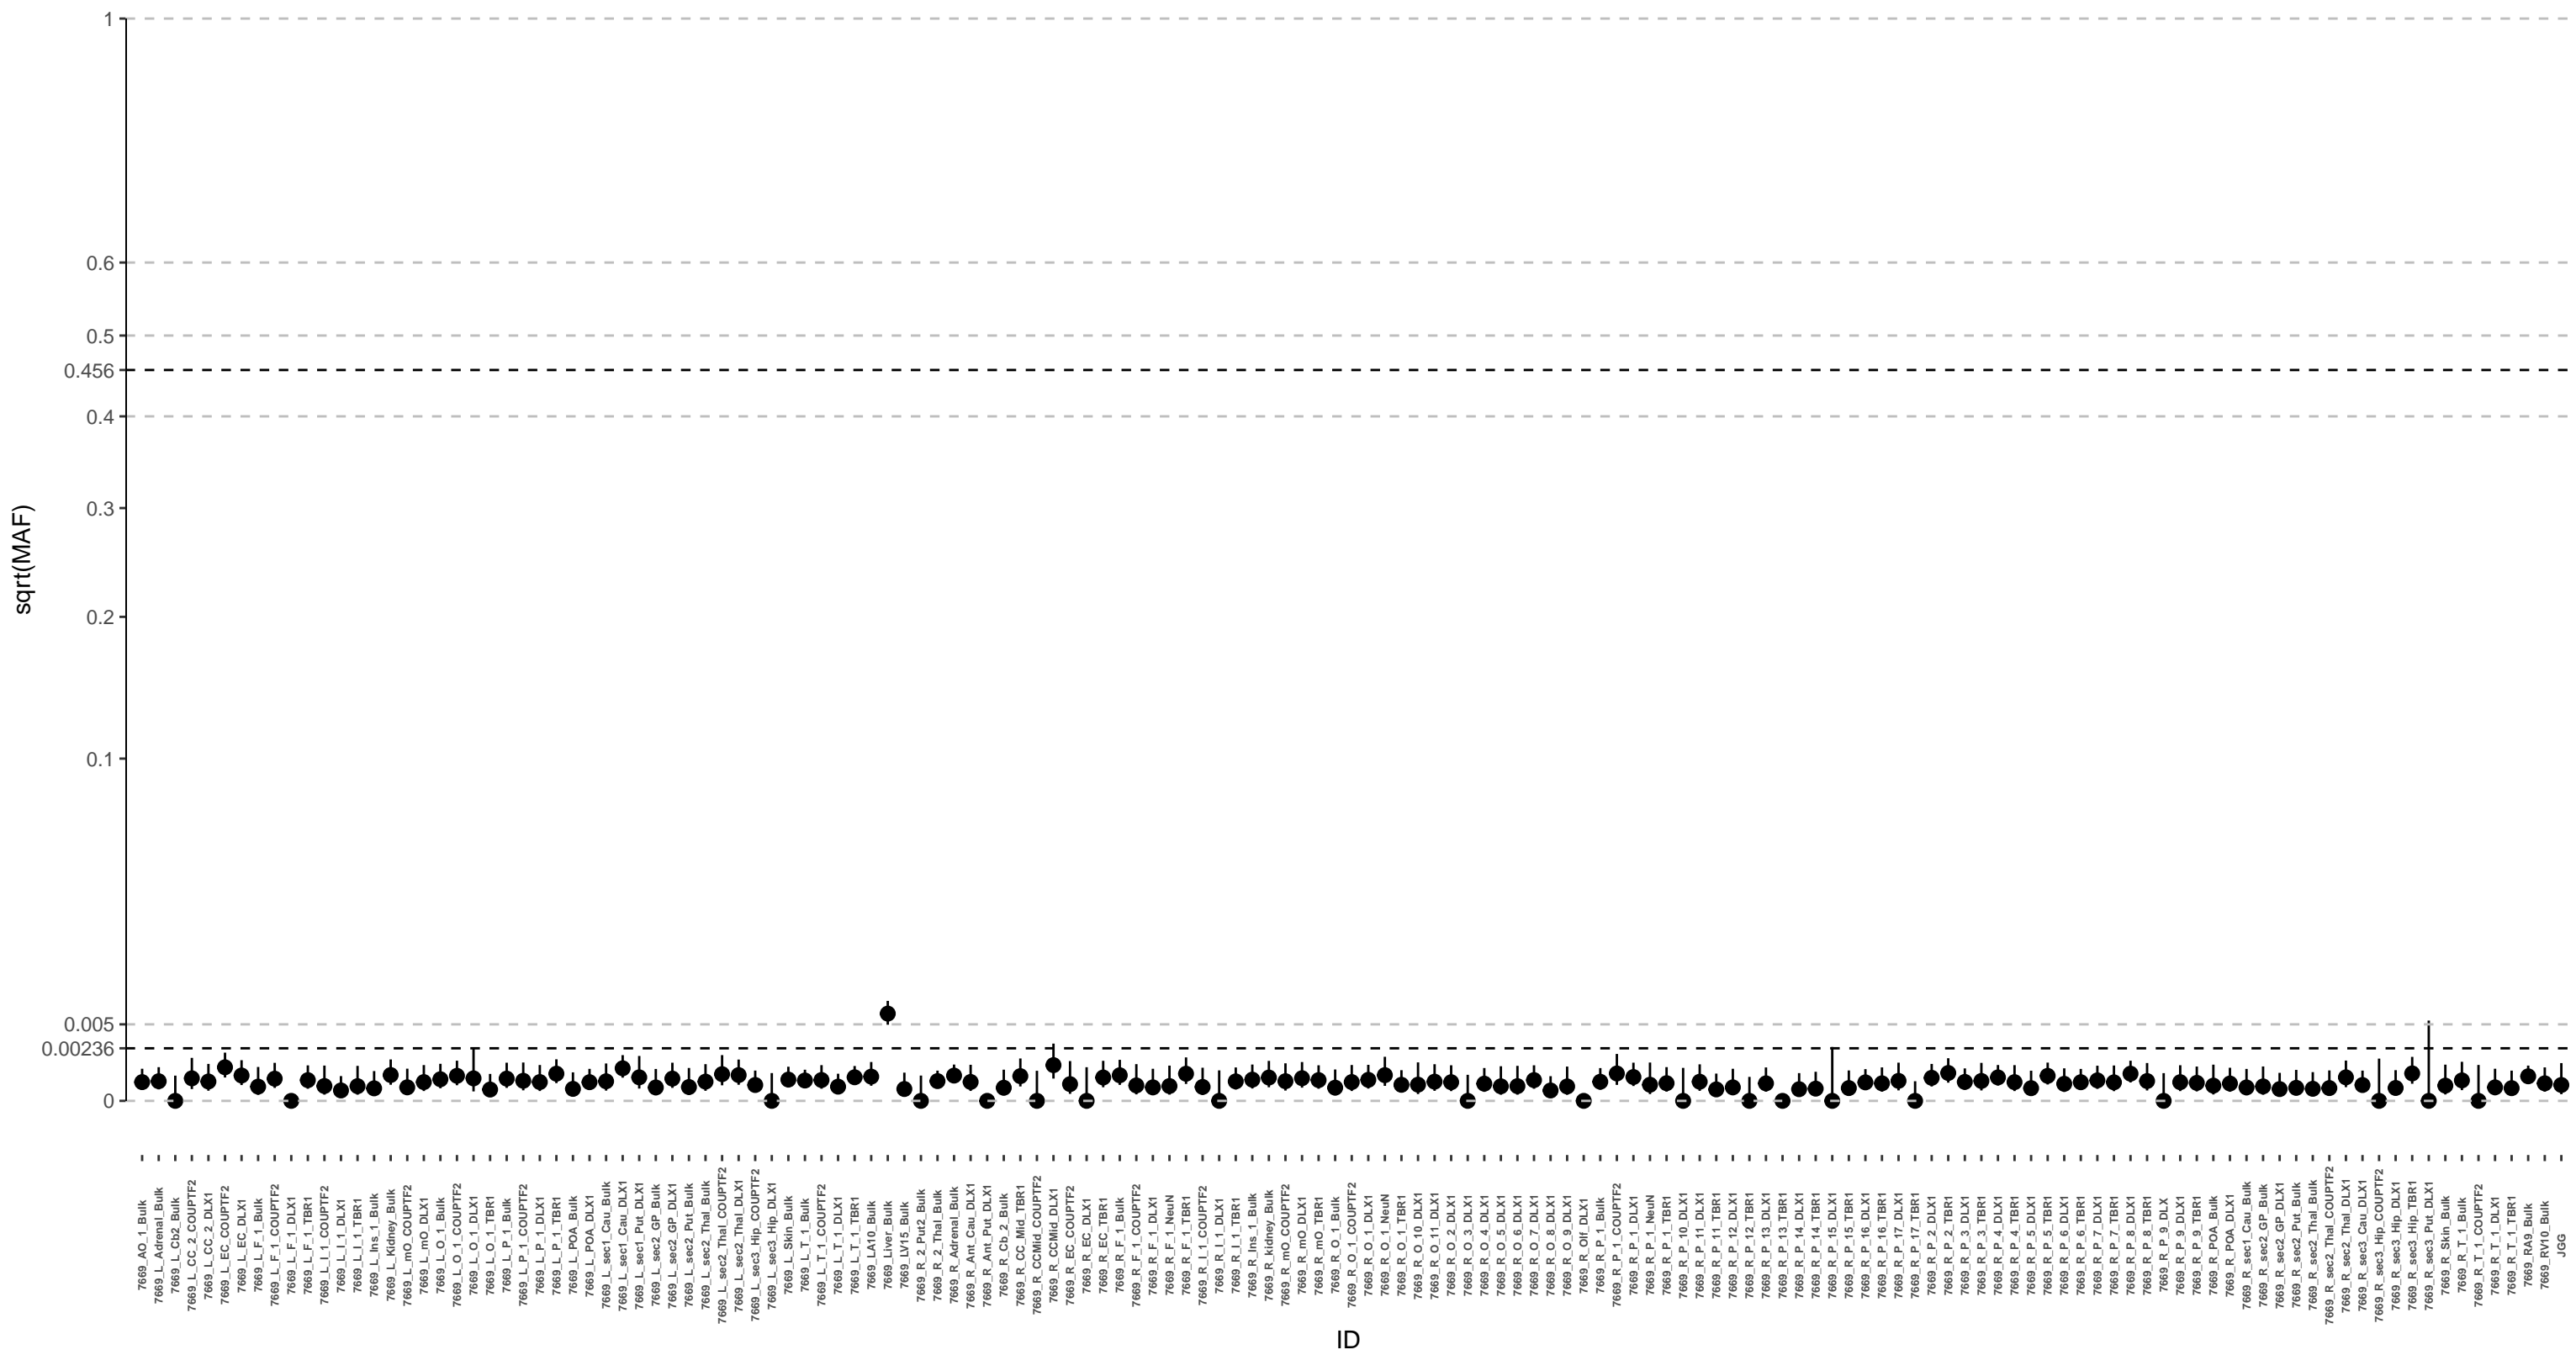

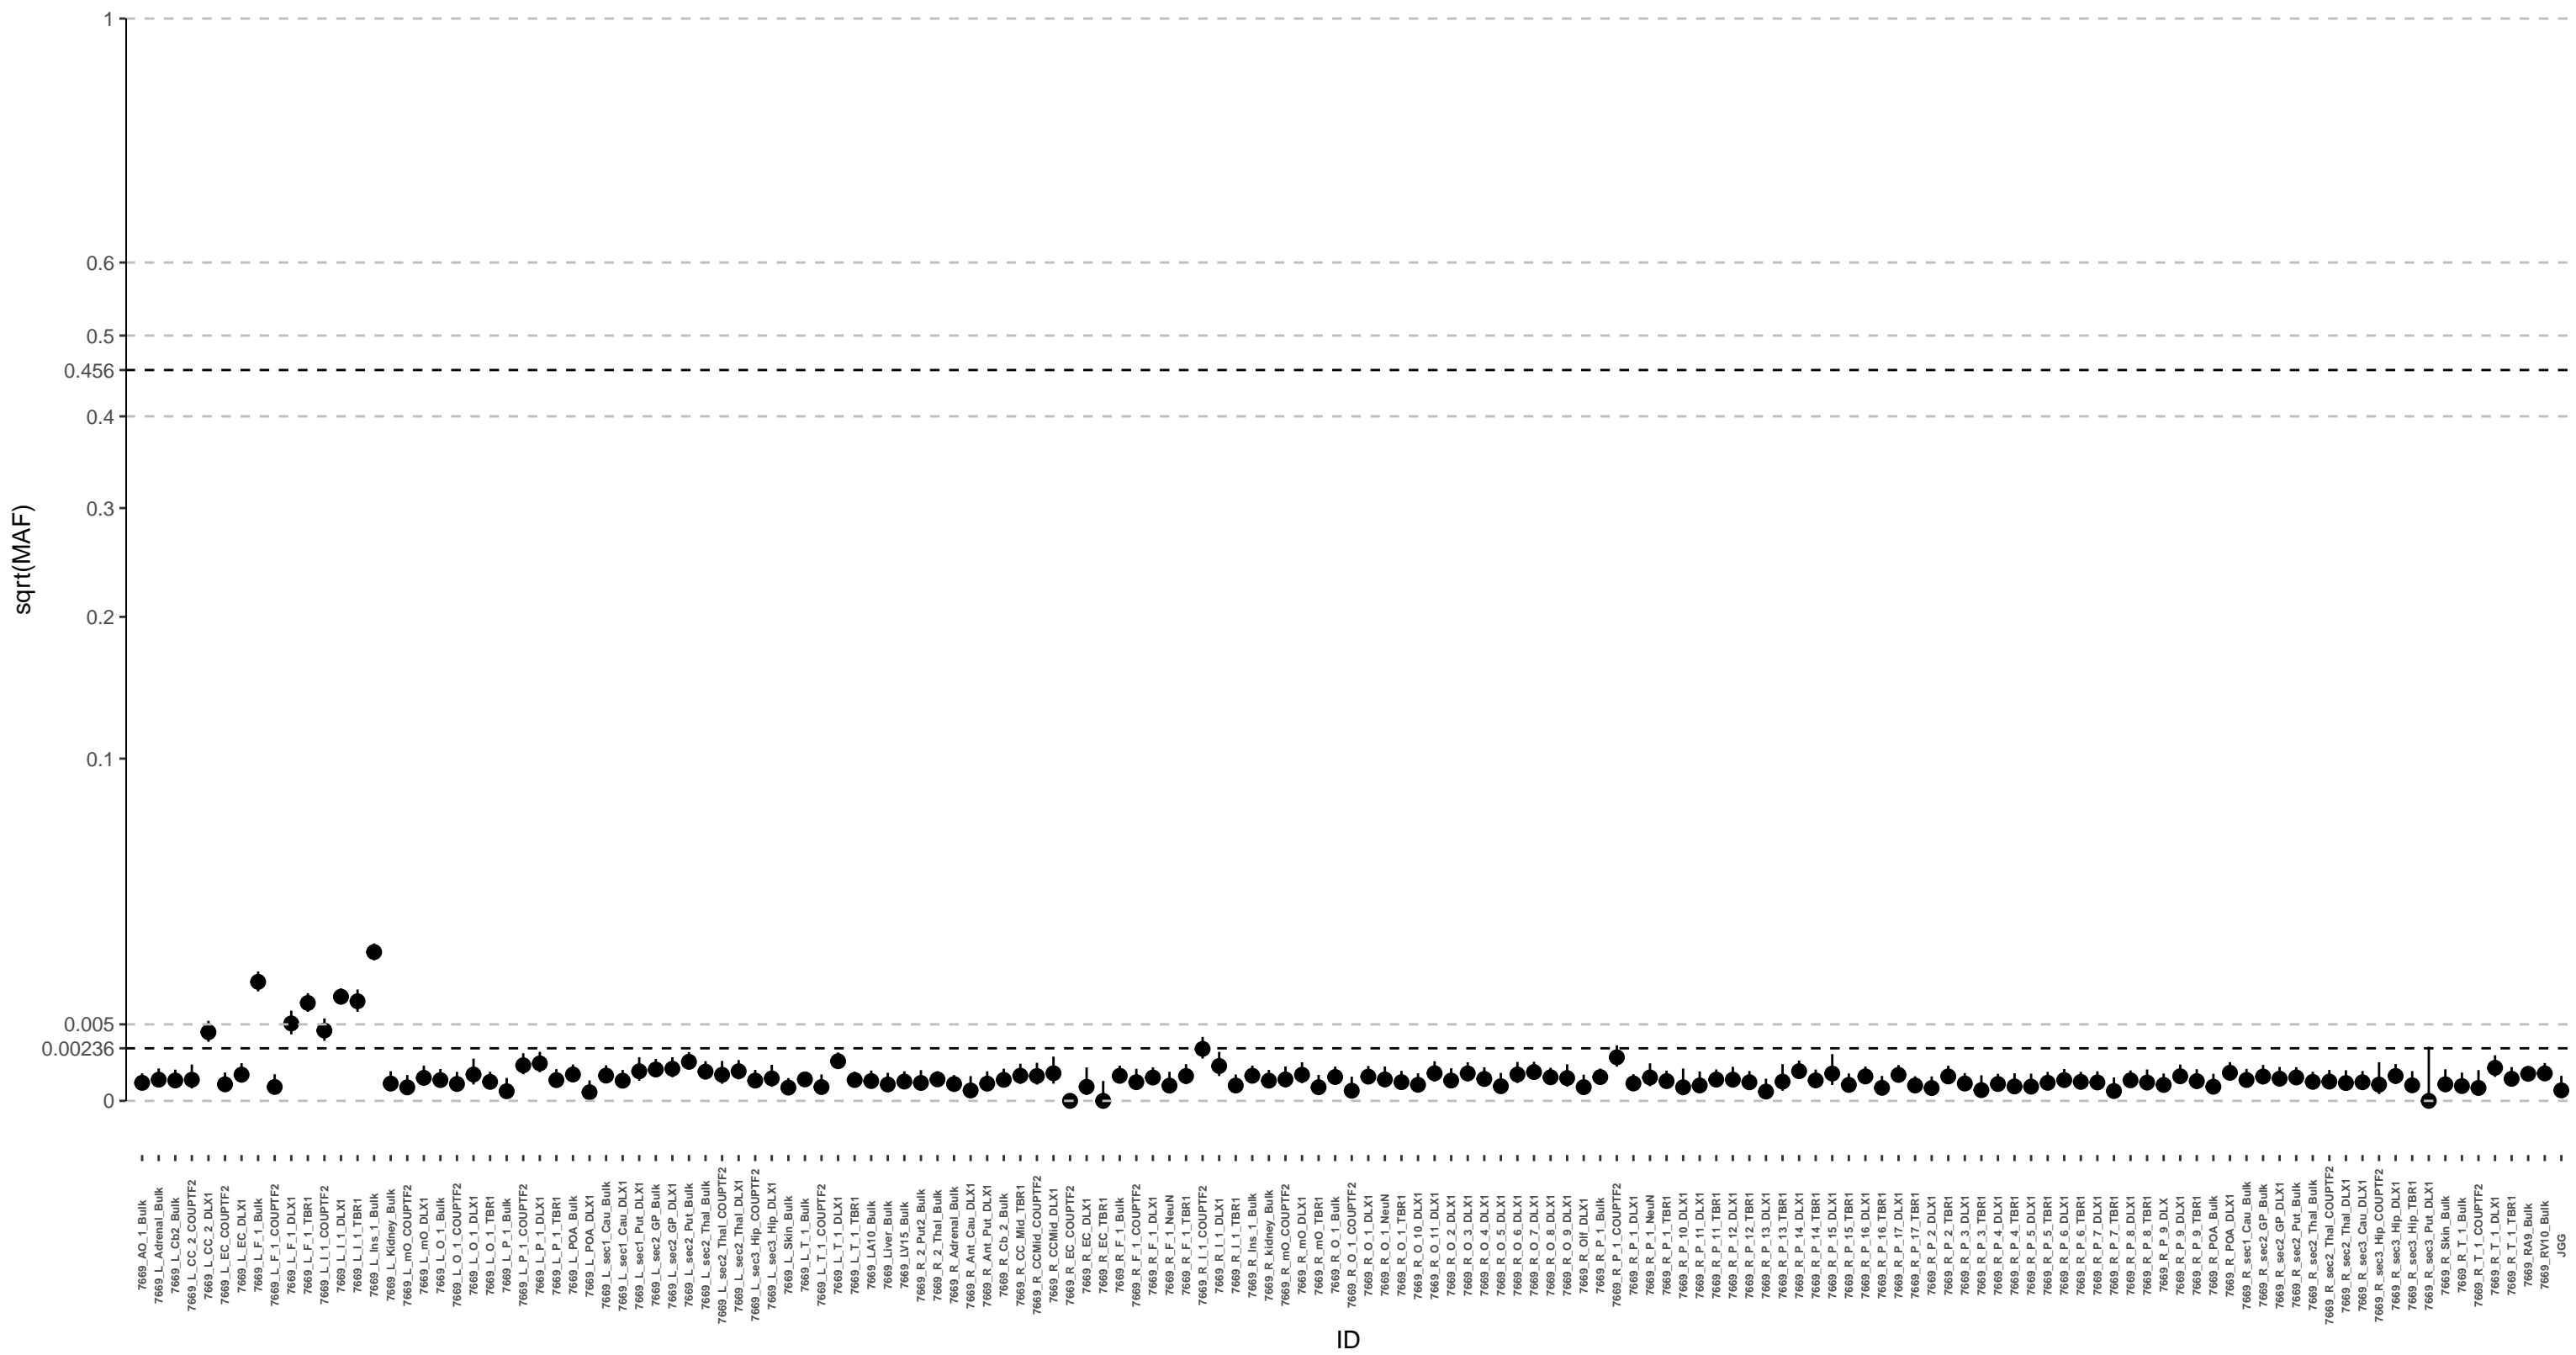

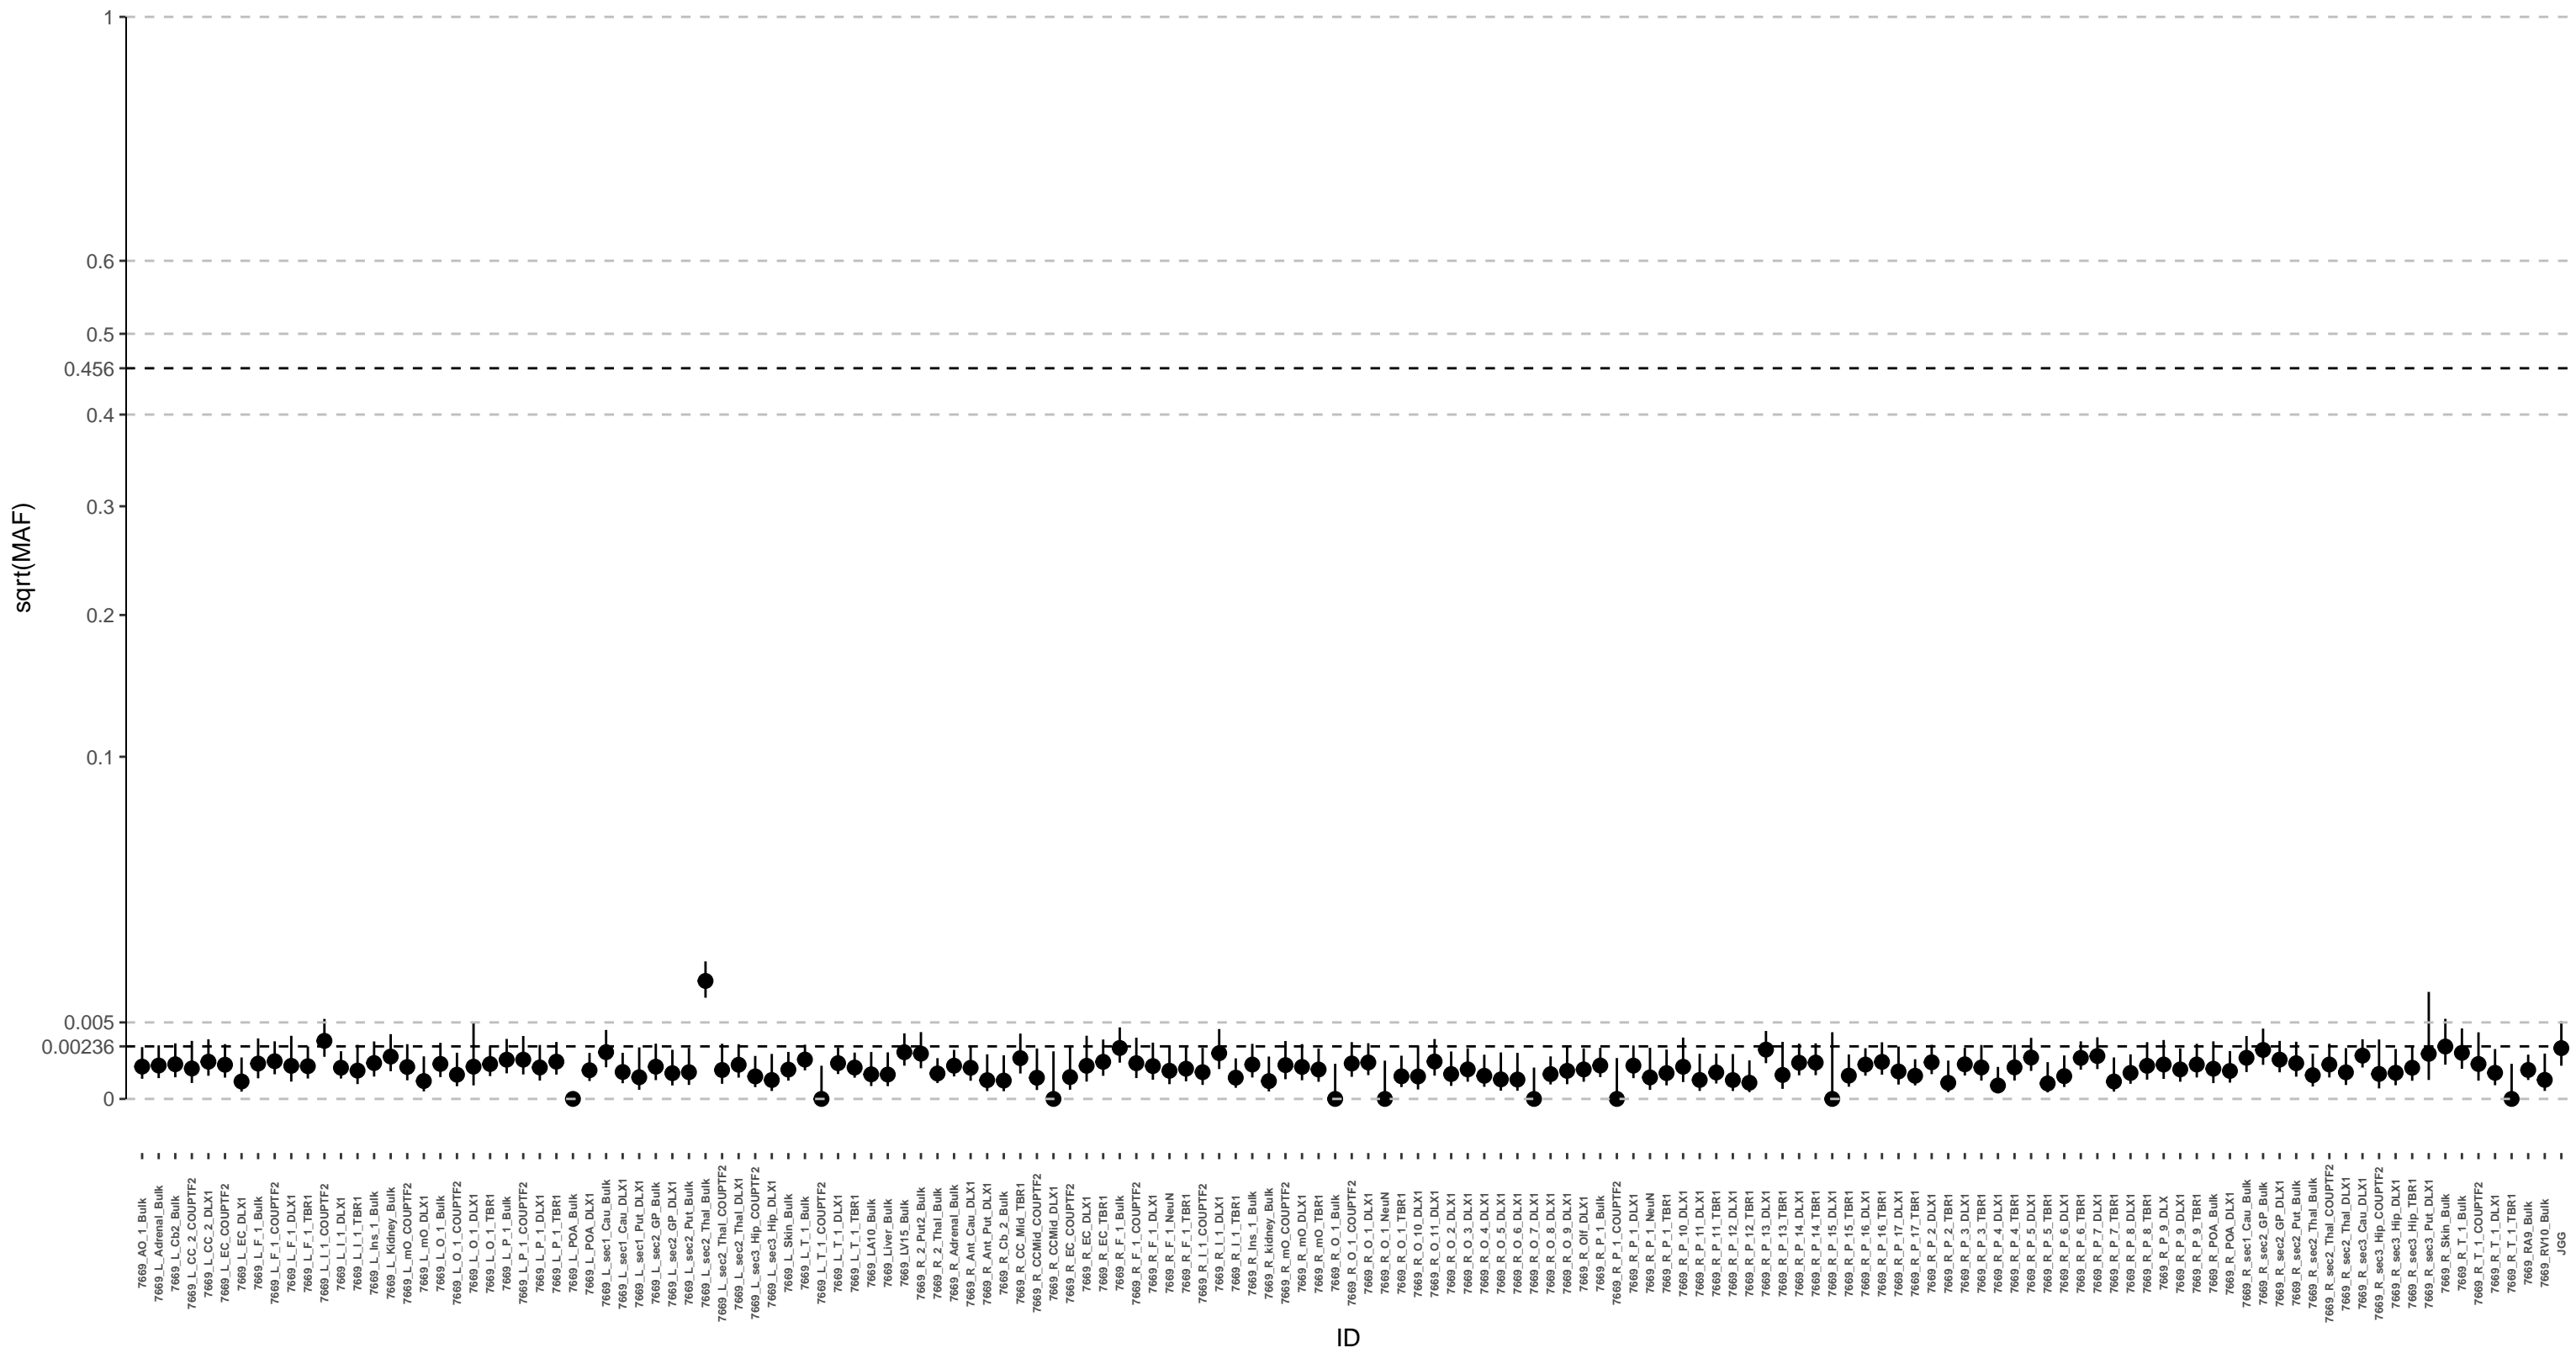

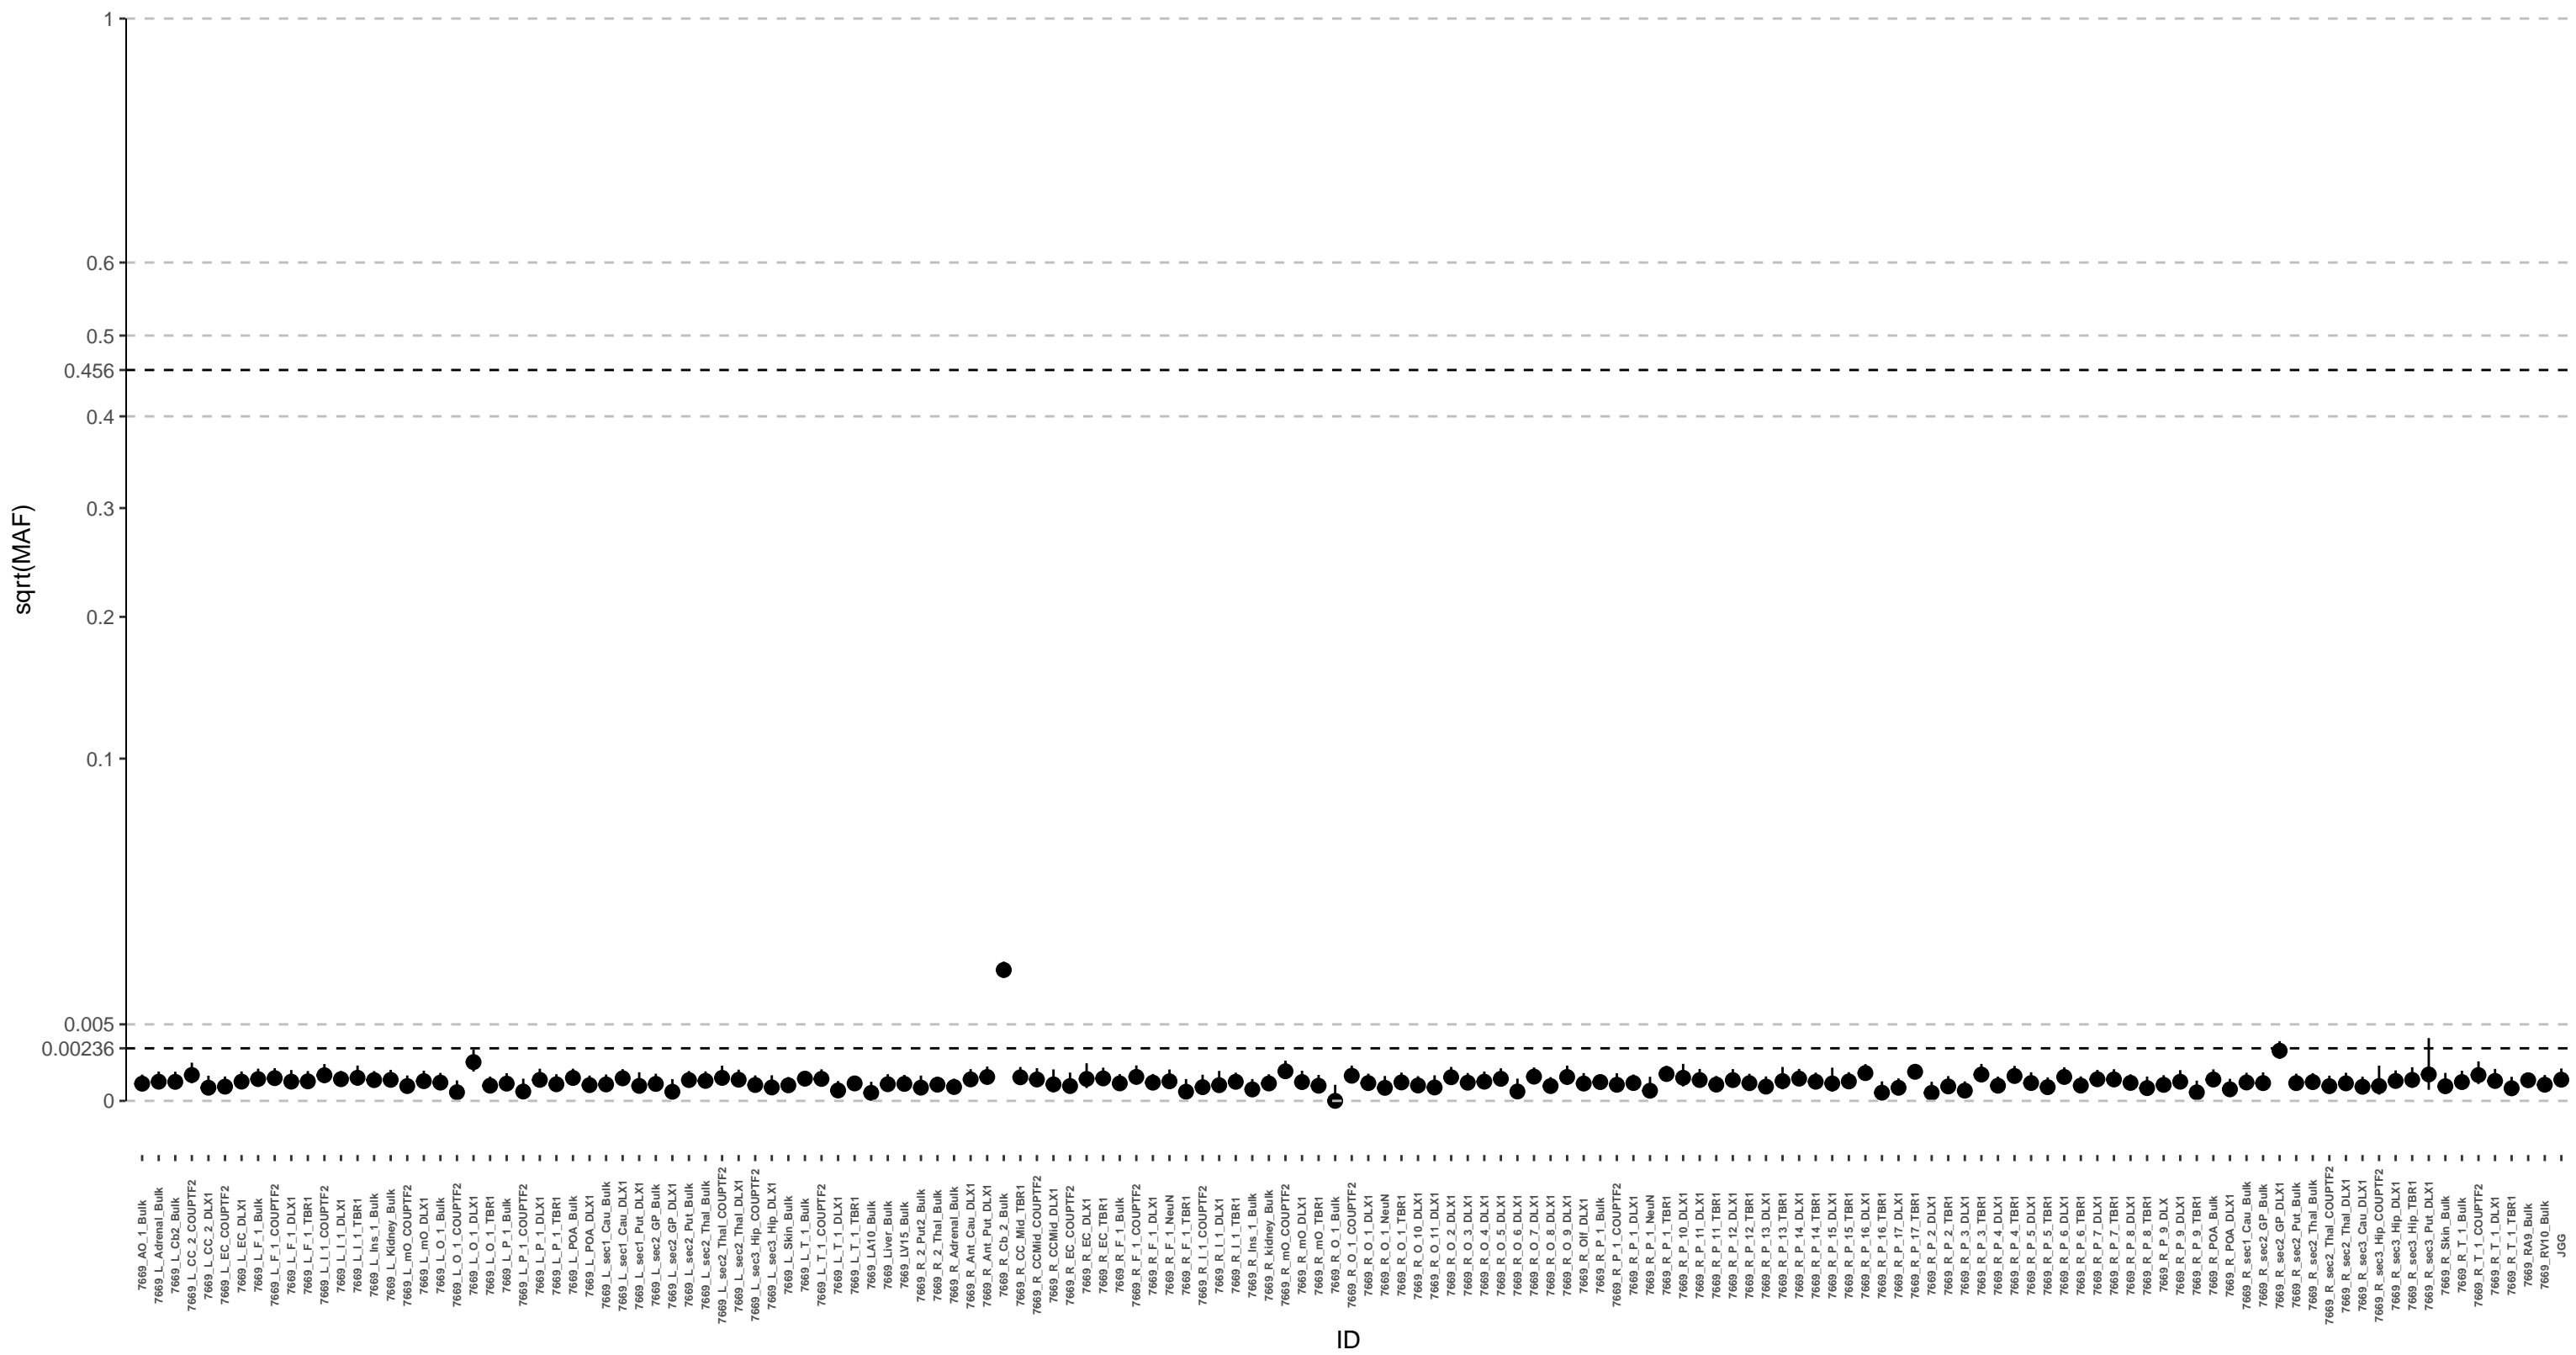

ID05 X-17091941-T-G

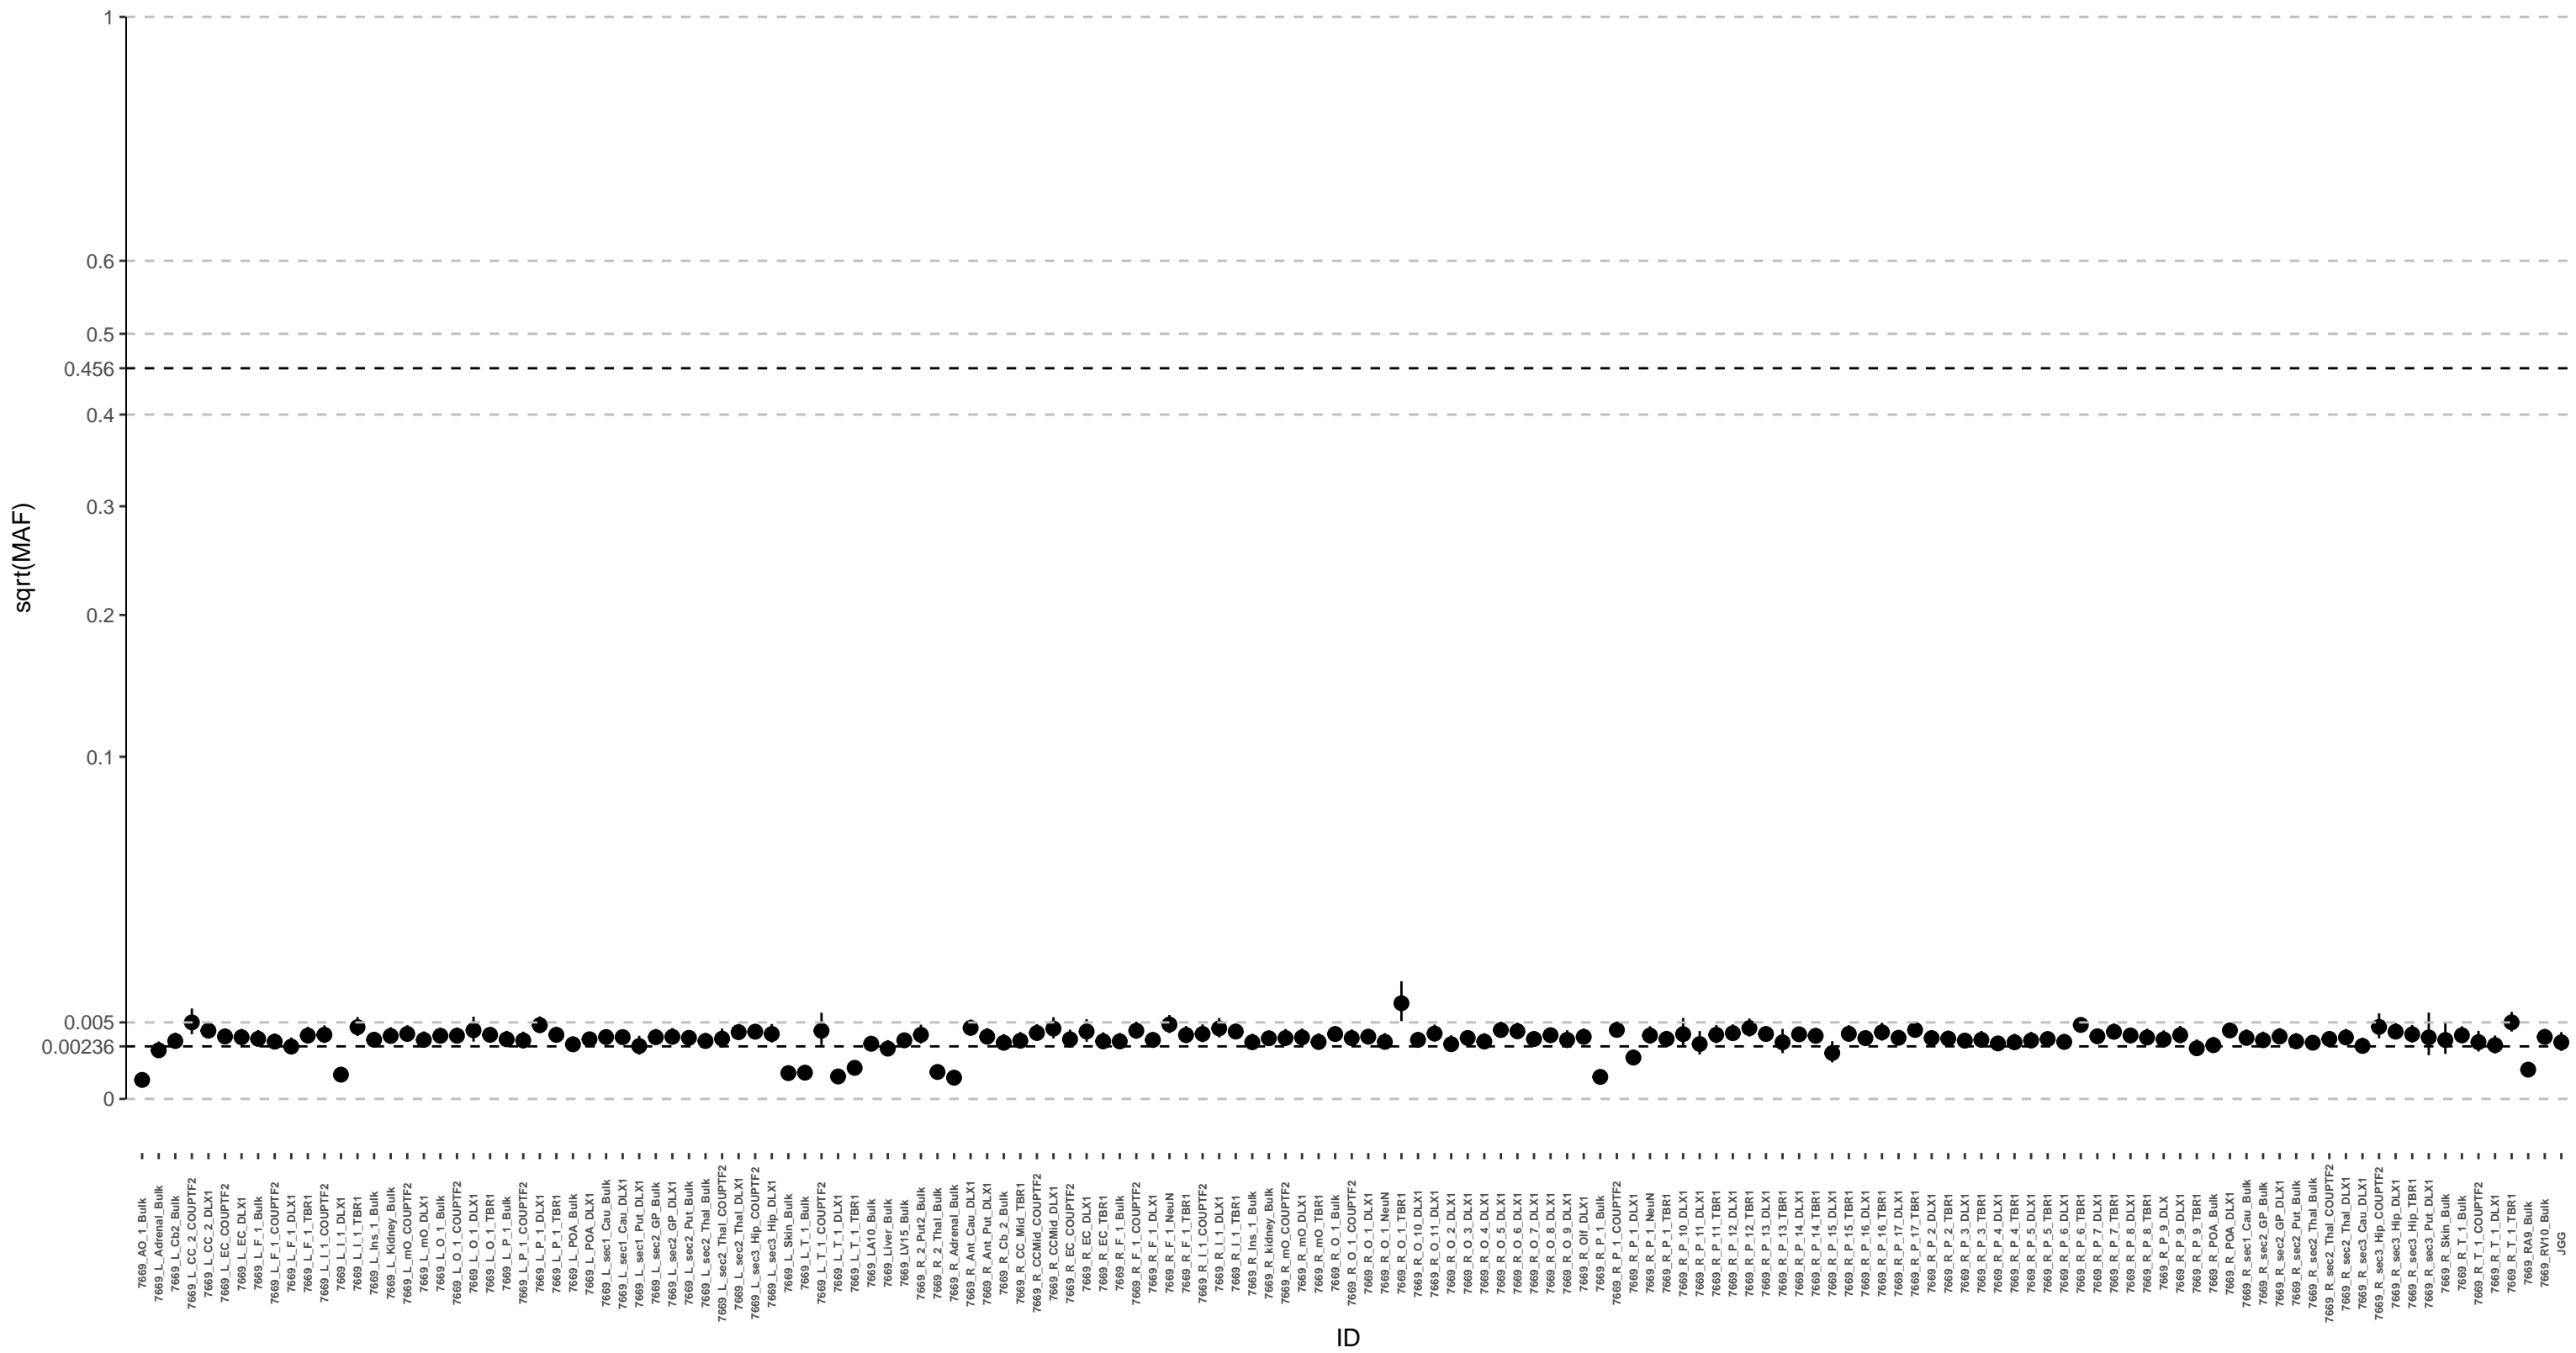



ID05 X-17091942-C-A

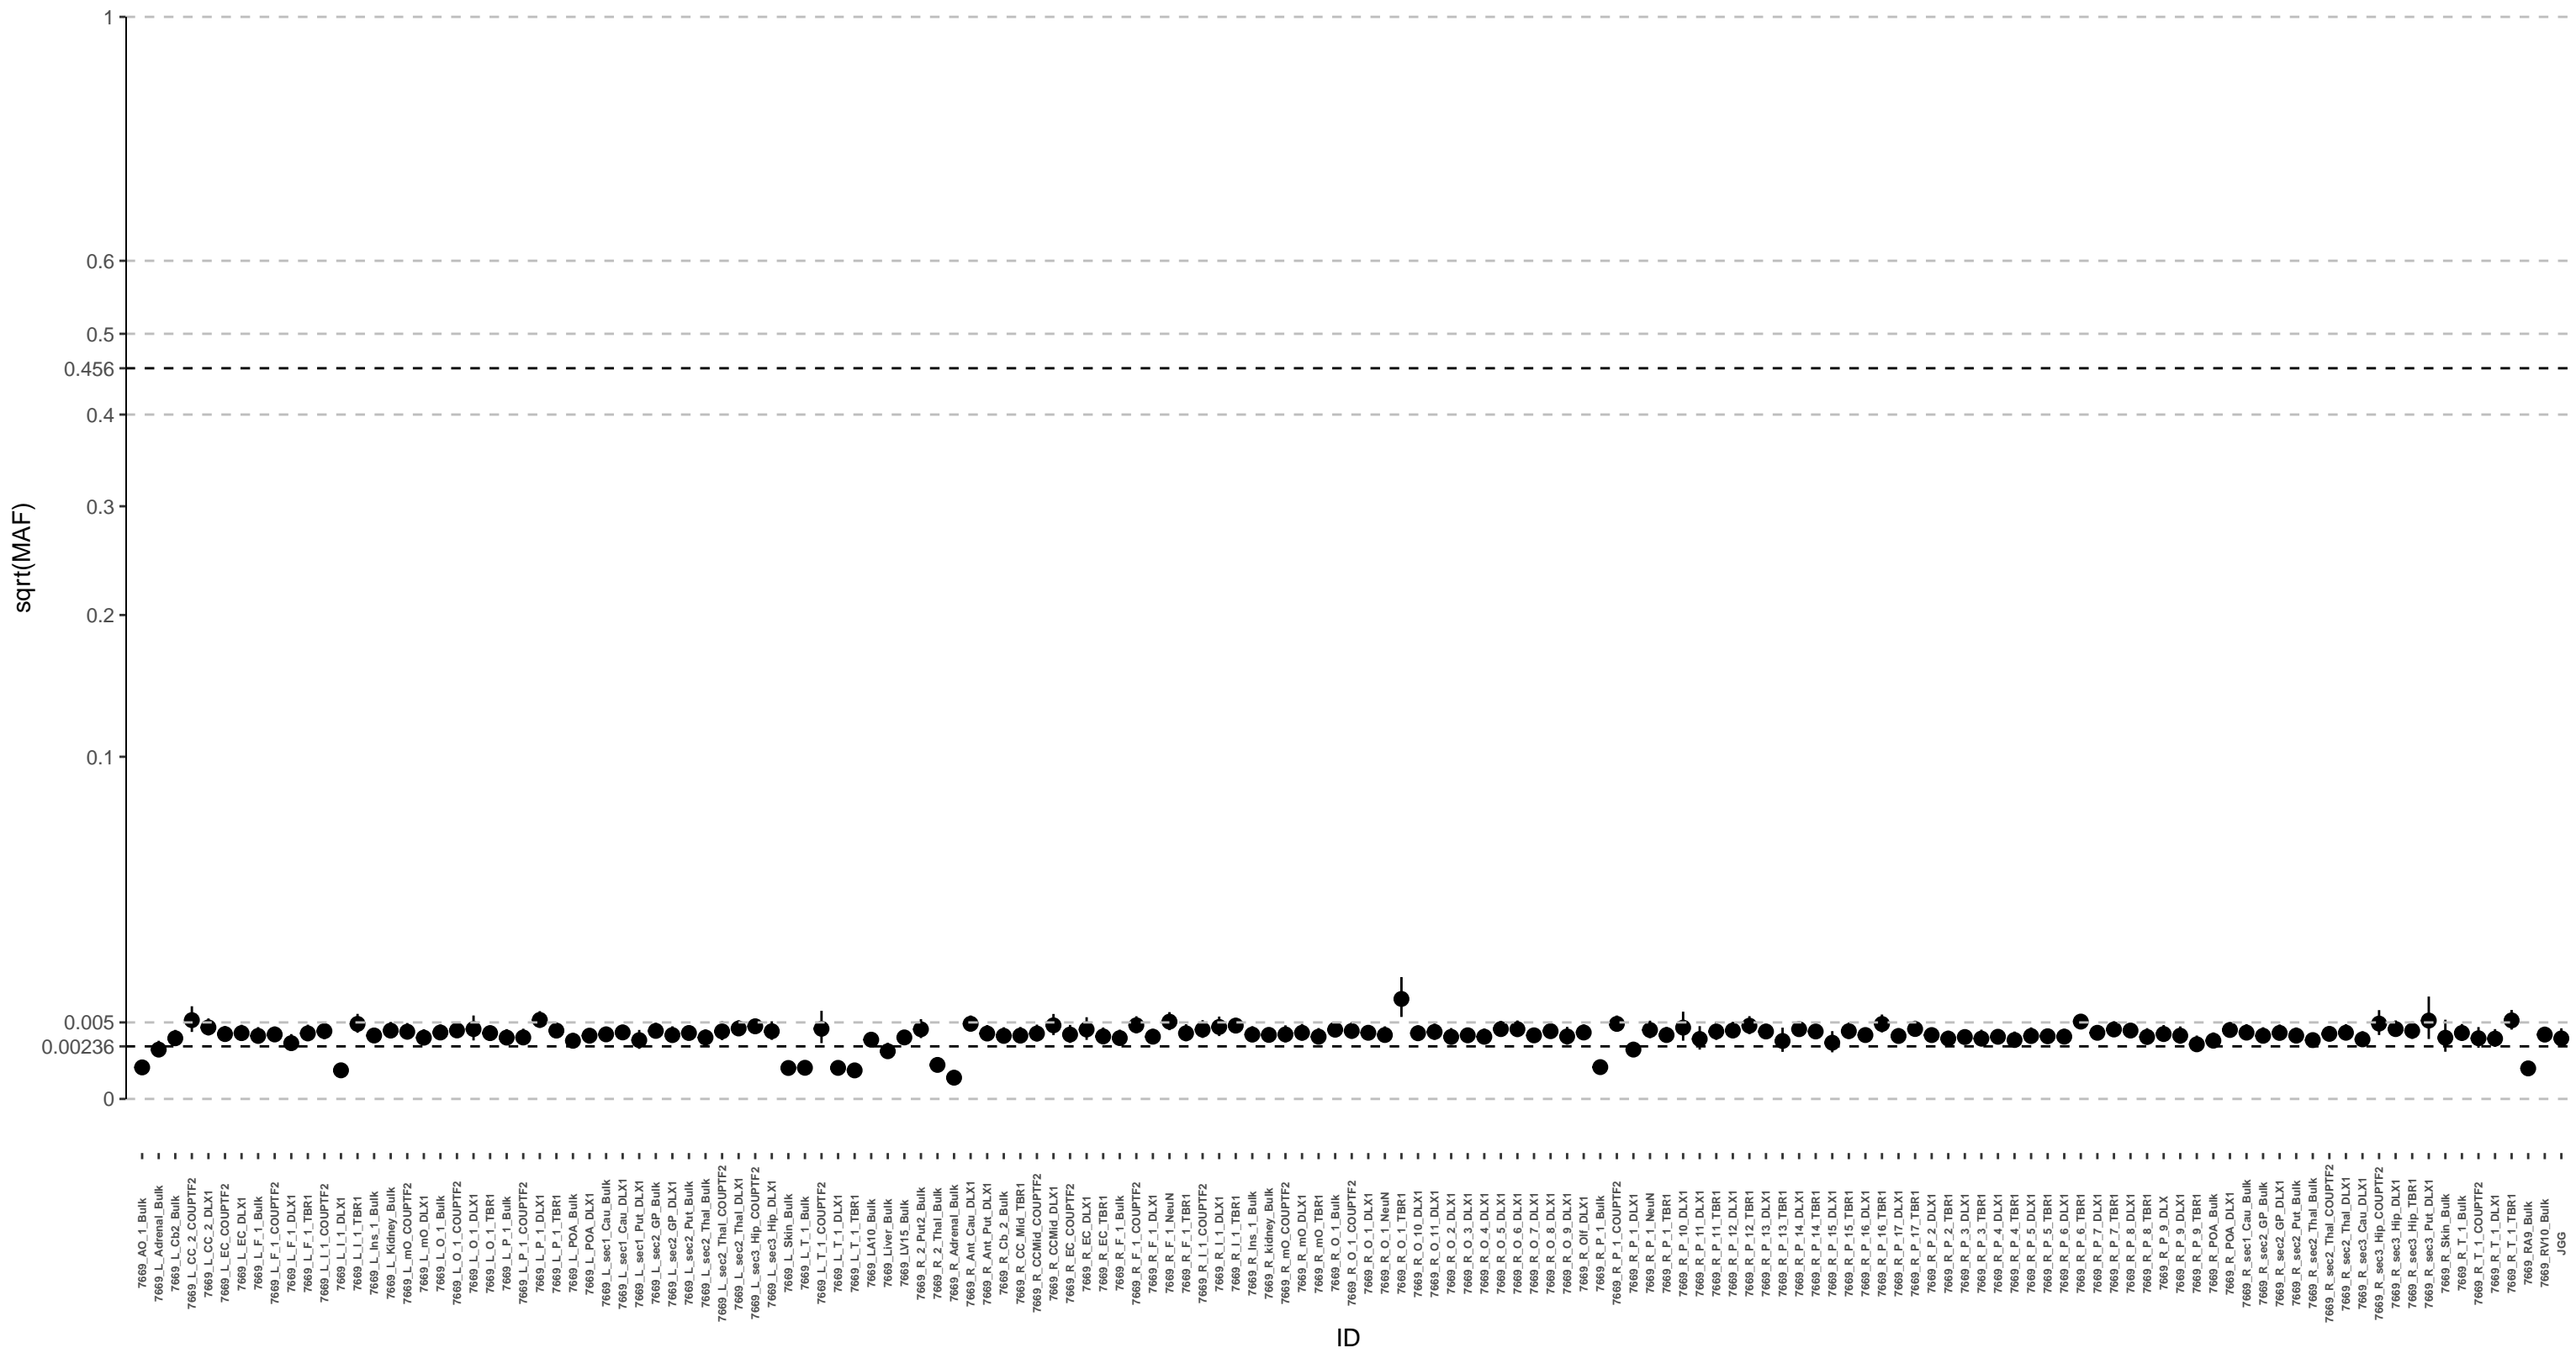

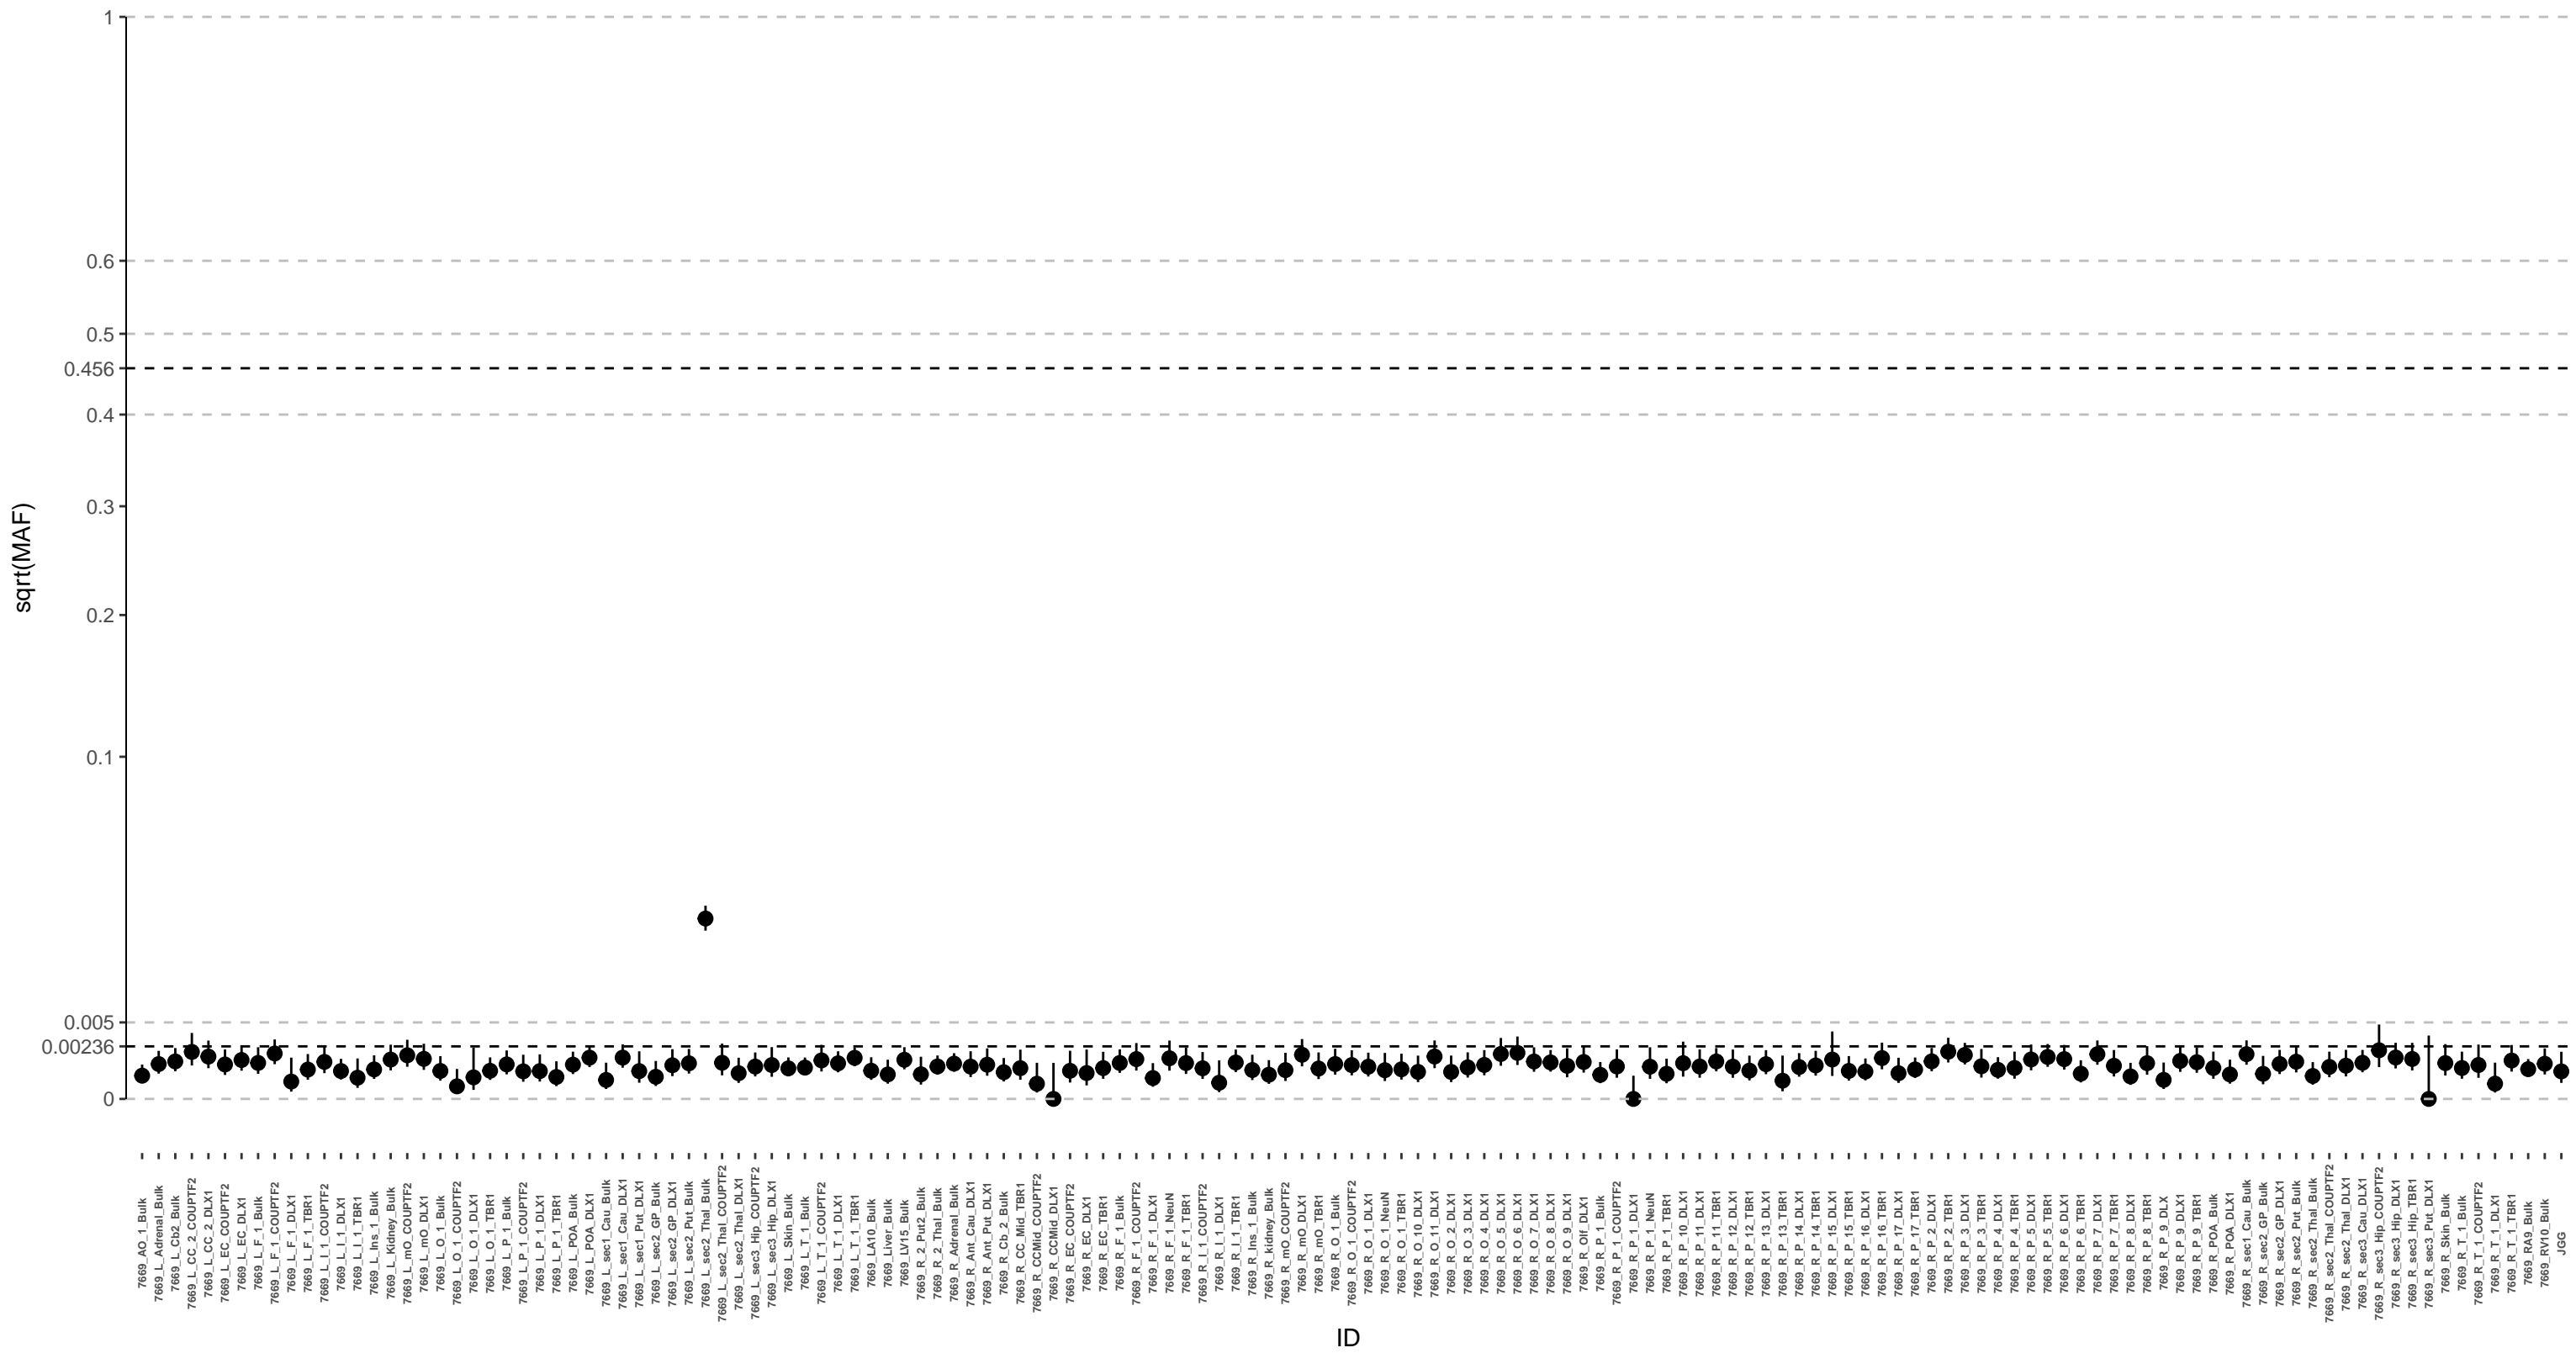

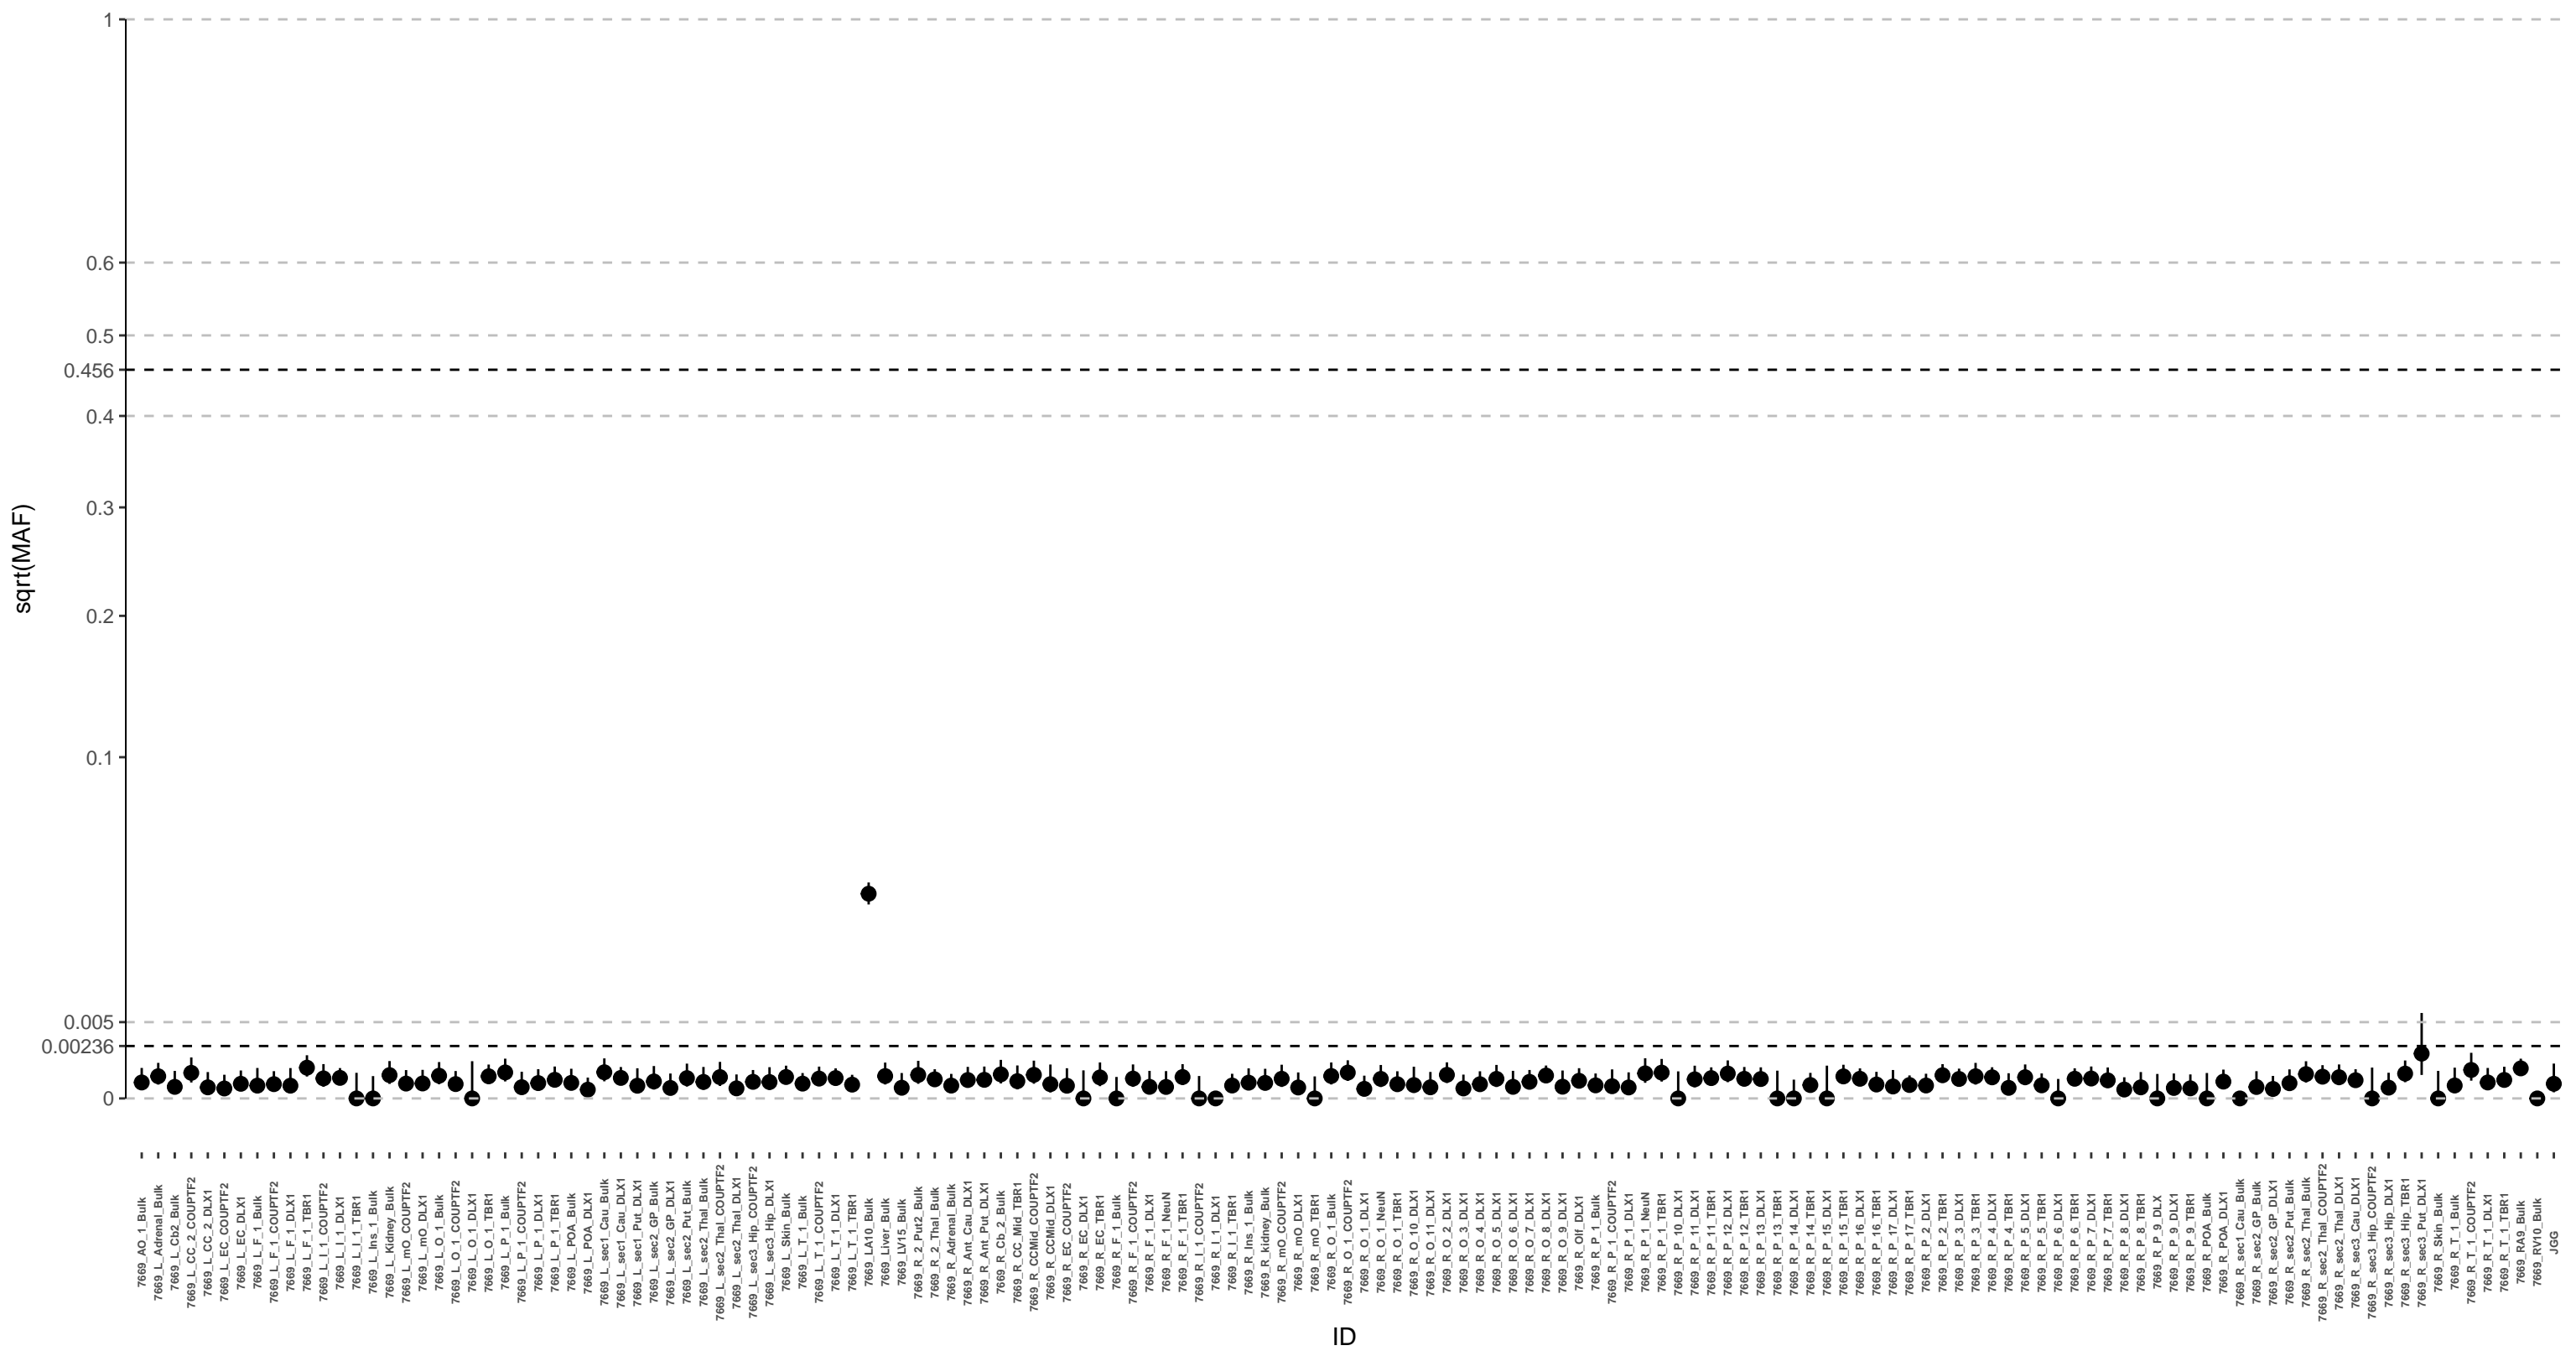

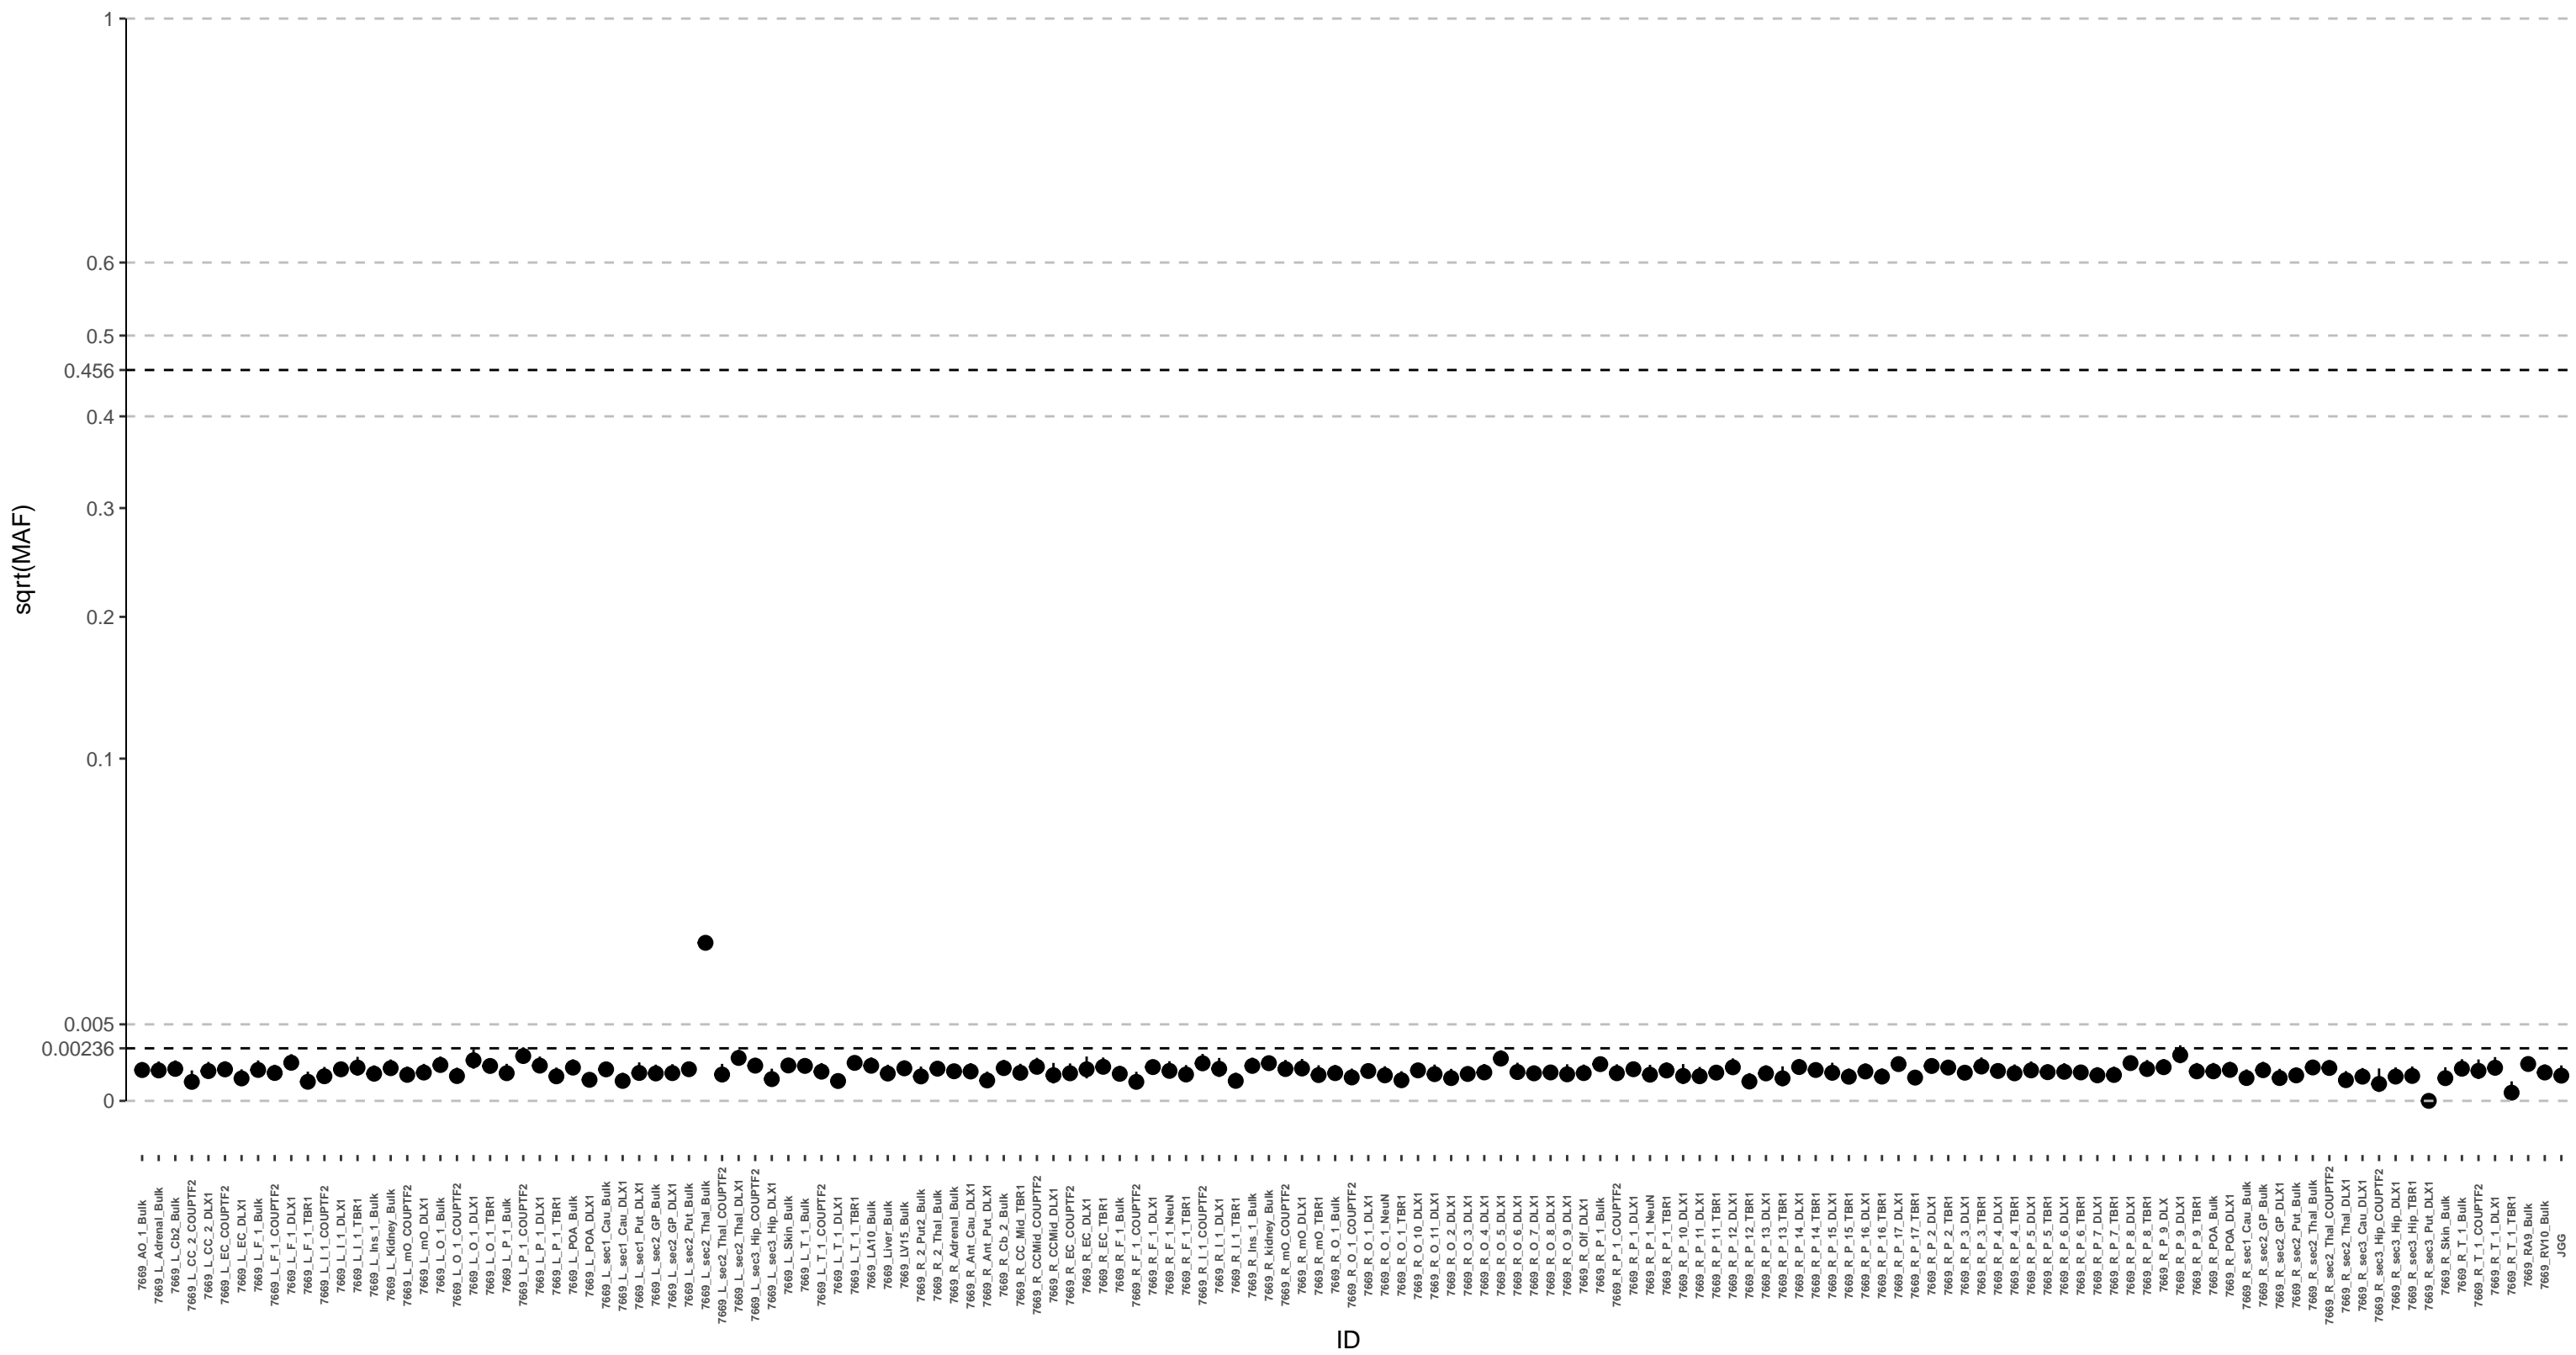

# ID05 X-28357791-T-A

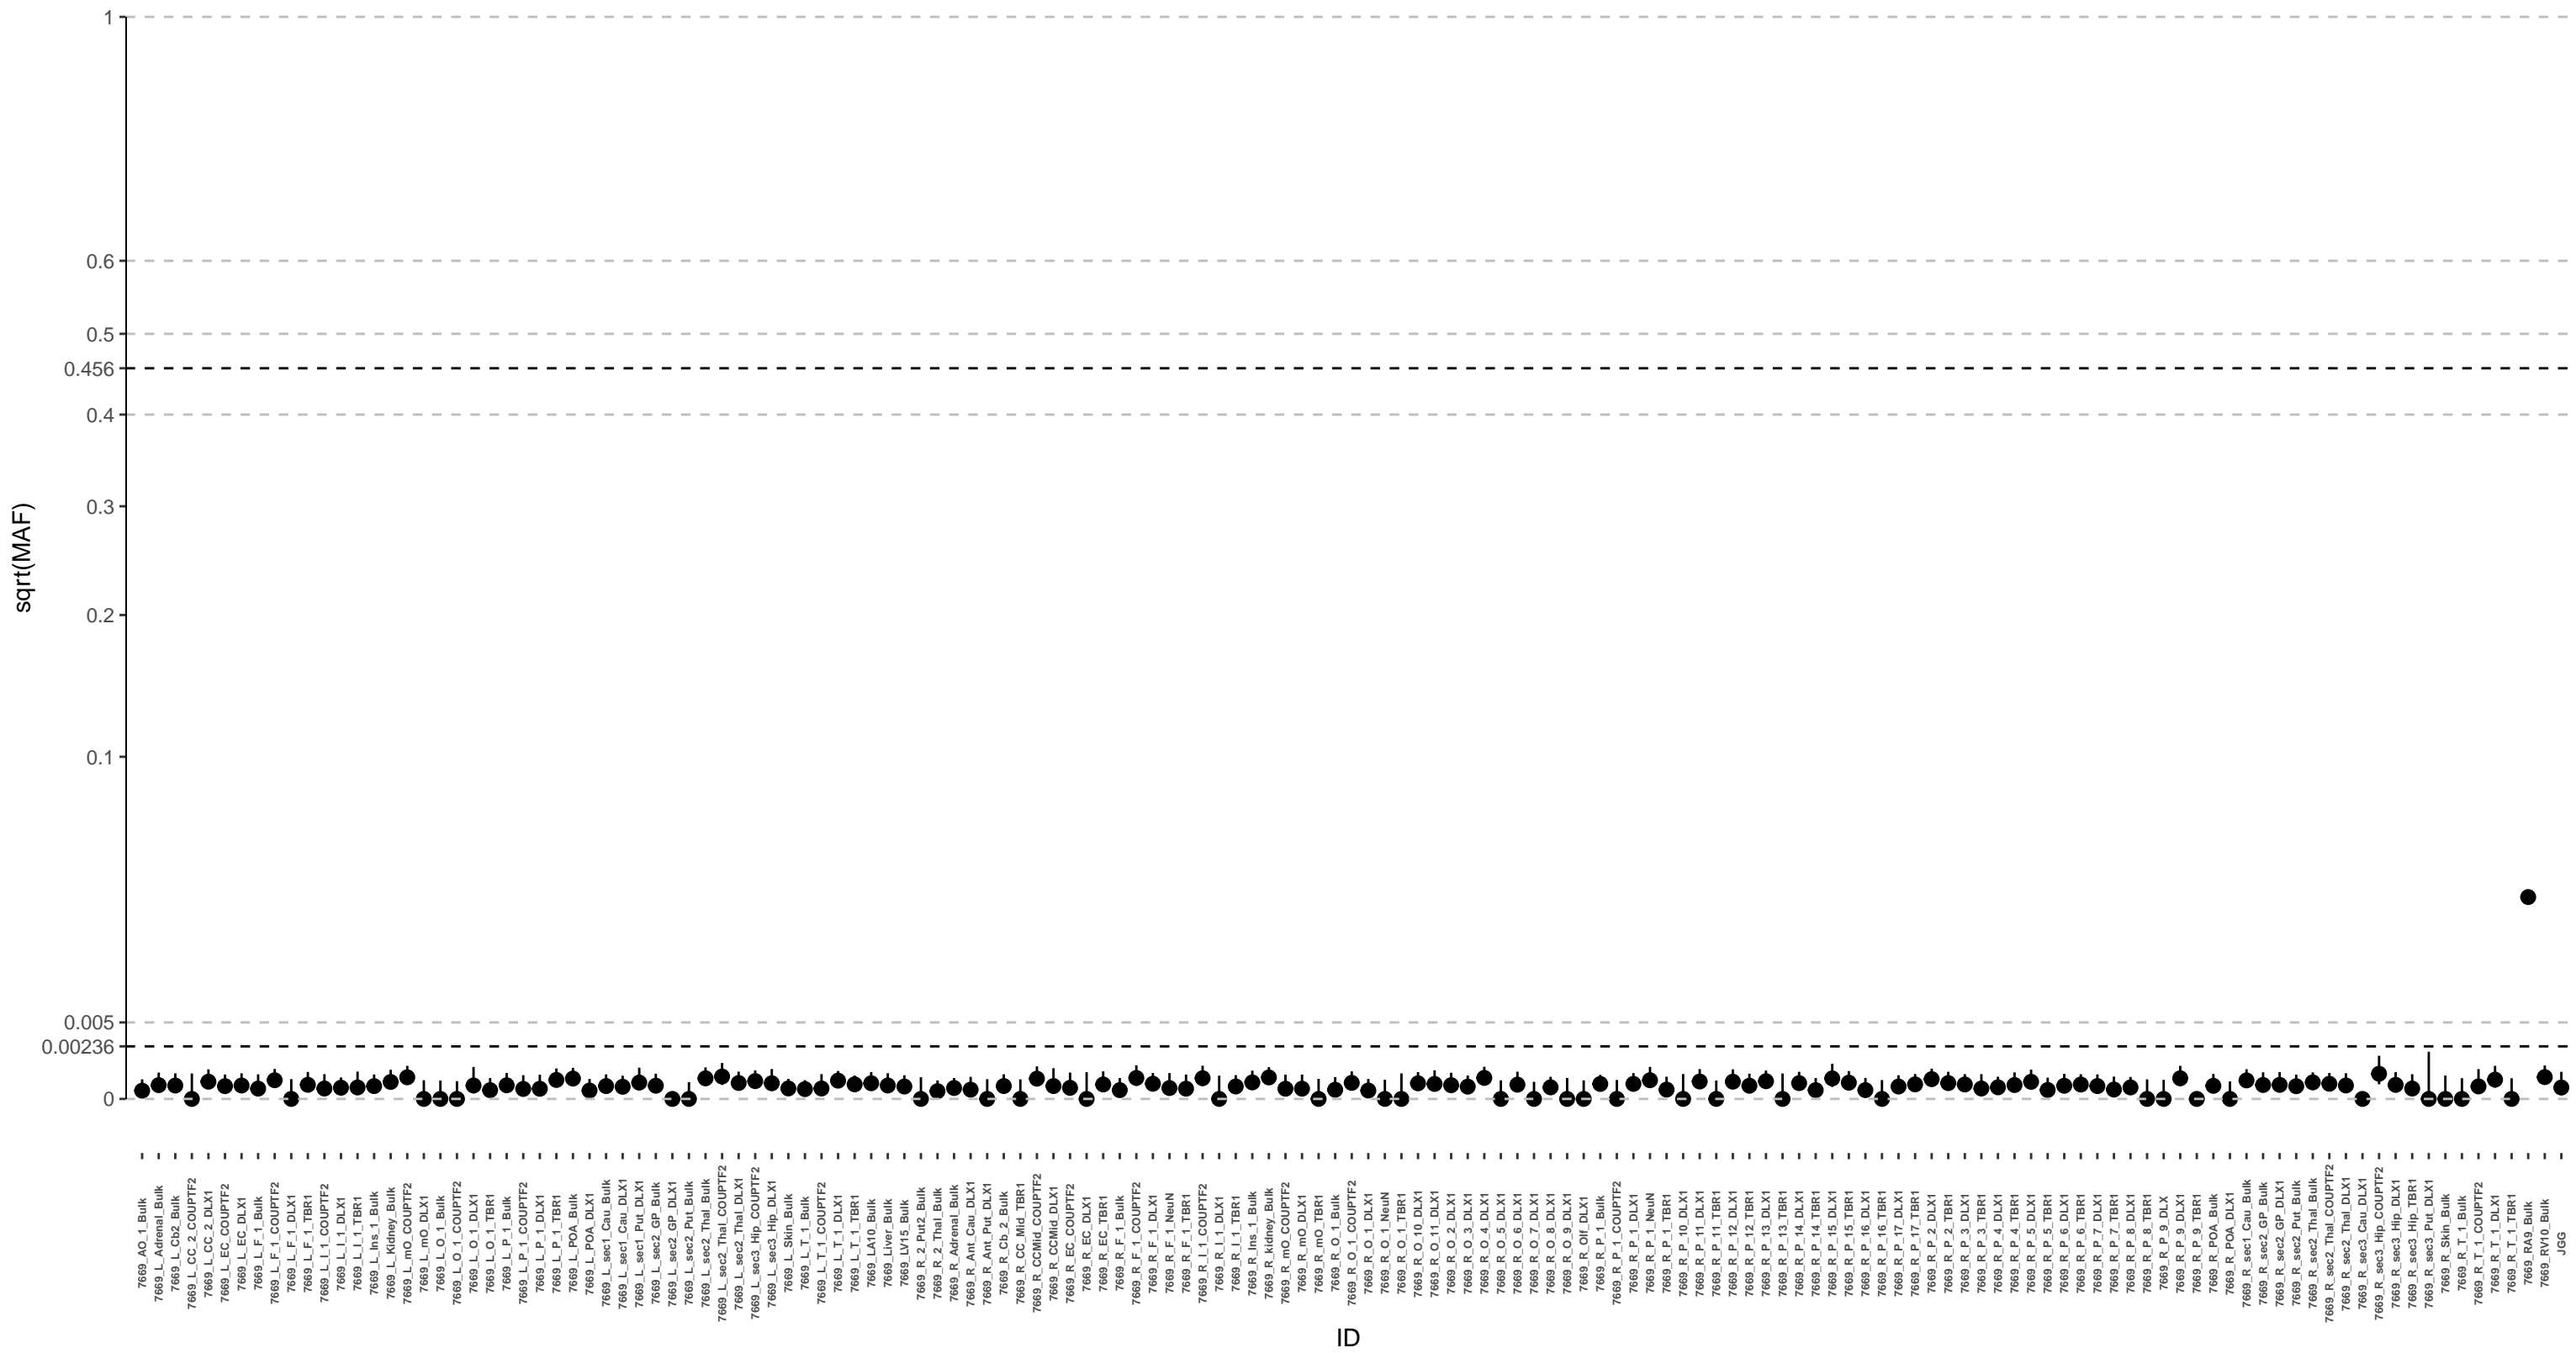

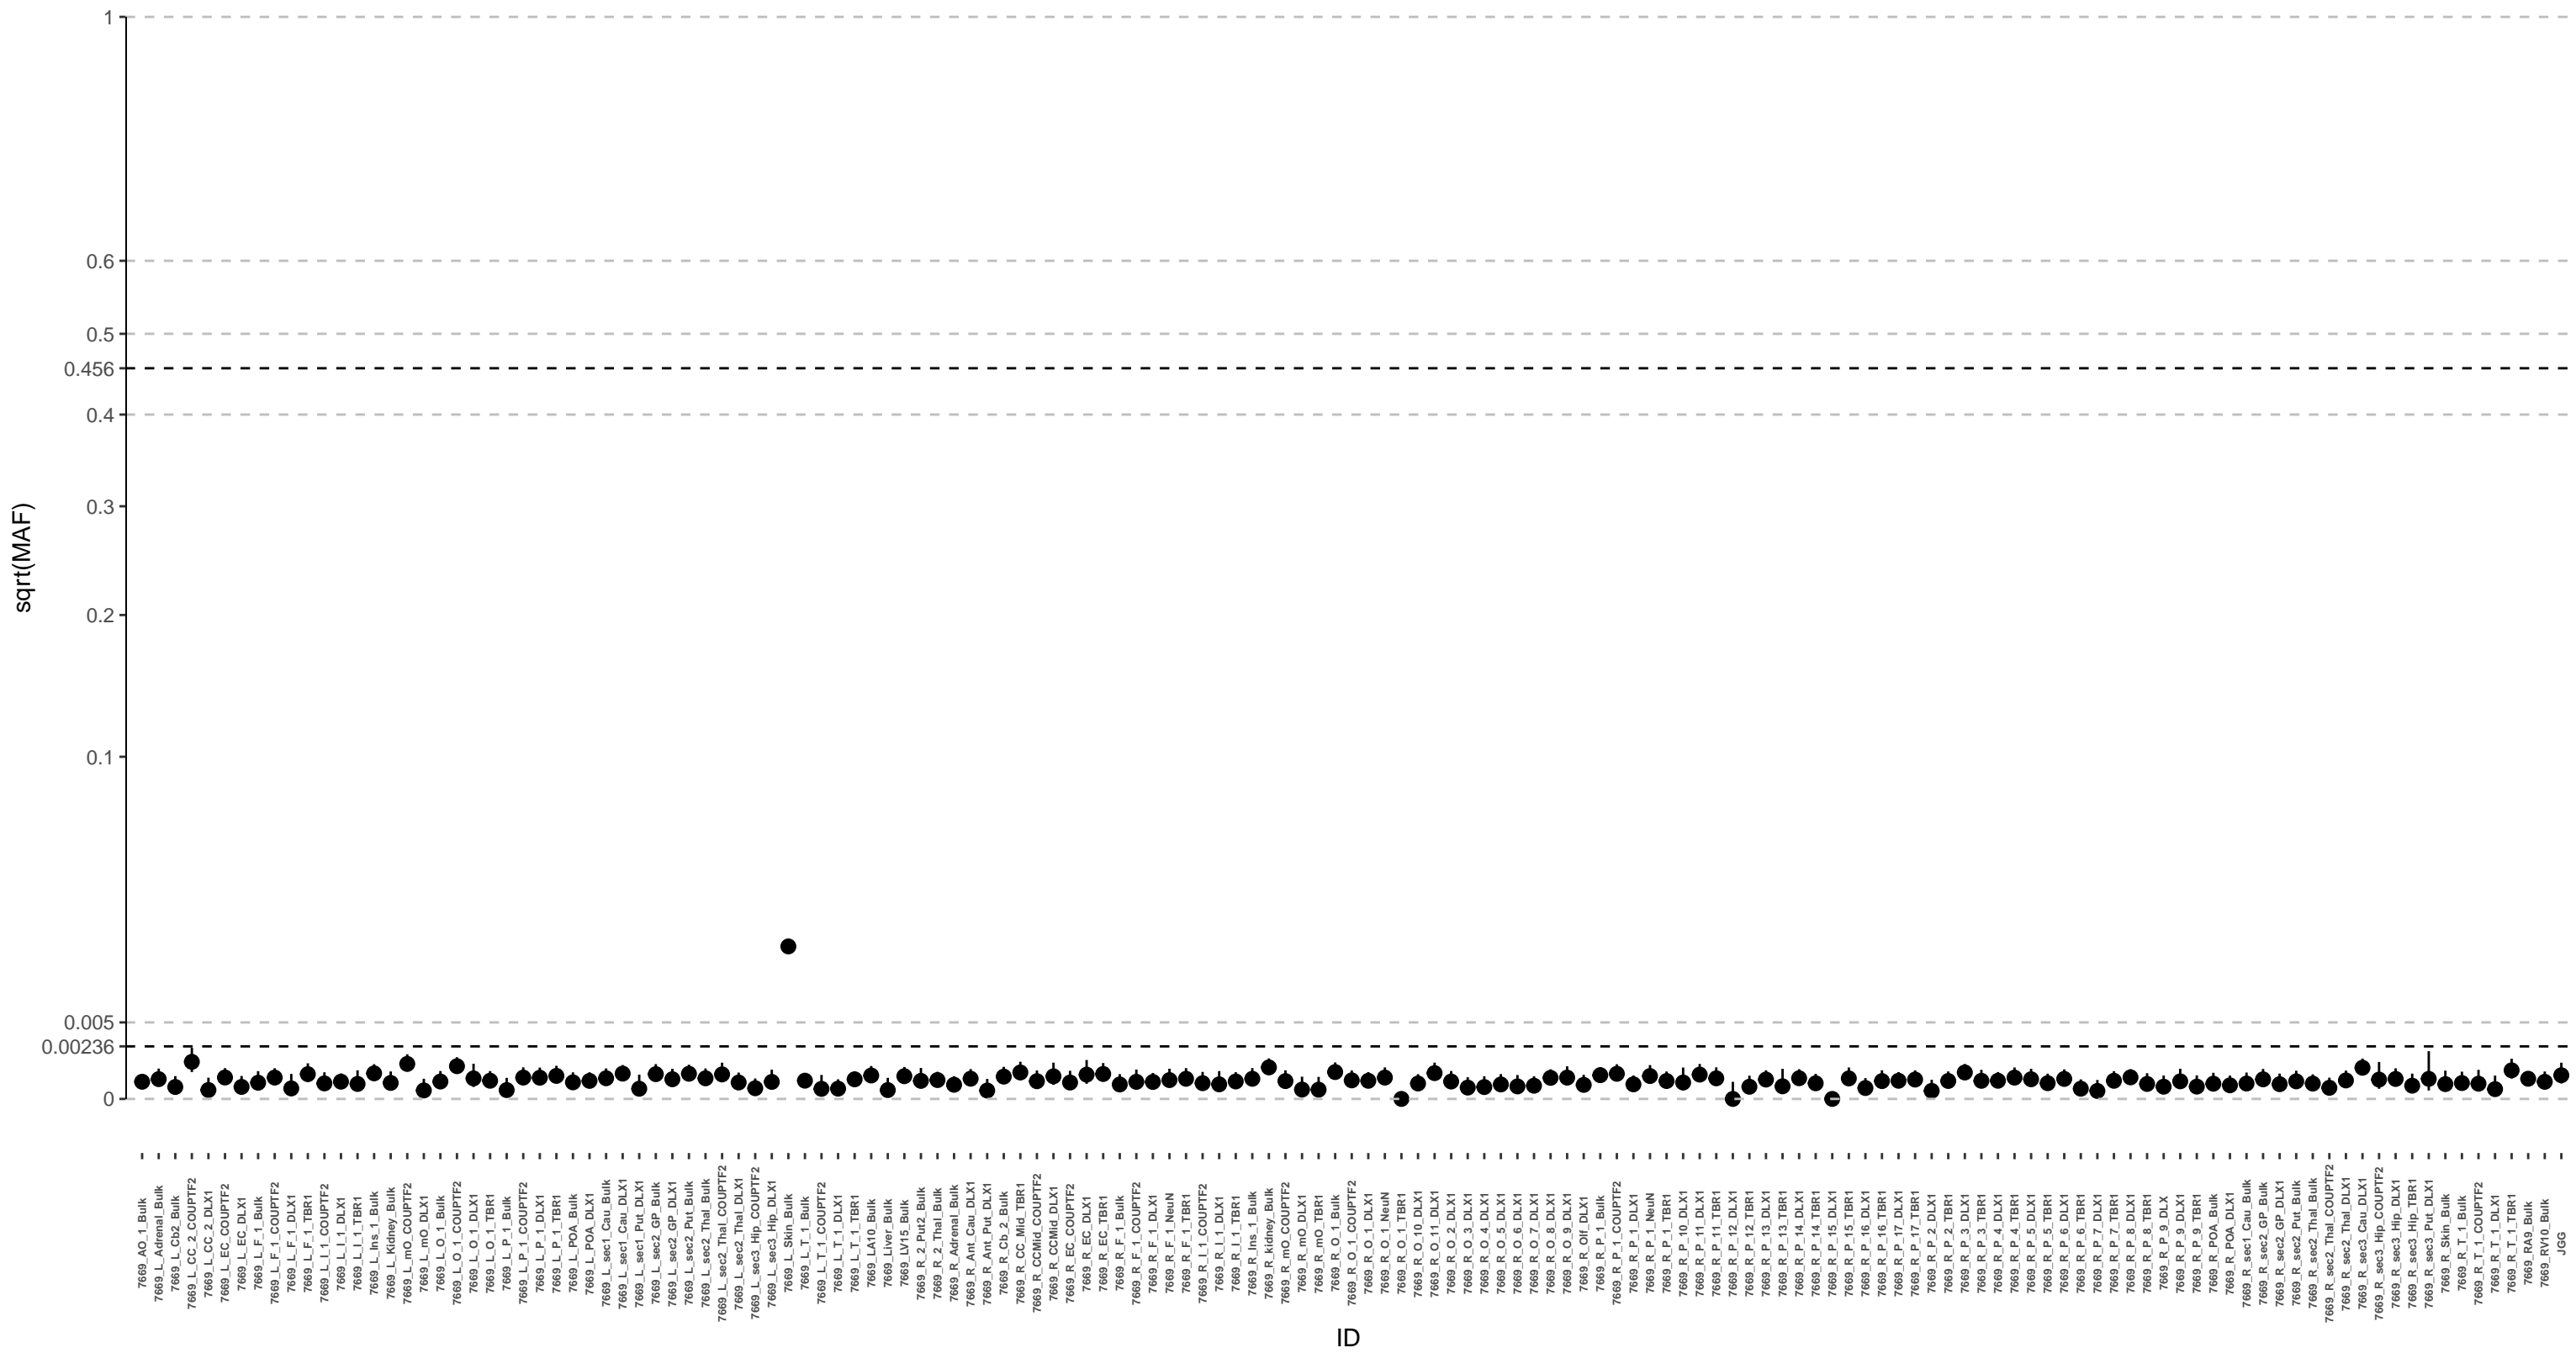

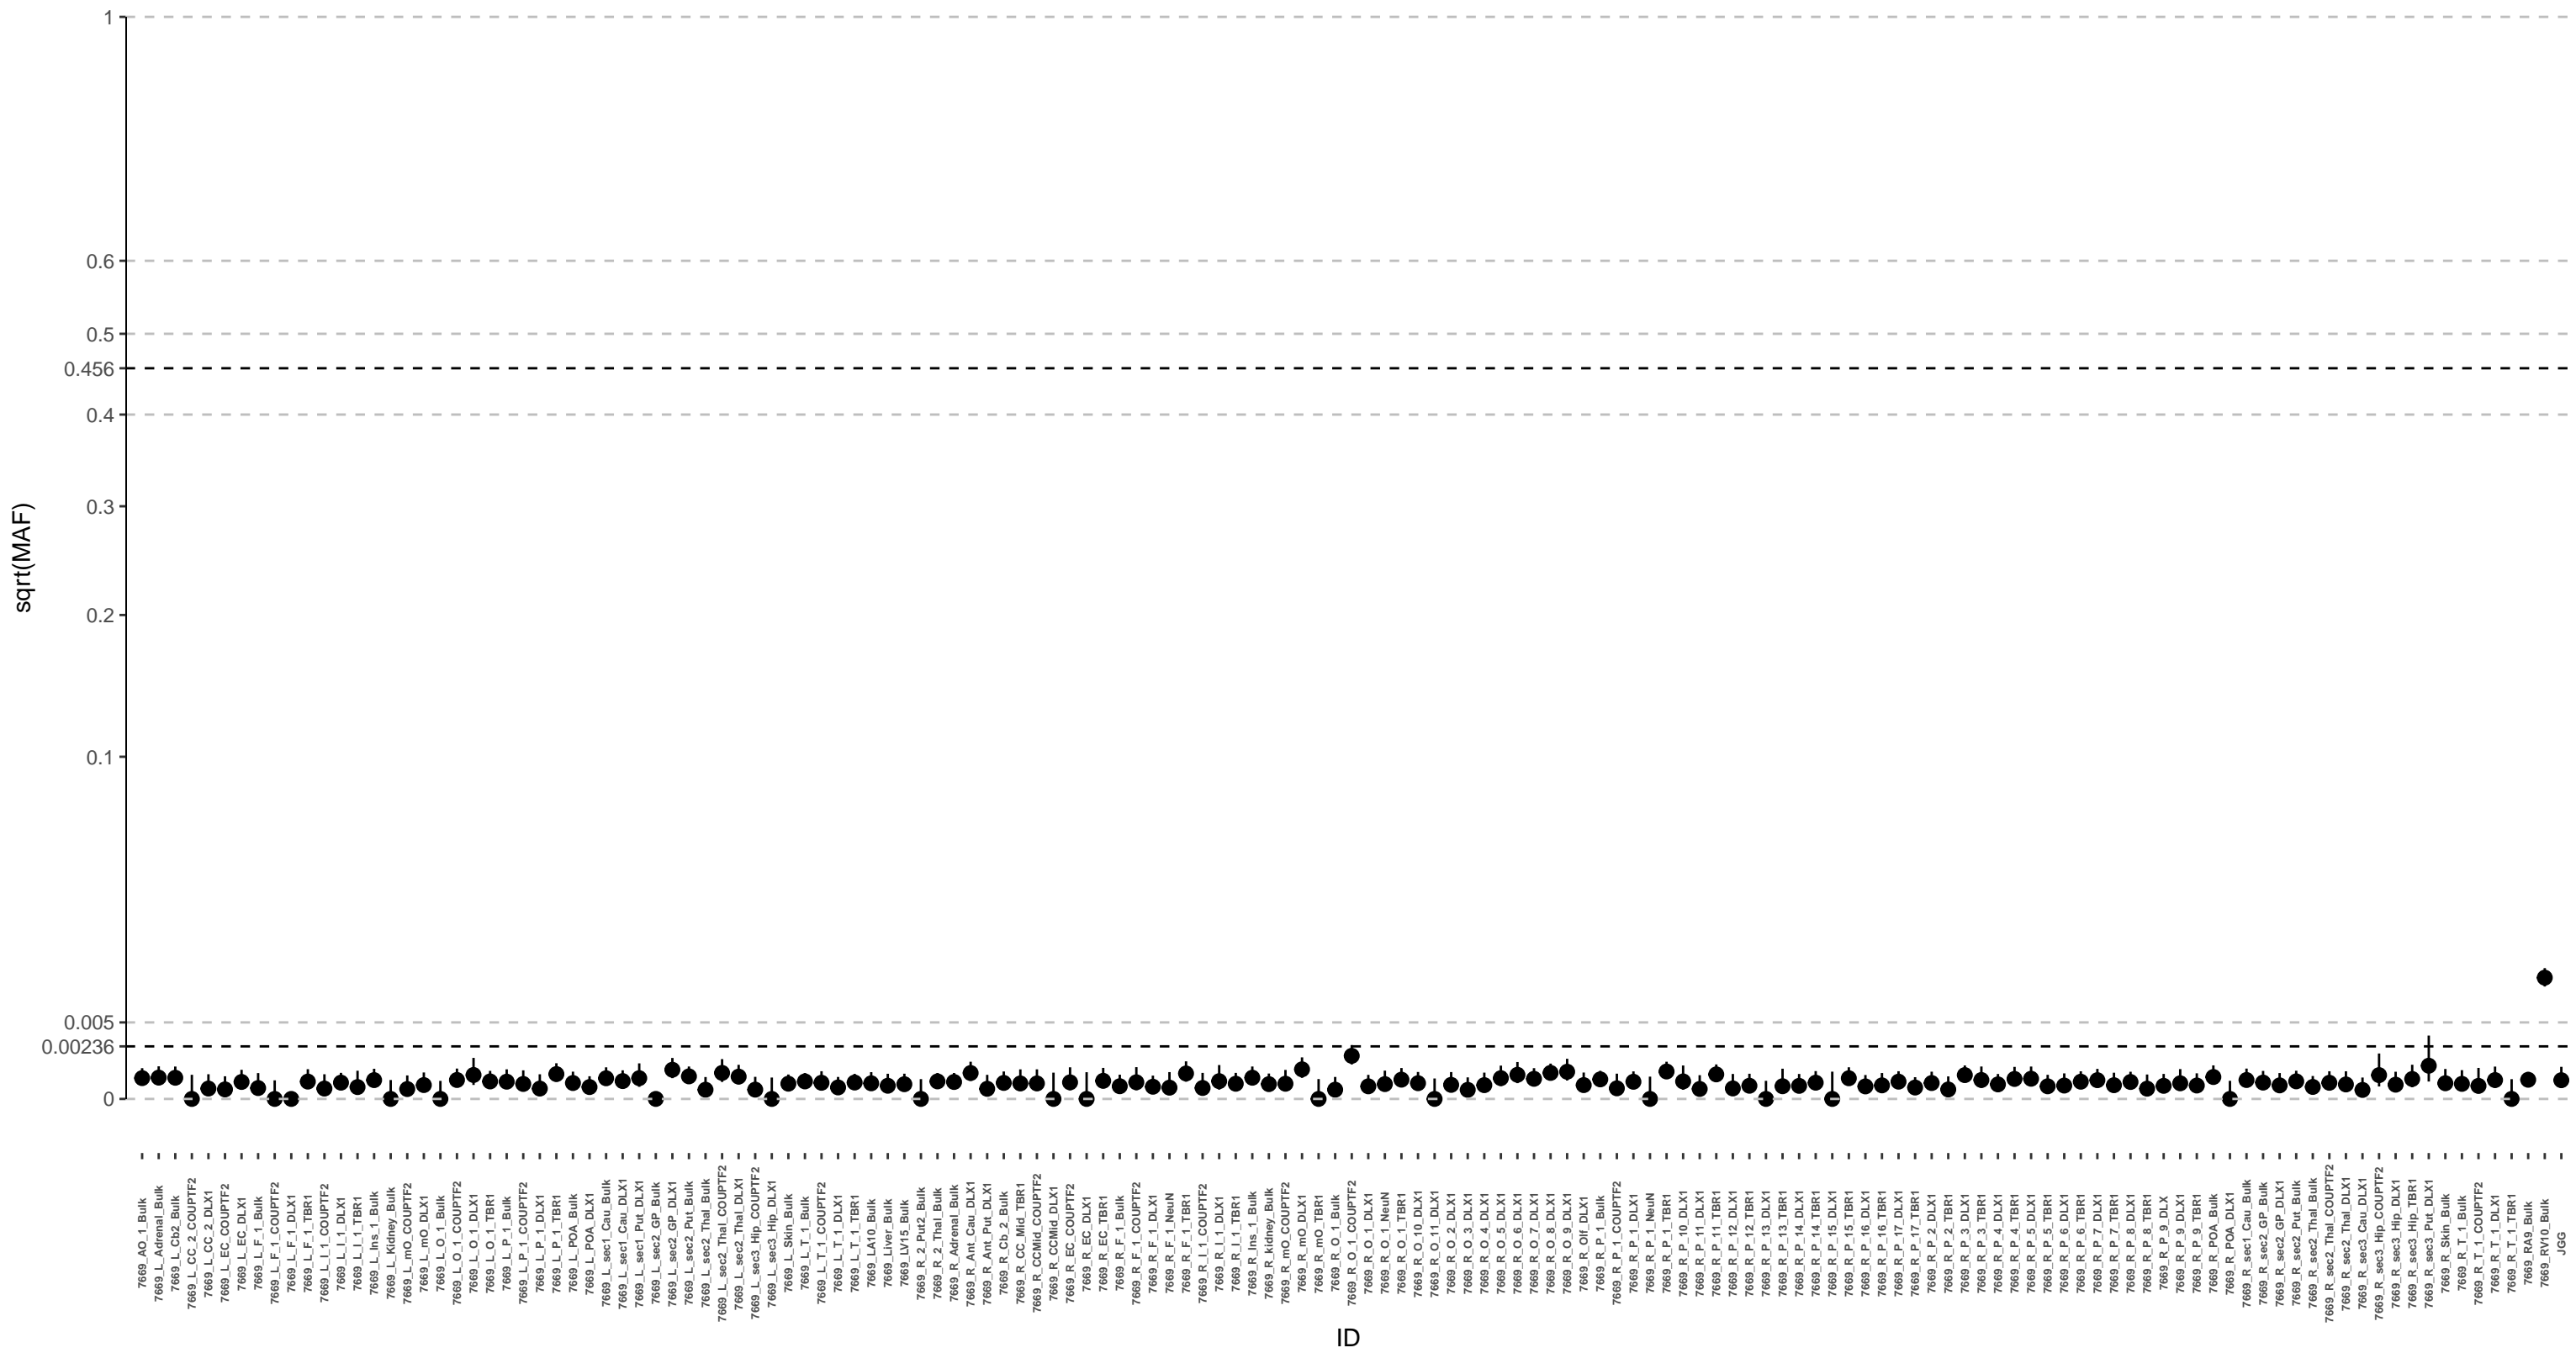

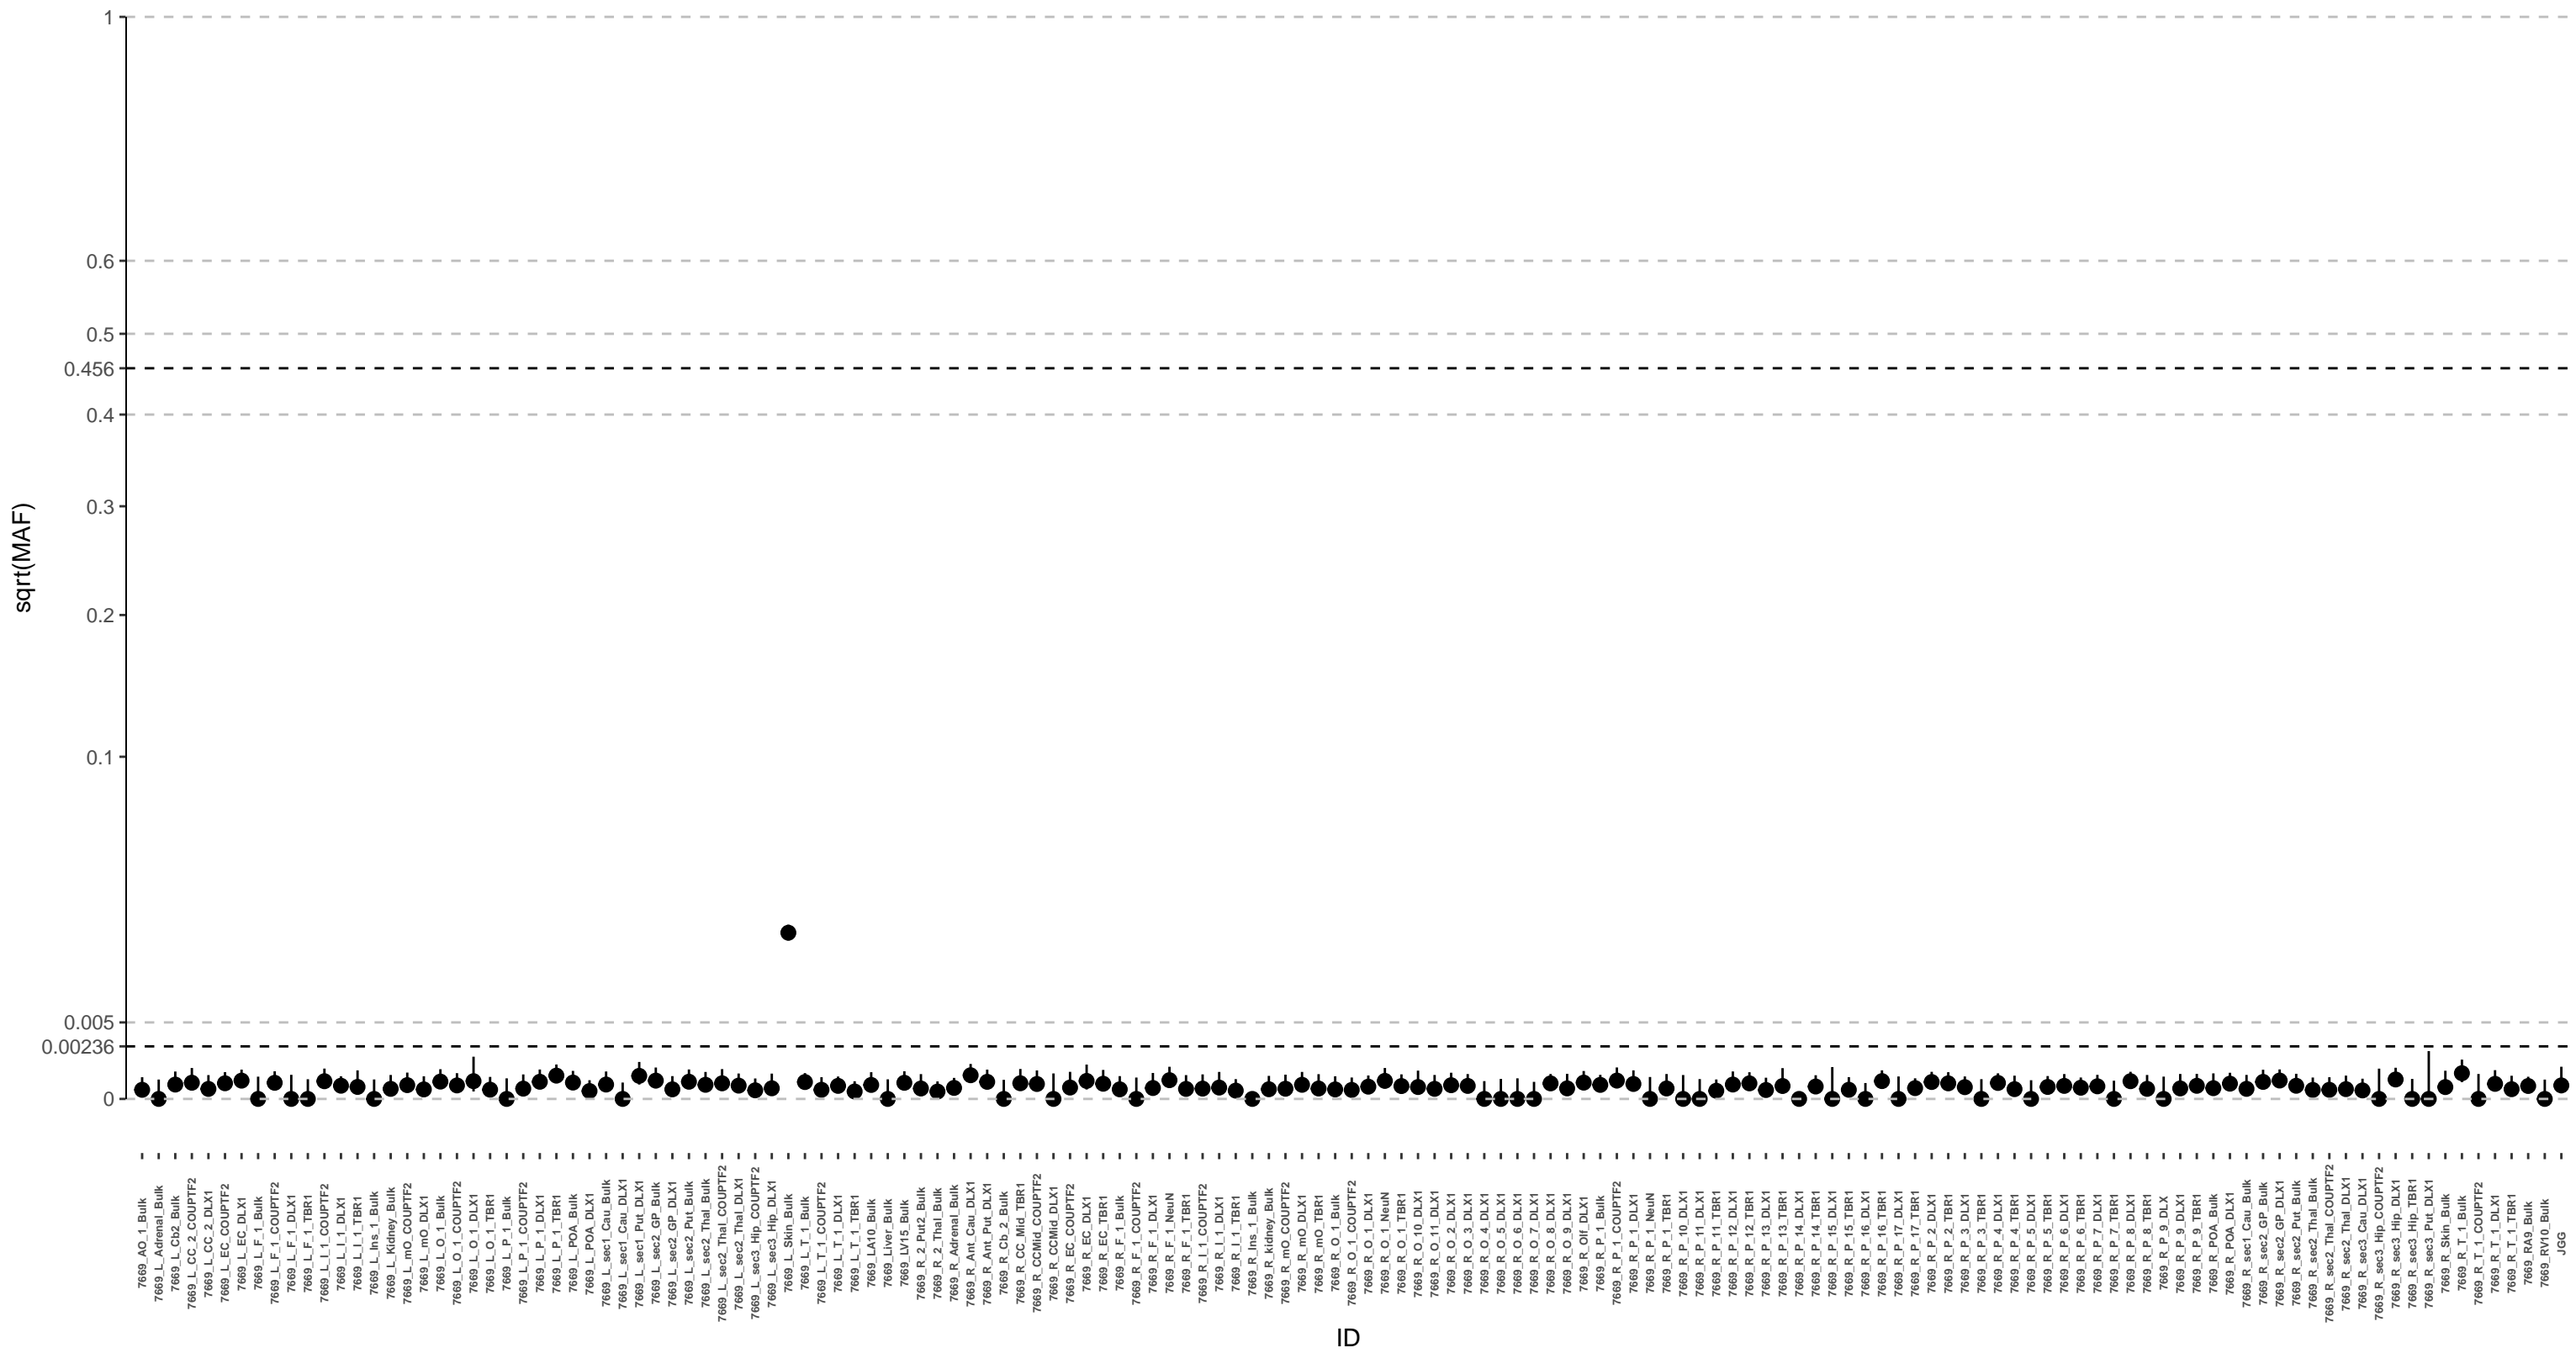



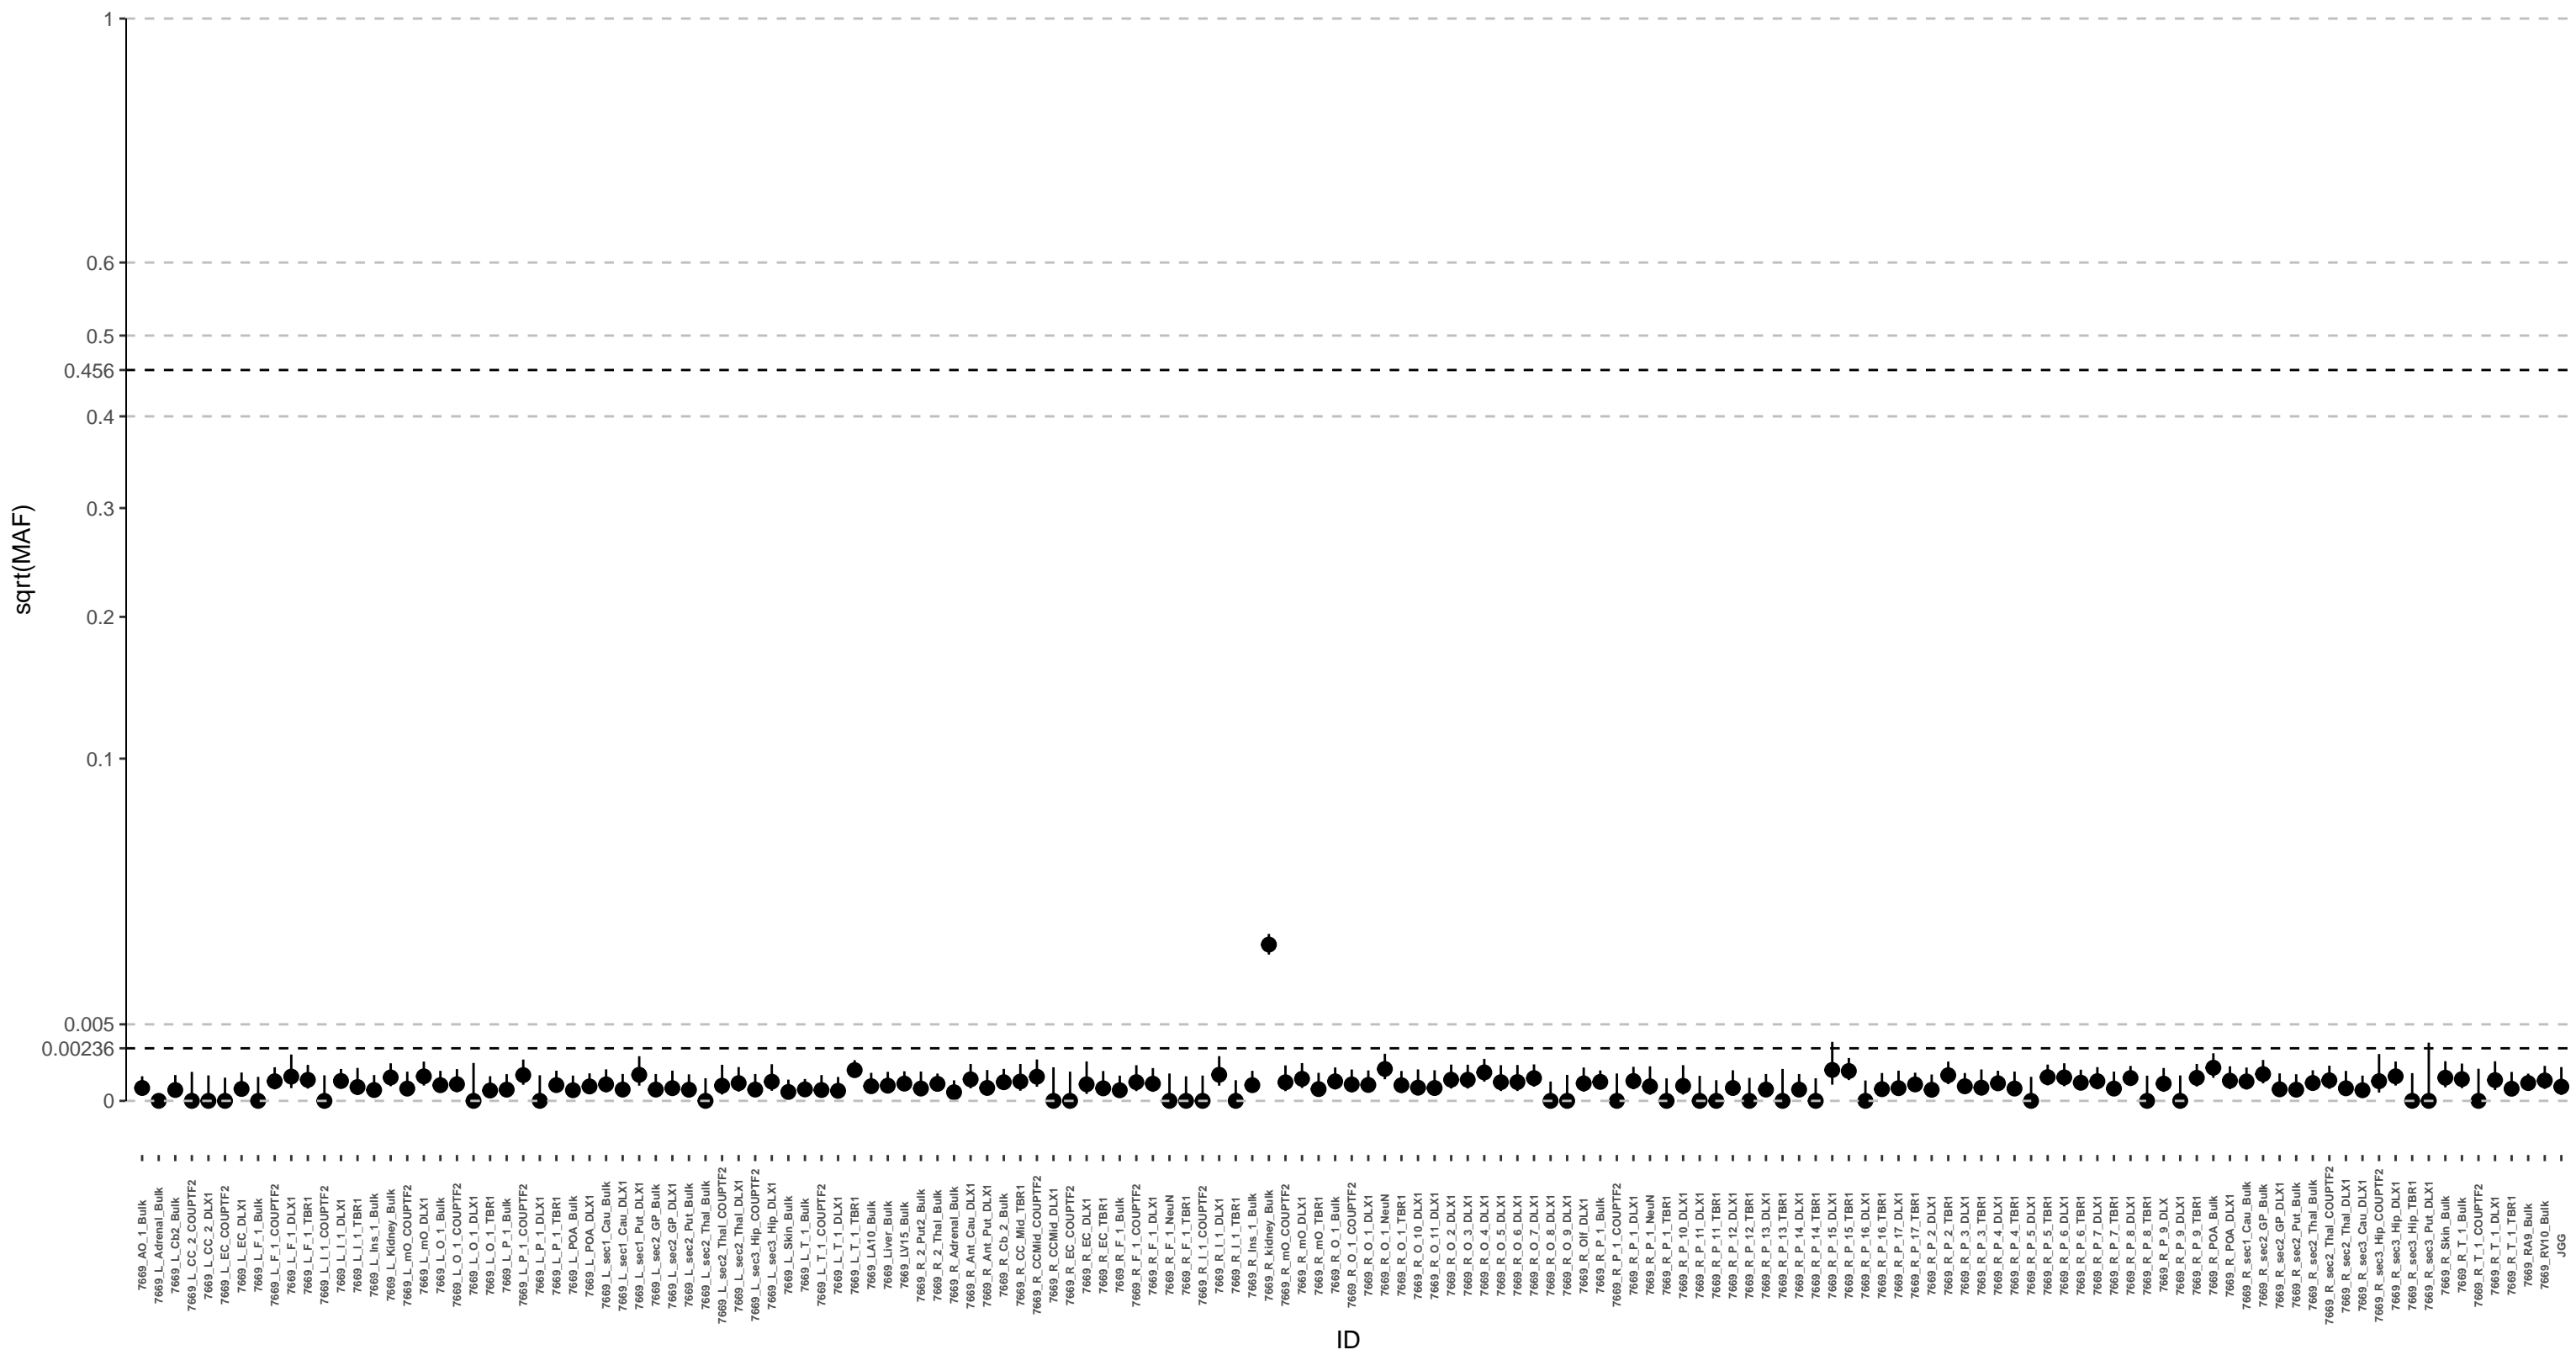

ID05 X-34801213-T-C

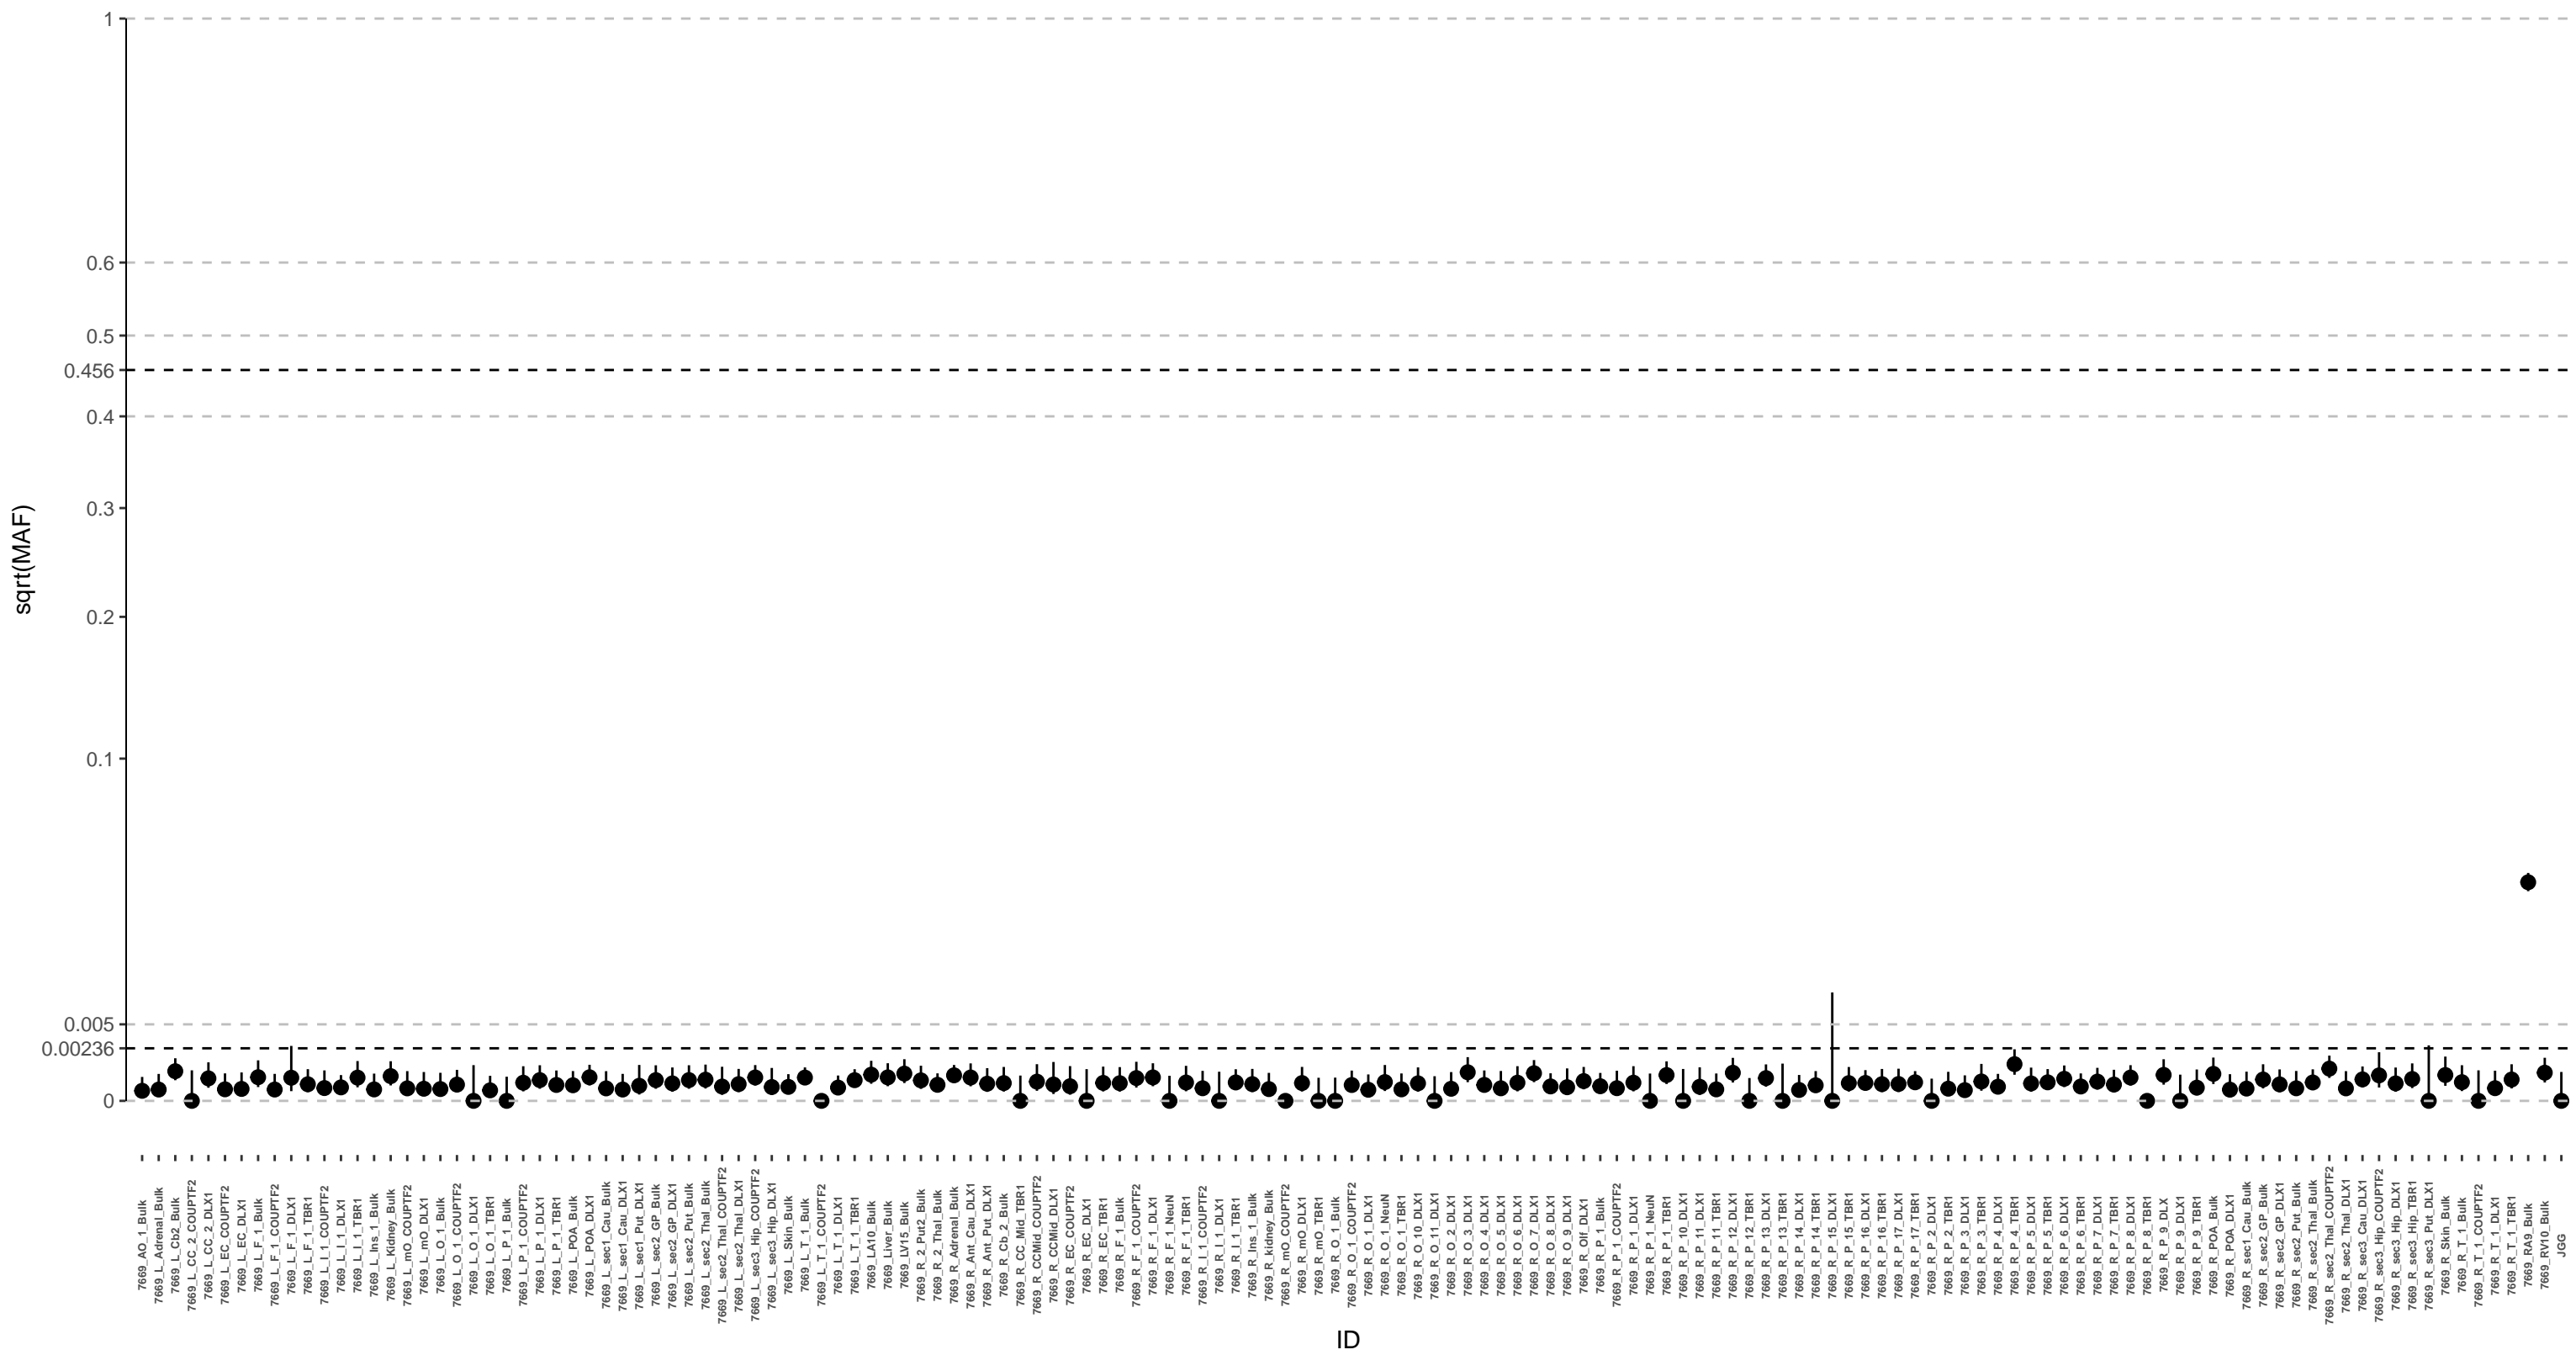

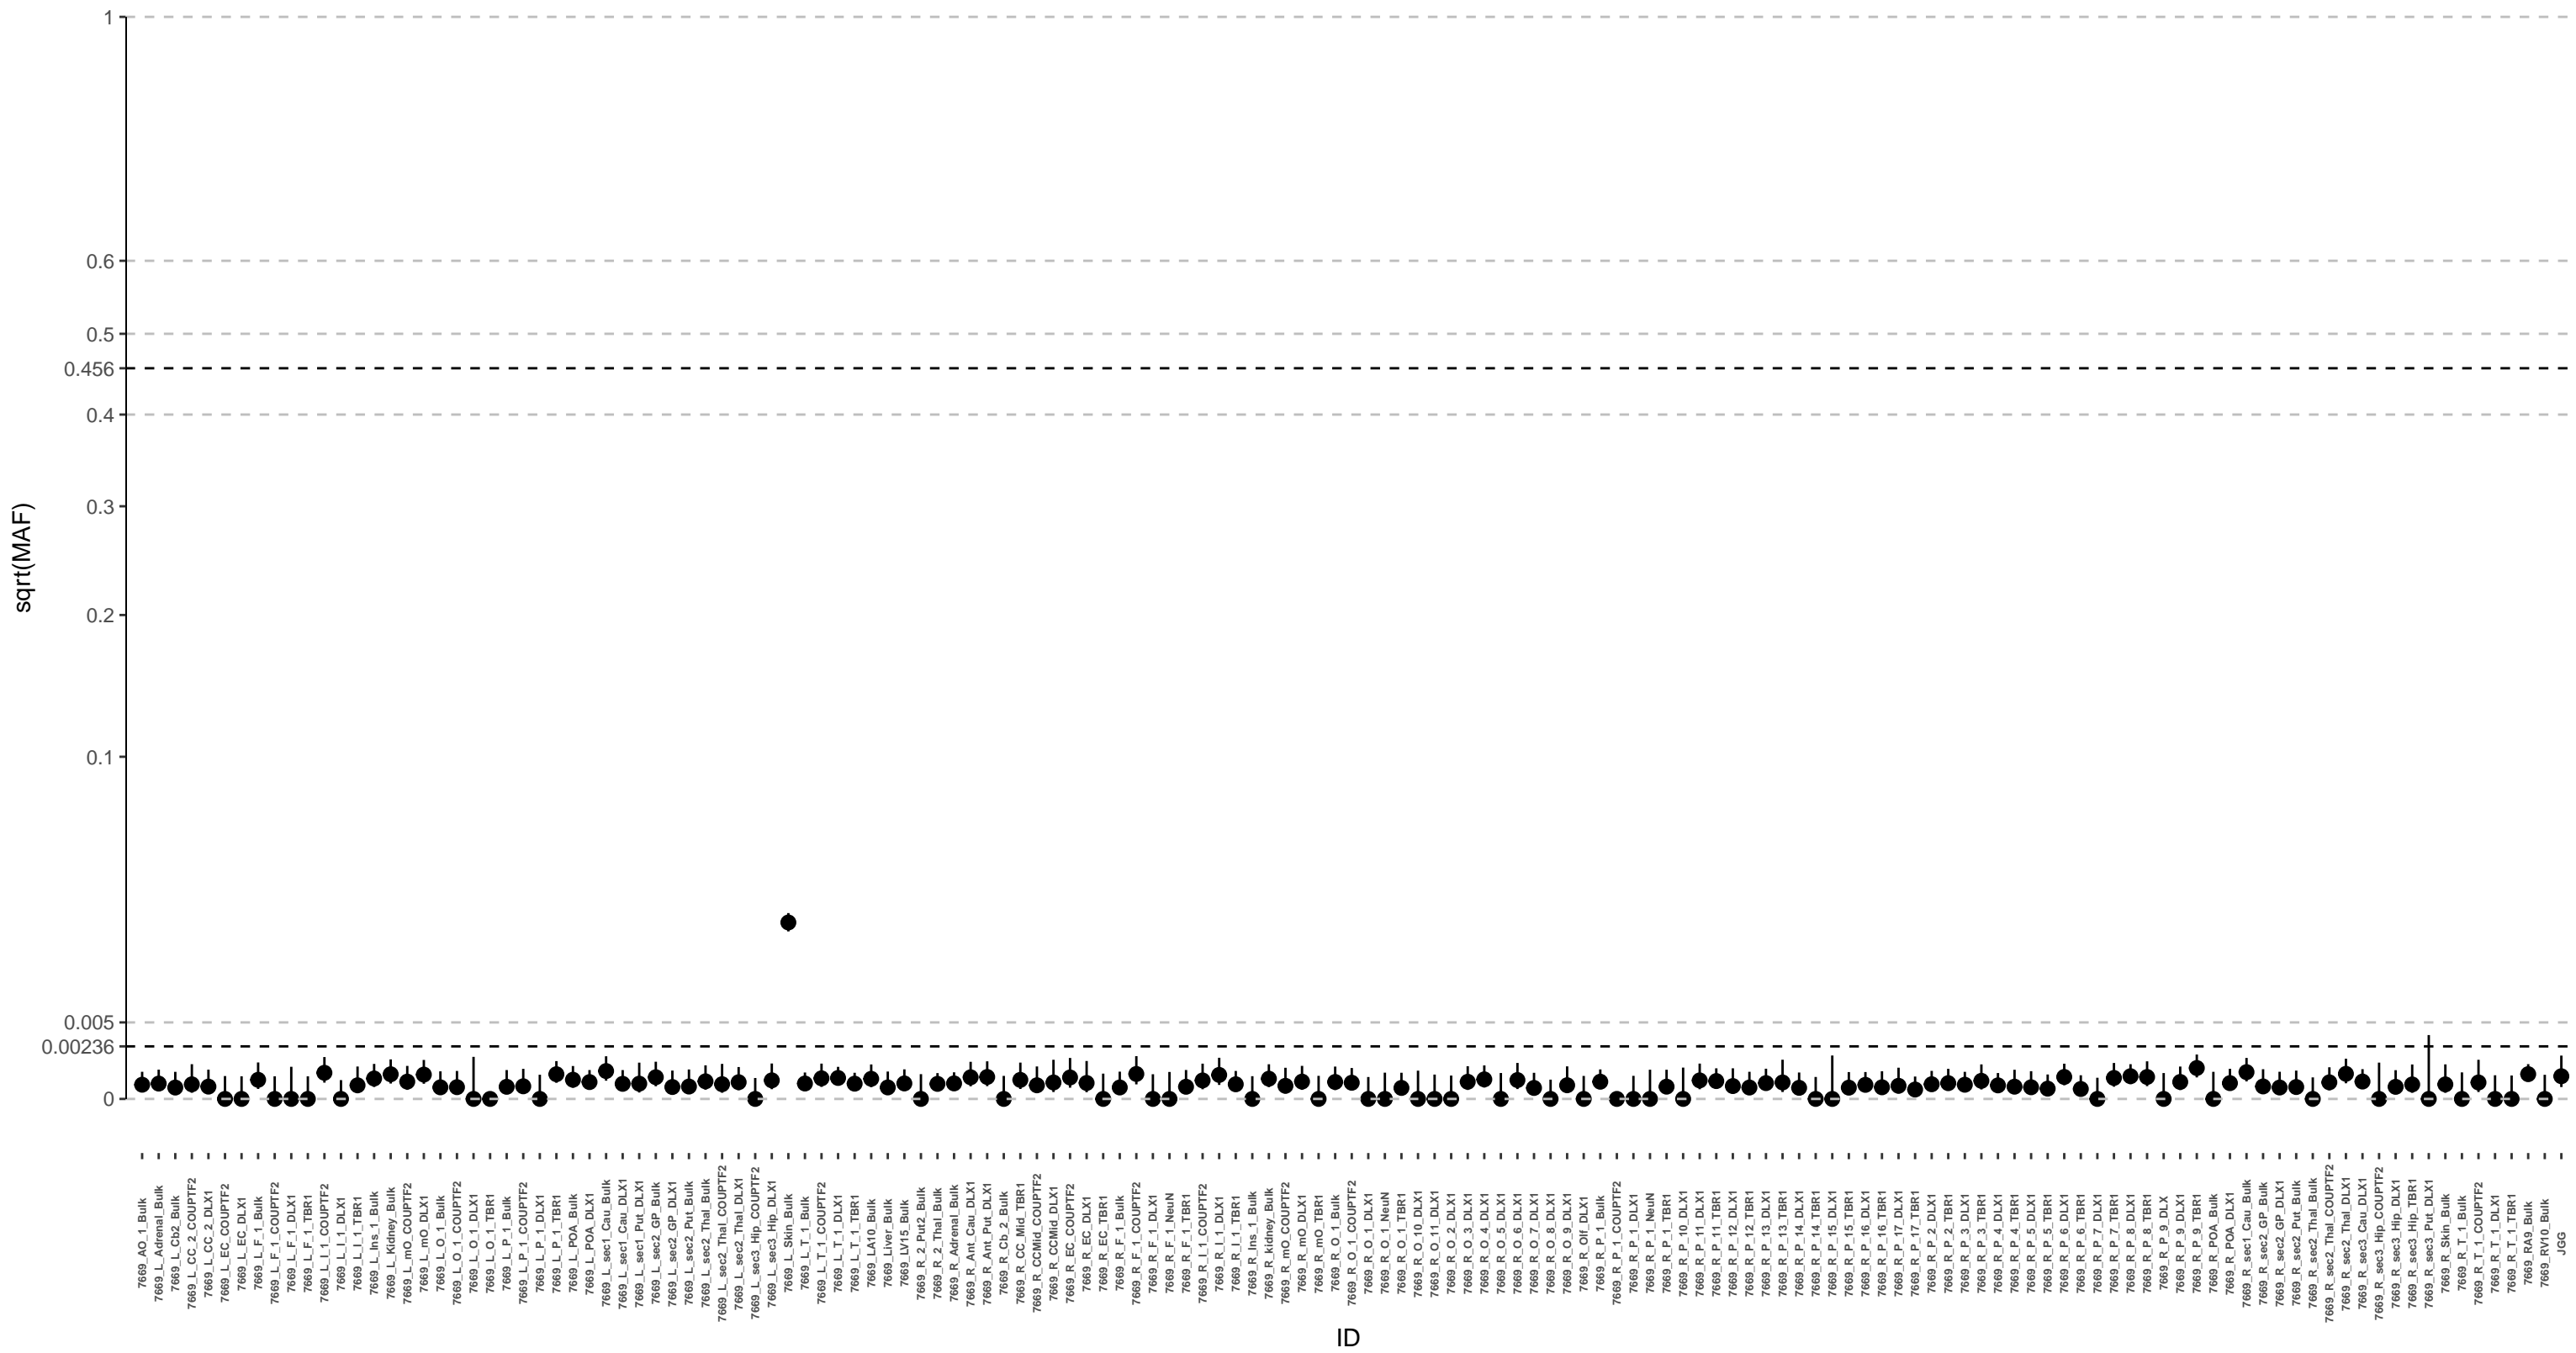

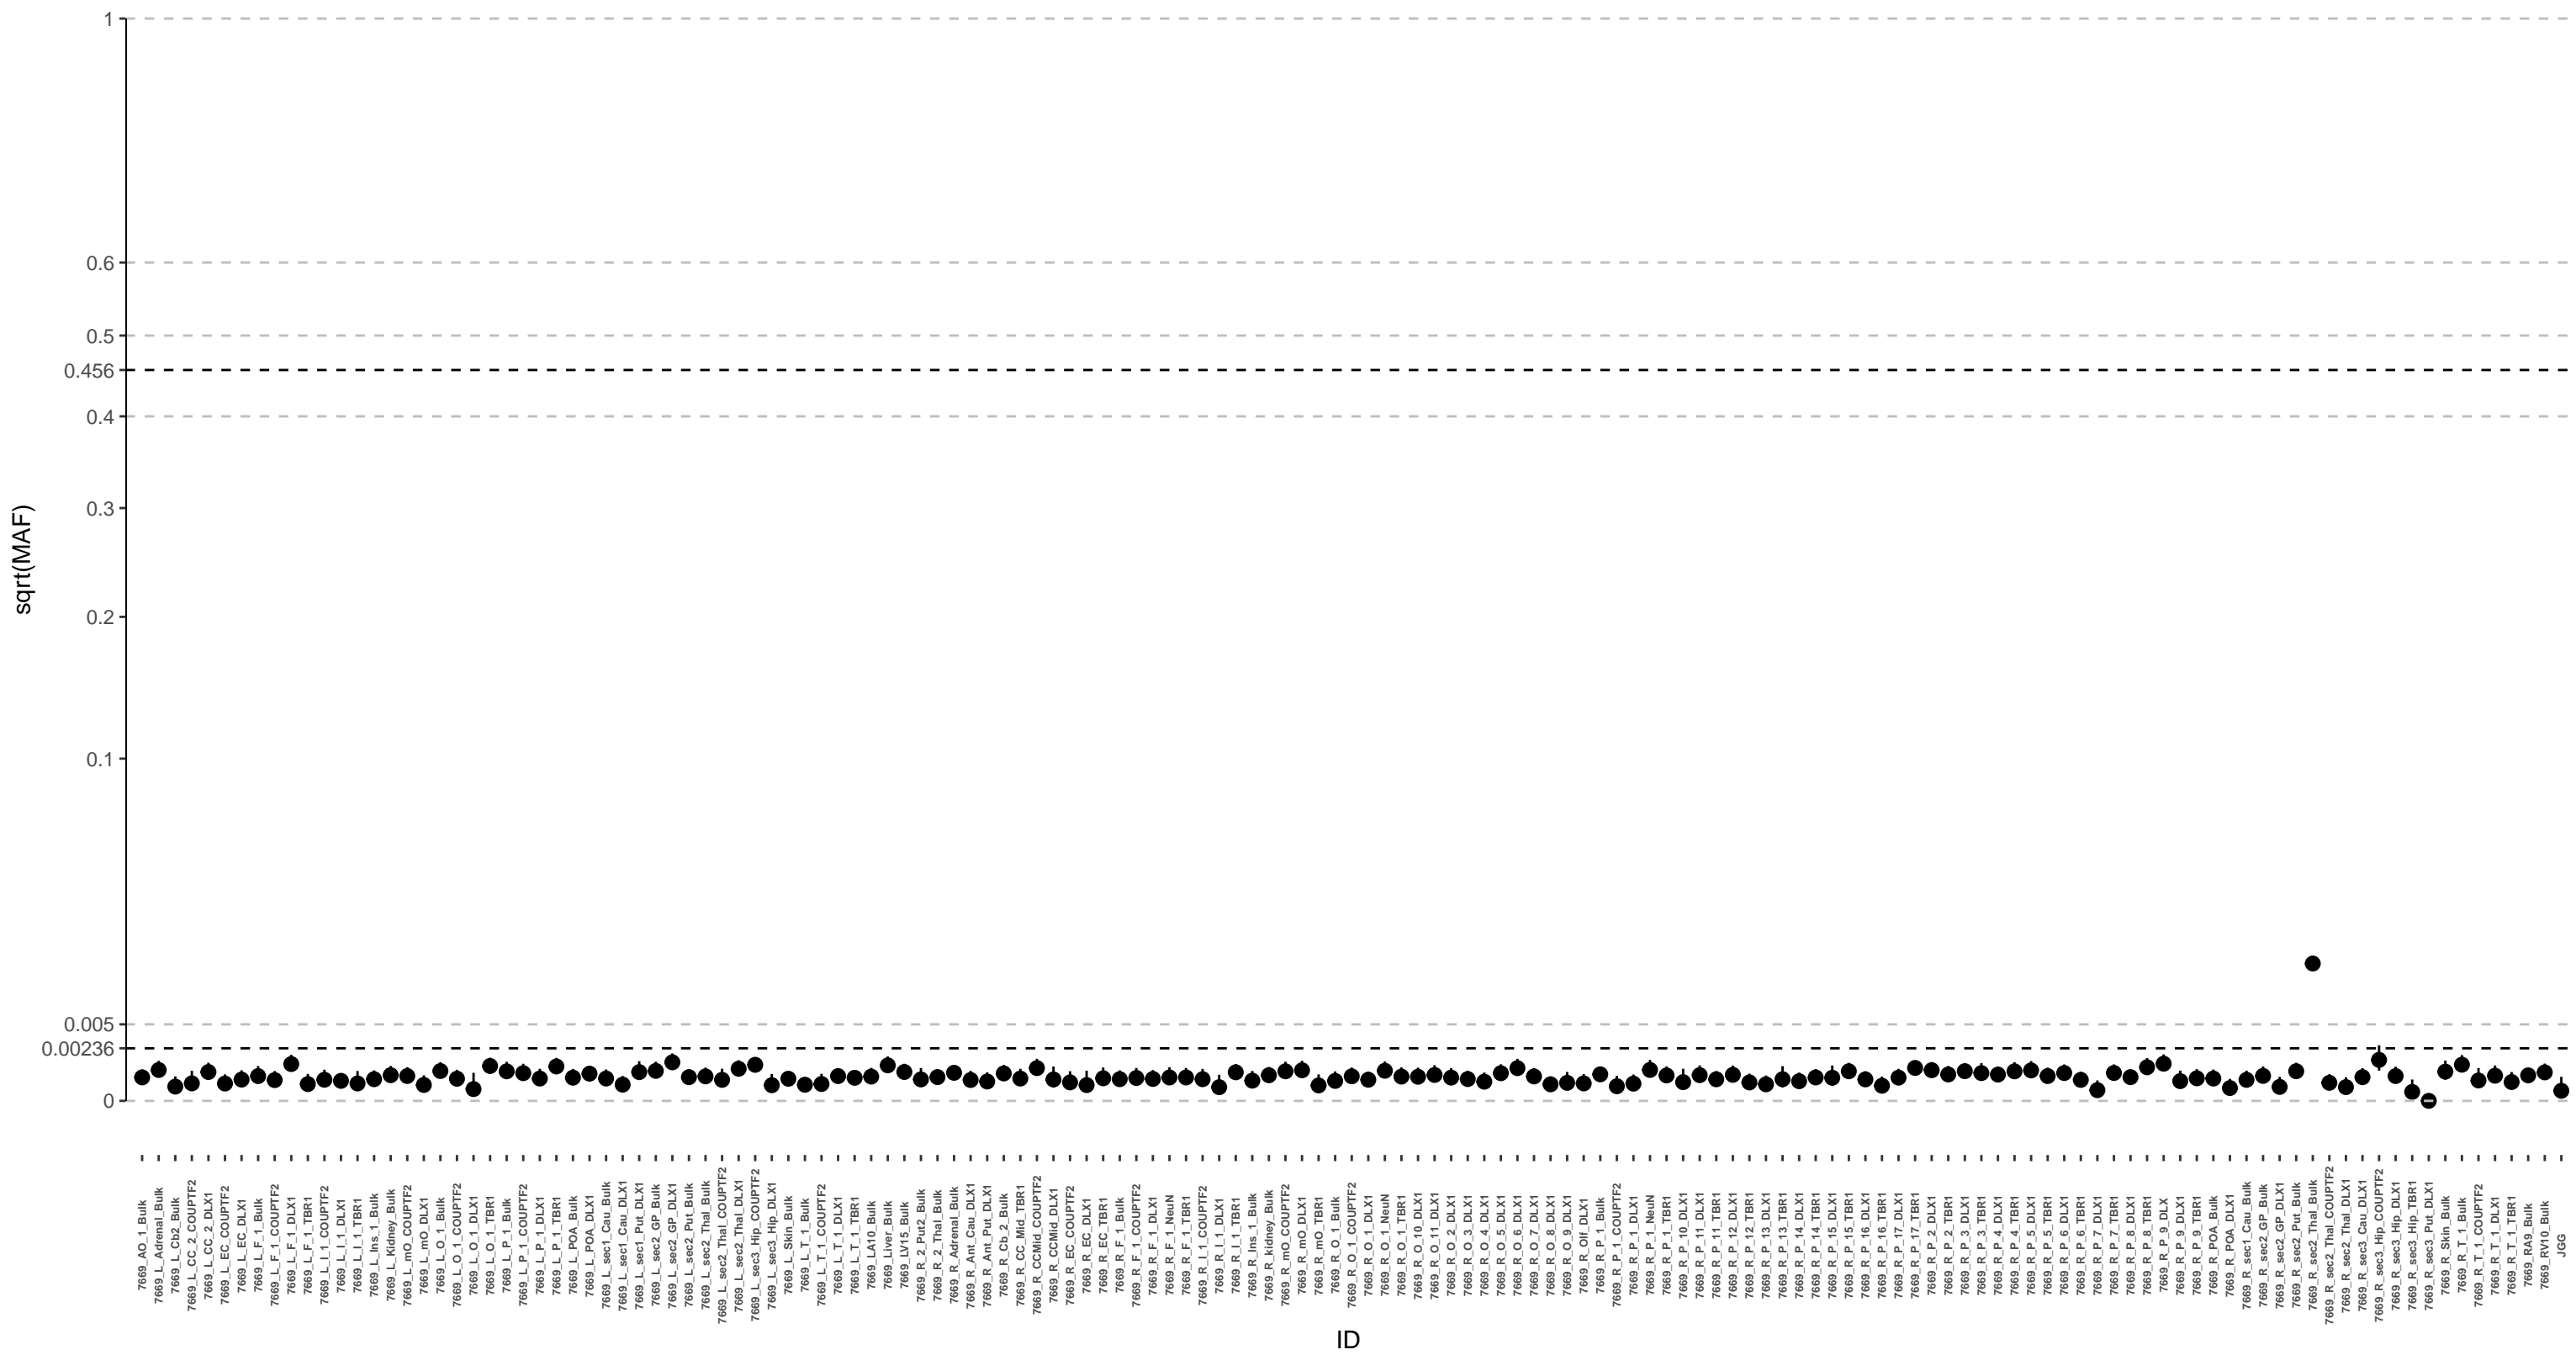

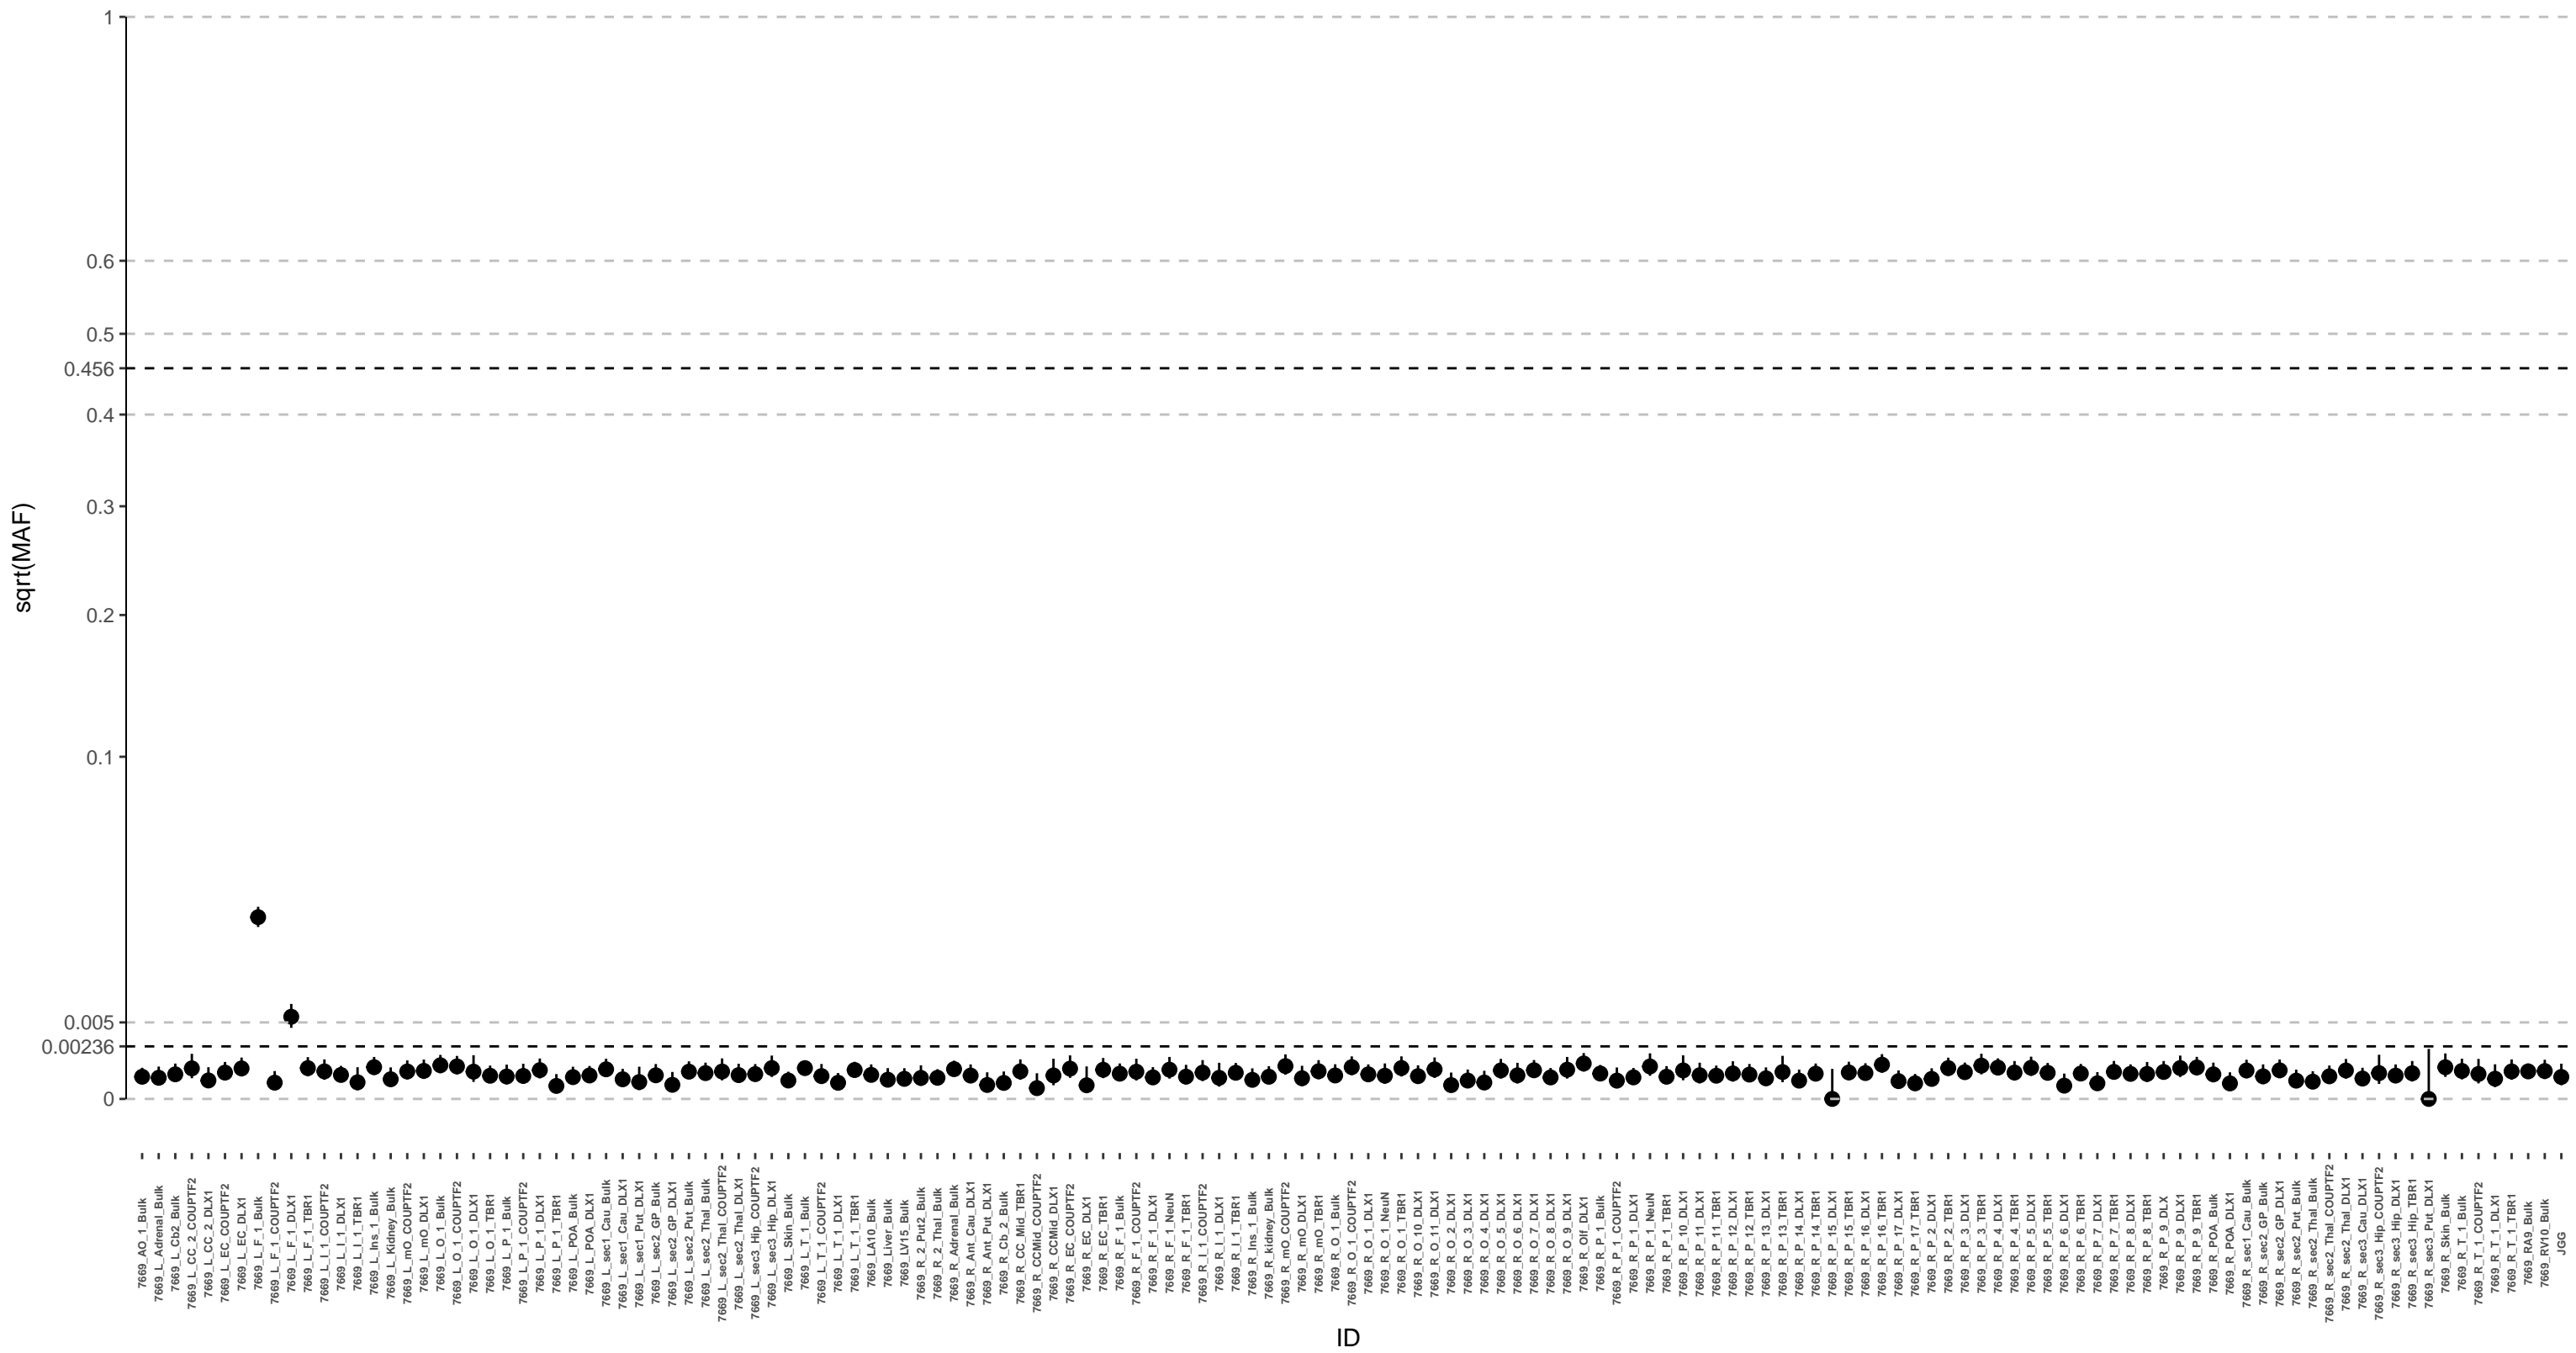

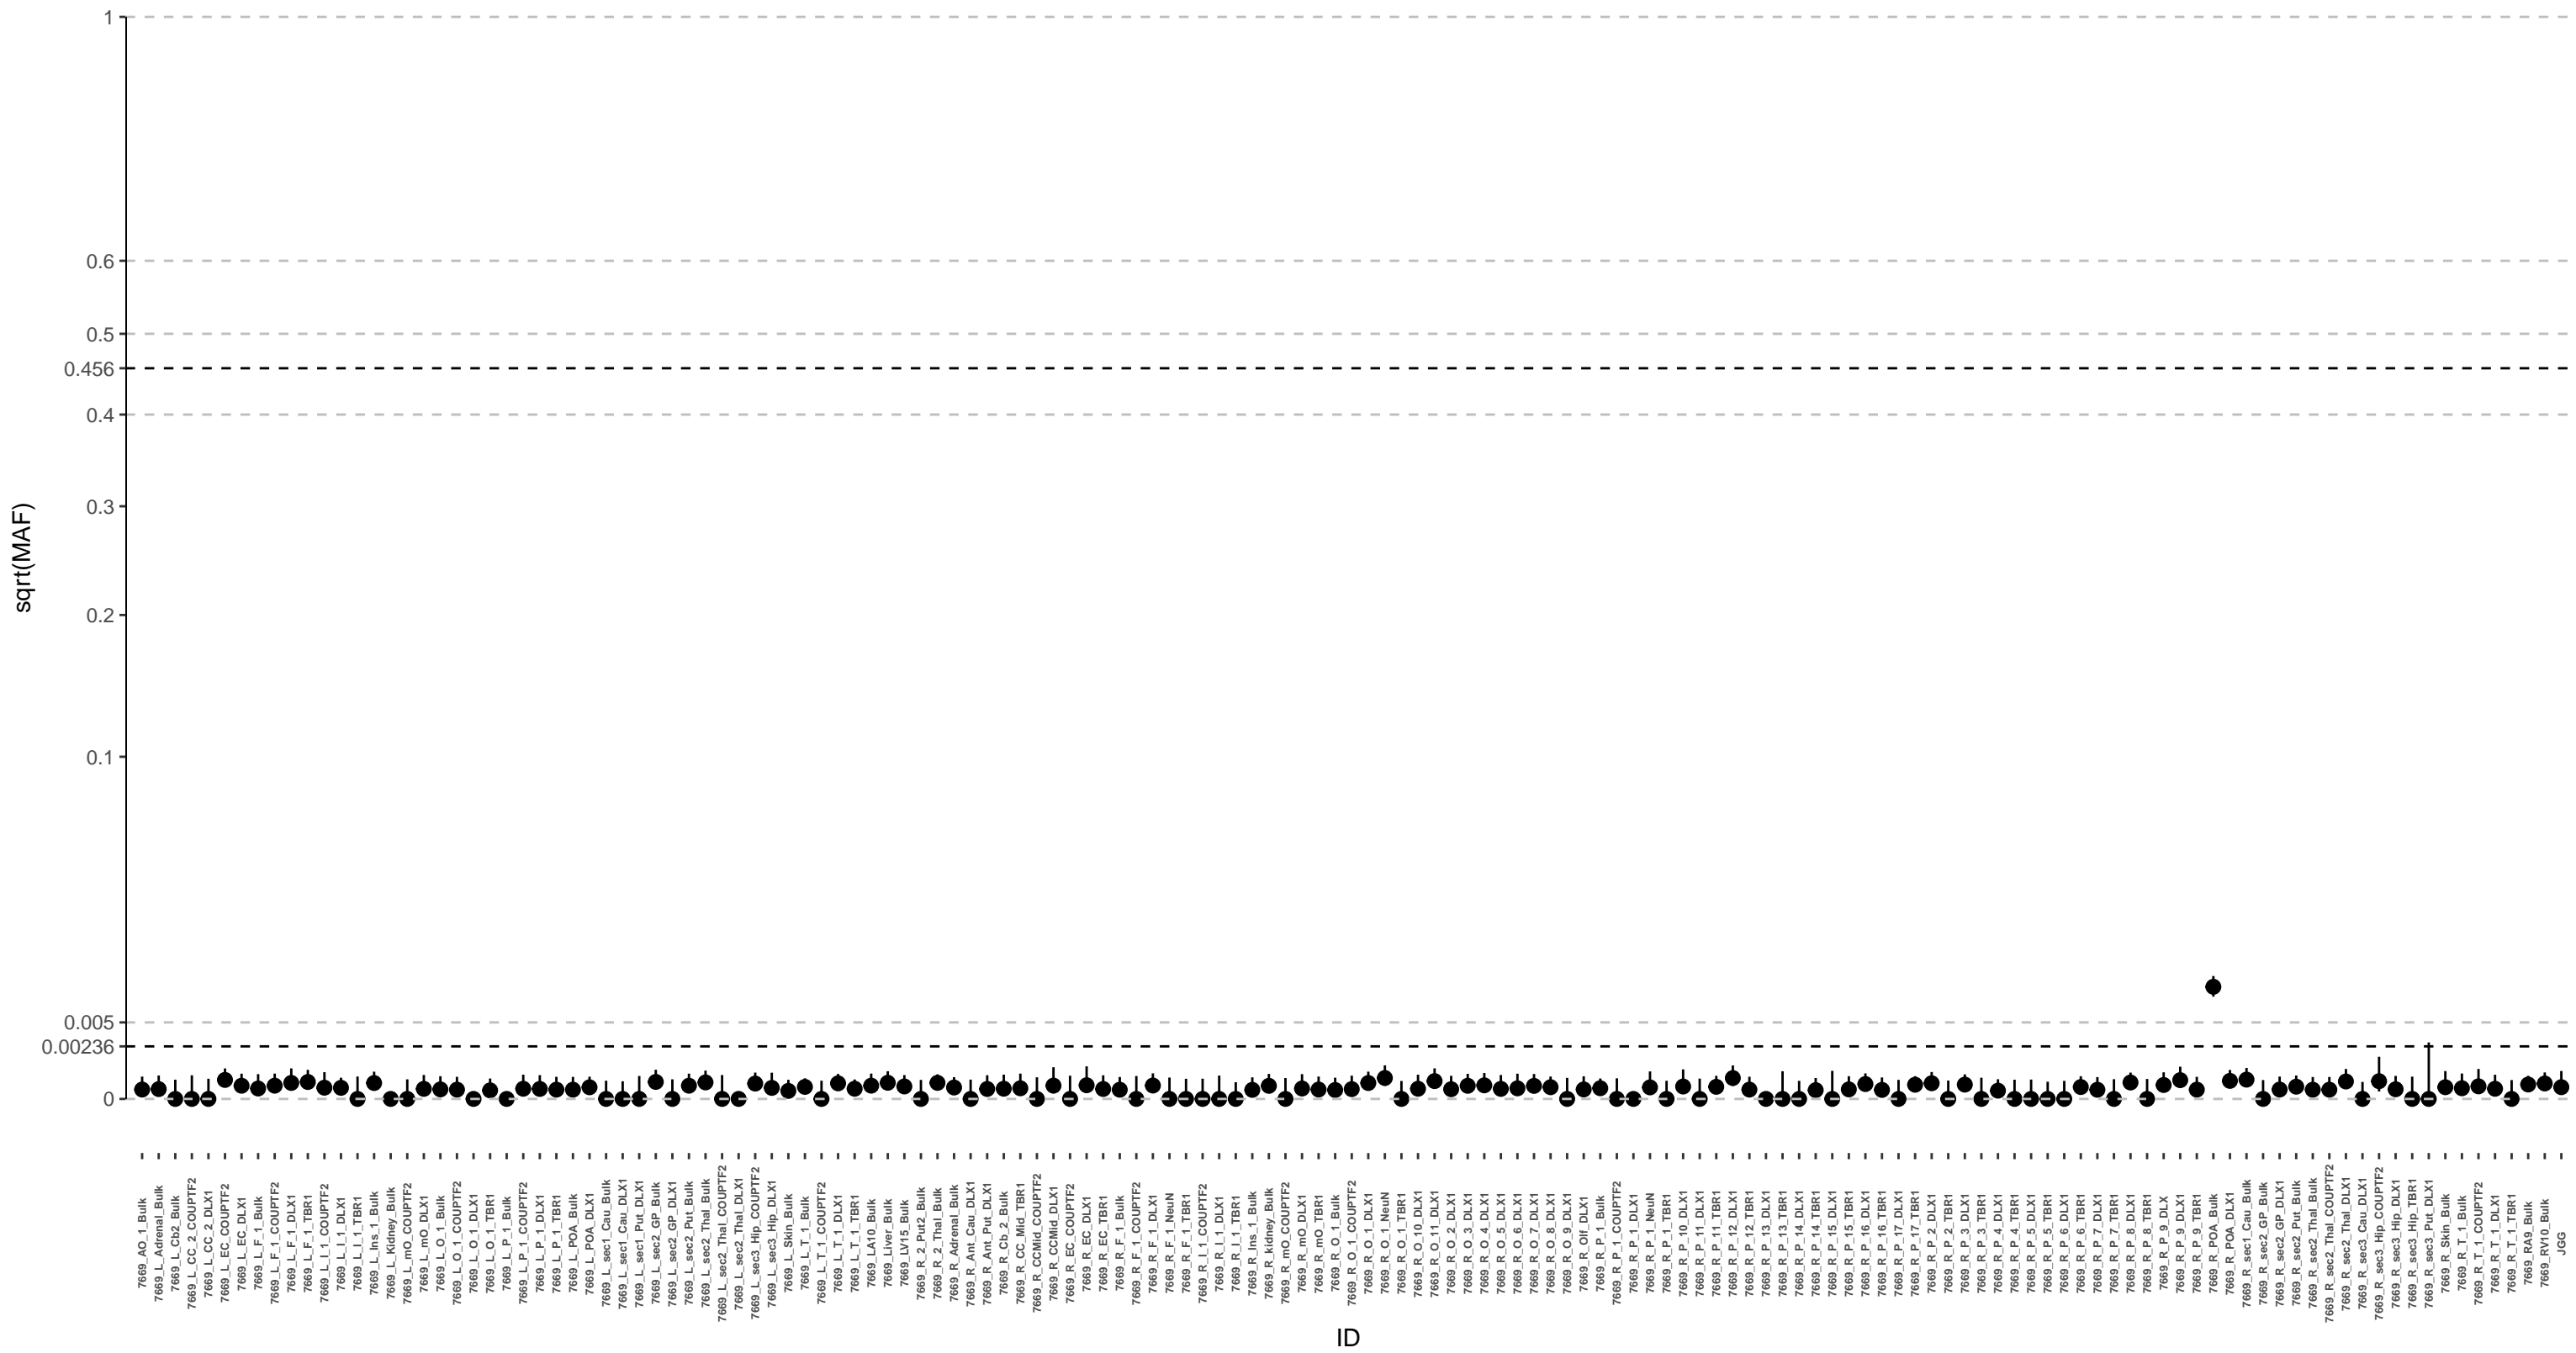

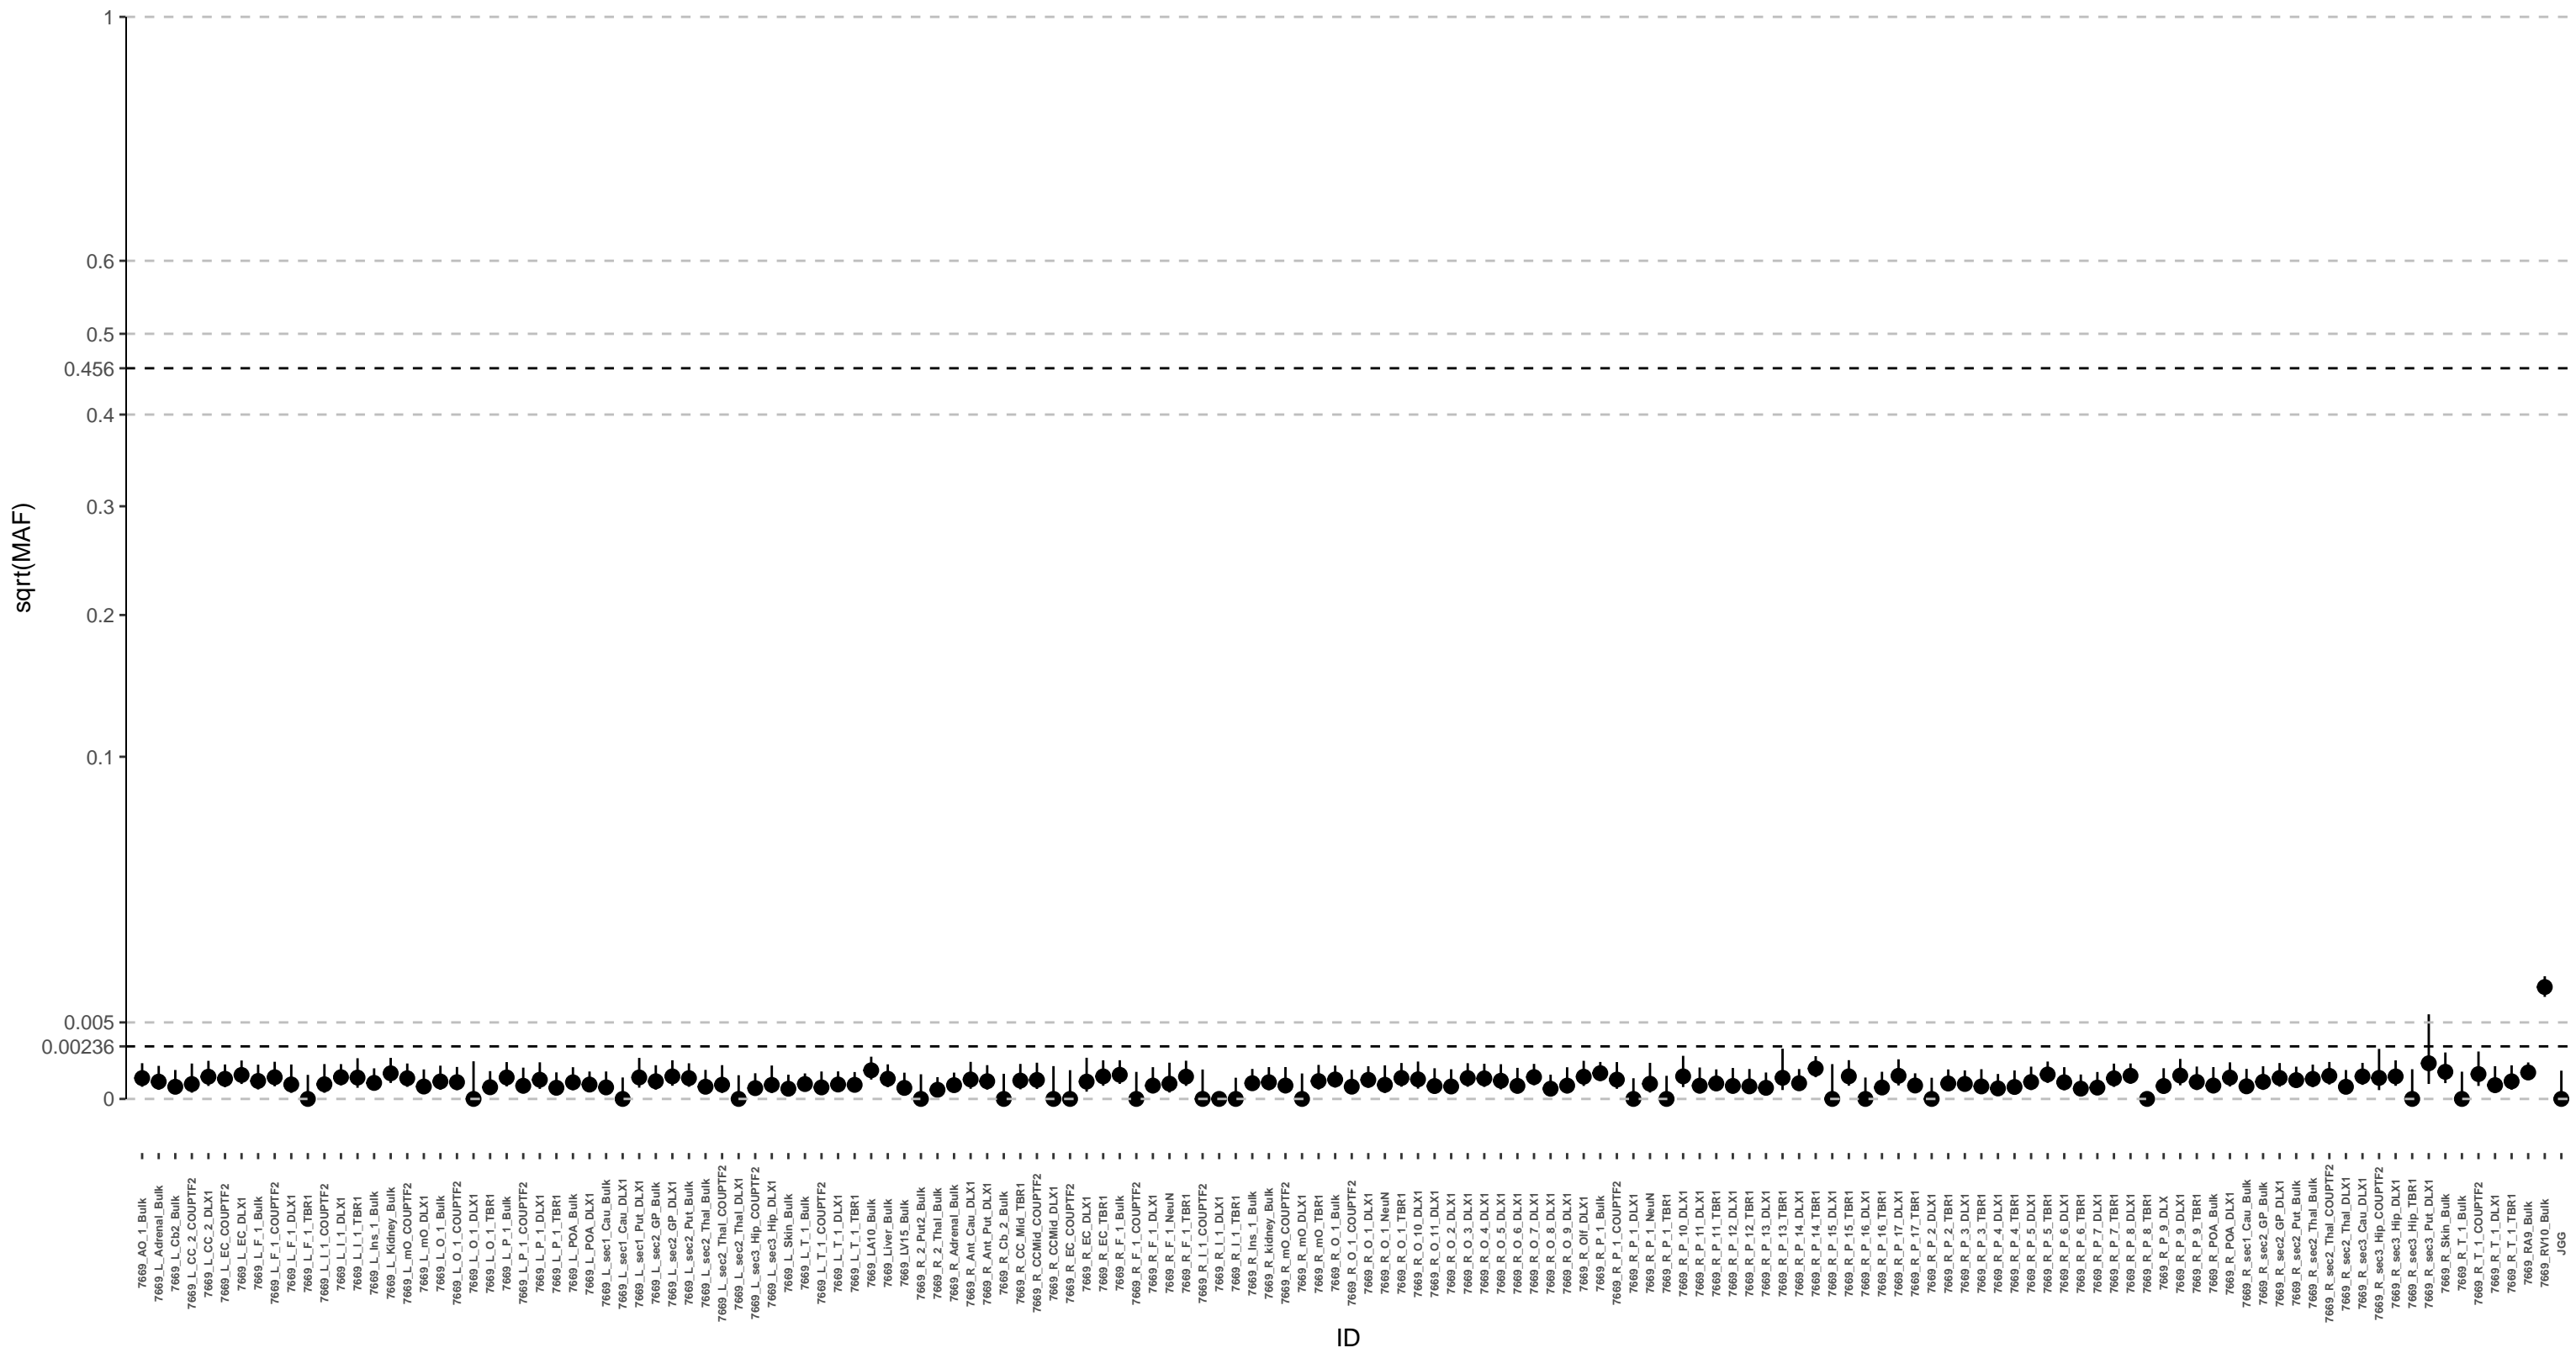

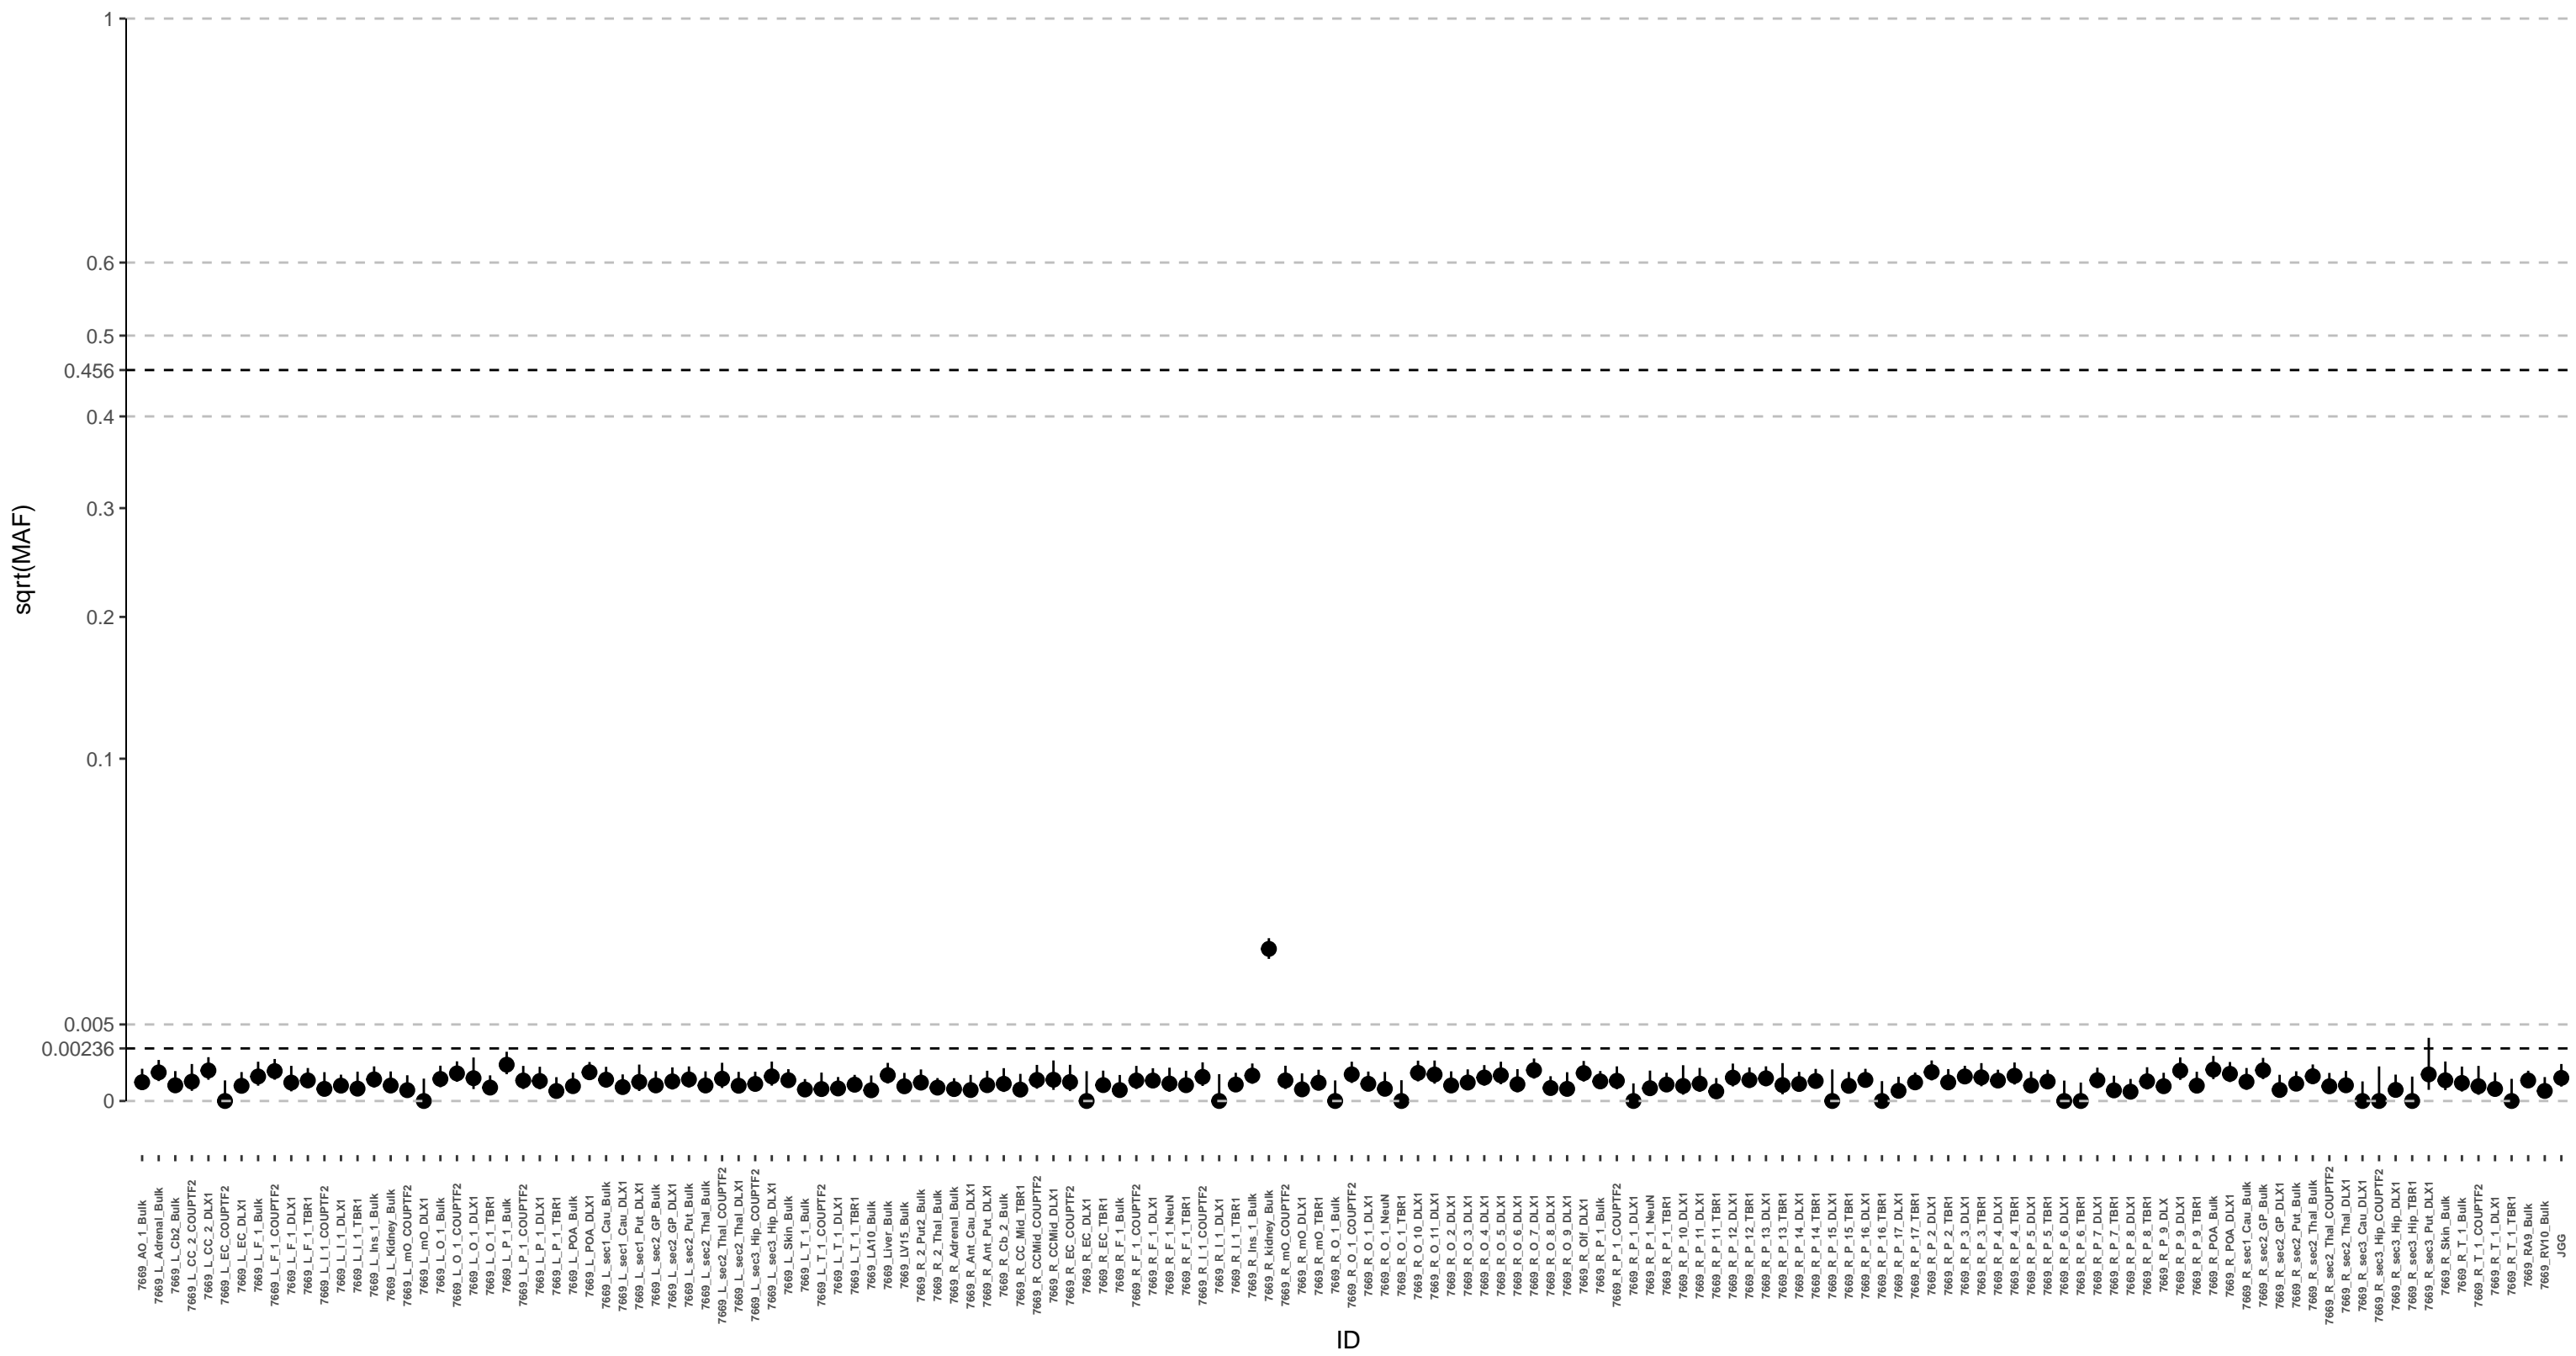



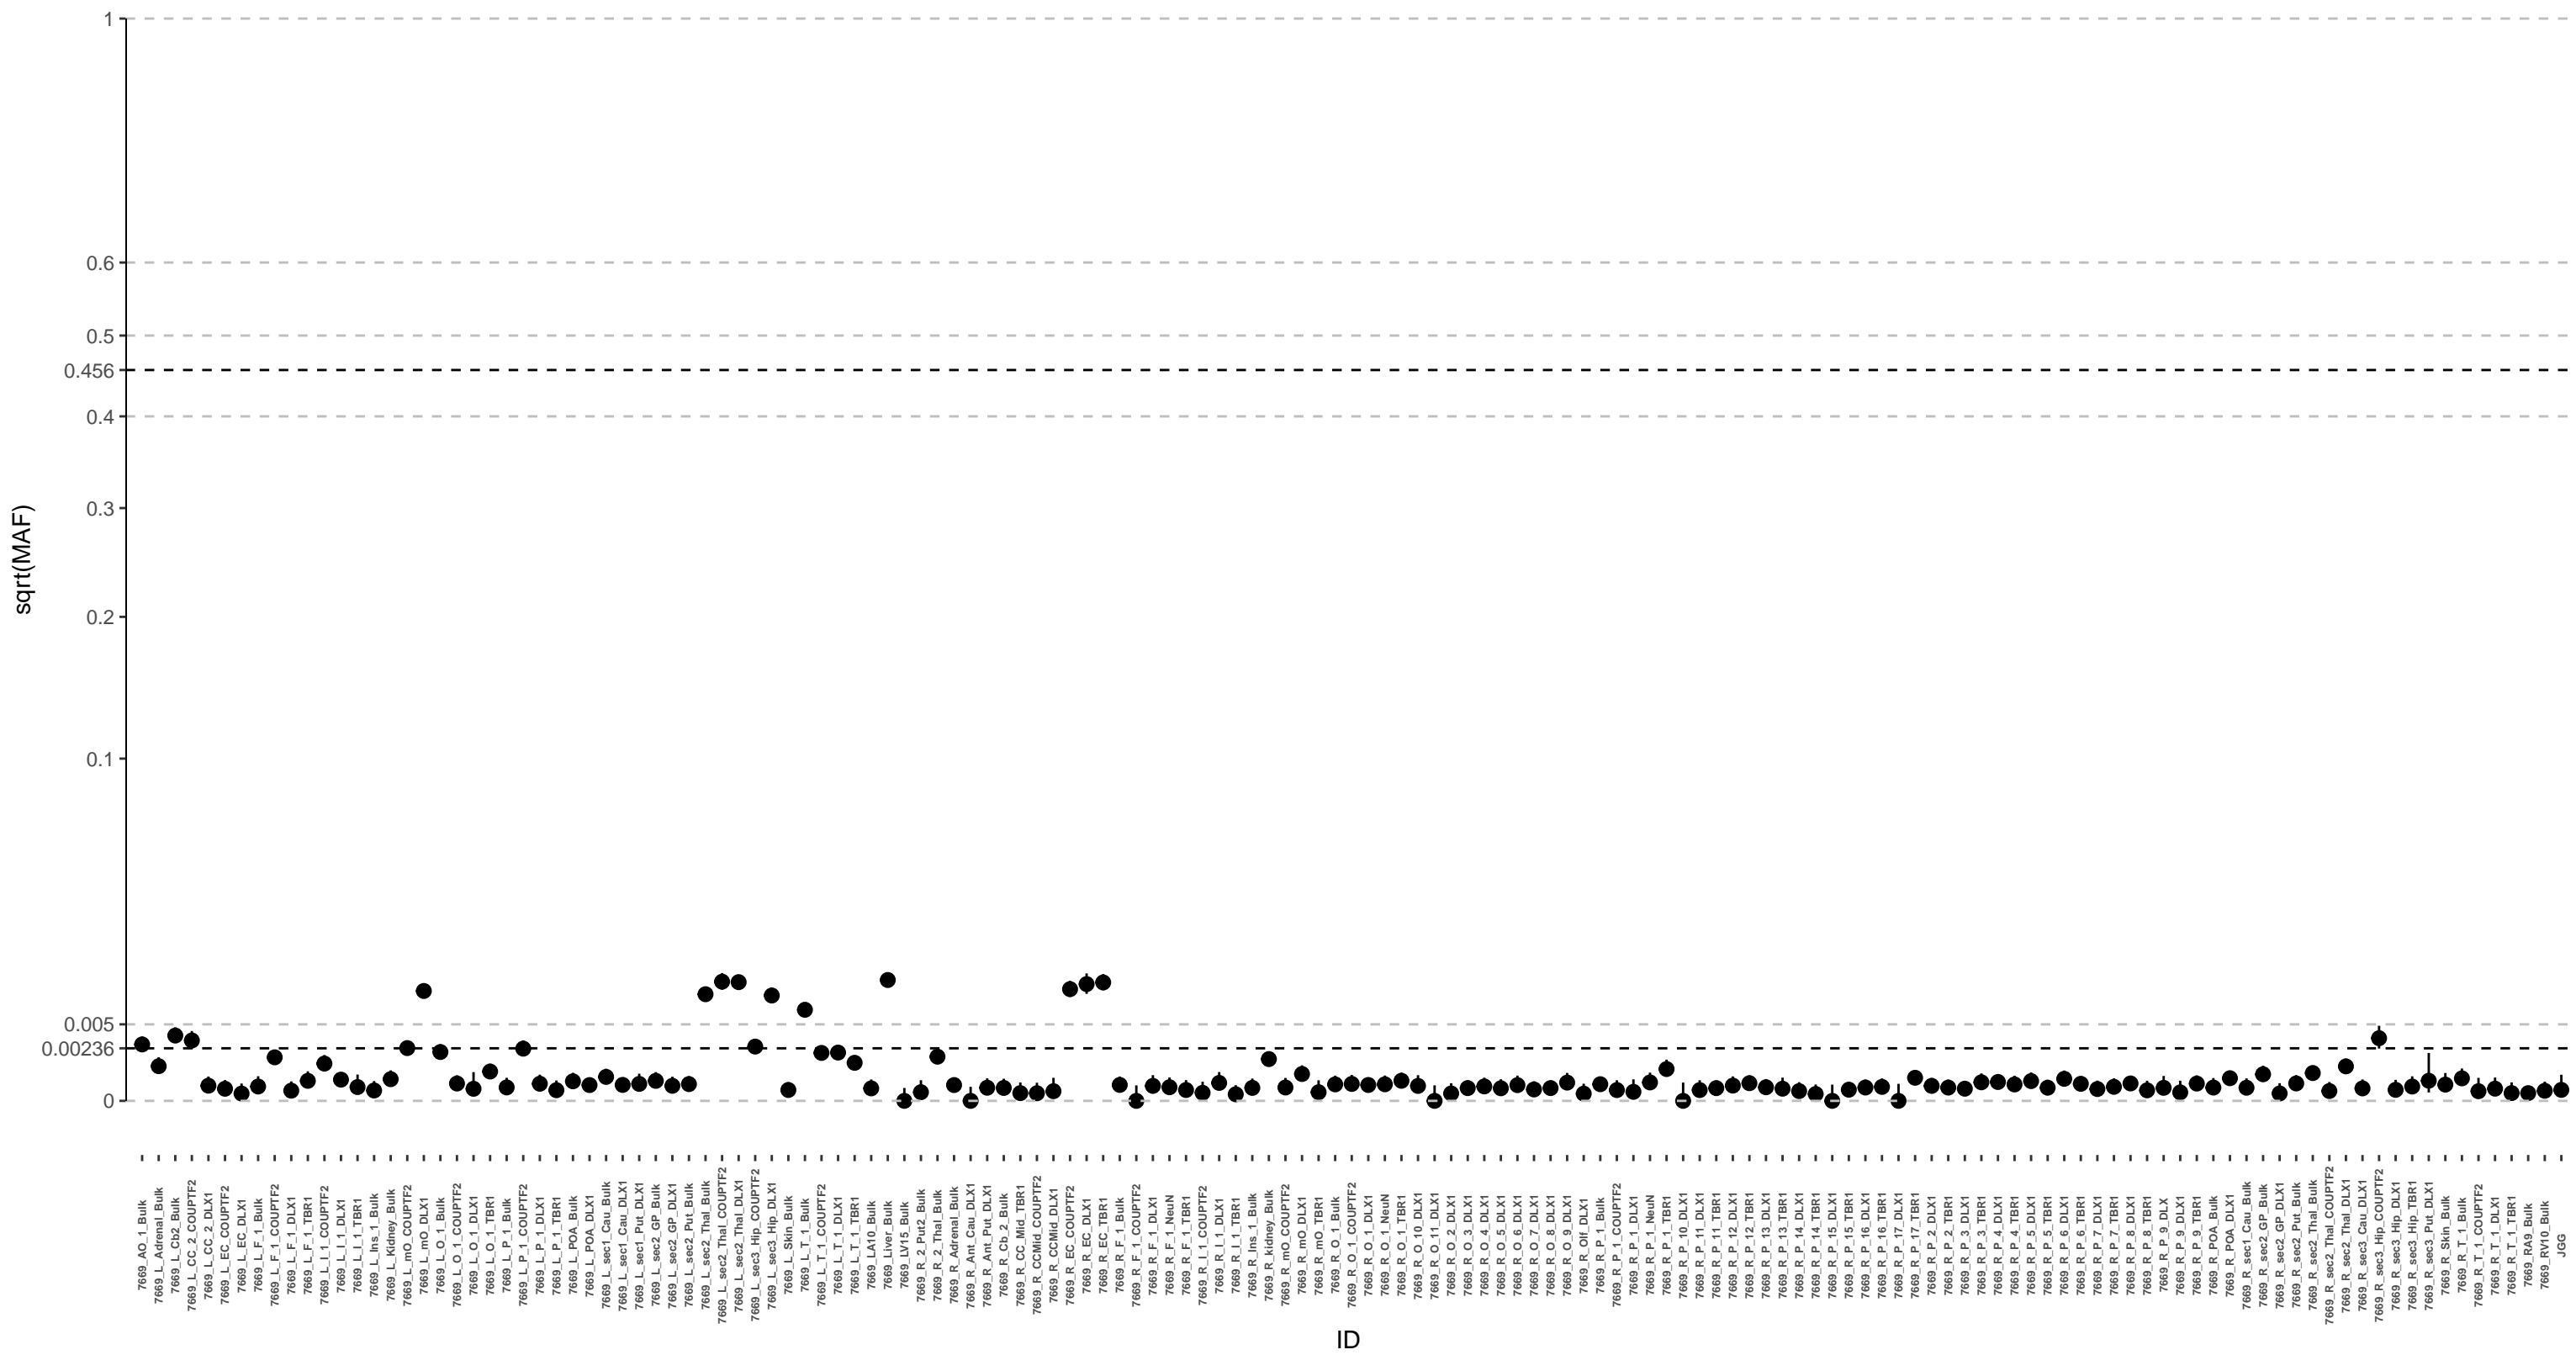

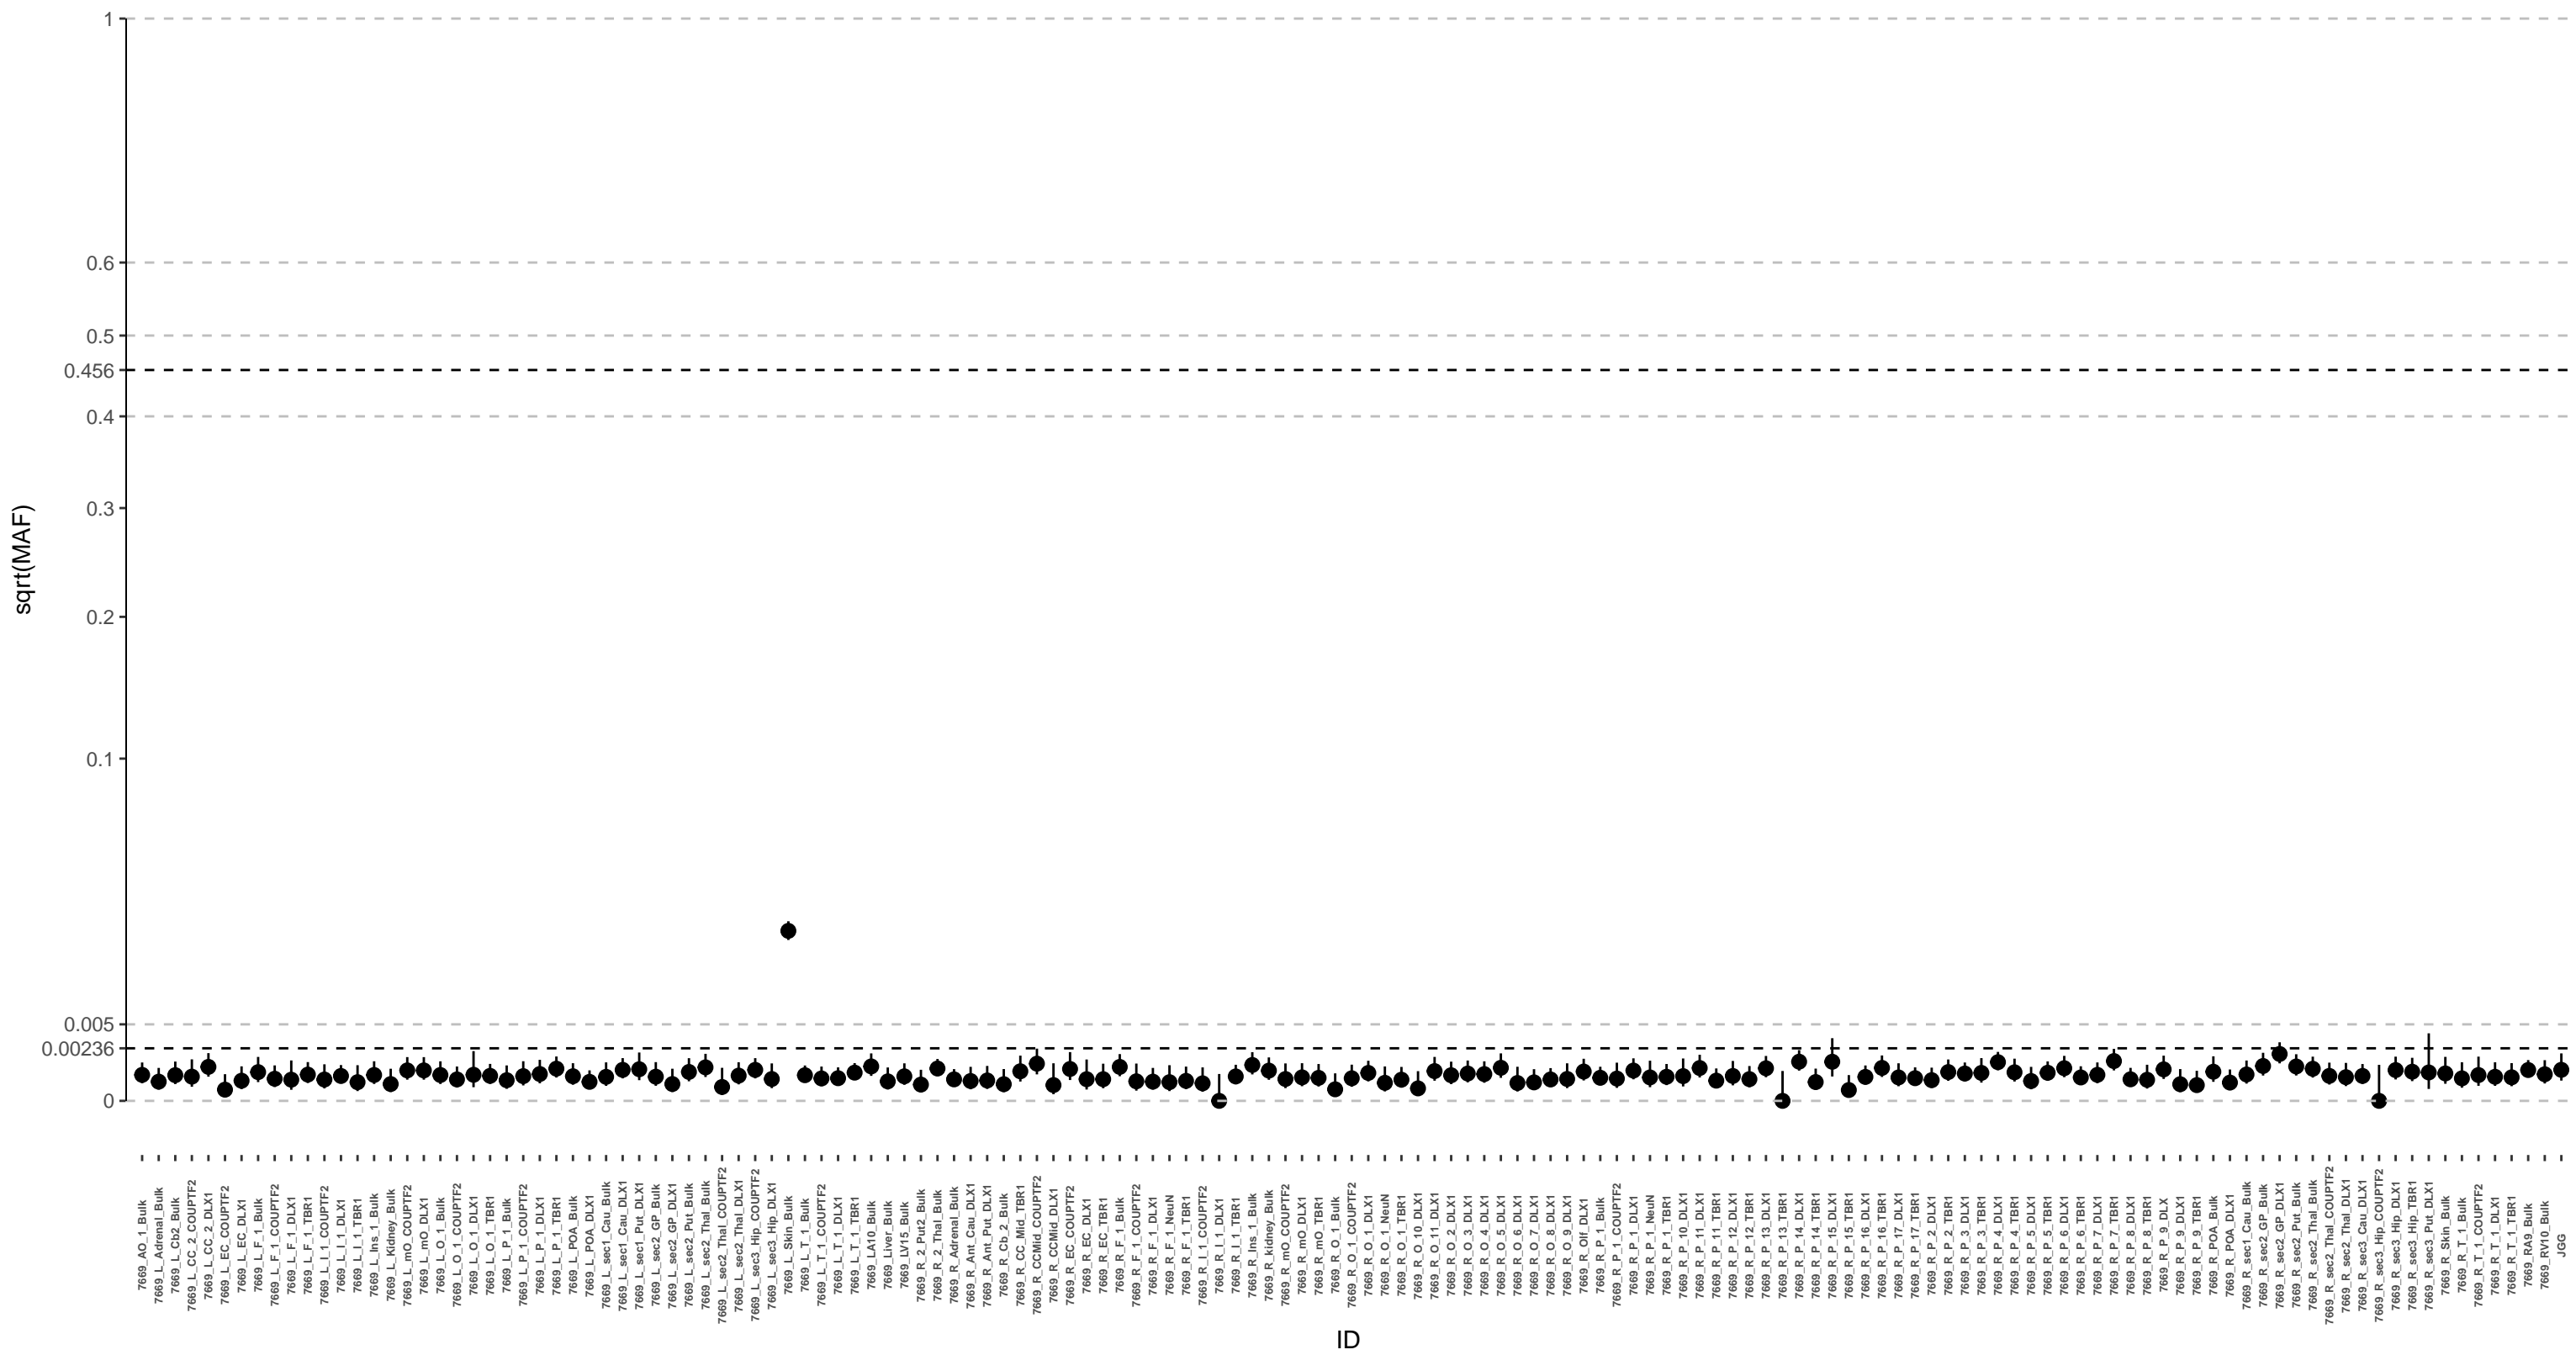

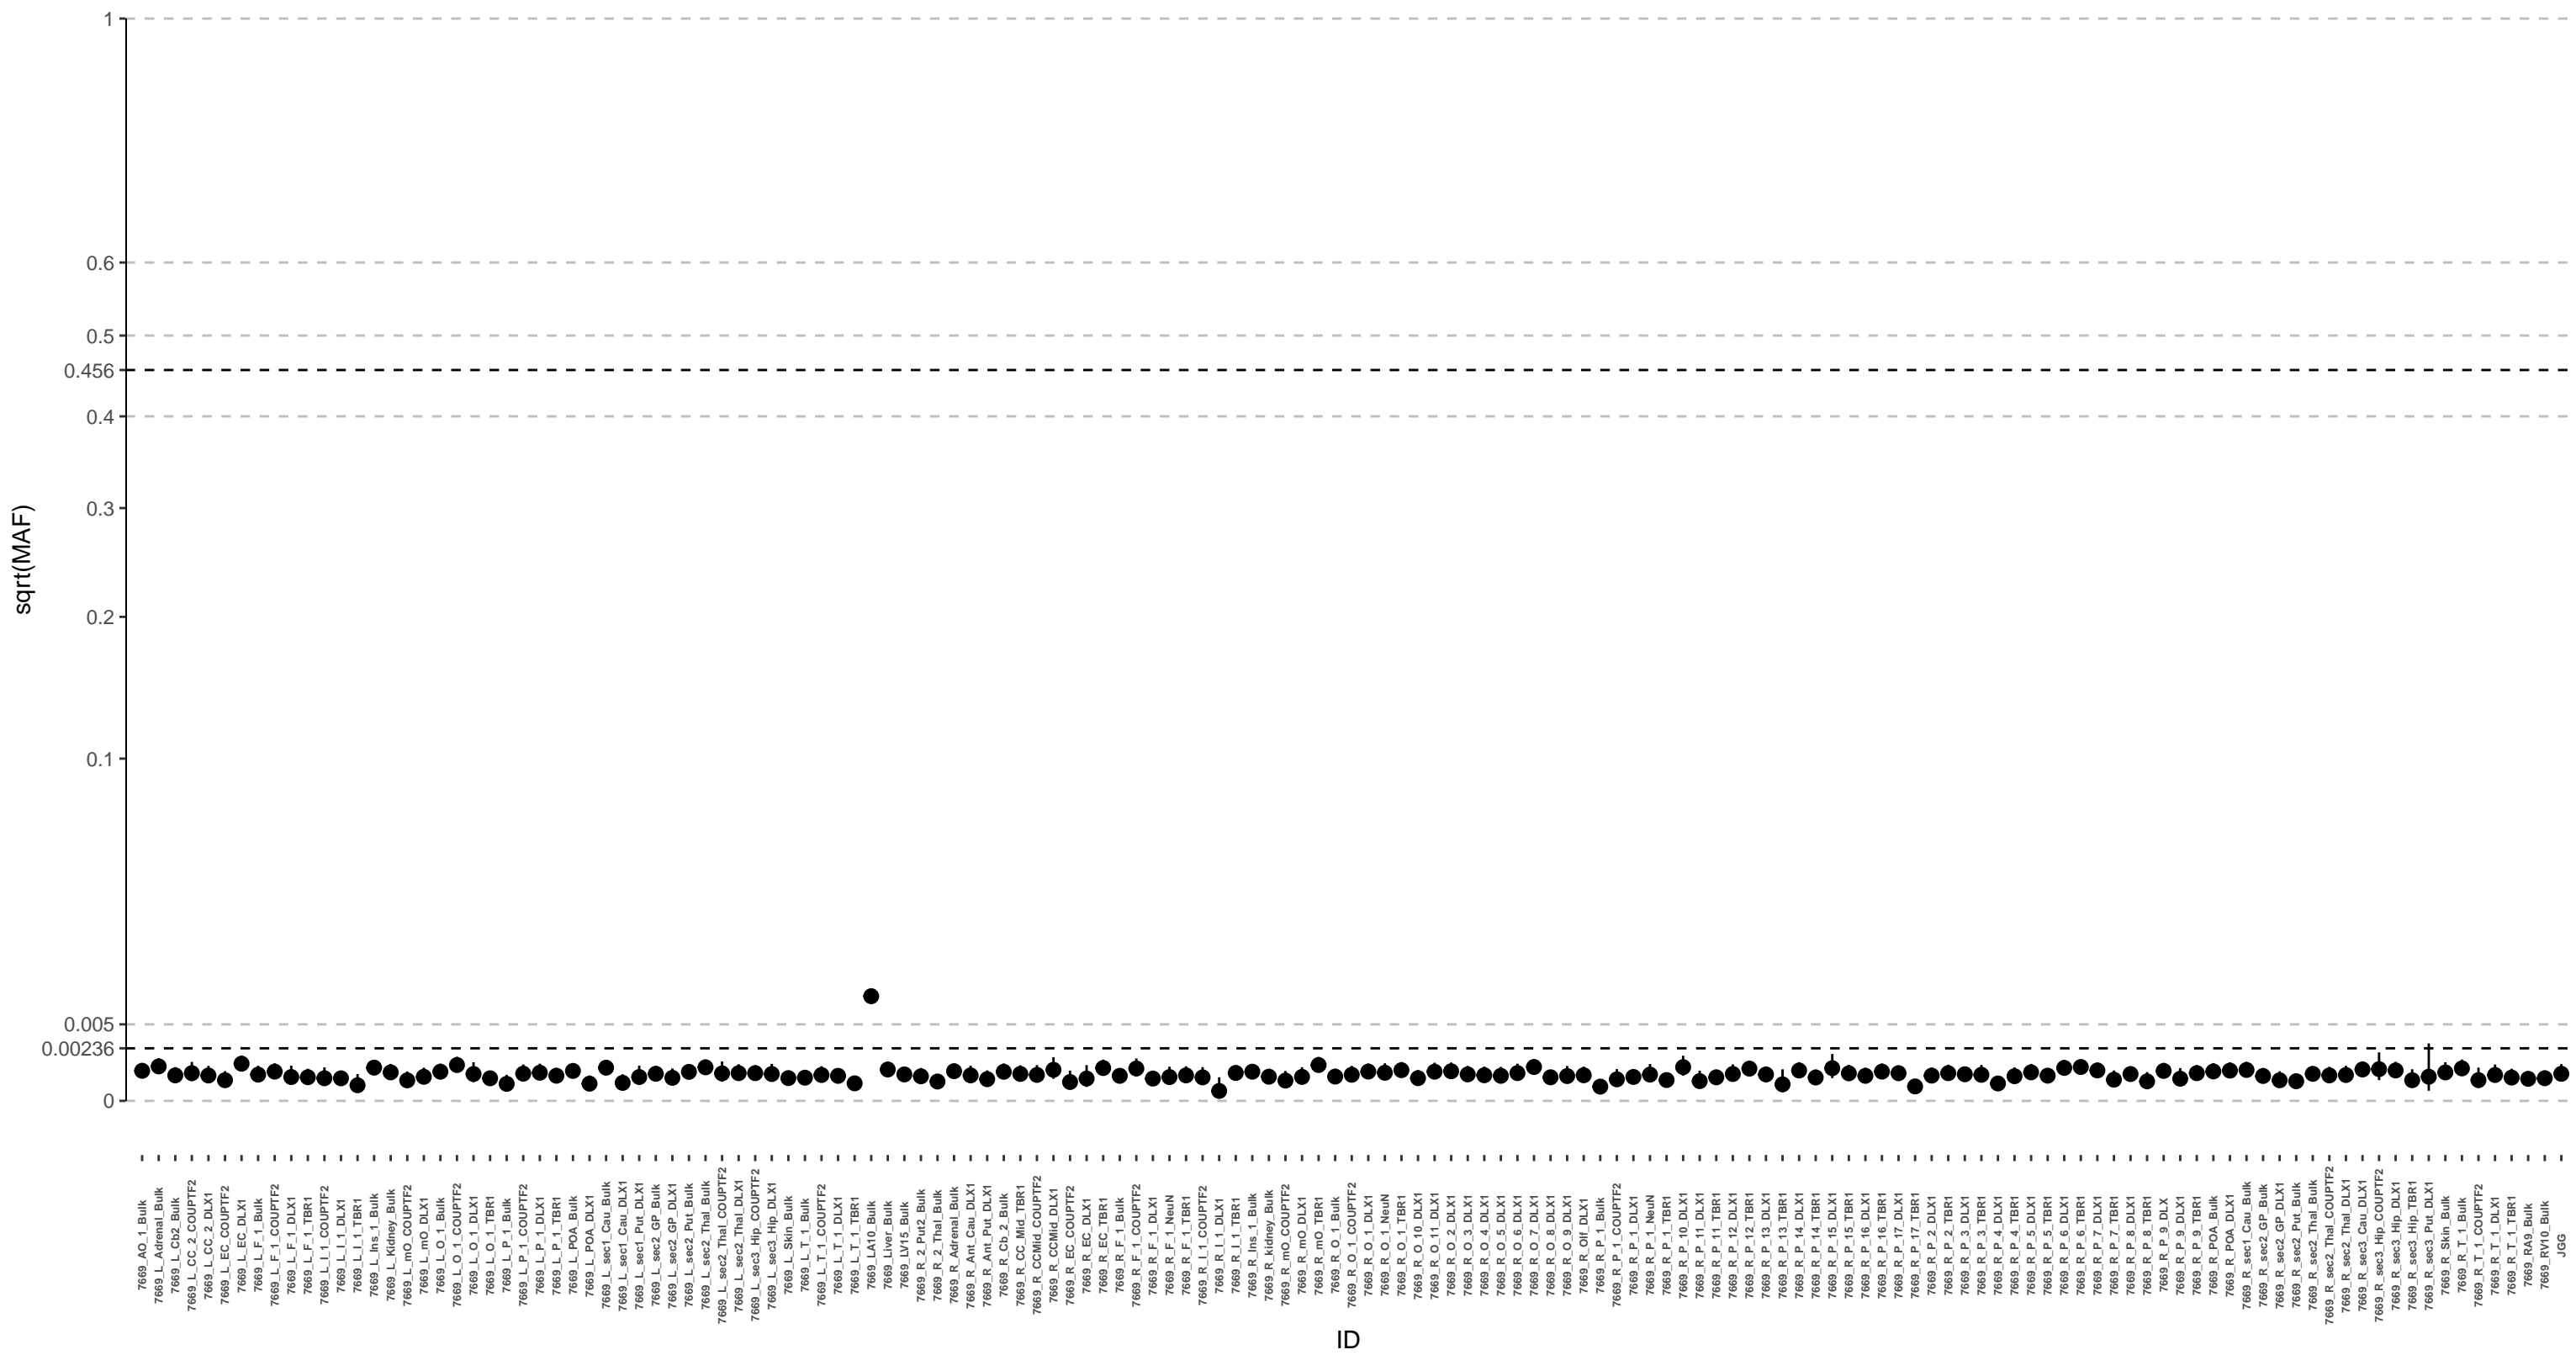

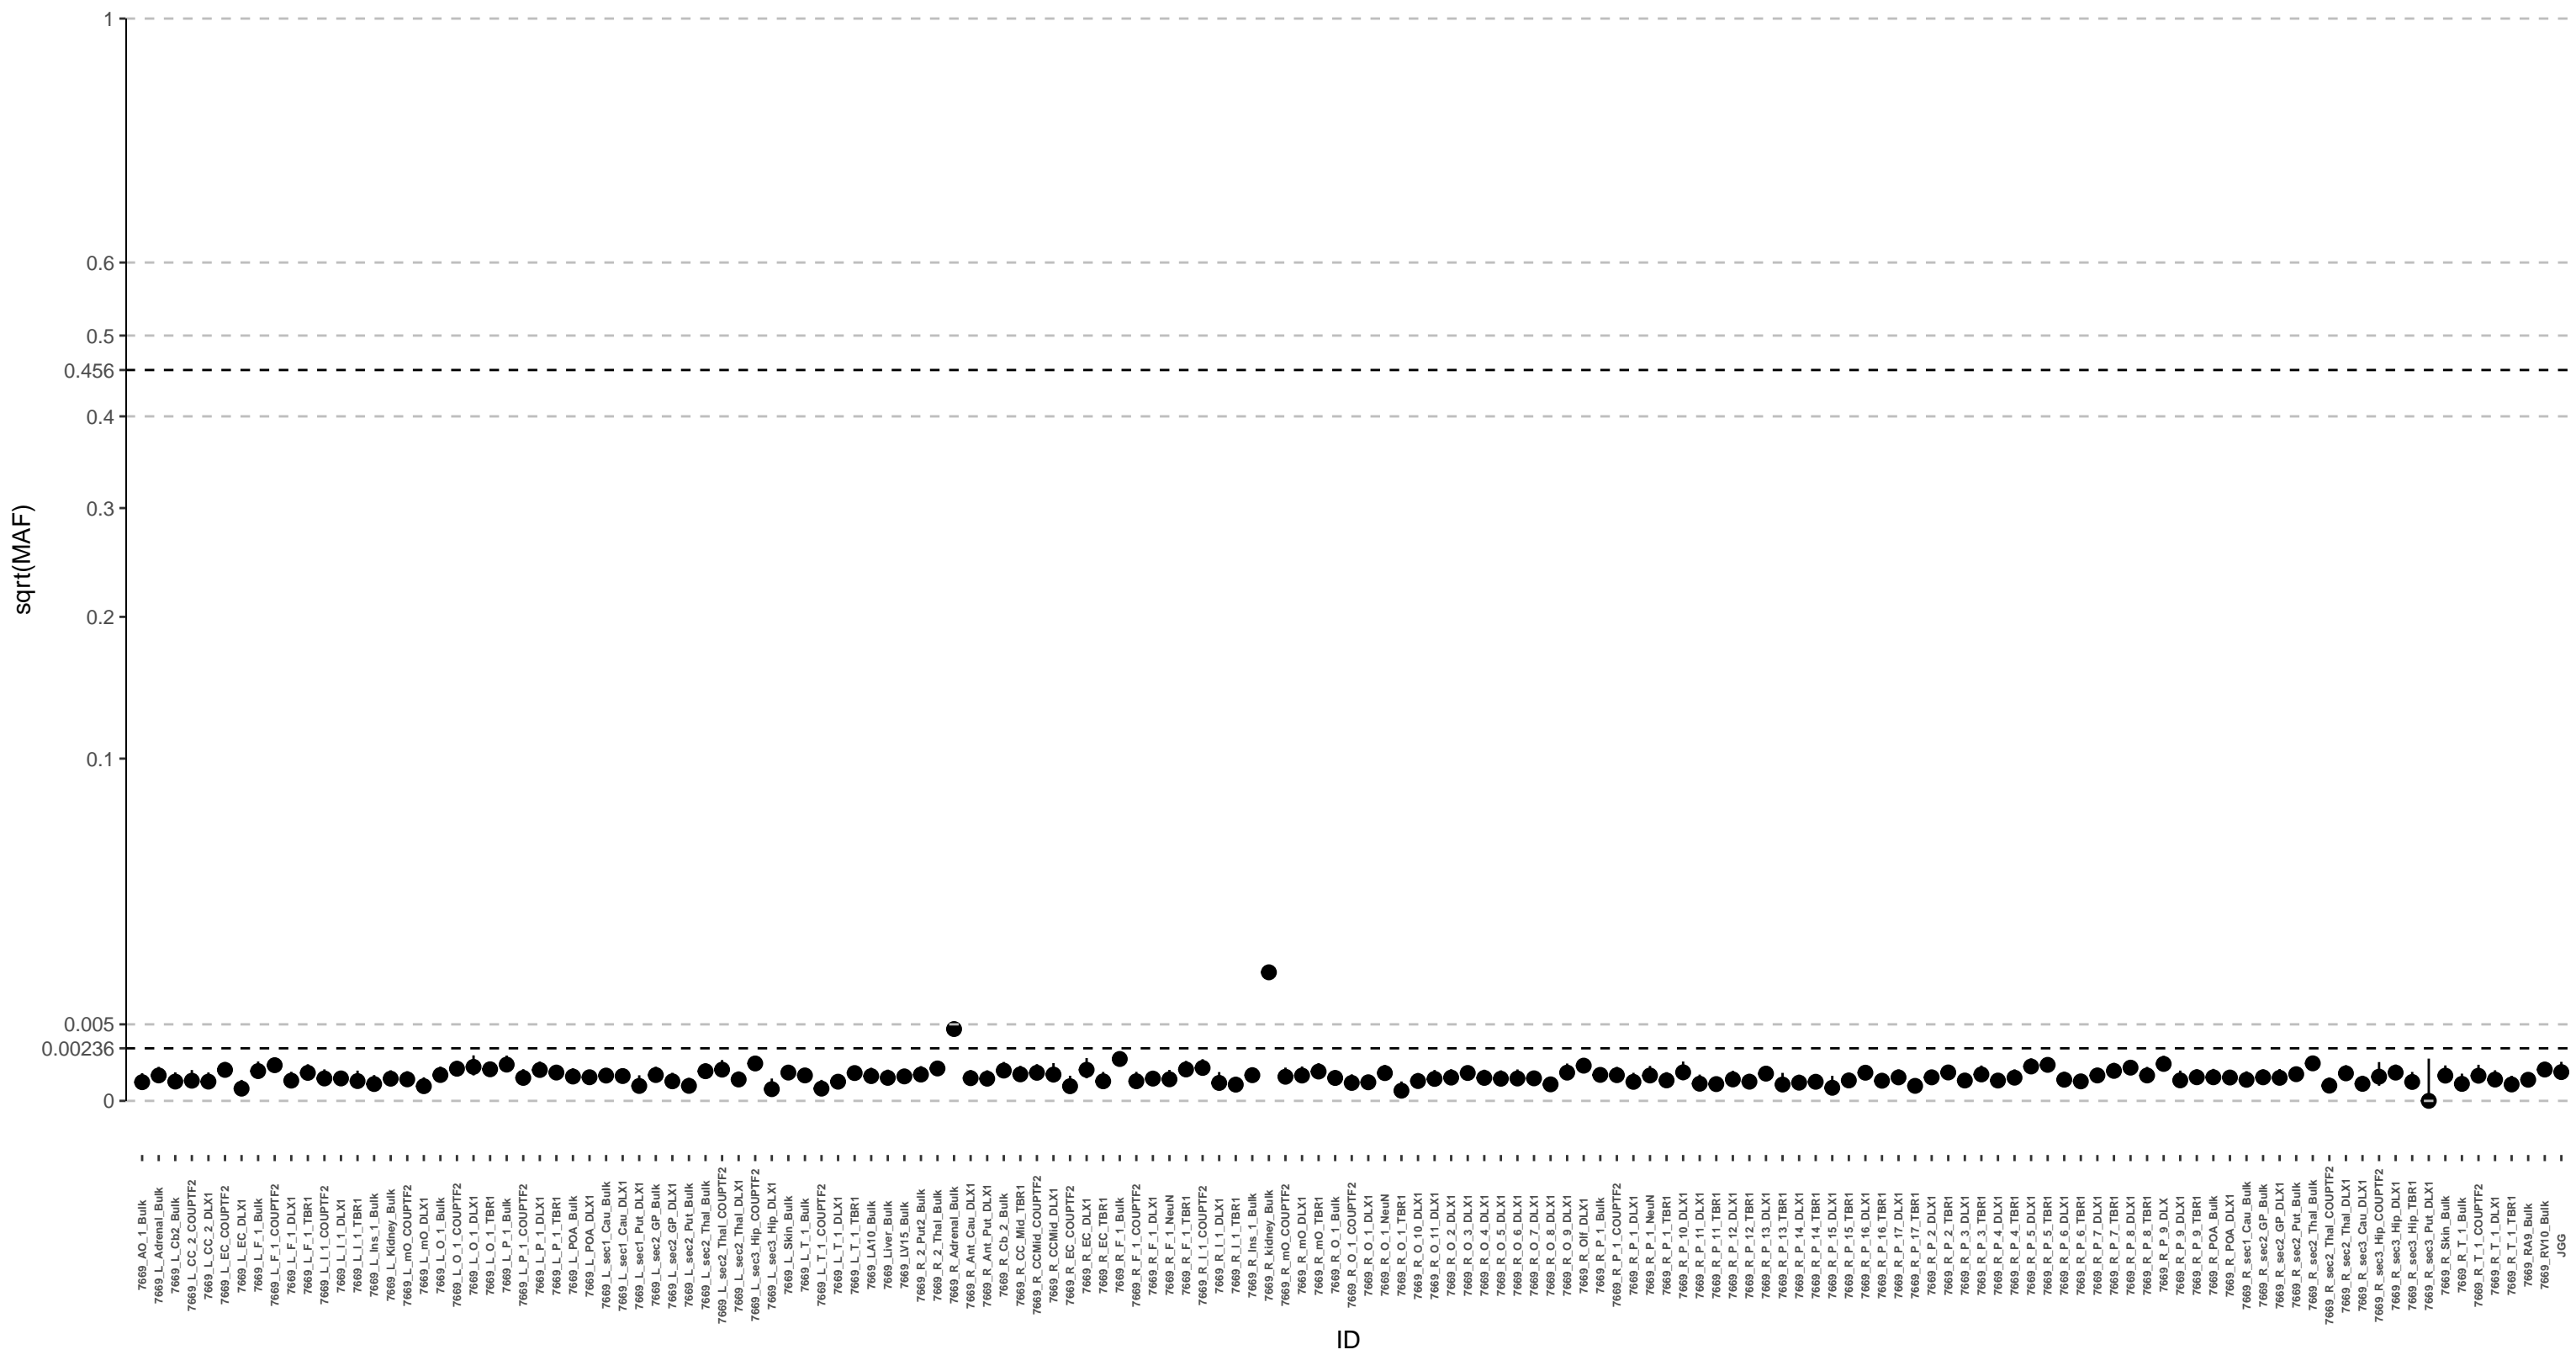

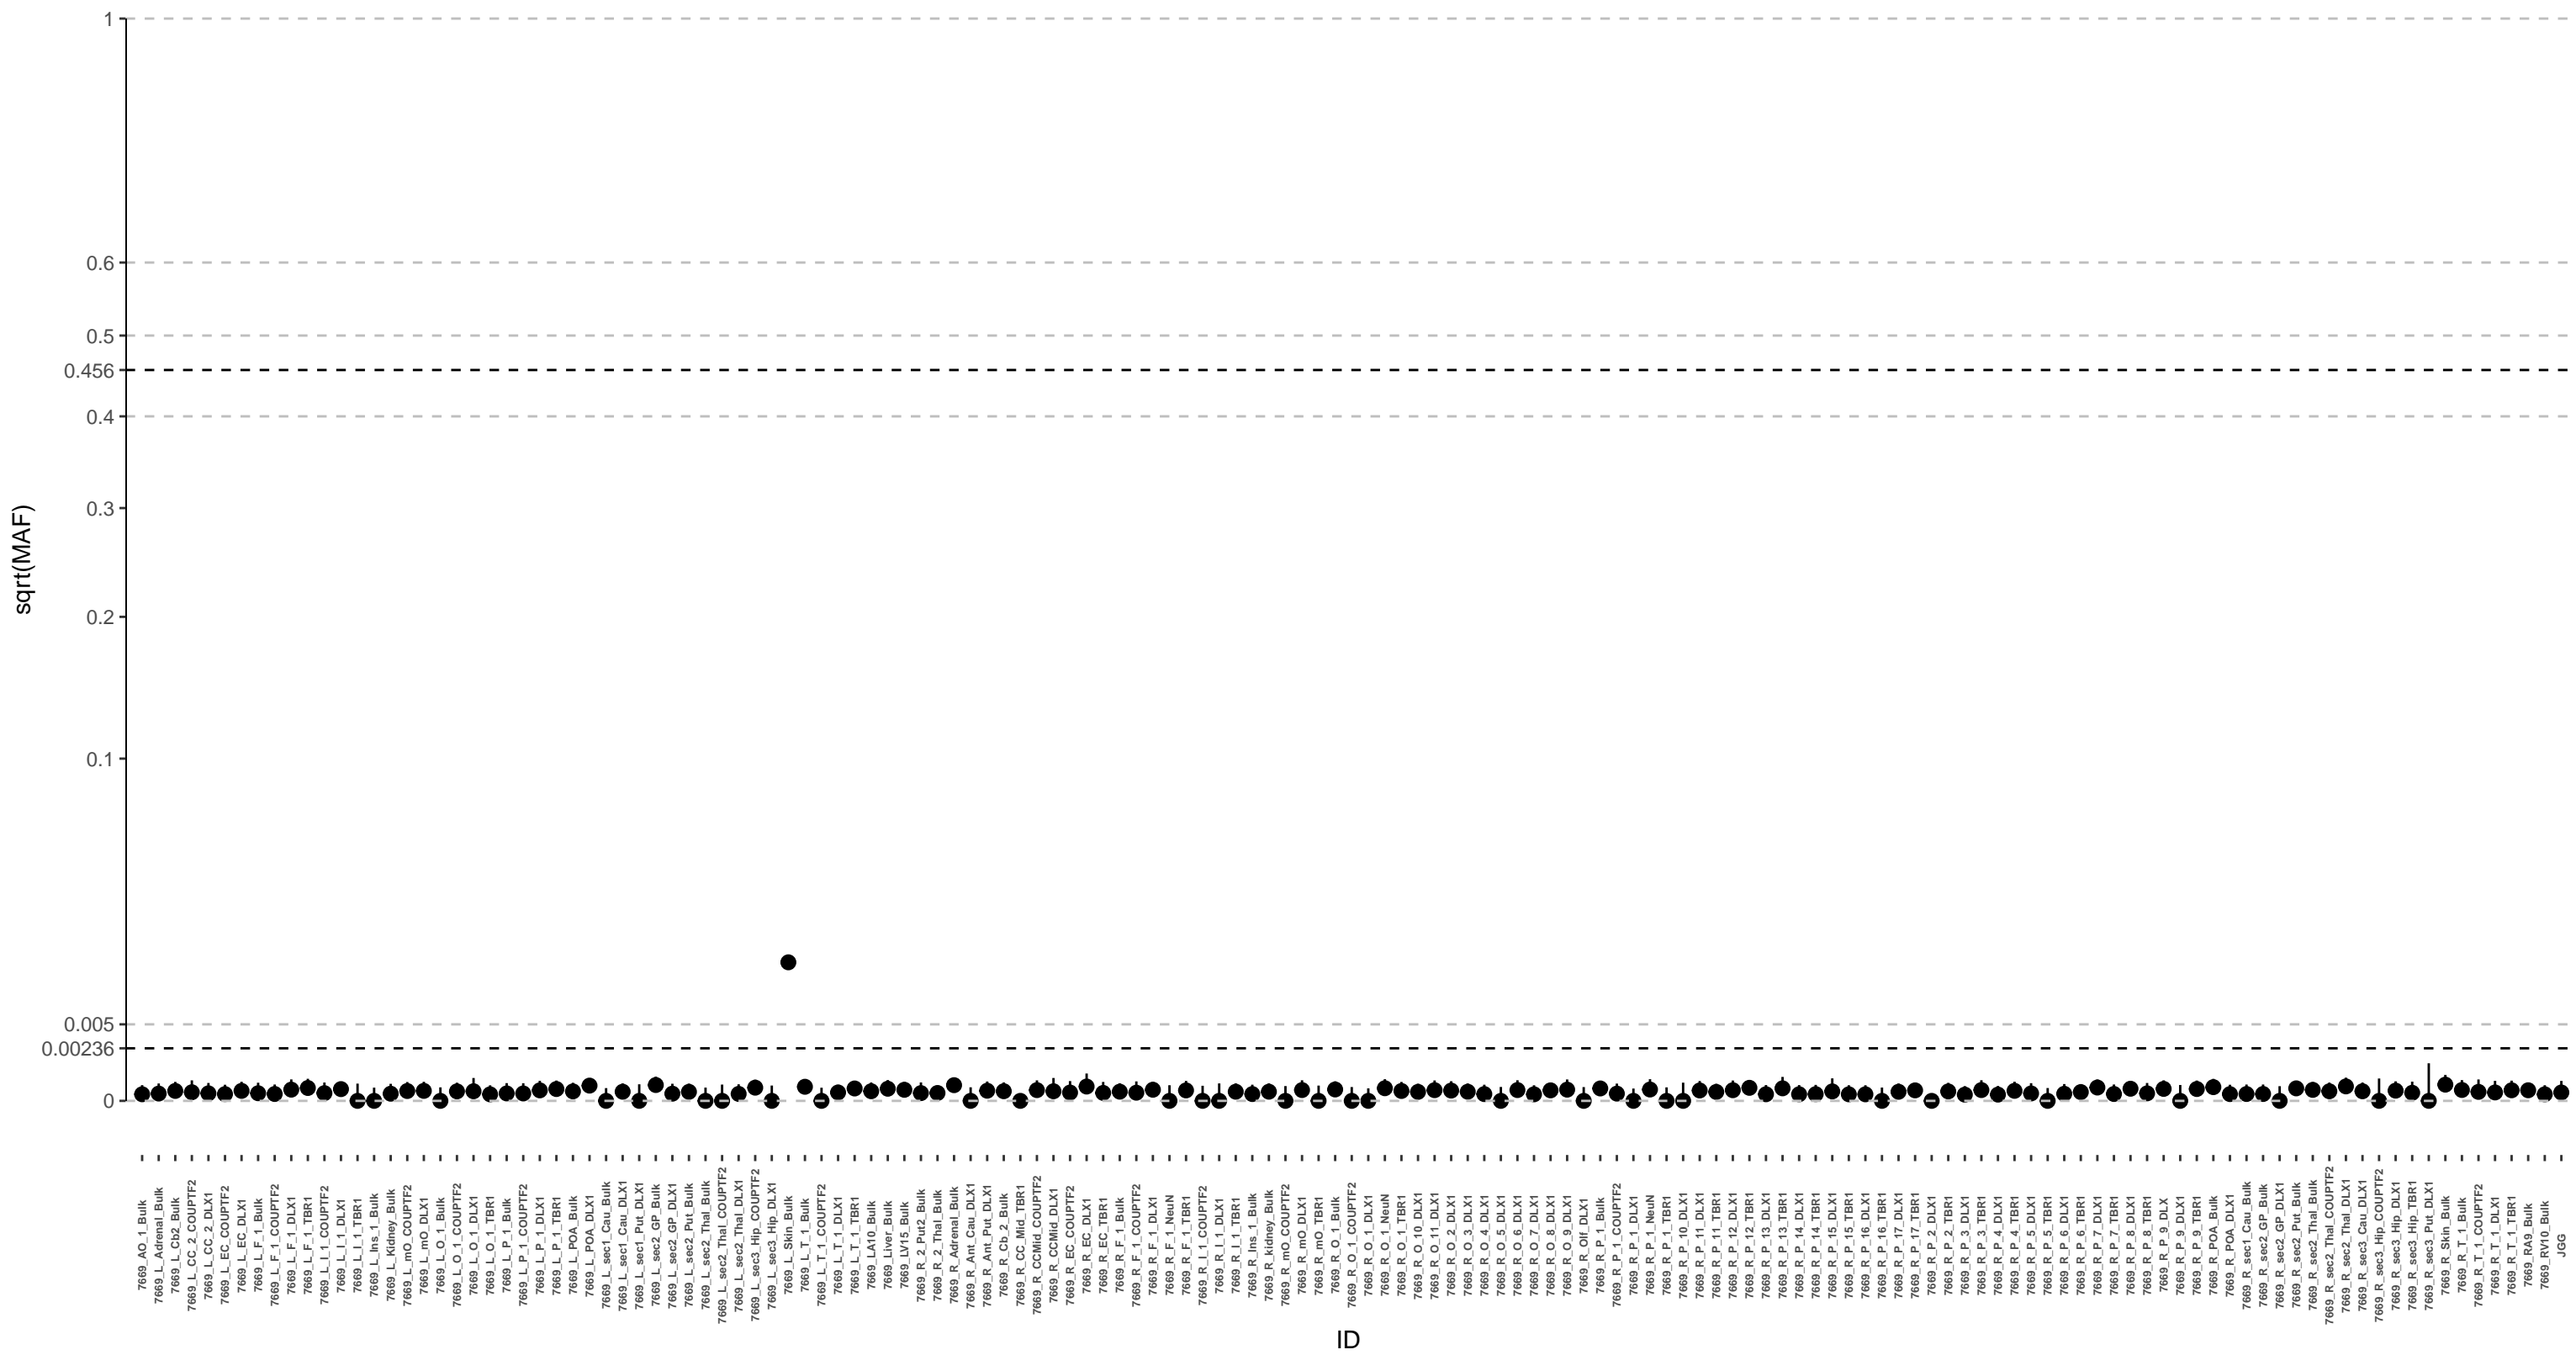

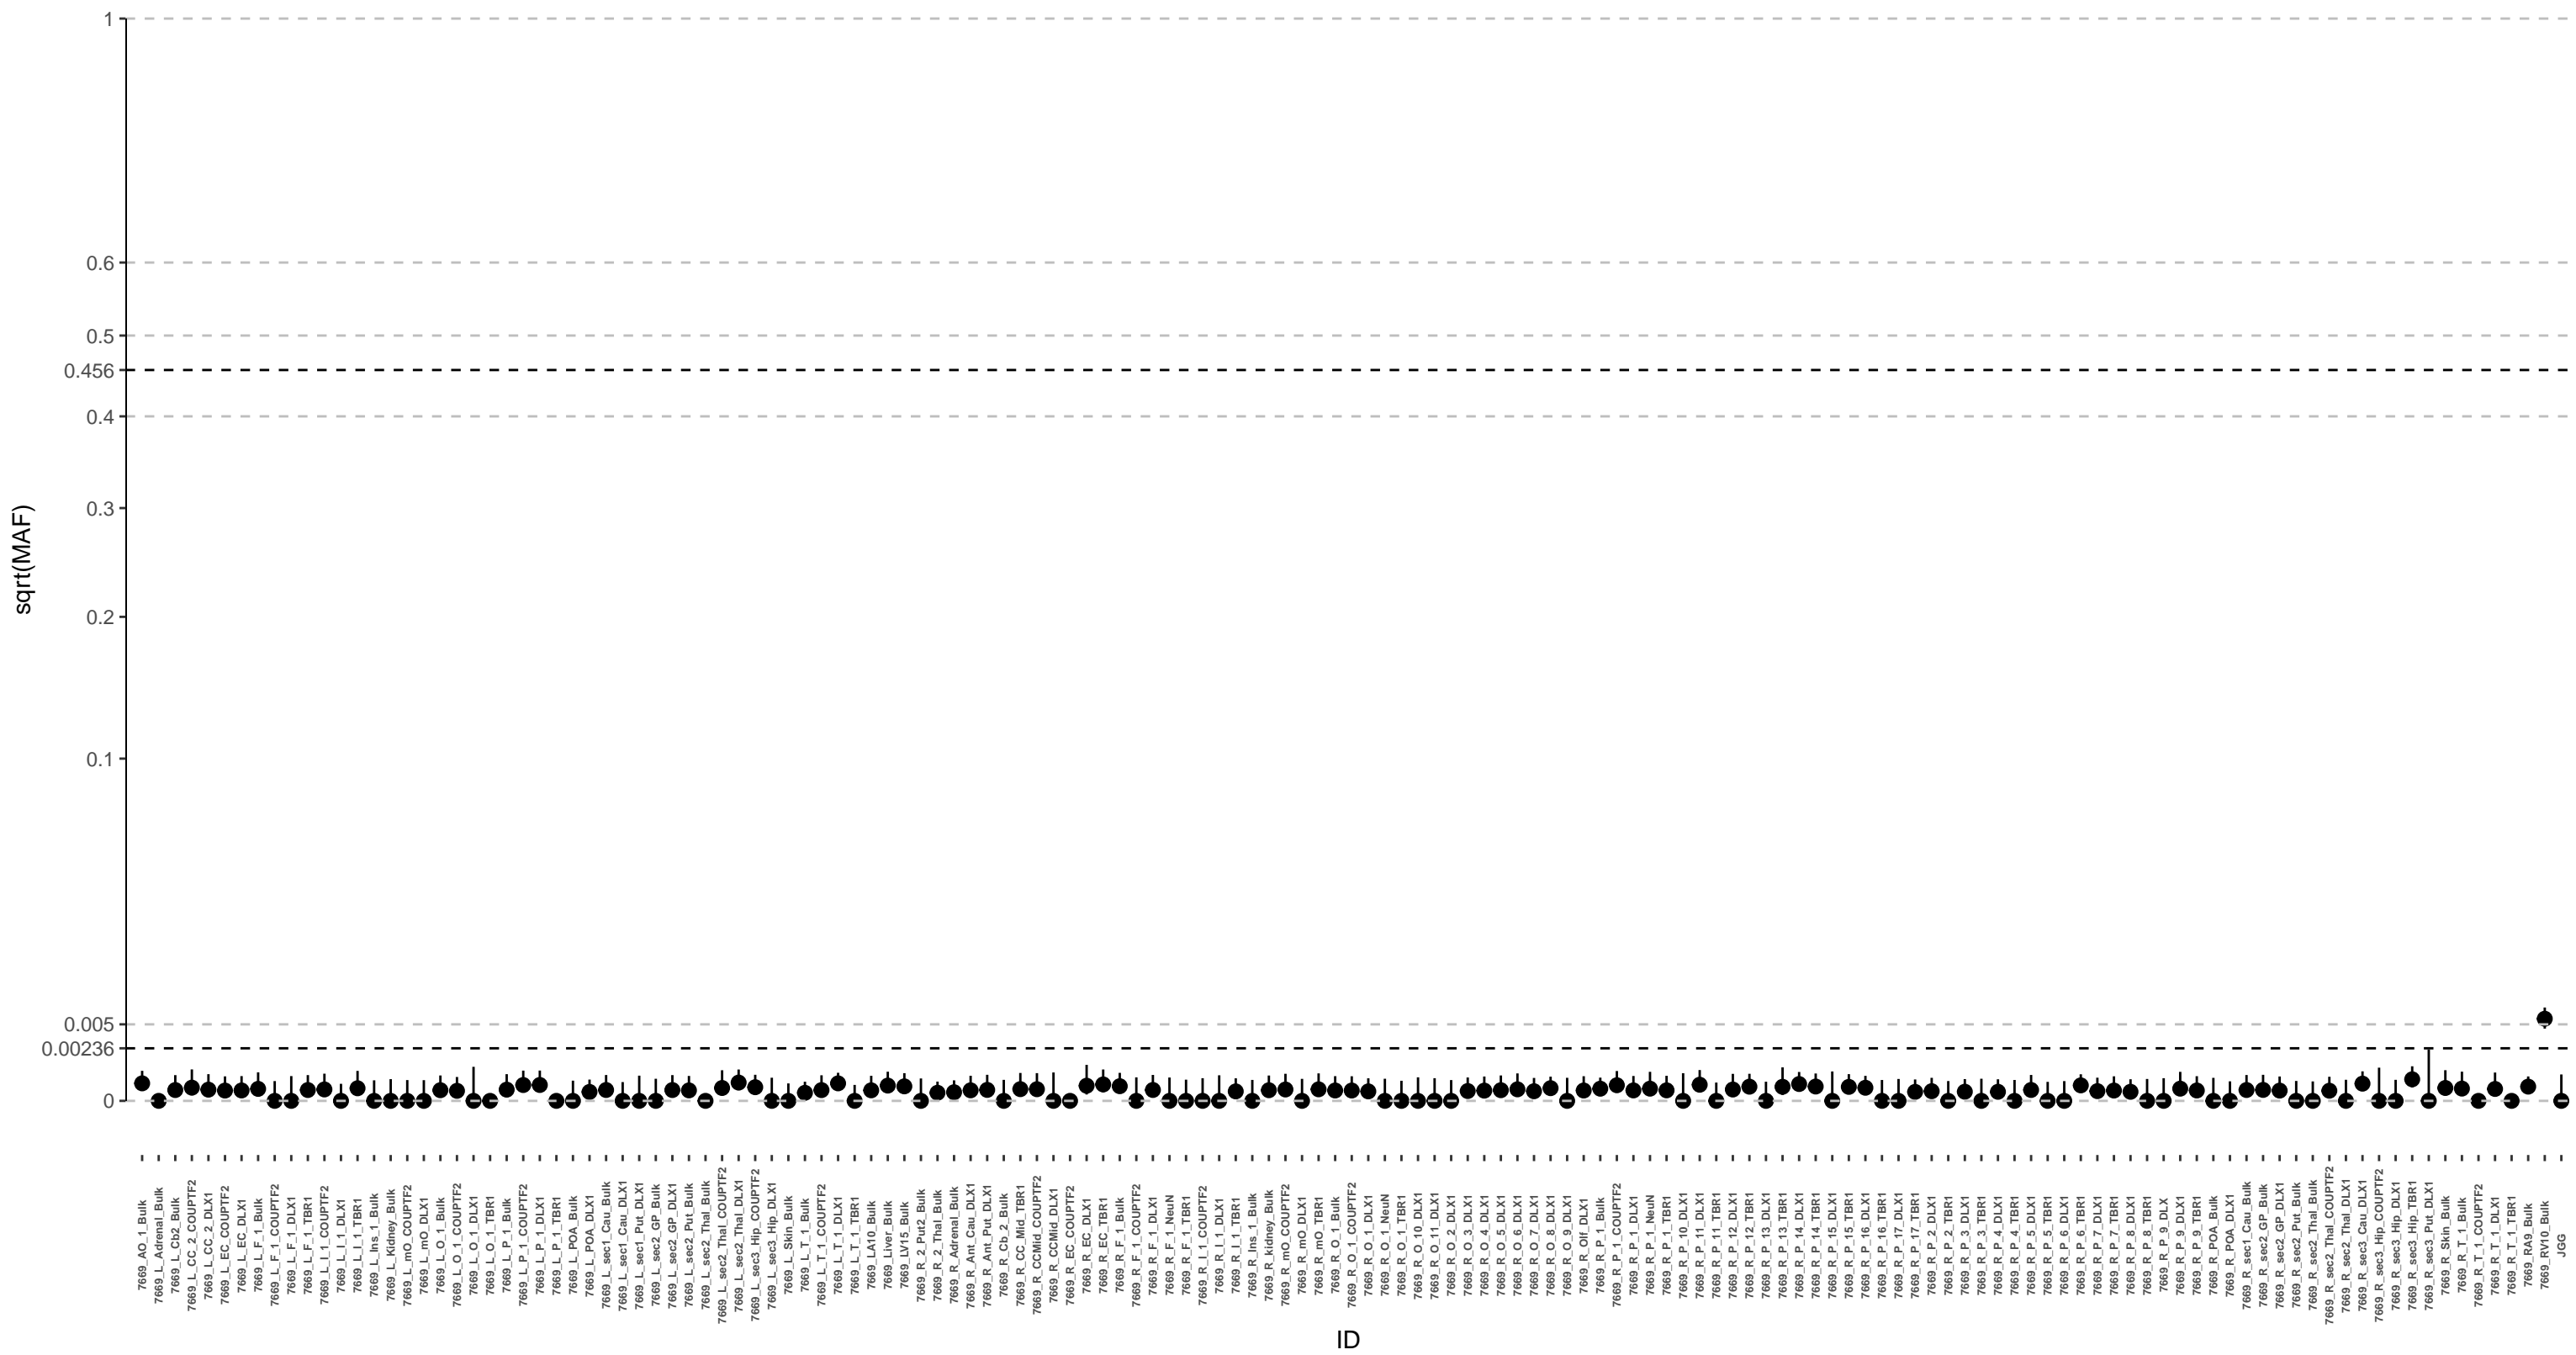

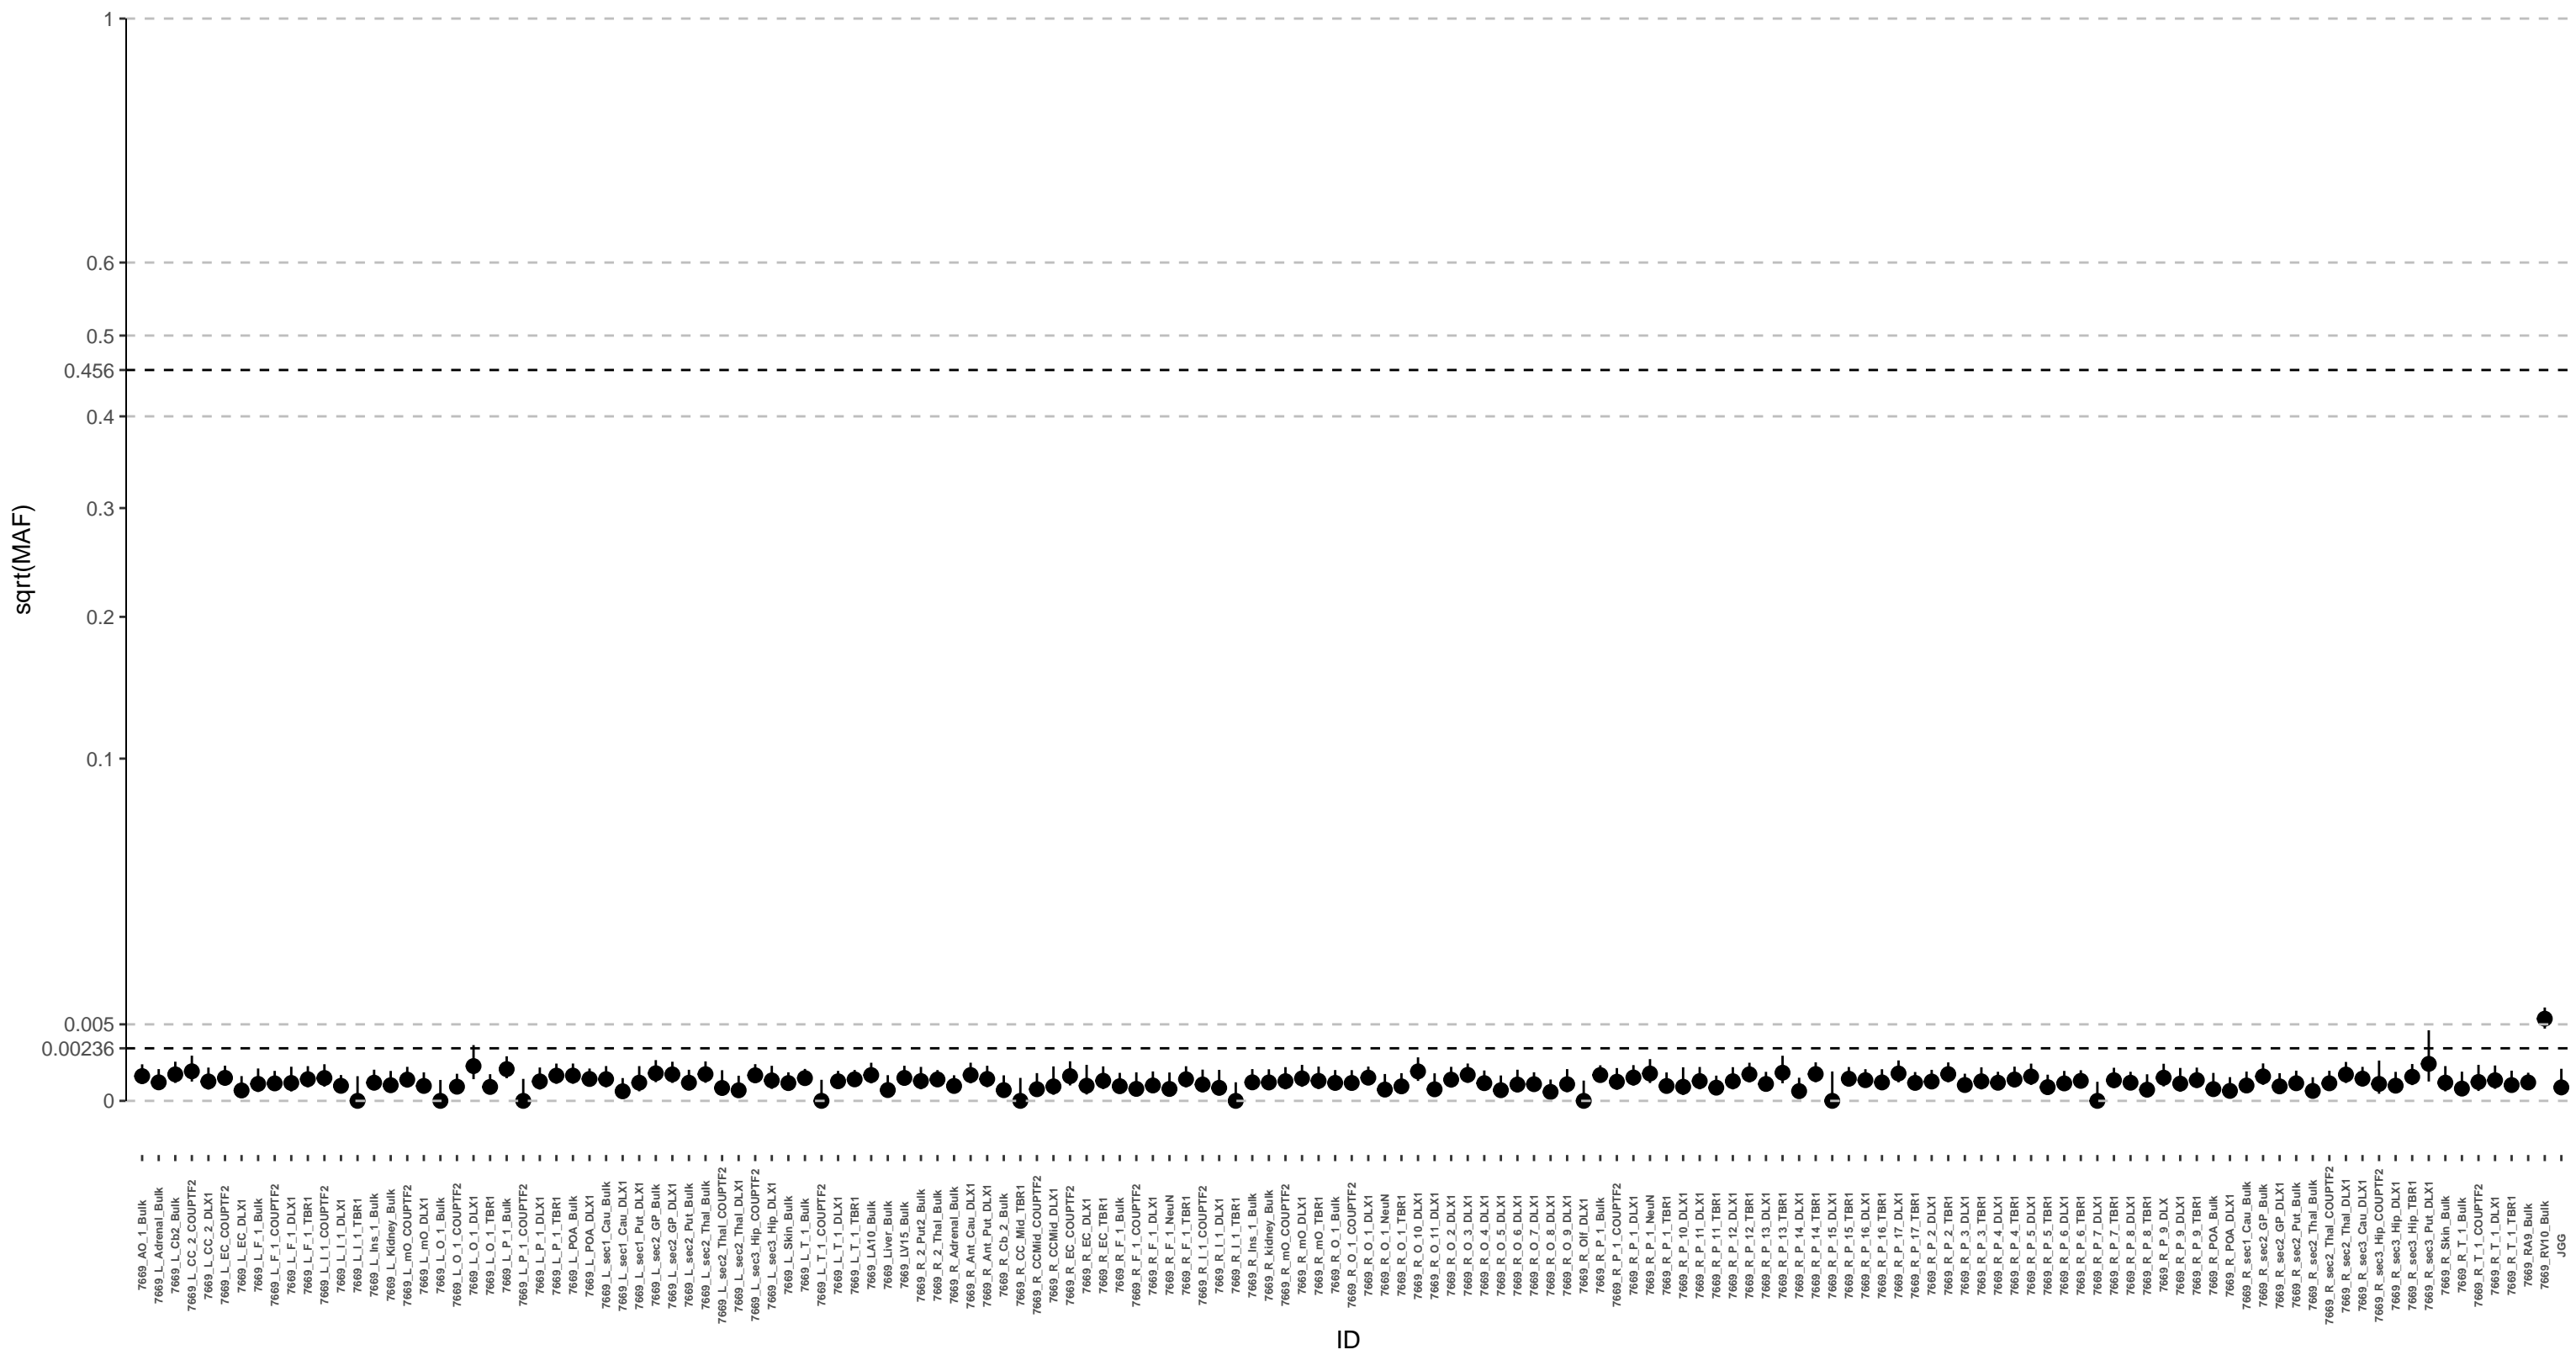

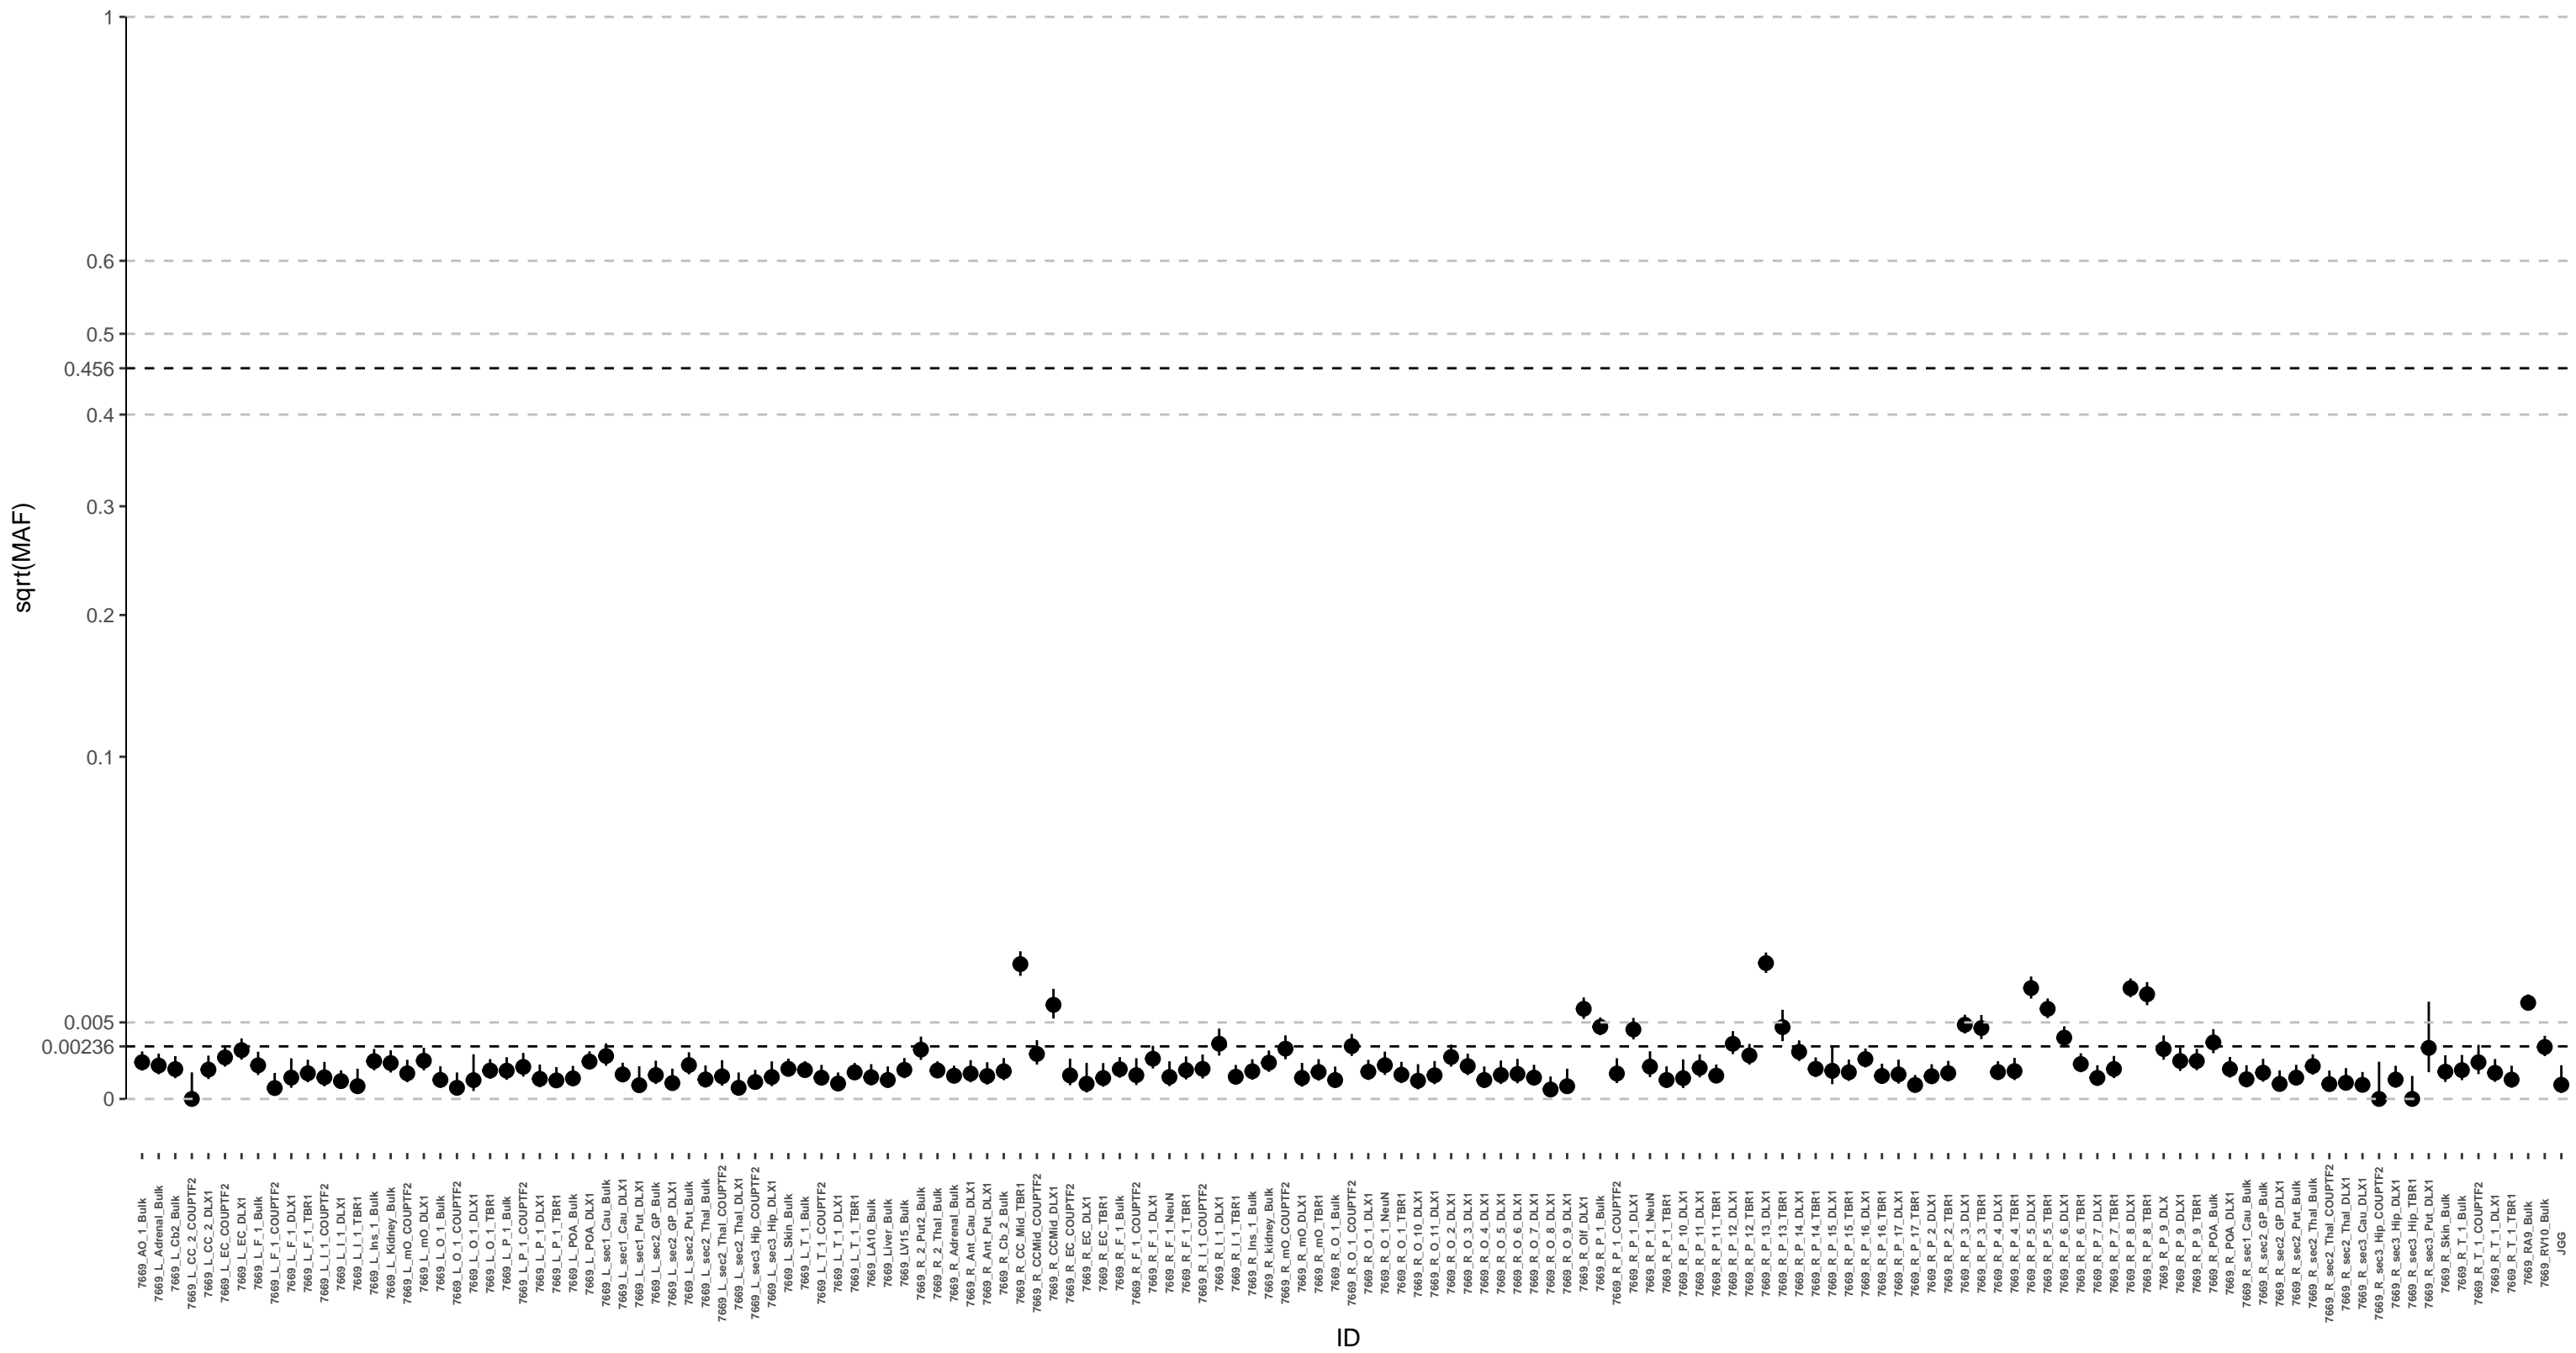



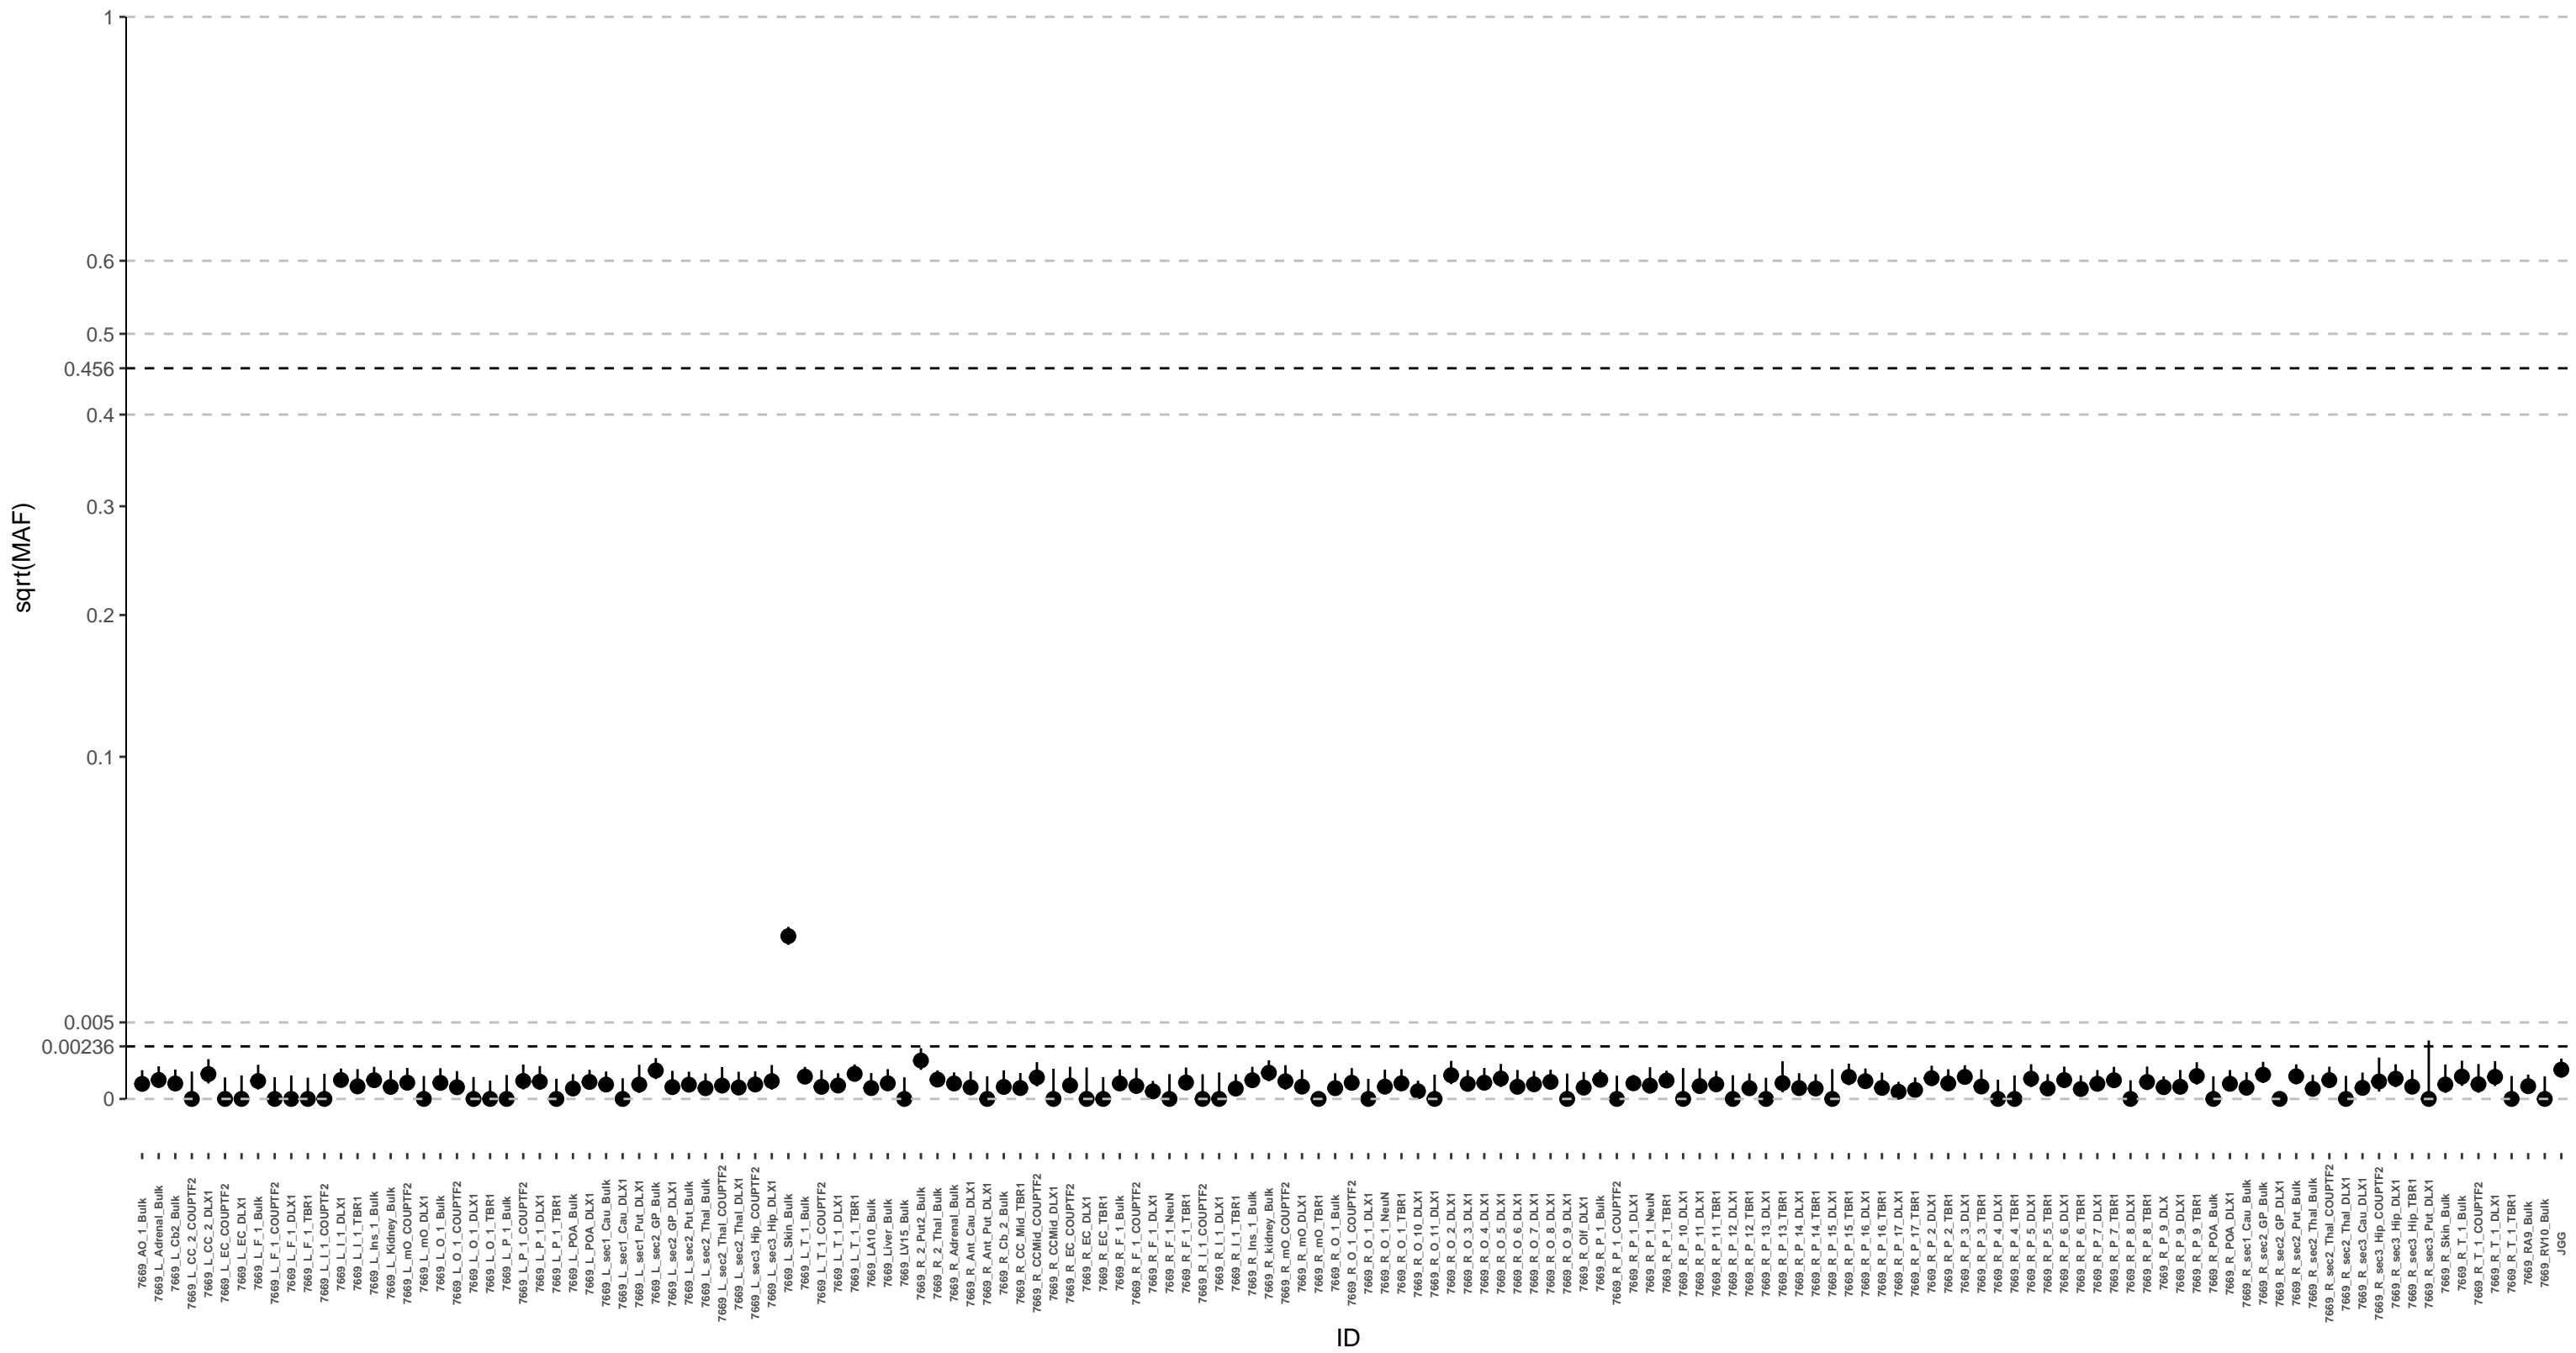

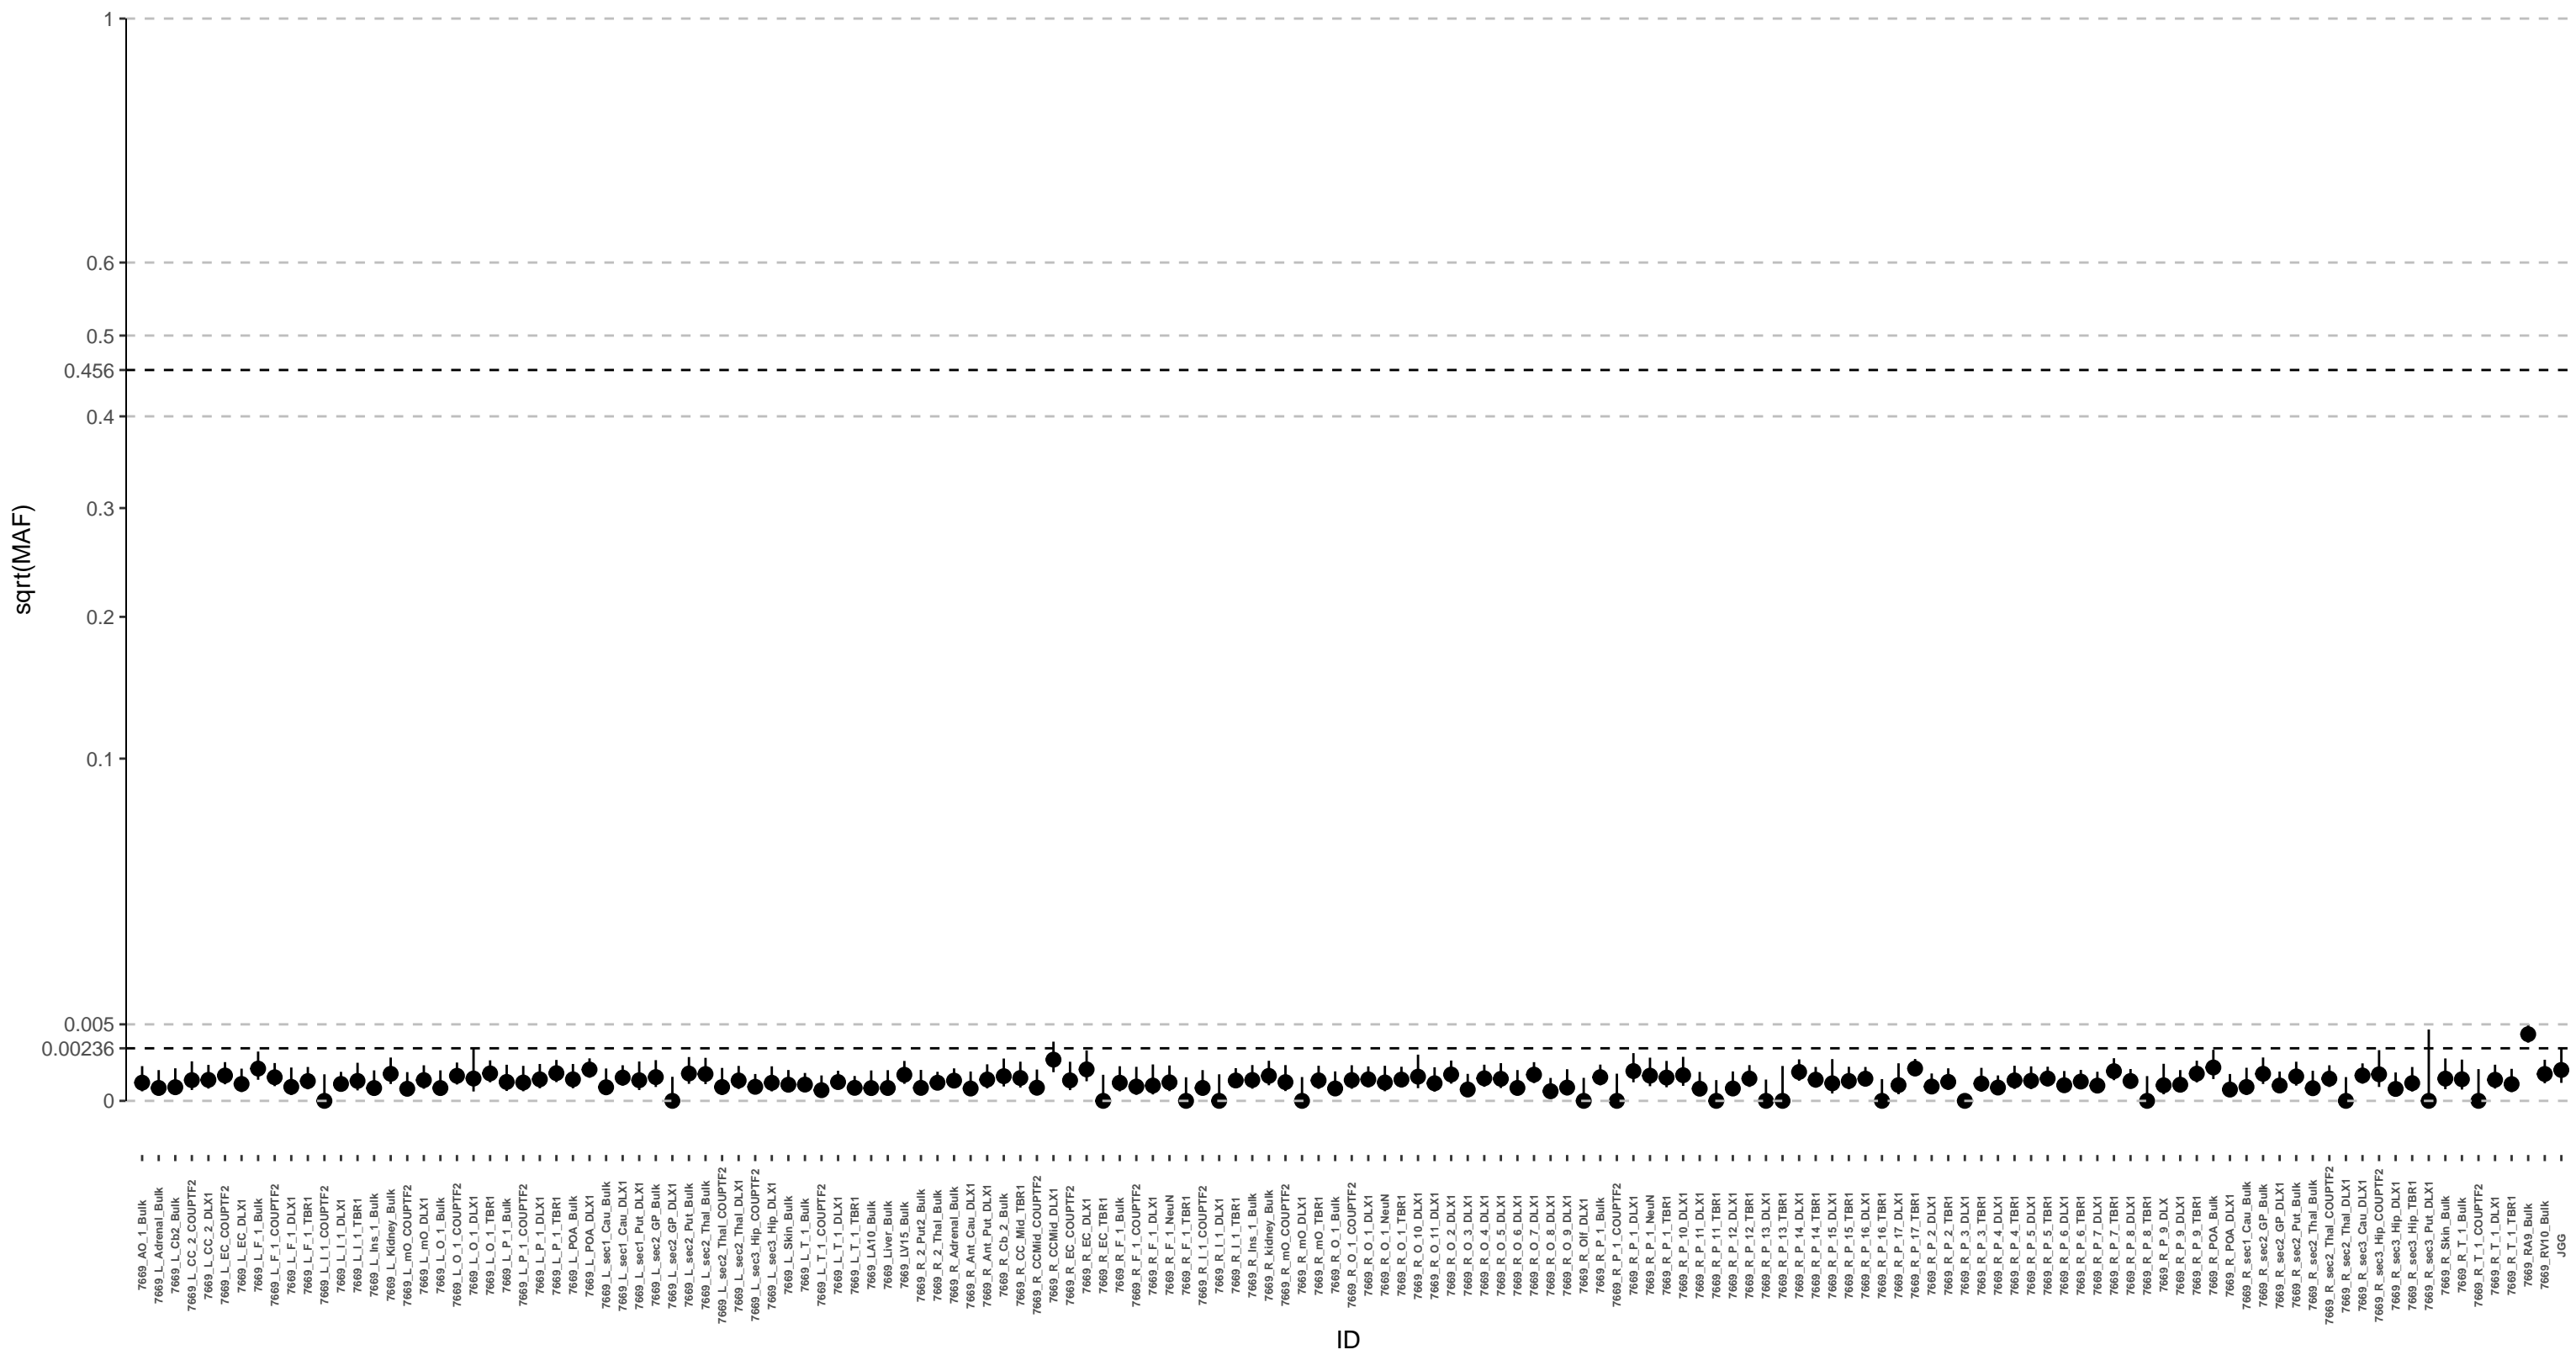

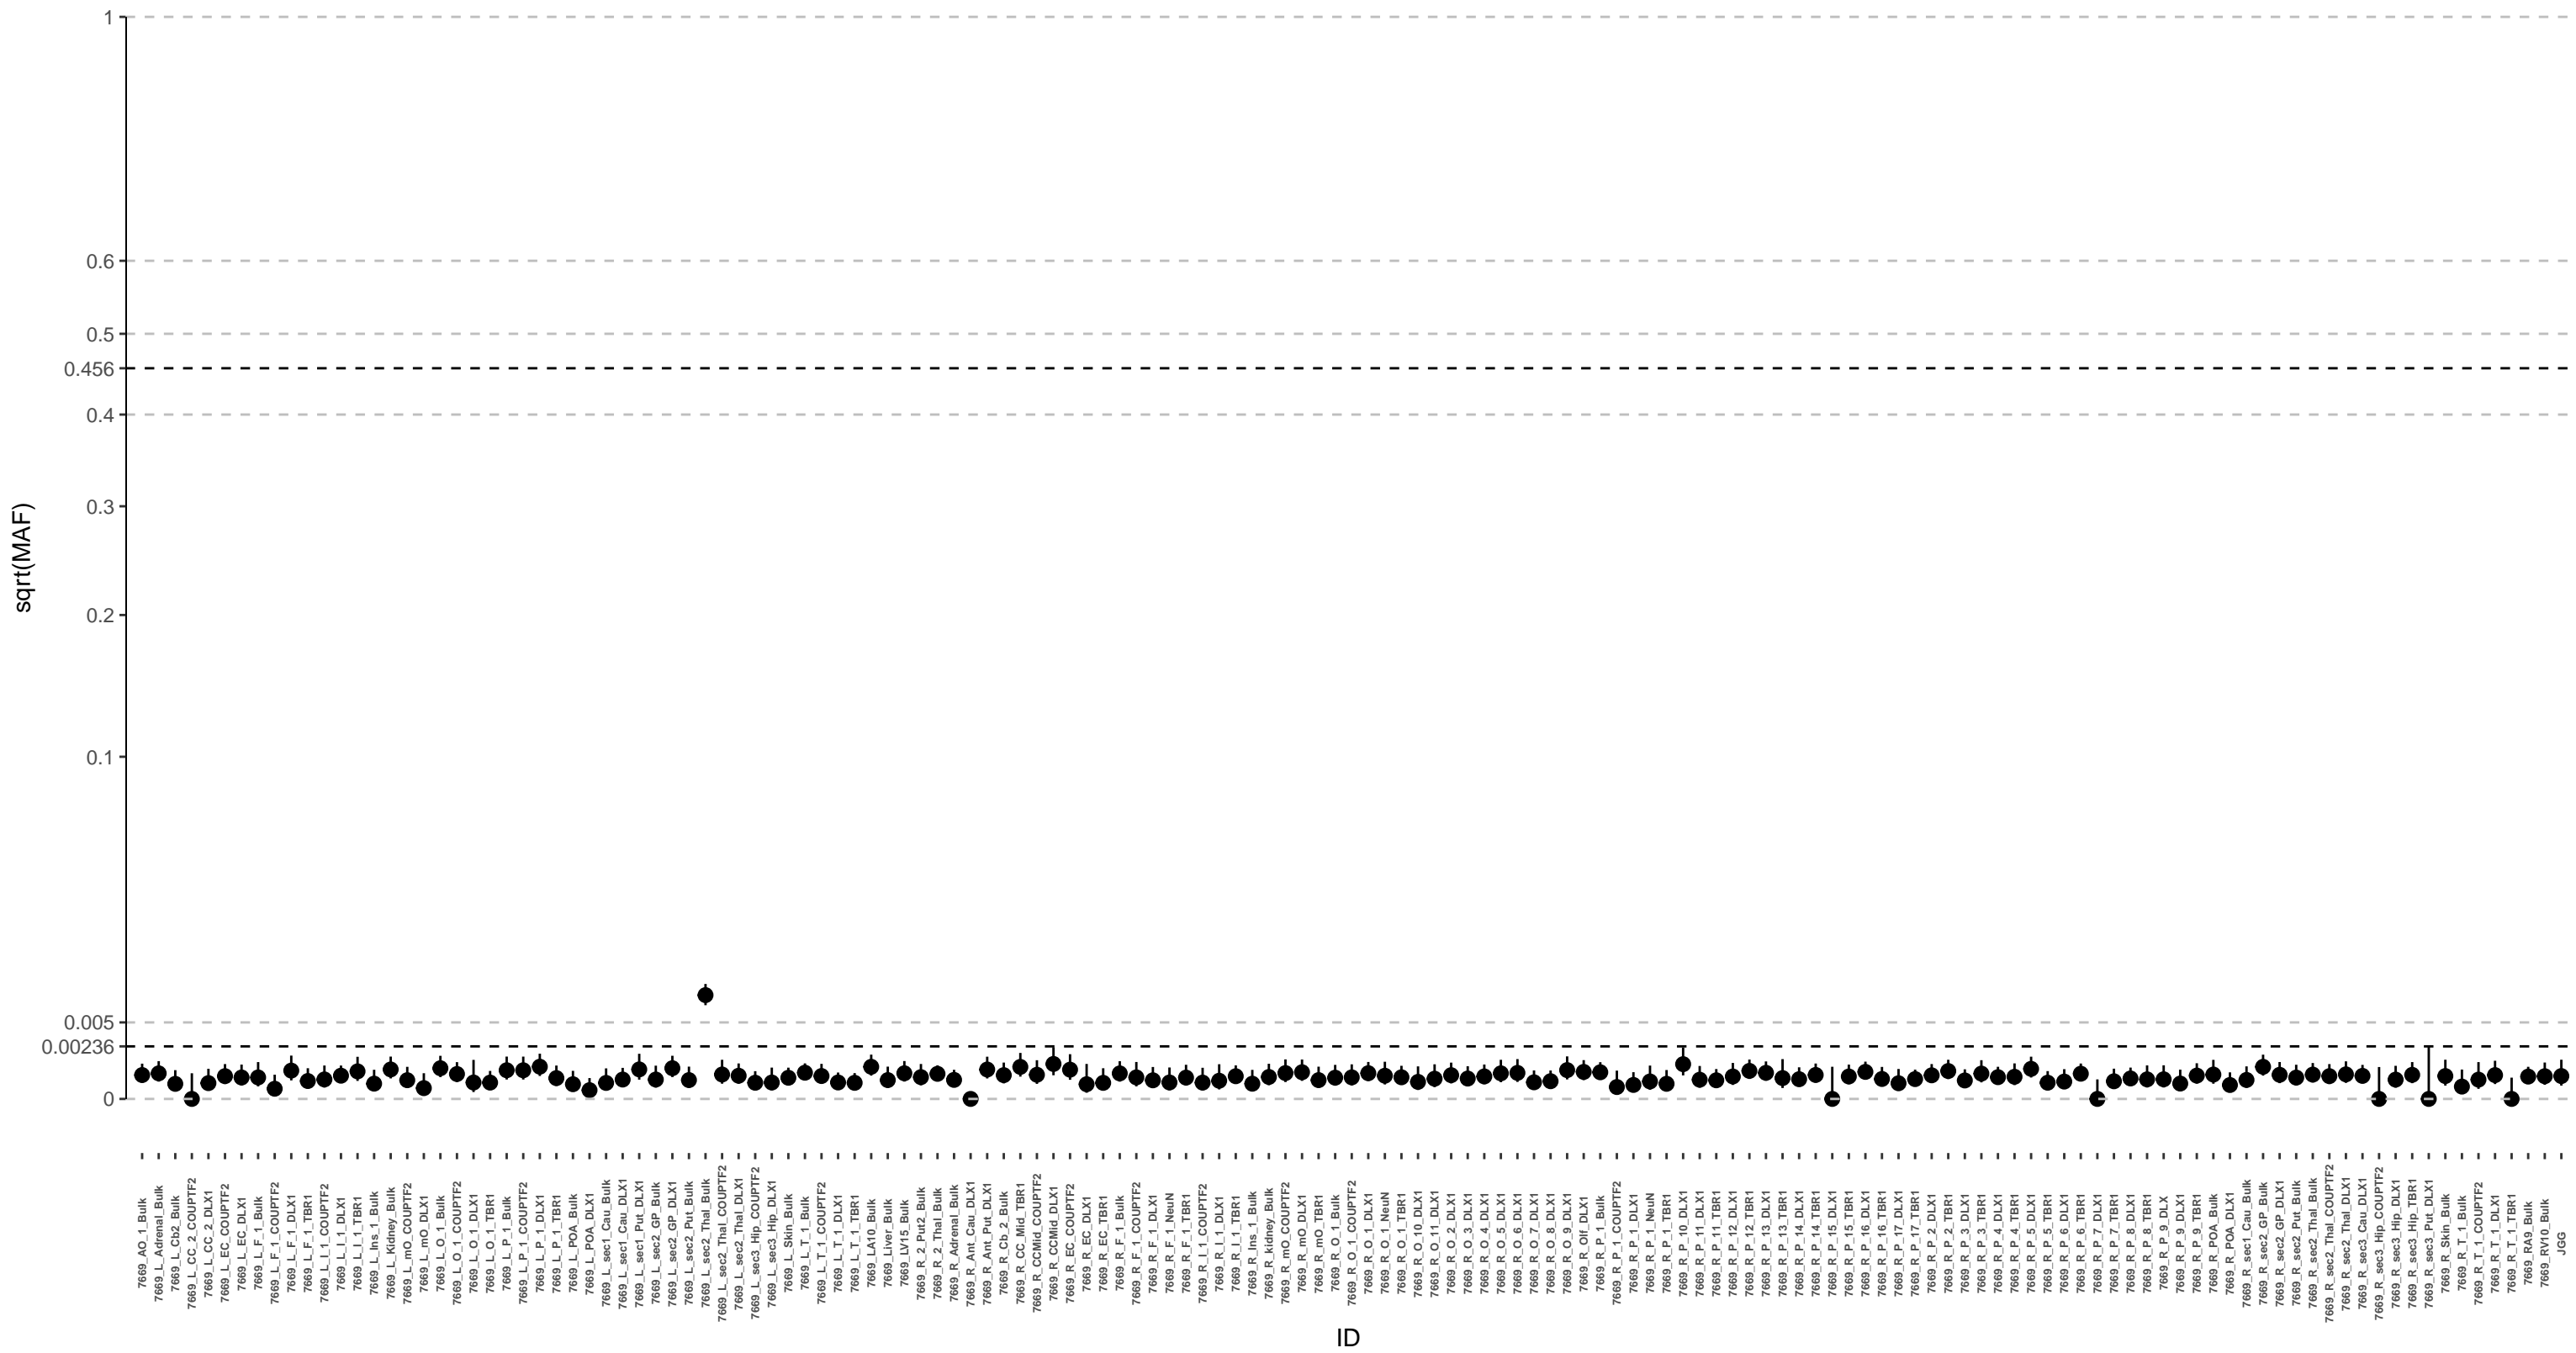

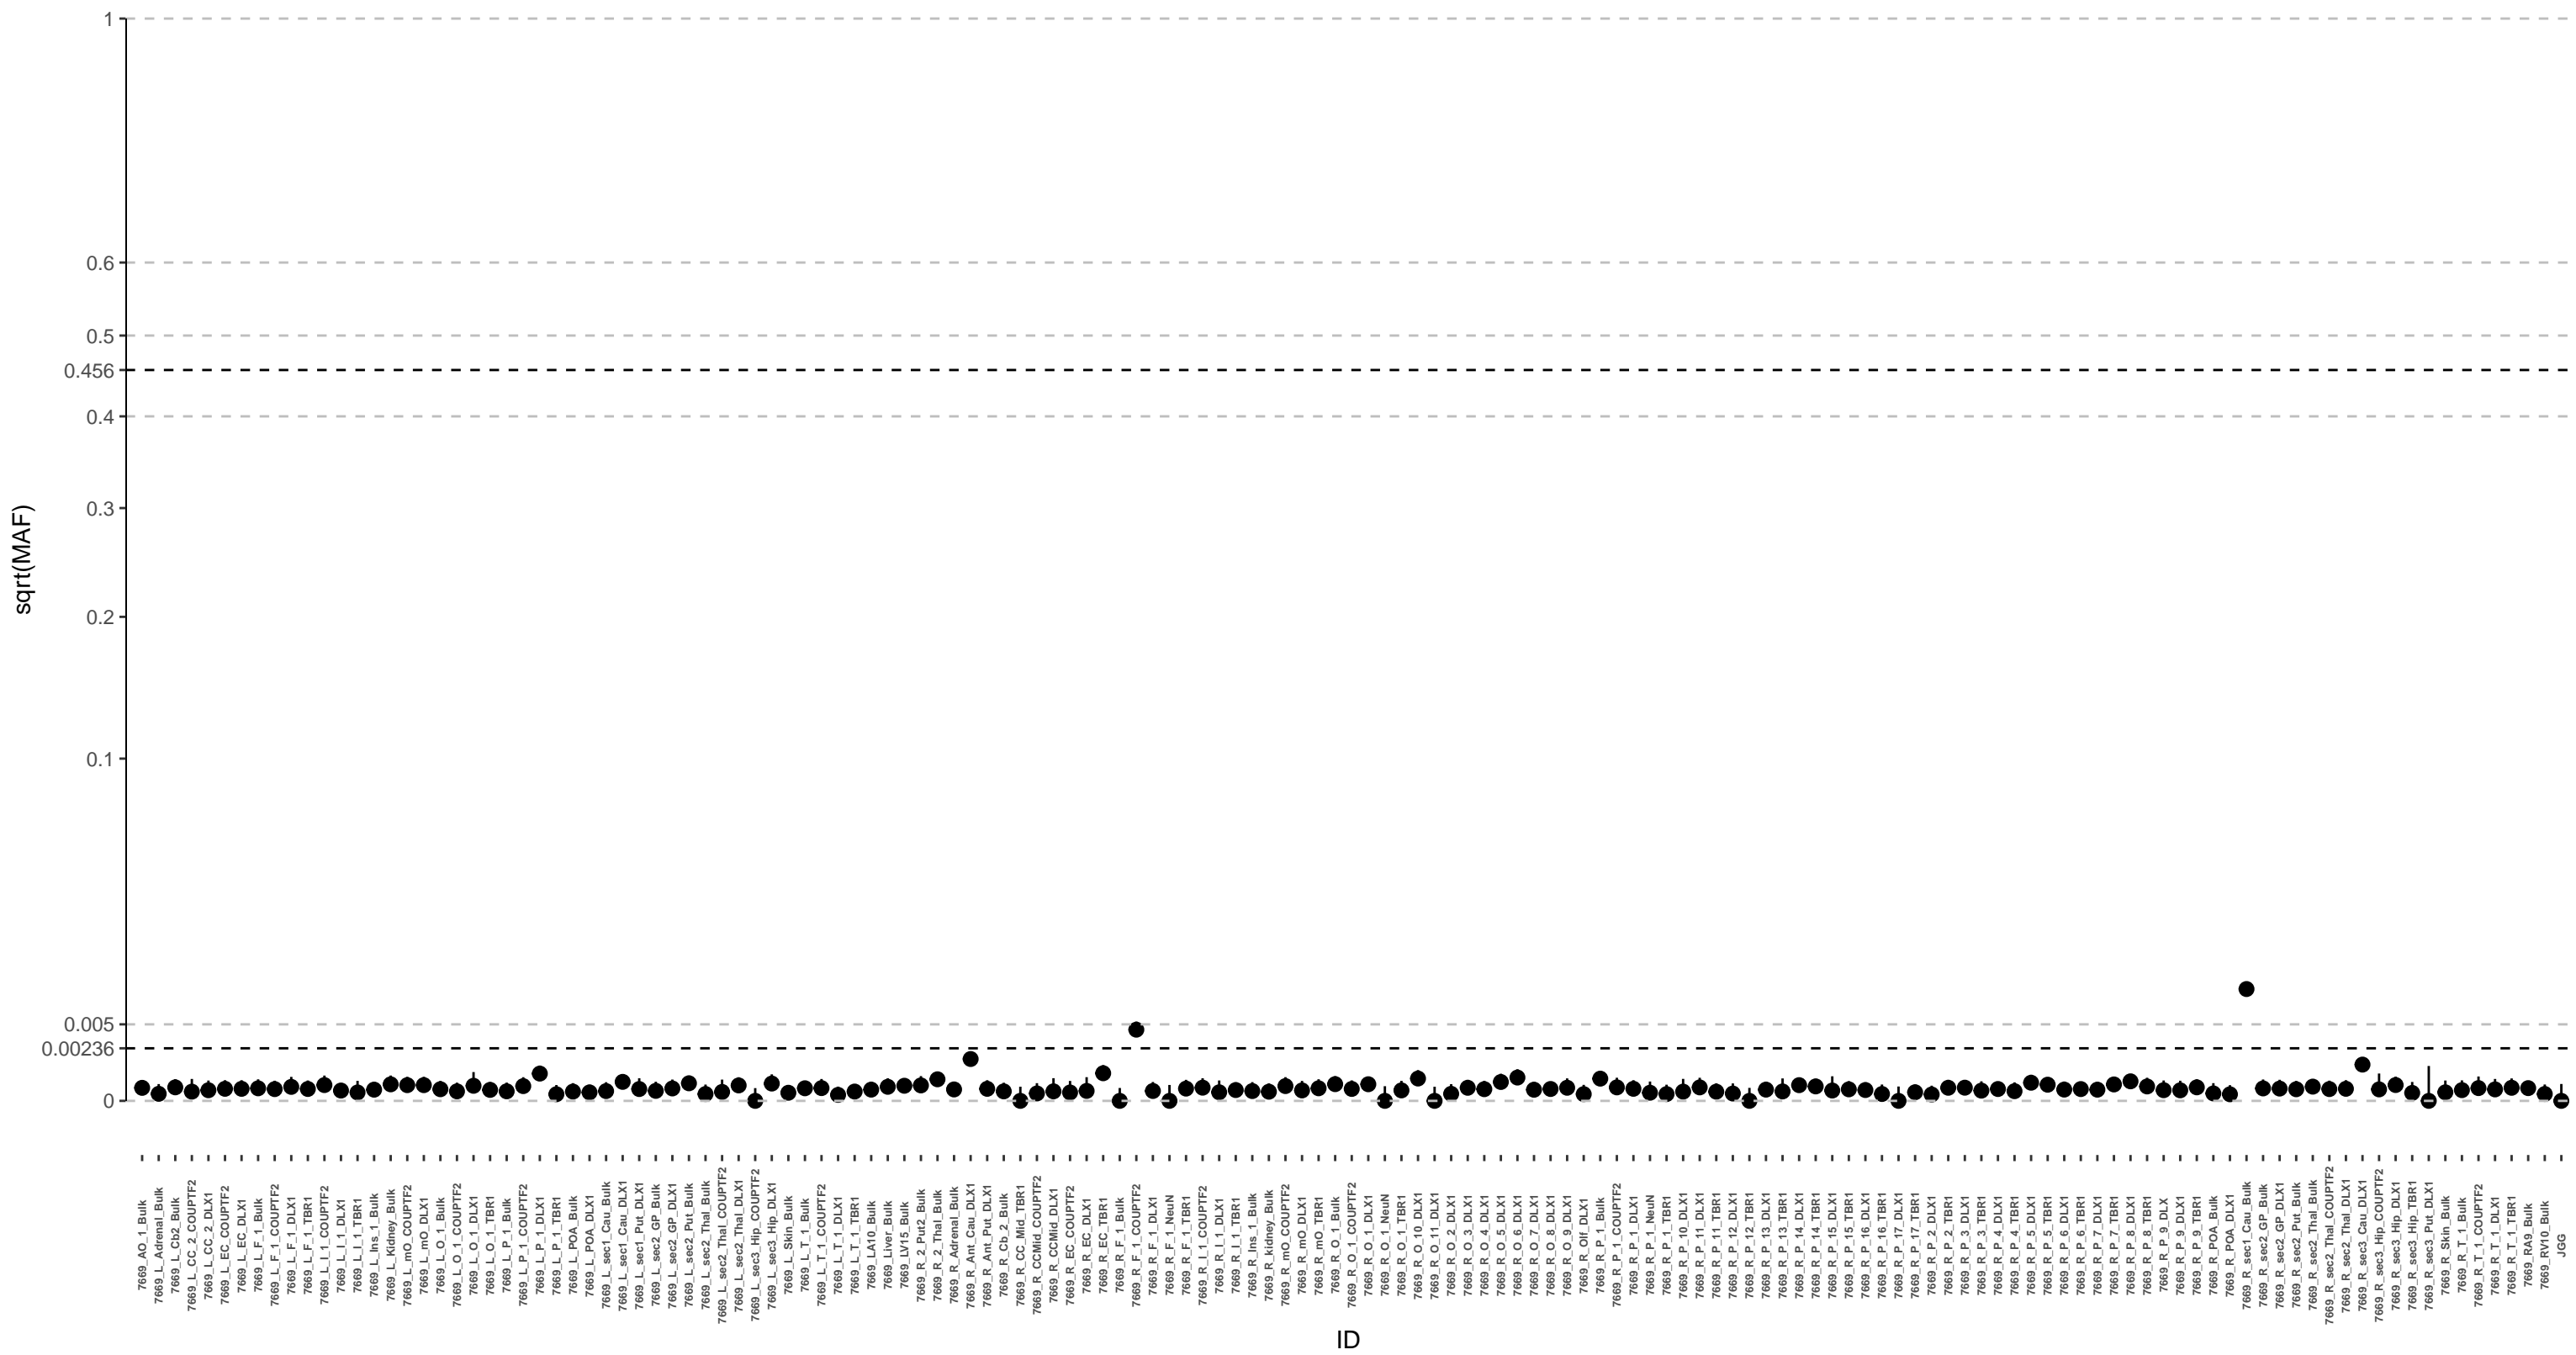

ID05 X-79691731-A-T

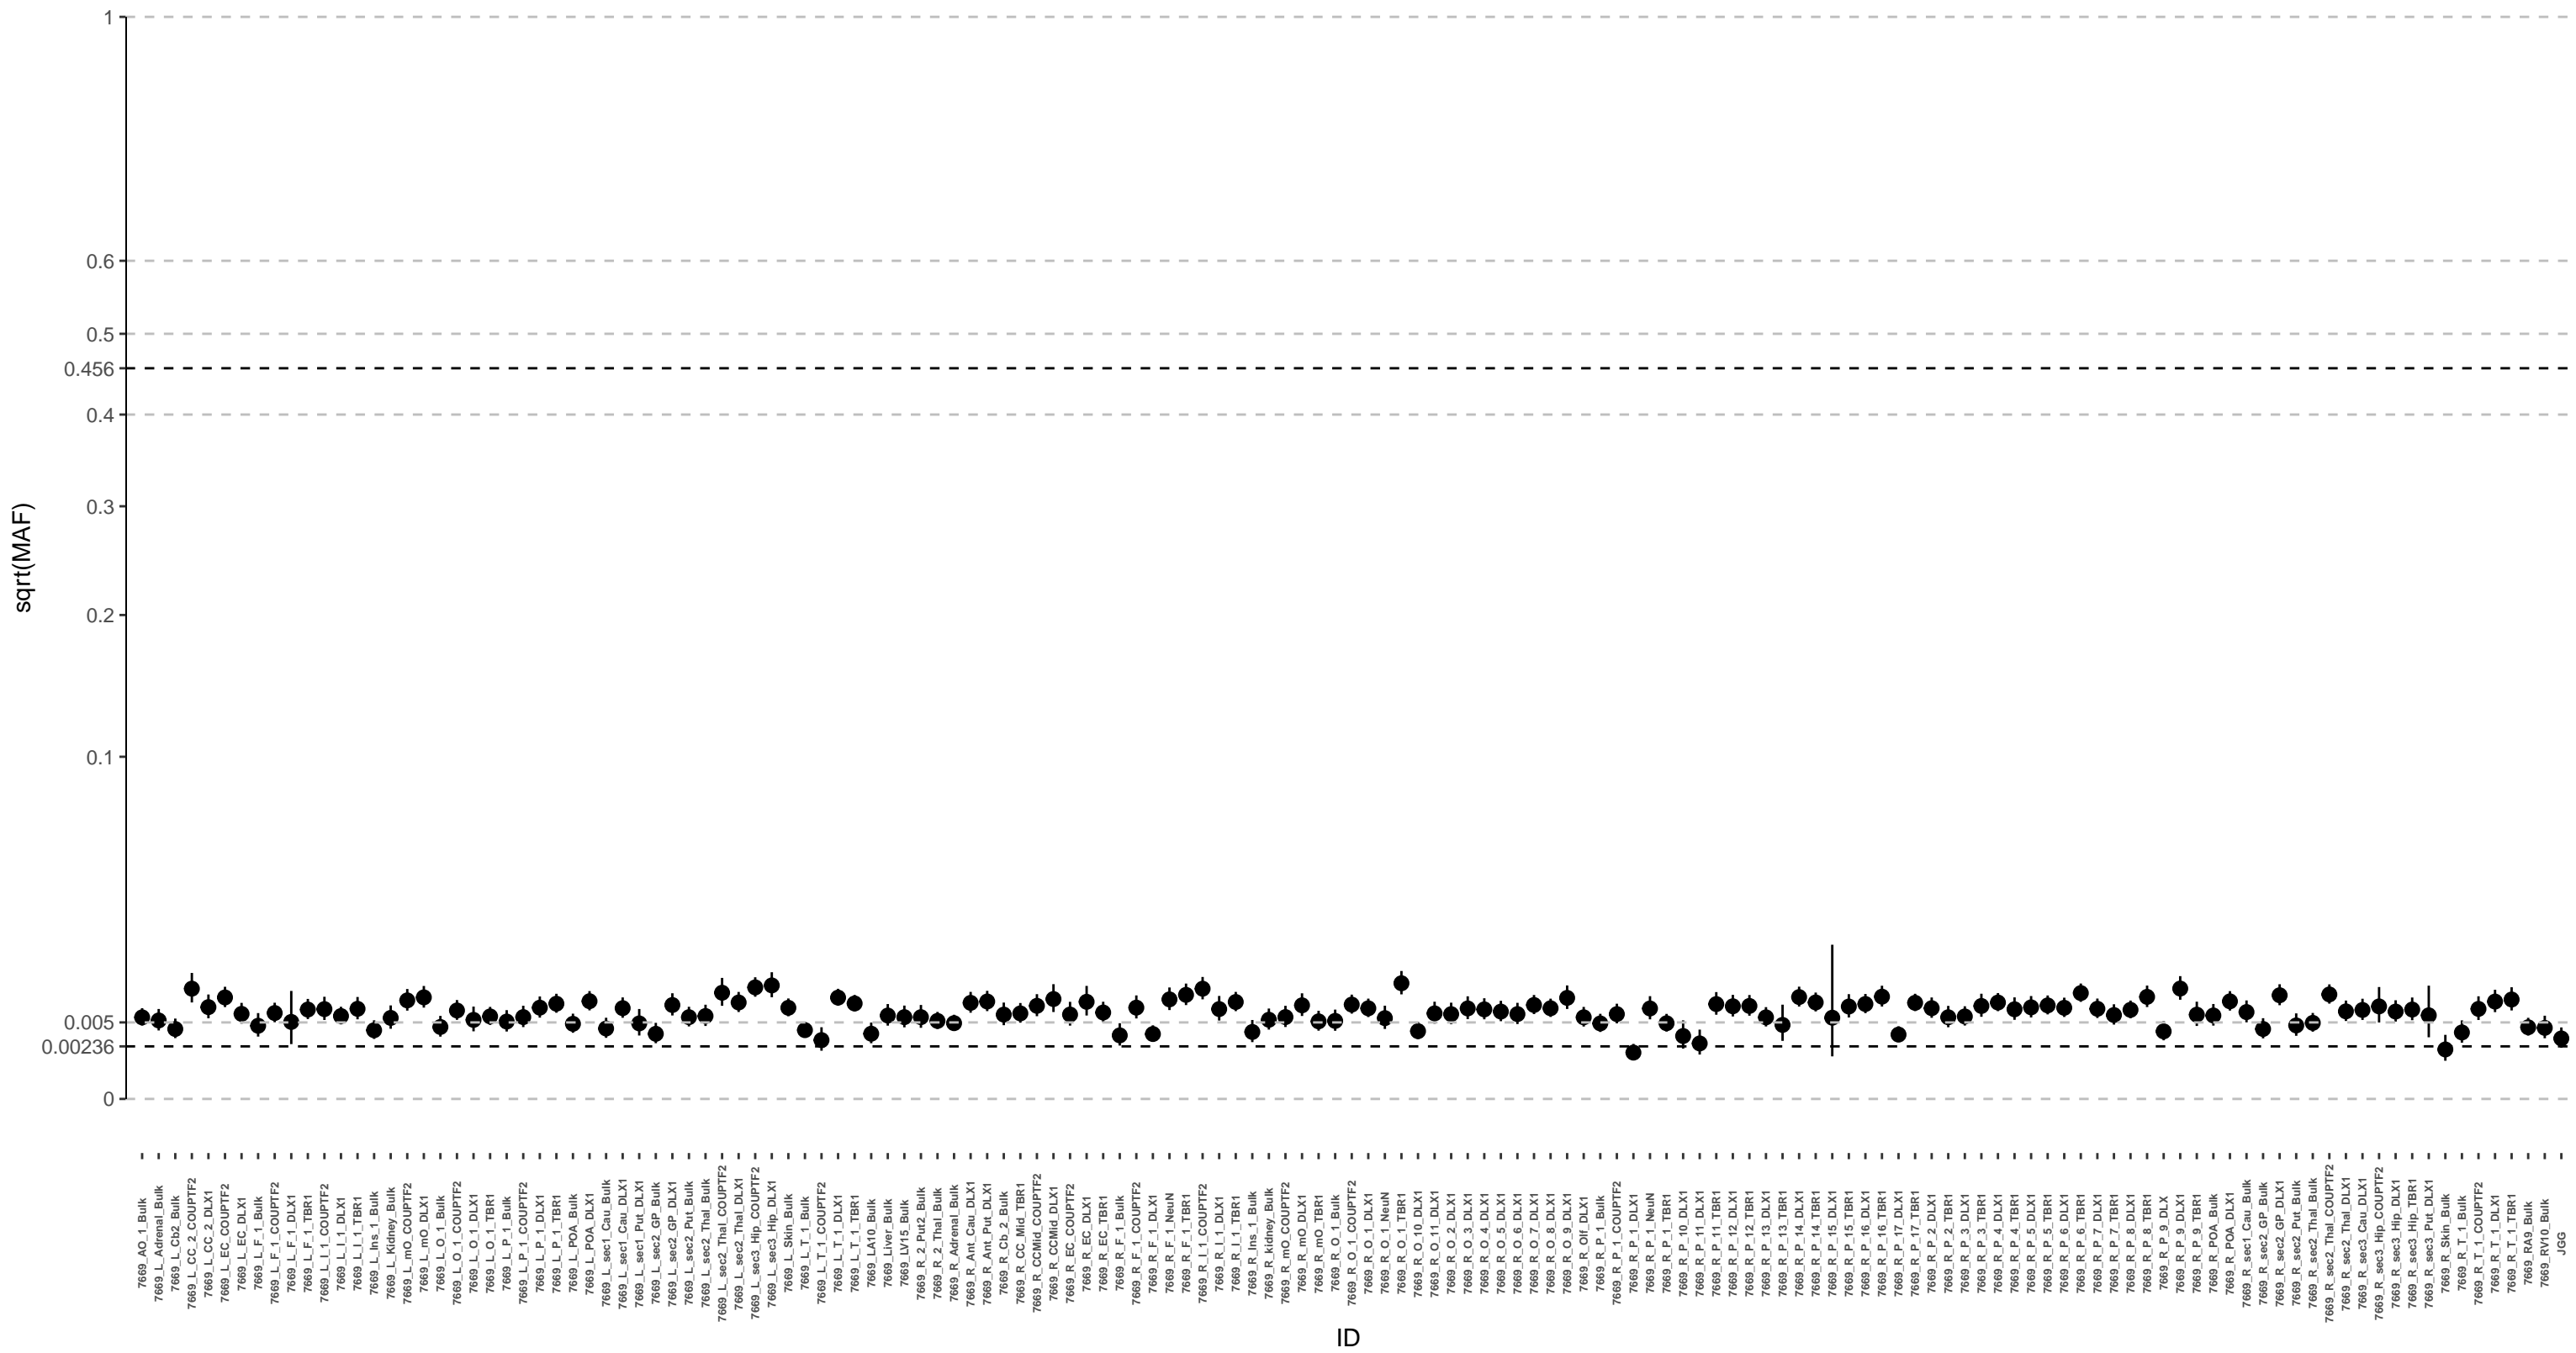

ID05 X-79691734-A-T

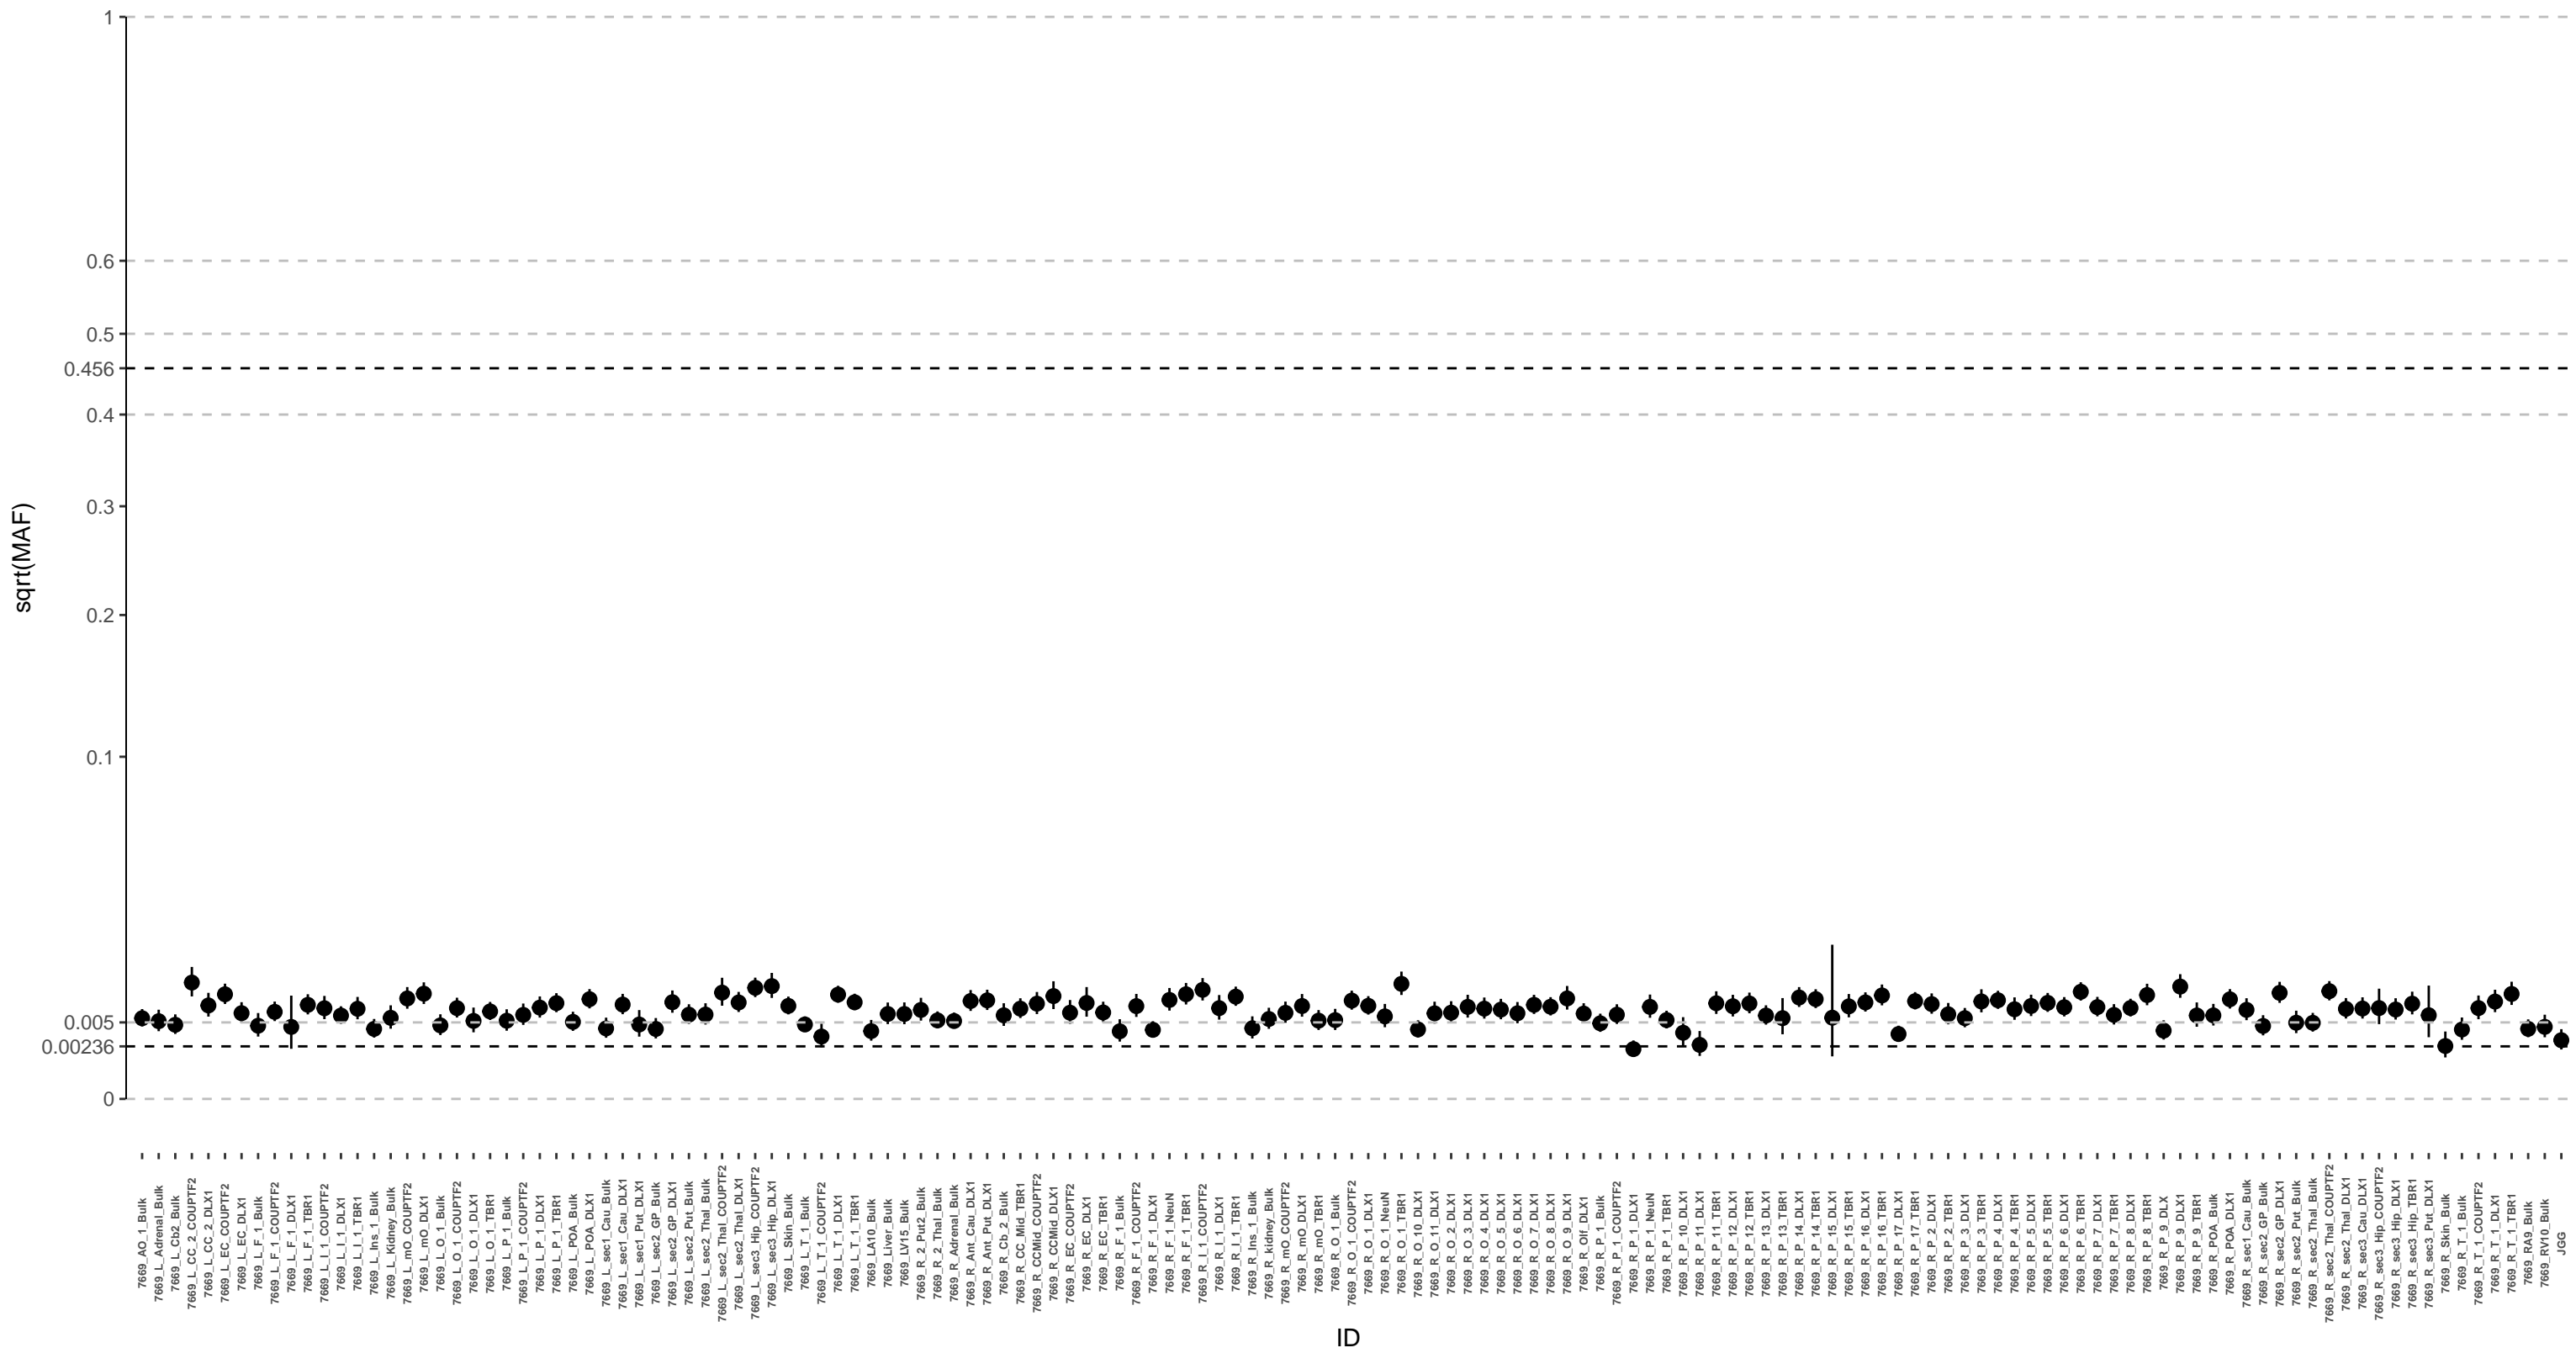

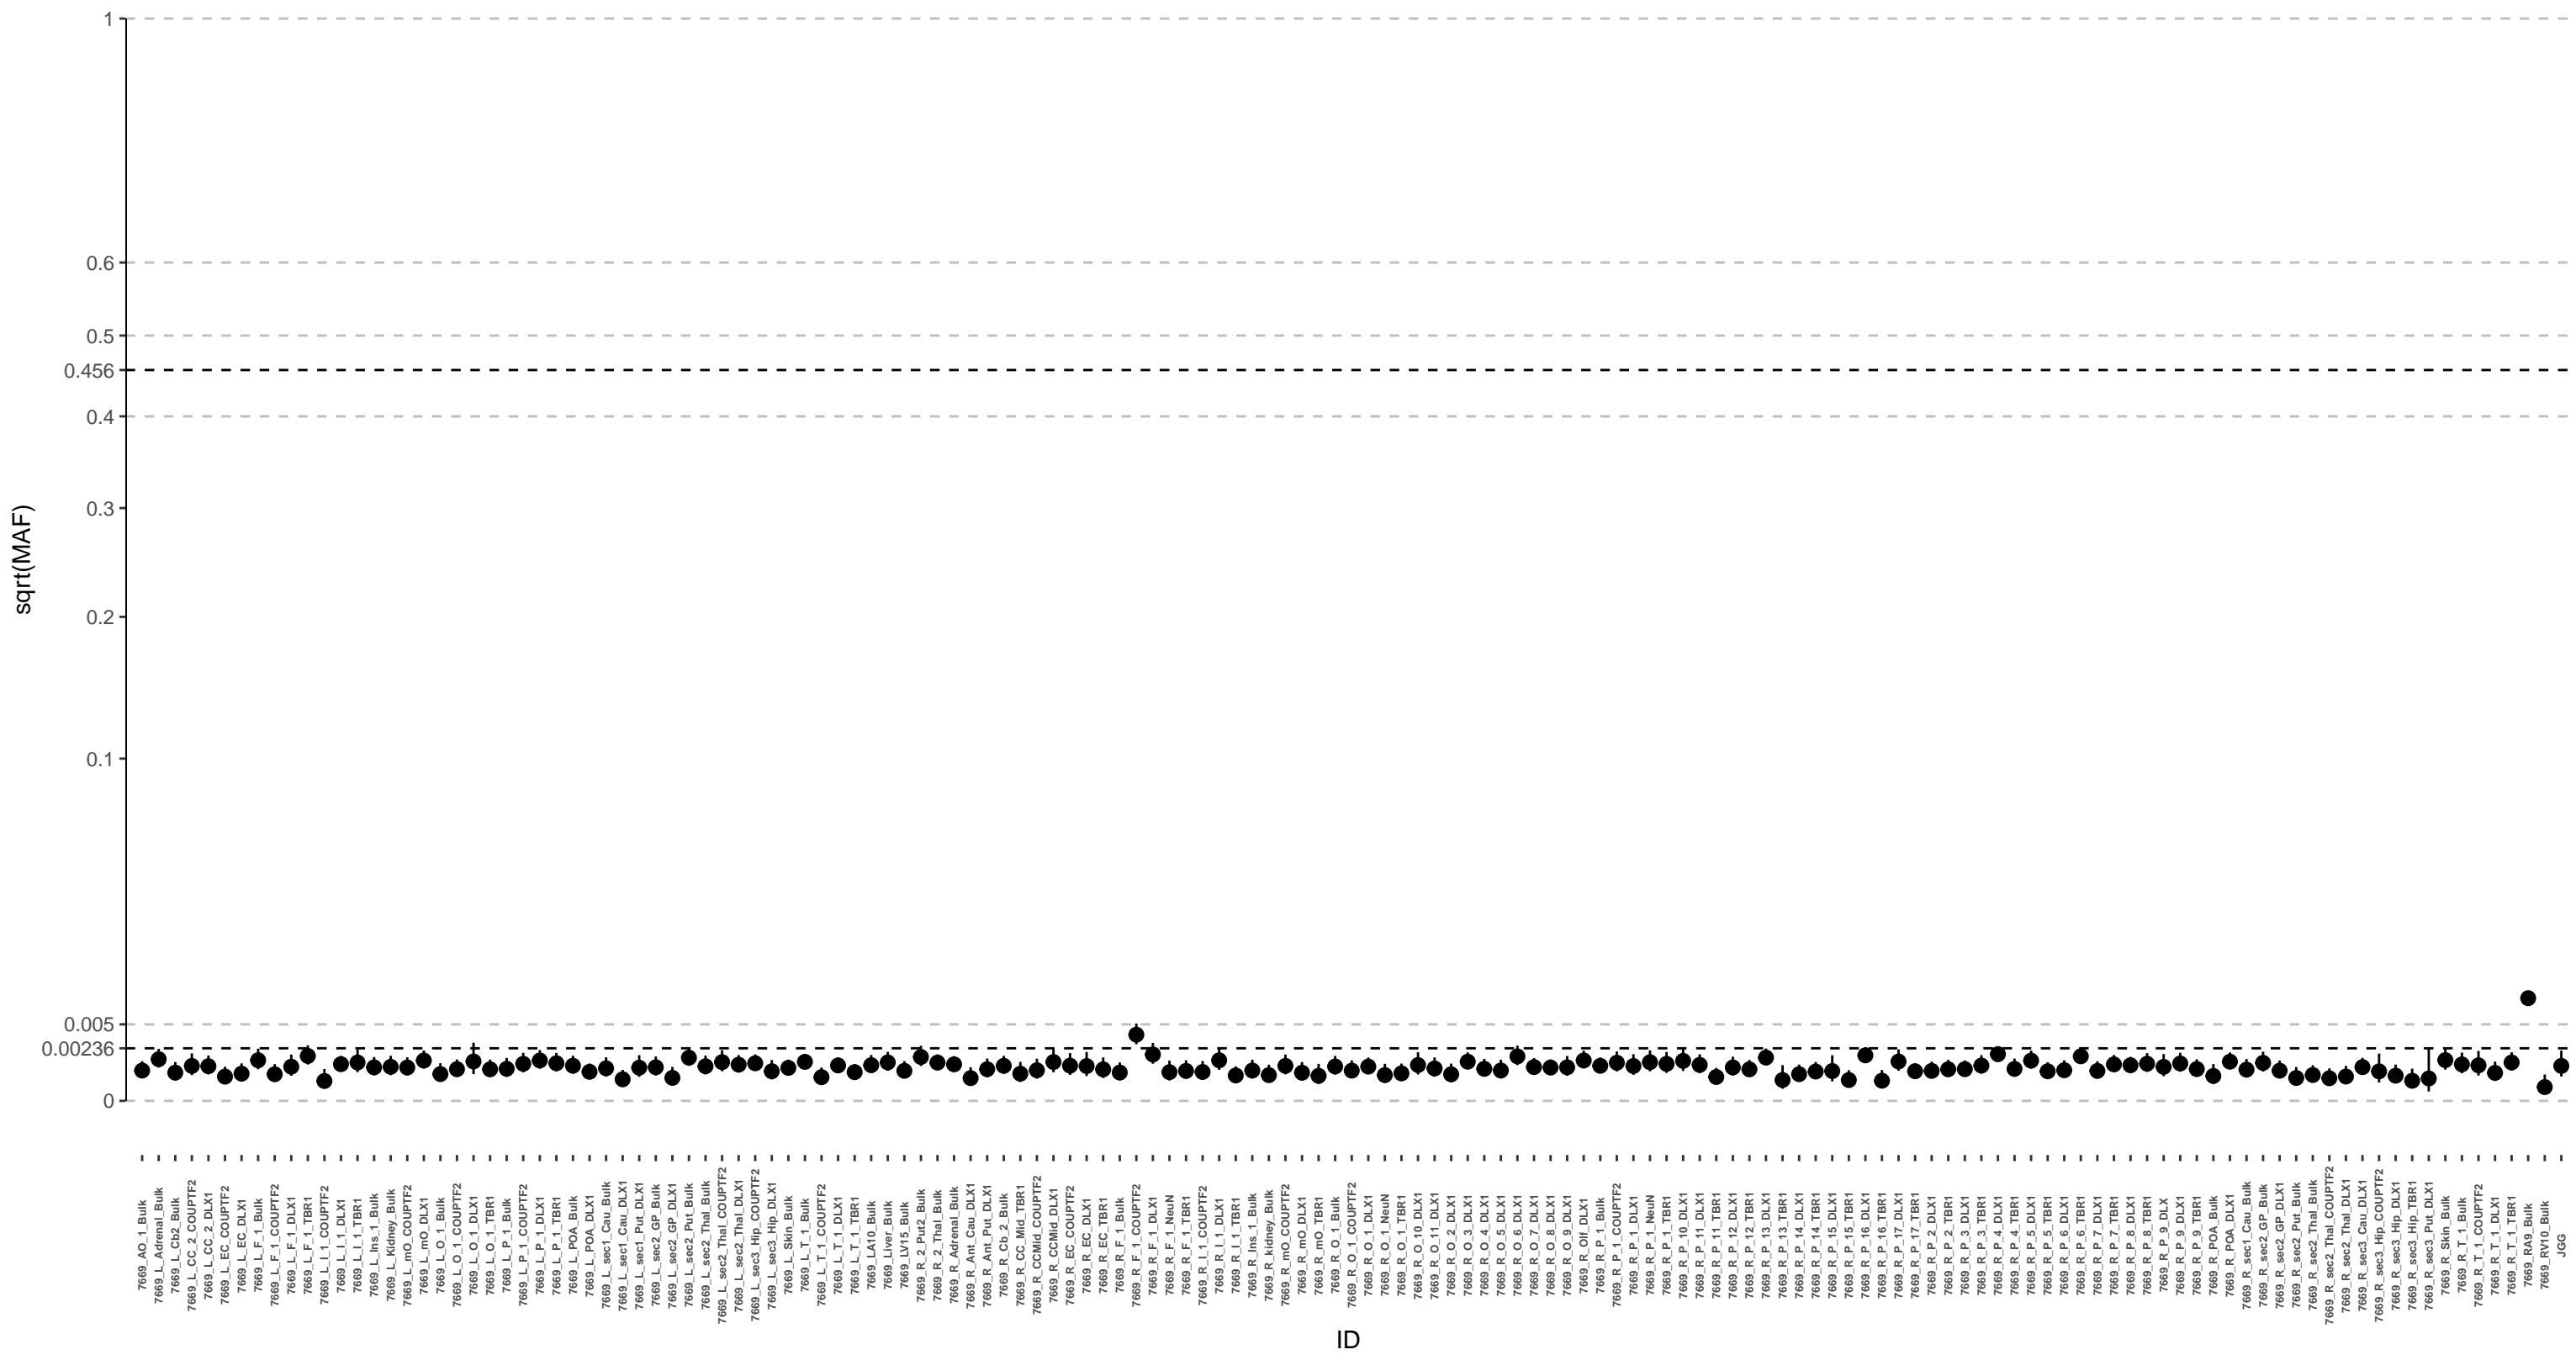

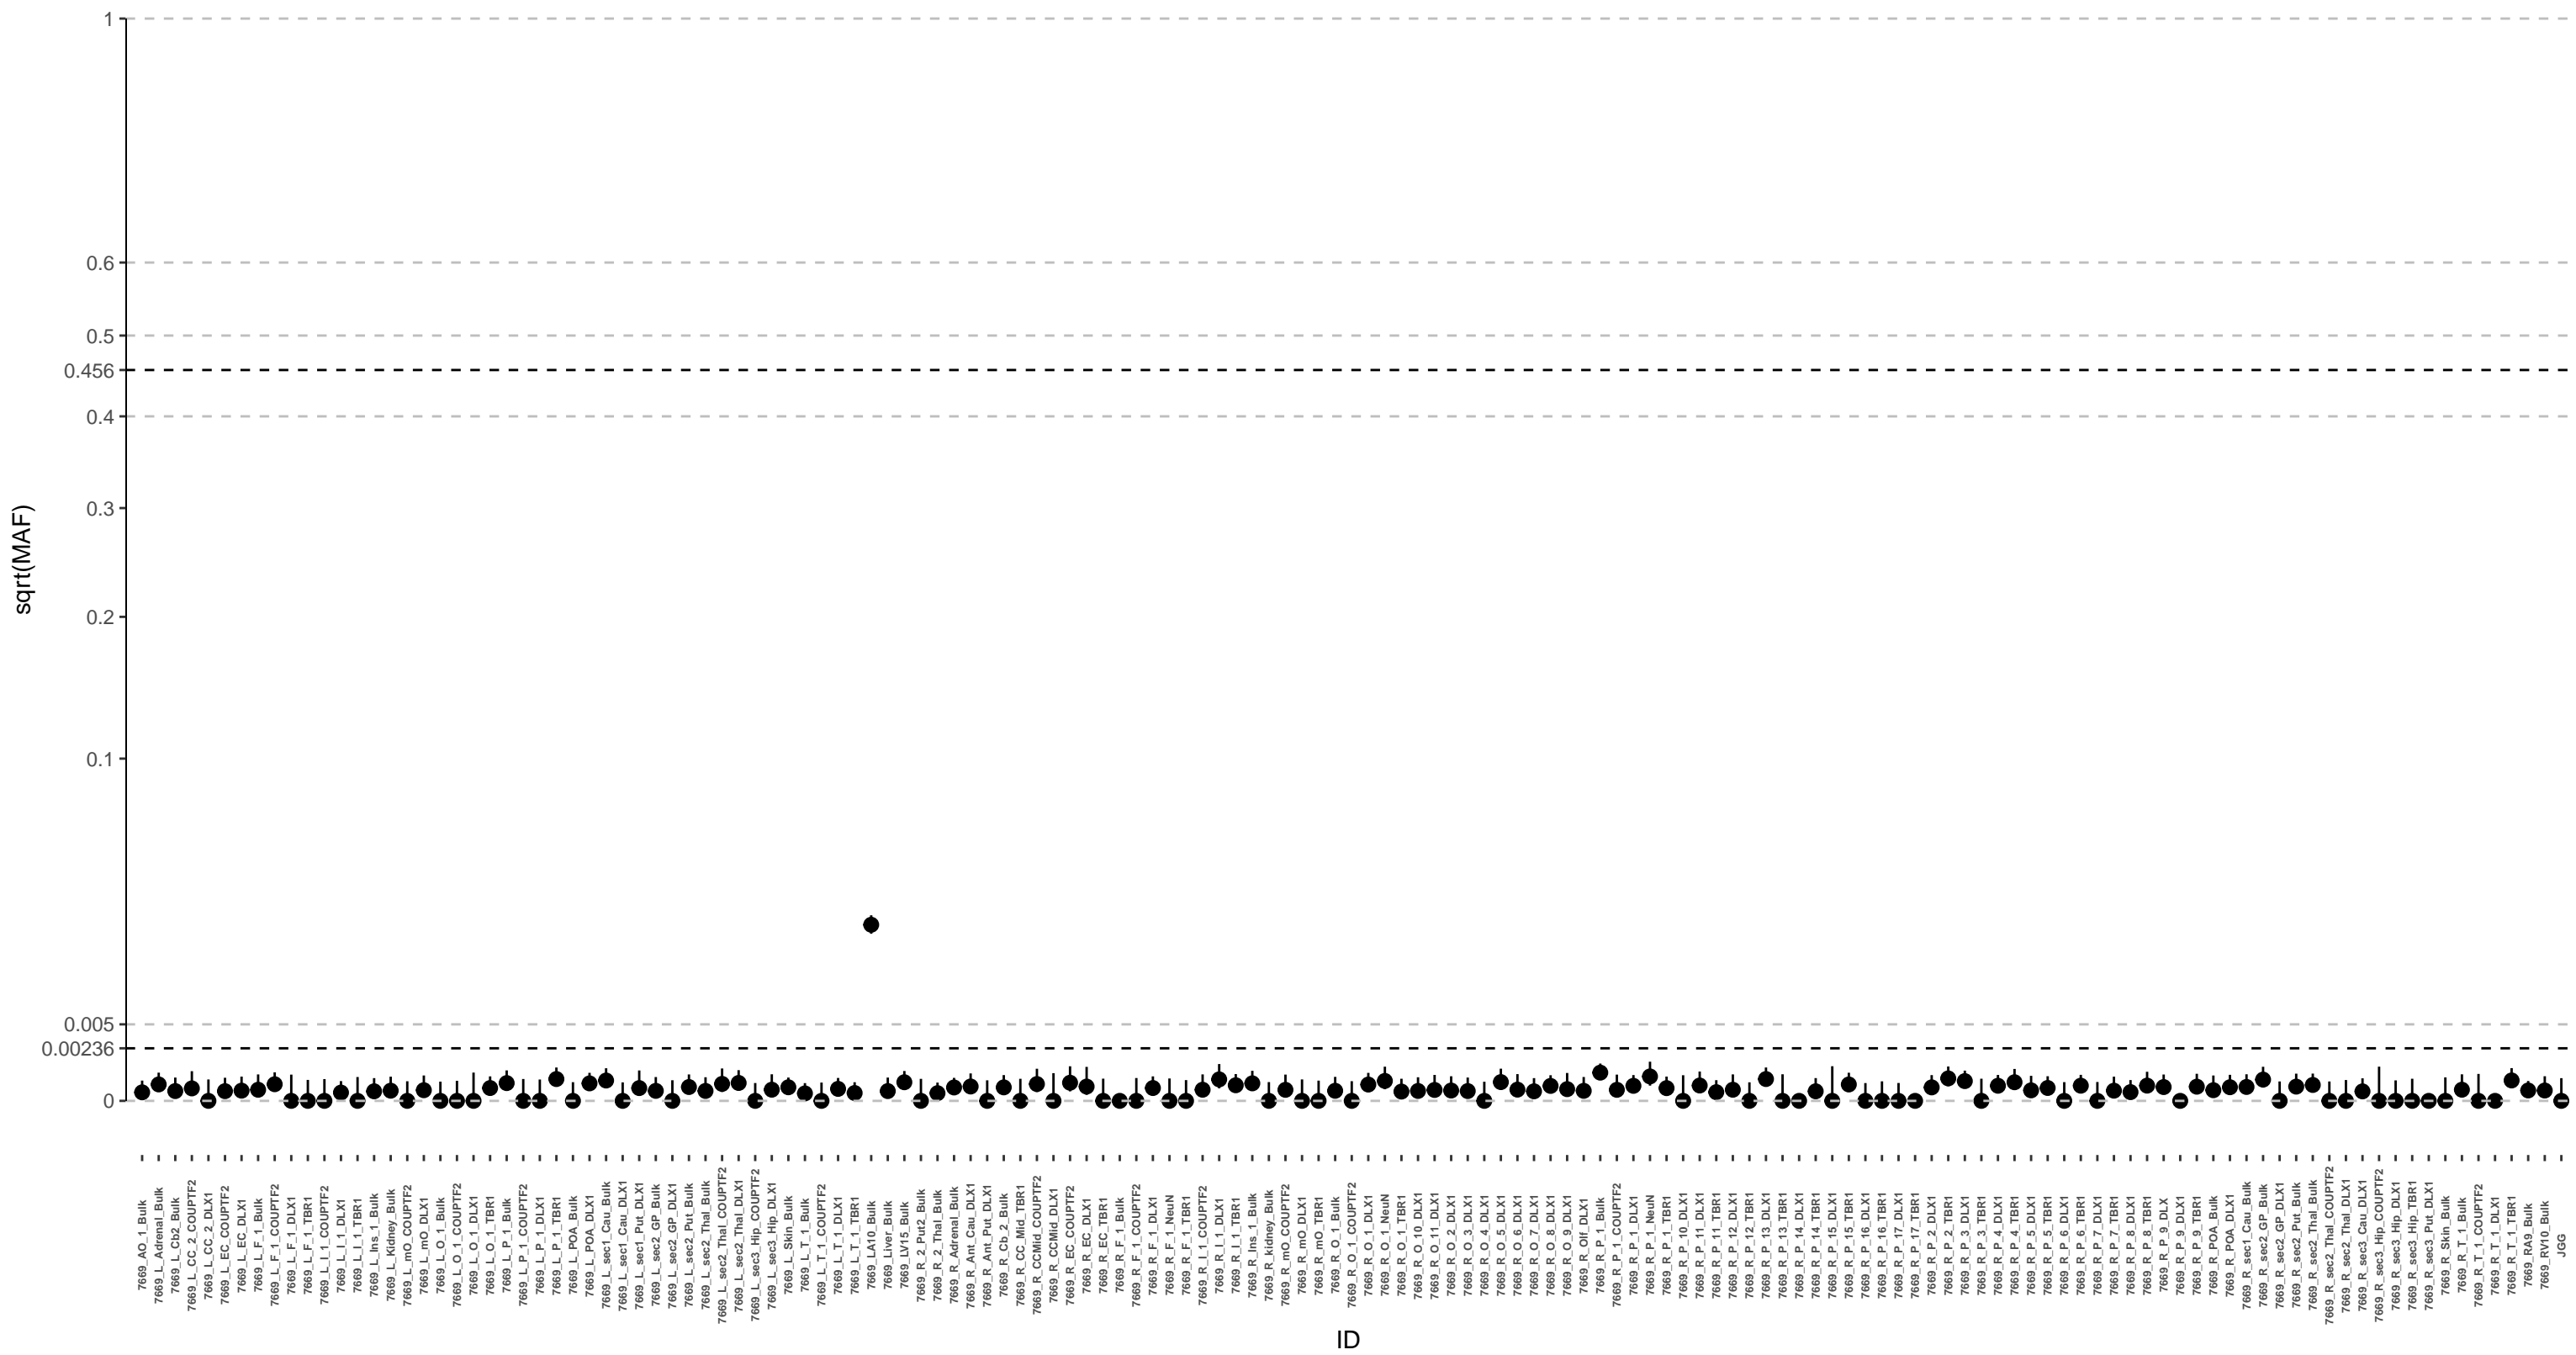



ID05 X-95198288-C-T

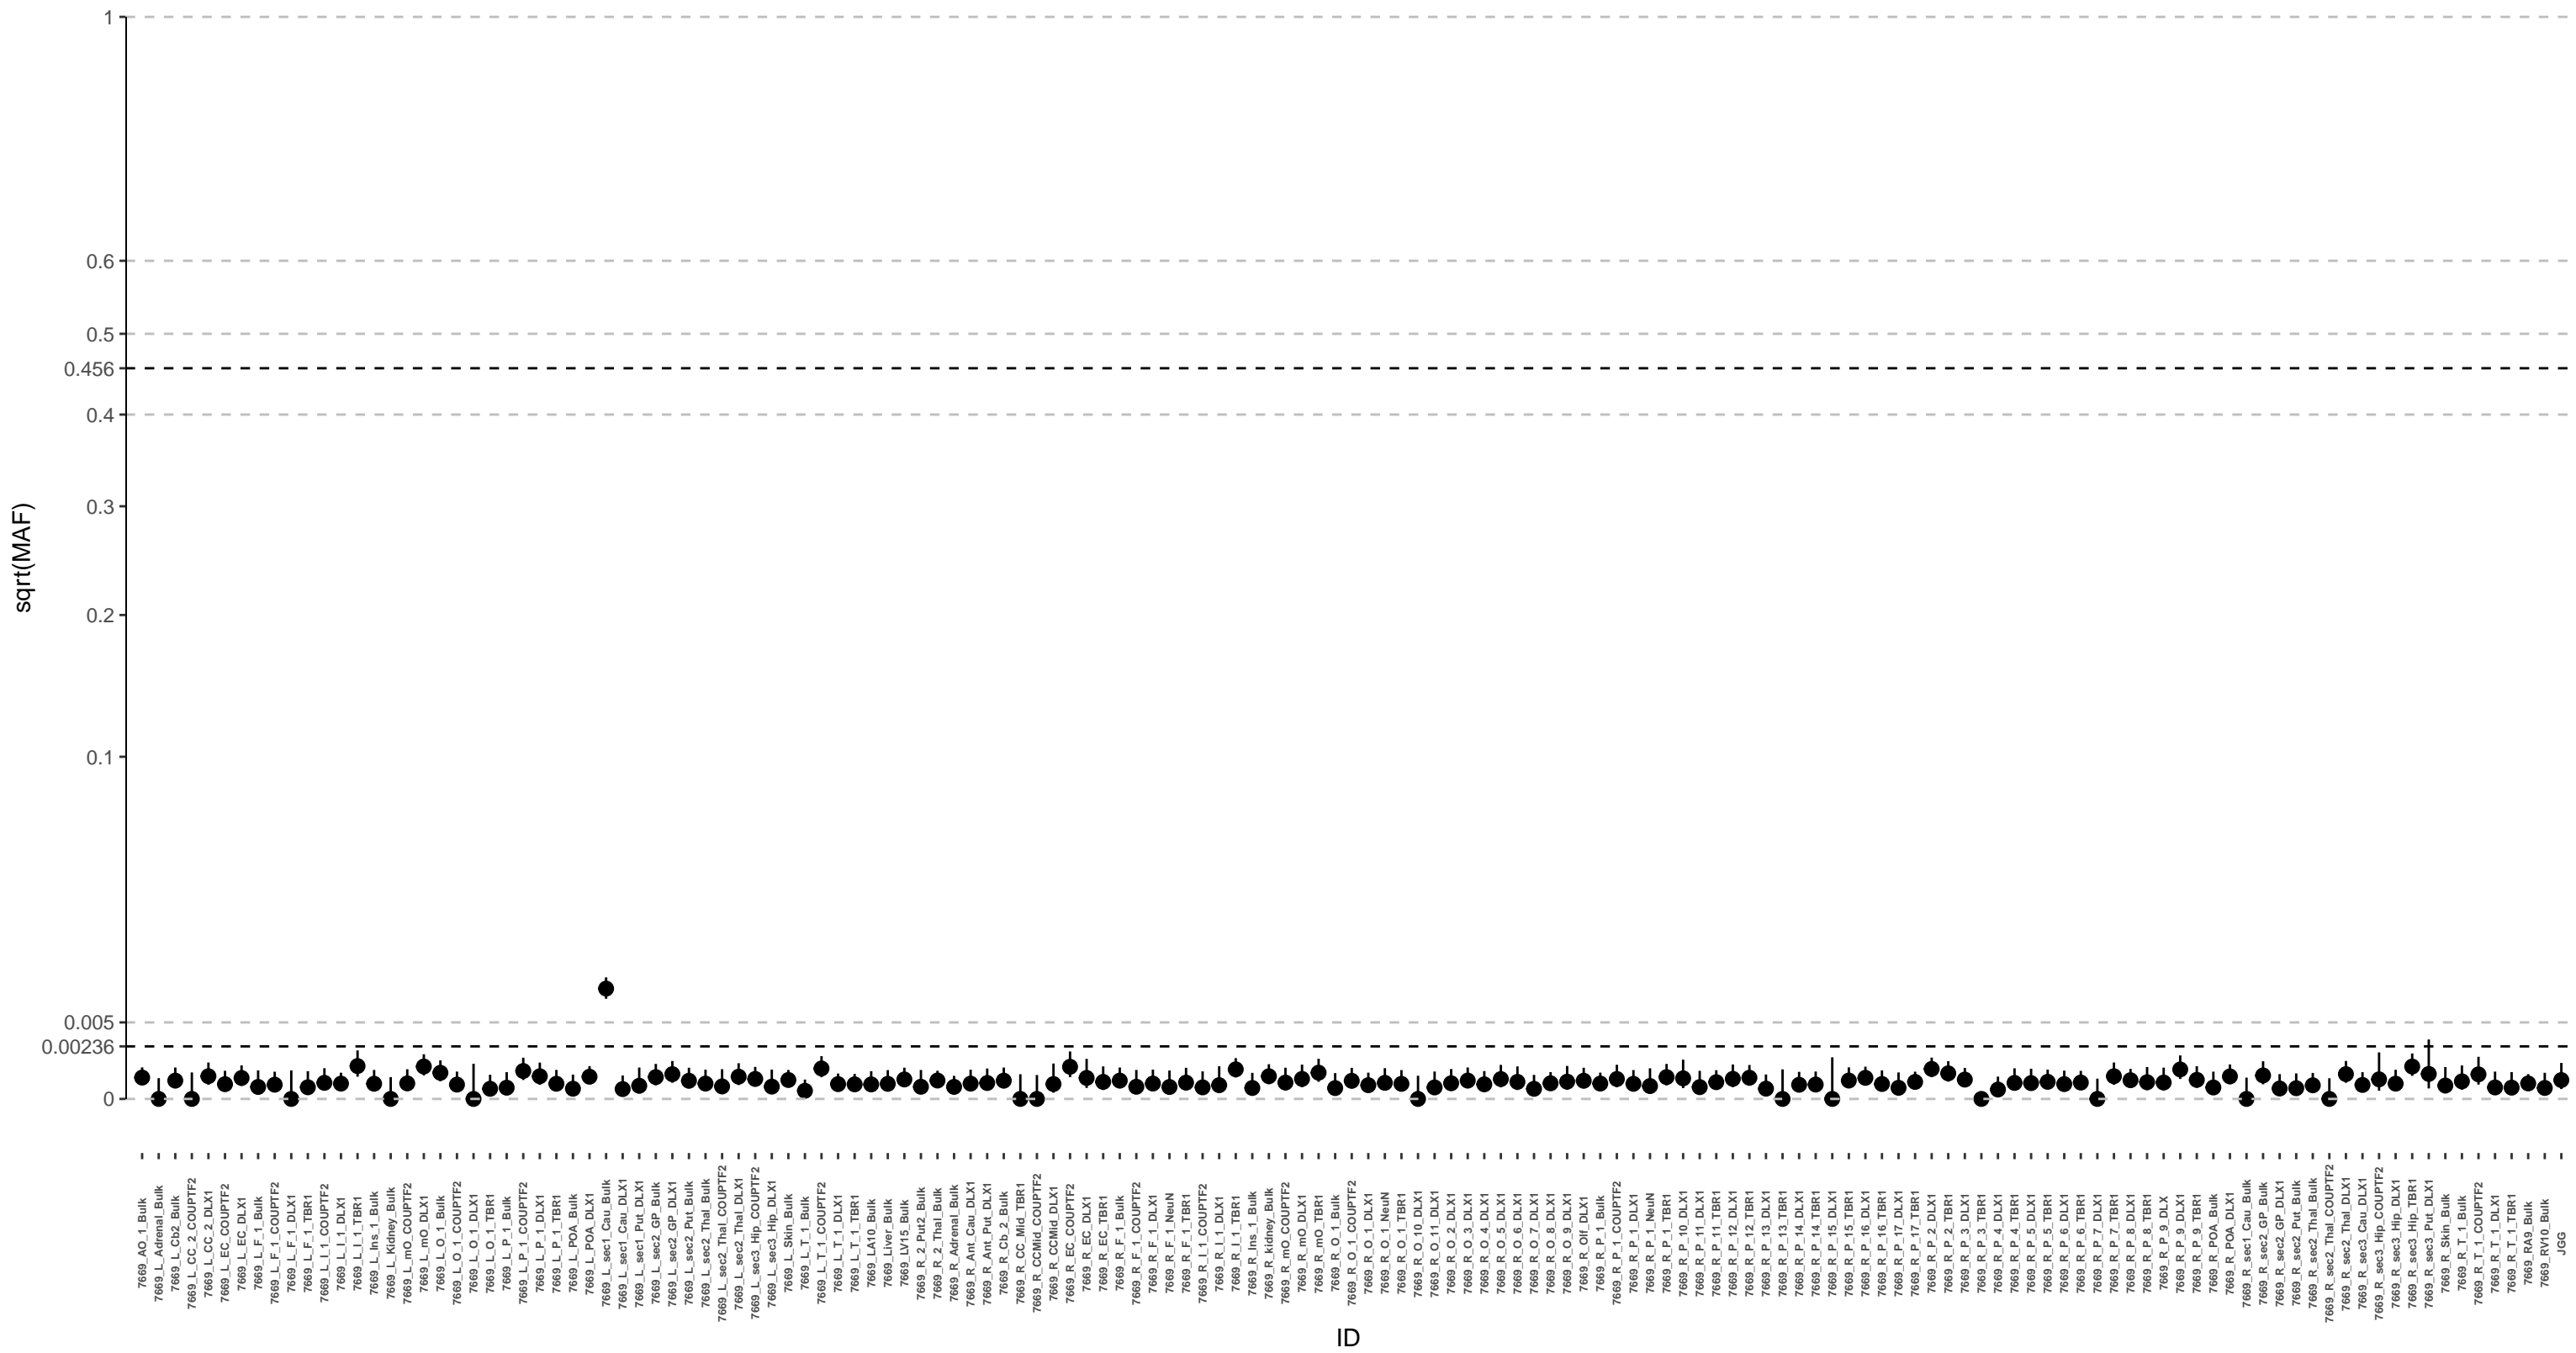

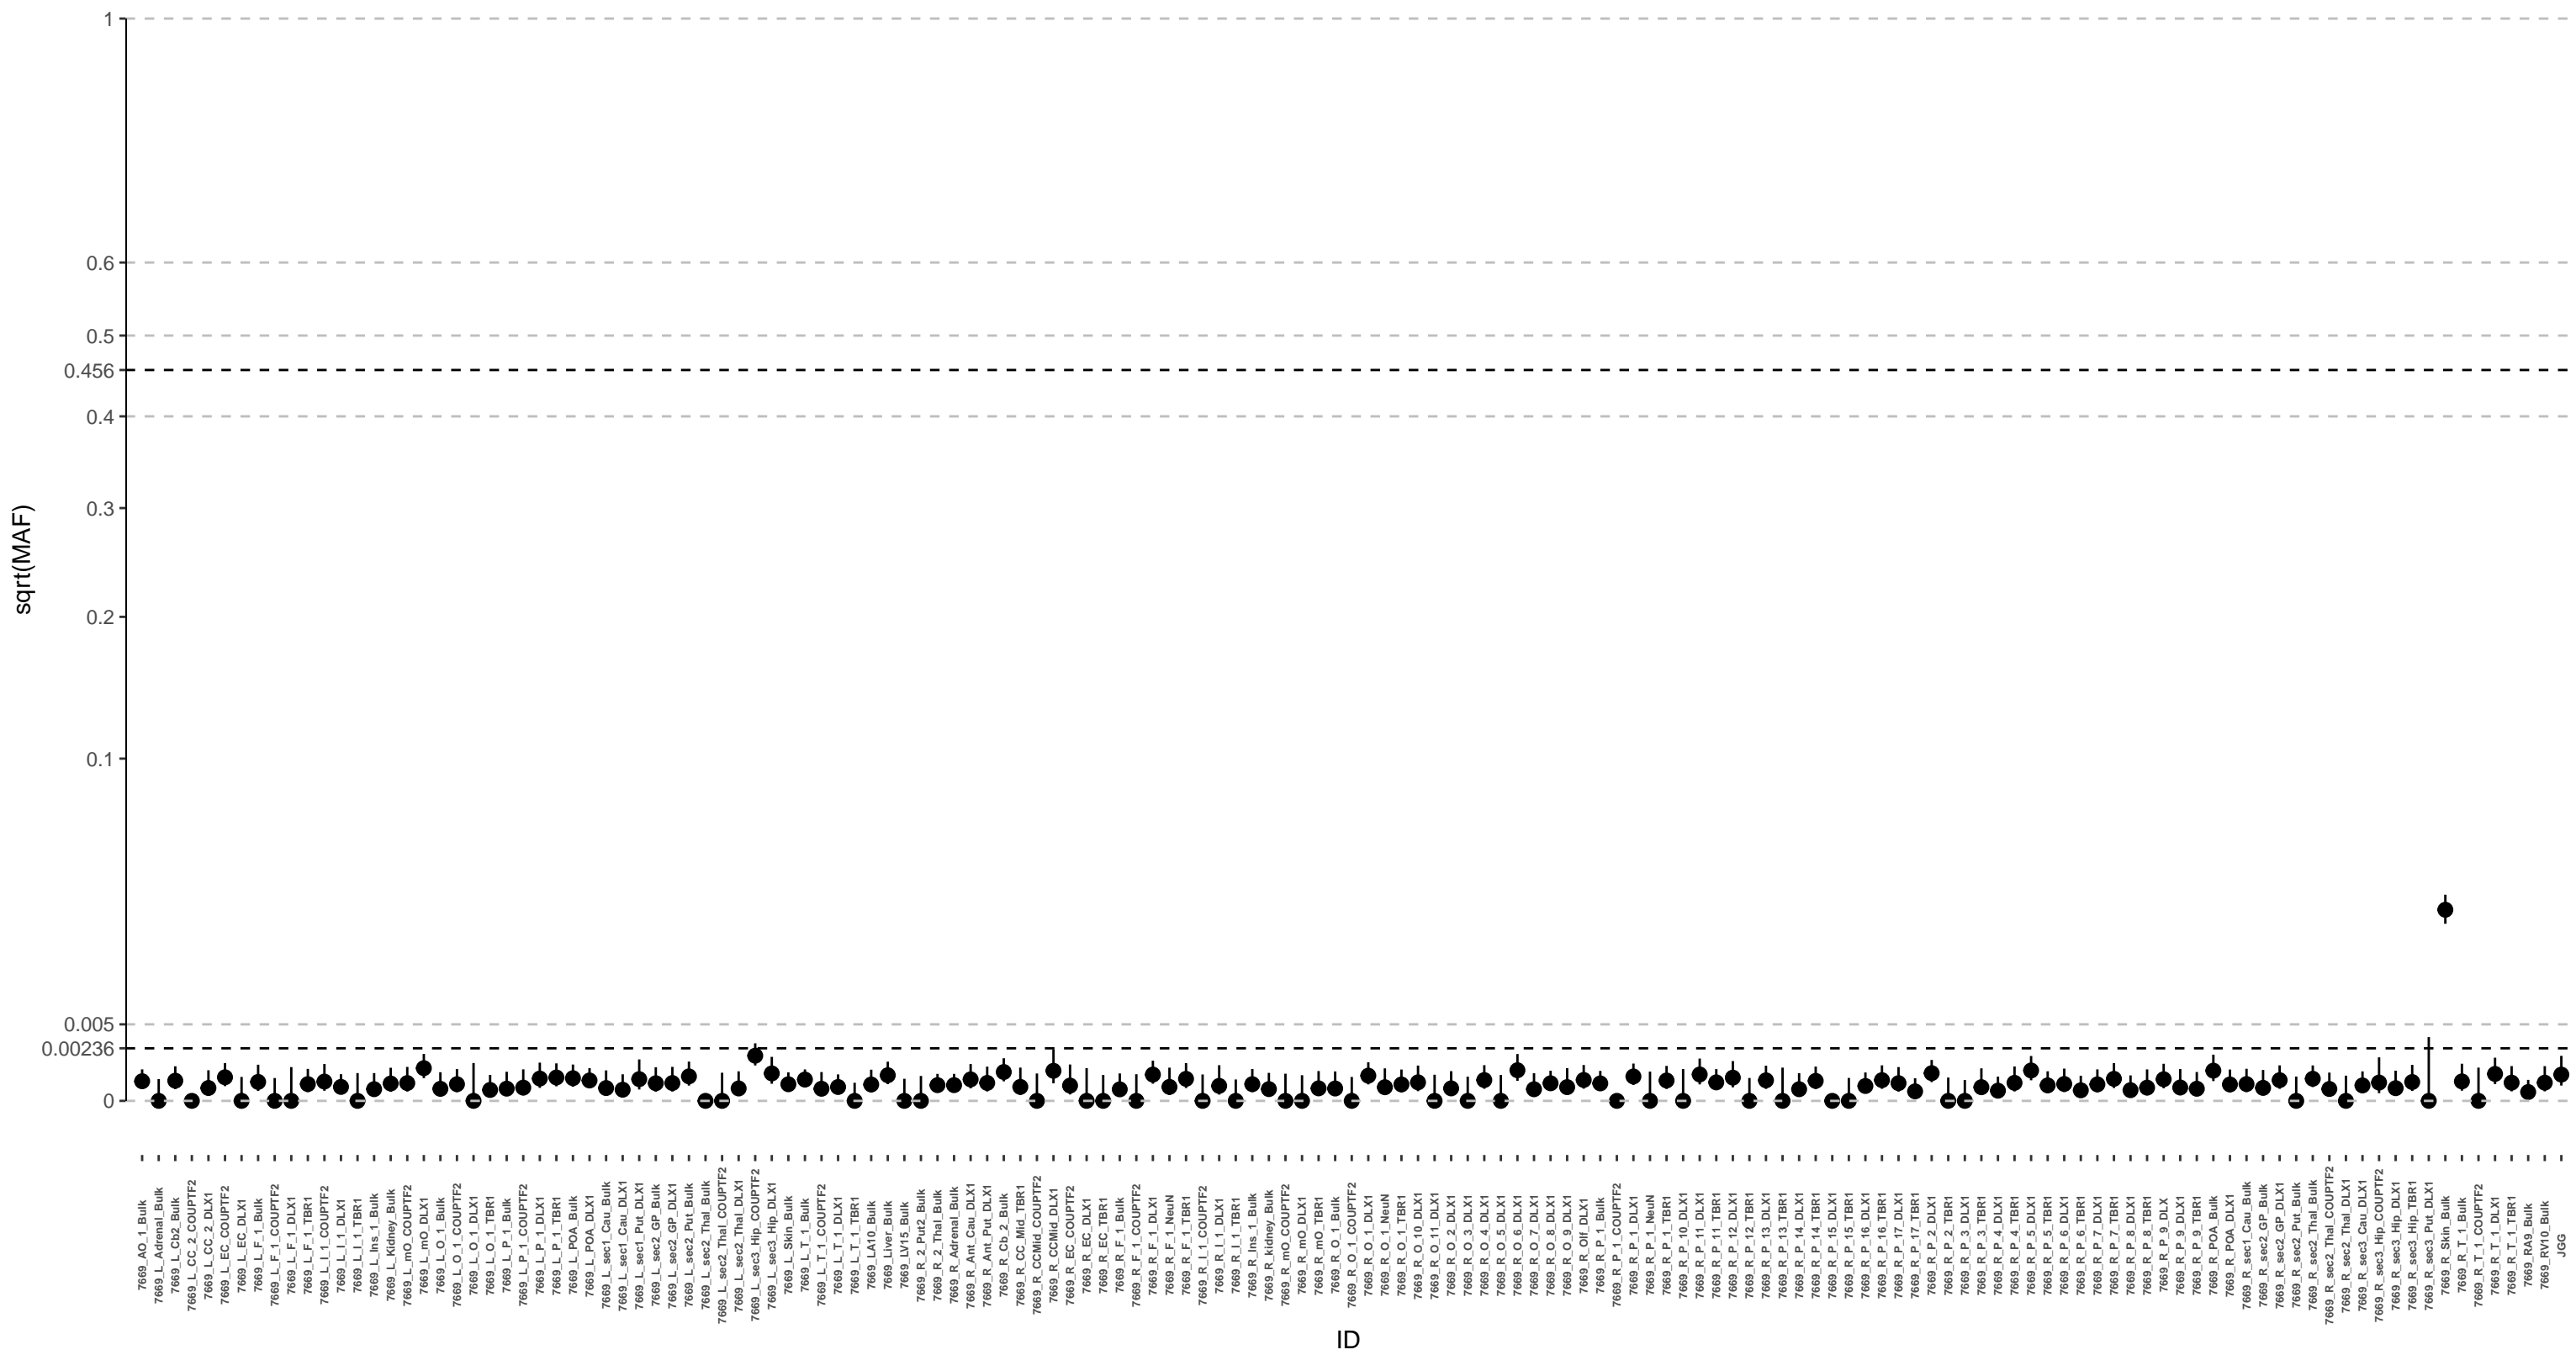

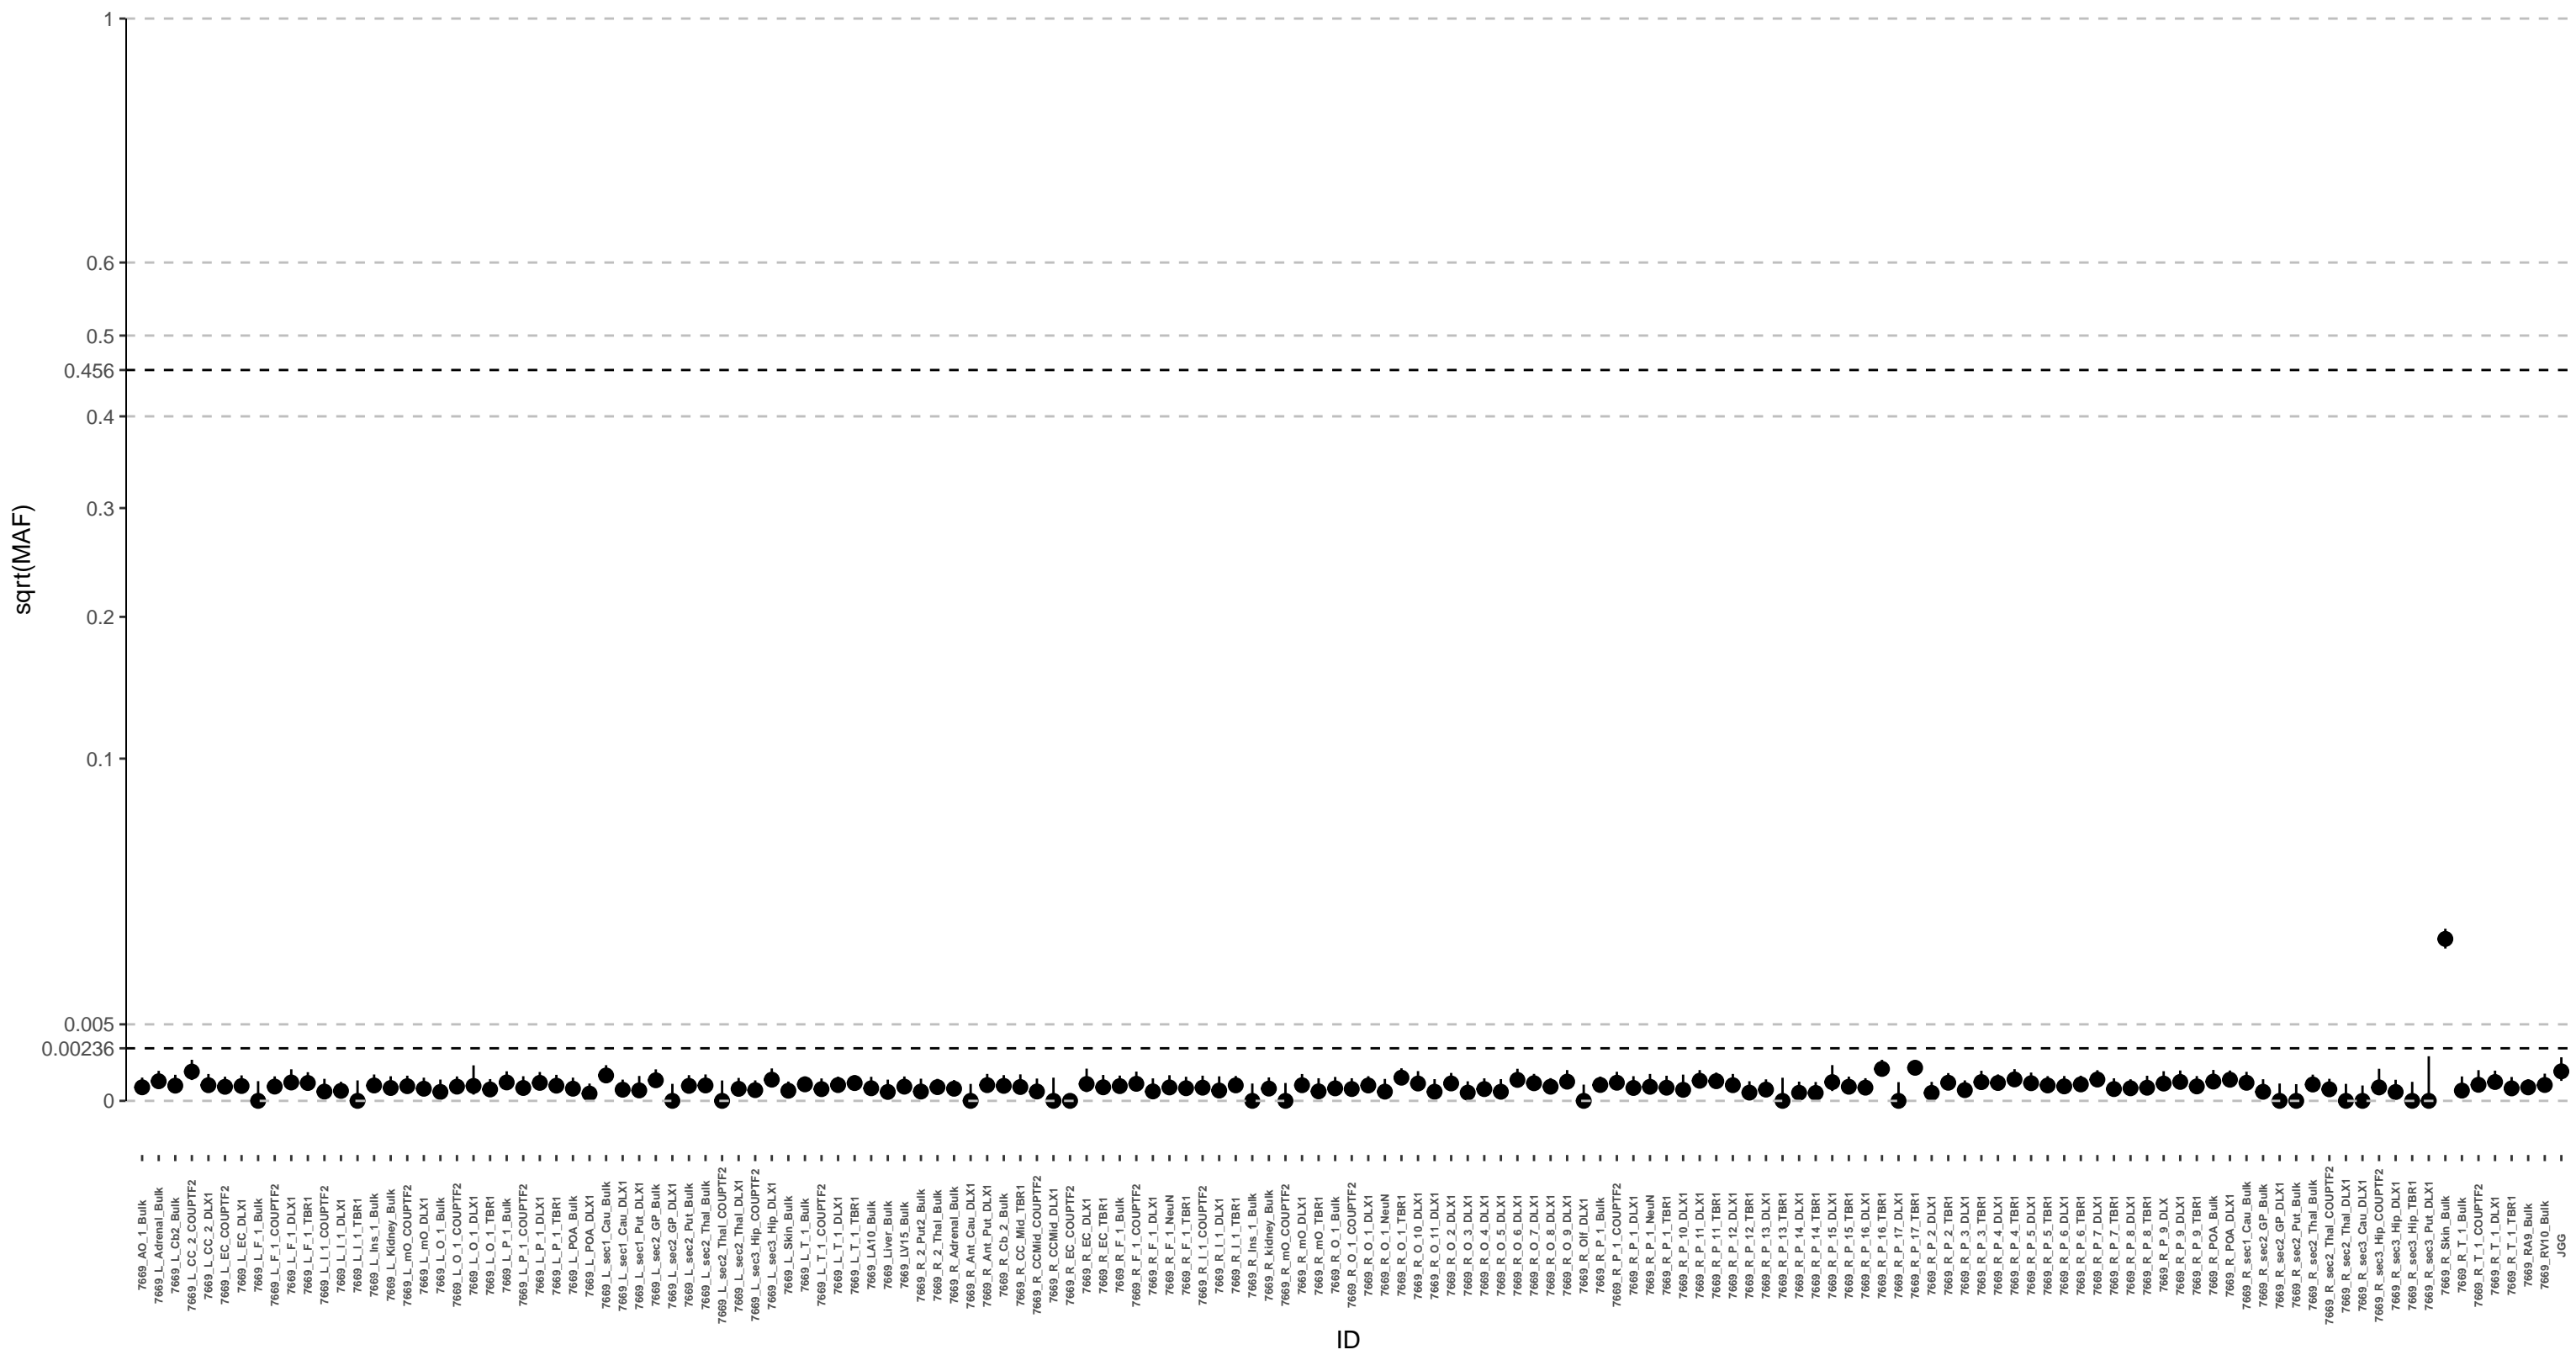

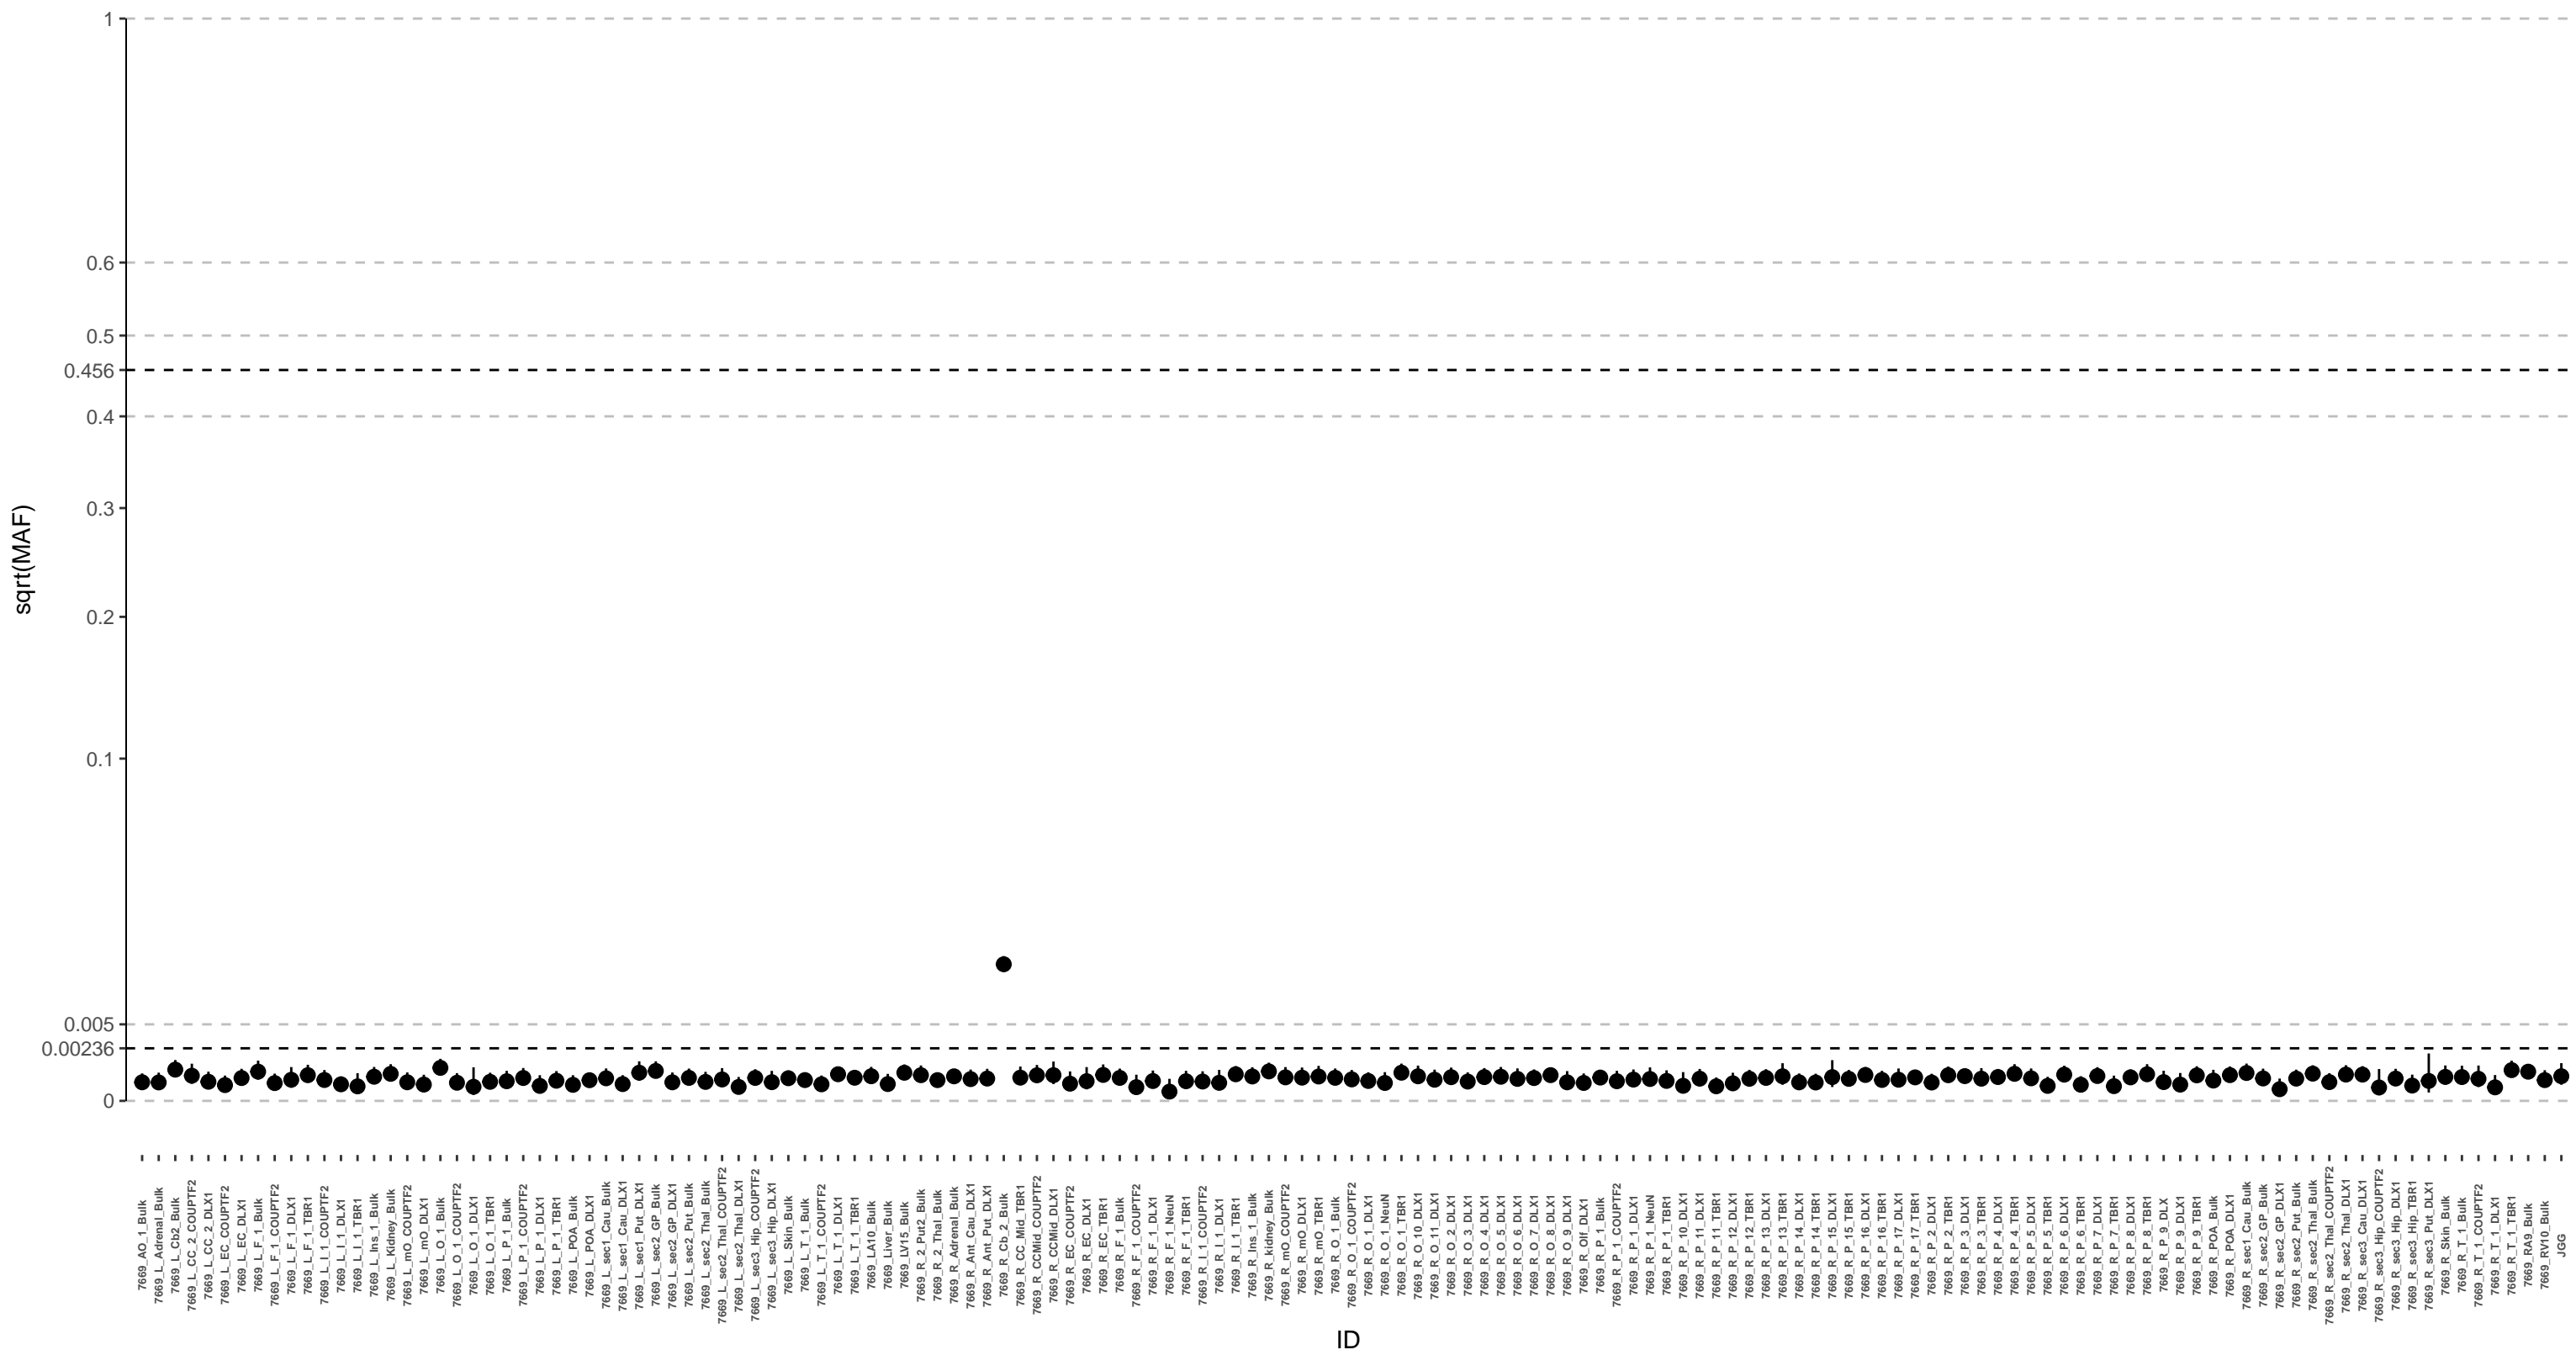

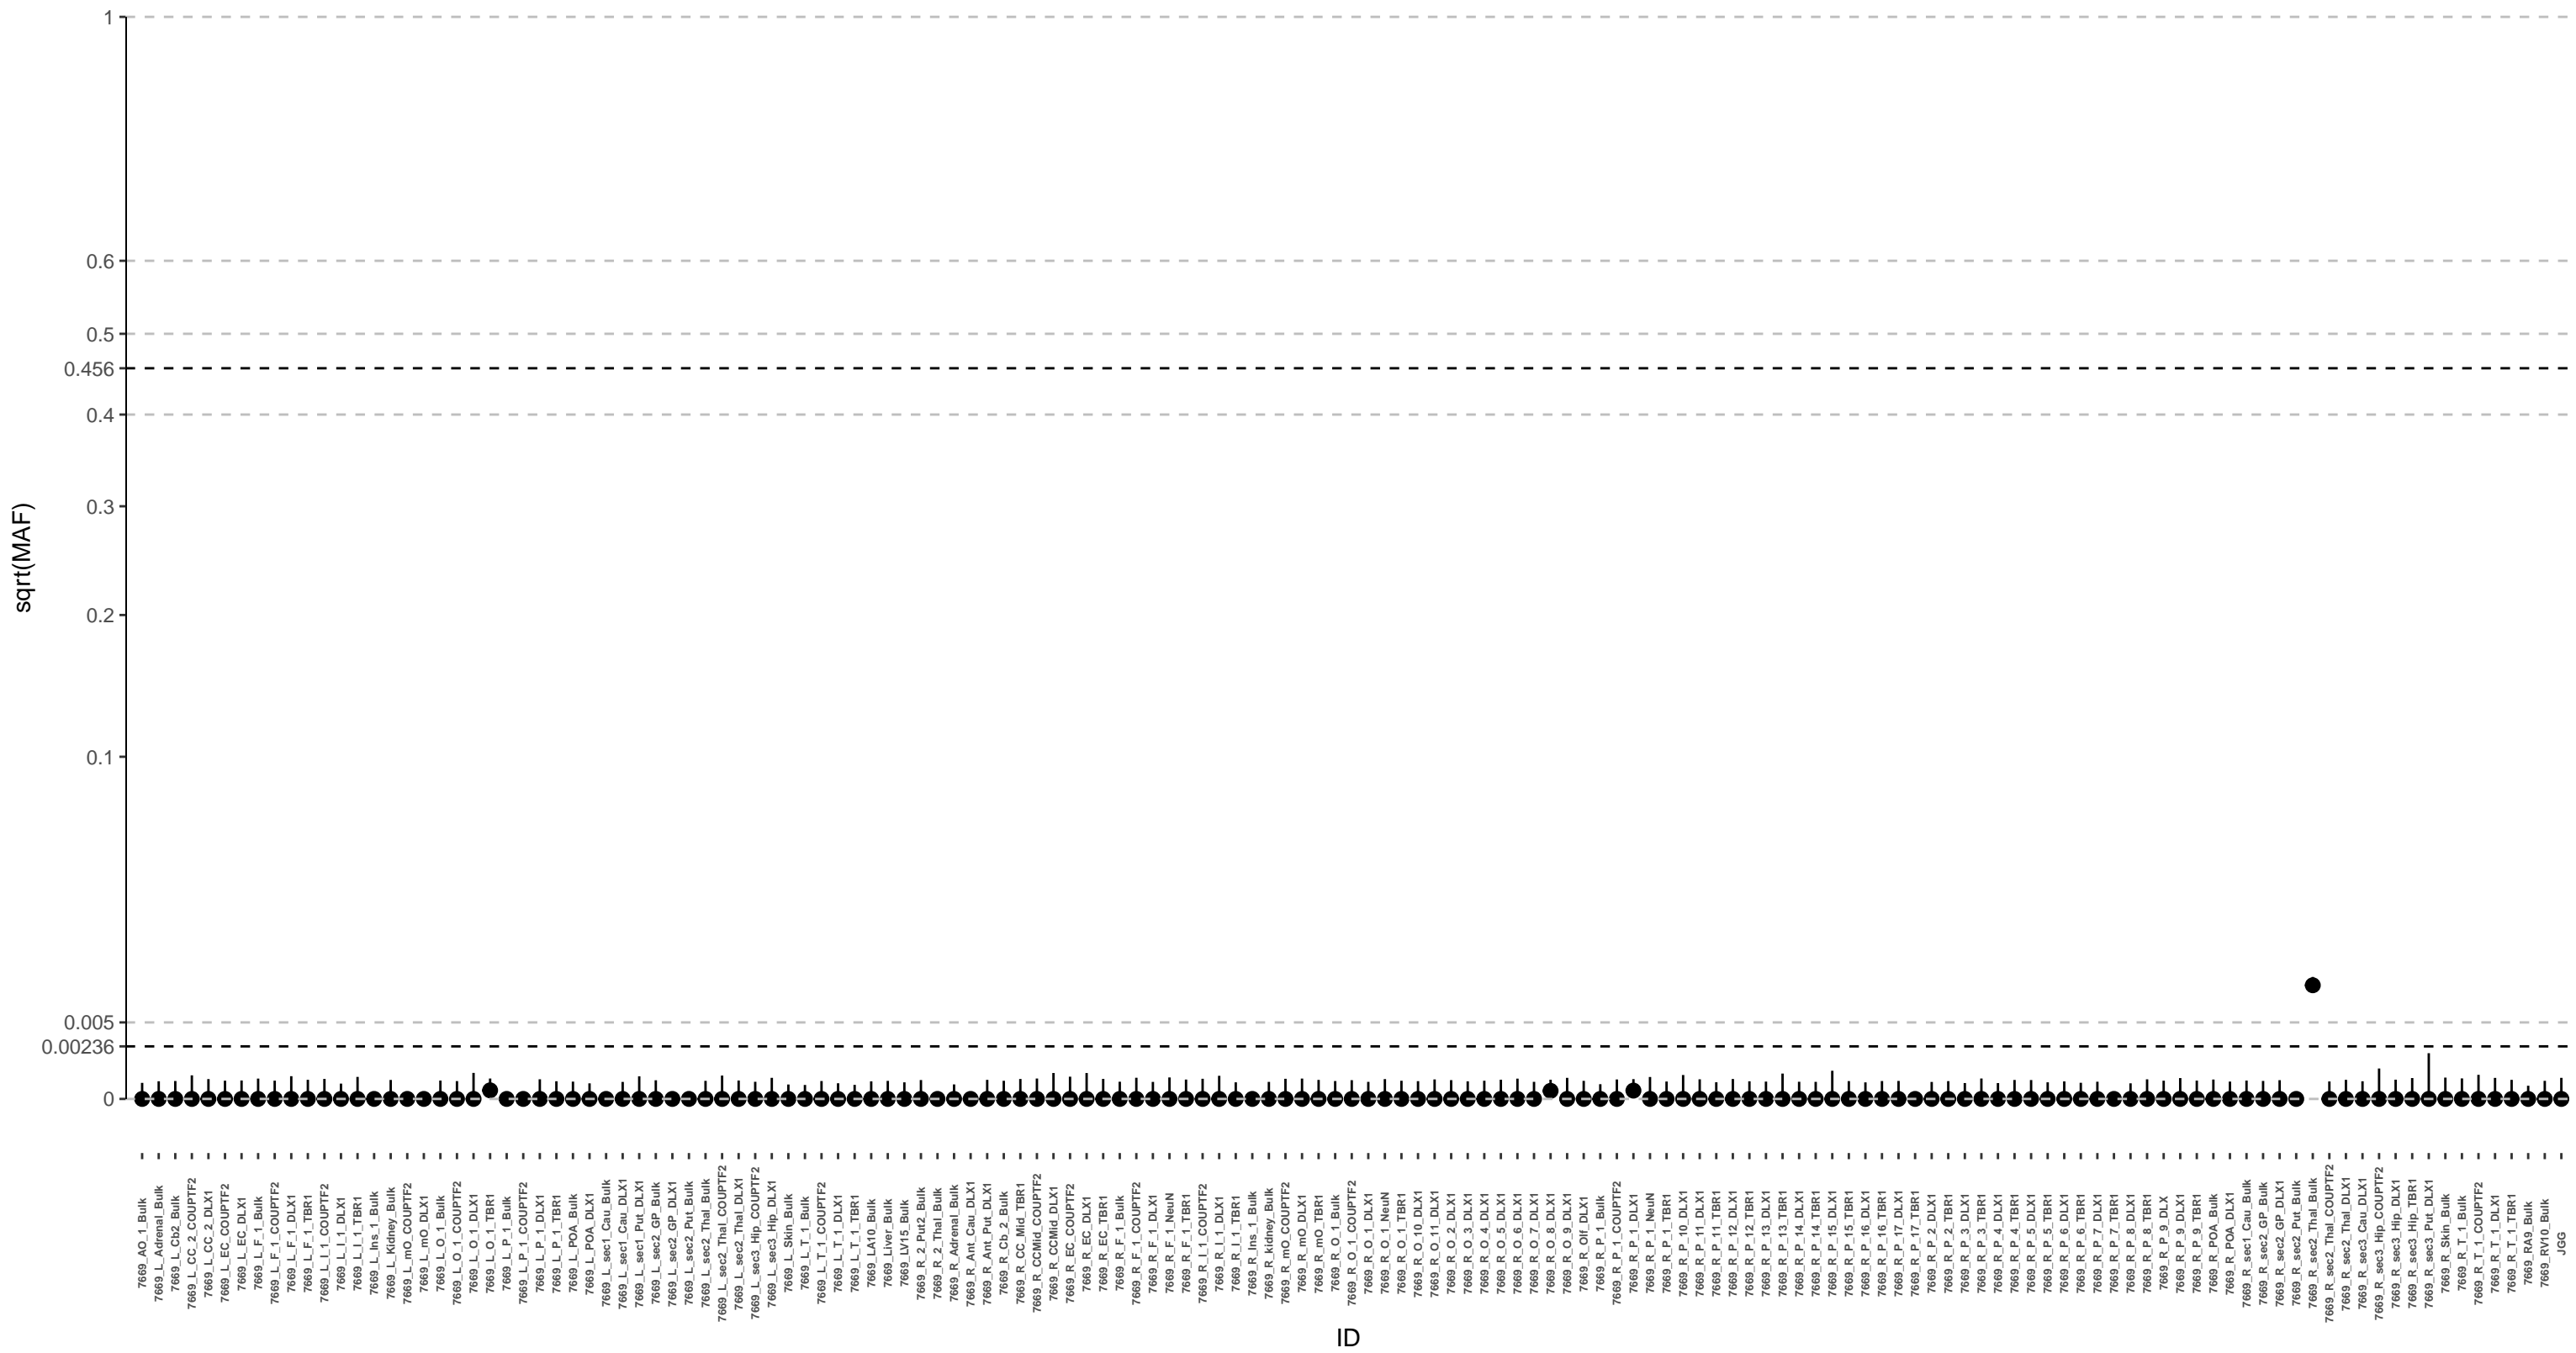

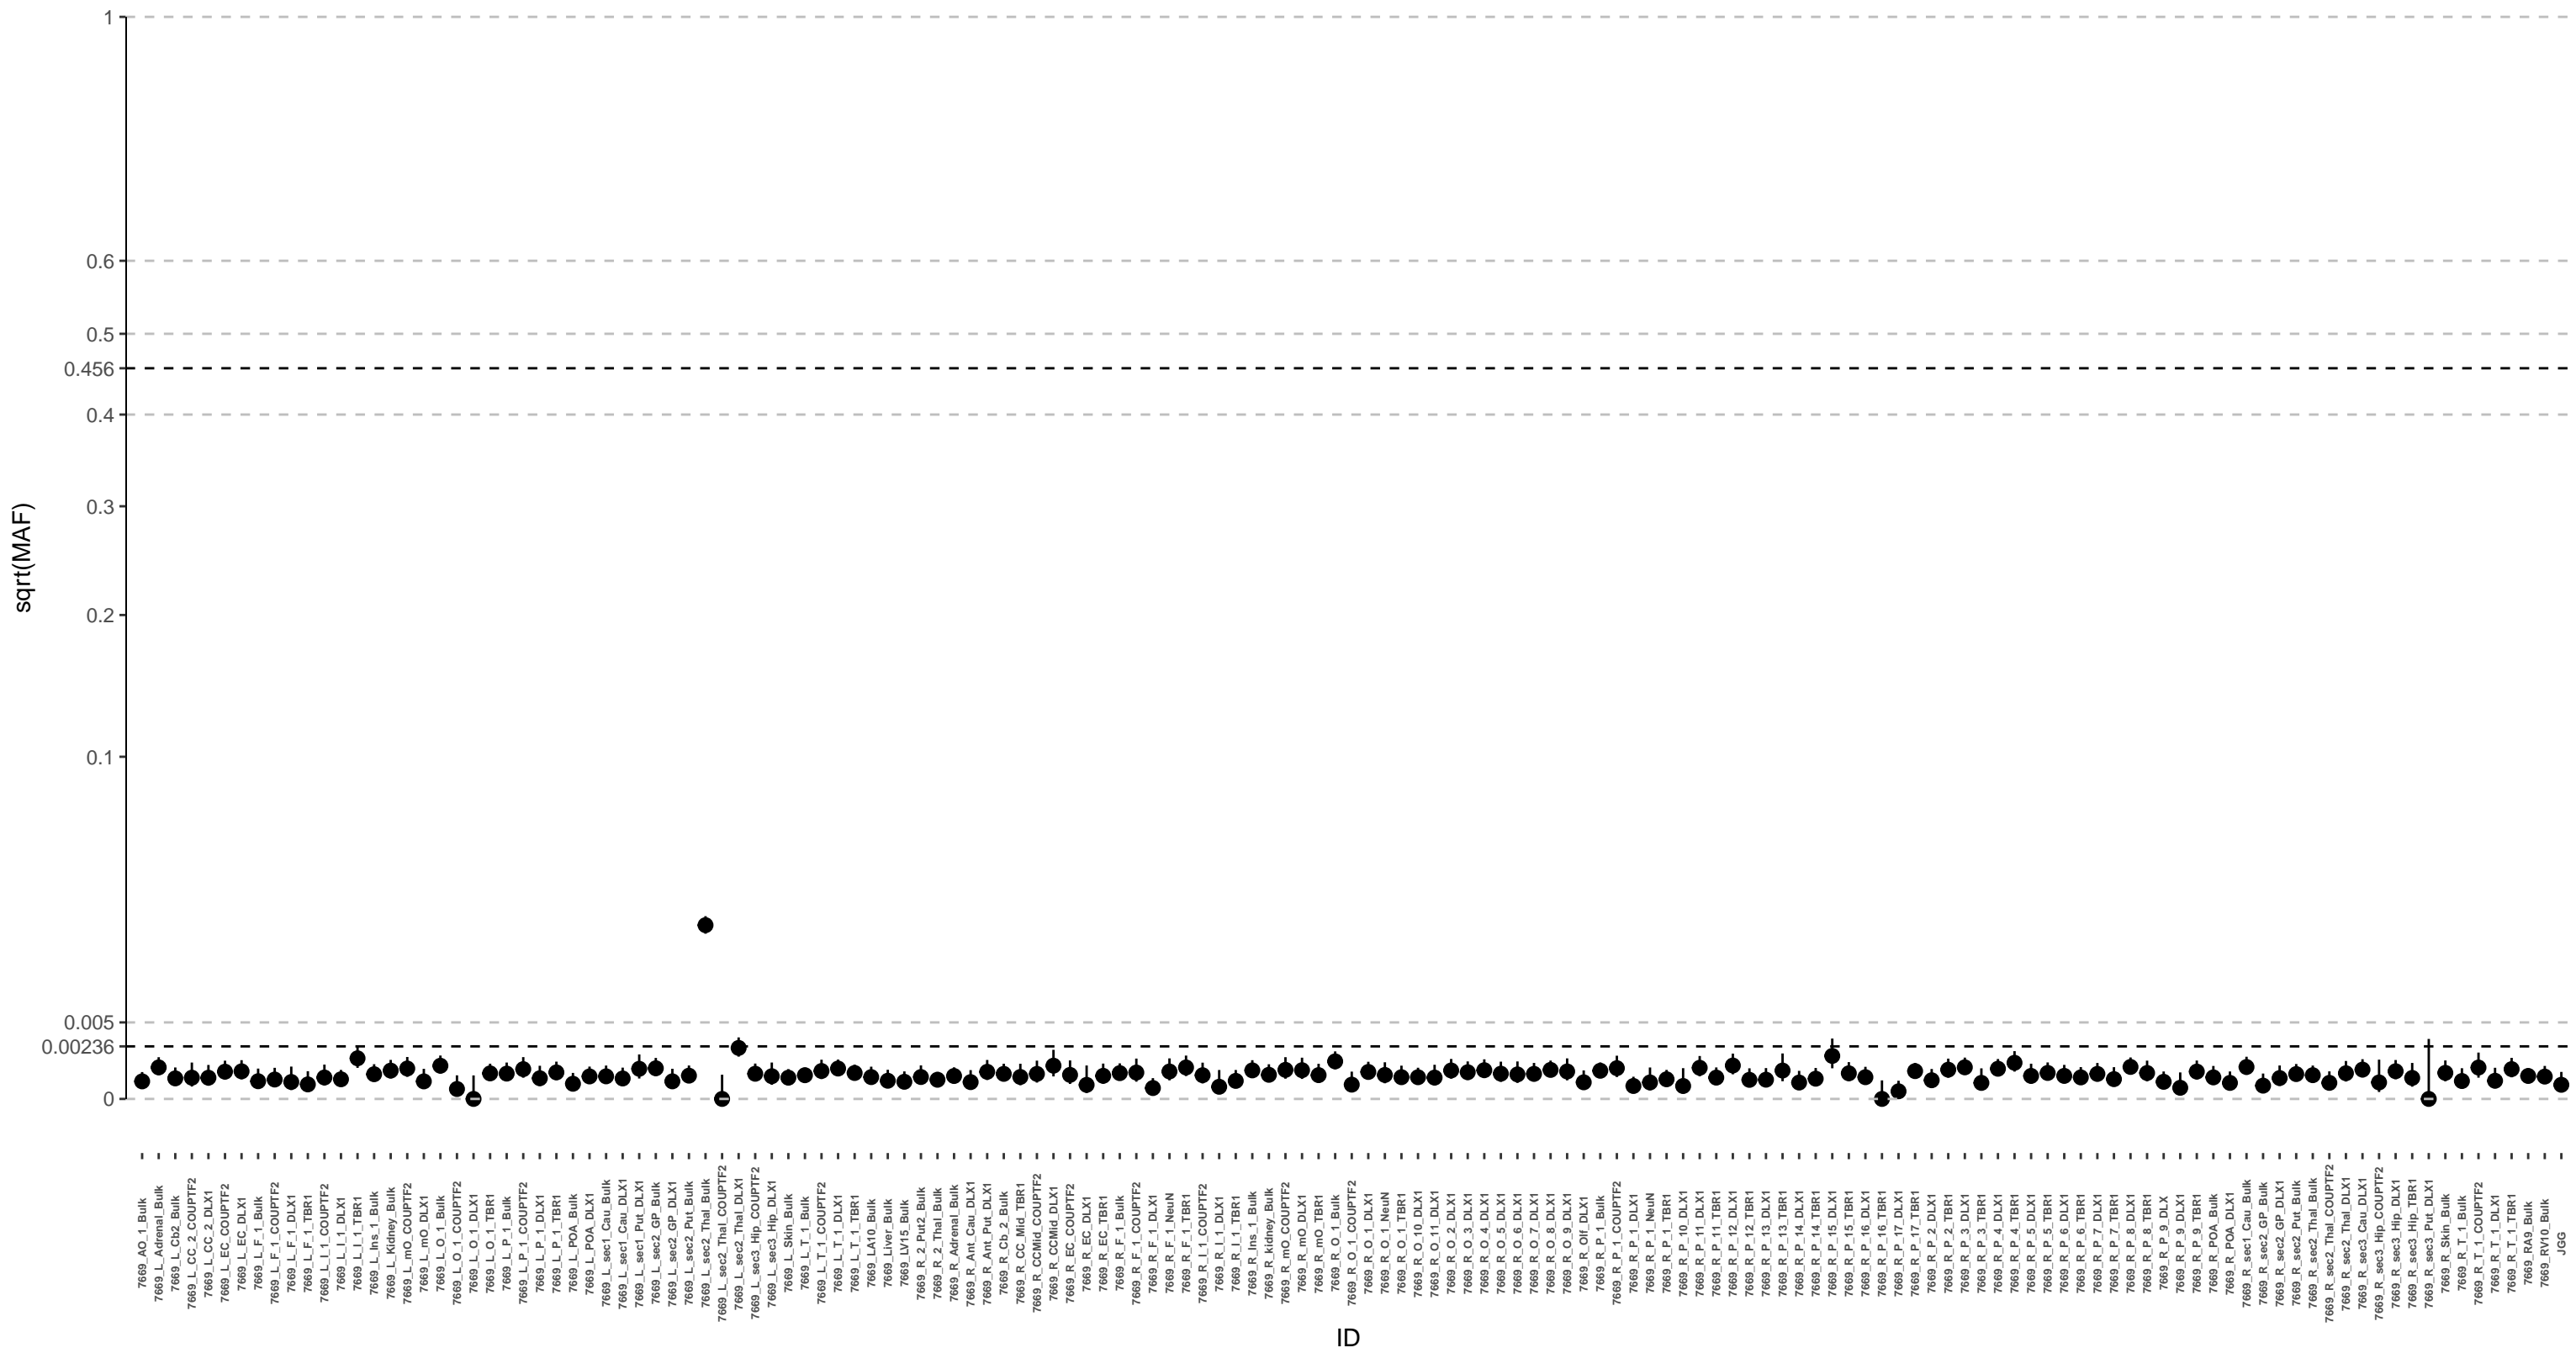

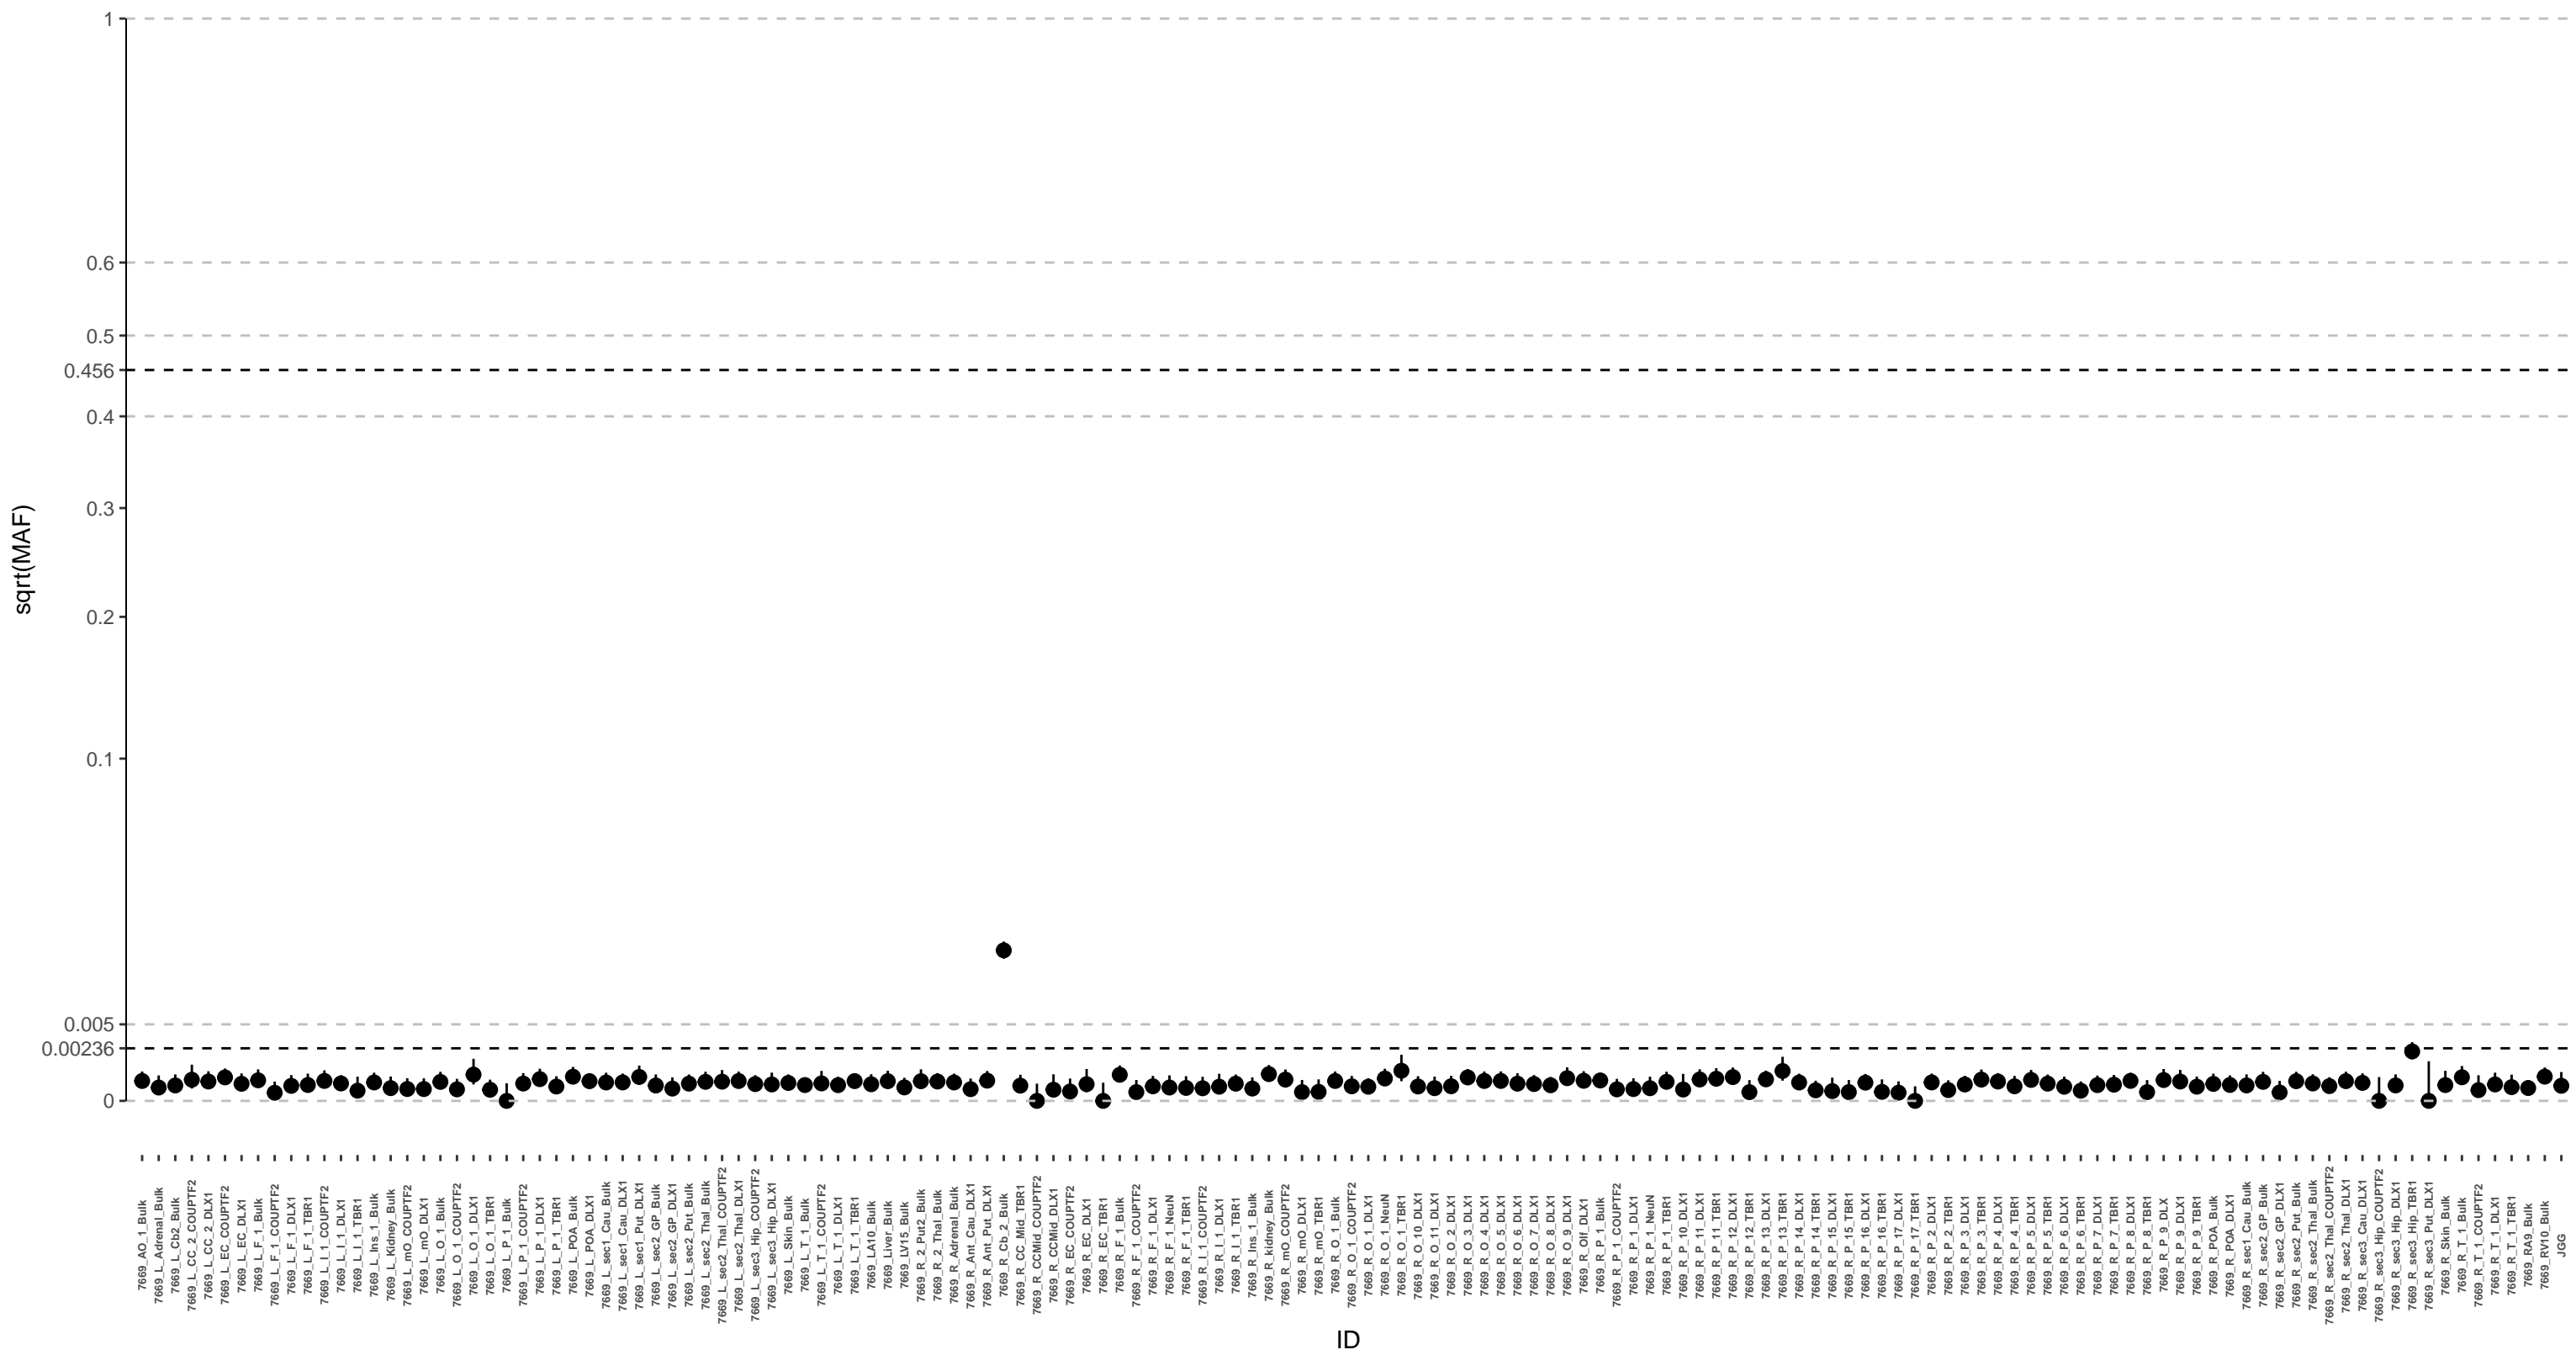

Supplement: media-7.pdf [file media-7.pdf]
