# Supplementary material for: Cell-type-resolved somatic mosaicism reveals clonal dynamics of the human forebrain
Source: PubMed Central journal article supplement — bioRxiv. 2023 Oct 26:2023.10.24.563814. Preprint. [Version 2] doi: 10.1101/2023.10.24.563814 (PMC10634852; doi:10.1101/2023.10.24.563814), 2023-10-26
Supplement: media-9.pdf [file media-9.pdf]

ID01

Pearson r

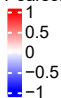

DLX1

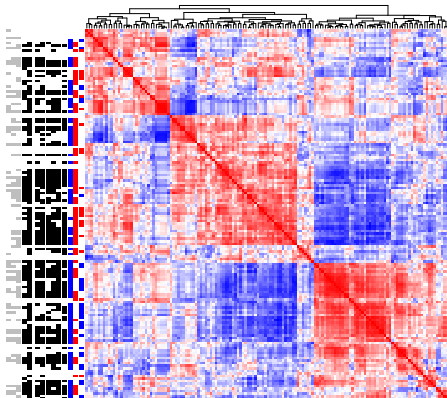

HEART  
LIVER  
KIDNEY  
CB  
CTX  
C  
P  
F  
E  
P  
O  
T  
L  
R  
LR ONLY

HEART  
LIVER  
KIDNEY  
CB  
CTX  
PE  
PE  
PO  
I  
LR ONLY

TBR1

ID01

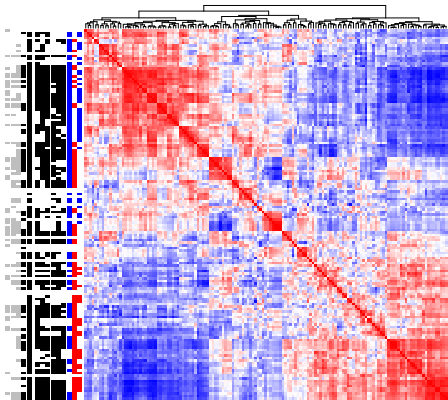

ID01

COUPTFII

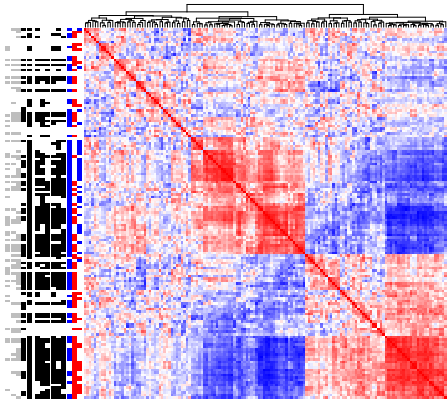

HEART  
LIVER  
KIDNEY  
CB  
CTX  
CPE  
POT  
I  
LR ONLY

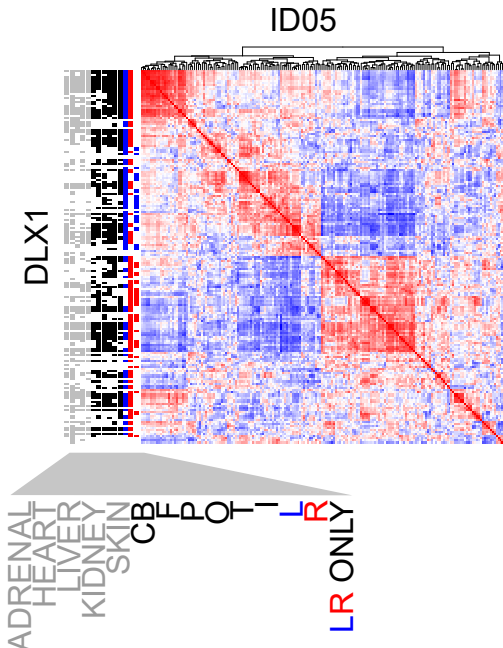

ADRENAL  
HEART  
LIVER  
KIDNEY  
SKIN  
CB  
CF  
POT  
I  
LR ONLY

TBR1

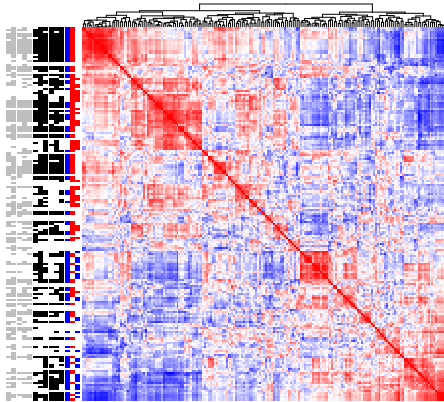

ID05

COUPTFII

ID05

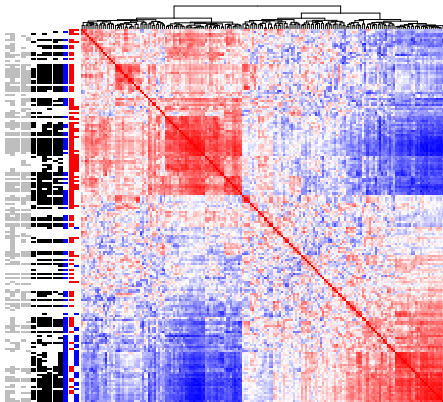

ADRENAL  
HEART  
LIVER  
KIDNEY  
SKIN  
CB  
FL  
POT  
I  
LR  
LR ONLY
